# Supplementary material for: The Geographical Coexist of the Migratory Birds, Ticks, and Nairobi Sheep Disease Virus May Potentially Contribute to the Passive Spreading of Nairobi Sheep Disease
Source: Hindawi journal article supplement (doi:10.1155/2023/5598142), 2023-10-30
Supplement: f4 [file 5598142.f4.pdf]

**Distribution data of selected migratory birds in the study area** (NIA-Number Identification Agreements NID-Number Identification Disagreements)

| No | scientific name         | common name | date       | NIA | NID | latitude   | longitude  | url                                                                                                                 |
|----|-------------------------|-------------|------------|-----|-----|------------|------------|---------------------------------------------------------------------------------------------------------------------|
| 1  | <i>Anthus trivialis</i> | Tree Pipit  | 2021/11/8  | 1   | 0   | -5.0997620 | 38.6302930 | <a href="https://www.inaturalist.org/observations/105115923">https://www.inaturalist.org/observations/105115923</a> |
| 2  | <i>Anthus trivialis</i> | Tree Pipit  | 2018/11/29 | 1   | 0   | -3.3614408 | 38.3355012 | <a href="https://www.inaturalist.org/observations/19081708">https://www.inaturalist.org/observations/19081708</a>   |
| 3  | <i>Anthus trivialis</i> | Tree Pipit  | 2018/1/25  | 1   | 0   | -3.1540060 | 35.6765950 | <a href="https://www.inaturalist.org/observations/16814311">https://www.inaturalist.org/observations/16814311</a>   |
| 4  | <i>Anthus trivialis</i> | Tree Pipit  | 2020/1/3   | 0   | 0   | -3.1522317 | 35.6756950 | <a href="https://www.inaturalist.org/observations/37690476">https://www.inaturalist.org/observations/37690476</a>   |
| 5  | <i>Anthus trivialis</i> | Tree Pipit  | 2018/1/3   | 1   | 0   | -3.1520887 | 35.6770876 | <a href="https://www.inaturalist.org/observations/16652333">https://www.inaturalist.org/observations/16652333</a>   |
| 6  | <i>Anthus trivialis</i> | Tree Pipit  | 2022/1/10  | 0   | 0   | -2.5758974 | 37.8364669 | <a href="https://www.inaturalist.org/observations/112724499">https://www.inaturalist.org/observations/112724499</a> |
| 7  | <i>Anthus trivialis</i> | Tree Pipit  | 2022/1/10  | 0   | 0   | -2.5758974 | 37.8364669 | <a href="https://www.inaturalist.org/observations/112724504">https://www.inaturalist.org/observations/112724504</a> |
| 8  | <i>Anthus trivialis</i> | Tree Pipit  | 2022/1/10  | 1   | 0   | -2.5758974 | 37.8364669 | <a href="https://www.inaturalist.org/observations/112724514">https://www.inaturalist.org/observations/112724514</a> |
| 9  | <i>Anthus trivialis</i> | Tree Pipit  | 2022/1/11  | 0   | 0   | -2.5293527 | 37.9017028 | <a href="https://www.inaturalist.org/observations/112724613">https://www.inaturalist.org/observations/112724613</a> |
| 10 | <i>Anthus trivialis</i> | Tree Pipit  | 2010/12/31 | 2   | 0   | -1.9716567 | 35.1699829 | <a href="https://www.inaturalist.org/observations/7131279">https://www.inaturalist.org/observations/7131279</a>     |
| 11 | <i>Anthus trivialis</i> | Tree Pipit  | 2019/4/11  | 1   | 0   | -1.8749622 | 37.2338896 | <a href="https://www.inaturalist.org/observations/22366674">https://www.inaturalist.org/observations/22366674</a>   |
| 12 | <i>Anthus trivialis</i> | Tree Pipit  | 2017/12/14 | 1   | 0   | -1.3597540 | 36.7200442 | <a href="https://www.inaturalist.org/observations/9782237">https://www.inaturalist.org/observations/9782237</a>     |
| 13 | <i>Anthus trivialis</i> | Tree Pipit  | 2005/3/20  | 1   | 0   | -1.3520746 | 36.7119868 | <a href="https://www.inaturalist.org/observations/135347383">https://www.inaturalist.org/observations/135347383</a> |
| 14 | <i>Anthus trivialis</i> | Tree Pipit  | 2016/3/9   | 1   | 0   | -1.1812436 | 36.8247795 | <a href="https://www.inaturalist.org/observations/36698383">https://www.inaturalist.org/observations/36698383</a>   |
| 15 | <i>Anthus trivialis</i> | Tree Pipit  | 2019/12/31 | 0   | 0   | -1.1419189 | 36.7932025 | <a href="https://www.inaturalist.org/observations/37223330">https://www.inaturalist.org/observations/37223330</a>   |
| 16 | <i>Anthus trivialis</i> | Tree Pipit  | 2019/3/9   | 1   | 0   | -0.9439805 | 36.5960290 | <a href="https://www.inaturalist.org/observations/22292179">https://www.inaturalist.org/observations/22292179</a>   |
| 17 | <i>Anthus trivialis</i> | Tree Pipit  | 2019/3/9   | 0   | 0   | -0.9434214 | 36.5984401 | <a href="https://www.inaturalist.org/observations/108444061">https://www.inaturalist.org/observations/108444061</a> |
| 18 | <i>Anthus trivialis</i> | Tree Pipit  | 2021/2/26  | 1   | 0   | -0.9431500 | 36.5940814 | <a href="https://www.inaturalist.org/observations/70198488">https://www.inaturalist.org/observations/70198488</a>   |
| 19 | <i>Anthus trivialis</i> | Tree Pipit  | 2022/3/14  | 0   | 0   | -0.9428707 | 36.5945579 | <a href="https://www.inaturalist.org/observations/109282428">https://www.inaturalist.org/observations/109282428</a> |
| 20 | <i>Anthus trivialis</i> | Tree Pipit  | 2019/3/9   | 1   | 0   | -0.3205965 | 36.9329590 | <a href="https://www.inaturalist.org/observations/28693221">https://www.inaturalist.org/observations/28693221</a>   |
| 21 | <i>Anthus trivialis</i> | Tree Pipit  | 2019/3/17  | 1   | 0   | 1.7851000  | 34.7266300 | <a href="https://www.inaturalist.org/observations/21777662">https://www.inaturalist.org/observations/21777662</a>   |
| 22 | <i>Anthus trivialis</i> | Tree Pipit  | 2013/1/21  | 2   | 0   | 7.5364239  | 38.8105771 | <a href="https://www.inaturalist.org/observations/7506893">https://www.inaturalist.org/observations/7506893</a>     |
| 23 | <i>Anthus trivialis</i> | Tree Pipit  | 2022/11/30 | 0   | 0   | 8.8625127  | 76.9484628 | <a href="https://www.inaturalist.org/observations/144972114">https://www.inaturalist.org/observations/144972114</a> |

|    |                  |            |            |   |   |            |            |                                                                                                                     |
|----|------------------|------------|------------|---|---|------------|------------|---------------------------------------------------------------------------------------------------------------------|
| 24 | Anthus trivialis | Tree Pipit | 2009/2/7   | 3 | 0 | 9.9206550  | 38.9024840 | <a href="https://www.inaturalist.org/observations/37135333">https://www.inaturalist.org/observations/37135333</a>   |
| 25 | Anthus trivialis | Tree Pipit | 2021/12/21 | 1 | 0 | 10.0520622 | 76.3503845 | <a href="https://www.inaturalist.org/observations/127077462">https://www.inaturalist.org/observations/127077462</a> |
| 26 | Anthus trivialis | Tree Pipit | 2020/12/23 | 2 | 0 | 11.3204253 | 76.6246357 | <a href="https://www.inaturalist.org/observations/120875767">https://www.inaturalist.org/observations/120875767</a> |
| 27 | Anthus trivialis | Tree Pipit | 2016/12/25 | 1 | 0 | 11.3230384 | 79.2433528 | <a href="https://www.inaturalist.org/observations/54540049">https://www.inaturalist.org/observations/54540049</a>   |
| 28 | Anthus trivialis | Tree Pipit | 2018/11/15 | 2 | 0 | 11.6525402 | 76.6066110 | <a href="https://www.inaturalist.org/observations/82795733">https://www.inaturalist.org/observations/82795733</a>   |
| 29 | Anthus trivialis | Tree Pipit | 2019/1/23  | 0 | 0 | 11.6616667 | 76.6272222 | <a href="https://www.inaturalist.org/observations/94108976">https://www.inaturalist.org/observations/94108976</a>   |
| 30 | Anthus trivialis | Tree Pipit | 2019/3/24  | 1 | 0 | 11.7206943 | 76.5807582 | <a href="https://www.inaturalist.org/observations/82694547">https://www.inaturalist.org/observations/82694547</a>   |
| 31 | Anthus trivialis | Tree Pipit | 2022/12/3  | 0 | 0 | 11.9446843 | 75.3849381 | <a href="https://www.inaturalist.org/observations/145187719">https://www.inaturalist.org/observations/145187719</a> |
| 32 | Anthus trivialis | Tree Pipit | 2022/12/3  | 0 | 0 | 11.9446843 | 75.3849381 | <a href="https://www.inaturalist.org/observations/145187895">https://www.inaturalist.org/observations/145187895</a> |
| 33 | Anthus trivialis | Tree Pipit | 2022/12/2  | 0 | 0 | 11.9446843 | 75.3849381 | <a href="https://www.inaturalist.org/observations/144972229">https://www.inaturalist.org/observations/144972229</a> |
| 34 | Anthus trivialis | Tree Pipit | 2022/12/1  | 0 | 0 | 11.9446843 | 75.3849381 | <a href="https://www.inaturalist.org/observations/144969927">https://www.inaturalist.org/observations/144969927</a> |
| 35 | Anthus trivialis | Tree Pipit | 2022/12/1  | 0 | 0 | 11.9446843 | 75.3849381 | <a href="https://www.inaturalist.org/observations/144969933">https://www.inaturalist.org/observations/144969933</a> |
| 36 | Anthus trivialis | Tree Pipit | 2022/12/1  | 0 | 0 | 11.9446843 | 75.3849381 | <a href="https://www.inaturalist.org/observations/144972339">https://www.inaturalist.org/observations/144972339</a> |
| 37 | Anthus trivialis | Tree Pipit | 2022/11/30 | 0 | 0 | 11.9446843 | 75.3849381 | <a href="https://www.inaturalist.org/observations/144910706">https://www.inaturalist.org/observations/144910706</a> |
| 38 | Anthus trivialis | Tree Pipit | 2022/11/30 | 0 | 0 | 11.9446843 | 75.3849381 | <a href="https://www.inaturalist.org/observations/144910727">https://www.inaturalist.org/observations/144910727</a> |
| 39 | Anthus trivialis | Tree Pipit | 2022/11/30 | 0 | 0 | 11.9446843 | 75.3849381 | <a href="https://www.inaturalist.org/observations/144915847">https://www.inaturalist.org/observations/144915847</a> |
| 40 | Anthus trivialis | Tree Pipit | 2022/11/27 | 0 | 0 | 11.9446843 | 75.3849381 | <a href="https://www.inaturalist.org/observations/144837333">https://www.inaturalist.org/observations/144837333</a> |
| 41 | Anthus trivialis | Tree Pipit | 2022/11/21 | 0 | 0 | 11.9446843 | 75.3849381 | <a href="https://www.inaturalist.org/observations/144354821">https://www.inaturalist.org/observations/144354821</a> |
| 42 | Anthus trivialis | Tree Pipit | 2022/11/21 | 0 | 0 | 11.9446843 | 75.3849381 | <a href="https://www.inaturalist.org/observations/144354829">https://www.inaturalist.org/observations/144354829</a> |
| 43 | Anthus trivialis | Tree Pipit | 2022/11/21 | 0 | 0 | 11.9446843 | 75.3849381 | <a href="https://www.inaturalist.org/observations/144354840">https://www.inaturalist.org/observations/144354840</a> |
| 44 | Anthus trivialis | Tree Pipit | 2022/11/17 | 1 | 0 | 11.9446843 | 75.3849381 | <a href="https://www.inaturalist.org/observations/144065539">https://www.inaturalist.org/observations/144065539</a> |
| 45 | Anthus trivialis | Tree Pipit | 2022/11/14 | 0 | 0 | 11.9446843 | 75.3849381 | <a href="https://www.inaturalist.org/observations/143986502">https://www.inaturalist.org/observations/143986502</a> |
| 46 | Anthus trivialis | Tree Pipit | 2022/11/10 | 1 | 0 | 11.9446843 | 75.3849381 | <a href="https://www.inaturalist.org/observations/143556573">https://www.inaturalist.org/observations/143556573</a> |
| 47 | Anthus trivialis | Tree Pipit | 2022/11/10 | 0 | 0 | 11.9446843 | 75.3849381 | <a href="https://www.inaturalist.org/observations/143786183">https://www.inaturalist.org/observations/143786183</a> |
| 48 | Anthus trivialis | Tree Pipit | 2022/11/10 | 0 | 0 | 11.9446843 | 75.3849381 | <a href="https://www.inaturalist.org/observations/143786189">https://www.inaturalist.org/observations/143786189</a> |

|    |                         |            |            |   |   |            |            |                                                                                                                     |
|----|-------------------------|------------|------------|---|---|------------|------------|---------------------------------------------------------------------------------------------------------------------|
| 49 | <i>Anthus trivialis</i> | Tree Pipit | 2022/11/10 | 0 | 0 | 11.9446843 | 75.3849381 | <a href="https://www.inaturalist.org/observations/143786203">https://www.inaturalist.org/observations/143786203</a> |
| 50 | <i>Anthus trivialis</i> | Tree Pipit | 2022/11/10 | 1 | 0 | 11.9446843 | 75.3849381 | <a href="https://www.inaturalist.org/observations/143786218">https://www.inaturalist.org/observations/143786218</a> |
| 51 | <i>Anthus trivialis</i> | Tree Pipit | 2022/11/10 | 0 | 0 | 11.9446843 | 75.3849381 | <a href="https://www.inaturalist.org/observations/143786252">https://www.inaturalist.org/observations/143786252</a> |
| 52 | <i>Anthus trivialis</i> | Tree Pipit | 2022/11/10 | 1 | 0 | 11.9446843 | 75.3849381 | <a href="https://www.inaturalist.org/observations/143993605">https://www.inaturalist.org/observations/143993605</a> |
| 53 | <i>Anthus trivialis</i> | Tree Pipit | 2022/11/10 | 1 | 0 | 11.9446843 | 75.3849381 | <a href="https://www.inaturalist.org/observations/143993959">https://www.inaturalist.org/observations/143993959</a> |
| 54 | <i>Anthus trivialis</i> | Tree Pipit | 2022/11/9  | 1 | 0 | 11.9446843 | 75.3849381 | <a href="https://www.inaturalist.org/observations/143544716">https://www.inaturalist.org/observations/143544716</a> |
| 55 | <i>Anthus trivialis</i> | Tree Pipit | 2022/11/9  | 1 | 0 | 11.9446843 | 75.3849381 | <a href="https://www.inaturalist.org/observations/143544725">https://www.inaturalist.org/observations/143544725</a> |
| 56 | <i>Anthus trivialis</i> | Tree Pipit | 2022/11/9  | 1 | 0 | 11.9446843 | 75.3849381 | <a href="https://www.inaturalist.org/observations/143556446">https://www.inaturalist.org/observations/143556446</a> |
| 57 | <i>Anthus trivialis</i> | Tree Pipit | 2022/11/8  | 1 | 0 | 11.9446843 | 75.3849381 | <a href="https://www.inaturalist.org/observations/143257938">https://www.inaturalist.org/observations/143257938</a> |
| 58 | <i>Anthus trivialis</i> | Tree Pipit | 2022/11/8  | 0 | 0 | 11.9446843 | 75.3849381 | <a href="https://www.inaturalist.org/observations/143257969">https://www.inaturalist.org/observations/143257969</a> |
| 59 | <i>Anthus trivialis</i> | Tree Pipit | 2022/11/8  | 0 | 0 | 11.9446843 | 75.3849381 | <a href="https://www.inaturalist.org/observations/143858334">https://www.inaturalist.org/observations/143858334</a> |
| 60 | <i>Anthus trivialis</i> | Tree Pipit | 2022/11/8  | 0 | 0 | 11.9446843 | 75.3849381 | <a href="https://www.inaturalist.org/observations/143858341">https://www.inaturalist.org/observations/143858341</a> |
| 61 | <i>Anthus trivialis</i> | Tree Pipit | 2022/10/26 | 0 | 0 | 11.9446843 | 75.3849381 | <a href="https://www.inaturalist.org/observations/142205172">https://www.inaturalist.org/observations/142205172</a> |
| 62 | <i>Anthus trivialis</i> | Tree Pipit | 2022/3/30  | 0 | 0 | 11.9446843 | 75.3849381 | <a href="https://www.inaturalist.org/observations/116127256">https://www.inaturalist.org/observations/116127256</a> |
| 63 | <i>Anthus trivialis</i> | Tree Pipit | 2020/12/16 | 2 | 0 | 11.9446846 | 75.3849381 | <a href="https://www.inaturalist.org/observations/67564967">https://www.inaturalist.org/observations/67564967</a>   |
| 64 | <i>Anthus trivialis</i> | Tree Pipit | 2019/10/6  | 1 | 0 | 11.9446846 | 75.3849381 | <a href="https://www.inaturalist.org/observations/63153870">https://www.inaturalist.org/observations/63153870</a>   |
| 65 | <i>Anthus trivialis</i> | Tree Pipit | 2019/10/15 | 1 | 0 | 12.0303367 | 75.2512233 | <a href="https://www.inaturalist.org/observations/34573181">https://www.inaturalist.org/observations/34573181</a>   |
| 66 | <i>Anthus trivialis</i> | Tree Pipit | 2019/10/15 | 1 | 0 | 12.0303717 | 75.2513083 | <a href="https://www.inaturalist.org/observations/34573180">https://www.inaturalist.org/observations/34573180</a>   |
| 67 | <i>Anthus trivialis</i> | Tree Pipit | 2019/10/15 | 1 | 0 | 12.0323467 | 75.2566564 | <a href="https://www.inaturalist.org/observations/34573186">https://www.inaturalist.org/observations/34573186</a>   |
| 68 | <i>Anthus trivialis</i> | Tree Pipit | 2019/10/15 | 1 | 0 | 12.0323467 | 75.2566564 | <a href="https://www.inaturalist.org/observations/34573187">https://www.inaturalist.org/observations/34573187</a>   |
| 69 | <i>Anthus trivialis</i> | Tree Pipit | 2019/10/15 | 1 | 0 | 12.0323467 | 75.2566564 | <a href="https://www.inaturalist.org/observations/34573188">https://www.inaturalist.org/observations/34573188</a>   |
| 70 | <i>Anthus trivialis</i> | Tree Pipit | 2019/10/15 | 1 | 0 | 12.0323467 | 75.2566564 | <a href="https://www.inaturalist.org/observations/34573189">https://www.inaturalist.org/observations/34573189</a>   |
| 71 | <i>Anthus trivialis</i> | Tree Pipit | 2019/10/15 | 1 | 0 | 12.0323467 | 75.2566564 | <a href="https://www.inaturalist.org/observations/94061644">https://www.inaturalist.org/observations/94061644</a>   |
| 72 | <i>Anthus trivialis</i> | Tree Pipit | 2021/1/1   | 1 | 0 | 12.0466556 | 76.6268304 | <a href="https://www.inaturalist.org/observations/67769482">https://www.inaturalist.org/observations/67769482</a>   |
| 73 | <i>Anthus trivialis</i> | Tree Pipit | 2009/1/27  | 0 | 0 | 12.1178461 | 77.7763615 | <a href="https://www.inaturalist.org/observations/90633492">https://www.inaturalist.org/observations/90633492</a>   |

|    |                  |            |            |   |   |            |            |                                                                                                                     |
|----|------------------|------------|------------|---|---|------------|------------|---------------------------------------------------------------------------------------------------------------------|
| 74 | Anthus trivialis | Tree Pipit | 2020/12/19 | 1 | 0 | 12.1262837 | 76.3923919 | <a href="https://www.inaturalist.org/observations/93041016">https://www.inaturalist.org/observations/93041016</a>   |
| 75 | Anthus trivialis | Tree Pipit | 2012/12/22 | 0 | 0 | 12.1307476 | 76.4186495 | <a href="https://www.inaturalist.org/observations/91846201">https://www.inaturalist.org/observations/91846201</a>   |
| 76 | Anthus trivialis | Tree Pipit | 2022/11/15 | 2 | 0 | 12.1806086 | 76.7262009 | <a href="https://www.inaturalist.org/observations/142068881">https://www.inaturalist.org/observations/142068881</a> |
| 77 | Anthus trivialis | Tree Pipit | 2022/11/15 | 2 | 0 | 12.1806086 | 76.7262009 | <a href="https://www.inaturalist.org/observations/142068883">https://www.inaturalist.org/observations/142068883</a> |
| 78 | Anthus trivialis | Tree Pipit | 2017/3/19  | 0 | 0 | 12.2252841 | 79.0746957 | <a href="https://www.inaturalist.org/observations/95858026">https://www.inaturalist.org/observations/95858026</a>   |
| 79 | Anthus trivialis | Tree Pipit | 2022/12/8  | 1 | 0 | 12.2485521 | 76.5921897 | <a href="https://www.inaturalist.org/observations/145115925">https://www.inaturalist.org/observations/145115925</a> |
| 80 | Anthus trivialis | Tree Pipit | 2022/11/22 | 1 | 0 | 12.2485521 | 76.5921897 | <a href="https://www.inaturalist.org/observations/142583513">https://www.inaturalist.org/observations/142583513</a> |
| 81 | Anthus trivialis | Tree Pipit | 2021/12/7  | 0 | 0 | 12.2485521 | 76.5921897 | <a href="https://www.inaturalist.org/observations/102652327">https://www.inaturalist.org/observations/102652327</a> |
| 82 | Anthus trivialis | Tree Pipit | 2015/12/5  | 0 | 0 | 12.2561049 | 76.6134073 | <a href="https://www.inaturalist.org/observations/98770789">https://www.inaturalist.org/observations/98770789</a>   |
| 83 | Anthus trivialis | Tree Pipit | 2015/11/15 | 0 | 0 | 12.2609374 | 76.5916724 | <a href="https://www.inaturalist.org/observations/98771507">https://www.inaturalist.org/observations/98771507</a>   |
| 84 | Anthus trivialis | Tree Pipit | 2022/12/7  | 1 | 0 | 12.2626994 | 76.5676206 | <a href="https://www.inaturalist.org/observations/145113814">https://www.inaturalist.org/observations/145113814</a> |
| 85 | Anthus trivialis | Tree Pipit | 2022/12/4  | 1 | 0 | 12.2626994 | 76.5676206 | <a href="https://www.inaturalist.org/observations/145112845">https://www.inaturalist.org/observations/145112845</a> |
| 86 | Anthus trivialis | Tree Pipit | 2022/11/26 | 3 | 0 | 12.2626994 | 76.5676206 | <a href="https://www.inaturalist.org/observations/143550275">https://www.inaturalist.org/observations/143550275</a> |
| 87 | Anthus trivialis | Tree Pipit | 2022/11/13 | 1 | 0 | 12.2626994 | 76.5676206 | <a href="https://www.inaturalist.org/observations/141885920">https://www.inaturalist.org/observations/141885920</a> |
| 88 | Anthus trivialis | Tree Pipit | 2012/1/21  | 0 | 0 | 12.2693720 | 76.6119780 | <a href="https://www.inaturalist.org/observations/94717024">https://www.inaturalist.org/observations/94717024</a>   |
| 89 | Anthus trivialis | Tree Pipit | 2014/12/28 | 0 | 0 | 12.2728479 | 76.2122647 | <a href="https://www.inaturalist.org/observations/95548796">https://www.inaturalist.org/observations/95548796</a>   |
| 90 | Anthus trivialis | Tree Pipit | 2021/12/5  | 0 | 0 | 12.3092189 | 76.5556046 | <a href="https://www.inaturalist.org/observations/102516677">https://www.inaturalist.org/observations/102516677</a> |
| 91 | Anthus trivialis | Tree Pipit | 2022/1/13  | 1 | 0 | 12.3161900 | 76.5483528 | <a href="https://www.inaturalist.org/observations/104855153">https://www.inaturalist.org/observations/104855153</a> |
| 92 | Anthus trivialis | Tree Pipit | 2022/12/1  | 2 | 0 | 12.3162928 | 76.5503740 | <a href="https://www.inaturalist.org/observations/143549932">https://www.inaturalist.org/observations/143549932</a> |
| 93 | Anthus trivialis | Tree Pipit | 2020/11/22 | 0 | 0 | 12.3720686 | 76.6283475 | <a href="https://www.inaturalist.org/observations/95014266">https://www.inaturalist.org/observations/95014266</a>   |
| 94 | Anthus trivialis | Tree Pipit | 2014/11/30 | 0 | 0 | 12.4331532 | 76.1928640 | <a href="https://www.inaturalist.org/observations/145241294">https://www.inaturalist.org/observations/145241294</a> |
| 95 | Anthus trivialis | Tree Pipit | 2018/3/17  | 1 | 0 | 12.4440489 | 76.4592855 | <a href="https://www.inaturalist.org/observations/93474486">https://www.inaturalist.org/observations/93474486</a>   |
| 96 | Anthus trivialis | Tree Pipit | 2010/11/14 | 0 | 0 | 12.6478028 | 76.6229409 | <a href="https://www.inaturalist.org/observations/93150604">https://www.inaturalist.org/observations/93150604</a>   |
| 97 | Anthus trivialis | Tree Pipit | 2020/10/2  | 2 | 0 | 12.6747309 | 75.0161820 | <a href="https://www.inaturalist.org/observations/61917585">https://www.inaturalist.org/observations/61917585</a>   |
| 98 | Anthus trivialis | Tree Pipit | 2022/12/24 | 1 | 0 | 12.6788317 | 77.9162000 | <a href="https://www.inaturalist.org/observations/144992572">https://www.inaturalist.org/observations/144992572</a> |



|     |                         |            |            |   |   |            |            |                                                                                                                     |
|-----|-------------------------|------------|------------|---|---|------------|------------|---------------------------------------------------------------------------------------------------------------------|
| 99  | <i>Anthus trivialis</i> | Tree Pipit | 2022/12/24 | 1 | 0 | 12.6789900 | 77.9159817 | <a href="https://www.inaturalist.org/observations/144992579">https://www.inaturalist.org/observations/144992579</a> |
| 100 | <i>Anthus trivialis</i> | Tree Pipit | 2022/12/24 | 1 | 0 | 12.6790417 | 77.9159050 | <a href="https://www.inaturalist.org/observations/144992795">https://www.inaturalist.org/observations/144992795</a> |
| 101 | <i>Anthus trivialis</i> | Tree Pipit | 2022/12/24 | 1 | 0 | 12.6798550 | 77.9227000 | <a href="https://www.inaturalist.org/observations/144982032">https://www.inaturalist.org/observations/144982032</a> |
| 102 | <i>Anthus trivialis</i> | Tree Pipit | 2018/1/20  | 1 | 0 | 12.7575074 | 77.6516517 | <a href="https://www.inaturalist.org/observations/65002139">https://www.inaturalist.org/observations/65002139</a>   |
| 103 | <i>Anthus trivialis</i> | Tree Pipit | 2016/1/9   | 1 | 0 | 12.8078755 | 77.6020038 | <a href="https://www.inaturalist.org/observations/65637955">https://www.inaturalist.org/observations/65637955</a>   |
| 104 | <i>Anthus trivialis</i> | Tree Pipit | 2018/10/31 | 0 | 0 | 12.8236213 | 76.9098222 | <a href="https://www.inaturalist.org/observations/88695058">https://www.inaturalist.org/observations/88695058</a>   |
| 105 | <i>Anthus trivialis</i> | Tree Pipit | 2019/2/2   | 2 | 0 | 12.8300625 | 79.7427179 | <a href="https://www.inaturalist.org/observations/22612018">https://www.inaturalist.org/observations/22612018</a>   |
| 106 | <i>Anthus trivialis</i> | Tree Pipit | 2019/1/7   | 1 | 0 | 12.8557074 | 77.0751538 | <a href="https://www.inaturalist.org/observations/89157963">https://www.inaturalist.org/observations/89157963</a>   |
| 107 | <i>Anthus trivialis</i> | Tree Pipit | 2021/3/21  | 2 | 0 | 12.8571865 | 77.5089110 | <a href="https://www.inaturalist.org/observations/71692547">https://www.inaturalist.org/observations/71692547</a>   |
| 108 | <i>Anthus trivialis</i> | Tree Pipit | 2020/12/29 | 1 | 0 | 12.9599739 | 79.3672751 | <a href="https://www.inaturalist.org/observations/73007442">https://www.inaturalist.org/observations/73007442</a>   |
| 109 | <i>Anthus trivialis</i> | Tree Pipit | 2022/1/13  | 2 | 0 | 12.9715987 | 77.5945627 | <a href="https://www.inaturalist.org/observations/120864735">https://www.inaturalist.org/observations/120864735</a> |
| 110 | <i>Anthus trivialis</i> | Tree Pipit | 2016/11/26 | 2 | 0 | 13.0033968 | 80.2251183 | <a href="https://www.inaturalist.org/observations/22552703">https://www.inaturalist.org/observations/22552703</a>   |
| 111 | <i>Anthus trivialis</i> | Tree Pipit | 2016/12/25 | 1 | 0 | 13.0114447 | 80.0590803 | <a href="https://www.inaturalist.org/observations/45163008">https://www.inaturalist.org/observations/45163008</a>   |
| 112 | <i>Anthus trivialis</i> | Tree Pipit | 2019/1/26  | 1 | 0 | 13.0826802 | 80.2707184 | <a href="https://www.inaturalist.org/observations/135547091">https://www.inaturalist.org/observations/135547091</a> |
| 113 | <i>Anthus trivialis</i> | Tree Pipit | 2019/4/9   | 2 | 0 | 13.3714183 | 77.6853033 | <a href="https://www.inaturalist.org/observations/29238222">https://www.inaturalist.org/observations/29238222</a>   |
| 114 | <i>Anthus trivialis</i> | Tree Pipit | 2011/12/25 | 0 | 0 | 14.8809083 | 74.5068819 | <a href="https://www.inaturalist.org/observations/96684167">https://www.inaturalist.org/observations/96684167</a>   |
| 115 | <i>Anthus trivialis</i> | Tree Pipit | 2019/1/28  | 0 | 0 | 15.0112879 | 76.5643027 | <a href="https://www.inaturalist.org/observations/84832647">https://www.inaturalist.org/observations/84832647</a>   |
| 116 | <i>Anthus trivialis</i> | Tree Pipit | 2022/11/9  | 1 | 0 | 15.3935376 | 73.8207841 | <a href="https://www.inaturalist.org/observations/141511817">https://www.inaturalist.org/observations/141511817</a> |
| 117 | <i>Anthus trivialis</i> | Tree Pipit | 2019/1/27  | 0 | 0 | 16.0405923 | 73.5925378 | <a href="https://www.inaturalist.org/observations/56497999">https://www.inaturalist.org/observations/56497999</a>   |
| 118 | <i>Anthus trivialis</i> | Tree Pipit | 2019/1/27  | 0 | 0 | 16.0405923 | 73.5925378 | <a href="https://www.inaturalist.org/observations/56498004">https://www.inaturalist.org/observations/56498004</a>   |
| 119 | <i>Anthus trivialis</i> | Tree Pipit | 2020/3/7   | 0 | 0 | 16.2656091 | 77.3084366 | <a href="https://www.inaturalist.org/observations/95627225">https://www.inaturalist.org/observations/95627225</a>   |
| 120 | <i>Anthus trivialis</i> | Tree Pipit | 2021/3/15  | 1 | 0 | 16.3600400 | 74.2958390 | <a href="https://www.inaturalist.org/observations/71280390">https://www.inaturalist.org/observations/71280390</a>   |
| 121 | <i>Anthus trivialis</i> | Tree Pipit | 2016/11/12 | 2 | 0 | 16.7966026 | 74.2910357 | <a href="https://www.inaturalist.org/observations/30795870">https://www.inaturalist.org/observations/30795870</a>   |
| 122 | <i>Anthus trivialis</i> | Tree Pipit | 2021/1/23  | 2 | 0 | 17.1900996 | 81.5334906 | <a href="https://www.inaturalist.org/observations/114671432">https://www.inaturalist.org/observations/114671432</a> |
| 123 | <i>Anthus trivialis</i> | Tree Pipit | 2017/3/7   | 1 | 0 | 17.8241997 | 75.8849796 | <a href="https://www.inaturalist.org/observations/65454001">https://www.inaturalist.org/observations/65454001</a>   |

|     |                         |            |            |   |   |            |            |                                                                                                                     |
|-----|-------------------------|------------|------------|---|---|------------|------------|---------------------------------------------------------------------------------------------------------------------|
| 124 | <i>Anthus trivialis</i> | Tree Pipit | 2013/12/23 | 2 | 0 | 17.9789709 | 73.4106321 | <a href="https://www.inaturalist.org/observations/104577279">https://www.inaturalist.org/observations/104577279</a> |
| 125 | <i>Anthus trivialis</i> | Tree Pipit | 2019/1/5   | 0 | 0 | 18.1124372 | 79.0192997 | <a href="https://www.inaturalist.org/observations/63620591">https://www.inaturalist.org/observations/63620591</a>   |
| 126 | <i>Anthus trivialis</i> | Tree Pipit | 2018/10/24 | 1 | 0 | 18.1453254 | 73.7935299 | <a href="https://www.inaturalist.org/observations/84720898">https://www.inaturalist.org/observations/84720898</a>   |
| 127 | <i>Anthus trivialis</i> | Tree Pipit | 2018/10/7  | 1 | 0 | 18.1509732 | 73.7890851 | <a href="https://www.inaturalist.org/observations/91547489">https://www.inaturalist.org/observations/91547489</a>   |
| 128 | <i>Anthus trivialis</i> | Tree Pipit | 2020/2/28  | 1 | 0 | 18.2760720 | 73.6227170 | <a href="https://www.inaturalist.org/observations/63881501">https://www.inaturalist.org/observations/63881501</a>   |
| 129 | <i>Anthus trivialis</i> | Tree Pipit | 2014/2/4   | 1 | 0 | 18.3515415 | 74.3675446 | <a href="https://www.inaturalist.org/observations/41677668">https://www.inaturalist.org/observations/41677668</a>   |
| 130 | <i>Anthus trivialis</i> | Tree Pipit | 2016/2/12  | 1 | 0 | 18.3565030 | 73.7507280 | <a href="http://www.inaturalist.org/observations/2708021">http://www.inaturalist.org/observations/2708021</a>       |
| 131 | <i>Anthus trivialis</i> | Tree Pipit | 2018/2/5   | 3 | 0 | 18.3569695 | 73.7796896 | <a href="https://www.inaturalist.org/observations/33243291">https://www.inaturalist.org/observations/33243291</a>   |
| 132 | <i>Anthus trivialis</i> | Tree Pipit | 2012/1/1   | 1 | 0 | 18.3662770 | 73.7558777 | <a href="https://www.inaturalist.org/observations/79624650">https://www.inaturalist.org/observations/79624650</a>   |
| 133 | <i>Anthus trivialis</i> | Tree Pipit | 2019/2/3   | 1 | 0 | 18.3721362 | 73.7623948 | <a href="https://www.inaturalist.org/observations/20246336">https://www.inaturalist.org/observations/20246336</a>   |
| 134 | <i>Anthus trivialis</i> | Tree Pipit | 2014/3/16  | 2 | 0 | 18.3735266 | 73.7677223 | <a href="https://www.inaturalist.org/observations/56552171">https://www.inaturalist.org/observations/56552171</a>   |
| 135 | <i>Anthus trivialis</i> | Tree Pipit | 2014/3/16  | 3 | 0 | 18.3735266 | 73.7677223 | <a href="https://www.inaturalist.org/observations/56552314">https://www.inaturalist.org/observations/56552314</a>   |
| 136 | <i>Anthus trivialis</i> | Tree Pipit | 2014/2/8   | 1 | 0 | 18.3749974 | 73.7697441 | <a href="https://www.inaturalist.org/observations/130215883">https://www.inaturalist.org/observations/130215883</a> |
| 137 | <i>Anthus trivialis</i> | Tree Pipit | 2014/2/8   | 2 | 0 | 18.3749974 | 73.7697441 | <a href="https://www.inaturalist.org/observations/130216892">https://www.inaturalist.org/observations/130216892</a> |
| 138 | <i>Anthus trivialis</i> | Tree Pipit | 2021/2/14  | 2 | 0 | 18.3758628 | 73.7691647 | <a href="https://www.inaturalist.org/observations/75058877">https://www.inaturalist.org/observations/75058877</a>   |
| 139 | <i>Anthus trivialis</i> | Tree Pipit | 2021/2/13  | 2 | 0 | 18.3758628 | 73.7691647 | <a href="https://www.inaturalist.org/observations/75058828">https://www.inaturalist.org/observations/75058828</a>   |
| 140 | <i>Anthus trivialis</i> | Tree Pipit | 2019/2/3   | 1 | 0 | 18.3758628 | 73.7691647 | <a href="https://www.inaturalist.org/observations/44359008">https://www.inaturalist.org/observations/44359008</a>   |
| 141 | <i>Anthus trivialis</i> | Tree Pipit | 2019/2/3   | 1 | 0 | 18.3758628 | 73.7691647 | <a href="https://www.inaturalist.org/observations/44359030">https://www.inaturalist.org/observations/44359030</a>   |
| 142 | <i>Anthus trivialis</i> | Tree Pipit | 2018/3/31  | 2 | 0 | 18.3758628 | 73.7691647 | <a href="https://www.inaturalist.org/observations/44360068">https://www.inaturalist.org/observations/44360068</a>   |
| 143 | <i>Anthus trivialis</i> | Tree Pipit | 2018/3/31  | 0 | 0 | 18.3758628 | 73.7691647 | <a href="https://www.inaturalist.org/observations/67006339">https://www.inaturalist.org/observations/67006339</a>   |
| 144 | <i>Anthus trivialis</i> | Tree Pipit | 2019/2/3   | 1 | 0 | 18.3758630 | 73.7691650 | <a href="https://www.inaturalist.org/observations/40073872">https://www.inaturalist.org/observations/40073872</a>   |
| 145 | <i>Anthus trivialis</i> | Tree Pipit | 2022/2/24  | 1 | 0 | 18.3802793 | 73.7676430 | <a href="https://www.inaturalist.org/observations/121368360">https://www.inaturalist.org/observations/121368360</a> |
| 146 | <i>Anthus trivialis</i> | Tree Pipit | 2017/4/1   | 2 | 0 | 18.3802793 | 73.7676430 | <a href="https://www.inaturalist.org/observations/41811009">https://www.inaturalist.org/observations/41811009</a>   |
| 147 | <i>Anthus trivialis</i> | Tree Pipit | 2017/4/1   | 2 | 0 | 18.3802793 | 73.7676430 | <a href="https://www.inaturalist.org/observations/41811027">https://www.inaturalist.org/observations/41811027</a>   |
| 148 | <i>Anthus trivialis</i> | Tree Pipit | 2013/3/26  | 3 | 0 | 18.3802793 | 73.7676430 | <a href="https://www.inaturalist.org/observations/127343141">https://www.inaturalist.org/observations/127343141</a> |

|     |                         |            |            |   |   |            |            |                                                                                                                     |
|-----|-------------------------|------------|------------|---|---|------------|------------|---------------------------------------------------------------------------------------------------------------------|
| 149 | <i>Anthus trivialis</i> | Tree Pipit | 2013/2/26  | 2 | 0 | 18.3802793 | 73.7676430 | <a href="https://www.inaturalist.org/observations/127343144">https://www.inaturalist.org/observations/127343144</a> |
| 150 | <i>Anthus trivialis</i> | Tree Pipit | 2022/4/11  | 2 | 0 | 18.5010536 | 73.5137654 | <a href="https://www.inaturalist.org/observations/121450022">https://www.inaturalist.org/observations/121450022</a> |
| 151 | <i>Anthus trivialis</i> | Tree Pipit | 2017/2/10  | 1 | 0 | 18.5203887 | 73.8567438 | <a href="https://www.inaturalist.org/observations/139601270">https://www.inaturalist.org/observations/139601270</a> |
| 152 | <i>Anthus trivialis</i> | Tree Pipit | 2015/2/2   | 2 | 0 | 18.5204303 | 73.8567437 | <a href="https://www.inaturalist.org/observations/38149359">https://www.inaturalist.org/observations/38149359</a>   |
| 153 | <i>Anthus trivialis</i> | Tree Pipit | 2021/10/28 | 1 | 0 | 18.5254899 | 73.8153845 | <a href="https://www.inaturalist.org/observations/141470711">https://www.inaturalist.org/observations/141470711</a> |
| 154 | <i>Anthus trivialis</i> | Tree Pipit | 2012/12/9  | 2 | 0 | 18.5320170 | 73.8165064 | <a href="https://www.inaturalist.org/observations/128111191">https://www.inaturalist.org/observations/128111191</a> |
| 155 | <i>Anthus trivialis</i> | Tree Pipit | 2021/3/27  | 3 | 0 | 18.5957704 | 73.9258938 | <a href="https://www.inaturalist.org/observations/121118820">https://www.inaturalist.org/observations/121118820</a> |
| 156 | <i>Anthus trivialis</i> | Tree Pipit | 2020/1/6   | 2 | 0 | 18.8132975 | 82.0189247 | <a href="https://www.inaturalist.org/observations/37578255">https://www.inaturalist.org/observations/37578255</a>   |
| 157 | <i>Anthus trivialis</i> | Tree Pipit | 2018/4/1   | 1 | 0 | 19.0858505 | 73.7404306 | <a href="https://www.inaturalist.org/observations/30471464">https://www.inaturalist.org/observations/30471464</a>   |
| 158 | <i>Anthus trivialis</i> | Tree Pipit | 2014/10/18 | 2 | 0 | 19.1505534 | 72.9564893 | <a href="https://www.inaturalist.org/observations/57550580">https://www.inaturalist.org/observations/57550580</a>   |
| 159 | <i>Anthus trivialis</i> | Tree Pipit | 2014/10/18 | 2 | 0 | 19.1505534 | 72.9564893 | <a href="https://www.inaturalist.org/observations/57550588">https://www.inaturalist.org/observations/57550588</a>   |
| 160 | <i>Anthus trivialis</i> | Tree Pipit | 2014/10/20 | 1 | 0 | 19.2022321 | 73.0025168 | <a href="https://www.inaturalist.org/observations/38469767">https://www.inaturalist.org/observations/38469767</a>   |
| 161 | <i>Anthus trivialis</i> | Tree Pipit | 2015/2/15  | 2 | 0 | 19.2166700 | 73.0833300 | <a href="http://www.inaturalist.org/observations/1301475">http://www.inaturalist.org/observations/1301475</a>       |
| 162 | <i>Anthus trivialis</i> | Tree Pipit | 2020/11/7  | 1 | 0 | 19.2194233 | 73.1248344 | <a href="https://www.inaturalist.org/observations/64660739">https://www.inaturalist.org/observations/64660739</a>   |
| 163 | <i>Anthus trivialis</i> | Tree Pipit | 2020/11/7  | 1 | 0 | 19.2194233 | 73.1248344 | <a href="https://www.inaturalist.org/observations/64660768">https://www.inaturalist.org/observations/64660768</a>   |
| 164 | <i>Anthus trivialis</i> | Tree Pipit | 2022/10/26 | 1 | 0 | 19.2266945 | 73.1143087 | <a href="https://www.inaturalist.org/observations/140038190">https://www.inaturalist.org/observations/140038190</a> |
| 165 | <i>Anthus trivialis</i> | Tree Pipit | 2018/12/28 | 2 | 0 | 19.2372539 | 72.9645546 | <a href="https://www.inaturalist.org/observations/30320223">https://www.inaturalist.org/observations/30320223</a>   |
| 166 | <i>Anthus trivialis</i> | Tree Pipit | 2019/1/13  | 1 | 0 | 19.8240300 | 72.9218542 | <a href="https://www.inaturalist.org/observations/19615362">https://www.inaturalist.org/observations/19615362</a>   |
| 167 | <i>Anthus trivialis</i> | Tree Pipit | 2022/10/30 | 3 | 0 | 19.9517790 | 73.7860274 | <a href="https://www.inaturalist.org/observations/140505783">https://www.inaturalist.org/observations/140505783</a> |
| 168 | <i>Anthus trivialis</i> | Tree Pipit | 2019/1/14  | 1 | 0 | 19.9974533 | 73.7898023 | <a href="https://www.inaturalist.org/observations/79946146">https://www.inaturalist.org/observations/79946146</a>   |
| 169 | <i>Anthus trivialis</i> | Tree Pipit | 2019/1/11  | 1 | 0 | 19.9974533 | 73.7898023 | <a href="https://www.inaturalist.org/observations/56498506">https://www.inaturalist.org/observations/56498506</a>   |
| 170 | <i>Anthus trivialis</i> | Tree Pipit | 2020/2/9   | 1 | 0 | 20.1529973 | 73.4499557 | <a href="https://www.inaturalist.org/observations/92223075">https://www.inaturalist.org/observations/92223075</a>   |
| 171 | <i>Anthus trivialis</i> | Tree Pipit | 2021/11/23 | 0 | 0 | 20.2743384 | 79.0276479 | <a href="https://www.inaturalist.org/observations/101759782">https://www.inaturalist.org/observations/101759782</a> |
| 172 | <i>Anthus trivialis</i> | Tree Pipit | 2017/12/3  | 1 | 0 | 20.8253781 | 73.7007088 | <a href="https://www.inaturalist.org/observations/31119843">https://www.inaturalist.org/observations/31119843</a>   |
| 173 | <i>Anthus trivialis</i> | Tree Pipit | 2021/1/28  | 1 | 0 | 21.0112840 | 81.4596970 | <a href="https://www.inaturalist.org/observations/68723448">https://www.inaturalist.org/observations/68723448</a>   |

|     |                         |            |            |   |   |            |             |                                                                                                                     |
|-----|-------------------------|------------|------------|---|---|------------|-------------|---------------------------------------------------------------------------------------------------------------------|
| 174 | <i>Anthus trivialis</i> | Tree Pipit | 2018/12/23 | 2 | 0 | 21.0146501 | 75.9084892  | <a href="https://www.inaturalist.org/observations/54279467">https://www.inaturalist.org/observations/54279467</a>   |
| 175 | <i>Anthus trivialis</i> | Tree Pipit | 2021/1/28  | 1 | 0 | 21.0727375 | 81.4809042  | <a href="https://www.inaturalist.org/observations/68723352">https://www.inaturalist.org/observations/68723352</a>   |
| 176 | <i>Anthus trivialis</i> | Tree Pipit | 2018/12/23 | 2 | 0 | 21.0738364 | 75.9456553  | <a href="https://www.inaturalist.org/observations/54279250">https://www.inaturalist.org/observations/54279250</a>   |
| 177 | <i>Anthus trivialis</i> | Tree Pipit | 2021/5/19  | 1 | 0 | 21.0881974 | 80.6645796  | <a href="https://www.inaturalist.org/observations/79375810">https://www.inaturalist.org/observations/79375810</a>   |
| 178 | <i>Anthus trivialis</i> | Tree Pipit | 2021/2/26  | 1 | 0 | 21.1862271 | 82.1094142  | <a href="https://www.inaturalist.org/observations/70947648">https://www.inaturalist.org/observations/70947648</a>   |
| 179 | <i>Anthus trivialis</i> | Tree Pipit | 2020/5/20  | 1 | 0 | 21.1905709 | 81.2849169  | <a href="https://www.inaturalist.org/observations/68752095">https://www.inaturalist.org/observations/68752095</a>   |
| 180 | <i>Anthus trivialis</i> | Tree Pipit | 2013/1/13  | 2 | 0 | 21.2269507 | 75.4812341  | <a href="https://www.inaturalist.org/observations/85653687">https://www.inaturalist.org/observations/85653687</a>   |
| 181 | <i>Anthus trivialis</i> | Tree Pipit | 2021/11/14 | 1 | 0 | 21.4293093 | 76.3318085  | <a href="https://www.inaturalist.org/observations/112489692">https://www.inaturalist.org/observations/112489692</a> |
| 182 | <i>Anthus trivialis</i> | Tree Pipit | 2022/2/13  | 2 | 0 | 21.4351917 | 69.9807983  | <a href="https://www.inaturalist.org/observations/120166919">https://www.inaturalist.org/observations/120166919</a> |
| 183 | <i>Anthus trivialis</i> | Tree Pipit | 2018/12/10 | 1 | 0 | 21.6717166 | 82.0775522  | <a href="https://www.inaturalist.org/observations/19004930">https://www.inaturalist.org/observations/19004930</a>   |
| 184 | <i>Anthus trivialis</i> | Tree Pipit | 2019/3/15  | 2 | 0 | 21.6775014 | 79.3397950  | <a href="https://www.inaturalist.org/observations/52916336">https://www.inaturalist.org/observations/52916336</a>   |
| 185 | <i>Anthus trivialis</i> | Tree Pipit | 2021/2/2   | 0 | 0 | 22.1619405 | 73.4840496  | <a href="https://www.inaturalist.org/observations/98494480">https://www.inaturalist.org/observations/98494480</a>   |
| 186 | <i>Anthus trivialis</i> | Tree Pipit | 2022/1/4   | 1 | 0 | 22.3135583 | 73.2773333  | <a href="https://www.inaturalist.org/observations/120809260">https://www.inaturalist.org/observations/120809260</a> |
| 187 | <i>Anthus trivialis</i> | Tree Pipit | 2022/1/4   | 3 | 0 | 22.3135700 | 73.2774083  | <a href="https://www.inaturalist.org/observations/120809272">https://www.inaturalist.org/observations/120809272</a> |
| 188 | <i>Anthus trivialis</i> | Tree Pipit | 2022/1/4   | 1 | 0 | 22.3135733 | 73.2773983  | <a href="https://www.inaturalist.org/observations/120809262">https://www.inaturalist.org/observations/120809262</a> |
| 189 | <i>Anthus trivialis</i> | Tree Pipit | 2022/1/4   | 2 | 0 | 22.3178442 | 73.2794845  | <a href="https://www.inaturalist.org/observations/104429330">https://www.inaturalist.org/observations/104429330</a> |
| 190 | <i>Anthus trivialis</i> | Tree Pipit | 2020/10/18 | 2 | 0 | 22.3178442 | 73.2794845  | <a href="https://www.inaturalist.org/observations/62891669">https://www.inaturalist.org/observations/62891669</a>   |
| 191 | <i>Anthus trivialis</i> | Tree Pipit | 2021/1/19  | 1 | 0 | 22.3766340 | 70.0991232  | <a href="https://www.inaturalist.org/observations/94235377">https://www.inaturalist.org/observations/94235377</a>   |
| 192 | <i>Anthus trivialis</i> | Tree Pipit | 2021/12/24 | 1 | 0 | 22.3880553 | 70.2220210  | <a href="https://www.inaturalist.org/observations/136772361">https://www.inaturalist.org/observations/136772361</a> |
| 193 | <i>Anthus trivialis</i> | Tree Pipit | 2022/3/5   | 2 | 0 | 22.4427777 | 114.0387911 | <a href="https://www.inaturalist.org/observations/108496802">https://www.inaturalist.org/observations/108496802</a> |
| 194 | <i>Anthus trivialis</i> | Tree Pipit | 2022/1/23  | 2 | 0 | 22.4917467 | 73.5633733  | <a href="https://www.inaturalist.org/observations/120517107">https://www.inaturalist.org/observations/120517107</a> |
| 195 | <i>Anthus trivialis</i> | Tree Pipit | 2022/3/16  | 1 | 0 | 22.4917555 | 114.0416703 | <a href="https://www.inaturalist.org/observations/115135426">https://www.inaturalist.org/observations/115135426</a> |
| 196 | <i>Anthus trivialis</i> | Tree Pipit | 2022/3/17  | 0 | 0 | 22.4932137 | 114.0451505 | <a href="https://www.inaturalist.org/observations/118533835">https://www.inaturalist.org/observations/118533835</a> |
| 197 | <i>Anthus trivialis</i> | Tree Pipit | 2022/3/4   | 0 | 0 | 22.4935050 | 114.0455799 | <a href="https://www.inaturalist.org/observations/118533826">https://www.inaturalist.org/observations/118533826</a> |
| 198 | <i>Anthus trivialis</i> | Tree Pipit | 2022/3/7   | 3 | 0 | 22.4950569 | 114.0339342 | <a href="https://www.inaturalist.org/observations/108092470">https://www.inaturalist.org/observations/108092470</a> |

|     |                  |            |            |   |   |            |             |                                                                                                                     |
|-----|------------------|------------|------------|---|---|------------|-------------|---------------------------------------------------------------------------------------------------------------------|
| 199 | Anthus trivialis | Tree Pipit | 2022/3/6   | 1 | 0 | 22.4950724 | 114.0339231 | <a href="https://www.inaturalist.org/observations/108101902">https://www.inaturalist.org/observations/108101902</a> |
| 200 | Anthus trivialis | Tree Pipit | 2014/10/4  | 1 | 0 | 22.5645175 | 72.9288710  | <a href="https://www.inaturalist.org/observations/39915535">https://www.inaturalist.org/observations/39915535</a>   |
| 201 | Anthus trivialis | Tree Pipit | 2022/1/30  | 1 | 0 | 22.9177673 | 77.7222939  | <a href="https://www.inaturalist.org/observations/143852559">https://www.inaturalist.org/observations/143852559</a> |
| 202 | Anthus trivialis | Tree Pipit | 2022/11/28 | 1 | 0 | 22.9916412 | 86.9999576  | <a href="https://www.inaturalist.org/observations/143234303">https://www.inaturalist.org/observations/143234303</a> |
| 203 | Anthus trivialis | Tree Pipit | 2022/11/28 | 1 | 0 | 22.9916521 | 86.9999962  | <a href="https://www.inaturalist.org/observations/143234304">https://www.inaturalist.org/observations/143234304</a> |
| 204 | Anthus trivialis | Tree Pipit | 2021/1/3   | 2 | 0 | 23.0121448 | 72.4354762  | <a href="https://www.inaturalist.org/observations/67792438">https://www.inaturalist.org/observations/67792438</a>   |
| 205 | Anthus trivialis | Tree Pipit | 2021/1/22  | 1 | 0 | 23.2490759 | 75.7779662  | <a href="https://www.inaturalist.org/observations/68485894">https://www.inaturalist.org/observations/68485894</a>   |
| 206 | Anthus trivialis | Tree Pipit | 2022/1/6   | 1 | 0 | 23.2639930 | 77.4968080  | <a href="https://www.inaturalist.org/observations/104517615">https://www.inaturalist.org/observations/104517615</a> |
| 207 | Anthus trivialis | Tree Pipit | 2022/10/8  | 2 | 0 | 23.2837629 | 71.7613757  | <a href="https://www.inaturalist.org/observations/138364146">https://www.inaturalist.org/observations/138364146</a> |
| 208 | Anthus trivialis | Tree Pipit | 2022/10/7  | 2 | 0 | 23.2843542 | 71.7611397  | <a href="https://www.inaturalist.org/observations/138285336">https://www.inaturalist.org/observations/138285336</a> |
| 209 | Anthus trivialis | Tree Pipit | 2008/11/3  | 2 | 0 | 23.3353213 | 71.7784869  | <a href="https://www.inaturalist.org/observations/7417173">https://www.inaturalist.org/observations/7417173</a>     |
| 210 | Anthus trivialis | Tree Pipit | 2021/2/5   | 0 | 0 | 23.3728047 | 72.0390148  | <a href="https://www.inaturalist.org/observations/69196974">https://www.inaturalist.org/observations/69196974</a>   |
| 211 | Anthus trivialis | Tree Pipit | 2021/2/5   | 1 | 0 | 23.3741274 | 72.0393457  | <a href="https://www.inaturalist.org/observations/69193738">https://www.inaturalist.org/observations/69193738</a>   |
| 212 | Anthus trivialis | Tree Pipit | 2022/10/24 | 1 | 0 | 23.3743514 | 72.0394333  | <a href="https://www.inaturalist.org/observations/139870593">https://www.inaturalist.org/observations/139870593</a> |
| 213 | Anthus trivialis | Tree Pipit | 2022/10/24 | 1 | 0 | 23.3746466 | 72.0386377  | <a href="https://www.inaturalist.org/observations/139870618">https://www.inaturalist.org/observations/139870618</a> |
| 214 | Anthus trivialis | Tree Pipit | 2022/11/12 | 1 | 0 | 23.3746761 | 72.0384768  | <a href="https://www.inaturalist.org/observations/141774169">https://www.inaturalist.org/observations/141774169</a> |
| 215 | Anthus trivialis | Tree Pipit | 2022/11/12 | 1 | 0 | 23.3746761 | 72.0384768  | <a href="https://www.inaturalist.org/observations/141774170">https://www.inaturalist.org/observations/141774170</a> |
| 216 | Anthus trivialis | Tree Pipit | 2022/10/24 | 1 | 0 | 23.3748687 | 72.0388972  | <a href="https://www.inaturalist.org/observations/139870615">https://www.inaturalist.org/observations/139870615</a> |
| 217 | Anthus trivialis | Tree Pipit | 2021/2/14  | 1 | 0 | 23.3837311 | 72.0361921  | <a href="https://www.inaturalist.org/observations/69676129">https://www.inaturalist.org/observations/69676129</a>   |
| 218 | Anthus trivialis | Tree Pipit | 2018/10/12 | 1 | 0 | 23.5862133 | 87.3245550  | <a href="https://www.inaturalist.org/observations/17468297">https://www.inaturalist.org/observations/17468297</a>   |
| 219 | Anthus trivialis | Tree Pipit | 2017/1/9   | 1 | 0 | 23.6176353 | 87.2398899  | <a href="https://www.inaturalist.org/observations/6140462">https://www.inaturalist.org/observations/6140462</a>     |
| 220 | Anthus trivialis | Tree Pipit | 2022/1/9   | 0 | 0 | 23.8011930 | 86.8275570  | <a href="https://www.inaturalist.org/observations/104717608">https://www.inaturalist.org/observations/104717608</a> |
| 221 | Anthus trivialis | Tree Pipit | 2021/12/23 | 0 | 0 | 24.4810528 | 73.6691660  | <a href="https://www.inaturalist.org/observations/103518890">https://www.inaturalist.org/observations/103518890</a> |
| 222 | Anthus trivialis | Tree Pipit | 2017/11/13 | 1 | 0 | 24.5854450 | 73.7124790  | <a href="https://www.inaturalist.org/observations/31165114">https://www.inaturalist.org/observations/31165114</a>   |
| 223 | Anthus trivialis | Tree Pipit | 2022/10/16 | 0 | 0 | 24.5925909 | 72.7156274  | <a href="https://www.inaturalist.org/observations/139519496">https://www.inaturalist.org/observations/139519496</a> |

|     |                         |            |            |   |   |            |             |                                                                                                                     |
|-----|-------------------------|------------|------------|---|---|------------|-------------|---------------------------------------------------------------------------------------------------------------------|
| 224 | <i>Anthus trivialis</i> | Tree Pipit | 2022/10/15 | 1 | 0 | 24.5925909 | 72.7156274  | <a href="https://www.inaturalist.org/observations/139519414">https://www.inaturalist.org/observations/139519414</a> |
| 225 | <i>Anthus trivialis</i> | Tree Pipit | 2022/10/15 | 1 | 0 | 24.5925909 | 72.7156274  | <a href="https://www.inaturalist.org/observations/139519427">https://www.inaturalist.org/observations/139519427</a> |
| 226 | <i>Anthus trivialis</i> | Tree Pipit | 2022/10/15 | 1 | 0 | 24.5925909 | 72.7156274  | <a href="https://www.inaturalist.org/observations/139519431">https://www.inaturalist.org/observations/139519431</a> |
| 227 | <i>Anthus trivialis</i> | Tree Pipit | 2020/2/2   | 2 | 0 | 24.6922245 | 75.5688610  | <a href="https://www.inaturalist.org/observations/40595427">https://www.inaturalist.org/observations/40595427</a>   |
| 228 | <i>Anthus trivialis</i> | Tree Pipit | 2020/2/2   | 2 | 0 | 24.6940961 | 75.5698909  | <a href="https://www.inaturalist.org/observations/40595413">https://www.inaturalist.org/observations/40595413</a>   |
| 229 | <i>Anthus trivialis</i> | Tree Pipit | 2020/2/1   | 2 | 0 | 24.6956557 | 75.5729808  | <a href="https://www.inaturalist.org/observations/40595381">https://www.inaturalist.org/observations/40595381</a>   |
| 230 | <i>Anthus trivialis</i> | Tree Pipit | 2013/11/3  | 0 | 0 | 24.8421769 | 121.9412716 | <a href="https://www.inaturalist.org/observations/62767187">https://www.inaturalist.org/observations/62767187</a>   |
| 231 | <i>Anthus trivialis</i> | Tree Pipit | 2021/4/2   | 2 | 0 | 25.3101124 | 91.9025971  | <a href="https://www.inaturalist.org/observations/83498069">https://www.inaturalist.org/observations/83498069</a>   |
| 232 | <i>Anthus trivialis</i> | Tree Pipit | 2018/9/12  | 2 | 0 | 25.3314134 | 74.7759465  | <a href="https://www.inaturalist.org/observations/121383772">https://www.inaturalist.org/observations/121383772</a> |
| 233 | <i>Anthus trivialis</i> | Tree Pipit | 2020/2/27  | 1 | 0 | 26.0173274 | 76.5025742  | <a href="https://www.inaturalist.org/observations/104673074">https://www.inaturalist.org/observations/104673074</a> |
| 234 | <i>Anthus trivialis</i> | Tree Pipit | 2020/2/26  | 0 | 0 | 26.0173274 | 76.5025742  | <a href="https://www.inaturalist.org/observations/104668520">https://www.inaturalist.org/observations/104668520</a> |
| 235 | <i>Anthus trivialis</i> | Tree Pipit | 2017/11/26 | 1 | 0 | 26.9555478 | 78.3646801  | <a href="https://www.inaturalist.org/observations/69975119">https://www.inaturalist.org/observations/69975119</a>   |
| 236 | <i>Anthus trivialis</i> | Tree Pipit | 2013/12/28 | 1 | 0 | 27.8094852 | 74.4351838  | <a href="https://www.inaturalist.org/observations/36297247">https://www.inaturalist.org/observations/36297247</a>   |
| 237 | <i>Anthus trivialis</i> | Tree Pipit | 2013/1/14  | 1 | 0 | 28.4614365 | 76.8909361  | <a href="https://www.inaturalist.org/observations/31516284">https://www.inaturalist.org/observations/31516284</a>   |
| 238 | <i>Anthus trivialis</i> | Tree Pipit | 2011/1/23  | 2 | 0 | 28.5324253 | 76.5517131  | <a href="https://www.inaturalist.org/observations/31491915">https://www.inaturalist.org/observations/31491915</a>   |
| 239 | <i>Anthus trivialis</i> | Tree Pipit | 2017/12/6  | 1 | 0 | 29.3443090 | 79.5294318  | <a href="https://www.inaturalist.org/observations/44373234">https://www.inaturalist.org/observations/44373234</a>   |
| 240 | <i>Anthus trivialis</i> | Tree Pipit | 2019/2/9   | 2 | 0 | 29.5062635 | 79.6164390  | <a href="https://www.inaturalist.org/observations/37779449">https://www.inaturalist.org/observations/37779449</a>   |
| 241 | <i>Anthus trivialis</i> | Tree Pipit | 2016/12/13 | 1 | 0 | 29.5300138 | 78.7746603  | <a href="https://www.inaturalist.org/observations/41680173">https://www.inaturalist.org/observations/41680173</a>   |
| 242 | <i>Anthus trivialis</i> | Tree Pipit | 2019/9/3   | 1 | 0 | 30.3411208 | 78.0014706  | <a href="https://www.inaturalist.org/observations/32951099">https://www.inaturalist.org/observations/32951099</a>   |
| 243 | <i>Anthus trivialis</i> | Tree Pipit | 2017/9/14  | 1 | 0 | 30.6475926 | 78.9882083  | <a href="https://www.inaturalist.org/observations/80464592">https://www.inaturalist.org/observations/80464592</a>   |
| 244 | <i>Anthus trivialis</i> | Tree Pipit | 2021/2/2   | 2 | 0 | 30.8029302 | 76.7298368  | <a href="https://www.inaturalist.org/observations/134740655">https://www.inaturalist.org/observations/134740655</a> |
| 245 | <i>Anthus trivialis</i> | Tree Pipit | 2018/8/26  | 0 | 0 | 30.8106399 | 76.7094924  | <a href="https://www.inaturalist.org/observations/135481650">https://www.inaturalist.org/observations/135481650</a> |
| 246 | <i>Anthus trivialis</i> | Tree Pipit | 2017/4/5   | 1 | 0 | 32.0419148 | 76.7199892  | <a href="https://www.inaturalist.org/observations/64390660">https://www.inaturalist.org/observations/64390660</a>   |

| No | scientific name | common name  | date       | NIA | NID | latitude   | longitude  | url                                                                                                                 |
|----|-----------------|--------------|------------|-----|-----|------------|------------|---------------------------------------------------------------------------------------------------------------------|
| 1  | Bubulcus ibis   | Cattle Egret | 2014/4/6   | 2   | 0   | -9.4875560 | 34.0237500 | <a href="http://www.inaturalist.org/observations/610618">http://www.inaturalist.org/observations/610618</a>         |
| 2  | Bubulcus ibis   | Cattle Egret | 2014/4/26  | 1   | 0   | -8.6001083 | 31.1840083 | <a href="https://www.inaturalist.org/observations/71890161">https://www.inaturalist.org/observations/71890161</a>   |
| 3  | Bubulcus ibis   | Cattle Egret | 2015/10/12 | 4   | 0   | -8.1892000 | 36.6841050 | <a href="http://www.inaturalist.org/observations/2211107">http://www.inaturalist.org/observations/2211107</a>       |
| 4  | Bubulcus ibis   | Cattle Egret | 2016/10/11 | 4   | 0   | -7.9785222 | 39.7290667 | <a href="http://www.inaturalist.org/observations/4334928">http://www.inaturalist.org/observations/4334928</a>       |
| 5  | Bubulcus ibis   | Cattle Egret | 2022/11/24 | 1   | 0   | -7.9691861 | 39.7398430 | <a href="https://www.inaturalist.org/observations/143722801">https://www.inaturalist.org/observations/143722801</a> |
| 6  | Bubulcus ibis   | Cattle Egret | 2008/1/5   | 5   | 0   | -7.8698950 | 39.7549511 | <a href="https://www.inaturalist.org/observations/7557358">https://www.inaturalist.org/observations/7557358</a>     |
| 7  | Bubulcus ibis   | Cattle Egret | 2017/10/20 | 4   | 0   | -7.7684300 | 38.2311233 | <a href="https://www.inaturalist.org/observations/8640652">https://www.inaturalist.org/observations/8640652</a>     |
| 8  | Bubulcus ibis   | Cattle Egret | 2017/10/21 | 2   | 0   | -7.7660267 | 38.2323367 | <a href="https://www.inaturalist.org/observations/8663925">https://www.inaturalist.org/observations/8663925</a>     |
| 9  | Bubulcus ibis   | Cattle Egret | 2017/10/20 | 1   | 0   | -7.7631535 | 38.2236995 | <a href="https://www.inaturalist.org/observations/110898004">https://www.inaturalist.org/observations/110898004</a> |
| 10 | Bubulcus ibis   | Cattle Egret | 2017/10/21 | 1   | 0   | -7.6787238 | 38.0504616 | <a href="https://www.inaturalist.org/observations/107057081">https://www.inaturalist.org/observations/107057081</a> |
| 11 | Bubulcus ibis   | Cattle Egret | 2017/10/21 | 3   | 0   | -7.6735950 | 38.0727183 | <a href="https://www.inaturalist.org/observations/8741238">https://www.inaturalist.org/observations/8741238</a>     |
| 12 | Bubulcus ibis   | Cattle Egret | 2011/11/14 | 2   | 0   | -7.6672964 | 38.1540222 | <a href="https://www.inaturalist.org/observations/68207074">https://www.inaturalist.org/observations/68207074</a>   |
| 13 | Bubulcus ibis   | Cattle Egret | 2017/1/28  | 1   | 0   | -7.6567900 | 38.0944667 | <a href="https://www.inaturalist.org/observations/86568274">https://www.inaturalist.org/observations/86568274</a>   |
| 14 | Bubulcus ibis   | Cattle Egret | 2014/6/4   | 1   | 0   | -7.6566306 | 38.1118056 | <a href="https://www.inaturalist.org/observations/34868393">https://www.inaturalist.org/observations/34868393</a>   |
| 15 | Bubulcus ibis   | Cattle Egret | 2017/10/21 | 4   | 0   | -7.6511850 | 38.1054783 | <a href="https://www.inaturalist.org/observations/8684000">https://www.inaturalist.org/observations/8684000</a>     |
| 16 | Bubulcus ibis   | Cattle Egret | 2017/10/21 | 3   | 0   | -7.6494467 | 38.1057917 | <a href="https://www.inaturalist.org/observations/8684003">https://www.inaturalist.org/observations/8684003</a>     |
| 17 | Bubulcus ibis   | Cattle Egret | 2016/10/16 | 4   | 0   | -7.6481889 | 38.1047694 | <a href="http://www.inaturalist.org/observations/4427159">http://www.inaturalist.org/observations/4427159</a>       |
| 18 | Bubulcus ibis   | Cattle Egret | 2017/7/24  | 4   | 0   | -7.6429017 | 38.0442717 | <a href="https://www.inaturalist.org/observations/7248179">https://www.inaturalist.org/observations/7248179</a>     |
| 19 | Bubulcus ibis   | Cattle Egret | 2018/1/20  | 3   | 0   | -7.3475662 | 37.1345766 | <a href="https://www.inaturalist.org/observations/9866298">https://www.inaturalist.org/observations/9866298</a>     |
| 20 | Bubulcus ibis   | Cattle Egret | 2012/12/10 | 2   | 0   | -7.3203731 | 34.9300932 | <a href="https://www.inaturalist.org/observations/24376732">https://www.inaturalist.org/observations/24376732</a>   |
| 21 | Bubulcus ibis   | Cattle Egret | 2021/7/26  | 2   | 0   | -6.9456008 | 31.2845259 | <a href="https://www.inaturalist.org/observations/101079122">https://www.inaturalist.org/observations/101079122</a> |
| 22 | Bubulcus ibis   | Cattle Egret | 2021/9/28  | 2   | 0   | -6.8981556 | 31.1865139 | <a href="https://www.inaturalist.org/observations/97642833">https://www.inaturalist.org/observations/97642833</a>   |
| 23 | Bubulcus ibis   | Cattle Egret | 2022/7/22  | 1   | 0   | -6.8520287 | 37.6575913 | <a href="https://www.inaturalist.org/observations/144376477">https://www.inaturalist.org/observations/144376477</a> |
| 24 | Bubulcus ibis   | Cattle Egret | 2014/7/14  | 3   | 0   | -6.8510000 | 37.6390000 | <a href="http://www.inaturalist.org/observations/4650900">http://www.inaturalist.org/observations/4650900</a>       |

|    |               |              |            |   |   |            |            |                                                                                                                     |
|----|---------------|--------------|------------|---|---|------------|------------|---------------------------------------------------------------------------------------------------------------------|
| 25 | Bubulcus ibis | Cattle Egret | 2014/7/14  | 4 | 0 | -6.8510000 | 37.6390000 | <a href="http://www.inaturalist.org/observations/4650914">http://www.inaturalist.org/observations/4650914</a>       |
| 26 | Bubulcus ibis | Cattle Egret | 2018/6/3   | 2 | 0 | -6.8170800 | 39.2910017 | <a href="https://www.inaturalist.org/observations/14709036">https://www.inaturalist.org/observations/14709036</a>   |
| 27 | Bubulcus ibis | Cattle Egret | 2018/6/3   | 0 | 0 | -6.8170383 | 39.2909333 | <a href="https://www.inaturalist.org/observations/14709039">https://www.inaturalist.org/observations/14709039</a>   |
| 28 | Bubulcus ibis | Cattle Egret | 2017/10/25 | 2 | 0 | -6.8125450 | 39.2982183 | <a href="https://www.inaturalist.org/observations/8831483">https://www.inaturalist.org/observations/8831483</a>     |
| 29 | Bubulcus ibis | Cattle Egret | 2018/7/24  | 3 | 0 | -6.8113244 | 37.6707231 | <a href="https://www.inaturalist.org/observations/14644955">https://www.inaturalist.org/observations/14644955</a>   |
| 30 | Bubulcus ibis | Cattle Egret | 2017/10/15 | 4 | 0 | -6.7821700 | 39.0375550 | <a href="https://www.inaturalist.org/observations/8462590">https://www.inaturalist.org/observations/8462590</a>     |
| 31 | Bubulcus ibis | Cattle Egret | 2017/10/15 | 1 | 0 | -6.7819201 | 39.0374488 | <a href="https://www.inaturalist.org/observations/69894872">https://www.inaturalist.org/observations/69894872</a>   |
| 32 | Bubulcus ibis | Cattle Egret | 2019/6/21  | 2 | 0 | -6.7814682 | 39.2052484 | <a href="https://www.inaturalist.org/observations/28667908">https://www.inaturalist.org/observations/28667908</a>   |
| 33 | Bubulcus ibis | Cattle Egret | 2018/1/29  | 2 | 0 | -6.7334853 | 39.2386365 | <a href="https://www.inaturalist.org/observations/9726440">https://www.inaturalist.org/observations/9726440</a>     |
| 34 | Bubulcus ibis | Cattle Egret | 2022/6/8   | 1 | 0 | -6.7322667 | 39.2381133 | <a href="https://www.inaturalist.org/observations/123338754">https://www.inaturalist.org/observations/123338754</a> |
| 35 | Bubulcus ibis | Cattle Egret | 2018/1/27  | 4 | 0 | -6.4746326 | 38.8607025 | <a href="https://www.inaturalist.org/observations/9714869">https://www.inaturalist.org/observations/9714869</a>     |
| 36 | Bubulcus ibis | Cattle Egret | 2018/6/2   | 2 | 0 | -6.3243650 | 38.8158783 | <a href="https://www.inaturalist.org/observations/14356977">https://www.inaturalist.org/observations/14356977</a>   |
| 37 | Bubulcus ibis | Cattle Egret | 2021/12/30 | 1 | 0 | -6.2783067 | 39.3655850 | <a href="https://www.inaturalist.org/observations/104471795">https://www.inaturalist.org/observations/104471795</a> |
| 38 | Bubulcus ibis | Cattle Egret | 2020/12/20 | 1 | 0 | -6.2707389 | 39.4184082 | <a href="https://www.inaturalist.org/observations/67754538">https://www.inaturalist.org/observations/67754538</a>   |
| 39 | Bubulcus ibis | Cattle Egret | 2019/10/1  | 2 | 0 | -6.2623754 | 39.4146368 | <a href="https://www.inaturalist.org/observations/66054680">https://www.inaturalist.org/observations/66054680</a>   |
| 40 | Bubulcus ibis | Cattle Egret | 2018/9/14  | 6 | 0 | -6.2036167 | 39.2083750 | <a href="https://www.inaturalist.org/observations/16516994">https://www.inaturalist.org/observations/16516994</a>   |
| 41 | Bubulcus ibis | Cattle Egret | 2017/2/16  | 0 | 0 | -6.1579134 | 39.1984099 | <a href="https://www.inaturalist.org/observations/106108987">https://www.inaturalist.org/observations/106108987</a> |
| 42 | Bubulcus ibis | Cattle Egret | 2019/3/4   | 4 | 0 | -6.1145617 | 39.2546633 | <a href="https://www.inaturalist.org/observations/21201700">https://www.inaturalist.org/observations/21201700</a>   |
| 43 | Bubulcus ibis | Cattle Egret | 2018/7/3   | 4 | 0 | -6.1030920 | 39.2245606 | <a href="https://www.inaturalist.org/observations/15006462">https://www.inaturalist.org/observations/15006462</a>   |
| 44 | Bubulcus ibis | Cattle Egret | 2018/7/3   | 3 | 0 | -6.1030920 | 39.2245606 | <a href="https://www.inaturalist.org/observations/15006464">https://www.inaturalist.org/observations/15006464</a>   |
| 45 | Bubulcus ibis | Cattle Egret | 2019/9/19  | 1 | 0 | -6.0689507 | 39.3598352 | <a href="https://www.inaturalist.org/observations/34028017">https://www.inaturalist.org/observations/34028017</a>   |
| 46 | Bubulcus ibis | Cattle Egret | 2019/9/17  | 1 | 0 | -6.0268369 | 39.3979514 | <a href="https://www.inaturalist.org/observations/33479476">https://www.inaturalist.org/observations/33479476</a>   |
| 47 | Bubulcus ibis | Cattle Egret | 2021/12/30 | 1 | 0 | -6.0193667 | 39.3249000 | <a href="https://www.inaturalist.org/observations/104471794">https://www.inaturalist.org/observations/104471794</a> |
| 48 | Bubulcus ibis | Cattle Egret | 2022/1/4   | 1 | 0 | -5.9938683 | 39.2674417 | <a href="https://www.inaturalist.org/observations/104625721">https://www.inaturalist.org/observations/104625721</a> |
| 49 | Bubulcus ibis | Cattle Egret | 2022/1/2   | 1 | 0 | -5.9557667 | 39.3109117 | <a href="https://www.inaturalist.org/observations/104570737">https://www.inaturalist.org/observations/104570737</a> |



|    |               |              |            |   |   |            |            |                                                                                                                     |
|----|---------------|--------------|------------|---|---|------------|------------|---------------------------------------------------------------------------------------------------------------------|
| 50 | Bubulcus ibis | Cattle Egret | 2022/5/2   | 1 | 0 | -5.7370001 | 39.2911981 | <a href="https://www.inaturalist.org/observations/114683557">https://www.inaturalist.org/observations/114683557</a> |
| 51 | Bubulcus ibis | Cattle Egret | 2022/1/4   | 1 | 0 | -5.7276167 | 39.3101900 | <a href="https://www.inaturalist.org/observations/104625720">https://www.inaturalist.org/observations/104625720</a> |
| 52 | Bubulcus ibis | Cattle Egret | 2021/2/15  | 1 | 0 | -5.0942483 | 30.8220350 | <a href="https://www.inaturalist.org/observations/70236604">https://www.inaturalist.org/observations/70236604</a>   |
| 53 | Bubulcus ibis | Cattle Egret | 2021/2/17  | 1 | 0 | -5.0896147 | 30.8973471 | <a href="https://www.inaturalist.org/observations/70890777">https://www.inaturalist.org/observations/70890777</a>   |
| 54 | Bubulcus ibis | Cattle Egret | 2021/2/17  | 1 | 0 | -5.0680606 | 30.8810222 | <a href="https://www.inaturalist.org/observations/71153834">https://www.inaturalist.org/observations/71153834</a>   |
| 55 | Bubulcus ibis | Cattle Egret | 2021/2/16  | 1 | 0 | -5.0440908 | 30.9242083 | <a href="https://www.inaturalist.org/observations/70432803">https://www.inaturalist.org/observations/70432803</a>   |
| 56 | Bubulcus ibis | Cattle Egret | 2021/2/16  | 1 | 0 | -5.0434448 | 30.9322426 | <a href="https://www.inaturalist.org/observations/70432834">https://www.inaturalist.org/observations/70432834</a>   |
| 57 | Bubulcus ibis | Cattle Egret | 2021/2/16  | 1 | 0 | -5.0427995 | 30.9293708 | <a href="https://www.inaturalist.org/observations/70432820">https://www.inaturalist.org/observations/70432820</a>   |
| 58 | Bubulcus ibis | Cattle Egret | 2009/1/9   | 4 | 0 | -5.0319352 | 39.7755571 | <a href="https://www.inaturalist.org/observations/7566718">https://www.inaturalist.org/observations/7566718</a>     |
| 59 | Bubulcus ibis | Cattle Egret | 2022/11/4  | 2 | 0 | -4.9207817 | 39.6895454 | <a href="https://www.inaturalist.org/observations/143774147">https://www.inaturalist.org/observations/143774147</a> |
| 60 | Bubulcus ibis | Cattle Egret | 2021/11/12 | 1 | 0 | -4.9003400 | 39.6781740 | <a href="https://www.inaturalist.org/observations/106800204">https://www.inaturalist.org/observations/106800204</a> |
| 61 | Bubulcus ibis | Cattle Egret | 2021/2/19  | 1 | 0 | -4.5488619 | 33.1651808 | <a href="https://www.inaturalist.org/observations/70593936">https://www.inaturalist.org/observations/70593936</a>   |
| 62 | Bubulcus ibis | Cattle Egret | 2021/2/20  | 1 | 0 | -4.3983790 | 34.0608193 | <a href="https://www.inaturalist.org/observations/71280210">https://www.inaturalist.org/observations/71280210</a>   |
| 63 | Bubulcus ibis | Cattle Egret | 2022/7/18  | 1 | 0 | -4.0828333 | 36.1266383 | <a href="https://www.inaturalist.org/observations/128363187">https://www.inaturalist.org/observations/128363187</a> |
| 64 | Bubulcus ibis | Cattle Egret | 2007/10/19 | 3 | 0 | -4.0425799 | 36.1215457 | <a href="https://www.inaturalist.org/observations/19703508">https://www.inaturalist.org/observations/19703508</a>   |
| 65 | Bubulcus ibis | Cattle Egret | 2013/8/12  | 1 | 0 | -4.0422507 | 36.1208931 | <a href="https://www.inaturalist.org/observations/72276709">https://www.inaturalist.org/observations/72276709</a>   |
| 66 | Bubulcus ibis | Cattle Egret | 2022/1/26  | 1 | 0 | -4.0227270 | 36.1210400 | <a href="https://www.inaturalist.org/observations/107018806">https://www.inaturalist.org/observations/107018806</a> |
| 67 | Bubulcus ibis | Cattle Egret | 2022/1/26  | 1 | 0 | -4.0187070 | 36.1191430 | <a href="https://www.inaturalist.org/observations/107018798">https://www.inaturalist.org/observations/107018798</a> |
| 68 | Bubulcus ibis | Cattle Egret | 2017/2/2   | 1 | 0 | -3.9889560 | 36.1293980 | <a href="https://www.inaturalist.org/observations/92249408">https://www.inaturalist.org/observations/92249408</a>   |
| 69 | Bubulcus ibis | Cattle Egret | 2018/2/5   | 3 | 0 | -3.7733503 | 35.9698341 | <a href="https://www.inaturalist.org/observations/16659711">https://www.inaturalist.org/observations/16659711</a>   |
| 70 | Bubulcus ibis | Cattle Egret | 2021/5/20  | 1 | 0 | -3.7006900 | 35.8632467 | <a href="https://www.inaturalist.org/observations/80543858">https://www.inaturalist.org/observations/80543858</a>   |
| 71 | Bubulcus ibis | Cattle Egret | 2019/6/5   | 1 | 0 | -3.6873305 | 35.7469595 | <a href="https://www.inaturalist.org/observations/131334501">https://www.inaturalist.org/observations/131334501</a> |
| 72 | Bubulcus ibis | Cattle Egret | 2019/6/6   | 1 | 0 | -3.6473748 | 35.7455004 | <a href="https://www.inaturalist.org/observations/131361641">https://www.inaturalist.org/observations/131361641</a> |
| 73 | Bubulcus ibis | Cattle Egret | 2009/2/15  | 1 | 0 | -3.6190593 | 35.8061779 | <a href="https://www.inaturalist.org/observations/59802416">https://www.inaturalist.org/observations/59802416</a>   |
| 74 | Bubulcus ibis | Cattle Egret | 2022/1/11  | 1 | 0 | -3.6177500 | 35.7381767 | <a href="https://www.inaturalist.org/observations/105165956">https://www.inaturalist.org/observations/105165956</a> |

|    |               |              |            |   |   |            |            |                                                                                                                     |
|----|---------------|--------------|------------|---|---|------------|------------|---------------------------------------------------------------------------------------------------------------------|
| 75 | Bubulcus ibis | Cattle Egret | 2019/9/19  | 2 | 0 | -3.6175318 | 35.7381038 | <a href="https://www.inaturalist.org/observations/33465263">https://www.inaturalist.org/observations/33465263</a>   |
| 76 | Bubulcus ibis | Cattle Egret | 2019/11/16 | 1 | 0 | -3.6145400 | 37.7760117 | <a href="https://www.inaturalist.org/observations/37411563">https://www.inaturalist.org/observations/37411563</a>   |
| 77 | Bubulcus ibis | Cattle Egret | 2014/7/10  | 3 | 0 | -3.5877105 | 35.8195483 | <a href="https://www.inaturalist.org/observations/6620640">https://www.inaturalist.org/observations/6620640</a>     |
| 78 | Bubulcus ibis | Cattle Egret | 2019/10/26 | 2 | 0 | -3.5668481 | 36.9836558 | <a href="https://www.inaturalist.org/observations/105163073">https://www.inaturalist.org/observations/105163073</a> |
| 79 | Bubulcus ibis | Cattle Egret | 2019/11/17 | 1 | 0 | -3.5530056 | 38.1799861 | <a href="https://www.inaturalist.org/observations/37411592">https://www.inaturalist.org/observations/37411592</a>   |
| 80 | Bubulcus ibis | Cattle Egret | 2019/11/15 | 1 | 0 | -3.5420383 | 38.1429667 | <a href="https://www.inaturalist.org/observations/37658444">https://www.inaturalist.org/observations/37658444</a>   |
| 81 | Bubulcus ibis | Cattle Egret | 2022/11/7  | 2 | 0 | -3.5183795 | 37.3639294 | <a href="https://www.inaturalist.org/observations/141907320">https://www.inaturalist.org/observations/141907320</a> |
| 82 | Bubulcus ibis | Cattle Egret | 2022/11/17 | 1 | 0 | -3.5183795 | 37.3639294 | <a href="https://www.inaturalist.org/observations/143546000">https://www.inaturalist.org/observations/143546000</a> |
| 83 | Bubulcus ibis | Cattle Egret | 2019/5/11  | 1 | 0 | -3.5107457 | 36.7353385 | <a href="https://www.inaturalist.org/observations/69796575">https://www.inaturalist.org/observations/69796575</a>   |
| 84 | Bubulcus ibis | Cattle Egret | 2017/4/19  | 5 | 0 | -3.5000000 | 35.8333333 | <a href="https://www.inaturalist.org/observations/6036681">https://www.inaturalist.org/observations/6036681</a>     |
| 85 | Bubulcus ibis | Cattle Egret | 2018/2/11  | 4 | 0 | -3.4957341 | 35.7468419 | <a href="https://www.inaturalist.org/observations/10001712">https://www.inaturalist.org/observations/10001712</a>   |
| 86 | Bubulcus ibis | Cattle Egret | 2019/9/26  | 2 | 0 | -3.4786878 | 33.9378981 | <a href="https://www.inaturalist.org/observations/34197188">https://www.inaturalist.org/observations/34197188</a>   |
| 87 | Bubulcus ibis | Cattle Egret | 2019/5/27  | 1 | 0 | -3.4768414 | 35.6566458 | <a href="https://www.inaturalist.org/observations/105210190">https://www.inaturalist.org/observations/105210190</a> |
| 88 | Bubulcus ibis | Cattle Egret | 2015/2/8   | 2 | 0 | -3.4741033 | 35.3495300 | <a href="https://www.inaturalist.org/observations/23202486">https://www.inaturalist.org/observations/23202486</a>   |
| 89 | Bubulcus ibis | Cattle Egret | 2012/11/26 | 5 | 0 | -3.4719654 | 35.8055757 | <a href="https://www.inaturalist.org/observations/27611632">https://www.inaturalist.org/observations/27611632</a>   |
| 90 | Bubulcus ibis | Cattle Egret | 2012/11/27 | 2 | 0 | -3.4719654 | 35.8055757 | <a href="https://www.inaturalist.org/observations/27611683">https://www.inaturalist.org/observations/27611683</a>   |
| 91 | Bubulcus ibis | Cattle Egret | 2012/6/6   | 2 | 0 | -3.4655450 | 35.7855790 | <a href="http://www.inaturalist.org/observations/606557">http://www.inaturalist.org/observations/606557</a>         |
| 92 | Bubulcus ibis | Cattle Egret | 2019/12/23 | 1 | 0 | -3.4497456 | 35.8116243 | <a href="https://www.inaturalist.org/observations/39882954">https://www.inaturalist.org/observations/39882954</a>   |
| 93 | Bubulcus ibis | Cattle Egret | 2018/12/29 | 3 | 0 | -3.4494430 | 35.8057635 | <a href="https://www.inaturalist.org/observations/57630606">https://www.inaturalist.org/observations/57630606</a>   |
| 94 | Bubulcus ibis | Cattle Egret | 2022/1/10  | 1 | 0 | -3.4233450 | 36.3516800 | <a href="https://www.inaturalist.org/observations/104712135">https://www.inaturalist.org/observations/104712135</a> |
| 95 | Bubulcus ibis | Cattle Egret | 2019/2/11  | 3 | 0 | -3.4227296 | 35.8148061 | <a href="https://www.inaturalist.org/observations/43549176">https://www.inaturalist.org/observations/43549176</a>   |
| 96 | Bubulcus ibis | Cattle Egret | 2010/6/20  | 2 | 0 | -3.4174140 | 35.8364799 | <a href="https://www.inaturalist.org/observations/36732974">https://www.inaturalist.org/observations/36732974</a>   |
| 97 | Bubulcus ibis | Cattle Egret | 2008/7/22  | 1 | 0 | -3.4163450 | 35.8349815 | <a href="https://www.inaturalist.org/observations/68399735">https://www.inaturalist.org/observations/68399735</a>   |
| 98 | Bubulcus ibis | Cattle Egret | 2016/12/28 | 3 | 0 | -3.4152179 | 35.8338545 | <a href="https://www.inaturalist.org/observations/21381230">https://www.inaturalist.org/observations/21381230</a>   |
| 99 | Bubulcus ibis | Cattle Egret | 2019/9/29  | 1 | 0 | -3.4147967 | 35.8347333 | <a href="https://www.inaturalist.org/observations/35092977">https://www.inaturalist.org/observations/35092977</a>   |

|     |               |              |            |   |   |            |            |                                                                                                                     |
|-----|---------------|--------------|------------|---|---|------------|------------|---------------------------------------------------------------------------------------------------------------------|
| 100 | Bubulcus ibis | Cattle Egret | 2016/12/28 | 5 | 0 | -3.4146690 | 35.8350297 | <a href="https://www.inaturalist.org/observations/18818141">https://www.inaturalist.org/observations/18818141</a>   |
| 101 | Bubulcus ibis | Cattle Egret | 2013/2/10  | 0 | 0 | -3.4138433 | 35.8383550 | <a href="https://www.inaturalist.org/observations/34922162">https://www.inaturalist.org/observations/34922162</a>   |
| 102 | Bubulcus ibis | Cattle Egret | 2019/7/26  | 1 | 0 | -3.4133489 | 35.8361624 | <a href="https://www.inaturalist.org/observations/60464043">https://www.inaturalist.org/observations/60464043</a>   |
| 103 | Bubulcus ibis | Cattle Egret | 2019/4/28  | 1 | 0 | -3.4124286 | 35.8267874 | <a href="https://www.inaturalist.org/observations/128775123">https://www.inaturalist.org/observations/128775123</a> |
| 104 | Bubulcus ibis | Cattle Egret | 2019/2/11  | 2 | 0 | -3.4096779 | 35.8297921 | <a href="https://www.inaturalist.org/observations/43547037">https://www.inaturalist.org/observations/43547037</a>   |
| 105 | Bubulcus ibis | Cattle Egret | 2019/7/26  | 1 | 0 | -3.4094733 | 35.8402322 | <a href="https://www.inaturalist.org/observations/60464013">https://www.inaturalist.org/observations/60464013</a>   |
| 106 | Bubulcus ibis | Cattle Egret | 2019/8/29  | 2 | 0 | -3.4093203 | 37.4077853 | <a href="https://www.inaturalist.org/observations/31917779">https://www.inaturalist.org/observations/31917779</a>   |
| 107 | Bubulcus ibis | Cattle Egret | 2018/7/10  | 3 | 0 | -3.4034414 | 35.8201367 | <a href="https://www.inaturalist.org/observations/14265737">https://www.inaturalist.org/observations/14265737</a>   |
| 108 | Bubulcus ibis | Cattle Egret | 2019/4/28  | 1 | 0 | -3.3927223 | 35.8355422 | <a href="https://www.inaturalist.org/observations/128775133">https://www.inaturalist.org/observations/128775133</a> |
| 109 | Bubulcus ibis | Cattle Egret | 2018/10/26 | 2 | 0 | -3.3862912 | 36.8621330 | <a href="https://www.inaturalist.org/observations/107185708">https://www.inaturalist.org/observations/107185708</a> |
| 110 | Bubulcus ibis | Cattle Egret | 2016/2/4   | 2 | 0 | -3.3860360 | 35.8446300 | <a href="http://www.inaturalist.org/observations/2784767">http://www.inaturalist.org/observations/2784767</a>       |
| 111 | Bubulcus ibis | Cattle Egret | 2022/2/6   | 1 | 0 | -3.3808202 | 35.8538574 | <a href="https://www.inaturalist.org/observations/106504371">https://www.inaturalist.org/observations/106504371</a> |
| 112 | Bubulcus ibis | Cattle Egret | 2021/2/21  | 1 | 0 | -3.3803758 | 36.8370165 | <a href="https://www.inaturalist.org/observations/71781138">https://www.inaturalist.org/observations/71781138</a>   |
| 113 | Bubulcus ibis | Cattle Egret | 2007/1/24  | 1 | 0 | -3.3702837 | 35.8463396 | <a href="https://www.inaturalist.org/observations/143769156">https://www.inaturalist.org/observations/143769156</a> |
| 114 | Bubulcus ibis | Cattle Egret | 2019/3/15  | 1 | 0 | -3.3604281 | 36.6097706 | <a href="https://www.inaturalist.org/observations/119546667">https://www.inaturalist.org/observations/119546667</a> |
| 115 | Bubulcus ibis | Cattle Egret | 2019/9/2   | 1 | 0 | -3.3461103 | 37.3406924 | <a href="https://www.inaturalist.org/observations/31976147">https://www.inaturalist.org/observations/31976147</a>   |
| 116 | Bubulcus ibis | Cattle Egret | 2017/8/27  | 1 | 0 | -3.3179828 | 36.8825110 | <a href="https://www.inaturalist.org/observations/137149122">https://www.inaturalist.org/observations/137149122</a> |
| 117 | Bubulcus ibis | Cattle Egret | 2022/10/31 | 1 | 0 | -3.3109777 | 37.6922379 | <a href="https://www.inaturalist.org/observations/140665697">https://www.inaturalist.org/observations/140665697</a> |
| 118 | Bubulcus ibis | Cattle Egret | 2022/1/4   | 1 | 0 | -3.2886671 | 39.0550547 | <a href="https://www.inaturalist.org/observations/112714234">https://www.inaturalist.org/observations/112714234</a> |
| 119 | Bubulcus ibis | Cattle Egret | 2014/9/14  | 2 | 0 | -3.2499515 | 36.7499542 | <a href="https://www.inaturalist.org/observations/10019908">https://www.inaturalist.org/observations/10019908</a>   |
| 120 | Bubulcus ibis | Cattle Egret | 2019/6/17  | 1 | 0 | -3.2437483 | 36.8102826 | <a href="https://www.inaturalist.org/observations/128232048">https://www.inaturalist.org/observations/128232048</a> |
| 121 | Bubulcus ibis | Cattle Egret | 2019/2/26  | 2 | 0 | -3.2304650 | 35.5438600 | <a href="https://www.inaturalist.org/observations/21110240">https://www.inaturalist.org/observations/21110240</a>   |
| 122 | Bubulcus ibis | Cattle Egret | 2019/2/26  | 3 | 0 | -3.2288200 | 35.5484517 | <a href="https://www.inaturalist.org/observations/21110250">https://www.inaturalist.org/observations/21110250</a>   |
| 123 | Bubulcus ibis | Cattle Egret | 2018/5/21  | 5 | 0 | -3.2261675 | 35.4466595 | <a href="https://www.inaturalist.org/observations/18878671">https://www.inaturalist.org/observations/18878671</a>   |
| 124 | Bubulcus ibis | Cattle Egret | 2018/12/30 | 2 | 0 | -3.2261675 | 35.4466595 | <a href="https://www.inaturalist.org/observations/57864472">https://www.inaturalist.org/observations/57864472</a>   |

|     |               |              |            |   |   |            |            |                                                                                                                     |
|-----|---------------|--------------|------------|---|---|------------|------------|---------------------------------------------------------------------------------------------------------------------|
| 125 | Bubulcus ibis | Cattle Egret | 2014/11/17 | 4 | 0 | -3.2102663 | 35.6005668 | <a href="https://www.inaturalist.org/observations/19774440">https://www.inaturalist.org/observations/19774440</a>   |
| 126 | Bubulcus ibis | Cattle Egret | 2019/2/26  | 2 | 0 | -3.2100400 | 35.5997283 | <a href="https://www.inaturalist.org/observations/21109157">https://www.inaturalist.org/observations/21109157</a>   |
| 127 | Bubulcus ibis | Cattle Egret | 2013/3/6   | 1 | 0 | -3.2094306 | 35.5985983 | <a href="https://www.inaturalist.org/observations/98872354">https://www.inaturalist.org/observations/98872354</a>   |
| 128 | Bubulcus ibis | Cattle Egret | 2018/4/19  | 2 | 0 | -3.2090545 | 35.5807452 | <a href="https://www.inaturalist.org/observations/14482269">https://www.inaturalist.org/observations/14482269</a>   |
| 129 | Bubulcus ibis | Cattle Egret | 2019/6/26  | 1 | 0 | -3.1967172 | 35.5814899 | <a href="https://www.inaturalist.org/observations/33163616">https://www.inaturalist.org/observations/33163616</a>   |
| 130 | Bubulcus ibis | Cattle Egret | 2022/1/4   | 3 | 0 | -3.1960257 | 35.5638640 | <a href="https://www.inaturalist.org/observations/116447000">https://www.inaturalist.org/observations/116447000</a> |
| 131 | Bubulcus ibis | Cattle Egret | 1993/12/27 | 1 | 0 | -3.1884903 | 35.5725635 | <a href="https://www.inaturalist.org/observations/135823408">https://www.inaturalist.org/observations/135823408</a> |
| 132 | Bubulcus ibis | Cattle Egret | 2017/7/11  | 1 | 0 | -3.1810280 | 35.5728850 | <a href="https://www.inaturalist.org/observations/131295306">https://www.inaturalist.org/observations/131295306</a> |
| 133 | Bubulcus ibis | Cattle Egret | 2021/4/12  | 3 | 0 | -3.1808117 | 35.5716583 | <a href="https://www.inaturalist.org/observations/80556000">https://www.inaturalist.org/observations/80556000</a>   |
| 134 | Bubulcus ibis | Cattle Egret | 2020/12/23 | 2 | 0 | -3.1806918 | 35.5579722 | <a href="https://www.inaturalist.org/observations/67786537">https://www.inaturalist.org/observations/67786537</a>   |
| 135 | Bubulcus ibis | Cattle Egret | 2020/12/23 | 1 | 0 | -3.1806918 | 35.5579722 | <a href="https://www.inaturalist.org/observations/67786553">https://www.inaturalist.org/observations/67786553</a>   |
| 136 | Bubulcus ibis | Cattle Egret | 2019/4/27  | 1 | 0 | -3.1798950 | 35.5732555 | <a href="https://www.inaturalist.org/observations/128030508">https://www.inaturalist.org/observations/128030508</a> |
| 137 | Bubulcus ibis | Cattle Egret | 2022/8/11  | 1 | 0 | -3.1795404 | 35.5049421 | <a href="https://www.inaturalist.org/observations/134625817">https://www.inaturalist.org/observations/134625817</a> |
| 138 | Bubulcus ibis | Cattle Egret | 2016/9/7   | 1 | 0 | -3.1788920 | 35.5684429 | <a href="https://www.inaturalist.org/observations/106135320">https://www.inaturalist.org/observations/106135320</a> |
| 139 | Bubulcus ibis | Cattle Egret | 2007/1/27  | 2 | 0 | -3.1768595 | 35.5750216 | <a href="https://www.inaturalist.org/observations/143836079">https://www.inaturalist.org/observations/143836079</a> |
| 140 | Bubulcus ibis | Cattle Egret | 2007/1/27  | 2 | 0 | -3.1768595 | 35.5750216 | <a href="https://www.inaturalist.org/observations/143836114">https://www.inaturalist.org/observations/143836114</a> |
| 141 | Bubulcus ibis | Cattle Egret | 2012/4/15  | 1 | 0 | -3.1743475 | 35.5645975 | <a href="https://www.inaturalist.org/observations/43851118">https://www.inaturalist.org/observations/43851118</a>   |
| 142 | Bubulcus ibis | Cattle Egret | 2014/9/23  | 3 | 0 | -3.1740030 | 35.5638920 | <a href="http://www.inaturalist.org/observations/1988332">http://www.inaturalist.org/observations/1988332</a>       |
| 143 | Bubulcus ibis | Cattle Egret | 2017/2/28  | 4 | 0 | -3.1735485 | 35.5745544 | <a href="https://www.inaturalist.org/observations/9524641">https://www.inaturalist.org/observations/9524641</a>     |
| 144 | Bubulcus ibis | Cattle Egret | 2011/6/10  | 2 | 0 | -3.1727217 | 35.5684436 | <a href="https://www.inaturalist.org/observations/54829201">https://www.inaturalist.org/observations/54829201</a>   |
| 145 | Bubulcus ibis | Cattle Egret | 2021/10/16 | 2 | 0 | -3.1723860 | 35.5231740 | <a href="https://www.inaturalist.org/observations/100184144">https://www.inaturalist.org/observations/100184144</a> |
| 146 | Bubulcus ibis | Cattle Egret | 2021/2/6   | 1 | 0 | -3.1679226 | 35.5804599 | <a href="https://www.inaturalist.org/observations/70506819">https://www.inaturalist.org/observations/70506819</a>   |
| 147 | Bubulcus ibis | Cattle Egret | 2020/12/24 | 2 | 0 | -3.1659640 | 35.5351422 | <a href="https://www.inaturalist.org/observations/82192715">https://www.inaturalist.org/observations/82192715</a>   |
| 148 | Bubulcus ibis | Cattle Egret | 2014/9/30  | 3 | 0 | -3.1654450 | 35.5749820 | <a href="http://www.inaturalist.org/observations/2511757">http://www.inaturalist.org/observations/2511757</a>       |
| 149 | Bubulcus ibis | Cattle Egret | 1991/3/12  | 5 | 0 | -3.1617522 | 35.5876697 | <a href="http://www.inaturalist.org/observations/4456394">http://www.inaturalist.org/observations/4456394</a>       |

|     |               |              |            |   |   |            |            |                                                                                                                     |
|-----|---------------|--------------|------------|---|---|------------|------------|---------------------------------------------------------------------------------------------------------------------|
| 150 | Bubulcus ibis | Cattle Egret | 2018/6/24  | 4 | 0 | -3.1617522 | 35.5876697 | <a href="https://www.inaturalist.org/observations/15092906">https://www.inaturalist.org/observations/15092906</a>   |
| 151 | Bubulcus ibis | Cattle Egret | 2019/7/16  | 3 | 0 | -3.1617522 | 35.5876697 | <a href="https://www.inaturalist.org/observations/30282154">https://www.inaturalist.org/observations/30282154</a>   |
| 152 | Bubulcus ibis | Cattle Egret | 2018/1/23  | 1 | 0 | -3.1617522 | 35.5876697 | <a href="https://www.inaturalist.org/observations/81701024">https://www.inaturalist.org/observations/81701024</a>   |
| 153 | Bubulcus ibis | Cattle Egret | 2009/2/25  | 1 | 0 | -3.1617522 | 35.5876697 | <a href="https://www.inaturalist.org/observations/92408022">https://www.inaturalist.org/observations/92408022</a>   |
| 154 | Bubulcus ibis | Cattle Egret | 2019/6/22  | 1 | 0 | -3.1617522 | 35.5876697 | <a href="https://www.inaturalist.org/observations/138735941">https://www.inaturalist.org/observations/138735941</a> |
| 155 | Bubulcus ibis | Cattle Egret | 2007/2/10  | 1 | 0 | -3.1617522 | 35.5876697 | <a href="https://www.inaturalist.org/observations/142357876">https://www.inaturalist.org/observations/142357876</a> |
| 156 | Bubulcus ibis | Cattle Egret | 2022/8/11  | 3 | 0 | -3.1613842 | 35.5222620 | <a href="https://www.inaturalist.org/observations/138434063">https://www.inaturalist.org/observations/138434063</a> |
| 157 | Bubulcus ibis | Cattle Egret | 2019/7/27  | 1 | 0 | -3.1590952 | 35.5498933 | <a href="https://www.inaturalist.org/observations/60655856">https://www.inaturalist.org/observations/60655856</a>   |
| 158 | Bubulcus ibis | Cattle Egret | 2019/8/23  | 1 | 0 | -3.1587970 | 35.5499340 | <a href="https://www.inaturalist.org/observations/35919995">https://www.inaturalist.org/observations/35919995</a>   |
| 159 | Bubulcus ibis | Cattle Egret | 2017/11/10 | 3 | 0 | -3.1586443 | 35.5501784 | <a href="https://www.inaturalist.org/observations/19390270">https://www.inaturalist.org/observations/19390270</a>   |
| 160 | Bubulcus ibis | Cattle Egret | 2007/10/17 | 4 | 0 | -3.1586220 | 35.5497866 | <a href="https://www.inaturalist.org/observations/19686603">https://www.inaturalist.org/observations/19686603</a>   |
| 161 | Bubulcus ibis | Cattle Egret | 2018/10/21 | 5 | 0 | -3.1586117 | 35.5500617 | <a href="https://www.inaturalist.org/observations/18027665">https://www.inaturalist.org/observations/18027665</a>   |
| 162 | Bubulcus ibis | Cattle Egret | 2016/8/27  | 4 | 0 | -3.1583242 | 35.5495609 | <a href="https://www.inaturalist.org/observations/21262807">https://www.inaturalist.org/observations/21262807</a>   |
| 163 | Bubulcus ibis | Cattle Egret | 2022/1/15  | 1 | 0 | -3.1578533 | 35.5159683 | <a href="https://www.inaturalist.org/observations/105567361">https://www.inaturalist.org/observations/105567361</a> |
| 164 | Bubulcus ibis | Cattle Egret | 2007/10/16 | 3 | 0 | -3.1577880 | 35.5496998 | <a href="https://www.inaturalist.org/observations/19684356">https://www.inaturalist.org/observations/19684356</a>   |
| 165 | Bubulcus ibis | Cattle Egret | 2014/11/18 | 3 | 0 | -3.1575279 | 35.5501712 | <a href="https://www.inaturalist.org/observations/19793603">https://www.inaturalist.org/observations/19793603</a>   |
| 166 | Bubulcus ibis | Cattle Egret | 2011/2/9   | 1 | 0 | -3.1475746 | 35.5966606 | <a href="https://www.inaturalist.org/observations/68921781">https://www.inaturalist.org/observations/68921781</a>   |
| 167 | Bubulcus ibis | Cattle Egret | 2022/10/2  | 2 | 0 | -3.1133530 | 35.6052004 | <a href="https://www.inaturalist.org/observations/139777525">https://www.inaturalist.org/observations/139777525</a> |
| 168 | Bubulcus ibis | Cattle Egret | 2015/7/18  | 3 | 0 | -3.0699469 | 35.4389479 | <a href="http://www.inaturalist.org/observations/3054131">http://www.inaturalist.org/observations/3054131</a>       |
| 169 | Bubulcus ibis | Cattle Egret | 2019/6/3   | 2 | 0 | -3.0332250 | 33.2096467 | <a href="https://www.inaturalist.org/observations/27620390">https://www.inaturalist.org/observations/27620390</a>   |
| 170 | Bubulcus ibis | Cattle Egret | 2009/11/22 | 1 | 0 | -2.9088530 | 35.3900710 | <a href="https://www.inaturalist.org/observations/142132993">https://www.inaturalist.org/observations/142132993</a> |
| 171 | Bubulcus ibis | Cattle Egret | 2019/6/1   | 2 | 0 | -2.8698083 | 31.7235750 | <a href="https://www.inaturalist.org/observations/27368482">https://www.inaturalist.org/observations/27368482</a>   |
| 172 | Bubulcus ibis | Cattle Egret | 2018/4/18  | 4 | 0 | -2.7753233 | 35.1221800 | <a href="https://www.inaturalist.org/observations/14214652">https://www.inaturalist.org/observations/14214652</a>   |
| 173 | Bubulcus ibis | Cattle Egret | 2019/9/14  | 2 | 0 | -2.7070958 | 35.4594877 | <a href="https://www.inaturalist.org/observations/33744612">https://www.inaturalist.org/observations/33744612</a>   |
| 174 | Bubulcus ibis | Cattle Egret | 2019/2/27  | 1 | 0 | -2.7020278 | 37.3079694 | <a href="https://www.inaturalist.org/observations/72194023">https://www.inaturalist.org/observations/72194023</a>   |

|     |               |              |            |   |   |            |            |                                                                                                                     |
|-----|---------------|--------------|------------|---|---|------------|------------|---------------------------------------------------------------------------------------------------------------------|
| 175 | Bubulcus ibis | Cattle Egret | 2018/8/30  | 2 | 0 | -2.6869237 | 37.2906449 | <a href="https://www.inaturalist.org/observations/19326351">https://www.inaturalist.org/observations/19326351</a>   |
| 176 | Bubulcus ibis | Cattle Egret | 2018/8/30  | 2 | 0 | -2.6869237 | 37.2906449 | <a href="https://www.inaturalist.org/observations/19326353">https://www.inaturalist.org/observations/19326353</a>   |
| 177 | Bubulcus ibis | Cattle Egret | 2018/8/30  | 2 | 0 | -2.6869237 | 37.2906449 | <a href="https://www.inaturalist.org/observations/19326354">https://www.inaturalist.org/observations/19326354</a>   |
| 178 | Bubulcus ibis | Cattle Egret | 2018/8/30  | 2 | 0 | -2.6869237 | 37.2906449 | <a href="https://www.inaturalist.org/observations/19326359">https://www.inaturalist.org/observations/19326359</a>   |
| 179 | Bubulcus ibis | Cattle Egret | 2018/8/30  | 2 | 0 | -2.6869237 | 37.2906449 | <a href="https://www.inaturalist.org/observations/19326364">https://www.inaturalist.org/observations/19326364</a>   |
| 180 | Bubulcus ibis | Cattle Egret | 2018/8/30  | 3 | 0 | -2.6869237 | 37.2906449 | <a href="https://www.inaturalist.org/observations/19326367">https://www.inaturalist.org/observations/19326367</a>   |
| 181 | Bubulcus ibis | Cattle Egret | 2018/8/30  | 2 | 0 | -2.6869237 | 37.2906449 | <a href="https://www.inaturalist.org/observations/19326374">https://www.inaturalist.org/observations/19326374</a>   |
| 182 | Bubulcus ibis | Cattle Egret | 2022/1/12  | 1 | 0 | -2.6807486 | 37.2607387 | <a href="https://www.inaturalist.org/observations/112727539">https://www.inaturalist.org/observations/112727539</a> |
| 183 | Bubulcus ibis | Cattle Egret | 2014/11/11 | 4 | 0 | -2.6751562 | 37.2946130 | <a href="https://www.inaturalist.org/observations/19979526">https://www.inaturalist.org/observations/19979526</a>   |
| 184 | Bubulcus ibis | Cattle Egret | 2012/10/10 | 2 | 0 | -2.6684379 | 37.2326660 | <a href="https://www.inaturalist.org/observations/5119614">https://www.inaturalist.org/observations/5119614</a>     |
| 185 | Bubulcus ibis | Cattle Egret | 2011/4/22  | 1 | 0 | -2.6656810 | 37.2817880 | <a href="https://www.inaturalist.org/observations/50093415">https://www.inaturalist.org/observations/50093415</a>   |
| 186 | Bubulcus ibis | Cattle Egret | 2022/10/2  | 1 | 0 | -2.6650945 | 37.3064952 | <a href="https://www.inaturalist.org/observations/139959322">https://www.inaturalist.org/observations/139959322</a> |
| 187 | Bubulcus ibis | Cattle Egret | 2021/8/27  | 1 | 0 | -2.6639468 | 37.2756180 | <a href="https://www.inaturalist.org/observations/98005065">https://www.inaturalist.org/observations/98005065</a>   |
| 188 | Bubulcus ibis | Cattle Egret | 2012/10/10 | 2 | 0 | -2.6629507 | 37.2601318 | <a href="https://www.inaturalist.org/observations/5119911">https://www.inaturalist.org/observations/5119911</a>     |
| 189 | Bubulcus ibis | Cattle Egret | 2018/8/31  | 2 | 0 | -2.6627519 | 37.2978222 | <a href="https://www.inaturalist.org/observations/19324367">https://www.inaturalist.org/observations/19324367</a>   |
| 190 | Bubulcus ibis | Cattle Egret | 2019/6/1   | 2 | 0 | -2.6622067 | 31.7537250 | <a href="https://www.inaturalist.org/observations/27367798">https://www.inaturalist.org/observations/27367798</a>   |
| 191 | Bubulcus ibis | Cattle Egret | 2021/8/27  | 1 | 0 | -2.6621651 | 37.2334805 | <a href="https://www.inaturalist.org/observations/98005148">https://www.inaturalist.org/observations/98005148</a>   |
| 192 | Bubulcus ibis | Cattle Egret | 2021/8/25  | 1 | 0 | -2.6613203 | 37.3037707 | <a href="https://www.inaturalist.org/observations/105862138">https://www.inaturalist.org/observations/105862138</a> |
| 193 | Bubulcus ibis | Cattle Egret | 2022/10/2  | 1 | 0 | -2.6612480 | 37.2970345 | <a href="https://www.inaturalist.org/observations/139959347">https://www.inaturalist.org/observations/139959347</a> |
| 194 | Bubulcus ibis | Cattle Egret | 2015/4/14  | 1 | 0 | -2.6604655 | 37.2395324 | <a href="https://www.inaturalist.org/observations/86832676">https://www.inaturalist.org/observations/86832676</a>   |
| 195 | Bubulcus ibis | Cattle Egret | 2011/2/18  | 1 | 0 | -2.6602199 | 37.2115829 | <a href="https://www.inaturalist.org/observations/108113129">https://www.inaturalist.org/observations/108113129</a> |
| 196 | Bubulcus ibis | Cattle Egret | 2021/8/25  | 1 | 0 | -2.6593608 | 37.2303970 | <a href="https://www.inaturalist.org/observations/107424117">https://www.inaturalist.org/observations/107424117</a> |
| 197 | Bubulcus ibis | Cattle Egret | 2018/8/30  | 3 | 0 | -2.6590121 | 37.2388448 | <a href="https://www.inaturalist.org/observations/19328953">https://www.inaturalist.org/observations/19328953</a>   |
| 198 | Bubulcus ibis | Cattle Egret | 2018/8/30  | 3 | 0 | -2.6590121 | 37.2388448 | <a href="https://www.inaturalist.org/observations/19328984">https://www.inaturalist.org/observations/19328984</a>   |
| 199 | Bubulcus ibis | Cattle Egret | 2018/8/30  | 3 | 0 | -2.6590121 | 37.2388448 | <a href="https://www.inaturalist.org/observations/19328985">https://www.inaturalist.org/observations/19328985</a>   |

|     |               |              |            |   |   |            |            |                                                                                                                     |
|-----|---------------|--------------|------------|---|---|------------|------------|---------------------------------------------------------------------------------------------------------------------|
| 200 | Bubulcus ibis | Cattle Egret | 2018/8/30  | 4 | 0 | -2.6590121 | 37.2388448 | <a href="https://www.inaturalist.org/observations/19328988">https://www.inaturalist.org/observations/19328988</a>   |
| 201 | Bubulcus ibis | Cattle Egret | 2017/6/3   | 2 | 0 | -2.6584017 | 37.2919350 | <a href="https://www.inaturalist.org/observations/135164718">https://www.inaturalist.org/observations/135164718</a> |
| 202 | Bubulcus ibis | Cattle Egret | 2021/8/25  | 1 | 0 | -2.6581373 | 37.2316994 | <a href="https://www.inaturalist.org/observations/107424132">https://www.inaturalist.org/observations/107424132</a> |
| 203 | Bubulcus ibis | Cattle Egret | 2017/11/17 | 5 | 0 | -2.6554919 | 37.2275727 | <a href="https://www.inaturalist.org/observations/19203342">https://www.inaturalist.org/observations/19203342</a>   |
| 204 | Bubulcus ibis | Cattle Egret | 2021/7/23  | 1 | 0 | -2.6547444 | 37.2543848 | <a href="https://www.inaturalist.org/observations/93006930">https://www.inaturalist.org/observations/93006930</a>   |
| 205 | Bubulcus ibis | Cattle Egret | 2022/10/3  | 2 | 0 | -2.6542414 | 37.2612115 | <a href="https://www.inaturalist.org/observations/140056951">https://www.inaturalist.org/observations/140056951</a> |
| 206 | Bubulcus ibis | Cattle Egret | 2013/9/23  | 1 | 0 | -2.6526742 | 37.2605650 | <a href="https://www.inaturalist.org/observations/110104709">https://www.inaturalist.org/observations/110104709</a> |
| 207 | Bubulcus ibis | Cattle Egret | 2019/1/7   | 2 | 0 | -2.6520778 | 37.2748028 | <a href="https://www.inaturalist.org/observations/60870334">https://www.inaturalist.org/observations/60870334</a>   |
| 208 | Bubulcus ibis | Cattle Egret | 2020/2/23  | 1 | 0 | -2.6520157 | 37.2607672 | <a href="https://www.inaturalist.org/observations/39322575">https://www.inaturalist.org/observations/39322575</a>   |
| 209 | Bubulcus ibis | Cattle Egret | 2012/10/10 | 2 | 0 | -2.6519761 | 37.2271729 | <a href="https://www.inaturalist.org/observations/5120040">https://www.inaturalist.org/observations/5120040</a>     |
| 210 | Bubulcus ibis | Cattle Egret | 2012/10/10 | 2 | 0 | -2.6519761 | 37.2436523 | <a href="https://www.inaturalist.org/observations/5119978">https://www.inaturalist.org/observations/5119978</a>     |
| 211 | Bubulcus ibis | Cattle Egret | 2021/9/14  | 1 | 0 | -2.6517776 | 37.2750937 | <a href="https://www.inaturalist.org/observations/94829555">https://www.inaturalist.org/observations/94829555</a>   |
| 212 | Bubulcus ibis | Cattle Egret | 2021/8/28  | 1 | 0 | -2.6513919 | 37.2849455 | <a href="https://www.inaturalist.org/observations/98020025">https://www.inaturalist.org/observations/98020025</a>   |
| 213 | Bubulcus ibis | Cattle Egret | 2010/10/23 | 1 | 0 | -2.6511383 | 37.2753707 | <a href="https://www.inaturalist.org/observations/131931046">https://www.inaturalist.org/observations/131931046</a> |
| 214 | Bubulcus ibis | Cattle Egret | 2021/8/25  | 1 | 0 | -2.6503564 | 37.2774348 | <a href="https://www.inaturalist.org/observations/105859564">https://www.inaturalist.org/observations/105859564</a> |
| 215 | Bubulcus ibis | Cattle Egret | 2019/10/18 | 3 | 0 | -2.6502156 | 37.2434220 | <a href="https://www.inaturalist.org/observations/41008105">https://www.inaturalist.org/observations/41008105</a>   |
| 216 | Bubulcus ibis | Cattle Egret | 2021/9/13  | 2 | 0 | -2.6495399 | 37.2777156 | <a href="https://www.inaturalist.org/observations/94729488">https://www.inaturalist.org/observations/94729488</a>   |
| 217 | Bubulcus ibis | Cattle Egret | 2017/8/30  | 5 | 0 | -2.6491639 | 37.2317219 | <a href="https://www.inaturalist.org/observations/7898467">https://www.inaturalist.org/observations/7898467</a>     |
| 218 | Bubulcus ibis | Cattle Egret | 2021/3/31  | 1 | 0 | -2.6490049 | 37.2511226 | <a href="https://www.inaturalist.org/observations/131183390">https://www.inaturalist.org/observations/131183390</a> |
| 219 | Bubulcus ibis | Cattle Egret | 2014/12/24 | 4 | 0 | -2.6474620 | 37.2428210 | <a href="http://www.inaturalist.org/observations/1500562">http://www.inaturalist.org/observations/1500562</a>       |
| 220 | Bubulcus ibis | Cattle Egret | 2021/12/30 | 1 | 0 | -2.6410689 | 37.1646500 | <a href="https://www.inaturalist.org/observations/103947900">https://www.inaturalist.org/observations/103947900</a> |
| 221 | Bubulcus ibis | Cattle Egret | 2018/4/4   | 3 | 0 | -2.6366130 | 37.2244511 | <a href="https://www.inaturalist.org/observations/32601591">https://www.inaturalist.org/observations/32601591</a>   |
| 222 | Bubulcus ibis | Cattle Egret | 2019/11/29 | 2 | 0 | -2.6299650 | 34.7898250 | <a href="https://www.inaturalist.org/observations/68811058">https://www.inaturalist.org/observations/68811058</a>   |
| 223 | Bubulcus ibis | Cattle Egret | 2015/9/28  | 1 | 0 | -2.6077855 | 37.2076656 | <a href="https://www.inaturalist.org/observations/134643681">https://www.inaturalist.org/observations/134643681</a> |
| 224 | Bubulcus ibis | Cattle Egret | 2019/10/3  | 1 | 0 | -2.5924467 | 37.2491183 | <a href="https://www.inaturalist.org/observations/36427325">https://www.inaturalist.org/observations/36427325</a>   |

|     |               |              |            |   |   |            |            |                                                                                                                     |
|-----|---------------|--------------|------------|---|---|------------|------------|---------------------------------------------------------------------------------------------------------------------|
| 225 | Bubulcus ibis | Cattle Egret | 2019/6/1   | 2 | 0 | -2.5880533 | 31.7255467 | <a href="https://www.inaturalist.org/observations/27367789">https://www.inaturalist.org/observations/27367789</a>   |
| 226 | Bubulcus ibis | Cattle Egret | 2018/4/16  | 3 | 0 | -2.5541217 | 34.9234117 | <a href="https://www.inaturalist.org/observations/14051026">https://www.inaturalist.org/observations/14051026</a>   |
| 227 | Bubulcus ibis | Cattle Egret | 2009/1/9   | 1 | 0 | -2.5403113 | 34.8312034 | <a href="https://www.inaturalist.org/observations/135950818">https://www.inaturalist.org/observations/135950818</a> |
| 228 | Bubulcus ibis | Cattle Egret | 2020/5/3   | 1 | 0 | -2.5294503 | 37.3256144 | <a href="https://www.inaturalist.org/observations/45067759">https://www.inaturalist.org/observations/45067759</a>   |
| 229 | Bubulcus ibis | Cattle Egret | 2018/1/28  | 1 | 0 | -2.4880531 | 40.3032240 | <a href="https://www.inaturalist.org/observations/91836977">https://www.inaturalist.org/observations/91836977</a>   |
| 230 | Bubulcus ibis | Cattle Egret | 2019/6/1   | 1 | 0 | -2.4859433 | 31.7102417 | <a href="https://www.inaturalist.org/observations/27193397">https://www.inaturalist.org/observations/27193397</a>   |
| 231 | Bubulcus ibis | Cattle Egret | 1996/2/4   | 1 | 0 | -2.4542055 | 35.0066638 | <a href="https://www.inaturalist.org/observations/69069114">https://www.inaturalist.org/observations/69069114</a>   |
| 232 | Bubulcus ibis | Cattle Egret | 2005/12/23 | 2 | 0 | -2.3790378 | 34.8669253 | <a href="https://www.inaturalist.org/observations/22348398">https://www.inaturalist.org/observations/22348398</a>   |
| 233 | Bubulcus ibis | Cattle Egret | 2007/1/28  | 1 | 0 | -2.3541275 | 34.8221937 | <a href="https://www.inaturalist.org/observations/143845788">https://www.inaturalist.org/observations/143845788</a> |
| 234 | Bubulcus ibis | Cattle Egret | 2019/12/28 | 2 | 0 | -2.3435563 | 36.0458437 | <a href="https://www.inaturalist.org/observations/41142250">https://www.inaturalist.org/observations/41142250</a>   |
| 235 | Bubulcus ibis | Cattle Egret | 2019/12/28 | 2 | 0 | -2.3435563 | 36.0458437 | <a href="https://www.inaturalist.org/observations/40340883">https://www.inaturalist.org/observations/40340883</a>   |
| 236 | Bubulcus ibis | Cattle Egret | 2009/2/11  | 1 | 0 | -2.3333333 | 34.8333333 | <a href="https://www.inaturalist.org/observations/59796964">https://www.inaturalist.org/observations/59796964</a>   |
| 237 | Bubulcus ibis | Cattle Egret | 2018/8/22  | 0 | 0 | -2.3333333 | 34.8333333 | <a href="https://www.inaturalist.org/observations/37850710">https://www.inaturalist.org/observations/37850710</a>   |
| 238 | Bubulcus ibis | Cattle Egret | 2007/12/7  | 1 | 0 | -2.3333333 | 34.8333333 | <a href="https://www.inaturalist.org/observations/69758958">https://www.inaturalist.org/observations/69758958</a>   |
| 239 | Bubulcus ibis | Cattle Egret | 2011/3/10  | 2 | 0 | -2.3333333 | 34.8333333 | <a href="https://www.inaturalist.org/observations/107783866">https://www.inaturalist.org/observations/107783866</a> |
| 240 | Bubulcus ibis | Cattle Egret | 2008/6/11  | 3 | 0 | -2.2882841 | 40.1266621 | <a href="https://www.inaturalist.org/observations/18475731">https://www.inaturalist.org/observations/18475731</a>   |
| 241 | Bubulcus ibis | Cattle Egret | 2020/1/2   | 1 | 0 | -2.2498505 | 33.8467624 | <a href="https://www.inaturalist.org/observations/121068402">https://www.inaturalist.org/observations/121068402</a> |
| 242 | Bubulcus ibis | Cattle Egret | 2012/12/5  | 2 | 0 | -2.2356060 | 34.9198720 | <a href="http://www.inaturalist.org/observations/615615">http://www.inaturalist.org/observations/615615</a>         |
| 243 | Bubulcus ibis | Cattle Egret | 2005/12/23 | 2 | 0 | -2.1430103 | 34.9850333 | <a href="https://www.inaturalist.org/observations/22335364">https://www.inaturalist.org/observations/22335364</a>   |
| 244 | Bubulcus ibis | Cattle Egret | 2009/11/23 | 1 | 0 | -1.8936000 | 34.6856510 | <a href="https://www.inaturalist.org/observations/142162779">https://www.inaturalist.org/observations/142162779</a> |
| 245 | Bubulcus ibis | Cattle Egret | 2017/8/14  | 2 | 0 | -1.8715841 | 37.2485859 | <a href="https://www.inaturalist.org/observations/21868132">https://www.inaturalist.org/observations/21868132</a>   |
| 246 | Bubulcus ibis | Cattle Egret | 2017/6/22  | 1 | 0 | -1.8698563 | 37.2469381 | <a href="https://www.inaturalist.org/observations/21868134">https://www.inaturalist.org/observations/21868134</a>   |
| 247 | Bubulcus ibis | Cattle Egret | 2017/6/22  | 3 | 0 | -1.8698407 | 37.2469390 | <a href="https://www.inaturalist.org/observations/21868133">https://www.inaturalist.org/observations/21868133</a>   |
| 248 | Bubulcus ibis | Cattle Egret | 2020/5/13  | 1 | 0 | -1.6454576 | 36.8659370 | <a href="https://www.inaturalist.org/observations/45794457">https://www.inaturalist.org/observations/45794457</a>   |
| 249 | Bubulcus ibis | Cattle Egret | 2005/3/31  | 3 | 0 | -1.6161530 | 31.6197530 | <a href="http://www.inaturalist.org/observations/1977388">http://www.inaturalist.org/observations/1977388</a>       |



|     |               |              |            |   |   |            |            |                                                                                                                     |
|-----|---------------|--------------|------------|---|---|------------|------------|---------------------------------------------------------------------------------------------------------------------|
| 250 | Bubulcus ibis | Cattle Egret | 2019/5/31  | 1 | 0 | -1.5905150 | 31.6709233 | <a href="https://www.inaturalist.org/observations/27093447">https://www.inaturalist.org/observations/27093447</a>   |
| 251 | Bubulcus ibis | Cattle Egret | 2019/5/31  | 1 | 0 | -1.5899067 | 31.6744117 | <a href="https://www.inaturalist.org/observations/27093436">https://www.inaturalist.org/observations/27093436</a>   |
| 252 | Bubulcus ibis | Cattle Egret | 2019/5/31  | 2 | 0 | -1.5026350 | 31.7412633 | <a href="https://www.inaturalist.org/observations/27039510">https://www.inaturalist.org/observations/27039510</a>   |
| 253 | Bubulcus ibis | Cattle Egret | 2021/8/5   | 1 | 0 | -1.4949250 | 37.0991900 | <a href="https://www.inaturalist.org/observations/90041532">https://www.inaturalist.org/observations/90041532</a>   |
| 254 | Bubulcus ibis | Cattle Egret | 2019/6/6   | 4 | 0 | -1.4786567 | 33.8055717 | <a href="https://www.inaturalist.org/observations/28111095">https://www.inaturalist.org/observations/28111095</a>   |
| 255 | Bubulcus ibis | Cattle Egret | 2022/12/6  | 1 | 0 | -1.4734607 | 37.0700486 | <a href="https://www.inaturalist.org/observations/144354494">https://www.inaturalist.org/observations/144354494</a> |
| 256 | Bubulcus ibis | Cattle Egret | 2021/12/21 | 1 | 0 | -1.4482387 | 34.9624024 | <a href="https://www.inaturalist.org/observations/112650960">https://www.inaturalist.org/observations/112650960</a> |
| 257 | Bubulcus ibis | Cattle Egret | 2008/6/4   | 1 | 0 | -1.4432517 | 35.2080989 | <a href="https://www.inaturalist.org/observations/110433544">https://www.inaturalist.org/observations/110433544</a> |
| 258 | Bubulcus ibis | Cattle Egret | 2008/6/4   | 1 | 0 | -1.4432517 | 35.2080989 | <a href="https://www.inaturalist.org/observations/131629881">https://www.inaturalist.org/observations/131629881</a> |
| 259 | Bubulcus ibis | Cattle Egret | 2009/12/8  | 2 | 0 | -1.4367698 | 35.0120897 | <a href="https://www.inaturalist.org/observations/18044076">https://www.inaturalist.org/observations/18044076</a>   |
| 260 | Bubulcus ibis | Cattle Egret | 2022/4/2   | 1 | 0 | -1.4130381 | 36.9306705 | <a href="https://www.inaturalist.org/observations/110382067">https://www.inaturalist.org/observations/110382067</a> |
| 261 | Bubulcus ibis | Cattle Egret | 2018/8/5   | 3 | 0 | -1.3930934 | 36.8962707 | <a href="https://www.inaturalist.org/observations/15318197">https://www.inaturalist.org/observations/15318197</a>   |
| 262 | Bubulcus ibis | Cattle Egret | 2021/7/12  | 2 | 0 | -1.3882118 | 36.8915967 | <a href="https://www.inaturalist.org/observations/86702476">https://www.inaturalist.org/observations/86702476</a>   |
| 263 | Bubulcus ibis | Cattle Egret | 2009/12/10 | 2 | 0 | -1.3820834 | 36.8639374 | <a href="http://www.inaturalist.org/observations/28296">http://www.inaturalist.org/observations/28296</a>           |
| 264 | Bubulcus ibis | Cattle Egret | 2022/12/2  | 1 | 0 | -1.3766714 | 36.8389792 | <a href="https://www.inaturalist.org/observations/144482144">https://www.inaturalist.org/observations/144482144</a> |
| 265 | Bubulcus ibis | Cattle Egret | 2022/12/2  | 1 | 0 | -1.3766714 | 36.8389792 | <a href="https://www.inaturalist.org/observations/144483155">https://www.inaturalist.org/observations/144483155</a> |
| 266 | Bubulcus ibis | Cattle Egret | 2017/6/21  | 5 | 0 | -1.3762541 | 36.8360892 | <a href="https://www.inaturalist.org/observations/17364419">https://www.inaturalist.org/observations/17364419</a>   |
| 267 | Bubulcus ibis | Cattle Egret | 2022/6/22  | 1 | 0 | -1.3706931 | 36.8506763 | <a href="https://www.inaturalist.org/observations/131931422">https://www.inaturalist.org/observations/131931422</a> |
| 268 | Bubulcus ibis | Cattle Egret | 2009/8/22  | 3 | 0 | -1.3666667 | 36.8333333 | <a href="https://www.inaturalist.org/observations/4959554">https://www.inaturalist.org/observations/4959554</a>     |
| 269 | Bubulcus ibis | Cattle Egret | 2017/9/8   | 4 | 0 | -1.3666667 | 36.8333333 | <a href="https://www.inaturalist.org/observations/8088361">https://www.inaturalist.org/observations/8088361</a>     |
| 270 | Bubulcus ibis | Cattle Egret | 2018/7/13  | 2 | 0 | -1.3631818 | 36.8455411 | <a href="https://www.inaturalist.org/observations/46646801">https://www.inaturalist.org/observations/46646801</a>   |
| 271 | Bubulcus ibis | Cattle Egret | 2019/6/13  | 1 | 0 | -1.3624021 | 36.7964597 | <a href="https://www.inaturalist.org/observations/52561340">https://www.inaturalist.org/observations/52561340</a>   |
| 272 | Bubulcus ibis | Cattle Egret | 2022/6/1   | 1 | 0 | -1.3618845 | 36.8483800 | <a href="https://www.inaturalist.org/observations/119851688">https://www.inaturalist.org/observations/119851688</a> |
| 273 | Bubulcus ibis | Cattle Egret | 2018/7/20  | 1 | 0 | -1.3615881 | 36.8451532 | <a href="https://www.inaturalist.org/observations/38658542">https://www.inaturalist.org/observations/38658542</a>   |
| 274 | Bubulcus ibis | Cattle Egret | 2022/11/7  | 1 | 0 | -1.3612073 | 36.8473286 | <a href="https://www.inaturalist.org/observations/141531510">https://www.inaturalist.org/observations/141531510</a> |

|     |               |              |            |   |   |            |            |                                                                                                                     |
|-----|---------------|--------------|------------|---|---|------------|------------|---------------------------------------------------------------------------------------------------------------------|
| 275 | Bubulcus ibis | Cattle Egret | 2017/3/5   | 2 | 0 | -1.3608909 | 36.8107151 | <a href="https://www.inaturalist.org/observations/5259088">https://www.inaturalist.org/observations/5259088</a>     |
| 276 | Bubulcus ibis | Cattle Egret | 2019/7/31  | 1 | 0 | -1.3600610 | 36.8237662 | <a href="https://www.inaturalist.org/observations/47011706">https://www.inaturalist.org/observations/47011706</a>   |
| 277 | Bubulcus ibis | Cattle Egret | 2019/4/28  | 3 | 0 | -1.3585375 | 36.8530977 | <a href="https://www.inaturalist.org/observations/23595570">https://www.inaturalist.org/observations/23595570</a>   |
| 278 | Bubulcus ibis | Cattle Egret | 2008/6/20  | 1 | 0 | -1.3569641 | 36.8465564 | <a href="https://www.inaturalist.org/observations/61542362">https://www.inaturalist.org/observations/61542362</a>   |
| 279 | Bubulcus ibis | Cattle Egret | 2018/6/28  | 1 | 0 | -1.3569641 | 36.8465564 | <a href="https://www.inaturalist.org/observations/64369315">https://www.inaturalist.org/observations/64369315</a>   |
| 280 | Bubulcus ibis | Cattle Egret | 2022/11/12 | 1 | 0 | -1.3569641 | 36.8465564 | <a href="https://www.inaturalist.org/observations/144468008">https://www.inaturalist.org/observations/144468008</a> |
| 281 | Bubulcus ibis | Cattle Egret | 2022/12/25 | 1 | 0 | -1.3569641 | 36.8465564 | <a href="https://www.inaturalist.org/observations/145036027">https://www.inaturalist.org/observations/145036027</a> |
| 282 | Bubulcus ibis | Cattle Egret | 2018/2/25  | 3 | 0 | -1.3518633 | 36.8205300 | <a href="https://www.inaturalist.org/observations/9988554">https://www.inaturalist.org/observations/9988554</a>     |
| 283 | Bubulcus ibis | Cattle Egret | 2022/6/24  | 1 | 0 | -1.3508133 | 36.7987117 | <a href="https://www.inaturalist.org/observations/125331272">https://www.inaturalist.org/observations/125331272</a> |
| 284 | Bubulcus ibis | Cattle Egret | 2022/6/27  | 1 | 0 | -1.3485139 | 36.7975379 | <a href="https://www.inaturalist.org/observations/125325222">https://www.inaturalist.org/observations/125325222</a> |
| 285 | Bubulcus ibis | Cattle Egret | 2022/6/25  | 2 | 0 | -1.3480588 | 36.8150804 | <a href="https://www.inaturalist.org/observations/123484989">https://www.inaturalist.org/observations/123484989</a> |
| 286 | Bubulcus ibis | Cattle Egret | 2022/6/27  | 1 | 0 | -1.3477761 | 36.7964818 | <a href="https://www.inaturalist.org/observations/125309068">https://www.inaturalist.org/observations/125309068</a> |
| 287 | Bubulcus ibis | Cattle Egret | 2017/7/3   | 1 | 0 | -1.3468442 | 36.8502386 | <a href="https://www.inaturalist.org/observations/108771346">https://www.inaturalist.org/observations/108771346</a> |
| 288 | Bubulcus ibis | Cattle Egret | 2021/9/13  | 1 | 0 | -1.3397181 | 36.8089449 | <a href="https://www.inaturalist.org/observations/97139360">https://www.inaturalist.org/observations/97139360</a>   |
| 289 | Bubulcus ibis | Cattle Egret | 2022/10/14 | 2 | 0 | -1.3396226 | 36.8101058 | <a href="https://www.inaturalist.org/observations/138743031">https://www.inaturalist.org/observations/138743031</a> |
| 290 | Bubulcus ibis | Cattle Egret | 2022/2/19  | 1 | 0 | -1.3388672 | 36.8096324 | <a href="https://www.inaturalist.org/observations/110309781">https://www.inaturalist.org/observations/110309781</a> |
| 291 | Bubulcus ibis | Cattle Egret | 2018/8/4   | 3 | 0 | -1.3381884 | 36.8095855 | <a href="https://www.inaturalist.org/observations/15100438">https://www.inaturalist.org/observations/15100438</a>   |
| 292 | Bubulcus ibis | Cattle Egret | 2021/2/20  | 2 | 0 | -1.3343397 | 36.7796825 | <a href="https://www.inaturalist.org/observations/86422917">https://www.inaturalist.org/observations/86422917</a>   |
| 293 | Bubulcus ibis | Cattle Egret | 2022/6/29  | 2 | 0 | -1.3342348 | 36.7153765 | <a href="https://www.inaturalist.org/observations/124525186">https://www.inaturalist.org/observations/124525186</a> |
| 294 | Bubulcus ibis | Cattle Egret | 2019/4/28  | 3 | 0 | -1.3339467 | 36.7574806 | <a href="https://www.inaturalist.org/observations/24160390">https://www.inaturalist.org/observations/24160390</a>   |
| 295 | Bubulcus ibis | Cattle Egret | 2018/8/19  | 3 | 0 | -1.3310650 | 36.7096500 | <a href="https://www.inaturalist.org/observations/15715138">https://www.inaturalist.org/observations/15715138</a>   |
| 296 | Bubulcus ibis | Cattle Egret | 2019/6/5   | 4 | 0 | -1.3197607 | 34.9500236 | <a href="https://www.inaturalist.org/observations/26658886">https://www.inaturalist.org/observations/26658886</a>   |
| 297 | Bubulcus ibis | Cattle Egret | 2018/8/30  | 2 | 0 | -1.3079471 | 36.8040254 | <a href="https://www.inaturalist.org/observations/16026542">https://www.inaturalist.org/observations/16026542</a>   |
| 298 | Bubulcus ibis | Cattle Egret | 2020/1/5   | 1 | 0 | -1.3013221 | 35.0058454 | <a href="https://www.inaturalist.org/observations/121086627">https://www.inaturalist.org/observations/121086627</a> |
| 299 | Bubulcus ibis | Cattle Egret | 2019/12/22 | 1 | 0 | -1.2920659 | 36.8219462 | <a href="https://www.inaturalist.org/observations/39882956">https://www.inaturalist.org/observations/39882956</a>   |

|     |               |              |            |   |   |            |            |                                                                                                                     |
|-----|---------------|--------------|------------|---|---|------------|------------|---------------------------------------------------------------------------------------------------------------------|
| 300 | Bubulcus ibis | Cattle Egret | 2018/3/22  | 4 | 0 | -1.2001686 | 35.1177979 | <a href="https://www.inaturalist.org/observations/11187459">https://www.inaturalist.org/observations/11187459</a>   |
| 301 | Bubulcus ibis | Cattle Egret | 2021/11/21 | 1 | 0 | -1.0954229 | 37.0168856 | <a href="https://www.inaturalist.org/observations/101604010">https://www.inaturalist.org/observations/101604010</a> |
| 302 | Bubulcus ibis | Cattle Egret | 2020/5/30  | 1 | 0 | -1.0737650 | 35.2167600 | <a href="https://www.inaturalist.org/observations/47883779">https://www.inaturalist.org/observations/47883779</a>   |
| 303 | Bubulcus ibis | Cattle Egret | 2019/7/18  | 4 | 0 | -1.0718388 | 35.2555783 | <a href="https://www.inaturalist.org/observations/29068900">https://www.inaturalist.org/observations/29068900</a>   |
| 304 | Bubulcus ibis | Cattle Egret | 2022/12/22 | 1 | 0 | -1.0656889 | 35.2334226 | <a href="https://www.inaturalist.org/observations/144843508">https://www.inaturalist.org/observations/144843508</a> |
| 305 | Bubulcus ibis | Cattle Egret | 2013/1/13  | 3 | 0 | -0.9573523 | 36.2582438 | <a href="https://www.inaturalist.org/observations/83994828">https://www.inaturalist.org/observations/83994828</a>   |
| 306 | Bubulcus ibis | Cattle Egret | 2016/12/27 | 4 | 0 | -0.8855660 | 36.3062100 | <a href="https://www.inaturalist.org/observations/4921113">https://www.inaturalist.org/observations/4921113</a>     |
| 307 | Bubulcus ibis | Cattle Egret | 2017/2/21  | 2 | 0 | -0.8576280 | 36.3650940 | <a href="https://www.inaturalist.org/observations/33959818">https://www.inaturalist.org/observations/33959818</a>   |
| 308 | Bubulcus ibis | Cattle Egret | 2016/11/28 | 2 | 0 | -0.8262800 | 36.3367500 | <a href="https://www.inaturalist.org/observations/80691540">https://www.inaturalist.org/observations/80691540</a>   |
| 309 | Bubulcus ibis | Cattle Egret | 2022/9/30  | 2 | 0 | -0.8165637 | 36.3237288 | <a href="https://www.inaturalist.org/observations/137676358">https://www.inaturalist.org/observations/137676358</a> |
| 310 | Bubulcus ibis | Cattle Egret | 1992/10/16 | 2 | 0 | -0.8052417 | 36.3911222 | <a href="https://www.inaturalist.org/observations/18868613">https://www.inaturalist.org/observations/18868613</a>   |
| 311 | Bubulcus ibis | Cattle Egret | 2022/10/1  | 2 | 0 | -0.7850262 | 36.4147881 | <a href="https://www.inaturalist.org/observations/139899849">https://www.inaturalist.org/observations/139899849</a> |
| 312 | Bubulcus ibis | Cattle Egret | 2022/7/5   | 1 | 0 | -0.7789079 | 36.4097941 | <a href="https://www.inaturalist.org/observations/128167708">https://www.inaturalist.org/observations/128167708</a> |
| 313 | Bubulcus ibis | Cattle Egret | 2022/6/18  | 0 | 0 | -0.7709246 | 37.3613743 | <a href="https://www.inaturalist.org/observations/122677982">https://www.inaturalist.org/observations/122677982</a> |
| 314 | Bubulcus ibis | Cattle Egret | 2010/6/10  | 2 | 0 | -0.7703224 | 36.3654331 | <a href="https://www.inaturalist.org/observations/107637985">https://www.inaturalist.org/observations/107637985</a> |
| 315 | Bubulcus ibis | Cattle Egret | 2022/7/3   | 1 | 0 | -0.7674751 | 36.4071870 | <a href="https://www.inaturalist.org/observations/131071658">https://www.inaturalist.org/observations/131071658</a> |
| 316 | Bubulcus ibis | Cattle Egret | 2013/1/13  | 5 | 0 | -0.6773340 | 34.7796030 | <a href="https://www.inaturalist.org/observations/7543354">https://www.inaturalist.org/observations/7543354</a>     |
| 317 | Bubulcus ibis | Cattle Egret | 2017/5/1   | 1 | 0 | -0.6161137 | 30.9801069 | <a href="https://www.inaturalist.org/observations/140110821">https://www.inaturalist.org/observations/140110821</a> |
| 318 | Bubulcus ibis | Cattle Egret | 2016/11/19 | 2 | 0 | -0.5694167 | 29.7013889 | <a href="http://www.inaturalist.org/observations/4675119">http://www.inaturalist.org/observations/4675119</a>       |
| 319 | Bubulcus ibis | Cattle Egret | 2022/10/14 | 2 | 0 | -0.5583740 | 30.9806575 | <a href="https://www.inaturalist.org/observations/139950795">https://www.inaturalist.org/observations/139950795</a> |
| 320 | Bubulcus ibis | Cattle Egret | 2021/10/30 | 1 | 0 | -0.5520000 | 36.5460000 | <a href="https://www.inaturalist.org/observations/102253295">https://www.inaturalist.org/observations/102253295</a> |
| 321 | Bubulcus ibis | Cattle Egret | 2021/4/25  | 1 | 0 | -0.4785843 | 36.1174129 | <a href="https://www.inaturalist.org/observations/75658611">https://www.inaturalist.org/observations/75658611</a>   |
| 322 | Bubulcus ibis | Cattle Egret | 2018/8/12  | 4 | 0 | -0.4764208 | 36.2661483 | <a href="https://www.inaturalist.org/observations/15341591">https://www.inaturalist.org/observations/15341591</a>   |
| 323 | Bubulcus ibis | Cattle Egret | 2018/8/12  | 3 | 0 | -0.4762760 | 36.2661095 | <a href="https://www.inaturalist.org/observations/15342032">https://www.inaturalist.org/observations/15342032</a>   |
| 324 | Bubulcus ibis | Cattle Egret | 2021/7/30  | 1 | 0 | -0.4585700 | 36.0850231 | <a href="https://www.inaturalist.org/observations/97303702">https://www.inaturalist.org/observations/97303702</a>   |

|     |               |              |            |   |   |            |            |                                                                                                                     |
|-----|---------------|--------------|------------|---|---|------------|------------|---------------------------------------------------------------------------------------------------------------------|
| 325 | Bubulcus ibis | Cattle Egret | 2016/3/16  | 2 | 0 | -0.4500000 | 36.2500000 | <a href="https://www.inaturalist.org/observations/23654614">https://www.inaturalist.org/observations/23654614</a>   |
| 326 | Bubulcus ibis | Cattle Egret | 2019/10/26 | 1 | 0 | -0.4290789 | 34.2057276 | <a href="https://www.inaturalist.org/observations/40832274">https://www.inaturalist.org/observations/40832274</a>   |
| 327 | Bubulcus ibis | Cattle Egret | 2020/3/15  | 1 | 0 | -0.4284658 | 34.2060126 | <a href="https://www.inaturalist.org/observations/110666998">https://www.inaturalist.org/observations/110666998</a> |
| 328 | Bubulcus ibis | Cattle Egret | 2021/3/4   | 1 | 0 | -0.4233639 | 36.1296167 | <a href="https://www.inaturalist.org/observations/103962967">https://www.inaturalist.org/observations/103962967</a> |
| 329 | Bubulcus ibis | Cattle Egret | 2022/9/29  | 1 | 0 | -0.4225926 | 36.1145254 | <a href="https://www.inaturalist.org/observations/139741467">https://www.inaturalist.org/observations/139741467</a> |
| 330 | Bubulcus ibis | Cattle Egret | 2022/9/29  | 1 | 0 | -0.4225839 | 36.1145206 | <a href="https://www.inaturalist.org/observations/139741465">https://www.inaturalist.org/observations/139741465</a> |
| 331 | Bubulcus ibis | Cattle Egret | 2005/3/29  | 1 | 0 | -0.4203793 | 36.9457851 | <a href="https://www.inaturalist.org/observations/123247804">https://www.inaturalist.org/observations/123247804</a> |
| 332 | Bubulcus ibis | Cattle Egret | 2010/10/21 | 1 | 0 | -0.4182971 | 36.1254471 | <a href="https://www.inaturalist.org/observations/131907459">https://www.inaturalist.org/observations/131907459</a> |
| 333 | Bubulcus ibis | Cattle Egret | 2018/7/20  | 2 | 0 | -0.4181900 | 36.1140181 | <a href="https://www.inaturalist.org/observations/21560116">https://www.inaturalist.org/observations/21560116</a>   |
| 334 | Bubulcus ibis | Cattle Egret | 2021/7/30  | 1 | 0 | -0.4131114 | 36.1235514 | <a href="https://www.inaturalist.org/observations/97298747">https://www.inaturalist.org/observations/97298747</a>   |
| 335 | Bubulcus ibis | Cattle Egret | 2014/10/11 | 1 | 0 | -0.4104552 | 36.0711433 | <a href="https://www.inaturalist.org/observations/66313407">https://www.inaturalist.org/observations/66313407</a>   |
| 336 | Bubulcus ibis | Cattle Egret | 2014/10/11 | 1 | 0 | -0.4093461 | 36.0689669 | <a href="https://www.inaturalist.org/observations/66313140">https://www.inaturalist.org/observations/66313140</a>   |
| 337 | Bubulcus ibis | Cattle Egret | 2014/8/13  | 1 | 0 | -0.4088402 | 36.0937589 | <a href="https://www.inaturalist.org/observations/142541355">https://www.inaturalist.org/observations/142541355</a> |
| 338 | Bubulcus ibis | Cattle Egret | 2017/2/23  | 2 | 0 | -0.4043190 | 36.1061920 | <a href="https://www.inaturalist.org/observations/34030653">https://www.inaturalist.org/observations/34030653</a>   |
| 339 | Bubulcus ibis | Cattle Egret | 2019/1/6   | 1 | 0 | -0.4034278 | 36.0671667 | <a href="https://www.inaturalist.org/observations/58076100">https://www.inaturalist.org/observations/58076100</a>   |
| 340 | Bubulcus ibis | Cattle Egret | 2021/3/5   | 1 | 0 | -0.3944278 | 36.1202056 | <a href="https://www.inaturalist.org/observations/103822157">https://www.inaturalist.org/observations/103822157</a> |
| 341 | Bubulcus ibis | Cattle Egret | 2012/12/15 | 5 | 0 | -0.3777491 | 36.0891346 | <a href="https://www.inaturalist.org/observations/7128759">https://www.inaturalist.org/observations/7128759</a>     |
| 342 | Bubulcus ibis | Cattle Egret | 2013/11/15 | 1 | 0 | -0.3693169 | 36.1194440 | <a href="https://www.inaturalist.org/observations/142278948">https://www.inaturalist.org/observations/142278948</a> |
| 343 | Bubulcus ibis | Cattle Egret | 2005/3/24  | 1 | 0 | -0.3680538 | 36.0507285 | <a href="https://www.inaturalist.org/observations/102126591">https://www.inaturalist.org/observations/102126591</a> |
| 344 | Bubulcus ibis | Cattle Egret | 2019/3/4   | 3 | 0 | -0.3640150 | 36.1210533 | <a href="https://www.inaturalist.org/observations/21395981">https://www.inaturalist.org/observations/21395981</a>   |
| 345 | Bubulcus ibis | Cattle Egret | 2014/5/19  | 2 | 0 | -0.3634050 | 36.0865920 | <a href="https://www.inaturalist.org/observations/54468800">https://www.inaturalist.org/observations/54468800</a>   |
| 346 | Bubulcus ibis | Cattle Egret | 2006/7/23  | 2 | 0 | -0.3561660 | 36.1002110 | <a href="https://www.inaturalist.org/observations/31994689">https://www.inaturalist.org/observations/31994689</a>   |
| 347 | Bubulcus ibis | Cattle Egret | 2013/8/22  | 1 | 0 | -0.3561660 | 36.1002110 | <a href="https://www.inaturalist.org/observations/75422081">https://www.inaturalist.org/observations/75422081</a>   |
| 348 | Bubulcus ibis | Cattle Egret | 2021/9/21  | 1 | 0 | -0.3540000 | 36.1180000 | <a href="https://www.inaturalist.org/observations/96384339">https://www.inaturalist.org/observations/96384339</a>   |
| 349 | Bubulcus ibis | Cattle Egret | 2013/2/13  | 3 | 0 | -0.3390160 | 36.0671500 | <a href="http://www.inaturalist.org/observations/2752148">http://www.inaturalist.org/observations/2752148</a>       |

|     |               |              |            |   |   |            |            |                                                                                                                     |
|-----|---------------|--------------|------------|---|---|------------|------------|---------------------------------------------------------------------------------------------------------------------|
| 350 | Bubulcus ibis | Cattle Egret | 2021/7/30  | 2 | 0 | -0.3101587 | 36.0841572 | <a href="https://www.inaturalist.org/observations/93628202">https://www.inaturalist.org/observations/93628202</a>   |
| 351 | Bubulcus ibis | Cattle Egret | 2022/8/13  | 1 | 0 | -0.3101587 | 36.0841572 | <a href="https://www.inaturalist.org/observations/135747776">https://www.inaturalist.org/observations/135747776</a> |
| 352 | Bubulcus ibis | Cattle Egret | 2021/7/20  | 2 | 0 | -0.3030988 | 36.0800260 | <a href="https://www.inaturalist.org/observations/88721931">https://www.inaturalist.org/observations/88721931</a>   |
| 353 | Bubulcus ibis | Cattle Egret | 2021/7/30  | 1 | 0 | -0.3030988 | 36.0800260 | <a href="https://www.inaturalist.org/observations/95468065">https://www.inaturalist.org/observations/95468065</a>   |
| 354 | Bubulcus ibis | Cattle Egret | 2022/9/19  | 1 | 0 | -0.2957997 | 36.1439285 | <a href="https://www.inaturalist.org/observations/135669877">https://www.inaturalist.org/observations/135669877</a> |
| 355 | Bubulcus ibis | Cattle Egret | 2019/3/11  | 2 | 0 | -0.2388244 | 36.9039160 | <a href="https://www.inaturalist.org/observations/101277674">https://www.inaturalist.org/observations/101277674</a> |
| 356 | Bubulcus ibis | Cattle Egret | 2016/12/4  | 2 | 0 | -0.2085750 | 29.8902637 | <a href="https://www.inaturalist.org/observations/5186155">https://www.inaturalist.org/observations/5186155</a>     |
| 357 | Bubulcus ibis | Cattle Egret | 2021/8/4   | 1 | 0 | -0.2031816 | 29.9051175 | <a href="https://www.inaturalist.org/observations/94861322">https://www.inaturalist.org/observations/94861322</a>   |
| 358 | Bubulcus ibis | Cattle Egret | 2022/10/28 | 1 | 0 | -0.2026350 | 29.8979667 | <a href="https://www.inaturalist.org/observations/143276107">https://www.inaturalist.org/observations/143276107</a> |
| 359 | Bubulcus ibis | Cattle Egret | 2019/7/30  | 5 | 0 | -0.2004390 | 29.9091130 | <a href="https://www.inaturalist.org/observations/31420296">https://www.inaturalist.org/observations/31420296</a>   |
| 360 | Bubulcus ibis | Cattle Egret | 2018/9/24  | 1 | 0 | -0.1927666 | 29.9090633 | <a href="https://www.inaturalist.org/observations/131990139">https://www.inaturalist.org/observations/131990139</a> |
| 361 | Bubulcus ibis | Cattle Egret | 2021/7/24  | 1 | 0 | -0.1907172 | 29.9088445 | <a href="https://www.inaturalist.org/observations/109936813">https://www.inaturalist.org/observations/109936813</a> |
| 362 | Bubulcus ibis | Cattle Egret | 2021/12/9  | 1 | 0 | -0.1857032 | 29.9070966 | <a href="https://www.inaturalist.org/observations/106216270">https://www.inaturalist.org/observations/106216270</a> |
| 363 | Bubulcus ibis | Cattle Egret | 2019/9/7   | 1 | 0 | -0.1823701 | 29.9400381 | <a href="https://www.inaturalist.org/observations/142326321">https://www.inaturalist.org/observations/142326321</a> |
| 364 | Bubulcus ibis | Cattle Egret | 2015/8/8   | 1 | 0 | -0.1640715 | 30.0202536 | <a href="https://www.inaturalist.org/observations/47058498">https://www.inaturalist.org/observations/47058498</a>   |
| 365 | Bubulcus ibis | Cattle Egret | 2015/8/9   | 1 | 0 | -0.1582701 | 34.7532980 | <a href="https://www.inaturalist.org/observations/117979339">https://www.inaturalist.org/observations/117979339</a> |
| 366 | Bubulcus ibis | Cattle Egret | 2007/12/20 | 2 | 0 | -0.1572050 | 30.0181940 | <a href="https://www.inaturalist.org/observations/68886910">https://www.inaturalist.org/observations/68886910</a>   |
| 367 | Bubulcus ibis | Cattle Egret | 2021/12/24 | 1 | 0 | -0.1370930 | 34.7385931 | <a href="https://www.inaturalist.org/observations/112658279">https://www.inaturalist.org/observations/112658279</a> |
| 368 | Bubulcus ibis | Cattle Egret | 2022/8/15  | 2 | 0 | -0.1349917 | 30.0251821 | <a href="https://www.inaturalist.org/observations/141845052">https://www.inaturalist.org/observations/141845052</a> |
| 369 | Bubulcus ibis | Cattle Egret | 2022/8/15  | 2 | 0 | -0.1349917 | 30.0251821 | <a href="https://www.inaturalist.org/observations/141845054">https://www.inaturalist.org/observations/141845054</a> |
| 370 | Bubulcus ibis | Cattle Egret | 2018/5/28  | 2 | 0 | -0.1349914 | 30.0251821 | <a href="https://www.inaturalist.org/observations/66087006">https://www.inaturalist.org/observations/66087006</a>   |
| 371 | Bubulcus ibis | Cattle Egret | 2019/8/7   | 3 | 0 | -0.1259649 | 30.0239938 | <a href="https://www.inaturalist.org/observations/46785535">https://www.inaturalist.org/observations/46785535</a>   |
| 372 | Bubulcus ibis | Cattle Egret | 2011/11/14 | 1 | 0 | -0.1039008 | 32.6528365 | <a href="https://www.inaturalist.org/observations/142280138">https://www.inaturalist.org/observations/142280138</a> |
| 373 | Bubulcus ibis | Cattle Egret | 2013/8/9   | 4 | 0 | -0.0771797 | 30.0620323 | <a href="https://www.inaturalist.org/observations/105710639">https://www.inaturalist.org/observations/105710639</a> |
| 374 | Bubulcus ibis | Cattle Egret | 2022/3/21  | 1 | 0 | -0.0628840 | 34.7751900 | <a href="https://www.inaturalist.org/observations/109228257">https://www.inaturalist.org/observations/109228257</a> |

|     |               |              |            |   |   |            |            |                                                                                                                     |
|-----|---------------|--------------|------------|---|---|------------|------------|---------------------------------------------------------------------------------------------------------------------|
| 375 | Bubulcus ibis | Cattle Egret | 2021/2/28  | 1 | 0 | -0.0470683 | 34.8298416 | <a href="https://www.inaturalist.org/observations/70555593">https://www.inaturalist.org/observations/70555593</a>   |
| 376 | Bubulcus ibis | Cattle Egret | 2021/3/1   | 2 | 0 | -0.0420652 | 30.1001743 | <a href="https://www.inaturalist.org/observations/78678734">https://www.inaturalist.org/observations/78678734</a>   |
| 377 | Bubulcus ibis | Cattle Egret | 2022/10/9  | 1 | 0 | -0.0393434 | 30.0822312 | <a href="https://www.inaturalist.org/observations/139670110">https://www.inaturalist.org/observations/139670110</a> |
| 378 | Bubulcus ibis | Cattle Egret | 2021/7/24  | 1 | 0 | -0.0384974 | 30.1297534 | <a href="https://www.inaturalist.org/observations/96772978">https://www.inaturalist.org/observations/96772978</a>   |
| 379 | Bubulcus ibis | Cattle Egret | 2005/1/14  | 3 | 0 | -0.0235590 | 37.9061930 | <a href="https://www.inaturalist.org/observations/35670491">https://www.inaturalist.org/observations/35670491</a>   |
| 380 | Bubulcus ibis | Cattle Egret | 2018/6/23  | 1 | 0 | -0.0043140 | 36.9637340 | <a href="https://www.inaturalist.org/observations/64304172">https://www.inaturalist.org/observations/64304172</a>   |
| 381 | Bubulcus ibis | Cattle Egret | 2017/8/31  | 5 | 0 | -0.0042590 | 36.9636710 | <a href="https://www.inaturalist.org/observations/7922721">https://www.inaturalist.org/observations/7922721</a>     |
| 382 | Bubulcus ibis | Cattle Egret | 2017/2/19  | 3 | 0 | -0.0042590 | 36.9636710 | <a href="https://www.inaturalist.org/observations/12655326">https://www.inaturalist.org/observations/12655326</a>   |
| 383 | Bubulcus ibis | Cattle Egret | 2017/2/19  | 2 | 0 | 0.0058358  | 36.9636705 | <a href="https://www.inaturalist.org/observations/42014614">https://www.inaturalist.org/observations/42014614</a>   |
| 384 | Bubulcus ibis | Cattle Egret | 2017/2/19  | 2 | 0 | 0.0061228  | 36.9635647 | <a href="https://www.inaturalist.org/observations/42014720">https://www.inaturalist.org/observations/42014720</a>   |
| 385 | Bubulcus ibis | Cattle Egret | 2015/12/27 | 3 | 0 | 0.0108043  | 36.8950065 | <a href="https://www.inaturalist.org/observations/9850130">https://www.inaturalist.org/observations/9850130</a>     |
| 386 | Bubulcus ibis | Cattle Egret | 2019/10/12 | 1 | 0 | 0.0311128  | 36.9605877 | <a href="https://www.inaturalist.org/observations/107593359">https://www.inaturalist.org/observations/107593359</a> |
| 387 | Bubulcus ibis | Cattle Egret | 2019/10/12 | 1 | 0 | 0.0313778  | 36.9602895 | <a href="https://www.inaturalist.org/observations/107593358">https://www.inaturalist.org/observations/107593358</a> |
| 388 | Bubulcus ibis | Cattle Egret | 2019/7/31  | 2 | 0 | 0.0317579  | 36.9313169 | <a href="https://www.inaturalist.org/observations/33943731">https://www.inaturalist.org/observations/33943731</a>   |
| 389 | Bubulcus ibis | Cattle Egret | 2019/10/12 | 1 | 0 | 0.0318457  | 36.9600960 | <a href="https://www.inaturalist.org/observations/107593355">https://www.inaturalist.org/observations/107593355</a> |
| 390 | Bubulcus ibis | Cattle Egret | 2019/10/12 | 1 | 0 | 0.0326454  | 36.9597821 | <a href="https://www.inaturalist.org/observations/107593353">https://www.inaturalist.org/observations/107593353</a> |
| 391 | Bubulcus ibis | Cattle Egret | 2019/3/14  | 2 | 0 | 0.0341937  | 36.9392678 | <a href="https://www.inaturalist.org/observations/101280918">https://www.inaturalist.org/observations/101280918</a> |
| 392 | Bubulcus ibis | Cattle Egret | 2019/8/9   | 3 | 0 | 0.0392651  | 36.9381027 | <a href="https://www.inaturalist.org/observations/32384592">https://www.inaturalist.org/observations/32384592</a>   |
| 393 | Bubulcus ibis | Cattle Egret | 2022/7/18  | 2 | 0 | 0.0419917  | 36.9675467 | <a href="https://www.inaturalist.org/observations/126923790">https://www.inaturalist.org/observations/126923790</a> |
| 394 | Bubulcus ibis | Cattle Egret | 2019/10/12 | 1 | 0 | 0.0437742  | 36.9524212 | <a href="https://www.inaturalist.org/observations/107593361">https://www.inaturalist.org/observations/107593361</a> |
| 395 | Bubulcus ibis | Cattle Egret | 2017/2/10  | 3 | 0 | 0.0440000  | 32.4700000 | <a href="https://www.inaturalist.org/observations/9073450">https://www.inaturalist.org/observations/9073450</a>     |
| 396 | Bubulcus ibis | Cattle Egret | 2022/9/18  | 2 | 0 | 0.0452150  | 36.9520250 | <a href="https://www.inaturalist.org/observations/138070734">https://www.inaturalist.org/observations/138070734</a> |
| 397 | Bubulcus ibis | Cattle Egret | 2020/1/14  | 0 | 0 | 0.0525914  | 32.4775427 | <a href="https://www.inaturalist.org/observations/38395132">https://www.inaturalist.org/observations/38395132</a>   |
| 398 | Bubulcus ibis | Cattle Egret | 2019/3/12  | 1 | 0 | 0.0528704  | 32.4770920 | <a href="https://www.inaturalist.org/observations/37448780">https://www.inaturalist.org/observations/37448780</a>   |
| 399 | Bubulcus ibis | Cattle Egret | 2011/11/14 | 1 | 0 | 0.0532180  | 32.4720700 | <a href="https://www.inaturalist.org/observations/142229855">https://www.inaturalist.org/observations/142229855</a> |

|     |               |              |            |   |   |           |            |                                                                                                                     |
|-----|---------------|--------------|------------|---|---|-----------|------------|---------------------------------------------------------------------------------------------------------------------|
| 400 | Bubulcus ibis | Cattle Egret | 2022/1/15  | 2 | 0 | 0.0532297 | 32.4778479 | <a href="https://www.inaturalist.org/observations/110462836">https://www.inaturalist.org/observations/110462836</a> |
| 401 | Bubulcus ibis | Cattle Egret | 2014/6/18  | 1 | 0 | 0.0532814 | 32.4747726 | <a href="https://www.inaturalist.org/observations/106521332">https://www.inaturalist.org/observations/106521332</a> |
| 402 | Bubulcus ibis | Cattle Egret | 2018/11/8  | 4 | 0 | 0.0533726 | 32.4765119 | <a href="https://www.inaturalist.org/observations/18323526">https://www.inaturalist.org/observations/18323526</a>   |
| 403 | Bubulcus ibis | Cattle Egret | 2022/11/8  | 1 | 0 | 0.0542590 | 32.4757871 | <a href="https://www.inaturalist.org/observations/141688426">https://www.inaturalist.org/observations/141688426</a> |
| 404 | Bubulcus ibis | Cattle Egret | 2016/9/5   | 1 | 0 | 0.0585490 | 32.3575860 | <a href="https://www.inaturalist.org/observations/90184233">https://www.inaturalist.org/observations/90184233</a>   |
| 405 | Bubulcus ibis | Cattle Egret | 2016/11/21 | 2 | 0 | 0.0589417 | 32.4813111 | <a href="http://www.inaturalist.org/observations/4679481">http://www.inaturalist.org/observations/4679481</a>       |
| 406 | Bubulcus ibis | Cattle Egret | 2022/9/13  | 1 | 0 | 0.0611033 | 32.4797633 | <a href="https://www.inaturalist.org/observations/134839054">https://www.inaturalist.org/observations/134839054</a> |
| 407 | Bubulcus ibis | Cattle Egret | 2019/6/24  | 3 | 0 | 0.0620109 | 32.4792744 | <a href="https://www.inaturalist.org/observations/28329947">https://www.inaturalist.org/observations/28329947</a>   |
| 408 | Bubulcus ibis | Cattle Egret | 2018/4/17  | 1 | 0 | 0.0620109 | 32.4792744 | <a href="https://www.inaturalist.org/observations/121083550">https://www.inaturalist.org/observations/121083550</a> |
| 409 | Bubulcus ibis | Cattle Egret | 2020/1/26  | 1 | 0 | 0.0620170 | 32.4792743 | <a href="https://www.inaturalist.org/observations/38178559">https://www.inaturalist.org/observations/38178559</a>   |
| 410 | Bubulcus ibis | Cattle Egret | 2017/1/31  | 1 | 0 | 0.0621414 | 32.4790192 | <a href="https://www.inaturalist.org/observations/107289453">https://www.inaturalist.org/observations/107289453</a> |
| 411 | Bubulcus ibis | Cattle Egret | 2022/11/1  | 1 | 0 | 0.0621755 | 32.4805326 | <a href="https://www.inaturalist.org/observations/141535730">https://www.inaturalist.org/observations/141535730</a> |
| 412 | Bubulcus ibis | Cattle Egret | 2022/2/3   | 1 | 0 | 0.0624418 | 32.4784184 | <a href="https://www.inaturalist.org/observations/106985306">https://www.inaturalist.org/observations/106985306</a> |
| 413 | Bubulcus ibis | Cattle Egret | 2011/2/18  | 1 | 0 | 0.0625063 | 32.4791813 | <a href="https://www.inaturalist.org/observations/68266737">https://www.inaturalist.org/observations/68266737</a>   |
| 414 | Bubulcus ibis | Cattle Egret | 2022/7/26  | 2 | 0 | 0.0626824 | 32.4788896 | <a href="https://www.inaturalist.org/observations/143007601">https://www.inaturalist.org/observations/143007601</a> |
| 415 | Bubulcus ibis | Cattle Egret | 2019/3/14  | 2 | 0 | 0.0627798 | 32.4784184 | <a href="https://www.inaturalist.org/observations/37452109">https://www.inaturalist.org/observations/37452109</a>   |
| 416 | Bubulcus ibis | Cattle Egret | 2020/1/15  | 1 | 0 | 0.0628017 | 32.4790548 | <a href="https://www.inaturalist.org/observations/38285235">https://www.inaturalist.org/observations/38285235</a>   |
| 417 | Bubulcus ibis | Cattle Egret | 2020/1/15  | 1 | 0 | 0.0628017 | 32.4790548 | <a href="https://www.inaturalist.org/observations/38285262">https://www.inaturalist.org/observations/38285262</a>   |
| 418 | Bubulcus ibis | Cattle Egret | 2022/11/11 | 1 | 0 | 0.0630312 | 32.4803707 | <a href="https://www.inaturalist.org/observations/143935800">https://www.inaturalist.org/observations/143935800</a> |
| 419 | Bubulcus ibis | Cattle Egret | 2019/6/25  | 1 | 0 | 0.0632984 | 32.4789096 | <a href="https://www.inaturalist.org/observations/59114476">https://www.inaturalist.org/observations/59114476</a>   |
| 420 | Bubulcus ibis | Cattle Egret | 2021/6/19  | 1 | 0 | 0.0632984 | 32.4789096 | <a href="https://www.inaturalist.org/observations/109741271">https://www.inaturalist.org/observations/109741271</a> |
| 421 | Bubulcus ibis | Cattle Egret | 2022/8/2   | 1 | 0 | 0.0633139 | 32.4782186 | <a href="https://www.inaturalist.org/observations/144668555">https://www.inaturalist.org/observations/144668555</a> |
| 422 | Bubulcus ibis | Cattle Egret | 2011/2/23  | 2 | 0 | 0.0634021 | 32.4788557 | <a href="https://www.inaturalist.org/observations/68268586">https://www.inaturalist.org/observations/68268586</a>   |
| 423 | Bubulcus ibis | Cattle Egret | 2019/3/9   | 2 | 0 | 0.0634271 | 32.4791886 | <a href="https://www.inaturalist.org/observations/37253813">https://www.inaturalist.org/observations/37253813</a>   |
| 424 | Bubulcus ibis | Cattle Egret | 2019/8/24  | 1 | 0 | 0.0634271 | 32.4791886 | <a href="https://www.inaturalist.org/observations/37641436">https://www.inaturalist.org/observations/37641436</a>   |

|     |               |              |           |   |   |           |            |                                                                                                                     |
|-----|---------------|--------------|-----------|---|---|-----------|------------|---------------------------------------------------------------------------------------------------------------------|
| 425 | Bubulcus ibis | Cattle Egret | 2019/3/14 | 1 | 0 | 0.0635308 | 32.4798346 | <a href="https://www.inaturalist.org/observations/37462260">https://www.inaturalist.org/observations/37462260</a>   |
| 426 | Bubulcus ibis | Cattle Egret | 2019/3/14 | 2 | 0 | 0.0637239 | 32.4797917 | <a href="https://www.inaturalist.org/observations/37456087">https://www.inaturalist.org/observations/37456087</a>   |
| 427 | Bubulcus ibis | Cattle Egret | 2019/3/14 | 1 | 0 | 0.0637239 | 32.4797917 | <a href="https://www.inaturalist.org/observations/37456095">https://www.inaturalist.org/observations/37456095</a>   |
| 428 | Bubulcus ibis | Cattle Egret | 2022/7/14 | 2 | 0 | 0.0637465 | 32.4789975 | <a href="https://www.inaturalist.org/observations/127112230">https://www.inaturalist.org/observations/127112230</a> |
| 429 | Bubulcus ibis | Cattle Egret | 2022/11/4 | 1 | 0 | 0.0654923 | 32.3571008 | <a href="https://www.inaturalist.org/observations/141677545">https://www.inaturalist.org/observations/141677545</a> |
| 430 | Bubulcus ibis | Cattle Egret | 2021/6/20 | 1 | 0 | 0.0658396 | 32.3558765 | <a href="https://www.inaturalist.org/observations/109909199">https://www.inaturalist.org/observations/109909199</a> |
| 431 | Bubulcus ibis | Cattle Egret | 2018/9/19 | 1 | 0 | 0.0659349 | 32.3575884 | <a href="https://www.inaturalist.org/observations/131883409">https://www.inaturalist.org/observations/131883409</a> |
| 432 | Bubulcus ibis | Cattle Egret | 2019/2/10 | 4 | 0 | 0.0669650 | 32.4781483 | <a href="https://www.inaturalist.org/observations/20265191">https://www.inaturalist.org/observations/20265191</a>   |
| 433 | Bubulcus ibis | Cattle Egret | 2019/7/27 | 4 | 0 | 0.0670470 | 32.3500160 | <a href="https://www.inaturalist.org/observations/31020756">https://www.inaturalist.org/observations/31020756</a>   |
| 434 | Bubulcus ibis | Cattle Egret | 2022/11/1 | 1 | 0 | 0.0672315 | 32.4788928 | <a href="https://www.inaturalist.org/observations/141529601">https://www.inaturalist.org/observations/141529601</a> |
| 435 | Bubulcus ibis | Cattle Egret | 2013/3/18 | 2 | 0 | 0.0679400 | 32.3491100 | <a href="https://www.inaturalist.org/observations/47500973">https://www.inaturalist.org/observations/47500973</a>   |
| 436 | Bubulcus ibis | Cattle Egret | 2016/2/28 | 1 | 0 | 0.0755880 | 32.3500500 | <a href="https://www.inaturalist.org/observations/34627136">https://www.inaturalist.org/observations/34627136</a>   |
| 437 | Bubulcus ibis | Cattle Egret | 2021/7/22 | 1 | 0 | 0.0778770 | 36.0791095 | <a href="https://www.inaturalist.org/observations/90636654">https://www.inaturalist.org/observations/90636654</a>   |
| 438 | Bubulcus ibis | Cattle Egret | 2019/7/25 | 4 | 0 | 0.0829230 | 32.4507720 | <a href="https://www.inaturalist.org/observations/30808049">https://www.inaturalist.org/observations/30808049</a>   |
| 439 | Bubulcus ibis | Cattle Egret | 2013/3/17 | 1 | 0 | 0.0833333 | 32.3333333 | <a href="https://www.inaturalist.org/observations/123209243">https://www.inaturalist.org/observations/123209243</a> |
| 440 | Bubulcus ibis | Cattle Egret | 2013/3/17 | 1 | 0 | 0.0833333 | 32.3333333 | <a href="https://www.inaturalist.org/observations/123210188">https://www.inaturalist.org/observations/123210188</a> |
| 441 | Bubulcus ibis | Cattle Egret | 2021/1/24 | 2 | 0 | 0.0882865 | 32.9543354 | <a href="https://www.inaturalist.org/observations/69570171">https://www.inaturalist.org/observations/69570171</a>   |
| 442 | Bubulcus ibis | Cattle Egret | 2013/8/29 | 1 | 0 | 0.0896280 | 38.1900290 | <a href="https://www.inaturalist.org/observations/65570290">https://www.inaturalist.org/observations/65570290</a>   |
| 443 | Bubulcus ibis | Cattle Egret | 2021/10/7 | 1 | 0 | 0.0901535 | 32.3577133 | <a href="https://www.inaturalist.org/observations/97787664">https://www.inaturalist.org/observations/97787664</a>   |
| 444 | Bubulcus ibis | Cattle Egret | 2022/7/27 | 1 | 0 | 0.1275443 | 32.4525833 | <a href="https://www.inaturalist.org/observations/138497265">https://www.inaturalist.org/observations/138497265</a> |
| 445 | Bubulcus ibis | Cattle Egret | 2016/2/4  | 3 | 0 | 0.1358550 | 32.4825680 | <a href="http://www.inaturalist.org/observations/2833318">http://www.inaturalist.org/observations/2833318</a>       |
| 446 | Bubulcus ibis | Cattle Egret | 2022/3/13 | 1 | 0 | 0.1446237 | 32.7508529 | <a href="https://www.inaturalist.org/observations/108502727">https://www.inaturalist.org/observations/108502727</a> |
| 447 | Bubulcus ibis | Cattle Egret | 2011/8/10 | 2 | 0 | 0.1564263 | 30.0788069 | <a href="https://www.inaturalist.org/observations/41133924">https://www.inaturalist.org/observations/41133924</a>   |
| 448 | Bubulcus ibis | Cattle Egret | 2022/8/14 | 2 | 0 | 0.1564263 | 30.0788069 | <a href="https://www.inaturalist.org/observations/141927764">https://www.inaturalist.org/observations/141927764</a> |
| 449 | Bubulcus ibis | Cattle Egret | 2021/6/21 | 2 | 0 | 0.1599883 | 32.5591433 | <a href="https://www.inaturalist.org/observations/87364875">https://www.inaturalist.org/observations/87364875</a>   |



|     |               |              |            |   |   |           |            |                                                                                                                     |
|-----|---------------|--------------|------------|---|---|-----------|------------|---------------------------------------------------------------------------------------------------------------------|
| 450 | Bubulcus ibis | Cattle Egret | 2021/6/12  | 1 | 0 | 0.1604417 | 32.5593800 | <a href="https://www.inaturalist.org/observations/84298709">https://www.inaturalist.org/observations/84298709</a>   |
| 451 | Bubulcus ibis | Cattle Egret | 2017/5/15  | 2 | 0 | 0.1847213 | 38.1932071 | <a href="https://www.inaturalist.org/observations/6820533">https://www.inaturalist.org/observations/6820533</a>     |
| 452 | Bubulcus ibis | Cattle Egret | 2018/12/9  | 4 | 0 | 0.1883006 | 37.4496832 | <a href="https://www.inaturalist.org/observations/18915259">https://www.inaturalist.org/observations/18915259</a>   |
| 453 | Bubulcus ibis | Cattle Egret | 2021/10/19 | 1 | 0 | 0.1913988 | 37.4576745 | <a href="https://www.inaturalist.org/observations/101689594">https://www.inaturalist.org/observations/101689594</a> |
| 454 | Bubulcus ibis | Cattle Egret | 2018/8/21  | 1 | 0 | 0.1938264 | 38.1904831 | <a href="https://www.inaturalist.org/observations/66511938">https://www.inaturalist.org/observations/66511938</a>   |
| 455 | Bubulcus ibis | Cattle Egret | 2022/7/2   | 1 | 0 | 0.2170215 | 37.4303548 | <a href="https://www.inaturalist.org/observations/133501308">https://www.inaturalist.org/observations/133501308</a> |
| 456 | Bubulcus ibis | Cattle Egret | 2020/11/17 | 1 | 0 | 0.2193777 | 32.5507161 | <a href="https://www.inaturalist.org/observations/65332694">https://www.inaturalist.org/observations/65332694</a>   |
| 457 | Bubulcus ibis | Cattle Egret | 2021/11/23 | 1 | 0 | 0.2235740 | 36.9476110 | <a href="https://www.inaturalist.org/observations/103363884">https://www.inaturalist.org/observations/103363884</a> |
| 458 | Bubulcus ibis | Cattle Egret | 2019/6/11  | 1 | 0 | 0.2567966 | 36.8475634 | <a href="https://www.inaturalist.org/observations/41164118">https://www.inaturalist.org/observations/41164118</a>   |
| 459 | Bubulcus ibis | Cattle Egret | 2022/4/29  | 1 | 0 | 0.2591030 | 36.9377731 | <a href="https://www.inaturalist.org/observations/116802851">https://www.inaturalist.org/observations/116802851</a> |
| 460 | Bubulcus ibis | Cattle Egret | 2021/6/21  | 2 | 0 | 0.2850783 | 32.5630867 | <a href="https://www.inaturalist.org/observations/83904476">https://www.inaturalist.org/observations/83904476</a>   |
| 461 | Bubulcus ibis | Cattle Egret | 2022/2/3   | 2 | 0 | 0.2923660 | 36.8984604 | <a href="https://www.inaturalist.org/observations/106369295">https://www.inaturalist.org/observations/106369295</a> |
| 462 | Bubulcus ibis | Cattle Egret | 2019/4/4   | 3 | 0 | 0.2924420 | 36.8986050 | <a href="https://www.inaturalist.org/observations/26409936">https://www.inaturalist.org/observations/26409936</a>   |
| 463 | Bubulcus ibis | Cattle Egret | 2014/1/5   | 2 | 0 | 0.3324188 | 32.3780443 | <a href="https://www.inaturalist.org/observations/122624747">https://www.inaturalist.org/observations/122624747</a> |
| 464 | Bubulcus ibis | Cattle Egret | 2019/5/23  | 2 | 0 | 0.3427970 | 36.8723244 | <a href="https://www.inaturalist.org/observations/108489240">https://www.inaturalist.org/observations/108489240</a> |
| 465 | Bubulcus ibis | Cattle Egret | 2013/8/4   | 1 | 0 | 0.3475964 | 32.5825197 | <a href="https://www.inaturalist.org/observations/69492792">https://www.inaturalist.org/observations/69492792</a>   |
| 466 | Bubulcus ibis | Cattle Egret | 2014/12/19 | 3 | 0 | 0.3536190 | 32.6032390 | <a href="http://www.inaturalist.org/observations/1499937">http://www.inaturalist.org/observations/1499937</a>       |
| 467 | Bubulcus ibis | Cattle Egret | 2019/8/13  | 3 | 0 | 0.3606063 | 36.7819505 | <a href="https://www.inaturalist.org/observations/30919524">https://www.inaturalist.org/observations/30919524</a>   |
| 468 | Bubulcus ibis | Cattle Egret | 2020/1/22  | 1 | 0 | 0.3800967 | 32.5710917 | <a href="https://www.inaturalist.org/observations/37841655">https://www.inaturalist.org/observations/37841655</a>   |
| 469 | Bubulcus ibis | Cattle Egret | 2011/3/2   | 1 | 0 | 0.4053550 | 33.1984361 | <a href="https://www.inaturalist.org/observations/38693467">https://www.inaturalist.org/observations/38693467</a>   |
| 470 | Bubulcus ibis | Cattle Egret | 2022/4/8   | 1 | 0 | 0.4478563 | 33.2026121 | <a href="https://www.inaturalist.org/observations/111957374">https://www.inaturalist.org/observations/111957374</a> |
| 471 | Bubulcus ibis | Cattle Egret | 2009/3/10  | 3 | 0 | 0.4908943 | 36.2809303 | <a href="http://www.inaturalist.org/observations/4632166">http://www.inaturalist.org/observations/4632166</a>       |
| 472 | Bubulcus ibis | Cattle Egret | 2007/8/3   | 2 | 0 | 0.4956443 | 33.3059840 | <a href="https://www.inaturalist.org/observations/142863957">https://www.inaturalist.org/observations/142863957</a> |
| 473 | Bubulcus ibis | Cattle Egret | 2019/6/9   | 3 | 0 | 0.5328783 | 33.8854267 | <a href="https://www.inaturalist.org/observations/28353978">https://www.inaturalist.org/observations/28353978</a>   |
| 474 | Bubulcus ibis | Cattle Egret | 2020/1/13  | 1 | 0 | 0.5435383 | 33.0894083 | <a href="https://www.inaturalist.org/observations/143520782">https://www.inaturalist.org/observations/143520782</a> |

|     |               |              |            |   |   |           |            |                                                                                                                     |
|-----|---------------|--------------|------------|---|---|-----------|------------|---------------------------------------------------------------------------------------------------------------------|
| 475 | Bubulcus ibis | Cattle Egret | 2019/6/14  | 1 | 0 | 0.5451353 | 37.5883645 | <a href="https://www.inaturalist.org/observations/53348897">https://www.inaturalist.org/observations/53348897</a>   |
| 476 | Bubulcus ibis | Cattle Egret | 2017/12/31 | 3 | 0 | 0.5534717 | 35.3137817 | <a href="https://www.inaturalist.org/observations/9563247">https://www.inaturalist.org/observations/9563247</a>     |
| 477 | Bubulcus ibis | Cattle Egret | 2019/6/15  | 2 | 0 | 0.5566629 | 37.6059708 | <a href="https://www.inaturalist.org/observations/53824848">https://www.inaturalist.org/observations/53824848</a>   |
| 478 | Bubulcus ibis | Cattle Egret | 2014/1/2   | 6 | 0 | 0.5700383 | 35.3140167 | <a href="https://www.inaturalist.org/observations/9023440">https://www.inaturalist.org/observations/9023440</a>     |
| 479 | Bubulcus ibis | Cattle Egret | 2010/9/9   | 1 | 0 | 0.5718048 | 36.0727166 | <a href="https://www.inaturalist.org/observations/46178234">https://www.inaturalist.org/observations/46178234</a>   |
| 480 | Bubulcus ibis | Cattle Egret | 2019/3/9   | 2 | 0 | 0.5774645 | 37.4915773 | <a href="https://www.inaturalist.org/observations/42293935">https://www.inaturalist.org/observations/42293935</a>   |
| 481 | Bubulcus ibis | Cattle Egret | 2020/7/17  | 1 | 0 | 0.5774698 | 37.4915770 | <a href="https://www.inaturalist.org/observations/73962849">https://www.inaturalist.org/observations/73962849</a>   |
| 482 | Bubulcus ibis | Cattle Egret | 2019/8/4   | 6 | 0 | 0.5899190 | 37.5897930 | <a href="https://www.inaturalist.org/observations/31866599">https://www.inaturalist.org/observations/31866599</a>   |
| 483 | Bubulcus ibis | Cattle Egret | 2010/9/9   | 2 | 0 | 0.5900000 | 36.0710000 | <a href="https://www.inaturalist.org/observations/46052233">https://www.inaturalist.org/observations/46052233</a>   |
| 484 | Bubulcus ibis | Cattle Egret | 2021/8/9   | 2 | 0 | 0.6136856 | 37.6217401 | <a href="https://www.inaturalist.org/observations/94037731">https://www.inaturalist.org/observations/94037731</a>   |
| 485 | Bubulcus ibis | Cattle Egret | 2010/9/9   | 2 | 0 | 0.6140000 | 36.0230000 | <a href="https://www.inaturalist.org/observations/46329589">https://www.inaturalist.org/observations/46329589</a>   |
| 486 | Bubulcus ibis | Cattle Egret | 2008/9/26  | 3 | 0 | 0.6304548 | 36.0723283 | <a href="https://www.inaturalist.org/observations/38093075">https://www.inaturalist.org/observations/38093075</a>   |
| 487 | Bubulcus ibis | Cattle Egret | 2007/3/3   | 1 | 0 | 0.6446745 | 36.0557215 | <a href="https://www.inaturalist.org/observations/103095194">https://www.inaturalist.org/observations/103095194</a> |
| 488 | Bubulcus ibis | Cattle Egret | 2022/11/14 | 1 | 0 | 0.8376569 | 30.1661420 | <a href="https://www.inaturalist.org/observations/142201412">https://www.inaturalist.org/observations/142201412</a> |
| 489 | Bubulcus ibis | Cattle Egret | 2017/12/27 | 3 | 0 | 0.8442617 | 35.2623183 | <a href="https://www.inaturalist.org/observations/9764390">https://www.inaturalist.org/observations/9764390</a>     |
| 490 | Bubulcus ibis | Cattle Egret | 2014/6/5   | 3 | 0 | 1.2351800 | 30.7383730 | <a href="http://www.inaturalist.org/observations/1232292">http://www.inaturalist.org/observations/1232292</a>       |
| 491 | Bubulcus ibis | Cattle Egret | 2016/2/17  | 1 | 0 | 1.4080530 | 32.1223620 | <a href="https://www.inaturalist.org/observations/34527878">https://www.inaturalist.org/observations/34527878</a>   |
| 492 | Bubulcus ibis | Cattle Egret | 2022/10/13 | 1 | 0 | 1.5798625 | 31.1083441 | <a href="https://www.inaturalist.org/observations/138640092">https://www.inaturalist.org/observations/138640092</a> |
| 493 | Bubulcus ibis | Cattle Egret | 2022/9/29  | 2 | 0 | 1.6279243 | 32.0320373 | <a href="https://www.inaturalist.org/observations/139257213">https://www.inaturalist.org/observations/139257213</a> |
| 494 | Bubulcus ibis | Cattle Egret | 2009/6/17  | 4 | 0 | 1.9641080 | 33.0654144 | <a href="https://www.inaturalist.org/observations/8679311">https://www.inaturalist.org/observations/8679311</a>     |
| 495 | Bubulcus ibis | Cattle Egret | 2019/2/7   | 1 | 0 | 2.1473243 | 31.8054199 | <a href="https://www.inaturalist.org/observations/34929866">https://www.inaturalist.org/observations/34929866</a>   |
| 496 | Bubulcus ibis | Cattle Egret | 2016/2/5   | 2 | 0 | 2.1746008 | 31.3680305 | <a href="https://www.inaturalist.org/observations/48498422">https://www.inaturalist.org/observations/48498422</a>   |
| 497 | Bubulcus ibis | Cattle Egret | 2011/1/22  | 2 | 0 | 2.2153333 | 31.8286667 | <a href="https://www.inaturalist.org/observations/131547240">https://www.inaturalist.org/observations/131547240</a> |
| 498 | Bubulcus ibis | Cattle Egret | 2018/8/13  | 1 | 0 | 2.2202780 | 31.4162061 | <a href="https://www.inaturalist.org/observations/144237332">https://www.inaturalist.org/observations/144237332</a> |
| 499 | Bubulcus ibis | Cattle Egret | 2010/11/24 | 1 | 0 | 2.2275088 | 31.4397285 | <a href="https://www.inaturalist.org/observations/109417648">https://www.inaturalist.org/observations/109417648</a> |

|     |               |              |            |   |   |           |            |                                                                                                                     |
|-----|---------------|--------------|------------|---|---|-----------|------------|---------------------------------------------------------------------------------------------------------------------|
| 500 | Bubulcus ibis | Cattle Egret | 2017/6/10  | 4 | 0 | 2.2433497 | 31.4066488 | <a href="https://www.inaturalist.org/observations/18599522">https://www.inaturalist.org/observations/18599522</a>   |
| 501 | Bubulcus ibis | Cattle Egret | 2014/12/26 | 2 | 0 | 2.2487981 | 31.4902262 | <a href="https://www.inaturalist.org/observations/33545027">https://www.inaturalist.org/observations/33545027</a>   |
| 502 | Bubulcus ibis | Cattle Egret | 2005/8/13  | 1 | 0 | 2.2574146 | 31.6538776 | <a href="https://www.inaturalist.org/observations/67457336">https://www.inaturalist.org/observations/67457336</a>   |
| 503 | Bubulcus ibis | Cattle Egret | 2019/9/23  | 1 | 0 | 2.2672525 | 31.6567405 | <a href="https://www.inaturalist.org/observations/118147539">https://www.inaturalist.org/observations/118147539</a> |
| 504 | Bubulcus ibis | Cattle Egret | 2017/12/23 | 1 | 0 | 2.2698179 | 31.3742086 | <a href="https://www.inaturalist.org/observations/38135062">https://www.inaturalist.org/observations/38135062</a>   |
| 505 | Bubulcus ibis | Cattle Egret | 2013/8/2   | 4 | 0 | 2.2749452 | 31.5719605 | <a href="https://www.inaturalist.org/observations/9765939">https://www.inaturalist.org/observations/9765939</a>     |
| 506 | Bubulcus ibis | Cattle Egret | 2012/9/26  | 1 | 0 | 2.2780283 | 31.3837900 | <a href="https://www.inaturalist.org/observations/39838513">https://www.inaturalist.org/observations/39838513</a>   |
| 507 | Bubulcus ibis | Cattle Egret | 2018/7/23  | 2 | 0 | 2.2839481 | 31.5901681 | <a href="https://www.inaturalist.org/observations/21560119">https://www.inaturalist.org/observations/21560119</a>   |
| 508 | Bubulcus ibis | Cattle Egret | 2020/3/21  | 2 | 0 | 2.2848899 | 31.5681891 | <a href="https://www.inaturalist.org/observations/40767907">https://www.inaturalist.org/observations/40767907</a>   |
| 509 | Bubulcus ibis | Cattle Egret | 2019/6/14  | 3 | 0 | 2.2882450 | 31.4792629 | <a href="https://www.inaturalist.org/observations/28325470">https://www.inaturalist.org/observations/28325470</a>   |
| 510 | Bubulcus ibis | Cattle Egret | 2019/3/16  | 1 | 0 | 2.2970912 | 31.4830860 | <a href="https://www.inaturalist.org/observations/37520767">https://www.inaturalist.org/observations/37520767</a>   |
| 511 | Bubulcus ibis | Cattle Egret | 2021/6/3   | 2 | 0 | 2.2977633 | 31.4678700 | <a href="https://www.inaturalist.org/observations/83114780">https://www.inaturalist.org/observations/83114780</a>   |
| 512 | Bubulcus ibis | Cattle Egret | 2019/6/23  | 1 | 0 | 2.3021875 | 31.4965960 | <a href="https://www.inaturalist.org/observations/58820681">https://www.inaturalist.org/observations/58820681</a>   |
| 513 | Bubulcus ibis | Cattle Egret | 2019/8/27  | 0 | 0 | 2.3032015 | 31.4959486 | <a href="https://www.inaturalist.org/observations/37772372">https://www.inaturalist.org/observations/37772372</a>   |
| 514 | Bubulcus ibis | Cattle Egret | 2021/6/14  | 1 | 0 | 2.3083800 | 31.4136183 | <a href="https://www.inaturalist.org/observations/84816619">https://www.inaturalist.org/observations/84816619</a>   |
| 515 | Bubulcus ibis | Cattle Egret | 2021/6/14  | 1 | 0 | 2.3129017 | 31.4236233 | <a href="https://www.inaturalist.org/observations/84834405">https://www.inaturalist.org/observations/84834405</a>   |
| 516 | Bubulcus ibis | Cattle Egret | 2021/6/13  | 1 | 0 | 2.3616833 | 31.4859967 | <a href="https://www.inaturalist.org/observations/84522309">https://www.inaturalist.org/observations/84522309</a>   |
| 517 | Bubulcus ibis | Cattle Egret | 2021/6/13  | 1 | 0 | 2.3633550 | 31.4862067 | <a href="https://www.inaturalist.org/observations/84522304">https://www.inaturalist.org/observations/84522304</a>   |
| 518 | Bubulcus ibis | Cattle Egret | 2020/3/21  | 1 | 0 | 2.3908133 | 31.6995039 | <a href="https://www.inaturalist.org/observations/40363595">https://www.inaturalist.org/observations/40363595</a>   |
| 519 | Bubulcus ibis | Cattle Egret | 2018/4/25  | 2 | 0 | 2.3921095 | 32.1931399 | <a href="https://www.inaturalist.org/observations/13685593">https://www.inaturalist.org/observations/13685593</a>   |
| 520 | Bubulcus ibis | Cattle Egret | 2022/10/25 | 1 | 0 | 2.4074950 | 31.5127717 | <a href="https://www.inaturalist.org/observations/142468393">https://www.inaturalist.org/observations/142468393</a> |
| 521 | Bubulcus ibis | Cattle Egret | 2018/9/16  | 1 | 0 | 3.7253055 | 33.7103398 | <a href="https://www.inaturalist.org/observations/131782475">https://www.inaturalist.org/observations/131782475</a> |
| 522 | Bubulcus ibis | Cattle Egret | 2017/2/3   | 2 | 0 | 3.7527171 | 33.7041264 | <a href="https://www.inaturalist.org/observations/68337126">https://www.inaturalist.org/observations/68337126</a>   |
| 523 | Bubulcus ibis | Cattle Egret | 2021/6/18  | 1 | 0 | 3.7756400 | 33.6957567 | <a href="https://www.inaturalist.org/observations/86264887">https://www.inaturalist.org/observations/86264887</a>   |
| 524 | Bubulcus ibis | Cattle Egret | 2022/4/30  | 1 | 0 | 6.0582872 | 37.6029851 | <a href="https://www.inaturalist.org/observations/113869098">https://www.inaturalist.org/observations/113869098</a> |

|     |               |              |            |   |   |            |            |                                                                                                                     |
|-----|---------------|--------------|------------|---|---|------------|------------|---------------------------------------------------------------------------------------------------------------------|
| 525 | Bubulcus ibis | Cattle Egret | 2015/10/20 | 3 | 0 | 7.0008472  | 38.5742417 | <a href="https://www.inaturalist.org/observations/68220741">https://www.inaturalist.org/observations/68220741</a>   |
| 526 | Bubulcus ibis | Cattle Egret | 2012/8/15  | 3 | 0 | 7.0231230  | 38.4663100 | <a href="http://www.inaturalist.org/observations/1710402">http://www.inaturalist.org/observations/1710402</a>       |
| 527 | Bubulcus ibis | Cattle Egret | 2014/1/12  | 1 | 0 | 7.0312974  | 38.4218849 | <a href="https://www.inaturalist.org/observations/129326393">https://www.inaturalist.org/observations/129326393</a> |
| 528 | Bubulcus ibis | Cattle Egret | 2014/1/12  | 1 | 0 | 7.0312974  | 38.4218849 | <a href="https://www.inaturalist.org/observations/129457079">https://www.inaturalist.org/observations/129457079</a> |
| 529 | Bubulcus ibis | Cattle Egret | 2014/1/28  | 2 | 0 | 7.0332720  | 38.4617550 | <a href="https://www.inaturalist.org/observations/37371715">https://www.inaturalist.org/observations/37371715</a>   |
| 530 | Bubulcus ibis | Cattle Egret | 2022/6/2   | 1 | 0 | 7.9170451  | 38.7309685 | <a href="https://www.inaturalist.org/observations/119845318">https://www.inaturalist.org/observations/119845318</a> |
| 531 | Bubulcus ibis | Cattle Egret | 2014/1/12  | 2 | 0 | 8.4673473  | 39.1558159 | <a href="https://www.inaturalist.org/observations/129326061">https://www.inaturalist.org/observations/129326061</a> |
| 532 | Bubulcus ibis | Cattle Egret | 2015/1/11  | 1 | 0 | 8.7866855  | 38.9941937 | <a href="https://www.inaturalist.org/observations/49924595">https://www.inaturalist.org/observations/49924595</a>   |
| 533 | Bubulcus ibis | Cattle Egret | 2021/11/2  | 2 | 0 | 8.8031473  | 38.7127037 | <a href="https://www.inaturalist.org/observations/100161527">https://www.inaturalist.org/observations/100161527</a> |
| 534 | Bubulcus ibis | Cattle Egret | 2022/9/11  | 1 | 0 | 8.8765678  | 38.8191185 | <a href="https://www.inaturalist.org/observations/134567004">https://www.inaturalist.org/observations/134567004</a> |
| 535 | Bubulcus ibis | Cattle Egret | 2014/1/23  | 1 | 0 | 9.0833333  | 40.0000000 | <a href="https://www.inaturalist.org/observations/129457151">https://www.inaturalist.org/observations/129457151</a> |
| 536 | Bubulcus ibis | Cattle Egret | 2016/4/23  | 4 | 0 | 9.1059892  | 40.0207901 | <a href="https://www.inaturalist.org/observations/5238488">https://www.inaturalist.org/observations/5238488</a>     |
| 537 | Bubulcus ibis | Cattle Egret | 2012/12/20 | 1 | 0 | 9.1852784  | 38.7603778 | <a href="https://www.inaturalist.org/observations/54415420">https://www.inaturalist.org/observations/54415420</a>   |
| 538 | Bubulcus ibis | Cattle Egret | 2014/2/22  | 1 | 0 | 9.2536585  | 34.8682286 | <a href="https://www.inaturalist.org/observations/143529471">https://www.inaturalist.org/observations/143529471</a> |
| 539 | Bubulcus ibis | Cattle Egret | 2012/12/20 | 3 | 0 | 9.3258450  | 38.7690350 | <a href="https://www.inaturalist.org/observations/18677366">https://www.inaturalist.org/observations/18677366</a>   |
| 540 | Bubulcus ibis | Cattle Egret | 2015/7/22  | 4 | 0 | 9.3604944  | 42.8000972 | <a href="http://www.inaturalist.org/observations/2130018">http://www.inaturalist.org/observations/2130018</a>       |
| 541 | Bubulcus ibis | Cattle Egret | 2011/7/6   | 2 | 0 | 9.6008180  | 43.3323530 | <a href="http://www.inaturalist.org/observations/502550">http://www.inaturalist.org/observations/502550</a>         |
| 542 | Bubulcus ibis | Cattle Egret | 2020/2/17  | 0 | 0 | 11.4901771 | 37.5833883 | <a href="https://www.inaturalist.org/observations/39378397">https://www.inaturalist.org/observations/39378397</a>   |
| 543 | Bubulcus ibis | Cattle Egret | 2020/2/17  | 1 | 0 | 11.4901771 | 37.5833883 | <a href="https://www.inaturalist.org/observations/39378418">https://www.inaturalist.org/observations/39378418</a>   |
| 544 | Bubulcus ibis | Cattle Egret | 2014/12/3  | 1 | 0 | 11.4905079 | 37.5803714 | <a href="https://www.inaturalist.org/observations/46423513">https://www.inaturalist.org/observations/46423513</a>   |
| 545 | Bubulcus ibis | Cattle Egret | 2014/4/16  | 1 | 0 | 11.5742086 | 37.3613533 | <a href="https://www.inaturalist.org/observations/58447447">https://www.inaturalist.org/observations/58447447</a>   |
| 546 | Bubulcus ibis | Cattle Egret | 2021/10/20 | 1 | 0 | 11.5742086 | 37.3613533 | <a href="https://www.inaturalist.org/observations/103139432">https://www.inaturalist.org/observations/103139432</a> |
| 547 | Bubulcus ibis | Cattle Egret | 2021/6/5   | 1 | 0 | 11.5742086 | 37.3613533 | <a href="https://www.inaturalist.org/observations/104176200">https://www.inaturalist.org/observations/104176200</a> |
| 548 | Bubulcus ibis | Cattle Egret | 2022/1/11  | 1 | 0 | 11.5742086 | 37.3613533 | <a href="https://www.inaturalist.org/observations/104754178">https://www.inaturalist.org/observations/104754178</a> |
| 549 | Bubulcus ibis | Cattle Egret | 2022/3/31  | 1 | 0 | 11.5742086 | 37.3613533 | <a href="https://www.inaturalist.org/observations/109999521">https://www.inaturalist.org/observations/109999521</a> |

|     |                     |                   |            |   |   |            |            |                                                                                                                     |
|-----|---------------------|-------------------|------------|---|---|------------|------------|---------------------------------------------------------------------------------------------------------------------|
| 550 | Bubulcus ibis       | Cattle Egret      | 2022/11/17 | 1 | 0 | 11.5742086 | 37.3613533 | <a href="https://www.inaturalist.org/observations/142209113">https://www.inaturalist.org/observations/142209113</a> |
| 551 | Bubulcus ibis       | Cattle Egret      | 2022/12/6  | 1 | 0 | 11.5742086 | 37.3613533 | <a href="https://www.inaturalist.org/observations/143786736">https://www.inaturalist.org/observations/143786736</a> |
| 552 | Bubulcus ibis       | Cattle Egret      | 2011/1/23  | 4 | 0 | 11.6013910 | 37.3912810 | <a href="https://www.inaturalist.org/observations/9777343">https://www.inaturalist.org/observations/9777343</a>     |
| 553 | Bubulcus ibis       | Cattle Egret      | 2022/12/2  | 1 | 0 | 11.6104633 | 37.3780233 | <a href="https://www.inaturalist.org/observations/143513324">https://www.inaturalist.org/observations/143513324</a> |
| 554 | Bubulcus ibis       | Cattle Egret      | 2020/2/18  | 0 | 0 | 11.9642963 | 37.7034069 | <a href="https://www.inaturalist.org/observations/39682860">https://www.inaturalist.org/observations/39682860</a>   |
| 555 | Bubulcus ibis       | Cattle Egret      | 2015/1/17  | 1 | 0 | 12.0265982 | 37.3034845 | <a href="https://www.inaturalist.org/observations/50116472">https://www.inaturalist.org/observations/50116472</a>   |
| 556 | Bubulcus ibis       | Cattle Egret      | 2015/3/14  | 2 | 0 | 5.9424583  | 80.4521900 | <a href="https://www.inaturalist.org/observations/18953623">https://www.inaturalist.org/observations/18953623</a>   |
| 557 | Bubulcus ibis       | Cattle Egret      | 2015/3/20  | 3 | 0 | 5.9424583  | 80.4521900 | <a href="https://www.inaturalist.org/observations/18953658">https://www.inaturalist.org/observations/18953658</a>   |
| 558 | Bubulcus ibis       | Cattle Egret      | 2021/1/15  | 6 | 0 | 5.9548881  | 80.5375545 | <a href="https://www.inaturalist.org/observations/68950646">https://www.inaturalist.org/observations/68950646</a>   |
| 559 | Bubulcus ibis       | Cattle Egret      | 2019/4/15  | 2 | 0 | 5.9833890  | 80.4669410 | <a href="https://www.inaturalist.org/observations/22700108">https://www.inaturalist.org/observations/22700108</a>   |
| 560 | Bubulcus ibis       | Cattle Egret      | 2019/4/10  | 5 | 0 | 5.9845010  | 80.4666670 | <a href="https://www.inaturalist.org/observations/22308938">https://www.inaturalist.org/observations/22308938</a>   |
| 561 | Bubulcus ibis       | Cattle Egret      | 2022/2/10  | 1 | 0 | 6.0007040  | 80.3352364 | <a href="https://www.inaturalist.org/observations/109653762">https://www.inaturalist.org/observations/109653762</a> |
| 562 | Bubulcus ibis       | Cattle Egret      | 2018/12/28 | 3 | 0 | 6.0107890  | 80.2437956 | <a href="https://www.inaturalist.org/observations/19610102">https://www.inaturalist.org/observations/19610102</a>   |
| 563 | Bubulcus ibis       | Cattle Egret      | 2019/4/19  | 8 | 0 | 6.0249689  | 80.2162479 | <a href="https://www.inaturalist.org/observations/40347652">https://www.inaturalist.org/observations/40347652</a>   |
| 564 | Bubulcus ibis       | Cattle Egret      | 2019/1/12  | 2 | 0 | 6.0271971  | 80.2164717 | <a href="https://www.inaturalist.org/observations/144267471">https://www.inaturalist.org/observations/144267471</a> |
| 565 | Bubulcus ibis       | Cattle Egret      | 2016/4/10  | 3 | 0 | 6.0279764  | 80.2174389 | <a href="https://www.inaturalist.org/observations/127458399">https://www.inaturalist.org/observations/127458399</a> |
| 566 | Bubulcus ibis       | Cattle Egret      | 2019/2/2   | 5 | 0 | 6.0294521  | 80.2138258 | <a href="https://www.inaturalist.org/observations/20455573">https://www.inaturalist.org/observations/20455573</a>   |
| 567 | Bubulcus ibis       | Cattle Egret      | 2017/2/8   | 5 | 0 | 6.0300426  | 80.2156501 | <a href="https://www.inaturalist.org/observations/5073991">https://www.inaturalist.org/observations/5073991</a>     |
| 568 | Bubulcus ibis       | Cattle Egret      | 2017/11/18 | 4 | 0 | 6.0301157  | 80.2168063 | <a href="https://www.inaturalist.org/observations/22724414">https://www.inaturalist.org/observations/22724414</a>   |
| 569 | Bubulcus ibis       | Cattle Egret      | 2019/2/5   | 6 | 0 | 6.0303917  | 80.2166133 | <a href="https://www.inaturalist.org/observations/20145420">https://www.inaturalist.org/observations/20145420</a>   |
| 570 | Bubulcus coromandus | ibis Cattle Egret | 2018/12/10 | 4 | 0 | 6.0304700  | 80.2161367 | <a href="https://www.inaturalist.org/observations/19269795">https://www.inaturalist.org/observations/19269795</a>   |
| 571 | Bubulcus ibis       | Cattle Egret      | 2019/12/20 | 2 | 0 | 6.0322291  | 80.2152387 | <a href="https://www.inaturalist.org/observations/38385507">https://www.inaturalist.org/observations/38385507</a>   |
| 572 | Bubulcus ibis       | Cattle Egret      | 2018/2/25  | 1 | 0 | 6.0328928  | 80.2167912 | <a href="https://www.inaturalist.org/observations/136784136">https://www.inaturalist.org/observations/136784136</a> |
| 573 | Bubulcus ibis       | Cattle Egret      | 2019/4/17  | 4 | 0 | 6.0340830  | 80.2142530 | <a href="https://www.inaturalist.org/observations/22791468">https://www.inaturalist.org/observations/22791468</a>   |
| 574 | Bubulcus ibis       | Cattle Egret      | 2012/11/10 | 5 | 0 | 6.0369601  | 80.2161710 | <a href="https://www.inaturalist.org/observations/41232138">https://www.inaturalist.org/observations/41232138</a>   |

|     |                     |                   |            |   |   |           |            |                                                                                                                     |
|-----|---------------------|-------------------|------------|---|---|-----------|------------|---------------------------------------------------------------------------------------------------------------------|
| 575 | Bubulcus ibis       | Cattle Egret      | 2015/11/14 | 5 | 0 | 6.0451542 | 80.2213207 | <a href="https://www.inaturalist.org/observations/63752283">https://www.inaturalist.org/observations/63752283</a>   |
| 576 | Bubulcus ibis       | Cattle Egret      | 2019/3/7   | 3 | 0 | 6.0480774 | 80.8566247 | <a href="https://www.inaturalist.org/observations/22136110">https://www.inaturalist.org/observations/22136110</a>   |
| 577 | Bubulcus ibis       | Cattle Egret      | 2019/3/8   | 4 | 0 | 6.0511938 | 80.8587395 | <a href="https://www.inaturalist.org/observations/22157712">https://www.inaturalist.org/observations/22157712</a>   |
| 578 | Bubulcus ibis       | Cattle Egret      | 2020/3/4   | 4 | 0 | 6.0535185 | 80.2209773 | <a href="https://www.inaturalist.org/observations/39914160">https://www.inaturalist.org/observations/39914160</a>   |
| 579 | Bubulcus ibis       | Cattle Egret      | 2019/12/5  | 3 | 0 | 6.0631314 | 80.8732118 | <a href="https://www.inaturalist.org/observations/104809845">https://www.inaturalist.org/observations/104809845</a> |
| 580 | Bubulcus ibis       | Cattle Egret      | 2019/1/6   | 4 | 0 | 6.0882170 | 80.9397881 | <a href="https://www.inaturalist.org/observations/28193208">https://www.inaturalist.org/observations/28193208</a>   |
| 581 | Bubulcus ibis       | Cattle Egret      | 2019/3/11  | 6 | 0 | 6.1214388 | 80.1133500 | <a href="https://www.inaturalist.org/observations/21137973">https://www.inaturalist.org/observations/21137973</a>   |
| 582 | Bubulcus ibis       | Cattle Egret      | 2019/2/5   | 6 | 0 | 6.1219887 | 80.1125174 | <a href="https://www.inaturalist.org/observations/20107449">https://www.inaturalist.org/observations/20107449</a>   |
| 583 | Bubulcus coromandus | ibis Cattle Egret | 2019/3/11  | 2 | 0 | 6.1240805 | 80.1148445 | <a href="https://www.inaturalist.org/observations/21356511">https://www.inaturalist.org/observations/21356511</a>   |
| 584 | Bubulcus coromandus | ibis Cattle Egret | 2019/3/11  | 2 | 0 | 6.1240805 | 80.1148445 | <a href="https://www.inaturalist.org/observations/57900761">https://www.inaturalist.org/observations/57900761</a>   |
| 585 | Bubulcus ibis       | Cattle Egret      | 2014/2/15  | 5 | 0 | 6.1394676 | 80.1062861 | <a href="https://www.inaturalist.org/observations/39273170">https://www.inaturalist.org/observations/39273170</a>   |
| 586 | Bubulcus ibis       | Cattle Egret      | 2019/4/24  | 5 | 0 | 6.1394676 | 80.1062861 | <a href="https://www.inaturalist.org/observations/49860678">https://www.inaturalist.org/observations/49860678</a>   |
| 587 | Bubulcus ibis       | Cattle Egret      | 2019/11/28 | 2 | 0 | 6.1756815 | 81.2163652 | <a href="https://www.inaturalist.org/observations/37056691">https://www.inaturalist.org/observations/37056691</a>   |
| 588 | Bubulcus ibis       | Cattle Egret      | 2016/4/5   | 4 | 0 | 6.2008703 | 81.1984936 | <a href="https://www.inaturalist.org/observations/127458353">https://www.inaturalist.org/observations/127458353</a> |
| 589 | Bubulcus ibis       | Cattle Egret      | 2019/2/27  | 1 | 0 | 6.2028608 | 81.2457846 | <a href="https://www.inaturalist.org/observations/124603677">https://www.inaturalist.org/observations/124603677</a> |
| 590 | Bubulcus ibis       | Cattle Egret      | 2019/12/24 | 3 | 0 | 6.2640171 | 81.4112857 | <a href="https://www.inaturalist.org/observations/36961034">https://www.inaturalist.org/observations/36961034</a>   |
| 591 | Bubulcus ibis       | Cattle Egret      | 2007/7/25  | 2 | 0 | 6.2899000 | 81.2919000 | <a href="https://www.inaturalist.org/observations/53812591">https://www.inaturalist.org/observations/53812591</a>   |
| 592 | Bubulcus ibis       | Cattle Egret      | 2017/11/20 | 2 | 0 | 6.2913046 | 81.2759127 | <a href="https://www.inaturalist.org/observations/22724921">https://www.inaturalist.org/observations/22724921</a>   |
| 593 | Bubulcus ibis       | Cattle Egret      | 2012/12/31 | 3 | 0 | 6.2913473 | 81.2863399 | <a href="https://www.inaturalist.org/observations/30527165">https://www.inaturalist.org/observations/30527165</a>   |
| 594 | Bubulcus ibis       | Cattle Egret      | 2011/1/21  | 5 | 0 | 6.2930225 | 81.2667776 | <a href="https://www.inaturalist.org/observations/57910369">https://www.inaturalist.org/observations/57910369</a>   |
| 595 | Bubulcus ibis       | Cattle Egret      | 2020/12/20 | 6 | 0 | 6.2957783 | 81.3127217 | <a href="https://www.inaturalist.org/observations/66822123">https://www.inaturalist.org/observations/66822123</a>   |
| 596 | Bubulcus ibis       | Cattle Egret      | 2011/1/23  | 5 | 0 | 6.2960254 | 81.2706266 | <a href="https://www.inaturalist.org/observations/57913380">https://www.inaturalist.org/observations/57913380</a>   |
| 597 | Bubulcus ibis       | Cattle Egret      | 2017/12/30 | 3 | 0 | 6.2970698 | 81.2775411 | <a href="https://www.inaturalist.org/observations/14166397">https://www.inaturalist.org/observations/14166397</a>   |
| 598 | Bubulcus ibis       | Cattle Egret      | 2017/12/30 | 3 | 0 | 6.2970698 | 81.2775411 | <a href="https://www.inaturalist.org/observations/14166398">https://www.inaturalist.org/observations/14166398</a>   |
| 599 | Bubulcus coromandus | ibis Cattle Egret | 2018/12/11 | 4 | 0 | 6.2976013 | 81.2711784 | <a href="https://www.inaturalist.org/observations/19374210">https://www.inaturalist.org/observations/19374210</a>   |

|     |                        |                      |            |   |   |           |            |                                                                                                                     |
|-----|------------------------|----------------------|------------|---|---|-----------|------------|---------------------------------------------------------------------------------------------------------------------|
| 600 | Bubulcus ibis          | Cattle Egret         | 2014/4/20  | 2 | 0 | 6.3113031 | 80.0322209 | <a href="https://www.inaturalist.org/observations/19173320">https://www.inaturalist.org/observations/19173320</a>   |
| 601 | Bubulcus ibis          | Cattle Egret         | 2014/4/20  | 3 | 0 | 6.3119114 | 80.0312557 | <a href="https://www.inaturalist.org/observations/19172589">https://www.inaturalist.org/observations/19172589</a>   |
| 602 | Bubulcus ibis          | Cattle Egret         | 2019/2/4   | 3 | 0 | 6.3228088 | 81.4705947 | <a href="https://www.inaturalist.org/observations/20668082">https://www.inaturalist.org/observations/20668082</a>   |
| 603 | Bubulcus ibis          | Cattle Egret         | 2011/1/21  | 4 | 0 | 6.3232935 | 81.4778641 | <a href="https://www.inaturalist.org/observations/57910785">https://www.inaturalist.org/observations/57910785</a>   |
| 604 | Bubulcus ibis          | Cattle Egret         | 2018/12/25 | 4 | 0 | 6.3562145 | 81.3726262 | <a href="https://www.inaturalist.org/observations/19486763">https://www.inaturalist.org/observations/19486763</a>   |
| 605 | Bubulcus ibis          | Cattle Egret         | 2016/2/8   | 3 | 0 | 6.3897222 | 80.5013889 | <a href="https://www.inaturalist.org/observations/35666786">https://www.inaturalist.org/observations/35666786</a>   |
| 606 | Bubulcus ibis          | Cattle Egret         | 2017/12/29 | 3 | 0 | 6.3966688 | 81.5206430 | <a href="https://www.inaturalist.org/observations/14143330">https://www.inaturalist.org/observations/14143330</a>   |
| 607 | Bubulcus ibis          | Cattle Egret         | 2019/11/30 | 2 | 0 | 6.4115617 | 79.9989224 | <a href="https://www.inaturalist.org/observations/104804201">https://www.inaturalist.org/observations/104804201</a> |
| 608 | Bubulcus ibis          | Cattle Egret         | 2019/2/27  | 5 | 0 | 6.4174199 | 79.9964708 | <a href="https://www.inaturalist.org/observations/20803017">https://www.inaturalist.org/observations/20803017</a>   |
| 609 | Bubulcus ibis          | Cattle Egret         | 2013/3/31  | 2 | 0 | 6.4256777 | 81.4199904 | <a href="https://www.inaturalist.org/observations/105664591">https://www.inaturalist.org/observations/105664591</a> |
| 610 | Bubulcus ibis          | Cattle Egret         | 2015/4/8   | 5 | 0 | 6.4299250 | 79.9994659 | <a href="https://www.inaturalist.org/observations/20761617">https://www.inaturalist.org/observations/20761617</a>   |
| 611 | Bubulcus ibis          | Cattle Egret         | 2018/3/6   | 3 | 0 | 6.4456050 | 80.3010867 | <a href="https://www.inaturalist.org/observations/10180279">https://www.inaturalist.org/observations/10180279</a>   |
| 612 | Bubulcus ibis          | Cattle Egret         | 2015/2/3   | 6 | 0 | 6.4632511 | 80.8750411 | <a href="https://www.inaturalist.org/observations/65617516">https://www.inaturalist.org/observations/65617516</a>   |
| 613 | Bubulcus ibis          | Cattle Egret         | 2017/7/28  | 4 | 0 | 6.4815806 | 80.9321785 | <a href="https://www.inaturalist.org/observations/30926966">https://www.inaturalist.org/observations/30926966</a>   |
| 614 | Bubulcus ibis          | Cattle Egret         | 2018/3/7   | 3 | 0 | 6.5177850 | 80.2236133 | <a href="https://www.inaturalist.org/observations/10183057">https://www.inaturalist.org/observations/10183057</a>   |
| 615 | Bubulcus ibis          | Cattle Egret         | 2014/4/18  | 3 | 0 | 6.5199513 | 81.5657259 | <a href="https://www.inaturalist.org/observations/19169793">https://www.inaturalist.org/observations/19169793</a>   |
| 616 | Bubulcus ibis          | Cattle Egret         | 2012/3/8   | 6 | 0 | 6.5392974 | 81.1789904 | <a href="https://www.inaturalist.org/observations/64607956">https://www.inaturalist.org/observations/64607956</a>   |
| 617 | Bubulcus<br>coromandus | ibis<br>Cattle Egret | 2022/3/17  | 2 | 0 | 6.5853422 | 81.5614371 | <a href="https://www.inaturalist.org/observations/108939092">https://www.inaturalist.org/observations/108939092</a> |
| 618 | Bubulcus ibis          | Cattle Egret         | 2018/7/19  | 2 | 0 | 6.5853950 | 79.9607400 | <a href="https://www.inaturalist.org/observations/15082357">https://www.inaturalist.org/observations/15082357</a>   |
| 619 | Bubulcus ibis          | Cattle Egret         | 2020/5/18  | 7 | 0 | 6.5857726 | 80.0374291 | <a href="https://www.inaturalist.org/observations/46444602">https://www.inaturalist.org/observations/46444602</a>   |
| 620 | Bubulcus ibis          | Cattle Egret         | 2020/5/18  | 3 | 0 | 6.5857730 | 80.0374290 | <a href="https://www.inaturalist.org/observations/46449470">https://www.inaturalist.org/observations/46449470</a>   |
| 621 | Bubulcus ibis          | Cattle Egret         | 2020/5/18  | 8 | 0 | 6.6071490 | 80.0079830 | <a href="https://www.inaturalist.org/observations/46444411">https://www.inaturalist.org/observations/46444411</a>   |
| 622 | Bubulcus ibis          | Cattle Egret         | 2019/4/19  | 2 | 0 | 6.6266220 | 79.9438250 | <a href="https://www.inaturalist.org/observations/22718614">https://www.inaturalist.org/observations/22718614</a>   |
| 623 | Bubulcus ibis          | Cattle Egret         | 2019/11/16 | 4 | 0 | 6.6273639 | 79.9409994 | <a href="https://www.inaturalist.org/observations/101032394">https://www.inaturalist.org/observations/101032394</a> |
| 624 | Bubulcus ibis          | Cattle Egret         | 2018/3/27  | 4 | 0 | 6.6782883 | 79.9197617 | <a href="https://www.inaturalist.org/observations/18051747">https://www.inaturalist.org/observations/18051747</a>   |

|     |                     |                   |            |   |   |           |            |                                                                                                                     |
|-----|---------------------|-------------------|------------|---|---|-----------|------------|---------------------------------------------------------------------------------------------------------------------|
| 625 | Bubulcus ibis       | Cattle Egret      | 2021/2/23  | 4 | 0 | 6.6804028 | 80.6959706 | <a href="https://www.inaturalist.org/observations/70027729">https://www.inaturalist.org/observations/70027729</a>   |
| 626 | Bubulcus ibis       | Cattle Egret      | 2021/3/19  | 6 | 0 | 6.6835133 | 79.9187550 | <a href="https://www.inaturalist.org/observations/71548927">https://www.inaturalist.org/observations/71548927</a>   |
| 627 | Bubulcus ibis       | Cattle Egret      | 2019/3/9   | 1 | 0 | 6.7503867 | 81.0996333 | <a href="https://www.inaturalist.org/observations/21314351">https://www.inaturalist.org/observations/21314351</a>   |
| 628 | Bubulcus ibis       | Cattle Egret      | 2018/3/5   | 3 | 0 | 6.7861111 | 79.9669444 | <a href="https://www.inaturalist.org/observations/10168585">https://www.inaturalist.org/observations/10168585</a>   |
| 629 | Bubulcus ibis       | Cattle Egret      | 2020/12/13 | 6 | 0 | 6.7937011 | 80.0933881 | <a href="https://www.inaturalist.org/observations/67578844">https://www.inaturalist.org/observations/67578844</a>   |
| 630 | Bubulcus ibis       | Cattle Egret      | 2020/11/29 | 7 | 0 | 6.8017575 | 79.9227313 | <a href="https://www.inaturalist.org/observations/66011274">https://www.inaturalist.org/observations/66011274</a>   |
| 631 | Bubulcus ibis       | Cattle Egret      | 2020/4/22  | 5 | 0 | 6.8289837 | 79.9809163 | <a href="https://www.inaturalist.org/observations/42831797">https://www.inaturalist.org/observations/42831797</a>   |
| 632 | Bubulcus coromandus | ibis Cattle Egret | 2021/1/20  | 3 | 0 | 6.8332823 | 80.0898356 | <a href="https://www.inaturalist.org/observations/71310401">https://www.inaturalist.org/observations/71310401</a>   |
| 633 | Bubulcus ibis       | Cattle Egret      | 2018/3/7   | 3 | 0 | 6.8443883 | 79.8912333 | <a href="https://www.inaturalist.org/observations/10183070">https://www.inaturalist.org/observations/10183070</a>   |
| 634 | Bubulcus coromandus | ibis Cattle Egret | 2021/9/5   | 0 | 0 | 6.8445148 | 81.8229904 | <a href="https://www.inaturalist.org/observations/93746294">https://www.inaturalist.org/observations/93746294</a>   |
| 635 | Bubulcus ibis       | Cattle Egret      | 2022/1/12  | 6 | 0 | 6.8450558 | 80.1034618 | <a href="https://www.inaturalist.org/observations/104861719">https://www.inaturalist.org/observations/104861719</a> |
| 636 | Bubulcus ibis       | Cattle Egret      | 2021/4/9   | 6 | 0 | 6.8453630 | 80.1037719 | <a href="https://www.inaturalist.org/observations/79184644">https://www.inaturalist.org/observations/79184644</a>   |
| 637 | Bubulcus ibis       | Cattle Egret      | 2022/1/12  | 4 | 0 | 6.8453634 | 80.1037721 | <a href="https://www.inaturalist.org/observations/104860993">https://www.inaturalist.org/observations/104860993</a> |
| 638 | Bubulcus ibis       | Cattle Egret      | 2022/1/12  | 5 | 0 | 6.8459766 | 80.1040058 | <a href="https://www.inaturalist.org/observations/104900255">https://www.inaturalist.org/observations/104900255</a> |
| 639 | Bubulcus ibis       | Cattle Egret      | 2019/3/17  | 3 | 0 | 6.8592833 | 80.0311750 | <a href="https://www.inaturalist.org/observations/21369679">https://www.inaturalist.org/observations/21369679</a>   |
| 640 | Bubulcus ibis       | Cattle Egret      | 2020/11/21 | 4 | 0 | 6.8758250 | 79.9300167 | <a href="https://www.inaturalist.org/observations/65312935">https://www.inaturalist.org/observations/65312935</a>   |
| 641 | Bubulcus ibis       | Cattle Egret      | 2014/6/8   | 5 | 0 | 6.8921354 | 81.6942070 | <a href="https://www.inaturalist.org/observations/69694375">https://www.inaturalist.org/observations/69694375</a>   |
| 642 | Bubulcus coromandus | ibis Cattle Egret | 2021/8/8   | 2 | 0 | 6.8923336 | 79.8959607 | <a href="https://www.inaturalist.org/observations/94904703">https://www.inaturalist.org/observations/94904703</a>   |
| 643 | Bubulcus ibis       | Cattle Egret      | 2022/1/23  | 4 | 0 | 6.8994181 | 79.9785787 | <a href="https://www.inaturalist.org/observations/105414511">https://www.inaturalist.org/observations/105414511</a> |
| 644 | Bubulcus coromandus | ibis Cattle Egret | 2021/10/29 | 0 | 0 | 6.9016953 | 79.9110489 | <a href="https://www.inaturalist.org/observations/99681272">https://www.inaturalist.org/observations/99681272</a>   |
| 645 | Bubulcus ibis       | Cattle Egret      | 2019/3/11  | 5 | 0 | 6.9032300 | 79.8681867 | <a href="https://www.inaturalist.org/observations/21412646">https://www.inaturalist.org/observations/21412646</a>   |
| 646 | Bubulcus ibis       | Cattle Egret      | 2020/11/13 | 4 | 0 | 6.9068500 | 79.8641050 | <a href="https://www.inaturalist.org/observations/64923302">https://www.inaturalist.org/observations/64923302</a>   |
| 647 | Bubulcus ibis       | Cattle Egret      | 2022/3/7   | 1 | 0 | 6.9085306 | 79.8773066 | <a href="https://www.inaturalist.org/observations/108108147">https://www.inaturalist.org/observations/108108147</a> |
| 648 | Bubulcus coromandus | ibis Cattle Egret | 2020/2/25  | 2 | 0 | 6.9127314 | 79.8613415 | <a href="https://www.inaturalist.org/observations/39202579">https://www.inaturalist.org/observations/39202579</a>   |
| 649 | Bubulcus ibis       | Cattle Egret      | 2020/5/11  | 4 | 0 | 6.9133904 | 79.8617220 | <a href="https://www.inaturalist.org/observations/45556865">https://www.inaturalist.org/observations/45556865</a>   |



|     |                     |                   |            |   |   |           |            |                                                                                                                     |
|-----|---------------------|-------------------|------------|---|---|-----------|------------|---------------------------------------------------------------------------------------------------------------------|
| 650 | Bubulcus ibis       | Cattle Egret      | 2020/5/11  | 4 | 0 | 6.9133907 | 79.8617401 | <a href="https://www.inaturalist.org/observations/45556863">https://www.inaturalist.org/observations/45556863</a>   |
| 651 | Bubulcus ibis       | Cattle Egret      | 2022/1/20  | 2 | 0 | 6.9148061 | 79.8630057 | <a href="https://www.inaturalist.org/observations/105367505">https://www.inaturalist.org/observations/105367505</a> |
| 652 | Bubulcus ibis       | Cattle Egret      | 2019/4/18  | 4 | 0 | 6.9165648 | 79.8534564 | <a href="https://www.inaturalist.org/observations/33365449">https://www.inaturalist.org/observations/33365449</a>   |
| 653 | Bubulcus ibis       | Cattle Egret      | 2019/10/11 | 2 | 0 | 6.9173950 | 79.8546450 | <a href="https://www.inaturalist.org/observations/34202820">https://www.inaturalist.org/observations/34202820</a>   |
| 654 | Bubulcus coromandus | ibis Cattle Egret | 2019/3/27  | 5 | 0 | 6.9176301 | 79.8528950 | <a href="https://www.inaturalist.org/observations/61814692">https://www.inaturalist.org/observations/61814692</a>   |
| 655 | Bubulcus ibis       | Cattle Egret      | 2022/4/6   | 4 | 0 | 6.9183083 | 79.8502283 | <a href="https://www.inaturalist.org/observations/110580363">https://www.inaturalist.org/observations/110580363</a> |
| 656 | Bubulcus ibis       | Cattle Egret      | 2018/10/13 | 1 | 0 | 6.9270786 | 79.8612430 | <a href="https://www.inaturalist.org/observations/17706761">https://www.inaturalist.org/observations/17706761</a>   |
| 657 | Bubulcus ibis       | Cattle Egret      | 2015/11/4  | 7 | 0 | 6.9270786 | 79.8612430 | <a href="https://www.inaturalist.org/observations/63246589">https://www.inaturalist.org/observations/63246589</a>   |
| 658 | Bubulcus ibis       | Cattle Egret      | 2019/2/8   | 4 | 0 | 6.9679697 | 80.7693960 | <a href="https://www.inaturalist.org/observations/20678227">https://www.inaturalist.org/observations/20678227</a>   |
| 659 | Bubulcus ibis       | Cattle Egret      | 2020/3/11  | 3 | 0 | 6.9682790 | 80.7678789 | <a href="https://www.inaturalist.org/observations/142861719">https://www.inaturalist.org/observations/142861719</a> |
| 660 | Bubulcus ibis       | Cattle Egret      | 2020/2/13  | 4 | 0 | 6.9690590 | 80.7682014 | <a href="https://www.inaturalist.org/observations/39425621">https://www.inaturalist.org/observations/39425621</a>   |
| 661 | Bubulcus ibis       | Cattle Egret      | 2019/3/8   | 5 | 0 | 6.9697950 | 80.7686083 | <a href="https://www.inaturalist.org/observations/21057797">https://www.inaturalist.org/observations/21057797</a>   |
| 662 | Bubulcus coromandus | ibis Cattle Egret | 2015/1/22  | 2 | 0 | 6.9712290 | 80.7648570 | <a href="https://www.inaturalist.org/observations/35182761">https://www.inaturalist.org/observations/35182761</a>   |
| 663 | Bubulcus coromandus | ibis Cattle Egret | 2015/1/16  | 3 | 0 | 6.9865470 | 80.4240420 | <a href="https://www.inaturalist.org/observations/35084697">https://www.inaturalist.org/observations/35084697</a>   |
| 664 | Bubulcus coromandus | ibis Cattle Egret | 2009/1/13  | 3 | 0 | 6.9870583 | 80.4277752 | <a href="https://www.inaturalist.org/observations/6985867">https://www.inaturalist.org/observations/6985867</a>     |
| 665 | Bubulcus ibis       | Cattle Egret      | 2022/12/11 | 1 | 0 | 7.0249000 | 79.8619300 | <a href="https://www.inaturalist.org/observations/144230142">https://www.inaturalist.org/observations/144230142</a> |
| 666 | Bubulcus ibis       | Cattle Egret      | 2022/10/9  | 3 | 0 | 7.0667984 | 79.9040932 | <a href="https://www.inaturalist.org/observations/139603663">https://www.inaturalist.org/observations/139603663</a> |
| 667 | Bubulcus ibis       | Cattle Egret      | 2022/12/21 | 1 | 0 | 7.0667984 | 79.9040932 | <a href="https://www.inaturalist.org/observations/144782343">https://www.inaturalist.org/observations/144782343</a> |
| 668 | Bubulcus ibis       | Cattle Egret      | 2019/1/14  | 4 | 0 | 7.0699687 | 80.1128780 | <a href="https://www.inaturalist.org/observations/32221545">https://www.inaturalist.org/observations/32221545</a>   |
| 669 | Bubulcus ibis       | Cattle Egret      | 2019/4/6   | 4 | 0 | 7.0772050 | 80.0434400 | <a href="https://www.inaturalist.org/observations/22138412">https://www.inaturalist.org/observations/22138412</a>   |
| 670 | Bubulcus ibis       | Cattle Egret      | 2022/11/15 | 5 | 0 | 7.0890800 | 79.8966767 | <a href="https://www.inaturalist.org/observations/142072393">https://www.inaturalist.org/observations/142072393</a> |
| 671 | Bubulcus ibis       | Cattle Egret      | 2022/4/9   | 3 | 0 | 7.1740417 | 79.8873367 | <a href="https://www.inaturalist.org/observations/110818395">https://www.inaturalist.org/observations/110818395</a> |
| 672 | Bubulcus ibis       | Cattle Egret      | 2017/3/31  | 3 | 0 | 7.1747194 | 79.8887472 | <a href="https://www.inaturalist.org/observations/136132542">https://www.inaturalist.org/observations/136132542</a> |
| 673 | Bubulcus ibis       | Cattle Egret      | 2020/4/21  | 4 | 0 | 7.1804990 | 80.3123066 | <a href="https://www.inaturalist.org/observations/42770049">https://www.inaturalist.org/observations/42770049</a>   |
| 674 | Bubulcus ibis       | Cattle Egret      | 2020/2/12  | 3 | 0 | 7.1848633 | 79.8961417 | <a href="https://www.inaturalist.org/observations/38790170">https://www.inaturalist.org/observations/38790170</a>   |

|     |               |              |            |   |   |           |            |                                                                                                                     |
|-----|---------------|--------------|------------|---|---|-----------|------------|---------------------------------------------------------------------------------------------------------------------|
| 675 | Bubulcus ibis | Cattle Egret | 2019/12/27 | 2 | 0 | 7.2234583 | 79.8390500 | <a href="https://www.inaturalist.org/observations/37098002">https://www.inaturalist.org/observations/37098002</a>   |
| 676 | Bubulcus ibis | Cattle Egret | 2017/1/19  | 3 | 0 | 7.2267700 | 79.8394017 | <a href="https://www.inaturalist.org/observations/110310346">https://www.inaturalist.org/observations/110310346</a> |
| 677 | Bubulcus ibis | Cattle Egret | 2019/2/26  | 4 | 0 | 7.2392837 | 79.8499857 | <a href="https://www.inaturalist.org/observations/21828073">https://www.inaturalist.org/observations/21828073</a>   |
| 678 | Bubulcus ibis | Cattle Egret | 2019/4/21  | 5 | 0 | 7.2475971 | 80.5971671 | <a href="https://www.inaturalist.org/observations/22989137">https://www.inaturalist.org/observations/22989137</a>   |
| 679 | Bubulcus ibis | Cattle Egret | 2019/4/14  | 4 | 0 | 7.2486100 | 80.2344430 | <a href="https://www.inaturalist.org/observations/22484623">https://www.inaturalist.org/observations/22484623</a>   |
| 680 | Bubulcus ibis | Cattle Egret | 2019/4/10  | 4 | 0 | 7.2568096 | 80.5958540 | <a href="https://www.inaturalist.org/observations/22276279">https://www.inaturalist.org/observations/22276279</a>   |
| 681 | Bubulcus ibis | Cattle Egret | 2019/4/4   | 5 | 0 | 7.2585710 | 80.5983990 | <a href="https://www.inaturalist.org/observations/22023973">https://www.inaturalist.org/observations/22023973</a>   |
| 682 | Bubulcus ibis | Cattle Egret | 2019/4/8   | 4 | 0 | 7.2586230 | 80.5972210 | <a href="https://www.inaturalist.org/observations/22452503">https://www.inaturalist.org/observations/22452503</a>   |
| 683 | Bubulcus ibis | Cattle Egret | 2019/4/11  | 5 | 0 | 7.2588610 | 80.5973680 | <a href="https://www.inaturalist.org/observations/22353556">https://www.inaturalist.org/observations/22353556</a>   |
| 684 | Bubulcus ibis | Cattle Egret | 2019/4/20  | 4 | 0 | 7.2599570 | 80.5959770 | <a href="https://www.inaturalist.org/observations/22791543">https://www.inaturalist.org/observations/22791543</a>   |
| 685 | Bubulcus ibis | Cattle Egret | 2019/3/21  | 7 | 0 | 7.2600217 | 80.5961083 | <a href="https://www.inaturalist.org/observations/21538670">https://www.inaturalist.org/observations/21538670</a>   |
| 686 | Bubulcus ibis | Cattle Egret | 2019/4/5   | 3 | 0 | 7.2602000 | 80.5955547 | <a href="https://www.inaturalist.org/observations/22084654">https://www.inaturalist.org/observations/22084654</a>   |
| 687 | Bubulcus ibis | Cattle Egret | 2019/4/19  | 4 | 0 | 7.2610310 | 80.5989680 | <a href="https://www.inaturalist.org/observations/22806473">https://www.inaturalist.org/observations/22806473</a>   |
| 688 | Bubulcus ibis | Cattle Egret | 2019/4/1   | 5 | 0 | 7.2612512 | 80.5990635 | <a href="https://www.inaturalist.org/observations/22293980">https://www.inaturalist.org/observations/22293980</a>   |
| 689 | Bubulcus ibis | Cattle Egret | 2019/4/5   | 5 | 0 | 7.2664960 | 80.5523680 | <a href="https://www.inaturalist.org/observations/22007975">https://www.inaturalist.org/observations/22007975</a>   |
| 690 | Bubulcus ibis | Cattle Egret | 2015/4/30  | 3 | 0 | 7.2785276 | 80.2106728 | <a href="https://www.inaturalist.org/observations/33942955">https://www.inaturalist.org/observations/33942955</a>   |
| 691 | Bubulcus ibis | Cattle Egret | 2019/4/6   | 3 | 0 | 7.2789340 | 80.7132162 | <a href="https://www.inaturalist.org/observations/22218459">https://www.inaturalist.org/observations/22218459</a>   |
| 692 | Bubulcus ibis | Cattle Egret | 2018/4/30  | 5 | 0 | 7.2803003 | 80.5396383 | <a href="https://www.inaturalist.org/observations/37120680">https://www.inaturalist.org/observations/37120680</a>   |
| 693 | Bubulcus ibis | Cattle Egret | 2022/3/29  | 2 | 0 | 7.2872939 | 79.8869002 | <a href="https://www.inaturalist.org/observations/131833603">https://www.inaturalist.org/observations/131833603</a> |
| 694 | Bubulcus ibis | Cattle Egret | 2022/2/19  | 3 | 0 | 7.2877668 | 79.8876124 | <a href="https://www.inaturalist.org/observations/107299046">https://www.inaturalist.org/observations/107299046</a> |
| 695 | Bubulcus ibis | Cattle Egret | 2019/4/18  | 4 | 0 | 7.2892270 | 80.6437520 | <a href="https://www.inaturalist.org/observations/22685622">https://www.inaturalist.org/observations/22685622</a>   |
| 696 | Bubulcus ibis | Cattle Egret | 2016/7/19  | 1 | 0 | 7.2893954 | 80.6446149 | <a href="https://www.inaturalist.org/observations/16777047">https://www.inaturalist.org/observations/16777047</a>   |
| 697 | Bubulcus ibis | Cattle Egret | 2018/3/9   | 2 | 0 | 7.2901762 | 80.6428282 | <a href="https://www.inaturalist.org/observations/10388064">https://www.inaturalist.org/observations/10388064</a>   |
| 698 | Bubulcus ibis | Cattle Egret | 2021/12/18 | 4 | 0 | 7.2974630 | 79.8821879 | <a href="https://www.inaturalist.org/observations/103233126">https://www.inaturalist.org/observations/103233126</a> |
| 699 | Bubulcus ibis | Cattle Egret | 2021/12/31 | 2 | 0 | 7.2974630 | 79.8821879 | <a href="https://www.inaturalist.org/observations/104056686">https://www.inaturalist.org/observations/104056686</a> |

|     |                     |                   |            |   |   |           |            |                                                                                                                     |
|-----|---------------------|-------------------|------------|---|---|-----------|------------|---------------------------------------------------------------------------------------------------------------------|
| 700 | Bubulcus ibis       | Cattle Egret      | 2021/12/31 | 1 | 0 | 7.2974630 | 79.8821879 | <a href="https://www.inaturalist.org/observations/104056909">https://www.inaturalist.org/observations/104056909</a> |
| 701 | Bubulcus ibis       | Cattle Egret      | 2022/1/5   | 2 | 0 | 7.2974630 | 79.8821879 | <a href="https://www.inaturalist.org/observations/104420032">https://www.inaturalist.org/observations/104420032</a> |
| 702 | Bubulcus ibis       | Cattle Egret      | 2022/1/5   | 2 | 0 | 7.2974630 | 79.8821879 | <a href="https://www.inaturalist.org/observations/104495565">https://www.inaturalist.org/observations/104495565</a> |
| 703 | Bubulcus ibis       | Cattle Egret      | 2022/1/5   | 2 | 0 | 7.2974630 | 79.8821879 | <a href="https://www.inaturalist.org/observations/104495697">https://www.inaturalist.org/observations/104495697</a> |
| 704 | Bubulcus ibis       | Cattle Egret      | 2018/10/27 | 4 | 0 | 7.2976237 | 79.8457658 | <a href="https://www.inaturalist.org/observations/18347866">https://www.inaturalist.org/observations/18347866</a>   |
| 705 | Bubulcus ibis       | Cattle Egret      | 2019/12/27 | 3 | 0 | 7.3006741 | 80.3837603 | <a href="https://www.inaturalist.org/observations/37004329">https://www.inaturalist.org/observations/37004329</a>   |
| 706 | Bubulcus ibis       | Cattle Egret      | 2017/6/27  | 2 | 0 | 7.3014151 | 79.8466912 | <a href="https://www.inaturalist.org/observations/142225179">https://www.inaturalist.org/observations/142225179</a> |
| 707 | Bubulcus ibis       | Cattle Egret      | 2022/4/1   | 3 | 0 | 7.3080916 | 80.5967783 | <a href="https://www.inaturalist.org/observations/110072088">https://www.inaturalist.org/observations/110072088</a> |
| 708 | Bubulcus ibis       | Cattle Egret      | 2019/4/15  | 3 | 0 | 7.3676620 | 80.7011990 | <a href="https://www.inaturalist.org/observations/22594378">https://www.inaturalist.org/observations/22594378</a>   |
| 709 | Bubulcus ibis       | Cattle Egret      | 2015/12/26 | 4 | 0 | 7.3902072 | 80.9872767 | <a href="https://www.inaturalist.org/observations/46835661">https://www.inaturalist.org/observations/46835661</a>   |
| 710 | Bubulcus ibis       | Cattle Egret      | 2019/3/19  | 1 | 0 | 7.6412091 | 79.8015354 | <a href="https://www.inaturalist.org/observations/112486466">https://www.inaturalist.org/observations/112486466</a> |
| 711 | Bubulcus ibis       | Cattle Egret      | 2022/7/10  | 3 | 0 | 7.7057844 | 79.8119244 | <a href="https://www.inaturalist.org/observations/125744699">https://www.inaturalist.org/observations/125744699</a> |
| 712 | Bubulcus ibis       | Cattle Egret      | 2022/3/12  | 2 | 0 | 7.8114383 | 80.6134533 | <a href="https://www.inaturalist.org/observations/109821237">https://www.inaturalist.org/observations/109821237</a> |
| 713 | Bubulcus ibis       | Cattle Egret      | 2012/12/23 | 3 | 0 | 7.8184869 | 79.8307800 | <a href="http://www.inaturalist.org/observations/177096">http://www.inaturalist.org/observations/177096</a>         |
| 714 | Bubulcus ibis       | Cattle Egret      | 2019/1/3   | 1 | 0 | 7.8388137 | 80.6495905 | <a href="https://www.inaturalist.org/observations/144267259">https://www.inaturalist.org/observations/144267259</a> |
| 715 | Bubulcus ibis       | Cattle Egret      | 2011/3/11  | 6 | 0 | 7.8569575 | 80.6244459 | <a href="https://www.inaturalist.org/observations/65947385">https://www.inaturalist.org/observations/65947385</a>   |
| 716 | Bubulcus ibis       | Cattle Egret      | 2014/4/12  | 6 | 0 | 7.8691282 | 80.7717969 | <a href="https://www.inaturalist.org/observations/82784127">https://www.inaturalist.org/observations/82784127</a>   |
| 717 | Bubulcus ibis       | Cattle Egret      | 2015/11/5  | 7 | 0 | 7.8697216 | 80.7064906 | <a href="https://www.inaturalist.org/observations/63248100">https://www.inaturalist.org/observations/63248100</a>   |
| 718 | Bubulcus ibis       | Cattle Egret      | 2015/11/5  | 6 | 0 | 7.8708139 | 80.7060615 | <a href="https://www.inaturalist.org/observations/63248095">https://www.inaturalist.org/observations/63248095</a>   |
| 719 | Bubulcus ibis       | Cattle Egret      | 2017/11/29 | 3 | 0 | 7.8730540 | 80.7717970 | <a href="https://www.inaturalist.org/observations/9951508">https://www.inaturalist.org/observations/9951508</a>     |
| 720 | Bubulcus ibis       | Cattle Egret      | 2017/8/22  | 4 | 0 | 7.8730540 | 80.7717970 | <a href="https://www.inaturalist.org/observations/49650837">https://www.inaturalist.org/observations/49650837</a>   |
| 721 | Bubulcus ibis       | Cattle Egret      | 2014/12/16 | 2 | 0 | 7.8730540 | 80.7717970 | <a href="https://www.inaturalist.org/observations/93801794">https://www.inaturalist.org/observations/93801794</a>   |
| 722 | Bubulcus coromandus | ibis Cattle Egret | 2022/5/10  | 1 | 0 | 7.8730540 | 80.7717970 | <a href="https://www.inaturalist.org/observations/116513882">https://www.inaturalist.org/observations/116513882</a> |
| 723 | Bubulcus coromandus | ibis Cattle Egret | 2022/5/10  | 1 | 0 | 7.8730540 | 80.7717970 | <a href="https://www.inaturalist.org/observations/116513972">https://www.inaturalist.org/observations/116513972</a> |
| 724 | Bubulcus ibis       | Cattle Egret      | 2018/12/21 | 4 | 0 | 7.8742170 | 80.6511287 | <a href="https://www.inaturalist.org/observations/19439511">https://www.inaturalist.org/observations/19439511</a>   |

|     |                     |                   |           |   |   |           |            |                                                                                                                     |
|-----|---------------------|-------------------|-----------|---|---|-----------|------------|---------------------------------------------------------------------------------------------------------------------|
| 725 | Bubulcus ibis       | Cattle Egret      | 2019/3/20 | 1 | 0 | 7.8777860 | 80.7026284 | <a href="https://www.inaturalist.org/observations/112537058">https://www.inaturalist.org/observations/112537058</a> |
| 726 | Bubulcus ibis       | Cattle Egret      | 2012/11/2 | 3 | 0 | 7.8843230 | 80.6946805 | <a href="https://www.inaturalist.org/observations/41177237">https://www.inaturalist.org/observations/41177237</a>   |
| 727 | Bubulcus ibis       | Cattle Egret      | 2014/4/14 | 4 | 0 | 7.8865081 | 80.7223981 | <a href="https://www.inaturalist.org/observations/19155040">https://www.inaturalist.org/observations/19155040</a>   |
| 728 | Bubulcus ibis       | Cattle Egret      | 2014/2/4  | 5 | 0 | 7.8898600 | 80.7258500 | <a href="http://www.inaturalist.org/observations/3849787">http://www.inaturalist.org/observations/3849787</a>       |
| 729 | Bubulcus ibis       | Cattle Egret      | 2022/3/11 | 3 | 0 | 7.8931581 | 80.6995372 | <a href="https://www.inaturalist.org/observations/108343712">https://www.inaturalist.org/observations/108343712</a> |
| 730 | Bubulcus ibis       | Cattle Egret      | 2018/8/16 | 6 | 0 | 7.9253154 | 80.7195179 | <a href="https://www.inaturalist.org/observations/68689155">https://www.inaturalist.org/observations/68689155</a>   |
| 731 | Bubulcus coromandus | ibis Cattle Egret | 2014/1/22 | 1 | 0 | 7.9286743 | 80.9942658 | <a href="https://www.inaturalist.org/observations/92603376">https://www.inaturalist.org/observations/92603376</a>   |
| 732 | Bubulcus ibis       | Cattle Egret      | 2019/8/27 | 1 | 0 | 7.9362865 | 80.7120101 | <a href="https://www.inaturalist.org/observations/38068707">https://www.inaturalist.org/observations/38068707</a>   |
| 733 | Bubulcus ibis       | Cattle Egret      | 2019/2/13 | 4 | 0 | 7.9397678 | 80.9978699 | <a href="https://www.inaturalist.org/observations/20690601">https://www.inaturalist.org/observations/20690601</a>   |
| 734 | Bubulcus coromandus | ibis Cattle Egret | 2019/2/7  | 4 | 0 | 7.9403384 | 81.0187984 | <a href="https://www.inaturalist.org/observations/30735094">https://www.inaturalist.org/observations/30735094</a>   |
| 735 | Bubulcus ibis       | Cattle Egret      | 2020/2/6  | 2 | 0 | 7.9418300 | 80.9975583 | <a href="https://www.inaturalist.org/observations/38380446">https://www.inaturalist.org/observations/38380446</a>   |
| 736 | Bubulcus ibis       | Cattle Egret      | 2019/1/3  | 1 | 0 | 7.9470051 | 81.0004796 | <a href="https://www.inaturalist.org/observations/144267303">https://www.inaturalist.org/observations/144267303</a> |
| 737 | Bubulcus ibis       | Cattle Egret      | 2019/3/4  | 3 | 0 | 7.9502533 | 80.9719167 | <a href="https://www.inaturalist.org/observations/20946459">https://www.inaturalist.org/observations/20946459</a>   |
| 738 | Bubulcus ibis       | Cattle Egret      | 2020/1/26 | 5 | 0 | 7.9567603 | 80.7557307 | <a href="https://www.inaturalist.org/observations/39528344">https://www.inaturalist.org/observations/39528344</a>   |
| 739 | Bubulcus ibis       | Cattle Egret      | 2022/2/1  | 1 | 0 | 7.9569250 | 80.7538222 | <a href="https://www.inaturalist.org/observations/144442131">https://www.inaturalist.org/observations/144442131</a> |
| 740 | Bubulcus ibis       | Cattle Egret      | 2019/2/6  | 4 | 0 | 7.9590717 | 80.7439500 | <a href="https://www.inaturalist.org/observations/26051330">https://www.inaturalist.org/observations/26051330</a>   |
| 741 | Bubulcus ibis       | Cattle Egret      | 2022/1/12 | 2 | 0 | 7.9648233 | 81.0038017 | <a href="https://www.inaturalist.org/observations/111399813">https://www.inaturalist.org/observations/111399813</a> |
| 742 | Bubulcus ibis       | Cattle Egret      | 2013/2/28 | 4 | 0 | 7.9658333 | 81.0047222 | <a href="https://www.inaturalist.org/observations/66505378">https://www.inaturalist.org/observations/66505378</a>   |
| 743 | Bubulcus ibis       | Cattle Egret      | 2022/4/10 | 1 | 0 | 7.9800361 | 80.7495791 | <a href="https://www.inaturalist.org/observations/118568159">https://www.inaturalist.org/observations/118568159</a> |
| 744 | Bubulcus coromandus | ibis Cattle Egret | 2014/1/22 | 2 | 0 | 8.0011335 | 80.9240381 | <a href="https://www.inaturalist.org/observations/92596674">https://www.inaturalist.org/observations/92596674</a>   |
| 745 | Bubulcus coromandus | ibis Cattle Egret | 2019/8/5  | 1 | 0 | 8.0083000 | 80.5714667 | <a href="https://www.inaturalist.org/observations/32681995">https://www.inaturalist.org/observations/32681995</a>   |
| 746 | Bubulcus coromandus | ibis Cattle Egret | 2019/8/5  | 1 | 0 | 8.0083028 | 80.5714667 | <a href="https://www.inaturalist.org/observations/32681953">https://www.inaturalist.org/observations/32681953</a>   |
| 747 | Bubulcus coromandus | ibis Cattle Egret | 2019/8/5  | 2 | 0 | 8.0083639 | 80.5715889 | <a href="https://www.inaturalist.org/observations/32681889">https://www.inaturalist.org/observations/32681889</a>   |
| 748 | Bubulcus coromandus | ibis Cattle Egret | 2014/1/20 | 1 | 0 | 8.0326298 | 80.8676898 | <a href="https://www.inaturalist.org/observations/92599096">https://www.inaturalist.org/observations/92599096</a>   |
| 749 | Bubulcus ibis       | Cattle Egret      | 2017/7/11 | 3 | 0 | 8.0329625 | 80.8989864 | <a href="https://www.inaturalist.org/observations/142687590">https://www.inaturalist.org/observations/142687590</a> |

|     |                     |                   |            |   |   |           |            |                                                                                                                     |
|-----|---------------------|-------------------|------------|---|---|-----------|------------|---------------------------------------------------------------------------------------------------------------------|
| 750 | Bubulcus ibis       | Cattle Egret      | 2019/3/4   | 5 | 0 | 8.0340472 | 80.8923262 | <a href="https://www.inaturalist.org/observations/20971220">https://www.inaturalist.org/observations/20971220</a>   |
| 751 | Bubulcus coromandus | ibis Cattle Egret | 2013/3/4   | 1 | 0 | 8.0360923 | 80.7472065 | <a href="https://www.inaturalist.org/observations/110773971">https://www.inaturalist.org/observations/110773971</a> |
| 752 | Bubulcus ibis       | Cattle Egret      | 2015/12/25 | 5 | 0 | 8.0484617 | 80.8719083 | <a href="https://www.inaturalist.org/observations/46835251">https://www.inaturalist.org/observations/46835251</a>   |
| 753 | Bubulcus ibis       | Cattle Egret      | 2018/12/27 | 2 | 0 | 8.0918333 | 77.5578433 | <a href="https://www.inaturalist.org/observations/34522899">https://www.inaturalist.org/observations/34522899</a>   |
| 754 | Bubulcus ibis       | Cattle Egret      | 2018/12/26 | 1 | 0 | 8.0918830 | 77.5561340 | <a href="https://www.inaturalist.org/observations/34522460">https://www.inaturalist.org/observations/34522460</a>   |
| 755 | Bubulcus ibis       | Cattle Egret      | 2018/12/25 | 2 | 0 | 8.0919650 | 77.5561718 | <a href="https://www.inaturalist.org/observations/32339442">https://www.inaturalist.org/observations/32339442</a>   |
| 756 | Bubulcus coromandus | ibis Cattle Egret | 2018/11/13 | 1 | 0 | 8.1020442 | 77.5428195 | <a href="https://www.inaturalist.org/observations/56766461">https://www.inaturalist.org/observations/56766461</a>   |
| 757 | Bubulcus ibis       | Cattle Egret      | 2019/4/10  | 5 | 0 | 8.1198350 | 79.7068220 | <a href="https://www.inaturalist.org/observations/22321998">https://www.inaturalist.org/observations/22321998</a>   |
| 758 | Bubulcus ibis       | Cattle Egret      | 2018/9/3   | 1 | 0 | 8.1611963 | 80.9136200 | <a href="https://www.inaturalist.org/observations/76572649">https://www.inaturalist.org/observations/76572649</a>   |
| 759 | Bubulcus ibis       | Cattle Egret      | 2019/5/3   | 3 | 0 | 8.1756296 | 77.2444253 | <a href="https://www.inaturalist.org/observations/24417781">https://www.inaturalist.org/observations/24417781</a>   |
| 760 | Bubulcus ibis       | Cattle Egret      | 2022/2/12  | 4 | 0 | 8.1802414 | 77.7049798 | <a href="https://www.inaturalist.org/observations/107473734">https://www.inaturalist.org/observations/107473734</a> |
| 761 | Bubulcus ibis       | Cattle Egret      | 2022/8/4   | 2 | 0 | 8.1818092 | 77.3759178 | <a href="https://www.inaturalist.org/observations/129396149">https://www.inaturalist.org/observations/129396149</a> |
| 762 | Bubulcus ibis       | Cattle Egret      | 2014/8/9   | 4 | 0 | 8.1832857 | 77.4118996 | <a href="https://www.inaturalist.org/observations/20048289">https://www.inaturalist.org/observations/20048289</a>   |
| 763 | Bubulcus ibis       | Cattle Egret      | 2020/2/5   | 2 | 0 | 8.2088728 | 80.0739193 | <a href="https://www.inaturalist.org/observations/39241201">https://www.inaturalist.org/observations/39241201</a>   |
| 764 | Bubulcus ibis       | Cattle Egret      | 2021/11/9  | 2 | 0 | 8.2347075 | 77.4841504 | <a href="https://www.inaturalist.org/observations/105038157">https://www.inaturalist.org/observations/105038157</a> |
| 765 | Bubulcus ibis       | Cattle Egret      | 2019/2/7   | 4 | 0 | 8.3113518 | 80.4036508 | <a href="https://www.inaturalist.org/observations/30608589">https://www.inaturalist.org/observations/30608589</a>   |
| 766 | Bubulcus ibis       | Cattle Egret      | 2016/2/19  | 2 | 0 | 8.3113518 | 80.4036508 | <a href="https://www.inaturalist.org/observations/37070167">https://www.inaturalist.org/observations/37070167</a>   |
| 767 | Bubulcus ibis       | Cattle Egret      | 2009/10/29 | 1 | 0 | 8.3210629 | 80.4083149 | <a href="https://www.inaturalist.org/observations/131794540">https://www.inaturalist.org/observations/131794540</a> |
| 768 | Bubulcus ibis       | Cattle Egret      | 2022/4/13  | 1 | 0 | 8.3251833 | 80.4162354 | <a href="https://www.inaturalist.org/observations/111616846">https://www.inaturalist.org/observations/111616846</a> |
| 769 | Bubulcus ibis       | Cattle Egret      | 2019/3/2   | 3 | 0 | 8.3287250 | 80.3857717 | <a href="https://www.inaturalist.org/observations/20877009">https://www.inaturalist.org/observations/20877009</a>   |
| 770 | Bubulcus ibis       | Cattle Egret      | 2019/3/2   | 2 | 0 | 8.3288583 | 80.3817750 | <a href="https://www.inaturalist.org/observations/20929021">https://www.inaturalist.org/observations/20929021</a>   |
| 771 | Bubulcus ibis       | Cattle Egret      | 2015/4/25  | 6 | 0 | 8.3365180 | 80.4034420 | <a href="http://www.inaturalist.org/observations/1449687">http://www.inaturalist.org/observations/1449687</a>       |
| 772 | Bubulcus ibis       | Cattle Egret      | 2016/3/26  | 3 | 0 | 8.3374126 | 80.3939863 | <a href="https://www.inaturalist.org/observations/127458276">https://www.inaturalist.org/observations/127458276</a> |
| 773 | Bubulcus ibis       | Cattle Egret      | 2016/1/18  | 3 | 0 | 8.3430416 | 80.3996624 | <a href="https://www.inaturalist.org/observations/42004348">https://www.inaturalist.org/observations/42004348</a>   |
| 774 | Bubulcus ibis       | Cattle Egret      | 2020/2/26  | 2 | 0 | 8.3445550 | 80.3890917 | <a href="https://www.inaturalist.org/observations/39246264">https://www.inaturalist.org/observations/39246264</a>   |

|     |                     |                   |            |   |   |           |            |                                                                                                                     |
|-----|---------------------|-------------------|------------|---|---|-----------|------------|---------------------------------------------------------------------------------------------------------------------|
| 775 | Bubulcus ibis       | Cattle Egret      | 2019/3/2   | 5 | 0 | 8.3463667 | 80.3975133 | <a href="https://www.inaturalist.org/observations/20918356">https://www.inaturalist.org/observations/20918356</a>   |
| 776 | Bubulcus ibis       | Cattle Egret      | 2022/1/29  | 1 | 0 | 8.3465556 | 80.3973444 | <a href="https://www.inaturalist.org/observations/144431379">https://www.inaturalist.org/observations/144431379</a> |
| 777 | Bubulcus ibis       | Cattle Egret      | 2021/11/12 | 5 | 0 | 8.3467579 | 80.3971566 | <a href="https://www.inaturalist.org/observations/129547666">https://www.inaturalist.org/observations/129547666</a> |
| 778 | Bubulcus ibis       | Cattle Egret      | 2017/2/11  | 2 | 0 | 8.3467718 | 77.7412704 | <a href="https://www.inaturalist.org/observations/65345104">https://www.inaturalist.org/observations/65345104</a>   |
| 779 | Bubulcus ibis       | Cattle Egret      | 2021/11/12 | 5 | 0 | 8.3467866 | 80.3972443 | <a href="https://www.inaturalist.org/observations/129547662">https://www.inaturalist.org/observations/129547662</a> |
| 780 | Bubulcus ibis       | Cattle Egret      | 2017/1/22  | 3 | 0 | 8.3482072 | 80.3969722 | <a href="https://www.inaturalist.org/observations/106707655">https://www.inaturalist.org/observations/106707655</a> |
| 781 | Bubulcus ibis       | Cattle Egret      | 2015/4/4   | 3 | 0 | 8.3495161 | 80.3977806 | <a href="https://www.inaturalist.org/observations/12171871">https://www.inaturalist.org/observations/12171871</a>   |
| 782 | Bubulcus ibis       | Cattle Egret      | 2019/2/15  | 4 | 0 | 8.3499116 | 80.4051644 | <a href="https://www.inaturalist.org/observations/20733717">https://www.inaturalist.org/observations/20733717</a>   |
| 783 | Bubulcus ibis       | Cattle Egret      | 2019/3/1   | 6 | 0 | 8.3523367 | 80.4335633 | <a href="https://www.inaturalist.org/observations/20853968">https://www.inaturalist.org/observations/20853968</a>   |
| 784 | Bubulcus ibis       | Cattle Egret      | 2014/3/10  | 6 | 0 | 8.3564700 | 80.4172600 | <a href="http://www.inaturalist.org/observations/2477697">http://www.inaturalist.org/observations/2477697</a>       |
| 785 | Bubulcus coromandus | ibis Cattle Egret | 2016/2/5   | 5 | 0 | 8.3652984 | 80.5453313 | <a href="http://www.inaturalist.org/observations/3776908">http://www.inaturalist.org/observations/3776908</a>       |
| 786 | Bubulcus ibis       | Cattle Egret      | 2019/3/27  | 4 | 0 | 8.3690140 | 80.0316080 | <a href="https://www.inaturalist.org/observations/21818490">https://www.inaturalist.org/observations/21818490</a>   |
| 787 | Bubulcus ibis       | Cattle Egret      | 2022/1/28  | 1 | 0 | 8.3776306 | 80.0698139 | <a href="https://www.inaturalist.org/observations/144428273">https://www.inaturalist.org/observations/144428273</a> |
| 788 | Bubulcus ibis       | Cattle Egret      | 2009/12/29 | 1 | 0 | 8.3802974 | 81.0073693 | <a href="https://www.inaturalist.org/observations/144670701">https://www.inaturalist.org/observations/144670701</a> |
| 789 | Bubulcus ibis       | Cattle Egret      | 2019/3/15  | 2 | 0 | 8.3888922 | 76.9760433 | <a href="https://www.inaturalist.org/observations/47557628">https://www.inaturalist.org/observations/47557628</a>   |
| 790 | Bubulcus coromandus | ibis Cattle Egret | 2017/2/24  | 1 | 0 | 8.3948786 | 76.9738000 | <a href="https://www.inaturalist.org/observations/62025560">https://www.inaturalist.org/observations/62025560</a>   |
| 791 | Bubulcus ibis       | Cattle Egret      | 2022/2/12  | 2 | 0 | 8.4080133 | 78.0449383 | <a href="https://www.inaturalist.org/observations/106982307">https://www.inaturalist.org/observations/106982307</a> |
| 792 | Bubulcus ibis       | Cattle Egret      | 2022/12/14 | 2 | 0 | 8.4142351 | 77.6054508 | <a href="https://www.inaturalist.org/observations/144336667">https://www.inaturalist.org/observations/144336667</a> |
| 793 | Bubulcus ibis       | Cattle Egret      | 2022/11/5  | 1 | 0 | 8.4184449 | 77.6017534 | <a href="https://www.inaturalist.org/observations/141226255">https://www.inaturalist.org/observations/141226255</a> |
| 794 | Bubulcus ibis       | Cattle Egret      | 2020/2/4   | 1 | 0 | 8.4213683 | 80.0090667 | <a href="https://www.inaturalist.org/observations/39206350">https://www.inaturalist.org/observations/39206350</a>   |
| 795 | Bubulcus ibis       | Cattle Egret      | 2022/11/5  | 3 | 0 | 8.4217118 | 77.6003657 | <a href="https://www.inaturalist.org/observations/143007899">https://www.inaturalist.org/observations/143007899</a> |
| 796 | Bubulcus ibis       | Cattle Egret      | 2020/2/4   | 2 | 0 | 8.4240600 | 80.0240750 | <a href="https://www.inaturalist.org/observations/39206425">https://www.inaturalist.org/observations/39206425</a>   |
| 797 | Bubulcus coromandus | ibis Cattle Egret | 2021/11/1  | 1 | 0 | 8.4252933 | 81.2892268 | <a href="https://www.inaturalist.org/observations/100314689">https://www.inaturalist.org/observations/100314689</a> |
| 798 | Bubulcus ibis       | Cattle Egret      | 2022/12/6  | 2 | 0 | 8.4271284 | 77.5951464 | <a href="https://www.inaturalist.org/observations/143773204">https://www.inaturalist.org/observations/143773204</a> |
| 799 | Bubulcus ibis       | Cattle Egret      | 2022/4/9   | 3 | 0 | 8.4474674 | 77.4365987 | <a href="https://www.inaturalist.org/observations/116241815">https://www.inaturalist.org/observations/116241815</a> |

|     |                     |      |              |            |   |   |           |            |                                                                                                                     |
|-----|---------------------|------|--------------|------------|---|---|-----------|------------|---------------------------------------------------------------------------------------------------------------------|
| 800 | Bubulcus coromandus | ibis | Cattle Egret | 2020/2/20  | 3 | 0 | 8.4562965 | 80.0476383 | <a href="https://www.inaturalist.org/observations/76978489">https://www.inaturalist.org/observations/76978489</a>   |
| 801 | Bubulcus coromandus | ibis | Cattle Egret | 2016/4/8   | 2 | 0 | 8.4563723 | 80.0476383 | <a href="https://www.inaturalist.org/observations/58182603">https://www.inaturalist.org/observations/58182603</a>   |
| 802 | Bubulcus ibis       |      | Cattle Egret | 2021/4/24  | 2 | 0 | 8.4750836 | 76.9469977 | <a href="https://www.inaturalist.org/observations/76560267">https://www.inaturalist.org/observations/76560267</a>   |
| 803 | Bubulcus ibis       |      | Cattle Egret | 2022/4/9   | 2 | 0 | 8.4888581 | 77.5165953 | <a href="https://www.inaturalist.org/observations/116241814">https://www.inaturalist.org/observations/116241814</a> |
| 804 | Bubulcus ibis       |      | Cattle Egret | 2019/6/30  | 5 | 0 | 8.4928000 | 79.9210283 | <a href="https://www.inaturalist.org/observations/41874539">https://www.inaturalist.org/observations/41874539</a>   |
| 805 | Bubulcus ibis       |      | Cattle Egret | 2022/2/12  | 2 | 0 | 8.4959367 | 77.7591617 | <a href="https://www.inaturalist.org/observations/106982271">https://www.inaturalist.org/observations/106982271</a> |
| 806 | Bubulcus ibis       |      | Cattle Egret | 2021/12/8  | 2 | 0 | 8.5176839 | 77.4194642 | <a href="https://www.inaturalist.org/observations/103937933">https://www.inaturalist.org/observations/103937933</a> |
| 807 | Bubulcus ibis       |      | Cattle Egret | 2022/4/24  | 4 | 0 | 8.5205839 | 76.9615020 | <a href="https://www.inaturalist.org/observations/112659173">https://www.inaturalist.org/observations/112659173</a> |
| 808 | Bubulcus ibis       |      | Cattle Egret | 2020/11/9  | 2 | 0 | 8.5255879 | 76.9366376 | <a href="https://www.inaturalist.org/observations/64522318">https://www.inaturalist.org/observations/64522318</a>   |
| 809 | Bubulcus ibis       |      | Cattle Egret | 2020/10/30 | 1 | 0 | 8.5255879 | 76.9366376 | <a href="https://www.inaturalist.org/observations/64911333">https://www.inaturalist.org/observations/64911333</a>   |
| 810 | Bubulcus ibis       |      | Cattle Egret | 2018/7/6   | 4 | 0 | 8.5301284 | 76.9384593 | <a href="https://www.inaturalist.org/observations/22993370">https://www.inaturalist.org/observations/22993370</a>   |
| 811 | Bubulcus ibis       |      | Cattle Egret | 2021/12/8  | 2 | 0 | 8.5537723 | 77.4860075 | <a href="https://www.inaturalist.org/observations/103871978">https://www.inaturalist.org/observations/103871978</a> |
| 812 | Bubulcus ibis       |      | Cattle Egret | 2020/12/13 | 1 | 0 | 8.5742943 | 81.2392542 | <a href="https://www.inaturalist.org/observations/66770255">https://www.inaturalist.org/observations/66770255</a>   |
| 813 | Bubulcus coromandus | ibis | Cattle Egret | 2021/11/15 | 1 | 0 | 8.5744914 | 81.2392286 | <a href="https://www.inaturalist.org/observations/101513105">https://www.inaturalist.org/observations/101513105</a> |
| 814 | Bubulcus ibis       |      | Cattle Egret | 2020/12/12 | 1 | 0 | 8.5748405 | 81.2388892 | <a href="https://www.inaturalist.org/observations/66468965">https://www.inaturalist.org/observations/66468965</a>   |
| 815 | Bubulcus coromandus | ibis | Cattle Egret | 2017/7/24  | 3 | 0 | 8.5781906 | 81.2305958 | <a href="https://www.inaturalist.org/observations/69815167">https://www.inaturalist.org/observations/69815167</a>   |
| 816 | Bubulcus ibis       |      | Cattle Egret | 2015/12/30 | 2 | 0 | 8.5784570 | 77.7837772 | <a href="https://www.inaturalist.org/observations/66133948">https://www.inaturalist.org/observations/66133948</a>   |
| 817 | Bubulcus coromandus | ibis | Cattle Egret | 2021/1/23  | 2 | 0 | 8.5918420 | 81.1881065 | <a href="https://www.inaturalist.org/observations/68539402">https://www.inaturalist.org/observations/68539402</a>   |
| 818 | Bubulcus ibis       |      | Cattle Egret | 2010/1/3   | 2 | 0 | 8.6181193 | 81.2087554 | <a href="https://www.inaturalist.org/observations/144736080">https://www.inaturalist.org/observations/144736080</a> |
| 819 | Bubulcus ibis       |      | Cattle Egret | 2021/1/16  | 2 | 0 | 8.6229920 | 76.9404192 | <a href="https://www.inaturalist.org/observations/73869241">https://www.inaturalist.org/observations/73869241</a>   |
| 820 | Bubulcus ibis       |      | Cattle Egret | 2017/12/12 | 3 | 0 | 8.6730208 | 77.1406030 | <a href="https://www.inaturalist.org/observations/36013736">https://www.inaturalist.org/observations/36013736</a>   |
| 821 | Bubulcus ibis       |      | Cattle Egret | 2019/3/2   | 5 | 0 | 8.6822594 | 77.1365292 | <a href="https://www.inaturalist.org/observations/20876031">https://www.inaturalist.org/observations/20876031</a>   |
| 822 | Bubulcus ibis       |      | Cattle Egret | 2019/9/15  | 3 | 0 | 8.7043734 | 77.7382355 | <a href="https://www.inaturalist.org/observations/32746141">https://www.inaturalist.org/observations/32746141</a>   |
| 823 | Bubulcus ibis       |      | Cattle Egret | 2019/9/11  | 2 | 0 | 8.7055597 | 77.7354965 | <a href="https://www.inaturalist.org/observations/32519279">https://www.inaturalist.org/observations/32519279</a>   |
| 824 | Bubulcus ibis       |      | Cattle Egret | 2019/8/26  | 1 | 0 | 8.7129427 | 81.1847467 | <a href="https://www.inaturalist.org/observations/36302483">https://www.inaturalist.org/observations/36302483</a>   |

|     |                     |                      |            |   |   |           |            |                                                                                                                     |
|-----|---------------------|----------------------|------------|---|---|-----------|------------|---------------------------------------------------------------------------------------------------------------------|
| 825 | Bubulcus ibis       | Cattle Egret         | 2015/10/28 | 3 | 0 | 8.7139130 | 77.7566520 | <a href="https://www.inaturalist.org/observations/23908672">https://www.inaturalist.org/observations/23908672</a>   |
| 826 | Bubulcus ibis       | Cattle Egret         | 2022/5/17  | 6 | 0 | 8.7266894 | 77.4992483 | <a href="https://www.inaturalist.org/observations/120897873">https://www.inaturalist.org/observations/120897873</a> |
| 827 | Bubulcus ibis       | Cattle Egret         | 2021/6/11  | 3 | 0 | 8.7583206 | 78.1740862 | <a href="https://www.inaturalist.org/observations/91492855">https://www.inaturalist.org/observations/91492855</a>   |
| 828 | Bubulcus ibis       | Cattle Egret         | 2020/11/8  | 2 | 0 | 8.8241876 | 76.8948713 | <a href="https://www.inaturalist.org/observations/64423760">https://www.inaturalist.org/observations/64423760</a>   |
| 829 | Bubulcus ibis       | Cattle Egret         | 2019/2/17  | 3 | 0 | 8.8396306 | 76.7009785 | <a href="https://www.inaturalist.org/observations/65980816">https://www.inaturalist.org/observations/65980816</a>   |
| 830 | Bubulcus ibis       | Cattle Egret         | 2022/5/11  | 3 | 0 | 8.8698046 | 76.6018342 | <a href="https://www.inaturalist.org/observations/124895278">https://www.inaturalist.org/observations/124895278</a> |
| 831 | Bubulcus ibis       | Cattle Egret         | 2022/2/12  | 2 | 0 | 8.8698387 | 76.6012281 | <a href="https://www.inaturalist.org/observations/125581766">https://www.inaturalist.org/observations/125581766</a> |
| 832 | Bubulcus ibis       | Cattle Egret         | 2021/12/15 | 3 | 0 | 8.8700590 | 76.6012548 | <a href="https://www.inaturalist.org/observations/103742515">https://www.inaturalist.org/observations/103742515</a> |
| 833 | Bubulcus ibis       | Cattle Egret         | 2021/7/3   | 2 | 0 | 8.8836214 | 76.7710048 | <a href="https://www.inaturalist.org/observations/85738054">https://www.inaturalist.org/observations/85738054</a>   |
| 834 | Bubulcus ibis       | Cattle Egret         | 2019/5/12  | 3 | 0 | 8.9023003 | 76.6565543 | <a href="https://www.inaturalist.org/observations/66039631">https://www.inaturalist.org/observations/66039631</a>   |
| 835 | Bubulcus ibis       | Cattle Egret         | 2020/11/7  | 3 | 0 | 8.9493433 | 76.6266537 | <a href="https://www.inaturalist.org/observations/64830385">https://www.inaturalist.org/observations/64830385</a>   |
| 836 | Bubulcus ibis       | Cattle Egret         | 2020/11/4  | 3 | 0 | 8.9540327 | 76.6344726 | <a href="https://www.inaturalist.org/observations/64168848">https://www.inaturalist.org/observations/64168848</a>   |
| 837 | Bubulcus ibis       | Cattle Egret         | 2022/2/5   | 2 | 0 | 9.0104191 | 76.6601530 | <a href="https://www.inaturalist.org/observations/106715290">https://www.inaturalist.org/observations/106715290</a> |
| 838 | Bubulcus ibis       | Cattle Egret         | 2022/2/5   | 1 | 0 | 9.0118650 | 76.6632262 | <a href="https://www.inaturalist.org/observations/106826229">https://www.inaturalist.org/observations/106826229</a> |
| 839 | Bubulcus ibis       | Cattle Egret         | 2022/2/5   | 1 | 0 | 9.0122041 | 76.6640416 | <a href="https://www.inaturalist.org/observations/106826301">https://www.inaturalist.org/observations/106826301</a> |
| 840 | Bubulcus ibis       | Cattle Egret         | 2022/2/5   | 2 | 0 | 9.0122274 | 76.6640203 | <a href="https://www.inaturalist.org/observations/106727199">https://www.inaturalist.org/observations/106727199</a> |
| 841 | Bubulcus ibis       | Cattle Egret         | 2022/2/5   | 0 | 0 | 9.0123736 | 76.6643849 | <a href="https://www.inaturalist.org/observations/106927263">https://www.inaturalist.org/observations/106927263</a> |
| 842 | Bubulcus ibis       | Cattle Egret         | 2022/1/14  | 2 | 0 | 9.1672573 | 77.8642807 | <a href="https://www.inaturalist.org/observations/104913050">https://www.inaturalist.org/observations/104913050</a> |
| 843 | Bubulcus ibis       | Cattle Egret         | 2022/2/26  | 3 | 0 | 9.2173550 | 76.6483467 | <a href="https://www.inaturalist.org/observations/142757715">https://www.inaturalist.org/observations/142757715</a> |
| 844 | Bubulcus ibis       | Cattle Egret         | 2018/4/2   | 5 | 0 | 9.2690996 | 76.6068292 | <a href="https://www.inaturalist.org/observations/10568397">https://www.inaturalist.org/observations/10568397</a>   |
| 845 | Bubulcus ibis       | Cattle Egret         | 2022/12/5  | 1 | 0 | 9.2908502 | 76.6127703 | <a href="https://www.inaturalist.org/observations/143714391">https://www.inaturalist.org/observations/143714391</a> |
| 846 | Bubulcus coromandus | ibis<br>Cattle Egret | 2022/12/18 | 2 | 0 | 9.2955532 | 76.6162296 | <a href="https://www.inaturalist.org/observations/144720722">https://www.inaturalist.org/observations/144720722</a> |
| 847 | Bubulcus ibis       | Cattle Egret         | 2022/2/27  | 2 | 0 | 9.3064783 | 76.4994700 | <a href="https://www.inaturalist.org/observations/142757846">https://www.inaturalist.org/observations/142757846</a> |
| 848 | Bubulcus ibis       | Cattle Egret         | 2022/5/15  | 2 | 0 | 9.3388450 | 76.6537483 | <a href="https://www.inaturalist.org/observations/142804992">https://www.inaturalist.org/observations/142804992</a> |
| 849 | Bubulcus ibis       | Cattle Egret         | 2022/2/26  | 2 | 0 | 9.3430733 | 76.8294450 | <a href="https://www.inaturalist.org/observations/142757681">https://www.inaturalist.org/observations/142757681</a> |



|     |               |              |            |   |   |           |            |                                                                                                                     |
|-----|---------------|--------------|------------|---|---|-----------|------------|---------------------------------------------------------------------------------------------------------------------|
| 850 | Bubulcus ibis | Cattle Egret | 2021/12/29 | 5 | 0 | 9.3518830 | 76.6953863 | <a href="https://www.inaturalist.org/observations/130740593">https://www.inaturalist.org/observations/130740593</a> |
| 851 | Bubulcus ibis | Cattle Egret | 2019/4/8   | 4 | 0 | 9.3724197 | 76.5837965 | <a href="https://www.inaturalist.org/observations/22279557">https://www.inaturalist.org/observations/22279557</a>   |
| 852 | Bubulcus ibis | Cattle Egret | 2015/11/23 | 3 | 0 | 9.4390053 | 76.5443431 | <a href="https://www.inaturalist.org/observations/62789459">https://www.inaturalist.org/observations/62789459</a>   |
| 853 | Bubulcus ibis | Cattle Egret | 2021/4/8   | 1 | 0 | 9.4973892 | 78.1380145 | <a href="https://www.inaturalist.org/observations/85361802">https://www.inaturalist.org/observations/85361802</a>   |
| 854 | Bubulcus ibis | Cattle Egret | 2022/1/7   | 2 | 0 | 9.5032478 | 76.5490581 | <a href="https://www.inaturalist.org/observations/105242733">https://www.inaturalist.org/observations/105242733</a> |
| 855 | Bubulcus ibis | Cattle Egret | 2020/1/26  | 3 | 0 | 9.5082532 | 76.3600795 | <a href="https://www.inaturalist.org/observations/63700766">https://www.inaturalist.org/observations/63700766</a>   |
| 856 | Bubulcus ibis | Cattle Egret | 2013/12/25 | 1 | 0 | 9.5324114 | 76.5497972 | <a href="https://www.inaturalist.org/observations/81670885">https://www.inaturalist.org/observations/81670885</a>   |
| 857 | Bubulcus ibis | Cattle Egret | 2013/11/24 | 1 | 0 | 9.5325021 | 76.5498402 | <a href="https://www.inaturalist.org/observations/81672393">https://www.inaturalist.org/observations/81672393</a>   |
| 858 | Bubulcus ibis | Cattle Egret | 2013/11/18 | 1 | 0 | 9.5325233 | 76.5498402 | <a href="https://www.inaturalist.org/observations/81672390">https://www.inaturalist.org/observations/81672390</a>   |
| 859 | Bubulcus ibis | Cattle Egret | 2019/1/20  | 3 | 0 | 9.5665322 | 76.4423940 | <a href="https://www.inaturalist.org/observations/41031567">https://www.inaturalist.org/observations/41031567</a>   |
| 860 | Bubulcus ibis | Cattle Egret | 2019/2/12  | 5 | 0 | 9.5694798 | 76.4241721 | <a href="https://www.inaturalist.org/observations/20510689">https://www.inaturalist.org/observations/20510689</a>   |
| 861 | Bubulcus ibis | Cattle Egret | 2020/12/26 | 3 | 0 | 9.5761528 | 76.4372750 | <a href="https://www.inaturalist.org/observations/67380180">https://www.inaturalist.org/observations/67380180</a>   |
| 862 | Bubulcus ibis | Cattle Egret | 2022/5/2   | 3 | 0 | 9.5762508 | 76.4367763 | <a href="https://www.inaturalist.org/observations/124512723">https://www.inaturalist.org/observations/124512723</a> |
| 863 | Bubulcus ibis | Cattle Egret | 2014/11/6  | 1 | 0 | 9.5838466 | 77.1786689 | <a href="https://www.inaturalist.org/observations/71554140">https://www.inaturalist.org/observations/71554140</a>   |
| 864 | Bubulcus ibis | Cattle Egret | 2022/5/1   | 1 | 0 | 9.5886855 | 76.4243447 | <a href="https://www.inaturalist.org/observations/114134091">https://www.inaturalist.org/observations/114134091</a> |
| 865 | Bubulcus ibis | Cattle Egret | 2022/11/1  | 2 | 0 | 9.5923806 | 76.4463639 | <a href="https://www.inaturalist.org/observations/140814954">https://www.inaturalist.org/observations/140814954</a> |
| 866 | Bubulcus ibis | Cattle Egret | 2018/12/19 | 3 | 0 | 9.5972099 | 76.5206807 | <a href="https://www.inaturalist.org/observations/42833313">https://www.inaturalist.org/observations/42833313</a>   |
| 867 | Bubulcus ibis | Cattle Egret | 2018/12/17 | 3 | 0 | 9.5976625 | 76.5110900 | <a href="https://www.inaturalist.org/observations/42832935">https://www.inaturalist.org/observations/42832935</a>   |
| 868 | Bubulcus ibis | Cattle Egret | 2019/4/15  | 1 | 0 | 9.5979879 | 76.5110398 | <a href="https://www.inaturalist.org/observations/41148754">https://www.inaturalist.org/observations/41148754</a>   |
| 869 | Bubulcus ibis | Cattle Egret | 2022/9/13  | 0 | 0 | 9.5987360 | 76.3116235 | <a href="https://www.inaturalist.org/observations/134878703">https://www.inaturalist.org/observations/134878703</a> |
| 870 | Bubulcus ibis | Cattle Egret | 2020/10/4  | 2 | 0 | 9.6005863 | 76.3579400 | <a href="https://www.inaturalist.org/observations/62467718">https://www.inaturalist.org/observations/62467718</a>   |
| 871 | Bubulcus ibis | Cattle Egret | 2020/10/10 | 3 | 0 | 9.6005863 | 76.3579400 | <a href="https://www.inaturalist.org/observations/62474673">https://www.inaturalist.org/observations/62474673</a>   |
| 872 | Bubulcus ibis | Cattle Egret | 2022/4/14  | 3 | 0 | 9.6122720 | 76.4308660 | <a href="https://www.inaturalist.org/observations/111439582">https://www.inaturalist.org/observations/111439582</a> |
| 873 | Bubulcus ibis | Cattle Egret | 2018/4/28  | 4 | 0 | 9.6194354 | 76.3233948 | <a href="https://www.inaturalist.org/observations/12593413">https://www.inaturalist.org/observations/12593413</a>   |
| 874 | Bubulcus ibis | Cattle Egret | 2019/12/26 | 1 | 0 | 9.6264099 | 76.4291613 | <a href="https://www.inaturalist.org/observations/96979531">https://www.inaturalist.org/observations/96979531</a>   |

|     |               |              |            |   |   |           |            |                                                                                                                     |
|-----|---------------|--------------|------------|---|---|-----------|------------|---------------------------------------------------------------------------------------------------------------------|
| 875 | Bubulcus ibis | Cattle Egret | 2018/1/13  | 3 | 0 | 9.6328464 | 76.4185395 | <a href="https://www.inaturalist.org/observations/117705602">https://www.inaturalist.org/observations/117705602</a> |
| 876 | Bubulcus ibis | Cattle Egret | 2020/5/29  | 3 | 0 | 9.6681611 | 76.3214656 | <a href="https://www.inaturalist.org/observations/48640775">https://www.inaturalist.org/observations/48640775</a>   |
| 877 | Bubulcus ibis | Cattle Egret | 2022/9/3   | 5 | 0 | 9.6682036 | 76.3492569 | <a href="https://www.inaturalist.org/observations/133597569">https://www.inaturalist.org/observations/133597569</a> |
| 878 | Bubulcus ibis | Cattle Egret | 2012/12/25 | 3 | 0 | 9.6741360 | 76.3400960 | <a href="https://www.inaturalist.org/observations/129508023">https://www.inaturalist.org/observations/129508023</a> |
| 879 | Bubulcus ibis | Cattle Egret | 2021/5/12  | 2 | 0 | 9.7184883 | 76.3124481 | <a href="https://www.inaturalist.org/observations/78919236">https://www.inaturalist.org/observations/78919236</a>   |
| 880 | Bubulcus ibis | Cattle Egret | 2018/6/11  | 4 | 0 | 9.7347238 | 77.2843678 | <a href="https://www.inaturalist.org/observations/63810305">https://www.inaturalist.org/observations/63810305</a>   |
| 881 | Bubulcus ibis | Cattle Egret | 2020/9/20  | 3 | 0 | 9.7377848 | 77.2953755 | <a href="https://www.inaturalist.org/observations/61275907">https://www.inaturalist.org/observations/61275907</a>   |
| 882 | Bubulcus ibis | Cattle Egret | 2021/5/12  | 3 | 0 | 9.7835306 | 76.3114966 | <a href="https://www.inaturalist.org/observations/78919241">https://www.inaturalist.org/observations/78919241</a>   |
| 883 | Bubulcus ibis | Cattle Egret | 2022/12/21 | 1 | 0 | 9.7900056 | 76.3056083 | <a href="https://www.inaturalist.org/observations/144788573">https://www.inaturalist.org/observations/144788573</a> |
| 884 | Bubulcus ibis | Cattle Egret | 2019/5/9   | 1 | 0 | 9.7902181 | 76.3047531 | <a href="https://www.inaturalist.org/observations/48629635">https://www.inaturalist.org/observations/48629635</a>   |
| 885 | Bubulcus ibis | Cattle Egret | 2019/5/9   | 1 | 0 | 9.7902750 | 76.3047031 | <a href="https://www.inaturalist.org/observations/45343360">https://www.inaturalist.org/observations/45343360</a>   |
| 886 | Bubulcus ibis | Cattle Egret | 2022/12/6  | 2 | 0 | 9.7903583 | 76.3046917 | <a href="https://www.inaturalist.org/observations/143777200">https://www.inaturalist.org/observations/143777200</a> |
| 887 | Bubulcus ibis | Cattle Egret | 2022/12/12 | 2 | 0 | 9.7903750 | 76.3044361 | <a href="https://www.inaturalist.org/observations/144737744">https://www.inaturalist.org/observations/144737744</a> |
| 888 | Bubulcus ibis | Cattle Egret | 2022/12/6  | 1 | 0 | 9.7904083 | 76.3041833 | <a href="https://www.inaturalist.org/observations/144904391">https://www.inaturalist.org/observations/144904391</a> |
| 889 | Bubulcus ibis | Cattle Egret | 2020/1/11  | 3 | 0 | 9.7904614 | 76.3045547 | <a href="https://www.inaturalist.org/observations/46815207">https://www.inaturalist.org/observations/46815207</a>   |
| 890 | Bubulcus ibis | Cattle Egret | 2019/6/29  | 1 | 0 | 9.7907414 | 76.3045000 | <a href="https://www.inaturalist.org/observations/48934618">https://www.inaturalist.org/observations/48934618</a>   |
| 891 | Bubulcus ibis | Cattle Egret | 2022/12/17 | 1 | 0 | 9.7974309 | 76.2889039 | <a href="https://www.inaturalist.org/observations/145176299">https://www.inaturalist.org/observations/145176299</a> |
| 892 | Bubulcus ibis | Cattle Egret | 2022/12/16 | 1 | 0 | 9.7974309 | 76.2889039 | <a href="https://www.inaturalist.org/observations/145196162">https://www.inaturalist.org/observations/145196162</a> |
| 893 | Bubulcus ibis | Cattle Egret | 2022/12/16 | 0 | 0 | 9.7974309 | 76.2889039 | <a href="https://www.inaturalist.org/observations/145229271">https://www.inaturalist.org/observations/145229271</a> |
| 894 | Bubulcus ibis | Cattle Egret | 2022/12/16 | 1 | 0 | 9.7974309 | 76.2889039 | <a href="https://www.inaturalist.org/observations/145232288">https://www.inaturalist.org/observations/145232288</a> |
| 895 | Bubulcus ibis | Cattle Egret | 2022/12/16 | 0 | 0 | 9.7974309 | 76.2889039 | <a href="https://www.inaturalist.org/observations/145239554">https://www.inaturalist.org/observations/145239554</a> |
| 896 | Bubulcus ibis | Cattle Egret | 2022/12/16 | 0 | 0 | 9.7974309 | 76.2889039 | <a href="https://www.inaturalist.org/observations/145240338">https://www.inaturalist.org/observations/145240338</a> |
| 897 | Bubulcus ibis | Cattle Egret | 2020/5/31  | 3 | 0 | 9.7994514 | 76.2931064 | <a href="https://www.inaturalist.org/observations/48013974">https://www.inaturalist.org/observations/48013974</a>   |
| 898 | Bubulcus ibis | Cattle Egret | 2022/10/8  | 3 | 0 | 9.8310481 | 76.7883827 | <a href="https://www.inaturalist.org/observations/138016629">https://www.inaturalist.org/observations/138016629</a> |
| 899 | Bubulcus ibis | Cattle Egret | 2021/12/7  | 2 | 0 | 9.8321461 | 76.7884413 | <a href="https://www.inaturalist.org/observations/102771311">https://www.inaturalist.org/observations/102771311</a> |

|     |               |              |            |   |   |            |            |                                                                                                                     |
|-----|---------------|--------------|------------|---|---|------------|------------|---------------------------------------------------------------------------------------------------------------------|
| 900 | Bubulcus ibis | Cattle Egret | 2022/3/13  | 1 | 0 | 9.8330226  | 76.7624094 | <a href="https://www.inaturalist.org/observations/110464538">https://www.inaturalist.org/observations/110464538</a> |
| 901 | Bubulcus ibis | Cattle Egret | 2021/11/4  | 2 | 0 | 9.8391083  | 76.7832926 | <a href="https://www.inaturalist.org/observations/100221967">https://www.inaturalist.org/observations/100221967</a> |
| 902 | Bubulcus ibis | Cattle Egret | 2021/11/28 | 2 | 0 | 9.8398721  | 76.7836510 | <a href="https://www.inaturalist.org/observations/102415704">https://www.inaturalist.org/observations/102415704</a> |
| 903 | Bubulcus ibis | Cattle Egret | 2018/12/5  | 1 | 0 | 9.8404457  | 76.7829539 | <a href="https://www.inaturalist.org/observations/88838342">https://www.inaturalist.org/observations/88838342</a>   |
| 904 | Bubulcus ibis | Cattle Egret | 2018/11/17 | 3 | 0 | 9.8477869  | 76.7453861 | <a href="https://www.inaturalist.org/observations/87107764">https://www.inaturalist.org/observations/87107764</a>   |
| 905 | Bubulcus ibis | Cattle Egret | 2019/1/6   | 2 | 0 | 9.8505611  | 76.7666936 | <a href="https://www.inaturalist.org/observations/96801431">https://www.inaturalist.org/observations/96801431</a>   |
| 906 | Bubulcus ibis | Cattle Egret | 2018/12/5  | 1 | 0 | 9.8718695  | 76.7708848 | <a href="https://www.inaturalist.org/observations/88838329">https://www.inaturalist.org/observations/88838329</a>   |
| 907 | Bubulcus ibis | Cattle Egret | 2018/12/4  | 1 | 0 | 9.8765716  | 76.7651581 | <a href="https://www.inaturalist.org/observations/88147612">https://www.inaturalist.org/observations/88147612</a>   |
| 908 | Bubulcus ibis | Cattle Egret | 2019/1/12  | 3 | 0 | 9.8845431  | 76.7327851 | <a href="https://www.inaturalist.org/observations/97982984">https://www.inaturalist.org/observations/97982984</a>   |
| 909 | Bubulcus ibis | Cattle Egret | 2018/12/4  | 2 | 0 | 9.8922581  | 76.7420961 | <a href="https://www.inaturalist.org/observations/88147642">https://www.inaturalist.org/observations/88147642</a>   |
| 910 | Bubulcus ibis | Cattle Egret | 2021/11/18 | 2 | 0 | 9.8955535  | 76.7487912 | <a href="https://www.inaturalist.org/observations/101384704">https://www.inaturalist.org/observations/101384704</a> |
| 911 | Bubulcus ibis | Cattle Egret | 2021/11/21 | 2 | 0 | 9.8955535  | 76.7487912 | <a href="https://www.inaturalist.org/observations/101639237">https://www.inaturalist.org/observations/101639237</a> |
| 912 | Bubulcus ibis | Cattle Egret | 2021/10/24 | 2 | 0 | 9.9057067  | 76.7075246 | <a href="https://www.inaturalist.org/observations/99715084">https://www.inaturalist.org/observations/99715084</a>   |
| 913 | Bubulcus ibis | Cattle Egret | 2013/11/8  | 2 | 0 | 9.9186293  | 76.7813133 | <a href="https://www.inaturalist.org/observations/91676800">https://www.inaturalist.org/observations/91676800</a>   |
| 914 | Bubulcus ibis | Cattle Egret | 2020/4/17  | 3 | 0 | 9.9312328  | 76.2673041 | <a href="https://www.inaturalist.org/observations/42383442">https://www.inaturalist.org/observations/42383442</a>   |
| 915 | Bubulcus ibis | Cattle Egret | 2020/4/28  | 2 | 0 | 9.9312328  | 76.2673041 | <a href="https://www.inaturalist.org/observations/44131245">https://www.inaturalist.org/observations/44131245</a>   |
| 916 | Bubulcus ibis | Cattle Egret | 2022/4/12  | 0 | 0 | 9.9415822  | 78.1575322 | <a href="https://www.inaturalist.org/observations/111188875">https://www.inaturalist.org/observations/111188875</a> |
| 917 | Bubulcus ibis | Cattle Egret | 2022/4/12  | 1 | 0 | 9.9426174  | 78.1559461 | <a href="https://www.inaturalist.org/observations/111189041">https://www.inaturalist.org/observations/111189041</a> |
| 918 | Bubulcus ibis | Cattle Egret | 2022/4/12  | 2 | 0 | 9.9442621  | 78.1551947 | <a href="https://www.inaturalist.org/observations/111188929">https://www.inaturalist.org/observations/111188929</a> |
| 919 | Bubulcus ibis | Cattle Egret | 2015/3/5   | 2 | 0 | 9.9520550  | 76.3113843 | <a href="https://www.inaturalist.org/observations/48524789">https://www.inaturalist.org/observations/48524789</a>   |
| 920 | Bubulcus ibis | Cattle Egret | 2019/8/28  | 4 | 0 | 9.9531329  | 76.4087609 | <a href="https://www.inaturalist.org/observations/31664248">https://www.inaturalist.org/observations/31664248</a>   |
| 921 | Bubulcus ibis | Cattle Egret | 2019/12/19 | 2 | 0 | 9.9664914  | 76.2396314 | <a href="https://www.inaturalist.org/observations/36768853">https://www.inaturalist.org/observations/36768853</a>   |
| 922 | Bubulcus ibis | Cattle Egret | 2013/12/11 | 3 | 0 | 9.9668582  | 76.2399809 | <a href="https://www.inaturalist.org/observations/97920203">https://www.inaturalist.org/observations/97920203</a>   |
| 923 | Bubulcus ibis | Cattle Egret | 2022/12/8  | 3 | 0 | 9.9943972  | 76.5780778 | <a href="https://www.inaturalist.org/observations/143919755">https://www.inaturalist.org/observations/143919755</a> |
| 924 | Bubulcus ibis | Cattle Egret | 2019/1/25  | 4 | 0 | 10.0055251 | 76.8538196 | <a href="https://www.inaturalist.org/observations/121632002">https://www.inaturalist.org/observations/121632002</a> |

|     |                        |                      |            |   |   |            |            |                                                                                                                     |
|-----|------------------------|----------------------|------------|---|---|------------|------------|---------------------------------------------------------------------------------------------------------------------|
| 925 | Bubulcus ibis          | Cattle Egret         | 2020/11/11 | 4 | 0 | 10.0119353 | 76.3673193 | <a href="https://www.inaturalist.org/observations/65016443">https://www.inaturalist.org/observations/65016443</a>   |
| 926 | Bubulcus ibis          | Cattle Egret         | 2020/3/7   | 1 | 0 | 10.0367767 | 76.8573850 | <a href="https://www.inaturalist.org/observations/40039875">https://www.inaturalist.org/observations/40039875</a>   |
| 927 | Bubulcus ibis          | Cattle Egret         | 2019/11/26 | 1 | 0 | 10.0458527 | 76.6167212 | <a href="https://www.inaturalist.org/observations/80851267">https://www.inaturalist.org/observations/80851267</a>   |
| 928 | Bubulcus ibis          | Cattle Egret         | 2022/12/17 | 1 | 0 | 10.0516871 | 76.3404863 | <a href="https://www.inaturalist.org/observations/144524363">https://www.inaturalist.org/observations/144524363</a> |
| 929 | Bubulcus ibis          | Cattle Egret         | 2022/1/16  | 3 | 0 | 10.0522167 | 76.3382767 | <a href="https://www.inaturalist.org/observations/142746163">https://www.inaturalist.org/observations/142746163</a> |
| 930 | Bubulcus ibis          | Cattle Egret         | 2020/12/24 | 2 | 0 | 10.0529872 | 76.3155969 | <a href="https://www.inaturalist.org/observations/66989711">https://www.inaturalist.org/observations/66989711</a>   |
| 931 | Bubulcus ibis          | Cattle Egret         | 2022/11/3  | 1 | 0 | 10.0932833 | 76.2556617 | <a href="https://www.inaturalist.org/observations/140960929">https://www.inaturalist.org/observations/140960929</a> |
| 932 | Bubulcus ibis          | Cattle Egret         | 2021/5/8   | 2 | 0 | 10.0942918 | 76.2671806 | <a href="https://www.inaturalist.org/observations/105245024">https://www.inaturalist.org/observations/105245024</a> |
| 933 | Bubulcus ibis          | Cattle Egret         | 2016/4/16  | 4 | 0 | 10.1039800 | 76.7004600 | <a href="http://www.inaturalist.org/observations/3594702">http://www.inaturalist.org/observations/3594702</a>       |
| 934 | Bubulcus ibis          | Cattle Egret         | 2014/11/4  | 1 | 0 | 10.1039803 | 76.7004605 | <a href="https://www.inaturalist.org/observations/71554034">https://www.inaturalist.org/observations/71554034</a>   |
| 935 | Bubulcus ibis          | Cattle Egret         | 2020/12/12 | 2 | 0 | 10.1154737 | 76.6748884 | <a href="https://www.inaturalist.org/observations/66517059">https://www.inaturalist.org/observations/66517059</a>   |
| 936 | Bubulcus ibis          | Cattle Egret         | 2020/12/12 | 1 | 0 | 10.1160964 | 76.6746976 | <a href="https://www.inaturalist.org/observations/66996892">https://www.inaturalist.org/observations/66996892</a>   |
| 937 | Bubulcus ibis          | Cattle Egret         | 2022/5/10  | 5 | 0 | 10.1174654 | 76.6746856 | <a href="https://www.inaturalist.org/observations/117595405">https://www.inaturalist.org/observations/117595405</a> |
| 938 | Bubulcus ibis          | Cattle Egret         | 2022/2/5   | 3 | 0 | 10.1174900 | 76.3553688 | <a href="https://www.inaturalist.org/observations/106155008">https://www.inaturalist.org/observations/106155008</a> |
| 939 | Bubulcus ibis          | Cattle Egret         | 2021/11/3  | 1 | 0 | 10.1275216 | 76.3344964 | <a href="https://www.inaturalist.org/observations/101473541">https://www.inaturalist.org/observations/101473541</a> |
| 940 | Bubulcus ibis          | Cattle Egret         | 2019/5/15  | 3 | 0 | 10.1297816 | 76.6870809 | <a href="https://www.inaturalist.org/observations/80905555">https://www.inaturalist.org/observations/80905555</a>   |
| 941 | Bubulcus ibis          | Cattle Egret         | 2022/12/15 | 2 | 0 | 10.1499581 | 76.3689709 | <a href="https://www.inaturalist.org/observations/144409654">https://www.inaturalist.org/observations/144409654</a> |
| 942 | Bubulcus ibis          | Cattle Egret         | 2018/6/8   | 3 | 0 | 10.2673954 | 76.2081252 | <a href="https://www.inaturalist.org/observations/56645610">https://www.inaturalist.org/observations/56645610</a>   |
| 943 | Bubulcus ibis          | Cattle Egret         | 2021/6/5   | 3 | 0 | 10.2955218 | 76.2314037 | <a href="https://www.inaturalist.org/observations/82049019">https://www.inaturalist.org/observations/82049019</a>   |
| 944 | Bubulcus ibis          | Cattle Egret         | 2021/12/2  | 5 | 0 | 10.3021427 | 76.4273844 | <a href="https://www.inaturalist.org/observations/102439521">https://www.inaturalist.org/observations/102439521</a> |
| 945 | Bubulcus ibis          | Cattle Egret         | 2022/4/12  | 2 | 0 | 10.3021915 | 76.4273844 | <a href="https://www.inaturalist.org/observations/111198820">https://www.inaturalist.org/observations/111198820</a> |
| 946 | Bubulcus<br>coromandus | ibis<br>Cattle Egret | 2011/12/16 | 4 | 0 | 10.3235908 | 76.9510030 | <a href="https://www.inaturalist.org/observations/30495577">https://www.inaturalist.org/observations/30495577</a>   |
| 947 | Bubulcus ibis          | Cattle Egret         | 2015/10/18 | 1 | 0 | 10.3235908 | 76.9510030 | <a href="https://www.inaturalist.org/observations/44519137">https://www.inaturalist.org/observations/44519137</a>   |
| 948 | Bubulcus ibis          | Cattle Egret         | 2021/3/29  | 3 | 0 | 10.3269734 | 76.9553967 | <a href="https://www.inaturalist.org/observations/105206849">https://www.inaturalist.org/observations/105206849</a> |
| 949 | Bubulcus ibis          | Cattle Egret         | 2015/5/4   | 4 | 0 | 10.3472648 | 76.2531318 | <a href="https://www.inaturalist.org/observations/35271986">https://www.inaturalist.org/observations/35271986</a>   |

|     |               |              |            |   |   |            |            |                                                                                                                     |
|-----|---------------|--------------|------------|---|---|------------|------------|---------------------------------------------------------------------------------------------------------------------|
| 950 | Bubulcus ibis | Cattle Egret | 2015/5/10  | 3 | 0 | 10.3515740 | 76.2519754 | <a href="https://www.inaturalist.org/observations/46835682">https://www.inaturalist.org/observations/46835682</a>   |
| 951 | Bubulcus ibis | Cattle Egret | 2022/5/1   | 2 | 0 | 10.3613150 | 76.2500967 | <a href="https://www.inaturalist.org/observations/114746676">https://www.inaturalist.org/observations/114746676</a> |
| 952 | Bubulcus ibis | Cattle Egret | 2022/5/1   | 3 | 0 | 10.3613150 | 76.2500967 | <a href="https://www.inaturalist.org/observations/142801401">https://www.inaturalist.org/observations/142801401</a> |
| 953 | Bubulcus ibis | Cattle Egret | 2019/6/18  | 2 | 0 | 10.3699133 | 76.2826892 | <a href="https://www.inaturalist.org/observations/53833755">https://www.inaturalist.org/observations/53833755</a>   |
| 954 | Bubulcus ibis | Cattle Egret | 2021/10/31 | 1 | 0 | 10.4175799 | 76.2296578 | <a href="https://www.inaturalist.org/observations/99880859">https://www.inaturalist.org/observations/99880859</a>   |
| 955 | Bubulcus ibis | Cattle Egret | 2021/10/31 | 1 | 0 | 10.4176170 | 76.2296766 | <a href="https://www.inaturalist.org/observations/100250371">https://www.inaturalist.org/observations/100250371</a> |
| 956 | Bubulcus ibis | Cattle Egret | 2021/10/31 | 2 | 0 | 10.4257830 | 76.2223830 | <a href="https://www.inaturalist.org/observations/100293840">https://www.inaturalist.org/observations/100293840</a> |
| 957 | Bubulcus ibis | Cattle Egret | 2020/5/18  | 4 | 0 | 10.4393498 | 76.1198433 | <a href="https://www.inaturalist.org/observations/46326381">https://www.inaturalist.org/observations/46326381</a>   |
| 958 | Bubulcus ibis | Cattle Egret | 2021/11/1  | 0 | 0 | 10.4441280 | 76.2336700 | <a href="https://www.inaturalist.org/observations/100040873">https://www.inaturalist.org/observations/100040873</a> |
| 959 | Bubulcus ibis | Cattle Egret | 2014/12/29 | 1 | 0 | 10.4470060 | 76.8156911 | <a href="https://www.inaturalist.org/observations/45582537">https://www.inaturalist.org/observations/45582537</a>   |
| 960 | Bubulcus ibis | Cattle Egret | 2021/11/3  | 3 | 0 | 10.4489203 | 76.2310257 | <a href="https://www.inaturalist.org/observations/100128799">https://www.inaturalist.org/observations/100128799</a> |
| 961 | Bubulcus ibis | Cattle Egret | 2020/11/29 | 2 | 0 | 10.4517100 | 76.1549286 | <a href="https://www.inaturalist.org/observations/65822845">https://www.inaturalist.org/observations/65822845</a>   |
| 962 | Bubulcus ibis | Cattle Egret | 2022/12/18 | 1 | 0 | 10.4543123 | 76.1537499 | <a href="https://www.inaturalist.org/observations/144864214">https://www.inaturalist.org/observations/144864214</a> |
| 963 | Bubulcus ibis | Cattle Egret | 2017/5/24  | 1 | 0 | 10.5101373 | 76.1468568 | <a href="https://www.inaturalist.org/observations/30260336">https://www.inaturalist.org/observations/30260336</a>   |
| 964 | Bubulcus ibis | Cattle Egret | 2020/11/7  | 3 | 0 | 10.5276314 | 76.2144347 | <a href="https://www.inaturalist.org/observations/64367107">https://www.inaturalist.org/observations/64367107</a>   |
| 965 | Bubulcus ibis | Cattle Egret | 2018/4/13  | 6 | 0 | 10.5306050 | 76.1360700 | <a href="https://www.inaturalist.org/observations/18016386">https://www.inaturalist.org/observations/18016386</a>   |
| 966 | Bubulcus ibis | Cattle Egret | 2020/1/6   | 2 | 0 | 10.5321017 | 76.1283967 | <a href="https://www.inaturalist.org/observations/44162266">https://www.inaturalist.org/observations/44162266</a>   |
| 967 | Bubulcus ibis | Cattle Egret | 2020/1/29  | 2 | 0 | 10.5332333 | 76.1289917 | <a href="https://www.inaturalist.org/observations/67019445">https://www.inaturalist.org/observations/67019445</a>   |
| 968 | Bubulcus ibis | Cattle Egret | 2018/5/24  | 2 | 0 | 10.5336781 | 76.1758381 | <a href="https://www.inaturalist.org/observations/140128742">https://www.inaturalist.org/observations/140128742</a> |
| 969 | Bubulcus ibis | Cattle Egret | 2021/4/26  | 2 | 0 | 10.5368165 | 76.0237187 | <a href="https://www.inaturalist.org/observations/79491993">https://www.inaturalist.org/observations/79491993</a>   |
| 970 | Bubulcus ibis | Cattle Egret | 2021/12/18 | 2 | 0 | 10.5397262 | 76.1528520 | <a href="https://www.inaturalist.org/observations/103245107">https://www.inaturalist.org/observations/103245107</a> |
| 971 | Bubulcus ibis | Cattle Egret | 2021/1/3   | 2 | 0 | 10.5450770 | 76.1464903 | <a href="https://www.inaturalist.org/observations/67513216">https://www.inaturalist.org/observations/67513216</a>   |
| 972 | Bubulcus ibis | Cattle Egret | 2020/2/23  | 0 | 0 | 10.5508767 | 76.1763967 | <a href="https://www.inaturalist.org/observations/39213485">https://www.inaturalist.org/observations/39213485</a>   |
| 973 | Bubulcus ibis | Cattle Egret | 2021/4/15  | 3 | 0 | 10.5519758 | 76.1755809 | <a href="https://www.inaturalist.org/observations/74334730">https://www.inaturalist.org/observations/74334730</a>   |
| 974 | Bubulcus ibis | Cattle Egret | 2022/3/26  | 4 | 0 | 10.5782382 | 76.0190886 | <a href="https://www.inaturalist.org/observations/109656608">https://www.inaturalist.org/observations/109656608</a> |

|     |               |              |            |   |   |            |            |                                                                                                                     |
|-----|---------------|--------------|------------|---|---|------------|------------|---------------------------------------------------------------------------------------------------------------------|
| 975 | Bubulcus ibis | Cattle Egret | 2022/5/6   | 2 | 0 | 10.5924689 | 76.0330121 | <a href="https://www.inaturalist.org/observations/116967368">https://www.inaturalist.org/observations/116967368</a> |
| 976 | Bubulcus ibis | Cattle Egret | 2021/5/8   | 2 | 0 | 10.6138270 | 76.1947792 | <a href="https://www.inaturalist.org/observations/107043451">https://www.inaturalist.org/observations/107043451</a> |
| 977 | Bubulcus ibis | Cattle Egret | 2021/5/22  | 3 | 0 | 10.6139988 | 76.1941462 | <a href="https://www.inaturalist.org/observations/107045247">https://www.inaturalist.org/observations/107045247</a> |
| 978 | Bubulcus ibis | Cattle Egret | 2018/12/14 | 5 | 0 | 10.6141210 | 76.1443262 | <a href="https://www.inaturalist.org/observations/19033119">https://www.inaturalist.org/observations/19033119</a>   |
| 979 | Bubulcus ibis | Cattle Egret | 2020/5/31  | 2 | 0 | 10.6153063 | 76.1893091 | <a href="https://www.inaturalist.org/observations/49757046">https://www.inaturalist.org/observations/49757046</a>   |
| 980 | Bubulcus ibis | Cattle Egret | 2020/5/5   | 4 | 0 | 10.6158836 | 76.1932527 | <a href="https://www.inaturalist.org/observations/48354029">https://www.inaturalist.org/observations/48354029</a>   |
| 981 | Bubulcus ibis | Cattle Egret | 2022/3/18  | 2 | 0 | 10.6323317 | 76.8009967 | <a href="https://www.inaturalist.org/observations/115064531">https://www.inaturalist.org/observations/115064531</a> |
| 982 | Bubulcus ibis | Cattle Egret | 2022/3/18  | 3 | 0 | 10.6323317 | 76.8009967 | <a href="https://www.inaturalist.org/observations/142799117">https://www.inaturalist.org/observations/142799117</a> |
| 983 | Bubulcus ibis | Cattle Egret | 2022/5/5   | 3 | 0 | 10.6873587 | 78.6913244 | <a href="https://www.inaturalist.org/observations/115508703">https://www.inaturalist.org/observations/115508703</a> |
| 984 | Bubulcus ibis | Cattle Egret | 2021/12/24 | 2 | 0 | 10.7034567 | 79.3205533 | <a href="https://www.inaturalist.org/observations/103745310">https://www.inaturalist.org/observations/103745310</a> |
| 985 | Bubulcus ibis | Cattle Egret | 2016/12/29 | 3 | 0 | 10.7472960 | 76.4672130 | <a href="https://www.inaturalist.org/observations/87008585">https://www.inaturalist.org/observations/87008585</a>   |
| 986 | Bubulcus ibis | Cattle Egret | 2016/12/28 | 3 | 0 | 10.7475660 | 76.4673670 | <a href="https://www.inaturalist.org/observations/87008582">https://www.inaturalist.org/observations/87008582</a>   |
| 987 | Bubulcus ibis | Cattle Egret | 2016/12/17 | 3 | 0 | 10.7476287 | 76.4673708 | <a href="https://www.inaturalist.org/observations/65301098">https://www.inaturalist.org/observations/65301098</a>   |
| 988 | Bubulcus ibis | Cattle Egret | 2015/11/23 | 3 | 0 | 10.7497424 | 76.3786039 | <a href="https://www.inaturalist.org/observations/62789120">https://www.inaturalist.org/observations/62789120</a>   |
| 989 | Bubulcus ibis | Cattle Egret | 2022/1/1   | 4 | 0 | 10.7551158 | 76.6718444 | <a href="https://www.inaturalist.org/observations/104101276">https://www.inaturalist.org/observations/104101276</a> |
| 990 | Bubulcus ibis | Cattle Egret | 2020/2/15  | 1 | 0 | 10.7726572 | 76.2538196 | <a href="https://www.inaturalist.org/observations/38853562">https://www.inaturalist.org/observations/38853562</a>   |
| 991 | Bubulcus ibis | Cattle Egret | 2020/2/15  | 1 | 0 | 10.7727686 | 76.2542289 | <a href="https://www.inaturalist.org/observations/38853701">https://www.inaturalist.org/observations/38853701</a>   |
| 992 | Bubulcus ibis | Cattle Egret | 2020/4/17  | 1 | 0 | 10.7727724 | 79.1329936 | <a href="https://www.inaturalist.org/observations/42749157">https://www.inaturalist.org/observations/42749157</a>   |
| 993 | Bubulcus ibis | Cattle Egret | 2017/11/9  | 4 | 0 | 10.7846735 | 76.6618214 | <a href="https://www.inaturalist.org/observations/10518015">https://www.inaturalist.org/observations/10518015</a>   |
| 994 | Bubulcus ibis | Cattle Egret | 2022/5/11  | 5 | 0 | 10.7861367 | 75.9180217 | <a href="https://www.inaturalist.org/observations/131548749">https://www.inaturalist.org/observations/131548749</a> |
| 995 | Bubulcus ibis | Cattle Egret | 2021/3/10  | 1 | 0 | 10.7867270 | 76.6547931 | <a href="https://www.inaturalist.org/observations/103955084">https://www.inaturalist.org/observations/103955084</a> |
| 996 | Bubulcus ibis | Cattle Egret | 2016/1/24  | 5 | 0 | 10.7867300 | 76.6547930 | <a href="https://www.inaturalist.org/observations/7279949">https://www.inaturalist.org/observations/7279949</a>     |
| 997 | Bubulcus ibis | Cattle Egret | 2021/2/16  | 3 | 0 | 10.7867303 | 76.6547932 | <a href="https://www.inaturalist.org/observations/69921945">https://www.inaturalist.org/observations/69921945</a>   |
| 998 | Bubulcus ibis | Cattle Egret | 2022/11/15 | 4 | 0 | 10.8057297 | 76.1956646 | <a href="https://www.inaturalist.org/observations/142901640">https://www.inaturalist.org/observations/142901640</a> |
| 999 | Bubulcus ibis | Cattle Egret | 2022/3/13  | 3 | 0 | 10.8156917 | 76.8009017 | <a href="https://www.inaturalist.org/observations/142797634">https://www.inaturalist.org/observations/142797634</a> |

|      |                     |                      |            |   |   |            |            |                                                                                                                     |
|------|---------------------|----------------------|------------|---|---|------------|------------|---------------------------------------------------------------------------------------------------------------------|
| 1000 | Bubulcus ibis       | Cattle Egret         | 2022/3/13  | 3 | 0 | 10.8401531 | 76.8356224 | <a href="https://www.inaturalist.org/observations/115189758">https://www.inaturalist.org/observations/115189758</a> |
| 1001 | Bubulcus ibis       | Cattle Egret         | 2022/3/13  | 3 | 0 | 10.8401531 | 76.8356224 | <a href="https://www.inaturalist.org/observations/115189810">https://www.inaturalist.org/observations/115189810</a> |
| 1002 | Bubulcus ibis       | Cattle Egret         | 2019/11/17 | 4 | 0 | 10.8656858 | 75.9843017 | <a href="https://www.inaturalist.org/observations/67191609">https://www.inaturalist.org/observations/67191609</a>   |
| 1003 | Bubulcus ibis       | Cattle Egret         | 2021/5/23  | 4 | 0 | 10.8847499 | 76.0658477 | <a href="https://www.inaturalist.org/observations/79949338">https://www.inaturalist.org/observations/79949338</a>   |
| 1004 | Bubulcus ibis       | Cattle Egret         | 2021/5/30  | 4 | 0 | 10.8849484 | 76.0658695 | <a href="https://www.inaturalist.org/observations/80846005">https://www.inaturalist.org/observations/80846005</a>   |
| 1005 | Bubulcus ibis       | Cattle Egret         | 2021/5/30  | 3 | 0 | 10.8849491 | 76.0658725 | <a href="https://www.inaturalist.org/observations/80846388">https://www.inaturalist.org/observations/80846388</a>   |
| 1006 | Bubulcus ibis       | Cattle Egret         | 2022/4/20  | 3 | 0 | 10.9567124 | 76.1757242 | <a href="https://www.inaturalist.org/observations/112127014">https://www.inaturalist.org/observations/112127014</a> |
| 1007 | Bubulcus ibis       | Cattle Egret         | 2020/10/31 | 2 | 0 | 10.9835556 | 77.5368528 | <a href="https://www.inaturalist.org/observations/63890073">https://www.inaturalist.org/observations/63890073</a>   |
| 1008 | Bubulcus coromandus | ibis<br>Cattle Egret | 2020/2/15  | 1 | 0 | 10.9938033 | 75.8762967 | <a href="https://www.inaturalist.org/observations/38853760">https://www.inaturalist.org/observations/38853760</a>   |
| 1009 | Bubulcus ibis       | Cattle Egret         | 2020/5/27  | 1 | 0 | 11.0168445 | 76.9558321 | <a href="https://www.inaturalist.org/observations/92664890">https://www.inaturalist.org/observations/92664890</a>   |
| 1010 | Bubulcus ibis       | Cattle Egret         | 2021/1/14  | 2 | 0 | 11.0953602 | 77.3750794 | <a href="https://www.inaturalist.org/observations/69359399">https://www.inaturalist.org/observations/69359399</a>   |
| 1011 | Bubulcus ibis       | Cattle Egret         | 2022/2/12  | 3 | 0 | 11.1072083 | 76.6601750 | <a href="https://www.inaturalist.org/observations/142754219">https://www.inaturalist.org/observations/142754219</a> |
| 1012 | Bubulcus coromandus | ibis<br>Cattle Egret | 2021/2/3   | 1 | 0 | 11.1275708 | 79.4543910 | <a href="https://www.inaturalist.org/observations/70375240">https://www.inaturalist.org/observations/70375240</a>   |
| 1013 | Bubulcus ibis       | Cattle Egret         | 2020/12/25 | 1 | 0 | 11.1625398 | 75.8794249 | <a href="https://www.inaturalist.org/observations/67196756">https://www.inaturalist.org/observations/67196756</a>   |
| 1014 | Bubulcus ibis       | Cattle Egret         | 2020/12/27 | 4 | 0 | 11.1625398 | 75.8794249 | <a href="https://www.inaturalist.org/observations/67401093">https://www.inaturalist.org/observations/67401093</a>   |
| 1015 | Bubulcus ibis       | Cattle Egret         | 2020/6/2   | 2 | 0 | 11.2195874 | 76.9717326 | <a href="https://www.inaturalist.org/observations/50131868">https://www.inaturalist.org/observations/50131868</a>   |
| 1016 | Bubulcus ibis       | Cattle Egret         | 2019/5/6   | 4 | 0 | 11.2341230 | 77.6586236 | <a href="https://www.inaturalist.org/observations/38786110">https://www.inaturalist.org/observations/38786110</a>   |
| 1017 | Bubulcus ibis       | Cattle Egret         | 2022/2/13  | 1 | 0 | 11.2543865 | 77.6576908 | <a href="https://www.inaturalist.org/observations/107477934">https://www.inaturalist.org/observations/107477934</a> |
| 1018 | Bubulcus ibis       | Cattle Egret         | 2022/2/13  | 2 | 0 | 11.2543865 | 77.6576908 | <a href="https://www.inaturalist.org/observations/107477962">https://www.inaturalist.org/observations/107477962</a> |
| 1019 | Bubulcus ibis       | Cattle Egret         | 2022/2/13  | 2 | 0 | 11.2543865 | 77.6576908 | <a href="https://www.inaturalist.org/observations/107477964">https://www.inaturalist.org/observations/107477964</a> |
| 1020 | Bubulcus ibis       | Cattle Egret         | 2021/3/28  | 1 | 0 | 11.2587319 | 75.7804101 | <a href="https://www.inaturalist.org/observations/83751710">https://www.inaturalist.org/observations/83751710</a>   |
| 1021 | Bubulcus ibis       | Cattle Egret         | 2021/12/23 | 2 | 0 | 11.2621500 | 79.5212085 | <a href="https://www.inaturalist.org/observations/103529526">https://www.inaturalist.org/observations/103529526</a> |
| 1022 | Bubulcus ibis       | Cattle Egret         | 2019/12/21 | 1 | 0 | 11.2757852 | 77.5829873 | <a href="https://www.inaturalist.org/observations/86294149">https://www.inaturalist.org/observations/86294149</a>   |
| 1023 | Bubulcus ibis       | Cattle Egret         | 2019/10/16 | 3 | 0 | 11.2757855 | 77.5829873 | <a href="https://www.inaturalist.org/observations/37124833">https://www.inaturalist.org/observations/37124833</a>   |
| 1024 | Bubulcus ibis       | Cattle Egret         | 2021/3/19  | 2 | 0 | 11.3043970 | 75.8029440 | <a href="https://www.inaturalist.org/observations/71545828">https://www.inaturalist.org/observations/71545828</a>   |

|      |               |              |            |   |   |            |            |                                                                                                                     |
|------|---------------|--------------|------------|---|---|------------|------------|---------------------------------------------------------------------------------------------------------------------|
| 1025 | Bubulcus ibis | Cattle Egret | 2022/2/6   | 2 | 0 | 11.3176603 | 79.2445983 | <a href="https://www.inaturalist.org/observations/106317887">https://www.inaturalist.org/observations/106317887</a> |
| 1026 | Bubulcus ibis | Cattle Egret | 2022/4/3   | 3 | 0 | 11.3222382 | 75.7479345 | <a href="https://www.inaturalist.org/observations/138749339">https://www.inaturalist.org/observations/138749339</a> |
| 1027 | Bubulcus ibis | Cattle Egret | 2022/4/3   | 3 | 0 | 11.3223102 | 75.7460028 | <a href="https://www.inaturalist.org/observations/138749348">https://www.inaturalist.org/observations/138749348</a> |
| 1028 | Bubulcus ibis | Cattle Egret | 2022/4/3   | 3 | 0 | 11.3226160 | 75.7463895 | <a href="https://www.inaturalist.org/observations/138749343">https://www.inaturalist.org/observations/138749343</a> |
| 1029 | Bubulcus ibis | Cattle Egret | 2019/1/15  | 2 | 0 | 11.3230384 | 79.2433528 | <a href="https://www.inaturalist.org/observations/54716334">https://www.inaturalist.org/observations/54716334</a>   |
| 1030 | Bubulcus ibis | Cattle Egret | 2022/12/3  | 4 | 0 | 11.3230384 | 79.2433528 | <a href="https://www.inaturalist.org/observations/143614492">https://www.inaturalist.org/observations/143614492</a> |
| 1031 | Bubulcus ibis | Cattle Egret | 2022/12/4  | 4 | 0 | 11.3230384 | 79.2433528 | <a href="https://www.inaturalist.org/observations/143652329">https://www.inaturalist.org/observations/143652329</a> |
| 1032 | Bubulcus ibis | Cattle Egret | 2020/1/12  | 1 | 0 | 11.3230466 | 79.2433528 | <a href="https://www.inaturalist.org/observations/82839968">https://www.inaturalist.org/observations/82839968</a>   |
| 1033 | Bubulcus ibis | Cattle Egret | 2022/1/13  | 3 | 0 | 11.3230466 | 79.2433528 | <a href="https://www.inaturalist.org/observations/104866439">https://www.inaturalist.org/observations/104866439</a> |
| 1034 | Bubulcus ibis | Cattle Egret | 2022/4/3   | 2 | 0 | 11.3233098 | 75.7465177 | <a href="https://www.inaturalist.org/observations/138749344">https://www.inaturalist.org/observations/138749344</a> |
| 1035 | Bubulcus ibis | Cattle Egret | 2021/1/10  | 1 | 0 | 11.3426158 | 79.2251352 | <a href="https://www.inaturalist.org/observations/81837099">https://www.inaturalist.org/observations/81837099</a>   |
| 1036 | Bubulcus ibis | Cattle Egret | 2022/12/25 | 2 | 0 | 11.3681160 | 75.8361460 | <a href="https://www.inaturalist.org/observations/145027842">https://www.inaturalist.org/observations/145027842</a> |
| 1037 | Bubulcus ibis | Cattle Egret | 2018/4/20  | 4 | 0 | 11.5284281 | 76.5272980 | <a href="https://www.inaturalist.org/observations/13019062">https://www.inaturalist.org/observations/13019062</a>   |
| 1038 | Bubulcus ibis | Cattle Egret | 2019/3/23  | 4 | 0 | 11.5766897 | 75.6322327 | <a href="https://www.inaturalist.org/observations/21513962">https://www.inaturalist.org/observations/21513962</a>   |
| 1039 | Bubulcus ibis | Cattle Egret | 2020/12/25 | 3 | 0 | 11.5877341 | 78.7086467 | <a href="https://www.inaturalist.org/observations/67110798">https://www.inaturalist.org/observations/67110798</a>   |
| 1040 | Bubulcus ibis | Cattle Egret | 2021/1/17  | 1 | 0 | 11.5901419 | 78.7165562 | <a href="https://www.inaturalist.org/observations/142125251">https://www.inaturalist.org/observations/142125251</a> |
| 1041 | Bubulcus ibis | Cattle Egret | 2022/4/10  | 3 | 0 | 11.6154601 | 92.6190327 | <a href="https://www.inaturalist.org/observations/111493591">https://www.inaturalist.org/observations/111493591</a> |
| 1042 | Bubulcus ibis | Cattle Egret | 2022/4/10  | 3 | 0 | 11.6154601 | 92.6190327 | <a href="https://www.inaturalist.org/observations/111493592">https://www.inaturalist.org/observations/111493592</a> |
| 1043 | Bubulcus ibis | Cattle Egret | 2021/4/4   | 1 | 0 | 11.6645959 | 78.1460141 | <a href="https://www.inaturalist.org/observations/72876224">https://www.inaturalist.org/observations/72876224</a>   |
| 1044 | Bubulcus ibis | Cattle Egret | 2022/2/27  | 3 | 0 | 11.6645959 | 78.1460141 | <a href="https://www.inaturalist.org/observations/107537066">https://www.inaturalist.org/observations/107537066</a> |
| 1045 | Bubulcus ibis | Cattle Egret | 2022/4/16  | 1 | 0 | 11.6741251 | 78.1715488 | <a href="https://www.inaturalist.org/observations/111619748">https://www.inaturalist.org/observations/111619748</a> |
| 1046 | Bubulcus ibis | Cattle Egret | 2018/2/18  | 6 | 0 | 11.6874052 | 78.1806683 | <a href="https://www.inaturalist.org/observations/57088475">https://www.inaturalist.org/observations/57088475</a>   |
| 1047 | Bubulcus ibis | Cattle Egret | 2020/10/30 | 2 | 0 | 11.6874052 | 78.1806683 | <a href="https://www.inaturalist.org/observations/63812303">https://www.inaturalist.org/observations/63812303</a>   |
| 1048 | Bubulcus ibis | Cattle Egret | 2020/11/8  | 4 | 0 | 11.6874213 | 78.1806683 | <a href="https://www.inaturalist.org/observations/64584558">https://www.inaturalist.org/observations/64584558</a>   |
| 1049 | Bubulcus ibis | Cattle Egret | 2021/2/13  | 1 | 0 | 11.6874213 | 78.1806683 | <a href="https://www.inaturalist.org/observations/69667427">https://www.inaturalist.org/observations/69667427</a>   |



|      |               |              |            |   |   |            |            |                                                                                                                     |
|------|---------------|--------------|------------|---|---|------------|------------|---------------------------------------------------------------------------------------------------------------------|
| 1050 | Bubulcus ibis | Cattle Egret | 2021/2/28  | 1 | 0 | 11.6874213 | 78.1806683 | <a href="https://www.inaturalist.org/observations/70307244">https://www.inaturalist.org/observations/70307244</a>   |
| 1051 | Bubulcus ibis | Cattle Egret | 2021/3/28  | 1 | 0 | 11.6874213 | 78.1806683 | <a href="https://www.inaturalist.org/observations/72243885">https://www.inaturalist.org/observations/72243885</a>   |
| 1052 | Bubulcus ibis | Cattle Egret | 2021/4/4   | 1 | 0 | 11.6874213 | 78.1806683 | <a href="https://www.inaturalist.org/observations/72866067">https://www.inaturalist.org/observations/72866067</a>   |
| 1053 | Bubulcus ibis | Cattle Egret | 2021/4/4   | 1 | 0 | 11.6874213 | 78.1806683 | <a href="https://www.inaturalist.org/observations/72866252">https://www.inaturalist.org/observations/72866252</a>   |
| 1054 | Bubulcus ibis | Cattle Egret | 2021/4/14  | 1 | 0 | 11.6874213 | 78.1806683 | <a href="https://www.inaturalist.org/observations/73919916">https://www.inaturalist.org/observations/73919916</a>   |
| 1055 | Bubulcus ibis | Cattle Egret | 2021/4/14  | 1 | 0 | 11.6874213 | 78.1806683 | <a href="https://www.inaturalist.org/observations/73919986">https://www.inaturalist.org/observations/73919986</a>   |
| 1056 | Bubulcus ibis | Cattle Egret | 2021/11/11 | 1 | 0 | 11.6874213 | 78.1806683 | <a href="https://www.inaturalist.org/observations/100985304">https://www.inaturalist.org/observations/100985304</a> |
| 1057 | Bubulcus ibis | Cattle Egret | 2021/11/28 | 1 | 0 | 11.6874213 | 78.1806683 | <a href="https://www.inaturalist.org/observations/102079496">https://www.inaturalist.org/observations/102079496</a> |
| 1058 | Bubulcus ibis | Cattle Egret | 2021/12/25 | 1 | 0 | 11.6874213 | 78.1806683 | <a href="https://www.inaturalist.org/observations/103620467">https://www.inaturalist.org/observations/103620467</a> |
| 1059 | Bubulcus ibis | Cattle Egret | 2022/5/1   | 1 | 0 | 11.6874213 | 78.1806683 | <a href="https://www.inaturalist.org/observations/114130096">https://www.inaturalist.org/observations/114130096</a> |
| 1060 | Bubulcus ibis | Cattle Egret | 2022/5/8   | 3 | 0 | 11.6874213 | 78.1806683 | <a href="https://www.inaturalist.org/observations/116080660">https://www.inaturalist.org/observations/116080660</a> |
| 1061 | Bubulcus ibis | Cattle Egret | 2022/6/5   | 3 | 0 | 11.6924019 | 78.1991896 | <a href="https://www.inaturalist.org/observations/120296773">https://www.inaturalist.org/observations/120296773</a> |
| 1062 | Bubulcus ibis | Cattle Egret | 2022/2/19  | 1 | 0 | 11.6976123 | 78.1806287 | <a href="https://www.inaturalist.org/observations/107030734">https://www.inaturalist.org/observations/107030734</a> |
| 1063 | Bubulcus ibis | Cattle Egret | 2021/3/21  | 2 | 0 | 11.6976560 | 78.1806287 | <a href="https://www.inaturalist.org/observations/71684987">https://www.inaturalist.org/observations/71684987</a>   |
| 1064 | Bubulcus ibis | Cattle Egret | 2022/2/18  | 2 | 0 | 11.7031338 | 78.1877922 | <a href="https://www.inaturalist.org/observations/106962955">https://www.inaturalist.org/observations/106962955</a> |
| 1065 | Bubulcus ibis | Cattle Egret | 2021/11/21 | 2 | 0 | 11.7059375 | 78.2561577 | <a href="https://www.inaturalist.org/observations/101693789">https://www.inaturalist.org/observations/101693789</a> |
| 1066 | Bubulcus ibis | Cattle Egret | 2022/4/9   | 3 | 0 | 11.7092688 | 78.1893536 | <a href="https://www.inaturalist.org/observations/110842021">https://www.inaturalist.org/observations/110842021</a> |
| 1067 | Bubulcus ibis | Cattle Egret | 2022/10/1  | 1 | 0 | 11.7103509 | 78.1892034 | <a href="https://www.inaturalist.org/observations/137237017">https://www.inaturalist.org/observations/137237017</a> |
| 1068 | Bubulcus ibis | Cattle Egret | 2022/10/5  | 1 | 0 | 11.7104119 | 78.1890140 | <a href="https://www.inaturalist.org/observations/137625383">https://www.inaturalist.org/observations/137625383</a> |
| 1069 | Bubulcus ibis | Cattle Egret | 2022/3/12  | 3 | 0 | 11.7107393 | 78.1894515 | <a href="https://www.inaturalist.org/observations/108429868">https://www.inaturalist.org/observations/108429868</a> |
| 1070 | Bubulcus ibis | Cattle Egret | 2020/4/8   | 4 | 0 | 11.7119336 | 76.1638825 | <a href="https://www.inaturalist.org/observations/43269356">https://www.inaturalist.org/observations/43269356</a>   |
| 1071 | Bubulcus ibis | Cattle Egret | 2022/1/2   | 3 | 0 | 11.7189508 | 78.2522095 | <a href="https://www.inaturalist.org/observations/104380168">https://www.inaturalist.org/observations/104380168</a> |
| 1072 | Bubulcus ibis | Cattle Egret | 2021/5/23  | 2 | 0 | 11.7341025 | 75.9376147 | <a href="https://www.inaturalist.org/observations/80451337">https://www.inaturalist.org/observations/80451337</a>   |
| 1073 | Bubulcus ibis | Cattle Egret | 2021/3/19  | 2 | 0 | 11.7356162 | 78.2020388 | <a href="https://www.inaturalist.org/observations/71538449">https://www.inaturalist.org/observations/71538449</a>   |
| 1074 | Bubulcus ibis | Cattle Egret | 2021/4/14  | 1 | 0 | 11.7356162 | 78.2020388 | <a href="https://www.inaturalist.org/observations/73919845">https://www.inaturalist.org/observations/73919845</a>   |

|      |               |              |            |   |   |            |            |                                                                                                                     |
|------|---------------|--------------|------------|---|---|------------|------------|---------------------------------------------------------------------------------------------------------------------|
| 1075 | Bubulcus ibis | Cattle Egret | 2018/4/29  | 4 | 0 | 11.7462051 | 75.4881761 | <a href="https://www.inaturalist.org/observations/11711102">https://www.inaturalist.org/observations/11711102</a>   |
| 1076 | Bubulcus ibis | Cattle Egret | 2022/1/3   | 2 | 0 | 11.8049115 | 75.4368397 | <a href="https://www.inaturalist.org/observations/104247079">https://www.inaturalist.org/observations/104247079</a> |
| 1077 | Bubulcus ibis | Cattle Egret | 2022/10/7  | 3 | 0 | 11.8101363 | 75.4542766 | <a href="https://www.inaturalist.org/observations/137851158">https://www.inaturalist.org/observations/137851158</a> |
| 1078 | Bubulcus ibis | Cattle Egret | 2014/12/27 | 2 | 0 | 11.8263213 | 76.0666054 | <a href="https://www.inaturalist.org/observations/105847565">https://www.inaturalist.org/observations/105847565</a> |
| 1079 | Bubulcus ibis | Cattle Egret | 2019/12/23 | 1 | 0 | 11.8294520 | 75.5409521 | <a href="https://www.inaturalist.org/observations/77643289">https://www.inaturalist.org/observations/77643289</a>   |
| 1080 | Bubulcus ibis | Cattle Egret | 2016/1/31  | 4 | 0 | 11.8328729 | 75.4641119 | <a href="https://www.inaturalist.org/observations/47139127">https://www.inaturalist.org/observations/47139127</a>   |
| 1081 | Bubulcus ibis | Cattle Egret | 2017/2/9   | 1 | 0 | 11.8329186 | 93.0526120 | <a href="https://www.inaturalist.org/observations/82026000">https://www.inaturalist.org/observations/82026000</a>   |
| 1082 | Bubulcus ibis | Cattle Egret | 2021/3/8   | 1 | 0 | 11.8413837 | 75.4203614 | <a href="https://www.inaturalist.org/observations/70886617">https://www.inaturalist.org/observations/70886617</a>   |
| 1083 | Bubulcus ibis | Cattle Egret | 2006/11/16 | 4 | 0 | 11.8624817 | 77.1550204 | <a href="https://www.inaturalist.org/observations/31931943">https://www.inaturalist.org/observations/31931943</a>   |
| 1084 | Bubulcus ibis | Cattle Egret | 2022/10/9  | 1 | 0 | 11.8634628 | 78.1229461 | <a href="https://www.inaturalist.org/observations/138241575">https://www.inaturalist.org/observations/138241575</a> |
| 1085 | Bubulcus ibis | Cattle Egret | 2021/4/11  | 2 | 0 | 11.8763714 | 75.3995285 | <a href="https://www.inaturalist.org/observations/73589562">https://www.inaturalist.org/observations/73589562</a>   |
| 1086 | Bubulcus ibis | Cattle Egret | 2020/10/5  | 3 | 0 | 11.8819714 | 78.1446452 | <a href="https://www.inaturalist.org/observations/62318070">https://www.inaturalist.org/observations/62318070</a>   |
| 1087 | Bubulcus ibis | Cattle Egret | 2021/11/3  | 2 | 0 | 11.8932289 | 78.1000181 | <a href="https://www.inaturalist.org/observations/100134178">https://www.inaturalist.org/observations/100134178</a> |
| 1088 | Bubulcus ibis | Cattle Egret | 2021/7/24  | 1 | 0 | 11.8993930 | 77.7720800 | <a href="https://www.inaturalist.org/observations/88726543">https://www.inaturalist.org/observations/88726543</a>   |
| 1089 | Bubulcus ibis | Cattle Egret | 2020/5/14  | 6 | 0 | 11.9030545 | 75.3738686 | <a href="https://www.inaturalist.org/observations/48310431">https://www.inaturalist.org/observations/48310431</a>   |
| 1090 | Bubulcus ibis | Cattle Egret | 2012/1/16  | 2 | 0 | 11.9048304 | 78.6166376 | <a href="https://www.inaturalist.org/observations/97326715">https://www.inaturalist.org/observations/97326715</a>   |
| 1091 | Bubulcus ibis | Cattle Egret | 2021/5/11  | 4 | 0 | 11.9446843 | 75.3849381 | <a href="https://www.inaturalist.org/observations/81266614">https://www.inaturalist.org/observations/81266614</a>   |
| 1092 | Bubulcus ibis | Cattle Egret | 2018/12/10 | 4 | 0 | 11.9446843 | 75.3849381 | <a href="https://www.inaturalist.org/observations/97533279">https://www.inaturalist.org/observations/97533279</a>   |
| 1093 | Bubulcus ibis | Cattle Egret | 2018/12/10 | 4 | 0 | 11.9446843 | 75.3849381 | <a href="https://www.inaturalist.org/observations/110002511">https://www.inaturalist.org/observations/110002511</a> |
| 1094 | Bubulcus ibis | Cattle Egret | 2022/3/16  | 1 | 0 | 11.9446843 | 75.3849381 | <a href="https://www.inaturalist.org/observations/110081975">https://www.inaturalist.org/observations/110081975</a> |
| 1095 | Bubulcus ibis | Cattle Egret | 2022/6/27  | 2 | 0 | 11.9446843 | 75.3849381 | <a href="https://www.inaturalist.org/observations/126454520">https://www.inaturalist.org/observations/126454520</a> |
| 1096 | Bubulcus ibis | Cattle Egret | 2022/7/8   | 1 | 0 | 11.9446843 | 75.3849381 | <a href="https://www.inaturalist.org/observations/127078812">https://www.inaturalist.org/observations/127078812</a> |
| 1097 | Bubulcus ibis | Cattle Egret | 2022/7/8   | 2 | 0 | 11.9446843 | 75.3849381 | <a href="https://www.inaturalist.org/observations/127081561">https://www.inaturalist.org/observations/127081561</a> |
| 1098 | Bubulcus ibis | Cattle Egret | 2022/7/8   | 2 | 0 | 11.9446843 | 75.3849381 | <a href="https://www.inaturalist.org/observations/127081887">https://www.inaturalist.org/observations/127081887</a> |
| 1099 | Bubulcus ibis | Cattle Egret | 2022/4/9   | 1 | 0 | 11.9446843 | 75.3849381 | <a href="https://www.inaturalist.org/observations/128117620">https://www.inaturalist.org/observations/128117620</a> |

|      |               |              |            |   |   |            |            |                                                                                                                     |
|------|---------------|--------------|------------|---|---|------------|------------|---------------------------------------------------------------------------------------------------------------------|
| 1100 | Bubulcus ibis | Cattle Egret | 2022/6/8   | 3 | 0 | 11.9446843 | 75.3849381 | <a href="https://www.inaturalist.org/observations/128174589">https://www.inaturalist.org/observations/128174589</a> |
| 1101 | Bubulcus ibis | Cattle Egret | 2022/11/13 | 2 | 0 | 11.9446843 | 75.3849381 | <a href="https://www.inaturalist.org/observations/142122817">https://www.inaturalist.org/observations/142122817</a> |
| 1102 | Bubulcus ibis | Cattle Egret | 2018/5/5   | 3 | 0 | 11.9446846 | 75.3849381 | <a href="https://www.inaturalist.org/observations/83820057">https://www.inaturalist.org/observations/83820057</a>   |
| 1103 | Bubulcus ibis | Cattle Egret | 2018/7/8   | 4 | 0 | 11.9446846 | 75.3849381 | <a href="https://www.inaturalist.org/observations/83820645">https://www.inaturalist.org/observations/83820645</a>   |
| 1104 | Bubulcus ibis | Cattle Egret | 2022/11/14 | 2 | 0 | 11.9760500 | 92.9875570 | <a href="https://www.inaturalist.org/observations/142804603">https://www.inaturalist.org/observations/142804603</a> |
| 1105 | Bubulcus ibis | Cattle Egret | 2020/4/18  | 4 | 0 | 11.9842763 | 75.3994546 | <a href="https://www.inaturalist.org/observations/45567529">https://www.inaturalist.org/observations/45567529</a>   |
| 1106 | Bubulcus ibis | Cattle Egret | 2020/4/13  | 1 | 0 | 11.9871204 | 92.9480729 | <a href="https://www.inaturalist.org/observations/48747655">https://www.inaturalist.org/observations/48747655</a>   |
| 1107 | Bubulcus ibis | Cattle Egret | 2020/11/6  | 3 | 0 | 11.9884395 | 75.3211505 | <a href="https://www.inaturalist.org/observations/64500777">https://www.inaturalist.org/observations/64500777</a>   |
| 1108 | Bubulcus ibis | Cattle Egret | 2021/4/29  | 2 | 0 | 11.9887737 | 75.3196200 | <a href="https://www.inaturalist.org/observations/75651818">https://www.inaturalist.org/observations/75651818</a>   |
| 1109 | Bubulcus ibis | Cattle Egret | 2022/2/21  | 3 | 0 | 11.9957617 | 75.3770567 | <a href="https://www.inaturalist.org/observations/142757642">https://www.inaturalist.org/observations/142757642</a> |
| 1110 | Bubulcus ibis | Cattle Egret | 2017/2/22  | 5 | 0 | 11.9971750 | 75.2618933 | <a href="https://www.inaturalist.org/observations/30663948">https://www.inaturalist.org/observations/30663948</a>   |
| 1111 | Bubulcus ibis | Cattle Egret | 2018/10/28 | 3 | 0 | 12.0201921 | 75.4221501 | <a href="https://www.inaturalist.org/observations/48519336">https://www.inaturalist.org/observations/48519336</a>   |
| 1112 | Bubulcus ibis | Cattle Egret | 2019/9/20  | 3 | 0 | 12.0276300 | 75.2640467 | <a href="https://www.inaturalist.org/observations/33136183">https://www.inaturalist.org/observations/33136183</a>   |
| 1113 | Bubulcus ibis | Cattle Egret | 2021/9/9   | 3 | 0 | 12.0304062 | 75.2540228 | <a href="https://www.inaturalist.org/observations/141774477">https://www.inaturalist.org/observations/141774477</a> |
| 1114 | Bubulcus ibis | Cattle Egret | 2019/9/5   | 2 | 0 | 12.0313733 | 75.2525167 | <a href="https://www.inaturalist.org/observations/32201046">https://www.inaturalist.org/observations/32201046</a>   |
| 1115 | Bubulcus ibis | Cattle Egret | 2013/5/10  | 1 | 0 | 12.0314216 | 76.1206821 | <a href="https://www.inaturalist.org/observations/56002543">https://www.inaturalist.org/observations/56002543</a>   |
| 1116 | Bubulcus ibis | Cattle Egret | 2022/10/16 | 1 | 0 | 12.0323463 | 75.2566565 | <a href="https://www.inaturalist.org/observations/141592821">https://www.inaturalist.org/observations/141592821</a> |
| 1117 | Bubulcus ibis | Cattle Egret | 2019/10/15 | 2 | 0 | 12.0323467 | 75.2566564 | <a href="https://www.inaturalist.org/observations/34573193">https://www.inaturalist.org/observations/34573193</a>   |
| 1118 | Bubulcus ibis | Cattle Egret | 2019/10/15 | 2 | 0 | 12.0323467 | 75.2566564 | <a href="https://www.inaturalist.org/observations/34573194">https://www.inaturalist.org/observations/34573194</a>   |
| 1119 | Bubulcus ibis | Cattle Egret | 2019/10/15 | 2 | 0 | 12.0323467 | 75.2566564 | <a href="https://www.inaturalist.org/observations/34573197">https://www.inaturalist.org/observations/34573197</a>   |
| 1120 | Bubulcus ibis | Cattle Egret | 2019/10/15 | 2 | 0 | 12.0323467 | 75.2566564 | <a href="https://www.inaturalist.org/observations/34573198">https://www.inaturalist.org/observations/34573198</a>   |
| 1121 | Bubulcus ibis | Cattle Egret | 2019/10/15 | 2 | 0 | 12.0323467 | 75.2566564 | <a href="https://www.inaturalist.org/observations/34573199">https://www.inaturalist.org/observations/34573199</a>   |
| 1122 | Bubulcus ibis | Cattle Egret | 2019/10/15 | 2 | 0 | 12.0323467 | 75.2566564 | <a href="https://www.inaturalist.org/observations/34574173">https://www.inaturalist.org/observations/34574173</a>   |
| 1123 | Bubulcus ibis | Cattle Egret | 2019/10/15 | 4 | 0 | 12.0323467 | 75.2566564 | <a href="https://www.inaturalist.org/observations/34574181">https://www.inaturalist.org/observations/34574181</a>   |
| 1124 | Bubulcus ibis | Cattle Egret | 2021/9/11  | 1 | 0 | 12.0323467 | 75.2566564 | <a href="https://www.inaturalist.org/observations/94542588">https://www.inaturalist.org/observations/94542588</a>   |

|      |               |              |            |   |   |            |            |                                                                                                                     |
|------|---------------|--------------|------------|---|---|------------|------------|---------------------------------------------------------------------------------------------------------------------|
| 1125 | Bubulcus ibis | Cattle Egret | 2022/6/1   | 3 | 0 | 12.0327400 | 75.2605217 | <a href="https://www.inaturalist.org/observations/142805081">https://www.inaturalist.org/observations/142805081</a> |
| 1126 | Bubulcus ibis | Cattle Egret | 2021/8/28  | 1 | 0 | 12.0328701 | 75.2575718 | <a href="https://www.inaturalist.org/observations/93066428">https://www.inaturalist.org/observations/93066428</a>   |
| 1127 | Bubulcus ibis | Cattle Egret | 2019/5/9   | 4 | 0 | 12.0346900 | 75.2897750 | <a href="https://www.inaturalist.org/observations/29242860">https://www.inaturalist.org/observations/29242860</a>   |
| 1128 | Bubulcus ibis | Cattle Egret | 2022/6/22  | 3 | 0 | 12.0372867 | 75.2580667 | <a href="https://www.inaturalist.org/observations/126932748">https://www.inaturalist.org/observations/126932748</a> |
| 1129 | Bubulcus ibis | Cattle Egret | 2020/4/10  | 1 | 0 | 12.0574917 | 75.2006266 | <a href="https://www.inaturalist.org/observations/41837097">https://www.inaturalist.org/observations/41837097</a>   |
| 1130 | Bubulcus ibis | Cattle Egret | 2022/11/6  | 1 | 0 | 12.0659217 | 75.2122117 | <a href="https://www.inaturalist.org/observations/141471657">https://www.inaturalist.org/observations/141471657</a> |
| 1131 | Bubulcus ibis | Cattle Egret | 2021/6/7   | 2 | 0 | 12.0847065 | 75.2414651 | <a href="https://www.inaturalist.org/observations/82178283">https://www.inaturalist.org/observations/82178283</a>   |
| 1132 | Bubulcus ibis | Cattle Egret | 2019/1/20  | 1 | 0 | 12.0941481 | 77.0211822 | <a href="https://www.inaturalist.org/observations/97525617">https://www.inaturalist.org/observations/97525617</a>   |
| 1133 | Bubulcus ibis | Cattle Egret | 2018/6/14  | 4 | 0 | 12.1148946 | 75.8359685 | <a href="https://www.inaturalist.org/observations/13451837">https://www.inaturalist.org/observations/13451837</a>   |
| 1134 | Bubulcus ibis | Cattle Egret | 2002/1/5   | 1 | 0 | 12.1307476 | 76.4186495 | <a href="https://www.inaturalist.org/observations/91844738">https://www.inaturalist.org/observations/91844738</a>   |
| 1135 | Bubulcus ibis | Cattle Egret | 2014/7/27  | 3 | 0 | 12.1365023 | 76.6491264 | <a href="https://www.inaturalist.org/observations/90007130">https://www.inaturalist.org/observations/90007130</a>   |
| 1136 | Bubulcus ibis | Cattle Egret | 2021/2/5   | 2 | 0 | 12.1398728 | 75.2196408 | <a href="https://www.inaturalist.org/observations/69083606">https://www.inaturalist.org/observations/69083606</a>   |
| 1137 | Bubulcus ibis | Cattle Egret | 2021/2/1   | 1 | 0 | 12.1399275 | 75.2196584 | <a href="https://www.inaturalist.org/observations/68907573">https://www.inaturalist.org/observations/68907573</a>   |
| 1138 | Bubulcus ibis | Cattle Egret | 2021/7/4   | 2 | 0 | 12.1494135 | 76.5574930 | <a href="https://www.inaturalist.org/observations/85601233">https://www.inaturalist.org/observations/85601233</a>   |
| 1139 | Bubulcus ibis | Cattle Egret | 2022/4/10  | 2 | 0 | 12.1559500 | 75.1978417 | <a href="https://www.inaturalist.org/observations/142799212">https://www.inaturalist.org/observations/142799212</a> |
| 1140 | Bubulcus ibis | Cattle Egret | 2020/5/20  | 2 | 0 | 12.1608281 | 75.1632934 | <a href="https://www.inaturalist.org/observations/142896958">https://www.inaturalist.org/observations/142896958</a> |
| 1141 | Bubulcus ibis | Cattle Egret | 2020/5/28  | 2 | 0 | 12.1608281 | 75.1632934 | <a href="https://www.inaturalist.org/observations/143564581">https://www.inaturalist.org/observations/143564581</a> |
| 1142 | Bubulcus ibis | Cattle Egret | 2015/12/27 | 1 | 0 | 12.1642219 | 76.5425617 | <a href="https://www.inaturalist.org/observations/85735948">https://www.inaturalist.org/observations/85735948</a>   |
| 1143 | Bubulcus ibis | Cattle Egret | 2022/11/15 | 2 | 0 | 12.1649444 | 75.1715556 | <a href="https://www.inaturalist.org/observations/142039356">https://www.inaturalist.org/observations/142039356</a> |
| 1144 | Bubulcus ibis | Cattle Egret | 2019/5/25  | 4 | 0 | 12.1661342 | 75.4605712 | <a href="https://www.inaturalist.org/observations/32678296">https://www.inaturalist.org/observations/32678296</a>   |
| 1145 | Bubulcus ibis | Cattle Egret | 2014/7/6   | 2 | 0 | 12.1677012 | 76.5314817 | <a href="https://www.inaturalist.org/observations/85732389">https://www.inaturalist.org/observations/85732389</a>   |
| 1146 | Bubulcus ibis | Cattle Egret | 2013/10/16 | 1 | 0 | 12.1677012 | 76.5314817 | <a href="https://www.inaturalist.org/observations/85735534">https://www.inaturalist.org/observations/85735534</a>   |
| 1147 | Bubulcus ibis | Cattle Egret | 2020/9/27  | 1 | 0 | 12.1702110 | 76.5437370 | <a href="https://www.inaturalist.org/observations/82525049">https://www.inaturalist.org/observations/82525049</a>   |
| 1148 | Bubulcus ibis | Cattle Egret | 2022/9/3   | 2 | 0 | 12.1800914 | 76.7419525 | <a href="https://www.inaturalist.org/observations/133586747">https://www.inaturalist.org/observations/133586747</a> |
| 1149 | Bubulcus ibis | Cattle Egret | 2022/12/18 | 1 | 0 | 12.1816982 | 77.7293856 | <a href="https://www.inaturalist.org/observations/144598126">https://www.inaturalist.org/observations/144598126</a> |

|      |               |              |            |   |   |            |            |                                                                                                                     |
|------|---------------|--------------|------------|---|---|------------|------------|---------------------------------------------------------------------------------------------------------------------|
| 1150 | Bubulcus ibis | Cattle Egret | 2018/3/5   | 5 | 0 | 12.2006565 | 75.1665553 | <a href="https://www.inaturalist.org/observations/18265228">https://www.inaturalist.org/observations/18265228</a>   |
| 1151 | Bubulcus ibis | Cattle Egret | 2022/8/17  | 2 | 0 | 12.2028258 | 75.8117695 | <a href="https://www.inaturalist.org/observations/131851742">https://www.inaturalist.org/observations/131851742</a> |
| 1152 | Bubulcus ibis | Cattle Egret | 2020/5/5   | 6 | 0 | 12.2124074 | 75.3552266 | <a href="https://www.inaturalist.org/observations/83776470">https://www.inaturalist.org/observations/83776470</a>   |
| 1153 | Bubulcus ibis | Cattle Egret | 2021/6/10  | 1 | 0 | 12.2124735 | 76.6334254 | <a href="https://www.inaturalist.org/observations/82395083">https://www.inaturalist.org/observations/82395083</a>   |
| 1154 | Bubulcus ibis | Cattle Egret | 2017/1/21  | 1 | 0 | 12.2124735 | 76.6334254 | <a href="https://www.inaturalist.org/observations/88942324">https://www.inaturalist.org/observations/88942324</a>   |
| 1155 | Bubulcus ibis | Cattle Egret | 2019/8/22  | 1 | 0 | 12.2132993 | 76.6253001 | <a href="https://www.inaturalist.org/observations/96557350">https://www.inaturalist.org/observations/96557350</a>   |
| 1156 | Bubulcus ibis | Cattle Egret | 2018/12/1  | 5 | 0 | 12.2148127 | 75.6579659 | <a href="https://www.inaturalist.org/observations/19207966">https://www.inaturalist.org/observations/19207966</a>   |
| 1157 | Bubulcus ibis | Cattle Egret | 2017/11/16 | 3 | 0 | 12.2148127 | 75.6579659 | <a href="https://www.inaturalist.org/observations/36726717">https://www.inaturalist.org/observations/36726717</a>   |
| 1158 | Bubulcus ibis | Cattle Egret | 2015/4/20  | 3 | 0 | 12.2227233 | 76.6272876 | <a href="https://www.inaturalist.org/observations/142801522">https://www.inaturalist.org/observations/142801522</a> |
| 1159 | Bubulcus ibis | Cattle Egret | 2014/10/4  | 2 | 0 | 12.2227233 | 76.6272876 | <a href="https://www.inaturalist.org/observations/143348931">https://www.inaturalist.org/observations/143348931</a> |
| 1160 | Bubulcus ibis | Cattle Egret | 2014/10/30 | 1 | 0 | 12.2227233 | 76.6272876 | <a href="https://www.inaturalist.org/observations/143348937">https://www.inaturalist.org/observations/143348937</a> |
| 1161 | Bubulcus ibis | Cattle Egret | 2014/11/9  | 1 | 0 | 12.2227233 | 76.6272876 | <a href="https://www.inaturalist.org/observations/145242722">https://www.inaturalist.org/observations/145242722</a> |
| 1162 | Bubulcus ibis | Cattle Egret | 2018/5/5   | 1 | 0 | 12.2252841 | 79.0746957 | <a href="https://www.inaturalist.org/observations/96085182">https://www.inaturalist.org/observations/96085182</a>   |
| 1163 | Bubulcus ibis | Cattle Egret | 2022/5/29  | 3 | 0 | 12.2271678 | 76.6433448 | <a href="https://www.inaturalist.org/observations/119198245">https://www.inaturalist.org/observations/119198245</a> |
| 1164 | Bubulcus ibis | Cattle Egret | 2021/10/28 | 1 | 0 | 12.2409060 | 76.5979445 | <a href="https://www.inaturalist.org/observations/99606928">https://www.inaturalist.org/observations/99606928</a>   |
| 1165 | Bubulcus ibis | Cattle Egret | 2020/12/20 | 2 | 0 | 12.2517833 | 75.2770317 | <a href="https://www.inaturalist.org/observations/66994048">https://www.inaturalist.org/observations/66994048</a>   |
| 1166 | Bubulcus ibis | Cattle Egret | 2014/5/10  | 2 | 0 | 12.2555440 | 76.6118253 | <a href="https://www.inaturalist.org/observations/94567357">https://www.inaturalist.org/observations/94567357</a>   |
| 1167 | Bubulcus ibis | Cattle Egret | 2011/4/14  | 2 | 0 | 12.2555440 | 76.6118253 | <a href="https://www.inaturalist.org/observations/94571717">https://www.inaturalist.org/observations/94571717</a>   |
| 1168 | Bubulcus ibis | Cattle Egret | 2022/10/27 | 2 | 0 | 12.2556866 | 79.0302825 | <a href="https://www.inaturalist.org/observations/140367932">https://www.inaturalist.org/observations/140367932</a> |
| 1169 | Bubulcus ibis | Cattle Egret | 2022/11/5  | 1 | 0 | 12.2571479 | 78.8049910 | <a href="https://www.inaturalist.org/observations/141546395">https://www.inaturalist.org/observations/141546395</a> |
| 1170 | Bubulcus ibis | Cattle Egret | 2018/4/15  | 1 | 0 | 12.2693720 | 76.6119780 | <a href="https://www.inaturalist.org/observations/94104163">https://www.inaturalist.org/observations/94104163</a>   |
| 1171 | Bubulcus ibis | Cattle Egret | 2012/11/11 | 2 | 0 | 12.2693720 | 76.6119780 | <a href="https://www.inaturalist.org/observations/94706635">https://www.inaturalist.org/observations/94706635</a>   |
| 1172 | Bubulcus ibis | Cattle Egret | 2019/1/3   | 5 | 0 | 12.2703717 | 76.6091100 | <a href="https://www.inaturalist.org/observations/19465631">https://www.inaturalist.org/observations/19465631</a>   |
| 1173 | Bubulcus ibis | Cattle Egret | 2013/11/26 | 1 | 0 | 12.2704249 | 76.7756307 | <a href="https://www.inaturalist.org/observations/90401803">https://www.inaturalist.org/observations/90401803</a>   |
| 1174 | Bubulcus ibis | Cattle Egret | 2018/10/23 | 1 | 0 | 12.2752546 | 76.6701475 | <a href="https://www.inaturalist.org/observations/88663075">https://www.inaturalist.org/observations/88663075</a>   |

|      |               |              |            |   |   |            |            |                                                                                                                     |
|------|---------------|--------------|------------|---|---|------------|------------|---------------------------------------------------------------------------------------------------------------------|
| 1175 | Bubulcus ibis | Cattle Egret | 2020/2/3   | 2 | 0 | 12.2759998 | 76.8823880 | <a href="https://www.inaturalist.org/observations/65747871">https://www.inaturalist.org/observations/65747871</a>   |
| 1176 | Bubulcus ibis | Cattle Egret | 2018/3/7   | 5 | 0 | 12.2822492 | 76.6161594 | <a href="https://www.inaturalist.org/observations/10125148">https://www.inaturalist.org/observations/10125148</a>   |
| 1177 | Bubulcus ibis | Cattle Egret | 2018/2/19  | 4 | 0 | 12.2828660 | 76.6154766 | <a href="https://www.inaturalist.org/observations/9931351">https://www.inaturalist.org/observations/9931351</a>     |
| 1178 | Bubulcus ibis | Cattle Egret | 2018/5/17  | 4 | 0 | 12.2830983 | 76.6149050 | <a href="https://www.inaturalist.org/observations/12705985">https://www.inaturalist.org/observations/12705985</a>   |
| 1179 | Bubulcus ibis | Cattle Egret | 2018/5/12  | 4 | 0 | 12.2831067 | 76.6149033 | <a href="https://www.inaturalist.org/observations/12443532">https://www.inaturalist.org/observations/12443532</a>   |
| 1180 | Bubulcus ibis | Cattle Egret | 2018/3/23  | 4 | 0 | 12.2832170 | 76.6148742 | <a href="https://www.inaturalist.org/observations/10374289">https://www.inaturalist.org/observations/10374289</a>   |
| 1181 | Bubulcus ibis | Cattle Egret | 2018/3/22  | 5 | 0 | 12.2834405 | 76.6172791 | <a href="https://www.inaturalist.org/observations/10357628">https://www.inaturalist.org/observations/10357628</a>   |
| 1182 | Bubulcus ibis | Cattle Egret | 2021/2/20  | 1 | 0 | 12.2841661 | 75.1602206 | <a href="https://www.inaturalist.org/observations/69845484">https://www.inaturalist.org/observations/69845484</a>   |
| 1183 | Bubulcus ibis | Cattle Egret | 2021/11/14 | 0 | 0 | 12.2855820 | 76.5676071 | <a href="https://www.inaturalist.org/observations/101074497">https://www.inaturalist.org/observations/101074497</a> |
| 1184 | Bubulcus ibis | Cattle Egret | 2021/10/27 | 2 | 0 | 12.2942421 | 76.5653969 | <a href="https://www.inaturalist.org/observations/99523415">https://www.inaturalist.org/observations/99523415</a>   |
| 1185 | Bubulcus ibis | Cattle Egret | 2022/3/4   | 4 | 0 | 12.2957999 | 76.6393805 | <a href="https://www.inaturalist.org/observations/107886907">https://www.inaturalist.org/observations/107886907</a> |
| 1186 | Bubulcus ibis | Cattle Egret | 2022/8/27  | 2 | 0 | 12.3092189 | 76.5556046 | <a href="https://www.inaturalist.org/observations/132523169">https://www.inaturalist.org/observations/132523169</a> |
| 1187 | Bubulcus ibis | Cattle Egret | 2022/10/23 | 1 | 0 | 12.3103953 | 76.6304409 | <a href="https://www.inaturalist.org/observations/139962780">https://www.inaturalist.org/observations/139962780</a> |
| 1188 | Bubulcus ibis | Cattle Egret | 2022/10/25 | 4 | 0 | 12.3103953 | 76.6304409 | <a href="https://www.inaturalist.org/observations/140118579">https://www.inaturalist.org/observations/140118579</a> |
| 1189 | Bubulcus ibis | Cattle Egret | 2018/2/18  | 2 | 0 | 12.3220310 | 75.8901176 | <a href="https://www.inaturalist.org/observations/37518098">https://www.inaturalist.org/observations/37518098</a>   |
| 1190 | Bubulcus ibis | Cattle Egret | 2020/12/20 | 2 | 0 | 12.3474150 | 75.0893617 | <a href="https://www.inaturalist.org/observations/66994794">https://www.inaturalist.org/observations/66994794</a>   |
| 1191 | Bubulcus ibis | Cattle Egret | 2020/6/15  | 2 | 0 | 12.3502010 | 76.5125120 | <a href="https://www.inaturalist.org/observations/50019886">https://www.inaturalist.org/observations/50019886</a>   |
| 1192 | Bubulcus ibis | Cattle Egret | 2020/12/20 | 2 | 0 | 12.3516767 | 75.0940450 | <a href="https://www.inaturalist.org/observations/66994780">https://www.inaturalist.org/observations/66994780</a>   |
| 1193 | Bubulcus ibis | Cattle Egret | 2019/1/22  | 1 | 0 | 12.3580693 | 76.6100719 | <a href="https://www.inaturalist.org/observations/91848141">https://www.inaturalist.org/observations/91848141</a>   |
| 1194 | Bubulcus ibis | Cattle Egret | 2020/1/22  | 4 | 0 | 12.3679149 | 76.4807923 | <a href="https://www.inaturalist.org/observations/38319695">https://www.inaturalist.org/observations/38319695</a>   |
| 1195 | Bubulcus ibis | Cattle Egret | 2021/10/29 | 2 | 0 | 12.4138944 | 75.7543102 | <a href="https://www.inaturalist.org/observations/102531024">https://www.inaturalist.org/observations/102531024</a> |
| 1196 | Bubulcus ibis | Cattle Egret | 2022/11/4  | 1 | 0 | 12.4157590 | 75.0450088 | <a href="https://www.inaturalist.org/observations/141058585">https://www.inaturalist.org/observations/141058585</a> |
| 1197 | Bubulcus ibis | Cattle Egret | 2017/9/13  | 1 | 0 | 12.4200282 | 76.6227068 | <a href="https://www.inaturalist.org/observations/79896999">https://www.inaturalist.org/observations/79896999</a>   |
| 1198 | Bubulcus ibis | Cattle Egret | 2018/4/16  | 4 | 0 | 12.4237099 | 76.6540146 | <a href="https://www.inaturalist.org/observations/13018957">https://www.inaturalist.org/observations/13018957</a>   |
| 1199 | Bubulcus ibis | Cattle Egret | 2018/4/16  | 3 | 0 | 12.4237099 | 76.6540146 | <a href="https://www.inaturalist.org/observations/13018972">https://www.inaturalist.org/observations/13018972</a>   |

|      |                     |                   |            |   |   |            |            |                                                                                                                     |
|------|---------------------|-------------------|------------|---|---|------------|------------|---------------------------------------------------------------------------------------------------------------------|
| 1200 | Bubulcus ibis       | Cattle Egret      | 2022/6/2   | 4 | 0 | 12.4239250 | 76.6547895 | <a href="https://www.inaturalist.org/observations/120474031">https://www.inaturalist.org/observations/120474031</a> |
| 1201 | Bubulcus ibis       | Cattle Egret      | 2022/6/25  | 3 | 0 | 12.4243205 | 76.6539623 | <a href="https://www.inaturalist.org/observations/123363909">https://www.inaturalist.org/observations/123363909</a> |
| 1202 | Bubulcus ibis       | Cattle Egret      | 2015/5/1   | 2 | 0 | 12.4243603 | 76.6563491 | <a href="https://www.inaturalist.org/observations/105419538">https://www.inaturalist.org/observations/105419538</a> |
| 1203 | Bubulcus ibis       | Cattle Egret      | 2010/5/9   | 1 | 0 | 12.4243603 | 76.6563492 | <a href="https://www.inaturalist.org/observations/52821415">https://www.inaturalist.org/observations/52821415</a>   |
| 1204 | Bubulcus ibis       | Cattle Egret      | 2009/5/9   | 1 | 0 | 12.4243603 | 76.6563492 | <a href="https://www.inaturalist.org/observations/55132011">https://www.inaturalist.org/observations/55132011</a>   |
| 1205 | Bubulcus ibis       | Cattle Egret      | 2019/10/6  | 1 | 0 | 12.4243678 | 76.6563491 | <a href="https://www.inaturalist.org/observations/37087743">https://www.inaturalist.org/observations/37087743</a>   |
| 1206 | Bubulcus ibis       | Cattle Egret      | 2020/11/10 | 1 | 0 | 12.4253452 | 76.6561346 | <a href="https://www.inaturalist.org/observations/96065697">https://www.inaturalist.org/observations/96065697</a>   |
| 1207 | Bubulcus ibis       | Cattle Egret      | 2021/11/23 | 2 | 0 | 12.4312957 | 75.7630562 | <a href="https://www.inaturalist.org/observations/128754079">https://www.inaturalist.org/observations/128754079</a> |
| 1208 | Bubulcus ibis       | Cattle Egret      | 2019/12/25 | 1 | 0 | 12.4349608 | 76.2400175 | <a href="https://www.inaturalist.org/observations/92361086">https://www.inaturalist.org/observations/92361086</a>   |
| 1209 | Bubulcus ibis       | Cattle Egret      | 2021/11/16 | 2 | 0 | 12.4376023 | 75.6671417 | <a href="https://www.inaturalist.org/observations/102292463">https://www.inaturalist.org/observations/102292463</a> |
| 1210 | Bubulcus coromandus | ibis Cattle Egret | 2012/5/22  | 3 | 0 | 12.4410379 | 75.7948096 | <a href="https://www.inaturalist.org/observations/36663873">https://www.inaturalist.org/observations/36663873</a>   |
| 1211 | Bubulcus ibis       | Cattle Egret      | 2011/7/23  | 1 | 0 | 12.4440489 | 76.4592855 | <a href="https://www.inaturalist.org/observations/93239520">https://www.inaturalist.org/observations/93239520</a>   |
| 1212 | Bubulcus ibis       | Cattle Egret      | 2011/12/11 | 1 | 0 | 12.4676385 | 76.1001646 | <a href="https://www.inaturalist.org/observations/84952253">https://www.inaturalist.org/observations/84952253</a>   |
| 1213 | Bubulcus coromandus | ibis Cattle Egret | 2021/11/5  | 2 | 0 | 12.4746265 | 78.1860066 | <a href="https://www.inaturalist.org/observations/100312353">https://www.inaturalist.org/observations/100312353</a> |
| 1214 | Bubulcus ibis       | Cattle Egret      | 2020/12/29 | 1 | 0 | 12.5113813 | 76.9903743 | <a href="https://www.inaturalist.org/observations/96586149">https://www.inaturalist.org/observations/96586149</a>   |
| 1215 | Bubulcus ibis       | Cattle Egret      | 2017/2/11  | 2 | 0 | 12.5435660 | 79.8551078 | <a href="https://www.inaturalist.org/observations/67508382">https://www.inaturalist.org/observations/67508382</a>   |
| 1216 | Bubulcus ibis       | Cattle Egret      | 2019/12/28 | 2 | 0 | 12.5454597 | 79.8560692 | <a href="https://www.inaturalist.org/observations/48641524">https://www.inaturalist.org/observations/48641524</a>   |
| 1217 | Bubulcus ibis       | Cattle Egret      | 2022/12/25 | 2 | 0 | 12.5454597 | 79.8560692 | <a href="https://www.inaturalist.org/observations/145048383">https://www.inaturalist.org/observations/145048383</a> |
| 1218 | Bubulcus ibis       | Cattle Egret      | 2020/3/4   | 1 | 0 | 12.5454600 | 79.8560690 | <a href="https://www.inaturalist.org/observations/89996440">https://www.inaturalist.org/observations/89996440</a>   |
| 1219 | Bubulcus ibis       | Cattle Egret      | 2022/1/5   | 3 | 0 | 12.5472833 | 79.8555586 | <a href="https://www.inaturalist.org/observations/104403179">https://www.inaturalist.org/observations/104403179</a> |
| 1220 | Bubulcus ibis       | Cattle Egret      | 2012/4/7   | 3 | 0 | 12.5798634 | 78.9029503 | <a href="https://www.inaturalist.org/observations/89039248">https://www.inaturalist.org/observations/89039248</a>   |
| 1221 | Bubulcus ibis       | Cattle Egret      | 2017/2/11  | 3 | 0 | 12.5879709 | 79.8400503 | <a href="https://www.inaturalist.org/observations/67458900">https://www.inaturalist.org/observations/67458900</a>   |
| 1222 | Bubulcus ibis       | Cattle Egret      | 2020/3/15  | 2 | 0 | 12.6124176 | 75.2078706 | <a href="https://www.inaturalist.org/observations/62101633">https://www.inaturalist.org/observations/62101633</a>   |
| 1223 | Bubulcus ibis       | Cattle Egret      | 2022/6/21  | 6 | 0 | 12.6135233 | 76.0843750 | <a href="https://www.inaturalist.org/observations/124086976">https://www.inaturalist.org/observations/124086976</a> |
| 1224 | Bubulcus ibis       | Cattle Egret      | 2022/5/7   | 1 | 0 | 12.6360697 | 77.9794772 | <a href="https://www.inaturalist.org/observations/119229953">https://www.inaturalist.org/observations/119229953</a> |

|      |               |              |            |   |   |            |            |                                                                                                                     |
|------|---------------|--------------|------------|---|---|------------|------------|---------------------------------------------------------------------------------------------------------------------|
| 1225 | Bubulcus ibis | Cattle Egret | 2020/11/14 | 1 | 0 | 12.6397621 | 80.2034449 | <a href="https://www.inaturalist.org/observations/89428226">https://www.inaturalist.org/observations/89428226</a>   |
| 1226 | Bubulcus ibis | Cattle Egret | 2022/1/14  | 2 | 0 | 12.6558486 | 77.9677951 | <a href="https://www.inaturalist.org/observations/107474614">https://www.inaturalist.org/observations/107474614</a> |
| 1227 | Bubulcus ibis | Cattle Egret | 2022/1/19  | 2 | 0 | 12.6588053 | 79.8052360 | <a href="https://www.inaturalist.org/observations/105613340">https://www.inaturalist.org/observations/105613340</a> |
| 1228 | Bubulcus ibis | Cattle Egret | 2022/11/23 | 0 | 0 | 12.6747923 | 77.7654114 | <a href="https://www.inaturalist.org/observations/142656455">https://www.inaturalist.org/observations/142656455</a> |
| 1229 | Bubulcus ibis | Cattle Egret | 2022/11/26 | 2 | 0 | 12.6749917 | 77.7667883 | <a href="https://www.inaturalist.org/observations/142900254">https://www.inaturalist.org/observations/142900254</a> |
| 1230 | Bubulcus ibis | Cattle Egret | 2022/11/23 | 1 | 0 | 12.6751680 | 77.7653122 | <a href="https://www.inaturalist.org/observations/142652796">https://www.inaturalist.org/observations/142652796</a> |
| 1231 | Bubulcus ibis | Cattle Egret | 2022/11/26 | 2 | 0 | 12.6759167 | 77.7657700 | <a href="https://www.inaturalist.org/observations/142894112">https://www.inaturalist.org/observations/142894112</a> |
| 1232 | Bubulcus ibis | Cattle Egret | 2022/12/17 | 1 | 0 | 12.6781267 | 77.9266933 | <a href="https://www.inaturalist.org/observations/144533436">https://www.inaturalist.org/observations/144533436</a> |
| 1233 | Bubulcus ibis | Cattle Egret | 2022/12/24 | 1 | 0 | 12.6782167 | 77.9266117 | <a href="https://www.inaturalist.org/observations/144981624">https://www.inaturalist.org/observations/144981624</a> |
| 1234 | Bubulcus ibis | Cattle Egret | 2022/12/3  | 4 | 0 | 12.6785233 | 77.9257717 | <a href="https://www.inaturalist.org/observations/143552653">https://www.inaturalist.org/observations/143552653</a> |
| 1235 | Bubulcus ibis | Cattle Egret | 2022/2/20  | 1 | 0 | 12.6864903 | 77.6653652 | <a href="https://www.inaturalist.org/observations/107473260">https://www.inaturalist.org/observations/107473260</a> |
| 1236 | Bubulcus ibis | Cattle Egret | 2021/1/6   | 2 | 0 | 12.6961839 | 75.1097271 | <a href="https://www.inaturalist.org/observations/67691004">https://www.inaturalist.org/observations/67691004</a>   |
| 1237 | Bubulcus ibis | Cattle Egret | 2022/1/9   | 1 | 0 | 12.7138497 | 77.8143883 | <a href="https://www.inaturalist.org/observations/106980821">https://www.inaturalist.org/observations/106980821</a> |
| 1238 | Bubulcus ibis | Cattle Egret | 2022/1/15  | 1 | 0 | 12.7138497 | 77.8143883 | <a href="https://www.inaturalist.org/observations/106980827">https://www.inaturalist.org/observations/106980827</a> |
| 1239 | Bubulcus ibis | Cattle Egret | 2022/1/26  | 1 | 0 | 12.7138497 | 77.8143883 | <a href="https://www.inaturalist.org/observations/106980849">https://www.inaturalist.org/observations/106980849</a> |
| 1240 | Bubulcus ibis | Cattle Egret | 2022/11/19 | 2 | 0 | 12.7138617 | 77.8144217 | <a href="https://www.inaturalist.org/observations/142332117">https://www.inaturalist.org/observations/142332117</a> |
| 1241 | Bubulcus ibis | Cattle Egret | 2021/12/19 | 1 | 0 | 12.7139035 | 77.8142702 | <a href="https://www.inaturalist.org/observations/103307760">https://www.inaturalist.org/observations/103307760</a> |
| 1242 | Bubulcus ibis | Cattle Egret | 2022/11/9  | 2 | 0 | 12.7139816 | 77.8135875 | <a href="https://www.inaturalist.org/observations/141500930">https://www.inaturalist.org/observations/141500930</a> |
| 1243 | Bubulcus ibis | Cattle Egret | 2015/4/4   | 3 | 0 | 12.7204878 | 77.5607733 | <a href="https://www.inaturalist.org/observations/52037630">https://www.inaturalist.org/observations/52037630</a>   |
| 1244 | Bubulcus ibis | Cattle Egret | 2015/4/4   | 2 | 0 | 12.7204878 | 77.5607733 | <a href="https://www.inaturalist.org/observations/52037641">https://www.inaturalist.org/observations/52037641</a>   |
| 1245 | Bubulcus ibis | Cattle Egret | 2022/10/30 | 1 | 0 | 12.7322332 | 79.0565819 | <a href="https://www.inaturalist.org/observations/140868381">https://www.inaturalist.org/observations/140868381</a> |
| 1246 | Bubulcus ibis | Cattle Egret | 2022/12/1  | 2 | 0 | 12.7326633 | 77.7900267 | <a href="https://www.inaturalist.org/observations/143419649">https://www.inaturalist.org/observations/143419649</a> |
| 1247 | Bubulcus ibis | Cattle Egret | 2022/4/10  | 2 | 0 | 12.7327741 | 77.7897038 | <a href="https://www.inaturalist.org/observations/139409023">https://www.inaturalist.org/observations/139409023</a> |
| 1248 | Bubulcus ibis | Cattle Egret | 2022/11/20 | 1 | 0 | 12.7395005 | 77.7864153 | <a href="https://www.inaturalist.org/observations/142420722">https://www.inaturalist.org/observations/142420722</a> |
| 1249 | Bubulcus ibis | Cattle Egret | 2022/2/6   | 1 | 0 | 12.7419889 | 77.5427487 | <a href="https://www.inaturalist.org/observations/106232942">https://www.inaturalist.org/observations/106232942</a> |



|      |               |              |            |   |   |            |            |                                                                                                                     |
|------|---------------|--------------|------------|---|---|------------|------------|---------------------------------------------------------------------------------------------------------------------|
| 1250 | Bubulcus ibis | Cattle Egret | 2021/12/11 | 2 | 0 | 12.7450165 | 80.2053814 | <a href="https://www.inaturalist.org/observations/102855885">https://www.inaturalist.org/observations/102855885</a> |
| 1251 | Bubulcus ibis | Cattle Egret | 2022/2/6   | 1 | 0 | 12.7477105 | 77.4978000 | <a href="https://www.inaturalist.org/observations/107039683">https://www.inaturalist.org/observations/107039683</a> |
| 1252 | Bubulcus ibis | Cattle Egret | 2019/2/16  | 3 | 0 | 12.7513671 | 80.1889300 | <a href="https://www.inaturalist.org/observations/22558661">https://www.inaturalist.org/observations/22558661</a>   |
| 1253 | Bubulcus ibis | Cattle Egret | 2020/12/31 | 3 | 0 | 12.7532017 | 77.3013674 | <a href="https://www.inaturalist.org/observations/67378487">https://www.inaturalist.org/observations/67378487</a>   |
| 1254 | Bubulcus ibis | Cattle Egret | 2022/2/6   | 1 | 0 | 12.7547156 | 77.5309263 | <a href="https://www.inaturalist.org/observations/106231873">https://www.inaturalist.org/observations/106231873</a> |
| 1255 | Bubulcus ibis | Cattle Egret | 2020/11/9  | 0 | 0 | 12.7616258 | 75.2032168 | <a href="https://www.inaturalist.org/observations/64708042">https://www.inaturalist.org/observations/64708042</a>   |
| 1256 | Bubulcus ibis | Cattle Egret | 2022/11/13 | 3 | 0 | 12.7667767 | 77.8669417 | <a href="https://www.inaturalist.org/observations/141869126">https://www.inaturalist.org/observations/141869126</a> |
| 1257 | Bubulcus ibis | Cattle Egret | 2022/5/1   | 1 | 0 | 12.7673560 | 77.8739691 | <a href="https://www.inaturalist.org/observations/114131773">https://www.inaturalist.org/observations/114131773</a> |
| 1258 | Bubulcus ibis | Cattle Egret | 2022/5/1   | 1 | 0 | 12.7673560 | 77.8739691 | <a href="https://www.inaturalist.org/observations/114131825">https://www.inaturalist.org/observations/114131825</a> |
| 1259 | Bubulcus ibis | Cattle Egret | 2022/5/1   | 1 | 0 | 12.7673560 | 77.8739691 | <a href="https://www.inaturalist.org/observations/114131826">https://www.inaturalist.org/observations/114131826</a> |
| 1260 | Bubulcus ibis | Cattle Egret | 2022/5/1   | 1 | 0 | 12.7673560 | 77.8739691 | <a href="https://www.inaturalist.org/observations/114131837">https://www.inaturalist.org/observations/114131837</a> |
| 1261 | Bubulcus ibis | Cattle Egret | 2021/12/12 | 1 | 0 | 12.7676155 | 77.8680224 | <a href="https://www.inaturalist.org/observations/102921114">https://www.inaturalist.org/observations/102921114</a> |
| 1262 | Bubulcus ibis | Cattle Egret | 2022/5/1   | 1 | 0 | 12.7684467 | 77.8821050 | <a href="https://www.inaturalist.org/observations/114411245">https://www.inaturalist.org/observations/114411245</a> |
| 1263 | Bubulcus ibis | Cattle Egret | 2022/5/1   | 1 | 0 | 12.7727850 | 77.8761533 | <a href="https://www.inaturalist.org/observations/114395110">https://www.inaturalist.org/observations/114395110</a> |
| 1264 | Bubulcus ibis | Cattle Egret | 2022/11/12 | 2 | 0 | 12.7735767 | 77.6177417 | <a href="https://www.inaturalist.org/observations/141774072">https://www.inaturalist.org/observations/141774072</a> |
| 1265 | Bubulcus ibis | Cattle Egret | 2016/5/7   | 6 | 0 | 12.7743726 | 77.6592099 | <a href="https://www.inaturalist.org/observations/126172696">https://www.inaturalist.org/observations/126172696</a> |
| 1266 | Bubulcus ibis | Cattle Egret | 2022/2/27  | 2 | 0 | 12.7779250 | 77.8612167 | <a href="https://www.inaturalist.org/observations/107552795">https://www.inaturalist.org/observations/107552795</a> |
| 1267 | Bubulcus ibis | Cattle Egret | 2022/5/6   | 5 | 0 | 12.7834509 | 77.8106894 | <a href="https://www.inaturalist.org/observations/119229936">https://www.inaturalist.org/observations/119229936</a> |
| 1268 | Bubulcus ibis | Cattle Egret | 2022/5/1   | 0 | 0 | 12.7838645 | 77.8927863 | <a href="https://www.inaturalist.org/observations/114136746">https://www.inaturalist.org/observations/114136746</a> |
| 1269 | Bubulcus ibis | Cattle Egret | 2021/4/9   | 1 | 0 | 12.7907739 | 78.3644940 | <a href="https://www.inaturalist.org/observations/74040052">https://www.inaturalist.org/observations/74040052</a>   |
| 1270 | Bubulcus ibis | Cattle Egret | 2022/2/9   | 1 | 0 | 12.8071169 | 77.5320287 | <a href="https://www.inaturalist.org/observations/106439345">https://www.inaturalist.org/observations/106439345</a> |
| 1271 | Bubulcus ibis | Cattle Egret | 2022/2/9   | 3 | 0 | 12.8071518 | 77.5309799 | <a href="https://www.inaturalist.org/observations/106445494">https://www.inaturalist.org/observations/106445494</a> |
| 1272 | Bubulcus ibis | Cattle Egret | 2022/2/9   | 3 | 0 | 12.8081598 | 77.5301437 | <a href="https://www.inaturalist.org/observations/106446026">https://www.inaturalist.org/observations/106446026</a> |
| 1273 | Bubulcus ibis | Cattle Egret | 2021/12/31 | 1 | 0 | 12.8138533 | 76.9460964 | <a href="https://www.inaturalist.org/observations/104182932">https://www.inaturalist.org/observations/104182932</a> |
| 1274 | Bubulcus ibis | Cattle Egret | 2022/1/14  | 3 | 0 | 12.8225173 | 77.7294705 | <a href="https://www.inaturalist.org/observations/104914940">https://www.inaturalist.org/observations/104914940</a> |

|      |                     |                   |            |   |   |            |            |                                                                                                                     |
|------|---------------------|-------------------|------------|---|---|------------|------------|---------------------------------------------------------------------------------------------------------------------|
| 1275 | Bubulcus ibis       | Cattle Egret      | 2020/12/24 | 1 | 0 | 12.8419594 | 80.1738604 | <a href="https://www.inaturalist.org/observations/67620826">https://www.inaturalist.org/observations/67620826</a>   |
| 1276 | Bubulcus coromandus | ibis Cattle Egret | 2016/2/21  | 3 | 0 | 12.8420533 | 77.5891983 | <a href="http://www.inaturalist.org/observations/2727129">http://www.inaturalist.org/observations/2727129</a>       |
| 1277 | Bubulcus ibis       | Cattle Egret      | 2020/1/23  | 0 | 0 | 12.8421681 | 77.7060194 | <a href="https://www.inaturalist.org/observations/37863307">https://www.inaturalist.org/observations/37863307</a>   |
| 1278 | Bubulcus coromandus | ibis Cattle Egret | 2022/1/5   | 1 | 0 | 12.8427500 | 77.7244630 | <a href="https://www.inaturalist.org/observations/109221759">https://www.inaturalist.org/observations/109221759</a> |
| 1279 | Bubulcus ibis       | Cattle Egret      | 2021/11/21 | 1 | 0 | 12.8430343 | 80.1786427 | <a href="https://www.inaturalist.org/observations/101611072">https://www.inaturalist.org/observations/101611072</a> |
| 1280 | Bubulcus ibis       | Cattle Egret      | 2021/11/21 | 2 | 0 | 12.8430343 | 80.1786427 | <a href="https://www.inaturalist.org/observations/101611075">https://www.inaturalist.org/observations/101611075</a> |
| 1281 | Bubulcus ibis       | Cattle Egret      | 2021/12/17 | 3 | 0 | 12.8457562 | 77.7754195 | <a href="https://www.inaturalist.org/observations/105364669">https://www.inaturalist.org/observations/105364669</a> |
| 1282 | Bubulcus ibis       | Cattle Egret      | 2020/12/20 | 2 | 0 | 12.8571865 | 77.5089110 | <a href="https://www.inaturalist.org/observations/66816598">https://www.inaturalist.org/observations/66816598</a>   |
| 1283 | Bubulcus ibis       | Cattle Egret      | 2021/3/7   | 1 | 0 | 12.8571865 | 77.5089110 | <a href="https://www.inaturalist.org/observations/70743665">https://www.inaturalist.org/observations/70743665</a>   |
| 1284 | Bubulcus ibis       | Cattle Egret      | 2021/3/21  | 2 | 0 | 12.8571865 | 77.5089110 | <a href="https://www.inaturalist.org/observations/71692543">https://www.inaturalist.org/observations/71692543</a>   |
| 1285 | Bubulcus ibis       | Cattle Egret      | 2021/10/31 | 2 | 0 | 12.8575976 | 77.7864057 | <a href="https://www.inaturalist.org/observations/99865167">https://www.inaturalist.org/observations/99865167</a>   |
| 1286 | Bubulcus ibis       | Cattle Egret      | 2022/2/20  | 2 | 0 | 12.8575976 | 77.7864057 | <a href="https://www.inaturalist.org/observations/107361839">https://www.inaturalist.org/observations/107361839</a> |
| 1287 | Bubulcus ibis       | Cattle Egret      | 2019/11/10 | 1 | 0 | 12.8655653 | 77.5217171 | <a href="https://www.inaturalist.org/observations/55132012">https://www.inaturalist.org/observations/55132012</a>   |
| 1288 | Bubulcus ibis       | Cattle Egret      | 2020/11/8  | 2 | 0 | 12.8658517 | 77.5682383 | <a href="https://www.inaturalist.org/observations/64536356">https://www.inaturalist.org/observations/64536356</a>   |
| 1289 | Bubulcus ibis       | Cattle Egret      | 2020/9/26  | 2 | 0 | 12.8687750 | 77.6441266 | <a href="https://www.inaturalist.org/observations/60812489">https://www.inaturalist.org/observations/60812489</a>   |
| 1290 | Bubulcus ibis       | Cattle Egret      | 2020/10/25 | 3 | 0 | 12.8717417 | 77.5797417 | <a href="https://www.inaturalist.org/observations/63558045">https://www.inaturalist.org/observations/63558045</a>   |
| 1291 | Bubulcus ibis       | Cattle Egret      | 2021/1/1   | 2 | 0 | 12.8726501 | 77.5151777 | <a href="https://www.inaturalist.org/observations/67399747">https://www.inaturalist.org/observations/67399747</a>   |
| 1292 | Bubulcus ibis       | Cattle Egret      | 2021/12/21 | 1 | 0 | 12.8741482 | 75.7644532 | <a href="https://www.inaturalist.org/observations/103677714">https://www.inaturalist.org/observations/103677714</a> |
| 1293 | Bubulcus ibis       | Cattle Egret      | 2021/12/22 | 1 | 0 | 12.8741482 | 75.7644532 | <a href="https://www.inaturalist.org/observations/103679927">https://www.inaturalist.org/observations/103679927</a> |
| 1294 | Bubulcus ibis       | Cattle Egret      | 2020/1/26  | 2 | 0 | 12.8745759 | 77.6307832 | <a href="https://www.inaturalist.org/observations/61770247">https://www.inaturalist.org/observations/61770247</a>   |
| 1295 | Bubulcus ibis       | Cattle Egret      | 2020/12/20 | 3 | 0 | 12.8749875 | 77.6299856 | <a href="https://www.inaturalist.org/observations/66818076">https://www.inaturalist.org/observations/66818076</a>   |
| 1296 | Bubulcus ibis       | Cattle Egret      | 2019/12/14 | 2 | 0 | 12.8807814 | 77.6382566 | <a href="https://www.inaturalist.org/observations/36637554">https://www.inaturalist.org/observations/36637554</a>   |
| 1297 | Bubulcus ibis       | Cattle Egret      | 2021/4/13  | 3 | 0 | 12.8822217 | 77.4623467 | <a href="https://www.inaturalist.org/observations/73831371">https://www.inaturalist.org/observations/73831371</a>   |
| 1298 | Bubulcus ibis       | Cattle Egret      | 2022/4/14  | 2 | 0 | 12.8858591 | 80.2335255 | <a href="https://www.inaturalist.org/observations/111393388">https://www.inaturalist.org/observations/111393388</a> |
| 1299 | Bubulcus ibis       | Cattle Egret      | 2018/12/30 | 2 | 0 | 12.8904140 | 77.5871900 | <a href="https://www.inaturalist.org/observations/86154917">https://www.inaturalist.org/observations/86154917</a>   |

|      |               |              |            |   |   |            |            |                                                                                                                     |
|------|---------------|--------------|------------|---|---|------------|------------|---------------------------------------------------------------------------------------------------------------------|
| 1300 | Bubulcus ibis | Cattle Egret | 2021/4/17  | 1 | 0 | 12.8905000 | 77.5640000 | <a href="https://www.inaturalist.org/observations/80296052">https://www.inaturalist.org/observations/80296052</a>   |
| 1301 | Bubulcus ibis | Cattle Egret | 2019/3/5   | 2 | 0 | 12.8935419 | 80.2231306 | <a href="https://www.inaturalist.org/observations/65623252">https://www.inaturalist.org/observations/65623252</a>   |
| 1302 | Bubulcus ibis | Cattle Egret | 2021/3/29  | 2 | 0 | 12.8951482 | 77.6625845 | <a href="https://www.inaturalist.org/observations/72523889">https://www.inaturalist.org/observations/72523889</a>   |
| 1303 | Bubulcus ibis | Cattle Egret | 2021/4/20  | 1 | 0 | 12.8957306 | 80.2353222 | <a href="https://www.inaturalist.org/observations/74683888">https://www.inaturalist.org/observations/74683888</a>   |
| 1304 | Bubulcus ibis | Cattle Egret | 2022/1/18  | 2 | 0 | 12.8961819 | 77.8145154 | <a href="https://www.inaturalist.org/observations/137707607">https://www.inaturalist.org/observations/137707607</a> |
| 1305 | Bubulcus ibis | Cattle Egret | 2021/4/23  | 1 | 0 | 12.8966167 | 80.2356806 | <a href="https://www.inaturalist.org/observations/74911697">https://www.inaturalist.org/observations/74911697</a>   |
| 1306 | Bubulcus ibis | Cattle Egret | 2020/12/6  | 2 | 0 | 12.8991793 | 77.6669909 | <a href="https://www.inaturalist.org/observations/67082905">https://www.inaturalist.org/observations/67082905</a>   |
| 1307 | Bubulcus ibis | Cattle Egret | 2022/4/15  | 4 | 0 | 12.8993628 | 80.2209489 | <a href="https://www.inaturalist.org/observations/111614114">https://www.inaturalist.org/observations/111614114</a> |
| 1308 | Bubulcus ibis | Cattle Egret | 2020/2/22  | 0 | 0 | 12.8998320 | 77.5409830 | <a href="https://www.inaturalist.org/observations/39250640">https://www.inaturalist.org/observations/39250640</a>   |
| 1309 | Bubulcus ibis | Cattle Egret | 2022/1/29  | 1 | 0 | 12.9012250 | 80.2219209 | <a href="https://www.inaturalist.org/observations/105818886">https://www.inaturalist.org/observations/105818886</a> |
| 1310 | Bubulcus ibis | Cattle Egret | 2022/1/29  | 1 | 0 | 12.9012250 | 80.2219209 | <a href="https://www.inaturalist.org/observations/105819601">https://www.inaturalist.org/observations/105819601</a> |
| 1311 | Bubulcus ibis | Cattle Egret | 2021/1/17  | 2 | 0 | 12.9015717 | 80.2182350 | <a href="https://www.inaturalist.org/observations/103082792">https://www.inaturalist.org/observations/103082792</a> |
| 1312 | Bubulcus ibis | Cattle Egret | 2010/6/2   | 4 | 0 | 12.9046136 | 77.6149480 | <a href="https://www.inaturalist.org/observations/28845427">https://www.inaturalist.org/observations/28845427</a>   |
| 1313 | Bubulcus ibis | Cattle Egret | 2020/7/6   | 1 | 0 | 12.9064508 | 77.6771124 | <a href="https://www.inaturalist.org/observations/52228202">https://www.inaturalist.org/observations/52228202</a>   |
| 1314 | Bubulcus ibis | Cattle Egret | 2021/1/14  | 1 | 0 | 12.9108315 | 79.4011488 | <a href="https://www.inaturalist.org/observations/82160900">https://www.inaturalist.org/observations/82160900</a>   |
| 1315 | Bubulcus ibis | Cattle Egret | 2022/1/23  | 3 | 0 | 12.9114730 | 77.6161230 | <a href="https://www.inaturalist.org/observations/106435820">https://www.inaturalist.org/observations/106435820</a> |
| 1316 | Bubulcus ibis | Cattle Egret | 2020/11/9  | 1 | 0 | 12.9124005 | 76.9362747 | <a href="https://www.inaturalist.org/observations/97142376">https://www.inaturalist.org/observations/97142376</a>   |
| 1317 | Bubulcus ibis | Cattle Egret | 2021/10/29 | 1 | 0 | 12.9124005 | 76.9362747 | <a href="https://www.inaturalist.org/observations/99771029">https://www.inaturalist.org/observations/99771029</a>   |
| 1318 | Bubulcus ibis | Cattle Egret | 2022/1/15  | 2 | 0 | 12.9132740 | 80.2293710 | <a href="https://www.inaturalist.org/observations/105157960">https://www.inaturalist.org/observations/105157960</a> |
| 1319 | Bubulcus ibis | Cattle Egret | 2022/1/18  | 2 | 0 | 12.9132740 | 80.2293710 | <a href="https://www.inaturalist.org/observations/105437462">https://www.inaturalist.org/observations/105437462</a> |
| 1320 | Bubulcus ibis | Cattle Egret | 2021/4/5   | 5 | 0 | 12.9137650 | 77.5190040 | <a href="https://www.inaturalist.org/observations/108492919">https://www.inaturalist.org/observations/108492919</a> |
| 1321 | Bubulcus ibis | Cattle Egret | 2021/11/2  | 1 | 0 | 12.9150945 | 77.4696980 | <a href="https://www.inaturalist.org/observations/100161692">https://www.inaturalist.org/observations/100161692</a> |
| 1322 | Bubulcus ibis | Cattle Egret | 2021/11/2  | 1 | 0 | 12.9150945 | 77.4696980 | <a href="https://www.inaturalist.org/observations/100161693">https://www.inaturalist.org/observations/100161693</a> |
| 1323 | Bubulcus ibis | Cattle Egret | 2022/4/2   | 2 | 0 | 12.9150945 | 77.4696980 | <a href="https://www.inaturalist.org/observations/110268214">https://www.inaturalist.org/observations/110268214</a> |
| 1324 | Bubulcus ibis | Cattle Egret | 2019/12/9  | 1 | 0 | 12.9153773 | 79.4483482 | <a href="https://www.inaturalist.org/observations/134421759">https://www.inaturalist.org/observations/134421759</a> |

|      |               |              |            |   |   |            |            |                                                                                                                     |
|------|---------------|--------------|------------|---|---|------------|------------|---------------------------------------------------------------------------------------------------------------------|
| 1325 | Bubulcus ibis | Cattle Egret | 2020/4/18  | 2 | 0 | 12.9163766 | 77.6642086 | <a href="https://www.inaturalist.org/observations/52782022">https://www.inaturalist.org/observations/52782022</a>   |
| 1326 | Bubulcus ibis | Cattle Egret | 2021/4/17  | 2 | 0 | 12.9169633 | 77.6471550 | <a href="https://www.inaturalist.org/observations/80872179">https://www.inaturalist.org/observations/80872179</a>   |
| 1327 | Bubulcus ibis | Cattle Egret | 2022/3/5   | 2 | 0 | 12.9174276 | 80.2093854 | <a href="https://www.inaturalist.org/observations/142077165">https://www.inaturalist.org/observations/142077165</a> |
| 1328 | Bubulcus ibis | Cattle Egret | 2022/1/15  | 2 | 0 | 12.9180070 | 80.2256500 | <a href="https://www.inaturalist.org/observations/105023838">https://www.inaturalist.org/observations/105023838</a> |
| 1329 | Bubulcus ibis | Cattle Egret | 2022/4/15  | 2 | 0 | 12.9195652 | 77.6797409 | <a href="https://www.inaturalist.org/observations/112497466">https://www.inaturalist.org/observations/112497466</a> |
| 1330 | Bubulcus ibis | Cattle Egret | 2019/2/2   | 3 | 0 | 12.9348912 | 80.2137124 | <a href="https://www.inaturalist.org/observations/64436336">https://www.inaturalist.org/observations/64436336</a>   |
| 1331 | Bubulcus ibis | Cattle Egret | 2020/5/10  | 2 | 0 | 12.9348913 | 80.2137123 | <a href="https://www.inaturalist.org/observations/45508369">https://www.inaturalist.org/observations/45508369</a>   |
| 1332 | Bubulcus ibis | Cattle Egret | 2020/4/18  | 1 | 0 | 12.9375139 | 80.2054434 | <a href="https://www.inaturalist.org/observations/44089230">https://www.inaturalist.org/observations/44089230</a>   |
| 1333 | Bubulcus ibis | Cattle Egret | 2019/11/26 | 4 | 0 | 12.9399258 | 80.2164549 | <a href="https://www.inaturalist.org/observations/36216723">https://www.inaturalist.org/observations/36216723</a>   |
| 1334 | Bubulcus ibis | Cattle Egret | 2019/5/19  | 5 | 0 | 12.9427130 | 80.2107951 | <a href="https://www.inaturalist.org/observations/25497555">https://www.inaturalist.org/observations/25497555</a>   |
| 1335 | Bubulcus ibis | Cattle Egret | 2022/3/5   | 3 | 0 | 12.9459686 | 80.2588535 | <a href="https://www.inaturalist.org/observations/142077168">https://www.inaturalist.org/observations/142077168</a> |
| 1336 | Bubulcus ibis | Cattle Egret | 2022/11/13 | 2 | 0 | 12.9462212 | 77.6487498 | <a href="https://www.inaturalist.org/observations/142065980">https://www.inaturalist.org/observations/142065980</a> |
| 1337 | Bubulcus ibis | Cattle Egret | 2015/4/16  | 4 | 0 | 12.9465761 | 80.2237660 | <a href="https://www.inaturalist.org/observations/22597479">https://www.inaturalist.org/observations/22597479</a>   |
| 1338 | Bubulcus ibis | Cattle Egret | 2013/9/20  | 4 | 0 | 12.9465761 | 80.2237660 | <a href="https://www.inaturalist.org/observations/22602984">https://www.inaturalist.org/observations/22602984</a>   |
| 1339 | Bubulcus ibis | Cattle Egret | 2013/11/1  | 4 | 0 | 12.9465761 | 80.2237660 | <a href="https://www.inaturalist.org/observations/63147480">https://www.inaturalist.org/observations/63147480</a>   |
| 1340 | Bubulcus ibis | Cattle Egret | 2020/12/29 | 1 | 0 | 12.9465761 | 80.2237660 | <a href="https://www.inaturalist.org/observations/83231601">https://www.inaturalist.org/observations/83231601</a>   |
| 1341 | Bubulcus ibis | Cattle Egret | 2018/9/23  | 1 | 0 | 12.9465761 | 80.2237660 | <a href="https://www.inaturalist.org/observations/88817272">https://www.inaturalist.org/observations/88817272</a>   |
| 1342 | Bubulcus ibis | Cattle Egret | 2022/1/29  | 2 | 0 | 12.9465761 | 80.2237660 | <a href="https://www.inaturalist.org/observations/106113747">https://www.inaturalist.org/observations/106113747</a> |
| 1343 | Bubulcus ibis | Cattle Egret | 2020/2/14  | 0 | 0 | 12.9492500 | 77.5116800 | <a href="https://www.inaturalist.org/observations/39019306">https://www.inaturalist.org/observations/39019306</a>   |
| 1344 | Bubulcus ibis | Cattle Egret | 2018/1/1   | 4 | 0 | 12.9494800 | 80.2216900 | <a href="https://www.inaturalist.org/observations/22522551">https://www.inaturalist.org/observations/22522551</a>   |
| 1345 | Bubulcus ibis | Cattle Egret | 2019/1/1   | 4 | 0 | 12.9498297 | 74.8565613 | <a href="https://www.inaturalist.org/observations/19397003">https://www.inaturalist.org/observations/19397003</a>   |
| 1346 | Bubulcus ibis | Cattle Egret | 2022/12/4  | 2 | 0 | 12.9580590 | 80.1519592 | <a href="https://www.inaturalist.org/observations/143774062">https://www.inaturalist.org/observations/143774062</a> |
| 1347 | Bubulcus ibis | Cattle Egret | 2022/11/16 | 3 | 0 | 12.9582659 | 77.7255356 | <a href="https://www.inaturalist.org/observations/142153652">https://www.inaturalist.org/observations/142153652</a> |
| 1348 | Bubulcus ibis | Cattle Egret | 2022/11/26 | 2 | 0 | 12.9582659 | 77.7255356 | <a href="https://www.inaturalist.org/observations/143011922">https://www.inaturalist.org/observations/143011922</a> |
| 1349 | Bubulcus ibis | Cattle Egret | 2022/11/29 | 2 | 0 | 12.9582659 | 77.7255356 | <a href="https://www.inaturalist.org/observations/143706448">https://www.inaturalist.org/observations/143706448</a> |

|      |               |              |            |   |   |            |            |                                                                                                                     |
|------|---------------|--------------|------------|---|---|------------|------------|---------------------------------------------------------------------------------------------------------------------|
| 1350 | Bubulcus ibis | Cattle Egret | 2022/10/15 | 1 | 0 | 12.9582660 | 77.7255357 | <a href="https://www.inaturalist.org/observations/138914853">https://www.inaturalist.org/observations/138914853</a> |
| 1351 | Bubulcus ibis | Cattle Egret | 2022/10/17 | 4 | 0 | 12.9582660 | 77.7255357 | <a href="https://www.inaturalist.org/observations/139120353">https://www.inaturalist.org/observations/139120353</a> |
| 1352 | Bubulcus ibis | Cattle Egret | 2022/10/18 | 3 | 0 | 12.9582660 | 77.7255357 | <a href="https://www.inaturalist.org/observations/139230764">https://www.inaturalist.org/observations/139230764</a> |
| 1353 | Bubulcus ibis | Cattle Egret | 2022/10/27 | 3 | 0 | 12.9582660 | 77.7255357 | <a href="https://www.inaturalist.org/observations/140244117">https://www.inaturalist.org/observations/140244117</a> |
| 1354 | Bubulcus ibis | Cattle Egret | 2022/10/28 | 3 | 0 | 12.9582660 | 77.7255357 | <a href="https://www.inaturalist.org/observations/140250763">https://www.inaturalist.org/observations/140250763</a> |
| 1355 | Bubulcus ibis | Cattle Egret | 2022/11/21 | 4 | 0 | 12.9582660 | 77.7255357 | <a href="https://www.inaturalist.org/observations/142583450">https://www.inaturalist.org/observations/142583450</a> |
| 1356 | Bubulcus ibis | Cattle Egret | 2020/9/30  | 2 | 0 | 12.9609817 | 77.7083641 | <a href="https://www.inaturalist.org/observations/61385247">https://www.inaturalist.org/observations/61385247</a>   |
| 1357 | Bubulcus ibis | Cattle Egret | 2022/5/20  | 2 | 0 | 12.9640703 | 80.2036849 | <a href="https://www.inaturalist.org/observations/118326713">https://www.inaturalist.org/observations/118326713</a> |
| 1358 | Bubulcus ibis | Cattle Egret | 2022/11/26 | 2 | 0 | 12.9658592 | 77.7069332 | <a href="https://www.inaturalist.org/observations/143011529">https://www.inaturalist.org/observations/143011529</a> |
| 1359 | Bubulcus ibis | Cattle Egret | 2021/11/21 | 2 | 0 | 12.9672627 | 74.8471248 | <a href="https://www.inaturalist.org/observations/101761276">https://www.inaturalist.org/observations/101761276</a> |
| 1360 | Bubulcus ibis | Cattle Egret | 2022/12/28 | 2 | 0 | 12.9714785 | 77.5945627 | <a href="https://www.inaturalist.org/observations/145215793">https://www.inaturalist.org/observations/145215793</a> |
| 1361 | Bubulcus ibis | Cattle Egret | 2019/11/15 | 1 | 0 | 12.9715987 | 77.5945627 | <a href="https://www.inaturalist.org/observations/55132009">https://www.inaturalist.org/observations/55132009</a>   |
| 1362 | Bubulcus ibis | Cattle Egret | 2019/11/3  | 1 | 0 | 12.9715987 | 77.5945627 | <a href="https://www.inaturalist.org/observations/55895079">https://www.inaturalist.org/observations/55895079</a>   |
| 1363 | Bubulcus ibis | Cattle Egret | 2021/9/19  | 3 | 0 | 12.9715987 | 77.5945627 | <a href="https://www.inaturalist.org/observations/121977400">https://www.inaturalist.org/observations/121977400</a> |
| 1364 | Bubulcus ibis | Cattle Egret | 2015/5/15  | 4 | 0 | 12.9719400 | 77.5936900 | <a href="http://www.inaturalist.org/observations/1501121">http://www.inaturalist.org/observations/1501121</a>       |
| 1365 | Bubulcus ibis | Cattle Egret | 2015/5/15  | 4 | 0 | 12.9719400 | 77.5936900 | <a href="http://www.inaturalist.org/observations/1501135">http://www.inaturalist.org/observations/1501135</a>       |
| 1366 | Bubulcus ibis | Cattle Egret | 2021/7/3   | 3 | 0 | 12.9721614 | 77.8659858 | <a href="https://www.inaturalist.org/observations/85419135">https://www.inaturalist.org/observations/85419135</a>   |
| 1367 | Bubulcus ibis | Cattle Egret | 2021/1/1   | 3 | 0 | 12.9722790 | 77.5945627 | <a href="https://www.inaturalist.org/observations/67504351">https://www.inaturalist.org/observations/67504351</a>   |
| 1368 | Bubulcus ibis | Cattle Egret | 2021/1/1   | 4 | 0 | 12.9722790 | 77.5945627 | <a href="https://www.inaturalist.org/observations/70490438">https://www.inaturalist.org/observations/70490438</a>   |
| 1369 | Bubulcus ibis | Cattle Egret | 2018/5/7   | 5 | 0 | 12.9738583 | 77.6860967 | <a href="https://www.inaturalist.org/observations/12219734">https://www.inaturalist.org/observations/12219734</a>   |
| 1370 | Bubulcus ibis | Cattle Egret | 2022/1/1   | 1 | 0 | 12.9739550 | 75.8681981 | <a href="https://www.inaturalist.org/observations/104150576">https://www.inaturalist.org/observations/104150576</a> |
| 1371 | Bubulcus ibis | Cattle Egret | 2020/12/4  | 2 | 0 | 12.9759467 | 77.6912783 | <a href="https://www.inaturalist.org/observations/66177270">https://www.inaturalist.org/observations/66177270</a>   |
| 1372 | Bubulcus ibis | Cattle Egret | 2020/10/28 | 1 | 0 | 12.9760300 | 77.6911467 | <a href="https://www.inaturalist.org/observations/63684634">https://www.inaturalist.org/observations/63684634</a>   |
| 1373 | Bubulcus ibis | Cattle Egret | 2019/10/12 | 2 | 0 | 12.9781300 | 77.6857300 | <a href="https://www.inaturalist.org/observations/34235634">https://www.inaturalist.org/observations/34235634</a>   |
| 1374 | Bubulcus ibis | Cattle Egret | 2020/2/15  | 0 | 0 | 12.9784867 | 77.6881417 | <a href="https://www.inaturalist.org/observations/38690960">https://www.inaturalist.org/observations/38690960</a>   |

|      |               |              |            |   |   |            |            |                                                                                                                     |
|------|---------------|--------------|------------|---|---|------------|------------|---------------------------------------------------------------------------------------------------------------------|
| 1375 | Bubulcus ibis | Cattle Egret | 2018/10/25 | 4 | 0 | 12.9825445 | 77.6196229 | <a href="https://www.inaturalist.org/observations/17844290">https://www.inaturalist.org/observations/17844290</a>   |
| 1376 | Bubulcus ibis | Cattle Egret | 2021/1/11  | 1 | 0 | 12.9843944 | 80.1896241 | <a href="https://www.inaturalist.org/observations/67915320">https://www.inaturalist.org/observations/67915320</a>   |
| 1377 | Bubulcus ibis | Cattle Egret | 2020/11/5  | 3 | 0 | 12.9895811 | 77.4896404 | <a href="https://www.inaturalist.org/observations/64226392">https://www.inaturalist.org/observations/64226392</a>   |
| 1378 | Bubulcus ibis | Cattle Egret | 2022/1/6   | 3 | 0 | 12.9907664 | 80.2376866 | <a href="https://www.inaturalist.org/observations/104467528">https://www.inaturalist.org/observations/104467528</a> |
| 1379 | Bubulcus ibis | Cattle Egret | 2022/1/28  | 1 | 0 | 12.9922535 | 80.1901478 | <a href="https://www.inaturalist.org/observations/105733760">https://www.inaturalist.org/observations/105733760</a> |
| 1380 | Bubulcus ibis | Cattle Egret | 2022/1/27  | 1 | 0 | 12.9926926 | 80.1904348 | <a href="https://www.inaturalist.org/observations/105678046">https://www.inaturalist.org/observations/105678046</a> |
| 1381 | Bubulcus ibis | Cattle Egret | 2014/2/18  | 6 | 0 | 12.9978673 | 80.0958252 | <a href="http://www.inaturalist.org/observations/1495587">http://www.inaturalist.org/observations/1495587</a>       |
| 1382 | Bubulcus ibis | Cattle Egret | 2021/3/9   | 5 | 0 | 13.0075100 | 77.5108300 | <a href="https://www.inaturalist.org/observations/108705150">https://www.inaturalist.org/observations/108705150</a> |
| 1383 | Bubulcus ibis | Cattle Egret | 2020/12/18 | 2 | 0 | 13.0078522 | 80.1925295 | <a href="https://www.inaturalist.org/observations/93231328">https://www.inaturalist.org/observations/93231328</a>   |
| 1384 | Bubulcus ibis | Cattle Egret | 2019/1/17  | 2 | 0 | 13.0111830 | 80.2755925 | <a href="https://www.inaturalist.org/observations/109822324">https://www.inaturalist.org/observations/109822324</a> |
| 1385 | Bubulcus ibis | Cattle Egret | 2022/4/9   | 3 | 0 | 13.0128872 | 80.2529269 | <a href="https://www.inaturalist.org/observations/112546321">https://www.inaturalist.org/observations/112546321</a> |
| 1386 | Bubulcus ibis | Cattle Egret | 2022/4/9   | 3 | 0 | 13.0128872 | 80.2529269 | <a href="https://www.inaturalist.org/observations/112546326">https://www.inaturalist.org/observations/112546326</a> |
| 1387 | Bubulcus ibis | Cattle Egret | 2022/4/9   | 3 | 0 | 13.0128872 | 80.2529269 | <a href="https://www.inaturalist.org/observations/112546327">https://www.inaturalist.org/observations/112546327</a> |
| 1388 | Bubulcus ibis | Cattle Egret | 2022/4/9   | 3 | 0 | 13.0128872 | 80.2529269 | <a href="https://www.inaturalist.org/observations/112546329">https://www.inaturalist.org/observations/112546329</a> |
| 1389 | Bubulcus ibis | Cattle Egret | 2022/12/3  | 2 | 0 | 13.0142867 | 77.6833237 | <a href="https://www.inaturalist.org/observations/143712467">https://www.inaturalist.org/observations/143712467</a> |
| 1390 | Bubulcus ibis | Cattle Egret | 2022/12/3  | 3 | 0 | 13.0142867 | 77.6833237 | <a href="https://www.inaturalist.org/observations/143713955">https://www.inaturalist.org/observations/143713955</a> |
| 1391 | Bubulcus ibis | Cattle Egret | 2021/10/27 | 2 | 0 | 13.0156222 | 77.5686950 | <a href="https://www.inaturalist.org/observations/99767950">https://www.inaturalist.org/observations/99767950</a>   |
| 1392 | Bubulcus ibis | Cattle Egret | 2020/2/6   | 5 | 0 | 13.0167102 | 80.2363903 | <a href="https://www.inaturalist.org/observations/109841407">https://www.inaturalist.org/observations/109841407</a> |
| 1393 | Bubulcus ibis | Cattle Egret | 2019/1/13  | 3 | 0 | 13.0170655 | 75.6405138 | <a href="https://www.inaturalist.org/observations/63629852">https://www.inaturalist.org/observations/63629852</a>   |
| 1394 | Bubulcus ibis | Cattle Egret | 2022/12/3  | 0 | 0 | 13.0191915 | 80.2646894 | <a href="https://www.inaturalist.org/observations/143732951">https://www.inaturalist.org/observations/143732951</a> |
| 1395 | Bubulcus ibis | Cattle Egret | 2021/10/21 | 1 | 0 | 13.0197095 | 80.1984177 | <a href="https://www.inaturalist.org/observations/98856349">https://www.inaturalist.org/observations/98856349</a>   |
| 1396 | Bubulcus ibis | Cattle Egret | 2015/3/15  | 6 | 0 | 13.0279640 | 77.5688816 | <a href="https://www.inaturalist.org/observations/20845974">https://www.inaturalist.org/observations/20845974</a>   |
| 1397 | Bubulcus ibis | Cattle Egret | 2021/2/8   | 1 | 0 | 13.0304639 | 77.5733306 | <a href="https://www.inaturalist.org/observations/69236930">https://www.inaturalist.org/observations/69236930</a>   |
| 1398 | Bubulcus ibis | Cattle Egret | 2021/12/18 | 4 | 0 | 13.0390545 | 80.1419356 | <a href="https://www.inaturalist.org/observations/103514536">https://www.inaturalist.org/observations/103514536</a> |
| 1399 | Bubulcus ibis | Cattle Egret | 2021/12/8  | 2 | 0 | 13.0399610 | 77.6312850 | <a href="https://www.inaturalist.org/observations/102707546">https://www.inaturalist.org/observations/102707546</a> |

|      |               |              |            |   |   |            |            |                                                                                                                     |
|------|---------------|--------------|------------|---|---|------------|------------|---------------------------------------------------------------------------------------------------------------------|
| 1400 | Bubulcus ibis | Cattle Egret | 2022/10/29 | 2 | 0 | 13.0459063 | 80.2532708 | <a href="https://www.inaturalist.org/observations/140487631">https://www.inaturalist.org/observations/140487631</a> |
| 1401 | Bubulcus ibis | Cattle Egret | 2022/10/29 | 2 | 0 | 13.0459063 | 80.2532708 | <a href="https://www.inaturalist.org/observations/140487634">https://www.inaturalist.org/observations/140487634</a> |
| 1402 | Bubulcus ibis | Cattle Egret | 2022/12/19 | 1 | 0 | 13.0459063 | 80.2532708 | <a href="https://www.inaturalist.org/observations/144900897">https://www.inaturalist.org/observations/144900897</a> |
| 1403 | Bubulcus ibis | Cattle Egret | 2022/12/19 | 1 | 0 | 13.0459063 | 80.2532708 | <a href="https://www.inaturalist.org/observations/144900899">https://www.inaturalist.org/observations/144900899</a> |
| 1404 | Bubulcus ibis | Cattle Egret | 2022/12/21 | 2 | 0 | 13.0459063 | 80.2532708 | <a href="https://www.inaturalist.org/observations/145095171">https://www.inaturalist.org/observations/145095171</a> |
| 1405 | Bubulcus ibis | Cattle Egret | 2022/11/15 | 1 | 0 | 13.0459110 | 80.2532705 | <a href="https://www.inaturalist.org/observations/142298255">https://www.inaturalist.org/observations/142298255</a> |
| 1406 | Bubulcus ibis | Cattle Egret | 2021/3/17  | 1 | 0 | 13.0463405 | 80.2533557 | <a href="https://www.inaturalist.org/observations/90664150">https://www.inaturalist.org/observations/90664150</a>   |
| 1407 | Bubulcus ibis | Cattle Egret | 2021/11/16 | 1 | 0 | 13.0463405 | 80.2533557 | <a href="https://www.inaturalist.org/observations/101320539">https://www.inaturalist.org/observations/101320539</a> |
| 1408 | Bubulcus ibis | Cattle Egret | 2021/11/16 | 1 | 0 | 13.0463405 | 80.2533557 | <a href="https://www.inaturalist.org/observations/101320555">https://www.inaturalist.org/observations/101320555</a> |
| 1409 | Bubulcus ibis | Cattle Egret | 2021/11/16 | 1 | 0 | 13.0463405 | 80.2533557 | <a href="https://www.inaturalist.org/observations/101320614">https://www.inaturalist.org/observations/101320614</a> |
| 1410 | Bubulcus ibis | Cattle Egret | 2021/11/16 | 2 | 0 | 13.0463405 | 80.2533557 | <a href="https://www.inaturalist.org/observations/101320658">https://www.inaturalist.org/observations/101320658</a> |
| 1411 | Bubulcus ibis | Cattle Egret | 2021/11/16 | 2 | 0 | 13.0463405 | 80.2533557 | <a href="https://www.inaturalist.org/observations/101320776">https://www.inaturalist.org/observations/101320776</a> |
| 1412 | Bubulcus ibis | Cattle Egret | 2021/11/16 | 1 | 0 | 13.0463405 | 80.2533557 | <a href="https://www.inaturalist.org/observations/101320795">https://www.inaturalist.org/observations/101320795</a> |
| 1413 | Bubulcus ibis | Cattle Egret | 2021/10/29 | 1 | 0 | 13.0463405 | 80.2533557 | <a href="https://www.inaturalist.org/observations/101988541">https://www.inaturalist.org/observations/101988541</a> |
| 1414 | Bubulcus ibis | Cattle Egret | 2021/12/6  | 1 | 0 | 13.0463405 | 80.2533557 | <a href="https://www.inaturalist.org/observations/102599115">https://www.inaturalist.org/observations/102599115</a> |
| 1415 | Bubulcus ibis | Cattle Egret | 2021/12/6  | 1 | 0 | 13.0463405 | 80.2533557 | <a href="https://www.inaturalist.org/observations/102599145">https://www.inaturalist.org/observations/102599145</a> |
| 1416 | Bubulcus ibis | Cattle Egret | 2021/12/15 | 2 | 0 | 13.0463405 | 80.2533557 | <a href="https://www.inaturalist.org/observations/103093741">https://www.inaturalist.org/observations/103093741</a> |
| 1417 | Bubulcus ibis | Cattle Egret | 2021/12/20 | 3 | 0 | 13.0463405 | 80.2533557 | <a href="https://www.inaturalist.org/observations/103402178">https://www.inaturalist.org/observations/103402178</a> |
| 1418 | Bubulcus ibis | Cattle Egret | 2021/12/20 | 3 | 0 | 13.0463405 | 80.2533557 | <a href="https://www.inaturalist.org/observations/103402621">https://www.inaturalist.org/observations/103402621</a> |
| 1419 | Bubulcus ibis | Cattle Egret | 2021/12/18 | 1 | 0 | 13.0463405 | 80.2533557 | <a href="https://www.inaturalist.org/observations/103409219">https://www.inaturalist.org/observations/103409219</a> |
| 1420 | Bubulcus ibis | Cattle Egret | 2022/2/18  | 3 | 0 | 13.0463405 | 80.2533557 | <a href="https://www.inaturalist.org/observations/106960828">https://www.inaturalist.org/observations/106960828</a> |
| 1421 | Bubulcus ibis | Cattle Egret | 2022/2/18  | 3 | 0 | 13.0463405 | 80.2533557 | <a href="https://www.inaturalist.org/observations/106960943">https://www.inaturalist.org/observations/106960943</a> |
| 1422 | Bubulcus ibis | Cattle Egret | 2022/2/18  | 3 | 0 | 13.0463405 | 80.2533557 | <a href="https://www.inaturalist.org/observations/106961217">https://www.inaturalist.org/observations/106961217</a> |
| 1423 | Bubulcus ibis | Cattle Egret | 2022/2/18  | 4 | 0 | 13.0463405 | 80.2533557 | <a href="https://www.inaturalist.org/observations/106961327">https://www.inaturalist.org/observations/106961327</a> |
| 1424 | Bubulcus ibis | Cattle Egret | 2022/3/4   | 4 | 0 | 13.0463405 | 80.2533557 | <a href="https://www.inaturalist.org/observations/107883498">https://www.inaturalist.org/observations/107883498</a> |

|      |               |              |            |   |   |            |            |                                                                                                                     |
|------|---------------|--------------|------------|---|---|------------|------------|---------------------------------------------------------------------------------------------------------------------|
| 1425 | Bubulcus ibis | Cattle Egret | 2022/1/5   | 3 | 0 | 13.0463405 | 80.2533557 | <a href="https://www.inaturalist.org/observations/133468440">https://www.inaturalist.org/observations/133468440</a> |
| 1426 | Bubulcus ibis | Cattle Egret | 2022/11/15 | 1 | 0 | 13.0463405 | 80.2533557 | <a href="https://www.inaturalist.org/observations/142054882">https://www.inaturalist.org/observations/142054882</a> |
| 1427 | Bubulcus ibis | Cattle Egret | 2022/11/16 | 1 | 0 | 13.0463405 | 80.2533557 | <a href="https://www.inaturalist.org/observations/142131797">https://www.inaturalist.org/observations/142131797</a> |
| 1428 | Bubulcus ibis | Cattle Egret | 2021/12/13 | 5 | 0 | 13.0463406 | 80.2533559 | <a href="https://www.inaturalist.org/observations/108363800">https://www.inaturalist.org/observations/108363800</a> |
| 1429 | Bubulcus ibis | Cattle Egret | 2022/12/19 | 2 | 0 | 13.0463406 | 80.2533559 | <a href="https://www.inaturalist.org/observations/144922604">https://www.inaturalist.org/observations/144922604</a> |
| 1430 | Bubulcus ibis | Cattle Egret | 2022/1/15  | 3 | 0 | 13.0463463 | 80.2533557 | <a href="https://www.inaturalist.org/observations/132639219">https://www.inaturalist.org/observations/132639219</a> |
| 1431 | Bubulcus ibis | Cattle Egret | 2022/8/29  | 3 | 0 | 13.0463496 | 80.2533557 | <a href="https://www.inaturalist.org/observations/132794204">https://www.inaturalist.org/observations/132794204</a> |
| 1432 | Bubulcus ibis | Cattle Egret | 2019/11/12 | 1 | 0 | 13.0473487 | 80.2540004 | <a href="https://www.inaturalist.org/observations/89443291">https://www.inaturalist.org/observations/89443291</a>   |
| 1433 | Bubulcus ibis | Cattle Egret | 2021/2/19  | 2 | 0 | 13.0473487 | 80.2540004 | <a href="https://www.inaturalist.org/observations/89748862">https://www.inaturalist.org/observations/89748862</a>   |
| 1434 | Bubulcus ibis | Cattle Egret | 2021/3/6   | 1 | 0 | 13.0473487 | 80.2540004 | <a href="https://www.inaturalist.org/observations/89748908">https://www.inaturalist.org/observations/89748908</a>   |
| 1435 | Bubulcus ibis | Cattle Egret | 2020/2/14  | 1 | 0 | 13.0473487 | 80.2540004 | <a href="https://www.inaturalist.org/observations/88274129">https://www.inaturalist.org/observations/88274129</a>   |
| 1436 | Bubulcus ibis | Cattle Egret | 2020/2/14  | 1 | 0 | 13.0473487 | 80.2540004 | <a href="https://www.inaturalist.org/observations/89024839">https://www.inaturalist.org/observations/89024839</a>   |
| 1437 | Bubulcus ibis | Cattle Egret | 2021/10/7  | 2 | 0 | 13.0473533 | 80.2540001 | <a href="https://www.inaturalist.org/observations/97436356">https://www.inaturalist.org/observations/97436356</a>   |
| 1438 | Bubulcus ibis | Cattle Egret | 2021/12/6  | 2 | 0 | 13.0473533 | 80.2540001 | <a href="https://www.inaturalist.org/observations/102612663">https://www.inaturalist.org/observations/102612663</a> |
| 1439 | Bubulcus ibis | Cattle Egret | 2021/12/13 | 2 | 0 | 13.0473533 | 80.2540001 | <a href="https://www.inaturalist.org/observations/103373318">https://www.inaturalist.org/observations/103373318</a> |
| 1440 | Bubulcus ibis | Cattle Egret | 2021/12/17 | 1 | 0 | 13.0473533 | 80.2540001 | <a href="https://www.inaturalist.org/observations/103398657">https://www.inaturalist.org/observations/103398657</a> |
| 1441 | Bubulcus ibis | Cattle Egret | 2021/12/18 | 2 | 0 | 13.0473533 | 80.2540001 | <a href="https://www.inaturalist.org/observations/103398687">https://www.inaturalist.org/observations/103398687</a> |
| 1442 | Bubulcus ibis | Cattle Egret | 2022/1/6   | 1 | 0 | 13.0473533 | 80.2540001 | <a href="https://www.inaturalist.org/observations/104466456">https://www.inaturalist.org/observations/104466456</a> |
| 1443 | Bubulcus ibis | Cattle Egret | 2022/3/10  | 4 | 0 | 13.0473533 | 80.2540001 | <a href="https://www.inaturalist.org/observations/108351732">https://www.inaturalist.org/observations/108351732</a> |
| 1444 | Bubulcus ibis | Cattle Egret | 2022/3/22  | 5 | 0 | 13.0473533 | 80.2540001 | <a href="https://www.inaturalist.org/observations/109214624">https://www.inaturalist.org/observations/109214624</a> |
| 1445 | Bubulcus ibis | Cattle Egret | 2022/4/6   | 4 | 0 | 13.0473533 | 80.2540001 | <a href="https://www.inaturalist.org/observations/110562220">https://www.inaturalist.org/observations/110562220</a> |
| 1446 | Bubulcus ibis | Cattle Egret | 2022/4/11  | 3 | 0 | 13.0473533 | 80.2540001 | <a href="https://www.inaturalist.org/observations/111078858">https://www.inaturalist.org/observations/111078858</a> |
| 1447 | Bubulcus ibis | Cattle Egret | 2022/11/25 | 1 | 0 | 13.0514455 | 80.2546562 | <a href="https://www.inaturalist.org/observations/142825260">https://www.inaturalist.org/observations/142825260</a> |
| 1448 | Bubulcus ibis | Cattle Egret | 2021/4/5   | 2 | 0 | 13.0548325 | 77.5424805 | <a href="https://www.inaturalist.org/observations/72973641">https://www.inaturalist.org/observations/72973641</a>   |
| 1449 | Bubulcus ibis | Cattle Egret | 2022/1/7   | 2 | 0 | 13.0561236 | 77.7523708 | <a href="https://www.inaturalist.org/observations/105414846">https://www.inaturalist.org/observations/105414846</a> |



|      |                     |                   |            |   |   |            |            |                                                                                                                     |
|------|---------------------|-------------------|------------|---|---|------------|------------|---------------------------------------------------------------------------------------------------------------------|
| 1450 | Bubulcus ibis       | Cattle Egret      | 2021/10/15 | 1 | 0 | 13.0582576 | 77.7527523 | <a href="https://www.inaturalist.org/observations/99160663">https://www.inaturalist.org/observations/99160663</a>   |
| 1451 | Bubulcus coromandus | ibis Cattle Egret | 2021/1/31  | 2 | 0 | 13.0604558 | 77.6570840 | <a href="https://www.inaturalist.org/observations/68902297">https://www.inaturalist.org/observations/68902297</a>   |
| 1452 | Bubulcus ibis       | Cattle Egret      | 2020/12/20 | 1 | 0 | 13.0702915 | 77.7695255 | <a href="https://www.inaturalist.org/observations/105188115">https://www.inaturalist.org/observations/105188115</a> |
| 1453 | Bubulcus ibis       | Cattle Egret      | 2019/4/7   | 3 | 0 | 13.0711600 | 77.5804750 | <a href="https://www.inaturalist.org/observations/29238165">https://www.inaturalist.org/observations/29238165</a>   |
| 1454 | Bubulcus ibis       | Cattle Egret      | 2022/1/5   | 1 | 0 | 13.0826438 | 80.2707183 | <a href="https://www.inaturalist.org/observations/143354246">https://www.inaturalist.org/observations/143354246</a> |
| 1455 | Bubulcus ibis       | Cattle Egret      | 2022/1/6   | 1 | 0 | 13.0826438 | 80.2707183 | <a href="https://www.inaturalist.org/observations/143356229">https://www.inaturalist.org/observations/143356229</a> |
| 1456 | Bubulcus ibis       | Cattle Egret      | 2022/2/13  | 1 | 0 | 13.0826438 | 80.2707183 | <a href="https://www.inaturalist.org/observations/143411528">https://www.inaturalist.org/observations/143411528</a> |
| 1457 | Bubulcus ibis       | Cattle Egret      | 2021/2/16  | 1 | 0 | 13.0826802 | 80.2707184 | <a href="https://www.inaturalist.org/observations/69650747">https://www.inaturalist.org/observations/69650747</a>   |
| 1458 | Bubulcus ibis       | Cattle Egret      | 2012/3/25  | 2 | 0 | 13.0826802 | 80.2707184 | <a href="https://www.inaturalist.org/observations/89166947">https://www.inaturalist.org/observations/89166947</a>   |
| 1459 | Bubulcus ibis       | Cattle Egret      | 2020/2/7   | 2 | 0 | 13.0826802 | 80.2707184 | <a href="https://www.inaturalist.org/observations/137421997">https://www.inaturalist.org/observations/137421997</a> |
| 1460 | Bubulcus ibis       | Cattle Egret      | 2020/4/24  | 1 | 0 | 13.0845939 | 77.6457427 | <a href="https://www.inaturalist.org/observations/43871378">https://www.inaturalist.org/observations/43871378</a>   |
| 1461 | Bubulcus ibis       | Cattle Egret      | 2022/11/29 | 3 | 0 | 13.1067415 | 80.0969511 | <a href="https://www.inaturalist.org/observations/143227463">https://www.inaturalist.org/observations/143227463</a> |
| 1462 | Bubulcus coromandus | ibis Cattle Egret | 2017/5/5   | 6 | 0 | 13.1105551 | 77.5963286 | <a href="https://www.inaturalist.org/observations/6149841">https://www.inaturalist.org/observations/6149841</a>     |
| 1463 | Bubulcus ibis       | Cattle Egret      | 2021/3/24  | 1 | 0 | 13.1108173 | 77.5759123 | <a href="https://www.inaturalist.org/observations/72082339">https://www.inaturalist.org/observations/72082339</a>   |
| 1464 | Bubulcus ibis       | Cattle Egret      | 2021/2/13  | 1 | 0 | 13.1169157 | 77.5360799 | <a href="https://www.inaturalist.org/observations/69613259">https://www.inaturalist.org/observations/69613259</a>   |
| 1465 | Bubulcus ibis       | Cattle Egret      | 2020/12/26 | 3 | 0 | 13.1241361 | 79.9556422 | <a href="https://www.inaturalist.org/observations/67087155">https://www.inaturalist.org/observations/67087155</a>   |
| 1466 | Bubulcus ibis       | Cattle Egret      | 2022/12/4  | 1 | 0 | 13.1502389 | 79.9631584 | <a href="https://www.inaturalist.org/observations/143791892">https://www.inaturalist.org/observations/143791892</a> |
| 1467 | Bubulcus ibis       | Cattle Egret      | 2017/4/16  | 2 | 0 | 13.2156583 | 75.9806550 | <a href="https://www.inaturalist.org/observations/65517333">https://www.inaturalist.org/observations/65517333</a>   |
| 1468 | Bubulcus ibis       | Cattle Egret      | 2020/4/6   | 2 | 0 | 13.3004896 | 77.4170514 | <a href="https://www.inaturalist.org/observations/57529569">https://www.inaturalist.org/observations/57529569</a>   |
| 1469 | Bubulcus ibis       | Cattle Egret      | 2020/11/18 | 4 | 0 | 13.3128754 | 77.5420005 | <a href="https://www.inaturalist.org/observations/115836194">https://www.inaturalist.org/observations/115836194</a> |
| 1470 | Bubulcus ibis       | Cattle Egret      | 2019/1/14  | 5 | 0 | 13.3456297 | 74.7942886 | <a href="https://www.inaturalist.org/observations/19652982">https://www.inaturalist.org/observations/19652982</a>   |
| 1471 | Bubulcus ibis       | Cattle Egret      | 2020/1/13  | 2 | 0 | 13.3470147 | 74.7966744 | <a href="https://www.inaturalist.org/observations/37558518">https://www.inaturalist.org/observations/37558518</a>   |
| 1472 | Bubulcus ibis       | Cattle Egret      | 2019/1/9   | 5 | 0 | 13.3473083 | 74.7940367 | <a href="https://www.inaturalist.org/observations/19528295">https://www.inaturalist.org/observations/19528295</a>   |
| 1473 | Bubulcus ibis       | Cattle Egret      | 2020/1/8   | 2 | 0 | 13.3488320 | 74.7940710 | <a href="https://www.inaturalist.org/observations/37543471">https://www.inaturalist.org/observations/37543471</a>   |
| 1474 | Bubulcus ibis       | Cattle Egret      | 2020/1/16  | 2 | 0 | 13.3489300 | 74.7929617 | <a href="https://www.inaturalist.org/observations/37646397">https://www.inaturalist.org/observations/37646397</a>   |

|      |               |              |            |   |   |            |            |                                                                                                                     |
|------|---------------|--------------|------------|---|---|------------|------------|---------------------------------------------------------------------------------------------------------------------|
| 1475 | Bubulcus ibis | Cattle Egret | 2020/1/13  | 2 | 0 | 13.3489959 | 74.7855559 | <a href="https://www.inaturalist.org/observations/37583081">https://www.inaturalist.org/observations/37583081</a>   |
| 1476 | Bubulcus ibis | Cattle Egret | 2020/1/13  | 1 | 0 | 13.3490105 | 74.7929764 | <a href="https://www.inaturalist.org/observations/37739337">https://www.inaturalist.org/observations/37739337</a>   |
| 1477 | Bubulcus ibis | Cattle Egret | 2020/1/15  | 1 | 0 | 13.3491231 | 74.7855559 | <a href="https://www.inaturalist.org/observations/37739305">https://www.inaturalist.org/observations/37739305</a>   |
| 1478 | Bubulcus ibis | Cattle Egret | 2020/1/11  | 2 | 0 | 13.3495333 | 74.7928783 | <a href="https://www.inaturalist.org/observations/37512700">https://www.inaturalist.org/observations/37512700</a>   |
| 1479 | Bubulcus ibis | Cattle Egret | 2019/2/9   | 5 | 0 | 13.3514767 | 74.7861083 | <a href="https://www.inaturalist.org/observations/20219650">https://www.inaturalist.org/observations/20219650</a>   |
| 1480 | Bubulcus ibis | Cattle Egret | 2019/1/4   | 5 | 0 | 13.3515501 | 74.7926254 | <a href="https://www.inaturalist.org/observations/19490613">https://www.inaturalist.org/observations/19490613</a>   |
| 1481 | Bubulcus ibis | Cattle Egret | 2020/1/7   | 3 | 0 | 13.3525321 | 74.7928224 | <a href="https://www.inaturalist.org/observations/37361004">https://www.inaturalist.org/observations/37361004</a>   |
| 1482 | Bubulcus ibis | Cattle Egret | 2020/1/14  | 1 | 0 | 13.3525321 | 74.7928224 | <a href="https://www.inaturalist.org/observations/37614451">https://www.inaturalist.org/observations/37614451</a>   |
| 1483 | Bubulcus ibis | Cattle Egret | 2020/10/24 | 2 | 0 | 13.3555464 | 80.3352364 | <a href="https://www.inaturalist.org/observations/63445264">https://www.inaturalist.org/observations/63445264</a>   |
| 1484 | Bubulcus ibis | Cattle Egret | 2020/3/9   | 2 | 0 | 13.3618883 | 74.7163683 | <a href="https://www.inaturalist.org/observations/40656825">https://www.inaturalist.org/observations/40656825</a>   |
| 1485 | Bubulcus ibis | Cattle Egret | 2022/11/10 | 1 | 0 | 13.3673824 | 74.8176881 | <a href="https://www.inaturalist.org/observations/141886339">https://www.inaturalist.org/observations/141886339</a> |
| 1486 | Bubulcus ibis | Cattle Egret | 2016/1/31  | 2 | 0 | 13.4078482 | 80.2979325 | <a href="https://www.inaturalist.org/observations/73977804">https://www.inaturalist.org/observations/73977804</a>   |
| 1487 | Bubulcus ibis | Cattle Egret | 2021/1/4   | 0 | 0 | 13.4157405 | 75.2515063 | <a href="https://www.inaturalist.org/observations/81534327">https://www.inaturalist.org/observations/81534327</a>   |
| 1488 | Bubulcus ibis | Cattle Egret | 2022/1/31  | 2 | 0 | 13.4166639 | 80.2906659 | <a href="https://www.inaturalist.org/observations/105917850">https://www.inaturalist.org/observations/105917850</a> |
| 1489 | Bubulcus ibis | Cattle Egret | 2022/1/31  | 2 | 0 | 13.4166639 | 80.2906659 | <a href="https://www.inaturalist.org/observations/105917860">https://www.inaturalist.org/observations/105917860</a> |
| 1490 | Bubulcus ibis | Cattle Egret | 2022/1/31  | 3 | 0 | 13.4166639 | 80.2906659 | <a href="https://www.inaturalist.org/observations/105924281">https://www.inaturalist.org/observations/105924281</a> |
| 1491 | Bubulcus ibis | Cattle Egret | 2022/1/31  | 1 | 0 | 13.4166639 | 80.2906659 | <a href="https://www.inaturalist.org/observations/105976339">https://www.inaturalist.org/observations/105976339</a> |
| 1492 | Bubulcus ibis | Cattle Egret | 2020/1/30  | 3 | 0 | 13.4485095 | 94.2651945 | <a href="https://www.inaturalist.org/observations/38814713">https://www.inaturalist.org/observations/38814713</a>   |
| 1493 | Bubulcus ibis | Cattle Egret | 2022/2/26  | 3 | 0 | 13.4580902 | 80.2966653 | <a href="https://www.inaturalist.org/observations/142075800">https://www.inaturalist.org/observations/142075800</a> |
| 1494 | Bubulcus ibis | Cattle Egret | 2022/2/13  | 3 | 0 | 13.5058442 | 78.3336165 | <a href="https://www.inaturalist.org/observations/106909197">https://www.inaturalist.org/observations/106909197</a> |
| 1495 | Bubulcus ibis | Cattle Egret | 2022/12/16 | 1 | 0 | 13.5100618 | 75.1022199 | <a href="https://www.inaturalist.org/observations/144461364">https://www.inaturalist.org/observations/144461364</a> |
| 1496 | Bubulcus ibis | Cattle Egret | 2015/11/24 | 1 | 0 | 13.5193307 | 75.0904302 | <a href="https://www.inaturalist.org/observations/144459613">https://www.inaturalist.org/observations/144459613</a> |
| 1497 | Bubulcus ibis | Cattle Egret | 2022/3/14  | 1 | 0 | 13.5316750 | 79.3083783 | <a href="https://www.inaturalist.org/observations/115057376">https://www.inaturalist.org/observations/115057376</a> |
| 1498 | Bubulcus ibis | Cattle Egret | 2022/9/25  | 2 | 0 | 13.5822967 | 79.5517983 | <a href="https://www.inaturalist.org/observations/143847791">https://www.inaturalist.org/observations/143847791</a> |
| 1499 | Bubulcus ibis | Cattle Egret | 2022/9/25  | 1 | 0 | 13.5823350 | 79.5517883 | <a href="https://www.inaturalist.org/observations/137832288">https://www.inaturalist.org/observations/137832288</a> |

|      |               |              |            |   |   |            |            |                                                                                                                     |
|------|---------------|--------------|------------|---|---|------------|------------|---------------------------------------------------------------------------------------------------------------------|
| 1500 | Bubulcus ibis | Cattle Egret | 2022/9/25  | 1 | 0 | 13.5916217 | 79.5497167 | <a href="https://www.inaturalist.org/observations/143847743">https://www.inaturalist.org/observations/143847743</a> |
| 1501 | Bubulcus ibis | Cattle Egret | 2022/3/21  | 4 | 0 | 13.5920478 | 79.4455109 | <a href="https://www.inaturalist.org/observations/111891310">https://www.inaturalist.org/observations/111891310</a> |
| 1502 | Bubulcus ibis | Cattle Egret | 2022/3/19  | 3 | 0 | 13.6012237 | 79.4361808 | <a href="https://www.inaturalist.org/observations/111772996">https://www.inaturalist.org/observations/111772996</a> |
| 1503 | Bubulcus ibis | Cattle Egret | 2016/3/14  | 1 | 0 | 13.6208983 | 74.6713720 | <a href="https://www.inaturalist.org/observations/48312085">https://www.inaturalist.org/observations/48312085</a>   |
| 1504 | Bubulcus ibis | Cattle Egret | 2022/3/26  | 3 | 0 | 13.6370932 | 79.4465182 | <a href="https://www.inaturalist.org/observations/109925553">https://www.inaturalist.org/observations/109925553</a> |
| 1505 | Bubulcus ibis | Cattle Egret | 2022/3/26  | 3 | 0 | 13.6371111 | 79.4464857 | <a href="https://www.inaturalist.org/observations/109925560">https://www.inaturalist.org/observations/109925560</a> |
| 1506 | Bubulcus ibis | Cattle Egret | 2020/5/20  | 2 | 0 | 13.6440621 | 79.4511702 | <a href="https://www.inaturalist.org/observations/47245904">https://www.inaturalist.org/observations/47245904</a>   |
| 1507 | Bubulcus ibis | Cattle Egret | 2019/12/9  | 1 | 0 | 13.6445646 | 79.4512329 | <a href="https://www.inaturalist.org/observations/36631384">https://www.inaturalist.org/observations/36631384</a>   |
| 1508 | Bubulcus ibis | Cattle Egret | 2020/4/7   | 2 | 0 | 13.6482194 | 79.4512326 | <a href="https://www.inaturalist.org/observations/43064271">https://www.inaturalist.org/observations/43064271</a>   |
| 1509 | Bubulcus ibis | Cattle Egret | 2022/3/20  | 2 | 0 | 13.6502436 | 79.4666079 | <a href="https://www.inaturalist.org/observations/111174418">https://www.inaturalist.org/observations/111174418</a> |
| 1510 | Bubulcus ibis | Cattle Egret | 2022/3/9   | 2 | 0 | 13.6504354 | 79.4669579 | <a href="https://www.inaturalist.org/observations/108230151">https://www.inaturalist.org/observations/108230151</a> |
| 1511 | Bubulcus ibis | Cattle Egret | 2021/10/13 | 2 | 0 | 13.6514544 | 79.4684563 | <a href="https://www.inaturalist.org/observations/98083270">https://www.inaturalist.org/observations/98083270</a>   |
| 1512 | Bubulcus ibis | Cattle Egret | 2022/2/26  | 1 | 0 | 13.6518788 | 79.4707455 | <a href="https://www.inaturalist.org/observations/115048059">https://www.inaturalist.org/observations/115048059</a> |
| 1513 | Bubulcus ibis | Cattle Egret | 2022/2/26  | 1 | 0 | 13.6533078 | 79.4720710 | <a href="https://www.inaturalist.org/observations/109822031">https://www.inaturalist.org/observations/109822031</a> |
| 1514 | Bubulcus ibis | Cattle Egret | 2020/3/22  | 1 | 0 | 13.6538465 | 74.9337264 | <a href="https://www.inaturalist.org/observations/51089746">https://www.inaturalist.org/observations/51089746</a>   |
| 1515 | Bubulcus ibis | Cattle Egret | 2022/4/10  | 1 | 0 | 13.6588313 | 79.4900322 | <a href="https://www.inaturalist.org/observations/111054416">https://www.inaturalist.org/observations/111054416</a> |
| 1516 | Bubulcus ibis | Cattle Egret | 2021/3/16  | 4 | 0 | 13.7158637 | 79.5961605 | <a href="https://www.inaturalist.org/observations/71361327">https://www.inaturalist.org/observations/71361327</a>   |
| 1517 | Bubulcus ibis | Cattle Egret | 2021/3/16  | 3 | 0 | 13.7160001 | 79.5962626 | <a href="https://www.inaturalist.org/observations/71361324">https://www.inaturalist.org/observations/71361324</a>   |
| 1518 | Bubulcus ibis | Cattle Egret | 2022/4/6   | 2 | 0 | 13.7162197 | 79.5990671 | <a href="https://www.inaturalist.org/observations/110635963">https://www.inaturalist.org/observations/110635963</a> |
| 1519 | Bubulcus ibis | Cattle Egret | 2016/1/30  | 1 | 0 | 13.7198764 | 80.1154694 | <a href="https://www.inaturalist.org/observations/73979571">https://www.inaturalist.org/observations/73979571</a>   |
| 1520 | Bubulcus ibis | Cattle Egret | 2019/12/17 | 3 | 0 | 13.7242176 | 80.1234449 | <a href="https://www.inaturalist.org/observations/65587758">https://www.inaturalist.org/observations/65587758</a>   |
| 1521 | Bubulcus ibis | Cattle Egret | 2019/11/4  | 1 | 0 | 13.7358951 | 75.6324272 | <a href="https://www.inaturalist.org/observations/88654748">https://www.inaturalist.org/observations/88654748</a>   |
| 1522 | Bubulcus ibis | Cattle Egret | 2015/11/14 | 1 | 0 | 13.7400521 | 77.3232365 | <a href="https://www.inaturalist.org/observations/96570778">https://www.inaturalist.org/observations/96570778</a>   |
| 1523 | Bubulcus ibis | Cattle Egret | 2020/11/14 | 1 | 0 | 13.7725628 | 79.4291224 | <a href="https://www.inaturalist.org/observations/64839655">https://www.inaturalist.org/observations/64839655</a>   |
| 1524 | Bubulcus ibis | Cattle Egret | 2021/11/22 | 2 | 0 | 13.8219499 | 74.6425865 | <a href="https://www.inaturalist.org/observations/141903019">https://www.inaturalist.org/observations/141903019</a> |

|      |                        |                      |            |   |   |            |            |                                                                                                                     |
|------|------------------------|----------------------|------------|---|---|------------|------------|---------------------------------------------------------------------------------------------------------------------|
| 1525 | Bubulcus ibis          | Cattle Egret         | 2017/2/5   | 5 | 0 | 13.9627732 | 77.6750869 | <a href="https://www.inaturalist.org/observations/5135097">https://www.inaturalist.org/observations/5135097</a>     |
| 1526 | Bubulcus ibis          | Cattle Egret         | 2019/12/23 | 3 | 0 | 14.0998874 | 78.2941639 | <a href="https://www.inaturalist.org/observations/36877137">https://www.inaturalist.org/observations/36877137</a>   |
| 1527 | Bubulcus ibis          | Cattle Egret         | 2021/10/31 | 1 | 0 | 14.2489372 | 74.6530699 | <a href="https://www.inaturalist.org/observations/100599008">https://www.inaturalist.org/observations/100599008</a> |
| 1528 | Bubulcus ibis          | Cattle Egret         | 2020/4/4   | 2 | 0 | 14.2876030 | 74.4450519 | <a href="https://www.inaturalist.org/observations/41505927">https://www.inaturalist.org/observations/41505927</a>   |
| 1529 | Bubulcus ibis          | Cattle Egret         | 2019/1/26  | 1 | 0 | 14.3874785 | 75.8330591 | <a href="https://www.inaturalist.org/observations/84829106">https://www.inaturalist.org/observations/84829106</a>   |
| 1530 | Bubulcus ibis          | Cattle Egret         | 2021/12/18 | 1 | 0 | 14.4672704 | 79.9885043 | <a href="https://www.inaturalist.org/observations/103235689">https://www.inaturalist.org/observations/103235689</a> |
| 1531 | Bubulcus ibis          | Cattle Egret         | 2011/2/9   | 1 | 0 | 14.5699919 | 79.0419822 | <a href="https://www.inaturalist.org/observations/80829049">https://www.inaturalist.org/observations/80829049</a>   |
| 1532 | Bubulcus ibis          | Cattle Egret         | 2020/12/5  | 1 | 0 | 14.8187253 | 75.6110924 | <a href="https://www.inaturalist.org/observations/90234692">https://www.inaturalist.org/observations/90234692</a>   |
| 1533 | Bubulcus ibis          | Cattle Egret         | 2021/3/17  | 5 | 0 | 14.8665642 | 74.1611552 | <a href="https://www.inaturalist.org/observations/121108220">https://www.inaturalist.org/observations/121108220</a> |
| 1534 | Bubulcus ibis          | Cattle Egret         | 2018/5/13  | 5 | 0 | 14.9902716 | 74.0386271 | <a href="https://www.inaturalist.org/observations/13100717">https://www.inaturalist.org/observations/13100717</a>   |
| 1535 | Bubulcus ibis          | Cattle Egret         | 2012/5/16  | 5 | 0 | 14.9910530 | 74.1026802 | <a href="https://www.inaturalist.org/observations/75530079">https://www.inaturalist.org/observations/75530079</a>   |
| 1536 | Bubulcus ibis          | Cattle Egret         | 2021/12/6  | 2 | 0 | 15.0093890 | 74.0293730 | <a href="https://www.inaturalist.org/observations/102603183">https://www.inaturalist.org/observations/102603183</a> |
| 1537 | Bubulcus ibis          | Cattle Egret         | 2019/4/23  | 5 | 0 | 15.1302516 | 76.2240123 | <a href="https://www.inaturalist.org/observations/116077127">https://www.inaturalist.org/observations/116077127</a> |
| 1538 | Bubulcus ibis          | Cattle Egret         | 2020/2/7   | 3 | 0 | 15.1575695 | 73.9464867 | <a href="https://www.inaturalist.org/observations/38384459">https://www.inaturalist.org/observations/38384459</a>   |
| 1539 | Bubulcus ibis          | Cattle Egret         | 2014/1/21  | 1 | 0 | 15.1757125 | 73.9408350 | <a href="https://www.inaturalist.org/observations/103477715">https://www.inaturalist.org/observations/103477715</a> |
| 1540 | Bubulcus ibis          | Cattle Egret         | 2019/11/18 | 6 | 0 | 15.1811792 | 73.9496120 | <a href="https://www.inaturalist.org/observations/36153981">https://www.inaturalist.org/observations/36153981</a>   |
| 1541 | Bubulcus ibis          | Cattle Egret         | 2020/4/4   | 2 | 0 | 15.2137626 | 73.9357281 | <a href="https://www.inaturalist.org/observations/41677123">https://www.inaturalist.org/observations/41677123</a>   |
| 1542 | Bubulcus ibis          | Cattle Egret         | 2021/10/23 | 2 | 0 | 15.2159113 | 74.2195572 | <a href="https://www.inaturalist.org/observations/106552938">https://www.inaturalist.org/observations/106552938</a> |
| 1543 | Bubulcus ibis          | Cattle Egret         | 2018/5/16  | 2 | 0 | 15.2230556 | 73.9372222 | <a href="https://www.inaturalist.org/observations/85063463">https://www.inaturalist.org/observations/85063463</a>   |
| 1544 | Bubulcus ibis          | Cattle Egret         | 2016/7/14  | 2 | 0 | 15.2395777 | 77.0574663 | <a href="https://www.inaturalist.org/observations/137233649">https://www.inaturalist.org/observations/137233649</a> |
| 1545 | Bubulcus ibis          | Cattle Egret         | 2016/11/3  | 1 | 0 | 15.2454651 | 73.9325010 | <a href="https://www.inaturalist.org/observations/37781442">https://www.inaturalist.org/observations/37781442</a>   |
| 1546 | Bubulcus<br>coromandus | ibis<br>Cattle Egret | 2021/2/26  | 2 | 0 | 15.2620385 | 76.4803470 | <a href="https://www.inaturalist.org/observations/70188165">https://www.inaturalist.org/observations/70188165</a>   |
| 1547 | Bubulcus ibis          | Cattle Egret         | 2020/12/6  | 1 | 0 | 15.2857066 | 74.9298191 | <a href="https://www.inaturalist.org/observations/90235421">https://www.inaturalist.org/observations/90235421</a>   |
| 1548 | Bubulcus ibis          | Cattle Egret         | 2020/1/22  | 1 | 0 | 15.2865157 | 73.9409132 | <a href="https://www.inaturalist.org/observations/38951651">https://www.inaturalist.org/observations/38951651</a>   |
| 1549 | Bubulcus ibis          | Cattle Egret         | 2019/3/1   | 4 | 0 | 15.2948634 | 73.9074282 | <a href="https://www.inaturalist.org/observations/65494156">https://www.inaturalist.org/observations/65494156</a>   |

|      |               |              |            |   |   |            |            |                                                                                                                     |
|------|---------------|--------------|------------|---|---|------------|------------|---------------------------------------------------------------------------------------------------------------------|
| 1550 | Bubulcus ibis | Cattle Egret | 2019/11/20 | 2 | 0 | 15.3002305 | 74.1239958 | <a href="https://www.inaturalist.org/observations/65468717">https://www.inaturalist.org/observations/65468717</a>   |
| 1551 | Bubulcus ibis | Cattle Egret | 2020/12/7  | 2 | 0 | 15.3002305 | 74.1239958 | <a href="https://www.inaturalist.org/observations/67693978">https://www.inaturalist.org/observations/67693978</a>   |
| 1552 | Bubulcus ibis | Cattle Egret | 2022/8/19  | 0 | 0 | 15.3172775 | 75.7138884 | <a href="https://www.inaturalist.org/observations/132797069">https://www.inaturalist.org/observations/132797069</a> |
| 1553 | Bubulcus ibis | Cattle Egret | 2022/10/4  | 2 | 0 | 15.3303778 | 76.4592517 | <a href="https://www.inaturalist.org/observations/143010828">https://www.inaturalist.org/observations/143010828</a> |
| 1554 | Bubulcus ibis | Cattle Egret | 2014/3/15  | 1 | 0 | 15.3350132 | 76.4600240 | <a href="https://www.inaturalist.org/observations/81444035">https://www.inaturalist.org/observations/81444035</a>   |
| 1555 | Bubulcus ibis | Cattle Egret | 2003/3/17  | 2 | 0 | 15.3350132 | 76.4600240 | <a href="https://www.inaturalist.org/observations/105666651">https://www.inaturalist.org/observations/105666651</a> |
| 1556 | Bubulcus ibis | Cattle Egret | 2015/2/7   | 4 | 0 | 15.3376955 | 76.4630119 | <a href="https://www.inaturalist.org/observations/42458852">https://www.inaturalist.org/observations/42458852</a>   |
| 1557 | Bubulcus ibis | Cattle Egret | 2020/11/20 | 4 | 0 | 15.3849015 | 75.1026649 | <a href="https://www.inaturalist.org/observations/66245551">https://www.inaturalist.org/observations/66245551</a>   |
| 1558 | Bubulcus ibis | Cattle Egret | 2011/2/22  | 3 | 0 | 15.3911236 | 73.8781616 | <a href="https://www.inaturalist.org/observations/46580498">https://www.inaturalist.org/observations/46580498</a>   |
| 1559 | Bubulcus ibis | Cattle Egret | 2008/11/17 | 2 | 0 | 15.3993440 | 73.8441730 | <a href="https://www.inaturalist.org/observations/57421652">https://www.inaturalist.org/observations/57421652</a>   |
| 1560 | Bubulcus ibis | Cattle Egret | 2021/12/24 | 1 | 0 | 15.4515667 | 73.8503033 | <a href="https://www.inaturalist.org/observations/103677073">https://www.inaturalist.org/observations/103677073</a> |
| 1561 | Bubulcus ibis | Cattle Egret | 2014/11/18 | 2 | 0 | 15.4527767 | 74.0107378 | <a href="https://www.inaturalist.org/observations/142408050">https://www.inaturalist.org/observations/142408050</a> |
| 1562 | Bubulcus ibis | Cattle Egret | 2022/1/3   | 1 | 0 | 15.4650724 | 73.8656665 | <a href="https://www.inaturalist.org/observations/105643636">https://www.inaturalist.org/observations/105643636</a> |
| 1563 | Bubulcus ibis | Cattle Egret | 2019/12/22 | 2 | 0 | 15.4781590 | 73.8106269 | <a href="https://www.inaturalist.org/observations/36845972">https://www.inaturalist.org/observations/36845972</a>   |
| 1564 | Bubulcus ibis | Cattle Egret | 2018/4/15  | 1 | 0 | 15.4935065 | 73.8171632 | <a href="https://www.inaturalist.org/observations/47262168">https://www.inaturalist.org/observations/47262168</a>   |
| 1565 | Bubulcus ibis | Cattle Egret | 2018/12/15 | 2 | 0 | 15.5024167 | 73.9134167 | <a href="https://www.inaturalist.org/observations/67967872">https://www.inaturalist.org/observations/67967872</a>   |
| 1566 | Bubulcus ibis | Cattle Egret | 2022/11/12 | 3 | 0 | 15.5032250 | 73.9126150 | <a href="https://www.inaturalist.org/observations/141883186">https://www.inaturalist.org/observations/141883186</a> |
| 1567 | Bubulcus ibis | Cattle Egret | 2022/5/20  | 5 | 0 | 15.5038769 | 73.9121918 | <a href="https://www.inaturalist.org/observations/118141818">https://www.inaturalist.org/observations/118141818</a> |
| 1568 | Bubulcus ibis | Cattle Egret | 2019/3/6   | 2 | 0 | 15.5134106 | 73.8222427 | <a href="https://www.inaturalist.org/observations/21508071">https://www.inaturalist.org/observations/21508071</a>   |
| 1569 | Bubulcus ibis | Cattle Egret | 2017/6/1   | 3 | 0 | 15.5261977 | 73.8321404 | <a href="https://www.inaturalist.org/observations/36403331">https://www.inaturalist.org/observations/36403331</a>   |
| 1570 | Bubulcus ibis | Cattle Egret | 2017/5/28  | 6 | 0 | 15.5634075 | 73.8051895 | <a href="https://www.inaturalist.org/observations/36093376">https://www.inaturalist.org/observations/36093376</a>   |
| 1571 | Bubulcus ibis | Cattle Egret | 2022/4/9   | 3 | 0 | 15.5638262 | 73.8053098 | <a href="https://www.inaturalist.org/observations/111154043">https://www.inaturalist.org/observations/111154043</a> |
| 1572 | Bubulcus ibis | Cattle Egret | 2012/3/6   | 4 | 0 | 15.5817690 | 73.8489990 | <a href="http://www.inaturalist.org/observations/1587787">http://www.inaturalist.org/observations/1587787</a>       |
| 1573 | Bubulcus ibis | Cattle Egret | 2021/5/2   | 1 | 0 | 15.5868106 | 73.7453296 | <a href="https://www.inaturalist.org/observations/76447810">https://www.inaturalist.org/observations/76447810</a>   |
| 1574 | Bubulcus ibis | Cattle Egret | 2021/10/29 | 2 | 0 | 15.6843116 | 73.9668408 | <a href="https://www.inaturalist.org/observations/100685743">https://www.inaturalist.org/observations/100685743</a> |

|      |                     |      |              |            |   |   |            |            |                                                                                                                     |
|------|---------------------|------|--------------|------------|---|---|------------|------------|---------------------------------------------------------------------------------------------------------------------|
| 1575 | Bubulcus coromandus | ibis | Cattle Egret | 2022/11/17 | 0 | 0 | 15.7092388 | 74.2274459 | <a href="https://www.inaturalist.org/observations/142676249">https://www.inaturalist.org/observations/142676249</a> |
| 1576 | Bubulcus ibis       |      | Cattle Egret | 2021/10/29 | 3 | 0 | 15.7245025 | 73.9775642 | <a href="https://www.inaturalist.org/observations/104257193">https://www.inaturalist.org/observations/104257193</a> |
| 1577 | Bubulcus ibis       |      | Cattle Egret | 2020/7/31  | 4 | 0 | 15.8039250 | 78.0786694 | <a href="https://www.inaturalist.org/observations/63330676">https://www.inaturalist.org/observations/63330676</a>   |
| 1578 | Bubulcus ibis       |      | Cattle Egret | 2016/12/10 | 1 | 0 | 15.9498279 | 75.8160444 | <a href="https://www.inaturalist.org/observations/82685072">https://www.inaturalist.org/observations/82685072</a>   |
| 1579 | Bubulcus ibis       |      | Cattle Egret | 2020/1/1   | 2 | 0 | 16.0199067 | 75.8809899 | <a href="https://www.inaturalist.org/observations/37333322">https://www.inaturalist.org/observations/37333322</a>   |
| 1580 | Bubulcus ibis       |      | Cattle Egret | 2021/1/20  | 1 | 0 | 16.1842754 | 77.4099496 | <a href="https://www.inaturalist.org/observations/81796003">https://www.inaturalist.org/observations/81796003</a>   |
| 1581 | Bubulcus ibis       |      | Cattle Egret | 2020/12/27 | 1 | 0 | 16.1903698 | 77.3668809 | <a href="https://www.inaturalist.org/observations/67122020">https://www.inaturalist.org/observations/67122020</a>   |
| 1582 | Bubulcus ibis       |      | Cattle Egret | 2018/12/16 | 1 | 0 | 16.2209164 | 74.7489645 | <a href="https://www.inaturalist.org/observations/90276728">https://www.inaturalist.org/observations/90276728</a>   |
| 1583 | Bubulcus ibis       |      | Cattle Egret | 2015/7/22  | 7 | 0 | 16.2377925 | 80.1659372 | <a href="https://www.inaturalist.org/observations/17832723">https://www.inaturalist.org/observations/17832723</a>   |
| 1584 | Bubulcus ibis       |      | Cattle Egret | 2020/10/26 | 2 | 0 | 16.2693758 | 73.6784256 | <a href="https://www.inaturalist.org/observations/63626282">https://www.inaturalist.org/observations/63626282</a>   |
| 1585 | Bubulcus ibis       |      | Cattle Egret | 2014/5/21  | 1 | 0 | 16.3009744 | 80.4826479 | <a href="https://www.inaturalist.org/observations/94112850">https://www.inaturalist.org/observations/94112850</a>   |
| 1586 | Bubulcus ibis       |      | Cattle Egret | 2014/12/9  | 2 | 0 | 16.3061785 | 80.5129217 | <a href="https://www.inaturalist.org/observations/88111015">https://www.inaturalist.org/observations/88111015</a>   |
| 1587 | Bubulcus ibis       |      | Cattle Egret | 2013/5/19  | 2 | 0 | 16.3063074 | 80.5123720 | <a href="https://www.inaturalist.org/observations/88104302">https://www.inaturalist.org/observations/88104302</a>   |
| 1588 | Bubulcus ibis       |      | Cattle Egret | 2013/5/19  | 2 | 0 | 16.3063074 | 80.5123720 | <a href="https://www.inaturalist.org/observations/88104306">https://www.inaturalist.org/observations/88104306</a>   |
| 1589 | Bubulcus ibis       |      | Cattle Egret | 2014/12/1  | 1 | 0 | 16.3066195 | 80.5126851 | <a href="https://www.inaturalist.org/observations/94110991">https://www.inaturalist.org/observations/94110991</a>   |
| 1590 | Bubulcus ibis       |      | Cattle Egret | 2014/5/7   | 3 | 0 | 16.3068910 | 80.5125264 | <a href="https://www.inaturalist.org/observations/90128776">https://www.inaturalist.org/observations/90128776</a>   |
| 1591 | Bubulcus ibis       |      | Cattle Egret | 2014/5/21  | 2 | 0 | 16.3068910 | 80.5125264 | <a href="https://www.inaturalist.org/observations/90240685">https://www.inaturalist.org/observations/90240685</a>   |
| 1592 | Bubulcus ibis       |      | Cattle Egret | 2014/5/30  | 4 | 0 | 16.3068910 | 80.5125264 | <a href="https://www.inaturalist.org/observations/90240973">https://www.inaturalist.org/observations/90240973</a>   |
| 1593 | Bubulcus ibis       |      | Cattle Egret | 2014/6/16  | 1 | 0 | 16.3068910 | 80.5125264 | <a href="https://www.inaturalist.org/observations/94112031">https://www.inaturalist.org/observations/94112031</a>   |
| 1594 | Bubulcus ibis       |      | Cattle Egret | 2014/4/18  | 2 | 0 | 16.3081759 | 80.4422321 | <a href="https://www.inaturalist.org/observations/89170137">https://www.inaturalist.org/observations/89170137</a>   |
| 1595 | Bubulcus ibis       |      | Cattle Egret | 2020/11/16 | 2 | 0 | 16.3589350 | 74.3046760 | <a href="https://www.inaturalist.org/observations/65214680">https://www.inaturalist.org/observations/65214680</a>   |
| 1596 | Bubulcus ibis       |      | Cattle Egret | 2020/9/27  | 0 | 0 | 16.3631180 | 74.2915000 | <a href="https://www.inaturalist.org/observations/60979747">https://www.inaturalist.org/observations/60979747</a>   |
| 1597 | Bubulcus ibis       |      | Cattle Egret | 2015/7/22  | 5 | 0 | 16.3891696 | 80.1558853 | <a href="https://www.inaturalist.org/observations/17832751">https://www.inaturalist.org/observations/17832751</a>   |
| 1598 | Bubulcus ibis       |      | Cattle Egret | 2022/5/7   | 4 | 0 | 16.4072319 | 80.4031423 | <a href="https://www.inaturalist.org/observations/115842294">https://www.inaturalist.org/observations/115842294</a> |
| 1599 | Bubulcus ibis       |      | Cattle Egret | 2012/7/13  | 2 | 0 | 16.4984380 | 80.5984582 | <a href="https://www.inaturalist.org/observations/93589681">https://www.inaturalist.org/observations/93589681</a>   |

|      |               |              |            |   |   |            |            |                                                                                                                     |
|------|---------------|--------------|------------|---|---|------------|------------|---------------------------------------------------------------------------------------------------------------------|
| 1600 | Bubulcus ibis | Cattle Egret | 2013/4/24  | 2 | 0 | 16.5003047 | 80.6011540 | <a href="https://www.inaturalist.org/observations/88092037">https://www.inaturalist.org/observations/88092037</a>   |
| 1601 | Bubulcus ibis | Cattle Egret | 2012/2/28  | 1 | 0 | 16.5009947 | 80.5914539 | <a href="https://www.inaturalist.org/observations/88029888">https://www.inaturalist.org/observations/88029888</a>   |
| 1602 | Bubulcus ibis | Cattle Egret | 2015/1/25  | 2 | 0 | 16.5046081 | 79.2783437 | <a href="https://www.inaturalist.org/observations/94201313">https://www.inaturalist.org/observations/94201313</a>   |
| 1603 | Bubulcus ibis | Cattle Egret | 2022/5/8   | 0 | 0 | 16.5073362 | 80.6332328 | <a href="https://www.inaturalist.org/observations/116218595">https://www.inaturalist.org/observations/116218595</a> |
| 1604 | Bubulcus ibis | Cattle Egret | 2021/12/20 | 1 | 0 | 16.5158642 | 80.5911313 | <a href="https://www.inaturalist.org/observations/103396095">https://www.inaturalist.org/observations/103396095</a> |
| 1605 | Bubulcus ibis | Cattle Egret | 2020/11/29 | 3 | 0 | 16.5183747 | 81.2758326 | <a href="https://www.inaturalist.org/observations/67455545">https://www.inaturalist.org/observations/67455545</a>   |
| 1606 | Bubulcus ibis | Cattle Egret | 2020/5/8   | 1 | 0 | 16.5214906 | 80.5908978 | <a href="https://www.inaturalist.org/observations/45249581">https://www.inaturalist.org/observations/45249581</a>   |
| 1607 | Bubulcus ibis | Cattle Egret | 2011/12/13 | 2 | 0 | 16.5223155 | 80.5727870 | <a href="https://www.inaturalist.org/observations/89648078">https://www.inaturalist.org/observations/89648078</a>   |
| 1608 | Bubulcus ibis | Cattle Egret | 2020/3/9   | 1 | 0 | 16.5269154 | 76.6576161 | <a href="https://www.inaturalist.org/observations/95630936">https://www.inaturalist.org/observations/95630936</a>   |
| 1609 | Bubulcus ibis | Cattle Egret | 2022/2/1   | 1 | 0 | 16.5358633 | 81.4976300 | <a href="https://www.inaturalist.org/observations/105946846">https://www.inaturalist.org/observations/105946846</a> |
| 1610 | Bubulcus ibis | Cattle Egret | 2022/8/24  | 3 | 0 | 16.5383388 | 81.5003314 | <a href="https://www.inaturalist.org/observations/132111606">https://www.inaturalist.org/observations/132111606</a> |
| 1611 | Bubulcus ibis | Cattle Egret | 2021/10/23 | 2 | 0 | 16.5436780 | 81.4922860 | <a href="https://www.inaturalist.org/observations/99070750">https://www.inaturalist.org/observations/99070750</a>   |
| 1612 | Bubulcus ibis | Cattle Egret | 2021/12/22 | 1 | 0 | 16.5448909 | 81.5212409 | <a href="https://www.inaturalist.org/observations/103471949">https://www.inaturalist.org/observations/103471949</a> |
| 1613 | Bubulcus ibis | Cattle Egret | 2021/12/22 | 1 | 0 | 16.5448909 | 81.5212409 | <a href="https://www.inaturalist.org/observations/103531632">https://www.inaturalist.org/observations/103531632</a> |
| 1614 | Bubulcus ibis | Cattle Egret | 2021/12/25 | 1 | 0 | 16.5448909 | 81.5212409 | <a href="https://www.inaturalist.org/observations/103639029">https://www.inaturalist.org/observations/103639029</a> |
| 1615 | Bubulcus ibis | Cattle Egret | 2022/5/7   | 1 | 0 | 16.5448909 | 81.5212409 | <a href="https://www.inaturalist.org/observations/116117502">https://www.inaturalist.org/observations/116117502</a> |
| 1616 | Bubulcus ibis | Cattle Egret | 2022/5/7   | 2 | 0 | 16.5448909 | 81.5212409 | <a href="https://www.inaturalist.org/observations/116435564">https://www.inaturalist.org/observations/116435564</a> |
| 1617 | Bubulcus ibis | Cattle Egret | 2022/5/7   | 2 | 0 | 16.5448909 | 81.5212409 | <a href="https://www.inaturalist.org/observations/116437670">https://www.inaturalist.org/observations/116437670</a> |
| 1618 | Bubulcus ibis | Cattle Egret | 2022/5/7   | 2 | 0 | 16.5448909 | 81.5212409 | <a href="https://www.inaturalist.org/observations/116574957">https://www.inaturalist.org/observations/116574957</a> |
| 1619 | Bubulcus ibis | Cattle Egret | 2022/5/7   | 1 | 0 | 16.5448909 | 81.5212409 | <a href="https://www.inaturalist.org/observations/116718015">https://www.inaturalist.org/observations/116718015</a> |
| 1620 | Bubulcus ibis | Cattle Egret | 2022/5/7   | 1 | 0 | 16.5448909 | 81.5212409 | <a href="https://www.inaturalist.org/observations/116718629">https://www.inaturalist.org/observations/116718629</a> |
| 1621 | Bubulcus ibis | Cattle Egret | 2022/5/7   | 3 | 0 | 16.5468896 | 81.4832253 | <a href="https://www.inaturalist.org/observations/115842389">https://www.inaturalist.org/observations/115842389</a> |
| 1622 | Bubulcus ibis | Cattle Egret | 2021/11/22 | 1 | 0 | 16.5559300 | 81.4912760 | <a href="https://www.inaturalist.org/observations/102016153">https://www.inaturalist.org/observations/102016153</a> |
| 1623 | Bubulcus ibis | Cattle Egret | 2021/11/22 | 1 | 0 | 16.5559300 | 81.4912760 | <a href="https://www.inaturalist.org/observations/102017096">https://www.inaturalist.org/observations/102017096</a> |
| 1624 | Bubulcus ibis | Cattle Egret | 2021/9/1   | 2 | 0 | 16.5567355 | 81.4942043 | <a href="https://www.inaturalist.org/observations/99065973">https://www.inaturalist.org/observations/99065973</a>   |

|      |               |              |            |   |   |            |            |                                                                                                                     |
|------|---------------|--------------|------------|---|---|------------|------------|---------------------------------------------------------------------------------------------------------------------|
| 1625 | Bubulcus ibis | Cattle Egret | 2021/12/25 | 1 | 0 | 16.5569433 | 81.4961333 | <a href="https://www.inaturalist.org/observations/104647603">https://www.inaturalist.org/observations/104647603</a> |
| 1626 | Bubulcus ibis | Cattle Egret | 2021/12/25 | 3 | 0 | 16.5569950 | 81.4941817 | <a href="https://www.inaturalist.org/observations/111967110">https://www.inaturalist.org/observations/111967110</a> |
| 1627 | Bubulcus ibis | Cattle Egret | 2022/2/4   | 2 | 0 | 16.5571917 | 81.4943100 | <a href="https://www.inaturalist.org/observations/106119782">https://www.inaturalist.org/observations/106119782</a> |
| 1628 | Bubulcus ibis | Cattle Egret | 2020/12/20 | 1 | 0 | 16.5577292 | 80.7269854 | <a href="https://www.inaturalist.org/observations/92475027">https://www.inaturalist.org/observations/92475027</a>   |
| 1629 | Bubulcus ibis | Cattle Egret | 2020/9/1   | 3 | 0 | 16.5578752 | 80.7064398 | <a href="https://www.inaturalist.org/observations/58258010">https://www.inaturalist.org/observations/58258010</a>   |
| 1630 | Bubulcus ibis | Cattle Egret | 2021/10/10 | 3 | 0 | 16.5581190 | 81.4981635 | <a href="https://www.inaturalist.org/observations/97889568">https://www.inaturalist.org/observations/97889568</a>   |
| 1631 | Bubulcus ibis | Cattle Egret | 2020/12/6  | 1 | 0 | 16.5592179 | 80.7610010 | <a href="https://www.inaturalist.org/observations/92452601">https://www.inaturalist.org/observations/92452601</a>   |
| 1632 | Bubulcus ibis | Cattle Egret | 2021/8/1   | 1 | 0 | 16.5665453 | 80.6189987 | <a href="https://www.inaturalist.org/observations/89445113">https://www.inaturalist.org/observations/89445113</a>   |
| 1633 | Bubulcus ibis | Cattle Egret | 2021/12/5  | 2 | 0 | 16.5755915 | 80.6823019 | <a href="https://www.inaturalist.org/observations/104498307">https://www.inaturalist.org/observations/104498307</a> |
| 1634 | Bubulcus ibis | Cattle Egret | 2020/11/29 | 1 | 0 | 16.5758927 | 80.6886222 | <a href="https://www.inaturalist.org/observations/92670072">https://www.inaturalist.org/observations/92670072</a>   |
| 1635 | Bubulcus ibis | Cattle Egret | 2021/12/24 | 2 | 0 | 16.5759672 | 79.3124022 | <a href="https://www.inaturalist.org/observations/105600292">https://www.inaturalist.org/observations/105600292</a> |
| 1636 | Bubulcus ibis | Cattle Egret | 2020/12/27 | 1 | 0 | 16.5957792 | 80.6181858 | <a href="https://www.inaturalist.org/observations/90049745">https://www.inaturalist.org/observations/90049745</a>   |
| 1637 | Bubulcus ibis | Cattle Egret | 2020/12/27 | 1 | 0 | 16.6002639 | 80.6164944 | <a href="https://www.inaturalist.org/observations/67125892">https://www.inaturalist.org/observations/67125892</a>   |
| 1638 | Bubulcus ibis | Cattle Egret | 2022/5/4   | 2 | 0 | 16.6174076 | 80.3606048 | <a href="https://www.inaturalist.org/observations/116945948">https://www.inaturalist.org/observations/116945948</a> |
| 1639 | Bubulcus ibis | Cattle Egret | 2017/12/21 | 6 | 0 | 16.6343900 | 73.3570047 | <a href="https://www.inaturalist.org/observations/30732789">https://www.inaturalist.org/observations/30732789</a>   |
| 1640 | Bubulcus ibis | Cattle Egret | 2020/11/8  | 1 | 0 | 16.6357807 | 80.7980061 | <a href="https://www.inaturalist.org/observations/92484760">https://www.inaturalist.org/observations/92484760</a>   |
| 1641 | Bubulcus ibis | Cattle Egret | 2020/11/8  | 1 | 0 | 16.6357807 | 80.7980061 | <a href="https://www.inaturalist.org/observations/92484784">https://www.inaturalist.org/observations/92484784</a>   |
| 1642 | Bubulcus ibis | Cattle Egret | 2022/10/16 | 2 | 0 | 16.6398103 | 80.4851532 | <a href="https://www.inaturalist.org/observations/140376593">https://www.inaturalist.org/observations/140376593</a> |
| 1643 | Bubulcus ibis | Cattle Egret | 2022/2/19  | 3 | 0 | 16.6495021 | 80.4908577 | <a href="https://www.inaturalist.org/observations/108083299">https://www.inaturalist.org/observations/108083299</a> |
| 1644 | Bubulcus ibis | Cattle Egret | 2022/9/18  | 1 | 0 | 16.6511318 | 80.4669117 | <a href="https://www.inaturalist.org/observations/135761402">https://www.inaturalist.org/observations/135761402</a> |
| 1645 | Bubulcus ibis | Cattle Egret | 2018/3/11  | 4 | 0 | 16.6545164 | 73.5125814 | <a href="https://www.inaturalist.org/observations/30862166">https://www.inaturalist.org/observations/30862166</a>   |
| 1646 | Bubulcus ibis | Cattle Egret | 2020/9/12  | 4 | 0 | 16.6616227 | 74.2408329 | <a href="https://www.inaturalist.org/observations/59863561">https://www.inaturalist.org/observations/59863561</a>   |
| 1647 | Bubulcus ibis | Cattle Egret | 2021/7/9   | 2 | 0 | 16.6624481 | 80.6997220 | <a href="https://www.inaturalist.org/observations/86538368">https://www.inaturalist.org/observations/86538368</a>   |
| 1648 | Bubulcus ibis | Cattle Egret | 2018/6/3   | 1 | 0 | 16.6646610 | 81.1840201 | <a href="https://www.inaturalist.org/observations/96476607">https://www.inaturalist.org/observations/96476607</a>   |
| 1649 | Bubulcus ibis | Cattle Egret | 2015/11/22 | 2 | 0 | 16.6649730 | 81.1810684 | <a href="https://www.inaturalist.org/observations/94303545">https://www.inaturalist.org/observations/94303545</a>   |



|      |                     |                   |            |   |   |            |            |                                                                                                                     |
|------|---------------------|-------------------|------------|---|---|------------|------------|---------------------------------------------------------------------------------------------------------------------|
| 1650 | Bubulcus ibis       | Cattle Egret      | 2018/3/3   | 1 | 0 | 16.6649730 | 81.1810684 | <a href="https://www.inaturalist.org/observations/96478149">https://www.inaturalist.org/observations/96478149</a>   |
| 1651 | Bubulcus ibis       | Cattle Egret      | 2017/10/20 | 1 | 0 | 16.6649730 | 81.1810684 | <a href="https://www.inaturalist.org/observations/98112197">https://www.inaturalist.org/observations/98112197</a>   |
| 1652 | Bubulcus ibis       | Cattle Egret      | 2015/2/21  | 1 | 0 | 16.6651507 | 81.1822816 | <a href="https://www.inaturalist.org/observations/94230965">https://www.inaturalist.org/observations/94230965</a>   |
| 1653 | Bubulcus ibis       | Cattle Egret      | 2018/3/10  | 4 | 0 | 16.6825881 | 73.5468581 | <a href="https://www.inaturalist.org/observations/30858980">https://www.inaturalist.org/observations/30858980</a>   |
| 1654 | Bubulcus ibis       | Cattle Egret      | 2022/2/18  | 0 | 0 | 16.6919639 | 80.7736000 | <a href="https://www.inaturalist.org/observations/106968151">https://www.inaturalist.org/observations/106968151</a> |
| 1655 | Bubulcus ibis       | Cattle Egret      | 2021/12/30 | 1 | 0 | 16.6996611 | 80.7642333 | <a href="https://www.inaturalist.org/observations/103957929">https://www.inaturalist.org/observations/103957929</a> |
| 1656 | Bubulcus ibis       | Cattle Egret      | 2020/10/31 | 1 | 0 | 16.7129620 | 82.1079752 | <a href="https://www.inaturalist.org/observations/63935031">https://www.inaturalist.org/observations/63935031</a>   |
| 1657 | Bubulcus ibis       | Cattle Egret      | 2020/3/9   | 1 | 0 | 16.7424318 | 77.1068781 | <a href="https://www.inaturalist.org/observations/95631080">https://www.inaturalist.org/observations/95631080</a>   |
| 1658 | Bubulcus ibis       | Cattle Egret      | 2022/2/21  | 3 | 0 | 16.7433636 | 81.2167693 | <a href="https://www.inaturalist.org/observations/107168715">https://www.inaturalist.org/observations/107168715</a> |
| 1659 | Bubulcus ibis       | Cattle Egret      | 2020/11/6  | 1 | 0 | 16.7454198 | 74.2284334 | <a href="https://www.inaturalist.org/observations/64422918">https://www.inaturalist.org/observations/64422918</a>   |
| 1660 | Bubulcus ibis       | Cattle Egret      | 2021/3/27  | 1 | 0 | 16.7480817 | 73.3307267 | <a href="https://www.inaturalist.org/observations/72887308">https://www.inaturalist.org/observations/72887308</a>   |
| 1661 | Bubulcus ibis       | Cattle Egret      | 2022/5/10  | 5 | 0 | 16.7566737 | 81.6769713 | <a href="https://www.inaturalist.org/observations/116381126">https://www.inaturalist.org/observations/116381126</a> |
| 1662 | Bubulcus ibis       | Cattle Egret      | 2017/6/16  | 5 | 0 | 16.8523950 | 73.3204750 | <a href="https://www.inaturalist.org/observations/30471075">https://www.inaturalist.org/observations/30471075</a>   |
| 1663 | Bubulcus ibis       | Cattle Egret      | 2021/5/19  | 1 | 0 | 16.8776035 | 80.9276858 | <a href="https://www.inaturalist.org/observations/99640542">https://www.inaturalist.org/observations/99640542</a>   |
| 1664 | Bubulcus ibis       | Cattle Egret      | 2019/3/15  | 2 | 0 | 16.8860901 | 75.7093519 | <a href="https://www.inaturalist.org/observations/48656053">https://www.inaturalist.org/observations/48656053</a>   |
| 1665 | Bubulcus ibis       | Cattle Egret      | 2011/10/19 | 2 | 0 | 16.9135908 | 81.8182663 | <a href="https://www.inaturalist.org/observations/50745210">https://www.inaturalist.org/observations/50745210</a>   |
| 1666 | Bubulcus ibis       | Cattle Egret      | 2022/8/21  | 4 | 0 | 16.9361416 | 79.5084509 | <a href="https://www.inaturalist.org/observations/132118896">https://www.inaturalist.org/observations/132118896</a> |
| 1667 | Bubulcus ibis       | Cattle Egret      | 2021/5/10  | 1 | 0 | 16.9442253 | 74.4291135 | <a href="https://www.inaturalist.org/observations/78200873">https://www.inaturalist.org/observations/78200873</a>   |
| 1668 | Bubulcus coromandus | ibis Cattle Egret | 2019/8/16  | 1 | 0 | 16.9840206 | 81.7836210 | <a href="https://www.inaturalist.org/observations/31125755">https://www.inaturalist.org/observations/31125755</a>   |
| 1669 | Bubulcus ibis       | Cattle Egret      | 2022/1/15  | 2 | 0 | 16.9889430 | 82.2476168 | <a href="https://www.inaturalist.org/observations/105019147">https://www.inaturalist.org/observations/105019147</a> |
| 1670 | Bubulcus ibis       | Cattle Egret      | 2014/1/31  | 2 | 0 | 16.9930000 | 82.2720000 | <a href="https://www.inaturalist.org/observations/35240921">https://www.inaturalist.org/observations/35240921</a>   |
| 1671 | Bubulcus ibis       | Cattle Egret      | 2018/5/8   | 3 | 0 | 16.9997067 | 73.3241014 | <a href="https://www.inaturalist.org/observations/22764568">https://www.inaturalist.org/observations/22764568</a>   |
| 1672 | Bubulcus ibis       | Cattle Egret      | 2018/4/27  | 4 | 0 | 17.0009623 | 73.3221212 | <a href="https://www.inaturalist.org/observations/11486471">https://www.inaturalist.org/observations/11486471</a>   |
| 1673 | Bubulcus ibis       | Cattle Egret      | 2020/3/25  | 2 | 0 | 17.0686131 | 81.8871384 | <a href="https://www.inaturalist.org/observations/40691553">https://www.inaturalist.org/observations/40691553</a>   |
| 1674 | Bubulcus ibis       | Cattle Egret      | 2022/11/2  | 1 | 0 | 17.0699110 | 75.6877025 | <a href="https://www.inaturalist.org/observations/141457838">https://www.inaturalist.org/observations/141457838</a> |

|      |               |              |            |   |   |            |            |                                                                                                                     |
|------|---------------|--------------|------------|---|---|------------|------------|---------------------------------------------------------------------------------------------------------------------|
| 1675 | Bubulcus ibis | Cattle Egret | 2021/12/25 | 1 | 0 | 17.1783353 | 80.4738868 | <a href="https://www.inaturalist.org/observations/103617786">https://www.inaturalist.org/observations/103617786</a> |
| 1676 | Bubulcus ibis | Cattle Egret | 2019/4/18  | 2 | 0 | 17.3270279 | 78.4104486 | <a href="https://www.inaturalist.org/observations/22696598">https://www.inaturalist.org/observations/22696598</a>   |
| 1677 | Bubulcus ibis | Cattle Egret | 2022/1/7   | 8 | 0 | 17.3506780 | 78.4513068 | <a href="https://www.inaturalist.org/observations/104522786">https://www.inaturalist.org/observations/104522786</a> |
| 1678 | Bubulcus ibis | Cattle Egret | 2022/1/7   | 3 | 0 | 17.3506780 | 78.4513068 | <a href="https://www.inaturalist.org/observations/104522787">https://www.inaturalist.org/observations/104522787</a> |
| 1679 | Bubulcus ibis | Cattle Egret | 1980/1/1   | 2 | 0 | 17.3605399 | 78.5830721 | <a href="https://www.inaturalist.org/observations/106677305">https://www.inaturalist.org/observations/106677305</a> |
| 1680 | Bubulcus ibis | Cattle Egret | 2022/2/11  | 2 | 0 | 17.3616868 | 78.5810122 | <a href="https://www.inaturalist.org/observations/106677304">https://www.inaturalist.org/observations/106677304</a> |
| 1681 | Bubulcus ibis | Cattle Egret | 2022/2/11  | 2 | 0 | 17.3621783 | 78.5820421 | <a href="https://www.inaturalist.org/observations/106677303">https://www.inaturalist.org/observations/106677303</a> |
| 1682 | Bubulcus ibis | Cattle Egret | 2022/2/11  | 2 | 0 | 17.3621816 | 78.5816988 | <a href="https://www.inaturalist.org/observations/106677302">https://www.inaturalist.org/observations/106677302</a> |
| 1683 | Bubulcus ibis | Cattle Egret | 2022/2/11  | 2 | 0 | 17.3631613 | 78.5796389 | <a href="https://www.inaturalist.org/observations/106677306">https://www.inaturalist.org/observations/106677306</a> |
| 1684 | Bubulcus ibis | Cattle Egret | 2022/2/20  | 2 | 0 | 17.3657498 | 78.5823237 | <a href="https://www.inaturalist.org/observations/107109066">https://www.inaturalist.org/observations/107109066</a> |
| 1685 | Bubulcus ibis | Cattle Egret | 2019/4/29  | 2 | 0 | 17.3659770 | 77.8955797 | <a href="https://www.inaturalist.org/observations/23856018">https://www.inaturalist.org/observations/23856018</a>   |
| 1686 | Bubulcus ibis | Cattle Egret | 2007/3/3   | 5 | 0 | 17.3727390 | 78.4785170 | <a href="https://www.inaturalist.org/observations/18798180">https://www.inaturalist.org/observations/18798180</a>   |
| 1687 | Bubulcus ibis | Cattle Egret | 2022/11/27 | 3 | 0 | 17.3836184 | 78.3713540 | <a href="https://www.inaturalist.org/observations/143132627">https://www.inaturalist.org/observations/143132627</a> |
| 1688 | Bubulcus ibis | Cattle Egret | 2019/6/4   | 2 | 0 | 17.3970536 | 78.5197202 | <a href="https://www.inaturalist.org/observations/26428823">https://www.inaturalist.org/observations/26428823</a>   |
| 1689 | Bubulcus ibis | Cattle Egret | 2020/7/5   | 3 | 0 | 17.4135013 | 78.5287355 | <a href="https://www.inaturalist.org/observations/65023451">https://www.inaturalist.org/observations/65023451</a>   |
| 1690 | Bubulcus ibis | Cattle Egret | 2019/11/14 | 2 | 0 | 17.4168890 | 78.4386700 | <a href="https://www.inaturalist.org/observations/58420054">https://www.inaturalist.org/observations/58420054</a>   |
| 1691 | Bubulcus ibis | Cattle Egret | 2022/2/5   | 2 | 0 | 17.4209212 | 78.4717085 | <a href="https://www.inaturalist.org/observations/106160721">https://www.inaturalist.org/observations/106160721</a> |
| 1692 | Bubulcus ibis | Cattle Egret | 2021/10/13 | 2 | 0 | 17.4212122 | 78.5408036 | <a href="https://www.inaturalist.org/observations/98391060">https://www.inaturalist.org/observations/98391060</a>   |
| 1693 | Bubulcus ibis | Cattle Egret | 2022/7/31  | 3 | 0 | 17.4320751 | 78.4753877 | <a href="https://www.inaturalist.org/observations/130092336">https://www.inaturalist.org/observations/130092336</a> |
| 1694 | Bubulcus ibis | Cattle Egret | 2022/9/23  | 2 | 0 | 17.4320751 | 78.4753877 | <a href="https://www.inaturalist.org/observations/137095129">https://www.inaturalist.org/observations/137095129</a> |
| 1695 | Bubulcus ibis | Cattle Egret | 2019/8/18  | 6 | 0 | 17.4334618 | 78.5266567 | <a href="https://www.inaturalist.org/observations/31033930">https://www.inaturalist.org/observations/31033930</a>   |
| 1696 | Bubulcus ibis | Cattle Egret | 2019/8/1   | 5 | 0 | 17.4340682 | 78.5257549 | <a href="https://www.inaturalist.org/observations/30736404">https://www.inaturalist.org/observations/30736404</a>   |
| 1697 | Bubulcus ibis | Cattle Egret | 2017/12/1  | 5 | 0 | 17.4360208 | 78.3919117 | <a href="https://www.inaturalist.org/observations/9014932">https://www.inaturalist.org/observations/9014932</a>     |
| 1698 | Bubulcus ibis | Cattle Egret | 2022/7/20  | 2 | 0 | 17.4460810 | 78.2221074 | <a href="https://www.inaturalist.org/observations/140230610">https://www.inaturalist.org/observations/140230610</a> |
| 1699 | Bubulcus ibis | Cattle Egret | 2022/10/12 | 0 | 0 | 17.4567789 | 78.2333743 | <a href="https://www.inaturalist.org/observations/138816912">https://www.inaturalist.org/observations/138816912</a> |

|      |               |              |            |   |   |            |            |                                                                                                                     |
|------|---------------|--------------|------------|---|---|------------|------------|---------------------------------------------------------------------------------------------------------------------|
| 1700 | Bubulcus ibis | Cattle Egret | 2019/5/4   | 3 | 0 | 17.4697527 | 79.6930711 | <a href="https://www.inaturalist.org/observations/24497681">https://www.inaturalist.org/observations/24497681</a>   |
| 1701 | Bubulcus ibis | Cattle Egret | 2020/12/3  | 2 | 0 | 17.4723432 | 78.7974250 | <a href="https://www.inaturalist.org/observations/67861303">https://www.inaturalist.org/observations/67861303</a>   |
| 1702 | Bubulcus ibis | Cattle Egret | 2022/3/5   | 6 | 0 | 17.4846398 | 78.2429867 | <a href="https://www.inaturalist.org/observations/107947011">https://www.inaturalist.org/observations/107947011</a> |
| 1703 | Bubulcus ibis | Cattle Egret | 2022/3/5   | 5 | 0 | 17.4846398 | 78.2429867 | <a href="https://www.inaturalist.org/observations/107947014">https://www.inaturalist.org/observations/107947014</a> |
| 1704 | Bubulcus ibis | Cattle Egret | 2019/5/4   | 3 | 0 | 17.4851333 | 79.6855550 | <a href="https://www.inaturalist.org/observations/24510432">https://www.inaturalist.org/observations/24510432</a>   |
| 1705 | Bubulcus ibis | Cattle Egret | 2022/2/19  | 1 | 0 | 17.4860569 | 78.3465311 | <a href="https://www.inaturalist.org/observations/107240695">https://www.inaturalist.org/observations/107240695</a> |
| 1706 | Bubulcus ibis | Cattle Egret | 2022/9/3   | 4 | 0 | 17.4860569 | 78.3465311 | <a href="https://www.inaturalist.org/observations/133432833">https://www.inaturalist.org/observations/133432833</a> |
| 1707 | Bubulcus ibis | Cattle Egret | 2022/9/3   | 5 | 0 | 17.4860569 | 78.3465311 | <a href="https://www.inaturalist.org/observations/133432845">https://www.inaturalist.org/observations/133432845</a> |
| 1708 | Bubulcus ibis | Cattle Egret | 2021/12/4  | 3 | 0 | 17.4860570 | 78.3465311 | <a href="https://www.inaturalist.org/observations/102469055">https://www.inaturalist.org/observations/102469055</a> |
| 1709 | Bubulcus ibis | Cattle Egret | 2021/12/8  | 2 | 0 | 17.4860570 | 78.3465311 | <a href="https://www.inaturalist.org/observations/102805806">https://www.inaturalist.org/observations/102805806</a> |
| 1710 | Bubulcus ibis | Cattle Egret | 2021/12/8  | 2 | 0 | 17.4860570 | 78.3465311 | <a href="https://www.inaturalist.org/observations/102805812">https://www.inaturalist.org/observations/102805812</a> |
| 1711 | Bubulcus ibis | Cattle Egret | 2020/7/1   | 3 | 0 | 17.4901217 | 78.5319050 | <a href="https://www.inaturalist.org/observations/51565455">https://www.inaturalist.org/observations/51565455</a>   |
| 1712 | Bubulcus ibis | Cattle Egret | 2020/7/22  | 2 | 0 | 17.4952106 | 78.3134994 | <a href="https://www.inaturalist.org/observations/53907535">https://www.inaturalist.org/observations/53907535</a>   |
| 1713 | Bubulcus ibis | Cattle Egret | 2022/11/6  | 1 | 0 | 17.4958478 | 77.9410251 | <a href="https://www.inaturalist.org/observations/141255480">https://www.inaturalist.org/observations/141255480</a> |
| 1714 | Bubulcus ibis | Cattle Egret | 2020/10/10 | 6 | 0 | 17.5175446 | 78.6512303 | <a href="https://www.inaturalist.org/observations/62195376">https://www.inaturalist.org/observations/62195376</a>   |
| 1715 | Bubulcus ibis | Cattle Egret | 2022/9/6   | 2 | 0 | 17.5180951 | 78.2631080 | <a href="https://www.inaturalist.org/observations/134276023">https://www.inaturalist.org/observations/134276023</a> |
| 1716 | Bubulcus ibis | Cattle Egret | 2020/8/4   | 2 | 0 | 17.5224680 | 78.3344380 | <a href="https://www.inaturalist.org/observations/56042724">https://www.inaturalist.org/observations/56042724</a>   |
| 1717 | Bubulcus ibis | Cattle Egret | 2021/10/29 | 1 | 0 | 17.5224792 | 78.3344383 | <a href="https://www.inaturalist.org/observations/100986658">https://www.inaturalist.org/observations/100986658</a> |
| 1718 | Bubulcus ibis | Cattle Egret | 2019/1/24  | 5 | 0 | 17.5238740 | 78.3889649 | <a href="https://www.inaturalist.org/observations/19859519">https://www.inaturalist.org/observations/19859519</a>   |
| 1719 | Bubulcus ibis | Cattle Egret | 2021/10/3  | 3 | 0 | 17.5369001 | 78.6881403 | <a href="https://www.inaturalist.org/observations/97882832">https://www.inaturalist.org/observations/97882832</a>   |
| 1720 | Bubulcus ibis | Cattle Egret | 2020/3/10  | 1 | 0 | 17.5712219 | 76.9075777 | <a href="https://www.inaturalist.org/observations/95631477">https://www.inaturalist.org/observations/95631477</a>   |
| 1721 | Bubulcus ibis | Cattle Egret | 2022/6/12  | 1 | 0 | 17.6552448 | 78.0760688 | <a href="https://www.inaturalist.org/observations/121375258">https://www.inaturalist.org/observations/121375258</a> |
| 1722 | Bubulcus ibis | Cattle Egret | 2022/12/11 | 1 | 0 | 17.6595013 | 78.0602999 | <a href="https://www.inaturalist.org/observations/144148590">https://www.inaturalist.org/observations/144148590</a> |
| 1723 | Bubulcus ibis | Cattle Egret | 2013/8/2   | 2 | 0 | 17.6687912 | 80.8935925 | <a href="https://www.inaturalist.org/observations/52544583">https://www.inaturalist.org/observations/52544583</a>   |
| 1724 | Bubulcus ibis | Cattle Egret | 2020/2/2   | 3 | 0 | 17.6804587 | 74.0182611 | <a href="https://www.inaturalist.org/observations/66400706">https://www.inaturalist.org/observations/66400706</a>   |

|      |                     |                   |            |   |   |            |             |                                                                                                                     |
|------|---------------------|-------------------|------------|---|---|------------|-------------|---------------------------------------------------------------------------------------------------------------------|
| 1725 | Bubulcus ibis       | Cattle Egret      | 2020/12/16 | 4 | 0 | 17.6804639 | 74.0182610  | <a href="https://www.inaturalist.org/observations/69146472">https://www.inaturalist.org/observations/69146472</a>   |
| 1726 | Bubulcus ibis       | Cattle Egret      | 2020/11/25 | 1 | 0 | 17.6804639 | 74.0182610  | <a href="https://www.inaturalist.org/observations/71068309">https://www.inaturalist.org/observations/71068309</a>   |
| 1727 | Bubulcus ibis       | Cattle Egret      | 2020/11/25 | 1 | 0 | 17.6804639 | 74.0182610  | <a href="https://www.inaturalist.org/observations/71068313">https://www.inaturalist.org/observations/71068313</a>   |
| 1728 | Bubulcus ibis       | Cattle Egret      | 2021/12/12 | 1 | 0 | 17.6866168 | 78.3273244  | <a href="https://www.inaturalist.org/observations/104472175">https://www.inaturalist.org/observations/104472175</a> |
| 1729 | Bubulcus ibis       | Cattle Egret      | 2019/1/31  | 5 | 0 | 17.7082806 | 73.9814453  | <a href="https://www.inaturalist.org/observations/19986377">https://www.inaturalist.org/observations/19986377</a>   |
| 1730 | Bubulcus ibis       | Cattle Egret      | 2020/9/18  | 5 | 0 | 17.7880092 | 83.2118825  | <a href="https://www.inaturalist.org/observations/59951062">https://www.inaturalist.org/observations/59951062</a>   |
| 1731 | Bubulcus ibis       | Cattle Egret      | 2022/5/5   | 3 | 0 | 17.8129020 | 83.4101520  | <a href="https://www.inaturalist.org/observations/115553445">https://www.inaturalist.org/observations/115553445</a> |
| 1732 | Bubulcus ibis       | Cattle Egret      | 2022/2/2   | 1 | 0 | 17.9325228 | 83.4267972  | <a href="https://www.inaturalist.org/observations/107107267">https://www.inaturalist.org/observations/107107267</a> |
| 1733 | Bubulcus ibis       | Cattle Egret      | 2019/6/1   | 2 | 0 | 17.9525830 | 80.0059790  | <a href="https://www.inaturalist.org/observations/63635583">https://www.inaturalist.org/observations/63635583</a>   |
| 1734 | Bubulcus ibis       | Cattle Egret      | 2020/11/7  | 6 | 0 | 17.9918461 | 79.5591114  | <a href="https://www.inaturalist.org/observations/64357484">https://www.inaturalist.org/observations/64357484</a>   |
| 1735 | Bubulcus ibis       | Cattle Egret      | 2020/8/2   | 1 | 0 | 17.9949490 | 78.3816220  | <a href="https://www.inaturalist.org/observations/55353726">https://www.inaturalist.org/observations/55353726</a>   |
| 1736 | Bubulcus ibis       | Cattle Egret      | 2021/10/15 | 1 | 0 | 18.0529343 | 78.2618531  | <a href="https://www.inaturalist.org/observations/99562760">https://www.inaturalist.org/observations/99562760</a>   |
| 1737 | Bubulcus ibis       | Cattle Egret      | 2021/1/18  | 4 | 0 | 18.0558778 | 83.3569250  | <a href="https://www.inaturalist.org/observations/68259876">https://www.inaturalist.org/observations/68259876</a>   |
| 1738 | Bubulcus ibis       | Cattle Egret      | 2020/8/20  | 7 | 0 | 18.1073639 | 78.2307039  | <a href="https://www.inaturalist.org/observations/57041750">https://www.inaturalist.org/observations/57041750</a>   |
| 1739 | Bubulcus ibis       | Cattle Egret      | 2018/11/11 | 3 | 0 | 18.1124370 | 79.0193000  | <a href="https://www.inaturalist.org/observations/63556098">https://www.inaturalist.org/observations/63556098</a>   |
| 1740 | Bubulcus ibis       | Cattle Egret      | 2015/7/31  | 3 | 0 | 18.1124372 | 79.0192997  | <a href="https://www.inaturalist.org/observations/63558558">https://www.inaturalist.org/observations/63558558</a>   |
| 1741 | Bubulcus ibis       | Cattle Egret      | 2018/6/21  | 2 | 0 | 18.1124372 | 79.0192997  | <a href="https://www.inaturalist.org/observations/63573598">https://www.inaturalist.org/observations/63573598</a>   |
| 1742 | Bubulcus ibis       | Cattle Egret      | 2020/2/2   | 3 | 0 | 18.1404807 | 73.7908178  | <a href="https://www.inaturalist.org/observations/66175050">https://www.inaturalist.org/observations/66175050</a>   |
| 1743 | Bubulcus ibis       | Cattle Egret      | 2022/2/2   | 4 | 0 | 18.1408172 | 73.7904463  | <a href="https://www.inaturalist.org/observations/106016644">https://www.inaturalist.org/observations/106016644</a> |
| 1744 | Bubulcus ibis       | Cattle Egret      | 2022/4/30  | 1 | 0 | 18.1408200 | 73.7904463  | <a href="https://www.inaturalist.org/observations/114565071">https://www.inaturalist.org/observations/114565071</a> |
| 1745 | Bubulcus ibis       | Cattle Egret      | 2020/11/5  | 5 | 0 | 18.1422866 | 73.7912332  | <a href="https://www.inaturalist.org/observations/64235412">https://www.inaturalist.org/observations/64235412</a>   |
| 1746 | Bubulcus ibis       | Cattle Egret      | 2018/12/23 | 5 | 0 | 18.1724729 | 72.9888166  | <a href="https://www.inaturalist.org/observations/19467068">https://www.inaturalist.org/observations/19467068</a>   |
| 1747 | Bubulcus ibis       | Cattle Egret      | 2020/3/10  | 5 | 0 | 18.1794381 | 74.6051258  | <a href="https://www.inaturalist.org/observations/58676772">https://www.inaturalist.org/observations/58676772</a>   |
| 1748 | Bubulcus coromandus | ibis Cattle Egret | 2017/4/15  | 2 | 0 | 18.2143505 | 109.4959259 | <a href="https://www.inaturalist.org/observations/5743387">https://www.inaturalist.org/observations/5743387</a>     |
| 1749 | Bubulcus ibis       | Cattle Egret      | 2021/5/14  | 2 | 0 | 18.2187857 | 73.8862876  | <a href="https://www.inaturalist.org/observations/79173557">https://www.inaturalist.org/observations/79173557</a>   |

|      |                     |      |              |            |   |   |            |             |                                                                                                                     |
|------|---------------------|------|--------------|------------|---|---|------------|-------------|---------------------------------------------------------------------------------------------------------------------|
| 1750 | Bubulcus coromandus | ibis | Cattle Egret | 2019/8/11  | 2 | 0 | 18.2524350 | 83.3379600  | <a href="https://www.inaturalist.org/observations/34631395">https://www.inaturalist.org/observations/34631395</a>   |
| 1751 | Bubulcus ibis       |      | Cattle Egret | 2018/11/27 | 1 | 0 | 18.2524850 | 74.7998117  | <a href="https://www.inaturalist.org/observations/53841834">https://www.inaturalist.org/observations/53841834</a>   |
| 1752 | Bubulcus ibis       |      | Cattle Egret | 2020/2/22  | 0 | 0 | 18.2633860 | 74.8042270  | <a href="https://www.inaturalist.org/observations/39646955">https://www.inaturalist.org/observations/39646955</a>   |
| 1753 | Bubulcus ibis       |      | Cattle Egret | 2018/5/13  | 1 | 0 | 18.2720439 | 74.7950705  | <a href="https://www.inaturalist.org/observations/56207076">https://www.inaturalist.org/observations/56207076</a>   |
| 1754 | Bubulcus ibis       |      | Cattle Egret | 2021/10/25 | 3 | 0 | 18.2726478 | 74.3206208  | <a href="https://www.inaturalist.org/observations/121383465">https://www.inaturalist.org/observations/121383465</a> |
| 1755 | Bubulcus ibis       |      | Cattle Egret | 2020/8/13  | 1 | 0 | 18.2730400 | 84.0048438  | <a href="https://www.inaturalist.org/observations/95508379">https://www.inaturalist.org/observations/95508379</a>   |
| 1756 | Bubulcus ibis       |      | Cattle Egret | 2020/6/4   | 1 | 0 | 18.2730400 | 84.0048438  | <a href="https://www.inaturalist.org/observations/95646473">https://www.inaturalist.org/observations/95646473</a>   |
| 1757 | Bubulcus ibis       |      | Cattle Egret | 2021/8/19  | 1 | 0 | 18.2730400 | 84.0048438  | <a href="https://www.inaturalist.org/observations/99488907">https://www.inaturalist.org/observations/99488907</a>   |
| 1758 | Bubulcus ibis       |      | Cattle Egret | 2018/6/17  | 2 | 0 | 18.2751193 | 74.7962045  | <a href="https://www.inaturalist.org/observations/54606150">https://www.inaturalist.org/observations/54606150</a>   |
| 1759 | Bubulcus ibis       |      | Cattle Egret | 2018/11/20 | 3 | 0 | 18.2839133 | 74.7557633  | <a href="https://www.inaturalist.org/observations/53840835">https://www.inaturalist.org/observations/53840835</a>   |
| 1760 | Bubulcus ibis       |      | Cattle Egret | 2018/12/21 | 1 | 0 | 18.2844583 | 74.7555583  | <a href="https://www.inaturalist.org/observations/53471185">https://www.inaturalist.org/observations/53471185</a>   |
| 1761 | Bubulcus ibis       |      | Cattle Egret | 2019/1/23  | 2 | 0 | 18.2861664 | 74.7998481  | <a href="https://www.inaturalist.org/observations/53344202">https://www.inaturalist.org/observations/53344202</a>   |
| 1762 | Bubulcus ibis       |      | Cattle Egret | 2022/1/24  | 1 | 0 | 18.2889611 | 73.1335145  | <a href="https://www.inaturalist.org/observations/105501696">https://www.inaturalist.org/observations/105501696</a> |
| 1763 | Bubulcus ibis       |      | Cattle Egret | 2012/3/9   | 2 | 0 | 18.2915827 | 74.7740800  | <a href="https://www.inaturalist.org/observations/56113754">https://www.inaturalist.org/observations/56113754</a>   |
| 1764 | Bubulcus ibis       |      | Cattle Egret | 2007/11/17 | 2 | 0 | 18.2929968 | 74.7720181  | <a href="https://www.inaturalist.org/observations/44449798">https://www.inaturalist.org/observations/44449798</a>   |
| 1765 | Bubulcus ibis       |      | Cattle Egret | 2022/1/29  | 1 | 0 | 18.3008734 | 73.1371371  | <a href="https://www.inaturalist.org/observations/105763851">https://www.inaturalist.org/observations/105763851</a> |
| 1766 | Bubulcus ibis       |      | Cattle Egret | 2018/12/7  | 3 | 0 | 18.3266815 | 109.5392115 | <a href="https://www.inaturalist.org/observations/19269236">https://www.inaturalist.org/observations/19269236</a>   |
| 1767 | Bubulcus ibis       |      | Cattle Egret | 2018/9/29  | 2 | 0 | 18.3317534 | 109.5361216 | <a href="https://www.inaturalist.org/observations/18979307">https://www.inaturalist.org/observations/18979307</a>   |
| 1768 | Bubulcus ibis       |      | Cattle Egret | 2019/2/13  | 2 | 0 | 18.3376098 | 109.5874049 | <a href="https://www.inaturalist.org/observations/20339268">https://www.inaturalist.org/observations/20339268</a>   |
| 1769 | Bubulcus ibis       |      | Cattle Egret | 2016/8/15  | 2 | 0 | 18.3415649 | 74.3647834  | <a href="https://www.inaturalist.org/observations/55508885">https://www.inaturalist.org/observations/55508885</a>   |
| 1770 | Bubulcus ibis       |      | Cattle Egret | 2013/11/4  | 2 | 0 | 18.3465719 | 74.3639398  | <a href="https://www.inaturalist.org/observations/57817560">https://www.inaturalist.org/observations/57817560</a>   |
| 1771 | Bubulcus ibis       |      | Cattle Egret | 2018/12/29 | 3 | 0 | 18.3536280 | 109.6538814 | <a href="https://www.inaturalist.org/observations/19321544">https://www.inaturalist.org/observations/19321544</a>   |
| 1772 | Bubulcus ibis       |      | Cattle Egret | 2017/11/29 | 2 | 0 | 18.3560814 | 73.7029447  | <a href="https://www.inaturalist.org/observations/55012809">https://www.inaturalist.org/observations/55012809</a>   |
| 1773 | Bubulcus ibis       |      | Cattle Egret | 2014/3/16  | 5 | 0 | 18.3735266 | 73.7677223  | <a href="https://www.inaturalist.org/observations/56552225">https://www.inaturalist.org/observations/56552225</a>   |
| 1774 | Bubulcus ibis       |      | Cattle Egret | 2014/3/16  | 4 | 0 | 18.3735266 | 73.7677223  | <a href="https://www.inaturalist.org/observations/56552234">https://www.inaturalist.org/observations/56552234</a>   |

|      |                     |                      |            |   |   |            |            |                                                                                                                     |
|------|---------------------|----------------------|------------|---|---|------------|------------|---------------------------------------------------------------------------------------------------------------------|
| 1775 | Bubulcus ibis       | Cattle Egret         | 2017/11/5  | 3 | 0 | 18.3869637 | 74.1684625 | <a href="https://www.inaturalist.org/observations/45665553">https://www.inaturalist.org/observations/45665553</a>   |
| 1776 | Bubulcus ibis       | Cattle Egret         | 2021/1/6   | 1 | 0 | 18.4029425 | 73.9955228 | <a href="https://www.inaturalist.org/observations/70978241">https://www.inaturalist.org/observations/70978241</a>   |
| 1777 | Bubulcus ibis       | Cattle Egret         | 2021/3/29  | 3 | 0 | 18.4157565 | 73.3635013 | <a href="https://www.inaturalist.org/observations/75178776">https://www.inaturalist.org/observations/75178776</a>   |
| 1778 | Bubulcus ibis       | Cattle Egret         | 2019/2/26  | 4 | 0 | 18.4260614 | 73.7635781 | <a href="https://www.inaturalist.org/observations/53232684">https://www.inaturalist.org/observations/53232684</a>   |
| 1779 | Bubulcus ibis       | Cattle Egret         | 2022/11/7  | 2 | 0 | 18.4421428 | 73.7983443 | <a href="https://www.inaturalist.org/observations/141357288">https://www.inaturalist.org/observations/141357288</a> |
| 1780 | Bubulcus ibis       | Cattle Egret         | 2012/3/26  | 5 | 0 | 18.4564586 | 73.4506869 | <a href="https://www.inaturalist.org/observations/17740835">https://www.inaturalist.org/observations/17740835</a>   |
| 1781 | Bubulcus ibis       | Cattle Egret         | 2018/2/2   | 2 | 0 | 18.4668531 | 73.4504300 | <a href="https://www.inaturalist.org/observations/54822479">https://www.inaturalist.org/observations/54822479</a>   |
| 1782 | Bubulcus ibis       | Cattle Egret         | 2017/11/6  | 3 | 0 | 18.4842364 | 73.8260981 | <a href="https://www.inaturalist.org/observations/55241909">https://www.inaturalist.org/observations/55241909</a>   |
| 1783 | Bubulcus ibis       | Cattle Egret         | 2019/5/11  | 7 | 0 | 18.4929055 | 73.8965665 | <a href="https://www.inaturalist.org/observations/24969822">https://www.inaturalist.org/observations/24969822</a>   |
| 1784 | Bubulcus ibis       | Cattle Egret         | 2021/12/4  | 2 | 0 | 18.4932467 | 73.7964319 | <a href="https://www.inaturalist.org/observations/102472713">https://www.inaturalist.org/observations/102472713</a> |
| 1785 | Bubulcus ibis       | Cattle Egret         | 2021/12/4  | 2 | 0 | 18.4932726 | 73.7964266 | <a href="https://www.inaturalist.org/observations/102472712">https://www.inaturalist.org/observations/102472712</a> |
| 1786 | Bubulcus ibis       | Cattle Egret         | 2022/10/7  | 4 | 0 | 18.4943888 | 83.2828598 | <a href="https://www.inaturalist.org/observations/137849747">https://www.inaturalist.org/observations/137849747</a> |
| 1787 | Bubulcus ibis       | Cattle Egret         | 2013/8/4   | 4 | 0 | 18.4985537 | 73.5133839 | <a href="https://www.inaturalist.org/observations/33243089">https://www.inaturalist.org/observations/33243089</a>   |
| 1788 | Bubulcus ibis       | Cattle Egret         | 2019/7/23  | 3 | 0 | 18.5006647 | 73.8530750 | <a href="https://www.inaturalist.org/observations/52337062">https://www.inaturalist.org/observations/52337062</a>   |
| 1789 | Bubulcus ibis       | Cattle Egret         | 2017/10/28 | 2 | 0 | 18.5051631 | 73.9993697 | <a href="https://www.inaturalist.org/observations/55245529">https://www.inaturalist.org/observations/55245529</a>   |
| 1790 | Bubulcus ibis       | Cattle Egret         | 2013/1/18  | 3 | 0 | 18.5052891 | 74.0001730 | <a href="https://www.inaturalist.org/observations/56533307">https://www.inaturalist.org/observations/56533307</a>   |
| 1791 | Bubulcus ibis       | Cattle Egret         | 2013/1/18  | 3 | 0 | 18.5052891 | 74.0001730 | <a href="https://www.inaturalist.org/observations/56533329">https://www.inaturalist.org/observations/56533329</a>   |
| 1792 | Bubulcus ibis       | Cattle Egret         | 2016/2/28  | 3 | 0 | 18.5059569 | 73.9965956 | <a href="https://www.inaturalist.org/observations/48914806">https://www.inaturalist.org/observations/48914806</a>   |
| 1793 | Bubulcus ibis       | Cattle Egret         | 2016/2/28  | 2 | 0 | 18.5059569 | 73.9965956 | <a href="https://www.inaturalist.org/observations/48914816">https://www.inaturalist.org/observations/48914816</a>   |
| 1794 | Bubulcus ibis       | Cattle Egret         | 2014/6/14  | 5 | 0 | 18.5305880 | 73.7863720 | <a href="https://www.inaturalist.org/observations/17981152">https://www.inaturalist.org/observations/17981152</a>   |
| 1795 | Bubulcus ibis       | Cattle Egret         | 2013/12/12 | 2 | 0 | 18.5343969 | 73.7852922 | <a href="https://www.inaturalist.org/observations/56545274">https://www.inaturalist.org/observations/56545274</a>   |
| 1796 | Bubulcus ibis       | Cattle Egret         | 2015/5/9   | 2 | 0 | 18.5343969 | 73.7852922 | <a href="https://www.inaturalist.org/observations/141622223">https://www.inaturalist.org/observations/141622223</a> |
| 1797 | Bubulcus coromandus | ibis<br>Cattle Egret | 2019/8/11  | 2 | 0 | 18.5361117 | 83.3155550 | <a href="https://www.inaturalist.org/observations/34631513">https://www.inaturalist.org/observations/34631513</a>   |
| 1798 | Bubulcus ibis       | Cattle Egret         | 2015/1/18  | 4 | 0 | 18.5443774 | 73.8907638 | <a href="https://www.inaturalist.org/observations/109739892">https://www.inaturalist.org/observations/109739892</a> |
| 1799 | Bubulcus ibis       | Cattle Egret         | 2014/4/20  | 1 | 0 | 18.5540312 | 73.7904576 | <a href="https://www.inaturalist.org/observations/141622220">https://www.inaturalist.org/observations/141622220</a> |

|      |                     |      |              |            |   |   |            |             |                                                                                                                     |
|------|---------------------|------|--------------|------------|---|---|------------|-------------|---------------------------------------------------------------------------------------------------------------------|
| 1800 | Bubulcus coromandus | ibis | Cattle Egret | 2019/8/15  | 4 | 0 | 18.5715783 | 82.6107500  | <a href="https://www.inaturalist.org/observations/35536949">https://www.inaturalist.org/observations/35536949</a>   |
| 1801 | Bubulcus ibis       |      | Cattle Egret | 2022/2/2   | 5 | 0 | 18.5748139 | 79.8851639  | <a href="https://www.inaturalist.org/observations/106017052">https://www.inaturalist.org/observations/106017052</a> |
| 1802 | Bubulcus coromandus | ibis | Cattle Egret | 2019/8/16  | 3 | 0 | 18.5907667 | 82.5674367  | <a href="https://www.inaturalist.org/observations/35539499">https://www.inaturalist.org/observations/35539499</a>   |
| 1803 | Bubulcus ibis       |      | Cattle Egret | 2016/9/10  | 4 | 0 | 18.5911292 | 73.9188200  | <a href="http://www.inaturalist.org/observations/4077720">http://www.inaturalist.org/observations/4077720</a>       |
| 1804 | Bubulcus ibis       |      | Cattle Egret | 2018/12/18 | 1 | 0 | 18.6416433 | 72.8969717  | <a href="https://www.inaturalist.org/observations/53458630">https://www.inaturalist.org/observations/53458630</a>   |
| 1805 | Bubulcus ibis       |      | Cattle Egret | 2019/4/2   | 3 | 0 | 18.6419981 | 72.8956747  | <a href="https://www.inaturalist.org/observations/52661538">https://www.inaturalist.org/observations/52661538</a>   |
| 1806 | Bubulcus ibis       |      | Cattle Egret | 2019/1/16  | 2 | 0 | 18.6420747 | 72.8956531  | <a href="https://www.inaturalist.org/observations/53331310">https://www.inaturalist.org/observations/53331310</a>   |
| 1807 | Bubulcus ibis       |      | Cattle Egret | 2020/5/24  | 2 | 0 | 18.6615809 | 72.8894230  | <a href="https://www.inaturalist.org/observations/52270382">https://www.inaturalist.org/observations/52270382</a>   |
| 1808 | Bubulcus ibis       |      | Cattle Egret | 2020/5/24  | 2 | 0 | 18.6619806 | 72.8894806  | <a href="https://www.inaturalist.org/observations/102601443">https://www.inaturalist.org/observations/102601443</a> |
| 1809 | Bubulcus ibis       |      | Cattle Egret | 2020/10/30 | 2 | 0 | 18.6820507 | 76.9547653  | <a href="https://www.inaturalist.org/observations/63809491">https://www.inaturalist.org/observations/63809491</a>   |
| 1810 | Bubulcus ibis       |      | Cattle Egret | 2021/2/16  | 2 | 0 | 18.7035363 | 84.4041342  | <a href="https://www.inaturalist.org/observations/69898749">https://www.inaturalist.org/observations/69898749</a>   |
| 1811 | Bubulcus coromandus | ibis | Cattle Egret | 2019/8/11  | 2 | 0 | 18.7281100 | 83.3925283  | <a href="https://www.inaturalist.org/observations/34631637">https://www.inaturalist.org/observations/34631637</a>   |
| 1812 | Bubulcus coromandus | ibis | Cattle Egret | 2019/8/11  | 3 | 0 | 18.7281550 | 83.3926383  | <a href="https://www.inaturalist.org/observations/34631123">https://www.inaturalist.org/observations/34631123</a>   |
| 1813 | Bubulcus coromandus | ibis | Cattle Egret | 2006/5/29  | 1 | 0 | 18.7421813 | 72.8627658  | <a href="https://www.inaturalist.org/observations/70485393">https://www.inaturalist.org/observations/70485393</a>   |
| 1814 | Bubulcus ibis       |      | Cattle Egret | 2022/11/26 | 1 | 0 | 18.7786600 | 81.9971108  | <a href="https://www.inaturalist.org/observations/143342285">https://www.inaturalist.org/observations/143342285</a> |
| 1815 | Bubulcus ibis       |      | Cattle Egret | 2018/7/4   | 6 | 0 | 18.7857495 | 81.9842046  | <a href="https://www.inaturalist.org/observations/18161909">https://www.inaturalist.org/observations/18161909</a>   |
| 1816 | Bubulcus coromandus | ibis | Cattle Egret | 2019/8/11  | 3 | 0 | 18.7927767 | 83.4289817  | <a href="https://www.inaturalist.org/observations/34631780">https://www.inaturalist.org/observations/34631780</a>   |
| 1817 | Bubulcus coromandus | ibis | Cattle Egret | 2019/8/11  | 3 | 0 | 18.8005383 | 83.4321250  | <a href="https://www.inaturalist.org/observations/34631812">https://www.inaturalist.org/observations/34631812</a>   |
| 1818 | Bubulcus coromandus | ibis | Cattle Egret | 2019/8/11  | 4 | 0 | 18.8005733 | 83.4322600  | <a href="https://www.inaturalist.org/observations/34631150">https://www.inaturalist.org/observations/34631150</a>   |
| 1819 | Bubulcus coromandus | ibis | Cattle Egret | 2019/8/11  | 3 | 0 | 18.8007900 | 83.4323100  | <a href="https://www.inaturalist.org/observations/34631858">https://www.inaturalist.org/observations/34631858</a>   |
| 1820 | Bubulcus ibis       |      | Cattle Egret | 2020/10/26 | 6 | 0 | 18.8214712 | 75.6470687  | <a href="https://www.inaturalist.org/observations/63577030">https://www.inaturalist.org/observations/63577030</a>   |
| 1821 | Bubulcus ibis       |      | Cattle Egret | 2018/3/29  | 2 | 0 | 18.8309158 | 110.3768921 | <a href="https://www.inaturalist.org/observations/12161466">https://www.inaturalist.org/observations/12161466</a>   |
| 1822 | Bubulcus ibis       |      | Cattle Egret | 2020/8/25  | 3 | 0 | 18.8312398 | 73.0703939  | <a href="https://www.inaturalist.org/observations/57553226">https://www.inaturalist.org/observations/57553226</a>   |
| 1823 | Bubulcus ibis       |      | Cattle Egret | 2020/1/10  | 4 | 0 | 18.8349686 | 80.6625493  | <a href="https://www.inaturalist.org/observations/37578018">https://www.inaturalist.org/observations/37578018</a>   |
| 1824 | Bubulcus ibis       |      | Cattle Egret | 2018/6/22  | 1 | 0 | 18.8366340 | 83.8506902  | <a href="https://www.inaturalist.org/observations/84161783">https://www.inaturalist.org/observations/84161783</a>   |

|      |                     |                   |            |   |   |            |             |                                                                                                                     |
|------|---------------------|-------------------|------------|---|---|------------|-------------|---------------------------------------------------------------------------------------------------------------------|
| 1825 | Bubulcus ibis       | Cattle Egret      | 2022/3/29  | 3 | 0 | 18.8412056 | 81.3555495  | <a href="https://www.inaturalist.org/observations/109928279">https://www.inaturalist.org/observations/109928279</a> |
| 1826 | Bubulcus ibis       | Cattle Egret      | 2012/11/25 | 1 | 0 | 18.8910379 | 73.1219185  | <a href="https://www.inaturalist.org/observations/41608774">https://www.inaturalist.org/observations/41608774</a>   |
| 1827 | Bubulcus ibis       | Cattle Egret      | 2008/2/9   | 4 | 0 | 18.8929120 | 73.1169840  | <a href="https://www.inaturalist.org/observations/69133009">https://www.inaturalist.org/observations/69133009</a>   |
| 1828 | Bubulcus ibis       | Cattle Egret      | 2016/10/23 | 1 | 0 | 18.8999280 | 72.9520270  | <a href="https://www.inaturalist.org/observations/100514356">https://www.inaturalist.org/observations/100514356</a> |
| 1829 | Bubulcus ibis       | Cattle Egret      | 2011/11/27 | 2 | 0 | 18.9118144 | 72.8247150  | <a href="https://www.inaturalist.org/observations/102933085">https://www.inaturalist.org/observations/102933085</a> |
| 1830 | Bubulcus ibis       | Cattle Egret      | 2018/6/9   | 3 | 0 | 18.9157481 | 73.2936764  | <a href="https://www.inaturalist.org/observations/54511188">https://www.inaturalist.org/observations/54511188</a>   |
| 1831 | Bubulcus ibis       | Cattle Egret      | 2015/1/25  | 4 | 0 | 18.9666700 | 72.8333300  | <a href="http://www.inaturalist.org/observations/1239378">http://www.inaturalist.org/observations/1239378</a>       |
| 1832 | Bubulcus ibis       | Cattle Egret      | 2021/12/18 | 3 | 0 | 18.9785477 | 72.8359150  | <a href="https://www.inaturalist.org/observations/105599154">https://www.inaturalist.org/observations/105599154</a> |
| 1833 | Bubulcus ibis       | Cattle Egret      | 2017/12/3  | 1 | 0 | 18.9787099 | 72.8351209  | <a href="https://www.inaturalist.org/observations/102405201">https://www.inaturalist.org/observations/102405201</a> |
| 1834 | Bubulcus ibis       | Cattle Egret      | 2020/10/27 | 3 | 0 | 18.9919750 | 75.7158875  | <a href="https://www.inaturalist.org/observations/63628564">https://www.inaturalist.org/observations/63628564</a>   |
| 1835 | Bubulcus coromandus | ibis Cattle Egret | 2019/8/11  | 2 | 0 | 18.9938850 | 83.4446400  | <a href="https://www.inaturalist.org/observations/34634637">https://www.inaturalist.org/observations/34634637</a>   |
| 1836 | Bubulcus ibis       | Cattle Egret      | 2011/8/21  | 4 | 0 | 19.0021303 | 73.3026999  | <a href="https://www.inaturalist.org/observations/36850786">https://www.inaturalist.org/observations/36850786</a>   |
| 1837 | Bubulcus ibis       | Cattle Egret      | 2022/6/22  | 4 | 0 | 19.0244600 | 77.9583067  | <a href="https://www.inaturalist.org/observations/122924669">https://www.inaturalist.org/observations/122924669</a> |
| 1838 | Bubulcus ibis       | Cattle Egret      | 2022/6/15  | 3 | 0 | 19.0247782 | 77.9570207  | <a href="https://www.inaturalist.org/observations/122659838">https://www.inaturalist.org/observations/122659838</a> |
| 1839 | Bubulcus ibis       | Cattle Egret      | 2022/6/17  | 3 | 0 | 19.0248633 | 77.9566133  | <a href="https://www.inaturalist.org/observations/122128400">https://www.inaturalist.org/observations/122128400</a> |
| 1840 | Bubulcus coromandus | ibis Cattle Egret | 2014/7/27  | 1 | 0 | 19.0267148 | 73.0615956  | <a href="https://www.inaturalist.org/observations/88910005">https://www.inaturalist.org/observations/88910005</a>   |
| 1841 | Bubulcus ibis       | Cattle Egret      | 2018/1/5   | 5 | 0 | 19.0306568 | 72.8422744  | <a href="https://www.inaturalist.org/observations/20938541">https://www.inaturalist.org/observations/20938541</a>   |
| 1842 | Bubulcus ibis       | Cattle Egret      | 2022/7/30  | 1 | 0 | 19.0358268 | 73.0412453  | <a href="https://www.inaturalist.org/observations/129007857">https://www.inaturalist.org/observations/129007857</a> |
| 1843 | Bubulcus ibis       | Cattle Egret      | 2013/3/3   | 3 | 0 | 19.0515824 | 72.8575411  | <a href="https://www.inaturalist.org/observations/32856542">https://www.inaturalist.org/observations/32856542</a>   |
| 1844 | Bubulcus ibis       | Cattle Egret      | 2017/12/10 | 2 | 0 | 19.0522582 | 72.8627641  | <a href="https://www.inaturalist.org/observations/102933796">https://www.inaturalist.org/observations/102933796</a> |
| 1845 | Bubulcus ibis       | Cattle Egret      | 2017/9/9   | 2 | 0 | 19.0522583 | 72.8627641  | <a href="https://www.inaturalist.org/observations/43306500">https://www.inaturalist.org/observations/43306500</a>   |
| 1846 | Bubulcus ibis       | Cattle Egret      | 2019/9/14  | 1 | 0 | 19.0615987 | 108.7246081 | <a href="https://www.inaturalist.org/observations/32937021">https://www.inaturalist.org/observations/32937021</a>   |
| 1847 | Bubulcus ibis       | Cattle Egret      | 2019/9/14  | 2 | 0 | 19.0615987 | 108.7246081 | <a href="https://www.inaturalist.org/observations/32937023">https://www.inaturalist.org/observations/32937023</a>   |
| 1848 | Bubulcus ibis       | Cattle Egret      | 2021/5/29  | 2 | 0 | 19.0616064 | 72.9069709  | <a href="https://www.inaturalist.org/observations/84033260">https://www.inaturalist.org/observations/84033260</a>   |
| 1849 | Bubulcus ibis       | Cattle Egret      | 2019/9/8   | 1 | 0 | 19.0624417 | 72.8329000  | <a href="https://www.inaturalist.org/observations/32332537">https://www.inaturalist.org/observations/32332537</a>   |



|      |                     |      |              |            |   |   |            |             |                                                                                                                     |
|------|---------------------|------|--------------|------------|---|---|------------|-------------|---------------------------------------------------------------------------------------------------------------------|
| 1850 | Bubulcus coromandus | ibis | Cattle Egret | 2019/8/12  | 2 | 0 | 19.1039717 | 83.8859800  | <a href="https://www.inaturalist.org/observations/34635808">https://www.inaturalist.org/observations/34635808</a>   |
| 1851 | Bubulcus coromandus | ibis | Cattle Egret | 2022/2/17  | 0 | 0 | 19.1210867 | 77.3011583  | <a href="https://www.inaturalist.org/observations/106902172">https://www.inaturalist.org/observations/106902172</a> |
| 1852 | Bubulcus ibis       |      | Cattle Egret | 2019/1/20  | 6 | 0 | 19.1242962 | 72.8343964  | <a href="https://www.inaturalist.org/observations/19747582">https://www.inaturalist.org/observations/19747582</a>   |
| 1853 | Bubulcus ibis       |      | Cattle Egret | 2020/9/6   | 4 | 0 | 19.1312500 | 72.8177633  | <a href="https://www.inaturalist.org/observations/58706726">https://www.inaturalist.org/observations/58706726</a>   |
| 1854 | Bubulcus ibis       |      | Cattle Egret | 2011/3/7   | 2 | 0 | 19.1321583 | 72.9011631  | <a href="https://www.inaturalist.org/observations/66843351">https://www.inaturalist.org/observations/66843351</a>   |
| 1855 | Bubulcus ibis       |      | Cattle Egret | 2020/10/28 | 1 | 0 | 19.1366280 | 110.3875590 | <a href="https://www.inaturalist.org/observations/65982845">https://www.inaturalist.org/observations/65982845</a>   |
| 1856 | Bubulcus ibis       |      | Cattle Egret | 2022/8/24  | 3 | 0 | 19.1416891 | 72.9626396  | <a href="https://www.inaturalist.org/observations/132145412">https://www.inaturalist.org/observations/132145412</a> |
| 1857 | Bubulcus ibis       |      | Cattle Egret | 2016/7/13  | 6 | 0 | 19.1419038 | 72.9646254  | <a href="https://www.inaturalist.org/observations/30478429">https://www.inaturalist.org/observations/30478429</a>   |
| 1858 | Bubulcus ibis       |      | Cattle Egret | 2018/10/26 | 5 | 0 | 19.1419038 | 72.9646254  | <a href="https://www.inaturalist.org/observations/31473348">https://www.inaturalist.org/observations/31473348</a>   |
| 1859 | Bubulcus ibis       |      | Cattle Egret | 2020/10/10 | 3 | 0 | 19.1419055 | 72.9646284  | <a href="https://www.inaturalist.org/observations/62186492">https://www.inaturalist.org/observations/62186492</a>   |
| 1860 | Bubulcus ibis       |      | Cattle Egret | 2018/11/2  | 2 | 0 | 19.1419248 | 72.9646254  | <a href="https://www.inaturalist.org/observations/56300018">https://www.inaturalist.org/observations/56300018</a>   |
| 1861 | Bubulcus ibis       |      | Cattle Egret | 2018/11/7  | 2 | 0 | 19.1419248 | 72.9646254  | <a href="https://www.inaturalist.org/observations/56300052">https://www.inaturalist.org/observations/56300052</a>   |
| 1862 | Bubulcus ibis       |      | Cattle Egret | 2017/12/2  | 2 | 0 | 19.1419248 | 72.9646254  | <a href="https://www.inaturalist.org/observations/56406526">https://www.inaturalist.org/observations/56406526</a>   |
| 1863 | Bubulcus ibis       |      | Cattle Egret | 2019/5/8   | 2 | 0 | 19.1419248 | 72.9646254  | <a href="https://www.inaturalist.org/observations/56496798">https://www.inaturalist.org/observations/56496798</a>   |
| 1864 | Bubulcus ibis       |      | Cattle Egret | 2019/5/8   | 2 | 0 | 19.1419248 | 72.9646254  | <a href="https://www.inaturalist.org/observations/56496803">https://www.inaturalist.org/observations/56496803</a>   |
| 1865 | Bubulcus ibis       |      | Cattle Egret | 2020/6/18  | 4 | 0 | 19.1443969 | 72.8179441  | <a href="https://www.inaturalist.org/observations/58146581">https://www.inaturalist.org/observations/58146581</a>   |
| 1866 | Bubulcus ibis       |      | Cattle Egret | 2011/5/17  | 1 | 0 | 19.1473831 | 73.0406335  | <a href="https://www.inaturalist.org/observations/41616272">https://www.inaturalist.org/observations/41616272</a>   |
| 1867 | Bubulcus ibis       |      | Cattle Egret | 2022/10/1  | 3 | 0 | 19.1485040 | 73.1559946  | <a href="https://www.inaturalist.org/observations/137480861">https://www.inaturalist.org/observations/137480861</a> |
| 1868 | Bubulcus ibis       |      | Cattle Egret | 2015/11/8  | 1 | 0 | 19.1592080 | 73.0572893  | <a href="https://www.inaturalist.org/observations/101343647">https://www.inaturalist.org/observations/101343647</a> |
| 1869 | Bubulcus ibis       |      | Cattle Egret | 2020/9/21  | 1 | 0 | 19.1665044 | 73.0807402  | <a href="https://www.inaturalist.org/observations/135214566">https://www.inaturalist.org/observations/135214566</a> |
| 1870 | Bubulcus ibis       |      | Cattle Egret | 2019/12/28 | 4 | 0 | 19.1729238 | 82.1504840  | <a href="https://www.inaturalist.org/observations/37579716">https://www.inaturalist.org/observations/37579716</a>   |
| 1871 | Bubulcus ibis       |      | Cattle Egret | 2020/1/13  | 0 | 0 | 19.1782430 | 108.6903734 | <a href="https://www.inaturalist.org/observations/37834241">https://www.inaturalist.org/observations/37834241</a>   |
| 1872 | Bubulcus ibis       |      | Cattle Egret | 2018/9/20  | 1 | 0 | 19.1834895 | 72.9780731  | <a href="https://www.inaturalist.org/observations/56307367">https://www.inaturalist.org/observations/56307367</a>   |
| 1873 | Bubulcus ibis       |      | Cattle Egret | 2022/10/15 | 5 | 0 | 19.1858766 | 73.1173198  | <a href="https://www.inaturalist.org/observations/139116161">https://www.inaturalist.org/observations/139116161</a> |
| 1874 | Bubulcus ibis       |      | Cattle Egret | 2018/9/25  | 3 | 0 | 19.1883417 | 72.9805413  | <a href="https://www.inaturalist.org/observations/136704934">https://www.inaturalist.org/observations/136704934</a> |

|      |                     |                   |            |   |   |            |            |                                                                                                                     |
|------|---------------------|-------------------|------------|---|---|------------|------------|---------------------------------------------------------------------------------------------------------------------|
| 1875 | Bubulcus ibis       | Cattle Egret      | 2019/5/26  | 5 | 0 | 19.1952752 | 73.0698015 | <a href="https://www.inaturalist.org/observations/25809817">https://www.inaturalist.org/observations/25809817</a>   |
| 1876 | Bubulcus ibis       | Cattle Egret      | 2012/9/18  | 5 | 0 | 19.1977659 | 73.0749615 | <a href="https://www.inaturalist.org/observations/66918387">https://www.inaturalist.org/observations/66918387</a>   |
| 1877 | Bubulcus ibis       | Cattle Egret      | 2020/3/7   | 3 | 0 | 19.2110382 | 72.8928026 | <a href="https://www.inaturalist.org/observations/39839144">https://www.inaturalist.org/observations/39839144</a>   |
| 1878 | Bubulcus ibis       | Cattle Egret      | 2019/4/7   | 1 | 0 | 19.2202450 | 73.0747660 | <a href="https://www.inaturalist.org/observations/22134993">https://www.inaturalist.org/observations/22134993</a>   |
| 1879 | Bubulcus coromandus | ibis Cattle Egret | 2021/8/10  | 1 | 0 | 19.2231167 | 72.8711250 | <a href="https://www.inaturalist.org/observations/90629142">https://www.inaturalist.org/observations/90629142</a>   |
| 1880 | Bubulcus coromandus | ibis Cattle Egret | 2021/8/10  | 1 | 0 | 19.2237167 | 72.8704300 | <a href="https://www.inaturalist.org/observations/90629098">https://www.inaturalist.org/observations/90629098</a>   |
| 1881 | Bubulcus ibis       | Cattle Egret      | 2018/4/22  | 5 | 0 | 19.2249910 | 72.8700597 | <a href="https://www.inaturalist.org/observations/11445637">https://www.inaturalist.org/observations/11445637</a>   |
| 1882 | Bubulcus ibis       | Cattle Egret      | 2005/1/1   | 4 | 0 | 19.2263817 | 72.8828033 | <a href="https://www.inaturalist.org/observations/8234480">https://www.inaturalist.org/observations/8234480</a>     |
| 1883 | Bubulcus ibis       | Cattle Egret      | 2021/9/18  | 2 | 0 | 19.2308790 | 73.1103494 | <a href="https://www.inaturalist.org/observations/96443686">https://www.inaturalist.org/observations/96443686</a>   |
| 1884 | Bubulcus ibis       | Cattle Egret      | 2017/10/19 | 2 | 0 | 19.2337650 | 72.9445802 | <a href="https://www.inaturalist.org/observations/56400421">https://www.inaturalist.org/observations/56400421</a>   |
| 1885 | Bubulcus ibis       | Cattle Egret      | 2020/11/28 | 2 | 0 | 19.2337650 | 72.9445802 | <a href="https://www.inaturalist.org/observations/65746598">https://www.inaturalist.org/observations/65746598</a>   |
| 1886 | Bubulcus coromandus | ibis Cattle Egret | 2019/8/12  | 2 | 0 | 19.2483017 | 83.4680850 | <a href="https://www.inaturalist.org/observations/34635025">https://www.inaturalist.org/observations/34635025</a>   |
| 1887 | Bubulcus coromandus | ibis Cattle Egret | 2019/8/12  | 2 | 0 | 19.2483033 | 83.4680400 | <a href="https://www.inaturalist.org/observations/34634975">https://www.inaturalist.org/observations/34634975</a>   |
| 1888 | Bubulcus ibis       | Cattle Egret      | 2010/4/11  | 2 | 0 | 19.2569711 | 73.1239534 | <a href="https://www.inaturalist.org/observations/42475100">https://www.inaturalist.org/observations/42475100</a>   |
| 1889 | Bubulcus ibis       | Cattle Egret      | 2022/4/30  | 1 | 0 | 19.2612261 | 73.2235652 | <a href="https://www.inaturalist.org/observations/113771372">https://www.inaturalist.org/observations/113771372</a> |
| 1890 | Bubulcus ibis       | Cattle Egret      | 2021/9/21  | 1 | 0 | 19.2651176 | 73.1723893 | <a href="https://www.inaturalist.org/observations/117560861">https://www.inaturalist.org/observations/117560861</a> |
| 1891 | Bubulcus coromandus | ibis Cattle Egret | 2019/8/13  | 3 | 0 | 19.2842233 | 83.4319667 | <a href="https://www.inaturalist.org/observations/34636412">https://www.inaturalist.org/observations/34636412</a>   |
| 1892 | Bubulcus ibis       | Cattle Egret      | 2009/7/11  | 5 | 0 | 19.2854060 | 72.9403270 | <a href="https://www.inaturalist.org/observations/69811762">https://www.inaturalist.org/observations/69811762</a>   |
| 1893 | Bubulcus ibis       | Cattle Egret      | 2021/5/24  | 3 | 0 | 19.2855606 | 72.8343878 | <a href="https://www.inaturalist.org/observations/80078813">https://www.inaturalist.org/observations/80078813</a>   |
| 1894 | Bubulcus ibis       | Cattle Egret      | 2021/5/4   | 2 | 0 | 19.3042315 | 84.8039285 | <a href="https://www.inaturalist.org/observations/77249441">https://www.inaturalist.org/observations/77249441</a>   |
| 1895 | Bubulcus ibis       | Cattle Egret      | 2021/8/3   | 3 | 0 | 19.3210756 | 84.7969919 | <a href="https://www.inaturalist.org/observations/89747581">https://www.inaturalist.org/observations/89747581</a>   |
| 1896 | Bubulcus ibis       | Cattle Egret      | 2021/10/6  | 1 | 0 | 19.3263653 | 84.7918260 | <a href="https://www.inaturalist.org/observations/97338661">https://www.inaturalist.org/observations/97338661</a>   |
| 1897 | Bubulcus coromandus | ibis Cattle Egret | 2019/8/13  | 3 | 0 | 19.3486100 | 83.4452017 | <a href="https://www.inaturalist.org/observations/34636568">https://www.inaturalist.org/observations/34636568</a>   |
| 1898 | Bubulcus ibis       | Cattle Egret      | 2017/12/31 | 4 | 0 | 19.3824677 | 72.7717775 | <a href="https://www.inaturalist.org/observations/30817774">https://www.inaturalist.org/observations/30817774</a>   |
| 1899 | Bubulcus ibis       | Cattle Egret      | 2017/10/8  | 2 | 0 | 19.3824677 | 72.7717775 | <a href="https://www.inaturalist.org/observations/42584311">https://www.inaturalist.org/observations/42584311</a>   |

|      |                     |                   |            |   |   |            |             |                                                                                                                     |
|------|---------------------|-------------------|------------|---|---|------------|-------------|---------------------------------------------------------------------------------------------------------------------|
| 1900 | Bubulcus ibis       | Cattle Egret      | 2018/10/14 | 2 | 0 | 19.3824677 | 72.7717775  | <a href="https://www.inaturalist.org/observations/42587072">https://www.inaturalist.org/observations/42587072</a>   |
| 1901 | Bubulcus coromandus | ibis Cattle Egret | 2021/8/7   | 1 | 0 | 19.4022783 | 72.7731467  | <a href="https://www.inaturalist.org/observations/90232190">https://www.inaturalist.org/observations/90232190</a>   |
| 1902 | Bubulcus coromandus | ibis Cattle Egret | 2021/8/7   | 1 | 0 | 19.4025717 | 72.7724300  | <a href="https://www.inaturalist.org/observations/90232109">https://www.inaturalist.org/observations/90232109</a>   |
| 1903 | Bubulcus ibis       | Cattle Egret      | 2021/9/20  | 1 | 0 | 19.4066277 | 72.8394477  | <a href="https://www.inaturalist.org/observations/97217296">https://www.inaturalist.org/observations/97217296</a>   |
| 1904 | Bubulcus coromandus | ibis Cattle Egret | 2019/8/19  | 3 | 0 | 19.4173217 | 85.0717633  | <a href="https://www.inaturalist.org/observations/35542719">https://www.inaturalist.org/observations/35542719</a>   |
| 1905 | Bubulcus ibis       | Cattle Egret      | 2022/5/16  | 4 | 0 | 19.4192068 | 81.6567947  | <a href="https://www.inaturalist.org/observations/117397661">https://www.inaturalist.org/observations/117397661</a> |
| 1906 | Bubulcus ibis       | Cattle Egret      | 2019/6/5   | 6 | 0 | 19.4220610 | 72.8913374  | <a href="https://www.inaturalist.org/observations/27014661">https://www.inaturalist.org/observations/27014661</a>   |
| 1907 | Bubulcus ibis       | Cattle Egret      | 2017/4/7   | 1 | 0 | 19.4392830 | 108.8474500 | <a href="https://www.inaturalist.org/observations/64917616">https://www.inaturalist.org/observations/64917616</a>   |
| 1908 | Bubulcus ibis       | Cattle Egret      | 2021/10/4  | 1 | 0 | 19.4392830 | 108.8474500 | <a href="https://www.inaturalist.org/observations/98014399">https://www.inaturalist.org/observations/98014399</a>   |
| 1909 | Bubulcus coromandus | ibis Cattle Egret | 2019/8/13  | 3 | 0 | 19.4813433 | 83.5224250  | <a href="https://www.inaturalist.org/observations/34637217">https://www.inaturalist.org/observations/34637217</a>   |
| 1910 | Bubulcus ibis       | Cattle Egret      | 2019/8/13  | 3 | 0 | 19.4813533 | 83.5224333  | <a href="https://www.inaturalist.org/observations/34637218">https://www.inaturalist.org/observations/34637218</a>   |
| 1911 | Bubulcus ibis       | Cattle Egret      | 2015/3/7   | 5 | 0 | 19.4835620 | 73.2595983  | <a href="https://www.inaturalist.org/observations/60056393">https://www.inaturalist.org/observations/60056393</a>   |
| 1912 | Bubulcus coromandus | ibis Cattle Egret | 2019/8/13  | 3 | 0 | 19.4881700 | 83.4693817  | <a href="https://www.inaturalist.org/observations/34636919">https://www.inaturalist.org/observations/34636919</a>   |
| 1913 | Bubulcus ibis       | Cattle Egret      | 2022/4/13  | 2 | 0 | 19.5009285 | 73.0146642  | <a href="https://www.inaturalist.org/observations/111430853">https://www.inaturalist.org/observations/111430853</a> |
| 1914 | Bubulcus ibis       | Cattle Egret      | 2022/10/27 | 3 | 0 | 19.5078544 | 73.0187007  | <a href="https://www.inaturalist.org/observations/143648802">https://www.inaturalist.org/observations/143648802</a> |
| 1915 | Bubulcus ibis       | Cattle Egret      | 2022/5/21  | 3 | 0 | 19.5155424 | 83.5074497  | <a href="https://www.inaturalist.org/observations/117965384">https://www.inaturalist.org/observations/117965384</a> |
| 1916 | Bubulcus ibis       | Cattle Egret      | 2019/4/21  | 1 | 0 | 19.5453272 | 73.2630382  | <a href="https://www.inaturalist.org/observations/44126242">https://www.inaturalist.org/observations/44126242</a>   |
| 1917 | Bubulcus ibis       | Cattle Egret      | 2022/10/16 | 2 | 0 | 19.5618896 | 81.6756363  | <a href="https://www.inaturalist.org/observations/139597551">https://www.inaturalist.org/observations/139597551</a> |
| 1918 | Bubulcus ibis       | Cattle Egret      | 2022/7/3   | 2 | 0 | 19.5867119 | 81.6708908  | <a href="https://www.inaturalist.org/observations/124872774">https://www.inaturalist.org/observations/124872774</a> |
| 1919 | Bubulcus coromandus | ibis Cattle Egret | 2019/8/5   | 2 | 0 | 19.5943379 | 81.2857457  | <a href="https://www.inaturalist.org/observations/32234731">https://www.inaturalist.org/observations/32234731</a>   |
| 1920 | Bubulcus ibis       | Cattle Egret      | 2022/1/25  | 1 | 0 | 19.7529942 | 109.2186265 | <a href="https://www.inaturalist.org/observations/122940534">https://www.inaturalist.org/observations/122940534</a> |
| 1921 | Bubulcus ibis       | Cattle Egret      | 2020/10/2  | 1 | 0 | 19.7766099 | 109.2008285 | <a href="https://www.inaturalist.org/observations/64423111">https://www.inaturalist.org/observations/64423111</a>   |
| 1922 | Bubulcus ibis       | Cattle Egret      | 2019/9/30  | 2 | 0 | 19.8500287 | 82.6125997  | <a href="https://www.inaturalist.org/observations/33636132">https://www.inaturalist.org/observations/33636132</a>   |
| 1923 | Bubulcus ibis       | Cattle Egret      | 2021/5/21  | 1 | 0 | 19.8653412 | 82.6968384  | <a href="https://www.inaturalist.org/observations/79648041">https://www.inaturalist.org/observations/79648041</a>   |
| 1924 | Bubulcus ibis       | Cattle Egret      | 2021/5/21  | 1 | 0 | 19.8689393 | 82.6293576  | <a href="https://www.inaturalist.org/observations/79615429">https://www.inaturalist.org/observations/79615429</a>   |

|      |                        |      |              |            |   |   |            |            |                                                                                                                     |
|------|------------------------|------|--------------|------------|---|---|------------|------------|---------------------------------------------------------------------------------------------------------------------|
| 1925 | Bubulcus<br>coromandus | ibis | Cattle Egret | 2019/8/20  | 4 | 0 | 19.8865350 | 86.0959633 | <a href="https://www.inaturalist.org/observations/35545801">https://www.inaturalist.org/observations/35545801</a>   |
| 1926 | Bubulcus ibis          |      | Cattle Egret | 2013/11/17 | 1 | 0 | 19.8870563 | 86.0940468 | <a href="https://www.inaturalist.org/observations/68547890">https://www.inaturalist.org/observations/68547890</a>   |
| 1927 | Bubulcus ibis          |      | Cattle Egret | 2012/3/31  | 4 | 0 | 19.8871450 | 86.0948750 | <a href="http://www.inaturalist.org/observations/699325">http://www.inaturalist.org/observations/699325</a>         |
| 1928 | Bubulcus ibis          |      | Cattle Egret | 2016/12/12 | 2 | 0 | 19.8878935 | 86.0948427 | <a href="https://www.inaturalist.org/observations/110217226">https://www.inaturalist.org/observations/110217226</a> |
| 1929 | Bubulcus ibis          |      | Cattle Egret | 2022/4/1   | 3 | 0 | 19.8891016 | 86.0946126 | <a href="https://www.inaturalist.org/observations/110169139">https://www.inaturalist.org/observations/110169139</a> |
| 1930 | Bubulcus ibis          |      | Cattle Egret | 2021/2/23  | 3 | 0 | 19.8944738 | 82.6608819 | <a href="https://www.inaturalist.org/observations/70020668">https://www.inaturalist.org/observations/70020668</a>   |
| 1931 | Bubulcus ibis          |      | Cattle Egret | 2018/4/29  | 3 | 0 | 19.8956382 | 82.6658096 | <a href="https://www.inaturalist.org/observations/15994901">https://www.inaturalist.org/observations/15994901</a>   |
| 1932 | Bubulcus ibis          |      | Cattle Egret | 2018/10/4  | 4 | 0 | 19.8961867 | 82.6523300 | <a href="https://www.inaturalist.org/observations/17270432">https://www.inaturalist.org/observations/17270432</a>   |
| 1933 | Bubulcus ibis          |      | Cattle Egret | 2019/3/25  | 3 | 0 | 19.8968267 | 82.6557783 | <a href="https://www.inaturalist.org/observations/21583159">https://www.inaturalist.org/observations/21583159</a>   |
| 1934 | Bubulcus ibis          |      | Cattle Egret | 2020/10/28 | 3 | 0 | 19.9081766 | 75.3221694 | <a href="https://www.inaturalist.org/observations/63718753">https://www.inaturalist.org/observations/63718753</a>   |
| 1935 | Bubulcus ibis          |      | Cattle Egret | 2021/5/20  | 4 | 0 | 19.9137036 | 82.6432294 | <a href="https://www.inaturalist.org/observations/79511616">https://www.inaturalist.org/observations/79511616</a>   |
| 1936 | Bubulcus ibis          |      | Cattle Egret | 2021/4/18  | 2 | 0 | 19.9194047 | 85.4254317 | <a href="https://www.inaturalist.org/observations/101935740">https://www.inaturalist.org/observations/101935740</a> |
| 1937 | Bubulcus ibis          |      | Cattle Egret | 2021/4/13  | 1 | 0 | 19.9280896 | 82.4361736 | <a href="https://www.inaturalist.org/observations/73834908">https://www.inaturalist.org/observations/73834908</a>   |
| 1938 | Bubulcus ibis          |      | Cattle Egret | 2022/8/5   | 3 | 0 | 19.9745197 | 82.4021317 | <a href="https://www.inaturalist.org/observations/129622661">https://www.inaturalist.org/observations/129622661</a> |
| 1939 | Bubulcus ibis          |      | Cattle Egret | 2018/12/18 | 3 | 0 | 20.0086157 | 74.1323815 | <a href="https://www.inaturalist.org/observations/24757641">https://www.inaturalist.org/observations/24757641</a>   |
| 1940 | Bubulcus ibis          |      | Cattle Egret | 2018/12/18 | 3 | 0 | 20.0089632 | 74.1323479 | <a href="https://www.inaturalist.org/observations/24757627">https://www.inaturalist.org/observations/24757627</a>   |
| 1941 | Bubulcus ibis          |      | Cattle Egret | 2021/11/7  | 1 | 0 | 20.1127338 | 79.1144726 | <a href="https://www.inaturalist.org/observations/100492927">https://www.inaturalist.org/observations/100492927</a> |
| 1942 | Bubulcus ibis          |      | Cattle Egret | 2019/9/27  | 3 | 0 | 20.1702862 | 85.6848068 | <a href="https://www.inaturalist.org/observations/33487038">https://www.inaturalist.org/observations/33487038</a>   |
| 1943 | Bubulcus ibis          |      | Cattle Egret | 2022/9/27  | 1 | 0 | 20.1719856 | 85.6863695 | <a href="https://www.inaturalist.org/observations/136687482">https://www.inaturalist.org/observations/136687482</a> |
| 1944 | Bubulcus<br>coromandus | ibis | Cattle Egret | 2015/6/16  | 5 | 0 | 20.2006682 | 79.3418884 | <a href="https://www.inaturalist.org/observations/12182688">https://www.inaturalist.org/observations/12182688</a>   |
| 1945 | Bubulcus ibis          |      | Cattle Egret | 2010/5/25  | 2 | 0 | 20.2483827 | 79.3606890 | <a href="https://www.inaturalist.org/observations/55252623">https://www.inaturalist.org/observations/55252623</a>   |
| 1946 | Bubulcus ibis          |      | Cattle Egret | 2016/6/4   | 3 | 0 | 20.2483827 | 79.3606890 | <a href="https://www.inaturalist.org/observations/55505166">https://www.inaturalist.org/observations/55505166</a>   |
| 1947 | Bubulcus ibis          |      | Cattle Egret | 2022/5/8   | 3 | 0 | 20.2483827 | 79.3606890 | <a href="https://www.inaturalist.org/observations/135770805">https://www.inaturalist.org/observations/135770805</a> |
| 1948 | Bubulcus ibis          |      | Cattle Egret | 2022/1/6   | 3 | 0 | 20.3051463 | 85.8388361 | <a href="https://www.inaturalist.org/observations/104441505">https://www.inaturalist.org/observations/104441505</a> |
| 1949 | Bubulcus ibis          |      | Cattle Egret | 2022/7/25  | 1 | 0 | 20.3334433 | 81.7633283 | <a href="https://www.inaturalist.org/observations/129117053">https://www.inaturalist.org/observations/129117053</a> |

|      |               |              |            |   |   |            |             |                                                                                                                     |
|------|---------------|--------------|------------|---|---|------------|-------------|---------------------------------------------------------------------------------------------------------------------|
| 1950 | Bubulcus ibis | Cattle Egret | 2014/6/25  | 3 | 0 | 20.3400256 | 79.3059006  | <a href="https://www.inaturalist.org/observations/58578981">https://www.inaturalist.org/observations/58578981</a>   |
| 1951 | Bubulcus ibis | Cattle Egret | 2018/5/14  | 3 | 0 | 20.3496852 | 79.3252978  | <a href="https://www.inaturalist.org/observations/52550526">https://www.inaturalist.org/observations/52550526</a>   |
| 1952 | Bubulcus ibis | Cattle Egret | 2016/12/16 | 1 | 0 | 20.3959093 | 85.8272958  | <a href="https://www.inaturalist.org/observations/110401498">https://www.inaturalist.org/observations/110401498</a> |
| 1953 | Bubulcus ibis | Cattle Egret | 2021/7/18  | 1 | 0 | 20.6291153 | 81.6395438  | <a href="https://www.inaturalist.org/observations/134156712">https://www.inaturalist.org/observations/134156712</a> |
| 1954 | Bubulcus ibis | Cattle Egret | 2020/9/13  | 5 | 0 | 20.6661768 | 77.1049693  | <a href="https://www.inaturalist.org/observations/59414796">https://www.inaturalist.org/observations/59414796</a>   |
| 1955 | Bubulcus ibis | Cattle Egret | 2020/9/13  | 3 | 0 | 20.6662071 | 77.1054101  | <a href="https://www.inaturalist.org/observations/59414797">https://www.inaturalist.org/observations/59414797</a>   |
| 1956 | Bubulcus ibis | Cattle Egret | 2020/8/13  | 3 | 0 | 20.6926384 | 77.0173962  | <a href="https://www.inaturalist.org/observations/56299543">https://www.inaturalist.org/observations/56299543</a>   |
| 1957 | Bubulcus ibis | Cattle Egret | 2020/8/13  | 2 | 0 | 20.6927670 | 77.0174452  | <a href="https://www.inaturalist.org/observations/56299115">https://www.inaturalist.org/observations/56299115</a>   |
| 1958 | Bubulcus ibis | Cattle Egret | 2019/11/5  | 1 | 0 | 20.7012302 | 116.7280890 | <a href="https://www.inaturalist.org/observations/35411721">https://www.inaturalist.org/observations/35411721</a>   |
| 1959 | Bubulcus ibis | Cattle Egret | 2021/11/11 | 1 | 0 | 20.7226997 | 81.1902362  | <a href="https://www.inaturalist.org/observations/100865444">https://www.inaturalist.org/observations/100865444</a> |
| 1960 | Bubulcus ibis | Cattle Egret | 2021/1/24  | 1 | 0 | 20.7347168 | 81.2031671  | <a href="https://www.inaturalist.org/observations/143848742">https://www.inaturalist.org/observations/143848742</a> |
| 1961 | Bubulcus ibis | Cattle Egret | 2021/2/9   | 0 | 0 | 20.8200227 | 81.8379760  | <a href="https://www.inaturalist.org/observations/69297083">https://www.inaturalist.org/observations/69297083</a>   |
| 1962 | Bubulcus ibis | Cattle Egret | 2022/11/30 | 3 | 0 | 20.8270286 | 81.7131929  | <a href="https://www.inaturalist.org/observations/143341689">https://www.inaturalist.org/observations/143341689</a> |
| 1963 | Bubulcus ibis | Cattle Egret | 2022/8/23  | 4 | 0 | 20.8280568 | 82.0597946  | <a href="https://www.inaturalist.org/observations/133573196">https://www.inaturalist.org/observations/133573196</a> |
| 1964 | Bubulcus ibis | Cattle Egret | 2022/8/23  | 4 | 0 | 20.8280568 | 82.0597946  | <a href="https://www.inaturalist.org/observations/133573197">https://www.inaturalist.org/observations/133573197</a> |
| 1965 | Bubulcus ibis | Cattle Egret | 2021/11/9  | 2 | 0 | 20.8303945 | 81.7084430  | <a href="https://www.inaturalist.org/observations/100836751">https://www.inaturalist.org/observations/100836751</a> |
| 1966 | Bubulcus ibis | Cattle Egret | 2012/11/28 | 1 | 0 | 20.8417114 | 77.9147708  | <a href="https://www.inaturalist.org/observations/85593389">https://www.inaturalist.org/observations/85593389</a>   |
| 1967 | Bubulcus ibis | Cattle Egret | 2021/7/10  | 1 | 0 | 20.8431415 | 85.1349711  | <a href="https://www.inaturalist.org/observations/87368313">https://www.inaturalist.org/observations/87368313</a>   |
| 1968 | Bubulcus ibis | Cattle Egret | 2021/8/1   | 2 | 0 | 20.8584668 | 72.8180534  | <a href="https://www.inaturalist.org/observations/90136311">https://www.inaturalist.org/observations/90136311</a>   |
| 1969 | Bubulcus ibis | Cattle Egret | 2021/11/12 | 2 | 0 | 20.9060992 | 81.8024682  | <a href="https://www.inaturalist.org/observations/100976671">https://www.inaturalist.org/observations/100976671</a> |
| 1970 | Bubulcus ibis | Cattle Egret | 2022/9/12  | 2 | 0 | 20.9197844 | 81.7901506  | <a href="https://www.inaturalist.org/observations/134714185">https://www.inaturalist.org/observations/134714185</a> |
| 1971 | Bubulcus ibis | Cattle Egret | 2020/11/9  | 2 | 0 | 20.9241199 | 72.9093170  | <a href="https://www.inaturalist.org/observations/64730101">https://www.inaturalist.org/observations/64730101</a>   |
| 1972 | Bubulcus ibis | Cattle Egret | 2021/10/2  | 1 | 0 | 20.9431270 | 86.1315510  | <a href="https://www.inaturalist.org/observations/96829912">https://www.inaturalist.org/observations/96829912</a>   |
| 1973 | Bubulcus ibis | Cattle Egret | 2022/7/10  | 4 | 0 | 20.9748546 | 75.5383760  | <a href="https://www.inaturalist.org/observations/126361289">https://www.inaturalist.org/observations/126361289</a> |
| 1974 | Bubulcus ibis | Cattle Egret | 2021/1/3   | 2 | 0 | 20.9794586 | 75.5647869  | <a href="https://www.inaturalist.org/observations/75133471">https://www.inaturalist.org/observations/75133471</a>   |

|      |                     |                      |            |   |   |            |            |                                                                                                                     |
|------|---------------------|----------------------|------------|---|---|------------|------------|---------------------------------------------------------------------------------------------------------------------|
| 1975 | Bubulcus ibis       | Cattle Egret         | 2020/12/17 | 3 | 0 | 20.9819874 | 75.5385000 | <a href="https://www.inaturalist.org/observations/66969741">https://www.inaturalist.org/observations/66969741</a>   |
| 1976 | Bubulcus ibis       | Cattle Egret         | 2020/12/16 | 2 | 0 | 20.9892264 | 75.5456102 | <a href="https://www.inaturalist.org/observations/66959513">https://www.inaturalist.org/observations/66959513</a>   |
| 1977 | Bubulcus ibis       | Cattle Egret         | 2021/1/30  | 1 | 0 | 21.0055478 | 81.4759190 | <a href="https://www.inaturalist.org/observations/68795992">https://www.inaturalist.org/observations/68795992</a>   |
| 1978 | Bubulcus ibis       | Cattle Egret         | 2020/10/28 | 1 | 0 | 21.0365310 | 79.0294290 | <a href="https://www.inaturalist.org/observations/63899981">https://www.inaturalist.org/observations/63899981</a>   |
| 1979 | Bubulcus ibis       | Cattle Egret         | 2020/8/25  | 3 | 0 | 21.0451917 | 75.8385050 | <a href="https://www.inaturalist.org/observations/57526126">https://www.inaturalist.org/observations/57526126</a>   |
| 1980 | Bubulcus ibis       | Cattle Egret         | 2022/9/10  | 1 | 0 | 21.0459495 | 79.0228323 | <a href="https://www.inaturalist.org/observations/134431270">https://www.inaturalist.org/observations/134431270</a> |
| 1981 | Bubulcus ibis       | Cattle Egret         | 2020/5/25  | 2 | 0 | 21.0571850 | 75.8421583 | <a href="https://www.inaturalist.org/observations/51022797">https://www.inaturalist.org/observations/51022797</a>   |
| 1982 | Bubulcus ibis       | Cattle Egret         | 2021/3/26  | 1 | 0 | 21.0943248 | 81.0434379 | <a href="https://www.inaturalist.org/observations/72103403">https://www.inaturalist.org/observations/72103403</a>   |
| 1983 | Bubulcus coromandus | ibis<br>Cattle Egret | 2021/1/24  | 2 | 0 | 21.0973559 | 81.0324030 | <a href="https://www.inaturalist.org/observations/70797961">https://www.inaturalist.org/observations/70797961</a>   |
| 1984 | Bubulcus ibis       | Cattle Egret         | 2011/10/17 | 5 | 0 | 21.1243054 | 70.8241507 | <a href="https://www.inaturalist.org/observations/75530076">https://www.inaturalist.org/observations/75530076</a>   |
| 1985 | Bubulcus ibis       | Cattle Egret         | 2014/2/4   | 2 | 0 | 21.1243054 | 70.8241507 | <a href="https://www.inaturalist.org/observations/78322199">https://www.inaturalist.org/observations/78322199</a>   |
| 1986 | Bubulcus ibis       | Cattle Egret         | 2011/10/20 | 4 | 0 | 21.1243054 | 70.8241507 | <a href="https://www.inaturalist.org/observations/122262668">https://www.inaturalist.org/observations/122262668</a> |
| 1987 | Bubulcus ibis       | Cattle Egret         | 2020/7/15  | 3 | 0 | 21.1397493 | 72.7677978 | <a href="https://www.inaturalist.org/observations/53217766">https://www.inaturalist.org/observations/53217766</a>   |
| 1988 | Bubulcus ibis       | Cattle Egret         | 2022/9/10  | 1 | 0 | 21.1457620 | 79.0881545 | <a href="https://www.inaturalist.org/observations/134431339">https://www.inaturalist.org/observations/134431339</a> |
| 1989 | Bubulcus ibis       | Cattle Egret         | 2016/6/28  | 4 | 0 | 21.1458005 | 79.0881545 | <a href="https://www.inaturalist.org/observations/56120178">https://www.inaturalist.org/observations/56120178</a>   |
| 1990 | Bubulcus ibis       | Cattle Egret         | 2020/2/2   | 1 | 0 | 21.1870321 | 80.7618636 | <a href="https://www.inaturalist.org/observations/41530275">https://www.inaturalist.org/observations/41530275</a>   |
| 1991 | Bubulcus ibis       | Cattle Egret         | 2021/1/28  | 1 | 0 | 21.1879299 | 81.3598150 | <a href="https://www.inaturalist.org/observations/68709693">https://www.inaturalist.org/observations/68709693</a>   |
| 1992 | Bubulcus ibis       | Cattle Egret         | 2021/2/28  | 3 | 0 | 21.1921990 | 81.7207810 | <a href="https://www.inaturalist.org/observations/121441745">https://www.inaturalist.org/observations/121441745</a> |
| 1993 | Bubulcus ibis       | Cattle Egret         | 2022/7/26  | 6 | 0 | 21.1921990 | 81.7207810 | <a href="https://www.inaturalist.org/observations/129294160">https://www.inaturalist.org/observations/129294160</a> |
| 1994 | Bubulcus ibis       | Cattle Egret         | 2017/8/26  | 2 | 0 | 21.1940648 | 81.3509414 | <a href="https://www.inaturalist.org/observations/89188798">https://www.inaturalist.org/observations/89188798</a>   |
| 1995 | Bubulcus ibis       | Cattle Egret         | 2020/5/31  | 3 | 0 | 21.2047328 | 78.9851469 | <a href="https://www.inaturalist.org/observations/65261292">https://www.inaturalist.org/observations/65261292</a>   |
| 1996 | Bubulcus ibis       | Cattle Egret         | 2022/6/4   | 4 | 0 | 21.2084446 | 81.3377379 | <a href="https://www.inaturalist.org/observations/123869927">https://www.inaturalist.org/observations/123869927</a> |
| 1997 | Bubulcus ibis       | Cattle Egret         | 2020/2/26  | 3 | 0 | 21.2097899 | 81.4368154 | <a href="https://www.inaturalist.org/observations/51404353">https://www.inaturalist.org/observations/51404353</a>   |
| 1998 | Bubulcus ibis       | Cattle Egret         | 2022/10/18 | 2 | 0 | 21.2456966 | 81.5995950 | <a href="https://www.inaturalist.org/observations/139198102">https://www.inaturalist.org/observations/139198102</a> |
| 1999 | Bubulcus ibis       | Cattle Egret         | 2020/2/26  | 3 | 0 | 21.2467117 | 81.6033325 | <a href="https://www.inaturalist.org/observations/39918151">https://www.inaturalist.org/observations/39918151</a>   |

|      |               |              |           |   |   |            |            |                                                                                                                     |
|------|---------------|--------------|-----------|---|---|------------|------------|---------------------------------------------------------------------------------------------------------------------|
| 2000 | Bubulcus ibis | Cattle Egret | 2022/6/15 | 4 | 0 | 21.2468599 | 81.5974452 | <a href="https://www.inaturalist.org/observations/121903980">https://www.inaturalist.org/observations/121903980</a> |
| 2001 | Bubulcus ibis | Cattle Egret | 2022/8/7  | 0 | 0 | 21.2474248 | 81.6457994 | <a href="https://www.inaturalist.org/observations/129995202">https://www.inaturalist.org/observations/129995202</a> |
| 2002 | Bubulcus ibis | Cattle Egret | 2022/8/7  | 3 | 0 | 21.2474248 | 81.6457994 | <a href="https://www.inaturalist.org/observations/129995203">https://www.inaturalist.org/observations/129995203</a> |
| 2003 | Bubulcus ibis | Cattle Egret | 2020/6/30 | 4 | 0 | 21.2513844 | 81.6296413 | <a href="https://www.inaturalist.org/observations/61108413">https://www.inaturalist.org/observations/61108413</a>   |
| 2004 | Bubulcus ibis | Cattle Egret | 2022/7/12 | 3 | 0 | 21.2587629 | 81.6237831 | <a href="https://www.inaturalist.org/observations/129098892">https://www.inaturalist.org/observations/129098892</a> |
| 2005 | Bubulcus ibis | Cattle Egret | 2022/7/12 | 2 | 0 | 21.2587629 | 81.6237831 | <a href="https://www.inaturalist.org/observations/129098893">https://www.inaturalist.org/observations/129098893</a> |
| 2006 | Bubulcus ibis | Cattle Egret | 2022/7/31 | 4 | 0 | 21.2587629 | 81.6237831 | <a href="https://www.inaturalist.org/observations/129304471">https://www.inaturalist.org/observations/129304471</a> |
| 2007 | Bubulcus ibis | Cattle Egret | 2022/8/6  | 4 | 0 | 21.2587629 | 81.6237831 | <a href="https://www.inaturalist.org/observations/129991793">https://www.inaturalist.org/observations/129991793</a> |
| 2008 | Bubulcus ibis | Cattle Egret | 2022/8/6  | 4 | 0 | 21.2587629 | 81.6237831 | <a href="https://www.inaturalist.org/observations/129991795">https://www.inaturalist.org/observations/129991795</a> |
| 2009 | Bubulcus ibis | Cattle Egret | 2022/8/6  | 5 | 0 | 21.2587629 | 81.6237831 | <a href="https://www.inaturalist.org/observations/129991796">https://www.inaturalist.org/observations/129991796</a> |
| 2010 | Bubulcus ibis | Cattle Egret | 2022/8/6  | 5 | 0 | 21.2587629 | 81.6237831 | <a href="https://www.inaturalist.org/observations/129991797">https://www.inaturalist.org/observations/129991797</a> |
| 2011 | Bubulcus ibis | Cattle Egret | 2022/8/8  | 4 | 0 | 21.2587629 | 81.6237831 | <a href="https://www.inaturalist.org/observations/130111385">https://www.inaturalist.org/observations/130111385</a> |
| 2012 | Bubulcus ibis | Cattle Egret | 2022/8/16 | 5 | 0 | 21.2587629 | 81.6237831 | <a href="https://www.inaturalist.org/observations/131339930">https://www.inaturalist.org/observations/131339930</a> |
| 2013 | Bubulcus ibis | Cattle Egret | 2022/8/16 | 5 | 0 | 21.2587629 | 81.6237831 | <a href="https://www.inaturalist.org/observations/131340050">https://www.inaturalist.org/observations/131340050</a> |
| 2014 | Bubulcus ibis | Cattle Egret | 2022/8/21 | 4 | 0 | 21.2587629 | 81.6237831 | <a href="https://www.inaturalist.org/observations/131788379">https://www.inaturalist.org/observations/131788379</a> |
| 2015 | Bubulcus ibis | Cattle Egret | 2022/8/21 | 5 | 0 | 21.2587629 | 81.6237831 | <a href="https://www.inaturalist.org/observations/131788380">https://www.inaturalist.org/observations/131788380</a> |
| 2016 | Bubulcus ibis | Cattle Egret | 2022/8/21 | 4 | 0 | 21.2587629 | 81.6237831 | <a href="https://www.inaturalist.org/observations/131788424">https://www.inaturalist.org/observations/131788424</a> |
| 2017 | Bubulcus ibis | Cattle Egret | 2022/8/21 | 2 | 0 | 21.2587629 | 81.6237831 | <a href="https://www.inaturalist.org/observations/131788462">https://www.inaturalist.org/observations/131788462</a> |
| 2018 | Bubulcus ibis | Cattle Egret | 2022/8/23 | 3 | 0 | 21.2587629 | 81.6237831 | <a href="https://www.inaturalist.org/observations/133427623">https://www.inaturalist.org/observations/133427623</a> |
| 2019 | Bubulcus ibis | Cattle Egret | 2022/8/26 | 3 | 0 | 21.2587629 | 81.6237831 | <a href="https://www.inaturalist.org/observations/133427626">https://www.inaturalist.org/observations/133427626</a> |
| 2020 | Bubulcus ibis | Cattle Egret | 2022/8/26 | 2 | 0 | 21.2587629 | 81.6237831 | <a href="https://www.inaturalist.org/observations/133427628">https://www.inaturalist.org/observations/133427628</a> |
| 2021 | Bubulcus ibis | Cattle Egret | 2022/8/26 | 2 | 0 | 21.2587629 | 81.6237831 | <a href="https://www.inaturalist.org/observations/133427630">https://www.inaturalist.org/observations/133427630</a> |
| 2022 | Bubulcus ibis | Cattle Egret | 2022/8/26 | 4 | 0 | 21.2587629 | 81.6237831 | <a href="https://www.inaturalist.org/observations/133427632">https://www.inaturalist.org/observations/133427632</a> |
| 2023 | Bubulcus ibis | Cattle Egret | 2022/8/26 | 3 | 0 | 21.2587629 | 81.6237831 | <a href="https://www.inaturalist.org/observations/133427633">https://www.inaturalist.org/observations/133427633</a> |
| 2024 | Bubulcus ibis | Cattle Egret | 2022/8/26 | 2 | 0 | 21.2587629 | 81.6237831 | <a href="https://www.inaturalist.org/observations/133427638">https://www.inaturalist.org/observations/133427638</a> |

|      |                        |                      |            |   |   |            |            |                                                                                                                     |
|------|------------------------|----------------------|------------|---|---|------------|------------|---------------------------------------------------------------------------------------------------------------------|
| 2025 | Bubulcus ibis          | Cattle Egret         | 2022/8/26  | 2 | 0 | 21.2587629 | 81.6237831 | <a href="https://www.inaturalist.org/observations/133427640">https://www.inaturalist.org/observations/133427640</a> |
| 2026 | Bubulcus ibis          | Cattle Egret         | 2022/8/23  | 2 | 0 | 21.2587629 | 81.6237831 | <a href="https://www.inaturalist.org/observations/133427641">https://www.inaturalist.org/observations/133427641</a> |
| 2027 | Bubulcus ibis          | Cattle Egret         | 2022/9/2   | 4 | 0 | 21.2587629 | 81.6237831 | <a href="https://www.inaturalist.org/observations/134198430">https://www.inaturalist.org/observations/134198430</a> |
| 2028 | Bubulcus ibis          | Cattle Egret         | 2021/7/30  | 3 | 0 | 21.2600146 | 81.3585033 | <a href="https://www.inaturalist.org/observations/89650917">https://www.inaturalist.org/observations/89650917</a>   |
| 2029 | Bubulcus ibis          | Cattle Egret         | 2021/8/27  | 1 | 0 | 21.2600146 | 81.3585033 | <a href="https://www.inaturalist.org/observations/93383479">https://www.inaturalist.org/observations/93383479</a>   |
| 2030 | Bubulcus ibis          | Cattle Egret         | 2022/7/5   | 3 | 0 | 21.2674596 | 81.6184959 | <a href="https://www.inaturalist.org/observations/124881421">https://www.inaturalist.org/observations/124881421</a> |
| 2031 | Bubulcus ibis          | Cattle Egret         | 2022/7/8   | 2 | 0 | 21.2766770 | 81.6446049 | <a href="https://www.inaturalist.org/observations/125802347">https://www.inaturalist.org/observations/125802347</a> |
| 2032 | Bubulcus ibis          | Cattle Egret         | 2022/11/30 | 0 | 0 | 21.2920803 | 82.3515606 | <a href="https://www.inaturalist.org/observations/143721703">https://www.inaturalist.org/observations/143721703</a> |
| 2033 | Bubulcus ibis          | Cattle Egret         | 2020/10/25 | 3 | 0 | 21.2977170 | 80.3498170 | <a href="https://www.inaturalist.org/observations/63689563">https://www.inaturalist.org/observations/63689563</a>   |
| 2034 | Bubulcus ibis          | Cattle Egret         | 2022/8/10  | 0 | 0 | 21.3038044 | 81.6362152 | <a href="https://www.inaturalist.org/observations/130207229">https://www.inaturalist.org/observations/130207229</a> |
| 2035 | Bubulcus ibis          | Cattle Egret         | 2022/8/10  | 2 | 0 | 21.3040504 | 81.6382523 | <a href="https://www.inaturalist.org/observations/130213314">https://www.inaturalist.org/observations/130213314</a> |
| 2036 | Bubulcus ibis          | Cattle Egret         | 2022/8/24  | 0 | 0 | 21.3040543 | 81.6382523 | <a href="https://www.inaturalist.org/observations/132160077">https://www.inaturalist.org/observations/132160077</a> |
| 2037 | Bubulcus ibis          | Cattle Egret         | 2022/7/15  | 2 | 0 | 21.3042240 | 81.6385198 | <a href="https://www.inaturalist.org/observations/126446399">https://www.inaturalist.org/observations/126446399</a> |
| 2038 | Bubulcus ibis          | Cattle Egret         | 2022/8/4   | 0 | 0 | 21.3042240 | 81.6385198 | <a href="https://www.inaturalist.org/observations/129418218">https://www.inaturalist.org/observations/129418218</a> |
| 2039 | Bubulcus ibis          | Cattle Egret         | 2022/8/4   | 0 | 0 | 21.3042240 | 81.6385198 | <a href="https://www.inaturalist.org/observations/129418668">https://www.inaturalist.org/observations/129418668</a> |
| 2040 | Bubulcus ibis          | Cattle Egret         | 2022/9/2   | 3 | 0 | 21.3321217 | 81.7229883 | <a href="https://www.inaturalist.org/observations/133308008">https://www.inaturalist.org/observations/133308008</a> |
| 2041 | Bubulcus ibis          | Cattle Egret         | 2019/2/24  | 1 | 0 | 21.4124738 | 72.6830156 | <a href="https://www.inaturalist.org/observations/88249067">https://www.inaturalist.org/observations/88249067</a>   |
| 2042 | Bubulcus ibis          | Cattle Egret         | 2022/6/28  | 5 | 0 | 21.4487577 | 81.1579638 | <a href="https://www.inaturalist.org/observations/124278503">https://www.inaturalist.org/observations/124278503</a> |
| 2043 | Bubulcus ibis          | Cattle Egret         | 2022/6/4   | 3 | 0 | 21.4749138 | 79.3212058 | <a href="https://www.inaturalist.org/observations/121057090">https://www.inaturalist.org/observations/121057090</a> |
| 2044 | Bubulcus ibis          | Cattle Egret         | 2019/6/5   | 2 | 0 | 21.5201321 | 81.0295853 | <a href="https://www.inaturalist.org/observations/74532388">https://www.inaturalist.org/observations/74532388</a>   |
| 2045 | Bubulcus ibis          | Cattle Egret         | 2020/6/6   | 2 | 0 | 21.5265545 | 70.4586736 | <a href="https://www.inaturalist.org/observations/48625570">https://www.inaturalist.org/observations/48625570</a>   |
| 2046 | Bubulcus<br>coromandus | ibis<br>Cattle Egret | 2021/7/16  | 1 | 0 | 21.5387410 | 70.5027647 | <a href="https://www.inaturalist.org/observations/87232023">https://www.inaturalist.org/observations/87232023</a>   |
| 2047 | Bubulcus ibis          | Cattle Egret         | 2020/2/14  | 1 | 0 | 21.5631303 | 88.2595023 | <a href="https://www.inaturalist.org/observations/40946508">https://www.inaturalist.org/observations/40946508</a>   |
| 2048 | Bubulcus ibis          | Cattle Egret         | 2020/2/14  | 0 | 0 | 21.5631304 | 88.2595022 | <a href="https://www.inaturalist.org/observations/39744039">https://www.inaturalist.org/observations/39744039</a>   |
| 2049 | Bubulcus ibis          | Cattle Egret         | 2020/2/14  | 4 | 0 | 21.5650823 | 88.2490489 | <a href="https://www.inaturalist.org/observations/39919825">https://www.inaturalist.org/observations/39919825</a>   |



|      |                     |                   |            |   |   |            |             |                                                                                                                     |
|------|---------------------|-------------------|------------|---|---|------------|-------------|---------------------------------------------------------------------------------------------------------------------|
| 2050 | Bubulcus ibis       | Cattle Egret      | 2020/2/14  | 1 | 0 | 21.5706191 | 88.2430140  | <a href="https://www.inaturalist.org/observations/58235233">https://www.inaturalist.org/observations/58235233</a>   |
| 2051 | Bubulcus ibis       | Cattle Egret      | 2020/2/14  | 1 | 0 | 21.5706191 | 88.2430140  | <a href="https://www.inaturalist.org/observations/58235235">https://www.inaturalist.org/observations/58235235</a>   |
| 2052 | Bubulcus ibis       | Cattle Egret      | 2020/2/14  | 1 | 0 | 21.5706191 | 88.2430140  | <a href="https://www.inaturalist.org/observations/58235237">https://www.inaturalist.org/observations/58235237</a>   |
| 2053 | Bubulcus coromandus | ibis Cattle Egret | 2021/2/7   | 0 | 0 | 21.5794933 | 88.2512208  | <a href="https://www.inaturalist.org/observations/97936591">https://www.inaturalist.org/observations/97936591</a>   |
| 2054 | Bubulcus ibis       | Cattle Egret      | 2015/12/29 | 2 | 0 | 21.6391102 | 87.5531080  | <a href="https://www.inaturalist.org/observations/61106553">https://www.inaturalist.org/observations/61106553</a>   |
| 2055 | Bubulcus ibis       | Cattle Egret      | 2018/10/15 | 5 | 0 | 21.6519658 | 71.8581503  | <a href="https://www.inaturalist.org/observations/66366094">https://www.inaturalist.org/observations/66366094</a>   |
| 2056 | Bubulcus ibis       | Cattle Egret      | 2020/5/17  | 4 | 0 | 21.6622222 | 71.8525000  | <a href="https://www.inaturalist.org/observations/46373543">https://www.inaturalist.org/observations/46373543</a>   |
| 2057 | Bubulcus ibis       | Cattle Egret      | 2020/3/8   | 2 | 0 | 21.7257909 | 73.0074705  | <a href="https://www.inaturalist.org/observations/63693886">https://www.inaturalist.org/observations/63693886</a>   |
| 2058 | Bubulcus ibis       | Cattle Egret      | 2014/4/9   | 3 | 0 | 21.7560486 | 72.1257072  | <a href="https://www.inaturalist.org/observations/39749665">https://www.inaturalist.org/observations/39749665</a>   |
| 2059 | Bubulcus ibis       | Cattle Egret      | 2021/1/23  | 2 | 0 | 21.7705556 | 108.1697222 | <a href="https://www.inaturalist.org/observations/68490423">https://www.inaturalist.org/observations/68490423</a>   |
| 2060 | Bubulcus ibis       | Cattle Egret      | 2021/5/21  | 1 | 0 | 21.8190129 | 83.3121738  | <a href="https://www.inaturalist.org/observations/79642152">https://www.inaturalist.org/observations/79642152</a>   |
| 2061 | Bubulcus ibis       | Cattle Egret      | 2021/5/7   | 1 | 0 | 21.8190713 | 83.3120839  | <a href="https://www.inaturalist.org/observations/79921565">https://www.inaturalist.org/observations/79921565</a>   |
| 2062 | Bubulcus ibis       | Cattle Egret      | 2021/8/4   | 1 | 0 | 21.8193250 | 83.3120850  | <a href="https://www.inaturalist.org/observations/89949271">https://www.inaturalist.org/observations/89949271</a>   |
| 2063 | Bubulcus ibis       | Cattle Egret      | 2021/8/8   | 1 | 0 | 21.8194217 | 83.3118133  | <a href="https://www.inaturalist.org/observations/92207590">https://www.inaturalist.org/observations/92207590</a>   |
| 2064 | Bubulcus ibis       | Cattle Egret      | 2022/11/26 | 2 | 0 | 21.8493162 | 84.0479835  | <a href="https://www.inaturalist.org/observations/142895453">https://www.inaturalist.org/observations/142895453</a> |
| 2065 | Bubulcus ibis       | Cattle Egret      | 2022/11/26 | 1 | 0 | 21.8493268 | 84.0480390  | <a href="https://www.inaturalist.org/observations/142895416">https://www.inaturalist.org/observations/142895416</a> |
| 2066 | Bubulcus ibis       | Cattle Egret      | 2021/5/21  | 2 | 0 | 21.8507517 | 81.8227156  | <a href="https://www.inaturalist.org/observations/79566128">https://www.inaturalist.org/observations/79566128</a>   |
| 2067 | Bubulcus ibis       | Cattle Egret      | 2019/1/2   | 5 | 0 | 21.8839254 | 80.5136326  | <a href="https://www.inaturalist.org/observations/19435645">https://www.inaturalist.org/observations/19435645</a>   |
| 2068 | Bubulcus ibis       | Cattle Egret      | 2020/6/4   | 3 | 0 | 21.8884500 | 83.4030040  | <a href="https://www.inaturalist.org/observations/69038619">https://www.inaturalist.org/observations/69038619</a>   |
| 2069 | Bubulcus ibis       | Cattle Egret      | 2020/12/22 | 1 | 0 | 21.8973977 | 83.3949631  | <a href="https://www.inaturalist.org/observations/79749214">https://www.inaturalist.org/observations/79749214</a>   |
| 2070 | Bubulcus ibis       | Cattle Egret      | 2019/10/12 | 1 | 0 | 21.9260667 | 120.8475633 | <a href="https://www.inaturalist.org/observations/34292507">https://www.inaturalist.org/observations/34292507</a>   |
| 2071 | Bubulcus ibis       | Cattle Egret      | 2019/10/14 | 1 | 0 | 21.9272344 | 120.8479628 | <a href="https://www.inaturalist.org/observations/39690114">https://www.inaturalist.org/observations/39690114</a>   |
| 2072 | Bubulcus ibis       | Cattle Egret      | 2019/10/3  | 1 | 0 | 21.9365685 | 120.7320223 | <a href="https://www.inaturalist.org/observations/33976774">https://www.inaturalist.org/observations/33976774</a>   |
| 2073 | Bubulcus ibis       | Cattle Egret      | 2019/10/3  | 1 | 0 | 21.9366665 | 120.7321167 | <a href="https://www.inaturalist.org/observations/34066219">https://www.inaturalist.org/observations/34066219</a>   |
| 2074 | Bubulcus ibis       | Cattle Egret      | 2019/10/7  | 1 | 0 | 21.9422628 | 120.8272304 | <a href="https://www.inaturalist.org/observations/34336399">https://www.inaturalist.org/observations/34336399</a>   |

|      |                     |                   |            |   |   |            |             |                                                                                                                     |
|------|---------------------|-------------------|------------|---|---|------------|-------------|---------------------------------------------------------------------------------------------------------------------|
| 2075 | Bubulcus ibis       | Cattle Egret      | 2019/9/16  | 1 | 0 | 21.9437800 | 120.8248579 | <a href="https://www.inaturalist.org/observations/32827480">https://www.inaturalist.org/observations/32827480</a>   |
| 2076 | Bubulcus ibis       | Cattle Egret      | 2021/10/22 | 1 | 0 | 21.9444301 | 120.8245252 | <a href="https://www.inaturalist.org/observations/99202460">https://www.inaturalist.org/observations/99202460</a>   |
| 2077 | Bubulcus ibis       | Cattle Egret      | 2022/9/18  | 2 | 0 | 21.9448278 | 120.7944111 | <a href="https://www.inaturalist.org/observations/135632387">https://www.inaturalist.org/observations/135632387</a> |
| 2078 | Bubulcus ibis       | Cattle Egret      | 2016/10/28 | 4 | 0 | 21.9487122 | 120.7805264 | <a href="http://www.inaturalist.org/observations/4696248">http://www.inaturalist.org/observations/4696248</a>       |
| 2079 | Bubulcus coromandus | ibis Cattle Egret | 2020/10/18 | 1 | 0 | 21.9531559 | 120.8226981 | <a href="https://www.inaturalist.org/observations/63374887">https://www.inaturalist.org/observations/63374887</a>   |
| 2080 | Bubulcus ibis       | Cattle Egret      | 2021/10/10 | 1 | 0 | 21.9533948 | 120.8233666 | <a href="https://www.inaturalist.org/observations/97886498">https://www.inaturalist.org/observations/97886498</a>   |
| 2081 | Bubulcus ibis       | Cattle Egret      | 2022/1/9   | 1 | 0 | 21.9563698 | 120.8189188 | <a href="https://www.inaturalist.org/observations/104693615">https://www.inaturalist.org/observations/104693615</a> |
| 2082 | Bubulcus ibis       | Cattle Egret      | 2019/9/16  | 1 | 0 | 21.9563800 | 120.8189034 | <a href="https://www.inaturalist.org/observations/32827488">https://www.inaturalist.org/observations/32827488</a>   |
| 2083 | Bubulcus ibis       | Cattle Egret      | 2019/10/8  | 2 | 0 | 21.9699614 | 120.7490319 | <a href="https://www.inaturalist.org/observations/34095719">https://www.inaturalist.org/observations/34095719</a>   |
| 2084 | Bubulcus ibis       | Cattle Egret      | 2019/12/1  | 1 | 0 | 21.9704520 | 120.7485440 | <a href="https://www.inaturalist.org/observations/45761759">https://www.inaturalist.org/observations/45761759</a>   |
| 2085 | Bubulcus ibis       | Cattle Egret      | 2019/11/18 | 2 | 0 | 21.9791195 | 120.7277359 | <a href="https://www.inaturalist.org/observations/35853242">https://www.inaturalist.org/observations/35853242</a>   |
| 2086 | Bubulcus ibis       | Cattle Egret      | 2019/11/14 | 1 | 0 | 21.9829044 | 120.7353493 | <a href="https://www.inaturalist.org/observations/35917168">https://www.inaturalist.org/observations/35917168</a>   |
| 2087 | Bubulcus ibis       | Cattle Egret      | 2019/11/12 | 1 | 0 | 21.9873501 | 120.7399138 | <a href="https://www.inaturalist.org/observations/35607449">https://www.inaturalist.org/observations/35607449</a>   |
| 2088 | Bubulcus ibis       | Cattle Egret      | 2021/10/20 | 2 | 0 | 22.0002783 | 81.2208400  | <a href="https://www.inaturalist.org/observations/98792655">https://www.inaturalist.org/observations/98792655</a>   |
| 2089 | Bubulcus ibis       | Cattle Egret      | 2018/10/10 | 1 | 0 | 22.0015984 | 120.8190189 | <a href="https://www.inaturalist.org/observations/17491530">https://www.inaturalist.org/observations/17491530</a>   |
| 2090 | Bubulcus ibis       | Cattle Egret      | 2019/10/5  | 1 | 0 | 22.0131431 | 120.8047458 | <a href="https://www.inaturalist.org/observations/87650544">https://www.inaturalist.org/observations/87650544</a>   |
| 2091 | Bubulcus ibis       | Cattle Egret      | 2021/9/5   | 1 | 0 | 22.0131925 | 81.2214228  | <a href="https://www.inaturalist.org/observations/93968588">https://www.inaturalist.org/observations/93968588</a>   |
| 2092 | Bubulcus ibis       | Cattle Egret      | 2019/10/5  | 1 | 0 | 22.0132781 | 120.8049242 | <a href="https://www.inaturalist.org/observations/87649739">https://www.inaturalist.org/observations/87649739</a>   |
| 2093 | Bubulcus ibis       | Cattle Egret      | 2022/7/7   | 4 | 0 | 22.0158899 | 72.1254608  | <a href="https://www.inaturalist.org/observations/131547379">https://www.inaturalist.org/observations/131547379</a> |
| 2094 | Bubulcus ibis       | Cattle Egret      | 2021/10/10 | 1 | 0 | 22.0190372 | 120.8429264 | <a href="https://www.inaturalist.org/observations/97886503">https://www.inaturalist.org/observations/97886503</a>   |
| 2095 | Bubulcus ibis       | Cattle Egret      | 2011/10/10 | 2 | 0 | 22.0192131 | 120.8425447 | <a href="https://www.inaturalist.org/observations/59457244">https://www.inaturalist.org/observations/59457244</a>   |
| 2096 | Bubulcus ibis       | Cattle Egret      | 2019/10/19 | 0 | 0 | 22.0220870 | 120.8349630 | <a href="https://www.inaturalist.org/observations/38084280">https://www.inaturalist.org/observations/38084280</a>   |
| 2097 | Bubulcus ibis       | Cattle Egret      | 2019/10/11 | 0 | 0 | 22.0238833 | 120.8611000 | <a href="https://www.inaturalist.org/observations/37973803">https://www.inaturalist.org/observations/37973803</a>   |
| 2098 | Bubulcus ibis       | Cattle Egret      | 2017/4/16  | 3 | 0 | 22.0264389 | 73.0906827  | <a href="https://www.inaturalist.org/observations/89290705">https://www.inaturalist.org/observations/89290705</a>   |
| 2099 | Bubulcus ibis       | Cattle Egret      | 2019/9/8   | 1 | 0 | 22.0295120 | 120.7777817 | <a href="https://www.inaturalist.org/observations/32333157">https://www.inaturalist.org/observations/32333157</a>   |

|      |               |              |            |   |   |            |             |                                                                                                                     |
|------|---------------|--------------|------------|---|---|------------|-------------|---------------------------------------------------------------------------------------------------------------------|
| 2100 | Bubulcus ibis | Cattle Egret | 2019/9/28  | 1 | 0 | 22.0328670 | 120.7169331 | <a href="https://www.inaturalist.org/observations/33587915">https://www.inaturalist.org/observations/33587915</a>   |
| 2101 | Bubulcus ibis | Cattle Egret | 2020/9/5   | 1 | 0 | 22.0341968 | 121.5743335 | <a href="https://www.inaturalist.org/observations/59033952">https://www.inaturalist.org/observations/59033952</a>   |
| 2102 | Bubulcus ibis | Cattle Egret | 2022/9/19  | 2 | 0 | 22.0346950 | 121.5737770 | <a href="https://www.inaturalist.org/observations/136532858">https://www.inaturalist.org/observations/136532858</a> |
| 2103 | Bubulcus ibis | Cattle Egret | 2017/5/22  | 3 | 0 | 22.0435616 | 121.5484180 | <a href="https://www.inaturalist.org/observations/6547455">https://www.inaturalist.org/observations/6547455</a>     |
| 2104 | Bubulcus ibis | Cattle Egret | 2011/1/26  | 2 | 0 | 22.0441079 | 72.0202813  | <a href="https://www.inaturalist.org/observations/59217790">https://www.inaturalist.org/observations/59217790</a>   |
| 2105 | Bubulcus ibis | Cattle Egret | 2021/8/20  | 1 | 0 | 22.0578650 | 82.0578733  | <a href="https://www.inaturalist.org/observations/93701539">https://www.inaturalist.org/observations/93701539</a>   |
| 2106 | Bubulcus ibis | Cattle Egret | 2021/8/20  | 1 | 0 | 22.0584233 | 82.0635517  | <a href="https://www.inaturalist.org/observations/93694719">https://www.inaturalist.org/observations/93694719</a>   |
| 2107 | Bubulcus ibis | Cattle Egret | 2021/8/20  | 1 | 0 | 22.0584233 | 82.0635517  | <a href="https://www.inaturalist.org/observations/93694721">https://www.inaturalist.org/observations/93694721</a>   |
| 2108 | Bubulcus ibis | Cattle Egret | 2021/9/3   | 1 | 0 | 22.0585133 | 82.2098783  | <a href="https://www.inaturalist.org/observations/93737515">https://www.inaturalist.org/observations/93737515</a>   |
| 2109 | Bubulcus ibis | Cattle Egret | 2019/11/12 | 1 | 0 | 22.0585284 | 120.7299035 | <a href="https://www.inaturalist.org/observations/35607866">https://www.inaturalist.org/observations/35607866</a>   |
| 2110 | Bubulcus ibis | Cattle Egret | 2019/2/2   | 3 | 0 | 22.0597151 | 82.0434380  | <a href="https://www.inaturalist.org/observations/60722946">https://www.inaturalist.org/observations/60722946</a>   |
| 2111 | Bubulcus ibis | Cattle Egret | 2019/7/12  | 4 | 0 | 22.0597151 | 82.0434380  | <a href="https://www.inaturalist.org/observations/62090775">https://www.inaturalist.org/observations/62090775</a>   |
| 2112 | Bubulcus ibis | Cattle Egret | 2008/10/19 | 1 | 0 | 22.0612933 | 121.5111341 | <a href="https://www.inaturalist.org/observations/126207270">https://www.inaturalist.org/observations/126207270</a> |
| 2113 | Bubulcus ibis | Cattle Egret | 2021/9/5   | 0 | 0 | 22.0630517 | 82.2011000  | <a href="https://www.inaturalist.org/observations/93742342">https://www.inaturalist.org/observations/93742342</a>   |
| 2114 | Bubulcus ibis | Cattle Egret | 2021/8/31  | 1 | 0 | 22.0659000 | 82.2051650  | <a href="https://www.inaturalist.org/observations/93439021">https://www.inaturalist.org/observations/93439021</a>   |
| 2115 | Bubulcus ibis | Cattle Egret | 2021/8/31  | 1 | 0 | 22.0659000 | 82.2051650  | <a href="https://www.inaturalist.org/observations/93439074">https://www.inaturalist.org/observations/93439074</a>   |
| 2116 | Bubulcus ibis | Cattle Egret | 2019/9/1   | 2 | 0 | 22.0720830 | 120.7188988 | <a href="https://www.inaturalist.org/observations/31903295">https://www.inaturalist.org/observations/31903295</a>   |
| 2117 | Bubulcus ibis | Cattle Egret | 2019/4/7   | 1 | 0 | 22.0740291 | 120.7223755 | <a href="https://www.inaturalist.org/observations/22133802">https://www.inaturalist.org/observations/22133802</a>   |
| 2118 | Bubulcus ibis | Cattle Egret | 2016/3/14  | 1 | 0 | 22.0773072 | 120.7326128 | <a href="https://www.inaturalist.org/observations/82393381">https://www.inaturalist.org/observations/82393381</a>   |
| 2119 | Bubulcus ibis | Cattle Egret | 2020/9/5   | 1 | 0 | 22.0774898 | 121.5080571 | <a href="https://www.inaturalist.org/observations/106670650">https://www.inaturalist.org/observations/106670650</a> |
| 2120 | Bubulcus ibis | Cattle Egret | 2019/6/30  | 2 | 0 | 22.0795040 | 121.5188441 | <a href="https://www.inaturalist.org/observations/28199701">https://www.inaturalist.org/observations/28199701</a>   |
| 2121 | Bubulcus ibis | Cattle Egret | 2019/10/15 | 3 | 0 | 22.0796545 | 82.1409152  | <a href="https://www.inaturalist.org/observations/60488891">https://www.inaturalist.org/observations/60488891</a>   |
| 2122 | Bubulcus ibis | Cattle Egret | 2019/6/30  | 1 | 0 | 22.0800492 | 121.5285098 | <a href="https://www.inaturalist.org/observations/28600315">https://www.inaturalist.org/observations/28600315</a>   |
| 2123 | Bubulcus ibis | Cattle Egret | 2022/4/16  | 2 | 0 | 22.0912181 | 88.7615667  | <a href="https://www.inaturalist.org/observations/112701772">https://www.inaturalist.org/observations/112701772</a> |
| 2124 | Bubulcus ibis | Cattle Egret | 2021/11/28 | 1 | 0 | 22.1033917 | 120.7920972 | <a href="https://www.inaturalist.org/observations/102068567">https://www.inaturalist.org/observations/102068567</a> |

|      |               |              |            |   |   |            |             |                                                                                                                     |
|------|---------------|--------------|------------|---|---|------------|-------------|---------------------------------------------------------------------------------------------------------------------|
| 2125 | Bubulcus ibis | Cattle Egret | 2022/12/14 | 1 | 0 | 22.1119457 | 120.8760168 | <a href="https://www.inaturalist.org/observations/144334453">https://www.inaturalist.org/observations/144334453</a> |
| 2126 | Bubulcus ibis | Cattle Egret | 2022/12/14 | 2 | 0 | 22.1123176 | 120.8773247 | <a href="https://www.inaturalist.org/observations/144727819">https://www.inaturalist.org/observations/144727819</a> |
| 2127 | Bubulcus ibis | Cattle Egret | 2013/10/26 | 4 | 0 | 22.1191298 | 80.6743047  | <a href="https://www.inaturalist.org/observations/69360382">https://www.inaturalist.org/observations/69360382</a>   |
| 2128 | Bubulcus ibis | Cattle Egret | 2019/9/1   | 1 | 0 | 22.1260510 | 82.1425522  | <a href="https://www.inaturalist.org/observations/32244086">https://www.inaturalist.org/observations/32244086</a>   |
| 2129 | Bubulcus ibis | Cattle Egret | 2021/8/16  | 1 | 0 | 22.1261445 | 82.1430395  | <a href="https://www.inaturalist.org/observations/93694754">https://www.inaturalist.org/observations/93694754</a>   |
| 2130 | Bubulcus ibis | Cattle Egret | 2021/9/5   | 0 | 0 | 22.1281650 | 82.1424983  | <a href="https://www.inaturalist.org/observations/93746555">https://www.inaturalist.org/observations/93746555</a>   |
| 2131 | Bubulcus ibis | Cattle Egret | 2021/8/30  | 1 | 0 | 22.1282217 | 82.1437117  | <a href="https://www.inaturalist.org/observations/93206875">https://www.inaturalist.org/observations/93206875</a>   |
| 2132 | Bubulcus ibis | Cattle Egret | 2021/8/30  | 1 | 0 | 22.1291300 | 82.1410217  | <a href="https://www.inaturalist.org/observations/93206952">https://www.inaturalist.org/observations/93206952</a>   |
| 2133 | Bubulcus ibis | Cattle Egret | 2022/5/3   | 2 | 0 | 22.1292283 | 120.7841195 | <a href="https://www.inaturalist.org/observations/117393492">https://www.inaturalist.org/observations/117393492</a> |
| 2134 | Bubulcus ibis | Cattle Egret | 2022/5/3   | 2 | 0 | 22.1292669 | 120.7841568 | <a href="https://www.inaturalist.org/observations/117393493">https://www.inaturalist.org/observations/117393493</a> |
| 2135 | Bubulcus ibis | Cattle Egret | 2021/8/30  | 1 | 0 | 22.1298850 | 82.1425800  | <a href="https://www.inaturalist.org/observations/93206938">https://www.inaturalist.org/observations/93206938</a>   |
| 2136 | Bubulcus ibis | Cattle Egret | 2019/9/10  | 3 | 0 | 22.1299364 | 82.1361662  | <a href="https://www.inaturalist.org/observations/32519955">https://www.inaturalist.org/observations/32519955</a>   |
| 2137 | Bubulcus ibis | Cattle Egret | 2022/5/3   | 2 | 0 | 22.1302403 | 120.7837341 | <a href="https://www.inaturalist.org/observations/117393495">https://www.inaturalist.org/observations/117393495</a> |
| 2138 | Bubulcus ibis | Cattle Egret | 2022/5/3   | 1 | 0 | 22.1307917 | 120.7830592 | <a href="https://www.inaturalist.org/observations/117393506">https://www.inaturalist.org/observations/117393506</a> |
| 2139 | Bubulcus ibis | Cattle Egret | 2022/5/3   | 1 | 0 | 22.1311171 | 120.7834531 | <a href="https://www.inaturalist.org/observations/117393489">https://www.inaturalist.org/observations/117393489</a> |
| 2140 | Bubulcus ibis | Cattle Egret | 2021/9/1   | 2 | 0 | 22.1321883 | 82.0463317  | <a href="https://www.inaturalist.org/observations/93451114">https://www.inaturalist.org/observations/93451114</a>   |
| 2141 | Bubulcus ibis | Cattle Egret | 2017/5/11  | 1 | 0 | 22.1623045 | 114.1919963 | <a href="https://www.inaturalist.org/observations/58299384">https://www.inaturalist.org/observations/58299384</a>   |
| 2142 | Bubulcus ibis | Cattle Egret | 2009/5/2   | 0 | 0 | 22.1650590 | 114.2548540 | <a href="https://www.inaturalist.org/observations/39483730">https://www.inaturalist.org/observations/39483730</a>   |
| 2143 | Bubulcus ibis | Cattle Egret | 2013/4/7   | 1 | 0 | 22.1651360 | 114.2550490 | <a href="https://www.inaturalist.org/observations/37551298">https://www.inaturalist.org/observations/37551298</a>   |
| 2144 | Bubulcus ibis | Cattle Egret | 2022/4/30  | 1 | 0 | 22.1652941 | 114.2551501 | <a href="https://www.inaturalist.org/observations/114052284">https://www.inaturalist.org/observations/114052284</a> |
| 2145 | Bubulcus ibis | Cattle Egret | 2022/5/3   | 1 | 0 | 22.1653661 | 114.2549622 | <a href="https://www.inaturalist.org/observations/115249581">https://www.inaturalist.org/observations/115249581</a> |
| 2146 | Bubulcus ibis | Cattle Egret | 2022/4/30  | 1 | 0 | 22.1655021 | 114.2554062 | <a href="https://www.inaturalist.org/observations/115517731">https://www.inaturalist.org/observations/115517731</a> |
| 2147 | Bubulcus ibis | Cattle Egret | 2020/4/5   | 1 | 0 | 22.1660801 | 114.2616417 | <a href="https://www.inaturalist.org/observations/45564566">https://www.inaturalist.org/observations/45564566</a>   |
| 2148 | Bubulcus ibis | Cattle Egret | 2020/5/3   | 1 | 0 | 22.1689984 | 114.2594818 | <a href="https://www.inaturalist.org/observations/53104149">https://www.inaturalist.org/observations/53104149</a>   |
| 2149 | Bubulcus ibis | Cattle Egret | 2021/9/25  | 1 | 0 | 22.1692320 | 114.2598530 | <a href="https://www.inaturalist.org/observations/96885175">https://www.inaturalist.org/observations/96885175</a>   |

|      |                     |                   |            |   |   |            |             |                                                                                                                     |
|------|---------------------|-------------------|------------|---|---|------------|-------------|---------------------------------------------------------------------------------------------------------------------|
| 2150 | Bubulcus ibis       | Cattle Egret      | 2018/1/19  | 7 | 0 | 22.1778762 | 69.3906560  | <a href="https://www.inaturalist.org/observations/30347557">https://www.inaturalist.org/observations/30347557</a>   |
| 2151 | Bubulcus ibis       | Cattle Egret      | 2016/11/5  | 1 | 0 | 22.1960974 | 114.1398459 | <a href="https://www.inaturalist.org/observations/35942458">https://www.inaturalist.org/observations/35942458</a>   |
| 2152 | Bubulcus ibis       | Cattle Egret      | 2021/10/11 | 1 | 0 | 22.2005170 | 113.5477910 | <a href="https://www.inaturalist.org/observations/97867092">https://www.inaturalist.org/observations/97867092</a>   |
| 2153 | Bubulcus coromandus | ibis Cattle Egret | 2015/10/16 | 1 | 0 | 22.2030155 | 114.1309155 | <a href="https://www.inaturalist.org/observations/32100335">https://www.inaturalist.org/observations/32100335</a>   |
| 2154 | Bubulcus ibis       | Cattle Egret      | 2022/9/22  | 1 | 0 | 22.2039649 | 113.9616873 | <a href="https://www.inaturalist.org/observations/136093780">https://www.inaturalist.org/observations/136093780</a> |
| 2155 | Bubulcus ibis       | Cattle Egret      | 2020/4/23  | 1 | 0 | 22.2042536 | 114.1274529 | <a href="https://www.inaturalist.org/observations/43016874">https://www.inaturalist.org/observations/43016874</a>   |
| 2156 | Bubulcus ibis       | Cattle Egret      | 2021/10/11 | 1 | 0 | 22.2043717 | 114.1256805 | <a href="https://www.inaturalist.org/observations/97875021">https://www.inaturalist.org/observations/97875021</a>   |
| 2157 | Bubulcus ibis       | Cattle Egret      | 2019/11/1  | 1 | 0 | 22.2043874 | 114.1250667 | <a href="https://www.inaturalist.org/observations/35159525">https://www.inaturalist.org/observations/35159525</a>   |
| 2158 | Bubulcus coromandus | ibis Cattle Egret | 2020/4/18  | 1 | 0 | 22.2046305 | 114.1264604 | <a href="https://www.inaturalist.org/observations/42658799">https://www.inaturalist.org/observations/42658799</a>   |
| 2159 | Bubulcus ibis       | Cattle Egret      | 2020/10/27 | 2 | 0 | 22.2095444 | 120.7293917 | <a href="https://www.inaturalist.org/observations/63617450">https://www.inaturalist.org/observations/63617450</a>   |
| 2160 | Bubulcus ibis       | Cattle Egret      | 2020/11/8  | 1 | 0 | 22.2100465 | 114.2549018 | <a href="https://www.inaturalist.org/observations/64413871">https://www.inaturalist.org/observations/64413871</a>   |
| 2161 | Bubulcus ibis       | Cattle Egret      | 2022/8/17  | 2 | 0 | 22.2163750 | 120.7990333 | <a href="https://www.inaturalist.org/observations/132530811">https://www.inaturalist.org/observations/132530811</a> |
| 2162 | Bubulcus ibis       | Cattle Egret      | 2017/5/23  | 4 | 0 | 22.2168381 | 114.2143814 | <a href="https://www.inaturalist.org/observations/19352422">https://www.inaturalist.org/observations/19352422</a>   |
| 2163 | Bubulcus ibis       | Cattle Egret      | 2022/8/23  | 1 | 0 | 22.2173361 | 120.8026167 | <a href="https://www.inaturalist.org/observations/132367080">https://www.inaturalist.org/observations/132367080</a> |
| 2164 | Bubulcus ibis       | Cattle Egret      | 2017/10/18 | 2 | 0 | 22.2191783 | 113.9180517 | <a href="https://www.inaturalist.org/observations/8453425">https://www.inaturalist.org/observations/8453425</a>     |
| 2165 | Bubulcus ibis       | Cattle Egret      | 2021/12/15 | 1 | 0 | 22.2191853 | 113.9184304 | <a href="https://www.inaturalist.org/observations/103094226">https://www.inaturalist.org/observations/103094226</a> |
| 2166 | Bubulcus coromandus | ibis Cattle Egret | 2018/4/23  | 3 | 0 | 22.2197143 | 113.9150734 | <a href="https://www.inaturalist.org/observations/11498021">https://www.inaturalist.org/observations/11498021</a>   |
| 2167 | Bubulcus ibis       | Cattle Egret      | 2020/4/27  | 2 | 0 | 22.2198773 | 113.9173066 | <a href="https://www.inaturalist.org/observations/43847089">https://www.inaturalist.org/observations/43847089</a>   |
| 2168 | Bubulcus ibis       | Cattle Egret      | 2020/4/27  | 2 | 0 | 22.2199245 | 113.9172626 | <a href="https://www.inaturalist.org/observations/44082636">https://www.inaturalist.org/observations/44082636</a>   |
| 2169 | Bubulcus ibis       | Cattle Egret      | 2020/4/27  | 2 | 0 | 22.2200000 | 113.9166667 | <a href="https://www.inaturalist.org/observations/43846611">https://www.inaturalist.org/observations/43846611</a>   |
| 2170 | Bubulcus ibis       | Cattle Egret      | 2020/4/27  | 1 | 0 | 22.2200000 | 113.9172222 | <a href="https://www.inaturalist.org/observations/44476981">https://www.inaturalist.org/observations/44476981</a>   |
| 2171 | Bubulcus ibis       | Cattle Egret      | 2020/9/22  | 2 | 0 | 22.2200211 | 113.9173376 | <a href="https://www.inaturalist.org/observations/60510958">https://www.inaturalist.org/observations/60510958</a>   |
| 2172 | Bubulcus ibis       | Cattle Egret      | 2019/10/21 | 1 | 0 | 22.2200620 | 113.9137750 | <a href="https://www.inaturalist.org/observations/34815060">https://www.inaturalist.org/observations/34815060</a>   |
| 2173 | Bubulcus ibis       | Cattle Egret      | 2020/4/27  | 1 | 0 | 22.2200883 | 113.9173800 | <a href="https://www.inaturalist.org/observations/43899396">https://www.inaturalist.org/observations/43899396</a>   |
| 2174 | Bubulcus ibis       | Cattle Egret      | 2020/4/27  | 1 | 0 | 22.2201655 | 113.9175070 | <a href="https://www.inaturalist.org/observations/43846613">https://www.inaturalist.org/observations/43846613</a>   |

|      |                     |                   |            |   |   |            |             |                                                                                                                     |
|------|---------------------|-------------------|------------|---|---|------------|-------------|---------------------------------------------------------------------------------------------------------------------|
| 2175 | Bubulcus ibis       | Cattle Egret      | 2020/4/26  | 1 | 0 | 22.2202033 | 113.9174500 | <a href="https://www.inaturalist.org/observations/43576822">https://www.inaturalist.org/observations/43576822</a>   |
| 2176 | Bubulcus ibis       | Cattle Egret      | 2022/9/17  | 1 | 0 | 22.2202131 | 113.9169266 | <a href="https://www.inaturalist.org/observations/135494346">https://www.inaturalist.org/observations/135494346</a> |
| 2177 | Bubulcus ibis       | Cattle Egret      | 2020/4/7   | 2 | 0 | 22.2202967 | 113.9163667 | <a href="https://www.inaturalist.org/observations/41606352">https://www.inaturalist.org/observations/41606352</a>   |
| 2178 | Bubulcus ibis       | Cattle Egret      | 2022/4/14  | 2 | 0 | 22.2203700 | 113.9159500 | <a href="https://www.inaturalist.org/observations/111391917">https://www.inaturalist.org/observations/111391917</a> |
| 2179 | Bubulcus ibis       | Cattle Egret      | 2019/10/21 | 1 | 0 | 22.2203900 | 113.9176370 | <a href="https://www.inaturalist.org/observations/34992277">https://www.inaturalist.org/observations/34992277</a>   |
| 2180 | Bubulcus ibis       | Cattle Egret      | 2022/4/30  | 2 | 0 | 22.2204083 | 113.9158950 | <a href="https://www.inaturalist.org/observations/115353464">https://www.inaturalist.org/observations/115353464</a> |
| 2181 | Bubulcus ibis       | Cattle Egret      | 2020/4/27  | 1 | 0 | 22.2204559 | 113.9145034 | <a href="https://www.inaturalist.org/observations/43915368">https://www.inaturalist.org/observations/43915368</a>   |
| 2182 | Bubulcus ibis       | Cattle Egret      | 2019/10/10 | 1 | 0 | 22.2204694 | 113.9156779 | <a href="https://www.inaturalist.org/observations/34153425">https://www.inaturalist.org/observations/34153425</a>   |
| 2183 | Bubulcus coromandus | ibis Cattle Egret | 2020/3/30  | 1 | 0 | 22.2204800 | 113.9160617 | <a href="https://www.inaturalist.org/observations/41021399">https://www.inaturalist.org/observations/41021399</a>   |
| 2184 | Bubulcus ibis       | Cattle Egret      | 2022/5/2   | 2 | 0 | 22.2208098 | 113.9154175 | <a href="https://www.inaturalist.org/observations/115585447">https://www.inaturalist.org/observations/115585447</a> |
| 2185 | Bubulcus ibis       | Cattle Egret      | 2022/9/22  | 1 | 0 | 22.2208899 | 113.9155024 | <a href="https://www.inaturalist.org/observations/137033287">https://www.inaturalist.org/observations/137033287</a> |
| 2186 | Bubulcus ibis       | Cattle Egret      | 2020/5/23  | 1 | 0 | 22.2211603 | 114.1168317 | <a href="https://www.inaturalist.org/observations/46948894">https://www.inaturalist.org/observations/46948894</a>   |
| 2187 | Bubulcus coromandus | ibis Cattle Egret | 2020/4/27  | 0 | 0 | 22.2214058 | 113.9195496 | <a href="https://www.inaturalist.org/observations/43914645">https://www.inaturalist.org/observations/43914645</a>   |
| 2188 | Bubulcus ibis       | Cattle Egret      | 2022/4/30  | 1 | 0 | 22.2214700 | 113.9150433 | <a href="https://www.inaturalist.org/observations/115839555">https://www.inaturalist.org/observations/115839555</a> |
| 2189 | Bubulcus ibis       | Cattle Egret      | 2022/4/30  | 1 | 0 | 22.2214700 | 113.9150433 | <a href="https://www.inaturalist.org/observations/115839557">https://www.inaturalist.org/observations/115839557</a> |
| 2190 | Bubulcus ibis       | Cattle Egret      | 2022/10/25 | 2 | 0 | 22.2214700 | 120.8084550 | <a href="https://www.inaturalist.org/observations/139956750">https://www.inaturalist.org/observations/139956750</a> |
| 2191 | Bubulcus ibis       | Cattle Egret      | 2022/11/5  | 3 | 0 | 22.2216347 | 114.1155529 | <a href="https://www.inaturalist.org/observations/141124202">https://www.inaturalist.org/observations/141124202</a> |
| 2192 | Bubulcus ibis       | Cattle Egret      | 2018/10/31 | 4 | 0 | 22.2219028 | 113.9189015 | <a href="https://www.inaturalist.org/observations/17981379">https://www.inaturalist.org/observations/17981379</a>   |
| 2193 | Bubulcus ibis       | Cattle Egret      | 2020/4/27  | 1 | 0 | 22.2230150 | 113.9147990 | <a href="https://www.inaturalist.org/observations/43934409">https://www.inaturalist.org/observations/43934409</a>   |
| 2194 | Bubulcus coromandus | ibis Cattle Egret | 2020/4/19  | 1 | 0 | 22.2251437 | 113.8469127 | <a href="https://www.inaturalist.org/observations/42833508">https://www.inaturalist.org/observations/42833508</a>   |
| 2195 | Bubulcus coromandus | ibis Cattle Egret | 2020/11/8  | 1 | 0 | 22.2260939 | 113.8471622 | <a href="https://www.inaturalist.org/observations/64663891">https://www.inaturalist.org/observations/64663891</a>   |
| 2196 | Bubulcus ibis       | Cattle Egret      | 2022/4/15  | 1 | 0 | 22.2262841 | 113.8943053 | <a href="https://www.inaturalist.org/observations/111493302">https://www.inaturalist.org/observations/111493302</a> |
| 2197 | Bubulcus ibis       | Cattle Egret      | 2020/4/25  | 2 | 0 | 22.2265713 | 113.8479232 | <a href="https://www.inaturalist.org/observations/44096209">https://www.inaturalist.org/observations/44096209</a>   |
| 2198 | Bubulcus ibis       | Cattle Egret      | 2021/10/16 | 1 | 0 | 22.2267993 | 113.9041579 | <a href="https://www.inaturalist.org/observations/98494283">https://www.inaturalist.org/observations/98494283</a>   |
| 2199 | Bubulcus ibis       | Cattle Egret      | 2021/10/12 | 1 | 0 | 22.2271115 | 114.1132518 | <a href="https://www.inaturalist.org/observations/97989741">https://www.inaturalist.org/observations/97989741</a>   |

|      |                     |                   |            |   |   |            |             |                                                                                                                     |
|------|---------------------|-------------------|------------|---|---|------------|-------------|---------------------------------------------------------------------------------------------------------------------|
| 2200 | Bubulcus ibis       | Cattle Egret      | 2021/10/26 | 1 | 0 | 22.2273300 | 113.9326467 | <a href="https://www.inaturalist.org/observations/99436771">https://www.inaturalist.org/observations/99436771</a>   |
| 2201 | Bubulcus ibis       | Cattle Egret      | 2020/12/30 | 2 | 0 | 22.2277570 | 113.9322090 | <a href="https://www.inaturalist.org/observations/67277098">https://www.inaturalist.org/observations/67277098</a>   |
| 2202 | Bubulcus coromandus | ibis Cattle Egret | 2017/11/8  | 2 | 0 | 22.2280463 | 114.1148145 | <a href="https://www.inaturalist.org/observations/8729392">https://www.inaturalist.org/observations/8729392</a>     |
| 2203 | Bubulcus coromandus | ibis Cattle Egret | 2022/5/2   | 0 | 0 | 22.2283222 | 113.8918146 | <a href="https://www.inaturalist.org/observations/114990597">https://www.inaturalist.org/observations/114990597</a> |
| 2204 | Bubulcus ibis       | Cattle Egret      | 2020/4/21  | 2 | 0 | 22.2285058 | 113.9233828 | <a href="https://www.inaturalist.org/observations/86982871">https://www.inaturalist.org/observations/86982871</a>   |
| 2205 | Bubulcus coromandus | ibis Cattle Egret | 2020/10/7  | 2 | 0 | 22.2289130 | 113.9364470 | <a href="https://www.inaturalist.org/observations/61903584">https://www.inaturalist.org/observations/61903584</a>   |
| 2206 | Bubulcus ibis       | Cattle Egret      | 2022/4/26  | 1 | 0 | 22.2308173 | 113.9678530 | <a href="https://www.inaturalist.org/observations/113089006">https://www.inaturalist.org/observations/113089006</a> |
| 2207 | Bubulcus ibis       | Cattle Egret      | 2021/5/1   | 1 | 0 | 22.2358977 | 114.1138811 | <a href="https://www.inaturalist.org/observations/76017898">https://www.inaturalist.org/observations/76017898</a>   |
| 2208 | Bubulcus ibis       | Cattle Egret      | 2022/5/2   | 1 | 0 | 22.2361533 | 114.1914833 | <a href="https://www.inaturalist.org/observations/115046367">https://www.inaturalist.org/observations/115046367</a> |
| 2209 | Bubulcus ibis       | Cattle Egret      | 2020/4/26  | 2 | 0 | 22.2384529 | 114.1170340 | <a href="https://www.inaturalist.org/observations/43574280">https://www.inaturalist.org/observations/43574280</a>   |
| 2210 | Bubulcus ibis       | Cattle Egret      | 2021/2/5   | 1 | 0 | 22.2388305 | 113.9906638 | <a href="https://www.inaturalist.org/observations/69139066">https://www.inaturalist.org/observations/69139066</a>   |
| 2211 | Bubulcus ibis       | Cattle Egret      | 2018/5/6   | 2 | 0 | 22.2389361 | 114.2229778 | <a href="https://www.inaturalist.org/observations/12188540">https://www.inaturalist.org/observations/12188540</a>   |
| 2212 | Bubulcus ibis       | Cattle Egret      | 2021/5/3   | 3 | 0 | 22.2390540 | 114.2232440 | <a href="https://www.inaturalist.org/observations/76957411">https://www.inaturalist.org/observations/76957411</a>   |
| 2213 | Bubulcus ibis       | Cattle Egret      | 2021/5/3   | 2 | 0 | 22.2391821 | 114.2233356 | <a href="https://www.inaturalist.org/observations/76867907">https://www.inaturalist.org/observations/76867907</a>   |
| 2214 | Bubulcus ibis       | Cattle Egret      | 2021/5/3   | 1 | 0 | 22.2393867 | 114.2232750 | <a href="https://www.inaturalist.org/observations/76851283">https://www.inaturalist.org/observations/76851283</a>   |
| 2215 | Bubulcus ibis       | Cattle Egret      | 2021/5/3   | 1 | 0 | 22.2396081 | 114.2234093 | <a href="https://www.inaturalist.org/observations/76851334">https://www.inaturalist.org/observations/76851334</a>   |
| 2216 | Bubulcus ibis       | Cattle Egret      | 2021/11/21 | 2 | 0 | 22.2397114 | 113.9768132 | <a href="https://www.inaturalist.org/observations/123193220">https://www.inaturalist.org/observations/123193220</a> |
| 2217 | Bubulcus ibis       | Cattle Egret      | 2019/8/24  | 2 | 0 | 22.2403423 | 113.9784547 | <a href="https://www.inaturalist.org/observations/31392261">https://www.inaturalist.org/observations/31392261</a>   |
| 2218 | Bubulcus coromandus | ibis Cattle Egret | 2019/10/5  | 1 | 0 | 22.2405731 | 113.9764745 | <a href="https://www.inaturalist.org/observations/33879643">https://www.inaturalist.org/observations/33879643</a>   |
| 2219 | Bubulcus coromandus | ibis Cattle Egret | 2020/1/4   | 1 | 0 | 22.2408945 | 113.9764599 | <a href="https://www.inaturalist.org/observations/37302099">https://www.inaturalist.org/observations/37302099</a>   |
| 2220 | Bubulcus ibis       | Cattle Egret      | 2019/12/15 | 1 | 0 | 22.2411203 | 113.9743986 | <a href="https://www.inaturalist.org/observations/47483871">https://www.inaturalist.org/observations/47483871</a>   |
| 2221 | Bubulcus ibis       | Cattle Egret      | 2022/2/3   | 1 | 0 | 22.2411295 | 113.9750055 | <a href="https://www.inaturalist.org/observations/106065784">https://www.inaturalist.org/observations/106065784</a> |
| 2222 | Bubulcus ibis       | Cattle Egret      | 2016/3/20  | 1 | 0 | 22.2414488 | 113.9776663 | <a href="https://www.inaturalist.org/observations/49217086">https://www.inaturalist.org/observations/49217086</a>   |
| 2223 | Bubulcus ibis       | Cattle Egret      | 2021/5/1   | 2 | 0 | 22.2415669 | 113.9747405 | <a href="https://www.inaturalist.org/observations/76517585">https://www.inaturalist.org/observations/76517585</a>   |
| 2224 | Bubulcus ibis       | Cattle Egret      | 2009/11/22 | 1 | 0 | 22.2416380 | 113.9752500 | <a href="https://www.inaturalist.org/observations/140744812">https://www.inaturalist.org/observations/140744812</a> |

|      |                     |                   |            |   |   |            |             |                                                                                                                     |
|------|---------------------|-------------------|------------|---|---|------------|-------------|---------------------------------------------------------------------------------------------------------------------|
| 2225 | Bubulcus ibis       | Cattle Egret      | 2012/4/21  | 2 | 0 | 22.2417602 | 113.9740333 | <a href="https://www.inaturalist.org/observations/104640498">https://www.inaturalist.org/observations/104640498</a> |
| 2226 | Bubulcus coromandus | ibis Cattle Egret | 2019/5/13  | 2 | 0 | 22.2417811 | 113.9752602 | <a href="https://www.inaturalist.org/observations/25162503">https://www.inaturalist.org/observations/25162503</a>   |
| 2227 | Bubulcus ibis       | Cattle Egret      | 2021/4/18  | 4 | 0 | 22.2418731 | 81.4292385  | <a href="https://www.inaturalist.org/observations/75160132">https://www.inaturalist.org/observations/75160132</a>   |
| 2228 | Bubulcus ibis       | Cattle Egret      | 2021/12/19 | 2 | 0 | 22.2419061 | 113.9749893 | <a href="https://www.inaturalist.org/observations/103519988">https://www.inaturalist.org/observations/103519988</a> |
| 2229 | Bubulcus ibis       | Cattle Egret      | 2021/11/29 | 1 | 0 | 22.2420550 | 113.9749249 | <a href="https://www.inaturalist.org/observations/102351916">https://www.inaturalist.org/observations/102351916</a> |
| 2230 | Bubulcus ibis       | Cattle Egret      | 2010/1/1   | 0 | 0 | 22.2420990 | 113.9758680 | <a href="https://www.inaturalist.org/observations/39205066">https://www.inaturalist.org/observations/39205066</a>   |
| 2231 | Bubulcus ibis       | Cattle Egret      | 2011/10/16 | 0 | 0 | 22.2424110 | 113.9796950 | <a href="https://www.inaturalist.org/observations/38376690">https://www.inaturalist.org/observations/38376690</a>   |
| 2232 | Bubulcus coromandus | ibis Cattle Egret | 2020/4/25  | 1 | 0 | 22.2428602 | 113.9794520 | <a href="https://www.inaturalist.org/observations/43307870">https://www.inaturalist.org/observations/43307870</a>   |
| 2233 | Bubulcus ibis       | Cattle Egret      | 2021/11/19 | 1 | 0 | 22.2428912 | 113.9795939 | <a href="https://www.inaturalist.org/observations/101544572">https://www.inaturalist.org/observations/101544572</a> |
| 2234 | Bubulcus ibis       | Cattle Egret      | 2020/9/5   | 2 | 0 | 22.2428950 | 113.9795300 | <a href="https://www.inaturalist.org/observations/58574224">https://www.inaturalist.org/observations/58574224</a>   |
| 2235 | Bubulcus ibis       | Cattle Egret      | 2020/11/1  | 1 | 0 | 22.2429136 | 113.9785716 | <a href="https://www.inaturalist.org/observations/64041762">https://www.inaturalist.org/observations/64041762</a>   |
| 2236 | Bubulcus ibis       | Cattle Egret      | 2020/11/1  | 1 | 0 | 22.2429689 | 113.9783057 | <a href="https://www.inaturalist.org/observations/64104488">https://www.inaturalist.org/observations/64104488</a>   |
| 2237 | Bubulcus ibis       | Cattle Egret      | 2020/5/16  | 1 | 0 | 22.2433760 | 113.9753490 | <a href="https://www.inaturalist.org/observations/46170631">https://www.inaturalist.org/observations/46170631</a>   |
| 2238 | Bubulcus ibis       | Cattle Egret      | 2022/5/2   | 2 | 0 | 22.2437797 | 113.9796724 | <a href="https://www.inaturalist.org/observations/114554653">https://www.inaturalist.org/observations/114554653</a> |
| 2239 | Bubulcus ibis       | Cattle Egret      | 2021/9/1   | 2 | 0 | 22.2440833 | 82.0194250  | <a href="https://www.inaturalist.org/observations/93451117">https://www.inaturalist.org/observations/93451117</a>   |
| 2240 | Bubulcus ibis       | Cattle Egret      | 2022/4/17  | 2 | 0 | 22.2445060 | 113.9791870 | <a href="https://www.inaturalist.org/observations/111776058">https://www.inaturalist.org/observations/111776058</a> |
| 2241 | Bubulcus ibis       | Cattle Egret      | 2021/9/25  | 2 | 0 | 22.2445640 | 113.9799394 | <a href="https://www.inaturalist.org/observations/101526719">https://www.inaturalist.org/observations/101526719</a> |
| 2242 | Bubulcus ibis       | Cattle Egret      | 2019/11/7  | 1 | 0 | 22.2446897 | 114.1761282 | <a href="https://www.inaturalist.org/observations/35403161">https://www.inaturalist.org/observations/35403161</a>   |
| 2243 | Bubulcus ibis       | Cattle Egret      | 2019/11/7  | 1 | 0 | 22.2453598 | 114.1760136 | <a href="https://www.inaturalist.org/observations/35442412">https://www.inaturalist.org/observations/35442412</a>   |
| 2244 | Bubulcus ibis       | Cattle Egret      | 2021/4/1   | 2 | 0 | 22.2454610 | 113.9778410 | <a href="https://www.inaturalist.org/observations/72600220">https://www.inaturalist.org/observations/72600220</a>   |
| 2245 | Bubulcus ibis       | Cattle Egret      | 2021/5/5   | 1 | 0 | 22.2460767 | 114.1449555 | <a href="https://www.inaturalist.org/observations/77897113">https://www.inaturalist.org/observations/77897113</a>   |
| 2246 | Bubulcus ibis       | Cattle Egret      | 2021/9/30  | 1 | 0 | 22.2461668 | 113.9810414 | <a href="https://www.inaturalist.org/observations/96705191">https://www.inaturalist.org/observations/96705191</a>   |
| 2247 | Bubulcus ibis       | Cattle Egret      | 2018/4/17  | 3 | 0 | 22.2465782 | 114.1882553 | <a href="https://www.inaturalist.org/observations/11102847">https://www.inaturalist.org/observations/11102847</a>   |
| 2248 | Bubulcus ibis       | Cattle Egret      | 2021/12/31 | 1 | 0 | 22.2472558 | 114.1871953 | <a href="https://www.inaturalist.org/observations/104031864">https://www.inaturalist.org/observations/104031864</a> |
| 2249 | Bubulcus ibis       | Cattle Egret      | 2021/4/28  | 4 | 0 | 22.2474748 | 114.1745500 | <a href="https://www.inaturalist.org/observations/75539908">https://www.inaturalist.org/observations/75539908</a>   |



|      |                     |                   |            |   |   |            |             |                                                                                                                     |
|------|---------------------|-------------------|------------|---|---|------------|-------------|---------------------------------------------------------------------------------------------------------------------|
| 2250 | Bubulcus ibis       | Cattle Egret      | 2020/10/29 | 1 | 0 | 22.2486502 | 114.1750102 | <a href="https://www.inaturalist.org/observations/63752405">https://www.inaturalist.org/observations/63752405</a>   |
| 2251 | Bubulcus ibis       | Cattle Egret      | 2021/6/26  | 2 | 0 | 22.2492755 | 114.1399515 | <a href="https://www.inaturalist.org/observations/84514554">https://www.inaturalist.org/observations/84514554</a>   |
| 2252 | Bubulcus coromandus | ibis Cattle Egret | 2018/4/29  | 2 | 0 | 22.2505294 | 113.8653958 | <a href="https://www.inaturalist.org/observations/11835973">https://www.inaturalist.org/observations/11835973</a>   |
| 2253 | Bubulcus ibis       | Cattle Egret      | 2020/11/15 | 1 | 0 | 22.2532069 | 114.1587005 | <a href="https://www.inaturalist.org/observations/64917278">https://www.inaturalist.org/observations/64917278</a>   |
| 2254 | Bubulcus ibis       | Cattle Egret      | 2022/11/7  | 2 | 0 | 22.2532450 | 114.1583862 | <a href="https://www.inaturalist.org/observations/141420313">https://www.inaturalist.org/observations/141420313</a> |
| 2255 | Bubulcus ibis       | Cattle Egret      | 2020/5/23  | 1 | 0 | 22.2541247 | 114.1616040 | <a href="https://www.inaturalist.org/observations/46934266">https://www.inaturalist.org/observations/46934266</a>   |
| 2256 | Bubulcus ibis       | Cattle Egret      | 2021/10/23 | 2 | 0 | 22.2545358 | 114.1596100 | <a href="https://www.inaturalist.org/observations/99057382">https://www.inaturalist.org/observations/99057382</a>   |
| 2257 | Bubulcus ibis       | Cattle Egret      | 2022/12/18 | 1 | 0 | 22.2554529 | 114.3989675 | <a href="https://www.inaturalist.org/observations/144590922">https://www.inaturalist.org/observations/144590922</a> |
| 2258 | Bubulcus ibis       | Cattle Egret      | 2022/11/5  | 1 | 0 | 22.2558267 | 114.1563847 | <a href="https://www.inaturalist.org/observations/141164474">https://www.inaturalist.org/observations/141164474</a> |
| 2259 | Bubulcus ibis       | Cattle Egret      | 2021/11/11 | 2 | 0 | 22.2566258 | 113.9878304 | <a href="https://www.inaturalist.org/observations/100841173">https://www.inaturalist.org/observations/100841173</a> |
| 2260 | Bubulcus ibis       | Cattle Egret      | 2021/4/30  | 2 | 0 | 22.2566667 | 114.1313888 | <a href="https://www.inaturalist.org/observations/75737371">https://www.inaturalist.org/observations/75737371</a>   |
| 2261 | Bubulcus ibis       | Cattle Egret      | 2020/5/3   | 1 | 0 | 22.2591691 | 114.2100571 | <a href="https://www.inaturalist.org/observations/44736852">https://www.inaturalist.org/observations/44736852</a>   |
| 2262 | Bubulcus ibis       | Cattle Egret      | 2020/12/9  | 2 | 0 | 22.2594707 | 114.1301740 | <a href="https://www.inaturalist.org/observations/66325619">https://www.inaturalist.org/observations/66325619</a>   |
| 2263 | Bubulcus ibis       | Cattle Egret      | 2022/10/16 | 1 | 0 | 22.2600871 | 114.1665406 | <a href="https://www.inaturalist.org/observations/138968929">https://www.inaturalist.org/observations/138968929</a> |
| 2264 | Bubulcus ibis       | Cattle Egret      | 2022/4/29  | 1 | 0 | 22.2623939 | 113.9932688 | <a href="https://www.inaturalist.org/observations/114141721">https://www.inaturalist.org/observations/114141721</a> |
| 2265 | Bubulcus ibis       | Cattle Egret      | 2021/5/29  | 2 | 0 | 22.2627768 | 113.9571599 | <a href="https://www.inaturalist.org/observations/81258312">https://www.inaturalist.org/observations/81258312</a>   |
| 2266 | Bubulcus ibis       | Cattle Egret      | 2020/4/25  | 1 | 0 | 22.2633700 | 113.9923333 | <a href="https://www.inaturalist.org/observations/43513099">https://www.inaturalist.org/observations/43513099</a>   |
| 2267 | Bubulcus ibis       | Cattle Egret      | 2021/1/23  | 2 | 0 | 22.2635486 | 113.9922533 | <a href="https://www.inaturalist.org/observations/68479447">https://www.inaturalist.org/observations/68479447</a>   |
| 2268 | Bubulcus ibis       | Cattle Egret      | 2020/3/25  | 1 | 0 | 22.2643648 | 113.9904766 | <a href="https://www.inaturalist.org/observations/40747343">https://www.inaturalist.org/observations/40747343</a>   |
| 2269 | Bubulcus ibis       | Cattle Egret      | 2018/10/1  | 3 | 0 | 22.2643698 | 114.1365256 | <a href="https://www.inaturalist.org/observations/17094557">https://www.inaturalist.org/observations/17094557</a>   |
| 2270 | Bubulcus coromandus | ibis Cattle Egret | 2018/5/11  | 2 | 0 | 22.2648909 | 114.1575314 | <a href="https://www.inaturalist.org/observations/12340906">https://www.inaturalist.org/observations/12340906</a>   |
| 2271 | Bubulcus ibis       | Cattle Egret      | 2020/10/3  | 1 | 0 | 22.2660320 | 113.9947441 | <a href="https://www.inaturalist.org/observations/61827898">https://www.inaturalist.org/observations/61827898</a>   |
| 2272 | Bubulcus ibis       | Cattle Egret      | 2021/3/13  | 1 | 0 | 22.2660320 | 113.9947441 | <a href="https://www.inaturalist.org/observations/72175830">https://www.inaturalist.org/observations/72175830</a>   |
| 2273 | Bubulcus ibis       | Cattle Egret      | 2022/9/29  | 1 | 0 | 22.2660833 | 114.2500750 | <a href="https://www.inaturalist.org/observations/136914957">https://www.inaturalist.org/observations/136914957</a> |
| 2274 | Bubulcus coromandus | ibis Cattle Egret | 2022/4/4   | 1 | 0 | 22.2662178 | 113.9920624 | <a href="https://www.inaturalist.org/observations/110391643">https://www.inaturalist.org/observations/110391643</a> |

|      |                     |                      |           |   |   |            |             |                                                                                                                     |
|------|---------------------|----------------------|-----------|---|---|------------|-------------|---------------------------------------------------------------------------------------------------------------------|
| 2275 | Bubulcus ibis       | Cattle Egret         | 2021/5/3  | 2 | 0 | 22.2664984 | 113.9417510 | <a href="https://www.inaturalist.org/observations/76903885">https://www.inaturalist.org/observations/76903885</a>   |
| 2276 | Bubulcus ibis       | Cattle Egret         | 2022/4/28 | 1 | 0 | 22.2667780 | 113.9417507 | <a href="https://www.inaturalist.org/observations/113241551">https://www.inaturalist.org/observations/113241551</a> |
| 2277 | Bubulcus ibis       | Cattle Egret         | 2022/9/24 | 2 | 0 | 22.2667780 | 113.9417510 | <a href="https://www.inaturalist.org/observations/136561498">https://www.inaturalist.org/observations/136561498</a> |
| 2278 | Bubulcus ibis       | Cattle Egret         | 2016/5/27 | 2 | 0 | 22.2686701 | 114.1232643 | <a href="https://www.inaturalist.org/observations/10339992">https://www.inaturalist.org/observations/10339992</a>   |
| 2279 | Bubulcus ibis       | Cattle Egret         | 2020/11/7 | 1 | 0 | 22.2692512 | 113.9923600 | <a href="https://www.inaturalist.org/observations/64584799">https://www.inaturalist.org/observations/64584799</a>   |
| 2280 | Bubulcus ibis       | Cattle Egret         | 2020/4/26 | 1 | 0 | 22.2695451 | 113.9901829 | <a href="https://www.inaturalist.org/observations/43566564">https://www.inaturalist.org/observations/43566564</a>   |
| 2281 | Bubulcus ibis       | Cattle Egret         | 2012/9/26 | 2 | 0 | 22.2699674 | 113.9924498 | <a href="https://www.inaturalist.org/observations/24180178">https://www.inaturalist.org/observations/24180178</a>   |
| 2282 | Bubulcus ibis       | Cattle Egret         | 2022/5/2  | 1 | 0 | 22.2705632 | 113.9924699 | <a href="https://www.inaturalist.org/observations/114551916">https://www.inaturalist.org/observations/114551916</a> |
| 2283 | Bubulcus ibis       | Cattle Egret         | 2020/9/27 | 1 | 0 | 22.2706450 | 113.9888580 | <a href="https://www.inaturalist.org/observations/62009122">https://www.inaturalist.org/observations/62009122</a>   |
| 2284 | Bubulcus ibis       | Cattle Egret         | 2021/5/2  | 2 | 0 | 22.2718450 | 113.9964967 | <a href="https://www.inaturalist.org/observations/113725365">https://www.inaturalist.org/observations/113725365</a> |
| 2285 | Bubulcus ibis       | Cattle Egret         | 2020/10/8 | 1 | 0 | 22.2721187 | 113.9931363 | <a href="https://www.inaturalist.org/observations/62101772">https://www.inaturalist.org/observations/62101772</a>   |
| 2286 | Bubulcus ibis       | Cattle Egret         | 2020/9/27 | 1 | 0 | 22.2724770 | 113.9952670 | <a href="https://www.inaturalist.org/observations/62008994">https://www.inaturalist.org/observations/62008994</a>   |
| 2287 | Bubulcus ibis       | Cattle Egret         | 2022/4/30 | 1 | 0 | 22.2726467 | 113.9962917 | <a href="https://www.inaturalist.org/observations/113767718">https://www.inaturalist.org/observations/113767718</a> |
| 2288 | Bubulcus coromandus | ibis<br>Cattle Egret | 2019/4/2  | 3 | 0 | 22.2739913 | 113.9953780 | <a href="https://www.inaturalist.org/observations/22070491">https://www.inaturalist.org/observations/22070491</a>   |
| 2289 | Bubulcus ibis       | Cattle Egret         | 2020/5/11 | 2 | 0 | 22.2764950 | 114.1891950 | <a href="https://www.inaturalist.org/observations/45567076">https://www.inaturalist.org/observations/45567076</a>   |
| 2290 | Bubulcus ibis       | Cattle Egret         | 2021/5/2  | 2 | 0 | 22.2766737 | 114.2968257 | <a href="https://www.inaturalist.org/observations/76481490">https://www.inaturalist.org/observations/76481490</a>   |
| 2291 | Bubulcus ibis       | Cattle Egret         | 2013/5/4  | 3 | 0 | 22.2783151 | 114.1746950 | <a href="http://www.inaturalist.org/observations/3917208">http://www.inaturalist.org/observations/3917208</a>       |
| 2292 | Bubulcus ibis       | Cattle Egret         | 2022/5/7  | 1 | 0 | 22.2786867 | 114.1272138 | <a href="https://www.inaturalist.org/observations/115894547">https://www.inaturalist.org/observations/115894547</a> |
| 2293 | Bubulcus ibis       | Cattle Egret         | 2021/9/25 | 1 | 0 | 22.2801005 | 113.9327465 | <a href="https://www.inaturalist.org/observations/96175981">https://www.inaturalist.org/observations/96175981</a>   |
| 2294 | Bubulcus ibis       | Cattle Egret         | 2021/5/16 | 1 | 0 | 22.2814917 | 114.1877217 | <a href="https://www.inaturalist.org/observations/78975597">https://www.inaturalist.org/observations/78975597</a>   |
| 2295 | Bubulcus coromandus | ibis<br>Cattle Egret | 2021/5/18 | 3 | 0 | 22.2824950 | 114.1881867 | <a href="https://www.inaturalist.org/observations/91069215">https://www.inaturalist.org/observations/91069215</a>   |
| 2296 | Bubulcus coromandus | ibis<br>Cattle Egret | 2018/1/3  | 2 | 0 | 22.2837050 | 114.0005583 | <a href="https://www.inaturalist.org/observations/9370882">https://www.inaturalist.org/observations/9370882</a>     |
| 2297 | Bubulcus ibis       | Cattle Egret         | 2021/5/15 | 1 | 0 | 22.2872064 | 114.1617807 | <a href="https://www.inaturalist.org/observations/78883712">https://www.inaturalist.org/observations/78883712</a>   |
| 2298 | Bubulcus ibis       | Cattle Egret         | 2019/10/8 | 3 | 0 | 22.2875276 | 114.0044913 | <a href="https://www.inaturalist.org/observations/34106327">https://www.inaturalist.org/observations/34106327</a>   |
| 2299 | Bubulcus ibis       | Cattle Egret         | 2022/4/30 | 1 | 0 | 22.2887174 | 114.2830025 | <a href="https://www.inaturalist.org/observations/114437018">https://www.inaturalist.org/observations/114437018</a> |

|      |               |              |            |   |   |            |             |                                                                                                                     |
|------|---------------|--------------|------------|---|---|------------|-------------|---------------------------------------------------------------------------------------------------------------------|
| 2300 | Bubulcus ibis | Cattle Egret | 2020/5/4   | 1 | 0 | 22.2944817 | 114.2702546 | <a href="https://www.inaturalist.org/observations/44876957">https://www.inaturalist.org/observations/44876957</a>   |
| 2301 | Bubulcus ibis | Cattle Egret | 2021/5/2   | 1 | 0 | 22.2948236 | 114.0132228 | <a href="https://www.inaturalist.org/observations/76452749">https://www.inaturalist.org/observations/76452749</a>   |
| 2302 | Bubulcus ibis | Cattle Egret | 2021/5/1   | 1 | 0 | 22.2950727 | 114.0118565 | <a href="https://www.inaturalist.org/observations/76451315">https://www.inaturalist.org/observations/76451315</a>   |
| 2303 | Bubulcus ibis | Cattle Egret | 2020/4/25  | 1 | 0 | 22.2965706 | 114.2762291 | <a href="https://www.inaturalist.org/observations/44097440">https://www.inaturalist.org/observations/44097440</a>   |
| 2304 | Bubulcus ibis | Cattle Egret | 2020/4/27  | 1 | 0 | 22.2975480 | 114.2760973 | <a href="https://www.inaturalist.org/observations/44133913">https://www.inaturalist.org/observations/44133913</a>   |
| 2305 | Bubulcus ibis | Cattle Egret | 2021/9/1   | 1 | 0 | 22.3004583 | 82.0822050  | <a href="https://www.inaturalist.org/observations/93442900">https://www.inaturalist.org/observations/93442900</a>   |
| 2306 | Bubulcus ibis | Cattle Egret | 2022/11/22 | 1 | 0 | 22.3039526 | 114.2678195 | <a href="https://www.inaturalist.org/observations/142607639">https://www.inaturalist.org/observations/142607639</a> |
| 2307 | Bubulcus ibis | Cattle Egret | 2021/6/25  | 2 | 0 | 22.3041572 | 114.2666935 | <a href="https://www.inaturalist.org/observations/87076909">https://www.inaturalist.org/observations/87076909</a>   |
| 2308 | Bubulcus ibis | Cattle Egret | 2021/10/11 | 2 | 0 | 22.3044076 | 114.2668263 | <a href="https://www.inaturalist.org/observations/97915540">https://www.inaturalist.org/observations/97915540</a>   |
| 2309 | Bubulcus ibis | Cattle Egret | 2021/10/10 | 1 | 0 | 22.3045430 | 114.2670055 | <a href="https://www.inaturalist.org/observations/97749622">https://www.inaturalist.org/observations/97749622</a>   |
| 2310 | Bubulcus ibis | Cattle Egret | 2022/10/12 | 1 | 0 | 22.3047034 | 114.2692966 | <a href="https://www.inaturalist.org/observations/138508628">https://www.inaturalist.org/observations/138508628</a> |
| 2311 | Bubulcus ibis | Cattle Egret | 2021/10/10 | 1 | 0 | 22.3048798 | 114.2162088 | <a href="https://www.inaturalist.org/observations/101082004">https://www.inaturalist.org/observations/101082004</a> |
| 2312 | Bubulcus ibis | Cattle Egret | 2022/11/3  | 2 | 0 | 22.3050162 | 114.2666605 | <a href="https://www.inaturalist.org/observations/140986548">https://www.inaturalist.org/observations/140986548</a> |
| 2313 | Bubulcus ibis | Cattle Egret | 2019/4/12  | 3 | 0 | 22.3061513 | 114.2177895 | <a href="https://www.inaturalist.org/observations/23972491">https://www.inaturalist.org/observations/23972491</a>   |
| 2314 | Bubulcus ibis | Cattle Egret | 2022/5/29  | 1 | 0 | 22.3066077 | 114.0391545 | <a href="https://www.inaturalist.org/observations/119218132">https://www.inaturalist.org/observations/119218132</a> |
| 2315 | Bubulcus ibis | Cattle Egret | 2014/10/24 | 2 | 0 | 22.3071588 | 73.1812187  | <a href="https://www.inaturalist.org/observations/56857619">https://www.inaturalist.org/observations/56857619</a>   |
| 2316 | Bubulcus ibis | Cattle Egret | 2015/8/27  | 5 | 0 | 22.3071590 | 73.1812190  | <a href="http://www.inaturalist.org/observations/1926979">http://www.inaturalist.org/observations/1926979</a>       |
| 2317 | Bubulcus ibis | Cattle Egret | 2022/5/7   | 2 | 0 | 22.3073130 | 114.2653916 | <a href="https://www.inaturalist.org/observations/136544807">https://www.inaturalist.org/observations/136544807</a> |
| 2318 | Bubulcus ibis | Cattle Egret | 2021/5/12  | 2 | 0 | 22.3073830 | 114.2196025 | <a href="https://www.inaturalist.org/observations/78489184">https://www.inaturalist.org/observations/78489184</a>   |
| 2319 | Bubulcus ibis | Cattle Egret | 2022/10/6  | 1 | 0 | 22.3085163 | 114.2652298 | <a href="https://www.inaturalist.org/observations/137773162">https://www.inaturalist.org/observations/137773162</a> |
| 2320 | Bubulcus ibis | Cattle Egret | 2021/4/20  | 2 | 0 | 22.3119357 | 114.2568776 | <a href="https://www.inaturalist.org/observations/75159701">https://www.inaturalist.org/observations/75159701</a>   |
| 2321 | Bubulcus ibis | Cattle Egret | 2020/6/18  | 3 | 0 | 22.3126839 | 73.2853817  | <a href="https://www.inaturalist.org/observations/61619809">https://www.inaturalist.org/observations/61619809</a>   |
| 2322 | Bubulcus ibis | Cattle Egret | 2021/5/2   | 4 | 0 | 22.3127159 | 73.2853817  | <a href="https://www.inaturalist.org/observations/105207519">https://www.inaturalist.org/observations/105207519</a> |
| 2323 | Bubulcus ibis | Cattle Egret | 2021/5/1   | 1 | 0 | 22.3137476 | 114.2750841 | <a href="https://www.inaturalist.org/observations/87220223">https://www.inaturalist.org/observations/87220223</a>   |
| 2324 | Bubulcus ibis | Cattle Egret | 2022/3/20  | 3 | 0 | 22.3138700 | 73.2763667  | <a href="https://www.inaturalist.org/observations/119749592">https://www.inaturalist.org/observations/119749592</a> |

|      |                     |      |              |            |   |   |            |             |                                                                                                                     |
|------|---------------------|------|--------------|------------|---|---|------------|-------------|---------------------------------------------------------------------------------------------------------------------|
| 2325 | Bubulcus coromandus | ibis | Cattle Egret | 2022/4/26  | 2 | 0 | 22.3186796 | 114.0428344 | <a href="https://www.inaturalist.org/observations/113202282">https://www.inaturalist.org/observations/113202282</a> |
| 2326 | Bubulcus ibis       |      | Cattle Egret | 2020/10/6  | 5 | 0 | 22.3219737 | 114.0378249 | <a href="https://www.inaturalist.org/observations/61856930">https://www.inaturalist.org/observations/61856930</a>   |
| 2327 | Bubulcus ibis       |      | Cattle Egret | 2020/10/11 | 2 | 0 | 22.3228664 | 73.5606995  | <a href="https://www.inaturalist.org/observations/62279113">https://www.inaturalist.org/observations/62279113</a>   |
| 2328 | Bubulcus ibis       |      | Cattle Egret | 2020/9/27  | 5 | 0 | 22.3261689 | 72.6354001  | <a href="https://www.inaturalist.org/observations/61073030">https://www.inaturalist.org/observations/61073030</a>   |
| 2329 | Bubulcus ibis       |      | Cattle Egret | 2019/10/1  | 2 | 0 | 22.3323748 | 114.1828934 | <a href="https://www.inaturalist.org/observations/33837183">https://www.inaturalist.org/observations/33837183</a>   |
| 2330 | Bubulcus ibis       |      | Cattle Egret | 2019/5/7   | 4 | 0 | 22.3326396 | 114.1831987 | <a href="https://www.inaturalist.org/observations/24722354">https://www.inaturalist.org/observations/24722354</a>   |
| 2331 | Bubulcus ibis       |      | Cattle Egret | 2022/4/30  | 1 | 0 | 22.3327928 | 114.1830179 | <a href="https://www.inaturalist.org/observations/113728382">https://www.inaturalist.org/observations/113728382</a> |
| 2332 | Bubulcus ibis       |      | Cattle Egret | 2020/5/14  | 3 | 0 | 22.3331557 | 114.1833241 | <a href="https://www.inaturalist.org/observations/45857737">https://www.inaturalist.org/observations/45857737</a>   |
| 2333 | Bubulcus ibis       |      | Cattle Egret | 2021/3/19  | 1 | 0 | 22.3340777 | 80.6112046  | <a href="https://www.inaturalist.org/observations/73364930">https://www.inaturalist.org/observations/73364930</a>   |
| 2334 | Bubulcus ibis       |      | Cattle Egret | 2012/5/17  | 3 | 0 | 22.3345132 | 80.6115130  | <a href="https://www.inaturalist.org/observations/55791236">https://www.inaturalist.org/observations/55791236</a>   |
| 2335 | Bubulcus ibis       |      | Cattle Egret | 2019/2/12  | 1 | 0 | 22.3345132 | 80.6115130  | <a href="https://www.inaturalist.org/observations/90522215">https://www.inaturalist.org/observations/90522215</a>   |
| 2336 | Bubulcus ibis       |      | Cattle Egret | 2020/10/9  | 3 | 0 | 22.3346469 | 114.1375696 | <a href="https://www.inaturalist.org/observations/82384475">https://www.inaturalist.org/observations/82384475</a>   |
| 2337 | Bubulcus ibis       |      | Cattle Egret | 2020/10/17 | 2 | 0 | 22.3416178 | 114.1598017 | <a href="https://www.inaturalist.org/observations/62774830">https://www.inaturalist.org/observations/62774830</a>   |
| 2338 | Bubulcus ibis       |      | Cattle Egret | 2019/2/13  | 0 | 0 | 22.3444650 | 80.4552699  | <a href="https://www.inaturalist.org/observations/90508030">https://www.inaturalist.org/observations/90508030</a>   |
| 2339 | Bubulcus ibis       |      | Cattle Egret | 2018/4/29  | 1 | 0 | 22.3508385 | 113.5833626 | <a href="https://www.inaturalist.org/observations/142749179">https://www.inaturalist.org/observations/142749179</a> |
| 2340 | Bubulcus ibis       |      | Cattle Egret | 2021/5/8   | 1 | 0 | 22.3509056 | 114.2383972 | <a href="https://www.inaturalist.org/observations/77989570">https://www.inaturalist.org/observations/77989570</a>   |
| 2341 | Bubulcus ibis       |      | Cattle Egret | 2022/2/20  | 2 | 0 | 22.3518233 | 73.5907133  | <a href="https://www.inaturalist.org/observations/120020524">https://www.inaturalist.org/observations/120020524</a> |
| 2342 | Bubulcus coromandus | ibis | Cattle Egret | 2020/4/14  | 3 | 0 | 22.3554492 | 73.1357684  | <a href="https://www.inaturalist.org/observations/44058941">https://www.inaturalist.org/observations/44058941</a>   |
| 2343 | Bubulcus ibis       |      | Cattle Egret | 2020/4/17  | 2 | 0 | 22.3555940 | 114.1054437 | <a href="https://www.inaturalist.org/observations/42387363">https://www.inaturalist.org/observations/42387363</a>   |
| 2344 | Bubulcus ibis       |      | Cattle Egret | 2020/4/27  | 1 | 0 | 22.3558983 | 114.1056299 | <a href="https://www.inaturalist.org/observations/43866372">https://www.inaturalist.org/observations/43866372</a>   |
| 2345 | Bubulcus ibis       |      | Cattle Egret | 2020/5/2   | 1 | 0 | 22.3562691 | 114.1056228 | <a href="https://www.inaturalist.org/observations/44661433">https://www.inaturalist.org/observations/44661433</a>   |
| 2346 | Bubulcus ibis       |      | Cattle Egret | 2020/5/6   | 1 | 0 | 22.3565247 | 114.1059689 | <a href="https://www.inaturalist.org/observations/45047753">https://www.inaturalist.org/observations/45047753</a>   |
| 2347 | Bubulcus ibis       |      | Cattle Egret | 2021/1/31  | 1 | 0 | 22.3566645 | 88.3899022  | <a href="https://www.inaturalist.org/observations/104113869">https://www.inaturalist.org/observations/104113869</a> |
| 2348 | Bubulcus ibis       |      | Cattle Egret | 2020/4/13  | 1 | 0 | 22.3570594 | 114.1037166 | <a href="https://www.inaturalist.org/observations/43907926">https://www.inaturalist.org/observations/43907926</a>   |
| 2349 | Bubulcus ibis       |      | Cattle Egret | 2022/3/19  | 5 | 0 | 22.3594235 | 82.7500594  | <a href="https://www.inaturalist.org/observations/121760218">https://www.inaturalist.org/observations/121760218</a> |

|      |                     |                      |            |   |   |            |             |                                                                                                                     |
|------|---------------------|----------------------|------------|---|---|------------|-------------|---------------------------------------------------------------------------------------------------------------------|
| 2350 | Bubulcus ibis       | Cattle Egret         | 2021/4/17  | 1 | 0 | 22.3602516 | 82.7551168  | <a href="https://www.inaturalist.org/observations/75729763">https://www.inaturalist.org/observations/75729763</a>   |
| 2351 | Bubulcus ibis       | Cattle Egret         | 2022/3/29  | 1 | 0 | 22.3631217 | 73.5859317  | <a href="https://www.inaturalist.org/observations/119566004">https://www.inaturalist.org/observations/119566004</a> |
| 2352 | Bubulcus ibis       | Cattle Egret         | 2022/3/29  | 2 | 0 | 22.3637167 | 73.5856617  | <a href="https://www.inaturalist.org/observations/119566014">https://www.inaturalist.org/observations/119566014</a> |
| 2353 | Bubulcus ibis       | Cattle Egret         | 2021/5/22  | 3 | 0 | 22.3671452 | 82.1403410  | <a href="https://www.inaturalist.org/observations/79757849">https://www.inaturalist.org/observations/79757849</a>   |
| 2354 | Bubulcus ibis       | Cattle Egret         | 2022/4/17  | 2 | 0 | 22.3678947 | 114.2702018 | <a href="https://www.inaturalist.org/observations/112038189">https://www.inaturalist.org/observations/112038189</a> |
| 2355 | Bubulcus ibis       | Cattle Egret         | 2018/12/26 | 3 | 0 | 22.3685873 | 114.0599175 | <a href="https://www.inaturalist.org/observations/19308909">https://www.inaturalist.org/observations/19308909</a>   |
| 2356 | Bubulcus ibis       | Cattle Egret         | 2021/4/25  | 2 | 0 | 22.3723169 | 114.0229796 | <a href="https://www.inaturalist.org/observations/75152882">https://www.inaturalist.org/observations/75152882</a>   |
| 2357 | Bubulcus ibis       | Cattle Egret         | 2021/11/28 | 1 | 0 | 22.3724292 | 113.9343161 | <a href="https://www.inaturalist.org/observations/102083337">https://www.inaturalist.org/observations/102083337</a> |
| 2358 | Bubulcus ibis       | Cattle Egret         | 2021/12/1  | 1 | 0 | 22.3724292 | 113.9343161 | <a href="https://www.inaturalist.org/observations/102347593">https://www.inaturalist.org/observations/102347593</a> |
| 2359 | Bubulcus ibis       | Cattle Egret         | 2021/12/1  | 1 | 0 | 22.3724292 | 113.9343161 | <a href="https://www.inaturalist.org/observations/102347788">https://www.inaturalist.org/observations/102347788</a> |
| 2360 | Bubulcus ibis       | Cattle Egret         | 2022/4/8   | 1 | 0 | 22.3726735 | 113.9314323 | <a href="https://www.inaturalist.org/observations/111098471">https://www.inaturalist.org/observations/111098471</a> |
| 2361 | Bubulcus ibis       | Cattle Egret         | 2020/4/26  | 1 | 0 | 22.3731484 | 114.1245003 | <a href="https://www.inaturalist.org/observations/43550973">https://www.inaturalist.org/observations/43550973</a>   |
| 2362 | Bubulcus ibis       | Cattle Egret         | 2018/11/2  | 3 | 0 | 22.3734420 | 114.3366443 | <a href="https://www.inaturalist.org/observations/23087920">https://www.inaturalist.org/observations/23087920</a>   |
| 2363 | Bubulcus ibis       | Cattle Egret         | 2021/11/11 | 2 | 0 | 22.3740888 | 114.2650540 | <a href="https://www.inaturalist.org/observations/100833720">https://www.inaturalist.org/observations/100833720</a> |
| 2364 | Bubulcus ibis       | Cattle Egret         | 2021/11/13 | 2 | 0 | 22.3740889 | 114.2650538 | <a href="https://www.inaturalist.org/observations/101190108">https://www.inaturalist.org/observations/101190108</a> |
| 2365 | Bubulcus ibis       | Cattle Egret         | 2021/11/13 | 3 | 0 | 22.3740889 | 114.2650538 | <a href="https://www.inaturalist.org/observations/101190154">https://www.inaturalist.org/observations/101190154</a> |
| 2366 | Bubulcus ibis       | Cattle Egret         | 2022/11/11 | 1 | 0 | 22.3740930 | 114.2650538 | <a href="https://www.inaturalist.org/observations/141742495">https://www.inaturalist.org/observations/141742495</a> |
| 2367 | Bubulcus ibis       | Cattle Egret         | 2017/10/14 | 2 | 0 | 22.3740970 | 114.2668680 | <a href="https://www.inaturalist.org/observations/8406819">https://www.inaturalist.org/observations/8406819</a>     |
| 2368 | Bubulcus ibis       | Cattle Egret         | 2021/11/6  | 1 | 0 | 22.3741069 | 114.2650437 | <a href="https://www.inaturalist.org/observations/100584348">https://www.inaturalist.org/observations/100584348</a> |
| 2369 | Bubulcus ibis       | Cattle Egret         | 2018/10/20 | 5 | 0 | 22.3743858 | 114.2651443 | <a href="https://www.inaturalist.org/observations/17674344">https://www.inaturalist.org/observations/17674344</a>   |
| 2370 | Bubulcus ibis       | Cattle Egret         | 2021/10/30 | 1 | 0 | 22.3744641 | 114.2638850 | <a href="https://www.inaturalist.org/observations/99780885">https://www.inaturalist.org/observations/99780885</a>   |
| 2371 | Bubulcus ibis       | Cattle Egret         | 2021/5/1   | 1 | 0 | 22.3744862 | 114.2652298 | <a href="https://www.inaturalist.org/observations/76008370">https://www.inaturalist.org/observations/76008370</a>   |
| 2372 | Bubulcus ibis       | Cattle Egret         | 2022/12/14 | 2 | 0 | 22.3746005 | 114.2649633 | <a href="https://www.inaturalist.org/observations/144741106">https://www.inaturalist.org/observations/144741106</a> |
| 2373 | Bubulcus ibis       | Cattle Egret         | 2022/12/18 | 2 | 0 | 22.3746480 | 114.2649208 | <a href="https://www.inaturalist.org/observations/144590612">https://www.inaturalist.org/observations/144590612</a> |
| 2374 | Bubulcus coromandus | ibis<br>Cattle Egret | 2022/12/19 | 2 | 0 | 22.3747279 | 114.2643173 | <a href="https://www.inaturalist.org/observations/144768850">https://www.inaturalist.org/observations/144768850</a> |

|      |                     |                   |            |   |   |            |             |                                                                                                                     |
|------|---------------------|-------------------|------------|---|---|------------|-------------|---------------------------------------------------------------------------------------------------------------------|
| 2375 | Bubulcus ibis       | Cattle Egret      | 2021/9/7   | 1 | 0 | 22.3751289 | 114.1839496 | <a href="https://www.inaturalist.org/observations/93982725">https://www.inaturalist.org/observations/93982725</a>   |
| 2376 | Bubulcus ibis       | Cattle Egret      | 2020/5/3   | 2 | 0 | 22.3755552 | 114.1264790 | <a href="https://www.inaturalist.org/observations/44676796">https://www.inaturalist.org/observations/44676796</a>   |
| 2377 | Bubulcus ibis       | Cattle Egret      | 2022/11/3  | 1 | 0 | 22.3758269 | 73.1440339  | <a href="https://www.inaturalist.org/observations/140974377">https://www.inaturalist.org/observations/140974377</a> |
| 2378 | Bubulcus ibis       | Cattle Egret      | 2021/11/11 | 2 | 0 | 22.3772205 | 114.2645229 | <a href="https://www.inaturalist.org/observations/100848304">https://www.inaturalist.org/observations/100848304</a> |
| 2379 | Bubulcus ibis       | Cattle Egret      | 2020/4/12  | 2 | 0 | 22.3775892 | 114.1269604 | <a href="https://www.inaturalist.org/observations/41973848">https://www.inaturalist.org/observations/41973848</a>   |
| 2380 | Bubulcus ibis       | Cattle Egret      | 2022/4/15  | 1 | 0 | 22.3801768 | 114.2772490 | <a href="https://www.inaturalist.org/observations/114772481">https://www.inaturalist.org/observations/114772481</a> |
| 2381 | Bubulcus ibis       | Cattle Egret      | 2017/11/1  | 4 | 0 | 22.3802367 | 114.2678046 | <a href="https://www.inaturalist.org/observations/20075806">https://www.inaturalist.org/observations/20075806</a>   |
| 2382 | Bubulcus ibis       | Cattle Egret      | 2021/5/1   | 1 | 0 | 22.3811185 | 114.2651807 | <a href="https://www.inaturalist.org/observations/76822763">https://www.inaturalist.org/observations/76822763</a>   |
| 2383 | Bubulcus ibis       | Cattle Egret      | 2017/5/8   | 1 | 0 | 22.3846410 | 114.1445800 | <a href="https://www.inaturalist.org/observations/39829194">https://www.inaturalist.org/observations/39829194</a>   |
| 2384 | Bubulcus ibis       | Cattle Egret      | 2021/11/6  | 1 | 0 | 22.3849500 | 114.2730867 | <a href="https://www.inaturalist.org/observations/101074292">https://www.inaturalist.org/observations/101074292</a> |
| 2385 | Bubulcus ibis       | Cattle Egret      | 2020/10/31 | 2 | 0 | 22.3851416 | 114.1982366 | <a href="https://www.inaturalist.org/observations/63868864">https://www.inaturalist.org/observations/63868864</a>   |
| 2386 | Bubulcus coromandus | ibis Cattle Egret | 2020/11/15 | 2 | 0 | 22.3856604 | 114.2751246 | <a href="https://www.inaturalist.org/observations/64910993">https://www.inaturalist.org/observations/64910993</a>   |
| 2387 | Bubulcus ibis       | Cattle Egret      | 2021/4/30  | 1 | 0 | 22.3862601 | 114.1012398 | <a href="https://www.inaturalist.org/observations/76854773">https://www.inaturalist.org/observations/76854773</a>   |
| 2388 | Bubulcus ibis       | Cattle Egret      | 2021/5/14  | 2 | 0 | 22.3869739 | 114.1453990 | <a href="https://www.inaturalist.org/observations/142516864">https://www.inaturalist.org/observations/142516864</a> |
| 2389 | Bubulcus ibis       | Cattle Egret      | 2019/5/5   | 3 | 0 | 22.3878049 | 114.1456546 | <a href="https://www.inaturalist.org/observations/25804385">https://www.inaturalist.org/observations/25804385</a>   |
| 2390 | Bubulcus ibis       | Cattle Egret      | 2021/2/14  | 3 | 0 | 22.3882383 | 120.6062117 | <a href="https://www.inaturalist.org/observations/69553598">https://www.inaturalist.org/observations/69553598</a>   |
| 2391 | Bubulcus ibis       | Cattle Egret      | 2021/2/12  | 1 | 0 | 22.3884700 | 120.6067467 | <a href="https://www.inaturalist.org/observations/69450664">https://www.inaturalist.org/observations/69450664</a>   |
| 2392 | Bubulcus ibis       | Cattle Egret      | 2019/5/14  | 4 | 0 | 22.3886201 | 114.1457999 | <a href="https://www.inaturalist.org/observations/26316657">https://www.inaturalist.org/observations/26316657</a>   |
| 2393 | Bubulcus ibis       | Cattle Egret      | 2022/4/3   | 2 | 0 | 22.3889416 | 114.3158947 | <a href="https://www.inaturalist.org/observations/113734015">https://www.inaturalist.org/observations/113734015</a> |
| 2394 | Bubulcus ibis       | Cattle Egret      | 2021/4/21  | 1 | 0 | 22.3923206 | 114.1492880 | <a href="https://www.inaturalist.org/observations/74756264">https://www.inaturalist.org/observations/74756264</a>   |
| 2395 | Bubulcus ibis       | Cattle Egret      | 2022/12/23 | 2 | 0 | 22.3926331 | 114.3485651 | <a href="https://www.inaturalist.org/observations/144909735">https://www.inaturalist.org/observations/144909735</a> |
| 2396 | Bubulcus coromandus | ibis Cattle Egret | 2021/5/2   | 2 | 0 | 22.3939467 | 114.1520833 | <a href="https://www.inaturalist.org/observations/76449591">https://www.inaturalist.org/observations/76449591</a>   |
| 2397 | Bubulcus ibis       | Cattle Egret      | 2020/4/28  | 1 | 0 | 22.3939957 | 114.1515447 | <a href="https://www.inaturalist.org/observations/49731246">https://www.inaturalist.org/observations/49731246</a>   |
| 2398 | Bubulcus ibis       | Cattle Egret      | 2021/5/1   | 1 | 0 | 22.3944747 | 114.1520859 | <a href="https://www.inaturalist.org/observations/76035485">https://www.inaturalist.org/observations/76035485</a>   |
| 2399 | Bubulcus ibis       | Cattle Egret      | 2021/5/1   | 2 | 0 | 22.3944949 | 114.1520834 | <a href="https://www.inaturalist.org/observations/76037917">https://www.inaturalist.org/observations/76037917</a>   |

|      |                        |                      |            |   |   |            |             |                                                                                                                     |
|------|------------------------|----------------------|------------|---|---|------------|-------------|---------------------------------------------------------------------------------------------------------------------|
| 2400 | Bubulcus ibis          | Cattle Egret         | 2021/5/1   | 2 | 0 | 22.3945538 | 114.1523597 | <a href="https://www.inaturalist.org/observations/76035797">https://www.inaturalist.org/observations/76035797</a>   |
| 2401 | Bubulcus ibis          | Cattle Egret         | 2019/1/29  | 3 | 0 | 22.3946033 | 120.6016617 | <a href="https://www.inaturalist.org/observations/19942404">https://www.inaturalist.org/observations/19942404</a>   |
| 2402 | Bubulcus ibis          | Cattle Egret         | 2021/4/21  | 1 | 0 | 22.3948456 | 114.1509368 | <a href="https://www.inaturalist.org/observations/74756267">https://www.inaturalist.org/observations/74756267</a>   |
| 2403 | Bubulcus ibis          | Cattle Egret         | 2022/10/23 | 2 | 0 | 22.3950340 | 114.1116758 | <a href="https://www.inaturalist.org/observations/139946578">https://www.inaturalist.org/observations/139946578</a> |
| 2404 | Bubulcus ibis          | Cattle Egret         | 2021/5/1   | 1 | 0 | 22.3954333 | 114.1524289 | <a href="https://www.inaturalist.org/observations/76063076">https://www.inaturalist.org/observations/76063076</a>   |
| 2405 | Bubulcus ibis          | Cattle Egret         | 2021/11/2  | 0 | 0 | 22.3957383 | 114.2843700 | <a href="https://www.inaturalist.org/observations/100270573">https://www.inaturalist.org/observations/100270573</a> |
| 2406 | Bubulcus ibis          | Cattle Egret         | 2019/5/15  | 2 | 0 | 22.3958470 | 114.1509348 | <a href="https://www.inaturalist.org/observations/34050936">https://www.inaturalist.org/observations/34050936</a>   |
| 2407 | Bubulcus ibis          | Cattle Egret         | 2004/4/4   | 2 | 0 | 22.3979422 | 114.2054321 | <a href="https://www.inaturalist.org/observations/8555575">https://www.inaturalist.org/observations/8555575</a>     |
| 2408 | Bubulcus ibis          | Cattle Egret         | 2020/4/30  | 1 | 0 | 22.3980878 | 114.3191005 | <a href="https://www.inaturalist.org/observations/44347892">https://www.inaturalist.org/observations/44347892</a>   |
| 2409 | Bubulcus ibis          | Cattle Egret         | 2020/4/17  | 1 | 0 | 22.4033431 | 114.3257760 | <a href="https://www.inaturalist.org/observations/42452156">https://www.inaturalist.org/observations/42452156</a>   |
| 2410 | Bubulcus ibis          | Cattle Egret         | 2022/11/9  | 2 | 0 | 22.4034537 | 114.2327395 | <a href="https://www.inaturalist.org/observations/141533324">https://www.inaturalist.org/observations/141533324</a> |
| 2411 | Bubulcus ibis          | Cattle Egret         | 2021/11/7  | 1 | 0 | 22.4055298 | 114.2774164 | <a href="https://www.inaturalist.org/observations/100472296">https://www.inaturalist.org/observations/100472296</a> |
| 2412 | Bubulcus ibis          | Cattle Egret         | 2019/4/4   | 1 | 0 | 22.4057283 | 120.6192083 | <a href="https://www.inaturalist.org/observations/21977350">https://www.inaturalist.org/observations/21977350</a>   |
| 2413 | Bubulcus ibis          | Cattle Egret         | 2019/9/23  | 4 | 0 | 22.4075518 | 72.5307071  | <a href="https://www.inaturalist.org/observations/33241108">https://www.inaturalist.org/observations/33241108</a>   |
| 2414 | Bubulcus ibis          | Cattle Egret         | 2021/10/20 | 2 | 0 | 22.4081906 | 113.9842909 | <a href="https://www.inaturalist.org/observations/111183817">https://www.inaturalist.org/observations/111183817</a> |
| 2415 | Bubulcus ibis          | Cattle Egret         | 2022/11/6  | 2 | 0 | 22.4084695 | 114.3435211 | <a href="https://www.inaturalist.org/observations/141273798">https://www.inaturalist.org/observations/141273798</a> |
| 2416 | Bubulcus ibis          | Cattle Egret         | 2022/10/30 | 2 | 0 | 22.4092222 | 114.0313944 | <a href="https://www.inaturalist.org/observations/140466163">https://www.inaturalist.org/observations/140466163</a> |
| 2417 | Bubulcus ibis          | Cattle Egret         | 2021/5/1   | 1 | 0 | 22.4108700 | 114.2730626 | <a href="https://www.inaturalist.org/observations/76799430">https://www.inaturalist.org/observations/76799430</a>   |
| 2418 | Bubulcus ibis          | Cattle Egret         | 2021/3/31  | 1 | 0 | 22.4173764 | 114.0849424 | <a href="https://www.inaturalist.org/observations/72575890">https://www.inaturalist.org/observations/72575890</a>   |
| 2419 | Bubulcus ibis          | Cattle Egret         | 2018/11/17 | 5 | 0 | 22.4174960 | 114.2691930 | <a href="https://www.inaturalist.org/observations/18622961">https://www.inaturalist.org/observations/18622961</a>   |
| 2420 | Bubulcus ibis          | Cattle Egret         | 2020/4/26  | 3 | 0 | 22.4182804 | 114.2121010 | <a href="https://www.inaturalist.org/observations/43563573">https://www.inaturalist.org/observations/43563573</a>   |
| 2421 | Bubulcus<br>coromandus | ibis<br>Cattle Egret | 2022/2/3   | 0 | 0 | 22.4184005 | 114.2768225 | <a href="https://www.inaturalist.org/observations/106063159">https://www.inaturalist.org/observations/106063159</a> |
| 2422 | Bubulcus ibis          | Cattle Egret         | 2022/1/4   | 1 | 0 | 22.4215201 | 114.0635009 | <a href="https://www.inaturalist.org/observations/104380396">https://www.inaturalist.org/observations/104380396</a> |
| 2423 | Bubulcus ibis          | Cattle Egret         | 2018/2/23  | 2 | 0 | 22.4230000 | 88.2864000  | <a href="https://www.inaturalist.org/observations/69879104">https://www.inaturalist.org/observations/69879104</a>   |
| 2424 | Bubulcus ibis          | Cattle Egret         | 2022/2/2   | 2 | 0 | 22.4234295 | 114.0473415 | <a href="https://www.inaturalist.org/observations/106021081">https://www.inaturalist.org/observations/106021081</a> |

|      |               |              |            |   |   |            |             |                                                                                                                     |
|------|---------------|--------------|------------|---|---|------------|-------------|---------------------------------------------------------------------------------------------------------------------|
| 2425 | Bubulcus ibis | Cattle Egret | 2018/4/30  | 4 | 0 | 22.4237741 | 113.9408656 | <a href="https://www.inaturalist.org/observations/11864701">https://www.inaturalist.org/observations/11864701</a>   |
| 2426 | Bubulcus ibis | Cattle Egret | 2019/12/15 | 1 | 0 | 22.4238753 | 113.9406253 | <a href="https://www.inaturalist.org/observations/36666207">https://www.inaturalist.org/observations/36666207</a>   |
| 2427 | Bubulcus ibis | Cattle Egret | 2018/4/30  | 4 | 0 | 22.4239527 | 113.9410158 | <a href="https://www.inaturalist.org/observations/11864679">https://www.inaturalist.org/observations/11864679</a>   |
| 2428 | Bubulcus ibis | Cattle Egret | 2020/5/1   | 1 | 0 | 22.4271975 | 114.2917887 | <a href="https://www.inaturalist.org/observations/44446402">https://www.inaturalist.org/observations/44446402</a>   |
| 2429 | Bubulcus ibis | Cattle Egret | 2020/9/27  | 1 | 0 | 22.4275760 | 114.0874146 | <a href="https://www.inaturalist.org/observations/60981042">https://www.inaturalist.org/observations/60981042</a>   |
| 2430 | Bubulcus ibis | Cattle Egret | 2020/9/27  | 1 | 0 | 22.4275760 | 114.0874146 | <a href="https://www.inaturalist.org/observations/60981066">https://www.inaturalist.org/observations/60981066</a>   |
| 2431 | Bubulcus ibis | Cattle Egret | 2020/11/1  | 1 | 0 | 22.4275760 | 114.0874146 | <a href="https://www.inaturalist.org/observations/64017943">https://www.inaturalist.org/observations/64017943</a>   |
| 2432 | Bubulcus ibis | Cattle Egret | 2021/5/30  | 3 | 0 | 22.4275969 | 114.0887397 | <a href="https://www.inaturalist.org/observations/81057685">https://www.inaturalist.org/observations/81057685</a>   |
| 2433 | Bubulcus ibis | Cattle Egret | 2022/9/24  | 1 | 0 | 22.4309572 | 120.4929402 | <a href="https://www.inaturalist.org/observations/136389299">https://www.inaturalist.org/observations/136389299</a> |
| 2434 | Bubulcus ibis | Cattle Egret | 2022/5/7   | 2 | 0 | 22.4310578 | 114.0851528 | <a href="https://www.inaturalist.org/observations/115875974">https://www.inaturalist.org/observations/115875974</a> |
| 2435 | Bubulcus ibis | Cattle Egret | 2021/11/18 | 2 | 0 | 22.4317281 | 114.3271367 | <a href="https://www.inaturalist.org/observations/101361399">https://www.inaturalist.org/observations/101361399</a> |
| 2436 | Bubulcus ibis | Cattle Egret | 2018/4/27  | 3 | 0 | 22.4318028 | 114.2557220 | <a href="https://www.inaturalist.org/observations/11477386">https://www.inaturalist.org/observations/11477386</a>   |
| 2437 | Bubulcus ibis | Cattle Egret | 2022/2/6   | 1 | 0 | 22.4318666 | 114.0057069 | <a href="https://www.inaturalist.org/observations/106355465">https://www.inaturalist.org/observations/106355465</a> |
| 2438 | Bubulcus ibis | Cattle Egret | 2020/4/30  | 1 | 0 | 22.4361937 | 114.3309272 | <a href="https://www.inaturalist.org/observations/44359163">https://www.inaturalist.org/observations/44359163</a>   |
| 2439 | Bubulcus ibis | Cattle Egret | 2021/11/5  | 1 | 0 | 22.4398887 | 114.0256179 | <a href="https://www.inaturalist.org/observations/128124595">https://www.inaturalist.org/observations/128124595</a> |
| 2440 | Bubulcus ibis | Cattle Egret | 2021/5/7   | 2 | 0 | 22.4408680 | 114.2824839 | <a href="https://www.inaturalist.org/observations/77706933">https://www.inaturalist.org/observations/77706933</a>   |
| 2441 | Bubulcus ibis | Cattle Egret | 2021/4/29  | 1 | 0 | 22.4414985 | 114.2861028 | <a href="https://www.inaturalist.org/observations/75633658">https://www.inaturalist.org/observations/75633658</a>   |
| 2442 | Bubulcus ibis | Cattle Egret | 2020/5/9   | 1 | 0 | 22.4422689 | 114.2856858 | <a href="https://www.inaturalist.org/observations/45453197">https://www.inaturalist.org/observations/45453197</a>   |
| 2443 | Bubulcus ibis | Cattle Egret | 2020/4/11  | 2 | 0 | 22.4423218 | 114.1655064 | <a href="https://www.inaturalist.org/observations/96035079">https://www.inaturalist.org/observations/96035079</a>   |
| 2444 | Bubulcus ibis | Cattle Egret | 2017/3/14  | 6 | 0 | 22.4425478 | 78.1831039  | <a href="https://www.inaturalist.org/observations/5574265">https://www.inaturalist.org/observations/5574265</a>     |
| 2445 | Bubulcus ibis | Cattle Egret | 2015/8/9   | 1 | 0 | 22.4439509 | 120.4916027 | <a href="https://www.inaturalist.org/observations/63755297">https://www.inaturalist.org/observations/63755297</a>   |
| 2446 | Bubulcus ibis | Cattle Egret | 2021/12/29 | 1 | 0 | 22.4445376 | 114.0222076 | <a href="https://www.inaturalist.org/observations/107938743">https://www.inaturalist.org/observations/107938743</a> |
| 2447 | Bubulcus ibis | Cattle Egret | 2022/5/8   | 2 | 0 | 22.4445376 | 114.0222076 | <a href="https://www.inaturalist.org/observations/141152185">https://www.inaturalist.org/observations/141152185</a> |
| 2448 | Bubulcus ibis | Cattle Egret | 2020/5/8   | 1 | 0 | 22.4449472 | 114.1778290 | <a href="https://www.inaturalist.org/observations/46487400">https://www.inaturalist.org/observations/46487400</a>   |
| 2449 | Bubulcus ibis | Cattle Egret | 2020/4/25  | 2 | 0 | 22.4450990 | 114.1385870 | <a href="https://www.inaturalist.org/observations/44733978">https://www.inaturalist.org/observations/44733978</a>   |



|      |                     |                   |            |   |   |            |             |                                                                                                                     |
|------|---------------------|-------------------|------------|---|---|------------|-------------|---------------------------------------------------------------------------------------------------------------------|
| 2450 | Bubulcus ibis       | Cattle Egret      | 2020/4/16  | 1 | 0 | 22.4451402 | 114.1385703 | <a href="https://www.inaturalist.org/observations/45146389">https://www.inaturalist.org/observations/45146389</a>   |
| 2451 | Bubulcus coromandus | ibis Cattle Egret | 2020/4/26  | 1 | 0 | 22.4452337 | 114.1374250 | <a href="https://www.inaturalist.org/observations/43613244">https://www.inaturalist.org/observations/43613244</a>   |
| 2452 | Bubulcus ibis       | Cattle Egret      | 2018/12/15 | 4 | 0 | 22.4452440 | 114.1379470 | <a href="https://www.inaturalist.org/observations/19418766">https://www.inaturalist.org/observations/19418766</a>   |
| 2453 | Bubulcus coromandus | ibis Cattle Egret | 2020/12/19 | 2 | 0 | 22.4452840 | 114.1373856 | <a href="https://www.inaturalist.org/observations/66901717">https://www.inaturalist.org/observations/66901717</a>   |
| 2454 | Bubulcus ibis       | Cattle Egret      | 2022/4/17  | 1 | 0 | 22.4453277 | 114.1378574 | <a href="https://www.inaturalist.org/observations/114618024">https://www.inaturalist.org/observations/114618024</a> |
| 2455 | Bubulcus ibis       | Cattle Egret      | 2019/3/31  | 2 | 0 | 22.4454506 | 114.1375517 | <a href="https://www.inaturalist.org/observations/22186227">https://www.inaturalist.org/observations/22186227</a>   |
| 2456 | Bubulcus coromandus | ibis Cattle Egret | 2021/1/16  | 2 | 0 | 22.4454740 | 114.1373964 | <a href="https://www.inaturalist.org/observations/68205205">https://www.inaturalist.org/observations/68205205</a>   |
| 2457 | Bubulcus ibis       | Cattle Egret      | 2019/1/10  | 3 | 0 | 22.4458243 | 114.1377284 | <a href="https://www.inaturalist.org/observations/19549207">https://www.inaturalist.org/observations/19549207</a>   |
| 2458 | Bubulcus ibis       | Cattle Egret      | 2018/12/15 | 4 | 0 | 22.4458719 | 114.1377393 | <a href="https://www.inaturalist.org/observations/19129871">https://www.inaturalist.org/observations/19129871</a>   |
| 2459 | Bubulcus ibis       | Cattle Egret      | 2021/4/17  | 1 | 0 | 22.4465010 | 120.5056193 | <a href="https://www.inaturalist.org/observations/74509584">https://www.inaturalist.org/observations/74509584</a>   |
| 2460 | Bubulcus ibis       | Cattle Egret      | 2021/4/19  | 2 | 0 | 22.4472939 | 120.5070208 | <a href="https://www.inaturalist.org/observations/74516869">https://www.inaturalist.org/observations/74516869</a>   |
| 2461 | Bubulcus ibis       | Cattle Egret      | 2021/4/19  | 1 | 0 | 22.4474117 | 120.5067050 | <a href="https://www.inaturalist.org/observations/74503151">https://www.inaturalist.org/observations/74503151</a>   |
| 2462 | Bubulcus ibis       | Cattle Egret      | 2020/6/8   | 1 | 0 | 22.4490861 | 120.5103667 | <a href="https://www.inaturalist.org/observations/48911170">https://www.inaturalist.org/observations/48911170</a>   |
| 2463 | Bubulcus ibis       | Cattle Egret      | 2020/5/15  | 1 | 0 | 22.4497719 | 120.5101648 | <a href="https://www.inaturalist.org/observations/46059589">https://www.inaturalist.org/observations/46059589</a>   |
| 2464 | Bubulcus ibis       | Cattle Egret      | 2021/5/1   | 1 | 0 | 22.4554798 | 114.1454727 | <a href="https://www.inaturalist.org/observations/76121618">https://www.inaturalist.org/observations/76121618</a>   |
| 2465 | Bubulcus ibis       | Cattle Egret      | 2022/12/1  | 1 | 0 | 22.4586717 | 114.3258883 | <a href="https://www.inaturalist.org/observations/143536460">https://www.inaturalist.org/observations/143536460</a> |
| 2466 | Bubulcus ibis       | Cattle Egret      | 2022/5/8   | 1 | 0 | 22.4590854 | 114.1956386 | <a href="https://www.inaturalist.org/observations/116114336">https://www.inaturalist.org/observations/116114336</a> |
| 2467 | Bubulcus ibis       | Cattle Egret      | 2015/12/5  | 2 | 0 | 22.4606419 | 114.0041996 | <a href="https://www.inaturalist.org/observations/24473928">https://www.inaturalist.org/observations/24473928</a>   |
| 2468 | Bubulcus ibis       | Cattle Egret      | 2015/12/5  | 2 | 0 | 22.4606419 | 114.0041996 | <a href="https://www.inaturalist.org/observations/24475422">https://www.inaturalist.org/observations/24475422</a>   |
| 2469 | Bubulcus ibis       | Cattle Egret      | 2015/12/5  | 2 | 0 | 22.4606419 | 114.0041996 | <a href="https://www.inaturalist.org/observations/24502661">https://www.inaturalist.org/observations/24502661</a>   |
| 2470 | Bubulcus ibis       | Cattle Egret      | 2016/12/3  | 3 | 0 | 22.4606419 | 114.0041996 | <a href="https://www.inaturalist.org/observations/28596036">https://www.inaturalist.org/observations/28596036</a>   |
| 2471 | Bubulcus ibis       | Cattle Egret      | 2021/11/15 | 0 | 0 | 22.4606467 | 114.3289000 | <a href="https://www.inaturalist.org/observations/101176779">https://www.inaturalist.org/observations/101176779</a> |
| 2472 | Bubulcus ibis       | Cattle Egret      | 2021/11/15 | 0 | 0 | 22.4606533 | 114.3286750 | <a href="https://www.inaturalist.org/observations/101176682">https://www.inaturalist.org/observations/101176682</a> |
| 2473 | Bubulcus ibis       | Cattle Egret      | 2021/11/15 | 0 | 0 | 22.4606997 | 114.3284814 | <a href="https://www.inaturalist.org/observations/101160025">https://www.inaturalist.org/observations/101160025</a> |
| 2474 | Bubulcus ibis       | Cattle Egret      | 2020/4/6   | 1 | 0 | 22.4607117 | 114.3288033 | <a href="https://www.inaturalist.org/observations/43250622">https://www.inaturalist.org/observations/43250622</a>   |

|      |                     |                      |            |   |   |            |             |                                                                                                                     |
|------|---------------------|----------------------|------------|---|---|------------|-------------|---------------------------------------------------------------------------------------------------------------------|
| 2475 | Bubulcus ibis       | Cattle Egret         | 2021/7/1   | 1 | 0 | 22.4622430 | 114.0383940 | <a href="https://www.inaturalist.org/observations/85407331">https://www.inaturalist.org/observations/85407331</a>   |
| 2476 | Bubulcus ibis       | Cattle Egret         | 2020/12/20 | 4 | 0 | 22.4653450 | 114.0370081 | <a href="https://www.inaturalist.org/observations/122321859">https://www.inaturalist.org/observations/122321859</a> |
| 2477 | Bubulcus ibis       | Cattle Egret         | 2022/11/16 | 1 | 0 | 22.4659717 | 114.0369600 | <a href="https://www.inaturalist.org/observations/142143610">https://www.inaturalist.org/observations/142143610</a> |
| 2478 | Bubulcus ibis       | Cattle Egret         | 2022/11/30 | 1 | 0 | 22.4660323 | 114.0388417 | <a href="https://www.inaturalist.org/observations/143350502">https://www.inaturalist.org/observations/143350502</a> |
| 2479 | Bubulcus ibis       | Cattle Egret         | 2021/7/4   | 3 | 0 | 22.4671648 | 114.0408427 | <a href="https://www.inaturalist.org/observations/85601221">https://www.inaturalist.org/observations/85601221</a>   |
| 2480 | Bubulcus ibis       | Cattle Egret         | 2022/5/1   | 1 | 0 | 22.4687693 | 114.0102363 | <a href="https://www.inaturalist.org/observations/114140686">https://www.inaturalist.org/observations/114140686</a> |
| 2481 | Bubulcus ibis       | Cattle Egret         | 2021/6/27  | 3 | 0 | 22.4692630 | 114.0097302 | <a href="https://www.inaturalist.org/observations/84736908">https://www.inaturalist.org/observations/84736908</a>   |
| 2482 | Bubulcus coromandus | ibis<br>Cattle Egret | 2022/5/14  | 2 | 0 | 22.4693050 | 114.0055083 | <a href="https://www.inaturalist.org/observations/118112367">https://www.inaturalist.org/observations/118112367</a> |
| 2483 | Bubulcus ibis       | Cattle Egret         | 2019/11/17 | 1 | 0 | 22.4695341 | 114.0100226 | <a href="https://www.inaturalist.org/observations/35766054">https://www.inaturalist.org/observations/35766054</a>   |
| 2484 | Bubulcus ibis       | Cattle Egret         | 2021/8/29  | 1 | 0 | 22.4695539 | 114.0095730 | <a href="https://www.inaturalist.org/observations/92999006">https://www.inaturalist.org/observations/92999006</a>   |
| 2485 | Bubulcus ibis       | Cattle Egret         | 2022/5/7   | 1 | 0 | 22.4697464 | 114.0087050 | <a href="https://www.inaturalist.org/observations/116057668">https://www.inaturalist.org/observations/116057668</a> |
| 2486 | Bubulcus ibis       | Cattle Egret         | 2019/3/30  | 3 | 0 | 22.4697770 | 114.0298200 | <a href="https://www.inaturalist.org/observations/21968752">https://www.inaturalist.org/observations/21968752</a>   |
| 2487 | Bubulcus ibis       | Cattle Egret         | 2021/7/10  | 1 | 0 | 22.4698812 | 88.3228301  | <a href="https://www.inaturalist.org/observations/86401885">https://www.inaturalist.org/observations/86401885</a>   |
| 2488 | Bubulcus ibis       | Cattle Egret         | 2020/12/20 | 1 | 0 | 22.4700011 | 88.3321069  | <a href="https://www.inaturalist.org/observations/66870952">https://www.inaturalist.org/observations/66870952</a>   |
| 2489 | Bubulcus ibis       | Cattle Egret         | 2022/5/7   | 2 | 0 | 22.4700585 | 114.0065831 | <a href="https://www.inaturalist.org/observations/116381234">https://www.inaturalist.org/observations/116381234</a> |
| 2490 | Bubulcus ibis       | Cattle Egret         | 2022/5/2   | 2 | 0 | 22.4704533 | 114.0062722 | <a href="https://www.inaturalist.org/observations/114603090">https://www.inaturalist.org/observations/114603090</a> |
| 2491 | Bubulcus ibis       | Cattle Egret         | 2021/5/2   | 1 | 0 | 22.4706804 | 114.0240430 | <a href="https://www.inaturalist.org/observations/77446711">https://www.inaturalist.org/observations/77446711</a>   |
| 2492 | Bubulcus ibis       | Cattle Egret         | 2018/4/28  | 2 | 0 | 22.4708396 | 114.0100580 | <a href="https://www.inaturalist.org/observations/11587171">https://www.inaturalist.org/observations/11587171</a>   |
| 2493 | Bubulcus ibis       | Cattle Egret         | 2022/3/29  | 1 | 0 | 22.4709693 | 114.0427050 | <a href="https://www.inaturalist.org/observations/109820088">https://www.inaturalist.org/observations/109820088</a> |
| 2494 | Bubulcus ibis       | Cattle Egret         | 2022/4/16  | 1 | 0 | 22.4709693 | 114.0427050 | <a href="https://www.inaturalist.org/observations/111913098">https://www.inaturalist.org/observations/111913098</a> |
| 2495 | Bubulcus coromandus | ibis<br>Cattle Egret | 2021/5/1   | 2 | 0 | 22.4709700 | 114.0427050 | <a href="https://www.inaturalist.org/observations/77913656">https://www.inaturalist.org/observations/77913656</a>   |
| 2496 | Bubulcus ibis       | Cattle Egret         | 2021/11/22 | 1 | 0 | 22.4709700 | 114.0427050 | <a href="https://www.inaturalist.org/observations/101875551">https://www.inaturalist.org/observations/101875551</a> |
| 2497 | Bubulcus ibis       | Cattle Egret         | 2022/4/7   | 2 | 0 | 22.4715833 | 114.3628217 | <a href="https://www.inaturalist.org/observations/139424706">https://www.inaturalist.org/observations/139424706</a> |
| 2498 | Bubulcus ibis       | Cattle Egret         | 2021/1/26  | 2 | 0 | 22.4721862 | 88.3262712  | <a href="https://www.inaturalist.org/observations/68690380">https://www.inaturalist.org/observations/68690380</a>   |
| 2499 | Bubulcus ibis       | Cattle Egret         | 2022/9/28  | 0 | 0 | 22.4723483 | 88.3255283  | <a href="https://www.inaturalist.org/observations/138097842">https://www.inaturalist.org/observations/138097842</a> |

|      |               |              |            |   |   |            |             |                                                                                                                     |
|------|---------------|--------------|------------|---|---|------------|-------------|---------------------------------------------------------------------------------------------------------------------|
| 2500 | Bubulcus ibis | Cattle Egret | 2021/5/1   | 1 | 0 | 22.4724081 | 114.2352434 | <a href="https://www.inaturalist.org/observations/76072023">https://www.inaturalist.org/observations/76072023</a>   |
| 2501 | Bubulcus ibis | Cattle Egret | 2022/12/4  | 1 | 0 | 22.4730590 | 114.0221330 | <a href="https://www.inaturalist.org/observations/143780076">https://www.inaturalist.org/observations/143780076</a> |
| 2502 | Bubulcus ibis | Cattle Egret | 2020/12/26 | 1 | 0 | 22.4733420 | 114.0224100 | <a href="https://www.inaturalist.org/observations/67127742">https://www.inaturalist.org/observations/67127742</a>   |
| 2503 | Bubulcus ibis | Cattle Egret | 2022/5/2   | 1 | 0 | 22.4733900 | 114.0241167 | <a href="https://www.inaturalist.org/observations/115557077">https://www.inaturalist.org/observations/115557077</a> |
| 2504 | Bubulcus ibis | Cattle Egret | 2020/4/30  | 1 | 0 | 22.4735981 | 114.0245656 | <a href="https://www.inaturalist.org/observations/44349722">https://www.inaturalist.org/observations/44349722</a>   |
| 2505 | Bubulcus ibis | Cattle Egret | 2020/5/8   | 3 | 0 | 22.4736241 | 88.3129264  | <a href="https://www.inaturalist.org/observations/131994674">https://www.inaturalist.org/observations/131994674</a> |
| 2506 | Bubulcus ibis | Cattle Egret | 2020/5/8   | 2 | 0 | 22.4736278 | 88.3129801  | <a href="https://www.inaturalist.org/observations/131995627">https://www.inaturalist.org/observations/131995627</a> |
| 2507 | Bubulcus ibis | Cattle Egret | 2021/11/15 | 0 | 0 | 22.4736848 | 114.3356287 | <a href="https://www.inaturalist.org/observations/101177310">https://www.inaturalist.org/observations/101177310</a> |
| 2508 | Bubulcus ibis | Cattle Egret | 2022/4/30  | 1 | 0 | 22.4741931 | 114.0371807 | <a href="https://www.inaturalist.org/observations/115128397">https://www.inaturalist.org/observations/115128397</a> |
| 2509 | Bubulcus ibis | Cattle Egret | 2022/4/3   | 1 | 0 | 22.4742136 | 114.0376858 | <a href="https://www.inaturalist.org/observations/110261682">https://www.inaturalist.org/observations/110261682</a> |
| 2510 | Bubulcus ibis | Cattle Egret | 2022/4/5   | 1 | 0 | 22.4742200 | 114.0377500 | <a href="https://www.inaturalist.org/observations/110481691">https://www.inaturalist.org/observations/110481691</a> |
| 2511 | Bubulcus ibis | Cattle Egret | 2022/11/25 | 1 | 0 | 22.4743580 | 114.0365370 | <a href="https://www.inaturalist.org/observations/143041552">https://www.inaturalist.org/observations/143041552</a> |
| 2512 | Bubulcus ibis | Cattle Egret | 2022/4/5   | 1 | 0 | 22.4744500 | 114.0372292 | <a href="https://www.inaturalist.org/observations/110470029">https://www.inaturalist.org/observations/110470029</a> |
| 2513 | Bubulcus ibis | Cattle Egret | 2019/4/9   | 3 | 0 | 22.4750580 | 114.0359250 | <a href="https://www.inaturalist.org/observations/24709390">https://www.inaturalist.org/observations/24709390</a>   |
| 2514 | Bubulcus ibis | Cattle Egret | 2020/8/4   | 1 | 0 | 22.4810495 | 114.0348385 | <a href="https://www.inaturalist.org/observations/55675214">https://www.inaturalist.org/observations/55675214</a>   |
| 2515 | Bubulcus ibis | Cattle Egret | 2020/11/13 | 2 | 0 | 22.4835629 | 114.3097785 | <a href="https://www.inaturalist.org/observations/65148038">https://www.inaturalist.org/observations/65148038</a>   |
| 2516 | Bubulcus ibis | Cattle Egret | 2019/4/1   | 2 | 0 | 22.4852300 | 114.0487750 | <a href="https://www.inaturalist.org/observations/21870031">https://www.inaturalist.org/observations/21870031</a>   |
| 2517 | Bubulcus ibis | Cattle Egret | 2018/4/30  | 6 | 0 | 22.4867120 | 114.0401200 | <a href="https://www.inaturalist.org/observations/12040029">https://www.inaturalist.org/observations/12040029</a>   |
| 2518 | Bubulcus ibis | Cattle Egret | 2022/5/2   | 1 | 0 | 22.4867865 | 114.0402426 | <a href="https://www.inaturalist.org/observations/115523493">https://www.inaturalist.org/observations/115523493</a> |
| 2519 | Bubulcus ibis | Cattle Egret | 2016/5/14  | 4 | 0 | 22.4868110 | 114.0397340 | <a href="https://www.inaturalist.org/observations/30347030">https://www.inaturalist.org/observations/30347030</a>   |
| 2520 | Bubulcus ibis | Cattle Egret | 2021/5/1   | 1 | 0 | 22.4868173 | 114.0400287 | <a href="https://www.inaturalist.org/observations/77233096">https://www.inaturalist.org/observations/77233096</a>   |
| 2521 | Bubulcus ibis | Cattle Egret | 2021/5/4   | 2 | 0 | 22.4868793 | 114.0373177 | <a href="https://www.inaturalist.org/observations/81982108">https://www.inaturalist.org/observations/81982108</a>   |
| 2522 | Bubulcus ibis | Cattle Egret | 2022/6/3   | 2 | 0 | 22.4869230 | 114.1023871 | <a href="https://www.inaturalist.org/observations/121689882">https://www.inaturalist.org/observations/121689882</a> |
| 2523 | Bubulcus ibis | Cattle Egret | 2021/9/29  | 1 | 0 | 22.4878600 | 114.0368420 | <a href="https://www.inaturalist.org/observations/96760508">https://www.inaturalist.org/observations/96760508</a>   |
| 2524 | Bubulcus ibis | Cattle Egret | 2022/12/5  | 1 | 0 | 22.4882994 | 114.1401527 | <a href="https://www.inaturalist.org/observations/143715273">https://www.inaturalist.org/observations/143715273</a> |

|      |                     |                   |            |   |   |            |             |                                                                                                                     |
|------|---------------------|-------------------|------------|---|---|------------|-------------|---------------------------------------------------------------------------------------------------------------------|
| 2525 | Bubulcus ibis       | Cattle Egret      | 2020/6/12  | 1 | 0 | 22.4893345 | 114.1234939 | <a href="https://www.inaturalist.org/observations/67647390">https://www.inaturalist.org/observations/67647390</a>   |
| 2526 | Bubulcus ibis       | Cattle Egret      | 2022/6/3   | 0 | 0 | 22.4905674 | 114.0435368 | <a href="https://www.inaturalist.org/observations/119992347">https://www.inaturalist.org/observations/119992347</a> |
| 2527 | Bubulcus ibis       | Cattle Egret      | 2012/9/16  | 1 | 0 | 22.4905723 | 72.5082813  | <a href="https://www.inaturalist.org/observations/40530376">https://www.inaturalist.org/observations/40530376</a>   |
| 2528 | Bubulcus ibis       | Cattle Egret      | 2020/4/26  | 1 | 0 | 22.4909898 | 114.0381139 | <a href="https://www.inaturalist.org/observations/43616385">https://www.inaturalist.org/observations/43616385</a>   |
| 2529 | Bubulcus ibis       | Cattle Egret      | 2020/9/29  | 1 | 0 | 22.4920389 | 114.0446297 | <a href="https://www.inaturalist.org/observations/61226728">https://www.inaturalist.org/observations/61226728</a>   |
| 2530 | Bubulcus ibis       | Cattle Egret      | 2020/4/26  | 2 | 0 | 22.4924030 | 114.0441019 | <a href="https://www.inaturalist.org/observations/43563260">https://www.inaturalist.org/observations/43563260</a>   |
| 2531 | Bubulcus coromandus | ibis Cattle Egret | 2022/5/6   | 1 | 0 | 22.4926962 | 114.0369254 | <a href="https://www.inaturalist.org/observations/115728275">https://www.inaturalist.org/observations/115728275</a> |
| 2532 | Bubulcus coromandus | ibis Cattle Egret | 2018/9/4   | 3 | 0 | 22.4928483 | 114.1040517 | <a href="https://www.inaturalist.org/observations/16317817">https://www.inaturalist.org/observations/16317817</a>   |
| 2533 | Bubulcus ibis       | Cattle Egret      | 2021/4/24  | 1 | 0 | 22.4932617 | 114.0452278 | <a href="https://www.inaturalist.org/observations/75018406">https://www.inaturalist.org/observations/75018406</a>   |
| 2534 | Bubulcus coromandus | ibis Cattle Egret | 2018/8/4   | 4 | 0 | 22.4933453 | 114.1057735 | <a href="https://www.inaturalist.org/observations/15096481">https://www.inaturalist.org/observations/15096481</a>   |
| 2535 | Bubulcus ibis       | Cattle Egret      | 2022/1/23  | 3 | 0 | 22.4934467 | 73.4826117  | <a href="https://www.inaturalist.org/observations/120517019">https://www.inaturalist.org/observations/120517019</a> |
| 2536 | Bubulcus coromandus | ibis Cattle Egret | 2011/3/28  | 2 | 0 | 22.4934710 | 114.0349640 | <a href="https://www.inaturalist.org/observations/10431707">https://www.inaturalist.org/observations/10431707</a>   |
| 2537 | Bubulcus ibis ibis  | Cattle Egret      | 2022/9/24  | 0 | 0 | 22.4935998 | 114.1055489 | <a href="https://www.inaturalist.org/observations/136239156">https://www.inaturalist.org/observations/136239156</a> |
| 2538 | Bubulcus ibis       | Cattle Egret      | 2022/1/23  | 3 | 0 | 22.4936000 | 73.4826667  | <a href="https://www.inaturalist.org/observations/120517030">https://www.inaturalist.org/observations/120517030</a> |
| 2539 | Bubulcus ibis       | Cattle Egret      | 2020/4/25  | 1 | 0 | 22.4938673 | 114.0403715 | <a href="https://www.inaturalist.org/observations/44098438">https://www.inaturalist.org/observations/44098438</a>   |
| 2540 | Bubulcus ibis       | Cattle Egret      | 2020/4/26  | 2 | 0 | 22.4938673 | 114.0403715 | <a href="https://www.inaturalist.org/observations/44143594">https://www.inaturalist.org/observations/44143594</a>   |
| 2541 | Bubulcus ibis       | Cattle Egret      | 2022/5/2   | 1 | 0 | 22.4938673 | 114.0403715 | <a href="https://www.inaturalist.org/observations/116033907">https://www.inaturalist.org/observations/116033907</a> |
| 2542 | Bubulcus ibis       | Cattle Egret      | 2021/6/6   | 3 | 0 | 22.4939667 | 114.0461883 | <a href="https://www.inaturalist.org/observations/82136217">https://www.inaturalist.org/observations/82136217</a>   |
| 2543 | Bubulcus ibis       | Cattle Egret      | 2009/9/5   | 1 | 0 | 22.4941650 | 114.0517510 | <a href="https://www.inaturalist.org/observations/141038934">https://www.inaturalist.org/observations/141038934</a> |
| 2544 | Bubulcus ibis       | Cattle Egret      | 2017/4/29  | 2 | 0 | 22.4941850 | 114.0534180 | <a href="https://www.inaturalist.org/observations/6159695">https://www.inaturalist.org/observations/6159695</a>     |
| 2545 | Bubulcus coromandus | ibis Cattle Egret | 2018/8/4   | 3 | 0 | 22.4945367 | 114.1043731 | <a href="https://www.inaturalist.org/observations/15096462">https://www.inaturalist.org/observations/15096462</a>   |
| 2546 | Bubulcus ibis       | Cattle Egret      | 2020/10/20 | 1 | 0 | 22.4945824 | 120.5126099 | <a href="https://www.inaturalist.org/observations/63170089">https://www.inaturalist.org/observations/63170089</a>   |
| 2547 | Bubulcus ibis       | Cattle Egret      | 2020/7/12  | 1 | 0 | 22.4945986 | 114.0283136 | <a href="https://www.inaturalist.org/observations/56017294">https://www.inaturalist.org/observations/56017294</a>   |
| 2548 | Bubulcus ibis       | Cattle Egret      | 2019/4/28  | 1 | 0 | 22.4946767 | 114.1094317 | <a href="https://www.inaturalist.org/observations/23689666">https://www.inaturalist.org/observations/23689666</a>   |
| 2549 | Bubulcus ibis       | Cattle Egret      | 2010/5/9   | 1 | 0 | 22.4947010 | 114.0530550 | <a href="https://www.inaturalist.org/observations/68752823">https://www.inaturalist.org/observations/68752823</a>   |

|      |                     |                   |            |   |   |            |             |                                                                                                                     |
|------|---------------------|-------------------|------------|---|---|------------|-------------|---------------------------------------------------------------------------------------------------------------------|
| 2550 | Bubulcus ibis       | Cattle Egret      | 2011/3/25  | 2 | 0 | 22.4947300 | 114.0529460 | <a href="https://www.inaturalist.org/observations/67850003">https://www.inaturalist.org/observations/67850003</a>   |
| 2551 | Bubulcus ibis       | Cattle Egret      | 2021/11/3  | 1 | 0 | 22.4948440 | 114.0473540 | <a href="https://www.inaturalist.org/observations/100486590">https://www.inaturalist.org/observations/100486590</a> |
| 2552 | Bubulcus ibis       | Cattle Egret      | 2019/12/22 | 2 | 0 | 22.4948580 | 114.0555900 | <a href="https://www.inaturalist.org/observations/36882528">https://www.inaturalist.org/observations/36882528</a>   |
| 2553 | Bubulcus ibis       | Cattle Egret      | 2014/4/29  | 1 | 0 | 22.4950121 | 114.0696131 | <a href="https://www.inaturalist.org/observations/64232589">https://www.inaturalist.org/observations/64232589</a>   |
| 2554 | Bubulcus ibis       | Cattle Egret      | 2010/4/25  | 1 | 0 | 22.4950470 | 114.0556630 | <a href="https://www.inaturalist.org/observations/68946880">https://www.inaturalist.org/observations/68946880</a>   |
| 2555 | Bubulcus ibis       | Cattle Egret      | 2020/4/27  | 1 | 0 | 22.4950569 | 114.0339342 | <a href="https://www.inaturalist.org/observations/43847405">https://www.inaturalist.org/observations/43847405</a>   |
| 2556 | Bubulcus ibis       | Cattle Egret      | 2020/4/27  | 1 | 0 | 22.4950569 | 114.0339342 | <a href="https://www.inaturalist.org/observations/43847414">https://www.inaturalist.org/observations/43847414</a>   |
| 2557 | Bubulcus ibis       | Cattle Egret      | 2020/6/5   | 1 | 0 | 22.4950569 | 114.0339342 | <a href="https://www.inaturalist.org/observations/48785544">https://www.inaturalist.org/observations/48785544</a>   |
| 2558 | Bubulcus ibis       | Cattle Egret      | 2020/7/26  | 1 | 0 | 22.4950569 | 114.0339342 | <a href="https://www.inaturalist.org/observations/54379685">https://www.inaturalist.org/observations/54379685</a>   |
| 2559 | Bubulcus ibis       | Cattle Egret      | 2021/11/20 | 2 | 0 | 22.4950613 | 114.0339342 | <a href="https://www.inaturalist.org/observations/101533740">https://www.inaturalist.org/observations/101533740</a> |
| 2560 | Bubulcus ibis       | Cattle Egret      | 2022/5/28  | 1 | 0 | 22.4950613 | 114.0339342 | <a href="https://www.inaturalist.org/observations/119157286">https://www.inaturalist.org/observations/119157286</a> |
| 2561 | Bubulcus ibis       | Cattle Egret      | 2020/11/24 | 1 | 0 | 22.4950940 | 114.0530410 | <a href="https://www.inaturalist.org/observations/65795315">https://www.inaturalist.org/observations/65795315</a>   |
| 2562 | Bubulcus ibis       | Cattle Egret      | 2021/9/7   | 1 | 0 | 22.4951430 | 114.0547904 | <a href="https://www.inaturalist.org/observations/94319191">https://www.inaturalist.org/observations/94319191</a>   |
| 2563 | Bubulcus ibis       | Cattle Egret      | 2022/5/7   | 1 | 0 | 22.4951821 | 114.0297599 | <a href="https://www.inaturalist.org/observations/116410858">https://www.inaturalist.org/observations/116410858</a> |
| 2564 | Bubulcus ibis       | Cattle Egret      | 2022/9/11  | 1 | 0 | 22.4954420 | 114.0540910 | <a href="https://www.inaturalist.org/observations/134837972">https://www.inaturalist.org/observations/134837972</a> |
| 2565 | Bubulcus ibis       | Cattle Egret      | 2018/4/29  | 2 | 0 | 22.4956875 | 114.0530853 | <a href="https://www.inaturalist.org/observations/11761782">https://www.inaturalist.org/observations/11761782</a>   |
| 2566 | Bubulcus ibis       | Cattle Egret      | 2019/10/27 | 1 | 0 | 22.4956925 | 88.2714903  | <a href="https://www.inaturalist.org/observations/64162044">https://www.inaturalist.org/observations/64162044</a>   |
| 2567 | Bubulcus ibis       | Cattle Egret      | 2019/6/2   | 3 | 0 | 22.4962987 | 114.1055925 | <a href="https://www.inaturalist.org/observations/26234337">https://www.inaturalist.org/observations/26234337</a>   |
| 2568 | Bubulcus ibis       | Cattle Egret      | 2022/4/20  | 2 | 0 | 22.4966988 | 120.4998604 | <a href="https://www.inaturalist.org/observations/112147978">https://www.inaturalist.org/observations/112147978</a> |
| 2569 | Bubulcus ibis       | Cattle Egret      | 2022/4/24  | 1 | 0 | 22.4970365 | 120.4986418 | <a href="https://www.inaturalist.org/observations/112817692">https://www.inaturalist.org/observations/112817692</a> |
| 2570 | Bubulcus coromandus | ibis Cattle Egret | 2020/4/26  | 1 | 0 | 22.4987239 | 114.0449105 | <a href="https://www.inaturalist.org/observations/43562864">https://www.inaturalist.org/observations/43562864</a>   |
| 2571 | Bubulcus ibis       | Cattle Egret      | 2020/4/25  | 2 | 0 | 22.4989095 | 114.0274326 | <a href="https://www.inaturalist.org/observations/43342325">https://www.inaturalist.org/observations/43342325</a>   |
| 2572 | Bubulcus ibis       | Cattle Egret      | 2020/4/25  | 2 | 0 | 22.4989888 | 114.0274541 | <a href="https://www.inaturalist.org/observations/43342460">https://www.inaturalist.org/observations/43342460</a>   |
| 2573 | Bubulcus coromandus | ibis Cattle Egret | 2019/4/27  | 2 | 0 | 22.4990751 | 114.0276574 | <a href="https://www.inaturalist.org/observations/23410664">https://www.inaturalist.org/observations/23410664</a>   |
| 2574 | Bubulcus ibis       | Cattle Egret      | 2019/11/6  | 1 | 0 | 22.4991667 | 114.0556367 | <a href="https://www.inaturalist.org/observations/35606140">https://www.inaturalist.org/observations/35606140</a>   |

|      |                     |                   |            |   |   |            |             |                                                                                                                     |
|------|---------------------|-------------------|------------|---|---|------------|-------------|---------------------------------------------------------------------------------------------------------------------|
| 2575 | Bubulcus ibis       | Cattle Egret      | 2020/4/25  | 2 | 0 | 22.4991772 | 114.0274487 | <a href="https://www.inaturalist.org/observations/43342602">https://www.inaturalist.org/observations/43342602</a>   |
| 2576 | Bubulcus ibis       | Cattle Egret      | 2020/4/25  | 1 | 0 | 22.4991920 | 114.0273253 | <a href="https://www.inaturalist.org/observations/44346315">https://www.inaturalist.org/observations/44346315</a>   |
| 2577 | Bubulcus ibis       | Cattle Egret      | 2021/4/11  | 1 | 0 | 22.4999379 | 114.1907692 | <a href="https://www.inaturalist.org/observations/76063245">https://www.inaturalist.org/observations/76063245</a>   |
| 2578 | Bubulcus ibis       | Cattle Egret      | 2021/1/17  | 1 | 0 | 22.5000000 | 114.1166667 | <a href="https://www.inaturalist.org/observations/68324557">https://www.inaturalist.org/observations/68324557</a>   |
| 2579 | Bubulcus ibis       | Cattle Egret      | 2015/4/3   | 1 | 0 | 22.5000000 | 114.1166667 | <a href="https://www.inaturalist.org/observations/68356658">https://www.inaturalist.org/observations/68356658</a>   |
| 2580 | Bubulcus ibis       | Cattle Egret      | 2020/10/25 | 1 | 0 | 22.5000000 | 114.1166667 | <a href="https://www.inaturalist.org/observations/114516223">https://www.inaturalist.org/observations/114516223</a> |
| 2581 | Bubulcus coromandus | ibis Cattle Egret | 2017/2/24  | 1 | 0 | 22.5000000 | 114.1166667 | <a href="https://www.inaturalist.org/observations/129286930">https://www.inaturalist.org/observations/129286930</a> |
| 2582 | Bubulcus ibis       | Cattle Egret      | 2022/1/20  | 1 | 0 | 22.5000000 | 114.1166670 | <a href="https://www.inaturalist.org/observations/105354379">https://www.inaturalist.org/observations/105354379</a> |
| 2583 | Bubulcus ibis       | Cattle Egret      | 2022/1/20  | 1 | 0 | 22.5000000 | 114.1166670 | <a href="https://www.inaturalist.org/observations/105354380">https://www.inaturalist.org/observations/105354380</a> |
| 2584 | Bubulcus ibis       | Cattle Egret      | 2022/1/20  | 1 | 0 | 22.5000000 | 114.1166670 | <a href="https://www.inaturalist.org/observations/105354533">https://www.inaturalist.org/observations/105354533</a> |
| 2585 | Bubulcus ibis       | Cattle Egret      | 2022/10/15 | 2 | 0 | 22.5012120 | 114.0721549 | <a href="https://www.inaturalist.org/observations/138989718">https://www.inaturalist.org/observations/138989718</a> |
| 2586 | Bubulcus ibis       | Cattle Egret      | 2021/5/1   | 2 | 0 | 22.5014568 | 114.0578203 | <a href="https://www.inaturalist.org/observations/77380313">https://www.inaturalist.org/observations/77380313</a>   |
| 2587 | Bubulcus ibis       | Cattle Egret      | 2022/4/12  | 1 | 0 | 22.5015247 | 114.0720189 | <a href="https://www.inaturalist.org/observations/111182590">https://www.inaturalist.org/observations/111182590</a> |
| 2588 | Bubulcus ibis       | Cattle Egret      | 2019/11/2  | 0 | 0 | 22.5018802 | 114.0425071 | <a href="https://www.inaturalist.org/observations/35186541">https://www.inaturalist.org/observations/35186541</a>   |
| 2589 | Bubulcus ibis       | Cattle Egret      | 2019/11/9  | 2 | 0 | 22.5024300 | 114.0609283 | <a href="https://www.inaturalist.org/observations/35640311">https://www.inaturalist.org/observations/35640311</a>   |
| 2590 | Bubulcus ibis       | Cattle Egret      | 2022/4/10  | 1 | 0 | 22.5029609 | 114.0702515 | <a href="https://www.inaturalist.org/observations/111050947">https://www.inaturalist.org/observations/111050947</a> |
| 2591 | Bubulcus ibis       | Cattle Egret      | 2021/11/12 | 1 | 0 | 22.5033596 | 114.0692343 | <a href="https://www.inaturalist.org/observations/101004953">https://www.inaturalist.org/observations/101004953</a> |
| 2592 | Bubulcus ibis       | Cattle Egret      | 2021/11/15 | 1 | 0 | 22.5040343 | 88.3989157  | <a href="https://www.inaturalist.org/observations/102364625">https://www.inaturalist.org/observations/102364625</a> |
| 2593 | Bubulcus ibis       | Cattle Egret      | 2015/11/15 | 1 | 0 | 22.5044480 | 114.0676820 | <a href="https://www.inaturalist.org/observations/36405047">https://www.inaturalist.org/observations/36405047</a>   |
| 2594 | Bubulcus ibis       | Cattle Egret      | 2019/11/27 | 1 | 0 | 22.5046410 | 114.0662260 | <a href="https://www.inaturalist.org/observations/36238330">https://www.inaturalist.org/observations/36238330</a>   |
| 2595 | Bubulcus ibis       | Cattle Egret      | 2019/12/2  | 1 | 0 | 22.5046660 | 114.0681800 | <a href="https://www.inaturalist.org/observations/36376099">https://www.inaturalist.org/observations/36376099</a>   |
| 2596 | Bubulcus ibis       | Cattle Egret      | 2021/10/22 | 1 | 0 | 22.5049136 | 114.1200014 | <a href="https://www.inaturalist.org/observations/99110340">https://www.inaturalist.org/observations/99110340</a>   |
| 2597 | Bubulcus ibis       | Cattle Egret      | 2022/10/15 | 1 | 0 | 22.5050000 | 114.1196564 | <a href="https://www.inaturalist.org/observations/138984675">https://www.inaturalist.org/observations/138984675</a> |
| 2598 | Bubulcus ibis       | Cattle Egret      | 2021/11/6  | 1 | 0 | 22.5053351 | 114.1192158 | <a href="https://www.inaturalist.org/observations/100461745">https://www.inaturalist.org/observations/100461745</a> |
| 2599 | Bubulcus ibis       | Cattle Egret      | 2018/12/1  | 5 | 0 | 22.5058614 | 114.1165391 | <a href="https://www.inaturalist.org/observations/18770430">https://www.inaturalist.org/observations/18770430</a>   |

|      |                     |                   |            |   |   |            |             |                                                                                                                     |
|------|---------------------|-------------------|------------|---|---|------------|-------------|---------------------------------------------------------------------------------------------------------------------|
| 2600 | Bubulcus ibis       | Cattle Egret      | 2021/5/1   | 2 | 0 | 22.5059750 | 114.1109850 | <a href="https://www.inaturalist.org/observations/76921948">https://www.inaturalist.org/observations/76921948</a>   |
| 2601 | Bubulcus ibis       | Cattle Egret      | 2020/4/27  | 2 | 0 | 22.5060460 | 114.2430130 | <a href="https://www.inaturalist.org/observations/44348435">https://www.inaturalist.org/observations/44348435</a>   |
| 2602 | Bubulcus ibis       | Cattle Egret      | 2020/11/23 | 1 | 0 | 22.5062030 | 114.1122130 | <a href="https://www.inaturalist.org/observations/66653551">https://www.inaturalist.org/observations/66653551</a>   |
| 2603 | Bubulcus ibis       | Cattle Egret      | 2021/5/1   | 2 | 0 | 22.5062317 | 114.1105650 | <a href="https://www.inaturalist.org/observations/76921956">https://www.inaturalist.org/observations/76921956</a>   |
| 2604 | Bubulcus ibis       | Cattle Egret      | 2020/2/18  | 0 | 0 | 22.5063683 | 114.1116233 | <a href="https://www.inaturalist.org/observations/38980747">https://www.inaturalist.org/observations/38980747</a>   |
| 2605 | Bubulcus ibis       | Cattle Egret      | 2009/4/5   | 1 | 0 | 22.5069120 | 114.1183420 | <a href="https://www.inaturalist.org/observations/39872473">https://www.inaturalist.org/observations/39872473</a>   |
| 2606 | Bubulcus ibis       | Cattle Egret      | 2008/11/30 | 1 | 0 | 22.5069320 | 114.1184600 | <a href="https://www.inaturalist.org/observations/40012775">https://www.inaturalist.org/observations/40012775</a>   |
| 2607 | Bubulcus ibis       | Cattle Egret      | 2020/4/30  | 1 | 0 | 22.5071366 | 114.1127184 | <a href="https://www.inaturalist.org/observations/44365104">https://www.inaturalist.org/observations/44365104</a>   |
| 2608 | Bubulcus ibis       | Cattle Egret      | 2020/4/27  | 1 | 0 | 22.5074438 | 114.2430017 | <a href="https://www.inaturalist.org/observations/44468447">https://www.inaturalist.org/observations/44468447</a>   |
| 2609 | Bubulcus coromandus | ibis Cattle Egret | 2018/12/1  | 1 | 0 | 22.5074472 | 114.1151658 | <a href="https://www.inaturalist.org/observations/33620317">https://www.inaturalist.org/observations/33620317</a>   |
| 2610 | Bubulcus ibis       | Cattle Egret      | 2010/4/6   | 0 | 0 | 22.5076450 | 114.1179770 | <a href="https://www.inaturalist.org/observations/38703795">https://www.inaturalist.org/observations/38703795</a>   |
| 2611 | Bubulcus ibis       | Cattle Egret      | 2019/11/23 | 1 | 0 | 22.5076804 | 114.1182498 | <a href="https://www.inaturalist.org/observations/35969873">https://www.inaturalist.org/observations/35969873</a>   |
| 2612 | Bubulcus ibis       | Cattle Egret      | 2017/12/6  | 3 | 0 | 22.5077337 | 114.0746737 | <a href="https://www.inaturalist.org/observations/10613533">https://www.inaturalist.org/observations/10613533</a>   |
| 2613 | Bubulcus coromandus | ibis Cattle Egret | 2021/3/24  | 1 | 0 | 22.5077535 | 114.1134840 | <a href="https://www.inaturalist.org/observations/73066277">https://www.inaturalist.org/observations/73066277</a>   |
| 2614 | Bubulcus coromandus | ibis Cattle Egret | 2021/5/3   | 1 | 0 | 22.5077535 | 114.1134840 | <a href="https://www.inaturalist.org/observations/77371886">https://www.inaturalist.org/observations/77371886</a>   |
| 2615 | Bubulcus ibis       | Cattle Egret      | 2020/11/11 | 2 | 0 | 22.5077663 | 114.1127856 | <a href="https://www.inaturalist.org/observations/64678476">https://www.inaturalist.org/observations/64678476</a>   |
| 2616 | Bubulcus ibis       | Cattle Egret      | 2019/9/21  | 1 | 0 | 22.5077751 | 114.1155592 | <a href="https://www.inaturalist.org/observations/47387877">https://www.inaturalist.org/observations/47387877</a>   |
| 2617 | Bubulcus ibis       | Cattle Egret      | 2010/10/12 | 2 | 0 | 22.5078530 | 114.1179900 | <a href="https://www.inaturalist.org/observations/109641917">https://www.inaturalist.org/observations/109641917</a> |
| 2618 | Bubulcus ibis       | Cattle Egret      | 2021/4/1   | 1 | 0 | 22.5079233 | 114.1119574 | <a href="https://www.inaturalist.org/observations/72592110">https://www.inaturalist.org/observations/72592110</a>   |
| 2619 | Bubulcus ibis       | Cattle Egret      | 2020/10/28 | 1 | 0 | 22.5079633 | 114.1126862 | <a href="https://www.inaturalist.org/observations/63748667">https://www.inaturalist.org/observations/63748667</a>   |
| 2620 | Bubulcus ibis       | Cattle Egret      | 2018/4/29  | 4 | 0 | 22.5079770 | 114.1124019 | <a href="https://www.inaturalist.org/observations/11945909">https://www.inaturalist.org/observations/11945909</a>   |
| 2621 | Bubulcus ibis       | Cattle Egret      | 2020/1/11  | 1 | 0 | 22.5080228 | 114.1182401 | <a href="https://www.inaturalist.org/observations/37478298">https://www.inaturalist.org/observations/37478298</a>   |
| 2622 | Bubulcus ibis       | Cattle Egret      | 2019/11/23 | 1 | 0 | 22.5080916 | 114.1180670 | <a href="https://www.inaturalist.org/observations/35969953">https://www.inaturalist.org/observations/35969953</a>   |
| 2623 | Bubulcus ibis       | Cattle Egret      | 2017/1/7   | 2 | 0 | 22.5081003 | 114.1148655 | <a href="https://www.inaturalist.org/observations/28779844">https://www.inaturalist.org/observations/28779844</a>   |
| 2624 | Bubulcus ibis       | Cattle Egret      | 2017/1/7   | 2 | 0 | 22.5081003 | 114.1148655 | <a href="https://www.inaturalist.org/observations/28780042">https://www.inaturalist.org/observations/28780042</a>   |

|      |                     |                      |            |   |   |            |             |                                                                                                                     |
|------|---------------------|----------------------|------------|---|---|------------|-------------|---------------------------------------------------------------------------------------------------------------------|
| 2625 | Bubulcus ibis       | Cattle Egret         | 2017/1/7   | 2 | 0 | 22.5081003 | 114.1148655 | <a href="https://www.inaturalist.org/observations/28780480">https://www.inaturalist.org/observations/28780480</a>   |
| 2626 | Bubulcus ibis       | Cattle Egret         | 2017/1/7   | 2 | 0 | 22.5081003 | 114.1148655 | <a href="https://www.inaturalist.org/observations/28780665">https://www.inaturalist.org/observations/28780665</a>   |
| 2627 | Bubulcus ibis       | Cattle Egret         | 2022/4/19  | 1 | 0 | 22.5081702 | 114.2822495 | <a href="https://www.inaturalist.org/observations/112002890">https://www.inaturalist.org/observations/112002890</a> |
| 2628 | Bubulcus ibis       | Cattle Egret         | 2009/9/6   | 1 | 0 | 22.5082210 | 114.1181460 | <a href="https://www.inaturalist.org/observations/140651640">https://www.inaturalist.org/observations/140651640</a> |
| 2629 | Bubulcus ibis       | Cattle Egret         | 2017/4/1   | 3 | 0 | 22.5082600 | 114.1149727 | <a href="https://www.inaturalist.org/observations/29625592">https://www.inaturalist.org/observations/29625592</a>   |
| 2630 | Bubulcus ibis       | Cattle Egret         | 2017/4/1   | 2 | 0 | 22.5082600 | 114.1149727 | <a href="https://www.inaturalist.org/observations/29626120">https://www.inaturalist.org/observations/29626120</a>   |
| 2631 | Bubulcus ibis       | Cattle Egret         | 2017/4/1   | 3 | 0 | 22.5082600 | 114.1149727 | <a href="https://www.inaturalist.org/observations/29626349">https://www.inaturalist.org/observations/29626349</a>   |
| 2632 | Bubulcus ibis       | Cattle Egret         | 2017/4/1   | 3 | 0 | 22.5082600 | 114.1149727 | <a href="https://www.inaturalist.org/observations/29691851">https://www.inaturalist.org/observations/29691851</a>   |
| 2633 | Bubulcus ibis       | Cattle Egret         | 2017/12/6  | 3 | 0 | 22.5085204 | 114.1130571 | <a href="https://www.inaturalist.org/observations/10550583">https://www.inaturalist.org/observations/10550583</a>   |
| 2634 | Bubulcus coromandus | ibis<br>Cattle Egret | 2020/4/28  | 1 | 0 | 22.5086366 | 114.1170924 | <a href="https://www.inaturalist.org/observations/44102736">https://www.inaturalist.org/observations/44102736</a>   |
| 2635 | Bubulcus ibis       | Cattle Egret         | 2021/2/18  | 1 | 0 | 22.5086934 | 114.1125763 | <a href="https://www.inaturalist.org/observations/71859788">https://www.inaturalist.org/observations/71859788</a>   |
| 2636 | Bubulcus ibis       | Cattle Egret         | 2021/10/31 | 2 | 0 | 22.5087374 | 114.1137251 | <a href="https://www.inaturalist.org/observations/100154683">https://www.inaturalist.org/observations/100154683</a> |
| 2637 | Bubulcus ibis       | Cattle Egret         | 2010/4/24  | 0 | 0 | 22.5087540 | 114.1127970 | <a href="https://www.inaturalist.org/observations/38703673">https://www.inaturalist.org/observations/38703673</a>   |
| 2638 | Bubulcus ibis       | Cattle Egret         | 2017/1/21  | 3 | 0 | 22.5087952 | 114.1129771 | <a href="https://www.inaturalist.org/observations/20958618">https://www.inaturalist.org/observations/20958618</a>   |
| 2639 | Bubulcus ibis       | Cattle Egret         | 2020/11/28 | 2 | 0 | 22.5087952 | 114.1129771 | <a href="https://www.inaturalist.org/observations/65808729">https://www.inaturalist.org/observations/65808729</a>   |
| 2640 | Bubulcus ibis       | Cattle Egret         | 2010/2/19  | 2 | 0 | 22.5087952 | 114.1129771 | <a href="https://www.inaturalist.org/observations/105487028">https://www.inaturalist.org/observations/105487028</a> |
| 2641 | Bubulcus ibis       | Cattle Egret         | 2020/12/9  | 1 | 0 | 22.5087953 | 114.1129769 | <a href="https://www.inaturalist.org/observations/66330539">https://www.inaturalist.org/observations/66330539</a>   |
| 2642 | Bubulcus ibis       | Cattle Egret         | 2021/3/29  | 1 | 0 | 22.5087953 | 114.1129769 | <a href="https://www.inaturalist.org/observations/72353261">https://www.inaturalist.org/observations/72353261</a>   |
| 2643 | Bubulcus ibis       | Cattle Egret         | 2020/12/25 | 1 | 0 | 22.5087953 | 114.1129769 | <a href="https://www.inaturalist.org/observations/101687177">https://www.inaturalist.org/observations/101687177</a> |
| 2644 | Bubulcus ibis       | Cattle Egret         | 2022/12/4  | 1 | 0 | 22.5087953 | 114.1129769 | <a href="https://www.inaturalist.org/observations/143934311">https://www.inaturalist.org/observations/143934311</a> |
| 2645 | Bubulcus ibis       | Cattle Egret         | 2022/1/30  | 2 | 0 | 22.5087993 | 114.1129769 | <a href="https://www.inaturalist.org/observations/105834720">https://www.inaturalist.org/observations/105834720</a> |
| 2646 | Bubulcus ibis       | Cattle Egret         | 2017/5/6   | 1 | 0 | 22.5088176 | 114.1130161 | <a href="https://www.inaturalist.org/observations/72428786">https://www.inaturalist.org/observations/72428786</a>   |
| 2647 | Bubulcus coromandus | ibis<br>Cattle Egret | 2021/5/1   | 1 | 0 | 22.5089130 | 114.1131781 | <a href="https://www.inaturalist.org/observations/76194672">https://www.inaturalist.org/observations/76194672</a>   |
| 2648 | Bubulcus ibis       | Cattle Egret         | 2022/6/19  | 5 | 0 | 22.5089786 | 73.4740233  | <a href="https://www.inaturalist.org/observations/125050991">https://www.inaturalist.org/observations/125050991</a> |
| 2649 | Bubulcus ibis       | Cattle Egret         | 2021/5/2   | 1 | 0 | 22.5091103 | 114.1132025 | <a href="https://www.inaturalist.org/observations/76562427">https://www.inaturalist.org/observations/76562427</a>   |



|      |                     |                   |            |   |   |            |             |                                                                                                                     |
|------|---------------------|-------------------|------------|---|---|------------|-------------|---------------------------------------------------------------------------------------------------------------------|
| 2650 | Bubulcus ibis       | Cattle Egret      | 2020/4/20  | 1 | 0 | 22.5091210 | 114.1145410 | <a href="https://www.inaturalist.org/observations/44678426">https://www.inaturalist.org/observations/44678426</a>   |
| 2651 | Bubulcus ibis       | Cattle Egret      | 2019/10/30 | 1 | 0 | 22.5091278 | 114.1134967 | <a href="https://www.inaturalist.org/observations/35191030">https://www.inaturalist.org/observations/35191030</a>   |
| 2652 | Bubulcus ibis       | Cattle Egret      | 2021/11/22 | 1 | 0 | 22.5091400 | 88.3475618  | <a href="https://www.inaturalist.org/observations/115399059">https://www.inaturalist.org/observations/115399059</a> |
| 2653 | Bubulcus ibis       | Cattle Egret      | 2021/4/6   | 1 | 0 | 22.5092379 | 114.1126638 | <a href="https://www.inaturalist.org/observations/73092668">https://www.inaturalist.org/observations/73092668</a>   |
| 2654 | Bubulcus ibis       | Cattle Egret      | 2020/12/21 | 2 | 0 | 22.5092696 | 114.1174133 | <a href="https://www.inaturalist.org/observations/66914687">https://www.inaturalist.org/observations/66914687</a>   |
| 2655 | Bubulcus ibis       | Cattle Egret      | 2020/12/5  | 1 | 0 | 22.5092940 | 114.1111382 | <a href="https://www.inaturalist.org/observations/69293533">https://www.inaturalist.org/observations/69293533</a>   |
| 2656 | Bubulcus ibis       | Cattle Egret      | 2018/12/28 | 4 | 0 | 22.5095221 | 114.1117867 | <a href="https://www.inaturalist.org/observations/19271717">https://www.inaturalist.org/observations/19271717</a>   |
| 2657 | Bubulcus ibis       | Cattle Egret      | 2020/4/28  | 1 | 0 | 22.5097212 | 114.1144926 | <a href="https://www.inaturalist.org/observations/44103865">https://www.inaturalist.org/observations/44103865</a>   |
| 2658 | Bubulcus ibis       | Cattle Egret      | 2020/1/21  | 0 | 0 | 22.5097888 | 114.1120050 | <a href="https://www.inaturalist.org/observations/38029217">https://www.inaturalist.org/observations/38029217</a>   |
| 2659 | Bubulcus ibis       | Cattle Egret      | 2020/11/23 | 1 | 0 | 22.5098360 | 114.1120220 | <a href="https://www.inaturalist.org/observations/65572942">https://www.inaturalist.org/observations/65572942</a>   |
| 2660 | Bubulcus ibis       | Cattle Egret      | 2021/10/30 | 1 | 0 | 22.5098409 | 114.1173412 | <a href="https://www.inaturalist.org/observations/99858148">https://www.inaturalist.org/observations/99858148</a>   |
| 2661 | Bubulcus coromandus | ibis Cattle Egret | 2021/2/14  | 1 | 0 | 22.5099152 | 114.1146079 | <a href="https://www.inaturalist.org/observations/73931956">https://www.inaturalist.org/observations/73931956</a>   |
| 2662 | Bubulcus ibis       | Cattle Egret      | 2021/12/20 | 2 | 0 | 22.5100063 | 88.3602349  | <a href="https://www.inaturalist.org/observations/103361474">https://www.inaturalist.org/observations/103361474</a> |
| 2663 | Bubulcus ibis       | Cattle Egret      | 2021/3/9   | 1 | 0 | 22.5100753 | 114.1173678 | <a href="https://www.inaturalist.org/observations/70945696">https://www.inaturalist.org/observations/70945696</a>   |
| 2664 | Bubulcus ibis       | Cattle Egret      | 2019/3/22  | 1 | 0 | 22.5102417 | 114.1106325 | <a href="https://www.inaturalist.org/observations/62556974">https://www.inaturalist.org/observations/62556974</a>   |
| 2665 | Bubulcus coromandus | ibis Cattle Egret | 2018/5/5   | 3 | 0 | 22.5102442 | 114.1157841 | <a href="https://www.inaturalist.org/observations/12186062">https://www.inaturalist.org/observations/12186062</a>   |
| 2666 | Bubulcus ibis       | Cattle Egret      | 2019/11/10 | 2 | 0 | 22.5102840 | 114.1126220 | <a href="https://www.inaturalist.org/observations/35774716">https://www.inaturalist.org/observations/35774716</a>   |
| 2667 | Bubulcus ibis       | Cattle Egret      | 2019/3/22  | 1 | 0 | 22.5103297 | 114.1106307 | <a href="https://www.inaturalist.org/observations/62556977">https://www.inaturalist.org/observations/62556977</a>   |
| 2668 | Bubulcus ibis       | Cattle Egret      | 2020/11/22 | 1 | 0 | 22.5104402 | 114.1113534 | <a href="https://www.inaturalist.org/observations/65407657">https://www.inaturalist.org/observations/65407657</a>   |
| 2669 | Bubulcus ibis       | Cattle Egret      | 2022/12/23 | 1 | 0 | 22.5105068 | 114.1165002 | <a href="https://www.inaturalist.org/observations/145189124">https://www.inaturalist.org/observations/145189124</a> |
| 2670 | Bubulcus ibis       | Cattle Egret      | 2021/12/28 | 2 | 0 | 22.5106467 | 114.1160028 | <a href="https://www.inaturalist.org/observations/103810179">https://www.inaturalist.org/observations/103810179</a> |
| 2671 | Bubulcus ibis       | Cattle Egret      | 2020/11/9  | 1 | 0 | 22.5107259 | 114.1135189 | <a href="https://www.inaturalist.org/observations/64519229">https://www.inaturalist.org/observations/64519229</a>   |
| 2672 | Bubulcus coromandus | ibis Cattle Egret | 2021/5/8   | 1 | 0 | 22.5108539 | 114.1126198 | <a href="https://www.inaturalist.org/observations/78041937">https://www.inaturalist.org/observations/78041937</a>   |
| 2673 | Bubulcus ibis       | Cattle Egret      | 2020/11/14 | 1 | 0 | 22.5115050 | 114.1129250 | <a href="https://www.inaturalist.org/observations/64840245">https://www.inaturalist.org/observations/64840245</a>   |
| 2674 | Bubulcus ibis       | Cattle Egret      | 2020/2/16  | 1 | 0 | 22.5118360 | 114.1083690 | <a href="https://www.inaturalist.org/observations/110954708">https://www.inaturalist.org/observations/110954708</a> |

|      |                     |                      |            |   |   |            |             |                                                                                                                     |
|------|---------------------|----------------------|------------|---|---|------------|-------------|---------------------------------------------------------------------------------------------------------------------|
| 2675 | Bubulcus ibis       | Cattle Egret         | 2021/5/20  | 2 | 0 | 22.5119633 | 114.1309858 | <a href="https://www.inaturalist.org/observations/79530114">https://www.inaturalist.org/observations/79530114</a>   |
| 2676 | Bubulcus ibis       | Cattle Egret         | 2020/11/30 | 3 | 0 | 22.5136049 | 88.3600248  | <a href="https://www.inaturalist.org/observations/65877182">https://www.inaturalist.org/observations/65877182</a>   |
| 2677 | Bubulcus ibis       | Cattle Egret         | 2020/11/30 | 2 | 0 | 22.5136569 | 88.3599298  | <a href="https://www.inaturalist.org/observations/65877119">https://www.inaturalist.org/observations/65877119</a>   |
| 2678 | Bubulcus ibis       | Cattle Egret         | 2020/11/30 | 4 | 0 | 22.5136582 | 88.3599468  | <a href="https://www.inaturalist.org/observations/65876964">https://www.inaturalist.org/observations/65876964</a>   |
| 2679 | Bubulcus ibis       | Cattle Egret         | 2020/11/30 | 3 | 0 | 22.5136756 | 88.3598372  | <a href="https://www.inaturalist.org/observations/65876956">https://www.inaturalist.org/observations/65876956</a>   |
| 2680 | Bubulcus ibis       | Cattle Egret         | 2021/8/3   | 1 | 0 | 22.5142553 | 114.1145997 | <a href="https://www.inaturalist.org/observations/89754022">https://www.inaturalist.org/observations/89754022</a>   |
| 2681 | Bubulcus ibis       | Cattle Egret         | 2020/2/25  | 0 | 0 | 22.5142875 | 114.1130517 | <a href="https://www.inaturalist.org/observations/39397839">https://www.inaturalist.org/observations/39397839</a>   |
| 2682 | Bubulcus coromandus | ibis<br>Cattle Egret | 2021/4/15  | 1 | 0 | 22.5143347 | 114.1123681 | <a href="https://www.inaturalist.org/observations/76015319">https://www.inaturalist.org/observations/76015319</a>   |
| 2683 | Bubulcus ibis       | Cattle Egret         | 2013/4/14  | 1 | 0 | 22.5144623 | 114.0536317 | <a href="https://www.inaturalist.org/observations/37551181">https://www.inaturalist.org/observations/37551181</a>   |
| 2684 | Bubulcus ibis       | Cattle Egret         | 2020/3/22  | 1 | 0 | 22.5154198 | 114.1054685 | <a href="https://www.inaturalist.org/observations/40569028">https://www.inaturalist.org/observations/40569028</a>   |
| 2685 | Bubulcus ibis       | Cattle Egret         | 2022/1/8   | 3 | 0 | 22.5180643 | 114.2707296 | <a href="https://www.inaturalist.org/observations/104566556">https://www.inaturalist.org/observations/104566556</a> |
| 2686 | Bubulcus ibis       | Cattle Egret         | 2013/7/21  | 1 | 0 | 22.5188470 | 114.1134050 | <a href="https://www.inaturalist.org/observations/74120108">https://www.inaturalist.org/observations/74120108</a>   |
| 2687 | Bubulcus ibis       | Cattle Egret         | 2021/5/1   | 1 | 0 | 22.5188950 | 114.2164420 | <a href="https://www.inaturalist.org/observations/76072825">https://www.inaturalist.org/observations/76072825</a>   |
| 2688 | Bubulcus ibis       | Cattle Egret         | 2021/10/23 | 1 | 0 | 22.5188950 | 114.2164420 | <a href="https://www.inaturalist.org/observations/99464637">https://www.inaturalist.org/observations/99464637</a>   |
| 2689 | Bubulcus ibis       | Cattle Egret         | 2022/7/3   | 4 | 0 | 22.5191120 | 72.9702309  | <a href="https://www.inaturalist.org/observations/124504895">https://www.inaturalist.org/observations/124504895</a> |
| 2690 | Bubulcus ibis       | Cattle Egret         | 2019/4/28  | 4 | 0 | 22.5191633 | 114.1132250 | <a href="https://www.inaturalist.org/observations/23561738">https://www.inaturalist.org/observations/23561738</a>   |
| 2691 | Bubulcus ibis       | Cattle Egret         | 2021/10/15 | 1 | 0 | 22.5195450 | 114.2159250 | <a href="https://www.inaturalist.org/observations/98263400">https://www.inaturalist.org/observations/98263400</a>   |
| 2692 | Bubulcus ibis       | Cattle Egret         | 2014/4/26  | 4 | 0 | 22.5202920 | 114.1153840 | <a href="https://www.inaturalist.org/observations/19684117">https://www.inaturalist.org/observations/19684117</a>   |
| 2693 | Bubulcus ibis       | Cattle Egret         | 2022/11/1  | 1 | 0 | 22.5206256 | 114.2140818 | <a href="https://www.inaturalist.org/observations/140860001">https://www.inaturalist.org/observations/140860001</a> |
| 2694 | Bubulcus ibis       | Cattle Egret         | 2022/4/15  | 1 | 0 | 22.5206290 | 114.2138563 | <a href="https://www.inaturalist.org/observations/111507990">https://www.inaturalist.org/observations/111507990</a> |
| 2695 | Bubulcus ibis       | Cattle Egret         | 2020/9/3   | 1 | 0 | 22.5208616 | 114.2087624 | <a href="https://www.inaturalist.org/observations/58584446">https://www.inaturalist.org/observations/58584446</a>   |
| 2696 | Bubulcus ibis       | Cattle Egret         | 2015/4/2   | 1 | 0 | 22.5209277 | 114.2097701 | <a href="https://www.inaturalist.org/observations/47943718">https://www.inaturalist.org/observations/47943718</a>   |
| 2697 | Bubulcus ibis       | Cattle Egret         | 2020/10/8  | 1 | 0 | 22.5210766 | 114.2163295 | <a href="https://www.inaturalist.org/observations/62869453">https://www.inaturalist.org/observations/62869453</a>   |
| 2698 | Bubulcus ibis       | Cattle Egret         | 2020/5/28  | 1 | 0 | 22.5210979 | 114.2099162 | <a href="https://www.inaturalist.org/observations/48105166">https://www.inaturalist.org/observations/48105166</a>   |
| 2699 | Bubulcus ibis       | Cattle Egret         | 2021/1/15  | 1 | 0 | 22.5231263 | 114.2160089 | <a href="https://www.inaturalist.org/observations/68099297">https://www.inaturalist.org/observations/68099297</a>   |

|      |                     |                   |            |   |   |            |             |                                                                                                                     |
|------|---------------------|-------------------|------------|---|---|------------|-------------|---------------------------------------------------------------------------------------------------------------------|
| 2700 | Bubulcus ibis       | Cattle Egret      | 2022/5/19  | 1 | 0 | 22.5232328 | 114.2926371 | <a href="https://www.inaturalist.org/observations/118313893">https://www.inaturalist.org/observations/118313893</a> |
| 2701 | Bubulcus ibis       | Cattle Egret      | 2018/5/3   | 3 | 0 | 22.5236683 | 114.1142080 | <a href="https://www.inaturalist.org/observations/12083735">https://www.inaturalist.org/observations/12083735</a>   |
| 2702 | Bubulcus ibis       | Cattle Egret      | 2021/1/28  | 2 | 0 | 22.5239160 | 114.2175468 | <a href="https://www.inaturalist.org/observations/68753674">https://www.inaturalist.org/observations/68753674</a>   |
| 2703 | Bubulcus coromandus | ibis Cattle Egret | 2019/3/17  | 2 | 0 | 22.5251125 | 114.0859660 | <a href="https://www.inaturalist.org/observations/21317026">https://www.inaturalist.org/observations/21317026</a>   |
| 2704 | Bubulcus ibis       | Cattle Egret      | 2020/12/27 | 1 | 0 | 22.5253750 | 114.2595700 | <a href="https://www.inaturalist.org/observations/67128757">https://www.inaturalist.org/observations/67128757</a>   |
| 2705 | Bubulcus ibis       | Cattle Egret      | 2018/4/29  | 3 | 0 | 22.5255694 | 114.2589196 | <a href="https://www.inaturalist.org/observations/11724265">https://www.inaturalist.org/observations/11724265</a>   |
| 2706 | Bubulcus ibis       | Cattle Egret      | 2020/11/15 | 2 | 0 | 22.5259354 | 114.2593443 | <a href="https://www.inaturalist.org/observations/64916000">https://www.inaturalist.org/observations/64916000</a>   |
| 2707 | Bubulcus ibis       | Cattle Egret      | 2020/12/31 | 1 | 0 | 22.5262717 | 114.1111055 | <a href="https://www.inaturalist.org/observations/67345150">https://www.inaturalist.org/observations/67345150</a>   |
| 2708 | Bubulcus ibis       | Cattle Egret      | 2021/11/27 | 2 | 0 | 22.5270220 | 114.0945800 | <a href="https://www.inaturalist.org/observations/102161081">https://www.inaturalist.org/observations/102161081</a> |
| 2709 | Bubulcus ibis       | Cattle Egret      | 2019/11/24 | 1 | 0 | 22.5273307 | 114.2286761 | <a href="https://www.inaturalist.org/observations/38554122">https://www.inaturalist.org/observations/38554122</a>   |
| 2710 | Bubulcus ibis       | Cattle Egret      | 2009/4/10  | 1 | 0 | 22.5274510 | 114.2107270 | <a href="https://www.inaturalist.org/observations/144723083">https://www.inaturalist.org/observations/144723083</a> |
| 2711 | Bubulcus ibis       | Cattle Egret      | 2020/2/28  | 2 | 0 | 22.5274641 | 72.9336914  | <a href="https://www.inaturalist.org/observations/53570974">https://www.inaturalist.org/observations/53570974</a>   |
| 2712 | Bubulcus ibis       | Cattle Egret      | 2021/11/6  | 2 | 0 | 22.5280100 | 114.2337703 | <a href="https://www.inaturalist.org/observations/102236289">https://www.inaturalist.org/observations/102236289</a> |
| 2713 | Bubulcus ibis       | Cattle Egret      | 2020/12/13 | 1 | 0 | 22.5282596 | 114.2226215 | <a href="https://www.inaturalist.org/observations/66506006">https://www.inaturalist.org/observations/66506006</a>   |
| 2714 | Bubulcus ibis       | Cattle Egret      | 2020/12/13 | 1 | 0 | 22.5286063 | 114.2238448 | <a href="https://www.inaturalist.org/observations/66506005">https://www.inaturalist.org/observations/66506005</a>   |
| 2715 | Bubulcus coromandus | ibis Cattle Egret | 2019/4/28  | 3 | 0 | 22.5297906 | 114.2345895 | <a href="https://www.inaturalist.org/observations/24328039">https://www.inaturalist.org/observations/24328039</a>   |
| 2716 | Bubulcus ibis       | Cattle Egret      | 2020/5/3   | 1 | 0 | 22.5299029 | 114.2352897 | <a href="https://www.inaturalist.org/observations/44691247">https://www.inaturalist.org/observations/44691247</a>   |
| 2717 | Bubulcus ibis       | Cattle Egret      | 2021/1/22  | 1 | 0 | 22.5317317 | 114.2368715 | <a href="https://www.inaturalist.org/observations/68482340">https://www.inaturalist.org/observations/68482340</a>   |
| 2718 | Bubulcus ibis       | Cattle Egret      | 2022/11/5  | 4 | 0 | 22.5349018 | 114.1347252 | <a href="https://www.inaturalist.org/observations/141151762">https://www.inaturalist.org/observations/141151762</a> |
| 2719 | Bubulcus ibis       | Cattle Egret      | 2020/6/5   | 2 | 0 | 22.5360843 | 120.5888128 | <a href="https://www.inaturalist.org/observations/48542435">https://www.inaturalist.org/observations/48542435</a>   |
| 2720 | Bubulcus coromandus | ibis Cattle Egret | 2018/10/20 | 3 | 0 | 22.5372929 | 114.1442404 | <a href="https://www.inaturalist.org/observations/17668520">https://www.inaturalist.org/observations/17668520</a>   |
| 2721 | Bubulcus ibis       | Cattle Egret      | 2020/10/1  | 1 | 0 | 22.5387202 | 120.5903149 | <a href="https://www.inaturalist.org/observations/61565116">https://www.inaturalist.org/observations/61565116</a>   |
| 2722 | Bubulcus ibis       | Cattle Egret      | 2022/8/13  | 3 | 0 | 22.5389191 | 88.3331132  | <a href="https://www.inaturalist.org/observations/130730901">https://www.inaturalist.org/observations/130730901</a> |
| 2723 | Bubulcus ibis       | Cattle Egret      | 2022/1/19  | 1 | 0 | 22.5413258 | 114.0352223 | <a href="https://www.inaturalist.org/observations/105305747">https://www.inaturalist.org/observations/105305747</a> |
| 2724 | Bubulcus ibis       | Cattle Egret      | 2021/5/3   | 1 | 0 | 22.5428599 | 114.0595600 | <a href="https://www.inaturalist.org/observations/106361601">https://www.inaturalist.org/observations/106361601</a> |

|      |               |              |            |   |   |            |             |                                                                                                                     |
|------|---------------|--------------|------------|---|---|------------|-------------|---------------------------------------------------------------------------------------------------------------------|
| 2725 | Bubulcus ibis | Cattle Egret | 2020/4/18  | 1 | 0 | 22.5444392 | 113.9611403 | <a href="https://www.inaturalist.org/observations/66562588">https://www.inaturalist.org/observations/66562588</a>   |
| 2726 | Bubulcus ibis | Cattle Egret | 2020/10/31 | 1 | 0 | 22.5544381 | 114.1228762 | <a href="https://www.inaturalist.org/observations/140626370">https://www.inaturalist.org/observations/140626370</a> |
| 2727 | Bubulcus ibis | Cattle Egret | 2022/12/26 | 1 | 0 | 22.5551837 | 114.3024965 | <a href="https://www.inaturalist.org/observations/145108540">https://www.inaturalist.org/observations/145108540</a> |
| 2728 | Bubulcus ibis | Cattle Egret | 2021/12/22 | 1 | 0 | 22.5574981 | 88.2917216  | <a href="https://www.inaturalist.org/observations/104274285">https://www.inaturalist.org/observations/104274285</a> |
| 2729 | Bubulcus ibis | Cattle Egret | 2020/10/20 | 2 | 0 | 22.5641146 | 120.5376474 | <a href="https://www.inaturalist.org/observations/63170099">https://www.inaturalist.org/observations/63170099</a>   |
| 2730 | Bubulcus ibis | Cattle Egret | 2022/2/3   | 1 | 0 | 22.5669294 | 114.1146683 | <a href="https://www.inaturalist.org/observations/120511076">https://www.inaturalist.org/observations/120511076</a> |
| 2731 | Bubulcus ibis | Cattle Egret | 2022/10/17 | 1 | 0 | 22.5678829 | 120.3671519 | <a href="https://www.inaturalist.org/observations/139088921">https://www.inaturalist.org/observations/139088921</a> |
| 2732 | Bubulcus ibis | Cattle Egret | 2022/10/29 | 2 | 0 | 22.5697778 | 120.3670742 | <a href="https://www.inaturalist.org/observations/140371842">https://www.inaturalist.org/observations/140371842</a> |
| 2733 | Bubulcus ibis | Cattle Egret | 2022/2/2   | 1 | 0 | 22.5727475 | 114.1595979 | <a href="https://www.inaturalist.org/observations/106014339">https://www.inaturalist.org/observations/106014339</a> |
| 2734 | Bubulcus ibis | Cattle Egret | 2022/2/27  | 1 | 0 | 22.5728759 | 114.0604130 | <a href="https://www.inaturalist.org/observations/107564210">https://www.inaturalist.org/observations/107564210</a> |
| 2735 | Bubulcus ibis | Cattle Egret | 2022/7/16  | 1 | 0 | 22.5732915 | 120.4545224 | <a href="https://www.inaturalist.org/observations/140837560">https://www.inaturalist.org/observations/140837560</a> |
| 2736 | Bubulcus ibis | Cattle Egret | 2020/10/3  | 1 | 0 | 22.5749086 | 114.1982562 | <a href="https://www.inaturalist.org/observations/62479958">https://www.inaturalist.org/observations/62479958</a>   |
| 2737 | Bubulcus ibis | Cattle Egret | 2018/3/12  | 3 | 0 | 22.5774552 | 88.4508430  | <a href="https://www.inaturalist.org/observations/23117683">https://www.inaturalist.org/observations/23117683</a>   |
| 2738 | Bubulcus ibis | Cattle Egret | 2020/10/28 | 1 | 0 | 22.5783367 | 120.3490703 | <a href="https://www.inaturalist.org/observations/63964481">https://www.inaturalist.org/observations/63964481</a>   |
| 2739 | Bubulcus ibis | Cattle Egret | 2022/2/17  | 3 | 0 | 22.5796821 | 120.3506109 | <a href="https://www.inaturalist.org/observations/106908025">https://www.inaturalist.org/observations/106908025</a> |
| 2740 | Bubulcus ibis | Cattle Egret | 2021/4/11  | 1 | 0 | 22.5798846 | 114.0845043 | <a href="https://www.inaturalist.org/observations/76063244">https://www.inaturalist.org/observations/76063244</a>   |
| 2741 | Bubulcus ibis | Cattle Egret | 2022/4/21  | 2 | 0 | 22.5811626 | 114.1891720 | <a href="https://www.inaturalist.org/observations/113104959">https://www.inaturalist.org/observations/113104959</a> |
| 2742 | Bubulcus ibis | Cattle Egret | 2022/2/27  | 3 | 0 | 22.5841697 | 72.9499866  | <a href="https://www.inaturalist.org/observations/107563325">https://www.inaturalist.org/observations/107563325</a> |
| 2743 | Bubulcus ibis | Cattle Egret | 2022/2/8   | 1 | 0 | 22.5841972 | 120.3416103 | <a href="https://www.inaturalist.org/observations/106380364">https://www.inaturalist.org/observations/106380364</a> |
| 2744 | Bubulcus ibis | Cattle Egret | 2021/12/25 | 1 | 0 | 22.5845547 | 120.3966746 | <a href="https://www.inaturalist.org/observations/103754530">https://www.inaturalist.org/observations/103754530</a> |
| 2745 | Bubulcus ibis | Cattle Egret | 2022/10/24 | 2 | 0 | 22.5853735 | 120.5781298 | <a href="https://www.inaturalist.org/observations/139849359">https://www.inaturalist.org/observations/139849359</a> |
| 2746 | Bubulcus ibis | Cattle Egret | 2011/10/29 | 5 | 0 | 22.5864293 | 88.4135719  | <a href="https://www.inaturalist.org/observations/25504212">https://www.inaturalist.org/observations/25504212</a>   |
| 2747 | Bubulcus ibis | Cattle Egret | 2014/11/9  | 2 | 0 | 22.5866805 | 88.4165709  | <a href="https://www.inaturalist.org/observations/60171422">https://www.inaturalist.org/observations/60171422</a>   |
| 2748 | Bubulcus ibis | Cattle Egret | 2014/11/9  | 3 | 0 | 22.5866805 | 88.4165709  | <a href="https://www.inaturalist.org/observations/60171428">https://www.inaturalist.org/observations/60171428</a>   |
| 2749 | Bubulcus ibis | Cattle Egret | 2014/11/9  | 3 | 0 | 22.5866805 | 88.4165709  | <a href="https://www.inaturalist.org/observations/60171431">https://www.inaturalist.org/observations/60171431</a>   |

|      |               |              |            |   |   |            |             |                                                                                                                     |
|------|---------------|--------------|------------|---|---|------------|-------------|---------------------------------------------------------------------------------------------------------------------|
| 2750 | Bubulcus ibis | Cattle Egret | 2022/2/8   | 1 | 0 | 22.5870131 | 120.3525318 | <a href="https://www.inaturalist.org/observations/106380356">https://www.inaturalist.org/observations/106380356</a> |
| 2751 | Bubulcus ibis | Cattle Egret | 2021/2/1   | 1 | 0 | 22.5871357 | 88.4151858  | <a href="https://www.inaturalist.org/observations/69797246">https://www.inaturalist.org/observations/69797246</a>   |
| 2752 | Bubulcus ibis | Cattle Egret | 2021/1/3   | 1 | 0 | 22.5872247 | 120.3919090 | <a href="https://www.inaturalist.org/observations/67570219">https://www.inaturalist.org/observations/67570219</a>   |
| 2753 | Bubulcus ibis | Cattle Egret | 2020/12/8  | 1 | 0 | 22.5917702 | 114.0609882 | <a href="https://www.inaturalist.org/observations/66462901">https://www.inaturalist.org/observations/66462901</a>   |
| 2754 | Bubulcus ibis | Cattle Egret | 2022/10/26 | 1 | 0 | 22.5921073 | 120.3535845 | <a href="https://www.inaturalist.org/observations/140032976">https://www.inaturalist.org/observations/140032976</a> |
| 2755 | Bubulcus ibis | Cattle Egret | 2021/5/4   | 1 | 0 | 22.5929210 | 120.3541610 | <a href="https://www.inaturalist.org/observations/77435390">https://www.inaturalist.org/observations/77435390</a>   |
| 2756 | Bubulcus ibis | Cattle Egret | 2021/3/8   | 1 | 0 | 22.5930124 | 120.3537183 | <a href="https://www.inaturalist.org/observations/70936176">https://www.inaturalist.org/observations/70936176</a>   |
| 2757 | Bubulcus ibis | Cattle Egret | 2022/11/14 | 3 | 0 | 22.5933816 | 120.3537737 | <a href="https://www.inaturalist.org/observations/142114379">https://www.inaturalist.org/observations/142114379</a> |
| 2758 | Bubulcus ibis | Cattle Egret | 2022/10/26 | 1 | 0 | 22.5949401 | 120.3554571 | <a href="https://www.inaturalist.org/observations/140032987">https://www.inaturalist.org/observations/140032987</a> |
| 2759 | Bubulcus ibis | Cattle Egret | 2018/10/24 | 2 | 0 | 22.5962638 | 120.9638488 | <a href="https://www.inaturalist.org/observations/17871534">https://www.inaturalist.org/observations/17871534</a>   |
| 2760 | Bubulcus ibis | Cattle Egret | 2022/10/8  | 2 | 0 | 22.5988966 | 87.9754847  | <a href="https://www.inaturalist.org/observations/138841706">https://www.inaturalist.org/observations/138841706</a> |
| 2761 | Bubulcus ibis | Cattle Egret | 2022/2/27  | 1 | 0 | 22.5999339 | 114.1265767 | <a href="https://www.inaturalist.org/observations/107564114">https://www.inaturalist.org/observations/107564114</a> |
| 2762 | Bubulcus ibis | Cattle Egret | 2021/9/18  | 1 | 0 | 22.6065647 | 120.3560270 | <a href="https://www.inaturalist.org/observations/95393003">https://www.inaturalist.org/observations/95393003</a>   |
| 2763 | Bubulcus ibis | Cattle Egret | 2022/11/19 | 3 | 0 | 22.6066880 | 87.3107300  | <a href="https://www.inaturalist.org/observations/142375179">https://www.inaturalist.org/observations/142375179</a> |
| 2764 | Bubulcus ibis | Cattle Egret | 2022/2/18  | 2 | 0 | 22.6073900 | 73.5559967  | <a href="https://www.inaturalist.org/observations/119838463">https://www.inaturalist.org/observations/119838463</a> |
| 2765 | Bubulcus ibis | Cattle Egret | 2020/11/21 | 5 | 0 | 22.6091925 | 88.4644508  | <a href="https://www.inaturalist.org/observations/108032723">https://www.inaturalist.org/observations/108032723</a> |
| 2766 | Bubulcus ibis | Cattle Egret | 2021/12/14 | 1 | 0 | 22.6126840 | 120.3583920 | <a href="https://www.inaturalist.org/observations/103091320">https://www.inaturalist.org/observations/103091320</a> |
| 2767 | Bubulcus ibis | Cattle Egret | 2021/5/12  | 2 | 0 | 22.6160709 | 120.3769398 | <a href="https://www.inaturalist.org/observations/78566612">https://www.inaturalist.org/observations/78566612</a>   |
| 2768 | Bubulcus ibis | Cattle Egret | 2020/5/19  | 1 | 0 | 22.6165151 | 120.3750482 | <a href="https://www.inaturalist.org/observations/46450586">https://www.inaturalist.org/observations/46450586</a>   |
| 2769 | Bubulcus ibis | Cattle Egret | 2017/10/30 | 2 | 0 | 22.6172395 | 120.3392708 | <a href="https://www.inaturalist.org/observations/12607365">https://www.inaturalist.org/observations/12607365</a>   |
| 2770 | Bubulcus ibis | Cattle Egret | 2022/9/24  | 2 | 0 | 22.6180946 | 120.3774648 | <a href="https://www.inaturalist.org/observations/136238547">https://www.inaturalist.org/observations/136238547</a> |
| 2771 | Bubulcus ibis | Cattle Egret | 2020/4/28  | 1 | 0 | 22.6181997 | 120.2688029 | <a href="https://www.inaturalist.org/observations/44104928">https://www.inaturalist.org/observations/44104928</a>   |
| 2772 | Bubulcus ibis | Cattle Egret | 2017/11/16 | 4 | 0 | 22.6197682 | 120.3395529 | <a href="https://www.inaturalist.org/observations/9482372">https://www.inaturalist.org/observations/9482372</a>     |
| 2773 | Bubulcus ibis | Cattle Egret | 2018/9/7   | 3 | 0 | 22.6197682 | 120.3395529 | <a href="https://www.inaturalist.org/observations/16344098">https://www.inaturalist.org/observations/16344098</a>   |
| 2774 | Bubulcus ibis | Cattle Egret | 2017/10/26 | 2 | 0 | 22.6197682 | 120.3395529 | <a href="https://www.inaturalist.org/observations/20022047">https://www.inaturalist.org/observations/20022047</a>   |

|      |               |              |            |   |   |            |             |                                                                                                                     |
|------|---------------|--------------|------------|---|---|------------|-------------|---------------------------------------------------------------------------------------------------------------------|
| 2775 | Bubulcus ibis | Cattle Egret | 2017/9/14  | 2 | 0 | 22.6197682 | 120.3395529 | <a href="https://www.inaturalist.org/observations/20022123">https://www.inaturalist.org/observations/20022123</a>   |
| 2776 | Bubulcus ibis | Cattle Egret | 2022/5/9   | 1 | 0 | 22.6197682 | 120.3395529 | <a href="https://www.inaturalist.org/observations/116415514">https://www.inaturalist.org/observations/116415514</a> |
| 2777 | Bubulcus ibis | Cattle Egret | 2022/10/5  | 1 | 0 | 22.6197682 | 120.3395529 | <a href="https://www.inaturalist.org/observations/137603851">https://www.inaturalist.org/observations/137603851</a> |
| 2778 | Bubulcus ibis | Cattle Egret | 2019/12/8  | 1 | 0 | 22.6197749 | 120.3395498 | <a href="https://www.inaturalist.org/observations/36460185">https://www.inaturalist.org/observations/36460185</a>   |
| 2779 | Bubulcus ibis | Cattle Egret | 2020/4/9   | 1 | 0 | 22.6197749 | 120.3395498 | <a href="https://www.inaturalist.org/observations/41758276">https://www.inaturalist.org/observations/41758276</a>   |
| 2780 | Bubulcus ibis | Cattle Egret | 2021/11/17 | 1 | 0 | 22.6197947 | 120.3395176 | <a href="https://www.inaturalist.org/observations/101396220">https://www.inaturalist.org/observations/101396220</a> |
| 2781 | Bubulcus ibis | Cattle Egret | 2018/9/7   | 3 | 0 | 22.6200035 | 120.3392204 | <a href="https://www.inaturalist.org/observations/16343948">https://www.inaturalist.org/observations/16343948</a>   |
| 2782 | Bubulcus ibis | Cattle Egret | 2017/8/21  | 2 | 0 | 22.6200348 | 120.3413361 | <a href="https://www.inaturalist.org/observations/12607363">https://www.inaturalist.org/observations/12607363</a>   |
| 2783 | Bubulcus ibis | Cattle Egret | 2020/8/17  | 2 | 0 | 22.6201469 | 120.3382546 | <a href="https://www.inaturalist.org/observations/56725388">https://www.inaturalist.org/observations/56725388</a>   |
| 2784 | Bubulcus ibis | Cattle Egret | 2020/8/17  | 2 | 0 | 22.6202163 | 120.3382439 | <a href="https://www.inaturalist.org/observations/56725387">https://www.inaturalist.org/observations/56725387</a>   |
| 2785 | Bubulcus ibis | Cattle Egret | 2020/8/17  | 2 | 0 | 22.6202460 | 120.3382653 | <a href="https://www.inaturalist.org/observations/56725390">https://www.inaturalist.org/observations/56725390</a>   |
| 2786 | Bubulcus ibis | Cattle Egret | 2018/1/31  | 1 | 0 | 22.6205425 | 120.3401328 | <a href="https://www.inaturalist.org/observations/123676029">https://www.inaturalist.org/observations/123676029</a> |
| 2787 | Bubulcus ibis | Cattle Egret | 2021/12/3  | 3 | 0 | 22.6208915 | 88.4031475  | <a href="https://www.inaturalist.org/observations/102449063">https://www.inaturalist.org/observations/102449063</a> |
| 2788 | Bubulcus ibis | Cattle Egret | 2018/1/11  | 1 | 0 | 22.6209799 | 120.3406018 | <a href="https://www.inaturalist.org/observations/123674626">https://www.inaturalist.org/observations/123674626</a> |
| 2789 | Bubulcus ibis | Cattle Egret | 2020/8/17  | 2 | 0 | 22.6212686 | 120.3394563 | <a href="https://www.inaturalist.org/observations/56725342">https://www.inaturalist.org/observations/56725342</a>   |
| 2790 | Bubulcus ibis | Cattle Egret | 2022/2/14  | 3 | 0 | 22.6216397 | 120.3637671 | <a href="https://www.inaturalist.org/observations/106734009">https://www.inaturalist.org/observations/106734009</a> |
| 2791 | Bubulcus ibis | Cattle Egret | 2021/5/8   | 1 | 0 | 22.6219754 | 120.3874398 | <a href="https://www.inaturalist.org/observations/78316560">https://www.inaturalist.org/observations/78316560</a>   |
| 2792 | Bubulcus ibis | Cattle Egret | 2018/12/31 | 5 | 0 | 22.6221200 | 120.3816300 | <a href="https://www.inaturalist.org/observations/19368388">https://www.inaturalist.org/observations/19368388</a>   |
| 2793 | Bubulcus ibis | Cattle Egret | 2021/11/3  | 1 | 0 | 22.6226225 | 120.3375489 | <a href="https://www.inaturalist.org/observations/100124240">https://www.inaturalist.org/observations/100124240</a> |
| 2794 | Bubulcus ibis | Cattle Egret | 2021/11/3  | 1 | 0 | 22.6226364 | 120.3374899 | <a href="https://www.inaturalist.org/observations/100124243">https://www.inaturalist.org/observations/100124243</a> |
| 2795 | Bubulcus ibis | Cattle Egret | 2021/11/3  | 1 | 0 | 22.6232668 | 120.3380564 | <a href="https://www.inaturalist.org/observations/100118278">https://www.inaturalist.org/observations/100118278</a> |
| 2796 | Bubulcus ibis | Cattle Egret | 2021/2/18  | 1 | 0 | 22.6234857 | 120.3860903 | <a href="https://www.inaturalist.org/observations/69809474">https://www.inaturalist.org/observations/69809474</a>   |
| 2797 | Bubulcus ibis | Cattle Egret | 2022/2/14  | 3 | 0 | 22.6254623 | 120.3657416 | <a href="https://www.inaturalist.org/observations/106733989">https://www.inaturalist.org/observations/106733989</a> |
| 2798 | Bubulcus ibis | Cattle Egret | 2021/2/25  | 1 | 0 | 22.6256145 | 120.5972734 | <a href="https://www.inaturalist.org/observations/70249055">https://www.inaturalist.org/observations/70249055</a>   |
| 2799 | Bubulcus ibis | Cattle Egret | 2021/3/23  | 1 | 0 | 22.6261957 | 120.5973131 | <a href="https://www.inaturalist.org/observations/72010149">https://www.inaturalist.org/observations/72010149</a>   |

|      |               |              |            |   |   |            |             |                                                                                                                     |
|------|---------------|--------------|------------|---|---|------------|-------------|---------------------------------------------------------------------------------------------------------------------|
| 2800 | Bubulcus ibis | Cattle Egret | 2020/4/26  | 1 | 0 | 22.6317444 | 120.2615250 | <a href="https://www.inaturalist.org/observations/43533867">https://www.inaturalist.org/observations/43533867</a>   |
| 2801 | Bubulcus ibis | Cattle Egret | 2022/10/19 | 1 | 0 | 22.6326610 | 114.4388724 | <a href="https://www.inaturalist.org/observations/141769992">https://www.inaturalist.org/observations/141769992</a> |
| 2802 | Bubulcus ibis | Cattle Egret | 2022/4/13  | 1 | 0 | 22.6335387 | 114.4394060 | <a href="https://www.inaturalist.org/observations/112014833">https://www.inaturalist.org/observations/112014833</a> |
| 2803 | Bubulcus ibis | Cattle Egret | 2022/9/26  | 3 | 0 | 22.6348141 | 120.3007438 | <a href="https://www.inaturalist.org/observations/136560678">https://www.inaturalist.org/observations/136560678</a> |
| 2804 | Bubulcus ibis | Cattle Egret | 2022/9/26  | 1 | 0 | 22.6366119 | 120.2775345 | <a href="https://www.inaturalist.org/observations/136548360">https://www.inaturalist.org/observations/136548360</a> |
| 2805 | Bubulcus ibis | Cattle Egret | 2019/12/27 | 1 | 0 | 22.6386398 | 120.6154847 | <a href="https://www.inaturalist.org/observations/36991486">https://www.inaturalist.org/observations/36991486</a>   |
| 2806 | Bubulcus ibis | Cattle Egret | 2018/3/29  | 1 | 0 | 22.6387801 | 120.2966167 | <a href="https://www.inaturalist.org/observations/15777795">https://www.inaturalist.org/observations/15777795</a>   |
| 2807 | Bubulcus ibis | Cattle Egret | 2020/9/24  | 2 | 0 | 22.6395594 | 120.6167975 | <a href="https://www.inaturalist.org/observations/60579827">https://www.inaturalist.org/observations/60579827</a>   |
| 2808 | Bubulcus ibis | Cattle Egret | 2021/7/24  | 1 | 0 | 22.6397039 | 120.6141167 | <a href="https://www.inaturalist.org/observations/88936571">https://www.inaturalist.org/observations/88936571</a>   |
| 2809 | Bubulcus ibis | Cattle Egret | 2022/7/2   | 1 | 0 | 22.6411256 | 120.3587671 | <a href="https://www.inaturalist.org/observations/124366743">https://www.inaturalist.org/observations/124366743</a> |
| 2810 | Bubulcus ibis | Cattle Egret | 2020/12/20 | 3 | 0 | 22.6413102 | 120.6168718 | <a href="https://www.inaturalist.org/observations/66915262">https://www.inaturalist.org/observations/66915262</a>   |
| 2811 | Bubulcus ibis | Cattle Egret | 2020/10/1  | 1 | 0 | 22.6414771 | 120.6063102 | <a href="https://www.inaturalist.org/observations/61565107">https://www.inaturalist.org/observations/61565107</a>   |
| 2812 | Bubulcus ibis | Cattle Egret | 2022/1/1   | 2 | 0 | 22.6442951 | 120.2765004 | <a href="https://www.inaturalist.org/observations/106011578">https://www.inaturalist.org/observations/106011578</a> |
| 2813 | Bubulcus ibis | Cattle Egret | 2021/2/27  | 1 | 0 | 22.6445400 | 120.2821964 | <a href="https://www.inaturalist.org/observations/70736065">https://www.inaturalist.org/observations/70736065</a>   |
| 2814 | Bubulcus ibis | Cattle Egret | 2022/4/4   | 3 | 0 | 22.6450053 | 120.2751066 | <a href="https://www.inaturalist.org/observations/120821134">https://www.inaturalist.org/observations/120821134</a> |
| 2815 | Bubulcus ibis | Cattle Egret | 2022/4/4   | 3 | 0 | 22.6453809 | 120.2749435 | <a href="https://www.inaturalist.org/observations/120821135">https://www.inaturalist.org/observations/120821135</a> |
| 2816 | Bubulcus ibis | Cattle Egret | 2022/4/4   | 3 | 0 | 22.6454924 | 120.2742312 | <a href="https://www.inaturalist.org/observations/120821137">https://www.inaturalist.org/observations/120821137</a> |
| 2817 | Bubulcus ibis | Cattle Egret | 2022/12/19 | 1 | 0 | 22.6457333 | 120.2744244 | <a href="https://www.inaturalist.org/observations/144661178">https://www.inaturalist.org/observations/144661178</a> |
| 2818 | Bubulcus ibis | Cattle Egret | 2020/10/23 | 1 | 0 | 22.6461642 | 120.2860095 | <a href="https://www.inaturalist.org/observations/63383266">https://www.inaturalist.org/observations/63383266</a>   |
| 2819 | Bubulcus ibis | Cattle Egret | 2020/9/24  | 2 | 0 | 22.6463816 | 120.6054510 | <a href="https://www.inaturalist.org/observations/60579823">https://www.inaturalist.org/observations/60579823</a>   |
| 2820 | Bubulcus ibis | Cattle Egret | 2019/10/28 | 1 | 0 | 22.6485519 | 120.6043375 | <a href="https://www.inaturalist.org/observations/35005452">https://www.inaturalist.org/observations/35005452</a>   |
| 2821 | Bubulcus ibis | Cattle Egret | 2020/11/16 | 1 | 0 | 22.6500210 | 120.2953140 | <a href="https://www.inaturalist.org/observations/64997778">https://www.inaturalist.org/observations/64997778</a>   |
| 2822 | Bubulcus ibis | Cattle Egret | 2020/11/10 | 1 | 0 | 22.6521160 | 120.4419136 | <a href="https://www.inaturalist.org/observations/64727211">https://www.inaturalist.org/observations/64727211</a>   |
| 2823 | Bubulcus ibis | Cattle Egret | 2015/10/22 | 1 | 0 | 22.6523001 | 120.3501560 | <a href="https://www.inaturalist.org/observations/132011997">https://www.inaturalist.org/observations/132011997</a> |
| 2824 | Bubulcus ibis | Cattle Egret | 2021/2/7   | 1 | 0 | 22.6525433 | 120.3500904 | <a href="https://www.inaturalist.org/observations/69199320">https://www.inaturalist.org/observations/69199320</a>   |

|      |               |              |            |   |   |            |             |                                                                                                                     |
|------|---------------|--------------|------------|---|---|------------|-------------|---------------------------------------------------------------------------------------------------------------------|
| 2825 | Bubulcus ibis | Cattle Egret | 2020/9/27  | 1 | 0 | 22.6529065 | 120.3499119 | <a href="https://www.inaturalist.org/observations/62772888">https://www.inaturalist.org/observations/62772888</a>   |
| 2826 | Bubulcus ibis | Cattle Egret | 2022/4/17  | 2 | 0 | 22.6551967 | 120.2849633 | <a href="https://www.inaturalist.org/observations/111783725">https://www.inaturalist.org/observations/111783725</a> |
| 2827 | Bubulcus ibis | Cattle Egret | 2021/12/28 | 1 | 0 | 22.6553400 | 120.2736580 | <a href="https://www.inaturalist.org/observations/103937060">https://www.inaturalist.org/observations/103937060</a> |
| 2828 | Bubulcus ibis | Cattle Egret | 2022/1/4   | 1 | 0 | 22.6554930 | 120.2736370 | <a href="https://www.inaturalist.org/observations/104332368">https://www.inaturalist.org/observations/104332368</a> |
| 2829 | Bubulcus ibis | Cattle Egret | 2022/4/16  | 2 | 0 | 22.6562843 | 87.7358856  | <a href="https://www.inaturalist.org/observations/111605865">https://www.inaturalist.org/observations/111605865</a> |
| 2830 | Bubulcus ibis | Cattle Egret | 2018/3/31  | 4 | 0 | 22.6564323 | 120.2862630 | <a href="https://www.inaturalist.org/observations/10524874">https://www.inaturalist.org/observations/10524874</a>   |
| 2831 | Bubulcus ibis | Cattle Egret | 2021/10/27 | 1 | 0 | 22.6568268 | 120.2846776 | <a href="https://www.inaturalist.org/observations/99543873">https://www.inaturalist.org/observations/99543873</a>   |
| 2832 | Bubulcus ibis | Cattle Egret | 2022/7/10  | 1 | 0 | 22.6574690 | 120.3473279 | <a href="https://www.inaturalist.org/observations/125602471">https://www.inaturalist.org/observations/125602471</a> |
| 2833 | Bubulcus ibis | Cattle Egret | 2018/4/7   | 3 | 0 | 22.6574895 | 120.2884249 | <a href="https://www.inaturalist.org/observations/13579824">https://www.inaturalist.org/observations/13579824</a>   |
| 2834 | Bubulcus ibis | Cattle Egret | 2021/10/23 | 2 | 0 | 22.6575956 | 120.2864372 | <a href="https://www.inaturalist.org/observations/99047763">https://www.inaturalist.org/observations/99047763</a>   |
| 2835 | Bubulcus ibis | Cattle Egret | 2021/10/23 | 1 | 0 | 22.6578364 | 120.2859267 | <a href="https://www.inaturalist.org/observations/99051143">https://www.inaturalist.org/observations/99051143</a>   |
| 2836 | Bubulcus ibis | Cattle Egret | 2021/9/6   | 1 | 0 | 22.6578967 | 120.2855317 | <a href="https://www.inaturalist.org/observations/94067020">https://www.inaturalist.org/observations/94067020</a>   |
| 2837 | Bubulcus ibis | Cattle Egret | 2018/10/21 | 2 | 0 | 22.6579573 | 120.2859455 | <a href="https://www.inaturalist.org/observations/17711770">https://www.inaturalist.org/observations/17711770</a>   |
| 2838 | Bubulcus ibis | Cattle Egret | 2021/5/30  | 2 | 0 | 22.6580583 | 120.2857389 | <a href="https://www.inaturalist.org/observations/80849468">https://www.inaturalist.org/observations/80849468</a>   |
| 2839 | Bubulcus ibis | Cattle Egret | 2022/11/13 | 1 | 0 | 22.6583361 | 120.2974361 | <a href="https://www.inaturalist.org/observations/141860091">https://www.inaturalist.org/observations/141860091</a> |
| 2840 | Bubulcus ibis | Cattle Egret | 2021/1/1   | 1 | 0 | 22.6583472 | 120.2871083 | <a href="https://www.inaturalist.org/observations/67386936">https://www.inaturalist.org/observations/67386936</a>   |
| 2841 | Bubulcus ibis | Cattle Egret | 2022/12/23 | 1 | 0 | 22.6592888 | 120.2857224 | <a href="https://www.inaturalist.org/observations/144900286">https://www.inaturalist.org/observations/144900286</a> |
| 2842 | Bubulcus ibis | Cattle Egret | 2017/3/14  | 5 | 0 | 22.6601952 | 78.1549358  | <a href="https://www.inaturalist.org/observations/8085938">https://www.inaturalist.org/observations/8085938</a>     |
| 2843 | Bubulcus ibis | Cattle Egret | 2018/4/22  | 1 | 0 | 22.6603607 | 120.3538060 | <a href="https://www.inaturalist.org/observations/82125546">https://www.inaturalist.org/observations/82125546</a>   |
| 2844 | Bubulcus ibis | Cattle Egret | 2022/3/25  | 2 | 0 | 22.6615961 | 120.2842622 | <a href="https://www.inaturalist.org/observations/109438568">https://www.inaturalist.org/observations/109438568</a> |
| 2845 | Bubulcus ibis | Cattle Egret | 2022/11/10 | 2 | 0 | 22.6623198 | 120.4288502 | <a href="https://www.inaturalist.org/observations/141606540">https://www.inaturalist.org/observations/141606540</a> |
| 2846 | Bubulcus ibis | Cattle Egret | 2021/10/26 | 2 | 0 | 22.6626406 | 120.3342819 | <a href="https://www.inaturalist.org/observations/99536484">https://www.inaturalist.org/observations/99536484</a>   |
| 2847 | Bubulcus ibis | Cattle Egret | 2018/10/29 | 2 | 0 | 22.6631947 | 120.4283324 | <a href="https://www.inaturalist.org/observations/17930208">https://www.inaturalist.org/observations/17930208</a>   |
| 2848 | Bubulcus ibis | Cattle Egret | 2022/11/10 | 1 | 0 | 22.6637346 | 120.4288814 | <a href="https://www.inaturalist.org/observations/141606541">https://www.inaturalist.org/observations/141606541</a> |
| 2849 | Bubulcus ibis | Cattle Egret | 2022/11/8  | 1 | 0 | 22.6683962 | 120.3273373 | <a href="https://www.inaturalist.org/observations/141434954">https://www.inaturalist.org/observations/141434954</a> |



|      |               |              |            |   |   |            |             |                                                                                                                     |
|------|---------------|--------------|------------|---|---|------------|-------------|---------------------------------------------------------------------------------------------------------------------|
| 2850 | Bubulcus ibis | Cattle Egret | 2022/8/19  | 2 | 0 | 22.6692760 | 120.3272870 | <a href="https://www.inaturalist.org/observations/131461351">https://www.inaturalist.org/observations/131461351</a> |
| 2851 | Bubulcus ibis | Cattle Egret | 2022/2/1   | 1 | 0 | 22.6693004 | 120.3283059 | <a href="https://www.inaturalist.org/observations/106016446">https://www.inaturalist.org/observations/106016446</a> |
| 2852 | Bubulcus ibis | Cattle Egret | 2021/9/17  | 1 | 0 | 22.6716787 | 120.3487035 | <a href="https://www.inaturalist.org/observations/95980796">https://www.inaturalist.org/observations/95980796</a>   |
| 2853 | Bubulcus ibis | Cattle Egret | 2021/11/12 | 2 | 0 | 22.6752599 | 120.2903257 | <a href="https://www.inaturalist.org/observations/101188541">https://www.inaturalist.org/observations/101188541</a> |
| 2854 | Bubulcus ibis | Cattle Egret | 2020/2/11  | 0 | 0 | 22.6758611 | 120.2902028 | <a href="https://www.inaturalist.org/observations/38529375">https://www.inaturalist.org/observations/38529375</a>   |
| 2855 | Bubulcus ibis | Cattle Egret | 2022/9/10  | 3 | 0 | 22.6759333 | 120.2897667 | <a href="https://www.inaturalist.org/observations/134551429">https://www.inaturalist.org/observations/134551429</a> |
| 2856 | Bubulcus ibis | Cattle Egret | 2020/6/12  | 0 | 0 | 22.6760056 | 120.2937556 | <a href="https://www.inaturalist.org/observations/49296001">https://www.inaturalist.org/observations/49296001</a>   |
| 2857 | Bubulcus ibis | Cattle Egret | 2019/12/17 | 3 | 0 | 22.6760807 | 120.2903519 | <a href="https://www.inaturalist.org/observations/36720498">https://www.inaturalist.org/observations/36720498</a>   |
| 2858 | Bubulcus ibis | Cattle Egret | 2021/10/17 | 1 | 0 | 22.6764050 | 120.2908667 | <a href="https://www.inaturalist.org/observations/98493943">https://www.inaturalist.org/observations/98493943</a>   |
| 2859 | Bubulcus ibis | Cattle Egret | 2020/11/24 | 1 | 0 | 22.6764136 | 120.2877198 | <a href="https://www.inaturalist.org/observations/65513892">https://www.inaturalist.org/observations/65513892</a>   |
| 2860 | Bubulcus ibis | Cattle Egret | 2020/11/24 | 1 | 0 | 22.6764200 | 120.2883300 | <a href="https://www.inaturalist.org/observations/65530072">https://www.inaturalist.org/observations/65530072</a>   |
| 2861 | Bubulcus ibis | Cattle Egret | 2020/11/24 | 1 | 0 | 22.6765241 | 120.2874408 | <a href="https://www.inaturalist.org/observations/65513891">https://www.inaturalist.org/observations/65513891</a>   |
| 2862 | Bubulcus ibis | Cattle Egret | 2021/10/3  | 1 | 0 | 22.6766550 | 120.2887117 | <a href="https://www.inaturalist.org/observations/97020751">https://www.inaturalist.org/observations/97020751</a>   |
| 2863 | Bubulcus ibis | Cattle Egret | 2020/12/1  | 1 | 0 | 22.6772385 | 120.2936385 | <a href="https://www.inaturalist.org/observations/65924684">https://www.inaturalist.org/observations/65924684</a>   |
| 2864 | Bubulcus ibis | Cattle Egret | 2020/12/1  | 0 | 0 | 22.6772633 | 120.2936550 | <a href="https://www.inaturalist.org/observations/65925416">https://www.inaturalist.org/observations/65925416</a>   |
| 2865 | Bubulcus ibis | Cattle Egret | 2020/12/1  | 1 | 0 | 22.6773149 | 120.2935693 | <a href="https://www.inaturalist.org/observations/65924690">https://www.inaturalist.org/observations/65924690</a>   |
| 2866 | Bubulcus ibis | Cattle Egret | 2020/12/1  | 1 | 0 | 22.6774835 | 120.2939813 | <a href="https://www.inaturalist.org/observations/65924720">https://www.inaturalist.org/observations/65924720</a>   |
| 2867 | Bubulcus ibis | Cattle Egret | 2020/2/18  | 2 | 0 | 22.6779079 | 72.8816376  | <a href="https://www.inaturalist.org/observations/38788168">https://www.inaturalist.org/observations/38788168</a>   |
| 2868 | Bubulcus ibis | Cattle Egret | 2020/12/1  | 1 | 0 | 22.6786200 | 120.2944117 | <a href="https://www.inaturalist.org/observations/65927296">https://www.inaturalist.org/observations/65927296</a>   |
| 2869 | Bubulcus ibis | Cattle Egret | 2020/12/1  | 1 | 0 | 22.6786333 | 120.2943800 | <a href="https://www.inaturalist.org/observations/65927117">https://www.inaturalist.org/observations/65927117</a>   |
| 2870 | Bubulcus ibis | Cattle Egret | 2020/12/1  | 0 | 0 | 22.6786591 | 120.2944964 | <a href="https://www.inaturalist.org/observations/65925581">https://www.inaturalist.org/observations/65925581</a>   |
| 2871 | Bubulcus ibis | Cattle Egret | 2020/12/1  | 2 | 0 | 22.6786687 | 120.2943993 | <a href="https://www.inaturalist.org/observations/65925592">https://www.inaturalist.org/observations/65925592</a>   |
| 2872 | Bubulcus ibis | Cattle Egret | 2020/12/1  | 2 | 0 | 22.6786887 | 120.2944735 | <a href="https://www.inaturalist.org/observations/65925607">https://www.inaturalist.org/observations/65925607</a>   |
| 2873 | Bubulcus ibis | Cattle Egret | 2020/12/1  | 1 | 0 | 22.6787025 | 120.2948848 | <a href="https://www.inaturalist.org/observations/65924806">https://www.inaturalist.org/observations/65924806</a>   |
| 2874 | Bubulcus ibis | Cattle Egret | 2020/12/1  | 2 | 0 | 22.6787150 | 120.2944510 | <a href="https://www.inaturalist.org/observations/65925578">https://www.inaturalist.org/observations/65925578</a>   |

|      |               |              |            |   |   |            |             |                                                                                                                     |
|------|---------------|--------------|------------|---|---|------------|-------------|---------------------------------------------------------------------------------------------------------------------|
| 2875 | Bubulcus ibis | Cattle Egret | 2019/11/6  | 3 | 0 | 22.6787643 | 120.2939987 | <a href="https://www.inaturalist.org/observations/35362518">https://www.inaturalist.org/observations/35362518</a>   |
| 2876 | Bubulcus ibis | Cattle Egret | 2020/12/1  | 1 | 0 | 22.6790558 | 120.2934775 | <a href="https://www.inaturalist.org/observations/65926970">https://www.inaturalist.org/observations/65926970</a>   |
| 2877 | Bubulcus ibis | Cattle Egret | 2020/2/26  | 1 | 0 | 22.6795367 | 72.8800800  | <a href="https://www.inaturalist.org/observations/39235813">https://www.inaturalist.org/observations/39235813</a>   |
| 2878 | Bubulcus ibis | Cattle Egret | 2020/2/15  | 2 | 0 | 22.6796285 | 72.8801579  | <a href="https://www.inaturalist.org/observations/38661688">https://www.inaturalist.org/observations/38661688</a>   |
| 2879 | Bubulcus ibis | Cattle Egret | 2020/2/26  | 2 | 0 | 22.6798286 | 72.8803330  | <a href="https://www.inaturalist.org/observations/39236364">https://www.inaturalist.org/observations/39236364</a>   |
| 2880 | Bubulcus ibis | Cattle Egret | 2020/2/18  | 2 | 0 | 22.6802291 | 72.8797936  | <a href="https://www.inaturalist.org/observations/39310229">https://www.inaturalist.org/observations/39310229</a>   |
| 2881 | Bubulcus ibis | Cattle Egret | 2020/2/15  | 2 | 0 | 22.6802447 | 72.8801988  | <a href="https://www.inaturalist.org/observations/38737123">https://www.inaturalist.org/observations/38737123</a>   |
| 2882 | Bubulcus ibis | Cattle Egret | 2018/2/24  | 4 | 0 | 22.6805540 | 120.2982190 | <a href="https://www.inaturalist.org/observations/18349851">https://www.inaturalist.org/observations/18349851</a>   |
| 2883 | Bubulcus ibis | Cattle Egret | 2020/12/1  | 1 | 0 | 22.6820571 | 120.2954764 | <a href="https://www.inaturalist.org/observations/65932258">https://www.inaturalist.org/observations/65932258</a>   |
| 2884 | Bubulcus ibis | Cattle Egret | 2022/12/3  | 1 | 0 | 22.6824316 | 120.4513265 | <a href="https://www.inaturalist.org/observations/143546997">https://www.inaturalist.org/observations/143546997</a> |
| 2885 | Bubulcus ibis | Cattle Egret | 2022/1/26  | 2 | 0 | 22.6827273 | 120.2982377 | <a href="https://www.inaturalist.org/observations/105661999">https://www.inaturalist.org/observations/105661999</a> |
| 2886 | Bubulcus ibis | Cattle Egret | 2017/11/5  | 2 | 0 | 22.6832085 | 120.2983753 | <a href="https://www.inaturalist.org/observations/13110887">https://www.inaturalist.org/observations/13110887</a>   |
| 2887 | Bubulcus ibis | Cattle Egret | 2019/11/20 | 1 | 0 | 22.6843948 | 120.2950058 | <a href="https://www.inaturalist.org/observations/35881764">https://www.inaturalist.org/observations/35881764</a>   |
| 2888 | Bubulcus ibis | Cattle Egret | 2020/12/20 | 3 | 0 | 22.6846140 | 88.3208530  | <a href="https://www.inaturalist.org/observations/66907122">https://www.inaturalist.org/observations/66907122</a>   |
| 2889 | Bubulcus ibis | Cattle Egret | 2019/8/10  | 3 | 0 | 22.6847534 | 120.6397781 | <a href="https://www.inaturalist.org/observations/30512487">https://www.inaturalist.org/observations/30512487</a>   |
| 2890 | Bubulcus ibis | Cattle Egret | 2020/12/20 | 3 | 0 | 22.6849034 | 88.3206299  | <a href="https://www.inaturalist.org/observations/67046463">https://www.inaturalist.org/observations/67046463</a>   |
| 2891 | Bubulcus ibis | Cattle Egret | 2020/12/13 | 2 | 0 | 22.6857761 | 88.3213234  | <a href="https://www.inaturalist.org/observations/66576896">https://www.inaturalist.org/observations/66576896</a>   |
| 2892 | Bubulcus ibis | Cattle Egret | 2020/12/13 | 2 | 0 | 22.6857761 | 88.3213234  | <a href="https://www.inaturalist.org/observations/66657992">https://www.inaturalist.org/observations/66657992</a>   |
| 2893 | Bubulcus ibis | Cattle Egret | 2019/12/2  | 2 | 0 | 22.6861324 | 120.6380367 | <a href="https://www.inaturalist.org/observations/36287684">https://www.inaturalist.org/observations/36287684</a>   |
| 2894 | Bubulcus ibis | Cattle Egret | 2020/1/12  | 1 | 0 | 22.6864773 | 120.3611275 | <a href="https://www.inaturalist.org/observations/37516400">https://www.inaturalist.org/observations/37516400</a>   |
| 2895 | Bubulcus ibis | Cattle Egret | 2021/8/25  | 1 | 0 | 22.6866520 | 120.3258116 | <a href="https://www.inaturalist.org/observations/92547561">https://www.inaturalist.org/observations/92547561</a>   |
| 2896 | Bubulcus ibis | Cattle Egret | 2020/2/16  | 3 | 0 | 22.6871710 | 88.3207484  | <a href="https://www.inaturalist.org/observations/38788022">https://www.inaturalist.org/observations/38788022</a>   |
| 2897 | Bubulcus ibis | Cattle Egret | 2019/10/20 | 2 | 0 | 22.6873660 | 120.9916050 | <a href="https://www.inaturalist.org/observations/34760903">https://www.inaturalist.org/observations/34760903</a>   |
| 2898 | Bubulcus ibis | Cattle Egret | 2019/11/15 | 2 | 0 | 22.6876917 | 120.9905783 | <a href="https://www.inaturalist.org/observations/35691862">https://www.inaturalist.org/observations/35691862</a>   |
| 2899 | Bubulcus ibis | Cattle Egret | 2020/2/18  | 1 | 0 | 22.6880868 | 72.8388435  | <a href="https://www.inaturalist.org/observations/38788210">https://www.inaturalist.org/observations/38788210</a>   |

|      |               |              |            |   |   |            |             |                                                                                                                     |
|------|---------------|--------------|------------|---|---|------------|-------------|---------------------------------------------------------------------------------------------------------------------|
| 2900 | Bubulcus ibis | Cattle Egret | 2022/2/6   | 2 | 0 | 22.6913324 | 120.3270691 | <a href="https://www.inaturalist.org/observations/106228433">https://www.inaturalist.org/observations/106228433</a> |
| 2901 | Bubulcus ibis | Cattle Egret | 2020/2/17  | 2 | 0 | 22.6915853 | 72.8633636  | <a href="https://www.inaturalist.org/observations/39235893">https://www.inaturalist.org/observations/39235893</a>   |
| 2902 | Bubulcus ibis | Cattle Egret | 2022/6/22  | 3 | 0 | 22.6926909 | 120.3293555 | <a href="https://www.inaturalist.org/observations/122920978">https://www.inaturalist.org/observations/122920978</a> |
| 2903 | Bubulcus ibis | Cattle Egret | 2020/3/18  | 2 | 0 | 22.6962939 | 121.0194579 | <a href="https://www.inaturalist.org/observations/40170462">https://www.inaturalist.org/observations/40170462</a>   |
| 2904 | Bubulcus ibis | Cattle Egret | 2021/10/16 | 1 | 0 | 22.7014351 | 120.6442598 | <a href="https://www.inaturalist.org/observations/98482571">https://www.inaturalist.org/observations/98482571</a>   |
| 2905 | Bubulcus ibis | Cattle Egret | 2020/10/16 | 1 | 0 | 22.7025183 | 120.2965836 | <a href="https://www.inaturalist.org/observations/62790391">https://www.inaturalist.org/observations/62790391</a>   |
| 2906 | Bubulcus ibis | Cattle Egret | 2021/2/26  | 2 | 0 | 22.7030528 | 120.2944833 | <a href="https://www.inaturalist.org/observations/70201246">https://www.inaturalist.org/observations/70201246</a>   |
| 2907 | Bubulcus ibis | Cattle Egret | 2020/9/25  | 1 | 0 | 22.7055552 | 120.3686839 | <a href="https://www.inaturalist.org/observations/62116466">https://www.inaturalist.org/observations/62116466</a>   |
| 2908 | Bubulcus ibis | Cattle Egret | 2017/4/11  | 2 | 0 | 22.7062335 | 121.0454047 | <a href="https://www.inaturalist.org/observations/9112001">https://www.inaturalist.org/observations/9112001</a>     |
| 2909 | Bubulcus ibis | Cattle Egret | 2019/4/15  | 2 | 0 | 22.7070320 | 120.3541150 | <a href="https://www.inaturalist.org/observations/24574913">https://www.inaturalist.org/observations/24574913</a>   |
| 2910 | Bubulcus ibis | Cattle Egret | 2020/9/25  | 1 | 0 | 22.7076039 | 120.3670532 | <a href="https://www.inaturalist.org/observations/62116357">https://www.inaturalist.org/observations/62116357</a>   |
| 2911 | Bubulcus ibis | Cattle Egret | 2015/11/4  | 2 | 0 | 22.7098880 | 120.4910102 | <a href="https://www.inaturalist.org/observations/15195194">https://www.inaturalist.org/observations/15195194</a>   |
| 2912 | Bubulcus ibis | Cattle Egret | 2021/7/25  | 1 | 0 | 22.7101790 | 120.5072810 | <a href="https://www.inaturalist.org/observations/88936541">https://www.inaturalist.org/observations/88936541</a>   |
| 2913 | Bubulcus ibis | Cattle Egret | 2020/10/3  | 1 | 0 | 22.7103058 | 120.5085450 | <a href="https://www.inaturalist.org/observations/61565131">https://www.inaturalist.org/observations/61565131</a>   |
| 2914 | Bubulcus ibis | Cattle Egret | 2019/1/25  | 4 | 0 | 22.7109509 | 120.5086736 | <a href="https://www.inaturalist.org/observations/19859417">https://www.inaturalist.org/observations/19859417</a>   |
| 2915 | Bubulcus ibis | Cattle Egret | 2020/5/15  | 1 | 0 | 22.7110427 | 120.5092624 | <a href="https://www.inaturalist.org/observations/46095331">https://www.inaturalist.org/observations/46095331</a>   |
| 2916 | Bubulcus ibis | Cattle Egret | 2021/4/18  | 1 | 0 | 22.7130460 | 115.4472769 | <a href="https://www.inaturalist.org/observations/80077984">https://www.inaturalist.org/observations/80077984</a>   |
| 2917 | Bubulcus ibis | Cattle Egret | 2020/2/22  | 1 | 0 | 22.7156184 | 120.4740539 | <a href="https://www.inaturalist.org/observations/39276862">https://www.inaturalist.org/observations/39276862</a>   |
| 2918 | Bubulcus ibis | Cattle Egret | 2018/5/18  | 2 | 0 | 22.7160375 | 120.4734477 | <a href="https://www.inaturalist.org/observations/14067169">https://www.inaturalist.org/observations/14067169</a>   |
| 2919 | Bubulcus ibis | Cattle Egret | 2021/4/18  | 1 | 0 | 22.7163368 | 115.4698410 | <a href="https://www.inaturalist.org/observations/80082426">https://www.inaturalist.org/observations/80082426</a>   |
| 2920 | Bubulcus ibis | Cattle Egret | 2018/9/8   | 3 | 0 | 22.7173338 | 120.4716315 | <a href="https://www.inaturalist.org/observations/16350953">https://www.inaturalist.org/observations/16350953</a>   |
| 2921 | Bubulcus ibis | Cattle Egret | 2022/8/20  | 2 | 0 | 22.7195750 | 120.5150735 | <a href="https://www.inaturalist.org/observations/131558762">https://www.inaturalist.org/observations/131558762</a> |
| 2922 | Bubulcus ibis | Cattle Egret | 2021/9/28  | 1 | 0 | 22.7196059 | 120.5150199 | <a href="https://www.inaturalist.org/observations/96675166">https://www.inaturalist.org/observations/96675166</a>   |
| 2923 | Bubulcus ibis | Cattle Egret | 2020/11/10 | 1 | 0 | 22.7198351 | 120.5149066 | <a href="https://www.inaturalist.org/observations/64727210">https://www.inaturalist.org/observations/64727210</a>   |
| 2924 | Bubulcus ibis | Cattle Egret | 2021/4/18  | 1 | 0 | 22.7204564 | 115.4649094 | <a href="https://www.inaturalist.org/observations/80082435">https://www.inaturalist.org/observations/80082435</a>   |

|      |                     |                   |            |   |   |            |             |                                                                                                                     |
|------|---------------------|-------------------|------------|---|---|------------|-------------|---------------------------------------------------------------------------------------------------------------------|
| 2925 | Bubulcus ibis       | Cattle Egret      | 2022/10/18 | 1 | 0 | 22.7266556 | 120.2854722 | <a href="https://www.inaturalist.org/observations/139212121">https://www.inaturalist.org/observations/139212121</a> |
| 2926 | Bubulcus ibis       | Cattle Egret      | 2022/10/18 | 3 | 0 | 22.7295917 | 120.2865917 | <a href="https://www.inaturalist.org/observations/139212210">https://www.inaturalist.org/observations/139212210</a> |
| 2927 | Bubulcus ibis       | Cattle Egret      | 2022/9/15  | 1 | 0 | 22.7320972 | 120.3123111 | <a href="https://www.inaturalist.org/observations/135115938">https://www.inaturalist.org/observations/135115938</a> |
| 2928 | Bubulcus ibis       | Cattle Egret      | 2020/7/13  | 2 | 0 | 22.7338956 | 120.3148057 | <a href="https://www.inaturalist.org/observations/52937889">https://www.inaturalist.org/observations/52937889</a>   |
| 2929 | Bubulcus ibis       | Cattle Egret      | 2020/7/13  | 1 | 0 | 22.7340737 | 120.3144623 | <a href="https://www.inaturalist.org/observations/52937884">https://www.inaturalist.org/observations/52937884</a>   |
| 2930 | Bubulcus ibis       | Cattle Egret      | 2022/11/11 | 2 | 0 | 22.7398165 | 88.3797724  | <a href="https://www.inaturalist.org/observations/141692786">https://www.inaturalist.org/observations/141692786</a> |
| 2931 | Bubulcus coromandus | ibis Cattle Egret | 2022/5/5   | 2 | 0 | 22.7418412 | 88.3787428  | <a href="https://www.inaturalist.org/observations/126971030">https://www.inaturalist.org/observations/126971030</a> |
| 2932 | Bubulcus coromandus | ibis Cattle Egret | 2022/5/5   | 1 | 0 | 22.7422716 | 88.3786308  | <a href="https://www.inaturalist.org/observations/127052410">https://www.inaturalist.org/observations/127052410</a> |
| 2933 | Bubulcus ibis       | Cattle Egret      | 2013/1/27  | 1 | 0 | 22.7449690 | 120.6378320 | <a href="https://www.inaturalist.org/observations/82256048">https://www.inaturalist.org/observations/82256048</a>   |
| 2934 | Bubulcus ibis       | Cattle Egret      | 2020/9/26  | 2 | 0 | 22.7555316 | 120.2695268 | <a href="https://www.inaturalist.org/observations/129821822">https://www.inaturalist.org/observations/129821822</a> |
| 2935 | Bubulcus ibis       | Cattle Egret      | 2021/10/2  | 1 | 0 | 22.7714136 | 120.3360592 | <a href="https://www.inaturalist.org/observations/97025957">https://www.inaturalist.org/observations/97025957</a>   |
| 2936 | Bubulcus ibis       | Cattle Egret      | 2022/4/4   | 1 | 0 | 22.7832231 | 120.2455033 | <a href="https://www.inaturalist.org/observations/145239230">https://www.inaturalist.org/observations/145239230</a> |
| 2937 | Bubulcus ibis       | Cattle Egret      | 2022/8/31  | 3 | 0 | 22.7860667 | 72.6429133  | <a href="https://www.inaturalist.org/observations/133092041">https://www.inaturalist.org/observations/133092041</a> |
| 2938 | Bubulcus ibis       | Cattle Egret      | 2022/6/26  | 4 | 0 | 22.7924536 | 88.2959795  | <a href="https://www.inaturalist.org/observations/123489186">https://www.inaturalist.org/observations/123489186</a> |
| 2939 | Bubulcus ibis       | Cattle Egret      | 2022/1/3   | 1 | 0 | 22.7940654 | 121.1258666 | <a href="https://www.inaturalist.org/observations/106015880">https://www.inaturalist.org/observations/106015880</a> |
| 2940 | Bubulcus ibis       | Cattle Egret      | 2020/11/7  | 1 | 0 | 22.7943000 | 120.2704722 | <a href="https://www.inaturalist.org/observations/64339640">https://www.inaturalist.org/observations/64339640</a>   |
| 2941 | Bubulcus ibis       | Cattle Egret      | 2020/12/22 | 1 | 0 | 22.7980874 | 86.9464955  | <a href="https://www.inaturalist.org/observations/71212858">https://www.inaturalist.org/observations/71212858</a>   |
| 2942 | Bubulcus ibis       | Cattle Egret      | 2018/2/13  | 1 | 0 | 22.7981700 | 120.5506700 | <a href="https://www.inaturalist.org/observations/27987173">https://www.inaturalist.org/observations/27987173</a>   |
| 2943 | Bubulcus ibis       | Cattle Egret      | 2022/8/21  | 3 | 0 | 22.7982682 | 88.2680172  | <a href="https://www.inaturalist.org/observations/134753057">https://www.inaturalist.org/observations/134753057</a> |
| 2944 | Bubulcus ibis       | Cattle Egret      | 2020/8/30  | 1 | 0 | 22.8041604 | 88.3339234  | <a href="https://www.inaturalist.org/observations/68067117">https://www.inaturalist.org/observations/68067117</a>   |
| 2945 | Bubulcus ibis       | Cattle Egret      | 2022/11/27 | 1 | 0 | 22.8049618 | 88.3320821  | <a href="https://www.inaturalist.org/observations/143043924">https://www.inaturalist.org/observations/143043924</a> |
| 2946 | Bubulcus ibis       | Cattle Egret      | 2022/10/9  | 3 | 0 | 22.8056934 | 88.3314236  | <a href="https://www.inaturalist.org/observations/139247246">https://www.inaturalist.org/observations/139247246</a> |
| 2947 | Bubulcus coromandus | ibis Cattle Egret | 2014/3/7   | 1 | 0 | 22.8072175 | 121.1283559 | <a href="https://www.inaturalist.org/observations/92613662">https://www.inaturalist.org/observations/92613662</a>   |
| 2948 | Bubulcus ibis       | Cattle Egret      | 2019/7/25  | 2 | 0 | 22.8116197 | 120.2484208 | <a href="https://www.inaturalist.org/observations/29609636">https://www.inaturalist.org/observations/29609636</a>   |
| 2949 | Bubulcus ibis       | Cattle Egret      | 2007/3/17  | 2 | 0 | 22.8188528 | 72.0444822  | <a href="https://www.inaturalist.org/observations/54906883">https://www.inaturalist.org/observations/54906883</a>   |

|      |               |              |            |   |   |            |             |                                                                                                                     |
|------|---------------|--------------|------------|---|---|------------|-------------|---------------------------------------------------------------------------------------------------------------------|
| 2950 | Bubulcus ibis | Cattle Egret | 2012/7/9   | 3 | 0 | 22.8194461 | 72.0634448  | <a href="https://www.inaturalist.org/observations/32857431">https://www.inaturalist.org/observations/32857431</a>   |
| 2951 | Bubulcus ibis | Cattle Egret | 2012/1/5   | 2 | 0 | 22.8209477 | 72.0571863  | <a href="https://www.inaturalist.org/observations/32858588">https://www.inaturalist.org/observations/32858588</a>   |
| 2952 | Bubulcus ibis | Cattle Egret | 2019/7/25  | 2 | 0 | 22.8211143 | 120.2459948 | <a href="https://www.inaturalist.org/observations/29609629">https://www.inaturalist.org/observations/29609629</a>   |
| 2953 | Bubulcus ibis | Cattle Egret | 2019/7/25  | 1 | 0 | 22.8214672 | 120.2526906 | <a href="https://www.inaturalist.org/observations/29609539">https://www.inaturalist.org/observations/29609539</a>   |
| 2954 | Bubulcus ibis | Cattle Egret | 2019/7/25  | 2 | 0 | 22.8218217 | 120.2515672 | <a href="https://www.inaturalist.org/observations/29609545">https://www.inaturalist.org/observations/29609545</a>   |
| 2955 | Bubulcus ibis | Cattle Egret | 2021/10/23 | 1 | 0 | 22.8293647 | 120.5807216 | <a href="https://www.inaturalist.org/observations/134945308">https://www.inaturalist.org/observations/134945308</a> |
| 2956 | Bubulcus ibis | Cattle Egret | 2022/8/14  | 1 | 0 | 22.8337406 | 120.1999909 | <a href="https://www.inaturalist.org/observations/136122312">https://www.inaturalist.org/observations/136122312</a> |
| 2957 | Bubulcus ibis | Cattle Egret | 2020/7/10  | 1 | 0 | 22.8351055 | 120.2152492 | <a href="https://www.inaturalist.org/observations/53329344">https://www.inaturalist.org/observations/53329344</a>   |
| 2958 | Bubulcus ibis | Cattle Egret | 2022/2/24  | 2 | 0 | 22.8359176 | 120.2114582 | <a href="https://www.inaturalist.org/observations/107369511">https://www.inaturalist.org/observations/107369511</a> |
| 2959 | Bubulcus ibis | Cattle Egret | 2021/4/1   | 2 | 0 | 22.8379777 | 121.0871310 | <a href="https://www.inaturalist.org/observations/73160903">https://www.inaturalist.org/observations/73160903</a>   |
| 2960 | Bubulcus ibis | Cattle Egret | 2020/7/20  | 2 | 0 | 22.8383464 | 120.2681317 | <a href="https://www.inaturalist.org/observations/54497067">https://www.inaturalist.org/observations/54497067</a>   |
| 2961 | Bubulcus ibis | Cattle Egret | 2020/5/15  | 1 | 0 | 22.8521867 | 120.5440717 | <a href="https://www.inaturalist.org/observations/46471971">https://www.inaturalist.org/observations/46471971</a>   |
| 2962 | Bubulcus ibis | Cattle Egret | 2021/1/8   | 1 | 0 | 22.8581167 | 120.5052000 | <a href="https://www.inaturalist.org/observations/67771698">https://www.inaturalist.org/observations/67771698</a>   |
| 2963 | Bubulcus ibis | Cattle Egret | 2020/5/26  | 1 | 0 | 22.8605600 | 120.5377417 | <a href="https://www.inaturalist.org/observations/47593601">https://www.inaturalist.org/observations/47593601</a>   |
| 2964 | Bubulcus ibis | Cattle Egret | 2003/8/30  | 2 | 0 | 22.8619063 | 120.4985999 | <a href="https://www.inaturalist.org/observations/25565641">https://www.inaturalist.org/observations/25565641</a>   |
| 2965 | Bubulcus ibis | Cattle Egret | 2019/3/4   | 4 | 0 | 22.8729980 | 86.9291783  | <a href="https://www.inaturalist.org/observations/20943797">https://www.inaturalist.org/observations/20943797</a>   |
| 2966 | Bubulcus ibis | Cattle Egret | 2020/6/18  | 1 | 0 | 22.8856525 | 120.5814579 | <a href="https://www.inaturalist.org/observations/50049810">https://www.inaturalist.org/observations/50049810</a>   |
| 2967 | Bubulcus ibis | Cattle Egret | 2019/12/29 | 1 | 0 | 22.8860485 | 120.6195140 | <a href="https://www.inaturalist.org/observations/49696918">https://www.inaturalist.org/observations/49696918</a>   |
| 2968 | Bubulcus ibis | Cattle Egret | 2020/4/26  | 2 | 0 | 22.8870521 | 120.6186096 | <a href="https://www.inaturalist.org/observations/43921347">https://www.inaturalist.org/observations/43921347</a>   |
| 2969 | Bubulcus ibis | Cattle Egret | 2020/10/8  | 1 | 0 | 22.8880984 | 120.6200589 | <a href="https://www.inaturalist.org/observations/62300729">https://www.inaturalist.org/observations/62300729</a>   |
| 2970 | Bubulcus ibis | Cattle Egret | 2021/12/2  | 1 | 0 | 22.8887161 | 120.6202318 | <a href="https://www.inaturalist.org/observations/102350550">https://www.inaturalist.org/observations/102350550</a> |
| 2971 | Bubulcus ibis | Cattle Egret | 2020/7/10  | 3 | 0 | 22.8916350 | 120.5797133 | <a href="https://www.inaturalist.org/observations/52577586">https://www.inaturalist.org/observations/52577586</a>   |
| 2972 | Bubulcus ibis | Cattle Egret | 2020/4/9   | 1 | 0 | 22.8963606 | 113.8897043 | <a href="https://www.inaturalist.org/observations/41749429">https://www.inaturalist.org/observations/41749429</a>   |
| 2973 | Bubulcus ibis | Cattle Egret | 2020/6/14  | 2 | 0 | 22.8965883 | 86.2061027  | <a href="https://www.inaturalist.org/observations/50759051">https://www.inaturalist.org/observations/50759051</a>   |
| 2974 | Bubulcus ibis | Cattle Egret | 2020/12/17 | 1 | 0 | 22.9029176 | 120.4676079 | <a href="https://www.inaturalist.org/observations/66688925">https://www.inaturalist.org/observations/66688925</a>   |

|      |               |              |            |   |   |            |             |                                                                                                                     |
|------|---------------|--------------|------------|---|---|------------|-------------|---------------------------------------------------------------------------------------------------------------------|
| 2975 | Bubulcus ibis | Cattle Egret | 2020/12/17 | 1 | 0 | 22.9034772 | 120.4664506 | <a href="https://www.inaturalist.org/observations/66689089">https://www.inaturalist.org/observations/66689089</a>   |
| 2976 | Bubulcus ibis | Cattle Egret | 2021/12/18 | 2 | 0 | 22.9041573 | 83.9127756  | <a href="https://www.inaturalist.org/observations/105911697">https://www.inaturalist.org/observations/105911697</a> |
| 2977 | Bubulcus ibis | Cattle Egret | 2022/4/21  | 1 | 0 | 22.9072287 | 120.3116619 | <a href="https://www.inaturalist.org/observations/131187066">https://www.inaturalist.org/observations/131187066</a> |
| 2978 | Bubulcus ibis | Cattle Egret | 2020/11/24 | 1 | 0 | 22.9082217 | 120.5556281 | <a href="https://www.inaturalist.org/observations/65581074">https://www.inaturalist.org/observations/65581074</a>   |
| 2979 | Bubulcus ibis | Cattle Egret | 2022/6/14  | 1 | 0 | 22.9089844 | 120.5559981 | <a href="https://www.inaturalist.org/observations/121740514">https://www.inaturalist.org/observations/121740514</a> |
| 2980 | Bubulcus ibis | Cattle Egret | 2020/10/8  | 1 | 0 | 22.9091084 | 120.5560175 | <a href="https://www.inaturalist.org/observations/62300737">https://www.inaturalist.org/observations/62300737</a>   |
| 2981 | Bubulcus ibis | Cattle Egret | 2020/4/14  | 2 | 0 | 22.9099598 | 120.2494888 | <a href="https://www.inaturalist.org/observations/43198653">https://www.inaturalist.org/observations/43198653</a>   |
| 2982 | Bubulcus ibis | Cattle Egret | 2020/10/27 | 2 | 0 | 22.9103553 | 87.8193577  | <a href="https://www.inaturalist.org/observations/64912049">https://www.inaturalist.org/observations/64912049</a>   |
| 2983 | Bubulcus ibis | Cattle Egret | 2020/4/26  | 2 | 0 | 22.9104156 | 120.5560964 | <a href="https://www.inaturalist.org/observations/43924765">https://www.inaturalist.org/observations/43924765</a>   |
| 2984 | Bubulcus ibis | Cattle Egret | 2021/6/14  | 1 | 0 | 22.9143258 | 88.3877838  | <a href="https://www.inaturalist.org/observations/82927741">https://www.inaturalist.org/observations/82927741</a>   |
| 2985 | Bubulcus ibis | Cattle Egret | 2021/6/10  | 1 | 0 | 22.9144600 | 88.3879391  | <a href="https://www.inaturalist.org/observations/82357959">https://www.inaturalist.org/observations/82357959</a>   |
| 2986 | Bubulcus ibis | Cattle Egret | 2020/10/17 | 1 | 0 | 22.9151851 | 120.3121874 | <a href="https://www.inaturalist.org/observations/62790401">https://www.inaturalist.org/observations/62790401</a>   |
| 2987 | Bubulcus ibis | Cattle Egret | 2021/4/24  | 1 | 0 | 22.9164841 | 121.2546398 | <a href="https://www.inaturalist.org/observations/75157647">https://www.inaturalist.org/observations/75157647</a>   |
| 2988 | Bubulcus ibis | Cattle Egret | 2018/4/3   | 1 | 0 | 22.9167225 | 120.3088149 | <a href="https://www.inaturalist.org/observations/140770472">https://www.inaturalist.org/observations/140770472</a> |
| 2989 | Bubulcus ibis | Cattle Egret | 2017/8/19  | 4 | 0 | 22.9181583 | 87.0708947  | <a href="https://www.inaturalist.org/observations/17177130">https://www.inaturalist.org/observations/17177130</a>   |
| 2990 | Bubulcus ibis | Cattle Egret | 2020/1/28  | 0 | 0 | 22.9187735 | 120.5546179 | <a href="https://www.inaturalist.org/observations/38078192">https://www.inaturalist.org/observations/38078192</a>   |
| 2991 | Bubulcus ibis | Cattle Egret | 2021/12/18 | 1 | 0 | 22.9195417 | 120.5564028 | <a href="https://www.inaturalist.org/observations/103239412">https://www.inaturalist.org/observations/103239412</a> |
| 2992 | Bubulcus ibis | Cattle Egret | 2020/8/22  | 1 | 0 | 22.9198862 | 120.3110829 | <a href="https://www.inaturalist.org/observations/57541625">https://www.inaturalist.org/observations/57541625</a>   |
| 2993 | Bubulcus ibis | Cattle Egret | 2020/4/25  | 2 | 0 | 22.9200555 | 120.2630456 | <a href="https://www.inaturalist.org/observations/44093660">https://www.inaturalist.org/observations/44093660</a>   |
| 2994 | Bubulcus ibis | Cattle Egret | 2020/10/30 | 1 | 0 | 22.9206782 | 120.2629421 | <a href="https://www.inaturalist.org/observations/64040769">https://www.inaturalist.org/observations/64040769</a>   |
| 2995 | Bubulcus ibis | Cattle Egret | 2021/5/22  | 2 | 0 | 22.9215534 | 120.2931242 | <a href="https://www.inaturalist.org/observations/81827036">https://www.inaturalist.org/observations/81827036</a>   |
| 2996 | Bubulcus ibis | Cattle Egret | 2021/10/3  | 1 | 0 | 22.9223503 | 120.2623489 | <a href="https://www.inaturalist.org/observations/101074299">https://www.inaturalist.org/observations/101074299</a> |
| 2997 | Bubulcus ibis | Cattle Egret | 2021/11/9  | 1 | 0 | 22.9230366 | 120.3462601 | <a href="https://www.inaturalist.org/observations/100663950">https://www.inaturalist.org/observations/100663950</a> |
| 2998 | Bubulcus ibis | Cattle Egret | 2018/8/31  | 1 | 0 | 22.9237771 | 120.2861550 | <a href="https://www.inaturalist.org/observations/142661995">https://www.inaturalist.org/observations/142661995</a> |
| 2999 | Bubulcus ibis | Cattle Egret | 2021/10/3  | 1 | 0 | 22.9246564 | 120.2596836 | <a href="https://www.inaturalist.org/observations/101074892">https://www.inaturalist.org/observations/101074892</a> |

|      |                     |                   |            |   |   |            |             |                                                                                                                     |
|------|---------------------|-------------------|------------|---|---|------------|-------------|---------------------------------------------------------------------------------------------------------------------|
| 3000 | Bubulcus ibis       | Cattle Egret      | 2021/8/28  | 1 | 0 | 22.9248922 | 120.3088382 | <a href="https://www.inaturalist.org/observations/94556207">https://www.inaturalist.org/observations/94556207</a>   |
| 3001 | Bubulcus ibis       | Cattle Egret      | 2018/4/1   | 1 | 0 | 22.9258324 | 120.3054669 | <a href="https://www.inaturalist.org/observations/140769441">https://www.inaturalist.org/observations/140769441</a> |
| 3002 | Bubulcus ibis       | Cattle Egret      | 2018/3/30  | 1 | 0 | 22.9264187 | 120.3058180 | <a href="https://www.inaturalist.org/observations/140768610">https://www.inaturalist.org/observations/140768610</a> |
| 3003 | Bubulcus ibis       | Cattle Egret      | 2018/3/30  | 1 | 0 | 22.9264187 | 120.3058180 | <a href="https://www.inaturalist.org/observations/140768620">https://www.inaturalist.org/observations/140768620</a> |
| 3004 | Bubulcus ibis       | Cattle Egret      | 2018/9/29  | 3 | 0 | 22.9264855 | 120.2945299 | <a href="https://www.inaturalist.org/observations/17027146">https://www.inaturalist.org/observations/17027146</a>   |
| 3005 | Bubulcus ibis       | Cattle Egret      | 2021/9/29  | 1 | 0 | 22.9268349 | 120.5765331 | <a href="https://www.inaturalist.org/observations/96669909">https://www.inaturalist.org/observations/96669909</a>   |
| 3006 | Bubulcus ibis       | Cattle Egret      | 2021/10/3  | 1 | 0 | 22.9270017 | 120.2648061 | <a href="https://www.inaturalist.org/observations/101074238">https://www.inaturalist.org/observations/101074238</a> |
| 3007 | Bubulcus ibis       | Cattle Egret      | 2020/3/7   | 0 | 0 | 22.9275159 | 120.2601551 | <a href="https://www.inaturalist.org/observations/39642754">https://www.inaturalist.org/observations/39642754</a>   |
| 3008 | Bubulcus ibis       | Cattle Egret      | 2019/5/8   | 2 | 0 | 22.9282064 | 120.5855164 | <a href="https://www.inaturalist.org/observations/24888008">https://www.inaturalist.org/observations/24888008</a>   |
| 3009 | Bubulcus ibis       | Cattle Egret      | 2020/4/25  | 1 | 0 | 22.9282295 | 120.2619467 | <a href="https://www.inaturalist.org/observations/43319190">https://www.inaturalist.org/observations/43319190</a>   |
| 3010 | Bubulcus ibis       | Cattle Egret      | 2018/4/3   | 1 | 0 | 22.9286758 | 120.3035673 | <a href="https://www.inaturalist.org/observations/81601354">https://www.inaturalist.org/observations/81601354</a>   |
| 3011 | Bubulcus ibis       | Cattle Egret      | 2020/4/25  | 1 | 0 | 22.9307439 | 120.2656288 | <a href="https://www.inaturalist.org/observations/43282574">https://www.inaturalist.org/observations/43282574</a>   |
| 3012 | Bubulcus ibis       | Cattle Egret      | 2020/4/25  | 1 | 0 | 22.9307923 | 120.2656700 | <a href="https://www.inaturalist.org/observations/43282521">https://www.inaturalist.org/observations/43282521</a>   |
| 3013 | Bubulcus ibis       | Cattle Egret      | 2021/8/1   | 2 | 0 | 22.9316189 | 120.2619082 | <a href="https://www.inaturalist.org/observations/90000660">https://www.inaturalist.org/observations/90000660</a>   |
| 3014 | Bubulcus ibis       | Cattle Egret      | 2020/12/31 | 1 | 0 | 22.9317216 | 120.2622303 | <a href="https://www.inaturalist.org/observations/67352345">https://www.inaturalist.org/observations/67352345</a>   |
| 3015 | Bubulcus ibis       | Cattle Egret      | 2021/4/2   | 1 | 0 | 22.9317483 | 120.2623125 | <a href="https://www.inaturalist.org/observations/101077047">https://www.inaturalist.org/observations/101077047</a> |
| 3016 | Bubulcus ibis       | Cattle Egret      | 2020/3/7   | 0 | 0 | 22.9317694 | 120.2622927 | <a href="https://www.inaturalist.org/observations/39642924">https://www.inaturalist.org/observations/39642924</a>   |
| 3017 | Bubulcus ibis       | Cattle Egret      | 2013/6/12  | 1 | 0 | 22.9319405 | 120.7349950 | <a href="https://www.inaturalist.org/observations/82255625">https://www.inaturalist.org/observations/82255625</a>   |
| 3018 | Bubulcus coromandus | ibis Cattle Egret | 2022/11/27 | 1 | 0 | 22.9325869 | 120.5922250 | <a href="https://www.inaturalist.org/observations/143034826">https://www.inaturalist.org/observations/143034826</a> |
| 3019 | Bubulcus ibis       | Cattle Egret      | 2020/1/4   | 1 | 0 | 22.9336345 | 120.3010776 | <a href="https://www.inaturalist.org/observations/37296210">https://www.inaturalist.org/observations/37296210</a>   |
| 3020 | Bubulcus ibis       | Cattle Egret      | 2018/11/23 | 4 | 0 | 22.9345750 | 120.2223883 | <a href="https://www.inaturalist.org/observations/19150436">https://www.inaturalist.org/observations/19150436</a>   |
| 3021 | Bubulcus ibis       | Cattle Egret      | 2020/7/24  | 3 | 0 | 22.9346428 | 120.2249069 | <a href="https://www.inaturalist.org/observations/55463212">https://www.inaturalist.org/observations/55463212</a>   |
| 3022 | Bubulcus ibis       | Cattle Egret      | 2018/6/12  | 4 | 0 | 22.9389734 | 120.3121138 | <a href="https://www.inaturalist.org/observations/56306892">https://www.inaturalist.org/observations/56306892</a>   |
| 3023 | Bubulcus ibis       | Cattle Egret      | 2020/4/10  | 1 | 0 | 22.9447715 | 121.1279735 | <a href="https://www.inaturalist.org/observations/42924041">https://www.inaturalist.org/observations/42924041</a>   |
| 3024 | Bubulcus ibis       | Cattle Egret      | 2020/7/24  | 1 | 0 | 22.9571032 | 120.6046131 | <a href="https://www.inaturalist.org/observations/54517433">https://www.inaturalist.org/observations/54517433</a>   |

|      |               |              |            |   |   |            |             |                                                                                                                     |
|------|---------------|--------------|------------|---|---|------------|-------------|---------------------------------------------------------------------------------------------------------------------|
| 3025 | Bubulcus ibis | Cattle Egret | 2021/12/11 | 1 | 0 | 22.9614366 | 88.4588717  | <a href="https://www.inaturalist.org/observations/102865118">https://www.inaturalist.org/observations/102865118</a> |
| 3026 | Bubulcus ibis | Cattle Egret | 2018/2/15  | 2 | 0 | 22.9648102 | 86.8953406  | <a href="https://www.inaturalist.org/observations/55191156">https://www.inaturalist.org/observations/55191156</a>   |
| 3027 | Bubulcus ibis | Cattle Egret | 2022/12/12 | 1 | 0 | 22.9702255 | 120.2227959 | <a href="https://www.inaturalist.org/observations/144216667">https://www.inaturalist.org/observations/144216667</a> |
| 3028 | Bubulcus ibis | Cattle Egret | 2022/12/12 | 1 | 0 | 22.9705920 | 120.2228642 | <a href="https://www.inaturalist.org/observations/144215592">https://www.inaturalist.org/observations/144215592</a> |
| 3029 | Bubulcus ibis | Cattle Egret | 2018/1/16  | 3 | 0 | 22.9711281 | 86.9893694  | <a href="https://www.inaturalist.org/observations/50588558">https://www.inaturalist.org/observations/50588558</a>   |
| 3030 | Bubulcus ibis | Cattle Egret | 2022/12/12 | 1 | 0 | 22.9715547 | 120.2234193 | <a href="https://www.inaturalist.org/observations/144215534">https://www.inaturalist.org/observations/144215534</a> |
| 3031 | Bubulcus ibis | Cattle Egret | 2019/11/30 | 3 | 0 | 22.9719929 | 120.2225874 | <a href="https://www.inaturalist.org/observations/36697080">https://www.inaturalist.org/observations/36697080</a>   |
| 3032 | Bubulcus ibis | Cattle Egret | 2022/12/12 | 2 | 0 | 22.9723335 | 120.2236398 | <a href="https://www.inaturalist.org/observations/144215547">https://www.inaturalist.org/observations/144215547</a> |
| 3033 | Bubulcus ibis | Cattle Egret | 2021/12/13 | 2 | 0 | 22.9724679 | 120.2230730 | <a href="https://www.inaturalist.org/observations/102967090">https://www.inaturalist.org/observations/102967090</a> |
| 3034 | Bubulcus ibis | Cattle Egret | 2021/10/31 | 1 | 0 | 22.9725081 | 120.2236244 | <a href="https://www.inaturalist.org/observations/99845691">https://www.inaturalist.org/observations/99845691</a>   |
| 3035 | Bubulcus ibis | Cattle Egret | 2022/12/12 | 1 | 0 | 22.9725692 | 120.2232851 | <a href="https://www.inaturalist.org/observations/144213616">https://www.inaturalist.org/observations/144213616</a> |
| 3036 | Bubulcus ibis | Cattle Egret | 2020/6/13  | 1 | 0 | 22.9759885 | 120.2068502 | <a href="https://www.inaturalist.org/observations/49548937">https://www.inaturalist.org/observations/49548937</a>   |
| 3037 | Bubulcus ibis | Cattle Egret | 2022/5/11  | 1 | 0 | 22.9867569 | 87.8549755  | <a href="https://www.inaturalist.org/observations/122766226">https://www.inaturalist.org/observations/122766226</a> |
| 3038 | Bubulcus ibis | Cattle Egret | 2022/5/11  | 1 | 0 | 22.9867569 | 87.8549755  | <a href="https://www.inaturalist.org/observations/122766228">https://www.inaturalist.org/observations/122766228</a> |
| 3039 | Bubulcus ibis | Cattle Egret | 2017/11/11 | 4 | 0 | 22.9869463 | 86.9974977  | <a href="https://www.inaturalist.org/observations/13358560">https://www.inaturalist.org/observations/13358560</a>   |
| 3040 | Bubulcus ibis | Cattle Egret | 2019/7/30  | 6 | 0 | 22.9888698 | 87.0049462  | <a href="https://www.inaturalist.org/observations/30618614">https://www.inaturalist.org/observations/30618614</a>   |
| 3041 | Bubulcus ibis | Cattle Egret | 2020/9/11  | 2 | 0 | 22.9893178 | 87.0031154  | <a href="https://www.inaturalist.org/observations/59228190">https://www.inaturalist.org/observations/59228190</a>   |
| 3042 | Bubulcus ibis | Cattle Egret | 2020/1/3   | 5 | 0 | 22.9897931 | 87.0078094  | <a href="https://www.inaturalist.org/observations/37265126">https://www.inaturalist.org/observations/37265126</a>   |
| 3043 | Bubulcus ibis | Cattle Egret | 2020/12/5  | 1 | 0 | 22.9902307 | 87.0070984  | <a href="https://www.inaturalist.org/observations/66144407">https://www.inaturalist.org/observations/66144407</a>   |
| 3044 | Bubulcus ibis | Cattle Egret | 2020/9/11  | 3 | 0 | 22.9902857 | 87.0011198  | <a href="https://www.inaturalist.org/observations/59228206">https://www.inaturalist.org/observations/59228206</a>   |
| 3045 | Bubulcus ibis | Cattle Egret | 2020/11/1  | 3 | 0 | 22.9906304 | 86.9976302  | <a href="https://www.inaturalist.org/observations/63950859">https://www.inaturalist.org/observations/63950859</a>   |
| 3046 | Bubulcus ibis | Cattle Egret | 2020/11/23 | 3 | 0 | 22.9911744 | 87.0005846  | <a href="https://www.inaturalist.org/observations/65470598">https://www.inaturalist.org/observations/65470598</a>   |
| 3047 | Bubulcus ibis | Cattle Egret | 2020/11/1  | 2 | 0 | 22.9912364 | 86.9976365  | <a href="https://www.inaturalist.org/observations/63950878">https://www.inaturalist.org/observations/63950878</a>   |
| 3048 | Bubulcus ibis | Cattle Egret | 2019/6/11  | 2 | 0 | 22.9995830 | 120.2193463 | <a href="https://www.inaturalist.org/observations/26866374">https://www.inaturalist.org/observations/26866374</a>   |
| 3049 | Bubulcus ibis | Cattle Egret | 2022/11/27 | 1 | 0 | 23.0011351 | 120.1547248 | <a href="https://www.inaturalist.org/observations/143050894">https://www.inaturalist.org/observations/143050894</a> |



|      |               |              |            |   |   |            |             |                                                                                                                     |
|------|---------------|--------------|------------|---|---|------------|-------------|---------------------------------------------------------------------------------------------------------------------|
| 3050 | Bubulcus ibis | Cattle Egret | 2022/5/10  | 1 | 0 | 23.0025659 | 120.1534229 | <a href="https://www.inaturalist.org/observations/116405454">https://www.inaturalist.org/observations/116405454</a> |
| 3051 | Bubulcus ibis | Cattle Egret | 2020/4/9   | 1 | 0 | 23.0025909 | 87.5912821  | <a href="https://www.inaturalist.org/observations/41759229">https://www.inaturalist.org/observations/41759229</a>   |
| 3052 | Bubulcus ibis | Cattle Egret | 2020/9/14  | 1 | 0 | 23.0031649 | 88.4425837  | <a href="https://www.inaturalist.org/observations/89541222">https://www.inaturalist.org/observations/89541222</a>   |
| 3053 | Bubulcus ibis | Cattle Egret | 2018/4/15  | 1 | 0 | 23.0040768 | 120.1486067 | <a href="https://www.inaturalist.org/observations/140378371">https://www.inaturalist.org/observations/140378371</a> |
| 3054 | Bubulcus ibis | Cattle Egret | 2019/3/16  | 4 | 0 | 23.0071503 | 120.1728981 | <a href="https://www.inaturalist.org/observations/21281811">https://www.inaturalist.org/observations/21281811</a>   |
| 3055 | Bubulcus ibis | Cattle Egret | 2020/5/24  | 4 | 0 | 23.0157564 | 120.1806950 | <a href="https://www.inaturalist.org/observations/47501973">https://www.inaturalist.org/observations/47501973</a>   |
| 3056 | Bubulcus ibis | Cattle Egret | 2020/5/24  | 2 | 0 | 23.0165364 | 120.1799533 | <a href="https://www.inaturalist.org/observations/47502057">https://www.inaturalist.org/observations/47502057</a>   |
| 3057 | Bubulcus ibis | Cattle Egret | 2019/12/8  | 1 | 0 | 23.0220376 | 120.2024483 | <a href="https://www.inaturalist.org/observations/45952447">https://www.inaturalist.org/observations/45952447</a>   |
| 3058 | Bubulcus ibis | Cattle Egret | 2021/3/12  | 1 | 0 | 23.0238305 | 120.3555300 | <a href="https://www.inaturalist.org/observations/71042284">https://www.inaturalist.org/observations/71042284</a>   |
| 3059 | Bubulcus ibis | Cattle Egret | 2021/6/27  | 2 | 0 | 23.0248651 | 120.2753520 | <a href="https://www.inaturalist.org/observations/85047730">https://www.inaturalist.org/observations/85047730</a>   |
| 3060 | Bubulcus ibis | Cattle Egret | 2022/10/10 | 2 | 0 | 23.0265436 | 120.3506773 | <a href="https://www.inaturalist.org/observations/138228758">https://www.inaturalist.org/observations/138228758</a> |
| 3061 | Bubulcus ibis | Cattle Egret | 2020/7/1   | 1 | 0 | 23.0400000 | 121.1738889 | <a href="https://www.inaturalist.org/observations/51784752">https://www.inaturalist.org/observations/51784752</a>   |
| 3062 | Bubulcus ibis | Cattle Egret | 2021/5/3   | 2 | 0 | 23.0469040 | 120.1176992 | <a href="https://www.inaturalist.org/observations/76918515">https://www.inaturalist.org/observations/76918515</a>   |
| 3063 | Bubulcus ibis | Cattle Egret | 2020/11/6  | 2 | 0 | 23.0524042 | 120.1542920 | <a href="https://www.inaturalist.org/observations/64282864">https://www.inaturalist.org/observations/64282864</a>   |
| 3064 | Bubulcus ibis | Cattle Egret | 2022/3/18  | 3 | 0 | 23.0607738 | 72.5640573  | <a href="https://www.inaturalist.org/observations/124892564">https://www.inaturalist.org/observations/124892564</a> |
| 3065 | Bubulcus ibis | Cattle Egret | 2020/12/2  | 1 | 0 | 23.0650913 | 120.1965133 | <a href="https://www.inaturalist.org/observations/65990956">https://www.inaturalist.org/observations/65990956</a>   |
| 3066 | Bubulcus ibis | Cattle Egret | 2020/12/2  | 1 | 0 | 23.0651353 | 120.1965026 | <a href="https://www.inaturalist.org/observations/65990955">https://www.inaturalist.org/observations/65990955</a>   |
| 3067 | Bubulcus ibis | Cattle Egret | 2019/7/30  | 2 | 0 | 23.0675317 | 120.1822079 | <a href="https://www.inaturalist.org/observations/29972890">https://www.inaturalist.org/observations/29972890</a>   |
| 3068 | Bubulcus ibis | Cattle Egret | 2021/4/11  | 1 | 0 | 23.0689677 | 120.0899255 | <a href="https://www.inaturalist.org/observations/73825794">https://www.inaturalist.org/observations/73825794</a>   |
| 3069 | Bubulcus ibis | Cattle Egret | 2014/8/14  | 2 | 0 | 23.0824343 | 120.2602694 | <a href="https://www.inaturalist.org/observations/18894763">https://www.inaturalist.org/observations/18894763</a>   |
| 3070 | Bubulcus ibis | Cattle Egret | 2019/4/10  | 1 | 0 | 23.0839003 | 120.1693100 | <a href="https://www.inaturalist.org/observations/28347087">https://www.inaturalist.org/observations/28347087</a>   |
| 3071 | Bubulcus ibis | Cattle Egret | 2019/6/21  | 2 | 0 | 23.0865492 | 120.1789934 | <a href="https://www.inaturalist.org/observations/50613338">https://www.inaturalist.org/observations/50613338</a>   |
| 3072 | Bubulcus ibis | Cattle Egret | 2019/10/13 | 1 | 0 | 23.0873265 | 120.3597355 | <a href="https://www.inaturalist.org/observations/85317833">https://www.inaturalist.org/observations/85317833</a>   |
| 3073 | Bubulcus ibis | Cattle Egret | 2021/1/9   | 1 | 0 | 23.0875946 | 72.4433898  | <a href="https://www.inaturalist.org/observations/67788428">https://www.inaturalist.org/observations/67788428</a>   |
| 3074 | Bubulcus ibis | Cattle Egret | 2019/10/11 | 3 | 0 | 23.0877247 | 120.3594081 | <a href="https://www.inaturalist.org/observations/34254929">https://www.inaturalist.org/observations/34254929</a>   |

|      |                        |                      |            |   |   |            |             |                                                                                                                     |
|------|------------------------|----------------------|------------|---|---|------------|-------------|---------------------------------------------------------------------------------------------------------------------|
| 3075 | Bubulcus ibis          | Cattle Egret         | 2019/4/27  | 3 | 0 | 23.0884500 | 120.0996250 | <a href="https://www.inaturalist.org/observations/23308444">https://www.inaturalist.org/observations/23308444</a>   |
| 3076 | Bubulcus ibis          | Cattle Egret         | 2021/5/14  | 1 | 0 | 23.0889225 | 120.1972328 | <a href="https://www.inaturalist.org/observations/78993839">https://www.inaturalist.org/observations/78993839</a>   |
| 3077 | Bubulcus ibis          | Cattle Egret         | 2020/10/30 | 2 | 0 | 23.0890734 | 120.3586948 | <a href="https://www.inaturalist.org/observations/64032841">https://www.inaturalist.org/observations/64032841</a>   |
| 3078 | Bubulcus ibis          | Cattle Egret         | 2016/8/28  | 1 | 0 | 23.0910710 | 120.1067000 | <a href="https://www.inaturalist.org/observations/85041643">https://www.inaturalist.org/observations/85041643</a>   |
| 3079 | Bubulcus ibis          | Cattle Egret         | 2018/9/3   | 2 | 0 | 23.0911020 | 120.1079680 | <a href="https://www.inaturalist.org/observations/17423736">https://www.inaturalist.org/observations/17423736</a>   |
| 3080 | Bubulcus ibis          | Cattle Egret         | 2020/9/20  | 1 | 0 | 23.0970249 | 120.3608434 | <a href="https://www.inaturalist.org/observations/60162867">https://www.inaturalist.org/observations/60162867</a>   |
| 3081 | Bubulcus ibis          | Cattle Egret         | 2019/7/22  | 3 | 0 | 23.0983759 | 120.2710297 | <a href="https://www.inaturalist.org/observations/29424128">https://www.inaturalist.org/observations/29424128</a>   |
| 3082 | Bubulcus ibis          | Cattle Egret         | 2022/4/20  | 3 | 0 | 23.0989862 | 120.3614117 | <a href="https://www.inaturalist.org/observations/112147546">https://www.inaturalist.org/observations/112147546</a> |
| 3083 | Bubulcus ibis          | Cattle Egret         | 2021/12/17 | 2 | 0 | 23.0999596 | 120.3617580 | <a href="https://www.inaturalist.org/observations/103181530">https://www.inaturalist.org/observations/103181530</a> |
| 3084 | Bubulcus ibis          | Cattle Egret         | 2021/8/17  | 1 | 0 | 23.1002733 | 120.1190648 | <a href="https://www.inaturalist.org/observations/107246449">https://www.inaturalist.org/observations/107246449</a> |
| 3085 | Bubulcus ibis          | Cattle Egret         | 2021/7/24  | 2 | 0 | 23.1045184 | 72.4822550  | <a href="https://www.inaturalist.org/observations/88345663">https://www.inaturalist.org/observations/88345663</a>   |
| 3086 | Bubulcus ibis          | Cattle Egret         | 2020/7/14  | 2 | 0 | 23.1115980 | 120.1863317 | <a href="https://www.inaturalist.org/observations/53100069">https://www.inaturalist.org/observations/53100069</a>   |
| 3087 | Bubulcus ibis          | Cattle Egret         | 2020/7/14  | 1 | 0 | 23.1137763 | 120.1861433 | <a href="https://www.inaturalist.org/observations/53033562">https://www.inaturalist.org/observations/53033562</a>   |
| 3088 | Bubulcus ibis          | Cattle Egret         | 2020/7/14  | 1 | 0 | 23.1137763 | 120.1861433 | <a href="https://www.inaturalist.org/observations/53099527">https://www.inaturalist.org/observations/53099527</a>   |
| 3089 | Bubulcus ibis          | Cattle Egret         | 2022/7/30  | 1 | 0 | 23.1175061 | 121.2202330 | <a href="https://www.inaturalist.org/observations/128520195">https://www.inaturalist.org/observations/128520195</a> |
| 3090 | Bubulcus<br>coromandus | ibis<br>Cattle Egret | 2014/3/16  | 1 | 0 | 23.1195166 | 120.1011836 | <a href="https://www.inaturalist.org/observations/92899974">https://www.inaturalist.org/observations/92899974</a>   |
| 3091 | Bubulcus ibis          | Cattle Egret         | 2021/2/7   | 1 | 0 | 23.1224563 | 116.4995150 | <a href="https://www.inaturalist.org/observations/69245772">https://www.inaturalist.org/observations/69245772</a>   |
| 3092 | Bubulcus ibis          | Cattle Egret         | 2019/6/16  | 4 | 0 | 23.1236377 | 72.0527421  | <a href="https://www.inaturalist.org/observations/27203389">https://www.inaturalist.org/observations/27203389</a>   |
| 3093 | Bubulcus ibis          | Cattle Egret         | 2019/7/22  | 3 | 0 | 23.1260000 | 120.2768100 | <a href="https://www.inaturalist.org/observations/29424125">https://www.inaturalist.org/observations/29424125</a>   |
| 3094 | Bubulcus ibis          | Cattle Egret         | 2021/2/7   | 1 | 0 | 23.1261222 | 116.4887331 | <a href="https://www.inaturalist.org/observations/69245997">https://www.inaturalist.org/observations/69245997</a>   |
| 3095 | Bubulcus ibis          | Cattle Egret         | 2022/6/16  | 6 | 0 | 23.1319243 | 79.9647135  | <a href="https://www.inaturalist.org/observations/121981262">https://www.inaturalist.org/observations/121981262</a> |
| 3096 | Bubulcus ibis          | Cattle Egret         | 2021/12/9  | 3 | 0 | 23.1335733 | 71.7842533  | <a href="https://www.inaturalist.org/observations/121873611">https://www.inaturalist.org/observations/121873611</a> |
| 3097 | Bubulcus ibis          | Cattle Egret         | 2022/12/7  | 1 | 0 | 23.1371766 | 120.1412678 | <a href="https://www.inaturalist.org/observations/143840802">https://www.inaturalist.org/observations/143840802</a> |
| 3098 | Bubulcus ibis          | Cattle Egret         | 2019/11/10 | 2 | 0 | 23.1372866 | 72.4065810  | <a href="https://www.inaturalist.org/observations/102293916">https://www.inaturalist.org/observations/102293916</a> |
| 3099 | Bubulcus ibis          | Cattle Egret         | 2021/3/26  | 1 | 0 | 23.1425542 | 120.1147810 | <a href="https://www.inaturalist.org/observations/72417309">https://www.inaturalist.org/observations/72417309</a>   |

|      |               |              |            |   |   |            |             |                                                                                                                     |
|------|---------------|--------------|------------|---|---|------------|-------------|---------------------------------------------------------------------------------------------------------------------|
| 3100 | Bubulcus ibis | Cattle Egret | 2019/7/21  | 6 | 0 | 23.1488389 | 72.3865917  | <a href="https://www.inaturalist.org/observations/29263344">https://www.inaturalist.org/observations/29263344</a>   |
| 3101 | Bubulcus ibis | Cattle Egret | 2021/12/23 | 1 | 0 | 23.1515806 | 120.2607167 | <a href="https://www.inaturalist.org/observations/103525103">https://www.inaturalist.org/observations/103525103</a> |
| 3102 | Bubulcus ibis | Cattle Egret | 2020/3/18  | 5 | 0 | 23.1520947 | 86.9231261  | <a href="https://www.inaturalist.org/observations/40182641">https://www.inaturalist.org/observations/40182641</a>   |
| 3103 | Bubulcus ibis | Cattle Egret | 2022/9/19  | 2 | 0 | 23.1544160 | 121.2855249 | <a href="https://www.inaturalist.org/observations/140124920">https://www.inaturalist.org/observations/140124920</a> |
| 3104 | Bubulcus ibis | Cattle Egret | 2022/9/19  | 2 | 0 | 23.1544160 | 121.2855249 | <a href="https://www.inaturalist.org/observations/140126403">https://www.inaturalist.org/observations/140126403</a> |
| 3105 | Bubulcus ibis | Cattle Egret | 2022/8/1   | 2 | 0 | 23.1544160 | 121.2855249 | <a href="https://www.inaturalist.org/observations/140131280">https://www.inaturalist.org/observations/140131280</a> |
| 3106 | Bubulcus ibis | Cattle Egret | 2022/8/8   | 2 | 0 | 23.1544160 | 121.2855249 | <a href="https://www.inaturalist.org/observations/140224252">https://www.inaturalist.org/observations/140224252</a> |
| 3107 | Bubulcus ibis | Cattle Egret | 2022/8/15  | 2 | 0 | 23.1544160 | 121.2855249 | <a href="https://www.inaturalist.org/observations/140227890">https://www.inaturalist.org/observations/140227890</a> |
| 3108 | Bubulcus ibis | Cattle Egret | 2022/8/8   | 1 | 0 | 23.1544160 | 121.2855249 | <a href="https://www.inaturalist.org/observations/140232161">https://www.inaturalist.org/observations/140232161</a> |
| 3109 | Bubulcus ibis | Cattle Egret | 2022/8/15  | 2 | 0 | 23.1544160 | 121.2855249 | <a href="https://www.inaturalist.org/observations/140232751">https://www.inaturalist.org/observations/140232751</a> |
| 3110 | Bubulcus ibis | Cattle Egret | 2022/10/24 | 2 | 0 | 23.1544160 | 121.2855249 | <a href="https://www.inaturalist.org/observations/143923492">https://www.inaturalist.org/observations/143923492</a> |
| 3111 | Bubulcus ibis | Cattle Egret | 2022/8/12  | 1 | 0 | 23.1544160 | 121.2855249 | <a href="https://www.inaturalist.org/observations/143924557">https://www.inaturalist.org/observations/143924557</a> |
| 3112 | Bubulcus ibis | Cattle Egret | 2022/8/26  | 1 | 0 | 23.1544160 | 121.2855249 | <a href="https://www.inaturalist.org/observations/143924573">https://www.inaturalist.org/observations/143924573</a> |
| 3113 | Bubulcus ibis | Cattle Egret | 2022/9/2   | 1 | 0 | 23.1544160 | 121.2855249 | <a href="https://www.inaturalist.org/observations/143924585">https://www.inaturalist.org/observations/143924585</a> |
| 3114 | Bubulcus ibis | Cattle Egret | 2022/10/17 | 1 | 0 | 23.1544160 | 121.2855249 | <a href="https://www.inaturalist.org/observations/143926620">https://www.inaturalist.org/observations/143926620</a> |
| 3115 | Bubulcus ibis | Cattle Egret | 2022/9/9   | 1 | 0 | 23.1544160 | 121.2855249 | <a href="https://www.inaturalist.org/observations/143927543">https://www.inaturalist.org/observations/143927543</a> |
| 3116 | Bubulcus ibis | Cattle Egret | 2022/11/7  | 1 | 0 | 23.1544160 | 121.2855249 | <a href="https://www.inaturalist.org/observations/143929060">https://www.inaturalist.org/observations/143929060</a> |
| 3117 | Bubulcus ibis | Cattle Egret | 2022/11/18 | 2 | 0 | 23.1544160 | 121.2855249 | <a href="https://www.inaturalist.org/observations/143929704">https://www.inaturalist.org/observations/143929704</a> |
| 3118 | Bubulcus ibis | Cattle Egret | 2022/11/18 | 2 | 0 | 23.1544160 | 121.2855249 | <a href="https://www.inaturalist.org/observations/143929705">https://www.inaturalist.org/observations/143929705</a> |
| 3119 | Bubulcus ibis | Cattle Egret | 2022/9/23  | 2 | 0 | 23.1544160 | 121.2855249 | <a href="https://www.inaturalist.org/observations/143982504">https://www.inaturalist.org/observations/143982504</a> |
| 3120 | Bubulcus ibis | Cattle Egret | 2022/9/23  | 3 | 0 | 23.1544160 | 121.2855249 | <a href="https://www.inaturalist.org/observations/143982505">https://www.inaturalist.org/observations/143982505</a> |
| 3121 | Bubulcus ibis | Cattle Egret | 2022/10/7  | 1 | 0 | 23.1544160 | 121.2855249 | <a href="https://www.inaturalist.org/observations/143982519">https://www.inaturalist.org/observations/143982519</a> |
| 3122 | Bubulcus ibis | Cattle Egret | 2022/11/18 | 2 | 0 | 23.1544160 | 121.2855249 | <a href="https://www.inaturalist.org/observations/143982571">https://www.inaturalist.org/observations/143982571</a> |
| 3123 | Bubulcus ibis | Cattle Egret | 2022/11/7  | 2 | 0 | 23.1544160 | 121.2855249 | <a href="https://www.inaturalist.org/observations/143983454">https://www.inaturalist.org/observations/143983454</a> |
| 3124 | Bubulcus ibis | Cattle Egret | 2022/10/31 | 0 | 0 | 23.1544160 | 121.2855249 | <a href="https://www.inaturalist.org/observations/143989885">https://www.inaturalist.org/observations/143989885</a> |

|      |               |              |            |   |   |            |             |                                                                                                                     |
|------|---------------|--------------|------------|---|---|------------|-------------|---------------------------------------------------------------------------------------------------------------------|
| 3125 | Bubulcus ibis | Cattle Egret | 2022/8/26  | 1 | 0 | 23.1544160 | 121.2855249 | <a href="https://www.inaturalist.org/observations/143990401">https://www.inaturalist.org/observations/143990401</a> |
| 3126 | Bubulcus ibis | Cattle Egret | 2022/9/12  | 2 | 0 | 23.1544160 | 121.2855249 | <a href="https://www.inaturalist.org/observations/143994216">https://www.inaturalist.org/observations/143994216</a> |
| 3127 | Bubulcus ibis | Cattle Egret | 2022/9/16  | 2 | 0 | 23.1544160 | 121.2855249 | <a href="https://www.inaturalist.org/observations/143994393">https://www.inaturalist.org/observations/143994393</a> |
| 3128 | Bubulcus ibis | Cattle Egret | 2022/10/28 | 1 | 0 | 23.1544160 | 121.2855249 | <a href="https://www.inaturalist.org/observations/143994430">https://www.inaturalist.org/observations/143994430</a> |
| 3129 | Bubulcus ibis | Cattle Egret | 2022/10/10 | 1 | 0 | 23.1544160 | 121.2855249 | <a href="https://www.inaturalist.org/observations/144000495">https://www.inaturalist.org/observations/144000495</a> |
| 3130 | Bubulcus ibis | Cattle Egret | 2022/10/10 | 1 | 0 | 23.1544160 | 121.2855249 | <a href="https://www.inaturalist.org/observations/144000499">https://www.inaturalist.org/observations/144000499</a> |
| 3131 | Bubulcus ibis | Cattle Egret | 2022/8/1   | 1 | 0 | 23.1544160 | 121.2855249 | <a href="https://www.inaturalist.org/observations/144002861">https://www.inaturalist.org/observations/144002861</a> |
| 3132 | Bubulcus ibis | Cattle Egret | 2022/11/18 | 1 | 0 | 23.1544160 | 121.2855249 | <a href="https://www.inaturalist.org/observations/144004697">https://www.inaturalist.org/observations/144004697</a> |
| 3133 | Bubulcus ibis | Cattle Egret | 2022/8/15  | 0 | 0 | 23.1544160 | 121.2855249 | <a href="https://www.inaturalist.org/observations/144004823">https://www.inaturalist.org/observations/144004823</a> |
| 3134 | Bubulcus ibis | Cattle Egret | 2022/11/14 | 2 | 0 | 23.1544160 | 121.2855249 | <a href="https://www.inaturalist.org/observations/144007344">https://www.inaturalist.org/observations/144007344</a> |
| 3135 | Bubulcus ibis | Cattle Egret | 2022/8/8   | 0 | 0 | 23.1544160 | 121.2855249 | <a href="https://www.inaturalist.org/observations/144047223">https://www.inaturalist.org/observations/144047223</a> |
| 3136 | Bubulcus ibis | Cattle Egret | 2022/8/8   | 1 | 0 | 23.1544160 | 121.2855249 | <a href="https://www.inaturalist.org/observations/144059631">https://www.inaturalist.org/observations/144059631</a> |
| 3137 | Bubulcus ibis | Cattle Egret | 2022/8/29  | 1 | 0 | 23.1544160 | 121.2855249 | <a href="https://www.inaturalist.org/observations/144067256">https://www.inaturalist.org/observations/144067256</a> |
| 3138 | Bubulcus ibis | Cattle Egret | 2022/11/7  | 1 | 0 | 23.1544160 | 121.2855249 | <a href="https://www.inaturalist.org/observations/144067997">https://www.inaturalist.org/observations/144067997</a> |
| 3139 | Bubulcus ibis | Cattle Egret | 2022/11/14 | 0 | 0 | 23.1544160 | 121.2855249 | <a href="https://www.inaturalist.org/observations/144068054">https://www.inaturalist.org/observations/144068054</a> |
| 3140 | Bubulcus ibis | Cattle Egret | 2022/8/15  | 1 | 0 | 23.1544160 | 121.2855249 | <a href="https://www.inaturalist.org/observations/144068211">https://www.inaturalist.org/observations/144068211</a> |
| 3141 | Bubulcus ibis | Cattle Egret | 2022/10/17 | 1 | 0 | 23.1544160 | 121.2855249 | <a href="https://www.inaturalist.org/observations/144068952">https://www.inaturalist.org/observations/144068952</a> |
| 3142 | Bubulcus ibis | Cattle Egret | 2022/8/22  | 1 | 0 | 23.1544160 | 121.2855249 | <a href="https://www.inaturalist.org/observations/144073526">https://www.inaturalist.org/observations/144073526</a> |
| 3143 | Bubulcus ibis | Cattle Egret | 2022/11/7  | 1 | 0 | 23.1544160 | 121.2855249 | <a href="https://www.inaturalist.org/observations/144119287">https://www.inaturalist.org/observations/144119287</a> |
| 3144 | Bubulcus ibis | Cattle Egret | 2022/11/14 | 2 | 0 | 23.1544160 | 121.2855249 | <a href="https://www.inaturalist.org/observations/144222397">https://www.inaturalist.org/observations/144222397</a> |
| 3145 | Bubulcus ibis | Cattle Egret | 2022/10/3  | 2 | 0 | 23.1544160 | 121.2855249 | <a href="https://www.inaturalist.org/observations/144468978">https://www.inaturalist.org/observations/144468978</a> |
| 3146 | Bubulcus ibis | Cattle Egret | 2020/11/6  | 1 | 0 | 23.1665130 | 120.2103283 | <a href="https://www.inaturalist.org/observations/64282774">https://www.inaturalist.org/observations/64282774</a>   |
| 3147 | Bubulcus ibis | Cattle Egret | 2020/9/22  | 6 | 0 | 23.1673382 | 72.4632904  | <a href="https://www.inaturalist.org/observations/61087391">https://www.inaturalist.org/observations/61087391</a>   |
| 3148 | Bubulcus ibis | Cattle Egret | 2022/9/9   | 2 | 0 | 23.1740641 | 121.2476137 | <a href="https://www.inaturalist.org/observations/143992086">https://www.inaturalist.org/observations/143992086</a> |
| 3149 | Bubulcus ibis | Cattle Egret | 2019/4/30  | 2 | 0 | 23.1764597 | 75.7885164  | <a href="https://www.inaturalist.org/observations/79290806">https://www.inaturalist.org/observations/79290806</a>   |

|      |               |              |            |   |   |            |             |                                                                                                                     |
|------|---------------|--------------|------------|---|---|------------|-------------|---------------------------------------------------------------------------------------------------------------------|
| 3150 | Bubulcus ibis | Cattle Egret | 2019/11/14 | 2 | 0 | 23.1805109 | 120.3098550 | <a href="https://www.inaturalist.org/observations/35658952">https://www.inaturalist.org/observations/35658952</a>   |
| 3151 | Bubulcus ibis | Cattle Egret | 2019/10/13 | 1 | 0 | 23.1830622 | 120.3127808 | <a href="https://www.inaturalist.org/observations/34297724">https://www.inaturalist.org/observations/34297724</a>   |
| 3152 | Bubulcus ibis | Cattle Egret | 2019/11/14 | 2 | 0 | 23.1834949 | 120.3118604 | <a href="https://www.inaturalist.org/observations/35658884">https://www.inaturalist.org/observations/35658884</a>   |
| 3153 | Bubulcus ibis | Cattle Egret | 2022/10/1  | 1 | 0 | 23.1835819 | 120.3117432 | <a href="https://www.inaturalist.org/observations/137133334">https://www.inaturalist.org/observations/137133334</a> |
| 3154 | Bubulcus ibis | Cattle Egret | 2019/12/22 | 1 | 0 | 23.1839394 | 120.3111321 | <a href="https://www.inaturalist.org/observations/49225459">https://www.inaturalist.org/observations/49225459</a>   |
| 3155 | Bubulcus ibis | Cattle Egret | 2019/11/14 | 2 | 0 | 23.1844540 | 120.3131102 | <a href="https://www.inaturalist.org/observations/35670235">https://www.inaturalist.org/observations/35670235</a>   |
| 3156 | Bubulcus ibis | Cattle Egret | 2004/6/22  | 5 | 0 | 23.1844640 | 120.3131150 | <a href="https://www.inaturalist.org/observations/16280112">https://www.inaturalist.org/observations/16280112</a>   |
| 3157 | Bubulcus ibis | Cattle Egret | 2018/5/14  | 2 | 0 | 23.1844640 | 120.3131150 | <a href="https://www.inaturalist.org/observations/16313020">https://www.inaturalist.org/observations/16313020</a>   |
| 3158 | Bubulcus ibis | Cattle Egret | 2019/11/19 | 2 | 0 | 23.1852044 | 120.3173588 | <a href="https://www.inaturalist.org/observations/35875759">https://www.inaturalist.org/observations/35875759</a>   |
| 3159 | Bubulcus ibis | Cattle Egret | 2016/5/20  | 2 | 0 | 23.1855682 | 120.3149284 | <a href="https://www.inaturalist.org/observations/25609639">https://www.inaturalist.org/observations/25609639</a>   |
| 3160 | Bubulcus ibis | Cattle Egret | 2022/7/24  | 2 | 0 | 23.1858126 | 120.3257110 | <a href="https://www.inaturalist.org/observations/127840631">https://www.inaturalist.org/observations/127840631</a> |
| 3161 | Bubulcus ibis | Cattle Egret | 2021/1/11  | 2 | 0 | 23.1865200 | 120.3269576 | <a href="https://www.inaturalist.org/observations/81001499">https://www.inaturalist.org/observations/81001499</a>   |
| 3162 | Bubulcus ibis | Cattle Egret | 2021/4/3   | 2 | 0 | 23.1878146 | 120.3614342 | <a href="https://www.inaturalist.org/observations/76012993">https://www.inaturalist.org/observations/76012993</a>   |
| 3163 | Bubulcus ibis | Cattle Egret | 2022/4/5   | 2 | 0 | 23.1898030 | 120.1860780 | <a href="https://www.inaturalist.org/observations/110816680">https://www.inaturalist.org/observations/110816680</a> |
| 3164 | Bubulcus ibis | Cattle Egret | 2022/4/5   | 2 | 0 | 23.1898030 | 120.1860780 | <a href="https://www.inaturalist.org/observations/110816681">https://www.inaturalist.org/observations/110816681</a> |
| 3165 | Bubulcus ibis | Cattle Egret | 2022/4/5   | 2 | 0 | 23.1898030 | 120.1860780 | <a href="https://www.inaturalist.org/observations/110817077">https://www.inaturalist.org/observations/110817077</a> |
| 3166 | Bubulcus ibis | Cattle Egret | 2019/9/3   | 1 | 0 | 23.1898901 | 120.3106319 | <a href="https://www.inaturalist.org/observations/32211451">https://www.inaturalist.org/observations/32211451</a>   |
| 3167 | Bubulcus ibis | Cattle Egret | 2018/5/12  | 1 | 0 | 23.1944809 | 120.2954653 | <a href="https://www.inaturalist.org/observations/81666364">https://www.inaturalist.org/observations/81666364</a>   |
| 3168 | Bubulcus ibis | Cattle Egret | 2018/12/10 | 6 | 0 | 23.1954449 | 72.6445127  | <a href="https://www.inaturalist.org/observations/18934216">https://www.inaturalist.org/observations/18934216</a>   |
| 3169 | Bubulcus ibis | Cattle Egret | 2021/12/4  | 1 | 0 | 23.1976667 | 120.3701944 | <a href="https://www.inaturalist.org/observations/102454688">https://www.inaturalist.org/observations/102454688</a> |
| 3170 | Bubulcus ibis | Cattle Egret | 2018/5/12  | 1 | 0 | 23.1979951 | 120.2975531 | <a href="https://www.inaturalist.org/observations/141776970">https://www.inaturalist.org/observations/141776970</a> |
| 3171 | Bubulcus ibis | Cattle Egret | 2020/8/30  | 3 | 0 | 23.1990683 | 77.0833068  | <a href="https://www.inaturalist.org/observations/58037340">https://www.inaturalist.org/observations/58037340</a>   |
| 3172 | Bubulcus ibis | Cattle Egret | 2020/8/30  | 3 | 0 | 23.1990683 | 77.0833068  | <a href="https://www.inaturalist.org/observations/58037343">https://www.inaturalist.org/observations/58037343</a>   |
| 3173 | Bubulcus ibis | Cattle Egret | 2021/6/19  | 1 | 0 | 23.2066161 | 120.3595428 | <a href="https://www.inaturalist.org/observations/85069041">https://www.inaturalist.org/observations/85069041</a>   |
| 3174 | Bubulcus ibis | Cattle Egret | 2021/10/21 | 2 | 0 | 23.2067580 | 77.4601620  | <a href="https://www.inaturalist.org/observations/99201434">https://www.inaturalist.org/observations/99201434</a>   |

|      |                     |                      |            |   |   |            |             |                                                                                                                     |
|------|---------------------|----------------------|------------|---|---|------------|-------------|---------------------------------------------------------------------------------------------------------------------|
| 3175 | Bubulcus ibis       | Cattle Egret         | 2021/10/21 | 3 | 0 | 23.2067580 | 77.4601620  | <a href="https://www.inaturalist.org/observations/99203471">https://www.inaturalist.org/observations/99203471</a>   |
| 3176 | Bubulcus ibis       | Cattle Egret         | 2021/5/2   | 1 | 0 | 23.2069536 | 120.3571222 | <a href="https://www.inaturalist.org/observations/77417875">https://www.inaturalist.org/observations/77417875</a>   |
| 3177 | Bubulcus ibis       | Cattle Egret         | 2021/5/2   | 1 | 0 | 23.2069540 | 120.3571220 | <a href="https://www.inaturalist.org/observations/77418060">https://www.inaturalist.org/observations/77418060</a>   |
| 3178 | Bubulcus ibis       | Cattle Egret         | 2021/12/5  | 1 | 0 | 23.2077244 | 120.3456719 | <a href="https://www.inaturalist.org/observations/106529148">https://www.inaturalist.org/observations/106529148</a> |
| 3179 | Bubulcus ibis       | Cattle Egret         | 2021/12/13 | 3 | 0 | 23.2094480 | 77.4581710  | <a href="https://www.inaturalist.org/observations/102994354">https://www.inaturalist.org/observations/102994354</a> |
| 3180 | Bubulcus ibis       | Cattle Egret         | 2022/1/17  | 3 | 0 | 23.2094480 | 77.4581710  | <a href="https://www.inaturalist.org/observations/107292665">https://www.inaturalist.org/observations/107292665</a> |
| 3181 | Bubulcus ibis       | Cattle Egret         | 2021/7/3   | 2 | 0 | 23.2102150 | 120.3584180 | <a href="https://www.inaturalist.org/observations/86527573">https://www.inaturalist.org/observations/86527573</a>   |
| 3182 | Bubulcus ibis       | Cattle Egret         | 2021/7/3   | 1 | 0 | 23.2102150 | 120.3584180 | <a href="https://www.inaturalist.org/observations/86527729">https://www.inaturalist.org/observations/86527729</a>   |
| 3183 | Bubulcus ibis       | Cattle Egret         | 2021/7/3   | 1 | 0 | 23.2102150 | 120.3584180 | <a href="https://www.inaturalist.org/observations/86527990">https://www.inaturalist.org/observations/86527990</a>   |
| 3184 | Bubulcus ibis       | Cattle Egret         | 2021/7/3   | 2 | 0 | 23.2102150 | 120.3584180 | <a href="https://www.inaturalist.org/observations/86528738">https://www.inaturalist.org/observations/86528738</a>   |
| 3185 | Bubulcus ibis       | Cattle Egret         | 2021/7/3   | 2 | 0 | 23.2102150 | 120.3584180 | <a href="https://www.inaturalist.org/observations/86529184">https://www.inaturalist.org/observations/86529184</a>   |
| 3186 | Bubulcus ibis       | Cattle Egret         | 2021/7/3   | 1 | 0 | 23.2102150 | 120.3584180 | <a href="https://www.inaturalist.org/observations/86529334">https://www.inaturalist.org/observations/86529334</a>   |
| 3187 | Bubulcus ibis       | Cattle Egret         | 2021/6/19  | 1 | 0 | 23.2102150 | 120.3584181 | <a href="https://www.inaturalist.org/observations/85069313">https://www.inaturalist.org/observations/85069313</a>   |
| 3188 | Bubulcus ibis       | Cattle Egret         | 2020/4/25  | 1 | 0 | 23.2119375 | 120.0882707 | <a href="https://www.inaturalist.org/observations/44593919">https://www.inaturalist.org/observations/44593919</a>   |
| 3189 | Bubulcus coromandus | ibis<br>Cattle Egret | 2018/6/18  | 5 | 0 | 23.2131681 | 72.6541668  | <a href="https://www.inaturalist.org/observations/13545815">https://www.inaturalist.org/observations/13545815</a>   |
| 3190 | Bubulcus ibis       | Cattle Egret         | 2022/12/10 | 2 | 0 | 23.2155879 | 77.4386844  | <a href="https://www.inaturalist.org/observations/144075015">https://www.inaturalist.org/observations/144075015</a> |
| 3191 | Bubulcus coromandus | ibis<br>Cattle Egret | 2022/8/6   | 2 | 0 | 23.2209441 | 120.1374854 | <a href="https://www.inaturalist.org/observations/130058358">https://www.inaturalist.org/observations/130058358</a> |
| 3192 | Bubulcus ibis       | Cattle Egret         | 2022/8/6   | 1 | 0 | 23.2209737 | 120.1381655 | <a href="https://www.inaturalist.org/observations/129806396">https://www.inaturalist.org/observations/129806396</a> |
| 3193 | Bubulcus ibis       | Cattle Egret         | 2022/7/15  | 1 | 0 | 23.2210138 | 120.1395402 | <a href="https://www.inaturalist.org/observations/126666385">https://www.inaturalist.org/observations/126666385</a> |
| 3194 | Bubulcus ibis       | Cattle Egret         | 2020/12/15 | 3 | 0 | 23.2224588 | 87.8812170  | <a href="https://www.inaturalist.org/observations/70434748">https://www.inaturalist.org/observations/70434748</a>   |
| 3195 | Bubulcus ibis       | Cattle Egret         | 2020/3/19  | 2 | 0 | 23.2290031 | 73.7407708  | <a href="https://www.inaturalist.org/observations/40224044">https://www.inaturalist.org/observations/40224044</a>   |
| 3196 | Bubulcus ibis       | Cattle Egret         | 2021/12/30 | 1 | 0 | 23.2290090 | 77.3640260  | <a href="https://www.inaturalist.org/observations/104105520">https://www.inaturalist.org/observations/104105520</a> |
| 3197 | Bubulcus ibis       | Cattle Egret         | 2022/1/3   | 2 | 0 | 23.2290090 | 77.3640260  | <a href="https://www.inaturalist.org/observations/104269993">https://www.inaturalist.org/observations/104269993</a> |
| 3198 | Bubulcus ibis       | Cattle Egret         | 2019/2/14  | 5 | 0 | 23.2322917 | 69.7006967  | <a href="https://www.inaturalist.org/observations/28682869">https://www.inaturalist.org/observations/28682869</a>   |
| 3199 | Bubulcus ibis       | Cattle Egret         | 2019/8/25  | 1 | 0 | 23.2330079 | 120.5074307 | <a href="https://www.inaturalist.org/observations/35079950">https://www.inaturalist.org/observations/35079950</a>   |

|      |               |              |            |   |   |            |             |                                                                                                                     |
|------|---------------|--------------|------------|---|---|------------|-------------|---------------------------------------------------------------------------------------------------------------------|
| 3200 | Bubulcus ibis | Cattle Egret | 2020/6/13  | 2 | 0 | 23.2335341 | 120.1114428 | <a href="https://www.inaturalist.org/observations/54735965">https://www.inaturalist.org/observations/54735965</a>   |
| 3201 | Bubulcus ibis | Cattle Egret | 2020/2/17  | 0 | 0 | 23.2350383 | 120.1262550 | <a href="https://www.inaturalist.org/observations/38745905">https://www.inaturalist.org/observations/38745905</a>   |
| 3202 | Bubulcus ibis | Cattle Egret | 2022/8/29  | 1 | 0 | 23.2372972 | 120.1342833 | <a href="https://www.inaturalist.org/observations/133180045">https://www.inaturalist.org/observations/133180045</a> |
| 3203 | Bubulcus ibis | Cattle Egret | 2022/8/29  | 2 | 0 | 23.2374222 | 120.1337306 | <a href="https://www.inaturalist.org/observations/133180032">https://www.inaturalist.org/observations/133180032</a> |
| 3204 | Bubulcus ibis | Cattle Egret | 2022/8/29  | 1 | 0 | 23.2374222 | 120.1337306 | <a href="https://www.inaturalist.org/observations/133180033">https://www.inaturalist.org/observations/133180033</a> |
| 3205 | Bubulcus ibis | Cattle Egret | 2022/8/29  | 1 | 0 | 23.2374472 | 120.1338944 | <a href="https://www.inaturalist.org/observations/133180042">https://www.inaturalist.org/observations/133180042</a> |
| 3206 | Bubulcus ibis | Cattle Egret | 2022/8/24  | 1 | 0 | 23.2378028 | 120.1279917 | <a href="https://www.inaturalist.org/observations/133293163">https://www.inaturalist.org/observations/133293163</a> |
| 3207 | Bubulcus ibis | Cattle Egret | 2022/8/29  | 1 | 0 | 23.2388944 | 120.1277556 | <a href="https://www.inaturalist.org/observations/133180827">https://www.inaturalist.org/observations/133180827</a> |
| 3208 | Bubulcus ibis | Cattle Egret | 2022/8/29  | 1 | 0 | 23.2393222 | 120.1276306 | <a href="https://www.inaturalist.org/observations/133180826">https://www.inaturalist.org/observations/133180826</a> |
| 3209 | Bubulcus ibis | Cattle Egret | 2022/8/29  | 1 | 0 | 23.2393222 | 120.1276306 | <a href="https://www.inaturalist.org/observations/133180871">https://www.inaturalist.org/observations/133180871</a> |
| 3210 | Bubulcus ibis | Cattle Egret | 2021/8/17  | 1 | 0 | 23.2408392 | 120.1310749 | <a href="https://www.inaturalist.org/observations/107249226">https://www.inaturalist.org/observations/107249226</a> |
| 3211 | Bubulcus ibis | Cattle Egret | 2022/7/27  | 2 | 0 | 23.2437309 | 120.1500894 | <a href="https://www.inaturalist.org/observations/129541156">https://www.inaturalist.org/observations/129541156</a> |
| 3212 | Bubulcus ibis | Cattle Egret | 2020/6/20  | 2 | 0 | 23.2474867 | 70.6927100  | <a href="https://www.inaturalist.org/observations/72992935">https://www.inaturalist.org/observations/72992935</a>   |
| 3213 | Bubulcus ibis | Cattle Egret | 2017/11/20 | 2 | 0 | 23.2519444 | 87.0636111  | <a href="https://www.inaturalist.org/observations/136252932">https://www.inaturalist.org/observations/136252932</a> |
| 3214 | Bubulcus ibis | Cattle Egret | 2022/11/26 | 1 | 0 | 23.2519749 | 87.0637436  | <a href="https://www.inaturalist.org/observations/142901171">https://www.inaturalist.org/observations/142901171</a> |
| 3215 | Bubulcus ibis | Cattle Egret | 2022/11/8  | 2 | 0 | 23.2522318 | 87.0638837  | <a href="https://www.inaturalist.org/observations/141444415">https://www.inaturalist.org/observations/141444415</a> |
| 3216 | Bubulcus ibis | Cattle Egret | 2022/12/19 | 2 | 0 | 23.2533797 | 87.0656768  | <a href="https://www.inaturalist.org/observations/144789282">https://www.inaturalist.org/observations/144789282</a> |
| 3217 | Bubulcus ibis | Cattle Egret | 2019/5/25  | 3 | 0 | 23.2590571 | 69.3973671  | <a href="https://www.inaturalist.org/observations/124551725">https://www.inaturalist.org/observations/124551725</a> |
| 3218 | Bubulcus ibis | Cattle Egret | 2022/9/29  | 1 | 0 | 23.2602962 | 71.7383389  | <a href="https://www.inaturalist.org/observations/137395283">https://www.inaturalist.org/observations/137395283</a> |
| 3219 | Bubulcus ibis | Cattle Egret | 2018/3/27  | 4 | 0 | 23.2665206 | 86.7485350  | <a href="https://www.inaturalist.org/observations/31127109">https://www.inaturalist.org/observations/31127109</a>   |
| 3220 | Bubulcus ibis | Cattle Egret | 2019/4/18  | 3 | 0 | 23.2730997 | 77.2350874  | <a href="https://www.inaturalist.org/observations/22649759">https://www.inaturalist.org/observations/22649759</a>   |
| 3221 | Bubulcus ibis | Cattle Egret | 2020/4/23  | 1 | 0 | 23.2776950 | 120.1699967 | <a href="https://www.inaturalist.org/observations/43059972">https://www.inaturalist.org/observations/43059972</a>   |
| 3222 | Bubulcus ibis | Cattle Egret | 2020/4/23  | 1 | 0 | 23.2777217 | 120.1702333 | <a href="https://www.inaturalist.org/observations/43065540">https://www.inaturalist.org/observations/43065540</a>   |
| 3223 | Bubulcus ibis | Cattle Egret | 2022/10/5  | 2 | 0 | 23.2788625 | 71.7567401  | <a href="https://www.inaturalist.org/observations/138081939">https://www.inaturalist.org/observations/138081939</a> |
| 3224 | Bubulcus ibis | Cattle Egret | 2022/4/20  | 2 | 0 | 23.2788908 | 120.1889688 | <a href="https://www.inaturalist.org/observations/112134031">https://www.inaturalist.org/observations/112134031</a> |

|      |               |              |            |   |   |            |             |                                                                                                                     |
|------|---------------|--------------|------------|---|---|------------|-------------|---------------------------------------------------------------------------------------------------------------------|
| 3225 | Bubulcus ibis | Cattle Egret | 2014/7/19  | 3 | 0 | 23.2851280 | 120.3188176 | <a href="https://www.inaturalist.org/observations/15099321">https://www.inaturalist.org/observations/15099321</a>   |
| 3226 | Bubulcus ibis | Cattle Egret | 2022/9/30  | 3 | 0 | 23.2885995 | 71.7631131  | <a href="https://www.inaturalist.org/observations/137732339">https://www.inaturalist.org/observations/137732339</a> |
| 3227 | Bubulcus ibis | Cattle Egret | 2019/8/16  | 2 | 0 | 23.2915173 | 77.2708817  | <a href="https://www.inaturalist.org/observations/30971995">https://www.inaturalist.org/observations/30971995</a>   |
| 3228 | Bubulcus ibis | Cattle Egret | 2022/10/22 | 1 | 0 | 23.2986250 | 120.2458056 | <a href="https://www.inaturalist.org/observations/139582715">https://www.inaturalist.org/observations/139582715</a> |
| 3229 | Bubulcus ibis | Cattle Egret | 2021/8/17  | 1 | 0 | 23.2993602 | 120.5855794 | <a href="https://www.inaturalist.org/observations/91807402">https://www.inaturalist.org/observations/91807402</a>   |
| 3230 | Bubulcus ibis | Cattle Egret | 2018/5/26  | 4 | 0 | 23.3145485 | 86.3660284  | <a href="https://www.inaturalist.org/observations/13242662">https://www.inaturalist.org/observations/13242662</a>   |
| 3231 | Bubulcus ibis | Cattle Egret | 2022/10/23 | 2 | 0 | 23.3172090 | 120.2691044 | <a href="https://www.inaturalist.org/observations/139712009">https://www.inaturalist.org/observations/139712009</a> |
| 3232 | Bubulcus ibis | Cattle Egret | 2021/12/31 | 1 | 0 | 23.3203430 | 121.3254007 | <a href="https://www.inaturalist.org/observations/105137883">https://www.inaturalist.org/observations/105137883</a> |
| 3233 | Bubulcus ibis | Cattle Egret | 2021/12/31 | 1 | 0 | 23.3206156 | 121.3259052 | <a href="https://www.inaturalist.org/observations/105137880">https://www.inaturalist.org/observations/105137880</a> |
| 3234 | Bubulcus ibis | Cattle Egret | 2022/10/18 | 2 | 0 | 23.3306250 | 120.3178660 | <a href="https://www.inaturalist.org/observations/139312834">https://www.inaturalist.org/observations/139312834</a> |
| 3235 | Bubulcus ibis | Cattle Egret | 2017/4/8   | 3 | 0 | 23.3306718 | 77.7961911  | <a href="https://www.inaturalist.org/observations/72768469">https://www.inaturalist.org/observations/72768469</a>   |
| 3236 | Bubulcus ibis | Cattle Egret | 2020/8/27  | 2 | 0 | 23.3339942 | 120.4588058 | <a href="https://www.inaturalist.org/observations/65384430">https://www.inaturalist.org/observations/65384430</a>   |
| 3237 | Bubulcus ibis | Cattle Egret | 2020/12/6  | 2 | 0 | 23.3417527 | 77.7796349  | <a href="https://www.inaturalist.org/observations/66177351">https://www.inaturalist.org/observations/66177351</a>   |
| 3238 | Bubulcus ibis | Cattle Egret | 2021/9/28  | 0 | 0 | 23.3436583 | 120.1729722 | <a href="https://www.inaturalist.org/observations/96741498">https://www.inaturalist.org/observations/96741498</a>   |
| 3239 | Bubulcus ibis | Cattle Egret | 2022/2/5   | 1 | 0 | 23.3457709 | 120.2804571 | <a href="https://www.inaturalist.org/observations/107304294">https://www.inaturalist.org/observations/107304294</a> |
| 3240 | Bubulcus ibis | Cattle Egret | 2021/9/4   | 2 | 0 | 23.3482410 | 77.7812580  | <a href="https://www.inaturalist.org/observations/93734778">https://www.inaturalist.org/observations/93734778</a>   |
| 3241 | Bubulcus ibis | Cattle Egret | 2021/2/6   | 2 | 0 | 23.3528182 | 77.7815200  | <a href="https://www.inaturalist.org/observations/69132593">https://www.inaturalist.org/observations/69132593</a>   |
| 3242 | Bubulcus ibis | Cattle Egret | 2018/11/1  | 3 | 0 | 23.3535361 | 120.4730033 | <a href="https://www.inaturalist.org/observations/18004619">https://www.inaturalist.org/observations/18004619</a>   |
| 3243 | Bubulcus ibis | Cattle Egret | 2020/4/26  | 2 | 0 | 23.3593430 | 120.1935920 | <a href="https://www.inaturalist.org/observations/44102149">https://www.inaturalist.org/observations/44102149</a>   |
| 3244 | Bubulcus ibis | Cattle Egret | 2018/7/28  | 3 | 0 | 23.3714733 | 121.3297831 | <a href="https://www.inaturalist.org/observations/18418021">https://www.inaturalist.org/observations/18418021</a>   |
| 3245 | Bubulcus ibis | Cattle Egret | 2018/6/20  | 3 | 0 | 23.3727640 | 121.3240830 | <a href="https://www.inaturalist.org/observations/18417963">https://www.inaturalist.org/observations/18417963</a>   |
| 3246 | Bubulcus ibis | Cattle Egret | 2022/9/11  | 1 | 0 | 23.3743763 | 72.0390454  | <a href="https://www.inaturalist.org/observations/134549321">https://www.inaturalist.org/observations/134549321</a> |
| 3247 | Bubulcus ibis | Cattle Egret | 2021/2/5   | 1 | 0 | 23.3759072 | 72.0407140  | <a href="https://www.inaturalist.org/observations/69195805">https://www.inaturalist.org/observations/69195805</a>   |
| 3248 | Bubulcus ibis | Cattle Egret | 2021/1/8   | 3 | 0 | 23.3759670 | 72.0405510  | <a href="https://www.inaturalist.org/observations/67736212">https://www.inaturalist.org/observations/67736212</a>   |
| 3249 | Bubulcus ibis | Cattle Egret | 2022/10/2  | 2 | 0 | 23.3766280 | 72.0397630  | <a href="https://www.inaturalist.org/observations/138094787">https://www.inaturalist.org/observations/138094787</a> |



|      |               |              |            |   |   |            |             |                                                                                                                     |
|------|---------------|--------------|------------|---|---|------------|-------------|---------------------------------------------------------------------------------------------------------------------|
| 3250 | Bubulcus ibis | Cattle Egret | 2022/7/24  | 2 | 0 | 23.3767877 | 72.0396400  | <a href="https://www.inaturalist.org/observations/127673159">https://www.inaturalist.org/observations/127673159</a> |
| 3251 | Bubulcus ibis | Cattle Egret | 2022/11/3  | 1 | 0 | 23.3797841 | 120.6271371 | <a href="https://www.inaturalist.org/observations/140938463">https://www.inaturalist.org/observations/140938463</a> |
| 3252 | Bubulcus ibis | Cattle Egret | 2022/11/3  | 1 | 0 | 23.3800346 | 120.6270319 | <a href="https://www.inaturalist.org/observations/140940526">https://www.inaturalist.org/observations/140940526</a> |
| 3253 | Bubulcus ibis | Cattle Egret | 2021/1/13  | 2 | 0 | 23.3800711 | 120.3369829 | <a href="https://www.inaturalist.org/observations/68015117">https://www.inaturalist.org/observations/68015117</a>   |
| 3254 | Bubulcus ibis | Cattle Egret | 2019/5/25  | 4 | 0 | 23.3905943 | 71.5433121  | <a href="https://www.inaturalist.org/observations/34454682">https://www.inaturalist.org/observations/34454682</a>   |
| 3255 | Bubulcus ibis | Cattle Egret | 2022/10/17 | 1 | 0 | 23.4040070 | 121.2168466 | <a href="https://www.inaturalist.org/observations/143908423">https://www.inaturalist.org/observations/143908423</a> |
| 3256 | Bubulcus ibis | Cattle Egret | 2022/10/24 | 0 | 0 | 23.4040070 | 121.2168466 | <a href="https://www.inaturalist.org/observations/143919955">https://www.inaturalist.org/observations/143919955</a> |
| 3257 | Bubulcus ibis | Cattle Egret | 2022/11/14 | 0 | 0 | 23.4040070 | 121.2168466 | <a href="https://www.inaturalist.org/observations/143921089">https://www.inaturalist.org/observations/143921089</a> |
| 3258 | Bubulcus ibis | Cattle Egret | 2022/9/26  | 0 | 0 | 23.4040070 | 121.2168466 | <a href="https://www.inaturalist.org/observations/143921345">https://www.inaturalist.org/observations/143921345</a> |
| 3259 | Bubulcus ibis | Cattle Egret | 2022/10/17 | 0 | 0 | 23.4040070 | 121.2168466 | <a href="https://www.inaturalist.org/observations/143922383">https://www.inaturalist.org/observations/143922383</a> |
| 3260 | Bubulcus ibis | Cattle Egret | 2022/9/2   | 1 | 0 | 23.4040070 | 121.2168466 | <a href="https://www.inaturalist.org/observations/144073647">https://www.inaturalist.org/observations/144073647</a> |
| 3261 | Bubulcus ibis | Cattle Egret | 2022/9/19  | 3 | 0 | 23.4040070 | 121.2168466 | <a href="https://www.inaturalist.org/observations/144202340">https://www.inaturalist.org/observations/144202340</a> |
| 3262 | Bubulcus ibis | Cattle Egret | 2022/9/19  | 2 | 0 | 23.4040070 | 121.2168466 | <a href="https://www.inaturalist.org/observations/144203168">https://www.inaturalist.org/observations/144203168</a> |
| 3263 | Bubulcus ibis | Cattle Egret | 2022/11/14 | 2 | 0 | 23.4040070 | 121.2168466 | <a href="https://www.inaturalist.org/observations/144220006">https://www.inaturalist.org/observations/144220006</a> |
| 3264 | Bubulcus ibis | Cattle Egret | 2022/7/3   | 1 | 0 | 23.4084389 | 121.3404028 | <a href="https://www.inaturalist.org/observations/124551016">https://www.inaturalist.org/observations/124551016</a> |
| 3265 | Bubulcus ibis | Cattle Egret | 2022/7/3   | 1 | 0 | 23.4084389 | 121.3404028 | <a href="https://www.inaturalist.org/observations/124551098">https://www.inaturalist.org/observations/124551098</a> |
| 3266 | Bubulcus ibis | Cattle Egret | 2022/7/3   | 1 | 0 | 23.4084389 | 121.3404028 | <a href="https://www.inaturalist.org/observations/124551195">https://www.inaturalist.org/observations/124551195</a> |
| 3267 | Bubulcus ibis | Cattle Egret | 2022/7/3   | 1 | 0 | 23.4084389 | 121.3404028 | <a href="https://www.inaturalist.org/observations/124551336">https://www.inaturalist.org/observations/124551336</a> |
| 3268 | Bubulcus ibis | Cattle Egret | 2022/12/23 | 0 | 0 | 23.4160301 | 120.1708828 | <a href="https://www.inaturalist.org/observations/144912728">https://www.inaturalist.org/observations/144912728</a> |
| 3269 | Bubulcus ibis | Cattle Egret | 2020/4/27  | 1 | 0 | 23.4194518 | 120.3002205 | <a href="https://www.inaturalist.org/observations/44020860">https://www.inaturalist.org/observations/44020860</a>   |
| 3270 | Bubulcus ibis | Cattle Egret | 2022/8/23  | 1 | 0 | 23.4197850 | 120.4964183 | <a href="https://www.inaturalist.org/observations/132087094">https://www.inaturalist.org/observations/132087094</a> |
| 3271 | Bubulcus ibis | Cattle Egret | 2022/4/15  | 1 | 0 | 23.4234639 | 121.3558522 | <a href="https://www.inaturalist.org/observations/120113753">https://www.inaturalist.org/observations/120113753</a> |
| 3272 | Bubulcus ibis | Cattle Egret | 2022/4/15  | 1 | 0 | 23.4239411 | 121.3553193 | <a href="https://www.inaturalist.org/observations/120113754">https://www.inaturalist.org/observations/120113754</a> |
| 3273 | Bubulcus ibis | Cattle Egret | 2022/4/15  | 2 | 0 | 23.4262795 | 121.3563389 | <a href="https://www.inaturalist.org/observations/126194495">https://www.inaturalist.org/observations/126194495</a> |
| 3274 | Bubulcus ibis | Cattle Egret | 2022/4/15  | 2 | 0 | 23.4268260 | 121.3571357 | <a href="https://www.inaturalist.org/observations/126194496">https://www.inaturalist.org/observations/126194496</a> |

|      |               |              |            |   |   |            |             |                                                                                                                     |
|------|---------------|--------------|------------|---|---|------------|-------------|---------------------------------------------------------------------------------------------------------------------|
| 3275 | Bubulcus ibis | Cattle Egret | 2019/11/3  | 1 | 0 | 23.4272493 | 88.3912935  | <a href="https://www.inaturalist.org/observations/95556955">https://www.inaturalist.org/observations/95556955</a>   |
| 3276 | Bubulcus ibis | Cattle Egret | 2021/4/2   | 1 | 0 | 23.4292730 | 116.3828052 | <a href="https://www.inaturalist.org/observations/72676528">https://www.inaturalist.org/observations/72676528</a>   |
| 3277 | Bubulcus ibis | Cattle Egret | 2019/5/15  | 2 | 0 | 23.4366670 | 120.1633143 | <a href="https://www.inaturalist.org/observations/25184627">https://www.inaturalist.org/observations/25184627</a>   |
| 3278 | Bubulcus ibis | Cattle Egret | 2020/10/27 | 1 | 0 | 23.4415417 | 120.5991383 | <a href="https://www.inaturalist.org/observations/63619183">https://www.inaturalist.org/observations/63619183</a>   |
| 3279 | Bubulcus ibis | Cattle Egret | 2019/4/1   | 1 | 0 | 23.4468155 | 88.3289999  | <a href="https://www.inaturalist.org/observations/100292556">https://www.inaturalist.org/observations/100292556</a> |
| 3280 | Bubulcus ibis | Cattle Egret | 2018/12/31 | 5 | 0 | 23.4469000 | 120.3518300 | <a href="https://www.inaturalist.org/observations/19328425">https://www.inaturalist.org/observations/19328425</a>   |
| 3281 | Bubulcus ibis | Cattle Egret | 2022/2/8   | 1 | 0 | 23.4485400 | 121.3987200 | <a href="https://www.inaturalist.org/observations/106383561">https://www.inaturalist.org/observations/106383561</a> |
| 3282 | Bubulcus ibis | Cattle Egret | 2022/2/10  | 1 | 0 | 23.4495017 | 121.3980117 | <a href="https://www.inaturalist.org/observations/106475675">https://www.inaturalist.org/observations/106475675</a> |
| 3283 | Bubulcus ibis | Cattle Egret | 2021/11/28 | 1 | 0 | 23.4510450 | 120.4844857 | <a href="https://www.inaturalist.org/observations/102063863">https://www.inaturalist.org/observations/102063863</a> |
| 3284 | Bubulcus ibis | Cattle Egret | 2022/10/20 | 1 | 0 | 23.4531884 | 120.5594478 | <a href="https://www.inaturalist.org/observations/139850630">https://www.inaturalist.org/observations/139850630</a> |
| 3285 | Bubulcus ibis | Cattle Egret | 2022/4/21  | 1 | 0 | 23.4531950 | 120.5596633 | <a href="https://www.inaturalist.org/observations/117694067">https://www.inaturalist.org/observations/117694067</a> |
| 3286 | Bubulcus ibis | Cattle Egret | 2014/1/2   | 1 | 0 | 23.4532766 | 120.5603104 | <a href="https://www.inaturalist.org/observations/98086548">https://www.inaturalist.org/observations/98086548</a>   |
| 3287 | Bubulcus ibis | Cattle Egret | 2012/10/18 | 1 | 0 | 23.4532929 | 120.5593186 | <a href="https://www.inaturalist.org/observations/118893793">https://www.inaturalist.org/observations/118893793</a> |
| 3288 | Bubulcus ibis | Cattle Egret | 2022/7/29  | 0 | 0 | 23.4533178 | 120.5598138 | <a href="https://www.inaturalist.org/observations/135634130">https://www.inaturalist.org/observations/135634130</a> |
| 3289 | Bubulcus ibis | Cattle Egret | 2012/10/17 | 1 | 0 | 23.4533245 | 120.5593109 | <a href="https://www.inaturalist.org/observations/118887242">https://www.inaturalist.org/observations/118887242</a> |
| 3290 | Bubulcus ibis | Cattle Egret | 2020/8/18  | 1 | 0 | 23.4534796 | 120.5592370 | <a href="https://www.inaturalist.org/observations/60689544">https://www.inaturalist.org/observations/60689544</a>   |
| 3291 | Bubulcus ibis | Cattle Egret | 2015/5/7   | 1 | 0 | 23.4534833 | 120.5588996 | <a href="https://www.inaturalist.org/observations/97962326">https://www.inaturalist.org/observations/97962326</a>   |
| 3292 | Bubulcus ibis | Cattle Egret | 2015/1/28  | 1 | 0 | 23.4534833 | 120.5588996 | <a href="https://www.inaturalist.org/observations/97962334">https://www.inaturalist.org/observations/97962334</a>   |
| 3293 | Bubulcus ibis | Cattle Egret | 2022/9/22  | 1 | 0 | 23.4535054 | 120.5579636 | <a href="https://www.inaturalist.org/observations/136008977">https://www.inaturalist.org/observations/136008977</a> |
| 3294 | Bubulcus ibis | Cattle Egret | 2020/11/9  | 1 | 0 | 23.4535353 | 120.5591051 | <a href="https://www.inaturalist.org/observations/64762081">https://www.inaturalist.org/observations/64762081</a>   |
| 3295 | Bubulcus ibis | Cattle Egret | 2019/8/28  | 1 | 0 | 23.4537516 | 120.5595193 | <a href="https://www.inaturalist.org/observations/42377287">https://www.inaturalist.org/observations/42377287</a>   |
| 3296 | Bubulcus ibis | Cattle Egret | 2020/4/25  | 1 | 0 | 23.4558511 | 120.1779884 | <a href="https://www.inaturalist.org/observations/43583888">https://www.inaturalist.org/observations/43583888</a>   |
| 3297 | Bubulcus ibis | Cattle Egret | 2022/9/1   | 1 | 0 | 23.4569806 | 121.3811745 | <a href="https://www.inaturalist.org/observations/140238884">https://www.inaturalist.org/observations/140238884</a> |
| 3298 | Bubulcus ibis | Cattle Egret | 2021/4/17  | 1 | 0 | 23.4600203 | 120.4815421 | <a href="https://www.inaturalist.org/observations/74334276">https://www.inaturalist.org/observations/74334276</a>   |
| 3299 | Bubulcus ibis | Cattle Egret | 2022/6/11  | 1 | 0 | 23.4604820 | 120.1983882 | <a href="https://www.inaturalist.org/observations/121378159">https://www.inaturalist.org/observations/121378159</a> |

|      |               |              |            |   |   |            |             |                                                                                                                     |
|------|---------------|--------------|------------|---|---|------------|-------------|---------------------------------------------------------------------------------------------------------------------|
| 3300 | Bubulcus ibis | Cattle Egret | 2019/6/29  | 3 | 0 | 23.4622002 | 120.4780655 | <a href="https://www.inaturalist.org/observations/27878070">https://www.inaturalist.org/observations/27878070</a>   |
| 3301 | Bubulcus ibis | Cattle Egret | 2020/1/15  | 3 | 0 | 23.4622270 | 120.4780665 | <a href="https://www.inaturalist.org/observations/40122532">https://www.inaturalist.org/observations/40122532</a>   |
| 3302 | Bubulcus ibis | Cattle Egret | 2019/4/29  | 1 | 0 | 23.4665876 | 120.1663997 | <a href="https://www.inaturalist.org/observations/23899102">https://www.inaturalist.org/observations/23899102</a>   |
| 3303 | Bubulcus ibis | Cattle Egret | 2019/4/29  | 1 | 0 | 23.4695809 | 120.4825658 | <a href="https://www.inaturalist.org/observations/23914714">https://www.inaturalist.org/observations/23914714</a>   |
| 3304 | Bubulcus ibis | Cattle Egret | 2021/4/15  | 1 | 0 | 23.4696010 | 120.1486159 | <a href="https://www.inaturalist.org/observations/76561604">https://www.inaturalist.org/observations/76561604</a>   |
| 3305 | Bubulcus ibis | Cattle Egret | 2022/10/3  | 2 | 0 | 23.4710183 | 120.4856638 | <a href="https://www.inaturalist.org/observations/137383877">https://www.inaturalist.org/observations/137383877</a> |
| 3306 | Bubulcus ibis | Cattle Egret | 2018/10/4  | 4 | 0 | 23.4713917 | 120.4869300 | <a href="https://www.inaturalist.org/observations/17343851">https://www.inaturalist.org/observations/17343851</a>   |
| 3307 | Bubulcus ibis | Cattle Egret | 2022/7/5   | 2 | 0 | 23.4716467 | 120.4843967 | <a href="https://www.inaturalist.org/observations/124842514">https://www.inaturalist.org/observations/124842514</a> |
| 3308 | Bubulcus ibis | Cattle Egret | 2019/11/24 | 2 | 0 | 23.4731747 | 120.4796848 | <a href="https://www.inaturalist.org/observations/36011008">https://www.inaturalist.org/observations/36011008</a>   |
| 3309 | Bubulcus ibis | Cattle Egret | 2020/6/17  | 1 | 0 | 23.4748103 | 120.4508681 | <a href="https://www.inaturalist.org/observations/51599042">https://www.inaturalist.org/observations/51599042</a>   |
| 3310 | Bubulcus ibis | Cattle Egret | 2020/8/6   | 1 | 0 | 23.4750833 | 120.4516139 | <a href="https://www.inaturalist.org/observations/55583885">https://www.inaturalist.org/observations/55583885</a>   |
| 3311 | Bubulcus ibis | Cattle Egret | 2021/4/15  | 1 | 0 | 23.4757590 | 120.1576381 | <a href="https://www.inaturalist.org/observations/76556988">https://www.inaturalist.org/observations/76556988</a>   |
| 3312 | Bubulcus ibis | Cattle Egret | 2019/2/17  | 5 | 0 | 23.4815564 | 87.3030978  | <a href="https://www.inaturalist.org/observations/20418558">https://www.inaturalist.org/observations/20418558</a>   |
| 3313 | Bubulcus ibis | Cattle Egret | 2022/4/23  | 0 | 0 | 23.4817883 | 120.2536797 | <a href="https://www.inaturalist.org/observations/112495756">https://www.inaturalist.org/observations/112495756</a> |
| 3314 | Bubulcus ibis | Cattle Egret | 2022/2/10  | 2 | 0 | 23.4832560 | 77.5046100  | <a href="https://www.inaturalist.org/observations/107300776">https://www.inaturalist.org/observations/107300776</a> |
| 3315 | Bubulcus ibis | Cattle Egret | 2022/2/10  | 2 | 0 | 23.4832560 | 77.5046100  | <a href="https://www.inaturalist.org/observations/107304068">https://www.inaturalist.org/observations/107304068</a> |
| 3316 | Bubulcus ibis | Cattle Egret | 2022/5/7   | 2 | 0 | 23.4870870 | 120.1896943 | <a href="https://www.inaturalist.org/observations/116942101">https://www.inaturalist.org/observations/116942101</a> |
| 3317 | Bubulcus ibis | Cattle Egret | 2020/10/5  | 1 | 0 | 23.4916116 | 120.4466990 | <a href="https://www.inaturalist.org/observations/61763131">https://www.inaturalist.org/observations/61763131</a>   |
| 3318 | Bubulcus ibis | Cattle Egret | 2020/3/1   | 0 | 0 | 23.4934032 | 120.1569634 | <a href="https://www.inaturalist.org/observations/39397077">https://www.inaturalist.org/observations/39397077</a>   |
| 3319 | Bubulcus ibis | Cattle Egret | 2021/5/5   | 1 | 0 | 23.4936117 | 120.1519250 | <a href="https://www.inaturalist.org/observations/79243100">https://www.inaturalist.org/observations/79243100</a>   |
| 3320 | Bubulcus ibis | Cattle Egret | 2020/1/23  | 0 | 0 | 23.4938033 | 120.1523300 | <a href="https://www.inaturalist.org/observations/37907649">https://www.inaturalist.org/observations/37907649</a>   |
| 3321 | Bubulcus ibis | Cattle Egret | 2021/1/5   | 1 | 0 | 23.4941600 | 120.1538200 | <a href="https://www.inaturalist.org/observations/67635215">https://www.inaturalist.org/observations/67635215</a>   |
| 3322 | Bubulcus ibis | Cattle Egret | 2021/2/2   | 1 | 0 | 23.4941750 | 120.1539250 | <a href="https://www.inaturalist.org/observations/68975341">https://www.inaturalist.org/observations/68975341</a>   |
| 3323 | Bubulcus ibis | Cattle Egret | 2021/11/17 | 1 | 0 | 23.4947083 | 120.1568817 | <a href="https://www.inaturalist.org/observations/101652951">https://www.inaturalist.org/observations/101652951</a> |
| 3324 | Bubulcus ibis | Cattle Egret | 2018/1/25  | 1 | 0 | 23.4947918 | 120.1549515 | <a href="https://www.inaturalist.org/observations/123738140">https://www.inaturalist.org/observations/123738140</a> |

|      |               |              |            |   |   |            |             |                                                                                                                     |
|------|---------------|--------------|------------|---|---|------------|-------------|---------------------------------------------------------------------------------------------------------------------|
| 3325 | Bubulcus ibis | Cattle Egret | 2022/2/9   | 1 | 0 | 23.4948992 | 120.1566441 | <a href="https://www.inaturalist.org/observations/106479791">https://www.inaturalist.org/observations/106479791</a> |
| 3326 | Bubulcus ibis | Cattle Egret | 2020/4/27  | 2 | 0 | 23.4951800 | 120.2959100 | <a href="https://www.inaturalist.org/observations/43891283">https://www.inaturalist.org/observations/43891283</a>   |
| 3327 | Bubulcus ibis | Cattle Egret | 2021/6/4   | 1 | 0 | 23.4959474 | 120.1538465 | <a href="https://www.inaturalist.org/observations/84824706">https://www.inaturalist.org/observations/84824706</a>   |
| 3328 | Bubulcus ibis | Cattle Egret | 2020/4/27  | 1 | 0 | 23.4959989 | 120.1555550 | <a href="https://www.inaturalist.org/observations/44097224">https://www.inaturalist.org/observations/44097224</a>   |
| 3329 | Bubulcus ibis | Cattle Egret | 2021/4/16  | 1 | 0 | 23.4966260 | 120.1683772 | <a href="https://www.inaturalist.org/observations/78568842">https://www.inaturalist.org/observations/78568842</a>   |
| 3330 | Bubulcus ibis | Cattle Egret | 2020/4/25  | 1 | 0 | 23.4970550 | 120.1683433 | <a href="https://www.inaturalist.org/observations/43873887">https://www.inaturalist.org/observations/43873887</a>   |
| 3331 | Bubulcus ibis | Cattle Egret | 2020/2/13  | 0 | 0 | 23.4981833 | 120.1529800 | <a href="https://www.inaturalist.org/observations/38625253">https://www.inaturalist.org/observations/38625253</a>   |
| 3332 | Bubulcus ibis | Cattle Egret | 2013/7/8   | 5 | 0 | 23.4993110 | 87.3051740  | <a href="http://www.inaturalist.org/observations/611724">http://www.inaturalist.org/observations/611724</a>         |
| 3333 | Bubulcus ibis | Cattle Egret | 2020/4/10  | 1 | 0 | 23.5057164 | 120.1782418 | <a href="https://www.inaturalist.org/observations/41820557">https://www.inaturalist.org/observations/41820557</a>   |
| 3334 | Bubulcus ibis | Cattle Egret | 2019/10/8  | 2 | 0 | 23.5075590 | 120.3907470 | <a href="https://www.inaturalist.org/observations/35086597">https://www.inaturalist.org/observations/35086597</a>   |
| 3335 | Bubulcus ibis | Cattle Egret | 2021/11/28 | 1 | 0 | 23.5075700 | 120.1485717 | <a href="https://www.inaturalist.org/observations/102081237">https://www.inaturalist.org/observations/102081237</a> |
| 3336 | Bubulcus ibis | Cattle Egret | 2019/4/29  | 1 | 0 | 23.5079227 | 120.1619869 | <a href="https://www.inaturalist.org/observations/23876340">https://www.inaturalist.org/observations/23876340</a>   |
| 3337 | Bubulcus ibis | Cattle Egret | 2022/5/9   | 2 | 0 | 23.5148656 | 120.2053900 | <a href="https://www.inaturalist.org/observations/116234369">https://www.inaturalist.org/observations/116234369</a> |
| 3338 | Bubulcus ibis | Cattle Egret | 2020/12/19 | 1 | 0 | 23.5159493 | 120.5663260 | <a href="https://www.inaturalist.org/observations/68101764">https://www.inaturalist.org/observations/68101764</a>   |
| 3339 | Bubulcus ibis | Cattle Egret | 2020/1/19  | 0 | 0 | 23.5164183 | 120.1900917 | <a href="https://www.inaturalist.org/observations/37772103">https://www.inaturalist.org/observations/37772103</a>   |
| 3340 | Bubulcus ibis | Cattle Egret | 2016/8/7   | 5 | 0 | 23.5166786 | 121.4158686 | <a href="http://www.inaturalist.org/observations/3820336">http://www.inaturalist.org/observations/3820336</a>       |
| 3341 | Bubulcus ibis | Cattle Egret | 2021/1/24  | 1 | 0 | 23.5167683 | 120.1935883 | <a href="https://www.inaturalist.org/observations/68637770">https://www.inaturalist.org/observations/68637770</a>   |
| 3342 | Bubulcus ibis | Cattle Egret | 2020/1/19  | 1 | 0 | 23.5200200 | 120.1921733 | <a href="https://www.inaturalist.org/observations/37772102">https://www.inaturalist.org/observations/37772102</a>   |
| 3343 | Bubulcus ibis | Cattle Egret | 2022/1/23  | 1 | 0 | 23.5207099 | 120.2165634 | <a href="https://www.inaturalist.org/observations/107233807">https://www.inaturalist.org/observations/107233807</a> |
| 3344 | Bubulcus ibis | Cattle Egret | 2021/1/24  | 1 | 0 | 23.5282067 | 120.2325783 | <a href="https://www.inaturalist.org/observations/68638505">https://www.inaturalist.org/observations/68638505</a>   |
| 3345 | Bubulcus ibis | Cattle Egret | 2020/1/19  | 0 | 0 | 23.5331183 | 120.2172650 | <a href="https://www.inaturalist.org/observations/37772146">https://www.inaturalist.org/observations/37772146</a>   |
| 3346 | Bubulcus ibis | Cattle Egret | 2020/1/19  | 0 | 0 | 23.5352167 | 120.2374967 | <a href="https://www.inaturalist.org/observations/37772153">https://www.inaturalist.org/observations/37772153</a>   |
| 3347 | Bubulcus ibis | Cattle Egret | 2019/10/26 | 1 | 0 | 23.5368684 | 120.1856485 | <a href="https://www.inaturalist.org/observations/34913454">https://www.inaturalist.org/observations/34913454</a>   |
| 3348 | Bubulcus ibis | Cattle Egret | 2020/4/30  | 1 | 0 | 23.5380907 | 120.1690899 | <a href="https://www.inaturalist.org/observations/44407090">https://www.inaturalist.org/observations/44407090</a>   |
| 3349 | Bubulcus ibis | Cattle Egret | 2019/5/10  | 1 | 0 | 23.5382140 | 120.1860694 | <a href="https://www.inaturalist.org/observations/25051177">https://www.inaturalist.org/observations/25051177</a>   |

|      |               |              |            |   |   |            |             |                                                                                                                     |
|------|---------------|--------------|------------|---|---|------------|-------------|---------------------------------------------------------------------------------------------------------------------|
| 3350 | Bubulcus ibis | Cattle Egret | 2018/12/23 | 2 | 0 | 23.5395741 | 120.1732206 | <a href="https://www.inaturalist.org/observations/19170904">https://www.inaturalist.org/observations/19170904</a>   |
| 3351 | Bubulcus ibis | Cattle Egret | 2020/11/16 | 1 | 0 | 23.5397666 | 120.7255334 | <a href="https://www.inaturalist.org/observations/67551362">https://www.inaturalist.org/observations/67551362</a>   |
| 3352 | Bubulcus ibis | Cattle Egret | 2021/11/3  | 2 | 0 | 23.5401217 | 72.7179850  | <a href="https://www.inaturalist.org/observations/122138156">https://www.inaturalist.org/observations/122138156</a> |
| 3353 | Bubulcus ibis | Cattle Egret | 2022/10/22 | 1 | 0 | 23.5406888 | 120.4384720 | <a href="https://www.inaturalist.org/observations/140621437">https://www.inaturalist.org/observations/140621437</a> |
| 3354 | Bubulcus ibis | Cattle Egret | 2020/8/29  | 2 | 0 | 23.5409027 | 88.6614231  | <a href="https://www.inaturalist.org/observations/58123594">https://www.inaturalist.org/observations/58123594</a>   |
| 3355 | Bubulcus ibis | Cattle Egret | 2020/11/20 | 4 | 0 | 23.5410133 | 120.6890054 | <a href="https://www.inaturalist.org/observations/65256138">https://www.inaturalist.org/observations/65256138</a>   |
| 3356 | Bubulcus ibis | Cattle Egret | 2020/9/25  | 2 | 0 | 23.5410247 | 120.6890054 | <a href="https://www.inaturalist.org/observations/64764288">https://www.inaturalist.org/observations/64764288</a>   |
| 3357 | Bubulcus ibis | Cattle Egret | 2020/9/25  | 1 | 0 | 23.5410250 | 120.6890060 | <a href="https://www.inaturalist.org/observations/65930772">https://www.inaturalist.org/observations/65930772</a>   |
| 3358 | Bubulcus ibis | Cattle Egret | 2022/3/15  | 1 | 0 | 23.5431665 | 120.2028875 | <a href="https://www.inaturalist.org/observations/108656269">https://www.inaturalist.org/observations/108656269</a> |
| 3359 | Bubulcus ibis | Cattle Egret | 2021/4/13  | 1 | 0 | 23.5441302 | 120.2046856 | <a href="https://www.inaturalist.org/observations/74032947">https://www.inaturalist.org/observations/74032947</a>   |
| 3360 | Bubulcus ibis | Cattle Egret | 2021/5/20  | 1 | 0 | 23.5442275 | 120.2044286 | <a href="https://www.inaturalist.org/observations/79636940">https://www.inaturalist.org/observations/79636940</a>   |
| 3361 | Bubulcus ibis | Cattle Egret | 2020/9/28  | 1 | 0 | 23.5496900 | 120.6347683 | <a href="https://www.inaturalist.org/observations/61216910">https://www.inaturalist.org/observations/61216910</a>   |
| 3362 | Bubulcus ibis | Cattle Egret | 2021/4/13  | 2 | 0 | 23.5504508 | 120.2060911 | <a href="https://www.inaturalist.org/observations/74032966">https://www.inaturalist.org/observations/74032966</a>   |
| 3363 | Bubulcus ibis | Cattle Egret | 2022/3/15  | 1 | 0 | 23.5506903 | 120.2074594 | <a href="https://www.inaturalist.org/observations/108656312">https://www.inaturalist.org/observations/108656312</a> |
| 3364 | Bubulcus ibis | Cattle Egret | 2019/9/14  | 1 | 0 | 23.5531279 | 120.6328322 | <a href="https://www.inaturalist.org/observations/32686106">https://www.inaturalist.org/observations/32686106</a>   |
| 3365 | Bubulcus ibis | Cattle Egret | 2018/4/1   | 2 | 0 | 23.5578093 | 119.6031578 | <a href="https://www.inaturalist.org/observations/105322188">https://www.inaturalist.org/observations/105322188</a> |
| 3366 | Bubulcus ibis | Cattle Egret | 2020/3/17  | 2 | 0 | 23.5583800 | 120.1824367 | <a href="https://www.inaturalist.org/observations/40119319">https://www.inaturalist.org/observations/40119319</a>   |
| 3367 | Bubulcus ibis | Cattle Egret | 2017/4/30  | 2 | 0 | 23.5588997 | 119.6111205 | <a href="https://www.inaturalist.org/observations/105322178">https://www.inaturalist.org/observations/105322178</a> |
| 3368 | Bubulcus ibis | Cattle Egret | 2021/5/12  | 1 | 0 | 23.5611737 | 120.1643022 | <a href="https://www.inaturalist.org/observations/78672190">https://www.inaturalist.org/observations/78672190</a>   |
| 3369 | Bubulcus ibis | Cattle Egret | 2022/4/24  | 1 | 0 | 23.5630492 | 120.1632065 | <a href="https://www.inaturalist.org/observations/112809823">https://www.inaturalist.org/observations/112809823</a> |
| 3370 | Bubulcus ibis | Cattle Egret | 2021/2/4   | 1 | 0 | 23.5663983 | 120.1974867 | <a href="https://www.inaturalist.org/observations/69370019">https://www.inaturalist.org/observations/69370019</a>   |
| 3371 | Bubulcus ibis | Cattle Egret | 2016/12/20 | 4 | 0 | 23.5666908 | 87.3034771  | <a href="https://www.inaturalist.org/observations/5936338">https://www.inaturalist.org/observations/5936338</a>     |
| 3372 | Bubulcus ibis | Cattle Egret | 2021/1/10  | 1 | 0 | 23.5669276 | 120.1636277 | <a href="https://www.inaturalist.org/observations/67887549">https://www.inaturalist.org/observations/67887549</a>   |
| 3373 | Bubulcus ibis | Cattle Egret | 2020/1/15  | 0 | 0 | 23.5674650 | 120.2430800 | <a href="https://www.inaturalist.org/observations/37772497">https://www.inaturalist.org/observations/37772497</a>   |
| 3374 | Bubulcus ibis | Cattle Egret | 2020/4/25  | 1 | 0 | 23.5675853 | 120.1658789 | <a href="https://www.inaturalist.org/observations/44296069">https://www.inaturalist.org/observations/44296069</a>   |

|      |               |              |            |   |   |            |             |                                                                                                                     |
|------|---------------|--------------|------------|---|---|------------|-------------|---------------------------------------------------------------------------------------------------------------------|
| 3375 | Bubulcus ibis | Cattle Egret | 2022/4/30  | 1 | 0 | 23.5695172 | 120.1649084 | <a href="https://www.inaturalist.org/observations/114454821">https://www.inaturalist.org/observations/114454821</a> |
| 3376 | Bubulcus ibis | Cattle Egret | 2020/4/29  | 1 | 0 | 23.5696133 | 120.1649483 | <a href="https://www.inaturalist.org/observations/44292645">https://www.inaturalist.org/observations/44292645</a>   |
| 3377 | Bubulcus ibis | Cattle Egret | 2022/2/22  | 1 | 0 | 23.5699367 | 120.2186879 | <a href="https://www.inaturalist.org/observations/107300329">https://www.inaturalist.org/observations/107300329</a> |
| 3378 | Bubulcus ibis | Cattle Egret | 2021/12/8  | 1 | 0 | 23.5699517 | 120.2193350 | <a href="https://www.inaturalist.org/observations/103066815">https://www.inaturalist.org/observations/103066815</a> |
| 3379 | Bubulcus ibis | Cattle Egret | 2022/3/25  | 1 | 0 | 23.5699540 | 120.1635690 | <a href="https://www.inaturalist.org/observations/125135632">https://www.inaturalist.org/observations/125135632</a> |
| 3380 | Bubulcus ibis | Cattle Egret | 2022/11/21 | 2 | 0 | 23.5701917 | 120.4926000 | <a href="https://www.inaturalist.org/observations/142517943">https://www.inaturalist.org/observations/142517943</a> |
| 3381 | Bubulcus ibis | Cattle Egret | 2021/4/20  | 1 | 0 | 23.5710349 | 120.1717198 | <a href="https://www.inaturalist.org/observations/74716801">https://www.inaturalist.org/observations/74716801</a>   |
| 3382 | Bubulcus ibis | Cattle Egret | 2022/5/9   | 1 | 0 | 23.5721674 | 120.1866538 | <a href="https://www.inaturalist.org/observations/116245606">https://www.inaturalist.org/observations/116245606</a> |
| 3383 | Bubulcus ibis | Cattle Egret | 2022/5/9   | 1 | 0 | 23.5722260 | 120.1866549 | <a href="https://www.inaturalist.org/observations/116245584">https://www.inaturalist.org/observations/116245584</a> |
| 3384 | Bubulcus ibis | Cattle Egret | 2020/3/9   | 2 | 0 | 23.5732767 | 120.1687517 | <a href="https://www.inaturalist.org/observations/39832543">https://www.inaturalist.org/observations/39832543</a>   |
| 3385 | Bubulcus ibis | Cattle Egret | 2022/4/24  | 2 | 0 | 23.5736166 | 120.1656834 | <a href="https://www.inaturalist.org/observations/112813037">https://www.inaturalist.org/observations/112813037</a> |
| 3386 | Bubulcus ibis | Cattle Egret | 2022/4/19  | 2 | 0 | 23.5749986 | 120.1593501 | <a href="https://www.inaturalist.org/observations/112033793">https://www.inaturalist.org/observations/112033793</a> |
| 3387 | Bubulcus ibis | Cattle Egret | 2020/4/28  | 1 | 0 | 23.5755317 | 120.1982000 | <a href="https://www.inaturalist.org/observations/44290990">https://www.inaturalist.org/observations/44290990</a>   |
| 3388 | Bubulcus ibis | Cattle Egret | 2018/2/24  | 2 | 0 | 23.5768330 | 119.5851031 | <a href="https://www.inaturalist.org/observations/105322187">https://www.inaturalist.org/observations/105322187</a> |
| 3389 | Bubulcus ibis | Cattle Egret | 2020/4/17  | 1 | 0 | 23.5776300 | 120.2058750 | <a href="https://www.inaturalist.org/observations/42737934">https://www.inaturalist.org/observations/42737934</a>   |
| 3390 | Bubulcus ibis | Cattle Egret | 2022/2/22  | 1 | 0 | 23.5788830 | 120.2200262 | <a href="https://www.inaturalist.org/observations/107299938">https://www.inaturalist.org/observations/107299938</a> |
| 3391 | Bubulcus ibis | Cattle Egret | 2022/5/11  | 1 | 0 | 23.5790778 | 120.2163556 | <a href="https://www.inaturalist.org/observations/116530655">https://www.inaturalist.org/observations/116530655</a> |
| 3392 | Bubulcus ibis | Cattle Egret | 2020/4/17  | 2 | 0 | 23.5791383 | 120.2151967 | <a href="https://www.inaturalist.org/observations/42738486">https://www.inaturalist.org/observations/42738486</a>   |
| 3393 | Bubulcus ibis | Cattle Egret | 2017/11/15 | 2 | 0 | 23.5795220 | 119.5837630 | <a href="https://www.inaturalist.org/observations/105322186">https://www.inaturalist.org/observations/105322186</a> |
| 3394 | Bubulcus ibis | Cattle Egret | 2022/3/3   | 1 | 0 | 23.5811905 | 120.1645183 | <a href="https://www.inaturalist.org/observations/108089853">https://www.inaturalist.org/observations/108089853</a> |
| 3395 | Bubulcus ibis | Cattle Egret | 2020/9/25  | 2 | 0 | 23.5820381 | 120.5587701 | <a href="https://www.inaturalist.org/observations/65256510">https://www.inaturalist.org/observations/65256510</a>   |
| 3396 | Bubulcus ibis | Cattle Egret | 2022/3/2   | 1 | 0 | 23.5848748 | 120.2394496 | <a href="https://www.inaturalist.org/observations/107984118">https://www.inaturalist.org/observations/107984118</a> |
| 3397 | Bubulcus ibis | Cattle Egret | 2022/11/4  | 2 | 0 | 23.5851901 | 121.5027404 | <a href="https://www.inaturalist.org/observations/143863513">https://www.inaturalist.org/observations/143863513</a> |
| 3398 | Bubulcus ibis | Cattle Egret | 2022/11/4  | 2 | 0 | 23.5851901 | 121.5027404 | <a href="https://www.inaturalist.org/observations/143863514">https://www.inaturalist.org/observations/143863514</a> |
| 3399 | Bubulcus ibis | Cattle Egret | 2022/11/11 | 2 | 0 | 23.5851901 | 121.5027404 | <a href="https://www.inaturalist.org/observations/143863516">https://www.inaturalist.org/observations/143863516</a> |

|      |               |              |            |   |   |            |             |                                                                                                                     |
|------|---------------|--------------|------------|---|---|------------|-------------|---------------------------------------------------------------------------------------------------------------------|
| 3400 | Bubulcus ibis | Cattle Egret | 2022/9/2   | 2 | 0 | 23.5851901 | 121.5027404 | <a href="https://www.inaturalist.org/observations/143912644">https://www.inaturalist.org/observations/143912644</a> |
| 3401 | Bubulcus ibis | Cattle Egret | 2022/9/30  | 1 | 0 | 23.5851901 | 121.5027404 | <a href="https://www.inaturalist.org/observations/143914795">https://www.inaturalist.org/observations/143914795</a> |
| 3402 | Bubulcus ibis | Cattle Egret | 2022/10/21 | 2 | 0 | 23.5851901 | 121.5027404 | <a href="https://www.inaturalist.org/observations/143914819">https://www.inaturalist.org/observations/143914819</a> |
| 3403 | Bubulcus ibis | Cattle Egret | 2022/10/21 | 1 | 0 | 23.5851901 | 121.5027404 | <a href="https://www.inaturalist.org/observations/143914824">https://www.inaturalist.org/observations/143914824</a> |
| 3404 | Bubulcus ibis | Cattle Egret | 2022/10/21 | 1 | 0 | 23.5851901 | 121.5027404 | <a href="https://www.inaturalist.org/observations/143914829">https://www.inaturalist.org/observations/143914829</a> |
| 3405 | Bubulcus ibis | Cattle Egret | 2022/10/28 | 1 | 0 | 23.5851901 | 121.5027404 | <a href="https://www.inaturalist.org/observations/143914849">https://www.inaturalist.org/observations/143914849</a> |
| 3406 | Bubulcus ibis | Cattle Egret | 2022/11/4  | 1 | 0 | 23.5851901 | 121.5027404 | <a href="https://www.inaturalist.org/observations/143914859">https://www.inaturalist.org/observations/143914859</a> |
| 3407 | Bubulcus ibis | Cattle Egret | 2022/9/10  | 1 | 0 | 23.5856426 | 120.5147755 | <a href="https://www.inaturalist.org/observations/134369804">https://www.inaturalist.org/observations/134369804</a> |
| 3408 | Bubulcus ibis | Cattle Egret | 2018/12/6  | 2 | 0 | 23.5874655 | 120.2511646 | <a href="https://www.inaturalist.org/observations/18852157">https://www.inaturalist.org/observations/18852157</a>   |
| 3409 | Bubulcus ibis | Cattle Egret | 2020/2/13  | 0 | 0 | 23.5905367 | 120.2438567 | <a href="https://www.inaturalist.org/observations/38625362">https://www.inaturalist.org/observations/38625362</a>   |
| 3410 | Bubulcus ibis | Cattle Egret | 2022/5/1   | 1 | 0 | 23.5910484 | 120.5984203 | <a href="https://www.inaturalist.org/observations/114225440">https://www.inaturalist.org/observations/114225440</a> |
| 3411 | Bubulcus ibis | Cattle Egret | 2018/6/24  | 3 | 0 | 23.5931930 | 120.3019990 | <a href="https://www.inaturalist.org/observations/13760608">https://www.inaturalist.org/observations/13760608</a>   |
| 3412 | Bubulcus ibis | Cattle Egret | 2020/12/9  | 1 | 0 | 23.5944411 | 120.2372257 | <a href="https://www.inaturalist.org/observations/66634589">https://www.inaturalist.org/observations/66634589</a>   |
| 3413 | Bubulcus ibis | Cattle Egret | 2021/3/14  | 1 | 0 | 23.5975580 | 120.3359310 | <a href="https://www.inaturalist.org/observations/71220442">https://www.inaturalist.org/observations/71220442</a>   |
| 3414 | Bubulcus ibis | Cattle Egret | 2021/12/8  | 1 | 0 | 23.5985183 | 120.2360550 | <a href="https://www.inaturalist.org/observations/103066823">https://www.inaturalist.org/observations/103066823</a> |
| 3415 | Bubulcus ibis | Cattle Egret | 2019/1/27  | 2 | 0 | 23.5991394 | 120.1728520 | <a href="https://www.inaturalist.org/observations/19903799">https://www.inaturalist.org/observations/19903799</a>   |
| 3416 | Bubulcus ibis | Cattle Egret | 2019/1/28  | 3 | 0 | 23.5993719 | 120.2424807 | <a href="https://www.inaturalist.org/observations/19927432">https://www.inaturalist.org/observations/19927432</a>   |
| 3417 | Bubulcus ibis | Cattle Egret | 2021/3/11  | 2 | 0 | 23.5994451 | 120.2799848 | <a href="https://www.inaturalist.org/observations/71041137">https://www.inaturalist.org/observations/71041137</a>   |
| 3418 | Bubulcus ibis | Cattle Egret | 2020/1/21  | 0 | 0 | 23.6000446 | 120.3362094 | <a href="https://www.inaturalist.org/observations/37843218">https://www.inaturalist.org/observations/37843218</a>   |
| 3419 | Bubulcus ibis | Cattle Egret | 2022/1/17  | 2 | 0 | 23.6042102 | 120.2311797 | <a href="https://www.inaturalist.org/observations/108111790">https://www.inaturalist.org/observations/108111790</a> |
| 3420 | Bubulcus ibis | Cattle Egret | 2022/2/5   | 1 | 0 | 23.6051028 | 120.4018417 | <a href="https://www.inaturalist.org/observations/106165093">https://www.inaturalist.org/observations/106165093</a> |
| 3421 | Bubulcus ibis | Cattle Egret | 2021/12/2  | 1 | 0 | 23.6057591 | 120.2413642 | <a href="https://www.inaturalist.org/observations/102627988">https://www.inaturalist.org/observations/102627988</a> |
| 3422 | Bubulcus ibis | Cattle Egret | 2021/12/8  | 1 | 0 | 23.6059950 | 120.2505533 | <a href="https://www.inaturalist.org/observations/103113576">https://www.inaturalist.org/observations/103113576</a> |
| 3423 | Bubulcus ibis | Cattle Egret | 2020/9/19  | 1 | 0 | 23.6062354 | 120.2378823 | <a href="https://www.inaturalist.org/observations/60040558">https://www.inaturalist.org/observations/60040558</a>   |
| 3424 | Bubulcus ibis | Cattle Egret | 2021/4/30  | 1 | 0 | 23.6074694 | 120.2874056 | <a href="https://www.inaturalist.org/observations/75769446">https://www.inaturalist.org/observations/75769446</a>   |

|      |                     |                   |            |   |   |            |             |                                                                                                                     |
|------|---------------------|-------------------|------------|---|---|------------|-------------|---------------------------------------------------------------------------------------------------------------------|
| 3425 | Bubulcus ibis       | Cattle Egret      | 2019/4/28  | 1 | 0 | 23.6099088 | 120.4609830 | <a href="https://www.inaturalist.org/observations/23584232">https://www.inaturalist.org/observations/23584232</a>   |
| 3426 | Bubulcus ibis       | Cattle Egret      | 2020/3/6   | 1 | 0 | 23.6105790 | 120.2633421 | <a href="https://www.inaturalist.org/observations/39604432">https://www.inaturalist.org/observations/39604432</a>   |
| 3427 | Bubulcus ibis       | Cattle Egret      | 2020/4/27  | 4 | 0 | 23.6107786 | 120.4586018 | <a href="https://www.inaturalist.org/observations/44038304">https://www.inaturalist.org/observations/44038304</a>   |
| 3428 | Bubulcus ibis       | Cattle Egret      | 2019/10/9  | 1 | 0 | 23.6108983 | 120.2441133 | <a href="https://www.inaturalist.org/observations/34105929">https://www.inaturalist.org/observations/34105929</a>   |
| 3429 | Bubulcus coromandus | ibis Cattle Egret | 2020/12/23 | 1 | 0 | 23.6109600 | 120.2609083 | <a href="https://www.inaturalist.org/observations/67028359">https://www.inaturalist.org/observations/67028359</a>   |
| 3430 | Bubulcus ibis       | Cattle Egret      | 2021/11/24 | 2 | 0 | 23.6120033 | 120.2530883 | <a href="https://www.inaturalist.org/observations/102239254">https://www.inaturalist.org/observations/102239254</a> |
| 3431 | Bubulcus ibis       | Cattle Egret      | 2021/2/1   | 1 | 0 | 23.6128503 | 120.3397260 | <a href="https://www.inaturalist.org/observations/68916421">https://www.inaturalist.org/observations/68916421</a>   |
| 3432 | Bubulcus ibis       | Cattle Egret      | 2022/1/7   | 2 | 0 | 23.6130845 | 120.3403689 | <a href="https://www.inaturalist.org/observations/104506601">https://www.inaturalist.org/observations/104506601</a> |
| 3433 | Bubulcus ibis       | Cattle Egret      | 2019/5/9   | 1 | 0 | 23.6132622 | 120.1459199 | <a href="https://www.inaturalist.org/observations/24831151">https://www.inaturalist.org/observations/24831151</a>   |
| 3434 | Bubulcus ibis       | Cattle Egret      | 2020/2/3   | 0 | 0 | 23.6133050 | 120.1807483 | <a href="https://www.inaturalist.org/observations/38282496">https://www.inaturalist.org/observations/38282496</a>   |
| 3435 | Bubulcus ibis       | Cattle Egret      | 2022/9/12  | 1 | 0 | 23.6141872 | 120.6449510 | <a href="https://www.inaturalist.org/observations/134711118">https://www.inaturalist.org/observations/134711118</a> |
| 3436 | Bubulcus ibis       | Cattle Egret      | 2020/4/14  | 1 | 0 | 23.6142250 | 120.5223383 | <a href="https://www.inaturalist.org/observations/42146326">https://www.inaturalist.org/observations/42146326</a>   |
| 3437 | Bubulcus ibis       | Cattle Egret      | 2021/9/5   | 1 | 0 | 23.6164063 | 120.3766558 | <a href="https://www.inaturalist.org/observations/93645878">https://www.inaturalist.org/observations/93645878</a>   |
| 3438 | Bubulcus ibis       | Cattle Egret      | 2018/12/11 | 2 | 0 | 23.6166304 | 120.2626554 | <a href="https://www.inaturalist.org/observations/18958347">https://www.inaturalist.org/observations/18958347</a>   |
| 3439 | Bubulcus ibis       | Cattle Egret      | 2021/1/21  | 1 | 0 | 23.6166800 | 120.2675317 | <a href="https://www.inaturalist.org/observations/68403695">https://www.inaturalist.org/observations/68403695</a>   |
| 3440 | Bubulcus ibis       | Cattle Egret      | 2020/3/5   | 1 | 0 | 23.6173300 | 120.2615850 | <a href="https://www.inaturalist.org/observations/39604427">https://www.inaturalist.org/observations/39604427</a>   |
| 3441 | Bubulcus ibis       | Cattle Egret      | 2019/1/8   | 3 | 0 | 23.6181694 | 120.2282391 | <a href="https://www.inaturalist.org/observations/19513237">https://www.inaturalist.org/observations/19513237</a>   |
| 3442 | Bubulcus ibis       | Cattle Egret      | 2020/3/9   | 3 | 0 | 23.6187300 | 120.2626817 | <a href="https://www.inaturalist.org/observations/39832545">https://www.inaturalist.org/observations/39832545</a>   |
| 3443 | Bubulcus ibis       | Cattle Egret      | 2021/9/10  | 1 | 0 | 23.6191801 | 120.6514376 | <a href="https://www.inaturalist.org/observations/96883105">https://www.inaturalist.org/observations/96883105</a>   |
| 3444 | Bubulcus ibis       | Cattle Egret      | 2021/3/24  | 1 | 0 | 23.6195177 | 120.2605910 | <a href="https://www.inaturalist.org/observations/71934986">https://www.inaturalist.org/observations/71934986</a>   |
| 3445 | Bubulcus ibis       | Cattle Egret      | 2022/12/23 | 1 | 0 | 23.6197636 | 120.2565476 | <a href="https://www.inaturalist.org/observations/144924348">https://www.inaturalist.org/observations/144924348</a> |
| 3446 | Bubulcus ibis       | Cattle Egret      | 2022/6/2   | 1 | 0 | 23.6197761 | 120.2615389 | <a href="https://www.inaturalist.org/observations/120969589">https://www.inaturalist.org/observations/120969589</a> |
| 3447 | Bubulcus ibis       | Cattle Egret      | 2022/1/17  | 1 | 0 | 23.6199111 | 120.2610574 | <a href="https://www.inaturalist.org/observations/108110610">https://www.inaturalist.org/observations/108110610</a> |
| 3448 | Bubulcus ibis       | Cattle Egret      | 2022/5/2   | 2 | 0 | 23.6199800 | 120.2614133 | <a href="https://www.inaturalist.org/observations/114495974">https://www.inaturalist.org/observations/114495974</a> |
| 3449 | Bubulcus ibis       | Cattle Egret      | 2021/5/4   | 2 | 0 | 23.6201483 | 120.2624583 | <a href="https://www.inaturalist.org/observations/78402326">https://www.inaturalist.org/observations/78402326</a>   |



|      |               |              |            |   |   |            |             |                                                                                                                     |
|------|---------------|--------------|------------|---|---|------------|-------------|---------------------------------------------------------------------------------------------------------------------|
| 3450 | Bubulcus ibis | Cattle Egret | 2021/4/26  | 1 | 0 | 23.6201678 | 120.2615948 | <a href="https://www.inaturalist.org/observations/75267292">https://www.inaturalist.org/observations/75267292</a>   |
| 3451 | Bubulcus ibis | Cattle Egret | 2021/4/30  | 1 | 0 | 23.6203075 | 120.2615124 | <a href="https://www.inaturalist.org/observations/75770509">https://www.inaturalist.org/observations/75770509</a>   |
| 3452 | Bubulcus ibis | Cattle Egret | 2020/5/15  | 2 | 0 | 23.6203193 | 120.2615912 | <a href="https://www.inaturalist.org/observations/45944184">https://www.inaturalist.org/observations/45944184</a>   |
| 3453 | Bubulcus ibis | Cattle Egret | 2020/4/8   | 1 | 0 | 23.6209600 | 120.2522817 | <a href="https://www.inaturalist.org/observations/41673626">https://www.inaturalist.org/observations/41673626</a>   |
| 3454 | Bubulcus ibis | Cattle Egret | 2018/12/23 | 2 | 0 | 23.6210883 | 120.2549950 | <a href="https://www.inaturalist.org/observations/19171000">https://www.inaturalist.org/observations/19171000</a>   |
| 3455 | Bubulcus ibis | Cattle Egret | 2020/1/15  | 0 | 0 | 23.6215233 | 120.2363567 | <a href="https://www.inaturalist.org/observations/37772515">https://www.inaturalist.org/observations/37772515</a>   |
| 3456 | Bubulcus ibis | Cattle Egret | 2022/1/14  | 2 | 0 | 23.6215600 | 120.2258220 | <a href="https://www.inaturalist.org/observations/108104672">https://www.inaturalist.org/observations/108104672</a> |
| 3457 | Bubulcus ibis | Cattle Egret | 2022/3/2   | 1 | 0 | 23.6218362 | 120.2414849 | <a href="https://www.inaturalist.org/observations/107981024">https://www.inaturalist.org/observations/107981024</a> |
| 3458 | Bubulcus ibis | Cattle Egret | 2018/12/19 | 2 | 0 | 23.6231378 | 120.2601019 | <a href="https://www.inaturalist.org/observations/19152488">https://www.inaturalist.org/observations/19152488</a>   |
| 3459 | Bubulcus ibis | Cattle Egret | 2019/1/16  | 2 | 0 | 23.6232610 | 120.2405549 | <a href="https://www.inaturalist.org/observations/19709366">https://www.inaturalist.org/observations/19709366</a>   |
| 3460 | Bubulcus ibis | Cattle Egret | 2018/1/28  | 2 | 0 | 23.6239200 | 120.2287470 | <a href="https://www.inaturalist.org/observations/14414946">https://www.inaturalist.org/observations/14414946</a>   |
| 3461 | Bubulcus ibis | Cattle Egret | 2020/1/13  | 1 | 0 | 23.6240959 | 119.5974265 | <a href="https://www.inaturalist.org/observations/37558636">https://www.inaturalist.org/observations/37558636</a>   |
| 3462 | Bubulcus ibis | Cattle Egret | 2018/1/28  | 2 | 0 | 23.6247730 | 120.1991060 | <a href="https://www.inaturalist.org/observations/14414943">https://www.inaturalist.org/observations/14414943</a>   |
| 3463 | Bubulcus ibis | Cattle Egret | 2021/11/26 | 1 | 0 | 23.6247833 | 120.3729900 | <a href="https://www.inaturalist.org/observations/102236214">https://www.inaturalist.org/observations/102236214</a> |
| 3464 | Bubulcus ibis | Cattle Egret | 2020/4/17  | 2 | 0 | 23.6253554 | 120.5245152 | <a href="https://www.inaturalist.org/observations/42383004">https://www.inaturalist.org/observations/42383004</a>   |
| 3465 | Bubulcus ibis | Cattle Egret | 2009/8/31  | 2 | 0 | 23.6253596 | 120.2678766 | <a href="https://www.inaturalist.org/observations/18692974">https://www.inaturalist.org/observations/18692974</a>   |
| 3466 | Bubulcus ibis | Cattle Egret | 2019/12/25 | 1 | 0 | 23.6266305 | 120.2346750 | <a href="https://www.inaturalist.org/observations/36987670">https://www.inaturalist.org/observations/36987670</a>   |
| 3467 | Bubulcus ibis | Cattle Egret | 2020/8/19  | 1 | 0 | 23.6268944 | 120.3094528 | <a href="https://www.inaturalist.org/observations/56909342">https://www.inaturalist.org/observations/56909342</a>   |
| 3468 | Bubulcus ibis | Cattle Egret | 2022/6/10  | 1 | 0 | 23.6271181 | 120.2505345 | <a href="https://www.inaturalist.org/observations/121064315">https://www.inaturalist.org/observations/121064315</a> |
| 3469 | Bubulcus ibis | Cattle Egret | 2022/7/19  | 2 | 0 | 23.6285750 | 120.2941933 | <a href="https://www.inaturalist.org/observations/127233247">https://www.inaturalist.org/observations/127233247</a> |
| 3470 | Bubulcus ibis | Cattle Egret | 2018/11/19 | 3 | 0 | 23.6288771 | 120.3320195 | <a href="https://www.inaturalist.org/observations/18494053">https://www.inaturalist.org/observations/18494053</a>   |
| 3471 | Bubulcus ibis | Cattle Egret | 2021/9/29  | 0 | 0 | 23.6303700 | 120.4050917 | <a href="https://www.inaturalist.org/observations/96633133">https://www.inaturalist.org/observations/96633133</a>   |
| 3472 | Bubulcus ibis | Cattle Egret | 2022/7/19  | 0 | 0 | 23.6304017 | 120.2918083 | <a href="https://www.inaturalist.org/observations/127233194">https://www.inaturalist.org/observations/127233194</a> |
| 3473 | Bubulcus ibis | Cattle Egret | 2020/5/14  | 2 | 0 | 23.6324901 | 120.3003080 | <a href="https://www.inaturalist.org/observations/45944175">https://www.inaturalist.org/observations/45944175</a>   |
| 3474 | Bubulcus ibis | Cattle Egret | 2022/3/26  | 1 | 0 | 23.6327531 | 120.2888914 | <a href="https://www.inaturalist.org/observations/109518121">https://www.inaturalist.org/observations/109518121</a> |

|      |               |              |            |   |   |            |             |                                                                                                                     |
|------|---------------|--------------|------------|---|---|------------|-------------|---------------------------------------------------------------------------------------------------------------------|
| 3475 | Bubulcus ibis | Cattle Egret | 2020/9/26  | 3 | 0 | 23.6328033 | 120.2645600 | <a href="https://www.inaturalist.org/observations/60779968">https://www.inaturalist.org/observations/60779968</a>   |
| 3476 | Bubulcus ibis | Cattle Egret | 2021/11/12 | 1 | 0 | 23.6336861 | 120.4840861 | <a href="https://www.inaturalist.org/observations/100915546">https://www.inaturalist.org/observations/100915546</a> |
| 3477 | Bubulcus ibis | Cattle Egret | 2021/1/27  | 1 | 0 | 23.6339583 | 120.1584150 | <a href="https://www.inaturalist.org/observations/85719379">https://www.inaturalist.org/observations/85719379</a>   |
| 3478 | Bubulcus ibis | Cattle Egret | 2020/6/23  | 1 | 0 | 23.6342433 | 120.4007667 | <a href="https://www.inaturalist.org/observations/50712787">https://www.inaturalist.org/observations/50712787</a>   |
| 3479 | Bubulcus ibis | Cattle Egret | 2021/5/28  | 1 | 0 | 23.6343013 | 120.5047960 | <a href="https://www.inaturalist.org/observations/80803799">https://www.inaturalist.org/observations/80803799</a>   |
| 3480 | Bubulcus ibis | Cattle Egret | 2022/3/2   | 1 | 0 | 23.6345096 | 120.2397392 | <a href="https://www.inaturalist.org/observations/107981017">https://www.inaturalist.org/observations/107981017</a> |
| 3481 | Bubulcus ibis | Cattle Egret | 2020/3/7   | 0 | 0 | 23.6355207 | 120.4921832 | <a href="https://www.inaturalist.org/observations/39646969">https://www.inaturalist.org/observations/39646969</a>   |
| 3482 | Bubulcus ibis | Cattle Egret | 2020/4/17  | 3 | 0 | 23.6359839 | 120.5237441 | <a href="https://www.inaturalist.org/observations/42380800">https://www.inaturalist.org/observations/42380800</a>   |
| 3483 | Bubulcus ibis | Cattle Egret | 2020/8/22  | 1 | 0 | 23.6367447 | 120.5420475 | <a href="https://www.inaturalist.org/observations/57220159">https://www.inaturalist.org/observations/57220159</a>   |
| 3484 | Bubulcus ibis | Cattle Egret | 2022/5/23  | 1 | 0 | 23.6367721 | 120.5236780 | <a href="https://www.inaturalist.org/observations/118342263">https://www.inaturalist.org/observations/118342263</a> |
| 3485 | Bubulcus ibis | Cattle Egret | 2022/2/24  | 2 | 0 | 23.6369394 | 120.3091315 | <a href="https://www.inaturalist.org/observations/107391697">https://www.inaturalist.org/observations/107391697</a> |
| 3486 | Bubulcus ibis | Cattle Egret | 2022/5/23  | 1 | 0 | 23.6370043 | 120.5229091 | <a href="https://www.inaturalist.org/observations/118345777">https://www.inaturalist.org/observations/118345777</a> |
| 3487 | Bubulcus ibis | Cattle Egret | 2022/9/2   | 1 | 0 | 23.6370233 | 120.4827949 | <a href="https://www.inaturalist.org/observations/133301068">https://www.inaturalist.org/observations/133301068</a> |
| 3488 | Bubulcus ibis | Cattle Egret | 2022/6/4   | 1 | 0 | 23.6371047 | 120.4934540 | <a href="https://www.inaturalist.org/observations/120127776">https://www.inaturalist.org/observations/120127776</a> |
| 3489 | Bubulcus ibis | Cattle Egret | 2021/2/2   | 1 | 0 | 23.6389327 | 120.3078328 | <a href="https://www.inaturalist.org/observations/68963564">https://www.inaturalist.org/observations/68963564</a>   |
| 3490 | Bubulcus ibis | Cattle Egret | 2021/10/5  | 1 | 0 | 23.6392116 | 120.4091549 | <a href="https://www.inaturalist.org/observations/97217529">https://www.inaturalist.org/observations/97217529</a>   |
| 3491 | Bubulcus ibis | Cattle Egret | 2021/8/16  | 1 | 0 | 23.6393806 | 120.4938000 | <a href="https://www.inaturalist.org/observations/91378244">https://www.inaturalist.org/observations/91378244</a>   |
| 3492 | Bubulcus ibis | Cattle Egret | 2021/6/5   | 4 | 0 | 23.6394462 | 120.5184266 | <a href="https://www.inaturalist.org/observations/81652773">https://www.inaturalist.org/observations/81652773</a>   |
| 3493 | Bubulcus ibis | Cattle Egret | 2019/10/22 | 2 | 0 | 23.6395078 | 120.5336711 | <a href="https://www.inaturalist.org/observations/45460485">https://www.inaturalist.org/observations/45460485</a>   |
| 3494 | Bubulcus ibis | Cattle Egret | 2020/2/12  | 0 | 0 | 23.6400076 | 120.1588300 | <a href="https://www.inaturalist.org/observations/38625833">https://www.inaturalist.org/observations/38625833</a>   |
| 3495 | Bubulcus ibis | Cattle Egret | 1980/1/1   | 1 | 0 | 23.6409235 | 120.5604128 | <a href="https://www.inaturalist.org/observations/64029172">https://www.inaturalist.org/observations/64029172</a>   |
| 3496 | Bubulcus ibis | Cattle Egret | 2020/3/31  | 2 | 0 | 23.6422150 | 120.2986883 | <a href="https://www.inaturalist.org/observations/41209366">https://www.inaturalist.org/observations/41209366</a>   |
| 3497 | Bubulcus ibis | Cattle Egret | 2020/2/12  | 0 | 0 | 23.6427006 | 120.1691419 | <a href="https://www.inaturalist.org/observations/38625850">https://www.inaturalist.org/observations/38625850</a>   |
| 3498 | Bubulcus ibis | Cattle Egret | 2022/11/6  | 1 | 0 | 23.6449083 | 120.6585250 | <a href="https://www.inaturalist.org/observations/141255033">https://www.inaturalist.org/observations/141255033</a> |
| 3499 | Bubulcus ibis | Cattle Egret | 2022/7/5   | 1 | 0 | 23.6451501 | 120.4836566 | <a href="https://www.inaturalist.org/observations/124840803">https://www.inaturalist.org/observations/124840803</a> |

|      |               |              |            |   |   |            |             |                                                                                                                     |
|------|---------------|--------------|------------|---|---|------------|-------------|---------------------------------------------------------------------------------------------------------------------|
| 3500 | Bubulcus ibis | Cattle Egret | 2021/8/24  | 2 | 0 | 23.6451694 | 120.4887444 | <a href="https://www.inaturalist.org/observations/92315812">https://www.inaturalist.org/observations/92315812</a>   |
| 3501 | Bubulcus ibis | Cattle Egret | 2017/1/23  | 2 | 0 | 23.6459240 | 120.3195770 | <a href="https://www.inaturalist.org/observations/47487506">https://www.inaturalist.org/observations/47487506</a>   |
| 3502 | Bubulcus ibis | Cattle Egret | 1980/1/1   | 1 | 0 | 23.6459716 | 120.5585388 | <a href="https://www.inaturalist.org/observations/64029220">https://www.inaturalist.org/observations/64029220</a>   |
| 3503 | Bubulcus ibis | Cattle Egret | 2021/12/6  | 1 | 0 | 23.6468750 | 120.2905200 | <a href="https://www.inaturalist.org/observations/102659093">https://www.inaturalist.org/observations/102659093</a> |
| 3504 | Bubulcus ibis | Cattle Egret | 2020/4/22  | 1 | 0 | 23.6480186 | 120.3496820 | <a href="https://www.inaturalist.org/observations/42821109">https://www.inaturalist.org/observations/42821109</a>   |
| 3505 | Bubulcus ibis | Cattle Egret | 2022/10/28 | 1 | 0 | 23.6483274 | 120.3249148 | <a href="https://www.inaturalist.org/observations/140225952">https://www.inaturalist.org/observations/140225952</a> |
| 3506 | Bubulcus ibis | Cattle Egret | 2022/10/28 | 1 | 0 | 23.6483344 | 120.3249846 | <a href="https://www.inaturalist.org/observations/140226013">https://www.inaturalist.org/observations/140226013</a> |
| 3507 | Bubulcus ibis | Cattle Egret | 2020/10/14 | 1 | 0 | 23.6486528 | 120.2696694 | <a href="https://www.inaturalist.org/observations/62549741">https://www.inaturalist.org/observations/62549741</a>   |
| 3508 | Bubulcus ibis | Cattle Egret | 2020/2/20  | 0 | 0 | 23.6489233 | 120.2796233 | <a href="https://www.inaturalist.org/observations/38948899">https://www.inaturalist.org/observations/38948899</a>   |
| 3509 | Bubulcus ibis | Cattle Egret | 1980/1/1   | 1 | 0 | 23.6492478 | 120.5600469 | <a href="https://www.inaturalist.org/observations/64029238">https://www.inaturalist.org/observations/64029238</a>   |
| 3510 | Bubulcus ibis | Cattle Egret | 2022/7/15  | 1 | 0 | 23.6508882 | 120.2596599 | <a href="https://www.inaturalist.org/observations/126308971">https://www.inaturalist.org/observations/126308971</a> |
| 3511 | Bubulcus ibis | Cattle Egret | 2020/5/7   | 1 | 0 | 23.6514418 | 120.2863081 | <a href="https://www.inaturalist.org/observations/45246383">https://www.inaturalist.org/observations/45246383</a>   |
| 3512 | Bubulcus ibis | Cattle Egret | 2020/2/18  | 0 | 0 | 23.6527333 | 120.2262317 | <a href="https://www.inaturalist.org/observations/38816321">https://www.inaturalist.org/observations/38816321</a>   |
| 3513 | Bubulcus ibis | Cattle Egret | 2021/12/9  | 1 | 0 | 23.6543942 | 120.2657867 | <a href="https://www.inaturalist.org/observations/103113583">https://www.inaturalist.org/observations/103113583</a> |
| 3514 | Bubulcus ibis | Cattle Egret | 2021/12/21 | 1 | 0 | 23.6545026 | 120.3025412 | <a href="https://www.inaturalist.org/observations/103408555">https://www.inaturalist.org/observations/103408555</a> |
| 3515 | Bubulcus ibis | Cattle Egret | 2020/4/17  | 1 | 0 | 23.6547983 | 120.3065067 | <a href="https://www.inaturalist.org/observations/42736418">https://www.inaturalist.org/observations/42736418</a>   |
| 3516 | Bubulcus ibis | Cattle Egret | 2021/7/25  | 2 | 0 | 23.6550342 | 120.5082708 | <a href="https://www.inaturalist.org/observations/88507040">https://www.inaturalist.org/observations/88507040</a>   |
| 3517 | Bubulcus ibis | Cattle Egret | 2021/11/2  | 1 | 0 | 23.6554173 | 120.2857043 | <a href="https://www.inaturalist.org/observations/100026878">https://www.inaturalist.org/observations/100026878</a> |
| 3518 | Bubulcus ibis | Cattle Egret | 2021/1/13  | 1 | 0 | 23.6557867 | 120.3019467 | <a href="https://www.inaturalist.org/observations/68267287">https://www.inaturalist.org/observations/68267287</a>   |
| 3519 | Bubulcus ibis | Cattle Egret | 2022/1/23  | 1 | 0 | 23.6584314 | 120.3048063 | <a href="https://www.inaturalist.org/observations/106494559">https://www.inaturalist.org/observations/106494559</a> |
| 3520 | Bubulcus ibis | Cattle Egret | 2021/4/22  | 2 | 0 | 23.6594941 | 120.2312797 | <a href="https://www.inaturalist.org/observations/74814733">https://www.inaturalist.org/observations/74814733</a>   |
| 3521 | Bubulcus ibis | Cattle Egret | 2020/1/14  | 0 | 0 | 23.6604500 | 120.3168300 | <a href="https://www.inaturalist.org/observations/37772724">https://www.inaturalist.org/observations/37772724</a>   |
| 3522 | Bubulcus ibis | Cattle Egret | 2022/9/11  | 1 | 0 | 23.6605944 | 120.6553034 | <a href="https://www.inaturalist.org/observations/138666988">https://www.inaturalist.org/observations/138666988</a> |
| 3523 | Bubulcus ibis | Cattle Egret | 2021/1/28  | 3 | 0 | 23.6606015 | 120.3641031 | <a href="https://www.inaturalist.org/observations/68742464">https://www.inaturalist.org/observations/68742464</a>   |
| 3524 | Bubulcus ibis | Cattle Egret | 2021/1/8   | 2 | 0 | 23.6608461 | 120.3132078 | <a href="https://www.inaturalist.org/observations/67834279">https://www.inaturalist.org/observations/67834279</a>   |

|      |               |              |            |   |   |            |             |                                                                                                                     |
|------|---------------|--------------|------------|---|---|------------|-------------|---------------------------------------------------------------------------------------------------------------------|
| 3525 | Bubulcus ibis | Cattle Egret | 2020/11/25 | 1 | 0 | 23.6615833 | 120.3056183 | <a href="https://www.inaturalist.org/observations/65565856">https://www.inaturalist.org/observations/65565856</a>   |
| 3526 | Bubulcus ibis | Cattle Egret | 2022/12/4  | 1 | 0 | 23.6626574 | 120.2756140 | <a href="https://www.inaturalist.org/observations/144396808">https://www.inaturalist.org/observations/144396808</a> |
| 3527 | Bubulcus ibis | Cattle Egret | 2021/10/19 | 1 | 0 | 23.6626687 | 120.5402802 | <a href="https://www.inaturalist.org/observations/98679972">https://www.inaturalist.org/observations/98679972</a>   |
| 3528 | Bubulcus ibis | Cattle Egret | 2021/10/19 | 1 | 0 | 23.6627925 | 120.5399709 | <a href="https://www.inaturalist.org/observations/98679251">https://www.inaturalist.org/observations/98679251</a>   |
| 3529 | Bubulcus ibis | Cattle Egret | 2021/10/19 | 1 | 0 | 23.6633125 | 120.5392455 | <a href="https://www.inaturalist.org/observations/98679769">https://www.inaturalist.org/observations/98679769</a>   |
| 3530 | Bubulcus ibis | Cattle Egret | 2018/4/24  | 2 | 0 | 23.6635503 | 120.2837712 | <a href="https://www.inaturalist.org/observations/22993082">https://www.inaturalist.org/observations/22993082</a>   |
| 3531 | Bubulcus ibis | Cattle Egret | 2021/12/6  | 1 | 0 | 23.6650824 | 120.2842236 | <a href="https://www.inaturalist.org/observations/102659409">https://www.inaturalist.org/observations/102659409</a> |
| 3532 | Bubulcus ibis | Cattle Egret | 2022/1/13  | 1 | 0 | 23.6679676 | 120.2336403 | <a href="https://www.inaturalist.org/observations/108104409">https://www.inaturalist.org/observations/108104409</a> |
| 3533 | Bubulcus ibis | Cattle Egret | 2022/1/17  | 3 | 0 | 23.6704089 | 120.2346525 | <a href="https://www.inaturalist.org/observations/108110098">https://www.inaturalist.org/observations/108110098</a> |
| 3534 | Bubulcus ibis | Cattle Egret | 2021/2/18  | 1 | 0 | 23.6763035 | 120.2776564 | <a href="https://www.inaturalist.org/observations/69757667">https://www.inaturalist.org/observations/69757667</a>   |
| 3535 | Bubulcus ibis | Cattle Egret | 2020/5/1   | 1 | 0 | 23.6767750 | 120.2981583 | <a href="https://www.inaturalist.org/observations/45245437">https://www.inaturalist.org/observations/45245437</a>   |
| 3536 | Bubulcus ibis | Cattle Egret | 2021/11/24 | 1 | 0 | 23.6775483 | 120.3160883 | <a href="https://www.inaturalist.org/observations/102239240">https://www.inaturalist.org/observations/102239240</a> |
| 3537 | Bubulcus ibis | Cattle Egret | 2020/8/17  | 1 | 0 | 23.6780306 | 120.2331778 | <a href="https://www.inaturalist.org/observations/56704900">https://www.inaturalist.org/observations/56704900</a>   |
| 3538 | Bubulcus ibis | Cattle Egret | 2019/11/1  | 4 | 0 | 23.6784294 | 120.5553965 | <a href="https://www.inaturalist.org/observations/35161628">https://www.inaturalist.org/observations/35161628</a>   |
| 3539 | Bubulcus ibis | Cattle Egret | 2019/11/6  | 2 | 0 | 23.6788096 | 120.5550207 | <a href="https://www.inaturalist.org/observations/35668304">https://www.inaturalist.org/observations/35668304</a>   |
| 3540 | Bubulcus ibis | Cattle Egret | 2019/10/23 | 3 | 0 | 23.6788808 | 120.5560419 | <a href="https://www.inaturalist.org/observations/35672676">https://www.inaturalist.org/observations/35672676</a>   |
| 3541 | Bubulcus ibis | Cattle Egret | 2019/11/8  | 2 | 0 | 23.6788872 | 120.5550643 | <a href="https://www.inaturalist.org/observations/35668130">https://www.inaturalist.org/observations/35668130</a>   |
| 3542 | Bubulcus ibis | Cattle Egret | 2019/11/4  | 2 | 0 | 23.6791191 | 120.5559038 | <a href="https://www.inaturalist.org/observations/35353646">https://www.inaturalist.org/observations/35353646</a>   |
| 3543 | Bubulcus ibis | Cattle Egret | 2018/11/6  | 4 | 0 | 23.6792967 | 120.5569083 | <a href="https://www.inaturalist.org/observations/18162057">https://www.inaturalist.org/observations/18162057</a>   |
| 3544 | Bubulcus ibis | Cattle Egret | 2019/12/26 | 2 | 0 | 23.6793669 | 120.5563641 | <a href="https://www.inaturalist.org/observations/37417349">https://www.inaturalist.org/observations/37417349</a>   |
| 3545 | Bubulcus ibis | Cattle Egret | 2021/8/19  | 2 | 0 | 23.6794181 | 120.1768681 | <a href="https://www.inaturalist.org/observations/91729200">https://www.inaturalist.org/observations/91729200</a>   |
| 3546 | Bubulcus ibis | Cattle Egret | 2021/5/27  | 1 | 0 | 23.6799081 | 120.1654188 | <a href="https://www.inaturalist.org/observations/80456118">https://www.inaturalist.org/observations/80456118</a>   |
| 3547 | Bubulcus ibis | Cattle Egret | 2020/10/23 | 2 | 0 | 23.6803300 | 120.5595700 | <a href="https://www.inaturalist.org/observations/65254508">https://www.inaturalist.org/observations/65254508</a>   |
| 3548 | Bubulcus ibis | Cattle Egret | 2020/3/3   | 1 | 0 | 23.6812500 | 120.4279717 | <a href="https://www.inaturalist.org/observations/39485274">https://www.inaturalist.org/observations/39485274</a>   |
| 3549 | Bubulcus ibis | Cattle Egret | 2022/1/13  | 1 | 0 | 23.6821370 | 120.4335300 | <a href="https://www.inaturalist.org/observations/108103428">https://www.inaturalist.org/observations/108103428</a> |

|      |                        |                      |            |   |   |            |             |                                                                                                                     |
|------|------------------------|----------------------|------------|---|---|------------|-------------|---------------------------------------------------------------------------------------------------------------------|
| 3550 | Bubulcus ibis          | Cattle Egret         | 2019/12/12 | 1 | 0 | 23.6826958 | 120.4758519 | <a href="https://www.inaturalist.org/observations/36587562">https://www.inaturalist.org/observations/36587562</a>   |
| 3551 | Bubulcus ibis          | Cattle Egret         | 2021/5/13  | 1 | 0 | 23.6845135 | 116.3061076 | <a href="https://www.inaturalist.org/observations/78545290">https://www.inaturalist.org/observations/78545290</a>   |
| 3552 | Bubulcus ibis          | Cattle Egret         | 2015/2/26  | 3 | 0 | 23.6855503 | 81.0258168  | <a href="https://www.inaturalist.org/observations/69187560">https://www.inaturalist.org/observations/69187560</a>   |
| 3553 | Bubulcus ibis          | Cattle Egret         | 2021/11/12 | 1 | 0 | 23.6857798 | 120.6207728 | <a href="https://www.inaturalist.org/observations/102745371">https://www.inaturalist.org/observations/102745371</a> |
| 3554 | Bubulcus ibis          | Cattle Egret         | 2022/5/17  | 1 | 0 | 23.6884790 | 120.3105207 | <a href="https://www.inaturalist.org/observations/117417662">https://www.inaturalist.org/observations/117417662</a> |
| 3555 | Bubulcus<br>coromandus | ibis<br>Cattle Egret | 2019/2/23  | 4 | 0 | 23.6895245 | 120.5210019 | <a href="https://www.inaturalist.org/observations/20780019">https://www.inaturalist.org/observations/20780019</a>   |
| 3556 | Bubulcus ibis          | Cattle Egret         | 2019/2/23  | 4 | 0 | 23.6898856 | 120.5207779 | <a href="https://www.inaturalist.org/observations/20780008">https://www.inaturalist.org/observations/20780008</a>   |
| 3557 | Bubulcus ibis          | Cattle Egret         | 2020/4/20  | 1 | 0 | 23.6903950 | 120.2397917 | <a href="https://www.inaturalist.org/observations/42670417">https://www.inaturalist.org/observations/42670417</a>   |
| 3558 | Bubulcus ibis          | Cattle Egret         | 2020/2/12  | 1 | 0 | 23.6919059 | 120.3145398 | <a href="https://www.inaturalist.org/observations/38559602">https://www.inaturalist.org/observations/38559602</a>   |
| 3559 | Bubulcus ibis          | Cattle Egret         | 2022/3/9   | 1 | 0 | 23.6940398 | 120.4514207 | <a href="https://www.inaturalist.org/observations/108334598">https://www.inaturalist.org/observations/108334598</a> |
| 3560 | Bubulcus ibis          | Cattle Egret         | 2021/12/22 | 1 | 0 | 23.6950821 | 120.2045653 | <a href="https://www.inaturalist.org/observations/103460730">https://www.inaturalist.org/observations/103460730</a> |
| 3561 | Bubulcus ibis          | Cattle Egret         | 2021/2/4   | 1 | 0 | 23.6959517 | 120.3214467 | <a href="https://www.inaturalist.org/observations/69369982">https://www.inaturalist.org/observations/69369982</a>   |
| 3562 | Bubulcus ibis          | Cattle Egret         | 2020/10/20 | 1 | 0 | 23.6960144 | 120.5925293 | <a href="https://www.inaturalist.org/observations/63076975">https://www.inaturalist.org/observations/63076975</a>   |
| 3563 | Bubulcus ibis          | Cattle Egret         | 2018/10/7  | 4 | 0 | 23.6961917 | 120.5093917 | <a href="https://www.inaturalist.org/observations/17272675">https://www.inaturalist.org/observations/17272675</a>   |
| 3564 | Bubulcus ibis          | Cattle Egret         | 2018/10/7  | 5 | 0 | 23.6961917 | 120.5093917 | <a href="https://www.inaturalist.org/observations/17272682">https://www.inaturalist.org/observations/17272682</a>   |
| 3565 | Bubulcus ibis          | Cattle Egret         | 2022/4/29  | 1 | 0 | 23.6970045 | 120.3874655 | <a href="https://www.inaturalist.org/observations/113343678">https://www.inaturalist.org/observations/113343678</a> |
| 3566 | Bubulcus ibis          | Cattle Egret         | 2019/9/14  | 1 | 0 | 23.6978100 | 120.9605150 | <a href="https://www.inaturalist.org/observations/48335871">https://www.inaturalist.org/observations/48335871</a>   |
| 3567 | Bubulcus<br>coromandus | ibis<br>Cattle Egret | 2017/2/16  | 2 | 0 | 23.6978100 | 120.9605150 | <a href="https://www.inaturalist.org/observations/129287049">https://www.inaturalist.org/observations/129287049</a> |
| 3568 | Bubulcus ibis          | Cattle Egret         | 2020/4/2   | 1 | 0 | 23.6984325 | 120.3592839 | <a href="https://www.inaturalist.org/observations/41213427">https://www.inaturalist.org/observations/41213427</a>   |
| 3569 | Bubulcus ibis          | Cattle Egret         | 2020/4/19  | 1 | 0 | 23.7027250 | 120.4633967 | <a href="https://www.inaturalist.org/observations/44231116">https://www.inaturalist.org/observations/44231116</a>   |
| 3570 | Bubulcus ibis          | Cattle Egret         | 2020/3/4   | 0 | 0 | 23.7029869 | 120.4164975 | <a href="https://www.inaturalist.org/observations/39523561">https://www.inaturalist.org/observations/39523561</a>   |
| 3571 | Bubulcus ibis          | Cattle Egret         | 2020/10/20 | 1 | 0 | 23.7031846 | 120.5946382 | <a href="https://www.inaturalist.org/observations/63076967">https://www.inaturalist.org/observations/63076967</a>   |
| 3572 | Bubulcus ibis          | Cattle Egret         | 2020/5/5   | 3 | 0 | 23.7038541 | 120.4635798 | <a href="https://www.inaturalist.org/observations/44964188">https://www.inaturalist.org/observations/44964188</a>   |
| 3573 | Bubulcus ibis          | Cattle Egret         | 2020/3/24  | 2 | 0 | 23.7039667 | 120.3356000 | <a href="https://www.inaturalist.org/observations/40683679">https://www.inaturalist.org/observations/40683679</a>   |
| 3574 | Bubulcus ibis          | Cattle Egret         | 2022/5/28  | 1 | 0 | 23.7040131 | 120.4623814 | <a href="https://www.inaturalist.org/observations/119039215">https://www.inaturalist.org/observations/119039215</a> |

|      |               |              |            |   |   |            |             |                                                                                                                     |
|------|---------------|--------------|------------|---|---|------------|-------------|---------------------------------------------------------------------------------------------------------------------|
| 3575 | Bubulcus ibis | Cattle Egret | 2021/2/20  | 1 | 0 | 23.7040976 | 120.4634454 | <a href="https://www.inaturalist.org/observations/69855746">https://www.inaturalist.org/observations/69855746</a>   |
| 3576 | Bubulcus ibis | Cattle Egret | 2020/3/12  | 1 | 0 | 23.7045083 | 120.4628700 | <a href="https://www.inaturalist.org/observations/39875100">https://www.inaturalist.org/observations/39875100</a>   |
| 3577 | Bubulcus ibis | Cattle Egret | 2020/3/12  | 1 | 0 | 23.7045980 | 120.4625069 | <a href="https://www.inaturalist.org/observations/39875076">https://www.inaturalist.org/observations/39875076</a>   |
| 3578 | Bubulcus ibis | Cattle Egret | 2020/5/9   | 1 | 0 | 23.7062372 | 120.3525933 | <a href="https://www.inaturalist.org/observations/45626131">https://www.inaturalist.org/observations/45626131</a>   |
| 3579 | Bubulcus ibis | Cattle Egret | 2020/5/4   | 1 | 0 | 23.7064155 | 120.3534194 | <a href="https://www.inaturalist.org/observations/45627901">https://www.inaturalist.org/observations/45627901</a>   |
| 3580 | Bubulcus ibis | Cattle Egret | 2020/5/3   | 1 | 0 | 23.7067224 | 120.3531702 | <a href="https://www.inaturalist.org/observations/44691851">https://www.inaturalist.org/observations/44691851</a>   |
| 3581 | Bubulcus ibis | Cattle Egret | 2021/4/18  | 4 | 0 | 23.7071511 | 120.4101033 | <a href="https://www.inaturalist.org/observations/74354436">https://www.inaturalist.org/observations/74354436</a>   |
| 3582 | Bubulcus ibis | Cattle Egret | 2021/2/22  | 1 | 0 | 23.7093716 | 120.5040526 | <a href="https://www.inaturalist.org/observations/70025647">https://www.inaturalist.org/observations/70025647</a>   |
| 3583 | Bubulcus ibis | Cattle Egret | 2019/12/14 | 1 | 0 | 23.7094729 | 120.5883823 | <a href="https://www.inaturalist.org/observations/36639938">https://www.inaturalist.org/observations/36639938</a>   |
| 3584 | Bubulcus ibis | Cattle Egret | 2020/12/27 | 1 | 0 | 23.7137133 | 120.3726050 | <a href="https://www.inaturalist.org/observations/67114940">https://www.inaturalist.org/observations/67114940</a>   |
| 3585 | Bubulcus ibis | Cattle Egret | 2020/3/24  | 1 | 0 | 23.7140146 | 120.3433459 | <a href="https://www.inaturalist.org/observations/40620770">https://www.inaturalist.org/observations/40620770</a>   |
| 3586 | Bubulcus ibis | Cattle Egret | 2021/12/25 | 1 | 0 | 23.7150150 | 120.3905881 | <a href="https://www.inaturalist.org/observations/103626677">https://www.inaturalist.org/observations/103626677</a> |
| 3587 | Bubulcus ibis | Cattle Egret | 2021/2/15  | 1 | 0 | 23.7170783 | 120.3669633 | <a href="https://www.inaturalist.org/observations/69622177">https://www.inaturalist.org/observations/69622177</a>   |
| 3588 | Bubulcus ibis | Cattle Egret | 2020/3/15  | 1 | 0 | 23.7172029 | 120.4343317 | <a href="https://www.inaturalist.org/observations/40009211">https://www.inaturalist.org/observations/40009211</a>   |
| 3589 | Bubulcus ibis | Cattle Egret | 2019/6/25  | 1 | 0 | 23.7196744 | 120.3383222 | <a href="https://www.inaturalist.org/observations/27633103">https://www.inaturalist.org/observations/27633103</a>   |
| 3590 | Bubulcus ibis | Cattle Egret | 2020/4/14  | 1 | 0 | 23.7211550 | 120.3701650 | <a href="https://www.inaturalist.org/observations/42155829">https://www.inaturalist.org/observations/42155829</a>   |
| 3591 | Bubulcus ibis | Cattle Egret | 2020/7/5   | 1 | 0 | 23.7221417 | 120.3664867 | <a href="https://www.inaturalist.org/observations/51999358">https://www.inaturalist.org/observations/51999358</a>   |
| 3592 | Bubulcus ibis | Cattle Egret | 2020/6/25  | 1 | 0 | 23.7232017 | 120.3082050 | <a href="https://www.inaturalist.org/observations/50873191">https://www.inaturalist.org/observations/50873191</a>   |
| 3593 | Bubulcus ibis | Cattle Egret | 2022/2/27  | 1 | 0 | 23.7242631 | 120.4221197 | <a href="https://www.inaturalist.org/observations/107534166">https://www.inaturalist.org/observations/107534166</a> |
| 3594 | Bubulcus ibis | Cattle Egret | 2022/4/30  | 1 | 0 | 23.7252609 | 120.6263092 | <a href="https://www.inaturalist.org/observations/114204833">https://www.inaturalist.org/observations/114204833</a> |
| 3595 | Bubulcus ibis | Cattle Egret | 2020/5/21  | 1 | 0 | 23.7255396 | 120.6273282 | <a href="https://www.inaturalist.org/observations/46725252">https://www.inaturalist.org/observations/46725252</a>   |
| 3596 | Bubulcus ibis | Cattle Egret | 2022/3/10  | 1 | 0 | 23.7256828 | 120.3579093 | <a href="https://www.inaturalist.org/observations/108308111">https://www.inaturalist.org/observations/108308111</a> |
| 3597 | Bubulcus ibis | Cattle Egret | 2021/9/12  | 1 | 0 | 23.7261981 | 120.4142900 | <a href="https://www.inaturalist.org/observations/94528453">https://www.inaturalist.org/observations/94528453</a>   |
| 3598 | Bubulcus ibis | Cattle Egret | 2022/8/21  | 2 | 0 | 23.7262631 | 120.4231331 | <a href="https://www.inaturalist.org/observations/132808589">https://www.inaturalist.org/observations/132808589</a> |
| 3599 | Bubulcus ibis | Cattle Egret | 2020/10/4  | 2 | 0 | 23.7263091 | 120.4219457 | <a href="https://www.inaturalist.org/observations/61650603">https://www.inaturalist.org/observations/61650603</a>   |

|      |               |              |            |   |   |            |             |                                                                                                                     |
|------|---------------|--------------|------------|---|---|------------|-------------|---------------------------------------------------------------------------------------------------------------------|
| 3600 | Bubulcus ibis | Cattle Egret | 2021/12/17 | 1 | 0 | 23.7263303 | 120.4717929 | <a href="https://www.inaturalist.org/observations/103172809">https://www.inaturalist.org/observations/103172809</a> |
| 3601 | Bubulcus ibis | Cattle Egret | 2022/3/13  | 1 | 0 | 23.7269284 | 120.3558316 | <a href="https://www.inaturalist.org/observations/108490418">https://www.inaturalist.org/observations/108490418</a> |
| 3602 | Bubulcus ibis | Cattle Egret | 2019/6/23  | 1 | 0 | 23.7278785 | 120.6220697 | <a href="https://www.inaturalist.org/observations/32399534">https://www.inaturalist.org/observations/32399534</a>   |
| 3603 | Bubulcus ibis | Cattle Egret | 2019/7/20  | 2 | 0 | 23.7278820 | 120.6220777 | <a href="https://www.inaturalist.org/observations/32399532">https://www.inaturalist.org/observations/32399532</a>   |
| 3604 | Bubulcus ibis | Cattle Egret | 2019/7/14  | 1 | 0 | 23.7278834 | 120.6220657 | <a href="https://www.inaturalist.org/observations/32399533">https://www.inaturalist.org/observations/32399533</a>   |
| 3605 | Bubulcus ibis | Cattle Egret | 2019/8/24  | 1 | 0 | 23.7278871 | 120.6220858 | <a href="https://www.inaturalist.org/observations/32399536">https://www.inaturalist.org/observations/32399536</a>   |
| 3606 | Bubulcus ibis | Cattle Egret | 2013/5/5   | 3 | 0 | 23.7286082 | 120.6161466 | <a href="https://www.inaturalist.org/observations/19485801">https://www.inaturalist.org/observations/19485801</a>   |
| 3607 | Bubulcus ibis | Cattle Egret | 2022/7/2   | 0 | 0 | 23.7292651 | 120.3904102 | <a href="https://www.inaturalist.org/observations/124458030">https://www.inaturalist.org/observations/124458030</a> |
| 3608 | Bubulcus ibis | Cattle Egret | 2020/2/2   | 0 | 0 | 23.7310667 | 120.3584117 | <a href="https://www.inaturalist.org/observations/38245504">https://www.inaturalist.org/observations/38245504</a>   |
| 3609 | Bubulcus ibis | Cattle Egret | 2019/11/19 | 2 | 0 | 23.7315020 | 120.3767130 | <a href="https://www.inaturalist.org/observations/35846029">https://www.inaturalist.org/observations/35846029</a>   |
| 3610 | Bubulcus ibis | Cattle Egret | 2018/3/18  | 2 | 0 | 23.7315182 | 120.3652644 | <a href="https://www.inaturalist.org/observations/109292128">https://www.inaturalist.org/observations/109292128</a> |
| 3611 | Bubulcus ibis | Cattle Egret | 2020/12/16 | 0 | 0 | 23.7315633 | 120.3870250 | <a href="https://www.inaturalist.org/observations/66647134">https://www.inaturalist.org/observations/66647134</a>   |
| 3612 | Bubulcus ibis | Cattle Egret | 2021/10/29 | 1 | 0 | 23.7323767 | 120.5121350 | <a href="https://www.inaturalist.org/observations/100071258">https://www.inaturalist.org/observations/100071258</a> |
| 3613 | Bubulcus ibis | Cattle Egret | 2020/6/30  | 2 | 0 | 23.7325807 | 120.3878668 | <a href="https://www.inaturalist.org/observations/51536433">https://www.inaturalist.org/observations/51536433</a>   |
| 3614 | Bubulcus ibis | Cattle Egret | 2020/12/16 | 1 | 0 | 23.7328204 | 120.3861877 | <a href="https://www.inaturalist.org/observations/66648506">https://www.inaturalist.org/observations/66648506</a>   |
| 3615 | Bubulcus ibis | Cattle Egret | 2019/1/25  | 2 | 0 | 23.7329966 | 120.3821925 | <a href="https://www.inaturalist.org/observations/19872283">https://www.inaturalist.org/observations/19872283</a>   |
| 3616 | Bubulcus ibis | Cattle Egret | 2021/12/4  | 1 | 0 | 23.7337150 | 120.3795700 | <a href="https://www.inaturalist.org/observations/102628875">https://www.inaturalist.org/observations/102628875</a> |
| 3617 | Bubulcus ibis | Cattle Egret | 2021/3/14  | 3 | 0 | 23.7337614 | 120.4328412 | <a href="https://www.inaturalist.org/observations/71697431">https://www.inaturalist.org/observations/71697431</a>   |
| 3618 | Bubulcus ibis | Cattle Egret | 2021/12/4  | 1 | 0 | 23.7339833 | 120.3798050 | <a href="https://www.inaturalist.org/observations/102628876">https://www.inaturalist.org/observations/102628876</a> |
| 3619 | Bubulcus ibis | Cattle Egret | 2020/5/24  | 1 | 0 | 23.7342367 | 120.4085812 | <a href="https://www.inaturalist.org/observations/47125803">https://www.inaturalist.org/observations/47125803</a>   |
| 3620 | Bubulcus ibis | Cattle Egret | 2021/6/26  | 3 | 0 | 23.7354967 | 120.3834186 | <a href="https://www.inaturalist.org/observations/84533136">https://www.inaturalist.org/observations/84533136</a>   |
| 3621 | Bubulcus ibis | Cattle Egret | 2019/1/30  | 2 | 0 | 23.7358018 | 120.3915688 | <a href="https://www.inaturalist.org/observations/19982891">https://www.inaturalist.org/observations/19982891</a>   |
| 3622 | Bubulcus ibis | Cattle Egret | 2021/12/4  | 2 | 0 | 23.7365117 | 120.3839733 | <a href="https://www.inaturalist.org/observations/102629885">https://www.inaturalist.org/observations/102629885</a> |
| 3623 | Bubulcus ibis | Cattle Egret | 2020/12/14 | 0 | 0 | 23.7408767 | 120.6582200 | <a href="https://www.inaturalist.org/observations/66558573">https://www.inaturalist.org/observations/66558573</a>   |
| 3624 | Bubulcus ibis | Cattle Egret | 2022/3/13  | 1 | 0 | 23.7414188 | 120.3926605 | <a href="https://www.inaturalist.org/observations/108487605">https://www.inaturalist.org/observations/108487605</a> |

|      |               |              |            |   |   |            |             |                                                                                                                     |
|------|---------------|--------------|------------|---|---|------------|-------------|---------------------------------------------------------------------------------------------------------------------|
| 3625 | Bubulcus ibis | Cattle Egret | 2021/1/7   | 3 | 0 | 23.7421111 | 86.1047146  | <a href="https://www.inaturalist.org/observations/67701136">https://www.inaturalist.org/observations/67701136</a>   |
| 3626 | Bubulcus ibis | Cattle Egret | 2018/7/27  | 2 | 0 | 23.7428122 | 120.5782015 | <a href="https://www.inaturalist.org/observations/15067712">https://www.inaturalist.org/observations/15067712</a>   |
| 3627 | Bubulcus ibis | Cattle Egret | 2022/3/1   | 1 | 0 | 23.7433944 | 121.4602861 | <a href="https://www.inaturalist.org/observations/107700089">https://www.inaturalist.org/observations/107700089</a> |
| 3628 | Bubulcus ibis | Cattle Egret | 2020/12/8  | 1 | 0 | 23.7444067 | 120.3476017 | <a href="https://www.inaturalist.org/observations/66279806">https://www.inaturalist.org/observations/66279806</a>   |
| 3629 | Bubulcus ibis | Cattle Egret | 2021/11/12 | 2 | 0 | 23.7452593 | 121.4787019 | <a href="https://www.inaturalist.org/observations/101158123">https://www.inaturalist.org/observations/101158123</a> |
| 3630 | Bubulcus ibis | Cattle Egret | 2020/4/19  | 1 | 0 | 23.7466672 | 119.6150084 | <a href="https://www.inaturalist.org/observations/44343265">https://www.inaturalist.org/observations/44343265</a>   |
| 3631 | Bubulcus ibis | Cattle Egret | 2020/7/21  | 0 | 0 | 23.7475694 | 120.2300167 | <a href="https://www.inaturalist.org/observations/53978380">https://www.inaturalist.org/observations/53978380</a>   |
| 3632 | Bubulcus ibis | Cattle Egret | 2022/1/13  | 1 | 0 | 23.7540400 | 120.5251900 | <a href="https://www.inaturalist.org/observations/108103921">https://www.inaturalist.org/observations/108103921</a> |
| 3633 | Bubulcus ibis | Cattle Egret | 2017/1/19  | 3 | 0 | 23.7540674 | 121.4711656 | <a href="https://www.inaturalist.org/observations/18878884">https://www.inaturalist.org/observations/18878884</a>   |
| 3634 | Bubulcus ibis | Cattle Egret | 2022/4/29  | 1 | 0 | 23.7541140 | 120.6147190 | <a href="https://www.inaturalist.org/observations/115809549">https://www.inaturalist.org/observations/115809549</a> |
| 3635 | Bubulcus ibis | Cattle Egret | 2020/1/24  | 0 | 0 | 23.7547483 | 120.5365033 | <a href="https://www.inaturalist.org/observations/37905251">https://www.inaturalist.org/observations/37905251</a>   |
| 3636 | Bubulcus ibis | Cattle Egret | 2022/2/22  | 1 | 0 | 23.7585645 | 120.5263170 | <a href="https://www.inaturalist.org/observations/107298417">https://www.inaturalist.org/observations/107298417</a> |
| 3637 | Bubulcus ibis | Cattle Egret | 2020/6/13  | 2 | 0 | 23.7590059 | 120.3828571 | <a href="https://www.inaturalist.org/observations/49758754">https://www.inaturalist.org/observations/49758754</a>   |
| 3638 | Bubulcus ibis | Cattle Egret | 2022/4/11  | 1 | 0 | 23.7599510 | 120.5511013 | <a href="https://www.inaturalist.org/observations/111038608">https://www.inaturalist.org/observations/111038608</a> |
| 3639 | Bubulcus ibis | Cattle Egret | 2020/3/21  | 1 | 0 | 23.7608297 | 121.4825163 | <a href="https://www.inaturalist.org/observations/41698757">https://www.inaturalist.org/observations/41698757</a>   |
| 3640 | Bubulcus ibis | Cattle Egret | 2021/2/20  | 1 | 0 | 23.7609000 | 120.5998317 | <a href="https://www.inaturalist.org/observations/69845365">https://www.inaturalist.org/observations/69845365</a>   |
| 3641 | Bubulcus ibis | Cattle Egret | 2020/3/21  | 1 | 0 | 23.7610859 | 121.4811009 | <a href="https://www.inaturalist.org/observations/41698760">https://www.inaturalist.org/observations/41698760</a>   |
| 3642 | Bubulcus ibis | Cattle Egret | 2020/3/21  | 1 | 0 | 23.7616234 | 121.4795208 | <a href="https://www.inaturalist.org/observations/41698770">https://www.inaturalist.org/observations/41698770</a>   |
| 3643 | Bubulcus ibis | Cattle Egret | 2022/10/21 | 2 | 0 | 23.7624662 | 120.2302261 | <a href="https://www.inaturalist.org/observations/139483614">https://www.inaturalist.org/observations/139483614</a> |
| 3644 | Bubulcus ibis | Cattle Egret | 2021/2/27  | 1 | 0 | 23.7647167 | 121.4705785 | <a href="https://www.inaturalist.org/observations/70247452">https://www.inaturalist.org/observations/70247452</a>   |
| 3645 | Bubulcus ibis | Cattle Egret | 2022/4/21  | 2 | 0 | 23.7687429 | 120.2571700 | <a href="https://www.inaturalist.org/observations/112232762">https://www.inaturalist.org/observations/112232762</a> |
| 3646 | Bubulcus ibis | Cattle Egret | 2022/5/22  | 1 | 0 | 23.7689725 | 120.5440977 | <a href="https://www.inaturalist.org/observations/118155136">https://www.inaturalist.org/observations/118155136</a> |
| 3647 | Bubulcus ibis | Cattle Egret | 2022/2/22  | 1 | 0 | 23.7703092 | 120.5291789 | <a href="https://www.inaturalist.org/observations/107298420">https://www.inaturalist.org/observations/107298420</a> |
| 3648 | Bubulcus ibis | Cattle Egret | 2020/5/9   | 1 | 0 | 23.7703750 | 120.3980450 | <a href="https://www.inaturalist.org/observations/45345938">https://www.inaturalist.org/observations/45345938</a>   |
| 3649 | Bubulcus ibis | Cattle Egret | 2022/4/21  | 1 | 0 | 23.7709090 | 120.2244128 | <a href="https://www.inaturalist.org/observations/112254624">https://www.inaturalist.org/observations/112254624</a> |



|      |               |              |            |   |   |            |             |                                                                                                                     |
|------|---------------|--------------|------------|---|---|------------|-------------|---------------------------------------------------------------------------------------------------------------------|
| 3650 | Bubulcus ibis | Cattle Egret | 2022/2/22  | 1 | 0 | 23.7717678 | 120.5223842 | <a href="https://www.inaturalist.org/observations/107298082">https://www.inaturalist.org/observations/107298082</a> |
| 3651 | Bubulcus ibis | Cattle Egret | 2021/1/25  | 1 | 0 | 23.7718005 | 120.6266411 | <a href="https://www.inaturalist.org/observations/68586957">https://www.inaturalist.org/observations/68586957</a>   |
| 3652 | Bubulcus ibis | Cattle Egret | 2020/12/8  | 1 | 0 | 23.7731433 | 120.3782150 | <a href="https://www.inaturalist.org/observations/66279054">https://www.inaturalist.org/observations/66279054</a>   |
| 3653 | Bubulcus ibis | Cattle Egret | 2022/9/8   | 2 | 0 | 23.7737166 | 120.6728383 | <a href="https://www.inaturalist.org/observations/134127736">https://www.inaturalist.org/observations/134127736</a> |
| 3654 | Bubulcus ibis | Cattle Egret | 2021/4/27  | 1 | 0 | 23.7781903 | 120.5597267 | <a href="https://www.inaturalist.org/observations/75499340">https://www.inaturalist.org/observations/75499340</a>   |
| 3655 | Bubulcus ibis | Cattle Egret | 2021/1/15  | 1 | 0 | 23.7788933 | 120.4252533 | <a href="https://www.inaturalist.org/observations/68262201">https://www.inaturalist.org/observations/68262201</a>   |
| 3656 | Bubulcus ibis | Cattle Egret | 2021/8/5   | 1 | 0 | 23.7792056 | 120.5773722 | <a href="https://www.inaturalist.org/observations/90002973">https://www.inaturalist.org/observations/90002973</a>   |
| 3657 | Bubulcus ibis | Cattle Egret | 2021/8/5   | 1 | 0 | 23.7827531 | 120.5361223 | <a href="https://www.inaturalist.org/observations/90003289">https://www.inaturalist.org/observations/90003289</a>   |
| 3658 | Bubulcus ibis | Cattle Egret | 2021/5/2   | 2 | 0 | 23.7881283 | 120.2280917 | <a href="https://www.inaturalist.org/observations/76505667">https://www.inaturalist.org/observations/76505667</a>   |
| 3659 | Bubulcus ibis | Cattle Egret | 2019/10/28 | 3 | 0 | 23.7904309 | 120.4697838 | <a href="https://www.inaturalist.org/observations/35437751">https://www.inaturalist.org/observations/35437751</a>   |
| 3660 | Bubulcus ibis | Cattle Egret | 2020/11/11 | 1 | 0 | 23.7946467 | 120.4655183 | <a href="https://www.inaturalist.org/observations/64657444">https://www.inaturalist.org/observations/64657444</a>   |
| 3661 | Bubulcus ibis | Cattle Egret | 2022/3/17  | 1 | 0 | 23.7960508 | 120.2905246 | <a href="https://www.inaturalist.org/observations/108774719">https://www.inaturalist.org/observations/108774719</a> |
| 3662 | Bubulcus ibis | Cattle Egret | 2022/1/23  | 2 | 0 | 23.7965078 | 120.3686882 | <a href="https://www.inaturalist.org/observations/105395107">https://www.inaturalist.org/observations/105395107</a> |
| 3663 | Bubulcus ibis | Cattle Egret | 2022/5/26  | 0 | 0 | 23.7971028 | 120.4321972 | <a href="https://www.inaturalist.org/observations/118825211">https://www.inaturalist.org/observations/118825211</a> |
| 3664 | Bubulcus ibis | Cattle Egret | 2020/12/16 | 1 | 0 | 23.7985383 | 120.3165933 | <a href="https://www.inaturalist.org/observations/66643878">https://www.inaturalist.org/observations/66643878</a>   |
| 3665 | Bubulcus ibis | Cattle Egret | 2021/3/4   | 1 | 0 | 23.7997217 | 120.2308533 | <a href="https://www.inaturalist.org/observations/70551628">https://www.inaturalist.org/observations/70551628</a>   |
| 3666 | Bubulcus ibis | Cattle Egret | 2022/10/12 | 1 | 0 | 23.8064408 | 120.8500904 | <a href="https://www.inaturalist.org/observations/138435951">https://www.inaturalist.org/observations/138435951</a> |
| 3667 | Bubulcus ibis | Cattle Egret | 2022/7/12  | 1 | 0 | 23.8065102 | 120.3116069 | <a href="https://www.inaturalist.org/observations/125891283">https://www.inaturalist.org/observations/125891283</a> |
| 3668 | Bubulcus ibis | Cattle Egret | 2022/12/4  | 0 | 0 | 23.8084873 | 120.3129121 | <a href="https://www.inaturalist.org/observations/143635141">https://www.inaturalist.org/observations/143635141</a> |
| 3669 | Bubulcus ibis | Cattle Egret | 2022/2/21  | 3 | 0 | 23.8107734 | 121.5288055 | <a href="https://www.inaturalist.org/observations/110070791">https://www.inaturalist.org/observations/110070791</a> |
| 3670 | Bubulcus ibis | Cattle Egret | 2019/4/7   | 1 | 0 | 23.8120284 | 120.2975221 | <a href="https://www.inaturalist.org/observations/22144840">https://www.inaturalist.org/observations/22144840</a>   |
| 3671 | Bubulcus ibis | Cattle Egret | 2020/1/16  | 1 | 0 | 23.8123269 | 120.7403293 | <a href="https://www.inaturalist.org/observations/37632269">https://www.inaturalist.org/observations/37632269</a>   |
| 3672 | Bubulcus ibis | Cattle Egret | 2021/3/14  | 1 | 0 | 23.8126370 | 120.2408759 | <a href="https://www.inaturalist.org/observations/71201712">https://www.inaturalist.org/observations/71201712</a>   |
| 3673 | Bubulcus ibis | Cattle Egret | 2020/5/22  | 1 | 0 | 23.8157444 | 120.3942326 | <a href="https://www.inaturalist.org/observations/46801005">https://www.inaturalist.org/observations/46801005</a>   |
| 3674 | Bubulcus ibis | Cattle Egret | 2020/5/29  | 1 | 0 | 23.8171685 | 120.3823719 | <a href="https://www.inaturalist.org/observations/47940673">https://www.inaturalist.org/observations/47940673</a>   |

|      |               |              |            |   |   |            |             |                                                                                                                     |
|------|---------------|--------------|------------|---|---|------------|-------------|---------------------------------------------------------------------------------------------------------------------|
| 3675 | Bubulcus ibis | Cattle Egret | 2022/5/1   | 1 | 0 | 23.8173165 | 120.3624718 | <a href="https://www.inaturalist.org/observations/115706934">https://www.inaturalist.org/observations/115706934</a> |
| 3676 | Bubulcus ibis | Cattle Egret | 2020/2/11  | 1 | 0 | 23.8181462 | 120.3865607 | <a href="https://www.inaturalist.org/observations/38529653">https://www.inaturalist.org/observations/38529653</a>   |
| 3677 | Bubulcus ibis | Cattle Egret | 2022/9/5   | 1 | 0 | 23.8197043 | 120.5961690 | <a href="https://www.inaturalist.org/observations/133723372">https://www.inaturalist.org/observations/133723372</a> |
| 3678 | Bubulcus ibis | Cattle Egret | 2022/2/21  | 3 | 0 | 23.8239394 | 121.5240004 | <a href="https://www.inaturalist.org/observations/110070790">https://www.inaturalist.org/observations/110070790</a> |
| 3679 | Bubulcus ibis | Cattle Egret | 2022/5/5   | 1 | 0 | 23.8268000 | 120.8006833 | <a href="https://www.inaturalist.org/observations/115513344">https://www.inaturalist.org/observations/115513344</a> |
| 3680 | Bubulcus ibis | Cattle Egret | 2022/4/17  | 2 | 0 | 23.8268200 | 120.8006583 | <a href="https://www.inaturalist.org/observations/112450470">https://www.inaturalist.org/observations/112450470</a> |
| 3681 | Bubulcus ibis | Cattle Egret | 2021/5/11  | 2 | 0 | 23.8271838 | 120.8004958 | <a href="https://www.inaturalist.org/observations/78327891">https://www.inaturalist.org/observations/78327891</a>   |
| 3682 | Bubulcus ibis | Cattle Egret | 2021/10/25 | 1 | 0 | 23.8276147 | 120.5866257 | <a href="https://www.inaturalist.org/observations/99309601">https://www.inaturalist.org/observations/99309601</a>   |
| 3683 | Bubulcus ibis | Cattle Egret | 2018/10/21 | 3 | 0 | 23.8288220 | 120.6889600 | <a href="https://www.inaturalist.org/observations/19670688">https://www.inaturalist.org/observations/19670688</a>   |
| 3684 | Bubulcus ibis | Cattle Egret | 2021/3/31  | 1 | 0 | 23.8297939 | 120.9015654 | <a href="https://www.inaturalist.org/observations/72516935">https://www.inaturalist.org/observations/72516935</a>   |
| 3685 | Bubulcus ibis | Cattle Egret | 2015/6/30  | 2 | 0 | 23.8308734 | 120.5259960 | <a href="https://www.inaturalist.org/observations/13519117">https://www.inaturalist.org/observations/13519117</a>   |
| 3686 | Bubulcus ibis | Cattle Egret | 2019/8/31  | 1 | 0 | 23.8310635 | 120.5253905 | <a href="https://www.inaturalist.org/observations/31973758">https://www.inaturalist.org/observations/31973758</a>   |
| 3687 | Bubulcus ibis | Cattle Egret | 2022/5/19  | 1 | 0 | 23.8398024 | 120.8030794 | <a href="https://www.inaturalist.org/observations/117661336">https://www.inaturalist.org/observations/117661336</a> |
| 3688 | Bubulcus ibis | Cattle Egret | 2020/7/15  | 2 | 0 | 23.8405750 | 120.9068028 | <a href="https://www.inaturalist.org/observations/53109954">https://www.inaturalist.org/observations/53109954</a>   |
| 3689 | Bubulcus ibis | Cattle Egret | 2018/7/24  | 4 | 0 | 23.8422069 | 86.2384829  | <a href="https://www.inaturalist.org/observations/14726978">https://www.inaturalist.org/observations/14726978</a>   |
| 3690 | Bubulcus ibis | Cattle Egret | 2005/5/8   | 2 | 0 | 23.8483614 | 120.3089541 | <a href="https://www.inaturalist.org/observations/13332450">https://www.inaturalist.org/observations/13332450</a>   |
| 3691 | Bubulcus ibis | Cattle Egret | 2020/10/31 | 2 | 0 | 23.8495067 | 77.9370969  | <a href="https://www.inaturalist.org/observations/64918317">https://www.inaturalist.org/observations/64918317</a>   |
| 3692 | Bubulcus ibis | Cattle Egret | 2022/1/23  | 2 | 0 | 23.8503882 | 121.4771243 | <a href="https://www.inaturalist.org/observations/105482735">https://www.inaturalist.org/observations/105482735</a> |
| 3693 | Bubulcus ibis | Cattle Egret | 2022/1/23  | 2 | 0 | 23.8503882 | 121.4771243 | <a href="https://www.inaturalist.org/observations/105482738">https://www.inaturalist.org/observations/105482738</a> |
| 3694 | Bubulcus ibis | Cattle Egret | 2022/7/31  | 1 | 0 | 23.8513813 | 120.9018457 | <a href="https://www.inaturalist.org/observations/128730991">https://www.inaturalist.org/observations/128730991</a> |
| 3695 | Bubulcus ibis | Cattle Egret | 2022/7/29  | 1 | 0 | 23.8520298 | 120.9022521 | <a href="https://www.inaturalist.org/observations/141984944">https://www.inaturalist.org/observations/141984944</a> |
| 3696 | Bubulcus ibis | Cattle Egret | 2021/4/19  | 1 | 0 | 23.8563524 | 120.7786586 | <a href="https://www.inaturalist.org/observations/74704908">https://www.inaturalist.org/observations/74704908</a>   |
| 3697 | Bubulcus ibis | Cattle Egret | 2021/5/11  | 1 | 0 | 23.8575467 | 120.7803591 | <a href="https://www.inaturalist.org/observations/78317232">https://www.inaturalist.org/observations/78317232</a>   |
| 3698 | Bubulcus ibis | Cattle Egret | 2018/9/20  | 1 | 0 | 23.8579352 | 120.9428644 | <a href="https://www.inaturalist.org/observations/81811604">https://www.inaturalist.org/observations/81811604</a>   |
| 3699 | Bubulcus ibis | Cattle Egret | 2022/7/3   | 3 | 0 | 23.8582528 | 120.8552139 | <a href="https://www.inaturalist.org/observations/144009878">https://www.inaturalist.org/observations/144009878</a> |

|      |               |              |            |   |   |            |             |                                                                                                                     |
|------|---------------|--------------|------------|---|---|------------|-------------|---------------------------------------------------------------------------------------------------------------------|
| 3700 | Bubulcus ibis | Cattle Egret | 2018/8/7   | 3 | 0 | 23.8584049 | 120.4816737 | <a href="https://www.inaturalist.org/observations/15314395">https://www.inaturalist.org/observations/15314395</a>   |
| 3701 | Bubulcus ibis | Cattle Egret | 2022/8/29  | 2 | 0 | 23.8593411 | 121.5598345 | <a href="https://www.inaturalist.org/observations/139398150">https://www.inaturalist.org/observations/139398150</a> |
| 3702 | Bubulcus ibis | Cattle Egret | 2020/7/15  | 1 | 0 | 23.8619417 | 120.9008861 | <a href="https://www.inaturalist.org/observations/53113319">https://www.inaturalist.org/observations/53113319</a>   |
| 3703 | Bubulcus ibis | Cattle Egret | 2020/10/12 | 2 | 0 | 23.8621229 | 120.9015809 | <a href="https://www.inaturalist.org/observations/62373773">https://www.inaturalist.org/observations/62373773</a>   |
| 3704 | Bubulcus ibis | Cattle Egret | 2022/1/23  | 1 | 0 | 23.8723010 | 86.9150760  | <a href="https://www.inaturalist.org/observations/105429647">https://www.inaturalist.org/observations/105429647</a> |
| 3705 | Bubulcus ibis | Cattle Egret | 2018/9/29  | 0 | 0 | 23.8736656 | 120.9223934 | <a href="https://www.inaturalist.org/observations/37770108">https://www.inaturalist.org/observations/37770108</a>   |
| 3706 | Bubulcus ibis | Cattle Egret | 2020/5/2   | 1 | 0 | 23.8798679 | 121.5506854 | <a href="https://www.inaturalist.org/observations/44604989">https://www.inaturalist.org/observations/44604989</a>   |
| 3707 | Bubulcus ibis | Cattle Egret | 2021/10/22 | 2 | 0 | 23.8837678 | 84.1917750  | <a href="https://www.inaturalist.org/observations/98976530">https://www.inaturalist.org/observations/98976530</a>   |
| 3708 | Bubulcus ibis | Cattle Egret | 2020/5/8   | 1 | 0 | 23.8908892 | 121.5408042 | <a href="https://www.inaturalist.org/observations/45259149">https://www.inaturalist.org/observations/45259149</a>   |
| 3709 | Bubulcus ibis | Cattle Egret | 2020/10/28 | 1 | 0 | 23.8911287 | 121.5350655 | <a href="https://www.inaturalist.org/observations/67299909">https://www.inaturalist.org/observations/67299909</a>   |
| 3710 | Bubulcus ibis | Cattle Egret | 2019/10/3  | 2 | 0 | 23.8921411 | 121.5357268 | <a href="https://www.inaturalist.org/observations/33790303">https://www.inaturalist.org/observations/33790303</a>   |
| 3711 | Bubulcus ibis | Cattle Egret | 2021/11/3  | 1 | 0 | 23.8924448 | 121.5362810 | <a href="https://www.inaturalist.org/observations/100400558">https://www.inaturalist.org/observations/100400558</a> |
| 3712 | Bubulcus ibis | Cattle Egret | 2019/10/17 | 2 | 0 | 23.8930550 | 121.5450130 | <a href="https://www.inaturalist.org/observations/34489309">https://www.inaturalist.org/observations/34489309</a>   |
| 3713 | Bubulcus ibis | Cattle Egret | 2019/10/17 | 1 | 0 | 23.8932694 | 121.5450784 | <a href="https://www.inaturalist.org/observations/34489737">https://www.inaturalist.org/observations/34489737</a>   |
| 3714 | Bubulcus ibis | Cattle Egret | 2020/10/20 | 1 | 0 | 23.8939602 | 121.5347851 | <a href="https://www.inaturalist.org/observations/63469459">https://www.inaturalist.org/observations/63469459</a>   |
| 3715 | Bubulcus ibis | Cattle Egret | 2014/5/15  | 4 | 0 | 23.8941759 | 121.5484643 | <a href="https://www.inaturalist.org/observations/12264699">https://www.inaturalist.org/observations/12264699</a>   |
| 3716 | Bubulcus ibis | Cattle Egret | 2020/10/7  | 1 | 0 | 23.8942900 | 121.5440567 | <a href="https://www.inaturalist.org/observations/63470734">https://www.inaturalist.org/observations/63470734</a>   |
| 3717 | Bubulcus ibis | Cattle Egret | 2021/11/6  | 1 | 0 | 23.8950393 | 121.5451450 | <a href="https://www.inaturalist.org/observations/100374361">https://www.inaturalist.org/observations/100374361</a> |
| 3718 | Bubulcus ibis | Cattle Egret | 2022/10/1  | 1 | 0 | 23.8958389 | 121.5449553 | <a href="https://www.inaturalist.org/observations/137125227">https://www.inaturalist.org/observations/137125227</a> |
| 3719 | Bubulcus ibis | Cattle Egret | 2020/7/9   | 1 | 0 | 23.8962978 | 121.5451427 | <a href="https://www.inaturalist.org/observations/54427620">https://www.inaturalist.org/observations/54427620</a>   |
| 3720 | Bubulcus ibis | Cattle Egret | 2020/7/9   | 1 | 0 | 23.8963051 | 121.5452500 | <a href="https://www.inaturalist.org/observations/54427623">https://www.inaturalist.org/observations/54427623</a>   |
| 3721 | Bubulcus ibis | Cattle Egret | 2020/4/14  | 2 | 0 | 23.8963543 | 121.5452992 | <a href="https://www.inaturalist.org/observations/42158228">https://www.inaturalist.org/observations/42158228</a>   |
| 3722 | Bubulcus ibis | Cattle Egret | 2020/7/9   | 1 | 0 | 23.8963626 | 121.5452698 | <a href="https://www.inaturalist.org/observations/54427611">https://www.inaturalist.org/observations/54427611</a>   |
| 3723 | Bubulcus ibis | Cattle Egret | 2020/7/9   | 2 | 0 | 23.8963640 | 121.5452768 | <a href="https://www.inaturalist.org/observations/54427624">https://www.inaturalist.org/observations/54427624</a>   |
| 3724 | Bubulcus ibis | Cattle Egret | 2019/9/29  | 2 | 0 | 23.8963674 | 121.5449125 | <a href="https://www.inaturalist.org/observations/33584840">https://www.inaturalist.org/observations/33584840</a>   |

|      |               |              |            |   |   |            |             |                                                                                                                     |
|------|---------------|--------------|------------|---|---|------------|-------------|---------------------------------------------------------------------------------------------------------------------|
| 3725 | Bubulcus ibis | Cattle Egret | 2020/5/5   | 1 | 0 | 23.8963725 | 121.5452272 | <a href="https://www.inaturalist.org/observations/44971117">https://www.inaturalist.org/observations/44971117</a>   |
| 3726 | Bubulcus ibis | Cattle Egret | 2020/5/2   | 3 | 0 | 23.8963740 | 121.5453444 | <a href="https://www.inaturalist.org/observations/44541811">https://www.inaturalist.org/observations/44541811</a>   |
| 3727 | Bubulcus ibis | Cattle Egret | 2020/5/18  | 1 | 0 | 23.8963761 | 121.5452004 | <a href="https://www.inaturalist.org/observations/46363096">https://www.inaturalist.org/observations/46363096</a>   |
| 3728 | Bubulcus ibis | Cattle Egret | 2020/5/18  | 3 | 0 | 23.8963829 | 121.5451605 | <a href="https://www.inaturalist.org/observations/46363090">https://www.inaturalist.org/observations/46363090</a>   |
| 3729 | Bubulcus ibis | Cattle Egret | 2020/10/27 | 2 | 0 | 23.8963876 | 121.5452113 | <a href="https://www.inaturalist.org/observations/63675691">https://www.inaturalist.org/observations/63675691</a>   |
| 3730 | Bubulcus ibis | Cattle Egret | 2019/10/17 | 2 | 0 | 23.8964240 | 121.5448720 | <a href="https://www.inaturalist.org/observations/34489298">https://www.inaturalist.org/observations/34489298</a>   |
| 3731 | Bubulcus ibis | Cattle Egret | 2020/4/29  | 4 | 0 | 23.8964833 | 121.5448550 | <a href="https://www.inaturalist.org/observations/44238186">https://www.inaturalist.org/observations/44238186</a>   |
| 3732 | Bubulcus ibis | Cattle Egret | 2020/4/29  | 3 | 0 | 23.8965233 | 121.5448233 | <a href="https://www.inaturalist.org/observations/44238181">https://www.inaturalist.org/observations/44238181</a>   |
| 3733 | Bubulcus ibis | Cattle Egret | 2019/11/30 | 2 | 0 | 23.8965994 | 120.5821831 | <a href="https://www.inaturalist.org/observations/37366305">https://www.inaturalist.org/observations/37366305</a>   |
| 3734 | Bubulcus ibis | Cattle Egret | 2020/11/12 | 1 | 0 | 23.8966290 | 121.5476763 | <a href="https://www.inaturalist.org/observations/64709463">https://www.inaturalist.org/observations/64709463</a>   |
| 3735 | Bubulcus ibis | Cattle Egret | 2019/10/17 | 2 | 0 | 23.8967200 | 121.5451486 | <a href="https://www.inaturalist.org/observations/34489724">https://www.inaturalist.org/observations/34489724</a>   |
| 3736 | Bubulcus ibis | Cattle Egret | 2021/11/24 | 0 | 0 | 23.8967220 | 121.5364185 | <a href="https://www.inaturalist.org/observations/102153058">https://www.inaturalist.org/observations/102153058</a> |
| 3737 | Bubulcus ibis | Cattle Egret | 2019/9/29  | 2 | 0 | 23.8967269 | 121.5458883 | <a href="https://www.inaturalist.org/observations/33591729">https://www.inaturalist.org/observations/33591729</a>   |
| 3738 | Bubulcus ibis | Cattle Egret | 2019/10/9  | 2 | 0 | 23.8967389 | 121.5458819 | <a href="https://www.inaturalist.org/observations/34118476">https://www.inaturalist.org/observations/34118476</a>   |
| 3739 | Bubulcus ibis | Cattle Egret | 2020/9/26  | 2 | 0 | 23.8968601 | 121.5461619 | <a href="https://www.inaturalist.org/observations/61129838">https://www.inaturalist.org/observations/61129838</a>   |
| 3740 | Bubulcus ibis | Cattle Egret | 2017/2/28  | 4 | 0 | 23.8969441 | 120.9369431 | <a href="https://www.inaturalist.org/observations/5215502">https://www.inaturalist.org/observations/5215502</a>     |
| 3741 | Bubulcus ibis | Cattle Egret | 2020/9/26  | 2 | 0 | 23.8969562 | 121.5461771 | <a href="https://www.inaturalist.org/observations/61129837">https://www.inaturalist.org/observations/61129837</a>   |
| 3742 | Bubulcus ibis | Cattle Egret | 2020/10/26 | 1 | 0 | 23.8969837 | 121.5457470 | <a href="https://www.inaturalist.org/observations/63579796">https://www.inaturalist.org/observations/63579796</a>   |
| 3743 | Bubulcus ibis | Cattle Egret | 2019/10/9  | 1 | 0 | 23.8970095 | 121.5471359 | <a href="https://www.inaturalist.org/observations/34489536">https://www.inaturalist.org/observations/34489536</a>   |
| 3744 | Bubulcus ibis | Cattle Egret | 2020/10/28 | 1 | 0 | 23.8972133 | 121.5472850 | <a href="https://www.inaturalist.org/observations/63675679">https://www.inaturalist.org/observations/63675679</a>   |
| 3745 | Bubulcus ibis | Cattle Egret | 2019/10/4  | 2 | 0 | 23.8973999 | 121.5342177 | <a href="https://www.inaturalist.org/observations/34104159">https://www.inaturalist.org/observations/34104159</a>   |
| 3746 | Bubulcus ibis | Cattle Egret | 2019/9/29  | 2 | 0 | 23.8976021 | 121.5509933 | <a href="https://www.inaturalist.org/observations/33584815">https://www.inaturalist.org/observations/33584815</a>   |
| 3747 | Bubulcus ibis | Cattle Egret | 2021/12/1  | 1 | 0 | 23.8976303 | 121.5467370 | <a href="https://www.inaturalist.org/observations/102291280">https://www.inaturalist.org/observations/102291280</a> |
| 3748 | Bubulcus ibis | Cattle Egret | 2021/12/1  | 1 | 0 | 23.8979530 | 121.5464526 | <a href="https://www.inaturalist.org/observations/102291312">https://www.inaturalist.org/observations/102291312</a> |
| 3749 | Bubulcus ibis | Cattle Egret | 2022/6/3   | 2 | 0 | 23.8979538 | 121.5413977 | <a href="https://www.inaturalist.org/observations/120009374">https://www.inaturalist.org/observations/120009374</a> |

|      |               |              |            |   |   |            |             |                                                                                                                     |
|------|---------------|--------------|------------|---|---|------------|-------------|---------------------------------------------------------------------------------------------------------------------|
| 3750 | Bubulcus ibis | Cattle Egret | 2021/12/13 | 1 | 0 | 23.8983528 | 121.5462222 | <a href="https://www.inaturalist.org/observations/103003086">https://www.inaturalist.org/observations/103003086</a> |
| 3751 | Bubulcus ibis | Cattle Egret | 2022/12/24 | 1 | 0 | 23.8992556 | 121.5496778 | <a href="https://www.inaturalist.org/observations/144972970">https://www.inaturalist.org/observations/144972970</a> |
| 3752 | Bubulcus ibis | Cattle Egret | 2019/11/6  | 2 | 0 | 23.8993830 | 121.5413470 | <a href="https://www.inaturalist.org/observations/35367337">https://www.inaturalist.org/observations/35367337</a>   |
| 3753 | Bubulcus ibis | Cattle Egret | 2019/11/6  | 2 | 0 | 23.8993833 | 121.5413350 | <a href="https://www.inaturalist.org/observations/35366359">https://www.inaturalist.org/observations/35366359</a>   |
| 3754 | Bubulcus ibis | Cattle Egret | 2015/10/11 | 2 | 0 | 23.8994826 | 121.5413886 | <a href="https://www.inaturalist.org/observations/12229662">https://www.inaturalist.org/observations/12229662</a>   |
| 3755 | Bubulcus ibis | Cattle Egret | 2022/2/24  | 1 | 0 | 23.8998966 | 121.5249341 | <a href="https://www.inaturalist.org/observations/107423072">https://www.inaturalist.org/observations/107423072</a> |
| 3756 | Bubulcus ibis | Cattle Egret | 2022/2/24  | 2 | 0 | 23.8998966 | 121.5249341 | <a href="https://www.inaturalist.org/observations/107476777">https://www.inaturalist.org/observations/107476777</a> |
| 3757 | Bubulcus ibis | Cattle Egret | 2022/2/24  | 1 | 0 | 23.8998966 | 121.5249341 | <a href="https://www.inaturalist.org/observations/107476787">https://www.inaturalist.org/observations/107476787</a> |
| 3758 | Bubulcus ibis | Cattle Egret | 2019/12/19 | 1 | 0 | 23.8999010 | 121.5425390 | <a href="https://www.inaturalist.org/observations/36768103">https://www.inaturalist.org/observations/36768103</a>   |
| 3759 | Bubulcus ibis | Cattle Egret | 2019/10/8  | 1 | 0 | 23.8999140 | 121.5503460 | <a href="https://www.inaturalist.org/observations/34060125">https://www.inaturalist.org/observations/34060125</a>   |
| 3760 | Bubulcus ibis | Cattle Egret | 2019/10/10 | 2 | 0 | 23.9000847 | 121.5418801 | <a href="https://www.inaturalist.org/observations/34164439">https://www.inaturalist.org/observations/34164439</a>   |
| 3761 | Bubulcus ibis | Cattle Egret | 2019/10/9  | 1 | 0 | 23.9004022 | 121.5458220 | <a href="https://www.inaturalist.org/observations/34740358">https://www.inaturalist.org/observations/34740358</a>   |
| 3762 | Bubulcus ibis | Cattle Egret | 2019/10/14 | 2 | 0 | 23.9004515 | 121.5420310 | <a href="https://www.inaturalist.org/observations/34362498">https://www.inaturalist.org/observations/34362498</a>   |
| 3763 | Bubulcus ibis | Cattle Egret | 2020/11/20 | 1 | 0 | 23.9005116 | 121.5392496 | <a href="https://www.inaturalist.org/observations/65251776">https://www.inaturalist.org/observations/65251776</a>   |
| 3764 | Bubulcus ibis | Cattle Egret | 2022/10/15 | 1 | 0 | 23.9005583 | 121.5364722 | <a href="https://www.inaturalist.org/observations/138799946">https://www.inaturalist.org/observations/138799946</a> |
| 3765 | Bubulcus ibis | Cattle Egret | 2022/10/15 | 1 | 0 | 23.9005639 | 121.5365111 | <a href="https://www.inaturalist.org/observations/138800024">https://www.inaturalist.org/observations/138800024</a> |
| 3766 | Bubulcus ibis | Cattle Egret | 2019/10/10 | 2 | 0 | 23.9005810 | 121.5366520 | <a href="https://www.inaturalist.org/observations/34155401">https://www.inaturalist.org/observations/34155401</a>   |
| 3767 | Bubulcus ibis | Cattle Egret | 2022/10/15 | 1 | 0 | 23.9006444 | 121.5366278 | <a href="https://www.inaturalist.org/observations/138800203">https://www.inaturalist.org/observations/138800203</a> |
| 3768 | Bubulcus ibis | Cattle Egret | 2020/11/7  | 1 | 0 | 23.9006677 | 121.5486777 | <a href="https://www.inaturalist.org/observations/64444449">https://www.inaturalist.org/observations/64444449</a>   |
| 3769 | Bubulcus ibis | Cattle Egret | 2019/10/25 | 2 | 0 | 23.9006967 | 121.5384805 | <a href="https://www.inaturalist.org/observations/35015155">https://www.inaturalist.org/observations/35015155</a>   |
| 3770 | Bubulcus ibis | Cattle Egret | 2019/10/25 | 2 | 0 | 23.9007061 | 121.5384288 | <a href="https://www.inaturalist.org/observations/34874614">https://www.inaturalist.org/observations/34874614</a>   |
| 3771 | Bubulcus ibis | Cattle Egret | 2019/10/10 | 2 | 0 | 23.9007132 | 121.5420245 | <a href="https://www.inaturalist.org/observations/34155416">https://www.inaturalist.org/observations/34155416</a>   |
| 3772 | Bubulcus ibis | Cattle Egret | 2020/5/17  | 2 | 0 | 23.9007573 | 121.5364921 | <a href="https://www.inaturalist.org/observations/46469347">https://www.inaturalist.org/observations/46469347</a>   |
| 3773 | Bubulcus ibis | Cattle Egret | 2020/4/25  | 2 | 0 | 23.9007717 | 121.5423650 | <a href="https://www.inaturalist.org/observations/43288737">https://www.inaturalist.org/observations/43288737</a>   |
| 3774 | Bubulcus ibis | Cattle Egret | 2019/10/10 | 2 | 0 | 23.9007889 | 121.5362898 | <a href="https://www.inaturalist.org/observations/34164435">https://www.inaturalist.org/observations/34164435</a>   |

|      |               |              |            |   |   |            |             |                                                                                                                     |
|------|---------------|--------------|------------|---|---|------------|-------------|---------------------------------------------------------------------------------------------------------------------|
| 3775 | Bubulcus ibis | Cattle Egret | 2019/12/25 | 2 | 0 | 23.9008080 | 121.5461350 | <a href="https://www.inaturalist.org/observations/36931993">https://www.inaturalist.org/observations/36931993</a>   |
| 3776 | Bubulcus ibis | Cattle Egret | 2019/10/14 | 3 | 0 | 23.9008580 | 121.5423970 | <a href="https://www.inaturalist.org/observations/34365665">https://www.inaturalist.org/observations/34365665</a>   |
| 3777 | Bubulcus ibis | Cattle Egret | 2022/4/2   | 1 | 0 | 23.9008887 | 121.5457708 | <a href="https://www.inaturalist.org/observations/119842724">https://www.inaturalist.org/observations/119842724</a> |
| 3778 | Bubulcus ibis | Cattle Egret | 2019/10/25 | 2 | 0 | 23.9009300 | 121.5396583 | <a href="https://www.inaturalist.org/observations/34854517">https://www.inaturalist.org/observations/34854517</a>   |
| 3779 | Bubulcus ibis | Cattle Egret | 2019/12/21 | 1 | 0 | 23.9009776 | 121.5456041 | <a href="https://www.inaturalist.org/observations/36883375">https://www.inaturalist.org/observations/36883375</a>   |
| 3780 | Bubulcus ibis | Cattle Egret | 2020/11/14 | 2 | 0 | 23.9009857 | 121.5423445 | <a href="https://www.inaturalist.org/observations/64840781">https://www.inaturalist.org/observations/64840781</a>   |
| 3781 | Bubulcus ibis | Cattle Egret | 2022/4/22  | 2 | 0 | 23.9013585 | 121.5388503 | <a href="https://www.inaturalist.org/observations/119551389">https://www.inaturalist.org/observations/119551389</a> |
| 3782 | Bubulcus ibis | Cattle Egret | 2020/4/24  | 3 | 0 | 23.9015146 | 121.5383491 | <a href="https://www.inaturalist.org/observations/47111673">https://www.inaturalist.org/observations/47111673</a>   |
| 3783 | Bubulcus ibis | Cattle Egret | 2019/10/10 | 2 | 0 | 23.9016298 | 121.5365225 | <a href="https://www.inaturalist.org/observations/34164422">https://www.inaturalist.org/observations/34164422</a>   |
| 3784 | Bubulcus ibis | Cattle Egret | 2020/4/24  | 2 | 0 | 23.9016867 | 121.5385159 | <a href="https://www.inaturalist.org/observations/43025307">https://www.inaturalist.org/observations/43025307</a>   |
| 3785 | Bubulcus ibis | Cattle Egret | 2019/10/9  | 2 | 0 | 23.9019190 | 121.5387510 | <a href="https://www.inaturalist.org/observations/34111532">https://www.inaturalist.org/observations/34111532</a>   |
| 3786 | Bubulcus ibis | Cattle Egret | 2019/11/22 | 2 | 0 | 23.9020258 | 121.5472101 | <a href="https://www.inaturalist.org/observations/35930636">https://www.inaturalist.org/observations/35930636</a>   |
| 3787 | Bubulcus ibis | Cattle Egret | 2020/4/24  | 3 | 0 | 23.9020761 | 121.5382218 | <a href="https://www.inaturalist.org/observations/47111678">https://www.inaturalist.org/observations/47111678</a>   |
| 3788 | Bubulcus ibis | Cattle Egret | 2020/4/24  | 3 | 0 | 23.9021257 | 121.5370400 | <a href="https://www.inaturalist.org/observations/47111680">https://www.inaturalist.org/observations/47111680</a>   |
| 3789 | Bubulcus ibis | Cattle Egret | 2020/4/24  | 3 | 0 | 23.9022265 | 121.5385613 | <a href="https://www.inaturalist.org/observations/43025305">https://www.inaturalist.org/observations/43025305</a>   |
| 3790 | Bubulcus ibis | Cattle Egret | 2020/4/24  | 3 | 0 | 23.9023090 | 121.5386166 | <a href="https://www.inaturalist.org/observations/47111672">https://www.inaturalist.org/observations/47111672</a>   |
| 3791 | Bubulcus ibis | Cattle Egret | 2020/4/24  | 3 | 0 | 23.9027628 | 121.5383742 | <a href="https://www.inaturalist.org/observations/47111674">https://www.inaturalist.org/observations/47111674</a>   |
| 3792 | Bubulcus ibis | Cattle Egret | 2018/5/13  | 2 | 0 | 23.9029617 | 121.5366367 | <a href="https://www.inaturalist.org/observations/12408128">https://www.inaturalist.org/observations/12408128</a>   |
| 3793 | Bubulcus ibis | Cattle Egret | 2019/9/29  | 2 | 0 | 23.9031045 | 121.5470554 | <a href="https://www.inaturalist.org/observations/33584811">https://www.inaturalist.org/observations/33584811</a>   |
| 3794 | Bubulcus ibis | Cattle Egret | 2022/4/2   | 2 | 0 | 23.9049597 | 121.5412397 | <a href="https://www.inaturalist.org/observations/110162250">https://www.inaturalist.org/observations/110162250</a> |
| 3795 | Bubulcus ibis | Cattle Egret | 2021/2/26  | 1 | 0 | 23.9064350 | 91.3131860  | <a href="https://www.inaturalist.org/observations/80062590">https://www.inaturalist.org/observations/80062590</a>   |
| 3796 | Bubulcus ibis | Cattle Egret | 2018/8/19  | 2 | 0 | 23.9066938 | 121.5283312 | <a href="https://www.inaturalist.org/observations/38982837">https://www.inaturalist.org/observations/38982837</a>   |
| 3797 | Bubulcus ibis | Cattle Egret | 2018/8/4   | 3 | 0 | 23.9068823 | 120.9357594 | <a href="https://www.inaturalist.org/observations/15285259">https://www.inaturalist.org/observations/15285259</a>   |
| 3798 | Bubulcus ibis | Cattle Egret | 2020/1/6   | 1 | 0 | 23.9096830 | 121.5417440 | <a href="https://www.inaturalist.org/observations/37395060">https://www.inaturalist.org/observations/37395060</a>   |
| 3799 | Bubulcus ibis | Cattle Egret | 2021/11/19 | 2 | 0 | 23.9097307 | 121.5538534 | <a href="https://www.inaturalist.org/observations/101451728">https://www.inaturalist.org/observations/101451728</a> |

|      |               |              |            |   |   |            |             |                                                                                                                     |
|------|---------------|--------------|------------|---|---|------------|-------------|---------------------------------------------------------------------------------------------------------------------|
| 3800 | Bubulcus ibis | Cattle Egret | 2021/10/21 | 1 | 0 | 23.9135857 | 121.5416760 | <a href="https://www.inaturalist.org/observations/98861894">https://www.inaturalist.org/observations/98861894</a>   |
| 3801 | Bubulcus ibis | Cattle Egret | 2014/4/4   | 3 | 0 | 23.9226115 | 120.3179570 | <a href="https://www.inaturalist.org/observations/11264246">https://www.inaturalist.org/observations/11264246</a>   |
| 3802 | Bubulcus ibis | Cattle Egret | 2020/8/5   | 1 | 0 | 23.9287417 | 120.3160722 | <a href="https://www.inaturalist.org/observations/55471149">https://www.inaturalist.org/observations/55471149</a>   |
| 3803 | Bubulcus ibis | Cattle Egret | 2022/9/13  | 1 | 0 | 23.9312179 | 120.3217486 | <a href="https://www.inaturalist.org/observations/134855733">https://www.inaturalist.org/observations/134855733</a> |
| 3804 | Bubulcus ibis | Cattle Egret | 2022/9/13  | 1 | 0 | 23.9312179 | 120.3217486 | <a href="https://www.inaturalist.org/observations/134855782">https://www.inaturalist.org/observations/134855782</a> |
| 3805 | Bubulcus ibis | Cattle Egret | 2022/8/31  | 1 | 0 | 23.9315422 | 120.3146901 | <a href="https://www.inaturalist.org/observations/133164347">https://www.inaturalist.org/observations/133164347</a> |
| 3806 | Bubulcus ibis | Cattle Egret | 2022/11/4  | 1 | 0 | 23.9340368 | 120.7766800 | <a href="https://www.inaturalist.org/observations/141058356">https://www.inaturalist.org/observations/141058356</a> |
| 3807 | Bubulcus ibis | Cattle Egret | 2020/5/2   | 1 | 0 | 23.9350400 | 121.6032354 | <a href="https://www.inaturalist.org/observations/44603378">https://www.inaturalist.org/observations/44603378</a>   |
| 3808 | Bubulcus ibis | Cattle Egret | 2022/9/13  | 1 | 0 | 23.9371026 | 120.3144883 | <a href="https://www.inaturalist.org/observations/134820445">https://www.inaturalist.org/observations/134820445</a> |
| 3809 | Bubulcus ibis | Cattle Egret | 2020/4/14  | 1 | 0 | 23.9402067 | 120.3166567 | <a href="https://www.inaturalist.org/observations/42155838">https://www.inaturalist.org/observations/42155838</a>   |
| 3810 | Bubulcus ibis | Cattle Egret | 2021/10/7  | 1 | 0 | 23.9483690 | 121.5544547 | <a href="https://www.inaturalist.org/observations/97435043">https://www.inaturalist.org/observations/97435043</a>   |
| 3811 | Bubulcus ibis | Cattle Egret | 2020/6/13  | 1 | 0 | 23.9504082 | 120.9682669 | <a href="https://www.inaturalist.org/observations/49403332">https://www.inaturalist.org/observations/49403332</a>   |
| 3812 | Bubulcus ibis | Cattle Egret | 2021/11/22 | 2 | 0 | 23.9517912 | 120.9289827 | <a href="https://www.inaturalist.org/observations/108223512">https://www.inaturalist.org/observations/108223512</a> |
| 3813 | Bubulcus ibis | Cattle Egret | 2020/4/5   | 2 | 0 | 23.9532399 | 120.4078138 | <a href="https://www.inaturalist.org/observations/41432636">https://www.inaturalist.org/observations/41432636</a>   |
| 3814 | Bubulcus ibis | Cattle Egret | 2022/11/13 | 1 | 0 | 23.9561888 | 120.3351409 | <a href="https://www.inaturalist.org/observations/144187677">https://www.inaturalist.org/observations/144187677</a> |
| 3815 | Bubulcus ibis | Cattle Egret | 2022/11/13 | 1 | 0 | 23.9561932 | 120.3351405 | <a href="https://www.inaturalist.org/observations/144187678">https://www.inaturalist.org/observations/144187678</a> |
| 3816 | Bubulcus ibis | Cattle Egret | 2022/11/13 | 1 | 0 | 23.9561958 | 120.3351421 | <a href="https://www.inaturalist.org/observations/144187679">https://www.inaturalist.org/observations/144187679</a> |
| 3817 | Bubulcus ibis | Cattle Egret | 2022/12/11 | 1 | 0 | 23.9565025 | 120.3369255 | <a href="https://www.inaturalist.org/observations/144144540">https://www.inaturalist.org/observations/144144540</a> |
| 3818 | Bubulcus ibis | Cattle Egret | 2020/11/7  | 1 | 0 | 23.9651371 | 120.9673768 | <a href="https://www.inaturalist.org/observations/64349155">https://www.inaturalist.org/observations/64349155</a>   |
| 3819 | Bubulcus ibis | Cattle Egret | 2020/11/7  | 1 | 0 | 23.9651371 | 120.9673768 | <a href="https://www.inaturalist.org/observations/64349162">https://www.inaturalist.org/observations/64349162</a>   |
| 3820 | Bubulcus ibis | Cattle Egret | 2020/11/16 | 1 | 0 | 23.9651371 | 120.9673768 | <a href="https://www.inaturalist.org/observations/65005455">https://www.inaturalist.org/observations/65005455</a>   |
| 3821 | Bubulcus ibis | Cattle Egret | 2020/11/16 | 1 | 0 | 23.9651371 | 120.9673768 | <a href="https://www.inaturalist.org/observations/65005456">https://www.inaturalist.org/observations/65005456</a>   |
| 3822 | Bubulcus ibis | Cattle Egret | 2020/11/23 | 1 | 0 | 23.9651371 | 120.9673768 | <a href="https://www.inaturalist.org/observations/65464498">https://www.inaturalist.org/observations/65464498</a>   |
| 3823 | Bubulcus ibis | Cattle Egret | 2020/11/23 | 1 | 0 | 23.9651371 | 120.9673768 | <a href="https://www.inaturalist.org/observations/65464499">https://www.inaturalist.org/observations/65464499</a>   |
| 3824 | Bubulcus ibis | Cattle Egret | 2020/11/24 | 1 | 0 | 23.9651371 | 120.9673768 | <a href="https://www.inaturalist.org/observations/65522766">https://www.inaturalist.org/observations/65522766</a>   |

|      |               |              |            |   |   |            |             |                                                                                                                     |
|------|---------------|--------------|------------|---|---|------------|-------------|---------------------------------------------------------------------------------------------------------------------|
| 3825 | Bubulcus ibis | Cattle Egret | 2020/11/24 | 2 | 0 | 23.9651371 | 120.9673768 | <a href="https://www.inaturalist.org/observations/65522768">https://www.inaturalist.org/observations/65522768</a>   |
| 3826 | Bubulcus ibis | Cattle Egret | 2020/11/27 | 1 | 0 | 23.9651371 | 120.9673768 | <a href="https://www.inaturalist.org/observations/65686024">https://www.inaturalist.org/observations/65686024</a>   |
| 3827 | Bubulcus ibis | Cattle Egret | 2020/12/5  | 2 | 0 | 23.9651371 | 120.9673768 | <a href="https://www.inaturalist.org/observations/66285045">https://www.inaturalist.org/observations/66285045</a>   |
| 3828 | Bubulcus ibis | Cattle Egret | 2022/7/2   | 3 | 0 | 23.9657093 | 120.9897034 | <a href="https://www.inaturalist.org/observations/128436132">https://www.inaturalist.org/observations/128436132</a> |
| 3829 | Bubulcus ibis | Cattle Egret | 2022/7/2   | 3 | 0 | 23.9657168 | 120.9896980 | <a href="https://www.inaturalist.org/observations/128436133">https://www.inaturalist.org/observations/128436133</a> |
| 3830 | Bubulcus ibis | Cattle Egret | 2022/7/2   | 3 | 0 | 23.9657266 | 120.9896980 | <a href="https://www.inaturalist.org/observations/128436134">https://www.inaturalist.org/observations/128436134</a> |
| 3831 | Bubulcus ibis | Cattle Egret | 2013/11/16 | 4 | 0 | 23.9668750 | 120.9662170 | <a href="https://www.inaturalist.org/observations/9264741">https://www.inaturalist.org/observations/9264741</a>     |
| 3832 | Bubulcus ibis | Cattle Egret | 2009/6/25  | 3 | 0 | 23.9846346 | 120.4214386 | <a href="https://www.inaturalist.org/observations/19284783">https://www.inaturalist.org/observations/19284783</a>   |
| 3833 | Bubulcus ibis | Cattle Egret | 2021/7/29  | 2 | 0 | 23.9860133 | 120.7238167 | <a href="https://www.inaturalist.org/observations/89289992">https://www.inaturalist.org/observations/89289992</a>   |
| 3834 | Bubulcus ibis | Cattle Egret | 2022/3/5   | 1 | 0 | 23.9861467 | 72.9691250  | <a href="https://www.inaturalist.org/observations/120118678">https://www.inaturalist.org/observations/120118678</a> |
| 3835 | Bubulcus ibis | Cattle Egret | 2022/3/5   | 2 | 0 | 23.9866017 | 72.9682100  | <a href="https://www.inaturalist.org/observations/120122843">https://www.inaturalist.org/observations/120122843</a> |
| 3836 | Bubulcus ibis | Cattle Egret | 2019/3/10  | 2 | 0 | 23.9888598 | 120.5765290 | <a href="https://www.inaturalist.org/observations/21105474">https://www.inaturalist.org/observations/21105474</a>   |
| 3837 | Bubulcus ibis | Cattle Egret | 2021/3/15  | 2 | 0 | 23.9888817 | 120.7258517 | <a href="https://www.inaturalist.org/observations/71349888">https://www.inaturalist.org/observations/71349888</a>   |
| 3838 | Bubulcus ibis | Cattle Egret | 2019/3/10  | 2 | 0 | 23.9894451 | 120.5784425 | <a href="https://www.inaturalist.org/observations/21105473">https://www.inaturalist.org/observations/21105473</a>   |
| 3839 | Bubulcus ibis | Cattle Egret | 2022/6/27  | 1 | 0 | 23.9914083 | 120.7383483 | <a href="https://www.inaturalist.org/observations/124356545">https://www.inaturalist.org/observations/124356545</a> |
| 3840 | Bubulcus ibis | Cattle Egret | 2022/6/27  | 1 | 0 | 23.9914617 | 120.7382817 | <a href="https://www.inaturalist.org/observations/124356544">https://www.inaturalist.org/observations/124356544</a> |
| 3841 | Bubulcus ibis | Cattle Egret | 2021/12/1  | 2 | 0 | 23.9933000 | 120.7379983 | <a href="https://www.inaturalist.org/observations/102804754">https://www.inaturalist.org/observations/102804754</a> |
| 3842 | Bubulcus ibis | Cattle Egret | 2022/8/8   | 1 | 0 | 23.9934067 | 120.7379783 | <a href="https://www.inaturalist.org/observations/129936247">https://www.inaturalist.org/observations/129936247</a> |
| 3843 | Bubulcus ibis | Cattle Egret | 2022/8/8   | 2 | 0 | 23.9934067 | 120.7379783 | <a href="https://www.inaturalist.org/observations/129936249">https://www.inaturalist.org/observations/129936249</a> |
| 3844 | Bubulcus ibis | Cattle Egret | 2014/7/5   | 1 | 0 | 23.9943397 | 120.7716826 | <a href="https://www.inaturalist.org/observations/49315213">https://www.inaturalist.org/observations/49315213</a>   |
| 3845 | Bubulcus ibis | Cattle Egret | 2022/6/27  | 2 | 0 | 23.9972783 | 120.7221400 | <a href="https://www.inaturalist.org/observations/124356550">https://www.inaturalist.org/observations/124356550</a> |
| 3846 | Bubulcus ibis | Cattle Egret | 2022/8/8   | 3 | 0 | 23.9981550 | 120.7342150 | <a href="https://www.inaturalist.org/observations/129936256">https://www.inaturalist.org/observations/129936256</a> |
| 3847 | Bubulcus ibis | Cattle Egret | 2020/5/1   | 1 | 0 | 23.9998515 | 120.5726130 | <a href="https://www.inaturalist.org/observations/44469167">https://www.inaturalist.org/observations/44469167</a>   |
| 3848 | Bubulcus ibis | Cattle Egret | 2019/4/9   | 2 | 0 | 24.0007985 | 120.5735332 | <a href="https://www.inaturalist.org/observations/22267910">https://www.inaturalist.org/observations/22267910</a>   |
| 3849 | Bubulcus ibis | Cattle Egret | 2019/11/9  | 1 | 0 | 24.0011100 | 120.5346430 | <a href="https://www.inaturalist.org/observations/35475423">https://www.inaturalist.org/observations/35475423</a>   |



|      |               |              |            |   |   |            |             |                                                                                                                     |
|------|---------------|--------------|------------|---|---|------------|-------------|---------------------------------------------------------------------------------------------------------------------|
| 3850 | Bubulcus ibis | Cattle Egret | 2019/3/21  | 5 | 0 | 24.0018103 | 120.5682324 | <a href="https://www.inaturalist.org/observations/21512265">https://www.inaturalist.org/observations/21512265</a>   |
| 3851 | Bubulcus ibis | Cattle Egret | 2019/9/7   | 1 | 0 | 24.0019138 | 120.5325620 | <a href="https://www.inaturalist.org/observations/32251550">https://www.inaturalist.org/observations/32251550</a>   |
| 3852 | Bubulcus ibis | Cattle Egret | 2019/9/7   | 2 | 0 | 24.0022667 | 120.5321329 | <a href="https://www.inaturalist.org/observations/32251608">https://www.inaturalist.org/observations/32251608</a>   |
| 3853 | Bubulcus ibis | Cattle Egret | 2020/11/16 | 1 | 0 | 24.0030172 | 120.5686962 | <a href="https://www.inaturalist.org/observations/65006214">https://www.inaturalist.org/observations/65006214</a>   |
| 3854 | Bubulcus ibis | Cattle Egret | 2019/7/24  | 4 | 0 | 24.0037743 | 120.5325703 | <a href="https://www.inaturalist.org/observations/29442478">https://www.inaturalist.org/observations/29442478</a>   |
| 3855 | Bubulcus ibis | Cattle Egret | 2019/6/15  | 2 | 0 | 24.0038550 | 120.5322533 | <a href="https://www.inaturalist.org/observations/27022980">https://www.inaturalist.org/observations/27022980</a>   |
| 3856 | Bubulcus ibis | Cattle Egret | 2019/6/15  | 3 | 0 | 24.0043000 | 120.5352483 | <a href="https://www.inaturalist.org/observations/27023305">https://www.inaturalist.org/observations/27023305</a>   |
| 3857 | Bubulcus ibis | Cattle Egret | 2019/7/7   | 2 | 0 | 24.0043017 | 120.5352283 | <a href="https://www.inaturalist.org/observations/28341765">https://www.inaturalist.org/observations/28341765</a>   |
| 3858 | Bubulcus ibis | Cattle Egret | 2019/8/28  | 1 | 0 | 24.0052650 | 120.5342800 | <a href="https://www.inaturalist.org/observations/31826734">https://www.inaturalist.org/observations/31826734</a>   |
| 3859 | Bubulcus ibis | Cattle Egret | 2019/8/28  | 2 | 0 | 24.0052667 | 120.5342900 | <a href="https://www.inaturalist.org/observations/31826712">https://www.inaturalist.org/observations/31826712</a>   |
| 3860 | Bubulcus ibis | Cattle Egret | 2019/4/23  | 3 | 0 | 24.0054864 | 120.5335794 | <a href="https://www.inaturalist.org/observations/22940272">https://www.inaturalist.org/observations/22940272</a>   |
| 3861 | Bubulcus ibis | Cattle Egret | 2020/2/10  | 1 | 0 | 24.0058205 | 120.5675562 | <a href="https://www.inaturalist.org/observations/38503085">https://www.inaturalist.org/observations/38503085</a>   |
| 3862 | Bubulcus ibis | Cattle Egret | 2022/12/5  | 1 | 0 | 24.0070983 | 120.7046683 | <a href="https://www.inaturalist.org/observations/143859256">https://www.inaturalist.org/observations/143859256</a> |
| 3863 | Bubulcus ibis | Cattle Egret | 2018/12/18 | 3 | 0 | 24.0088129 | 120.5631787 | <a href="https://www.inaturalist.org/observations/19649786">https://www.inaturalist.org/observations/19649786</a>   |
| 3864 | Bubulcus ibis | Cattle Egret | 2022/1/14  | 2 | 0 | 24.0090083 | 120.7179650 | <a href="https://www.inaturalist.org/observations/105249745">https://www.inaturalist.org/observations/105249745</a> |
| 3865 | Bubulcus ibis | Cattle Egret | 2021/3/15  | 2 | 0 | 24.0090283 | 120.7181083 | <a href="https://www.inaturalist.org/observations/71349872">https://www.inaturalist.org/observations/71349872</a>   |
| 3866 | Bubulcus ibis | Cattle Egret | 2021/4/12  | 1 | 0 | 24.0091250 | 120.7191367 | <a href="https://www.inaturalist.org/observations/74942659">https://www.inaturalist.org/observations/74942659</a>   |
| 3867 | Bubulcus ibis | Cattle Egret | 2021/3/15  | 2 | 0 | 24.0091250 | 120.7196633 | <a href="https://www.inaturalist.org/observations/71349874">https://www.inaturalist.org/observations/71349874</a>   |
| 3868 | Bubulcus ibis | Cattle Egret | 2022/11/18 | 1 | 0 | 24.0091367 | 120.7192033 | <a href="https://www.inaturalist.org/observations/143859228">https://www.inaturalist.org/observations/143859228</a> |
| 3869 | Bubulcus ibis | Cattle Egret | 2022/1/14  | 1 | 0 | 24.0091400 | 120.7194617 | <a href="https://www.inaturalist.org/observations/105249749">https://www.inaturalist.org/observations/105249749</a> |
| 3870 | Bubulcus ibis | Cattle Egret | 2022/12/9  | 1 | 0 | 24.0091683 | 120.7192567 | <a href="https://www.inaturalist.org/observations/144005187">https://www.inaturalist.org/observations/144005187</a> |
| 3871 | Bubulcus ibis | Cattle Egret | 2022/9/12  | 1 | 0 | 24.0092250 | 120.7199500 | <a href="https://www.inaturalist.org/observations/137510217">https://www.inaturalist.org/observations/137510217</a> |
| 3872 | Bubulcus ibis | Cattle Egret | 2022/9/12  | 1 | 0 | 24.0092433 | 120.7199483 | <a href="https://www.inaturalist.org/observations/137510219">https://www.inaturalist.org/observations/137510219</a> |
| 3873 | Bubulcus ibis | Cattle Egret | 2022/8/29  | 2 | 0 | 24.0097833 | 120.7198983 | <a href="https://www.inaturalist.org/observations/133862358">https://www.inaturalist.org/observations/133862358</a> |
| 3874 | Bubulcus ibis | Cattle Egret | 2022/10/12 | 2 | 0 | 24.0121250 | 120.4706417 | <a href="https://www.inaturalist.org/observations/140037103">https://www.inaturalist.org/observations/140037103</a> |

|      |               |              |            |   |   |            |             |                                                                                                                     |
|------|---------------|--------------|------------|---|---|------------|-------------|---------------------------------------------------------------------------------------------------------------------|
| 3875 | Bubulcus ibis | Cattle Egret | 2020/4/25  | 2 | 0 | 24.0122898 | 120.4810217 | <a href="https://www.inaturalist.org/observations/43333474">https://www.inaturalist.org/observations/43333474</a>   |
| 3876 | Bubulcus ibis | Cattle Egret | 2020/4/25  | 2 | 0 | 24.0128558 | 120.4769686 | <a href="https://www.inaturalist.org/observations/43333477">https://www.inaturalist.org/observations/43333477</a>   |
| 3877 | Bubulcus ibis | Cattle Egret | 2020/4/26  | 1 | 0 | 24.0137197 | 120.3718728 | <a href="https://www.inaturalist.org/observations/44345107">https://www.inaturalist.org/observations/44345107</a>   |
| 3878 | Bubulcus ibis | Cattle Egret | 2022/7/15  | 2 | 0 | 24.0187020 | 120.6174246 | <a href="https://www.inaturalist.org/observations/136016319">https://www.inaturalist.org/observations/136016319</a> |
| 3879 | Bubulcus ibis | Cattle Egret | 2019/6/13  | 1 | 0 | 24.0210101 | 120.3738643 | <a href="https://www.inaturalist.org/observations/36499900">https://www.inaturalist.org/observations/36499900</a>   |
| 3880 | Bubulcus ibis | Cattle Egret | 2018/11/10 | 3 | 0 | 24.0265675 | 120.4729903 | <a href="https://www.inaturalist.org/observations/18314372">https://www.inaturalist.org/observations/18314372</a>   |
| 3881 | Bubulcus ibis | Cattle Egret | 2019/6/13  | 1 | 0 | 24.0282505 | 120.4197376 | <a href="https://www.inaturalist.org/observations/36499878">https://www.inaturalist.org/observations/36499878</a>   |
| 3882 | Bubulcus ibis | Cattle Egret | 2022/10/28 | 1 | 0 | 24.0288096 | 120.4733412 | <a href="https://www.inaturalist.org/observations/140621016">https://www.inaturalist.org/observations/140621016</a> |
| 3883 | Bubulcus ibis | Cattle Egret | 2022/12/15 | 1 | 0 | 24.0300200 | 120.6287317 | <a href="https://www.inaturalist.org/observations/145190447">https://www.inaturalist.org/observations/145190447</a> |
| 3884 | Bubulcus ibis | Cattle Egret | 2022/3/4   | 2 | 0 | 24.0314139 | 120.6882806 | <a href="https://www.inaturalist.org/observations/107874895">https://www.inaturalist.org/observations/107874895</a> |
| 3885 | Bubulcus ibis | Cattle Egret | 2019/6/13  | 1 | 0 | 24.0359849 | 120.3818686 | <a href="https://www.inaturalist.org/observations/36499920">https://www.inaturalist.org/observations/36499920</a>   |
| 3886 | Bubulcus ibis | Cattle Egret | 2018/1/14  | 3 | 0 | 24.0371540 | 120.4683328 | <a href="https://www.inaturalist.org/observations/9482019">https://www.inaturalist.org/observations/9482019</a>     |
| 3887 | Bubulcus ibis | Cattle Egret | 2022/12/15 | 1 | 0 | 24.0372067 | 120.6277450 | <a href="https://www.inaturalist.org/observations/145190480">https://www.inaturalist.org/observations/145190480</a> |
| 3888 | Bubulcus ibis | Cattle Egret | 2018/10/22 | 2 | 0 | 24.0378922 | 120.3837514 | <a href="https://www.inaturalist.org/observations/18430347">https://www.inaturalist.org/observations/18430347</a>   |
| 3889 | Bubulcus ibis | Cattle Egret | 2020/4/3   | 1 | 0 | 24.0380917 | 120.3852600 | <a href="https://www.inaturalist.org/observations/41312962">https://www.inaturalist.org/observations/41312962</a>   |
| 3890 | Bubulcus ibis | Cattle Egret | 2020/7/5   | 1 | 0 | 24.0404450 | 120.3870467 | <a href="https://www.inaturalist.org/observations/59689817">https://www.inaturalist.org/observations/59689817</a>   |
| 3891 | Bubulcus ibis | Cattle Egret | 2021/4/20  | 1 | 0 | 24.0418973 | 120.3797898 | <a href="https://www.inaturalist.org/observations/93714180">https://www.inaturalist.org/observations/93714180</a>   |
| 3892 | Bubulcus ibis | Cattle Egret | 2022/4/2   | 2 | 0 | 24.0444879 | 88.7105797  | <a href="https://www.inaturalist.org/observations/117279861">https://www.inaturalist.org/observations/117279861</a> |
| 3893 | Bubulcus ibis | Cattle Egret | 2020/1/30  | 3 | 0 | 24.0454286 | 70.1455805  | <a href="https://www.inaturalist.org/observations/51869623">https://www.inaturalist.org/observations/51869623</a>   |
| 3894 | Bubulcus ibis | Cattle Egret | 2020/7/11  | 1 | 0 | 24.0457317 | 120.6329250 | <a href="https://www.inaturalist.org/observations/53049583">https://www.inaturalist.org/observations/53049583</a>   |
| 3895 | Bubulcus ibis | Cattle Egret | 2021/4/17  | 1 | 0 | 24.0462188 | 120.4152574 | <a href="https://www.inaturalist.org/observations/74277717">https://www.inaturalist.org/observations/74277717</a>   |
| 3896 | Bubulcus ibis | Cattle Egret | 2015/4/3   | 2 | 0 | 24.0469257 | 88.7105357  | <a href="https://www.inaturalist.org/observations/117567649">https://www.inaturalist.org/observations/117567649</a> |
| 3897 | Bubulcus ibis | Cattle Egret | 2021/8/17  | 3 | 0 | 24.0555951 | 120.4705290 | <a href="https://www.inaturalist.org/observations/91610034">https://www.inaturalist.org/observations/91610034</a>   |
| 3898 | Bubulcus ibis | Cattle Egret | 2021/8/18  | 2 | 0 | 24.0569332 | 120.4683737 | <a href="https://www.inaturalist.org/observations/91713237">https://www.inaturalist.org/observations/91713237</a>   |
| 3899 | Bubulcus ibis | Cattle Egret | 2021/4/17  | 1 | 0 | 24.0679323 | 120.4523265 | <a href="https://www.inaturalist.org/observations/74277716">https://www.inaturalist.org/observations/74277716</a>   |

|      |               |              |            |   |   |            |             |                                                                                                                     |
|------|---------------|--------------|------------|---|---|------------|-------------|---------------------------------------------------------------------------------------------------------------------|
| 3900 | Bubulcus ibis | Cattle Egret | 2021/5/1   | 1 | 0 | 24.0764306 | 120.6950072 | <a href="https://www.inaturalist.org/observations/76033364">https://www.inaturalist.org/observations/76033364</a>   |
| 3901 | Bubulcus ibis | Cattle Egret | 2015/11/23 | 2 | 0 | 24.0782745 | 88.6916530  | <a href="https://www.inaturalist.org/observations/117575923">https://www.inaturalist.org/observations/117575923</a> |
| 3902 | Bubulcus ibis | Cattle Egret | 2021/5/24  | 2 | 0 | 24.1122550 | 120.6720017 | <a href="https://www.inaturalist.org/observations/84674983">https://www.inaturalist.org/observations/84674983</a>   |
| 3903 | Bubulcus ibis | Cattle Egret | 2021/1/10  | 1 | 0 | 24.1125264 | 120.6716556 | <a href="https://www.inaturalist.org/observations/67864883">https://www.inaturalist.org/observations/67864883</a>   |
| 3904 | Bubulcus ibis | Cattle Egret | 2021/4/17  | 1 | 0 | 24.1129565 | 120.4309930 | <a href="https://www.inaturalist.org/observations/74277719">https://www.inaturalist.org/observations/74277719</a>   |
| 3905 | Bubulcus ibis | Cattle Egret | 2021/6/12  | 1 | 0 | 24.1149493 | 120.4432680 | <a href="https://www.inaturalist.org/observations/82612748">https://www.inaturalist.org/observations/82612748</a>   |
| 3906 | Bubulcus ibis | Cattle Egret | 2020/5/12  | 1 | 0 | 24.1169201 | 120.4696670 | <a href="https://www.inaturalist.org/observations/45667866">https://www.inaturalist.org/observations/45667866</a>   |
| 3907 | Bubulcus ibis | Cattle Egret | 2020/12/14 | 2 | 0 | 24.1174612 | 120.6764217 | <a href="https://www.inaturalist.org/observations/66566706">https://www.inaturalist.org/observations/66566706</a>   |
| 3908 | Bubulcus ibis | Cattle Egret | 2018/9/20  | 1 | 0 | 24.1223795 | 121.2724378 | <a href="https://www.inaturalist.org/observations/68532372">https://www.inaturalist.org/observations/68532372</a>   |
| 3909 | Bubulcus ibis | Cattle Egret | 2016/10/14 | 3 | 0 | 24.1228000 | 120.6737367 | <a href="https://www.inaturalist.org/observations/18530126">https://www.inaturalist.org/observations/18530126</a>   |
| 3910 | Bubulcus ibis | Cattle Egret | 2022/2/25  | 2 | 0 | 24.1235000 | 120.6752250 | <a href="https://www.inaturalist.org/observations/107673851">https://www.inaturalist.org/observations/107673851</a> |
| 3911 | Bubulcus ibis | Cattle Egret | 2021/12/19 | 2 | 0 | 24.1235722 | 120.6783617 | <a href="https://www.inaturalist.org/observations/103290199">https://www.inaturalist.org/observations/103290199</a> |
| 3912 | Bubulcus ibis | Cattle Egret | 2021/11/23 | 1 | 0 | 24.1241777 | 120.6743957 | <a href="https://www.inaturalist.org/observations/101748846">https://www.inaturalist.org/observations/101748846</a> |
| 3913 | Bubulcus ibis | Cattle Egret | 2022/1/7   | 1 | 0 | 24.1241840 | 120.6747890 | <a href="https://www.inaturalist.org/observations/104503167">https://www.inaturalist.org/observations/104503167</a> |
| 3914 | Bubulcus ibis | Cattle Egret | 2020/7/15  | 3 | 0 | 24.1244017 | 82.7791167  | <a href="https://www.inaturalist.org/observations/72994325">https://www.inaturalist.org/observations/72994325</a>   |
| 3915 | Bubulcus ibis | Cattle Egret | 2020/12/20 | 2 | 0 | 24.1344893 | 120.6274346 | <a href="https://www.inaturalist.org/observations/66954705">https://www.inaturalist.org/observations/66954705</a>   |
| 3916 | Bubulcus ibis | Cattle Egret | 2020/11/26 | 1 | 0 | 24.1370886 | 120.6911319 | <a href="https://www.inaturalist.org/observations/66965651">https://www.inaturalist.org/observations/66965651</a>   |
| 3917 | Bubulcus ibis | Cattle Egret | 2020/11/26 | 1 | 0 | 24.1371140 | 120.6911158 | <a href="https://www.inaturalist.org/observations/66965671">https://www.inaturalist.org/observations/66965671</a>   |
| 3918 | Bubulcus ibis | Cattle Egret | 2020/4/17  | 1 | 0 | 24.1371287 | 120.6913607 | <a href="https://www.inaturalist.org/observations/43271317">https://www.inaturalist.org/observations/43271317</a>   |
| 3919 | Bubulcus ibis | Cattle Egret | 2022/4/8   | 2 | 0 | 24.1373128 | 120.6909640 | <a href="https://www.inaturalist.org/observations/129112994">https://www.inaturalist.org/observations/129112994</a> |
| 3920 | Bubulcus ibis | Cattle Egret | 2020/12/26 | 1 | 0 | 24.1374214 | 120.6911408 | <a href="https://www.inaturalist.org/observations/78279085">https://www.inaturalist.org/observations/78279085</a>   |
| 3921 | Bubulcus ibis | Cattle Egret | 2022/6/20  | 2 | 0 | 24.1448133 | 120.6301967 | <a href="https://www.inaturalist.org/observations/122813750">https://www.inaturalist.org/observations/122813750</a> |
| 3922 | Bubulcus ibis | Cattle Egret | 2021/12/14 | 1 | 0 | 24.1485790 | 120.7299527 | <a href="https://www.inaturalist.org/observations/103260647">https://www.inaturalist.org/observations/103260647</a> |
| 3923 | Bubulcus ibis | Cattle Egret | 2019/10/29 | 3 | 0 | 24.1579475 | 121.6215106 | <a href="https://www.inaturalist.org/observations/36523168">https://www.inaturalist.org/observations/36523168</a>   |
| 3924 | Bubulcus ibis | Cattle Egret | 2019/1/5   | 3 | 0 | 24.1587497 | 120.7044859 | <a href="https://www.inaturalist.org/observations/19675748">https://www.inaturalist.org/observations/19675748</a>   |

|      |               |              |            |   |   |            |             |                                                                                                                     |
|------|---------------|--------------|------------|---|---|------------|-------------|---------------------------------------------------------------------------------------------------------------------|
| 3925 | Bubulcus ibis | Cattle Egret | 2021/7/16  | 1 | 0 | 24.1710500 | 120.7698283 | <a href="https://www.inaturalist.org/observations/87246730">https://www.inaturalist.org/observations/87246730</a>   |
| 3926 | Bubulcus ibis | Cattle Egret | 2020/7/14  | 1 | 0 | 24.1759517 | 120.6305350 | <a href="https://www.inaturalist.org/observations/53133306">https://www.inaturalist.org/observations/53133306</a>   |
| 3927 | Bubulcus ibis | Cattle Egret | 2022/9/13  | 1 | 0 | 24.1777632 | 120.6566000 | <a href="https://www.inaturalist.org/observations/134816428">https://www.inaturalist.org/observations/134816428</a> |
| 3928 | Bubulcus ibis | Cattle Egret | 2022/9/1   | 1 | 0 | 24.1779848 | 120.6564003 | <a href="https://www.inaturalist.org/observations/133186148">https://www.inaturalist.org/observations/133186148</a> |
| 3929 | Bubulcus ibis | Cattle Egret | 2020/4/21  | 3 | 0 | 24.1788690 | 120.6014960 | <a href="https://www.inaturalist.org/observations/42737969">https://www.inaturalist.org/observations/42737969</a>   |
| 3930 | Bubulcus ibis | Cattle Egret | 2022/11/1  | 1 | 0 | 24.1788802 | 120.6561878 | <a href="https://www.inaturalist.org/observations/140748110">https://www.inaturalist.org/observations/140748110</a> |
| 3931 | Bubulcus ibis | Cattle Egret | 2022/12/25 | 1 | 0 | 24.1789551 | 120.6001434 | <a href="https://www.inaturalist.org/observations/145029835">https://www.inaturalist.org/observations/145029835</a> |
| 3932 | Bubulcus ibis | Cattle Egret | 2022/12/14 | 1 | 0 | 24.1789660 | 120.6009150 | <a href="https://www.inaturalist.org/observations/144346127">https://www.inaturalist.org/observations/144346127</a> |
| 3933 | Bubulcus ibis | Cattle Egret | 2022/10/25 | 3 | 0 | 24.1792756 | 120.6552911 | <a href="https://www.inaturalist.org/observations/139943585">https://www.inaturalist.org/observations/139943585</a> |
| 3934 | Bubulcus ibis | Cattle Egret | 2022/9/27  | 2 | 0 | 24.1793694 | 120.6002445 | <a href="https://www.inaturalist.org/observations/136668059">https://www.inaturalist.org/observations/136668059</a> |
| 3935 | Bubulcus ibis | Cattle Egret | 2022/10/18 | 1 | 0 | 24.1796310 | 120.6610279 | <a href="https://www.inaturalist.org/observations/139211145">https://www.inaturalist.org/observations/139211145</a> |
| 3936 | Bubulcus ibis | Cattle Egret | 2020/4/26  | 3 | 0 | 24.1799789 | 120.6291647 | <a href="https://www.inaturalist.org/observations/43518404">https://www.inaturalist.org/observations/43518404</a>   |
| 3937 | Bubulcus ibis | Cattle Egret | 2022/10/25 | 1 | 0 | 24.1800217 | 120.6556217 | <a href="https://www.inaturalist.org/observations/139948310">https://www.inaturalist.org/observations/139948310</a> |
| 3938 | Bubulcus ibis | Cattle Egret | 2022/10/25 | 2 | 0 | 24.1801794 | 120.6555971 | <a href="https://www.inaturalist.org/observations/139948013">https://www.inaturalist.org/observations/139948013</a> |
| 3939 | Bubulcus ibis | Cattle Egret | 2021/5/11  | 1 | 0 | 24.1801867 | 120.6015550 | <a href="https://www.inaturalist.org/observations/78959268">https://www.inaturalist.org/observations/78959268</a>   |
| 3940 | Bubulcus ibis | Cattle Egret | 2022/11/1  | 2 | 0 | 24.1804667 | 120.6549883 | <a href="https://www.inaturalist.org/observations/140847351">https://www.inaturalist.org/observations/140847351</a> |
| 3941 | Bubulcus ibis | Cattle Egret | 2022/5/10  | 2 | 0 | 24.1805467 | 120.5995554 | <a href="https://www.inaturalist.org/observations/116357882">https://www.inaturalist.org/observations/116357882</a> |
| 3942 | Bubulcus ibis | Cattle Egret | 2022/11/1  | 2 | 0 | 24.1806037 | 120.6557625 | <a href="https://www.inaturalist.org/observations/140847246">https://www.inaturalist.org/observations/140847246</a> |
| 3943 | Bubulcus ibis | Cattle Egret | 2019/6/6   | 2 | 0 | 24.1807356 | 120.6093388 | <a href="https://www.inaturalist.org/observations/26475816">https://www.inaturalist.org/observations/26475816</a>   |
| 3944 | Bubulcus ibis | Cattle Egret | 2022/11/1  | 2 | 0 | 24.1809328 | 120.6555766 | <a href="https://www.inaturalist.org/observations/140847383">https://www.inaturalist.org/observations/140847383</a> |
| 3945 | Bubulcus ibis | Cattle Egret | 2021/11/5  | 1 | 0 | 24.1810543 | 120.9835511 | <a href="https://www.inaturalist.org/observations/100286718">https://www.inaturalist.org/observations/100286718</a> |
| 3946 | Bubulcus ibis | Cattle Egret | 2022/11/1  | 1 | 0 | 24.1810955 | 120.6550098 | <a href="https://www.inaturalist.org/observations/140748240">https://www.inaturalist.org/observations/140748240</a> |
| 3947 | Bubulcus ibis | Cattle Egret | 2022/11/1  | 2 | 0 | 24.1813486 | 120.6552266 | <a href="https://www.inaturalist.org/observations/140847287">https://www.inaturalist.org/observations/140847287</a> |
| 3948 | Bubulcus ibis | Cattle Egret | 2019/6/5   | 2 | 0 | 24.1815698 | 120.6020398 | <a href="https://www.inaturalist.org/observations/26430177">https://www.inaturalist.org/observations/26430177</a>   |
| 3949 | Bubulcus ibis | Cattle Egret | 2022/5/2   | 1 | 0 | 24.1826867 | 121.4947133 | <a href="https://www.inaturalist.org/observations/114571999">https://www.inaturalist.org/observations/114571999</a> |

|      |                     |                   |            |   |   |            |             |                                                                                                                     |
|------|---------------------|-------------------|------------|---|---|------------|-------------|---------------------------------------------------------------------------------------------------------------------|
| 3950 | Bubulcus ibis       | Cattle Egret      | 2022/9/20  | 1 | 0 | 24.1841147 | 120.6551427 | <a href="https://www.inaturalist.org/observations/135767049">https://www.inaturalist.org/observations/135767049</a> |
| 3951 | Bubulcus ibis       | Cattle Egret      | 2022/9/20  | 2 | 0 | 24.1843186 | 120.6545890 | <a href="https://www.inaturalist.org/observations/135743649">https://www.inaturalist.org/observations/135743649</a> |
| 3952 | Bubulcus ibis       | Cattle Egret      | 2014/8/31  | 1 | 0 | 24.1844975 | 88.2849045  | <a href="https://www.inaturalist.org/observations/93178985">https://www.inaturalist.org/observations/93178985</a>   |
| 3953 | Bubulcus ibis       | Cattle Egret      | 2022/10/18 | 2 | 0 | 24.1877435 | 120.6534075 | <a href="https://www.inaturalist.org/observations/139203210">https://www.inaturalist.org/observations/139203210</a> |
| 3954 | Bubulcus ibis       | Cattle Egret      | 2022/8/23  | 1 | 0 | 24.1878350 | 120.6532808 | <a href="https://www.inaturalist.org/observations/131984253">https://www.inaturalist.org/observations/131984253</a> |
| 3955 | Bubulcus ibis       | Cattle Egret      | 2022/8/23  | 1 | 0 | 24.1878994 | 120.6532682 | <a href="https://www.inaturalist.org/observations/131980156">https://www.inaturalist.org/observations/131980156</a> |
| 3956 | Bubulcus ibis       | Cattle Egret      | 2022/10/18 | 1 | 0 | 24.1882633 | 120.6523450 | <a href="https://www.inaturalist.org/observations/139211067">https://www.inaturalist.org/observations/139211067</a> |
| 3957 | Bubulcus ibis       | Cattle Egret      | 2022/10/18 | 2 | 0 | 24.1885439 | 120.6531870 | <a href="https://www.inaturalist.org/observations/139211179">https://www.inaturalist.org/observations/139211179</a> |
| 3958 | Bubulcus ibis       | Cattle Egret      | 2022/10/18 | 1 | 0 | 24.1890220 | 120.6537587 | <a href="https://www.inaturalist.org/observations/139203219">https://www.inaturalist.org/observations/139203219</a> |
| 3959 | Bubulcus ibis       | Cattle Egret      | 2022/10/18 | 1 | 0 | 24.1890332 | 120.6532740 | <a href="https://www.inaturalist.org/observations/139203235">https://www.inaturalist.org/observations/139203235</a> |
| 3960 | Bubulcus ibis       | Cattle Egret      | 2022/10/18 | 2 | 0 | 24.1891373 | 120.6535130 | <a href="https://www.inaturalist.org/observations/139211199">https://www.inaturalist.org/observations/139211199</a> |
| 3961 | Bubulcus ibis       | Cattle Egret      | 2022/10/18 | 1 | 0 | 24.1896939 | 120.6532128 | <a href="https://www.inaturalist.org/observations/139210687">https://www.inaturalist.org/observations/139210687</a> |
| 3962 | Bubulcus ibis       | Cattle Egret      | 2022/10/18 | 1 | 0 | 24.1898196 | 120.6535014 | <a href="https://www.inaturalist.org/observations/139210721">https://www.inaturalist.org/observations/139210721</a> |
| 3963 | Bubulcus ibis       | Cattle Egret      | 2022/10/18 | 1 | 0 | 24.1900950 | 120.6520117 | <a href="https://www.inaturalist.org/observations/139210885">https://www.inaturalist.org/observations/139210885</a> |
| 3964 | Bubulcus ibis       | Cattle Egret      | 2021/10/9  | 2 | 0 | 24.1916575 | 120.5518389 | <a href="https://www.inaturalist.org/observations/99623784">https://www.inaturalist.org/observations/99623784</a>   |
| 3965 | Bubulcus ibis       | Cattle Egret      | 2020/6/1   | 2 | 0 | 24.2016457 | 120.8118214 | <a href="https://www.inaturalist.org/observations/48076816">https://www.inaturalist.org/observations/48076816</a>   |
| 3966 | Bubulcus ibis       | Cattle Egret      | 2022/10/22 | 1 | 0 | 24.2058005 | 120.5977433 | <a href="https://www.inaturalist.org/observations/139603045">https://www.inaturalist.org/observations/139603045</a> |
| 3967 | Bubulcus ibis       | Cattle Egret      | 2022/10/22 | 1 | 0 | 24.2060645 | 120.5976291 | <a href="https://www.inaturalist.org/observations/139600013">https://www.inaturalist.org/observations/139600013</a> |
| 3968 | Bubulcus ibis       | Cattle Egret      | 2022/10/22 | 1 | 0 | 24.2062516 | 120.5973122 | <a href="https://www.inaturalist.org/observations/139600003">https://www.inaturalist.org/observations/139600003</a> |
| 3969 | Bubulcus ibis       | Cattle Egret      | 2019/1/11  | 4 | 0 | 24.2062519 | 120.8201742 | <a href="https://www.inaturalist.org/observations/19634177">https://www.inaturalist.org/observations/19634177</a>   |
| 3970 | Bubulcus coromandus | ibis Cattle Egret | 2019/5/7   | 1 | 0 | 24.2062519 | 120.8201742 | <a href="https://www.inaturalist.org/observations/27247714">https://www.inaturalist.org/observations/27247714</a>   |
| 3971 | Bubulcus coromandus | ibis Cattle Egret | 2020/4/24  | 1 | 0 | 24.2062519 | 120.8201742 | <a href="https://www.inaturalist.org/observations/44088365">https://www.inaturalist.org/observations/44088365</a>   |
| 3972 | Bubulcus ibis       | Cattle Egret      | 2020/4/26  | 1 | 0 | 24.2062519 | 120.8201742 | <a href="https://www.inaturalist.org/observations/44728339">https://www.inaturalist.org/observations/44728339</a>   |
| 3973 | Bubulcus ibis       | Cattle Egret      | 2020/9/9   | 2 | 0 | 24.2067533 | 120.5947867 | <a href="https://www.inaturalist.org/observations/59133039">https://www.inaturalist.org/observations/59133039</a>   |
| 3974 | Bubulcus ibis       | Cattle Egret      | 2022/11/12 | 1 | 0 | 24.2067902 | 120.5985381 | <a href="https://www.inaturalist.org/observations/141766215">https://www.inaturalist.org/observations/141766215</a> |

|      |               |              |            |   |   |            |             |                                                                                                                     |
|------|---------------|--------------|------------|---|---|------------|-------------|---------------------------------------------------------------------------------------------------------------------|
| 3975 | Bubulcus ibis | Cattle Egret | 2022/10/23 | 1 | 0 | 24.2068481 | 120.5985619 | <a href="https://www.inaturalist.org/observations/139711772">https://www.inaturalist.org/observations/139711772</a> |
| 3976 | Bubulcus ibis | Cattle Egret | 2022/11/12 | 1 | 0 | 24.2070577 | 120.5984263 | <a href="https://www.inaturalist.org/observations/141773180">https://www.inaturalist.org/observations/141773180</a> |
| 3977 | Bubulcus ibis | Cattle Egret | 2019/10/27 | 1 | 0 | 24.2071233 | 120.5999282 | <a href="https://www.inaturalist.org/observations/34936660">https://www.inaturalist.org/observations/34936660</a>   |
| 3978 | Bubulcus ibis | Cattle Egret | 2022/11/12 | 1 | 0 | 24.2072133 | 120.5985523 | <a href="https://www.inaturalist.org/observations/141773188">https://www.inaturalist.org/observations/141773188</a> |
| 3979 | Bubulcus ibis | Cattle Egret | 2022/11/12 | 1 | 0 | 24.2072467 | 120.5985981 | <a href="https://www.inaturalist.org/observations/141766217">https://www.inaturalist.org/observations/141766217</a> |
| 3980 | Bubulcus ibis | Cattle Egret | 2022/11/12 | 2 | 0 | 24.2072911 | 120.5985759 | <a href="https://www.inaturalist.org/observations/141775816">https://www.inaturalist.org/observations/141775816</a> |
| 3981 | Bubulcus ibis | Cattle Egret | 2022/11/27 | 1 | 0 | 24.2074073 | 120.5973030 | <a href="https://www.inaturalist.org/observations/143162165">https://www.inaturalist.org/observations/143162165</a> |
| 3982 | Bubulcus ibis | Cattle Egret | 2022/10/10 | 1 | 0 | 24.2074716 | 120.5987616 | <a href="https://www.inaturalist.org/observations/138225629">https://www.inaturalist.org/observations/138225629</a> |
| 3983 | Bubulcus ibis | Cattle Egret | 2022/11/27 | 2 | 0 | 24.2075945 | 120.5972135 | <a href="https://www.inaturalist.org/observations/143021755">https://www.inaturalist.org/observations/143021755</a> |
| 3984 | Bubulcus ibis | Cattle Egret | 2022/12/11 | 4 | 0 | 24.2076655 | 120.5978223 | <a href="https://www.inaturalist.org/observations/144121568">https://www.inaturalist.org/observations/144121568</a> |
| 3985 | Bubulcus ibis | Cattle Egret | 2022/5/26  | 1 | 0 | 24.2078321 | 120.5988161 | <a href="https://www.inaturalist.org/observations/118748260">https://www.inaturalist.org/observations/118748260</a> |
| 3986 | Bubulcus ibis | Cattle Egret | 2022/8/5   | 1 | 0 | 24.2078321 | 120.5988161 | <a href="https://www.inaturalist.org/observations/129501238">https://www.inaturalist.org/observations/129501238</a> |
| 3987 | Bubulcus ibis | Cattle Egret | 2022/7/17  | 1 | 0 | 24.2079413 | 120.5981886 | <a href="https://www.inaturalist.org/observations/126623246">https://www.inaturalist.org/observations/126623246</a> |
| 3988 | Bubulcus ibis | Cattle Egret | 2022/7/16  | 1 | 0 | 24.2079622 | 120.5980405 | <a href="https://www.inaturalist.org/observations/126423351">https://www.inaturalist.org/observations/126423351</a> |
| 3989 | Bubulcus ibis | Cattle Egret | 2022/10/10 | 0 | 0 | 24.2079716 | 120.5979084 | <a href="https://www.inaturalist.org/observations/138202043">https://www.inaturalist.org/observations/138202043</a> |
| 3990 | Bubulcus ibis | Cattle Egret | 2022/10/29 | 1 | 0 | 24.2079895 | 120.5966997 | <a href="https://www.inaturalist.org/observations/140358607">https://www.inaturalist.org/observations/140358607</a> |
| 3991 | Bubulcus ibis | Cattle Egret | 2022/7/1   | 1 | 0 | 24.2080583 | 120.5981000 | <a href="https://www.inaturalist.org/observations/124186100">https://www.inaturalist.org/observations/124186100</a> |
| 3992 | Bubulcus ibis | Cattle Egret | 2022/10/2  | 1 | 0 | 24.2080843 | 120.5978851 | <a href="https://www.inaturalist.org/observations/137250537">https://www.inaturalist.org/observations/137250537</a> |
| 3993 | Bubulcus ibis | Cattle Egret | 2022/10/1  | 1 | 0 | 24.2081450 | 120.5980550 | <a href="https://www.inaturalist.org/observations/137220258">https://www.inaturalist.org/observations/137220258</a> |
| 3994 | Bubulcus ibis | Cattle Egret | 2022/11/20 | 2 | 0 | 24.2081516 | 120.5972482 | <a href="https://www.inaturalist.org/observations/142439688">https://www.inaturalist.org/observations/142439688</a> |
| 3995 | Bubulcus ibis | Cattle Egret | 2022/4/25  | 1 | 0 | 24.2081785 | 120.5978506 | <a href="https://www.inaturalist.org/observations/112783164">https://www.inaturalist.org/observations/112783164</a> |
| 3996 | Bubulcus ibis | Cattle Egret | 2022/8/17  | 1 | 0 | 24.2082002 | 120.5932740 | <a href="https://www.inaturalist.org/observations/139623762">https://www.inaturalist.org/observations/139623762</a> |
| 3997 | Bubulcus ibis | Cattle Egret | 2019/5/25  | 3 | 0 | 24.2082140 | 120.5965686 | <a href="https://www.inaturalist.org/observations/25741579">https://www.inaturalist.org/observations/25741579</a>   |
| 3998 | Bubulcus ibis | Cattle Egret | 2022/6/25  | 1 | 0 | 24.2082896 | 120.5985684 | <a href="https://www.inaturalist.org/observations/123338062">https://www.inaturalist.org/observations/123338062</a> |
| 3999 | Bubulcus ibis | Cattle Egret | 2022/10/26 | 1 | 0 | 24.2085596 | 120.5976717 | <a href="https://www.inaturalist.org/observations/140034394">https://www.inaturalist.org/observations/140034394</a> |

|      |               |              |            |   |   |            |             |                                                                                                                     |
|------|---------------|--------------|------------|---|---|------------|-------------|---------------------------------------------------------------------------------------------------------------------|
| 4000 | Bubulcus ibis | Cattle Egret | 2021/10/2  | 3 | 0 | 24.2086053 | 120.5991929 | <a href="https://www.inaturalist.org/observations/120287189">https://www.inaturalist.org/observations/120287189</a> |
| 4001 | Bubulcus ibis | Cattle Egret | 2022/6/4   | 1 | 0 | 24.2086138 | 120.5986067 | <a href="https://www.inaturalist.org/observations/120111110">https://www.inaturalist.org/observations/120111110</a> |
| 4002 | Bubulcus ibis | Cattle Egret | 2022/6/4   | 1 | 0 | 24.2086184 | 120.5986361 | <a href="https://www.inaturalist.org/observations/120113029">https://www.inaturalist.org/observations/120113029</a> |
| 4003 | Bubulcus ibis | Cattle Egret | 2022/11/20 | 2 | 0 | 24.2086571 | 120.5978084 | <a href="https://www.inaturalist.org/observations/142439677">https://www.inaturalist.org/observations/142439677</a> |
| 4004 | Bubulcus ibis | Cattle Egret | 2021/4/17  | 1 | 0 | 24.2087295 | 120.5978198 | <a href="https://www.inaturalist.org/observations/94617035">https://www.inaturalist.org/observations/94617035</a>   |
| 4005 | Bubulcus ibis | Cattle Egret | 2022/10/26 | 2 | 0 | 24.2087353 | 120.5978423 | <a href="https://www.inaturalist.org/observations/140029602">https://www.inaturalist.org/observations/140029602</a> |
| 4006 | Bubulcus ibis | Cattle Egret | 2022/7/9   | 1 | 0 | 24.2087391 | 120.5986415 | <a href="https://www.inaturalist.org/observations/125393459">https://www.inaturalist.org/observations/125393459</a> |
| 4007 | Bubulcus ibis | Cattle Egret | 2022/10/1  | 1 | 0 | 24.2087444 | 120.5987482 | <a href="https://www.inaturalist.org/observations/137215350">https://www.inaturalist.org/observations/137215350</a> |
| 4008 | Bubulcus ibis | Cattle Egret | 2022/11/20 | 3 | 0 | 24.2087508 | 120.5988159 | <a href="https://www.inaturalist.org/observations/142530786">https://www.inaturalist.org/observations/142530786</a> |
| 4009 | Bubulcus ibis | Cattle Egret | 2021/10/23 | 2 | 0 | 24.2088797 | 120.5986322 | <a href="https://www.inaturalist.org/observations/120297857">https://www.inaturalist.org/observations/120297857</a> |
| 4010 | Bubulcus ibis | Cattle Egret | 2019/10/20 | 2 | 0 | 24.2089020 | 120.5956749 | <a href="https://www.inaturalist.org/observations/34676907">https://www.inaturalist.org/observations/34676907</a>   |
| 4011 | Bubulcus ibis | Cattle Egret | 2022/9/24  | 1 | 0 | 24.2089083 | 120.5991550 | <a href="https://www.inaturalist.org/observations/136230054">https://www.inaturalist.org/observations/136230054</a> |
| 4012 | Bubulcus ibis | Cattle Egret | 2022/9/24  | 1 | 0 | 24.2089335 | 120.5991839 | <a href="https://www.inaturalist.org/observations/136229930">https://www.inaturalist.org/observations/136229930</a> |
| 4013 | Bubulcus ibis | Cattle Egret | 2022/10/1  | 1 | 0 | 24.2089383 | 120.5993417 | <a href="https://www.inaturalist.org/observations/137097015">https://www.inaturalist.org/observations/137097015</a> |
| 4014 | Bubulcus ibis | Cattle Egret | 2022/10/29 | 1 | 0 | 24.2090087 | 120.5977006 | <a href="https://www.inaturalist.org/observations/140356869">https://www.inaturalist.org/observations/140356869</a> |
| 4015 | Bubulcus ibis | Cattle Egret | 2022/9/4   | 1 | 0 | 24.2090248 | 120.5989829 | <a href="https://www.inaturalist.org/observations/133557648">https://www.inaturalist.org/observations/133557648</a> |
| 4016 | Bubulcus ibis | Cattle Egret | 2022/9/24  | 2 | 0 | 24.2092790 | 120.5995190 | <a href="https://www.inaturalist.org/observations/136230689">https://www.inaturalist.org/observations/136230689</a> |
| 4017 | Bubulcus ibis | Cattle Egret | 2022/10/23 | 2 | 0 | 24.2092798 | 120.5988882 | <a href="https://www.inaturalist.org/observations/139730228">https://www.inaturalist.org/observations/139730228</a> |
| 4018 | Bubulcus ibis | Cattle Egret | 2022/10/23 | 2 | 0 | 24.2093229 | 120.5995459 | <a href="https://www.inaturalist.org/observations/139746264">https://www.inaturalist.org/observations/139746264</a> |
| 4019 | Bubulcus ibis | Cattle Egret | 2022/7/16  | 1 | 0 | 24.2093318 | 120.5975515 | <a href="https://www.inaturalist.org/observations/126420876">https://www.inaturalist.org/observations/126420876</a> |
| 4020 | Bubulcus ibis | Cattle Egret | 2022/10/23 | 2 | 0 | 24.2095033 | 120.5988333 | <a href="https://www.inaturalist.org/observations/139816741">https://www.inaturalist.org/observations/139816741</a> |
| 4021 | Bubulcus ibis | Cattle Egret | 2022/10/23 | 3 | 0 | 24.2095108 | 120.5987332 | <a href="https://www.inaturalist.org/observations/139711586">https://www.inaturalist.org/observations/139711586</a> |
| 4022 | Bubulcus ibis | Cattle Egret | 2021/11/5  | 1 | 0 | 24.2095968 | 120.6020720 | <a href="https://www.inaturalist.org/observations/102362081">https://www.inaturalist.org/observations/102362081</a> |
| 4023 | Bubulcus ibis | Cattle Egret | 2022/1/31  | 1 | 0 | 24.2099682 | 120.5980186 | <a href="https://www.inaturalist.org/observations/116561625">https://www.inaturalist.org/observations/116561625</a> |
| 4024 | Bubulcus ibis | Cattle Egret | 2021/4/24  | 1 | 0 | 24.2104466 | 120.5976708 | <a href="https://www.inaturalist.org/observations/119199132">https://www.inaturalist.org/observations/119199132</a> |

|      |                     |                   |            |   |   |            |             |                                                                                                                     |
|------|---------------------|-------------------|------------|---|---|------------|-------------|---------------------------------------------------------------------------------------------------------------------|
| 4025 | Bubulcus ibis       | Cattle Egret      | 2019/8/20  | 1 | 0 | 24.2105774 | 120.5955653 | <a href="https://www.inaturalist.org/observations/33520156">https://www.inaturalist.org/observations/33520156</a>   |
| 4026 | Bubulcus ibis       | Cattle Egret      | 2018/6/27  | 2 | 0 | 24.2247970 | 120.7021211 | <a href="https://www.inaturalist.org/observations/17606720">https://www.inaturalist.org/observations/17606720</a>   |
| 4027 | Bubulcus ibis       | Cattle Egret      | 2022/4/21  | 3 | 0 | 24.2379718 | 121.3882545 | <a href="https://www.inaturalist.org/observations/116455124">https://www.inaturalist.org/observations/116455124</a> |
| 4028 | Bubulcus ibis       | Cattle Egret      | 2022/5/24  | 1 | 0 | 24.2401887 | 120.7955177 | <a href="https://www.inaturalist.org/observations/118513287">https://www.inaturalist.org/observations/118513287</a> |
| 4029 | Bubulcus ibis       | Cattle Egret      | 2022/5/24  | 1 | 0 | 24.2402484 | 120.7956771 | <a href="https://www.inaturalist.org/observations/118513094">https://www.inaturalist.org/observations/118513094</a> |
| 4030 | Bubulcus ibis       | Cattle Egret      | 2019/8/10  | 2 | 0 | 24.2414588 | 120.6613676 | <a href="https://www.inaturalist.org/observations/30522611">https://www.inaturalist.org/observations/30522611</a>   |
| 4031 | Bubulcus coromandus | ibis Cattle Egret | 2021/7/18  | 0 | 0 | 24.2425500 | 120.6769167 | <a href="https://www.inaturalist.org/observations/87682546">https://www.inaturalist.org/observations/87682546</a>   |
| 4032 | Bubulcus ibis       | Cattle Egret      | 2019/11/8  | 1 | 0 | 24.2647983 | 120.8213817 | <a href="https://www.inaturalist.org/observations/35489031">https://www.inaturalist.org/observations/35489031</a>   |
| 4033 | Bubulcus ibis       | Cattle Egret      | 2022/9/5   | 2 | 0 | 24.2657950 | 120.6052283 | <a href="https://www.inaturalist.org/observations/133862366">https://www.inaturalist.org/observations/133862366</a> |
| 4034 | Bubulcus ibis       | Cattle Egret      | 2022/7/23  | 1 | 0 | 24.2665793 | 120.9569926 | <a href="https://www.inaturalist.org/observations/134813752">https://www.inaturalist.org/observations/134813752</a> |
| 4035 | Bubulcus ibis       | Cattle Egret      | 2022/7/23  | 2 | 0 | 24.2923343 | 120.8969776 | <a href="https://www.inaturalist.org/observations/134813748">https://www.inaturalist.org/observations/134813748</a> |
| 4036 | Bubulcus ibis       | Cattle Egret      | 2022/4/21  | 2 | 0 | 24.2983163 | 121.3087099 | <a href="https://www.inaturalist.org/observations/116455126">https://www.inaturalist.org/observations/116455126</a> |
| 4037 | Bubulcus ibis       | Cattle Egret      | 2020/7/2   | 1 | 0 | 24.3047500 | 120.5480967 | <a href="https://www.inaturalist.org/observations/51835484">https://www.inaturalist.org/observations/51835484</a>   |
| 4038 | Bubulcus ibis       | Cattle Egret      | 2019/7/26  | 3 | 0 | 24.3058796 | 120.6457694 | <a href="https://www.inaturalist.org/observations/31219802">https://www.inaturalist.org/observations/31219802</a>   |
| 4039 | Bubulcus ibis       | Cattle Egret      | 2022/4/21  | 2 | 0 | 24.3081882 | 121.3131106 | <a href="https://www.inaturalist.org/observations/116455138">https://www.inaturalist.org/observations/116455138</a> |
| 4040 | Bubulcus ibis       | Cattle Egret      | 2018/4/4   | 1 | 0 | 24.3129340 | 120.5459347 | <a href="https://www.inaturalist.org/observations/51749863">https://www.inaturalist.org/observations/51749863</a>   |
| 4041 | Bubulcus ibis       | Cattle Egret      | 2021/6/13  | 3 | 0 | 24.3150717 | 120.7310400 | <a href="https://www.inaturalist.org/observations/83354862">https://www.inaturalist.org/observations/83354862</a>   |
| 4042 | Bubulcus ibis       | Cattle Egret      | 2022/6/21  | 0 | 0 | 24.3250675 | 120.5569917 | <a href="https://www.inaturalist.org/observations/123155411">https://www.inaturalist.org/observations/123155411</a> |
| 4043 | Bubulcus ibis       | Cattle Egret      | 2022/6/21  | 1 | 0 | 24.3257541 | 120.5568145 | <a href="https://www.inaturalist.org/observations/122921080">https://www.inaturalist.org/observations/122921080</a> |
| 4044 | Bubulcus ibis       | Cattle Egret      | 2022/7/23  | 1 | 0 | 24.3278673 | 120.8982551 | <a href="https://www.inaturalist.org/observations/134813754">https://www.inaturalist.org/observations/134813754</a> |
| 4045 | Bubulcus ibis       | Cattle Egret      | 2022/12/20 | 1 | 0 | 24.3458567 | 120.6723500 | <a href="https://www.inaturalist.org/observations/145190498">https://www.inaturalist.org/observations/145190498</a> |
| 4046 | Bubulcus ibis       | Cattle Egret      | 2018/12/2  | 6 | 0 | 24.3526742 | 92.3448154  | <a href="https://www.inaturalist.org/observations/19982622">https://www.inaturalist.org/observations/19982622</a>   |
| 4047 | Bubulcus ibis       | Cattle Egret      | 2019/2/8   | 4 | 0 | 24.3526742 | 92.3448154  | <a href="https://www.inaturalist.org/observations/20444517">https://www.inaturalist.org/observations/20444517</a>   |
| 4048 | Bubulcus ibis       | Cattle Egret      | 2019/2/8   | 4 | 0 | 24.3526742 | 92.3448154  | <a href="https://www.inaturalist.org/observations/20444523">https://www.inaturalist.org/observations/20444523</a>   |
| 4049 | Bubulcus ibis       | Cattle Egret      | 2019/2/8   | 5 | 0 | 24.3526742 | 92.3448154  | <a href="https://www.inaturalist.org/observations/20444597">https://www.inaturalist.org/observations/20444597</a>   |



|      |               |              |            |   |   |            |             |                                                                                                                     |
|------|---------------|--------------|------------|---|---|------------|-------------|---------------------------------------------------------------------------------------------------------------------|
| 4050 | Bubulcus ibis | Cattle Egret | 2019/2/8   | 5 | 0 | 24.3526742 | 92.3448154  | <a href="https://www.inaturalist.org/observations/20444601">https://www.inaturalist.org/observations/20444601</a>   |
| 4051 | Bubulcus ibis | Cattle Egret | 2021/12/3  | 2 | 0 | 24.3526742 | 92.3448154  | <a href="https://www.inaturalist.org/observations/104960841">https://www.inaturalist.org/observations/104960841</a> |
| 4052 | Bubulcus ibis | Cattle Egret | 2020/9/20  | 2 | 0 | 24.3526778 | 92.3448139  | <a href="https://www.inaturalist.org/observations/64098350">https://www.inaturalist.org/observations/64098350</a>   |
| 4053 | Bubulcus ibis | Cattle Egret | 2021/4/16  | 1 | 0 | 24.3526803 | 92.3448153  | <a href="https://www.inaturalist.org/observations/81702931">https://www.inaturalist.org/observations/81702931</a>   |
| 4054 | Bubulcus ibis | Cattle Egret | 2018/11/14 | 6 | 0 | 24.3528077 | 92.3446028  | <a href="https://www.inaturalist.org/observations/19413597">https://www.inaturalist.org/observations/19413597</a>   |
| 4055 | Bubulcus ibis | Cattle Egret | 2018/3/23  | 4 | 0 | 24.3543130 | 92.3528410  | <a href="https://www.inaturalist.org/observations/13604523">https://www.inaturalist.org/observations/13604523</a>   |
| 4056 | Bubulcus ibis | Cattle Egret | 2022/9/16  | 2 | 0 | 24.3608599 | 120.9495181 | <a href="https://www.inaturalist.org/observations/138675519">https://www.inaturalist.org/observations/138675519</a> |
| 4057 | Bubulcus ibis | Cattle Egret | 2022/4/21  | 3 | 0 | 24.3652564 | 121.3354313 | <a href="https://www.inaturalist.org/observations/116455123">https://www.inaturalist.org/observations/116455123</a> |
| 4058 | Bubulcus ibis | Cattle Egret | 2022/4/3   | 1 | 0 | 24.3784603 | 120.6585700 | <a href="https://www.inaturalist.org/observations/110268377">https://www.inaturalist.org/observations/110268377</a> |
| 4059 | Bubulcus ibis | Cattle Egret | 2022/3/16  | 2 | 0 | 24.4003343 | 120.6743998 | <a href="https://www.inaturalist.org/observations/108795792">https://www.inaturalist.org/observations/108795792</a> |
| 4060 | Bubulcus ibis | Cattle Egret | 2021/9/14  | 1 | 0 | 24.4084633 | 118.2962800 | <a href="https://www.inaturalist.org/observations/95123788">https://www.inaturalist.org/observations/95123788</a>   |
| 4061 | Bubulcus ibis | Cattle Egret | 2018/11/30 | 4 | 0 | 24.4245041 | 120.7760217 | <a href="https://www.inaturalist.org/observations/30656832">https://www.inaturalist.org/observations/30656832</a>   |
| 4062 | Bubulcus ibis | Cattle Egret | 2018/6/3   | 4 | 0 | 24.4271460 | 92.3366300  | <a href="https://www.inaturalist.org/observations/14538026">https://www.inaturalist.org/observations/14538026</a>   |
| 4063 | Bubulcus ibis | Cattle Egret | 2019/4/15  | 1 | 0 | 24.4279737 | 118.2351192 | <a href="https://www.inaturalist.org/observations/69449197">https://www.inaturalist.org/observations/69449197</a>   |
| 4064 | Bubulcus ibis | Cattle Egret | 2020/2/11  | 2 | 0 | 24.4281351 | 92.3354226  | <a href="https://www.inaturalist.org/observations/46470123">https://www.inaturalist.org/observations/46470123</a>   |
| 4065 | Bubulcus ibis | Cattle Egret | 2020/2/12  | 2 | 0 | 24.4281351 | 92.3354226  | <a href="https://www.inaturalist.org/observations/46567678">https://www.inaturalist.org/observations/46567678</a>   |
| 4066 | Bubulcus ibis | Cattle Egret | 2020/3/8   | 1 | 0 | 24.4294076 | 92.3333012  | <a href="https://www.inaturalist.org/observations/39793389">https://www.inaturalist.org/observations/39793389</a>   |
| 4067 | Bubulcus ibis | Cattle Egret | 2018/1/30  | 4 | 0 | 24.4298200 | 92.3332290  | <a href="https://www.inaturalist.org/observations/13604512">https://www.inaturalist.org/observations/13604512</a>   |
| 4068 | Bubulcus ibis | Cattle Egret | 2018/1/30  | 4 | 0 | 24.4319100 | 92.3308080  | <a href="https://www.inaturalist.org/observations/13252270">https://www.inaturalist.org/observations/13252270</a>   |
| 4069 | Bubulcus ibis | Cattle Egret | 2019/5/26  | 5 | 0 | 24.4320197 | 92.3306894  | <a href="https://www.inaturalist.org/observations/26659181">https://www.inaturalist.org/observations/26659181</a>   |
| 4070 | Bubulcus ibis | Cattle Egret | 2010/3/31  | 2 | 0 | 24.4320200 | 92.3306890  | <a href="https://www.inaturalist.org/observations/103465503">https://www.inaturalist.org/observations/103465503</a> |
| 4071 | Bubulcus ibis | Cattle Egret | 2010/6/7   | 2 | 0 | 24.4320200 | 92.3306890  | <a href="https://www.inaturalist.org/observations/103466137">https://www.inaturalist.org/observations/103466137</a> |
| 4072 | Bubulcus ibis | Cattle Egret | 2010/8/24  | 1 | 0 | 24.4320200 | 92.3306890  | <a href="https://www.inaturalist.org/observations/103510271">https://www.inaturalist.org/observations/103510271</a> |
| 4073 | Bubulcus ibis | Cattle Egret | 2010/12/3  | 2 | 0 | 24.4320200 | 92.3306890  | <a href="https://www.inaturalist.org/observations/103620966">https://www.inaturalist.org/observations/103620966</a> |
| 4074 | Bubulcus ibis | Cattle Egret | 2010/12/27 | 2 | 0 | 24.4320200 | 92.3306890  | <a href="https://www.inaturalist.org/observations/103622192">https://www.inaturalist.org/observations/103622192</a> |

|      |               |              |            |   |   |            |             |                                                                                                                     |
|------|---------------|--------------|------------|---|---|------------|-------------|---------------------------------------------------------------------------------------------------------------------|
| 4075 | Bubulcus ibis | Cattle Egret | 2019/2/6   | 2 | 0 | 24.4324204 | 120.6216558 | <a href="https://www.inaturalist.org/observations/20152869">https://www.inaturalist.org/observations/20152869</a>   |
| 4076 | Bubulcus ibis | Cattle Egret | 2020/5/23  | 1 | 0 | 24.4330273 | 92.3337174  | <a href="https://www.inaturalist.org/observations/46969647">https://www.inaturalist.org/observations/46969647</a>   |
| 4077 | Bubulcus ibis | Cattle Egret | 2019/9/26  | 4 | 0 | 24.4338515 | 92.3284793  | <a href="https://www.inaturalist.org/observations/34063096">https://www.inaturalist.org/observations/34063096</a>   |
| 4078 | Bubulcus ibis | Cattle Egret | 2020/9/22  | 1 | 0 | 24.4460215 | 118.2475554 | <a href="https://www.inaturalist.org/observations/63295906">https://www.inaturalist.org/observations/63295906</a>   |
| 4079 | Bubulcus ibis | Cattle Egret | 2022/10/7  | 1 | 0 | 24.4475789 | 120.6415303 | <a href="https://www.inaturalist.org/observations/137825994">https://www.inaturalist.org/observations/137825994</a> |
| 4080 | Bubulcus ibis | Cattle Egret | 2022/9/11  | 2 | 0 | 24.4478281 | 120.8812254 | <a href="https://www.inaturalist.org/observations/134540641">https://www.inaturalist.org/observations/134540641</a> |
| 4081 | Bubulcus ibis | Cattle Egret | 2022/9/11  | 2 | 0 | 24.4483711 | 120.8810440 | <a href="https://www.inaturalist.org/observations/134540705">https://www.inaturalist.org/observations/134540705</a> |
| 4082 | Bubulcus ibis | Cattle Egret | 2015/12/30 | 2 | 0 | 24.4484060 | 82.9790306  | <a href="https://www.inaturalist.org/observations/59107310">https://www.inaturalist.org/observations/59107310</a>   |
| 4083 | Bubulcus ibis | Cattle Egret | 2022/9/13  | 2 | 0 | 24.4486917 | 120.6430117 | <a href="https://www.inaturalist.org/observations/134832980">https://www.inaturalist.org/observations/134832980</a> |
| 4084 | Bubulcus ibis | Cattle Egret | 2011/6/2   | 1 | 0 | 24.4488116 | 118.3738469 | <a href="https://www.inaturalist.org/observations/55863919">https://www.inaturalist.org/observations/55863919</a>   |
| 4085 | Bubulcus ibis | Cattle Egret | 2021/5/3   | 2 | 0 | 24.4523840 | 118.4402000 | <a href="https://www.inaturalist.org/observations/79461270">https://www.inaturalist.org/observations/79461270</a>   |
| 4086 | Bubulcus ibis | Cattle Egret | 2022/10/7  | 2 | 0 | 24.4535503 | 120.6508775 | <a href="https://www.inaturalist.org/observations/137826006">https://www.inaturalist.org/observations/137826006</a> |
| 4087 | Bubulcus ibis | Cattle Egret | 2022/9/13  | 1 | 0 | 24.4557517 | 120.6489083 | <a href="https://www.inaturalist.org/observations/134832961">https://www.inaturalist.org/observations/134832961</a> |
| 4088 | Bubulcus ibis | Cattle Egret | 2021/10/24 | 3 | 0 | 24.4566498 | 118.0913079 | <a href="https://www.inaturalist.org/observations/99229027">https://www.inaturalist.org/observations/99229027</a>   |
| 4089 | Bubulcus ibis | Cattle Egret | 2021/12/1  | 1 | 0 | 24.4602133 | 121.7930267 | <a href="https://www.inaturalist.org/observations/104697600">https://www.inaturalist.org/observations/104697600</a> |
| 4090 | Bubulcus ibis | Cattle Egret | 2018/2/6   | 1 | 0 | 24.4612517 | 121.8058110 | <a href="https://www.inaturalist.org/observations/137514449">https://www.inaturalist.org/observations/137514449</a> |
| 4091 | Bubulcus ibis | Cattle Egret | 2020/4/27  | 1 | 0 | 24.4659020 | 121.8018680 | <a href="https://www.inaturalist.org/observations/44235201">https://www.inaturalist.org/observations/44235201</a>   |
| 4092 | Bubulcus ibis | Cattle Egret | 2020/4/27  | 1 | 0 | 24.4659020 | 121.8018680 | <a href="https://www.inaturalist.org/observations/44235214">https://www.inaturalist.org/observations/44235214</a>   |
| 4093 | Bubulcus ibis | Cattle Egret | 2020/4/27  | 2 | 0 | 24.4659020 | 121.8018680 | <a href="https://www.inaturalist.org/observations/44235254">https://www.inaturalist.org/observations/44235254</a>   |
| 4094 | Bubulcus ibis | Cattle Egret | 2020/4/27  | 1 | 0 | 24.4659020 | 121.8018680 | <a href="https://www.inaturalist.org/observations/44235255">https://www.inaturalist.org/observations/44235255</a>   |
| 4095 | Bubulcus ibis | Cattle Egret | 2020/4/27  | 1 | 0 | 24.4659020 | 121.8018680 | <a href="https://www.inaturalist.org/observations/44235256">https://www.inaturalist.org/observations/44235256</a>   |
| 4096 | Bubulcus ibis | Cattle Egret | 2020/4/27  | 2 | 0 | 24.4659020 | 121.8018680 | <a href="https://www.inaturalist.org/observations/44235265">https://www.inaturalist.org/observations/44235265</a>   |
| 4097 | Bubulcus ibis | Cattle Egret | 2018/12/29 | 3 | 0 | 24.4757656 | 118.4563815 | <a href="https://www.inaturalist.org/observations/19330585">https://www.inaturalist.org/observations/19330585</a>   |
| 4098 | Bubulcus ibis | Cattle Egret | 2011/3/20  | 2 | 0 | 24.4796320 | 92.3240080  | <a href="https://www.inaturalist.org/observations/103684120">https://www.inaturalist.org/observations/103684120</a> |
| 4099 | Bubulcus ibis | Cattle Egret | 2011/8/14  | 2 | 0 | 24.4796320 | 92.3240080  | <a href="https://www.inaturalist.org/observations/103694248">https://www.inaturalist.org/observations/103694248</a> |

|      |                     |                   |            |   |   |            |             |                                                                                                                     |
|------|---------------------|-------------------|------------|---|---|------------|-------------|---------------------------------------------------------------------------------------------------------------------|
| 4100 | Bubulcus ibis       | Cattle Egret      | 2018/8/15  | 4 | 0 | 24.4809080 | 92.3230080  | <a href="https://www.inaturalist.org/observations/15604733">https://www.inaturalist.org/observations/15604733</a>   |
| 4101 | Bubulcus ibis       | Cattle Egret      | 2019/5/18  | 1 | 0 | 24.4825014 | 118.4362529 | <a href="https://www.inaturalist.org/observations/25554642">https://www.inaturalist.org/observations/25554642</a>   |
| 4102 | Bubulcus ibis       | Cattle Egret      | 2020/2/9   | 3 | 0 | 24.4829440 | 92.2907123  | <a href="https://www.inaturalist.org/observations/46468684">https://www.inaturalist.org/observations/46468684</a>   |
| 4103 | Bubulcus ibis       | Cattle Egret      | 2020/3/1   | 4 | 0 | 24.4829440 | 92.2907123  | <a href="https://www.inaturalist.org/observations/46705500">https://www.inaturalist.org/observations/46705500</a>   |
| 4104 | Bubulcus ibis       | Cattle Egret      | 2020/3/1   | 4 | 0 | 24.4829440 | 92.2907123  | <a href="https://www.inaturalist.org/observations/46705503">https://www.inaturalist.org/observations/46705503</a>   |
| 4105 | Bubulcus ibis       | Cattle Egret      | 2017/2/6   | 1 | 0 | 24.4850581 | 118.4075186 | <a href="https://www.inaturalist.org/observations/57000434">https://www.inaturalist.org/observations/57000434</a>   |
| 4106 | Bubulcus ibis       | Cattle Egret      | 2021/2/21  | 3 | 0 | 24.4965459 | 92.3143072  | <a href="https://www.inaturalist.org/observations/70075040">https://www.inaturalist.org/observations/70075040</a>   |
| 4107 | Bubulcus ibis       | Cattle Egret      | 2021/10/24 | 1 | 0 | 24.4977727 | 92.3147675  | <a href="https://www.inaturalist.org/observations/102744497">https://www.inaturalist.org/observations/102744497</a> |
| 4108 | Bubulcus ibis       | Cattle Egret      | 2020/3/1   | 4 | 0 | 24.4978148 | 92.3147678  | <a href="https://www.inaturalist.org/observations/39439283">https://www.inaturalist.org/observations/39439283</a>   |
| 4109 | Bubulcus ibis       | Cattle Egret      | 2019/3/14  | 1 | 0 | 24.4996750 | 120.7790900 | <a href="https://www.inaturalist.org/observations/62184163">https://www.inaturalist.org/observations/62184163</a>   |
| 4110 | Bubulcus ibis       | Cattle Egret      | 2021/4/25  | 3 | 0 | 24.5042400 | 120.8303317 | <a href="https://www.inaturalist.org/observations/75155567">https://www.inaturalist.org/observations/75155567</a>   |
| 4111 | Bubulcus ibis       | Cattle Egret      | 2019/9/22  | 1 | 0 | 24.5156554 | 118.1744357 | <a href="https://www.inaturalist.org/observations/62694136">https://www.inaturalist.org/observations/62694136</a>   |
| 4112 | Bubulcus ibis       | Cattle Egret      | 2019/10/3  | 3 | 0 | 24.5195610 | 73.7380134  | <a href="https://www.inaturalist.org/observations/33785276">https://www.inaturalist.org/observations/33785276</a>   |
| 4113 | Bubulcus ibis       | Cattle Egret      | 2022/5/7   | 2 | 0 | 24.5460992 | 120.7919511 | <a href="https://www.inaturalist.org/observations/115909209">https://www.inaturalist.org/observations/115909209</a> |
| 4114 | Bubulcus ibis       | Cattle Egret      | 2021/4/30  | 1 | 0 | 24.5516250 | 118.2320520 | <a href="https://www.inaturalist.org/observations/83479782">https://www.inaturalist.org/observations/83479782</a>   |
| 4115 | Bubulcus ibis       | Cattle Egret      | 2017/5/28  | 4 | 0 | 24.5743112 | 121.1057378 | <a href="https://www.inaturalist.org/observations/29490025">https://www.inaturalist.org/observations/29490025</a>   |
| 4116 | Bubulcus ibis       | Cattle Egret      | 2019/12/26 | 0 | 0 | 24.5797039 | 73.6806226  | <a href="https://www.inaturalist.org/observations/37721144">https://www.inaturalist.org/observations/37721144</a>   |
| 4117 | Bubulcus coromandus | ibis Cattle Egret | 2019/7/6   | 2 | 0 | 24.5918805 | 74.1064635  | <a href="https://www.inaturalist.org/observations/31905258">https://www.inaturalist.org/observations/31905258</a>   |
| 4118 | Bubulcus ibis       | Cattle Egret      | 2010/5/15  | 5 | 0 | 24.5934510 | 73.6672350  | <a href="http://www.inaturalist.org/observations/321893">http://www.inaturalist.org/observations/321893</a>         |
| 4119 | Bubulcus ibis       | Cattle Egret      | 2022/4/4   | 1 | 0 | 24.5948033 | 121.8442467 | <a href="https://www.inaturalist.org/observations/110375826">https://www.inaturalist.org/observations/110375826</a> |
| 4120 | Bubulcus ibis       | Cattle Egret      | 2019/4/13  | 3 | 0 | 24.6030127 | 73.6858378  | <a href="https://www.inaturalist.org/observations/42079237">https://www.inaturalist.org/observations/42079237</a>   |
| 4121 | Bubulcus ibis       | Cattle Egret      | 2020/2/29  | 1 | 0 | 24.6044159 | 120.8261776 | <a href="https://www.inaturalist.org/observations/41229824">https://www.inaturalist.org/observations/41229824</a>   |
| 4122 | Bubulcus coromandus | ibis Cattle Egret | 2012/8/19  | 3 | 0 | 24.6072879 | 92.3834412  | <a href="http://www.inaturalist.org/observations/115298">http://www.inaturalist.org/observations/115298</a>         |
| 4123 | Bubulcus ibis       | Cattle Egret      | 2012/1/1   | 4 | 0 | 24.6072880 | 92.3834410  | <a href="http://www.inaturalist.org/observations/409336">http://www.inaturalist.org/observations/409336</a>         |
| 4124 | Bubulcus ibis       | Cattle Egret      | 2021/10/9  | 1 | 0 | 24.6099284 | 121.8377710 | <a href="https://www.inaturalist.org/observations/97598332">https://www.inaturalist.org/observations/97598332</a>   |

|      |               |              |            |   |   |            |             |                                                                                                                     |
|------|---------------|--------------|------------|---|---|------------|-------------|---------------------------------------------------------------------------------------------------------------------|
| 4125 | Bubulcus ibis | Cattle Egret | 2021/10/9  | 2 | 0 | 24.6099591 | 121.8378160 | <a href="https://www.inaturalist.org/observations/97598807">https://www.inaturalist.org/observations/97598807</a>   |
| 4126 | Bubulcus ibis | Cattle Egret | 2021/10/9  | 2 | 0 | 24.6100185 | 121.8377649 | <a href="https://www.inaturalist.org/observations/97599162">https://www.inaturalist.org/observations/97599162</a>   |
| 4127 | Bubulcus ibis | Cattle Egret | 2021/9/14  | 1 | 0 | 24.6103207 | 121.8413917 | <a href="https://www.inaturalist.org/observations/94770385">https://www.inaturalist.org/observations/94770385</a>   |
| 4128 | Bubulcus ibis | Cattle Egret | 2021/9/9   | 2 | 0 | 24.6105377 | 121.8403946 | <a href="https://www.inaturalist.org/observations/94171977">https://www.inaturalist.org/observations/94171977</a>   |
| 4129 | Bubulcus ibis | Cattle Egret | 2021/8/29  | 1 | 0 | 24.6109380 | 121.8404580 | <a href="https://www.inaturalist.org/observations/92865143">https://www.inaturalist.org/observations/92865143</a>   |
| 4130 | Bubulcus ibis | Cattle Egret | 2021/8/29  | 1 | 0 | 24.6110020 | 121.8411154 | <a href="https://www.inaturalist.org/observations/92865139">https://www.inaturalist.org/observations/92865139</a>   |
| 4131 | Bubulcus ibis | Cattle Egret | 2021/10/10 | 1 | 0 | 24.6123474 | 121.8433470 | <a href="https://www.inaturalist.org/observations/97733090">https://www.inaturalist.org/observations/97733090</a>   |
| 4132 | Bubulcus ibis | Cattle Egret | 2022/6/3   | 2 | 0 | 24.6142767 | 121.8551983 | <a href="https://www.inaturalist.org/observations/120300893">https://www.inaturalist.org/observations/120300893</a> |
| 4133 | Bubulcus ibis | Cattle Egret | 2021/10/10 | 1 | 0 | 24.6147506 | 121.8452638 | <a href="https://www.inaturalist.org/observations/97734025">https://www.inaturalist.org/observations/97734025</a>   |
| 4134 | Bubulcus ibis | Cattle Egret | 2022/1/12  | 1 | 0 | 24.6219311 | 121.8012218 | <a href="https://www.inaturalist.org/observations/106914145">https://www.inaturalist.org/observations/106914145</a> |
| 4135 | Bubulcus ibis | Cattle Egret | 2022/11/9  | 1 | 0 | 24.6238140 | 121.8413320 | <a href="https://www.inaturalist.org/observations/143962469">https://www.inaturalist.org/observations/143962469</a> |
| 4136 | Bubulcus ibis | Cattle Egret | 2022/5/5   | 1 | 0 | 24.6239264 | 121.7935293 | <a href="https://www.inaturalist.org/observations/123206679">https://www.inaturalist.org/observations/123206679</a> |
| 4137 | Bubulcus ibis | Cattle Egret | 2022/4/3   | 3 | 0 | 24.6242336 | 121.7527406 | <a href="https://www.inaturalist.org/observations/138677877">https://www.inaturalist.org/observations/138677877</a> |
| 4138 | Bubulcus ibis | Cattle Egret | 2022/8/4   | 1 | 0 | 24.6267466 | 121.8452110 | <a href="https://www.inaturalist.org/observations/144241740">https://www.inaturalist.org/observations/144241740</a> |
| 4139 | Bubulcus ibis | Cattle Egret | 2021/10/17 | 1 | 0 | 24.6294065 | 121.7892717 | <a href="https://www.inaturalist.org/observations/102230645">https://www.inaturalist.org/observations/102230645</a> |
| 4140 | Bubulcus ibis | Cattle Egret | 2020/4/24  | 2 | 0 | 24.6304040 | 121.7496000 | <a href="https://www.inaturalist.org/observations/43098802">https://www.inaturalist.org/observations/43098802</a>   |
| 4141 | Bubulcus ibis | Cattle Egret | 2020/6/10  | 2 | 0 | 24.6313822 | 121.7606081 | <a href="https://www.inaturalist.org/observations/49106138">https://www.inaturalist.org/observations/49106138</a>   |
| 4142 | Bubulcus ibis | Cattle Egret | 2021/4/14  | 1 | 0 | 24.6314784 | 121.7602775 | <a href="https://www.inaturalist.org/observations/75025834">https://www.inaturalist.org/observations/75025834</a>   |
| 4143 | Bubulcus ibis | Cattle Egret | 2021/5/18  | 2 | 0 | 24.6315408 | 121.7604956 | <a href="https://www.inaturalist.org/observations/79218352">https://www.inaturalist.org/observations/79218352</a>   |
| 4144 | Bubulcus ibis | Cattle Egret | 2021/4/17  | 1 | 0 | 24.6316102 | 121.7614797 | <a href="https://www.inaturalist.org/observations/74311591">https://www.inaturalist.org/observations/74311591</a>   |
| 4145 | Bubulcus ibis | Cattle Egret | 2020/5/9   | 1 | 0 | 24.6319190 | 121.7537404 | <a href="https://www.inaturalist.org/observations/54501611">https://www.inaturalist.org/observations/54501611</a>   |
| 4146 | Bubulcus ibis | Cattle Egret | 2022/6/15  | 3 | 0 | 24.6335498 | 121.7617958 | <a href="https://www.inaturalist.org/observations/121841726">https://www.inaturalist.org/observations/121841726</a> |
| 4147 | Bubulcus ibis | Cattle Egret | 2020/5/15  | 2 | 0 | 24.6335976 | 121.7617398 | <a href="https://www.inaturalist.org/observations/45937748">https://www.inaturalist.org/observations/45937748</a>   |
| 4148 | Bubulcus ibis | Cattle Egret | 2021/4/26  | 1 | 0 | 24.6375111 | 121.7908857 | <a href="https://www.inaturalist.org/observations/75293845">https://www.inaturalist.org/observations/75293845</a>   |
| 4149 | Bubulcus ibis | Cattle Egret | 2020/9/8   | 1 | 0 | 24.6395573 | 121.7803942 | <a href="https://www.inaturalist.org/observations/59025771">https://www.inaturalist.org/observations/59025771</a>   |

|      |                        |                      |            |   |   |            |             |                                                                                                                     |
|------|------------------------|----------------------|------------|---|---|------------|-------------|---------------------------------------------------------------------------------------------------------------------|
| 4150 | Bubulcus ibis          | Cattle Egret         | 2022/5/15  | 2 | 0 | 24.6436056 | 121.5966083 | <a href="https://www.inaturalist.org/observations/117114447">https://www.inaturalist.org/observations/117114447</a> |
| 4151 | Bubulcus ibis          | Cattle Egret         | 2022/10/15 | 2 | 0 | 24.6436194 | 121.5967139 | <a href="https://www.inaturalist.org/observations/138795322">https://www.inaturalist.org/observations/138795322</a> |
| 4152 | Bubulcus ibis          | Cattle Egret         | 2020/8/22  | 1 | 0 | 24.6444467 | 121.7740243 | <a href="https://www.inaturalist.org/observations/58128433">https://www.inaturalist.org/observations/58128433</a>   |
| 4153 | Bubulcus ibis          | Cattle Egret         | 2022/8/24  | 1 | 0 | 24.6502538 | 121.8247537 | <a href="https://www.inaturalist.org/observations/144555443">https://www.inaturalist.org/observations/144555443</a> |
| 4154 | Bubulcus ibis          | Cattle Egret         | 2022/9/7   | 2 | 0 | 24.6505683 | 121.8257673 | <a href="https://www.inaturalist.org/observations/144492530">https://www.inaturalist.org/observations/144492530</a> |
| 4155 | Bubulcus<br>coromandus | ibis<br>Cattle Egret | 2021/5/1   | 1 | 0 | 24.6522354 | 121.6460088 | <a href="https://www.inaturalist.org/observations/77212607">https://www.inaturalist.org/observations/77212607</a>   |
| 4156 | Bubulcus ibis          | Cattle Egret         | 2021/7/23  | 1 | 0 | 24.6522438 | 121.8142176 | <a href="https://www.inaturalist.org/observations/92549963">https://www.inaturalist.org/observations/92549963</a>   |
| 4157 | Bubulcus ibis          | Cattle Egret         | 2019/4/28  | 2 | 0 | 24.6524678 | 121.8227495 | <a href="https://www.inaturalist.org/observations/23594143">https://www.inaturalist.org/observations/23594143</a>   |
| 4158 | Bubulcus ibis          | Cattle Egret         | 2021/5/1   | 1 | 0 | 24.6529257 | 121.6454434 | <a href="https://www.inaturalist.org/observations/94706001">https://www.inaturalist.org/observations/94706001</a>   |
| 4159 | Bubulcus ibis          | Cattle Egret         | 2022/4/26  | 1 | 0 | 24.6541935 | 121.8236600 | <a href="https://www.inaturalist.org/observations/123202941">https://www.inaturalist.org/observations/123202941</a> |
| 4160 | Bubulcus ibis          | Cattle Egret         | 2021/9/13  | 1 | 0 | 24.6556895 | 121.8166933 | <a href="https://www.inaturalist.org/observations/100860445">https://www.inaturalist.org/observations/100860445</a> |
| 4161 | Bubulcus ibis          | Cattle Egret         | 2018/8/31  | 3 | 0 | 24.6562932 | 121.8196613 | <a href="https://www.inaturalist.org/observations/19888605">https://www.inaturalist.org/observations/19888605</a>   |
| 4162 | Bubulcus ibis          | Cattle Egret         | 2020/5/13  | 1 | 0 | 24.6565435 | 121.7508923 | <a href="https://www.inaturalist.org/observations/47072458">https://www.inaturalist.org/observations/47072458</a>   |
| 4163 | Bubulcus ibis          | Cattle Egret         | 2020/10/25 | 1 | 0 | 24.6566351 | 121.7284344 | <a href="https://www.inaturalist.org/observations/65139449">https://www.inaturalist.org/observations/65139449</a>   |
| 4164 | Bubulcus ibis          | Cattle Egret         | 2019/4/28  | 2 | 0 | 24.6566904 | 121.8138408 | <a href="https://www.inaturalist.org/observations/23589118">https://www.inaturalist.org/observations/23589118</a>   |
| 4165 | Bubulcus ibis          | Cattle Egret         | 2019/4/28  | 2 | 0 | 24.6566904 | 121.8138408 | <a href="https://www.inaturalist.org/observations/23589121">https://www.inaturalist.org/observations/23589121</a>   |
| 4166 | Bubulcus ibis          | Cattle Egret         | 2019/4/28  | 2 | 0 | 24.6566904 | 121.8138408 | <a href="https://www.inaturalist.org/observations/23589122">https://www.inaturalist.org/observations/23589122</a>   |
| 4167 | Bubulcus ibis          | Cattle Egret         | 2019/4/28  | 2 | 0 | 24.6571840 | 121.8215950 | <a href="https://www.inaturalist.org/observations/23658765">https://www.inaturalist.org/observations/23658765</a>   |
| 4168 | Bubulcus ibis          | Cattle Egret         | 2019/4/28  | 2 | 0 | 24.6578801 | 121.8213201 | <a href="https://www.inaturalist.org/observations/23534862">https://www.inaturalist.org/observations/23534862</a>   |
| 4169 | Bubulcus ibis          | Cattle Egret         | 2020/4/25  | 2 | 0 | 24.6591400 | 121.0230630 | <a href="https://www.inaturalist.org/observations/43274531">https://www.inaturalist.org/observations/43274531</a>   |
| 4170 | Bubulcus ibis          | Cattle Egret         | 2020/7/16  | 1 | 0 | 24.6592873 | 121.8205473 | <a href="https://www.inaturalist.org/observations/54424673">https://www.inaturalist.org/observations/54424673</a>   |
| 4171 | Bubulcus ibis          | Cattle Egret         | 2020/7/8   | 1 | 0 | 24.6599954 | 121.8194148 | <a href="https://www.inaturalist.org/observations/53481995">https://www.inaturalist.org/observations/53481995</a>   |
| 4172 | Bubulcus ibis          | Cattle Egret         | 2020/4/25  | 2 | 0 | 24.6615049 | 121.6189375 | <a href="https://www.inaturalist.org/observations/43286613">https://www.inaturalist.org/observations/43286613</a>   |
| 4173 | Bubulcus ibis          | Cattle Egret         | 2022/8/5   | 3 | 0 | 24.6624387 | 121.8170625 | <a href="https://www.inaturalist.org/observations/131532169">https://www.inaturalist.org/observations/131532169</a> |
| 4174 | Bubulcus ibis          | Cattle Egret         | 2018/10/22 | 2 | 0 | 24.6628246 | 121.8164544 | <a href="https://www.inaturalist.org/observations/17739209">https://www.inaturalist.org/observations/17739209</a>   |

|      |               |              |            |   |   |            |             |                                                                                                                     |
|------|---------------|--------------|------------|---|---|------------|-------------|---------------------------------------------------------------------------------------------------------------------|
| 4175 | Bubulcus ibis | Cattle Egret | 2019/4/28  | 1 | 0 | 24.6632325 | 121.8178269 | <a href="https://www.inaturalist.org/observations/23582480">https://www.inaturalist.org/observations/23582480</a>   |
| 4176 | Bubulcus ibis | Cattle Egret | 2019/9/23  | 2 | 0 | 24.6632325 | 121.8178269 | <a href="https://www.inaturalist.org/observations/33250141">https://www.inaturalist.org/observations/33250141</a>   |
| 4177 | Bubulcus ibis | Cattle Egret | 2019/9/23  | 1 | 0 | 24.6632325 | 121.8178269 | <a href="https://www.inaturalist.org/observations/33250156">https://www.inaturalist.org/observations/33250156</a>   |
| 4178 | Bubulcus ibis | Cattle Egret | 2019/9/23  | 2 | 0 | 24.6632325 | 121.8178269 | <a href="https://www.inaturalist.org/observations/33250157">https://www.inaturalist.org/observations/33250157</a>   |
| 4179 | Bubulcus ibis | Cattle Egret | 2019/9/23  | 2 | 0 | 24.6632325 | 121.8178269 | <a href="https://www.inaturalist.org/observations/33250708">https://www.inaturalist.org/observations/33250708</a>   |
| 4180 | Bubulcus ibis | Cattle Egret | 2020/3/23  | 2 | 0 | 24.6638197 | 121.8127244 | <a href="https://www.inaturalist.org/observations/40638325">https://www.inaturalist.org/observations/40638325</a>   |
| 4181 | Bubulcus ibis | Cattle Egret | 2021/9/24  | 1 | 0 | 24.6654654 | 121.8142605 | <a href="https://www.inaturalist.org/observations/101402132">https://www.inaturalist.org/observations/101402132</a> |
| 4182 | Bubulcus ibis | Cattle Egret | 2022/5/2   | 1 | 0 | 24.6656950 | 121.8128683 | <a href="https://www.inaturalist.org/observations/115564213">https://www.inaturalist.org/observations/115564213</a> |
| 4183 | Bubulcus ibis | Cattle Egret | 2018/8/20  | 3 | 0 | 24.6658455 | 121.8189427 | <a href="https://www.inaturalist.org/observations/15717668">https://www.inaturalist.org/observations/15717668</a>   |
| 4184 | Bubulcus ibis | Cattle Egret | 2022/5/1   | 1 | 0 | 24.6659375 | 121.8138243 | <a href="https://www.inaturalist.org/observations/115536695">https://www.inaturalist.org/observations/115536695</a> |
| 4185 | Bubulcus ibis | Cattle Egret | 2021/12/13 | 3 | 0 | 24.6662274 | 121.7937469 | <a href="https://www.inaturalist.org/observations/102981535">https://www.inaturalist.org/observations/102981535</a> |
| 4186 | Bubulcus ibis | Cattle Egret | 2019/12/19 | 4 | 0 | 24.6666943 | 77.1464197  | <a href="https://www.inaturalist.org/observations/66196024">https://www.inaturalist.org/observations/66196024</a>   |
| 4187 | Bubulcus ibis | Cattle Egret | 2019/6/22  | 2 | 0 | 24.6679117 | 121.7608417 | <a href="https://www.inaturalist.org/observations/27410798">https://www.inaturalist.org/observations/27410798</a>   |
| 4188 | Bubulcus ibis | Cattle Egret | 2022/12/25 | 2 | 0 | 24.6686770 | 121.6330285 | <a href="https://www.inaturalist.org/observations/145156018">https://www.inaturalist.org/observations/145156018</a> |
| 4189 | Bubulcus ibis | Cattle Egret | 2020/10/2  | 2 | 0 | 24.6694135 | 121.7336199 | <a href="https://www.inaturalist.org/observations/61470851">https://www.inaturalist.org/observations/61470851</a>   |
| 4190 | Bubulcus ibis | Cattle Egret | 2020/10/2  | 2 | 0 | 24.6694135 | 121.7336199 | <a href="https://www.inaturalist.org/observations/61470863">https://www.inaturalist.org/observations/61470863</a>   |
| 4191 | Bubulcus ibis | Cattle Egret | 2021/10/30 | 1 | 0 | 24.6704302 | 121.8130198 | <a href="https://www.inaturalist.org/observations/103819775">https://www.inaturalist.org/observations/103819775</a> |
| 4192 | Bubulcus ibis | Cattle Egret | 2018/6/18  | 1 | 0 | 24.6732772 | 121.6719047 | <a href="https://www.inaturalist.org/observations/50844262">https://www.inaturalist.org/observations/50844262</a>   |
| 4193 | Bubulcus ibis | Cattle Egret | 2022/5/11  | 3 | 0 | 24.6735569 | 121.8168382 | <a href="https://www.inaturalist.org/observations/116525587">https://www.inaturalist.org/observations/116525587</a> |
| 4194 | Bubulcus ibis | Cattle Egret | 2021/2/7   | 1 | 0 | 24.6736550 | 121.8170017 | <a href="https://www.inaturalist.org/observations/69195263">https://www.inaturalist.org/observations/69195263</a>   |
| 4195 | Bubulcus ibis | Cattle Egret | 2020/9/7   | 1 | 0 | 24.6768680 | 121.7443059 | <a href="https://www.inaturalist.org/observations/58818933">https://www.inaturalist.org/observations/58818933</a>   |
| 4196 | Bubulcus ibis | Cattle Egret | 2017/6/26  | 2 | 0 | 24.6775439 | 121.7745553 | <a href="https://www.inaturalist.org/observations/17406936">https://www.inaturalist.org/observations/17406936</a>   |
| 4197 | Bubulcus ibis | Cattle Egret | 2020/9/2   | 1 | 0 | 24.6787317 | 121.7464288 | <a href="https://www.inaturalist.org/observations/58318412">https://www.inaturalist.org/observations/58318412</a>   |
| 4198 | Bubulcus ibis | Cattle Egret | 2021/6/11  | 1 | 0 | 24.6790577 | 121.7557202 | <a href="https://www.inaturalist.org/observations/83908149">https://www.inaturalist.org/observations/83908149</a>   |
| 4199 | Bubulcus ibis | Cattle Egret | 2021/6/21  | 1 | 0 | 24.6797703 | 121.7554860 | <a href="https://www.inaturalist.org/observations/84174497">https://www.inaturalist.org/observations/84174497</a>   |

|      |               |              |           |   |   |            |             |                                                                                                                     |
|------|---------------|--------------|-----------|---|---|------------|-------------|---------------------------------------------------------------------------------------------------------------------|
| 4200 | Bubulcus ibis | Cattle Egret | 2021/5/29 | 1 | 0 | 24.6801029 | 121.7556522 | <a href="https://www.inaturalist.org/observations/81846358">https://www.inaturalist.org/observations/81846358</a>   |
| 4201 | Bubulcus ibis | Cattle Egret | 2019/8/10 | 3 | 0 | 24.6813529 | 121.7535321 | <a href="https://www.inaturalist.org/observations/30522227">https://www.inaturalist.org/observations/30522227</a>   |
| 4202 | Bubulcus ibis | Cattle Egret | 2022/4/28 | 1 | 0 | 24.6815024 | 121.7627584 | <a href="https://www.inaturalist.org/observations/113195162">https://www.inaturalist.org/observations/113195162</a> |
| 4203 | Bubulcus ibis | Cattle Egret | 2019/4/22 | 2 | 0 | 24.6827423 | 121.7735229 | <a href="https://www.inaturalist.org/observations/23109615">https://www.inaturalist.org/observations/23109615</a>   |
| 4204 | Bubulcus ibis | Cattle Egret | 2021/8/13 | 1 | 0 | 24.6828222 | 121.7738528 | <a href="https://www.inaturalist.org/observations/93011739">https://www.inaturalist.org/observations/93011739</a>   |
| 4205 | Bubulcus ibis | Cattle Egret | 2022/3/19 | 4 | 0 | 24.6828740 | 121.7508760 | <a href="https://www.inaturalist.org/observations/109344912">https://www.inaturalist.org/observations/109344912</a> |
| 4206 | Bubulcus ibis | Cattle Egret | 2020/5/9  | 1 | 0 | 24.6828842 | 121.7524759 | <a href="https://www.inaturalist.org/observations/45322294">https://www.inaturalist.org/observations/45322294</a>   |
| 4207 | Bubulcus ibis | Cattle Egret | 2020/7/2  | 1 | 0 | 24.6829182 | 121.7531973 | <a href="https://www.inaturalist.org/observations/56794235">https://www.inaturalist.org/observations/56794235</a>   |
| 4208 | Bubulcus ibis | Cattle Egret | 2020/7/2  | 1 | 0 | 24.6829182 | 121.7531973 | <a href="https://www.inaturalist.org/observations/56794262">https://www.inaturalist.org/observations/56794262</a>   |
| 4209 | Bubulcus ibis | Cattle Egret | 2020/7/2  | 1 | 0 | 24.6829182 | 121.7531973 | <a href="https://www.inaturalist.org/observations/56794265">https://www.inaturalist.org/observations/56794265</a>   |
| 4210 | Bubulcus ibis | Cattle Egret | 2020/5/5  | 2 | 0 | 24.6832316 | 121.7530948 | <a href="https://www.inaturalist.org/observations/46459176">https://www.inaturalist.org/observations/46459176</a>   |
| 4211 | Bubulcus ibis | Cattle Egret | 2018/6/30 | 4 | 0 | 24.6833126 | 120.9328192 | <a href="https://www.inaturalist.org/observations/18858034">https://www.inaturalist.org/observations/18858034</a>   |
| 4212 | Bubulcus ibis | Cattle Egret | 2020/2/26 | 0 | 0 | 24.6840994 | 121.7557775 | <a href="https://www.inaturalist.org/observations/39524186">https://www.inaturalist.org/observations/39524186</a>   |
| 4213 | Bubulcus ibis | Cattle Egret | 2020/4/27 | 2 | 0 | 24.6842814 | 121.7723536 | <a href="https://www.inaturalist.org/observations/44236301">https://www.inaturalist.org/observations/44236301</a>   |
| 4214 | Bubulcus ibis | Cattle Egret | 2020/4/27 | 2 | 0 | 24.6842814 | 121.7723536 | <a href="https://www.inaturalist.org/observations/44236335">https://www.inaturalist.org/observations/44236335</a>   |
| 4215 | Bubulcus ibis | Cattle Egret | 2020/4/27 | 2 | 0 | 24.6842814 | 121.7723536 | <a href="https://www.inaturalist.org/observations/44236355">https://www.inaturalist.org/observations/44236355</a>   |
| 4216 | Bubulcus ibis | Cattle Egret | 2020/4/27 | 2 | 0 | 24.6842814 | 121.7723536 | <a href="https://www.inaturalist.org/observations/44236420">https://www.inaturalist.org/observations/44236420</a>   |
| 4217 | Bubulcus ibis | Cattle Egret | 2020/4/27 | 2 | 0 | 24.6842814 | 121.7723536 | <a href="https://www.inaturalist.org/observations/44236435">https://www.inaturalist.org/observations/44236435</a>   |
| 4218 | Bubulcus ibis | Cattle Egret | 2020/4/27 | 2 | 0 | 24.6842814 | 121.7723536 | <a href="https://www.inaturalist.org/observations/44236436">https://www.inaturalist.org/observations/44236436</a>   |
| 4219 | Bubulcus ibis | Cattle Egret | 2020/4/27 | 1 | 0 | 24.6842814 | 121.7723536 | <a href="https://www.inaturalist.org/observations/44236441">https://www.inaturalist.org/observations/44236441</a>   |
| 4220 | Bubulcus ibis | Cattle Egret | 2020/4/27 | 2 | 0 | 24.6842814 | 121.7723536 | <a href="https://www.inaturalist.org/observations/44236543">https://www.inaturalist.org/observations/44236543</a>   |
| 4221 | Bubulcus ibis | Cattle Egret | 2018/7/17 | 3 | 0 | 24.6853362 | 121.7739356 | <a href="https://www.inaturalist.org/observations/14456809">https://www.inaturalist.org/observations/14456809</a>   |
| 4222 | Bubulcus ibis | Cattle Egret | 2022/4/2  | 2 | 0 | 24.6856050 | 121.7536083 | <a href="https://www.inaturalist.org/observations/110148535">https://www.inaturalist.org/observations/110148535</a> |
| 4223 | Bubulcus ibis | Cattle Egret | 2022/8/4  | 1 | 0 | 24.6856066 | 121.7538959 | <a href="https://www.inaturalist.org/observations/134831667">https://www.inaturalist.org/observations/134831667</a> |
| 4224 | Bubulcus ibis | Cattle Egret | 2017/5/21 | 3 | 0 | 24.6918694 | 121.0111344 | <a href="https://www.inaturalist.org/observations/9255779">https://www.inaturalist.org/observations/9255779</a>     |

|      |                        |                      |            |   |   |            |             |                                                                                                                     |
|------|------------------------|----------------------|------------|---|---|------------|-------------|---------------------------------------------------------------------------------------------------------------------|
| 4225 | Bubulcus ibis          | Cattle Egret         | 2021/9/20  | 2 | 0 | 24.6940782 | 121.8221800 | <a href="https://www.inaturalist.org/observations/95525025">https://www.inaturalist.org/observations/95525025</a>   |
| 4226 | Bubulcus ibis          | Cattle Egret         | 2021/9/20  | 2 | 0 | 24.6940782 | 121.8221800 | <a href="https://www.inaturalist.org/observations/95525088">https://www.inaturalist.org/observations/95525088</a>   |
| 4227 | Bubulcus ibis          | Cattle Egret         | 2021/9/20  | 1 | 0 | 24.6940782 | 121.8221800 | <a href="https://www.inaturalist.org/observations/95525117">https://www.inaturalist.org/observations/95525117</a>   |
| 4228 | Bubulcus ibis          | Cattle Egret         | 2021/9/20  | 2 | 0 | 24.6940782 | 121.8221800 | <a href="https://www.inaturalist.org/observations/95525125">https://www.inaturalist.org/observations/95525125</a>   |
| 4229 | Bubulcus ibis          | Cattle Egret         | 2021/9/20  | 2 | 0 | 24.6940782 | 121.8221800 | <a href="https://www.inaturalist.org/observations/95525130">https://www.inaturalist.org/observations/95525130</a>   |
| 4230 | Bubulcus ibis          | Cattle Egret         | 2021/9/20  | 2 | 0 | 24.6940782 | 121.8221800 | <a href="https://www.inaturalist.org/observations/95525141">https://www.inaturalist.org/observations/95525141</a>   |
| 4231 | Bubulcus ibis          | Cattle Egret         | 2021/9/20  | 2 | 0 | 24.6940782 | 121.8221800 | <a href="https://www.inaturalist.org/observations/95525184">https://www.inaturalist.org/observations/95525184</a>   |
| 4232 | Bubulcus ibis          | Cattle Egret         | 2021/9/20  | 2 | 0 | 24.6940782 | 121.8221800 | <a href="https://www.inaturalist.org/observations/95525201">https://www.inaturalist.org/observations/95525201</a>   |
| 4233 | Bubulcus ibis          | Cattle Egret         | 2019/7/24  | 3 | 0 | 24.6960935 | 121.0996050 | <a href="https://www.inaturalist.org/observations/29623551">https://www.inaturalist.org/observations/29623551</a>   |
| 4234 | Bubulcus ibis          | Cattle Egret         | 2019/7/24  | 2 | 0 | 24.6963254 | 121.0995266 | <a href="https://www.inaturalist.org/observations/29622672">https://www.inaturalist.org/observations/29622672</a>   |
| 4235 | Bubulcus ibis          | Cattle Egret         | 2020/7/3   | 1 | 0 | 24.6969846 | 121.7636985 | <a href="https://www.inaturalist.org/observations/53371814">https://www.inaturalist.org/observations/53371814</a>   |
| 4236 | Bubulcus ibis          | Cattle Egret         | 2020/9/10  | 1 | 0 | 24.6986096 | 121.7627180 | <a href="https://www.inaturalist.org/observations/59114256">https://www.inaturalist.org/observations/59114256</a>   |
| 4237 | Bubulcus ibis          | Cattle Egret         | 2022/6/15  | 2 | 0 | 24.7021073 | 121.7377502 | <a href="https://www.inaturalist.org/observations/121893459">https://www.inaturalist.org/observations/121893459</a> |
| 4238 | Bubulcus ibis          | Cattle Egret         | 2022/6/15  | 1 | 0 | 24.7021073 | 121.7377502 | <a href="https://www.inaturalist.org/observations/121991252">https://www.inaturalist.org/observations/121991252</a> |
| 4239 | Bubulcus ibis          | Cattle Egret         | 2020/10/14 | 1 | 0 | 24.7036382 | 121.7553478 | <a href="https://www.inaturalist.org/observations/62697660">https://www.inaturalist.org/observations/62697660</a>   |
| 4240 | Bubulcus ibis          | Cattle Egret         | 2020/4/24  | 2 | 0 | 24.7043771 | 121.1574586 | <a href="https://www.inaturalist.org/observations/43223578">https://www.inaturalist.org/observations/43223578</a>   |
| 4241 | Bubulcus ibis          | Cattle Egret         | 2022/4/30  | 1 | 0 | 24.7044201 | 121.1553074 | <a href="https://www.inaturalist.org/observations/113800000">https://www.inaturalist.org/observations/113800000</a> |
| 4242 | Bubulcus ibis          | Cattle Egret         | 2022/5/1   | 1 | 0 | 24.7045882 | 121.1172828 | <a href="https://www.inaturalist.org/observations/114073713">https://www.inaturalist.org/observations/114073713</a> |
| 4243 | Bubulcus ibis          | Cattle Egret         | 2022/5/1   | 1 | 0 | 24.7047723 | 121.1169647 | <a href="https://www.inaturalist.org/observations/115127775">https://www.inaturalist.org/observations/115127775</a> |
| 4244 | Bubulcus ibis          | Cattle Egret         | 2020/10/7  | 1 | 0 | 24.7067950 | 121.7620910 | <a href="https://www.inaturalist.org/observations/62481381">https://www.inaturalist.org/observations/62481381</a>   |
| 4245 | Bubulcus ibis          | Cattle Egret         | 2020/4/22  | 1 | 0 | 24.7068963 | 121.1566573 | <a href="https://www.inaturalist.org/observations/44359385">https://www.inaturalist.org/observations/44359385</a>   |
| 4246 | Bubulcus<br>coromandus | ibis<br>Cattle Egret | 2022/5/21  | 2 | 0 | 24.7076629 | 121.8296195 | <a href="https://www.inaturalist.org/observations/118152554">https://www.inaturalist.org/observations/118152554</a> |
| 4247 | Bubulcus<br>coromandus | ibis<br>Cattle Egret | 2022/5/21  | 2 | 0 | 24.7076629 | 121.8296195 | <a href="https://www.inaturalist.org/observations/118152556">https://www.inaturalist.org/observations/118152556</a> |
| 4248 | Bubulcus ibis          | Cattle Egret         | 2020/6/27  | 1 | 0 | 24.7083633 | 121.7852550 | <a href="https://www.inaturalist.org/observations/53609346">https://www.inaturalist.org/observations/53609346</a>   |
| 4249 | Bubulcus ibis          | Cattle Egret         | 2020/4/25  | 2 | 0 | 24.7092411 | 121.7228444 | <a href="https://www.inaturalist.org/observations/43286767">https://www.inaturalist.org/observations/43286767</a>   |



|      |                     |                   |           |   |   |            |             |                                                                                                                     |
|------|---------------------|-------------------|-----------|---|---|------------|-------------|---------------------------------------------------------------------------------------------------------------------|
| 4250 | Bubulcus ibis       | Cattle Egret      | 2020/4/25 | 1 | 0 | 24.7092411 | 121.7228444 | <a href="https://www.inaturalist.org/observations/43286812">https://www.inaturalist.org/observations/43286812</a>   |
| 4251 | Bubulcus ibis       | Cattle Egret      | 2020/4/25 | 2 | 0 | 24.7092411 | 121.7228444 | <a href="https://www.inaturalist.org/observations/43286841">https://www.inaturalist.org/observations/43286841</a>   |
| 4252 | Bubulcus ibis       | Cattle Egret      | 2021/5/1  | 1 | 0 | 24.7102779 | 121.7612015 | <a href="https://www.inaturalist.org/observations/77632096">https://www.inaturalist.org/observations/77632096</a>   |
| 4253 | Bubulcus ibis       | Cattle Egret      | 2022/7/5  | 1 | 0 | 24.7116444 | 121.0008156 | <a href="https://www.inaturalist.org/observations/124741676">https://www.inaturalist.org/observations/124741676</a> |
| 4254 | Bubulcus coromandus | ibis Cattle Egret | 2021/3/17 | 1 | 0 | 24.7138583 | 121.6887500 | <a href="https://www.inaturalist.org/observations/77715889">https://www.inaturalist.org/observations/77715889</a>   |
| 4255 | Bubulcus ibis       | Cattle Egret      | 2022/8/10 | 1 | 0 | 24.7173669 | 121.8152529 | <a href="https://www.inaturalist.org/observations/143886964">https://www.inaturalist.org/observations/143886964</a> |
| 4256 | Bubulcus ibis       | Cattle Egret      | 2021/6/14 | 2 | 0 | 24.7176056 | 121.1016389 | <a href="https://www.inaturalist.org/observations/83630437">https://www.inaturalist.org/observations/83630437</a>   |
| 4257 | Bubulcus ibis       | Cattle Egret      | 2022/10/5 | 1 | 0 | 24.7181148 | 121.8154919 | <a href="https://www.inaturalist.org/observations/143887019">https://www.inaturalist.org/observations/143887019</a> |
| 4258 | Bubulcus ibis       | Cattle Egret      | 2020/4/22 | 2 | 0 | 24.7185273 | 121.1147496 | <a href="https://www.inaturalist.org/observations/42827047">https://www.inaturalist.org/observations/42827047</a>   |
| 4259 | Bubulcus ibis       | Cattle Egret      | 2022/8/24 | 1 | 0 | 24.7190472 | 121.8157266 | <a href="https://www.inaturalist.org/observations/143877952">https://www.inaturalist.org/observations/143877952</a> |
| 4260 | Bubulcus ibis       | Cattle Egret      | 2022/8/10 | 1 | 0 | 24.7194791 | 121.8159126 | <a href="https://www.inaturalist.org/observations/143877942">https://www.inaturalist.org/observations/143877942</a> |
| 4261 | Bubulcus ibis       | Cattle Egret      | 2020/3/31 | 1 | 0 | 24.7202024 | 121.7144297 | <a href="https://www.inaturalist.org/observations/41608199">https://www.inaturalist.org/observations/41608199</a>   |
| 4262 | Bubulcus ibis       | Cattle Egret      | 2019/1/21 | 2 | 0 | 24.7205496 | 121.8050125 | <a href="https://www.inaturalist.org/observations/19869648">https://www.inaturalist.org/observations/19869648</a>   |
| 4263 | Bubulcus ibis       | Cattle Egret      | 2022/8/22 | 2 | 0 | 24.7207651 | 121.8078730 | <a href="https://www.inaturalist.org/observations/141599271">https://www.inaturalist.org/observations/141599271</a> |
| 4264 | Bubulcus ibis       | Cattle Egret      | 2021/8/26 | 1 | 0 | 24.7208872 | 121.7105954 | <a href="https://www.inaturalist.org/observations/97226677">https://www.inaturalist.org/observations/97226677</a>   |
| 4265 | Bubulcus ibis       | Cattle Egret      | 2020/6/1  | 1 | 0 | 24.7209624 | 121.7351283 | <a href="https://www.inaturalist.org/observations/48903818">https://www.inaturalist.org/observations/48903818</a>   |
| 4266 | Bubulcus ibis       | Cattle Egret      | 2020/4/25 | 3 | 0 | 24.7220146 | 121.6872714 | <a href="https://www.inaturalist.org/observations/43306273">https://www.inaturalist.org/observations/43306273</a>   |
| 4267 | Bubulcus ibis       | Cattle Egret      | 2020/4/25 | 3 | 0 | 24.7220146 | 121.6872714 | <a href="https://www.inaturalist.org/observations/43306275">https://www.inaturalist.org/observations/43306275</a>   |
| 4268 | Bubulcus ibis       | Cattle Egret      | 2020/4/25 | 3 | 0 | 24.7220146 | 121.6872714 | <a href="https://www.inaturalist.org/observations/43306277">https://www.inaturalist.org/observations/43306277</a>   |
| 4269 | Bubulcus ibis       | Cattle Egret      | 2020/4/25 | 3 | 0 | 24.7220146 | 121.6872714 | <a href="https://www.inaturalist.org/observations/43306298">https://www.inaturalist.org/observations/43306298</a>   |
| 4270 | Bubulcus ibis       | Cattle Egret      | 2022/9/5  | 2 | 0 | 24.7220483 | 121.8127031 | <a href="https://www.inaturalist.org/observations/141599577">https://www.inaturalist.org/observations/141599577</a> |
| 4271 | Bubulcus ibis       | Cattle Egret      | 2022/9/19 | 2 | 0 | 24.7221971 | 121.8126726 | <a href="https://www.inaturalist.org/observations/141599996">https://www.inaturalist.org/observations/141599996</a> |
| 4272 | Bubulcus ibis       | Cattle Egret      | 2022/8/9  | 2 | 0 | 24.7223078 | 121.8100134 | <a href="https://www.inaturalist.org/observations/141599076">https://www.inaturalist.org/observations/141599076</a> |
| 4273 | Bubulcus ibis       | Cattle Egret      | 2022/11/3 | 2 | 0 | 24.7224261 | 121.8081719 | <a href="https://www.inaturalist.org/observations/141695615">https://www.inaturalist.org/observations/141695615</a> |
| 4274 | Bubulcus ibis       | Cattle Egret      | 2022/8/7  | 0 | 0 | 24.7227130 | 121.8118950 | <a href="https://www.inaturalist.org/observations/143983667">https://www.inaturalist.org/observations/143983667</a> |

|      |               |              |            |   |   |            |             |                                                                                                                     |
|------|---------------|--------------|------------|---|---|------------|-------------|---------------------------------------------------------------------------------------------------------------------|
| 4275 | Bubulcus ibis | Cattle Egret | 2022/9/18  | 2 | 0 | 24.7227130 | 121.8118950 | <a href="https://www.inaturalist.org/observations/143984310">https://www.inaturalist.org/observations/143984310</a> |
| 4276 | Bubulcus ibis | Cattle Egret | 2022/8/29  | 2 | 0 | 24.7228739 | 121.8094982 | <a href="https://www.inaturalist.org/observations/141599362">https://www.inaturalist.org/observations/141599362</a> |
| 4277 | Bubulcus ibis | Cattle Egret | 2022/8/27  | 2 | 0 | 24.7232880 | 121.8107820 | <a href="https://www.inaturalist.org/observations/144533000">https://www.inaturalist.org/observations/144533000</a> |
| 4278 | Bubulcus ibis | Cattle Egret | 2022/9/3   | 2 | 0 | 24.7232880 | 121.8107820 | <a href="https://www.inaturalist.org/observations/144533550">https://www.inaturalist.org/observations/144533550</a> |
| 4279 | Bubulcus ibis | Cattle Egret | 2020/9/5   | 1 | 0 | 24.7240999 | 121.8205968 | <a href="https://www.inaturalist.org/observations/60295708">https://www.inaturalist.org/observations/60295708</a>   |
| 4280 | Bubulcus ibis | Cattle Egret | 2021/2/4   | 2 | 0 | 24.7243301 | 121.6935466 | <a href="https://www.inaturalist.org/observations/69077780">https://www.inaturalist.org/observations/69077780</a>   |
| 4281 | Bubulcus ibis | Cattle Egret | 2022/8/8   | 2 | 0 | 24.7254450 | 121.8124710 | <a href="https://www.inaturalist.org/observations/144590355">https://www.inaturalist.org/observations/144590355</a> |
| 4282 | Bubulcus ibis | Cattle Egret | 2022/6/4   | 1 | 0 | 24.7255233 | 121.7629500 | <a href="https://www.inaturalist.org/observations/120146744">https://www.inaturalist.org/observations/120146744</a> |
| 4283 | Bubulcus ibis | Cattle Egret | 2022/5/1   | 1 | 0 | 24.7268791 | 121.7451773 | <a href="https://www.inaturalist.org/observations/114167200">https://www.inaturalist.org/observations/114167200</a> |
| 4284 | Bubulcus ibis | Cattle Egret | 2022/5/1   | 2 | 0 | 24.7268791 | 121.7451773 | <a href="https://www.inaturalist.org/observations/114167214">https://www.inaturalist.org/observations/114167214</a> |
| 4285 | Bubulcus ibis | Cattle Egret | 2022/5/1   | 1 | 0 | 24.7268791 | 121.7451773 | <a href="https://www.inaturalist.org/observations/114167219">https://www.inaturalist.org/observations/114167219</a> |
| 4286 | Bubulcus ibis | Cattle Egret | 2022/11/13 | 2 | 0 | 24.7276752 | 121.7565281 | <a href="https://www.inaturalist.org/observations/141879206">https://www.inaturalist.org/observations/141879206</a> |
| 4287 | Bubulcus ibis | Cattle Egret | 2021/5/29  | 1 | 0 | 24.7276883 | 121.7636850 | <a href="https://www.inaturalist.org/observations/80859893">https://www.inaturalist.org/observations/80859893</a>   |
| 4288 | Bubulcus ibis | Cattle Egret | 2022/8/29  | 1 | 0 | 24.7279150 | 121.8043950 | <a href="https://www.inaturalist.org/observations/145183836">https://www.inaturalist.org/observations/145183836</a> |
| 4289 | Bubulcus ibis | Cattle Egret | 2020/4/25  | 1 | 0 | 24.7288804 | 121.7447866 | <a href="https://www.inaturalist.org/observations/43285252">https://www.inaturalist.org/observations/43285252</a>   |
| 4290 | Bubulcus ibis | Cattle Egret | 2022/10/4  | 2 | 0 | 24.7289650 | 121.8096300 | <a href="https://www.inaturalist.org/observations/144465535">https://www.inaturalist.org/observations/144465535</a> |
| 4291 | Bubulcus ibis | Cattle Egret | 2022/9/10  | 0 | 0 | 24.7292740 | 121.8034530 | <a href="https://www.inaturalist.org/observations/145241801">https://www.inaturalist.org/observations/145241801</a> |
| 4292 | Bubulcus ibis | Cattle Egret | 2022/9/10  | 0 | 0 | 24.7292740 | 121.8034530 | <a href="https://www.inaturalist.org/observations/145241806">https://www.inaturalist.org/observations/145241806</a> |
| 4293 | Bubulcus ibis | Cattle Egret | 2022/9/19  | 3 | 0 | 24.7301425 | 121.7447745 | <a href="https://www.inaturalist.org/observations/139720355">https://www.inaturalist.org/observations/139720355</a> |
| 4294 | Bubulcus ibis | Cattle Egret | 2022/9/19  | 3 | 0 | 24.7301425 | 121.7447745 | <a href="https://www.inaturalist.org/observations/139720389">https://www.inaturalist.org/observations/139720389</a> |
| 4295 | Bubulcus ibis | Cattle Egret | 2022/9/19  | 3 | 0 | 24.7301425 | 121.7447745 | <a href="https://www.inaturalist.org/observations/139720404">https://www.inaturalist.org/observations/139720404</a> |
| 4296 | Bubulcus ibis | Cattle Egret | 2022/9/19  | 3 | 0 | 24.7301425 | 121.7447745 | <a href="https://www.inaturalist.org/observations/139720475">https://www.inaturalist.org/observations/139720475</a> |
| 4297 | Bubulcus ibis | Cattle Egret | 2022/11/25 | 1 | 0 | 24.7301425 | 121.7447745 | <a href="https://www.inaturalist.org/observations/142977680">https://www.inaturalist.org/observations/142977680</a> |
| 4298 | Bubulcus ibis | Cattle Egret | 2022/10/14 | 1 | 0 | 24.7303089 | 121.7446929 | <a href="https://www.inaturalist.org/observations/139703487">https://www.inaturalist.org/observations/139703487</a> |
| 4299 | Bubulcus ibis | Cattle Egret | 2022/10/14 | 2 | 0 | 24.7303089 | 121.7446929 | <a href="https://www.inaturalist.org/observations/139703530">https://www.inaturalist.org/observations/139703530</a> |

|      |                        |                      |            |   |   |            |             |                                                                                                                     |
|------|------------------------|----------------------|------------|---|---|------------|-------------|---------------------------------------------------------------------------------------------------------------------|
| 4300 | Bubulcus ibis          | Cattle Egret         | 2022/8/8   | 2 | 0 | 24.7305430 | 121.8091720 | <a href="https://www.inaturalist.org/observations/144344145">https://www.inaturalist.org/observations/144344145</a> |
| 4301 | Bubulcus ibis          | Cattle Egret         | 2022/9/11  | 0 | 0 | 24.7314359 | 121.8044785 | <a href="https://www.inaturalist.org/observations/134562294">https://www.inaturalist.org/observations/134562294</a> |
| 4302 | Bubulcus ibis          | Cattle Egret         | 2020/4/19  | 1 | 0 | 24.7315067 | 121.7467983 | <a href="https://www.inaturalist.org/observations/42562763">https://www.inaturalist.org/observations/42562763</a>   |
| 4303 | Bubulcus ibis          | Cattle Egret         | 2022/10/22 | 1 | 0 | 24.7315830 | 121.8087620 | <a href="https://www.inaturalist.org/observations/144358064">https://www.inaturalist.org/observations/144358064</a> |
| 4304 | Bubulcus ibis          | Cattle Egret         | 2022/8/27  | 2 | 0 | 24.7321480 | 121.8092070 | <a href="https://www.inaturalist.org/observations/144342928">https://www.inaturalist.org/observations/144342928</a> |
| 4305 | Bubulcus ibis          | Cattle Egret         | 2022/5/1   | 3 | 0 | 24.7326067 | 121.7612600 | <a href="https://www.inaturalist.org/observations/116017812">https://www.inaturalist.org/observations/116017812</a> |
| 4306 | Bubulcus ibis          | Cattle Egret         | 2022/11/11 | 1 | 0 | 24.7356906 | 121.7313630 | <a href="https://www.inaturalist.org/observations/141771322">https://www.inaturalist.org/observations/141771322</a> |
| 4307 | Bubulcus ibis          | Cattle Egret         | 2022/11/11 | 1 | 0 | 24.7356906 | 121.7313630 | <a href="https://www.inaturalist.org/observations/141771324">https://www.inaturalist.org/observations/141771324</a> |
| 4308 | Bubulcus ibis          | Cattle Egret         | 2021/1/1   | 2 | 0 | 24.7358688 | 121.7403967 | <a href="https://www.inaturalist.org/observations/67390279">https://www.inaturalist.org/observations/67390279</a>   |
| 4309 | Bubulcus ibis          | Cattle Egret         | 2021/6/13  | 4 | 0 | 24.7375469 | 121.7387748 | <a href="https://www.inaturalist.org/observations/83590890">https://www.inaturalist.org/observations/83590890</a>   |
| 4310 | Bubulcus ibis          | Cattle Egret         | 2021/6/13  | 4 | 0 | 24.7375469 | 121.7387748 | <a href="https://www.inaturalist.org/observations/83590891">https://www.inaturalist.org/observations/83590891</a>   |
| 4311 | Bubulcus ibis          | Cattle Egret         | 2022/5/1   | 1 | 0 | 24.7381293 | 121.6625320 | <a href="https://www.inaturalist.org/observations/115109092">https://www.inaturalist.org/observations/115109092</a> |
| 4312 | Bubulcus ibis          | Cattle Egret         | 2022/9/17  | 2 | 0 | 24.7415130 | 121.8110750 | <a href="https://www.inaturalist.org/observations/140851982">https://www.inaturalist.org/observations/140851982</a> |
| 4313 | Bubulcus ibis          | Cattle Egret         | 2020/2/18  | 1 | 0 | 24.7423242 | 121.7520630 | <a href="https://www.inaturalist.org/observations/58948189">https://www.inaturalist.org/observations/58948189</a>   |
| 4314 | Bubulcus ibis          | Cattle Egret         | 2022/10/14 | 1 | 0 | 24.7426501 | 121.7366867 | <a href="https://www.inaturalist.org/observations/139606252">https://www.inaturalist.org/observations/139606252</a> |
| 4315 | Bubulcus ibis          | Cattle Egret         | 2022/1/26  | 2 | 0 | 24.7427843 | 121.7376526 | <a href="https://www.inaturalist.org/observations/105752898">https://www.inaturalist.org/observations/105752898</a> |
| 4316 | Bubulcus ibis          | Cattle Egret         | 2021/7/26  | 2 | 0 | 24.7431958 | 121.7351417 | <a href="https://www.inaturalist.org/observations/89575356">https://www.inaturalist.org/observations/89575356</a>   |
| 4317 | Bubulcus ibis          | Cattle Egret         | 2022/10/14 | 2 | 0 | 24.7434701 | 121.7340994 | <a href="https://www.inaturalist.org/observations/139606992">https://www.inaturalist.org/observations/139606992</a> |
| 4318 | Bubulcus ibis          | Cattle Egret         | 2022/9/10  | 2 | 0 | 24.7437540 | 121.6970210 | <a href="https://www.inaturalist.org/observations/134455412">https://www.inaturalist.org/observations/134455412</a> |
| 4319 | Bubulcus<br>coromandus | ibis<br>Cattle Egret | 2021/1/24  | 1 | 0 | 24.7437857 | 121.7371475 | <a href="https://www.inaturalist.org/observations/68758447">https://www.inaturalist.org/observations/68758447</a>   |
| 4320 | Bubulcus ibis          | Cattle Egret         | 2021/7/23  | 2 | 0 | 24.7442204 | 121.7396494 | <a href="https://www.inaturalist.org/observations/89465583">https://www.inaturalist.org/observations/89465583</a>   |
| 4321 | Bubulcus ibis          | Cattle Egret         | 2021/7/24  | 1 | 0 | 24.7443373 | 121.7395100 | <a href="https://www.inaturalist.org/observations/89466320">https://www.inaturalist.org/observations/89466320</a>   |
| 4322 | Bubulcus ibis          | Cattle Egret         | 2021/7/24  | 2 | 0 | 24.7443373 | 121.7395100 | <a href="https://www.inaturalist.org/observations/89466334">https://www.inaturalist.org/observations/89466334</a>   |
| 4323 | Bubulcus ibis          | Cattle Egret         | 2021/12/7  | 2 | 0 | 24.7449240 | 121.7207109 | <a href="https://www.inaturalist.org/observations/104077180">https://www.inaturalist.org/observations/104077180</a> |
| 4324 | Bubulcus ibis          | Cattle Egret         | 2021/12/12 | 2 | 0 | 24.7449240 | 121.7207109 | <a href="https://www.inaturalist.org/observations/104077445">https://www.inaturalist.org/observations/104077445</a> |

|      |                     |      |              |            |   |   |            |             |                                                                                                                     |
|------|---------------------|------|--------------|------------|---|---|------------|-------------|---------------------------------------------------------------------------------------------------------------------|
| 4325 | Bubulcus coromandus | ibis | Cattle Egret | 2021/6/28  | 1 | 0 | 24.7452448 | 121.7325735 | <a href="https://www.inaturalist.org/observations/87523949">https://www.inaturalist.org/observations/87523949</a>   |
| 4326 | Bubulcus ibis       |      | Cattle Egret | 2022/6/14  | 1 | 0 | 24.7459275 | 121.7453209 | <a href="https://www.inaturalist.org/observations/121704901">https://www.inaturalist.org/observations/121704901</a> |
| 4327 | Bubulcus ibis       |      | Cattle Egret | 2020/5/10  | 1 | 0 | 24.7462462 | 121.7499538 | <a href="https://www.inaturalist.org/observations/46064296">https://www.inaturalist.org/observations/46064296</a>   |
| 4328 | Bubulcus ibis       |      | Cattle Egret | 2020/5/10  | 1 | 0 | 24.7462462 | 121.7499538 | <a href="https://www.inaturalist.org/observations/46064299">https://www.inaturalist.org/observations/46064299</a>   |
| 4329 | Bubulcus ibis       |      | Cattle Egret | 2021/5/29  | 2 | 0 | 24.7475278 | 121.0870000 | <a href="https://www.inaturalist.org/observations/80680493">https://www.inaturalist.org/observations/80680493</a>   |
| 4330 | Bubulcus ibis       |      | Cattle Egret | 2019/9/14  | 1 | 0 | 24.7493605 | 121.6386489 | <a href="https://www.inaturalist.org/observations/32753056">https://www.inaturalist.org/observations/32753056</a>   |
| 4331 | Bubulcus ibis       |      | Cattle Egret | 2019/9/14  | 4 | 0 | 24.7493605 | 121.6386489 | <a href="https://www.inaturalist.org/observations/32753058">https://www.inaturalist.org/observations/32753058</a>   |
| 4332 | Bubulcus ibis       |      | Cattle Egret | 2022/7/4   | 4 | 0 | 24.7507701 | 84.3713374  | <a href="https://www.inaturalist.org/observations/126072104">https://www.inaturalist.org/observations/126072104</a> |
| 4333 | Bubulcus ibis       |      | Cattle Egret | 2019/4/13  | 3 | 0 | 24.7510579 | 121.7217589 | <a href="https://www.inaturalist.org/observations/22505627">https://www.inaturalist.org/observations/22505627</a>   |
| 4334 | Bubulcus ibis       |      | Cattle Egret | 2019/10/13 | 2 | 0 | 24.7530067 | 121.6357350 | <a href="https://www.inaturalist.org/observations/34292943">https://www.inaturalist.org/observations/34292943</a>   |
| 4335 | Bubulcus ibis       |      | Cattle Egret | 2019/10/13 | 2 | 0 | 24.7530083 | 121.6357367 | <a href="https://www.inaturalist.org/observations/34292941">https://www.inaturalist.org/observations/34292941</a>   |
| 4336 | Bubulcus ibis       |      | Cattle Egret | 2019/10/13 | 2 | 0 | 24.7531283 | 121.6354600 | <a href="https://www.inaturalist.org/observations/34292937">https://www.inaturalist.org/observations/34292937</a>   |
| 4337 | Bubulcus ibis       |      | Cattle Egret | 2019/10/13 | 2 | 0 | 24.7531533 | 121.6355900 | <a href="https://www.inaturalist.org/observations/34292939">https://www.inaturalist.org/observations/34292939</a>   |
| 4338 | Bubulcus ibis       |      | Cattle Egret | 2019/10/13 | 2 | 0 | 24.7531650 | 121.6356183 | <a href="https://www.inaturalist.org/observations/34292940">https://www.inaturalist.org/observations/34292940</a>   |
| 4339 | Bubulcus ibis       |      | Cattle Egret | 2021/2/18  | 1 | 0 | 24.7538940 | 121.6357550 | <a href="https://www.inaturalist.org/observations/69862343">https://www.inaturalist.org/observations/69862343</a>   |
| 4340 | Bubulcus ibis       |      | Cattle Egret | 2022/2/26  | 2 | 0 | 24.7545174 | 121.7754512 | <a href="https://www.inaturalist.org/observations/108792015">https://www.inaturalist.org/observations/108792015</a> |
| 4341 | Bubulcus ibis       |      | Cattle Egret | 2022/1/26  | 2 | 0 | 24.7562125 | 121.6488014 | <a href="https://www.inaturalist.org/observations/105745200">https://www.inaturalist.org/observations/105745200</a> |
| 4342 | Bubulcus ibis       |      | Cattle Egret | 2020/4/27  | 1 | 0 | 24.7581248 | 121.2088363 | <a href="https://www.inaturalist.org/observations/43800743">https://www.inaturalist.org/observations/43800743</a>   |
| 4343 | Bubulcus ibis       |      | Cattle Egret | 2021/8/16  | 1 | 0 | 24.7623634 | 121.0560201 | <a href="https://www.inaturalist.org/observations/91383453">https://www.inaturalist.org/observations/91383453</a>   |
| 4344 | Bubulcus ibis       |      | Cattle Egret | 2021/8/16  | 2 | 0 | 24.7624269 | 121.0559546 | <a href="https://www.inaturalist.org/observations/91379719">https://www.inaturalist.org/observations/91379719</a>   |
| 4345 | Bubulcus ibis       |      | Cattle Egret | 2021/1/30  | 1 | 0 | 24.7625077 | 121.7502886 | <a href="https://www.inaturalist.org/observations/69041417">https://www.inaturalist.org/observations/69041417</a>   |
| 4346 | Bubulcus ibis       |      | Cattle Egret | 2022/9/13  | 1 | 0 | 24.7630000 | 121.7505717 | <a href="https://www.inaturalist.org/observations/134835192">https://www.inaturalist.org/observations/134835192</a> |
| 4347 | Bubulcus ibis       |      | Cattle Egret | 2020/4/27  | 1 | 0 | 24.7672222 | 121.0255556 | <a href="https://www.inaturalist.org/observations/43848274">https://www.inaturalist.org/observations/43848274</a>   |
| 4348 | Bubulcus ibis       |      | Cattle Egret | 2022/10/25 | 3 | 0 | 24.7690246 | 121.6055112 | <a href="https://www.inaturalist.org/observations/139938811">https://www.inaturalist.org/observations/139938811</a> |
| 4349 | Bubulcus ibis       |      | Cattle Egret | 2021/8/7   | 2 | 0 | 24.7695690 | 121.7993168 | <a href="https://www.inaturalist.org/observations/137483639">https://www.inaturalist.org/observations/137483639</a> |

|      |               |              |           |   |   |            |             |                                                                                                                     |
|------|---------------|--------------|-----------|---|---|------------|-------------|---------------------------------------------------------------------------------------------------------------------|
| 4350 | Bubulcus ibis | Cattle Egret | 2021/8/7  | 3 | 0 | 24.7695690 | 121.7993168 | <a href="https://www.inaturalist.org/observations/137483641">https://www.inaturalist.org/observations/137483641</a> |
| 4351 | Bubulcus ibis | Cattle Egret | 2021/9/1  | 2 | 0 | 24.7695690 | 121.7993168 | <a href="https://www.inaturalist.org/observations/137608033">https://www.inaturalist.org/observations/137608033</a> |
| 4352 | Bubulcus ibis | Cattle Egret | 2021/9/29 | 2 | 0 | 24.7695690 | 121.7993168 | <a href="https://www.inaturalist.org/observations/137609355">https://www.inaturalist.org/observations/137609355</a> |
| 4353 | Bubulcus ibis | Cattle Egret | 2021/9/29 | 2 | 0 | 24.7695690 | 121.7993168 | <a href="https://www.inaturalist.org/observations/137609356">https://www.inaturalist.org/observations/137609356</a> |
| 4354 | Bubulcus ibis | Cattle Egret | 2021/9/29 | 2 | 0 | 24.7695690 | 121.7993168 | <a href="https://www.inaturalist.org/observations/137609357">https://www.inaturalist.org/observations/137609357</a> |
| 4355 | Bubulcus ibis | Cattle Egret | 2021/9/29 | 2 | 0 | 24.7695690 | 121.7993168 | <a href="https://www.inaturalist.org/observations/137609358">https://www.inaturalist.org/observations/137609358</a> |
| 4356 | Bubulcus ibis | Cattle Egret | 2020/5/2  | 2 | 0 | 24.7707520 | 121.0250341 | <a href="https://www.inaturalist.org/observations/44557029">https://www.inaturalist.org/observations/44557029</a>   |
| 4357 | Bubulcus ibis | Cattle Egret | 2022/1/30 | 1 | 0 | 24.7722964 | 121.7777827 | <a href="https://www.inaturalist.org/observations/110237360">https://www.inaturalist.org/observations/110237360</a> |
| 4358 | Bubulcus ibis | Cattle Egret | 2020/5/12 | 1 | 0 | 24.7731693 | 121.0460689 | <a href="https://www.inaturalist.org/observations/46195025">https://www.inaturalist.org/observations/46195025</a>   |
| 4359 | Bubulcus ibis | Cattle Egret | 2022/5/22 | 2 | 0 | 24.7798208 | 121.7174390 | <a href="https://www.inaturalist.org/observations/118171582">https://www.inaturalist.org/observations/118171582</a> |
| 4360 | Bubulcus ibis | Cattle Egret | 2022/5/22 | 2 | 0 | 24.7798208 | 121.7174390 | <a href="https://www.inaturalist.org/observations/118171583">https://www.inaturalist.org/observations/118171583</a> |
| 4361 | Bubulcus ibis | Cattle Egret | 2022/5/22 | 2 | 0 | 24.7798208 | 121.7174390 | <a href="https://www.inaturalist.org/observations/118171584">https://www.inaturalist.org/observations/118171584</a> |
| 4362 | Bubulcus ibis | Cattle Egret | 2022/5/22 | 2 | 0 | 24.7798208 | 121.7174390 | <a href="https://www.inaturalist.org/observations/118171588">https://www.inaturalist.org/observations/118171588</a> |
| 4363 | Bubulcus ibis | Cattle Egret | 2020/7/1  | 2 | 0 | 24.7843201 | 121.0001280 | <a href="https://www.inaturalist.org/observations/51557369">https://www.inaturalist.org/observations/51557369</a>   |
| 4364 | Bubulcus ibis | Cattle Egret | 2019/7/26 | 3 | 0 | 24.7848148 | 120.9945450 | <a href="https://www.inaturalist.org/observations/29554727">https://www.inaturalist.org/observations/29554727</a>   |
| 4365 | Bubulcus ibis | Cattle Egret | 2022/4/26 | 1 | 0 | 24.7864682 | 120.9140893 | <a href="https://www.inaturalist.org/observations/113054134">https://www.inaturalist.org/observations/113054134</a> |
| 4366 | Bubulcus ibis | Cattle Egret | 2022/9/25 | 2 | 0 | 24.7873383 | 120.9840917 | <a href="https://www.inaturalist.org/observations/136390730">https://www.inaturalist.org/observations/136390730</a> |
| 4367 | Bubulcus ibis | Cattle Egret | 2021/5/12 | 1 | 0 | 24.7892056 | 121.0349808 | <a href="https://www.inaturalist.org/observations/78441030">https://www.inaturalist.org/observations/78441030</a>   |
| 4368 | Bubulcus ibis | Cattle Egret | 2020/6/7  | 1 | 0 | 24.7900290 | 120.9905460 | <a href="https://www.inaturalist.org/observations/48729724">https://www.inaturalist.org/observations/48729724</a>   |
| 4369 | Bubulcus ibis | Cattle Egret | 2022/7/3  | 1 | 0 | 24.7908950 | 120.9868083 | <a href="https://www.inaturalist.org/observations/124519095">https://www.inaturalist.org/observations/124519095</a> |
| 4370 | Bubulcus ibis | Cattle Egret | 2022/6/20 | 1 | 0 | 24.7909817 | 120.9877770 | <a href="https://www.inaturalist.org/observations/124724144">https://www.inaturalist.org/observations/124724144</a> |
| 4371 | Bubulcus ibis | Cattle Egret | 2021/5/8  | 3 | 0 | 24.7910383 | 120.9866417 | <a href="https://www.inaturalist.org/observations/77856321">https://www.inaturalist.org/observations/77856321</a>   |
| 4372 | Bubulcus ibis | Cattle Egret | 2021/5/8  | 2 | 0 | 24.7910550 | 120.9866633 | <a href="https://www.inaturalist.org/observations/77856304">https://www.inaturalist.org/observations/77856304</a>   |
| 4373 | Bubulcus ibis | Cattle Egret | 2021/6/20 | 1 | 0 | 24.7911494 | 120.9962118 | <a href="https://www.inaturalist.org/observations/83758118">https://www.inaturalist.org/observations/83758118</a>   |
| 4374 | Bubulcus ibis | Cattle Egret | 2022/5/22 | 2 | 0 | 24.7911879 | 121.7193978 | <a href="https://www.inaturalist.org/observations/118164829">https://www.inaturalist.org/observations/118164829</a> |

|      |                        |      |              |            |   |   |            |             |                                                                                                                     |
|------|------------------------|------|--------------|------------|---|---|------------|-------------|---------------------------------------------------------------------------------------------------------------------|
| 4375 | Bubulcus<br>coromandus | ibis | Cattle Egret | 2022/5/22  | 2 | 0 | 24.7911879 | 121.7193978 | <a href="https://www.inaturalist.org/observations/118164858">https://www.inaturalist.org/observations/118164858</a> |
| 4376 | Bubulcus<br>coromandus | ibis | Cattle Egret | 2022/5/22  | 2 | 0 | 24.7911879 | 121.7193978 | <a href="https://www.inaturalist.org/observations/118164859">https://www.inaturalist.org/observations/118164859</a> |
| 4377 | Bubulcus<br>coromandus | ibis | Cattle Egret | 2022/5/22  | 2 | 0 | 24.7911879 | 121.7193978 | <a href="https://www.inaturalist.org/observations/118164860">https://www.inaturalist.org/observations/118164860</a> |
| 4378 | Bubulcus ibis          |      | Cattle Egret | 2021/6/20  | 1 | 0 | 24.7911964 | 120.9962511 | <a href="https://www.inaturalist.org/observations/83758538">https://www.inaturalist.org/observations/83758538</a>   |
| 4379 | Bubulcus ibis          |      | Cattle Egret | 2021/6/20  | 1 | 0 | 24.7913900 | 120.9961240 | <a href="https://www.inaturalist.org/observations/83758438">https://www.inaturalist.org/observations/83758438</a>   |
| 4380 | Bubulcus ibis          |      | Cattle Egret | 2022/5/17  | 1 | 0 | 24.7915234 | 120.9963087 | <a href="https://www.inaturalist.org/observations/117428525">https://www.inaturalist.org/observations/117428525</a> |
| 4381 | Bubulcus ibis          |      | Cattle Egret | 2022/5/21  | 1 | 0 | 24.7915724 | 120.9962129 | <a href="https://www.inaturalist.org/observations/117974265">https://www.inaturalist.org/observations/117974265</a> |
| 4382 | Bubulcus ibis          |      | Cattle Egret | 2022/3/29  | 2 | 0 | 24.7918700 | 120.9919133 | <a href="https://www.inaturalist.org/observations/111416930">https://www.inaturalist.org/observations/111416930</a> |
| 4383 | Bubulcus ibis          |      | Cattle Egret | 2021/6/21  | 1 | 0 | 24.7921486 | 120.9920554 | <a href="https://www.inaturalist.org/observations/83946828">https://www.inaturalist.org/observations/83946828</a>   |
| 4384 | Bubulcus ibis          |      | Cattle Egret | 2020/5/29  | 1 | 0 | 24.7923023 | 120.9921472 | <a href="https://www.inaturalist.org/observations/47686392">https://www.inaturalist.org/observations/47686392</a>   |
| 4385 | Bubulcus ibis          |      | Cattle Egret | 2018/5/10  | 3 | 0 | 24.7924200 | 120.9833300 | <a href="https://www.inaturalist.org/observations/17309855">https://www.inaturalist.org/observations/17309855</a>   |
| 4386 | Bubulcus ibis          |      | Cattle Egret | 2019/9/1   | 2 | 0 | 24.7924300 | 121.7425967 | <a href="https://www.inaturalist.org/observations/32143878">https://www.inaturalist.org/observations/32143878</a>   |
| 4387 | Bubulcus ibis          |      | Cattle Egret | 2020/1/8   | 2 | 0 | 24.7926825 | 121.7403539 | <a href="https://www.inaturalist.org/observations/37422473">https://www.inaturalist.org/observations/37422473</a>   |
| 4388 | Bubulcus ibis          |      | Cattle Egret | 2022/9/15  | 1 | 0 | 24.7930033 | 120.9837417 | <a href="https://www.inaturalist.org/observations/144233291">https://www.inaturalist.org/observations/144233291</a> |
| 4389 | Bubulcus ibis          |      | Cattle Egret | 2022/4/29  | 1 | 0 | 24.7931812 | 120.9797777 | <a href="https://www.inaturalist.org/observations/113290539">https://www.inaturalist.org/observations/113290539</a> |
| 4390 | Bubulcus ibis          |      | Cattle Egret | 2021/3/14  | 3 | 0 | 24.7932950 | 121.7420433 | <a href="https://www.inaturalist.org/observations/71209790">https://www.inaturalist.org/observations/71209790</a>   |
| 4391 | Bubulcus ibis          |      | Cattle Egret | 2020/8/27  | 1 | 0 | 24.7938462 | 120.9819180 | <a href="https://www.inaturalist.org/observations/57733129">https://www.inaturalist.org/observations/57733129</a>   |
| 4392 | Bubulcus ibis          |      | Cattle Egret | 2022/4/29  | 2 | 0 | 24.7943200 | 120.9926383 | <a href="https://www.inaturalist.org/observations/135879822">https://www.inaturalist.org/observations/135879822</a> |
| 4393 | Bubulcus ibis          |      | Cattle Egret | 2015/10/15 | 5 | 0 | 24.7944110 | 121.7639040 | <a href="https://www.inaturalist.org/observations/9320379">https://www.inaturalist.org/observations/9320379</a>     |
| 4394 | Bubulcus ibis          |      | Cattle Egret | 2020/8/23  | 1 | 0 | 24.7957239 | 120.9170664 | <a href="https://www.inaturalist.org/observations/57408253">https://www.inaturalist.org/observations/57408253</a>   |
| 4395 | Bubulcus ibis          |      | Cattle Egret | 2020/4/27  | 1 | 0 | 24.7972978 | 120.9169134 | <a href="https://www.inaturalist.org/observations/43869099">https://www.inaturalist.org/observations/43869099</a>   |
| 4396 | Bubulcus ibis          |      | Cattle Egret | 2019/11/8  | 2 | 0 | 24.7973375 | 121.7408514 | <a href="https://www.inaturalist.org/observations/35626348">https://www.inaturalist.org/observations/35626348</a>   |
| 4397 | Bubulcus ibis          |      | Cattle Egret | 2022/7/8   | 2 | 0 | 24.7975128 | 120.9157321 | <a href="https://www.inaturalist.org/observations/128910960">https://www.inaturalist.org/observations/128910960</a> |
| 4398 | Bubulcus ibis          |      | Cattle Egret | 2020/5/25  | 1 | 0 | 24.7979787 | 120.9820769 | <a href="https://www.inaturalist.org/observations/47245271">https://www.inaturalist.org/observations/47245271</a>   |
| 4399 | Bubulcus ibis          |      | Cattle Egret | 2021/4/25  | 1 | 0 | 24.7980367 | 121.7383100 | <a href="https://www.inaturalist.org/observations/76520044">https://www.inaturalist.org/observations/76520044</a>   |

|      |               |              |            |   |   |            |             |                                                                                                                     |
|------|---------------|--------------|------------|---|---|------------|-------------|---------------------------------------------------------------------------------------------------------------------|
| 4400 | Bubulcus ibis | Cattle Egret | 2021/4/11  | 2 | 0 | 24.7992850 | 121.7389600 | <a href="https://www.inaturalist.org/observations/73596991">https://www.inaturalist.org/observations/73596991</a>   |
| 4401 | Bubulcus ibis | Cattle Egret | 2021/7/7   | 1 | 0 | 24.7999517 | 121.8036433 | <a href="https://www.inaturalist.org/observations/86395662">https://www.inaturalist.org/observations/86395662</a>   |
| 4402 | Bubulcus ibis | Cattle Egret | 2022/6/10  | 1 | 0 | 24.8003180 | 121.0328031 | <a href="https://www.inaturalist.org/observations/121800319">https://www.inaturalist.org/observations/121800319</a> |
| 4403 | Bubulcus ibis | Cattle Egret | 2022/6/10  | 1 | 0 | 24.8006789 | 121.0319234 | <a href="https://www.inaturalist.org/observations/121800320">https://www.inaturalist.org/observations/121800320</a> |
| 4404 | Bubulcus ibis | Cattle Egret | 2022/6/10  | 1 | 0 | 24.8020771 | 121.0308762 | <a href="https://www.inaturalist.org/observations/121800342">https://www.inaturalist.org/observations/121800342</a> |
| 4405 | Bubulcus ibis | Cattle Egret | 2020/4/19  | 2 | 0 | 24.8034067 | 120.9881698 | <a href="https://www.inaturalist.org/observations/42544624">https://www.inaturalist.org/observations/42544624</a>   |
| 4406 | Bubulcus ibis | Cattle Egret | 2020/4/25  | 2 | 0 | 24.8047160 | 121.0285607 | <a href="https://www.inaturalist.org/observations/43345409">https://www.inaturalist.org/observations/43345409</a>   |
| 4407 | Bubulcus ibis | Cattle Egret | 2021/7/19  | 1 | 0 | 24.8052211 | 120.9354411 | <a href="https://www.inaturalist.org/observations/87677051">https://www.inaturalist.org/observations/87677051</a>   |
| 4408 | Bubulcus ibis | Cattle Egret | 2020/7/15  | 1 | 0 | 24.8057430 | 121.0181020 | <a href="https://www.inaturalist.org/observations/53340048">https://www.inaturalist.org/observations/53340048</a>   |
| 4409 | Bubulcus ibis | Cattle Egret | 2020/12/6  | 1 | 0 | 24.8062077 | 121.7836207 | <a href="https://www.inaturalist.org/observations/66324734">https://www.inaturalist.org/observations/66324734</a>   |
| 4410 | Bubulcus ibis | Cattle Egret | 2020/7/22  | 1 | 0 | 24.8071150 | 121.0165350 | <a href="https://www.inaturalist.org/observations/54483457">https://www.inaturalist.org/observations/54483457</a>   |
| 4411 | Bubulcus ibis | Cattle Egret | 2020/4/26  | 2 | 0 | 24.8086291 | 121.8025017 | <a href="https://www.inaturalist.org/observations/43587222">https://www.inaturalist.org/observations/43587222</a>   |
| 4412 | Bubulcus ibis | Cattle Egret | 2022/5/7   | 1 | 0 | 24.8087367 | 121.0139389 | <a href="https://www.inaturalist.org/observations/115869130">https://www.inaturalist.org/observations/115869130</a> |
| 4413 | Bubulcus ibis | Cattle Egret | 2022/6/3   | 1 | 0 | 24.8102488 | 121.0549421 | <a href="https://www.inaturalist.org/observations/121801127">https://www.inaturalist.org/observations/121801127</a> |
| 4414 | Bubulcus ibis | Cattle Egret | 2019/9/20  | 2 | 0 | 24.8129164 | 121.0394222 | <a href="https://www.inaturalist.org/observations/33046328">https://www.inaturalist.org/observations/33046328</a>   |
| 4415 | Bubulcus ibis | Cattle Egret | 2019/10/10 | 1 | 0 | 24.8133823 | 102.7890955 | <a href="https://www.inaturalist.org/observations/34146757">https://www.inaturalist.org/observations/34146757</a>   |
| 4416 | Bubulcus ibis | Cattle Egret | 2019/10/22 | 1 | 0 | 24.8160297 | 102.7863365 | <a href="https://www.inaturalist.org/observations/34734235">https://www.inaturalist.org/observations/34734235</a>   |
| 4417 | Bubulcus ibis | Cattle Egret | 2021/8/1   | 3 | 0 | 24.8165756 | 121.8129932 | <a href="https://www.inaturalist.org/observations/89484633">https://www.inaturalist.org/observations/89484633</a>   |
| 4418 | Bubulcus ibis | Cattle Egret | 2021/8/1   | 2 | 0 | 24.8165756 | 121.8129932 | <a href="https://www.inaturalist.org/observations/89484635">https://www.inaturalist.org/observations/89484635</a>   |
| 4419 | Bubulcus ibis | Cattle Egret | 2019/7/16  | 1 | 0 | 24.8170167 | 121.2519400 | <a href="https://www.inaturalist.org/observations/65881770">https://www.inaturalist.org/observations/65881770</a>   |
| 4420 | Bubulcus ibis | Cattle Egret | 2020/7/23  | 1 | 0 | 24.8251950 | 120.9792250 | <a href="https://www.inaturalist.org/observations/54485270">https://www.inaturalist.org/observations/54485270</a>   |
| 4421 | Bubulcus ibis | Cattle Egret | 2020/5/20  | 1 | 0 | 24.8253733 | 121.7559067 | <a href="https://www.inaturalist.org/observations/49696576">https://www.inaturalist.org/observations/49696576</a>   |
| 4422 | Bubulcus ibis | Cattle Egret | 2021/4/10  | 1 | 0 | 24.8259139 | 121.4436497 | <a href="https://www.inaturalist.org/observations/73475395">https://www.inaturalist.org/observations/73475395</a>   |
| 4423 | Bubulcus ibis | Cattle Egret | 2020/8/8   | 1 | 0 | 24.8292667 | 120.9813467 | <a href="https://www.inaturalist.org/observations/55783579">https://www.inaturalist.org/observations/55783579</a>   |
| 4424 | Bubulcus ibis | Cattle Egret | 2022/3/26  | 1 | 0 | 24.8299348 | 120.9176764 | <a href="https://www.inaturalist.org/observations/109521153">https://www.inaturalist.org/observations/109521153</a> |

|      |               |              |            |   |   |            |             |                                                                                                                     |
|------|---------------|--------------|------------|---|---|------------|-------------|---------------------------------------------------------------------------------------------------------------------|
| 4425 | Bubulcus ibis | Cattle Egret | 2018/12/4  | 3 | 0 | 24.8312222 | 121.7764583 | <a href="https://www.inaturalist.org/observations/19151088">https://www.inaturalist.org/observations/19151088</a>   |
| 4426 | Bubulcus ibis | Cattle Egret | 2020/5/22  | 1 | 0 | 24.8317833 | 121.7702117 | <a href="https://www.inaturalist.org/observations/46947247">https://www.inaturalist.org/observations/46947247</a>   |
| 4427 | Bubulcus ibis | Cattle Egret | 2019/11/18 | 1 | 0 | 24.8374913 | 121.7537901 | <a href="https://www.inaturalist.org/observations/35972141">https://www.inaturalist.org/observations/35972141</a>   |
| 4428 | Bubulcus ibis | Cattle Egret | 2022/6/15  | 2 | 0 | 24.8388061 | 121.7803631 | <a href="https://www.inaturalist.org/observations/125754889">https://www.inaturalist.org/observations/125754889</a> |
| 4429 | Bubulcus ibis | Cattle Egret | 2020/5/2   | 2 | 0 | 24.8394645 | 121.7974941 | <a href="https://www.inaturalist.org/observations/44577993">https://www.inaturalist.org/observations/44577993</a>   |
| 4430 | Bubulcus ibis | Cattle Egret | 2022/5/1   | 1 | 0 | 24.8414931 | 120.9207690 | <a href="https://www.inaturalist.org/observations/114133313">https://www.inaturalist.org/observations/114133313</a> |
| 4431 | Bubulcus ibis | Cattle Egret | 2018/6/17  | 2 | 0 | 24.8423918 | 121.2877526 | <a href="https://www.inaturalist.org/observations/13542444">https://www.inaturalist.org/observations/13542444</a>   |
| 4432 | Bubulcus ibis | Cattle Egret | 2022/6/17  | 1 | 0 | 24.8431133 | 121.9439550 | <a href="https://www.inaturalist.org/observations/122140125">https://www.inaturalist.org/observations/122140125</a> |
| 4433 | Bubulcus ibis | Cattle Egret | 2020/4/25  | 2 | 0 | 24.8507411 | 121.2278049 | <a href="https://www.inaturalist.org/observations/43273436">https://www.inaturalist.org/observations/43273436</a>   |
| 4434 | Bubulcus ibis | Cattle Egret | 2020/4/25  | 2 | 0 | 24.8508371 | 121.2277287 | <a href="https://www.inaturalist.org/observations/43273452">https://www.inaturalist.org/observations/43273452</a>   |
| 4435 | Bubulcus ibis | Cattle Egret | 2022/3/18  | 2 | 0 | 24.8837843 | 121.2273602 | <a href="https://www.inaturalist.org/observations/108850128">https://www.inaturalist.org/observations/108850128</a> |
| 4436 | Bubulcus ibis | Cattle Egret | 2022/8/2   | 0 | 0 | 24.8849908 | 121.6661249 | <a href="https://www.inaturalist.org/observations/129048358">https://www.inaturalist.org/observations/129048358</a> |
| 4437 | Bubulcus ibis | Cattle Egret | 2022/8/2   | 0 | 0 | 24.8851067 | 121.6661433 | <a href="https://www.inaturalist.org/observations/129087893">https://www.inaturalist.org/observations/129087893</a> |
| 4438 | Bubulcus ibis | Cattle Egret | 2022/8/2   | 0 | 0 | 24.8852031 | 121.6659993 | <a href="https://www.inaturalist.org/observations/129048307">https://www.inaturalist.org/observations/129048307</a> |
| 4439 | Bubulcus ibis | Cattle Egret | 2020/10/4  | 3 | 0 | 24.8865783 | 121.1361305 | <a href="https://www.inaturalist.org/observations/61651728">https://www.inaturalist.org/observations/61651728</a>   |
| 4440 | Bubulcus ibis | Cattle Egret | 2020/4/26  | 1 | 0 | 24.8895710 | 121.1587061 | <a href="https://www.inaturalist.org/observations/43612022">https://www.inaturalist.org/observations/43612022</a>   |
| 4441 | Bubulcus ibis | Cattle Egret | 2022/9/17  | 2 | 0 | 24.8922417 | 121.0586778 | <a href="https://www.inaturalist.org/observations/135349761">https://www.inaturalist.org/observations/135349761</a> |
| 4442 | Bubulcus ibis | Cattle Egret | 2016/10/6  | 1 | 0 | 24.8998862 | 121.5541077 | <a href="https://www.inaturalist.org/observations/33295333">https://www.inaturalist.org/observations/33295333</a>   |
| 4443 | Bubulcus ibis | Cattle Egret | 2021/9/17  | 1 | 0 | 24.8999772 | 121.3695834 | <a href="https://www.inaturalist.org/observations/95736003">https://www.inaturalist.org/observations/95736003</a>   |
| 4444 | Bubulcus ibis | Cattle Egret | 2019/4/29  | 2 | 0 | 24.9001246 | 121.7325098 | <a href="https://www.inaturalist.org/observations/24236822">https://www.inaturalist.org/observations/24236822</a>   |
| 4445 | Bubulcus ibis | Cattle Egret | 2020/5/16  | 1 | 0 | 24.9073181 | 121.3092804 | <a href="https://www.inaturalist.org/observations/46059605">https://www.inaturalist.org/observations/46059605</a>   |
| 4446 | Bubulcus ibis | Cattle Egret | 2022/9/11  | 1 | 0 | 24.9120165 | 121.3005561 | <a href="https://www.inaturalist.org/observations/135397398">https://www.inaturalist.org/observations/135397398</a> |
| 4447 | Bubulcus ibis | Cattle Egret | 2022/3/30  | 1 | 0 | 24.9141433 | 121.3050255 | <a href="https://www.inaturalist.org/observations/109894175">https://www.inaturalist.org/observations/109894175</a> |
| 4448 | Bubulcus ibis | Cattle Egret | 2019/7/28  | 2 | 0 | 24.9160577 | 121.8403661 | <a href="https://www.inaturalist.org/observations/29701673">https://www.inaturalist.org/observations/29701673</a>   |
| 4449 | Bubulcus ibis | Cattle Egret | 2022/10/4  | 1 | 0 | 24.9165307 | 121.1251004 | <a href="https://www.inaturalist.org/observations/137529396">https://www.inaturalist.org/observations/137529396</a> |



|      |               |              |            |   |   |            |             |                                                                                                                     |
|------|---------------|--------------|------------|---|---|------------|-------------|---------------------------------------------------------------------------------------------------------------------|
| 4450 | Bubulcus ibis | Cattle Egret | 2020/6/6   | 1 | 0 | 24.9186639 | 121.1267604 | <a href="https://www.inaturalist.org/observations/49132247">https://www.inaturalist.org/observations/49132247</a>   |
| 4451 | Bubulcus ibis | Cattle Egret | 2021/12/23 | 2 | 0 | 24.9248820 | 121.1776610 | <a href="https://www.inaturalist.org/observations/103549830">https://www.inaturalist.org/observations/103549830</a> |
| 4452 | Bubulcus ibis | Cattle Egret | 2022/5/4   | 2 | 0 | 24.9267158 | 121.2343334 | <a href="https://www.inaturalist.org/observations/115329593">https://www.inaturalist.org/observations/115329593</a> |
| 4453 | Bubulcus ibis | Cattle Egret | 2022/8/20  | 4 | 0 | 24.9285919 | 121.3944946 | <a href="https://www.inaturalist.org/observations/131745772">https://www.inaturalist.org/observations/131745772</a> |
| 4454 | Bubulcus ibis | Cattle Egret | 2020/5/16  | 2 | 0 | 24.9332367 | 121.3683917 | <a href="https://www.inaturalist.org/observations/46485156">https://www.inaturalist.org/observations/46485156</a>   |
| 4455 | Bubulcus ibis | Cattle Egret | 2022/3/1   | 2 | 0 | 24.9337267 | 121.0781483 | <a href="https://www.inaturalist.org/observations/144774549">https://www.inaturalist.org/observations/144774549</a> |
| 4456 | Bubulcus ibis | Cattle Egret | 2020/4/21  | 1 | 0 | 24.9344289 | 121.7130037 | <a href="https://www.inaturalist.org/observations/48901918">https://www.inaturalist.org/observations/48901918</a>   |
| 4457 | Bubulcus ibis | Cattle Egret | 2014/7/13  | 1 | 0 | 24.9350844 | 121.7107613 | <a href="https://www.inaturalist.org/observations/70893104">https://www.inaturalist.org/observations/70893104</a>   |
| 4458 | Bubulcus ibis | Cattle Egret | 2022/8/11  | 1 | 0 | 24.9357183 | 121.7129131 | <a href="https://www.inaturalist.org/observations/131348835">https://www.inaturalist.org/observations/131348835</a> |
| 4459 | Bubulcus ibis | Cattle Egret | 2022/4/17  | 1 | 0 | 24.9357434 | 121.7131031 | <a href="https://www.inaturalist.org/observations/111756029">https://www.inaturalist.org/observations/111756029</a> |
| 4460 | Bubulcus ibis | Cattle Egret | 2022/4/17  | 1 | 0 | 24.9358033 | 121.7132117 | <a href="https://www.inaturalist.org/observations/111911721">https://www.inaturalist.org/observations/111911721</a> |
| 4461 | Bubulcus ibis | Cattle Egret | 2020/4/18  | 1 | 0 | 24.9358783 | 121.7131717 | <a href="https://www.inaturalist.org/observations/43641378">https://www.inaturalist.org/observations/43641378</a>   |
| 4462 | Bubulcus ibis | Cattle Egret | 2019/4/21  | 1 | 0 | 24.9359036 | 121.7131424 | <a href="https://www.inaturalist.org/observations/23028393">https://www.inaturalist.org/observations/23028393</a>   |
| 4463 | Bubulcus ibis | Cattle Egret | 2012/5/6   | 2 | 0 | 24.9361302 | 121.7132967 | <a href="https://www.inaturalist.org/observations/45677112">https://www.inaturalist.org/observations/45677112</a>   |
| 4464 | Bubulcus ibis | Cattle Egret | 2021/8/17  | 2 | 0 | 24.9363667 | 121.2108000 | <a href="https://www.inaturalist.org/observations/91499072">https://www.inaturalist.org/observations/91499072</a>   |
| 4465 | Bubulcus ibis | Cattle Egret | 2019/10/24 | 1 | 0 | 24.9375443 | 121.3632410 | <a href="https://www.inaturalist.org/observations/34820248">https://www.inaturalist.org/observations/34820248</a>   |
| 4466 | Bubulcus ibis | Cattle Egret | 2022/8/3   | 3 | 0 | 24.9377367 | 121.0283233 | <a href="https://www.inaturalist.org/observations/129253261">https://www.inaturalist.org/observations/129253261</a> |
| 4467 | Bubulcus ibis | Cattle Egret | 2022/8/3   | 3 | 0 | 24.9377783 | 121.0283233 | <a href="https://www.inaturalist.org/observations/129253262">https://www.inaturalist.org/observations/129253262</a> |
| 4468 | Bubulcus ibis | Cattle Egret | 2022/11/14 | 2 | 0 | 24.9399650 | 121.0276533 | <a href="https://www.inaturalist.org/observations/141967889">https://www.inaturalist.org/observations/141967889</a> |
| 4469 | Bubulcus ibis | Cattle Egret | 2019/10/25 | 1 | 0 | 24.9401034 | 121.3654202 | <a href="https://www.inaturalist.org/observations/34862984">https://www.inaturalist.org/observations/34862984</a>   |
| 4470 | Bubulcus ibis | Cattle Egret | 2019/10/23 | 1 | 0 | 24.9404507 | 121.3659592 | <a href="https://www.inaturalist.org/observations/34774150">https://www.inaturalist.org/observations/34774150</a>   |
| 4471 | Bubulcus ibis | Cattle Egret | 2019/10/23 | 2 | 0 | 24.9411833 | 121.3676755 | <a href="https://www.inaturalist.org/observations/34771478">https://www.inaturalist.org/observations/34771478</a>   |
| 4472 | Bubulcus ibis | Cattle Egret | 2019/10/25 | 2 | 0 | 24.9412514 | 121.3680864 | <a href="https://www.inaturalist.org/observations/34864018">https://www.inaturalist.org/observations/34864018</a>   |
| 4473 | Bubulcus ibis | Cattle Egret | 2019/10/23 | 1 | 0 | 24.9412911 | 121.3681914 | <a href="https://www.inaturalist.org/observations/34773763">https://www.inaturalist.org/observations/34773763</a>   |
| 4474 | Bubulcus ibis | Cattle Egret | 2019/10/23 | 2 | 0 | 24.9412918 | 121.3681946 | <a href="https://www.inaturalist.org/observations/34771384">https://www.inaturalist.org/observations/34771384</a>   |

|      |               |              |            |   |   |            |             |                                                                                                                   |
|------|---------------|--------------|------------|---|---|------------|-------------|-------------------------------------------------------------------------------------------------------------------|
| 4475 | Bubulcus ibis | Cattle Egret | 2019/10/23 | 2 | 0 | 24.9413637 | 121.3677413 | <a href="https://www.inaturalist.org/observations/34771543">https://www.inaturalist.org/observations/34771543</a> |
| 4476 | Bubulcus ibis | Cattle Egret | 2019/10/25 | 2 | 0 | 24.9416024 | 121.3685966 | <a href="https://www.inaturalist.org/observations/34863976">https://www.inaturalist.org/observations/34863976</a> |
| 4477 | Bubulcus ibis | Cattle Egret | 2019/10/23 | 1 | 0 | 24.9417085 | 121.3669512 | <a href="https://www.inaturalist.org/observations/34773678">https://www.inaturalist.org/observations/34773678</a> |
| 4478 | Bubulcus ibis | Cattle Egret | 2019/10/23 | 2 | 0 | 24.9417137 | 121.3680908 | <a href="https://www.inaturalist.org/observations/34771463">https://www.inaturalist.org/observations/34771463</a> |
| 4479 | Bubulcus ibis | Cattle Egret | 2019/10/23 | 2 | 0 | 24.9418099 | 121.3669888 | <a href="https://www.inaturalist.org/observations/34771295">https://www.inaturalist.org/observations/34771295</a> |
| 4480 | Bubulcus ibis | Cattle Egret | 2019/10/23 | 1 | 0 | 24.9418283 | 121.3671944 | <a href="https://www.inaturalist.org/observations/34771359">https://www.inaturalist.org/observations/34771359</a> |
| 4481 | Bubulcus ibis | Cattle Egret | 2019/10/23 | 2 | 0 | 24.9418329 | 121.3671015 | <a href="https://www.inaturalist.org/observations/34771468">https://www.inaturalist.org/observations/34771468</a> |
| 4482 | Bubulcus ibis | Cattle Egret | 2019/10/23 | 1 | 0 | 24.9418530 | 121.3668528 | <a href="https://www.inaturalist.org/observations/34774095">https://www.inaturalist.org/observations/34774095</a> |
| 4483 | Bubulcus ibis | Cattle Egret | 2019/10/23 | 1 | 0 | 24.9418838 | 121.3661603 | <a href="https://www.inaturalist.org/observations/34773777">https://www.inaturalist.org/observations/34773777</a> |
| 4484 | Bubulcus ibis | Cattle Egret | 2019/10/23 | 2 | 0 | 24.9419117 | 121.3666917 | <a href="https://www.inaturalist.org/observations/34771528">https://www.inaturalist.org/observations/34771528</a> |
| 4485 | Bubulcus ibis | Cattle Egret | 2019/10/23 | 1 | 0 | 24.9419217 | 121.3666533 | <a href="https://www.inaturalist.org/observations/34771797">https://www.inaturalist.org/observations/34771797</a> |
| 4486 | Bubulcus ibis | Cattle Egret | 2019/10/23 | 2 | 0 | 24.9419219 | 121.3666517 | <a href="https://www.inaturalist.org/observations/34771082">https://www.inaturalist.org/observations/34771082</a> |
| 4487 | Bubulcus ibis | Cattle Egret | 2019/10/23 | 1 | 0 | 24.9419242 | 121.3665388 | <a href="https://www.inaturalist.org/observations/34774205">https://www.inaturalist.org/observations/34774205</a> |
| 4488 | Bubulcus ibis | Cattle Egret | 2019/10/23 | 2 | 0 | 24.9419293 | 121.3660423 | <a href="https://www.inaturalist.org/observations/34773766">https://www.inaturalist.org/observations/34773766</a> |
| 4489 | Bubulcus ibis | Cattle Egret | 2019/10/23 | 1 | 0 | 24.9419417 | 121.3666167 | <a href="https://www.inaturalist.org/observations/34772540">https://www.inaturalist.org/observations/34772540</a> |
| 4490 | Bubulcus ibis | Cattle Egret | 2019/10/23 | 1 | 0 | 24.9419583 | 121.3664383 | <a href="https://www.inaturalist.org/observations/34774345">https://www.inaturalist.org/observations/34774345</a> |
| 4491 | Bubulcus ibis | Cattle Egret | 2019/10/23 | 2 | 0 | 24.9419612 | 121.3666547 | <a href="https://www.inaturalist.org/observations/34771553">https://www.inaturalist.org/observations/34771553</a> |
| 4492 | Bubulcus ibis | Cattle Egret | 2019/10/23 | 2 | 0 | 24.9419629 | 121.3663940 | <a href="https://www.inaturalist.org/observations/34771381">https://www.inaturalist.org/observations/34771381</a> |
| 4493 | Bubulcus ibis | Cattle Egret | 2019/10/23 | 2 | 0 | 24.9419704 | 121.3673882 | <a href="https://www.inaturalist.org/observations/34771389">https://www.inaturalist.org/observations/34771389</a> |
| 4494 | Bubulcus ibis | Cattle Egret | 2019/10/23 | 1 | 0 | 24.9419785 | 121.3664856 | <a href="https://www.inaturalist.org/observations/35007561">https://www.inaturalist.org/observations/35007561</a> |
| 4495 | Bubulcus ibis | Cattle Egret | 2019/10/23 | 2 | 0 | 24.9419820 | 121.3665536 | <a href="https://www.inaturalist.org/observations/34771067">https://www.inaturalist.org/observations/34771067</a> |
| 4496 | Bubulcus ibis | Cattle Egret | 2019/10/23 | 1 | 0 | 24.9420007 | 121.3661878 | <a href="https://www.inaturalist.org/observations/34774666">https://www.inaturalist.org/observations/34774666</a> |
| 4497 | Bubulcus ibis | Cattle Egret | 2019/10/23 | 2 | 0 | 24.9420036 | 121.3684409 | <a href="https://www.inaturalist.org/observations/34832992">https://www.inaturalist.org/observations/34832992</a> |
| 4498 | Bubulcus ibis | Cattle Egret | 2019/10/23 | 2 | 0 | 24.9420242 | 121.3663431 | <a href="https://www.inaturalist.org/observations/34771126">https://www.inaturalist.org/observations/34771126</a> |
| 4499 | Bubulcus ibis | Cattle Egret | 2019/10/25 | 1 | 0 | 24.9420420 | 121.3683233 | <a href="https://www.inaturalist.org/observations/34864052">https://www.inaturalist.org/observations/34864052</a> |

|      |               |              |            |   |   |            |             |                                                                                                                     |
|------|---------------|--------------|------------|---|---|------------|-------------|---------------------------------------------------------------------------------------------------------------------|
| 4500 | Bubulcus ibis | Cattle Egret | 2019/10/23 | 2 | 0 | 24.9420451 | 121.3673371 | <a href="https://www.inaturalist.org/observations/34771283">https://www.inaturalist.org/observations/34771283</a>   |
| 4501 | Bubulcus ibis | Cattle Egret | 2020/6/5   | 1 | 0 | 24.9420500 | 121.3674700 | <a href="https://www.inaturalist.org/observations/48598568">https://www.inaturalist.org/observations/48598568</a>   |
| 4502 | Bubulcus ibis | Cattle Egret | 2019/10/24 | 2 | 0 | 24.9421040 | 121.3689330 | <a href="https://www.inaturalist.org/observations/34809559">https://www.inaturalist.org/observations/34809559</a>   |
| 4503 | Bubulcus ibis | Cattle Egret | 2019/10/24 | 2 | 0 | 24.9421572 | 121.3690630 | <a href="https://www.inaturalist.org/observations/34808692">https://www.inaturalist.org/observations/34808692</a>   |
| 4504 | Bubulcus ibis | Cattle Egret | 2016/8/13  | 3 | 0 | 24.9421787 | 121.3701172 | <a href="http://www.inaturalist.org/observations/3966678">http://www.inaturalist.org/observations/3966678</a>       |
| 4505 | Bubulcus ibis | Cattle Egret | 2019/10/23 | 1 | 0 | 24.9421852 | 121.3690880 | <a href="https://www.inaturalist.org/observations/34771027">https://www.inaturalist.org/observations/34771027</a>   |
| 4506 | Bubulcus ibis | Cattle Egret | 2019/10/23 | 3 | 0 | 24.9423142 | 121.3693161 | <a href="https://www.inaturalist.org/observations/34871970">https://www.inaturalist.org/observations/34871970</a>   |
| 4507 | Bubulcus ibis | Cattle Egret | 2019/10/23 | 2 | 0 | 24.9423414 | 121.3710240 | <a href="https://www.inaturalist.org/observations/34774861">https://www.inaturalist.org/observations/34774861</a>   |
| 4508 | Bubulcus ibis | Cattle Egret | 2020/6/2   | 3 | 0 | 24.9423467 | 121.3675833 | <a href="https://www.inaturalist.org/observations/48199193">https://www.inaturalist.org/observations/48199193</a>   |
| 4509 | Bubulcus ibis | Cattle Egret | 2019/10/25 | 1 | 0 | 24.9423730 | 121.3686995 | <a href="https://www.inaturalist.org/observations/34864004">https://www.inaturalist.org/observations/34864004</a>   |
| 4510 | Bubulcus ibis | Cattle Egret | 2020/5/6   | 2 | 0 | 24.9426449 | 121.7108612 | <a href="https://www.inaturalist.org/observations/45233087">https://www.inaturalist.org/observations/45233087</a>   |
| 4511 | Bubulcus ibis | Cattle Egret | 2019/10/25 | 2 | 0 | 24.9426583 | 121.3664962 | <a href="https://www.inaturalist.org/observations/34860790">https://www.inaturalist.org/observations/34860790</a>   |
| 4512 | Bubulcus ibis | Cattle Egret | 2019/10/23 | 2 | 0 | 24.9428469 | 121.3677263 | <a href="https://www.inaturalist.org/observations/34771382">https://www.inaturalist.org/observations/34771382</a>   |
| 4513 | Bubulcus ibis | Cattle Egret | 2019/10/23 | 1 | 0 | 24.9429809 | 121.3693045 | <a href="https://www.inaturalist.org/observations/34930646">https://www.inaturalist.org/observations/34930646</a>   |
| 4514 | Bubulcus ibis | Cattle Egret | 2019/10/23 | 2 | 0 | 24.9433814 | 121.3698173 | <a href="https://www.inaturalist.org/observations/34771883">https://www.inaturalist.org/observations/34771883</a>   |
| 4515 | Bubulcus ibis | Cattle Egret | 2020/7/3   | 1 | 0 | 24.9434083 | 121.3676300 | <a href="https://www.inaturalist.org/observations/51786677">https://www.inaturalist.org/observations/51786677</a>   |
| 4516 | Bubulcus ibis | Cattle Egret | 2019/10/27 | 2 | 0 | 24.9442722 | 121.3681463 | <a href="https://www.inaturalist.org/observations/34947874">https://www.inaturalist.org/observations/34947874</a>   |
| 4517 | Bubulcus ibis | Cattle Egret | 2019/10/26 | 2 | 0 | 24.9451160 | 121.3691177 | <a href="https://www.inaturalist.org/observations/34892930">https://www.inaturalist.org/observations/34892930</a>   |
| 4518 | Bubulcus ibis | Cattle Egret | 2019/10/25 | 2 | 0 | 24.9451450 | 121.3686257 | <a href="https://www.inaturalist.org/observations/34861846">https://www.inaturalist.org/observations/34861846</a>   |
| 4519 | Bubulcus ibis | Cattle Egret | 2018/5/6   | 3 | 0 | 24.9452187 | 121.3678746 | <a href="https://www.inaturalist.org/observations/12189208">https://www.inaturalist.org/observations/12189208</a>   |
| 4520 | Bubulcus ibis | Cattle Egret | 2019/10/23 | 2 | 0 | 24.9470898 | 121.3806755 | <a href="https://www.inaturalist.org/observations/35050191">https://www.inaturalist.org/observations/35050191</a>   |
| 4521 | Bubulcus ibis | Cattle Egret | 2021/12/8  | 1 | 0 | 24.9513544 | 121.5001340 | <a href="https://www.inaturalist.org/observations/102704141">https://www.inaturalist.org/observations/102704141</a> |
| 4522 | Bubulcus ibis | Cattle Egret | 2021/4/13  | 2 | 0 | 24.9514817 | 121.5001057 | <a href="https://www.inaturalist.org/observations/73934814">https://www.inaturalist.org/observations/73934814</a>   |
| 4523 | Bubulcus ibis | Cattle Egret | 2022/11/29 | 3 | 0 | 24.9515259 | 121.4998465 | <a href="https://www.inaturalist.org/observations/143269239">https://www.inaturalist.org/observations/143269239</a> |
| 4524 | Bubulcus ibis | Cattle Egret | 2021/11/17 | 2 | 0 | 24.9515377 | 121.4998332 | <a href="https://www.inaturalist.org/observations/101311808">https://www.inaturalist.org/observations/101311808</a> |

|      |                        |                      |            |   |   |            |             |                                                                                                                     |
|------|------------------------|----------------------|------------|---|---|------------|-------------|---------------------------------------------------------------------------------------------------------------------|
| 4525 | Bubulcus ibis          | Cattle Egret         | 2022/11/28 | 2 | 0 | 24.9515591 | 121.4997897 | <a href="https://www.inaturalist.org/observations/143180558">https://www.inaturalist.org/observations/143180558</a> |
| 4526 | Bubulcus ibis          | Cattle Egret         | 2021/11/30 | 2 | 0 | 24.9515897 | 121.5001355 | <a href="https://www.inaturalist.org/observations/102231148">https://www.inaturalist.org/observations/102231148</a> |
| 4527 | Bubulcus ibis          | Cattle Egret         | 2021/11/29 | 2 | 0 | 24.9517736 | 121.4999562 | <a href="https://www.inaturalist.org/observations/102130782">https://www.inaturalist.org/observations/102130782</a> |
| 4528 | Bubulcus ibis          | Cattle Egret         | 2018/5/10  | 3 | 0 | 24.9527667 | 121.3013633 | <a href="https://www.inaturalist.org/observations/19482359">https://www.inaturalist.org/observations/19482359</a>   |
| 4529 | Bubulcus ibis          | Cattle Egret         | 2022/8/23  | 2 | 0 | 24.9554722 | 121.4917861 | <a href="https://www.inaturalist.org/observations/131987739">https://www.inaturalist.org/observations/131987739</a> |
| 4530 | Bubulcus ibis          | Cattle Egret         | 2022/5/29  | 2 | 0 | 24.9584992 | 121.1906346 | <a href="https://www.inaturalist.org/observations/119369677">https://www.inaturalist.org/observations/119369677</a> |
| 4531 | Bubulcus ibis          | Cattle Egret         | 2022/3/5   | 2 | 0 | 24.9588200 | 121.5264500 | <a href="https://www.inaturalist.org/observations/107928907">https://www.inaturalist.org/observations/107928907</a> |
| 4532 | Bubulcus ibis          | Cattle Egret         | 2020/5/1   | 2 | 0 | 24.9589407 | 121.5431052 | <a href="https://www.inaturalist.org/observations/44743704">https://www.inaturalist.org/observations/44743704</a>   |
| 4533 | Bubulcus ibis          | Cattle Egret         | 2006/9/3   | 3 | 0 | 24.9602016 | 121.5276659 | <a href="https://www.inaturalist.org/observations/16706906">https://www.inaturalist.org/observations/16706906</a>   |
| 4534 | Bubulcus ibis          | Cattle Egret         | 2021/4/11  | 2 | 0 | 24.9608926 | 121.2181881 | <a href="https://www.inaturalist.org/observations/73608069">https://www.inaturalist.org/observations/73608069</a>   |
| 4535 | Bubulcus ibis          | Cattle Egret         | 2020/6/8   | 1 | 0 | 24.9647000 | 121.1935667 | <a href="https://www.inaturalist.org/observations/51900422">https://www.inaturalist.org/observations/51900422</a>   |
| 4536 | Bubulcus ibis          | Cattle Egret         | 2017/4/11  | 4 | 0 | 24.9674636 | 121.2681906 | <a href="https://www.inaturalist.org/observations/5646095">https://www.inaturalist.org/observations/5646095</a>     |
| 4537 | Bubulcus<br>coromandus | ibis<br>Cattle Egret | 2017/6/5   | 2 | 0 | 24.9677122 | 121.2669992 | <a href="https://www.inaturalist.org/observations/6506311">https://www.inaturalist.org/observations/6506311</a>     |
| 4538 | Bubulcus ibis          | Cattle Egret         | 2020/7/15  | 3 | 0 | 24.9677367 | 121.1945200 | <a href="https://www.inaturalist.org/observations/53464818">https://www.inaturalist.org/observations/53464818</a>   |
| 4539 | Bubulcus ibis          | Cattle Egret         | 2020/7/10  | 1 | 0 | 24.9680283 | 121.1930300 | <a href="https://www.inaturalist.org/observations/52629112">https://www.inaturalist.org/observations/52629112</a>   |
| 4540 | Bubulcus ibis          | Cattle Egret         | 2017/4/12  | 4 | 0 | 24.9680528 | 121.2683662 | <a href="https://www.inaturalist.org/observations/5657476">https://www.inaturalist.org/observations/5657476</a>     |
| 4541 | Bubulcus ibis          | Cattle Egret         | 2017/5/5   | 3 | 0 | 24.9681627 | 121.2688134 | <a href="https://www.inaturalist.org/observations/6097403">https://www.inaturalist.org/observations/6097403</a>     |
| 4542 | Bubulcus ibis          | Cattle Egret         | 2022/6/10  | 1 | 0 | 24.9683755 | 121.4106643 | <a href="https://www.inaturalist.org/observations/121387725">https://www.inaturalist.org/observations/121387725</a> |
| 4543 | Bubulcus ibis          | Cattle Egret         | 2022/5/1   | 2 | 0 | 24.9684854 | 121.1918692 | <a href="https://www.inaturalist.org/observations/114179796">https://www.inaturalist.org/observations/114179796</a> |
| 4544 | Bubulcus ibis          | Cattle Egret         | 2018/8/22  | 4 | 0 | 24.9690083 | 121.1937117 | <a href="https://www.inaturalist.org/observations/15776824">https://www.inaturalist.org/observations/15776824</a>   |
| 4545 | Bubulcus ibis          | Cattle Egret         | 2022/3/13  | 3 | 0 | 24.9694028 | 121.5328518 | <a href="https://www.inaturalist.org/observations/108493429">https://www.inaturalist.org/observations/108493429</a> |
| 4546 | Bubulcus ibis          | Cattle Egret         | 2021/5/1   | 2 | 0 | 24.9697744 | 121.1950774 | <a href="https://www.inaturalist.org/observations/76005757">https://www.inaturalist.org/observations/76005757</a>   |
| 4547 | Bubulcus ibis          | Cattle Egret         | 2019/9/23  | 2 | 0 | 24.9698203 | 121.2679243 | <a href="https://www.inaturalist.org/observations/33231751">https://www.inaturalist.org/observations/33231751</a>   |
| 4548 | Bubulcus ibis          | Cattle Egret         | 2019/7/14  | 2 | 0 | 24.9704060 | 121.1942307 | <a href="https://www.inaturalist.org/observations/29000206">https://www.inaturalist.org/observations/29000206</a>   |
| 4549 | Bubulcus ibis          | Cattle Egret         | 2020/6/26  | 2 | 0 | 24.9704500 | 121.1919340 | <a href="https://www.inaturalist.org/observations/51036252">https://www.inaturalist.org/observations/51036252</a>   |

|      |                     |                      |            |   |   |            |             |                                                                                                                     |
|------|---------------------|----------------------|------------|---|---|------------|-------------|---------------------------------------------------------------------------------------------------------------------|
| 4550 | Bubulcus ibis       | Cattle Egret         | 2020/6/26  | 2 | 0 | 24.9704500 | 121.1919340 | <a href="https://www.inaturalist.org/observations/71924487">https://www.inaturalist.org/observations/71924487</a>   |
| 4551 | Bubulcus ibis       | Cattle Egret         | 2019/5/30  | 6 | 0 | 24.9792011 | 121.4713697 | <a href="https://www.inaturalist.org/observations/26046128">https://www.inaturalist.org/observations/26046128</a>   |
| 4552 | Bubulcus ibis       | Cattle Egret         | 2021/12/7  | 1 | 0 | 24.9845799 | 121.5725543 | <a href="https://www.inaturalist.org/observations/102671347">https://www.inaturalist.org/observations/102671347</a> |
| 4553 | Bubulcus ibis       | Cattle Egret         | 2012/7/10  | 1 | 0 | 24.9867251 | 121.7068489 | <a href="https://www.inaturalist.org/observations/67324882">https://www.inaturalist.org/observations/67324882</a>   |
| 4554 | Bubulcus ibis       | Cattle Egret         | 2021/10/6  | 1 | 0 | 24.9888588 | 121.5362404 | <a href="https://www.inaturalist.org/observations/97652722">https://www.inaturalist.org/observations/97652722</a>   |
| 4555 | Bubulcus ibis       | Cattle Egret         | 2022/2/7   | 1 | 0 | 24.9895201 | 121.5362112 | <a href="https://www.inaturalist.org/observations/107258550">https://www.inaturalist.org/observations/107258550</a> |
| 4556 | Bubulcus ibis       | Cattle Egret         | 2020/6/18  | 2 | 0 | 24.9896953 | 121.5554720 | <a href="https://www.inaturalist.org/observations/50022801">https://www.inaturalist.org/observations/50022801</a>   |
| 4557 | Bubulcus ibis       | Cattle Egret         | 2022/2/7   | 1 | 0 | 24.9905452 | 121.5363069 | <a href="https://www.inaturalist.org/observations/107258549">https://www.inaturalist.org/observations/107258549</a> |
| 4558 | Bubulcus ibis       | Cattle Egret         | 2020/12/6  | 1 | 0 | 24.9907562 | 121.5926678 | <a href="https://www.inaturalist.org/observations/105608442">https://www.inaturalist.org/observations/105608442</a> |
| 4559 | Bubulcus ibis       | Cattle Egret         | 2021/4/14  | 2 | 0 | 24.9915450 | 121.5895217 | <a href="https://www.inaturalist.org/observations/74582920">https://www.inaturalist.org/observations/74582920</a>   |
| 4560 | Bubulcus ibis       | Cattle Egret         | 2019/7/30  | 3 | 0 | 24.9915610 | 121.5889136 | <a href="https://www.inaturalist.org/observations/29890916">https://www.inaturalist.org/observations/29890916</a>   |
| 4561 | Bubulcus ibis       | Cattle Egret         | 2022/5/1   | 3 | 0 | 24.9919802 | 121.5451351 | <a href="https://www.inaturalist.org/observations/116730594">https://www.inaturalist.org/observations/116730594</a> |
| 4562 | Bubulcus ibis       | Cattle Egret         | 2021/12/22 | 1 | 0 | 24.9920088 | 121.5368435 | <a href="https://www.inaturalist.org/observations/103476104">https://www.inaturalist.org/observations/103476104</a> |
| 4563 | Bubulcus ibis       | Cattle Egret         | 2019/9/22  | 2 | 0 | 24.9924955 | 121.5907773 | <a href="https://www.inaturalist.org/observations/33173540">https://www.inaturalist.org/observations/33173540</a>   |
| 4564 | Bubulcus ibis       | Cattle Egret         | 2020/1/17  | 1 | 0 | 24.9924957 | 121.5908480 | <a href="https://www.inaturalist.org/observations/37673985">https://www.inaturalist.org/observations/37673985</a>   |
| 4565 | Bubulcus ibis       | Cattle Egret         | 2020/2/12  | 2 | 0 | 24.9926000 | 121.5906008 | <a href="https://www.inaturalist.org/observations/38558230">https://www.inaturalist.org/observations/38558230</a>   |
| 4566 | Bubulcus ibis       | Cattle Egret         | 2020/5/24  | 2 | 0 | 24.9926250 | 121.5906050 | <a href="https://www.inaturalist.org/observations/47120113">https://www.inaturalist.org/observations/47120113</a>   |
| 4567 | Bubulcus ibis       | Cattle Egret         | 2022/7/19  | 2 | 0 | 24.9926540 | 121.5906190 | <a href="https://www.inaturalist.org/observations/126960077">https://www.inaturalist.org/observations/126960077</a> |
| 4568 | Bubulcus ibis       | Cattle Egret         | 2020/8/23  | 2 | 0 | 24.9926717 | 121.5908800 | <a href="https://www.inaturalist.org/observations/57301010">https://www.inaturalist.org/observations/57301010</a>   |
| 4569 | Bubulcus ibis       | Cattle Egret         | 2020/3/4   | 1 | 0 | 24.9932262 | 121.5901251 | <a href="https://www.inaturalist.org/observations/40921272">https://www.inaturalist.org/observations/40921272</a>   |
| 4570 | Bubulcus ibis       | Cattle Egret         | 2020/3/4   | 1 | 0 | 24.9932287 | 121.5901282 | <a href="https://www.inaturalist.org/observations/40921274">https://www.inaturalist.org/observations/40921274</a>   |
| 4571 | Bubulcus ibis       | Cattle Egret         | 2011/11/14 | 2 | 0 | 24.9935985 | 121.5845901 | <a href="https://www.inaturalist.org/observations/130588359">https://www.inaturalist.org/observations/130588359</a> |
| 4572 | Bubulcus ibis       | Cattle Egret         | 2017/5/29  | 2 | 0 | 24.9941434 | 121.5878325 | <a href="https://www.inaturalist.org/observations/105322183">https://www.inaturalist.org/observations/105322183</a> |
| 4573 | Bubulcus ibis       | Cattle Egret         | 2017/5/29  | 2 | 0 | 24.9942330 | 121.5884189 | <a href="https://www.inaturalist.org/observations/105322182">https://www.inaturalist.org/observations/105322182</a> |
| 4574 | Bubulcus coromandus | ibis<br>Cattle Egret | 2022/8/3   | 3 | 0 | 24.9942870 | 121.5860032 | <a href="https://www.inaturalist.org/observations/129608774">https://www.inaturalist.org/observations/129608774</a> |

|      |                     |                   |            |   |   |            |             |                                                                                                                     |
|------|---------------------|-------------------|------------|---|---|------------|-------------|---------------------------------------------------------------------------------------------------------------------|
| 4575 | Bubulcus ibis       | Cattle Egret      | 2017/12/30 | 2 | 0 | 24.9949343 | 121.5887316 | <a href="https://www.inaturalist.org/observations/112856902">https://www.inaturalist.org/observations/112856902</a> |
| 4576 | Bubulcus ibis       | Cattle Egret      | 2021/2/23  | 2 | 0 | 24.9949854 | 121.5871226 | <a href="https://www.inaturalist.org/observations/75020404">https://www.inaturalist.org/observations/75020404</a>   |
| 4577 | Bubulcus ibis       | Cattle Egret      | 2008/11/21 | 1 | 0 | 24.9950525 | 121.5856276 | <a href="https://www.inaturalist.org/observations/81252117">https://www.inaturalist.org/observations/81252117</a>   |
| 4578 | Bubulcus ibis       | Cattle Egret      | 2020/8/29  | 1 | 0 | 24.9950667 | 121.5874972 | <a href="https://www.inaturalist.org/observations/57914180">https://www.inaturalist.org/observations/57914180</a>   |
| 4579 | Bubulcus coromandus | ibis Cattle Egret | 2019/3/2   | 4 | 0 | 24.9951459 | 121.5872260 | <a href="https://www.inaturalist.org/observations/20872395">https://www.inaturalist.org/observations/20872395</a>   |
| 4580 | Bubulcus ibis       | Cattle Egret      | 2022/3/6   | 1 | 0 | 24.9951550 | 121.5875083 | <a href="https://www.inaturalist.org/observations/108006984">https://www.inaturalist.org/observations/108006984</a> |
| 4581 | Bubulcus ibis       | Cattle Egret      | 2020/1/28  | 0 | 0 | 24.9951750 | 121.5872722 | <a href="https://www.inaturalist.org/observations/38118639">https://www.inaturalist.org/observations/38118639</a>   |
| 4582 | Bubulcus ibis       | Cattle Egret      | 2019/7/7   | 1 | 0 | 24.9952383 | 121.5856467 | <a href="https://www.inaturalist.org/observations/73187721">https://www.inaturalist.org/observations/73187721</a>   |
| 4583 | Bubulcus ibis       | Cattle Egret      | 2020/3/4   | 1 | 0 | 24.9952613 | 121.5871867 | <a href="https://www.inaturalist.org/observations/40921347">https://www.inaturalist.org/observations/40921347</a>   |
| 4584 | Bubulcus ibis       | Cattle Egret      | 2022/8/20  | 2 | 0 | 24.9952615 | 121.5870639 | <a href="https://www.inaturalist.org/observations/131700503">https://www.inaturalist.org/observations/131700503</a> |
| 4585 | Bubulcus ibis       | Cattle Egret      | 2017/12/9  | 6 | 0 | 24.9952621 | 121.5870130 | <a href="https://www.inaturalist.org/observations/9099457">https://www.inaturalist.org/observations/9099457</a>     |
| 4586 | Bubulcus ibis       | Cattle Egret      | 2018/8/7   | 1 | 0 | 24.9952631 | 121.5871793 | <a href="https://www.inaturalist.org/observations/111437783">https://www.inaturalist.org/observations/111437783</a> |
| 4587 | Bubulcus ibis       | Cattle Egret      | 2019/3/6   | 2 | 0 | 24.9952827 | 121.5868956 | <a href="https://www.inaturalist.org/observations/20991602">https://www.inaturalist.org/observations/20991602</a>   |
| 4588 | Bubulcus ibis       | Cattle Egret      | 2018/9/26  | 2 | 0 | 24.9952927 | 121.5870361 | <a href="https://www.inaturalist.org/observations/17028368">https://www.inaturalist.org/observations/17028368</a>   |
| 4589 | Bubulcus ibis       | Cattle Egret      | 2014/8/16  | 6 | 0 | 24.9952930 | 121.5874900 | <a href="http://www.inaturalist.org/observations/1078376">http://www.inaturalist.org/observations/1078376</a>       |
| 4590 | Bubulcus ibis       | Cattle Egret      | 2022/11/10 | 1 | 0 | 24.9953044 | 121.5873192 | <a href="https://www.inaturalist.org/observations/141594824">https://www.inaturalist.org/observations/141594824</a> |
| 4591 | Bubulcus ibis       | Cattle Egret      | 2016/7/23  | 2 | 0 | 24.9953093 | 121.5868703 | <a href="https://www.inaturalist.org/observations/105322177">https://www.inaturalist.org/observations/105322177</a> |
| 4592 | Bubulcus ibis       | Cattle Egret      | 2020/3/3   | 1 | 0 | 24.9953460 | 121.5869228 | <a href="https://www.inaturalist.org/observations/39485310">https://www.inaturalist.org/observations/39485310</a>   |
| 4593 | Bubulcus ibis       | Cattle Egret      | 2020/3/4   | 1 | 0 | 24.9953490 | 121.5871560 | <a href="https://www.inaturalist.org/observations/39743396">https://www.inaturalist.org/observations/39743396</a>   |
| 4594 | Bubulcus ibis       | Cattle Egret      | 2020/3/4   | 1 | 0 | 24.9953575 | 121.5871251 | <a href="https://www.inaturalist.org/observations/40921334">https://www.inaturalist.org/observations/40921334</a>   |
| 4595 | Bubulcus ibis       | Cattle Egret      | 2022/4/9   | 1 | 0 | 24.9953667 | 121.5872637 | <a href="https://www.inaturalist.org/observations/110832182">https://www.inaturalist.org/observations/110832182</a> |
| 4596 | Bubulcus ibis       | Cattle Egret      | 2018/9/26  | 2 | 0 | 24.9955467 | 121.5837950 | <a href="https://www.inaturalist.org/observations/17021949">https://www.inaturalist.org/observations/17021949</a>   |
| 4597 | Bubulcus ibis       | Cattle Egret      | 2017/5/6   | 3 | 0 | 24.9967300 | 121.5779583 | <a href="https://www.inaturalist.org/observations/6109565">https://www.inaturalist.org/observations/6109565</a>     |
| 4598 | Bubulcus ibis       | Cattle Egret      | 2019/1/9   | 7 | 0 | 24.9967583 | 121.5778050 | <a href="https://www.inaturalist.org/observations/19534751">https://www.inaturalist.org/observations/19534751</a>   |
| 4599 | Bubulcus ibis       | Cattle Egret      | 2022/8/20  | 2 | 0 | 24.9969730 | 121.5826256 | <a href="https://www.inaturalist.org/observations/131700412">https://www.inaturalist.org/observations/131700412</a> |

|      |                        |                      |            |   |   |            |             |                                                                                                                     |
|------|------------------------|----------------------|------------|---|---|------------|-------------|---------------------------------------------------------------------------------------------------------------------|
| 4600 | Bubulcus ibis          | Cattle Egret         | 2022/10/4  | 1 | 0 | 24.9973075 | 121.5815184 | <a href="https://www.inaturalist.org/observations/137478518">https://www.inaturalist.org/observations/137478518</a> |
| 4601 | Bubulcus ibis          | Cattle Egret         | 2020/7/30  | 1 | 0 | 24.9975033 | 121.5830682 | <a href="https://www.inaturalist.org/observations/54820474">https://www.inaturalist.org/observations/54820474</a>   |
| 4602 | Bubulcus ibis          | Cattle Egret         | 2020/1/13  | 2 | 0 | 24.9977466 | 121.5859408 | <a href="https://www.inaturalist.org/observations/37647981">https://www.inaturalist.org/observations/37647981</a>   |
| 4603 | Bubulcus ibis          | Cattle Egret         | 2018/8/26  | 3 | 0 | 24.9977583 | 121.5803059 | <a href="https://www.inaturalist.org/observations/16225118">https://www.inaturalist.org/observations/16225118</a>   |
| 4604 | Bubulcus ibis          | Cattle Egret         | 2021/9/11  | 1 | 0 | 24.9980725 | 121.5816589 | <a href="https://www.inaturalist.org/observations/96689689">https://www.inaturalist.org/observations/96689689</a>   |
| 4605 | Bubulcus ibis          | Cattle Egret         | 2020/10/9  | 1 | 0 | 24.9980725 | 121.5816589 | <a href="https://www.inaturalist.org/observations/134374259">https://www.inaturalist.org/observations/134374259</a> |
| 4606 | Bubulcus ibis          | Cattle Egret         | 2013/8/29  | 1 | 0 | 24.9980730 | 121.5816590 | <a href="https://www.inaturalist.org/observations/106974522">https://www.inaturalist.org/observations/106974522</a> |
| 4607 | Bubulcus ibis          | Cattle Egret         | 2018/7/24  | 2 | 0 | 24.9981393 | 121.5796094 | <a href="https://www.inaturalist.org/observations/14876013">https://www.inaturalist.org/observations/14876013</a>   |
| 4608 | Bubulcus ibis          | Cattle Egret         | 2019/7/7   | 2 | 0 | 24.9982383 | 121.5814533 | <a href="https://www.inaturalist.org/observations/73585558">https://www.inaturalist.org/observations/73585558</a>   |
| 4609 | Bubulcus ibis          | Cattle Egret         | 2021/4/23  | 3 | 0 | 24.9982578 | 121.5819646 | <a href="https://www.inaturalist.org/observations/74915017">https://www.inaturalist.org/observations/74915017</a>   |
| 4610 | Bubulcus ibis          | Cattle Egret         | 2019/9/14  | 1 | 0 | 24.9983469 | 121.5810358 | <a href="https://www.inaturalist.org/observations/34293090">https://www.inaturalist.org/observations/34293090</a>   |
| 4611 | Bubulcus ibis          | Cattle Egret         | 2021/4/23  | 3 | 0 | 24.9984436 | 121.5815926 | <a href="https://www.inaturalist.org/observations/74915054">https://www.inaturalist.org/observations/74915054</a>   |
| 4612 | Bubulcus<br>coromandus | ibis<br>Cattle Egret | 2021/5/16  | 2 | 0 | 24.9984951 | 121.4458178 | <a href="https://www.inaturalist.org/observations/78962091">https://www.inaturalist.org/observations/78962091</a>   |
| 4613 | Bubulcus ibis          | Cattle Egret         | 2020/2/14  | 2 | 0 | 24.9986580 | 121.5812070 | <a href="https://www.inaturalist.org/observations/49543209">https://www.inaturalist.org/observations/49543209</a>   |
| 4614 | Bubulcus ibis          | Cattle Egret         | 2008/10/18 | 2 | 0 | 24.9987461 | 121.5823333 | <a href="https://www.inaturalist.org/observations/79221079">https://www.inaturalist.org/observations/79221079</a>   |
| 4615 | Bubulcus ibis          | Cattle Egret         | 2020/4/15  | 1 | 0 | 24.9987890 | 121.5815960 | <a href="https://www.inaturalist.org/observations/102180877">https://www.inaturalist.org/observations/102180877</a> |
| 4616 | Bubulcus ibis          | Cattle Egret         | 2015/7/24  | 4 | 0 | 24.9988534 | 121.5810682 | <a href="http://www.inaturalist.org/observations/3687502">http://www.inaturalist.org/observations/3687502</a>       |
| 4617 | Bubulcus ibis          | Cattle Egret         | 2019/4/20  | 1 | 0 | 24.9998304 | 121.4386032 | <a href="https://www.inaturalist.org/observations/23911462">https://www.inaturalist.org/observations/23911462</a>   |
| 4618 | Bubulcus ibis          | Cattle Egret         | 2018/8/26  | 2 | 0 | 25.0009561 | 121.5856959 | <a href="https://www.inaturalist.org/observations/16225124">https://www.inaturalist.org/observations/16225124</a>   |
| 4619 | Bubulcus ibis          | Cattle Egret         | 2020/6/12  | 2 | 0 | 25.0021050 | 121.3282355 | <a href="https://www.inaturalist.org/observations/49289967">https://www.inaturalist.org/observations/49289967</a>   |
| 4620 | Bubulcus ibis          | Cattle Egret         | 2017/4/15  | 2 | 0 | 25.0025291 | 121.9299730 | <a href="https://www.inaturalist.org/observations/36014487">https://www.inaturalist.org/observations/36014487</a>   |
| 4621 | Bubulcus ibis          | Cattle Egret         | 2020/4/19  | 1 | 0 | 25.0069883 | 121.5295767 | <a href="https://www.inaturalist.org/observations/42550369">https://www.inaturalist.org/observations/42550369</a>   |
| 4622 | Bubulcus ibis          | Cattle Egret         | 2021/11/12 | 1 | 0 | 25.0071983 | 121.5364246 | <a href="https://www.inaturalist.org/observations/103135076">https://www.inaturalist.org/observations/103135076</a> |
| 4623 | Bubulcus ibis          | Cattle Egret         | 2021/11/4  | 2 | 0 | 25.0075361 | 121.5353550 | <a href="https://www.inaturalist.org/observations/100399770">https://www.inaturalist.org/observations/100399770</a> |
| 4624 | Bubulcus ibis          | Cattle Egret         | 2021/11/10 | 1 | 0 | 25.0077099 | 121.5904230 | <a href="https://www.inaturalist.org/observations/101275610">https://www.inaturalist.org/observations/101275610</a> |

|      |               |              |            |   |   |            |             |                                                                                                                     |
|------|---------------|--------------|------------|---|---|------------|-------------|---------------------------------------------------------------------------------------------------------------------|
| 4625 | Bubulcus ibis | Cattle Egret | 2022/4/17  | 1 | 0 | 25.0080544 | 121.5292940 | <a href="https://www.inaturalist.org/observations/115309793">https://www.inaturalist.org/observations/115309793</a> |
| 4626 | Bubulcus ibis | Cattle Egret | 2020/3/11  | 2 | 0 | 25.0091730 | 121.4912580 | <a href="https://www.inaturalist.org/observations/40165941">https://www.inaturalist.org/observations/40165941</a>   |
| 4627 | Bubulcus ibis | Cattle Egret | 2022/11/19 | 1 | 0 | 25.0094675 | 121.6217000 | <a href="https://www.inaturalist.org/observations/142345598">https://www.inaturalist.org/observations/142345598</a> |
| 4628 | Bubulcus ibis | Cattle Egret | 2019/9/20  | 1 | 0 | 25.0099025 | 121.5316517 | <a href="https://www.inaturalist.org/observations/33075570">https://www.inaturalist.org/observations/33075570</a>   |
| 4629 | Bubulcus ibis | Cattle Egret | 2019/9/20  | 2 | 0 | 25.0099563 | 121.5319440 | <a href="https://www.inaturalist.org/observations/33075578">https://www.inaturalist.org/observations/33075578</a>   |
| 4630 | Bubulcus ibis | Cattle Egret | 2022/10/19 | 2 | 0 | 25.0101028 | 121.5318919 | <a href="https://www.inaturalist.org/observations/141447206">https://www.inaturalist.org/observations/141447206</a> |
| 4631 | Bubulcus ibis | Cattle Egret | 2020/2/10  | 0 | 0 | 25.0105880 | 121.5920171 | <a href="https://www.inaturalist.org/observations/38713312">https://www.inaturalist.org/observations/38713312</a>   |
| 4632 | Bubulcus ibis | Cattle Egret | 2020/2/10  | 0 | 0 | 25.0105880 | 121.5920171 | <a href="https://www.inaturalist.org/observations/38713313">https://www.inaturalist.org/observations/38713313</a>   |
| 4633 | Bubulcus ibis | Cattle Egret | 2019/9/23  | 1 | 0 | 25.0108727 | 121.5283775 | <a href="https://www.inaturalist.org/observations/33248439">https://www.inaturalist.org/observations/33248439</a>   |
| 4634 | Bubulcus ibis | Cattle Egret | 2019/5/26  | 1 | 0 | 25.0112862 | 98.4532197  | <a href="https://www.inaturalist.org/observations/36405450">https://www.inaturalist.org/observations/36405450</a>   |
| 4635 | Bubulcus ibis | Cattle Egret | 2022/12/8  | 0 | 0 | 25.0119371 | 121.2230982 | <a href="https://www.inaturalist.org/observations/143913592">https://www.inaturalist.org/observations/143913592</a> |
| 4636 | Bubulcus ibis | Cattle Egret | 2020/4/30  | 1 | 0 | 25.0141656 | 121.4681628 | <a href="https://www.inaturalist.org/observations/61459053">https://www.inaturalist.org/observations/61459053</a>   |
| 4637 | Bubulcus ibis | Cattle Egret | 2021/12/4  | 1 | 0 | 25.0153628 | 121.9231214 | <a href="https://www.inaturalist.org/observations/104770968">https://www.inaturalist.org/observations/104770968</a> |
| 4638 | Bubulcus ibis | Cattle Egret | 2020/7/24  | 2 | 0 | 25.0153667 | 121.5382383 | <a href="https://www.inaturalist.org/observations/54153018">https://www.inaturalist.org/observations/54153018</a>   |
| 4639 | Bubulcus ibis | Cattle Egret | 2021/12/13 | 1 | 0 | 25.0155715 | 121.9183244 | <a href="https://www.inaturalist.org/observations/103051054">https://www.inaturalist.org/observations/103051054</a> |
| 4640 | Bubulcus ibis | Cattle Egret | 2009/5/31  | 2 | 0 | 25.0160000 | 98.4660000  | <a href="https://www.inaturalist.org/observations/106145140">https://www.inaturalist.org/observations/106145140</a> |
| 4641 | Bubulcus ibis | Cattle Egret | 2018/8/20  | 4 | 0 | 25.0160269 | 121.5397382 | <a href="https://www.inaturalist.org/observations/20433740">https://www.inaturalist.org/observations/20433740</a>   |
| 4642 | Bubulcus ibis | Cattle Egret | 2020/4/24  | 4 | 0 | 25.0160606 | 121.3419446 | <a href="https://www.inaturalist.org/observations/43033733">https://www.inaturalist.org/observations/43033733</a>   |
| 4643 | Bubulcus ibis | Cattle Egret | 2020/11/7  | 1 | 0 | 25.0163531 | 121.9241364 | <a href="https://www.inaturalist.org/observations/64453433">https://www.inaturalist.org/observations/64453433</a>   |
| 4644 | Bubulcus ibis | Cattle Egret | 2020/4/29  | 1 | 0 | 25.0168761 | 121.5538394 | <a href="https://www.inaturalist.org/observations/44205092">https://www.inaturalist.org/observations/44205092</a>   |
| 4645 | Bubulcus ibis | Cattle Egret | 2019/4/11  | 4 | 0 | 25.0169615 | 121.5203104 | <a href="https://www.inaturalist.org/observations/22302785">https://www.inaturalist.org/observations/22302785</a>   |
| 4646 | Bubulcus ibis | Cattle Egret | 2022/10/21 | 1 | 0 | 25.0170556 | 121.5337240 | <a href="https://www.inaturalist.org/observations/143865179">https://www.inaturalist.org/observations/143865179</a> |
| 4647 | Bubulcus ibis | Cattle Egret | 2020/1/23  | 1 | 0 | 25.0173405 | 121.5397518 | <a href="https://www.inaturalist.org/observations/38144914">https://www.inaturalist.org/observations/38144914</a>   |
| 4648 | Bubulcus ibis | Cattle Egret | 2021/7/21  | 2 | 0 | 25.0174472 | 121.4910050 | <a href="https://www.inaturalist.org/observations/88125610">https://www.inaturalist.org/observations/88125610</a>   |
| 4649 | Bubulcus ibis | Cattle Egret | 2022/4/28  | 2 | 0 | 25.0176465 | 121.4921155 | <a href="https://www.inaturalist.org/observations/113203876">https://www.inaturalist.org/observations/113203876</a> |



|      |               |              |            |   |   |            |             |                                                                                                                     |
|------|---------------|--------------|------------|---|---|------------|-------------|---------------------------------------------------------------------------------------------------------------------|
| 4650 | Bubulcus ibis | Cattle Egret | 2021/10/10 | 1 | 0 | 25.0177725 | 121.9268616 | <a href="https://www.inaturalist.org/observations/104103185">https://www.inaturalist.org/observations/104103185</a> |
| 4651 | Bubulcus ibis | Cattle Egret | 2019/10/14 | 2 | 0 | 25.0178799 | 121.5375364 | <a href="https://www.inaturalist.org/observations/36702885">https://www.inaturalist.org/observations/36702885</a>   |
| 4652 | Bubulcus ibis | Cattle Egret | 2021/4/11  | 1 | 0 | 25.0179078 | 121.9235144 | <a href="https://www.inaturalist.org/observations/73718678">https://www.inaturalist.org/observations/73718678</a>   |
| 4653 | Bubulcus ibis | Cattle Egret | 2022/6/19  | 1 | 0 | 25.0179593 | 121.5178668 | <a href="https://www.inaturalist.org/observations/122432210">https://www.inaturalist.org/observations/122432210</a> |
| 4654 | Bubulcus ibis | Cattle Egret | 2011/12/18 | 1 | 0 | 25.0186671 | 121.9244101 | <a href="https://www.inaturalist.org/observations/55987552">https://www.inaturalist.org/observations/55987552</a>   |
| 4655 | Bubulcus ibis | Cattle Egret | 2022/11/13 | 1 | 0 | 25.0188603 | 121.9212331 | <a href="https://www.inaturalist.org/observations/142273859">https://www.inaturalist.org/observations/142273859</a> |
| 4656 | Bubulcus ibis | Cattle Egret | 2020/12/2  | 1 | 0 | 25.0190388 | 121.5373467 | <a href="https://www.inaturalist.org/observations/65992318">https://www.inaturalist.org/observations/65992318</a>   |
| 4657 | Bubulcus ibis | Cattle Egret | 2020/12/2  | 1 | 0 | 25.0190555 | 121.5373467 | <a href="https://www.inaturalist.org/observations/65992331">https://www.inaturalist.org/observations/65992331</a>   |
| 4658 | Bubulcus ibis | Cattle Egret | 2021/5/15  | 2 | 0 | 25.0191111 | 121.5371861 | <a href="https://www.inaturalist.org/observations/79768948">https://www.inaturalist.org/observations/79768948</a>   |
| 4659 | Bubulcus ibis | Cattle Egret | 2021/4/30  | 1 | 0 | 25.0196638 | 121.5373617 | <a href="https://www.inaturalist.org/observations/76586663">https://www.inaturalist.org/observations/76586663</a>   |
| 4660 | Bubulcus ibis | Cattle Egret | 2022/5/18  | 1 | 0 | 25.0197182 | 121.5171539 | <a href="https://www.inaturalist.org/observations/122583749">https://www.inaturalist.org/observations/122583749</a> |
| 4661 | Bubulcus ibis | Cattle Egret | 2022/9/15  | 3 | 0 | 25.0197862 | 121.5373700 | <a href="https://www.inaturalist.org/observations/136393004">https://www.inaturalist.org/observations/136393004</a> |
| 4662 | Bubulcus ibis | Cattle Egret | 2019/3/12  | 1 | 0 | 25.0197943 | 121.5381804 | <a href="https://www.inaturalist.org/observations/48523002">https://www.inaturalist.org/observations/48523002</a>   |
| 4663 | Bubulcus ibis | Cattle Egret | 2020/5/31  | 1 | 0 | 25.0198756 | 121.9244019 | <a href="https://www.inaturalist.org/observations/47967487">https://www.inaturalist.org/observations/47967487</a>   |
| 4664 | Bubulcus ibis | Cattle Egret | 2020/12/19 | 1 | 0 | 25.0198767 | 121.5378183 | <a href="https://www.inaturalist.org/observations/66769195">https://www.inaturalist.org/observations/66769195</a>   |
| 4665 | Bubulcus ibis | Cattle Egret | 2021/2/16  | 2 | 0 | 25.0199083 | 121.5377417 | <a href="https://www.inaturalist.org/observations/69708679">https://www.inaturalist.org/observations/69708679</a>   |
| 4666 | Bubulcus ibis | Cattle Egret | 2022/6/12  | 1 | 0 | 25.0199169 | 121.5373988 | <a href="https://www.inaturalist.org/observations/121352716">https://www.inaturalist.org/observations/121352716</a> |
| 4667 | Bubulcus ibis | Cattle Egret | 2020/11/6  | 2 | 0 | 25.0199433 | 121.5370567 | <a href="https://www.inaturalist.org/observations/64289960">https://www.inaturalist.org/observations/64289960</a>   |
| 4668 | Bubulcus ibis | Cattle Egret | 2022/9/29  | 2 | 0 | 25.0199555 | 121.5377800 | <a href="https://www.inaturalist.org/observations/136892654">https://www.inaturalist.org/observations/136892654</a> |
| 4669 | Bubulcus ibis | Cattle Egret | 2021/2/16  | 2 | 0 | 25.0199667 | 121.5376200 | <a href="https://www.inaturalist.org/observations/69708687">https://www.inaturalist.org/observations/69708687</a>   |
| 4670 | Bubulcus ibis | Cattle Egret | 2022/10/6  | 2 | 0 | 25.0200003 | 121.5377347 | <a href="https://www.inaturalist.org/observations/137726792">https://www.inaturalist.org/observations/137726792</a> |
| 4671 | Bubulcus ibis | Cattle Egret | 2020/2/9   | 1 | 0 | 25.0200432 | 121.5376094 | <a href="https://www.inaturalist.org/observations/41212882">https://www.inaturalist.org/observations/41212882</a>   |
| 4672 | Bubulcus ibis | Cattle Egret | 2019/7/7   | 1 | 0 | 25.0201250 | 121.5376967 | <a href="https://www.inaturalist.org/observations/49036710">https://www.inaturalist.org/observations/49036710</a>   |
| 4673 | Bubulcus ibis | Cattle Egret | 2020/7/18  | 1 | 0 | 25.0202083 | 121.5374133 | <a href="https://www.inaturalist.org/observations/53452327">https://www.inaturalist.org/observations/53452327</a>   |
| 4674 | Bubulcus ibis | Cattle Egret | 2021/12/13 | 1 | 0 | 25.0202333 | 121.5374833 | <a href="https://www.inaturalist.org/observations/102969851">https://www.inaturalist.org/observations/102969851</a> |

|      |               |              |            |   |   |            |             |                                                                                                                     |
|------|---------------|--------------|------------|---|---|------------|-------------|---------------------------------------------------------------------------------------------------------------------|
| 4675 | Bubulcus ibis | Cattle Egret | 2020/9/15  | 2 | 0 | 25.0202917 | 121.5380083 | <a href="https://www.inaturalist.org/observations/60949287">https://www.inaturalist.org/observations/60949287</a>   |
| 4676 | Bubulcus ibis | Cattle Egret | 2020/6/19  | 2 | 0 | 25.0202951 | 121.5370649 | <a href="https://www.inaturalist.org/observations/50242003">https://www.inaturalist.org/observations/50242003</a>   |
| 4677 | Bubulcus ibis | Cattle Egret | 2022/10/26 | 2 | 0 | 25.0203080 | 121.5377160 | <a href="https://www.inaturalist.org/observations/140507276">https://www.inaturalist.org/observations/140507276</a> |
| 4678 | Bubulcus ibis | Cattle Egret | 2022/10/26 | 2 | 0 | 25.0203080 | 121.5377160 | <a href="https://www.inaturalist.org/observations/140507277">https://www.inaturalist.org/observations/140507277</a> |
| 4679 | Bubulcus ibis | Cattle Egret | 2022/10/26 | 2 | 0 | 25.0203080 | 121.5377160 | <a href="https://www.inaturalist.org/observations/140507278">https://www.inaturalist.org/observations/140507278</a> |
| 4680 | Bubulcus ibis | Cattle Egret | 2022/10/26 | 2 | 0 | 25.0203080 | 121.5377160 | <a href="https://www.inaturalist.org/observations/140507280">https://www.inaturalist.org/observations/140507280</a> |
| 4681 | Bubulcus ibis | Cattle Egret | 2022/10/26 | 2 | 0 | 25.0203080 | 121.5377160 | <a href="https://www.inaturalist.org/observations/140507282">https://www.inaturalist.org/observations/140507282</a> |
| 4682 | Bubulcus ibis | Cattle Egret | 2022/3/31  | 2 | 0 | 25.0203333 | 121.5381383 | <a href="https://www.inaturalist.org/observations/109995615">https://www.inaturalist.org/observations/109995615</a> |
| 4683 | Bubulcus ibis | Cattle Egret | 2018/5/30  | 2 | 0 | 25.0203806 | 121.5372778 | <a href="https://www.inaturalist.org/observations/13055559">https://www.inaturalist.org/observations/13055559</a>   |
| 4684 | Bubulcus ibis | Cattle Egret | 2021/2/21  | 1 | 0 | 25.0203862 | 121.5378500 | <a href="https://www.inaturalist.org/observations/69911940">https://www.inaturalist.org/observations/69911940</a>   |
| 4685 | Bubulcus ibis | Cattle Egret | 2022/1/18  | 1 | 0 | 25.0204340 | 121.5376962 | <a href="https://www.inaturalist.org/observations/121402808">https://www.inaturalist.org/observations/121402808</a> |
| 4686 | Bubulcus ibis | Cattle Egret | 2022/9/5   | 1 | 0 | 25.0204384 | 121.5212704 | <a href="https://www.inaturalist.org/observations/133735313">https://www.inaturalist.org/observations/133735313</a> |
| 4687 | Bubulcus ibis | Cattle Egret | 2021/2/6   | 1 | 0 | 25.0204610 | 121.5379582 | <a href="https://www.inaturalist.org/observations/69132929">https://www.inaturalist.org/observations/69132929</a>   |
| 4688 | Bubulcus ibis | Cattle Egret | 2022/4/4   | 2 | 0 | 25.0204620 | 121.5379333 | <a href="https://www.inaturalist.org/observations/110377604">https://www.inaturalist.org/observations/110377604</a> |
| 4689 | Bubulcus ibis | Cattle Egret | 2021/3/27  | 1 | 0 | 25.0204722 | 121.5379867 | <a href="https://www.inaturalist.org/observations/72143346">https://www.inaturalist.org/observations/72143346</a>   |
| 4690 | Bubulcus ibis | Cattle Egret | 2021/3/27  | 1 | 0 | 25.0204917 | 121.5379950 | <a href="https://www.inaturalist.org/observations/72143326">https://www.inaturalist.org/observations/72143326</a>   |
| 4691 | Bubulcus ibis | Cattle Egret | 2019/7/24  | 3 | 0 | 25.0205383 | 121.5371617 | <a href="https://www.inaturalist.org/observations/29501769">https://www.inaturalist.org/observations/29501769</a>   |
| 4692 | Bubulcus ibis | Cattle Egret | 2022/9/23  | 1 | 0 | 25.0205778 | 121.5379117 | <a href="https://www.inaturalist.org/observations/136558794">https://www.inaturalist.org/observations/136558794</a> |
| 4693 | Bubulcus ibis | Cattle Egret | 2021/12/4  | 1 | 0 | 25.0207550 | 121.9227289 | <a href="https://www.inaturalist.org/observations/104772485">https://www.inaturalist.org/observations/104772485</a> |
| 4694 | Bubulcus ibis | Cattle Egret | 2022/2/19  | 1 | 0 | 25.0207612 | 121.5371500 | <a href="https://www.inaturalist.org/observations/124250575">https://www.inaturalist.org/observations/124250575</a> |
| 4695 | Bubulcus ibis | Cattle Egret | 2021/3/26  | 3 | 0 | 25.0207901 | 121.5376012 | <a href="https://www.inaturalist.org/observations/72074305">https://www.inaturalist.org/observations/72074305</a>   |
| 4696 | Bubulcus ibis | Cattle Egret | 2021/10/27 | 3 | 0 | 25.0209388 | 121.5377117 | <a href="https://www.inaturalist.org/observations/99525556">https://www.inaturalist.org/observations/99525556</a>   |
| 4697 | Bubulcus ibis | Cattle Egret | 2022/8/11  | 2 | 0 | 25.0209638 | 121.5566417 | <a href="https://www.inaturalist.org/observations/130362833">https://www.inaturalist.org/observations/130362833</a> |
| 4698 | Bubulcus ibis | Cattle Egret | 2021/5/3   | 1 | 0 | 25.0211668 | 121.5551359 | <a href="https://www.inaturalist.org/observations/76902622">https://www.inaturalist.org/observations/76902622</a>   |
| 4699 | Bubulcus ibis | Cattle Egret | 2022/2/11  | 1 | 0 | 25.0216136 | 121.5076081 | <a href="https://www.inaturalist.org/observations/106549592">https://www.inaturalist.org/observations/106549592</a> |

|      |               |              |            |   |   |            |             |                                                                                                                     |
|------|---------------|--------------|------------|---|---|------------|-------------|---------------------------------------------------------------------------------------------------------------------|
| 4700 | Bubulcus ibis | Cattle Egret | 2018/9/5   | 2 | 0 | 25.0216491 | 121.5046322 | <a href="https://www.inaturalist.org/observations/16220900">https://www.inaturalist.org/observations/16220900</a>   |
| 4701 | Bubulcus ibis | Cattle Egret | 2019/4/28  | 3 | 0 | 25.0217358 | 121.5054628 | <a href="https://www.inaturalist.org/observations/23540319">https://www.inaturalist.org/observations/23540319</a>   |
| 4702 | Bubulcus ibis | Cattle Egret | 2021/12/4  | 1 | 0 | 25.0217403 | 121.9231181 | <a href="https://www.inaturalist.org/observations/104772481">https://www.inaturalist.org/observations/104772481</a> |
| 4703 | Bubulcus ibis | Cattle Egret | 2020/4/25  | 2 | 0 | 25.0222144 | 121.5145347 | <a href="https://www.inaturalist.org/observations/43264246">https://www.inaturalist.org/observations/43264246</a>   |
| 4704 | Bubulcus ibis | Cattle Egret | 2022/2/11  | 2 | 0 | 25.0224158 | 121.5134431 | <a href="https://www.inaturalist.org/observations/106597203">https://www.inaturalist.org/observations/106597203</a> |
| 4705 | Bubulcus ibis | Cattle Egret | 2022/3/6   | 1 | 0 | 25.0224330 | 121.5135108 | <a href="https://www.inaturalist.org/observations/108103938">https://www.inaturalist.org/observations/108103938</a> |
| 4706 | Bubulcus ibis | Cattle Egret | 2020/7/5   | 1 | 0 | 25.0224948 | 121.5060164 | <a href="https://www.inaturalist.org/observations/51981814">https://www.inaturalist.org/observations/51981814</a>   |
| 4707 | Bubulcus ibis | Cattle Egret | 2018/9/16  | 1 | 0 | 25.0225604 | 121.5048841 | <a href="https://www.inaturalist.org/observations/16577348">https://www.inaturalist.org/observations/16577348</a>   |
| 4708 | Bubulcus ibis | Cattle Egret | 2022/7/26  | 3 | 0 | 25.0227242 | 121.5056725 | <a href="https://www.inaturalist.org/observations/127949201">https://www.inaturalist.org/observations/127949201</a> |
| 4709 | Bubulcus ibis | Cattle Egret | 2022/10/20 | 1 | 0 | 25.0227972 | 121.5370717 | <a href="https://www.inaturalist.org/observations/139504007">https://www.inaturalist.org/observations/139504007</a> |
| 4710 | Bubulcus ibis | Cattle Egret | 2022/6/25  | 2 | 0 | 25.0229793 | 121.5042655 | <a href="https://www.inaturalist.org/observations/123315484">https://www.inaturalist.org/observations/123315484</a> |
| 4711 | Bubulcus ibis | Cattle Egret | 2020/12/19 | 2 | 0 | 25.0230556 | 121.5052778 | <a href="https://www.inaturalist.org/observations/67078729">https://www.inaturalist.org/observations/67078729</a>   |
| 4712 | Bubulcus ibis | Cattle Egret | 2018/7/4   | 4 | 0 | 25.0233510 | 121.5056968 | <a href="https://www.inaturalist.org/observations/14033279">https://www.inaturalist.org/observations/14033279</a>   |
| 4713 | Bubulcus ibis | Cattle Egret | 2021/11/13 | 2 | 0 | 25.0243122 | 121.5051099 | <a href="https://www.inaturalist.org/observations/100985068">https://www.inaturalist.org/observations/100985068</a> |
| 4714 | Bubulcus ibis | Cattle Egret | 2019/7/10  | 2 | 0 | 25.0243612 | 121.5459788 | <a href="https://www.inaturalist.org/observations/28544424">https://www.inaturalist.org/observations/28544424</a>   |
| 4715 | Bubulcus ibis | Cattle Egret | 2021/7/13  | 2 | 0 | 25.0244055 | 121.5053467 | <a href="https://www.inaturalist.org/observations/86852763">https://www.inaturalist.org/observations/86852763</a>   |
| 4716 | Bubulcus ibis | Cattle Egret | 2021/4/9   | 1 | 0 | 25.0244095 | 121.5061899 | <a href="https://www.inaturalist.org/observations/73371978">https://www.inaturalist.org/observations/73371978</a>   |
| 4717 | Bubulcus ibis | Cattle Egret | 2019/11/10 | 3 | 0 | 25.0244400 | 121.5039933 | <a href="https://www.inaturalist.org/observations/35526901">https://www.inaturalist.org/observations/35526901</a>   |
| 4718 | Bubulcus ibis | Cattle Egret | 2019/11/10 | 2 | 0 | 25.0245300 | 121.5065800 | <a href="https://www.inaturalist.org/observations/35526929">https://www.inaturalist.org/observations/35526929</a>   |
| 4719 | Bubulcus ibis | Cattle Egret | 2022/9/10  | 5 | 0 | 25.0245736 | 121.5049620 | <a href="https://www.inaturalist.org/observations/134556483">https://www.inaturalist.org/observations/134556483</a> |
| 4720 | Bubulcus ibis | Cattle Egret | 2021/10/6  | 1 | 0 | 25.0245896 | 121.5066268 | <a href="https://www.inaturalist.org/observations/97567577">https://www.inaturalist.org/observations/97567577</a>   |
| 4721 | Bubulcus ibis | Cattle Egret | 2019/10/26 | 2 | 0 | 25.0246100 | 121.5039817 | <a href="https://www.inaturalist.org/observations/35081950">https://www.inaturalist.org/observations/35081950</a>   |
| 4722 | Bubulcus ibis | Cattle Egret | 2022/11/14 | 2 | 0 | 25.0246484 | 121.3036543 | <a href="https://www.inaturalist.org/observations/142663612">https://www.inaturalist.org/observations/142663612</a> |
| 4723 | Bubulcus ibis | Cattle Egret | 2021/11/13 | 1 | 0 | 25.0246704 | 121.5062664 | <a href="https://www.inaturalist.org/observations/100984992">https://www.inaturalist.org/observations/100984992</a> |
| 4724 | Bubulcus ibis | Cattle Egret | 2019/7/7   | 2 | 0 | 25.0247803 | 121.5075449 | <a href="https://www.inaturalist.org/observations/28350118">https://www.inaturalist.org/observations/28350118</a>   |

|      |               |              |            |   |   |            |             |                                                                                                                     |
|------|---------------|--------------|------------|---|---|------------|-------------|---------------------------------------------------------------------------------------------------------------------|
| 4725 | Bubulcus ibis | Cattle Egret | 2018/8/3   | 2 | 0 | 25.0248750 | 121.5057367 | <a href="https://www.inaturalist.org/observations/15067676">https://www.inaturalist.org/observations/15067676</a>   |
| 4726 | Bubulcus ibis | Cattle Egret | 2021/11/13 | 1 | 0 | 25.0252415 | 121.5072247 | <a href="https://www.inaturalist.org/observations/100984566">https://www.inaturalist.org/observations/100984566</a> |
| 4727 | Bubulcus ibis | Cattle Egret | 2018/10/13 | 4 | 0 | 25.0253868 | 121.5073929 | <a href="https://www.inaturalist.org/observations/17459113">https://www.inaturalist.org/observations/17459113</a>   |
| 4728 | Bubulcus ibis | Cattle Egret | 2020/7/13  | 1 | 0 | 25.0259305 | 121.5357133 | <a href="https://www.inaturalist.org/observations/53018587">https://www.inaturalist.org/observations/53018587</a>   |
| 4729 | Bubulcus ibis | Cattle Egret | 2020/7/12  | 1 | 0 | 25.0266778 | 121.5362333 | <a href="https://www.inaturalist.org/observations/52766819">https://www.inaturalist.org/observations/52766819</a>   |
| 4730 | Bubulcus ibis | Cattle Egret | 2022/9/20  | 1 | 0 | 25.0267639 | 121.5345839 | <a href="https://www.inaturalist.org/observations/135731681">https://www.inaturalist.org/observations/135731681</a> |
| 4731 | Bubulcus ibis | Cattle Egret | 2022/8/1   | 2 | 0 | 25.0269051 | 121.5347596 | <a href="https://www.inaturalist.org/observations/128917916">https://www.inaturalist.org/observations/128917916</a> |
| 4732 | Bubulcus ibis | Cattle Egret | 2020/2/13  | 0 | 0 | 25.0270760 | 121.5342584 | <a href="https://www.inaturalist.org/observations/39039112">https://www.inaturalist.org/observations/39039112</a>   |
| 4733 | Bubulcus ibis | Cattle Egret | 2020/5/23  | 1 | 0 | 25.0271695 | 121.5362333 | <a href="https://www.inaturalist.org/observations/46934566">https://www.inaturalist.org/observations/46934566</a>   |
| 4734 | Bubulcus ibis | Cattle Egret | 2022/10/26 | 2 | 0 | 25.0271702 | 121.5372238 | <a href="https://www.inaturalist.org/observations/140030923">https://www.inaturalist.org/observations/140030923</a> |
| 4735 | Bubulcus ibis | Cattle Egret | 2022/3/9   | 2 | 0 | 25.0276589 | 121.2958000 | <a href="https://www.inaturalist.org/observations/112520175">https://www.inaturalist.org/observations/112520175</a> |
| 4736 | Bubulcus ibis | Cattle Egret | 2022/8/24  | 2 | 0 | 25.0282083 | 121.5347806 | <a href="https://www.inaturalist.org/observations/132112885">https://www.inaturalist.org/observations/132112885</a> |
| 4737 | Bubulcus ibis | Cattle Egret | 2017/7/7   | 2 | 0 | 25.0282224 | 121.5358179 | <a href="https://www.inaturalist.org/observations/105322184">https://www.inaturalist.org/observations/105322184</a> |
| 4738 | Bubulcus ibis | Cattle Egret | 2020/3/24  | 2 | 0 | 25.0284789 | 121.5353288 | <a href="https://www.inaturalist.org/observations/105972854">https://www.inaturalist.org/observations/105972854</a> |
| 4739 | Bubulcus ibis | Cattle Egret | 2018/11/24 | 3 | 0 | 25.0288306 | 121.5358417 | <a href="https://www.inaturalist.org/observations/18594150">https://www.inaturalist.org/observations/18594150</a>   |
| 4740 | Bubulcus ibis | Cattle Egret | 2018/9/23  | 3 | 0 | 25.0289943 | 121.5350482 | <a href="https://www.inaturalist.org/observations/16824145">https://www.inaturalist.org/observations/16824145</a>   |
| 4741 | Bubulcus ibis | Cattle Egret | 2020/10/18 | 1 | 0 | 25.0290868 | 121.5366797 | <a href="https://www.inaturalist.org/observations/62864717">https://www.inaturalist.org/observations/62864717</a>   |
| 4742 | Bubulcus ibis | Cattle Egret | 2017/3/29  | 1 | 0 | 25.0292030 | 121.9295743 | <a href="https://www.inaturalist.org/observations/81720211">https://www.inaturalist.org/observations/81720211</a>   |
| 4743 | Bubulcus ibis | Cattle Egret | 2018/5/30  | 2 | 0 | 25.0293167 | 121.5349972 | <a href="https://www.inaturalist.org/observations/13055545">https://www.inaturalist.org/observations/13055545</a>   |
| 4744 | Bubulcus ibis | Cattle Egret | 2022/5/22  | 1 | 0 | 25.0293436 | 121.5355021 | <a href="https://www.inaturalist.org/observations/118147233">https://www.inaturalist.org/observations/118147233</a> |
| 4745 | Bubulcus ibis | Cattle Egret | 2020/7/2   | 1 | 0 | 25.0293805 | 121.3659967 | <a href="https://www.inaturalist.org/observations/51698934">https://www.inaturalist.org/observations/51698934</a>   |
| 4746 | Bubulcus ibis | Cattle Egret | 2020/8/7   | 1 | 0 | 25.0296500 | 121.5368528 | <a href="https://www.inaturalist.org/observations/55673006">https://www.inaturalist.org/observations/55673006</a>   |
| 4747 | Bubulcus ibis | Cattle Egret | 2022/7/23  | 4 | 0 | 25.0297195 | 121.5358800 | <a href="https://www.inaturalist.org/observations/127472928">https://www.inaturalist.org/observations/127472928</a> |
| 4748 | Bubulcus ibis | Cattle Egret | 2019/12/24 | 1 | 0 | 25.0301199 | 121.5360118 | <a href="https://www.inaturalist.org/observations/36912313">https://www.inaturalist.org/observations/36912313</a>   |
| 4749 | Bubulcus ibis | Cattle Egret | 2017/12/11 | 3 | 0 | 25.0302386 | 121.5346822 | <a href="https://www.inaturalist.org/observations/14446361">https://www.inaturalist.org/observations/14446361</a>   |

|      |                     |                   |            |   |   |            |             |                                                                                                                     |
|------|---------------------|-------------------|------------|---|---|------------|-------------|---------------------------------------------------------------------------------------------------------------------|
| 4750 | Bubulcus ibis       | Cattle Egret      | 2019/9/2   | 2 | 0 | 25.0302486 | 121.5357277 | <a href="https://www.inaturalist.org/observations/32098446">https://www.inaturalist.org/observations/32098446</a>   |
| 4751 | Bubulcus ibis       | Cattle Egret      | 2021/9/28  | 1 | 0 | 25.0303148 | 121.5369549 | <a href="https://www.inaturalist.org/observations/96595266">https://www.inaturalist.org/observations/96595266</a>   |
| 4752 | Bubulcus ibis       | Cattle Egret      | 2020/4/21  | 1 | 0 | 25.0304324 | 121.5369143 | <a href="https://www.inaturalist.org/observations/42731809">https://www.inaturalist.org/observations/42731809</a>   |
| 4753 | Bubulcus ibis       | Cattle Egret      | 2019/9/15  | 3 | 0 | 25.0305126 | 121.5360486 | <a href="https://www.inaturalist.org/observations/32753099">https://www.inaturalist.org/observations/32753099</a>   |
| 4754 | Bubulcus ibis       | Cattle Egret      | 2020/3/15  | 2 | 0 | 25.0307342 | 121.5339731 | <a href="https://www.inaturalist.org/observations/40011464">https://www.inaturalist.org/observations/40011464</a>   |
| 4755 | Bubulcus coromandus | ibis Cattle Egret | 2018/11/29 | 4 | 0 | 25.0307778 | 121.5352472 | <a href="https://www.inaturalist.org/observations/19151024">https://www.inaturalist.org/observations/19151024</a>   |
| 4756 | Bubulcus ibis       | Cattle Egret      | 2022/9/7   | 1 | 0 | 25.0309119 | 121.5359387 | <a href="https://www.inaturalist.org/observations/137354695">https://www.inaturalist.org/observations/137354695</a> |
| 4757 | Bubulcus ibis       | Cattle Egret      | 2020/1/25  | 0 | 0 | 25.0309150 | 121.5349050 | <a href="https://www.inaturalist.org/observations/38237123">https://www.inaturalist.org/observations/38237123</a>   |
| 4758 | Bubulcus ibis       | Cattle Egret      | 2019/12/7  | 1 | 0 | 25.0309322 | 121.5347290 | <a href="https://www.inaturalist.org/observations/36424698">https://www.inaturalist.org/observations/36424698</a>   |
| 4759 | Bubulcus ibis       | Cattle Egret      | 2021/9/21  | 1 | 0 | 25.0309799 | 121.5349807 | <a href="https://www.inaturalist.org/observations/95659396">https://www.inaturalist.org/observations/95659396</a>   |
| 4760 | Bubulcus ibis       | Cattle Egret      | 2021/9/21  | 1 | 0 | 25.0309800 | 121.5349800 | <a href="https://www.inaturalist.org/observations/95659394">https://www.inaturalist.org/observations/95659394</a>   |
| 4761 | Bubulcus ibis       | Cattle Egret      | 2022/10/2  | 2 | 0 | 25.0309846 | 121.5352397 | <a href="https://www.inaturalist.org/observations/137250748">https://www.inaturalist.org/observations/137250748</a> |
| 4762 | Bubulcus ibis       | Cattle Egret      | 2021/9/21  | 1 | 0 | 25.0309866 | 121.5349766 | <a href="https://www.inaturalist.org/observations/95659395">https://www.inaturalist.org/observations/95659395</a>   |
| 4763 | Bubulcus ibis       | Cattle Egret      | 2021/9/1   | 1 | 0 | 25.0310083 | 121.5350367 | <a href="https://www.inaturalist.org/observations/93308068">https://www.inaturalist.org/observations/93308068</a>   |
| 4764 | Bubulcus ibis       | Cattle Egret      | 2022/5/4   | 2 | 0 | 25.0310254 | 121.5361392 | <a href="https://www.inaturalist.org/observations/116526960">https://www.inaturalist.org/observations/116526960</a> |
| 4765 | Bubulcus ibis       | Cattle Egret      | 2022/5/4   | 2 | 0 | 25.0310254 | 121.5361392 | <a href="https://www.inaturalist.org/observations/116526964">https://www.inaturalist.org/observations/116526964</a> |
| 4766 | Bubulcus ibis       | Cattle Egret      | 2021/8/23  | 1 | 0 | 25.0310382 | 121.5355015 | <a href="https://www.inaturalist.org/observations/94730907">https://www.inaturalist.org/observations/94730907</a>   |
| 4767 | Bubulcus ibis       | Cattle Egret      | 2020/10/27 | 1 | 0 | 25.0310474 | 121.5348358 | <a href="https://www.inaturalist.org/observations/64165535">https://www.inaturalist.org/observations/64165535</a>   |
| 4768 | Bubulcus ibis       | Cattle Egret      | 2019/1/3   | 3 | 0 | 25.0310489 | 121.5348567 | <a href="https://www.inaturalist.org/observations/19389999">https://www.inaturalist.org/observations/19389999</a>   |
| 4769 | Bubulcus ibis       | Cattle Egret      | 2020/3/22  | 1 | 0 | 25.0310516 | 121.5348558 | <a href="https://www.inaturalist.org/observations/40637364">https://www.inaturalist.org/observations/40637364</a>   |
| 4770 | Bubulcus ibis       | Cattle Egret      | 2019/2/6   | 3 | 0 | 25.0310528 | 121.5350200 | <a href="https://www.inaturalist.org/observations/20150495">https://www.inaturalist.org/observations/20150495</a>   |
| 4771 | Bubulcus ibis       | Cattle Egret      | 2017/4/25  | 1 | 0 | 25.0310587 | 121.5356475 | <a href="https://www.inaturalist.org/observations/94729175">https://www.inaturalist.org/observations/94729175</a>   |
| 4772 | Bubulcus coromandus | ibis Cattle Egret | 2018/5/25  | 4 | 0 | 25.0310614 | 121.5350314 | <a href="https://www.inaturalist.org/observations/12797954">https://www.inaturalist.org/observations/12797954</a>   |
| 4773 | Bubulcus ibis       | Cattle Egret      | 2020/2/13  | 0 | 0 | 25.0310691 | 121.5345284 | <a href="https://www.inaturalist.org/observations/39039471">https://www.inaturalist.org/observations/39039471</a>   |
| 4774 | Bubulcus ibis       | Cattle Egret      | 2018/12/30 | 3 | 0 | 25.0310771 | 121.5349972 | <a href="https://www.inaturalist.org/observations/19351829">https://www.inaturalist.org/observations/19351829</a>   |

|      |               |              |            |   |   |            |             |                                                                                                                     |
|------|---------------|--------------|------------|---|---|------------|-------------|---------------------------------------------------------------------------------------------------------------------|
| 4775 | Bubulcus ibis | Cattle Egret | 2019/1/3   | 3 | 0 | 25.0310784 | 121.5346579 | <a href="https://www.inaturalist.org/observations/19389975">https://www.inaturalist.org/observations/19389975</a>   |
| 4776 | Bubulcus ibis | Cattle Egret | 2021/9/7   | 1 | 0 | 25.0310841 | 121.5342783 | <a href="https://www.inaturalist.org/observations/93974254">https://www.inaturalist.org/observations/93974254</a>   |
| 4777 | Bubulcus ibis | Cattle Egret | 2018/6/2   | 3 | 0 | 25.0310898 | 121.5346216 | <a href="https://www.inaturalist.org/observations/13034036">https://www.inaturalist.org/observations/13034036</a>   |
| 4778 | Bubulcus ibis | Cattle Egret | 2018/12/30 | 4 | 0 | 25.0310943 | 121.5349022 | <a href="https://www.inaturalist.org/observations/19351834">https://www.inaturalist.org/observations/19351834</a>   |
| 4779 | Bubulcus ibis | Cattle Egret | 2019/1/26  | 1 | 0 | 25.0310983 | 121.5351759 | <a href="https://www.inaturalist.org/observations/94729536">https://www.inaturalist.org/observations/94729536</a>   |
| 4780 | Bubulcus ibis | Cattle Egret | 2018/5/5   | 2 | 0 | 25.0311111 | 121.5347222 | <a href="https://www.inaturalist.org/observations/113828893">https://www.inaturalist.org/observations/113828893</a> |
| 4781 | Bubulcus ibis | Cattle Egret | 2021/4/18  | 3 | 0 | 25.0311167 | 121.5347883 | <a href="https://www.inaturalist.org/observations/74353124">https://www.inaturalist.org/observations/74353124</a>   |
| 4782 | Bubulcus ibis | Cattle Egret | 2019/9/29  | 2 | 0 | 25.0311266 | 121.5370834 | <a href="https://www.inaturalist.org/observations/34192885">https://www.inaturalist.org/observations/34192885</a>   |
| 4783 | Bubulcus ibis | Cattle Egret | 2022/7/23  | 5 | 0 | 25.0311472 | 121.5329750 | <a href="https://www.inaturalist.org/observations/128411633">https://www.inaturalist.org/observations/128411633</a> |
| 4784 | Bubulcus ibis | Cattle Egret | 2021/9/18  | 2 | 0 | 25.0311506 | 121.5341716 | <a href="https://www.inaturalist.org/observations/97130728">https://www.inaturalist.org/observations/97130728</a>   |
| 4785 | Bubulcus ibis | Cattle Egret | 2020/3/14  | 1 | 0 | 25.0311623 | 121.5349503 | <a href="https://www.inaturalist.org/observations/43533095">https://www.inaturalist.org/observations/43533095</a>   |
| 4786 | Bubulcus ibis | Cattle Egret | 2018/9/23  | 4 | 0 | 25.0311999 | 121.5346928 | <a href="https://www.inaturalist.org/observations/16824508">https://www.inaturalist.org/observations/16824508</a>   |
| 4787 | Bubulcus ibis | Cattle Egret | 2020/4/16  | 3 | 0 | 25.0312628 | 121.5349492 | <a href="https://www.inaturalist.org/observations/71311438">https://www.inaturalist.org/observations/71311438</a>   |
| 4788 | Bubulcus ibis | Cattle Egret | 2021/10/12 | 2 | 0 | 25.0313050 | 121.5349640 | <a href="https://www.inaturalist.org/observations/97986142">https://www.inaturalist.org/observations/97986142</a>   |
| 4789 | Bubulcus ibis | Cattle Egret | 2016/5/9   | 2 | 0 | 25.0313065 | 121.5348155 | <a href="https://www.inaturalist.org/observations/67911158">https://www.inaturalist.org/observations/67911158</a>   |
| 4790 | Bubulcus ibis | Cattle Egret | 2018/5/29  | 2 | 0 | 25.0313110 | 121.5345329 | <a href="https://www.inaturalist.org/observations/12940122">https://www.inaturalist.org/observations/12940122</a>   |
| 4791 | Bubulcus ibis | Cattle Egret | 2022/10/4  | 1 | 0 | 25.0313193 | 121.5353328 | <a href="https://www.inaturalist.org/observations/137519133">https://www.inaturalist.org/observations/137519133</a> |
| 4792 | Bubulcus ibis | Cattle Egret | 2021/6/17  | 1 | 0 | 25.0313501 | 121.5348493 | <a href="https://www.inaturalist.org/observations/83385447">https://www.inaturalist.org/observations/83385447</a>   |
| 4793 | Bubulcus ibis | Cattle Egret | 2021/5/2   | 1 | 0 | 25.0313528 | 121.5339367 | <a href="https://www.inaturalist.org/observations/76976570">https://www.inaturalist.org/observations/76976570</a>   |
| 4794 | Bubulcus ibis | Cattle Egret | 2021/3/18  | 1 | 0 | 25.0313618 | 121.5345281 | <a href="https://www.inaturalist.org/observations/79497033">https://www.inaturalist.org/observations/79497033</a>   |
| 4795 | Bubulcus ibis | Cattle Egret | 2019/4/12  | 1 | 0 | 25.0313680 | 121.5350092 | <a href="https://www.inaturalist.org/observations/22401496">https://www.inaturalist.org/observations/22401496</a>   |
| 4796 | Bubulcus ibis | Cattle Egret | 2021/6/17  | 2 | 0 | 25.0314050 | 121.5348516 | <a href="https://www.inaturalist.org/observations/83385297">https://www.inaturalist.org/observations/83385297</a>   |
| 4797 | Bubulcus ibis | Cattle Egret | 2020/4/26  | 1 | 0 | 25.0314487 | 121.5336104 | <a href="https://www.inaturalist.org/observations/43550364">https://www.inaturalist.org/observations/43550364</a>   |
| 4798 | Bubulcus ibis | Cattle Egret | 2019/10/17 | 1 | 0 | 25.0314631 | 121.5352373 | <a href="https://www.inaturalist.org/observations/34956664">https://www.inaturalist.org/observations/34956664</a>   |
| 4799 | Bubulcus ibis | Cattle Egret | 2021/7/4   | 1 | 0 | 25.0314692 | 121.5349990 | <a href="https://www.inaturalist.org/observations/85583489">https://www.inaturalist.org/observations/85583489</a>   |

|      |                     |                   |            |   |   |            |             |                                                                                                                     |
|------|---------------------|-------------------|------------|---|---|------------|-------------|---------------------------------------------------------------------------------------------------------------------|
| 4800 | Bubulcus ibis       | Cattle Egret      | 2021/8/22  | 1 | 0 | 25.0315042 | 121.5347418 | <a href="https://www.inaturalist.org/observations/92574330">https://www.inaturalist.org/observations/92574330</a>   |
| 4801 | Bubulcus ibis       | Cattle Egret      | 2021/8/22  | 2 | 0 | 25.0315042 | 121.5347418 | <a href="https://www.inaturalist.org/observations/92574340">https://www.inaturalist.org/observations/92574340</a>   |
| 4802 | Bubulcus ibis       | Cattle Egret      | 2019/6/2   | 3 | 0 | 25.0315098 | 121.5349676 | <a href="https://www.inaturalist.org/observations/26286615">https://www.inaturalist.org/observations/26286615</a>   |
| 4803 | Bubulcus ibis       | Cattle Egret      | 2019/2/28  | 1 | 0 | 25.0315252 | 121.5351149 | <a href="https://www.inaturalist.org/observations/32211116">https://www.inaturalist.org/observations/32211116</a>   |
| 4804 | Bubulcus coromandus | ibis Cattle Egret | 2019/11/2  | 1 | 0 | 25.0315371 | 121.5342822 | <a href="https://www.inaturalist.org/observations/35188062">https://www.inaturalist.org/observations/35188062</a>   |
| 4805 | Bubulcus ibis       | Cattle Egret      | 2022/2/28  | 1 | 0 | 25.0316055 | 121.5343550 | <a href="https://www.inaturalist.org/observations/107629255">https://www.inaturalist.org/observations/107629255</a> |
| 4806 | Bubulcus ibis       | Cattle Egret      | 2020/9/12  | 2 | 0 | 25.0316485 | 121.5353031 | <a href="https://www.inaturalist.org/observations/59438453">https://www.inaturalist.org/observations/59438453</a>   |
| 4807 | Bubulcus ibis       | Cattle Egret      | 2022/11/11 | 2 | 0 | 25.0316732 | 121.5343352 | <a href="https://www.inaturalist.org/observations/141679508">https://www.inaturalist.org/observations/141679508</a> |
| 4808 | Bubulcus ibis       | Cattle Egret      | 2022/2/26  | 1 | 0 | 25.0317121 | 121.5343896 | <a href="https://www.inaturalist.org/observations/107483856">https://www.inaturalist.org/observations/107483856</a> |
| 4809 | Bubulcus ibis       | Cattle Egret      | 2018/6/9   | 2 | 0 | 25.0317146 | 121.5348474 | <a href="https://www.inaturalist.org/observations/13253881">https://www.inaturalist.org/observations/13253881</a>   |
| 4810 | Bubulcus ibis       | Cattle Egret      | 2021/6/13  | 2 | 0 | 25.0317167 | 121.5341543 | <a href="https://www.inaturalist.org/observations/82813854">https://www.inaturalist.org/observations/82813854</a>   |
| 4811 | Bubulcus ibis       | Cattle Egret      | 2018/5/28  | 3 | 0 | 25.0317217 | 121.5347797 | <a href="https://www.inaturalist.org/observations/12922266">https://www.inaturalist.org/observations/12922266</a>   |
| 4812 | Bubulcus ibis       | Cattle Egret      | 2019/12/21 | 1 | 0 | 25.0317850 | 121.5343733 | <a href="https://www.inaturalist.org/observations/122151031">https://www.inaturalist.org/observations/122151031</a> |
| 4813 | Bubulcus ibis       | Cattle Egret      | 2022/3/26  | 1 | 0 | 25.0317865 | 121.5369210 | <a href="https://www.inaturalist.org/observations/109522659">https://www.inaturalist.org/observations/109522659</a> |
| 4814 | Bubulcus ibis       | Cattle Egret      | 2019/3/19  | 2 | 0 | 25.0318226 | 121.5353238 | <a href="https://www.inaturalist.org/observations/21384064">https://www.inaturalist.org/observations/21384064</a>   |
| 4815 | Bubulcus ibis       | Cattle Egret      | 2020/9/1   | 1 | 0 | 25.0318806 | 121.5342556 | <a href="https://www.inaturalist.org/observations/58226387">https://www.inaturalist.org/observations/58226387</a>   |
| 4816 | Bubulcus ibis       | Cattle Egret      | 2018/7/28  | 2 | 0 | 25.0319550 | 121.5345529 | <a href="https://www.inaturalist.org/observations/14923394">https://www.inaturalist.org/observations/14923394</a>   |
| 4817 | Bubulcus ibis       | Cattle Egret      | 2018/7/28  | 2 | 0 | 25.0319574 | 121.5345475 | <a href="https://www.inaturalist.org/observations/14923395">https://www.inaturalist.org/observations/14923395</a>   |
| 4818 | Bubulcus ibis       | Cattle Egret      | 2022/4/23  | 2 | 0 | 25.0320050 | 121.5345233 | <a href="https://www.inaturalist.org/observations/112511299">https://www.inaturalist.org/observations/112511299</a> |
| 4819 | Bubulcus ibis       | Cattle Egret      | 2022/8/24  | 1 | 0 | 25.0320389 | 121.5334139 | <a href="https://www.inaturalist.org/observations/132112791">https://www.inaturalist.org/observations/132112791</a> |
| 4820 | Bubulcus ibis       | Cattle Egret      | 2020/2/8   | 0 | 0 | 25.0320550 | 121.5348860 | <a href="https://www.inaturalist.org/observations/38838352">https://www.inaturalist.org/observations/38838352</a>   |
| 4821 | Bubulcus ibis       | Cattle Egret      | 2022/11/22 | 2 | 0 | 25.0320612 | 121.5347133 | <a href="https://www.inaturalist.org/observations/142586220">https://www.inaturalist.org/observations/142586220</a> |
| 4822 | Bubulcus ibis       | Cattle Egret      | 2021/9/21  | 1 | 0 | 25.0320938 | 121.5350746 | <a href="https://www.inaturalist.org/observations/95659398">https://www.inaturalist.org/observations/95659398</a>   |
| 4823 | Bubulcus ibis       | Cattle Egret      | 2022/8/27  | 2 | 0 | 25.0321083 | 121.5337450 | <a href="https://www.inaturalist.org/observations/135668332">https://www.inaturalist.org/observations/135668332</a> |
| 4824 | Bubulcus ibis       | Cattle Egret      | 2021/3/17  | 2 | 0 | 25.0321293 | 121.5350869 | <a href="https://www.inaturalist.org/observations/77726380">https://www.inaturalist.org/observations/77726380</a>   |

|      |                        |                      |            |   |   |            |             |                                                                                                                     |
|------|------------------------|----------------------|------------|---|---|------------|-------------|---------------------------------------------------------------------------------------------------------------------|
| 4825 | Bubulcus ibis          | Cattle Egret         | 2022/7/23  | 2 | 0 | 25.0321778 | 121.5346750 | <a href="https://www.inaturalist.org/observations/127448235">https://www.inaturalist.org/observations/127448235</a> |
| 4826 | Bubulcus ibis          | Cattle Egret         | 2021/9/18  | 2 | 0 | 25.0322789 | 121.5344972 | <a href="https://www.inaturalist.org/observations/97130727">https://www.inaturalist.org/observations/97130727</a>   |
| 4827 | Bubulcus ibis          | Cattle Egret         | 2021/5/8   | 2 | 0 | 25.0324347 | 121.5349054 | <a href="https://www.inaturalist.org/observations/78335761">https://www.inaturalist.org/observations/78335761</a>   |
| 4828 | Bubulcus ibis          | Cattle Egret         | 2020/4/25  | 1 | 0 | 25.0324350 | 121.5349054 | <a href="https://www.inaturalist.org/observations/43607942">https://www.inaturalist.org/observations/43607942</a>   |
| 4829 | Bubulcus ibis          | Cattle Egret         | 2019/3/21  | 1 | 0 | 25.0324350 | 121.5349054 | <a href="https://www.inaturalist.org/observations/65111927">https://www.inaturalist.org/observations/65111927</a>   |
| 4830 | Bubulcus ibis          | Cattle Egret         | 2019/1/25  | 1 | 0 | 25.0324350 | 121.5349054 | <a href="https://www.inaturalist.org/observations/82639147">https://www.inaturalist.org/observations/82639147</a>   |
| 4831 | Bubulcus<br>coromandus | ibis<br>Cattle Egret | 2021/8/22  | 1 | 0 | 25.0324350 | 121.5349054 | <a href="https://www.inaturalist.org/observations/92678066">https://www.inaturalist.org/observations/92678066</a>   |
| 4832 | Bubulcus ibis          | Cattle Egret         | 2021/10/12 | 3 | 0 | 25.0325021 | 121.5344483 | <a href="https://www.inaturalist.org/observations/97985808">https://www.inaturalist.org/observations/97985808</a>   |
| 4833 | Bubulcus ibis          | Cattle Egret         | 2020/9/2   | 1 | 0 | 25.0325310 | 121.5800718 | <a href="https://www.inaturalist.org/observations/63688893">https://www.inaturalist.org/observations/63688893</a>   |
| 4834 | Bubulcus ibis          | Cattle Egret         | 2021/6/15  | 1 | 0 | 25.0326205 | 121.4588944 | <a href="https://www.inaturalist.org/observations/83226365">https://www.inaturalist.org/observations/83226365</a>   |
| 4835 | Bubulcus ibis          | Cattle Egret         | 2021/10/12 | 3 | 0 | 25.0328353 | 121.5350765 | <a href="https://www.inaturalist.org/observations/97985715">https://www.inaturalist.org/observations/97985715</a>   |
| 4836 | Bubulcus ibis          | Cattle Egret         | 2018/5/30  | 2 | 0 | 25.0328528 | 121.5336222 | <a href="https://www.inaturalist.org/observations/13055549">https://www.inaturalist.org/observations/13055549</a>   |
| 4837 | Bubulcus ibis          | Cattle Egret         | 2016/5/31  | 5 | 0 | 25.0329636 | 121.5654268 | <a href="http://www.inaturalist.org/observations/4449826">http://www.inaturalist.org/observations/4449826</a>       |
| 4838 | Bubulcus ibis          | Cattle Egret         | 2022/8/14  | 1 | 0 | 25.0329636 | 121.5654268 | <a href="https://www.inaturalist.org/observations/130788325">https://www.inaturalist.org/observations/130788325</a> |
| 4839 | Bubulcus ibis          | Cattle Egret         | 2022/5/6   | 1 | 0 | 25.0329945 | 121.5336833 | <a href="https://www.inaturalist.org/observations/115694604">https://www.inaturalist.org/observations/115694604</a> |
| 4840 | Bubulcus ibis          | Cattle Egret         | 2020/9/29  | 1 | 0 | 25.0330407 | 121.5349426 | <a href="https://www.inaturalist.org/observations/63149485">https://www.inaturalist.org/observations/63149485</a>   |
| 4841 | Bubulcus ibis          | Cattle Egret         | 2022/4/21  | 3 | 0 | 25.0331695 | 121.5340208 | <a href="https://www.inaturalist.org/observations/112248621">https://www.inaturalist.org/observations/112248621</a> |
| 4842 | Bubulcus ibis          | Cattle Egret         | 2021/9/17  | 2 | 0 | 25.0331758 | 121.5342201 | <a href="https://www.inaturalist.org/observations/95114005">https://www.inaturalist.org/observations/95114005</a>   |
| 4843 | Bubulcus ibis          | Cattle Egret         | 2021/12/18 | 1 | 0 | 25.0332398 | 121.5355371 | <a href="https://www.inaturalist.org/observations/103572842">https://www.inaturalist.org/observations/103572842</a> |
| 4844 | Bubulcus ibis          | Cattle Egret         | 2020/12/29 | 2 | 0 | 25.0332452 | 121.5359325 | <a href="https://www.inaturalist.org/observations/67498508">https://www.inaturalist.org/observations/67498508</a>   |
| 4845 | Bubulcus ibis          | Cattle Egret         | 2021/5/12  | 1 | 0 | 25.0333549 | 121.5358874 | <a href="https://www.inaturalist.org/observations/78535745">https://www.inaturalist.org/observations/78535745</a>   |
| 4846 | Bubulcus ibis          | Cattle Egret         | 2020/11/9  | 1 | 0 | 25.0333919 | 121.5361557 | <a href="https://www.inaturalist.org/observations/64508181">https://www.inaturalist.org/observations/64508181</a>   |
| 4847 | Bubulcus ibis          | Cattle Egret         | 2018/2/14  | 2 | 0 | 25.0334317 | 121.5654175 | <a href="https://www.inaturalist.org/observations/61791230">https://www.inaturalist.org/observations/61791230</a>   |
| 4848 | Bubulcus<br>coromandus | ibis<br>Cattle Egret | 2019/10/30 | 3 | 0 | 25.0334358 | 121.5336075 | <a href="https://www.inaturalist.org/observations/36738084">https://www.inaturalist.org/observations/36738084</a>   |
| 4849 | Bubulcus ibis          | Cattle Egret         | 2021/4/14  | 1 | 0 | 25.0334949 | 121.5808411 | <a href="https://www.inaturalist.org/observations/73922524">https://www.inaturalist.org/observations/73922524</a>   |



|      |                     |                   |            |   |   |            |             |                                                                                                                     |
|------|---------------------|-------------------|------------|---|---|------------|-------------|---------------------------------------------------------------------------------------------------------------------|
| 4850 | Bubulcus ibis       | Cattle Egret      | 2021/6/30  | 1 | 0 | 25.0340112 | 121.4823383 | <a href="https://www.inaturalist.org/observations/85050844">https://www.inaturalist.org/observations/85050844</a>   |
| 4851 | Bubulcus ibis       | Cattle Egret      | 2021/1/28  | 1 | 0 | 25.0344982 | 121.5350571 | <a href="https://www.inaturalist.org/observations/68712913">https://www.inaturalist.org/observations/68712913</a>   |
| 4852 | Bubulcus ibis       | Cattle Egret      | 2022/3/20  | 2 | 0 | 25.0350313 | 121.4844438 | <a href="https://www.inaturalist.org/observations/109844912">https://www.inaturalist.org/observations/109844912</a> |
| 4853 | Bubulcus ibis       | Cattle Egret      | 2020/3/11  | 2 | 0 | 25.0351630 | 121.4823810 | <a href="https://www.inaturalist.org/observations/40165952">https://www.inaturalist.org/observations/40165952</a>   |
| 4854 | Bubulcus coromandus | ibis Cattle Egret | 2012/3/21  | 3 | 0 | 25.0357880 | 121.5216626 | <a href="https://www.inaturalist.org/observations/19822247">https://www.inaturalist.org/observations/19822247</a>   |
| 4855 | Bubulcus ibis       | Cattle Egret      | 2021/5/27  | 1 | 0 | 25.0362028 | 121.4819717 | <a href="https://www.inaturalist.org/observations/82779158">https://www.inaturalist.org/observations/82779158</a>   |
| 4856 | Bubulcus ibis       | Cattle Egret      | 2012/7/7   | 2 | 0 | 25.0364500 | 121.5197000 | <a href="https://www.inaturalist.org/observations/10429933">https://www.inaturalist.org/observations/10429933</a>   |
| 4857 | Bubulcus ibis       | Cattle Egret      | 2012/7/7   | 2 | 0 | 25.0364500 | 121.5197000 | <a href="https://www.inaturalist.org/observations/124432259">https://www.inaturalist.org/observations/124432259</a> |
| 4858 | Bubulcus ibis       | Cattle Egret      | 2021/9/24  | 1 | 0 | 25.0366380 | 121.4907191 | <a href="https://www.inaturalist.org/observations/98800936">https://www.inaturalist.org/observations/98800936</a>   |
| 4859 | Bubulcus ibis       | Cattle Egret      | 2019/10/7  | 1 | 0 | 25.0371590 | 121.4977670 | <a href="https://www.inaturalist.org/observations/34068087">https://www.inaturalist.org/observations/34068087</a>   |
| 4860 | Bubulcus ibis       | Cattle Egret      | 2020/4/17  | 1 | 0 | 25.0372160 | 121.5103269 | <a href="https://www.inaturalist.org/observations/61527839">https://www.inaturalist.org/observations/61527839</a>   |
| 4861 | Bubulcus ibis       | Cattle Egret      | 2018/12/18 | 4 | 0 | 25.0377888 | 121.4914121 | <a href="https://www.inaturalist.org/observations/19201113">https://www.inaturalist.org/observations/19201113</a>   |
| 4862 | Bubulcus ibis       | Cattle Egret      | 2020/11/14 | 1 | 0 | 25.0379117 | 121.2620760 | <a href="https://www.inaturalist.org/observations/68752395">https://www.inaturalist.org/observations/68752395</a>   |
| 4863 | Bubulcus ibis       | Cattle Egret      | 2022/10/11 | 2 | 0 | 25.0383106 | 121.4941478 | <a href="https://www.inaturalist.org/observations/138610862">https://www.inaturalist.org/observations/138610862</a> |
| 4864 | Bubulcus ibis       | Cattle Egret      | 2018/12/29 | 3 | 0 | 25.0383641 | 121.4914895 | <a href="https://www.inaturalist.org/observations/19837935">https://www.inaturalist.org/observations/19837935</a>   |
| 4865 | Bubulcus ibis       | Cattle Egret      | 2018/11/11 | 4 | 0 | 25.0383641 | 121.4914895 | <a href="https://www.inaturalist.org/observations/19984070">https://www.inaturalist.org/observations/19984070</a>   |
| 4866 | Bubulcus ibis       | Cattle Egret      | 2017/7/28  | 1 | 0 | 25.0384131 | 121.4912955 | <a href="https://www.inaturalist.org/observations/65978781">https://www.inaturalist.org/observations/65978781</a>   |
| 4867 | Bubulcus ibis       | Cattle Egret      | 2018/11/24 | 4 | 0 | 25.0385433 | 121.4945617 | <a href="https://www.inaturalist.org/observations/18623078">https://www.inaturalist.org/observations/18623078</a>   |
| 4868 | Bubulcus ibis       | Cattle Egret      | 2019/11/10 | 1 | 0 | 25.0386602 | 121.4943160 | <a href="https://www.inaturalist.org/observations/36102310">https://www.inaturalist.org/observations/36102310</a>   |
| 4869 | Bubulcus coromandus | ibis Cattle Egret | 2020/1/22  | 3 | 0 | 25.0387025 | 121.4952208 | <a href="https://www.inaturalist.org/observations/37941164">https://www.inaturalist.org/observations/37941164</a>   |
| 4870 | Bubulcus ibis       | Cattle Egret      | 2019/3/25  | 3 | 0 | 25.0390524 | 121.4932467 | <a href="https://www.inaturalist.org/observations/26529953">https://www.inaturalist.org/observations/26529953</a>   |
| 4871 | Bubulcus ibis       | Cattle Egret      | 2017/5/27  | 1 | 0 | 25.0391699 | 121.8630124 | <a href="https://www.inaturalist.org/observations/115745051">https://www.inaturalist.org/observations/115745051</a> |
| 4872 | Bubulcus coromandus | ibis Cattle Egret | 2017/4/22  | 1 | 0 | 25.0400870 | 121.4955160 | <a href="https://www.inaturalist.org/observations/136567359">https://www.inaturalist.org/observations/136567359</a> |
| 4873 | Bubulcus ibis       | Cattle Egret      | 2020/4/17  | 1 | 0 | 25.0413304 | 121.4594610 | <a href="https://www.inaturalist.org/observations/61543720">https://www.inaturalist.org/observations/61543720</a>   |
| 4874 | Bubulcus ibis       | Cattle Egret      | 2021/4/30  | 2 | 0 | 25.0414362 | 121.5907750 | <a href="https://www.inaturalist.org/observations/75772596">https://www.inaturalist.org/observations/75772596</a>   |

|      |               |              |            |   |   |            |             |                                                                                                                     |
|------|---------------|--------------|------------|---|---|------------|-------------|---------------------------------------------------------------------------------------------------------------------|
| 4875 | Bubulcus ibis | Cattle Egret | 2022/7/23  | 1 | 0 | 25.0417720 | 121.5917830 | <a href="https://www.inaturalist.org/observations/129140842">https://www.inaturalist.org/observations/129140842</a> |
| 4876 | Bubulcus ibis | Cattle Egret | 2022/10/13 | 1 | 0 | 25.0421121 | 121.5150042 | <a href="https://www.inaturalist.org/observations/139441246">https://www.inaturalist.org/observations/139441246</a> |
| 4877 | Bubulcus ibis | Cattle Egret | 2019/10/15 | 3 | 0 | 25.0421852 | 121.6145477 | <a href="https://www.inaturalist.org/observations/34404087">https://www.inaturalist.org/observations/34404087</a>   |
| 4878 | Bubulcus ibis | Cattle Egret | 2020/2/18  | 0 | 0 | 25.0422267 | 121.5913201 | <a href="https://www.inaturalist.org/observations/38793249">https://www.inaturalist.org/observations/38793249</a>   |
| 4879 | Bubulcus ibis | Cattle Egret | 2020/9/13  | 2 | 0 | 25.0427620 | 121.5914549 | <a href="https://www.inaturalist.org/observations/59417726">https://www.inaturalist.org/observations/59417726</a>   |
| 4880 | Bubulcus ibis | Cattle Egret | 2021/1/10  | 1 | 0 | 25.0440980 | 121.5925654 | <a href="https://www.inaturalist.org/observations/67832376">https://www.inaturalist.org/observations/67832376</a>   |
| 4881 | Bubulcus ibis | Cattle Egret | 2021/8/12  | 2 | 0 | 25.0443460 | 121.5920244 | <a href="https://www.inaturalist.org/observations/90868438">https://www.inaturalist.org/observations/90868438</a>   |
| 4882 | Bubulcus ibis | Cattle Egret | 2021/8/4   | 3 | 0 | 25.0450499 | 121.5925247 | <a href="https://www.inaturalist.org/observations/89881923">https://www.inaturalist.org/observations/89881923</a>   |
| 4883 | Bubulcus ibis | Cattle Egret | 2018/3/11  | 3 | 0 | 25.0473313 | 121.5040742 | <a href="https://www.inaturalist.org/observations/10200718">https://www.inaturalist.org/observations/10200718</a>   |
| 4884 | Bubulcus ibis | Cattle Egret | 2020/7/11  | 1 | 0 | 25.0519840 | 121.6080464 | <a href="https://www.inaturalist.org/observations/52644747">https://www.inaturalist.org/observations/52644747</a>   |
| 4885 | Bubulcus ibis | Cattle Egret | 2021/9/11  | 1 | 0 | 25.0535917 | 121.5739283 | <a href="https://www.inaturalist.org/observations/94400583">https://www.inaturalist.org/observations/94400583</a>   |
| 4886 | Bubulcus ibis | Cattle Egret | 2020/3/22  | 1 | 0 | 25.0583833 | 121.5972967 | <a href="https://www.inaturalist.org/observations/40498235">https://www.inaturalist.org/observations/40498235</a>   |
| 4887 | Bubulcus ibis | Cattle Egret | 2020/4/9   | 1 | 0 | 25.0584862 | 121.5971450 | <a href="https://www.inaturalist.org/observations/42563934">https://www.inaturalist.org/observations/42563934</a>   |
| 4888 | Bubulcus ibis | Cattle Egret | 2019/11/20 | 1 | 0 | 25.0599623 | 121.5723202 | <a href="https://www.inaturalist.org/observations/35878856">https://www.inaturalist.org/observations/35878856</a>   |
| 4889 | Bubulcus ibis | Cattle Egret | 2022/5/29  | 1 | 0 | 25.0601055 | 121.6053300 | <a href="https://www.inaturalist.org/observations/119220417">https://www.inaturalist.org/observations/119220417</a> |
| 4890 | Bubulcus ibis | Cattle Egret | 2019/11/13 | 2 | 0 | 25.0609183 | 121.2339967 | <a href="https://www.inaturalist.org/observations/66140185">https://www.inaturalist.org/observations/66140185</a>   |
| 4891 | Bubulcus ibis | Cattle Egret | 2022/5/6   | 3 | 0 | 25.0627777 | 121.4608440 | <a href="https://www.inaturalist.org/observations/116314401">https://www.inaturalist.org/observations/116314401</a> |
| 4892 | Bubulcus ibis | Cattle Egret | 2022/5/6   | 3 | 0 | 25.0627869 | 121.4607518 | <a href="https://www.inaturalist.org/observations/116314413">https://www.inaturalist.org/observations/116314413</a> |
| 4893 | Bubulcus ibis | Cattle Egret | 2020/10/17 | 1 | 0 | 25.0633722 | 121.5405417 | <a href="https://www.inaturalist.org/observations/63479216">https://www.inaturalist.org/observations/63479216</a>   |
| 4894 | Bubulcus ibis | Cattle Egret | 2019/8/23  | 2 | 0 | 25.0634445 | 121.6507550 | <a href="https://www.inaturalist.org/observations/31321692">https://www.inaturalist.org/observations/31321692</a>   |
| 4895 | Bubulcus ibis | Cattle Egret | 2020/10/3  | 1 | 0 | 25.0636079 | 121.5397264 | <a href="https://www.inaturalist.org/observations/64023260">https://www.inaturalist.org/observations/64023260</a>   |
| 4896 | Bubulcus ibis | Cattle Egret | 2020/5/27  | 1 | 0 | 25.0663839 | 121.6081951 | <a href="https://www.inaturalist.org/observations/47478941">https://www.inaturalist.org/observations/47478941</a>   |
| 4897 | Bubulcus ibis | Cattle Egret | 2017/2/20  | 0 | 0 | 25.0688665 | 121.6485231 | <a href="https://www.inaturalist.org/observations/39045881">https://www.inaturalist.org/observations/39045881</a>   |
| 4898 | Bubulcus ibis | Cattle Egret | 2022/12/6  | 1 | 0 | 25.0712566 | 121.5967139 | <a href="https://www.inaturalist.org/observations/143796164">https://www.inaturalist.org/observations/143796164</a> |
| 4899 | Bubulcus ibis | Cattle Egret | 2021/12/5  | 1 | 0 | 25.0716168 | 121.6212408 | <a href="https://www.inaturalist.org/observations/102521890">https://www.inaturalist.org/observations/102521890</a> |

|      |                     |                      |            |   |   |            |             |                                                                                                                     |
|------|---------------------|----------------------|------------|---|---|------------|-------------|---------------------------------------------------------------------------------------------------------------------|
| 4900 | Bubulcus ibis       | Cattle Egret         | 2020/6/1   | 2 | 0 | 25.0720750 | 121.5897133 | <a href="https://www.inaturalist.org/observations/48101466">https://www.inaturalist.org/observations/48101466</a>   |
| 4901 | Bubulcus ibis       | Cattle Egret         | 2022/7/20  | 2 | 0 | 25.0730050 | 121.5295580 | <a href="https://www.inaturalist.org/observations/127088048">https://www.inaturalist.org/observations/127088048</a> |
| 4902 | Bubulcus ibis       | Cattle Egret         | 2022/8/6   | 1 | 0 | 25.0741587 | 121.6181481 | <a href="https://www.inaturalist.org/observations/129677178">https://www.inaturalist.org/observations/129677178</a> |
| 4903 | Bubulcus ibis       | Cattle Egret         | 2022/11/25 | 0 | 0 | 25.0745817 | 121.5334550 | <a href="https://www.inaturalist.org/observations/142799954">https://www.inaturalist.org/observations/142799954</a> |
| 4904 | Bubulcus ibis       | Cattle Egret         | 2022/4/13  | 1 | 0 | 25.0759528 | 121.6750444 | <a href="https://www.inaturalist.org/observations/111261646">https://www.inaturalist.org/observations/111261646</a> |
| 4905 | Bubulcus ibis       | Cattle Egret         | 2021/11/17 | 2 | 0 | 25.0759833 | 121.6604000 | <a href="https://www.inaturalist.org/observations/101388861">https://www.inaturalist.org/observations/101388861</a> |
| 4906 | Bubulcus ibis       | Cattle Egret         | 2021/8/10  | 3 | 0 | 25.0764112 | 121.6740283 | <a href="https://www.inaturalist.org/observations/90631811">https://www.inaturalist.org/observations/90631811</a>   |
| 4907 | Bubulcus ibis       | Cattle Egret         | 2022/4/5   | 1 | 0 | 25.0766810 | 121.6743106 | <a href="https://www.inaturalist.org/observations/110473450">https://www.inaturalist.org/observations/110473450</a> |
| 4908 | Bubulcus ibis       | Cattle Egret         | 2020/7/9   | 1 | 0 | 25.0772874 | 121.5251127 | <a href="https://www.inaturalist.org/observations/52451216">https://www.inaturalist.org/observations/52451216</a>   |
| 4909 | Bubulcus ibis       | Cattle Egret         | 2020/10/4  | 1 | 0 | 25.0788050 | 121.4711198 | <a href="https://www.inaturalist.org/observations/62995327">https://www.inaturalist.org/observations/62995327</a>   |
| 4910 | Bubulcus ibis       | Cattle Egret         | 2022/10/1  | 1 | 0 | 25.0807733 | 121.6033723 | <a href="https://www.inaturalist.org/observations/137304780">https://www.inaturalist.org/observations/137304780</a> |
| 4911 | Bubulcus ibis       | Cattle Egret         | 2022/4/20  | 1 | 0 | 25.0810017 | 121.6709101 | <a href="https://www.inaturalist.org/observations/112122767">https://www.inaturalist.org/observations/112122767</a> |
| 4912 | Bubulcus ibis       | Cattle Egret         | 2022/5/9   | 2 | 0 | 25.0810017 | 121.6709101 | <a href="https://www.inaturalist.org/observations/116214068">https://www.inaturalist.org/observations/116214068</a> |
| 4913 | Bubulcus ibis       | Cattle Egret         | 2022/5/9   | 2 | 0 | 25.0810419 | 121.6708190 | <a href="https://www.inaturalist.org/observations/117898166">https://www.inaturalist.org/observations/117898166</a> |
| 4914 | Bubulcus ibis       | Cattle Egret         | 2021/9/19  | 1 | 0 | 25.0810524 | 121.2030961 | <a href="https://www.inaturalist.org/observations/95567093">https://www.inaturalist.org/observations/95567093</a>   |
| 4915 | Bubulcus ibis       | Cattle Egret         | 2022/4/4   | 1 | 0 | 25.0816043 | 121.6052766 | <a href="https://www.inaturalist.org/observations/110494929">https://www.inaturalist.org/observations/110494929</a> |
| 4916 | Bubulcus ibis       | Cattle Egret         | 2022/2/7   | 1 | 0 | 25.0819990 | 121.6740684 | <a href="https://www.inaturalist.org/observations/106404427">https://www.inaturalist.org/observations/106404427</a> |
| 4917 | Bubulcus ibis       | Cattle Egret         | 2022/4/9   | 3 | 0 | 25.0820206 | 121.6243691 | <a href="https://www.inaturalist.org/observations/110838457">https://www.inaturalist.org/observations/110838457</a> |
| 4918 | Bubulcus ibis       | Cattle Egret         | 2022/2/9   | 2 | 0 | 25.0820278 | 121.5841917 | <a href="https://www.inaturalist.org/observations/106494954">https://www.inaturalist.org/observations/106494954</a> |
| 4919 | Bubulcus ibis       | Cattle Egret         | 2019/6/15  | 2 | 0 | 25.0820555 | 121.4274583 | <a href="https://www.inaturalist.org/observations/27008293">https://www.inaturalist.org/observations/27008293</a>   |
| 4920 | Bubulcus coromandus | ibis<br>Cattle Egret | 2019/7/4   | 3 | 0 | 25.0822038 | 121.5855796 | <a href="https://www.inaturalist.org/observations/28158016">https://www.inaturalist.org/observations/28158016</a>   |
| 4921 | Bubulcus ibis       | Cattle Egret         | 2013/10/14 | 1 | 0 | 25.0822805 | 121.6044519 | <a href="https://www.inaturalist.org/observations/70856134">https://www.inaturalist.org/observations/70856134</a>   |
| 4922 | Bubulcus ibis       | Cattle Egret         | 2021/9/1   | 1 | 0 | 25.0823301 | 121.5828206 | <a href="https://www.inaturalist.org/observations/93346135">https://www.inaturalist.org/observations/93346135</a>   |
| 4923 | Bubulcus ibis       | Cattle Egret         | 2011/5/22  | 1 | 0 | 25.0828320 | 121.2000043 | <a href="https://www.inaturalist.org/observations/55786160">https://www.inaturalist.org/observations/55786160</a>   |
| 4924 | Bubulcus ibis       | Cattle Egret         | 2019/4/16  | 1 | 0 | 25.0832639 | 121.1866736 | <a href="https://www.inaturalist.org/observations/22555977">https://www.inaturalist.org/observations/22555977</a>   |

|      |               |              |            |   |   |            |             |                                                                                                                     |
|------|---------------|--------------|------------|---|---|------------|-------------|---------------------------------------------------------------------------------------------------------------------|
| 4925 | Bubulcus ibis | Cattle Egret | 2019/4/16  | 1 | 0 | 25.0832639 | 121.1866736 | <a href="https://www.inaturalist.org/observations/22555979">https://www.inaturalist.org/observations/22555979</a>   |
| 4926 | Bubulcus ibis | Cattle Egret | 2019/4/16  | 1 | 0 | 25.0832639 | 121.1866736 | <a href="https://www.inaturalist.org/observations/22556095">https://www.inaturalist.org/observations/22556095</a>   |
| 4927 | Bubulcus ibis | Cattle Egret | 2019/4/18  | 2 | 0 | 25.0832639 | 121.1866736 | <a href="https://www.inaturalist.org/observations/22702742">https://www.inaturalist.org/observations/22702742</a>   |
| 4928 | Bubulcus ibis | Cattle Egret | 2019/4/18  | 1 | 0 | 25.0832639 | 121.1866736 | <a href="https://www.inaturalist.org/observations/22702775">https://www.inaturalist.org/observations/22702775</a>   |
| 4929 | Bubulcus ibis | Cattle Egret | 2022/7/10  | 2 | 0 | 25.0833417 | 121.5819033 | <a href="https://www.inaturalist.org/observations/125596494">https://www.inaturalist.org/observations/125596494</a> |
| 4930 | Bubulcus ibis | Cattle Egret | 2011/5/8   | 1 | 0 | 25.0835025 | 121.1985131 | <a href="https://www.inaturalist.org/observations/55784426">https://www.inaturalist.org/observations/55784426</a>   |
| 4931 | Bubulcus ibis | Cattle Egret | 2022/5/28  | 1 | 0 | 25.0835667 | 121.6838617 | <a href="https://www.inaturalist.org/observations/119016155">https://www.inaturalist.org/observations/119016155</a> |
| 4932 | Bubulcus ibis | Cattle Egret | 2021/10/26 | 1 | 0 | 25.0836986 | 121.6790902 | <a href="https://www.inaturalist.org/observations/99418558">https://www.inaturalist.org/observations/99418558</a>   |
| 4933 | Bubulcus ibis | Cattle Egret | 2011/5/15  | 2 | 0 | 25.0839523 | 121.1995403 | <a href="https://www.inaturalist.org/observations/55785575">https://www.inaturalist.org/observations/55785575</a>   |
| 4934 | Bubulcus ibis | Cattle Egret | 2012/8/4   | 1 | 0 | 25.0841437 | 121.2003596 | <a href="https://www.inaturalist.org/observations/56490066">https://www.inaturalist.org/observations/56490066</a>   |
| 4935 | Bubulcus ibis | Cattle Egret | 2022/5/18  | 1 | 0 | 25.0843628 | 121.6630151 | <a href="https://www.inaturalist.org/observations/117539065">https://www.inaturalist.org/observations/117539065</a> |
| 4936 | Bubulcus ibis | Cattle Egret | 2013/9/7   | 1 | 0 | 25.0844936 | 121.1995859 | <a href="https://www.inaturalist.org/observations/56824078">https://www.inaturalist.org/observations/56824078</a>   |
| 4937 | Bubulcus ibis | Cattle Egret | 2018/1/11  | 2 | 0 | 25.0850101 | 121.2013835 | <a href="https://www.inaturalist.org/observations/9481964">https://www.inaturalist.org/observations/9481964</a>     |
| 4938 | Bubulcus ibis | Cattle Egret | 2022/4/27  | 1 | 0 | 25.0851083 | 121.6630700 | <a href="https://www.inaturalist.org/observations/113065429">https://www.inaturalist.org/observations/113065429</a> |
| 4939 | Bubulcus ibis | Cattle Egret | 2011/8/7   | 1 | 0 | 25.0852321 | 121.2004335 | <a href="https://www.inaturalist.org/observations/55875444">https://www.inaturalist.org/observations/55875444</a>   |
| 4940 | Bubulcus ibis | Cattle Egret | 2012/5/26  | 1 | 0 | 25.0856894 | 121.1965609 | <a href="https://www.inaturalist.org/observations/56400382">https://www.inaturalist.org/observations/56400382</a>   |
| 4941 | Bubulcus ibis | Cattle Egret | 2021/10/15 | 5 | 0 | 25.0867921 | 121.6812150 | <a href="https://www.inaturalist.org/observations/98240690">https://www.inaturalist.org/observations/98240690</a>   |
| 4942 | Bubulcus ibis | Cattle Egret | 2021/8/22  | 3 | 0 | 25.0870583 | 121.6811450 | <a href="https://www.inaturalist.org/observations/92040945">https://www.inaturalist.org/observations/92040945</a>   |
| 4943 | Bubulcus ibis | Cattle Egret | 2020/4/25  | 2 | 0 | 25.0871673 | 121.5131215 | <a href="https://www.inaturalist.org/observations/43276868">https://www.inaturalist.org/observations/43276868</a>   |
| 4944 | Bubulcus ibis | Cattle Egret | 2021/5/11  | 2 | 0 | 25.0873336 | 121.1762525 | <a href="https://www.inaturalist.org/observations/78337417">https://www.inaturalist.org/observations/78337417</a>   |
| 4945 | Bubulcus ibis | Cattle Egret | 2019/7/1   | 1 | 0 | 25.0883317 | 121.6215295 | <a href="https://www.inaturalist.org/observations/27988853">https://www.inaturalist.org/observations/27988853</a>   |
| 4946 | Bubulcus ibis | Cattle Egret | 2022/10/13 | 4 | 0 | 25.0893514 | 121.5982751 | <a href="https://www.inaturalist.org/observations/138601358">https://www.inaturalist.org/observations/138601358</a> |
| 4947 | Bubulcus ibis | Cattle Egret | 2020/1/12  | 2 | 0 | 25.0894417 | 121.5983800 | <a href="https://www.inaturalist.org/observations/37516398">https://www.inaturalist.org/observations/37516398</a>   |
| 4948 | Bubulcus ibis | Cattle Egret | 2021/10/28 | 1 | 0 | 25.0897083 | 121.1811550 | <a href="https://www.inaturalist.org/observations/100055658">https://www.inaturalist.org/observations/100055658</a> |
| 4949 | Bubulcus ibis | Cattle Egret | 1980/1/1   | 1 | 0 | 25.0907480 | 121.5821835 | <a href="https://www.inaturalist.org/observations/24066305">https://www.inaturalist.org/observations/24066305</a>   |

|      |               |              |            |   |   |            |             |                                                                                                                     |
|------|---------------|--------------|------------|---|---|------------|-------------|---------------------------------------------------------------------------------------------------------------------|
| 4950 | Bubulcus ibis | Cattle Egret | 2019/7/31  | 4 | 0 | 25.0908220 | 121.5814099 | <a href="https://www.inaturalist.org/observations/30236970">https://www.inaturalist.org/observations/30236970</a>   |
| 4951 | Bubulcus ibis | Cattle Egret | 2019/4/7   | 2 | 0 | 25.0908722 | 121.5817341 | <a href="https://www.inaturalist.org/observations/22125587">https://www.inaturalist.org/observations/22125587</a>   |
| 4952 | Bubulcus ibis | Cattle Egret | 2020/8/22  | 1 | 0 | 25.0909036 | 121.5832522 | <a href="https://www.inaturalist.org/observations/58820054">https://www.inaturalist.org/observations/58820054</a>   |
| 4953 | Bubulcus ibis | Cattle Egret | 2019/10/18 | 1 | 0 | 25.0909066 | 121.5824582 | <a href="https://www.inaturalist.org/observations/40685855">https://www.inaturalist.org/observations/40685855</a>   |
| 4954 | Bubulcus ibis | Cattle Egret | 2019/7/25  | 3 | 0 | 25.0909287 | 121.5825936 | <a href="https://www.inaturalist.org/observations/31157287">https://www.inaturalist.org/observations/31157287</a>   |
| 4955 | Bubulcus ibis | Cattle Egret | 2019/6/17  | 2 | 0 | 25.0909300 | 121.5824392 | <a href="https://www.inaturalist.org/observations/27563674">https://www.inaturalist.org/observations/27563674</a>   |
| 4956 | Bubulcus ibis | Cattle Egret | 2019/6/18  | 4 | 0 | 25.0909396 | 121.5827066 | <a href="https://www.inaturalist.org/observations/27243707">https://www.inaturalist.org/observations/27243707</a>   |
| 4957 | Bubulcus ibis | Cattle Egret | 2019/9/2   | 2 | 0 | 25.0909649 | 121.5825039 | <a href="https://www.inaturalist.org/observations/40334567">https://www.inaturalist.org/observations/40334567</a>   |
| 4958 | Bubulcus ibis | Cattle Egret | 2019/6/25  | 2 | 0 | 25.0909740 | 121.5825475 | <a href="https://www.inaturalist.org/observations/28102284">https://www.inaturalist.org/observations/28102284</a>   |
| 4959 | Bubulcus ibis | Cattle Egret | 2019/7/2   | 2 | 0 | 25.0909752 | 121.5825840 | <a href="https://www.inaturalist.org/observations/33127691">https://www.inaturalist.org/observations/33127691</a>   |
| 4960 | Bubulcus ibis | Cattle Egret | 2019/6/4   | 3 | 0 | 25.0909874 | 121.5827521 | <a href="https://www.inaturalist.org/observations/26908266">https://www.inaturalist.org/observations/26908266</a>   |
| 4961 | Bubulcus ibis | Cattle Egret | 2019/5/13  | 1 | 0 | 25.0910243 | 121.5826950 | <a href="https://www.inaturalist.org/observations/25102297">https://www.inaturalist.org/observations/25102297</a>   |
| 4962 | Bubulcus ibis | Cattle Egret | 2019/6/20  | 3 | 0 | 25.0910552 | 121.5827501 | <a href="https://www.inaturalist.org/observations/27315904">https://www.inaturalist.org/observations/27315904</a>   |
| 4963 | Bubulcus ibis | Cattle Egret | 2018/8/28  | 2 | 0 | 25.0910610 | 121.5817390 | <a href="https://www.inaturalist.org/observations/16223040">https://www.inaturalist.org/observations/16223040</a>   |
| 4964 | Bubulcus ibis | Cattle Egret | 2019/6/25  | 2 | 0 | 25.0910631 | 121.5826531 | <a href="https://www.inaturalist.org/observations/28051304">https://www.inaturalist.org/observations/28051304</a>   |
| 4965 | Bubulcus ibis | Cattle Egret | 2019/6/25  | 2 | 0 | 25.0910672 | 121.5824244 | <a href="https://www.inaturalist.org/observations/28101705">https://www.inaturalist.org/observations/28101705</a>   |
| 4966 | Bubulcus ibis | Cattle Egret | 2019/4/30  | 1 | 0 | 25.0910689 | 121.5826561 | <a href="https://www.inaturalist.org/observations/24359949">https://www.inaturalist.org/observations/24359949</a>   |
| 4967 | Bubulcus ibis | Cattle Egret | 2018/9/18  | 2 | 0 | 25.0910691 | 121.5826014 | <a href="https://www.inaturalist.org/observations/16652186">https://www.inaturalist.org/observations/16652186</a>   |
| 4968 | Bubulcus ibis | Cattle Egret | 2019/7/16  | 4 | 0 | 25.0910759 | 121.5827164 | <a href="https://www.inaturalist.org/observations/28989303">https://www.inaturalist.org/observations/28989303</a>   |
| 4969 | Bubulcus ibis | Cattle Egret | 2018/10/2  | 3 | 0 | 25.0910961 | 121.5813012 | <a href="https://www.inaturalist.org/observations/20989772">https://www.inaturalist.org/observations/20989772</a>   |
| 4970 | Bubulcus ibis | Cattle Egret | 2020/6/25  | 1 | 0 | 25.0911311 | 121.5820799 | <a href="https://www.inaturalist.org/observations/50861322">https://www.inaturalist.org/observations/50861322</a>   |
| 4971 | Bubulcus ibis | Cattle Egret | 2021/7/16  | 2 | 0 | 25.0911918 | 121.5816784 | <a href="https://www.inaturalist.org/observations/121544014">https://www.inaturalist.org/observations/121544014</a> |
| 4972 | Bubulcus ibis | Cattle Egret | 2019/3/26  | 1 | 0 | 25.0912987 | 121.5812968 | <a href="https://www.inaturalist.org/observations/21932741">https://www.inaturalist.org/observations/21932741</a>   |
| 4973 | Bubulcus ibis | Cattle Egret | 2022/12/27 | 1 | 0 | 25.0913138 | 121.5970300 | <a href="https://www.inaturalist.org/observations/145181859">https://www.inaturalist.org/observations/145181859</a> |
| 4974 | Bubulcus ibis | Cattle Egret | 2022/11/20 | 3 | 0 | 25.0913671 | 121.5818608 | <a href="https://www.inaturalist.org/observations/142439909">https://www.inaturalist.org/observations/142439909</a> |

|      |                        |                      |            |   |   |            |             |                                                                                                                     |
|------|------------------------|----------------------|------------|---|---|------------|-------------|---------------------------------------------------------------------------------------------------------------------|
| 4975 | Bubulcus ibis          | Cattle Egret         | 2022/1/10  | 1 | 0 | 25.0915518 | 121.5829691 | <a href="https://www.inaturalist.org/observations/106306218">https://www.inaturalist.org/observations/106306218</a> |
| 4976 | Bubulcus ibis          | Cattle Egret         | 2019/7/12  | 0 | 0 | 25.0917975 | 121.4920321 | <a href="https://www.inaturalist.org/observations/38419494">https://www.inaturalist.org/observations/38419494</a>   |
| 4977 | Bubulcus ibis          | Cattle Egret         | 2021/7/17  | 2 | 0 | 25.0917975 | 121.4920321 | <a href="https://www.inaturalist.org/observations/87389259">https://www.inaturalist.org/observations/87389259</a>   |
| 4978 | Bubulcus ibis          | Cattle Egret         | 2022/5/18  | 1 | 0 | 25.0917975 | 121.4920321 | <a href="https://www.inaturalist.org/observations/117699561">https://www.inaturalist.org/observations/117699561</a> |
| 4979 | Bubulcus ibis          | Cattle Egret         | 2022/5/18  | 1 | 0 | 25.0917975 | 121.4920321 | <a href="https://www.inaturalist.org/observations/118896152">https://www.inaturalist.org/observations/118896152</a> |
| 4980 | Bubulcus ibis          | Cattle Egret         | 2021/4/23  | 3 | 0 | 25.0930615 | 121.5323848 | <a href="https://www.inaturalist.org/observations/77550743">https://www.inaturalist.org/observations/77550743</a>   |
| 4981 | Bubulcus ibis          | Cattle Egret         | 2022/8/28  | 1 | 0 | 25.0930710 | 121.5323991 | <a href="https://www.inaturalist.org/observations/133132296">https://www.inaturalist.org/observations/133132296</a> |
| 4982 | Bubulcus ibis          | Cattle Egret         | 2018/10/6  | 4 | 0 | 25.0938699 | 121.4523313 | <a href="https://www.inaturalist.org/observations/18409165">https://www.inaturalist.org/observations/18409165</a>   |
| 4983 | Bubulcus ibis          | Cattle Egret         | 2021/5/2   | 3 | 0 | 25.0947659 | 121.5303680 | <a href="https://www.inaturalist.org/observations/76409521">https://www.inaturalist.org/observations/76409521</a>   |
| 4984 | Bubulcus ibis          | Cattle Egret         | 2020/6/17  | 1 | 0 | 25.0950492 | 121.5246077 | <a href="https://www.inaturalist.org/observations/51069482">https://www.inaturalist.org/observations/51069482</a>   |
| 4985 | Bubulcus ibis          | Cattle Egret         | 2022/2/27  | 2 | 0 | 25.0957694 | 121.4595635 | <a href="https://www.inaturalist.org/observations/107635184">https://www.inaturalist.org/observations/107635184</a> |
| 4986 | Bubulcus ibis          | Cattle Egret         | 2022/1/10  | 2 | 0 | 25.0960244 | 121.4594422 | <a href="https://www.inaturalist.org/observations/104706098">https://www.inaturalist.org/observations/104706098</a> |
| 4987 | Bubulcus<br>coromandus | ibis<br>Cattle Egret | 2018/12/21 | 3 | 0 | 25.0964657 | 121.4549263 | <a href="https://www.inaturalist.org/observations/19140794">https://www.inaturalist.org/observations/19140794</a>   |
| 4988 | Bubulcus ibis          | Cattle Egret         | 2021/6/8   | 1 | 0 | 25.0966055 | 121.5170237 | <a href="https://www.inaturalist.org/observations/82127640">https://www.inaturalist.org/observations/82127640</a>   |
| 4989 | Bubulcus ibis          | Cattle Egret         | 2021/5/22  | 1 | 0 | 25.0970178 | 121.5173067 | <a href="https://www.inaturalist.org/observations/79744399">https://www.inaturalist.org/observations/79744399</a>   |
| 4990 | Bubulcus ibis          | Cattle Egret         | 2020/8/9   | 4 | 0 | 25.0971559 | 76.5343019  | <a href="https://www.inaturalist.org/observations/64850401">https://www.inaturalist.org/observations/64850401</a>   |
| 4991 | Bubulcus ibis          | Cattle Egret         | 2022/3/6   | 4 | 0 | 25.0975877 | 121.4569688 | <a href="https://www.inaturalist.org/observations/108024704">https://www.inaturalist.org/observations/108024704</a> |
| 4992 | Bubulcus ibis          | Cattle Egret         | 2022/8/7   | 2 | 0 | 25.0975963 | 121.4556268 | <a href="https://www.inaturalist.org/observations/132114844">https://www.inaturalist.org/observations/132114844</a> |
| 4993 | Bubulcus ibis          | Cattle Egret         | 2020/1/15  | 1 | 0 | 25.0976125 | 121.4556566 | <a href="https://www.inaturalist.org/observations/37743175">https://www.inaturalist.org/observations/37743175</a>   |
| 4994 | Bubulcus ibis          | Cattle Egret         | 2022/4/6   | 2 | 0 | 25.0977091 | 121.4570255 | <a href="https://www.inaturalist.org/observations/110559895">https://www.inaturalist.org/observations/110559895</a> |
| 4995 | Bubulcus ibis          | Cattle Egret         | 2018/9/2   | 4 | 0 | 25.0979390 | 121.4557610 | <a href="https://www.inaturalist.org/observations/16136763">https://www.inaturalist.org/observations/16136763</a>   |
| 4996 | Bubulcus ibis          | Cattle Egret         | 2020/5/7   | 1 | 0 | 25.0980330 | 121.4567492 | <a href="https://www.inaturalist.org/observations/48312312">https://www.inaturalist.org/observations/48312312</a>   |
| 4997 | Bubulcus ibis          | Cattle Egret         | 2021/7/3   | 2 | 0 | 25.0982919 | 121.4566395 | <a href="https://www.inaturalist.org/observations/86007843">https://www.inaturalist.org/observations/86007843</a>   |
| 4998 | Bubulcus ibis          | Cattle Egret         | 2018/10/31 | 4 | 0 | 25.0983181 | 121.5391693 | <a href="https://www.inaturalist.org/observations/17986892">https://www.inaturalist.org/observations/17986892</a>   |
| 4999 | Bubulcus ibis          | Cattle Egret         | 2021/6/15  | 1 | 0 | 25.0983617 | 121.5167294 | <a href="https://www.inaturalist.org/observations/83105283">https://www.inaturalist.org/observations/83105283</a>   |

|      |                     |                      |            |   |   |            |             |                                                                                                                     |
|------|---------------------|----------------------|------------|---|---|------------|-------------|---------------------------------------------------------------------------------------------------------------------|
| 5000 | Bubulcus ibis       | Cattle Egret         | 2021/1/16  | 2 | 0 | 25.0987006 | 121.4543006 | <a href="https://www.inaturalist.org/observations/68995689">https://www.inaturalist.org/observations/68995689</a>   |
| 5001 | Bubulcus ibis       | Cattle Egret         | 2022/10/11 | 1 | 0 | 25.0987149 | 121.4551976 | <a href="https://www.inaturalist.org/observations/139503710">https://www.inaturalist.org/observations/139503710</a> |
| 5002 | Bubulcus coromandus | ibis<br>Cattle Egret | 2022/10/10 | 0 | 0 | 25.0987682 | 121.4552767 | <a href="https://www.inaturalist.org/observations/139503292">https://www.inaturalist.org/observations/139503292</a> |
| 5003 | Bubulcus ibis       | Cattle Egret         | 2022/10/11 | 1 | 0 | 25.0988558 | 121.4552181 | <a href="https://www.inaturalist.org/observations/139503713">https://www.inaturalist.org/observations/139503713</a> |
| 5004 | Bubulcus ibis       | Cattle Egret         | 2019/4/13  | 2 | 0 | 25.0989009 | 121.4542140 | <a href="https://www.inaturalist.org/observations/24281665">https://www.inaturalist.org/observations/24281665</a>   |
| 5005 | Bubulcus ibis       | Cattle Egret         | 2019/7/26  | 3 | 0 | 25.0989964 | 121.6299412 | <a href="https://www.inaturalist.org/observations/29573658">https://www.inaturalist.org/observations/29573658</a>   |
| 5006 | Bubulcus ibis       | Cattle Egret         | 2021/10/15 | 1 | 0 | 25.0991359 | 121.4555660 | <a href="https://www.inaturalist.org/observations/100127588">https://www.inaturalist.org/observations/100127588</a> |
| 5007 | Bubulcus ibis       | Cattle Egret         | 2009/10/30 | 2 | 0 | 25.0992391 | 121.4726938 | <a href="https://www.inaturalist.org/observations/55448671">https://www.inaturalist.org/observations/55448671</a>   |
| 5008 | Bubulcus ibis       | Cattle Egret         | 2019/8/5   | 3 | 0 | 25.0994234 | 121.4612692 | <a href="https://www.inaturalist.org/observations/30741564">https://www.inaturalist.org/observations/30741564</a>   |
| 5009 | Bubulcus ibis       | Cattle Egret         | 2021/11/23 | 1 | 0 | 25.0996112 | 121.5294717 | <a href="https://www.inaturalist.org/observations/101742770">https://www.inaturalist.org/observations/101742770</a> |
| 5010 | Bubulcus ibis       | Cattle Egret         | 2020/4/25  | 1 | 0 | 25.0997806 | 121.4543960 | <a href="https://www.inaturalist.org/observations/44146941">https://www.inaturalist.org/observations/44146941</a>   |
| 5011 | Bubulcus ibis       | Cattle Egret         | 2020/12/19 | 1 | 0 | 25.0999917 | 121.5297700 | <a href="https://www.inaturalist.org/observations/66774524">https://www.inaturalist.org/observations/66774524</a>   |
| 5012 | Bubulcus ibis       | Cattle Egret         | 2022/4/23  | 1 | 0 | 25.1005164 | 121.5272334 | <a href="https://www.inaturalist.org/observations/114018686">https://www.inaturalist.org/observations/114018686</a> |
| 5013 | Bubulcus ibis       | Cattle Egret         | 2018/12/29 | 3 | 0 | 25.1005753 | 121.5364444 | <a href="https://www.inaturalist.org/observations/19351478">https://www.inaturalist.org/observations/19351478</a>   |
| 5014 | Bubulcus ibis       | Cattle Egret         | 2013/4/4   | 1 | 0 | 25.1006370 | 121.2215779 | <a href="https://www.inaturalist.org/observations/56720706">https://www.inaturalist.org/observations/56720706</a>   |
| 5015 | Bubulcus ibis       | Cattle Egret         | 2020/8/27  | 2 | 0 | 25.1016280 | 121.5303002 | <a href="https://www.inaturalist.org/observations/57714304">https://www.inaturalist.org/observations/57714304</a>   |
| 5016 | Bubulcus ibis       | Cattle Egret         | 2022/7/3   | 3 | 0 | 25.1045417 | 121.5306700 | <a href="https://www.inaturalist.org/observations/141078657">https://www.inaturalist.org/observations/141078657</a> |
| 5017 | Bubulcus ibis       | Cattle Egret         | 2021/7/1   | 2 | 0 | 25.1051422 | 121.4615024 | <a href="https://www.inaturalist.org/observations/86007754">https://www.inaturalist.org/observations/86007754</a>   |
| 5018 | Bubulcus ibis       | Cattle Egret         | 2020/7/7   | 2 | 0 | 25.1057888 | 121.4592863 | <a href="https://www.inaturalist.org/observations/53263117">https://www.inaturalist.org/observations/53263117</a>   |
| 5019 | Bubulcus ibis       | Cattle Egret         | 2021/5/1   | 0 | 0 | 25.1073950 | 121.5046760 | <a href="https://www.inaturalist.org/observations/76159399">https://www.inaturalist.org/observations/76159399</a>   |
| 5020 | Bubulcus ibis       | Cattle Egret         | 2021/5/2   | 1 | 0 | 25.1074295 | 121.5673584 | <a href="https://www.inaturalist.org/observations/76733882">https://www.inaturalist.org/observations/76733882</a>   |
| 5021 | Bubulcus ibis       | Cattle Egret         | 2021/5/2   | 1 | 0 | 25.1083565 | 121.5709235 | <a href="https://www.inaturalist.org/observations/76378108">https://www.inaturalist.org/observations/76378108</a>   |
| 5022 | Bubulcus ibis       | Cattle Egret         | 2022/1/31  | 3 | 0 | 25.1092617 | 121.4564739 | <a href="https://www.inaturalist.org/observations/105969213">https://www.inaturalist.org/observations/105969213</a> |
| 5023 | Bubulcus ibis       | Cattle Egret         | 2018/6/30  | 3 | 0 | 25.1095474 | 121.4654884 | <a href="https://www.inaturalist.org/observations/13912080">https://www.inaturalist.org/observations/13912080</a>   |
| 5024 | Bubulcus ibis       | Cattle Egret         | 2021/6/24  | 1 | 0 | 25.1096010 | 121.5124084 | <a href="https://www.inaturalist.org/observations/84262145">https://www.inaturalist.org/observations/84262145</a>   |

|      |                        |                      |            |   |   |            |             |                                                                                                                     |
|------|------------------------|----------------------|------------|---|---|------------|-------------|---------------------------------------------------------------------------------------------------------------------|
| 5025 | Bubulcus ibis          | Cattle Egret         | 2018/6/30  | 3 | 0 | 25.1097728 | 121.4638748 | <a href="https://www.inaturalist.org/observations/13912076">https://www.inaturalist.org/observations/13912076</a>   |
| 5026 | Bubulcus ibis          | Cattle Egret         | 2020/7/7   | 1 | 0 | 25.1098060 | 121.4564700 | <a href="https://www.inaturalist.org/observations/53263361">https://www.inaturalist.org/observations/53263361</a>   |
| 5027 | Bubulcus ibis          | Cattle Egret         | 2018/6/30  | 3 | 0 | 25.1100684 | 121.4650622 | <a href="https://www.inaturalist.org/observations/13912081">https://www.inaturalist.org/observations/13912081</a>   |
| 5028 | Bubulcus ibis          | Cattle Egret         | 2020/7/7   | 1 | 0 | 25.1105644 | 121.4583359 | <a href="https://www.inaturalist.org/observations/53259465">https://www.inaturalist.org/observations/53259465</a>   |
| 5029 | Bubulcus ibis          | Cattle Egret         | 2019/10/20 | 3 | 0 | 25.1108303 | 121.4625778 | <a href="https://www.inaturalist.org/observations/35528724">https://www.inaturalist.org/observations/35528724</a>   |
| 5030 | Bubulcus ibis          | Cattle Egret         | 2020/7/7   | 1 | 0 | 25.1113028 | 121.4595107 | <a href="https://www.inaturalist.org/observations/53259408">https://www.inaturalist.org/observations/53259408</a>   |
| 5031 | Bubulcus ibis          | Cattle Egret         | 2022/12/7  | 1 | 0 | 25.1117462 | 121.4968227 | <a href="https://www.inaturalist.org/observations/143867902">https://www.inaturalist.org/observations/143867902</a> |
| 5032 | Bubulcus ibis          | Cattle Egret         | 2022/4/1   | 1 | 0 | 25.1120066 | 121.5526675 | <a href="https://www.inaturalist.org/observations/137004554">https://www.inaturalist.org/observations/137004554</a> |
| 5033 | Bubulcus ibis          | Cattle Egret         | 2020/4/25  | 3 | 0 | 25.1123093 | 121.4906270 | <a href="https://www.inaturalist.org/observations/44101317">https://www.inaturalist.org/observations/44101317</a>   |
| 5034 | Bubulcus ibis          | Cattle Egret         | 2020/4/25  | 1 | 0 | 25.1123093 | 121.4906270 | <a href="https://www.inaturalist.org/observations/56193076">https://www.inaturalist.org/observations/56193076</a>   |
| 5035 | Bubulcus ibis          | Cattle Egret         | 2020/7/8   | 1 | 0 | 25.1125109 | 121.4608765 | <a href="https://www.inaturalist.org/observations/53356303">https://www.inaturalist.org/observations/53356303</a>   |
| 5036 | Bubulcus ibis          | Cattle Egret         | 2020/7/8   | 1 | 0 | 25.1134606 | 121.4589533 | <a href="https://www.inaturalist.org/observations/53347436">https://www.inaturalist.org/observations/53347436</a>   |
| 5037 | Bubulcus ibis          | Cattle Egret         | 2022/5/26  | 2 | 0 | 25.1142393 | 121.6264143 | <a href="https://www.inaturalist.org/observations/118754112">https://www.inaturalist.org/observations/118754112</a> |
| 5038 | Bubulcus ibis          | Cattle Egret         | 2019/4/7   | 3 | 0 | 25.1152746 | 121.4725225 | <a href="https://www.inaturalist.org/observations/71050709">https://www.inaturalist.org/observations/71050709</a>   |
| 5039 | Bubulcus ibis          | Cattle Egret         | 2021/8/21  | 2 | 0 | 25.1162132 | 121.4645783 | <a href="https://www.inaturalist.org/observations/91924139">https://www.inaturalist.org/observations/91924139</a>   |
| 5040 | Bubulcus ibis          | Cattle Egret         | 2020/6/7   | 1 | 0 | 25.1167730 | 121.4712180 | <a href="https://www.inaturalist.org/observations/48743871">https://www.inaturalist.org/observations/48743871</a>   |
| 5041 | Bubulcus ibis          | Cattle Egret         | 2019/7/25  | 2 | 0 | 25.1169848 | 121.4719391 | <a href="https://www.inaturalist.org/observations/36368917">https://www.inaturalist.org/observations/36368917</a>   |
| 5042 | Bubulcus ibis          | Cattle Egret         | 2018/7/4   | 2 | 0 | 25.1183775 | 121.4719110 | <a href="https://www.inaturalist.org/observations/58215919">https://www.inaturalist.org/observations/58215919</a>   |
| 5043 | Bubulcus ibis          | Cattle Egret         | 2018/7/4   | 2 | 0 | 25.1184222 | 121.4718015 | <a href="https://www.inaturalist.org/observations/58215918">https://www.inaturalist.org/observations/58215918</a>   |
| 5044 | Bubulcus ibis          | Cattle Egret         | 2018/8/28  | 3 | 0 | 25.1185778 | 121.4697717 | <a href="https://www.inaturalist.org/observations/17003772">https://www.inaturalist.org/observations/17003772</a>   |
| 5045 | Bubulcus ibis          | Cattle Egret         | 2014/3/16  | 4 | 0 | 25.1187890 | 121.4712260 | <a href="http://www.inaturalist.org/observations/574076">http://www.inaturalist.org/observations/574076</a>         |
| 5046 | Bubulcus<br>coromandus | ibis<br>Cattle Egret | 2016/3/20  | 0 | 0 | 25.1188888 | 121.4708331 | <a href="https://www.inaturalist.org/observations/134122984">https://www.inaturalist.org/observations/134122984</a> |
| 5047 | Bubulcus ibis          | Cattle Egret         | 2012/11/17 | 1 | 0 | 25.1188889 | 121.4708333 | <a href="https://www.inaturalist.org/observations/70852020">https://www.inaturalist.org/observations/70852020</a>   |
| 5048 | Bubulcus ibis          | Cattle Egret         | 2021/8/21  | 2 | 0 | 25.1188889 | 121.4708333 | <a href="https://www.inaturalist.org/observations/92573619">https://www.inaturalist.org/observations/92573619</a>   |
| 5049 | Bubulcus ibis          | Cattle Egret         | 2022/2/6   | 1 | 0 | 25.1188889 | 121.4708333 | <a href="https://www.inaturalist.org/observations/108280473">https://www.inaturalist.org/observations/108280473</a> |



|      |               |              |            |   |   |            |             |                                                                                                                     |
|------|---------------|--------------|------------|---|---|------------|-------------|---------------------------------------------------------------------------------------------------------------------|
| 5050 | Bubulcus ibis | Cattle Egret | 2018/9/21  | 3 | 0 | 25.1188989 | 121.4707983 | <a href="https://www.inaturalist.org/observations/16904651">https://www.inaturalist.org/observations/16904651</a>   |
| 5051 | Bubulcus ibis | Cattle Egret | 2019/4/17  | 4 | 0 | 25.1188989 | 121.4707983 | <a href="https://www.inaturalist.org/observations/24388620">https://www.inaturalist.org/observations/24388620</a>   |
| 5052 | Bubulcus ibis | Cattle Egret | 2018/8/15  | 2 | 0 | 25.1188990 | 121.4707980 | <a href="https://www.inaturalist.org/observations/15476654">https://www.inaturalist.org/observations/15476654</a>   |
| 5053 | Bubulcus ibis | Cattle Egret | 2018/8/15  | 2 | 0 | 25.1188990 | 121.4707980 | <a href="https://www.inaturalist.org/observations/15476707">https://www.inaturalist.org/observations/15476707</a>   |
| 5054 | Bubulcus ibis | Cattle Egret | 2017/8/20  | 2 | 0 | 25.1189966 | 121.4714349 | <a href="https://www.inaturalist.org/observations/105322185">https://www.inaturalist.org/observations/105322185</a> |
| 5055 | Bubulcus ibis | Cattle Egret | 2019/10/20 | 1 | 0 | 25.1190017 | 121.4706817 | <a href="https://www.inaturalist.org/observations/34727130">https://www.inaturalist.org/observations/34727130</a>   |
| 5056 | Bubulcus ibis | Cattle Egret | 2021/11/2  | 1 | 0 | 25.1190383 | 121.4715020 | <a href="https://www.inaturalist.org/observations/100125528">https://www.inaturalist.org/observations/100125528</a> |
| 5057 | Bubulcus ibis | Cattle Egret | 2022/11/12 | 2 | 0 | 25.1190536 | 121.4722114 | <a href="https://www.inaturalist.org/observations/141903108">https://www.inaturalist.org/observations/141903108</a> |
| 5058 | Bubulcus ibis | Cattle Egret | 2019/10/19 | 1 | 0 | 25.1190710 | 121.4716857 | <a href="https://www.inaturalist.org/observations/34727158">https://www.inaturalist.org/observations/34727158</a>   |
| 5059 | Bubulcus ibis | Cattle Egret | 2019/10/19 | 1 | 0 | 25.1191120 | 121.4704666 | <a href="https://www.inaturalist.org/observations/34568248">https://www.inaturalist.org/observations/34568248</a>   |
| 5060 | Bubulcus ibis | Cattle Egret | 2019/10/20 | 1 | 0 | 25.1191141 | 121.4712884 | <a href="https://www.inaturalist.org/observations/34735278">https://www.inaturalist.org/observations/34735278</a>   |
| 5061 | Bubulcus ibis | Cattle Egret | 2018/4/28  | 4 | 0 | 25.1191715 | 121.4716130 | <a href="https://www.inaturalist.org/observations/11585873">https://www.inaturalist.org/observations/11585873</a>   |
| 5062 | Bubulcus ibis | Cattle Egret | 2022/4/3   | 1 | 0 | 25.1191903 | 121.4370921 | <a href="https://www.inaturalist.org/observations/123792949">https://www.inaturalist.org/observations/123792949</a> |
| 5063 | Bubulcus ibis | Cattle Egret | 2018/4/28  | 3 | 0 | 25.1192057 | 121.4716579 | <a href="https://www.inaturalist.org/observations/11585963">https://www.inaturalist.org/observations/11585963</a>   |
| 5064 | Bubulcus ibis | Cattle Egret | 2017/2/11  | 4 | 0 | 25.1192267 | 121.4705180 | <a href="https://www.inaturalist.org/observations/5134722">https://www.inaturalist.org/observations/5134722</a>     |
| 5065 | Bubulcus ibis | Cattle Egret | 2020/3/5   | 2 | 0 | 25.1192338 | 121.4715473 | <a href="https://www.inaturalist.org/observations/40942315">https://www.inaturalist.org/observations/40942315</a>   |
| 5066 | Bubulcus ibis | Cattle Egret | 2020/4/26  | 1 | 0 | 25.1192346 | 121.4716564 | <a href="https://www.inaturalist.org/observations/43559833">https://www.inaturalist.org/observations/43559833</a>   |
| 5067 | Bubulcus ibis | Cattle Egret | 2018/7/15  | 4 | 0 | 25.1192448 | 121.4708721 | <a href="https://www.inaturalist.org/observations/14370880">https://www.inaturalist.org/observations/14370880</a>   |
| 5068 | Bubulcus ibis | Cattle Egret | 2018/12/2  | 2 | 0 | 25.1193333 | 121.4709700 | <a href="https://www.inaturalist.org/observations/18776449">https://www.inaturalist.org/observations/18776449</a>   |
| 5069 | Bubulcus ibis | Cattle Egret | 2018/10/27 | 1 | 0 | 25.1193390 | 121.4710998 | <a href="https://www.inaturalist.org/observations/99630453">https://www.inaturalist.org/observations/99630453</a>   |
| 5070 | Bubulcus ibis | Cattle Egret | 2020/10/4  | 1 | 0 | 25.1193946 | 121.4214828 | <a href="https://www.inaturalist.org/observations/63206588">https://www.inaturalist.org/observations/63206588</a>   |
| 5071 | Bubulcus ibis | Cattle Egret | 2022/5/29  | 1 | 0 | 25.1194055 | 121.4698950 | <a href="https://www.inaturalist.org/observations/122429825">https://www.inaturalist.org/observations/122429825</a> |
| 5072 | Bubulcus ibis | Cattle Egret | 2020/9/18  | 2 | 0 | 25.1194445 | 121.4726550 | <a href="https://www.inaturalist.org/observations/59944044">https://www.inaturalist.org/observations/59944044</a>   |
| 5073 | Bubulcus ibis | Cattle Egret | 2021/5/2   | 1 | 0 | 25.1194638 | 121.4721617 | <a href="https://www.inaturalist.org/observations/76493976">https://www.inaturalist.org/observations/76493976</a>   |
| 5074 | Bubulcus ibis | Cattle Egret | 2021/12/5  | 1 | 0 | 25.1195248 | 121.4746376 | <a href="https://www.inaturalist.org/observations/102510806">https://www.inaturalist.org/observations/102510806</a> |

|      |                     |                   |            |   |   |            |             |                                                                                                                     |
|------|---------------------|-------------------|------------|---|---|------------|-------------|---------------------------------------------------------------------------------------------------------------------|
| 5075 | Bubulcus ibis       | Cattle Egret      | 2019/10/19 | 1 | 0 | 25.1198336 | 121.4711141 | <a href="https://www.inaturalist.org/observations/34570062">https://www.inaturalist.org/observations/34570062</a>   |
| 5076 | Bubulcus coromandus | ibis Cattle Egret | 2017/12/27 | 2 | 0 | 25.1200540 | 98.5584740  | <a href="https://www.inaturalist.org/observations/9372289">https://www.inaturalist.org/observations/9372289</a>     |
| 5077 | Bubulcus ibis       | Cattle Egret      | 2019/9/25  | 2 | 0 | 25.1202049 | 121.5529159 | <a href="https://www.inaturalist.org/observations/35268909">https://www.inaturalist.org/observations/35268909</a>   |
| 5078 | Bubulcus ibis       | Cattle Egret      | 2020/4/17  | 1 | 0 | 25.1250739 | 121.4560150 | <a href="https://www.inaturalist.org/observations/61546702">https://www.inaturalist.org/observations/61546702</a>   |
| 5079 | Bubulcus ibis       | Cattle Egret      | 2021/4/2   | 1 | 0 | 25.1251483 | 121.4807203 | <a href="https://www.inaturalist.org/observations/72706574">https://www.inaturalist.org/observations/72706574</a>   |
| 5080 | Bubulcus ibis       | Cattle Egret      | 2021/4/2   | 1 | 0 | 25.1252139 | 121.4810394 | <a href="https://www.inaturalist.org/observations/72706573">https://www.inaturalist.org/observations/72706573</a>   |
| 5081 | Bubulcus ibis       | Cattle Egret      | 2021/4/4   | 1 | 0 | 25.1290113 | 121.4884336 | <a href="https://www.inaturalist.org/observations/73195504">https://www.inaturalist.org/observations/73195504</a>   |
| 5082 | Bubulcus ibis       | Cattle Egret      | 2021/4/2   | 1 | 0 | 25.1308611 | 121.4909514 | <a href="https://www.inaturalist.org/observations/72706545">https://www.inaturalist.org/observations/72706545</a>   |
| 5083 | Bubulcus ibis       | Cattle Egret      | 2021/4/2   | 1 | 0 | 25.1322125 | 121.4888961 | <a href="https://www.inaturalist.org/observations/72706552">https://www.inaturalist.org/observations/72706552</a>   |
| 5084 | Bubulcus ibis       | Cattle Egret      | 2019/7/7   | 3 | 0 | 25.1332479 | 121.5728156 | <a href="https://www.inaturalist.org/observations/28352288">https://www.inaturalist.org/observations/28352288</a>   |
| 5085 | Bubulcus ibis       | Cattle Egret      | 2021/5/28  | 1 | 0 | 25.1332612 | 121.4591667 | <a href="https://www.inaturalist.org/observations/80572411">https://www.inaturalist.org/observations/80572411</a>   |
| 5086 | Bubulcus ibis       | Cattle Egret      | 2021/5/28  | 1 | 0 | 25.1332612 | 121.4591667 | <a href="https://www.inaturalist.org/observations/80572472">https://www.inaturalist.org/observations/80572472</a>   |
| 5087 | Bubulcus ibis       | Cattle Egret      | 2014/4/20  | 7 | 0 | 25.1336060 | 121.4699130 | <a href="http://www.inaturalist.org/observations/635558">http://www.inaturalist.org/observations/635558</a>         |
| 5088 | Bubulcus ibis       | Cattle Egret      | 2022/5/8   | 1 | 0 | 25.1341133 | 121.4718170 | <a href="https://www.inaturalist.org/observations/116035015">https://www.inaturalist.org/observations/116035015</a> |
| 5089 | Bubulcus ibis       | Cattle Egret      | 2021/4/2   | 2 | 0 | 25.1343817 | 121.4895828 | <a href="https://www.inaturalist.org/observations/72706549">https://www.inaturalist.org/observations/72706549</a>   |
| 5090 | Bubulcus ibis       | Cattle Egret      | 2020/5/9   | 1 | 0 | 25.1350476 | 121.4895831 | <a href="https://www.inaturalist.org/observations/45479386">https://www.inaturalist.org/observations/45479386</a>   |
| 5091 | Bubulcus ibis       | Cattle Egret      | 2020/10/21 | 1 | 0 | 25.1390722 | 121.4573450 | <a href="https://www.inaturalist.org/observations/63141811">https://www.inaturalist.org/observations/63141811</a>   |
| 5092 | Bubulcus ibis       | Cattle Egret      | 2020/11/29 | 1 | 0 | 25.1398000 | 121.4733500 | <a href="https://www.inaturalist.org/observations/65794200">https://www.inaturalist.org/observations/65794200</a>   |
| 5093 | Bubulcus ibis       | Cattle Egret      | 2018/9/25  | 2 | 0 | 25.1436722 | 121.5223083 | <a href="https://www.inaturalist.org/observations/16899841">https://www.inaturalist.org/observations/16899841</a>   |
| 5094 | Bubulcus ibis       | Cattle Egret      | 2022/5/8   | 1 | 0 | 25.1467190 | 121.4825270 | <a href="https://www.inaturalist.org/observations/116059910">https://www.inaturalist.org/observations/116059910</a> |
| 5095 | Bubulcus ibis       | Cattle Egret      | 2020/4/28  | 1 | 0 | 25.1480397 | 121.4579679 | <a href="https://www.inaturalist.org/observations/44087052">https://www.inaturalist.org/observations/44087052</a>   |
| 5096 | Bubulcus ibis       | Cattle Egret      | 2020/4/28  | 1 | 0 | 25.1480500 | 121.4579467 | <a href="https://www.inaturalist.org/observations/44086970">https://www.inaturalist.org/observations/44086970</a>   |
| 5097 | Bubulcus ibis       | Cattle Egret      | 2020/4/28  | 2 | 0 | 25.1480945 | 121.4579842 | <a href="https://www.inaturalist.org/observations/44086806">https://www.inaturalist.org/observations/44086806</a>   |
| 5098 | Bubulcus ibis       | Cattle Egret      | 2019/9/28  | 2 | 0 | 25.1491416 | 121.5098995 | <a href="https://www.inaturalist.org/observations/67284755">https://www.inaturalist.org/observations/67284755</a>   |
| 5099 | Bubulcus ibis       | Cattle Egret      | 2020/6/6   | 1 | 0 | 25.1514028 | 121.5058533 | <a href="https://www.inaturalist.org/observations/48647891">https://www.inaturalist.org/observations/48647891</a>   |

|      |                        |      |              |            |   |   |            |             |                                                                                                                     |
|------|------------------------|------|--------------|------------|---|---|------------|-------------|---------------------------------------------------------------------------------------------------------------------|
| 5100 | Bubulcus<br>coromandus | ibis | Cattle Egret | 2018/5/19  | 2 | 0 | 25.1541772 | 121.4584705 | <a href="https://www.inaturalist.org/observations/12763362">https://www.inaturalist.org/observations/12763362</a>   |
| 5101 | Bubulcus ibis          |      | Cattle Egret | 2020/5/29  | 1 | 0 | 25.1549141 | 121.5040167 | <a href="https://www.inaturalist.org/observations/47971283">https://www.inaturalist.org/observations/47971283</a>   |
| 5102 | Bubulcus ibis          |      | Cattle Egret | 2021/5/3   | 2 | 0 | 25.1559354 | 121.5475336 | <a href="https://www.inaturalist.org/observations/76873999">https://www.inaturalist.org/observations/76873999</a>   |
| 5103 | Bubulcus ibis          |      | Cattle Egret | 2021/5/3   | 3 | 0 | 25.1560833 | 121.5461800 | <a href="https://www.inaturalist.org/observations/76868182">https://www.inaturalist.org/observations/76868182</a>   |
| 5104 | Bubulcus ibis          |      | Cattle Egret | 2014/5/3   | 5 | 0 | 25.1569770 | 121.4571570 | <a href="http://www.inaturalist.org/observations/655320">http://www.inaturalist.org/observations/655320</a>         |
| 5105 | Bubulcus ibis          |      | Cattle Egret | 2022/10/21 | 1 | 0 | 25.1583219 | 121.5070701 | <a href="https://www.inaturalist.org/observations/142905339">https://www.inaturalist.org/observations/142905339</a> |
| 5106 | Bubulcus ibis          |      | Cattle Egret | 2021/9/6   | 2 | 0 | 25.1632370 | 121.4166718 | <a href="https://www.inaturalist.org/observations/103676420">https://www.inaturalist.org/observations/103676420</a> |
| 5107 | Bubulcus ibis          |      | Cattle Egret | 2021/7/31  | 2 | 0 | 25.1632528 | 121.4166221 | <a href="https://www.inaturalist.org/observations/99630456">https://www.inaturalist.org/observations/99630456</a>   |
| 5108 | Bubulcus ibis          |      | Cattle Egret | 2022/9/6   | 1 | 0 | 25.1636733 | 121.5731550 | <a href="https://www.inaturalist.org/observations/133926327">https://www.inaturalist.org/observations/133926327</a> |
| 5109 | Bubulcus ibis          |      | Cattle Egret | 2021/12/22 | 1 | 0 | 25.1639108 | 121.5781515 | <a href="https://www.inaturalist.org/observations/136561207">https://www.inaturalist.org/observations/136561207</a> |
| 5110 | Bubulcus ibis          |      | Cattle Egret | 2021/12/29 | 1 | 0 | 25.1639108 | 121.5781515 | <a href="https://www.inaturalist.org/observations/136563540">https://www.inaturalist.org/observations/136563540</a> |
| 5111 | Bubulcus ibis          |      | Cattle Egret | 2021/9/21  | 2 | 0 | 25.1646105 | 121.5756502 | <a href="https://www.inaturalist.org/observations/95654756">https://www.inaturalist.org/observations/95654756</a>   |
| 5112 | Bubulcus ibis          |      | Cattle Egret | 2022/9/16  | 3 | 0 | 25.1646141 | 121.5764334 | <a href="https://www.inaturalist.org/observations/135333151">https://www.inaturalist.org/observations/135333151</a> |
| 5113 | Bubulcus ibis          |      | Cattle Egret | 2018/10/1  | 3 | 0 | 25.1655217 | 121.4142350 | <a href="https://www.inaturalist.org/observations/19047034">https://www.inaturalist.org/observations/19047034</a>   |
| 5114 | Bubulcus ibis          |      | Cattle Egret | 2022/8/27  | 2 | 0 | 25.1655521 | 121.5721436 | <a href="https://www.inaturalist.org/observations/132476991">https://www.inaturalist.org/observations/132476991</a> |
| 5115 | Bubulcus ibis          |      | Cattle Egret | 2020/2/19  | 0 | 0 | 25.1656613 | 121.4129410 | <a href="https://www.inaturalist.org/observations/39206753">https://www.inaturalist.org/observations/39206753</a>   |
| 5116 | Bubulcus ibis          |      | Cattle Egret | 2022/4/13  | 2 | 0 | 25.1660328 | 121.4186939 | <a href="https://www.inaturalist.org/observations/111305933">https://www.inaturalist.org/observations/111305933</a> |
| 5117 | Bubulcus ibis          |      | Cattle Egret | 2018/7/4   | 3 | 0 | 25.1745867 | 121.4501800 | <a href="https://www.inaturalist.org/observations/14343082">https://www.inaturalist.org/observations/14343082</a>   |
| 5118 | Bubulcus ibis          |      | Cattle Egret | 2022/7/10  | 1 | 0 | 25.1747833 | 121.4494833 | <a href="https://www.inaturalist.org/observations/125775740">https://www.inaturalist.org/observations/125775740</a> |
| 5119 | Bubulcus ibis          |      | Cattle Egret | 2021/5/3   | 4 | 0 | 25.1768250 | 121.5384833 | <a href="https://www.inaturalist.org/observations/76877689">https://www.inaturalist.org/observations/76877689</a>   |
| 5120 | Bubulcus ibis          |      | Cattle Egret | 2021/5/3   | 5 | 0 | 25.1771204 | 121.5379785 | <a href="https://www.inaturalist.org/observations/76874214">https://www.inaturalist.org/observations/76874214</a>   |
| 5121 | Bubulcus ibis          |      | Cattle Egret | 2021/5/7   | 2 | 0 | 25.1781359 | 121.5683183 | <a href="https://www.inaturalist.org/observations/77697919">https://www.inaturalist.org/observations/77697919</a>   |
| 5122 | Bubulcus ibis          |      | Cattle Egret | 2020/9/1   | 1 | 0 | 25.1781525 | 121.4295455 | <a href="https://www.inaturalist.org/observations/58215021">https://www.inaturalist.org/observations/58215021</a>   |
| 5123 | Bubulcus ibis          |      | Cattle Egret | 2020/5/13  | 1 | 0 | 25.1831499 | 121.4883285 | <a href="https://www.inaturalist.org/observations/56379310">https://www.inaturalist.org/observations/56379310</a>   |
| 5124 | Bubulcus ibis          |      | Cattle Egret | 2016/7/29  | 1 | 0 | 25.1834499 | 121.4269459 | <a href="https://www.inaturalist.org/observations/39050406">https://www.inaturalist.org/observations/39050406</a>   |

|      |                        |                      |            |   |   |            |             |                                                                                                                     |
|------|------------------------|----------------------|------------|---|---|------------|-------------|---------------------------------------------------------------------------------------------------------------------|
| 5125 | Bubulcus ibis          | Cattle Egret         | 2020/5/8   | 1 | 0 | 25.1858777 | 121.4272656 | <a href="https://www.inaturalist.org/observations/46218086">https://www.inaturalist.org/observations/46218086</a>   |
| 5126 | Bubulcus ibis          | Cattle Egret         | 2019/9/11  | 2 | 0 | 25.1872467 | 121.4539717 | <a href="https://www.inaturalist.org/observations/32511006">https://www.inaturalist.org/observations/32511006</a>   |
| 5127 | Bubulcus ibis          | Cattle Egret         | 2018/9/12  | 1 | 0 | 25.1874875 | 121.4551203 | <a href="https://www.inaturalist.org/observations/16443333">https://www.inaturalist.org/observations/16443333</a>   |
| 5128 | Bubulcus ibis          | Cattle Egret         | 2018/9/12  | 3 | 0 | 25.1875315 | 121.4567715 | <a href="https://www.inaturalist.org/observations/16442404">https://www.inaturalist.org/observations/16442404</a>   |
| 5129 | Bubulcus ibis          | Cattle Egret         | 2019/9/11  | 2 | 0 | 25.1877200 | 121.4536217 | <a href="https://www.inaturalist.org/observations/32510899">https://www.inaturalist.org/observations/32510899</a>   |
| 5130 | Bubulcus ibis          | Cattle Egret         | 2012/9/22  | 2 | 0 | 25.1942462 | 121.5609363 | <a href="https://www.inaturalist.org/observations/70850829">https://www.inaturalist.org/observations/70850829</a>   |
| 5131 | Bubulcus ibis          | Cattle Egret         | 2022/6/16  | 3 | 0 | 25.2031639 | 75.7922781  | <a href="https://www.inaturalist.org/observations/121972199">https://www.inaturalist.org/observations/121972199</a> |
| 5132 | Bubulcus ibis          | Cattle Egret         | 2014/5/12  | 1 | 0 | 25.2071533 | 110.3476974 | <a href="https://www.inaturalist.org/observations/116083079">https://www.inaturalist.org/observations/116083079</a> |
| 5133 | Bubulcus ibis          | Cattle Egret         | 2022/12/3  | 4 | 0 | 25.2208730 | 75.8361810  | <a href="https://www.inaturalist.org/observations/143557722">https://www.inaturalist.org/observations/143557722</a> |
| 5134 | Bubulcus ibis          | Cattle Egret         | 2015/9/5   | 1 | 0 | 25.2308046 | 121.6324989 | <a href="https://www.inaturalist.org/observations/58826154">https://www.inaturalist.org/observations/58826154</a>   |
| 5135 | Bubulcus<br>coromandus | ibis<br>Cattle Egret | 2021/1/15  | 1 | 0 | 25.2308240 | 121.6328422 | <a href="https://www.inaturalist.org/observations/68403414">https://www.inaturalist.org/observations/68403414</a>   |
| 5136 | Bubulcus ibis          | Cattle Egret         | 2015/3/21  | 1 | 0 | 25.2308919 | 121.6323916 | <a href="https://www.inaturalist.org/observations/57611402">https://www.inaturalist.org/observations/57611402</a>   |
| 5137 | Bubulcus ibis          | Cattle Egret         | 2020/11/20 | 1 | 0 | 25.2309710 | 121.6317430 | <a href="https://www.inaturalist.org/observations/65456631">https://www.inaturalist.org/observations/65456631</a>   |
| 5138 | Bubulcus ibis          | Cattle Egret         | 2022/4/9   | 1 | 0 | 25.2310543 | 121.6315540 | <a href="https://www.inaturalist.org/observations/115869199">https://www.inaturalist.org/observations/115869199</a> |
| 5139 | Bubulcus ibis          | Cattle Egret         | 2022/4/9   | 1 | 0 | 25.2310860 | 121.6315544 | <a href="https://www.inaturalist.org/observations/115869206">https://www.inaturalist.org/observations/115869206</a> |
| 5140 | Bubulcus ibis          | Cattle Egret         | 2022/8/17  | 2 | 0 | 25.2394435 | 121.6152244 | <a href="https://www.inaturalist.org/observations/131169091">https://www.inaturalist.org/observations/131169091</a> |
| 5141 | Bubulcus ibis          | Cattle Egret         | 2022/8/16  | 3 | 0 | 25.2398271 | 121.6148979 | <a href="https://www.inaturalist.org/observations/131057962">https://www.inaturalist.org/observations/131057962</a> |
| 5142 | Bubulcus ibis          | Cattle Egret         | 2022/8/16  | 2 | 0 | 25.2398272 | 121.6148980 | <a href="https://www.inaturalist.org/observations/131042830">https://www.inaturalist.org/observations/131042830</a> |
| 5143 | Bubulcus ibis          | Cattle Egret         | 2022/8/18  | 2 | 0 | 25.2398272 | 121.6148980 | <a href="https://www.inaturalist.org/observations/131306502">https://www.inaturalist.org/observations/131306502</a> |
| 5144 | Bubulcus ibis          | Cattle Egret         | 2022/8/19  | 1 | 0 | 25.2398272 | 121.6148980 | <a href="https://www.inaturalist.org/observations/131431466">https://www.inaturalist.org/observations/131431466</a> |
| 5145 | Bubulcus ibis          | Cattle Egret         | 2022/8/22  | 2 | 0 | 25.2398307 | 121.6148979 | <a href="https://www.inaturalist.org/observations/131858962">https://www.inaturalist.org/observations/131858962</a> |
| 5146 | Bubulcus ibis          | Cattle Egret         | 2022/9/7   | 1 | 0 | 25.2398307 | 121.6148979 | <a href="https://www.inaturalist.org/observations/133997577">https://www.inaturalist.org/observations/133997577</a> |
| 5147 | Bubulcus ibis          | Cattle Egret         | 2022/8/17  | 2 | 0 | 25.2401728 | 121.6138330 | <a href="https://www.inaturalist.org/observations/131169083">https://www.inaturalist.org/observations/131169083</a> |
| 5148 | Bubulcus ibis          | Cattle Egret         | 2022/8/17  | 2 | 0 | 25.2402032 | 121.6137074 | <a href="https://www.inaturalist.org/observations/131169086">https://www.inaturalist.org/observations/131169086</a> |
| 5149 | Bubulcus ibis          | Cattle Egret         | 2022/8/17  | 2 | 0 | 25.2402032 | 121.6137074 | <a href="https://www.inaturalist.org/observations/131169088">https://www.inaturalist.org/observations/131169088</a> |

|      |               |              |            |   |   |            |             |                                                                                                                     |
|------|---------------|--------------|------------|---|---|------------|-------------|---------------------------------------------------------------------------------------------------------------------|
| 5150 | Bubulcus ibis | Cattle Egret | 2022/8/17  | 2 | 0 | 25.2402032 | 121.6137074 | <a href="https://www.inaturalist.org/observations/131169089">https://www.inaturalist.org/observations/131169089</a> |
| 5151 | Bubulcus ibis | Cattle Egret | 2022/8/17  | 2 | 0 | 25.2402627 | 121.6139408 | <a href="https://www.inaturalist.org/observations/131169084">https://www.inaturalist.org/observations/131169084</a> |
| 5152 | Bubulcus ibis | Cattle Egret | 2022/8/17  | 2 | 0 | 25.2402627 | 121.6139408 | <a href="https://www.inaturalist.org/observations/131169085">https://www.inaturalist.org/observations/131169085</a> |
| 5153 | Bubulcus ibis | Cattle Egret | 2022/8/17  | 2 | 0 | 25.2403783 | 121.6137445 | <a href="https://www.inaturalist.org/observations/131169090">https://www.inaturalist.org/observations/131169090</a> |
| 5154 | Bubulcus ibis | Cattle Egret | 2022/8/11  | 2 | 0 | 25.2410606 | 121.6147399 | <a href="https://www.inaturalist.org/observations/130586550">https://www.inaturalist.org/observations/130586550</a> |
| 5155 | Bubulcus ibis | Cattle Egret | 2022/8/26  | 2 | 0 | 25.2411615 | 121.6134981 | <a href="https://www.inaturalist.org/observations/132369594">https://www.inaturalist.org/observations/132369594</a> |
| 5156 | Bubulcus ibis | Cattle Egret | 2022/5/10  | 2 | 0 | 25.2413522 | 121.6171678 | <a href="https://www.inaturalist.org/observations/127069392">https://www.inaturalist.org/observations/127069392</a> |
| 5157 | Bubulcus ibis | Cattle Egret | 2022/8/24  | 1 | 0 | 25.2435921 | 121.6147058 | <a href="https://www.inaturalist.org/observations/132258147">https://www.inaturalist.org/observations/132258147</a> |
| 5158 | Bubulcus ibis | Cattle Egret | 2022/5/6   | 1 | 0 | 25.2442750 | 121.6156300 | <a href="https://www.inaturalist.org/observations/115656080">https://www.inaturalist.org/observations/115656080</a> |
| 5159 | Bubulcus ibis | Cattle Egret | 2022/5/8   | 1 | 0 | 25.2444628 | 121.6166497 | <a href="https://www.inaturalist.org/observations/116018567">https://www.inaturalist.org/observations/116018567</a> |
| 5160 | Bubulcus ibis | Cattle Egret | 2020/11/15 | 3 | 0 | 25.2677187 | 82.9912581  | <a href="https://www.inaturalist.org/observations/64929430">https://www.inaturalist.org/observations/64929430</a>   |
| 5161 | Bubulcus ibis | Cattle Egret | 2011/11/1  | 1 | 0 | 25.3047508 | 75.4118450  | <a href="https://www.inaturalist.org/observations/45528652">https://www.inaturalist.org/observations/45528652</a>   |
| 5162 | Bubulcus ibis | Cattle Egret | 2016/3/31  | 2 | 0 | 25.3080738 | 83.0063801  | <a href="https://www.inaturalist.org/observations/59942711">https://www.inaturalist.org/observations/59942711</a>   |
| 5163 | Bubulcus ibis | Cattle Egret | 2016/3/31  | 2 | 0 | 25.3199654 | 83.0142009  | <a href="https://www.inaturalist.org/observations/91084203">https://www.inaturalist.org/observations/91084203</a>   |
| 5164 | Bubulcus ibis | Cattle Egret | 2018/2/20  | 2 | 0 | 25.3233000 | 83.0331000  | <a href="https://www.inaturalist.org/observations/69874975">https://www.inaturalist.org/observations/69874975</a>   |
| 5165 | Bubulcus ibis | Cattle Egret | 2021/2/13  | 4 | 0 | 25.4115995 | 81.8485844  | <a href="https://www.inaturalist.org/observations/69490787">https://www.inaturalist.org/observations/69490787</a>   |
| 5166 | Bubulcus ibis | Cattle Egret | 2018/9/9   | 2 | 0 | 25.5963363 | 85.1005811  | <a href="https://www.inaturalist.org/observations/21745449">https://www.inaturalist.org/observations/21745449</a>   |
| 5167 | Bubulcus ibis | Cattle Egret | 2022/2/9   | 4 | 0 | 25.6063227 | 85.8823039  | <a href="https://www.inaturalist.org/observations/106415996">https://www.inaturalist.org/observations/106415996</a> |
| 5168 | Bubulcus ibis | Cattle Egret | 2019/12/25 | 2 | 0 | 25.6367363 | 88.1199865  | <a href="https://www.inaturalist.org/observations/71412849">https://www.inaturalist.org/observations/71412849</a>   |
| 5169 | Bubulcus ibis | Cattle Egret | 2022/12/13 | 1 | 0 | 25.6517540 | 90.8032181  | <a href="https://www.inaturalist.org/observations/144418748">https://www.inaturalist.org/observations/144418748</a> |
| 5170 | Bubulcus ibis | Cattle Egret | 2021/1/24  | 1 | 0 | 25.6517761 | 90.8032180  | <a href="https://www.inaturalist.org/observations/77565096">https://www.inaturalist.org/observations/77565096</a>   |
| 5171 | Bubulcus ibis | Cattle Egret | 2022/9/5   | 1 | 0 | 25.6714886 | 100.2122690 | <a href="https://www.inaturalist.org/observations/133746538">https://www.inaturalist.org/observations/133746538</a> |
| 5172 | Bubulcus ibis | Cattle Egret | 2021/8/3   | 1 | 0 | 25.6956992 | 100.2075542 | <a href="https://www.inaturalist.org/observations/91217391">https://www.inaturalist.org/observations/91217391</a>   |
| 5173 | Bubulcus ibis | Cattle Egret | 2022/6/24  | 1 | 0 | 25.7034092 | 100.1662833 | <a href="https://www.inaturalist.org/observations/123321791">https://www.inaturalist.org/observations/123321791</a> |
| 5174 | Bubulcus ibis | Cattle Egret | 2014/5/23  | 2 | 0 | 25.7429167 | 100.1628611 | <a href="https://www.inaturalist.org/observations/68418538">https://www.inaturalist.org/observations/68418538</a>   |

|      |                     |                   |            |   |   |            |             |                                                                                                                     |
|------|---------------------|-------------------|------------|---|---|------------|-------------|---------------------------------------------------------------------------------------------------------------------|
| 5175 | Bubulcus ibis       | Cattle Egret      | 2022/4/24  | 1 | 0 | 25.8450652 | 100.1294354 | <a href="https://www.inaturalist.org/observations/112653467">https://www.inaturalist.org/observations/112653467</a> |
| 5176 | Bubulcus ibis       | Cattle Egret      | 2018/11/24 | 5 | 0 | 25.8661376 | 93.4667024  | <a href="https://www.inaturalist.org/observations/18591289">https://www.inaturalist.org/observations/18591289</a>   |
| 5177 | Bubulcus ibis       | Cattle Egret      | 2021/5/14  | 1 | 0 | 25.9516318 | 119.9683432 | <a href="https://www.inaturalist.org/observations/83947955">https://www.inaturalist.org/observations/83947955</a>   |
| 5178 | Bubulcus ibis       | Cattle Egret      | 2022/6/3   | 1 | 0 | 26.0053583 | 119.6236549 | <a href="https://www.inaturalist.org/observations/132116155">https://www.inaturalist.org/observations/132116155</a> |
| 5179 | Bubulcus ibis       | Cattle Egret      | 2009/1/16  | 1 | 0 | 26.0173274 | 76.5025742  | <a href="https://www.inaturalist.org/observations/48209306">https://www.inaturalist.org/observations/48209306</a>   |
| 5180 | Bubulcus ibis       | Cattle Egret      | 2022/6/3   | 1 | 0 | 26.0218349 | 119.6314567 | <a href="https://www.inaturalist.org/observations/132116182">https://www.inaturalist.org/observations/132116182</a> |
| 5181 | Bubulcus ibis       | Cattle Egret      | 2022/6/3   | 1 | 0 | 26.0220100 | 119.6308433 | <a href="https://www.inaturalist.org/observations/132116188">https://www.inaturalist.org/observations/132116188</a> |
| 5182 | Bubulcus ibis       | Cattle Egret      | 2015/5/26  | 5 | 0 | 26.0284019 | 76.4651526  | <a href="https://www.inaturalist.org/observations/140701080">https://www.inaturalist.org/observations/140701080</a> |
| 5183 | Bubulcus ibis       | Cattle Egret      | 2021/6/14  | 2 | 0 | 26.0554350 | 119.1892940 | <a href="https://www.inaturalist.org/observations/82977389">https://www.inaturalist.org/observations/82977389</a>   |
| 5184 | Bubulcus ibis       | Cattle Egret      | 2021/6/15  | 2 | 0 | 26.0586530 | 119.1948590 | <a href="https://www.inaturalist.org/observations/84636199">https://www.inaturalist.org/observations/84636199</a>   |
| 5185 | Bubulcus ibis       | Cattle Egret      | 2022/6/21  | 1 | 0 | 26.0608300 | 119.1879950 | <a href="https://www.inaturalist.org/observations/122896873">https://www.inaturalist.org/observations/122896873</a> |
| 5186 | Bubulcus ibis       | Cattle Egret      | 2020/2/28  | 0 | 0 | 26.0658552 | 76.4332443  | <a href="https://www.inaturalist.org/observations/39745260">https://www.inaturalist.org/observations/39745260</a>   |
| 5187 | Bubulcus ibis       | Cattle Egret      | 2020/2/20  | 2 | 0 | 26.1104778 | 91.6351579  | <a href="https://www.inaturalist.org/observations/46574660">https://www.inaturalist.org/observations/46574660</a>   |
| 5188 | Bubulcus ibis       | Cattle Egret      | 2006/2/9   | 3 | 0 | 26.1120000 | 91.6520000  | <a href="https://www.inaturalist.org/observations/104851128">https://www.inaturalist.org/observations/104851128</a> |
| 5189 | Bubulcus coromandus | ibis Cattle Egret | 2013/3/11  | 2 | 0 | 26.1120000 | 91.6770000  | <a href="https://www.inaturalist.org/observations/37662701">https://www.inaturalist.org/observations/37662701</a>   |
| 5190 | Bubulcus coromandus | ibis Cattle Egret | 2013/3/11  | 1 | 0 | 26.1120000 | 91.6770000  | <a href="https://www.inaturalist.org/observations/37662762">https://www.inaturalist.org/observations/37662762</a>   |
| 5191 | Bubulcus ibis       | Cattle Egret      | 2012/11/25 | 2 | 0 | 26.1130203 | 91.6560049  | <a href="https://www.inaturalist.org/observations/60751624">https://www.inaturalist.org/observations/60751624</a>   |
| 5192 | Bubulcus ibis       | Cattle Egret      | 2019/4/2   | 4 | 0 | 26.1141729 | 91.6784492  | <a href="https://www.inaturalist.org/observations/97304581">https://www.inaturalist.org/observations/97304581</a>   |
| 5193 | Bubulcus ibis       | Cattle Egret      | 2019/4/2   | 5 | 0 | 26.1145833 | 91.6768750  | <a href="https://www.inaturalist.org/observations/25777967">https://www.inaturalist.org/observations/25777967</a>   |
| 5194 | Bubulcus ibis       | Cattle Egret      | 2016/6/12  | 1 | 0 | 26.1176941 | 91.6493532  | <a href="https://www.inaturalist.org/observations/95938587">https://www.inaturalist.org/observations/95938587</a>   |
| 5195 | Bubulcus ibis       | Cattle Egret      | 2015/3/22  | 2 | 0 | 26.1243663 | 91.6680913  | <a href="https://www.inaturalist.org/observations/68903335">https://www.inaturalist.org/observations/68903335</a>   |
| 5196 | Bubulcus ibis       | Cattle Egret      | 2020/5/7   | 1 | 0 | 26.1407242 | 119.9270926 | <a href="https://www.inaturalist.org/observations/46065503">https://www.inaturalist.org/observations/46065503</a>   |
| 5197 | Bubulcus coromandus | ibis Cattle Egret | 2013/4/15  | 5 | 0 | 26.1482138 | 91.8351113  | <a href="https://www.inaturalist.org/observations/7458822">https://www.inaturalist.org/observations/7458822</a>     |
| 5198 | Bubulcus ibis       | Cattle Egret      | 2022/4/6   | 2 | 0 | 26.1538020 | 91.6578865  | <a href="https://www.inaturalist.org/observations/110648090">https://www.inaturalist.org/observations/110648090</a> |
| 5199 | Bubulcus ibis       | Cattle Egret      | 2018/5/1   | 3 | 0 | 26.1549926 | 91.6685871  | <a href="https://www.inaturalist.org/observations/59611117">https://www.inaturalist.org/observations/59611117</a>   |

|      |               |              |            |   |   |            |             |                                                                                                                     |
|------|---------------|--------------|------------|---|---|------------|-------------|---------------------------------------------------------------------------------------------------------------------|
| 5200 | Bubulcus ibis | Cattle Egret | 2022/5/23  | 1 | 0 | 26.1558843 | 119.9401461 | <a href="https://www.inaturalist.org/observations/119411254">https://www.inaturalist.org/observations/119411254</a> |
| 5201 | Bubulcus ibis | Cattle Egret | 2018/9/8   | 4 | 0 | 26.1635190 | 91.7807250  | <a href="https://www.inaturalist.org/observations/16412175">https://www.inaturalist.org/observations/16412175</a>   |
| 5202 | Bubulcus ibis | Cattle Egret | 2018/9/8   | 5 | 0 | 26.1635190 | 91.7807250  | <a href="https://www.inaturalist.org/observations/19484616">https://www.inaturalist.org/observations/19484616</a>   |
| 5203 | Bubulcus ibis | Cattle Egret | 2021/6/12  | 2 | 0 | 26.1659034 | 75.7962851  | <a href="https://www.inaturalist.org/observations/82653472">https://www.inaturalist.org/observations/82653472</a>   |
| 5204 | Bubulcus ibis | Cattle Egret | 2018/6/14  | 4 | 0 | 26.1712302 | 91.7779827  | <a href="https://www.inaturalist.org/observations/13445228">https://www.inaturalist.org/observations/13445228</a>   |
| 5205 | Bubulcus ibis | Cattle Egret | 2021/2/16  | 4 | 0 | 26.1801793 | 91.7352279  | <a href="https://www.inaturalist.org/observations/75628462">https://www.inaturalist.org/observations/75628462</a>   |
| 5206 | Bubulcus ibis | Cattle Egret | 2013/2/10  | 0 | 0 | 26.1878680 | 91.6912937  | <a href="https://www.inaturalist.org/observations/103620253">https://www.inaturalist.org/observations/103620253</a> |
| 5207 | Bubulcus ibis | Cattle Egret | 2019/4/22  | 5 | 0 | 26.1889012 | 91.7468533  | <a href="https://www.inaturalist.org/observations/23340923">https://www.inaturalist.org/observations/23340923</a>   |
| 5208 | Bubulcus ibis | Cattle Egret | 2020/4/10  | 3 | 0 | 26.1893606 | 91.7532970  | <a href="https://www.inaturalist.org/observations/54023447">https://www.inaturalist.org/observations/54023447</a>   |
| 5209 | Bubulcus ibis | Cattle Egret | 2021/5/8   | 2 | 0 | 26.1954583 | 78.1979450  | <a href="https://www.inaturalist.org/observations/78179113">https://www.inaturalist.org/observations/78179113</a>   |
| 5210 | Bubulcus ibis | Cattle Egret | 2018/9/12  | 5 | 0 | 26.1964284 | 91.7012290  | <a href="https://www.inaturalist.org/observations/39875623">https://www.inaturalist.org/observations/39875623</a>   |
| 5211 | Bubulcus ibis | Cattle Egret | 2015/12/16 | 1 | 0 | 26.2173732 | 91.6334666  | <a href="https://www.inaturalist.org/observations/90516750">https://www.inaturalist.org/observations/90516750</a>   |
| 5212 | Bubulcus ibis | Cattle Egret | 2015/12/16 | 3 | 0 | 26.2189207 | 91.6329246  | <a href="https://www.inaturalist.org/observations/129148177">https://www.inaturalist.org/observations/129148177</a> |
| 5213 | Bubulcus ibis | Cattle Egret | 2018/9/15  | 4 | 0 | 26.2419229 | 73.0045427  | <a href="https://www.inaturalist.org/observations/16546456">https://www.inaturalist.org/observations/16546456</a>   |
| 5214 | Bubulcus ibis | Cattle Egret | 2018/8/20  | 5 | 0 | 26.2424894 | 73.0030896  | <a href="https://www.inaturalist.org/observations/16447403">https://www.inaturalist.org/observations/16447403</a>   |
| 5215 | Bubulcus ibis | Cattle Egret | 2017/7/6   | 4 | 0 | 26.2426620 | 73.0033752  | <a href="https://www.inaturalist.org/observations/16526820">https://www.inaturalist.org/observations/16526820</a>   |
| 5216 | Bubulcus ibis | Cattle Egret | 2018/7/22  | 4 | 0 | 26.2438652 | 73.0017880  | <a href="https://www.inaturalist.org/observations/16526730">https://www.inaturalist.org/observations/16526730</a>   |
| 5217 | Bubulcus ibis | Cattle Egret | 2019/12/29 | 0 | 0 | 26.2527772 | 76.3410819  | <a href="https://www.inaturalist.org/observations/37782847">https://www.inaturalist.org/observations/37782847</a>   |
| 5218 | Bubulcus ibis | Cattle Egret | 2022/8/12  | 5 | 0 | 26.2983975 | 74.7354242  | <a href="https://www.inaturalist.org/observations/132148379">https://www.inaturalist.org/observations/132148379</a> |
| 5219 | Bubulcus ibis | Cattle Egret | 2020/4/20  | 3 | 0 | 26.3131661 | 79.7396268  | <a href="https://www.inaturalist.org/observations/55903825">https://www.inaturalist.org/observations/55903825</a>   |
| 5220 | Bubulcus ibis | Cattle Egret | 2015/7/23  | 5 | 0 | 26.3345034 | 91.2241497  | <a href="https://www.inaturalist.org/observations/19121995">https://www.inaturalist.org/observations/19121995</a>   |
| 5221 | Bubulcus ibis | Cattle Egret | 2018/4/30  | 1 | 0 | 26.3686778 | 120.4883333 | <a href="https://www.inaturalist.org/observations/56823058">https://www.inaturalist.org/observations/56823058</a>   |
| 5222 | Bubulcus ibis | Cattle Egret | 2019/4/21  | 2 | 0 | 26.3696038 | 120.4923492 | <a href="https://www.inaturalist.org/observations/22932193">https://www.inaturalist.org/observations/22932193</a>   |
| 5223 | Bubulcus ibis | Cattle Egret | 2022/5/23  | 1 | 0 | 26.3805803 | 120.4772464 | <a href="https://www.inaturalist.org/observations/118442792">https://www.inaturalist.org/observations/118442792</a> |
| 5224 | Bubulcus ibis | Cattle Egret | 2021/4/27  | 1 | 0 | 26.3817056 | 120.4763286 | <a href="https://www.inaturalist.org/observations/75406474">https://www.inaturalist.org/observations/75406474</a>   |

|      |                     |                   |            |   |   |            |             |                                                                                                                     |
|------|---------------------|-------------------|------------|---|---|------------|-------------|---------------------------------------------------------------------------------------------------------------------|
| 5225 | Bubulcus ibis       | Cattle Egret      | 2022/10/8  | 1 | 0 | 26.4234217 | 106.3695259 | <a href="https://www.inaturalist.org/observations/142895329">https://www.inaturalist.org/observations/142895329</a> |
| 5226 | Bubulcus ibis       | Cattle Egret      | 2022/9/30  | 1 | 0 | 26.4661960 | 106.6786976 | <a href="https://www.inaturalist.org/observations/142150435">https://www.inaturalist.org/observations/142150435</a> |
| 5227 | Bubulcus ibis       | Cattle Egret      | 2008/9/9   | 3 | 0 | 26.4698596 | 74.6305978  | <a href="https://www.inaturalist.org/observations/107925921">https://www.inaturalist.org/observations/107925921</a> |
| 5228 | Bubulcus ibis       | Cattle Egret      | 2020/10/18 | 1 | 0 | 26.4847219 | 74.6252591  | <a href="https://www.inaturalist.org/observations/63454148">https://www.inaturalist.org/observations/63454148</a>   |
| 5229 | Bubulcus ibis       | Cattle Egret      | 2020/11/7  | 1 | 0 | 26.4852730 | 74.6268070  | <a href="https://www.inaturalist.org/observations/64344085">https://www.inaturalist.org/observations/64344085</a>   |
| 5230 | Bubulcus ibis       | Cattle Egret      | 2022/4/1   | 2 | 0 | 26.4906468 | 80.2823524  | <a href="https://www.inaturalist.org/observations/119700520">https://www.inaturalist.org/observations/119700520</a> |
| 5231 | Bubulcus ibis       | Cattle Egret      | 2022/4/11  | 1 | 0 | 26.5093412 | 106.6497552 | <a href="https://www.inaturalist.org/observations/112045268">https://www.inaturalist.org/observations/112045268</a> |
| 5232 | Bubulcus ibis       | Cattle Egret      | 2022/4/21  | 1 | 0 | 26.5093412 | 106.6497552 | <a href="https://www.inaturalist.org/observations/112256100">https://www.inaturalist.org/observations/112256100</a> |
| 5233 | Bubulcus ibis       | Cattle Egret      | 2022/11/10 | 1 | 0 | 26.5093412 | 106.6497552 | <a href="https://www.inaturalist.org/observations/142908364">https://www.inaturalist.org/observations/142908364</a> |
| 5234 | Bubulcus ibis       | Cattle Egret      | 2019/12/10 | 3 | 0 | 26.5252813 | 92.9938080  | <a href="https://www.inaturalist.org/observations/39928340">https://www.inaturalist.org/observations/39928340</a>   |
| 5235 | Bubulcus ibis       | Cattle Egret      | 2020/2/15  | 5 | 0 | 26.5442267 | 77.9607250  | <a href="https://www.inaturalist.org/observations/50950039">https://www.inaturalist.org/observations/50950039</a>   |
| 5236 | Bubulcus ibis       | Cattle Egret      | 2021/1/15  | 1 | 0 | 26.5758957 | 93.0872373  | <a href="https://www.inaturalist.org/observations/69969824">https://www.inaturalist.org/observations/69969824</a>   |
| 5237 | Bubulcus ibis       | Cattle Egret      | 2006/2/6   | 1 | 0 | 26.5760000 | 93.1890000  | <a href="https://www.inaturalist.org/observations/104830871">https://www.inaturalist.org/observations/104830871</a> |
| 5238 | Bubulcus ibis       | Cattle Egret      | 2017/11/8  | 1 | 0 | 26.5775310 | 93.1711220  | <a href="https://www.inaturalist.org/observations/82655839">https://www.inaturalist.org/observations/82655839</a>   |
| 5239 | Bubulcus ibis       | Cattle Egret      | 2021/10/5  | 1 | 0 | 26.5775344 | 93.1711217  | <a href="https://www.inaturalist.org/observations/105599146">https://www.inaturalist.org/observations/105599146</a> |
| 5240 | Bubulcus ibis       | Cattle Egret      | 2020/12/6  | 2 | 0 | 26.5775842 | 93.1709772  | <a href="https://www.inaturalist.org/observations/70860416">https://www.inaturalist.org/observations/70860416</a>   |
| 5241 | Bubulcus ibis       | Cattle Egret      | 2021/9/12  | 1 | 0 | 26.5830638 | 106.8501414 | <a href="https://www.inaturalist.org/observations/94910219">https://www.inaturalist.org/observations/94910219</a>   |
| 5242 | Bubulcus ibis       | Cattle Egret      | 2006/2/3   | 3 | 0 | 26.5870000 | 93.4130000  | <a href="https://www.inaturalist.org/observations/104802915">https://www.inaturalist.org/observations/104802915</a> |
| 5243 | Bubulcus coromandus | ibis Cattle Egret | 2013/4/23  | 2 | 0 | 26.5961627 | 93.2970644  | <a href="https://www.inaturalist.org/observations/59039277">https://www.inaturalist.org/observations/59039277</a>   |
| 5244 | Bubulcus ibis       | Cattle Egret      | 2018/11/27 | 6 | 0 | 26.5965967 | 93.3954400  | <a href="https://www.inaturalist.org/observations/19761636">https://www.inaturalist.org/observations/19761636</a>   |
| 5245 | Bubulcus ibis       | Cattle Egret      | 2017/11/25 | 1 | 0 | 26.6022374 | 78.6406833  | <a href="https://www.inaturalist.org/observations/70000168">https://www.inaturalist.org/observations/70000168</a>   |
| 5246 | Bubulcus ibis       | Cattle Egret      | 2018/4/26  | 4 | 0 | 26.6282310 | 92.7804530  | <a href="https://www.inaturalist.org/observations/13604494">https://www.inaturalist.org/observations/13604494</a>   |
| 5247 | Bubulcus ibis       | Cattle Egret      | 2017/9/7   | 2 | 0 | 26.6288820 | 92.7796770  | <a href="https://www.inaturalist.org/observations/49002056">https://www.inaturalist.org/observations/49002056</a>   |
| 5248 | Bubulcus ibis       | Cattle Egret      | 2021/8/24  | 1 | 0 | 26.6335984 | 106.6335758 | <a href="https://www.inaturalist.org/observations/92891696">https://www.inaturalist.org/observations/92891696</a>   |
| 5249 | Bubulcus ibis       | Cattle Egret      | 2021/12/8  | 3 | 0 | 26.6409927 | 94.1913931  | <a href="https://www.inaturalist.org/observations/105602053">https://www.inaturalist.org/observations/105602053</a> |



|      |                     |                   |            |   |   |            |             |                                                                                                                     |
|------|---------------------|-------------------|------------|---|---|------------|-------------|---------------------------------------------------------------------------------------------------------------------|
| 5250 | Bubulcus ibis       | Cattle Egret      | 2021/5/3   | 1 | 0 | 26.6468098 | 106.5474618 | <a href="https://www.inaturalist.org/observations/78330384">https://www.inaturalist.org/observations/78330384</a>   |
| 5251 | Bubulcus ibis       | Cattle Egret      | 2021/8/24  | 1 | 0 | 26.6468098 | 106.5474618 | <a href="https://www.inaturalist.org/observations/92891754">https://www.inaturalist.org/observations/92891754</a>   |
| 5252 | Bubulcus ibis       | Cattle Egret      | 2021/8/24  | 1 | 0 | 26.6468098 | 106.5474618 | <a href="https://www.inaturalist.org/observations/92891799">https://www.inaturalist.org/observations/92891799</a>   |
| 5253 | Bubulcus ibis       | Cattle Egret      | 2020/2/6   | 3 | 0 | 26.6511191 | 93.4060271  | <a href="https://www.inaturalist.org/observations/104723629">https://www.inaturalist.org/observations/104723629</a> |
| 5254 | Bubulcus ibis       | Cattle Egret      | 2018/4/26  | 5 | 0 | 26.6528495 | 92.7925592  | <a href="https://www.inaturalist.org/observations/19635555">https://www.inaturalist.org/observations/19635555</a>   |
| 5255 | Bubulcus ibis       | Cattle Egret      | 2018/4/26  | 5 | 0 | 26.6528495 | 92.7925592  | <a href="https://www.inaturalist.org/observations/19635560">https://www.inaturalist.org/observations/19635560</a>   |
| 5256 | Bubulcus ibis       | Cattle Egret      | 2018/4/26  | 5 | 0 | 26.6528495 | 92.7925592  | <a href="https://www.inaturalist.org/observations/19635584">https://www.inaturalist.org/observations/19635584</a>   |
| 5257 | Bubulcus ibis       | Cattle Egret      | 2018/4/26  | 5 | 0 | 26.6528495 | 92.7925592  | <a href="https://www.inaturalist.org/observations/19635587">https://www.inaturalist.org/observations/19635587</a>   |
| 5258 | Bubulcus ibis       | Cattle Egret      | 2018/4/26  | 4 | 0 | 26.6528495 | 92.7925592  | <a href="https://www.inaturalist.org/observations/19635590">https://www.inaturalist.org/observations/19635590</a>   |
| 5259 | Bubulcus ibis       | Cattle Egret      | 2020/8/25  | 1 | 0 | 26.6557583 | 106.5278056 | <a href="https://www.inaturalist.org/observations/58008274">https://www.inaturalist.org/observations/58008274</a>   |
| 5260 | Bubulcus coromandus | ibis Cattle Egret | 2021/12/23 | 3 | 0 | 26.6742782 | 88.3711277  | <a href="https://www.inaturalist.org/observations/103521647">https://www.inaturalist.org/observations/103521647</a> |
| 5261 | Bubulcus ibis       | Cattle Egret      | 2014/3/23  | 2 | 0 | 26.6773400 | 93.5499050  | <a href="https://www.inaturalist.org/observations/37728952">https://www.inaturalist.org/observations/37728952</a>   |
| 5262 | Bubulcus ibis       | Cattle Egret      | 2022/1/5   | 3 | 0 | 26.6967233 | 93.9817064  | <a href="https://www.inaturalist.org/observations/105666060">https://www.inaturalist.org/observations/105666060</a> |
| 5263 | Bubulcus ibis       | Cattle Egret      | 2022/4/19  | 2 | 0 | 26.6967317 | 93.9808753  | <a href="https://www.inaturalist.org/observations/112263383">https://www.inaturalist.org/observations/112263383</a> |
| 5264 | Bubulcus ibis       | Cattle Egret      | 2021/4/26  | 2 | 0 | 26.6970423 | 93.9780539  | <a href="https://www.inaturalist.org/observations/76844217">https://www.inaturalist.org/observations/76844217</a>   |
| 5265 | Bubulcus ibis       | Cattle Egret      | 2021/12/7  | 2 | 0 | 26.7079444 | 88.7062222  | <a href="https://www.inaturalist.org/observations/104292212">https://www.inaturalist.org/observations/104292212</a> |
| 5266 | Bubulcus ibis       | Cattle Egret      | 2022/4/15  | 1 | 0 | 26.7346049 | 106.6555595 | <a href="https://www.inaturalist.org/observations/112145992">https://www.inaturalist.org/observations/112145992</a> |
| 5267 | Bubulcus ibis       | Cattle Egret      | 2019/12/11 | 2 | 0 | 26.7551754 | 94.1504895  | <a href="https://www.inaturalist.org/observations/39929358">https://www.inaturalist.org/observations/39929358</a>   |
| 5268 | Bubulcus ibis       | Cattle Egret      | 2021/9/27  | 1 | 0 | 26.7732111 | 80.9651889  | <a href="https://www.inaturalist.org/observations/96380217">https://www.inaturalist.org/observations/96380217</a>   |
| 5269 | Bubulcus ibis       | Cattle Egret      | 2021/11/18 | 1 | 0 | 26.7878430 | 81.0696360  | <a href="https://www.inaturalist.org/observations/101686916">https://www.inaturalist.org/observations/101686916</a> |
| 5270 | Bubulcus ibis       | Cattle Egret      | 2022/7/5   | 2 | 0 | 26.8129389 | 75.8416917  | <a href="https://www.inaturalist.org/observations/124834684">https://www.inaturalist.org/observations/124834684</a> |
| 5271 | Bubulcus ibis       | Cattle Egret      | 2022/2/4   | 1 | 0 | 26.8132534 | 92.5867691  | <a href="https://www.inaturalist.org/observations/106112346">https://www.inaturalist.org/observations/106112346</a> |
| 5272 | Bubulcus ibis       | Cattle Egret      | 2022/7/26  | 3 | 0 | 26.8187617 | 81.0153417  | <a href="https://www.inaturalist.org/observations/127947446">https://www.inaturalist.org/observations/127947446</a> |
| 5273 | Bubulcus ibis       | Cattle Egret      | 2021/9/12  | 1 | 0 | 26.8441166 | 88.2402630  | <a href="https://www.inaturalist.org/observations/94916014">https://www.inaturalist.org/observations/94916014</a>   |
| 5274 | Bubulcus ibis       | Cattle Egret      | 2020/8/25  | 2 | 0 | 26.8477981 | 91.8578757  | <a href="https://www.inaturalist.org/observations/57637997">https://www.inaturalist.org/observations/57637997</a>   |

|      |               |              |            |   |   |            |             |                                                                                                                     |
|------|---------------|--------------|------------|---|---|------------|-------------|---------------------------------------------------------------------------------------------------------------------|
| 5275 | Bubulcus ibis | Cattle Egret | 2016/3/23  | 4 | 0 | 26.8492163 | 94.2062761  | <a href="https://www.inaturalist.org/observations/107583855">https://www.inaturalist.org/observations/107583855</a> |
| 5276 | Bubulcus ibis | Cattle Egret | 2022/8/15  | 3 | 0 | 26.8549114 | 75.8328411  | <a href="https://www.inaturalist.org/observations/132146925">https://www.inaturalist.org/observations/132146925</a> |
| 5277 | Bubulcus ibis | Cattle Egret | 2022/8/15  | 4 | 0 | 26.8549114 | 75.8328411  | <a href="https://www.inaturalist.org/observations/132146931">https://www.inaturalist.org/observations/132146931</a> |
| 5278 | Bubulcus ibis | Cattle Egret | 2022/7/19  | 2 | 0 | 26.8554416 | 75.8323418  | <a href="https://www.inaturalist.org/observations/129019097">https://www.inaturalist.org/observations/129019097</a> |
| 5279 | Bubulcus ibis | Cattle Egret | 2022/7/19  | 3 | 0 | 26.8554416 | 75.8323418  | <a href="https://www.inaturalist.org/observations/129019099">https://www.inaturalist.org/observations/129019099</a> |
| 5280 | Bubulcus ibis | Cattle Egret | 2022/3/12  | 3 | 0 | 26.8661050 | 76.3212389  | <a href="https://www.inaturalist.org/observations/108575551">https://www.inaturalist.org/observations/108575551</a> |
| 5281 | Bubulcus ibis | Cattle Egret | 2016/2/11  | 1 | 0 | 26.8789073 | 77.3611549  | <a href="https://www.inaturalist.org/observations/47912711">https://www.inaturalist.org/observations/47912711</a>   |
| 5282 | Bubulcus ibis | Cattle Egret | 2020/10/25 | 3 | 0 | 26.8859148 | 80.9998057  | <a href="https://www.inaturalist.org/observations/63458711">https://www.inaturalist.org/observations/63458711</a>   |
| 5283 | Bubulcus ibis | Cattle Egret | 2013/10/23 | 3 | 0 | 26.8939118 | 78.2629704  | <a href="https://www.inaturalist.org/observations/69357593">https://www.inaturalist.org/observations/69357593</a>   |
| 5284 | Bubulcus ibis | Cattle Egret | 2020/1/17  | 1 | 0 | 26.9101227 | 70.8085675  | <a href="https://www.inaturalist.org/observations/92469014">https://www.inaturalist.org/observations/92469014</a>   |
| 5285 | Bubulcus ibis | Cattle Egret | 2016/9/16  | 1 | 0 | 26.9127701 | 75.7872708  | <a href="https://www.inaturalist.org/observations/117960430">https://www.inaturalist.org/observations/117960430</a> |
| 5286 | Bubulcus ibis | Cattle Egret | 2022/7/18  | 2 | 0 | 26.9168605 | 75.8647354  | <a href="https://www.inaturalist.org/observations/128746131">https://www.inaturalist.org/observations/128746131</a> |
| 5287 | Bubulcus ibis | Cattle Egret | 2022/7/18  | 1 | 0 | 26.9168605 | 75.8647354  | <a href="https://www.inaturalist.org/observations/128746132">https://www.inaturalist.org/observations/128746132</a> |
| 5288 | Bubulcus ibis | Cattle Egret | 2011/12/2  | 3 | 0 | 26.9435588 | 94.2000242  | <a href="https://www.inaturalist.org/observations/51793961">https://www.inaturalist.org/observations/51793961</a>   |
| 5289 | Bubulcus ibis | Cattle Egret | 2020/7/16  | 1 | 0 | 26.9479558 | 94.2940664  | <a href="https://www.inaturalist.org/observations/93498333">https://www.inaturalist.org/observations/93498333</a>   |
| 5290 | Bubulcus ibis | Cattle Egret | 2020/2/25  | 2 | 0 | 26.9533458 | 80.9256023  | <a href="https://www.inaturalist.org/observations/47944963">https://www.inaturalist.org/observations/47944963</a>   |
| 5291 | Bubulcus ibis | Cattle Egret | 2017/9/1   | 5 | 0 | 26.9602633 | 78.9659717  | <a href="https://www.inaturalist.org/observations/7735419">https://www.inaturalist.org/observations/7735419</a>     |
| 5292 | Bubulcus ibis | Cattle Egret | 2022/8/21  | 5 | 0 | 26.9620915 | 75.8510534  | <a href="https://www.inaturalist.org/observations/132165062">https://www.inaturalist.org/observations/132165062</a> |
| 5293 | Bubulcus ibis | Cattle Egret | 2022/8/21  | 5 | 0 | 26.9621717 | 75.8543582  | <a href="https://www.inaturalist.org/observations/132164990">https://www.inaturalist.org/observations/132164990</a> |
| 5294 | Bubulcus ibis | Cattle Egret | 2020/5/23  | 1 | 0 | 26.9648137 | 113.1888404 | <a href="https://www.inaturalist.org/observations/47511476">https://www.inaturalist.org/observations/47511476</a>   |
| 5295 | Bubulcus ibis | Cattle Egret | 2018/10/25 | 2 | 0 | 26.9710528 | 94.2088866  | <a href="https://www.inaturalist.org/observations/48524021">https://www.inaturalist.org/observations/48524021</a>   |
| 5296 | Bubulcus ibis | Cattle Egret | 2017/11/26 | 2 | 0 | 26.9814258 | 78.2020337  | <a href="https://www.inaturalist.org/observations/69975109">https://www.inaturalist.org/observations/69975109</a>   |
| 5297 | Bubulcus ibis | Cattle Egret | 2022/3/31  | 5 | 0 | 27.0069294 | 78.9825507  | <a href="https://www.inaturalist.org/observations/125193747">https://www.inaturalist.org/observations/125193747</a> |
| 5298 | Bubulcus ibis | Cattle Egret | 2018/10/25 | 2 | 0 | 27.0271279 | 94.1008616  | <a href="https://www.inaturalist.org/observations/48524045">https://www.inaturalist.org/observations/48524045</a>   |
| 5299 | Bubulcus ibis | Cattle Egret | 2020/10/3  | 7 | 0 | 27.1127763 | 77.9924221  | <a href="https://www.inaturalist.org/observations/61767364">https://www.inaturalist.org/observations/61767364</a>   |

|      |                     |                      |            |   |   |            |            |                                                                                                                     |
|------|---------------------|----------------------|------------|---|---|------------|------------|---------------------------------------------------------------------------------------------------------------------|
| 5300 | Bubulcus ibis       | Cattle Egret         | 2022/9/19  | 1 | 0 | 27.1176170 | 78.0245071 | <a href="https://www.inaturalist.org/observations/141154838">https://www.inaturalist.org/observations/141154838</a> |
| 5301 | Bubulcus ibis       | Cattle Egret         | 2018/2/11  | 1 | 0 | 27.1238106 | 77.9912762 | <a href="https://www.inaturalist.org/observations/42150112">https://www.inaturalist.org/observations/42150112</a>   |
| 5302 | Bubulcus ibis       | Cattle Egret         | 2020/7/30  | 2 | 0 | 27.1307559 | 75.6128126 | <a href="https://www.inaturalist.org/observations/54840368">https://www.inaturalist.org/observations/54840368</a>   |
| 5303 | Bubulcus ibis       | Cattle Egret         | 2011/1/27  | 4 | 0 | 27.1569200 | 77.5236510 | <a href="https://www.inaturalist.org/observations/24371115">https://www.inaturalist.org/observations/24371115</a>   |
| 5304 | Bubulcus ibis       | Cattle Egret         | 2019/9/25  | 4 | 0 | 27.1569200 | 77.5236510 | <a href="https://www.inaturalist.org/observations/33784148">https://www.inaturalist.org/observations/33784148</a>   |
| 5305 | Bubulcus ibis       | Cattle Egret         | 2013/9/27  | 4 | 0 | 27.1569200 | 77.5236510 | <a href="https://www.inaturalist.org/observations/41359941">https://www.inaturalist.org/observations/41359941</a>   |
| 5306 | Bubulcus ibis       | Cattle Egret         | 2013/2/10  | 4 | 0 | 27.1592690 | 77.5231999 | <a href="https://www.inaturalist.org/observations/6870063">https://www.inaturalist.org/observations/6870063</a>     |
| 5307 | Bubulcus coromandus | ibis<br>Cattle Egret | 2014/12/7  | 1 | 0 | 27.1592690 | 77.5231999 | <a href="https://www.inaturalist.org/observations/43032183">https://www.inaturalist.org/observations/43032183</a>   |
| 5308 | Bubulcus ibis       | Cattle Egret         | 2018/7/17  | 2 | 0 | 27.1592690 | 77.5231999 | <a href="https://www.inaturalist.org/observations/46906071">https://www.inaturalist.org/observations/46906071</a>   |
| 5309 | Bubulcus ibis       | Cattle Egret         | 2009/1/17  | 2 | 0 | 27.1592690 | 77.5231999 | <a href="https://www.inaturalist.org/observations/48211544">https://www.inaturalist.org/observations/48211544</a>   |
| 5310 | Bubulcus ibis       | Cattle Egret         | 2009/1/17  | 0 | 0 | 27.1592690 | 77.5231999 | <a href="https://www.inaturalist.org/observations/48211552">https://www.inaturalist.org/observations/48211552</a>   |
| 5311 | Bubulcus ibis       | Cattle Egret         | 2008/12/2  | 2 | 0 | 27.1592690 | 77.5231999 | <a href="https://www.inaturalist.org/observations/55245756">https://www.inaturalist.org/observations/55245756</a>   |
| 5312 | Bubulcus ibis       | Cattle Egret         | 2008/9/5   | 2 | 0 | 27.1629346 | 77.5231999 | <a href="https://www.inaturalist.org/observations/107804205">https://www.inaturalist.org/observations/107804205</a> |
| 5313 | Bubulcus ibis       | Cattle Egret         | 2006/1/14  | 1 | 0 | 27.1650000 | 77.5250000 | <a href="https://www.inaturalist.org/observations/104654447">https://www.inaturalist.org/observations/104654447</a> |
| 5314 | Bubulcus ibis       | Cattle Egret         | 2006/1/9   | 5 | 0 | 27.1670000 | 77.5180000 | <a href="https://www.inaturalist.org/observations/9771282">https://www.inaturalist.org/observations/9771282</a>     |
| 5315 | Bubulcus ibis       | Cattle Egret         | 2011/12/11 | 3 | 0 | 27.1697148 | 77.5141323 | <a href="https://www.inaturalist.org/observations/21936811">https://www.inaturalist.org/observations/21936811</a>   |
| 5316 | Bubulcus coromandus | ibis<br>Cattle Egret | 2019/8/10  | 4 | 0 | 27.1711883 | 77.9721567 | <a href="https://www.inaturalist.org/observations/34630848">https://www.inaturalist.org/observations/34630848</a>   |
| 5317 | Bubulcus ibis       | Cattle Egret         | 2019/1/2   | 4 | 0 | 27.1714607 | 78.0418633 | <a href="https://www.inaturalist.org/observations/120645413">https://www.inaturalist.org/observations/120645413</a> |
| 5318 | Bubulcus ibis       | Cattle Egret         | 2018/2/9   | 3 | 0 | 27.1721422 | 78.0413076 | <a href="https://www.inaturalist.org/observations/22096124">https://www.inaturalist.org/observations/22096124</a>   |
| 5319 | Bubulcus coromandus | ibis<br>Cattle Egret | 2019/3/31  | 1 | 0 | 27.1725168 | 78.0420283 | <a href="https://www.inaturalist.org/observations/24551826">https://www.inaturalist.org/observations/24551826</a>   |
| 5320 | Bubulcus ibis       | Cattle Egret         | 2011/4/10  | 1 | 0 | 27.1726167 | 78.0422750 | <a href="https://www.inaturalist.org/observations/68534107">https://www.inaturalist.org/observations/68534107</a>   |
| 5321 | Bubulcus ibis       | Cattle Egret         | 2019/1/30  | 6 | 0 | 27.1726283 | 78.0422333 | <a href="https://www.inaturalist.org/observations/20510694">https://www.inaturalist.org/observations/20510694</a>   |
| 5322 | Bubulcus ibis       | Cattle Egret         | 2020/2/23  | 1 | 0 | 27.1727210 | 78.0418057 | <a href="https://www.inaturalist.org/observations/39209016">https://www.inaturalist.org/observations/39209016</a>   |
| 5323 | Bubulcus ibis       | Cattle Egret         | 2011/4/1   | 5 | 0 | 27.1729096 | 78.0418490 | <a href="http://www.inaturalist.org/observations/240984">http://www.inaturalist.org/observations/240984</a>         |
| 5324 | Bubulcus ibis       | Cattle Egret         | 2014/12/31 | 1 | 0 | 27.1729150 | 78.0427667 | <a href="https://www.inaturalist.org/observations/74663446">https://www.inaturalist.org/observations/74663446</a>   |

|      |                     |                      |            |   |   |            |             |                                                                                                                     |
|------|---------------------|----------------------|------------|---|---|------------|-------------|---------------------------------------------------------------------------------------------------------------------|
| 5325 | Bubulcus ibis       | Cattle Egret         | 2018/10/24 | 6 | 0 | 27.1730590 | 78.0421380  | <a href="https://www.inaturalist.org/observations/131465499">https://www.inaturalist.org/observations/131465499</a> |
| 5326 | Bubulcus ibis       | Cattle Egret         | 2014/3/31  | 4 | 0 | 27.1730668 | 78.0420801  | <a href="https://www.inaturalist.org/observations/127164151">https://www.inaturalist.org/observations/127164151</a> |
| 5327 | Bubulcus ibis       | Cattle Egret         | 2020/1/2   | 2 | 0 | 27.1731873 | 78.0423660  | <a href="https://www.inaturalist.org/observations/37187225">https://www.inaturalist.org/observations/37187225</a>   |
| 5328 | Bubulcus ibis       | Cattle Egret         | 2020/2/23  | 1 | 0 | 27.1731977 | 78.0432580  | <a href="https://www.inaturalist.org/observations/104564161">https://www.inaturalist.org/observations/104564161</a> |
| 5329 | Bubulcus ibis       | Cattle Egret         | 2020/1/2   | 1 | 0 | 27.1732349 | 78.0423508  | <a href="https://www.inaturalist.org/observations/37187874">https://www.inaturalist.org/observations/37187874</a>   |
| 5330 | Bubulcus ibis       | Cattle Egret         | 2014/5/24  | 2 | 0 | 27.1732981 | 78.0421639  | <a href="https://www.inaturalist.org/observations/69290603">https://www.inaturalist.org/observations/69290603</a>   |
| 5331 | Bubulcus ibis       | Cattle Egret         | 2012/5/8   | 2 | 0 | 27.1735202 | 78.0427601  | <a href="https://www.inaturalist.org/observations/63352379">https://www.inaturalist.org/observations/63352379</a>   |
| 5332 | Bubulcus ibis       | Cattle Egret         | 2016/12/15 | 3 | 0 | 27.1735986 | 78.0425928  | <a href="https://www.inaturalist.org/observations/37316422">https://www.inaturalist.org/observations/37316422</a>   |
| 5333 | Bubulcus ibis       | Cattle Egret         | 2019/3/3   | 1 | 0 | 27.1742106 | 78.0423010  | <a href="https://www.inaturalist.org/observations/49614270">https://www.inaturalist.org/observations/49614270</a>   |
| 5334 | Bubulcus ibis       | Cattle Egret         | 2022/5/30  | 2 | 0 | 27.1744516 | 78.0423520  | <a href="https://www.inaturalist.org/observations/119397851">https://www.inaturalist.org/observations/119397851</a> |
| 5335 | Bubulcus ibis       | Cattle Egret         | 2019/1/10  | 2 | 0 | 27.1749594 | 78.0419860  | <a href="https://www.inaturalist.org/observations/52147721">https://www.inaturalist.org/observations/52147721</a>   |
| 5336 | Bubulcus ibis       | Cattle Egret         | 2016/11/17 | 4 | 0 | 27.1750090 | 78.0420906  | <a href="http://www.inaturalist.org/observations/4683330">http://www.inaturalist.org/observations/4683330</a>       |
| 5337 | Bubulcus ibis       | Cattle Egret         | 2010/7/15  | 5 | 0 | 27.1751360 | 78.0420874  | <a href="https://www.inaturalist.org/observations/108791426">https://www.inaturalist.org/observations/108791426</a> |
| 5338 | Bubulcus ibis       | Cattle Egret         | 2022/7/12  | 6 | 0 | 27.1751448 | 78.0421422  | <a href="https://www.inaturalist.org/observations/127471866">https://www.inaturalist.org/observations/127471866</a> |
| 5339 | Bubulcus coromandus | ibis<br>Cattle Egret | 2019/8/10  | 4 | 0 | 27.1753833 | 78.0421250  | <a href="https://www.inaturalist.org/observations/34630135">https://www.inaturalist.org/observations/34630135</a>   |
| 5340 | Bubulcus coromandus | ibis<br>Cattle Egret | 2019/8/10  | 1 | 0 | 27.1754100 | 78.0421317  | <a href="https://www.inaturalist.org/observations/34629585">https://www.inaturalist.org/observations/34629585</a>   |
| 5341 | Bubulcus ibis       | Cattle Egret         | 2019/3/3   | 1 | 0 | 27.1764585 | 78.0333516  | <a href="https://www.inaturalist.org/observations/49616863">https://www.inaturalist.org/observations/49616863</a>   |
| 5342 | Bubulcus ibis       | Cattle Egret         | 2017/11/27 | 3 | 0 | 27.1765000 | 78.0418000  | <a href="https://www.inaturalist.org/observations/69972846">https://www.inaturalist.org/observations/69972846</a>   |
| 5343 | Bubulcus ibis       | Cattle Egret         | 2017/10/22 | 2 | 0 | 27.1766701 | 78.0080745  | <a href="https://www.inaturalist.org/observations/45732597">https://www.inaturalist.org/observations/45732597</a>   |
| 5344 | Bubulcus ibis       | Cattle Egret         | 2020/3/17  | 2 | 0 | 27.1779567 | 77.5187083  | <a href="https://www.inaturalist.org/observations/47555227">https://www.inaturalist.org/observations/47555227</a>   |
| 5345 | Bubulcus ibis       | Cattle Egret         | 2016/2/11  | 2 | 0 | 27.1795329 | 78.0211121  | <a href="https://www.inaturalist.org/observations/47874005">https://www.inaturalist.org/observations/47874005</a>   |
| 5346 | Bubulcus ibis       | Cattle Egret         | 2021/6/14  | 1 | 0 | 27.1877630 | 113.8286601 | <a href="https://www.inaturalist.org/observations/85224169">https://www.inaturalist.org/observations/85224169</a>   |
| 5347 | Bubulcus ibis       | Cattle Egret         | 2021/7/14  | 1 | 0 | 27.1884310 | 113.8287110 | <a href="https://www.inaturalist.org/observations/88641079">https://www.inaturalist.org/observations/88641079</a>   |
| 5348 | Bubulcus ibis       | Cattle Egret         | 2007/1/16  | 5 | 0 | 27.1985527 | 77.4842119  | <a href="https://www.inaturalist.org/observations/8266722">https://www.inaturalist.org/observations/8266722</a>     |
| 5349 | Bubulcus ibis       | Cattle Egret         | 2013/12/25 | 1 | 0 | 27.2072208 | 77.5131798  | <a href="https://www.inaturalist.org/observations/67015050">https://www.inaturalist.org/observations/67015050</a>   |

|      |                     |                   |            |   |   |            |             |                                                                                                                     |
|------|---------------------|-------------------|------------|---|---|------------|-------------|---------------------------------------------------------------------------------------------------------------------|
| 5350 | Bubulcus ibis       | Cattle Egret      | 2022/9/4   | 3 | 0 | 27.2151817 | 77.5029995  | <a href="https://www.inaturalist.org/observations/133726642">https://www.inaturalist.org/observations/133726642</a> |
| 5351 | Bubulcus ibis       | Cattle Egret      | 2004/12/17 | 3 | 0 | 27.2151863 | 77.5029996  | <a href="https://www.inaturalist.org/observations/70912619">https://www.inaturalist.org/observations/70912619</a>   |
| 5352 | Bubulcus ibis       | Cattle Egret      | 2020/6/9   | 2 | 0 | 27.2236655 | 78.0162381  | <a href="https://www.inaturalist.org/observations/48968975">https://www.inaturalist.org/observations/48968975</a>   |
| 5353 | Bubulcus ibis       | Cattle Egret      | 2016/11/13 | 2 | 0 | 27.3194314 | 95.5103451  | <a href="https://www.inaturalist.org/observations/105926512">https://www.inaturalist.org/observations/105926512</a> |
| 5354 | Bubulcus ibis       | Cattle Egret      | 2011/2/22  | 4 | 0 | 27.4728078 | 77.9936547  | <a href="https://www.inaturalist.org/observations/17855207">https://www.inaturalist.org/observations/17855207</a>   |
| 5355 | Bubulcus ibis       | Cattle Egret      | 2016/4/17  | 5 | 0 | 27.5788683 | 95.3917459  | <a href="https://www.inaturalist.org/observations/19516788">https://www.inaturalist.org/observations/19516788</a>   |
| 5356 | Bubulcus ibis       | Cattle Egret      | 2021/5/10  | 1 | 0 | 27.5946867 | 117.3927817 | <a href="https://www.inaturalist.org/observations/88837490">https://www.inaturalist.org/observations/88837490</a>   |
| 5357 | Bubulcus ibis       | Cattle Egret      | 2022/7/27  | 1 | 0 | 27.7441896 | 108.8195120 | <a href="https://www.inaturalist.org/observations/130074821">https://www.inaturalist.org/observations/130074821</a> |
| 5358 | Bubulcus ibis       | Cattle Egret      | 2017/7/14  | 1 | 0 | 27.7971559 | 74.4337676  | <a href="https://www.inaturalist.org/observations/105545965">https://www.inaturalist.org/observations/105545965</a> |
| 5359 | Bubulcus ibis       | Cattle Egret      | 2019/5/18  | 1 | 0 | 27.8774330 | 108.6575429 | <a href="https://www.inaturalist.org/observations/38632138">https://www.inaturalist.org/observations/38632138</a>   |
| 5360 | Bubulcus ibis       | Cattle Egret      | 2022/6/8   | 3 | 0 | 27.8965988 | 74.6296082  | <a href="https://www.inaturalist.org/observations/120751774">https://www.inaturalist.org/observations/120751774</a> |
| 5361 | Bubulcus ibis       | Cattle Egret      | 2019/12/12 | 2 | 0 | 27.9634793 | 73.3826585  | <a href="https://www.inaturalist.org/observations/43258534">https://www.inaturalist.org/observations/43258534</a>   |
| 5362 | Bubulcus ibis       | Cattle Egret      | 2022/7/17  | 4 | 0 | 27.9646908 | 76.3773719  | <a href="https://www.inaturalist.org/observations/126634113">https://www.inaturalist.org/observations/126634113</a> |
| 5363 | Bubulcus ibis       | Cattle Egret      | 2017/1/16  | 4 | 0 | 28.0229348 | 73.3119159  | <a href="https://www.inaturalist.org/observations/5013160">https://www.inaturalist.org/observations/5013160</a>     |
| 5364 | Bubulcus ibis       | Cattle Egret      | 2017/7/18  | 3 | 0 | 28.1095242 | 114.4883430 | <a href="https://www.inaturalist.org/observations/7489595">https://www.inaturalist.org/observations/7489595</a>     |
| 5365 | Bubulcus ibis       | Cattle Egret      | 2017/7/4   | 4 | 0 | 28.2190841 | 79.5248499  | <a href="https://www.inaturalist.org/observations/6915858">https://www.inaturalist.org/observations/6915858</a>     |
| 5366 | Bubulcus ibis       | Cattle Egret      | 2017/7/4   | 4 | 0 | 28.2775593 | 79.5842536  | <a href="https://www.inaturalist.org/observations/6915908">https://www.inaturalist.org/observations/6915908</a>     |
| 5367 | Bubulcus ibis       | Cattle Egret      | 2022/1/22  | 3 | 0 | 28.2850431 | 77.4554456  | <a href="https://www.inaturalist.org/observations/105352717">https://www.inaturalist.org/observations/105352717</a> |
| 5368 | Bubulcus coromandus | ibis Cattle Egret | 2017/6/23  | 6 | 0 | 28.3104448 | 79.2182128  | <a href="https://www.inaturalist.org/observations/6764178">https://www.inaturalist.org/observations/6764178</a>     |
| 5369 | Bubulcus ibis       | Cattle Egret      | 2017/7/14  | 4 | 0 | 28.3272212 | 79.2968738  | <a href="https://www.inaturalist.org/observations/7102710">https://www.inaturalist.org/observations/7102710</a>     |
| 5370 | Bubulcus ibis       | Cattle Egret      | 2018/11/6  | 1 | 0 | 28.3412469 | 77.9253153  | <a href="https://www.inaturalist.org/observations/91083638">https://www.inaturalist.org/observations/91083638</a>   |
| 5371 | Bubulcus ibis       | Cattle Egret      | 2021/8/5   | 1 | 0 | 28.3504718 | 77.5564339  | <a href="https://www.inaturalist.org/observations/90053720">https://www.inaturalist.org/observations/90053720</a>   |
| 5372 | Bubulcus ibis       | Cattle Egret      | 2020/2/17  | 0 | 0 | 28.3733370 | 77.5415446  | <a href="https://www.inaturalist.org/observations/38748706">https://www.inaturalist.org/observations/38748706</a>   |
| 5373 | Bubulcus ibis       | Cattle Egret      | 2019/8/16  | 5 | 0 | 28.3940667 | 79.4589250  | <a href="https://www.inaturalist.org/observations/31264590">https://www.inaturalist.org/observations/31264590</a>   |
| 5374 | Bubulcus ibis       | Cattle Egret      | 2021/6/11  | 2 | 0 | 28.3954316 | 77.0596726  | <a href="https://www.inaturalist.org/observations/82564065">https://www.inaturalist.org/observations/82564065</a>   |

|      |                     |      |              |            |   |   |            |             |                                                                                                                     |
|------|---------------------|------|--------------|------------|---|---|------------|-------------|---------------------------------------------------------------------------------------------------------------------|
| 5375 | Bubulcus coromandus | ibis | Cattle Egret | 2021/7/17  | 3 | 0 | 28.4522965 | 77.5038890  | <a href="https://www.inaturalist.org/observations/87368250">https://www.inaturalist.org/observations/87368250</a>   |
| 5376 | Bubulcus ibis       |      | Cattle Egret | 2021/8/3   | 1 | 0 | 28.4522965 | 77.5038890  | <a href="https://www.inaturalist.org/observations/89777075">https://www.inaturalist.org/observations/89777075</a>   |
| 5377 | Bubulcus ibis       |      | Cattle Egret | 2022/11/12 | 2 | 0 | 28.4543910 | 119.9192730 | <a href="https://www.inaturalist.org/observations/141763352">https://www.inaturalist.org/observations/141763352</a> |
| 5378 | Bubulcus ibis       |      | Cattle Egret | 2020/2/10  | 2 | 0 | 28.4564579 | 76.8890506  | <a href="https://www.inaturalist.org/observations/61820093">https://www.inaturalist.org/observations/61820093</a>   |
| 5379 | Bubulcus ibis       |      | Cattle Egret | 2020/1/4   | 4 | 0 | 28.4668117 | 76.8918933  | <a href="https://www.inaturalist.org/observations/65639112">https://www.inaturalist.org/observations/65639112</a>   |
| 5380 | Bubulcus ibis       |      | Cattle Egret | 2016/10/9  | 3 | 0 | 28.4685990 | 77.2907380  | <a href="http://www.inaturalist.org/observations/4306472">http://www.inaturalist.org/observations/4306472</a>       |
| 5381 | Bubulcus ibis       |      | Cattle Egret | 2011/2/5   | 5 | 0 | 28.4695998 | 76.9795532  | <a href="https://www.inaturalist.org/observations/31497889">https://www.inaturalist.org/observations/31497889</a>   |
| 5382 | Bubulcus ibis       |      | Cattle Egret | 2011/8/8   | 5 | 0 | 28.4695998 | 76.9795532  | <a href="https://www.inaturalist.org/observations/31511912">https://www.inaturalist.org/observations/31511912</a>   |
| 5383 | Bubulcus ibis       |      | Cattle Egret | 2010/7/31  | 5 | 0 | 28.4695998 | 76.9795532  | <a href="https://www.inaturalist.org/observations/31576943">https://www.inaturalist.org/observations/31576943</a>   |
| 5384 | Bubulcus ibis       |      | Cattle Egret | 2022/5/24  | 3 | 0 | 28.4713993 | 77.4804993  | <a href="https://www.inaturalist.org/observations/118506379">https://www.inaturalist.org/observations/118506379</a> |
| 5385 | Bubulcus ibis       |      | Cattle Egret | 2020/9/24  | 2 | 0 | 28.5126977 | 77.4841858  | <a href="https://www.inaturalist.org/observations/60819254">https://www.inaturalist.org/observations/60819254</a>   |
| 5386 | Bubulcus ibis       |      | Cattle Egret | 2020/8/21  | 1 | 0 | 28.5355161 | 77.3910265  | <a href="https://www.inaturalist.org/observations/57536199">https://www.inaturalist.org/observations/57536199</a>   |
| 5387 | Bubulcus ibis       |      | Cattle Egret | 2020/7/9   | 4 | 0 | 28.5359756 | 77.3910266  | <a href="https://www.inaturalist.org/observations/55149377">https://www.inaturalist.org/observations/55149377</a>   |
| 5388 | Bubulcus ibis       |      | Cattle Egret | 2020/7/9   | 5 | 0 | 28.5359756 | 77.3910266  | <a href="https://www.inaturalist.org/observations/55149793">https://www.inaturalist.org/observations/55149793</a>   |
| 5389 | Bubulcus ibis       |      | Cattle Egret | 2021/8/8   | 1 | 0 | 28.5514466 | 77.3185215  | <a href="https://www.inaturalist.org/observations/90364331">https://www.inaturalist.org/observations/90364331</a>   |
| 5390 | Bubulcus ibis       |      | Cattle Egret | 2009/4/11  | 4 | 0 | 28.5525772 | 77.5548100  | <a href="https://www.inaturalist.org/observations/31585017">https://www.inaturalist.org/observations/31585017</a>   |
| 5391 | Bubulcus ibis       |      | Cattle Egret | 2009/7/15  | 5 | 0 | 28.5572098 | 77.2127891  | <a href="https://www.inaturalist.org/observations/31583632">https://www.inaturalist.org/observations/31583632</a>   |
| 5392 | Bubulcus ibis       |      | Cattle Egret | 2020/1/20  | 2 | 0 | 28.5889922 | 77.3174716  | <a href="https://www.inaturalist.org/observations/105275209">https://www.inaturalist.org/observations/105275209</a> |
| 5393 | Bubulcus ibis       |      | Cattle Egret | 2019/12/25 | 2 | 0 | 28.5914554 | 77.2417831  | <a href="https://www.inaturalist.org/observations/36936798">https://www.inaturalist.org/observations/36936798</a>   |
| 5394 | Bubulcus ibis       |      | Cattle Egret | 2019/2/18  | 2 | 0 | 28.5944436 | 77.2453998  | <a href="https://www.inaturalist.org/observations/33783687">https://www.inaturalist.org/observations/33783687</a>   |
| 5395 | Bubulcus ibis       |      | Cattle Egret | 2021/7/9   | 1 | 0 | 28.5944950 | 77.0275414  | <a href="https://www.inaturalist.org/observations/88651532">https://www.inaturalist.org/observations/88651532</a>   |
| 5396 | Bubulcus ibis       |      | Cattle Egret | 2021/6/28  | 1 | 0 | 28.5944950 | 77.0275414  | <a href="https://www.inaturalist.org/observations/88651945">https://www.inaturalist.org/observations/88651945</a>   |
| 5397 | Bubulcus ibis       |      | Cattle Egret | 2021/12/31 | 4 | 0 | 28.6010180 | 77.3789320  | <a href="https://www.inaturalist.org/observations/104022274">https://www.inaturalist.org/observations/104022274</a> |
| 5398 | Bubulcus ibis       |      | Cattle Egret | 2020/12/14 | 4 | 0 | 28.6015864 | 77.2484270  | <a href="https://www.inaturalist.org/observations/66569063">https://www.inaturalist.org/observations/66569063</a>   |
| 5399 | Bubulcus ibis       |      | Cattle Egret | 2021/10/24 | 1 | 0 | 28.6053969 | 77.3395587  | <a href="https://www.inaturalist.org/observations/99189527">https://www.inaturalist.org/observations/99189527</a>   |

|      |                     |                   |            |   |   |            |            |                                                                                                                     |
|------|---------------------|-------------------|------------|---|---|------------|------------|---------------------------------------------------------------------------------------------------------------------|
| 5400 | Bubulcus ibis       | Cattle Egret      | 2021/6/27  | 1 | 0 | 28.6067011 | 77.3388959 | <a href="https://www.inaturalist.org/observations/84660944">https://www.inaturalist.org/observations/84660944</a>   |
| 5401 | Bubulcus coromandus | ibis Cattle Egret | 2021/1/29  | 2 | 0 | 28.6072118 | 77.5930828 | <a href="https://www.inaturalist.org/observations/68755323">https://www.inaturalist.org/observations/68755323</a>   |
| 5402 | Bubulcus ibis       | Cattle Egret      | 2020/6/20  | 1 | 0 | 28.6362565 | 77.0791108 | <a href="https://www.inaturalist.org/observations/50375112">https://www.inaturalist.org/observations/50375112</a>   |
| 5403 | Bubulcus ibis       | Cattle Egret      | 2019/12/25 | 1 | 0 | 28.6413346 | 77.2428131 | <a href="https://www.inaturalist.org/observations/36936796">https://www.inaturalist.org/observations/36936796</a>   |
| 5404 | Bubulcus ibis       | Cattle Egret      | 2022/7/1   | 4 | 0 | 28.6550170 | 77.2436433 | <a href="https://www.inaturalist.org/observations/134113162">https://www.inaturalist.org/observations/134113162</a> |
| 5405 | Bubulcus ibis       | Cattle Egret      | 2019/3/20  | 1 | 0 | 28.6634302 | 77.2465782 | <a href="https://www.inaturalist.org/observations/39880640">https://www.inaturalist.org/observations/39880640</a>   |
| 5406 | Bubulcus ibis       | Cattle Egret      | 2020/11/13 | 1 | 0 | 28.6683598 | 77.1905289 | <a href="https://www.inaturalist.org/observations/64785052">https://www.inaturalist.org/observations/64785052</a>   |
| 5407 | Bubulcus ibis       | Cattle Egret      | 2020/11/5  | 1 | 0 | 28.6686039 | 77.1902542 | <a href="https://www.inaturalist.org/observations/64508564">https://www.inaturalist.org/observations/64508564</a>   |
| 5408 | Bubulcus ibis       | Cattle Egret      | 2021/11/15 | 2 | 0 | 28.6862738 | 77.2217831 | <a href="https://www.inaturalist.org/observations/101130817">https://www.inaturalist.org/observations/101130817</a> |
| 5409 | Bubulcus ibis       | Cattle Egret      | 2022/6/10  | 4 | 0 | 28.6870230 | 77.3177246 | <a href="https://www.inaturalist.org/observations/126957298">https://www.inaturalist.org/observations/126957298</a> |
| 5410 | Bubulcus ibis       | Cattle Egret      | 2022/3/8   | 1 | 0 | 28.8289391 | 78.6854228 | <a href="https://www.inaturalist.org/observations/108245617">https://www.inaturalist.org/observations/108245617</a> |
| 5411 | Bubulcus ibis       | Cattle Egret      | 2022/7/23  | 3 | 0 | 28.8389459 | 78.6990397 | <a href="https://www.inaturalist.org/observations/128125687">https://www.inaturalist.org/observations/128125687</a> |
| 5412 | Bubulcus ibis       | Cattle Egret      | 2020/9/16  | 2 | 0 | 28.8833810 | 79.7594390 | <a href="https://www.inaturalist.org/observations/59802218">https://www.inaturalist.org/observations/59802218</a>   |
| 5413 | Bubulcus ibis       | Cattle Egret      | 2021/9/26  | 1 | 0 | 28.9065560 | 77.3570730 | <a href="https://www.inaturalist.org/observations/96333887">https://www.inaturalist.org/observations/96333887</a>   |
| 5414 | Bubulcus ibis       | Cattle Egret      | 2022/8/8   | 6 | 0 | 28.9068340 | 77.3551656 | <a href="https://www.inaturalist.org/observations/134338796">https://www.inaturalist.org/observations/134338796</a> |
| 5415 | Bubulcus ibis       | Cattle Egret      | 2022/8/8   | 3 | 0 | 28.9068340 | 77.3551656 | <a href="https://www.inaturalist.org/observations/134338797">https://www.inaturalist.org/observations/134338797</a> |
| 5416 | Bubulcus ibis       | Cattle Egret      | 2022/8/8   | 3 | 0 | 28.9068340 | 77.3551656 | <a href="https://www.inaturalist.org/observations/134338802">https://www.inaturalist.org/observations/134338802</a> |
| 5417 | Bubulcus ibis       | Cattle Egret      | 2022/8/8   | 4 | 0 | 28.9068340 | 77.3551656 | <a href="https://www.inaturalist.org/observations/134338803">https://www.inaturalist.org/observations/134338803</a> |
| 5418 | Bubulcus ibis       | Cattle Egret      | 2021/12/11 | 1 | 0 | 28.9301090 | 77.6983390 | <a href="https://www.inaturalist.org/observations/102858647">https://www.inaturalist.org/observations/102858647</a> |
| 5419 | Bubulcus ibis       | Cattle Egret      | 2021/3/7   | 2 | 0 | 28.9384166 | 79.8055316 | <a href="https://www.inaturalist.org/observations/70730101">https://www.inaturalist.org/observations/70730101</a>   |
| 5420 | Bubulcus ibis       | Cattle Egret      | 2021/9/25  | 2 | 0 | 28.9392160 | 79.7964220 | <a href="https://www.inaturalist.org/observations/96076137">https://www.inaturalist.org/observations/96076137</a>   |
| 5421 | Bubulcus ibis       | Cattle Egret      | 2020/9/19  | 3 | 0 | 28.9400508 | 79.7911786 | <a href="https://www.inaturalist.org/observations/60061340">https://www.inaturalist.org/observations/60061340</a>   |
| 5422 | Bubulcus ibis       | Cattle Egret      | 2021/5/1   | 2 | 0 | 28.9409797 | 79.8156668 | <a href="https://www.inaturalist.org/observations/76122709">https://www.inaturalist.org/observations/76122709</a>   |
| 5423 | Bubulcus ibis       | Cattle Egret      | 2021/5/7   | 1 | 0 | 28.9416923 | 79.7990265 | <a href="https://www.inaturalist.org/observations/78193854">https://www.inaturalist.org/observations/78193854</a>   |
| 5424 | Bubulcus ibis       | Cattle Egret      | 2020/9/15  | 4 | 0 | 28.9436474 | 79.8115845 | <a href="https://www.inaturalist.org/observations/59660000">https://www.inaturalist.org/observations/59660000</a>   |

|      |               |              |           |   |   |            |            |                                                                                                                     |
|------|---------------|--------------|-----------|---|---|------------|------------|---------------------------------------------------------------------------------------------------------------------|
| 5425 | Bubulcus ibis | Cattle Egret | 2020/9/19 | 3 | 0 | 28.9459915 | 79.8119125 | <a href="https://www.inaturalist.org/observations/60061605">https://www.inaturalist.org/observations/60061605</a>   |
| 5426 | Bubulcus ibis | Cattle Egret | 2021/4/30 | 2 | 0 | 28.9463711 | 79.7883911 | <a href="https://www.inaturalist.org/observations/75755619">https://www.inaturalist.org/observations/75755619</a>   |
| 5427 | Bubulcus ibis | Cattle Egret | 2021/9/26 | 1 | 0 | 28.9475861 | 79.8102417 | <a href="https://www.inaturalist.org/observations/96200516">https://www.inaturalist.org/observations/96200516</a>   |
| 5428 | Bubulcus ibis | Cattle Egret | 2021/5/2  | 1 | 0 | 28.9495481 | 79.7604903 | <a href="https://www.inaturalist.org/observations/76417803">https://www.inaturalist.org/observations/76417803</a>   |
| 5429 | Bubulcus ibis | Cattle Egret | 2021/9/27 | 0 | 0 | 28.9516110 | 79.7545330 | <a href="https://www.inaturalist.org/observations/96482870">https://www.inaturalist.org/observations/96482870</a>   |
| 5430 | Bubulcus ibis | Cattle Egret | 2021/9/25 | 1 | 0 | 28.9529571 | 79.8004303 | <a href="https://www.inaturalist.org/observations/96045625">https://www.inaturalist.org/observations/96045625</a>   |
| 5431 | Bubulcus ibis | Cattle Egret | 2022/4/16 | 2 | 0 | 28.9532610 | 79.7808130 | <a href="https://www.inaturalist.org/observations/144592613">https://www.inaturalist.org/observations/144592613</a> |
| 5432 | Bubulcus ibis | Cattle Egret | 2022/4/16 | 2 | 0 | 28.9532610 | 79.7808130 | <a href="https://www.inaturalist.org/observations/144592614">https://www.inaturalist.org/observations/144592614</a> |
| 5433 | Bubulcus ibis | Cattle Egret | 2021/5/15 | 2 | 0 | 28.9534784 | 79.7999816 | <a href="https://www.inaturalist.org/observations/78939479">https://www.inaturalist.org/observations/78939479</a>   |
| 5434 | Bubulcus ibis | Cattle Egret | 2021/3/19 | 1 | 0 | 28.9535972 | 79.8007250 | <a href="https://www.inaturalist.org/observations/71523202">https://www.inaturalist.org/observations/71523202</a>   |
| 5435 | Bubulcus ibis | Cattle Egret | 2021/3/26 | 2 | 0 | 28.9537703 | 79.8000228 | <a href="https://www.inaturalist.org/observations/73318425">https://www.inaturalist.org/observations/73318425</a>   |
| 5436 | Bubulcus ibis | Cattle Egret | 2021/9/25 | 1 | 0 | 28.9547801 | 79.7808132 | <a href="https://www.inaturalist.org/observations/96082986">https://www.inaturalist.org/observations/96082986</a>   |
| 5437 | Bubulcus ibis | Cattle Egret | 2020/6/22 | 2 | 0 | 28.9550467 | 77.7553633 | <a href="https://www.inaturalist.org/observations/50532934">https://www.inaturalist.org/observations/50532934</a>   |
| 5438 | Bubulcus ibis | Cattle Egret | 2020/9/13 | 4 | 0 | 28.9551111 | 79.8024167 | <a href="https://www.inaturalist.org/observations/59417113">https://www.inaturalist.org/observations/59417113</a>   |
| 5439 | Bubulcus ibis | Cattle Egret | 2021/9/24 | 3 | 0 | 28.9574717 | 79.8077935 | <a href="https://www.inaturalist.org/observations/95940927">https://www.inaturalist.org/observations/95940927</a>   |
| 5440 | Bubulcus ibis | Cattle Egret | 2021/9/26 | 1 | 0 | 28.9580556 | 79.8075000 | <a href="https://www.inaturalist.org/observations/96249593">https://www.inaturalist.org/observations/96249593</a>   |
| 5441 | Bubulcus ibis | Cattle Egret | 2021/5/1  | 1 | 0 | 28.9599133 | 79.8027267 | <a href="https://www.inaturalist.org/observations/76399814">https://www.inaturalist.org/observations/76399814</a>   |
| 5442 | Bubulcus ibis | Cattle Egret | 2021/7/22 | 2 | 0 | 28.9609705 | 79.8053242 | <a href="https://www.inaturalist.org/observations/88230247">https://www.inaturalist.org/observations/88230247</a>   |
| 5443 | Bubulcus ibis | Cattle Egret | 2021/8/25 | 2 | 0 | 28.9619218 | 79.8054885 | <a href="https://www.inaturalist.org/observations/92457952">https://www.inaturalist.org/observations/92457952</a>   |
| 5444 | Bubulcus ibis | Cattle Egret | 2022/7/8  | 3 | 0 | 28.9619528 | 79.8055250 | <a href="https://www.inaturalist.org/observations/125243500">https://www.inaturalist.org/observations/125243500</a> |
| 5445 | Bubulcus ibis | Cattle Egret | 2022/9/4  | 5 | 0 | 28.9619556 | 79.8053472 | <a href="https://www.inaturalist.org/observations/133571760">https://www.inaturalist.org/observations/133571760</a> |
| 5446 | Bubulcus ibis | Cattle Egret | 2021/8/17 | 2 | 0 | 28.9620577 | 79.8054875 | <a href="https://www.inaturalist.org/observations/91543339">https://www.inaturalist.org/observations/91543339</a>   |
| 5447 | Bubulcus ibis | Cattle Egret | 2021/7/19 | 2 | 0 | 28.9627667 | 79.8055891 | <a href="https://www.inaturalist.org/observations/87711311">https://www.inaturalist.org/observations/87711311</a>   |
| 5448 | Bubulcus ibis | Cattle Egret | 2022/7/9  | 3 | 0 | 28.9628056 | 79.8056139 | <a href="https://www.inaturalist.org/observations/125391485">https://www.inaturalist.org/observations/125391485</a> |
| 5449 | Bubulcus ibis | Cattle Egret | 2022/7/25 | 3 | 0 | 28.9628722 | 79.8055194 | <a href="https://www.inaturalist.org/observations/127867495">https://www.inaturalist.org/observations/127867495</a> |



|      |                     |                   |            |   |   |            |             |                                                                                                                     |
|------|---------------------|-------------------|------------|---|---|------------|-------------|---------------------------------------------------------------------------------------------------------------------|
| 5450 | Bubulcus ibis       | Cattle Egret      | 2021/12/26 | 2 | 0 | 28.9628913 | 79.8054553  | <a href="https://www.inaturalist.org/observations/103689602">https://www.inaturalist.org/observations/103689602</a> |
| 5451 | Bubulcus ibis       | Cattle Egret      | 2021/10/18 | 3 | 0 | 28.9630673 | 79.8054482  | <a href="https://www.inaturalist.org/observations/98932025">https://www.inaturalist.org/observations/98932025</a>   |
| 5452 | Bubulcus ibis       | Cattle Egret      | 2022/7/4   | 5 | 0 | 28.9636197 | 79.8049946  | <a href="https://www.inaturalist.org/observations/124657813">https://www.inaturalist.org/observations/124657813</a> |
| 5453 | Bubulcus ibis       | Cattle Egret      | 2021/12/22 | 3 | 0 | 28.9638541 | 79.8041474  | <a href="https://www.inaturalist.org/observations/103466642">https://www.inaturalist.org/observations/103466642</a> |
| 5454 | Bubulcus ibis       | Cattle Egret      | 2021/6/30  | 2 | 0 | 28.9640870 | 79.8039620  | <a href="https://www.inaturalist.org/observations/85064255">https://www.inaturalist.org/observations/85064255</a>   |
| 5455 | Bubulcus ibis       | Cattle Egret      | 2021/9/25  | 1 | 0 | 28.9640884 | 79.8000793  | <a href="https://www.inaturalist.org/observations/96242768">https://www.inaturalist.org/observations/96242768</a>   |
| 5456 | Bubulcus ibis       | Cattle Egret      | 2021/6/17  | 3 | 0 | 28.9643862 | 79.8042932  | <a href="https://www.inaturalist.org/observations/83366619">https://www.inaturalist.org/observations/83366619</a>   |
| 5457 | Bubulcus ibis       | Cattle Egret      | 2021/5/2   | 1 | 0 | 28.9702660 | 79.7443690  | <a href="https://www.inaturalist.org/observations/76422507">https://www.inaturalist.org/observations/76422507</a>   |
| 5458 | Bubulcus ibis       | Cattle Egret      | 2021/9/26  | 1 | 0 | 28.9711111 | 79.7652778  | <a href="https://www.inaturalist.org/observations/96207003">https://www.inaturalist.org/observations/96207003</a>   |
| 5459 | Bubulcus ibis       | Cattle Egret      | 2020/9/12  | 3 | 0 | 28.9721228 | 79.7649295  | <a href="https://www.inaturalist.org/observations/59858876">https://www.inaturalist.org/observations/59858876</a>   |
| 5460 | Bubulcus ibis       | Cattle Egret      | 2021/5/2   | 2 | 0 | 28.9738283 | 79.7815139  | <a href="https://www.inaturalist.org/observations/76442833">https://www.inaturalist.org/observations/76442833</a>   |
| 5461 | Bubulcus ibis       | Cattle Egret      | 2021/5/23  | 1 | 0 | 28.9806415 | 79.7906226  | <a href="https://www.inaturalist.org/observations/79937824">https://www.inaturalist.org/observations/79937824</a>   |
| 5462 | Bubulcus ibis       | Cattle Egret      | 2021/5/1   | 1 | 0 | 28.9861949 | 79.8044588  | <a href="https://www.inaturalist.org/observations/77529558">https://www.inaturalist.org/observations/77529558</a>   |
| 5463 | Bubulcus ibis       | Cattle Egret      | 2021/9/19  | 2 | 0 | 28.9898254 | 79.7740969  | <a href="https://www.inaturalist.org/observations/95357929">https://www.inaturalist.org/observations/95357929</a>   |
| 5464 | Bubulcus ibis       | Cattle Egret      | 2022/10/4  | 2 | 0 | 28.9998194 | 77.0443361  | <a href="https://www.inaturalist.org/observations/137636535">https://www.inaturalist.org/observations/137636535</a> |
| 5465 | Bubulcus ibis       | Cattle Egret      | 2019/4/25  | 1 | 0 | 29.0228626 | 79.4879412  | <a href="https://www.inaturalist.org/observations/48679230">https://www.inaturalist.org/observations/48679230</a>   |
| 5466 | Bubulcus ibis       | Cattle Egret      | 2021/12/24 | 4 | 0 | 29.0233950 | 79.4847070  | <a href="https://www.inaturalist.org/observations/103571241">https://www.inaturalist.org/observations/103571241</a> |
| 5467 | Bubulcus ibis       | Cattle Egret      | 2020/12/27 | 1 | 0 | 29.0256540 | 79.4810130  | <a href="https://www.inaturalist.org/observations/67125347">https://www.inaturalist.org/observations/67125347</a>   |
| 5468 | Bubulcus coromandus | ibis Cattle Egret | 2019/5/8   | 1 | 0 | 29.0835373 | 117.7638963 | <a href="https://www.inaturalist.org/observations/31774353">https://www.inaturalist.org/observations/31774353</a>   |
| 5469 | Bubulcus ibis       | Cattle Egret      | 2021/6/18  | 1 | 0 | 29.1549699 | 117.8568600 | <a href="https://www.inaturalist.org/observations/109620455">https://www.inaturalist.org/observations/109620455</a> |
| 5470 | Bubulcus ibis       | Cattle Egret      | 2017/9/5   | 4 | 0 | 29.1889388 | 78.9520039  | <a href="https://www.inaturalist.org/observations/8086438">https://www.inaturalist.org/observations/8086438</a>     |
| 5471 | Bubulcus ibis       | Cattle Egret      | 2021/3/17  | 2 | 0 | 29.2182639 | 79.5129768  | <a href="https://www.inaturalist.org/observations/104498069">https://www.inaturalist.org/observations/104498069</a> |
| 5472 | Bubulcus ibis       | Cattle Egret      | 2020/6/26  | 3 | 0 | 29.2331723 | 79.0121700  | <a href="https://www.inaturalist.org/observations/50973236">https://www.inaturalist.org/observations/50973236</a>   |
| 5473 | Bubulcus ibis       | Cattle Egret      | 2020/6/13  | 1 | 0 | 29.2337143 | 79.0116822  | <a href="https://www.inaturalist.org/observations/49427356">https://www.inaturalist.org/observations/49427356</a>   |
| 5474 | Bubulcus ibis       | Cattle Egret      | 2021/9/12  | 3 | 0 | 29.2877629 | 79.1082079  | <a href="https://www.inaturalist.org/observations/96682418">https://www.inaturalist.org/observations/96682418</a>   |

|      |                     |                      |            |   |   |            |             |                                                                                                                     |
|------|---------------------|----------------------|------------|---|---|------------|-------------|---------------------------------------------------------------------------------------------------------------------|
| 5475 | Bubulcus ibis       | Cattle Egret         | 2013/1/27  | 5 | 0 | 29.3803039 | 79.4635658  | <a href="https://www.inaturalist.org/observations/31520522">https://www.inaturalist.org/observations/31520522</a>   |
| 5476 | Bubulcus ibis       | Cattle Egret         | 2022/12/6  | 1 | 0 | 29.3980225 | 79.0831306  | <a href="https://www.inaturalist.org/observations/144402420">https://www.inaturalist.org/observations/144402420</a> |
| 5477 | Bubulcus coromandus | ibis<br>Cattle Egret | 2020/6/16  | 0 | 0 | 29.4331733 | 103.6106813 | <a href="https://www.inaturalist.org/observations/49810664">https://www.inaturalist.org/observations/49810664</a>   |
| 5478 | Bubulcus ibis       | Cattle Egret         | 2017/3/10  | 1 | 0 | 29.4565213 | 79.1482658  | <a href="https://www.inaturalist.org/observations/102513165">https://www.inaturalist.org/observations/102513165</a> |
| 5479 | Bubulcus ibis       | Cattle Egret         | 2020/8/22  | 1 | 0 | 29.5135270 | 76.9072850  | <a href="https://www.inaturalist.org/observations/57213230">https://www.inaturalist.org/observations/57213230</a>   |
| 5480 | Bubulcus ibis       | Cattle Egret         | 2020/5/12  | 1 | 0 | 29.5143712 | 76.9098098  | <a href="https://www.inaturalist.org/observations/57235908">https://www.inaturalist.org/observations/57235908</a>   |
| 5481 | Bubulcus ibis       | Cattle Egret         | 2020/5/2   | 2 | 0 | 29.6882676 | 76.9977508  | <a href="https://www.inaturalist.org/observations/44592925">https://www.inaturalist.org/observations/44592925</a>   |
| 5482 | Bubulcus ibis       | Cattle Egret         | 2021/6/7   | 1 | 0 | 29.7677150 | 121.3306461 | <a href="https://www.inaturalist.org/observations/82006130">https://www.inaturalist.org/observations/82006130</a>   |
| 5483 | Bubulcus ibis       | Cattle Egret         | 2022/8/7   | 2 | 0 | 29.7687213 | 78.0100331  | <a href="https://www.inaturalist.org/observations/129827269">https://www.inaturalist.org/observations/129827269</a> |
| 5484 | Bubulcus ibis       | Cattle Egret         | 2021/4/25  | 1 | 0 | 29.7687278 | 121.3284692 | <a href="https://www.inaturalist.org/observations/75157943">https://www.inaturalist.org/observations/75157943</a>   |
| 5485 | Bubulcus ibis       | Cattle Egret         | 2020/10/29 | 1 | 0 | 29.8042699 | 76.4039016  | <a href="https://www.inaturalist.org/observations/63753397">https://www.inaturalist.org/observations/63753397</a>   |
| 5486 | Bubulcus ibis       | Cattle Egret         | 2020/9/2   | 3 | 0 | 29.8173494 | 76.4173782  | <a href="https://www.inaturalist.org/observations/60044452">https://www.inaturalist.org/observations/60044452</a>   |
| 5487 | Bubulcus ibis       | Cattle Egret         | 2017/8/19  | 4 | 0 | 29.9040146 | 78.1786499  | <a href="https://www.inaturalist.org/observations/139173224">https://www.inaturalist.org/observations/139173224</a> |
| 5488 | Bubulcus ibis       | Cattle Egret         | 2022/8/3   | 1 | 0 | 29.9562359 | 77.5525393  | <a href="https://www.inaturalist.org/observations/129241228">https://www.inaturalist.org/observations/129241228</a> |
| 5489 | Bubulcus ibis       | Cattle Egret         | 2020/6/11  | 2 | 0 | 30.0826290 | 105.2598309 | <a href="https://www.inaturalist.org/observations/143670814">https://www.inaturalist.org/observations/143670814</a> |
| 5490 | Bubulcus ibis       | Cattle Egret         | 2019/4/2   | 4 | 0 | 30.0985837 | 77.8056682  | <a href="https://www.inaturalist.org/observations/36864952">https://www.inaturalist.org/observations/36864952</a>   |
| 5491 | Bubulcus ibis       | Cattle Egret         | 2021/8/21  | 4 | 0 | 30.2093250 | 120.1381305 | <a href="https://www.inaturalist.org/observations/92050461">https://www.inaturalist.org/observations/92050461</a>   |
| 5492 | Bubulcus ibis       | Cattle Egret         | 2022/9/5   | 2 | 0 | 30.2386474 | 119.7501659 | <a href="https://www.inaturalist.org/observations/133744569">https://www.inaturalist.org/observations/133744569</a> |
| 5493 | Bubulcus ibis       | Cattle Egret         | 2021/9/21  | 2 | 0 | 30.2418194 | 120.1580064 | <a href="https://www.inaturalist.org/observations/95750351">https://www.inaturalist.org/observations/95750351</a>   |
| 5494 | Bubulcus ibis       | Cattle Egret         | 2011/4/17  | 2 | 0 | 30.2430278 | 119.7888221 | <a href="https://www.inaturalist.org/observations/27004049">https://www.inaturalist.org/observations/27004049</a>   |
| 5495 | Bubulcus ibis       | Cattle Egret         | 2021/7/25  | 1 | 0 | 30.2480546 | 119.9504986 | <a href="https://www.inaturalist.org/observations/88505877">https://www.inaturalist.org/observations/88505877</a>   |
| 5496 | Bubulcus ibis       | Cattle Egret         | 2020/7/1   | 4 | 0 | 30.2671897 | 78.0075192  | <a href="https://www.inaturalist.org/observations/51710443">https://www.inaturalist.org/observations/51710443</a>   |
| 5497 | Bubulcus ibis       | Cattle Egret         | 2019/5/4   | 1 | 0 | 30.2691765 | 120.0665091 | <a href="https://www.inaturalist.org/observations/38790350">https://www.inaturalist.org/observations/38790350</a>   |
| 5498 | Bubulcus coromandus | ibis<br>Cattle Egret | 2015/6/11  | 6 | 0 | 30.2833210 | 77.9728840  | <a href="http://www.inaturalist.org/observations/1617501">http://www.inaturalist.org/observations/1617501</a>       |
| 5499 | Bubulcus ibis       | Cattle Egret         | 2020/9/5   | 3 | 0 | 30.3028788 | 78.0826231  | <a href="https://www.inaturalist.org/observations/58583140">https://www.inaturalist.org/observations/58583140</a>   |

|      |                        |                      |            |   |   |            |             |                                                                                                                     |
|------|------------------------|----------------------|------------|---|---|------------|-------------|---------------------------------------------------------------------------------------------------------------------|
| 5500 | Bubulcus ibis          | Cattle Egret         | 2020/9/22  | 3 | 0 | 30.3169593 | 78.0321919  | <a href="https://www.inaturalist.org/observations/60401252">https://www.inaturalist.org/observations/60401252</a>   |
| 5501 | Bubulcus ibis          | Cattle Egret         | 2021/12/12 | 2 | 0 | 30.3177011 | 78.0593419  | <a href="https://www.inaturalist.org/observations/115096814">https://www.inaturalist.org/observations/115096814</a> |
| 5502 | Bubulcus ibis          | Cattle Egret         | 2022/7/10  | 4 | 0 | 30.3390529 | 77.8813074  | <a href="https://www.inaturalist.org/observations/141167015">https://www.inaturalist.org/observations/141167015</a> |
| 5503 | Bubulcus ibis          | Cattle Egret         | 2022/7/12  | 1 | 0 | 30.3390979 | 77.8811049  | <a href="https://www.inaturalist.org/observations/141271746">https://www.inaturalist.org/observations/141271746</a> |
| 5504 | Bubulcus ibis          | Cattle Egret         | 2022/8/5   | 2 | 0 | 30.3454610 | 77.9929978  | <a href="https://www.inaturalist.org/observations/129496936">https://www.inaturalist.org/observations/129496936</a> |
| 5505 | Bubulcus ibis          | Cattle Egret         | 2022/8/3   | 2 | 0 | 30.3455695 | 77.9942051  | <a href="https://www.inaturalist.org/observations/129364656">https://www.inaturalist.org/observations/129364656</a> |
| 5506 | Bubulcus ibis          | Cattle Egret         | 2022/6/27  | 1 | 0 | 30.3521115 | 119.9318164 | <a href="https://www.inaturalist.org/observations/125913142">https://www.inaturalist.org/observations/125913142</a> |
| 5507 | Bubulcus ibis          | Cattle Egret         | 2021/4/21  | 1 | 0 | 30.3644134 | 76.7880194  | <a href="https://www.inaturalist.org/observations/75049162">https://www.inaturalist.org/observations/75049162</a>   |
| 5508 | Bubulcus ibis          | Cattle Egret         | 2021/5/25  | 1 | 0 | 30.3644134 | 76.7880194  | <a href="https://www.inaturalist.org/observations/82802681">https://www.inaturalist.org/observations/82802681</a>   |
| 5509 | Bubulcus ibis          | Cattle Egret         | 2020/9/3   | 3 | 0 | 30.3644203 | 76.7880194  | <a href="https://www.inaturalist.org/observations/58419013">https://www.inaturalist.org/observations/58419013</a>   |
| 5510 | Bubulcus ibis          | Cattle Egret         | 2020/9/3   | 3 | 0 | 30.3644203 | 76.7880194  | <a href="https://www.inaturalist.org/observations/58419106">https://www.inaturalist.org/observations/58419106</a>   |
| 5511 | Bubulcus<br>coromandus | ibis<br>Cattle Egret | 2018/8/3   | 3 | 0 | 30.3924654 | 120.0064385 | <a href="https://www.inaturalist.org/observations/18135428">https://www.inaturalist.org/observations/18135428</a>   |
| 5512 | Bubulcus<br>coromandus | ibis<br>Cattle Egret | 2020/5/17  | 0 | 0 | 30.4482469 | 77.7549491  | <a href="https://www.inaturalist.org/observations/134571487">https://www.inaturalist.org/observations/134571487</a> |
| 5513 | Bubulcus ibis          | Cattle Egret         | 2020/5/17  | 2 | 0 | 30.4482665 | 77.7549536  | <a href="https://www.inaturalist.org/observations/107528613">https://www.inaturalist.org/observations/107528613</a> |
| 5514 | Bubulcus ibis          | Cattle Egret         | 2021/11/5  | 1 | 0 | 30.4597892 | 78.0643723  | <a href="https://www.inaturalist.org/observations/100316914">https://www.inaturalist.org/observations/100316914</a> |
| 5515 | Bubulcus ibis          | Cattle Egret         | 2018/11/18 | 6 | 0 | 30.5913084 | 74.8115340  | <a href="https://www.inaturalist.org/observations/18510012">https://www.inaturalist.org/observations/18510012</a>   |
| 5516 | Bubulcus ibis          | Cattle Egret         | 2022/9/1   | 1 | 0 | 30.6139998 | 76.9326166  | <a href="https://www.inaturalist.org/observations/133347768">https://www.inaturalist.org/observations/133347768</a> |
| 5517 | Bubulcus ibis          | Cattle Egret         | 2019/5/12  | 3 | 0 | 30.6509950 | 76.4604667  | <a href="https://www.inaturalist.org/observations/124431173">https://www.inaturalist.org/observations/124431173</a> |
| 5518 | Bubulcus ibis          | Cattle Egret         | 2017/8/15  | 3 | 0 | 30.6634083 | 76.7273026  | <a href="https://www.inaturalist.org/observations/7565759">https://www.inaturalist.org/observations/7565759</a>     |
| 5519 | Bubulcus ibis          | Cattle Egret         | 2020/7/21  | 5 | 0 | 30.6778332 | 76.7091771  | <a href="https://www.inaturalist.org/observations/131553174">https://www.inaturalist.org/observations/131553174</a> |
| 5520 | Bubulcus ibis          | Cattle Egret         | 2020/8/3   | 2 | 0 | 30.7097342 | 76.7236264  | <a href="https://www.inaturalist.org/observations/55250007">https://www.inaturalist.org/observations/55250007</a>   |
| 5521 | Bubulcus ibis          | Cattle Egret         | 2022/6/5   | 3 | 0 | 30.7367000 | 76.6447915  | <a href="https://www.inaturalist.org/observations/120287373">https://www.inaturalist.org/observations/120287373</a> |
| 5522 | Bubulcus ibis          | Cattle Egret         | 2020/9/22  | 1 | 0 | 30.8908140 | 121.5894270 | <a href="https://www.inaturalist.org/observations/60407875">https://www.inaturalist.org/observations/60407875</a>   |
| 5523 | Bubulcus ibis          | Cattle Egret         | 2022/9/23  | 1 | 0 | 30.9375684 | 121.8706514 | <a href="https://www.inaturalist.org/observations/136929226">https://www.inaturalist.org/observations/136929226</a> |
| 5524 | Bubulcus ibis          | Cattle Egret         | 2012/7/22  | 4 | 0 | 31.0732496 | 75.4011421  | <a href="https://www.inaturalist.org/observations/133036746">https://www.inaturalist.org/observations/133036746</a> |

|      |                     |                   |            |   |   |            |             |                                                                                                                     |
|------|---------------------|-------------------|------------|---|---|------------|-------------|---------------------------------------------------------------------------------------------------------------------|
| 5525 | Bubulcus ibis       | Cattle Egret      | 2021/4/21  | 2 | 0 | 31.0746570 | 121.1487090 | <a href="https://www.inaturalist.org/observations/74802688">https://www.inaturalist.org/observations/74802688</a>   |
| 5526 | Bubulcus ibis       | Cattle Egret      | 2013/12/27 | 2 | 0 | 31.1434568 | 74.9513447  | <a href="https://www.inaturalist.org/observations/36295596">https://www.inaturalist.org/observations/36295596</a>   |
| 5527 | Bubulcus ibis       | Cattle Egret      | 2021/10/16 | 2 | 0 | 31.1731566 | 120.5365409 | <a href="https://www.inaturalist.org/observations/98337125">https://www.inaturalist.org/observations/98337125</a>   |
| 5528 | Bubulcus ibis       | Cattle Egret      | 2020/8/5   | 3 | 0 | 31.1771214 | 121.6054250 | <a href="https://www.inaturalist.org/observations/55476313">https://www.inaturalist.org/observations/55476313</a>   |
| 5529 | Bubulcus coromandus | ibis Cattle Egret | 2005/5/19  | 1 | 0 | 31.1940585 | 121.3645503 | <a href="https://www.inaturalist.org/observations/140623785">https://www.inaturalist.org/observations/140623785</a> |
| 5530 | Bubulcus ibis       | Cattle Egret      | 2020/7/19  | 1 | 0 | 31.2557047 | 119.6091068 | <a href="https://www.inaturalist.org/observations/102759277">https://www.inaturalist.org/observations/102759277</a> |
| 5531 | Bubulcus ibis       | Cattle Egret      | 2020/7/20  | 2 | 0 | 31.2922157 | 119.6257733 | <a href="https://www.inaturalist.org/observations/102844646">https://www.inaturalist.org/observations/102844646</a> |
| 5532 | Bubulcus ibis       | Cattle Egret      | 2022/6/23  | 1 | 0 | 31.3051500 | 119.0879100 | <a href="https://www.inaturalist.org/observations/126303953">https://www.inaturalist.org/observations/126303953</a> |
| 5533 | Bubulcus ibis       | Cattle Egret      | 2022/7/20  | 1 | 0 | 31.3106801 | 118.4866622 | <a href="https://www.inaturalist.org/observations/127084580">https://www.inaturalist.org/observations/127084580</a> |
| 5534 | Bubulcus ibis       | Cattle Egret      | 2018/7/15  | 4 | 0 | 31.3260152 | 75.5761829  | <a href="https://www.inaturalist.org/observations/14468532">https://www.inaturalist.org/observations/14468532</a>   |
| 5535 | Bubulcus ibis       | Cattle Egret      | 2021/5/30  | 2 | 0 | 31.3534489 | 121.2010990 | <a href="https://www.inaturalist.org/observations/80857619">https://www.inaturalist.org/observations/80857619</a>   |
| 5536 | Bubulcus ibis       | Cattle Egret      | 2021/5/30  | 1 | 0 | 31.3587950 | 121.1916117 | <a href="https://www.inaturalist.org/observations/80859054">https://www.inaturalist.org/observations/80859054</a>   |
| 5537 | Bubulcus ibis       | Cattle Egret      | 2021/4/20  | 1 | 0 | 31.3733215 | 120.3829097 | <a href="https://www.inaturalist.org/observations/74610211">https://www.inaturalist.org/observations/74610211</a>   |
| 5538 | Bubulcus ibis       | Cattle Egret      | 2021/6/7   | 2 | 0 | 31.3989048 | 120.8331070 | <a href="https://www.inaturalist.org/observations/81985888">https://www.inaturalist.org/observations/81985888</a>   |
| 5539 | Bubulcus ibis       | Cattle Egret      | 2021/6/28  | 1 | 0 | 31.4000000 | 119.4000000 | <a href="https://www.inaturalist.org/observations/84952428">https://www.inaturalist.org/observations/84952428</a>   |
| 5540 | Bubulcus ibis       | Cattle Egret      | 2020/10/11 | 1 | 0 | 31.4474084 | 120.7836914 | <a href="https://www.inaturalist.org/observations/62275646">https://www.inaturalist.org/observations/62275646</a>   |
| 5541 | Bubulcus ibis       | Cattle Egret      | 2020/5/19  | 1 | 0 | 31.4936160 | 120.5066830 | <a href="https://www.inaturalist.org/observations/46490708">https://www.inaturalist.org/observations/46490708</a>   |
| 5542 | Bubulcus ibis       | Cattle Egret      | 2020/5/19  | 1 | 0 | 31.4936160 | 120.5066830 | <a href="https://www.inaturalist.org/observations/46490714">https://www.inaturalist.org/observations/46490714</a>   |
| 5543 | Bubulcus ibis       | Cattle Egret      | 2020/5/19  | 1 | 0 | 31.4936160 | 120.5066830 | <a href="https://www.inaturalist.org/observations/46490718">https://www.inaturalist.org/observations/46490718</a>   |
| 5544 | Bubulcus ibis       | Cattle Egret      | 2021/6/19  | 1 | 0 | 31.4954617 | 119.0880750 | <a href="https://www.inaturalist.org/observations/83672227">https://www.inaturalist.org/observations/83672227</a>   |
| 5545 | Bubulcus ibis       | Cattle Egret      | 2022/7/21  | 2 | 0 | 31.5161391 | 118.9297398 | <a href="https://www.inaturalist.org/observations/127224447">https://www.inaturalist.org/observations/127224447</a> |
| 5546 | Bubulcus ibis       | Cattle Egret      | 2022/7/21  | 1 | 0 | 31.5161391 | 118.9297398 | <a href="https://www.inaturalist.org/observations/127370381">https://www.inaturalist.org/observations/127370381</a> |
| 5547 | Bubulcus ibis       | Cattle Egret      | 2020/7/18  | 1 | 0 | 31.5506430 | 121.8118395 | <a href="https://www.inaturalist.org/observations/127972140">https://www.inaturalist.org/observations/127972140</a> |
| 5548 | Bubulcus ibis       | Cattle Egret      | 2021/6/19  | 1 | 0 | 31.5619683 | 118.9780000 | <a href="https://www.inaturalist.org/observations/87858124">https://www.inaturalist.org/observations/87858124</a>   |
| 5549 | Bubulcus ibis       | Cattle Egret      | 2022/6/9   | 0 | 0 | 31.6044300 | 120.7362583 | <a href="https://www.inaturalist.org/observations/120900114">https://www.inaturalist.org/observations/120900114</a> |

|      |               |              |            |   |   |            |             |                                                                                                                     |
|------|---------------|--------------|------------|---|---|------------|-------------|---------------------------------------------------------------------------------------------------------------------|
| 5550 | Bubulcus ibis | Cattle Egret | 2020/5/9   | 1 | 0 | 31.6058452 | 121.5399884 | <a href="https://www.inaturalist.org/observations/131073137">https://www.inaturalist.org/observations/131073137</a> |
| 5551 | Bubulcus ibis | Cattle Egret | 2021/5/1   | 1 | 0 | 31.6437266 | 119.2473831 | <a href="https://www.inaturalist.org/observations/77293831">https://www.inaturalist.org/observations/77293831</a>   |
| 5552 | Bubulcus ibis | Cattle Egret | 2020/5/22  | 0 | 0 | 31.6473502 | 121.5942645 | <a href="https://www.inaturalist.org/observations/131060453">https://www.inaturalist.org/observations/131060453</a> |
| 5553 | Bubulcus ibis | Cattle Egret | 2021/5/3   | 1 | 0 | 31.6496686 | 119.2150937 | <a href="https://www.inaturalist.org/observations/77310330">https://www.inaturalist.org/observations/77310330</a>   |
| 5554 | Bubulcus ibis | Cattle Egret | 2021/5/3   | 1 | 0 | 31.6496800 | 119.2150905 | <a href="https://www.inaturalist.org/observations/77310288">https://www.inaturalist.org/observations/77310288</a>   |
| 5555 | Bubulcus ibis | Cattle Egret | 2021/5/3   | 1 | 0 | 31.6496800 | 119.2150905 | <a href="https://www.inaturalist.org/observations/77310291">https://www.inaturalist.org/observations/77310291</a>   |
| 5556 | Bubulcus ibis | Cattle Egret | 2021/5/3   | 1 | 0 | 31.6496941 | 119.2150891 | <a href="https://www.inaturalist.org/observations/77310388">https://www.inaturalist.org/observations/77310388</a>   |
| 5557 | Bubulcus ibis | Cattle Egret | 2021/5/2   | 1 | 0 | 31.6498940 | 119.2158416 | <a href="https://www.inaturalist.org/observations/77293880">https://www.inaturalist.org/observations/77293880</a>   |
| 5558 | Bubulcus ibis | Cattle Egret | 2021/5/3   | 1 | 0 | 31.6499577 | 119.2152554 | <a href="https://www.inaturalist.org/observations/77310299">https://www.inaturalist.org/observations/77310299</a>   |
| 5559 | Bubulcus ibis | Cattle Egret | 2020/5/15  | 0 | 0 | 31.7446912 | 121.6369506 | <a href="https://www.inaturalist.org/observations/131061538">https://www.inaturalist.org/observations/131061538</a> |
| 5560 | Bubulcus ibis | Cattle Egret | 2020/6/6   | 1 | 0 | 31.7471277 | 121.7197619 | <a href="https://www.inaturalist.org/observations/127470962">https://www.inaturalist.org/observations/127470962</a> |
| 5561 | Bubulcus ibis | Cattle Egret | 2022/6/30  | 0 | 0 | 31.7869616 | 118.6246386 | <a href="https://www.inaturalist.org/observations/126304474">https://www.inaturalist.org/observations/126304474</a> |
| 5562 | Bubulcus ibis | Cattle Egret | 2021/8/25  | 1 | 0 | 31.8381683 | 118.5103367 | <a href="https://www.inaturalist.org/observations/92647187">https://www.inaturalist.org/observations/92647187</a>   |
| 5563 | Bubulcus ibis | Cattle Egret | 2021/8/25  | 1 | 0 | 31.8381683 | 118.5103367 | <a href="https://www.inaturalist.org/observations/92647188">https://www.inaturalist.org/observations/92647188</a>   |
| 5564 | Bubulcus ibis | Cattle Egret | 2021/8/25  | 2 | 0 | 31.8381683 | 118.5103367 | <a href="https://www.inaturalist.org/observations/92647190">https://www.inaturalist.org/observations/92647190</a>   |
| 5565 | Bubulcus ibis | Cattle Egret | 2015/9/4   | 1 | 0 | 31.8894128 | 118.8157261 | <a href="https://www.inaturalist.org/observations/141880866">https://www.inaturalist.org/observations/141880866</a> |
| 5566 | Bubulcus ibis | Cattle Egret | 2021/1/10  | 4 | 0 | 32.0269411 | 75.3939902  | <a href="https://www.inaturalist.org/observations/68003661">https://www.inaturalist.org/observations/68003661</a>   |
| 5567 | Bubulcus ibis | Cattle Egret | 2020/9/24  | 1 | 0 | 32.0724850 | 118.8968030 | <a href="https://www.inaturalist.org/observations/67986789">https://www.inaturalist.org/observations/67986789</a>   |
| 5568 | Bubulcus ibis | Cattle Egret | 2021/8/29  | 2 | 0 | 32.0880585 | 118.8343277 | <a href="https://www.inaturalist.org/observations/142067379">https://www.inaturalist.org/observations/142067379</a> |
| 5569 | Bubulcus ibis | Cattle Egret | 2021/9/4   | 2 | 0 | 32.0880623 | 118.8344421 | <a href="https://www.inaturalist.org/observations/142067173">https://www.inaturalist.org/observations/142067173</a> |
| 5570 | Bubulcus ibis | Cattle Egret | 2020/5/12  | 3 | 0 | 32.0880707 | 76.5496703  | <a href="https://www.inaturalist.org/observations/45677930">https://www.inaturalist.org/observations/45677930</a>   |
| 5571 | Bubulcus ibis | Cattle Egret | 2022/10/2  | 1 | 0 | 32.1802131 | 118.8592194 | <a href="https://www.inaturalist.org/observations/141088159">https://www.inaturalist.org/observations/141088159</a> |
| 5572 | Bubulcus ibis | Cattle Egret | 2022/1/2   | 1 | 0 | 32.1936400 | 118.9874167 | <a href="https://www.inaturalist.org/observations/120273510">https://www.inaturalist.org/observations/120273510</a> |
| 5573 | Bubulcus ibis | Cattle Egret | 2019/7/15  | 2 | 0 | 32.2008679 | 76.3621045  | <a href="https://www.inaturalist.org/observations/105433105">https://www.inaturalist.org/observations/105433105</a> |
| 5574 | Bubulcus ibis | Cattle Egret | 2021/11/11 | 1 | 0 | 32.2086350 | 76.3324250  | <a href="https://www.inaturalist.org/observations/100817085">https://www.inaturalist.org/observations/100817085</a> |

|      |                     |                   |            |   |   |            |             |                                                                                                                     |
|------|---------------------|-------------------|------------|---|---|------------|-------------|---------------------------------------------------------------------------------------------------------------------|
| 5575 | Bubulcus ibis       | Cattle Egret      | 2015/6/21  | 3 | 0 | 32.2190420 | 76.3234037  | <a href="https://www.inaturalist.org/observations/30503288">https://www.inaturalist.org/observations/30503288</a>   |
| 5576 | Bubulcus ibis       | Cattle Egret      | 2022/7/16  | 1 | 0 | 32.3210648 | 118.8084889 | <a href="https://www.inaturalist.org/observations/126613259">https://www.inaturalist.org/observations/126613259</a> |
| 5577 | Bubulcus ibis       | Cattle Egret      | 2022/5/15  | 1 | 0 | 32.3222199 | 118.8215500 | <a href="https://www.inaturalist.org/observations/126652587">https://www.inaturalist.org/observations/126652587</a> |
| 5578 | Bubulcus ibis       | Cattle Egret      | 2021/5/3   | 1 | 0 | 32.4564171 | 119.5849762 | <a href="https://www.inaturalist.org/observations/142515920">https://www.inaturalist.org/observations/142515920</a> |
| 5579 | Bubulcus coromandus | ibis Cattle Egret | 2020/9/6   | 1 | 0 | 32.4687653 | 119.5685043 | <a href="https://www.inaturalist.org/observations/142862838">https://www.inaturalist.org/observations/142862838</a> |
| 5580 | Bubulcus ibis       | Cattle Egret      | 2020/9/18  | 1 | 0 | 32.6607250 | 119.5136033 | <a href="https://www.inaturalist.org/observations/60049290">https://www.inaturalist.org/observations/60049290</a>   |
| 5581 | Bubulcus ibis       | Cattle Egret      | 2022/3/4   | 3 | 0 | 32.7252407 | 74.8502005  | <a href="https://www.inaturalist.org/observations/108009360">https://www.inaturalist.org/observations/108009360</a> |
| 5582 | Bubulcus ibis       | Cattle Egret      | 2021/4/14  | 3 | 0 | 32.7266016 | 74.8570259  | <a href="https://www.inaturalist.org/observations/74398319">https://www.inaturalist.org/observations/74398319</a>   |
| 5583 | Bubulcus ibis       | Cattle Egret      | 2021/7/17  | 1 | 0 | 33.0748250 | 114.1276267 | <a href="https://www.inaturalist.org/observations/91264523">https://www.inaturalist.org/observations/91264523</a>   |
| 5584 | Bubulcus ibis       | Cattle Egret      | 2016/7/17  | 4 | 0 | 33.6300189 | 78.3159844  | <a href="https://www.inaturalist.org/observations/10524036">https://www.inaturalist.org/observations/10524036</a>   |
| 5585 | Bubulcus ibis       | Cattle Egret      | 2016/7/8   | 2 | 0 | 34.0731818 | 77.6392939  | <a href="https://www.inaturalist.org/observations/93828543">https://www.inaturalist.org/observations/93828543</a>   |
| 5586 | Bubulcus ibis       | Cattle Egret      | 2022/6/17  | 1 | 0 | 34.3950870 | 117.4822351 | <a href="https://www.inaturalist.org/observations/122741067">https://www.inaturalist.org/observations/122741067</a> |
| 5587 | Bubulcus ibis       | Cattle Egret      | 2021/10/6  | 1 | 0 | 36.1239816 | 120.5891187 | <a href="https://www.inaturalist.org/observations/103686875">https://www.inaturalist.org/observations/103686875</a> |
| 5588 | Bubulcus ibis       | Cattle Egret      | 2022/5/18  | 1 | 0 | 36.2696842 | 120.4419373 | <a href="https://www.inaturalist.org/observations/118001874">https://www.inaturalist.org/observations/118001874</a> |
| 5589 | Bubulcus ibis       | Cattle Egret      | 2021/10/10 | 2 | 0 | 36.3656260 | 120.6806710 | <a href="https://www.inaturalist.org/observations/105560123">https://www.inaturalist.org/observations/105560123</a> |
| 5590 | Bubulcus ibis       | Cattle Egret      | 2020/9/14  | 2 | 0 | 36.3700000 | 120.6813000 | <a href="https://www.inaturalist.org/observations/105147745">https://www.inaturalist.org/observations/105147745</a> |
| 5591 | Bubulcus ibis       | Cattle Egret      | 2021/6/4   | 1 | 0 | 37.6037050 | 118.7203794 | <a href="https://www.inaturalist.org/observations/142604552">https://www.inaturalist.org/observations/142604552</a> |
| 5592 | Bubulcus ibis       | Cattle Egret      | 2021/5/2   | 1 | 0 | 39.0215852 | 117.1556932 | <a href="https://www.inaturalist.org/observations/143181072">https://www.inaturalist.org/observations/143181072</a> |
| 5593 | Bubulcus ibis       | Cattle Egret      | 2017/5/16  | 2 | 0 | 39.8715900 | 123.8947300 | <a href="https://www.inaturalist.org/observations/6680710">https://www.inaturalist.org/observations/6680710</a>     |
| 5594 | Bubulcus ibis       | Cattle Egret      | 2017/5/11  | 2 | 0 | 39.8949213 | 123.8968563 | <a href="https://www.inaturalist.org/observations/6678764">https://www.inaturalist.org/observations/6678764</a>     |
| 5595 | Bubulcus ibis       | Cattle Egret      | 2022/9/18  | 1 | 0 | 40.1363097 | 116.3055089 | <a href="https://www.inaturalist.org/observations/136427804">https://www.inaturalist.org/observations/136427804</a> |
| 5596 | Bubulcus ibis       | Cattle Egret      | 2022/10/1  | 1 | 0 | 40.1374204 | 116.3039022 | <a href="https://www.inaturalist.org/observations/137351092">https://www.inaturalist.org/observations/137351092</a> |
| 5597 | Bubulcus ibis       | Cattle Egret      | 2021/5/22  | 1 | 0 | 40.1534374 | 116.6746867 | <a href="https://www.inaturalist.org/observations/80621989">https://www.inaturalist.org/observations/80621989</a>   |
| 5598 | Bubulcus ibis       | Cattle Egret      | 2021/9/5   | 1 | 0 | 40.1927778 | 116.6713062 | <a href="https://www.inaturalist.org/observations/94322632">https://www.inaturalist.org/observations/94322632</a>   |

| No | scientific name        | common name   | date       | NIA | NID | latitude   | longitude  | url                                                                                                                 |
|----|------------------------|---------------|------------|-----|-----|------------|------------|---------------------------------------------------------------------------------------------------------------------|
| 1  | <i>Ciconia abdimii</i> | Abdim's Stork | 2013/1/24  | 1   | 0   | -9.0863660 | 33.9527031 | <a href="https://www.inaturalist.org/observations/79513326">https://www.inaturalist.org/observations/79513326</a>   |
| 2  | <i>Ciconia abdimii</i> | Abdim's Stork | 2011/2/10  | 3   | 0   | -7.6732877 | 34.9308096 | <a href="https://www.inaturalist.org/observations/56763861">https://www.inaturalist.org/observations/56763861</a>   |
| 3  | <i>Ciconia abdimii</i> | Abdim's Stork | 2021/2/20  | 1   | 0   | -4.4989233 | 35.4490354 | <a href="https://www.inaturalist.org/observations/71567109">https://www.inaturalist.org/observations/71567109</a>   |
| 4  | <i>Ciconia abdimii</i> | Abdim's Stork | 2021/2/5   | 3   | 0   | -3.6936433 | 35.9285756 | <a href="https://www.inaturalist.org/observations/70384504">https://www.inaturalist.org/observations/70384504</a>   |
| 5  | <i>Ciconia abdimii</i> | Abdim's Stork | 2019/3/25  | 1   | 0   | -3.6190593 | 35.8061779 | <a href="https://www.inaturalist.org/observations/66984417">https://www.inaturalist.org/observations/66984417</a>   |
| 6  | <i>Ciconia abdimii</i> | Abdim's Stork | 2016/2/16  | 2   | 0   | -3.6190593 | 35.8061779 | <a href="https://www.inaturalist.org/observations/137402794">https://www.inaturalist.org/observations/137402794</a> |
| 7  | <i>Ciconia abdimii</i> | Abdim's Stork | 2021/2/20  | 2   | 0   | -3.6157223 | 36.0349918 | <a href="https://www.inaturalist.org/observations/71697327">https://www.inaturalist.org/observations/71697327</a>   |
| 8  | <i>Ciconia abdimii</i> | Abdim's Stork | 2019/2/27  | 3   | 0   | -3.6145917 | 36.0366550 | <a href="https://www.inaturalist.org/observations/21113473">https://www.inaturalist.org/observations/21113473</a>   |
| 9  | <i>Ciconia abdimii</i> | Abdim's Stork | 2021/4/9   | 2   | 0   | -3.6139717 | 36.0376817 | <a href="https://www.inaturalist.org/observations/80408696">https://www.inaturalist.org/observations/80408696</a>   |
| 10 | <i>Ciconia abdimii</i> | Abdim's Stork | 2016/1/24  | 7   | 0   | -3.4249514 | 36.3731931 | <a href="https://www.inaturalist.org/observations/34413215">https://www.inaturalist.org/observations/34413215</a>   |
| 11 | <i>Ciconia abdimii</i> | Abdim's Stork | 2015/2/13  | 4   | 0   | -3.4060236 | 36.2945433 | <a href="http://www.inaturalist.org/observations/1231426">http://www.inaturalist.org/observations/1231426</a>       |
| 12 | <i>Ciconia abdimii</i> | Abdim's Stork | 2019/1/29  | 2   | 0   | -3.4045738 | 36.8825776 | <a href="https://www.inaturalist.org/observations/117964337">https://www.inaturalist.org/observations/117964337</a> |
| 13 | <i>Ciconia abdimii</i> | Abdim's Stork | 2002/2/4   | 4   | 0   | -3.3989600 | 36.2363430 | <a href="http://www.inaturalist.org/observations/528731">http://www.inaturalist.org/observations/528731</a>         |
| 14 | <i>Ciconia abdimii</i> | Abdim's Stork | 2019/3/7   | 4   | 0   | -3.3951186 | 36.8660231 | <a href="https://www.inaturalist.org/observations/104963750">https://www.inaturalist.org/observations/104963750</a> |
| 15 | <i>Ciconia abdimii</i> | Abdim's Stork | 2019/12/23 | 0   | 0   | -3.3869254 | 36.6829927 | <a href="https://www.inaturalist.org/observations/39699426">https://www.inaturalist.org/observations/39699426</a>   |
| 16 | <i>Ciconia abdimii</i> | Abdim's Stork | 2020/1/23  | 2   | 0   | -3.3869254 | 36.6829927 | <a href="https://www.inaturalist.org/observations/39701312">https://www.inaturalist.org/observations/39701312</a>   |
| 17 | <i>Ciconia abdimii</i> | Abdim's Stork | 2019/12/23 | 1   | 0   | -3.3869254 | 36.6829927 | <a href="https://www.inaturalist.org/observations/40208740">https://www.inaturalist.org/observations/40208740</a>   |
| 18 | <i>Ciconia abdimii</i> | Abdim's Stork | 2018/1/20  | 2   | 0   | -3.3869254 | 36.6829927 | <a href="https://www.inaturalist.org/observations/81063625">https://www.inaturalist.org/observations/81063625</a>   |
| 19 | <i>Ciconia abdimii</i> | Abdim's Stork | 2020/1/23  | 2   | 0   | -3.3861415 | 36.6809381 | <a href="https://www.inaturalist.org/observations/39701315">https://www.inaturalist.org/observations/39701315</a>   |
| 20 | <i>Ciconia abdimii</i> | Abdim's Stork | 2019/3/8   | 1   | 0   | -3.3859232 | 36.8625436 | <a href="https://www.inaturalist.org/observations/120300528">https://www.inaturalist.org/observations/120300528</a> |
| 21 | <i>Ciconia abdimii</i> | Abdim's Stork | 2018/3/29  | 3   | 0   | -3.3542634 | 38.8256903 | <a href="https://www.inaturalist.org/observations/10735181">https://www.inaturalist.org/observations/10735181</a>   |
| 22 | <i>Ciconia abdimii</i> | Abdim's Stork | 2015/2/27  | 3   | 0   | -3.3462130 | 38.8220227 | <a href="https://www.inaturalist.org/observations/106813279">https://www.inaturalist.org/observations/106813279</a> |
| 23 | <i>Ciconia abdimii</i> | Abdim's Stork | 2005/2/13  | 0   | 0   | -3.2500000 | 35.5200000 | <a href="https://www.inaturalist.org/observations/37948498">https://www.inaturalist.org/observations/37948498</a>   |
| 24 | <i>Ciconia abdimii</i> | Abdim's Stork | 2009/2/24  | 4   | 0   | -3.2415440 | 35.4877780 | <a href="http://www.inaturalist.org/observations/1522926">http://www.inaturalist.org/observations/1522926</a>       |

|    |                 |               |            |   |   |            |            |                                                                                                                       |
|----|-----------------|---------------|------------|---|---|------------|------------|-----------------------------------------------------------------------------------------------------------------------|
| 25 | Ciconia abdimii | Abdim's Stork | 2022/1/15  | 3 | 0 | -3.2292383 | 35.5585617 | <a href="https://www.inaturalist.org/observations/105570043">https://www.inaturalist.org/observations/105570043</a>   |
| 26 | Ciconia abdimii | Abdim's Stork | 2016/3/28  | 6 | 0 | -3.2224833 | 35.5576783 | <a href="http://conabio.inaturalist.org/observations/2843022">http://conabio.inaturalist.org/observations/2843022</a> |
| 27 | Ciconia abdimii | Abdim's Stork | 2003/1/25  | 4 | 0 | -3.2137424 | 35.5582429 | <a href="https://www.inaturalist.org/observations/40890482">https://www.inaturalist.org/observations/40890482</a>     |
| 28 | Ciconia abdimii | Abdim's Stork | 2022/1/15  | 3 | 0 | -3.2083133 | 35.5808283 | <a href="https://www.inaturalist.org/observations/105569943">https://www.inaturalist.org/observations/105569943</a>   |
| 29 | Ciconia abdimii | Abdim's Stork | 2019/2/23  | 4 | 0 | -3.1995829 | 35.6479178 | <a href="https://www.inaturalist.org/observations/142916118">https://www.inaturalist.org/observations/142916118</a>   |
| 30 | Ciconia abdimii | Abdim's Stork | 2017/1/30  | 4 | 0 | -3.1992630 | 35.5879130 | <a href="https://www.inaturalist.org/observations/5935558">https://www.inaturalist.org/observations/5935558</a>       |
| 31 | Ciconia abdimii | Abdim's Stork | 2019/12/31 | 3 | 0 | -3.1956379 | 35.5650104 | <a href="https://www.inaturalist.org/observations/120935906">https://www.inaturalist.org/observations/120935906</a>   |
| 32 | Ciconia abdimii | Abdim's Stork | 2020/12/24 | 3 | 0 | -3.1897682 | 35.5060183 | <a href="https://www.inaturalist.org/observations/82192709">https://www.inaturalist.org/observations/82192709</a>     |
| 33 | Ciconia abdimii | Abdim's Stork | 2018/1/25  | 3 | 0 | -3.1884899 | 35.5753099 | <a href="https://www.inaturalist.org/observations/16814038">https://www.inaturalist.org/observations/16814038</a>     |
| 34 | Ciconia abdimii | Abdim's Stork | 2018/2/6   | 2 | 0 | -3.1871191 | 35.6171955 | <a href="https://www.inaturalist.org/observations/142070130">https://www.inaturalist.org/observations/142070130</a>   |
| 35 | Ciconia abdimii | Abdim's Stork | 2015/1/1   | 2 | 0 | -3.1836908 | 35.6213151 | <a href="https://www.inaturalist.org/observations/21381386">https://www.inaturalist.org/observations/21381386</a>     |
| 36 | Ciconia abdimii | Abdim's Stork | 2020/12/23 | 2 | 0 | -3.1806918 | 35.5579722 | <a href="https://www.inaturalist.org/observations/67786560">https://www.inaturalist.org/observations/67786560</a>     |
| 37 | Ciconia abdimii | Abdim's Stork | 2010/12/27 | 4 | 0 | -3.1802810 | 35.5757904 | <a href="https://www.inaturalist.org/observations/7131275">https://www.inaturalist.org/observations/7131275</a>       |
| 38 | Ciconia abdimii | Abdim's Stork | 2020/2/12  | 2 | 0 | -3.1795780 | 35.5670703 | <a href="https://www.inaturalist.org/observations/49695890">https://www.inaturalist.org/observations/49695890</a>     |
| 39 | Ciconia abdimii | Abdim's Stork | 2015/2/16  | 4 | 0 | -3.1793370 | 35.6108530 | <a href="https://www.inaturalist.org/observations/34840787">https://www.inaturalist.org/observations/34840787</a>     |
| 40 | Ciconia abdimii | Abdim's Stork | 2019/2/26  | 2 | 0 | -3.1789333 | 35.5686200 | <a href="https://www.inaturalist.org/observations/21108264">https://www.inaturalist.org/observations/21108264</a>     |
| 41 | Ciconia abdimii | Abdim's Stork | 2017/2/19  | 4 | 0 | -3.1782060 | 35.5684440 | <a href="https://www.inaturalist.org/observations/6098418">https://www.inaturalist.org/observations/6098418</a>       |
| 42 | Ciconia abdimii | Abdim's Stork | 2017/2/19  | 4 | 0 | -3.1782060 | 35.5711900 | <a href="https://www.inaturalist.org/observations/6137034">https://www.inaturalist.org/observations/6137034</a>       |
| 43 | Ciconia abdimii | Abdim's Stork | 2007/1/26  | 2 | 0 | -3.1781359 | 35.5659136 | <a href="https://www.inaturalist.org/observations/143846616">https://www.inaturalist.org/observations/143846616</a>   |
| 44 | Ciconia abdimii | Abdim's Stork | 2007/1/27  | 3 | 0 | -3.1768595 | 35.5750216 | <a href="https://www.inaturalist.org/observations/143836050">https://www.inaturalist.org/observations/143836050</a>   |
| 45 | Ciconia abdimii | Abdim's Stork | 2007/1/27  | 3 | 0 | -3.1768595 | 35.5750216 | <a href="https://www.inaturalist.org/observations/143836065">https://www.inaturalist.org/observations/143836065</a>   |
| 46 | Ciconia abdimii | Abdim's Stork | 2019/3/2   | 2 | 0 | -3.1768222 | 35.5121611 | <a href="https://www.inaturalist.org/observations/80211739">https://www.inaturalist.org/observations/80211739</a>     |
| 47 | Ciconia abdimii | Abdim's Stork | 2019/2/26  | 2 | 0 | -3.1768100 | 35.5618517 | <a href="https://www.inaturalist.org/observations/21108260">https://www.inaturalist.org/observations/21108260</a>     |
| 48 | Ciconia abdimii | Abdim's Stork | 2016/2/22  | 6 | 0 | -3.1764100 | 35.5898684 | <a href="https://www.inaturalist.org/observations/13077839">https://www.inaturalist.org/observations/13077839</a>     |
| 49 | Ciconia abdimii | Abdim's Stork | 2022/1/4   | 1 | 0 | -3.1747725 | 35.5260985 | <a href="https://www.inaturalist.org/observations/116446990">https://www.inaturalist.org/observations/116446990</a>   |



|    |                 |               |           |   |   |            |            |                                                                                                                     |
|----|-----------------|---------------|-----------|---|---|------------|------------|---------------------------------------------------------------------------------------------------------------------|
| 50 | Ciconia abdimii | Abdim's Stork | 2012/4/15 | 2 | 0 | -3.1743475 | 35.5645975 | <a href="https://www.inaturalist.org/observations/43851122">https://www.inaturalist.org/observations/43851122</a>   |
| 51 | Ciconia abdimii | Abdim's Stork | 2017/2/28 | 5 | 0 | -3.1721773 | 35.5718078 | <a href="https://www.inaturalist.org/observations/9524531">https://www.inaturalist.org/observations/9524531</a>     |
| 52 | Ciconia abdimii | Abdim's Stork | 2011/3/8  | 1 | 0 | -3.1666667 | 35.5833333 | <a href="https://www.inaturalist.org/observations/102079947">https://www.inaturalist.org/observations/102079947</a> |
| 53 | Ciconia abdimii | Abdim's Stork | 2014/3/29 | 2 | 0 | -3.1646992 | 35.6034402 | <a href="https://www.inaturalist.org/observations/64893593">https://www.inaturalist.org/observations/64893593</a>   |
| 54 | Ciconia abdimii | Abdim's Stork | 2019/2/26 | 3 | 0 | -3.1633900 | 35.5000800 | <a href="https://www.inaturalist.org/observations/21106417">https://www.inaturalist.org/observations/21106417</a>   |
| 55 | Ciconia abdimii | Abdim's Stork | 2009/2/14 | 2 | 0 | -3.1617522 | 35.5876697 | <a href="https://www.inaturalist.org/observations/59800242">https://www.inaturalist.org/observations/59800242</a>   |
| 56 | Ciconia abdimii | Abdim's Stork | 2018/1/23 | 2 | 0 | -3.1617522 | 35.5876697 | <a href="https://www.inaturalist.org/observations/81636907">https://www.inaturalist.org/observations/81636907</a>   |
| 57 | Ciconia abdimii | Abdim's Stork | 2018/1/23 | 2 | 0 | -3.1617522 | 35.5876697 | <a href="https://www.inaturalist.org/observations/81695576">https://www.inaturalist.org/observations/81695576</a>   |
| 58 | Ciconia abdimii | Abdim's Stork | 2011/2/20 | 5 | 0 | -3.1617522 | 35.5876697 | <a href="https://www.inaturalist.org/observations/108305456">https://www.inaturalist.org/observations/108305456</a> |
| 59 | Ciconia abdimii | Abdim's Stork | 2011/2/20 | 4 | 0 | -3.1617522 | 35.5876697 | <a href="https://www.inaturalist.org/observations/108367433">https://www.inaturalist.org/observations/108367433</a> |
| 60 | Ciconia abdimii | Abdim's Stork | 2022/2/23 | 4 | 0 | -3.1617522 | 35.5876697 | <a href="https://www.inaturalist.org/observations/108427170">https://www.inaturalist.org/observations/108427170</a> |
| 61 | Ciconia abdimii | Abdim's Stork | 2007/2/10 | 2 | 0 | -3.1617522 | 35.5876697 | <a href="https://www.inaturalist.org/observations/142357883">https://www.inaturalist.org/observations/142357883</a> |
| 62 | Ciconia abdimii | Abdim's Stork | 2019/2/26 | 3 | 0 | -3.1606200 | 35.5693250 | <a href="https://www.inaturalist.org/observations/21107545">https://www.inaturalist.org/observations/21107545</a>   |
| 63 | Ciconia abdimii | Abdim's Stork | 2019/2/26 | 2 | 0 | -3.1579050 | 35.5771650 | <a href="https://www.inaturalist.org/observations/21107539">https://www.inaturalist.org/observations/21107539</a>   |
| 64 | Ciconia abdimii | Abdim's Stork | 2022/1/15 | 2 | 0 | -3.1575388 | 35.5287467 | <a href="https://www.inaturalist.org/observations/105567810">https://www.inaturalist.org/observations/105567810</a> |
| 65 | Ciconia abdimii | Abdim's Stork | 2020/2/14 | 2 | 0 | -3.1558038 | 35.5956790 | <a href="https://www.inaturalist.org/observations/134512520">https://www.inaturalist.org/observations/134512520</a> |
| 66 | Ciconia abdimii | Abdim's Stork | 2019/2/26 | 3 | 0 | -3.1509750 | 35.5027650 | <a href="https://www.inaturalist.org/observations/21106422">https://www.inaturalist.org/observations/21106422</a>   |
| 67 | Ciconia abdimii | Abdim's Stork | 2022/1/15 | 2 | 0 | -3.1504467 | 35.5981033 | <a href="https://www.inaturalist.org/observations/105568814">https://www.inaturalist.org/observations/105568814</a> |
| 68 | Ciconia abdimii | Abdim's Stork | 2019/2/26 | 3 | 0 | -3.1499100 | 35.5824733 | <a href="https://www.inaturalist.org/observations/21107530">https://www.inaturalist.org/observations/21107530</a>   |
| 69 | Ciconia abdimii | Abdim's Stork | 2014/3/9  | 3 | 0 | -3.1483140 | 35.5400840 | <a href="https://www.inaturalist.org/observations/5380622">https://www.inaturalist.org/observations/5380622</a>     |
| 70 | Ciconia abdimii | Abdim's Stork | 2016/2/6  | 5 | 0 | -3.1397230 | 35.5879250 | <a href="http://www.inaturalist.org/observations/2785855">http://www.inaturalist.org/observations/2785855</a>       |
| 71 | Ciconia abdimii | Abdim's Stork | 2013/3/6  | 1 | 0 | -3.1367088 | 35.6052753 | <a href="https://www.inaturalist.org/observations/98872344">https://www.inaturalist.org/observations/98872344</a>   |
| 72 | Ciconia abdimii | Abdim's Stork | 2019/2/23 | 4 | 0 | -3.1274995 | 35.5838264 | <a href="https://www.inaturalist.org/observations/142916130">https://www.inaturalist.org/observations/142916130</a> |
| 73 | Ciconia abdimii | Abdim's Stork | 2019/3/4  | 3 | 0 | -3.1244554 | 36.6970852 | <a href="https://www.inaturalist.org/observations/106722012">https://www.inaturalist.org/observations/106722012</a> |
| 74 | Ciconia abdimii | Abdim's Stork | 2013/1/8  | 4 | 0 | -3.1219672 | 35.5864398 | <a href="https://www.inaturalist.org/observations/142611991">https://www.inaturalist.org/observations/142611991</a> |

|    |                 |               |            |   |   |            |            |                                                                                                                     |
|----|-----------------|---------------|------------|---|---|------------|------------|---------------------------------------------------------------------------------------------------------------------|
| 75 | Ciconia abdimii | Abdim's Stork | 2016/1/10  | 5 | 0 | -3.0199429 | 34.9969000 | <a href="https://www.inaturalist.org/observations/9867211">https://www.inaturalist.org/observations/9867211</a>     |
| 76 | Ciconia abdimii | Abdim's Stork | 2020/2/12  | 2 | 0 | -2.9908754 | 34.9937318 | <a href="https://www.inaturalist.org/observations/134466262">https://www.inaturalist.org/observations/134466262</a> |
| 77 | Ciconia abdimii | Abdim's Stork | 2020/2/24  | 3 | 0 | -2.9890143 | 35.3534836 | <a href="https://www.inaturalist.org/observations/70439839">https://www.inaturalist.org/observations/70439839</a>   |
| 78 | Ciconia abdimii | Abdim's Stork | 2018/1/21  | 2 | 0 | -2.9388654 | 36.3136140 | <a href="https://www.inaturalist.org/observations/81234989">https://www.inaturalist.org/observations/81234989</a>   |
| 79 | Ciconia abdimii | Abdim's Stork | 2020/2/10  | 2 | 0 | -2.8580960 | 34.9990756 | <a href="https://www.inaturalist.org/observations/108501996">https://www.inaturalist.org/observations/108501996</a> |
| 80 | Ciconia abdimii | Abdim's Stork | 2020/2/7   | 2 | 0 | -2.8459512 | 35.0239097 | <a href="https://www.inaturalist.org/observations/40899867">https://www.inaturalist.org/observations/40899867</a>   |
| 81 | Ciconia abdimii | Abdim's Stork | 2020/12/27 | 3 | 0 | -2.6943221 | 38.1673059 | <a href="https://www.inaturalist.org/observations/67448052">https://www.inaturalist.org/observations/67448052</a>   |
| 82 | Ciconia abdimii | Abdim's Stork | 2010/12/16 | 5 | 0 | -2.6532816 | 37.2607672 | <a href="https://www.inaturalist.org/observations/34852473">https://www.inaturalist.org/observations/34852473</a>   |
| 83 | Ciconia abdimii | Abdim's Stork | 2007/1/12  | 2 | 0 | -2.6526870 | 37.2605650 | <a href="https://www.inaturalist.org/observations/49132767">https://www.inaturalist.org/observations/49132767</a>   |
| 84 | Ciconia abdimii | Abdim's Stork | 2018/4/7   | 2 | 0 | -2.4927410 | 34.8287696 | <a href="https://www.inaturalist.org/observations/107803453">https://www.inaturalist.org/observations/107803453</a> |
| 85 | Ciconia abdimii | Abdim's Stork | 2001/2/14  | 3 | 0 | -2.4361300 | 34.8205900 | <a href="https://www.inaturalist.org/observations/139838633">https://www.inaturalist.org/observations/139838633</a> |
| 86 | Ciconia abdimii | Abdim's Stork | 2019/12/25 | 2 | 0 | -2.3333333 | 34.8333333 | <a href="https://www.inaturalist.org/observations/39701317">https://www.inaturalist.org/observations/39701317</a>   |
| 87 | Ciconia abdimii | Abdim's Stork | 2019/12/25 | 2 | 0 | -2.3284604 | 34.8266602 | <a href="https://www.inaturalist.org/observations/39701318">https://www.inaturalist.org/observations/39701318</a>   |
| 88 | Ciconia abdimii | Abdim's Stork | 2019/12/25 | 2 | 0 | -2.3284604 | 34.8266602 | <a href="https://www.inaturalist.org/observations/39701319">https://www.inaturalist.org/observations/39701319</a>   |
| 89 | Ciconia abdimii | Abdim's Stork | 2019/12/25 | 2 | 0 | -2.3284604 | 34.8266602 | <a href="https://www.inaturalist.org/observations/39701320">https://www.inaturalist.org/observations/39701320</a>   |
| 90 | Ciconia abdimii | Abdim's Stork | 2019/12/25 | 2 | 0 | -2.3284604 | 34.8266602 | <a href="https://www.inaturalist.org/observations/39701321">https://www.inaturalist.org/observations/39701321</a>   |
| 91 | Ciconia abdimii | Abdim's Stork | 2021/12/31 | 1 | 0 | -2.2495147 | 38.3376639 | <a href="https://www.inaturalist.org/observations/104638388">https://www.inaturalist.org/observations/104638388</a> |
| 92 | Ciconia abdimii | Abdim's Stork | 2011/11/22 | 3 | 0 | -1.8936000 | 34.6856510 | <a href="https://www.inaturalist.org/observations/142380171">https://www.inaturalist.org/observations/142380171</a> |
| 93 | Ciconia abdimii | Abdim's Stork | 2022/11/19 | 4 | 0 | -1.6017180 | 34.8404410 | <a href="https://www.inaturalist.org/observations/144456033">https://www.inaturalist.org/observations/144456033</a> |
| 94 | Ciconia abdimii | Abdim's Stork | 2019/5/22  | 2 | 0 | -1.6016957 | 35.2140610 | <a href="https://www.inaturalist.org/observations/25572349">https://www.inaturalist.org/observations/25572349</a>   |
| 95 | Ciconia abdimii | Abdim's Stork | 2022/3/26  | 4 | 0 | -1.5269045 | 35.2034632 | <a href="https://www.inaturalist.org/observations/110847400">https://www.inaturalist.org/observations/110847400</a> |
| 96 | Ciconia abdimii | Abdim's Stork | 2016/11/24 | 3 | 0 | -1.4239980 | 35.0747570 | <a href="https://www.inaturalist.org/observations/8329858">https://www.inaturalist.org/observations/8329858</a>     |
| 97 | Ciconia abdimii | Abdim's Stork | 2022/3/21  | 2 | 0 | -1.1349610 | 35.2635520 | <a href="https://www.inaturalist.org/observations/109622630">https://www.inaturalist.org/observations/109622630</a> |
| 98 | Ciconia abdimii | Abdim's Stork | 2022/12/22 | 2 | 0 | -1.0726778 | 35.2282917 | <a href="https://www.inaturalist.org/observations/144834451">https://www.inaturalist.org/observations/144834451</a> |
| 99 | Ciconia abdimii | Abdim's Stork | 2022/12/22 | 2 | 0 | -1.0723972 | 35.2273550 | <a href="https://www.inaturalist.org/observations/144835669">https://www.inaturalist.org/observations/144835669</a> |

|     |                 |               |            |   |   |            |            |                                                                                                                     |
|-----|-----------------|---------------|------------|---|---|------------|------------|---------------------------------------------------------------------------------------------------------------------|
| 100 | Ciconia abdimii | Abdim's Stork | 2022/12/22 | 2 | 0 | -1.0718917 | 35.2276533 | <a href="https://www.inaturalist.org/observations/144841903">https://www.inaturalist.org/observations/144841903</a> |
| 101 | Ciconia abdimii | Abdim's Stork | 2022/12/22 | 3 | 0 | -1.0718361 | 35.2276642 | <a href="https://www.inaturalist.org/observations/144837836">https://www.inaturalist.org/observations/144837836</a> |
| 102 | Ciconia abdimii | Abdim's Stork | 2022/12/22 | 3 | 0 | -1.0694842 | 35.2272571 | <a href="https://www.inaturalist.org/observations/144841980">https://www.inaturalist.org/observations/144841980</a> |
| 103 | Ciconia abdimii | Abdim's Stork | 2022/11/3  | 2 | 0 | -0.6350750 | 30.5296950 | <a href="https://www.inaturalist.org/observations/143788011">https://www.inaturalist.org/observations/143788011</a> |
| 104 | Ciconia abdimii | Abdim's Stork | 2022/11/3  | 2 | 0 | -0.6350750 | 30.5296950 | <a href="https://www.inaturalist.org/observations/143788012">https://www.inaturalist.org/observations/143788012</a> |
| 105 | Ciconia abdimii | Abdim's Stork | 2022/11/3  | 1 | 0 | -0.6349883 | 30.5300833 | <a href="https://www.inaturalist.org/observations/143788015">https://www.inaturalist.org/observations/143788015</a> |
| 106 | Ciconia abdimii | Abdim's Stork | 2022/11/3  | 2 | 0 | -0.6349883 | 30.5300833 | <a href="https://www.inaturalist.org/observations/143788018">https://www.inaturalist.org/observations/143788018</a> |
| 107 | Ciconia abdimii | Abdim's Stork | 2022/4/18  | 3 | 0 | -0.4227050 | 36.1295612 | <a href="https://www.inaturalist.org/observations/111896988">https://www.inaturalist.org/observations/111896988</a> |
| 108 | Ciconia abdimii | Abdim's Stork | 2017/5/28  | 3 | 0 | -0.4148460 | 36.1192335 | <a href="https://www.inaturalist.org/observations/106960496">https://www.inaturalist.org/observations/106960496</a> |
| 109 | Ciconia abdimii | Abdim's Stork | 2022/10/28 | 3 | 0 | -0.2001500 | 30.0880250 | <a href="https://www.inaturalist.org/observations/143256643">https://www.inaturalist.org/observations/143256643</a> |
| 110 | Ciconia abdimii | Abdim's Stork | 2022/11/22 | 2 | 0 | -0.1337649 | 29.8806415 | <a href="https://www.inaturalist.org/observations/145240154">https://www.inaturalist.org/observations/145240154</a> |
| 111 | Ciconia abdimii | Abdim's Stork | 2020/2/23  | 3 | 0 | -0.1273833 | 34.7461467 | <a href="https://www.inaturalist.org/observations/39100607">https://www.inaturalist.org/observations/39100607</a>   |
| 112 | Ciconia abdimii | Abdim's Stork | 2022/11/8  | 2 | 0 | 0.0533796  | 32.4757864 | <a href="https://www.inaturalist.org/observations/141688777">https://www.inaturalist.org/observations/141688777</a> |
| 113 | Ciconia abdimii | Abdim's Stork | 2021/2/28  | 1 | 0 | 0.1014194  | 37.3818361 | <a href="https://www.inaturalist.org/observations/104511897">https://www.inaturalist.org/observations/104511897</a> |
| 114 | Ciconia abdimii | Abdim's Stork | 2017/3/4   | 5 | 0 | 0.1101470  | 37.4341180 | <a href="https://www.inaturalist.org/observations/34314755">https://www.inaturalist.org/observations/34314755</a>   |
| 115 | Ciconia abdimii | Abdim's Stork | 2015/12/4  | 5 | 0 | 0.1345660  | 37.0330350 | <a href="http://www.inaturalist.org/observations/2449929">http://www.inaturalist.org/observations/2449929</a>       |
| 116 | Ciconia abdimii | Abdim's Stork | 2020/11/18 | 1 | 0 | 0.2194528  | 32.5506839 | <a href="https://www.inaturalist.org/observations/65333669">https://www.inaturalist.org/observations/65333669</a>   |
| 117 | Ciconia abdimii | Abdim's Stork | 2015/4/13  | 4 | 0 | 0.6320551  | 36.0567202 | <a href="https://www.inaturalist.org/observations/36344307">https://www.inaturalist.org/observations/36344307</a>   |
| 118 | Ciconia abdimii | Abdim's Stork | 2008/10/27 | 2 | 0 | 0.8968830  | 30.3666099 | <a href="https://www.inaturalist.org/observations/6480519">https://www.inaturalist.org/observations/6480519</a>     |
| 119 | Ciconia abdimii | Abdim's Stork | 2015/3/22  | 2 | 0 | 1.4481100  | 32.0790480 | <a href="http://www.inaturalist.org/observations/1422394">http://www.inaturalist.org/observations/1422394</a>       |
| 120 | Ciconia abdimii | Abdim's Stork | 2019/3/11  | 2 | 0 | 1.5706617  | 34.6096954 | <a href="https://www.inaturalist.org/observations/21777664">https://www.inaturalist.org/observations/21777664</a>   |
| 121 | Ciconia abdimii | Abdim's Stork | 2019/3/16  | 1 | 0 | 2.1118125  | 31.7204817 | <a href="https://www.inaturalist.org/observations/37478193">https://www.inaturalist.org/observations/37478193</a>   |
| 122 | Ciconia abdimii | Abdim's Stork | 2010/2/6   | 5 | 0 | 2.1457680  | 31.8069054 | <a href="https://www.inaturalist.org/observations/35997283">https://www.inaturalist.org/observations/35997283</a>   |
| 123 | Ciconia abdimii | Abdim's Stork | 2016/2/4   | 1 | 0 | 2.1457680  | 31.8069054 | <a href="https://www.inaturalist.org/observations/48400861">https://www.inaturalist.org/observations/48400861</a>   |
| 124 | Ciconia abdimii | Abdim's Stork | 2015/3/14  | 3 | 0 | 2.1802592  | 31.8246382 | <a href="https://www.inaturalist.org/observations/44695164">https://www.inaturalist.org/observations/44695164</a>   |

|     |                 |               |            |   |   |           |            |                                                                                                                     |
|-----|-----------------|---------------|------------|---|---|-----------|------------|---------------------------------------------------------------------------------------------------------------------|
| 125 | Ciconia abdimii | Abdim's Stork | 2015/3/14  | 3 | 0 | 2.1802592 | 31.8246382 | <a href="https://www.inaturalist.org/observations/44695165">https://www.inaturalist.org/observations/44695165</a>   |
| 126 | Ciconia abdimii | Abdim's Stork | 2014/3/4   | 3 | 0 | 2.2566618 | 31.6464412 | <a href="https://www.inaturalist.org/observations/127478710">https://www.inaturalist.org/observations/127478710</a> |
| 127 | Ciconia abdimii | Abdim's Stork | 2014/3/4   | 3 | 0 | 2.2566618 | 31.6464412 | <a href="https://www.inaturalist.org/observations/127479220">https://www.inaturalist.org/observations/127479220</a> |
| 128 | Ciconia abdimii | Abdim's Stork | 2014/3/3   | 3 | 0 | 2.2568501 | 31.6472367 | <a href="https://www.inaturalist.org/observations/127476648">https://www.inaturalist.org/observations/127476648</a> |
| 129 | Ciconia abdimii | Abdim's Stork | 2017/2/6   | 3 | 0 | 2.2646565 | 31.4594793 | <a href="https://www.inaturalist.org/observations/68337424">https://www.inaturalist.org/observations/68337424</a>   |
| 130 | Ciconia abdimii | Abdim's Stork | 2019/3/17  | 2 | 0 | 2.2722716 | 31.6290075 | <a href="https://www.inaturalist.org/observations/37478194">https://www.inaturalist.org/observations/37478194</a>   |
| 131 | Ciconia abdimii | Abdim's Stork | 2014/2/6   | 1 | 0 | 2.2749810 | 31.6733120 | <a href="https://www.inaturalist.org/observations/38220490">https://www.inaturalist.org/observations/38220490</a>   |
| 132 | Ciconia abdimii | Abdim's Stork | 2016/2/17  | 3 | 0 | 2.2829800 | 31.5649210 | <a href="https://www.inaturalist.org/observations/34527953">https://www.inaturalist.org/observations/34527953</a>   |
| 133 | Ciconia abdimii | Abdim's Stork | 2015/3/23  | 4 | 0 | 2.3152690 | 31.4326660 | <a href="http://www.inaturalist.org/observations/1434489">http://www.inaturalist.org/observations/1434489</a>       |
| 134 | Ciconia abdimii | Abdim's Stork | 2016/2/17  | 4 | 0 | 2.3245830 | 31.4758580 | <a href="https://www.inaturalist.org/observations/34530495">https://www.inaturalist.org/observations/34530495</a>   |
| 135 | Ciconia abdimii | Abdim's Stork | 2020/3/21  | 1 | 0 | 2.3623605 | 31.6486481 | <a href="https://www.inaturalist.org/observations/40363618">https://www.inaturalist.org/observations/40363618</a>   |
| 136 | Ciconia abdimii | Abdim's Stork | 2015/12/10 | 4 | 0 | 2.3837630 | 35.6478190 | <a href="http://www.inaturalist.org/observations/2896370">http://www.inaturalist.org/observations/2896370</a>       |
| 137 | Ciconia abdimii | Abdim's Stork | 2016/2/13  | 5 | 0 | 2.3940972 | 31.5077639 | <a href="http://www.inaturalist.org/observations/2829227">http://www.inaturalist.org/observations/2829227</a>       |
| 138 | Ciconia abdimii | Abdim's Stork | 2020/3/9   | 3 | 0 | 2.3949738 | 31.5020599 | <a href="https://www.inaturalist.org/observations/70506257">https://www.inaturalist.org/observations/70506257</a>   |
| 139 | Ciconia abdimii | Abdim's Stork | 2017/2/4   | 4 | 0 | 2.3968084 | 31.5524408 | <a href="https://www.inaturalist.org/observations/107322093">https://www.inaturalist.org/observations/107322093</a> |
| 140 | Ciconia abdimii | Abdim's Stork | 2014/3/4   | 3 | 0 | 2.4797333 | 31.5433517 | <a href="https://www.inaturalist.org/observations/127479333">https://www.inaturalist.org/observations/127479333</a> |
| 141 | Ciconia abdimii | Abdim's Stork | 2014/3/4   | 3 | 0 | 2.4797333 | 31.5433517 | <a href="https://www.inaturalist.org/observations/127479355">https://www.inaturalist.org/observations/127479355</a> |
| 142 | Ciconia abdimii | Abdim's Stork | 2020/3/21  | 1 | 0 | 3.4125083 | 33.4764533 | <a href="https://www.inaturalist.org/observations/40348157">https://www.inaturalist.org/observations/40348157</a>   |
| 143 | Ciconia abdimii | Abdim's Stork | 2020/3/21  | 1 | 0 | 3.4549972 | 33.5148934 | <a href="https://www.inaturalist.org/observations/40347622">https://www.inaturalist.org/observations/40347622</a>   |
| 144 | Ciconia abdimii | Abdim's Stork | 2020/3/20  | 1 | 0 | 3.7154749 | 33.6734490 | <a href="https://www.inaturalist.org/observations/40279251">https://www.inaturalist.org/observations/40279251</a>   |
| 145 | Ciconia abdimii | Abdim's Stork | 2022/11/14 | 3 | 0 | 3.7357391 | 33.6978290 | <a href="https://www.inaturalist.org/observations/144324472">https://www.inaturalist.org/observations/144324472</a> |
| 146 | Ciconia abdimii | Abdim's Stork | 2019/3/23  | 1 | 0 | 5.9122114 | 37.5000231 | <a href="https://www.inaturalist.org/observations/47403085">https://www.inaturalist.org/observations/47403085</a>   |
| 147 | Ciconia abdimii | Abdim's Stork | 2015/4/26  | 6 | 0 | 6.0362383 | 37.5898239 | <a href="http://www.inaturalist.org/observations/2458659">http://www.inaturalist.org/observations/2458659</a>       |
| 148 | Ciconia abdimii | Abdim's Stork | 2022/4/29  | 3 | 0 | 6.2936819 | 37.7659368 | <a href="https://www.inaturalist.org/observations/113535617">https://www.inaturalist.org/observations/113535617</a> |
| 149 | Ciconia abdimii | Abdim's Stork | 2011/1/13  | 6 | 0 | 6.7442590 | 39.6784970 | <a href="https://www.inaturalist.org/observations/9777133">https://www.inaturalist.org/observations/9777133</a>     |

|     |                        |               |           |   |   |            |            |                                                                                                                     |
|-----|------------------------|---------------|-----------|---|---|------------|------------|---------------------------------------------------------------------------------------------------------------------|
| 150 | <i>Ciconia abdimii</i> | Abdim's Stork | 2014/1/29 | 1 | 0 | 6.9902290  | 38.4964730 | <a href="https://www.inaturalist.org/observations/37371675">https://www.inaturalist.org/observations/37371675</a>   |
| 151 | <i>Ciconia abdimii</i> | Abdim's Stork | 2020/3/6  | 2 | 0 | 7.0068049  | 39.0592387 | <a href="https://www.inaturalist.org/observations/82396450">https://www.inaturalist.org/observations/82396450</a>   |
| 152 | <i>Ciconia abdimii</i> | Abdim's Stork | 2022/4/5  | 2 | 0 | 7.0565319  | 38.4962654 | <a href="https://www.inaturalist.org/observations/110477663">https://www.inaturalist.org/observations/110477663</a> |
| 153 | <i>Ciconia abdimii</i> | Abdim's Stork | 2019/3/18 | 2 | 0 | 8.0189136  | 38.7232903 | <a href="https://www.inaturalist.org/observations/21671383">https://www.inaturalist.org/observations/21671383</a>   |
| 154 | <i>Ciconia abdimii</i> | Abdim's Stork | 2014/4/20 | 1 | 0 | 8.2302215  | 38.8022698 | <a href="https://www.inaturalist.org/observations/58449643">https://www.inaturalist.org/observations/58449643</a>   |
| 155 | <i>Ciconia abdimii</i> | Abdim's Stork | 2014/1/23 | 2 | 0 | 8.9066289  | 39.9815855 | <a href="https://www.inaturalist.org/observations/141702189">https://www.inaturalist.org/observations/141702189</a> |
| 156 | <i>Ciconia abdimii</i> | Abdim's Stork | 2014/1/18 | 1 | 0 | 9.3320580  | 40.2934520 | <a href="https://www.inaturalist.org/observations/37268073">https://www.inaturalist.org/observations/37268073</a>   |
| 157 | <i>Ciconia abdimii</i> | Abdim's Stork | 2021/5/2  | 2 | 0 | 10.6854238 | 34.4361550 | <a href="https://www.inaturalist.org/observations/76543807">https://www.inaturalist.org/observations/76543807</a>   |
| 158 | <i>Ciconia abdimii</i> | Abdim's Stork | 2020/2/17 | 3 | 0 | 11.4901771 | 37.5833883 | <a href="https://www.inaturalist.org/observations/39378411">https://www.inaturalist.org/observations/39378411</a>   |
| 159 | <i>Ciconia abdimii</i> | Abdim's Stork | 2021/6/28 | 1 | 0 | 11.5742086 | 37.3613533 | <a href="https://www.inaturalist.org/observations/103813860">https://www.inaturalist.org/observations/103813860</a> |
| 160 | <i>Ciconia abdimii</i> | Abdim's Stork | 2022/3/15 | 3 | 0 | 11.5742086 | 37.3613533 | <a href="https://www.inaturalist.org/observations/108644187">https://www.inaturalist.org/observations/108644187</a> |
| 161 | <i>Ciconia abdimii</i> | Abdim's Stork | 2022/7/10 | 3 | 0 | 11.5742086 | 37.3613533 | <a href="https://www.inaturalist.org/observations/125585867">https://www.inaturalist.org/observations/125585867</a> |
| 162 | <i>Ciconia abdimii</i> | Abdim's Stork | 2019/12/3 | 2 | 0 | 12.9605384 | 36.1701223 | <a href="https://www.inaturalist.org/observations/98508580">https://www.inaturalist.org/observations/98508580</a>   |

| No | scientific name                | common name       | date       | NIA | NID | latitude   | longitude  | url                                                                                                                 |
|----|--------------------------------|-------------------|------------|-----|-----|------------|------------|---------------------------------------------------------------------------------------------------------------------|
| 1  | <i>Plectropterus gambensis</i> | Spur-winged Goose | 2004/11/13 | 1   | 0   | -7.7956150 | 36.6941690 | <a href="https://www.inaturalist.org/observations/58236463">https://www.inaturalist.org/observations/58236463</a>   |
| 2  | <i>Plectropterus gambensis</i> | Spur-winged Goose | 2017/10/21 | 5   | 0   | -7.7661700 | 38.2326867 | <a href="https://www.inaturalist.org/observations/8663737">https://www.inaturalist.org/observations/8663737</a>     |
| 3  | <i>Plectropterus gambensis</i> | Spur-winged Goose | 2017/7/25  | 4   | 0   | -7.7659100 | 38.2324950 | <a href="https://www.inaturalist.org/observations/7248443">https://www.inaturalist.org/observations/7248443</a>     |
| 4  | <i>Plectropterus gambensis</i> | Spur-winged Goose | 2012/12/10 | 4   | 0   | -7.3203731 | 34.9300932 | <a href="https://www.inaturalist.org/observations/24376717">https://www.inaturalist.org/observations/24376717</a>   |
| 5  | <i>Plectropterus gambensis</i> | Spur-winged Goose | 2021/9/28  | 2   | 0   | -6.8981556 | 31.1865139 | <a href="https://www.inaturalist.org/observations/97643246">https://www.inaturalist.org/observations/97643246</a>   |
| 6  | <i>Plectropterus gambensis</i> | Spur-winged Goose | 2011/11/7  | 1   | 0   | -6.8980932 | 31.1658998 | <a href="https://www.inaturalist.org/observations/97748593">https://www.inaturalist.org/observations/97748593</a>   |
| 7  | <i>Plectropterus gambensis</i> | Spur-winged Goose | 2011/11/9  | 1   | 0   | -6.8257239 | 31.1279349 | <a href="https://www.inaturalist.org/observations/67104251">https://www.inaturalist.org/observations/67104251</a>   |
| 8  | <i>Plectropterus gambensis</i> | Spur-winged Goose | 1980/1/1   | 1   | 0   | -5.7661159 | 31.9102672 | <a href="https://www.inaturalist.org/observations/70935185">https://www.inaturalist.org/observations/70935185</a>   |
| 9  | <i>Plectropterus gambensis</i> | Spur-winged Goose | 2021/2/15  | 2   | 0   | -5.0944000 | 30.8227333 | <a href="https://www.inaturalist.org/observations/70273378">https://www.inaturalist.org/observations/70273378</a>   |
| 10 | <i>Plectropterus gambensis</i> | Spur-winged Goose | 2021/2/17  | 1   | 0   | -5.0759550 | 30.8899356 | <a href="https://www.inaturalist.org/observations/70984438">https://www.inaturalist.org/observations/70984438</a>   |
| 11 | <i>Plectropterus gambensis</i> | Spur-winged Goose | 2021/2/17  | 1   | 0   | -5.0758721 | 30.8899797 | <a href="https://www.inaturalist.org/observations/70984436">https://www.inaturalist.org/observations/70984436</a>   |
| 12 | <i>Plectropterus gambensis</i> | Spur-winged Goose | 2021/2/15  | 1   | 0   | -5.0541819 | 30.9550488 | <a href="https://www.inaturalist.org/observations/70185125">https://www.inaturalist.org/observations/70185125</a>   |
| 13 | <i>Plectropterus gambensis</i> | Spur-winged Goose | 2021/2/16  | 1   | 0   | -5.0425588 | 30.9298460 | <a href="https://www.inaturalist.org/observations/70432823">https://www.inaturalist.org/observations/70432823</a>   |
| 14 | <i>Plectropterus gambensis</i> | Spur-winged Goose | 2021/2/19  | 1   | 0   | -5.0068566 | 31.4153008 | <a href="https://www.inaturalist.org/observations/70593975">https://www.inaturalist.org/observations/70593975</a>   |
| 15 | <i>Plectropterus gambensis</i> | Spur-winged Goose | 2017/7/18  | 4   | 0   | -4.1656368 | 38.1665039 | <a href="https://www.inaturalist.org/observations/40803898">https://www.inaturalist.org/observations/40803898</a>   |
| 16 | <i>Plectropterus gambensis</i> | Spur-winged Goose | 2022/7/19  | 1   | 0   | -4.0880050 | 36.1368783 | <a href="https://www.inaturalist.org/observations/128476157">https://www.inaturalist.org/observations/128476157</a> |
| 17 | <i>Plectropterus gambensis</i> | Spur-winged Goose | 2017/9/23  | 4   | 0   | -4.0677100 | 36.1203833 | <a href="https://www.inaturalist.org/observations/31317591">https://www.inaturalist.org/observations/31317591</a>   |
| 18 | <i>Plectropterus gambensis</i> | Spur-winged Goose | 2007/10/19 | 3   | 0   | -4.0523092 | 36.1216489 | <a href="https://www.inaturalist.org/observations/19703510">https://www.inaturalist.org/observations/19703510</a>   |
| 19 | <i>Plectropterus gambensis</i> | Spur-winged Goose | 2018/8/31  | 4   | 0   | -4.0503233 | 36.1207333 | <a href="https://www.inaturalist.org/observations/20145305">https://www.inaturalist.org/observations/20145305</a>   |
| 20 | <i>Plectropterus gambensis</i> | Spur-winged Goose | 2017/2/2   | 3   | 0   | -4.0498910 | 36.1221880 | <a href="https://www.inaturalist.org/observations/27028604">https://www.inaturalist.org/observations/27028604</a>   |
| 21 | <i>Plectropterus gambensis</i> | Spur-winged Goose | 2018/10/19 | 3   | 0   | -4.0234467 | 36.1211267 | <a href="https://www.inaturalist.org/observations/18013474">https://www.inaturalist.org/observations/18013474</a>   |
| 22 | <i>Plectropterus gambensis</i> | Spur-winged Goose | 2016/9/4   | 5   | 0   | -4.0218281 | 36.1218998 | <a href="https://www.inaturalist.org/observations/39995383">https://www.inaturalist.org/observations/39995383</a>   |

|    |                         |                   |            |   |   |            |            |                                                                                                                     |
|----|-------------------------|-------------------|------------|---|---|------------|------------|---------------------------------------------------------------------------------------------------------------------|
| 23 | Plectropterus gambensis | Spur-winged Goose | 2021/10/30 | 2 | 0 | -4.0056666 | 35.9787556 | <a href="https://www.inaturalist.org/observations/101641484">https://www.inaturalist.org/observations/101641484</a> |
| 24 | Plectropterus gambensis | Spur-winged Goose | 2022/11/13 | 1 | 0 | -4.0056291 | 35.9787341 | <a href="https://www.inaturalist.org/observations/144050197">https://www.inaturalist.org/observations/144050197</a> |
| 25 | Plectropterus gambensis | Spur-winged Goose | 2021/9/12  | 1 | 0 | -3.9892191 | 37.7672892 | <a href="https://www.inaturalist.org/observations/95052405">https://www.inaturalist.org/observations/95052405</a>   |
| 26 | Plectropterus gambensis | Spur-winged Goose | 2022/12/16 | 1 | 0 | -3.9831380 | 38.0431108 | <a href="https://www.inaturalist.org/observations/145053691">https://www.inaturalist.org/observations/145053691</a> |
| 27 | Plectropterus gambensis | Spur-winged Goose | 2015/10/4  | 1 | 0 | -3.9506743 | 35.8661255 | <a href="https://www.inaturalist.org/observations/75087459">https://www.inaturalist.org/observations/75087459</a>   |
| 28 | Plectropterus gambensis | Spur-winged Goose | 2019/1/18  | 3 | 0 | -3.9057791 | 37.8629110 | <a href="https://www.inaturalist.org/observations/49699285">https://www.inaturalist.org/observations/49699285</a>   |
| 29 | Plectropterus gambensis | Spur-winged Goose | 2007/10/19 | 3 | 0 | -3.8293150 | 35.9815980 | <a href="http://www.inaturalist.org/observations/18363">http://www.inaturalist.org/observations/18363</a>           |
| 30 | Plectropterus gambensis | Spur-winged Goose | 2019/10/20 | 4 | 0 | -3.7744500 | 35.9734000 | <a href="https://www.inaturalist.org/observations/35938994">https://www.inaturalist.org/observations/35938994</a>   |
| 31 | Plectropterus gambensis | Spur-winged Goose | 2021/12/5  | 2 | 0 | -3.7711283 | 35.9704767 | <a href="https://www.inaturalist.org/observations/104806115">https://www.inaturalist.org/observations/104806115</a> |
| 32 | Plectropterus gambensis | Spur-winged Goose | 2022/1/25  | 1 | 0 | -3.7694230 | 35.9687790 | <a href="https://www.inaturalist.org/observations/106903145">https://www.inaturalist.org/observations/106903145</a> |
| 33 | Plectropterus gambensis | Spur-winged Goose | 2019/10/26 | 2 | 0 | -3.6993190 | 36.9025825 | <a href="https://www.inaturalist.org/observations/145176203">https://www.inaturalist.org/observations/145176203</a> |
| 34 | Plectropterus gambensis | Spur-winged Goose | 2022/4/16  | 1 | 0 | -3.6235004 | 37.7829847 | <a href="https://www.inaturalist.org/observations/112059344">https://www.inaturalist.org/observations/112059344</a> |
| 35 | Plectropterus gambensis | Spur-winged Goose | 2019/9/11  | 3 | 0 | -3.6190593 | 35.8061779 | <a href="https://www.inaturalist.org/observations/39509438">https://www.inaturalist.org/observations/39509438</a>   |
| 36 | Plectropterus gambensis | Spur-winged Goose | 2019/11/18 | 3 | 0 | -3.6147017 | 38.2255450 | <a href="https://www.inaturalist.org/observations/37411610">https://www.inaturalist.org/observations/37411610</a>   |
| 37 | Plectropterus gambensis | Spur-winged Goose | 2019/11/17 | 2 | 0 | -3.5308333 | 38.1697389 | <a href="https://www.inaturalist.org/observations/37411587">https://www.inaturalist.org/observations/37411587</a>   |
| 38 | Plectropterus gambensis | Spur-winged Goose | 2019/11/17 | 3 | 0 | -3.5308278 | 38.1697472 | <a href="https://www.inaturalist.org/observations/37411589">https://www.inaturalist.org/observations/37411589</a>   |
| 39 | Plectropterus gambensis | Spur-winged Goose | 2022/4/10  | 1 | 0 | -3.5210218 | 38.2621545 | <a href="https://www.inaturalist.org/observations/112854409">https://www.inaturalist.org/observations/112854409</a> |
| 40 | Plectropterus gambensis | Spur-winged Goose | 2022/4/10  | 1 | 0 | -3.5199520 | 38.2431860 | <a href="https://www.inaturalist.org/observations/112854384">https://www.inaturalist.org/observations/112854384</a> |
| 41 | Plectropterus gambensis | Spur-winged Goose | 2019/12/23 | 3 | 0 | -3.4497456 | 35.8116243 | <a href="https://www.inaturalist.org/observations/38713450">https://www.inaturalist.org/observations/38713450</a>   |
| 42 | Plectropterus gambensis | Spur-winged Goose | 2019/8/17  | 5 | 0 | -3.4317957 | 35.8001111 | <a href="https://www.inaturalist.org/observations/33436722">https://www.inaturalist.org/observations/33436722</a>   |
| 43 | Plectropterus gambensis | Spur-winged Goose | 2010/10/27 | 2 | 0 | -3.4156303 | 38.6505499 | <a href="https://www.inaturalist.org/observations/132034600">https://www.inaturalist.org/observations/132034600</a> |
| 44 | Plectropterus gambensis | Spur-winged Goose | 2018/1/24  | 2 | 0 | -3.4125589 | 35.8383455 | <a href="https://www.inaturalist.org/observations/81896260">https://www.inaturalist.org/observations/81896260</a>   |
| 45 | Plectropterus gambensis | Spur-winged Goose | 2011/3/6   | 2 | 0 | -3.4117411 | 35.8364167 | <a href="https://www.inaturalist.org/observations/106711631">https://www.inaturalist.org/observations/106711631</a> |

|    |                         |                   |            |   |   |            |            |                                                                                                                     |
|----|-------------------------|-------------------|------------|---|---|------------|------------|---------------------------------------------------------------------------------------------------------------------|
| 46 | Plectropterus gambensis | Spur-winged Goose | 2022/1/10  | 2 | 0 | -3.4085300 | 35.8289800 | <a href="https://www.inaturalist.org/observations/104719054">https://www.inaturalist.org/observations/104719054</a> |
| 47 | Plectropterus gambensis | Spur-winged Goose | 2015/5/14  | 2 | 0 | -3.3588039 | 36.8372193 | <a href="https://www.inaturalist.org/observations/69748671">https://www.inaturalist.org/observations/69748671</a>   |
| 48 | Plectropterus gambensis | Spur-winged Goose | 2020/6/14  | 1 | 0 | -3.3436925 | 36.9596761 | <a href="https://www.inaturalist.org/observations/104649537">https://www.inaturalist.org/observations/104649537</a> |
| 49 | Plectropterus gambensis | Spur-winged Goose | 2021/7/31  | 1 | 0 | -3.2934304 | 36.8782651 | <a href="https://www.inaturalist.org/observations/94641410">https://www.inaturalist.org/observations/94641410</a>   |
| 50 | Plectropterus gambensis | Spur-winged Goose | 2021/11/2  | 1 | 0 | -3.2884430 | 36.8374290 | <a href="https://www.inaturalist.org/observations/102929405">https://www.inaturalist.org/observations/102929405</a> |
| 51 | Plectropterus gambensis | Spur-winged Goose | 2019/1/12  | 1 | 0 | -3.2676599 | 36.8955189 | <a href="https://www.inaturalist.org/observations/116047811">https://www.inaturalist.org/observations/116047811</a> |
| 52 | Plectropterus gambensis | Spur-winged Goose | 2014/9/6   | 4 | 0 | -3.2529510 | 36.7925260 | <a href="http://www.inaturalist.org/observations/1048330">http://www.inaturalist.org/observations/1048330</a>       |
| 53 | Plectropterus gambensis | Spur-winged Goose | 2015/12/31 | 4 | 0 | -3.2316798 | 35.5430374 | <a href="https://www.inaturalist.org/observations/18817813">https://www.inaturalist.org/observations/18817813</a>   |
| 54 | Plectropterus gambensis | Spur-winged Goose | 2019/6/14  | 1 | 0 | -3.2279236 | 35.5291148 | <a href="https://www.inaturalist.org/observations/128218820">https://www.inaturalist.org/observations/128218820</a> |
| 55 | Plectropterus gambensis | Spur-winged Goose | 2015/12/31 | 3 | 0 | -3.2124841 | 35.5799443 | <a href="https://www.inaturalist.org/observations/21380994">https://www.inaturalist.org/observations/21380994</a>   |
| 56 | Plectropterus gambensis | Spur-winged Goose | 2018/1/25  | 3 | 0 | -3.2123130 | 35.6024319 | <a href="https://www.inaturalist.org/observations/16814035">https://www.inaturalist.org/observations/16814035</a>   |
| 57 | Plectropterus gambensis | Spur-winged Goose | 2018/4/19  | 4 | 0 | -3.2054933 | 35.5845267 | <a href="https://www.inaturalist.org/observations/14282026">https://www.inaturalist.org/observations/14282026</a>   |
| 58 | Plectropterus gambensis | Spur-winged Goose | 2018/4/19  | 3 | 0 | -3.2037883 | 35.5882367 | <a href="https://www.inaturalist.org/observations/14282008">https://www.inaturalist.org/observations/14282008</a>   |
| 59 | Plectropterus gambensis | Spur-winged Goose | 1993/12/27 | 2 | 0 | -3.1884903 | 35.5725635 | <a href="https://www.inaturalist.org/observations/135823395">https://www.inaturalist.org/observations/135823395</a> |
| 60 | Plectropterus gambensis | Spur-winged Goose | 2020/9/22  | 1 | 0 | -3.1809490 | 35.5560838 | <a href="https://www.inaturalist.org/observations/62803034">https://www.inaturalist.org/observations/62803034</a>   |
| 61 | Plectropterus gambensis | Spur-winged Goose | 2020/12/23 | 1 | 0 | -3.1806918 | 35.5579722 | <a href="https://www.inaturalist.org/observations/67786541">https://www.inaturalist.org/observations/67786541</a>   |
| 62 | Plectropterus gambensis | Spur-winged Goose | 2017/1/13  | 2 | 0 | -3.1802695 | 35.6946503 | <a href="https://www.inaturalist.org/observations/82927519">https://www.inaturalist.org/observations/82927519</a>   |
| 63 | Plectropterus gambensis | Spur-winged Goose | 2021/11/8  | 1 | 0 | -3.1795778 | 35.5622629 | <a href="https://www.inaturalist.org/observations/102447759">https://www.inaturalist.org/observations/102447759</a> |
| 64 | Plectropterus gambensis | Spur-winged Goose | 2021/7/20  | 1 | 0 | -3.1788418 | 35.5577688 | <a href="https://www.inaturalist.org/observations/88528539">https://www.inaturalist.org/observations/88528539</a>   |
| 65 | Plectropterus gambensis | Spur-winged Goose | 2019/4/27  | 1 | 0 | -3.1783838 | 35.5624741 | <a href="https://www.inaturalist.org/observations/126815159">https://www.inaturalist.org/observations/126815159</a> |
| 66 | Plectropterus gambensis | Spur-winged Goose | 2022/8/1   | 3 | 0 | -3.1768207 | 35.5472944 | <a href="https://www.inaturalist.org/observations/129435264">https://www.inaturalist.org/observations/129435264</a> |
| 67 | Plectropterus gambensis | Spur-winged Goose | 2021/12/8  | 1 | 0 | -3.1722450 | 35.5241717 | <a href="https://www.inaturalist.org/observations/104864650">https://www.inaturalist.org/observations/104864650</a> |
| 68 | Plectropterus gambensis | Spur-winged Goose | 2022/1/15  | 1 | 0 | -3.1720617 | 35.5459450 | <a href="https://www.inaturalist.org/observations/105574505">https://www.inaturalist.org/observations/105574505</a> |



|    |                                      |                   |            |   |   |            |            |                                                                                                                     |
|----|--------------------------------------|-------------------|------------|---|---|------------|------------|---------------------------------------------------------------------------------------------------------------------|
| 69 | Plectropterus gambensis              | Spur-winged Goose | 2016/6/17  | 1 | 0 | -3.1716816 | 35.5419229 | <a href="https://www.inaturalist.org/observations/141322768">https://www.inaturalist.org/observations/141322768</a> |
| 70 | Plectropterus gambensis              | Spur-winged Goose | 2022/1/15  | 1 | 0 | -3.1699333 | 35.5344500 | <a href="https://www.inaturalist.org/observations/105618124">https://www.inaturalist.org/observations/105618124</a> |
| 71 | Plectropterus gambensis              | Spur-winged Goose | 2022/1/15  | 2 | 0 | -3.1698000 | 35.5343200 | <a href="https://www.inaturalist.org/observations/105618332">https://www.inaturalist.org/observations/105618332</a> |
| 72 | Plectropterus gambensis              | Spur-winged Goose | 2021/10/16 | 2 | 0 | -3.1697470 | 35.5337070 | <a href="https://www.inaturalist.org/observations/100184059">https://www.inaturalist.org/observations/100184059</a> |
| 73 | Plectropterus gambensis              | Spur-winged Goose | 1999/2/26  | 5 | 0 | -3.1617522 | 35.5876697 | <a href="https://www.inaturalist.org/observations/8707754">https://www.inaturalist.org/observations/8707754</a>     |
| 74 | Plectropterus gambensis              | Spur-winged Goose | 2015/2/19  | 3 | 0 | -3.1617522 | 35.5876697 | <a href="https://www.inaturalist.org/observations/23371968">https://www.inaturalist.org/observations/23371968</a>   |
| 75 | Plectropterus gambensis              | Spur-winged Goose | 2012/12/1  | 5 | 0 | -3.1617522 | 35.5876697 | <a href="https://www.inaturalist.org/observations/27633217">https://www.inaturalist.org/observations/27633217</a>   |
| 76 | Plectropterus gambensis              | Spur-winged Goose | 2011/1/1   | 1 | 0 | -3.1617522 | 35.5876697 | <a href="https://www.inaturalist.org/observations/54519362">https://www.inaturalist.org/observations/54519362</a>   |
| 77 | Plectropterus gambensis<br>gambensis | Spur-winged Goose | 2009/2/14  | 1 | 0 | -3.1617522 | 35.5876697 | <a href="https://www.inaturalist.org/observations/59799980">https://www.inaturalist.org/observations/59799980</a>   |
| 78 | Plectropterus gambensis              | Spur-winged Goose | 2022/2/23  | 2 | 0 | -3.1617522 | 35.5876697 | <a href="https://www.inaturalist.org/observations/108427570">https://www.inaturalist.org/observations/108427570</a> |
| 79 | Plectropterus gambensis              | Spur-winged Goose | 2022/1/15  | 1 | 0 | -3.1601638 | 35.5567117 | <a href="https://www.inaturalist.org/observations/105571272">https://www.inaturalist.org/observations/105571272</a> |
| 80 | Plectropterus gambensis              | Spur-winged Goose | 2022/1/4   | 1 | 0 | -3.1600322 | 35.5329649 | <a href="https://www.inaturalist.org/observations/116446993">https://www.inaturalist.org/observations/116446993</a> |
| 81 | Plectropterus gambensis              | Spur-winged Goose | 2019/2/21  | 1 | 0 | -3.1430551 | 35.5605355 | <a href="https://www.inaturalist.org/observations/142700552">https://www.inaturalist.org/observations/142700552</a> |
| 82 | Plectropterus gambensis              | Spur-winged Goose | 2017/2/26  | 3 | 0 | -3.0908621 | 35.3492959 | <a href="https://www.inaturalist.org/observations/9517711">https://www.inaturalist.org/observations/9517711</a>     |
| 83 | Plectropterus gambensis              | Spur-winged Goose | 2022/1/12  | 1 | 0 | -2.6714614 | 37.2377641 | <a href="https://www.inaturalist.org/observations/112727554">https://www.inaturalist.org/observations/112727554</a> |
| 84 | Plectropterus gambensis              | Spur-winged Goose | 2017/7/9   | 1 | 0 | -2.6662336 | 37.3039095 | <a href="https://www.inaturalist.org/observations/77938096">https://www.inaturalist.org/observations/77938096</a>   |
| 85 | Plectropterus gambensis              | Spur-winged Goose | 2008/7/15  | 1 | 0 | -2.6605841 | 37.2886007 | <a href="https://www.inaturalist.org/observations/103964273">https://www.inaturalist.org/observations/103964273</a> |
| 86 | Plectropterus gambensis              | Spur-winged Goose | 2022/1/11  | 1 | 0 | -2.6528566 | 37.2545370 | <a href="https://www.inaturalist.org/observations/112727452">https://www.inaturalist.org/observations/112727452</a> |
| 87 | Plectropterus gambensis              | Spur-winged Goose | 2017/7/25  | 1 | 0 | -2.6526870 | 37.2605650 | <a href="https://www.inaturalist.org/observations/62024095">https://www.inaturalist.org/observations/62024095</a>   |
| 88 | Plectropterus gambensis              | Spur-winged Goose | 2022/7/27  | 2 | 0 | -2.6526870 | 37.2605650 | <a href="https://www.inaturalist.org/observations/137402085">https://www.inaturalist.org/observations/137402085</a> |
| 89 | Plectropterus gambensis              | Spur-winged Goose | 2022/10/5  | 2 | 0 | -2.6526705 | 37.2606207 | <a href="https://www.inaturalist.org/observations/144751142">https://www.inaturalist.org/observations/144751142</a> |
| 90 | Plectropterus gambensis              | Spur-winged Goose | 2022/10/3  | 1 | 0 | -2.6523230 | 37.2746134 | <a href="https://www.inaturalist.org/observations/140056880">https://www.inaturalist.org/observations/140056880</a> |
| 91 | Plectropterus gambensis              | Spur-winged Goose | 2021/6/19  | 2 | 0 | -2.6519967 | 37.2748950 | <a href="https://www.inaturalist.org/observations/83918772">https://www.inaturalist.org/observations/83918772</a>   |

|     |                                |                   |            |   |   |            |            |                                                                                                                     |
|-----|--------------------------------|-------------------|------------|---|---|------------|------------|---------------------------------------------------------------------------------------------------------------------|
| 92  | <i>Plectropterus gambensis</i> | Spur-winged Goose | 2018/8/31  | 3 | 0 | -2.6501483 | 37.2817034 | <a href="https://www.inaturalist.org/observations/19324426">https://www.inaturalist.org/observations/19324426</a>   |
| 93  | <i>Plectropterus gambensis</i> | Spur-winged Goose | 2021/8/25  | 1 | 0 | -2.6495839 | 37.2771959 | <a href="https://www.inaturalist.org/observations/107424146">https://www.inaturalist.org/observations/107424146</a> |
| 94  | <i>Plectropterus gambensis</i> | Spur-winged Goose | 2018/8/31  | 3 | 0 | -2.6483864 | 37.2787999 | <a href="https://www.inaturalist.org/observations/19324428">https://www.inaturalist.org/observations/19324428</a>   |
| 95  | <i>Plectropterus gambensis</i> | Spur-winged Goose | 2022/10/3  | 1 | 0 | -2.6482810 | 37.2827970 | <a href="https://www.inaturalist.org/observations/139999177">https://www.inaturalist.org/observations/139999177</a> |
| 96  | <i>Plectropterus gambensis</i> | Spur-winged Goose | 2017/5/21  | 5 | 0 | -2.6478966 | 37.2805530 | <a href="https://www.inaturalist.org/observations/6828237">https://www.inaturalist.org/observations/6828237</a>     |
| 97  | <i>Plectropterus gambensis</i> | Spur-winged Goose | 2018/9/1   | 3 | 0 | -2.6394583 | 37.2283200 | <a href="https://www.inaturalist.org/observations/18601103">https://www.inaturalist.org/observations/18601103</a>   |
| 98  | <i>Plectropterus gambensis</i> | Spur-winged Goose | 2021/3/18  | 1 | 0 | -2.6349101 | 37.2592888 | <a href="https://www.inaturalist.org/observations/98268743">https://www.inaturalist.org/observations/98268743</a>   |
| 99  | <i>Plectropterus gambensis</i> | Spur-winged Goose | 2013/4/21  | 5 | 0 | -1.4769805 | 35.0927769 | <a href="https://www.inaturalist.org/observations/43172175">https://www.inaturalist.org/observations/43172175</a>   |
| 100 | <i>Plectropterus gambensis</i> | Spur-winged Goose | 2019/5/22  | 4 | 0 | -1.4478450 | 34.9621697 | <a href="https://www.inaturalist.org/observations/25574503">https://www.inaturalist.org/observations/25574503</a>   |
| 101 | <i>Plectropterus gambensis</i> | Spur-winged Goose | 2021/8/30  | 2 | 0 | -1.4478217 | 34.9621878 | <a href="https://www.inaturalist.org/observations/105866474">https://www.inaturalist.org/observations/105866474</a> |
| 102 | <i>Plectropterus gambensis</i> | Spur-winged Goose | 2022/12/22 | 1 | 0 | -1.0695164 | 35.2271643 | <a href="https://www.inaturalist.org/observations/144834410">https://www.inaturalist.org/observations/144834410</a> |
| 103 | <i>Plectropterus gambensis</i> | Spur-winged Goose | 2013/3/19  | 1 | 0 | -0.6747625 | 30.9245216 | <a href="https://www.inaturalist.org/observations/123268569">https://www.inaturalist.org/observations/123268569</a> |
| 104 | <i>Plectropterus gambensis</i> | Spur-winged Goose | 2014/1/5   | 1 | 0 | 0.0684377  | 32.4329086 | <a href="https://www.inaturalist.org/observations/122624752">https://www.inaturalist.org/observations/122624752</a> |
| 105 | <i>Plectropterus gambensis</i> | Spur-winged Goose | 2021/7/18  | 1 | 0 | 0.0716261  | 32.3503480 | <a href="https://www.inaturalist.org/observations/96537161">https://www.inaturalist.org/observations/96537161</a>   |
| 106 | <i>Plectropterus gambensis</i> | Spur-winged Goose | 2022/2/3   | 2 | 0 | 0.0718994  | 32.3678398 | <a href="https://www.inaturalist.org/observations/106969831">https://www.inaturalist.org/observations/106969831</a> |
| 107 | <i>Plectropterus gambensis</i> | Spur-winged Goose | 2022/12/18 | 2 | 0 | 0.0833332  | 32.3333333 | <a href="https://www.inaturalist.org/observations/144590801">https://www.inaturalist.org/observations/144590801</a> |
| 108 | <i>Plectropterus gambensis</i> | Spur-winged Goose | 2014/12/22 | 5 | 0 | 0.0833333  | 32.3333333 | <a href="https://www.inaturalist.org/observations/33471174">https://www.inaturalist.org/observations/33471174</a>   |
| 109 | <i>Plectropterus gambensis</i> | Spur-winged Goose | 2016/12/18 | 1 | 0 | 0.1109314  | 35.9082956 | <a href="https://www.inaturalist.org/observations/78796021">https://www.inaturalist.org/observations/78796021</a>   |
| 110 | <i>Plectropterus gambensis</i> | Spur-winged Goose | 2021/6/22  | 1 | 0 | 0.1587833  | 32.5704433 | <a href="https://www.inaturalist.org/observations/87524011">https://www.inaturalist.org/observations/87524011</a>   |
| 111 | <i>Plectropterus gambensis</i> | Spur-winged Goose | 2009/8/14  | 3 | 0 | 0.2401261  | 36.3681356 | <a href="https://www.inaturalist.org/observations/35466441">https://www.inaturalist.org/observations/35466441</a>   |
| 112 | <i>Plectropterus gambensis</i> | Spur-winged Goose | 2019/6/9   | 3 | 0 | 0.5332617  | 33.8830850 | <a href="https://www.inaturalist.org/observations/28353971">https://www.inaturalist.org/observations/28353971</a>   |
| 113 | <i>Plectropterus gambensis</i> | Spur-winged Goose | 2021/2/10  | 2 | 0 | 0.6257530  | 36.7887520 | <a href="https://www.inaturalist.org/observations/69553531">https://www.inaturalist.org/observations/69553531</a>   |
| 114 | <i>Plectropterus gambensis</i> | Spur-winged Goose | 2019/6/24  | 2 | 0 | 1.4253069  | 32.0763415 | <a href="https://www.inaturalist.org/observations/59031535">https://www.inaturalist.org/observations/59031535</a>   |

|     |                         |                   |            |   |   |           |            |                                                                                                                     |
|-----|-------------------------|-------------------|------------|---|---|-----------|------------|---------------------------------------------------------------------------------------------------------------------|
| 115 | Plectropterus gambensis | Spur-winged Goose | 2015/3/15  | 3 | 0 | 2.1802592 | 31.8246382 | <a href="https://www.inaturalist.org/observations/44695184">https://www.inaturalist.org/observations/44695184</a>   |
| 116 | Plectropterus gambensis | Spur-winged Goose | 2017/6/10  | 2 | 0 | 2.2437343 | 31.4094600 | <a href="https://www.inaturalist.org/observations/18599704">https://www.inaturalist.org/observations/18599704</a>   |
| 117 | Plectropterus gambensis | Spur-winged Goose | 2014/3/3   | 1 | 0 | 2.2568501 | 31.6472367 | <a href="https://www.inaturalist.org/observations/127475497">https://www.inaturalist.org/observations/127475497</a> |
| 118 | Plectropterus gambensis | Spur-winged Goose | 2014/3/3   | 3 | 0 | 2.2568501 | 31.6472367 | <a href="https://www.inaturalist.org/observations/127476178">https://www.inaturalist.org/observations/127476178</a> |
| 119 | Plectropterus gambensis | Spur-winged Goose | 2016/2/18  | 3 | 0 | 2.2646770 | 31.6577720 | <a href="https://www.inaturalist.org/observations/34534242">https://www.inaturalist.org/observations/34534242</a>   |
| 120 | Plectropterus gambensis | Spur-winged Goose | 2016/2/18  | 3 | 0 | 2.2660530 | 31.6355130 | <a href="https://www.inaturalist.org/observations/34533885">https://www.inaturalist.org/observations/34533885</a>   |
| 121 | Plectropterus gambensis | Spur-winged Goose | 2019/3/17  | 3 | 0 | 2.2720489 | 31.6214449 | <a href="https://www.inaturalist.org/observations/37520592">https://www.inaturalist.org/observations/37520592</a>   |
| 122 | Plectropterus gambensis | Spur-winged Goose | 2019/3/17  | 4 | 0 | 2.2720592 | 31.6231356 | <a href="https://www.inaturalist.org/observations/37495428">https://www.inaturalist.org/observations/37495428</a>   |
| 123 | Plectropterus gambensis | Spur-winged Goose | 2019/9/23  | 2 | 0 | 2.2741305 | 31.6712367 | <a href="https://www.inaturalist.org/observations/69190505">https://www.inaturalist.org/observations/69190505</a>   |
| 124 | Plectropterus gambensis | Spur-winged Goose | 2014/2/6   | 2 | 0 | 2.2749810 | 31.6733120 | <a href="https://www.inaturalist.org/observations/38220480">https://www.inaturalist.org/observations/38220480</a>   |
| 125 | Plectropterus gambensis | Spur-winged Goose | 2019/3/9   | 4 | 0 | 2.2750334 | 31.6324056 | <a href="https://www.inaturalist.org/observations/38660290">https://www.inaturalist.org/observations/38660290</a>   |
| 126 | Plectropterus gambensis | Spur-winged Goose | 2016/2/13  | 5 | 0 | 2.2805592 | 31.5726104 | <a href="http://www.inaturalist.org/observations/2829310">http://www.inaturalist.org/observations/2829310</a>       |
| 127 | Plectropterus gambensis | Spur-winged Goose | 2021/6/14  | 2 | 0 | 2.3121150 | 31.4243367 | <a href="https://www.inaturalist.org/observations/84834407">https://www.inaturalist.org/observations/84834407</a>   |
| 128 | Plectropterus gambensis | Spur-winged Goose | 2017/2/3   | 2 | 0 | 2.3968084 | 31.5524408 | <a href="https://www.inaturalist.org/observations/107292788">https://www.inaturalist.org/observations/107292788</a> |
| 129 | Plectropterus gambensis | Spur-winged Goose | 2014/1/28  | 2 | 0 | 7.0332720 | 38.4617550 | <a href="https://www.inaturalist.org/observations/37371707">https://www.inaturalist.org/observations/37371707</a>   |
| 130 | Plectropterus gambensis | Spur-winged Goose | 2011/1/6   | 5 | 0 | 7.0485600 | 38.4586720 | <a href="https://www.inaturalist.org/observations/9776842">https://www.inaturalist.org/observations/9776842</a>     |
| 131 | Plectropterus gambensis | Spur-winged Goose | 2012/1/9   | 2 | 0 | 7.0795884 | 38.4790939 | <a href="https://www.inaturalist.org/observations/109664085">https://www.inaturalist.org/observations/109664085</a> |
| 132 | Plectropterus gambensis | Spur-winged Goose | 2011/1/11  | 5 | 0 | 7.0913620 | 38.4821250 | <a href="https://www.inaturalist.org/observations/9777096">https://www.inaturalist.org/observations/9777096</a>     |
| 133 | Plectropterus gambensis | Spur-winged Goose | 2007/10/22 | 1 | 0 | 7.5938756 | 38.6365075 | <a href="https://www.inaturalist.org/observations/123957976">https://www.inaturalist.org/observations/123957976</a> |
| 134 | Plectropterus gambensis | Spur-winged Goose | 2012/12/26 | 4 | 0 | 7.5981830 | 38.7480920 | <a href="https://www.inaturalist.org/observations/18677409">https://www.inaturalist.org/observations/18677409</a>   |
| 135 | Plectropterus gambensis | Spur-winged Goose | 2015/8/6   | 4 | 0 | 7.8299605 | 38.6608887 | <a href="https://www.inaturalist.org/observations/9513319">https://www.inaturalist.org/observations/9513319</a>     |
| 136 | Plectropterus gambensis | Spur-winged Goose | 2019/3/20  | 4 | 0 | 7.9180287 | 38.7276310 | <a href="https://www.inaturalist.org/observations/21532057">https://www.inaturalist.org/observations/21532057</a>   |
| 137 | Plectropterus gambensis | Spur-winged Goose | 2022/11/5  | 2 | 0 | 7.9265599 | 38.7267493 | <a href="https://www.inaturalist.org/observations/142245476">https://www.inaturalist.org/observations/142245476</a> |

|     |                                                    |                   |            |   |   |            |            |                                                                                                                     |
|-----|----------------------------------------------------|-------------------|------------|---|---|------------|------------|---------------------------------------------------------------------------------------------------------------------|
| 138 | <i>Plectropterus gambensis</i><br><i>gambensis</i> | Spur-winged Goose | 2019/11/14 | 5 | 0 | 7.9266229  | 38.7268537 | <a href="https://www.inaturalist.org/observations/36761262">https://www.inaturalist.org/observations/36761262</a>   |
| 139 | <i>Plectropterus gambensis</i>                     | Spur-winged Goose | 2017/11/26 | 3 | 0 | 7.9272554  | 38.7270334 | <a href="https://www.inaturalist.org/observations/42253134">https://www.inaturalist.org/observations/42253134</a>   |
| 140 | <i>Plectropterus gambensis</i>                     | Spur-winged Goose | 2018/11/17 | 4 | 0 | 8.0073084  | 38.8414602 | <a href="https://www.inaturalist.org/observations/18610559">https://www.inaturalist.org/observations/18610559</a>   |
| 141 | <i>Plectropterus gambensis</i>                     | Spur-winged Goose | 2019/3/19  | 4 | 0 | 8.0073084  | 38.8414602 | <a href="https://www.inaturalist.org/observations/21516838">https://www.inaturalist.org/observations/21516838</a>   |
| 142 | <i>Plectropterus gambensis</i>                     | Spur-winged Goose | 2018/11/17 | 2 | 0 | 8.0073084  | 38.8414602 | <a href="https://www.inaturalist.org/observations/112412478">https://www.inaturalist.org/observations/112412478</a> |
| 143 | <i>Plectropterus gambensis</i>                     | Spur-winged Goose | 2018/9/12  | 1 | 0 | 8.3399056  | 38.9871139 | <a href="https://www.inaturalist.org/observations/63080950">https://www.inaturalist.org/observations/63080950</a>   |
| 144 | <i>Plectropterus gambensis</i>                     | Spur-winged Goose | 2018/9/12  | 1 | 0 | 8.3399222  | 38.9870889 | <a href="https://www.inaturalist.org/observations/63080949">https://www.inaturalist.org/observations/63080949</a>   |
| 145 | <i>Plectropterus gambensis</i>                     | Spur-winged Goose | 2014/1/12  | 2 | 0 | 8.4673473  | 39.1558159 | <a href="https://www.inaturalist.org/observations/106934494">https://www.inaturalist.org/observations/106934494</a> |
| 146 | <i>Plectropterus gambensis</i>                     | Spur-winged Goose | 2014/2/22  | 1 | 0 | 9.2536585  | 34.8682286 | <a href="https://www.inaturalist.org/observations/143529469">https://www.inaturalist.org/observations/143529469</a> |
| 147 | <i>Plectropterus gambensis</i>                     | Spur-winged Goose | 2019/9/17  | 2 | 0 | 11.5742086 | 37.3613533 | <a href="https://www.inaturalist.org/observations/58044525">https://www.inaturalist.org/observations/58044525</a>   |
| 148 | <i>Plectropterus gambensis</i>                     | Spur-winged Goose | 2014/4/16  | 1 | 0 | 11.5742086 | 37.3613533 | <a href="https://www.inaturalist.org/observations/58448211">https://www.inaturalist.org/observations/58448211</a>   |
| 149 | <i>Plectropterus gambensis</i>                     | Spur-winged Goose | 2021/10/16 | 2 | 0 | 11.5742086 | 37.3613533 | <a href="https://www.inaturalist.org/observations/103243580">https://www.inaturalist.org/observations/103243580</a> |
| 150 | <i>Plectropterus gambensis</i>                     | Spur-winged Goose | 2022/2/11  | 1 | 0 | 11.5742086 | 37.3613533 | <a href="https://www.inaturalist.org/observations/106540808">https://www.inaturalist.org/observations/106540808</a> |
| 151 | <i>Plectropterus gambensis</i>                     | Spur-winged Goose | 2022/2/22  | 1 | 0 | 11.5742086 | 37.3613533 | <a href="https://www.inaturalist.org/observations/107244552">https://www.inaturalist.org/observations/107244552</a> |
| 152 | <i>Plectropterus gambensis</i>                     | Spur-winged Goose | 2022/3/31  | 1 | 0 | 11.5742086 | 37.3613533 | <a href="https://www.inaturalist.org/observations/109999522">https://www.inaturalist.org/observations/109999522</a> |
| 153 | <i>Plectropterus gambensis</i>                     | Spur-winged Goose | 2022/5/12  | 2 | 0 | 11.5742086 | 37.3613533 | <a href="https://www.inaturalist.org/observations/116674198">https://www.inaturalist.org/observations/116674198</a> |
| 154 | <i>Plectropterus gambensis</i>                     | Spur-winged Goose | 2022/5/12  | 2 | 0 | 11.5742086 | 37.3613533 | <a href="https://www.inaturalist.org/observations/116674202">https://www.inaturalist.org/observations/116674202</a> |
| 155 | <i>Plectropterus gambensis</i>                     | Spur-winged Goose | 2022/6/3   | 1 | 0 | 11.5742086 | 37.3613533 | <a href="https://www.inaturalist.org/observations/119999773">https://www.inaturalist.org/observations/119999773</a> |
| 156 | <i>Plectropterus gambensis</i>                     | Spur-winged Goose | 2022/8/21  | 2 | 0 | 11.5742086 | 37.3613533 | <a href="https://www.inaturalist.org/observations/131882954">https://www.inaturalist.org/observations/131882954</a> |
| 157 | <i>Plectropterus gambensis</i>                     | Spur-winged Goose | 2022/10/19 | 1 | 0 | 11.5742086 | 37.3613533 | <a href="https://www.inaturalist.org/observations/139313669">https://www.inaturalist.org/observations/139313669</a> |
| 158 | <i>Plectropterus gambensis</i>                     | Spur-winged Goose | 2022/10/20 | 1 | 0 | 11.5742086 | 37.3613533 | <a href="https://www.inaturalist.org/observations/139412300">https://www.inaturalist.org/observations/139412300</a> |
| 159 | <i>Plectropterus gambensis</i>                     | Spur-winged Goose | 2022/12/6  | 2 | 0 | 11.5742086 | 37.3613533 | <a href="https://www.inaturalist.org/observations/143786744">https://www.inaturalist.org/observations/143786744</a> |
| 160 | <i>Plectropterus gambensis</i>                     | Spur-winged Goose | 2018/4/14  | 4 | 0 | 11.5762266 | 37.4056419 | <a href="https://www.inaturalist.org/observations/11075640">https://www.inaturalist.org/observations/11075640</a>   |

|     |                                                    |                   |            |   |   |            |            |                                                                                                                   |
|-----|----------------------------------------------------|-------------------|------------|---|---|------------|------------|-------------------------------------------------------------------------------------------------------------------|
| 161 | <i>Plectropterus gambensis</i>                     | Spur-winged Goose | 2012/8/4   | 3 | 0 | 11.6199617 | 37.4084061 | <a href="https://www.inaturalist.org/observations/65945130">https://www.inaturalist.org/observations/65945130</a> |
| 162 | <i>Plectropterus gambensis</i>                     | Spur-winged Goose | 2020/2/26  | 1 | 0 | 11.6323363 | 37.3784637 | <a href="https://www.inaturalist.org/observations/81148234">https://www.inaturalist.org/observations/81148234</a> |
| 163 | <i>Plectropterus gambensis</i>                     | Spur-winged Goose | 2019/10/29 | 5 | 0 | 11.9495828 | 37.3020045 | <a href="https://www.inaturalist.org/observations/35197980">https://www.inaturalist.org/observations/35197980</a> |
| 164 | <i>Plectropterus gambensis</i><br><i>gambensis</i> | Spur-winged Goose | 2020/2/18  | 2 | 0 | 11.9642963 | 37.7034069 | <a href="https://www.inaturalist.org/observations/39682857">https://www.inaturalist.org/observations/39682857</a> |
| 165 | <i>Plectropterus gambensis</i>                     | Spur-winged Goose | 2020/2/18  | 3 | 0 | 11.9642963 | 37.7034069 | <a href="https://www.inaturalist.org/observations/39682865">https://www.inaturalist.org/observations/39682865</a> |
| 166 | <i>Plectropterus gambensis</i>                     | Spur-winged Goose | 2020/2/27  | 1 | 0 | 12.1483100 | 37.7491390 | <a href="https://www.inaturalist.org/observations/81405192">https://www.inaturalist.org/observations/81405192</a> |

| No | scientific name          | common name   | date       | NIA | NID | latitude   | longitude  | url                                                                                                                 |
|----|--------------------------|---------------|------------|-----|-----|------------|------------|---------------------------------------------------------------------------------------------------------------------|
| 1  | Sagittarius serpentarius | Secretarybird | 2021/3/31  | 5   | 0   | -7.7017421 | 34.9391613 | <a href="https://www.inaturalist.org/observations/72544739">https://www.inaturalist.org/observations/72544739</a>   |
| 2  | Sagittarius serpentarius | Secretarybird | 2022/8/28  | 3   | 0   | -7.2943196 | 37.0615315 | <a href="https://www.inaturalist.org/observations/134145885">https://www.inaturalist.org/observations/134145885</a> |
| 3  | Sagittarius serpentarius | Secretarybird | 2019/7/2   | 4   | 0   | -7.0270224 | 34.7721793 | <a href="https://www.inaturalist.org/observations/80452736">https://www.inaturalist.org/observations/80452736</a>   |
| 4  | Sagittarius serpentarius | Secretarybird | 2022/3/23  | 6   | 0   | -6.2080520 | 34.9838272 | <a href="https://www.inaturalist.org/observations/110407539">https://www.inaturalist.org/observations/110407539</a> |
| 5  | Sagittarius serpentarius | Secretarybird | 2017/6/19  | 4   | 0   | -4.3997598 | 36.3734062 | <a href="https://www.inaturalist.org/observations/19220562">https://www.inaturalist.org/observations/19220562</a>   |
| 6  | Sagittarius serpentarius | Secretarybird | 2018/11/13 | 4   | 0   | -4.3642007 | 36.0845695 | <a href="https://www.inaturalist.org/observations/18388559">https://www.inaturalist.org/observations/18388559</a>   |
| 7  | Sagittarius serpentarius | Secretarybird | 2017/11/23 | 5   | 0   | -4.2694456 | 36.2245204 | <a href="https://www.inaturalist.org/observations/9074582">https://www.inaturalist.org/observations/9074582</a>     |
| 8  | Sagittarius serpentarius | Secretarybird | 2017/9/23  | 6   | 0   | -4.1857123 | 36.1199497 | <a href="https://www.inaturalist.org/observations/33292851">https://www.inaturalist.org/observations/33292851</a>   |
| 9  | Sagittarius serpentarius | Secretarybird | 2022/1/3   | 6   | 0   | -4.1790935 | 35.8976950 | <a href="https://www.inaturalist.org/observations/116168190">https://www.inaturalist.org/observations/116168190</a> |
| 10 | Sagittarius serpentarius | Secretarybird | 2018/8/31  | 5   | 0   | -4.1570504 | 36.1837945 | <a href="https://www.inaturalist.org/observations/20145309">https://www.inaturalist.org/observations/20145309</a>   |
| 11 | Sagittarius serpentarius | Secretarybird | 2022/7/11  | 5   | 0   | -4.1495579 | 35.8132236 | <a href="https://www.inaturalist.org/observations/127679530">https://www.inaturalist.org/observations/127679530</a> |
| 12 | Sagittarius serpentarius | Secretarybird | 2019/7/17  | 6   | 0   | -4.1434478 | 36.1306310 | <a href="https://www.inaturalist.org/observations/108829930">https://www.inaturalist.org/observations/108829930</a> |
| 13 | Sagittarius serpentarius | Secretarybird | 2021/10/30 | 4   | 0   | -4.1427459 | 35.8888423 | <a href="https://www.inaturalist.org/observations/101641850">https://www.inaturalist.org/observations/101641850</a> |
| 14 | Sagittarius serpentarius | Secretarybird | 2018/2/10  | 6   | 0   | -4.1321840 | 38.0992794 | <a href="https://www.inaturalist.org/observations/40803117">https://www.inaturalist.org/observations/40803117</a>   |
| 15 | Sagittarius serpentarius | Secretarybird | 2020/2/18  | 5   | 0   | -4.1307444 | 35.9760259 | <a href="https://www.inaturalist.org/observations/134638591">https://www.inaturalist.org/observations/134638591</a> |
| 16 | Sagittarius serpentarius | Secretarybird | 2022/7/11  | 6   | 0   | -4.1067568 | 35.9653482 | <a href="https://www.inaturalist.org/observations/129412701">https://www.inaturalist.org/observations/129412701</a> |
| 17 | Sagittarius serpentarius | Secretarybird | 2020/4/2   | 6   | 0   | -4.0934114 | 38.0264980 | <a href="https://www.inaturalist.org/observations/42403059">https://www.inaturalist.org/observations/42403059</a>   |
| 18 | Sagittarius serpentarius | Secretarybird | 2002/2/5   | 8   | 0   | -4.0619377 | 36.1215069 | <a href="http://www.inaturalist.org/observations/560977">http://www.inaturalist.org/observations/560977</a>         |
| 19 | Sagittarius serpentarius | Secretarybird | 2021/7/11  | 3   | 0   | -4.0437290 | 35.8326790 | <a href="https://www.inaturalist.org/observations/122153343">https://www.inaturalist.org/observations/122153343</a> |
| 20 | Sagittarius serpentarius | Secretarybird | 2018/6/20  | 4   | 0   | -4.0270983 | 36.0624104 | <a href="https://www.inaturalist.org/observations/13769589">https://www.inaturalist.org/observations/13769589</a>   |
| 21 | Sagittarius serpentarius | Secretarybird | 2017/11/15 | 4   | 0   | -4.0044793 | 35.8040323 | <a href="https://www.inaturalist.org/observations/19468389">https://www.inaturalist.org/observations/19468389</a>   |
| 22 | Sagittarius serpentarius | Secretarybird | 2007/10/19 | 8   | 0   | -3.9864962 | 35.8598035 | <a href="http://www.inaturalist.org/observations/18339">http://www.inaturalist.org/observations/18339</a>           |

|    |                          |               |            |   |   |            |            |                                                                                                                     |
|----|--------------------------|---------------|------------|---|---|------------|------------|---------------------------------------------------------------------------------------------------------------------|
| 23 | Sagittarius serpentarius | Secretarybird | 2020/12/22 | 5 | 0 | -3.9673379 | 35.9486686 | <a href="https://www.inaturalist.org/observations/67760375">https://www.inaturalist.org/observations/67760375</a>   |
| 24 | Sagittarius serpentarius | Secretarybird | 2021/9/12  | 4 | 0 | -3.9587271 | 37.6620376 | <a href="https://www.inaturalist.org/observations/95123690">https://www.inaturalist.org/observations/95123690</a>   |
| 25 | Sagittarius serpentarius | Secretarybird | 2016/4/30  | 5 | 0 | -3.9265239 | 36.0774640 | <a href="https://www.inaturalist.org/observations/80770750">https://www.inaturalist.org/observations/80770750</a>   |
| 26 | Sagittarius serpentarius | Secretarybird | 2018/6/7   | 5 | 0 | -3.9165302 | 35.9817506 | <a href="https://www.inaturalist.org/observations/15919496">https://www.inaturalist.org/observations/15919496</a>   |
| 27 | Sagittarius serpentarius | Secretarybird | 2015/7/22  | 5 | 0 | -3.9108858 | 36.1495948 | <a href="https://www.inaturalist.org/observations/126045617">https://www.inaturalist.org/observations/126045617</a> |
| 28 | Sagittarius serpentarius | Secretarybird | 2022/7/17  | 4 | 0 | -3.9046788 | 36.1245170 | <a href="https://www.inaturalist.org/observations/128194468">https://www.inaturalist.org/observations/128194468</a> |
| 29 | Sagittarius serpentarius | Secretarybird | 2021/10/30 | 4 | 0 | -3.8901333 | 36.0821772 | <a href="https://www.inaturalist.org/observations/103610565">https://www.inaturalist.org/observations/103610565</a> |
| 30 | Sagittarius serpentarius | Secretarybird | 2019/9/23  | 3 | 0 | -3.8776805 | 37.9704706 | <a href="https://www.inaturalist.org/observations/35913028">https://www.inaturalist.org/observations/35913028</a>   |
| 31 | Sagittarius serpentarius | Secretarybird | 2017/12/20 | 6 | 0 | -3.8593268 | 35.9035752 | <a href="https://www.inaturalist.org/observations/38129191">https://www.inaturalist.org/observations/38129191</a>   |
| 32 | Sagittarius serpentarius | Secretarybird | 2013/6/6   | 4 | 0 | -3.8566830 | 36.0841107 | <a href="https://www.inaturalist.org/observations/85741112">https://www.inaturalist.org/observations/85741112</a>   |
| 33 | Sagittarius serpentarius | Secretarybird | 2017/12/20 | 7 | 0 | -3.8540435 | 35.9422628 | <a href="https://www.inaturalist.org/observations/38129280">https://www.inaturalist.org/observations/38129280</a>   |
| 34 | Sagittarius serpentarius | Secretarybird | 2019/8/4   | 3 | 0 | -3.8394736 | 35.9050298 | <a href="https://www.inaturalist.org/observations/70637161">https://www.inaturalist.org/observations/70637161</a>   |
| 35 | Sagittarius serpentarius | Secretarybird | 2019/8/16  | 7 | 0 | -3.8297194 | 35.8084759 | <a href="https://www.inaturalist.org/observations/33434967">https://www.inaturalist.org/observations/33434967</a>   |
| 36 | Sagittarius serpentarius | Secretarybird | 2019/8/16  | 6 | 0 | -3.8253379 | 35.9160854 | <a href="https://www.inaturalist.org/observations/33434858">https://www.inaturalist.org/observations/33434858</a>   |
| 37 | Sagittarius serpentarius | Secretarybird | 2015/3/1   | 5 | 0 | -3.8160526 | 35.8766766 | <a href="https://www.inaturalist.org/observations/67721066">https://www.inaturalist.org/observations/67721066</a>   |
| 38 | Sagittarius serpentarius | Secretarybird | 2019/7/31  | 4 | 0 | -3.8154787 | 35.8389143 | <a href="https://www.inaturalist.org/observations/68993017">https://www.inaturalist.org/observations/68993017</a>   |
| 39 | Sagittarius serpentarius | Secretarybird | 2017/7/5   | 5 | 0 | -3.8142238 | 38.8332557 | <a href="https://www.inaturalist.org/observations/104784632">https://www.inaturalist.org/observations/104784632</a> |
| 40 | Sagittarius serpentarius | Secretarybird | 2021/4/14  | 7 | 0 | -3.8122358 | 37.8792407 | <a href="https://www.inaturalist.org/observations/105830985">https://www.inaturalist.org/observations/105830985</a> |
| 41 | Sagittarius serpentarius | Secretarybird | 2021/6/28  | 5 | 0 | -3.7998367 | 35.8081829 | <a href="https://www.inaturalist.org/observations/85097022">https://www.inaturalist.org/observations/85097022</a>   |
| 42 | Sagittarius serpentarius | Secretarybird | 2017/7/5   | 6 | 0 | -3.7956638 | 38.6069255 | <a href="https://www.inaturalist.org/observations/8660665">https://www.inaturalist.org/observations/8660665</a>     |
| 43 | Sagittarius serpentarius | Secretarybird | 2022/10/27 | 2 | 0 | -3.7493761 | 36.0625189 | <a href="https://www.inaturalist.org/observations/140291651">https://www.inaturalist.org/observations/140291651</a> |
| 44 | Sagittarius serpentarius | Secretarybird | 2018/2/5   | 5 | 0 | -3.7474509 | 36.1092995 | <a href="https://www.inaturalist.org/observations/16659865">https://www.inaturalist.org/observations/16659865</a>   |
| 45 | Sagittarius serpentarius | Secretarybird | 2014/11/20 | 4 | 0 | -3.7362264 | 36.1259894 | <a href="https://www.inaturalist.org/observations/19734583">https://www.inaturalist.org/observations/19734583</a>   |

|    |                          |               |            |   |   |            |            |                                                                                                                     |
|----|--------------------------|---------------|------------|---|---|------------|------------|---------------------------------------------------------------------------------------------------------------------|
| 46 | Sagittarius serpentarius | Secretarybird | 2015/2/14  | 4 | 0 | -3.7247968 | 35.8939759 | <a href="https://www.inaturalist.org/observations/34865404">https://www.inaturalist.org/observations/34865404</a>   |
| 47 | Sagittarius serpentarius | Secretarybird | 2021/4/11  | 6 | 0 | -3.7144286 | 35.9982457 | <a href="https://www.inaturalist.org/observations/80523726">https://www.inaturalist.org/observations/80523726</a>   |
| 48 | Sagittarius serpentarius | Secretarybird | 2019/7/28  | 6 | 0 | -3.7079137 | 35.9782495 | <a href="https://www.inaturalist.org/observations/60904388">https://www.inaturalist.org/observations/60904388</a>   |
| 49 | Sagittarius serpentarius | Secretarybird | 2022/1/7   | 4 | 0 | -3.6931413 | 38.8876736 | <a href="https://www.inaturalist.org/observations/112719994">https://www.inaturalist.org/observations/112719994</a> |
| 50 | Sagittarius serpentarius | Secretarybird | 2017/7/4   | 8 | 0 | -3.6748762 | 38.7988033 | <a href="https://www.inaturalist.org/observations/7694555">https://www.inaturalist.org/observations/7694555</a>     |
| 51 | Sagittarius serpentarius | Secretarybird | 2019/8/18  | 4 | 0 | -3.6482738 | 38.1452043 | <a href="https://www.inaturalist.org/observations/34317370">https://www.inaturalist.org/observations/34317370</a>   |
| 52 | Sagittarius serpentarius | Secretarybird | 2021/10/30 | 5 | 0 | -3.6333306 | 35.8553165 | <a href="https://www.inaturalist.org/observations/102323115">https://www.inaturalist.org/observations/102323115</a> |
| 53 | Sagittarius serpentarius | Secretarybird | 2018/10/19 | 7 | 0 | -3.6297252 | 36.0928804 | <a href="https://www.inaturalist.org/observations/18012871">https://www.inaturalist.org/observations/18012871</a>   |
| 54 | Sagittarius serpentarius | Secretarybird | 2022/1/16  | 5 | 0 | -3.6144815 | 36.1394832 | <a href="https://www.inaturalist.org/observations/105664719">https://www.inaturalist.org/observations/105664719</a> |
| 55 | Sagittarius serpentarius | Secretarybird | 2018/6/15  | 6 | 0 | -3.5755946 | 36.0115507 | <a href="https://www.inaturalist.org/observations/15092153">https://www.inaturalist.org/observations/15092153</a>   |
| 56 | Sagittarius serpentarius | Secretarybird | 2022/4/11  | 3 | 0 | -3.5754492 | 38.3966604 | <a href="https://www.inaturalist.org/observations/111066455">https://www.inaturalist.org/observations/111066455</a> |
| 57 | Sagittarius serpentarius | Secretarybird | 2019/11/24 | 3 | 0 | -3.5720635 | 38.0905069 | <a href="https://www.inaturalist.org/observations/37411629">https://www.inaturalist.org/observations/37411629</a>   |
| 58 | Sagittarius serpentarius | Secretarybird | 2018/11/11 | 4 | 0 | -3.5708821 | 38.8172578 | <a href="https://www.inaturalist.org/observations/78652202">https://www.inaturalist.org/observations/78652202</a>   |
| 59 | Sagittarius serpentarius | Secretarybird | 2020/2/26  | 4 | 0 | -3.5653387 | 38.3379108 | <a href="https://www.inaturalist.org/observations/39323751">https://www.inaturalist.org/observations/39323751</a>   |
| 60 | Sagittarius serpentarius | Secretarybird | 2014/12/29 | 7 | 0 | -3.5593725 | 38.2372831 | <a href="http://www.inaturalist.org/observations/1200884">http://www.inaturalist.org/observations/1200884</a>       |
| 61 | Sagittarius serpentarius | Secretarybird | 2019/11/18 | 3 | 0 | -3.5271675 | 38.0142747 | <a href="https://www.inaturalist.org/observations/37411597">https://www.inaturalist.org/observations/37411597</a>   |
| 62 | Sagittarius serpentarius | Secretarybird | 2019/11/18 | 3 | 0 | -3.5135843 | 38.0470615 | <a href="https://www.inaturalist.org/observations/37411595">https://www.inaturalist.org/observations/37411595</a>   |
| 63 | Sagittarius serpentarius | Secretarybird | 2019/11/16 | 4 | 0 | -3.5024725 | 37.9596985 | <a href="https://www.inaturalist.org/observations/37411555">https://www.inaturalist.org/observations/37411555</a>   |
| 64 | Sagittarius serpentarius | Secretarybird | 2020/7/20  | 5 | 0 | -3.4768280 | 38.9812003 | <a href="https://www.inaturalist.org/observations/54040957">https://www.inaturalist.org/observations/54040957</a>   |
| 65 | Sagittarius serpentarius | Secretarybird | 2010/10/27 | 5 | 0 | -3.4535247 | 38.6357698 | <a href="https://www.inaturalist.org/observations/132043521">https://www.inaturalist.org/observations/132043521</a> |
| 66 | Sagittarius serpentarius | Secretarybird | 2015/2/27  | 4 | 0 | -3.4424437 | 38.6442839 | <a href="https://www.inaturalist.org/observations/106813327">https://www.inaturalist.org/observations/106813327</a> |
| 67 | Sagittarius serpentarius | Secretarybird | 2022/7/22  | 4 | 0 | -3.4349283 | 36.0074877 | <a href="https://www.inaturalist.org/observations/127496204">https://www.inaturalist.org/observations/127496204</a> |
| 68 | Sagittarius serpentarius | Secretarybird | 2022/4/11  | 4 | 0 | -3.4211326 | 38.2503370 | <a href="https://www.inaturalist.org/observations/111066121">https://www.inaturalist.org/observations/111066121</a> |



|    |                          |               |            |   |   |            |            |                                                                                                                     |
|----|--------------------------|---------------|------------|---|---|------------|------------|---------------------------------------------------------------------------------------------------------------------|
| 69 | Sagittarius serpentarius | Secretarybird | 2020/2/25  | 4 | 0 | -3.3744551 | 37.7702434 | <a href="https://www.inaturalist.org/observations/39322899">https://www.inaturalist.org/observations/39322899</a>   |
| 70 | Sagittarius serpentarius | Secretarybird | 2013/11/14 | 6 | 0 | -3.3658985 | 38.6004942 | <a href="https://www.inaturalist.org/observations/18775861">https://www.inaturalist.org/observations/18775861</a>   |
| 71 | Sagittarius serpentarius | Secretarybird | 2005/2/13  | 5 | 0 | -3.2991491 | 35.5842202 | <a href="https://www.inaturalist.org/observations/37948472">https://www.inaturalist.org/observations/37948472</a>   |
| 72 | Sagittarius serpentarius | Secretarybird | 2015/3/23  | 6 | 0 | -3.2771391 | 35.6927741 | <a href="https://www.inaturalist.org/observations/67735237">https://www.inaturalist.org/observations/67735237</a>   |
| 73 | Sagittarius serpentarius | Secretarybird | 2013/3/6   | 6 | 0 | -3.2695263 | 35.4629209 | <a href="https://www.inaturalist.org/observations/98756036">https://www.inaturalist.org/observations/98756036</a>   |
| 74 | Sagittarius serpentarius | Secretarybird | 2018/4/7   | 5 | 0 | -3.2669562 | 38.4536809 | <a href="https://www.inaturalist.org/observations/63258775">https://www.inaturalist.org/observations/63258775</a>   |
| 75 | Sagittarius serpentarius | Secretarybird | 2019/8/23  | 4 | 0 | -3.2571307 | 35.4836324 | <a href="https://www.inaturalist.org/observations/35920811">https://www.inaturalist.org/observations/35920811</a>   |
| 76 | Sagittarius serpentarius | Secretarybird | 2014/11/6  | 4 | 0 | -3.2317500 | 38.6864619 | <a href="https://www.inaturalist.org/observations/92700137">https://www.inaturalist.org/observations/92700137</a>   |
| 77 | Sagittarius serpentarius | Secretarybird | 2022/1/3   | 4 | 0 | -3.2293787 | 38.6763461 | <a href="https://www.inaturalist.org/observations/112714066">https://www.inaturalist.org/observations/112714066</a> |
| 78 | Sagittarius serpentarius | Secretarybird | 2020/8/19  | 3 | 0 | -3.2206604 | 38.5777878 | <a href="https://www.inaturalist.org/observations/106415689">https://www.inaturalist.org/observations/106415689</a> |
| 79 | Sagittarius serpentarius | Secretarybird | 2018/4/20  | 5 | 0 | -3.2156918 | 35.4183357 | <a href="https://www.inaturalist.org/observations/14482308">https://www.inaturalist.org/observations/14482308</a>   |
| 80 | Sagittarius serpentarius | Secretarybird | 2017/11/10 | 5 | 0 | -3.2095839 | 35.4620279 | <a href="https://www.inaturalist.org/observations/19370176">https://www.inaturalist.org/observations/19370176</a>   |
| 81 | Sagittarius serpentarius | Secretarybird | 2015/8/23  | 4 | 0 | -3.2088851 | 35.4812263 | <a href="https://www.inaturalist.org/observations/30321398">https://www.inaturalist.org/observations/30321398</a>   |
| 82 | Sagittarius serpentarius | Secretarybird | 2020/1/27  | 5 | 0 | -3.1986320 | 35.1959858 | <a href="https://www.inaturalist.org/observations/93222393">https://www.inaturalist.org/observations/93222393</a>   |
| 83 | Sagittarius serpentarius | Secretarybird | 2019/8/1   | 5 | 0 | -3.1970543 | 35.5828302 | <a href="https://www.inaturalist.org/observations/32938838">https://www.inaturalist.org/observations/32938838</a>   |
| 84 | Sagittarius serpentarius | Secretarybird | 2007/10/24 | 7 | 0 | -3.1906431 | 35.6277505 | <a href="https://www.inaturalist.org/observations/32955892">https://www.inaturalist.org/observations/32955892</a>   |
| 85 | Sagittarius serpentarius | Secretarybird | 2019/12/31 | 5 | 0 | -3.1829185 | 35.5449569 | <a href="https://www.inaturalist.org/observations/120935905">https://www.inaturalist.org/observations/120935905</a> |
| 86 | Sagittarius serpentarius | Secretarybird | 2011/3/8   | 4 | 0 | -3.1786482 | 34.9986156 | <a href="https://www.inaturalist.org/observations/107139637">https://www.inaturalist.org/observations/107139637</a> |
| 87 | Sagittarius serpentarius | Secretarybird | 2014/3/9   | 8 | 0 | -3.1773551 | 35.5773939 | <a href="https://www.inaturalist.org/observations/5385452">https://www.inaturalist.org/observations/5385452</a>     |
| 88 | Sagittarius serpentarius | Secretarybird | 2019/2/23  | 2 | 0 | -3.1730203 | 35.4054891 | <a href="https://www.inaturalist.org/observations/142916133">https://www.inaturalist.org/observations/142916133</a> |
| 89 | Sagittarius serpentarius | Secretarybird | 2017/11/10 | 4 | 0 | -3.1697167 | 35.4282790 | <a href="https://www.inaturalist.org/observations/19389248">https://www.inaturalist.org/observations/19389248</a>   |
| 90 | Sagittarius serpentarius | Secretarybird | 2013/6/12  | 7 | 0 | -3.1687882 | 35.5475341 | <a href="https://www.inaturalist.org/observations/82707441">https://www.inaturalist.org/observations/82707441</a>   |
| 91 | Sagittarius serpentarius | Secretarybird | 2020/1/9   | 5 | 0 | -3.1665749 | 35.4561068 | <a href="https://www.inaturalist.org/observations/70373241">https://www.inaturalist.org/observations/70373241</a>   |

|     |                          |               |            |   |   |            |            |                                                                                                                     |
|-----|--------------------------|---------------|------------|---|---|------------|------------|---------------------------------------------------------------------------------------------------------------------|
| 92  | Sagittarius serpentarius | Secretarybird | 2018/2/1   | 4 | 0 | -3.1659281 | 35.5361222 | <a href="https://www.inaturalist.org/observations/20818244">https://www.inaturalist.org/observations/20818244</a>   |
| 93  | Sagittarius serpentarius | Secretarybird | 2017/2/19  | 8 | 0 | -3.1635978 | 35.5419880 | <a href="https://www.inaturalist.org/observations/6098406">https://www.inaturalist.org/observations/6098406</a>     |
| 94  | Sagittarius serpentarius | Secretarybird | 2014/3/30  | 4 | 0 | -3.1631842 | 35.3758562 | <a href="https://www.inaturalist.org/observations/64895943">https://www.inaturalist.org/observations/64895943</a>   |
| 95  | Sagittarius serpentarius | Secretarybird | 2017/1/11  | 4 | 0 | -3.1629025 | 35.7365425 | <a href="https://www.inaturalist.org/observations/82927491">https://www.inaturalist.org/observations/82927491</a>   |
| 96  | Sagittarius serpentarius | Secretarybird | 2022/7/11  | 3 | 0 | -3.1625391 | 35.5437513 | <a href="https://www.inaturalist.org/observations/125770696">https://www.inaturalist.org/observations/125770696</a> |
| 97  | Sagittarius serpentarius | Secretarybird | 2015/10/6  | 5 | 0 | -3.1624838 | 35.5328185 | <a href="https://www.inaturalist.org/observations/75123709">https://www.inaturalist.org/observations/75123709</a>   |
| 98  | Sagittarius serpentarius | Secretarybird | 2010/12/19 | 5 | 0 | -3.1615378 | 38.6826424 | <a href="https://www.inaturalist.org/observations/34853665">https://www.inaturalist.org/observations/34853665</a>   |
| 99  | Sagittarius serpentarius | Secretarybird | 2019/12/22 | 8 | 0 | -3.1488051 | 35.5097720 | <a href="https://www.inaturalist.org/observations/56902773">https://www.inaturalist.org/observations/56902773</a>   |
| 100 | Sagittarius serpentarius | Secretarybird | 2011/3/9   | 4 | 0 | -3.1476951 | 34.8127318 | <a href="https://www.inaturalist.org/observations/107146028">https://www.inaturalist.org/observations/107146028</a> |
| 101 | Sagittarius serpentarius | Secretarybird | 2012/12/3  | 6 | 0 | -3.1345225 | 34.8657944 | <a href="https://www.inaturalist.org/observations/27634354">https://www.inaturalist.org/observations/27634354</a>   |
| 102 | Sagittarius serpentarius | Secretarybird | 2019/2/14  | 5 | 0 | -3.1301163 | 38.0820411 | <a href="https://www.inaturalist.org/observations/49698988">https://www.inaturalist.org/observations/49698988</a>   |
| 103 | Sagittarius serpentarius | Secretarybird | 2019/8/17  | 6 | 0 | -3.1278727 | 35.5034658 | <a href="https://www.inaturalist.org/observations/107254088">https://www.inaturalist.org/observations/107254088</a> |
| 104 | Sagittarius serpentarius | Secretarybird | 2019/7/16  | 5 | 0 | -3.1111348 | 35.4503966 | <a href="https://www.inaturalist.org/observations/30282653">https://www.inaturalist.org/observations/30282653</a>   |
| 105 | Sagittarius serpentarius | Secretarybird | 2005/12/21 | 4 | 0 | -3.1074477 | 35.5650903 | <a href="https://www.inaturalist.org/observations/22335248">https://www.inaturalist.org/observations/22335248</a>   |
| 106 | Sagittarius serpentarius | Secretarybird | 2019/1/23  | 7 | 0 | -3.1063355 | 38.8417345 | <a href="https://www.inaturalist.org/observations/19838569">https://www.inaturalist.org/observations/19838569</a>   |
| 107 | Sagittarius serpentarius | Secretarybird | 2014/8/19  | 5 | 0 | -3.1016156 | 36.0205269 | <a href="https://www.inaturalist.org/observations/70385089">https://www.inaturalist.org/observations/70385089</a>   |
| 108 | Sagittarius serpentarius | Secretarybird | 2018/6/23  | 4 | 0 | -3.1000555 | 35.5151874 | <a href="https://www.inaturalist.org/observations/13999083">https://www.inaturalist.org/observations/13999083</a>   |
| 109 | Sagittarius serpentarius | Secretarybird | 2020/2/11  | 4 | 0 | -3.0982007 | 35.1744551 | <a href="https://www.inaturalist.org/observations/109088366">https://www.inaturalist.org/observations/109088366</a> |
| 110 | Sagittarius serpentarius | Secretarybird | 2018/10/21 | 6 | 0 | -3.0958190 | 35.5446175 | <a href="https://www.inaturalist.org/observations/18028016">https://www.inaturalist.org/observations/18028016</a>   |
| 111 | Sagittarius serpentarius | Secretarybird | 2008/8/10  | 8 | 0 | -3.0894760 | 35.4220806 | <a href="https://www.inaturalist.org/observations/7131270">https://www.inaturalist.org/observations/7131270</a>     |
| 112 | Sagittarius serpentarius | Secretarybird | 2017/5/28  | 6 | 0 | -3.0867823 | 35.4582444 | <a href="https://www.inaturalist.org/observations/135144965">https://www.inaturalist.org/observations/135144965</a> |
| 113 | Sagittarius serpentarius | Secretarybird | 2017/11/2  | 1 | 0 | -3.0848076 | 35.4977507 | <a href="https://www.inaturalist.org/observations/142937310">https://www.inaturalist.org/observations/142937310</a> |
| 114 | Sagittarius serpentarius | Secretarybird | 2014/9/30  | 6 | 0 | -3.0842282 | 35.4356589 | <a href="http://www.inaturalist.org/observations/1065693">http://www.inaturalist.org/observations/1065693</a>       |

|     |                          |               |            |   |   |            |            |                                                                                                                     |
|-----|--------------------------|---------------|------------|---|---|------------|------------|---------------------------------------------------------------------------------------------------------------------|
| 115 | Sagittarius serpentarius | Secretarybird | 2017/11/2  | 3 | 0 | -3.0816918 | 35.4444800 | <a href="https://www.inaturalist.org/observations/142938046">https://www.inaturalist.org/observations/142938046</a> |
| 116 | Sagittarius serpentarius | Secretarybird | 2020/1/2   | 6 | 0 | -3.0799248 | 35.5428094 | <a href="https://www.inaturalist.org/observations/37688528">https://www.inaturalist.org/observations/37688528</a>   |
| 117 | Sagittarius serpentarius | Secretarybird | 2006/11/27 | 5 | 0 | -3.0725795 | 35.4871195 | <a href="http://www.inaturalist.org/observations/2362015">http://www.inaturalist.org/observations/2362015</a>       |
| 118 | Sagittarius serpentarius | Secretarybird | 2011/9/10  | 6 | 0 | -3.0710974 | 35.5832272 | <a href="https://www.inaturalist.org/observations/130018455">https://www.inaturalist.org/observations/130018455</a> |
| 119 | Sagittarius serpentarius | Secretarybird | 2022/1/15  | 4 | 0 | -3.0699727 | 35.5220813 | <a href="https://www.inaturalist.org/observations/105513677">https://www.inaturalist.org/observations/105513677</a> |
| 120 | Sagittarius serpentarius | Secretarybird | 2019/10/1  | 8 | 0 | -3.0683329 | 35.5650985 | <a href="https://www.inaturalist.org/observations/33938225">https://www.inaturalist.org/observations/33938225</a>   |
| 121 | Sagittarius serpentarius | Secretarybird | 2015/9/16  | 4 | 0 | -3.0682850 | 35.4825753 | <a href="https://www.inaturalist.org/observations/27269313">https://www.inaturalist.org/observations/27269313</a>   |
| 122 | Sagittarius serpentarius | Secretarybird | 2007/8/10  | 4 | 0 | -3.0552779 | 35.5629483 | <a href="https://www.inaturalist.org/observations/103391863">https://www.inaturalist.org/observations/103391863</a> |
| 123 | Sagittarius serpentarius | Secretarybird | 2004/11/9  | 4 | 0 | -3.0530726 | 35.5874016 | <a href="https://www.inaturalist.org/observations/81510574">https://www.inaturalist.org/observations/81510574</a>   |
| 124 | Sagittarius serpentarius | Secretarybird | 2018/8/21  | 4 | 0 | -3.0513394 | 35.5100389 | <a href="https://www.inaturalist.org/observations/74429462">https://www.inaturalist.org/observations/74429462</a>   |
| 125 | Sagittarius serpentarius | Secretarybird | 2018/4/16  | 4 | 0 | -3.0474175 | 35.1333491 | <a href="https://www.inaturalist.org/observations/14117021">https://www.inaturalist.org/observations/14117021</a>   |
| 126 | Sagittarius serpentarius | Secretarybird | 2018/7/13  | 4 | 0 | -3.0438640 | 35.5071801 | <a href="https://www.inaturalist.org/observations/14596450">https://www.inaturalist.org/observations/14596450</a>   |
| 127 | Sagittarius serpentarius | Secretarybird | 2019/9/24  | 6 | 0 | -3.0387369 | 35.4292184 | <a href="https://www.inaturalist.org/observations/49717610">https://www.inaturalist.org/observations/49717610</a>   |
| 128 | Sagittarius serpentarius | Secretarybird | 2022/1/4   | 4 | 0 | -3.0380856 | 35.4475317 | <a href="https://www.inaturalist.org/observations/116446975">https://www.inaturalist.org/observations/116446975</a> |
| 129 | Sagittarius serpentarius | Secretarybird | 2013/2/13  | 4 | 0 | -3.0364702 | 35.1799868 | <a href="https://www.inaturalist.org/observations/34923685">https://www.inaturalist.org/observations/34923685</a>   |
| 130 | Sagittarius serpentarius | Secretarybird | 2017/11/11 | 4 | 0 | -3.0346430 | 35.5318401 | <a href="https://www.inaturalist.org/observations/19434764">https://www.inaturalist.org/observations/19434764</a>   |
| 131 | Sagittarius serpentarius | Secretarybird | 2018/7/27  | 4 | 0 | -3.0258473 | 35.5912076 | <a href="https://www.inaturalist.org/observations/14819329">https://www.inaturalist.org/observations/14819329</a>   |
| 132 | Sagittarius serpentarius | Secretarybird | 2019/11/3  | 6 | 0 | -3.0195984 | 35.5376665 | <a href="https://www.inaturalist.org/observations/35937704">https://www.inaturalist.org/observations/35937704</a>   |
| 133 | Sagittarius serpentarius | Secretarybird | 2017/11/2  | 2 | 0 | -3.0187148 | 35.4678254 | <a href="https://www.inaturalist.org/observations/142937312">https://www.inaturalist.org/observations/142937312</a> |
| 134 | Sagittarius serpentarius | Secretarybird | 2017/12/4  | 5 | 0 | -3.0138526 | 35.4117044 | <a href="https://www.inaturalist.org/observations/51997861">https://www.inaturalist.org/observations/51997861</a>   |
| 135 | Sagittarius serpentarius | Secretarybird | 2018/1/27  | 4 | 0 | -3.0011126 | 34.9346529 | <a href="https://www.inaturalist.org/observations/16850647">https://www.inaturalist.org/observations/16850647</a>   |
| 136 | Sagittarius serpentarius | Secretarybird | 2017/8/10  | 4 | 0 | -3.0006443 | 35.4159774 | <a href="https://www.inaturalist.org/observations/17209271">https://www.inaturalist.org/observations/17209271</a>   |
| 137 | Sagittarius serpentarius | Secretarybird | 2018/11/15 | 5 | 0 | -3.0004492 | 35.5035266 | <a href="https://www.inaturalist.org/observations/21691599">https://www.inaturalist.org/observations/21691599</a>   |

|     |                          |               |            |    |   |            |            |                                                                                                                     |
|-----|--------------------------|---------------|------------|----|---|------------|------------|---------------------------------------------------------------------------------------------------------------------|
| 138 | Sagittarius serpentarius | Secretarybird | 2017/7/12  | 5  | 0 | -3.0001535 | 35.5405792 | <a href="https://www.inaturalist.org/observations/9300384">https://www.inaturalist.org/observations/9300384</a>     |
| 139 | Sagittarius serpentarius | Secretarybird | 2011/6/10  | 6  | 0 | -3.0001321 | 35.4903229 | <a href="https://www.inaturalist.org/observations/50964108">https://www.inaturalist.org/observations/50964108</a>   |
| 140 | Sagittarius serpentarius | Secretarybird | 2018/8/28  | 5  | 0 | -2.9862087 | 34.8408805 | <a href="https://www.inaturalist.org/observations/19269713">https://www.inaturalist.org/observations/19269713</a>   |
| 141 | Sagittarius serpentarius | Secretarybird | 2014/9/4   | 7  | 0 | -2.9836828 | 35.0592777 | <a href="http://www.inaturalist.org/observations/2748328">http://www.inaturalist.org/observations/2748328</a>       |
| 142 | Sagittarius serpentarius | Secretarybird | 2019/6/25  | 6  | 0 | -2.9801601 | 36.4744781 | <a href="https://www.inaturalist.org/observations/131329417">https://www.inaturalist.org/observations/131329417</a> |
| 143 | Sagittarius serpentarius | Secretarybird | 2019/11/29 | 3  | 0 | -2.9758948 | 33.8788347 | <a href="https://www.inaturalist.org/observations/68811946">https://www.inaturalist.org/observations/68811946</a>   |
| 144 | Sagittarius serpentarius | Secretarybird | 2019/10/23 | 4  | 0 | -2.9751223 | 35.1015305 | <a href="https://www.inaturalist.org/observations/35413320">https://www.inaturalist.org/observations/35413320</a>   |
| 145 | Sagittarius serpentarius | Secretarybird | 2020/6/24  | 1  | 0 | -2.9725247 | 37.8082769 | <a href="https://www.inaturalist.org/observations/51558638">https://www.inaturalist.org/observations/51558638</a>   |
| 146 | Sagittarius serpentarius | Secretarybird | 2020/2/10  | 3  | 0 | -2.9383259 | 35.0419746 | <a href="https://www.inaturalist.org/observations/108501997">https://www.inaturalist.org/observations/108501997</a> |
| 147 | Sagittarius serpentarius | Secretarybird | 2015/3/21  | 5  | 0 | -2.9380030 | 36.9547812 | <a href="https://www.inaturalist.org/observations/50765035">https://www.inaturalist.org/observations/50765035</a>   |
| 148 | Sagittarius serpentarius | Secretarybird | 2007/10/14 | 5  | 0 | -2.9379377 | 34.6964551 | <a href="https://www.inaturalist.org/observations/19669216">https://www.inaturalist.org/observations/19669216</a>   |
| 149 | Sagittarius serpentarius | Secretarybird | 2014/9/1   | 5  | 0 | -2.9325648 | 36.7751827 | <a href="https://www.inaturalist.org/observations/12104979">https://www.inaturalist.org/observations/12104979</a>   |
| 150 | Sagittarius serpentarius | Secretarybird | 2021/4/16  | 6  | 0 | -2.9321552 | 35.1471663 | <a href="https://www.inaturalist.org/observations/82612987">https://www.inaturalist.org/observations/82612987</a>   |
| 151 | Sagittarius serpentarius | Secretarybird | 2015/8/19  | 4  | 0 | -2.9080677 | 38.8429278 | <a href="https://www.inaturalist.org/observations/19351705">https://www.inaturalist.org/observations/19351705</a>   |
| 152 | Sagittarius serpentarius | Secretarybird | 2017/2/26  | 5  | 0 | -2.9029057 | 35.0424950 | <a href="https://www.inaturalist.org/observations/9519338">https://www.inaturalist.org/observations/9519338</a>     |
| 153 | Sagittarius serpentarius | Secretarybird | 2020/4/4   | 7  | 0 | -2.8971144 | 35.1924330 | <a href="https://www.inaturalist.org/observations/41405257">https://www.inaturalist.org/observations/41405257</a>   |
| 154 | Sagittarius serpentarius | Secretarybird | 2021/12/1  | 4  | 0 | -2.8867590 | 35.4277108 | <a href="https://www.inaturalist.org/observations/102308086">https://www.inaturalist.org/observations/102308086</a> |
| 155 | Sagittarius serpentarius | Secretarybird | 2016/2/7   | 10 | 0 | -2.8850678 | 35.0086331 | <a href="http://www.inaturalist.org/observations/2786910">http://www.inaturalist.org/observations/2786910</a>       |
| 156 | Sagittarius serpentarius | Secretarybird | 2022/9/13  | 1  | 0 | -2.8773416 | 38.1597936 | <a href="https://www.inaturalist.org/observations/145036168">https://www.inaturalist.org/observations/145036168</a> |
| 157 | Sagittarius serpentarius | Secretarybird | 2022/7/25  | 4  | 0 | -2.8720404 | 38.1129751 | <a href="https://www.inaturalist.org/observations/137400497">https://www.inaturalist.org/observations/137400497</a> |
| 158 | Sagittarius serpentarius | Secretarybird | 2022/1/12  | 4  | 0 | -2.8679595 | 34.8242250 | <a href="https://www.inaturalist.org/observations/105277501">https://www.inaturalist.org/observations/105277501</a> |
| 159 | Sagittarius serpentarius | Secretarybird | 2018/4/17  | 4  | 0 | -2.8631912 | 34.8402644 | <a href="https://www.inaturalist.org/observations/14117270">https://www.inaturalist.org/observations/14117270</a>   |
| 160 | Sagittarius serpentarius | Secretarybird | 2022/7/28  | 5  | 0 | -2.8522500 | 38.0628332 | <a href="https://www.inaturalist.org/observations/128281526">https://www.inaturalist.org/observations/128281526</a> |

|     |                          |               |            |    |   |            |            |                                                                                                                     |
|-----|--------------------------|---------------|------------|----|---|------------|------------|---------------------------------------------------------------------------------------------------------------------|
| 161 | Sagittarius serpentarius | Secretarybird | 2022/1/28  | 4  | 0 | -2.8489602 | 35.2330240 | <a href="https://www.inaturalist.org/observations/107240131">https://www.inaturalist.org/observations/107240131</a> |
| 162 | Sagittarius serpentarius | Secretarybird | 2013/7/2   | 6  | 0 | -2.8428892 | 37.8631014 | <a href="http://www.inaturalist.org/observations/727244">http://www.inaturalist.org/observations/727244</a>         |
| 163 | Sagittarius serpentarius | Secretarybird | 2017/2/25  | 10 | 0 | -2.8427017 | 34.8159661 | <a href="https://www.inaturalist.org/observations/6509733">https://www.inaturalist.org/observations/6509733</a>     |
| 164 | Sagittarius serpentarius | Secretarybird | 2019/11/30 | 6  | 0 | -2.8380641 | 35.0900326 | <a href="https://www.inaturalist.org/observations/68919703">https://www.inaturalist.org/observations/68919703</a>   |
| 165 | Sagittarius serpentarius | Secretarybird | 2022/1/28  | 5  | 0 | -2.8316361 | 34.9411990 | <a href="https://www.inaturalist.org/observations/107299086">https://www.inaturalist.org/observations/107299086</a> |
| 166 | Sagittarius serpentarius | Secretarybird | 2022/1/29  | 6  | 0 | -2.8314630 | 35.0573530 | <a href="https://www.inaturalist.org/observations/107422473">https://www.inaturalist.org/observations/107422473</a> |
| 167 | Sagittarius serpentarius | Secretarybird | 1986/3/17  | 5  | 0 | -2.8299633 | 38.0336848 | <a href="https://www.inaturalist.org/observations/63830392">https://www.inaturalist.org/observations/63830392</a>   |
| 168 | Sagittarius serpentarius | Secretarybird | 2017/1/27  | 4  | 0 | -2.8200903 | 34.8226547 | <a href="https://www.inaturalist.org/observations/91572042">https://www.inaturalist.org/observations/91572042</a>   |
| 169 | Sagittarius serpentarius | Secretarybird | 2013/11/12 | 3  | 0 | -2.8189306 | 35.3559058 | <a href="https://www.inaturalist.org/observations/35665316">https://www.inaturalist.org/observations/35665316</a>   |
| 170 | Sagittarius serpentarius | Secretarybird | 2021/7/20  | 4  | 0 | -2.8082119 | 35.3948537 | <a href="https://www.inaturalist.org/observations/88817735">https://www.inaturalist.org/observations/88817735</a>   |
| 171 | Sagittarius serpentarius | Secretarybird | 1990/10/18 | 7  | 0 | -2.8065989 | 35.3606562 | <a href="http://www.inaturalist.org/observations/4484397">http://www.inaturalist.org/observations/4484397</a>       |
| 172 | Sagittarius serpentarius | Secretarybird | 1993/12/28 | 6  | 0 | -2.7996426 | 34.8710350 | <a href="https://www.inaturalist.org/observations/135828251">https://www.inaturalist.org/observations/135828251</a> |
| 173 | Sagittarius serpentarius | Secretarybird | 2022/6/25  | 3  | 0 | -2.7988292 | 34.8801339 | <a href="https://www.inaturalist.org/observations/125140860">https://www.inaturalist.org/observations/125140860</a> |
| 174 | Sagittarius serpentarius | Secretarybird | 2017/5/20  | 11 | 0 | -2.7968547 | 37.2383923 | <a href="https://www.inaturalist.org/observations/6812086">https://www.inaturalist.org/observations/6812086</a>     |
| 175 | Sagittarius serpentarius | Secretarybird | 2015/9/4   | 6  | 0 | -2.7941743 | 34.8505378 | <a href="https://www.inaturalist.org/observations/67365190">https://www.inaturalist.org/observations/67365190</a>   |
| 176 | Sagittarius serpentarius | Secretarybird | 2012/6/9   | 8  | 0 | -2.7927532 | 34.8245521 | <a href="http://www.inaturalist.org/observations/509220">http://www.inaturalist.org/observations/509220</a>         |
| 177 | Sagittarius serpentarius | Secretarybird | 2021/9/9   | 7  | 0 | -2.7894082 | 34.7688350 | <a href="https://www.inaturalist.org/observations/100431815">https://www.inaturalist.org/observations/100431815</a> |
| 178 | Sagittarius serpentarius | Secretarybird | 2016/6/8   | 5  | 0 | -2.7879252 | 37.3281217 | <a href="https://www.inaturalist.org/observations/141637632">https://www.inaturalist.org/observations/141637632</a> |
| 179 | Sagittarius serpentarius | Secretarybird | 2021/7/20  | 4  | 0 | -2.7872174 | 37.3371140 | <a href="https://www.inaturalist.org/observations/88426999">https://www.inaturalist.org/observations/88426999</a>   |
| 180 | Sagittarius serpentarius | Secretarybird | 2020/12/16 | 4  | 0 | -2.7871017 | 37.2848571 | <a href="https://www.inaturalist.org/observations/79055004">https://www.inaturalist.org/observations/79055004</a>   |
| 181 | Sagittarius serpentarius | Secretarybird | 2017/7/8   | 5  | 0 | -2.7848725 | 37.2095693 | <a href="https://www.inaturalist.org/observations/77851869">https://www.inaturalist.org/observations/77851869</a>   |
| 182 | Sagittarius serpentarius | Secretarybird | 2010/5/3   | 8  | 0 | -2.7848705 | 37.3741552 | <a href="https://www.inaturalist.org/observations/7091090">https://www.inaturalist.org/observations/7091090</a>     |
| 183 | Sagittarius serpentarius | Secretarybird | 2021/9/8   | 4  | 0 | -2.7766713 | 34.7077444 | <a href="https://www.inaturalist.org/observations/100606642">https://www.inaturalist.org/observations/100606642</a> |

|     |                          |               |            |   |   |            |            |                                                                                                                     |
|-----|--------------------------|---------------|------------|---|---|------------|------------|---------------------------------------------------------------------------------------------------------------------|
| 184 | Sagittarius serpentarius | Secretarybird | 2019/6/25  | 5 | 0 | -2.7763340 | 37.3616006 | <a href="https://www.inaturalist.org/observations/37077912">https://www.inaturalist.org/observations/37077912</a>   |
| 185 | Sagittarius serpentarius | Secretarybird | 2018/3/9   | 6 | 0 | -2.7755510 | 37.2445237 | <a href="https://www.inaturalist.org/observations/56918820">https://www.inaturalist.org/observations/56918820</a>   |
| 186 | Sagittarius serpentarius | Secretarybird | 2014/12/23 | 4 | 0 | -2.7663193 | 37.3593758 | <a href="https://www.inaturalist.org/observations/65563211">https://www.inaturalist.org/observations/65563211</a>   |
| 187 | Sagittarius serpentarius | Secretarybird | 2021/8/10  | 4 | 0 | -2.7632035 | 38.5949003 | <a href="https://www.inaturalist.org/observations/136176612">https://www.inaturalist.org/observations/136176612</a> |
| 188 | Sagittarius serpentarius | Secretarybird | 2017/8/30  | 8 | 0 | -2.7631050 | 37.3205458 | <a href="https://www.inaturalist.org/observations/7891887">https://www.inaturalist.org/observations/7891887</a>     |
| 189 | Sagittarius serpentarius | Secretarybird | 2021/6/18  | 5 | 0 | -2.7517541 | 37.3648243 | <a href="https://www.inaturalist.org/observations/83480300">https://www.inaturalist.org/observations/83480300</a>   |
| 190 | Sagittarius serpentarius | Secretarybird | 2020/8/18  | 3 | 0 | -2.7453235 | 38.0036805 | <a href="https://www.inaturalist.org/observations/106379091">https://www.inaturalist.org/observations/106379091</a> |
| 191 | Sagittarius serpentarius | Secretarybird | 2016/8/12  | 4 | 0 | -2.7337672 | 34.9572670 | <a href="https://www.inaturalist.org/observations/21242041">https://www.inaturalist.org/observations/21242041</a>   |
| 192 | Sagittarius serpentarius | Secretarybird | 2022/4/12  | 5 | 0 | -2.7331937 | 37.3891618 | <a href="https://www.inaturalist.org/observations/111508970">https://www.inaturalist.org/observations/111508970</a> |
| 193 | Sagittarius serpentarius | Secretarybird | 2021/2/21  | 5 | 0 | -2.7330922 | 34.8613121 | <a href="https://www.inaturalist.org/observations/73402518">https://www.inaturalist.org/observations/73402518</a>   |
| 194 | Sagittarius serpentarius | Secretarybird | 2022/1/30  | 4 | 0 | -2.7279541 | 34.8280649 | <a href="https://www.inaturalist.org/observations/107686960">https://www.inaturalist.org/observations/107686960</a> |
| 195 | Sagittarius serpentarius | Secretarybird | 2011/4/22  | 5 | 0 | -2.7265468 | 37.2360658 | <a href="https://www.inaturalist.org/observations/50192050">https://www.inaturalist.org/observations/50192050</a>   |
| 196 | Sagittarius serpentarius | Secretarybird | 2022/9/22  | 4 | 0 | -2.7258266 | 34.8751863 | <a href="https://www.inaturalist.org/observations/136134852">https://www.inaturalist.org/observations/136134852</a> |
| 197 | Sagittarius serpentarius | Secretarybird | 2007/2/7   | 2 | 0 | -2.7224982 | 35.0623704 | <a href="https://www.inaturalist.org/observations/137128017">https://www.inaturalist.org/observations/137128017</a> |
| 198 | Sagittarius serpentarius | Secretarybird | 2018/2/9   | 5 | 0 | -2.7213436 | 37.2975999 | <a href="https://www.inaturalist.org/observations/10003046">https://www.inaturalist.org/observations/10003046</a>   |
| 199 | Sagittarius serpentarius | Secretarybird | 2016/9/5   | 3 | 0 | -2.7212797 | 34.7694056 | <a href="https://www.inaturalist.org/observations/106133548">https://www.inaturalist.org/observations/106133548</a> |
| 200 | Sagittarius serpentarius | Secretarybird | 2021/9/26  | 4 | 0 | -2.7189390 | 34.9644995 | <a href="https://www.inaturalist.org/observations/96865088">https://www.inaturalist.org/observations/96865088</a>   |
| 201 | Sagittarius serpentarius | Secretarybird | 2018/10/18 | 5 | 0 | -2.7177351 | 37.2069348 | <a href="https://www.inaturalist.org/observations/17983655">https://www.inaturalist.org/observations/17983655</a>   |
| 202 | Sagittarius serpentarius | Secretarybird | 2022/7/21  | 3 | 0 | -2.7144675 | 35.0121877 | <a href="https://www.inaturalist.org/observations/128677384">https://www.inaturalist.org/observations/128677384</a> |
| 203 | Sagittarius serpentarius | Secretarybird | 2017/6/1   | 5 | 0 | -2.7043557 | 37.3623458 | <a href="https://www.inaturalist.org/observations/17853818">https://www.inaturalist.org/observations/17853818</a>   |
| 204 | Sagittarius serpentarius | Secretarybird | 2018/3/24  | 6 | 0 | -2.7033182 | 37.3289779 | <a href="https://www.inaturalist.org/observations/10565638">https://www.inaturalist.org/observations/10565638</a>   |
| 205 | Sagittarius serpentarius | Secretarybird | 2018/7/13  | 7 | 0 | -2.7031486 | 34.8698788 | <a href="https://www.inaturalist.org/observations/14423687">https://www.inaturalist.org/observations/14423687</a>   |
| 206 | Sagittarius serpentarius | Secretarybird | 2018/10/24 | 7 | 0 | -2.7025414 | 34.6431638 | <a href="https://www.inaturalist.org/observations/18038102">https://www.inaturalist.org/observations/18038102</a>   |

|     |                          |               |            |   |   |            |            |                                                                                                                     |
|-----|--------------------------|---------------|------------|---|---|------------|------------|---------------------------------------------------------------------------------------------------------------------|
| 207 | Sagittarius serpentarius | Secretarybird | 2013/8/16  | 4 | 0 | -2.7007006 | 37.2461372 | <a href="https://www.inaturalist.org/observations/68802808">https://www.inaturalist.org/observations/68802808</a>   |
| 208 | Sagittarius serpentarius | Secretarybird | 2013/6/24  | 7 | 0 | -2.6984050 | 37.3809688 | <a href="https://www.inaturalist.org/observations/56965140">https://www.inaturalist.org/observations/56965140</a>   |
| 209 | Sagittarius serpentarius | Secretarybird | 2017/8/30  | 9 | 0 | -2.6915847 | 37.2101763 | <a href="https://www.inaturalist.org/observations/7898917">https://www.inaturalist.org/observations/7898917</a>     |
| 210 | Sagittarius serpentarius | Secretarybird | 2017/8/20  | 8 | 0 | -2.6804950 | 37.0183473 | <a href="https://www.inaturalist.org/observations/7749309">https://www.inaturalist.org/observations/7749309</a>     |
| 211 | Sagittarius serpentarius | Secretarybird | 2021/12/3  | 3 | 0 | -2.6789944 | 34.7873504 | <a href="https://www.inaturalist.org/observations/102416026">https://www.inaturalist.org/observations/102416026</a> |
| 212 | Sagittarius serpentarius | Secretarybird | 2007/10/1  | 4 | 0 | -2.6776760 | 34.9090771 | <a href="https://www.inaturalist.org/observations/25949955">https://www.inaturalist.org/observations/25949955</a>   |
| 213 | Sagittarius serpentarius | Secretarybird | 2021/8/7   | 4 | 0 | -2.6731022 | 37.2708217 | <a href="https://www.inaturalist.org/observations/94410771">https://www.inaturalist.org/observations/94410771</a>   |
| 214 | Sagittarius serpentarius | Secretarybird | 2017/11/18 | 6 | 0 | -2.6676483 | 37.2507323 | <a href="https://www.inaturalist.org/observations/19208155">https://www.inaturalist.org/observations/19208155</a>   |
| 215 | Sagittarius serpentarius | Secretarybird | 2018/9/15  | 5 | 0 | -2.6657178 | 37.2933105 | <a href="https://www.inaturalist.org/observations/53669734">https://www.inaturalist.org/observations/53669734</a>   |
| 216 | Sagittarius serpentarius | Secretarybird | 2021/5/24  | 6 | 0 | -2.6655650 | 38.5021148 | <a href="https://www.inaturalist.org/observations/82251934">https://www.inaturalist.org/observations/82251934</a>   |
| 217 | Sagittarius serpentarius | Secretarybird | 2021/12/4  | 4 | 0 | -2.6611845 | 37.3196760 | <a href="https://www.inaturalist.org/observations/102762828">https://www.inaturalist.org/observations/102762828</a> |
| 218 | Sagittarius serpentarius | Secretarybird | 2021/3/17  | 4 | 0 | -2.6565106 | 37.3358933 | <a href="https://www.inaturalist.org/observations/98468353">https://www.inaturalist.org/observations/98468353</a>   |
| 219 | Sagittarius serpentarius | Secretarybird | 2018/2/16  | 4 | 0 | -2.6532562 | 37.3786888 | <a href="https://www.inaturalist.org/observations/16312405">https://www.inaturalist.org/observations/16312405</a>   |
| 220 | Sagittarius serpentarius | Secretarybird | 2018/7/13  | 4 | 0 | -2.6500783 | 34.9880872 | <a href="https://www.inaturalist.org/observations/15193918">https://www.inaturalist.org/observations/15193918</a>   |
| 221 | Sagittarius serpentarius | Secretarybird | 2005/12/22 | 4 | 0 | -2.6474154 | 34.9587072 | <a href="https://www.inaturalist.org/observations/21642568">https://www.inaturalist.org/observations/21642568</a>   |
| 222 | Sagittarius serpentarius | Secretarybird | 2019/6/26  | 5 | 0 | -2.6457784 | 34.9286655 | <a href="https://www.inaturalist.org/observations/29662595">https://www.inaturalist.org/observations/29662595</a>   |
| 223 | Sagittarius serpentarius | Secretarybird | 2010/6/13  | 4 | 0 | -2.6454681 | 34.9261659 | <a href="https://www.inaturalist.org/observations/36057829">https://www.inaturalist.org/observations/36057829</a>   |
| 224 | Sagittarius serpentarius | Secretarybird | 2022/5/15  | 6 | 0 | -2.6431435 | 37.2593368 | <a href="https://www.inaturalist.org/observations/117584425">https://www.inaturalist.org/observations/117584425</a> |
| 225 | Sagittarius serpentarius | Secretarybird | 2019/9/17  | 6 | 0 | -2.6373631 | 37.1947709 | <a href="https://www.inaturalist.org/observations/35704610">https://www.inaturalist.org/observations/35704610</a>   |
| 226 | Sagittarius serpentarius | Secretarybird | 2020/5/10  | 3 | 0 | -2.6344274 | 37.3350280 | <a href="https://www.inaturalist.org/observations/45516496">https://www.inaturalist.org/observations/45516496</a>   |
| 227 | Sagittarius serpentarius | Secretarybird | 2018/8/30  | 4 | 0 | -2.6305124 | 37.2160551 | <a href="https://www.inaturalist.org/observations/19326379">https://www.inaturalist.org/observations/19326379</a>   |
| 228 | Sagittarius serpentarius | Secretarybird | 2022/10/3  | 3 | 0 | -2.6281130 | 37.2965144 | <a href="https://www.inaturalist.org/observations/140056988">https://www.inaturalist.org/observations/140056988</a> |
| 229 | Sagittarius serpentarius | Secretarybird | 2017/9/26  | 5 | 0 | -2.6250514 | 37.3304270 | <a href="https://www.inaturalist.org/observations/70273061">https://www.inaturalist.org/observations/70273061</a>   |

|     |                          |               |            |    |   |            |            |                                                                                                                     |
|-----|--------------------------|---------------|------------|----|---|------------|------------|---------------------------------------------------------------------------------------------------------------------|
| 230 | Sagittarius serpentarius | Secretarybird | 2015/9/28  | 5  | 0 | -2.6202732 | 37.2107180 | <a href="https://www.inaturalist.org/observations/134607781">https://www.inaturalist.org/observations/134607781</a> |
| 231 | Sagittarius serpentarius | Secretarybird | 2022/10/5  | 2  | 0 | -2.6185566 | 37.3436543 | <a href="https://www.inaturalist.org/observations/144751923">https://www.inaturalist.org/observations/144751923</a> |
| 232 | Sagittarius serpentarius | Secretarybird | 2018/8/7   | 7  | 0 | -2.6181262 | 35.1604659 | <a href="https://www.inaturalist.org/observations/15397665">https://www.inaturalist.org/observations/15397665</a>   |
| 233 | Sagittarius serpentarius | Secretarybird | 2019/10/19 | 7  | 0 | -2.6172752 | 37.3863703 | <a href="https://www.inaturalist.org/observations/34732820">https://www.inaturalist.org/observations/34732820</a>   |
| 234 | Sagittarius serpentarius | Secretarybird | 2015/3/23  | 10 | 0 | -2.6089161 | 34.9756094 | <a href="https://www.inaturalist.org/observations/6887996">https://www.inaturalist.org/observations/6887996</a>     |
| 235 | Sagittarius serpentarius | Secretarybird | 2009/1/9   | 6  | 0 | -2.6076455 | 34.8058456 | <a href="https://www.inaturalist.org/observations/135951409">https://www.inaturalist.org/observations/135951409</a> |
| 236 | Sagittarius serpentarius | Secretarybird | 2019/8/8   | 5  | 0 | -2.6042137 | 37.2514338 | <a href="https://www.inaturalist.org/observations/31625521">https://www.inaturalist.org/observations/31625521</a>   |
| 237 | Sagittarius serpentarius | Secretarybird | 2007/10/10 | 4  | 0 | -2.6029955 | 37.2272888 | <a href="https://www.inaturalist.org/observations/19543459">https://www.inaturalist.org/observations/19543459</a>   |
| 238 | Sagittarius serpentarius | Secretarybird | 2019/5/16  | 3  | 0 | -2.6026430 | 35.3024589 | <a href="https://www.inaturalist.org/observations/69769062">https://www.inaturalist.org/observations/69769062</a>   |
| 239 | Sagittarius serpentarius | Secretarybird | 2019/8/22  | 6  | 0 | -2.5968989 | 34.8229872 | <a href="https://www.inaturalist.org/observations/32776527">https://www.inaturalist.org/observations/32776527</a>   |
| 240 | Sagittarius serpentarius | Secretarybird | 2022/7/20  | 4  | 0 | -2.5948565 | 34.8315430 | <a href="https://www.inaturalist.org/observations/128518466">https://www.inaturalist.org/observations/128518466</a> |
| 241 | Sagittarius serpentarius | Secretarybird | 2018/4/12  | 5  | 0 | -2.5928934 | 34.8035032 | <a href="https://www.inaturalist.org/observations/13624890">https://www.inaturalist.org/observations/13624890</a>   |
| 242 | Sagittarius serpentarius | Secretarybird | 2019/10/3  | 4  | 0 | -2.5926140 | 37.2447580 | <a href="https://www.inaturalist.org/observations/36427323">https://www.inaturalist.org/observations/36427323</a>   |
| 243 | Sagittarius serpentarius | Secretarybird | 2022/7/20  | 4  | 0 | -2.5925277 | 35.1473529 | <a href="https://www.inaturalist.org/observations/128521198">https://www.inaturalist.org/observations/128521198</a> |
| 244 | Sagittarius serpentarius | Secretarybird | 2018/5/17  | 5  | 0 | -2.5905038 | 34.9072928 | <a href="https://www.inaturalist.org/observations/13009563">https://www.inaturalist.org/observations/13009563</a>   |
| 245 | Sagittarius serpentarius | Secretarybird | 2017/9/20  | 6  | 0 | -2.5867039 | 34.8007376 | <a href="https://www.inaturalist.org/observations/33292850">https://www.inaturalist.org/observations/33292850</a>   |
| 246 | Sagittarius serpentarius | Secretarybird | 2015/8/14  | 4  | 0 | -2.5848390 | 34.8914850 | <a href="https://www.inaturalist.org/observations/14374042">https://www.inaturalist.org/observations/14374042</a>   |
| 247 | Sagittarius serpentarius | Secretarybird | 2018/10/22 | 7  | 0 | -2.5741771 | 34.9549582 | <a href="https://www.inaturalist.org/observations/18028385">https://www.inaturalist.org/observations/18028385</a>   |
| 248 | Sagittarius serpentarius | Secretarybird | 2013/11/13 | 4  | 0 | -2.5718847 | 34.9673349 | <a href="https://www.inaturalist.org/observations/35665334">https://www.inaturalist.org/observations/35665334</a>   |
| 249 | Sagittarius serpentarius | Secretarybird | 2018/5/17  | 6  | 0 | -2.5702385 | 34.9141147 | <a href="https://www.inaturalist.org/observations/18878695">https://www.inaturalist.org/observations/18878695</a>   |
| 250 | Sagittarius serpentarius | Secretarybird | 2007/11/10 | 4  | 0 | -2.5665024 | 34.8837344 | <a href="https://www.inaturalist.org/observations/124223540">https://www.inaturalist.org/observations/124223540</a> |
| 251 | Sagittarius serpentarius | Secretarybird | 2007/11/11 | 4  | 0 | -2.5597654 | 38.5249331 | <a href="https://www.inaturalist.org/observations/19714179">https://www.inaturalist.org/observations/19714179</a>   |
| 252 | Sagittarius serpentarius | Secretarybird | 2015/9/21  | 4  | 0 | -2.5556532 | 34.9233743 | <a href="https://www.inaturalist.org/observations/12315219">https://www.inaturalist.org/observations/12315219</a>   |



|     |                          |               |            |    |   |            |            |                                                                                                                     |
|-----|--------------------------|---------------|------------|----|---|------------|------------|---------------------------------------------------------------------------------------------------------------------|
| 253 | Sagittarius serpentarius | Secretarybird | 2021/8/15  | 4  | 0 | -2.5521700 | 34.6320298 | <a href="https://www.inaturalist.org/observations/94919311">https://www.inaturalist.org/observations/94919311</a>   |
| 254 | Sagittarius serpentarius | Secretarybird | 2013/7/28  | 11 | 0 | -2.5490960 | 34.8061183 | <a href="http://inaturalist.ca/observations/6435764">http://inaturalist.ca/observations/6435764</a>                 |
| 255 | Sagittarius serpentarius | Secretarybird | 2018/7/15  | 7  | 0 | -2.5488256 | 34.8143659 | <a href="https://www.inaturalist.org/observations/15223403">https://www.inaturalist.org/observations/15223403</a>   |
| 256 | Sagittarius serpentarius | Secretarybird | 2021/11/3  | 7  | 0 | -2.5411199 | 34.7306342 | <a href="https://www.inaturalist.org/observations/100128831">https://www.inaturalist.org/observations/100128831</a> |
| 257 | Sagittarius serpentarius | Secretarybird | 1996/1/31  | 2  | 0 | -2.5374537 | 34.8598490 | <a href="https://www.inaturalist.org/observations/68358338">https://www.inaturalist.org/observations/68358338</a>   |
| 258 | Sagittarius serpentarius | Secretarybird | 2022/7/21  | 8  | 0 | -2.5354195 | 34.7524737 | <a href="https://www.inaturalist.org/observations/131796740">https://www.inaturalist.org/observations/131796740</a> |
| 259 | Sagittarius serpentarius | Secretarybird | 2019/8/22  | 6  | 0 | -2.5353769 | 34.9771596 | <a href="https://www.inaturalist.org/observations/34071847">https://www.inaturalist.org/observations/34071847</a>   |
| 260 | Sagittarius serpentarius | Secretarybird | 2018/10/26 | 6  | 0 | -2.5337298 | 34.9914558 | <a href="https://www.inaturalist.org/observations/18053730">https://www.inaturalist.org/observations/18053730</a>   |
| 261 | Sagittarius serpentarius | Secretarybird | 2019/1/1   | 6  | 0 | -2.5271332 | 34.6946829 | <a href="https://www.inaturalist.org/observations/57927568">https://www.inaturalist.org/observations/57927568</a>   |
| 262 | Sagittarius serpentarius | Secretarybird | 2021/9/8   | 5  | 0 | -2.5218692 | 34.9330301 | <a href="https://www.inaturalist.org/observations/94358907">https://www.inaturalist.org/observations/94358907</a>   |
| 263 | Sagittarius serpentarius | Secretarybird | 2022/10/2  | 3  | 0 | -2.5189454 | 34.9571306 | <a href="https://www.inaturalist.org/observations/139811306">https://www.inaturalist.org/observations/139811306</a> |
| 264 | Sagittarius serpentarius | Secretarybird | 2018/7/1   | 4  | 0 | -2.5075753 | 35.0654605 | <a href="https://www.inaturalist.org/observations/13930658">https://www.inaturalist.org/observations/13930658</a>   |
| 265 | Sagittarius serpentarius | Secretarybird | 2022/7/21  | 4  | 0 | -2.5066276 | 34.9177158 | <a href="https://www.inaturalist.org/observations/128136725">https://www.inaturalist.org/observations/128136725</a> |
| 266 | Sagittarius serpentarius | Secretarybird | 2021/9/9   | 5  | 0 | -2.5049620 | 34.8452794 | <a href="https://www.inaturalist.org/observations/100428942">https://www.inaturalist.org/observations/100428942</a> |
| 267 | Sagittarius serpentarius | Secretarybird | 2008/7/28  | 3  | 0 | -2.5001567 | 34.8927986 | <a href="https://www.inaturalist.org/observations/68408942">https://www.inaturalist.org/observations/68408942</a>   |
| 268 | Sagittarius serpentarius | Secretarybird | 2019/9/19  | 5  | 0 | -2.4976495 | 34.8513423 | <a href="https://www.inaturalist.org/observations/34006012">https://www.inaturalist.org/observations/34006012</a>   |
| 269 | Sagittarius serpentarius | Secretarybird | 2019/11/1  | 5  | 0 | -2.4925616 | 35.1761202 | <a href="https://www.inaturalist.org/observations/35456008">https://www.inaturalist.org/observations/35456008</a>   |
| 270 | Sagittarius serpentarius | Secretarybird | 2010/8/2   | 4  | 0 | -2.4804536 | 34.8412257 | <a href="https://www.inaturalist.org/observations/68535637">https://www.inaturalist.org/observations/68535637</a>   |
| 271 | Sagittarius serpentarius | Secretarybird | 2021/12/25 | 4  | 0 | -2.4769190 | 34.9047727 | <a href="https://www.inaturalist.org/observations/104564967">https://www.inaturalist.org/observations/104564967</a> |
| 272 | Sagittarius serpentarius | Secretarybird | 2020/1/1   | 5  | 0 | -2.4763748 | 34.9604479 | <a href="https://www.inaturalist.org/observations/120954780">https://www.inaturalist.org/observations/120954780</a> |
| 273 | Sagittarius serpentarius | Secretarybird | 2013/11/13 | 5  | 0 | -2.4730941 | 34.9424285 | <a href="https://www.inaturalist.org/observations/35665350">https://www.inaturalist.org/observations/35665350</a>   |
| 274 | Sagittarius serpentarius | Secretarybird | 2020/7/9   | 3  | 0 | -2.4713594 | 34.6680027 | <a href="https://www.inaturalist.org/observations/105375806">https://www.inaturalist.org/observations/105375806</a> |
| 275 | Sagittarius serpentarius | Secretarybird | 2015/12/22 | 7  | 0 | -2.4702500 | 38.4221012 | <a href="https://www.inaturalist.org/observations/7643543">https://www.inaturalist.org/observations/7643543</a>     |

|     |                          |               |            |   |   |            |            |                                                                                                                     |
|-----|--------------------------|---------------|------------|---|---|------------|------------|---------------------------------------------------------------------------------------------------------------------|
| 276 | Sagittarius serpentarius | Secretarybird | 2011/3/15  | 3 | 0 | -2.4680388 | 34.9462312 | <a href="https://www.inaturalist.org/observations/38770955">https://www.inaturalist.org/observations/38770955</a>   |
| 277 | Sagittarius serpentarius | Secretarybird | 2014/6/22  | 8 | 0 | -2.4660207 | 34.7632445 | <a href="https://www.inaturalist.org/observations/6620633">https://www.inaturalist.org/observations/6620633</a>     |
| 278 | Sagittarius serpentarius | Secretarybird | 2019/6/12  | 4 | 0 | -2.4657824 | 34.5969462 | <a href="https://www.inaturalist.org/observations/128057811">https://www.inaturalist.org/observations/128057811</a> |
| 279 | Sagittarius serpentarius | Secretarybird | 2016/2/21  | 7 | 0 | -2.4528554 | 34.8635270 | <a href="https://www.inaturalist.org/observations/12519420">https://www.inaturalist.org/observations/12519420</a>   |
| 280 | Sagittarius serpentarius | Secretarybird | 2022/7/22  | 5 | 0 | -2.4505477 | 34.9366253 | <a href="https://www.inaturalist.org/observations/128725463">https://www.inaturalist.org/observations/128725463</a> |
| 281 | Sagittarius serpentarius | Secretarybird | 2022/1/14  | 4 | 0 | -2.4451152 | 34.8852549 | <a href="https://www.inaturalist.org/observations/105443064">https://www.inaturalist.org/observations/105443064</a> |
| 282 | Sagittarius serpentarius | Secretarybird | 2005/1/2   | 5 | 0 | -2.4372683 | 34.9609331 | <a href="https://www.inaturalist.org/observations/24432960">https://www.inaturalist.org/observations/24432960</a>   |
| 283 | Sagittarius serpentarius | Secretarybird | 2020/2/3   | 6 | 0 | -2.4339603 | 34.7571432 | <a href="https://www.inaturalist.org/observations/38385064">https://www.inaturalist.org/observations/38385064</a>   |
| 284 | Sagittarius serpentarius | Secretarybird | 2022/11/19 | 3 | 0 | -2.4266817 | 34.8241597 | <a href="https://www.inaturalist.org/observations/144163788">https://www.inaturalist.org/observations/144163788</a> |
| 285 | Sagittarius serpentarius | Secretarybird | 2019/8/13  | 3 | 0 | -2.4149575 | 35.0171374 | <a href="https://www.inaturalist.org/observations/45890390">https://www.inaturalist.org/observations/45890390</a>   |
| 286 | Sagittarius serpentarius | Secretarybird | 1993/12/29 | 5 | 0 | -2.4145113 | 34.9317555 | <a href="https://www.inaturalist.org/observations/135833222">https://www.inaturalist.org/observations/135833222</a> |
| 287 | Sagittarius serpentarius | Secretarybird | 2019/10/10 | 4 | 0 | -2.4093762 | 34.8214924 | <a href="https://www.inaturalist.org/observations/108170519">https://www.inaturalist.org/observations/108170519</a> |
| 288 | Sagittarius serpentarius | Secretarybird | 2022/11/18 | 3 | 0 | -2.4077222 | 34.8382231 | <a href="https://www.inaturalist.org/observations/144344202">https://www.inaturalist.org/observations/144344202</a> |
| 289 | Sagittarius serpentarius | Secretarybird | 2019/2/4   | 3 | 0 | -2.4062529 | 34.9487026 | <a href="https://www.inaturalist.org/observations/137617358">https://www.inaturalist.org/observations/137617358</a> |
| 290 | Sagittarius serpentarius | Secretarybird | 2008/9/6   | 4 | 0 | -2.3980366 | 34.9132973 | <a href="https://www.inaturalist.org/observations/112628278">https://www.inaturalist.org/observations/112628278</a> |
| 291 | Sagittarius serpentarius | Secretarybird | 2007/12/7  | 3 | 0 | -2.3963598 | 34.8374115 | <a href="https://www.inaturalist.org/observations/69758955">https://www.inaturalist.org/observations/69758955</a>   |
| 292 | Sagittarius serpentarius | Secretarybird | 2011/7/11  | 5 | 0 | -2.3946690 | 34.8948900 | <a href="https://www.inaturalist.org/observations/55129479">https://www.inaturalist.org/observations/55129479</a>   |
| 293 | Sagittarius serpentarius | Secretarybird | 2020/12/24 | 4 | 0 | -2.3937953 | 34.7642780 | <a href="https://www.inaturalist.org/observations/67791635">https://www.inaturalist.org/observations/67791635</a>   |
| 294 | Sagittarius serpentarius | Secretarybird | 2019/9/17  | 6 | 0 | -2.3931391 | 34.5722285 | <a href="https://www.inaturalist.org/observations/33465227">https://www.inaturalist.org/observations/33465227</a>   |
| 295 | Sagittarius serpentarius | Secretarybird | 2022/7/12  | 4 | 0 | -2.3929366 | 34.9707298 | <a href="https://www.inaturalist.org/observations/127278994">https://www.inaturalist.org/observations/127278994</a> |
| 296 | Sagittarius serpentarius | Secretarybird | 2017/9/23  | 4 | 0 | -2.3893936 | 34.9332146 | <a href="https://www.inaturalist.org/observations/69624609">https://www.inaturalist.org/observations/69624609</a>   |
| 297 | Sagittarius serpentarius | Secretarybird | 2009/2/26  | 5 | 0 | -2.3868252 | 34.9878664 | <a href="https://www.inaturalist.org/observations/92408380">https://www.inaturalist.org/observations/92408380</a>   |
| 298 | Sagittarius serpentarius | Secretarybird | 2018/11/25 | 4 | 0 | -2.3789041 | 34.9738928 | <a href="https://www.inaturalist.org/observations/96480482">https://www.inaturalist.org/observations/96480482</a>   |

|     |                          |               |            |   |   |            |            |                                                                                                                     |
|-----|--------------------------|---------------|------------|---|---|------------|------------|---------------------------------------------------------------------------------------------------------------------|
| 299 | Sagittarius serpentarius | Secretarybird | 2011/2/21  | 6 | 0 | -2.3734183 | 34.4178035 | <a href="https://www.inaturalist.org/observations/109229551">https://www.inaturalist.org/observations/109229551</a> |
| 300 | Sagittarius serpentarius | Secretarybird | 2018/8/22  | 4 | 0 | -2.3695055 | 34.6332983 | <a href="https://www.inaturalist.org/observations/134307244">https://www.inaturalist.org/observations/134307244</a> |
| 301 | Sagittarius serpentarius | Secretarybird | 2018/9/5   | 6 | 0 | -2.3669546 | 34.9457726 | <a href="https://www.inaturalist.org/observations/16698286">https://www.inaturalist.org/observations/16698286</a>   |
| 302 | Sagittarius serpentarius | Secretarybird | 2017/7/14  | 4 | 0 | -2.3633325 | 34.8878423 | <a href="https://www.inaturalist.org/observations/69122626">https://www.inaturalist.org/observations/69122626</a>   |
| 303 | Sagittarius serpentarius | Secretarybird | 2016/9/19  | 4 | 0 | -2.3624738 | 34.9087313 | <a href="https://www.inaturalist.org/observations/98199890">https://www.inaturalist.org/observations/98199890</a>   |
| 304 | Sagittarius serpentarius | Secretarybird | 2019/6/29  | 5 | 0 | -2.3622092 | 34.9991000 | <a href="https://www.inaturalist.org/observations/34869161">https://www.inaturalist.org/observations/34869161</a>   |
| 305 | Sagittarius serpentarius | Secretarybird | 2017/7/14  | 4 | 0 | -2.3617751 | 34.9524124 | <a href="https://www.inaturalist.org/observations/50949635">https://www.inaturalist.org/observations/50949635</a>   |
| 306 | Sagittarius serpentarius | Secretarybird | 2021/11/3  | 5 | 0 | -2.3565106 | 34.9090577 | <a href="https://www.inaturalist.org/observations/102130042">https://www.inaturalist.org/observations/102130042</a> |
| 307 | Sagittarius serpentarius | Secretarybird | 2017/11/22 | 4 | 0 | -2.3504484 | 34.7271406 | <a href="https://www.inaturalist.org/observations/19388827">https://www.inaturalist.org/observations/19388827</a>   |
| 308 | Sagittarius serpentarius | Secretarybird | 2017/7/25  | 5 | 0 | -2.3414190 | 34.8286669 | <a href="https://www.inaturalist.org/observations/136913665">https://www.inaturalist.org/observations/136913665</a> |
| 309 | Sagittarius serpentarius | Secretarybird | 2019/6/12  | 4 | 0 | -2.3412376 | 34.9902511 | <a href="https://www.inaturalist.org/observations/128060099">https://www.inaturalist.org/observations/128060099</a> |
| 310 | Sagittarius serpentarius | Secretarybird | 2018/1/22  | 4 | 0 | -2.3392631 | 34.7461291 | <a href="https://www.inaturalist.org/observations/81490923">https://www.inaturalist.org/observations/81490923</a>   |
| 311 | Sagittarius serpentarius | Secretarybird | 2019/12/26 | 6 | 0 | -2.3387242 | 34.9155800 | <a href="https://www.inaturalist.org/observations/40657733">https://www.inaturalist.org/observations/40657733</a>   |
| 312 | Sagittarius serpentarius | Secretarybird | 2010/10/31 | 5 | 0 | -2.3269659 | 34.8173033 | <a href="https://www.inaturalist.org/observations/23049300">https://www.inaturalist.org/observations/23049300</a>   |
| 313 | Sagittarius serpentarius | Secretarybird | 2007/6/22  | 5 | 0 | -2.3233922 | 34.8543916 | <a href="https://www.inaturalist.org/observations/56786945">https://www.inaturalist.org/observations/56786945</a>   |
| 314 | Sagittarius serpentarius | Secretarybird | 2015/10/8  | 4 | 0 | -2.3213022 | 34.8693419 | <a href="https://www.inaturalist.org/observations/79592841">https://www.inaturalist.org/observations/79592841</a>   |
| 315 | Sagittarius serpentarius | Secretarybird | 2019/9/8   | 4 | 0 | -2.3212098 | 34.9834096 | <a href="https://www.inaturalist.org/observations/102681580">https://www.inaturalist.org/observations/102681580</a> |
| 316 | Sagittarius serpentarius | Secretarybird | 2020/2/25  | 4 | 0 | -2.3137517 | 34.8978499 | <a href="https://www.inaturalist.org/observations/70440246">https://www.inaturalist.org/observations/70440246</a>   |
| 317 | Sagittarius serpentarius | Secretarybird | 2010/4/28  | 5 | 0 | -2.3113852 | 34.6671841 | <a href="https://www.inaturalist.org/observations/136003402">https://www.inaturalist.org/observations/136003402</a> |
| 318 | Sagittarius serpentarius | Secretarybird | 2018/7/2   | 5 | 0 | -2.3107549 | 34.4211672 | <a href="https://www.inaturalist.org/observations/14782108">https://www.inaturalist.org/observations/14782108</a>   |
| 319 | Sagittarius serpentarius | Secretarybird | 2012/8/7   | 5 | 0 | -2.3072956 | 34.9192972 | <a href="https://www.inaturalist.org/observations/69941311">https://www.inaturalist.org/observations/69941311</a>   |
| 320 | Sagittarius serpentarius | Secretarybird | 2019/12/24 | 6 | 0 | -2.3050717 | 34.8255838 | <a href="https://www.inaturalist.org/observations/40657734">https://www.inaturalist.org/observations/40657734</a>   |
| 321 | Sagittarius serpentarius | Secretarybird | 2019/9/7   | 5 | 0 | -2.3044817 | 34.8636226 | <a href="https://www.inaturalist.org/observations/39509559">https://www.inaturalist.org/observations/39509559</a>   |

|     |                          |               |            |   |   |            |            |                                                                                                                     |
|-----|--------------------------|---------------|------------|---|---|------------|------------|---------------------------------------------------------------------------------------------------------------------|
| 322 | Sagittarius serpentarius | Secretarybird | 2016/1/13  | 5 | 0 | -2.2973077 | 34.9616923 | <a href="https://www.inaturalist.org/observations/9867734">https://www.inaturalist.org/observations/9867734</a>     |
| 323 | Sagittarius serpentarius | Secretarybird | 2015/8/3   | 5 | 0 | -2.2962794 | 34.9385838 | <a href="https://www.inaturalist.org/observations/35452435">https://www.inaturalist.org/observations/35452435</a>   |
| 324 | Sagittarius serpentarius | Secretarybird | 2008/9/6   | 5 | 0 | -2.2816835 | 34.9437348 | <a href="https://www.inaturalist.org/observations/112628591">https://www.inaturalist.org/observations/112628591</a> |
| 325 | Sagittarius serpentarius | Secretarybird | 1982/10/1  | 7 | 0 | -2.2785813 | 34.6086085 | <a href="http://www.inaturalist.org/observations/585372">http://www.inaturalist.org/observations/585372</a>         |
| 326 | Sagittarius serpentarius | Secretarybird | 2016/10/18 | 6 | 0 | -2.2783954 | 34.8344346 | <a href="https://www.inaturalist.org/observations/40045461">https://www.inaturalist.org/observations/40045461</a>   |
| 327 | Sagittarius serpentarius | Secretarybird | 2018/4/7   | 6 | 0 | -2.2774956 | 34.6064238 | <a href="https://www.inaturalist.org/observations/107803459">https://www.inaturalist.org/observations/107803459</a> |
| 328 | Sagittarius serpentarius | Secretarybird | 2021/9/9   | 6 | 0 | -2.2740570 | 34.6512240 | <a href="https://www.inaturalist.org/observations/100858353">https://www.inaturalist.org/observations/100858353</a> |
| 329 | Sagittarius serpentarius | Secretarybird | 2019/10/1  | 4 | 0 | -2.2659793 | 34.9312630 | <a href="https://www.inaturalist.org/observations/35656787">https://www.inaturalist.org/observations/35656787</a>   |
| 330 | Sagittarius serpentarius | Secretarybird | 2018/8/22  | 4 | 0 | -2.2625689 | 34.8930865 | <a href="https://www.inaturalist.org/observations/37891471">https://www.inaturalist.org/observations/37891471</a>   |
| 331 | Sagittarius serpentarius | Secretarybird | 2017/5/28  | 6 | 0 | -2.2540967 | 34.7526666 | <a href="https://www.inaturalist.org/observations/106959937">https://www.inaturalist.org/observations/106959937</a> |
| 332 | Sagittarius serpentarius | Secretarybird | 2017/11/6  | 5 | 0 | -2.2534205 | 34.4070100 | <a href="https://www.inaturalist.org/observations/19347541">https://www.inaturalist.org/observations/19347541</a>   |
| 333 | Sagittarius serpentarius | Secretarybird | 2014/11/14 | 4 | 0 | -2.2441481 | 34.8140049 | <a href="https://www.inaturalist.org/observations/20023620">https://www.inaturalist.org/observations/20023620</a>   |
| 334 | Sagittarius serpentarius | Secretarybird | 2022/1/20  | 4 | 0 | -2.2423280 | 37.0728681 | <a href="https://www.inaturalist.org/observations/105441452">https://www.inaturalist.org/observations/105441452</a> |
| 335 | Sagittarius serpentarius | Secretarybird | 2016/8/8   | 4 | 0 | -2.2344365 | 34.8749997 | <a href="https://www.inaturalist.org/observations/22102855">https://www.inaturalist.org/observations/22102855</a>   |
| 336 | Sagittarius serpentarius | Secretarybird | 2022/1/13  | 5 | 0 | -2.2202920 | 34.6368465 | <a href="https://www.inaturalist.org/observations/105312229">https://www.inaturalist.org/observations/105312229</a> |
| 337 | Sagittarius serpentarius | Secretarybird | 2009/2/13  | 6 | 0 | -2.2177302 | 34.9634595 | <a href="https://www.inaturalist.org/observations/59799416">https://www.inaturalist.org/observations/59799416</a>   |
| 338 | Sagittarius serpentarius | Secretarybird | 2011/11/24 | 5 | 0 | -2.2167101 | 34.9059167 | <a href="https://www.inaturalist.org/observations/21512035">https://www.inaturalist.org/observations/21512035</a>   |
| 339 | Sagittarius serpentarius | Secretarybird | 2019/6/13  | 4 | 0 | -2.2031634 | 34.8214177 | <a href="https://www.inaturalist.org/observations/128062635">https://www.inaturalist.org/observations/128062635</a> |
| 340 | Sagittarius serpentarius | Secretarybird | 2018/1/22  | 4 | 0 | -2.2002902 | 34.7889883 | <a href="https://www.inaturalist.org/observations/81375048">https://www.inaturalist.org/observations/81375048</a>   |
| 341 | Sagittarius serpentarius | Secretarybird | 2012/4/19  | 4 | 0 | -2.1528862 | 35.0609502 | <a href="https://www.inaturalist.org/observations/85742144">https://www.inaturalist.org/observations/85742144</a>   |
| 342 | Sagittarius serpentarius | Secretarybird | 2009/9/29  | 9 | 0 | -2.1402263 | 34.6354387 | <a href="http://www.inaturalist.org/observations/871121">http://www.inaturalist.org/observations/871121</a>         |
| 343 | Sagittarius serpentarius | Secretarybird | 2007/7/14  | 6 | 0 | -2.1380086 | 34.9190908 | <a href="https://www.inaturalist.org/observations/57898667">https://www.inaturalist.org/observations/57898667</a>   |
| 344 | Sagittarius serpentarius | Secretarybird | 2017/9/19  | 6 | 0 | -2.0956670 | 35.1802895 | <a href="https://www.inaturalist.org/observations/33292849">https://www.inaturalist.org/observations/33292849</a>   |

|     |                          |               |            |   |   |            |            |                                                                                                                     |
|-----|--------------------------|---------------|------------|---|---|------------|------------|---------------------------------------------------------------------------------------------------------------------|
| 345 | Sagittarius serpentarius | Secretarybird | 2018/6/25  | 4 | 0 | -2.0927366 | 34.6321706 | <a href="https://www.inaturalist.org/observations/15092474">https://www.inaturalist.org/observations/15092474</a>   |
| 346 | Sagittarius serpentarius | Secretarybird | 1998/11/10 | 7 | 0 | -2.0901537 | 35.1162059 | <a href="http://www.inaturalist.org/observations/4397774">http://www.inaturalist.org/observations/4397774</a>       |
| 347 | Sagittarius serpentarius | Secretarybird | 2007/9/24  | 6 | 0 | -2.0834189 | 34.9023214 | <a href="https://www.inaturalist.org/observations/56284679">https://www.inaturalist.org/observations/56284679</a>   |
| 348 | Sagittarius serpentarius | Secretarybird | 2017/9/19  | 6 | 0 | -2.0625183 | 35.0422347 | <a href="https://www.inaturalist.org/observations/33292848">https://www.inaturalist.org/observations/33292848</a>   |
| 349 | Sagittarius serpentarius | Secretarybird | 2022/9/3   | 5 | 0 | -2.0508973 | 35.4492543 | <a href="https://www.inaturalist.org/observations/134410564">https://www.inaturalist.org/observations/134410564</a> |
| 350 | Sagittarius serpentarius | Secretarybird | 2007/7/14  | 5 | 0 | -2.0107121 | 34.9068867 | <a href="https://www.inaturalist.org/observations/57898668">https://www.inaturalist.org/observations/57898668</a>   |
| 351 | Sagittarius serpentarius | Secretarybird | 2012/9/24  | 6 | 0 | -2.0089840 | 35.5901277 | <a href="http://www.inaturalist.org/observations/3121689">http://www.inaturalist.org/observations/3121689</a>       |
| 352 | Sagittarius serpentarius | Secretarybird | 2019/6/30  | 5 | 0 | -2.0085062 | 34.3156340 | <a href="https://www.inaturalist.org/observations/27926922">https://www.inaturalist.org/observations/27926922</a>   |
| 353 | Sagittarius serpentarius | Secretarybird | 2016/9/11  | 5 | 0 | -2.0016592 | 38.4402838 | <a href="https://www.inaturalist.org/observations/44775035">https://www.inaturalist.org/observations/44775035</a>   |
| 354 | Sagittarius serpentarius | Secretarybird | 2009/11/23 | 4 | 0 | -1.9943024 | 34.7661685 | <a href="https://www.inaturalist.org/observations/142163690">https://www.inaturalist.org/observations/142163690</a> |
| 355 | Sagittarius serpentarius | Secretarybird | 2015/1/4   | 5 | 0 | -1.9884124 | 34.6617758 | <a href="https://www.inaturalist.org/observations/117290570">https://www.inaturalist.org/observations/117290570</a> |
| 356 | Sagittarius serpentarius | Secretarybird | 2013/6/28  | 6 | 0 | -1.9808450 | 34.6610262 | <a href="https://www.inaturalist.org/observations/110598989">https://www.inaturalist.org/observations/110598989</a> |
| 357 | Sagittarius serpentarius | Secretarybird | 2011/11/8  | 4 | 0 | -1.9694730 | 34.8893158 | <a href="https://www.inaturalist.org/observations/28402615">https://www.inaturalist.org/observations/28402615</a>   |
| 358 | Sagittarius serpentarius | Secretarybird | 2016/5/25  | 6 | 0 | -1.9562954 | 34.7740779 | <a href="https://www.inaturalist.org/observations/131340305">https://www.inaturalist.org/observations/131340305</a> |
| 359 | Sagittarius serpentarius | Secretarybird | 2016/9/11  | 5 | 0 | -1.9514916 | 35.0410238 | <a href="https://www.inaturalist.org/observations/9108688">https://www.inaturalist.org/observations/9108688</a>     |
| 360 | Sagittarius serpentarius | Secretarybird | 2018/6/10  | 4 | 0 | -1.9498328 | 34.7195541 | <a href="https://www.inaturalist.org/observations/44392003">https://www.inaturalist.org/observations/44392003</a>   |
| 361 | Sagittarius serpentarius | Secretarybird | 2019/12/17 | 5 | 0 | -1.9428441 | 34.6279569 | <a href="https://www.inaturalist.org/observations/36932143">https://www.inaturalist.org/observations/36932143</a>   |
| 362 | Sagittarius serpentarius | Secretarybird | 2019/3/25  | 6 | 0 | -1.9346326 | 34.6381874 | <a href="https://www.inaturalist.org/observations/66970606">https://www.inaturalist.org/observations/66970606</a>   |
| 363 | Sagittarius serpentarius | Secretarybird | 2018/8/26  | 5 | 0 | -1.9178953 | 34.6323382 | <a href="https://www.inaturalist.org/observations/52023174">https://www.inaturalist.org/observations/52023174</a>   |
| 364 | Sagittarius serpentarius | Secretarybird | 2019/2/28  | 5 | 0 | -1.9066571 | 34.7239981 | <a href="https://www.inaturalist.org/observations/57950406">https://www.inaturalist.org/observations/57950406</a>   |
| 365 | Sagittarius serpentarius | Secretarybird | 2022/8/7   | 5 | 0 | -1.9054579 | 35.0222236 | <a href="https://www.inaturalist.org/observations/133458357">https://www.inaturalist.org/observations/133458357</a> |
| 366 | Sagittarius serpentarius | Secretarybird | 2013/6/28  | 5 | 0 | -1.8978396 | 34.6429777 | <a href="https://www.inaturalist.org/observations/110597972">https://www.inaturalist.org/observations/110597972</a> |
| 367 | Sagittarius serpentarius | Secretarybird | 2015/7/21  | 7 | 0 | -1.8963046 | 34.8041566 | <a href="http://www.inaturalist.org/observations/3054113">http://www.inaturalist.org/observations/3054113</a>       |

|     |                          |               |            |   |   |            |            |                                                                                                                     |
|-----|--------------------------|---------------|------------|---|---|------------|------------|---------------------------------------------------------------------------------------------------------------------|
| 368 | Sagittarius serpentarius | Secretarybird | 2016/12/28 | 5 | 0 | -1.8953977 | 34.7535554 | <a href="https://www.inaturalist.org/observations/51996305">https://www.inaturalist.org/observations/51996305</a>   |
| 369 | Sagittarius serpentarius | Secretarybird | 2017/10/7  | 5 | 0 | -1.8381752 | 37.2488066 | <a href="https://www.inaturalist.org/observations/21766521">https://www.inaturalist.org/observations/21766521</a>   |
| 370 | Sagittarius serpentarius | Secretarybird | 2009/11/22 | 6 | 0 | -1.8178778 | 34.7994925 | <a href="https://www.inaturalist.org/observations/142142922">https://www.inaturalist.org/observations/142142922</a> |
| 371 | Sagittarius serpentarius | Secretarybird | 2018/7/19  | 7 | 0 | -1.7951412 | 35.3380829 | <a href="https://www.inaturalist.org/observations/15255484">https://www.inaturalist.org/observations/15255484</a>   |
| 372 | Sagittarius serpentarius | Secretarybird | 2019/8/20  | 7 | 0 | -1.7699452 | 34.9567112 | <a href="https://www.inaturalist.org/observations/33449552">https://www.inaturalist.org/observations/33449552</a>   |
| 373 | Sagittarius serpentarius | Secretarybird | 2022/9/9   | 5 | 0 | -1.7689333 | 34.8800116 | <a href="https://www.inaturalist.org/observations/135350469">https://www.inaturalist.org/observations/135350469</a> |
| 374 | Sagittarius serpentarius | Secretarybird | 2019/8/11  | 6 | 0 | -1.7554575 | 35.3843330 | <a href="https://www.inaturalist.org/observations/32118097">https://www.inaturalist.org/observations/32118097</a>   |
| 375 | Sagittarius serpentarius | Secretarybird | 2016/9/24  | 5 | 0 | -1.7547412 | 37.0189039 | <a href="http://www.inaturalist.org/observations/4197185">http://www.inaturalist.org/observations/4197185</a>       |
| 376 | Sagittarius serpentarius | Secretarybird | 1988/8/19  | 6 | 0 | -1.7270277 | 35.3250445 | <a href="https://www.inaturalist.org/observations/42769655">https://www.inaturalist.org/observations/42769655</a>   |
| 377 | Sagittarius serpentarius | Secretarybird | 2007/10/5  | 5 | 0 | -1.7007018 | 35.3448356 | <a href="https://www.inaturalist.org/observations/19483942">https://www.inaturalist.org/observations/19483942</a>   |
| 378 | Sagittarius serpentarius | Secretarybird | 2022/7/11  | 3 | 0 | -1.6870865 | 35.2254973 | <a href="https://www.inaturalist.org/observations/125748021">https://www.inaturalist.org/observations/125748021</a> |
| 379 | Sagittarius serpentarius | Secretarybird | 2019/8/14  | 5 | 0 | -1.6710414 | 35.5210973 | <a href="https://www.inaturalist.org/observations/32185819">https://www.inaturalist.org/observations/32185819</a>   |
| 380 | Sagittarius serpentarius | Secretarybird | 2020/12/12 | 4 | 0 | -1.6527294 | 35.3683317 | <a href="https://www.inaturalist.org/observations/79046787">https://www.inaturalist.org/observations/79046787</a>   |
| 381 | Sagittarius serpentarius | Secretarybird | 2010/10/20 | 4 | 0 | -1.6470499 | 35.3182607 | <a href="https://www.inaturalist.org/observations/131629444">https://www.inaturalist.org/observations/131629444</a> |
| 382 | Sagittarius serpentarius | Secretarybird | 2022/10/22 | 2 | 0 | -1.6423119 | 35.2071977 | <a href="https://www.inaturalist.org/observations/139612716">https://www.inaturalist.org/observations/139612716</a> |
| 383 | Sagittarius serpentarius | Secretarybird | 2018/9/30  | 5 | 0 | -1.6381414 | 35.3044397 | <a href="https://www.inaturalist.org/observations/17130486">https://www.inaturalist.org/observations/17130486</a>   |
| 384 | Sagittarius serpentarius | Secretarybird | 2017/9/17  | 6 | 0 | -1.6132753 | 35.1657815 | <a href="https://www.inaturalist.org/observations/33292847">https://www.inaturalist.org/observations/33292847</a>   |
| 385 | Sagittarius serpentarius | Secretarybird | 2018/8/25  | 5 | 0 | -1.6028075 | 35.3150732 | <a href="https://www.inaturalist.org/observations/19234226">https://www.inaturalist.org/observations/19234226</a>   |
| 386 | Sagittarius serpentarius | Secretarybird | 2015/5/26  | 4 | 0 | -1.5999375 | 35.0254756 | <a href="https://www.inaturalist.org/observations/22945716">https://www.inaturalist.org/observations/22945716</a>   |
| 387 | Sagittarius serpentarius | Secretarybird | 2019/3/8   | 5 | 0 | -1.5981142 | 35.1774650 | <a href="https://www.inaturalist.org/observations/22164409">https://www.inaturalist.org/observations/22164409</a>   |
| 388 | Sagittarius serpentarius | Secretarybird | 2022/9/18  | 5 | 0 | -1.5927897 | 35.3966170 | <a href="https://www.inaturalist.org/observations/135552497">https://www.inaturalist.org/observations/135552497</a> |
| 389 | Sagittarius serpentarius | Secretarybird | 2007/3/6   | 4 | 0 | -1.5895403 | 35.1027932 | <a href="https://www.inaturalist.org/observations/103099658">https://www.inaturalist.org/observations/103099658</a> |
| 390 | Sagittarius serpentarius | Secretarybird | 2018/6/25  | 6 | 0 | -1.5892521 | 35.1019790 | <a href="https://www.inaturalist.org/observations/64348067">https://www.inaturalist.org/observations/64348067</a>   |

|     |                          |               |            |    |   |            |            |                                                                                                                     |
|-----|--------------------------|---------------|------------|----|---|------------|------------|---------------------------------------------------------------------------------------------------------------------|
| 391 | Sagittarius serpentarius | Secretarybird | 2022/6/20  | 4  | 0 | -1.5882626 | 35.3558234 | <a href="https://www.inaturalist.org/observations/144607671">https://www.inaturalist.org/observations/144607671</a> |
| 392 | Sagittarius serpentarius | Secretarybird | 2021/12/23 | 3  | 0 | -1.5881290 | 35.0798247 | <a href="https://www.inaturalist.org/observations/134839399">https://www.inaturalist.org/observations/134839399</a> |
| 393 | Sagittarius serpentarius | Secretarybird | 2008/9/30  | 6  | 0 | -1.5865095 | 35.1948149 | <a href="https://www.inaturalist.org/observations/38096412">https://www.inaturalist.org/observations/38096412</a>   |
| 394 | Sagittarius serpentarius | Secretarybird | 2011/3/1   | 3  | 0 | -1.5812340 | 35.2145328 | <a href="https://www.inaturalist.org/observations/122170266">https://www.inaturalist.org/observations/122170266</a> |
| 395 | Sagittarius serpentarius | Secretarybird | 2007/10/7  | 4  | 0 | -1.5810741 | 35.2925826 | <a href="https://www.inaturalist.org/observations/19526433">https://www.inaturalist.org/observations/19526433</a>   |
| 396 | Sagittarius serpentarius | Secretarybird | 2022/9/18  | 4  | 0 | -1.5783412 | 34.9656640 | <a href="https://www.inaturalist.org/observations/135551952">https://www.inaturalist.org/observations/135551952</a> |
| 397 | Sagittarius serpentarius | Secretarybird | 2017/4/21  | 4  | 0 | -1.5778817 | 35.0572423 | <a href="https://www.inaturalist.org/observations/36198219">https://www.inaturalist.org/observations/36198219</a>   |
| 398 | Sagittarius serpentarius | Secretarybird | 2012/9/30  | 5  | 0 | -1.5773035 | 35.3438114 | <a href="https://www.inaturalist.org/observations/101697093">https://www.inaturalist.org/observations/101697093</a> |
| 399 | Sagittarius serpentarius | Secretarybird | 2018/7/16  | 4  | 0 | -1.5729416 | 35.1169189 | <a href="https://www.inaturalist.org/observations/38682951">https://www.inaturalist.org/observations/38682951</a>   |
| 400 | Sagittarius serpentarius | Secretarybird | 2019/12/26 | 5  | 0 | -1.5692667 | 35.0994872 | <a href="https://www.inaturalist.org/observations/40210395">https://www.inaturalist.org/observations/40210395</a>   |
| 401 | Sagittarius serpentarius | Secretarybird | 2022/7/10  | 4  | 0 | -1.5648878 | 35.0980051 | <a href="https://www.inaturalist.org/observations/128125604">https://www.inaturalist.org/observations/128125604</a> |
| 402 | Sagittarius serpentarius | Secretarybird | 2014/10/15 | 4  | 0 | -1.5630900 | 35.1813811 | <a href="https://www.inaturalist.org/observations/66406699">https://www.inaturalist.org/observations/66406699</a>   |
| 403 | Sagittarius serpentarius | Secretarybird | 2008/7/21  | 11 | 0 | -1.5570656 | 35.3009109 | <a href="http://www.inaturalist.org/observations/1834115">http://www.inaturalist.org/observations/1834115</a>       |
| 404 | Sagittarius serpentarius | Secretarybird | 2010/6/13  | 5  | 0 | -1.5568382 | 35.0981263 | <a href="https://www.inaturalist.org/observations/107889880">https://www.inaturalist.org/observations/107889880</a> |
| 405 | Sagittarius serpentarius | Secretarybird | 2010/5/17  | 5  | 0 | -1.5557495 | 34.9803156 | <a href="https://www.inaturalist.org/observations/46192325">https://www.inaturalist.org/observations/46192325</a>   |
| 406 | Sagittarius serpentarius | Secretarybird | 2016/12/12 | 4  | 0 | -1.5517003 | 35.1235052 | <a href="https://www.inaturalist.org/observations/52418511">https://www.inaturalist.org/observations/52418511</a>   |
| 407 | Sagittarius serpentarius | Secretarybird | 2018/2/12  | 6  | 0 | -1.5500762 | 35.3177336 | <a href="https://www.inaturalist.org/observations/9844753">https://www.inaturalist.org/observations/9844753</a>     |
| 408 | Sagittarius serpentarius | Secretarybird | 2017/9/5   | 7  | 0 | -1.5455445 | 35.0759167 | <a href="https://www.inaturalist.org/observations/8039116">https://www.inaturalist.org/observations/8039116</a>     |
| 409 | Sagittarius serpentarius | Secretarybird | 2019/8/5   | 6  | 0 | -1.5453528 | 35.3090528 | <a href="https://www.inaturalist.org/observations/34214693">https://www.inaturalist.org/observations/34214693</a>   |
| 410 | Sagittarius serpentarius | Secretarybird | 2018/3/4   | 5  | 0 | -1.5422891 | 35.1492013 | <a href="https://www.inaturalist.org/observations/54149035">https://www.inaturalist.org/observations/54149035</a>   |
| 411 | Sagittarius serpentarius | Secretarybird | 2020/2/27  | 5  | 0 | -1.5416391 | 35.3251158 | <a href="https://www.inaturalist.org/observations/137753006">https://www.inaturalist.org/observations/137753006</a> |
| 412 | Sagittarius serpentarius | Secretarybird | 2018/8/25  | 4  | 0 | -1.5384074 | 35.0209429 | <a href="https://www.inaturalist.org/observations/64458504">https://www.inaturalist.org/observations/64458504</a>   |
| 413 | Sagittarius serpentarius | Secretarybird | 2008/7/18  | 6  | 0 | -1.5376544 | 35.1491749 | <a href="https://www.inaturalist.org/observations/61636993">https://www.inaturalist.org/observations/61636993</a>   |

|     |                          |               |            |    |   |            |            |                                                                                                                     |
|-----|--------------------------|---------------|------------|----|---|------------|------------|---------------------------------------------------------------------------------------------------------------------|
| 414 | Sagittarius serpentarius | Secretarybird | 2022/9/30  | 2  | 0 | -1.5376192 | 35.2480356 | <a href="https://www.inaturalist.org/observations/139850446">https://www.inaturalist.org/observations/139850446</a> |
| 415 | Sagittarius serpentarius | Secretarybird | 2020/6/5   | 5  | 0 | -1.5352191 | 36.9838344 | <a href="https://www.inaturalist.org/observations/48626759">https://www.inaturalist.org/observations/48626759</a>   |
| 416 | Sagittarius serpentarius | Secretarybird | 2018/4/15  | 3  | 0 | -1.5345073 | 35.0261115 | <a href="https://www.inaturalist.org/observations/68722072">https://www.inaturalist.org/observations/68722072</a>   |
| 417 | Sagittarius serpentarius | Secretarybird | 2013/8/24  | 3  | 0 | -1.5320070 | 35.0821996 | <a href="https://www.inaturalist.org/observations/76941724">https://www.inaturalist.org/observations/76941724</a>   |
| 418 | Sagittarius serpentarius | Secretarybird | 2015/2/18  | 7  | 0 | -1.5313533 | 35.1967252 | <a href="https://www.inaturalist.org/observations/100392950">https://www.inaturalist.org/observations/100392950</a> |
| 419 | Sagittarius serpentarius | Secretarybird | 2006/10/8  | 5  | 0 | -1.5307427 | 34.8807309 | <a href="https://www.inaturalist.org/observations/114685456">https://www.inaturalist.org/observations/114685456</a> |
| 420 | Sagittarius serpentarius | Secretarybird | 2009/8/25  | 7  | 0 | -1.5307231 | 35.1614427 | <a href="https://www.inaturalist.org/observations/27927439">https://www.inaturalist.org/observations/27927439</a>   |
| 421 | Sagittarius serpentarius | Secretarybird | 2020/7/23  | 5  | 0 | -1.5298424 | 36.8801943 | <a href="https://www.inaturalist.org/observations/54301688">https://www.inaturalist.org/observations/54301688</a>   |
| 422 | Sagittarius serpentarius | Secretarybird | 2019/7/21  | 4  | 0 | -1.5294307 | 35.2950732 | <a href="https://www.inaturalist.org/observations/75627167">https://www.inaturalist.org/observations/75627167</a>   |
| 423 | Sagittarius serpentarius | Secretarybird | 2008/4/8   | 4  | 0 | -1.5289921 | 34.8879615 | <a href="https://www.inaturalist.org/observations/39232234">https://www.inaturalist.org/observations/39232234</a>   |
| 424 | Sagittarius serpentarius | Secretarybird | 2022/5/23  | 6  | 0 | -1.5285556 | 35.1229243 | <a href="https://www.inaturalist.org/observations/126529870">https://www.inaturalist.org/observations/126529870</a> |
| 425 | Sagittarius serpentarius | Secretarybird | 2022/3/27  | 6  | 0 | -1.5277087 | 35.3225569 | <a href="https://www.inaturalist.org/observations/111654972">https://www.inaturalist.org/observations/111654972</a> |
| 426 | Sagittarius serpentarius | Secretarybird | 2012/5/22  | 4  | 0 | -1.5275973 | 35.2344473 | <a href="https://www.inaturalist.org/observations/101339630">https://www.inaturalist.org/observations/101339630</a> |
| 427 | Sagittarius serpentarius | Secretarybird | 2015/8/17  | 6  | 0 | -1.5229557 | 34.8318741 | <a href="https://www.inaturalist.org/observations/36693129">https://www.inaturalist.org/observations/36693129</a>   |
| 428 | Sagittarius serpentarius | Secretarybird | 2018/1/14  | 4  | 0 | -1.5218244 | 35.0649649 | <a href="https://www.inaturalist.org/observations/38145949">https://www.inaturalist.org/observations/38145949</a>   |
| 429 | Sagittarius serpentarius | Secretarybird | 2014/7/20  | 10 | 0 | -1.5158826 | 35.0224376 | <a href="http://www.inaturalist.org/observations/1500334">http://www.inaturalist.org/observations/1500334</a>       |
| 430 | Sagittarius serpentarius | Secretarybird | 2019/8/17  | 5  | 0 | -1.5103477 | 35.3239645 | <a href="https://www.inaturalist.org/observations/136516114">https://www.inaturalist.org/observations/136516114</a> |
| 431 | Sagittarius serpentarius | Secretarybird | 2017/7/8   | 9  | 0 | -1.5101322 | 35.0778966 | <a href="https://www.inaturalist.org/observations/7261147">https://www.inaturalist.org/observations/7261147</a>     |
| 432 | Sagittarius serpentarius | Secretarybird | 2019/12/24 | 4  | 0 | -1.5046232 | 35.1897734 | <a href="https://www.inaturalist.org/observations/99077766">https://www.inaturalist.org/observations/99077766</a>   |
| 433 | Sagittarius serpentarius | Secretarybird | 2014/10/15 | 4  | 0 | -1.5046202 | 35.0115030 | <a href="https://www.inaturalist.org/observations/66406700">https://www.inaturalist.org/observations/66406700</a>   |
| 434 | Sagittarius serpentarius | Secretarybird | 2019/9/6   | 7  | 0 | -1.4958438 | 35.1758184 | <a href="https://www.inaturalist.org/observations/32424437">https://www.inaturalist.org/observations/32424437</a>   |
| 435 | Sagittarius serpentarius | Secretarybird | 2021/8/1   | 3  | 0 | -1.4952314 | 35.0283579 | <a href="https://www.inaturalist.org/observations/125316853">https://www.inaturalist.org/observations/125316853</a> |
| 436 | Sagittarius serpentarius | Secretarybird | 2022/8/8   | 4  | 0 | -1.4935173 | 35.1006549 | <a href="https://www.inaturalist.org/observations/141738605">https://www.inaturalist.org/observations/141738605</a> |



|     |                          |               |           |   |   |            |            |                                                                                                                     |
|-----|--------------------------|---------------|-----------|---|---|------------|------------|---------------------------------------------------------------------------------------------------------------------|
| 437 | Sagittarius serpentarius | Secretarybird | 2020/3/5  | 5 | 0 | -1.4932585 | 35.1833950 | <a href="https://www.inaturalist.org/observations/40099854">https://www.inaturalist.org/observations/40099854</a>   |
| 438 | Sagittarius serpentarius | Secretarybird | 2011/8/19 | 6 | 0 | -1.4899859 | 35.0809752 | <a href="https://www.inaturalist.org/observations/41187658">https://www.inaturalist.org/observations/41187658</a>   |
| 439 | Sagittarius serpentarius | Secretarybird | 2022/9/29 | 3 | 0 | -1.4893468 | 35.2291963 | <a href="https://www.inaturalist.org/observations/139783191">https://www.inaturalist.org/observations/139783191</a> |
| 440 | Sagittarius serpentarius | Secretarybird | 2019/8/8  | 6 | 0 | -1.4875398 | 35.1111956 | <a href="https://www.inaturalist.org/observations/32197852">https://www.inaturalist.org/observations/32197852</a>   |
| 441 | Sagittarius serpentarius | Secretarybird | 2016/8/30 | 4 | 0 | -1.4861970 | 35.3108462 | <a href="https://www.inaturalist.org/observations/106110194">https://www.inaturalist.org/observations/106110194</a> |
| 442 | Sagittarius serpentarius | Secretarybird | 2014/8/28 | 7 | 0 | -1.4817342 | 35.0972444 | <a href="http://www.inaturalist.org/observations/2748343">http://www.inaturalist.org/observations/2748343</a>       |
| 443 | Sagittarius serpentarius | Secretarybird | 2021/9/6  | 4 | 0 | -1.4784313 | 34.9823221 | <a href="https://www.inaturalist.org/observations/98122946">https://www.inaturalist.org/observations/98122946</a>   |
| 444 | Sagittarius serpentarius | Secretarybird | 2019/5/22 | 5 | 0 | -1.4776923 | 35.2783386 | <a href="https://www.inaturalist.org/observations/25571100">https://www.inaturalist.org/observations/25571100</a>   |
| 445 | Sagittarius serpentarius | Secretarybird | 2019/8/8  | 5 | 0 | -1.4767673 | 35.0354700 | <a href="https://www.inaturalist.org/observations/32248319">https://www.inaturalist.org/observations/32248319</a>   |
| 446 | Sagittarius serpentarius | Secretarybird | 2009/12/9 | 5 | 0 | -1.4742685 | 34.9049552 | <a href="https://www.inaturalist.org/observations/18040087">https://www.inaturalist.org/observations/18040087</a>   |
| 447 | Sagittarius serpentarius | Secretarybird | 2004/8/7  | 3 | 0 | -1.4738953 | 35.1870615 | <a href="https://www.inaturalist.org/observations/123243155">https://www.inaturalist.org/observations/123243155</a> |
| 448 | Sagittarius serpentarius | Secretarybird | 2021/9/2  | 5 | 0 | -1.4731815 | 35.2646553 | <a href="https://www.inaturalist.org/observations/94108748">https://www.inaturalist.org/observations/94108748</a>   |
| 449 | Sagittarius serpentarius | Secretarybird | 2022/6/22 | 4 | 0 | -1.4730029 | 35.1784463 | <a href="https://www.inaturalist.org/observations/128013557">https://www.inaturalist.org/observations/128013557</a> |
| 450 | Sagittarius serpentarius | Secretarybird | 2012/7/15 | 5 | 0 | -1.4714900 | 34.8682302 | <a href="https://www.inaturalist.org/observations/118761557">https://www.inaturalist.org/observations/118761557</a> |
| 451 | Sagittarius serpentarius | Secretarybird | 2013/8/20 | 2 | 0 | -1.4687460 | 35.0805535 | <a href="https://www.inaturalist.org/observations/68263290">https://www.inaturalist.org/observations/68263290</a>   |
| 452 | Sagittarius serpentarius | Secretarybird | 2022/9/30 | 3 | 0 | -1.4674076 | 35.1043608 | <a href="https://www.inaturalist.org/observations/139850491">https://www.inaturalist.org/observations/139850491</a> |
| 453 | Sagittarius serpentarius | Secretarybird | 2014/8/21 | 4 | 0 | -1.4650944 | 35.0461422 | <a href="https://www.inaturalist.org/observations/80984777">https://www.inaturalist.org/observations/80984777</a>   |
| 454 | Sagittarius serpentarius | Secretarybird | 2022/3/31 | 3 | 0 | -1.4650841 | 36.9443647 | <a href="https://www.inaturalist.org/observations/110270379">https://www.inaturalist.org/observations/110270379</a> |
| 455 | Sagittarius serpentarius | Secretarybird | 2019/8/29 | 7 | 0 | -1.4626834 | 35.0493411 | <a href="https://www.inaturalist.org/observations/43172076">https://www.inaturalist.org/observations/43172076</a>   |
| 456 | Sagittarius serpentarius | Secretarybird | 2022/7/24 | 5 | 0 | -1.4591744 | 35.0700226 | <a href="https://www.inaturalist.org/observations/128916425">https://www.inaturalist.org/observations/128916425</a> |
| 457 | Sagittarius serpentarius | Secretarybird | 1987/10/4 | 4 | 0 | -1.4569053 | 35.3545177 | <a href="https://www.inaturalist.org/observations/104431449">https://www.inaturalist.org/observations/104431449</a> |
| 458 | Sagittarius serpentarius | Secretarybird | 2022/10/5 | 0 | 0 | -1.4550131 | 35.2407487 | <a href="https://www.inaturalist.org/observations/137641248">https://www.inaturalist.org/observations/137641248</a> |
| 459 | Sagittarius serpentarius | Secretarybird | 2022/6/28 | 5 | 0 | -1.4541801 | 35.3721680 | <a href="https://www.inaturalist.org/observations/125303307">https://www.inaturalist.org/observations/125303307</a> |

|     |                          |               |            |   |   |            |            |                                                                                                                     |
|-----|--------------------------|---------------|------------|---|---|------------|------------|---------------------------------------------------------------------------------------------------------------------|
| 460 | Sagittarius serpentarius | Secretarybird | 2008/7/14  | 7 | 0 | -1.4520841 | 35.0836614 | <a href="https://www.inaturalist.org/observations/61636973">https://www.inaturalist.org/observations/61636973</a>   |
| 461 | Sagittarius serpentarius | Secretarybird | 2018/2/13  | 6 | 0 | -1.4491101 | 35.1506290 | <a href="https://www.inaturalist.org/observations/23027016">https://www.inaturalist.org/observations/23027016</a>   |
| 462 | Sagittarius serpentarius | Secretarybird | 2015/2/24  | 5 | 0 | -1.4482810 | 35.1914988 | <a href="https://www.inaturalist.org/observations/106812635">https://www.inaturalist.org/observations/106812635</a> |
| 463 | Sagittarius serpentarius | Secretarybird | 2005/1/24  | 6 | 0 | -1.4454774 | 35.1789028 | <a href="https://www.inaturalist.org/observations/35669613">https://www.inaturalist.org/observations/35669613</a>   |
| 464 | Sagittarius serpentarius | Secretarybird | 2022/5/23  | 5 | 0 | -1.4436143 | 35.1765204 | <a href="https://www.inaturalist.org/observations/130960269">https://www.inaturalist.org/observations/130960269</a> |
| 465 | Sagittarius serpentarius | Secretarybird | 2019/9/20  | 4 | 0 | -1.4435619 | 35.0218556 | <a href="https://www.inaturalist.org/observations/66190146">https://www.inaturalist.org/observations/66190146</a>   |
| 466 | Sagittarius serpentarius | Secretarybird | 2018/10/2  | 5 | 0 | -1.4389642 | 35.1339387 | <a href="https://www.inaturalist.org/observations/17917390">https://www.inaturalist.org/observations/17917390</a>   |
| 467 | Sagittarius serpentarius | Secretarybird | 2014/7/9   | 4 | 0 | -1.4386231 | 34.8160589 | <a href="https://www.inaturalist.org/observations/20841814">https://www.inaturalist.org/observations/20841814</a>   |
| 468 | Sagittarius serpentarius | Secretarybird | 2013/10/30 | 9 | 0 | -1.4288307 | 35.1089210 | <a href="http://www.inaturalist.org/observations/863751">http://www.inaturalist.org/observations/863751</a>         |
| 469 | Sagittarius serpentarius | Secretarybird | 2019/4/28  | 4 | 0 | -1.4256444 | 36.8661391 | <a href="https://www.inaturalist.org/observations/23586611">https://www.inaturalist.org/observations/23586611</a>   |
| 470 | Sagittarius serpentarius | Secretarybird | 2021/12/18 | 5 | 0 | -1.4251364 | 35.1929578 | <a href="https://www.inaturalist.org/observations/132928773">https://www.inaturalist.org/observations/132928773</a> |
| 471 | Sagittarius serpentarius | Secretarybird | 2022/12/7  | 2 | 0 | -1.4232230 | 37.1940733 | <a href="https://www.inaturalist.org/observations/144354510">https://www.inaturalist.org/observations/144354510</a> |
| 472 | Sagittarius serpentarius | Secretarybird | 2018/11/25 | 6 | 0 | -1.4231863 | 35.0598388 | <a href="https://www.inaturalist.org/observations/18737143">https://www.inaturalist.org/observations/18737143</a>   |
| 473 | Sagittarius serpentarius | Secretarybird | 2021/8/21  | 3 | 0 | -1.4203622 | 35.0437175 | <a href="https://www.inaturalist.org/observations/97440598">https://www.inaturalist.org/observations/97440598</a>   |
| 474 | Sagittarius serpentarius | Secretarybird | 2018/12/15 | 5 | 0 | -1.4174767 | 34.9339307 | <a href="https://www.inaturalist.org/observations/23117775">https://www.inaturalist.org/observations/23117775</a>   |
| 475 | Sagittarius serpentarius | Secretarybird | 2021/9/17  | 4 | 0 | -1.4171288 | 35.0126778 | <a href="https://www.inaturalist.org/observations/95132497">https://www.inaturalist.org/observations/95132497</a>   |
| 476 | Sagittarius serpentarius | Secretarybird | 2010/5/18  | 5 | 0 | -1.4142440 | 34.8671355 | <a href="https://www.inaturalist.org/observations/65196844">https://www.inaturalist.org/observations/65196844</a>   |
| 477 | Sagittarius serpentarius | Secretarybird | 2022/9/28  | 6 | 0 | -1.4133581 | 35.0857858 | <a href="https://www.inaturalist.org/observations/141554298">https://www.inaturalist.org/observations/141554298</a> |
| 478 | Sagittarius serpentarius | Secretarybird | 2019/6/3   | 5 | 0 | -1.4129504 | 35.2317847 | <a href="https://www.inaturalist.org/observations/52456229">https://www.inaturalist.org/observations/52456229</a>   |
| 479 | Sagittarius serpentarius | Secretarybird | 2021/12/31 | 2 | 0 | -1.4121152 | 35.2541695 | <a href="https://www.inaturalist.org/observations/104029698">https://www.inaturalist.org/observations/104029698</a> |
| 480 | Sagittarius serpentarius | Secretarybird | 2022/6/29  | 3 | 0 | -1.4111037 | 35.1328469 | <a href="https://www.inaturalist.org/observations/133513435">https://www.inaturalist.org/observations/133513435</a> |
| 481 | Sagittarius serpentarius | Secretarybird | 2018/7/21  | 5 | 0 | -1.4096014 | 34.9911006 | <a href="https://www.inaturalist.org/observations/53797641">https://www.inaturalist.org/observations/53797641</a>   |
| 482 | Sagittarius serpentarius | Secretarybird | 2015/12/20 | 6 | 0 | -1.4015150 | 34.8535931 | <a href="https://www.inaturalist.org/observations/9622730">https://www.inaturalist.org/observations/9622730</a>     |

|     |                          |               |            |   |   |            |            |                                                                                                                     |
|-----|--------------------------|---------------|------------|---|---|------------|------------|---------------------------------------------------------------------------------------------------------------------|
| 483 | Sagittarius serpentarius | Secretarybird | 2008/1/5   | 2 | 0 | -1.3936331 | 36.9683439 | <a href="https://www.inaturalist.org/observations/145243119">https://www.inaturalist.org/observations/145243119</a> |
| 484 | Sagittarius serpentarius | Secretarybird | 2017/7/31  | 6 | 0 | -1.3884582 | 35.1302351 | <a href="https://www.inaturalist.org/observations/62028245">https://www.inaturalist.org/observations/62028245</a>   |
| 485 | Sagittarius serpentarius | Secretarybird | 2019/7/16  | 3 | 0 | -1.3883437 | 35.2496627 | <a href="https://www.inaturalist.org/observations/29075602">https://www.inaturalist.org/observations/29075602</a>   |
| 486 | Sagittarius serpentarius | Secretarybird | 2021/11/13 | 4 | 0 | -1.3871434 | 35.2000497 | <a href="https://www.inaturalist.org/observations/104031209">https://www.inaturalist.org/observations/104031209</a> |
| 487 | Sagittarius serpentarius | Secretarybird | 2017/9/8   | 7 | 0 | -1.3846853 | 36.8805613 | <a href="https://www.inaturalist.org/observations/8088104">https://www.inaturalist.org/observations/8088104</a>     |
| 488 | Sagittarius serpentarius | Secretarybird | 2018/7/16  | 4 | 0 | -1.3844485 | 34.8912603 | <a href="https://www.inaturalist.org/observations/46652750">https://www.inaturalist.org/observations/46652750</a>   |
| 489 | Sagittarius serpentarius | Secretarybird | 2018/5/31  | 4 | 0 | -1.3809082 | 35.1817491 | <a href="https://www.inaturalist.org/observations/47914625">https://www.inaturalist.org/observations/47914625</a>   |
| 490 | Sagittarius serpentarius | Secretarybird | 2019/3/12  | 5 | 0 | -1.3736878 | 35.0275743 | <a href="https://www.inaturalist.org/observations/42292851">https://www.inaturalist.org/observations/42292851</a>   |
| 491 | Sagittarius serpentarius | Secretarybird | 2017/11/5  | 4 | 0 | -1.3725623 | 34.8979762 | <a href="https://www.inaturalist.org/observations/19312077">https://www.inaturalist.org/observations/19312077</a>   |
| 492 | Sagittarius serpentarius | Secretarybird | 2021/6/25  | 4 | 0 | -1.3724905 | 34.8677497 | <a href="https://www.inaturalist.org/observations/86841834">https://www.inaturalist.org/observations/86841834</a>   |
| 493 | Sagittarius serpentarius | Secretarybird | 2019/1/27  | 5 | 0 | -1.3724122 | 36.9383793 | <a href="https://www.inaturalist.org/observations/110170638">https://www.inaturalist.org/observations/110170638</a> |
| 494 | Sagittarius serpentarius | Secretarybird | 2018/7/13  | 6 | 0 | -1.3718528 | 36.8196346 | <a href="https://www.inaturalist.org/observations/38512404">https://www.inaturalist.org/observations/38512404</a>   |
| 495 | Sagittarius serpentarius | Secretarybird | 2019/11/9  | 5 | 0 | -1.3710644 | 36.6419767 | <a href="https://www.inaturalist.org/observations/35840130">https://www.inaturalist.org/observations/35840130</a>   |
| 496 | Sagittarius serpentarius | Secretarybird | 2022/6/24  | 5 | 0 | -1.3704223 | 36.9623914 | <a href="https://www.inaturalist.org/observations/125331307">https://www.inaturalist.org/observations/125331307</a> |
| 497 | Sagittarius serpentarius | Secretarybird | 2018/12/30 | 5 | 0 | -1.3674714 | 36.9982961 | <a href="https://www.inaturalist.org/observations/108948641">https://www.inaturalist.org/observations/108948641</a> |
| 498 | Sagittarius serpentarius | Secretarybird | 2022/6/22  | 5 | 0 | -1.3664362 | 35.0293680 | <a href="https://www.inaturalist.org/observations/128016511">https://www.inaturalist.org/observations/128016511</a> |
| 499 | Sagittarius serpentarius | Secretarybird | 2009/12/21 | 8 | 0 | -1.3646613 | 36.6443458 | <a href="http://www.inaturalist.org/observations/28284">http://www.inaturalist.org/observations/28284</a>           |
| 500 | Sagittarius serpentarius | Secretarybird | 2017/7/31  | 6 | 0 | -1.3645577 | 35.1456555 | <a href="https://www.inaturalist.org/observations/62028244">https://www.inaturalist.org/observations/62028244</a>   |
| 501 | Sagittarius serpentarius | Secretarybird | 2018/4/15  | 4 | 0 | -1.3645122 | 36.9819231 | <a href="https://www.inaturalist.org/observations/14285666">https://www.inaturalist.org/observations/14285666</a>   |
| 502 | Sagittarius serpentarius | Secretarybird | 2015/12/23 | 5 | 0 | -1.3634560 | 36.8928306 | <a href="https://www.inaturalist.org/observations/9838439">https://www.inaturalist.org/observations/9838439</a>     |
| 503 | Sagittarius serpentarius | Secretarybird | 2022/8/7   | 5 | 0 | -1.3612579 | 36.9338041 | <a href="https://www.inaturalist.org/observations/141738540">https://www.inaturalist.org/observations/141738540</a> |
| 504 | Sagittarius serpentarius | Secretarybird | 1994/5/21  | 6 | 0 | -1.3524682 | 36.7045634 | <a href="https://www.inaturalist.org/observations/54813687">https://www.inaturalist.org/observations/54813687</a>   |
| 505 | Sagittarius serpentarius | Secretarybird | 2019/5/17  | 5 | 0 | -1.3484361 | 35.2965224 | <a href="https://www.inaturalist.org/observations/38414007">https://www.inaturalist.org/observations/38414007</a>   |

|     |                          |               |            |   |   |            |            |                                                                                                                     |
|-----|--------------------------|---------------|------------|---|---|------------|------------|---------------------------------------------------------------------------------------------------------------------|
| 506 | Sagittarius serpentarius | Secretarybird | 2018/1/7   | 5 | 0 | -1.3412852 | 34.8458995 | <a href="https://www.inaturalist.org/observations/9767034">https://www.inaturalist.org/observations/9767034</a>     |
| 507 | Sagittarius serpentarius | Secretarybird | 2015/11/27 | 7 | 0 | -1.3382753 | 36.9740822 | <a href="https://www.inaturalist.org/observations/38546792">https://www.inaturalist.org/observations/38546792</a>   |
| 508 | Sagittarius serpentarius | Secretarybird | 2016/5/3   | 3 | 0 | -1.3375666 | 36.8165712 | <a href="https://www.inaturalist.org/observations/87156182">https://www.inaturalist.org/observations/87156182</a>   |
| 509 | Sagittarius serpentarius | Secretarybird | 2022/2/19  | 4 | 0 | -1.3355325 | 36.8824321 | <a href="https://www.inaturalist.org/observations/110371635">https://www.inaturalist.org/observations/110371635</a> |
| 510 | Sagittarius serpentarius | Secretarybird | 2022/2/4   | 3 | 0 | -1.3352637 | 36.9396100 | <a href="https://www.inaturalist.org/observations/144481650">https://www.inaturalist.org/observations/144481650</a> |
| 511 | Sagittarius serpentarius | Secretarybird | 2020/1/31  | 4 | 0 | -1.3284925 | 35.2469622 | <a href="https://www.inaturalist.org/observations/130008366">https://www.inaturalist.org/observations/130008366</a> |
| 512 | Sagittarius serpentarius | Secretarybird | 2021/1/15  | 6 | 0 | -1.3274822 | 34.8836013 | <a href="https://www.inaturalist.org/observations/120819899">https://www.inaturalist.org/observations/120819899</a> |
| 513 | Sagittarius serpentarius | Secretarybird | 2022/6/21  | 4 | 0 | -1.3229822 | 35.1480317 | <a href="https://www.inaturalist.org/observations/127996189">https://www.inaturalist.org/observations/127996189</a> |
| 514 | Sagittarius serpentarius | Secretarybird | 2021/7/30  | 4 | 0 | -1.3218798 | 36.8854830 | <a href="https://www.inaturalist.org/observations/101935680">https://www.inaturalist.org/observations/101935680</a> |
| 515 | Sagittarius serpentarius | Secretarybird | 2019/7/31  | 4 | 0 | -1.3203771 | 36.8400718 | <a href="https://www.inaturalist.org/observations/47011708">https://www.inaturalist.org/observations/47011708</a>   |
| 516 | Sagittarius serpentarius | Secretarybird | 2021/8/30  | 5 | 0 | -1.3161544 | 34.9835366 | <a href="https://www.inaturalist.org/observations/106565342">https://www.inaturalist.org/observations/106565342</a> |
| 517 | Sagittarius serpentarius | Secretarybird | 2013/10/24 | 5 | 0 | -1.3148321 | 36.8184047 | <a href="https://www.inaturalist.org/observations/9790160">https://www.inaturalist.org/observations/9790160</a>     |
| 518 | Sagittarius serpentarius | Secretarybird | 2019/1/2   | 7 | 0 | -1.3147447 | 36.9515354 | <a href="https://www.inaturalist.org/observations/67852776">https://www.inaturalist.org/observations/67852776</a>   |
| 519 | Sagittarius serpentarius | Secretarybird | 2022/12/12 | 5 | 0 | -1.3143476 | 35.2092838 | <a href="https://www.inaturalist.org/observations/144649069">https://www.inaturalist.org/observations/144649069</a> |
| 520 | Sagittarius serpentarius | Secretarybird | 2020/1/5   | 3 | 0 | -1.3139182 | 34.8101863 | <a href="https://www.inaturalist.org/observations/121086618">https://www.inaturalist.org/observations/121086618</a> |
| 521 | Sagittarius serpentarius | Secretarybird | 1994/10/5  | 5 | 0 | -1.3101582 | 35.7469322 | <a href="https://www.inaturalist.org/observations/54888479">https://www.inaturalist.org/observations/54888479</a>   |
| 522 | Sagittarius serpentarius | Secretarybird | 2009/6/20  | 4 | 0 | -1.3099523 | 36.6615604 | <a href="https://www.inaturalist.org/observations/36298031">https://www.inaturalist.org/observations/36298031</a>   |
| 523 | Sagittarius serpentarius | Secretarybird | 2017/8/1   | 6 | 0 | -1.3086339 | 35.1338930 | <a href="https://www.inaturalist.org/observations/62029150">https://www.inaturalist.org/observations/62029150</a>   |
| 524 | Sagittarius serpentarius | Secretarybird | 2022/6/22  | 5 | 0 | -1.3083063 | 36.9117718 | <a href="https://www.inaturalist.org/observations/131931416">https://www.inaturalist.org/observations/131931416</a> |
| 525 | Sagittarius serpentarius | Secretarybird | 2009/9/24  | 6 | 0 | -1.3081595 | 34.9213414 | <a href="https://www.inaturalist.org/observations/45659347">https://www.inaturalist.org/observations/45659347</a>   |
| 526 | Sagittarius serpentarius | Secretarybird | 2021/12/21 | 4 | 0 | -1.3061823 | 34.9261307 | <a href="https://www.inaturalist.org/observations/112650979">https://www.inaturalist.org/observations/112650979</a> |
| 527 | Sagittarius serpentarius | Secretarybird | 2021/8/4   | 5 | 0 | -1.3036464 | 35.0227121 | <a href="https://www.inaturalist.org/observations/93626189">https://www.inaturalist.org/observations/93626189</a>   |
| 528 | Sagittarius serpentarius | Secretarybird | 2019/3/22  | 6 | 0 | -1.3011362 | 35.0278106 | <a href="https://www.inaturalist.org/observations/101346674">https://www.inaturalist.org/observations/101346674</a> |

|     |                          |               |            |   |   |            |            |                                                                                                                     |
|-----|--------------------------|---------------|------------|---|---|------------|------------|---------------------------------------------------------------------------------------------------------------------|
| 529 | Sagittarius serpentarius | Secretarybird | 2021/12/20 | 4 | 0 | -1.2891340 | 34.9751018 | <a href="https://www.inaturalist.org/observations/112650851">https://www.inaturalist.org/observations/112650851</a> |
| 530 | Sagittarius serpentarius | Secretarybird | 2015/11/7  | 7 | 0 | -1.2822935 | 36.9445736 | <a href="http://www.inaturalist.org/observations/2357389">http://www.inaturalist.org/observations/2357389</a>       |
| 531 | Sagittarius serpentarius | Secretarybird | 2017/1/30  | 4 | 0 | -1.2808836 | 35.3644724 | <a href="https://www.inaturalist.org/observations/17555665">https://www.inaturalist.org/observations/17555665</a>   |
| 532 | Sagittarius serpentarius | Secretarybird | 2014/8/29  | 7 | 0 | -1.2796929 | 34.8594911 | <a href="https://www.inaturalist.org/observations/63837325">https://www.inaturalist.org/observations/63837325</a>   |
| 533 | Sagittarius serpentarius | Secretarybird | 2017/9/6   | 8 | 0 | -1.2766414 | 35.1903868 | <a href="https://www.inaturalist.org/observations/8066091">https://www.inaturalist.org/observations/8066091</a>     |
| 534 | Sagittarius serpentarius | Secretarybird | 2017/1/27  | 5 | 0 | -1.2745098 | 36.8319713 | <a href="https://www.inaturalist.org/observations/17553443">https://www.inaturalist.org/observations/17553443</a>   |
| 535 | Sagittarius serpentarius | Secretarybird | 2019/4/14  | 6 | 0 | -1.2731935 | 36.9611391 | <a href="https://www.inaturalist.org/observations/110188193">https://www.inaturalist.org/observations/110188193</a> |
| 536 | Sagittarius serpentarius | Secretarybird | 2022/6/27  | 5 | 0 | -1.2711986 | 36.9673620 | <a href="https://www.inaturalist.org/observations/125304250">https://www.inaturalist.org/observations/125304250</a> |
| 537 | Sagittarius serpentarius | Secretarybird | 2017/7/30  | 5 | 0 | -1.2703014 | 35.0615933 | <a href="https://www.inaturalist.org/observations/99766455">https://www.inaturalist.org/observations/99766455</a>   |
| 538 | Sagittarius serpentarius | Secretarybird | 2014/8/7   | 5 | 0 | -1.2694246 | 35.0272745 | <a href="https://www.inaturalist.org/observations/106517996">https://www.inaturalist.org/observations/106517996</a> |
| 539 | Sagittarius serpentarius | Secretarybird | 2020/8/21  | 6 | 0 | -1.2685561 | 36.9105263 | <a href="https://www.inaturalist.org/observations/57305800">https://www.inaturalist.org/observations/57305800</a>   |
| 540 | Sagittarius serpentarius | Secretarybird | 2021/7/12  | 4 | 0 | -1.2685558 | 36.9890377 | <a href="https://www.inaturalist.org/observations/86699037">https://www.inaturalist.org/observations/86699037</a>   |
| 541 | Sagittarius serpentarius | Secretarybird | 2019/3/14  | 7 | 0 | -1.2685465 | 35.0256830 | <a href="https://www.inaturalist.org/observations/33741751">https://www.inaturalist.org/observations/33741751</a>   |
| 542 | Sagittarius serpentarius | Secretarybird | 2017/9/8   | 5 | 0 | -1.2681860 | 35.3100086 | <a href="https://www.inaturalist.org/observations/41921173">https://www.inaturalist.org/observations/41921173</a>   |
| 543 | Sagittarius serpentarius | Secretarybird | 2015/4/9   | 9 | 0 | -1.2670848 | 36.9297579 | <a href="http://www.inaturalist.org/observations/1445353">http://www.inaturalist.org/observations/1445353</a>       |
| 544 | Sagittarius serpentarius | Secretarybird | 2018/9/7   | 4 | 0 | -1.2628461 | 35.1588388 | <a href="https://www.inaturalist.org/observations/16354562">https://www.inaturalist.org/observations/16354562</a>   |
| 545 | Sagittarius serpentarius | Secretarybird | 2016/10/14 | 6 | 0 | -1.2580026 | 36.8858239 | <a href="http://www.inaturalist.org/observations/4657826">http://www.inaturalist.org/observations/4657826</a>       |
| 546 | Sagittarius serpentarius | Secretarybird | 2018/7/13  | 6 | 0 | -1.2536226 | 36.9909198 | <a href="https://www.inaturalist.org/observations/46646836">https://www.inaturalist.org/observations/46646836</a>   |
| 547 | Sagittarius serpentarius | Secretarybird | 2022/12/25 | 1 | 0 | -1.2526900 | 36.8093345 | <a href="https://www.inaturalist.org/observations/145035346">https://www.inaturalist.org/observations/145035346</a> |
| 548 | Sagittarius serpentarius | Secretarybird | 2015/7/6   | 5 | 0 | -1.2514068 | 34.9534335 | <a href="https://www.inaturalist.org/observations/40657894">https://www.inaturalist.org/observations/40657894</a>   |
| 549 | Sagittarius serpentarius | Secretarybird | 2015/4/2   | 8 | 0 | -1.2449593 | 35.1765695 | <a href="http://www.inaturalist.org/observations/1382569">http://www.inaturalist.org/observations/1382569</a>       |
| 550 | Sagittarius serpentarius | Secretarybird | 2019/3/5   | 6 | 0 | -1.2355839 | 35.0505784 | <a href="https://www.inaturalist.org/observations/42294385">https://www.inaturalist.org/observations/42294385</a>   |
| 551 | Sagittarius serpentarius | Secretarybird | 2019/7/30  | 5 | 0 | -1.2351937 | 36.6604843 | <a href="https://www.inaturalist.org/observations/49182323">https://www.inaturalist.org/observations/49182323</a>   |

|     |             |              |               |            |   |   |            |            |                                                                                                                     |
|-----|-------------|--------------|---------------|------------|---|---|------------|------------|---------------------------------------------------------------------------------------------------------------------|
| 552 | Sagittarius | serpentarius | Secretarybird | 2021/7/20  | 4 | 0 | -1.2292556 | 36.9968873 | <a href="https://www.inaturalist.org/observations/91859745">https://www.inaturalist.org/observations/91859745</a>   |
| 553 | Sagittarius | serpentarius | Secretarybird | 2019/2/23  | 4 | 0 | -1.2249367 | 35.3883975 | <a href="https://www.inaturalist.org/observations/71975005">https://www.inaturalist.org/observations/71975005</a>   |
| 554 | Sagittarius | serpentarius | Secretarybird | 2021/3/26  | 5 | 0 | -1.2215665 | 35.1055949 | <a href="https://www.inaturalist.org/observations/104698526">https://www.inaturalist.org/observations/104698526</a> |
| 555 | Sagittarius | serpentarius | Secretarybird | 2019/10/10 | 5 | 0 | -1.2186567 | 36.6525944 | <a href="https://www.inaturalist.org/observations/34256128">https://www.inaturalist.org/observations/34256128</a>   |
| 556 | Sagittarius | serpentarius | Secretarybird | 2019/8/3   | 5 | 0 | -1.2093576 | 34.9464075 | <a href="https://www.inaturalist.org/observations/46799514">https://www.inaturalist.org/observations/46799514</a>   |
| 557 | Sagittarius | serpentarius | Secretarybird | 2015/8/1   | 6 | 0 | -1.2042573 | 36.6760611 | <a href="https://www.inaturalist.org/observations/60781307">https://www.inaturalist.org/observations/60781307</a>   |
| 558 | Sagittarius | serpentarius | Secretarybird | 2017/11/24 | 4 | 0 | -1.2024166 | 36.8898283 | <a href="https://www.inaturalist.org/observations/27270542">https://www.inaturalist.org/observations/27270542</a>   |
| 559 | Sagittarius | serpentarius | Secretarybird | 2013/8/2   | 7 | 0 | -1.2012669 | 34.9177410 | <a href="https://www.inaturalist.org/observations/38569978">https://www.inaturalist.org/observations/38569978</a>   |
| 560 | Sagittarius | serpentarius | Secretarybird | 2019/11/7  | 5 | 0 | -1.1580390 | 35.2301128 | <a href="https://www.inaturalist.org/observations/35941502">https://www.inaturalist.org/observations/35941502</a>   |
| 561 | Sagittarius | serpentarius | Secretarybird | 2019/5/18  | 4 | 0 | -1.1237454 | 35.3717802 | <a href="https://www.inaturalist.org/observations/29125399">https://www.inaturalist.org/observations/29125399</a>   |
| 562 | Sagittarius | serpentarius | Secretarybird | 2020/2/12  | 3 | 0 | -1.1104619 | 35.1511589 | <a href="https://www.inaturalist.org/observations/39034490">https://www.inaturalist.org/observations/39034490</a>   |
| 563 | Sagittarius | serpentarius | Secretarybird | 2019/11/7  | 6 | 0 | -1.0942572 | 35.2350065 | <a href="https://www.inaturalist.org/observations/35941713">https://www.inaturalist.org/observations/35941713</a>   |
| 564 | Sagittarius | serpentarius | Secretarybird | 2022/5/31  | 4 | 0 | -1.0471971 | 35.0886638 | <a href="https://www.inaturalist.org/observations/128421676">https://www.inaturalist.org/observations/128421676</a> |
| 565 | Sagittarius | serpentarius | Secretarybird | 2019/11/7  | 5 | 0 | -1.0388258 | 35.2445915 | <a href="https://www.inaturalist.org/observations/35916342">https://www.inaturalist.org/observations/35916342</a>   |
| 566 | Sagittarius | serpentarius | Secretarybird | 2022/11/13 | 2 | 0 | -1.0229680 | 35.2691970 | <a href="https://www.inaturalist.org/observations/141903765">https://www.inaturalist.org/observations/141903765</a> |
| 567 | Sagittarius | serpentarius | Secretarybird | 2021/7/22  | 5 | 0 | -0.9540823 | 36.3739463 | <a href="https://www.inaturalist.org/observations/106038214">https://www.inaturalist.org/observations/106038214</a> |
| 568 | Sagittarius | serpentarius | Secretarybird | 2014/1/17  | 9 | 0 | -0.9465428 | 36.3670757 | <a href="http://www.inaturalist.org/observations/4019403">http://www.inaturalist.org/observations/4019403</a>       |
| 569 | Sagittarius | serpentarius | Secretarybird | 2022/4/10  | 3 | 0 | -0.9128155 | 36.2770117 | <a href="https://www.inaturalist.org/observations/111106404">https://www.inaturalist.org/observations/111106404</a> |
| 570 | Sagittarius | serpentarius | Secretarybird | 2014/11/6  | 5 | 0 | -0.8908588 | 36.2517767 | <a href="https://www.inaturalist.org/observations/19539154">https://www.inaturalist.org/observations/19539154</a>   |
| 571 | Sagittarius | serpentarius | Secretarybird | 2021/1/30  | 4 | 0 | -0.8813976 | 36.3637454 | <a href="https://www.inaturalist.org/observations/68803852">https://www.inaturalist.org/observations/68803852</a>   |
| 572 | Sagittarius | serpentarius | Secretarybird | 2019/11/3  | 5 | 0 | -0.8714394 | 36.3318807 | <a href="https://www.inaturalist.org/observations/61625252">https://www.inaturalist.org/observations/61625252</a>   |
| 573 | Sagittarius | serpentarius | Secretarybird | 2022/7/2   | 4 | 0 | -0.8614261 | 36.2680871 | <a href="https://www.inaturalist.org/observations/131114299">https://www.inaturalist.org/observations/131114299</a> |
| 574 | Sagittarius | serpentarius | Secretarybird | 2021/7/19  | 4 | 0 | -0.8160255 | 36.2568157 | <a href="https://www.inaturalist.org/observations/88698642">https://www.inaturalist.org/observations/88698642</a>   |

|     |                          |               |            |   |   |            |            |                                                                                                                     |
|-----|--------------------------|---------------|------------|---|---|------------|------------|---------------------------------------------------------------------------------------------------------------------|
| 575 | Sagittarius serpentarius | Secretarybird | 2018/10/28 | 6 | 0 | -0.7713268 | 36.3919780 | <a href="https://www.inaturalist.org/observations/17891590">https://www.inaturalist.org/observations/17891590</a>   |
| 576 | Sagittarius serpentarius | Secretarybird | 2018/11/24 | 4 | 0 | -0.6427220 | 36.2475662 | <a href="https://www.inaturalist.org/observations/64867165">https://www.inaturalist.org/observations/64867165</a>   |
| 577 | Sagittarius serpentarius | Secretarybird | 2018/8/29  | 5 | 0 | -0.6363530 | 36.4793580 | <a href="https://www.inaturalist.org/observations/106197504">https://www.inaturalist.org/observations/106197504</a> |
| 578 | Sagittarius serpentarius | Secretarybird | 2007/10/8  | 5 | 0 | -0.6156544 | 36.1526391 | <a href="https://www.inaturalist.org/observations/19526747">https://www.inaturalist.org/observations/19526747</a>   |
| 579 | Sagittarius serpentarius | Secretarybird | 2021/4/27  | 5 | 0 | -0.5824818 | 36.3733146 | <a href="https://www.inaturalist.org/observations/75663517">https://www.inaturalist.org/observations/75663517</a>   |
| 580 | Sagittarius serpentarius | Secretarybird | 2021/3/5   | 4 | 0 | -0.5441341 | 36.1560443 | <a href="https://www.inaturalist.org/observations/103822129">https://www.inaturalist.org/observations/103822129</a> |
| 581 | Sagittarius serpentarius | Secretarybird | 1988/8/23  | 1 | 0 | -0.5337372 | 36.1064366 | <a href="https://www.inaturalist.org/observations/144395841">https://www.inaturalist.org/observations/144395841</a> |
| 582 | Sagittarius serpentarius | Secretarybird | 2013/8/16  | 3 | 0 | -0.5291634 | 36.3206798 | <a href="https://www.inaturalist.org/observations/68216117">https://www.inaturalist.org/observations/68216117</a>   |
| 583 | Sagittarius serpentarius | Secretarybird | 2005/9/28  | 4 | 0 | -0.5081413 | 36.1732282 | <a href="https://www.inaturalist.org/observations/53291811">https://www.inaturalist.org/observations/53291811</a>   |
| 584 | Sagittarius serpentarius | Secretarybird | 2016/3/13  | 4 | 0 | -0.5006131 | 36.3635746 | <a href="https://www.inaturalist.org/observations/23647503">https://www.inaturalist.org/observations/23647503</a>   |
| 585 | Sagittarius serpentarius | Secretarybird | 2015/11/10 | 3 | 0 | -0.4778561 | 35.0537801 | <a href="https://www.inaturalist.org/observations/102295190">https://www.inaturalist.org/observations/102295190</a> |
| 586 | Sagittarius serpentarius | Secretarybird | 2017/2/23  | 6 | 0 | -0.4286497 | 36.1699826 | <a href="https://www.inaturalist.org/observations/34030891">https://www.inaturalist.org/observations/34030891</a>   |
| 587 | Sagittarius serpentarius | Secretarybird | 2012/7/18  | 8 | 0 | -0.4082258 | 36.1971113 | <a href="https://www.inaturalist.org/observations/8212950">https://www.inaturalist.org/observations/8212950</a>     |
| 588 | Sagittarius serpentarius | Secretarybird | 2018/8/28  | 4 | 0 | -0.4021597 | 36.1303294 | <a href="https://www.inaturalist.org/observations/19311435">https://www.inaturalist.org/observations/19311435</a>   |
| 589 | Sagittarius serpentarius | Secretarybird | 2013/8/22  | 4 | 0 | -0.3750722 | 36.1065632 | <a href="https://www.inaturalist.org/observations/75408977">https://www.inaturalist.org/observations/75408977</a>   |
| 590 | Sagittarius serpentarius | Secretarybird | 2012/7/25  | 4 | 0 | -0.3721916 | 36.0826560 | <a href="https://www.inaturalist.org/observations/67377756">https://www.inaturalist.org/observations/67377756</a>   |
| 591 | Sagittarius serpentarius | Secretarybird | 2022/5/19  | 5 | 0 | -0.3473339 | 36.0852270 | <a href="https://www.inaturalist.org/observations/118686746">https://www.inaturalist.org/observations/118686746</a> |
| 592 | Sagittarius serpentarius | Secretarybird | 2019/7/10  | 6 | 0 | -0.3343044 | 36.1698875 | <a href="https://www.inaturalist.org/observations/33067183">https://www.inaturalist.org/observations/33067183</a>   |
| 593 | Sagittarius serpentarius | Secretarybird | 2018/1/25  | 4 | 0 | -0.3292126 | 36.0610682 | <a href="https://www.inaturalist.org/observations/107246167">https://www.inaturalist.org/observations/107246167</a> |
| 594 | Sagittarius serpentarius | Secretarybird | 2005/1/3   | 4 | 0 | -0.3227299 | 36.1100750 | <a href="https://www.inaturalist.org/observations/78493960">https://www.inaturalist.org/observations/78493960</a>   |
| 595 | Sagittarius serpentarius | Secretarybird | 2011/7/5   | 4 | 0 | -0.3007868 | 36.1347262 | <a href="https://www.inaturalist.org/observations/48659211">https://www.inaturalist.org/observations/48659211</a>   |
| 596 | Sagittarius serpentarius | Secretarybird | 2021/9/4   | 4 | 0 | -0.2649171 | 36.9877273 | <a href="https://www.inaturalist.org/observations/106565665">https://www.inaturalist.org/observations/106565665</a> |
| 597 | Sagittarius serpentarius | Secretarybird | 2018/4/2   | 7 | 0 | -0.2563834 | 36.0966754 | <a href="https://www.inaturalist.org/observations/10566683">https://www.inaturalist.org/observations/10566683</a>   |

|     |                          |               |            |    |   |            |            |                                                                                                                     |
|-----|--------------------------|---------------|------------|----|---|------------|------------|---------------------------------------------------------------------------------------------------------------------|
| 598 | Sagittarius serpentarius | Secretarybird | 2009/11/30 | 6  | 0 | -0.2524509 | 36.0922906 | <a href="https://www.inaturalist.org/observations/67712667">https://www.inaturalist.org/observations/67712667</a>   |
| 599 | Sagittarius serpentarius | Secretarybird | 2019/3/12  | 3  | 0 | -0.2341856 | 36.8561431 | <a href="https://www.inaturalist.org/observations/101340407">https://www.inaturalist.org/observations/101340407</a> |
| 600 | Sagittarius serpentarius | Secretarybird | 2018/8/2   | 5  | 0 | -0.1697482 | 36.9824020 | <a href="https://www.inaturalist.org/observations/15765338">https://www.inaturalist.org/observations/15765338</a>   |
| 601 | Sagittarius serpentarius | Secretarybird | 2017/4/13  | 4  | 0 | -0.1681043 | 30.1274929 | <a href="https://www.inaturalist.org/observations/45517661">https://www.inaturalist.org/observations/45517661</a>   |
| 602 | Sagittarius serpentarius | Secretarybird | 2005/1/14  | 4  | 0 | -0.0709719 | 37.8362019 | <a href="https://www.inaturalist.org/observations/35669605">https://www.inaturalist.org/observations/35669605</a>   |
| 603 | Sagittarius serpentarius | Secretarybird | 2019/10/2  | 6  | 0 | -0.0338362 | 36.9680113 | <a href="https://www.inaturalist.org/observations/34296245">https://www.inaturalist.org/observations/34296245</a>   |
| 604 | Sagittarius serpentarius | Secretarybird | 2010/9/18  | 10 | 0 | -0.0147034 | 36.8904850 | <a href="http://www.inaturalist.org/observations/4493516">http://www.inaturalist.org/observations/4493516</a>       |
| 605 | Sagittarius serpentarius | Secretarybird | 2022/1/18  | 6  | 0 | 0.0021332  | 36.9493009 | <a href="https://www.inaturalist.org/observations/120334508">https://www.inaturalist.org/observations/120334508</a> |
| 606 | Sagittarius serpentarius | Secretarybird | 2018/8/10  | 4  | 0 | 0.0089160  | 36.8185556 | <a href="https://www.inaturalist.org/observations/15826969">https://www.inaturalist.org/observations/15826969</a>   |
| 607 | Sagittarius serpentarius | Secretarybird | 2022/7/18  | 6  | 0 | 0.0175373  | 36.8015165 | <a href="https://www.inaturalist.org/observations/126923801">https://www.inaturalist.org/observations/126923801</a> |
| 608 | Sagittarius serpentarius | Secretarybird | 2022/6/27  | 5  | 0 | 0.0257317  | 38.1976938 | <a href="https://www.inaturalist.org/observations/130942930">https://www.inaturalist.org/observations/130942930</a> |
| 609 | Sagittarius serpentarius | Secretarybird | 2009/9/10  | 7  | 0 | 0.0286099  | 36.9213669 | <a href="http://inaturalist.ca/observations/4798248">http://inaturalist.ca/observations/4798248</a>                 |
| 610 | Sagittarius serpentarius | Secretarybird | 2020/1/7   | 4  | 0 | 0.0486536  | 38.0041114 | <a href="https://www.inaturalist.org/observations/68934434">https://www.inaturalist.org/observations/68934434</a>   |
| 611 | Sagittarius serpentarius | Secretarybird | 2007/8/12  | 8  | 0 | 0.0507586  | 36.7945202 | <a href="https://www.inaturalist.org/observations/5393909">https://www.inaturalist.org/observations/5393909</a>     |
| 612 | Sagittarius serpentarius | Secretarybird | 2013/8/29  | 4  | 0 | 0.0666504  | 38.1005207 | <a href="https://www.inaturalist.org/observations/65569732">https://www.inaturalist.org/observations/65569732</a>   |
| 613 | Sagittarius serpentarius | Secretarybird | 2014/10/2  | 3  | 0 | 0.0752240  | 36.8974641 | <a href="https://www.inaturalist.org/observations/65978102">https://www.inaturalist.org/observations/65978102</a>   |
| 614 | Sagittarius serpentarius | Secretarybird | 2015/8/4   | 4  | 0 | 0.0798283  | 36.9922327 | <a href="https://www.inaturalist.org/observations/105593414">https://www.inaturalist.org/observations/105593414</a> |
| 615 | Sagittarius serpentarius | Secretarybird | 2022/6/27  | 4  | 0 | 0.0816037  | 38.0917318 | <a href="https://www.inaturalist.org/observations/130941409">https://www.inaturalist.org/observations/130941409</a> |
| 616 | Sagittarius serpentarius | Secretarybird | 2015/8/4   | 4  | 0 | 0.0944238  | 36.9266471 | <a href="https://www.inaturalist.org/observations/105593420">https://www.inaturalist.org/observations/105593420</a> |
| 617 | Sagittarius serpentarius | Secretarybird | 2014/8/28  | 6  | 0 | 0.1277004  | 36.9385049 | <a href="https://www.inaturalist.org/observations/66930810">https://www.inaturalist.org/observations/66930810</a>   |
| 618 | Sagittarius serpentarius | Secretarybird | 2014/10/3  | 4  | 0 | 0.1370600  | 36.8372910 | <a href="https://www.inaturalist.org/observations/65987071">https://www.inaturalist.org/observations/65987071</a>   |
| 619 | Sagittarius serpentarius | Secretarybird | 2020/2/13  | 5  | 0 | 0.1595794  | 36.9883097 | <a href="https://www.inaturalist.org/observations/38610448">https://www.inaturalist.org/observations/38610448</a>   |
| 620 | Sagittarius serpentarius | Secretarybird | 2022/8/12  | 7  | 0 | 0.1876222  | 36.9859869 | <a href="https://www.inaturalist.org/observations/135165150">https://www.inaturalist.org/observations/135165150</a> |



|     |                          |               |           |   |   |           |            |                                                                                                                     |
|-----|--------------------------|---------------|-----------|---|---|-----------|------------|---------------------------------------------------------------------------------------------------------------------|
| 621 | Sagittarius serpentarius | Secretarybird | 2018/12/9 | 6 | 0 | 0.1909767 | 37.5539211 | <a href="https://www.inaturalist.org/observations/109918591">https://www.inaturalist.org/observations/109918591</a> |
| 622 | Sagittarius serpentarius | Secretarybird | 2009/8/14 | 4 | 0 | 0.2073530 | 36.2319780 | <a href="https://www.inaturalist.org/observations/35468390">https://www.inaturalist.org/observations/35468390</a>   |
| 623 | Sagittarius serpentarius | Secretarybird | 2016/5/11 | 3 | 0 | 0.2131266 | 36.8236225 | <a href="https://www.inaturalist.org/observations/90850263">https://www.inaturalist.org/observations/90850263</a>   |
| 624 | Sagittarius serpentarius | Secretarybird | 2018/5/28 | 4 | 0 | 0.2384809 | 37.3445382 | <a href="https://www.inaturalist.org/observations/45899605">https://www.inaturalist.org/observations/45899605</a>   |
| 625 | Sagittarius serpentarius | Secretarybird | 2010/2/15 | 5 | 0 | 0.3186979 | 37.4770473 | <a href="https://www.inaturalist.org/observations/14236967">https://www.inaturalist.org/observations/14236967</a>   |
| 626 | Sagittarius serpentarius | Secretarybird | 2019/5/24 | 4 | 0 | 0.3314335 | 37.5863607 | <a href="https://www.inaturalist.org/observations/70293485">https://www.inaturalist.org/observations/70293485</a>   |
| 627 | Sagittarius serpentarius | Secretarybird | 2014/7/5  | 5 | 0 | 0.3391944 | 37.7432605 | <a href="https://www.inaturalist.org/observations/48463884">https://www.inaturalist.org/observations/48463884</a>   |
| 628 | Sagittarius serpentarius | Secretarybird | 2014/5/31 | 4 | 0 | 0.3472277 | 36.9122450 | <a href="https://www.inaturalist.org/observations/71097128">https://www.inaturalist.org/observations/71097128</a>   |
| 629 | Sagittarius serpentarius | Secretarybird | 2020/1/25 | 3 | 0 | 0.3635187 | 36.8784193 | <a href="https://www.inaturalist.org/observations/46597728">https://www.inaturalist.org/observations/46597728</a>   |
| 630 | Sagittarius serpentarius | Secretarybird | 2008/6/20 | 7 | 0 | 0.3737655 | 36.9956997 | <a href="http://www.inaturalist.org/observations/3013217">http://www.inaturalist.org/observations/3013217</a>       |
| 631 | Sagittarius serpentarius | Secretarybird | 2019/5/9  | 5 | 0 | 0.3775417 | 36.9359857 | <a href="https://www.inaturalist.org/observations/108461471">https://www.inaturalist.org/observations/108461471</a> |
| 632 | Sagittarius serpentarius | Secretarybird | 2012/2/15 | 4 | 0 | 0.3784771 | 37.5972749 | <a href="https://www.inaturalist.org/observations/71496903">https://www.inaturalist.org/observations/71496903</a>   |
| 633 | Sagittarius serpentarius | Secretarybird | 2019/3/9  | 6 | 0 | 0.4094597 | 37.5785281 | <a href="https://www.inaturalist.org/observations/42293931">https://www.inaturalist.org/observations/42293931</a>   |
| 634 | Sagittarius serpentarius | Secretarybird | 2018/6/2  | 3 | 0 | 0.4213994 | 37.4430460 | <a href="https://www.inaturalist.org/observations/66087909">https://www.inaturalist.org/observations/66087909</a>   |
| 635 | Sagittarius serpentarius | Secretarybird | 2019/2/3  | 5 | 0 | 0.4410139 | 37.5100947 | <a href="https://www.inaturalist.org/observations/53940255">https://www.inaturalist.org/observations/53940255</a>   |
| 636 | Sagittarius serpentarius | Secretarybird | 2012/4/28 | 8 | 0 | 0.4442076 | 37.9113628 | <a href="https://www.inaturalist.org/observations/7131885">https://www.inaturalist.org/observations/7131885</a>     |
| 637 | Sagittarius serpentarius | Secretarybird | 2020/1/5  | 3 | 0 | 0.4492489 | 37.5833215 | <a href="https://www.inaturalist.org/observations/68930942">https://www.inaturalist.org/observations/68930942</a>   |
| 638 | Sagittarius serpentarius | Secretarybird | 2019/6/15 | 7 | 0 | 0.4496836 | 37.6200511 | <a href="https://www.inaturalist.org/observations/53824873">https://www.inaturalist.org/observations/53824873</a>   |
| 639 | Sagittarius serpentarius | Secretarybird | 2013/8/19 | 5 | 0 | 0.4551236 | 37.4436710 | <a href="https://www.inaturalist.org/observations/74362738">https://www.inaturalist.org/observations/74362738</a>   |
| 640 | Sagittarius serpentarius | Secretarybird | 2019/9/13 | 5 | 0 | 0.4566932 | 37.6113887 | <a href="https://www.inaturalist.org/observations/34378915">https://www.inaturalist.org/observations/34378915</a>   |
| 641 | Sagittarius serpentarius | Secretarybird | 2019/7/31 | 6 | 0 | 0.4622454 | 37.5634531 | <a href="https://www.inaturalist.org/observations/33952809">https://www.inaturalist.org/observations/33952809</a>   |
| 642 | Sagittarius serpentarius | Secretarybird | 2018/7/15 | 5 | 0 | 0.5096179 | 37.7622566 | <a href="https://www.inaturalist.org/observations/36710119">https://www.inaturalist.org/observations/36710119</a>   |
| 643 | Sagittarius serpentarius | Secretarybird | 2014/5/16 | 6 | 0 | 0.5163328 | 37.5818628 | <a href="https://www.inaturalist.org/observations/54462495">https://www.inaturalist.org/observations/54462495</a>   |

|     |                          |               |            |    |   |           |            |                                                                                                                     |
|-----|--------------------------|---------------|------------|----|---|-----------|------------|---------------------------------------------------------------------------------------------------------------------|
| 644 | Sagittarius serpentarius | Secretarybird | 1994/10/2  | 5  | 0 | 0.5170775 | 37.4662676 | <a href="https://www.inaturalist.org/observations/54885308">https://www.inaturalist.org/observations/54885308</a>   |
| 645 | Sagittarius serpentarius | Secretarybird | 2016/5/11  | 4  | 0 | 0.5222602 | 37.7667418 | <a href="https://www.inaturalist.org/observations/87115558">https://www.inaturalist.org/observations/87115558</a>   |
| 646 | Sagittarius serpentarius | Secretarybird | 2022/12/8  | 3  | 0 | 0.5228367 | 36.9253623 | <a href="https://www.inaturalist.org/observations/144553203">https://www.inaturalist.org/observations/144553203</a> |
| 647 | Sagittarius serpentarius | Secretarybird | 2019/11/6  | 4  | 0 | 0.5228560 | 37.7649494 | <a href="https://www.inaturalist.org/observations/39965869">https://www.inaturalist.org/observations/39965869</a>   |
| 648 | Sagittarius serpentarius | Secretarybird | 2021/4/22  | 5  | 0 | 0.5319296 | 37.7275744 | <a href="https://www.inaturalist.org/observations/79975555">https://www.inaturalist.org/observations/79975555</a>   |
| 649 | Sagittarius serpentarius | Secretarybird | 2019/2/3   | 6  | 0 | 0.5399151 | 37.4452009 | <a href="https://www.inaturalist.org/observations/56609844">https://www.inaturalist.org/observations/56609844</a>   |
| 650 | Sagittarius serpentarius | Secretarybird | 2021/3/1   | 3  | 0 | 0.5410640 | 37.5537424 | <a href="https://www.inaturalist.org/observations/98270049">https://www.inaturalist.org/observations/98270049</a>   |
| 651 | Sagittarius serpentarius | Secretarybird | 2019/2/4   | 5  | 0 | 0.5424707 | 37.5708761 | <a href="https://www.inaturalist.org/observations/56610111">https://www.inaturalist.org/observations/56610111</a>   |
| 652 | Sagittarius serpentarius | Secretarybird | 2019/2/3   | 7  | 0 | 0.5656739 | 37.5279200 | <a href="https://www.inaturalist.org/observations/56609841">https://www.inaturalist.org/observations/56609841</a>   |
| 653 | Sagittarius serpentarius | Secretarybird | 2018/8/19  | 5  | 0 | 0.5838816 | 37.6130378 | <a href="https://www.inaturalist.org/observations/66474866">https://www.inaturalist.org/observations/66474866</a>   |
| 654 | Sagittarius serpentarius | Secretarybird | 2018/10/11 | 4  | 0 | 0.6152973 | 37.5030834 | <a href="https://www.inaturalist.org/observations/17917474">https://www.inaturalist.org/observations/17917474</a>   |
| 655 | Sagittarius serpentarius | Secretarybird | 2018/7/20  | 4  | 0 | 0.6421964 | 37.8267362 | <a href="https://www.inaturalist.org/observations/99167917">https://www.inaturalist.org/observations/99167917</a>   |
| 656 | Sagittarius serpentarius | Secretarybird | 2014/8/11  | 4  | 0 | 0.6458724 | 37.5705107 | <a href="https://www.inaturalist.org/observations/142538444">https://www.inaturalist.org/observations/142538444</a> |
| 657 | Sagittarius serpentarius | Secretarybird | 2017/2/28  | 7  | 0 | 0.6814332 | 37.7731788 | <a href="https://www.inaturalist.org/observations/34245463">https://www.inaturalist.org/observations/34245463</a>   |
| 658 | Sagittarius serpentarius | Secretarybird | 1999/2/19  | 6  | 0 | 0.6869954 | 37.5832998 | <a href="https://www.inaturalist.org/observations/8718211">https://www.inaturalist.org/observations/8718211</a>     |
| 659 | Sagittarius serpentarius | Secretarybird | 2002/7/11  | 3  | 0 | 0.6951674 | 37.8900047 | <a href="https://www.inaturalist.org/observations/100914058">https://www.inaturalist.org/observations/100914058</a> |
| 660 | Sagittarius serpentarius | Secretarybird | 2012/7/23  | 5  | 0 | 0.7007121 | 37.4871913 | <a href="https://www.inaturalist.org/observations/67328674">https://www.inaturalist.org/observations/67328674</a>   |
| 661 | Sagittarius serpentarius | Secretarybird | 2019/2/12  | 6  | 0 | 0.7031222 | 37.7016520 | <a href="https://www.inaturalist.org/observations/55466953">https://www.inaturalist.org/observations/55466953</a>   |
| 662 | Sagittarius serpentarius | Secretarybird | 2015/4/18  | 10 | 0 | 0.7075348 | 37.6529080 | <a href="https://www.inaturalist.org/observations/6484986">https://www.inaturalist.org/observations/6484986</a>     |
| 663 | Sagittarius serpentarius | Secretarybird | 2012/12/13 | 4  | 0 | 0.7090356 | 37.7986217 | <a href="https://www.inaturalist.org/observations/86704887">https://www.inaturalist.org/observations/86704887</a>   |
| 664 | Sagittarius serpentarius | Secretarybird | 2008/8/11  | 8  | 0 | 0.7391725 | 37.7920462 | <a href="https://www.inaturalist.org/observations/28423731">https://www.inaturalist.org/observations/28423731</a>   |
| 665 | Sagittarius serpentarius | Secretarybird | 2016/1/8   | 4  | 0 | 0.7392277 | 37.9649815 | <a href="https://www.inaturalist.org/observations/36198261">https://www.inaturalist.org/observations/36198261</a>   |
| 666 | Sagittarius serpentarius | Secretarybird | 2018/10/27 | 5  | 0 | 0.7442958 | 35.0340351 | <a href="https://www.inaturalist.org/observations/21556498">https://www.inaturalist.org/observations/21556498</a>   |

|     |             |              |               |            |   |   |           |            |                                                                                                                     |
|-----|-------------|--------------|---------------|------------|---|---|-----------|------------|---------------------------------------------------------------------------------------------------------------------|
| 667 | Sagittarius | serpentarius | Secretarybird | 2010/8/11  | 6 | 0 | 0.7896243 | 37.4461605 | <a href="https://www.inaturalist.org/observations/62229782">https://www.inaturalist.org/observations/62229782</a>   |
| 668 | Sagittarius | serpentarius | Secretarybird | 2018/10/11 | 3 | 0 | 1.2174256 | 36.8544992 | <a href="https://www.inaturalist.org/observations/18051353">https://www.inaturalist.org/observations/18051353</a>   |
| 669 | Sagittarius | serpentarius | Secretarybird | 2017/8/24  | 2 | 0 | 3.6672708 | 33.9826612 | <a href="https://www.inaturalist.org/observations/141983036">https://www.inaturalist.org/observations/141983036</a> |
| 670 | Sagittarius | serpentarius | Secretarybird | 2009/7/17  | 4 | 0 | 5.9493078 | 37.4013791 | <a href="https://www.inaturalist.org/observations/34123038">https://www.inaturalist.org/observations/34123038</a>   |
| 671 | Sagittarius | serpentarius | Secretarybird | 2015/1/14  | 5 | 0 | 9.0882502 | 40.0641417 | <a href="https://www.inaturalist.org/observations/50012657">https://www.inaturalist.org/observations/50012657</a>   |
| 672 | Sagittarius | serpentarius | Secretarybird | 2020/1/29  | 6 | 0 | 9.1848950 | 39.8074162 | <a href="https://www.inaturalist.org/observations/38110830">https://www.inaturalist.org/observations/38110830</a>   |
| 673 | Sagittarius | serpentarius | Secretarybird | 2018/7/23  | 5 | 0 | 9.1881085 | 40.1308918 | <a href="https://www.inaturalist.org/observations/18735617">https://www.inaturalist.org/observations/18735617</a>   |
| 674 | Sagittarius | serpentarius | Secretarybird | 2014/1/18  | 5 | 0 | 9.2597506 | 40.3991365 | <a href="https://www.inaturalist.org/observations/37268072">https://www.inaturalist.org/observations/37268072</a>   |
| 675 | Sagittarius | serpentarius | Secretarybird | 2020/2/28  | 4 | 0 | 9.3212186 | 40.3962196 | <a href="https://www.inaturalist.org/observations/40287120">https://www.inaturalist.org/observations/40287120</a>   |
| 676 | Sagittarius | serpentarius | Secretarybird | 2019/11/21 | 4 | 0 | 9.3383174 | 40.2561452 | <a href="https://www.inaturalist.org/observations/68768773">https://www.inaturalist.org/observations/68768773</a>   |
| 677 | Sagittarius | serpentarius | Secretarybird | 2018/11/14 | 3 | 0 | 9.3679930 | 40.2300280 | <a href="https://www.inaturalist.org/observations/69006729">https://www.inaturalist.org/observations/69006729</a>   |
| 678 | Sagittarius | serpentarius | Secretarybird | 2018/11/7  | 4 | 0 | 9.8131893 | 40.4656736 | <a href="https://www.inaturalist.org/observations/111168343">https://www.inaturalist.org/observations/111168343</a> |

| No | scientific name               | common name          | date       | NIA | NID | latitude   | longitude   | url                                                                                                                 |
|----|-------------------------------|----------------------|------------|-----|-----|------------|-------------|---------------------------------------------------------------------------------------------------------------------|
| 1  | <i>Acrocephalus dumetorum</i> | Blyth's Reed-warbler | 2020/2/16  | 3   | 0   | 6.17859000 | 81.21962833 | <a href="https://www.inaturalist.org/observations/39488263">https://www.inaturalist.org/observations/39488263</a>   |
| 2  | <i>Acrocephalus dumetorum</i> | Blyth's Reed-warbler | 2018/12/6  | 0   | 0   | 6.83038301 | 80.80678377 | <a href="https://www.inaturalist.org/observations/108652005">https://www.inaturalist.org/observations/108652005</a> |
| 3  | <i>Acrocephalus dumetorum</i> | Blyth's Reed-warbler | 2017/3/10  | 1   | 0   | 6.86313523 | 81.04749101 | <a href="https://www.inaturalist.org/observations/142455135">https://www.inaturalist.org/observations/142455135</a> |
| 4  | <i>Acrocephalus dumetorum</i> | Blyth's Reed-warbler | 2022/3/7   | 0   | 0   | 6.88414533 | 79.94816098 | <a href="https://www.inaturalist.org/observations/108174415">https://www.inaturalist.org/observations/108174415</a> |
| 5  | <i>Acrocephalus dumetorum</i> | Blyth's Reed-warbler | 2018/12/7  | 0   | 0   | 6.97090863 | 80.76750357 | <a href="https://www.inaturalist.org/observations/108652635">https://www.inaturalist.org/observations/108652635</a> |
| 6  | <i>Acrocephalus dumetorum</i> | Blyth's Reed-warbler | 2017/12/31 | 1   | 0   | 6.97169770 | 80.76833577 | <a href="https://www.inaturalist.org/observations/15184939">https://www.inaturalist.org/observations/15184939</a>   |
| 7  | <i>Acrocephalus dumetorum</i> | Blyth's Reed-warbler | 2022/11/19 | 0   | 0   | 7.06679840 | 79.90409320 | <a href="https://www.inaturalist.org/observations/142361211">https://www.inaturalist.org/observations/142361211</a> |
| 8  | <i>Acrocephalus dumetorum</i> | Blyth's Reed-warbler | 2020/11/22 | 1   | 0   | 7.13474511 | 80.59778418 | <a href="https://www.inaturalist.org/observations/66242596">https://www.inaturalist.org/observations/66242596</a>   |
| 9  | <i>Acrocephalus dumetorum</i> | Blyth's Reed-warbler | 2018/12/4  | 0   | 0   | 8.04018789 | 80.74074319 | <a href="https://www.inaturalist.org/observations/108586996">https://www.inaturalist.org/observations/108586996</a> |
| 10 | <i>Acrocephalus dumetorum</i> | Blyth's Reed-warbler | 2016/12/25 | 2   | 0   | 8.18328570 | 77.41189960 | <a href="https://www.inaturalist.org/observations/92355279">https://www.inaturalist.org/observations/92355279</a>   |
| 11 | <i>Acrocephalus dumetorum</i> | Blyth's Reed-warbler | 2017/2/22  | 2   | 0   | 8.39415968 | 76.97278194 | <a href="https://www.inaturalist.org/observations/63686884">https://www.inaturalist.org/observations/63686884</a>   |
| 12 | <i>Acrocephalus dumetorum</i> | Blyth's Reed-warbler | 2022/4/8   | 1   | 0   | 8.43790040 | 77.57431871 | <a href="https://www.inaturalist.org/observations/142139555">https://www.inaturalist.org/observations/142139555</a> |
| 13 | <i>Acrocephalus dumetorum</i> | Blyth's Reed-warbler | 2022/2/28  | 1   | 0   | 8.45086033 | 76.98304385 | <a href="https://www.inaturalist.org/observations/107683653">https://www.inaturalist.org/observations/107683653</a> |
| 14 | <i>Acrocephalus dumetorum</i> | Blyth's Reed-warbler | 2017/11/14 | 2   | 0   | 8.49622960 | 77.75593700 | <a href="https://www.inaturalist.org/observations/92338197">https://www.inaturalist.org/observations/92338197</a>   |
| 15 | <i>Acrocephalus dumetorum</i> | Blyth's Reed-warbler | 2018/3/17  | 2   | 0   | 8.59458890 | 77.35903530 | <a href="https://www.inaturalist.org/observations/92216226">https://www.inaturalist.org/observations/92216226</a>   |
| 16 | <i>Acrocephalus dumetorum</i> | Blyth's Reed-warbler | 2022/1/2   | 2   | 0   | 9.29508057 | 76.51290703 | <a href="https://www.inaturalist.org/observations/104579711">https://www.inaturalist.org/observations/104579711</a> |
| 17 | <i>Acrocephalus dumetorum</i> | Blyth's Reed-warbler | 2013/2/19  | 3   | 0   | 9.49782600 | 77.18444800 | <a href="https://www.inaturalist.org/observations/9791010">https://www.inaturalist.org/observations/9791010</a>     |
| 18 | <i>Acrocephalus dumetorum</i> | Blyth's Reed-warbler | 2022/3/31  | 3   | 0   | 9.58566092 | 76.52925868 | <a href="https://www.inaturalist.org/observations/125780837">https://www.inaturalist.org/observations/125780837</a> |
| 19 | <i>Acrocephalus dumetorum</i> | Blyth's Reed-warbler | 2018/12/22 | 1   | 0   | 9.59766245 | 76.51108997 | <a href="https://www.inaturalist.org/observations/42827867">https://www.inaturalist.org/observations/42827867</a>   |
| 20 | <i>Acrocephalus dumetorum</i> | Blyth's Reed-warbler | 2018/11/17 | 1   | 0   | 9.59766245 | 76.51108997 | <a href="https://www.inaturalist.org/observations/42830621">https://www.inaturalist.org/observations/42830621</a>   |
| 21 | <i>Acrocephalus dumetorum</i> | Blyth's Reed-warbler | 2018/12/2  | 1   | 0   | 9.59766245 | 76.51108997 | <a href="https://www.inaturalist.org/observations/42833031">https://www.inaturalist.org/observations/42833031</a>   |
| 22 | <i>Acrocephalus dumetorum</i> | Blyth's Reed-warbler | 2022/3/12  | 2   | 0   | 9.75227019 | 76.84708163 | <a href="https://www.inaturalist.org/observations/109025706">https://www.inaturalist.org/observations/109025706</a> |

|    |                               |                      |            |   |   |             |             |                                                                                                                     |
|----|-------------------------------|----------------------|------------|---|---|-------------|-------------|---------------------------------------------------------------------------------------------------------------------|
| 23 | <i>Acrocephalus dumetorum</i> | Blyth's Reed-warbler | 2022/3/29  | 2 | 0 | 9.79168429  | 76.88711400 | <a href="https://www.inaturalist.org/observations/110475494">https://www.inaturalist.org/observations/110475494</a> |
| 24 | <i>Acrocephalus dumetorum</i> | Blyth's Reed-warbler | 2022/12/17 | 1 | 0 | 9.79743095  | 76.28890391 | <a href="https://www.inaturalist.org/observations/145195391">https://www.inaturalist.org/observations/145195391</a> |
| 25 | <i>Acrocephalus dumetorum</i> | Blyth's Reed-warbler | 2020/11/17 | 2 | 0 | 9.79747423  | 76.28890693 | <a href="https://www.inaturalist.org/observations/132781205">https://www.inaturalist.org/observations/132781205</a> |
| 26 | <i>Acrocephalus dumetorum</i> | Blyth's Reed-warbler | 2015/2/21  | 1 | 0 | 9.81380760  | 76.92973540 | <a href="https://www.inaturalist.org/observations/91652452">https://www.inaturalist.org/observations/91652452</a>   |
| 27 | <i>Acrocephalus dumetorum</i> | Blyth's Reed-warbler | 2021/2/21  | 3 | 0 | 9.83242131  | 76.78719599 | <a href="https://www.inaturalist.org/observations/98355844">https://www.inaturalist.org/observations/98355844</a>   |
| 28 | <i>Acrocephalus dumetorum</i> | Blyth's Reed-warbler | 2021/12/15 | 1 | 0 | 9.83949625  | 76.78310320 | <a href="https://www.inaturalist.org/observations/103102426">https://www.inaturalist.org/observations/103102426</a> |
| 29 | <i>Acrocephalus dumetorum</i> | Blyth's Reed-warbler | 2018/12/22 | 1 | 0 | 9.83961495  | 76.78247295 | <a href="https://www.inaturalist.org/observations/93562390">https://www.inaturalist.org/observations/93562390</a>   |
| 30 | <i>Acrocephalus dumetorum</i> | Blyth's Reed-warbler | 2021/12/5  | 1 | 0 | 9.83967275  | 76.78260484 | <a href="https://www.inaturalist.org/observations/102768160">https://www.inaturalist.org/observations/102768160</a> |
| 31 | <i>Acrocephalus dumetorum</i> | Blyth's Reed-warbler | 2018/11/21 | 1 | 0 | 9.88868643  | 76.72812668 | <a href="https://www.inaturalist.org/observations/87113706">https://www.inaturalist.org/observations/87113706</a>   |
| 32 | <i>Acrocephalus dumetorum</i> | Blyth's Reed-warbler | 2018/12/13 | 1 | 0 | 9.88868643  | 76.72812668 | <a href="https://www.inaturalist.org/observations/91985092">https://www.inaturalist.org/observations/91985092</a>   |
| 33 | <i>Acrocephalus dumetorum</i> | Blyth's Reed-warbler | 2018/12/30 | 3 | 0 | 9.88868643  | 76.72812668 | <a href="https://www.inaturalist.org/observations/95771886">https://www.inaturalist.org/observations/95771886</a>   |
| 34 | <i>Acrocephalus dumetorum</i> | Blyth's Reed-warbler | 2022/11/27 | 1 | 0 | 9.89081268  | 76.69041719 | <a href="https://www.inaturalist.org/observations/143184828">https://www.inaturalist.org/observations/143184828</a> |
| 35 | <i>Acrocephalus dumetorum</i> | Blyth's Reed-warbler | 2019/2/9   | 1 | 0 | 9.90143090  | 76.79712470 | <a href="https://www.inaturalist.org/observations/91655521">https://www.inaturalist.org/observations/91655521</a>   |
| 36 | <i>Acrocephalus dumetorum</i> | Blyth's Reed-warbler | 2012/3/25  | 2 | 0 | 9.95205500  | 76.31138429 | <a href="https://www.inaturalist.org/observations/48679323">https://www.inaturalist.org/observations/48679323</a>   |
| 37 | <i>Acrocephalus dumetorum</i> | Blyth's Reed-warbler | 2014/12/28 | 1 | 0 | 10.00872499 | 77.16182171 | <a href="https://www.inaturalist.org/observations/79197314">https://www.inaturalist.org/observations/79197314</a>   |
| 38 | <i>Acrocephalus dumetorum</i> | Blyth's Reed-warbler | 2022/12/17 | 1 | 0 | 10.05168713 | 76.34048633 | <a href="https://www.inaturalist.org/observations/144524372">https://www.inaturalist.org/observations/144524372</a> |
| 39 | <i>Acrocephalus dumetorum</i> | Blyth's Reed-warbler | 2022/12/17 | 1 | 0 | 10.05168713 | 76.34048633 | <a href="https://www.inaturalist.org/observations/144524373">https://www.inaturalist.org/observations/144524373</a> |
| 40 | <i>Acrocephalus dumetorum</i> | Blyth's Reed-warbler | 2022/12/5  | 0 | 0 | 10.05435524 | 76.34151746 | <a href="https://www.inaturalist.org/observations/143708523">https://www.inaturalist.org/observations/143708523</a> |
| 41 | <i>Acrocephalus dumetorum</i> | Blyth's Reed-warbler | 2015/1/30  | 1 | 0 | 10.06137300 | 77.08433000 | <a href="https://www.inaturalist.org/observations/35324389">https://www.inaturalist.org/observations/35324389</a>   |
| 42 | <i>Acrocephalus dumetorum</i> | Blyth's Reed-warbler | 2016/11/27 | 1 | 0 | 10.06646078 | 77.01271880 | <a href="https://www.inaturalist.org/observations/59861035">https://www.inaturalist.org/observations/59861035</a>   |
| 43 | <i>Acrocephalus dumetorum</i> | Blyth's Reed-warbler | 2019/2/2   | 3 | 0 | 10.08695674 | 76.95485840 | <a href="https://www.inaturalist.org/observations/121908105">https://www.inaturalist.org/observations/121908105</a> |
| 44 | <i>Acrocephalus dumetorum</i> | Blyth's Reed-warbler | 2017/4/1   | 1 | 0 | 10.08893330 | 77.05952480 | <a href="https://www.inaturalist.org/observations/64362622">https://www.inaturalist.org/observations/64362622</a>   |
| 45 | <i>Acrocephalus dumetorum</i> | Blyth's Reed-warbler | 2021/1/30  | 1 | 0 | 10.08897943 | 77.05952469 | <a href="https://www.inaturalist.org/observations/68922048">https://www.inaturalist.org/observations/68922048</a>   |

|    |                               |                      |            |   |   |             |             |                                                                                                                     |
|----|-------------------------------|----------------------|------------|---|---|-------------|-------------|---------------------------------------------------------------------------------------------------------------------|
| 46 | <i>Acrocephalus dumetorum</i> | Blyth's Reed-warbler | 2020/12/3  | 1 | 0 | 10.09851993 | 76.33183468 | <a href="https://www.inaturalist.org/observations/66607096">https://www.inaturalist.org/observations/66607096</a>   |
| 47 | <i>Acrocephalus dumetorum</i> | Blyth's Reed-warbler | 2018/12/16 | 1 | 0 | 10.10398030 | 76.70046050 | <a href="https://www.inaturalist.org/observations/32152995">https://www.inaturalist.org/observations/32152995</a>   |
| 48 | <i>Acrocephalus dumetorum</i> | Blyth's Reed-warbler | 2017/12/20 | 2 | 0 | 10.12067400 | 76.75534700 | <a href="https://www.inaturalist.org/observations/9914839">https://www.inaturalist.org/observations/9914839</a>     |
| 49 | <i>Acrocephalus dumetorum</i> | Blyth's Reed-warbler | 2020/1/12  | 1 | 0 | 10.13098780 | 76.24104930 | <a href="https://www.inaturalist.org/observations/41221905">https://www.inaturalist.org/observations/41221905</a>   |
| 50 | <i>Acrocephalus dumetorum</i> | Blyth's Reed-warbler | 2020/1/18  | 1 | 0 | 10.13098780 | 76.24104930 | <a href="https://www.inaturalist.org/observations/41221931">https://www.inaturalist.org/observations/41221931</a>   |
| 51 | <i>Acrocephalus dumetorum</i> | Blyth's Reed-warbler | 2019/12/21 | 2 | 0 | 10.13098780 | 76.24104930 | <a href="https://www.inaturalist.org/observations/41279046">https://www.inaturalist.org/observations/41279046</a>   |
| 52 | <i>Acrocephalus dumetorum</i> | Blyth's Reed-warbler | 2019/12/21 | 1 | 0 | 10.13098780 | 76.24104930 | <a href="https://www.inaturalist.org/observations/41279064">https://www.inaturalist.org/observations/41279064</a>   |
| 53 | <i>Acrocephalus dumetorum</i> | Blyth's Reed-warbler | 2016/12/10 | 2 | 0 | 10.13431600 | 76.69413600 | <a href="https://www.inaturalist.org/observations/19624646">https://www.inaturalist.org/observations/19624646</a>   |
| 54 | <i>Acrocephalus dumetorum</i> | Blyth's Reed-warbler | 2016/12/10 | 1 | 0 | 10.13576843 | 76.66057829 | <a href="https://www.inaturalist.org/observations/5216245">https://www.inaturalist.org/observations/5216245</a>     |
| 55 | <i>Acrocephalus dumetorum</i> | Blyth's Reed-warbler | 2022/1/15  | 1 | 0 | 10.14991250 | 76.36897560 | <a href="https://www.inaturalist.org/observations/104959270">https://www.inaturalist.org/observations/104959270</a> |
| 56 | <i>Acrocephalus dumetorum</i> | Blyth's Reed-warbler | 2022/12/4  | 1 | 0 | 10.15322610 | 76.33767860 | <a href="https://www.inaturalist.org/observations/143622386">https://www.inaturalist.org/observations/143622386</a> |
| 57 | <i>Acrocephalus dumetorum</i> | Blyth's Reed-warbler | 2022/12/22 | 0 | 0 | 10.15322610 | 76.33767860 | <a href="https://www.inaturalist.org/observations/144927429">https://www.inaturalist.org/observations/144927429</a> |
| 58 | <i>Acrocephalus dumetorum</i> | Blyth's Reed-warbler | 2016/12/20 | 1 | 0 | 10.16706259 | 76.76549037 | <a href="https://www.inaturalist.org/observations/66798802">https://www.inaturalist.org/observations/66798802</a>   |
| 59 | <i>Acrocephalus dumetorum</i> | Blyth's Reed-warbler | 2020/12/14 | 1 | 0 | 10.24769080 | 76.33484780 | <a href="https://www.inaturalist.org/observations/143784835">https://www.inaturalist.org/observations/143784835</a> |
| 60 | <i>Acrocephalus dumetorum</i> | Blyth's Reed-warbler | 2020/12/14 | 1 | 0 | 10.24769080 | 76.33484780 | <a href="https://www.inaturalist.org/observations/143785101">https://www.inaturalist.org/observations/143785101</a> |
| 61 | <i>Acrocephalus dumetorum</i> | Blyth's Reed-warbler | 2016/11/10 | 1 | 0 | 10.31222761 | 76.25731722 | <a href="https://www.inaturalist.org/observations/35271299">https://www.inaturalist.org/observations/35271299</a>   |
| 62 | <i>Acrocephalus dumetorum</i> | Blyth's Reed-warbler | 2017/3/10  | 2 | 0 | 10.32697340 | 76.95539670 | <a href="https://www.inaturalist.org/observations/92335036">https://www.inaturalist.org/observations/92335036</a>   |
| 63 | <i>Acrocephalus dumetorum</i> | Blyth's Reed-warbler | 2021/3/27  | 1 | 0 | 10.32697340 | 76.95539670 | <a href="https://www.inaturalist.org/observations/105202395">https://www.inaturalist.org/observations/105202395</a> |
| 64 | <i>Acrocephalus dumetorum</i> | Blyth's Reed-warbler | 2021/3/31  | 2 | 0 | 10.32697340 | 76.95539670 | <a href="https://www.inaturalist.org/observations/105256430">https://www.inaturalist.org/observations/105256430</a> |
| 65 | <i>Acrocephalus dumetorum</i> | Blyth's Reed-warbler | 2020/1/1   | 1 | 0 | 10.34644550 | 76.26877896 | <a href="https://www.inaturalist.org/observations/41674314">https://www.inaturalist.org/observations/41674314</a>   |
| 66 | <i>Acrocephalus dumetorum</i> | Blyth's Reed-warbler | 2019/10/17 | 3 | 0 | 10.45731290 | 76.15495400 | <a href="https://www.inaturalist.org/observations/102271948">https://www.inaturalist.org/observations/102271948</a> |
| 67 | <i>Acrocephalus dumetorum</i> | Blyth's Reed-warbler | 2016/12/18 | 1 | 0 | 10.74748521 | 76.46730135 | <a href="https://www.inaturalist.org/observations/65617744">https://www.inaturalist.org/observations/65617744</a>   |
| 68 | <i>Acrocephalus dumetorum</i> | Blyth's Reed-warbler | 2016/12/28 | 3 | 0 | 10.74785979 | 76.46728928 | <a href="https://www.inaturalist.org/observations/87190204">https://www.inaturalist.org/observations/87190204</a>   |

|    |                               |                      |            |   |   |             |             |                                                                                                                     |
|----|-------------------------------|----------------------|------------|---|---|-------------|-------------|---------------------------------------------------------------------------------------------------------------------|
| 69 | <i>Acrocephalus dumetorum</i> | Blyth's Reed-warbler | 2016/12/30 | 3 | 0 | 10.74785979 | 76.46728928 | <a href="https://www.inaturalist.org/observations/87190205">https://www.inaturalist.org/observations/87190205</a>   |
| 70 | <i>Acrocephalus dumetorum</i> | Blyth's Reed-warbler | 2022/11/12 | 1 | 0 | 10.78576333 | 75.91389667 | <a href="https://www.inaturalist.org/observations/142464962">https://www.inaturalist.org/observations/142464962</a> |
| 71 | <i>Acrocephalus dumetorum</i> | Blyth's Reed-warbler | 2019/1/29  | 1 | 0 | 10.88777170 | 76.07321890 | <a href="https://www.inaturalist.org/observations/67239996">https://www.inaturalist.org/observations/67239996</a>   |
| 72 | <i>Acrocephalus dumetorum</i> | Blyth's Reed-warbler | 2012/11/11 | 2 | 0 | 10.98905300 | 77.02274400 | <a href="https://www.inaturalist.org/observations/98510675">https://www.inaturalist.org/observations/98510675</a>   |
| 73 | <i>Acrocephalus dumetorum</i> | Blyth's Reed-warbler | 2020/11/25 | 1 | 0 | 11.01684450 | 76.95583210 | <a href="https://www.inaturalist.org/observations/88778873">https://www.inaturalist.org/observations/88778873</a>   |
| 74 | <i>Acrocephalus dumetorum</i> | Blyth's Reed-warbler | 2020/11/10 | 1 | 0 | 11.07894586 | 79.83002432 | <a href="https://www.inaturalist.org/observations/64835885">https://www.inaturalist.org/observations/64835885</a>   |
| 75 | <i>Acrocephalus dumetorum</i> | Blyth's Reed-warbler | 2013/2/13  | 3 | 0 | 11.10483300 | 76.76827750 | <a href="http://www.inaturalist.org/observations/204215">http://www.inaturalist.org/observations/204215</a>         |
| 76 | <i>Acrocephalus dumetorum</i> | Blyth's Reed-warbler | 2019/10/16 | 1 | 0 | 11.27578553 | 77.58298729 | <a href="https://www.inaturalist.org/observations/37212458">https://www.inaturalist.org/observations/37212458</a>   |
| 77 | <i>Acrocephalus dumetorum</i> | Blyth's Reed-warbler | 2018/3/18  | 2 | 0 | 11.43910397 | 78.03879409 | <a href="https://www.inaturalist.org/observations/105405183">https://www.inaturalist.org/observations/105405183</a> |
| 78 | <i>Acrocephalus dumetorum</i> | Blyth's Reed-warbler | 2018/1/7   | 2 | 0 | 11.46102600 | 77.92968750 | <a href="https://www.inaturalist.org/observations/58736606">https://www.inaturalist.org/observations/58736606</a>   |
| 79 | <i>Acrocephalus dumetorum</i> | Blyth's Reed-warbler | 2016/11/12 | 2 | 0 | 11.63966497 | 75.93735350 | <a href="https://www.inaturalist.org/observations/46986410">https://www.inaturalist.org/observations/46986410</a>   |
| 80 | <i>Acrocephalus dumetorum</i> | Blyth's Reed-warbler | 2021/2/14  | 1 | 0 | 11.68742128 | 78.18066828 | <a href="https://www.inaturalist.org/observations/69551110">https://www.inaturalist.org/observations/69551110</a>   |
| 81 | <i>Acrocephalus dumetorum</i> | Blyth's Reed-warbler | 2021/2/28  | 1 | 0 | 11.68742128 | 78.18066828 | <a href="https://www.inaturalist.org/observations/70307168">https://www.inaturalist.org/observations/70307168</a>   |
| 82 | <i>Acrocephalus dumetorum</i> | Blyth's Reed-warbler | 2021/11/7  | 2 | 0 | 11.68742128 | 78.18066828 | <a href="https://www.inaturalist.org/observations/100985059">https://www.inaturalist.org/observations/100985059</a> |
| 83 | <i>Acrocephalus dumetorum</i> | Blyth's Reed-warbler | 2020/10/31 | 2 | 0 | 11.71324820 | 76.17053120 | <a href="https://www.inaturalist.org/observations/63900264">https://www.inaturalist.org/observations/63900264</a>   |
| 84 | <i>Acrocephalus dumetorum</i> | Blyth's Reed-warbler | 2015/1/20  | 1 | 0 | 11.74423266 | 78.05355422 | <a href="https://www.inaturalist.org/observations/143067257">https://www.inaturalist.org/observations/143067257</a> |
| 85 | <i>Acrocephalus dumetorum</i> | Blyth's Reed-warbler | 2022/11/30 | 1 | 0 | 11.77711166 | 76.78599972 | <a href="https://www.inaturalist.org/observations/144841318">https://www.inaturalist.org/observations/144841318</a> |
| 86 | <i>Acrocephalus dumetorum</i> | Blyth's Reed-warbler | 2015/3/15  | 2 | 0 | 11.93829479 | 76.24339692 | <a href="https://www.inaturalist.org/observations/63686882">https://www.inaturalist.org/observations/63686882</a>   |
| 87 | <i>Acrocephalus dumetorum</i> | Blyth's Reed-warbler | 2022/11/25 | 1 | 0 | 11.94468399 | 75.38493812 | <a href="https://www.inaturalist.org/observations/144724503">https://www.inaturalist.org/observations/144724503</a> |
| 88 | <i>Acrocephalus dumetorum</i> | Blyth's Reed-warbler | 2021/12/31 | 2 | 0 | 11.94468432 | 75.38493812 | <a href="https://www.inaturalist.org/observations/110830576">https://www.inaturalist.org/observations/110830576</a> |
| 89 | <i>Acrocephalus dumetorum</i> | Blyth's Reed-warbler | 2022/3/29  | 2 | 0 | 11.94468432 | 75.38493812 | <a href="https://www.inaturalist.org/observations/113079293">https://www.inaturalist.org/observations/113079293</a> |
| 90 | <i>Acrocephalus dumetorum</i> | Blyth's Reed-warbler | 2022/3/23  | 0 | 0 | 11.94468432 | 75.38493812 | <a href="https://www.inaturalist.org/observations/116440081">https://www.inaturalist.org/observations/116440081</a> |
| 91 | <i>Acrocephalus dumetorum</i> | Blyth's Reed-warbler | 2022/3/23  | 0 | 0 | 11.94468432 | 75.38493812 | <a href="https://www.inaturalist.org/observations/116441739">https://www.inaturalist.org/observations/116441739</a> |

|     |                               |                      |            |   |   |             |             |                                                                                                                     |
|-----|-------------------------------|----------------------|------------|---|---|-------------|-------------|---------------------------------------------------------------------------------------------------------------------|
| 92  | <i>Acrocephalus dumetorum</i> | Blyth's Reed-warbler | 2022/3/28  | 0 | 0 | 11.94468432 | 75.38493812 | <a href="https://www.inaturalist.org/observations/116444922">https://www.inaturalist.org/observations/116444922</a> |
| 93  | <i>Acrocephalus dumetorum</i> | Blyth's Reed-warbler | 2022/3/28  | 0 | 0 | 11.94468432 | 75.38493812 | <a href="https://www.inaturalist.org/observations/116444978">https://www.inaturalist.org/observations/116444978</a> |
| 94  | <i>Acrocephalus dumetorum</i> | Blyth's Reed-warbler | 2022/3/29  | 0 | 0 | 11.94468432 | 75.38493812 | <a href="https://www.inaturalist.org/observations/116446229">https://www.inaturalist.org/observations/116446229</a> |
| 95  | <i>Acrocephalus dumetorum</i> | Blyth's Reed-warbler | 2022/3/22  | 1 | 0 | 11.94468432 | 75.38493812 | <a href="https://www.inaturalist.org/observations/116447494">https://www.inaturalist.org/observations/116447494</a> |
| 96  | <i>Acrocephalus dumetorum</i> | Blyth's Reed-warbler | 2022/3/23  | 1 | 0 | 11.94468432 | 75.38493812 | <a href="https://www.inaturalist.org/observations/116515501">https://www.inaturalist.org/observations/116515501</a> |
| 97  | <i>Acrocephalus dumetorum</i> | Blyth's Reed-warbler | 2022/3/28  | 1 | 0 | 11.94468432 | 75.38493812 | <a href="https://www.inaturalist.org/observations/116538984">https://www.inaturalist.org/observations/116538984</a> |
| 98  | <i>Acrocephalus dumetorum</i> | Blyth's Reed-warbler | 2021/3/9   | 2 | 0 | 11.94468432 | 75.38493812 | <a href="https://www.inaturalist.org/observations/122789040">https://www.inaturalist.org/observations/122789040</a> |
| 99  | <i>Acrocephalus dumetorum</i> | Blyth's Reed-warbler | 2021/3/9   | 1 | 0 | 11.94468432 | 75.38493812 | <a href="https://www.inaturalist.org/observations/122789124">https://www.inaturalist.org/observations/122789124</a> |
| 100 | <i>Acrocephalus dumetorum</i> | Blyth's Reed-warbler | 2021/3/9   | 2 | 0 | 11.94468432 | 75.38493812 | <a href="https://www.inaturalist.org/observations/122789240">https://www.inaturalist.org/observations/122789240</a> |
| 101 | <i>Acrocephalus dumetorum</i> | Blyth's Reed-warbler | 2021/3/14  | 3 | 0 | 11.94468432 | 75.38493812 | <a href="https://www.inaturalist.org/observations/122789434">https://www.inaturalist.org/observations/122789434</a> |
| 102 | <i>Acrocephalus dumetorum</i> | Blyth's Reed-warbler | 2021/3/24  | 2 | 0 | 11.94468432 | 75.38493812 | <a href="https://www.inaturalist.org/observations/125427649">https://www.inaturalist.org/observations/125427649</a> |
| 103 | <i>Acrocephalus dumetorum</i> | Blyth's Reed-warbler | 2022/1/2   | 1 | 0 | 11.94468432 | 75.38493812 | <a href="https://www.inaturalist.org/observations/125767698">https://www.inaturalist.org/observations/125767698</a> |
| 104 | <i>Acrocephalus dumetorum</i> | Blyth's Reed-warbler | 2022/4/9   | 1 | 0 | 11.94468432 | 75.38493812 | <a href="https://www.inaturalist.org/observations/128118219">https://www.inaturalist.org/observations/128118219</a> |
| 105 | <i>Acrocephalus dumetorum</i> | Blyth's Reed-warbler | 2022/4/9   | 1 | 0 | 11.94468432 | 75.38493812 | <a href="https://www.inaturalist.org/observations/128121554">https://www.inaturalist.org/observations/128121554</a> |
| 106 | <i>Acrocephalus dumetorum</i> | Blyth's Reed-warbler | 2022/11/19 | 0 | 0 | 11.94468432 | 75.38493812 | <a href="https://www.inaturalist.org/observations/144223890">https://www.inaturalist.org/observations/144223890</a> |
| 107 | <i>Acrocephalus dumetorum</i> | Blyth's Reed-warbler | 2022/11/22 | 0 | 0 | 11.94468432 | 75.38493812 | <a href="https://www.inaturalist.org/observations/144412901">https://www.inaturalist.org/observations/144412901</a> |
| 108 | <i>Acrocephalus dumetorum</i> | Blyth's Reed-warbler | 2022/11/10 | 2 | 0 | 11.94468432 | 75.38493812 | <a href="https://www.inaturalist.org/observations/144725282">https://www.inaturalist.org/observations/144725282</a> |
| 109 | <i>Acrocephalus dumetorum</i> | Blyth's Reed-warbler | 2022/11/29 | 0 | 0 | 11.94468432 | 75.38493812 | <a href="https://www.inaturalist.org/observations/144910398">https://www.inaturalist.org/observations/144910398</a> |
| 110 | <i>Acrocephalus dumetorum</i> | Blyth's Reed-warbler | 2022/11/29 | 0 | 0 | 11.94468432 | 75.38493812 | <a href="https://www.inaturalist.org/observations/144910449">https://www.inaturalist.org/observations/144910449</a> |
| 111 | <i>Acrocephalus dumetorum</i> | Blyth's Reed-warbler | 2022/11/29 | 0 | 0 | 11.94468432 | 75.38493812 | <a href="https://www.inaturalist.org/observations/144910736">https://www.inaturalist.org/observations/144910736</a> |
| 112 | <i>Acrocephalus dumetorum</i> | Blyth's Reed-warbler | 2020/11/22 | 1 | 0 | 11.94468464 | 75.38493812 | <a href="https://www.inaturalist.org/observations/67564921">https://www.inaturalist.org/observations/67564921</a>   |
| 113 | <i>Acrocephalus dumetorum</i> | Blyth's Reed-warbler | 2020/12/15 | 0 | 0 | 11.94468464 | 75.38493812 | <a href="https://www.inaturalist.org/observations/67595105">https://www.inaturalist.org/observations/67595105</a>   |
| 114 | <i>Acrocephalus dumetorum</i> | Blyth's Reed-warbler | 2020/12/5  | 1 | 0 | 11.94468464 | 75.38493812 | <a href="https://www.inaturalist.org/observations/82715471">https://www.inaturalist.org/observations/82715471</a>   |



|     |                               |                      |            |   |   |             |             |                                                                                                                     |
|-----|-------------------------------|----------------------|------------|---|---|-------------|-------------|---------------------------------------------------------------------------------------------------------------------|
| 115 | <i>Acrocephalus dumetorum</i> | Blyth's Reed-warbler | 2021/12/24 | 1 | 0 | 12.02686493 | 75.36451109 | <a href="https://www.inaturalist.org/observations/103829514">https://www.inaturalist.org/observations/103829514</a> |
| 116 | <i>Acrocephalus dumetorum</i> | Blyth's Reed-warbler | 2017/3/14  | 1 | 0 | 12.03000078 | 75.20706394 | <a href="https://www.inaturalist.org/observations/30603840">https://www.inaturalist.org/observations/30603840</a>   |
| 117 | <i>Acrocephalus dumetorum</i> | Blyth's Reed-warbler | 2017/3/18  | 1 | 0 | 12.03000078 | 75.20706394 | <a href="https://www.inaturalist.org/observations/30603898">https://www.inaturalist.org/observations/30603898</a>   |
| 118 | <i>Acrocephalus dumetorum</i> | Blyth's Reed-warbler | 2020/12/19 | 1 | 0 | 12.05749173 | 75.20062657 | <a href="https://www.inaturalist.org/observations/66999102">https://www.inaturalist.org/observations/66999102</a>   |
| 119 | <i>Acrocephalus dumetorum</i> | Blyth's Reed-warbler | 2022/2/10  | 1 | 0 | 12.05749173 | 75.20062657 | <a href="https://www.inaturalist.org/observations/142750937">https://www.inaturalist.org/observations/142750937</a> |
| 120 | <i>Acrocephalus dumetorum</i> | Blyth's Reed-warbler | 2021/12/12 | 1 | 0 | 12.16529924 | 75.42718928 | <a href="https://www.inaturalist.org/observations/119894439">https://www.inaturalist.org/observations/119894439</a> |
| 121 | <i>Acrocephalus dumetorum</i> | Blyth's Reed-warbler | 2021/12/12 | 1 | 0 | 12.16529924 | 75.42718928 | <a href="https://www.inaturalist.org/observations/119989746">https://www.inaturalist.org/observations/119989746</a> |
| 122 | <i>Acrocephalus dumetorum</i> | Blyth's Reed-warbler | 2021/12/12 | 1 | 0 | 12.16529924 | 75.42718928 | <a href="https://www.inaturalist.org/observations/119989909">https://www.inaturalist.org/observations/119989909</a> |
| 123 | <i>Acrocephalus dumetorum</i> | Blyth's Reed-warbler | 2010/3/14  | 3 | 0 | 12.21050906 | 75.83248603 | <a href="http://www.inaturalist.org/observations/115978">http://www.inaturalist.org/observations/115978</a>         |
| 124 | <i>Acrocephalus dumetorum</i> | Blyth's Reed-warbler | 2015/12/15 | 2 | 0 | 12.22272330 | 76.62728760 | <a href="https://www.inaturalist.org/observations/142816116">https://www.inaturalist.org/observations/142816116</a> |
| 125 | <i>Acrocephalus dumetorum</i> | Blyth's Reed-warbler | 2017/4/25  | 1 | 0 | 12.22930016 | 79.05346120 | <a href="https://www.inaturalist.org/observations/95943643">https://www.inaturalist.org/observations/95943643</a>   |
| 126 | <i>Acrocephalus dumetorum</i> | Blyth's Reed-warbler | 2022/11/23 | 1 | 0 | 12.24090600 | 76.59794450 | <a href="https://www.inaturalist.org/observations/142674852">https://www.inaturalist.org/observations/142674852</a> |
| 127 | <i>Acrocephalus dumetorum</i> | Blyth's Reed-warbler | 2022/12/24 | 1 | 0 | 12.24180672 | 76.73531771 | <a href="https://www.inaturalist.org/observations/145115081">https://www.inaturalist.org/observations/145115081</a> |
| 128 | <i>Acrocephalus dumetorum</i> | Blyth's Reed-warbler | 2020/11/14 | 1 | 0 | 12.26269942 | 76.56762058 | <a href="https://www.inaturalist.org/observations/95042455">https://www.inaturalist.org/observations/95042455</a>   |
| 129 | <i>Acrocephalus dumetorum</i> | Blyth's Reed-warbler | 2012/1/19  | 2 | 0 | 12.26937200 | 76.61197800 | <a href="https://www.inaturalist.org/observations/94717002">https://www.inaturalist.org/observations/94717002</a>   |
| 130 | <i>Acrocephalus dumetorum</i> | Blyth's Reed-warbler | 2022/1/5   | 1 | 0 | 12.26937200 | 76.61197800 | <a href="https://www.inaturalist.org/observations/104401072">https://www.inaturalist.org/observations/104401072</a> |
| 131 | <i>Acrocephalus dumetorum</i> | Blyth's Reed-warbler | 2019/1/5   | 2 | 0 | 12.27601167 | 76.61604333 | <a href="https://www.inaturalist.org/observations/19465638">https://www.inaturalist.org/observations/19465638</a>   |
| 132 | <i>Acrocephalus dumetorum</i> | Blyth's Reed-warbler | 2018/2/8   | 2 | 0 | 12.28291627 | 76.61502596 | <a href="https://www.inaturalist.org/observations/10259720">https://www.inaturalist.org/observations/10259720</a>   |
| 133 | <i>Acrocephalus dumetorum</i> | Blyth's Reed-warbler | 2021/3/15  | 1 | 0 | 12.28427231 | 76.68319375 | <a href="https://www.inaturalist.org/observations/81010626">https://www.inaturalist.org/observations/81010626</a>   |
| 134 | <i>Acrocephalus dumetorum</i> | Blyth's Reed-warbler | 2022/11/7  | 1 | 0 | 12.31071867 | 76.63349030 | <a href="https://www.inaturalist.org/observations/141359619">https://www.inaturalist.org/observations/141359619</a> |
| 135 | <i>Acrocephalus dumetorum</i> | Blyth's Reed-warbler | 2022/1/7   | 1 | 0 | 12.32277930 | 76.91736680 | <a href="https://www.inaturalist.org/observations/104579896">https://www.inaturalist.org/observations/104579896</a> |
| 136 | <i>Acrocephalus dumetorum</i> | Blyth's Reed-warbler | 2021/2/14  | 2 | 0 | 12.35037258 | 77.84846985 | <a href="https://www.inaturalist.org/observations/92550760">https://www.inaturalist.org/observations/92550760</a>   |
| 137 | <i>Acrocephalus dumetorum</i> | Blyth's Reed-warbler | 2021/3/13  | 3 | 0 | 12.40395219 | 77.85719705 | <a href="https://www.inaturalist.org/observations/126170854">https://www.inaturalist.org/observations/126170854</a> |

|     |                               |                      |            |   |   |             |             |                                                                                                                     |
|-----|-------------------------------|----------------------|------------|---|---|-------------|-------------|---------------------------------------------------------------------------------------------------------------------|
| 138 | <i>Acrocephalus dumetorum</i> | Blyth's Reed-warbler | 2013/6/19  | 2 | 0 | 12.41666670 | 77.75000000 | <a href="https://www.inaturalist.org/observations/64289422">https://www.inaturalist.org/observations/64289422</a>   |
| 139 | <i>Acrocephalus dumetorum</i> | Blyth's Reed-warbler | 2020/3/28  | 0 | 0 | 12.42843735 | 77.65531272 | <a href="https://www.inaturalist.org/observations/65196607">https://www.inaturalist.org/observations/65196607</a>   |
| 140 | <i>Acrocephalus dumetorum</i> | Blyth's Reed-warbler | 2021/1/23  | 1 | 0 | 12.44703279 | 76.58019383 | <a href="https://www.inaturalist.org/observations/68592254">https://www.inaturalist.org/observations/68592254</a>   |
| 141 | <i>Acrocephalus dumetorum</i> | Blyth's Reed-warbler | 2017/2/10  | 2 | 0 | 12.54545970 | 79.85606940 | <a href="https://www.inaturalist.org/observations/92332973">https://www.inaturalist.org/observations/92332973</a>   |
| 142 | <i>Acrocephalus dumetorum</i> | Blyth's Reed-warbler | 2013/1/26  | 1 | 0 | 12.64780281 | 76.62294091 | <a href="https://www.inaturalist.org/observations/98110935">https://www.inaturalist.org/observations/98110935</a>   |
| 143 | <i>Acrocephalus dumetorum</i> | Blyth's Reed-warbler | 2022/12/3  | 1 | 0 | 12.67869667 | 77.92445833 | <a href="https://www.inaturalist.org/observations/143552270">https://www.inaturalist.org/observations/143552270</a> |
| 144 | <i>Acrocephalus dumetorum</i> | Blyth's Reed-warbler | 2022/2/21  | 1 | 0 | 12.68289207 | 77.81519048 | <a href="https://www.inaturalist.org/observations/107158160">https://www.inaturalist.org/observations/107158160</a> |
| 145 | <i>Acrocephalus dumetorum</i> | Blyth's Reed-warbler | 2022/1/1   | 1 | 0 | 12.71384972 | 77.81438833 | <a href="https://www.inaturalist.org/observations/106980791">https://www.inaturalist.org/observations/106980791</a> |
| 146 | <i>Acrocephalus dumetorum</i> | Blyth's Reed-warbler | 2016/2/9   | 1 | 0 | 12.73534289 | 77.79045663 | <a href="https://www.inaturalist.org/observations/141769089">https://www.inaturalist.org/observations/141769089</a> |
| 147 | <i>Acrocephalus dumetorum</i> | Blyth's Reed-warbler | 2017/11/30 | 2 | 0 | 12.73534289 | 77.79045663 | <a href="https://www.inaturalist.org/observations/141769333">https://www.inaturalist.org/observations/141769333</a> |
| 148 | <i>Acrocephalus dumetorum</i> | Blyth's Reed-warbler | 2016/12/4  | 1 | 0 | 12.73795236 | 77.01309715 | <a href="https://www.inaturalist.org/observations/82405088">https://www.inaturalist.org/observations/82405088</a>   |
| 149 | <i>Acrocephalus dumetorum</i> | Blyth's Reed-warbler | 2016/12/4  | 1 | 0 | 12.73795236 | 77.01309715 | <a href="https://www.inaturalist.org/observations/82405092">https://www.inaturalist.org/observations/82405092</a>   |
| 150 | <i>Acrocephalus dumetorum</i> | Blyth's Reed-warbler | 2015/12/23 | 2 | 0 | 12.74091270 | 77.82529230 | <a href="https://www.inaturalist.org/observations/33655043">https://www.inaturalist.org/observations/33655043</a>   |
| 151 | <i>Acrocephalus dumetorum</i> | Blyth's Reed-warbler | 2016/2/9   | 2 | 0 | 12.74091270 | 77.82529230 | <a href="https://www.inaturalist.org/observations/33655046">https://www.inaturalist.org/observations/33655046</a>   |
| 152 | <i>Acrocephalus dumetorum</i> | Blyth's Reed-warbler | 2018/11/17 | 1 | 0 | 12.78126397 | 77.66285777 | <a href="https://www.inaturalist.org/observations/18675692">https://www.inaturalist.org/observations/18675692</a>   |
| 153 | <i>Acrocephalus dumetorum</i> | Blyth's Reed-warbler | 2016/2/21  | 2 | 0 | 12.80202000 | 77.57435667 | <a href="http://www.inaturalist.org/observations/2729075">http://www.inaturalist.org/observations/2729075</a>       |
| 154 | <i>Acrocephalus dumetorum</i> | Blyth's Reed-warbler | 2016/2/21  | 1 | 0 | 12.80216833 | 77.57481667 | <a href="http://www.inaturalist.org/observations/2729077">http://www.inaturalist.org/observations/2729077</a>       |
| 155 | <i>Acrocephalus dumetorum</i> | Blyth's Reed-warbler | 2021/3/14  | 1 | 0 | 12.80648870 | 77.52726540 | <a href="https://www.inaturalist.org/observations/71202011">https://www.inaturalist.org/observations/71202011</a>   |
| 156 | <i>Acrocephalus dumetorum</i> | Blyth's Reed-warbler | 2018/1/14  | 1 | 0 | 12.81385331 | 76.94609644 | <a href="https://www.inaturalist.org/observations/96773247">https://www.inaturalist.org/observations/96773247</a>   |
| 157 | <i>Acrocephalus dumetorum</i> | Blyth's Reed-warbler | 2018/2/25  | 2 | 0 | 12.81385331 | 76.94609644 | <a href="https://www.inaturalist.org/observations/96773476">https://www.inaturalist.org/observations/96773476</a>   |
| 158 | <i>Acrocephalus dumetorum</i> | Blyth's Reed-warbler | 2021/3/24  | 1 | 0 | 12.81744369 | 76.94470741 | <a href="https://www.inaturalist.org/observations/81047425">https://www.inaturalist.org/observations/81047425</a>   |
| 159 | <i>Acrocephalus dumetorum</i> | Blyth's Reed-warbler | 2022/2/26  | 3 | 0 | 12.81813820 | 74.86750717 | <a href="https://www.inaturalist.org/observations/108010683">https://www.inaturalist.org/observations/108010683</a> |
| 160 | <i>Acrocephalus dumetorum</i> | Blyth's Reed-warbler | 2018/11/25 | 0 | 0 | 12.82046687 | 77.72457819 | <a href="https://www.inaturalist.org/observations/67003288">https://www.inaturalist.org/observations/67003288</a>   |

|     |                               |                      |            |   |   |             |             |                                                                                                                     |
|-----|-------------------------------|----------------------|------------|---|---|-------------|-------------|---------------------------------------------------------------------------------------------------------------------|
| 161 | <i>Acrocephalus dumetorum</i> | Blyth's Reed-warbler | 2022/1/24  | 2 | 0 | 12.83896200 | 77.65182300 | <a href="https://www.inaturalist.org/observations/106053772">https://www.inaturalist.org/observations/106053772</a> |
| 162 | <i>Acrocephalus dumetorum</i> | Blyth's Reed-warbler | 2022/12/22 | 0 | 0 | 12.84550402 | 77.72021143 | <a href="https://www.inaturalist.org/observations/144859510">https://www.inaturalist.org/observations/144859510</a> |
| 163 | <i>Acrocephalus dumetorum</i> | Blyth's Reed-warbler | 2021/12/12 | 1 | 0 | 12.85121818 | 77.49016882 | <a href="https://www.inaturalist.org/observations/102922077">https://www.inaturalist.org/observations/102922077</a> |
| 164 | <i>Acrocephalus dumetorum</i> | Blyth's Reed-warbler | 2022/11/27 | 2 | 0 | 12.85431470 | 77.50994530 | <a href="https://www.inaturalist.org/observations/143801409">https://www.inaturalist.org/observations/143801409</a> |
| 165 | <i>Acrocephalus dumetorum</i> | Blyth's Reed-warbler | 2021/3/21  | 1 | 0 | 12.85718650 | 77.50891100 | <a href="https://www.inaturalist.org/observations/71692530">https://www.inaturalist.org/observations/71692530</a>   |
| 166 | <i>Acrocephalus dumetorum</i> | Blyth's Reed-warbler | 2021/4/4   | 1 | 0 | 12.85718650 | 77.50891100 | <a href="https://www.inaturalist.org/observations/72895901">https://www.inaturalist.org/observations/72895901</a>   |
| 167 | <i>Acrocephalus dumetorum</i> | Blyth's Reed-warbler | 2020/3/15  | 1 | 0 | 12.86430660 | 77.52127510 | <a href="https://www.inaturalist.org/observations/55021331">https://www.inaturalist.org/observations/55021331</a>   |
| 168 | <i>Acrocephalus dumetorum</i> | Blyth's Reed-warbler | 2020/3/15  | 1 | 0 | 12.86556530 | 77.52171710 | <a href="https://www.inaturalist.org/observations/55021333">https://www.inaturalist.org/observations/55021333</a>   |
| 169 | <i>Acrocephalus dumetorum</i> | Blyth's Reed-warbler | 2021/12/22 | 1 | 0 | 12.87414820 | 75.76445320 | <a href="https://www.inaturalist.org/observations/103679445">https://www.inaturalist.org/observations/103679445</a> |
| 170 | <i>Acrocephalus dumetorum</i> | Blyth's Reed-warbler | 2022/2/27  | 3 | 0 | 12.87880300 | 79.13077500 | <a href="https://www.inaturalist.org/observations/129006275">https://www.inaturalist.org/observations/129006275</a> |
| 171 | <i>Acrocephalus dumetorum</i> | Blyth's Reed-warbler | 2021/3/27  | 1 | 0 | 12.87892400 | 77.53009120 | <a href="https://www.inaturalist.org/observations/72168377">https://www.inaturalist.org/observations/72168377</a>   |
| 172 | <i>Acrocephalus dumetorum</i> | Blyth's Reed-warbler | 2021/4/3   | 1 | 0 | 12.87896584 | 77.52959767 | <a href="https://www.inaturalist.org/observations/72766372">https://www.inaturalist.org/observations/72766372</a>   |
| 173 | <i>Acrocephalus dumetorum</i> | Blyth's Reed-warbler | 2022/2/19  | 1 | 0 | 12.87958292 | 77.52957622 | <a href="https://www.inaturalist.org/observations/107035737">https://www.inaturalist.org/observations/107035737</a> |
| 174 | <i>Acrocephalus dumetorum</i> | Blyth's Reed-warbler | 2022/2/19  | 1 | 0 | 12.87958292 | 77.52957622 | <a href="https://www.inaturalist.org/observations/107035741">https://www.inaturalist.org/observations/107035741</a> |
| 175 | <i>Acrocephalus dumetorum</i> | Blyth's Reed-warbler | 2020/12/24 | 0 | 0 | 12.87959337 | 77.52949039 | <a href="https://www.inaturalist.org/observations/67033374">https://www.inaturalist.org/observations/67033374</a>   |
| 176 | <i>Acrocephalus dumetorum</i> | Blyth's Reed-warbler | 2021/1/23  | 1 | 0 | 12.87976072 | 77.52975861 | <a href="https://www.inaturalist.org/observations/68483077">https://www.inaturalist.org/observations/68483077</a>   |
| 177 | <i>Acrocephalus dumetorum</i> | Blyth's Reed-warbler | 2018/12/25 | 2 | 0 | 12.88035107 | 77.52930391 | <a href="https://www.inaturalist.org/observations/19213991">https://www.inaturalist.org/observations/19213991</a>   |
| 178 | <i>Acrocephalus dumetorum</i> | Blyth's Reed-warbler | 2022/4/14  | 1 | 0 | 12.88585912 | 80.23352545 | <a href="https://www.inaturalist.org/observations/111392345">https://www.inaturalist.org/observations/111392345</a> |
| 179 | <i>Acrocephalus dumetorum</i> | Blyth's Reed-warbler | 2016/4/18  | 1 | 0 | 12.88662979 | 77.67267399 | <a href="https://www.inaturalist.org/observations/79309837">https://www.inaturalist.org/observations/79309837</a>   |
| 180 | <i>Acrocephalus dumetorum</i> | Blyth's Reed-warbler | 2018/12/22 | 1 | 0 | 12.89490040 | 77.59362590 | <a href="https://www.inaturalist.org/observations/19229595">https://www.inaturalist.org/observations/19229595</a>   |
| 181 | <i>Acrocephalus dumetorum</i> | Blyth's Reed-warbler | 2019/2/7   | 5 | 0 | 12.90075342 | 80.22180051 | <a href="https://www.inaturalist.org/observations/29122635">https://www.inaturalist.org/observations/29122635</a>   |
| 182 | <i>Acrocephalus dumetorum</i> | Blyth's Reed-warbler | 2020/3/28  | 2 | 0 | 12.90898530 | 77.49020970 | <a href="https://www.inaturalist.org/observations/41221046">https://www.inaturalist.org/observations/41221046</a>   |
| 183 | <i>Acrocephalus dumetorum</i> | Blyth's Reed-warbler | 2021/1/15  | 2 | 0 | 12.91083150 | 79.40114880 | <a href="https://www.inaturalist.org/observations/82160905">https://www.inaturalist.org/observations/82160905</a>   |

|     |                               |                      |            |   |   |             |             |                                                                                                                     |
|-----|-------------------------------|----------------------|------------|---|---|-------------|-------------|---------------------------------------------------------------------------------------------------------------------|
| 184 | <i>Acrocephalus dumetorum</i> | Blyth's Reed-warbler | 2021/1/16  | 0 | 0 | 12.91083150 | 79.40114880 | <a href="https://www.inaturalist.org/observations/82160920">https://www.inaturalist.org/observations/82160920</a>   |
| 185 | <i>Acrocephalus dumetorum</i> | Blyth's Reed-warbler | 2021/1/17  | 1 | 0 | 12.91083150 | 79.40114880 | <a href="https://www.inaturalist.org/observations/82160932">https://www.inaturalist.org/observations/82160932</a>   |
| 186 | <i>Acrocephalus dumetorum</i> | Blyth's Reed-warbler | 2021/4/18  | 1 | 0 | 12.91693093 | 77.66491146 | <a href="https://www.inaturalist.org/observations/74495250">https://www.inaturalist.org/observations/74495250</a>   |
| 187 | <i>Acrocephalus dumetorum</i> | Blyth's Reed-warbler | 2022/11/19 | 1 | 0 | 12.91831260 | 77.68009700 | <a href="https://www.inaturalist.org/observations/142377131">https://www.inaturalist.org/observations/142377131</a> |
| 188 | <i>Acrocephalus dumetorum</i> | Blyth's Reed-warbler | 2019/2/2   | 2 | 0 | 12.92352831 | 80.22974152 | <a href="https://www.inaturalist.org/observations/22614363">https://www.inaturalist.org/observations/22614363</a>   |
| 189 | <i>Acrocephalus dumetorum</i> | Blyth's Reed-warbler | 2020/11/27 | 1 | 0 | 12.92493080 | 80.10000260 | <a href="https://www.inaturalist.org/observations/65685359">https://www.inaturalist.org/observations/65685359</a>   |
| 190 | <i>Acrocephalus dumetorum</i> | Blyth's Reed-warbler | 2019/12/25 | 1 | 0 | 12.92904566 | 80.17216120 | <a href="https://www.inaturalist.org/observations/36940820">https://www.inaturalist.org/observations/36940820</a>   |
| 191 | <i>Acrocephalus dumetorum</i> | Blyth's Reed-warbler | 2017/1/21  | 1 | 0 | 12.93352999 | 80.16560955 | <a href="https://www.inaturalist.org/observations/48674456">https://www.inaturalist.org/observations/48674456</a>   |
| 192 | <i>Acrocephalus dumetorum</i> | Blyth's Reed-warbler | 2020/11/28 | 1 | 0 | 12.93365513 | 80.16540974 | <a href="https://www.inaturalist.org/observations/65750786">https://www.inaturalist.org/observations/65750786</a>   |
| 193 | <i>Acrocephalus dumetorum</i> | Blyth's Reed-warbler | 2019/2/9   | 3 | 0 | 12.93475220 | 80.16483650 | <a href="https://www.inaturalist.org/observations/22939351">https://www.inaturalist.org/observations/22939351</a>   |
| 194 | <i>Acrocephalus dumetorum</i> | Blyth's Reed-warbler | 2021/12/22 | 2 | 0 | 12.94663116 | 80.22376589 | <a href="https://www.inaturalist.org/observations/103526563">https://www.inaturalist.org/observations/103526563</a> |
| 195 | <i>Acrocephalus dumetorum</i> | Blyth's Reed-warbler | 2016/2/22  | 2 | 0 | 12.94747667 | 77.58131500 | <a href="http://www.inaturalist.org/observations/2729091">http://www.inaturalist.org/observations/2729091</a>       |
| 196 | <i>Acrocephalus dumetorum</i> | Blyth's Reed-warbler | 2022/12/16 | 1 | 0 | 12.95016470 | 77.74091620 | <a href="https://www.inaturalist.org/observations/144731612">https://www.inaturalist.org/observations/144731612</a> |
| 197 | <i>Acrocephalus dumetorum</i> | Blyth's Reed-warbler | 2022/12/16 | 1 | 0 | 12.95016470 | 77.74091620 | <a href="https://www.inaturalist.org/observations/144731613">https://www.inaturalist.org/observations/144731613</a> |
| 198 | <i>Acrocephalus dumetorum</i> | Blyth's Reed-warbler | 2022/1/29  | 2 | 0 | 12.95023600 | 74.86877440 | <a href="https://www.inaturalist.org/observations/107315659">https://www.inaturalist.org/observations/107315659</a> |
| 199 | <i>Acrocephalus dumetorum</i> | Blyth's Reed-warbler | 2022/11/17 | 2 | 0 | 12.95826591 | 77.72553563 | <a href="https://www.inaturalist.org/observations/142223363">https://www.inaturalist.org/observations/142223363</a> |
| 200 | <i>Acrocephalus dumetorum</i> | Blyth's Reed-warbler | 2022/11/21 | 1 | 0 | 12.95826600 | 77.72553570 | <a href="https://www.inaturalist.org/observations/142583446">https://www.inaturalist.org/observations/142583446</a> |
| 201 | <i>Acrocephalus dumetorum</i> | Blyth's Reed-warbler | 2022/11/5  | 1 | 0 | 12.96098599 | 77.70836413 | <a href="https://www.inaturalist.org/observations/141135196">https://www.inaturalist.org/observations/141135196</a> |
| 202 | <i>Acrocephalus dumetorum</i> | Blyth's Reed-warbler | 2022/11/6  | 1 | 0 | 12.96098599 | 77.70836413 | <a href="https://www.inaturalist.org/observations/141239267">https://www.inaturalist.org/observations/141239267</a> |
| 203 | <i>Acrocephalus dumetorum</i> | Blyth's Reed-warbler | 2020/1/26  | 1 | 0 | 12.97159870 | 77.59456270 | <a href="https://www.inaturalist.org/observations/55021332">https://www.inaturalist.org/observations/55021332</a>   |
| 204 | <i>Acrocephalus dumetorum</i> | Blyth's Reed-warbler | 2020/4/6   | 0 | 0 | 12.97159870 | 77.59456270 | <a href="https://www.inaturalist.org/observations/55895106">https://www.inaturalist.org/observations/55895106</a>   |
| 205 | <i>Acrocephalus dumetorum</i> | Blyth's Reed-warbler | 2010/12/7  | 2 | 0 | 12.98302954 | 80.26426727 | <a href="https://www.inaturalist.org/observations/22593185">https://www.inaturalist.org/observations/22593185</a>   |
| 206 | <i>Acrocephalus dumetorum</i> | Blyth's Reed-warbler | 2016/11/27 | 1 | 0 | 13.01428665 | 77.68332370 | <a href="https://www.inaturalist.org/observations/139102193">https://www.inaturalist.org/observations/139102193</a> |

|     |                               |                      |            |   |   |             |             |                                                                                                                     |
|-----|-------------------------------|----------------------|------------|---|---|-------------|-------------|---------------------------------------------------------------------------------------------------------------------|
| 207 | <i>Acrocephalus dumetorum</i> | Blyth's Reed-warbler | 2022/12/3  | 0 | 0 | 13.01428665 | 77.68332370 | <a href="https://www.inaturalist.org/observations/143713124">https://www.inaturalist.org/observations/143713124</a> |
| 208 | <i>Acrocephalus dumetorum</i> | Blyth's Reed-warbler | 2016/2/20  | 2 | 0 | 13.02121667 | 77.57052333 | <a href="http://www.inaturalist.org/observations/2729062">http://www.inaturalist.org/observations/2729062</a>       |
| 209 | <i>Acrocephalus dumetorum</i> | Blyth's Reed-warbler | 2016/2/20  | 2 | 0 | 13.02171167 | 77.57008000 | <a href="http://www.inaturalist.org/observations/2729063">http://www.inaturalist.org/observations/2729063</a>       |
| 210 | <i>Acrocephalus dumetorum</i> | Blyth's Reed-warbler | 2016/2/20  | 2 | 0 | 13.02171500 | 77.57007167 | <a href="http://www.inaturalist.org/observations/2729064">http://www.inaturalist.org/observations/2729064</a>       |
| 211 | <i>Acrocephalus dumetorum</i> | Blyth's Reed-warbler | 2020/12/17 | 1 | 0 | 13.02566907 | 77.56803554 | <a href="https://www.inaturalist.org/observations/143785460">https://www.inaturalist.org/observations/143785460</a> |
| 212 | <i>Acrocephalus dumetorum</i> | Blyth's Reed-warbler | 2022/2/25  | 3 | 0 | 13.03361997 | 77.57284864 | <a href="https://www.inaturalist.org/observations/109819503">https://www.inaturalist.org/observations/109819503</a> |
| 213 | <i>Acrocephalus dumetorum</i> | Blyth's Reed-warbler | 2022/3/13  | 2 | 0 | 13.03395440 | 77.57267691 | <a href="https://www.inaturalist.org/observations/110474630">https://www.inaturalist.org/observations/110474630</a> |
| 214 | <i>Acrocephalus dumetorum</i> | Blyth's Reed-warbler | 2022/1/31  | 1 | 0 | 13.06473088 | 77.74819393 | <a href="https://www.inaturalist.org/observations/106228084">https://www.inaturalist.org/observations/106228084</a> |
| 215 | <i>Acrocephalus dumetorum</i> | Blyth's Reed-warbler | 2021/1/6   | 2 | 0 | 13.06558420 | 80.16077680 | <a href="https://www.inaturalist.org/observations/83649561">https://www.inaturalist.org/observations/83649561</a>   |
| 216 | <i>Acrocephalus dumetorum</i> | Blyth's Reed-warbler | 2019/1/1   | 2 | 0 | 13.06606274 | 77.77125120 | <a href="https://www.inaturalist.org/observations/19396736">https://www.inaturalist.org/observations/19396736</a>   |
| 217 | <i>Acrocephalus dumetorum</i> | Blyth's Reed-warbler | 2022/11/27 | 1 | 0 | 13.07029114 | 77.76952554 | <a href="https://www.inaturalist.org/observations/143172896">https://www.inaturalist.org/observations/143172896</a> |
| 218 | <i>Acrocephalus dumetorum</i> | Blyth's Reed-warbler | 2022/11/27 | 1 | 0 | 13.07029114 | 77.76952554 | <a href="https://www.inaturalist.org/observations/143179596">https://www.inaturalist.org/observations/143179596</a> |
| 219 | <i>Acrocephalus dumetorum</i> | Blyth's Reed-warbler | 2022/12/17 | 2 | 0 | 13.07029150 | 77.76952550 | <a href="https://www.inaturalist.org/observations/144996125">https://www.inaturalist.org/observations/144996125</a> |
| 220 | <i>Acrocephalus dumetorum</i> | Blyth's Reed-warbler | 2019/4/7   | 2 | 0 | 13.07135833 | 77.58154000 | <a href="https://www.inaturalist.org/observations/29238172">https://www.inaturalist.org/observations/29238172</a>   |
| 221 | <i>Acrocephalus dumetorum</i> | Blyth's Reed-warbler | 2015/4/19  | 2 | 0 | 13.07979148 | 77.58405043 | <a href="https://www.inaturalist.org/observations/29642001">https://www.inaturalist.org/observations/29642001</a>   |
| 222 | <i>Acrocephalus dumetorum</i> | Blyth's Reed-warbler | 2021/2/24  | 2 | 0 | 13.08007180 | 77.57851510 | <a href="https://www.inaturalist.org/observations/117713529">https://www.inaturalist.org/observations/117713529</a> |
| 223 | <i>Acrocephalus dumetorum</i> | Blyth's Reed-warbler | 2019/12/20 | 1 | 0 | 13.08736710 | 77.60993500 | <a href="https://www.inaturalist.org/observations/45945945">https://www.inaturalist.org/observations/45945945</a>   |
| 224 | <i>Acrocephalus dumetorum</i> | Blyth's Reed-warbler | 2019/12/20 | 0 | 0 | 13.08736710 | 77.60993500 | <a href="https://www.inaturalist.org/observations/45945946">https://www.inaturalist.org/observations/45945946</a>   |
| 225 | <i>Acrocephalus dumetorum</i> | Blyth's Reed-warbler | 2019/12/20 | 1 | 0 | 13.08736710 | 77.60993500 | <a href="https://www.inaturalist.org/observations/45945947">https://www.inaturalist.org/observations/45945947</a>   |
| 226 | <i>Acrocephalus dumetorum</i> | Blyth's Reed-warbler | 2019/12/20 | 1 | 0 | 13.08736710 | 77.60993500 | <a href="https://www.inaturalist.org/observations/45945950">https://www.inaturalist.org/observations/45945950</a>   |
| 227 | <i>Acrocephalus dumetorum</i> | Blyth's Reed-warbler | 2019/12/20 | 1 | 0 | 13.08736710 | 77.60993500 | <a href="https://www.inaturalist.org/observations/45950668">https://www.inaturalist.org/observations/45950668</a>   |
| 228 | <i>Acrocephalus dumetorum</i> | Blyth's Reed-warbler | 2019/12/20 | 1 | 0 | 13.08736710 | 77.60993500 | <a href="https://www.inaturalist.org/observations/45950767">https://www.inaturalist.org/observations/45950767</a>   |
| 229 | <i>Acrocephalus dumetorum</i> | Blyth's Reed-warbler | 2021/2/24  | 2 | 0 | 13.08835418 | 77.48489857 | <a href="https://www.inaturalist.org/observations/70072394">https://www.inaturalist.org/observations/70072394</a>   |

|     |                               |                      |            |   |   |             |             |                                                                                                                     |
|-----|-------------------------------|----------------------|------------|---|---|-------------|-------------|---------------------------------------------------------------------------------------------------------------------|
| 230 | <i>Acrocephalus dumetorum</i> | Blyth's Reed-warbler | 2022/2/27  | 1 | 0 | 13.12287510 | 80.18053180 | <a href="https://www.inaturalist.org/observations/107697019">https://www.inaturalist.org/observations/107697019</a> |
| 231 | <i>Acrocephalus dumetorum</i> | Blyth's Reed-warbler | 2017/1/15  | 1 | 0 | 13.14914667 | 80.05789630 | <a href="https://www.inaturalist.org/observations/45849464">https://www.inaturalist.org/observations/45849464</a>   |
| 232 | <i>Acrocephalus dumetorum</i> | Blyth's Reed-warbler | 2019/1/5   | 1 | 0 | 13.15918863 | 77.57209618 | <a href="https://www.inaturalist.org/observations/19486843">https://www.inaturalist.org/observations/19486843</a>   |
| 233 | <i>Acrocephalus dumetorum</i> | Blyth's Reed-warbler | 2021/1/19  | 1 | 0 | 13.24022230 | 75.25405600 | <a href="https://www.inaturalist.org/observations/69714070">https://www.inaturalist.org/observations/69714070</a>   |
| 234 | <i>Acrocephalus dumetorum</i> | Blyth's Reed-warbler | 2022/11/10 | 1 | 0 | 13.36738239 | 74.81768807 | <a href="https://www.inaturalist.org/observations/141886348">https://www.inaturalist.org/observations/141886348</a> |
| 235 | <i>Acrocephalus dumetorum</i> | Blyth's Reed-warbler | 2019/4/13  | 1 | 0 | 13.37197088 | 77.68109337 | <a href="https://www.inaturalist.org/observations/22727957">https://www.inaturalist.org/observations/22727957</a>   |
| 236 | <i>Acrocephalus dumetorum</i> | Blyth's Reed-warbler | 2016/11/23 | 2 | 0 | 13.41773820 | 80.31852520 | <a href="https://www.inaturalist.org/observations/92321606">https://www.inaturalist.org/observations/92321606</a>   |
| 237 | <i>Acrocephalus dumetorum</i> | Blyth's Reed-warbler | 2022/2/10  | 0 | 0 | 13.60480000 | 79.37305000 | <a href="https://www.inaturalist.org/observations/112237291">https://www.inaturalist.org/observations/112237291</a> |
| 238 | <i>Acrocephalus dumetorum</i> | Blyth's Reed-warbler | 2019/2/15  | 1 | 0 | 13.66004482 | 79.48968047 | <a href="https://www.inaturalist.org/observations/55889045">https://www.inaturalist.org/observations/55889045</a>   |
| 239 | <i>Acrocephalus dumetorum</i> | Blyth's Reed-warbler | 2020/11/9  | 1 | 0 | 13.71792977 | 79.32248655 | <a href="https://www.inaturalist.org/observations/64726119">https://www.inaturalist.org/observations/64726119</a>   |
| 240 | <i>Acrocephalus dumetorum</i> | Blyth's Reed-warbler | 2019/2/9   | 1 | 0 | 13.72629778 | 80.13074047 | <a href="https://www.inaturalist.org/observations/55886782">https://www.inaturalist.org/observations/55886782</a>   |
| 241 | <i>Acrocephalus dumetorum</i> | Blyth's Reed-warbler | 2019/11/17 | 1 | 0 | 13.75772780 | 79.47021270 | <a href="https://www.inaturalist.org/observations/35763437">https://www.inaturalist.org/observations/35763437</a>   |
| 242 | <i>Acrocephalus dumetorum</i> | Blyth's Reed-warbler | 2014/1/8   | 1 | 0 | 14.86613746 | 74.43937294 | <a href="https://www.inaturalist.org/observations/108583919">https://www.inaturalist.org/observations/108583919</a> |
| 243 | <i>Acrocephalus dumetorum</i> | Blyth's Reed-warbler | 2019/1/20  | 1 | 0 | 14.86613746 | 74.43937294 | <a href="https://www.inaturalist.org/observations/109113923">https://www.inaturalist.org/observations/109113923</a> |
| 244 | <i>Acrocephalus dumetorum</i> | Blyth's Reed-warbler | 2018/11/30 | 3 | 0 | 14.86613770 | 74.43937290 | <a href="https://www.inaturalist.org/observations/126085000">https://www.inaturalist.org/observations/126085000</a> |
| 245 | <i>Acrocephalus dumetorum</i> | Blyth's Reed-warbler | 2011/12/25 | 2 | 0 | 14.88090830 | 74.50688190 | <a href="https://www.inaturalist.org/observations/96684175">https://www.inaturalist.org/observations/96684175</a>   |
| 246 | <i>Acrocephalus dumetorum</i> | Blyth's Reed-warbler | 2011/12/6  | 1 | 0 | 15.23611910 | 74.61728190 | <a href="https://www.inaturalist.org/observations/41279911">https://www.inaturalist.org/observations/41279911</a>   |
| 247 | <i>Acrocephalus dumetorum</i> | Blyth's Reed-warbler | 2016/1/2   | 1 | 0 | 15.23611910 | 74.61728190 | <a href="https://www.inaturalist.org/observations/41282799">https://www.inaturalist.org/observations/41282799</a>   |
| 248 | <i>Acrocephalus dumetorum</i> | Blyth's Reed-warbler | 2016/1/2   | 1 | 0 | 15.23611910 | 74.61728190 | <a href="https://www.inaturalist.org/observations/41282800">https://www.inaturalist.org/observations/41282800</a>   |
| 249 | <i>Acrocephalus dumetorum</i> | Blyth's Reed-warbler | 2019/3/8   | 1 | 0 | 15.23611910 | 74.61728190 | <a href="https://www.inaturalist.org/observations/102237327">https://www.inaturalist.org/observations/102237327</a> |
| 250 | <i>Acrocephalus dumetorum</i> | Blyth's Reed-warbler | 2019/3/7   | 1 | 0 | 15.28426770 | 74.53021590 | <a href="https://www.inaturalist.org/observations/56497356">https://www.inaturalist.org/observations/56497356</a>   |
| 251 | <i>Acrocephalus dumetorum</i> | Blyth's Reed-warbler | 2019/3/7   | 1 | 0 | 15.28426770 | 74.53021590 | <a href="https://www.inaturalist.org/observations/56497357">https://www.inaturalist.org/observations/56497357</a>   |
| 252 | <i>Acrocephalus dumetorum</i> | Blyth's Reed-warbler | 2019/3/7   | 1 | 0 | 15.28426770 | 74.53021590 | <a href="https://www.inaturalist.org/observations/56497360">https://www.inaturalist.org/observations/56497360</a>   |

|     |                               |                      |            |   |   |             |             |                                                                                                                     |
|-----|-------------------------------|----------------------|------------|---|---|-------------|-------------|---------------------------------------------------------------------------------------------------------------------|
| 253 | <i>Acrocephalus dumetorum</i> | Blyth's Reed-warbler | 2019/3/8   | 2 | 0 | 15.28426770 | 74.53021590 | <a href="https://www.inaturalist.org/observations/56497415">https://www.inaturalist.org/observations/56497415</a>   |
| 254 | <i>Acrocephalus dumetorum</i> | Blyth's Reed-warbler | 2019/3/8   | 2 | 0 | 15.28426770 | 74.53021590 | <a href="https://www.inaturalist.org/observations/56497420">https://www.inaturalist.org/observations/56497420</a>   |
| 255 | <i>Acrocephalus dumetorum</i> | Blyth's Reed-warbler | 2019/3/8   | 1 | 0 | 15.28426770 | 74.53021590 | <a href="https://www.inaturalist.org/observations/56497434">https://www.inaturalist.org/observations/56497434</a>   |
| 256 | <i>Acrocephalus dumetorum</i> | Blyth's Reed-warbler | 2016/11/3  | 2 | 0 | 15.52680097 | 73.87086728 | <a href="https://www.inaturalist.org/observations/37781509">https://www.inaturalist.org/observations/37781509</a>   |
| 257 | <i>Acrocephalus dumetorum</i> | Blyth's Reed-warbler | 2018/1/14  | 2 | 0 | 15.67789078 | 73.71019577 | <a href="https://www.inaturalist.org/observations/19495903">https://www.inaturalist.org/observations/19495903</a>   |
| 258 | <i>Acrocephalus dumetorum</i> | Blyth's Reed-warbler | 2022/1/29  | 1 | 0 | 15.85416167 | 80.50854833 | <a href="https://www.inaturalist.org/observations/105837258">https://www.inaturalist.org/observations/105837258</a> |
| 259 | <i>Acrocephalus dumetorum</i> | Blyth's Reed-warbler | 2021/2/7   | 1 | 0 | 16.20022766 | 77.37198327 | <a href="https://www.inaturalist.org/observations/81795462">https://www.inaturalist.org/observations/81795462</a>   |
| 260 | <i>Acrocephalus dumetorum</i> | Blyth's Reed-warbler | 2015/3/19  | 1 | 0 | 16.30689104 | 80.51252635 | <a href="https://www.inaturalist.org/observations/87981026">https://www.inaturalist.org/observations/87981026</a>   |
| 261 | <i>Acrocephalus dumetorum</i> | Blyth's Reed-warbler | 2017/3/18  | 2 | 0 | 16.30689104 | 80.51252635 | <a href="https://www.inaturalist.org/observations/98109606">https://www.inaturalist.org/observations/98109606</a>   |
| 262 | <i>Acrocephalus dumetorum</i> | Blyth's Reed-warbler | 2021/3/14  | 1 | 0 | 16.36004000 | 74.29583900 | <a href="https://www.inaturalist.org/observations/71221806">https://www.inaturalist.org/observations/71221806</a>   |
| 263 | <i>Acrocephalus dumetorum</i> | Blyth's Reed-warbler | 2017/3/18  | 1 | 0 | 16.36906170 | 78.72911010 | <a href="https://www.inaturalist.org/observations/136244504">https://www.inaturalist.org/observations/136244504</a> |
| 264 | <i>Acrocephalus dumetorum</i> | Blyth's Reed-warbler | 2022/1/28  | 1 | 0 | 16.53580545 | 81.49850350 | <a href="https://www.inaturalist.org/observations/105703681">https://www.inaturalist.org/observations/105703681</a> |
| 265 | <i>Acrocephalus dumetorum</i> | Blyth's Reed-warbler | 2022/1/2   | 1 | 0 | 16.53976228 | 81.50539845 | <a href="https://www.inaturalist.org/observations/104237069">https://www.inaturalist.org/observations/104237069</a> |
| 266 | <i>Acrocephalus dumetorum</i> | Blyth's Reed-warbler | 2022/10/30 | 2 | 0 | 16.55473667 | 81.49606000 | <a href="https://www.inaturalist.org/observations/140496486">https://www.inaturalist.org/observations/140496486</a> |
| 267 | <i>Acrocephalus dumetorum</i> | Blyth's Reed-warbler | 2020/11/22 | 1 | 0 | 16.55493600 | 80.72975710 | <a href="https://www.inaturalist.org/observations/92664026">https://www.inaturalist.org/observations/92664026</a>   |
| 268 | <i>Acrocephalus dumetorum</i> | Blyth's Reed-warbler | 2021/12/5  | 1 | 0 | 16.57559146 | 80.68230191 | <a href="https://www.inaturalist.org/observations/104498315">https://www.inaturalist.org/observations/104498315</a> |
| 269 | <i>Acrocephalus dumetorum</i> | Blyth's Reed-warbler | 2015/1/24  | 1 | 0 | 16.58784260 | 79.32380108 | <a href="https://www.inaturalist.org/observations/87981027">https://www.inaturalist.org/observations/87981027</a>   |
| 270 | <i>Acrocephalus dumetorum</i> | Blyth's Reed-warbler | 2022/2/13  | 2 | 0 | 16.64674448 | 80.81858563 | <a href="https://www.inaturalist.org/observations/106796050">https://www.inaturalist.org/observations/106796050</a> |
| 271 | <i>Acrocephalus dumetorum</i> | Blyth's Reed-warbler | 2020/11/21 | 1 | 0 | 16.71847642 | 74.23877053 | <a href="https://www.inaturalist.org/observations/65324605">https://www.inaturalist.org/observations/65324605</a>   |
| 272 | <i>Acrocephalus dumetorum</i> | Blyth's Reed-warbler | 2020/11/5  | 0 | 0 | 16.86603983 | 75.73659186 | <a href="https://www.inaturalist.org/observations/64237411">https://www.inaturalist.org/observations/64237411</a>   |
| 273 | <i>Acrocephalus dumetorum</i> | Blyth's Reed-warbler | 2019/12/8  | 1 | 0 | 16.89121745 | 75.51323051 | <a href="https://www.inaturalist.org/observations/48517650">https://www.inaturalist.org/observations/48517650</a>   |
| 274 | <i>Acrocephalus dumetorum</i> | Blyth's Reed-warbler | 2020/11/1  | 1 | 0 | 16.90655242 | 75.57091586 | <a href="https://www.inaturalist.org/observations/63971089">https://www.inaturalist.org/observations/63971089</a>   |
| 275 | <i>Acrocephalus dumetorum</i> | Blyth's Reed-warbler | 2015/1/26  | 3 | 0 | 16.94806230 | 73.51523810 | <a href="https://www.inaturalist.org/observations/107811356">https://www.inaturalist.org/observations/107811356</a> |

|     |                               |                      |            |   |   |             |             |                                                                                                                     |
|-----|-------------------------------|----------------------|------------|---|---|-------------|-------------|---------------------------------------------------------------------------------------------------------------------|
| 276 | <i>Acrocephalus dumetorum</i> | Blyth's Reed-warbler | 2007/3/6   | 1 | 0 | 17.25430100 | 78.68076700 | <a href="https://www.inaturalist.org/observations/26805253">https://www.inaturalist.org/observations/26805253</a>   |
| 277 | <i>Acrocephalus dumetorum</i> | Blyth's Reed-warbler | 2021/1/5   | 1 | 0 | 17.43004140 | 78.38945940 | <a href="https://www.inaturalist.org/observations/69370906">https://www.inaturalist.org/observations/69370906</a>   |
| 278 | <i>Acrocephalus dumetorum</i> | Blyth's Reed-warbler | 2021/12/19 | 1 | 0 | 17.63782000 | 78.06452667 | <a href="https://www.inaturalist.org/observations/121718423">https://www.inaturalist.org/observations/121718423</a> |
| 279 | <i>Acrocephalus dumetorum</i> | Blyth's Reed-warbler | 2021/12/19 | 1 | 0 | 17.64092333 | 78.06890667 | <a href="https://www.inaturalist.org/observations/121718371">https://www.inaturalist.org/observations/121718371</a> |
| 280 | <i>Acrocephalus dumetorum</i> | Blyth's Reed-warbler | 2020/12/17 | 1 | 0 | 17.68046390 | 74.01826100 | <a href="https://www.inaturalist.org/observations/69548177">https://www.inaturalist.org/observations/69548177</a>   |
| 281 | <i>Acrocephalus dumetorum</i> | Blyth's Reed-warbler | 2020/12/3  | 2 | 0 | 17.68046390 | 74.01826100 | <a href="https://www.inaturalist.org/observations/105501151">https://www.inaturalist.org/observations/105501151</a> |
| 282 | <i>Acrocephalus dumetorum</i> | Blyth's Reed-warbler | 2012/3/10  | 2 | 0 | 18.29158270 | 74.77408000 | <a href="https://www.inaturalist.org/observations/56113760">https://www.inaturalist.org/observations/56113760</a>   |
| 283 | <i>Acrocephalus dumetorum</i> | Blyth's Reed-warbler | 2014/1/5   | 1 | 0 | 18.29894780 | 74.75425710 | <a href="https://www.inaturalist.org/observations/41029782">https://www.inaturalist.org/observations/41029782</a>   |
| 284 | <i>Acrocephalus dumetorum</i> | Blyth's Reed-warbler | 2014/1/5   | 1 | 0 | 18.29894780 | 74.75425710 | <a href="https://www.inaturalist.org/observations/41029798">https://www.inaturalist.org/observations/41029798</a>   |
| 285 | <i>Acrocephalus dumetorum</i> | Blyth's Reed-warbler | 2020/11/29 | 2 | 0 | 18.35312390 | 75.63916110 | <a href="https://www.inaturalist.org/observations/75145471">https://www.inaturalist.org/observations/75145471</a>   |
| 286 | <i>Acrocephalus dumetorum</i> | Blyth's Reed-warbler | 2018/3/31  | 1 | 0 | 18.37586280 | 73.76916470 | <a href="https://www.inaturalist.org/observations/44360079">https://www.inaturalist.org/observations/44360079</a>   |
| 287 | <i>Acrocephalus dumetorum</i> | Blyth's Reed-warbler | 2021/3/12  | 1 | 0 | 18.37586280 | 73.76916470 | <a href="https://www.inaturalist.org/observations/71121907">https://www.inaturalist.org/observations/71121907</a>   |
| 288 | <i>Acrocephalus dumetorum</i> | Blyth's Reed-warbler | 2021/12/29 | 1 | 0 | 18.44690320 | 73.43054390 | <a href="https://www.inaturalist.org/observations/104093577">https://www.inaturalist.org/observations/104093577</a> |
| 289 | <i>Acrocephalus dumetorum</i> | Blyth's Reed-warbler | 2017/11/5  | 1 | 0 | 18.45783185 | 73.77355814 | <a href="https://www.inaturalist.org/observations/8705764">https://www.inaturalist.org/observations/8705764</a>     |
| 290 | <i>Acrocephalus dumetorum</i> | Blyth's Reed-warbler | 2020/11/29 | 2 | 0 | 18.46242915 | 73.92131663 | <a href="https://www.inaturalist.org/observations/66282175">https://www.inaturalist.org/observations/66282175</a>   |
| 291 | <i>Acrocephalus dumetorum</i> | Blyth's Reed-warbler | 2022/10/8  | 0 | 0 | 18.49064098 | 73.79870586 | <a href="https://www.inaturalist.org/observations/137966214">https://www.inaturalist.org/observations/137966214</a> |
| 292 | <i>Acrocephalus dumetorum</i> | Blyth's Reed-warbler | 2014/3/16  | 2 | 0 | 18.49183800 | 73.83643600 | <a href="https://www.inaturalist.org/observations/17632411">https://www.inaturalist.org/observations/17632411</a>   |
| 293 | <i>Acrocephalus dumetorum</i> | Blyth's Reed-warbler | 2021/4/3   | 2 | 0 | 18.50920750 | 73.42647610 | <a href="https://www.inaturalist.org/observations/75190582">https://www.inaturalist.org/observations/75190582</a>   |
| 294 | <i>Acrocephalus dumetorum</i> | Blyth's Reed-warbler | 2022/4/1   | 0 | 0 | 18.52210100 | 73.81377150 | <a href="https://www.inaturalist.org/observations/139765298">https://www.inaturalist.org/observations/139765298</a> |
| 295 | <i>Acrocephalus dumetorum</i> | Blyth's Reed-warbler | 2020/10/26 | 1 | 0 | 18.54855361 | 73.77981750 | <a href="https://www.inaturalist.org/observations/63554455">https://www.inaturalist.org/observations/63554455</a>   |
| 296 | <i>Acrocephalus dumetorum</i> | Blyth's Reed-warbler | 2016/1/2   | 2 | 0 | 18.55403120 | 73.79045760 | <a href="https://www.inaturalist.org/observations/141622230">https://www.inaturalist.org/observations/141622230</a> |
| 297 | <i>Acrocephalus dumetorum</i> | Blyth's Reed-warbler | 2022/11/24 | 1 | 0 | 18.55811186 | 73.80363978 | <a href="https://www.inaturalist.org/observations/143025482">https://www.inaturalist.org/observations/143025482</a> |
| 298 | <i>Acrocephalus dumetorum</i> | Blyth's Reed-warbler | 2022/11/21 | 2 | 0 | 18.56481574 | 73.79278847 | <a href="https://www.inaturalist.org/observations/142513151">https://www.inaturalist.org/observations/142513151</a> |



|     |                               |                      |            |   |   |             |             |                                                                                                                     |
|-----|-------------------------------|----------------------|------------|---|---|-------------|-------------|---------------------------------------------------------------------------------------------------------------------|
| 299 | <i>Acrocephalus dumetorum</i> | Blyth's Reed-warbler | 2022/11/15 | 1 | 0 | 18.58766526 | 73.77658497 | <a href="https://www.inaturalist.org/observations/142049923">https://www.inaturalist.org/observations/142049923</a> |
| 300 | <i>Acrocephalus dumetorum</i> | Blyth's Reed-warbler | 2022/11/15 | 1 | 0 | 18.58766526 | 73.77658497 | <a href="https://www.inaturalist.org/observations/142049927">https://www.inaturalist.org/observations/142049927</a> |
| 301 | <i>Acrocephalus dumetorum</i> | Blyth's Reed-warbler | 2013/1/28  | 1 | 0 | 18.69440338 | 72.93132734 | <a href="https://www.inaturalist.org/observations/104517108">https://www.inaturalist.org/observations/104517108</a> |
| 302 | <i>Acrocephalus dumetorum</i> | Blyth's Reed-warbler | 2014/1/5   | 2 | 0 | 18.69448717 | 72.93082081 | <a href="https://www.inaturalist.org/observations/104383279">https://www.inaturalist.org/observations/104383279</a> |
| 303 | <i>Acrocephalus dumetorum</i> | Blyth's Reed-warbler | 2013/12/12 | 2 | 0 | 18.69463490 | 72.93121948 | <a href="https://www.inaturalist.org/observations/104699650">https://www.inaturalist.org/observations/104699650</a> |
| 304 | <i>Acrocephalus dumetorum</i> | Blyth's Reed-warbler | 2013/3/9   | 1 | 0 | 18.69467398 | 72.93123224 | <a href="https://www.inaturalist.org/observations/104561561">https://www.inaturalist.org/observations/104561561</a> |
| 305 | <i>Acrocephalus dumetorum</i> | Blyth's Reed-warbler | 2013/2/11  | 2 | 0 | 18.69475638 | 72.93139969 | <a href="https://www.inaturalist.org/observations/53130032">https://www.inaturalist.org/observations/53130032</a>   |
| 306 | <i>Acrocephalus dumetorum</i> | Blyth's Reed-warbler | 2019/2/14  | 1 | 0 | 18.69554150 | 72.92532641 | <a href="https://www.inaturalist.org/observations/103305851">https://www.inaturalist.org/observations/103305851</a> |
| 307 | <i>Acrocephalus dumetorum</i> | Blyth's Reed-warbler | 2021/1/19  | 1 | 0 | 18.70122810 | 73.38855260 | <a href="https://www.inaturalist.org/observations/78431690">https://www.inaturalist.org/observations/78431690</a>   |
| 308 | <i>Acrocephalus dumetorum</i> | Blyth's Reed-warbler | 2019/1/3   | 1 | 0 | 18.98865870 | 73.27117900 | <a href="https://www.inaturalist.org/observations/102181499">https://www.inaturalist.org/observations/102181499</a> |
| 309 | <i>Acrocephalus dumetorum</i> | Blyth's Reed-warbler | 2018/10/21 | 1 | 0 | 19.00678040 | 73.01469960 | <a href="https://www.inaturalist.org/observations/44122295">https://www.inaturalist.org/observations/44122295</a>   |
| 310 | <i>Acrocephalus dumetorum</i> | Blyth's Reed-warbler | 2020/12/27 | 0 | 0 | 19.00678040 | 73.01469960 | <a href="https://www.inaturalist.org/observations/67797514">https://www.inaturalist.org/observations/67797514</a>   |
| 311 | <i>Acrocephalus dumetorum</i> | Blyth's Reed-warbler | 2020/12/27 | 2 | 0 | 19.00678040 | 73.01469960 | <a href="https://www.inaturalist.org/observations/75146521">https://www.inaturalist.org/observations/75146521</a>   |
| 312 | <i>Acrocephalus dumetorum</i> | Blyth's Reed-warbler | 2020/11/15 | 1 | 0 | 19.01659100 | 73.00593960 | <a href="https://www.inaturalist.org/observations/64923591">https://www.inaturalist.org/observations/64923591</a>   |
| 313 | <i>Acrocephalus dumetorum</i> | Blyth's Reed-warbler | 2016/4/17  | 1 | 0 | 19.08397427 | 73.53655184 | <a href="https://www.inaturalist.org/observations/7000713">https://www.inaturalist.org/observations/7000713</a>     |
| 314 | <i>Acrocephalus dumetorum</i> | Blyth's Reed-warbler | 2013/12/29 | 1 | 0 | 19.14190550 | 72.96462840 | <a href="https://www.inaturalist.org/observations/41421625">https://www.inaturalist.org/observations/41421625</a>   |
| 315 | <i>Acrocephalus dumetorum</i> | Blyth's Reed-warbler | 2018/2/25  | 1 | 0 | 19.14190550 | 72.96462840 | <a href="https://www.inaturalist.org/observations/56117017">https://www.inaturalist.org/observations/56117017</a>   |
| 316 | <i>Acrocephalus dumetorum</i> | Blyth's Reed-warbler | 2018/2/25  | 1 | 0 | 19.14190550 | 72.96462840 | <a href="https://www.inaturalist.org/observations/56117022">https://www.inaturalist.org/observations/56117022</a>   |
| 317 | <i>Acrocephalus dumetorum</i> | Blyth's Reed-warbler | 2018/2/25  | 1 | 0 | 19.14190550 | 72.96462840 | <a href="https://www.inaturalist.org/observations/56117026">https://www.inaturalist.org/observations/56117026</a>   |
| 318 | <i>Acrocephalus dumetorum</i> | Blyth's Reed-warbler | 2021/3/29  | 2 | 0 | 19.14190550 | 72.96462840 | <a href="https://www.inaturalist.org/observations/72351687">https://www.inaturalist.org/observations/72351687</a>   |
| 319 | <i>Acrocephalus dumetorum</i> | Blyth's Reed-warbler | 2021/3/29  | 1 | 0 | 19.14190550 | 72.96462840 | <a href="https://www.inaturalist.org/observations/72351695">https://www.inaturalist.org/observations/72351695</a>   |
| 320 | <i>Acrocephalus dumetorum</i> | Blyth's Reed-warbler | 2018/3/29  | 2 | 0 | 19.14192483 | 72.96462536 | <a href="https://www.inaturalist.org/observations/56123704">https://www.inaturalist.org/observations/56123704</a>   |
| 321 | <i>Acrocephalus dumetorum</i> | Blyth's Reed-warbler | 2013/3/17  | 1 | 0 | 19.15055340 | 72.95648930 | <a href="https://www.inaturalist.org/observations/41422458">https://www.inaturalist.org/observations/41422458</a>   |

|     |                               |                      |            |   |   |             |             |                                                                                                                     |
|-----|-------------------------------|----------------------|------------|---|---|-------------|-------------|---------------------------------------------------------------------------------------------------------------------|
| 322 | <i>Acrocephalus dumetorum</i> | Blyth's Reed-warbler | 2015/3/1   | 1 | 0 | 19.15055340 | 72.95648930 | <a href="https://www.inaturalist.org/observations/41424517">https://www.inaturalist.org/observations/41424517</a>   |
| 323 | <i>Acrocephalus dumetorum</i> | Blyth's Reed-warbler | 2018/4/8   | 1 | 0 | 19.15055340 | 72.95648930 | <a href="https://www.inaturalist.org/observations/44873461">https://www.inaturalist.org/observations/44873461</a>   |
| 324 | <i>Acrocephalus dumetorum</i> | Blyth's Reed-warbler | 2019/12/10 | 3 | 0 | 19.19094485 | 72.98145019 | <a href="https://www.inaturalist.org/observations/136701597">https://www.inaturalist.org/observations/136701597</a> |
| 325 | <i>Acrocephalus dumetorum</i> | Blyth's Reed-warbler | 2021/9/26  | 0 | 0 | 19.23063870 | 73.11032094 | <a href="https://www.inaturalist.org/observations/96441676">https://www.inaturalist.org/observations/96441676</a>   |
| 326 | <i>Acrocephalus dumetorum</i> | Blyth's Reed-warbler | 2018/4/27  | 3 | 0 | 19.23119333 | 72.87065685 | <a href="https://www.inaturalist.org/observations/11725673">https://www.inaturalist.org/observations/11725673</a>   |
| 327 | <i>Acrocephalus dumetorum</i> | Blyth's Reed-warbler | 2019/12/15 | 1 | 0 | 19.23376500 | 72.94458020 | <a href="https://www.inaturalist.org/observations/36818606">https://www.inaturalist.org/observations/36818606</a>   |
| 328 | <i>Acrocephalus dumetorum</i> | Blyth's Reed-warbler | 2020/1/12  | 1 | 0 | 19.23653973 | 72.99878794 | <a href="https://www.inaturalist.org/observations/37519188">https://www.inaturalist.org/observations/37519188</a>   |
| 329 | <i>Acrocephalus dumetorum</i> | Blyth's Reed-warbler | 2019/1/24  | 1 | 0 | 19.23700000 | 72.96400000 | <a href="https://www.inaturalist.org/observations/56498317">https://www.inaturalist.org/observations/56498317</a>   |
| 330 | <i>Acrocephalus dumetorum</i> | Blyth's Reed-warbler | 2018/10/28 | 1 | 0 | 19.24515270 | 72.99792940 | <a href="https://www.inaturalist.org/observations/75050259">https://www.inaturalist.org/observations/75050259</a>   |
| 331 | <i>Acrocephalus dumetorum</i> | Blyth's Reed-warbler | 2010/4/11  | 1 | 0 | 19.25697110 | 73.12395340 | <a href="https://www.inaturalist.org/observations/42475130">https://www.inaturalist.org/observations/42475130</a>   |
| 332 | <i>Acrocephalus dumetorum</i> | Blyth's Reed-warbler | 2012/12/16 | 1 | 0 | 19.26803820 | 73.14045390 | <a href="https://www.inaturalist.org/observations/41427654">https://www.inaturalist.org/observations/41427654</a>   |
| 333 | <i>Acrocephalus dumetorum</i> | Blyth's Reed-warbler | 2012/12/16 | 1 | 0 | 19.26803820 | 73.14045390 | <a href="https://www.inaturalist.org/observations/41427680">https://www.inaturalist.org/observations/41427680</a>   |
| 334 | <i>Acrocephalus dumetorum</i> | Blyth's Reed-warbler | 2021/3/18  | 1 | 0 | 19.40330945 | 72.95786753 | <a href="https://www.inaturalist.org/observations/71727627">https://www.inaturalist.org/observations/71727627</a>   |
| 335 | <i>Acrocephalus dumetorum</i> | Blyth's Reed-warbler | 2013/5/5   | 1 | 0 | 19.80419430 | 72.74955380 | <a href="https://www.inaturalist.org/observations/32856367">https://www.inaturalist.org/observations/32856367</a>   |
| 336 | <i>Acrocephalus dumetorum</i> | Blyth's Reed-warbler | 2019/7/14  | 1 | 0 | 19.86903254 | 75.36057964 | <a href="https://www.inaturalist.org/observations/110496497">https://www.inaturalist.org/observations/110496497</a> |
| 337 | <i>Acrocephalus dumetorum</i> | Blyth's Reed-warbler | 2012/1/29  | 1 | 0 | 19.89522918 | 85.44423379 | <a href="https://www.inaturalist.org/observations/20845384">https://www.inaturalist.org/observations/20845384</a>   |
| 338 | <i>Acrocephalus dumetorum</i> | Blyth's Reed-warbler | 2020/10/31 | 2 | 0 | 19.90734438 | 75.32153975 | <a href="https://www.inaturalist.org/observations/63879789">https://www.inaturalist.org/observations/63879789</a>   |
| 339 | <i>Acrocephalus dumetorum</i> | Blyth's Reed-warbler | 2020/10/31 | 2 | 0 | 19.90734438 | 75.32153975 | <a href="https://www.inaturalist.org/observations/63879904">https://www.inaturalist.org/observations/63879904</a>   |
| 340 | <i>Acrocephalus dumetorum</i> | Blyth's Reed-warbler | 2021/11/7  | 1 | 0 | 19.95247138 | 73.78284965 | <a href="https://www.inaturalist.org/observations/100474505">https://www.inaturalist.org/observations/100474505</a> |
| 341 | <i>Acrocephalus dumetorum</i> | Blyth's Reed-warbler | 2020/2/4   | 0 | 0 | 20.71172732 | 81.53439816 | <a href="https://www.inaturalist.org/observations/38312274">https://www.inaturalist.org/observations/38312274</a>   |
| 342 | <i>Acrocephalus dumetorum</i> | Blyth's Reed-warbler | 2020/12/24 | 1 | 0 | 20.99373835 | 75.54336984 | <a href="https://www.inaturalist.org/observations/67001828">https://www.inaturalist.org/observations/67001828</a>   |
| 343 | <i>Acrocephalus dumetorum</i> | Blyth's Reed-warbler | 2022/2/20  | 2 | 0 | 20.99947680 | 81.45188700 | <a href="https://www.inaturalist.org/observations/141545829">https://www.inaturalist.org/observations/141545829</a> |
| 344 | <i>Acrocephalus dumetorum</i> | Blyth's Reed-warbler | 2021/4/15  | 1 | 0 | 21.02616249 | 81.45505574 | <a href="https://www.inaturalist.org/observations/74212656">https://www.inaturalist.org/observations/74212656</a>   |

|     |                               |                      |            |   |   |             |              |                                                                                                                     |
|-----|-------------------------------|----------------------|------------|---|---|-------------|--------------|---------------------------------------------------------------------------------------------------------------------|
| 345 | <i>Acrocephalus dumetorum</i> | Blyth's Reed-warbler | 2021/4/13  | 1 | 0 | 21.02649171 | 81.45980425  | <a href="https://www.inaturalist.org/observations/73832387">https://www.inaturalist.org/observations/73832387</a>   |
| 346 | <i>Acrocephalus dumetorum</i> | Blyth's Reed-warbler | 2021/4/21  | 1 | 0 | 21.04034356 | 81.44709159  | <a href="https://www.inaturalist.org/observations/74823136">https://www.inaturalist.org/observations/74823136</a>   |
| 347 | <i>Acrocephalus dumetorum</i> | Blyth's Reed-warbler | 2020/11/26 | 0 | 0 | 21.04208167 | 75.84359833  | <a href="https://www.inaturalist.org/observations/65646483">https://www.inaturalist.org/observations/65646483</a>   |
| 348 | <i>Acrocephalus dumetorum</i> | Blyth's Reed-warbler | 2021/12/4  | 3 | 0 | 21.04218167 | 75.84752167  | <a href="https://www.inaturalist.org/observations/102537829">https://www.inaturalist.org/observations/102537829</a> |
| 349 | <i>Acrocephalus dumetorum</i> | Blyth's Reed-warbler | 2021/8/26  | 1 | 0 | 21.04749085 | 75.85351635  | <a href="https://www.inaturalist.org/observations/92652764">https://www.inaturalist.org/observations/92652764</a>   |
| 350 | <i>Acrocephalus dumetorum</i> | Blyth's Reed-warbler | 2021/7/7   | 2 | 0 | 21.05914308 | 81.46057203  | <a href="https://www.inaturalist.org/observations/86139903">https://www.inaturalist.org/observations/86139903</a>   |
| 351 | <i>Acrocephalus dumetorum</i> | Blyth's Reed-warbler | 2021/2/20  | 1 | 0 | 21.07367672 | 81.44190855  | <a href="https://www.inaturalist.org/observations/69991729">https://www.inaturalist.org/observations/69991729</a>   |
| 352 | <i>Acrocephalus dumetorum</i> | Blyth's Reed-warbler | 2018/3/15  | 1 | 0 | 21.19406481 | 81.35094143  | <a href="https://www.inaturalist.org/observations/95121458">https://www.inaturalist.org/observations/95121458</a>   |
| 353 | <i>Acrocephalus dumetorum</i> | Blyth's Reed-warbler | 2022/4/20  | 0 | 0 | 21.19406481 | 81.35094143  | <a href="https://www.inaturalist.org/observations/143367858">https://www.inaturalist.org/observations/143367858</a> |
| 354 | <i>Acrocephalus dumetorum</i> | Blyth's Reed-warbler | 2021/4/15  | 1 | 0 | 21.20607404 | 81.60739850  | <a href="https://www.inaturalist.org/observations/74646664">https://www.inaturalist.org/observations/74646664</a>   |
| 355 | <i>Acrocephalus dumetorum</i> | Blyth's Reed-warbler | 2019/1/14  | 1 | 0 | 21.21456422 | 81.44687936  | <a href="https://www.inaturalist.org/observations/78354030">https://www.inaturalist.org/observations/78354030</a>   |
| 356 | <i>Acrocephalus dumetorum</i> | Blyth's Reed-warbler | 2021/4/30  | 3 | 0 | 21.89483203 | 87.57942710  | <a href="https://www.inaturalist.org/observations/116139886">https://www.inaturalist.org/observations/116139886</a> |
| 357 | <i>Acrocephalus dumetorum</i> | Blyth's Reed-warbler | 2014/9/1   | 3 | 0 | 22.04370016 | 72.02045186  | <a href="https://www.inaturalist.org/observations/47810962">https://www.inaturalist.org/observations/47810962</a>   |
| 358 | <i>Acrocephalus dumetorum</i> | Blyth's Reed-warbler | 2020/12/1  | 1 | 0 | 22.16194050 | 73.48404960  | <a href="https://www.inaturalist.org/observations/96581850">https://www.inaturalist.org/observations/96581850</a>   |
| 359 | <i>Acrocephalus dumetorum</i> | Blyth's Reed-warbler | 2021/1/31  | 1 | 0 | 22.16194453 | 73.48404955  | <a href="https://www.inaturalist.org/observations/68998406">https://www.inaturalist.org/observations/68998406</a>   |
| 360 | <i>Acrocephalus dumetorum</i> | Blyth's Reed-warbler | 2017/2/3   | 1 | 0 | 22.24669167 | 80.60390500  | <a href="https://www.inaturalist.org/observations/5182915">https://www.inaturalist.org/observations/5182915</a>     |
| 361 | <i>Acrocephalus dumetorum</i> | Blyth's Reed-warbler | 2020/10/18 | 0 | 0 | 22.31784418 | 73.27948451  | <a href="https://www.inaturalist.org/observations/62887123">https://www.inaturalist.org/observations/62887123</a>   |
| 362 | <i>Acrocephalus dumetorum</i> | Blyth's Reed-warbler | 2021/5/24  | 1 | 0 | 22.31839874 | 73.27914856  | <a href="https://www.inaturalist.org/observations/136287192">https://www.inaturalist.org/observations/136287192</a> |
| 363 | <i>Acrocephalus dumetorum</i> | Blyth's Reed-warbler | 2014/1/23  | 2 | 0 | 22.37974600 | 114.18960200 | <a href="https://www.inaturalist.org/observations/20544447">https://www.inaturalist.org/observations/20544447</a>   |
| 364 | <i>Acrocephalus dumetorum</i> | Blyth's Reed-warbler | 2021/12/24 | 1 | 0 | 22.38805530 | 70.22202100  | <a href="https://www.inaturalist.org/observations/136772372">https://www.inaturalist.org/observations/136772372</a> |
| 365 | <i>Acrocephalus dumetorum</i> | Blyth's Reed-warbler | 2018/2/28  | 1 | 0 | 22.42240000 | 88.28990000  | <a href="https://www.inaturalist.org/observations/69906736">https://www.inaturalist.org/observations/69906736</a>   |
| 366 | <i>Acrocephalus dumetorum</i> | Blyth's Reed-warbler | 2022/4/24  | 2 | 0 | 22.42260016 | 88.38098578  | <a href="https://www.inaturalist.org/observations/113199431">https://www.inaturalist.org/observations/113199431</a> |
| 367 | <i>Acrocephalus dumetorum</i> | Blyth's Reed-warbler | 2022/4/24  | 1 | 0 | 22.42260016 | 88.38098578  | <a href="https://www.inaturalist.org/observations/115066837">https://www.inaturalist.org/observations/115066837</a> |

|     |                               |                      |            |   |   |             |             |                                                                                                                     |
|-----|-------------------------------|----------------------|------------|---|---|-------------|-------------|---------------------------------------------------------------------------------------------------------------------|
| 368 | <i>Acrocephalus dumetorum</i> | Blyth's Reed-warbler | 2018/2/28  | 1 | 0 | 22.42380000 | 88.28850000 | <a href="https://www.inaturalist.org/observations/69906750">https://www.inaturalist.org/observations/69906750</a>   |
| 369 | <i>Acrocephalus dumetorum</i> | Blyth's Reed-warbler | 2018/2/28  | 1 | 0 | 22.42390000 | 88.28850000 | <a href="https://www.inaturalist.org/observations/69906745">https://www.inaturalist.org/observations/69906745</a>   |
| 370 | <i>Acrocephalus dumetorum</i> | Blyth's Reed-warbler | 2020/12/6  | 1 | 0 | 22.44354797 | 88.30676754 | <a href="https://www.inaturalist.org/observations/66296713">https://www.inaturalist.org/observations/66296713</a>   |
| 371 | <i>Acrocephalus dumetorum</i> | Blyth's Reed-warbler | 2020/5/6   | 1 | 0 | 22.47355595 | 88.31298541 | <a href="https://www.inaturalist.org/observations/131766666">https://www.inaturalist.org/observations/131766666</a> |
| 372 | <i>Acrocephalus dumetorum</i> | Blyth's Reed-warbler | 2020/5/5   | 1 | 0 | 22.47363774 | 88.31293177 | <a href="https://www.inaturalist.org/observations/131762167">https://www.inaturalist.org/observations/131762167</a> |
| 373 | <i>Acrocephalus dumetorum</i> | Blyth's Reed-warbler | 2018/11/6  | 3 | 0 | 22.51223175 | 88.35585258 | <a href="https://www.inaturalist.org/observations/97878470">https://www.inaturalist.org/observations/97878470</a>   |
| 374 | <i>Acrocephalus dumetorum</i> | Blyth's Reed-warbler | 2021/12/31 | 0 | 0 | 22.51422540 | 70.15451650 | <a href="https://www.inaturalist.org/observations/136536625">https://www.inaturalist.org/observations/136536625</a> |
| 375 | <i>Acrocephalus dumetorum</i> | Blyth's Reed-warbler | 2020/12/4  | 0 | 0 | 22.51743010 | 70.15337860 | <a href="https://www.inaturalist.org/observations/136535263">https://www.inaturalist.org/observations/136535263</a> |
| 376 | <i>Acrocephalus dumetorum</i> | Blyth's Reed-warbler | 2020/4/26  | 5 | 0 | 22.53662761 | 88.36617405 | <a href="https://www.inaturalist.org/observations/126317224">https://www.inaturalist.org/observations/126317224</a> |
| 377 | <i>Acrocephalus dumetorum</i> | Blyth's Reed-warbler | 2021/8/15  | 1 | 0 | 22.54981204 | 72.60791503 | <a href="https://www.inaturalist.org/observations/91361664">https://www.inaturalist.org/observations/91361664</a>   |
| 378 | <i>Acrocephalus dumetorum</i> | Blyth's Reed-warbler | 2019/12/24 | 1 | 0 | 22.55218750 | 72.61806250 | <a href="https://www.inaturalist.org/observations/56410562">https://www.inaturalist.org/observations/56410562</a>   |
| 379 | <i>Acrocephalus dumetorum</i> | Blyth's Reed-warbler | 2017/1/8   | 1 | 0 | 22.58162751 | 88.28499781 | <a href="https://www.inaturalist.org/observations/100292549">https://www.inaturalist.org/observations/100292549</a> |
| 380 | <i>Acrocephalus dumetorum</i> | Blyth's Reed-warbler | 2022/11/22 | 1 | 0 | 22.60932126 | 88.46348039 | <a href="https://www.inaturalist.org/observations/143944337">https://www.inaturalist.org/observations/143944337</a> |
| 381 | <i>Acrocephalus dumetorum</i> | Blyth's Reed-warbler | 2021/4/9   | 2 | 0 | 22.62015305 | 73.45790841 | <a href="https://www.inaturalist.org/observations/97887966">https://www.inaturalist.org/observations/97887966</a>   |
| 382 | <i>Acrocephalus dumetorum</i> | Blyth's Reed-warbler | 2021/4/9   | 2 | 0 | 22.62015305 | 73.45790841 | <a href="https://www.inaturalist.org/observations/104174610">https://www.inaturalist.org/observations/104174610</a> |
| 383 | <i>Acrocephalus dumetorum</i> | Blyth's Reed-warbler | 2021/10/17 | 1 | 0 | 22.62017833 | 73.45859667 | <a href="https://www.inaturalist.org/observations/122151713">https://www.inaturalist.org/observations/122151713</a> |
| 384 | <i>Acrocephalus dumetorum</i> | Blyth's Reed-warbler | 2021/12/31 | 1 | 0 | 22.62020333 | 73.45865333 | <a href="https://www.inaturalist.org/observations/121711709">https://www.inaturalist.org/observations/121711709</a> |
| 385 | <i>Acrocephalus dumetorum</i> | Blyth's Reed-warbler | 2021/12/23 | 0 | 0 | 22.62022833 | 73.45850667 | <a href="https://www.inaturalist.org/observations/121714552">https://www.inaturalist.org/observations/121714552</a> |
| 386 | <i>Acrocephalus dumetorum</i> | Blyth's Reed-warbler | 2022/3/11  | 3 | 0 | 22.62025333 | 73.45839333 | <a href="https://www.inaturalist.org/observations/119756696">https://www.inaturalist.org/observations/119756696</a> |
| 387 | <i>Acrocephalus dumetorum</i> | Blyth's Reed-warbler | 2022/1/11  | 1 | 0 | 22.62025833 | 73.45830833 | <a href="https://www.inaturalist.org/observations/120791432">https://www.inaturalist.org/observations/120791432</a> |
| 388 | <i>Acrocephalus dumetorum</i> | Blyth's Reed-warbler | 2021/9/13  | 3 | 0 | 22.62031333 | 73.45877000 | <a href="https://www.inaturalist.org/observations/122275236">https://www.inaturalist.org/observations/122275236</a> |
| 389 | <i>Acrocephalus dumetorum</i> | Blyth's Reed-warbler | 2021/12/30 | 2 | 0 | 22.62037667 | 73.45848500 | <a href="https://www.inaturalist.org/observations/121714648">https://www.inaturalist.org/observations/121714648</a> |
| 390 | <i>Acrocephalus dumetorum</i> | Blyth's Reed-warbler | 2022/1/19  | 1 | 0 | 22.62043500 | 73.45850333 | <a href="https://www.inaturalist.org/observations/120521863">https://www.inaturalist.org/observations/120521863</a> |

|     |                               |                      |            |   |   |             |             |                                                                                                                     |
|-----|-------------------------------|----------------------|------------|---|---|-------------|-------------|---------------------------------------------------------------------------------------------------------------------|
| 391 | <i>Acrocephalus dumetorum</i> | Blyth's Reed-warbler | 2022/1/30  | 2 | 0 | 22.62052833 | 73.45849000 | <a href="https://www.inaturalist.org/observations/120510467">https://www.inaturalist.org/observations/120510467</a> |
| 392 | <i>Acrocephalus dumetorum</i> | Blyth's Reed-warbler | 2022/1/2   | 0 | 0 | 22.62060667 | 73.45881500 | <a href="https://www.inaturalist.org/observations/121711734">https://www.inaturalist.org/observations/121711734</a> |
| 393 | <i>Acrocephalus dumetorum</i> | Blyth's Reed-warbler | 2022/2/6   | 1 | 0 | 22.62061333 | 73.45854167 | <a href="https://www.inaturalist.org/observations/120502433">https://www.inaturalist.org/observations/120502433</a> |
| 394 | <i>Acrocephalus dumetorum</i> | Blyth's Reed-warbler | 2021/9/18  | 0 | 0 | 22.62063167 | 73.45871167 | <a href="https://www.inaturalist.org/observations/122273250">https://www.inaturalist.org/observations/122273250</a> |
| 395 | <i>Acrocephalus dumetorum</i> | Blyth's Reed-warbler | 2021/9/14  | 0 | 0 | 22.62070167 | 73.45878000 | <a href="https://www.inaturalist.org/observations/122275224">https://www.inaturalist.org/observations/122275224</a> |
| 396 | <i>Acrocephalus dumetorum</i> | Blyth's Reed-warbler | 2022/1/7   | 1 | 0 | 22.62540553 | 88.41226369 | <a href="https://www.inaturalist.org/observations/104557486">https://www.inaturalist.org/observations/104557486</a> |
| 397 | <i>Acrocephalus dumetorum</i> | Blyth's Reed-warbler | 2022/1/9   | 1 | 0 | 22.74791167 | 74.33546167 | <a href="https://www.inaturalist.org/observations/120793624">https://www.inaturalist.org/observations/120793624</a> |
| 398 | <i>Acrocephalus dumetorum</i> | Blyth's Reed-warbler | 2021/11/28 | 2 | 0 | 22.80416658 | 88.33392341 | <a href="https://www.inaturalist.org/observations/126925296">https://www.inaturalist.org/observations/126925296</a> |
| 399 | <i>Acrocephalus dumetorum</i> | Blyth's Reed-warbler | 2022/9/4   | 1 | 0 | 22.83463307 | 72.06067298 | <a href="https://www.inaturalist.org/observations/135760028">https://www.inaturalist.org/observations/135760028</a> |
| 400 | <i>Acrocephalus dumetorum</i> | Blyth's Reed-warbler | 2022/1/9   | 1 | 0 | 22.83819000 | 74.12402500 | <a href="https://www.inaturalist.org/observations/120791413">https://www.inaturalist.org/observations/120791413</a> |
| 401 | <i>Acrocephalus dumetorum</i> | Blyth's Reed-warbler | 2022/1/25  | 2 | 0 | 22.84517637 | 88.34970742 | <a href="https://www.inaturalist.org/observations/105600711">https://www.inaturalist.org/observations/105600711</a> |
| 402 | <i>Acrocephalus dumetorum</i> | Blyth's Reed-warbler | 2019/5/5   | 1 | 0 | 22.84519989 | 88.31391814 | <a href="https://www.inaturalist.org/observations/100462169">https://www.inaturalist.org/observations/100462169</a> |
| 403 | <i>Acrocephalus dumetorum</i> | Blyth's Reed-warbler | 2015/2/7   | 3 | 0 | 22.94958100 | 86.80465200 | <a href="http://www.inaturalist.org/observations/1251066">http://www.inaturalist.org/observations/1251066</a>       |
| 404 | <i>Acrocephalus dumetorum</i> | Blyth's Reed-warbler | 2021/1/24  | 2 | 0 | 22.95275200 | 88.53729439 | <a href="https://www.inaturalist.org/observations/103892009">https://www.inaturalist.org/observations/103892009</a> |
| 405 | <i>Acrocephalus dumetorum</i> | Blyth's Reed-warbler | 2022/1/2   | 1 | 0 | 22.95505943 | 88.53746586 | <a href="https://www.inaturalist.org/observations/104752088">https://www.inaturalist.org/observations/104752088</a> |
| 406 | <i>Acrocephalus dumetorum</i> | Blyth's Reed-warbler | 2022/1/2   | 1 | 0 | 22.95505943 | 88.53746586 | <a href="https://www.inaturalist.org/observations/104753270">https://www.inaturalist.org/observations/104753270</a> |
| 407 | <i>Acrocephalus dumetorum</i> | Blyth's Reed-warbler | 2019/11/23 | 1 | 0 | 22.95507394 | 88.53744507 | <a href="https://www.inaturalist.org/observations/36220487">https://www.inaturalist.org/observations/36220487</a>   |
| 408 | <i>Acrocephalus dumetorum</i> | Blyth's Reed-warbler | 2019/11/23 | 2 | 0 | 22.95507394 | 88.53744507 | <a href="https://www.inaturalist.org/observations/36220512">https://www.inaturalist.org/observations/36220512</a>   |
| 409 | <i>Acrocephalus dumetorum</i> | Blyth's Reed-warbler | 2019/3/25  | 2 | 0 | 22.98689440 | 87.00177045 | <a href="https://www.inaturalist.org/observations/21591586">https://www.inaturalist.org/observations/21591586</a>   |
| 410 | <i>Acrocephalus dumetorum</i> | Blyth's Reed-warbler | 2017/11/10 | 1 | 0 | 22.98881745 | 87.00500550 | <a href="https://www.inaturalist.org/observations/13388133">https://www.inaturalist.org/observations/13388133</a>   |
| 411 | <i>Acrocephalus dumetorum</i> | Blyth's Reed-warbler | 2020/11/23 | 0 | 0 | 22.99064958 | 86.99983091 | <a href="https://www.inaturalist.org/observations/65470600">https://www.inaturalist.org/observations/65470600</a>   |
| 412 | <i>Acrocephalus dumetorum</i> | Blyth's Reed-warbler | 2021/11/28 | 1 | 0 | 22.99106239 | 87.00014346 | <a href="https://www.inaturalist.org/observations/102160699">https://www.inaturalist.org/observations/102160699</a> |
| 413 | <i>Acrocephalus dumetorum</i> | Blyth's Reed-warbler | 2019/3/27  | 2 | 0 | 23.18608990 | 86.74776600 | <a href="https://www.inaturalist.org/observations/21700620">https://www.inaturalist.org/observations/21700620</a>   |

|     |                               |                      |            |   |   |             |             |                                                                                                                     |
|-----|-------------------------------|----------------------|------------|---|---|-------------|-------------|---------------------------------------------------------------------------------------------------------------------|
| 414 | <i>Acrocephalus dumetorum</i> | Blyth's Reed-warbler | 2021/10/25 | 1 | 0 | 23.20675800 | 77.46016200 | <a href="https://www.inaturalist.org/observations/100852712">https://www.inaturalist.org/observations/100852712</a> |
| 415 | <i>Acrocephalus dumetorum</i> | Blyth's Reed-warbler | 2015/1/2   | 2 | 0 | 23.24199970 | 69.66693240 | <a href="https://www.inaturalist.org/observations/69256996">https://www.inaturalist.org/observations/69256996</a>   |
| 416 | <i>Acrocephalus dumetorum</i> | Blyth's Reed-warbler | 2015/11/25 | 2 | 0 | 23.24681200 | 87.81896300 | <a href="http://www.inaturalist.org/observations/2425354">http://www.inaturalist.org/observations/2425354</a>       |
| 417 | <i>Acrocephalus dumetorum</i> | Blyth's Reed-warbler | 2019/4/21  | 1 | 0 | 23.35274181 | 69.23164426 | <a href="https://www.inaturalist.org/observations/137051675">https://www.inaturalist.org/observations/137051675</a> |
| 418 | <i>Acrocephalus dumetorum</i> | Blyth's Reed-warbler | 2019/4/7   | 1 | 0 | 23.47233001 | 87.30178515 | <a href="https://www.inaturalist.org/observations/22135914">https://www.inaturalist.org/observations/22135914</a>   |
| 419 | <i>Acrocephalus dumetorum</i> | Blyth's Reed-warbler | 2018/2/15  | 0 | 0 | 23.57704690 | 87.34384290 | <a href="https://www.inaturalist.org/observations/9956666">https://www.inaturalist.org/observations/9956666</a>     |
| 420 | <i>Acrocephalus dumetorum</i> | Blyth's Reed-warbler | 2018/11/19 | 1 | 0 | 23.58879833 | 87.33467500 | <a href="https://www.inaturalist.org/observations/18498447">https://www.inaturalist.org/observations/18498447</a>   |
| 421 | <i>Acrocephalus dumetorum</i> | Blyth's Reed-warbler | 2018/3/1   | 1 | 0 | 23.58936200 | 87.36866610 | <a href="https://www.inaturalist.org/observations/12712106">https://www.inaturalist.org/observations/12712106</a>   |
| 422 | <i>Acrocephalus dumetorum</i> | Blyth's Reed-warbler | 2018/12/8  | 1 | 0 | 23.59155167 | 87.34298333 | <a href="https://www.inaturalist.org/observations/18897488">https://www.inaturalist.org/observations/18897488</a>   |
| 423 | <i>Acrocephalus dumetorum</i> | Blyth's Reed-warbler | 2022/2/17  | 1 | 0 | 23.63010180 | 86.92689188 | <a href="https://www.inaturalist.org/observations/106916943">https://www.inaturalist.org/observations/106916943</a> |
| 424 | <i>Acrocephalus dumetorum</i> | Blyth's Reed-warbler | 2021/12/11 | 2 | 0 | 25.19313889 | 73.91811661 | <a href="https://www.inaturalist.org/observations/102870106">https://www.inaturalist.org/observations/102870106</a> |
| 425 | <i>Acrocephalus dumetorum</i> | Blyth's Reed-warbler | 2022/10/26 | 0 | 0 | 25.27482974 | 85.45689650 | <a href="https://www.inaturalist.org/observations/141752440">https://www.inaturalist.org/observations/141752440</a> |
| 426 | <i>Acrocephalus dumetorum</i> | Blyth's Reed-warbler | 2022/4/28  | 1 | 0 | 25.31011236 | 91.90259714 | <a href="https://www.inaturalist.org/observations/113493492">https://www.inaturalist.org/observations/113493492</a> |
| 427 | <i>Acrocephalus dumetorum</i> | Blyth's Reed-warbler | 2022/4/20  | 1 | 0 | 25.31100830 | 91.90020829 | <a href="https://www.inaturalist.org/observations/112532810">https://www.inaturalist.org/observations/112532810</a> |
| 428 | <i>Acrocephalus dumetorum</i> | Blyth's Reed-warbler | 2022/5/1   | 0 | 0 | 25.31105588 | 91.90021701 | <a href="https://www.inaturalist.org/observations/114107511">https://www.inaturalist.org/observations/114107511</a> |
| 429 | <i>Acrocephalus dumetorum</i> | Blyth's Reed-warbler | 2018/4/2   | 3 | 0 | 25.45090200 | 92.20891090 | <a href="https://www.inaturalist.org/observations/19526156">https://www.inaturalist.org/observations/19526156</a>   |
| 430 | <i>Acrocephalus dumetorum</i> | Blyth's Reed-warbler | 2018/4/2   | 3 | 0 | 25.45090200 | 92.20891100 | <a href="https://www.inaturalist.org/observations/15715801">https://www.inaturalist.org/observations/15715801</a>   |
| 431 | <i>Acrocephalus dumetorum</i> | Blyth's Reed-warbler | 2013/2/8   | 0 | 0 | 26.58517567 | 93.17021897 | <a href="https://www.inaturalist.org/observations/79802203">https://www.inaturalist.org/observations/79802203</a>   |
| 432 | <i>Acrocephalus dumetorum</i> | Blyth's Reed-warbler | 2022/10/22 | 0 | 0 | 26.85045930 | 75.76277020 | <a href="https://www.inaturalist.org/observations/139655459">https://www.inaturalist.org/observations/139655459</a> |
| 433 | <i>Acrocephalus dumetorum</i> | Blyth's Reed-warbler | 2019/3/11  | 1 | 0 | 27.15692000 | 77.52365100 | <a href="https://www.inaturalist.org/observations/42552797">https://www.inaturalist.org/observations/42552797</a>   |
| 434 | <i>Acrocephalus dumetorum</i> | Blyth's Reed-warbler | 2012/11/13 | 1 | 0 | 27.15926900 | 77.52319990 | <a href="https://www.inaturalist.org/observations/31165299">https://www.inaturalist.org/observations/31165299</a>   |
| 435 | <i>Acrocephalus dumetorum</i> | Blyth's Reed-warbler | 2021/2/13  | 1 | 0 | 27.15926900 | 77.52319990 | <a href="https://www.inaturalist.org/observations/70138153">https://www.inaturalist.org/observations/70138153</a>   |
| 436 | <i>Acrocephalus dumetorum</i> | Blyth's Reed-warbler | 2014/10/18 | 2 | 0 | 27.15926900 | 77.52319990 | <a href="https://www.inaturalist.org/observations/88831600">https://www.inaturalist.org/observations/88831600</a>   |

|     |                               |                      |            |   |   |             |             |                                                                                                                     |
|-----|-------------------------------|----------------------|------------|---|---|-------------|-------------|---------------------------------------------------------------------------------------------------------------------|
| 437 | <i>Acrocephalus dumetorum</i> | Blyth's Reed-warbler | 2022/3/13  | 2 | 0 | 27.15926900 | 77.52319990 | <a href="https://www.inaturalist.org/observations/109825126">https://www.inaturalist.org/observations/109825126</a> |
| 438 | <i>Acrocephalus dumetorum</i> | Blyth's Reed-warbler | 2017/2/14  | 1 | 0 | 27.18076000 | 77.51707833 | <a href="https://www.inaturalist.org/observations/5235295">https://www.inaturalist.org/observations/5235295</a>     |
| 439 | <i>Acrocephalus dumetorum</i> | Blyth's Reed-warbler | 2017/2/15  | 3 | 0 | 27.18532833 | 77.50642167 | <a href="https://www.inaturalist.org/observations/5241245">https://www.inaturalist.org/observations/5241245</a>     |
| 440 | <i>Acrocephalus dumetorum</i> | Blyth's Reed-warbler | 2019/10/13 | 2 | 0 | 28.49084489 | 77.25999915 | <a href="https://www.inaturalist.org/observations/34300687">https://www.inaturalist.org/observations/34300687</a>   |
| 441 | <i>Acrocephalus dumetorum</i> | Blyth's Reed-warbler | 2021/4/23  | 1 | 0 | 28.51617579 | 77.38643602 | <a href="https://www.inaturalist.org/observations/78328150">https://www.inaturalist.org/observations/78328150</a>   |
| 442 | <i>Acrocephalus dumetorum</i> | Blyth's Reed-warbler | 2020/4/22  | 2 | 0 | 28.56816830 | 77.33184749 | <a href="https://www.inaturalist.org/observations/43078991">https://www.inaturalist.org/observations/43078991</a>   |
| 443 | <i>Acrocephalus dumetorum</i> | Blyth's Reed-warbler | 2021/9/4   | 2 | 0 | 28.63864380 | 77.07206000 | <a href="https://www.inaturalist.org/observations/93716353">https://www.inaturalist.org/observations/93716353</a>   |
| 444 | <i>Acrocephalus dumetorum</i> | Blyth's Reed-warbler | 2022/5/6   | 0 | 0 | 28.63864380 | 77.07206000 | <a href="https://www.inaturalist.org/observations/115862355">https://www.inaturalist.org/observations/115862355</a> |
| 445 | <i>Acrocephalus dumetorum</i> | Blyth's Reed-warbler | 2022/9/15  | 1 | 0 | 28.68702300 | 77.31772460 | <a href="https://www.inaturalist.org/observations/135081861">https://www.inaturalist.org/observations/135081861</a> |
| 446 | <i>Acrocephalus dumetorum</i> | Blyth's Reed-warbler | 2021/5/3   | 1 | 0 | 29.61269140 | 78.81177360 | <a href="https://www.inaturalist.org/observations/79267806">https://www.inaturalist.org/observations/79267806</a>   |
| 447 | <i>Acrocephalus dumetorum</i> | Blyth's Reed-warbler | 2021/5/3   | 1 | 0 | 29.61269140 | 78.81177360 | <a href="https://www.inaturalist.org/observations/79741845">https://www.inaturalist.org/observations/79741845</a>   |
| 448 | <i>Acrocephalus dumetorum</i> | Blyth's Reed-warbler | 2021/5/3   | 1 | 0 | 29.61269140 | 78.81177360 | <a href="https://www.inaturalist.org/observations/79961333">https://www.inaturalist.org/observations/79961333</a>   |
| 449 | <i>Acrocephalus dumetorum</i> | Blyth's Reed-warbler | 2021/5/20  | 1 | 0 | 30.31770112 | 78.05934191 | <a href="https://www.inaturalist.org/observations/92883819">https://www.inaturalist.org/observations/92883819</a>   |
| 450 | <i>Acrocephalus dumetorum</i> | Blyth's Reed-warbler | 2020/5/6   | 2 | 0 | 30.31843249 | 78.05791095 | <a href="https://www.inaturalist.org/observations/45250008">https://www.inaturalist.org/observations/45250008</a>   |

| No | scientific name                 | common name  | date       | NIA | NID | latitude   | longitude   | url                                                                                                                 |
|----|---------------------------------|--------------|------------|-----|-----|------------|-------------|---------------------------------------------------------------------------------------------------------------------|
| 1  | Lanius cristatus                | Brown Shrike | 2021/12/30 | 3   | 0   | 5.98347500 | 80.37292500 | <a href="https://www.inaturalist.org/observations/104021688">https://www.inaturalist.org/observations/104021688</a> |
| 2  | Lanius cristatus                | Brown Shrike | 2022/2/13  | 1   | 0   | 6.01270000 | 80.26061111 | <a href="https://www.inaturalist.org/observations/144619426">https://www.inaturalist.org/observations/144619426</a> |
| 3  | Lanius cristatus                | Brown Shrike | 2019/3/6   | 3   | 0   | 6.04893152 | 80.85721313 | <a href="https://www.inaturalist.org/observations/22085745">https://www.inaturalist.org/observations/22085745</a>   |
| 4  | Lanius cristatus                | Brown Shrike | 2019/12/22 | 4   | 0   | 6.05903785 | 80.31588508 | <a href="https://www.inaturalist.org/observations/95056597">https://www.inaturalist.org/observations/95056597</a>   |
| 5  | Lanius cristatus                | Brown Shrike | 2020/2/15  | 4   | 0   | 6.07710000 | 80.93132000 | <a href="https://www.inaturalist.org/observations/39488086">https://www.inaturalist.org/observations/39488086</a>   |
| 6  | Lanius cristatus                | Brown Shrike | 2018/3/25  | 4   | 0   | 6.11125892 | 81.06659424 | <a href="https://www.inaturalist.org/observations/69669029">https://www.inaturalist.org/observations/69669029</a>   |
| 7  | Lanius cristatus                | Brown Shrike | 2020/1/24  | 4   | 0   | 6.17507693 | 81.21627774 | <a href="https://www.inaturalist.org/observations/41178570">https://www.inaturalist.org/observations/41178570</a>   |
| 8  | Lanius cristatus                | Brown Shrike | 2016/4/6   | 2   | 0   | 6.17612083 | 81.21685028 | <a href="https://www.inaturalist.org/observations/127818017">https://www.inaturalist.org/observations/127818017</a> |
| 9  | Lanius cristatus                | Brown Shrike | 2020/11/28 | 4   | 0   | 6.18266536 | 81.20492807 | <a href="https://www.inaturalist.org/observations/65824194">https://www.inaturalist.org/observations/65824194</a>   |
| 10 | Lanius cristatus                | Brown Shrike | 2022/2/21  | 3   | 0   | 6.18458018 | 81.20182462 | <a href="https://www.inaturalist.org/observations/108886349">https://www.inaturalist.org/observations/108886349</a> |
| 11 | Lanius cristatus                | Brown Shrike | 2020/2/16  | 5   | 0   | 6.18561167 | 81.22480333 | <a href="https://www.inaturalist.org/observations/39488321">https://www.inaturalist.org/observations/39488321</a>   |
| 12 | Lanius cristatus                | Brown Shrike | 2015/11/11 | 4   | 0   | 6.19742233 | 81.21126595 | <a href="https://www.inaturalist.org/observations/63709844">https://www.inaturalist.org/observations/63709844</a>   |
| 13 | Lanius cristatus                | Brown Shrike | 2015/11/11 | 4   | 0   | 6.19742233 | 81.21126595 | <a href="https://www.inaturalist.org/observations/63709845">https://www.inaturalist.org/observations/63709845</a>   |
| 14 | Lanius cristatus                | Brown Shrike | 2020/1/28  | 2   | 0   | 6.19884100 | 81.21095500 | <a href="https://www.inaturalist.org/observations/38134195">https://www.inaturalist.org/observations/38134195</a>   |
| 15 | Lanius cristatus                | Brown Shrike | 2018/12/14 | 3   | 0   | 6.19901600 | 81.21048100 | <a href="https://www.inaturalist.org/observations/19099040">https://www.inaturalist.org/observations/19099040</a>   |
| 16 | Lanius cristatus                | Brown Shrike | 2019/10/19 | 4   | 0   | 6.22418210 | 80.11383690 | <a href="https://www.inaturalist.org/observations/34767291">https://www.inaturalist.org/observations/34767291</a>   |
| 17 | Lanius cristatus                | Brown Shrike | 2020/10/20 | 6   | 0   | 6.23051895 | 80.11060282 | <a href="https://www.inaturalist.org/observations/64459962">https://www.inaturalist.org/observations/64459962</a>   |
| 18 | Lanius cristatus                | Brown Shrike | 2018/10/24 | 3   | 0   | 6.26849837 | 81.38951598 | <a href="https://www.inaturalist.org/observations/18136668">https://www.inaturalist.org/observations/18136668</a>   |
| 19 | Lanius cristatus<br>lucionensis | Brown Shrike | 2020/1/28  | 2   | 0   | 6.27841200 | 81.40194100 | <a href="https://www.inaturalist.org/observations/38542473">https://www.inaturalist.org/observations/38542473</a>   |
| 20 | Lanius cristatus                | Brown Shrike | 2020/1/31  | 4   | 0   | 6.27842205 | 81.40193224 | <a href="https://www.inaturalist.org/observations/40045621">https://www.inaturalist.org/observations/40045621</a>   |
| 21 | Lanius cristatus                | Brown Shrike | 2013/11/24 | 4   | 0   | 6.28666155 | 81.28148924 | <a href="https://www.inaturalist.org/observations/6985904">https://www.inaturalist.org/observations/6985904</a>     |
| 22 | Lanius cristatus                | Brown Shrike | 2017/2/2   | 1   | 0   | 6.29283657 | 81.43048704 | <a href="https://www.inaturalist.org/observations/136212810">https://www.inaturalist.org/observations/136212810</a> |



|    |                  |              |           |   |   |            |             |                                                                                                                     |
|----|------------------|--------------|-----------|---|---|------------|-------------|---------------------------------------------------------------------------------------------------------------------|
| 23 | Lanius cristatus | Brown Shrike | 2018/1/13 | 6 | 0 | 6.30744333 | 81.44434500 | <a href="https://www.inaturalist.org/observations/41520801">https://www.inaturalist.org/observations/41520801</a>   |
| 24 | Lanius cristatus | Brown Shrike | 2015/1/20 | 3 | 0 | 6.30763000 | 81.44494833 | <a href="https://www.inaturalist.org/observations/106737599">https://www.inaturalist.org/observations/106737599</a> |
| 25 | Lanius cristatus | Brown Shrike | 2022/4/25 | 2 | 0 | 6.31255320 | 81.40243271 | <a href="https://www.inaturalist.org/observations/116471828">https://www.inaturalist.org/observations/116471828</a> |
| 26 | Lanius cristatus | Brown Shrike | 2022/2/17 | 1 | 0 | 6.32828580 | 81.43741518 | <a href="https://www.inaturalist.org/observations/107540981">https://www.inaturalist.org/observations/107540981</a> |
| 27 | Lanius cristatus | Brown Shrike | 2022/2/17 | 2 | 0 | 6.33247519 | 81.42259564 | <a href="https://www.inaturalist.org/observations/107543129">https://www.inaturalist.org/observations/107543129</a> |
| 28 | Lanius cristatus | Brown Shrike | 2022/2/7  | 0 | 0 | 6.34159167 | 81.49611667 | <a href="https://www.inaturalist.org/observations/144499134">https://www.inaturalist.org/observations/144499134</a> |
| 29 | Lanius cristatus | Brown Shrike | 2020/1/14 | 1 | 0 | 6.34417211 | 81.49769615 | <a href="https://www.inaturalist.org/observations/132846711">https://www.inaturalist.org/observations/132846711</a> |
| 30 | Lanius cristatus | Brown Shrike | 2022/2/10 | 1 | 0 | 6.35115833 | 80.56822778 | <a href="https://www.inaturalist.org/observations/144613114">https://www.inaturalist.org/observations/144613114</a> |
| 31 | Lanius cristatus | Brown Shrike | 2014/2/20 | 5 | 0 | 6.35778780 | 80.48895520 | <a href="https://www.inaturalist.org/observations/39273358">https://www.inaturalist.org/observations/39273358</a>   |
| 32 | Lanius cristatus | Brown Shrike | 2022/2/9  | 3 | 0 | 6.37562400 | 80.53881870 | <a href="https://www.inaturalist.org/observations/108381340">https://www.inaturalist.org/observations/108381340</a> |
| 33 | Lanius cristatus | Brown Shrike | 2022/3/21 | 3 | 0 | 6.37600167 | 81.49217833 | <a href="https://www.inaturalist.org/observations/120876802">https://www.inaturalist.org/observations/120876802</a> |
| 34 | Lanius cristatus | Brown Shrike | 2018/1/13 | 5 | 0 | 6.38295000 | 81.48565000 | <a href="https://www.inaturalist.org/observations/41520809">https://www.inaturalist.org/observations/41520809</a>   |
| 35 | Lanius cristatus | Brown Shrike | 2020/1/24 | 3 | 0 | 6.38847009 | 80.59493680 | <a href="https://www.inaturalist.org/observations/37917938">https://www.inaturalist.org/observations/37917938</a>   |
| 36 | Lanius cristatus | Brown Shrike | 2020/1/24 | 3 | 0 | 6.38867764 | 80.59485208 | <a href="https://www.inaturalist.org/observations/37910876">https://www.inaturalist.org/observations/37910876</a>   |
| 37 | Lanius cristatus | Brown Shrike | 2020/1/24 | 3 | 0 | 6.38889442 | 80.59526121 | <a href="https://www.inaturalist.org/observations/37917905">https://www.inaturalist.org/observations/37917905</a>   |
| 38 | Lanius cristatus | Brown Shrike | 2020/1/24 | 3 | 0 | 6.38972333 | 80.50138861 | <a href="https://www.inaturalist.org/observations/38251244">https://www.inaturalist.org/observations/38251244</a>   |
| 39 | Lanius cristatus | Brown Shrike | 2021/1/2  | 3 | 0 | 6.38981822 | 80.59686628 | <a href="https://www.inaturalist.org/observations/68941725">https://www.inaturalist.org/observations/68941725</a>   |
| 40 | Lanius cristatus | Brown Shrike | 2022/2/9  | 1 | 0 | 6.39036389 | 80.59811667 | <a href="https://www.inaturalist.org/observations/144613100">https://www.inaturalist.org/observations/144613100</a> |
| 41 | Lanius cristatus | Brown Shrike | 2014/2/13 | 3 | 0 | 6.39821167 | 81.46314335 | <a href="https://www.inaturalist.org/observations/37173239">https://www.inaturalist.org/observations/37173239</a>   |
| 42 | Lanius cristatus | Brown Shrike | 2019/2/10 | 3 | 0 | 6.41855041 | 80.82393799 | <a href="https://www.inaturalist.org/observations/89523285">https://www.inaturalist.org/observations/89523285</a>   |
| 43 | Lanius cristatus | Brown Shrike | 2019/1/10 | 2 | 0 | 6.42642101 | 80.81708538 | <a href="https://www.inaturalist.org/observations/144267449">https://www.inaturalist.org/observations/144267449</a> |
| 44 | Lanius cristatus | Brown Shrike | 2017/2/6  | 5 | 0 | 6.42676979 | 81.30793531 | <a href="https://www.inaturalist.org/observations/54041226">https://www.inaturalist.org/observations/54041226</a>   |
| 45 | Lanius cristatus | Brown Shrike | 2017/2/7  | 7 | 0 | 6.42677800 | 81.30804700 | <a href="https://www.inaturalist.org/observations/56921114">https://www.inaturalist.org/observations/56921114</a>   |

|    |                  |              |            |   |   |            |             |                                                                                                                     |
|----|------------------|--------------|------------|---|---|------------|-------------|---------------------------------------------------------------------------------------------------------------------|
| 46 | Lanius cristatus | Brown Shrike | 2017/2/7   | 5 | 0 | 6.42678642 | 81.30804420 | <a href="https://www.inaturalist.org/observations/54041264">https://www.inaturalist.org/observations/54041264</a>   |
| 47 | Lanius cristatus | Brown Shrike | 2012/12/11 | 7 | 0 | 6.42678642 | 81.30804420 | <a href="https://www.inaturalist.org/observations/54634044">https://www.inaturalist.org/observations/54634044</a>   |
| 48 | Lanius cristatus | Brown Shrike | 2017/12/25 | 3 | 0 | 6.43305149 | 80.41435658 | <a href="https://www.inaturalist.org/observations/10466415">https://www.inaturalist.org/observations/10466415</a>   |
| 49 | Lanius cristatus | Brown Shrike | 2016/4/16  | 3 | 0 | 6.43603510 | 80.41958790 | <a href="https://www.inaturalist.org/observations/58176620">https://www.inaturalist.org/observations/58176620</a>   |
| 50 | Lanius cristatus | Brown Shrike | 2020/1/27  | 5 | 0 | 6.44045560 | 80.89099847 | <a href="https://www.inaturalist.org/observations/38023489">https://www.inaturalist.org/observations/38023489</a>   |
| 51 | Lanius cristatus | Brown Shrike | 2022/2/6   | 2 | 0 | 6.44771150 | 80.89262100 | <a href="https://www.inaturalist.org/observations/107503376">https://www.inaturalist.org/observations/107503376</a> |
| 52 | Lanius cristatus | Brown Shrike | 2018/12/10 | 3 | 0 | 6.45353771 | 80.89625078 | <a href="https://www.inaturalist.org/observations/19327595">https://www.inaturalist.org/observations/19327595</a>   |
| 53 | Lanius cristatus | Brown Shrike | 2012/3/5   | 4 | 0 | 6.45460310 | 80.89238783 | <a href="https://www.inaturalist.org/observations/64525765">https://www.inaturalist.org/observations/64525765</a>   |
| 54 | Lanius cristatus | Brown Shrike | 2019/12/23 | 4 | 0 | 6.45794226 | 81.21933959 | <a href="https://www.inaturalist.org/observations/36961029">https://www.inaturalist.org/observations/36961029</a>   |
| 55 | Lanius cristatus | Brown Shrike | 2022/2/6   | 1 | 0 | 6.46331389 | 80.91565000 | <a href="https://www.inaturalist.org/observations/144484839">https://www.inaturalist.org/observations/144484839</a> |
| 56 | Lanius cristatus | Brown Shrike | 2022/2/6   | 1 | 0 | 6.46663889 | 80.92591944 | <a href="https://www.inaturalist.org/observations/144484893">https://www.inaturalist.org/observations/144484893</a> |
| 57 | Lanius cristatus | Brown Shrike | 2020/2/17  | 2 | 0 | 6.47201478 | 80.87867316 | <a href="https://www.inaturalist.org/observations/90820124">https://www.inaturalist.org/observations/90820124</a>   |
| 58 | Lanius cristatus | Brown Shrike | 2017/12/27 | 3 | 0 | 6.48910000 | 80.86580000 | <a href="https://www.inaturalist.org/observations/10793886">https://www.inaturalist.org/observations/10793886</a>   |
| 59 | Lanius cristatus | Brown Shrike | 2011/1/20  | 4 | 0 | 6.49425641 | 80.89584688 | <a href="https://www.inaturalist.org/observations/57908091">https://www.inaturalist.org/observations/57908091</a>   |
| 60 | Lanius cristatus | Brown Shrike | 2021/12/5  | 3 | 0 | 6.52084466 | 80.88433664 | <a href="https://www.inaturalist.org/observations/102529930">https://www.inaturalist.org/observations/102529930</a> |
| 61 | Lanius cristatus | Brown Shrike | 2021/12/6  | 3 | 0 | 6.52469802 | 80.88317592 | <a href="https://www.inaturalist.org/observations/102600633">https://www.inaturalist.org/observations/102600633</a> |
| 62 | Lanius cristatus | Brown Shrike | 2020/3/31  | 5 | 0 | 6.53272000 | 80.14151117 | <a href="https://www.inaturalist.org/observations/41688166">https://www.inaturalist.org/observations/41688166</a>   |
| 63 | Lanius cristatus | Brown Shrike | 2020/10/26 | 6 | 0 | 6.60163391 | 79.95267637 | <a href="https://www.inaturalist.org/observations/63801388">https://www.inaturalist.org/observations/63801388</a>   |
| 64 | Lanius cristatus | Brown Shrike | 2020/4/2   | 4 | 0 | 6.60175598 | 79.95271125 | <a href="https://www.inaturalist.org/observations/41340655">https://www.inaturalist.org/observations/41340655</a>   |
| 65 | Lanius cristatus | Brown Shrike | 2021/10/23 | 4 | 0 | 6.74757920 | 80.36864880 | <a href="https://www.inaturalist.org/observations/99073785">https://www.inaturalist.org/observations/99073785</a>   |
| 66 | Lanius cristatus | Brown Shrike | 2022/3/19  | 2 | 0 | 6.77216000 | 80.88449167 | <a href="https://www.inaturalist.org/observations/110185533">https://www.inaturalist.org/observations/110185533</a> |
| 67 | Lanius cristatus | Brown Shrike | 2021/12/28 | 2 | 0 | 6.83660663 | 79.89268285 | <a href="https://www.inaturalist.org/observations/104167785">https://www.inaturalist.org/observations/104167785</a> |
| 68 | Lanius cristatus | Brown Shrike | 2022/1/20  | 2 | 0 | 6.83667750 | 80.09696419 | <a href="https://www.inaturalist.org/observations/129575515">https://www.inaturalist.org/observations/129575515</a> |

|    |                  |              |            |   |   |            |             |                                                                                                                     |
|----|------------------|--------------|------------|---|---|------------|-------------|---------------------------------------------------------------------------------------------------------------------|
| 69 | Lanius cristatus | Brown Shrike | 2017/3/10  | 2 | 0 | 6.86313523 | 81.04749101 | <a href="https://www.inaturalist.org/observations/142455138">https://www.inaturalist.org/observations/142455138</a> |
| 70 | Lanius cristatus | Brown Shrike | 2019/10/5  | 3 | 0 | 6.87289047 | 81.04663700 | <a href="https://www.inaturalist.org/observations/34401991">https://www.inaturalist.org/observations/34401991</a>   |
| 71 | Lanius cristatus | Brown Shrike | 2022/1/15  | 1 | 0 | 6.87783813 | 79.93120844 | <a href="https://www.inaturalist.org/observations/107104367">https://www.inaturalist.org/observations/107104367</a> |
| 72 | Lanius cristatus | Brown Shrike | 2020/11/26 | 7 | 0 | 6.88675520 | 79.94759990 | <a href="https://www.inaturalist.org/observations/65680128">https://www.inaturalist.org/observations/65680128</a>   |
| 73 | Lanius cristatus | Brown Shrike | 2022/1/23  | 3 | 0 | 6.89659474 | 79.97853443 | <a href="https://www.inaturalist.org/observations/105413857">https://www.inaturalist.org/observations/105413857</a> |
| 74 | Lanius cristatus | Brown Shrike | 2022/11/5  | 1 | 0 | 6.89857435 | 79.97868331 | <a href="https://www.inaturalist.org/observations/141132633">https://www.inaturalist.org/observations/141132633</a> |
| 75 | Lanius cristatus | Brown Shrike | 2022/2/6   | 2 | 0 | 6.89930413 | 79.97858430 | <a href="https://www.inaturalist.org/observations/106219009">https://www.inaturalist.org/observations/106219009</a> |
| 76 | Lanius cristatus | Brown Shrike | 2020/1/4   | 4 | 0 | 6.90063073 | 81.06519210 | <a href="https://www.inaturalist.org/observations/37294938">https://www.inaturalist.org/observations/37294938</a>   |
| 77 | Lanius cristatus | Brown Shrike | 2015/1/29  | 7 | 0 | 6.92777336 | 80.82151070 | <a href="https://www.inaturalist.org/observations/49033617">https://www.inaturalist.org/observations/49033617</a>   |
| 78 | Lanius cristatus | Brown Shrike | 2019/4/24  | 3 | 0 | 6.96797380 | 80.77155570 | <a href="https://www.inaturalist.org/observations/23026035">https://www.inaturalist.org/observations/23026035</a>   |
| 79 | Lanius cristatus | Brown Shrike | 2014/11/24 | 4 | 0 | 6.96905630 | 80.76820450 | <a href="https://www.inaturalist.org/observations/71308499">https://www.inaturalist.org/observations/71308499</a>   |
| 80 | Lanius cristatus | Brown Shrike | 2018/12/7  | 2 | 0 | 6.97006624 | 80.76761347 | <a href="https://www.inaturalist.org/observations/108652634">https://www.inaturalist.org/observations/108652634</a> |
| 81 | Lanius cristatus | Brown Shrike | 2018/1/1   | 3 | 0 | 6.97169770 | 80.76833577 | <a href="https://www.inaturalist.org/observations/15184940">https://www.inaturalist.org/observations/15184940</a>   |
| 82 | Lanius cristatus | Brown Shrike | 2017/10/28 | 6 | 0 | 7.26392179 | 80.58622513 | <a href="https://www.inaturalist.org/observations/37120630">https://www.inaturalist.org/observations/37120630</a>   |
| 83 | Lanius cristatus | Brown Shrike | 2022/2/4   | 2 | 0 | 7.27313333 | 80.59778333 | <a href="https://www.inaturalist.org/observations/144447935">https://www.inaturalist.org/observations/144447935</a> |
| 84 | Lanius cristatus | Brown Shrike | 2018/10/27 | 2 | 0 | 7.28426445 | 79.84239872 | <a href="https://www.inaturalist.org/observations/18347905">https://www.inaturalist.org/observations/18347905</a>   |
| 85 | Lanius cristatus | Brown Shrike | 2015/10/19 | 3 | 0 | 7.30329573 | 80.64245566 | <a href="https://www.inaturalist.org/observations/37924470">https://www.inaturalist.org/observations/37924470</a>   |
| 86 | Lanius cristatus | Brown Shrike | 2015/11/21 | 3 | 0 | 7.30329573 | 80.64245566 | <a href="https://www.inaturalist.org/observations/38069738">https://www.inaturalist.org/observations/38069738</a>   |
| 87 | Lanius cristatus | Brown Shrike | 2020/2/10  | 4 | 0 | 7.34284167 | 80.77466333 | <a href="https://www.inaturalist.org/observations/39424822">https://www.inaturalist.org/observations/39424822</a>   |
| 88 | Lanius cristatus | Brown Shrike | 2020/2/9   | 3 | 0 | 7.37781833 | 80.81302500 | <a href="https://www.inaturalist.org/observations/39424519">https://www.inaturalist.org/observations/39424519</a>   |
| 89 | Lanius cristatus | Brown Shrike | 2022/10/15 | 1 | 0 | 7.47767174 | 80.32696598 | <a href="https://www.inaturalist.org/observations/138811722">https://www.inaturalist.org/observations/138811722</a> |
| 90 | Lanius cristatus | Brown Shrike | 2017/11/29 | 4 | 0 | 7.87305400 | 80.77179700 | <a href="https://www.inaturalist.org/observations/9951502">https://www.inaturalist.org/observations/9951502</a>     |
| 91 | Lanius cristatus | Brown Shrike | 2017/11/29 | 4 | 0 | 7.87305400 | 80.77179700 | <a href="https://www.inaturalist.org/observations/9951571">https://www.inaturalist.org/observations/9951571</a>     |

|     |                              |              |            |   |   |            |             |                                                                                                                     |
|-----|------------------------------|--------------|------------|---|---|------------|-------------|---------------------------------------------------------------------------------------------------------------------|
| 92  | Lanius cristatus             | Brown Shrike | 2018/12/1  | 7 | 0 | 7.95499918 | 80.76522529 | <a href="https://www.inaturalist.org/observations/68546241">https://www.inaturalist.org/observations/68546241</a>   |
| 93  | Lanius cristatus             | Brown Shrike | 2019/11/7  | 2 | 0 | 7.95739229 | 80.75552622 | <a href="https://www.inaturalist.org/observations/80341827">https://www.inaturalist.org/observations/80341827</a>   |
| 94  | Lanius cristatus             | Brown Shrike | 2018/12/3  | 2 | 0 | 7.96932370 | 80.76097739 | <a href="https://www.inaturalist.org/observations/108584828">https://www.inaturalist.org/observations/108584828</a> |
| 95  | Lanius cristatus             | Brown Shrike | 2020/2/7   | 2 | 0 | 8.02230833 | 80.82710333 | <a href="https://www.inaturalist.org/observations/39243463">https://www.inaturalist.org/observations/39243463</a>   |
| 96  | Lanius cristatus lucionensis | Brown Shrike | 2018/12/16 | 2 | 0 | 8.03263702 | 80.74727805 | <a href="https://www.inaturalist.org/observations/19569536">https://www.inaturalist.org/observations/19569536</a>   |
| 97  | Lanius cristatus             | Brown Shrike | 2021/10/2  | 2 | 0 | 8.12902970 | 77.36402570 | <a href="https://www.inaturalist.org/observations/98698063">https://www.inaturalist.org/observations/98698063</a>   |
| 98  | Lanius cristatus             | Brown Shrike | 2020/2/5   | 3 | 0 | 8.20876667 | 80.07209000 | <a href="https://www.inaturalist.org/observations/39241213">https://www.inaturalist.org/observations/39241213</a>   |
| 99  | Lanius cristatus             | Brown Shrike | 2021/11/10 | 2 | 0 | 8.24014151 | 77.50143631 | <a href="https://www.inaturalist.org/observations/104865048">https://www.inaturalist.org/observations/104865048</a> |
| 100 | Lanius cristatus             | Brown Shrike | 2021/11/10 | 2 | 0 | 8.27058248 | 77.56396682 | <a href="https://www.inaturalist.org/observations/104865072">https://www.inaturalist.org/observations/104865072</a> |
| 101 | Lanius cristatus             | Brown Shrike | 2021/11/10 | 2 | 0 | 8.27683059 | 77.54436770 | <a href="https://www.inaturalist.org/observations/104864073">https://www.inaturalist.org/observations/104864073</a> |
| 102 | Lanius cristatus             | Brown Shrike | 2021/11/10 | 2 | 0 | 8.34177640 | 77.50973452 | <a href="https://www.inaturalist.org/observations/104865063">https://www.inaturalist.org/observations/104865063</a> |
| 103 | Lanius cristatus             | Brown Shrike | 2021/11/8  | 1 | 0 | 8.34281898 | 77.56256002 | <a href="https://www.inaturalist.org/observations/105085907">https://www.inaturalist.org/observations/105085907</a> |
| 104 | Lanius cristatus             | Brown Shrike | 2017/10/16 | 2 | 0 | 8.37812190 | 77.40802860 | <a href="https://www.inaturalist.org/observations/61497302">https://www.inaturalist.org/observations/61497302</a>   |
| 105 | Lanius cristatus             | Brown Shrike | 2021/11/10 | 2 | 0 | 8.38176511 | 77.42395356 | <a href="https://www.inaturalist.org/observations/104865073">https://www.inaturalist.org/observations/104865073</a> |
| 106 | Lanius cristatus             | Brown Shrike | 2021/11/8  | 3 | 0 | 8.39959276 | 77.53527051 | <a href="https://www.inaturalist.org/observations/102535064">https://www.inaturalist.org/observations/102535064</a> |
| 107 | Lanius cristatus             | Brown Shrike | 2022/3/27  | 1 | 0 | 8.41101220 | 77.39138770 | <a href="https://www.inaturalist.org/observations/110469982">https://www.inaturalist.org/observations/110469982</a> |
| 108 | Lanius cristatus             | Brown Shrike | 2020/12/16 | 2 | 0 | 8.44109221 | 76.98304720 | <a href="https://www.inaturalist.org/observations/81162999">https://www.inaturalist.org/observations/81162999</a>   |
| 109 | Lanius cristatus             | Brown Shrike | 2021/11/20 | 2 | 0 | 8.44176744 | 76.98298082 | <a href="https://www.inaturalist.org/observations/101508870">https://www.inaturalist.org/observations/101508870</a> |
| 110 | Lanius cristatus             | Brown Shrike | 2022/1/17  | 1 | 0 | 8.44442489 | 76.98398128 | <a href="https://www.inaturalist.org/observations/105139690">https://www.inaturalist.org/observations/105139690</a> |
| 111 | Lanius cristatus             | Brown Shrike | 2022/1/16  | 2 | 0 | 8.44503245 | 76.98461562 | <a href="https://www.inaturalist.org/observations/105081104">https://www.inaturalist.org/observations/105081104</a> |
| 112 | Lanius cristatus             | Brown Shrike | 2022/2/28  | 4 | 0 | 8.44885559 | 76.98348004 | <a href="https://www.inaturalist.org/observations/107686557">https://www.inaturalist.org/observations/107686557</a> |
| 113 | Lanius cristatus             | Brown Shrike | 2021/10/23 | 3 | 0 | 8.45391490 | 76.97329270 | <a href="https://www.inaturalist.org/observations/99543673">https://www.inaturalist.org/observations/99543673</a>   |
| 114 | Lanius cristatus             | Brown Shrike | 2022/1/26  | 1 | 0 | 8.49270650 | 77.75093030 | <a href="https://www.inaturalist.org/observations/105901526">https://www.inaturalist.org/observations/105901526</a> |

|     |                  |              |            |   |   |            |             |                                                                                                                     |
|-----|------------------|--------------|------------|---|---|------------|-------------|---------------------------------------------------------------------------------------------------------------------|
| 115 | Lanius cristatus | Brown Shrike | 2020/1/19  | 3 | 0 | 8.52243527 | 76.90322399 | <a href="https://www.inaturalist.org/observations/67015623">https://www.inaturalist.org/observations/67015623</a>   |
| 116 | Lanius cristatus | Brown Shrike | 2020/12/12 | 0 | 0 | 8.57353356 | 81.23815978 | <a href="https://www.inaturalist.org/observations/66466091">https://www.inaturalist.org/observations/66466091</a>   |
| 117 | Lanius cristatus | Brown Shrike | 2022/10/27 | 1 | 0 | 8.68834000 | 77.30946740 | <a href="https://www.inaturalist.org/observations/141257452">https://www.inaturalist.org/observations/141257452</a> |
| 118 | Lanius cristatus | Brown Shrike | 2022/11/2  | 1 | 0 | 8.68834000 | 77.30946740 | <a href="https://www.inaturalist.org/observations/141259565">https://www.inaturalist.org/observations/141259565</a> |
| 119 | Lanius cristatus | Brown Shrike | 2020/2/22  | 3 | 0 | 8.68989630 | 77.17067240 | <a href="https://www.inaturalist.org/observations/39243332">https://www.inaturalist.org/observations/39243332</a>   |
| 120 | Lanius cristatus | Brown Shrike | 2015/10/27 | 3 | 0 | 8.69969770 | 77.63132000 | <a href="https://www.inaturalist.org/observations/23905867">https://www.inaturalist.org/observations/23905867</a>   |
| 121 | Lanius cristatus | Brown Shrike | 2022/3/17  | 4 | 0 | 8.75994220 | 77.11687530 | <a href="https://www.inaturalist.org/observations/108936503">https://www.inaturalist.org/observations/108936503</a> |
| 122 | Lanius cristatus | Brown Shrike | 2019/4/2   | 6 | 0 | 8.77136208 | 81.13615356 | <a href="https://www.inaturalist.org/observations/61253497">https://www.inaturalist.org/observations/61253497</a>   |
| 123 | Lanius cristatus | Brown Shrike | 2020/12/16 | 2 | 0 | 8.87002778 | 76.60139722 | <a href="https://www.inaturalist.org/observations/66755195">https://www.inaturalist.org/observations/66755195</a>   |
| 124 | Lanius cristatus | Brown Shrike | 2018/10/17 | 5 | 0 | 8.87006725 | 76.60143861 | <a href="https://www.inaturalist.org/observations/65888075">https://www.inaturalist.org/observations/65888075</a>   |
| 125 | Lanius cristatus | Brown Shrike | 2022/2/14  | 1 | 0 | 8.93173360 | 79.92146080 | <a href="https://www.inaturalist.org/observations/107748946">https://www.inaturalist.org/observations/107748946</a> |
| 126 | Lanius cristatus | Brown Shrike | 2022/2/5   | 1 | 0 | 9.01135633 | 76.66208893 | <a href="https://www.inaturalist.org/observations/106836245">https://www.inaturalist.org/observations/106836245</a> |
| 127 | Lanius cristatus | Brown Shrike | 2019/1/6   | 4 | 0 | 9.29536875 | 76.51159113 | <a href="https://www.inaturalist.org/observations/65921296">https://www.inaturalist.org/observations/65921296</a>   |
| 128 | Lanius cristatus | Brown Shrike | 2022/4/30  | 3 | 0 | 9.30757790 | 77.06589460 | <a href="https://www.inaturalist.org/observations/130740276">https://www.inaturalist.org/observations/130740276</a> |
| 129 | Lanius cristatus | Brown Shrike | 2021/10/28 | 3 | 0 | 9.40061000 | 76.55001500 | <a href="https://www.inaturalist.org/observations/102158889">https://www.inaturalist.org/observations/102158889</a> |
| 130 | Lanius cristatus | Brown Shrike | 2018/1/21  | 2 | 0 | 9.40206960 | 76.42560510 | <a href="https://www.inaturalist.org/observations/67397429">https://www.inaturalist.org/observations/67397429</a>   |
| 131 | Lanius cristatus | Brown Shrike | 2019/1/24  | 4 | 0 | 9.46458000 | 76.97067806 | <a href="https://www.inaturalist.org/observations/47238636">https://www.inaturalist.org/observations/47238636</a>   |
| 132 | Lanius cristatus | Brown Shrike | 2022/2/19  | 2 | 0 | 9.53872270 | 76.51124710 | <a href="https://www.inaturalist.org/observations/129432377">https://www.inaturalist.org/observations/129432377</a> |
| 133 | Lanius cristatus | Brown Shrike | 2022/2/19  | 3 | 0 | 9.53872270 | 76.51124710 | <a href="https://www.inaturalist.org/observations/131229049">https://www.inaturalist.org/observations/131229049</a> |
| 134 | Lanius cristatus | Brown Shrike | 2021/1/26  | 4 | 0 | 9.54311003 | 76.50820199 | <a href="https://www.inaturalist.org/observations/68752069">https://www.inaturalist.org/observations/68752069</a>   |
| 135 | Lanius cristatus | Brown Shrike | 2020/10/8  | 4 | 0 | 9.54385793 | 76.62595097 | <a href="https://www.inaturalist.org/observations/62477950">https://www.inaturalist.org/observations/62477950</a>   |
| 136 | Lanius cristatus | Brown Shrike | 2014/12/25 | 2 | 0 | 9.56286103 | 76.41840311 | <a href="https://www.inaturalist.org/observations/78549784">https://www.inaturalist.org/observations/78549784</a>   |
| 137 | Lanius cristatus | Brown Shrike | 2018/4/4   | 5 | 0 | 9.56561399 | 76.43993062 | <a href="https://www.inaturalist.org/observations/66075736">https://www.inaturalist.org/observations/66075736</a>   |

|     |                  |              |            |   |   |            |             |                                                                                                                     |
|-----|------------------|--------------|------------|---|---|------------|-------------|---------------------------------------------------------------------------------------------------------------------|
| 138 | Lanius cristatus | Brown Shrike | 2018/12/29 | 4 | 0 | 9.56801469 | 76.44109807 | <a href="https://www.inaturalist.org/observations/66031722">https://www.inaturalist.org/observations/66031722</a>   |
| 139 | Lanius cristatus | Brown Shrike | 2019/2/8   | 4 | 0 | 9.57872431 | 76.52783509 | <a href="https://www.inaturalist.org/observations/41014346">https://www.inaturalist.org/observations/41014346</a>   |
| 140 | Lanius cristatus | Brown Shrike | 2012/12/14 | 6 | 0 | 9.58529902 | 77.18081024 | <a href="https://www.inaturalist.org/observations/124864523">https://www.inaturalist.org/observations/124864523</a> |
| 141 | Lanius cristatus | Brown Shrike | 2021/3/23  | 3 | 0 | 9.58566092 | 76.52925868 | <a href="https://www.inaturalist.org/observations/129501724">https://www.inaturalist.org/observations/129501724</a> |
| 142 | Lanius cristatus | Brown Shrike | 2019/12/14 | 4 | 0 | 9.59766245 | 76.51108997 | <a href="https://www.inaturalist.org/observations/43051016">https://www.inaturalist.org/observations/43051016</a>   |
| 143 | Lanius cristatus | Brown Shrike | 2020/1/24  | 3 | 0 | 9.60466890 | 77.17205976 | <a href="https://www.inaturalist.org/observations/59451149">https://www.inaturalist.org/observations/59451149</a>   |
| 144 | Lanius cristatus | Brown Shrike | 2020/3/13  | 3 | 0 | 9.66464288 | 76.33603070 | <a href="https://www.inaturalist.org/observations/39923775">https://www.inaturalist.org/observations/39923775</a>   |
| 145 | Lanius cristatus | Brown Shrike | 2020/3/13  | 3 | 0 | 9.66466121 | 76.33604976 | <a href="https://www.inaturalist.org/observations/39923495">https://www.inaturalist.org/observations/39923495</a>   |
| 146 | Lanius cristatus | Brown Shrike | 2022/11/22 | 3 | 0 | 9.70601240 | 76.47655193 | <a href="https://www.inaturalist.org/observations/142599758">https://www.inaturalist.org/observations/142599758</a> |
| 147 | Lanius cristatus | Brown Shrike | 2022/10/8  | 1 | 0 | 9.79519590 | 76.87057160 | <a href="https://www.inaturalist.org/observations/138003369">https://www.inaturalist.org/observations/138003369</a> |
| 148 | Lanius cristatus | Brown Shrike | 2022/4/17  | 2 | 0 | 9.83123041 | 76.78898888 | <a href="https://www.inaturalist.org/observations/114303449">https://www.inaturalist.org/observations/114303449</a> |
| 149 | Lanius cristatus | Brown Shrike | 2021/10/17 | 3 | 0 | 9.83178303 | 76.78950939 | <a href="https://www.inaturalist.org/observations/98513240">https://www.inaturalist.org/observations/98513240</a>   |
| 150 | Lanius cristatus | Brown Shrike | 2021/11/28 | 2 | 0 | 9.83314184 | 76.77787217 | <a href="https://www.inaturalist.org/observations/102415696">https://www.inaturalist.org/observations/102415696</a> |
| 151 | Lanius cristatus | Brown Shrike | 2022/10/8  | 2 | 0 | 9.83935417 | 76.78313078 | <a href="https://www.inaturalist.org/observations/137986965">https://www.inaturalist.org/observations/137986965</a> |
| 152 | Lanius cristatus | Brown Shrike | 2021/11/4  | 2 | 0 | 9.83981250 | 76.78269480 | <a href="https://www.inaturalist.org/observations/100221971">https://www.inaturalist.org/observations/100221971</a> |
| 153 | Lanius cristatus | Brown Shrike | 2021/11/18 | 2 | 0 | 9.84002040 | 76.78343068 | <a href="https://www.inaturalist.org/observations/101631590">https://www.inaturalist.org/observations/101631590</a> |
| 154 | Lanius cristatus | Brown Shrike | 2021/10/31 | 4 | 0 | 9.84071111 | 76.78055129 | <a href="https://www.inaturalist.org/observations/99882700">https://www.inaturalist.org/observations/99882700</a>   |
| 155 | Lanius cristatus | Brown Shrike | 2022/10/18 | 0 | 0 | 9.84891429 | 76.71430050 | <a href="https://www.inaturalist.org/observations/139843464">https://www.inaturalist.org/observations/139843464</a> |
| 156 | Lanius cristatus | Brown Shrike | 2019/1/2   | 2 | 0 | 9.87536058 | 76.72690920 | <a href="https://www.inaturalist.org/observations/96385171">https://www.inaturalist.org/observations/96385171</a>   |
| 157 | Lanius cristatus | Brown Shrike | 2022/4/7   | 2 | 0 | 9.89081268 | 76.69041719 | <a href="https://www.inaturalist.org/observations/114273756">https://www.inaturalist.org/observations/114273756</a> |
| 158 | Lanius cristatus | Brown Shrike | 2022/11/27 | 1 | 0 | 9.89081268 | 76.69041719 | <a href="https://www.inaturalist.org/observations/143184830">https://www.inaturalist.org/observations/143184830</a> |
| 159 | Lanius cristatus | Brown Shrike | 2021/10/9  | 3 | 0 | 9.89245159 | 76.66443767 | <a href="https://www.inaturalist.org/observations/97673536">https://www.inaturalist.org/observations/97673536</a>   |
| 160 | Lanius cristatus | Brown Shrike | 2021/10/5  | 5 | 0 | 9.89555351 | 76.74879118 | <a href="https://www.inaturalist.org/observations/97231352">https://www.inaturalist.org/observations/97231352</a>   |

|     |                                 |              |            |   |   |             |             |                                                                                                                     |
|-----|---------------------------------|--------------|------------|---|---|-------------|-------------|---------------------------------------------------------------------------------------------------------------------|
| 161 | Lanius cristatus                | Brown Shrike | 2021/10/13 | 1 | 0 | 9.89555351  | 76.74879118 | <a href="https://www.inaturalist.org/observations/98109952">https://www.inaturalist.org/observations/98109952</a>   |
| 162 | Lanius cristatus                | Brown Shrike | 2019/10/8  | 3 | 0 | 9.93188362  | 78.14039302 | <a href="https://www.inaturalist.org/observations/105339082">https://www.inaturalist.org/observations/105339082</a> |
| 163 | Lanius cristatus                | Brown Shrike | 2021/1/9   | 4 | 0 | 9.94835159  | 78.14931694 | <a href="https://www.inaturalist.org/observations/67792918">https://www.inaturalist.org/observations/67792918</a>   |
| 164 | Lanius cristatus                | Brown Shrike | 2014/3/25  | 3 | 0 | 9.95205500  | 76.31138429 | <a href="https://www.inaturalist.org/observations/48544035">https://www.inaturalist.org/observations/48544035</a>   |
| 165 | Lanius cristatus                | Brown Shrike | 2013/12/26 | 4 | 0 | 9.95205500  | 76.31138429 | <a href="https://www.inaturalist.org/observations/48609783">https://www.inaturalist.org/observations/48609783</a>   |
| 166 | Lanius cristatus                | Brown Shrike | 2021/12/20 | 3 | 0 | 10.05133978 | 76.33867749 | <a href="https://www.inaturalist.org/observations/104655365">https://www.inaturalist.org/observations/104655365</a> |
| 167 | Lanius cristatus                | Brown Shrike | 2022/11/12 | 0 | 0 | 10.05168713 | 76.34048633 | <a href="https://www.inaturalist.org/observations/141764264">https://www.inaturalist.org/observations/141764264</a> |
| 168 | Lanius cristatus                | Brown Shrike | 2022/11/12 | 1 | 0 | 10.05168713 | 76.34048633 | <a href="https://www.inaturalist.org/observations/141764290">https://www.inaturalist.org/observations/141764290</a> |
| 169 | Lanius cristatus                | Brown Shrike | 2022/12/17 | 1 | 0 | 10.05168713 | 76.34048633 | <a href="https://www.inaturalist.org/observations/144524367">https://www.inaturalist.org/observations/144524367</a> |
| 170 | Lanius cristatus                | Brown Shrike | 2022/12/17 | 1 | 0 | 10.05168713 | 76.34048633 | <a href="https://www.inaturalist.org/observations/144524369">https://www.inaturalist.org/observations/144524369</a> |
| 171 | Lanius cristatus                | Brown Shrike | 2020/1/31  | 3 | 0 | 10.06363333 | 76.33896667 | <a href="https://www.inaturalist.org/observations/67019358">https://www.inaturalist.org/observations/67019358</a>   |
| 172 | Lanius cristatus                | Brown Shrike | 2021/2/7   | 2 | 0 | 10.06455535 | 76.60683319 | <a href="https://www.inaturalist.org/observations/69265365">https://www.inaturalist.org/observations/69265365</a>   |
| 173 | Lanius cristatus                | Brown Shrike | 2019/2/2   | 5 | 0 | 10.07226635 | 76.95704289 | <a href="https://www.inaturalist.org/observations/49501574">https://www.inaturalist.org/observations/49501574</a>   |
| 174 | Lanius cristatus                | Brown Shrike | 2021/11/11 | 2 | 0 | 10.07269066 | 77.05676342 | <a href="https://www.inaturalist.org/observations/100935195">https://www.inaturalist.org/observations/100935195</a> |
| 175 | Lanius cristatus<br>lucionensis | Brown Shrike | 2020/1/28  | 1 | 0 | 10.09834893 | 76.71375134 | <a href="https://www.inaturalist.org/observations/39236016">https://www.inaturalist.org/observations/39236016</a>   |
| 176 | Lanius cristatus                | Brown Shrike | 2018/12/15 | 5 | 0 | 10.10398030 | 76.70046050 | <a href="https://www.inaturalist.org/observations/32149420">https://www.inaturalist.org/observations/32149420</a>   |
| 177 | Lanius cristatus                | Brown Shrike | 2018/12/15 | 3 | 0 | 10.10398030 | 76.70046050 | <a href="https://www.inaturalist.org/observations/56312204">https://www.inaturalist.org/observations/56312204</a>   |
| 178 | Lanius cristatus                | Brown Shrike | 2018/3/8   | 3 | 0 | 10.10398030 | 76.70046050 | <a href="https://www.inaturalist.org/observations/91676801">https://www.inaturalist.org/observations/91676801</a>   |
| 179 | Lanius cristatus                | Brown Shrike | 2019/11/29 | 4 | 0 | 10.10404183 | 76.70046039 | <a href="https://www.inaturalist.org/observations/50386277">https://www.inaturalist.org/observations/50386277</a>   |
| 180 | Lanius cristatus                | Brown Shrike | 2016/12/7  | 7 | 0 | 10.10634769 | 76.70470314 | <a href="http://www.inaturalist.org/observations/4729889">http://www.inaturalist.org/observations/4729889</a>       |
| 181 | Lanius cristatus                | Brown Shrike | 2022/4/18  | 2 | 0 | 10.12089500 | 76.75847500 | <a href="https://www.inaturalist.org/observations/114784180">https://www.inaturalist.org/observations/114784180</a> |
| 182 | Lanius cristatus                | Brown Shrike | 2016/12/21 | 6 | 0 | 10.12811910 | 76.75529410 | <a href="https://www.inaturalist.org/observations/66206541">https://www.inaturalist.org/observations/66206541</a>   |
| 183 | Lanius cristatus                | Brown Shrike | 2017/3/29  | 3 | 0 | 10.12979140 | 76.68711840 | <a href="https://www.inaturalist.org/observations/64265751">https://www.inaturalist.org/observations/64265751</a>   |

|     |                  |              |            |   |   |             |             |                                                                                                                     |
|-----|------------------|--------------|------------|---|---|-------------|-------------|---------------------------------------------------------------------------------------------------------------------|
| 184 | Lanius cristatus | Brown Shrike | 2020/1/16  | 3 | 0 | 10.12994139 | 76.68765639 | <a href="https://www.inaturalist.org/observations/51554490">https://www.inaturalist.org/observations/51554490</a>   |
| 185 | Lanius cristatus | Brown Shrike | 2020/2/9   | 4 | 0 | 10.13098780 | 76.24104930 | <a href="https://www.inaturalist.org/observations/41221294">https://www.inaturalist.org/observations/41221294</a>   |
| 186 | Lanius cristatus | Brown Shrike | 2014/1/30  | 4 | 0 | 10.13316447 | 76.68874613 | <a href="https://www.inaturalist.org/observations/68455414">https://www.inaturalist.org/observations/68455414</a>   |
| 187 | Lanius cristatus | Brown Shrike | 2022/10/24 | 3 | 0 | 10.13517211 | 76.38848886 | <a href="https://www.inaturalist.org/observations/139951106">https://www.inaturalist.org/observations/139951106</a> |
| 188 | Lanius cristatus | Brown Shrike | 2021/10/17 | 2 | 0 | 10.15322610 | 76.33767860 | <a href="https://www.inaturalist.org/observations/98458182">https://www.inaturalist.org/observations/98458182</a>   |
| 189 | Lanius cristatus | Brown Shrike | 2022/11/9  | 1 | 0 | 10.15322610 | 76.33767860 | <a href="https://www.inaturalist.org/observations/141515071">https://www.inaturalist.org/observations/141515071</a> |
| 190 | Lanius cristatus | Brown Shrike | 2022/11/20 | 1 | 0 | 10.15322610 | 76.33767860 | <a href="https://www.inaturalist.org/observations/142426701">https://www.inaturalist.org/observations/142426701</a> |
| 191 | Lanius cristatus | Brown Shrike | 2021/11/7  | 4 | 0 | 10.15587909 | 76.37910426 | <a href="https://www.inaturalist.org/observations/100844916">https://www.inaturalist.org/observations/100844916</a> |
| 192 | Lanius cristatus | Brown Shrike | 2021/12/27 | 1 | 0 | 10.19424410 | 77.99670430 | <a href="https://www.inaturalist.org/observations/104639605">https://www.inaturalist.org/observations/104639605</a> |
| 193 | Lanius cristatus | Brown Shrike | 2020/12/14 | 0 | 0 | 10.24769080 | 76.33484780 | <a href="https://www.inaturalist.org/observations/143784850">https://www.inaturalist.org/observations/143784850</a> |
| 194 | Lanius cristatus | Brown Shrike | 2021/12/25 | 1 | 0 | 10.29753000 | 79.81047333 | <a href="https://www.inaturalist.org/observations/103752216">https://www.inaturalist.org/observations/103752216</a> |
| 195 | Lanius cristatus | Brown Shrike | 2019/10/6  | 1 | 0 | 10.29911240 | 79.84561000 | <a href="https://www.inaturalist.org/observations/89439550">https://www.inaturalist.org/observations/89439550</a>   |
| 196 | Lanius cristatus | Brown Shrike | 2022/11/28 | 2 | 0 | 10.30214265 | 76.42738435 | <a href="https://www.inaturalist.org/observations/143180082">https://www.inaturalist.org/observations/143180082</a> |
| 197 | Lanius cristatus | Brown Shrike | 2018/4/3   | 4 | 0 | 10.30313333 | 76.99105556 | <a href="https://www.inaturalist.org/observations/66524199">https://www.inaturalist.org/observations/66524199</a>   |
| 198 | Lanius cristatus | Brown Shrike | 2011/2/22  | 5 | 0 | 10.32359080 | 76.95100300 | <a href="https://www.inaturalist.org/observations/30498099">https://www.inaturalist.org/observations/30498099</a>   |
| 199 | Lanius cristatus | Brown Shrike | 2019/10/12 | 2 | 0 | 10.32697340 | 76.95539670 | <a href="https://www.inaturalist.org/observations/55132008">https://www.inaturalist.org/observations/55132008</a>   |
| 200 | Lanius cristatus | Brown Shrike | 2021/3/31  | 2 | 0 | 10.32697340 | 76.95539670 | <a href="https://www.inaturalist.org/observations/105256419">https://www.inaturalist.org/observations/105256419</a> |
| 201 | Lanius cristatus | Brown Shrike | 2021/4/1   | 2 | 0 | 10.32697340 | 76.95539670 | <a href="https://www.inaturalist.org/observations/105256437">https://www.inaturalist.org/observations/105256437</a> |
| 202 | Lanius cristatus | Brown Shrike | 2018/11/10 | 4 | 0 | 10.37499116 | 76.21854052 | <a href="https://www.inaturalist.org/observations/18552047">https://www.inaturalist.org/observations/18552047</a>   |
| 203 | Lanius cristatus | Brown Shrike | 2020/1/7   | 4 | 0 | 10.39389333 | 76.23106500 | <a href="https://www.inaturalist.org/observations/44164534">https://www.inaturalist.org/observations/44164534</a>   |
| 204 | Lanius cristatus | Brown Shrike | 2020/1/7   | 3 | 0 | 10.39861746 | 76.23055806 | <a href="https://www.inaturalist.org/observations/44164679">https://www.inaturalist.org/observations/44164679</a>   |
| 205 | Lanius cristatus | Brown Shrike | 2020/2/1   | 4 | 0 | 10.43878000 | 76.17306000 | <a href="https://www.inaturalist.org/observations/67039867">https://www.inaturalist.org/observations/67039867</a>   |
| 206 | Lanius cristatus | Brown Shrike | 2019/1/6   | 4 | 0 | 10.46427294 | 76.15506904 | <a href="https://www.inaturalist.org/observations/100827075">https://www.inaturalist.org/observations/100827075</a> |



|     |                  |              |            |   |   |             |             |                                                                                                                     |
|-----|------------------|--------------|------------|---|---|-------------|-------------|---------------------------------------------------------------------------------------------------------------------|
| 207 | Lanius cristatus | Brown Shrike | 2019/10/18 | 3 | 0 | 10.46817167 | 76.16493333 | <a href="https://www.inaturalist.org/observations/35016188">https://www.inaturalist.org/observations/35016188</a>   |
| 208 | Lanius cristatus | Brown Shrike | 2014/12/14 | 5 | 0 | 10.49318983 | 76.21332647 | <a href="https://www.inaturalist.org/observations/35271984">https://www.inaturalist.org/observations/35271984</a>   |
| 209 | Lanius cristatus | Brown Shrike | 2020/1/6   | 3 | 0 | 10.53299675 | 76.12853717 | <a href="https://www.inaturalist.org/observations/44162309">https://www.inaturalist.org/observations/44162309</a>   |
| 210 | Lanius cristatus | Brown Shrike | 2020/1/5   | 4 | 0 | 10.53324000 | 76.12897333 | <a href="https://www.inaturalist.org/observations/44104620">https://www.inaturalist.org/observations/44104620</a>   |
| 211 | Lanius cristatus | Brown Shrike | 2022/1/2   | 2 | 0 | 10.53333000 | 76.12899833 | <a href="https://www.inaturalist.org/observations/142732383">https://www.inaturalist.org/observations/142732383</a> |
| 212 | Lanius cristatus | Brown Shrike | 2019/1/20  | 2 | 0 | 10.53367812 | 76.17583808 | <a href="https://www.inaturalist.org/observations/139315302">https://www.inaturalist.org/observations/139315302</a> |
| 213 | Lanius cristatus | Brown Shrike | 2020/1/6   | 4 | 0 | 10.53370167 | 76.12897000 | <a href="https://www.inaturalist.org/observations/44162296">https://www.inaturalist.org/observations/44162296</a>   |
| 214 | Lanius cristatus | Brown Shrike | 2020/1/29  | 4 | 0 | 10.53382000 | 76.12891667 | <a href="https://www.inaturalist.org/observations/67019449">https://www.inaturalist.org/observations/67019449</a>   |
| 215 | Lanius cristatus | Brown Shrike | 2020/1/29  | 4 | 0 | 10.53397500 | 76.12849167 | <a href="https://www.inaturalist.org/observations/67019451">https://www.inaturalist.org/observations/67019451</a>   |
| 216 | Lanius cristatus | Brown Shrike | 2022/4/16  | 2 | 0 | 10.53478239 | 76.14606136 | <a href="https://www.inaturalist.org/observations/114783978">https://www.inaturalist.org/observations/114783978</a> |
| 217 | Lanius cristatus | Brown Shrike | 2018/10/30 | 3 | 0 | 10.53595206 | 76.12947280 | <a href="https://www.inaturalist.org/observations/18264232">https://www.inaturalist.org/observations/18264232</a>   |
| 218 | Lanius cristatus | Brown Shrike | 2020/1/29  | 2 | 0 | 10.53759667 | 76.12866167 | <a href="https://www.inaturalist.org/observations/67019455">https://www.inaturalist.org/observations/67019455</a>   |
| 219 | Lanius cristatus | Brown Shrike | 2020/1/5   | 4 | 0 | 10.54159500 | 76.15447000 | <a href="https://www.inaturalist.org/observations/44104674">https://www.inaturalist.org/observations/44104674</a>   |
| 220 | Lanius cristatus | Brown Shrike | 2020/10/18 | 0 | 0 | 10.54587602 | 77.21157745 | <a href="https://www.inaturalist.org/observations/63228863">https://www.inaturalist.org/observations/63228863</a>   |
| 221 | Lanius cristatus | Brown Shrike | 2020/1/8   | 4 | 0 | 10.55849333 | 76.13233833 | <a href="https://www.inaturalist.org/observations/44169572">https://www.inaturalist.org/observations/44169572</a>   |
| 222 | Lanius cristatus | Brown Shrike | 2018/11/11 | 5 | 0 | 10.63750217 | 76.30570555 | <a href="https://www.inaturalist.org/observations/18669415">https://www.inaturalist.org/observations/18669415</a>   |
| 223 | Lanius cristatus | Brown Shrike | 2016/12/17 | 5 | 0 | 10.74762869 | 76.46737076 | <a href="https://www.inaturalist.org/observations/65301099">https://www.inaturalist.org/observations/65301099</a>   |
| 224 | Lanius cristatus | Brown Shrike | 2016/2/2   | 5 | 0 | 10.78673000 | 76.65479300 | <a href="https://www.inaturalist.org/observations/7265797">https://www.inaturalist.org/observations/7265797</a>     |
| 225 | Lanius cristatus | Brown Shrike | 2016/1/24  | 4 | 0 | 10.78673000 | 76.65479300 | <a href="https://www.inaturalist.org/observations/7279947">https://www.inaturalist.org/observations/7279947</a>     |
| 226 | Lanius cristatus | Brown Shrike | 2018/12/11 | 5 | 0 | 10.81531178 | 79.61054452 | <a href="https://www.inaturalist.org/observations/29355023">https://www.inaturalist.org/observations/29355023</a>   |
| 227 | Lanius cristatus | Brown Shrike | 2021/4/4   | 3 | 0 | 10.88499352 | 76.06601469 | <a href="https://www.inaturalist.org/observations/72870090">https://www.inaturalist.org/observations/72870090</a>   |
| 228 | Lanius cristatus | Brown Shrike | 2019/1/23  | 3 | 0 | 10.88777170 | 76.07321890 | <a href="https://www.inaturalist.org/observations/67397361">https://www.inaturalist.org/observations/67397361</a>   |
| 229 | Lanius cristatus | Brown Shrike | 2021/12/27 | 2 | 0 | 11.01684450 | 76.95583210 | <a href="https://www.inaturalist.org/observations/106483152">https://www.inaturalist.org/observations/106483152</a> |

|     |                              |              |            |   |   |             |             |                                                                                                                     |
|-----|------------------------------|--------------|------------|---|---|-------------|-------------|---------------------------------------------------------------------------------------------------------------------|
| 230 | Lanius cristatus             | Brown Shrike | 2022/10/13 | 1 | 0 | 11.04169167 | 79.35541944 | <a href="https://www.inaturalist.org/observations/138595566">https://www.inaturalist.org/observations/138595566</a> |
| 231 | Lanius cristatus             | Brown Shrike | 2021/10/17 | 2 | 0 | 11.07430916 | 79.85120773 | <a href="https://www.inaturalist.org/observations/99189029">https://www.inaturalist.org/observations/99189029</a>   |
| 232 | Lanius cristatus             | Brown Shrike | 2021/10/23 | 2 | 0 | 11.07760112 | 79.85221289 | <a href="https://www.inaturalist.org/observations/99084753">https://www.inaturalist.org/observations/99084753</a>   |
| 233 | Lanius cristatus             | Brown Shrike | 2021/1/10  | 2 | 0 | 11.07894586 | 79.83002432 | <a href="https://www.inaturalist.org/observations/88412642">https://www.inaturalist.org/observations/88412642</a>   |
| 234 | Lanius cristatus             | Brown Shrike | 2022/11/25 | 3 | 0 | 11.10722080 | 79.76986505 | <a href="https://www.inaturalist.org/observations/142813028">https://www.inaturalist.org/observations/142813028</a> |
| 235 | Lanius cristatus             | Brown Shrike | 2020/1/11  | 3 | 0 | 11.10909344 | 79.69935045 | <a href="https://www.inaturalist.org/observations/39694601">https://www.inaturalist.org/observations/39694601</a>   |
| 236 | Lanius cristatus             | Brown Shrike | 2021/12/29 | 2 | 0 | 11.11571108 | 79.69141044 | <a href="https://www.inaturalist.org/observations/103888818">https://www.inaturalist.org/observations/103888818</a> |
| 237 | Lanius cristatus             | Brown Shrike | 2020/10/31 | 1 | 0 | 11.16739935 | 77.11214610 | <a href="https://www.inaturalist.org/observations/107244965">https://www.inaturalist.org/observations/107244965</a> |
| 238 | Lanius cristatus             | Brown Shrike | 2019/12/31 | 3 | 0 | 11.23409110 | 77.65862357 | <a href="https://www.inaturalist.org/observations/37130643">https://www.inaturalist.org/observations/37130643</a>   |
| 239 | Lanius cristatus             | Brown Shrike | 2019/1/17  | 3 | 0 | 11.23986174 | 79.29021332 | <a href="https://www.inaturalist.org/observations/54719406">https://www.inaturalist.org/observations/54719406</a>   |
| 240 | Lanius cristatus             | Brown Shrike | 2022/12/4  | 2 | 0 | 11.32303840 | 79.24335279 | <a href="https://www.inaturalist.org/observations/143681736">https://www.inaturalist.org/observations/143681736</a> |
| 241 | Lanius cristatus             | Brown Shrike | 2021/1/10  | 3 | 0 | 11.32304662 | 79.24335279 | <a href="https://www.inaturalist.org/observations/68215981">https://www.inaturalist.org/observations/68215981</a>   |
| 242 | Lanius cristatus             | Brown Shrike | 2022/1/16  | 1 | 0 | 11.32304662 | 79.24335279 | <a href="https://www.inaturalist.org/observations/105022611">https://www.inaturalist.org/observations/105022611</a> |
| 243 | Lanius cristatus             | Brown Shrike | 2017/1/20  | 2 | 0 | 11.35775292 | 76.80015383 | <a href="https://www.inaturalist.org/observations/56913215">https://www.inaturalist.org/observations/56913215</a>   |
| 244 | Lanius cristatus             | Brown Shrike | 2017/12/10 | 4 | 0 | 11.50746108 | 92.70247341 | <a href="https://www.inaturalist.org/observations/9558269">https://www.inaturalist.org/observations/9558269</a>     |
| 245 | Lanius cristatus             | Brown Shrike | 2019/1/29  | 2 | 0 | 11.54115090 | 76.02178310 | <a href="https://www.inaturalist.org/observations/136678673">https://www.inaturalist.org/observations/136678673</a> |
| 246 | Lanius cristatus             | Brown Shrike | 2022/3/13  | 3 | 0 | 11.55938546 | 76.22768249 | <a href="https://www.inaturalist.org/observations/125461787">https://www.inaturalist.org/observations/125461787</a> |
| 247 | Lanius cristatus lucionensis | Brown Shrike | 2014/2/6   | 2 | 0 | 11.58776161 | 92.61504186 | <a href="https://www.inaturalist.org/observations/68651720">https://www.inaturalist.org/observations/68651720</a>   |
| 248 | Lanius cristatus             | Brown Shrike | 2017/12/14 | 4 | 0 | 11.59478800 | 92.69443000 | <a href="https://www.inaturalist.org/observations/9558324">https://www.inaturalist.org/observations/9558324</a>     |
| 249 | Lanius cristatus             | Brown Shrike | 2017/12/14 | 4 | 0 | 11.59478800 | 92.69443000 | <a href="https://www.inaturalist.org/observations/9558325">https://www.inaturalist.org/observations/9558325</a>     |
| 250 | Lanius cristatus lucionensis | Brown Shrike | 2022/4/6   | 1 | 0 | 11.61543688 | 92.61952009 | <a href="https://www.inaturalist.org/observations/111487566">https://www.inaturalist.org/observations/111487566</a> |
| 251 | Lanius cristatus lucionensis | Brown Shrike | 2022/4/10  | 1 | 0 | 11.61546007 | 92.61903273 | <a href="https://www.inaturalist.org/observations/111493590">https://www.inaturalist.org/observations/111493590</a> |
| 252 | Lanius cristatus             | Brown Shrike | 2017/2/11  | 1 | 0 | 11.62337740 | 92.72648280 | <a href="https://www.inaturalist.org/observations/82143305">https://www.inaturalist.org/observations/82143305</a>   |

|     |                                 |              |            |   |   |             |             |                                                                                                                     |
|-----|---------------------------------|--------------|------------|---|---|-------------|-------------|---------------------------------------------------------------------------------------------------------------------|
| 253 | Lanius cristatus                | Brown Shrike | 2022/11/13 | 1 | 0 | 11.62337740 | 92.72648280 | <a href="https://www.inaturalist.org/observations/142804594">https://www.inaturalist.org/observations/142804594</a> |
| 254 | Lanius cristatus                | Brown Shrike | 2022/2/23  | 2 | 0 | 11.66642990 | 92.67092900 | <a href="https://www.inaturalist.org/observations/107880805">https://www.inaturalist.org/observations/107880805</a> |
| 255 | Lanius cristatus                | Brown Shrike | 2022/12/22 | 1 | 0 | 11.67495647 | 92.74170678 | <a href="https://www.inaturalist.org/observations/144906877">https://www.inaturalist.org/observations/144906877</a> |
| 256 | Lanius cristatus                | Brown Shrike | 2021/1/28  | 2 | 0 | 11.68742128 | 78.18066828 | <a href="https://www.inaturalist.org/observations/68717097">https://www.inaturalist.org/observations/68717097</a>   |
| 257 | Lanius cristatus                | Brown Shrike | 2016/12/28 | 4 | 0 | 11.70338737 | 76.61443630 | <a href="https://www.inaturalist.org/observations/68734609">https://www.inaturalist.org/observations/68734609</a>   |
| 258 | Lanius cristatus                | Brown Shrike | 2020/4/26  | 4 | 0 | 11.71193359 | 76.16388246 | <a href="https://www.inaturalist.org/observations/52940225">https://www.inaturalist.org/observations/52940225</a>   |
| 259 | Lanius cristatus                | Brown Shrike | 2021/3/14  | 3 | 0 | 11.72005289 | 78.17852888 | <a href="https://www.inaturalist.org/observations/71200089">https://www.inaturalist.org/observations/71200089</a>   |
| 260 | Lanius cristatus                | Brown Shrike | 2013/2/10  | 3 | 0 | 11.72019670 | 92.73345460 | <a href="https://www.inaturalist.org/observations/31318491">https://www.inaturalist.org/observations/31318491</a>   |
| 261 | Lanius cristatus                | Brown Shrike | 2019/3/17  | 2 | 0 | 11.72019670 | 92.73345460 | <a href="https://www.inaturalist.org/observations/51213103">https://www.inaturalist.org/observations/51213103</a>   |
| 262 | Lanius cristatus                | Brown Shrike | 2017/2/4   | 1 | 0 | 11.72019670 | 92.73345460 | <a href="https://www.inaturalist.org/observations/81990698">https://www.inaturalist.org/observations/81990698</a>   |
| 263 | Lanius cristatus                | Brown Shrike | 2018/3/23  | 1 | 0 | 11.72019670 | 92.73345460 | <a href="https://www.inaturalist.org/observations/101158876">https://www.inaturalist.org/observations/101158876</a> |
| 264 | Lanius cristatus                | Brown Shrike | 2021/12/18 | 2 | 0 | 11.72031814 | 92.73336411 | <a href="https://www.inaturalist.org/observations/103519126">https://www.inaturalist.org/observations/103519126</a> |
| 265 | Lanius cristatus                | Brown Shrike | 2018/11/11 | 4 | 0 | 11.72301270 | 76.88286200 | <a href="https://www.inaturalist.org/observations/18449309">https://www.inaturalist.org/observations/18449309</a>   |
| 266 | Lanius cristatus<br>lucionensis | Brown Shrike | 2022/2/7   | 1 | 0 | 11.74008670 | 92.65864010 | <a href="https://www.inaturalist.org/observations/141982369">https://www.inaturalist.org/observations/141982369</a> |
| 267 | Lanius cristatus                | Brown Shrike | 2022/2/21  | 3 | 0 | 11.75915032 | 75.55387102 | <a href="https://www.inaturalist.org/observations/107195895">https://www.inaturalist.org/observations/107195895</a> |
| 268 | Lanius cristatus                | Brown Shrike | 2020/10/11 | 2 | 0 | 11.77978499 | 76.46468047 | <a href="https://www.inaturalist.org/observations/62468627">https://www.inaturalist.org/observations/62468627</a>   |
| 269 | Lanius cristatus                | Brown Shrike | 2021/1/12  | 2 | 0 | 11.79206521 | 76.02630056 | <a href="https://www.inaturalist.org/observations/68312891">https://www.inaturalist.org/observations/68312891</a>   |
| 270 | Lanius cristatus                | Brown Shrike | 2022/11/26 | 0 | 0 | 11.79515333 | 92.71206333 | <a href="https://www.inaturalist.org/observations/144524174">https://www.inaturalist.org/observations/144524174</a> |
| 271 | Lanius cristatus                | Brown Shrike | 2022/2/21  | 2 | 0 | 11.79615407 | 92.71869267 | <a href="https://www.inaturalist.org/observations/107877460">https://www.inaturalist.org/observations/107877460</a> |
| 272 | Lanius cristatus                | Brown Shrike | 2020/10/7  | 1 | 0 | 11.81766270 | 76.93148365 | <a href="https://www.inaturalist.org/observations/86542891">https://www.inaturalist.org/observations/86542891</a>   |
| 273 | Lanius cristatus                | Brown Shrike | 2017/2/9   | 0 | 0 | 11.83291860 | 93.05261200 | <a href="https://www.inaturalist.org/observations/82025999">https://www.inaturalist.org/observations/82025999</a>   |
| 274 | Lanius cristatus                | Brown Shrike | 2013/2/10  | 4 | 0 | 11.83969440 | 92.65382550 | <a href="https://www.inaturalist.org/observations/31317760">https://www.inaturalist.org/observations/31317760</a>   |
| 275 | Lanius cristatus                | Brown Shrike | 2017/11/13 | 2 | 0 | 11.86345120 | 78.12294640 | <a href="https://www.inaturalist.org/observations/143067265">https://www.inaturalist.org/observations/143067265</a> |

|     |                  |              |            |   |   |             |             |                                                                                                                     |
|-----|------------------|--------------|------------|---|---|-------------|-------------|---------------------------------------------------------------------------------------------------------------------|
| 276 | Lanius cristatus | Brown Shrike | 2021/4/10  | 1 | 0 | 11.90235333 | 77.12364500 | <a href="https://www.inaturalist.org/observations/87129092">https://www.inaturalist.org/observations/87129092</a>   |
| 277 | Lanius cristatus | Brown Shrike | 2021/1/24  | 3 | 0 | 11.93320530 | 79.42678450 | <a href="https://www.inaturalist.org/observations/69401932">https://www.inaturalist.org/observations/69401932</a>   |
| 278 | Lanius cristatus | Brown Shrike | 2022/11/5  | 4 | 0 | 11.94352100 | 76.47872500 | <a href="https://www.inaturalist.org/observations/143829659">https://www.inaturalist.org/observations/143829659</a> |
| 279 | Lanius cristatus | Brown Shrike | 2018/11/11 | 2 | 0 | 11.94468432 | 75.38493812 | <a href="https://www.inaturalist.org/observations/123696862">https://www.inaturalist.org/observations/123696862</a> |
| 280 | Lanius cristatus | Brown Shrike | 2021/3/28  | 2 | 0 | 11.94468432 | 75.38493812 | <a href="https://www.inaturalist.org/observations/125429652">https://www.inaturalist.org/observations/125429652</a> |
| 281 | Lanius cristatus | Brown Shrike | 2022/9/30  | 1 | 0 | 11.94468432 | 75.38493812 | <a href="https://www.inaturalist.org/observations/140358261">https://www.inaturalist.org/observations/140358261</a> |
| 282 | Lanius cristatus | Brown Shrike | 2022/10/8  | 0 | 0 | 11.94468432 | 75.38493812 | <a href="https://www.inaturalist.org/observations/140950550">https://www.inaturalist.org/observations/140950550</a> |
| 283 | Lanius cristatus | Brown Shrike | 2022/10/16 | 1 | 0 | 11.94468432 | 75.38493812 | <a href="https://www.inaturalist.org/observations/141602584">https://www.inaturalist.org/observations/141602584</a> |
| 284 | Lanius cristatus | Brown Shrike | 2022/11/12 | 1 | 0 | 11.94468432 | 75.38493812 | <a href="https://www.inaturalist.org/observations/143856729">https://www.inaturalist.org/observations/143856729</a> |
| 285 | Lanius cristatus | Brown Shrike | 2022/11/14 | 1 | 0 | 11.94468432 | 75.38493812 | <a href="https://www.inaturalist.org/observations/143987385">https://www.inaturalist.org/observations/143987385</a> |
| 286 | Lanius cristatus | Brown Shrike | 2022/11/15 | 0 | 0 | 11.94468432 | 75.38493812 | <a href="https://www.inaturalist.org/observations/143993207">https://www.inaturalist.org/observations/143993207</a> |
| 287 | Lanius cristatus | Brown Shrike | 2022/11/21 | 2 | 0 | 11.94468432 | 75.38493812 | <a href="https://www.inaturalist.org/observations/144354853">https://www.inaturalist.org/observations/144354853</a> |
| 288 | Lanius cristatus | Brown Shrike | 2022/11/24 | 1 | 0 | 11.94468432 | 75.38493812 | <a href="https://www.inaturalist.org/observations/144718306">https://www.inaturalist.org/observations/144718306</a> |
| 289 | Lanius cristatus | Brown Shrike | 2022/12/4  | 0 | 0 | 11.94468432 | 75.38493812 | <a href="https://www.inaturalist.org/observations/145246831">https://www.inaturalist.org/observations/145246831</a> |
| 290 | Lanius cristatus | Brown Shrike | 2019/3/3   | 2 | 0 | 11.94468464 | 75.38493812 | <a href="https://www.inaturalist.org/observations/83735583">https://www.inaturalist.org/observations/83735583</a>   |
| 291 | Lanius cristatus | Brown Shrike | 2018/3/21  | 3 | 0 | 11.97605030 | 92.98755650 | <a href="https://www.inaturalist.org/observations/100761313">https://www.inaturalist.org/observations/100761313</a> |
| 292 | Lanius cristatus | Brown Shrike | 2020/4/6   | 6 | 0 | 11.98427631 | 75.39945457 | <a href="https://www.inaturalist.org/observations/44390439">https://www.inaturalist.org/observations/44390439</a>   |
| 293 | Lanius cristatus | Brown Shrike | 2020/10/15 | 2 | 0 | 11.99509720 | 79.82337110 | <a href="https://www.inaturalist.org/observations/109834907">https://www.inaturalist.org/observations/109834907</a> |
| 294 | Lanius cristatus | Brown Shrike | 2017/1/15  | 6 | 0 | 11.99563240 | 77.14276400 | <a href="https://www.inaturalist.org/observations/19862824">https://www.inaturalist.org/observations/19862824</a>   |
| 295 | Lanius cristatus | Brown Shrike | 2019/3/1   | 3 | 0 | 11.99979140 | 75.95646020 | <a href="https://www.inaturalist.org/observations/69987105">https://www.inaturalist.org/observations/69987105</a>   |
| 296 | Lanius cristatus | Brown Shrike | 2022/11/27 | 0 | 0 | 12.01230833 | 75.59171833 | <a href="https://www.inaturalist.org/observations/143036222">https://www.inaturalist.org/observations/143036222</a> |
| 297 | Lanius cristatus | Brown Shrike | 2022/12/4  | 0 | 0 | 12.01653305 | 92.98663907 | <a href="https://www.inaturalist.org/observations/144472278">https://www.inaturalist.org/observations/144472278</a> |
| 298 | Lanius cristatus | Brown Shrike | 2017/2/19  | 3 | 0 | 12.02593667 | 75.23667833 | <a href="https://www.inaturalist.org/observations/30663934">https://www.inaturalist.org/observations/30663934</a>   |

|     |                  |              |            |   |   |             |             |                                                                                                                     |
|-----|------------------|--------------|------------|---|---|-------------|-------------|---------------------------------------------------------------------------------------------------------------------|
| 299 | Lanius cristatus | Brown Shrike | 2017/3/15  | 4 | 0 | 12.03000078 | 75.20706394 | <a href="https://www.inaturalist.org/observations/30603877">https://www.inaturalist.org/observations/30603877</a>   |
| 300 | Lanius cristatus | Brown Shrike | 2017/3/17  | 6 | 0 | 12.03000078 | 75.20706394 | <a href="https://www.inaturalist.org/observations/30603896">https://www.inaturalist.org/observations/30603896</a>   |
| 301 | Lanius cristatus | Brown Shrike | 2017/2/19  | 5 | 0 | 12.03114000 | 75.22991833 | <a href="https://www.inaturalist.org/observations/30663918">https://www.inaturalist.org/observations/30663918</a>   |
| 302 | Lanius cristatus | Brown Shrike | 2011/12/27 | 3 | 0 | 12.03126193 | 76.12014771 | <a href="https://www.inaturalist.org/observations/66843333">https://www.inaturalist.org/observations/66843333</a>   |
| 303 | Lanius cristatus | Brown Shrike | 2022/10/3  | 3 | 0 | 12.03234633 | 75.25665645 | <a href="https://www.inaturalist.org/observations/140749362">https://www.inaturalist.org/observations/140749362</a> |
| 304 | Lanius cristatus | Brown Shrike | 2022/11/20 | 1 | 0 | 12.03234633 | 75.25665645 | <a href="https://www.inaturalist.org/observations/144346104">https://www.inaturalist.org/observations/144346104</a> |
| 305 | Lanius cristatus | Brown Shrike | 2019/10/15 | 4 | 0 | 12.03234670 | 75.25665640 | <a href="https://www.inaturalist.org/observations/34574193">https://www.inaturalist.org/observations/34574193</a>   |
| 306 | Lanius cristatus | Brown Shrike | 2020/12/6  | 3 | 0 | 12.03234670 | 75.25665640 | <a href="https://www.inaturalist.org/observations/66999029">https://www.inaturalist.org/observations/66999029</a>   |
| 307 | Lanius cristatus | Brown Shrike | 2017/2/7   | 1 | 0 | 12.03747360 | 92.98714120 | <a href="https://www.inaturalist.org/observations/82010705">https://www.inaturalist.org/observations/82010705</a>   |
| 308 | Lanius cristatus | Brown Shrike | 2022/10/25 | 1 | 0 | 12.04009244 | 75.29748503 | <a href="https://www.inaturalist.org/observations/142200219">https://www.inaturalist.org/observations/142200219</a> |
| 309 | Lanius cristatus | Brown Shrike | 2022/10/25 | 1 | 0 | 12.04009244 | 75.29748503 | <a href="https://www.inaturalist.org/observations/142200313">https://www.inaturalist.org/observations/142200313</a> |
| 310 | Lanius cristatus | Brown Shrike | 2022/10/25 | 1 | 0 | 12.04009244 | 75.29748503 | <a href="https://www.inaturalist.org/observations/142200322">https://www.inaturalist.org/observations/142200322</a> |
| 311 | Lanius cristatus | Brown Shrike | 2021/10/2  | 1 | 0 | 12.10347138 | 75.23360022 | <a href="https://www.inaturalist.org/observations/96904729">https://www.inaturalist.org/observations/96904729</a>   |
| 312 | Lanius cristatus | Brown Shrike | 2021/10/2  | 2 | 0 | 12.10347138 | 75.23360022 | <a href="https://www.inaturalist.org/observations/96904746">https://www.inaturalist.org/observations/96904746</a>   |
| 313 | Lanius cristatus | Brown Shrike | 2020/2/17  | 2 | 0 | 12.10459333 | 75.23454833 | <a href="https://www.inaturalist.org/observations/39321478">https://www.inaturalist.org/observations/39321478</a>   |
| 314 | Lanius cristatus | Brown Shrike | 2021/1/16  | 2 | 0 | 12.14557700 | 75.79543000 | <a href="https://www.inaturalist.org/observations/68266722">https://www.inaturalist.org/observations/68266722</a>   |
| 315 | Lanius cristatus | Brown Shrike | 2021/10/9  | 1 | 0 | 12.15306351 | 76.54041270 | <a href="https://www.inaturalist.org/observations/97635438">https://www.inaturalist.org/observations/97635438</a>   |
| 316 | Lanius cristatus | Brown Shrike | 2022/1/26  | 3 | 0 | 12.15771983 | 76.47221448 | <a href="https://www.inaturalist.org/observations/105649524">https://www.inaturalist.org/observations/105649524</a> |
| 317 | Lanius cristatus | Brown Shrike | 2022/11/13 | 2 | 0 | 12.16529924 | 75.42718928 | <a href="https://www.inaturalist.org/observations/143931147">https://www.inaturalist.org/observations/143931147</a> |
| 318 | Lanius cristatus | Brown Shrike | 2022/2/6   | 1 | 0 | 12.17181333 | 75.56614833 | <a href="https://www.inaturalist.org/observations/142750897">https://www.inaturalist.org/observations/142750897</a> |
| 319 | Lanius cristatus | Brown Shrike | 2016/3/9   | 0 | 0 | 12.19110400 | 76.65484000 | <a href="https://www.inaturalist.org/observations/82672218">https://www.inaturalist.org/observations/82672218</a>   |
| 320 | Lanius cristatus | Brown Shrike | 2016/3/9   | 2 | 0 | 12.19113000 | 76.65513500 | <a href="https://www.inaturalist.org/observations/139622991">https://www.inaturalist.org/observations/139622991</a> |
| 321 | Lanius cristatus | Brown Shrike | 2015/9/27  | 0 | 0 | 12.20282576 | 75.81176954 | <a href="https://www.inaturalist.org/observations/92880064">https://www.inaturalist.org/observations/92880064</a>   |

|     |                  |              |            |   |   |             |             |                                                                                                                     |
|-----|------------------|--------------|------------|---|---|-------------|-------------|---------------------------------------------------------------------------------------------------------------------|
| 322 | Lanius cristatus | Brown Shrike | 2019/11/9  | 1 | 0 | 12.20282576 | 75.81176954 | <a href="https://www.inaturalist.org/observations/93598699">https://www.inaturalist.org/observations/93598699</a>   |
| 323 | Lanius cristatus | Brown Shrike | 2022/2/26  | 2 | 0 | 12.21247353 | 76.63342537 | <a href="https://www.inaturalist.org/observations/107462963">https://www.inaturalist.org/observations/107462963</a> |
| 324 | Lanius cristatus | Brown Shrike | 2014/10/4  | 1 | 0 | 12.22272330 | 76.62728760 | <a href="https://www.inaturalist.org/observations/143348914">https://www.inaturalist.org/observations/143348914</a> |
| 325 | Lanius cristatus | Brown Shrike | 2014/12/16 | 1 | 0 | 12.22272330 | 76.62728760 | <a href="https://www.inaturalist.org/observations/145244247">https://www.inaturalist.org/observations/145244247</a> |
| 326 | Lanius cristatus | Brown Shrike | 2016/3/21  | 1 | 0 | 12.22966583 | 79.09139769 | <a href="https://www.inaturalist.org/observations/96065123">https://www.inaturalist.org/observations/96065123</a>   |
| 327 | Lanius cristatus | Brown Shrike | 2022/10/11 | 2 | 0 | 12.23409360 | 76.68548729 | <a href="https://www.inaturalist.org/observations/139112069">https://www.inaturalist.org/observations/139112069</a> |
| 328 | Lanius cristatus | Brown Shrike | 2020/12/20 | 3 | 0 | 12.24937667 | 75.27790833 | <a href="https://www.inaturalist.org/observations/66994058">https://www.inaturalist.org/observations/66994058</a>   |
| 329 | Lanius cristatus | Brown Shrike | 2020/12/20 | 3 | 0 | 12.25179333 | 75.27723500 | <a href="https://www.inaturalist.org/observations/66994049">https://www.inaturalist.org/observations/66994049</a>   |
| 330 | Lanius cristatus | Brown Shrike | 2020/12/20 | 3 | 0 | 12.25224833 | 75.27641333 | <a href="https://www.inaturalist.org/observations/66994046">https://www.inaturalist.org/observations/66994046</a>   |
| 331 | Lanius cristatus | Brown Shrike | 2016/9/22  | 2 | 0 | 12.25554399 | 76.61182531 | <a href="https://www.inaturalist.org/observations/94567368">https://www.inaturalist.org/observations/94567368</a>   |
| 332 | Lanius cristatus | Brown Shrike | 2018/10/25 | 1 | 0 | 12.26005298 | 76.77324214 | <a href="https://www.inaturalist.org/observations/90361052">https://www.inaturalist.org/observations/90361052</a>   |
| 333 | Lanius cristatus | Brown Shrike | 2020/10/4  | 1 | 0 | 12.26269942 | 76.56762058 | <a href="https://www.inaturalist.org/observations/95042441">https://www.inaturalist.org/observations/95042441</a>   |
| 334 | Lanius cristatus | Brown Shrike | 2020/10/28 | 1 | 0 | 12.26937200 | 76.61197800 | <a href="https://www.inaturalist.org/observations/94224573">https://www.inaturalist.org/observations/94224573</a>   |
| 335 | Lanius cristatus | Brown Shrike | 2012/1/14  | 2 | 0 | 12.26937200 | 76.61197800 | <a href="https://www.inaturalist.org/observations/94711070">https://www.inaturalist.org/observations/94711070</a>   |
| 336 | Lanius cristatus | Brown Shrike | 2014/10/4  | 1 | 0 | 12.26937200 | 76.61197800 | <a href="https://www.inaturalist.org/observations/94790694">https://www.inaturalist.org/observations/94790694</a>   |
| 337 | Lanius cristatus | Brown Shrike | 2009/4/7   | 1 | 0 | 12.27042491 | 76.77563072 | <a href="https://www.inaturalist.org/observations/90362855">https://www.inaturalist.org/observations/90362855</a>   |
| 338 | Lanius cristatus | Brown Shrike | 2011/3/5   | 0 | 0 | 12.27042491 | 76.77563072 | <a href="https://www.inaturalist.org/observations/92668440">https://www.inaturalist.org/observations/92668440</a>   |
| 339 | Lanius cristatus | Brown Shrike | 2015/10/25 | 1 | 0 | 12.27525460 | 76.67014750 | <a href="https://www.inaturalist.org/observations/86684973">https://www.inaturalist.org/observations/86684973</a>   |
| 340 | Lanius cristatus | Brown Shrike | 2013/11/15 | 2 | 0 | 12.27525460 | 76.67014750 | <a href="https://www.inaturalist.org/observations/87713327">https://www.inaturalist.org/observations/87713327</a>   |
| 341 | Lanius cristatus | Brown Shrike | 2020/10/22 | 2 | 0 | 12.27525460 | 76.67014750 | <a href="https://www.inaturalist.org/observations/88506934">https://www.inaturalist.org/observations/88506934</a>   |
| 342 | Lanius cristatus | Brown Shrike | 2015/9/27  | 0 | 0 | 12.28234021 | 76.32413459 | <a href="https://www.inaturalist.org/observations/92777199">https://www.inaturalist.org/observations/92777199</a>   |
| 343 | Lanius cristatus | Brown Shrike | 2022/4/3   | 3 | 0 | 12.28297667 | 76.70857500 | <a href="https://www.inaturalist.org/observations/110454663">https://www.inaturalist.org/observations/110454663</a> |
| 344 | Lanius cristatus | Brown Shrike | 2021/10/27 | 1 | 0 | 12.29424209 | 76.56539693 | <a href="https://www.inaturalist.org/observations/99523414">https://www.inaturalist.org/observations/99523414</a>   |

|     |                  |              |            |   |   |             |             |                                                                                                                     |
|-----|------------------|--------------|------------|---|---|-------------|-------------|---------------------------------------------------------------------------------------------------------------------|
| 345 | Lanius cristatus | Brown Shrike | 2021/12/5  | 1 | 0 | 12.30921890 | 76.55560459 | <a href="https://www.inaturalist.org/observations/102516666">https://www.inaturalist.org/observations/102516666</a> |
| 346 | Lanius cristatus | Brown Shrike | 2022/12/1  | 2 | 0 | 12.31629282 | 76.55037403 | <a href="https://www.inaturalist.org/observations/143549934">https://www.inaturalist.org/observations/143549934</a> |
| 347 | Lanius cristatus | Brown Shrike | 2022/11/27 | 2 | 0 | 12.33606885 | 77.81784051 | <a href="https://www.inaturalist.org/observations/143637983">https://www.inaturalist.org/observations/143637983</a> |
| 348 | Lanius cristatus | Brown Shrike | 2017/9/2   | 2 | 0 | 12.35159000 | 77.64564667 | <a href="https://www.inaturalist.org/observations/67073853">https://www.inaturalist.org/observations/67073853</a>   |
| 349 | Lanius cristatus | Brown Shrike | 2022/11/27 | 2 | 0 | 12.36190500 | 77.86991167 | <a href="https://www.inaturalist.org/observations/143014633">https://www.inaturalist.org/observations/143014633</a> |
| 350 | Lanius cristatus | Brown Shrike | 2020/1/6   | 3 | 0 | 12.37254312 | 77.05188964 | <a href="https://www.inaturalist.org/observations/37817929">https://www.inaturalist.org/observations/37817929</a>   |
| 351 | Lanius cristatus | Brown Shrike | 2022/11/27 | 0 | 0 | 12.39316667 | 77.86548167 | <a href="https://www.inaturalist.org/observations/143013503">https://www.inaturalist.org/observations/143013503</a> |
| 352 | Lanius cristatus | Brown Shrike | 2018/3/4   | 3 | 0 | 12.39834324 | 76.68988894 | <a href="https://www.inaturalist.org/observations/64928592">https://www.inaturalist.org/observations/64928592</a>   |
| 353 | Lanius cristatus | Brown Shrike | 2021/3/6   | 4 | 0 | 12.41225289 | 77.85643991 | <a href="https://www.inaturalist.org/observations/126171352">https://www.inaturalist.org/observations/126171352</a> |
| 354 | Lanius cristatus | Brown Shrike | 2020/11/30 | 5 | 0 | 12.41666670 | 77.75000000 | <a href="https://www.inaturalist.org/observations/66007336">https://www.inaturalist.org/observations/66007336</a>   |
| 355 | Lanius cristatus | Brown Shrike | 2022/4/18  | 2 | 0 | 12.42362760 | 76.65678918 | <a href="https://www.inaturalist.org/observations/112122627">https://www.inaturalist.org/observations/112122627</a> |
| 356 | Lanius cristatus | Brown Shrike | 2020/11/10 | 0 | 0 | 12.42534519 | 76.65613462 | <a href="https://www.inaturalist.org/observations/96065696">https://www.inaturalist.org/observations/96065696</a>   |
| 357 | Lanius cristatus | Brown Shrike | 2022/2/7   | 2 | 0 | 12.43443611 | 75.77248985 | <a href="https://www.inaturalist.org/observations/115755902">https://www.inaturalist.org/observations/115755902</a> |
| 358 | Lanius cristatus | Brown Shrike | 2017/1/8   | 1 | 0 | 12.43496081 | 76.24001749 | <a href="https://www.inaturalist.org/observations/95551684">https://www.inaturalist.org/observations/95551684</a>   |
| 359 | Lanius cristatus | Brown Shrike | 2018/1/1   | 4 | 0 | 12.49405097 | 76.97686707 | <a href="https://www.inaturalist.org/observations/9355512">https://www.inaturalist.org/observations/9355512</a>     |
| 360 | Lanius cristatus | Brown Shrike | 2022/2/7   | 2 | 0 | 12.55537854 | 75.62993635 | <a href="https://www.inaturalist.org/observations/115755905">https://www.inaturalist.org/observations/115755905</a> |
| 361 | Lanius cristatus | Brown Shrike | 2021/11/7  | 0 | 0 | 12.56661654 | 75.78098942 | <a href="https://www.inaturalist.org/observations/141344918">https://www.inaturalist.org/observations/141344918</a> |
| 362 | Lanius cristatus | Brown Shrike | 2021/10/29 | 2 | 0 | 12.59597395 | 75.69609692 | <a href="https://www.inaturalist.org/observations/102531025">https://www.inaturalist.org/observations/102531025</a> |
| 363 | Lanius cristatus | Brown Shrike | 2014/12/21 | 2 | 0 | 12.63641730 | 76.99314520 | <a href="https://www.inaturalist.org/observations/97980225">https://www.inaturalist.org/observations/97980225</a>   |
| 364 | Lanius cristatus | Brown Shrike | 2022/11/13 | 1 | 0 | 12.67455667 | 75.01822500 | <a href="https://www.inaturalist.org/observations/144538336">https://www.inaturalist.org/observations/144538336</a> |
| 365 | Lanius cristatus | Brown Shrike | 2017/12/3  | 2 | 0 | 12.67588107 | 77.76815173 | <a href="https://www.inaturalist.org/observations/139617195">https://www.inaturalist.org/observations/139617195</a> |
| 366 | Lanius cristatus | Brown Shrike | 2016/2/2   | 1 | 0 | 12.67591249 | 77.77037641 | <a href="https://www.inaturalist.org/observations/83273835">https://www.inaturalist.org/observations/83273835</a>   |
| 367 | Lanius cristatus | Brown Shrike | 2017/12/3  | 1 | 0 | 12.67598563 | 77.76972776 | <a href="https://www.inaturalist.org/observations/82665805">https://www.inaturalist.org/observations/82665805</a>   |

|     |                  |              |            |   |   |             |             |                                                                                                                     |
|-----|------------------|--------------|------------|---|---|-------------|-------------|---------------------------------------------------------------------------------------------------------------------|
| 368 | Lanius cristatus | Brown Shrike | 2022/12/24 | 1 | 0 | 12.67689333 | 77.91016667 | <a href="https://www.inaturalist.org/observations/144995660">https://www.inaturalist.org/observations/144995660</a> |
| 369 | Lanius cristatus | Brown Shrike | 2021/10/3  | 2 | 0 | 12.67749487 | 77.91260335 | <a href="https://www.inaturalist.org/observations/96993928">https://www.inaturalist.org/observations/96993928</a>   |
| 370 | Lanius cristatus | Brown Shrike | 2017/7/9   | 1 | 0 | 12.70834886 | 77.53787189 | <a href="https://www.inaturalist.org/observations/66426131">https://www.inaturalist.org/observations/66426131</a>   |
| 371 | Lanius cristatus | Brown Shrike | 2022/2/19  | 2 | 0 | 12.71269193 | 77.80709054 | <a href="https://www.inaturalist.org/observations/107472805">https://www.inaturalist.org/observations/107472805</a> |
| 372 | Lanius cristatus | Brown Shrike | 2021/2/23  | 2 | 0 | 12.71317244 | 77.68367574 | <a href="https://www.inaturalist.org/observations/70140313">https://www.inaturalist.org/observations/70140313</a>   |
| 373 | Lanius cristatus | Brown Shrike | 2022/2/19  | 2 | 0 | 12.71383000 | 77.80799167 | <a href="https://www.inaturalist.org/observations/107120044">https://www.inaturalist.org/observations/107120044</a> |
| 374 | Lanius cristatus | Brown Shrike | 2018/1/21  | 3 | 0 | 12.74535601 | 77.44834727 | <a href="https://www.inaturalist.org/observations/65003474">https://www.inaturalist.org/observations/65003474</a>   |
| 375 | Lanius cristatus | Brown Shrike | 2019/2/15  | 4 | 0 | 12.74967697 | 80.19756265 | <a href="https://www.inaturalist.org/observations/22558639">https://www.inaturalist.org/observations/22558639</a>   |
| 376 | Lanius cristatus | Brown Shrike | 2022/10/8  | 2 | 0 | 12.75028167 | 77.59918000 | <a href="https://www.inaturalist.org/observations/137942687">https://www.inaturalist.org/observations/137942687</a> |
| 377 | Lanius cristatus | Brown Shrike | 2021/10/17 | 2 | 0 | 12.76346401 | 78.43047477 | <a href="https://www.inaturalist.org/observations/98479982">https://www.inaturalist.org/observations/98479982</a>   |
| 378 | Lanius cristatus | Brown Shrike | 2013/12/15 | 1 | 0 | 12.76865694 | 77.65885333 | <a href="https://www.inaturalist.org/observations/102935086">https://www.inaturalist.org/observations/102935086</a> |
| 379 | Lanius cristatus | Brown Shrike | 2020/10/17 | 3 | 0 | 12.76885310 | 77.57913580 | <a href="https://www.inaturalist.org/observations/62774519">https://www.inaturalist.org/observations/62774519</a>   |
| 380 | Lanius cristatus | Brown Shrike | 2022/10/29 | 2 | 0 | 12.77747860 | 80.18868540 | <a href="https://www.inaturalist.org/observations/140362363">https://www.inaturalist.org/observations/140362363</a> |
| 381 | Lanius cristatus | Brown Shrike | 2022/10/29 | 0 | 0 | 12.78970747 | 80.22158425 | <a href="https://www.inaturalist.org/observations/140364920">https://www.inaturalist.org/observations/140364920</a> |
| 382 | Lanius cristatus | Brown Shrike | 2022/4/17  | 2 | 0 | 12.82063293 | 77.73091888 | <a href="https://www.inaturalist.org/observations/112348137">https://www.inaturalist.org/observations/112348137</a> |
| 383 | Lanius cristatus | Brown Shrike | 2022/1/14  | 3 | 0 | 12.82251700 | 77.72947100 | <a href="https://www.inaturalist.org/observations/104914884">https://www.inaturalist.org/observations/104914884</a> |
| 384 | Lanius cristatus | Brown Shrike | 2018/10/27 | 4 | 0 | 12.82582814 | 77.73390044 | <a href="https://www.inaturalist.org/observations/17928198">https://www.inaturalist.org/observations/17928198</a>   |
| 385 | Lanius cristatus | Brown Shrike | 2021/1/14  | 1 | 0 | 12.82702320 | 80.24032100 | <a href="https://www.inaturalist.org/observations/89642251">https://www.inaturalist.org/observations/89642251</a>   |
| 386 | Lanius cristatus | Brown Shrike | 2020/11/24 | 4 | 0 | 12.83179501 | 79.18678171 | <a href="https://www.inaturalist.org/observations/73001489">https://www.inaturalist.org/observations/73001489</a>   |
| 387 | Lanius cristatus | Brown Shrike | 2021/10/26 | 1 | 0 | 12.83521880 | 80.20108040 | <a href="https://www.inaturalist.org/observations/99766560">https://www.inaturalist.org/observations/99766560</a>   |
| 388 | Lanius cristatus | Brown Shrike | 2021/1/1   | 2 | 0 | 12.84064788 | 75.38225658 | <a href="https://www.inaturalist.org/observations/67442460">https://www.inaturalist.org/observations/67442460</a>   |
| 389 | Lanius cristatus | Brown Shrike | 2021/12/22 | 1 | 0 | 12.84064788 | 75.38225658 | <a href="https://www.inaturalist.org/observations/103685961">https://www.inaturalist.org/observations/103685961</a> |
| 390 | Lanius cristatus | Brown Shrike | 2021/1/2   | 3 | 0 | 12.84197704 | 80.17383234 | <a href="https://www.inaturalist.org/observations/67620522">https://www.inaturalist.org/observations/67620522</a>   |



|     |                  |              |            |   |   |             |             |                                                                                                                     |
|-----|------------------|--------------|------------|---|---|-------------|-------------|---------------------------------------------------------------------------------------------------------------------|
| 391 | Lanius cristatus | Brown Shrike | 2021/1/4   | 2 | 0 | 12.84203140 | 80.17380851 | <a href="https://www.inaturalist.org/observations/67572433">https://www.inaturalist.org/observations/67572433</a>   |
| 392 | Lanius cristatus | Brown Shrike | 2021/12/17 | 4 | 0 | 12.84575615 | 77.77541950 | <a href="https://www.inaturalist.org/observations/105364656">https://www.inaturalist.org/observations/105364656</a> |
| 393 | Lanius cristatus | Brown Shrike | 2020/11/5  | 1 | 0 | 12.85018083 | 77.49715928 | <a href="https://www.inaturalist.org/observations/64289044">https://www.inaturalist.org/observations/64289044</a>   |
| 394 | Lanius cristatus | Brown Shrike | 2019/1/18  | 5 | 0 | 12.85502749 | 80.22369534 | <a href="https://www.inaturalist.org/observations/19839674">https://www.inaturalist.org/observations/19839674</a>   |
| 395 | Lanius cristatus | Brown Shrike | 2020/10/4  | 3 | 0 | 12.85552100 | 79.11450818 | <a href="https://www.inaturalist.org/observations/61669445">https://www.inaturalist.org/observations/61669445</a>   |
| 396 | Lanius cristatus | Brown Shrike | 2021/3/7   | 2 | 0 | 12.85718650 | 77.50891100 | <a href="https://www.inaturalist.org/observations/70743653">https://www.inaturalist.org/observations/70743653</a>   |
| 397 | Lanius cristatus | Brown Shrike | 2021/10/31 | 1 | 0 | 12.85718650 | 77.50891100 | <a href="https://www.inaturalist.org/observations/99861594">https://www.inaturalist.org/observations/99861594</a>   |
| 398 | Lanius cristatus | Brown Shrike | 2022/1/6   | 2 | 0 | 12.85755790 | 77.78640570 | <a href="https://www.inaturalist.org/observations/104757420">https://www.inaturalist.org/observations/104757420</a> |
| 399 | Lanius cristatus | Brown Shrike | 2021/2/7   | 2 | 0 | 12.86391821 | 79.14074186 | <a href="https://www.inaturalist.org/observations/69259285">https://www.inaturalist.org/observations/69259285</a>   |
| 400 | Lanius cristatus | Brown Shrike | 2018/10/19 | 2 | 0 | 12.87414820 | 75.76445320 | <a href="https://www.inaturalist.org/observations/65005757">https://www.inaturalist.org/observations/65005757</a>   |
| 401 | Lanius cristatus | Brown Shrike | 2020/10/26 | 2 | 0 | 12.87894620 | 77.52977930 | <a href="https://www.inaturalist.org/observations/63565926">https://www.inaturalist.org/observations/63565926</a>   |
| 402 | Lanius cristatus | Brown Shrike | 2021/1/23  | 3 | 0 | 12.87976072 | 77.52975861 | <a href="https://www.inaturalist.org/observations/68483083">https://www.inaturalist.org/observations/68483083</a>   |
| 403 | Lanius cristatus | Brown Shrike | 2021/11/20 | 1 | 0 | 12.88400499 | 77.46290982 | <a href="https://www.inaturalist.org/observations/101698226">https://www.inaturalist.org/observations/101698226</a> |
| 404 | Lanius cristatus | Brown Shrike | 2020/10/24 | 3 | 0 | 12.89047740 | 80.22585740 | <a href="https://www.inaturalist.org/observations/63370595">https://www.inaturalist.org/observations/63370595</a>   |
| 405 | Lanius cristatus | Brown Shrike | 2019/10/14 | 2 | 0 | 12.89231570 | 80.18889170 | <a href="https://www.inaturalist.org/observations/109824204">https://www.inaturalist.org/observations/109824204</a> |
| 406 | Lanius cristatus | Brown Shrike | 2018/12/10 | 2 | 0 | 12.90098770 | 80.22793010 | <a href="https://www.inaturalist.org/observations/109822136">https://www.inaturalist.org/observations/109822136</a> |
| 407 | Lanius cristatus | Brown Shrike | 2018/12/10 | 2 | 0 | 12.90098770 | 80.22793010 | <a href="https://www.inaturalist.org/observations/109822141">https://www.inaturalist.org/observations/109822141</a> |
| 408 | Lanius cristatus | Brown Shrike | 2021/2/21  | 3 | 0 | 12.90402881 | 80.21086426 | <a href="https://www.inaturalist.org/observations/109835100">https://www.inaturalist.org/observations/109835100</a> |
| 409 | Lanius cristatus | Brown Shrike | 2020/4/12  | 3 | 0 | 12.90898530 | 77.49020970 | <a href="https://www.inaturalist.org/observations/44570198">https://www.inaturalist.org/observations/44570198</a>   |
| 410 | Lanius cristatus | Brown Shrike | 2014/11/15 | 2 | 0 | 12.91499040 | 80.07201710 | <a href="https://www.inaturalist.org/observations/63147471">https://www.inaturalist.org/observations/63147471</a>   |
| 411 | Lanius cristatus | Brown Shrike | 2020/10/19 | 1 | 0 | 12.91509453 | 77.46969799 | <a href="https://www.inaturalist.org/observations/85940196">https://www.inaturalist.org/observations/85940196</a>   |
| 412 | Lanius cristatus | Brown Shrike | 2018/11/18 | 0 | 0 | 12.91831260 | 77.68009700 | <a href="https://www.inaturalist.org/observations/65007286">https://www.inaturalist.org/observations/65007286</a>   |
| 413 | Lanius cristatus | Brown Shrike | 2022/10/29 | 2 | 0 | 12.92070700 | 77.64144180 | <a href="https://www.inaturalist.org/observations/140480609">https://www.inaturalist.org/observations/140480609</a> |

|     |                  |              |            |   |   |             |             |                                                                                                                     |
|-----|------------------|--------------|------------|---|---|-------------|-------------|---------------------------------------------------------------------------------------------------------------------|
| 414 | Lanius cristatus | Brown Shrike | 2022/10/29 | 2 | 0 | 12.92070700 | 77.64144180 | <a href="https://www.inaturalist.org/observations/140480613">https://www.inaturalist.org/observations/140480613</a> |
| 415 | Lanius cristatus | Brown Shrike | 2018/12/28 | 5 | 0 | 12.92898480 | 80.17216130 | <a href="https://www.inaturalist.org/observations/24588728">https://www.inaturalist.org/observations/24588728</a>   |
| 416 | Lanius cristatus | Brown Shrike | 2020/11/1  | 3 | 0 | 12.93562489 | 80.16648799 | <a href="https://www.inaturalist.org/observations/65695765">https://www.inaturalist.org/observations/65695765</a>   |
| 417 | Lanius cristatus | Brown Shrike | 2019/11/17 | 6 | 0 | 12.93625261 | 80.21877129 | <a href="https://www.inaturalist.org/observations/35776617">https://www.inaturalist.org/observations/35776617</a>   |
| 418 | Lanius cristatus | Brown Shrike | 2020/10/24 | 2 | 0 | 12.94693690 | 80.22006387 | <a href="https://www.inaturalist.org/observations/64022206">https://www.inaturalist.org/observations/64022206</a>   |
| 419 | Lanius cristatus | Brown Shrike | 2019/2/7   | 5 | 0 | 12.94989475 | 80.22223569 | <a href="https://www.inaturalist.org/observations/29175475">https://www.inaturalist.org/observations/29175475</a>   |
| 420 | Lanius cristatus | Brown Shrike | 2013/10/13 | 4 | 0 | 12.95812020 | 80.11922810 | <a href="https://www.inaturalist.org/observations/22941879">https://www.inaturalist.org/observations/22941879</a>   |
| 421 | Lanius cristatus | Brown Shrike | 2013/10/13 | 2 | 0 | 12.95812020 | 80.11922810 | <a href="https://www.inaturalist.org/observations/63147470">https://www.inaturalist.org/observations/63147470</a>   |
| 422 | Lanius cristatus | Brown Shrike | 2022/10/17 | 2 | 0 | 12.95826600 | 77.72553570 | <a href="https://www.inaturalist.org/observations/139120367">https://www.inaturalist.org/observations/139120367</a> |
| 423 | Lanius cristatus | Brown Shrike | 2022/10/28 | 1 | 0 | 12.95826600 | 77.72553570 | <a href="https://www.inaturalist.org/observations/140250771">https://www.inaturalist.org/observations/140250771</a> |
| 424 | Lanius cristatus | Brown Shrike | 2022/10/30 | 3 | 0 | 12.95826600 | 77.72553570 | <a href="https://www.inaturalist.org/observations/140509851">https://www.inaturalist.org/observations/140509851</a> |
| 425 | Lanius cristatus | Brown Shrike | 2022/11/1  | 2 | 0 | 12.95826600 | 77.72553570 | <a href="https://www.inaturalist.org/observations/140750613">https://www.inaturalist.org/observations/140750613</a> |
| 426 | Lanius cristatus | Brown Shrike | 2022/11/6  | 2 | 0 | 12.95827212 | 77.72553563 | <a href="https://www.inaturalist.org/observations/141266145">https://www.inaturalist.org/observations/141266145</a> |
| 427 | Lanius cristatus | Brown Shrike | 2022/11/8  | 1 | 0 | 12.95827212 | 77.72553563 | <a href="https://www.inaturalist.org/observations/141507066">https://www.inaturalist.org/observations/141507066</a> |
| 428 | Lanius cristatus | Brown Shrike | 2022/11/8  | 1 | 0 | 12.95827212 | 77.72553563 | <a href="https://www.inaturalist.org/observations/141507775">https://www.inaturalist.org/observations/141507775</a> |
| 429 | Lanius cristatus | Brown Shrike | 2021/2/21  | 1 | 0 | 12.97100393 | 80.15854289 | <a href="https://www.inaturalist.org/observations/89428405">https://www.inaturalist.org/observations/89428405</a>   |
| 430 | Lanius cristatus | Brown Shrike | 2016/4/18  | 3 | 0 | 12.97137625 | 80.22727560 | <a href="https://www.inaturalist.org/observations/63744579">https://www.inaturalist.org/observations/63744579</a>   |
| 431 | Lanius cristatus | Brown Shrike | 2019/9/27  | 3 | 0 | 12.97147851 | 77.59456269 | <a href="https://www.inaturalist.org/observations/123058843">https://www.inaturalist.org/observations/123058843</a> |
| 432 | Lanius cristatus | Brown Shrike | 2022/3/24  | 4 | 0 | 12.97159870 | 77.59456270 | <a href="https://www.inaturalist.org/observations/120963717">https://www.inaturalist.org/observations/120963717</a> |
| 433 | Lanius cristatus | Brown Shrike | 2022/3/24  | 4 | 0 | 12.97159870 | 77.59456270 | <a href="https://www.inaturalist.org/observations/123299016">https://www.inaturalist.org/observations/123299016</a> |
| 434 | Lanius cristatus | Brown Shrike | 2020/2/15  | 2 | 0 | 12.97895401 | 77.68667026 | <a href="https://www.inaturalist.org/observations/38676990">https://www.inaturalist.org/observations/38676990</a>   |
| 435 | Lanius cristatus | Brown Shrike | 2018/10/7  | 5 | 0 | 12.98903043 | 77.66248455 | <a href="https://www.inaturalist.org/observations/18330009">https://www.inaturalist.org/observations/18330009</a>   |
| 436 | Lanius cristatus | Brown Shrike | 2021/12/23 | 3 | 0 | 12.99243120 | 80.23289680 | <a href="https://www.inaturalist.org/observations/105193887">https://www.inaturalist.org/observations/105193887</a> |

|     |                  |              |            |   |   |             |             |                                                                                                                     |
|-----|------------------|--------------|------------|---|---|-------------|-------------|---------------------------------------------------------------------------------------------------------------------|
| 437 | Lanius cristatus | Brown Shrike | 2021/12/23 | 1 | 0 | 12.99309831 | 80.23631651 | <a href="https://www.inaturalist.org/observations/103619268">https://www.inaturalist.org/observations/103619268</a> |
| 438 | Lanius cristatus | Brown Shrike | 2020/2/25  | 5 | 0 | 12.99333120 | 80.23610841 | <a href="https://www.inaturalist.org/observations/39235959">https://www.inaturalist.org/observations/39235959</a>   |
| 439 | Lanius cristatus | Brown Shrike | 2022/1/26  | 2 | 0 | 12.99547418 | 80.23978467 | <a href="https://www.inaturalist.org/observations/105620071">https://www.inaturalist.org/observations/105620071</a> |
| 440 | Lanius cristatus | Brown Shrike | 2022/2/15  | 2 | 0 | 13.00029229 | 80.26669834 | <a href="https://www.inaturalist.org/observations/106787398">https://www.inaturalist.org/observations/106787398</a> |
| 441 | Lanius cristatus | Brown Shrike | 2022/2/15  | 2 | 0 | 13.00029229 | 80.26669834 | <a href="https://www.inaturalist.org/observations/106842102">https://www.inaturalist.org/observations/106842102</a> |
| 442 | Lanius cristatus | Brown Shrike | 2022/3/27  | 2 | 0 | 13.00492510 | 80.23787250 | <a href="https://www.inaturalist.org/observations/109762065">https://www.inaturalist.org/observations/109762065</a> |
| 443 | Lanius cristatus | Brown Shrike | 2021/1/22  | 1 | 0 | 13.01136871 | 77.05193785 | <a href="https://www.inaturalist.org/observations/81701105">https://www.inaturalist.org/observations/81701105</a>   |
| 444 | Lanius cristatus | Brown Shrike | 2021/3/13  | 2 | 0 | 13.01856108 | 77.56938737 | <a href="https://www.inaturalist.org/observations/105159026">https://www.inaturalist.org/observations/105159026</a> |
| 445 | Lanius cristatus | Brown Shrike | 2020/1/19  | 5 | 0 | 13.02185970 | 77.56714230 | <a href="https://www.inaturalist.org/observations/37946403">https://www.inaturalist.org/observations/37946403</a>   |
| 446 | Lanius cristatus | Brown Shrike | 2022/10/8  | 2 | 0 | 13.02209419 | 77.57052463 | <a href="https://www.inaturalist.org/observations/138792499">https://www.inaturalist.org/observations/138792499</a> |
| 447 | Lanius cristatus | Brown Shrike | 2020/9/23  | 3 | 0 | 13.02262227 | 77.56902755 | <a href="https://www.inaturalist.org/observations/60499322">https://www.inaturalist.org/observations/60499322</a>   |
| 448 | Lanius cristatus | Brown Shrike | 2022/2/4   | 4 | 0 | 13.02398150 | 80.24441080 | <a href="https://www.inaturalist.org/observations/107742109">https://www.inaturalist.org/observations/107742109</a> |
| 449 | Lanius cristatus | Brown Shrike | 2021/10/14 | 2 | 0 | 13.03378717 | 77.57310610 | <a href="https://www.inaturalist.org/observations/105659135">https://www.inaturalist.org/observations/105659135</a> |
| 450 | Lanius cristatus | Brown Shrike | 2019/10/3  | 2 | 0 | 13.04734870 | 80.25400040 | <a href="https://www.inaturalist.org/observations/52560343">https://www.inaturalist.org/observations/52560343</a>   |
| 451 | Lanius cristatus | Brown Shrike | 2022/1/7   | 2 | 0 | 13.05498860 | 77.75384199 | <a href="https://www.inaturalist.org/observations/105414314">https://www.inaturalist.org/observations/105414314</a> |
| 452 | Lanius cristatus | Brown Shrike | 2018/10/27 | 4 | 0 | 13.07029150 | 77.76952550 | <a href="https://www.inaturalist.org/observations/18056412">https://www.inaturalist.org/observations/18056412</a>   |
| 453 | Lanius cristatus | Brown Shrike | 2016/2/25  | 2 | 0 | 13.08268020 | 80.27071840 | <a href="https://www.inaturalist.org/observations/106017438">https://www.inaturalist.org/observations/106017438</a> |
| 454 | Lanius cristatus | Brown Shrike | 2020/2/22  | 2 | 0 | 13.08268020 | 80.27071840 | <a href="https://www.inaturalist.org/observations/137422270">https://www.inaturalist.org/observations/137422270</a> |
| 455 | Lanius cristatus | Brown Shrike | 2017/12/24 | 2 | 0 | 13.14916756 | 80.05697362 | <a href="https://www.inaturalist.org/observations/45849795">https://www.inaturalist.org/observations/45849795</a>   |
| 456 | Lanius cristatus | Brown Shrike | 2018/11/3  | 1 | 0 | 13.15000000 | 77.49000000 | <a href="https://www.inaturalist.org/observations/18052017">https://www.inaturalist.org/observations/18052017</a>   |
| 457 | Lanius cristatus | Brown Shrike | 2020/10/18 | 3 | 0 | 13.16666700 | 80.17152800 | <a href="https://www.inaturalist.org/observations/62869750">https://www.inaturalist.org/observations/62869750</a>   |
| 458 | Lanius cristatus | Brown Shrike | 2021/11/23 | 1 | 0 | 13.19559767 | 75.41076850 | <a href="https://www.inaturalist.org/observations/102602088">https://www.inaturalist.org/observations/102602088</a> |
| 459 | Lanius cristatus | Brown Shrike | 2021/3/14  | 1 | 0 | 13.34708333 | 74.79470000 | <a href="https://www.inaturalist.org/observations/74335986">https://www.inaturalist.org/observations/74335986</a>   |

|     |                  |              |            |   |   |             |             |                                                                                                                     |
|-----|------------------|--------------|------------|---|---|-------------|-------------|---------------------------------------------------------------------------------------------------------------------|
| 460 | Lanius cristatus | Brown Shrike | 2022/11/10 | 1 | 0 | 13.36738239 | 74.81768807 | <a href="https://www.inaturalist.org/observations/141886337">https://www.inaturalist.org/observations/141886337</a> |
| 461 | Lanius cristatus | Brown Shrike | 2018/1/26  | 1 | 0 | 13.40196890 | 78.05513840 | <a href="https://www.inaturalist.org/observations/103460414">https://www.inaturalist.org/observations/103460414</a> |
| 462 | Lanius cristatus | Brown Shrike | 2019/10/19 | 1 | 0 | 13.50592299 | 75.08894210 | <a href="https://www.inaturalist.org/observations/81826336">https://www.inaturalist.org/observations/81826336</a>   |
| 463 | Lanius cristatus | Brown Shrike | 2019/10/18 | 1 | 0 | 13.50725830 | 75.09014373 | <a href="https://www.inaturalist.org/observations/81826338">https://www.inaturalist.org/observations/81826338</a>   |
| 464 | Lanius cristatus | Brown Shrike | 2022/2/10  | 3 | 0 | 13.60274913 | 79.38015391 | <a href="https://www.inaturalist.org/observations/112236732">https://www.inaturalist.org/observations/112236732</a> |
| 465 | Lanius cristatus | Brown Shrike | 2020/12/30 | 1 | 0 | 13.62480300 | 74.69174600 | <a href="https://www.inaturalist.org/observations/102882051">https://www.inaturalist.org/observations/102882051</a> |
| 466 | Lanius cristatus | Brown Shrike | 2019/1/15  | 4 | 0 | 13.64892008 | 79.46691055 | <a href="https://www.inaturalist.org/observations/35667301">https://www.inaturalist.org/observations/35667301</a>   |
| 467 | Lanius cristatus | Brown Shrike | 2019/1/15  | 3 | 0 | 13.65911635 | 79.48097763 | <a href="https://www.inaturalist.org/observations/55805468">https://www.inaturalist.org/observations/55805468</a>   |
| 468 | Lanius cristatus | Brown Shrike | 2022/10/20 | 1 | 0 | 13.74931164 | 79.59864515 | <a href="https://www.inaturalist.org/observations/139452132">https://www.inaturalist.org/observations/139452132</a> |
| 469 | Lanius cristatus | Brown Shrike | 2021/3/11  | 1 | 0 | 13.75959646 | 79.47082987 | <a href="https://www.inaturalist.org/observations/71541628">https://www.inaturalist.org/observations/71541628</a>   |
| 470 | Lanius cristatus | Brown Shrike | 2022/11/26 | 4 | 0 | 14.57646140 | 75.90992930 | <a href="https://www.inaturalist.org/observations/143499946">https://www.inaturalist.org/observations/143499946</a> |
| 471 | Lanius cristatus | Brown Shrike | 2020/11/8  | 3 | 0 | 14.66023904 | 74.90529943 | <a href="https://www.inaturalist.org/observations/64513047">https://www.inaturalist.org/observations/64513047</a>   |
| 472 | Lanius cristatus | Brown Shrike | 2012/10/21 | 0 | 0 | 14.79638640 | 74.49969580 | <a href="https://www.inaturalist.org/observations/96562080">https://www.inaturalist.org/observations/96562080</a>   |
| 473 | Lanius cristatus | Brown Shrike | 2022/10/31 | 3 | 0 | 14.81259020 | 76.80688695 | <a href="https://www.inaturalist.org/observations/141458539">https://www.inaturalist.org/observations/141458539</a> |
| 474 | Lanius cristatus | Brown Shrike | 2021/12/30 | 1 | 0 | 14.86613746 | 74.43937294 | <a href="https://www.inaturalist.org/observations/103946069">https://www.inaturalist.org/observations/103946069</a> |
| 475 | Lanius cristatus | Brown Shrike | 2021/3/12  | 1 | 0 | 15.23611910 | 74.61728190 | <a href="https://www.inaturalist.org/observations/101927807">https://www.inaturalist.org/observations/101927807</a> |
| 476 | Lanius cristatus | Brown Shrike | 2020/2/14  | 1 | 0 | 15.29123000 | 74.52274069 | <a href="https://www.inaturalist.org/observations/104348024">https://www.inaturalist.org/observations/104348024</a> |
| 477 | Lanius cristatus | Brown Shrike | 2018/10/27 | 2 | 0 | 15.29932650 | 74.12399600 | <a href="https://www.inaturalist.org/observations/56304116">https://www.inaturalist.org/observations/56304116</a>   |
| 478 | Lanius cristatus | Brown Shrike | 2019/1/30  | 1 | 0 | 15.33501320 | 76.46002400 | <a href="https://www.inaturalist.org/observations/84849991">https://www.inaturalist.org/observations/84849991</a>   |
| 479 | Lanius cristatus | Brown Shrike | 2020/11/19 | 2 | 0 | 15.38125989 | 75.10026568 | <a href="https://www.inaturalist.org/observations/65757368">https://www.inaturalist.org/observations/65757368</a>   |
| 480 | Lanius cristatus | Brown Shrike | 2020/11/20 | 3 | 0 | 15.38490147 | 75.10266490 | <a href="https://www.inaturalist.org/observations/66245553">https://www.inaturalist.org/observations/66245553</a>   |
| 481 | Lanius cristatus | Brown Shrike | 2020/11/20 | 4 | 0 | 15.38490147 | 75.10266490 | <a href="https://www.inaturalist.org/observations/66245558">https://www.inaturalist.org/observations/66245558</a>   |
| 482 | Lanius cristatus | Brown Shrike | 2020/12/6  | 1 | 0 | 15.41523300 | 75.00598370 | <a href="https://www.inaturalist.org/observations/90237904">https://www.inaturalist.org/observations/90237904</a>   |

|     |                  |              |            |   |   |             |             |                                                                                                                     |
|-----|------------------|--------------|------------|---|---|-------------|-------------|---------------------------------------------------------------------------------------------------------------------|
| 483 | Lanius cristatus | Brown Shrike | 2022/10/19 | 2 | 0 | 15.43591242 | 74.98346306 | <a href="https://www.inaturalist.org/observations/139331200">https://www.inaturalist.org/observations/139331200</a> |
| 484 | Lanius cristatus | Brown Shrike | 2021/12/19 | 1 | 0 | 15.86827397 | 74.49491445 | <a href="https://www.inaturalist.org/observations/103416152">https://www.inaturalist.org/observations/103416152</a> |
| 485 | Lanius cristatus | Brown Shrike | 2022/2/9   | 3 | 0 | 15.86843167 | 80.50994500 | <a href="https://www.inaturalist.org/observations/106438221">https://www.inaturalist.org/observations/106438221</a> |
| 486 | Lanius cristatus | Brown Shrike | 2020/10/25 | 1 | 0 | 16.19958797 | 77.37883100 | <a href="https://www.inaturalist.org/observations/81854450">https://www.inaturalist.org/observations/81854450</a>   |
| 487 | Lanius cristatus | Brown Shrike | 2014/10/15 | 2 | 0 | 16.30627144 | 80.51330510 | <a href="https://www.inaturalist.org/observations/88111330">https://www.inaturalist.org/observations/88111330</a>   |
| 488 | Lanius cristatus | Brown Shrike | 2015/11/7  | 2 | 0 | 16.30689104 | 80.51252635 | <a href="https://www.inaturalist.org/observations/87981040">https://www.inaturalist.org/observations/87981040</a>   |
| 489 | Lanius cristatus | Brown Shrike | 2014/2/26  | 2 | 0 | 16.30689104 | 80.51252635 | <a href="https://www.inaturalist.org/observations/89171157">https://www.inaturalist.org/observations/89171157</a>   |
| 490 | Lanius cristatus | Brown Shrike | 2014/11/1  | 1 | 0 | 16.30689104 | 80.51252635 | <a href="https://www.inaturalist.org/observations/94113063">https://www.inaturalist.org/observations/94113063</a>   |
| 491 | Lanius cristatus | Brown Shrike | 2020/11/27 | 2 | 0 | 16.36004000 | 74.29583900 | <a href="https://www.inaturalist.org/observations/65687468">https://www.inaturalist.org/observations/65687468</a>   |
| 492 | Lanius cristatus | Brown Shrike | 2021/11/28 | 2 | 0 | 16.36906182 | 78.72910995 | <a href="https://www.inaturalist.org/observations/102148493">https://www.inaturalist.org/observations/102148493</a> |
| 493 | Lanius cristatus | Brown Shrike | 2013/11/18 | 2 | 0 | 16.40966969 | 80.70889656 | <a href="https://www.inaturalist.org/observations/88106308">https://www.inaturalist.org/observations/88106308</a>   |
| 494 | Lanius cristatus | Brown Shrike | 2013/9/30  | 2 | 0 | 16.41060994 | 80.70892527 | <a href="https://www.inaturalist.org/observations/88105643">https://www.inaturalist.org/observations/88105643</a>   |
| 495 | Lanius cristatus | Brown Shrike | 2021/11/7  | 3 | 0 | 16.44354010 | 80.57479460 | <a href="https://www.inaturalist.org/observations/100846716">https://www.inaturalist.org/observations/100846716</a> |
| 496 | Lanius cristatus | Brown Shrike | 2021/12/24 | 0 | 0 | 16.49170000 | 80.59191167 | <a href="https://www.inaturalist.org/observations/103565949">https://www.inaturalist.org/observations/103565949</a> |
| 497 | Lanius cristatus | Brown Shrike | 2012/3/29  | 1 | 0 | 16.49979669 | 80.59578562 | <a href="https://www.inaturalist.org/observations/93593874">https://www.inaturalist.org/observations/93593874</a>   |
| 498 | Lanius cristatus | Brown Shrike | 2021/4/23  | 1 | 0 | 16.52286891 | 81.46555457 | <a href="https://www.inaturalist.org/observations/95520605">https://www.inaturalist.org/observations/95520605</a>   |
| 499 | Lanius cristatus | Brown Shrike | 2022/1/2   | 2 | 0 | 16.52400500 | 81.51144833 | <a href="https://www.inaturalist.org/observations/111965690">https://www.inaturalist.org/observations/111965690</a> |
| 500 | Lanius cristatus | Brown Shrike | 2022/1/2   | 2 | 0 | 16.52400500 | 81.51144833 | <a href="https://www.inaturalist.org/observations/113232252">https://www.inaturalist.org/observations/113232252</a> |
| 501 | Lanius cristatus | Brown Shrike | 2022/1/2   | 1 | 0 | 16.52400667 | 81.51145500 | <a href="https://www.inaturalist.org/observations/137427170">https://www.inaturalist.org/observations/137427170</a> |
| 502 | Lanius cristatus | Brown Shrike | 2020/12/10 | 3 | 0 | 16.52985159 | 80.59233785 | <a href="https://www.inaturalist.org/observations/66369911">https://www.inaturalist.org/observations/66369911</a>   |
| 503 | Lanius cristatus | Brown Shrike | 2022/2/1   | 1 | 0 | 16.53600167 | 81.50061500 | <a href="https://www.inaturalist.org/observations/105946795">https://www.inaturalist.org/observations/105946795</a> |
| 504 | Lanius cristatus | Brown Shrike | 2022/2/1   | 2 | 0 | 16.53600167 | 81.50061500 | <a href="https://www.inaturalist.org/observations/114298155">https://www.inaturalist.org/observations/114298155</a> |
| 505 | Lanius cristatus | Brown Shrike | 2022/2/25  | 2 | 0 | 16.53624833 | 81.49770667 | <a href="https://www.inaturalist.org/observations/107406046">https://www.inaturalist.org/observations/107406046</a> |

|     |                                 |              |            |   |   |             |             |                                                                                                                     |
|-----|---------------------------------|--------------|------------|---|---|-------------|-------------|---------------------------------------------------------------------------------------------------------------------|
| 506 | Lanius cristatus                | Brown Shrike | 2022/10/25 | 0 | 0 | 16.53886000 | 81.50652833 | <a href="https://www.inaturalist.org/observations/139980850">https://www.inaturalist.org/observations/139980850</a> |
| 507 | Lanius cristatus                | Brown Shrike | 2022/10/25 | 2 | 0 | 16.53900000 | 81.50651500 | <a href="https://www.inaturalist.org/observations/139980803">https://www.inaturalist.org/observations/139980803</a> |
| 508 | Lanius cristatus                | Brown Shrike | 2022/1/25  | 1 | 0 | 16.53938833 | 81.50571833 | <a href="https://www.inaturalist.org/observations/113231258">https://www.inaturalist.org/observations/113231258</a> |
| 509 | Lanius cristatus                | Brown Shrike | 2022/1/25  | 1 | 0 | 16.53958667 | 81.50563833 | <a href="https://www.inaturalist.org/observations/105548829">https://www.inaturalist.org/observations/105548829</a> |
| 510 | Lanius cristatus                | Brown Shrike | 2022/1/25  | 1 | 0 | 16.53960865 | 81.50545511 | <a href="https://www.inaturalist.org/observations/105664603">https://www.inaturalist.org/observations/105664603</a> |
| 511 | Lanius cristatus                | Brown Shrike | 2022/1/25  | 1 | 0 | 16.53972918 | 81.50553592 | <a href="https://www.inaturalist.org/observations/105569836">https://www.inaturalist.org/observations/105569836</a> |
| 512 | Lanius cristatus                | Brown Shrike | 2022/1/2   | 1 | 0 | 16.53974750 | 81.50541723 | <a href="https://www.inaturalist.org/observations/104187908">https://www.inaturalist.org/observations/104187908</a> |
| 513 | Lanius cristatus                | Brown Shrike | 2022/1/2   | 1 | 0 | 16.53975682 | 81.50542159 | <a href="https://www.inaturalist.org/observations/104166632">https://www.inaturalist.org/observations/104166632</a> |
| 514 | Lanius cristatus                | Brown Shrike | 2022/1/25  | 2 | 0 | 16.53976518 | 81.50555670 | <a href="https://www.inaturalist.org/observations/111964625">https://www.inaturalist.org/observations/111964625</a> |
| 515 | Lanius cristatus                | Brown Shrike | 2022/1/25  | 2 | 0 | 16.53996734 | 81.50542762 | <a href="https://www.inaturalist.org/observations/111964433">https://www.inaturalist.org/observations/111964433</a> |
| 516 | Lanius cristatus                | Brown Shrike | 2021/12/25 | 1 | 0 | 16.54489085 | 81.52124092 | <a href="https://www.inaturalist.org/observations/103636399">https://www.inaturalist.org/observations/103636399</a> |
| 517 | Lanius cristatus                | Brown Shrike | 2021/2/4   | 5 | 0 | 16.54518332 | 81.70476638 | <a href="https://www.inaturalist.org/observations/94458236">https://www.inaturalist.org/observations/94458236</a>   |
| 518 | Lanius cristatus                | Brown Shrike | 2021/11/20 | 1 | 0 | 16.54553500 | 81.50563497 | <a href="https://www.inaturalist.org/observations/102087159">https://www.inaturalist.org/observations/102087159</a> |
| 519 | Lanius cristatus                | Brown Shrike | 2021/12/25 | 1 | 0 | 16.55298167 | 81.50232167 | <a href="https://www.inaturalist.org/observations/112076210">https://www.inaturalist.org/observations/112076210</a> |
| 520 | Lanius cristatus                | Brown Shrike | 2021/12/25 | 1 | 0 | 16.55302833 | 81.50233167 | <a href="https://www.inaturalist.org/observations/104648425">https://www.inaturalist.org/observations/104648425</a> |
| 521 | Lanius cristatus                | Brown Shrike | 2021/12/25 | 2 | 0 | 16.55340333 | 81.50225500 | <a href="https://www.inaturalist.org/observations/112981002">https://www.inaturalist.org/observations/112981002</a> |
| 522 | Lanius cristatus                | Brown Shrike | 2021/12/25 | 2 | 0 | 16.55340833 | 81.50225500 | <a href="https://www.inaturalist.org/observations/104750303">https://www.inaturalist.org/observations/104750303</a> |
| 523 | Lanius cristatus<br>lucionensis | Brown Shrike | 2021/4/19  | 1 | 0 | 16.55345036 | 81.54328331 | <a href="https://www.inaturalist.org/observations/93127339">https://www.inaturalist.org/observations/93127339</a>   |
| 524 | Lanius cristatus                | Brown Shrike | 2020/10/7  | 2 | 0 | 16.55360559 | 80.58353109 | <a href="https://www.inaturalist.org/observations/61961132">https://www.inaturalist.org/observations/61961132</a>   |
| 525 | Lanius cristatus                | Brown Shrike | 2020/11/22 | 1 | 0 | 16.55493600 | 80.72975710 | <a href="https://www.inaturalist.org/observations/92663999">https://www.inaturalist.org/observations/92663999</a>   |
| 526 | Lanius cristatus                | Brown Shrike | 2020/11/22 | 1 | 0 | 16.55493600 | 80.72975710 | <a href="https://www.inaturalist.org/observations/92664014">https://www.inaturalist.org/observations/92664014</a>   |
| 527 | Lanius cristatus                | Brown Shrike | 2022/1/18  | 2 | 0 | 16.55633280 | 81.49540018 | <a href="https://www.inaturalist.org/observations/105258156">https://www.inaturalist.org/observations/105258156</a> |
| 528 | Lanius cristatus                | Brown Shrike | 2021/12/31 | 2 | 0 | 16.55692000 | 81.49239333 | <a href="https://www.inaturalist.org/observations/104112523">https://www.inaturalist.org/observations/104112523</a> |

|     |                  |              |            |   |   |             |             |                                                                                                                     |
|-----|------------------|--------------|------------|---|---|-------------|-------------|---------------------------------------------------------------------------------------------------------------------|
| 529 | Lanius cristatus | Brown Shrike | 2021/12/31 | 1 | 0 | 16.55692167 | 81.49237500 | <a href="https://www.inaturalist.org/observations/104114528">https://www.inaturalist.org/observations/104114528</a> |
| 530 | Lanius cristatus | Brown Shrike | 2021/12/31 | 1 | 0 | 16.55692167 | 81.49237500 | <a href="https://www.inaturalist.org/observations/104411232">https://www.inaturalist.org/observations/104411232</a> |
| 531 | Lanius cristatus | Brown Shrike | 2021/12/31 | 3 | 0 | 16.55692167 | 81.49237500 | <a href="https://www.inaturalist.org/observations/111418534">https://www.inaturalist.org/observations/111418534</a> |
| 532 | Lanius cristatus | Brown Shrike | 2022/1/2   | 1 | 0 | 16.55696667 | 81.49576167 | <a href="https://www.inaturalist.org/observations/104411864">https://www.inaturalist.org/observations/104411864</a> |
| 533 | Lanius cristatus | Brown Shrike | 2022/1/2   | 2 | 0 | 16.55696667 | 81.49576167 | <a href="https://www.inaturalist.org/observations/111317285">https://www.inaturalist.org/observations/111317285</a> |
| 534 | Lanius cristatus | Brown Shrike | 2021/12/19 | 2 | 0 | 16.55697105 | 81.49618272 | <a href="https://www.inaturalist.org/observations/103344107">https://www.inaturalist.org/observations/103344107</a> |
| 535 | Lanius cristatus | Brown Shrike | 2021/10/10 | 2 | 0 | 16.55811900 | 81.49816353 | <a href="https://www.inaturalist.org/observations/97871276">https://www.inaturalist.org/observations/97871276</a>   |
| 536 | Lanius cristatus | Brown Shrike | 2021/10/10 | 3 | 0 | 16.55811900 | 81.49816353 | <a href="https://www.inaturalist.org/observations/97895783">https://www.inaturalist.org/observations/97895783</a>   |
| 537 | Lanius cristatus | Brown Shrike | 2021/10/28 | 1 | 0 | 16.55811900 | 81.49816353 | <a href="https://www.inaturalist.org/observations/101397457">https://www.inaturalist.org/observations/101397457</a> |
| 538 | Lanius cristatus | Brown Shrike | 2021/11/4  | 2 | 0 | 16.55811900 | 81.49816353 | <a href="https://www.inaturalist.org/observations/101457506">https://www.inaturalist.org/observations/101457506</a> |
| 539 | Lanius cristatus | Brown Shrike | 2022/1/8   | 1 | 0 | 16.55811900 | 81.49816353 | <a href="https://www.inaturalist.org/observations/104566630">https://www.inaturalist.org/observations/104566630</a> |
| 540 | Lanius cristatus | Brown Shrike | 2020/12/6  | 1 | 0 | 16.55921794 | 80.76100097 | <a href="https://www.inaturalist.org/observations/92452618">https://www.inaturalist.org/observations/92452618</a>   |
| 541 | Lanius cristatus | Brown Shrike | 2020/9/15  | 2 | 0 | 16.56202333 | 80.69468833 | <a href="https://www.inaturalist.org/observations/59677547">https://www.inaturalist.org/observations/59677547</a>   |
| 542 | Lanius cristatus | Brown Shrike | 2020/10/6  | 3 | 0 | 16.56472500 | 80.71651333 | <a href="https://www.inaturalist.org/observations/61845159">https://www.inaturalist.org/observations/61845159</a>   |
| 543 | Lanius cristatus | Brown Shrike | 2022/2/21  | 2 | 0 | 16.56483167 | 81.51749167 | <a href="https://www.inaturalist.org/observations/107167077">https://www.inaturalist.org/observations/107167077</a> |
| 544 | Lanius cristatus | Brown Shrike | 2022/2/21  | 2 | 0 | 16.56486000 | 81.51743000 | <a href="https://www.inaturalist.org/observations/115843673">https://www.inaturalist.org/observations/115843673</a> |
| 545 | Lanius cristatus | Brown Shrike | 2021/12/31 | 2 | 0 | 16.56821883 | 81.49002437 | <a href="https://www.inaturalist.org/observations/104020982">https://www.inaturalist.org/observations/104020982</a> |
| 546 | Lanius cristatus | Brown Shrike | 2022/1/20  | 1 | 0 | 16.56874833 | 81.56501333 | <a href="https://www.inaturalist.org/observations/113231436">https://www.inaturalist.org/observations/113231436</a> |
| 547 | Lanius cristatus | Brown Shrike | 2022/1/20  | 2 | 0 | 16.56876167 | 81.56510667 | <a href="https://www.inaturalist.org/observations/105250631">https://www.inaturalist.org/observations/105250631</a> |
| 548 | Lanius cristatus | Brown Shrike | 2020/11/29 | 1 | 0 | 16.57589266 | 80.68862217 | <a href="https://www.inaturalist.org/observations/92670071">https://www.inaturalist.org/observations/92670071</a>   |
| 549 | Lanius cristatus | Brown Shrike | 2021/12/27 | 1 | 0 | 16.58994444 | 80.78369444 | <a href="https://www.inaturalist.org/observations/103753926">https://www.inaturalist.org/observations/103753926</a> |
| 550 | Lanius cristatus | Brown Shrike | 2020/12/27 | 1 | 0 | 16.59577924 | 80.61818580 | <a href="https://www.inaturalist.org/observations/90049785">https://www.inaturalist.org/observations/90049785</a>   |
| 551 | Lanius cristatus | Brown Shrike | 2022/2/18  | 4 | 0 | 16.60132391 | 80.58064514 | <a href="https://www.inaturalist.org/observations/107609864">https://www.inaturalist.org/observations/107609864</a> |

|     |                  |              |            |   |   |             |             |                                                                                                                     |
|-----|------------------|--------------|------------|---|---|-------------|-------------|---------------------------------------------------------------------------------------------------------------------|
| 552 | Lanius cristatus | Brown Shrike | 2020/10/24 | 2 | 0 | 16.62393664 | 80.61844333 | <a href="https://www.inaturalist.org/observations/63390780">https://www.inaturalist.org/observations/63390780</a>   |
| 553 | Lanius cristatus | Brown Shrike | 2014/3/2   | 2 | 0 | 16.63942370 | 80.79750281 | <a href="https://www.inaturalist.org/observations/89171359">https://www.inaturalist.org/observations/89171359</a>   |
| 554 | Lanius cristatus | Brown Shrike | 2021/9/26  | 2 | 0 | 16.64284764 | 80.48669251 | <a href="https://www.inaturalist.org/observations/96472489">https://www.inaturalist.org/observations/96472489</a>   |
| 555 | Lanius cristatus | Brown Shrike | 2022/2/13  | 2 | 0 | 16.64674448 | 80.81858563 | <a href="https://www.inaturalist.org/observations/106796061">https://www.inaturalist.org/observations/106796061</a> |
| 556 | Lanius cristatus | Brown Shrike | 2021/9/26  | 1 | 0 | 16.64878167 | 80.49127164 | <a href="https://www.inaturalist.org/observations/96203060">https://www.inaturalist.org/observations/96203060</a>   |
| 557 | Lanius cristatus | Brown Shrike | 2021/9/26  | 1 | 0 | 16.65175000 | 80.49308164 | <a href="https://www.inaturalist.org/observations/96203079">https://www.inaturalist.org/observations/96203079</a>   |
| 558 | Lanius cristatus | Brown Shrike | 2022/2/1   | 1 | 0 | 16.65248889 | 80.78360833 | <a href="https://www.inaturalist.org/observations/105958111">https://www.inaturalist.org/observations/105958111</a> |
| 559 | Lanius cristatus | Brown Shrike | 2022/1/24  | 1 | 0 | 16.65258889 | 80.78359444 | <a href="https://www.inaturalist.org/observations/105493547">https://www.inaturalist.org/observations/105493547</a> |
| 560 | Lanius cristatus | Brown Shrike | 2022/3/6   | 4 | 0 | 16.65391605 | 80.46723317 | <a href="https://www.inaturalist.org/observations/108249451">https://www.inaturalist.org/observations/108249451</a> |
| 561 | Lanius cristatus | Brown Shrike | 2022/3/13  | 4 | 0 | 16.66112798 | 80.47830352 | <a href="https://www.inaturalist.org/observations/108944395">https://www.inaturalist.org/observations/108944395</a> |
| 562 | Lanius cristatus | Brown Shrike | 2017/10/20 | 3 | 0 | 16.68100634 | 81.16978168 | <a href="https://www.inaturalist.org/observations/64937496">https://www.inaturalist.org/observations/64937496</a>   |
| 563 | Lanius cristatus | Brown Shrike | 2020/2/1   | 5 | 0 | 16.68739388 | 74.20737126 | <a href="https://www.inaturalist.org/observations/38323667">https://www.inaturalist.org/observations/38323667</a>   |
| 564 | Lanius cristatus | Brown Shrike | 2022/3/22  | 0 | 0 | 16.69952222 | 80.76473056 | <a href="https://www.inaturalist.org/observations/109278354">https://www.inaturalist.org/observations/109278354</a> |
| 565 | Lanius cristatus | Brown Shrike | 2022/1/15  | 2 | 0 | 16.74047667 | 81.34118667 | <a href="https://www.inaturalist.org/observations/105037010">https://www.inaturalist.org/observations/105037010</a> |
| 566 | Lanius cristatus | Brown Shrike | 2022/1/15  | 1 | 0 | 16.74047667 | 81.34118667 | <a href="https://www.inaturalist.org/observations/105562216">https://www.inaturalist.org/observations/105562216</a> |
| 567 | Lanius cristatus | Brown Shrike | 2016/11/14 | 4 | 0 | 16.79660260 | 74.29103570 | <a href="https://www.inaturalist.org/observations/30797174">https://www.inaturalist.org/observations/30797174</a>   |
| 568 | Lanius cristatus | Brown Shrike | 2019/11/8  | 2 | 0 | 16.88650185 | 75.70990551 | <a href="https://www.inaturalist.org/observations/48859252">https://www.inaturalist.org/observations/48859252</a>   |
| 569 | Lanius cristatus | Brown Shrike | 2019/11/28 | 2 | 0 | 16.88650185 | 75.70990551 | <a href="https://www.inaturalist.org/observations/48867770">https://www.inaturalist.org/observations/48867770</a>   |
| 570 | Lanius cristatus | Brown Shrike | 2019/12/11 | 3 | 0 | 16.88650185 | 75.70990551 | <a href="https://www.inaturalist.org/observations/48893550">https://www.inaturalist.org/observations/48893550</a>   |
| 571 | Lanius cristatus | Brown Shrike | 2021/7/31  | 1 | 0 | 17.18246227 | 78.79171371 | <a href="https://www.inaturalist.org/observations/90165539">https://www.inaturalist.org/observations/90165539</a>   |
| 572 | Lanius cristatus | Brown Shrike | 2022/10/4  | 1 | 0 | 17.31866950 | 78.35862240 | <a href="https://www.inaturalist.org/observations/137601826">https://www.inaturalist.org/observations/137601826</a> |
| 573 | Lanius cristatus | Brown Shrike | 2018/12/3  | 4 | 0 | 17.32689501 | 74.76560354 | <a href="https://www.inaturalist.org/observations/38323696">https://www.inaturalist.org/observations/38323696</a>   |
| 574 | Lanius cristatus | Brown Shrike | 2022/9/21  | 2 | 0 | 17.35067800 | 78.45130680 | <a href="https://www.inaturalist.org/observations/137029037">https://www.inaturalist.org/observations/137029037</a> |



|     |                                      |              |            |   |   |             |              |                                                                                                                     |
|-----|--------------------------------------|--------------|------------|---|---|-------------|--------------|---------------------------------------------------------------------------------------------------------------------|
| 575 | Lanius cristatus                     | Brown Shrike | 2021/12/26 | 3 | 0 | 17.37626560 | 78.29886370  | <a href="https://www.inaturalist.org/observations/104753086">https://www.inaturalist.org/observations/104753086</a> |
| 576 | Lanius cristatus                     | Brown Shrike | 2019/10/6  | 3 | 0 | 17.38113500 | 78.31638070  | <a href="https://www.inaturalist.org/observations/63639371">https://www.inaturalist.org/observations/63639371</a>   |
| 577 | Lanius cristatus                     | Brown Shrike | 2022/11/18 | 2 | 0 | 17.38977301 | 78.37702700  | <a href="https://www.inaturalist.org/observations/142678461">https://www.inaturalist.org/observations/142678461</a> |
| 578 | Lanius cristatus                     | Brown Shrike | 2022/12/4  | 0 | 0 | 17.43763720 | 78.47661520  | <a href="https://www.inaturalist.org/observations/143719007">https://www.inaturalist.org/observations/143719007</a> |
| 579 | Lanius cristatus                     | Brown Shrike | 2020/9/26  | 3 | 0 | 17.45536450 | 78.13116660  | <a href="https://www.inaturalist.org/observations/63702486">https://www.inaturalist.org/observations/63702486</a>   |
| 580 | Lanius cristatus                     | Brown Shrike | 2022/10/12 | 2 | 0 | 17.45677890 | 78.23337430  | <a href="https://www.inaturalist.org/observations/138816890">https://www.inaturalist.org/observations/138816890</a> |
| 581 | Lanius cristatus                     | Brown Shrike | 2014/12/11 | 5 | 0 | 17.49904151 | 81.38165502  | <a href="https://www.inaturalist.org/observations/66881021">https://www.inaturalist.org/observations/66881021</a>   |
| 582 | Lanius cristatus                     | Brown Shrike | 2021/12/11 | 2 | 0 | 17.59683001 | 81.68592447  | <a href="https://www.inaturalist.org/observations/103518176">https://www.inaturalist.org/observations/103518176</a> |
| 583 | Lanius cristatus                     | Brown Shrike | 2018/9/21  | 0 | 0 | 17.59833550 | 81.71354750  | <a href="https://www.inaturalist.org/observations/88959723">https://www.inaturalist.org/observations/88959723</a>   |
| 584 | Lanius cristatus                     | Brown Shrike | 2021/9/27  | 1 | 0 | 17.59839778 | 81.71354759  | <a href="https://www.inaturalist.org/observations/96362753">https://www.inaturalist.org/observations/96362753</a>   |
| 585 | Lanius cristatus<br>Lanius cristatus | Brown Shrike | 2021/1/2   | 3 | 0 | 17.63556488 | 74.55682956  | <a href="https://www.inaturalist.org/observations/67545186">https://www.inaturalist.org/observations/67545186</a>   |
| 586 | Lanius cristatus                     | Brown Shrike | 2021/12/19 | 4 | 0 | 17.63773667 | 78.06593500  | <a href="https://www.inaturalist.org/observations/121718491">https://www.inaturalist.org/observations/121718491</a> |
| 587 | Lanius cristatus                     | Brown Shrike | 2021/12/19 | 3 | 0 | 17.63997000 | 78.06640167  | <a href="https://www.inaturalist.org/observations/121718393">https://www.inaturalist.org/observations/121718393</a> |
| 588 | Lanius cristatus                     | Brown Shrike | 2022/11/21 | 2 | 0 | 17.65524480 | 78.07606880  | <a href="https://www.inaturalist.org/observations/142740839">https://www.inaturalist.org/observations/142740839</a> |
| 589 | Lanius cristatus                     | Brown Shrike | 2019/11/1  | 1 | 0 | 17.67067090 | 81.70914260  | <a href="https://www.inaturalist.org/observations/92889121">https://www.inaturalist.org/observations/92889121</a>   |
| 590 | Lanius cristatus                     | Brown Shrike | 2012/7/5   | 3 | 0 | 17.68058160 | 75.31550350  | <a href="https://www.inaturalist.org/observations/36498940">https://www.inaturalist.org/observations/36498940</a>   |
| 591 | Lanius cristatus                     | Brown Shrike | 2020/12/13 | 4 | 0 | 17.68292450 | 73.97297640  | <a href="https://www.inaturalist.org/observations/71123132">https://www.inaturalist.org/observations/71123132</a>   |
| 592 | Lanius cristatus                     | Brown Shrike | 2022/2/27  | 3 | 0 | 17.68662580 | 78.32732450  | <a href="https://www.inaturalist.org/observations/107689563">https://www.inaturalist.org/observations/107689563</a> |
| 593 | Lanius cristatus                     | Brown Shrike | 2018/3/10  | 3 | 0 | 18.10760008 | 79.01929948  | <a href="https://www.inaturalist.org/observations/63558713">https://www.inaturalist.org/observations/63558713</a>   |
| 594 | Lanius cristatus                     | Brown Shrike | 2015/9/18  | 3 | 0 | 18.11243720 | 79.01929970  | <a href="https://www.inaturalist.org/observations/63558587">https://www.inaturalist.org/observations/63558587</a>   |
| 595 | Lanius cristatus                     | Brown Shrike | 2017/12/20 | 2 | 0 | 18.24826365 | 109.51652530 | <a href="https://www.inaturalist.org/observations/12195701">https://www.inaturalist.org/observations/12195701</a>   |
| 596 | Lanius cristatus                     | Brown Shrike | 2016/9/20  | 2 | 0 | 18.25284700 | 109.51190900 | <a href="http://www.inaturalist.org/observations/4164251">http://www.inaturalist.org/observations/4164251</a>       |
| 597 | Lanius cristatus                     | Brown Shrike | 2016/10/2  | 2 | 0 | 18.25284700 | 109.51190900 | <a href="http://www.inaturalist.org/observations/4258947">http://www.inaturalist.org/observations/4258947</a>       |

|     |                  |              |            |   |   |             |              |                                                                                                                     |
|-----|------------------|--------------|------------|---|---|-------------|--------------|---------------------------------------------------------------------------------------------------------------------|
| 598 | Lanius cristatus | Brown Shrike | 2016/10/21 | 2 | 0 | 18.25284700 | 109.51190900 | <a href="http://www.inaturalist.org/observations/4410781">http://www.inaturalist.org/observations/4410781</a>       |
| 599 | Lanius cristatus | Brown Shrike | 2021/8/31  | 0 | 0 | 18.33159650 | 73.85287140  | <a href="https://www.inaturalist.org/observations/93447483">https://www.inaturalist.org/observations/93447483</a>   |
| 600 | Lanius cristatus | Brown Shrike | 2021/9/8   | 2 | 0 | 18.34631280 | 74.03018260  | <a href="https://www.inaturalist.org/observations/94793159">https://www.inaturalist.org/observations/94793159</a>   |
| 601 | Lanius cristatus | Brown Shrike | 2016/12/24 | 1 | 0 | 18.34631280 | 74.03018260  | <a href="https://www.inaturalist.org/observations/142000194">https://www.inaturalist.org/observations/142000194</a> |
| 602 | Lanius cristatus | Brown Shrike | 2019/9/16  | 2 | 0 | 18.34931939 | 109.48923760 | <a href="https://www.inaturalist.org/observations/32942859">https://www.inaturalist.org/observations/32942859</a>   |
| 603 | Lanius cristatus | Brown Shrike | 2018/9/14  | 2 | 0 | 18.41934871 | 109.70811540 | <a href="https://www.inaturalist.org/observations/16522771">https://www.inaturalist.org/observations/16522771</a>   |
| 604 | Lanius cristatus | Brown Shrike | 2018/3/25  | 2 | 0 | 18.50044746 | 108.73168950 | <a href="https://www.inaturalist.org/observations/12194440">https://www.inaturalist.org/observations/12194440</a>   |
| 605 | Lanius cristatus | Brown Shrike | 2018/12/24 | 2 | 0 | 18.50429210 | 108.72980230 | <a href="https://www.inaturalist.org/observations/19229901">https://www.inaturalist.org/observations/19229901</a>   |
| 606 | Lanius cristatus | Brown Shrike | 2018/12/24 | 2 | 0 | 18.50429210 | 108.72980230 | <a href="https://www.inaturalist.org/observations/19229905">https://www.inaturalist.org/observations/19229905</a>   |
| 607 | Lanius cristatus | Brown Shrike | 2022/12/6  | 0 | 0 | 18.52313546 | 73.83825734  | <a href="https://www.inaturalist.org/observations/143787364">https://www.inaturalist.org/observations/143787364</a> |
| 608 | Lanius cristatus | Brown Shrike | 2018/2/11  | 2 | 0 | 18.53878928 | 108.71635440 | <a href="https://www.inaturalist.org/observations/9832708">https://www.inaturalist.org/observations/9832708</a>     |
| 609 | Lanius cristatus | Brown Shrike | 2021/8/23  | 1 | 0 | 18.54588745 | 110.12078690 | <a href="https://www.inaturalist.org/observations/92223444">https://www.inaturalist.org/observations/92223444</a>   |
| 610 | Lanius cristatus | Brown Shrike | 2014/10/6  | 1 | 0 | 18.55403120 | 73.79045760  | <a href="https://www.inaturalist.org/observations/142674495">https://www.inaturalist.org/observations/142674495</a> |
| 611 | Lanius cristatus | Brown Shrike | 2018/2/9   | 2 | 0 | 18.60315524 | 108.71063240 | <a href="https://www.inaturalist.org/observations/10243247">https://www.inaturalist.org/observations/10243247</a>   |
| 612 | Lanius cristatus | Brown Shrike | 2018/2/9   | 2 | 0 | 18.60315524 | 108.71063240 | <a href="https://www.inaturalist.org/observations/10243252">https://www.inaturalist.org/observations/10243252</a>   |
| 613 | Lanius cristatus | Brown Shrike | 2021/2/17  | 2 | 0 | 18.70353626 | 84.40413415  | <a href="https://www.inaturalist.org/observations/69898936">https://www.inaturalist.org/observations/69898936</a>   |
| 614 | Lanius cristatus | Brown Shrike | 2022/11/25 | 0 | 0 | 18.77866000 | 81.99711080  | <a href="https://www.inaturalist.org/observations/143342290">https://www.inaturalist.org/observations/143342290</a> |
| 615 | Lanius cristatus | Brown Shrike | 2018/10/6  | 2 | 0 | 18.99888640 | 109.07169050 | <a href="https://www.inaturalist.org/observations/17669997">https://www.inaturalist.org/observations/17669997</a>   |
| 616 | Lanius cristatus | Brown Shrike | 2019/10/4  | 2 | 0 | 19.04998226 | 108.70949620 | <a href="https://www.inaturalist.org/observations/35530305">https://www.inaturalist.org/observations/35530305</a>   |
| 617 | Lanius cristatus | Brown Shrike | 2019/9/14  | 2 | 0 | 19.06159868 | 108.72460810 | <a href="https://www.inaturalist.org/observations/32937029">https://www.inaturalist.org/observations/32937029</a>   |
| 618 | Lanius cristatus | Brown Shrike | 2020/1/15  | 3 | 0 | 19.06696688 | 109.13983110 | <a href="https://www.inaturalist.org/observations/37780935">https://www.inaturalist.org/observations/37780935</a>   |
| 619 | Lanius cristatus | Brown Shrike | 2022/11/27 | 2 | 0 | 19.09509667 | 82.02064833  | <a href="https://www.inaturalist.org/observations/143169921">https://www.inaturalist.org/observations/143169921</a> |
| 620 | Lanius cristatus | Brown Shrike | 2020/9/14  | 2 | 0 | 19.24391718 | 110.45773940 | <a href="https://www.inaturalist.org/observations/64852557">https://www.inaturalist.org/observations/64852557</a>   |

|     |                  |              |            |   |   |             |              |                                                                                                                     |
|-----|------------------|--------------|------------|---|---|-------------|--------------|---------------------------------------------------------------------------------------------------------------------|
| 621 | Lanius cristatus | Brown Shrike | 2022/1/15  | 0 | 0 | 19.73844333 | 109.30207170 | <a href="https://www.inaturalist.org/observations/125272349">https://www.inaturalist.org/observations/125272349</a> |
| 622 | Lanius cristatus | Brown Shrike | 2019/10/16 | 5 | 0 | 19.74911955 | 81.39411327  | <a href="https://www.inaturalist.org/observations/34865564">https://www.inaturalist.org/observations/34865564</a>   |
| 623 | Lanius cristatus | Brown Shrike | 2019/12/16 | 3 | 0 | 19.86660882 | 86.11101589  | <a href="https://www.inaturalist.org/observations/40352141">https://www.inaturalist.org/observations/40352141</a>   |
| 624 | Lanius cristatus | Brown Shrike | 2021/5/21  | 2 | 0 | 19.91370362 | 82.64322940  | <a href="https://www.inaturalist.org/observations/79633204">https://www.inaturalist.org/observations/79633204</a>   |
| 625 | Lanius cristatus | Brown Shrike | 2021/11/27 | 2 | 0 | 20.04638000 | 110.20959670 | <a href="https://www.inaturalist.org/observations/101991893">https://www.inaturalist.org/observations/101991893</a> |
| 626 | Lanius cristatus | Brown Shrike | 2016/12/19 | 2 | 0 | 20.40032712 | 85.82660573  | <a href="https://www.inaturalist.org/observations/110266631">https://www.inaturalist.org/observations/110266631</a> |
| 627 | Lanius cristatus | Brown Shrike | 2019/1/19  | 3 | 0 | 20.66559832 | 81.55340530  | <a href="https://www.inaturalist.org/observations/37777269">https://www.inaturalist.org/observations/37777269</a>   |
| 628 | Lanius cristatus | Brown Shrike | 2020/10/31 | 4 | 0 | 20.67119885 | 77.09259412  | <a href="https://www.inaturalist.org/observations/63876633">https://www.inaturalist.org/observations/63876633</a>   |
| 629 | Lanius cristatus | Brown Shrike | 2011/8/31  | 2 | 0 | 20.69950011 | 116.72639220 | <a href="https://www.inaturalist.org/observations/40014085">https://www.inaturalist.org/observations/40014085</a>   |
| 630 | Lanius cristatus | Brown Shrike | 2021/3/31  | 2 | 0 | 20.97076402 | 81.49931554  | <a href="https://www.inaturalist.org/observations/72511954">https://www.inaturalist.org/observations/72511954</a>   |
| 631 | Lanius cristatus | Brown Shrike | 2021/3/15  | 2 | 0 | 20.98462279 | 75.53618079  | <a href="https://www.inaturalist.org/observations/71349186">https://www.inaturalist.org/observations/71349186</a>   |
| 632 | Lanius cristatus | Brown Shrike | 2021/1/1   | 4 | 0 | 20.98960524 | 75.54502911  | <a href="https://www.inaturalist.org/observations/67400583">https://www.inaturalist.org/observations/67400583</a>   |
| 633 | Lanius cristatus | Brown Shrike | 2021/5/4   | 1 | 0 | 21.01266268 | 81.45391613  | <a href="https://www.inaturalist.org/observations/77238765">https://www.inaturalist.org/observations/77238765</a>   |
| 634 | Lanius cristatus | Brown Shrike | 2022/10/5  | 2 | 0 | 21.01379191 | 81.45405293  | <a href="https://www.inaturalist.org/observations/142429826">https://www.inaturalist.org/observations/142429826</a> |
| 635 | Lanius cristatus | Brown Shrike | 2021/10/10 | 1 | 0 | 21.04801466 | 75.86916804  | <a href="https://www.inaturalist.org/observations/97763450">https://www.inaturalist.org/observations/97763450</a>   |
| 636 | Lanius cristatus | Brown Shrike | 2021/9/21  | 1 | 0 | 21.08152254 | 81.40923254  | <a href="https://www.inaturalist.org/observations/95730977">https://www.inaturalist.org/observations/95730977</a>   |
| 637 | Lanius cristatus | Brown Shrike | 2021/10/18 | 1 | 0 | 21.08662762 | 81.50319301  | <a href="https://www.inaturalist.org/observations/98594572">https://www.inaturalist.org/observations/98594572</a>   |
| 638 | Lanius cristatus | Brown Shrike | 2021/10/25 | 0 | 0 | 21.16231734 | 81.44367814  | <a href="https://www.inaturalist.org/observations/99851753">https://www.inaturalist.org/observations/99851753</a>   |
| 639 | Lanius cristatus | Brown Shrike | 2020/11/21 | 3 | 0 | 21.20267383 | 80.74586727  | <a href="https://www.inaturalist.org/observations/66920768">https://www.inaturalist.org/observations/66920768</a>   |
| 640 | Lanius cristatus | Brown Shrike | 2021/4/16  | 1 | 0 | 21.20626565 | 81.60784308  | <a href="https://www.inaturalist.org/observations/74646570">https://www.inaturalist.org/observations/74646570</a>   |
| 641 | Lanius cristatus | Brown Shrike | 2021/4/16  | 0 | 0 | 21.20948261 | 81.43681504  | <a href="https://www.inaturalist.org/observations/74212045">https://www.inaturalist.org/observations/74212045</a>   |
| 642 | Lanius cristatus | Brown Shrike | 2019/1/1   | 0 | 0 | 21.21123234 | 81.43891957  | <a href="https://www.inaturalist.org/observations/139509645">https://www.inaturalist.org/observations/139509645</a> |
| 643 | Lanius cristatus | Brown Shrike | 2018/3/16  | 4 | 0 | 21.28470333 | 81.68143000  | <a href="https://www.inaturalist.org/observations/10257074">https://www.inaturalist.org/observations/10257074</a>   |

|     |                  |              |            |   |   |             |              |                                                                                                                     |
|-----|------------------|--------------|------------|---|---|-------------|--------------|---------------------------------------------------------------------------------------------------------------------|
| 644 | Lanius cristatus | Brown Shrike | 2019/12/19 | 3 | 0 | 21.32356052 | 81.73493903  | <a href="https://www.inaturalist.org/observations/37580814">https://www.inaturalist.org/observations/37580814</a>   |
| 645 | Lanius cristatus | Brown Shrike | 2020/1/26  | 3 | 0 | 21.40602820 | 81.86887510  | <a href="https://www.inaturalist.org/observations/121766486">https://www.inaturalist.org/observations/121766486</a> |
| 646 | Lanius cristatus | Brown Shrike | 2018/10/29 | 4 | 0 | 21.42021477 | 81.89239595  | <a href="https://www.inaturalist.org/observations/17959181">https://www.inaturalist.org/observations/17959181</a>   |
| 647 | Lanius cristatus | Brown Shrike | 2019/10/8  | 2 | 0 | 21.45187800 | 109.05539500 | <a href="https://www.inaturalist.org/observations/34316859">https://www.inaturalist.org/observations/34316859</a>   |
| 648 | Lanius cristatus | Brown Shrike | 2016/4/27  | 3 | 0 | 21.63576500 | 87.56219167  | <a href="https://www.inaturalist.org/observations/61388327">https://www.inaturalist.org/observations/61388327</a>   |
| 649 | Lanius cristatus | Brown Shrike | 2015/1/16  | 2 | 0 | 21.63595490 | 87.56299431  | <a href="https://www.inaturalist.org/observations/58693791">https://www.inaturalist.org/observations/58693791</a>   |
| 650 | Lanius cristatus | Brown Shrike | 2015/1/16  | 4 | 0 | 21.63653006 | 87.56187777  | <a href="https://www.inaturalist.org/observations/61137081">https://www.inaturalist.org/observations/61137081</a>   |
| 651 | Lanius cristatus | Brown Shrike | 2016/2/3   | 3 | 0 | 21.64377000 | 87.56583000  | <a href="https://www.inaturalist.org/observations/58690647">https://www.inaturalist.org/observations/58690647</a>   |
| 652 | Lanius cristatus | Brown Shrike | 2015/1/1   | 4 | 0 | 21.64459142 | 87.57297024  | <a href="https://www.inaturalist.org/observations/61329617">https://www.inaturalist.org/observations/61329617</a>   |
| 653 | Lanius cristatus | Brown Shrike | 2021/1/9   | 1 | 0 | 21.65192759 | 111.74996620 | <a href="https://www.inaturalist.org/observations/67785814">https://www.inaturalist.org/observations/67785814</a>   |
| 654 | Lanius cristatus | Brown Shrike | 2014/12/26 | 4 | 0 | 21.65805361 | 87.57264234  | <a href="https://www.inaturalist.org/observations/61329615">https://www.inaturalist.org/observations/61329615</a>   |
| 655 | Lanius cristatus | Brown Shrike | 2021/2/22  | 2 | 0 | 21.66869363 | 81.31583367  | <a href="https://www.inaturalist.org/observations/69991858">https://www.inaturalist.org/observations/69991858</a>   |
| 656 | Lanius cristatus | Brown Shrike | 2019/3/16  | 2 | 0 | 21.77178306 | 79.27518306  | <a href="https://www.inaturalist.org/observations/52923214">https://www.inaturalist.org/observations/52923214</a>   |
| 657 | Lanius cristatus | Brown Shrike | 2020/10/3  | 2 | 0 | 21.80763510 | 83.31094413  | <a href="https://www.inaturalist.org/observations/79921563">https://www.inaturalist.org/observations/79921563</a>   |
| 658 | Lanius cristatus | Brown Shrike | 2021/2/2   | 3 | 0 | 21.83238812 | 81.80266734  | <a href="https://www.inaturalist.org/observations/68952481">https://www.inaturalist.org/observations/68952481</a>   |
| 659 | Lanius cristatus | Brown Shrike | 2018/1/25  | 3 | 0 | 21.83585950 | 88.88420110  | <a href="https://www.inaturalist.org/observations/55579884">https://www.inaturalist.org/observations/55579884</a>   |
| 660 | Lanius cristatus | Brown Shrike | 2021/2/21  | 1 | 0 | 21.83628651 | 88.88347154  | <a href="https://www.inaturalist.org/observations/81263984">https://www.inaturalist.org/observations/81263984</a>   |
| 661 | Lanius cristatus | Brown Shrike | 2021/4/26  | 3 | 0 | 21.89534424 | 87.58025111  | <a href="https://www.inaturalist.org/observations/116141090">https://www.inaturalist.org/observations/116141090</a> |
| 662 | Lanius cristatus | Brown Shrike | 2021/4/26  | 3 | 0 | 21.89534853 | 87.58030936  | <a href="https://www.inaturalist.org/observations/116141091">https://www.inaturalist.org/observations/116141091</a> |
| 663 | Lanius cristatus | Brown Shrike | 2021/4/26  | 2 | 0 | 21.89535911 | 87.58029961  | <a href="https://www.inaturalist.org/observations/116141098">https://www.inaturalist.org/observations/116141098</a> |
| 664 | Lanius cristatus | Brown Shrike | 2019/10/11 | 2 | 0 | 21.91855167 | 120.85027830 | <a href="https://www.inaturalist.org/observations/37983821">https://www.inaturalist.org/observations/37983821</a>   |
| 665 | Lanius cristatus | Brown Shrike | 2020/11/25 | 1 | 0 | 21.93277000 | 101.24932330 | <a href="https://www.inaturalist.org/observations/67952555">https://www.inaturalist.org/observations/67952555</a>   |
| 666 | Lanius cristatus | Brown Shrike | 2021/10/9  | 1 | 0 | 21.93558164 | 120.82187430 | <a href="https://www.inaturalist.org/observations/97650657">https://www.inaturalist.org/observations/97650657</a>   |

|     |                                 |              |            |   |   |             |              |                                                                                                                     |
|-----|---------------------------------|--------------|------------|---|---|-------------|--------------|---------------------------------------------------------------------------------------------------------------------|
| 667 | Lanius cristatus                | Brown Shrike | 2019/9/21  | 2 | 0 | 21.94351540 | 120.82663510 | <a href="https://www.inaturalist.org/observations/33186969">https://www.inaturalist.org/observations/33186969</a>   |
| 668 | Lanius cristatus                | Brown Shrike | 2022/9/11  | 1 | 0 | 21.94833070 | 120.77975160 | <a href="https://www.inaturalist.org/observations/134748395">https://www.inaturalist.org/observations/134748395</a> |
| 669 | Lanius cristatus                | Brown Shrike | 2022/9/12  | 1 | 0 | 21.94833070 | 120.77975160 | <a href="https://www.inaturalist.org/observations/135381331">https://www.inaturalist.org/observations/135381331</a> |
| 670 | Lanius cristatus                | Brown Shrike | 2022/9/11  | 1 | 0 | 21.94861116 | 120.79219270 | <a href="https://www.inaturalist.org/observations/134575945">https://www.inaturalist.org/observations/134575945</a> |
| 671 | Lanius cristatus                | Brown Shrike | 2022/9/17  | 1 | 0 | 21.95339470 | 120.82338470 | <a href="https://www.inaturalist.org/observations/136118713">https://www.inaturalist.org/observations/136118713</a> |
| 672 | Lanius cristatus                | Brown Shrike | 2022/9/17  | 2 | 0 | 21.95339481 | 120.82338470 | <a href="https://www.inaturalist.org/observations/135464115">https://www.inaturalist.org/observations/135464115</a> |
| 673 | Lanius cristatus                | Brown Shrike | 2019/9/16  | 2 | 0 | 21.95407721 | 120.82299410 | <a href="https://www.inaturalist.org/observations/32827500">https://www.inaturalist.org/observations/32827500</a>   |
| 674 | Lanius cristatus                | Brown Shrike | 2019/10/10 | 2 | 0 | 21.96980678 | 120.78820710 | <a href="https://www.inaturalist.org/observations/34455064">https://www.inaturalist.org/observations/34455064</a>   |
| 675 | Lanius cristatus                | Brown Shrike | 2019/12/1  | 2 | 0 | 21.97045200 | 120.74854400 | <a href="https://www.inaturalist.org/observations/45839438">https://www.inaturalist.org/observations/45839438</a>   |
| 676 | Lanius cristatus                | Brown Shrike | 2019/12/1  | 2 | 0 | 21.98540628 | 120.73557030 | <a href="https://www.inaturalist.org/observations/45758933">https://www.inaturalist.org/observations/45758933</a>   |
| 677 | Lanius cristatus                | Brown Shrike | 2019/10/18 | 2 | 0 | 21.98652649 | 120.74059300 | <a href="https://www.inaturalist.org/observations/37870612">https://www.inaturalist.org/observations/37870612</a>   |
| 678 | Lanius cristatus                | Brown Shrike | 2019/11/5  | 2 | 0 | 21.98802170 | 120.74014560 | <a href="https://www.inaturalist.org/observations/35315946">https://www.inaturalist.org/observations/35315946</a>   |
| 679 | Lanius cristatus                | Brown Shrike | 2020/9/24  | 2 | 0 | 21.99066624 | 120.82589590 | <a href="https://www.inaturalist.org/observations/60686293">https://www.inaturalist.org/observations/60686293</a>   |
| 680 | Lanius cristatus                | Brown Shrike | 2019/12/1  | 2 | 0 | 21.99081262 | 120.73646230 | <a href="https://www.inaturalist.org/observations/45760046">https://www.inaturalist.org/observations/45760046</a>   |
| 681 | Lanius cristatus                | Brown Shrike | 2019/9/20  | 2 | 0 | 21.99992774 | 120.73493720 | <a href="https://www.inaturalist.org/observations/46697676">https://www.inaturalist.org/observations/46697676</a>   |
| 682 | Lanius cristatus                | Brown Shrike | 2022/2/24  | 4 | 0 | 22.00770389 | 120.74879310 | <a href="https://www.inaturalist.org/observations/107357609">https://www.inaturalist.org/observations/107357609</a> |
| 683 | Lanius cristatus                | Brown Shrike | 2019/9/22  | 1 | 0 | 22.01362480 | 120.74186660 | <a href="https://www.inaturalist.org/observations/33249837">https://www.inaturalist.org/observations/33249837</a>   |
| 684 | Lanius cristatus                | Brown Shrike | 2019/10/14 | 3 | 0 | 22.01946274 | 120.74030730 | <a href="https://www.inaturalist.org/observations/34357808">https://www.inaturalist.org/observations/34357808</a>   |
| 685 | Lanius cristatus                | Brown Shrike | 2020/12/29 | 3 | 0 | 22.02055472 | 120.83856430 | <a href="https://www.inaturalist.org/observations/67236255">https://www.inaturalist.org/observations/67236255</a>   |
| 686 | Lanius cristatus                | Brown Shrike | 2019/10/12 | 3 | 0 | 22.02140427 | 120.83965300 | <a href="https://www.inaturalist.org/observations/34304812">https://www.inaturalist.org/observations/34304812</a>   |
| 687 | Lanius cristatus<br>lucionensis | Brown Shrike | 2018/10/11 | 2 | 0 | 22.02741333 | 120.85542330 | <a href="https://www.inaturalist.org/observations/17496294">https://www.inaturalist.org/observations/17496294</a>   |
| 688 | Lanius cristatus                | Brown Shrike | 2020/9/4   | 1 | 0 | 22.02974084 | 121.57996890 | <a href="https://www.inaturalist.org/observations/106670964">https://www.inaturalist.org/observations/106670964</a> |
| 689 | Lanius cristatus                | Brown Shrike | 2018/1/21  | 4 | 0 | 22.03464342 | 72.02090860  | <a href="https://www.inaturalist.org/observations/30384153">https://www.inaturalist.org/observations/30384153</a>   |

|     |                  |              |            |   |   |             |              |                                                                                                                     |
|-----|------------------|--------------|------------|---|---|-------------|--------------|---------------------------------------------------------------------------------------------------------------------|
| 690 | Lanius cristatus | Brown Shrike | 2019/10/7  | 2 | 0 | 22.03823871 | 120.84705140 | <a href="https://www.inaturalist.org/observations/34431357">https://www.inaturalist.org/observations/34431357</a>   |
| 691 | Lanius cristatus | Brown Shrike | 2020/9/10  | 2 | 0 | 22.04356160 | 121.54841800 | <a href="https://www.inaturalist.org/observations/61667012">https://www.inaturalist.org/observations/61667012</a>   |
| 692 | Lanius cristatus | Brown Shrike | 2017/4/27  | 1 | 0 | 22.04356200 | 121.54841800 | <a href="https://www.inaturalist.org/observations/137095544">https://www.inaturalist.org/observations/137095544</a> |
| 693 | Lanius cristatus | Brown Shrike | 2019/12/22 | 2 | 0 | 22.04410790 | 72.02028130  | <a href="https://www.inaturalist.org/observations/55904382">https://www.inaturalist.org/observations/55904382</a>   |
| 694 | Lanius cristatus | Brown Shrike | 2017/12/23 | 4 | 0 | 22.04410790 | 72.02028130  | <a href="https://www.inaturalist.org/observations/56417961">https://www.inaturalist.org/observations/56417961</a>   |
| 695 | Lanius cristatus | Brown Shrike | 2019/3/8   | 3 | 0 | 22.05971510 | 82.04343800  | <a href="https://www.inaturalist.org/observations/60035823">https://www.inaturalist.org/observations/60035823</a>   |
| 696 | Lanius cristatus | Brown Shrike | 2021/8/20  | 1 | 0 | 22.06030667 | 82.05720000  | <a href="https://www.inaturalist.org/observations/93631071">https://www.inaturalist.org/observations/93631071</a>   |
| 697 | Lanius cristatus | Brown Shrike | 2021/8/15  | 1 | 0 | 22.06740500 | 82.20358000  | <a href="https://www.inaturalist.org/observations/93615052">https://www.inaturalist.org/observations/93615052</a>   |
| 698 | Lanius cristatus | Brown Shrike | 2020/10/11 | 2 | 0 | 22.06829602 | 111.69132310 | <a href="https://www.inaturalist.org/observations/62380747">https://www.inaturalist.org/observations/62380747</a>   |
| 699 | Lanius cristatus | Brown Shrike | 2019/11/10 | 3 | 0 | 22.07965450 | 82.14091520  | <a href="https://www.inaturalist.org/observations/60429511">https://www.inaturalist.org/observations/60429511</a>   |
| 700 | Lanius cristatus | Brown Shrike | 2022/9/8   | 2 | 0 | 22.08022943 | 121.50541170 | <a href="https://www.inaturalist.org/observations/134693172">https://www.inaturalist.org/observations/134693172</a> |
| 701 | Lanius cristatus | Brown Shrike | 2020/12/2  | 2 | 0 | 22.08111512 | 120.74698960 | <a href="https://www.inaturalist.org/observations/65983180">https://www.inaturalist.org/observations/65983180</a>   |
| 702 | Lanius cristatus | Brown Shrike | 2022/11/10 | 0 | 0 | 22.08983705 | 86.11712795  | <a href="https://www.inaturalist.org/observations/141670871">https://www.inaturalist.org/observations/141670871</a> |
| 703 | Lanius cristatus | Brown Shrike | 2020/5/3   | 2 | 0 | 22.10111302 | 113.52423450 | <a href="https://www.inaturalist.org/observations/67285905">https://www.inaturalist.org/observations/67285905</a>   |
| 704 | Lanius cristatus | Brown Shrike | 2020/4/25  | 2 | 0 | 22.12408911 | 113.56960850 | <a href="https://www.inaturalist.org/observations/43283810">https://www.inaturalist.org/observations/43283810</a>   |
| 705 | Lanius cristatus | Brown Shrike | 2021/1/4   | 2 | 0 | 22.12580633 | 82.14299995  | <a href="https://www.inaturalist.org/observations/80077553">https://www.inaturalist.org/observations/80077553</a>   |
| 706 | Lanius cristatus | Brown Shrike | 2020/4/30  | 2 | 0 | 22.12597217 | 113.56092000 | <a href="https://www.inaturalist.org/observations/44346440">https://www.inaturalist.org/observations/44346440</a>   |
| 707 | Lanius cristatus | Brown Shrike | 2018/3/26  | 4 | 0 | 22.12762692 | 88.83064270  | <a href="https://www.inaturalist.org/observations/10812250">https://www.inaturalist.org/observations/10812250</a>   |
| 708 | Lanius cristatus | Brown Shrike | 2021/9/27  | 1 | 0 | 22.13425500 | 113.56922830 | <a href="https://www.inaturalist.org/observations/118814072">https://www.inaturalist.org/observations/118814072</a> |
| 709 | Lanius cristatus | Brown Shrike | 2019/5/4   | 2 | 0 | 22.13543368 | 113.57524400 | <a href="https://www.inaturalist.org/observations/24505358">https://www.inaturalist.org/observations/24505358</a>   |
| 710 | Lanius cristatus | Brown Shrike | 2022/12/24 | 0 | 0 | 22.15155460 | 113.55906620 | <a href="https://www.inaturalist.org/observations/144986042">https://www.inaturalist.org/observations/144986042</a> |
| 711 | Lanius cristatus | Brown Shrike | 2022/12/24 | 0 | 0 | 22.15309575 | 113.55939210 | <a href="https://www.inaturalist.org/observations/144986492">https://www.inaturalist.org/observations/144986492</a> |
| 712 | Lanius cristatus | Brown Shrike | 2021/1/22  | 2 | 0 | 22.15349450 | 113.56004500 | <a href="https://www.inaturalist.org/observations/68443386">https://www.inaturalist.org/observations/68443386</a>   |

|     |                  |              |            |   |   |             |              |                                                                                                                     |
|-----|------------------|--------------|------------|---|---|-------------|--------------|---------------------------------------------------------------------------------------------------------------------|
| 713 | Lanius cristatus | Brown Shrike | 2020/4/24  | 2 | 0 | 22.15354589 | 113.56046860 | <a href="https://www.inaturalist.org/observations/43052186">https://www.inaturalist.org/observations/43052186</a>   |
| 714 | Lanius cristatus | Brown Shrike | 2021/1/25  | 1 | 0 | 22.15355275 | 113.56100540 | <a href="https://www.inaturalist.org/observations/84331109">https://www.inaturalist.org/observations/84331109</a>   |
| 715 | Lanius cristatus | Brown Shrike | 2022/11/27 | 0 | 0 | 22.15365317 | 113.56037350 | <a href="https://www.inaturalist.org/observations/143040336">https://www.inaturalist.org/observations/143040336</a> |
| 716 | Lanius cristatus | Brown Shrike | 2021/2/20  | 2 | 0 | 22.15367167 | 113.56038830 | <a href="https://www.inaturalist.org/observations/69854253">https://www.inaturalist.org/observations/69854253</a>   |
| 717 | Lanius cristatus | Brown Shrike | 2022/9/21  | 1 | 0 | 22.15383698 | 113.55961770 | <a href="https://www.inaturalist.org/observations/136159285">https://www.inaturalist.org/observations/136159285</a> |
| 718 | Lanius cristatus | Brown Shrike | 2021/1/7   | 2 | 0 | 22.15389167 | 113.55999670 | <a href="https://www.inaturalist.org/observations/67698278">https://www.inaturalist.org/observations/67698278</a>   |
| 719 | Lanius cristatus | Brown Shrike | 2009/5/2   | 1 | 0 | 22.16114300 | 114.25610200 | <a href="https://www.inaturalist.org/observations/142733619">https://www.inaturalist.org/observations/142733619</a> |
| 720 | Lanius cristatus | Brown Shrike | 2022/5/2   | 1 | 0 | 22.16364493 | 114.25430310 | <a href="https://www.inaturalist.org/observations/114634850">https://www.inaturalist.org/observations/114634850</a> |
| 721 | Lanius cristatus | Brown Shrike | 2015/5/12  | 1 | 0 | 22.16457574 | 114.26517650 | <a href="https://www.inaturalist.org/observations/36282792">https://www.inaturalist.org/observations/36282792</a>   |
| 722 | Lanius cristatus | Brown Shrike | 2022/5/3   | 1 | 0 | 22.16461556 | 114.25668580 | <a href="https://www.inaturalist.org/observations/115251206">https://www.inaturalist.org/observations/115251206</a> |
| 723 | Lanius cristatus | Brown Shrike | 2021/5/19  | 1 | 0 | 22.16484500 | 114.25445000 | <a href="https://www.inaturalist.org/observations/112945194">https://www.inaturalist.org/observations/112945194</a> |
| 724 | Lanius cristatus | Brown Shrike | 2021/5/4   | 1 | 0 | 22.16541533 | 114.25548770 | <a href="https://www.inaturalist.org/observations/77418910">https://www.inaturalist.org/observations/77418910</a>   |
| 725 | Lanius cristatus | Brown Shrike | 2022/5/2   | 2 | 0 | 22.16553672 | 114.25812560 | <a href="https://www.inaturalist.org/observations/114697850">https://www.inaturalist.org/observations/114697850</a> |
| 726 | Lanius cristatus | Brown Shrike | 2022/5/2   | 3 | 0 | 22.16650481 | 114.25467360 | <a href="https://www.inaturalist.org/observations/114686681">https://www.inaturalist.org/observations/114686681</a> |
| 727 | Lanius cristatus | Brown Shrike | 2022/5/3   | 1 | 0 | 22.16923240 | 114.25985330 | <a href="https://www.inaturalist.org/observations/115285471">https://www.inaturalist.org/observations/115285471</a> |
| 728 | Lanius cristatus | Brown Shrike | 2019/5/22  | 1 | 0 | 22.19873721 | 113.54387280 | <a href="https://www.inaturalist.org/observations/95652232">https://www.inaturalist.org/observations/95652232</a>   |
| 729 | Lanius cristatus | Brown Shrike | 2022/5/19  | 1 | 0 | 22.19891632 | 113.55263020 | <a href="https://www.inaturalist.org/observations/117731095">https://www.inaturalist.org/observations/117731095</a> |
| 730 | Lanius cristatus | Brown Shrike | 2020/10/1  | 2 | 0 | 22.20009756 | 113.54785430 | <a href="https://www.inaturalist.org/observations/61367605">https://www.inaturalist.org/observations/61367605</a>   |
| 731 | Lanius cristatus | Brown Shrike | 2020/9/29  | 2 | 0 | 22.20035685 | 113.54783110 | <a href="https://www.inaturalist.org/observations/61206613">https://www.inaturalist.org/observations/61206613</a>   |
| 732 | Lanius cristatus | Brown Shrike | 2021/9/27  | 1 | 0 | 22.20048284 | 113.54796560 | <a href="https://www.inaturalist.org/observations/96320081">https://www.inaturalist.org/observations/96320081</a>   |
| 733 | Lanius cristatus | Brown Shrike | 2022/5/6   | 1 | 0 | 22.20059104 | 113.54806420 | <a href="https://www.inaturalist.org/observations/115714664">https://www.inaturalist.org/observations/115714664</a> |
| 734 | Lanius cristatus | Brown Shrike | 2021/5/10  | 1 | 0 | 22.20159912 | 113.54779260 | <a href="https://www.inaturalist.org/observations/78194696">https://www.inaturalist.org/observations/78194696</a>   |
| 735 | Lanius cristatus | Brown Shrike | 2022/5/2   | 1 | 0 | 22.20737259 | 113.54790130 | <a href="https://www.inaturalist.org/observations/114631870">https://www.inaturalist.org/observations/114631870</a> |

|     |                                 |              |            |   |   |             |              |                                                                                                                     |
|-----|---------------------------------|--------------|------------|---|---|-------------|--------------|---------------------------------------------------------------------------------------------------------------------|
| 736 | Lanius cristatus                | Brown Shrike | 2019/5/9   | 2 | 0 | 22.20793573 | 113.54793940 | <a href="https://www.inaturalist.org/observations/24829896">https://www.inaturalist.org/observations/24829896</a>   |
| 737 | Lanius cristatus                | Brown Shrike | 2022/10/16 | 0 | 0 | 22.20797993 | 113.54771370 | <a href="https://www.inaturalist.org/observations/138968030">https://www.inaturalist.org/observations/138968030</a> |
| 738 | Lanius cristatus                | Brown Shrike | 2022/5/2   | 2 | 0 | 22.20810583 | 114.26028110 | <a href="https://www.inaturalist.org/observations/114641050">https://www.inaturalist.org/observations/114641050</a> |
| 739 | Lanius cristatus                | Brown Shrike | 2019/4/29  | 2 | 0 | 22.20814557 | 113.54790490 | <a href="https://www.inaturalist.org/observations/23888044">https://www.inaturalist.org/observations/23888044</a>   |
| 740 | Lanius cristatus                | Brown Shrike | 2022/5/2   | 1 | 0 | 22.20814681 | 114.26028110 | <a href="https://www.inaturalist.org/observations/114641347">https://www.inaturalist.org/observations/114641347</a> |
| 741 | Lanius cristatus                | Brown Shrike | 2022/5/2   | 2 | 0 | 22.20814681 | 114.26028110 | <a href="https://www.inaturalist.org/observations/114643303">https://www.inaturalist.org/observations/114643303</a> |
| 742 | Lanius cristatus                | Brown Shrike | 2022/5/2   | 1 | 0 | 22.20814681 | 114.26028110 | <a href="https://www.inaturalist.org/observations/114643483">https://www.inaturalist.org/observations/114643483</a> |
| 743 | Lanius cristatus                | Brown Shrike | 2022/5/2   | 2 | 0 | 22.20814681 | 114.26028110 | <a href="https://www.inaturalist.org/observations/114643752">https://www.inaturalist.org/observations/114643752</a> |
| 744 | Lanius cristatus                | Brown Shrike | 2020/10/4  | 2 | 0 | 22.20818619 | 113.54777820 | <a href="https://www.inaturalist.org/observations/62254048">https://www.inaturalist.org/observations/62254048</a>   |
| 745 | Lanius cristatus                | Brown Shrike | 2019/5/10  | 2 | 0 | 22.20829281 | 113.54777630 | <a href="https://www.inaturalist.org/observations/24925852">https://www.inaturalist.org/observations/24925852</a>   |
| 746 | Lanius cristatus                | Brown Shrike | 2019/5/11  | 2 | 0 | 22.20833055 | 113.54799910 | <a href="https://www.inaturalist.org/observations/24932566">https://www.inaturalist.org/observations/24932566</a>   |
| 747 | Lanius cristatus                | Brown Shrike | 2022/9/25  | 1 | 0 | 22.20834712 | 114.06232370 | <a href="https://www.inaturalist.org/observations/136393197">https://www.inaturalist.org/observations/136393197</a> |
| 748 | Lanius cristatus                | Brown Shrike | 2019/5/9   | 2 | 0 | 22.20886695 | 113.54750840 | <a href="https://www.inaturalist.org/observations/27844352">https://www.inaturalist.org/observations/27844352</a>   |
| 749 | Lanius cristatus                | Brown Shrike | 2020/12/27 | 2 | 0 | 22.21527652 | 113.54376320 | <a href="https://www.inaturalist.org/observations/67129564">https://www.inaturalist.org/observations/67129564</a>   |
| 750 | Lanius cristatus                | Brown Shrike | 2021/1/2   | 3 | 0 | 22.22018390 | 114.03896700 | <a href="https://www.inaturalist.org/observations/67705347">https://www.inaturalist.org/observations/67705347</a>   |
| 751 | Lanius cristatus                | Brown Shrike | 2020/4/28  | 1 | 0 | 22.22379026 | 114.07255430 | <a href="https://www.inaturalist.org/observations/119050024">https://www.inaturalist.org/observations/119050024</a> |
| 752 | Lanius cristatus                | Brown Shrike | 2014/5/10  | 3 | 0 | 22.22488200 | 114.11450900 | <a href="http://www.inaturalist.org/observations/673657">http://www.inaturalist.org/observations/673657</a>         |
| 753 | Lanius cristatus                | Brown Shrike | 2020/4/25  | 2 | 0 | 22.22558286 | 113.84743970 | <a href="https://www.inaturalist.org/observations/44097928">https://www.inaturalist.org/observations/44097928</a>   |
| 754 | Lanius cristatus                | Brown Shrike | 2019/9/22  | 2 | 0 | 22.22558929 | 113.84657540 | <a href="https://www.inaturalist.org/observations/33798337">https://www.inaturalist.org/observations/33798337</a>   |
| 755 | Lanius cristatus                | Brown Shrike | 2020/4/26  | 2 | 0 | 22.22575924 | 114.11271990 | <a href="https://www.inaturalist.org/observations/43657485">https://www.inaturalist.org/observations/43657485</a>   |
| 756 | Lanius cristatus<br>lucionensis | Brown Shrike | 2018/4/29  | 2 | 0 | 22.22854524 | 113.84872290 | <a href="https://www.inaturalist.org/observations/11836314">https://www.inaturalist.org/observations/11836314</a>   |
| 757 | Lanius cristatus                | Brown Shrike | 2019/10/22 | 3 | 0 | 22.23378053 | 114.17086370 | <a href="https://www.inaturalist.org/observations/34727730">https://www.inaturalist.org/observations/34727730</a>   |
| 758 | Lanius cristatus                | Brown Shrike | 2022/9/22  | 2 | 0 | 22.23416619 | 113.99995530 | <a href="https://www.inaturalist.org/observations/137032429">https://www.inaturalist.org/observations/137032429</a> |



|     |                  |              |            |   |   |             |              |                                                                                                                     |
|-----|------------------|--------------|------------|---|---|-------------|--------------|---------------------------------------------------------------------------------------------------------------------|
| 759 | Lanius cristatus | Brown Shrike | 2018/10/1  | 3 | 0 | 22.23565303 | 114.11055010 | <a href="https://www.inaturalist.org/observations/17304402">https://www.inaturalist.org/observations/17304402</a>   |
| 760 | Lanius cristatus | Brown Shrike | 2022/5/2   | 3 | 0 | 22.23756167 | 114.19342830 | <a href="https://www.inaturalist.org/observations/115046322">https://www.inaturalist.org/observations/115046322</a> |
| 761 | Lanius cristatus | Brown Shrike | 2022/5/2   | 1 | 0 | 22.24044698 | 114.15030410 | <a href="https://www.inaturalist.org/observations/114617792">https://www.inaturalist.org/observations/114617792</a> |
| 762 | Lanius cristatus | Brown Shrike | 2017/1/9   | 2 | 0 | 22.24057100 | 113.97447700 | <a href="https://www.inaturalist.org/observations/11448660">https://www.inaturalist.org/observations/11448660</a>   |
| 763 | Lanius cristatus | Brown Shrike | 2021/2/16  | 2 | 0 | 22.24513333 | 114.17613830 | <a href="https://www.inaturalist.org/observations/69662098">https://www.inaturalist.org/observations/69662098</a>   |
| 764 | Lanius cristatus | Brown Shrike | 2021/4/16  | 3 | 0 | 22.24517475 | 114.17603970 | <a href="https://www.inaturalist.org/observations/74612051">https://www.inaturalist.org/observations/74612051</a>   |
| 765 | Lanius cristatus | Brown Shrike | 2020/4/4   | 2 | 0 | 22.24882591 | 113.94221310 | <a href="https://www.inaturalist.org/observations/41510990">https://www.inaturalist.org/observations/41510990</a>   |
| 766 | Lanius cristatus | Brown Shrike | 2019/12/20 | 3 | 0 | 22.25207297 | 114.13359720 | <a href="https://www.inaturalist.org/observations/36799470">https://www.inaturalist.org/observations/36799470</a>   |
| 767 | Lanius cristatus | Brown Shrike | 2021/5/3   | 1 | 0 | 22.25643409 | 114.38741320 | <a href="https://www.inaturalist.org/observations/77147655">https://www.inaturalist.org/observations/77147655</a>   |
| 768 | Lanius cristatus | Brown Shrike | 2022/10/2  | 1 | 0 | 22.25657785 | 114.29453500 | <a href="https://www.inaturalist.org/observations/137485249">https://www.inaturalist.org/observations/137485249</a> |
| 769 | Lanius cristatus | Brown Shrike | 2020/12/9  | 2 | 0 | 22.26402283 | 120.66604960 | <a href="https://www.inaturalist.org/observations/66319982">https://www.inaturalist.org/observations/66319982</a>   |
| 770 | Lanius cristatus | Brown Shrike | 2022/2/16  | 1 | 0 | 22.26668946 | 113.99247000 | <a href="https://www.inaturalist.org/observations/106848270">https://www.inaturalist.org/observations/106848270</a> |
| 771 | Lanius cristatus | Brown Shrike | 2022/5/6   | 1 | 0 | 22.26670755 | 114.18333330 | <a href="https://www.inaturalist.org/observations/115711217">https://www.inaturalist.org/observations/115711217</a> |
| 772 | Lanius cristatus | Brown Shrike | 2022/5/6   | 1 | 0 | 22.26670755 | 114.18333330 | <a href="https://www.inaturalist.org/observations/115711265">https://www.inaturalist.org/observations/115711265</a> |
| 773 | Lanius cristatus | Brown Shrike | 2022/9/24  | 2 | 0 | 22.26677799 | 113.94175100 | <a href="https://www.inaturalist.org/observations/136561112">https://www.inaturalist.org/observations/136561112</a> |
| 774 | Lanius cristatus | Brown Shrike | 2022/10/4  | 1 | 0 | 22.26917459 | 120.88325010 | <a href="https://www.inaturalist.org/observations/142204376">https://www.inaturalist.org/observations/142204376</a> |
| 775 | Lanius cristatus | Brown Shrike | 2010/4/18  | 1 | 0 | 22.26955200 | 113.99153200 | <a href="https://www.inaturalist.org/observations/109742105">https://www.inaturalist.org/observations/109742105</a> |
| 776 | Lanius cristatus | Brown Shrike | 2017/2/3   | 4 | 0 | 22.27172000 | 80.62366833  | <a href="https://www.inaturalist.org/observations/5183081">https://www.inaturalist.org/observations/5183081</a>     |
| 777 | Lanius cristatus | Brown Shrike | 2022/10/3  | 1 | 0 | 22.27226794 | 120.86929960 | <a href="https://www.inaturalist.org/observations/142575769">https://www.inaturalist.org/observations/142575769</a> |
| 778 | Lanius cristatus | Brown Shrike | 2022/5/4   | 1 | 0 | 22.27251639 | 114.20635630 | <a href="https://www.inaturalist.org/observations/115321182">https://www.inaturalist.org/observations/115321182</a> |
| 779 | Lanius cristatus | Brown Shrike | 2017/2/3   | 5 | 0 | 22.27365667 | 80.62430500  | <a href="https://www.inaturalist.org/observations/5183275">https://www.inaturalist.org/observations/5183275</a>     |
| 780 | Lanius cristatus | Brown Shrike | 2021/5/6   | 1 | 0 | 22.27664222 | 114.12369110 | <a href="https://www.inaturalist.org/observations/77604939">https://www.inaturalist.org/observations/77604939</a>   |
| 781 | Lanius cristatus | Brown Shrike | 2021/5/7   | 1 | 0 | 22.27728610 | 114.20568420 | <a href="https://www.inaturalist.org/observations/77713107">https://www.inaturalist.org/observations/77713107</a>   |

|     |                                 |              |            |   |   |             |              |                                                                                                                     |
|-----|---------------------------------|--------------|------------|---|---|-------------|--------------|---------------------------------------------------------------------------------------------------------------------|
| 782 | Lanius cristatus                | Brown Shrike | 2021/10/25 | 2 | 0 | 22.27741027 | 114.12196530 | <a href="https://www.inaturalist.org/observations/99322331">https://www.inaturalist.org/observations/99322331</a>   |
| 783 | Lanius cristatus                | Brown Shrike | 2013/5/4   | 4 | 0 | 22.27831510 | 114.17469500 | <a href="http://www.inaturalist.org/observations/3952650">http://www.inaturalist.org/observations/3952650</a>       |
| 784 | Lanius cristatus                | Brown Shrike | 2022/5/9   | 1 | 0 | 22.28015589 | 114.21083730 | <a href="https://www.inaturalist.org/observations/116250535">https://www.inaturalist.org/observations/116250535</a> |
| 785 | Lanius cristatus                | Brown Shrike | 2022/5/2   | 1 | 0 | 22.28190391 | 114.22214070 | <a href="https://www.inaturalist.org/observations/114611769">https://www.inaturalist.org/observations/114611769</a> |
| 786 | Lanius cristatus                | Brown Shrike | 2019/5/11  | 3 | 0 | 22.28511810 | 114.14567570 | <a href="https://www.inaturalist.org/observations/25094987">https://www.inaturalist.org/observations/25094987</a>   |
| 787 | Lanius cristatus                | Brown Shrike | 2020/4/26  | 2 | 0 | 22.28589986 | 114.15608180 | <a href="https://www.inaturalist.org/observations/43657168">https://www.inaturalist.org/observations/43657168</a>   |
| 788 | Lanius cristatus                | Brown Shrike | 2021/11/1  | 1 | 0 | 22.28986391 | 114.29977800 | <a href="https://www.inaturalist.org/observations/99943357">https://www.inaturalist.org/observations/99943357</a>   |
| 789 | Lanius cristatus                | Brown Shrike | 2019/4/20  | 2 | 0 | 22.29608708 | 114.16911580 | <a href="https://www.inaturalist.org/observations/67290694">https://www.inaturalist.org/observations/67290694</a>   |
| 790 | Lanius cristatus                | Brown Shrike | 2020/4/26  | 2 | 0 | 22.29646921 | 114.27601600 | <a href="https://www.inaturalist.org/observations/44103508">https://www.inaturalist.org/observations/44103508</a>   |
| 791 | Lanius cristatus                | Brown Shrike | 2020/4/25  | 2 | 0 | 22.29682969 | 114.27676330 | <a href="https://www.inaturalist.org/observations/44097782">https://www.inaturalist.org/observations/44097782</a>   |
| 792 | Lanius cristatus                | Brown Shrike | 2021/1/9   | 2 | 0 | 22.29780667 | 114.27308170 | <a href="https://www.inaturalist.org/observations/67792893">https://www.inaturalist.org/observations/67792893</a>   |
| 793 | Lanius cristatus                | Brown Shrike | 2020/4/27  | 2 | 0 | 22.29794861 | 114.27712070 | <a href="https://www.inaturalist.org/observations/44134312">https://www.inaturalist.org/observations/44134312</a>   |
| 794 | Lanius cristatus                | Brown Shrike | 2019/12/7  | 2 | 0 | 22.29837828 | 114.27637440 | <a href="https://www.inaturalist.org/observations/36427709">https://www.inaturalist.org/observations/36427709</a>   |
| 795 | Lanius cristatus<br>lucionensis | Brown Shrike | 2022/1/23  | 0 | 0 | 22.29881230 | 114.17217460 | <a href="https://www.inaturalist.org/observations/108810576">https://www.inaturalist.org/observations/108810576</a> |
| 796 | Lanius cristatus                | Brown Shrike | 2021/11/24 | 2 | 0 | 22.29925966 | 114.17064640 | <a href="https://www.inaturalist.org/observations/101927980">https://www.inaturalist.org/observations/101927980</a> |
| 797 | Lanius cristatus                | Brown Shrike | 2020/4/27  | 2 | 0 | 22.29970387 | 114.16995910 | <a href="https://www.inaturalist.org/observations/43880376">https://www.inaturalist.org/observations/43880376</a>   |
| 798 | Lanius cristatus                | Brown Shrike | 2022/5/3   | 1 | 0 | 22.29973972 | 114.18644810 | <a href="https://www.inaturalist.org/observations/115062536">https://www.inaturalist.org/observations/115062536</a> |
| 799 | Lanius cristatus                | Brown Shrike | 2022/2/7   | 3 | 0 | 22.30028392 | 114.17016090 | <a href="https://www.inaturalist.org/observations/106309974">https://www.inaturalist.org/observations/106309974</a> |
| 800 | Lanius cristatus                | Brown Shrike | 2022/1/15  | 1 | 0 | 22.30043871 | 114.17019250 | <a href="https://www.inaturalist.org/observations/104965803">https://www.inaturalist.org/observations/104965803</a> |
| 801 | Lanius cristatus                | Brown Shrike | 2022/5/7   | 2 | 0 | 22.30045267 | 114.17007710 | <a href="https://www.inaturalist.org/observations/115883950">https://www.inaturalist.org/observations/115883950</a> |
| 802 | Lanius cristatus                | Brown Shrike | 2020/1/17  | 2 | 0 | 22.30073330 | 114.17000590 | <a href="https://www.inaturalist.org/observations/37678126">https://www.inaturalist.org/observations/37678126</a>   |
| 803 | Lanius cristatus                | Brown Shrike | 2019/4/28  | 3 | 0 | 22.30075370 | 114.17005020 | <a href="https://www.inaturalist.org/observations/23821630">https://www.inaturalist.org/observations/23821630</a>   |
| 804 | Lanius cristatus                | Brown Shrike | 2022/1/15  | 1 | 0 | 22.30094837 | 114.16964060 | <a href="https://www.inaturalist.org/observations/104961228">https://www.inaturalist.org/observations/104961228</a> |

|     |                  |              |            |   |   |             |              |                                                                                                                     |
|-----|------------------|--------------|------------|---|---|-------------|--------------|---------------------------------------------------------------------------------------------------------------------|
| 805 | Lanius cristatus | Brown Shrike | 2022/1/15  | 1 | 0 | 22.30120727 | 114.16931960 | <a href="https://www.inaturalist.org/observations/104968717">https://www.inaturalist.org/observations/104968717</a> |
| 806 | Lanius cristatus | Brown Shrike | 2022/11/7  | 2 | 0 | 22.30218367 | 114.25506990 | <a href="https://www.inaturalist.org/observations/141422731">https://www.inaturalist.org/observations/141422731</a> |
| 807 | Lanius cristatus | Brown Shrike | 2022/2/24  | 1 | 0 | 22.30219985 | 114.25525760 | <a href="https://www.inaturalist.org/observations/107363610">https://www.inaturalist.org/observations/107363610</a> |
| 808 | Lanius cristatus | Brown Shrike | 2022/11/11 | 1 | 0 | 22.30220404 | 114.25502930 | <a href="https://www.inaturalist.org/observations/141899958">https://www.inaturalist.org/observations/141899958</a> |
| 809 | Lanius cristatus | Brown Shrike | 2022/1/25  | 1 | 0 | 22.30227452 | 114.25492270 | <a href="https://www.inaturalist.org/observations/105560744">https://www.inaturalist.org/observations/105560744</a> |
| 810 | Lanius cristatus | Brown Shrike | 2022/12/24 | 1 | 0 | 22.30270386 | 114.25495910 | <a href="https://www.inaturalist.org/observations/144969701">https://www.inaturalist.org/observations/144969701</a> |
| 811 | Lanius cristatus | Brown Shrike | 2022/12/23 | 2 | 0 | 22.30273833 | 114.25496670 | <a href="https://www.inaturalist.org/observations/144901359">https://www.inaturalist.org/observations/144901359</a> |
| 812 | Lanius cristatus | Brown Shrike | 2022/3/12  | 1 | 0 | 22.30303563 | 114.25386750 | <a href="https://www.inaturalist.org/observations/108504537">https://www.inaturalist.org/observations/108504537</a> |
| 813 | Lanius cristatus | Brown Shrike | 2019/5/9   | 3 | 0 | 22.30582647 | 113.91985250 | <a href="https://www.inaturalist.org/observations/24897927">https://www.inaturalist.org/observations/24897927</a>   |
| 814 | Lanius cristatus | Brown Shrike | 2022/11/5  | 2 | 0 | 22.30701076 | 114.19099470 | <a href="https://www.inaturalist.org/observations/141133661">https://www.inaturalist.org/observations/141133661</a> |
| 815 | Lanius cristatus | Brown Shrike | 2022/1/1   | 1 | 0 | 22.30704000 | 114.19035330 | <a href="https://www.inaturalist.org/observations/105398815">https://www.inaturalist.org/observations/105398815</a> |
| 816 | Lanius cristatus | Brown Shrike | 2022/11/6  | 1 | 0 | 22.30705472 | 114.19029310 | <a href="https://www.inaturalist.org/observations/141249217">https://www.inaturalist.org/observations/141249217</a> |
| 817 | Lanius cristatus | Brown Shrike | 2022/1/1   | 3 | 0 | 22.30706238 | 114.19036810 | <a href="https://www.inaturalist.org/observations/104105808">https://www.inaturalist.org/observations/104105808</a> |
| 818 | Lanius cristatus | Brown Shrike | 2021/12/30 | 2 | 0 | 22.30710600 | 114.19042800 | <a href="https://www.inaturalist.org/observations/103945504">https://www.inaturalist.org/observations/103945504</a> |
| 819 | Lanius cristatus | Brown Shrike | 2022/1/2   | 3 | 0 | 22.30735678 | 114.19076260 | <a href="https://www.inaturalist.org/observations/104197324">https://www.inaturalist.org/observations/104197324</a> |
| 820 | Lanius cristatus | Brown Shrike | 2022/1/1   | 2 | 0 | 22.30757940 | 114.19093750 | <a href="https://www.inaturalist.org/observations/104154986">https://www.inaturalist.org/observations/104154986</a> |
| 821 | Lanius cristatus | Brown Shrike | 2022/1/2   | 2 | 0 | 22.30757940 | 114.19093750 | <a href="https://www.inaturalist.org/observations/112989284">https://www.inaturalist.org/observations/112989284</a> |
| 822 | Lanius cristatus | Brown Shrike | 2021/12/27 | 3 | 0 | 22.30757964 | 114.19092890 | <a href="https://www.inaturalist.org/observations/103810348">https://www.inaturalist.org/observations/103810348</a> |
| 823 | Lanius cristatus | Brown Shrike | 2018/12/26 | 2 | 0 | 22.30877101 | 114.26533760 | <a href="https://www.inaturalist.org/observations/19857422">https://www.inaturalist.org/observations/19857422</a>   |
| 824 | Lanius cristatus | Brown Shrike | 2022/1/4   | 4 | 0 | 22.31021000 | 73.29345333  | <a href="https://www.inaturalist.org/observations/120809374">https://www.inaturalist.org/observations/120809374</a> |
| 825 | Lanius cristatus | Brown Shrike | 2014/10/10 | 5 | 0 | 22.31061500 | 88.67460300  | <a href="http://www.inaturalist.org/observations/918702">http://www.inaturalist.org/observations/918702</a>         |
| 826 | Lanius cristatus | Brown Shrike | 2020/2/23  | 3 | 0 | 22.31306017 | 114.18327360 | <a href="https://www.inaturalist.org/observations/101690541">https://www.inaturalist.org/observations/101690541</a> |
| 827 | Lanius cristatus | Brown Shrike | 2020/2/23  | 1 | 0 | 22.31306017 | 114.18327360 | <a href="https://www.inaturalist.org/observations/101690691">https://www.inaturalist.org/observations/101690691</a> |

|     |                                 |              |            |   |   |             |              |                                                                                                                     |
|-----|---------------------------------|--------------|------------|---|---|-------------|--------------|---------------------------------------------------------------------------------------------------------------------|
| 828 | Lanius cristatus                | Brown Shrike | 2022/4/15  | 3 | 0 | 22.31332588 | 114.26065830 | <a href="https://www.inaturalist.org/observations/116640835">https://www.inaturalist.org/observations/116640835</a> |
| 829 | Lanius cristatus<br>lucionensis | Brown Shrike | 2019/5/4   | 3 | 0 | 22.31772256 | 114.18321500 | <a href="https://www.inaturalist.org/observations/30412508">https://www.inaturalist.org/observations/30412508</a>   |
| 830 | Lanius cristatus                | Brown Shrike | 2020/9/16  | 2 | 0 | 22.31791707 | 114.18378230 | <a href="https://www.inaturalist.org/observations/59858626">https://www.inaturalist.org/observations/59858626</a>   |
| 831 | Lanius cristatus                | Brown Shrike | 2017/11/26 | 2 | 0 | 22.31794783 | 114.18379430 | <a href="https://www.inaturalist.org/observations/9447636">https://www.inaturalist.org/observations/9447636</a>     |
| 832 | Lanius cristatus                | Brown Shrike | 2021/11/21 | 1 | 0 | 22.31800453 | 114.18377310 | <a href="https://www.inaturalist.org/observations/101790712">https://www.inaturalist.org/observations/101790712</a> |
| 833 | Lanius cristatus                | Brown Shrike | 2022/9/24  | 2 | 0 | 22.31818526 | 114.18449170 | <a href="https://www.inaturalist.org/observations/136379700">https://www.inaturalist.org/observations/136379700</a> |
| 834 | Lanius cristatus                | Brown Shrike | 2022/9/26  | 2 | 0 | 22.31820616 | 114.18400460 | <a href="https://www.inaturalist.org/observations/136569172">https://www.inaturalist.org/observations/136569172</a> |
| 835 | Lanius cristatus                | Brown Shrike | 2019/9/14  | 2 | 0 | 22.31820986 | 114.18346840 | <a href="https://www.inaturalist.org/observations/32679460">https://www.inaturalist.org/observations/32679460</a>   |
| 836 | Lanius cristatus                | Brown Shrike | 2022/10/13 | 1 | 0 | 22.31830601 | 87.86356855  | <a href="https://www.inaturalist.org/observations/138600098">https://www.inaturalist.org/observations/138600098</a> |
| 837 | Lanius cristatus                | Brown Shrike | 2018/12/19 | 2 | 0 | 22.31833428 | 114.18329010 | <a href="https://www.inaturalist.org/observations/30412523">https://www.inaturalist.org/observations/30412523</a>   |
| 838 | Lanius cristatus                | Brown Shrike | 2018/10/1  | 3 | 0 | 22.31840330 | 114.18395360 | <a href="https://www.inaturalist.org/observations/17091036">https://www.inaturalist.org/observations/17091036</a>   |
| 839 | Lanius cristatus                | Brown Shrike | 2022/2/24  | 3 | 0 | 22.31840330 | 114.18395360 | <a href="https://www.inaturalist.org/observations/107370651">https://www.inaturalist.org/observations/107370651</a> |
| 840 | Lanius cristatus                | Brown Shrike | 2020/4/13  | 2 | 0 | 22.31841084 | 114.18395350 | <a href="https://www.inaturalist.org/observations/42084579">https://www.inaturalist.org/observations/42084579</a>   |
| 841 | Lanius cristatus                | Brown Shrike | 2022/10/16 | 1 | 0 | 22.31850700 | 114.17553390 | <a href="https://www.inaturalist.org/observations/139096401">https://www.inaturalist.org/observations/139096401</a> |
| 842 | Lanius cristatus                | Brown Shrike | 2022/9/23  | 2 | 0 | 22.31857191 | 114.18364420 | <a href="https://www.inaturalist.org/observations/136125785">https://www.inaturalist.org/observations/136125785</a> |
| 843 | Lanius cristatus                | Brown Shrike | 2021/1/2   | 3 | 0 | 22.32022040 | 114.27603400 | <a href="https://www.inaturalist.org/observations/70599790">https://www.inaturalist.org/observations/70599790</a>   |
| 844 | Lanius cristatus                | Brown Shrike | 2016/11/29 | 3 | 0 | 22.32787411 | 80.58360099  | <a href="https://www.inaturalist.org/observations/37750993">https://www.inaturalist.org/observations/37750993</a>   |
| 845 | Lanius cristatus                | Brown Shrike | 2022/10/4  | 1 | 0 | 22.32819647 | 114.10197900 | <a href="https://www.inaturalist.org/observations/140365391">https://www.inaturalist.org/observations/140365391</a> |
| 846 | Lanius cristatus                | Brown Shrike | 2014/3/26  | 4 | 0 | 22.32828400 | 114.20620700 | <a href="http://www.inaturalist.org/observations/592256">http://www.inaturalist.org/observations/592256</a>         |
| 847 | Lanius cristatus                | Brown Shrike | 2017/3/8   | 5 | 0 | 22.32838936 | 80.60695410  | <a href="https://www.inaturalist.org/observations/5464998">https://www.inaturalist.org/observations/5464998</a>     |
| 848 | Lanius cristatus<br>lucionensis | Brown Shrike | 2019/9/7   | 1 | 0 | 22.33111112 | 114.18291910 | <a href="https://www.inaturalist.org/observations/32260865">https://www.inaturalist.org/observations/32260865</a>   |
| 849 | Lanius cristatus                | Brown Shrike | 2019/5/7   | 4 | 0 | 22.33157756 | 114.18269380 | <a href="https://www.inaturalist.org/observations/24722298">https://www.inaturalist.org/observations/24722298</a>   |
| 850 | Lanius cristatus                | Brown Shrike | 2019/5/5   | 2 | 0 | 22.33159612 | 114.18285100 | <a href="https://www.inaturalist.org/observations/24578138">https://www.inaturalist.org/observations/24578138</a>   |

|     |                                 |              |            |   |   |             |              |                                                                                                                     |
|-----|---------------------------------|--------------|------------|---|---|-------------|--------------|---------------------------------------------------------------------------------------------------------------------|
| 851 | Lanius cristatus<br>lucionensis | Brown Shrike | 2022/9/20  | 1 | 0 | 22.33185830 | 114.18269930 | <a href="https://www.inaturalist.org/observations/135768417">https://www.inaturalist.org/observations/135768417</a> |
| 852 | Lanius cristatus                | Brown Shrike | 2022/2/12  | 1 | 0 | 22.33203474 | 114.18919370 | <a href="https://www.inaturalist.org/observations/106654148">https://www.inaturalist.org/observations/106654148</a> |
| 853 | Lanius cristatus                | Brown Shrike | 2020/2/1   | 2 | 0 | 22.33232134 | 114.18958660 | <a href="https://www.inaturalist.org/observations/38178070">https://www.inaturalist.org/observations/38178070</a>   |
| 854 | Lanius cristatus                | Brown Shrike | 2020/5/14  | 3 | 0 | 22.33326561 | 114.18540380 | <a href="https://www.inaturalist.org/observations/45857769">https://www.inaturalist.org/observations/45857769</a>   |
| 855 | Lanius cristatus                | Brown Shrike | 2022/3/6   | 1 | 0 | 22.33342500 | 114.14180000 | <a href="https://www.inaturalist.org/observations/108021672">https://www.inaturalist.org/observations/108021672</a> |
| 856 | Lanius cristatus                | Brown Shrike | 2022/2/1   | 2 | 0 | 22.33351926 | 114.14178070 | <a href="https://www.inaturalist.org/observations/113348457">https://www.inaturalist.org/observations/113348457</a> |
| 857 | Lanius cristatus                | Brown Shrike | 2021/3/20  | 1 | 0 | 22.33407770 | 80.61120460  | <a href="https://www.inaturalist.org/observations/73365594">https://www.inaturalist.org/observations/73365594</a>   |
| 858 | Lanius cristatus                | Brown Shrike | 2020/5/10  | 3 | 0 | 22.33414560 | 114.13846530 | <a href="https://www.inaturalist.org/observations/45475605">https://www.inaturalist.org/observations/45475605</a>   |
| 859 | Lanius cristatus                | Brown Shrike | 2022/3/11  | 2 | 0 | 22.33414907 | 114.18494610 | <a href="https://www.inaturalist.org/observations/108342196">https://www.inaturalist.org/observations/108342196</a> |
| 860 | Lanius cristatus                | Brown Shrike | 2022/5/9   | 2 | 0 | 22.33416485 | 114.18507480 | <a href="https://www.inaturalist.org/observations/116259463">https://www.inaturalist.org/observations/116259463</a> |
| 861 | Lanius cristatus                | Brown Shrike | 2022/12/6  | 2 | 0 | 22.33421395 | 114.13849930 | <a href="https://www.inaturalist.org/observations/143802543">https://www.inaturalist.org/observations/143802543</a> |
| 862 | Lanius cristatus                | Brown Shrike | 2020/4/27  | 2 | 0 | 22.33428020 | 114.18511380 | <a href="https://www.inaturalist.org/observations/43857133">https://www.inaturalist.org/observations/43857133</a>   |
| 863 | Lanius cristatus<br>lucionensis | Brown Shrike | 2020/4/28  | 3 | 0 | 22.33440086 | 114.18508880 | <a href="https://www.inaturalist.org/observations/44107689">https://www.inaturalist.org/observations/44107689</a>   |
| 864 | Lanius cristatus                | Brown Shrike | 2020/3/21  | 2 | 0 | 22.33447561 | 114.13792030 | <a href="https://www.inaturalist.org/observations/40454863">https://www.inaturalist.org/observations/40454863</a>   |
| 865 | Lanius cristatus                | Brown Shrike | 2014/3/6   | 3 | 0 | 22.33451320 | 80.61151300  | <a href="https://www.inaturalist.org/observations/52901137">https://www.inaturalist.org/observations/52901137</a>   |
| 866 | Lanius cristatus                | Brown Shrike | 2019/2/12  | 1 | 0 | 22.33451320 | 80.61151300  | <a href="https://www.inaturalist.org/observations/90521743">https://www.inaturalist.org/observations/90521743</a>   |
| 867 | Lanius cristatus                | Brown Shrike | 2022/2/13  | 1 | 0 | 22.33461745 | 114.13961260 | <a href="https://www.inaturalist.org/observations/107606785">https://www.inaturalist.org/observations/107606785</a> |
| 868 | Lanius cristatus                | Brown Shrike | 2022/2/11  | 2 | 0 | 22.33462681 | 114.13969780 | <a href="https://www.inaturalist.org/observations/107086707">https://www.inaturalist.org/observations/107086707</a> |
| 869 | Lanius cristatus                | Brown Shrike | 2020/11/11 | 2 | 0 | 22.33465417 | 114.13844660 | <a href="https://www.inaturalist.org/observations/82510759">https://www.inaturalist.org/observations/82510759</a>   |
| 870 | Lanius cristatus                | Brown Shrike | 2020/2/21  | 1 | 0 | 22.33469328 | 114.13809380 | <a href="https://www.inaturalist.org/observations/101690353">https://www.inaturalist.org/observations/101690353</a> |
| 871 | Lanius cristatus                | Brown Shrike | 2022/2/2   | 1 | 0 | 22.33469328 | 114.13809380 | <a href="https://www.inaturalist.org/observations/106010187">https://www.inaturalist.org/observations/106010187</a> |
| 872 | Lanius cristatus                | Brown Shrike | 2020/3/15  | 2 | 0 | 22.33501058 | 114.13773910 | <a href="https://www.inaturalist.org/observations/40063061">https://www.inaturalist.org/observations/40063061</a>   |
| 873 | Lanius cristatus                | Brown Shrike | 2022/2/3   | 1 | 0 | 22.33501147 | 114.13737130 | <a href="https://www.inaturalist.org/observations/123179640">https://www.inaturalist.org/observations/123179640</a> |

|     |                  |              |            |   |   |             |              |                                                                                                                     |
|-----|------------------|--------------|------------|---|---|-------------|--------------|---------------------------------------------------------------------------------------------------------------------|
| 874 | Lanius cristatus | Brown Shrike | 2011/11/4  | 3 | 0 | 22.33635907 | 80.60170874  | <a href="https://www.inaturalist.org/observations/41553739">https://www.inaturalist.org/observations/41553739</a>   |
| 875 | Lanius cristatus | Brown Shrike | 2019/5/4   | 2 | 0 | 22.33726825 | 113.50081070 | <a href="https://www.inaturalist.org/observations/67286809">https://www.inaturalist.org/observations/67286809</a>   |
| 876 | Lanius cristatus | Brown Shrike | 2021/5/5   | 2 | 0 | 22.33742871 | 114.13636610 | <a href="https://www.inaturalist.org/observations/82284192">https://www.inaturalist.org/observations/82284192</a>   |
| 877 | Lanius cristatus | Brown Shrike | 2020/2/2   | 3 | 0 | 22.33795365 | 114.17453180 | <a href="https://www.inaturalist.org/observations/38289556">https://www.inaturalist.org/observations/38289556</a>   |
| 878 | Lanius cristatus | Brown Shrike | 2021/1/5   | 2 | 0 | 22.33906596 | 114.17375210 | <a href="https://www.inaturalist.org/observations/67730472">https://www.inaturalist.org/observations/67730472</a>   |
| 879 | Lanius cristatus | Brown Shrike | 2021/1/6   | 2 | 0 | 22.33907092 | 114.17375210 | <a href="https://www.inaturalist.org/observations/67730530">https://www.inaturalist.org/observations/67730530</a>   |
| 880 | Lanius cristatus | Brown Shrike | 2022/3/9   | 1 | 0 | 22.34623333 | 120.36553330 | <a href="https://www.inaturalist.org/observations/108213489">https://www.inaturalist.org/observations/108213489</a> |
| 881 | Lanius cristatus | Brown Shrike | 2022/9/27  | 2 | 0 | 22.34652480 | 114.09830680 | <a href="https://www.inaturalist.org/observations/136682604">https://www.inaturalist.org/observations/136682604</a> |
| 882 | Lanius cristatus | Brown Shrike | 2020/11/1  | 3 | 0 | 22.34722947 | 80.44999849  | <a href="https://www.inaturalist.org/observations/63946051">https://www.inaturalist.org/observations/63946051</a>   |
| 883 | Lanius cristatus | Brown Shrike | 2020/4/26  | 2 | 0 | 22.35256293 | 114.24333920 | <a href="https://www.inaturalist.org/observations/44096630">https://www.inaturalist.org/observations/44096630</a>   |
| 884 | Lanius cristatus | Brown Shrike | 2020/3/25  | 2 | 0 | 22.35591033 | 114.10561320 | <a href="https://www.inaturalist.org/observations/41012082">https://www.inaturalist.org/observations/41012082</a>   |
| 885 | Lanius cristatus | Brown Shrike | 2018/12/21 | 2 | 0 | 22.35609177 | 114.10585340 | <a href="https://www.inaturalist.org/observations/68891460">https://www.inaturalist.org/observations/68891460</a>   |
| 886 | Lanius cristatus | Brown Shrike | 2021/1/14  | 2 | 0 | 22.35615969 | 114.10494270 | <a href="https://www.inaturalist.org/observations/68136910">https://www.inaturalist.org/observations/68136910</a>   |
| 887 | Lanius cristatus | Brown Shrike | 2020/12/6  | 2 | 0 | 22.36420099 | 88.38824130  | <a href="https://www.inaturalist.org/observations/111894239">https://www.inaturalist.org/observations/111894239</a> |
| 888 | Lanius cristatus | Brown Shrike | 2021/5/7   | 1 | 0 | 22.37407044 | 114.26530080 | <a href="https://www.inaturalist.org/observations/112031345">https://www.inaturalist.org/observations/112031345</a> |
| 889 | Lanius cristatus | Brown Shrike | 2022/11/5  | 1 | 0 | 22.37409295 | 114.26505380 | <a href="https://www.inaturalist.org/observations/141149055">https://www.inaturalist.org/observations/141149055</a> |
| 890 | Lanius cristatus | Brown Shrike | 2022/5/2   | 1 | 0 | 22.37421637 | 114.26498320 | <a href="https://www.inaturalist.org/observations/114635737">https://www.inaturalist.org/observations/114635737</a> |
| 891 | Lanius cristatus | Brown Shrike | 2022/3/18  | 1 | 0 | 22.37487418 | 114.07809660 | <a href="https://www.inaturalist.org/observations/108951183">https://www.inaturalist.org/observations/108951183</a> |
| 892 | Lanius cristatus | Brown Shrike | 2022/1/19  | 2 | 0 | 22.37519033 | 114.26340600 | <a href="https://www.inaturalist.org/observations/105217020">https://www.inaturalist.org/observations/105217020</a> |
| 893 | Lanius cristatus | Brown Shrike | 2022/3/13  | 1 | 0 | 22.38111847 | 114.26518070 | <a href="https://www.inaturalist.org/observations/108705689">https://www.inaturalist.org/observations/108705689</a> |
| 894 | Lanius cristatus | Brown Shrike | 2022/12/24 | 0 | 0 | 22.38364390 | 114.27078670 | <a href="https://www.inaturalist.org/observations/145246610">https://www.inaturalist.org/observations/145246610</a> |
| 895 | Lanius cristatus | Brown Shrike | 2019/5/9   | 5 | 0 | 22.38417667 | 114.10797500 | <a href="https://www.inaturalist.org/observations/24827793">https://www.inaturalist.org/observations/24827793</a>   |
| 896 | Lanius cristatus | Brown Shrike | 2022/1/24  | 2 | 0 | 22.38493080 | 114.27069740 | <a href="https://www.inaturalist.org/observations/105478802">https://www.inaturalist.org/observations/105478802</a> |

|     |                                 |              |            |   |   |             |              |                                                                                                                     |
|-----|---------------------------------|--------------|------------|---|---|-------------|--------------|---------------------------------------------------------------------------------------------------------------------|
| 897 | Lanius cristatus                | Brown Shrike | 2022/5/2   | 1 | 0 | 22.39042965 | 113.91989470 | <a href="https://www.inaturalist.org/observations/114583958">https://www.inaturalist.org/observations/114583958</a> |
| 898 | Lanius cristatus                | Brown Shrike | 2004/4/4   | 5 | 0 | 22.39754498 | 114.20549170 | <a href="https://www.inaturalist.org/observations/8555595">https://www.inaturalist.org/observations/8555595</a>     |
| 899 | Lanius cristatus                | Brown Shrike | 2022/5/2   | 1 | 0 | 22.40052977 | 114.20761340 | <a href="https://www.inaturalist.org/observations/114661491">https://www.inaturalist.org/observations/114661491</a> |
| 900 | Lanius cristatus                | Brown Shrike | 2022/12/2  | 1 | 0 | 22.40204164 | 114.09369400 | <a href="https://www.inaturalist.org/observations/143486056">https://www.inaturalist.org/observations/143486056</a> |
| 901 | Lanius cristatus                | Brown Shrike | 2019/5/8   | 3 | 0 | 22.40246421 | 113.96160950 | <a href="https://www.inaturalist.org/observations/25932606">https://www.inaturalist.org/observations/25932606</a>   |
| 902 | Lanius cristatus                | Brown Shrike | 2021/3/13  | 2 | 0 | 22.40415284 | 114.22229760 | <a href="https://www.inaturalist.org/observations/71121621">https://www.inaturalist.org/observations/71121621</a>   |
| 903 | Lanius cristatus                | Brown Shrike | 2012/12/14 | 1 | 0 | 22.40934879 | 114.03158130 | <a href="https://www.inaturalist.org/observations/92077917">https://www.inaturalist.org/observations/92077917</a>   |
| 904 | Lanius cristatus                | Brown Shrike | 2021/5/4   | 1 | 0 | 22.41640046 | 114.20803630 | <a href="https://www.inaturalist.org/observations/77238803">https://www.inaturalist.org/observations/77238803</a>   |
| 905 | Lanius cristatus                | Brown Shrike | 2020/9/24  | 2 | 0 | 22.42574680 | 114.18120860 | <a href="https://www.inaturalist.org/observations/63385039">https://www.inaturalist.org/observations/63385039</a>   |
| 906 | Lanius cristatus                | Brown Shrike | 2021/10/29 | 1 | 0 | 22.42574680 | 114.18120860 | <a href="https://www.inaturalist.org/observations/99708862">https://www.inaturalist.org/observations/99708862</a>   |
| 907 | Lanius cristatus                | Brown Shrike | 2022/5/2   | 1 | 0 | 22.42574680 | 114.18120860 | <a href="https://www.inaturalist.org/observations/114652786">https://www.inaturalist.org/observations/114652786</a> |
| 908 | Lanius cristatus<br>lucionensis | Brown Shrike | 2022/5/2   | 1 | 0 | 22.42574680 | 114.18120860 | <a href="https://www.inaturalist.org/observations/114725273">https://www.inaturalist.org/observations/114725273</a> |
| 909 | Lanius cristatus                | Brown Shrike | 2020/9/12  | 2 | 0 | 22.42895906 | 114.23543980 | <a href="https://www.inaturalist.org/observations/59453352">https://www.inaturalist.org/observations/59453352</a>   |
| 910 | Lanius cristatus                | Brown Shrike | 2022/4/21  | 1 | 0 | 22.42918361 | 114.18250780 | <a href="https://www.inaturalist.org/observations/112254993">https://www.inaturalist.org/observations/112254993</a> |
| 911 | Lanius cristatus                | Brown Shrike | 2018/12/14 | 3 | 0 | 22.42929167 | 114.18307170 | <a href="https://www.inaturalist.org/observations/19010869">https://www.inaturalist.org/observations/19010869</a>   |
| 912 | Lanius cristatus                | Brown Shrike | 2022/2/27  | 1 | 0 | 22.42958685 | 114.18250860 | <a href="https://www.inaturalist.org/observations/107567249">https://www.inaturalist.org/observations/107567249</a> |
| 913 | Lanius cristatus                | Brown Shrike | 2022/4/24  | 1 | 0 | 22.42960201 | 114.18244250 | <a href="https://www.inaturalist.org/observations/112636842">https://www.inaturalist.org/observations/112636842</a> |
| 914 | Lanius cristatus                | Brown Shrike | 2021/11/8  | 1 | 0 | 22.42993100 | 114.18316400 | <a href="https://www.inaturalist.org/observations/100581170">https://www.inaturalist.org/observations/100581170</a> |
| 915 | Lanius cristatus                | Brown Shrike | 2021/10/2  | 1 | 0 | 22.42998419 | 114.18340620 | <a href="https://www.inaturalist.org/observations/97017557">https://www.inaturalist.org/observations/97017557</a>   |
| 916 | Lanius cristatus                | Brown Shrike | 2021/2/21  | 2 | 0 | 22.42998700 | 114.18233600 | <a href="https://www.inaturalist.org/observations/69909683">https://www.inaturalist.org/observations/69909683</a>   |
| 917 | Lanius cristatus                | Brown Shrike | 2018/12/22 | 3 | 0 | 22.43000800 | 114.18325500 | <a href="https://www.inaturalist.org/observations/19211726">https://www.inaturalist.org/observations/19211726</a>   |
| 918 | Lanius cristatus                | Brown Shrike | 2019/1/16  | 2 | 0 | 22.43009300 | 114.18321700 | <a href="https://www.inaturalist.org/observations/19673932">https://www.inaturalist.org/observations/19673932</a>   |
| 919 | Lanius cristatus                | Brown Shrike | 2022/3/15  | 1 | 0 | 22.43166800 | 114.18518100 | <a href="https://www.inaturalist.org/observations/113722926">https://www.inaturalist.org/observations/113722926</a> |

|     |                                 |              |            |   |   |             |              |                                                                                                                     |
|-----|---------------------------------|--------------|------------|---|---|-------------|--------------|---------------------------------------------------------------------------------------------------------------------|
| 920 | Lanius cristatus                | Brown Shrike | 2022/2/11  | 2 | 0 | 22.43179950 | 120.49248090 | <a href="https://www.inaturalist.org/observations/106549428">https://www.inaturalist.org/observations/106549428</a> |
| 921 | Lanius cristatus                | Brown Shrike | 2019/11/20 | 2 | 0 | 22.43450028 | 120.49701030 | <a href="https://www.inaturalist.org/observations/36124311">https://www.inaturalist.org/observations/36124311</a>   |
| 922 | Lanius cristatus<br>lucionensis | Brown Shrike | 2022/10/9  | 1 | 0 | 22.43705450 | 114.18284290 | <a href="https://www.inaturalist.org/observations/138235244">https://www.inaturalist.org/observations/138235244</a> |
| 923 | Lanius cristatus                | Brown Shrike | 2021/12/29 | 1 | 0 | 22.43741208 | 120.58041520 | <a href="https://www.inaturalist.org/observations/104087173">https://www.inaturalist.org/observations/104087173</a> |
| 924 | Lanius cristatus                | Brown Shrike | 2021/12/13 | 1 | 0 | 22.43904803 | 120.58053270 | <a href="https://www.inaturalist.org/observations/102980319">https://www.inaturalist.org/observations/102980319</a> |
| 925 | Lanius cristatus                | Brown Shrike | 2021/1/11  | 2 | 0 | 22.44232341 | 114.01969870 | <a href="https://www.inaturalist.org/observations/67957848">https://www.inaturalist.org/observations/67957848</a>   |
| 926 | Lanius cristatus                | Brown Shrike | 2020/12/6  | 3 | 0 | 22.44320958 | 88.30743541  | <a href="https://www.inaturalist.org/observations/66251099">https://www.inaturalist.org/observations/66251099</a>   |
| 927 | Lanius cristatus                | Brown Shrike | 2021/12/31 | 2 | 0 | 22.44335013 | 88.30729578  | <a href="https://www.inaturalist.org/observations/104097484">https://www.inaturalist.org/observations/104097484</a> |
| 928 | Lanius cristatus                | Brown Shrike | 2022/4/20  | 2 | 0 | 22.44378100 | 120.49099200 | <a href="https://www.inaturalist.org/observations/112147945">https://www.inaturalist.org/observations/112147945</a> |
| 929 | Lanius cristatus                | Brown Shrike | 2020/11/4  | 2 | 0 | 22.44378521 | 120.49099200 | <a href="https://www.inaturalist.org/observations/64236003">https://www.inaturalist.org/observations/64236003</a>   |
| 930 | Lanius cristatus                | Brown Shrike | 2020/4/25  | 3 | 0 | 22.44509900 | 114.13858700 | <a href="https://www.inaturalist.org/observations/44734008">https://www.inaturalist.org/observations/44734008</a>   |
| 931 | Lanius cristatus                | Brown Shrike | 2019/11/19 | 3 | 0 | 22.44553167 | 120.49166780 | <a href="https://www.inaturalist.org/observations/36124667">https://www.inaturalist.org/observations/36124667</a>   |
| 932 | Lanius cristatus<br>lucionensis | Brown Shrike | 2019/4/28  | 2 | 0 | 22.44701596 | 114.14113170 | <a href="https://www.inaturalist.org/observations/24244324">https://www.inaturalist.org/observations/24244324</a>   |
| 933 | Lanius cristatus<br>lucionensis | Brown Shrike | 2020/4/24  | 3 | 0 | 22.45060452 | 114.13615270 | <a href="https://www.inaturalist.org/observations/43019924">https://www.inaturalist.org/observations/43019924</a>   |
| 934 | Lanius cristatus                | Brown Shrike | 2022/11/20 | 2 | 0 | 22.45389760 | 114.15257450 | <a href="https://www.inaturalist.org/observations/142736876">https://www.inaturalist.org/observations/142736876</a> |
| 935 | Lanius cristatus                | Brown Shrike | 2020/4/25  | 3 | 0 | 22.45816667 | 114.00898640 | <a href="https://www.inaturalist.org/observations/43284914">https://www.inaturalist.org/observations/43284914</a>   |
| 936 | Lanius cristatus                | Brown Shrike | 2018/11/22 | 3 | 0 | 22.46713560 | 114.17949120 | <a href="https://www.inaturalist.org/observations/18554191">https://www.inaturalist.org/observations/18554191</a>   |
| 937 | Lanius cristatus                | Brown Shrike | 2009/4/26  | 1 | 0 | 22.46929600 | 114.00932400 | <a href="https://www.inaturalist.org/observations/143495354">https://www.inaturalist.org/observations/143495354</a> |
| 938 | Lanius cristatus                | Brown Shrike | 2021/10/24 | 1 | 0 | 22.46998523 | 88.32822383  | <a href="https://www.inaturalist.org/observations/99363079">https://www.inaturalist.org/observations/99363079</a>   |
| 939 | Lanius cristatus                | Brown Shrike | 2021/10/24 | 1 | 0 | 22.47078556 | 88.33058406  | <a href="https://www.inaturalist.org/observations/99363092">https://www.inaturalist.org/observations/99363092</a>   |
| 940 | Lanius cristatus                | Brown Shrike | 2021/11/22 | 1 | 0 | 22.47097000 | 114.04270500 | <a href="https://www.inaturalist.org/observations/101699114">https://www.inaturalist.org/observations/101699114</a> |
| 941 | Lanius cristatus                | Brown Shrike | 2021/11/21 | 1 | 0 | 22.47097000 | 114.04270500 | <a href="https://www.inaturalist.org/observations/101750866">https://www.inaturalist.org/observations/101750866</a> |
| 942 | Lanius cristatus                | Brown Shrike | 2022/12/26 | 3 | 0 | 22.47097000 | 114.04270500 | <a href="https://www.inaturalist.org/observations/145099347">https://www.inaturalist.org/observations/145099347</a> |



|     |                  |              |            |   |   |             |              |                                                                                                                     |
|-----|------------------|--------------|------------|---|---|-------------|--------------|---------------------------------------------------------------------------------------------------------------------|
| 943 | Lanius cristatus | Brown Shrike | 2021/1/26  | 2 | 0 | 22.47218619 | 88.32627118  | <a href="https://www.inaturalist.org/observations/68690032">https://www.inaturalist.org/observations/68690032</a>   |
| 944 | Lanius cristatus | Brown Shrike | 2021/5/6   | 2 | 0 | 22.47219321 | 114.00441510 | <a href="https://www.inaturalist.org/observations/78199307">https://www.inaturalist.org/observations/78199307</a>   |
| 945 | Lanius cristatus | Brown Shrike | 2022/2/26  | 1 | 0 | 22.47338797 | 114.04183300 | <a href="https://www.inaturalist.org/observations/107463578">https://www.inaturalist.org/observations/107463578</a> |
| 946 | Lanius cristatus | Brown Shrike | 2020/10/4  | 2 | 0 | 22.47383728 | 88.31301446  | <a href="https://www.inaturalist.org/observations/61791327">https://www.inaturalist.org/observations/61791327</a>   |
| 947 | Lanius cristatus | Brown Shrike | 2021/12/26 | 1 | 0 | 22.47512554 | 114.03990040 | <a href="https://www.inaturalist.org/observations/103689693">https://www.inaturalist.org/observations/103689693</a> |
| 948 | Lanius cristatus | Brown Shrike | 2021/2/7   | 3 | 0 | 22.47608974 | 114.04194250 | <a href="https://www.inaturalist.org/observations/69187657">https://www.inaturalist.org/observations/69187657</a>   |
| 949 | Lanius cristatus | Brown Shrike | 2020/4/26  | 2 | 0 | 22.49386725 | 114.04037150 | <a href="https://www.inaturalist.org/observations/44143216">https://www.inaturalist.org/observations/44143216</a>   |
| 950 | Lanius cristatus | Brown Shrike | 2021/5/1   | 1 | 0 | 22.49386725 | 114.04037150 | <a href="https://www.inaturalist.org/observations/76853087">https://www.inaturalist.org/observations/76853087</a>   |
| 951 | Lanius cristatus | Brown Shrike | 2022/5/2   | 1 | 0 | 22.49386725 | 114.04037150 | <a href="https://www.inaturalist.org/observations/116033909">https://www.inaturalist.org/observations/116033909</a> |
| 952 | Lanius cristatus | Brown Shrike | 2018/12/11 | 5 | 0 | 22.49488833 | 114.10484330 | <a href="https://www.inaturalist.org/observations/18957142">https://www.inaturalist.org/observations/18957142</a>   |
| 953 | Lanius cristatus | Brown Shrike | 2022/1/1   | 1 | 0 | 22.49506125 | 114.03393420 | <a href="https://www.inaturalist.org/observations/104621201">https://www.inaturalist.org/observations/104621201</a> |
| 954 | Lanius cristatus | Brown Shrike | 2021/1/30  | 2 | 0 | 22.49545556 | 114.10690000 | <a href="https://www.inaturalist.org/observations/69756329">https://www.inaturalist.org/observations/69756329</a>   |
| 955 | Lanius cristatus | Brown Shrike | 2020/4/25  | 2 | 0 | 22.49553264 | 114.05427610 | <a href="https://www.inaturalist.org/observations/44098245">https://www.inaturalist.org/observations/44098245</a>   |
| 956 | Lanius cristatus | Brown Shrike | 2021/12/16 | 2 | 0 | 22.49688080 | 114.03661840 | <a href="https://www.inaturalist.org/observations/103183352">https://www.inaturalist.org/observations/103183352</a> |
| 957 | Lanius cristatus | Brown Shrike | 2021/5/4   | 2 | 0 | 22.49830384 | 114.05344960 | <a href="https://www.inaturalist.org/observations/116888084">https://www.inaturalist.org/observations/116888084</a> |
| 958 | Lanius cristatus | Brown Shrike | 2021/11/16 | 1 | 0 | 22.49876414 | 114.04582750 | <a href="https://www.inaturalist.org/observations/102230930">https://www.inaturalist.org/observations/102230930</a> |
| 959 | Lanius cristatus | Brown Shrike | 2021/11/16 | 2 | 0 | 22.49876414 | 114.04582750 | <a href="https://www.inaturalist.org/observations/102234090">https://www.inaturalist.org/observations/102234090</a> |
| 960 | Lanius cristatus | Brown Shrike | 2005/3/5   | 2 | 0 | 22.50438700 | 114.11105600 | <a href="https://www.inaturalist.org/observations/66960342">https://www.inaturalist.org/observations/66960342</a>   |
| 961 | Lanius cristatus | Brown Shrike | 2020/10/6  | 2 | 0 | 22.50489000 | 120.39480640 | <a href="https://www.inaturalist.org/observations/61844202">https://www.inaturalist.org/observations/61844202</a>   |
| 962 | Lanius cristatus | Brown Shrike | 2021/10/22 | 1 | 0 | 22.50506576 | 114.11262200 | <a href="https://www.inaturalist.org/observations/99107940">https://www.inaturalist.org/observations/99107940</a>   |
| 963 | Lanius cristatus | Brown Shrike | 2020/11/15 | 2 | 0 | 22.50532578 | 114.11082860 | <a href="https://www.inaturalist.org/observations/64912092">https://www.inaturalist.org/observations/64912092</a>   |
| 964 | Lanius cristatus | Brown Shrike | 2021/4/30  | 1 | 0 | 22.50642304 | 114.11228900 | <a href="https://www.inaturalist.org/observations/76011917">https://www.inaturalist.org/observations/76011917</a>   |
| 965 | Lanius cristatus | Brown Shrike | 2020/9/11  | 2 | 0 | 22.50686333 | 114.11221950 | <a href="https://www.inaturalist.org/observations/59215519">https://www.inaturalist.org/observations/59215519</a>   |

|     |                  |              |            |   |   |             |              |                                                                                                                     |
|-----|------------------|--------------|------------|---|---|-------------|--------------|---------------------------------------------------------------------------------------------------------------------|
| 966 | Lanius cristatus | Brown Shrike | 2020/11/2  | 2 | 0 | 22.50714500 | 114.11282830 | <a href="https://www.inaturalist.org/observations/64033467">https://www.inaturalist.org/observations/64033467</a>   |
| 967 | Lanius cristatus | Brown Shrike | 2021/11/6  | 1 | 0 | 22.50760510 | 114.11318550 | <a href="https://www.inaturalist.org/observations/100462159">https://www.inaturalist.org/observations/100462159</a> |
| 968 | Lanius cristatus | Brown Shrike | 2020/12/4  | 1 | 0 | 22.50775354 | 114.11348400 | <a href="https://www.inaturalist.org/observations/70599570">https://www.inaturalist.org/observations/70599570</a>   |
| 969 | Lanius cristatus | Brown Shrike | 2021/5/2   | 1 | 0 | 22.50780025 | 114.11199000 | <a href="https://www.inaturalist.org/observations/76578953">https://www.inaturalist.org/observations/76578953</a>   |
| 970 | Lanius cristatus | Brown Shrike | 2020/11/1  | 2 | 0 | 22.50855500 | 114.11442830 | <a href="https://www.inaturalist.org/observations/64032988">https://www.inaturalist.org/observations/64032988</a>   |
| 971 | Lanius cristatus | Brown Shrike | 2013/10/6  | 1 | 0 | 22.50879520 | 114.11297710 | <a href="https://www.inaturalist.org/observations/78955605">https://www.inaturalist.org/observations/78955605</a>   |
| 972 | Lanius cristatus | Brown Shrike | 2020/12/2  | 2 | 0 | 22.50879930 | 114.11297690 | <a href="https://www.inaturalist.org/observations/119038227">https://www.inaturalist.org/observations/119038227</a> |
| 973 | Lanius cristatus | Brown Shrike | 2021/5/2   | 1 | 0 | 22.50906939 | 114.11361460 | <a href="https://www.inaturalist.org/observations/76561767">https://www.inaturalist.org/observations/76561767</a>   |
| 974 | Lanius cristatus | Brown Shrike | 2020/11/18 | 2 | 0 | 22.51000467 | 114.11307900 | <a href="https://www.inaturalist.org/observations/65183021">https://www.inaturalist.org/observations/65183021</a>   |
| 975 | Lanius cristatus | Brown Shrike | 2011/12/17 | 1 | 0 | 22.51115400 | 114.11452200 | <a href="https://www.inaturalist.org/observations/95001557">https://www.inaturalist.org/observations/95001557</a>   |
| 976 | Lanius cristatus | Brown Shrike | 2020/9/24  | 1 | 0 | 22.51130336 | 120.36314870 | <a href="https://www.inaturalist.org/observations/62109419">https://www.inaturalist.org/observations/62109419</a>   |
| 977 | Lanius cristatus | Brown Shrike | 2020/12/5  | 2 | 0 | 22.51261575 | 120.52806590 | <a href="https://www.inaturalist.org/observations/66691481">https://www.inaturalist.org/observations/66691481</a>   |
| 978 | Lanius cristatus | Brown Shrike | 2020/3/8   | 2 | 0 | 22.51547718 | 114.24062830 | <a href="https://www.inaturalist.org/observations/39688425">https://www.inaturalist.org/observations/39688425</a>   |
| 979 | Lanius cristatus | Brown Shrike | 2019/12/27 | 2 | 0 | 22.51564923 | 120.50517080 | <a href="https://www.inaturalist.org/observations/36991502">https://www.inaturalist.org/observations/36991502</a>   |
| 980 | Lanius cristatus | Brown Shrike | 2022/3/17  | 1 | 0 | 22.51793447 | 120.46266500 | <a href="https://www.inaturalist.org/observations/108768112">https://www.inaturalist.org/observations/108768112</a> |
| 981 | Lanius cristatus | Brown Shrike | 2022/12/24 | 0 | 0 | 22.52623442 | 114.25953680 | <a href="https://www.inaturalist.org/observations/145104355">https://www.inaturalist.org/observations/145104355</a> |
| 982 | Lanius cristatus | Brown Shrike | 2020/1/16  | 2 | 0 | 22.53787538 | 120.58861470 | <a href="https://www.inaturalist.org/observations/37653488">https://www.inaturalist.org/observations/37653488</a>   |
| 983 | Lanius cristatus | Brown Shrike | 2019/12/1  | 2 | 0 | 22.53866866 | 120.59045980 | <a href="https://www.inaturalist.org/observations/45755794">https://www.inaturalist.org/observations/45755794</a>   |
| 984 | Lanius cristatus | Brown Shrike | 2017/11/17 | 2 | 0 | 22.53912970 | 120.39038550 | <a href="https://www.inaturalist.org/observations/9457905">https://www.inaturalist.org/observations/9457905</a>     |
| 985 | Lanius cristatus | Brown Shrike | 2022/5/25  | 1 | 0 | 22.54309900 | 114.05786800 | <a href="https://www.inaturalist.org/observations/118763116">https://www.inaturalist.org/observations/118763116</a> |
| 986 | Lanius cristatus | Brown Shrike | 2013/2/11  | 1 | 0 | 22.54490349 | 88.34243774  | <a href="https://www.inaturalist.org/observations/79812092">https://www.inaturalist.org/observations/79812092</a>   |
| 987 | Lanius cristatus | Brown Shrike | 2021/11/3  | 1 | 0 | 22.54682733 | 114.01722840 | <a href="https://www.inaturalist.org/observations/100695542">https://www.inaturalist.org/observations/100695542</a> |
| 988 | Lanius cristatus | Brown Shrike | 2017/11/17 | 2 | 0 | 22.55029385 | 120.39196010 | <a href="https://www.inaturalist.org/observations/9457906">https://www.inaturalist.org/observations/9457906</a>     |

|      |                                 |              |            |   |   |             |              |                                                                                                                     |
|------|---------------------------------|--------------|------------|---|---|-------------|--------------|---------------------------------------------------------------------------------------------------------------------|
| 989  | Lanius cristatus                | Brown Shrike | 2021/5/3   | 1 | 0 | 22.55143172 | 114.07936180 | <a href="https://www.inaturalist.org/observations/77240811">https://www.inaturalist.org/observations/77240811</a>   |
| 990  | Lanius cristatus                | Brown Shrike | 2022/9/20  | 2 | 0 | 22.55379126 | 120.31480380 | <a href="https://www.inaturalist.org/observations/135775321">https://www.inaturalist.org/observations/135775321</a> |
| 991  | Lanius cristatus                | Brown Shrike | 2022/4/7   | 3 | 0 | 22.55385964 | 120.31508270 | <a href="https://www.inaturalist.org/observations/110648910">https://www.inaturalist.org/observations/110648910</a> |
| 992  | Lanius cristatus                | Brown Shrike | 2020/11/27 | 2 | 0 | 22.55390918 | 120.31518590 | <a href="https://www.inaturalist.org/observations/65748374">https://www.inaturalist.org/observations/65748374</a>   |
| 993  | Lanius cristatus                | Brown Shrike | 2021/11/2  | 2 | 0 | 22.55390930 | 120.31518650 | <a href="https://www.inaturalist.org/observations/100137904">https://www.inaturalist.org/observations/100137904</a> |
| 994  | Lanius cristatus                | Brown Shrike | 2022/12/16 | 1 | 0 | 22.55391673 | 120.31348330 | <a href="https://www.inaturalist.org/observations/144470002">https://www.inaturalist.org/observations/144470002</a> |
| 995  | Lanius cristatus                | Brown Shrike | 2022/9/27  | 2 | 0 | 22.55415331 | 120.31446090 | <a href="https://www.inaturalist.org/observations/136671946">https://www.inaturalist.org/observations/136671946</a> |
| 996  | Lanius cristatus                | Brown Shrike | 2022/2/17  | 3 | 0 | 22.55455028 | 120.39002030 | <a href="https://www.inaturalist.org/observations/106908020">https://www.inaturalist.org/observations/106908020</a> |
| 997  | Lanius cristatus                | Brown Shrike | 2020/5/9   | 2 | 0 | 22.55513000 | 120.38903040 | <a href="https://www.inaturalist.org/observations/45352943">https://www.inaturalist.org/observations/45352943</a>   |
| 998  | Lanius cristatus                | Brown Shrike | 2016/9/24  | 0 | 0 | 22.55638056 | 120.38413330 | <a href="https://www.inaturalist.org/observations/52771908">https://www.inaturalist.org/observations/52771908</a>   |
| 999  | Lanius cristatus<br>lucionensis | Brown Shrike | 2018/12/15 | 1 | 0 | 22.55766400 | 120.38977400 | <a href="https://www.inaturalist.org/observations/83732194">https://www.inaturalist.org/observations/83732194</a>   |
| 1000 | Lanius cristatus                | Brown Shrike | 2021/2/20  | 2 | 0 | 22.55781439 | 120.44822560 | <a href="https://www.inaturalist.org/observations/69917684">https://www.inaturalist.org/observations/69917684</a>   |
| 1001 | Lanius cristatus                | Brown Shrike | 2021/3/11  | 2 | 0 | 22.56364634 | 120.53646050 | <a href="https://www.inaturalist.org/observations/70994431">https://www.inaturalist.org/observations/70994431</a>   |
| 1002 | Lanius cristatus                | Brown Shrike | 2022/12/2  | 1 | 0 | 22.56392860 | 113.97499080 | <a href="https://www.inaturalist.org/observations/144148499">https://www.inaturalist.org/observations/144148499</a> |
| 1003 | Lanius cristatus                | Brown Shrike | 2020/10/20 | 2 | 0 | 22.56392860 | 120.53766680 | <a href="https://www.inaturalist.org/observations/63170094">https://www.inaturalist.org/observations/63170094</a>   |
| 1004 | Lanius cristatus                | Brown Shrike | 2022/4/2   | 2 | 0 | 22.56453479 | 120.36053070 | <a href="https://www.inaturalist.org/observations/110162709">https://www.inaturalist.org/observations/110162709</a> |
| 1005 | Lanius cristatus                | Brown Shrike | 2019/1/8   | 2 | 0 | 22.57035833 | 120.34213170 | <a href="https://www.inaturalist.org/observations/19606562">https://www.inaturalist.org/observations/19606562</a>   |
| 1006 | Lanius cristatus                | Brown Shrike | 2020/10/27 | 2 | 0 | 22.57321417 | 120.33442420 | <a href="https://www.inaturalist.org/observations/63963929">https://www.inaturalist.org/observations/63963929</a>   |
| 1007 | Lanius cristatus                | Brown Shrike | 2019/10/15 | 1 | 0 | 22.57557411 | 88.47979032  | <a href="https://www.inaturalist.org/observations/95556063">https://www.inaturalist.org/observations/95556063</a>   |
| 1008 | Lanius cristatus                | Brown Shrike | 2020/10/27 | 2 | 0 | 22.57826630 | 120.34973240 | <a href="https://www.inaturalist.org/observations/63963390">https://www.inaturalist.org/observations/63963390</a>   |
| 1009 | Lanius cristatus                | Brown Shrike | 2020/10/27 | 2 | 0 | 22.57941940 | 120.35048730 | <a href="https://www.inaturalist.org/observations/63963374">https://www.inaturalist.org/observations/63963374</a>   |
| 1010 | Lanius cristatus                | Brown Shrike | 2020/10/26 | 2 | 0 | 22.57951417 | 120.35058830 | <a href="https://www.inaturalist.org/observations/63950481">https://www.inaturalist.org/observations/63950481</a>   |
| 1011 | Lanius cristatus                | Brown Shrike | 2020/2/16  | 2 | 0 | 22.58132701 | 88.28413021  | <a href="https://www.inaturalist.org/observations/65212495">https://www.inaturalist.org/observations/65212495</a>   |

|      |                  |              |            |   |   |             |              |                                                                                                                     |
|------|------------------|--------------|------------|---|---|-------------|--------------|---------------------------------------------------------------------------------------------------------------------|
| 1012 | Lanius cristatus | Brown Shrike | 2020/10/26 | 2 | 0 | 22.58151556 | 120.34172830 | <a href="https://www.inaturalist.org/observations/63950266">https://www.inaturalist.org/observations/63950266</a>   |
| 1013 | Lanius cristatus | Brown Shrike | 2020/10/26 | 2 | 0 | 22.58160833 | 120.34248560 | <a href="https://www.inaturalist.org/observations/63950238">https://www.inaturalist.org/observations/63950238</a>   |
| 1014 | Lanius cristatus | Brown Shrike | 2020/10/26 | 2 | 0 | 22.58162306 | 120.34200970 | <a href="https://www.inaturalist.org/observations/63950251">https://www.inaturalist.org/observations/63950251</a>   |
| 1015 | Lanius cristatus | Brown Shrike | 2020/10/26 | 2 | 0 | 22.58162444 | 120.34247530 | <a href="https://www.inaturalist.org/observations/63950244">https://www.inaturalist.org/observations/63950244</a>   |
| 1016 | Lanius cristatus | Brown Shrike | 2021/2/17  | 1 | 0 | 22.58315550 | 88.47774721  | <a href="https://www.inaturalist.org/observations/81277427">https://www.inaturalist.org/observations/81277427</a>   |
| 1017 | Lanius cristatus | Brown Shrike | 2021/4/13  | 2 | 0 | 22.58367882 | 120.57932920 | <a href="https://www.inaturalist.org/observations/73930734">https://www.inaturalist.org/observations/73930734</a>   |
| 1018 | Lanius cristatus | Brown Shrike | 2021/2/1   | 2 | 0 | 22.58452150 | 88.32408650  | <a href="https://www.inaturalist.org/observations/69797225">https://www.inaturalist.org/observations/69797225</a>   |
| 1019 | Lanius cristatus | Brown Shrike | 2022/4/19  | 1 | 0 | 22.58676000 | 88.41494000  | <a href="https://www.inaturalist.org/observations/112182923">https://www.inaturalist.org/observations/112182923</a> |
| 1020 | Lanius cristatus | Brown Shrike | 2021/3/9   | 3 | 0 | 22.58718339 | 120.35240940 | <a href="https://www.inaturalist.org/observations/70936188">https://www.inaturalist.org/observations/70936188</a>   |
| 1021 | Lanius cristatus | Brown Shrike | 2022/1/1   | 1 | 0 | 22.58898684 | 120.62091540 | <a href="https://www.inaturalist.org/observations/144122834">https://www.inaturalist.org/observations/144122834</a> |
| 1022 | Lanius cristatus | Brown Shrike | 2022/10/26 | 1 | 0 | 22.59233254 | 120.35343630 | <a href="https://www.inaturalist.org/observations/140032984">https://www.inaturalist.org/observations/140032984</a> |
| 1023 | Lanius cristatus | Brown Shrike | 2018/12/31 | 3 | 0 | 22.59449726 | 120.35721220 | <a href="https://www.inaturalist.org/observations/19333342">https://www.inaturalist.org/observations/19333342</a>   |
| 1024 | Lanius cristatus | Brown Shrike | 2022/12/20 | 1 | 0 | 22.59488589 | 120.35655120 | <a href="https://www.inaturalist.org/observations/144711614">https://www.inaturalist.org/observations/144711614</a> |
| 1025 | Lanius cristatus | Brown Shrike | 2021/3/9   | 2 | 0 | 22.59488990 | 120.35656140 | <a href="https://www.inaturalist.org/observations/70936192">https://www.inaturalist.org/observations/70936192</a>   |
| 1026 | Lanius cristatus | Brown Shrike | 2021/11/27 | 2 | 0 | 22.59491471 | 120.35655500 | <a href="https://www.inaturalist.org/observations/102089624">https://www.inaturalist.org/observations/102089624</a> |
| 1027 | Lanius cristatus | Brown Shrike | 2022/11/14 | 3 | 0 | 22.59562073 | 120.35572850 | <a href="https://www.inaturalist.org/observations/142114377">https://www.inaturalist.org/observations/142114377</a> |
| 1028 | Lanius cristatus | Brown Shrike | 2022/3/4   | 1 | 0 | 22.59671978 | 120.30936180 | <a href="https://www.inaturalist.org/observations/109640273">https://www.inaturalist.org/observations/109640273</a> |
| 1029 | Lanius cristatus | Brown Shrike | 2020/11/27 | 2 | 0 | 22.59941166 | 120.27570250 | <a href="https://www.inaturalist.org/observations/65748381">https://www.inaturalist.org/observations/65748381</a>   |
| 1030 | Lanius cristatus | Brown Shrike | 2021/12/24 | 1 | 0 | 22.60033375 | 88.47467434  | <a href="https://www.inaturalist.org/observations/103572985">https://www.inaturalist.org/observations/103572985</a> |
| 1031 | Lanius cristatus | Brown Shrike | 2022/4/10  | 2 | 0 | 22.60033530 | 88.47467434  | <a href="https://www.inaturalist.org/observations/111169949">https://www.inaturalist.org/observations/111169949</a> |
| 1032 | Lanius cristatus | Brown Shrike | 2021/11/27 | 2 | 0 | 22.60250194 | 120.35471250 | <a href="https://www.inaturalist.org/observations/102089613">https://www.inaturalist.org/observations/102089613</a> |
| 1033 | Lanius cristatus | Brown Shrike | 2021/2/21  | 0 | 0 | 22.60353600 | 70.20232420  | <a href="https://www.inaturalist.org/observations/137943195">https://www.inaturalist.org/observations/137943195</a> |
| 1034 | Lanius cristatus | Brown Shrike | 2019/12/24 | 3 | 0 | 22.60395035 | 88.47700252  | <a href="https://www.inaturalist.org/observations/60430169">https://www.inaturalist.org/observations/60430169</a>   |

|      |                  |              |            |   |   |             |              |                                                                                                                     |
|------|------------------|--------------|------------|---|---|-------------|--------------|---------------------------------------------------------------------------------------------------------------------|
| 1035 | Lanius cristatus | Brown Shrike | 2020/2/7   | 2 | 0 | 22.60406095 | 120.27223570 | <a href="https://www.inaturalist.org/observations/38386678">https://www.inaturalist.org/observations/38386678</a>   |
| 1036 | Lanius cristatus | Brown Shrike | 2021/11/27 | 2 | 0 | 22.60540700 | 120.35488150 | <a href="https://www.inaturalist.org/observations/102089629">https://www.inaturalist.org/observations/102089629</a> |
| 1037 | Lanius cristatus | Brown Shrike | 2017/3/4   | 2 | 0 | 22.60716146 | 120.30790640 | <a href="https://www.inaturalist.org/observations/64109053">https://www.inaturalist.org/observations/64109053</a>   |
| 1038 | Lanius cristatus | Brown Shrike | 2021/12/28 | 2 | 0 | 22.60727602 | 120.30930520 | <a href="https://www.inaturalist.org/observations/104404611">https://www.inaturalist.org/observations/104404611</a> |
| 1039 | Lanius cristatus | Brown Shrike | 2019/2/18  | 2 | 0 | 22.60733911 | 120.30799720 | <a href="https://www.inaturalist.org/observations/20448969">https://www.inaturalist.org/observations/20448969</a>   |
| 1040 | Lanius cristatus | Brown Shrike | 2022/12/21 | 2 | 0 | 22.60946000 | 88.46433667  | <a href="https://www.inaturalist.org/observations/144925464">https://www.inaturalist.org/observations/144925464</a> |
| 1041 | Lanius cristatus | Brown Shrike | 2021/12/28 | 2 | 0 | 22.61119812 | 120.35509590 | <a href="https://www.inaturalist.org/observations/104404609">https://www.inaturalist.org/observations/104404609</a> |
| 1042 | Lanius cristatus | Brown Shrike | 2021/3/8   | 3 | 0 | 22.61193320 | 120.35799060 | <a href="https://www.inaturalist.org/observations/70936164">https://www.inaturalist.org/observations/70936164</a>   |
| 1043 | Lanius cristatus | Brown Shrike | 2022/2/27  | 1 | 0 | 22.61232974 | 120.35869800 | <a href="https://www.inaturalist.org/observations/107538277">https://www.inaturalist.org/observations/107538277</a> |
| 1044 | Lanius cristatus | Brown Shrike | 2022/11/1  | 1 | 0 | 22.61420148 | 88.46456623  | <a href="https://www.inaturalist.org/observations/143942954">https://www.inaturalist.org/observations/143942954</a> |
| 1045 | Lanius cristatus | Brown Shrike | 2020/2/7   | 2 | 0 | 22.61444406 | 120.26419230 | <a href="https://www.inaturalist.org/observations/38386676">https://www.inaturalist.org/observations/38386676</a>   |
| 1046 | Lanius cristatus | Brown Shrike | 2018/9/26  | 2 | 0 | 22.61474320 | 120.37640970 | <a href="https://www.inaturalist.org/observations/16927318">https://www.inaturalist.org/observations/16927318</a>   |
| 1047 | Lanius cristatus | Brown Shrike | 2022/12/18 | 1 | 0 | 22.61480302 | 120.26618620 | <a href="https://www.inaturalist.org/observations/144597025">https://www.inaturalist.org/observations/144597025</a> |
| 1048 | Lanius cristatus | Brown Shrike | 2021/11/2  | 1 | 0 | 22.61491199 | 120.26575390 | <a href="https://www.inaturalist.org/observations/100137909">https://www.inaturalist.org/observations/100137909</a> |
| 1049 | Lanius cristatus | Brown Shrike | 2020/9/16  | 2 | 0 | 22.61542187 | 120.32011680 | <a href="https://www.inaturalist.org/observations/59763624">https://www.inaturalist.org/observations/59763624</a>   |
| 1050 | Lanius cristatus | Brown Shrike | 2021/1/13  | 2 | 0 | 22.61616269 | 120.37697450 | <a href="https://www.inaturalist.org/observations/68054835">https://www.inaturalist.org/observations/68054835</a>   |
| 1051 | Lanius cristatus | Brown Shrike | 2017/6/30  | 1 | 0 | 22.61782882 | 120.33860490 | <a href="https://www.inaturalist.org/observations/83144477">https://www.inaturalist.org/observations/83144477</a>   |
| 1052 | Lanius cristatus | Brown Shrike | 2020/4/4   | 2 | 0 | 22.61834583 | 120.37503360 | <a href="https://www.inaturalist.org/observations/42094005">https://www.inaturalist.org/observations/42094005</a>   |
| 1053 | Lanius cristatus | Brown Shrike | 2022/1/11  | 1 | 0 | 22.61845333 | 120.33985830 | <a href="https://www.inaturalist.org/observations/104745790">https://www.inaturalist.org/observations/104745790</a> |
| 1054 | Lanius cristatus | Brown Shrike | 2021/2/16  | 1 | 0 | 22.61948061 | 88.44338325  | <a href="https://www.inaturalist.org/observations/81268697">https://www.inaturalist.org/observations/81268697</a>   |
| 1055 | Lanius cristatus | Brown Shrike | 2018/2/20  | 2 | 0 | 22.61976820 | 120.33955290 | <a href="https://www.inaturalist.org/observations/9930985">https://www.inaturalist.org/observations/9930985</a>     |
| 1056 | Lanius cristatus | Brown Shrike | 2018/4/29  | 2 | 0 | 22.61976820 | 120.33955290 | <a href="https://www.inaturalist.org/observations/11724822">https://www.inaturalist.org/observations/11724822</a>   |
| 1057 | Lanius cristatus | Brown Shrike | 2018/11/19 | 2 | 0 | 22.61976820 | 120.33955290 | <a href="https://www.inaturalist.org/observations/18494658">https://www.inaturalist.org/observations/18494658</a>   |

|      |                                 |              |            |   |   |             |              |                                                                                                                     |
|------|---------------------------------|--------------|------------|---|---|-------------|--------------|---------------------------------------------------------------------------------------------------------------------|
| 1058 | Lanius cristatus                | Brown Shrike | 2018/11/30 | 3 | 0 | 22.61976820 | 120.33955290 | <a href="https://www.inaturalist.org/observations/18732851">https://www.inaturalist.org/observations/18732851</a>   |
| 1059 | Lanius cristatus                | Brown Shrike | 2022/11/1  | 1 | 0 | 22.61976820 | 120.33955290 | <a href="https://www.inaturalist.org/observations/140736556">https://www.inaturalist.org/observations/140736556</a> |
| 1060 | Lanius cristatus                | Brown Shrike | 2020/2/6   | 3 | 0 | 22.61976991 | 120.33954980 | <a href="https://www.inaturalist.org/observations/38354760">https://www.inaturalist.org/observations/38354760</a>   |
| 1061 | Lanius cristatus                | Brown Shrike | 2019/12/8  | 2 | 0 | 22.61977486 | 120.33954980 | <a href="https://www.inaturalist.org/observations/36460190">https://www.inaturalist.org/observations/36460190</a>   |
| 1062 | Lanius cristatus                | Brown Shrike | 2019/12/8  | 2 | 0 | 22.61977486 | 120.33954980 | <a href="https://www.inaturalist.org/observations/36460192">https://www.inaturalist.org/observations/36460192</a>   |
| 1063 | Lanius cristatus                | Brown Shrike | 2019/12/16 | 2 | 0 | 22.61977486 | 120.33954980 | <a href="https://www.inaturalist.org/observations/36698206">https://www.inaturalist.org/observations/36698206</a>   |
| 1064 | Lanius cristatus                | Brown Shrike | 2020/4/9   | 2 | 0 | 22.61977486 | 120.33954980 | <a href="https://www.inaturalist.org/observations/41758283">https://www.inaturalist.org/observations/41758283</a>   |
| 1065 | Lanius cristatus                | Brown Shrike | 2017/9/14  | 2 | 0 | 22.61979467 | 120.33951760 | <a href="https://www.inaturalist.org/observations/20022124">https://www.inaturalist.org/observations/20022124</a>   |
| 1066 | Lanius cristatus                | Brown Shrike | 2021/1/3   | 2 | 0 | 22.61979467 | 120.33951760 | <a href="https://www.inaturalist.org/observations/67570225">https://www.inaturalist.org/observations/67570225</a>   |
| 1067 | Lanius cristatus                | Brown Shrike | 2021/3/8   | 3 | 0 | 22.61979467 | 120.33951760 | <a href="https://www.inaturalist.org/observations/70936182">https://www.inaturalist.org/observations/70936182</a>   |
| 1068 | Lanius cristatus                | Brown Shrike | 2020/1/5   | 2 | 0 | 22.61990358 | 120.34106370 | <a href="https://www.inaturalist.org/observations/37295810">https://www.inaturalist.org/observations/37295810</a>   |
| 1069 | Lanius cristatus                | Brown Shrike | 2018/1/22  | 2 | 0 | 22.62030965 | 120.34013990 | <a href="https://www.inaturalist.org/observations/9561003">https://www.inaturalist.org/observations/9561003</a>     |
| 1070 | Lanius cristatus                | Brown Shrike | 2018/1/11  | 1 | 0 | 22.62032216 | 120.33944320 | <a href="https://www.inaturalist.org/observations/123674615">https://www.inaturalist.org/observations/123674615</a> |
| 1071 | Lanius cristatus                | Brown Shrike | 2017/6/30  | 1 | 0 | 22.62071761 | 120.34117310 | <a href="https://www.inaturalist.org/observations/83144442">https://www.inaturalist.org/observations/83144442</a>   |
| 1072 | Lanius cristatus                | Brown Shrike | 2020/2/17  | 2 | 0 | 22.62073910 | 120.36535730 | <a href="https://www.inaturalist.org/observations/42911217">https://www.inaturalist.org/observations/42911217</a>   |
| 1073 | Lanius cristatus                | Brown Shrike | 2018/1/11  | 1 | 0 | 22.62131309 | 120.34087000 | <a href="https://www.inaturalist.org/observations/123674628">https://www.inaturalist.org/observations/123674628</a> |
| 1074 | Lanius cristatus                | Brown Shrike | 2018/1/31  | 1 | 0 | 22.62172494 | 120.34056070 | <a href="https://www.inaturalist.org/observations/123676018">https://www.inaturalist.org/observations/123676018</a> |
| 1075 | Lanius cristatus<br>lucionensis | Brown Shrike | 2022/5/14  | 0 | 0 | 22.62174840 | 120.26858680 | <a href="https://www.inaturalist.org/observations/116932064">https://www.inaturalist.org/observations/116932064</a> |
| 1076 | Lanius cristatus                | Brown Shrike | 2019/3/21  | 2 | 0 | 22.62202039 | 120.34014500 | <a href="https://www.inaturalist.org/observations/21450492">https://www.inaturalist.org/observations/21450492</a>   |
| 1077 | Lanius cristatus                | Brown Shrike | 2022/9/6   | 1 | 0 | 22.62215400 | 120.26905610 | <a href="https://www.inaturalist.org/observations/133880270">https://www.inaturalist.org/observations/133880270</a> |
| 1078 | Lanius cristatus                | Brown Shrike | 2019/9/7   | 2 | 0 | 22.62221092 | 120.26916380 | <a href="https://www.inaturalist.org/observations/32245936">https://www.inaturalist.org/observations/32245936</a>   |
| 1079 | Lanius cristatus                | Brown Shrike | 2019/12/1  | 1 | 0 | 22.62223570 | 120.26791890 | <a href="https://www.inaturalist.org/observations/117115080">https://www.inaturalist.org/observations/117115080</a> |
| 1080 | Lanius cristatus                | Brown Shrike | 2019/5/23  | 2 | 0 | 22.62232840 | 120.26909500 | <a href="https://www.inaturalist.org/observations/30606532">https://www.inaturalist.org/observations/30606532</a>   |

|      |                                 |              |            |   |   |             |              |                                                                                                                     |
|------|---------------------------------|--------------|------------|---|---|-------------|--------------|---------------------------------------------------------------------------------------------------------------------|
| 1081 | Lanius cristatus                | Brown Shrike | 2017/6/30  | 1 | 0 | 22.62235631 | 120.33888280 | <a href="https://www.inaturalist.org/observations/83144462">https://www.inaturalist.org/observations/83144462</a>   |
| 1082 | Lanius cristatus                | Brown Shrike | 2022/10/17 | 3 | 0 | 22.62241396 | 120.26877720 | <a href="https://www.inaturalist.org/observations/139069042">https://www.inaturalist.org/observations/139069042</a> |
| 1083 | Lanius cristatus                | Brown Shrike | 2017/6/30  | 1 | 0 | 22.62242749 | 120.33910330 | <a href="https://www.inaturalist.org/observations/83144464">https://www.inaturalist.org/observations/83144464</a>   |
| 1084 | Lanius cristatus<br>lucionensis | Brown Shrike | 2022/3/18  | 0 | 0 | 22.62253125 | 120.33931680 | <a href="https://www.inaturalist.org/observations/109148517">https://www.inaturalist.org/observations/109148517</a> |
| 1085 | Lanius cristatus                | Brown Shrike | 2022/9/13  | 2 | 0 | 22.62261203 | 120.26800470 | <a href="https://www.inaturalist.org/observations/134851445">https://www.inaturalist.org/observations/134851445</a> |
| 1086 | Lanius cristatus                | Brown Shrike | 2022/2/11  | 2 | 0 | 22.62301323 | 120.38608760 | <a href="https://www.inaturalist.org/observations/106549440">https://www.inaturalist.org/observations/106549440</a> |
| 1087 | Lanius cristatus                | Brown Shrike | 2020/11/1  | 2 | 0 | 22.62305790 | 120.38643660 | <a href="https://www.inaturalist.org/observations/64032868">https://www.inaturalist.org/observations/64032868</a>   |
| 1088 | Lanius cristatus                | Brown Shrike | 2022/2/14  | 3 | 0 | 22.62310937 | 120.36383190 | <a href="https://www.inaturalist.org/observations/106733996">https://www.inaturalist.org/observations/106733996</a> |
| 1089 | Lanius cristatus<br>lucionensis | Brown Shrike | 2022/1/21  | 0 | 0 | 22.62344727 | 120.34377790 | <a href="https://www.inaturalist.org/observations/105643509">https://www.inaturalist.org/observations/105643509</a> |
| 1090 | Lanius cristatus<br>lucionensis | Brown Shrike | 2022/1/21  | 0 | 0 | 22.62344727 | 120.34377790 | <a href="https://www.inaturalist.org/observations/105643514">https://www.inaturalist.org/observations/105643514</a> |
| 1091 | Lanius cristatus                | Brown Shrike | 2020/10/10 | 3 | 0 | 22.62362295 | 88.44098009  | <a href="https://www.inaturalist.org/observations/63711706">https://www.inaturalist.org/observations/63711706</a>   |
| 1092 | Lanius cristatus                | Brown Shrike | 2019/4/20  | 2 | 0 | 22.62362870 | 88.44098000  | <a href="https://www.inaturalist.org/observations/78030477">https://www.inaturalist.org/observations/78030477</a>   |
| 1093 | Lanius cristatus                | Brown Shrike | 2019/12/29 | 4 | 0 | 22.62362883 | 88.44098009  | <a href="https://www.inaturalist.org/observations/37304115">https://www.inaturalist.org/observations/37304115</a>   |
| 1094 | Lanius cristatus                | Brown Shrike | 2019/11/1  | 1 | 0 | 22.62375231 | 88.44098009  | <a href="https://www.inaturalist.org/observations/95556849">https://www.inaturalist.org/observations/95556849</a>   |
| 1095 | Lanius cristatus                | Brown Shrike | 2022/9/15  | 1 | 0 | 22.62495910 | 120.26817640 | <a href="https://www.inaturalist.org/observations/135117070">https://www.inaturalist.org/observations/135117070</a> |
| 1096 | Lanius cristatus                | Brown Shrike | 2021/2/16  | 1 | 0 | 22.62581875 | 88.43857673  | <a href="https://www.inaturalist.org/observations/81268696">https://www.inaturalist.org/observations/81268696</a>   |
| 1097 | Lanius cristatus                | Brown Shrike | 2020/10/3  | 3 | 0 | 22.62703180 | 120.28757460 | <a href="https://www.inaturalist.org/observations/63562822">https://www.inaturalist.org/observations/63562822</a>   |
| 1098 | Lanius cristatus                | Brown Shrike | 2021/12/27 | 2 | 0 | 22.62939441 | 120.34314660 | <a href="https://www.inaturalist.org/observations/103739187">https://www.inaturalist.org/observations/103739187</a> |
| 1099 | Lanius cristatus                | Brown Shrike | 2022/2/15  | 2 | 0 | 22.62954400 | 120.26854800 | <a href="https://www.inaturalist.org/observations/106789940">https://www.inaturalist.org/observations/106789940</a> |
| 1100 | Lanius cristatus                | Brown Shrike | 2022/2/14  | 3 | 0 | 22.62977640 | 120.36520520 | <a href="https://www.inaturalist.org/observations/106733981">https://www.inaturalist.org/observations/106733981</a> |
| 1101 | Lanius cristatus                | Brown Shrike | 2017/1/24  | 2 | 0 | 22.62994585 | 120.28601450 | <a href="https://www.inaturalist.org/observations/39050415">https://www.inaturalist.org/observations/39050415</a>   |
| 1102 | Lanius cristatus                | Brown Shrike | 2020/9/3   | 1 | 0 | 22.63444466 | 120.60977740 | <a href="https://www.inaturalist.org/observations/58402474">https://www.inaturalist.org/observations/58402474</a>   |
| 1103 | Lanius cristatus                | Brown Shrike | 2020/3/3   | 2 | 0 | 22.63450630 | 120.27515420 | <a href="https://www.inaturalist.org/observations/39566667">https://www.inaturalist.org/observations/39566667</a>   |

|      |                  |              |            |   |   |             |              |                                                                                                                     |
|------|------------------|--------------|------------|---|---|-------------|--------------|---------------------------------------------------------------------------------------------------------------------|
| 1104 | Lanius cristatus | Brown Shrike | 2020/2/10  | 2 | 0 | 22.63703597 | 120.28452490 | <a href="https://www.inaturalist.org/observations/38536968">https://www.inaturalist.org/observations/38536968</a>   |
| 1105 | Lanius cristatus | Brown Shrike | 2022/2/7   | 1 | 0 | 22.63766743 | 114.40215590 | <a href="https://www.inaturalist.org/observations/107693506">https://www.inaturalist.org/observations/107693506</a> |
| 1106 | Lanius cristatus | Brown Shrike | 2022/4/21  | 1 | 0 | 22.63819326 | 114.40289650 | <a href="https://www.inaturalist.org/observations/124994641">https://www.inaturalist.org/observations/124994641</a> |
| 1107 | Lanius cristatus | Brown Shrike | 2019/12/27 | 2 | 0 | 22.63862020 | 120.61549010 | <a href="https://www.inaturalist.org/observations/36991496">https://www.inaturalist.org/observations/36991496</a>   |
| 1108 | Lanius cristatus | Brown Shrike | 2018/1/3   | 2 | 0 | 22.63892354 | 120.29651060 | <a href="https://www.inaturalist.org/observations/15778023">https://www.inaturalist.org/observations/15778023</a>   |
| 1109 | Lanius cristatus | Brown Shrike | 2021/4/1   | 1 | 0 | 22.63894220 | 120.60783370 | <a href="https://www.inaturalist.org/observations/72600661">https://www.inaturalist.org/observations/72600661</a>   |
| 1110 | Lanius cristatus | Brown Shrike | 2022/1/21  | 1 | 0 | 22.63917261 | 114.39554500 | <a href="https://www.inaturalist.org/observations/107372069">https://www.inaturalist.org/observations/107372069</a> |
| 1111 | Lanius cristatus | Brown Shrike | 2020/4/27  | 1 | 0 | 22.63922755 | 114.35685090 | <a href="https://www.inaturalist.org/observations/139437184">https://www.inaturalist.org/observations/139437184</a> |
| 1112 | Lanius cristatus | Brown Shrike | 2020/2/28  | 1 | 0 | 22.64095961 | 120.27614400 | <a href="https://www.inaturalist.org/observations/80227696">https://www.inaturalist.org/observations/80227696</a>   |
| 1113 | Lanius cristatus | Brown Shrike | 2019/12/2  | 2 | 0 | 22.64203479 | 120.59382090 | <a href="https://www.inaturalist.org/observations/36287682">https://www.inaturalist.org/observations/36287682</a>   |
| 1114 | Lanius cristatus | Brown Shrike | 2020/10/10 | 2 | 0 | 22.64432171 | 120.60662300 | <a href="https://www.inaturalist.org/observations/62372230">https://www.inaturalist.org/observations/62372230</a>   |
| 1115 | Lanius cristatus | Brown Shrike | 2018/2/6   | 1 | 0 | 22.64444400 | 120.60976400 | <a href="https://www.inaturalist.org/observations/14414949">https://www.inaturalist.org/observations/14414949</a>   |
| 1116 | Lanius cristatus | Brown Shrike | 2018/2/6   | 2 | 0 | 22.64444400 | 120.60976400 | <a href="https://www.inaturalist.org/observations/14414950">https://www.inaturalist.org/observations/14414950</a>   |
| 1117 | Lanius cristatus | Brown Shrike | 2017/10/7  | 2 | 0 | 22.64444400 | 120.60976400 | <a href="https://www.inaturalist.org/observations/20004839">https://www.inaturalist.org/observations/20004839</a>   |
| 1118 | Lanius cristatus | Brown Shrike | 2022/12/15 | 1 | 0 | 22.64463916 | 120.27425540 | <a href="https://www.inaturalist.org/observations/144414235">https://www.inaturalist.org/observations/144414235</a> |
| 1119 | Lanius cristatus | Brown Shrike | 2022/12/13 | 2 | 0 | 22.64505215 | 120.28630520 | <a href="https://www.inaturalist.org/observations/144294022">https://www.inaturalist.org/observations/144294022</a> |
| 1120 | Lanius cristatus | Brown Shrike | 2020/9/24  | 2 | 0 | 22.64585666 | 120.60625340 | <a href="https://www.inaturalist.org/observations/60686381">https://www.inaturalist.org/observations/60686381</a>   |
| 1121 | Lanius cristatus | Brown Shrike | 2018/3/29  | 2 | 0 | 22.64594400 | 120.28798600 | <a href="https://www.inaturalist.org/observations/10505912">https://www.inaturalist.org/observations/10505912</a>   |
| 1122 | Lanius cristatus | Brown Shrike | 2019/12/21 | 3 | 0 | 22.64601361 | 120.27414450 | <a href="https://www.inaturalist.org/observations/37062405">https://www.inaturalist.org/observations/37062405</a>   |
| 1123 | Lanius cristatus | Brown Shrike | 2021/3/9   | 2 | 0 | 22.64648074 | 120.61249480 | <a href="https://www.inaturalist.org/observations/70844052">https://www.inaturalist.org/observations/70844052</a>   |
| 1124 | Lanius cristatus | Brown Shrike | 2022/11/19 | 1 | 0 | 22.64701355 | 120.35442880 | <a href="https://www.inaturalist.org/observations/142343361">https://www.inaturalist.org/observations/142343361</a> |
| 1125 | Lanius cristatus | Brown Shrike | 2022/11/11 | 2 | 0 | 22.64882871 | 120.61415580 | <a href="https://www.inaturalist.org/observations/141648651">https://www.inaturalist.org/observations/141648651</a> |
| 1126 | Lanius cristatus | Brown Shrike | 2020/11/18 | 2 | 0 | 22.64912100 | 120.29541500 | <a href="https://www.inaturalist.org/observations/65137993">https://www.inaturalist.org/observations/65137993</a>   |



|      |                  |              |            |   |   |             |              |                                                                                                                     |
|------|------------------|--------------|------------|---|---|-------------|--------------|---------------------------------------------------------------------------------------------------------------------|
| 1127 | Lanius cristatus | Brown Shrike | 2021/11/25 | 1 | 0 | 22.65029112 | 120.60487550 | <a href="https://www.inaturalist.org/observations/102296147">https://www.inaturalist.org/observations/102296147</a> |
| 1128 | Lanius cristatus | Brown Shrike | 2019/12/10 | 2 | 0 | 22.65082590 | 120.60829260 | <a href="https://www.inaturalist.org/observations/36587689">https://www.inaturalist.org/observations/36587689</a>   |
| 1129 | Lanius cristatus | Brown Shrike | 2011/12/30 | 3 | 0 | 22.65092100 | 120.25066100 | <a href="https://www.inaturalist.org/observations/14643218">https://www.inaturalist.org/observations/14643218</a>   |
| 1130 | Lanius cristatus | Brown Shrike | 2020/2/9   | 2 | 0 | 22.65219392 | 120.27108510 | <a href="https://www.inaturalist.org/observations/38536291">https://www.inaturalist.org/observations/38536291</a>   |
| 1131 | Lanius cristatus | Brown Shrike | 2020/9/18  | 1 | 0 | 22.65272231 | 120.35001800 | <a href="https://www.inaturalist.org/observations/60507424">https://www.inaturalist.org/observations/60507424</a>   |
| 1132 | Lanius cristatus | Brown Shrike | 2020/4/28  | 2 | 0 | 22.65363333 | 120.27965500 | <a href="https://www.inaturalist.org/observations/44253411">https://www.inaturalist.org/observations/44253411</a>   |
| 1133 | Lanius cristatus | Brown Shrike | 2021/10/27 | 1 | 0 | 22.65683727 | 120.28464240 | <a href="https://www.inaturalist.org/observations/99543841">https://www.inaturalist.org/observations/99543841</a>   |
| 1134 | Lanius cristatus | Brown Shrike | 2022/11/14 | 1 | 0 | 22.65720275 | 120.28518280 | <a href="https://www.inaturalist.org/observations/141990586">https://www.inaturalist.org/observations/141990586</a> |
| 1135 | Lanius cristatus | Brown Shrike | 2022/11/10 | 1 | 0 | 22.65765382 | 120.42643700 | <a href="https://www.inaturalist.org/observations/141606515">https://www.inaturalist.org/observations/141606515</a> |
| 1136 | Lanius cristatus | Brown Shrike | 2022/3/14  | 1 | 0 | 22.65823611 | 120.29880280 | <a href="https://www.inaturalist.org/observations/108569726">https://www.inaturalist.org/observations/108569726</a> |
| 1137 | Lanius cristatus | Brown Shrike | 2022/1/1   | 1 | 0 | 22.65828339 | 120.28534030 | <a href="https://www.inaturalist.org/observations/144124187">https://www.inaturalist.org/observations/144124187</a> |
| 1138 | Lanius cristatus | Brown Shrike | 2022/1/1   | 1 | 0 | 22.65828339 | 120.28534030 | <a href="https://www.inaturalist.org/observations/144124194">https://www.inaturalist.org/observations/144124194</a> |
| 1139 | Lanius cristatus | Brown Shrike | 2022/1/1   | 1 | 0 | 22.65828339 | 120.28534030 | <a href="https://www.inaturalist.org/observations/144124197">https://www.inaturalist.org/observations/144124197</a> |
| 1140 | Lanius cristatus | Brown Shrike | 2022/1/1   | 1 | 0 | 22.65828339 | 120.28534030 | <a href="https://www.inaturalist.org/observations/144124206">https://www.inaturalist.org/observations/144124206</a> |
| 1141 | Lanius cristatus | Brown Shrike | 2022/1/1   | 1 | 0 | 22.65828339 | 120.28534030 | <a href="https://www.inaturalist.org/observations/144124210">https://www.inaturalist.org/observations/144124210</a> |
| 1142 | Lanius cristatus | Brown Shrike | 2021/12/31 | 2 | 0 | 22.65834500 | 120.28489830 | <a href="https://www.inaturalist.org/observations/105646974">https://www.inaturalist.org/observations/105646974</a> |
| 1143 | Lanius cristatus | Brown Shrike | 2022/2/4   | 0 | 0 | 22.65837874 | 120.31186820 | <a href="https://www.inaturalist.org/observations/106110791">https://www.inaturalist.org/observations/106110791</a> |
| 1144 | Lanius cristatus | Brown Shrike | 2022/3/14  | 1 | 0 | 22.65873333 | 120.29761110 | <a href="https://www.inaturalist.org/observations/108569721">https://www.inaturalist.org/observations/108569721</a> |
| 1145 | Lanius cristatus | Brown Shrike | 2022/3/14  | 1 | 0 | 22.65894444 | 120.29761670 | <a href="https://www.inaturalist.org/observations/108569733">https://www.inaturalist.org/observations/108569733</a> |
| 1146 | Lanius cristatus | Brown Shrike | 2022/11/23 | 1 | 0 | 22.65897668 | 120.29835380 | <a href="https://www.inaturalist.org/observations/142652956">https://www.inaturalist.org/observations/142652956</a> |
| 1147 | Lanius cristatus | Brown Shrike | 2022/3/14  | 2 | 0 | 22.65902500 | 120.30188610 | <a href="https://www.inaturalist.org/observations/108569714">https://www.inaturalist.org/observations/108569714</a> |
| 1148 | Lanius cristatus | Brown Shrike | 2019/2/13  | 2 | 0 | 22.65923808 | 120.28594170 | <a href="https://www.inaturalist.org/observations/20320764">https://www.inaturalist.org/observations/20320764</a>   |
| 1149 | Lanius cristatus | Brown Shrike | 2022/4/12  | 2 | 0 | 22.65969948 | 120.28547590 | <a href="https://www.inaturalist.org/observations/111178043">https://www.inaturalist.org/observations/111178043</a> |

|      |                                   |              |            |   |   |             |              |                                                                                                                     |
|------|-----------------------------------|--------------|------------|---|---|-------------|--------------|---------------------------------------------------------------------------------------------------------------------|
| 1150 | Lanius cristatus                  | Brown Shrike | 2020/2/9   | 1 | 0 | 22.65992700 | 120.57122800 | <a href="https://www.inaturalist.org/observations/81452021">https://www.inaturalist.org/observations/81452021</a>   |
| 1151 | Lanius cristatus                  | Brown Shrike | 2022/4/5   | 1 | 0 | 22.66125400 | 120.43929900 | <a href="https://www.inaturalist.org/observations/135082351">https://www.inaturalist.org/observations/135082351</a> |
| 1152 | Lanius cristatus                  | Brown Shrike | 2016/10/31 | 2 | 0 | 22.66344125 | 120.63112530 | <a href="https://www.inaturalist.org/observations/44365942">https://www.inaturalist.org/observations/44365942</a>   |
| 1153 | Lanius cristatus                  | Brown Shrike | 2021/1/10  | 1 | 0 | 22.66385267 | 120.44147030 | <a href="https://www.inaturalist.org/observations/81264554">https://www.inaturalist.org/observations/81264554</a>   |
| 1154 | Lanius cristatus                  | Brown Shrike | 2021/1/16  | 2 | 0 | 22.66453386 | 120.38788550 | <a href="https://www.inaturalist.org/observations/68152936">https://www.inaturalist.org/observations/68152936</a>   |
| 1155 | Lanius cristatus                  | Brown Shrike | 2021/3/7   | 3 | 0 | 22.67130000 | 120.30647170 | <a href="https://www.inaturalist.org/observations/70734464">https://www.inaturalist.org/observations/70734464</a>   |
| 1156 | Lanius cristatus                  | Brown Shrike | 2022/3/16  | 2 | 0 | 22.67703143 | 120.50357160 | <a href="https://www.inaturalist.org/observations/108801383">https://www.inaturalist.org/observations/108801383</a> |
| 1157 | Lanius cristatus                  | Brown Shrike | 2022/3/16  | 2 | 0 | 22.67708464 | 120.50360010 | <a href="https://www.inaturalist.org/observations/108801235">https://www.inaturalist.org/observations/108801235</a> |
| 1158 | Lanius cristatus                  | Brown Shrike | 2021/1/14  | 2 | 0 | 22.67901225 | 120.30052970 | <a href="https://www.inaturalist.org/observations/68040417">https://www.inaturalist.org/observations/68040417</a>   |
| 1159 | Lanius cristatus                  | Brown Shrike | 2022/4/30  | 1 | 0 | 22.67930000 | 120.32225830 | <a href="https://www.inaturalist.org/observations/113698210">https://www.inaturalist.org/observations/113698210</a> |
| 1160 | Lanius cristatus                  | Brown Shrike | 2021/11/3  | 3 | 0 | 22.67949777 | 120.30065340 | <a href="https://www.inaturalist.org/observations/106847217">https://www.inaturalist.org/observations/106847217</a> |
| 1161 | Lanius cristatus                  | Brown Shrike | 2020/1/18  | 2 | 0 | 22.68050670 | 120.29843890 | <a href="https://www.inaturalist.org/observations/37703960">https://www.inaturalist.org/observations/37703960</a>   |
| 1162 | Lanius cristatus<br>lucionensis   | Brown Shrike | 2020/2/27  | 2 | 0 | 22.68052430 | 120.29832630 | <a href="https://www.inaturalist.org/observations/39524351">https://www.inaturalist.org/observations/39524351</a>   |
| 1163 | Lanius cristatus                  | Brown Shrike | 2020/1/18  | 2 | 0 | 22.68055400 | 120.29821900 | <a href="https://www.inaturalist.org/observations/37780919">https://www.inaturalist.org/observations/37780919</a>   |
| 1164 | Lanius cristatus<br>superciliosus | Brown Shrike | 2015/5/4   | 1 | 0 | 22.68107330 | 88.31542690  | <a href="https://www.inaturalist.org/observations/100378053">https://www.inaturalist.org/observations/100378053</a> |
| 1165 | Lanius cristatus                  | Brown Shrike | 2021/2/27  | 2 | 0 | 22.68310277 | 120.32002660 | <a href="https://www.inaturalist.org/observations/70436305">https://www.inaturalist.org/observations/70436305</a>   |
| 1166 | Lanius cristatus                  | Brown Shrike | 2020/12/20 | 3 | 0 | 22.68364621 | 88.32208366  | <a href="https://www.inaturalist.org/observations/67046466">https://www.inaturalist.org/observations/67046466</a>   |
| 1167 | Lanius cristatus                  | Brown Shrike | 2022/2/20  | 1 | 0 | 22.68435500 | 120.32183000 | <a href="https://www.inaturalist.org/observations/107096015">https://www.inaturalist.org/observations/107096015</a> |
| 1168 | Lanius cristatus                  | Brown Shrike | 2021/1/3   | 2 | 0 | 22.68583250 | 120.29616530 | <a href="https://www.inaturalist.org/observations/67570230">https://www.inaturalist.org/observations/67570230</a>   |
| 1169 | Lanius cristatus                  | Brown Shrike | 2021/3/20  | 2 | 0 | 22.69666565 | 121.06492670 | <a href="https://www.inaturalist.org/observations/71625354">https://www.inaturalist.org/observations/71625354</a>   |
| 1170 | Lanius cristatus                  | Brown Shrike | 2021/3/11  | 3 | 0 | 22.69803910 | 120.64076210 | <a href="https://www.inaturalist.org/observations/70994427">https://www.inaturalist.org/observations/70994427</a>   |
| 1171 | Lanius cristatus                  | Brown Shrike | 2022/4/28  | 2 | 0 | 22.69848667 | 120.31007170 | <a href="https://www.inaturalist.org/observations/113211708">https://www.inaturalist.org/observations/113211708</a> |
| 1172 | Lanius cristatus                  | Brown Shrike | 2022/9/17  | 2 | 0 | 22.69848833 | 120.31004500 | <a href="https://www.inaturalist.org/observations/135342456">https://www.inaturalist.org/observations/135342456</a> |

|      |                  |              |            |   |   |             |              |                                                                                                                     |
|------|------------------|--------------|------------|---|---|-------------|--------------|---------------------------------------------------------------------------------------------------------------------|
| 1173 | Lanius cristatus | Brown Shrike | 2020/11/13 | 2 | 0 | 22.69856080 | 120.64196080 | <a href="https://www.inaturalist.org/observations/64848395">https://www.inaturalist.org/observations/64848395</a>   |
| 1174 | Lanius cristatus | Brown Shrike | 2022/9/30  | 1 | 0 | 22.70097417 | 88.37482106  | <a href="https://www.inaturalist.org/observations/136993496">https://www.inaturalist.org/observations/136993496</a> |
| 1175 | Lanius cristatus | Brown Shrike | 2020/10/16 | 1 | 0 | 22.70167984 | 120.29668370 | <a href="https://www.inaturalist.org/observations/62790379">https://www.inaturalist.org/observations/62790379</a>   |
| 1176 | Lanius cristatus | Brown Shrike | 2021/10/21 | 2 | 0 | 22.70668333 | 120.30830330 | <a href="https://www.inaturalist.org/observations/99205631">https://www.inaturalist.org/observations/99205631</a>   |
| 1177 | Lanius cristatus | Brown Shrike | 2020/11/10 | 3 | 0 | 22.70829085 | 120.54006040 | <a href="https://www.inaturalist.org/observations/64727203">https://www.inaturalist.org/observations/64727203</a>   |
| 1178 | Lanius cristatus | Brown Shrike | 2021/1/12  | 2 | 0 | 22.70947644 | 120.53735820 | <a href="https://www.inaturalist.org/observations/68054824">https://www.inaturalist.org/observations/68054824</a>   |
| 1179 | Lanius cristatus | Brown Shrike | 2020/1/22  | 2 | 0 | 22.70982090 | 120.36967100 | <a href="https://www.inaturalist.org/observations/37979655">https://www.inaturalist.org/observations/37979655</a>   |
| 1180 | Lanius cristatus | Brown Shrike | 2022/2/1   | 1 | 0 | 22.71566667 | 120.52668330 | <a href="https://www.inaturalist.org/observations/108288995">https://www.inaturalist.org/observations/108288995</a> |
| 1181 | Lanius cristatus | Brown Shrike | 2018/10/6  | 2 | 0 | 22.71585056 | 120.47491600 | <a href="https://www.inaturalist.org/observations/19673444">https://www.inaturalist.org/observations/19673444</a>   |
| 1182 | Lanius cristatus | Brown Shrike | 2020/2/10  | 2 | 0 | 22.71644565 | 120.47775810 | <a href="https://www.inaturalist.org/observations/38503686">https://www.inaturalist.org/observations/38503686</a>   |
| 1183 | Lanius cristatus | Brown Shrike | 2020/11/24 | 2 | 0 | 22.72481086 | 120.61522250 | <a href="https://www.inaturalist.org/observations/65581052">https://www.inaturalist.org/observations/65581052</a>   |
| 1184 | Lanius cristatus | Brown Shrike | 2021/4/19  | 1 | 0 | 22.72612848 | 115.34927410 | <a href="https://www.inaturalist.org/observations/80717591">https://www.inaturalist.org/observations/80717591</a>   |
| 1185 | Lanius cristatus | Brown Shrike | 2022/10/12 | 2 | 0 | 22.72856944 | 120.29333890 | <a href="https://www.inaturalist.org/observations/138482632">https://www.inaturalist.org/observations/138482632</a> |
| 1186 | Lanius cristatus | Brown Shrike | 2014/9/4   | 2 | 0 | 22.72930500 | 113.77666500 | <a href="https://www.inaturalist.org/observations/39808957">https://www.inaturalist.org/observations/39808957</a>   |
| 1187 | Lanius cristatus | Brown Shrike | 2015/1/20  | 3 | 0 | 22.73050931 | 120.27000960 | <a href="https://www.inaturalist.org/observations/16456114">https://www.inaturalist.org/observations/16456114</a>   |
| 1188 | Lanius cristatus | Brown Shrike | 2020/1/11  | 2 | 0 | 22.73266987 | 120.31665210 | <a href="https://www.inaturalist.org/observations/37481226">https://www.inaturalist.org/observations/37481226</a>   |
| 1189 | Lanius cristatus | Brown Shrike | 2017/1/22  | 2 | 0 | 22.73339700 | 120.31003310 | <a href="https://www.inaturalist.org/observations/9457455">https://www.inaturalist.org/observations/9457455</a>     |
| 1190 | Lanius cristatus | Brown Shrike | 2021/12/12 | 2 | 0 | 22.73584071 | 120.30949940 | <a href="https://www.inaturalist.org/observations/104853928">https://www.inaturalist.org/observations/104853928</a> |
| 1191 | Lanius cristatus | Brown Shrike | 2022/1/16  | 1 | 0 | 22.73621368 | 121.05733490 | <a href="https://www.inaturalist.org/observations/105017257">https://www.inaturalist.org/observations/105017257</a> |
| 1192 | Lanius cristatus | Brown Shrike | 2020/1/28  | 4 | 0 | 22.73676024 | 121.06739720 | <a href="https://www.inaturalist.org/observations/38054167">https://www.inaturalist.org/observations/38054167</a>   |
| 1193 | Lanius cristatus | Brown Shrike | 2020/5/14  | 4 | 0 | 22.73704586 | 121.06650960 | <a href="https://www.inaturalist.org/observations/71014683">https://www.inaturalist.org/observations/71014683</a>   |
| 1194 | Lanius cristatus | Brown Shrike | 2021/12/6  | 2 | 0 | 22.74527488 | 120.37592810 | <a href="https://www.inaturalist.org/observations/102580128">https://www.inaturalist.org/observations/102580128</a> |
| 1195 | Lanius cristatus | Brown Shrike | 2022/2/8   | 1 | 0 | 22.75204086 | 120.31652650 | <a href="https://www.inaturalist.org/observations/106371282">https://www.inaturalist.org/observations/106371282</a> |

|      |                  |              |            |   |   |             |              |                                                                                                                     |
|------|------------------|--------------|------------|---|---|-------------|--------------|---------------------------------------------------------------------------------------------------------------------|
| 1196 | Lanius cristatus | Brown Shrike | 2020/9/25  | 2 | 0 | 22.75216903 | 120.31609570 | <a href="https://www.inaturalist.org/observations/62639230">https://www.inaturalist.org/observations/62639230</a>   |
| 1197 | Lanius cristatus | Brown Shrike | 2021/3/28  | 2 | 0 | 22.75334180 | 121.14598110 | <a href="https://www.inaturalist.org/observations/90224606">https://www.inaturalist.org/observations/90224606</a>   |
| 1198 | Lanius cristatus | Brown Shrike | 2022/2/8   | 1 | 0 | 22.75344084 | 120.31508880 | <a href="https://www.inaturalist.org/observations/106371277">https://www.inaturalist.org/observations/106371277</a> |
| 1199 | Lanius cristatus | Brown Shrike | 2019/12/14 | 2 | 0 | 22.75429523 | 120.24886700 | <a href="https://www.inaturalist.org/observations/36774311">https://www.inaturalist.org/observations/36774311</a>   |
| 1200 | Lanius cristatus | Brown Shrike | 2020/9/26  | 1 | 0 | 22.75441013 | 120.26709270 | <a href="https://www.inaturalist.org/observations/62768593">https://www.inaturalist.org/observations/62768593</a>   |
| 1201 | Lanius cristatus | Brown Shrike | 2022/2/8   | 1 | 0 | 22.75456381 | 120.31552530 | <a href="https://www.inaturalist.org/observations/106371327">https://www.inaturalist.org/observations/106371327</a> |
| 1202 | Lanius cristatus | Brown Shrike | 2020/9/26  | 2 | 0 | 22.75539304 | 120.26894210 | <a href="https://www.inaturalist.org/observations/129821823">https://www.inaturalist.org/observations/129821823</a> |
| 1203 | Lanius cristatus | Brown Shrike | 2020/9/26  | 1 | 0 | 22.75561717 | 120.26986070 | <a href="https://www.inaturalist.org/observations/62770905">https://www.inaturalist.org/observations/62770905</a>   |
| 1204 | Lanius cristatus | Brown Shrike | 2022/12/19 | 1 | 0 | 22.76139420 | 121.15357270 | <a href="https://www.inaturalist.org/observations/144642303">https://www.inaturalist.org/observations/144642303</a> |
| 1205 | Lanius cristatus | Brown Shrike | 2021/1/19  | 3 | 0 | 22.76352882 | 121.05024720 | <a href="https://www.inaturalist.org/observations/68368462">https://www.inaturalist.org/observations/68368462</a>   |
| 1206 | Lanius cristatus | Brown Shrike | 2022/12/18 | 1 | 0 | 22.76419220 | 121.16042700 | <a href="https://www.inaturalist.org/observations/144575993">https://www.inaturalist.org/observations/144575993</a> |
| 1207 | Lanius cristatus | Brown Shrike | 2020/3/19  | 2 | 0 | 22.76742782 | 88.38834543  | <a href="https://www.inaturalist.org/observations/43658292">https://www.inaturalist.org/observations/43658292</a>   |
| 1208 | Lanius cristatus | Brown Shrike | 2022/1/19  | 1 | 0 | 22.77017091 | 121.15469690 | <a href="https://www.inaturalist.org/observations/105210202">https://www.inaturalist.org/observations/105210202</a> |
| 1209 | Lanius cristatus | Brown Shrike | 2021/12/7  | 1 | 0 | 22.77089500 | 121.14051950 | <a href="https://www.inaturalist.org/observations/102647036">https://www.inaturalist.org/observations/102647036</a> |
| 1210 | Lanius cristatus | Brown Shrike | 2020/3/21  | 3 | 0 | 22.77863500 | 120.28926000 | <a href="https://www.inaturalist.org/observations/40349417">https://www.inaturalist.org/observations/40349417</a>   |
| 1211 | Lanius cristatus | Brown Shrike | 2022/11/17 | 1 | 0 | 22.78541667 | 120.29289440 | <a href="https://www.inaturalist.org/observations/142207161">https://www.inaturalist.org/observations/142207161</a> |
| 1212 | Lanius cristatus | Brown Shrike | 2020/3/21  | 2 | 0 | 22.78868500 | 88.42515100  | <a href="https://www.inaturalist.org/observations/40358857">https://www.inaturalist.org/observations/40358857</a>   |
| 1213 | Lanius cristatus | Brown Shrike | 2020/9/12  | 2 | 0 | 22.79245360 | 88.29597950  | <a href="https://www.inaturalist.org/observations/98007673">https://www.inaturalist.org/observations/98007673</a>   |
| 1214 | Lanius cristatus | Brown Shrike | 2022/9/7   | 2 | 0 | 22.79245360 | 88.29597950  | <a href="https://www.inaturalist.org/observations/134010069">https://www.inaturalist.org/observations/134010069</a> |
| 1215 | Lanius cristatus | Brown Shrike | 2022/1/3   | 1 | 0 | 22.79322464 | 121.12374770 | <a href="https://www.inaturalist.org/observations/106016765">https://www.inaturalist.org/observations/106016765</a> |
| 1216 | Lanius cristatus | Brown Shrike | 2021/1/7   | 2 | 0 | 22.79420100 | 88.29109600  | <a href="https://www.inaturalist.org/observations/67714763">https://www.inaturalist.org/observations/67714763</a>   |
| 1217 | Lanius cristatus | Brown Shrike | 2022/10/9  | 1 | 0 | 22.80181170 | 88.33368621  | <a href="https://www.inaturalist.org/observations/138744256">https://www.inaturalist.org/observations/138744256</a> |
| 1218 | Lanius cristatus | Brown Shrike | 2019/6/19  | 2 | 0 | 22.80354226 | 112.07525580 | <a href="https://www.inaturalist.org/observations/27260762">https://www.inaturalist.org/observations/27260762</a>   |

|      |                  |              |            |   |   |             |              |                                                                                                                     |
|------|------------------|--------------|------------|---|---|-------------|--------------|---------------------------------------------------------------------------------------------------------------------|
| 1219 | Lanius cristatus | Brown Shrike | 2022/11/27 | 2 | 0 | 22.80496181 | 88.33208207  | <a href="https://www.inaturalist.org/observations/143038164">https://www.inaturalist.org/observations/143038164</a> |
| 1220 | Lanius cristatus | Brown Shrike | 2022/10/13 | 1 | 0 | 22.81965597 | 72.29820975  | <a href="https://www.inaturalist.org/observations/139507122">https://www.inaturalist.org/observations/139507122</a> |
| 1221 | Lanius cristatus | Brown Shrike | 2020/10/6  | 2 | 0 | 22.82866813 | 120.26852090 | <a href="https://www.inaturalist.org/observations/62287985">https://www.inaturalist.org/observations/62287985</a>   |
| 1222 | Lanius cristatus | Brown Shrike | 2020/10/6  | 2 | 0 | 22.82866923 | 120.26851960 | <a href="https://www.inaturalist.org/observations/62287984">https://www.inaturalist.org/observations/62287984</a>   |
| 1223 | Lanius cristatus | Brown Shrike | 2020/10/6  | 2 | 0 | 22.82867032 | 120.26851830 | <a href="https://www.inaturalist.org/observations/62287981">https://www.inaturalist.org/observations/62287981</a>   |
| 1224 | Lanius cristatus | Brown Shrike | 2021/2/6   | 1 | 0 | 22.83129413 | 120.29772640 | <a href="https://www.inaturalist.org/observations/100153513">https://www.inaturalist.org/observations/100153513</a> |
| 1225 | Lanius cristatus | Brown Shrike | 2021/11/23 | 1 | 0 | 22.83392748 | 86.72010499  | <a href="https://www.inaturalist.org/observations/101823568">https://www.inaturalist.org/observations/101823568</a> |
| 1226 | Lanius cristatus | Brown Shrike | 2022/2/24  | 2 | 0 | 22.83413328 | 120.21207440 | <a href="https://www.inaturalist.org/observations/107369524">https://www.inaturalist.org/observations/107369524</a> |
| 1227 | Lanius cristatus | Brown Shrike | 2017/11/27 | 2 | 0 | 22.83425359 | 120.21255390 | <a href="https://www.inaturalist.org/observations/19940508">https://www.inaturalist.org/observations/19940508</a>   |
| 1228 | Lanius cristatus | Brown Shrike | 2019/10/13 | 2 | 0 | 22.83487092 | 120.21201730 | <a href="https://www.inaturalist.org/observations/34298054">https://www.inaturalist.org/observations/34298054</a>   |
| 1229 | Lanius cristatus | Brown Shrike | 2022/11/6  | 1 | 0 | 22.83559147 | 120.45835240 | <a href="https://www.inaturalist.org/observations/141244719">https://www.inaturalist.org/observations/141244719</a> |
| 1230 | Lanius cristatus | Brown Shrike | 2020/10/5  | 2 | 0 | 22.83578754 | 120.20664840 | <a href="https://www.inaturalist.org/observations/61765877">https://www.inaturalist.org/observations/61765877</a>   |
| 1231 | Lanius cristatus | Brown Shrike | 2020/1/5   | 2 | 0 | 22.83583260 | 120.45861050 | <a href="https://www.inaturalist.org/observations/37297288">https://www.inaturalist.org/observations/37297288</a>   |
| 1232 | Lanius cristatus | Brown Shrike | 2022/2/18  | 1 | 0 | 22.83637304 | 120.27327540 | <a href="https://www.inaturalist.org/observations/107117518">https://www.inaturalist.org/observations/107117518</a> |
| 1233 | Lanius cristatus | Brown Shrike | 2022/9/17  | 1 | 0 | 22.84046755 | 120.58948980 | <a href="https://www.inaturalist.org/observations/135992183">https://www.inaturalist.org/observations/135992183</a> |
| 1234 | Lanius cristatus | Brown Shrike | 2022/10/8  | 2 | 0 | 22.84083855 | 120.58969670 | <a href="https://www.inaturalist.org/observations/138452387">https://www.inaturalist.org/observations/138452387</a> |
| 1235 | Lanius cristatus | Brown Shrike | 2022/3/17  | 1 | 0 | 22.84380817 | 120.29571970 | <a href="https://www.inaturalist.org/observations/110005292">https://www.inaturalist.org/observations/110005292</a> |
| 1236 | Lanius cristatus | Brown Shrike | 2020/3/16  | 2 | 0 | 22.86230635 | 120.53919440 | <a href="https://www.inaturalist.org/observations/40692522">https://www.inaturalist.org/observations/40692522</a>   |
| 1237 | Lanius cristatus | Brown Shrike | 2020/10/15 | 2 | 0 | 22.86797782 | 120.54743630 | <a href="https://www.inaturalist.org/observations/64034958">https://www.inaturalist.org/observations/64034958</a>   |
| 1238 | Lanius cristatus | Brown Shrike | 2020/10/15 | 1 | 0 | 22.86805320 | 120.54734510 | <a href="https://www.inaturalist.org/observations/64034976">https://www.inaturalist.org/observations/64034976</a>   |
| 1239 | Lanius cristatus | Brown Shrike | 2019/9/20  | 1 | 0 | 22.87911681 | 120.65742320 | <a href="https://www.inaturalist.org/observations/89996925">https://www.inaturalist.org/observations/89996925</a>   |
| 1240 | Lanius cristatus | Brown Shrike | 2021/2/2   | 2 | 0 | 22.88365082 | 120.20200420 | <a href="https://www.inaturalist.org/observations/69143169">https://www.inaturalist.org/observations/69143169</a>   |
| 1241 | Lanius cristatus | Brown Shrike | 2022/1/18  | 2 | 0 | 22.88472300 | 120.44814870 | <a href="https://www.inaturalist.org/observations/105158100">https://www.inaturalist.org/observations/105158100</a> |

|      |                  |              |            |   |   |             |              |                                                                                                                     |
|------|------------------|--------------|------------|---|---|-------------|--------------|---------------------------------------------------------------------------------------------------------------------|
| 1242 | Lanius cristatus | Brown Shrike | 2019/3/26  | 2 | 0 | 22.88781233 | 120.62033960 | <a href="https://www.inaturalist.org/observations/21630582">https://www.inaturalist.org/observations/21630582</a>   |
| 1243 | Lanius cristatus | Brown Shrike | 2017/12/5  | 2 | 0 | 22.89132472 | 120.57875850 | <a href="https://www.inaturalist.org/observations/18209888">https://www.inaturalist.org/observations/18209888</a>   |
| 1244 | Lanius cristatus | Brown Shrike | 2005/3/26  | 2 | 0 | 22.89142776 | 120.51948060 | <a href="https://www.inaturalist.org/observations/36017516">https://www.inaturalist.org/observations/36017516</a>   |
| 1245 | Lanius cristatus | Brown Shrike | 2017/12/5  | 2 | 0 | 22.89444688 | 120.57839780 | <a href="https://www.inaturalist.org/observations/19940557">https://www.inaturalist.org/observations/19940557</a>   |
| 1246 | Lanius cristatus | Brown Shrike | 2020/9/20  | 2 | 0 | 22.89447447 | 120.52186090 | <a href="https://www.inaturalist.org/observations/60319373">https://www.inaturalist.org/observations/60319373</a>   |
| 1247 | Lanius cristatus | Brown Shrike | 2021/1/28  | 4 | 0 | 22.90474401 | 121.12981070 | <a href="https://www.inaturalist.org/observations/68834108">https://www.inaturalist.org/observations/68834108</a>   |
| 1248 | Lanius cristatus | Brown Shrike | 2021/11/6  | 1 | 0 | 22.90554463 | 120.55121590 | <a href="https://www.inaturalist.org/observations/100680756">https://www.inaturalist.org/observations/100680756</a> |
| 1249 | Lanius cristatus | Brown Shrike | 2019/12/28 | 2 | 0 | 22.90590667 | 120.68862500 | <a href="https://www.inaturalist.org/observations/49692714">https://www.inaturalist.org/observations/49692714</a>   |
| 1250 | Lanius cristatus | Brown Shrike | 2021/12/21 | 2 | 0 | 22.90753631 | 83.91884811  | <a href="https://www.inaturalist.org/observations/105913680">https://www.inaturalist.org/observations/105913680</a> |
| 1251 | Lanius cristatus | Brown Shrike | 2021/2/20  | 1 | 0 | 22.90880158 | 120.31076290 | <a href="https://www.inaturalist.org/observations/80767091">https://www.inaturalist.org/observations/80767091</a>   |
| 1252 | Lanius cristatus | Brown Shrike | 2020/11/24 | 2 | 0 | 22.90923099 | 120.55547430 | <a href="https://www.inaturalist.org/observations/65581075">https://www.inaturalist.org/observations/65581075</a>   |
| 1253 | Lanius cristatus | Brown Shrike | 2020/1/8   | 2 | 0 | 22.91020102 | 120.55620320 | <a href="https://www.inaturalist.org/observations/37394755">https://www.inaturalist.org/observations/37394755</a>   |
| 1254 | Lanius cristatus | Brown Shrike | 2021/9/9   | 2 | 0 | 22.91036944 | 120.55360280 | <a href="https://www.inaturalist.org/observations/100500699">https://www.inaturalist.org/observations/100500699</a> |
| 1255 | Lanius cristatus | Brown Shrike | 2022/4/16  | 1 | 0 | 22.91119120 | 120.55444820 | <a href="https://www.inaturalist.org/observations/126333062">https://www.inaturalist.org/observations/126333062</a> |
| 1256 | Lanius cristatus | Brown Shrike | 2021/11/6  | 1 | 0 | 22.91140727 | 120.55477790 | <a href="https://www.inaturalist.org/observations/101166381">https://www.inaturalist.org/observations/101166381</a> |
| 1257 | Lanius cristatus | Brown Shrike | 2022/9/16  | 2 | 0 | 22.91148000 | 120.55460830 | <a href="https://www.inaturalist.org/observations/135621803">https://www.inaturalist.org/observations/135621803</a> |
| 1258 | Lanius cristatus | Brown Shrike | 2021/1/17  | 2 | 0 | 22.91275983 | 121.25833280 | <a href="https://www.inaturalist.org/observations/68477709">https://www.inaturalist.org/observations/68477709</a>   |
| 1259 | Lanius cristatus | Brown Shrike | 2021/5/2   | 1 | 0 | 22.91356833 | 120.31063890 | <a href="https://www.inaturalist.org/observations/77705896">https://www.inaturalist.org/observations/77705896</a>   |
| 1260 | Lanius cristatus | Brown Shrike | 2020/4/25  | 3 | 0 | 22.91679000 | 120.26157500 | <a href="https://www.inaturalist.org/observations/44091912">https://www.inaturalist.org/observations/44091912</a>   |
| 1261 | Lanius cristatus | Brown Shrike | 2018/9/29  | 2 | 0 | 22.91859013 | 120.31165730 | <a href="https://www.inaturalist.org/observations/17025578">https://www.inaturalist.org/observations/17025578</a>   |
| 1262 | Lanius cristatus | Brown Shrike | 2018/10/21 | 2 | 0 | 22.92152162 | 120.29775760 | <a href="https://www.inaturalist.org/observations/17710085">https://www.inaturalist.org/observations/17710085</a>   |
| 1263 | Lanius cristatus | Brown Shrike | 2020/9/27  | 2 | 0 | 22.92161167 | 120.26261720 | <a href="https://www.inaturalist.org/observations/60964521">https://www.inaturalist.org/observations/60964521</a>   |
| 1264 | Lanius cristatus | Brown Shrike | 2019/4/27  | 2 | 0 | 22.92325800 | 120.31000500 | <a href="https://www.inaturalist.org/observations/25060260">https://www.inaturalist.org/observations/25060260</a>   |

|      |                  |              |            |   |   |             |              |                                                                                                                     |
|------|------------------|--------------|------------|---|---|-------------|--------------|---------------------------------------------------------------------------------------------------------------------|
| 1265 | Lanius cristatus | Brown Shrike | 2018/5/10  | 1 | 0 | 22.92540785 | 120.30821300 | <a href="https://www.inaturalist.org/observations/81665992">https://www.inaturalist.org/observations/81665992</a>   |
| 1266 | Lanius cristatus | Brown Shrike | 2018/3/30  | 1 | 0 | 22.92641868 | 120.30581800 | <a href="https://www.inaturalist.org/observations/140768619">https://www.inaturalist.org/observations/140768619</a> |
| 1267 | Lanius cristatus | Brown Shrike | 2020/2/28  | 2 | 0 | 22.92752848 | 120.25956250 | <a href="https://www.inaturalist.org/observations/39403372">https://www.inaturalist.org/observations/39403372</a>   |
| 1268 | Lanius cristatus | Brown Shrike | 2020/2/16  | 2 | 0 | 22.92758467 | 120.26462180 | <a href="https://www.inaturalist.org/observations/39405812">https://www.inaturalist.org/observations/39405812</a>   |
| 1269 | Lanius cristatus | Brown Shrike | 2020/10/4  | 1 | 0 | 22.92759910 | 88.55048970  | <a href="https://www.inaturalist.org/observations/62284585">https://www.inaturalist.org/observations/62284585</a>   |
| 1270 | Lanius cristatus | Brown Shrike | 2019/10/26 | 3 | 0 | 22.92765834 | 120.30404170 | <a href="https://www.inaturalist.org/observations/38213939">https://www.inaturalist.org/observations/38213939</a>   |
| 1271 | Lanius cristatus | Brown Shrike | 2019/10/26 | 2 | 0 | 22.92808333 | 120.30897000 | <a href="https://www.inaturalist.org/observations/38216595">https://www.inaturalist.org/observations/38216595</a>   |
| 1272 | Lanius cristatus | Brown Shrike | 2018/5/10  | 1 | 0 | 22.92848511 | 120.30417170 | <a href="https://www.inaturalist.org/observations/141776614">https://www.inaturalist.org/observations/141776614</a> |
| 1273 | Lanius cristatus | Brown Shrike | 2020/10/30 | 2 | 0 | 22.92949528 | 120.26540860 | <a href="https://www.inaturalist.org/observations/64038408">https://www.inaturalist.org/observations/64038408</a>   |
| 1274 | Lanius cristatus | Brown Shrike | 2022/9/30  | 1 | 0 | 22.92960505 | 88.42490762  | <a href="https://www.inaturalist.org/observations/137111543">https://www.inaturalist.org/observations/137111543</a> |
| 1275 | Lanius cristatus | Brown Shrike | 2019/1/26  | 1 | 0 | 22.93038094 | 120.30517960 | <a href="https://www.inaturalist.org/observations/141360430">https://www.inaturalist.org/observations/141360430</a> |
| 1276 | Lanius cristatus | Brown Shrike | 2020/1/4   | 2 | 0 | 22.93068321 | 120.30234820 | <a href="https://www.inaturalist.org/observations/37266712">https://www.inaturalist.org/observations/37266712</a>   |
| 1277 | Lanius cristatus | Brown Shrike | 2020/4/25  | 2 | 0 | 22.93077014 | 120.26564550 | <a href="https://www.inaturalist.org/observations/43282648">https://www.inaturalist.org/observations/43282648</a>   |
| 1278 | Lanius cristatus | Brown Shrike | 2020/1/4   | 2 | 0 | 22.93086143 | 120.29362800 | <a href="https://www.inaturalist.org/observations/37265999">https://www.inaturalist.org/observations/37265999</a>   |
| 1279 | Lanius cristatus | Brown Shrike | 2020/4/25  | 2 | 0 | 22.93090932 | 120.26534180 | <a href="https://www.inaturalist.org/observations/43283185">https://www.inaturalist.org/observations/43283185</a>   |
| 1280 | Lanius cristatus | Brown Shrike | 2020/4/25  | 2 | 0 | 22.93107285 | 120.26686930 | <a href="https://www.inaturalist.org/observations/44074248">https://www.inaturalist.org/observations/44074248</a>   |
| 1281 | Lanius cristatus | Brown Shrike | 2020/10/30 | 2 | 0 | 22.93129012 | 120.26479390 | <a href="https://www.inaturalist.org/observations/64036115">https://www.inaturalist.org/observations/64036115</a>   |
| 1282 | Lanius cristatus | Brown Shrike | 2020/1/4   | 2 | 0 | 22.93186250 | 120.29678830 | <a href="https://www.inaturalist.org/observations/37266179">https://www.inaturalist.org/observations/37266179</a>   |
| 1283 | Lanius cristatus | Brown Shrike | 2022/1/9   | 2 | 0 | 22.93222167 | 120.22381670 | <a href="https://www.inaturalist.org/observations/104649657">https://www.inaturalist.org/observations/104649657</a> |
| 1284 | Lanius cristatus | Brown Shrike | 2020/4/14  | 3 | 0 | 22.93223190 | 120.22363280 | <a href="https://www.inaturalist.org/observations/43198761">https://www.inaturalist.org/observations/43198761</a>   |
| 1285 | Lanius cristatus | Brown Shrike | 2020/1/4   | 2 | 0 | 22.93268024 | 120.29885630 | <a href="https://www.inaturalist.org/observations/37295948">https://www.inaturalist.org/observations/37295948</a>   |
| 1286 | Lanius cristatus | Brown Shrike | 2020/1/4   | 2 | 0 | 22.93282470 | 120.29930410 | <a href="https://www.inaturalist.org/observations/37296121">https://www.inaturalist.org/observations/37296121</a>   |
| 1287 | Lanius cristatus | Brown Shrike | 2022/4/4   | 3 | 0 | 22.93322298 | 120.22323110 | <a href="https://www.inaturalist.org/observations/110622524">https://www.inaturalist.org/observations/110622524</a> |

|      |                  |              |            |   |   |             |              |                                                                                                                     |
|------|------------------|--------------|------------|---|---|-------------|--------------|---------------------------------------------------------------------------------------------------------------------|
| 1288 | Lanius cristatus | Brown Shrike | 2021/1/2   | 3 | 0 | 22.93462778 | 120.22684720 | <a href="https://www.inaturalist.org/observations/67706875">https://www.inaturalist.org/observations/67706875</a>   |
| 1289 | Lanius cristatus | Brown Shrike | 2021/9/25  | 1 | 0 | 22.93471917 | 120.30517580 | <a href="https://www.inaturalist.org/observations/96364879">https://www.inaturalist.org/observations/96364879</a>   |
| 1290 | Lanius cristatus | Brown Shrike | 2021/1/2   | 3 | 0 | 22.93572222 | 120.22179170 | <a href="https://www.inaturalist.org/observations/67706630">https://www.inaturalist.org/observations/67706630</a>   |
| 1291 | Lanius cristatus | Brown Shrike | 2021/11/21 | 2 | 0 | 22.93595050 | 120.22502190 | <a href="https://www.inaturalist.org/observations/101704876">https://www.inaturalist.org/observations/101704876</a> |
| 1292 | Lanius cristatus | Brown Shrike | 2021/1/22  | 2 | 0 | 22.93599073 | 120.22498520 | <a href="https://www.inaturalist.org/observations/68437175">https://www.inaturalist.org/observations/68437175</a>   |
| 1293 | Lanius cristatus | Brown Shrike | 2020/1/4   | 2 | 0 | 22.93664861 | 120.30071720 | <a href="https://www.inaturalist.org/observations/37370587">https://www.inaturalist.org/observations/37370587</a>   |
| 1294 | Lanius cristatus | Brown Shrike | 2018/10/27 | 2 | 0 | 22.93682586 | 120.22410580 | <a href="https://www.inaturalist.org/observations/21022071">https://www.inaturalist.org/observations/21022071</a>   |
| 1295 | Lanius cristatus | Brown Shrike | 2019/11/23 | 2 | 0 | 22.93690500 | 120.30734330 | <a href="https://www.inaturalist.org/observations/45045139">https://www.inaturalist.org/observations/45045139</a>   |
| 1296 | Lanius cristatus | Brown Shrike | 2021/5/5   | 1 | 0 | 22.94245357 | 120.53898030 | <a href="https://www.inaturalist.org/observations/105256983">https://www.inaturalist.org/observations/105256983</a> |
| 1297 | Lanius cristatus | Brown Shrike | 2020/4/13  | 2 | 0 | 22.94475405 | 121.12788960 | <a href="https://www.inaturalist.org/observations/42938114">https://www.inaturalist.org/observations/42938114</a>   |
| 1298 | Lanius cristatus | Brown Shrike | 2017/2/3   | 3 | 0 | 22.94603105 | 120.23021820 | <a href="https://www.inaturalist.org/observations/14779345">https://www.inaturalist.org/observations/14779345</a>   |
| 1299 | Lanius cristatus | Brown Shrike | 2018/3/31  | 1 | 0 | 22.95060400 | 88.53939600  | <a href="https://www.inaturalist.org/observations/102363274">https://www.inaturalist.org/observations/102363274</a> |
| 1300 | Lanius cristatus | Brown Shrike | 2021/1/24  | 2 | 0 | 22.95275200 | 88.53729439  | <a href="https://www.inaturalist.org/observations/103891972">https://www.inaturalist.org/observations/103891972</a> |
| 1301 | Lanius cristatus | Brown Shrike | 2022/1/2   | 2 | 0 | 22.95505943 | 88.53746586  | <a href="https://www.inaturalist.org/observations/104753054">https://www.inaturalist.org/observations/104753054</a> |
| 1302 | Lanius cristatus | Brown Shrike | 2020/12/31 | 2 | 0 | 22.95808313 | 120.52913880 | <a href="https://www.inaturalist.org/observations/67573780">https://www.inaturalist.org/observations/67573780</a>   |
| 1303 | Lanius cristatus | Brown Shrike | 2020/3/4   | 2 | 0 | 22.96089180 | 120.24363270 | <a href="https://www.inaturalist.org/observations/50386911">https://www.inaturalist.org/observations/50386911</a>   |
| 1304 | Lanius cristatus | Brown Shrike | 2022/5/2   | 1 | 0 | 22.96362260 | 120.24791650 | <a href="https://www.inaturalist.org/observations/114669978">https://www.inaturalist.org/observations/114669978</a> |
| 1305 | Lanius cristatus | Brown Shrike | 2018/2/15  | 2 | 0 | 22.96481018 | 86.89534058  | <a href="https://www.inaturalist.org/observations/55191155">https://www.inaturalist.org/observations/55191155</a>   |
| 1306 | Lanius cristatus | Brown Shrike | 2018/2/16  | 2 | 0 | 22.96481018 | 86.89534058  | <a href="https://www.inaturalist.org/observations/55191186">https://www.inaturalist.org/observations/55191186</a>   |
| 1307 | Lanius cristatus | Brown Shrike | 2018/2/16  | 2 | 0 | 22.96481018 | 86.89534058  | <a href="https://www.inaturalist.org/observations/55191197">https://www.inaturalist.org/observations/55191197</a>   |
| 1308 | Lanius cristatus | Brown Shrike | 2019/1/19  | 4 | 0 | 22.96942470 | 86.99956125  | <a href="https://www.inaturalist.org/observations/19729641">https://www.inaturalist.org/observations/19729641</a>   |
| 1309 | Lanius cristatus | Brown Shrike | 2022/1/23  | 1 | 0 | 22.97116964 | 120.22198660 | <a href="https://www.inaturalist.org/observations/105479515">https://www.inaturalist.org/observations/105479515</a> |
| 1310 | Lanius cristatus | Brown Shrike | 2022/5/16  | 1 | 0 | 22.97160433 | 120.22290080 | <a href="https://www.inaturalist.org/observations/117260584">https://www.inaturalist.org/observations/117260584</a> |



|      |                  |              |            |   |   |             |              |                                                                                                                     |
|------|------------------|--------------|------------|---|---|-------------|--------------|---------------------------------------------------------------------------------------------------------------------|
| 1311 | Lanius cristatus | Brown Shrike | 2022/5/18  | 2 | 0 | 22.97196333 | 120.22283500 | <a href="https://www.inaturalist.org/observations/117613904">https://www.inaturalist.org/observations/117613904</a> |
| 1312 | Lanius cristatus | Brown Shrike | 2017/2/18  | 2 | 0 | 22.97199290 | 120.22258740 | <a href="https://www.inaturalist.org/observations/16286610">https://www.inaturalist.org/observations/16286610</a>   |
| 1313 | Lanius cristatus | Brown Shrike | 2017/3/27  | 2 | 0 | 22.97199290 | 120.22258740 | <a href="https://www.inaturalist.org/observations/16286630">https://www.inaturalist.org/observations/16286630</a>   |
| 1314 | Lanius cristatus | Brown Shrike | 2020/10/30 | 2 | 0 | 22.97199290 | 120.22258740 | <a href="https://www.inaturalist.org/observations/64032850">https://www.inaturalist.org/observations/64032850</a>   |
| 1315 | Lanius cristatus | Brown Shrike | 2018/5/10  | 1 | 0 | 22.97199290 | 120.22258740 | <a href="https://www.inaturalist.org/observations/141775989">https://www.inaturalist.org/observations/141775989</a> |
| 1316 | Lanius cristatus | Brown Shrike | 2018/5/10  | 1 | 0 | 22.97235651 | 120.22349250 | <a href="https://www.inaturalist.org/observations/81665643">https://www.inaturalist.org/observations/81665643</a>   |
| 1317 | Lanius cristatus | Brown Shrike | 2022/4/30  | 1 | 0 | 22.97277167 | 120.22269500 | <a href="https://www.inaturalist.org/observations/113727222">https://www.inaturalist.org/observations/113727222</a> |
| 1318 | Lanius cristatus | Brown Shrike | 2018/5/10  | 1 | 0 | 22.97300311 | 120.22269760 | <a href="https://www.inaturalist.org/observations/81665639">https://www.inaturalist.org/observations/81665639</a>   |
| 1319 | Lanius cristatus | Brown Shrike | 2018/4/18  | 3 | 0 | 22.97307987 | 120.22259720 | <a href="https://www.inaturalist.org/observations/11219607">https://www.inaturalist.org/observations/11219607</a>   |
| 1320 | Lanius cristatus | Brown Shrike | 2020/10/9  | 2 | 0 | 22.97467013 | 120.21601490 | <a href="https://www.inaturalist.org/observations/62105568">https://www.inaturalist.org/observations/62105568</a>   |
| 1321 | Lanius cristatus | Brown Shrike | 2020/4/24  | 2 | 0 | 22.97530610 | 120.22233060 | <a href="https://www.inaturalist.org/observations/43020766">https://www.inaturalist.org/observations/43020766</a>   |
| 1322 | Lanius cristatus | Brown Shrike | 2019/10/27 | 2 | 0 | 22.98173811 | 120.26977130 | <a href="https://www.inaturalist.org/observations/34944807">https://www.inaturalist.org/observations/34944807</a>   |
| 1323 | Lanius cristatus | Brown Shrike | 2022/2/24  | 2 | 0 | 22.98490278 | 120.20741110 | <a href="https://www.inaturalist.org/observations/107359312">https://www.inaturalist.org/observations/107359312</a> |
| 1324 | Lanius cristatus | Brown Shrike | 2020/11/23 | 3 | 0 | 22.98561152 | 86.99751615  | <a href="https://www.inaturalist.org/observations/65470615">https://www.inaturalist.org/observations/65470615</a>   |
| 1325 | Lanius cristatus | Brown Shrike | 2018/1/17  | 2 | 0 | 22.98773148 | 87.00582041  | <a href="https://www.inaturalist.org/observations/50670052">https://www.inaturalist.org/observations/50670052</a>   |
| 1326 | Lanius cristatus | Brown Shrike | 2019/3/2   | 4 | 0 | 22.98845494 | 87.00563283  | <a href="https://www.inaturalist.org/observations/20876282">https://www.inaturalist.org/observations/20876282</a>   |
| 1327 | Lanius cristatus | Brown Shrike | 2019/3/2   | 4 | 0 | 22.98845494 | 87.00563283  | <a href="https://www.inaturalist.org/observations/20876298">https://www.inaturalist.org/observations/20876298</a>   |
| 1328 | Lanius cristatus | Brown Shrike | 2020/11/13 | 2 | 0 | 22.98920315 | 87.00760241  | <a href="https://www.inaturalist.org/observations/64846590">https://www.inaturalist.org/observations/64846590</a>   |
| 1329 | Lanius cristatus | Brown Shrike | 2018/1/24  | 3 | 0 | 22.98922533 | 87.00717779  | <a href="https://www.inaturalist.org/observations/50670071">https://www.inaturalist.org/observations/50670071</a>   |
| 1330 | Lanius cristatus | Brown Shrike | 2022/9/16  | 0 | 0 | 22.98941287 | 120.22295620 | <a href="https://www.inaturalist.org/observations/136879773">https://www.inaturalist.org/observations/136879773</a> |
| 1331 | Lanius cristatus | Brown Shrike | 2022/10/1  | 1 | 0 | 22.98941287 | 120.22295620 | <a href="https://www.inaturalist.org/observations/137142639">https://www.inaturalist.org/observations/137142639</a> |
| 1332 | Lanius cristatus | Brown Shrike | 2019/10/10 | 3 | 0 | 22.98960065 | 87.00670572  | <a href="https://www.inaturalist.org/observations/34497911">https://www.inaturalist.org/observations/34497911</a>   |
| 1333 | Lanius cristatus | Brown Shrike | 2020/10/11 | 3 | 0 | 22.98961286 | 86.99957087  | <a href="https://www.inaturalist.org/observations/62407164">https://www.inaturalist.org/observations/62407164</a>   |

|      |                  |              |            |   |   |             |              |                                                                                                                     |
|------|------------------|--------------|------------|---|---|-------------|--------------|---------------------------------------------------------------------------------------------------------------------|
| 1334 | Lanius cristatus | Brown Shrike | 2018/2/5   | 5 | 0 | 22.98972087 | 87.00750233  | <a href="https://www.inaturalist.org/observations/26958091">https://www.inaturalist.org/observations/26958091</a>   |
| 1335 | Lanius cristatus | Brown Shrike | 2017/11/5  | 4 | 0 | 22.99035383 | 87.00668158  | <a href="https://www.inaturalist.org/observations/13358612">https://www.inaturalist.org/observations/13358612</a>   |
| 1336 | Lanius cristatus | Brown Shrike | 2022/11/28 | 2 | 0 | 22.99154438 | 87.00096677  | <a href="https://www.inaturalist.org/observations/143234325">https://www.inaturalist.org/observations/143234325</a> |
| 1337 | Lanius cristatus | Brown Shrike | 2020/9/12  | 5 | 0 | 22.99246973 | 87.00793727  | <a href="https://www.inaturalist.org/observations/59412525">https://www.inaturalist.org/observations/59412525</a>   |
| 1338 | Lanius cristatus | Brown Shrike | 2016/5/9   | 3 | 0 | 22.99321226 | 120.21315600 | <a href="https://www.inaturalist.org/observations/7927605">https://www.inaturalist.org/observations/7927605</a>     |
| 1339 | Lanius cristatus | Brown Shrike | 2020/11/20 | 3 | 0 | 22.99406212 | 86.99845614  | <a href="https://www.inaturalist.org/observations/65338334">https://www.inaturalist.org/observations/65338334</a>   |
| 1340 | Lanius cristatus | Brown Shrike | 2019/2/23  | 2 | 0 | 22.99596574 | 120.41026330 | <a href="https://www.inaturalist.org/observations/20653927">https://www.inaturalist.org/observations/20653927</a>   |
| 1341 | Lanius cristatus | Brown Shrike | 2019/2/11  | 4 | 0 | 22.99623975 | 87.02886781  | <a href="https://www.inaturalist.org/observations/20281264">https://www.inaturalist.org/observations/20281264</a>   |
| 1342 | Lanius cristatus | Brown Shrike | 2018/9/12  | 1 | 0 | 22.99676250 | 120.21685640 | <a href="https://www.inaturalist.org/observations/142661749">https://www.inaturalist.org/observations/142661749</a> |
| 1343 | Lanius cristatus | Brown Shrike | 2018/4/13  | 1 | 0 | 22.99889450 | 120.21694500 | <a href="https://www.inaturalist.org/observations/140379983">https://www.inaturalist.org/observations/140379983</a> |
| 1344 | Lanius cristatus | Brown Shrike | 2021/1/21  | 2 | 0 | 23.00178104 | 120.20977140 | <a href="https://www.inaturalist.org/observations/68404770">https://www.inaturalist.org/observations/68404770</a>   |
| 1345 | Lanius cristatus | Brown Shrike | 2021/1/4   | 3 | 0 | 23.00275400 | 120.24403900 | <a href="https://www.inaturalist.org/observations/134715779">https://www.inaturalist.org/observations/134715779</a> |
| 1346 | Lanius cristatus | Brown Shrike | 2019/2/23  | 2 | 0 | 23.00316625 | 120.15449910 | <a href="https://www.inaturalist.org/observations/20684607">https://www.inaturalist.org/observations/20684607</a>   |
| 1347 | Lanius cristatus | Brown Shrike | 2021/1/4   | 1 | 0 | 23.00356076 | 120.24348120 | <a href="https://www.inaturalist.org/observations/81662705">https://www.inaturalist.org/observations/81662705</a>   |
| 1348 | Lanius cristatus | Brown Shrike | 2022/12/24 | 1 | 0 | 23.00492700 | 120.14848300 | <a href="https://www.inaturalist.org/observations/144973119">https://www.inaturalist.org/observations/144973119</a> |
| 1349 | Lanius cristatus | Brown Shrike | 2021/3/10  | 3 | 0 | 23.00653462 | 120.25854370 | <a href="https://www.inaturalist.org/observations/70917029">https://www.inaturalist.org/observations/70917029</a>   |
| 1350 | Lanius cristatus | Brown Shrike | 2020/12/18 | 2 | 0 | 23.00667500 | 120.27244500 | <a href="https://www.inaturalist.org/observations/66718596">https://www.inaturalist.org/observations/66718596</a>   |
| 1351 | Lanius cristatus | Brown Shrike | 2020/2/8   | 0 | 0 | 23.00858209 | 120.17417960 | <a href="https://www.inaturalist.org/observations/38563442">https://www.inaturalist.org/observations/38563442</a>   |
| 1352 | Lanius cristatus | Brown Shrike | 2019/12/8  | 3 | 0 | 23.01752713 | 120.19143150 | <a href="https://www.inaturalist.org/observations/48753306">https://www.inaturalist.org/observations/48753306</a>   |
| 1353 | Lanius cristatus | Brown Shrike | 2019/12/8  | 2 | 0 | 23.02165184 | 120.20250380 | <a href="https://www.inaturalist.org/observations/45952555">https://www.inaturalist.org/observations/45952555</a>   |
| 1354 | Lanius cristatus | Brown Shrike | 2021/1/11  | 1 | 0 | 23.02169341 | 120.33394610 | <a href="https://www.inaturalist.org/observations/81661279">https://www.inaturalist.org/observations/81661279</a>   |
| 1355 | Lanius cristatus | Brown Shrike | 2019/9/29  | 2 | 0 | 23.02545480 | 120.22648860 | <a href="https://www.inaturalist.org/observations/34629340">https://www.inaturalist.org/observations/34629340</a>   |
| 1356 | Lanius cristatus | Brown Shrike | 2022/1/10  | 1 | 0 | 23.04582646 | 121.15325120 | <a href="https://www.inaturalist.org/observations/104692350">https://www.inaturalist.org/observations/104692350</a> |

|      |                  |              |            |   |   |             |              |                                                                                                                     |
|------|------------------|--------------|------------|---|---|-------------|--------------|---------------------------------------------------------------------------------------------------------------------|
| 1357 | Lanius cristatus | Brown Shrike | 2021/12/29 | 2 | 0 | 23.04606433 | 121.15240830 | <a href="https://www.inaturalist.org/observations/103871160">https://www.inaturalist.org/observations/103871160</a> |
| 1358 | Lanius cristatus | Brown Shrike | 2022/1/22  | 0 | 0 | 23.04612397 | 121.15241500 | <a href="https://www.inaturalist.org/observations/105351711">https://www.inaturalist.org/observations/105351711</a> |
| 1359 | Lanius cristatus | Brown Shrike | 2022/1/3   | 1 | 0 | 23.04622000 | 121.15240300 | <a href="https://www.inaturalist.org/observations/104249853">https://www.inaturalist.org/observations/104249853</a> |
| 1360 | Lanius cristatus | Brown Shrike | 2020/9/3   | 2 | 0 | 23.05117024 | 120.18727700 | <a href="https://www.inaturalist.org/observations/58375195">https://www.inaturalist.org/observations/58375195</a>   |
| 1361 | Lanius cristatus | Brown Shrike | 2018/3/19  | 2 | 0 | 23.05337601 | 120.18703940 | <a href="https://www.inaturalist.org/observations/10353850">https://www.inaturalist.org/observations/10353850</a>   |
| 1362 | Lanius cristatus | Brown Shrike | 2019/10/6  | 2 | 0 | 23.05341100 | 120.24586200 | <a href="https://www.inaturalist.org/observations/37518652">https://www.inaturalist.org/observations/37518652</a>   |
| 1363 | Lanius cristatus | Brown Shrike | 2020/5/2   | 2 | 0 | 23.05367806 | 120.24532310 | <a href="https://www.inaturalist.org/observations/69364857">https://www.inaturalist.org/observations/69364857</a>   |
| 1364 | Lanius cristatus | Brown Shrike | 2018/12/22 | 2 | 0 | 23.05500667 | 120.24494500 | <a href="https://www.inaturalist.org/observations/19490066">https://www.inaturalist.org/observations/19490066</a>   |
| 1365 | Lanius cristatus | Brown Shrike | 2020/2/10  | 2 | 0 | 23.05804854 | 120.18547820 | <a href="https://www.inaturalist.org/observations/50401946">https://www.inaturalist.org/observations/50401946</a>   |
| 1366 | Lanius cristatus | Brown Shrike | 2017/1/7   | 3 | 0 | 23.06444100 | 120.19731100 | <a href="https://www.inaturalist.org/observations/37360969">https://www.inaturalist.org/observations/37360969</a>   |
| 1367 | Lanius cristatus | Brown Shrike | 2018/11/9  | 3 | 0 | 23.06471870 | 120.19633860 | <a href="https://www.inaturalist.org/observations/64482507">https://www.inaturalist.org/observations/64482507</a>   |
| 1368 | Lanius cristatus | Brown Shrike | 2017/9/21  | 2 | 0 | 23.06474567 | 120.19650440 | <a href="https://www.inaturalist.org/observations/60418876">https://www.inaturalist.org/observations/60418876</a>   |
| 1369 | Lanius cristatus | Brown Shrike | 2018/11/9  | 3 | 0 | 23.06492862 | 120.19638690 | <a href="https://www.inaturalist.org/observations/64482505">https://www.inaturalist.org/observations/64482505</a>   |
| 1370 | Lanius cristatus | Brown Shrike | 2019/1/10  | 2 | 0 | 23.06494500 | 120.19646500 | <a href="https://www.inaturalist.org/observations/37441127">https://www.inaturalist.org/observations/37441127</a>   |
| 1371 | Lanius cristatus | Brown Shrike | 2020/9/25  | 5 | 0 | 23.06499315 | 120.19646980 | <a href="https://www.inaturalist.org/observations/60800098">https://www.inaturalist.org/observations/60800098</a>   |
| 1372 | Lanius cristatus | Brown Shrike | 2020/9/16  | 4 | 0 | 23.06514260 | 120.19660160 | <a href="https://www.inaturalist.org/observations/60800097">https://www.inaturalist.org/observations/60800097</a>   |
| 1373 | Lanius cristatus | Brown Shrike | 2017/11/12 | 2 | 0 | 23.07253283 | 120.17636820 | <a href="https://www.inaturalist.org/observations/64729095">https://www.inaturalist.org/observations/64729095</a>   |
| 1374 | Lanius cristatus | Brown Shrike | 2020/2/12  | 2 | 0 | 23.07253648 | 120.17639860 | <a href="https://www.inaturalist.org/observations/50371325">https://www.inaturalist.org/observations/50371325</a>   |
| 1375 | Lanius cristatus | Brown Shrike | 2019/4/27  | 1 | 0 | 23.07794780 | 120.06882180 | <a href="https://www.inaturalist.org/observations/23260509">https://www.inaturalist.org/observations/23260509</a>   |
| 1376 | Lanius cristatus | Brown Shrike | 2020/10/9  | 2 | 0 | 23.08087133 | 120.16797950 | <a href="https://www.inaturalist.org/observations/62112931">https://www.inaturalist.org/observations/62112931</a>   |
| 1377 | Lanius cristatus | Brown Shrike | 2020/10/9  | 2 | 0 | 23.08100848 | 120.16798360 | <a href="https://www.inaturalist.org/observations/62112617">https://www.inaturalist.org/observations/62112617</a>   |
| 1378 | Lanius cristatus | Brown Shrike | 2020/1/19  | 1 | 0 | 23.08464717 | 113.45440000 | <a href="https://www.inaturalist.org/observations/142747180">https://www.inaturalist.org/observations/142747180</a> |
| 1379 | Lanius cristatus | Brown Shrike | 2018/9/25  | 1 | 0 | 23.09234930 | 120.12739690 | <a href="https://www.inaturalist.org/observations/16893547">https://www.inaturalist.org/observations/16893547</a>   |

|      |                  |              |            |   |   |             |              |                                                                                                                     |
|------|------------------|--------------|------------|---|---|-------------|--------------|---------------------------------------------------------------------------------------------------------------------|
| 1380 | Lanius cristatus | Brown Shrike | 2021/12/23 | 2 | 0 | 23.09425556 | 120.35088060 | <a href="https://www.inaturalist.org/observations/103525082">https://www.inaturalist.org/observations/103525082</a> |
| 1381 | Lanius cristatus | Brown Shrike | 2022/12/22 | 1 | 0 | 23.09682500 | 120.36000820 | <a href="https://www.inaturalist.org/observations/144856996">https://www.inaturalist.org/observations/144856996</a> |
| 1382 | Lanius cristatus | Brown Shrike | 2020/2/1   | 3 | 0 | 23.09885283 | 120.36103000 | <a href="https://www.inaturalist.org/observations/38217436">https://www.inaturalist.org/observations/38217436</a>   |
| 1383 | Lanius cristatus | Brown Shrike | 2022/4/21  | 1 | 0 | 23.10018407 | 113.29714290 | <a href="https://www.inaturalist.org/observations/142639888">https://www.inaturalist.org/observations/142639888</a> |
| 1384 | Lanius cristatus | Brown Shrike | 2022/9/17  | 1 | 0 | 23.10035865 | 113.29656930 | <a href="https://www.inaturalist.org/observations/142432787">https://www.inaturalist.org/observations/142432787</a> |
| 1385 | Lanius cristatus | Brown Shrike | 2020/1/31  | 2 | 0 | 23.10078460 | 120.28366380 | <a href="https://www.inaturalist.org/observations/50402700">https://www.inaturalist.org/observations/50402700</a>   |
| 1386 | Lanius cristatus | Brown Shrike | 2018/9/3   | 1 | 0 | 23.10140291 | 113.29475710 | <a href="https://www.inaturalist.org/observations/142752586">https://www.inaturalist.org/observations/142752586</a> |
| 1387 | Lanius cristatus | Brown Shrike | 2022/10/14 | 1 | 0 | 23.10158388 | 113.29499320 | <a href="https://www.inaturalist.org/observations/142432746">https://www.inaturalist.org/observations/142432746</a> |
| 1388 | Lanius cristatus | Brown Shrike | 2022/5/17  | 1 | 0 | 23.10224713 | 113.29240460 | <a href="https://www.inaturalist.org/observations/142601076">https://www.inaturalist.org/observations/142601076</a> |
| 1389 | Lanius cristatus | Brown Shrike | 2022/5/19  | 1 | 0 | 23.10224713 | 113.29240460 | <a href="https://www.inaturalist.org/observations/142601086">https://www.inaturalist.org/observations/142601086</a> |
| 1390 | Lanius cristatus | Brown Shrike | 2020/1/26  | 4 | 0 | 23.10310343 | 86.86219661  | <a href="https://www.inaturalist.org/observations/38902444">https://www.inaturalist.org/observations/38902444</a>   |
| 1391 | Lanius cristatus | Brown Shrike | 2019/12/15 | 2 | 0 | 23.10489203 | 121.22233330 | <a href="https://www.inaturalist.org/observations/36773718">https://www.inaturalist.org/observations/36773718</a>   |
| 1392 | Lanius cristatus | Brown Shrike | 2019/4/8   | 2 | 0 | 23.10638986 | 120.27342310 | <a href="https://www.inaturalist.org/observations/26744545">https://www.inaturalist.org/observations/26744545</a>   |
| 1393 | Lanius cristatus | Brown Shrike | 2020/10/6  | 2 | 0 | 23.11289480 | 120.28168910 | <a href="https://www.inaturalist.org/observations/62295967">https://www.inaturalist.org/observations/62295967</a>   |
| 1394 | Lanius cristatus | Brown Shrike | 2022/10/27 | 1 | 0 | 23.11391389 | 120.29867780 | <a href="https://www.inaturalist.org/observations/141581603">https://www.inaturalist.org/observations/141581603</a> |
| 1395 | Lanius cristatus | Brown Shrike | 2015/4/10  | 2 | 0 | 23.11420260 | 120.29820010 | <a href="https://www.inaturalist.org/observations/16280525">https://www.inaturalist.org/observations/16280525</a>   |
| 1396 | Lanius cristatus | Brown Shrike | 2019/1/3   | 4 | 0 | 23.11624833 | 121.22241500 | <a href="https://www.inaturalist.org/observations/19722979">https://www.inaturalist.org/observations/19722979</a>   |
| 1397 | Lanius cristatus | Brown Shrike | 2019/1/3   | 2 | 0 | 23.11750000 | 121.22231000 | <a href="https://www.inaturalist.org/observations/19722977">https://www.inaturalist.org/observations/19722977</a>   |
| 1398 | Lanius cristatus | Brown Shrike | 2020/4/3   | 2 | 0 | 23.11818228 | 121.22417450 | <a href="https://www.inaturalist.org/observations/41665548">https://www.inaturalist.org/observations/41665548</a>   |
| 1399 | Lanius cristatus | Brown Shrike | 2022/1/6   | 1 | 0 | 23.11847744 | 121.22258760 | <a href="https://www.inaturalist.org/observations/106103379">https://www.inaturalist.org/observations/106103379</a> |
| 1400 | Lanius cristatus | Brown Shrike | 2020/4/3   | 2 | 0 | 23.11917769 | 121.22552390 | <a href="https://www.inaturalist.org/observations/41665551">https://www.inaturalist.org/observations/41665551</a>   |
| 1401 | Lanius cristatus | Brown Shrike | 2021/9/3   | 1 | 0 | 23.11951660 | 120.10118360 | <a href="https://www.inaturalist.org/observations/100826997">https://www.inaturalist.org/observations/100826997</a> |
| 1402 | Lanius cristatus | Brown Shrike | 2021/3/11  | 2 | 0 | 23.12615270 | 121.36559890 | <a href="https://www.inaturalist.org/observations/74822067">https://www.inaturalist.org/observations/74822067</a>   |

|      |                  |              |            |   |   |             |              |                                                                                                                     |
|------|------------------|--------------|------------|---|---|-------------|--------------|---------------------------------------------------------------------------------------------------------------------|
| 1403 | Lanius cristatus | Brown Shrike | 2021/3/12  | 1 | 0 | 23.12615270 | 121.36559890 | <a href="https://www.inaturalist.org/observations/74822071">https://www.inaturalist.org/observations/74822071</a>   |
| 1404 | Lanius cristatus | Brown Shrike | 2021/10/2  | 1 | 0 | 23.12808108 | 120.12155390 | <a href="https://www.inaturalist.org/observations/97101393">https://www.inaturalist.org/observations/97101393</a>   |
| 1405 | Lanius cristatus | Brown Shrike | 2021/10/2  | 1 | 0 | 23.12811623 | 120.12201120 | <a href="https://www.inaturalist.org/observations/97101392">https://www.inaturalist.org/observations/97101392</a>   |
| 1406 | Lanius cristatus | Brown Shrike | 2012/4/13  | 2 | 0 | 23.13520050 | 120.49379730 | <a href="https://www.inaturalist.org/observations/14643230">https://www.inaturalist.org/observations/14643230</a>   |
| 1407 | Lanius cristatus | Brown Shrike | 2012/2/1   | 2 | 0 | 23.13524818 | 120.49377440 | <a href="https://www.inaturalist.org/observations/14643227">https://www.inaturalist.org/observations/14643227</a>   |
| 1408 | Lanius cristatus | Brown Shrike | 2011/9/24  | 2 | 0 | 23.13526917 | 120.49374390 | <a href="https://www.inaturalist.org/observations/14643181">https://www.inaturalist.org/observations/14643181</a>   |
| 1409 | Lanius cristatus | Brown Shrike | 2011/10/15 | 2 | 0 | 23.13526917 | 120.49375150 | <a href="https://www.inaturalist.org/observations/14643212">https://www.inaturalist.org/observations/14643212</a>   |
| 1410 | Lanius cristatus | Brown Shrike | 2022/9/12  | 2 | 0 | 23.15441600 | 121.28552490 | <a href="https://www.inaturalist.org/observations/140126397">https://www.inaturalist.org/observations/140126397</a> |
| 1411 | Lanius cristatus | Brown Shrike | 2022/11/18 | 2 | 0 | 23.15441600 | 121.28552490 | <a href="https://www.inaturalist.org/observations/143926403">https://www.inaturalist.org/observations/143926403</a> |
| 1412 | Lanius cristatus | Brown Shrike | 2022/10/31 | 1 | 0 | 23.15441600 | 121.28552490 | <a href="https://www.inaturalist.org/observations/143989888">https://www.inaturalist.org/observations/143989888</a> |
| 1413 | Lanius cristatus | Brown Shrike | 2022/10/17 | 1 | 0 | 23.15441600 | 121.28552490 | <a href="https://www.inaturalist.org/observations/143997770">https://www.inaturalist.org/observations/143997770</a> |
| 1414 | Lanius cristatus | Brown Shrike | 2022/11/7  | 1 | 0 | 23.15441600 | 121.28552490 | <a href="https://www.inaturalist.org/observations/144001113">https://www.inaturalist.org/observations/144001113</a> |
| 1415 | Lanius cristatus | Brown Shrike | 2022/1/13  | 1 | 0 | 23.16640300 | 77.37238000  | <a href="https://www.inaturalist.org/observations/105019672">https://www.inaturalist.org/observations/105019672</a> |
| 1416 | Lanius cristatus | Brown Shrike | 2020/9/13  | 1 | 0 | 23.16723299 | 69.18795511  | <a href="https://www.inaturalist.org/observations/137051676">https://www.inaturalist.org/observations/137051676</a> |
| 1417 | Lanius cristatus | Brown Shrike | 2016/12/1  | 6 | 0 | 23.17304100 | 87.96714200  | <a href="http://www.inaturalist.org/observations/4679920">http://www.inaturalist.org/observations/4679920</a>       |
| 1418 | Lanius cristatus | Brown Shrike | 2018/1/1   | 2 | 0 | 23.17535500 | 87.96075400  | <a href="https://www.inaturalist.org/observations/56031416">https://www.inaturalist.org/observations/56031416</a>   |
| 1419 | Lanius cristatus | Brown Shrike | 2016/9/17  | 5 | 0 | 23.17805200 | 87.96040400  | <a href="http://www.inaturalist.org/observations/4130647">http://www.inaturalist.org/observations/4130647</a>       |
| 1420 | Lanius cristatus | Brown Shrike | 2019/11/21 | 1 | 0 | 23.18209413 | 120.31262240 | <a href="https://www.inaturalist.org/observations/102379335">https://www.inaturalist.org/observations/102379335</a> |
| 1421 | Lanius cristatus | Brown Shrike | 2014/10/14 | 4 | 0 | 23.18262091 | 120.31220790 | <a href="https://www.inaturalist.org/observations/57529507">https://www.inaturalist.org/observations/57529507</a>   |
| 1422 | Lanius cristatus | Brown Shrike | 2022/1/9   | 2 | 0 | 23.18314712 | 120.31085460 | <a href="https://www.inaturalist.org/observations/104643930">https://www.inaturalist.org/observations/104643930</a> |
| 1423 | Lanius cristatus | Brown Shrike | 2019/11/14 | 2 | 0 | 23.18343102 | 120.31190110 | <a href="https://www.inaturalist.org/observations/35663957">https://www.inaturalist.org/observations/35663957</a>   |
| 1424 | Lanius cristatus | Brown Shrike | 2019/11/14 | 2 | 0 | 23.18360369 | 120.31173330 | <a href="https://www.inaturalist.org/observations/35663934">https://www.inaturalist.org/observations/35663934</a>   |
| 1425 | Lanius cristatus | Brown Shrike | 2019/12/22 | 2 | 0 | 23.18388025 | 120.31299360 | <a href="https://www.inaturalist.org/observations/49688944">https://www.inaturalist.org/observations/49688944</a>   |

|      |                  |              |            |   |   |             |              |                                                                                                                     |
|------|------------------|--------------|------------|---|---|-------------|--------------|---------------------------------------------------------------------------------------------------------------------|
| 1426 | Lanius cristatus | Brown Shrike | 2022/4/3   | 1 | 0 | 23.18397497 | 113.47805500 | <a href="https://www.inaturalist.org/observations/116052266">https://www.inaturalist.org/observations/116052266</a> |
| 1427 | Lanius cristatus | Brown Shrike | 2019/12/12 | 2 | 0 | 23.18436487 | 120.31337560 | <a href="https://www.inaturalist.org/observations/36606904">https://www.inaturalist.org/observations/36606904</a>   |
| 1428 | Lanius cristatus | Brown Shrike | 2022/9/28  | 3 | 0 | 23.18448667 | 120.09599170 | <a href="https://www.inaturalist.org/observations/136755425">https://www.inaturalist.org/observations/136755425</a> |
| 1429 | Lanius cristatus | Brown Shrike | 2019/11/19 | 2 | 0 | 23.18597363 | 120.31615880 | <a href="https://www.inaturalist.org/observations/35875757">https://www.inaturalist.org/observations/35875757</a>   |
| 1430 | Lanius cristatus | Brown Shrike | 2020/3/1   | 2 | 0 | 23.18601150 | 120.37431650 | <a href="https://www.inaturalist.org/observations/50386910">https://www.inaturalist.org/observations/50386910</a>   |
| 1431 | Lanius cristatus | Brown Shrike | 2022/10/6  | 2 | 0 | 23.19023471 | 120.24522360 | <a href="https://www.inaturalist.org/observations/137714883">https://www.inaturalist.org/observations/137714883</a> |
| 1432 | Lanius cristatus | Brown Shrike | 2019/11/14 | 2 | 0 | 23.19465178 | 120.29732430 | <a href="https://www.inaturalist.org/observations/35672661">https://www.inaturalist.org/observations/35672661</a>   |
| 1433 | Lanius cristatus | Brown Shrike | 2018/9/30  | 0 | 0 | 23.20719655 | 69.26338028  | <a href="https://www.inaturalist.org/observations/137872965">https://www.inaturalist.org/observations/137872965</a> |
| 1434 | Lanius cristatus | Brown Shrike | 2022/4/5   | 1 | 0 | 23.20753083 | 120.36051190 | <a href="https://www.inaturalist.org/observations/110825946">https://www.inaturalist.org/observations/110825946</a> |
| 1435 | Lanius cristatus | Brown Shrike | 2022/4/5   | 1 | 0 | 23.20777639 | 120.35907000 | <a href="https://www.inaturalist.org/observations/110825941">https://www.inaturalist.org/observations/110825941</a> |
| 1436 | Lanius cristatus | Brown Shrike | 2022/4/5   | 1 | 0 | 23.20779583 | 120.35929030 | <a href="https://www.inaturalist.org/observations/110825949">https://www.inaturalist.org/observations/110825949</a> |
| 1437 | Lanius cristatus | Brown Shrike | 2022/4/5   | 1 | 0 | 23.20900583 | 120.35854030 | <a href="https://www.inaturalist.org/observations/110825944">https://www.inaturalist.org/observations/110825944</a> |
| 1438 | Lanius cristatus | Brown Shrike | 2020/12/26 | 2 | 0 | 23.22397660 | 87.89792480  | <a href="https://www.inaturalist.org/observations/70433914">https://www.inaturalist.org/observations/70433914</a>   |
| 1439 | Lanius cristatus | Brown Shrike | 2020/9/10  | 5 | 0 | 23.23643156 | 120.11336470 | <a href="https://www.inaturalist.org/observations/59418328">https://www.inaturalist.org/observations/59418328</a>   |
| 1440 | Lanius cristatus | Brown Shrike | 2020/5/13  | 2 | 0 | 23.25316806 | 119.66829310 | <a href="https://www.inaturalist.org/observations/46204798">https://www.inaturalist.org/observations/46204798</a>   |
| 1441 | Lanius cristatus | Brown Shrike | 2020/5/15  | 2 | 0 | 23.25406642 | 119.66848280 | <a href="https://www.inaturalist.org/observations/46210534">https://www.inaturalist.org/observations/46210534</a>   |
| 1442 | Lanius cristatus | Brown Shrike | 2020/5/15  | 2 | 0 | 23.25406642 | 119.66848280 | <a href="https://www.inaturalist.org/observations/46210536">https://www.inaturalist.org/observations/46210536</a>   |
| 1443 | Lanius cristatus | Brown Shrike | 2020/5/15  | 2 | 0 | 23.25406642 | 119.66848280 | <a href="https://www.inaturalist.org/observations/46210537">https://www.inaturalist.org/observations/46210537</a>   |
| 1444 | Lanius cristatus | Brown Shrike | 2020/1/10  | 2 | 0 | 23.26393477 | 120.12104930 | <a href="https://www.inaturalist.org/observations/38117408">https://www.inaturalist.org/observations/38117408</a>   |
| 1445 | Lanius cristatus | Brown Shrike | 2020/9/26  | 2 | 0 | 23.26625653 | 120.50053250 | <a href="https://www.inaturalist.org/observations/61281303">https://www.inaturalist.org/observations/61281303</a>   |
| 1446 | Lanius cristatus | Brown Shrike | 2020/2/29  | 4 | 0 | 23.27208380 | 86.70998007  | <a href="https://www.inaturalist.org/observations/39575801">https://www.inaturalist.org/observations/39575801</a>   |
| 1447 | Lanius cristatus | Brown Shrike | 2016/10/30 | 2 | 0 | 23.28199956 | 71.68806233  | <a href="https://www.inaturalist.org/observations/37247296">https://www.inaturalist.org/observations/37247296</a>   |
| 1448 | Lanius cristatus | Brown Shrike | 2019/12/7  | 2 | 0 | 23.28564833 | 120.39741830 | <a href="https://www.inaturalist.org/observations/53311059">https://www.inaturalist.org/observations/53311059</a>   |

|      |                                 |              |            |   |   |             |              |                                                                                                                     |
|------|---------------------------------|--------------|------------|---|---|-------------|--------------|---------------------------------------------------------------------------------------------------------------------|
| 1449 | Lanius cristatus                | Brown Shrike | 2019/12/7  | 1 | 0 | 23.28571167 | 120.39740330 | <a href="https://www.inaturalist.org/observations/97093148">https://www.inaturalist.org/observations/97093148</a>   |
| 1450 | Lanius cristatus                | Brown Shrike | 2019/12/7  | 2 | 0 | 23.28597500 | 120.39723500 | <a href="https://www.inaturalist.org/observations/53311031">https://www.inaturalist.org/observations/53311031</a>   |
| 1451 | Lanius cristatus                | Brown Shrike | 2019/10/24 | 2 | 0 | 23.29892880 | 121.26015330 | <a href="https://www.inaturalist.org/observations/35709297">https://www.inaturalist.org/observations/35709297</a>   |
| 1452 | Lanius cristatus                | Brown Shrike | 2020/4/8   | 4 | 0 | 23.32184861 | 120.16673890 | <a href="https://www.inaturalist.org/observations/47271638">https://www.inaturalist.org/observations/47271638</a>   |
| 1453 | Lanius cristatus                | Brown Shrike | 2021/4/10  | 2 | 0 | 23.32234754 | 120.31084080 | <a href="https://www.inaturalist.org/observations/74816447">https://www.inaturalist.org/observations/74816447</a>   |
| 1454 | Lanius cristatus                | Brown Shrike | 2021/4/10  | 1 | 0 | 23.32250500 | 120.31042100 | <a href="https://www.inaturalist.org/observations/74816446">https://www.inaturalist.org/observations/74816446</a>   |
| 1455 | Lanius cristatus                | Brown Shrike | 2020/11/24 | 2 | 0 | 23.33120556 | 120.32082220 | <a href="https://www.inaturalist.org/observations/65505694">https://www.inaturalist.org/observations/65505694</a>   |
| 1456 | Lanius cristatus                | Brown Shrike | 2020/10/1  | 2 | 0 | 23.33471528 | 120.18564440 | <a href="https://www.inaturalist.org/observations/62285405">https://www.inaturalist.org/observations/62285405</a>   |
| 1457 | Lanius cristatus                | Brown Shrike | 2021/11/23 | 3 | 0 | 23.35223500 | 116.68323400 | <a href="https://www.inaturalist.org/observations/101766219">https://www.inaturalist.org/observations/101766219</a> |
| 1458 | Lanius cristatus                | Brown Shrike | 2021/11/23 | 4 | 0 | 23.35223500 | 116.68323400 | <a href="https://www.inaturalist.org/observations/101766220">https://www.inaturalist.org/observations/101766220</a> |
| 1459 | Lanius cristatus<br>lucionensis | Brown Shrike | 2022/9/7   | 0 | 0 | 23.37895439 | 120.16068800 | <a href="https://www.inaturalist.org/observations/134008701">https://www.inaturalist.org/observations/134008701</a> |
| 1460 | Lanius cristatus                | Brown Shrike | 2022/9/7   | 1 | 0 | 23.37919167 | 120.16201120 | <a href="https://www.inaturalist.org/observations/134045674">https://www.inaturalist.org/observations/134045674</a> |
| 1461 | Lanius cristatus                | Brown Shrike | 2015/1/24  | 2 | 0 | 23.38889930 | 71.34159440  | <a href="https://www.inaturalist.org/observations/33243087">https://www.inaturalist.org/observations/33243087</a>   |
| 1462 | Lanius cristatus                | Brown Shrike | 2022/10/24 | 0 | 0 | 23.40400700 | 121.21684660 | <a href="https://www.inaturalist.org/observations/143911187">https://www.inaturalist.org/observations/143911187</a> |
| 1463 | Lanius cristatus                | Brown Shrike | 2022/9/26  | 0 | 0 | 23.40400700 | 121.21684660 | <a href="https://www.inaturalist.org/observations/143913570">https://www.inaturalist.org/observations/143913570</a> |
| 1464 | Lanius cristatus                | Brown Shrike | 2022/8/29  | 1 | 0 | 23.40400700 | 121.21684660 | <a href="https://www.inaturalist.org/observations/144213659">https://www.inaturalist.org/observations/144213659</a> |
| 1465 | Lanius cristatus                | Brown Shrike | 2016/1/8   | 3 | 0 | 23.41182576 | 121.34753390 | <a href="https://www.inaturalist.org/observations/66651967">https://www.inaturalist.org/observations/66651967</a>   |
| 1466 | Lanius cristatus                | Brown Shrike | 2016/1/8   | 2 | 0 | 23.41591606 | 121.34987730 | <a href="https://www.inaturalist.org/observations/14814724">https://www.inaturalist.org/observations/14814724</a>   |
| 1467 | Lanius cristatus                | Brown Shrike | 2019/11/13 | 3 | 0 | 23.42501768 | 120.45499510 | <a href="https://www.inaturalist.org/observations/35700457">https://www.inaturalist.org/observations/35700457</a>   |
| 1468 | Lanius cristatus                | Brown Shrike | 2020/10/25 | 2 | 0 | 23.42624480 | 120.45410560 | <a href="https://www.inaturalist.org/observations/63634179">https://www.inaturalist.org/observations/63634179</a>   |
| 1469 | Lanius cristatus                | Brown Shrike | 2021/3/9   | 2 | 0 | 23.42886778 | 120.39780170 | <a href="https://www.inaturalist.org/observations/72071844">https://www.inaturalist.org/observations/72071844</a>   |
| 1470 | Lanius cristatus                | Brown Shrike | 2021/9/27  | 2 | 0 | 23.43158833 | 120.54754170 | <a href="https://www.inaturalist.org/observations/98887683">https://www.inaturalist.org/observations/98887683</a>   |
| 1471 | Lanius cristatus                | Brown Shrike | 2019/4/29  | 3 | 0 | 23.43171182 | 120.58721320 | <a href="https://www.inaturalist.org/observations/23882456">https://www.inaturalist.org/observations/23882456</a>   |

|      |                  |              |            |   |   |             |              |                                                                                                                     |
|------|------------------|--------------|------------|---|---|-------------|--------------|---------------------------------------------------------------------------------------------------------------------|
| 1472 | Lanius cristatus | Brown Shrike | 2020/2/2   | 3 | 0 | 23.43781884 | 120.43521450 | <a href="https://www.inaturalist.org/observations/38221404">https://www.inaturalist.org/observations/38221404</a>   |
| 1473 | Lanius cristatus | Brown Shrike | 2018/12/7  | 4 | 0 | 23.44457096 | 88.34205166  | <a href="https://www.inaturalist.org/observations/19906188">https://www.inaturalist.org/observations/19906188</a>   |
| 1474 | Lanius cristatus | Brown Shrike | 2022/9/13  | 1 | 0 | 23.45053211 | 121.39663940 | <a href="https://www.inaturalist.org/observations/140238875">https://www.inaturalist.org/observations/140238875</a> |
| 1475 | Lanius cristatus | Brown Shrike | 2018/11/14 | 2 | 0 | 23.45286297 | 120.46302720 | <a href="https://www.inaturalist.org/observations/19247004">https://www.inaturalist.org/observations/19247004</a>   |
| 1476 | Lanius cristatus | Brown Shrike | 2021/12/29 | 1 | 0 | 23.45317833 | 120.55983170 | <a href="https://www.inaturalist.org/observations/108573438">https://www.inaturalist.org/observations/108573438</a> |
| 1477 | Lanius cristatus | Brown Shrike | 2022/10/20 | 1 | 0 | 23.45318838 | 120.55944780 | <a href="https://www.inaturalist.org/observations/139850618">https://www.inaturalist.org/observations/139850618</a> |
| 1478 | Lanius cristatus | Brown Shrike | 2013/12/23 | 1 | 0 | 23.45325900 | 120.55941830 | <a href="https://www.inaturalist.org/observations/118748187">https://www.inaturalist.org/observations/118748187</a> |
| 1479 | Lanius cristatus | Brown Shrike | 2014/1/2   | 1 | 0 | 23.45327658 | 120.56031040 | <a href="https://www.inaturalist.org/observations/98086546">https://www.inaturalist.org/observations/98086546</a>   |
| 1480 | Lanius cristatus | Brown Shrike | 2022/12/16 | 2 | 0 | 23.45334069 | 120.55982680 | <a href="https://www.inaturalist.org/observations/144532617">https://www.inaturalist.org/observations/144532617</a> |
| 1481 | Lanius cristatus | Brown Shrike | 2016/1/20  | 1 | 0 | 23.45345987 | 120.55891520 | <a href="https://www.inaturalist.org/observations/96318683">https://www.inaturalist.org/observations/96318683</a>   |
| 1482 | Lanius cristatus | Brown Shrike | 2020/1/17  | 3 | 0 | 23.45347964 | 120.55923700 | <a href="https://www.inaturalist.org/observations/60689549">https://www.inaturalist.org/observations/60689549</a>   |
| 1483 | Lanius cristatus | Brown Shrike | 2015/3/9   | 2 | 0 | 23.45348328 | 120.55889960 | <a href="https://www.inaturalist.org/observations/97962308">https://www.inaturalist.org/observations/97962308</a>   |
| 1484 | Lanius cristatus | Brown Shrike | 2015/12/22 | 2 | 0 | 23.45348328 | 120.55889960 | <a href="https://www.inaturalist.org/observations/97962313">https://www.inaturalist.org/observations/97962313</a>   |
| 1485 | Lanius cristatus | Brown Shrike | 2015/5/6   | 2 | 0 | 23.45348328 | 120.55889960 | <a href="https://www.inaturalist.org/observations/97962317">https://www.inaturalist.org/observations/97962317</a>   |
| 1486 | Lanius cristatus | Brown Shrike | 2015/1/14  | 2 | 0 | 23.45348328 | 120.55889960 | <a href="https://www.inaturalist.org/observations/97962318">https://www.inaturalist.org/observations/97962318</a>   |
| 1487 | Lanius cristatus | Brown Shrike | 2013/2/6   | 1 | 0 | 23.45353369 | 120.55886700 | <a href="https://www.inaturalist.org/observations/101314986">https://www.inaturalist.org/observations/101314986</a> |
| 1488 | Lanius cristatus | Brown Shrike | 2020/10/16 | 2 | 0 | 23.45362730 | 120.55910370 | <a href="https://www.inaturalist.org/observations/63076078">https://www.inaturalist.org/observations/63076078</a>   |
| 1489 | Lanius cristatus | Brown Shrike | 2021/12/24 | 1 | 0 | 23.45629778 | 120.45702470 | <a href="https://www.inaturalist.org/observations/103569233">https://www.inaturalist.org/observations/103569233</a> |
| 1490 | Lanius cristatus | Brown Shrike | 2020/11/1  | 3 | 0 | 23.45644663 | 69.29472966  | <a href="https://www.inaturalist.org/observations/136907808">https://www.inaturalist.org/observations/136907808</a> |
| 1491 | Lanius cristatus | Brown Shrike | 2020/12/10 | 2 | 0 | 23.45686167 | 120.25689670 | <a href="https://www.inaturalist.org/observations/66368130">https://www.inaturalist.org/observations/66368130</a>   |
| 1492 | Lanius cristatus | Brown Shrike | 2019/4/29  | 3 | 0 | 23.45914179 | 120.32477810 | <a href="https://www.inaturalist.org/observations/24166898">https://www.inaturalist.org/observations/24166898</a>   |
| 1493 | Lanius cristatus | Brown Shrike | 2021/1/12  | 2 | 0 | 23.46054893 | 120.47043100 | <a href="https://www.inaturalist.org/observations/79382125">https://www.inaturalist.org/observations/79382125</a>   |
| 1494 | Lanius cristatus | Brown Shrike | 2009/2/5   | 2 | 0 | 23.46155072 | 120.47521260 | <a href="https://www.inaturalist.org/observations/16128393">https://www.inaturalist.org/observations/16128393</a>   |



|      |                  |              |            |   |   |             |              |                                                                                                                     |
|------|------------------|--------------|------------|---|---|-------------|--------------|---------------------------------------------------------------------------------------------------------------------|
| 1495 | Lanius cristatus | Brown Shrike | 2021/9/27  | 2 | 0 | 23.46158333 | 120.46821000 | <a href="https://www.inaturalist.org/observations/98887671">https://www.inaturalist.org/observations/98887671</a>   |
| 1496 | Lanius cristatus | Brown Shrike | 2015/12/11 | 2 | 0 | 23.46182050 | 71.28742090  | <a href="https://www.inaturalist.org/observations/56202829">https://www.inaturalist.org/observations/56202829</a>   |
| 1497 | Lanius cristatus | Brown Shrike | 2012/1/20  | 1 | 0 | 23.46182050 | 71.28742090  | <a href="https://www.inaturalist.org/observations/101871656">https://www.inaturalist.org/observations/101871656</a> |
| 1498 | Lanius cristatus | Brown Shrike | 2020/12/6  | 3 | 0 | 23.47062590 | 120.29346420 | <a href="https://www.inaturalist.org/observations/134716011">https://www.inaturalist.org/observations/134716011</a> |
| 1499 | Lanius cristatus | Brown Shrike | 2020/12/6  | 1 | 0 | 23.47395294 | 120.29165740 | <a href="https://www.inaturalist.org/observations/81663367">https://www.inaturalist.org/observations/81663367</a>   |
| 1500 | Lanius cristatus | Brown Shrike | 2022/1/2   | 3 | 0 | 23.47545000 | 120.45109170 | <a href="https://www.inaturalist.org/observations/104147882">https://www.inaturalist.org/observations/104147882</a> |
| 1501 | Lanius cristatus | Brown Shrike | 2005/10/27 | 1 | 0 | 23.48007510 | 120.44911130 | <a href="https://www.inaturalist.org/observations/77854881">https://www.inaturalist.org/observations/77854881</a>   |
| 1502 | Lanius cristatus | Brown Shrike | 2018/3/13  | 2 | 0 | 23.48104976 | 120.67368340 | <a href="https://www.inaturalist.org/observations/65019653">https://www.inaturalist.org/observations/65019653</a>   |
| 1503 | Lanius cristatus | Brown Shrike | 2018/9/11  | 3 | 0 | 23.48235330 | 120.43590820 | <a href="https://www.inaturalist.org/observations/16418732">https://www.inaturalist.org/observations/16418732</a>   |
| 1504 | Lanius cristatus | Brown Shrike | 2018/10/1  | 2 | 0 | 23.48351098 | 120.63085790 | <a href="https://www.inaturalist.org/observations/17130399">https://www.inaturalist.org/observations/17130399</a>   |
| 1505 | Lanius cristatus | Brown Shrike | 2021/9/18  | 2 | 0 | 23.48473824 | 120.48721100 | <a href="https://www.inaturalist.org/observations/95733356">https://www.inaturalist.org/observations/95733356</a>   |
| 1506 | Lanius cristatus | Brown Shrike | 2020/9/4   | 2 | 0 | 23.48593889 | 120.45275280 | <a href="https://www.inaturalist.org/observations/58583305">https://www.inaturalist.org/observations/58583305</a>   |
| 1507 | Lanius cristatus | Brown Shrike | 2019/11/9  | 2 | 0 | 23.49306899 | 120.44718700 | <a href="https://www.inaturalist.org/observations/49028704">https://www.inaturalist.org/observations/49028704</a>   |
| 1508 | Lanius cristatus | Brown Shrike | 2020/2/13  | 2 | 0 | 23.49322083 | 120.15019660 | <a href="https://www.inaturalist.org/observations/38625223">https://www.inaturalist.org/observations/38625223</a>   |
| 1509 | Lanius cristatus | Brown Shrike | 2021/2/20  | 2 | 0 | 23.49447930 | 120.15382970 | <a href="https://www.inaturalist.org/observations/70087297">https://www.inaturalist.org/observations/70087297</a>   |
| 1510 | Lanius cristatus | Brown Shrike | 2020/2/13  | 2 | 0 | 23.49977333 | 120.16634670 | <a href="https://www.inaturalist.org/observations/38625247">https://www.inaturalist.org/observations/38625247</a>   |
| 1511 | Lanius cristatus | Brown Shrike | 2019/5/9   | 3 | 0 | 23.50248718 | 121.00195310 | <a href="https://www.inaturalist.org/observations/25296180">https://www.inaturalist.org/observations/25296180</a>   |
| 1512 | Lanius cristatus | Brown Shrike | 2019/5/9   | 3 | 0 | 23.50249290 | 121.00195310 | <a href="https://www.inaturalist.org/observations/25296119">https://www.inaturalist.org/observations/25296119</a>   |
| 1513 | Lanius cristatus | Brown Shrike | 2020/2/6   | 3 | 0 | 23.50275276 | 120.14879570 | <a href="https://www.inaturalist.org/observations/40698641">https://www.inaturalist.org/observations/40698641</a>   |
| 1514 | Lanius cristatus | Brown Shrike | 2022/1/2   | 1 | 0 | 23.50456167 | 120.15588330 | <a href="https://www.inaturalist.org/observations/104145260">https://www.inaturalist.org/observations/104145260</a> |
| 1515 | Lanius cristatus | Brown Shrike | 2022/3/19  | 1 | 0 | 23.50717101 | 91.47139554  | <a href="https://www.inaturalist.org/observations/111090543">https://www.inaturalist.org/observations/111090543</a> |
| 1516 | Lanius cristatus | Brown Shrike | 2022/4/21  | 2 | 0 | 23.50981333 | 121.39056500 | <a href="https://www.inaturalist.org/observations/112940629">https://www.inaturalist.org/observations/112940629</a> |
| 1517 | Lanius cristatus | Brown Shrike | 2021/3/6   | 3 | 0 | 23.51000000 | 120.14800000 | <a href="https://www.inaturalist.org/observations/70737127">https://www.inaturalist.org/observations/70737127</a>   |

|      |                  |              |            |   |   |             |              |                                                                                                                     |
|------|------------------|--------------|------------|---|---|-------------|--------------|---------------------------------------------------------------------------------------------------------------------|
| 1518 | Lanius cristatus | Brown Shrike | 2021/9/14  | 1 | 0 | 23.51035400 | 120.82310090 | <a href="https://www.inaturalist.org/observations/102980388">https://www.inaturalist.org/observations/102980388</a> |
| 1519 | Lanius cristatus | Brown Shrike | 2016/8/16  | 1 | 0 | 23.51103471 | 120.14556470 | <a href="https://www.inaturalist.org/observations/80462969">https://www.inaturalist.org/observations/80462969</a>   |
| 1520 | Lanius cristatus | Brown Shrike | 2020/10/2  | 2 | 0 | 23.51579298 | 120.14485240 | <a href="https://www.inaturalist.org/observations/81453016">https://www.inaturalist.org/observations/81453016</a>   |
| 1521 | Lanius cristatus | Brown Shrike | 2022/3/20  | 1 | 0 | 23.51944752 | 91.47531590  | <a href="https://www.inaturalist.org/observations/111103331">https://www.inaturalist.org/observations/111103331</a> |
| 1522 | Lanius cristatus | Brown Shrike | 2021/3/14  | 4 | 0 | 23.52044430 | 87.31192270  | <a href="https://www.inaturalist.org/observations/71491479">https://www.inaturalist.org/observations/71491479</a>   |
| 1523 | Lanius cristatus | Brown Shrike | 2020/1/19  | 2 | 0 | 23.52521333 | 120.19414170 | <a href="https://www.inaturalist.org/observations/37772093">https://www.inaturalist.org/observations/37772093</a>   |
| 1524 | Lanius cristatus | Brown Shrike | 2020/1/19  | 2 | 0 | 23.52715333 | 120.20526170 | <a href="https://www.inaturalist.org/observations/37772107">https://www.inaturalist.org/observations/37772107</a>   |
| 1525 | Lanius cristatus | Brown Shrike | 2021/12/21 | 1 | 0 | 23.53392609 | 120.15069150 | <a href="https://www.inaturalist.org/observations/108797158">https://www.inaturalist.org/observations/108797158</a> |
| 1526 | Lanius cristatus | Brown Shrike | 2019/10/26 | 0 | 0 | 23.53686842 | 120.18564850 | <a href="https://www.inaturalist.org/observations/34913449">https://www.inaturalist.org/observations/34913449</a>   |
| 1527 | Lanius cristatus | Brown Shrike | 2021/12/21 | 2 | 0 | 23.53913680 | 120.17323100 | <a href="https://www.inaturalist.org/observations/103445238">https://www.inaturalist.org/observations/103445238</a> |
| 1528 | Lanius cristatus | Brown Shrike | 2019/4/18  | 6 | 0 | 23.53949300 | 81.05517550  | <a href="https://www.inaturalist.org/observations/123432311">https://www.inaturalist.org/observations/123432311</a> |
| 1529 | Lanius cristatus | Brown Shrike | 2021/1/10  | 2 | 0 | 23.54173833 | 120.17365670 | <a href="https://www.inaturalist.org/observations/67887583">https://www.inaturalist.org/observations/67887583</a>   |
| 1530 | Lanius cristatus | Brown Shrike | 2003/2/13  | 4 | 0 | 23.54364430 | 120.42336540 | <a href="https://www.inaturalist.org/observations/13814506">https://www.inaturalist.org/observations/13814506</a>   |
| 1531 | Lanius cristatus | Brown Shrike | 2020/12/25 | 3 | 0 | 23.54427944 | 120.43752560 | <a href="https://www.inaturalist.org/observations/67033934">https://www.inaturalist.org/observations/67033934</a>   |
| 1532 | Lanius cristatus | Brown Shrike | 2022/3/15  | 1 | 0 | 23.54651153 | 120.20760900 | <a href="https://www.inaturalist.org/observations/108656309">https://www.inaturalist.org/observations/108656309</a> |
| 1533 | Lanius cristatus | Brown Shrike | 2021/9/18  | 3 | 0 | 23.54861752 | 120.62842570 | <a href="https://www.inaturalist.org/observations/95244279">https://www.inaturalist.org/observations/95244279</a>   |
| 1534 | Lanius cristatus | Brown Shrike | 2022/3/8   | 1 | 0 | 23.55205060 | 120.17409260 | <a href="https://www.inaturalist.org/observations/108902875">https://www.inaturalist.org/observations/108902875</a> |
| 1535 | Lanius cristatus | Brown Shrike | 2014/12/21 | 1 | 0 | 23.55784754 | 120.43544500 | <a href="https://www.inaturalist.org/observations/56719660">https://www.inaturalist.org/observations/56719660</a>   |
| 1536 | Lanius cristatus | Brown Shrike | 2016/11/25 | 5 | 0 | 23.55805700 | 87.34445300  | <a href="http://www.inaturalist.org/observations/4655679">http://www.inaturalist.org/observations/4655679</a>       |
| 1537 | Lanius cristatus | Brown Shrike | 2019/4/29  | 4 | 0 | 23.55999673 | 120.47171990 | <a href="https://www.inaturalist.org/observations/23934812">https://www.inaturalist.org/observations/23934812</a>   |
| 1538 | Lanius cristatus | Brown Shrike | 2019/4/29  | 5 | 0 | 23.56013746 | 120.47181920 | <a href="https://www.inaturalist.org/observations/24418352">https://www.inaturalist.org/observations/24418352</a>   |
| 1539 | Lanius cristatus | Brown Shrike | 2016/12/17 | 3 | 0 | 23.56669080 | 87.30347710  | <a href="https://www.inaturalist.org/observations/5433660">https://www.inaturalist.org/observations/5433660</a>     |
| 1540 | Lanius cristatus | Brown Shrike | 2020/4/25  | 2 | 0 | 23.56758528 | 120.16587890 | <a href="https://www.inaturalist.org/observations/44296061">https://www.inaturalist.org/observations/44296061</a>   |

|      |                  |              |            |   |   |             |              |                                                                                                                     |
|------|------------------|--------------|------------|---|---|-------------|--------------|---------------------------------------------------------------------------------------------------------------------|
| 1541 | Lanius cristatus | Brown Shrike | 2022/4/30  | 1 | 0 | 23.56879180 | 120.17157980 | <a href="https://www.inaturalist.org/observations/114454862">https://www.inaturalist.org/observations/114454862</a> |
| 1542 | Lanius cristatus | Brown Shrike | 2021/1/10  | 2 | 0 | 23.57048833 | 120.16400500 | <a href="https://www.inaturalist.org/observations/67887558">https://www.inaturalist.org/observations/67887558</a>   |
| 1543 | Lanius cristatus | Brown Shrike | 2022/11/25 | 1 | 0 | 23.58519010 | 121.50274040 | <a href="https://www.inaturalist.org/observations/143858210">https://www.inaturalist.org/observations/143858210</a> |
| 1544 | Lanius cristatus | Brown Shrike | 2020/5/12  | 2 | 0 | 23.58747833 | 120.31786460 | <a href="https://www.inaturalist.org/observations/45645943">https://www.inaturalist.org/observations/45645943</a>   |
| 1545 | Lanius cristatus | Brown Shrike | 2018/10/9  | 3 | 0 | 23.58877167 | 87.33724000  | <a href="https://www.inaturalist.org/observations/17408746">https://www.inaturalist.org/observations/17408746</a>   |
| 1546 | Lanius cristatus | Brown Shrike | 2018/2/1   | 1 | 0 | 23.58881600 | 87.33407700  | <a href="https://www.inaturalist.org/observations/102354495">https://www.inaturalist.org/observations/102354495</a> |
| 1547 | Lanius cristatus | Brown Shrike | 2019/10/13 | 2 | 0 | 23.58905667 | 87.33467500  | <a href="https://www.inaturalist.org/observations/35948254">https://www.inaturalist.org/observations/35948254</a>   |
| 1548 | Lanius cristatus | Brown Shrike | 2019/10/13 | 3 | 0 | 23.58914667 | 87.33467500  | <a href="https://www.inaturalist.org/observations/34363325">https://www.inaturalist.org/observations/34363325</a>   |
| 1549 | Lanius cristatus | Brown Shrike | 2006/1/12  | 4 | 0 | 23.58916000 | 80.41992000  | <a href="https://www.inaturalist.org/observations/9771870">https://www.inaturalist.org/observations/9771870</a>     |
| 1550 | Lanius cristatus | Brown Shrike | 2015/9/16  | 5 | 0 | 23.59202600 | 87.22679800  | <a href="http://www.inaturalist.org/observations/1951301">http://www.inaturalist.org/observations/1951301</a>       |
| 1551 | Lanius cristatus | Brown Shrike | 2021/11/24 | 2 | 0 | 23.59528248 | 120.35679300 | <a href="https://www.inaturalist.org/observations/126223396">https://www.inaturalist.org/observations/126223396</a> |
| 1552 | Lanius cristatus | Brown Shrike | 2021/10/5  | 0 | 0 | 23.59577521 | 120.59822940 | <a href="https://www.inaturalist.org/observations/97198016">https://www.inaturalist.org/observations/97198016</a>   |
| 1553 | Lanius cristatus | Brown Shrike | 2021/10/5  | 1 | 0 | 23.59584000 | 120.59814670 | <a href="https://www.inaturalist.org/observations/97316871">https://www.inaturalist.org/observations/97316871</a>   |
| 1554 | Lanius cristatus | Brown Shrike | 2021/9/19  | 2 | 0 | 23.59662806 | 120.61230500 | <a href="https://www.inaturalist.org/observations/95374166">https://www.inaturalist.org/observations/95374166</a>   |
| 1555 | Lanius cristatus | Brown Shrike | 2018/10/21 | 3 | 0 | 23.59790000 | 87.36432833  | <a href="https://www.inaturalist.org/observations/18513396">https://www.inaturalist.org/observations/18513396</a>   |
| 1556 | Lanius cristatus | Brown Shrike | 2021/3/11  | 4 | 0 | 23.59908004 | 120.28085910 | <a href="https://www.inaturalist.org/observations/71041156">https://www.inaturalist.org/observations/71041156</a>   |
| 1557 | Lanius cristatus | Brown Shrike | 2019/1/28  | 2 | 0 | 23.59937185 | 120.24248070 | <a href="https://www.inaturalist.org/observations/19927422">https://www.inaturalist.org/observations/19927422</a>   |
| 1558 | Lanius cristatus | Brown Shrike | 2019/4/28  | 3 | 0 | 23.60009466 | 120.44479830 | <a href="https://www.inaturalist.org/observations/24186173">https://www.inaturalist.org/observations/24186173</a>   |
| 1559 | Lanius cristatus | Brown Shrike | 2020/2/10  | 2 | 0 | 23.60231180 | 120.57932290 | <a href="https://www.inaturalist.org/observations/38526533">https://www.inaturalist.org/observations/38526533</a>   |
| 1560 | Lanius cristatus | Brown Shrike | 2021/9/20  | 1 | 0 | 23.60776746 | 120.61046340 | <a href="https://www.inaturalist.org/observations/95614628">https://www.inaturalist.org/observations/95614628</a>   |
| 1561 | Lanius cristatus | Brown Shrike | 2018/12/9  | 3 | 0 | 23.60809397 | 120.34711260 | <a href="https://www.inaturalist.org/observations/18917157">https://www.inaturalist.org/observations/18917157</a>   |
| 1562 | Lanius cristatus | Brown Shrike | 2013/11/12 | 2 | 0 | 23.60850380 | 120.54458080 | <a href="https://www.inaturalist.org/observations/8498315">https://www.inaturalist.org/observations/8498315</a>     |
| 1563 | Lanius cristatus | Brown Shrike | 2020/4/27  | 2 | 0 | 23.60911667 | 120.45938330 | <a href="https://www.inaturalist.org/observations/44094299">https://www.inaturalist.org/observations/44094299</a>   |

|      |                              |              |            |   |   |             |              |                                                                                                                     |
|------|------------------------------|--------------|------------|---|---|-------------|--------------|---------------------------------------------------------------------------------------------------------------------|
| 1564 | Lanius cristatus             | Brown Shrike | 2019/5/9   | 2 | 0 | 23.61039219 | 120.16134420 | <a href="https://www.inaturalist.org/observations/24831342">https://www.inaturalist.org/observations/24831342</a>   |
| 1565 | Lanius cristatus             | Brown Shrike | 2021/2/2   | 3 | 0 | 23.61190333 | 120.18977170 | <a href="https://www.inaturalist.org/observations/68974251">https://www.inaturalist.org/observations/68974251</a>   |
| 1566 | Lanius cristatus             | Brown Shrike | 2021/11/24 | 1 | 0 | 23.61230000 | 120.25061000 | <a href="https://www.inaturalist.org/observations/102239252">https://www.inaturalist.org/observations/102239252</a> |
| 1567 | Lanius cristatus             | Brown Shrike | 2020/2/3   | 2 | 0 | 23.61330000 | 120.18077670 | <a href="https://www.inaturalist.org/observations/38282497">https://www.inaturalist.org/observations/38282497</a>   |
| 1568 | Lanius cristatus             | Brown Shrike | 2018/12/11 | 2 | 0 | 23.61663036 | 120.26265540 | <a href="https://www.inaturalist.org/observations/18958355">https://www.inaturalist.org/observations/18958355</a>   |
| 1569 | Lanius cristatus lucionensis | Brown Shrike | 2016/11/23 | 2 | 0 | 23.61670635 | 87.24338750  | <a href="https://www.inaturalist.org/observations/5433363">https://www.inaturalist.org/observations/5433363</a>     |
| 1570 | Lanius cristatus             | Brown Shrike | 2020/3/5   | 2 | 0 | 23.61737667 | 120.26110500 | <a href="https://www.inaturalist.org/observations/39604429">https://www.inaturalist.org/observations/39604429</a>   |
| 1571 | Lanius cristatus             | Brown Shrike | 2020/3/23  | 2 | 0 | 23.61741848 | 120.26059800 | <a href="https://www.inaturalist.org/observations/40620762">https://www.inaturalist.org/observations/40620762</a>   |
| 1572 | Lanius cristatus             | Brown Shrike | 2022/3/13  | 1 | 0 | 23.61755407 | 120.26077090 | <a href="https://www.inaturalist.org/observations/118892556">https://www.inaturalist.org/observations/118892556</a> |
| 1573 | Lanius cristatus             | Brown Shrike | 2022/3/13  | 2 | 0 | 23.61767203 | 120.26081380 | <a href="https://www.inaturalist.org/observations/118892555">https://www.inaturalist.org/observations/118892555</a> |
| 1574 | Lanius cristatus             | Brown Shrike | 2022/3/6   | 1 | 0 | 23.61776166 | 120.26073960 | <a href="https://www.inaturalist.org/observations/118892552">https://www.inaturalist.org/observations/118892552</a> |
| 1575 | Lanius cristatus             | Brown Shrike | 2022/3/2   | 1 | 0 | 23.61778363 | 120.26052820 | <a href="https://www.inaturalist.org/observations/118892549">https://www.inaturalist.org/observations/118892549</a> |
| 1576 | Lanius cristatus             | Brown Shrike | 2022/3/14  | 1 | 0 | 23.61780965 | 120.26062070 | <a href="https://www.inaturalist.org/observations/118892557">https://www.inaturalist.org/observations/118892557</a> |
| 1577 | Lanius cristatus             | Brown Shrike | 2022/3/6   | 1 | 0 | 23.61793860 | 120.26073960 | <a href="https://www.inaturalist.org/observations/118892551">https://www.inaturalist.org/observations/118892551</a> |
| 1578 | Lanius cristatus             | Brown Shrike | 2022/3/30  | 1 | 0 | 23.61801956 | 120.26085010 | <a href="https://www.inaturalist.org/observations/118892548">https://www.inaturalist.org/observations/118892548</a> |
| 1579 | Lanius cristatus             | Brown Shrike | 2002/3/27  | 2 | 0 | 23.61989424 | 120.26212590 | <a href="https://www.inaturalist.org/observations/13942558">https://www.inaturalist.org/observations/13942558</a>   |
| 1580 | Lanius cristatus             | Brown Shrike | 2021/3/24  | 2 | 0 | 23.61998174 | 120.26145080 | <a href="https://www.inaturalist.org/observations/71934993">https://www.inaturalist.org/observations/71934993</a>   |
| 1581 | Lanius cristatus             | Brown Shrike | 2013/1/29  | 3 | 0 | 23.62002270 | 120.26090940 | <a href="https://www.inaturalist.org/observations/13203109">https://www.inaturalist.org/observations/13203109</a>   |
| 1582 | Lanius cristatus             | Brown Shrike | 2021/9/22  | 1 | 0 | 23.62003559 | 120.26124010 | <a href="https://www.inaturalist.org/observations/95723167">https://www.inaturalist.org/observations/95723167</a>   |
| 1583 | Lanius cristatus             | Brown Shrike | 2020/3/20  | 1 | 0 | 23.62009755 | 120.26141430 | <a href="https://www.inaturalist.org/observations/40620780">https://www.inaturalist.org/observations/40620780</a>   |
| 1584 | Lanius cristatus             | Brown Shrike | 2020/4/14  | 2 | 0 | 23.62010167 | 120.26128830 | <a href="https://www.inaturalist.org/observations/42155856">https://www.inaturalist.org/observations/42155856</a>   |
| 1585 | Lanius cristatus             | Brown Shrike | 2020/3/12  | 2 | 0 | 23.62012273 | 120.26152380 | <a href="https://www.inaturalist.org/observations/40119291">https://www.inaturalist.org/observations/40119291</a>   |
| 1586 | Lanius cristatus             | Brown Shrike | 2021/9/14  | 1 | 0 | 23.62015267 | 120.26135360 | <a href="https://www.inaturalist.org/observations/94783575">https://www.inaturalist.org/observations/94783575</a>   |

|      |                  |              |            |   |   |             |              |                                                                                                                     |
|------|------------------|--------------|------------|---|---|-------------|--------------|---------------------------------------------------------------------------------------------------------------------|
| 1587 | Lanius cristatus | Brown Shrike | 2021/3/24  | 2 | 0 | 23.62015716 | 120.26151520 | <a href="https://www.inaturalist.org/observations/71934980">https://www.inaturalist.org/observations/71934980</a>   |
| 1588 | Lanius cristatus | Brown Shrike | 2021/2/23  | 2 | 0 | 23.62015853 | 120.26094000 | <a href="https://www.inaturalist.org/observations/70026074">https://www.inaturalist.org/observations/70026074</a>   |
| 1589 | Lanius cristatus | Brown Shrike | 2020/4/28  | 3 | 0 | 23.62023833 | 120.26156330 | <a href="https://www.inaturalist.org/observations/44289428">https://www.inaturalist.org/observations/44289428</a>   |
| 1590 | Lanius cristatus | Brown Shrike | 2019/5/10  | 2 | 0 | 23.62026752 | 120.26147520 | <a href="https://www.inaturalist.org/observations/25051164">https://www.inaturalist.org/observations/25051164</a>   |
| 1591 | Lanius cristatus | Brown Shrike | 2022/5/2   | 0 | 0 | 23.62032518 | 120.26193980 | <a href="https://www.inaturalist.org/observations/114494806">https://www.inaturalist.org/observations/114494806</a> |
| 1592 | Lanius cristatus | Brown Shrike | 2019/10/4  | 3 | 0 | 23.62039797 | 120.26144640 | <a href="https://www.inaturalist.org/observations/34105911">https://www.inaturalist.org/observations/34105911</a>   |
| 1593 | Lanius cristatus | Brown Shrike | 2021/5/4   | 3 | 0 | 23.62048667 | 120.26168330 | <a href="https://www.inaturalist.org/observations/78402315">https://www.inaturalist.org/observations/78402315</a>   |
| 1594 | Lanius cristatus | Brown Shrike | 2020/5/8   | 2 | 0 | 23.62048970 | 120.26138390 | <a href="https://www.inaturalist.org/observations/45247367">https://www.inaturalist.org/observations/45247367</a>   |
| 1595 | Lanius cristatus | Brown Shrike | 2021/4/20  | 1 | 0 | 23.62058603 | 120.26133790 | <a href="https://www.inaturalist.org/observations/74594975">https://www.inaturalist.org/observations/74594975</a>   |
| 1596 | Lanius cristatus | Brown Shrike | 2021/1/21  | 1 | 0 | 23.62111350 | 120.26834090 | <a href="https://www.inaturalist.org/observations/68403685">https://www.inaturalist.org/observations/68403685</a>   |
| 1597 | Lanius cristatus | Brown Shrike | 2020/1/15  | 2 | 0 | 23.62133047 | 120.23661030 | <a href="https://www.inaturalist.org/observations/37772514">https://www.inaturalist.org/observations/37772514</a>   |
| 1598 | Lanius cristatus | Brown Shrike | 2021/3/28  | 1 | 0 | 23.62453842 | 120.26551820 | <a href="https://www.inaturalist.org/observations/72237912">https://www.inaturalist.org/observations/72237912</a>   |
| 1599 | Lanius cristatus | Brown Shrike | 2020/2/12  | 2 | 0 | 23.63183333 | 120.15749170 | <a href="https://www.inaturalist.org/observations/38625855">https://www.inaturalist.org/observations/38625855</a>   |
| 1600 | Lanius cristatus | Brown Shrike | 2022/3/26  | 1 | 0 | 23.63212639 | 120.28139310 | <a href="https://www.inaturalist.org/observations/109518114">https://www.inaturalist.org/observations/109518114</a> |
| 1601 | Lanius cristatus | Brown Shrike | 2022/4/1   | 2 | 0 | 23.63359172 | 120.48439640 | <a href="https://www.inaturalist.org/observations/110073819">https://www.inaturalist.org/observations/110073819</a> |
| 1602 | Lanius cristatus | Brown Shrike | 2020/2/25  | 2 | 0 | 23.63359500 | 120.22406000 | <a href="https://www.inaturalist.org/observations/39198211">https://www.inaturalist.org/observations/39198211</a>   |
| 1603 | Lanius cristatus | Brown Shrike | 2021/2/2   | 3 | 0 | 23.63376500 | 120.28137670 | <a href="https://www.inaturalist.org/observations/68974239">https://www.inaturalist.org/observations/68974239</a>   |
| 1604 | Lanius cristatus | Brown Shrike | 2021/4/20  | 1 | 0 | 23.63406999 | 120.52379910 | <a href="https://www.inaturalist.org/observations/74605478">https://www.inaturalist.org/observations/74605478</a>   |
| 1605 | Lanius cristatus | Brown Shrike | 2020/2/8   | 4 | 0 | 23.63548873 | 120.49210010 | <a href="https://www.inaturalist.org/observations/38536411">https://www.inaturalist.org/observations/38536411</a>   |
| 1606 | Lanius cristatus | Brown Shrike | 2021/1/5   | 2 | 0 | 23.64216167 | 120.48285170 | <a href="https://www.inaturalist.org/observations/67617525">https://www.inaturalist.org/observations/67617525</a>   |
| 1607 | Lanius cristatus | Brown Shrike | 2022/10/14 | 1 | 0 | 23.64875579 | 121.41987060 | <a href="https://www.inaturalist.org/observations/143991527">https://www.inaturalist.org/observations/143991527</a> |
| 1608 | Lanius cristatus | Brown Shrike | 2022/3/26  | 2 | 0 | 23.65197500 | 120.30946000 | <a href="https://www.inaturalist.org/observations/109518100">https://www.inaturalist.org/observations/109518100</a> |
| 1609 | Lanius cristatus | Brown Shrike | 2022/2/9   | 1 | 0 | 23.65227500 | 120.30872310 | <a href="https://www.inaturalist.org/observations/107169341">https://www.inaturalist.org/observations/107169341</a> |

|      |                  |              |            |   |   |             |              |                                                                                                                     |
|------|------------------|--------------|------------|---|---|-------------|--------------|---------------------------------------------------------------------------------------------------------------------|
| 1610 | Lanius cristatus | Brown Shrike | 2021/1/28  | 3 | 0 | 23.65259532 | 120.30860400 | <a href="https://www.inaturalist.org/observations/68704765">https://www.inaturalist.org/observations/68704765</a>   |
| 1611 | Lanius cristatus | Brown Shrike | 2021/4/19  | 2 | 0 | 23.65294937 | 120.30981100 | <a href="https://www.inaturalist.org/observations/74475574">https://www.inaturalist.org/observations/74475574</a>   |
| 1612 | Lanius cristatus | Brown Shrike | 2020/2/18  | 2 | 0 | 23.65359167 | 120.23147000 | <a href="https://www.inaturalist.org/observations/38816323">https://www.inaturalist.org/observations/38816323</a>   |
| 1613 | Lanius cristatus | Brown Shrike | 2018/10/31 | 1 | 0 | 23.65468025 | 121.41748050 | <a href="https://www.inaturalist.org/observations/17979105">https://www.inaturalist.org/observations/17979105</a>   |
| 1614 | Lanius cristatus | Brown Shrike | 2021/9/27  | 1 | 0 | 23.66107167 | 120.50340170 | <a href="https://www.inaturalist.org/observations/96464019">https://www.inaturalist.org/observations/96464019</a>   |
| 1615 | Lanius cristatus | Brown Shrike | 2019/12/3  | 2 | 0 | 23.66367113 | 120.48499120 | <a href="https://www.inaturalist.org/observations/36418536">https://www.inaturalist.org/observations/36418536</a>   |
| 1616 | Lanius cristatus | Brown Shrike | 2020/2/19  | 2 | 0 | 23.66539333 | 120.29272830 | <a href="https://www.inaturalist.org/observations/38817300">https://www.inaturalist.org/observations/38817300</a>   |
| 1617 | Lanius cristatus | Brown Shrike | 2022/9/11  | 3 | 0 | 23.66754588 | 69.08645187  | <a href="https://www.inaturalist.org/observations/142267405">https://www.inaturalist.org/observations/142267405</a> |
| 1618 | Lanius cristatus | Brown Shrike | 2015/4/10  | 4 | 0 | 23.66842411 | 81.03790283  | <a href="https://www.inaturalist.org/observations/7613925">https://www.inaturalist.org/observations/7613925</a>     |
| 1619 | Lanius cristatus | Brown Shrike | 2013/5/4   | 2 | 0 | 23.67013402 | 120.28454360 | <a href="https://www.inaturalist.org/observations/41217641">https://www.inaturalist.org/observations/41217641</a>   |
| 1620 | Lanius cristatus | Brown Shrike | 2020/2/14  | 2 | 0 | 23.67648667 | 120.47291330 | <a href="https://www.inaturalist.org/observations/38655283">https://www.inaturalist.org/observations/38655283</a>   |
| 1621 | Lanius cristatus | Brown Shrike | 2020/3/3   | 2 | 0 | 23.67699833 | 120.47105670 | <a href="https://www.inaturalist.org/observations/39485522">https://www.inaturalist.org/observations/39485522</a>   |
| 1622 | Lanius cristatus | Brown Shrike | 2022/4/30  | 2 | 0 | 23.67892606 | 120.55758850 | <a href="https://www.inaturalist.org/observations/114923097">https://www.inaturalist.org/observations/114923097</a> |
| 1623 | Lanius cristatus | Brown Shrike | 2021/11/10 | 1 | 0 | 23.67892930 | 120.55668160 | <a href="https://www.inaturalist.org/observations/100815266">https://www.inaturalist.org/observations/100815266</a> |
| 1624 | Lanius cristatus | Brown Shrike | 2022/5/1   | 1 | 0 | 23.67897537 | 120.55565670 | <a href="https://www.inaturalist.org/observations/114964021">https://www.inaturalist.org/observations/114964021</a> |
| 1625 | Lanius cristatus | Brown Shrike | 2022/5/2   | 1 | 0 | 23.67899502 | 120.55699780 | <a href="https://www.inaturalist.org/observations/114964022">https://www.inaturalist.org/observations/114964022</a> |
| 1626 | Lanius cristatus | Brown Shrike | 2022/4/30  | 1 | 0 | 23.67899502 | 120.56078510 | <a href="https://www.inaturalist.org/observations/114964028">https://www.inaturalist.org/observations/114964028</a> |
| 1627 | Lanius cristatus | Brown Shrike | 2021/1/30  | 2 | 0 | 23.67912268 | 120.31215350 | <a href="https://www.inaturalist.org/observations/68806612">https://www.inaturalist.org/observations/68806612</a>   |
| 1628 | Lanius cristatus | Brown Shrike | 2019/10/23 | 2 | 0 | 23.67916696 | 120.55645060 | <a href="https://www.inaturalist.org/observations/35662185">https://www.inaturalist.org/observations/35662185</a>   |
| 1629 | Lanius cristatus | Brown Shrike | 2019/10/23 | 2 | 0 | 23.67923236 | 120.55645570 | <a href="https://www.inaturalist.org/observations/35532549">https://www.inaturalist.org/observations/35532549</a>   |
| 1630 | Lanius cristatus | Brown Shrike | 2018/11/22 | 2 | 0 | 23.67967451 | 120.56092360 | <a href="https://www.inaturalist.org/observations/18858582">https://www.inaturalist.org/observations/18858582</a>   |
| 1631 | Lanius cristatus | Brown Shrike | 2019/11/1  | 4 | 0 | 23.67971412 | 120.55706150 | <a href="https://www.inaturalist.org/observations/35161730">https://www.inaturalist.org/observations/35161730</a>   |
| 1632 | Lanius cristatus | Brown Shrike | 2019/9/23  | 4 | 0 | 23.67974084 | 120.55472500 | <a href="https://www.inaturalist.org/observations/35232886">https://www.inaturalist.org/observations/35232886</a>   |

|      |                  |              |            |   |   |             |              |                                                                                                                     |
|------|------------------|--------------|------------|---|---|-------------|--------------|---------------------------------------------------------------------------------------------------------------------|
| 1633 | Lanius cristatus | Brown Shrike | 2014/12/5  | 3 | 0 | 23.67975700 | 120.55720500 | <a href="https://www.inaturalist.org/observations/16710302">https://www.inaturalist.org/observations/16710302</a>   |
| 1634 | Lanius cristatus | Brown Shrike | 2019/11/8  | 6 | 0 | 23.67977308 | 120.55716310 | <a href="https://www.inaturalist.org/observations/35563899">https://www.inaturalist.org/observations/35563899</a>   |
| 1635 | Lanius cristatus | Brown Shrike | 2014/10/31 | 2 | 0 | 23.67980900 | 120.55780800 | <a href="https://www.inaturalist.org/observations/16709963">https://www.inaturalist.org/observations/16709963</a>   |
| 1636 | Lanius cristatus | Brown Shrike | 2020/11/20 | 4 | 0 | 23.67985291 | 120.55314110 | <a href="https://www.inaturalist.org/observations/65257907">https://www.inaturalist.org/observations/65257907</a>   |
| 1637 | Lanius cristatus | Brown Shrike | 2022/4/30  | 1 | 0 | 23.67985291 | 120.55314110 | <a href="https://www.inaturalist.org/observations/113872172">https://www.inaturalist.org/observations/113872172</a> |
| 1638 | Lanius cristatus | Brown Shrike | 2022/4/30  | 2 | 0 | 23.67999061 | 120.55548990 | <a href="https://www.inaturalist.org/observations/114923086">https://www.inaturalist.org/observations/114923086</a> |
| 1639 | Lanius cristatus | Brown Shrike | 2020/10/12 | 2 | 0 | 23.68009351 | 120.55704950 | <a href="https://www.inaturalist.org/observations/68158124">https://www.inaturalist.org/observations/68158124</a>   |
| 1640 | Lanius cristatus | Brown Shrike | 2022/5/2   | 1 | 0 | 23.68015443 | 120.55699780 | <a href="https://www.inaturalist.org/observations/114964023">https://www.inaturalist.org/observations/114964023</a> |
| 1641 | Lanius cristatus | Brown Shrike | 2022/4/29  | 2 | 0 | 23.68016507 | 120.55720440 | <a href="https://www.inaturalist.org/observations/114923095">https://www.inaturalist.org/observations/114923095</a> |
| 1642 | Lanius cristatus | Brown Shrike | 2020/12/19 | 3 | 0 | 23.68027440 | 120.47871200 | <a href="https://www.inaturalist.org/observations/66760050">https://www.inaturalist.org/observations/66760050</a>   |
| 1643 | Lanius cristatus | Brown Shrike | 2020/1/19  | 4 | 0 | 23.68029069 | 120.32751480 | <a href="https://www.inaturalist.org/observations/40169611">https://www.inaturalist.org/observations/40169611</a>   |
| 1644 | Lanius cristatus | Brown Shrike | 2013/12/6  | 2 | 0 | 23.68032049 | 120.55703120 | <a href="https://www.inaturalist.org/observations/16787100">https://www.inaturalist.org/observations/16787100</a>   |
| 1645 | Lanius cristatus | Brown Shrike | 2022/1/29  | 2 | 0 | 23.68035415 | 120.55626230 | <a href="https://www.inaturalist.org/observations/114923067">https://www.inaturalist.org/observations/114923067</a> |
| 1646 | Lanius cristatus | Brown Shrike | 2014/1/9   | 2 | 0 | 23.68039535 | 120.55704730 | <a href="https://www.inaturalist.org/observations/16787099">https://www.inaturalist.org/observations/16787099</a>   |
| 1647 | Lanius cristatus | Brown Shrike | 2022/5/2   | 1 | 0 | 23.68040801 | 120.55672510 | <a href="https://www.inaturalist.org/observations/114964014">https://www.inaturalist.org/observations/114964014</a> |
| 1648 | Lanius cristatus | Brown Shrike | 2014/1/22  | 2 | 0 | 23.68054970 | 120.55669980 | <a href="https://www.inaturalist.org/observations/16787106">https://www.inaturalist.org/observations/16787106</a>   |
| 1649 | Lanius cristatus | Brown Shrike | 2014/1/20  | 2 | 0 | 23.68103014 | 120.55658060 | <a href="https://www.inaturalist.org/observations/16787102">https://www.inaturalist.org/observations/16787102</a>   |
| 1650 | Lanius cristatus | Brown Shrike | 2009/2/8   | 4 | 0 | 23.68162954 | 81.02863431  | <a href="https://www.inaturalist.org/observations/7458770">https://www.inaturalist.org/observations/7458770</a>     |
| 1651 | Lanius cristatus | Brown Shrike | 2020/11/20 | 3 | 0 | 23.68164329 | 120.55880730 | <a href="https://www.inaturalist.org/observations/65274033">https://www.inaturalist.org/observations/65274033</a>   |
| 1652 | Lanius cristatus | Brown Shrike | 2020/4/20  | 2 | 0 | 23.68403633 | 120.24531860 | <a href="https://www.inaturalist.org/observations/42665636">https://www.inaturalist.org/observations/42665636</a>   |
| 1653 | Lanius cristatus | Brown Shrike | 2015/2/24  | 2 | 0 | 23.68555030 | 81.02581680  | <a href="https://www.inaturalist.org/observations/69242815">https://www.inaturalist.org/observations/69242815</a>   |
| 1654 | Lanius cristatus | Brown Shrike | 2021/11/10 | 1 | 0 | 23.68577980 | 120.62077280 | <a href="https://www.inaturalist.org/observations/102745329">https://www.inaturalist.org/observations/102745329</a> |
| 1655 | Lanius cristatus | Brown Shrike | 2021/11/11 | 1 | 0 | 23.68577980 | 120.62077280 | <a href="https://www.inaturalist.org/observations/102745361">https://www.inaturalist.org/observations/102745361</a> |

|      |                  |              |            |   |   |             |              |                                                                                                                     |
|------|------------------|--------------|------------|---|---|-------------|--------------|---------------------------------------------------------------------------------------------------------------------|
| 1656 | Lanius cristatus | Brown Shrike | 2021/11/12 | 1 | 0 | 23.68577980 | 120.62077280 | <a href="https://www.inaturalist.org/observations/102745368">https://www.inaturalist.org/observations/102745368</a> |
| 1657 | Lanius cristatus | Brown Shrike | 2021/9/9   | 1 | 0 | 23.68608480 | 120.62079450 | <a href="https://www.inaturalist.org/observations/94299727">https://www.inaturalist.org/observations/94299727</a>   |
| 1658 | Lanius cristatus | Brown Shrike | 2020/3/3   | 2 | 0 | 23.68710667 | 120.53515830 | <a href="https://www.inaturalist.org/observations/39517445">https://www.inaturalist.org/observations/39517445</a>   |
| 1659 | Lanius cristatus | Brown Shrike | 2021/2/22  | 2 | 0 | 23.68731032 | 120.54220620 | <a href="https://www.inaturalist.org/observations/70025437">https://www.inaturalist.org/observations/70025437</a>   |
| 1660 | Lanius cristatus | Brown Shrike | 2019/5/14  | 1 | 0 | 23.69081328 | 120.53410770 | <a href="https://www.inaturalist.org/observations/25101611">https://www.inaturalist.org/observations/25101611</a>   |
| 1661 | Lanius cristatus | Brown Shrike | 2020/2/12  | 2 | 0 | 23.69098368 | 120.31327320 | <a href="https://www.inaturalist.org/observations/38559611">https://www.inaturalist.org/observations/38559611</a>   |
| 1662 | Lanius cristatus | Brown Shrike | 2019/10/27 | 1 | 0 | 23.69290907 | 120.68457260 | <a href="https://www.inaturalist.org/observations/34955588">https://www.inaturalist.org/observations/34955588</a>   |
| 1663 | Lanius cristatus | Brown Shrike | 2019/10/27 | 1 | 0 | 23.69342894 | 120.68461730 | <a href="https://www.inaturalist.org/observations/34955102">https://www.inaturalist.org/observations/34955102</a>   |
| 1664 | Lanius cristatus | Brown Shrike | 2022/1/1   | 1 | 0 | 23.69432306 | 120.31117970 | <a href="https://www.inaturalist.org/observations/104341053">https://www.inaturalist.org/observations/104341053</a> |
| 1665 | Lanius cristatus | Brown Shrike | 2018/12/12 | 2 | 0 | 23.69677285 | 120.53229560 | <a href="https://www.inaturalist.org/observations/18978975">https://www.inaturalist.org/observations/18978975</a>   |
| 1666 | Lanius cristatus | Brown Shrike | 2019/4/30  | 2 | 0 | 23.69692022 | 120.53212400 | <a href="https://www.inaturalist.org/observations/24177925">https://www.inaturalist.org/observations/24177925</a>   |
| 1667 | Lanius cristatus | Brown Shrike | 2020/3/12  | 2 | 0 | 23.70446932 | 120.46257730 | <a href="https://www.inaturalist.org/observations/39875013">https://www.inaturalist.org/observations/39875013</a>   |
| 1668 | Lanius cristatus | Brown Shrike | 2021/9/11  | 1 | 0 | 23.70566811 | 120.51731490 | <a href="https://www.inaturalist.org/observations/94401673">https://www.inaturalist.org/observations/94401673</a>   |
| 1669 | Lanius cristatus | Brown Shrike | 2021/9/27  | 1 | 0 | 23.70598500 | 120.51699670 | <a href="https://www.inaturalist.org/observations/96373404">https://www.inaturalist.org/observations/96373404</a>   |
| 1670 | Lanius cristatus | Brown Shrike | 2018/1/21  | 1 | 0 | 23.70658224 | 120.53908170 | <a href="https://www.inaturalist.org/observations/18926001">https://www.inaturalist.org/observations/18926001</a>   |
| 1671 | Lanius cristatus | Brown Shrike | 2021/12/24 | 2 | 0 | 23.71559929 | 120.43425080 | <a href="https://www.inaturalist.org/observations/103562713">https://www.inaturalist.org/observations/103562713</a> |
| 1672 | Lanius cristatus | Brown Shrike | 2020/3/15  | 2 | 0 | 23.71620684 | 120.43247060 | <a href="https://www.inaturalist.org/observations/40009177">https://www.inaturalist.org/observations/40009177</a>   |
| 1673 | Lanius cristatus | Brown Shrike | 2021/12/25 | 1 | 0 | 23.71681139 | 120.40693640 | <a href="https://www.inaturalist.org/observations/103626678">https://www.inaturalist.org/observations/103626678</a> |
| 1674 | Lanius cristatus | Brown Shrike | 2020/5/9   | 2 | 0 | 23.71735833 | 120.36997330 | <a href="https://www.inaturalist.org/observations/45345234">https://www.inaturalist.org/observations/45345234</a>   |
| 1675 | Lanius cristatus | Brown Shrike | 2019/12/29 | 2 | 0 | 23.72262314 | 81.02188697  | <a href="https://www.inaturalist.org/observations/56496176">https://www.inaturalist.org/observations/56496176</a>   |
| 1676 | Lanius cristatus | Brown Shrike | 2018/1/4   | 4 | 0 | 23.72412559 | 120.63731700 | <a href="https://www.inaturalist.org/observations/13145091">https://www.inaturalist.org/observations/13145091</a>   |
| 1677 | Lanius cristatus | Brown Shrike | 2021/9/18  | 2 | 0 | 23.72460139 | 120.42389140 | <a href="https://www.inaturalist.org/observations/95249458">https://www.inaturalist.org/observations/95249458</a>   |
| 1678 | Lanius cristatus | Brown Shrike | 2021/12/26 | 3 | 0 | 23.72469000 | 120.42442970 | <a href="https://www.inaturalist.org/observations/103669907">https://www.inaturalist.org/observations/103669907</a> |



|      |                  |              |            |   |   |             |              |                                                                                                                     |
|------|------------------|--------------|------------|---|---|-------------|--------------|---------------------------------------------------------------------------------------------------------------------|
| 1679 | Lanius cristatus | Brown Shrike | 2022/3/5   | 1 | 0 | 23.72480306 | 120.42251640 | <a href="https://www.inaturalist.org/observations/107919228">https://www.inaturalist.org/observations/107919228</a> |
| 1680 | Lanius cristatus | Brown Shrike | 2021/12/11 | 2 | 0 | 23.72503639 | 120.42295000 | <a href="https://www.inaturalist.org/observations/102920438">https://www.inaturalist.org/observations/102920438</a> |
| 1681 | Lanius cristatus | Brown Shrike | 2022/4/4   | 1 | 0 | 23.72505472 | 120.42317640 | <a href="https://www.inaturalist.org/observations/110356155">https://www.inaturalist.org/observations/110356155</a> |
| 1682 | Lanius cristatus | Brown Shrike | 2022/2/27  | 1 | 0 | 23.72520639 | 120.42230310 | <a href="https://www.inaturalist.org/observations/107534164">https://www.inaturalist.org/observations/107534164</a> |
| 1683 | Lanius cristatus | Brown Shrike | 2022/9/25  | 1 | 0 | 23.72532139 | 120.42340140 | <a href="https://www.inaturalist.org/observations/136409764">https://www.inaturalist.org/observations/136409764</a> |
| 1684 | Lanius cristatus | Brown Shrike | 2021/3/14  | 2 | 0 | 23.72537086 | 120.42170220 | <a href="https://www.inaturalist.org/observations/71178408">https://www.inaturalist.org/observations/71178408</a>   |
| 1685 | Lanius cristatus | Brown Shrike | 2018/1/4   | 4 | 0 | 23.72555340 | 120.62583050 | <a href="https://www.inaturalist.org/observations/13145093">https://www.inaturalist.org/observations/13145093</a>   |
| 1686 | Lanius cristatus | Brown Shrike | 2018/1/11  | 2 | 0 | 23.72578418 | 120.62306900 | <a href="https://www.inaturalist.org/observations/19485204">https://www.inaturalist.org/observations/19485204</a>   |
| 1687 | Lanius cristatus | Brown Shrike | 2014/5/7   | 2 | 0 | 23.72620080 | 120.62047290 | <a href="https://www.inaturalist.org/observations/19485353">https://www.inaturalist.org/observations/19485353</a>   |
| 1688 | Lanius cristatus | Brown Shrike | 2018/1/6   | 2 | 0 | 23.72643333 | 120.42554830 | <a href="https://www.inaturalist.org/observations/16584118">https://www.inaturalist.org/observations/16584118</a>   |
| 1689 | Lanius cristatus | Brown Shrike | 2021/12/19 | 1 | 0 | 23.72651639 | 120.42322000 | <a href="https://www.inaturalist.org/observations/103291032">https://www.inaturalist.org/observations/103291032</a> |
| 1690 | Lanius cristatus | Brown Shrike | 2020/12/20 | 3 | 0 | 23.72684863 | 120.42208660 | <a href="https://www.inaturalist.org/observations/66818272">https://www.inaturalist.org/observations/66818272</a>   |
| 1691 | Lanius cristatus | Brown Shrike | 2022/11/25 | 1 | 0 | 23.72737497 | 120.42407730 | <a href="https://www.inaturalist.org/observations/142798421">https://www.inaturalist.org/observations/142798421</a> |
| 1692 | Lanius cristatus | Brown Shrike | 2019/12/11 | 2 | 0 | 23.72784999 | 120.42393210 | <a href="https://www.inaturalist.org/observations/36550394">https://www.inaturalist.org/observations/36550394</a>   |
| 1693 | Lanius cristatus | Brown Shrike | 2019/1/25  | 2 | 0 | 23.72895388 | 120.36396120 | <a href="https://www.inaturalist.org/observations/19872273">https://www.inaturalist.org/observations/19872273</a>   |
| 1694 | Lanius cristatus | Brown Shrike | 2022/2/17  | 1 | 0 | 23.72925498 | 120.42220460 | <a href="https://www.inaturalist.org/observations/107239281">https://www.inaturalist.org/observations/107239281</a> |
| 1695 | Lanius cristatus | Brown Shrike | 2021/11/25 | 2 | 0 | 23.73143650 | 120.58430760 | <a href="https://www.inaturalist.org/observations/126223377">https://www.inaturalist.org/observations/126223377</a> |
| 1696 | Lanius cristatus | Brown Shrike | 2019/11/29 | 2 | 0 | 23.73190330 | 120.53360220 | <a href="https://www.inaturalist.org/observations/36938308">https://www.inaturalist.org/observations/36938308</a>   |
| 1697 | Lanius cristatus | Brown Shrike | 2021/9/12  | 1 | 0 | 23.73273972 | 120.39588140 | <a href="https://www.inaturalist.org/observations/94528459">https://www.inaturalist.org/observations/94528459</a>   |
| 1698 | Lanius cristatus | Brown Shrike | 2022/9/4   | 1 | 0 | 23.73304639 | 120.39731640 | <a href="https://www.inaturalist.org/observations/133564171">https://www.inaturalist.org/observations/133564171</a> |
| 1699 | Lanius cristatus | Brown Shrike | 2022/12/20 | 2 | 0 | 23.73336310 | 120.39584710 | <a href="https://www.inaturalist.org/observations/144724163">https://www.inaturalist.org/observations/144724163</a> |
| 1700 | Lanius cristatus | Brown Shrike | 2021/10/16 | 2 | 0 | 23.73352658 | 120.78701630 | <a href="https://www.inaturalist.org/observations/102274622">https://www.inaturalist.org/observations/102274622</a> |
| 1701 | Lanius cristatus | Brown Shrike | 2019/1/30  | 2 | 0 | 23.73580181 | 120.39156880 | <a href="https://www.inaturalist.org/observations/19982897">https://www.inaturalist.org/observations/19982897</a>   |

|      |                                 |              |            |   |   |             |              |                                                                                                                     |
|------|---------------------------------|--------------|------------|---|---|-------------|--------------|---------------------------------------------------------------------------------------------------------------------|
| 1702 | Lanius cristatus                | Brown Shrike | 2021/12/31 | 1 | 0 | 23.73681639 | 120.39588810 | <a href="https://www.inaturalist.org/observations/104016444">https://www.inaturalist.org/observations/104016444</a> |
| 1703 | Lanius cristatus                | Brown Shrike | 2022/4/17  | 1 | 0 | 23.73845833 | 121.45428000 | <a href="https://www.inaturalist.org/observations/120114168">https://www.inaturalist.org/observations/120114168</a> |
| 1704 | Lanius cristatus                | Brown Shrike | 2021/10/10 | 1 | 0 | 23.74180451 | 120.44944030 | <a href="https://www.inaturalist.org/observations/97721558">https://www.inaturalist.org/observations/97721558</a>   |
| 1705 | Lanius cristatus                | Brown Shrike | 2019/8/8   | 2 | 0 | 23.74409888 | 120.27085150 | <a href="https://www.inaturalist.org/observations/34288695">https://www.inaturalist.org/observations/34288695</a>   |
| 1706 | Lanius cristatus                | Brown Shrike | 2021/10/14 | 1 | 0 | 23.74536167 | 120.62553000 | <a href="https://www.inaturalist.org/observations/98163558">https://www.inaturalist.org/observations/98163558</a>   |
| 1707 | Lanius cristatus                | Brown Shrike | 2022/5/2   | 1 | 0 | 23.75018197 | 120.63809100 | <a href="https://www.inaturalist.org/observations/114633672">https://www.inaturalist.org/observations/114633672</a> |
| 1708 | Lanius cristatus                | Brown Shrike | 2019/2/2   | 2 | 0 | 23.75340684 | 120.62122160 | <a href="https://www.inaturalist.org/observations/20117838">https://www.inaturalist.org/observations/20117838</a>   |
| 1709 | Lanius cristatus                | Brown Shrike | 2022/12/4  | 1 | 0 | 23.75678382 | 120.21304320 | <a href="https://www.inaturalist.org/observations/144396817">https://www.inaturalist.org/observations/144396817</a> |
| 1710 | Lanius cristatus                | Brown Shrike | 2018/12/30 | 1 | 0 | 23.75692029 | 121.47659080 | <a href="https://www.inaturalist.org/observations/109835153">https://www.inaturalist.org/observations/109835153</a> |
| 1711 | Lanius cristatus                | Brown Shrike | 2020/2/3   | 2 | 0 | 23.75819522 | 120.61182310 | <a href="https://www.inaturalist.org/observations/67037414">https://www.inaturalist.org/observations/67037414</a>   |
| 1712 | Lanius cristatus                | Brown Shrike | 2022/9/14  | 1 | 0 | 23.76726296 | 120.45859140 | <a href="https://www.inaturalist.org/observations/134924775">https://www.inaturalist.org/observations/134924775</a> |
| 1713 | Lanius cristatus                | Brown Shrike | 2020/12/27 | 3 | 0 | 23.77652804 | 120.34889480 | <a href="https://www.inaturalist.org/observations/67517059">https://www.inaturalist.org/observations/67517059</a>   |
| 1714 | Lanius cristatus                | Brown Shrike | 2022/1/14  | 2 | 0 | 23.78298577 | 120.61594380 | <a href="https://www.inaturalist.org/observations/105264896">https://www.inaturalist.org/observations/105264896</a> |
| 1715 | Lanius cristatus                | Brown Shrike | 2021/3/27  | 3 | 0 | 23.79057469 | 120.31146380 | <a href="https://www.inaturalist.org/observations/72158833">https://www.inaturalist.org/observations/72158833</a>   |
| 1716 | Lanius cristatus                | Brown Shrike | 2022/1/23  | 1 | 0 | 23.79335123 | 120.42449810 | <a href="https://www.inaturalist.org/observations/105555942">https://www.inaturalist.org/observations/105555942</a> |
| 1717 | Lanius cristatus                | Brown Shrike | 2016/4/23  | 4 | 0 | 23.79487999 | 120.47004110 | <a href="https://www.inaturalist.org/observations/30582030">https://www.inaturalist.org/observations/30582030</a>   |
| 1718 | Lanius cristatus                | Brown Shrike | 2021/10/11 | 2 | 0 | 23.80264551 | 120.22774730 | <a href="https://www.inaturalist.org/observations/98658711">https://www.inaturalist.org/observations/98658711</a>   |
| 1719 | Lanius cristatus                | Brown Shrike | 2021/1/1   | 2 | 0 | 23.80522167 | 120.36448830 | <a href="https://www.inaturalist.org/observations/67768317">https://www.inaturalist.org/observations/67768317</a>   |
| 1720 | Lanius cristatus                | Brown Shrike | 2017/5/2   | 2 | 0 | 23.80925439 | 120.27603560 | <a href="https://www.inaturalist.org/observations/18516960">https://www.inaturalist.org/observations/18516960</a>   |
| 1721 | Lanius cristatus                | Brown Shrike | 2018/10/21 | 3 | 0 | 23.81284764 | 120.68031660 | <a href="https://www.inaturalist.org/observations/19796830">https://www.inaturalist.org/observations/19796830</a>   |
| 1722 | Lanius cristatus                | Brown Shrike | 2019/1/15  | 1 | 0 | 23.82717563 | 120.80123440 | <a href="https://www.inaturalist.org/observations/141034116">https://www.inaturalist.org/observations/141034116</a> |
| 1723 | Lanius cristatus                | Brown Shrike | 2017/3/11  | 2 | 0 | 23.83021408 | 120.52804920 | <a href="https://www.inaturalist.org/observations/13519103">https://www.inaturalist.org/observations/13519103</a>   |
| 1724 | Lanius cristatus<br>lucionensis | Brown Shrike | 2021/9/18  | 1 | 0 | 23.83287003 | 120.78889470 | <a href="https://www.inaturalist.org/observations/95632289">https://www.inaturalist.org/observations/95632289</a>   |

|      |                  |              |            |   |   |             |              |                                                                                                                     |
|------|------------------|--------------|------------|---|---|-------------|--------------|---------------------------------------------------------------------------------------------------------------------|
| 1725 | Lanius cristatus | Brown Shrike | 2021/11/24 | 2 | 0 | 23.83720583 | 121.47504180 | <a href="https://www.inaturalist.org/observations/101823094">https://www.inaturalist.org/observations/101823094</a> |
| 1726 | Lanius cristatus | Brown Shrike | 2021/9/19  | 1 | 0 | 23.83865333 | 121.51096330 | <a href="https://www.inaturalist.org/observations/96057254">https://www.inaturalist.org/observations/96057254</a>   |
| 1727 | Lanius cristatus | Brown Shrike | 2022/1/21  | 2 | 0 | 23.84026105 | 121.50330250 | <a href="https://www.inaturalist.org/observations/105310077">https://www.inaturalist.org/observations/105310077</a> |
| 1728 | Lanius cristatus | Brown Shrike | 2020/2/5   | 3 | 0 | 23.84133210 | 120.49830440 | <a href="https://www.inaturalist.org/observations/38332945">https://www.inaturalist.org/observations/38332945</a>   |
| 1729 | Lanius cristatus | Brown Shrike | 2018/1/6   | 2 | 0 | 23.84232775 | 120.69159170 | <a href="https://www.inaturalist.org/observations/19796829">https://www.inaturalist.org/observations/19796829</a>   |
| 1730 | Lanius cristatus | Brown Shrike | 2021/1/25  | 2 | 0 | 23.84409790 | 121.51629670 | <a href="https://www.inaturalist.org/observations/69851799">https://www.inaturalist.org/observations/69851799</a>   |
| 1731 | Lanius cristatus | Brown Shrike | 2022/3/4   | 1 | 0 | 23.84671002 | 121.51213850 | <a href="https://www.inaturalist.org/observations/115489287">https://www.inaturalist.org/observations/115489287</a> |
| 1732 | Lanius cristatus | Brown Shrike | 2021/10/1  | 1 | 0 | 23.85484286 | 121.51700690 | <a href="https://www.inaturalist.org/observations/96990395">https://www.inaturalist.org/observations/96990395</a>   |
| 1733 | Lanius cristatus | Brown Shrike | 2022/1/14  | 2 | 0 | 23.85881671 | 120.61189840 | <a href="https://www.inaturalist.org/observations/105264860">https://www.inaturalist.org/observations/105264860</a> |
| 1734 | Lanius cristatus | Brown Shrike | 2022/1/10  | 2 | 0 | 23.86553768 | 121.52296480 | <a href="https://www.inaturalist.org/observations/104760030">https://www.inaturalist.org/observations/104760030</a> |
| 1735 | Lanius cristatus | Brown Shrike | 2021/10/7  | 3 | 0 | 23.86584284 | 121.52474110 | <a href="https://www.inaturalist.org/observations/97625225">https://www.inaturalist.org/observations/97625225</a>   |
| 1736 | Lanius cristatus | Brown Shrike | 2021/12/8  | 1 | 0 | 23.87208712 | 121.52359560 | <a href="https://www.inaturalist.org/observations/106916718">https://www.inaturalist.org/observations/106916718</a> |
| 1737 | Lanius cristatus | Brown Shrike | 2021/9/22  | 2 | 0 | 23.87242008 | 121.55861130 | <a href="https://www.inaturalist.org/observations/95726230">https://www.inaturalist.org/observations/95726230</a>   |
| 1738 | Lanius cristatus | Brown Shrike | 2021/9/22  | 2 | 0 | 23.87352996 | 121.56024640 | <a href="https://www.inaturalist.org/observations/95726231">https://www.inaturalist.org/observations/95726231</a>   |
| 1739 | Lanius cristatus | Brown Shrike | 2018/2/24  | 2 | 0 | 23.87433753 | 120.58006550 | <a href="https://www.inaturalist.org/observations/62010445">https://www.inaturalist.org/observations/62010445</a>   |
| 1740 | Lanius cristatus | Brown Shrike | 2019/10/25 | 2 | 0 | 23.87454739 | 121.50920370 | <a href="https://www.inaturalist.org/observations/34906306">https://www.inaturalist.org/observations/34906306</a>   |
| 1741 | Lanius cristatus | Brown Shrike | 2021/10/7  | 3 | 0 | 23.87968249 | 121.56584140 | <a href="https://www.inaturalist.org/observations/97625214">https://www.inaturalist.org/observations/97625214</a>   |
| 1742 | Lanius cristatus | Brown Shrike | 2022/12/4  | 1 | 0 | 23.88486167 | 121.51892670 | <a href="https://www.inaturalist.org/observations/143794207">https://www.inaturalist.org/observations/143794207</a> |
| 1743 | Lanius cristatus | Brown Shrike | 2020/5/5   | 3 | 0 | 23.88869395 | 121.53597670 | <a href="https://www.inaturalist.org/observations/46468774">https://www.inaturalist.org/observations/46468774</a>   |
| 1744 | Lanius cristatus | Brown Shrike | 2021/3/12  | 2 | 0 | 23.88898400 | 121.53521500 | <a href="https://www.inaturalist.org/observations/71050615">https://www.inaturalist.org/observations/71050615</a>   |
| 1745 | Lanius cristatus | Brown Shrike | 2020/12/31 | 2 | 0 | 23.88904457 | 121.53659190 | <a href="https://www.inaturalist.org/observations/69850288">https://www.inaturalist.org/observations/69850288</a>   |
| 1746 | Lanius cristatus | Brown Shrike | 2020/1/8   | 2 | 0 | 23.89020900 | 121.53766600 | <a href="https://www.inaturalist.org/observations/37395076">https://www.inaturalist.org/observations/37395076</a>   |
| 1747 | Lanius cristatus | Brown Shrike | 2020/1/8   | 2 | 0 | 23.89097200 | 121.53473900 | <a href="https://www.inaturalist.org/observations/37395079">https://www.inaturalist.org/observations/37395079</a>   |

|      |                  |              |            |   |   |             |              |                                                                                                                     |
|------|------------------|--------------|------------|---|---|-------------|--------------|---------------------------------------------------------------------------------------------------------------------|
| 1748 | Lanius cristatus | Brown Shrike | 2021/11/15 | 1 | 0 | 23.89148971 | 121.50692220 | <a href="https://www.inaturalist.org/observations/103297250">https://www.inaturalist.org/observations/103297250</a> |
| 1749 | Lanius cristatus | Brown Shrike | 2021/10/23 | 2 | 0 | 23.89171245 | 121.53846390 | <a href="https://www.inaturalist.org/observations/99045210">https://www.inaturalist.org/observations/99045210</a>   |
| 1750 | Lanius cristatus | Brown Shrike | 2019/9/26  | 2 | 0 | 23.89194672 | 121.54076380 | <a href="https://www.inaturalist.org/observations/33700774">https://www.inaturalist.org/observations/33700774</a>   |
| 1751 | Lanius cristatus | Brown Shrike | 2020/10/28 | 1 | 0 | 23.89232151 | 121.54116840 | <a href="https://www.inaturalist.org/observations/67299897">https://www.inaturalist.org/observations/67299897</a>   |
| 1752 | Lanius cristatus | Brown Shrike | 2020/4/24  | 2 | 0 | 23.89319197 | 121.54485910 | <a href="https://www.inaturalist.org/observations/43025284">https://www.inaturalist.org/observations/43025284</a>   |
| 1753 | Lanius cristatus | Brown Shrike | 2020/4/24  | 4 | 0 | 23.89343704 | 121.54564280 | <a href="https://www.inaturalist.org/observations/47111659">https://www.inaturalist.org/observations/47111659</a>   |
| 1754 | Lanius cristatus | Brown Shrike | 2020/10/28 | 2 | 0 | 23.89348727 | 121.54164530 | <a href="https://www.inaturalist.org/observations/63677510">https://www.inaturalist.org/observations/63677510</a>   |
| 1755 | Lanius cristatus | Brown Shrike | 2020/4/14  | 2 | 0 | 23.89394846 | 121.54902430 | <a href="https://www.inaturalist.org/observations/44592630">https://www.inaturalist.org/observations/44592630</a>   |
| 1756 | Lanius cristatus | Brown Shrike | 2019/10/1  | 2 | 0 | 23.89417766 | 121.53832390 | <a href="https://www.inaturalist.org/observations/33692781">https://www.inaturalist.org/observations/33692781</a>   |
| 1757 | Lanius cristatus | Brown Shrike | 2021/11/6  | 2 | 0 | 23.89452161 | 121.54996620 | <a href="https://www.inaturalist.org/observations/100374360">https://www.inaturalist.org/observations/100374360</a> |
| 1758 | Lanius cristatus | Brown Shrike | 2021/10/7  | 1 | 0 | 23.89455141 | 121.53696130 | <a href="https://www.inaturalist.org/observations/100404911">https://www.inaturalist.org/observations/100404911</a> |
| 1759 | Lanius cristatus | Brown Shrike | 2019/10/1  | 3 | 0 | 23.89535232 | 121.54838450 | <a href="https://www.inaturalist.org/observations/33693250">https://www.inaturalist.org/observations/33693250</a>   |
| 1760 | Lanius cristatus | Brown Shrike | 2020/10/27 | 1 | 0 | 23.89601425 | 121.55033370 | <a href="https://www.inaturalist.org/observations/63638752">https://www.inaturalist.org/observations/63638752</a>   |
| 1761 | Lanius cristatus | Brown Shrike | 2018/1/18  | 2 | 0 | 23.89639769 | 121.55110140 | <a href="https://www.inaturalist.org/observations/68204379">https://www.inaturalist.org/observations/68204379</a>   |
| 1762 | Lanius cristatus | Brown Shrike | 2020/10/28 | 2 | 0 | 23.89641000 | 121.55090000 | <a href="https://www.inaturalist.org/observations/63675684">https://www.inaturalist.org/observations/63675684</a>   |
| 1763 | Lanius cristatus | Brown Shrike | 2020/10/28 | 3 | 0 | 23.89641833 | 121.55088500 | <a href="https://www.inaturalist.org/observations/63675686">https://www.inaturalist.org/observations/63675686</a>   |
| 1764 | Lanius cristatus | Brown Shrike | 2020/3/17  | 4 | 0 | 23.89646853 | 121.55072150 | <a href="https://www.inaturalist.org/observations/40936203">https://www.inaturalist.org/observations/40936203</a>   |
| 1765 | Lanius cristatus | Brown Shrike | 2019/2/23  | 2 | 0 | 23.89675273 | 121.54484640 | <a href="https://www.inaturalist.org/observations/21284194">https://www.inaturalist.org/observations/21284194</a>   |
| 1766 | Lanius cristatus | Brown Shrike | 2021/11/6  | 1 | 0 | 23.89705618 | 121.54476090 | <a href="https://www.inaturalist.org/observations/100374359">https://www.inaturalist.org/observations/100374359</a> |
| 1767 | Lanius cristatus | Brown Shrike | 2011/2/6   | 2 | 0 | 23.89753850 | 121.54180180 | <a href="https://www.inaturalist.org/observations/55762465">https://www.inaturalist.org/observations/55762465</a>   |
| 1768 | Lanius cristatus | Brown Shrike | 2020/3/18  | 4 | 0 | 23.89756605 | 121.53560570 | <a href="https://www.inaturalist.org/observations/47109114">https://www.inaturalist.org/observations/47109114</a>   |
| 1769 | Lanius cristatus | Brown Shrike | 2019/12/25 | 3 | 0 | 23.89847000 | 121.54413500 | <a href="https://www.inaturalist.org/observations/36938595">https://www.inaturalist.org/observations/36938595</a>   |
| 1770 | Lanius cristatus | Brown Shrike | 2019/12/25 | 3 | 0 | 23.89855300 | 121.54427300 | <a href="https://www.inaturalist.org/observations/36931991">https://www.inaturalist.org/observations/36931991</a>   |

|      |                  |              |            |   |   |             |              |                                                                                                                     |
|------|------------------|--------------|------------|---|---|-------------|--------------|---------------------------------------------------------------------------------------------------------------------|
| 1771 | Lanius cristatus | Brown Shrike | 2014/1/14  | 2 | 0 | 23.90019868 | 121.54642580 | <a href="https://www.inaturalist.org/observations/12264597">https://www.inaturalist.org/observations/12264597</a>   |
| 1772 | Lanius cristatus | Brown Shrike | 2020/11/2  | 2 | 0 | 23.90025692 | 121.54969170 | <a href="https://www.inaturalist.org/observations/64028628">https://www.inaturalist.org/observations/64028628</a>   |
| 1773 | Lanius cristatus | Brown Shrike | 2021/1/11  | 3 | 0 | 23.90043501 | 121.54947410 | <a href="https://www.inaturalist.org/observations/67890143">https://www.inaturalist.org/observations/67890143</a>   |
| 1774 | Lanius cristatus | Brown Shrike | 2019/10/1  | 3 | 0 | 23.90055120 | 121.54473990 | <a href="https://www.inaturalist.org/observations/33692771">https://www.inaturalist.org/observations/33692771</a>   |
| 1775 | Lanius cristatus | Brown Shrike | 2020/9/28  | 2 | 0 | 23.90065333 | 121.53740830 | <a href="https://www.inaturalist.org/observations/61108742">https://www.inaturalist.org/observations/61108742</a>   |
| 1776 | Lanius cristatus | Brown Shrike | 2021/3/14  | 2 | 0 | 23.90076300 | 121.54849700 | <a href="https://www.inaturalist.org/observations/71196667">https://www.inaturalist.org/observations/71196667</a>   |
| 1777 | Lanius cristatus | Brown Shrike | 2019/10/13 | 3 | 0 | 23.90080500 | 121.54223600 | <a href="https://www.inaturalist.org/observations/34365660">https://www.inaturalist.org/observations/34365660</a>   |
| 1778 | Lanius cristatus | Brown Shrike | 2020/5/1   | 4 | 0 | 23.90085500 | 121.54378000 | <a href="https://www.inaturalist.org/observations/44445711">https://www.inaturalist.org/observations/44445711</a>   |
| 1779 | Lanius cristatus | Brown Shrike | 2019/10/13 | 3 | 0 | 23.90102700 | 121.54216810 | <a href="https://www.inaturalist.org/observations/34300054">https://www.inaturalist.org/observations/34300054</a>   |
| 1780 | Lanius cristatus | Brown Shrike | 2022/4/2   | 1 | 0 | 23.90121693 | 121.54560580 | <a href="https://www.inaturalist.org/observations/119842721">https://www.inaturalist.org/observations/119842721</a> |
| 1781 | Lanius cristatus | Brown Shrike | 2020/4/25  | 3 | 0 | 23.90126167 | 121.54610170 | <a href="https://www.inaturalist.org/observations/43288695">https://www.inaturalist.org/observations/43288695</a>   |
| 1782 | Lanius cristatus | Brown Shrike | 2020/4/14  | 4 | 0 | 23.90129500 | 121.54774330 | <a href="https://www.inaturalist.org/observations/42749781">https://www.inaturalist.org/observations/42749781</a>   |
| 1783 | Lanius cristatus | Brown Shrike | 2019/9/27  | 3 | 0 | 23.90145636 | 121.54327700 | <a href="https://www.inaturalist.org/observations/33470654">https://www.inaturalist.org/observations/33470654</a>   |
| 1784 | Lanius cristatus | Brown Shrike | 2020/4/14  | 3 | 0 | 23.90153029 | 121.54784350 | <a href="https://www.inaturalist.org/observations/42158203">https://www.inaturalist.org/observations/42158203</a>   |
| 1785 | Lanius cristatus | Brown Shrike | 2020/1/2   | 2 | 0 | 23.90173227 | 121.54537000 | <a href="https://www.inaturalist.org/observations/42087398">https://www.inaturalist.org/observations/42087398</a>   |
| 1786 | Lanius cristatus | Brown Shrike | 2019/11/2  | 1 | 0 | 23.90180300 | 121.53898300 | <a href="https://www.inaturalist.org/observations/35195393">https://www.inaturalist.org/observations/35195393</a>   |
| 1787 | Lanius cristatus | Brown Shrike | 2020/3/6   | 2 | 0 | 23.90182324 | 121.54363070 | <a href="https://www.inaturalist.org/observations/44592621">https://www.inaturalist.org/observations/44592621</a>   |
| 1788 | Lanius cristatus | Brown Shrike | 2020/3/2   | 6 | 0 | 23.90279463 | 121.54786920 | <a href="https://www.inaturalist.org/observations/39913698">https://www.inaturalist.org/observations/39913698</a>   |
| 1789 | Lanius cristatus | Brown Shrike | 2022/1/16  | 1 | 0 | 23.90400354 | 120.68275990 | <a href="https://www.inaturalist.org/observations/105029529">https://www.inaturalist.org/observations/105029529</a> |
| 1790 | Lanius cristatus | Brown Shrike | 2021/11/18 | 1 | 0 | 23.90609269 | 121.53758640 | <a href="https://www.inaturalist.org/observations/101393988">https://www.inaturalist.org/observations/101393988</a> |
| 1791 | Lanius cristatus | Brown Shrike | 2020/11/5  | 3 | 0 | 23.91232817 | 120.68122880 | <a href="https://www.inaturalist.org/observations/66825010">https://www.inaturalist.org/observations/66825010</a>   |
| 1792 | Lanius cristatus | Brown Shrike | 2018/12/18 | 2 | 0 | 23.91509972 | 121.51384320 | <a href="https://www.inaturalist.org/observations/34317897">https://www.inaturalist.org/observations/34317897</a>   |
| 1793 | Lanius cristatus | Brown Shrike | 2021/11/18 | 1 | 0 | 23.91560777 | 121.55859680 | <a href="https://www.inaturalist.org/observations/101596501">https://www.inaturalist.org/observations/101596501</a> |

|      |                  |              |            |   |   |             |              |                                                                                                                     |
|------|------------------|--------------|------------|---|---|-------------|--------------|---------------------------------------------------------------------------------------------------------------------|
| 1794 | Lanius cristatus | Brown Shrike | 2021/12/21 | 2 | 0 | 23.91593725 | 121.56295640 | <a href="https://www.inaturalist.org/observations/103416930">https://www.inaturalist.org/observations/103416930</a> |
| 1795 | Lanius cristatus | Brown Shrike | 2022/4/9   | 1 | 0 | 23.93607500 | 121.60174000 | <a href="https://www.inaturalist.org/observations/119967843">https://www.inaturalist.org/observations/119967843</a> |
| 1796 | Lanius cristatus | Brown Shrike | 2022/11/19 | 1 | 0 | 23.93638298 | 121.59902490 | <a href="https://www.inaturalist.org/observations/142738808">https://www.inaturalist.org/observations/142738808</a> |
| 1797 | Lanius cristatus | Brown Shrike | 2018/11/3  | 2 | 0 | 23.93666153 | 120.63010870 | <a href="https://www.inaturalist.org/observations/19649517">https://www.inaturalist.org/observations/19649517</a>   |
| 1798 | Lanius cristatus | Brown Shrike | 2019/10/11 | 1 | 0 | 23.93742900 | 121.60098600 | <a href="https://www.inaturalist.org/observations/34200255">https://www.inaturalist.org/observations/34200255</a>   |
| 1799 | Lanius cristatus | Brown Shrike | 2022/4/4   | 1 | 0 | 23.93764091 | 121.60115790 | <a href="https://www.inaturalist.org/observations/119397359">https://www.inaturalist.org/observations/119397359</a> |
| 1800 | Lanius cristatus | Brown Shrike | 2022/2/6   | 2 | 0 | 23.93882700 | 87.52484100  | <a href="https://www.inaturalist.org/observations/106294653">https://www.inaturalist.org/observations/106294653</a> |
| 1801 | Lanius cristatus | Brown Shrike | 2021/10/2  | 1 | 0 | 23.94828885 | 121.52341980 | <a href="https://www.inaturalist.org/observations/96991484">https://www.inaturalist.org/observations/96991484</a>   |
| 1802 | Lanius cristatus | Brown Shrike | 2019/3/8   | 2 | 0 | 23.95582833 | 120.68718000 | <a href="https://www.inaturalist.org/observations/21046148">https://www.inaturalist.org/observations/21046148</a>   |
| 1803 | Lanius cristatus | Brown Shrike | 2020/10/26 | 3 | 0 | 23.96513710 | 120.96737680 | <a href="https://www.inaturalist.org/observations/63557662">https://www.inaturalist.org/observations/63557662</a>   |
| 1804 | Lanius cristatus | Brown Shrike | 2020/11/3  | 2 | 0 | 23.96513710 | 120.96737680 | <a href="https://www.inaturalist.org/observations/64098659">https://www.inaturalist.org/observations/64098659</a>   |
| 1805 | Lanius cristatus | Brown Shrike | 2020/11/13 | 2 | 0 | 23.96513710 | 120.96737680 | <a href="https://www.inaturalist.org/observations/65005460">https://www.inaturalist.org/observations/65005460</a>   |
| 1806 | Lanius cristatus | Brown Shrike | 2020/11/19 | 2 | 0 | 23.96513710 | 120.96737680 | <a href="https://www.inaturalist.org/observations/65207111">https://www.inaturalist.org/observations/65207111</a>   |
| 1807 | Lanius cristatus | Brown Shrike | 2020/11/21 | 2 | 0 | 23.96513710 | 120.96737680 | <a href="https://www.inaturalist.org/observations/65321826">https://www.inaturalist.org/observations/65321826</a>   |
| 1808 | Lanius cristatus | Brown Shrike | 2020/11/25 | 2 | 0 | 23.96513710 | 120.96737680 | <a href="https://www.inaturalist.org/observations/65581531">https://www.inaturalist.org/observations/65581531</a>   |
| 1809 | Lanius cristatus | Brown Shrike | 2020/11/28 | 3 | 0 | 23.96513710 | 120.96737680 | <a href="https://www.inaturalist.org/observations/65804933">https://www.inaturalist.org/observations/65804933</a>   |
| 1810 | Lanius cristatus | Brown Shrike | 2020/12/4  | 2 | 0 | 23.96513710 | 120.96737680 | <a href="https://www.inaturalist.org/observations/66285044">https://www.inaturalist.org/observations/66285044</a>   |
| 1811 | Lanius cristatus | Brown Shrike | 2020/12/7  | 2 | 0 | 23.96513710 | 120.96737680 | <a href="https://www.inaturalist.org/observations/66285055">https://www.inaturalist.org/observations/66285055</a>   |
| 1812 | Lanius cristatus | Brown Shrike | 2020/12/8  | 2 | 0 | 23.96513710 | 120.96737680 | <a href="https://www.inaturalist.org/observations/66285057">https://www.inaturalist.org/observations/66285057</a>   |
| 1813 | Lanius cristatus | Brown Shrike | 2020/12/8  | 4 | 0 | 23.96513710 | 120.96737680 | <a href="https://www.inaturalist.org/observations/66285058">https://www.inaturalist.org/observations/66285058</a>   |
| 1814 | Lanius cristatus | Brown Shrike | 2021/1/4   | 2 | 0 | 23.96513710 | 120.96737680 | <a href="https://www.inaturalist.org/observations/67700392">https://www.inaturalist.org/observations/67700392</a>   |
| 1815 | Lanius cristatus | Brown Shrike | 2021/1/5   | 2 | 0 | 23.96513710 | 120.96737680 | <a href="https://www.inaturalist.org/observations/67700394">https://www.inaturalist.org/observations/67700394</a>   |
| 1816 | Lanius cristatus | Brown Shrike | 2021/1/7   | 2 | 0 | 23.96513710 | 120.96737680 | <a href="https://www.inaturalist.org/observations/67700396">https://www.inaturalist.org/observations/67700396</a>   |

|      |                  |              |            |   |   |             |              |                                                                                                                     |
|------|------------------|--------------|------------|---|---|-------------|--------------|---------------------------------------------------------------------------------------------------------------------|
| 1817 | Lanius cristatus | Brown Shrike | 2021/10/3  | 2 | 0 | 23.96696726 | 120.96615040 | <a href="https://www.inaturalist.org/observations/97005172">https://www.inaturalist.org/observations/97005172</a>   |
| 1818 | Lanius cristatus | Brown Shrike | 2020/9/12  | 2 | 0 | 23.97225148 | 121.54529340 | <a href="https://www.inaturalist.org/observations/59469091">https://www.inaturalist.org/observations/59469091</a>   |
| 1819 | Lanius cristatus | Brown Shrike | 2020/4/11  | 2 | 0 | 23.98036042 | 120.95245470 | <a href="https://www.inaturalist.org/observations/41901036">https://www.inaturalist.org/observations/41901036</a>   |
| 1820 | Lanius cristatus | Brown Shrike | 2022/12/10 | 2 | 0 | 23.98224792 | 120.95562580 | <a href="https://www.inaturalist.org/observations/144067585">https://www.inaturalist.org/observations/144067585</a> |
| 1821 | Lanius cristatus | Brown Shrike | 2021/11/10 | 3 | 0 | 23.98243895 | 121.61633340 | <a href="https://www.inaturalist.org/observations/100759503">https://www.inaturalist.org/observations/100759503</a> |
| 1822 | Lanius cristatus | Brown Shrike | 2021/11/10 | 3 | 0 | 23.98339958 | 121.61605080 | <a href="https://www.inaturalist.org/observations/100759504">https://www.inaturalist.org/observations/100759504</a> |
| 1823 | Lanius cristatus | Brown Shrike | 2019/2/7   | 2 | 0 | 23.98380190 | 121.59849100 | <a href="https://www.inaturalist.org/observations/20240473">https://www.inaturalist.org/observations/20240473</a>   |
| 1824 | Lanius cristatus | Brown Shrike | 2020/10/24 | 3 | 0 | 23.99560098 | 121.62872390 | <a href="https://www.inaturalist.org/observations/66509346">https://www.inaturalist.org/observations/66509346</a>   |
| 1825 | Lanius cristatus | Brown Shrike | 2020/2/10  | 2 | 0 | 23.99994001 | 120.57147240 | <a href="https://www.inaturalist.org/observations/38503083">https://www.inaturalist.org/observations/38503083</a>   |
| 1826 | Lanius cristatus | Brown Shrike | 2019/10/6  | 3 | 0 | 24.00111000 | 120.53464300 | <a href="https://www.inaturalist.org/observations/33940159">https://www.inaturalist.org/observations/33940159</a>   |
| 1827 | Lanius cristatus | Brown Shrike | 2019/4/9   | 2 | 0 | 24.00156784 | 120.57415970 | <a href="https://www.inaturalist.org/observations/22267914">https://www.inaturalist.org/observations/22267914</a>   |
| 1828 | Lanius cristatus | Brown Shrike | 2021/1/3   | 1 | 0 | 24.00177821 | 121.60228760 | <a href="https://www.inaturalist.org/observations/107177028">https://www.inaturalist.org/observations/107177028</a> |
| 1829 | Lanius cristatus | Brown Shrike | 2018/11/14 | 2 | 0 | 24.00506730 | 120.56655920 | <a href="https://www.inaturalist.org/observations/19649522">https://www.inaturalist.org/observations/19649522</a>   |
| 1830 | Lanius cristatus | Brown Shrike | 2022/11/7  | 2 | 0 | 24.00555977 | 120.45498330 | <a href="https://www.inaturalist.org/observations/141967632">https://www.inaturalist.org/observations/141967632</a> |
| 1831 | Lanius cristatus | Brown Shrike | 2021/3/15  | 3 | 0 | 24.00921333 | 120.72152000 | <a href="https://www.inaturalist.org/observations/71349876">https://www.inaturalist.org/observations/71349876</a>   |
| 1832 | Lanius cristatus | Brown Shrike | 2020/4/25  | 2 | 0 | 24.01234576 | 120.47661200 | <a href="https://www.inaturalist.org/observations/43333488">https://www.inaturalist.org/observations/43333488</a>   |
| 1833 | Lanius cristatus | Brown Shrike | 2020/4/25  | 2 | 0 | 24.01451332 | 120.47308680 | <a href="https://www.inaturalist.org/observations/43333487">https://www.inaturalist.org/observations/43333487</a>   |
| 1834 | Lanius cristatus | Brown Shrike | 2020/1/22  | 2 | 0 | 24.01566865 | 120.47126590 | <a href="https://www.inaturalist.org/observations/37843165">https://www.inaturalist.org/observations/37843165</a>   |
| 1835 | Lanius cristatus | Brown Shrike | 2022/10/13 | 3 | 0 | 24.01592257 | 120.48349620 | <a href="https://www.inaturalist.org/observations/138601500">https://www.inaturalist.org/observations/138601500</a> |
| 1836 | Lanius cristatus | Brown Shrike | 2021/2/23  | 2 | 0 | 24.02067147 | 120.91295210 | <a href="https://www.inaturalist.org/observations/105656681">https://www.inaturalist.org/observations/105656681</a> |
| 1837 | Lanius cristatus | Brown Shrike | 2021/10/24 | 2 | 0 | 24.03660171 | 121.62485570 | <a href="https://www.inaturalist.org/observations/99207248">https://www.inaturalist.org/observations/99207248</a>   |
| 1838 | Lanius cristatus | Brown Shrike | 2022/10/9  | 1 | 0 | 24.04039171 | 120.38548910 | <a href="https://www.inaturalist.org/observations/139311915">https://www.inaturalist.org/observations/139311915</a> |
| 1839 | Lanius cristatus | Brown Shrike | 2019/4/11  | 3 | 0 | 24.04251491 | 120.40168480 | <a href="https://www.inaturalist.org/observations/22318893">https://www.inaturalist.org/observations/22318893</a>   |

|      |                  |              |            |   |   |             |              |                                                                                                                     |
|------|------------------|--------------|------------|---|---|-------------|--------------|---------------------------------------------------------------------------------------------------------------------|
| 1840 | Lanius cristatus | Brown Shrike | 2021/1/20  | 2 | 0 | 24.04510749 | 120.38716880 | <a href="https://www.inaturalist.org/observations/68368875">https://www.inaturalist.org/observations/68368875</a>   |
| 1841 | Lanius cristatus | Brown Shrike | 2022/9/10  | 2 | 0 | 24.04616289 | 120.45184950 | <a href="https://www.inaturalist.org/observations/134855913">https://www.inaturalist.org/observations/134855913</a> |
| 1842 | Lanius cristatus | Brown Shrike | 2020/9/17  | 4 | 0 | 24.04877333 | 120.43910830 | <a href="https://www.inaturalist.org/observations/59871457">https://www.inaturalist.org/observations/59871457</a>   |
| 1843 | Lanius cristatus | Brown Shrike | 2020/10/14 | 1 | 0 | 24.06945566 | 120.70315530 | <a href="https://www.inaturalist.org/observations/62527202">https://www.inaturalist.org/observations/62527202</a>   |
| 1844 | Lanius cristatus | Brown Shrike | 2015/11/5  | 1 | 0 | 24.08605910 | 88.24229180  | <a href="https://www.inaturalist.org/observations/117574689">https://www.inaturalist.org/observations/117574689</a> |
| 1845 | Lanius cristatus | Brown Shrike | 2018/9/19  | 4 | 0 | 24.10574866 | 120.69046590 | <a href="https://www.inaturalist.org/observations/16679791">https://www.inaturalist.org/observations/16679791</a>   |
| 1846 | Lanius cristatus | Brown Shrike | 2022/3/6   | 1 | 0 | 24.10663199 | 120.75996510 | <a href="https://www.inaturalist.org/observations/109397819">https://www.inaturalist.org/observations/109397819</a> |
| 1847 | Lanius cristatus | Brown Shrike | 2020/11/1  | 3 | 0 | 24.10817153 | 120.65205420 | <a href="https://www.inaturalist.org/observations/65001593">https://www.inaturalist.org/observations/65001593</a>   |
| 1848 | Lanius cristatus | Brown Shrike | 2020/2/21  | 3 | 0 | 24.10925806 | 120.67229500 | <a href="https://www.inaturalist.org/observations/39133301">https://www.inaturalist.org/observations/39133301</a>   |
| 1849 | Lanius cristatus | Brown Shrike | 2021/1/10  | 3 | 0 | 24.10948000 | 120.67089810 | <a href="https://www.inaturalist.org/observations/67864882">https://www.inaturalist.org/observations/67864882</a>   |
| 1850 | Lanius cristatus | Brown Shrike | 2020/4/30  | 2 | 0 | 24.11139799 | 120.49395150 | <a href="https://www.inaturalist.org/observations/44350152">https://www.inaturalist.org/observations/44350152</a>   |
| 1851 | Lanius cristatus | Brown Shrike | 2022/5/3   | 1 | 0 | 24.11246383 | 120.49366950 | <a href="https://www.inaturalist.org/observations/114960400">https://www.inaturalist.org/observations/114960400</a> |
| 1852 | Lanius cristatus | Brown Shrike | 2022/4/7   | 1 | 0 | 24.11251069 | 120.49346940 | <a href="https://www.inaturalist.org/observations/110636165">https://www.inaturalist.org/observations/110636165</a> |
| 1853 | Lanius cristatus | Brown Shrike | 2021/12/30 | 2 | 0 | 24.11296237 | 120.49388440 | <a href="https://www.inaturalist.org/observations/103942708">https://www.inaturalist.org/observations/103942708</a> |
| 1854 | Lanius cristatus | Brown Shrike | 2021/3/18  | 1 | 0 | 24.11313099 | 120.49380330 | <a href="https://www.inaturalist.org/observations/71458875">https://www.inaturalist.org/observations/71458875</a>   |
| 1855 | Lanius cristatus | Brown Shrike | 2022/9/30  | 1 | 0 | 24.11318630 | 120.49355280 | <a href="https://www.inaturalist.org/observations/136987574">https://www.inaturalist.org/observations/136987574</a> |
| 1856 | Lanius cristatus | Brown Shrike | 2021/4/19  | 0 | 0 | 24.11319150 | 120.49360160 | <a href="https://www.inaturalist.org/observations/74499004">https://www.inaturalist.org/observations/74499004</a>   |
| 1857 | Lanius cristatus | Brown Shrike | 2022/3/1   | 1 | 0 | 24.11319373 | 120.49363560 | <a href="https://www.inaturalist.org/observations/107690166">https://www.inaturalist.org/observations/107690166</a> |
| 1858 | Lanius cristatus | Brown Shrike | 2021/3/13  | 1 | 0 | 24.11345471 | 120.72331380 | <a href="https://www.inaturalist.org/observations/72255745">https://www.inaturalist.org/observations/72255745</a>   |
| 1859 | Lanius cristatus | Brown Shrike | 2020/12/31 | 2 | 0 | 24.11364268 | 120.66173730 | <a href="https://www.inaturalist.org/observations/67346246">https://www.inaturalist.org/observations/67346246</a>   |
| 1860 | Lanius cristatus | Brown Shrike | 2020/2/21  | 3 | 0 | 24.11448472 | 120.67149640 | <a href="https://www.inaturalist.org/observations/39133303">https://www.inaturalist.org/observations/39133303</a>   |
| 1861 | Lanius cristatus | Brown Shrike | 2020/12/21 | 2 | 0 | 24.11460049 | 120.44323460 | <a href="https://www.inaturalist.org/observations/66856507">https://www.inaturalist.org/observations/66856507</a>   |
| 1862 | Lanius cristatus | Brown Shrike | 2021/10/31 | 2 | 0 | 24.11462329 | 120.44325970 | <a href="https://www.inaturalist.org/observations/99850287">https://www.inaturalist.org/observations/99850287</a>   |



|      |                  |              |            |   |   |             |              |                                                                                                                     |
|------|------------------|--------------|------------|---|---|-------------|--------------|---------------------------------------------------------------------------------------------------------------------|
| 1863 | Lanius cristatus | Brown Shrike | 2020/10/1  | 2 | 0 | 24.11471852 | 120.44319030 | <a href="https://www.inaturalist.org/observations/61345160">https://www.inaturalist.org/observations/61345160</a>   |
| 1864 | Lanius cristatus | Brown Shrike | 2021/11/20 | 1 | 0 | 24.11472840 | 120.44338560 | <a href="https://www.inaturalist.org/observations/101496659">https://www.inaturalist.org/observations/101496659</a> |
| 1865 | Lanius cristatus | Brown Shrike | 2020/10/1  | 3 | 0 | 24.11478409 | 120.44322170 | <a href="https://www.inaturalist.org/observations/61344692">https://www.inaturalist.org/observations/61344692</a>   |
| 1866 | Lanius cristatus | Brown Shrike | 2019/3/19  | 2 | 0 | 24.11541106 | 120.65947890 | <a href="https://www.inaturalist.org/observations/21383088">https://www.inaturalist.org/observations/21383088</a>   |
| 1867 | Lanius cristatus | Brown Shrike | 2018/12/24 | 2 | 0 | 24.11681940 | 120.67416470 | <a href="https://www.inaturalist.org/observations/62626309">https://www.inaturalist.org/observations/62626309</a>   |
| 1868 | Lanius cristatus | Brown Shrike | 2020/12/20 | 2 | 0 | 24.11732028 | 120.67716360 | <a href="https://www.inaturalist.org/observations/66911332">https://www.inaturalist.org/observations/66911332</a>   |
| 1869 | Lanius cristatus | Brown Shrike | 2020/12/20 | 2 | 0 | 24.11735778 | 120.67720390 | <a href="https://www.inaturalist.org/observations/66911331">https://www.inaturalist.org/observations/66911331</a>   |
| 1870 | Lanius cristatus | Brown Shrike | 2021/1/16  | 2 | 0 | 24.12077145 | 120.61813090 | <a href="https://www.inaturalist.org/observations/99542532">https://www.inaturalist.org/observations/99542532</a>   |
| 1871 | Lanius cristatus | Brown Shrike | 2019/12/3  | 2 | 0 | 24.12125389 | 120.67264080 | <a href="https://www.inaturalist.org/observations/36346094">https://www.inaturalist.org/observations/36346094</a>   |
| 1872 | Lanius cristatus | Brown Shrike | 2021/2/16  | 2 | 0 | 24.12195173 | 120.73025760 | <a href="https://www.inaturalist.org/observations/70085519">https://www.inaturalist.org/observations/70085519</a>   |
| 1873 | Lanius cristatus | Brown Shrike | 2020/2/19  | 2 | 0 | 24.13107866 | 120.61930150 | <a href="https://www.inaturalist.org/observations/44750740">https://www.inaturalist.org/observations/44750740</a>   |
| 1874 | Lanius cristatus | Brown Shrike | 2019/12/21 | 2 | 0 | 24.13186806 | 120.61942640 | <a href="https://www.inaturalist.org/observations/36821160">https://www.inaturalist.org/observations/36821160</a>   |
| 1875 | Lanius cristatus | Brown Shrike | 2021/3/7   | 1 | 0 | 24.13424889 | 120.61934620 | <a href="https://www.inaturalist.org/observations/95122127">https://www.inaturalist.org/observations/95122127</a>   |
| 1876 | Lanius cristatus | Brown Shrike | 2021/12/9  | 1 | 0 | 24.13843706 | 120.66935400 | <a href="https://www.inaturalist.org/observations/103144015">https://www.inaturalist.org/observations/103144015</a> |
| 1877 | Lanius cristatus | Brown Shrike | 2022/12/22 | 1 | 0 | 24.14305550 | 120.68464670 | <a href="https://www.inaturalist.org/observations/144840406">https://www.inaturalist.org/observations/144840406</a> |
| 1878 | Lanius cristatus | Brown Shrike | 2019/10/10 | 2 | 0 | 24.15351835 | 121.62416900 | <a href="https://www.inaturalist.org/observations/34201142">https://www.inaturalist.org/observations/34201142</a>   |
| 1879 | Lanius cristatus | Brown Shrike | 2022/12/11 | 1 | 0 | 24.15565811 | 120.75824520 | <a href="https://www.inaturalist.org/observations/144781644">https://www.inaturalist.org/observations/144781644</a> |
| 1880 | Lanius cristatus | Brown Shrike | 2015/2/3   | 1 | 0 | 24.15857430 | 120.66834200 | <a href="https://www.inaturalist.org/observations/110631024">https://www.inaturalist.org/observations/110631024</a> |
| 1881 | Lanius cristatus | Brown Shrike | 2019/1/5   | 2 | 0 | 24.15874971 | 120.70448590 | <a href="https://www.inaturalist.org/observations/19675750">https://www.inaturalist.org/observations/19675750</a>   |
| 1882 | Lanius cristatus | Brown Shrike | 2020/12/20 | 2 | 0 | 24.16012389 | 120.73487680 | <a href="https://www.inaturalist.org/observations/67501693">https://www.inaturalist.org/observations/67501693</a>   |
| 1883 | Lanius cristatus | Brown Shrike | 2019/3/11  | 3 | 0 | 24.16024500 | 120.51828000 | <a href="https://www.inaturalist.org/observations/34336931">https://www.inaturalist.org/observations/34336931</a>   |
| 1884 | Lanius cristatus | Brown Shrike | 2021/11/20 | 2 | 0 | 24.16491976 | 120.57114480 | <a href="https://www.inaturalist.org/observations/101503346">https://www.inaturalist.org/observations/101503346</a> |
| 1885 | Lanius cristatus | Brown Shrike | 2016/3/4   | 2 | 0 | 24.16602440 | 120.63214030 | <a href="https://www.inaturalist.org/observations/102470192">https://www.inaturalist.org/observations/102470192</a> |

|      |                  |              |            |   |   |             |              |                                                                                                                     |
|------|------------------|--------------|------------|---|---|-------------|--------------|---------------------------------------------------------------------------------------------------------------------|
| 1886 | Lanius cristatus | Brown Shrike | 2018/12/13 | 2 | 0 | 24.16749667 | 120.63897000 | <a href="https://www.inaturalist.org/observations/18989960">https://www.inaturalist.org/observations/18989960</a>   |
| 1887 | Lanius cristatus | Brown Shrike | 2021/2/3   | 1 | 0 | 24.17063883 | 121.57260480 | <a href="https://www.inaturalist.org/observations/79770256">https://www.inaturalist.org/observations/79770256</a>   |
| 1888 | Lanius cristatus | Brown Shrike | 2022/9/21  | 2 | 0 | 24.17481019 | 120.64909290 | <a href="https://www.inaturalist.org/observations/136667153">https://www.inaturalist.org/observations/136667153</a> |
| 1889 | Lanius cristatus | Brown Shrike | 2019/10/3  | 3 | 0 | 24.17781087 | 120.59790140 | <a href="https://www.inaturalist.org/observations/33832968">https://www.inaturalist.org/observations/33832968</a>   |
| 1890 | Lanius cristatus | Brown Shrike | 2019/9/15  | 2 | 0 | 24.17850933 | 120.73808670 | <a href="https://www.inaturalist.org/observations/33520180">https://www.inaturalist.org/observations/33520180</a>   |
| 1891 | Lanius cristatus | Brown Shrike | 2019/10/4  | 2 | 0 | 24.17939105 | 120.60028030 | <a href="https://www.inaturalist.org/observations/33833681">https://www.inaturalist.org/observations/33833681</a>   |
| 1892 | Lanius cristatus | Brown Shrike | 2019/3/19  | 1 | 0 | 24.17948360 | 120.60423430 | <a href="https://www.inaturalist.org/observations/99099306">https://www.inaturalist.org/observations/99099306</a>   |
| 1893 | Lanius cristatus | Brown Shrike | 2019/10/4  | 1 | 0 | 24.17951175 | 120.60024420 | <a href="https://www.inaturalist.org/observations/33844559">https://www.inaturalist.org/observations/33844559</a>   |
| 1894 | Lanius cristatus | Brown Shrike | 2019/3/21  | 4 | 0 | 24.17960362 | 120.60006700 | <a href="https://www.inaturalist.org/observations/21445144">https://www.inaturalist.org/observations/21445144</a>   |
| 1895 | Lanius cristatus | Brown Shrike | 2020/3/11  | 2 | 0 | 24.17986758 | 120.60449200 | <a href="https://www.inaturalist.org/observations/39966547">https://www.inaturalist.org/observations/39966547</a>   |
| 1896 | Lanius cristatus | Brown Shrike | 2018/10/31 | 3 | 0 | 24.17989722 | 120.59876940 | <a href="https://www.inaturalist.org/observations/19459006">https://www.inaturalist.org/observations/19459006</a>   |
| 1897 | Lanius cristatus | Brown Shrike | 2018/10/31 | 3 | 0 | 24.17989722 | 120.59876940 | <a href="https://www.inaturalist.org/observations/19459701">https://www.inaturalist.org/observations/19459701</a>   |
| 1898 | Lanius cristatus | Brown Shrike | 2018/10/31 | 4 | 0 | 24.17990910 | 120.59872280 | <a href="https://www.inaturalist.org/observations/17981127">https://www.inaturalist.org/observations/17981127</a>   |
| 1899 | Lanius cristatus | Brown Shrike | 2018/10/31 | 3 | 0 | 24.17991111 | 120.59876940 | <a href="https://www.inaturalist.org/observations/19460548">https://www.inaturalist.org/observations/19460548</a>   |
| 1900 | Lanius cristatus | Brown Shrike | 2018/10/31 | 4 | 0 | 24.17991111 | 120.59876940 | <a href="https://www.inaturalist.org/observations/19460550">https://www.inaturalist.org/observations/19460550</a>   |
| 1901 | Lanius cristatus | Brown Shrike | 2019/1/4   | 3 | 0 | 24.18025612 | 120.59780170 | <a href="https://www.inaturalist.org/observations/18533613">https://www.inaturalist.org/observations/18533613</a>   |
| 1902 | Lanius cristatus | Brown Shrike | 2020/4/6   | 3 | 0 | 24.18042119 | 120.59872020 | <a href="https://www.inaturalist.org/observations/41518382">https://www.inaturalist.org/observations/41518382</a>   |
| 1903 | Lanius cristatus | Brown Shrike | 2019/12/28 | 3 | 0 | 24.18043110 | 120.60137360 | <a href="https://www.inaturalist.org/observations/37023942">https://www.inaturalist.org/observations/37023942</a>   |
| 1904 | Lanius cristatus | Brown Shrike | 2020/4/24  | 3 | 0 | 24.18044871 | 120.59998620 | <a href="https://www.inaturalist.org/observations/43046718">https://www.inaturalist.org/observations/43046718</a>   |
| 1905 | Lanius cristatus | Brown Shrike | 2019/10/26 | 1 | 0 | 24.18053435 | 120.61082040 | <a href="https://www.inaturalist.org/observations/34892374">https://www.inaturalist.org/observations/34892374</a>   |
| 1906 | Lanius cristatus | Brown Shrike | 2022/12/13 | 1 | 0 | 24.18080759 | 120.65535580 | <a href="https://www.inaturalist.org/observations/144287191">https://www.inaturalist.org/observations/144287191</a> |
| 1907 | Lanius cristatus | Brown Shrike | 2022/12/20 | 1 | 0 | 24.18087931 | 120.65519020 | <a href="https://www.inaturalist.org/observations/144730556">https://www.inaturalist.org/observations/144730556</a> |
| 1908 | Lanius cristatus | Brown Shrike | 2022/11/1  | 1 | 0 | 24.18090998 | 120.65526870 | <a href="https://www.inaturalist.org/observations/140748597">https://www.inaturalist.org/observations/140748597</a> |

|      |                  |              |            |   |   |             |              |                                                                                                                     |
|------|------------------|--------------|------------|---|---|-------------|--------------|---------------------------------------------------------------------------------------------------------------------|
| 1909 | Lanius cristatus | Brown Shrike | 2020/11/4  | 1 | 0 | 24.18113073 | 120.59885080 | <a href="https://www.inaturalist.org/observations/98811726">https://www.inaturalist.org/observations/98811726</a>   |
| 1910 | Lanius cristatus | Brown Shrike | 2022/12/20 | 1 | 0 | 24.18120020 | 120.65497040 | <a href="https://www.inaturalist.org/observations/144731556">https://www.inaturalist.org/observations/144731556</a> |
| 1911 | Lanius cristatus | Brown Shrike | 2022/11/1  | 2 | 0 | 24.18210574 | 120.65581970 | <a href="https://www.inaturalist.org/observations/140847366">https://www.inaturalist.org/observations/140847366</a> |
| 1912 | Lanius cristatus | Brown Shrike | 2022/12/6  | 1 | 0 | 24.18219929 | 120.65513510 | <a href="https://www.inaturalist.org/observations/143787980">https://www.inaturalist.org/observations/143787980</a> |
| 1913 | Lanius cristatus | Brown Shrike | 2022/12/13 | 1 | 0 | 24.18259971 | 120.65599440 | <a href="https://www.inaturalist.org/observations/144469978">https://www.inaturalist.org/observations/144469978</a> |
| 1914 | Lanius cristatus | Brown Shrike | 2022/9/20  | 1 | 0 | 24.18421703 | 120.65533280 | <a href="https://www.inaturalist.org/observations/135741714">https://www.inaturalist.org/observations/135741714</a> |
| 1915 | Lanius cristatus | Brown Shrike | 2022/12/11 | 1 | 0 | 24.18426105 | 120.71918570 | <a href="https://www.inaturalist.org/observations/144781641">https://www.inaturalist.org/observations/144781641</a> |
| 1916 | Lanius cristatus | Brown Shrike | 2022/9/20  | 3 | 0 | 24.18497732 | 120.65421720 | <a href="https://www.inaturalist.org/observations/135743669">https://www.inaturalist.org/observations/135743669</a> |
| 1917 | Lanius cristatus | Brown Shrike | 2022/9/20  | 1 | 0 | 24.18510500 | 120.65391670 | <a href="https://www.inaturalist.org/observations/135767361">https://www.inaturalist.org/observations/135767361</a> |
| 1918 | Lanius cristatus | Brown Shrike | 2022/10/25 | 1 | 0 | 24.18684913 | 120.65365750 | <a href="https://www.inaturalist.org/observations/139943466">https://www.inaturalist.org/observations/139943466</a> |
| 1919 | Lanius cristatus | Brown Shrike | 2022/10/25 | 1 | 0 | 24.18721443 | 120.65328920 | <a href="https://www.inaturalist.org/observations/139943485">https://www.inaturalist.org/observations/139943485</a> |
| 1920 | Lanius cristatus | Brown Shrike | 2022/10/25 | 1 | 0 | 24.18850900 | 120.65318980 | <a href="https://www.inaturalist.org/observations/139935334">https://www.inaturalist.org/observations/139935334</a> |
| 1921 | Lanius cristatus | Brown Shrike | 2022/10/25 | 1 | 0 | 24.18851604 | 120.65237690 | <a href="https://www.inaturalist.org/observations/139943449">https://www.inaturalist.org/observations/139943449</a> |
| 1922 | Lanius cristatus | Brown Shrike | 2022/11/22 | 1 | 0 | 24.18870038 | 120.65322480 | <a href="https://www.inaturalist.org/observations/142668652">https://www.inaturalist.org/observations/142668652</a> |
| 1923 | Lanius cristatus | Brown Shrike | 2022/10/25 | 1 | 0 | 24.18953000 | 120.65431330 | <a href="https://www.inaturalist.org/observations/139948193">https://www.inaturalist.org/observations/139948193</a> |
| 1924 | Lanius cristatus | Brown Shrike | 2022/12/13 | 1 | 0 | 24.18968050 | 120.65298250 | <a href="https://www.inaturalist.org/observations/144287153">https://www.inaturalist.org/observations/144287153</a> |
| 1925 | Lanius cristatus | Brown Shrike | 2020/2/21  | 2 | 0 | 24.18984490 | 120.71207210 | <a href="https://www.inaturalist.org/observations/38982318">https://www.inaturalist.org/observations/38982318</a>   |
| 1926 | Lanius cristatus | Brown Shrike | 2020/2/21  | 2 | 0 | 24.18984490 | 120.71207210 | <a href="https://www.inaturalist.org/observations/38982948">https://www.inaturalist.org/observations/38982948</a>   |
| 1927 | Lanius cristatus | Brown Shrike | 2022/10/25 | 1 | 0 | 24.19006333 | 120.65261330 | <a href="https://www.inaturalist.org/observations/139948259">https://www.inaturalist.org/observations/139948259</a> |
| 1928 | Lanius cristatus | Brown Shrike | 2022/10/25 | 1 | 0 | 24.19010833 | 120.65347170 | <a href="https://www.inaturalist.org/observations/139948300">https://www.inaturalist.org/observations/139948300</a> |
| 1929 | Lanius cristatus | Brown Shrike | 2019/10/6  | 2 | 0 | 24.19480114 | 120.63564500 | <a href="https://www.inaturalist.org/observations/35045015">https://www.inaturalist.org/observations/35045015</a>   |
| 1930 | Lanius cristatus | Brown Shrike | 2022/2/4   | 2 | 0 | 24.19486793 | 120.65073900 | <a href="https://www.inaturalist.org/observations/112404580">https://www.inaturalist.org/observations/112404580</a> |
| 1931 | Lanius cristatus | Brown Shrike | 2022/1/18  | 1 | 0 | 24.20423500 | 120.59991670 | <a href="https://www.inaturalist.org/observations/105152578">https://www.inaturalist.org/observations/105152578</a> |

|      |                  |              |            |   |   |             |              |                                                                                                                     |
|------|------------------|--------------|------------|---|---|-------------|--------------|---------------------------------------------------------------------------------------------------------------------|
| 1932 | Lanius cristatus | Brown Shrike | 2018/9/10  | 1 | 0 | 24.20424444 | 120.50547780 | <a href="https://www.inaturalist.org/observations/16381038">https://www.inaturalist.org/observations/16381038</a>   |
| 1933 | Lanius cristatus | Brown Shrike | 2020/3/8   | 2 | 0 | 24.20469988 | 120.63744420 | <a href="https://www.inaturalist.org/observations/39700732">https://www.inaturalist.org/observations/39700732</a>   |
| 1934 | Lanius cristatus | Brown Shrike | 2021/12/12 | 1 | 0 | 24.20471923 | 120.51420960 | <a href="https://www.inaturalist.org/observations/102926208">https://www.inaturalist.org/observations/102926208</a> |
| 1935 | Lanius cristatus | Brown Shrike | 2022/12/25 | 1 | 0 | 24.20684336 | 120.59713620 | <a href="https://www.inaturalist.org/observations/145101928">https://www.inaturalist.org/observations/145101928</a> |
| 1936 | Lanius cristatus | Brown Shrike | 2022/12/25 | 2 | 0 | 24.20693026 | 120.59894370 | <a href="https://www.inaturalist.org/observations/145107917">https://www.inaturalist.org/observations/145107917</a> |
| 1937 | Lanius cristatus | Brown Shrike | 2022/12/25 | 1 | 0 | 24.20697008 | 120.59886960 | <a href="https://www.inaturalist.org/observations/145101701">https://www.inaturalist.org/observations/145101701</a> |
| 1938 | Lanius cristatus | Brown Shrike | 2021/2/6   | 3 | 0 | 24.20721250 | 120.59751500 | <a href="https://www.inaturalist.org/observations/69199069">https://www.inaturalist.org/observations/69199069</a>   |
| 1939 | Lanius cristatus | Brown Shrike | 2022/12/25 | 2 | 0 | 24.20737926 | 120.59886820 | <a href="https://www.inaturalist.org/observations/145107656">https://www.inaturalist.org/observations/145107656</a> |
| 1940 | Lanius cristatus | Brown Shrike | 2021/11/13 | 1 | 0 | 24.20752340 | 120.59926990 | <a href="https://www.inaturalist.org/observations/101302883">https://www.inaturalist.org/observations/101302883</a> |
| 1941 | Lanius cristatus | Brown Shrike | 2022/9/18  | 2 | 0 | 24.20756584 | 120.59728510 | <a href="https://www.inaturalist.org/observations/135495973">https://www.inaturalist.org/observations/135495973</a> |
| 1942 | Lanius cristatus | Brown Shrike | 2022/2/13  | 1 | 0 | 24.20782780 | 120.59881610 | <a href="https://www.inaturalist.org/observations/106673556">https://www.inaturalist.org/observations/106673556</a> |
| 1943 | Lanius cristatus | Brown Shrike | 2021/2/3   | 2 | 0 | 24.20782902 | 120.59881210 | <a href="https://www.inaturalist.org/observations/69851819">https://www.inaturalist.org/observations/69851819</a>   |
| 1944 | Lanius cristatus | Brown Shrike | 2020/1/4   | 3 | 0 | 24.20783514 | 120.59881610 | <a href="https://www.inaturalist.org/observations/37266518">https://www.inaturalist.org/observations/37266518</a>   |
| 1945 | Lanius cristatus | Brown Shrike | 2019/9/26  | 2 | 0 | 24.20787580 | 120.59851520 | <a href="https://www.inaturalist.org/observations/33520193">https://www.inaturalist.org/observations/33520193</a>   |
| 1946 | Lanius cristatus | Brown Shrike | 2022/11/29 | 3 | 0 | 24.20896116 | 120.59943700 | <a href="https://www.inaturalist.org/observations/143269068">https://www.inaturalist.org/observations/143269068</a> |
| 1947 | Lanius cristatus | Brown Shrike | 2021/1/29  | 2 | 0 | 24.20922833 | 120.59824670 | <a href="https://www.inaturalist.org/observations/68745795">https://www.inaturalist.org/observations/68745795</a>   |
| 1948 | Lanius cristatus | Brown Shrike | 2022/11/29 | 2 | 0 | 24.20927595 | 120.59923400 | <a href="https://www.inaturalist.org/observations/143306610">https://www.inaturalist.org/observations/143306610</a> |
| 1949 | Lanius cristatus | Brown Shrike | 2019/10/7  | 2 | 0 | 24.21056343 | 120.59672730 | <a href="https://www.inaturalist.org/observations/34011430">https://www.inaturalist.org/observations/34011430</a>   |
| 1950 | Lanius cristatus | Brown Shrike | 2019/2/11  | 2 | 0 | 24.21386188 | 120.55844420 | <a href="https://www.inaturalist.org/observations/20278192">https://www.inaturalist.org/observations/20278192</a>   |
| 1951 | Lanius cristatus | Brown Shrike | 2020/10/11 | 2 | 0 | 24.21429853 | 120.56223210 | <a href="https://www.inaturalist.org/observations/62261309">https://www.inaturalist.org/observations/62261309</a>   |
| 1952 | Lanius cristatus | Brown Shrike | 2022/12/27 | 1 | 0 | 24.21867667 | 120.78961170 | <a href="https://www.inaturalist.org/observations/145190521">https://www.inaturalist.org/observations/145190521</a> |
| 1953 | Lanius cristatus | Brown Shrike | 2022/12/3  | 1 | 0 | 24.22803279 | 120.51919830 | <a href="https://www.inaturalist.org/observations/144396204">https://www.inaturalist.org/observations/144396204</a> |
| 1954 | Lanius cristatus | Brown Shrike | 2022/9/19  | 1 | 0 | 24.23038256 | 120.65628510 | <a href="https://www.inaturalist.org/observations/136570432">https://www.inaturalist.org/observations/136570432</a> |

|      |                  |              |            |   |   |             |              |                                                                                                                     |
|------|------------------|--------------|------------|---|---|-------------|--------------|---------------------------------------------------------------------------------------------------------------------|
| 1955 | Lanius cristatus | Brown Shrike | 2022/1/23  | 1 | 0 | 24.23463092 | 120.54643040 | <a href="https://www.inaturalist.org/observations/105564850">https://www.inaturalist.org/observations/105564850</a> |
| 1956 | Lanius cristatus | Brown Shrike | 2020/10/9  | 2 | 0 | 24.24097833 | 120.69950330 | <a href="https://www.inaturalist.org/observations/62282402">https://www.inaturalist.org/observations/62282402</a>   |
| 1957 | Lanius cristatus | Brown Shrike | 2022/2/24  | 2 | 0 | 24.24342832 | 120.62408890 | <a href="https://www.inaturalist.org/observations/107420769">https://www.inaturalist.org/observations/107420769</a> |
| 1958 | Lanius cristatus | Brown Shrike | 2020/8/31  | 2 | 0 | 24.25071763 | 120.95585960 | <a href="https://www.inaturalist.org/observations/59656971">https://www.inaturalist.org/observations/59656971</a>   |
| 1959 | Lanius cristatus | Brown Shrike | 2022/9/7   | 1 | 0 | 24.25224250 | 120.81087110 | <a href="https://www.inaturalist.org/observations/136562230">https://www.inaturalist.org/observations/136562230</a> |
| 1960 | Lanius cristatus | Brown Shrike | 2020/1/13  | 2 | 0 | 24.25637972 | 120.59933970 | <a href="https://www.inaturalist.org/observations/37709106">https://www.inaturalist.org/observations/37709106</a>   |
| 1961 | Lanius cristatus | Brown Shrike | 2019/1/8   | 3 | 0 | 24.25727000 | 120.71637000 | <a href="https://www.inaturalist.org/observations/19543532">https://www.inaturalist.org/observations/19543532</a>   |
| 1962 | Lanius cristatus | Brown Shrike | 2020/1/13  | 2 | 0 | 24.25803139 | 120.60000640 | <a href="https://www.inaturalist.org/observations/37709104">https://www.inaturalist.org/observations/37709104</a>   |
| 1963 | Lanius cristatus | Brown Shrike | 2022/1/5   | 1 | 0 | 24.26918202 | 120.63554710 | <a href="https://www.inaturalist.org/observations/104387465">https://www.inaturalist.org/observations/104387465</a> |
| 1964 | Lanius cristatus | Brown Shrike | 2018/12/1  | 2 | 0 | 24.27039073 | 120.55741550 | <a href="https://www.inaturalist.org/observations/18752969">https://www.inaturalist.org/observations/18752969</a>   |
| 1965 | Lanius cristatus | Brown Shrike | 2020/10/10 | 3 | 0 | 24.27326392 | 120.54679870 | <a href="https://www.inaturalist.org/observations/62176881">https://www.inaturalist.org/observations/62176881</a>   |
| 1966 | Lanius cristatus | Brown Shrike | 2020/2/13  | 2 | 0 | 24.27483167 | 120.76082330 | <a href="https://www.inaturalist.org/observations/38659785">https://www.inaturalist.org/observations/38659785</a>   |
| 1967 | Lanius cristatus | Brown Shrike | 2020/2/12  | 2 | 0 | 24.27499500 | 120.76031830 | <a href="https://www.inaturalist.org/observations/38659779">https://www.inaturalist.org/observations/38659779</a>   |
| 1968 | Lanius cristatus | Brown Shrike | 2022/2/11  | 2 | 0 | 24.27525099 | 120.84533290 | <a href="https://www.inaturalist.org/observations/106532928">https://www.inaturalist.org/observations/106532928</a> |
| 1969 | Lanius cristatus | Brown Shrike | 2022/1/8   | 2 | 0 | 24.28133010 | 120.76942440 | <a href="https://www.inaturalist.org/observations/104621457">https://www.inaturalist.org/observations/104621457</a> |
| 1970 | Lanius cristatus | Brown Shrike | 2019/12/10 | 2 | 0 | 24.29413849 | 120.61040110 | <a href="https://www.inaturalist.org/observations/37675715">https://www.inaturalist.org/observations/37675715</a>   |
| 1971 | Lanius cristatus | Brown Shrike | 2020/2/19  | 2 | 0 | 24.30784167 | 120.73778330 | <a href="https://www.inaturalist.org/observations/39449285">https://www.inaturalist.org/observations/39449285</a>   |
| 1972 | Lanius cristatus | Brown Shrike | 2019/12/10 | 2 | 0 | 24.31194340 | 120.54964430 | <a href="https://www.inaturalist.org/observations/37675462">https://www.inaturalist.org/observations/37675462</a>   |
| 1973 | Lanius cristatus | Brown Shrike | 2021/2/4   | 2 | 0 | 24.31440468 | 120.55144180 | <a href="https://www.inaturalist.org/observations/69852294">https://www.inaturalist.org/observations/69852294</a>   |
| 1974 | Lanius cristatus | Brown Shrike | 2022/12/7  | 1 | 0 | 24.31776075 | 120.55235840 | <a href="https://www.inaturalist.org/observations/144148819">https://www.inaturalist.org/observations/144148819</a> |
| 1975 | Lanius cristatus | Brown Shrike | 2019/10/26 | 1 | 0 | 24.32305600 | 120.75976440 | <a href="https://www.inaturalist.org/observations/35007659">https://www.inaturalist.org/observations/35007659</a>   |
| 1976 | Lanius cristatus | Brown Shrike | 2022/9/24  | 2 | 0 | 24.33699987 | 120.99514860 | <a href="https://www.inaturalist.org/observations/141972476">https://www.inaturalist.org/observations/141972476</a> |
| 1977 | Lanius cristatus | Brown Shrike | 2022/1/26  | 1 | 0 | 24.34500514 | 121.30820540 | <a href="https://www.inaturalist.org/observations/105651217">https://www.inaturalist.org/observations/105651217</a> |

|      |                  |              |            |   |   |             |              |                                                                                                                     |
|------|------------------|--------------|------------|---|---|-------------|--------------|---------------------------------------------------------------------------------------------------------------------|
| 1978 | Lanius cristatus | Brown Shrike | 2021/1/2   | 1 | 0 | 24.35057824 | 120.72566680 | <a href="https://www.inaturalist.org/observations/95710553">https://www.inaturalist.org/observations/95710553</a>   |
| 1979 | Lanius cristatus | Brown Shrike | 2021/10/16 | 1 | 0 | 24.35267420 | 92.34481540  | <a href="https://www.inaturalist.org/observations/101251428">https://www.inaturalist.org/observations/101251428</a> |
| 1980 | Lanius cristatus | Brown Shrike | 2020/9/9   | 2 | 0 | 24.35301803 | 92.34154567  | <a href="https://www.inaturalist.org/observations/59785140">https://www.inaturalist.org/observations/59785140</a>   |
| 1981 | Lanius cristatus | Brown Shrike | 2018/11/7  | 4 | 0 | 24.35648280 | 92.34330460  | <a href="https://www.inaturalist.org/observations/19131913">https://www.inaturalist.org/observations/19131913</a>   |
| 1982 | Lanius cristatus | Brown Shrike | 2016/1/16  | 2 | 0 | 24.37695532 | 120.58277150 | <a href="https://www.inaturalist.org/observations/10542042">https://www.inaturalist.org/observations/10542042</a>   |
| 1983 | Lanius cristatus | Brown Shrike | 2019/12/17 | 2 | 0 | 24.40014056 | 120.61787180 | <a href="https://www.inaturalist.org/observations/36727434">https://www.inaturalist.org/observations/36727434</a>   |
| 1984 | Lanius cristatus | Brown Shrike | 2019/9/28  | 2 | 0 | 24.42563331 | 92.33881554  | <a href="https://www.inaturalist.org/observations/33881543">https://www.inaturalist.org/observations/33881543</a>   |
| 1985 | Lanius cristatus | Brown Shrike | 2019/10/2  | 4 | 0 | 24.42813514 | 92.33542255  | <a href="https://www.inaturalist.org/observations/34726159">https://www.inaturalist.org/observations/34726159</a>   |
| 1986 | Lanius cristatus | Brown Shrike | 2020/2/28  | 3 | 0 | 24.42813514 | 92.33542255  | <a href="https://www.inaturalist.org/observations/46584991">https://www.inaturalist.org/observations/46584991</a>   |
| 1987 | Lanius cristatus | Brown Shrike | 2020/3/6   | 2 | 0 | 24.42813514 | 92.33542255  | <a href="https://www.inaturalist.org/observations/46825167">https://www.inaturalist.org/observations/46825167</a>   |
| 1988 | Lanius cristatus | Brown Shrike | 2010/10/4  | 0 | 0 | 24.43202000 | 92.33068900  | <a href="https://www.inaturalist.org/observations/103528439">https://www.inaturalist.org/observations/103528439</a> |
| 1989 | Lanius cristatus | Brown Shrike | 2010/10/6  | 1 | 0 | 24.43202000 | 92.33068900  | <a href="https://www.inaturalist.org/observations/103586527">https://www.inaturalist.org/observations/103586527</a> |
| 1990 | Lanius cristatus | Brown Shrike | 2010/12/15 | 1 | 0 | 24.43202000 | 92.33068900  | <a href="https://www.inaturalist.org/observations/103621319">https://www.inaturalist.org/observations/103621319</a> |
| 1991 | Lanius cristatus | Brown Shrike | 2011/8/29  | 1 | 0 | 24.43202000 | 92.33068900  | <a href="https://www.inaturalist.org/observations/103671162">https://www.inaturalist.org/observations/103671162</a> |
| 1992 | Lanius cristatus | Brown Shrike | 2012/3/10  | 1 | 0 | 24.43202000 | 92.33068900  | <a href="https://www.inaturalist.org/observations/103677426">https://www.inaturalist.org/observations/103677426</a> |
| 1993 | Lanius cristatus | Brown Shrike | 2019/4/10  | 3 | 0 | 24.43334118 | 92.33028864  | <a href="https://www.inaturalist.org/observations/33841627">https://www.inaturalist.org/observations/33841627</a>   |
| 1994 | Lanius cristatus | Brown Shrike | 2017/10/11 | 4 | 0 | 24.43341530 | 92.32874360  | <a href="https://www.inaturalist.org/observations/13226823">https://www.inaturalist.org/observations/13226823</a>   |
| 1995 | Lanius cristatus | Brown Shrike | 2019/11/3  | 3 | 0 | 24.43353220 | 92.33039590  | <a href="https://www.inaturalist.org/observations/35285253">https://www.inaturalist.org/observations/35285253</a>   |
| 1996 | Lanius cristatus | Brown Shrike | 2022/5/3   | 2 | 0 | 24.43756486 | 118.10350890 | <a href="https://www.inaturalist.org/observations/115067614">https://www.inaturalist.org/observations/115067614</a> |
| 1997 | Lanius cristatus | Brown Shrike | 2022/5/19  | 1 | 0 | 24.43908511 | 118.10224290 | <a href="https://www.inaturalist.org/observations/118612680">https://www.inaturalist.org/observations/118612680</a> |
| 1998 | Lanius cristatus | Brown Shrike | 2022/10/24 | 0 | 0 | 24.44023271 | 118.09844610 | <a href="https://www.inaturalist.org/observations/139872628">https://www.inaturalist.org/observations/139872628</a> |
| 1999 | Lanius cristatus | Brown Shrike | 2018/5/14  | 2 | 0 | 24.44095350 | 118.35205540 | <a href="https://www.inaturalist.org/observations/15417147">https://www.inaturalist.org/observations/15417147</a>   |
| 2000 | Lanius cristatus | Brown Shrike | 2020/5/21  | 1 | 0 | 24.44305570 | 118.10020070 | <a href="https://www.inaturalist.org/observations/112514801">https://www.inaturalist.org/observations/112514801</a> |

|      |                  |              |            |   |   |             |              |                                                                                                                     |
|------|------------------|--------------|------------|---|---|-------------|--------------|---------------------------------------------------------------------------------------------------------------------|
| 2001 | Lanius cristatus | Brown Shrike | 2022/9/13  | 1 | 0 | 24.44555667 | 120.64006830 | <a href="https://www.inaturalist.org/observations/134832909">https://www.inaturalist.org/observations/134832909</a> |
| 2002 | Lanius cristatus | Brown Shrike | 2018/12/29 | 2 | 0 | 24.44647020 | 118.44712000 | <a href="https://www.inaturalist.org/observations/19330592">https://www.inaturalist.org/observations/19330592</a>   |
| 2003 | Lanius cristatus | Brown Shrike | 2022/10/7  | 2 | 0 | 24.44705306 | 120.63607060 | <a href="https://www.inaturalist.org/observations/137826018">https://www.inaturalist.org/observations/137826018</a> |
| 2004 | Lanius cristatus | Brown Shrike | 2022/10/7  | 1 | 0 | 24.44969028 | 120.65082080 | <a href="https://www.inaturalist.org/observations/137826005">https://www.inaturalist.org/observations/137826005</a> |
| 2005 | Lanius cristatus | Brown Shrike | 2016/1/16  | 3 | 0 | 24.44995541 | 120.63946430 | <a href="https://www.inaturalist.org/observations/11446746">https://www.inaturalist.org/observations/11446746</a>   |
| 2006 | Lanius cristatus | Brown Shrike | 2022/10/7  | 1 | 0 | 24.45128889 | 120.65126690 | <a href="https://www.inaturalist.org/observations/137826003">https://www.inaturalist.org/observations/137826003</a> |
| 2007 | Lanius cristatus | Brown Shrike | 2022/9/13  | 2 | 0 | 24.45179333 | 120.64231500 | <a href="https://www.inaturalist.org/observations/134832972">https://www.inaturalist.org/observations/134832972</a> |
| 2008 | Lanius cristatus | Brown Shrike | 2021/3/16  | 1 | 0 | 24.45944118 | 121.79799920 | <a href="https://www.inaturalist.org/observations/78240891">https://www.inaturalist.org/observations/78240891</a>   |
| 2009 | Lanius cristatus | Brown Shrike | 2019/5/28  | 2 | 0 | 24.46388740 | 118.41440230 | <a href="https://www.inaturalist.org/observations/30393798">https://www.inaturalist.org/observations/30393798</a>   |
| 2010 | Lanius cristatus | Brown Shrike | 2016/1/17  | 6 | 0 | 24.46555600 | 92.27400900  | <a href="http://www.inaturalist.org/observations/4173782">http://www.inaturalist.org/observations/4173782</a>       |
| 2011 | Lanius cristatus | Brown Shrike | 2017/11/30 | 4 | 0 | 24.47433500 | 92.31172000  | <a href="https://www.inaturalist.org/observations/13604563">https://www.inaturalist.org/observations/13604563</a>   |
| 2012 | Lanius cristatus | Brown Shrike | 2017/11/3  | 3 | 0 | 24.47873500 | 92.30142900  | <a href="https://www.inaturalist.org/observations/13604469">https://www.inaturalist.org/observations/13604469</a>   |
| 2013 | Lanius cristatus | Brown Shrike | 2021/5/13  | 1 | 0 | 24.47990167 | 118.30830000 | <a href="https://www.inaturalist.org/observations/79367509">https://www.inaturalist.org/observations/79367509</a>   |
| 2014 | Lanius cristatus | Brown Shrike | 2020/2/6   | 3 | 0 | 24.48294400 | 92.29071229  | <a href="https://www.inaturalist.org/observations/46464766">https://www.inaturalist.org/observations/46464766</a>   |
| 2015 | Lanius cristatus | Brown Shrike | 2020/3/1   | 2 | 0 | 24.48294400 | 92.29071229  | <a href="https://www.inaturalist.org/observations/46705496">https://www.inaturalist.org/observations/46705496</a>   |
| 2016 | Lanius cristatus | Brown Shrike | 2020/3/1   | 3 | 0 | 24.48294400 | 92.29071229  | <a href="https://www.inaturalist.org/observations/46705498">https://www.inaturalist.org/observations/46705498</a>   |
| 2017 | Lanius cristatus | Brown Shrike | 2021/1/6   | 0 | 0 | 24.48294400 | 92.29071229  | <a href="https://www.inaturalist.org/observations/95625304">https://www.inaturalist.org/observations/95625304</a>   |
| 2018 | Lanius cristatus | Brown Shrike | 2021/12/4  | 2 | 0 | 24.48294400 | 92.29071229  | <a href="https://www.inaturalist.org/observations/104961935">https://www.inaturalist.org/observations/104961935</a> |
| 2019 | Lanius cristatus | Brown Shrike | 2017/10/10 | 3 | 0 | 24.48298800 | 92.29041500  | <a href="https://www.inaturalist.org/observations/13604595">https://www.inaturalist.org/observations/13604595</a>   |
| 2020 | Lanius cristatus | Brown Shrike | 2018/9/20  | 4 | 0 | 24.49770120 | 92.31476770  | <a href="https://www.inaturalist.org/observations/19567360">https://www.inaturalist.org/observations/19567360</a>   |
| 2021 | Lanius cristatus | Brown Shrike | 2019/2/17  | 4 | 0 | 24.49770120 | 92.31476770  | <a href="https://www.inaturalist.org/observations/20848156">https://www.inaturalist.org/observations/20848156</a>   |
| 2022 | Lanius cristatus | Brown Shrike | 2020/3/1   | 4 | 0 | 24.49781478 | 92.31476784  | <a href="https://www.inaturalist.org/observations/39439412">https://www.inaturalist.org/observations/39439412</a>   |
| 2023 | Lanius cristatus | Brown Shrike | 2021/4/25  | 2 | 0 | 24.49930607 | 92.31533278  | <a href="https://www.inaturalist.org/observations/75309154">https://www.inaturalist.org/observations/75309154</a>   |

|      |                  |              |            |   |   |             |              |                                                                                                                     |
|------|------------------|--------------|------------|---|---|-------------|--------------|---------------------------------------------------------------------------------------------------------------------|
| 2024 | Lanius cristatus | Brown Shrike | 2017/10/8  | 4 | 0 | 24.50061700 | 92.34840300  | <a href="https://www.inaturalist.org/observations/9483738">https://www.inaturalist.org/observations/9483738</a>     |
| 2025 | Lanius cristatus | Brown Shrike | 2021/1/6   | 2 | 0 | 24.50145000 | 92.29966100  | <a href="https://www.inaturalist.org/observations/69314270">https://www.inaturalist.org/observations/69314270</a>   |
| 2026 | Lanius cristatus | Brown Shrike | 2019/2/13  | 1 | 0 | 24.50395280 | 118.43707960 | <a href="https://www.inaturalist.org/observations/141035392">https://www.inaturalist.org/observations/141035392</a> |
| 2027 | Lanius cristatus | Brown Shrike | 2021/1/6   | 2 | 0 | 24.56047040 | 120.81591600 | <a href="https://www.inaturalist.org/observations/67662294">https://www.inaturalist.org/observations/67662294</a>   |
| 2028 | Lanius cristatus | Brown Shrike | 2021/9/16  | 1 | 0 | 24.57079241 | 73.68263192  | <a href="https://www.inaturalist.org/observations/105021711">https://www.inaturalist.org/observations/105021711</a> |
| 2029 | Lanius cristatus | Brown Shrike | 2021/3/13  | 1 | 0 | 24.58434088 | 120.88638890 | <a href="https://www.inaturalist.org/observations/103053680">https://www.inaturalist.org/observations/103053680</a> |
| 2030 | Lanius cristatus | Brown Shrike | 2013/4/7   | 5 | 0 | 24.60728790 | 92.38344120  | <a href="http://www.inaturalist.org/observations/231236">http://www.inaturalist.org/observations/231236</a>         |
| 2031 | Lanius cristatus | Brown Shrike | 2022/1/30  | 1 | 0 | 24.61797922 | 121.85294140 | <a href="https://www.inaturalist.org/observations/121402300">https://www.inaturalist.org/observations/121402300</a> |
| 2032 | Lanius cristatus | Brown Shrike | 2022/12/22 | 1 | 0 | 24.62323304 | 120.75628690 | <a href="https://www.inaturalist.org/observations/144850153">https://www.inaturalist.org/observations/144850153</a> |
| 2033 | Lanius cristatus | Brown Shrike | 2022/12/22 | 1 | 0 | 24.62323304 | 120.75628690 | <a href="https://www.inaturalist.org/observations/144850155">https://www.inaturalist.org/observations/144850155</a> |
| 2034 | Lanius cristatus | Brown Shrike | 2021/1/10  | 2 | 0 | 24.65120833 | 121.81191000 | <a href="https://www.inaturalist.org/observations/67851197">https://www.inaturalist.org/observations/67851197</a>   |
| 2035 | Lanius cristatus | Brown Shrike | 2019/9/23  | 3 | 0 | 24.65144684 | 121.82257180 | <a href="https://www.inaturalist.org/observations/33694688">https://www.inaturalist.org/observations/33694688</a>   |
| 2036 | Lanius cristatus | Brown Shrike | 2021/1/24  | 3 | 0 | 24.65488810 | 121.81278390 | <a href="https://www.inaturalist.org/observations/68688865">https://www.inaturalist.org/observations/68688865</a>   |
| 2037 | Lanius cristatus | Brown Shrike | 2018/10/2  | 3 | 0 | 24.65915700 | 121.82011300 | <a href="https://www.inaturalist.org/observations/17123051">https://www.inaturalist.org/observations/17123051</a>   |
| 2038 | Lanius cristatus | Brown Shrike | 2019/1/23  | 2 | 0 | 24.65962638 | 121.82064540 | <a href="https://www.inaturalist.org/observations/21222447">https://www.inaturalist.org/observations/21222447</a>   |
| 2039 | Lanius cristatus | Brown Shrike | 2020/9/6   | 2 | 0 | 24.66256807 | 121.81455750 | <a href="https://www.inaturalist.org/observations/60299520">https://www.inaturalist.org/observations/60299520</a>   |
| 2040 | Lanius cristatus | Brown Shrike | 2019/12/16 | 2 | 0 | 24.66323250 | 121.81782690 | <a href="https://www.inaturalist.org/observations/37515524">https://www.inaturalist.org/observations/37515524</a>   |
| 2041 | Lanius cristatus | Brown Shrike | 2021/1/26  | 2 | 0 | 24.66323250 | 121.81782690 | <a href="https://www.inaturalist.org/observations/73182379">https://www.inaturalist.org/observations/73182379</a>   |
| 2042 | Lanius cristatus | Brown Shrike | 2021/1/26  | 1 | 0 | 24.66323250 | 121.81782690 | <a href="https://www.inaturalist.org/observations/73182380">https://www.inaturalist.org/observations/73182380</a>   |
| 2043 | Lanius cristatus | Brown Shrike | 2020/9/18  | 2 | 0 | 24.66382132 | 121.81422570 | <a href="https://www.inaturalist.org/observations/61280232">https://www.inaturalist.org/observations/61280232</a>   |
| 2044 | Lanius cristatus | Brown Shrike | 2020/10/8  | 2 | 0 | 24.66385300 | 121.81683790 | <a href="https://www.inaturalist.org/observations/62481414">https://www.inaturalist.org/observations/62481414</a>   |
| 2045 | Lanius cristatus | Brown Shrike | 2021/10/30 | 2 | 0 | 24.67043017 | 121.81301980 | <a href="https://www.inaturalist.org/observations/103819777">https://www.inaturalist.org/observations/103819777</a> |
| 2046 | Lanius cristatus | Brown Shrike | 2021/2/7   | 3 | 0 | 24.67339667 | 121.81656170 | <a href="https://www.inaturalist.org/observations/69194028">https://www.inaturalist.org/observations/69194028</a>   |



|      |                  |              |            |   |   |             |              |                                                                                                                     |
|------|------------------|--------------|------------|---|---|-------------|--------------|---------------------------------------------------------------------------------------------------------------------|
| 2047 | Lanius cristatus | Brown Shrike | 2017/3/3   | 2 | 0 | 24.67489044 | 121.76190770 | <a href="https://www.inaturalist.org/observations/17378426">https://www.inaturalist.org/observations/17378426</a>   |
| 2048 | Lanius cristatus | Brown Shrike | 2020/10/1  | 3 | 0 | 24.67965096 | 121.75600560 | <a href="https://www.inaturalist.org/observations/62012003">https://www.inaturalist.org/observations/62012003</a>   |
| 2049 | Lanius cristatus | Brown Shrike | 2019/11/27 | 2 | 0 | 24.68077057 | 121.73135230 | <a href="https://www.inaturalist.org/observations/36317773">https://www.inaturalist.org/observations/36317773</a>   |
| 2050 | Lanius cristatus | Brown Shrike | 2022/3/19  | 2 | 0 | 24.68259000 | 121.75622000 | <a href="https://www.inaturalist.org/observations/109344926">https://www.inaturalist.org/observations/109344926</a> |
| 2051 | Lanius cristatus | Brown Shrike | 2022/11/10 | 2 | 0 | 24.68284500 | 121.76413670 | <a href="https://www.inaturalist.org/observations/142054398">https://www.inaturalist.org/observations/142054398</a> |
| 2052 | Lanius cristatus | Brown Shrike | 2009/12/27 | 2 | 0 | 24.68318617 | 121.77388150 | <a href="https://www.inaturalist.org/observations/55455308">https://www.inaturalist.org/observations/55455308</a>   |
| 2053 | Lanius cristatus | Brown Shrike | 2021/1/1   | 3 | 0 | 24.68320475 | 121.77141520 | <a href="https://www.inaturalist.org/observations/67381299">https://www.inaturalist.org/observations/67381299</a>   |
| 2054 | Lanius cristatus | Brown Shrike | 2009/12/26 | 2 | 0 | 24.68350786 | 121.77402630 | <a href="https://www.inaturalist.org/observations/55454586">https://www.inaturalist.org/observations/55454586</a>   |
| 2055 | Lanius cristatus | Brown Shrike | 2009/12/26 | 2 | 0 | 24.68350786 | 121.77402630 | <a href="https://www.inaturalist.org/observations/55454615">https://www.inaturalist.org/observations/55454615</a>   |
| 2056 | Lanius cristatus | Brown Shrike | 2022/3/6   | 2 | 0 | 24.68408030 | 121.77218500 | <a href="https://www.inaturalist.org/observations/110253686">https://www.inaturalist.org/observations/110253686</a> |
| 2057 | Lanius cristatus | Brown Shrike | 2020/2/8   | 2 | 0 | 24.68427801 | 121.77235800 | <a href="https://www.inaturalist.org/observations/38605622">https://www.inaturalist.org/observations/38605622</a>   |
| 2058 | Lanius cristatus | Brown Shrike | 2021/2/18  | 2 | 0 | 24.68572667 | 121.77434830 | <a href="https://www.inaturalist.org/observations/69924062">https://www.inaturalist.org/observations/69924062</a>   |
| 2059 | Lanius cristatus | Brown Shrike | 2022/10/10 | 1 | 0 | 24.68659000 | 121.82288670 | <a href="https://www.inaturalist.org/observations/138250124">https://www.inaturalist.org/observations/138250124</a> |
| 2060 | Lanius cristatus | Brown Shrike | 2016/2/13  | 2 | 0 | 24.69210559 | 120.88631170 | <a href="https://www.inaturalist.org/observations/14561700">https://www.inaturalist.org/observations/14561700</a>   |
| 2061 | Lanius cristatus | Brown Shrike | 2022/10/14 | 1 | 0 | 24.69746546 | 121.80034920 | <a href="https://www.inaturalist.org/observations/138698042">https://www.inaturalist.org/observations/138698042</a> |
| 2062 | Lanius cristatus | Brown Shrike | 2022/5/4   | 3 | 0 | 24.70146561 | 120.86128120 | <a href="https://www.inaturalist.org/observations/116296650">https://www.inaturalist.org/observations/116296650</a> |
| 2063 | Lanius cristatus | Brown Shrike | 2022/4/30  | 1 | 0 | 24.70442010 | 121.15530740 | <a href="https://www.inaturalist.org/observations/113799968">https://www.inaturalist.org/observations/113799968</a> |
| 2064 | Lanius cristatus | Brown Shrike | 2020/1/9   | 2 | 0 | 24.70484667 | 121.80141670 | <a href="https://www.inaturalist.org/observations/37632832">https://www.inaturalist.org/observations/37632832</a>   |
| 2065 | Lanius cristatus | Brown Shrike | 2020/1/9   | 2 | 0 | 24.70566000 | 121.80714500 | <a href="https://www.inaturalist.org/observations/37632823">https://www.inaturalist.org/observations/37632823</a>   |
| 2066 | Lanius cristatus | Brown Shrike | 2020/4/25  | 3 | 0 | 24.70924107 | 121.72284440 | <a href="https://www.inaturalist.org/observations/43286887">https://www.inaturalist.org/observations/43286887</a>   |
| 2067 | Lanius cristatus | Brown Shrike | 2022/10/23 | 3 | 0 | 24.71584137 | 121.78129710 | <a href="https://www.inaturalist.org/observations/139708205">https://www.inaturalist.org/observations/139708205</a> |
| 2068 | Lanius cristatus | Brown Shrike | 2022/11/22 | 1 | 0 | 24.71737845 | 121.81390180 | <a href="https://www.inaturalist.org/observations/144910155">https://www.inaturalist.org/observations/144910155</a> |
| 2069 | Lanius cristatus | Brown Shrike | 2022/1/16  | 1 | 0 | 24.71769500 | 121.81097670 | <a href="https://www.inaturalist.org/observations/105029013">https://www.inaturalist.org/observations/105029013</a> |

|      |                  |              |            |   |   |             |              |                                                                                                                     |
|------|------------------|--------------|------------|---|---|-------------|--------------|---------------------------------------------------------------------------------------------------------------------|
| 2070 | Lanius cristatus | Brown Shrike | 2021/11/25 | 1 | 0 | 24.72406590 | 121.76465290 | <a href="https://www.inaturalist.org/observations/101932383">https://www.inaturalist.org/observations/101932383</a> |
| 2071 | Lanius cristatus | Brown Shrike | 2021/12/29 | 2 | 0 | 24.73001000 | 120.96419500 | <a href="https://www.inaturalist.org/observations/140156489">https://www.inaturalist.org/observations/140156489</a> |
| 2072 | Lanius cristatus | Brown Shrike | 2018/11/5  | 2 | 0 | 24.73077225 | 121.08722430 | <a href="https://www.inaturalist.org/observations/18158557">https://www.inaturalist.org/observations/18158557</a>   |
| 2073 | Lanius cristatus | Brown Shrike | 2021/12/4  | 2 | 0 | 24.73805560 | 121.75250000 | <a href="https://www.inaturalist.org/observations/102524698">https://www.inaturalist.org/observations/102524698</a> |
| 2074 | Lanius cristatus | Brown Shrike | 2021/2/19  | 2 | 0 | 24.74181000 | 121.69149830 | <a href="https://www.inaturalist.org/observations/69924027">https://www.inaturalist.org/observations/69924027</a>   |
| 2075 | Lanius cristatus | Brown Shrike | 2021/11/7  | 1 | 0 | 24.74481322 | 121.72969150 | <a href="https://www.inaturalist.org/observations/100471982">https://www.inaturalist.org/observations/100471982</a> |
| 2076 | Lanius cristatus | Brown Shrike | 2022/2/15  | 1 | 0 | 24.74501610 | 121.73233190 | <a href="https://www.inaturalist.org/observations/110252926">https://www.inaturalist.org/observations/110252926</a> |
| 2077 | Lanius cristatus | Brown Shrike | 2021/4/19  | 1 | 0 | 24.74587640 | 121.75427270 | <a href="https://www.inaturalist.org/observations/90241651">https://www.inaturalist.org/observations/90241651</a>   |
| 2078 | Lanius cristatus | Brown Shrike | 2021/2/20  | 2 | 0 | 24.74899833 | 121.63820670 | <a href="https://www.inaturalist.org/observations/69924041">https://www.inaturalist.org/observations/69924041</a>   |
| 2079 | Lanius cristatus | Brown Shrike | 2019/11/5  | 2 | 0 | 24.74925548 | 121.76748310 | <a href="https://www.inaturalist.org/observations/35526989">https://www.inaturalist.org/observations/35526989</a>   |
| 2080 | Lanius cristatus | Brown Shrike | 2018/1/17  | 1 | 0 | 24.74936050 | 121.63864890 | <a href="https://www.inaturalist.org/observations/38792166">https://www.inaturalist.org/observations/38792166</a>   |
| 2081 | Lanius cristatus | Brown Shrike | 2020/9/18  | 2 | 0 | 24.74936050 | 121.63864890 | <a href="https://www.inaturalist.org/observations/60696638">https://www.inaturalist.org/observations/60696638</a>   |
| 2082 | Lanius cristatus | Brown Shrike | 2020/10/23 | 1 | 0 | 24.74936050 | 121.63864890 | <a href="https://www.inaturalist.org/observations/68398831">https://www.inaturalist.org/observations/68398831</a>   |
| 2083 | Lanius cristatus | Brown Shrike | 2019/10/17 | 2 | 0 | 24.74939529 | 121.76691380 | <a href="https://www.inaturalist.org/observations/34558850">https://www.inaturalist.org/observations/34558850</a>   |
| 2084 | Lanius cristatus | Brown Shrike | 2021/2/20  | 3 | 0 | 24.74943500 | 121.63774330 | <a href="https://www.inaturalist.org/observations/69924032">https://www.inaturalist.org/observations/69924032</a>   |
| 2085 | Lanius cristatus | Brown Shrike | 2021/1/12  | 2 | 0 | 24.74957667 | 121.76695750 | <a href="https://www.inaturalist.org/observations/67952886">https://www.inaturalist.org/observations/67952886</a>   |
| 2086 | Lanius cristatus | Brown Shrike | 2021/1/12  | 2 | 0 | 24.74957667 | 121.76695750 | <a href="https://www.inaturalist.org/observations/67952890">https://www.inaturalist.org/observations/67952890</a>   |
| 2087 | Lanius cristatus | Brown Shrike | 2021/1/12  | 1 | 0 | 24.74965462 | 121.76693600 | <a href="https://www.inaturalist.org/observations/67953261">https://www.inaturalist.org/observations/67953261</a>   |
| 2088 | Lanius cristatus | Brown Shrike | 2020/10/17 | 2 | 0 | 24.74969390 | 121.76700950 | <a href="https://www.inaturalist.org/observations/66509692">https://www.inaturalist.org/observations/66509692</a>   |
| 2089 | Lanius cristatus | Brown Shrike | 2021/1/19  | 3 | 0 | 24.74974710 | 121.76645040 | <a href="https://www.inaturalist.org/observations/68320428">https://www.inaturalist.org/observations/68320428</a>   |
| 2090 | Lanius cristatus | Brown Shrike | 2021/1/19  | 3 | 0 | 24.74974710 | 121.76645040 | <a href="https://www.inaturalist.org/observations/68320430">https://www.inaturalist.org/observations/68320430</a>   |
| 2091 | Lanius cristatus | Brown Shrike | 2021/11/15 | 1 | 0 | 24.74978128 | 121.76701110 | <a href="https://www.inaturalist.org/observations/101259561">https://www.inaturalist.org/observations/101259561</a> |
| 2092 | Lanius cristatus | Brown Shrike | 2021/1/18  | 3 | 0 | 24.74985428 | 121.76656840 | <a href="https://www.inaturalist.org/observations/68320881">https://www.inaturalist.org/observations/68320881</a>   |

|      |                  |              |            |   |   |             |              |                                                                                                                     |
|------|------------------|--------------|------------|---|---|-------------|--------------|---------------------------------------------------------------------------------------------------------------------|
| 2093 | Lanius cristatus | Brown Shrike | 2021/1/19  | 3 | 0 | 24.74985428 | 121.76656840 | <a href="https://www.inaturalist.org/observations/68320894">https://www.inaturalist.org/observations/68320894</a>   |
| 2094 | Lanius cristatus | Brown Shrike | 2021/1/14  | 1 | 0 | 24.74992110 | 121.76701400 | <a href="https://www.inaturalist.org/observations/90108140">https://www.inaturalist.org/observations/90108140</a>   |
| 2095 | Lanius cristatus | Brown Shrike | 2021/1/14  | 1 | 0 | 24.74992110 | 121.76701400 | <a href="https://www.inaturalist.org/observations/90108141">https://www.inaturalist.org/observations/90108141</a>   |
| 2096 | Lanius cristatus | Brown Shrike | 2021/1/15  | 1 | 0 | 24.74992110 | 121.76701400 | <a href="https://www.inaturalist.org/observations/90108215">https://www.inaturalist.org/observations/90108215</a>   |
| 2097 | Lanius cristatus | Brown Shrike | 2021/1/15  | 1 | 0 | 24.74992110 | 121.76701400 | <a href="https://www.inaturalist.org/observations/90108216">https://www.inaturalist.org/observations/90108216</a>   |
| 2098 | Lanius cristatus | Brown Shrike | 2018/11/15 | 2 | 0 | 24.75044800 | 121.63543700 | <a href="https://www.inaturalist.org/observations/18428882">https://www.inaturalist.org/observations/18428882</a>   |
| 2099 | Lanius cristatus | Brown Shrike | 2018/1/12  | 4 | 0 | 24.75389400 | 121.63575500 | <a href="https://www.inaturalist.org/observations/38779677">https://www.inaturalist.org/observations/38779677</a>   |
| 2100 | Lanius cristatus | Brown Shrike | 2020/4/28  | 2 | 0 | 24.75411667 | 121.14201380 | <a href="https://www.inaturalist.org/observations/44105162">https://www.inaturalist.org/observations/44105162</a>   |
| 2101 | Lanius cristatus | Brown Shrike | 2015/10/15 | 2 | 0 | 24.75911500 | 121.75374000 | <a href="https://www.inaturalist.org/observations/8837591">https://www.inaturalist.org/observations/8837591</a>     |
| 2102 | Lanius cristatus | Brown Shrike | 2022/2/16  | 1 | 0 | 24.77799031 | 121.02475700 | <a href="https://www.inaturalist.org/observations/107299327">https://www.inaturalist.org/observations/107299327</a> |
| 2103 | Lanius cristatus | Brown Shrike | 2018/1/22  | 2 | 0 | 24.78288469 | 120.99491690 | <a href="https://www.inaturalist.org/observations/14196976">https://www.inaturalist.org/observations/14196976</a>   |
| 2104 | Lanius cristatus | Brown Shrike | 2021/12/25 | 2 | 0 | 24.78830667 | 120.99249500 | <a href="https://www.inaturalist.org/observations/103623792">https://www.inaturalist.org/observations/103623792</a> |
| 2105 | Lanius cristatus | Brown Shrike | 2011/9/28  | 1 | 0 | 24.78885800 | 92.79795400  | <a href="https://www.inaturalist.org/observations/103754474">https://www.inaturalist.org/observations/103754474</a> |
| 2106 | Lanius cristatus | Brown Shrike | 2021/12/2  | 1 | 0 | 24.79377939 | 120.91721930 | <a href="https://www.inaturalist.org/observations/109989611">https://www.inaturalist.org/observations/109989611</a> |
| 2107 | Lanius cristatus | Brown Shrike | 2021/8/30  | 2 | 0 | 24.79417500 | 120.95033830 | <a href="https://www.inaturalist.org/observations/93012693">https://www.inaturalist.org/observations/93012693</a>   |
| 2108 | Lanius cristatus | Brown Shrike | 2012/2/28  | 3 | 0 | 24.79871140 | 121.79631110 | <a href="https://www.inaturalist.org/observations/56209412">https://www.inaturalist.org/observations/56209412</a>   |
| 2109 | Lanius cristatus | Brown Shrike | 2022/12/4  | 1 | 0 | 24.79980901 | 121.80352090 | <a href="https://www.inaturalist.org/observations/143627577">https://www.inaturalist.org/observations/143627577</a> |
| 2110 | Lanius cristatus | Brown Shrike | 2020/1/23  | 2 | 0 | 24.80024910 | 121.73938750 | <a href="https://www.inaturalist.org/observations/37872321">https://www.inaturalist.org/observations/37872321</a>   |
| 2111 | Lanius cristatus | Brown Shrike | 2020/2/12  | 3 | 0 | 24.80037117 | 121.73938750 | <a href="https://www.inaturalist.org/observations/38750366">https://www.inaturalist.org/observations/38750366</a>   |
| 2112 | Lanius cristatus | Brown Shrike | 2020/2/8   | 4 | 0 | 24.80111178 | 120.97958150 | <a href="https://www.inaturalist.org/observations/38416101">https://www.inaturalist.org/observations/38416101</a>   |
| 2113 | Lanius cristatus | Brown Shrike | 2020/11/22 | 3 | 0 | 24.80951990 | 121.80435010 | <a href="https://www.inaturalist.org/observations/65402646">https://www.inaturalist.org/observations/65402646</a>   |
| 2114 | Lanius cristatus | Brown Shrike | 2018/12/18 | 3 | 0 | 24.81327529 | 120.93932860 | <a href="https://www.inaturalist.org/observations/19636240">https://www.inaturalist.org/observations/19636240</a>   |
| 2115 | Lanius cristatus | Brown Shrike | 2021/1/13  | 2 | 0 | 24.81564833 | 121.04706830 | <a href="https://www.inaturalist.org/observations/68007127">https://www.inaturalist.org/observations/68007127</a>   |

|      |                  |              |            |   |   |             |              |                                                                                                                     |
|------|------------------|--------------|------------|---|---|-------------|--------------|---------------------------------------------------------------------------------------------------------------------|
| 2116 | Lanius cristatus | Brown Shrike | 2022/9/12  | 1 | 0 | 24.82367500 | 120.98196940 | <a href="https://www.inaturalist.org/observations/134692760">https://www.inaturalist.org/observations/134692760</a> |
| 2117 | Lanius cristatus | Brown Shrike | 2021/3/8   | 3 | 0 | 24.83139727 | 121.00955300 | <a href="https://www.inaturalist.org/observations/70914237">https://www.inaturalist.org/observations/70914237</a>   |
| 2118 | Lanius cristatus | Brown Shrike | 2021/2/2   | 1 | 0 | 24.83175088 | 121.75424680 | <a href="https://www.inaturalist.org/observations/73368422">https://www.inaturalist.org/observations/73368422</a>   |
| 2119 | Lanius cristatus | Brown Shrike | 2020/9/8   | 2 | 0 | 24.83215052 | 121.00896740 | <a href="https://www.inaturalist.org/observations/59201409">https://www.inaturalist.org/observations/59201409</a>   |
| 2120 | Lanius cristatus | Brown Shrike | 2022/4/23  | 1 | 0 | 24.83326912 | 121.01999660 | <a href="https://www.inaturalist.org/observations/112484724">https://www.inaturalist.org/observations/112484724</a> |
| 2121 | Lanius cristatus | Brown Shrike | 2021/12/2  | 1 | 0 | 24.91801165 | 121.53875440 | <a href="https://www.inaturalist.org/observations/133072352">https://www.inaturalist.org/observations/133072352</a> |
| 2122 | Lanius cristatus | Brown Shrike | 2020/11/5  | 2 | 0 | 24.93230894 | 74.96835183  | <a href="https://www.inaturalist.org/observations/67467715">https://www.inaturalist.org/observations/67467715</a>   |
| 2123 | Lanius cristatus | Brown Shrike | 2022/3/1   | 1 | 0 | 24.93377590 | 121.06642710 | <a href="https://www.inaturalist.org/observations/109988633">https://www.inaturalist.org/observations/109988633</a> |
| 2124 | Lanius cristatus | Brown Shrike | 2019/9/23  | 0 | 0 | 24.93450203 | 121.24081790 | <a href="https://www.inaturalist.org/observations/33238809">https://www.inaturalist.org/observations/33238809</a>   |
| 2125 | Lanius cristatus | Brown Shrike | 2021/10/16 | 1 | 0 | 24.93903425 | 121.52667180 | <a href="https://www.inaturalist.org/observations/98801592">https://www.inaturalist.org/observations/98801592</a>   |
| 2126 | Lanius cristatus | Brown Shrike | 2020/9/27  | 3 | 0 | 24.94173832 | 121.36941000 | <a href="https://www.inaturalist.org/observations/60932613">https://www.inaturalist.org/observations/60932613</a>   |
| 2127 | Lanius cristatus | Brown Shrike | 2022/4/30  | 2 | 0 | 24.94750730 | 121.21306040 | <a href="https://www.inaturalist.org/observations/114622101">https://www.inaturalist.org/observations/114622101</a> |
| 2128 | Lanius cristatus | Brown Shrike | 2021/12/28 | 1 | 0 | 24.95123807 | 121.22801690 | <a href="https://www.inaturalist.org/observations/104091931">https://www.inaturalist.org/observations/104091931</a> |
| 2129 | Lanius cristatus | Brown Shrike | 2022/11/18 | 1 | 0 | 24.95146807 | 121.22812510 | <a href="https://www.inaturalist.org/observations/142599953">https://www.inaturalist.org/observations/142599953</a> |
| 2130 | Lanius cristatus | Brown Shrike | 2022/4/30  | 2 | 0 | 24.95231963 | 121.21721300 | <a href="https://www.inaturalist.org/observations/114620301">https://www.inaturalist.org/observations/114620301</a> |
| 2131 | Lanius cristatus | Brown Shrike | 2014/3/22  | 2 | 0 | 24.96222172 | 121.20959310 | <a href="https://www.inaturalist.org/observations/105655899">https://www.inaturalist.org/observations/105655899</a> |
| 2132 | Lanius cristatus | Brown Shrike | 2022/4/24  | 1 | 0 | 24.97277910 | 121.42040420 | <a href="https://www.inaturalist.org/observations/112833005">https://www.inaturalist.org/observations/112833005</a> |
| 2133 | Lanius cristatus | Brown Shrike | 2018/2/1   | 2 | 0 | 24.97415783 | 121.54115310 | <a href="https://www.inaturalist.org/observations/18616202">https://www.inaturalist.org/observations/18616202</a>   |
| 2134 | Lanius cristatus | Brown Shrike | 2018/2/1   | 2 | 0 | 24.97416148 | 121.54116920 | <a href="https://www.inaturalist.org/observations/18616201">https://www.inaturalist.org/observations/18616201</a>   |
| 2135 | Lanius cristatus | Brown Shrike | 2019/2/20  | 3 | 0 | 24.97842600 | 121.55736020 | <a href="https://www.inaturalist.org/observations/20505532">https://www.inaturalist.org/observations/20505532</a>   |
| 2136 | Lanius cristatus | Brown Shrike | 2019/4/21  | 2 | 0 | 24.97879434 | 121.27672470 | <a href="https://www.inaturalist.org/observations/40930678">https://www.inaturalist.org/observations/40930678</a>   |
| 2137 | Lanius cristatus | Brown Shrike | 2022/3/13  | 3 | 0 | 24.97921612 | 121.52680730 | <a href="https://www.inaturalist.org/observations/108484480">https://www.inaturalist.org/observations/108484480</a> |
| 2138 | Lanius cristatus | Brown Shrike | 2019/1/19  | 3 | 0 | 24.98547658 | 121.45724340 | <a href="https://www.inaturalist.org/observations/19771583">https://www.inaturalist.org/observations/19771583</a>   |

|      |                  |              |            |   |   |             |              |                                                                                                                     |
|------|------------------|--------------|------------|---|---|-------------|--------------|---------------------------------------------------------------------------------------------------------------------|
| 2139 | Lanius cristatus | Brown Shrike | 2018/2/16  | 2 | 0 | 24.98607255 | 121.45735110 | <a href="https://www.inaturalist.org/observations/18616469">https://www.inaturalist.org/observations/18616469</a>   |
| 2140 | Lanius cristatus | Brown Shrike | 2021/2/23  | 1 | 0 | 24.98646139 | 121.55278800 | <a href="https://www.inaturalist.org/observations/75019822">https://www.inaturalist.org/observations/75019822</a>   |
| 2141 | Lanius cristatus | Brown Shrike | 2021/11/8  | 2 | 0 | 24.98681225 | 121.55521230 | <a href="https://www.inaturalist.org/observations/100846115">https://www.inaturalist.org/observations/100846115</a> |
| 2142 | Lanius cristatus | Brown Shrike | 2022/11/10 | 1 | 0 | 24.98812490 | 121.48124220 | <a href="https://www.inaturalist.org/observations/141586556">https://www.inaturalist.org/observations/141586556</a> |
| 2143 | Lanius cristatus | Brown Shrike | 2021/1/1   | 2 | 0 | 24.98823780 | 121.53917460 | <a href="https://www.inaturalist.org/observations/101893650">https://www.inaturalist.org/observations/101893650</a> |
| 2144 | Lanius cristatus | Brown Shrike | 2021/11/18 | 2 | 0 | 24.98841321 | 121.57225700 | <a href="https://www.inaturalist.org/observations/101715241">https://www.inaturalist.org/observations/101715241</a> |
| 2145 | Lanius cristatus | Brown Shrike | 2021/12/20 | 2 | 0 | 24.98933848 | 121.53635380 | <a href="https://www.inaturalist.org/observations/103428520">https://www.inaturalist.org/observations/103428520</a> |
| 2146 | Lanius cristatus | Brown Shrike | 2021/12/22 | 2 | 0 | 24.98967530 | 121.53616440 | <a href="https://www.inaturalist.org/observations/103476083">https://www.inaturalist.org/observations/103476083</a> |
| 2147 | Lanius cristatus | Brown Shrike | 2021/12/22 | 2 | 0 | 24.98976564 | 121.53681330 | <a href="https://www.inaturalist.org/observations/103476084">https://www.inaturalist.org/observations/103476084</a> |
| 2148 | Lanius cristatus | Brown Shrike | 2021/12/22 | 2 | 0 | 24.99025282 | 121.53651690 | <a href="https://www.inaturalist.org/observations/103476086">https://www.inaturalist.org/observations/103476086</a> |
| 2149 | Lanius cristatus | Brown Shrike | 2009/11/20 | 2 | 0 | 24.99339645 | 121.32087420 | <a href="https://www.inaturalist.org/observations/55451639">https://www.inaturalist.org/observations/55451639</a>   |
| 2150 | Lanius cristatus | Brown Shrike | 2012/12/9  | 2 | 0 | 24.99386120 | 121.33903610 | <a href="https://www.inaturalist.org/observations/56615661">https://www.inaturalist.org/observations/56615661</a>   |
| 2151 | Lanius cristatus | Brown Shrike | 2010/12/19 | 2 | 0 | 24.99387154 | 121.33939140 | <a href="https://www.inaturalist.org/observations/55758389">https://www.inaturalist.org/observations/55758389</a>   |
| 2152 | Lanius cristatus | Brown Shrike | 2021/4/7   | 1 | 0 | 24.99505806 | 121.49999240 | <a href="https://www.inaturalist.org/observations/73214581">https://www.inaturalist.org/observations/73214581</a>   |
| 2153 | Lanius cristatus | Brown Shrike | 2022/3/8   | 1 | 0 | 24.99579876 | 121.32951520 | <a href="https://www.inaturalist.org/observations/112512697">https://www.inaturalist.org/observations/112512697</a> |
| 2154 | Lanius cristatus | Brown Shrike | 2019/12/9  | 2 | 0 | 24.99685000 | 121.43751170 | <a href="https://www.inaturalist.org/observations/36495743">https://www.inaturalist.org/observations/36495743</a>   |
| 2155 | Lanius cristatus | Brown Shrike | 2019/4/20  | 2 | 0 | 24.99983040 | 121.43860320 | <a href="https://www.inaturalist.org/observations/23911484">https://www.inaturalist.org/observations/23911484</a>   |
| 2156 | Lanius cristatus | Brown Shrike | 2009/10/22 | 3 | 0 | 25.00111912 | 121.32868850 | <a href="https://www.inaturalist.org/observations/55378197">https://www.inaturalist.org/observations/55378197</a>   |
| 2157 | Lanius cristatus | Brown Shrike | 2021/1/15  | 0 | 0 | 25.00797197 | 121.53577770 | <a href="https://www.inaturalist.org/observations/68400388">https://www.inaturalist.org/observations/68400388</a>   |
| 2158 | Lanius cristatus | Brown Shrike | 2019/2/3   | 2 | 0 | 25.01236667 | 121.32777500 | <a href="https://www.inaturalist.org/observations/29153691">https://www.inaturalist.org/observations/29153691</a>   |
| 2159 | Lanius cristatus | Brown Shrike | 2017/3/24  | 1 | 0 | 25.01277532 | 121.46114400 | <a href="https://www.inaturalist.org/observations/142124460">https://www.inaturalist.org/observations/142124460</a> |
| 2160 | Lanius cristatus | Brown Shrike | 2021/1/1   | 1 | 0 | 25.01277760 | 121.44089040 | <a href="https://www.inaturalist.org/observations/67705599">https://www.inaturalist.org/observations/67705599</a>   |
| 2161 | Lanius cristatus | Brown Shrike | 2021/11/5  | 1 | 0 | 25.01482588 | 121.91916440 | <a href="https://www.inaturalist.org/observations/100305662">https://www.inaturalist.org/observations/100305662</a> |

|      |                  |              |            |   |   |             |              |                                                                                                                     |
|------|------------------|--------------|------------|---|---|-------------|--------------|---------------------------------------------------------------------------------------------------------------------|
| 2162 | Lanius cristatus | Brown Shrike | 2021/4/11  | 1 | 0 | 25.01513611 | 121.92427140 | <a href="https://www.inaturalist.org/observations/73718712">https://www.inaturalist.org/observations/73718712</a>   |
| 2163 | Lanius cristatus | Brown Shrike | 2005/4/8   | 2 | 0 | 25.01530236 | 121.53991860 | <a href="https://www.inaturalist.org/observations/16706931">https://www.inaturalist.org/observations/16706931</a>   |
| 2164 | Lanius cristatus | Brown Shrike | 2022/3/14  | 3 | 0 | 25.01554323 | 121.91724690 | <a href="https://www.inaturalist.org/observations/109358862">https://www.inaturalist.org/observations/109358862</a> |
| 2165 | Lanius cristatus | Brown Shrike | 2019/1/22  | 2 | 0 | 25.01560738 | 121.53963310 | <a href="https://www.inaturalist.org/observations/19814862">https://www.inaturalist.org/observations/19814862</a>   |
| 2166 | Lanius cristatus | Brown Shrike | 2021/12/15 | 1 | 0 | 25.01576667 | 121.54072000 | <a href="https://www.inaturalist.org/observations/103082858">https://www.inaturalist.org/observations/103082858</a> |
| 2167 | Lanius cristatus | Brown Shrike | 2021/1/25  | 2 | 0 | 25.01601991 | 121.54057990 | <a href="https://www.inaturalist.org/observations/68583625">https://www.inaturalist.org/observations/68583625</a>   |
| 2168 | Lanius cristatus | Brown Shrike | 2021/2/2   | 2 | 0 | 25.01613020 | 121.54060200 | <a href="https://www.inaturalist.org/observations/68948568">https://www.inaturalist.org/observations/68948568</a>   |
| 2169 | Lanius cristatus | Brown Shrike | 2021/11/16 | 1 | 0 | 25.01620676 | 121.54044950 | <a href="https://www.inaturalist.org/observations/101245028">https://www.inaturalist.org/observations/101245028</a> |
| 2170 | Lanius cristatus | Brown Shrike | 2019/11/12 | 2 | 0 | 25.01646085 | 121.54055290 | <a href="https://www.inaturalist.org/observations/36285766">https://www.inaturalist.org/observations/36285766</a>   |
| 2171 | Lanius cristatus | Brown Shrike | 2021/11/16 | 1 | 0 | 25.01654161 | 121.54092390 | <a href="https://www.inaturalist.org/observations/101391264">https://www.inaturalist.org/observations/101391264</a> |
| 2172 | Lanius cristatus | Brown Shrike | 2022/11/13 | 1 | 0 | 25.01698222 | 121.92124940 | <a href="https://www.inaturalist.org/observations/142273841">https://www.inaturalist.org/observations/142273841</a> |
| 2173 | Lanius cristatus | Brown Shrike | 2022/1/3   | 1 | 0 | 25.01720950 | 121.92830650 | <a href="https://www.inaturalist.org/observations/104971608">https://www.inaturalist.org/observations/104971608</a> |
| 2174 | Lanius cristatus | Brown Shrike | 2022/3/6   | 2 | 0 | 25.01725730 | 85.41616420  | <a href="https://www.inaturalist.org/observations/108017689">https://www.inaturalist.org/observations/108017689</a> |
| 2175 | Lanius cristatus | Brown Shrike | 2021/10/6  | 2 | 0 | 25.01734397 | 121.53975180 | <a href="https://www.inaturalist.org/observations/97297952">https://www.inaturalist.org/observations/97297952</a>   |
| 2176 | Lanius cristatus | Brown Shrike | 2017/12/24 | 2 | 0 | 25.01835597 | 121.92430280 | <a href="https://www.inaturalist.org/observations/14127467">https://www.inaturalist.org/observations/14127467</a>   |
| 2177 | Lanius cristatus | Brown Shrike | 2022/1/10  | 1 | 0 | 25.01877131 | 121.53396730 | <a href="https://www.inaturalist.org/observations/104685571">https://www.inaturalist.org/observations/104685571</a> |
| 2178 | Lanius cristatus | Brown Shrike | 2014/10/8  | 4 | 0 | 25.01896872 | 121.92325030 | <a href="https://www.inaturalist.org/observations/57317752">https://www.inaturalist.org/observations/57317752</a>   |
| 2179 | Lanius cristatus | Brown Shrike | 2020/3/15  | 2 | 0 | 25.01933990 | 121.92294210 | <a href="https://www.inaturalist.org/observations/110839839">https://www.inaturalist.org/observations/110839839</a> |
| 2180 | Lanius cristatus | Brown Shrike | 2019/10/4  | 2 | 0 | 25.01935768 | 121.94384000 | <a href="https://www.inaturalist.org/observations/34299463">https://www.inaturalist.org/observations/34299463</a>   |
| 2181 | Lanius cristatus | Brown Shrike | 2019/3/12  | 2 | 0 | 25.01971651 | 121.53805160 | <a href="https://www.inaturalist.org/observations/48522999">https://www.inaturalist.org/observations/48522999</a>   |
| 2182 | Lanius cristatus | Brown Shrike | 2020/4/10  | 2 | 0 | 25.02010594 | 121.92228580 | <a href="https://www.inaturalist.org/observations/110656184">https://www.inaturalist.org/observations/110656184</a> |
| 2183 | Lanius cristatus | Brown Shrike | 2019/11/12 | 2 | 0 | 25.02032319 | 121.53771400 | <a href="https://www.inaturalist.org/observations/35739798">https://www.inaturalist.org/observations/35739798</a>   |
| 2184 | Lanius cristatus | Brown Shrike | 2019/11/18 | 2 | 0 | 25.02041100 | 121.92256700 | <a href="https://www.inaturalist.org/observations/35852459">https://www.inaturalist.org/observations/35852459</a>   |

|      |                                 |              |            |   |   |             |              |                                                                                                                     |
|------|---------------------------------|--------------|------------|---|---|-------------|--------------|---------------------------------------------------------------------------------------------------------------------|
| 2185 | Lanius cristatus                | Brown Shrike | 2022/9/10  | 3 | 0 | 25.02093056 | 121.31076390 | <a href="https://www.inaturalist.org/observations/134709710">https://www.inaturalist.org/observations/134709710</a> |
| 2186 | Lanius cristatus                | Brown Shrike | 2022/2/4   | 2 | 0 | 25.02135593 | 121.54643760 | <a href="https://www.inaturalist.org/observations/110064747">https://www.inaturalist.org/observations/110064747</a> |
| 2187 | Lanius cristatus                | Brown Shrike | 2022/2/11  | 1 | 0 | 25.02170856 | 121.50778380 | <a href="https://www.inaturalist.org/observations/106550049">https://www.inaturalist.org/observations/106550049</a> |
| 2188 | Lanius cristatus                | Brown Shrike | 2022/12/3  | 2 | 0 | 25.02180489 | 121.30611810 | <a href="https://www.inaturalist.org/observations/145176370">https://www.inaturalist.org/observations/145176370</a> |
| 2189 | Lanius cristatus                | Brown Shrike | 2020/4/25  | 2 | 0 | 25.02214029 | 121.51454110 | <a href="https://www.inaturalist.org/observations/43264442">https://www.inaturalist.org/observations/43264442</a>   |
| 2190 | Lanius cristatus                | Brown Shrike | 2022/2/11  | 1 | 0 | 25.02275837 | 121.51210200 | <a href="https://www.inaturalist.org/observations/106593729">https://www.inaturalist.org/observations/106593729</a> |
| 2191 | Lanius cristatus<br>lucionensis | Brown Shrike | 2019/3/11  | 2 | 0 | 25.02327866 | 121.50471210 | <a href="https://www.inaturalist.org/observations/65251136">https://www.inaturalist.org/observations/65251136</a>   |
| 2192 | Lanius cristatus                | Brown Shrike | 2019/10/28 | 1 | 0 | 25.02341900 | 121.92460500 | <a href="https://www.inaturalist.org/observations/35039466">https://www.inaturalist.org/observations/35039466</a>   |
| 2193 | Lanius cristatus                | Brown Shrike | 2022/2/22  | 2 | 0 | 25.02413617 | 121.50502830 | <a href="https://www.inaturalist.org/observations/107244509">https://www.inaturalist.org/observations/107244509</a> |
| 2194 | Lanius cristatus                | Brown Shrike | 2018/11/14 | 2 | 0 | 25.02450663 | 121.54553030 | <a href="https://www.inaturalist.org/observations/18421270">https://www.inaturalist.org/observations/18421270</a>   |
| 2195 | Lanius cristatus                | Brown Shrike | 2021/4/10  | 1 | 0 | 25.02455000 | 121.50502000 | <a href="https://www.inaturalist.org/observations/76019811">https://www.inaturalist.org/observations/76019811</a>   |
| 2196 | Lanius cristatus                | Brown Shrike | 2018/1/14  | 2 | 0 | 25.02574667 | 121.20277500 | <a href="https://www.inaturalist.org/observations/14838294">https://www.inaturalist.org/observations/14838294</a>   |
| 2197 | Lanius cristatus                | Brown Shrike | 2022/11/14 | 1 | 0 | 25.02744100 | 121.29676300 | <a href="https://www.inaturalist.org/observations/142663611">https://www.inaturalist.org/observations/142663611</a> |
| 2198 | Lanius cristatus                | Brown Shrike | 2019/3/19  | 2 | 0 | 25.02933278 | 121.53563720 | <a href="https://www.inaturalist.org/observations/21384692">https://www.inaturalist.org/observations/21384692</a>   |
| 2199 | Lanius cristatus                | Brown Shrike | 2020/9/29  | 2 | 0 | 25.03048676 | 121.53577950 | <a href="https://www.inaturalist.org/observations/63149498">https://www.inaturalist.org/observations/63149498</a>   |
| 2200 | Lanius cristatus                | Brown Shrike | 2021/12/14 | 1 | 0 | 25.03074500 | 121.53554500 | <a href="https://www.inaturalist.org/observations/104971591">https://www.inaturalist.org/observations/104971591</a> |
| 2201 | Lanius cristatus                | Brown Shrike | 2020/12/10 | 2 | 0 | 25.03171353 | 121.53601920 | <a href="https://www.inaturalist.org/observations/66367808">https://www.inaturalist.org/observations/66367808</a>   |
| 2202 | Lanius cristatus                | Brown Shrike | 2011/11/21 | 1 | 0 | 25.03185110 | 121.50945930 | <a href="https://www.inaturalist.org/observations/130587685">https://www.inaturalist.org/observations/130587685</a> |
| 2203 | Lanius cristatus                | Brown Shrike | 2020/5/8   | 1 | 0 | 25.03204368 | 121.50802050 | <a href="https://www.inaturalist.org/observations/102273241">https://www.inaturalist.org/observations/102273241</a> |
| 2204 | Lanius cristatus                | Brown Shrike | 2015/1/25  | 2 | 0 | 25.03214524 | 121.50976530 | <a href="https://www.inaturalist.org/observations/19795456">https://www.inaturalist.org/observations/19795456</a>   |
| 2205 | Lanius cristatus                | Brown Shrike | 2015/1/25  | 4 | 0 | 25.03226100 | 121.50914800 | <a href="http://www.inaturalist.org/observations/1192730">http://www.inaturalist.org/observations/1192730</a>       |
| 2206 | Lanius cristatus                | Brown Shrike | 2021/9/23  | 1 | 0 | 25.03246306 | 121.45840830 | <a href="https://www.inaturalist.org/observations/98684290">https://www.inaturalist.org/observations/98684290</a>   |
| 2207 | Lanius cristatus                | Brown Shrike | 2018/12/30 | 2 | 0 | 25.03279104 | 121.50878460 | <a href="https://www.inaturalist.org/observations/19351733">https://www.inaturalist.org/observations/19351733</a>   |

|      |                  |              |            |   |   |             |              |                                                                                                                     |
|------|------------------|--------------|------------|---|---|-------------|--------------|---------------------------------------------------------------------------------------------------------------------|
| 2208 | Lanius cristatus | Brown Shrike | 2021/8/1   | 1 | 0 | 25.03296360 | 121.56542680 | <a href="https://www.inaturalist.org/observations/89423648">https://www.inaturalist.org/observations/89423648</a>   |
| 2209 | Lanius cristatus | Brown Shrike | 2022/2/11  | 1 | 0 | 25.03296360 | 121.56542680 | <a href="https://www.inaturalist.org/observations/106536216">https://www.inaturalist.org/observations/106536216</a> |
| 2210 | Lanius cristatus | Brown Shrike | 2018/11/16 | 2 | 0 | 25.03344418 | 121.50944890 | <a href="https://www.inaturalist.org/observations/18733650">https://www.inaturalist.org/observations/18733650</a>   |
| 2211 | Lanius cristatus | Brown Shrike | 2021/12/2  | 2 | 0 | 25.03444282 | 121.52245390 | <a href="https://www.inaturalist.org/observations/102542459">https://www.inaturalist.org/observations/102542459</a> |
| 2212 | Lanius cristatus | Brown Shrike | 2021/12/23 | 2 | 0 | 25.03487200 | 121.52268700 | <a href="https://www.inaturalist.org/observations/103822422">https://www.inaturalist.org/observations/103822422</a> |
| 2213 | Lanius cristatus | Brown Shrike | 2021/12/2  | 2 | 0 | 25.03515344 | 121.52273370 | <a href="https://www.inaturalist.org/observations/102542462">https://www.inaturalist.org/observations/102542462</a> |
| 2214 | Lanius cristatus | Brown Shrike | 2016/1/27  | 1 | 0 | 25.03531751 | 121.52327770 | <a href="https://www.inaturalist.org/observations/142123861">https://www.inaturalist.org/observations/142123861</a> |
| 2215 | Lanius cristatus | Brown Shrike | 2021/12/23 | 2 | 0 | 25.03541653 | 121.52156510 | <a href="https://www.inaturalist.org/observations/103822421">https://www.inaturalist.org/observations/103822421</a> |
| 2216 | Lanius cristatus | Brown Shrike | 2021/2/15  | 2 | 0 | 25.03574648 | 121.56161170 | <a href="https://www.inaturalist.org/observations/69615302">https://www.inaturalist.org/observations/69615302</a>   |
| 2217 | Lanius cristatus | Brown Shrike | 2019/4/26  | 2 | 0 | 25.03623333 | 121.56495000 | <a href="https://www.inaturalist.org/observations/23319347">https://www.inaturalist.org/observations/23319347</a>   |
| 2218 | Lanius cristatus | Brown Shrike | 2021/12/28 | 1 | 0 | 25.03623632 | 121.47872330 | <a href="https://www.inaturalist.org/observations/104415659">https://www.inaturalist.org/observations/104415659</a> |
| 2219 | Lanius cristatus | Brown Shrike | 2017/12/30 | 2 | 0 | 25.03651207 | 121.48956680 | <a href="https://www.inaturalist.org/observations/14127250">https://www.inaturalist.org/observations/14127250</a>   |
| 2220 | Lanius cristatus | Brown Shrike | 2019/11/10 | 3 | 0 | 25.03696998 | 121.49060380 | <a href="https://www.inaturalist.org/observations/36102315">https://www.inaturalist.org/observations/36102315</a>   |
| 2221 | Lanius cristatus | Brown Shrike | 2019/3/6   | 3 | 0 | 25.03798922 | 121.56711270 | <a href="https://www.inaturalist.org/observations/70635966">https://www.inaturalist.org/observations/70635966</a>   |
| 2222 | Lanius cristatus | Brown Shrike | 2022/12/24 | 1 | 0 | 25.03835973 | 121.49090090 | <a href="https://www.inaturalist.org/observations/144975413">https://www.inaturalist.org/observations/144975413</a> |
| 2223 | Lanius cristatus | Brown Shrike | 2018/11/11 | 2 | 0 | 25.03836410 | 121.49148950 | <a href="https://www.inaturalist.org/observations/19984105">https://www.inaturalist.org/observations/19984105</a>   |
| 2224 | Lanius cristatus | Brown Shrike | 2022/12/19 | 1 | 0 | 25.03836410 | 121.49148950 | <a href="https://www.inaturalist.org/observations/144673970">https://www.inaturalist.org/observations/144673970</a> |
| 2225 | Lanius cristatus | Brown Shrike | 2022/11/26 | 1 | 0 | 25.03839167 | 121.49258670 | <a href="https://www.inaturalist.org/observations/142883565">https://www.inaturalist.org/observations/142883565</a> |
| 2226 | Lanius cristatus | Brown Shrike | 2020/12/5  | 3 | 0 | 25.03840000 | 121.47271670 | <a href="https://www.inaturalist.org/observations/66229575">https://www.inaturalist.org/observations/66229575</a>   |
| 2227 | Lanius cristatus | Brown Shrike | 2022/1/25  | 1 | 0 | 25.03856284 | 121.49191290 | <a href="https://www.inaturalist.org/observations/105604327">https://www.inaturalist.org/observations/105604327</a> |
| 2228 | Lanius cristatus | Brown Shrike | 2022/2/11  | 2 | 0 | 25.03857500 | 121.49234670 | <a href="https://www.inaturalist.org/observations/106538939">https://www.inaturalist.org/observations/106538939</a> |
| 2229 | Lanius cristatus | Brown Shrike | 2020/1/22  | 3 | 0 | 25.03870250 | 121.49522080 | <a href="https://www.inaturalist.org/observations/37941206">https://www.inaturalist.org/observations/37941206</a>   |
| 2230 | Lanius cristatus | Brown Shrike | 2020/9/11  | 2 | 0 | 25.03870250 | 121.49522080 | <a href="https://www.inaturalist.org/observations/110656185">https://www.inaturalist.org/observations/110656185</a> |



|      |                  |              |            |   |   |             |              |                                                                                                                     |
|------|------------------|--------------|------------|---|---|-------------|--------------|---------------------------------------------------------------------------------------------------------------------|
| 2231 | Lanius cristatus | Brown Shrike | 2009/10/23 | 2 | 0 | 25.03891957 | 121.49012230 | <a href="https://www.inaturalist.org/observations/55447255">https://www.inaturalist.org/observations/55447255</a>   |
| 2232 | Lanius cristatus | Brown Shrike | 2019/11/10 | 3 | 0 | 25.03943472 | 121.49499730 | <a href="https://www.inaturalist.org/observations/36102321">https://www.inaturalist.org/observations/36102321</a>   |
| 2233 | Lanius cristatus | Brown Shrike | 2021/11/21 | 1 | 0 | 25.03949450 | 121.49553670 | <a href="https://www.inaturalist.org/observations/101606962">https://www.inaturalist.org/observations/101606962</a> |
| 2234 | Lanius cristatus | Brown Shrike | 2020/12/5  | 3 | 0 | 25.03956667 | 121.47820000 | <a href="https://www.inaturalist.org/observations/66229573">https://www.inaturalist.org/observations/66229573</a>   |
| 2235 | Lanius cristatus | Brown Shrike | 2021/12/1  | 1 | 0 | 25.04212797 | 121.51542730 | <a href="https://www.inaturalist.org/observations/102463677">https://www.inaturalist.org/observations/102463677</a> |
| 2236 | Lanius cristatus | Brown Shrike | 2016/9/9   | 2 | 0 | 25.04311300 | 121.61643200 | <a href="https://www.inaturalist.org/observations/9735562">https://www.inaturalist.org/observations/9735562</a>     |
| 2237 | Lanius cristatus | Brown Shrike | 2020/10/23 | 3 | 0 | 25.04560300 | 121.52400000 | <a href="https://www.inaturalist.org/observations/63481406">https://www.inaturalist.org/observations/63481406</a>   |
| 2238 | Lanius cristatus | Brown Shrike | 2021/3/11  | 1 | 0 | 25.04562738 | 121.53013830 | <a href="https://www.inaturalist.org/observations/82171608">https://www.inaturalist.org/observations/82171608</a>   |
| 2239 | Lanius cristatus | Brown Shrike | 2020/10/27 | 2 | 0 | 25.05135500 | 121.59030320 | <a href="https://www.inaturalist.org/observations/63626004">https://www.inaturalist.org/observations/63626004</a>   |
| 2240 | Lanius cristatus | Brown Shrike | 2019/9/27  | 2 | 0 | 25.05189500 | 121.22428500 | <a href="https://www.inaturalist.org/observations/66140138">https://www.inaturalist.org/observations/66140138</a>   |
| 2241 | Lanius cristatus | Brown Shrike | 2018/12/17 | 2 | 0 | 25.05250000 | 121.52611110 | <a href="https://www.inaturalist.org/observations/19201087">https://www.inaturalist.org/observations/19201087</a>   |
| 2242 | Lanius cristatus | Brown Shrike | 2019/9/25  | 2 | 0 | 25.05533333 | 121.22509830 | <a href="https://www.inaturalist.org/observations/66140132">https://www.inaturalist.org/observations/66140132</a>   |
| 2243 | Lanius cristatus | Brown Shrike | 2020/4/27  | 3 | 0 | 25.05743886 | 121.45315150 | <a href="https://www.inaturalist.org/observations/43861400">https://www.inaturalist.org/observations/43861400</a>   |
| 2244 | Lanius cristatus | Brown Shrike | 2019/12/2  | 2 | 0 | 25.06012197 | 121.57162300 | <a href="https://www.inaturalist.org/observations/36405022">https://www.inaturalist.org/observations/36405022</a>   |
| 2245 | Lanius cristatus | Brown Shrike | 2021/11/14 | 1 | 0 | 25.06062285 | 121.47858070 | <a href="https://www.inaturalist.org/observations/101081773">https://www.inaturalist.org/observations/101081773</a> |
| 2246 | Lanius cristatus | Brown Shrike | 2022/4/25  | 2 | 0 | 25.06203355 | 121.45995660 | <a href="https://www.inaturalist.org/observations/112977106">https://www.inaturalist.org/observations/112977106</a> |
| 2247 | Lanius cristatus | Brown Shrike | 2022/4/18  | 1 | 0 | 25.06212474 | 121.45995250 | <a href="https://www.inaturalist.org/observations/111952961">https://www.inaturalist.org/observations/111952961</a> |
| 2248 | Lanius cristatus | Brown Shrike | 2022/3/22  | 1 | 0 | 25.06215303 | 121.45989740 | <a href="https://www.inaturalist.org/observations/109568729">https://www.inaturalist.org/observations/109568729</a> |
| 2249 | Lanius cristatus | Brown Shrike | 2022/4/22  | 2 | 0 | 25.06216445 | 121.45994010 | <a href="https://www.inaturalist.org/observations/112977067">https://www.inaturalist.org/observations/112977067</a> |
| 2250 | Lanius cristatus | Brown Shrike | 2022/3/31  | 2 | 0 | 25.06232084 | 121.46029980 | <a href="https://www.inaturalist.org/observations/110405181">https://www.inaturalist.org/observations/110405181</a> |
| 2251 | Lanius cristatus | Brown Shrike | 2022/4/28  | 2 | 0 | 25.06263594 | 121.45966510 | <a href="https://www.inaturalist.org/observations/113874523">https://www.inaturalist.org/observations/113874523</a> |
| 2252 | Lanius cristatus | Brown Shrike | 2022/12/4  | 1 | 0 | 25.06346679 | 121.53914090 | <a href="https://www.inaturalist.org/observations/143787184">https://www.inaturalist.org/observations/143787184</a> |
| 2253 | Lanius cristatus | Brown Shrike | 2019/9/27  | 2 | 0 | 25.06424000 | 121.21365830 | <a href="https://www.inaturalist.org/observations/66140142">https://www.inaturalist.org/observations/66140142</a>   |

|      |                  |              |            |   |   |             |              |                                                                                                                     |
|------|------------------|--------------|------------|---|---|-------------|--------------|---------------------------------------------------------------------------------------------------------------------|
| 2254 | Lanius cristatus | Brown Shrike | 2022/9/27  | 1 | 0 | 25.06461000 | 121.23190000 | <a href="https://www.inaturalist.org/observations/142054444">https://www.inaturalist.org/observations/142054444</a> |
| 2255 | Lanius cristatus | Brown Shrike | 2018/12/18 | 3 | 0 | 25.06721173 | 121.57177710 | <a href="https://www.inaturalist.org/observations/19076425">https://www.inaturalist.org/observations/19076425</a>   |
| 2256 | Lanius cristatus | Brown Shrike | 2022/9/27  | 1 | 0 | 25.06776446 | 121.57384100 | <a href="https://www.inaturalist.org/observations/136637846">https://www.inaturalist.org/observations/136637846</a> |
| 2257 | Lanius cristatus | Brown Shrike | 2021/11/18 | 1 | 0 | 25.06812217 | 121.61875830 | <a href="https://www.inaturalist.org/observations/101374263">https://www.inaturalist.org/observations/101374263</a> |
| 2258 | Lanius cristatus | Brown Shrike | 2021/9/29  | 1 | 0 | 25.06898166 | 121.59090250 | <a href="https://www.inaturalist.org/observations/96558461">https://www.inaturalist.org/observations/96558461</a>   |
| 2259 | Lanius cristatus | Brown Shrike | 2022/10/23 | 3 | 0 | 25.06945956 | 121.52970050 | <a href="https://www.inaturalist.org/observations/139714779">https://www.inaturalist.org/observations/139714779</a> |
| 2260 | Lanius cristatus | Brown Shrike | 2020/10/15 | 2 | 0 | 25.07125660 | 121.59671390 | <a href="https://www.inaturalist.org/observations/69182126">https://www.inaturalist.org/observations/69182126</a>   |
| 2261 | Lanius cristatus | Brown Shrike | 2021/2/17  | 2 | 0 | 25.07125660 | 121.59671390 | <a href="https://www.inaturalist.org/observations/69713836">https://www.inaturalist.org/observations/69713836</a>   |
| 2262 | Lanius cristatus | Brown Shrike | 2021/12/5  | 2 | 0 | 25.07161676 | 121.62124080 | <a href="https://www.inaturalist.org/observations/102521888">https://www.inaturalist.org/observations/102521888</a> |
| 2263 | Lanius cristatus | Brown Shrike | 2022/2/8   | 1 | 0 | 25.07274162 | 121.53777300 | <a href="https://www.inaturalist.org/observations/106365599">https://www.inaturalist.org/observations/106365599</a> |
| 2264 | Lanius cristatus | Brown Shrike | 2022/2/11  | 1 | 0 | 25.07542500 | 121.65994170 | <a href="https://www.inaturalist.org/observations/106536277">https://www.inaturalist.org/observations/106536277</a> |
| 2265 | Lanius cristatus | Brown Shrike | 2022/2/27  | 2 | 0 | 25.07698953 | 121.45731610 | <a href="https://www.inaturalist.org/observations/107635157">https://www.inaturalist.org/observations/107635157</a> |
| 2266 | Lanius cristatus | Brown Shrike | 2021/11/21 | 2 | 0 | 25.07740283 | 121.66636670 | <a href="https://www.inaturalist.org/observations/101608717">https://www.inaturalist.org/observations/101608717</a> |
| 2267 | Lanius cristatus | Brown Shrike | 2022/4/24  | 1 | 0 | 25.07778617 | 121.66653330 | <a href="https://www.inaturalist.org/observations/112658159">https://www.inaturalist.org/observations/112658159</a> |
| 2268 | Lanius cristatus | Brown Shrike | 2022/2/17  | 1 | 0 | 25.07795833 | 121.67403330 | <a href="https://www.inaturalist.org/observations/106897522">https://www.inaturalist.org/observations/106897522</a> |
| 2269 | Lanius cristatus | Brown Shrike | 2021/4/5   | 1 | 0 | 25.07997783 | 121.67146330 | <a href="https://www.inaturalist.org/observations/72994994">https://www.inaturalist.org/observations/72994994</a>   |
| 2270 | Lanius cristatus | Brown Shrike | 2022/9/22  | 1 | 0 | 25.08099923 | 121.67086300 | <a href="https://www.inaturalist.org/observations/135989147">https://www.inaturalist.org/observations/135989147</a> |
| 2271 | Lanius cristatus | Brown Shrike | 2022/5/5   | 1 | 0 | 25.08100174 | 121.67091010 | <a href="https://www.inaturalist.org/observations/115466459">https://www.inaturalist.org/observations/115466459</a> |
| 2272 | Lanius cristatus | Brown Shrike | 2021/9/18  | 5 | 0 | 25.08104186 | 121.67081900 | <a href="https://www.inaturalist.org/observations/95240748">https://www.inaturalist.org/observations/95240748</a>   |
| 2273 | Lanius cristatus | Brown Shrike | 2022/3/4   | 3 | 0 | 25.08104186 | 121.67081900 | <a href="https://www.inaturalist.org/observations/107861192">https://www.inaturalist.org/observations/107861192</a> |
| 2274 | Lanius cristatus | Brown Shrike | 2022/10/27 | 1 | 0 | 25.08118196 | 121.55614440 | <a href="https://www.inaturalist.org/observations/140121940">https://www.inaturalist.org/observations/140121940</a> |
| 2275 | Lanius cristatus | Brown Shrike | 2011/12/10 | 2 | 0 | 25.08228050 | 121.60445190 | <a href="https://www.inaturalist.org/observations/130586407">https://www.inaturalist.org/observations/130586407</a> |
| 2276 | Lanius cristatus | Brown Shrike | 2015/8/24  | 2 | 0 | 25.08272511 | 121.19819120 | <a href="https://www.inaturalist.org/observations/58824867">https://www.inaturalist.org/observations/58824867</a>   |

|      |                  |              |            |   |   |             |              |                                                                                                                     |
|------|------------------|--------------|------------|---|---|-------------|--------------|---------------------------------------------------------------------------------------------------------------------|
| 2277 | Lanius cristatus | Brown Shrike | 2010/9/25  | 2 | 0 | 25.08319153 | 121.20093780 | <a href="https://www.inaturalist.org/observations/55683838">https://www.inaturalist.org/observations/55683838</a>   |
| 2278 | Lanius cristatus | Brown Shrike | 2021/9/19  | 1 | 0 | 25.08358586 | 121.20360370 | <a href="https://www.inaturalist.org/observations/95567075">https://www.inaturalist.org/observations/95567075</a>   |
| 2279 | Lanius cristatus | Brown Shrike | 2021/9/19  | 2 | 0 | 25.08504503 | 121.20137950 | <a href="https://www.inaturalist.org/observations/95567095">https://www.inaturalist.org/observations/95567095</a>   |
| 2280 | Lanius cristatus | Brown Shrike | 2012/9/16  | 2 | 0 | 25.08587340 | 121.20014380 | <a href="https://www.inaturalist.org/observations/56493050">https://www.inaturalist.org/observations/56493050</a>   |
| 2281 | Lanius cristatus | Brown Shrike | 2015/8/30  | 3 | 0 | 25.08587340 | 121.20014380 | <a href="https://www.inaturalist.org/observations/58825257">https://www.inaturalist.org/observations/58825257</a>   |
| 2282 | Lanius cristatus | Brown Shrike | 2015/8/30  | 2 | 0 | 25.08587340 | 121.20014380 | <a href="https://www.inaturalist.org/observations/58825258">https://www.inaturalist.org/observations/58825258</a>   |
| 2283 | Lanius cristatus | Brown Shrike | 2015/8/30  | 2 | 0 | 25.08587340 | 121.20014380 | <a href="https://www.inaturalist.org/observations/58825260">https://www.inaturalist.org/observations/58825260</a>   |
| 2284 | Lanius cristatus | Brown Shrike | 2015/4/11  | 3 | 0 | 25.08641755 | 121.19904950 | <a href="https://www.inaturalist.org/observations/57626791">https://www.inaturalist.org/observations/57626791</a>   |
| 2285 | Lanius cristatus | Brown Shrike | 2019/1/10  | 2 | 0 | 25.08727894 | 121.50433040 | <a href="https://www.inaturalist.org/observations/139756618">https://www.inaturalist.org/observations/139756618</a> |
| 2286 | Lanius cristatus | Brown Shrike | 2019/1/10  | 2 | 0 | 25.08735667 | 121.50433040 | <a href="https://www.inaturalist.org/observations/139756616">https://www.inaturalist.org/observations/139756616</a> |
| 2287 | Lanius cristatus | Brown Shrike | 2022/9/10  | 1 | 0 | 25.08748861 | 121.19861440 | <a href="https://www.inaturalist.org/observations/144837985">https://www.inaturalist.org/observations/144837985</a> |
| 2288 | Lanius cristatus | Brown Shrike | 2021/8/27  | 1 | 0 | 25.08751667 | 121.17767170 | <a href="https://www.inaturalist.org/observations/92912746">https://www.inaturalist.org/observations/92912746</a>   |
| 2289 | Lanius cristatus | Brown Shrike | 2019/1/10  | 2 | 0 | 25.08782329 | 121.50416950 | <a href="https://www.inaturalist.org/observations/139756613">https://www.inaturalist.org/observations/139756613</a> |
| 2290 | Lanius cristatus | Brown Shrike | 2021/9/5   | 1 | 0 | 25.08842000 | 121.17948170 | <a href="https://www.inaturalist.org/observations/93707512">https://www.inaturalist.org/observations/93707512</a>   |
| 2291 | Lanius cristatus | Brown Shrike | 2022/2/27  | 1 | 0 | 25.08865017 | 121.45452360 | <a href="https://www.inaturalist.org/observations/107635166">https://www.inaturalist.org/observations/107635166</a> |
| 2292 | Lanius cristatus | Brown Shrike | 2021/3/9   | 3 | 0 | 25.08873609 | 121.45036550 | <a href="https://www.inaturalist.org/observations/71937177">https://www.inaturalist.org/observations/71937177</a>   |
| 2293 | Lanius cristatus | Brown Shrike | 2022/12/24 | 1 | 0 | 25.09062778 | 121.51157220 | <a href="https://www.inaturalist.org/observations/145039696">https://www.inaturalist.org/observations/145039696</a> |
| 2294 | Lanius cristatus | Brown Shrike | 2020/4/16  | 2 | 0 | 25.09109600 | 121.58130200 | <a href="https://www.inaturalist.org/observations/59027288">https://www.inaturalist.org/observations/59027288</a>   |
| 2295 | Lanius cristatus | Brown Shrike | 2018/10/7  | 3 | 0 | 25.09130482 | 121.44999220 | <a href="https://www.inaturalist.org/observations/18409163">https://www.inaturalist.org/observations/18409163</a>   |
| 2296 | Lanius cristatus | Brown Shrike | 2021/10/14 | 2 | 0 | 25.09159028 | 121.58306720 | <a href="https://www.inaturalist.org/observations/98255810">https://www.inaturalist.org/observations/98255810</a>   |
| 2297 | Lanius cristatus | Brown Shrike | 2021/10/2  | 1 | 0 | 25.09160167 | 121.18476330 | <a href="https://www.inaturalist.org/observations/96992826">https://www.inaturalist.org/observations/96992826</a>   |
| 2298 | Lanius cristatus | Brown Shrike | 2021/10/14 | 2 | 0 | 25.09160646 | 121.58306450 | <a href="https://www.inaturalist.org/observations/98255811">https://www.inaturalist.org/observations/98255811</a>   |
| 2299 | Lanius cristatus | Brown Shrike | 2021/9/5   | 1 | 0 | 25.09182500 | 121.18505830 | <a href="https://www.inaturalist.org/observations/93707509">https://www.inaturalist.org/observations/93707509</a>   |

|      |                  |              |            |   |   |             |              |                                                                                                                     |
|------|------------------|--------------|------------|---|---|-------------|--------------|---------------------------------------------------------------------------------------------------------------------|
| 2300 | Lanius cristatus | Brown Shrike | 2022/4/6   | 1 | 0 | 25.09220717 | 121.46309140 | <a href="https://www.inaturalist.org/observations/110559711">https://www.inaturalist.org/observations/110559711</a> |
| 2301 | Lanius cristatus | Brown Shrike | 2021/9/5   | 1 | 0 | 25.09223167 | 121.18613830 | <a href="https://www.inaturalist.org/observations/93707510">https://www.inaturalist.org/observations/93707510</a>   |
| 2302 | Lanius cristatus | Brown Shrike | 2022/12/24 | 1 | 0 | 25.09277927 | 121.45397450 | <a href="https://www.inaturalist.org/observations/145244852">https://www.inaturalist.org/observations/145244852</a> |
| 2303 | Lanius cristatus | Brown Shrike | 2020/9/5   | 3 | 0 | 25.09285352 | 121.52768520 | <a href="https://www.inaturalist.org/observations/58581807">https://www.inaturalist.org/observations/58581807</a>   |
| 2304 | Lanius cristatus | Brown Shrike | 2020/3/3   | 2 | 0 | 25.09307740 | 121.53239640 | <a href="https://www.inaturalist.org/observations/39555441">https://www.inaturalist.org/observations/39555441</a>   |
| 2305 | Lanius cristatus | Brown Shrike | 2022/2/4   | 1 | 0 | 25.09309397 | 121.18899070 | <a href="https://www.inaturalist.org/observations/110140444">https://www.inaturalist.org/observations/110140444</a> |
| 2306 | Lanius cristatus | Brown Shrike | 2021/12/5  | 1 | 0 | 25.09445866 | 121.45077750 | <a href="https://www.inaturalist.org/observations/105599712">https://www.inaturalist.org/observations/105599712</a> |
| 2307 | Lanius cristatus | Brown Shrike | 2022/11/19 | 2 | 0 | 25.09447003 | 121.45101850 | <a href="https://www.inaturalist.org/observations/142349551">https://www.inaturalist.org/observations/142349551</a> |
| 2308 | Lanius cristatus | Brown Shrike | 2022/1/10  | 1 | 0 | 25.09458727 | 121.45776660 | <a href="https://www.inaturalist.org/observations/104711078">https://www.inaturalist.org/observations/104711078</a> |
| 2309 | Lanius cristatus | Brown Shrike | 2022/1/10  | 1 | 0 | 25.09459863 | 121.46061490 | <a href="https://www.inaturalist.org/observations/104706082">https://www.inaturalist.org/observations/104706082</a> |
| 2310 | Lanius cristatus | Brown Shrike | 2020/1/31  | 3 | 0 | 25.09497147 | 121.52950000 | <a href="https://www.inaturalist.org/observations/38330284">https://www.inaturalist.org/observations/38330284</a>   |
| 2311 | Lanius cristatus | Brown Shrike | 2022/9/11  | 1 | 0 | 25.09513286 | 121.45084090 | <a href="https://www.inaturalist.org/observations/136562964">https://www.inaturalist.org/observations/136562964</a> |
| 2312 | Lanius cristatus | Brown Shrike | 2022/12/10 | 1 | 0 | 25.09521277 | 121.45086190 | <a href="https://www.inaturalist.org/observations/145245417">https://www.inaturalist.org/observations/145245417</a> |
| 2313 | Lanius cristatus | Brown Shrike | 2022/9/30  | 2 | 0 | 25.09538083 | 121.55698500 | <a href="https://www.inaturalist.org/observations/142570600">https://www.inaturalist.org/observations/142570600</a> |
| 2314 | Lanius cristatus | Brown Shrike | 2021/2/6   | 2 | 0 | 25.09567773 | 121.45105640 | <a href="https://www.inaturalist.org/observations/71934680">https://www.inaturalist.org/observations/71934680</a>   |
| 2315 | Lanius cristatus | Brown Shrike | 2022/12/24 | 1 | 0 | 25.09707833 | 121.49708500 | <a href="https://www.inaturalist.org/observations/145039695">https://www.inaturalist.org/observations/145039695</a> |
| 2316 | Lanius cristatus | Brown Shrike | 2019/4/7   | 2 | 0 | 25.09769833 | 121.20677330 | <a href="https://www.inaturalist.org/observations/22135434">https://www.inaturalist.org/observations/22135434</a>   |
| 2317 | Lanius cristatus | Brown Shrike | 2019/4/17  | 2 | 0 | 25.09784480 | 121.45682380 | <a href="https://www.inaturalist.org/observations/22651096">https://www.inaturalist.org/observations/22651096</a>   |
| 2318 | Lanius cristatus | Brown Shrike | 2021/12/5  | 1 | 0 | 25.09807640 | 121.45508090 | <a href="https://www.inaturalist.org/observations/105599711">https://www.inaturalist.org/observations/105599711</a> |
| 2319 | Lanius cristatus | Brown Shrike | 2020/4/19  | 4 | 0 | 25.09813400 | 121.45389800 | <a href="https://www.inaturalist.org/observations/45070042">https://www.inaturalist.org/observations/45070042</a>   |
| 2320 | Lanius cristatus | Brown Shrike | 2021/11/1  | 1 | 0 | 25.09814482 | 121.45647090 | <a href="https://www.inaturalist.org/observations/100127245">https://www.inaturalist.org/observations/100127245</a> |
| 2321 | Lanius cristatus | Brown Shrike | 2022/9/11  | 1 | 0 | 25.09818048 | 121.45606710 | <a href="https://www.inaturalist.org/observations/136562975">https://www.inaturalist.org/observations/136562975</a> |
| 2322 | Lanius cristatus | Brown Shrike | 2022/2/26  | 3 | 0 | 25.09842890 | 121.45625450 | <a href="https://www.inaturalist.org/observations/107463600">https://www.inaturalist.org/observations/107463600</a> |

|      |                                 |              |            |   |   |             |              |                                                                                                                     |
|------|---------------------------------|--------------|------------|---|---|-------------|--------------|---------------------------------------------------------------------------------------------------------------------|
| 2323 | Lanius cristatus                | Brown Shrike | 2015/4/12  | 2 | 0 | 25.09865496 | 121.22174960 | <a href="https://www.inaturalist.org/observations/57627325">https://www.inaturalist.org/observations/57627325</a>   |
| 2324 | Lanius cristatus                | Brown Shrike | 2022/11/13 | 2 | 0 | 25.09914847 | 121.45327120 | <a href="https://www.inaturalist.org/observations/141876815">https://www.inaturalist.org/observations/141876815</a> |
| 2325 | Lanius cristatus                | Brown Shrike | 2019/9/25  | 2 | 0 | 25.09916578 | 121.45762300 | <a href="https://www.inaturalist.org/observations/34949710">https://www.inaturalist.org/observations/34949710</a>   |
| 2326 | Lanius cristatus                | Brown Shrike | 2020/12/5  | 2 | 0 | 25.09964727 | 121.45476450 | <a href="https://www.inaturalist.org/observations/66324515">https://www.inaturalist.org/observations/66324515</a>   |
| 2327 | Lanius cristatus                | Brown Shrike | 2014/3/1   | 2 | 0 | 25.10000563 | 121.20730270 | <a href="https://www.inaturalist.org/observations/56903936">https://www.inaturalist.org/observations/56903936</a>   |
| 2328 | Lanius cristatus                | Brown Shrike | 2018/2/2   | 2 | 0 | 25.10569450 | 121.52396330 | <a href="https://www.inaturalist.org/observations/9701053">https://www.inaturalist.org/observations/9701053</a>     |
| 2329 | Lanius cristatus                | Brown Shrike | 2020/11/15 | 2 | 0 | 25.10856881 | 121.45607930 | <a href="https://www.inaturalist.org/observations/64914421">https://www.inaturalist.org/observations/64914421</a>   |
| 2330 | Lanius cristatus<br>lucionensis | Brown Shrike | 2021/2/5   | 1 | 0 | 25.11186330 | 121.49338170 | <a href="https://www.inaturalist.org/observations/69084565">https://www.inaturalist.org/observations/69084565</a>   |
| 2331 | Lanius cristatus                | Brown Shrike | 2018/10/6  | 3 | 0 | 25.11317053 | 121.48904610 | <a href="https://www.inaturalist.org/observations/17236681">https://www.inaturalist.org/observations/17236681</a>   |
| 2332 | Lanius cristatus                | Brown Shrike | 2018/4/15  | 2 | 0 | 25.11318450 | 121.48977680 | <a href="https://www.inaturalist.org/observations/15778085">https://www.inaturalist.org/observations/15778085</a>   |
| 2333 | Lanius cristatus                | Brown Shrike | 2019/12/9  | 3 | 0 | 25.11330205 | 121.48982900 | <a href="https://www.inaturalist.org/observations/54244876">https://www.inaturalist.org/observations/54244876</a>   |
| 2334 | Lanius cristatus                | Brown Shrike | 2021/3/29  | 1 | 0 | 25.11561495 | 121.53589830 | <a href="https://www.inaturalist.org/observations/72344693">https://www.inaturalist.org/observations/72344693</a>   |
| 2335 | Lanius cristatus                | Brown Shrike | 2020/12/21 | 2 | 0 | 25.11577300 | 121.49112000 | <a href="https://www.inaturalist.org/observations/67755193">https://www.inaturalist.org/observations/67755193</a>   |
| 2336 | Lanius cristatus                | Brown Shrike | 2022/1/20  | 2 | 0 | 25.11867231 | 121.47214300 | <a href="https://www.inaturalist.org/observations/105421255">https://www.inaturalist.org/observations/105421255</a> |
| 2337 | Lanius cristatus                | Brown Shrike | 2020/3/5   | 3 | 0 | 25.11871422 | 121.47119520 | <a href="https://www.inaturalist.org/observations/40942327">https://www.inaturalist.org/observations/40942327</a>   |
| 2338 | Lanius cristatus                | Brown Shrike | 2020/2/15  | 3 | 0 | 25.11883100 | 121.47126600 | <a href="https://www.inaturalist.org/observations/38898429">https://www.inaturalist.org/observations/38898429</a>   |
| 2339 | Lanius cristatus                | Brown Shrike | 2022/1/20  | 2 | 0 | 25.11883845 | 121.47151940 | <a href="https://www.inaturalist.org/observations/105421253">https://www.inaturalist.org/observations/105421253</a> |
| 2340 | Lanius cristatus<br>lucionensis | Brown Shrike | 2021/11/28 | 0 | 0 | 25.11902217 | 121.47228330 | <a href="https://www.inaturalist.org/observations/102074322">https://www.inaturalist.org/observations/102074322</a> |
| 2341 | Lanius cristatus                | Brown Shrike | 2018/12/26 | 2 | 0 | 25.11913840 | 121.47201040 | <a href="https://www.inaturalist.org/observations/33880399">https://www.inaturalist.org/observations/33880399</a>   |
| 2342 | Lanius cristatus                | Brown Shrike | 2021/4/30  | 2 | 0 | 25.11914800 | 121.47248600 | <a href="https://www.inaturalist.org/observations/76987132">https://www.inaturalist.org/observations/76987132</a>   |
| 2343 | Lanius cristatus                | Brown Shrike | 2021/3/19  | 1 | 0 | 25.12245211 | 121.52697970 | <a href="https://www.inaturalist.org/observations/107177027">https://www.inaturalist.org/observations/107177027</a> |
| 2344 | Lanius cristatus                | Brown Shrike | 2019/4/20  | 2 | 0 | 25.12616333 | 121.48742330 | <a href="https://www.inaturalist.org/observations/22752880">https://www.inaturalist.org/observations/22752880</a>   |
| 2345 | Lanius cristatus<br>lucionensis | Brown Shrike | 2021/4/26  | 0 | 0 | 25.12664450 | 121.48754170 | <a href="https://www.inaturalist.org/observations/75285363">https://www.inaturalist.org/observations/75285363</a>   |

|      |                  |              |            |   |   |             |              |                                                                                                                     |
|------|------------------|--------------|------------|---|---|-------------|--------------|---------------------------------------------------------------------------------------------------------------------|
| 2346 | Lanius cristatus | Brown Shrike | 2021/4/2   | 1 | 0 | 25.12678722 | 121.48775500 | <a href="https://www.inaturalist.org/observations/72706533">https://www.inaturalist.org/observations/72706533</a>   |
| 2347 | Lanius cristatus | Brown Shrike | 2009/10/20 | 2 | 0 | 25.12925344 | 121.48883560 | <a href="https://www.inaturalist.org/observations/55377853">https://www.inaturalist.org/observations/55377853</a>   |
| 2348 | Lanius cristatus | Brown Shrike | 2008/10/8  | 1 | 0 | 25.13039010 | 121.49875050 | <a href="https://www.inaturalist.org/observations/79223152">https://www.inaturalist.org/observations/79223152</a>   |
| 2349 | Lanius cristatus | Brown Shrike | 2021/1/1   | 2 | 0 | 25.13395833 | 121.80627500 | <a href="https://www.inaturalist.org/observations/67385833">https://www.inaturalist.org/observations/67385833</a>   |
| 2350 | Lanius cristatus | Brown Shrike | 2021/11/14 | 1 | 0 | 25.14107960 | 121.79722590 | <a href="https://www.inaturalist.org/observations/101059691">https://www.inaturalist.org/observations/101059691</a> |
| 2351 | Lanius cristatus | Brown Shrike | 2022/3/18  | 1 | 0 | 25.14593809 | 121.80454270 | <a href="https://www.inaturalist.org/observations/108856491">https://www.inaturalist.org/observations/108856491</a> |
| 2352 | Lanius cristatus | Brown Shrike | 2022/8/25  | 1 | 0 | 25.14622500 | 121.79853610 | <a href="https://www.inaturalist.org/observations/132277015">https://www.inaturalist.org/observations/132277015</a> |
| 2353 | Lanius cristatus | Brown Shrike | 2017/12/28 | 2 | 0 | 25.14989273 | 121.45866710 | <a href="https://www.inaturalist.org/observations/19940488">https://www.inaturalist.org/observations/19940488</a>   |
| 2354 | Lanius cristatus | Brown Shrike | 2022/4/3   | 1 | 0 | 25.15480049 | 121.45193820 | <a href="https://www.inaturalist.org/observations/123794501">https://www.inaturalist.org/observations/123794501</a> |
| 2355 | Lanius cristatus | Brown Shrike | 2018/10/1  | 2 | 0 | 25.16313333 | 121.41718830 | <a href="https://www.inaturalist.org/observations/19047025">https://www.inaturalist.org/observations/19047025</a>   |
| 2356 | Lanius cristatus | Brown Shrike | 2022/4/3   | 2 | 0 | 25.16557423 | 121.49119750 | <a href="https://www.inaturalist.org/observations/110282581">https://www.inaturalist.org/observations/110282581</a> |
| 2357 | Lanius cristatus | Brown Shrike | 2021/11/25 | 1 | 0 | 25.17198050 | 121.44337060 | <a href="https://www.inaturalist.org/observations/101876629">https://www.inaturalist.org/observations/101876629</a> |
| 2358 | Lanius cristatus | Brown Shrike | 2020/9/1   | 2 | 0 | 25.17856279 | 121.65121700 | <a href="https://www.inaturalist.org/observations/58323234">https://www.inaturalist.org/observations/58323234</a>   |
| 2359 | Lanius cristatus | Brown Shrike | 2018/11/25 | 4 | 0 | 25.19265640 | 75.10332514  | <a href="https://www.inaturalist.org/observations/121574449">https://www.inaturalist.org/observations/121574449</a> |
| 2360 | Lanius cristatus | Brown Shrike | 2021/9/15  | 1 | 0 | 25.22625167 | 121.64291830 | <a href="https://www.inaturalist.org/observations/94909131">https://www.inaturalist.org/observations/94909131</a>   |
| 2361 | Lanius cristatus | Brown Shrike | 2021/9/15  | 1 | 0 | 25.22637333 | 121.64284330 | <a href="https://www.inaturalist.org/observations/94909169">https://www.inaturalist.org/observations/94909169</a>   |
| 2362 | Lanius cristatus | Brown Shrike | 2020/10/10 | 1 | 0 | 25.22642274 | 121.64239770 | <a href="https://www.inaturalist.org/observations/62276627">https://www.inaturalist.org/observations/62276627</a>   |
| 2363 | Lanius cristatus | Brown Shrike | 2010/11/13 | 2 | 0 | 25.22652275 | 121.64174320 | <a href="https://www.inaturalist.org/observations/55754493">https://www.inaturalist.org/observations/55754493</a>   |
| 2364 | Lanius cristatus | Brown Shrike | 2022/1/10  | 1 | 0 | 25.22845418 | 121.64221170 | <a href="https://www.inaturalist.org/observations/104699321">https://www.inaturalist.org/observations/104699321</a> |
| 2365 | Lanius cristatus | Brown Shrike | 2015/10/14 | 4 | 0 | 25.23230900 | 121.62981700 | <a href="https://www.inaturalist.org/observations/8750166">https://www.inaturalist.org/observations/8750166</a>     |
| 2366 | Lanius cristatus | Brown Shrike | 2020/10/30 | 1 | 0 | 25.31008387 | 91.90259714  | <a href="https://www.inaturalist.org/observations/77865591">https://www.inaturalist.org/observations/77865591</a>   |
| 2367 | Lanius cristatus | Brown Shrike | 2020/3/19  | 1 | 0 | 25.31167448 | 91.89880550  | <a href="https://www.inaturalist.org/observations/103251535">https://www.inaturalist.org/observations/103251535</a> |
| 2368 | Lanius cristatus | Brown Shrike | 2018/12/16 | 5 | 0 | 25.52601990 | 92.13274910  | <a href="https://www.inaturalist.org/observations/19859183">https://www.inaturalist.org/observations/19859183</a>   |

|      |                                 |              |            |   |   |             |              |                                                                                                                     |
|------|---------------------------------|--------------|------------|---|---|-------------|--------------|---------------------------------------------------------------------------------------------------------------------|
| 2369 | Lanius cristatus                | Brown Shrike | 2021/1/23  | 3 | 0 | 25.55528523 | 91.90478677  | <a href="https://www.inaturalist.org/observations/75878319">https://www.inaturalist.org/observations/75878319</a>   |
| 2370 | Lanius cristatus                | Brown Shrike | 2019/1/24  | 4 | 0 | 25.60358665 | 91.89191373  | <a href="https://www.inaturalist.org/observations/19842093">https://www.inaturalist.org/observations/19842093</a>   |
| 2371 | Lanius cristatus                | Brown Shrike | 2019/12/13 | 2 | 0 | 25.63000526 | 88.12868111  | <a href="https://www.inaturalist.org/observations/57908151">https://www.inaturalist.org/observations/57908151</a>   |
| 2372 | Lanius cristatus                | Brown Shrike | 2022/7/8   | 0 | 0 | 25.70000000 | 100.10000000 | <a href="https://www.inaturalist.org/observations/130510005">https://www.inaturalist.org/observations/130510005</a> |
| 2373 | Lanius cristatus                | Brown Shrike | 2022/7/6   | 0 | 0 | 25.70000000 | 100.10000000 | <a href="https://www.inaturalist.org/observations/130514759">https://www.inaturalist.org/observations/130514759</a> |
| 2374 | Lanius cristatus                | Brown Shrike | 2013/7/26  | 2 | 0 | 25.70804937 | 100.18296120 | <a href="https://www.inaturalist.org/observations/17168879">https://www.inaturalist.org/observations/17168879</a>   |
| 2375 | Lanius cristatus                | Brown Shrike | 2013/4/26  | 1 | 0 | 25.76135405 | 110.12860210 | <a href="https://www.inaturalist.org/observations/105586701">https://www.inaturalist.org/observations/105586701</a> |
| 2376 | Lanius cristatus                | Brown Shrike | 2020/9/14  | 2 | 0 | 25.82715009 | 118.48213790 | <a href="https://www.inaturalist.org/observations/59679325">https://www.inaturalist.org/observations/59679325</a>   |
| 2377 | Lanius cristatus                | Brown Shrike | 2020/9/10  | 2 | 0 | 25.82754843 | 118.48125180 | <a href="https://www.inaturalist.org/observations/59677178">https://www.inaturalist.org/observations/59677178</a>   |
| 2378 | Lanius cristatus                | Brown Shrike | 2011/1/14  | 2 | 0 | 25.84652500 | 93.42987500  | <a href="https://www.inaturalist.org/observations/103884131">https://www.inaturalist.org/observations/103884131</a> |
| 2379 | Lanius cristatus                | Brown Shrike | 2017/10/19 | 1 | 0 | 25.95199649 | 119.97291390 | <a href="https://www.inaturalist.org/observations/13259478">https://www.inaturalist.org/observations/13259478</a>   |
| 2380 | Lanius cristatus                | Brown Shrike | 2021/12/26 | 1 | 0 | 26.17723724 | 91.76432122  | <a href="https://www.inaturalist.org/observations/103677296">https://www.inaturalist.org/observations/103677296</a> |
| 2381 | Lanius cristatus                | Brown Shrike | 2022/2/12  | 2 | 0 | 26.19615435 | 91.69796102  | <a href="https://www.inaturalist.org/observations/107013751">https://www.inaturalist.org/observations/107013751</a> |
| 2382 | Lanius cristatus                | Brown Shrike | 2015/12/16 | 1 | 0 | 26.21765237 | 91.63311252  | <a href="https://www.inaturalist.org/observations/90516749">https://www.inaturalist.org/observations/90516749</a>   |
| 2383 | Lanius cristatus<br>lucionensis | Brown Shrike | 2019/4/28  | 2 | 0 | 26.21829000 | 119.97498500 | <a href="https://www.inaturalist.org/observations/24820036">https://www.inaturalist.org/observations/24820036</a>   |
| 2384 | Lanius cristatus                | Brown Shrike | 2015/12/16 | 1 | 0 | 26.21895971 | 91.63298368  | <a href="https://www.inaturalist.org/observations/129148175">https://www.inaturalist.org/observations/129148175</a> |
| 2385 | Lanius cristatus                | Brown Shrike | 2014/3/16  | 4 | 0 | 26.27863958 | 91.72485352  | <a href="https://www.inaturalist.org/observations/9482581">https://www.inaturalist.org/observations/9482581</a>     |
| 2386 | Lanius cristatus                | Brown Shrike | 2011/7/8   | 2 | 0 | 26.32099075 | 99.84962082  | <a href="http://www.inaturalist.org/observations/4696423">http://www.inaturalist.org/observations/4696423</a>       |
| 2387 | Lanius cristatus                | Brown Shrike | 2017/10/29 | 3 | 0 | 26.32700170 | 89.43855300  | <a href="https://www.inaturalist.org/observations/58124876">https://www.inaturalist.org/observations/58124876</a>   |
| 2388 | Lanius cristatus                | Brown Shrike | 2021/5/21  | 1 | 0 | 26.42342173 | 106.36952590 | <a href="https://www.inaturalist.org/observations/80365549">https://www.inaturalist.org/observations/80365549</a>   |
| 2389 | Lanius cristatus                | Brown Shrike | 2021/5/21  | 1 | 0 | 26.42342173 | 106.36952590 | <a href="https://www.inaturalist.org/observations/80365563">https://www.inaturalist.org/observations/80365563</a>   |
| 2390 | Lanius cristatus                | Brown Shrike | 2021/5/21  | 1 | 0 | 26.42342173 | 106.36952590 | <a href="https://www.inaturalist.org/observations/80365570">https://www.inaturalist.org/observations/80365570</a>   |
| 2391 | Lanius cristatus                | Brown Shrike | 2022/5/14  | 2 | 0 | 26.42342173 | 106.36952590 | <a href="https://www.inaturalist.org/observations/118212128">https://www.inaturalist.org/observations/118212128</a> |

|      |                  |              |            |   |   |             |              |                                                                                                                     |
|------|------------------|--------------|------------|---|---|-------------|--------------|---------------------------------------------------------------------------------------------------------------------|
| 2392 | Lanius cristatus | Brown Shrike | 2022/5/14  | 1 | 0 | 26.42342173 | 106.36952590 | <a href="https://www.inaturalist.org/observations/123825434">https://www.inaturalist.org/observations/123825434</a> |
| 2393 | Lanius cristatus | Brown Shrike | 2021/5/21  | 1 | 0 | 26.44083862 | 106.48329400 | <a href="https://www.inaturalist.org/observations/80365505">https://www.inaturalist.org/observations/80365505</a>   |
| 2394 | Lanius cristatus | Brown Shrike | 2021/5/21  | 1 | 0 | 26.44083862 | 106.48329400 | <a href="https://www.inaturalist.org/observations/80367568">https://www.inaturalist.org/observations/80367568</a>   |
| 2395 | Lanius cristatus | Brown Shrike | 2021/5/8   | 1 | 0 | 26.46619599 | 106.67869760 | <a href="https://www.inaturalist.org/observations/78349351">https://www.inaturalist.org/observations/78349351</a>   |
| 2396 | Lanius cristatus | Brown Shrike | 2021/5/8   | 1 | 0 | 26.46619599 | 106.67869760 | <a href="https://www.inaturalist.org/observations/78349366">https://www.inaturalist.org/observations/78349366</a>   |
| 2397 | Lanius cristatus | Brown Shrike | 2021/5/8   | 1 | 0 | 26.46619599 | 106.67869760 | <a href="https://www.inaturalist.org/observations/78349373">https://www.inaturalist.org/observations/78349373</a>   |
| 2398 | Lanius cristatus | Brown Shrike | 2021/5/8   | 1 | 0 | 26.46619599 | 106.67869760 | <a href="https://www.inaturalist.org/observations/78356774">https://www.inaturalist.org/observations/78356774</a>   |
| 2399 | Lanius cristatus | Brown Shrike | 2020/5/9   | 2 | 0 | 26.46889170 | 106.67842690 | <a href="https://www.inaturalist.org/observations/45377440">https://www.inaturalist.org/observations/45377440</a>   |
| 2400 | Lanius cristatus | Brown Shrike | 2020/5/9   | 2 | 0 | 26.46889170 | 106.67842690 | <a href="https://www.inaturalist.org/observations/45377490">https://www.inaturalist.org/observations/45377490</a>   |
| 2401 | Lanius cristatus | Brown Shrike | 2022/5/6   | 1 | 0 | 26.50934121 | 106.64975520 | <a href="https://www.inaturalist.org/observations/117731315">https://www.inaturalist.org/observations/117731315</a> |
| 2402 | Lanius cristatus | Brown Shrike | 2022/5/6   | 1 | 0 | 26.50934121 | 106.64975520 | <a href="https://www.inaturalist.org/observations/117731322">https://www.inaturalist.org/observations/117731322</a> |
| 2403 | Lanius cristatus | Brown Shrike | 2022/11/20 | 0 | 0 | 26.51933620 | 88.73813121  | <a href="https://www.inaturalist.org/observations/142457050">https://www.inaturalist.org/observations/142457050</a> |
| 2404 | Lanius cristatus | Brown Shrike | 2019/12/8  | 3 | 0 | 26.52528130 | 92.99380800  | <a href="https://www.inaturalist.org/observations/39897402">https://www.inaturalist.org/observations/39897402</a>   |
| 2405 | Lanius cristatus | Brown Shrike | 2018/11/15 | 3 | 0 | 26.52528130 | 92.99380800  | <a href="https://www.inaturalist.org/observations/69928280">https://www.inaturalist.org/observations/69928280</a>   |
| 2406 | Lanius cristatus | Brown Shrike | 2017/11/8  | 1 | 0 | 26.57753100 | 93.17112200  | <a href="https://www.inaturalist.org/observations/82655848">https://www.inaturalist.org/observations/82655848</a>   |
| 2407 | Lanius cristatus | Brown Shrike | 2018/11/12 | 1 | 0 | 26.57753100 | 93.17112200  | <a href="https://www.inaturalist.org/observations/100735663">https://www.inaturalist.org/observations/100735663</a> |
| 2408 | Lanius cristatus | Brown Shrike | 2011/2/27  | 3 | 0 | 26.58990267 | 93.16069710  | <a href="https://www.inaturalist.org/observations/55277147">https://www.inaturalist.org/observations/55277147</a>   |
| 2409 | Lanius cristatus | Brown Shrike | 2022/10/21 | 2 | 0 | 26.61378838 | 89.97772809  | <a href="https://www.inaturalist.org/observations/140401733">https://www.inaturalist.org/observations/140401733</a> |
| 2410 | Lanius cristatus | Brown Shrike | 2022/10/10 | 3 | 0 | 26.62545734 | 94.35860038  | <a href="https://www.inaturalist.org/observations/138485826">https://www.inaturalist.org/observations/138485826</a> |
| 2411 | Lanius cristatus | Brown Shrike | 2022/10/16 | 0 | 0 | 26.62602711 | 94.35869358  | <a href="https://www.inaturalist.org/observations/139342450">https://www.inaturalist.org/observations/139342450</a> |
| 2412 | Lanius cristatus | Brown Shrike | 2022/5/13  | 1 | 0 | 26.64680980 | 106.54746180 | <a href="https://www.inaturalist.org/observations/117750661">https://www.inaturalist.org/observations/117750661</a> |
| 2413 | Lanius cristatus | Brown Shrike | 2018/5/3   | 3 | 0 | 26.64733550 | 89.54833710  | <a href="https://www.inaturalist.org/observations/29619329">https://www.inaturalist.org/observations/29619329</a>   |
| 2414 | Lanius cristatus | Brown Shrike | 2018/5/3   | 4 | 0 | 26.64766919 | 89.54829418  | <a href="https://www.inaturalist.org/observations/29619330">https://www.inaturalist.org/observations/29619330</a>   |



|      |                  |              |            |   |   |             |              |                                                                                                                     |
|------|------------------|--------------|------------|---|---|-------------|--------------|---------------------------------------------------------------------------------------------------------------------|
| 2415 | Lanius cristatus | Brown Shrike | 2021/11/2  | 1 | 0 | 26.69715347 | 93.97693176  | <a href="https://www.inaturalist.org/observations/100077250">https://www.inaturalist.org/observations/100077250</a> |
| 2416 | Lanius cristatus | Brown Shrike | 2022/5/20  | 1 | 0 | 26.73460493 | 106.65555950 | <a href="https://www.inaturalist.org/observations/119718912">https://www.inaturalist.org/observations/119718912</a> |
| 2417 | Lanius cristatus | Brown Shrike | 2022/5/20  | 0 | 0 | 26.73460493 | 106.65555950 | <a href="https://www.inaturalist.org/observations/119718925">https://www.inaturalist.org/observations/119718925</a> |
| 2418 | Lanius cristatus | Brown Shrike | 2020/11/25 | 2 | 0 | 26.78856434 | 94.21399679  | <a href="https://www.inaturalist.org/observations/65619812">https://www.inaturalist.org/observations/65619812</a>   |
| 2419 | Lanius cristatus | Brown Shrike | 2021/5/2   | 1 | 0 | 26.79601294 | 106.89834910 | <a href="https://www.inaturalist.org/observations/78328292">https://www.inaturalist.org/observations/78328292</a>   |
| 2420 | Lanius cristatus | Brown Shrike | 2022/5/10  | 3 | 0 | 26.81517800 | 88.82479760  | <a href="https://www.inaturalist.org/observations/118380459">https://www.inaturalist.org/observations/118380459</a> |
| 2421 | Lanius cristatus | Brown Shrike | 2019/3/9   | 5 | 0 | 26.84144933 | 88.82592570  | <a href="https://www.inaturalist.org/observations/26903554">https://www.inaturalist.org/observations/26903554</a>   |
| 2422 | Lanius cristatus | Brown Shrike | 2014/12/15 | 2 | 0 | 26.84452830 | 88.33971960  | <a href="https://www.inaturalist.org/observations/126604485">https://www.inaturalist.org/observations/126604485</a> |
| 2423 | Lanius cristatus | Brown Shrike | 2019/10/1  | 3 | 0 | 26.84953160 | 91.86521830  | <a href="https://www.inaturalist.org/observations/33709851">https://www.inaturalist.org/observations/33709851</a>   |
| 2424 | Lanius cristatus | Brown Shrike | 2019/10/6  | 3 | 0 | 26.84990770 | 91.86460830  | <a href="https://www.inaturalist.org/observations/34001222">https://www.inaturalist.org/observations/34001222</a>   |
| 2425 | Lanius cristatus | Brown Shrike | 2020/11/5  | 2 | 0 | 26.85023841 | 92.77330287  | <a href="https://www.inaturalist.org/observations/64246952">https://www.inaturalist.org/observations/64246952</a>   |
| 2426 | Lanius cristatus | Brown Shrike | 2021/9/9   | 2 | 0 | 26.85198143 | 88.25151790  | <a href="https://www.inaturalist.org/observations/94439065">https://www.inaturalist.org/observations/94439065</a>   |
| 2427 | Lanius cristatus | Brown Shrike | 2014/12/12 | 3 | 0 | 26.89552695 | 88.39755474  | <a href="https://www.inaturalist.org/observations/126599383">https://www.inaturalist.org/observations/126599383</a> |
| 2428 | Lanius cristatus | Brown Shrike | 2020/9/2   | 1 | 0 | 26.94237418 | 94.15179972  | <a href="https://www.inaturalist.org/observations/93684285">https://www.inaturalist.org/observations/93684285</a>   |
| 2429 | Lanius cristatus | Brown Shrike | 2019/11/21 | 4 | 0 | 26.95662308 | 75.84354401  | <a href="https://www.inaturalist.org/observations/35914818">https://www.inaturalist.org/observations/35914818</a>   |
| 2430 | Lanius cristatus | Brown Shrike | 2019/10/19 | 1 | 0 | 27.06117639 | 88.41054440  | <a href="https://www.inaturalist.org/observations/93213720">https://www.inaturalist.org/observations/93213720</a>   |
| 2431 | Lanius cristatus | Brown Shrike | 2008/12/2  | 3 | 0 | 27.15926900 | 77.52319990  | <a href="https://www.inaturalist.org/observations/55245734">https://www.inaturalist.org/observations/55245734</a>   |
| 2432 | Lanius cristatus | Brown Shrike | 2019/1/4   | 1 | 0 | 27.16647005 | 77.51560175  | <a href="https://www.inaturalist.org/observations/120664100">https://www.inaturalist.org/observations/120664100</a> |
| 2433 | Lanius cristatus | Brown Shrike | 1994/1/10  | 2 | 0 | 27.20324720 | 77.50702240  | <a href="https://www.inaturalist.org/observations/89164824">https://www.inaturalist.org/observations/89164824</a>   |
| 2434 | Lanius cristatus | Brown Shrike | 2022/9/21  | 1 | 0 | 27.48153873 | 88.50563556  | <a href="https://www.inaturalist.org/observations/136659550">https://www.inaturalist.org/observations/136659550</a> |
| 2435 | Lanius cristatus | Brown Shrike | 2019/10/10 | 4 | 0 | 27.73505472 | 96.33909257  | <a href="https://www.inaturalist.org/observations/39519335">https://www.inaturalist.org/observations/39519335</a>   |
| 2436 | Lanius cristatus | Brown Shrike | 2020/11/12 | 2 | 0 | 28.05539165 | 73.33982315  | <a href="https://www.inaturalist.org/observations/64732232">https://www.inaturalist.org/observations/64732232</a>   |
| 2437 | Lanius cristatus | Brown Shrike | 2021/5/5   | 1 | 0 | 28.12676842 | 112.92630950 | <a href="https://www.inaturalist.org/observations/77629717">https://www.inaturalist.org/observations/77629717</a>   |

|      |                                   |              |            |   |   |             |              |                                                                                                                     |
|------|-----------------------------------|--------------|------------|---|---|-------------|--------------|---------------------------------------------------------------------------------------------------------------------|
| 2438 | Lanius cristatus                  | Brown Shrike | 2014/12/19 | 0 | 0 | 28.46770511 | 76.89167440  | <a href="https://www.inaturalist.org/observations/144423901">https://www.inaturalist.org/observations/144423901</a> |
| 2439 | Lanius cristatus                  | Brown Shrike | 2022/9/4   | 0 | 0 | 28.81518745 | 113.08782200 | <a href="https://www.inaturalist.org/observations/133529532">https://www.inaturalist.org/observations/133529532</a> |
| 2440 | Lanius cristatus<br>superciliosus | Brown Shrike | 2022/9/4   | 0 | 0 | 28.90583333 | 105.44777780 | <a href="https://www.inaturalist.org/observations/133584103">https://www.inaturalist.org/observations/133584103</a> |
| 2441 | Lanius cristatus                  | Brown Shrike | 2020/2/18  | 1 | 0 | 28.94400616 | 77.10909091  | <a href="https://www.inaturalist.org/observations/83430272">https://www.inaturalist.org/observations/83430272</a>   |
| 2442 | Lanius cristatus                  | Brown Shrike | 2022/9/16  | 0 | 0 | 29.47148140 | 118.66986560 | <a href="https://www.inaturalist.org/observations/135502952">https://www.inaturalist.org/observations/135502952</a> |
| 2443 | Lanius cristatus                  | Brown Shrike | 2008/12/19 | 2 | 0 | 29.53001380 | 78.77466030  | <a href="https://www.inaturalist.org/observations/79496058">https://www.inaturalist.org/observations/79496058</a>   |
| 2444 | Lanius cristatus                  | Brown Shrike | 2017/5/19  | 1 | 0 | 29.68564800 | 102.84152100 | <a href="https://www.inaturalist.org/observations/72087937">https://www.inaturalist.org/observations/72087937</a>   |
| 2445 | Lanius cristatus                  | Brown Shrike | 2017/5/19  | 1 | 0 | 29.68564800 | 102.84152100 | <a href="https://www.inaturalist.org/observations/72087940">https://www.inaturalist.org/observations/72087940</a>   |
| 2446 | Lanius cristatus                  | Brown Shrike | 2021/5/12  | 1 | 0 | 29.80158837 | 121.56270550 | <a href="https://www.inaturalist.org/observations/80099733">https://www.inaturalist.org/observations/80099733</a>   |
| 2447 | Lanius cristatus                  | Brown Shrike | 2021/5/12  | 1 | 0 | 29.80213038 | 121.56408650 | <a href="https://www.inaturalist.org/observations/78666747">https://www.inaturalist.org/observations/78666747</a>   |
| 2448 | Lanius cristatus                  | Brown Shrike | 2021/5/1   | 1 | 0 | 29.81182328 | 121.53358410 | <a href="https://www.inaturalist.org/observations/76049521">https://www.inaturalist.org/observations/76049521</a>   |
| 2449 | Lanius cristatus                  | Brown Shrike | 2021/8/18  | 1 | 0 | 29.81259301 | 121.53427440 | <a href="https://www.inaturalist.org/observations/92643952">https://www.inaturalist.org/observations/92643952</a>   |
| 2450 | Lanius cristatus                  | Brown Shrike | 2021/2/8   | 1 | 0 | 30.08692810 | 78.26761160  | <a href="https://www.inaturalist.org/observations/101884209">https://www.inaturalist.org/observations/101884209</a> |
| 2451 | Lanius cristatus                  | Brown Shrike | 2022/9/5   | 1 | 0 | 30.23864740 | 119.75016590 | <a href="https://www.inaturalist.org/observations/133744623">https://www.inaturalist.org/observations/133744623</a> |
| 2452 | Lanius cristatus                  | Brown Shrike | 2019/9/15  | 2 | 0 | 30.26113000 | 120.14715550 | <a href="https://www.inaturalist.org/observations/32761844">https://www.inaturalist.org/observations/32761844</a>   |
| 2453 | Lanius cristatus                  | Brown Shrike | 2022/5/13  | 1 | 0 | 30.28808431 | 114.27283170 | <a href="https://www.inaturalist.org/observations/120629220">https://www.inaturalist.org/observations/120629220</a> |
| 2454 | Lanius cristatus                  | Brown Shrike | 2020/5/23  | 2 | 0 | 30.39137208 | 103.80448020 | <a href="https://www.inaturalist.org/observations/46924811">https://www.inaturalist.org/observations/46924811</a>   |
| 2455 | Lanius cristatus                  | Brown Shrike | 2019/9/12  | 1 | 0 | 30.44647707 | 114.40798820 | <a href="https://www.inaturalist.org/observations/111394827">https://www.inaturalist.org/observations/111394827</a> |
| 2456 | Lanius cristatus                  | Brown Shrike | 2022/9/17  | 0 | 0 | 30.54253735 | 114.36711160 | <a href="https://www.inaturalist.org/observations/138473094">https://www.inaturalist.org/observations/138473094</a> |
| 2457 | Lanius cristatus                  | Brown Shrike | 2020/7/12  | 1 | 0 | 30.63953933 | 104.19066050 | <a href="https://www.inaturalist.org/observations/52781688">https://www.inaturalist.org/observations/52781688</a>   |
| 2458 | Lanius cristatus                  | Brown Shrike | 2022/9/6   | 1 | 0 | 30.93756839 | 121.87065140 | <a href="https://www.inaturalist.org/observations/136660680">https://www.inaturalist.org/observations/136660680</a> |
| 2459 | Lanius cristatus                  | Brown Shrike | 2020/5/7   | 2 | 0 | 31.11845386 | 117.17324480 | <a href="https://www.inaturalist.org/observations/45163631">https://www.inaturalist.org/observations/45163631</a>   |
| 2460 | Lanius cristatus                  | Brown Shrike | 2020/5/10  | 3 | 0 | 31.11845581 | 117.17324360 | <a href="https://www.inaturalist.org/observations/45449691">https://www.inaturalist.org/observations/45449691</a>   |

|      |                  |              |           |   |   |             |              |                                                                                                                     |
|------|------------------|--------------|-----------|---|---|-------------|--------------|---------------------------------------------------------------------------------------------------------------------|
| 2461 | Lanius cristatus | Brown Shrike | 2020/5/10 | 2 | 0 | 31.11845581 | 117.17324360 | <a href="https://www.inaturalist.org/observations/45450997">https://www.inaturalist.org/observations/45450997</a>   |
| 2462 | Lanius cristatus | Brown Shrike | 2020/5/10 | 3 | 0 | 31.11845581 | 117.17324360 | <a href="https://www.inaturalist.org/observations/45451019">https://www.inaturalist.org/observations/45451019</a>   |
| 2463 | Lanius cristatus | Brown Shrike | 2018/9/4  | 2 | 0 | 31.22482485 | 121.41173140 | <a href="https://www.inaturalist.org/observations/25152460">https://www.inaturalist.org/observations/25152460</a>   |
| 2464 | Lanius cristatus | Brown Shrike | 2017/5/13 | 3 | 0 | 31.31182038 | 119.71809370 | <a href="https://www.inaturalist.org/observations/6715556">https://www.inaturalist.org/observations/6715556</a>     |
| 2465 | Lanius cristatus | Brown Shrike | 2021/5/25 | 2 | 0 | 31.34591667 | 121.35123330 | <a href="https://www.inaturalist.org/observations/80217822">https://www.inaturalist.org/observations/80217822</a>   |
| 2466 | Lanius cristatus | Brown Shrike | 2021/5/18 | 1 | 0 | 31.40000000 | 119.40000000 | <a href="https://www.inaturalist.org/observations/82256429">https://www.inaturalist.org/observations/82256429</a>   |
| 2467 | Lanius cristatus | Brown Shrike | 2021/5/23 | 1 | 0 | 31.49195884 | 121.34937970 | <a href="https://www.inaturalist.org/observations/81023225">https://www.inaturalist.org/observations/81023225</a>   |
| 2468 | Lanius cristatus | Brown Shrike | 2020/5/20 | 2 | 0 | 31.49762391 | 120.44113480 | <a href="https://www.inaturalist.org/observations/65411834">https://www.inaturalist.org/observations/65411834</a>   |
| 2469 | Lanius cristatus | Brown Shrike | 2018/6/13 | 2 | 0 | 31.74552048 | 120.92736480 | <a href="https://www.inaturalist.org/observations/13416885">https://www.inaturalist.org/observations/13416885</a>   |
| 2470 | Lanius cristatus | Brown Shrike | 2019/9/14 | 2 | 0 | 31.75116230 | 117.27189300 | <a href="https://www.inaturalist.org/observations/32686499">https://www.inaturalist.org/observations/32686499</a>   |
| 2471 | Lanius cristatus | Brown Shrike | 2021/8/25 | 1 | 0 | 31.81937000 | 118.52043330 | <a href="https://www.inaturalist.org/observations/92647051">https://www.inaturalist.org/observations/92647051</a>   |
| 2472 | Lanius cristatus | Brown Shrike | 2021/6/12 | 1 | 0 | 31.93790667 | 119.17396170 | <a href="https://www.inaturalist.org/observations/88347823">https://www.inaturalist.org/observations/88347823</a>   |
| 2473 | Lanius cristatus | Brown Shrike | 2022/5/22 | 1 | 0 | 31.97553167 | 118.63122160 | <a href="https://www.inaturalist.org/observations/118484239">https://www.inaturalist.org/observations/118484239</a> |
| 2474 | Lanius cristatus | Brown Shrike | 2021/5/27 | 2 | 0 | 31.98408667 | 118.77962500 | <a href="https://www.inaturalist.org/observations/80446464">https://www.inaturalist.org/observations/80446464</a>   |
| 2475 | Lanius cristatus | Brown Shrike | 2022/5/22 | 1 | 0 | 31.98555500 | 118.63399330 | <a href="https://www.inaturalist.org/observations/118481144">https://www.inaturalist.org/observations/118481144</a> |
| 2476 | Lanius cristatus | Brown Shrike | 2022/5/8  | 1 | 0 | 32.00782667 | 118.63955490 | <a href="https://www.inaturalist.org/observations/117969549">https://www.inaturalist.org/observations/117969549</a> |
| 2477 | Lanius cristatus | Brown Shrike | 2022/6/9  | 1 | 0 | 32.03789529 | 118.66126950 | <a href="https://www.inaturalist.org/observations/121375886">https://www.inaturalist.org/observations/121375886</a> |
| 2478 | Lanius cristatus | Brown Shrike | 2022/5/14 | 1 | 0 | 32.04426833 | 118.71171830 | <a href="https://www.inaturalist.org/observations/117324157">https://www.inaturalist.org/observations/117324157</a> |
| 2479 | Lanius cristatus | Brown Shrike | 2022/5/8  | 2 | 0 | 32.05279831 | 118.66822000 | <a href="https://www.inaturalist.org/observations/117969463">https://www.inaturalist.org/observations/117969463</a> |
| 2480 | Lanius cristatus | Brown Shrike | 2022/5/20 | 1 | 0 | 32.05437897 | 118.49732300 | <a href="https://www.inaturalist.org/observations/117947721">https://www.inaturalist.org/observations/117947721</a> |
| 2481 | Lanius cristatus | Brown Shrike | 2022/6/22 | 2 | 0 | 32.13681969 | 118.75953390 | <a href="https://www.inaturalist.org/observations/123032895">https://www.inaturalist.org/observations/123032895</a> |
| 2482 | Lanius cristatus | Brown Shrike | 2022/6/25 | 1 | 0 | 32.15393360 | 118.76455800 | <a href="https://www.inaturalist.org/observations/123829051">https://www.inaturalist.org/observations/123829051</a> |
| 2483 | Lanius cristatus | Brown Shrike | 2021/6/29 | 1 | 0 | 32.19477667 | 117.10107670 | <a href="https://www.inaturalist.org/observations/87946356">https://www.inaturalist.org/observations/87946356</a>   |

|      |                  |              |           |   |   |             |              |                                                                                                                     |
|------|------------------|--------------|-----------|---|---|-------------|--------------|---------------------------------------------------------------------------------------------------------------------|
| 2484 | Lanius cristatus | Brown Shrike | 2022/4/30 | 1 | 0 | 32.20946904 | 119.01955720 | <a href="https://www.inaturalist.org/observations/114084131">https://www.inaturalist.org/observations/114084131</a> |
| 2485 | Lanius cristatus | Brown Shrike | 2021/9/4  | 2 | 0 | 32.24382200 | 77.17466300  | <a href="https://www.inaturalist.org/observations/93559792">https://www.inaturalist.org/observations/93559792</a>   |
| 2486 | Lanius cristatus | Brown Shrike | 2020/8/30 | 0 | 0 | 32.42362976 | 119.56932070 | <a href="https://www.inaturalist.org/observations/137733119">https://www.inaturalist.org/observations/137733119</a> |
| 2487 | Lanius cristatus | Brown Shrike | 2021/7/17 | 1 | 0 | 32.60290833 | 115.83803830 | <a href="https://www.inaturalist.org/observations/91264629">https://www.inaturalist.org/observations/91264629</a>   |
| 2488 | Lanius cristatus | Brown Shrike | 2021/7/17 | 1 | 0 | 32.60290833 | 115.83803830 | <a href="https://www.inaturalist.org/observations/91264633">https://www.inaturalist.org/observations/91264633</a>   |
| 2489 | Lanius cristatus | Brown Shrike | 2021/7/17 | 1 | 0 | 32.64497000 | 115.60522500 | <a href="https://www.inaturalist.org/observations/91264580">https://www.inaturalist.org/observations/91264580</a>   |
| 2490 | Lanius cristatus | Brown Shrike | 2021/7/17 | 1 | 0 | 32.64497000 | 115.60522500 | <a href="https://www.inaturalist.org/observations/91264581">https://www.inaturalist.org/observations/91264581</a>   |
| 2491 | Lanius cristatus | Brown Shrike | 2022/5/25 | 2 | 0 | 32.86779370 | 120.82090670 | <a href="https://www.inaturalist.org/observations/118649415">https://www.inaturalist.org/observations/118649415</a> |
| 2492 | Lanius cristatus | Brown Shrike | 2020/7/10 | 2 | 0 | 34.08600723 | 74.84979920  | <a href="https://www.inaturalist.org/observations/61381083">https://www.inaturalist.org/observations/61381083</a>   |
| 2493 | Lanius cristatus | Brown Shrike | 2021/8/21 | 1 | 0 | 34.59001833 | 113.84936170 | <a href="https://www.inaturalist.org/observations/92213523">https://www.inaturalist.org/observations/92213523</a>   |
| 2494 | Lanius cristatus | Brown Shrike | 2021/7/18 | 1 | 0 | 34.59793500 | 113.85109500 | <a href="https://www.inaturalist.org/observations/87531671">https://www.inaturalist.org/observations/87531671</a>   |
| 2495 | Lanius cristatus | Brown Shrike | 2022/6/12 | 1 | 0 | 34.59802000 | 113.85134830 | <a href="https://www.inaturalist.org/observations/123362244">https://www.inaturalist.org/observations/123362244</a> |
| 2496 | Lanius cristatus | Brown Shrike | 2021/7/28 | 1 | 0 | 34.59810336 | 113.85198760 | <a href="https://www.inaturalist.org/observations/88928733">https://www.inaturalist.org/observations/88928733</a>   |
| 2497 | Lanius cristatus | Brown Shrike | 2021/7/31 | 1 | 0 | 34.59859353 | 113.85280200 | <a href="https://www.inaturalist.org/observations/89473665">https://www.inaturalist.org/observations/89473665</a>   |
| 2498 | Lanius cristatus | Brown Shrike | 2021/8/7  | 1 | 0 | 34.59874667 | 113.85234170 | <a href="https://www.inaturalist.org/observations/90484474">https://www.inaturalist.org/observations/90484474</a>   |
| 2499 | Lanius cristatus | Brown Shrike | 2022/5/14 | 1 | 0 | 34.59988396 | 113.86006330 | <a href="https://www.inaturalist.org/observations/116967034">https://www.inaturalist.org/observations/116967034</a> |
| 2500 | Lanius cristatus | Brown Shrike | 2022/5/14 | 1 | 0 | 34.59998833 | 113.85062500 | <a href="https://www.inaturalist.org/observations/116967138">https://www.inaturalist.org/observations/116967138</a> |
| 2501 | Lanius cristatus | Brown Shrike | 2022/5/14 | 1 | 0 | 34.60011333 | 113.85792330 | <a href="https://www.inaturalist.org/observations/116967104">https://www.inaturalist.org/observations/116967104</a> |
| 2502 | Lanius cristatus | Brown Shrike | 2022/5/14 | 1 | 0 | 34.60020833 | 113.85780000 | <a href="https://www.inaturalist.org/observations/116967094">https://www.inaturalist.org/observations/116967094</a> |
| 2503 | Lanius cristatus | Brown Shrike | 2022/5/14 | 1 | 0 | 34.60239201 | 113.85892610 | <a href="https://www.inaturalist.org/observations/116967036">https://www.inaturalist.org/observations/116967036</a> |
| 2504 | Lanius cristatus | Brown Shrike | 2022/6/12 | 1 | 0 | 34.60255833 | 113.85824000 | <a href="https://www.inaturalist.org/observations/121852706">https://www.inaturalist.org/observations/121852706</a> |
| 2505 | Lanius cristatus | Brown Shrike | 2022/6/12 | 1 | 0 | 34.60256167 | 113.85823000 | <a href="https://www.inaturalist.org/observations/121852704">https://www.inaturalist.org/observations/121852704</a> |
| 2506 | Lanius cristatus | Brown Shrike | 2022/8/17 | 1 | 0 | 34.72539000 | 113.57583350 | <a href="https://www.inaturalist.org/observations/131322561">https://www.inaturalist.org/observations/131322561</a> |

|      |                  |              |           |   |   |             |              |                                                                                                                     |
|------|------------------|--------------|-----------|---|---|-------------|--------------|---------------------------------------------------------------------------------------------------------------------|
| 2507 | Lanius cristatus | Brown Shrike | 2022/7/11 | 1 | 0 | 34.76053845 | 113.65922320 | <a href="https://www.inaturalist.org/observations/125774236">https://www.inaturalist.org/observations/125774236</a> |
| 2508 | Lanius cristatus | Brown Shrike | 2022/9/1  | 0 | 0 | 34.76279833 | 113.68320170 | <a href="https://www.inaturalist.org/observations/133195952">https://www.inaturalist.org/observations/133195952</a> |
| 2509 | Lanius cristatus | Brown Shrike | 2021/6/9  | 1 | 0 | 34.76430667 | 113.66330670 | <a href="https://www.inaturalist.org/observations/82264764">https://www.inaturalist.org/observations/82264764</a>   |
| 2510 | Lanius cristatus | Brown Shrike | 2009/8/2  | 2 | 0 | 34.95141144 | 113.51264330 | <a href="https://www.inaturalist.org/observations/20309060">https://www.inaturalist.org/observations/20309060</a>   |
| 2511 | Lanius cristatus | Brown Shrike | 2021/7/4  | 2 | 0 | 35.11307390 | 116.58726570 | <a href="https://www.inaturalist.org/observations/85610380">https://www.inaturalist.org/observations/85610380</a>   |
| 2512 | Lanius cristatus | Brown Shrike | 2022/7/30 | 0 | 0 | 35.55296015 | 118.43347620 | <a href="https://www.inaturalist.org/observations/144031945">https://www.inaturalist.org/observations/144031945</a> |
| 2513 | Lanius cristatus | Brown Shrike | 2022/7/30 | 1 | 0 | 35.55296015 | 118.43347620 | <a href="https://www.inaturalist.org/observations/144031968">https://www.inaturalist.org/observations/144031968</a> |
| 2514 | Lanius cristatus | Brown Shrike | 2022/7/31 | 0 | 0 | 35.55296015 | 118.43347620 | <a href="https://www.inaturalist.org/observations/144031983">https://www.inaturalist.org/observations/144031983</a> |
| 2515 | Lanius cristatus | Brown Shrike | 2022/7/31 | 0 | 0 | 35.55296015 | 118.43347620 | <a href="https://www.inaturalist.org/observations/144031989">https://www.inaturalist.org/observations/144031989</a> |
| 2516 | Lanius cristatus | Brown Shrike | 2019/5/26 | 2 | 0 | 35.56604427 | 113.80735870 | <a href="https://www.inaturalist.org/observations/25802062">https://www.inaturalist.org/observations/25802062</a>   |
| 2517 | Lanius cristatus | Brown Shrike | 2019/8/22 | 3 | 0 | 36.06652044 | 120.43133520 | <a href="https://www.inaturalist.org/observations/31263317">https://www.inaturalist.org/observations/31263317</a>   |
| 2518 | Lanius cristatus | Brown Shrike | 2019/8/23 | 2 | 0 | 36.09502133 | 120.47706480 | <a href="https://www.inaturalist.org/observations/31336119">https://www.inaturalist.org/observations/31336119</a>   |
| 2519 | Lanius cristatus | Brown Shrike | 2020/5/16 | 2 | 0 | 36.20737000 | 120.40872500 | <a href="https://www.inaturalist.org/observations/46075766">https://www.inaturalist.org/observations/46075766</a>   |
| 2520 | Lanius cristatus | Brown Shrike | 2019/5/12 | 1 | 0 | 36.37019000 | 120.68083100 | <a href="https://www.inaturalist.org/observations/106869706">https://www.inaturalist.org/observations/106869706</a> |
| 2521 | Lanius cristatus | Brown Shrike | 2020/9/21 | 1 | 0 | 36.37035100 | 120.68579400 | <a href="https://www.inaturalist.org/observations/105263330">https://www.inaturalist.org/observations/105263330</a> |
| 2522 | Lanius cristatus | Brown Shrike | 2019/5/21 | 1 | 0 | 36.37224600 | 120.68051500 | <a href="https://www.inaturalist.org/observations/106916225">https://www.inaturalist.org/observations/106916225</a> |
| 2523 | Lanius cristatus | Brown Shrike | 2021/5/8  | 1 | 0 | 36.37641200 | 120.68096100 | <a href="https://www.inaturalist.org/observations/105432607">https://www.inaturalist.org/observations/105432607</a> |
| 2524 | Lanius cristatus | Brown Shrike | 2012/5/5  | 1 | 0 | 36.67418100 | 117.02628900 | <a href="https://www.inaturalist.org/observations/103203988">https://www.inaturalist.org/observations/103203988</a> |
| 2525 | Lanius cristatus | Brown Shrike | 2021/5/7  | 2 | 0 | 37.39593060 | 121.33203640 | <a href="https://www.inaturalist.org/observations/143824332">https://www.inaturalist.org/observations/143824332</a> |
| 2526 | Lanius cristatus | Brown Shrike | 2021/5/14 | 1 | 0 | 38.68361500 | 117.48146500 | <a href="https://www.inaturalist.org/observations/79203843">https://www.inaturalist.org/observations/79203843</a>   |
| 2527 | Lanius cristatus | Brown Shrike | 2021/5/13 | 1 | 0 | 38.77425509 | 117.39527130 | <a href="https://www.inaturalist.org/observations/78902114">https://www.inaturalist.org/observations/78902114</a>   |
| 2528 | Lanius cristatus | Brown Shrike | 2021/5/13 | 1 | 0 | 38.78684333 | 117.39418830 | <a href="https://www.inaturalist.org/observations/78828132">https://www.inaturalist.org/observations/78828132</a>   |
| 2529 | Lanius cristatus | Brown Shrike | 2021/5/16 | 1 | 0 | 39.13631383 | 118.26759500 | <a href="https://www.inaturalist.org/observations/78955757">https://www.inaturalist.org/observations/78955757</a>   |

|      |                               |              |           |   |   |             |              |                                                                                                                     |
|------|-------------------------------|--------------|-----------|---|---|-------------|--------------|---------------------------------------------------------------------------------------------------------------------|
| 2530 | Lanius cristatus              | Brown Shrike | 2021/5/10 | 1 | 0 | 39.15805667 | 118.25784000 | <a href="https://www.inaturalist.org/observations/78284553">https://www.inaturalist.org/observations/78284553</a>   |
| 2531 | Lanius cristatus              | Brown Shrike | 2020/7/15 | 0 | 0 | 39.70564700 | 116.32164800 | <a href="https://www.inaturalist.org/observations/144468083">https://www.inaturalist.org/observations/144468083</a> |
| 2532 | Lanius cristatus              | Brown Shrike | 2022/6/4  | 1 | 0 | 39.73627292 | 116.91502470 | <a href="https://www.inaturalist.org/observations/120945893">https://www.inaturalist.org/observations/120945893</a> |
| 2533 | Lanius cristatus              | Brown Shrike | 2012/5/6  | 2 | 0 | 39.82286969 | 119.51077240 | <a href="https://www.inaturalist.org/observations/36408522">https://www.inaturalist.org/observations/36408522</a>   |
| 2534 | Lanius cristatus              | Brown Shrike | 2013/9/20 | 2 | 0 | 39.90021729 | 119.54064320 | <a href="https://www.inaturalist.org/observations/59373947">https://www.inaturalist.org/observations/59373947</a>   |
| 2535 | Lanius cristatus              | Brown Shrike | 2022/5/14 | 1 | 0 | 39.90077814 | 116.78292170 | <a href="https://www.inaturalist.org/observations/118004281">https://www.inaturalist.org/observations/118004281</a> |
| 2536 | Lanius cristatus              | Brown Shrike | 2021/8/26 | 1 | 0 | 39.97891990 | 119.77606000 | <a href="https://www.inaturalist.org/observations/123852022">https://www.inaturalist.org/observations/123852022</a> |
| 2537 | Lanius cristatus              | Brown Shrike | 2022/5/20 | 2 | 0 | 39.99694771 | 116.30491350 | <a href="https://www.inaturalist.org/observations/117828039">https://www.inaturalist.org/observations/117828039</a> |
| 2538 | Lanius cristatus              | Brown Shrike | 2022/9/3  | 1 | 0 | 40.01464407 | 116.38842810 | <a href="https://www.inaturalist.org/observations/138498352">https://www.inaturalist.org/observations/138498352</a> |
| 2539 | Lanius cristatus              | Brown Shrike | 2022/5/2  | 1 | 0 | 40.01899144 | 116.39257700 | <a href="https://www.inaturalist.org/observations/115224632">https://www.inaturalist.org/observations/115224632</a> |
| 2540 | Lanius cristatus              | Brown Shrike | 2021/7/30 | 1 | 0 | 40.10957164 | 116.71435120 | <a href="https://www.inaturalist.org/observations/89282196">https://www.inaturalist.org/observations/89282196</a>   |
| 2541 | Lanius cristatus              | Brown Shrike | 2020/5/14 | 2 | 0 | 40.11033667 | 116.69853830 | <a href="https://www.inaturalist.org/observations/45971371">https://www.inaturalist.org/observations/45971371</a>   |
| 2542 | Lanius cristatus              | Brown Shrike | 2019/6/6  | 3 | 0 | 40.11597000 | 116.69803500 | <a href="https://www.inaturalist.org/observations/26918049">https://www.inaturalist.org/observations/26918049</a>   |
| 2543 | Lanius cristatus              | Brown Shrike | 2020/8/16 | 3 | 0 | 40.11611658 | 116.70389820 | <a href="https://www.inaturalist.org/observations/57454959">https://www.inaturalist.org/observations/57454959</a>   |
| 2544 | Lanius cristatus              | Brown Shrike | 2020/8/16 | 3 | 0 | 40.11612096 | 116.70421090 | <a href="https://www.inaturalist.org/observations/57454964">https://www.inaturalist.org/observations/57454964</a>   |
| 2545 | Lanius cristatus              | Brown Shrike | 2021/6/26 | 2 | 0 | 40.11663671 | 116.70474040 | <a href="https://www.inaturalist.org/observations/86032099">https://www.inaturalist.org/observations/86032099</a>   |
| 2546 | Lanius cristatus<br>cristatus | Brown Shrike | 2019/5/26 | 3 | 0 | 40.11953833 | 116.69476670 | <a href="https://www.inaturalist.org/observations/25942791">https://www.inaturalist.org/observations/25942791</a>   |
| 2547 | Lanius cristatus              | Brown Shrike | 2019/5/26 | 2 | 0 | 40.12087000 | 116.69549000 | <a href="https://www.inaturalist.org/observations/25942295">https://www.inaturalist.org/observations/25942295</a>   |
| 2548 | Lanius cristatus              | Brown Shrike | 2019/6/2  | 2 | 0 | 40.12146333 | 116.69386500 | <a href="https://www.inaturalist.org/observations/26379293">https://www.inaturalist.org/observations/26379293</a>   |
| 2549 | Lanius cristatus              | Brown Shrike | 2019/5/26 | 3 | 0 | 40.12164333 | 116.69423500 | <a href="https://www.inaturalist.org/observations/25942978">https://www.inaturalist.org/observations/25942978</a>   |
| 2550 | Lanius cristatus              | Brown Shrike | 2019/5/26 | 3 | 0 | 40.12164333 | 116.69423500 | <a href="https://www.inaturalist.org/observations/25942984">https://www.inaturalist.org/observations/25942984</a>   |
| 2551 | Lanius cristatus              | Brown Shrike | 2019/5/26 | 3 | 0 | 40.12165333 | 116.69422170 | <a href="https://www.inaturalist.org/observations/25942798">https://www.inaturalist.org/observations/25942798</a>   |
| 2552 | Lanius cristatus              | Brown Shrike | 2019/5/26 | 2 | 0 | 40.12165667 | 116.69422000 | <a href="https://www.inaturalist.org/observations/25942160">https://www.inaturalist.org/observations/25942160</a>   |

|      |                                 |              |           |   |   |             |              |                                                                                                                     |
|------|---------------------------------|--------------|-----------|---|---|-------------|--------------|---------------------------------------------------------------------------------------------------------------------|
| 2553 | Lanius cristatus                | Brown Shrike | 2018/8/20 | 2 | 0 | 40.13034700 | 116.65465000 | <a href="https://www.inaturalist.org/observations/39608138">https://www.inaturalist.org/observations/39608138</a>   |
| 2554 | Lanius cristatus                | Brown Shrike | 2018/8/19 | 2 | 0 | 40.13034700 | 116.65465000 | <a href="https://www.inaturalist.org/observations/39608139">https://www.inaturalist.org/observations/39608139</a>   |
| 2555 | Lanius cristatus                | Brown Shrike | 2021/8/27 | 1 | 0 | 40.13304615 | 116.31133980 | <a href="https://www.inaturalist.org/observations/122030310">https://www.inaturalist.org/observations/122030310</a> |
| 2556 | Lanius cristatus                | Brown Shrike | 2021/8/30 | 1 | 0 | 40.13345818 | 116.29986590 | <a href="https://www.inaturalist.org/observations/143235849">https://www.inaturalist.org/observations/143235849</a> |
| 2557 | Lanius cristatus                | Brown Shrike | 2021/9/11 | 1 | 0 | 40.13570499 | 116.29124890 | <a href="https://www.inaturalist.org/observations/94421507">https://www.inaturalist.org/observations/94421507</a>   |
| 2558 | Lanius cristatus                | Brown Shrike | 2019/5/18 | 2 | 0 | 40.17742833 | 116.67585000 | <a href="https://www.inaturalist.org/observations/25624346">https://www.inaturalist.org/observations/25624346</a>   |
| 2559 | Lanius cristatus                | Brown Shrike | 2021/9/5  | 1 | 0 | 40.18293590 | 116.67409730 | <a href="https://www.inaturalist.org/observations/94319406">https://www.inaturalist.org/observations/94319406</a>   |
| 2560 | Lanius cristatus                | Brown Shrike | 2022/8/26 | 1 | 0 | 40.36026600 | 116.00924800 | <a href="https://www.inaturalist.org/observations/133481009">https://www.inaturalist.org/observations/133481009</a> |
| 2561 | Lanius cristatus                | Brown Shrike | 2021/8/27 | 1 | 0 | 40.38536530 | 115.83426430 | <a href="https://www.inaturalist.org/observations/122030320">https://www.inaturalist.org/observations/122030320</a> |
| 2562 | Lanius cristatus<br>confusus    | Brown Shrike | 2017/8/26 | 0 | 0 | 40.40536686 | 115.84512470 | <a href="https://www.inaturalist.org/observations/8462844">https://www.inaturalist.org/observations/8462844</a>     |
| 2563 | Lanius cristatus                | Brown Shrike | 2022/9/16 | 0 | 0 | 40.54371792 | 117.01492410 | <a href="https://www.inaturalist.org/observations/135610040">https://www.inaturalist.org/observations/135610040</a> |
| 2564 | Lanius cristatus                | Brown Shrike | 2022/9/16 | 0 | 0 | 40.54403468 | 117.01454120 | <a href="https://www.inaturalist.org/observations/135609988">https://www.inaturalist.org/observations/135609988</a> |
| 2565 | Lanius cristatus<br>lucionensis | Brown Shrike | 2014/6/20 | 1 | 0 | 41.04131965 | 121.70218720 | <a href="https://www.inaturalist.org/observations/66869744">https://www.inaturalist.org/observations/66869744</a>   |
| 2566 | Lanius cristatus                | Brown Shrike | 2016/6/18 | 2 | 0 | 42.77883118 | 123.27116710 | <a href="https://www.inaturalist.org/observations/66884710">https://www.inaturalist.org/observations/66884710</a>   |
| 2567 | Lanius cristatus                | Brown Shrike | 2022/7/17 | 1 | 0 | 43.62333452 | 126.17217280 | <a href="https://www.inaturalist.org/observations/127839368">https://www.inaturalist.org/observations/127839368</a> |
| 2568 | Lanius cristatus                | Brown Shrike | 2019/7/4  | 1 | 0 | 43.98969071 | 125.35785370 | <a href="https://www.inaturalist.org/observations/103744189">https://www.inaturalist.org/observations/103744189</a> |
| 2569 | Lanius cristatus                | Brown Shrike | 2007/5/21 | 2 | 0 | 47.02839700 | 129.02079300 | <a href="https://www.inaturalist.org/observations/65334541">https://www.inaturalist.org/observations/65334541</a>   |
| 2570 | Lanius cristatus                | Brown Shrike | 2007/5/21 | 2 | 0 | 47.02839700 | 129.02079300 | <a href="https://www.inaturalist.org/observations/65334544">https://www.inaturalist.org/observations/65334544</a>   |
| 2571 | Lanius cristatus                | Brown Shrike | 2007/5/22 | 2 | 0 | 47.02839700 | 129.02079300 | <a href="https://www.inaturalist.org/observations/65335712">https://www.inaturalist.org/observations/65335712</a>   |
| 2572 | Lanius cristatus                | Brown Shrike | 2006/6/1  | 2 | 0 | 47.02839700 | 129.02079300 | <a href="https://www.inaturalist.org/observations/65470645">https://www.inaturalist.org/observations/65470645</a>   |

| No | scientific name | common name  | date       | NIA | NID | latitude   | longitude   | url                                                                                                                 |
|----|-----------------|--------------|------------|-----|-----|------------|-------------|---------------------------------------------------------------------------------------------------------------------|
| 1  | Pitta brachyura | Indian Pitta | 2019/11/7  | 5   | 0   | 6.22418210 | 80.11383690 | <a href="https://www.inaturalist.org/observations/35452878">https://www.inaturalist.org/observations/35452878</a>   |
| 2  | Pitta brachyura | Indian Pitta | 2020/11/1  | 8   | 0   | 6.23051895 | 80.11060282 | <a href="https://www.inaturalist.org/observations/64459965">https://www.inaturalist.org/observations/64459965</a>   |
| 3  | Pitta brachyura | Indian Pitta | 2020/11/11 | 8   | 0   | 6.23051895 | 80.11060282 | <a href="https://www.inaturalist.org/observations/65029577">https://www.inaturalist.org/observations/65029577</a>   |
| 4  | Pitta brachyura | Indian Pitta | 2019/10/24 | 2   | 0   | 6.23059397 | 80.11046302 | <a href="https://www.inaturalist.org/observations/34825614">https://www.inaturalist.org/observations/34825614</a>   |
| 5  | Pitta brachyura | Indian Pitta | 2018/10/17 | 5   | 0   | 6.26805833 | 81.35912833 | <a href="https://www.inaturalist.org/observations/42732105">https://www.inaturalist.org/observations/42732105</a>   |
| 6  | Pitta brachyura | Indian Pitta | 2020/1/28  | 2   | 0   | 6.27841200 | 81.40194100 | <a href="https://www.inaturalist.org/observations/38542456">https://www.inaturalist.org/observations/38542456</a>   |
| 7  | Pitta brachyura | Indian Pitta | 2022/2/17  | 2   | 0   | 6.31305715 | 81.42936587 | <a href="https://www.inaturalist.org/observations/107457903">https://www.inaturalist.org/observations/107457903</a> |
| 8  | Pitta brachyura | Indian Pitta | 2022/2/11  | 1   | 0   | 6.34846944 | 80.56666667 | <a href="https://www.inaturalist.org/observations/144613165">https://www.inaturalist.org/observations/144613165</a> |
| 9  | Pitta brachyura | Indian Pitta | 2021/12/20 | 4   | 0   | 6.41954613 | 80.86661530 | <a href="https://www.inaturalist.org/observations/107902180">https://www.inaturalist.org/observations/107902180</a> |
| 10 | Pitta brachyura | Indian Pitta | 2021/11/1  | 5   | 0   | 6.74757920 | 80.36864880 | <a href="https://www.inaturalist.org/observations/101308794">https://www.inaturalist.org/observations/101308794</a> |
| 11 | Pitta brachyura | Indian Pitta | 2020/1/3   | 4   | 0   | 6.90080434 | 81.06509699 | <a href="https://www.inaturalist.org/observations/37294937">https://www.inaturalist.org/observations/37294937</a>   |
| 12 | Pitta brachyura | Indian Pitta | 2016/11/14 | 6   | 0   | 6.94971660 | 80.78910680 | <a href="https://www.inaturalist.org/observations/125401137">https://www.inaturalist.org/observations/125401137</a> |
| 13 | Pitta brachyura | Indian Pitta | 2015/2/17  | 3   | 0   | 6.96810457 | 80.76725861 | <a href="https://www.inaturalist.org/observations/36774764">https://www.inaturalist.org/observations/36774764</a>   |
| 14 | Pitta brachyura | Indian Pitta | 2014/11/24 | 6   | 0   | 6.96875811 | 80.76844590 | <a href="https://www.inaturalist.org/observations/70983316">https://www.inaturalist.org/observations/70983316</a>   |
| 15 | Pitta brachyura | Indian Pitta | 2011/1/17  | 5   | 0   | 6.96875957 | 80.76814544 | <a href="https://www.inaturalist.org/observations/57826465">https://www.inaturalist.org/observations/57826465</a>   |
| 16 | Pitta brachyura | Indian Pitta | 2017/2/9   | 4   | 0   | 6.96951197 | 80.76814485 | <a href="https://www.inaturalist.org/observations/80468090">https://www.inaturalist.org/observations/80468090</a>   |
| 17 | Pitta brachyura | Indian Pitta | 2018/12/7  | 4   | 0   | 6.96978788 | 80.76908458 | <a href="https://www.inaturalist.org/observations/108652639">https://www.inaturalist.org/observations/108652639</a> |
| 18 | Pitta brachyura | Indian Pitta | 2011/1/16  | 5   | 0   | 6.96979428 | 80.76802350 | <a href="https://www.inaturalist.org/observations/57825702">https://www.inaturalist.org/observations/57825702</a>   |
| 19 | Pitta brachyura | Indian Pitta | 2013/11/23 | 7   | 0   | 6.97018700 | 80.76902700 | <a href="https://www.inaturalist.org/observations/6505620">https://www.inaturalist.org/observations/6505620</a>     |
| 20 | Pitta brachyura | Indian Pitta | 2017/12/31 | 6   | 0   | 6.97169770 | 80.76833577 | <a href="https://www.inaturalist.org/observations/15184951">https://www.inaturalist.org/observations/15184951</a>   |
| 21 | Pitta brachyura | Indian Pitta | 2017/12/31 | 6   | 0   | 6.97169770 | 80.76833577 | <a href="https://www.inaturalist.org/observations/15184952">https://www.inaturalist.org/observations/15184952</a>   |
| 22 | Pitta brachyura | Indian Pitta | 2018/1/1   | 6   | 0   | 6.97169770 | 80.76833577 | <a href="https://www.inaturalist.org/observations/15184953">https://www.inaturalist.org/observations/15184953</a>   |



|    |                 |              |            |   |   |            |             |                                                                                                                     |
|----|-----------------|--------------|------------|---|---|------------|-------------|---------------------------------------------------------------------------------------------------------------------|
| 23 | Pitta brachyura | Indian Pitta | 2015/1/17  | 7 | 0 | 6.98654700 | 80.42404200 | <a href="https://www.inaturalist.org/observations/35084649">https://www.inaturalist.org/observations/35084649</a>   |
| 24 | Pitta brachyura | Indian Pitta | 2014/11/15 | 7 | 0 | 6.98793781 | 80.40601203 | <a href="https://www.inaturalist.org/observations/70983347">https://www.inaturalist.org/observations/70983347</a>   |
| 25 | Pitta brachyura | Indian Pitta | 2012/3/10  | 5 | 0 | 6.98978450 | 80.42708850 | <a href="https://www.inaturalist.org/observations/64664834">https://www.inaturalist.org/observations/64664834</a>   |
| 26 | Pitta brachyura | Indian Pitta | 2012/3/11  | 5 | 0 | 6.98978450 | 80.42708850 | <a href="https://www.inaturalist.org/observations/64664914">https://www.inaturalist.org/observations/64664914</a>   |
| 27 | Pitta brachyura | Indian Pitta | 2021/12/12 | 3 | 0 | 6.99823480 | 80.40944220 | <a href="https://www.inaturalist.org/observations/108640025">https://www.inaturalist.org/observations/108640025</a> |
| 28 | Pitta brachyura | Indian Pitta | 2022/1/28  | 4 | 0 | 7.19124632 | 79.90239199 | <a href="https://www.inaturalist.org/observations/133643741">https://www.inaturalist.org/observations/133643741</a> |
| 29 | Pitta brachyura | Indian Pitta | 2021/1/30  | 6 | 0 | 7.23643803 | 80.31188082 | <a href="https://www.inaturalist.org/observations/89150547">https://www.inaturalist.org/observations/89150547</a>   |
| 30 | Pitta brachyura | Indian Pitta | 2019/1/26  | 8 | 0 | 7.27213667 | 80.59504833 | <a href="https://www.inaturalist.org/observations/34059496">https://www.inaturalist.org/observations/34059496</a>   |
| 31 | Pitta brachyura | Indian Pitta | 2022/4/12  | 1 | 0 | 7.27800556 | 80.21505259 | <a href="https://www.inaturalist.org/observations/111891085">https://www.inaturalist.org/observations/111891085</a> |
| 32 | Pitta brachyura | Indian Pitta | 2014/12/26 | 6 | 0 | 7.27870738 | 80.21439350 | <a href="https://www.inaturalist.org/observations/33178690">https://www.inaturalist.org/observations/33178690</a>   |
| 33 | Pitta brachyura | Indian Pitta | 2020/3/23  | 6 | 0 | 7.29073528 | 80.63372612 | <a href="https://www.inaturalist.org/observations/62020347">https://www.inaturalist.org/observations/62020347</a>   |
| 34 | Pitta brachyura | Indian Pitta | 2019/4/12  | 7 | 0 | 7.29475900 | 80.71190000 | <a href="https://www.inaturalist.org/observations/22637444">https://www.inaturalist.org/observations/22637444</a>   |
| 35 | Pitta brachyura | Indian Pitta | 2018/11/20 | 4 | 0 | 7.29530810 | 80.66321030 | <a href="https://www.inaturalist.org/observations/52445621">https://www.inaturalist.org/observations/52445621</a>   |
| 36 | Pitta brachyura | Indian Pitta | 2022/3/14  | 4 | 0 | 7.29613000 | 80.64378833 | <a href="https://www.inaturalist.org/observations/109908795">https://www.inaturalist.org/observations/109908795</a> |
| 37 | Pitta brachyura | Indian Pitta | 2015/11/16 | 5 | 0 | 7.30329573 | 80.64245566 | <a href="https://www.inaturalist.org/observations/38067465">https://www.inaturalist.org/observations/38067465</a>   |
| 38 | Pitta brachyura | Indian Pitta | 2019/10/30 | 6 | 0 | 7.30344833 | 80.64323667 | <a href="https://www.inaturalist.org/observations/41382368">https://www.inaturalist.org/observations/41382368</a>   |
| 39 | Pitta brachyura | Indian Pitta | 2022/3/4   | 5 | 0 | 7.47759988 | 80.32682771 | <a href="https://www.inaturalist.org/observations/107862936">https://www.inaturalist.org/observations/107862936</a> |
| 40 | Pitta brachyura | Indian Pitta | 2019/4/16  | 7 | 0 | 7.63247298 | 80.49803303 | <a href="https://www.inaturalist.org/observations/22587466">https://www.inaturalist.org/observations/22587466</a>   |
| 41 | Pitta brachyura | Indian Pitta | 2014/12/17 | 5 | 0 | 7.87305400 | 80.77179700 | <a href="https://www.inaturalist.org/observations/93801785">https://www.inaturalist.org/observations/93801785</a>   |
| 42 | Pitta brachyura | Indian Pitta | 2018/12/2  | 2 | 0 | 7.99624165 | 80.64150500 | <a href="https://www.inaturalist.org/observations/121604031">https://www.inaturalist.org/observations/121604031</a> |
| 43 | Pitta brachyura | Indian Pitta | 2018/12/16 | 7 | 0 | 8.03269013 | 80.74722440 | <a href="https://www.inaturalist.org/observations/19569699">https://www.inaturalist.org/observations/19569699</a>   |
| 44 | Pitta brachyura | Indian Pitta | 2018/12/15 | 7 | 0 | 8.03465549 | 80.74704201 | <a href="https://www.inaturalist.org/observations/19568924">https://www.inaturalist.org/observations/19568924</a>   |
| 45 | Pitta brachyura | Indian Pitta | 2019/11/16 | 8 | 0 | 8.04518617 | 79.85135500 | <a href="https://www.inaturalist.org/observations/49329428">https://www.inaturalist.org/observations/49329428</a>   |

|    |                 |              |            |   |   |            |             |                                                                                                                     |
|----|-----------------|--------------|------------|---|---|------------|-------------|---------------------------------------------------------------------------------------------------------------------|
| 46 | Pitta brachyura | Indian Pitta | 2019/4/23  | 8 | 0 | 8.31202685 | 79.96946058 | <a href="https://www.inaturalist.org/observations/22966824">https://www.inaturalist.org/observations/22966824</a>   |
| 47 | Pitta brachyura | Indian Pitta | 2021/10/17 | 2 | 0 | 8.32972514 | 77.50839798 | <a href="https://www.inaturalist.org/observations/102798893">https://www.inaturalist.org/observations/102798893</a> |
| 48 | Pitta brachyura | Indian Pitta | 2022/4/7   | 1 | 0 | 8.50757542 | 77.40882379 | <a href="https://www.inaturalist.org/observations/142127219">https://www.inaturalist.org/observations/142127219</a> |
| 49 | Pitta brachyura | Indian Pitta | 2021/4/15  | 7 | 0 | 8.58649761 | 77.02874132 | <a href="https://www.inaturalist.org/observations/81521176">https://www.inaturalist.org/observations/81521176</a>   |
| 50 | Pitta brachyura | Indian Pitta | 2021/1/9   | 6 | 0 | 8.58651849 | 77.02900752 | <a href="https://www.inaturalist.org/observations/81323304">https://www.inaturalist.org/observations/81323304</a>   |
| 51 | Pitta brachyura | Indian Pitta | 2016/2/3   | 5 | 0 | 8.70446035 | 77.27187356 | <a href="https://www.inaturalist.org/observations/57533156">https://www.inaturalist.org/observations/57533156</a>   |
| 52 | Pitta brachyura | Indian Pitta | 2012/1/26  | 7 | 0 | 8.76736865 | 77.08084121 | <a href="https://www.inaturalist.org/observations/82547234">https://www.inaturalist.org/observations/82547234</a>   |
| 53 | Pitta brachyura | Indian Pitta | 2016/2/14  | 4 | 0 | 8.85782870 | 77.21752230 | <a href="https://www.inaturalist.org/observations/36321612">https://www.inaturalist.org/observations/36321612</a>   |
| 54 | Pitta brachyura | Indian Pitta | 2021/1/29  | 4 | 0 | 8.94900694 | 77.10936515 | <a href="https://www.inaturalist.org/observations/116255338">https://www.inaturalist.org/observations/116255338</a> |
| 55 | Pitta brachyura | Indian Pitta | 2022/2/26  | 5 | 0 | 8.96115117 | 77.03777632 | <a href="https://www.inaturalist.org/observations/110923147">https://www.inaturalist.org/observations/110923147</a> |
| 56 | Pitta brachyura | Indian Pitta | 2014/1/28  | 7 | 0 | 8.97506300 | 77.14944100 | <a href="http://www.inaturalist.org/observations/520264">http://www.inaturalist.org/observations/520264</a>         |
| 57 | Pitta brachyura | Indian Pitta | 2020/4/10  | 5 | 0 | 9.01761170 | 76.92609360 | <a href="https://www.inaturalist.org/observations/41924938">https://www.inaturalist.org/observations/41924938</a>   |
| 58 | Pitta brachyura | Indian Pitta | 2017/2/12  | 6 | 0 | 9.26475820 | 76.78704140 | <a href="https://www.inaturalist.org/observations/31912029">https://www.inaturalist.org/observations/31912029</a>   |
| 59 | Pitta brachyura | Indian Pitta | 2017/2/12  | 3 | 0 | 9.31590375 | 76.78785057 | <a href="https://www.inaturalist.org/observations/127534959">https://www.inaturalist.org/observations/127534959</a> |
| 60 | Pitta brachyura | Indian Pitta | 2013/1/5   | 3 | 0 | 9.45636096 | 77.18277407 | <a href="https://www.inaturalist.org/observations/73936556">https://www.inaturalist.org/observations/73936556</a>   |
| 61 | Pitta brachyura | Indian Pitta | 2013/2/19  | 6 | 0 | 9.49782600 | 77.18444800 | <a href="https://www.inaturalist.org/observations/9789153">https://www.inaturalist.org/observations/9789153</a>     |
| 62 | Pitta brachyura | Indian Pitta | 2015/1/27  | 6 | 0 | 9.49915100 | 77.17170200 | <a href="https://www.inaturalist.org/observations/35325684">https://www.inaturalist.org/observations/35325684</a>   |
| 63 | Pitta brachyura | Indian Pitta | 2022/12/24 | 1 | 0 | 9.55111597 | 76.58494335 | <a href="https://www.inaturalist.org/observations/144984130">https://www.inaturalist.org/observations/144984130</a> |
| 64 | Pitta brachyura | Indian Pitta | 2014/2/18  | 6 | 0 | 9.69059098 | 80.01837753 | <a href="https://www.inaturalist.org/observations/57833143">https://www.inaturalist.org/observations/57833143</a>   |
| 65 | Pitta brachyura | Indian Pitta | 2021/4/24  | 4 | 0 | 9.69062768 | 80.01858193 | <a href="https://www.inaturalist.org/observations/75384848">https://www.inaturalist.org/observations/75384848</a>   |
| 66 | Pitta brachyura | Indian Pitta | 2021/12/5  | 6 | 0 | 9.83967275 | 76.78260484 | <a href="https://www.inaturalist.org/observations/102768158">https://www.inaturalist.org/observations/102768158</a> |
| 67 | Pitta brachyura | Indian Pitta | 2018/12/7  | 4 | 0 | 9.88868643 | 76.72812668 | <a href="https://www.inaturalist.org/observations/91832929">https://www.inaturalist.org/observations/91832929</a>   |
| 68 | Pitta brachyura | Indian Pitta | 2018/12/8  | 5 | 0 | 9.88868643 | 76.72812668 | <a href="https://www.inaturalist.org/observations/91832949">https://www.inaturalist.org/observations/91832949</a>   |

|    |                 |              |            |   |   |             |             |                                                                                                                     |
|----|-----------------|--------------|------------|---|---|-------------|-------------|---------------------------------------------------------------------------------------------------------------------|
| 69 | Pitta brachyura | Indian Pitta | 2019/1/12  | 3 | 0 | 9.88868643  | 76.72812668 | <a href="https://www.inaturalist.org/observations/97462860">https://www.inaturalist.org/observations/97462860</a>   |
| 70 | Pitta brachyura | Indian Pitta | 2022/2/26  | 4 | 0 | 9.89042690  | 76.69041728 | <a href="https://www.inaturalist.org/observations/108286757">https://www.inaturalist.org/observations/108286757</a> |
| 71 | Pitta brachyura | Indian Pitta | 2021/11/17 | 3 | 0 | 9.89081268  | 76.69041719 | <a href="https://www.inaturalist.org/observations/101318616">https://www.inaturalist.org/observations/101318616</a> |
| 72 | Pitta brachyura | Indian Pitta | 2022/2/12  | 5 | 0 | 9.89081268  | 76.69041719 | <a href="https://www.inaturalist.org/observations/106805724">https://www.inaturalist.org/observations/106805724</a> |
| 73 | Pitta brachyura | Indian Pitta | 2022/2/15  | 3 | 0 | 9.89081268  | 76.69041719 | <a href="https://www.inaturalist.org/observations/106807384">https://www.inaturalist.org/observations/106807384</a> |
| 74 | Pitta brachyura | Indian Pitta | 2022/4/19  | 2 | 0 | 9.89081268  | 76.69041719 | <a href="https://www.inaturalist.org/observations/114307671">https://www.inaturalist.org/observations/114307671</a> |
| 75 | Pitta brachyura | Indian Pitta | 2022/2/28  | 6 | 0 | 9.89084968  | 76.69077133 | <a href="https://www.inaturalist.org/observations/108288382">https://www.inaturalist.org/observations/108288382</a> |
| 76 | Pitta brachyura | Indian Pitta | 2022/2/18  | 4 | 0 | 10.03271500 | 76.33188900 | <a href="https://www.inaturalist.org/observations/107040701">https://www.inaturalist.org/observations/107040701</a> |
| 77 | Pitta brachyura | Indian Pitta | 2020/10/26 | 4 | 0 | 10.06058039 | 78.77006762 | <a href="https://www.inaturalist.org/observations/76862243">https://www.inaturalist.org/observations/76862243</a>   |
| 78 | Pitta brachyura | Indian Pitta | 2018/12/16 | 6 | 0 | 10.10398030 | 76.70046050 | <a href="https://www.inaturalist.org/observations/32152987">https://www.inaturalist.org/observations/32152987</a>   |
| 79 | Pitta brachyura | Indian Pitta | 2014/11/3  | 6 | 0 | 10.10398030 | 76.70046050 | <a href="https://www.inaturalist.org/observations/70983379">https://www.inaturalist.org/observations/70983379</a>   |
| 80 | Pitta brachyura | Indian Pitta | 2018/3/3   | 5 | 0 | 10.10398030 | 76.70046050 | <a href="https://www.inaturalist.org/observations/91649466">https://www.inaturalist.org/observations/91649466</a>   |
| 81 | Pitta brachyura | Indian Pitta | 2020/2/1   | 6 | 0 | 10.10398043 | 76.70046039 | <a href="https://www.inaturalist.org/observations/38183624">https://www.inaturalist.org/observations/38183624</a>   |
| 82 | Pitta brachyura | Indian Pitta | 2017/2/12  | 4 | 0 | 10.11646740 | 76.67267890 | <a href="https://www.inaturalist.org/observations/43904867">https://www.inaturalist.org/observations/43904867</a>   |
| 83 | Pitta brachyura | Indian Pitta | 2016/12/6  | 7 | 0 | 10.11709483 | 76.66989909 | <a href="http://www.inaturalist.org/observations/4731094">http://www.inaturalist.org/observations/4731094</a>       |
| 84 | Pitta brachyura | Indian Pitta | 2017/12/17 | 7 | 0 | 10.12067400 | 76.75534700 | <a href="https://www.inaturalist.org/observations/9914862">https://www.inaturalist.org/observations/9914862</a>     |
| 85 | Pitta brachyura | Indian Pitta | 2015/2/22  | 2 | 0 | 10.12903097 | 76.70651617 | <a href="https://www.inaturalist.org/observations/44813529">https://www.inaturalist.org/observations/44813529</a>   |
| 86 | Pitta brachyura | Indian Pitta | 2018/4/5   | 5 | 0 | 10.12965278 | 76.68793889 | <a href="https://www.inaturalist.org/observations/66526735">https://www.inaturalist.org/observations/66526735</a>   |
| 87 | Pitta brachyura | Indian Pitta | 2016/1/28  | 4 | 0 | 10.12979100 | 76.68711800 | <a href="https://www.inaturalist.org/observations/7278942">https://www.inaturalist.org/observations/7278942</a>     |
| 88 | Pitta brachyura | Indian Pitta | 2014/12/23 | 3 | 0 | 10.12979140 | 76.68711840 | <a href="https://www.inaturalist.org/observations/105781620">https://www.inaturalist.org/observations/105781620</a> |
| 89 | Pitta brachyura | Indian Pitta | 2015/1/11  | 8 | 0 | 10.13000571 | 76.68728661 | <a href="https://www.inaturalist.org/observations/83604919">https://www.inaturalist.org/observations/83604919</a>   |
| 90 | Pitta brachyura | Indian Pitta | 2022/12/10 | 2 | 0 | 10.13061022 | 76.68780673 | <a href="https://www.inaturalist.org/observations/144141604">https://www.inaturalist.org/observations/144141604</a> |
| 91 | Pitta brachyura | Indian Pitta | 2020/3/30  | 7 | 0 | 10.13098780 | 76.24104930 | <a href="https://www.inaturalist.org/observations/41220153">https://www.inaturalist.org/observations/41220153</a>   |

|     |                 |              |            |   |   |             |             |                                                                                                                     |
|-----|-----------------|--------------|------------|---|---|-------------|-------------|---------------------------------------------------------------------------------------------------------------------|
| 92  | Pitta brachyura | Indian Pitta | 2020/4/1   | 5 | 0 | 10.24457702 | 76.35896024 | <a href="https://www.inaturalist.org/observations/43541091">https://www.inaturalist.org/observations/43541091</a>   |
| 93  | Pitta brachyura | Indian Pitta | 2015/3/8   | 5 | 0 | 10.29336111 | 76.47048355 | <a href="https://www.inaturalist.org/observations/46834843">https://www.inaturalist.org/observations/46834843</a>   |
| 94  | Pitta brachyura | Indian Pitta | 2017/3/9   | 4 | 0 | 10.32697340 | 76.95539670 | <a href="https://www.inaturalist.org/observations/91817748">https://www.inaturalist.org/observations/91817748</a>   |
| 95  | Pitta brachyura | Indian Pitta | 2021/1/4   | 3 | 0 | 10.33141665 | 76.40064893 | <a href="https://www.inaturalist.org/observations/67565844">https://www.inaturalist.org/observations/67565844</a>   |
| 96  | Pitta brachyura | Indian Pitta | 2016/12/23 | 5 | 0 | 10.35291658 | 77.21363068 | <a href="https://www.inaturalist.org/observations/65120275">https://www.inaturalist.org/observations/65120275</a>   |
| 97  | Pitta brachyura | Indian Pitta | 2016/10/26 | 7 | 0 | 10.48510800 | 77.74806900 | <a href="http://www.inaturalist.org/observations/4681070">http://www.inaturalist.org/observations/4681070</a>       |
| 98  | Pitta brachyura | Indian Pitta | 2021/4/8   | 4 | 0 | 10.52767097 | 76.34909197 | <a href="https://www.inaturalist.org/observations/100228245">https://www.inaturalist.org/observations/100228245</a> |
| 99  | Pitta brachyura | Indian Pitta | 2021/1/30  | 2 | 0 | 10.60074639 | 76.21713102 | <a href="https://www.inaturalist.org/observations/139055606">https://www.inaturalist.org/observations/139055606</a> |
| 100 | Pitta brachyura | Indian Pitta | 2018/2/7   | 5 | 0 | 10.61194637 | 76.35991738 | <a href="https://www.inaturalist.org/observations/95834840">https://www.inaturalist.org/observations/95834840</a>   |
| 101 | Pitta brachyura | Indian Pitta | 2019/2/10  | 6 | 0 | 10.63174793 | 76.37262169 | <a href="https://www.inaturalist.org/observations/48620065">https://www.inaturalist.org/observations/48620065</a>   |
| 102 | Pitta brachyura | Indian Pitta | 2019/3/23  | 5 | 0 | 10.73945143 | 76.15415409 | <a href="https://www.inaturalist.org/observations/102456243">https://www.inaturalist.org/observations/102456243</a> |
| 103 | Pitta brachyura | Indian Pitta | 2016/12/28 | 7 | 0 | 10.74753300 | 76.46716500 | <a href="https://www.inaturalist.org/observations/87008573">https://www.inaturalist.org/observations/87008573</a>   |
| 104 | Pitta brachyura | Indian Pitta | 2014/3/22  | 5 | 0 | 10.74974237 | 76.37860390 | <a href="https://www.inaturalist.org/observations/62118247">https://www.inaturalist.org/observations/62118247</a>   |
| 105 | Pitta brachyura | Indian Pitta | 2014/3/22  | 4 | 0 | 10.74974237 | 76.37860390 | <a href="https://www.inaturalist.org/observations/98107003">https://www.inaturalist.org/observations/98107003</a>   |
| 106 | Pitta brachyura | Indian Pitta | 2014/3/22  | 5 | 0 | 10.74974237 | 76.37860390 | <a href="https://www.inaturalist.org/observations/98107006">https://www.inaturalist.org/observations/98107006</a>   |
| 107 | Pitta brachyura | Indian Pitta | 2022/3/18  | 3 | 0 | 10.81723333 | 76.75621500 | <a href="https://www.inaturalist.org/observations/115064553">https://www.inaturalist.org/observations/115064553</a> |
| 108 | Pitta brachyura | Indian Pitta | 2018/12/28 | 5 | 0 | 10.82129581 | 76.64155137 | <a href="https://www.inaturalist.org/observations/96858626">https://www.inaturalist.org/observations/96858626</a>   |
| 109 | Pitta brachyura | Indian Pitta | 2022/2/20  | 2 | 0 | 10.85834860 | 76.65722083 | <a href="https://www.inaturalist.org/observations/136017722">https://www.inaturalist.org/observations/136017722</a> |
| 110 | Pitta brachyura | Indian Pitta | 2018/12/9  | 6 | 0 | 10.88777170 | 76.07321890 | <a href="https://www.inaturalist.org/observations/67399487">https://www.inaturalist.org/observations/67399487</a>   |
| 111 | Pitta brachyura | Indian Pitta | 2021/4/7   | 5 | 0 | 10.89101830 | 76.06852558 | <a href="https://www.inaturalist.org/observations/73177451">https://www.inaturalist.org/observations/73177451</a>   |
| 112 | Pitta brachyura | Indian Pitta | 2019/2/16  | 3 | 0 | 11.01684450 | 76.95583210 | <a href="https://www.inaturalist.org/observations/137613529">https://www.inaturalist.org/observations/137613529</a> |
| 113 | Pitta brachyura | Indian Pitta | 2022/11/11 | 1 | 0 | 11.05044313 | 76.85487529 | <a href="https://www.inaturalist.org/observations/141964438">https://www.inaturalist.org/observations/141964438</a> |
| 114 | Pitta brachyura | Indian Pitta | 2020/10/26 | 6 | 0 | 11.07894586 | 79.83002432 | <a href="https://www.inaturalist.org/observations/63578651">https://www.inaturalist.org/observations/63578651</a>   |

|     |                 |              |            |   |   |             |             |                                                                                                                     |
|-----|-----------------|--------------|------------|---|---|-------------|-------------|---------------------------------------------------------------------------------------------------------------------|
| 115 | Pitta brachyura | Indian Pitta | 2021/11/4  | 4 | 0 | 11.07894586 | 79.83002432 | <a href="https://www.inaturalist.org/observations/100227211">https://www.inaturalist.org/observations/100227211</a> |
| 116 | Pitta brachyura | Indian Pitta | 2018/1/28  | 4 | 0 | 11.08874798 | 76.45534521 | <a href="https://www.inaturalist.org/observations/65731183">https://www.inaturalist.org/observations/65731183</a>   |
| 117 | Pitta brachyura | Indian Pitta | 2019/1/17  | 3 | 0 | 11.23986174 | 79.29021332 | <a href="https://www.inaturalist.org/observations/54530035">https://www.inaturalist.org/observations/54530035</a>   |
| 118 | Pitta brachyura | Indian Pitta | 2011/3/9   | 2 | 0 | 11.35300220 | 76.79590950 | <a href="https://www.inaturalist.org/observations/95520211">https://www.inaturalist.org/observations/95520211</a>   |
| 119 | Pitta brachyura | Indian Pitta | 2021/3/23  | 4 | 0 | 11.40664871 | 75.73826920 | <a href="https://www.inaturalist.org/observations/79648465">https://www.inaturalist.org/observations/79648465</a>   |
| 120 | Pitta brachyura | Indian Pitta | 2020/10/21 | 4 | 0 | 11.42176660 | 76.86172750 | <a href="https://www.inaturalist.org/observations/88796554">https://www.inaturalist.org/observations/88796554</a>   |
| 121 | Pitta brachyura | Indian Pitta | 2012/11/18 | 7 | 0 | 11.53174400 | 76.64753300 | <a href="https://www.inaturalist.org/observations/133870427">https://www.inaturalist.org/observations/133870427</a> |
| 122 | Pitta brachyura | Indian Pitta | 2014/1/21  | 3 | 0 | 11.55643790 | 76.64076801 | <a href="https://www.inaturalist.org/observations/68292611">https://www.inaturalist.org/observations/68292611</a>   |
| 123 | Pitta brachyura | Indian Pitta | 2022/3/13  | 6 | 0 | 11.55956743 | 76.22497179 | <a href="https://www.inaturalist.org/observations/125460591">https://www.inaturalist.org/observations/125460591</a> |
| 124 | Pitta brachyura | Indian Pitta | 2013/11/6  | 7 | 0 | 11.57823125 | 76.65370137 | <a href="https://www.inaturalist.org/observations/9896940">https://www.inaturalist.org/observations/9896940</a>     |
| 125 | Pitta brachyura | Indian Pitta | 2022/4/24  | 4 | 0 | 11.76094531 | 79.76539611 | <a href="https://www.inaturalist.org/observations/112829925">https://www.inaturalist.org/observations/112829925</a> |
| 126 | Pitta brachyura | Indian Pitta | 2020/3/28  | 5 | 0 | 11.98427631 | 75.39945457 | <a href="https://www.inaturalist.org/observations/44398637">https://www.inaturalist.org/observations/44398637</a>   |
| 127 | Pitta brachyura | Indian Pitta | 2020/4/21  | 7 | 0 | 11.98947787 | 75.59228295 | <a href="https://www.inaturalist.org/observations/44360551">https://www.inaturalist.org/observations/44360551</a>   |
| 128 | Pitta brachyura | Indian Pitta | 2012/11/14 | 5 | 0 | 11.99293100 | 76.37999200 | <a href="https://www.inaturalist.org/observations/133913228">https://www.inaturalist.org/observations/133913228</a> |
| 129 | Pitta brachyura | Indian Pitta | 2017/3/20  | 9 | 0 | 12.03447000 | 75.19677667 | <a href="https://www.inaturalist.org/observations/30664112">https://www.inaturalist.org/observations/30664112</a>   |
| 130 | Pitta brachyura | Indian Pitta | 2017/3/19  | 7 | 0 | 12.03455500 | 75.19665167 | <a href="https://www.inaturalist.org/observations/30664065">https://www.inaturalist.org/observations/30664065</a>   |
| 131 | Pitta brachyura | Indian Pitta | 2022/11/8  | 3 | 0 | 12.14316753 | 75.93861513 | <a href="https://www.inaturalist.org/observations/142456788">https://www.inaturalist.org/observations/142456788</a> |
| 132 | Pitta brachyura | Indian Pitta | 2022/3/12  | 2 | 0 | 12.20900400 | 75.73540400 | <a href="https://www.inaturalist.org/observations/119195680">https://www.inaturalist.org/observations/119195680</a> |
| 133 | Pitta brachyura | Indian Pitta | 2014/10/16 | 5 | 0 | 12.21329760 | 79.05880115 | <a href="https://www.inaturalist.org/observations/122916039">https://www.inaturalist.org/observations/122916039</a> |
| 134 | Pitta brachyura | Indian Pitta | 2015/11/4  | 3 | 0 | 12.22272330 | 76.62728760 | <a href="https://www.inaturalist.org/observations/142800809">https://www.inaturalist.org/observations/142800809</a> |
| 135 | Pitta brachyura | Indian Pitta | 2016/3/3   | 4 | 0 | 12.22920841 | 79.05243123 | <a href="https://www.inaturalist.org/observations/96065224">https://www.inaturalist.org/observations/96065224</a>   |
| 136 | Pitta brachyura | Indian Pitta | 2011/2/12  | 3 | 0 | 12.26937200 | 76.61197800 | <a href="https://www.inaturalist.org/observations/94578865">https://www.inaturalist.org/observations/94578865</a>   |
| 137 | Pitta brachyura | Indian Pitta | 2012/1/21  | 3 | 0 | 12.26937200 | 76.61197800 | <a href="https://www.inaturalist.org/observations/94717033">https://www.inaturalist.org/observations/94717033</a>   |

|     |                 |              |            |   |   |             |             |                                                                                                                     |
|-----|-----------------|--------------|------------|---|---|-------------|-------------|---------------------------------------------------------------------------------------------------------------------|
| 138 | Pitta brachyura | Indian Pitta | 2022/10/22 | 3 | 0 | 12.27525460 | 76.67014750 | <a href="https://www.inaturalist.org/observations/139637374">https://www.inaturalist.org/observations/139637374</a> |
| 139 | Pitta brachyura | Indian Pitta | 2022/2/8   | 7 | 0 | 12.27680333 | 76.61296667 | <a href="https://www.inaturalist.org/observations/108231661">https://www.inaturalist.org/observations/108231661</a> |
| 140 | Pitta brachyura | Indian Pitta | 2019/5/1   | 6 | 0 | 12.28119801 | 77.39116236 | <a href="https://www.inaturalist.org/observations/34773761">https://www.inaturalist.org/observations/34773761</a>   |
| 141 | Pitta brachyura | Indian Pitta | 2022/2/18  | 4 | 0 | 12.31016778 | 76.63113076 | <a href="https://www.inaturalist.org/observations/106960065">https://www.inaturalist.org/observations/106960065</a> |
| 142 | Pitta brachyura | Indian Pitta | 2019/2/25  | 1 | 0 | 12.35651812 | 76.67031576 | <a href="https://www.inaturalist.org/observations/70264091">https://www.inaturalist.org/observations/70264091</a>   |
| 143 | Pitta brachyura | Indian Pitta | 2015/12/12 | 9 | 0 | 12.56311806 | 79.98715639 | <a href="https://www.inaturalist.org/observations/22609688">https://www.inaturalist.org/observations/22609688</a>   |
| 144 | Pitta brachyura | Indian Pitta | 2013/1/26  | 2 | 0 | 12.64780281 | 76.62294091 | <a href="https://www.inaturalist.org/observations/98110933">https://www.inaturalist.org/observations/98110933</a>   |
| 145 | Pitta brachyura | Indian Pitta | 2020/4/24  | 2 | 0 | 12.88437970 | 77.46371830 | <a href="https://www.inaturalist.org/observations/44092527">https://www.inaturalist.org/observations/44092527</a>   |
| 146 | Pitta brachyura | Indian Pitta | 2022/4/24  | 1 | 0 | 12.88507929 | 77.46421002 | <a href="https://www.inaturalist.org/observations/113745622">https://www.inaturalist.org/observations/113745622</a> |
| 147 | Pitta brachyura | Indian Pitta | 2017/11/12 | 8 | 0 | 12.92898480 | 80.17216130 | <a href="https://www.inaturalist.org/observations/24999701">https://www.inaturalist.org/observations/24999701</a>   |
| 148 | Pitta brachyura | Indian Pitta | 2021/2/9   | 7 | 0 | 12.94532610 | 79.23287340 | <a href="https://www.inaturalist.org/observations/107632857">https://www.inaturalist.org/observations/107632857</a> |
| 149 | Pitta brachyura | Indian Pitta | 2018/11/9  | 6 | 0 | 12.94982970 | 74.85656130 | <a href="https://www.inaturalist.org/observations/18301126">https://www.inaturalist.org/observations/18301126</a>   |
| 150 | Pitta brachyura | Indian Pitta | 2022/2/9   | 5 | 0 | 12.95626600 | 75.38068500 | <a href="https://www.inaturalist.org/observations/106438013">https://www.inaturalist.org/observations/106438013</a> |
| 151 | Pitta brachyura | Indian Pitta | 2013/10/13 | 7 | 0 | 12.95812020 | 80.11922810 | <a href="https://www.inaturalist.org/observations/22654990">https://www.inaturalist.org/observations/22654990</a>   |
| 152 | Pitta brachyura | Indian Pitta | 2019/2/17  | 8 | 0 | 12.98806353 | 80.22971290 | <a href="https://www.inaturalist.org/observations/22552799">https://www.inaturalist.org/observations/22552799</a>   |
| 153 | Pitta brachyura | Indian Pitta | 2020/1/26  | 3 | 0 | 12.98933770 | 80.23774890 | <a href="https://www.inaturalist.org/observations/38030169">https://www.inaturalist.org/observations/38030169</a>   |
| 154 | Pitta brachyura | Indian Pitta | 2022/2/27  | 6 | 0 | 12.99077680 | 80.23798700 | <a href="https://www.inaturalist.org/observations/107752537">https://www.inaturalist.org/observations/107752537</a> |
| 155 | Pitta brachyura | Indian Pitta | 2016/1/17  | 7 | 0 | 12.99701565 | 80.24066722 | <a href="https://www.inaturalist.org/observations/31903372">https://www.inaturalist.org/observations/31903372</a>   |
| 156 | Pitta brachyura | Indian Pitta | 2018/3/10  | 8 | 0 | 13.00139119 | 80.23092585 | <a href="https://www.inaturalist.org/observations/30877943">https://www.inaturalist.org/observations/30877943</a>   |
| 157 | Pitta brachyura | Indian Pitta | 2017/4/14  | 9 | 0 | 13.01677125 | 80.23569334 | <a href="https://www.inaturalist.org/observations/23290692">https://www.inaturalist.org/observations/23290692</a>   |
| 158 | Pitta brachyura | Indian Pitta | 2018/5/5   | 3 | 0 | 13.01883817 | 77.56704990 | <a href="https://www.inaturalist.org/observations/106329294">https://www.inaturalist.org/observations/106329294</a> |
| 159 | Pitta brachyura | Indian Pitta | 2019/1/6   | 8 | 0 | 13.02109848 | 77.57077351 | <a href="https://www.inaturalist.org/observations/26759180">https://www.inaturalist.org/observations/26759180</a>   |
| 160 | Pitta brachyura | Indian Pitta | 2021/10/24 | 4 | 0 | 13.05053719 | 80.25141276 | <a href="https://www.inaturalist.org/observations/99195010">https://www.inaturalist.org/observations/99195010</a>   |

|     |                 |              |            |   |   |             |             |                                                                                                                     |
|-----|-----------------|--------------|------------|---|---|-------------|-------------|---------------------------------------------------------------------------------------------------------------------|
| 161 | Pitta brachyura | Indian Pitta | 2018/10/12 | 9 | 0 | 13.05784757 | 77.63975767 | <a href="https://www.inaturalist.org/observations/28922788">https://www.inaturalist.org/observations/28922788</a>   |
| 162 | Pitta brachyura | Indian Pitta | 2021/2/12  | 4 | 0 | 13.08007180 | 77.57851510 | <a href="https://www.inaturalist.org/observations/117712884">https://www.inaturalist.org/observations/117712884</a> |
| 163 | Pitta brachyura | Indian Pitta | 2019/10/28 | 5 | 0 | 13.12686216 | 80.22766717 | <a href="https://www.inaturalist.org/observations/35036076">https://www.inaturalist.org/observations/35036076</a>   |
| 164 | Pitta brachyura | Indian Pitta | 2019/4/28  | 3 | 0 | 13.12963810 | 80.13099400 | <a href="https://www.inaturalist.org/observations/48412629">https://www.inaturalist.org/observations/48412629</a>   |
| 165 | Pitta brachyura | Indian Pitta | 2020/10/16 | 6 | 0 | 13.27142810 | 80.26393547 | <a href="https://www.inaturalist.org/observations/62683788">https://www.inaturalist.org/observations/62683788</a>   |
| 166 | Pitta brachyura | Indian Pitta | 2018/2/18  | 3 | 0 | 13.43512480 | 75.64240880 | <a href="https://www.inaturalist.org/observations/84867267">https://www.inaturalist.org/observations/84867267</a>   |
| 167 | Pitta brachyura | Indian Pitta | 2022/3/27  | 5 | 0 | 13.65182529 | 79.41621780 | <a href="https://www.inaturalist.org/observations/109660330">https://www.inaturalist.org/observations/109660330</a> |
| 168 | Pitta brachyura | Indian Pitta | 2022/3/26  | 1 | 0 | 13.65182529 | 79.41626072 | <a href="https://www.inaturalist.org/observations/111062639">https://www.inaturalist.org/observations/111062639</a> |
| 169 | Pitta brachyura | Indian Pitta | 2022/3/26  | 1 | 0 | 13.65182529 | 79.41626072 | <a href="https://www.inaturalist.org/observations/111062641">https://www.inaturalist.org/observations/111062641</a> |
| 170 | Pitta brachyura | Indian Pitta | 2022/3/24  | 8 | 0 | 13.65182529 | 79.41627145 | <a href="https://www.inaturalist.org/observations/109363191">https://www.inaturalist.org/observations/109363191</a> |
| 171 | Pitta brachyura | Indian Pitta | 2020/2/6   | 5 | 0 | 13.65413881 | 79.41542789 | <a href="https://www.inaturalist.org/observations/38374931">https://www.inaturalist.org/observations/38374931</a>   |
| 172 | Pitta brachyura | Indian Pitta | 2021/3/24  | 2 | 0 | 13.65475328 | 79.41864627 | <a href="https://www.inaturalist.org/observations/71941016">https://www.inaturalist.org/observations/71941016</a>   |
| 173 | Pitta brachyura | Indian Pitta | 2018/4/7   | 6 | 0 | 13.65762120 | 79.48696180 | <a href="https://www.inaturalist.org/observations/11014813">https://www.inaturalist.org/observations/11014813</a>   |
| 174 | Pitta brachyura | Indian Pitta | 2022/3/12  | 3 | 0 | 13.74988551 | 79.45526842 | <a href="https://www.inaturalist.org/observations/108479764">https://www.inaturalist.org/observations/108479764</a> |
| 175 | Pitta brachyura | Indian Pitta | 2016/4/26  | 7 | 0 | 13.85362750 | 75.52241470 | <a href="https://www.inaturalist.org/observations/9989151">https://www.inaturalist.org/observations/9989151</a>     |
| 176 | Pitta brachyura | Indian Pitta | 2021/1/29  | 5 | 0 | 14.14524639 | 77.82287139 | <a href="https://www.inaturalist.org/observations/88228992">https://www.inaturalist.org/observations/88228992</a>   |
| 177 | Pitta brachyura | Indian Pitta | 2011/12/23 | 2 | 0 | 14.86613746 | 74.43937294 | <a href="https://www.inaturalist.org/observations/103681909">https://www.inaturalist.org/observations/103681909</a> |
| 178 | Pitta brachyura | Indian Pitta | 2020/4/25  | 3 | 0 | 15.21376257 | 73.93572807 | <a href="https://www.inaturalist.org/observations/43662105">https://www.inaturalist.org/observations/43662105</a>   |
| 179 | Pitta brachyura | Indian Pitta | 2018/11/7  | 7 | 0 | 15.22097862 | 74.63251946 | <a href="https://www.inaturalist.org/observations/18192076">https://www.inaturalist.org/observations/18192076</a>   |
| 180 | Pitta brachyura | Indian Pitta | 2018/5/22  | 5 | 0 | 15.22883840 | 73.97418740 | <a href="https://www.inaturalist.org/observations/42656784">https://www.inaturalist.org/observations/42656784</a>   |
| 181 | Pitta brachyura | Indian Pitta | 2018/6/2   | 5 | 0 | 15.22883840 | 73.97418740 | <a href="https://www.inaturalist.org/observations/42656785">https://www.inaturalist.org/observations/42656785</a>   |
| 182 | Pitta brachyura | Indian Pitta | 2018/11/15 | 7 | 0 | 15.24301160 | 74.62162970 | <a href="https://www.inaturalist.org/observations/18568034">https://www.inaturalist.org/observations/18568034</a>   |
| 183 | Pitta brachyura | Indian Pitta | 2013/2/16  | 5 | 0 | 15.29168820 | 74.52099299 | <a href="https://www.inaturalist.org/observations/127448563">https://www.inaturalist.org/observations/127448563</a> |

|     |                 |              |           |   |   |             |             |                                                                                                                     |
|-----|-----------------|--------------|-----------|---|---|-------------|-------------|---------------------------------------------------------------------------------------------------------------------|
| 184 | Pitta brachyura | Indian Pitta | 2008/1/16 | 7 | 0 | 15.43502400 | 74.24530500 | <a href="http://www.inaturalist.org/observations/604614">http://www.inaturalist.org/observations/604614</a>         |
| 185 | Pitta brachyura | Indian Pitta | 2019/6/2  | 9 | 0 | 15.53741413 | 73.83271662 | <a href="https://www.inaturalist.org/observations/60168977">https://www.inaturalist.org/observations/60168977</a>   |
| 186 | Pitta brachyura | Indian Pitta | 2021/4/29 | 5 | 0 | 15.57145500 | 73.86578333 | <a href="https://www.inaturalist.org/observations/75650387">https://www.inaturalist.org/observations/75650387</a>   |
| 187 | Pitta brachyura | Indian Pitta | 2019/3/19 | 7 | 0 | 15.67160881 | 73.73275390 | <a href="https://www.inaturalist.org/observations/21384160">https://www.inaturalist.org/observations/21384160</a>   |
| 188 | Pitta brachyura | Indian Pitta | 2022/7/17 | 4 | 0 | 15.73395757 | 73.80246799 | <a href="https://www.inaturalist.org/observations/128637375">https://www.inaturalist.org/observations/128637375</a> |
| 189 | Pitta brachyura | Indian Pitta | 2020/5/24 | 5 | 0 | 15.88093717 | 73.73258438 | <a href="https://www.inaturalist.org/observations/50128910">https://www.inaturalist.org/observations/50128910</a>   |
| 190 | Pitta brachyura | Indian Pitta | 2018/5/19 | 2 | 0 | 16.03724810 | 73.57708010 | <a href="https://www.inaturalist.org/observations/56207387">https://www.inaturalist.org/observations/56207387</a>   |
| 191 | Pitta brachyura | Indian Pitta | 2018/5/19 | 2 | 0 | 16.03724810 | 73.57708010 | <a href="https://www.inaturalist.org/observations/56207390">https://www.inaturalist.org/observations/56207390</a>   |
| 192 | Pitta brachyura | Indian Pitta | 2022/7/21 | 9 | 0 | 16.07211265 | 73.65276326 | <a href="https://www.inaturalist.org/observations/127227905">https://www.inaturalist.org/observations/127227905</a> |
| 193 | Pitta brachyura | Indian Pitta | 2017/4/27 | 9 | 0 | 16.07270584 | 73.65325554 | <a href="https://www.inaturalist.org/observations/60170987">https://www.inaturalist.org/observations/60170987</a>   |
| 194 | Pitta brachyura | Indian Pitta | 2015/4/20 | 5 | 0 | 16.30689104 | 80.51252635 | <a href="https://www.inaturalist.org/observations/87981075">https://www.inaturalist.org/observations/87981075</a>   |
| 195 | Pitta brachyura | Indian Pitta | 2021/10/9 | 7 | 0 | 16.51985804 | 80.67636050 | <a href="https://www.inaturalist.org/observations/97970646">https://www.inaturalist.org/observations/97970646</a>   |
| 196 | Pitta brachyura | Indian Pitta | 2016/5/21 | 6 | 0 | 16.52154236 | 73.61417089 | <a href="https://www.inaturalist.org/observations/131041147">https://www.inaturalist.org/observations/131041147</a> |
| 197 | Pitta brachyura | Indian Pitta | 2019/6/26 | 4 | 0 | 16.52278155 | 73.53153180 | <a href="https://www.inaturalist.org/observations/50233498">https://www.inaturalist.org/observations/50233498</a>   |
| 198 | Pitta brachyura | Indian Pitta | 2022/2/13 | 4 | 0 | 16.64674448 | 80.81858563 | <a href="https://www.inaturalist.org/observations/106796077">https://www.inaturalist.org/observations/106796077</a> |
| 199 | Pitta brachyura | Indian Pitta | 2022/2/19 | 5 | 0 | 16.64950208 | 80.49085768 | <a href="https://www.inaturalist.org/observations/108083305">https://www.inaturalist.org/observations/108083305</a> |
| 200 | Pitta brachyura | Indian Pitta | 2021/5/6  | 3 | 0 | 16.71209500 | 73.33980000 | <a href="https://www.inaturalist.org/observations/77556103">https://www.inaturalist.org/observations/77556103</a>   |
| 201 | Pitta brachyura | Indian Pitta | 2022/6/5  | 5 | 0 | 16.71956910 | 73.35530210 | <a href="https://www.inaturalist.org/observations/120298098">https://www.inaturalist.org/observations/120298098</a> |
| 202 | Pitta brachyura | Indian Pitta | 2018/8/3  | 8 | 0 | 16.80923057 | 73.32867075 | <a href="https://www.inaturalist.org/observations/30376128">https://www.inaturalist.org/observations/30376128</a>   |
| 203 | Pitta brachyura | Indian Pitta | 2022/7/30 | 5 | 0 | 16.94205780 | 73.37381690 | <a href="https://www.inaturalist.org/observations/128762246">https://www.inaturalist.org/observations/128762246</a> |
| 204 | Pitta brachyura | Indian Pitta | 2018/7/29 | 8 | 0 | 16.96124391 | 73.30489207 | <a href="https://www.inaturalist.org/observations/14898603">https://www.inaturalist.org/observations/14898603</a>   |
| 205 | Pitta brachyura | Indian Pitta | 2006/5/3  | 8 | 0 | 16.98846626 | 73.31452179 | <a href="http://www.inaturalist.org/observations/2351">http://www.inaturalist.org/observations/2351</a>             |
| 206 | Pitta brachyura | Indian Pitta | 2022/10/3 | 7 | 0 | 16.99021500 | 73.31202330 | <a href="https://www.inaturalist.org/observations/139126087">https://www.inaturalist.org/observations/139126087</a> |



|     |                 |              |           |    |   |             |             |                                                                                                                     |
|-----|-----------------|--------------|-----------|----|---|-------------|-------------|---------------------------------------------------------------------------------------------------------------------|
| 207 | Pitta brachyura | Indian Pitta | 2019/5/4  | 3  | 0 | 16.99567353 | 73.30502810 | <a href="https://www.inaturalist.org/observations/55800952">https://www.inaturalist.org/observations/55800952</a>   |
| 208 | Pitta brachyura | Indian Pitta | 2020/6/10 | 4  | 0 | 17.16992167 | 73.53355333 | <a href="https://www.inaturalist.org/observations/49960355">https://www.inaturalist.org/observations/49960355</a>   |
| 209 | Pitta brachyura | Indian Pitta | 2019/5/23 | 5  | 0 | 17.31866950 | 78.35862240 | <a href="https://www.inaturalist.org/observations/63635300">https://www.inaturalist.org/observations/63635300</a>   |
| 210 | Pitta brachyura | Indian Pitta | 2022/6/10 | 1  | 0 | 17.34499793 | 73.33720867 | <a href="https://www.inaturalist.org/observations/136292154">https://www.inaturalist.org/observations/136292154</a> |
| 211 | Pitta brachyura | Indian Pitta | 2022/4/17 | 4  | 0 | 17.52246770 | 78.33443850 | <a href="https://www.inaturalist.org/observations/111761107">https://www.inaturalist.org/observations/111761107</a> |
| 212 | Pitta brachyura | Indian Pitta | 2015/7/5  | 3  | 0 | 17.53190370 | 73.51513410 | <a href="https://www.inaturalist.org/observations/122790511">https://www.inaturalist.org/observations/122790511</a> |
| 213 | Pitta brachyura | Indian Pitta | 2022/2/9  | 5  | 0 | 17.65949910 | 78.06029979 | <a href="https://www.inaturalist.org/observations/126095875">https://www.inaturalist.org/observations/126095875</a> |
| 214 | Pitta brachyura | Indian Pitta | 2022/4/10 | 6  | 0 | 17.84734150 | 73.08790320 | <a href="https://www.inaturalist.org/observations/132024123">https://www.inaturalist.org/observations/132024123</a> |
| 215 | Pitta brachyura | Indian Pitta | 2019/6/1  | 4  | 0 | 17.95258300 | 80.00597900 | <a href="https://www.inaturalist.org/observations/63635593">https://www.inaturalist.org/observations/63635593</a>   |
| 216 | Pitta brachyura | Indian Pitta | 2017/5/14 | 6  | 0 | 18.04319766 | 79.13091118 | <a href="https://www.inaturalist.org/observations/65885776">https://www.inaturalist.org/observations/65885776</a>   |
| 217 | Pitta brachyura | Indian Pitta | 2016/5/28 | 6  | 0 | 18.11243700 | 79.01930000 | <a href="https://www.inaturalist.org/observations/63558643">https://www.inaturalist.org/observations/63558643</a>   |
| 218 | Pitta brachyura | Indian Pitta | 2018/6/30 | 5  | 0 | 18.11243720 | 79.01929970 | <a href="https://www.inaturalist.org/observations/63556658">https://www.inaturalist.org/observations/63556658</a>   |
| 219 | Pitta brachyura | Indian Pitta | 2017/5/12 | 6  | 0 | 18.11243720 | 79.01929970 | <a href="https://www.inaturalist.org/observations/63558542">https://www.inaturalist.org/observations/63558542</a>   |
| 220 | Pitta brachyura | Indian Pitta | 2015/3/13 | 10 | 0 | 18.44690320 | 73.43054390 | <a href="https://www.inaturalist.org/observations/19696488">https://www.inaturalist.org/observations/19696488</a>   |
| 221 | Pitta brachyura | Indian Pitta | 2022/5/25 | 4  | 0 | 18.50735032 | 73.80765438 | <a href="https://www.inaturalist.org/observations/118660444">https://www.inaturalist.org/observations/118660444</a> |
| 222 | Pitta brachyura | Indian Pitta | 2011/5/5  | 6  | 0 | 18.65926661 | 72.93159704 | <a href="https://www.inaturalist.org/observations/104699437">https://www.inaturalist.org/observations/104699437</a> |
| 223 | Pitta brachyura | Indian Pitta | 2022/6/6  | 4  | 0 | 18.66130924 | 72.93403416 | <a href="https://www.inaturalist.org/observations/121698011">https://www.inaturalist.org/observations/121698011</a> |
| 224 | Pitta brachyura | Indian Pitta | 2014/6/9  | 7  | 0 | 18.69493988 | 72.92580150 | <a href="https://www.inaturalist.org/observations/53129599">https://www.inaturalist.org/observations/53129599</a>   |
| 225 | Pitta brachyura | Indian Pitta | 2014/6/9  | 4  | 0 | 18.69549747 | 72.92534850 | <a href="https://www.inaturalist.org/observations/103305169">https://www.inaturalist.org/observations/103305169</a> |
| 226 | Pitta brachyura | Indian Pitta | 2009/5/27 | 3  | 0 | 18.74214080 | 72.86302355 | <a href="https://www.inaturalist.org/observations/67030285">https://www.inaturalist.org/observations/67030285</a>   |
| 227 | Pitta brachyura | Indian Pitta | 2022/4/15 | 4  | 0 | 18.82090440 | 81.36942387 | <a href="https://www.inaturalist.org/observations/116231941">https://www.inaturalist.org/observations/116231941</a> |
| 228 | Pitta brachyura | Indian Pitta | 2019/6/9  | 8  | 0 | 18.85344575 | 81.36906613 | <a href="https://www.inaturalist.org/observations/27277968">https://www.inaturalist.org/observations/27277968</a>   |
| 229 | Pitta brachyura | Indian Pitta | 2017/7/4  | 6  | 0 | 18.89066965 | 82.10339494 | <a href="https://www.inaturalist.org/observations/7716760">https://www.inaturalist.org/observations/7716760</a>     |

|     |                 |              |           |   |   |             |             |                                                                                                                     |
|-----|-----------------|--------------|-----------|---|---|-------------|-------------|---------------------------------------------------------------------------------------------------------------------|
| 230 | Pitta brachyura | Indian Pitta | 2012/7/14 | 3 | 0 | 18.89103790 | 73.12191850 | <a href="https://www.inaturalist.org/observations/122790512">https://www.inaturalist.org/observations/122790512</a> |
| 231 | Pitta brachyura | Indian Pitta | 2020/10/9 | 5 | 0 | 19.07757163 | 72.84200985 | <a href="https://www.inaturalist.org/observations/65000246">https://www.inaturalist.org/observations/65000246</a>   |
| 232 | Pitta brachyura | Indian Pitta | 2013/7/12 | 5 | 0 | 19.15868740 | 73.52403490 | <a href="https://www.inaturalist.org/observations/91012894">https://www.inaturalist.org/observations/91012894</a>   |
| 233 | Pitta brachyura | Indian Pitta | 2020/6/1  | 3 | 0 | 19.17645645 | 72.85428619 | <a href="https://www.inaturalist.org/observations/50558256">https://www.inaturalist.org/observations/50558256</a>   |
| 234 | Pitta brachyura | Indian Pitta | 2020/6/1  | 5 | 0 | 19.17656872 | 72.85423928 | <a href="https://www.inaturalist.org/observations/48114145">https://www.inaturalist.org/observations/48114145</a>   |
| 235 | Pitta brachyura | Indian Pitta | 2022/6/18 | 5 | 0 | 19.23376500 | 72.94458020 | <a href="https://www.inaturalist.org/observations/122432690">https://www.inaturalist.org/observations/122432690</a> |
| 236 | Pitta brachyura | Indian Pitta | 2018/5/27 | 3 | 0 | 19.23825890 | 72.96358970 | <a href="https://www.inaturalist.org/observations/43620975">https://www.inaturalist.org/observations/43620975</a>   |
| 237 | Pitta brachyura | Indian Pitta | 2021/7/26 | 3 | 0 | 19.31100413 | 84.80094217 | <a href="https://www.inaturalist.org/observations/88667313">https://www.inaturalist.org/observations/88667313</a>   |
| 238 | Pitta brachyura | Indian Pitta | 2018/8/4  | 9 | 0 | 19.44450005 | 72.92818105 | <a href="https://www.inaturalist.org/observations/60170470">https://www.inaturalist.org/observations/60170470</a>   |
| 239 | Pitta brachyura | Indian Pitta | 2015/6/18 | 7 | 0 | 20.22289874 | 79.36008453 | <a href="https://www.inaturalist.org/observations/12189321">https://www.inaturalist.org/observations/12189321</a>   |
| 240 | Pitta brachyura | Indian Pitta | 2010/5/23 | 3 | 0 | 20.24838270 | 79.36068900 | <a href="https://www.inaturalist.org/observations/55252612">https://www.inaturalist.org/observations/55252612</a>   |
| 241 | Pitta brachyura | Indian Pitta | 2016/6/5  | 4 | 0 | 20.24838270 | 79.36068900 | <a href="https://www.inaturalist.org/observations/55505184">https://www.inaturalist.org/observations/55505184</a>   |
| 242 | Pitta brachyura | Indian Pitta | 2015/6/13 | 3 | 0 | 20.24838270 | 79.36068900 | <a href="https://www.inaturalist.org/observations/55897773">https://www.inaturalist.org/observations/55897773</a>   |
| 243 | Pitta brachyura | Indian Pitta | 2015/6/14 | 3 | 0 | 20.24838270 | 79.36068900 | <a href="https://www.inaturalist.org/observations/55897790">https://www.inaturalist.org/observations/55897790</a>   |
| 244 | Pitta brachyura | Indian Pitta | 2014/6/25 | 5 | 0 | 20.24838270 | 79.36068900 | <a href="https://www.inaturalist.org/observations/55899535">https://www.inaturalist.org/observations/55899535</a>   |
| 245 | Pitta brachyura | Indian Pitta | 2016/6/10 | 6 | 0 | 20.24838270 | 79.36068900 | <a href="https://www.inaturalist.org/observations/58942631">https://www.inaturalist.org/observations/58942631</a>   |
| 246 | Pitta brachyura | Indian Pitta | 2019/5/27 | 9 | 0 | 20.37298664 | 79.35119095 | <a href="https://www.inaturalist.org/observations/27587147">https://www.inaturalist.org/observations/27587147</a>   |
| 247 | Pitta brachyura | Indian Pitta | 2016/8/27 | 6 | 0 | 20.37816200 | 75.09774600 | <a href="http://www.inaturalist.org/observations/4157418">http://www.inaturalist.org/observations/4157418</a>       |
| 248 | Pitta brachyura | Indian Pitta | 2011/5/15 | 6 | 0 | 20.49522540 | 79.37189860 | <a href="https://www.inaturalist.org/observations/69553469">https://www.inaturalist.org/observations/69553469</a>   |
| 249 | Pitta brachyura | Indian Pitta | 2022/7/29 | 6 | 0 | 20.50009776 | 81.90122976 | <a href="https://www.inaturalist.org/observations/128451548">https://www.inaturalist.org/observations/128451548</a> |
| 250 | Pitta brachyura | Indian Pitta | 2021/5/29 | 5 | 0 | 20.59780733 | 82.05195419 | <a href="https://www.inaturalist.org/observations/80688887">https://www.inaturalist.org/observations/80688887</a>   |
| 251 | Pitta brachyura | Indian Pitta | 2019/5/26 | 5 | 0 | 20.61087143 | 81.55033417 | <a href="https://www.inaturalist.org/observations/37777578">https://www.inaturalist.org/observations/37777578</a>   |
| 252 | Pitta brachyura | Indian Pitta | 2019/5/29 | 4 | 0 | 21.16549961 | 81.39554054 | <a href="https://www.inaturalist.org/observations/51160373">https://www.inaturalist.org/observations/51160373</a>   |

|     |                 |              |           |   |   |             |             |                                                                                                                     |
|-----|-----------------|--------------|-----------|---|---|-------------|-------------|---------------------------------------------------------------------------------------------------------------------|
| 253 | Pitta brachyura | Indian Pitta | 2019/5/26 | 3 | 0 | 21.17295415 | 81.31154481 | <a href="https://www.inaturalist.org/observations/72753794">https://www.inaturalist.org/observations/72753794</a>   |
| 254 | Pitta brachyura | Indian Pitta | 2022/5/19 | 5 | 0 | 21.19300697 | 80.76201115 | <a href="https://www.inaturalist.org/observations/120312410">https://www.inaturalist.org/observations/120312410</a> |
| 255 | Pitta brachyura | Indian Pitta | 2020/6/14 | 3 | 0 | 21.19999874 | 80.75930212 | <a href="https://www.inaturalist.org/observations/49577634">https://www.inaturalist.org/observations/49577634</a>   |
| 256 | Pitta brachyura | Indian Pitta | 2021/5/20 | 5 | 0 | 21.20153666 | 80.71983241 | <a href="https://www.inaturalist.org/observations/79494710">https://www.inaturalist.org/observations/79494710</a>   |
| 257 | Pitta brachyura | Indian Pitta | 2021/4/20 | 3 | 0 | 21.20608998 | 81.60781559 | <a href="https://www.inaturalist.org/observations/74647043">https://www.inaturalist.org/observations/74647043</a>   |
| 258 | Pitta brachyura | Indian Pitta | 2019/1/1  | 3 | 0 | 21.21598352 | 81.44047827 | <a href="https://www.inaturalist.org/observations/139441012">https://www.inaturalist.org/observations/139441012</a> |
| 259 | Pitta brachyura | Indian Pitta | 2017/5/31 | 4 | 0 | 21.23559330 | 81.45205602 | <a href="https://www.inaturalist.org/observations/78506852">https://www.inaturalist.org/observations/78506852</a>   |
| 260 | Pitta brachyura | Indian Pitta | 2021/4/23 | 5 | 0 | 21.23990900 | 81.63186900 | <a href="https://www.inaturalist.org/observations/74866479">https://www.inaturalist.org/observations/74866479</a>   |
| 261 | Pitta brachyura | Indian Pitta | 2022/5/6  | 2 | 0 | 21.27257053 | 79.95874286 | <a href="https://www.inaturalist.org/observations/115841580">https://www.inaturalist.org/observations/115841580</a> |
| 262 | Pitta brachyura | Indian Pitta | 2019/6/14 | 9 | 0 | 21.27420338 | 80.00715225 | <a href="https://www.inaturalist.org/observations/27696434">https://www.inaturalist.org/observations/27696434</a>   |
| 263 | Pitta brachyura | Indian Pitta | 2022/5/5  | 6 | 0 | 21.33454181 | 82.29921900 | <a href="https://www.inaturalist.org/observations/116819023">https://www.inaturalist.org/observations/116819023</a> |
| 264 | Pitta brachyura | Indian Pitta | 2022/5/7  | 2 | 0 | 21.41124237 | 86.71953198 | <a href="https://www.inaturalist.org/observations/116947492">https://www.inaturalist.org/observations/116947492</a> |
| 265 | Pitta brachyura | Indian Pitta | 2019/5/26 | 3 | 0 | 21.41711410 | 86.60062490 | <a href="https://www.inaturalist.org/observations/97911996">https://www.inaturalist.org/observations/97911996</a>   |
| 266 | Pitta brachyura | Indian Pitta | 2022/5/7  | 2 | 0 | 21.41711410 | 86.60062490 | <a href="https://www.inaturalist.org/observations/116264844">https://www.inaturalist.org/observations/116264844</a> |
| 267 | Pitta brachyura | Indian Pitta | 2022/5/8  | 3 | 0 | 21.41711410 | 86.60062490 | <a href="https://www.inaturalist.org/observations/116264888">https://www.inaturalist.org/observations/116264888</a> |
| 268 | Pitta brachyura | Indian Pitta | 2022/5/6  | 4 | 0 | 21.41712041 | 86.60062496 | <a href="https://www.inaturalist.org/observations/117096058">https://www.inaturalist.org/observations/117096058</a> |
| 269 | Pitta brachyura | Indian Pitta | 2022/6/4  | 4 | 0 | 21.47491380 | 79.32120580 | <a href="https://www.inaturalist.org/observations/121057074">https://www.inaturalist.org/observations/121057074</a> |
| 270 | Pitta brachyura | Indian Pitta | 2022/6/4  | 3 | 0 | 21.47491380 | 79.32120580 | <a href="https://www.inaturalist.org/observations/121057082">https://www.inaturalist.org/observations/121057082</a> |
| 271 | Pitta brachyura | Indian Pitta | 2022/6/4  | 4 | 0 | 21.47491380 | 79.32120580 | <a href="https://www.inaturalist.org/observations/121057084">https://www.inaturalist.org/observations/121057084</a> |
| 272 | Pitta brachyura | Indian Pitta | 2013/6/9  | 3 | 0 | 21.50127398 | 75.78807947 | <a href="https://www.inaturalist.org/observations/85669277">https://www.inaturalist.org/observations/85669277</a>   |
| 273 | Pitta brachyura | Indian Pitta | 2016/5/27 | 4 | 0 | 21.56551889 | 71.32569083 | <a href="https://www.inaturalist.org/observations/74497824">https://www.inaturalist.org/observations/74497824</a>   |
| 274 | Pitta brachyura | Indian Pitta | 2013/6/9  | 3 | 0 | 21.57420865 | 75.63148867 | <a href="https://www.inaturalist.org/observations/85669294">https://www.inaturalist.org/observations/85669294</a>   |
| 275 | Pitta brachyura | Indian Pitta | 2022/6/3  | 4 | 0 | 21.58683800 | 79.28303000 | <a href="https://www.inaturalist.org/observations/121056840">https://www.inaturalist.org/observations/121056840</a> |

|     |                 |              |           |   |   |             |             |                                                                                                                     |
|-----|-----------------|--------------|-----------|---|---|-------------|-------------|---------------------------------------------------------------------------------------------------------------------|
| 276 | Pitta brachyura | Indian Pitta | 2018/6/8  | 3 | 0 | 21.63591260 | 79.23227860 | <a href="https://www.inaturalist.org/observations/56209634">https://www.inaturalist.org/observations/56209634</a>   |
| 277 | Pitta brachyura | Indian Pitta | 2018/6/10 | 5 | 0 | 21.63591260 | 79.23227860 | <a href="https://www.inaturalist.org/observations/56209673">https://www.inaturalist.org/observations/56209673</a>   |
| 278 | Pitta brachyura | Indian Pitta | 2022/5/10 | 3 | 0 | 21.63591260 | 79.23227860 | <a href="https://www.inaturalist.org/observations/135771401">https://www.inaturalist.org/observations/135771401</a> |
| 279 | Pitta brachyura | Indian Pitta | 2019/6/6  | 4 | 0 | 21.63591661 | 79.23227862 | <a href="https://www.inaturalist.org/observations/101797778">https://www.inaturalist.org/observations/101797778</a> |
| 280 | Pitta brachyura | Indian Pitta | 2022/6/3  | 3 | 0 | 21.66861570 | 79.36990140 | <a href="https://www.inaturalist.org/observations/121056514">https://www.inaturalist.org/observations/121056514</a> |
| 281 | Pitta brachyura | Indian Pitta | 2022/6/3  | 3 | 0 | 21.66861570 | 79.36990140 | <a href="https://www.inaturalist.org/observations/121056524">https://www.inaturalist.org/observations/121056524</a> |
| 282 | Pitta brachyura | Indian Pitta | 2022/6/3  | 3 | 0 | 21.66861570 | 79.36990140 | <a href="https://www.inaturalist.org/observations/121056525">https://www.inaturalist.org/observations/121056525</a> |
| 283 | Pitta brachyura | Indian Pitta | 2022/6/3  | 3 | 0 | 21.66861570 | 79.36990140 | <a href="https://www.inaturalist.org/observations/121056527">https://www.inaturalist.org/observations/121056527</a> |
| 284 | Pitta brachyura | Indian Pitta | 2022/6/3  | 3 | 0 | 21.66861570 | 79.36990140 | <a href="https://www.inaturalist.org/observations/121056531">https://www.inaturalist.org/observations/121056531</a> |
| 285 | Pitta brachyura | Indian Pitta | 2022/6/3  | 3 | 0 | 21.66861570 | 79.36990140 | <a href="https://www.inaturalist.org/observations/121056532">https://www.inaturalist.org/observations/121056532</a> |
| 286 | Pitta brachyura | Indian Pitta | 2020/5/14 | 6 | 0 | 21.67055556 | 71.85583333 | <a href="https://www.inaturalist.org/observations/45869327">https://www.inaturalist.org/observations/45869327</a>   |
| 287 | Pitta brachyura | Indian Pitta | 2021/7/16 | 4 | 0 | 21.86744240 | 69.92674500 | <a href="https://www.inaturalist.org/observations/137604567">https://www.inaturalist.org/observations/137604567</a> |
| 288 | Pitta brachyura | Indian Pitta | 2014/6/26 | 7 | 0 | 22.15310500 | 71.31711600 | <a href="http://www.inaturalist.org/observations/1062076">http://www.inaturalist.org/observations/1062076</a>       |
| 289 | Pitta brachyura | Indian Pitta | 2017/5/20 | 6 | 0 | 22.24651818 | 80.66129498 | <a href="https://www.inaturalist.org/observations/6519549">https://www.inaturalist.org/observations/6519549</a>     |
| 290 | Pitta brachyura | Indian Pitta | 2009/5/20 | 4 | 0 | 22.33451320 | 80.61151300 | <a href="https://www.inaturalist.org/observations/55159112">https://www.inaturalist.org/observations/55159112</a>   |
| 291 | Pitta brachyura | Indian Pitta | 2016/5/19 | 4 | 0 | 22.33451320 | 80.61151300 | <a href="https://www.inaturalist.org/observations/56311387">https://www.inaturalist.org/observations/56311387</a>   |
| 292 | Pitta brachyura | Indian Pitta | 2016/5/20 | 6 | 0 | 22.33451320 | 80.61151300 | <a href="https://www.inaturalist.org/observations/56311401">https://www.inaturalist.org/observations/56311401</a>   |
| 293 | Pitta brachyura | Indian Pitta | 2017/5/17 | 6 | 0 | 22.33451320 | 80.61151300 | <a href="https://www.inaturalist.org/observations/56923097">https://www.inaturalist.org/observations/56923097</a>   |
| 294 | Pitta brachyura | Indian Pitta | 2021/4/3  | 3 | 0 | 22.33451320 | 80.61151300 | <a href="https://www.inaturalist.org/observations/73485856">https://www.inaturalist.org/observations/73485856</a>   |
| 295 | Pitta brachyura | Indian Pitta | 2006/5/15 | 6 | 0 | 22.33483346 | 80.60943604 | <a href="https://www.inaturalist.org/observations/54715636">https://www.inaturalist.org/observations/54715636</a>   |
| 296 | Pitta brachyura | Indian Pitta | 2022/6/11 | 5 | 0 | 22.35682333 | 80.54005167 | <a href="https://www.inaturalist.org/observations/121699084">https://www.inaturalist.org/observations/121699084</a> |
| 297 | Pitta brachyura | Indian Pitta | 2022/5/29 | 4 | 0 | 22.35709605 | 73.66443515 | <a href="https://www.inaturalist.org/observations/119426838">https://www.inaturalist.org/observations/119426838</a> |
| 298 | Pitta brachyura | Indian Pitta | 2014/3/11 | 6 | 0 | 22.36938060 | 73.71410460 | <a href="https://www.inaturalist.org/observations/39916032">https://www.inaturalist.org/observations/39916032</a>   |

|     |                 |              |           |   |   |             |             |                                                                                                                     |
|-----|-----------------|--------------|-----------|---|---|-------------|-------------|---------------------------------------------------------------------------------------------------------------------|
| 299 | Pitta brachyura | Indian Pitta | 2020/6/27 | 3 | 0 | 22.36938060 | 73.71410460 | <a href="https://www.inaturalist.org/observations/53850268">https://www.inaturalist.org/observations/53850268</a>   |
| 300 | Pitta brachyura | Indian Pitta | 2022/4/24 | 5 | 0 | 22.42260016 | 88.38098578 | <a href="https://www.inaturalist.org/observations/112834102">https://www.inaturalist.org/observations/112834102</a> |
| 301 | Pitta brachyura | Indian Pitta | 2022/4/24 | 3 | 0 | 22.42347601 | 88.38202983 | <a href="https://www.inaturalist.org/observations/113110618">https://www.inaturalist.org/observations/113110618</a> |
| 302 | Pitta brachyura | Indian Pitta | 2019/5/23 | 7 | 0 | 22.43456300 | 81.70303300 | <a href="https://www.inaturalist.org/observations/59106556">https://www.inaturalist.org/observations/59106556</a>   |
| 303 | Pitta brachyura | Indian Pitta | 2017/5/31 | 7 | 0 | 22.46939200 | 81.78125060 | <a href="https://www.inaturalist.org/observations/60976391">https://www.inaturalist.org/observations/60976391</a>   |
| 304 | Pitta brachyura | Indian Pitta | 2019/5/24 | 5 | 0 | 22.46939200 | 81.78125060 | <a href="https://www.inaturalist.org/observations/62090607">https://www.inaturalist.org/observations/62090607</a>   |
| 305 | Pitta brachyura | Indian Pitta | 2016/5/1  | 4 | 0 | 22.51199388 | 88.35611007 | <a href="https://www.inaturalist.org/observations/97878472">https://www.inaturalist.org/observations/97878472</a>   |
| 306 | Pitta brachyura | Indian Pitta | 2019/4/22 | 2 | 0 | 22.51220567 | 88.35816087 | <a href="https://www.inaturalist.org/observations/66408402">https://www.inaturalist.org/observations/66408402</a>   |
| 307 | Pitta brachyura | Indian Pitta | 2019/5/23 | 7 | 0 | 22.59873571 | 80.52728100 | <a href="https://www.inaturalist.org/observations/34454680">https://www.inaturalist.org/observations/34454680</a>   |
| 308 | Pitta brachyura | Indian Pitta | 2019/5/16 | 7 | 0 | 22.79002338 | 80.60843135 | <a href="https://www.inaturalist.org/observations/34454666">https://www.inaturalist.org/observations/34454666</a>   |
| 309 | Pitta brachyura | Indian Pitta | 2015/5/6  | 5 | 0 | 22.79245360 | 88.29597950 | <a href="https://www.inaturalist.org/observations/100378056">https://www.inaturalist.org/observations/100378056</a> |
| 310 | Pitta brachyura | Indian Pitta | 2022/4/28 | 3 | 0 | 22.80416040 | 88.33392340 | <a href="https://www.inaturalist.org/observations/113701622">https://www.inaturalist.org/observations/113701622</a> |
| 311 | Pitta brachyura | Indian Pitta | 2022/6/10 | 4 | 0 | 22.87806000 | 77.51555833 | <a href="https://www.inaturalist.org/observations/124769503">https://www.inaturalist.org/observations/124769503</a> |
| 312 | Pitta brachyura | Indian Pitta | 2020/6/28 | 5 | 0 | 22.89659541 | 86.20610286 | <a href="https://www.inaturalist.org/observations/51345753">https://www.inaturalist.org/observations/51345753</a>   |
| 313 | Pitta brachyura | Indian Pitta | 2022/6/29 | 5 | 0 | 22.91585512 | 82.99684245 | <a href="https://www.inaturalist.org/observations/128322223">https://www.inaturalist.org/observations/128322223</a> |
| 314 | Pitta brachyura | Indian Pitta | 2021/5/9  | 5 | 0 | 22.91598081 | 86.14719383 | <a href="https://www.inaturalist.org/observations/78038534">https://www.inaturalist.org/observations/78038534</a>   |
| 315 | Pitta brachyura | Indian Pitta | 2021/7/23 | 6 | 0 | 22.96549705 | 83.02855589 | <a href="https://www.inaturalist.org/observations/88260758">https://www.inaturalist.org/observations/88260758</a>   |
| 316 | Pitta brachyura | Indian Pitta | 2018/8/24 | 7 | 0 | 22.96903936 | 86.89895969 | <a href="https://www.inaturalist.org/observations/17156934">https://www.inaturalist.org/observations/17156934</a>   |
| 317 | Pitta brachyura | Indian Pitta | 2019/5/31 | 6 | 0 | 22.97063040 | 87.04712687 | <a href="https://www.inaturalist.org/observations/26104805">https://www.inaturalist.org/observations/26104805</a>   |
| 318 | Pitta brachyura | Indian Pitta | 2019/5/31 | 7 | 0 | 22.97063040 | 87.04712687 | <a href="https://www.inaturalist.org/observations/26104807">https://www.inaturalist.org/observations/26104807</a>   |
| 319 | Pitta brachyura | Indian Pitta | 2019/5/31 | 8 | 0 | 22.97063040 | 87.04712687 | <a href="https://www.inaturalist.org/observations/26104808">https://www.inaturalist.org/observations/26104808</a>   |
| 320 | Pitta brachyura | Indian Pitta | 2022/6/5  | 3 | 0 | 22.97105296 | 83.03581730 | <a href="https://www.inaturalist.org/observations/122490143">https://www.inaturalist.org/observations/122490143</a> |
| 321 | Pitta brachyura | Indian Pitta | 2019/5/30 | 6 | 0 | 23.01424645 | 87.02129561 | <a href="https://www.inaturalist.org/observations/26048777">https://www.inaturalist.org/observations/26048777</a>   |

|     |                 |              |           |   |   |             |             |                                                                                                                     |
|-----|-----------------|--------------|-----------|---|---|-------------|-------------|---------------------------------------------------------------------------------------------------------------------|
| 322 | Pitta brachyura | Indian Pitta | 2019/5/30 | 6 | 0 | 23.01424645 | 87.02129561 | <a href="https://www.inaturalist.org/observations/26048778">https://www.inaturalist.org/observations/26048778</a>   |
| 323 | Pitta brachyura | Indian Pitta | 2019/5/30 | 6 | 0 | 23.01424645 | 87.02129561 | <a href="https://www.inaturalist.org/observations/26048779">https://www.inaturalist.org/observations/26048779</a>   |
| 324 | Pitta brachyura | Indian Pitta | 2019/5/30 | 6 | 0 | 23.01424645 | 87.02129561 | <a href="https://www.inaturalist.org/observations/26048780">https://www.inaturalist.org/observations/26048780</a>   |
| 325 | Pitta brachyura | Indian Pitta | 2019/5/30 | 6 | 0 | 23.01424645 | 87.02129561 | <a href="https://www.inaturalist.org/observations/26048782">https://www.inaturalist.org/observations/26048782</a>   |
| 326 | Pitta brachyura | Indian Pitta | 2019/5/30 | 6 | 0 | 23.01424645 | 87.02129561 | <a href="https://www.inaturalist.org/observations/26048783">https://www.inaturalist.org/observations/26048783</a>   |
| 327 | Pitta brachyura | Indian Pitta | 2019/5/30 | 7 | 0 | 23.01424645 | 87.02129561 | <a href="https://www.inaturalist.org/observations/26048784">https://www.inaturalist.org/observations/26048784</a>   |
| 328 | Pitta brachyura | Indian Pitta | 2019/5/30 | 7 | 0 | 23.01424645 | 87.02129561 | <a href="https://www.inaturalist.org/observations/26048785">https://www.inaturalist.org/observations/26048785</a>   |
| 329 | Pitta brachyura | Indian Pitta | 2019/5/30 | 7 | 0 | 23.01424645 | 87.02129561 | <a href="https://www.inaturalist.org/observations/26048786">https://www.inaturalist.org/observations/26048786</a>   |
| 330 | Pitta brachyura | Indian Pitta | 2019/5/30 | 7 | 0 | 23.01424645 | 87.02129561 | <a href="https://www.inaturalist.org/observations/26048787">https://www.inaturalist.org/observations/26048787</a>   |
| 331 | Pitta brachyura | Indian Pitta | 2019/5/30 | 7 | 0 | 23.01424645 | 87.02129561 | <a href="https://www.inaturalist.org/observations/26048788">https://www.inaturalist.org/observations/26048788</a>   |
| 332 | Pitta brachyura | Indian Pitta | 2019/5/30 | 8 | 0 | 23.01424645 | 87.02129561 | <a href="https://www.inaturalist.org/observations/26048790">https://www.inaturalist.org/observations/26048790</a>   |
| 333 | Pitta brachyura | Indian Pitta | 2019/5/30 | 8 | 0 | 23.01424645 | 87.02129561 | <a href="https://www.inaturalist.org/observations/26048792">https://www.inaturalist.org/observations/26048792</a>   |
| 334 | Pitta brachyura | Indian Pitta | 2019/5/30 | 9 | 0 | 23.01424645 | 87.02129561 | <a href="https://www.inaturalist.org/observations/26048795">https://www.inaturalist.org/observations/26048795</a>   |
| 335 | Pitta brachyura | Indian Pitta | 2018/5/1  | 2 | 0 | 23.25136166 | 88.59443665 | <a href="https://www.inaturalist.org/observations/74484623">https://www.inaturalist.org/observations/74484623</a>   |
| 336 | Pitta brachyura | Indian Pitta | 2021/5/28 | 3 | 0 | 23.25993330 | 77.41261500 | <a href="https://www.inaturalist.org/observations/88270171">https://www.inaturalist.org/observations/88270171</a>   |
| 337 | Pitta brachyura | Indian Pitta | 2022/6/8  | 5 | 0 | 23.29875775 | 77.41721369 | <a href="https://www.inaturalist.org/observations/120764305">https://www.inaturalist.org/observations/120764305</a> |
| 338 | Pitta brachyura | Indian Pitta | 2021/5/29 | 1 | 0 | 23.29884859 | 77.41662595 | <a href="https://www.inaturalist.org/observations/94000655">https://www.inaturalist.org/observations/94000655</a>   |
| 339 | Pitta brachyura | Indian Pitta | 2021/5/27 | 4 | 0 | 23.29888277 | 77.41761401 | <a href="https://www.inaturalist.org/observations/105942605">https://www.inaturalist.org/observations/105942605</a> |
| 340 | Pitta brachyura | Indian Pitta | 2021/5/15 | 6 | 0 | 23.52044430 | 87.31192270 | <a href="https://www.inaturalist.org/observations/79957784">https://www.inaturalist.org/observations/79957784</a>   |
| 341 | Pitta brachyura | Indian Pitta | 2017/5/12 | 7 | 0 | 23.59520000 | 87.42664500 | <a href="https://www.inaturalist.org/observations/8343108">https://www.inaturalist.org/observations/8343108</a>     |
| 342 | Pitta brachyura | Indian Pitta | 2016/5/10 | 5 | 0 | 23.60778840 | 87.44863080 | <a href="https://www.inaturalist.org/observations/5904484">https://www.inaturalist.org/observations/5904484</a>     |
| 343 | Pitta brachyura | Indian Pitta | 2017/4/23 | 6 | 0 | 23.65813800 | 87.28251300 | <a href="https://www.inaturalist.org/observations/5941634">https://www.inaturalist.org/observations/5941634</a>     |
| 344 | Pitta brachyura | Indian Pitta | 2019/5/24 | 4 | 0 | 23.69944400 | 80.96194400 | <a href="https://www.inaturalist.org/observations/56496007">https://www.inaturalist.org/observations/56496007</a>   |

|     |                 |              |            |    |   |             |             |                                                                                                                     |
|-----|-----------------|--------------|------------|----|---|-------------|-------------|---------------------------------------------------------------------------------------------------------------------|
| 345 | Pitta brachyura | Indian Pitta | 2009/5/25  | 4  | 0 | 23.72221060 | 81.02327100 | <a href="https://www.inaturalist.org/observations/55146100">https://www.inaturalist.org/observations/55146100</a>   |
| 346 | Pitta brachyura | Indian Pitta | 2018/5/21  | 10 | 0 | 23.72245400 | 81.02421900 | <a href="https://www.inaturalist.org/observations/13142147">https://www.inaturalist.org/observations/13142147</a>   |
| 347 | Pitta brachyura | Indian Pitta | 2022/5/20  | 5  | 0 | 23.72381403 | 81.02348697 | <a href="https://www.inaturalist.org/observations/118791165">https://www.inaturalist.org/observations/118791165</a> |
| 348 | Pitta brachyura | Indian Pitta | 2020/9/1   | 7  | 0 | 24.92312262 | 76.84470791 | <a href="https://www.inaturalist.org/observations/58506918">https://www.inaturalist.org/observations/58506918</a>   |
| 349 | Pitta brachyura | Indian Pitta | 2016/5/31  | 5  | 0 | 25.21169185 | 75.08970650 | <a href="https://www.inaturalist.org/observations/123217563">https://www.inaturalist.org/observations/123217563</a> |
| 350 | Pitta brachyura | Indian Pitta | 2022/7/7   | 3  | 0 | 26.01732619 | 76.50257405 | <a href="https://www.inaturalist.org/observations/125884147">https://www.inaturalist.org/observations/125884147</a> |
| 351 | Pitta brachyura | Indian Pitta | 2013/6/6   | 4  | 0 | 26.01732740 | 76.50257420 | <a href="https://www.inaturalist.org/observations/55272192">https://www.inaturalist.org/observations/55272192</a>   |
| 352 | Pitta brachyura | Indian Pitta | 2015/5/25  | 3  | 0 | 26.01732740 | 76.50257420 | <a href="https://www.inaturalist.org/observations/55474149">https://www.inaturalist.org/observations/55474149</a>   |
| 353 | Pitta brachyura | Indian Pitta | 2015/5/25  | 5  | 0 | 26.01732740 | 76.50257420 | <a href="https://www.inaturalist.org/observations/56407988">https://www.inaturalist.org/observations/56407988</a>   |
| 354 | Pitta brachyura | Indian Pitta | 2013/6/6   | 4  | 0 | 26.01732740 | 76.50257420 | <a href="https://www.inaturalist.org/observations/56619450">https://www.inaturalist.org/observations/56619450</a>   |
| 355 | Pitta brachyura | Indian Pitta | 2022/6/6   | 5  | 0 | 26.01732740 | 76.50257420 | <a href="https://www.inaturalist.org/observations/130132488">https://www.inaturalist.org/observations/130132488</a> |
| 356 | Pitta brachyura | Indian Pitta | 2015/5/17  | 4  | 0 | 26.01732740 | 76.50257420 | <a href="https://www.inaturalist.org/observations/142000185">https://www.inaturalist.org/observations/142000185</a> |
| 357 | Pitta brachyura | Indian Pitta | 2016/7/5   | 6  | 0 | 26.01936506 | 76.43667016 | <a href="https://www.inaturalist.org/observations/21748446">https://www.inaturalist.org/observations/21748446</a>   |
| 358 | Pitta brachyura | Indian Pitta | 2022/10/23 | 2  | 0 | 26.51233900 | 80.23290000 | <a href="https://www.inaturalist.org/observations/139977791">https://www.inaturalist.org/observations/139977791</a> |
| 359 | Pitta brachyura | Indian Pitta | 2022/7/18  | 5  | 0 | 26.91686047 | 75.86473536 | <a href="https://www.inaturalist.org/observations/128743834">https://www.inaturalist.org/observations/128743834</a> |
| 360 | Pitta brachyura | Indian Pitta | 2022/7/18  | 2  | 0 | 26.91686047 | 75.86473536 | <a href="https://www.inaturalist.org/observations/128743836">https://www.inaturalist.org/observations/128743836</a> |
| 361 | Pitta brachyura | Indian Pitta | 2022/7/18  | 6  | 0 | 26.91686047 | 75.86473536 | <a href="https://www.inaturalist.org/observations/128743837">https://www.inaturalist.org/observations/128743837</a> |
| 362 | Pitta brachyura | Indian Pitta | 2021/6/26  | 5  | 0 | 28.35031350 | 77.06277145 | <a href="https://www.inaturalist.org/observations/87819487">https://www.inaturalist.org/observations/87819487</a>   |
| 363 | Pitta brachyura | Indian Pitta | 2018/7/29  | 8  | 0 | 28.35095520 | 77.06148330 | <a href="https://www.inaturalist.org/observations/15008608">https://www.inaturalist.org/observations/15008608</a>   |
| 364 | Pitta brachyura | Indian Pitta | 2020/6/14  | 6  | 0 | 28.36300890 | 77.04498209 | <a href="https://www.inaturalist.org/observations/49930721">https://www.inaturalist.org/observations/49930721</a>   |
| 365 | Pitta brachyura | Indian Pitta | 2022/6/30  | 4  | 0 | 28.36301274 | 77.04498176 | <a href="https://www.inaturalist.org/observations/127453896">https://www.inaturalist.org/observations/127453896</a> |
| 366 | Pitta brachyura | Indian Pitta | 2020/8/2   | 4  | 0 | 28.37355947 | 77.17085112 | <a href="https://www.inaturalist.org/observations/58117873">https://www.inaturalist.org/observations/58117873</a>   |
| 367 | Pitta brachyura | Indian Pitta | 2022/7/3   | 2  | 0 | 28.48183520 | 77.26527742 | <a href="https://www.inaturalist.org/observations/132374777">https://www.inaturalist.org/observations/132374777</a> |

|     |                        |              |           |   |   |             |             |                                                                                                                     |
|-----|------------------------|--------------|-----------|---|---|-------------|-------------|---------------------------------------------------------------------------------------------------------------------|
| 368 | <i>Pitta brachyura</i> | Indian Pitta | 2008/5/29 | 4 | 0 | 29.53001380 | 78.77466030 | <a href="https://www.inaturalist.org/observations/55248050">https://www.inaturalist.org/observations/55248050</a>   |
| 369 | <i>Pitta brachyura</i> | Indian Pitta | 2013/6/21 | 4 | 0 | 29.59191109 | 79.04433193 | <a href="https://www.inaturalist.org/observations/105558375">https://www.inaturalist.org/observations/105558375</a> |
| 370 | <i>Pitta brachyura</i> | Indian Pitta | 2020/5/4  | 6 | 0 | 29.60279948 | 79.07377616 | <a href="https://www.inaturalist.org/observations/123682418">https://www.inaturalist.org/observations/123682418</a> |
| 371 | <i>Pitta brachyura</i> | Indian Pitta | 2013/5/25 | 3 | 0 | 29.61269140 | 78.81177360 | <a href="https://www.inaturalist.org/observations/122790510">https://www.inaturalist.org/observations/122790510</a> |
| 372 | <i>Pitta brachyura</i> | Indian Pitta | 2022/5/8  | 4 | 0 | 30.29655558 | 77.88279925 | <a href="https://www.inaturalist.org/observations/116067167">https://www.inaturalist.org/observations/116067167</a> |
| 373 | <i>Pitta brachyura</i> | Indian Pitta | 2017/5/21 | 4 | 0 | 30.75405040 | 76.79280734 | <a href="https://www.inaturalist.org/observations/128615240">https://www.inaturalist.org/observations/128615240</a> |



| No | scientific name          | common name       | date       | NIA | NID | latitude    | longitude   | url                                                                                                                 |
|----|--------------------------|-------------------|------------|-----|-----|-------------|-------------|---------------------------------------------------------------------------------------------------------------------|
| 1  | <i>Sturnus pagodarum</i> | Brahminy Starling | 2011/1/22  | 3   | 0   | 6.25722147  | 81.38384608 | <a href="https://www.inaturalist.org/observations/57912726">https://www.inaturalist.org/observations/57912726</a>   |
| 2  | <i>Sturnus pagodarum</i> | Brahminy Starling | 2018/10/24 | 3   | 0   | 6.27282560  | 81.38657213 | <a href="https://www.inaturalist.org/observations/18263778">https://www.inaturalist.org/observations/18263778</a>   |
| 3  | <i>Sturnus pagodarum</i> | Brahminy Starling | 2017/3/26  | 4   | 0   | 6.27962074  | 81.40191293 | <a href="https://www.inaturalist.org/observations/5505474">https://www.inaturalist.org/observations/5505474</a>     |
| 4  | <i>Sturnus pagodarum</i> | Brahminy Starling | 2020/12/14 | 6   | 0   | 6.30177324  | 81.36644707 | <a href="https://www.inaturalist.org/observations/84043608">https://www.inaturalist.org/observations/84043608</a>   |
| 5  | <i>Sturnus pagodarum</i> | Brahminy Starling | 2022/2/17  | 2   | 0   | 6.34214678  | 81.45768832 | <a href="https://www.inaturalist.org/observations/107540947">https://www.inaturalist.org/observations/107540947</a> |
| 6  | <i>Sturnus pagodarum</i> | Brahminy Starling | 2014/2/13  | 4   | 0   | 6.39821167  | 81.46314333 | <a href="https://www.inaturalist.org/observations/37148128">https://www.inaturalist.org/observations/37148128</a>   |
| 7  | <i>Sturnus pagodarum</i> | Brahminy Starling | 2016/12/24 | 5   | 0   | 6.52467110  | 81.68007463 | <a href="https://www.inaturalist.org/observations/55770126">https://www.inaturalist.org/observations/55770126</a>   |
| 8  | <i>Sturnus pagodarum</i> | Brahminy Starling | 2021/11/8  | 4   | 0   | 7.00193553  | 81.85070248 | <a href="https://www.inaturalist.org/observations/100611598">https://www.inaturalist.org/observations/100611598</a> |
| 9  | <i>Sturnus pagodarum</i> | Brahminy Starling | 2021/1/21  | 2   | 0   | 8.44698648  | 76.98138792 | <a href="https://www.inaturalist.org/observations/80755597">https://www.inaturalist.org/observations/80755597</a>   |
| 10 | <i>Sturnus pagodarum</i> | Brahminy Starling | 2019/11/17 | 2   | 0   | 8.45056153  | 76.97057661 | <a href="https://www.inaturalist.org/observations/42916691">https://www.inaturalist.org/observations/42916691</a>   |
| 11 | <i>Sturnus pagodarum</i> | Brahminy Starling | 2022/4/8   | 3   | 0   | 8.49769802  | 77.45777061 | <a href="https://www.inaturalist.org/observations/142139547">https://www.inaturalist.org/observations/142139547</a> |
| 12 | <i>Sturnus pagodarum</i> | Brahminy Starling | 2014/10/4  | 3   | 0   | 8.69969770  | 77.63132000 | <a href="https://www.inaturalist.org/observations/23921342">https://www.inaturalist.org/observations/23921342</a>   |
| 13 | <i>Sturnus pagodarum</i> | Brahminy Starling | 2021/12/23 | 2   | 0   | 8.70585758  | 77.61514621 | <a href="https://www.inaturalist.org/observations/103674846">https://www.inaturalist.org/observations/103674846</a> |
| 14 | <i>Sturnus pagodarum</i> | Brahminy Starling | 2021/4/25  | 1   | 0   | 9.36024228  | 77.92068515 | <a href="https://www.inaturalist.org/observations/99902798">https://www.inaturalist.org/observations/99902798</a>   |
| 15 | <i>Sturnus pagodarum</i> | Brahminy Starling | 2021/4/25  | 1   | 0   | 9.36024228  | 77.92068515 | <a href="https://www.inaturalist.org/observations/99902804">https://www.inaturalist.org/observations/99902804</a>   |
| 16 | <i>Sturnus pagodarum</i> | Brahminy Starling | 2021/12/5  | 3   | 0   | 9.83962543  | 76.78352549 | <a href="https://www.inaturalist.org/observations/102766867">https://www.inaturalist.org/observations/102766867</a> |
| 17 | <i>Sturnus pagodarum</i> | Brahminy Starling | 2022/12/9  | 2   | 0   | 10.05232199 | 76.33944813 | <a href="https://www.inaturalist.org/observations/143991345">https://www.inaturalist.org/observations/143991345</a> |
| 18 | <i>Sturnus pagodarum</i> | Brahminy Starling | 2016/1/27  | 1   | 0   | 10.12979100 | 76.68711800 | <a href="https://www.inaturalist.org/observations/7278974">https://www.inaturalist.org/observations/7278974</a>     |
| 19 | <i>Sturnus pagodarum</i> | Brahminy Starling | 2020/3/8   | 1   | 0   | 10.12979136 | 76.68711841 | <a href="https://www.inaturalist.org/observations/40601026">https://www.inaturalist.org/observations/40601026</a>   |
| 20 | <i>Sturnus pagodarum</i> | Brahminy Starling | 2022/10/24 | 1   | 0   | 10.13517211 | 76.38848886 | <a href="https://www.inaturalist.org/observations/139951111">https://www.inaturalist.org/observations/139951111</a> |
| 21 | <i>Sturnus pagodarum</i> | Brahminy Starling | 2018/1/26  | 4   | 0   | 10.36592393 | 76.24842564 | <a href="https://www.inaturalist.org/observations/35271982">https://www.inaturalist.org/observations/35271982</a>   |
| 22 | <i>Sturnus pagodarum</i> | Brahminy Starling | 2015/1/8   | 1   | 0   | 10.41267546 | 77.24186803 | <a href="https://www.inaturalist.org/observations/82346413">https://www.inaturalist.org/observations/82346413</a>   |

|    |                   |                   |            |   |   |             |             |                                                                                                                     |
|----|-------------------|-------------------|------------|---|---|-------------|-------------|---------------------------------------------------------------------------------------------------------------------|
| 23 | Sturnus pagodarum | Brahminy Starling | 2022/11/22 | 2 | 0 | 10.44940699 | 76.41066916 | <a href="https://www.inaturalist.org/observations/142733454">https://www.inaturalist.org/observations/142733454</a> |
| 24 | Sturnus pagodarum | Brahminy Starling | 2020/3/1   | 2 | 0 | 10.53367812 | 76.17583808 | <a href="https://www.inaturalist.org/observations/139509797">https://www.inaturalist.org/observations/139509797</a> |
| 25 | Sturnus pagodarum | Brahminy Starling | 2020/12/8  | 3 | 0 | 10.53426833 | 76.12865500 | <a href="https://www.inaturalist.org/observations/67002088">https://www.inaturalist.org/observations/67002088</a>   |
| 26 | Sturnus pagodarum | Brahminy Starling | 2021/5/13  | 3 | 0 | 10.61382704 | 76.19477921 | <a href="https://www.inaturalist.org/observations/107043483">https://www.inaturalist.org/observations/107043483</a> |
| 27 | Sturnus pagodarum | Brahminy Starling | 2021/5/14  | 3 | 0 | 10.61399875 | 76.19414621 | <a href="https://www.inaturalist.org/observations/107045216">https://www.inaturalist.org/observations/107045216</a> |
| 28 | Sturnus pagodarum | Brahminy Starling | 2021/6/3   | 3 | 0 | 10.61399875 | 76.19414621 | <a href="https://www.inaturalist.org/observations/107045265">https://www.inaturalist.org/observations/107045265</a> |
| 29 | Sturnus pagodarum | Brahminy Starling | 2019/5/28  | 6 | 0 | 10.62322000 | 76.18419833 | <a href="https://www.inaturalist.org/observations/29235195">https://www.inaturalist.org/observations/29235195</a>   |
| 30 | Sturnus pagodarum | Brahminy Starling | 2022/5/4   | 3 | 0 | 10.66926492 | 78.60887883 | <a href="https://www.inaturalist.org/observations/115264736">https://www.inaturalist.org/observations/115264736</a> |
| 31 | Sturnus pagodarum | Brahminy Starling | 2016/12/30 | 3 | 0 | 10.74751762 | 76.46718671 | <a href="https://www.inaturalist.org/observations/87028922">https://www.inaturalist.org/observations/87028922</a>   |
| 32 | Sturnus pagodarum | Brahminy Starling | 2016/12/29 | 3 | 0 | 10.74751762 | 76.46718671 | <a href="https://www.inaturalist.org/observations/87028923">https://www.inaturalist.org/observations/87028923</a>   |
| 33 | Sturnus pagodarum | Brahminy Starling | 2018/2/10  | 3 | 0 | 10.74974237 | 76.37860390 | <a href="https://www.inaturalist.org/observations/62641696">https://www.inaturalist.org/observations/62641696</a>   |
| 34 | Sturnus pagodarum | Brahminy Starling | 2019/10/20 | 3 | 0 | 10.76772010 | 75.92590130 | <a href="https://www.inaturalist.org/observations/67397051">https://www.inaturalist.org/observations/67397051</a>   |
| 35 | Sturnus pagodarum | Brahminy Starling | 2020/7/11  | 1 | 0 | 10.77030003 | 78.64099778 | <a href="https://www.inaturalist.org/observations/52648091">https://www.inaturalist.org/observations/52648091</a>   |
| 36 | Sturnus pagodarum | Brahminy Starling | 2022/5/4   | 3 | 0 | 10.78384664 | 78.79653922 | <a href="https://www.inaturalist.org/observations/115271105">https://www.inaturalist.org/observations/115271105</a> |
| 37 | Sturnus pagodarum | Brahminy Starling | 2022/4/17  | 1 | 0 | 10.80567810 | 79.13908580 | <a href="https://www.inaturalist.org/observations/113704594">https://www.inaturalist.org/observations/113704594</a> |
| 38 | Sturnus pagodarum | Brahminy Starling | 2022/3/19  | 3 | 0 | 10.81339167 | 76.73613167 | <a href="https://www.inaturalist.org/observations/115065051">https://www.inaturalist.org/observations/115065051</a> |
| 39 | Sturnus pagodarum | Brahminy Starling | 2022/3/19  | 2 | 0 | 10.81339167 | 76.73613167 | <a href="https://www.inaturalist.org/observations/142799202">https://www.inaturalist.org/observations/142799202</a> |
| 40 | Sturnus pagodarum | Brahminy Starling | 2022/3/19  | 3 | 0 | 10.81344333 | 76.73592167 | <a href="https://www.inaturalist.org/observations/115065067">https://www.inaturalist.org/observations/115065067</a> |
| 41 | Sturnus pagodarum | Brahminy Starling | 2022/3/19  | 2 | 0 | 10.81344333 | 76.73592167 | <a href="https://www.inaturalist.org/observations/142799200">https://www.inaturalist.org/observations/142799200</a> |
| 42 | Sturnus pagodarum | Brahminy Starling | 2016/2/2   | 3 | 0 | 10.83195700 | 76.71375300 | <a href="https://www.inaturalist.org/observations/7275794">https://www.inaturalist.org/observations/7275794</a>     |
| 43 | Sturnus pagodarum | Brahminy Starling | 2015/3/5   | 3 | 0 | 10.87883627 | 78.70316722 | <a href="https://www.inaturalist.org/observations/72024037">https://www.inaturalist.org/observations/72024037</a>   |
| 44 | Sturnus pagodarum | Brahminy Starling | 2020/10/2  | 1 | 0 | 10.97674599 | 76.87984203 | <a href="https://www.inaturalist.org/observations/103461712">https://www.inaturalist.org/observations/103461712</a> |
| 45 | Sturnus pagodarum | Brahminy Starling | 2020/10/2  | 3 | 0 | 11.07894586 | 79.83002432 | <a href="https://www.inaturalist.org/observations/61542993">https://www.inaturalist.org/observations/61542993</a>   |

|    |                   |                   |            |   |   |             |             |                                                                                                                     |
|----|-------------------|-------------------|------------|---|---|-------------|-------------|---------------------------------------------------------------------------------------------------------------------|
| 46 | Sturnus pagodarum | Brahminy Starling | 2020/12/13 | 2 | 0 | 11.07894586 | 79.83002432 | <a href="https://www.inaturalist.org/observations/66528739">https://www.inaturalist.org/observations/66528739</a>   |
| 47 | Sturnus pagodarum | Brahminy Starling | 2021/7/24  | 1 | 0 | 11.07894586 | 79.83002432 | <a href="https://www.inaturalist.org/observations/88418437">https://www.inaturalist.org/observations/88418437</a>   |
| 48 | Sturnus pagodarum | Brahminy Starling | 2021/7/24  | 1 | 0 | 11.07894586 | 79.83002432 | <a href="https://www.inaturalist.org/observations/88418775">https://www.inaturalist.org/observations/88418775</a>   |
| 49 | Sturnus pagodarum | Brahminy Starling | 2022/2/13  | 1 | 0 | 11.11290667 | 76.64201500 | <a href="https://www.inaturalist.org/observations/142754292">https://www.inaturalist.org/observations/142754292</a> |
| 50 | Sturnus pagodarum | Brahminy Starling | 2022/2/13  | 2 | 0 | 11.11338500 | 76.64268167 | <a href="https://www.inaturalist.org/observations/142754284">https://www.inaturalist.org/observations/142754284</a> |
| 51 | Sturnus pagodarum | Brahminy Starling | 2019/9/15  | 3 | 0 | 11.23409110 | 77.65862357 | <a href="https://www.inaturalist.org/observations/37122681">https://www.inaturalist.org/observations/37122681</a>   |
| 52 | Sturnus pagodarum | Brahminy Starling | 2019/6/9   | 3 | 0 | 11.23412300 | 77.65862357 | <a href="https://www.inaturalist.org/observations/38785582">https://www.inaturalist.org/observations/38785582</a>   |
| 53 | Sturnus pagodarum | Brahminy Starling | 2021/10/10 | 2 | 0 | 11.25546043 | 79.52609383 | <a href="https://www.inaturalist.org/observations/99330895">https://www.inaturalist.org/observations/99330895</a>   |
| 54 | Sturnus pagodarum | Brahminy Starling | 2022/2/26  | 3 | 0 | 11.25773689 | 79.52334389 | <a href="https://www.inaturalist.org/observations/107461150">https://www.inaturalist.org/observations/107461150</a> |
| 55 | Sturnus pagodarum | Brahminy Starling | 2020/3/13  | 2 | 0 | 11.31524644 | 79.43747688 | <a href="https://www.inaturalist.org/observations/39918723">https://www.inaturalist.org/observations/39918723</a>   |
| 56 | Sturnus pagodarum | Brahminy Starling | 2022/12/4  | 3 | 0 | 11.32303840 | 79.24335279 | <a href="https://www.inaturalist.org/observations/143645436">https://www.inaturalist.org/observations/143645436</a> |
| 57 | Sturnus pagodarum | Brahminy Starling | 2020/11/12 | 4 | 0 | 11.32304662 | 79.24335279 | <a href="https://www.inaturalist.org/observations/66090597">https://www.inaturalist.org/observations/66090597</a>   |
| 58 | Sturnus pagodarum | Brahminy Starling | 2021/1/11  | 3 | 0 | 11.32304662 | 79.24335279 | <a href="https://www.inaturalist.org/observations/68401618">https://www.inaturalist.org/observations/68401618</a>   |
| 59 | Sturnus pagodarum | Brahminy Starling | 2021/7/17  | 1 | 0 | 11.32304662 | 79.24335279 | <a href="https://www.inaturalist.org/observations/89279121">https://www.inaturalist.org/observations/89279121</a>   |
| 60 | Sturnus pagodarum | Brahminy Starling | 2022/1/13  | 1 | 0 | 11.32304662 | 79.24335279 | <a href="https://www.inaturalist.org/observations/104855938">https://www.inaturalist.org/observations/104855938</a> |
| 61 | Sturnus pagodarum | Brahminy Starling | 2021/1/15  | 1 | 0 | 11.33261638 | 79.22819730 | <a href="https://www.inaturalist.org/observations/68323323">https://www.inaturalist.org/observations/68323323</a>   |
| 62 | Sturnus pagodarum | Brahminy Starling | 2022/5/8   | 3 | 0 | 11.43570920 | 78.03808820 | <a href="https://www.inaturalist.org/observations/133725802">https://www.inaturalist.org/observations/133725802</a> |
| 63 | Sturnus pagodarum | Brahminy Starling | 2019/6/19  | 6 | 0 | 11.50831916 | 76.65684879 | <a href="https://www.inaturalist.org/observations/27794805">https://www.inaturalist.org/observations/27794805</a>   |
| 64 | Sturnus pagodarum | Brahminy Starling | 2016/8/12  | 1 | 0 | 11.51586789 | 79.32688951 | <a href="https://www.inaturalist.org/observations/56494521">https://www.inaturalist.org/observations/56494521</a>   |
| 65 | Sturnus pagodarum | Brahminy Starling | 2022/11/6  | 2 | 0 | 11.53036832 | 76.64691063 | <a href="https://www.inaturalist.org/observations/142718578">https://www.inaturalist.org/observations/142718578</a> |
| 66 | Sturnus pagodarum | Brahminy Starling | 2012/11/17 | 6 | 0 | 11.53140300 | 76.64780100 | <a href="https://www.inaturalist.org/observations/133870451">https://www.inaturalist.org/observations/133870451</a> |
| 67 | Sturnus pagodarum | Brahminy Starling | 2015/1/6   | 1 | 0 | 11.53526164 | 76.65010023 | <a href="https://www.inaturalist.org/observations/80580015">https://www.inaturalist.org/observations/80580015</a>   |
| 68 | Sturnus pagodarum | Brahminy Starling | 2015/2/3   | 4 | 0 | 11.56612300 | 76.63833800 | <a href="https://www.inaturalist.org/observations/35345251">https://www.inaturalist.org/observations/35345251</a>   |

|    |                   |                   |            |   |   |             |             |                                                                                                                     |
|----|-------------------|-------------------|------------|---|---|-------------|-------------|---------------------------------------------------------------------------------------------------------------------|
| 69 | Sturnus pagodarum | Brahminy Starling | 2022/12/24 | 2 | 0 | 11.56823216 | 76.92649383 | <a href="https://www.inaturalist.org/observations/145182303">https://www.inaturalist.org/observations/145182303</a> |
| 70 | Sturnus pagodarum | Brahminy Starling | 2014/11/10 | 2 | 0 | 11.57217680 | 76.64271520 | <a href="https://www.inaturalist.org/observations/71324501">https://www.inaturalist.org/observations/71324501</a>   |
| 71 | Sturnus pagodarum | Brahminy Starling | 2021/6/30  | 2 | 0 | 11.57218127 | 76.64271511 | <a href="https://www.inaturalist.org/observations/86837266">https://www.inaturalist.org/observations/86837266</a>   |
| 72 | Sturnus pagodarum | Brahminy Starling | 2018/12/28 | 4 | 0 | 11.57465100 | 76.91790800 | <a href="https://www.inaturalist.org/observations/19400828">https://www.inaturalist.org/observations/19400828</a>   |
| 73 | Sturnus pagodarum | Brahminy Starling | 2022/1/23  | 3 | 0 | 11.58026500 | 76.58731900 | <a href="https://www.inaturalist.org/observations/105409225">https://www.inaturalist.org/observations/105409225</a> |
| 74 | Sturnus pagodarum | Brahminy Starling | 2021/1/23  | 1 | 0 | 11.58678333 | 76.66998167 | <a href="https://www.inaturalist.org/observations/68720997">https://www.inaturalist.org/observations/68720997</a>   |
| 75 | Sturnus pagodarum | Brahminy Starling | 2014/12/25 | 5 | 0 | 11.59753800 | 78.66810700 | <a href="http://www.inaturalist.org/observations/1537049">http://www.inaturalist.org/observations/1537049</a>       |
| 76 | Sturnus pagodarum | Brahminy Starling | 2018/8/29  | 4 | 0 | 11.59879585 | 76.67267505 | <a href="https://www.inaturalist.org/observations/18406379">https://www.inaturalist.org/observations/18406379</a>   |
| 77 | Sturnus pagodarum | Brahminy Starling | 2019/5/28  | 5 | 0 | 11.60947439 | 76.55265194 | <a href="https://www.inaturalist.org/observations/69359398">https://www.inaturalist.org/observations/69359398</a>   |
| 78 | Sturnus pagodarum | Brahminy Starling | 2022/12/20 | 2 | 0 | 11.63394782 | 76.66670836 | <a href="https://www.inaturalist.org/observations/144714851">https://www.inaturalist.org/observations/144714851</a> |
| 79 | Sturnus pagodarum | Brahminy Starling | 2021/6/26  | 3 | 0 | 11.63784405 | 76.52570073 | <a href="https://www.inaturalist.org/observations/86833909">https://www.inaturalist.org/observations/86833909</a>   |
| 80 | Sturnus pagodarum | Brahminy Starling | 2019/10/6  | 2 | 0 | 11.65302908 | 76.60661090 | <a href="https://www.inaturalist.org/observations/37091102">https://www.inaturalist.org/observations/37091102</a>   |
| 81 | Sturnus pagodarum | Brahminy Starling | 2019/1/23  | 2 | 0 | 11.66166667 | 76.62722222 | <a href="https://www.inaturalist.org/observations/90266441">https://www.inaturalist.org/observations/90266441</a>   |
| 82 | Sturnus pagodarum | Brahminy Starling | 2022/2/25  | 3 | 0 | 11.66797900 | 78.05295600 | <a href="https://www.inaturalist.org/observations/107408175">https://www.inaturalist.org/observations/107408175</a> |
| 83 | Sturnus pagodarum | Brahminy Starling | 2019/12/7  | 2 | 0 | 11.66822060 | 76.63035407 | <a href="https://www.inaturalist.org/observations/36616583">https://www.inaturalist.org/observations/36616583</a>   |
| 84 | Sturnus pagodarum | Brahminy Starling | 2020/11/25 | 4 | 0 | 11.68742128 | 78.18066828 | <a href="https://www.inaturalist.org/observations/65576593">https://www.inaturalist.org/observations/65576593</a>   |
| 85 | Sturnus pagodarum | Brahminy Starling | 2021/3/21  | 2 | 0 | 11.68742128 | 78.18066828 | <a href="https://www.inaturalist.org/observations/71686364">https://www.inaturalist.org/observations/71686364</a>   |
| 86 | Sturnus pagodarum | Brahminy Starling | 2021/12/26 | 2 | 0 | 11.68742128 | 78.18066828 | <a href="https://www.inaturalist.org/observations/103682016">https://www.inaturalist.org/observations/103682016</a> |
| 87 | Sturnus pagodarum | Brahminy Starling | 2019/10/15 | 3 | 0 | 11.70262274 | 76.57144709 | <a href="https://www.inaturalist.org/observations/34861905">https://www.inaturalist.org/observations/34861905</a>   |
| 88 | Sturnus pagodarum | Brahminy Starling | 2016/12/28 | 2 | 0 | 11.70338737 | 76.61443630 | <a href="https://www.inaturalist.org/observations/68734594">https://www.inaturalist.org/observations/68734594</a>   |
| 89 | Sturnus pagodarum | Brahminy Starling | 2019/5/28  | 4 | 0 | 11.71084550 | 76.48650527 | <a href="https://www.inaturalist.org/observations/69376933">https://www.inaturalist.org/observations/69376933</a>   |
| 90 | Sturnus pagodarum | Brahminy Starling | 2017/6/21  | 3 | 0 | 11.74423266 | 78.05355422 | <a href="https://www.inaturalist.org/observations/143067264">https://www.inaturalist.org/observations/143067264</a> |
| 91 | Sturnus pagodarum | Brahminy Starling | 2018/11/6  | 2 | 0 | 11.75061048 | 76.60074304 | <a href="https://www.inaturalist.org/observations/90630920">https://www.inaturalist.org/observations/90630920</a>   |

|     |                          |                   |            |   |   |             |             |                                                                                                                     |
|-----|--------------------------|-------------------|------------|---|---|-------------|-------------|---------------------------------------------------------------------------------------------------------------------|
| 92  | <i>Sturnus pagodarum</i> | Brahminy Starling | 2021/7/10  | 1 | 0 | 11.81284564 | 77.05690613 | <a href="https://www.inaturalist.org/observations/86539223">https://www.inaturalist.org/observations/86539223</a>   |
| 93  | <i>Sturnus pagodarum</i> | Brahminy Starling | 2021/12/30 | 2 | 0 | 11.86345130 | 78.12294647 | <a href="https://www.inaturalist.org/observations/142127340">https://www.inaturalist.org/observations/142127340</a> |
| 94  | <i>Sturnus pagodarum</i> | Brahminy Starling | 2018/6/15  | 2 | 0 | 11.87674169 | 76.28920439 | <a href="https://www.inaturalist.org/observations/98035849">https://www.inaturalist.org/observations/98035849</a>   |
| 95  | <i>Sturnus pagodarum</i> | Brahminy Starling | 2021/10/23 | 1 | 0 | 11.92484330 | 76.59993914 | <a href="https://www.inaturalist.org/observations/99193798">https://www.inaturalist.org/observations/99193798</a>   |
| 96  | <i>Sturnus pagodarum</i> | Brahminy Starling | 2015/3/15  | 2 | 0 | 11.93824046 | 76.24342185 | <a href="https://www.inaturalist.org/observations/63158050">https://www.inaturalist.org/observations/63158050</a>   |
| 97  | <i>Sturnus pagodarum</i> | Brahminy Starling | 2022/7/9   | 3 | 0 | 11.93944667 | 79.80482500 | <a href="https://www.inaturalist.org/observations/125393548">https://www.inaturalist.org/observations/125393548</a> |
| 98  | <i>Sturnus pagodarum</i> | Brahminy Starling | 2022/7/11  | 3 | 0 | 11.94084250 | 79.80466564 | <a href="https://www.inaturalist.org/observations/125715393">https://www.inaturalist.org/observations/125715393</a> |
| 99  | <i>Sturnus pagodarum</i> | Brahminy Starling | 2022/3/28  | 1 | 0 | 11.94468432 | 75.38493812 | <a href="https://www.inaturalist.org/observations/116540427">https://www.inaturalist.org/observations/116540427</a> |
| 100 | <i>Sturnus pagodarum</i> | Brahminy Starling | 2022/3/28  | 1 | 0 | 11.94468432 | 75.38493812 | <a href="https://www.inaturalist.org/observations/116540655">https://www.inaturalist.org/observations/116540655</a> |
| 101 | <i>Sturnus pagodarum</i> | Brahminy Starling | 2022/3/28  | 2 | 0 | 11.94468432 | 75.38493812 | <a href="https://www.inaturalist.org/observations/116540856">https://www.inaturalist.org/observations/116540856</a> |
| 102 | <i>Sturnus pagodarum</i> | Brahminy Starling | 2022/11/1  | 1 | 0 | 11.94468432 | 75.38493812 | <a href="https://www.inaturalist.org/observations/142732182">https://www.inaturalist.org/observations/142732182</a> |
| 103 | <i>Sturnus pagodarum</i> | Brahminy Starling | 2022/11/1  | 1 | 0 | 11.94468432 | 75.38493812 | <a href="https://www.inaturalist.org/observations/142732301">https://www.inaturalist.org/observations/142732301</a> |
| 104 | <i>Sturnus pagodarum</i> | Brahminy Starling | 2022/11/1  | 2 | 0 | 11.94468432 | 75.38493812 | <a href="https://www.inaturalist.org/observations/142741183">https://www.inaturalist.org/observations/142741183</a> |
| 105 | <i>Sturnus pagodarum</i> | Brahminy Starling | 2022/11/1  | 2 | 0 | 11.94468432 | 75.38493812 | <a href="https://www.inaturalist.org/observations/142741197">https://www.inaturalist.org/observations/142741197</a> |
| 106 | <i>Sturnus pagodarum</i> | Brahminy Starling | 2022/11/7  | 2 | 0 | 11.94468432 | 75.38493812 | <a href="https://www.inaturalist.org/observations/143256959">https://www.inaturalist.org/observations/143256959</a> |
| 107 | <i>Sturnus pagodarum</i> | Brahminy Starling | 2022/11/7  | 2 | 0 | 11.94468432 | 75.38493812 | <a href="https://www.inaturalist.org/observations/143256969">https://www.inaturalist.org/observations/143256969</a> |
| 108 | <i>Sturnus pagodarum</i> | Brahminy Starling | 2022/11/7  | 2 | 0 | 11.94468432 | 75.38493812 | <a href="https://www.inaturalist.org/observations/143257054">https://www.inaturalist.org/observations/143257054</a> |
| 109 | <i>Sturnus pagodarum</i> | Brahminy Starling | 2022/11/7  | 3 | 0 | 11.94468432 | 75.38493812 | <a href="https://www.inaturalist.org/observations/143257068">https://www.inaturalist.org/observations/143257068</a> |
| 110 | <i>Sturnus pagodarum</i> | Brahminy Starling | 2022/11/7  | 3 | 0 | 11.94468432 | 75.38493812 | <a href="https://www.inaturalist.org/observations/143257080">https://www.inaturalist.org/observations/143257080</a> |
| 111 | <i>Sturnus pagodarum</i> | Brahminy Starling | 2022/11/7  | 3 | 0 | 11.94468432 | 75.38493812 | <a href="https://www.inaturalist.org/observations/143257086">https://www.inaturalist.org/observations/143257086</a> |
| 112 | <i>Sturnus pagodarum</i> | Brahminy Starling | 2022/11/18 | 2 | 0 | 11.94468432 | 75.38493812 | <a href="https://www.inaturalist.org/observations/144065829">https://www.inaturalist.org/observations/144065829</a> |
| 113 | <i>Sturnus pagodarum</i> | Brahminy Starling | 2022/11/18 | 2 | 0 | 11.94468432 | 75.38493812 | <a href="https://www.inaturalist.org/observations/144065841">https://www.inaturalist.org/observations/144065841</a> |
| 114 | <i>Sturnus pagodarum</i> | Brahminy Starling | 2022/11/18 | 2 | 0 | 11.94468432 | 75.38493812 | <a href="https://www.inaturalist.org/observations/144065888">https://www.inaturalist.org/observations/144065888</a> |

|     |                          |                   |            |   |   |             |             |                                                                                                                     |
|-----|--------------------------|-------------------|------------|---|---|-------------|-------------|---------------------------------------------------------------------------------------------------------------------|
| 115 | <i>Sturnus pagodarum</i> | Brahminy Starling | 2022/11/22 | 2 | 0 | 11.94468432 | 75.38493812 | <a href="https://www.inaturalist.org/observations/144412939">https://www.inaturalist.org/observations/144412939</a> |
| 116 | <i>Sturnus pagodarum</i> | Brahminy Starling | 2022/11/22 | 2 | 0 | 11.94468432 | 75.38493812 | <a href="https://www.inaturalist.org/observations/144412947">https://www.inaturalist.org/observations/144412947</a> |
| 117 | <i>Sturnus pagodarum</i> | Brahminy Starling | 2022/11/22 | 4 | 0 | 11.94468432 | 75.38493812 | <a href="https://www.inaturalist.org/observations/144414228">https://www.inaturalist.org/observations/144414228</a> |
| 118 | <i>Sturnus pagodarum</i> | Brahminy Starling | 2022/11/22 | 4 | 0 | 11.94468432 | 75.38493812 | <a href="https://www.inaturalist.org/observations/144414236">https://www.inaturalist.org/observations/144414236</a> |
| 119 | <i>Sturnus pagodarum</i> | Brahminy Starling | 2019/12/29 | 6 | 0 | 11.94468464 | 75.38493812 | <a href="https://www.inaturalist.org/observations/83242087">https://www.inaturalist.org/observations/83242087</a>   |
| 120 | <i>Sturnus pagodarum</i> | Brahminy Starling | 2018/3/27  | 7 | 0 | 11.97799167 | 76.17021667 | <a href="https://www.inaturalist.org/observations/66385865">https://www.inaturalist.org/observations/66385865</a>   |
| 121 | <i>Sturnus pagodarum</i> | Brahminy Starling | 2020/12/13 | 3 | 0 | 11.98977370 | 76.37704070 | <a href="https://www.inaturalist.org/observations/66723982">https://www.inaturalist.org/observations/66723982</a>   |
| 122 | <i>Sturnus pagodarum</i> | Brahminy Starling | 2022/10/23 | 2 | 0 | 12.00206860 | 76.28412804 | <a href="https://www.inaturalist.org/observations/139943138">https://www.inaturalist.org/observations/139943138</a> |
| 123 | <i>Sturnus pagodarum</i> | Brahminy Starling | 2018/2/3   | 3 | 0 | 12.00528210 | 79.81286490 | <a href="https://www.inaturalist.org/observations/9715675">https://www.inaturalist.org/observations/9715675</a>     |
| 124 | <i>Sturnus pagodarum</i> | Brahminy Starling | 2018/2/3   | 3 | 0 | 12.00528210 | 79.81286490 | <a href="https://www.inaturalist.org/observations/9715676">https://www.inaturalist.org/observations/9715676</a>     |
| 125 | <i>Sturnus pagodarum</i> | Brahminy Starling | 2018/2/3   | 4 | 0 | 12.00528210 | 79.81286490 | <a href="https://www.inaturalist.org/observations/9715677">https://www.inaturalist.org/observations/9715677</a>     |
| 126 | <i>Sturnus pagodarum</i> | Brahminy Starling | 2018/2/3   | 3 | 0 | 12.00528210 | 79.81286490 | <a href="https://www.inaturalist.org/observations/9715678">https://www.inaturalist.org/observations/9715678</a>     |
| 127 | <i>Sturnus pagodarum</i> | Brahminy Starling | 2017/2/27  | 2 | 0 | 12.01016190 | 76.25503900 | <a href="https://www.inaturalist.org/observations/89289549">https://www.inaturalist.org/observations/89289549</a>   |
| 128 | <i>Sturnus pagodarum</i> | Brahminy Starling | 2009/6/6   | 2 | 0 | 12.03152720 | 77.59202950 | <a href="https://www.inaturalist.org/observations/98179559">https://www.inaturalist.org/observations/98179559</a>   |
| 129 | <i>Sturnus pagodarum</i> | Brahminy Starling | 2019/10/15 | 4 | 0 | 12.03234670 | 75.25665640 | <a href="https://www.inaturalist.org/observations/34574175">https://www.inaturalist.org/observations/34574175</a>   |
| 130 | <i>Sturnus pagodarum</i> | Brahminy Starling | 2021/8/31  | 3 | 0 | 12.03237190 | 75.25665645 | <a href="https://www.inaturalist.org/observations/93471264">https://www.inaturalist.org/observations/93471264</a>   |
| 131 | <i>Sturnus pagodarum</i> | Brahminy Starling | 2022/10/25 | 2 | 0 | 12.04009244 | 75.29748503 | <a href="https://www.inaturalist.org/observations/142200392">https://www.inaturalist.org/observations/142200392</a> |
| 132 | <i>Sturnus pagodarum</i> | Brahminy Starling | 2016/1/3   | 1 | 0 | 12.21394126 | 79.02857030 | <a href="https://www.inaturalist.org/observations/96052784">https://www.inaturalist.org/observations/96052784</a>   |
| 133 | <i>Sturnus pagodarum</i> | Brahminy Starling | 2021/10/28 | 2 | 0 | 12.24090600 | 76.59794450 | <a href="https://www.inaturalist.org/observations/99606920">https://www.inaturalist.org/observations/99606920</a>   |
| 134 | <i>Sturnus pagodarum</i> | Brahminy Starling | 2022/11/23 | 2 | 0 | 12.24090600 | 76.59794450 | <a href="https://www.inaturalist.org/observations/142665903">https://www.inaturalist.org/observations/142665903</a> |
| 135 | <i>Sturnus pagodarum</i> | Brahminy Starling | 2020/10/4  | 1 | 0 | 12.26269942 | 76.56762058 | <a href="https://www.inaturalist.org/observations/95042439">https://www.inaturalist.org/observations/95042439</a>   |
| 136 | <i>Sturnus pagodarum</i> | Brahminy Starling | 2020/10/4  | 1 | 0 | 12.26269942 | 76.56762058 | <a href="https://www.inaturalist.org/observations/95042442">https://www.inaturalist.org/observations/95042442</a>   |
| 137 | <i>Sturnus pagodarum</i> | Brahminy Starling | 2020/11/14 | 1 | 0 | 12.26269942 | 76.56762058 | <a href="https://www.inaturalist.org/observations/95042460">https://www.inaturalist.org/observations/95042460</a>   |

|     |                          |                   |            |   |   |             |             |                                                                                                                     |
|-----|--------------------------|-------------------|------------|---|---|-------------|-------------|---------------------------------------------------------------------------------------------------------------------|
| 138 | <i>Sturnus pagodarum</i> | Brahminy Starling | 2020/10/29 | 1 | 0 | 12.26269942 | 76.56762058 | <a href="https://www.inaturalist.org/observations/95042487">https://www.inaturalist.org/observations/95042487</a>   |
| 139 | <i>Sturnus pagodarum</i> | Brahminy Starling | 2021/12/14 | 2 | 0 | 12.26269942 | 76.56762058 | <a href="https://www.inaturalist.org/observations/103041644">https://www.inaturalist.org/observations/103041644</a> |
| 140 | <i>Sturnus pagodarum</i> | Brahminy Starling | 2022/1/23  | 1 | 0 | 12.26269942 | 76.56762058 | <a href="https://www.inaturalist.org/observations/105417188">https://www.inaturalist.org/observations/105417188</a> |
| 141 | <i>Sturnus pagodarum</i> | Brahminy Starling | 2008/12/30 | 2 | 0 | 12.26937200 | 76.61197800 | <a href="https://www.inaturalist.org/observations/94574856">https://www.inaturalist.org/observations/94574856</a>   |
| 142 | <i>Sturnus pagodarum</i> | Brahminy Starling | 2014/10/30 | 1 | 0 | 12.26937200 | 76.61197800 | <a href="https://www.inaturalist.org/observations/94791356">https://www.inaturalist.org/observations/94791356</a>   |
| 143 | <i>Sturnus pagodarum</i> | Brahminy Starling | 2014/6/8   | 2 | 0 | 12.26937200 | 76.61197800 | <a href="https://www.inaturalist.org/observations/94817198">https://www.inaturalist.org/observations/94817198</a>   |
| 144 | <i>Sturnus pagodarum</i> | Brahminy Starling | 2018/11/23 | 4 | 0 | 12.27163500 | 76.61520333 | <a href="https://www.inaturalist.org/observations/18774437">https://www.inaturalist.org/observations/18774437</a>   |
| 145 | <i>Sturnus pagodarum</i> | Brahminy Starling | 2018/12/30 | 4 | 0 | 12.27238167 | 76.61418333 | <a href="https://www.inaturalist.org/observations/19331414">https://www.inaturalist.org/observations/19331414</a>   |
| 146 | <i>Sturnus pagodarum</i> | Brahminy Starling | 2020/4/7   | 2 | 0 | 12.27624403 | 76.61636609 | <a href="https://www.inaturalist.org/observations/92211685">https://www.inaturalist.org/observations/92211685</a>   |
| 147 | <i>Sturnus pagodarum</i> | Brahminy Starling | 2020/10/10 | 2 | 0 | 12.27936203 | 76.58896975 | <a href="https://www.inaturalist.org/observations/92779676">https://www.inaturalist.org/observations/92779676</a>   |
| 148 | <i>Sturnus pagodarum</i> | Brahminy Starling | 2018/2/19  | 3 | 0 | 12.28326434 | 76.61517620 | <a href="https://www.inaturalist.org/observations/9931350">https://www.inaturalist.org/observations/9931350</a>     |
| 149 | <i>Sturnus pagodarum</i> | Brahminy Starling | 2021/11/14 | 2 | 0 | 12.28558200 | 76.56760710 | <a href="https://www.inaturalist.org/observations/101074492">https://www.inaturalist.org/observations/101074492</a> |
| 150 | <i>Sturnus pagodarum</i> | Brahminy Starling | 2021/12/15 | 2 | 0 | 12.29424209 | 76.56539693 | <a href="https://www.inaturalist.org/observations/103086012">https://www.inaturalist.org/observations/103086012</a> |
| 151 | <i>Sturnus pagodarum</i> | Brahminy Starling | 2022/8/16  | 5 | 0 | 12.29833014 | 76.58334777 | <a href="https://www.inaturalist.org/observations/131048455">https://www.inaturalist.org/observations/131048455</a> |
| 152 | <i>Sturnus pagodarum</i> | Brahminy Starling | 2020/10/4  | 2 | 0 | 12.29927196 | 76.69088789 | <a href="https://www.inaturalist.org/observations/93859054">https://www.inaturalist.org/observations/93859054</a>   |
| 153 | <i>Sturnus pagodarum</i> | Brahminy Starling | 2021/5/23  | 2 | 0 | 12.32869760 | 76.55288440 | <a href="https://www.inaturalist.org/observations/79924525">https://www.inaturalist.org/observations/79924525</a>   |
| 154 | <i>Sturnus pagodarum</i> | Brahminy Starling | 2022/11/27 | 2 | 0 | 12.33606885 | 77.81784051 | <a href="https://www.inaturalist.org/observations/143637965">https://www.inaturalist.org/observations/143637965</a> |
| 155 | <i>Sturnus pagodarum</i> | Brahminy Starling | 2022/11/27 | 2 | 0 | 12.33606885 | 77.81784051 | <a href="https://www.inaturalist.org/observations/143637968">https://www.inaturalist.org/observations/143637968</a> |
| 156 | <i>Sturnus pagodarum</i> | Brahminy Starling | 2018/11/24 | 6 | 0 | 12.33672760 | 80.01409243 | <a href="https://www.inaturalist.org/observations/22611643">https://www.inaturalist.org/observations/22611643</a>   |
| 157 | <i>Sturnus pagodarum</i> | Brahminy Starling | 2022/11/27 | 2 | 0 | 12.36792833 | 77.86630667 | <a href="https://www.inaturalist.org/observations/143014498">https://www.inaturalist.org/observations/143014498</a> |
| 158 | <i>Sturnus pagodarum</i> | Brahminy Starling | 2022/11/27 | 2 | 0 | 12.39202167 | 77.86531667 | <a href="https://www.inaturalist.org/observations/143014694">https://www.inaturalist.org/observations/143014694</a> |
| 159 | <i>Sturnus pagodarum</i> | Brahminy Starling | 2022/10/23 | 2 | 0 | 12.40228230 | 77.88786348 | <a href="https://www.inaturalist.org/observations/139961199">https://www.inaturalist.org/observations/139961199</a> |
| 160 | <i>Sturnus pagodarum</i> | Brahminy Starling | 2022/10/23 | 3 | 0 | 12.40269591 | 77.84884959 | <a href="https://www.inaturalist.org/observations/139739099">https://www.inaturalist.org/observations/139739099</a> |

|     |                   |                   |            |   |   |             |             |                                                                                                                     |
|-----|-------------------|-------------------|------------|---|---|-------------|-------------|---------------------------------------------------------------------------------------------------------------------|
| 161 | Sturnus pagodarum | Brahminy Starling | 2020/4/19  | 2 | 0 | 12.42373333 | 77.66342500 | <a href="https://www.inaturalist.org/observations/65137422">https://www.inaturalist.org/observations/65137422</a>   |
| 162 | Sturnus pagodarum | Brahminy Starling | 2017/9/22  | 3 | 0 | 12.45551770 | 75.95702340 | <a href="https://www.inaturalist.org/observations/109829865">https://www.inaturalist.org/observations/109829865</a> |
| 163 | Sturnus pagodarum | Brahminy Starling | 2021/12/5  | 2 | 0 | 12.48112667 | 77.61970167 | <a href="https://www.inaturalist.org/observations/102524275">https://www.inaturalist.org/observations/102524275</a> |
| 164 | Sturnus pagodarum | Brahminy Starling | 2022/8/5   | 3 | 0 | 12.51577333 | 77.63620167 | <a href="https://www.inaturalist.org/observations/129513993">https://www.inaturalist.org/observations/129513993</a> |
| 165 | Sturnus pagodarum | Brahminy Starling | 2018/7/8   | 1 | 0 | 12.51906682 | 77.68443134 | <a href="https://www.inaturalist.org/observations/82426966">https://www.inaturalist.org/observations/82426966</a>   |
| 166 | Sturnus pagodarum | Brahminy Starling | 2021/4/18  | 2 | 0 | 12.55320736 | 77.61468228 | <a href="https://www.inaturalist.org/observations/82860395">https://www.inaturalist.org/observations/82860395</a>   |
| 167 | Sturnus pagodarum | Brahminy Starling | 2020/3/17  | 2 | 0 | 12.55692070 | 78.24457764 | <a href="https://www.inaturalist.org/observations/40126519">https://www.inaturalist.org/observations/40126519</a>   |
| 168 | Sturnus pagodarum | Brahminy Starling | 2018/7/26  | 5 | 0 | 12.57112306 | 79.84622639 | <a href="https://www.inaturalist.org/observations/22501980">https://www.inaturalist.org/observations/22501980</a>   |
| 169 | Sturnus pagodarum | Brahminy Starling | 2017/5/28  | 2 | 0 | 12.67862582 | 77.47086824 | <a href="https://www.inaturalist.org/observations/7262454">https://www.inaturalist.org/observations/7262454</a>     |
| 170 | Sturnus pagodarum | Brahminy Starling | 2021/4/10  | 1 | 0 | 12.68126667 | 76.65528589 | <a href="https://www.inaturalist.org/observations/80697311">https://www.inaturalist.org/observations/80697311</a>   |
| 171 | Sturnus pagodarum | Brahminy Starling | 2013/6/29  | 4 | 0 | 12.68193720 | 79.98884130 | <a href="https://www.inaturalist.org/observations/22556462">https://www.inaturalist.org/observations/22556462</a>   |
| 172 | Sturnus pagodarum | Brahminy Starling | 2020/1/12  | 4 | 0 | 12.68535257 | 80.15015150 | <a href="https://www.inaturalist.org/observations/37521259">https://www.inaturalist.org/observations/37521259</a>   |
| 173 | Sturnus pagodarum | Brahminy Starling | 2022/2/19  | 2 | 0 | 12.68573455 | 80.12562154 | <a href="https://www.inaturalist.org/observations/107244330">https://www.inaturalist.org/observations/107244330</a> |
| 174 | Sturnus pagodarum | Brahminy Starling | 2021/3/6   | 5 | 0 | 12.71317244 | 77.68367574 | <a href="https://www.inaturalist.org/observations/70670424">https://www.inaturalist.org/observations/70670424</a>   |
| 175 | Sturnus pagodarum | Brahminy Starling | 2015/10/14 | 2 | 0 | 12.73534289 | 77.79045663 | <a href="https://www.inaturalist.org/observations/141769123">https://www.inaturalist.org/observations/141769123</a> |
| 176 | Sturnus pagodarum | Brahminy Starling | 2022/2/27  | 4 | 0 | 12.77631000 | 77.86090833 | <a href="https://www.inaturalist.org/observations/107552803">https://www.inaturalist.org/observations/107552803</a> |
| 177 | Sturnus pagodarum | Brahminy Starling | 2020/11/21 | 2 | 0 | 12.81385331 | 76.94609644 | <a href="https://www.inaturalist.org/observations/96775284">https://www.inaturalist.org/observations/96775284</a>   |
| 178 | Sturnus pagodarum | Brahminy Starling | 2020/11/2  | 1 | 0 | 12.81385331 | 76.94609644 | <a href="https://www.inaturalist.org/observations/97213925">https://www.inaturalist.org/observations/97213925</a>   |
| 179 | Sturnus pagodarum | Brahminy Starling | 2020/8/29  | 2 | 0 | 12.81385331 | 76.94609644 | <a href="https://www.inaturalist.org/observations/97434945">https://www.inaturalist.org/observations/97434945</a>   |
| 180 | Sturnus pagodarum | Brahminy Starling | 2020/12/29 | 3 | 0 | 12.81723531 | 79.15190237 | <a href="https://www.inaturalist.org/observations/73007445">https://www.inaturalist.org/observations/73007445</a>   |
| 181 | Sturnus pagodarum | Brahminy Starling | 2020/1/16  | 2 | 0 | 12.81845600 | 79.69465860 | <a href="https://www.inaturalist.org/observations/89745751">https://www.inaturalist.org/observations/89745751</a>   |
| 182 | Sturnus pagodarum | Brahminy Starling | 2020/11/7  | 1 | 0 | 12.84849973 | 76.80860198 | <a href="https://www.inaturalist.org/observations/97213456">https://www.inaturalist.org/observations/97213456</a>   |
| 183 | Sturnus pagodarum | Brahminy Starling | 2020/12/31 | 2 | 0 | 12.85003961 | 79.29611735 | <a href="https://www.inaturalist.org/observations/71958984">https://www.inaturalist.org/observations/71958984</a>   |



|     |                          |                   |            |   |   |             |             |                                                                                                                     |
|-----|--------------------------|-------------------|------------|---|---|-------------|-------------|---------------------------------------------------------------------------------------------------------------------|
| 184 | <i>Sturnus pagodarum</i> | Brahminy Starling | 2021/2/7   | 5 | 0 | 12.85329009 | 79.13682047 | <a href="https://www.inaturalist.org/observations/107961068">https://www.inaturalist.org/observations/107961068</a> |
| 185 | <i>Sturnus pagodarum</i> | Brahminy Starling | 2020/12/29 | 2 | 0 | 12.85818595 | 79.08881312 | <a href="https://www.inaturalist.org/observations/73007446">https://www.inaturalist.org/observations/73007446</a>   |
| 186 | <i>Sturnus pagodarum</i> | Brahminy Starling | 2022/1/17  | 5 | 0 | 12.86587830 | 79.37550440 | <a href="https://www.inaturalist.org/observations/105607538">https://www.inaturalist.org/observations/105607538</a> |
| 187 | <i>Sturnus pagodarum</i> | Brahminy Starling | 2021/11/14 | 4 | 0 | 12.87177648 | 77.52343252 | <a href="https://www.inaturalist.org/observations/101102289">https://www.inaturalist.org/observations/101102289</a> |
| 188 | <i>Sturnus pagodarum</i> | Brahminy Starling | 2021/3/28  | 2 | 0 | 12.87595329 | 77.49380479 | <a href="https://www.inaturalist.org/observations/72247408">https://www.inaturalist.org/observations/72247408</a>   |
| 189 | <i>Sturnus pagodarum</i> | Brahminy Starling | 2021/7/31  | 4 | 0 | 12.87950540 | 79.40612680 | <a href="https://www.inaturalist.org/observations/89471538">https://www.inaturalist.org/observations/89471538</a>   |
| 190 | <i>Sturnus pagodarum</i> | Brahminy Starling | 2021/8/15  | 4 | 0 | 12.87950540 | 79.40612680 | <a href="https://www.inaturalist.org/observations/91937476">https://www.inaturalist.org/observations/91937476</a>   |
| 191 | <i>Sturnus pagodarum</i> | Brahminy Starling | 2021/9/29  | 3 | 0 | 12.87950540 | 79.40612680 | <a href="https://www.inaturalist.org/observations/96660318">https://www.inaturalist.org/observations/96660318</a>   |
| 192 | <i>Sturnus pagodarum</i> | Brahminy Starling | 2020/11/24 | 2 | 0 | 12.89164450 | 79.01576637 | <a href="https://www.inaturalist.org/observations/73001485">https://www.inaturalist.org/observations/73001485</a>   |
| 193 | <i>Sturnus pagodarum</i> | Brahminy Starling | 2020/12/29 | 3 | 0 | 12.90345288 | 79.13761659 | <a href="https://www.inaturalist.org/observations/73007449">https://www.inaturalist.org/observations/73007449</a>   |
| 194 | <i>Sturnus pagodarum</i> | Brahminy Starling | 2020/7/12  | 2 | 0 | 12.90364742 | 79.11386108 | <a href="https://www.inaturalist.org/observations/52789690">https://www.inaturalist.org/observations/52789690</a>   |
| 195 | <i>Sturnus pagodarum</i> | Brahminy Starling | 2021/1/16  | 3 | 0 | 12.91083150 | 79.40114880 | <a href="https://www.inaturalist.org/observations/82160898">https://www.inaturalist.org/observations/82160898</a>   |
| 196 | <i>Sturnus pagodarum</i> | Brahminy Starling | 2022/3/18  | 3 | 0 | 12.91910172 | 77.67842102 | <a href="https://www.inaturalist.org/observations/112367680">https://www.inaturalist.org/observations/112367680</a> |
| 197 | <i>Sturnus pagodarum</i> | Brahminy Starling | 2020/10/8  | 3 | 0 | 12.94415991 | 79.18025047 | <a href="https://www.inaturalist.org/observations/62006243">https://www.inaturalist.org/observations/62006243</a>   |
| 198 | <i>Sturnus pagodarum</i> | Brahminy Starling | 2018/12/27 | 4 | 0 | 12.94982970 | 74.85656130 | <a href="https://www.inaturalist.org/observations/19252433">https://www.inaturalist.org/observations/19252433</a>   |
| 199 | <i>Sturnus pagodarum</i> | Brahminy Starling | 2022/12/25 | 1 | 0 | 12.95307150 | 79.13100300 | <a href="https://www.inaturalist.org/observations/145026513">https://www.inaturalist.org/observations/145026513</a> |
| 200 | <i>Sturnus pagodarum</i> | Brahminy Starling | 2013/8/14  | 3 | 0 | 12.96376290 | 80.11462210 | <a href="https://www.inaturalist.org/observations/63089786">https://www.inaturalist.org/observations/63089786</a>   |
| 201 | <i>Sturnus pagodarum</i> | Brahminy Starling | 2019/8/4   | 3 | 0 | 12.97103486 | 79.23419138 | <a href="https://www.inaturalist.org/observations/69613675">https://www.inaturalist.org/observations/69613675</a>   |
| 202 | <i>Sturnus pagodarum</i> | Brahminy Starling | 2021/9/21  | 4 | 0 | 12.97159870 | 77.59456270 | <a href="https://www.inaturalist.org/observations/121979312">https://www.inaturalist.org/observations/121979312</a> |
| 203 | <i>Sturnus pagodarum</i> | Brahminy Starling | 2021/8/17  | 2 | 0 | 12.98087120 | 77.62934113 | <a href="https://www.inaturalist.org/observations/91619341">https://www.inaturalist.org/observations/91619341</a>   |
| 204 | <i>Sturnus pagodarum</i> | Brahminy Starling | 2020/10/17 | 2 | 0 | 12.99132563 | 80.23602959 | <a href="https://www.inaturalist.org/observations/63144706">https://www.inaturalist.org/observations/63144706</a>   |
| 205 | <i>Sturnus pagodarum</i> | Brahminy Starling | 2020/10/17 | 4 | 0 | 12.99174909 | 80.23688083 | <a href="https://www.inaturalist.org/observations/62792221">https://www.inaturalist.org/observations/62792221</a>   |
| 206 | <i>Sturnus pagodarum</i> | Brahminy Starling | 2022/6/9   | 2 | 0 | 12.99572489 | 79.03635450 | <a href="https://www.inaturalist.org/observations/121379621">https://www.inaturalist.org/observations/121379621</a> |

|     |                   |                   |            |   |   |             |             |                                                                                                                     |
|-----|-------------------|-------------------|------------|---|---|-------------|-------------|---------------------------------------------------------------------------------------------------------------------|
| 207 | Sturnus pagodarum | Brahminy Starling | 2019/11/1  | 1 | 0 | 12.99905550 | 79.30259573 | <a href="https://www.inaturalist.org/observations/69760664">https://www.inaturalist.org/observations/69760664</a>   |
| 208 | Sturnus pagodarum | Brahminy Starling | 2020/8/13  | 1 | 0 | 13.06275397 | 77.74924837 | <a href="https://www.inaturalist.org/observations/97153508">https://www.inaturalist.org/observations/97153508</a>   |
| 209 | Sturnus pagodarum | Brahminy Starling | 2016/11/21 | 2 | 0 | 13.08268020 | 80.27071840 | <a href="https://www.inaturalist.org/observations/92325079">https://www.inaturalist.org/observations/92325079</a>   |
| 210 | Sturnus pagodarum | Brahminy Starling | 2021/7/31  | 1 | 0 | 13.08308237 | 80.27071830 | <a href="https://www.inaturalist.org/observations/89999150">https://www.inaturalist.org/observations/89999150</a>   |
| 211 | Sturnus pagodarum | Brahminy Starling | 2021/9/23  | 3 | 0 | 13.14255810 | 77.58937073 | <a href="https://www.inaturalist.org/observations/120216226">https://www.inaturalist.org/observations/120216226</a> |
| 212 | Sturnus pagodarum | Brahminy Starling | 2017/11/12 | 1 | 0 | 13.14893047 | 80.05743265 | <a href="https://www.inaturalist.org/observations/45230970">https://www.inaturalist.org/observations/45230970</a>   |
| 213 | Sturnus pagodarum | Brahminy Starling | 2017/2/19  | 1 | 0 | 13.14906308 | 80.05751006 | <a href="https://www.inaturalist.org/observations/45849285">https://www.inaturalist.org/observations/45849285</a>   |
| 214 | Sturnus pagodarum | Brahminy Starling | 2009/6/29  | 1 | 0 | 13.25014327 | 76.33875201 | <a href="https://www.inaturalist.org/observations/93147462">https://www.inaturalist.org/observations/93147462</a>   |
| 215 | Sturnus pagodarum | Brahminy Starling | 2022/3/27  | 3 | 0 | 13.59693430 | 79.36818328 | <a href="https://www.inaturalist.org/observations/109660288">https://www.inaturalist.org/observations/109660288</a> |
| 216 | Sturnus pagodarum | Brahminy Starling | 2019/1/25  | 2 | 0 | 13.65294753 | 76.06936908 | <a href="https://www.inaturalist.org/observations/82860134">https://www.inaturalist.org/observations/82860134</a>   |
| 217 | Sturnus pagodarum | Brahminy Starling | 2021/9/15  | 1 | 0 | 13.66457030 | 77.46320460 | <a href="https://www.inaturalist.org/observations/95110403">https://www.inaturalist.org/observations/95110403</a>   |
| 218 | Sturnus pagodarum | Brahminy Starling | 2021/4/22  | 3 | 0 | 13.73918015 | 77.32319358 | <a href="https://www.inaturalist.org/observations/74793750">https://www.inaturalist.org/observations/74793750</a>   |
| 219 | Sturnus pagodarum | Brahminy Starling | 2022/5/15  | 3 | 0 | 13.77924891 | 79.17824094 | <a href="https://www.inaturalist.org/observations/119023826">https://www.inaturalist.org/observations/119023826</a> |
| 220 | Sturnus pagodarum | Brahminy Starling | 2022/6/30  | 6 | 0 | 13.98471500 | 78.91686500 | <a href="https://www.inaturalist.org/observations/124065814">https://www.inaturalist.org/observations/124065814</a> |
| 221 | Sturnus pagodarum | Brahminy Starling | 2022/2/17  | 2 | 0 | 14.23424946 | 75.64699329 | <a href="https://www.inaturalist.org/observations/106894232">https://www.inaturalist.org/observations/106894232</a> |
| 222 | Sturnus pagodarum | Brahminy Starling | 2022/1/25  | 3 | 0 | 14.24961331 | 76.96947397 | <a href="https://www.inaturalist.org/observations/105550701">https://www.inaturalist.org/observations/105550701</a> |
| 223 | Sturnus pagodarum | Brahminy Starling | 2020/12/5  | 2 | 0 | 14.70947300 | 75.64227400 | <a href="https://www.inaturalist.org/observations/90125210">https://www.inaturalist.org/observations/90125210</a>   |
| 224 | Sturnus pagodarum | Brahminy Starling | 2022/10/31 | 3 | 0 | 14.81259020 | 76.80688695 | <a href="https://www.inaturalist.org/observations/141458538">https://www.inaturalist.org/observations/141458538</a> |
| 225 | Sturnus pagodarum | Brahminy Starling | 2021/1/30  | 1 | 0 | 15.18206000 | 75.54994000 | <a href="https://www.inaturalist.org/observations/104333271">https://www.inaturalist.org/observations/104333271</a> |
| 226 | Sturnus pagodarum | Brahminy Starling | 2017/12/24 | 2 | 0 | 15.25298045 | 76.36168586 | <a href="https://www.inaturalist.org/observations/65646679">https://www.inaturalist.org/observations/65646679</a>   |
| 227 | Sturnus pagodarum | Brahminy Starling | 2022/9/27  | 1 | 0 | 15.26386164 | 76.48594664 | <a href="https://www.inaturalist.org/observations/136898487">https://www.inaturalist.org/observations/136898487</a> |
| 228 | Sturnus pagodarum | Brahminy Starling | 2019/7/4   | 4 | 0 | 15.32111900 | 76.47273680 | <a href="https://www.inaturalist.org/observations/29233132">https://www.inaturalist.org/observations/29233132</a>   |
| 229 | Sturnus pagodarum | Brahminy Starling | 2017/8/19  | 1 | 0 | 15.32799100 | 76.47237800 | <a href="https://www.inaturalist.org/observations/92918960">https://www.inaturalist.org/observations/92918960</a>   |

|     |                   |                   |            |   |   |             |             |                                                                                                                     |
|-----|-------------------|-------------------|------------|---|---|-------------|-------------|---------------------------------------------------------------------------------------------------------------------|
| 230 | Sturnus pagodarum | Brahminy Starling | 2012/10/8  | 2 | 0 | 15.33501320 | 76.46002400 | <a href="https://www.inaturalist.org/observations/40577477">https://www.inaturalist.org/observations/40577477</a>   |
| 231 | Sturnus pagodarum | Brahminy Starling | 2019/1/30  | 1 | 0 | 15.33501320 | 76.46002400 | <a href="https://www.inaturalist.org/observations/84849955">https://www.inaturalist.org/observations/84849955</a>   |
| 232 | Sturnus pagodarum | Brahminy Starling | 2020/1/24  | 3 | 0 | 15.33501320 | 76.46002400 | <a href="https://www.inaturalist.org/observations/102094748">https://www.inaturalist.org/observations/102094748</a> |
| 233 | Sturnus pagodarum | Brahminy Starling | 2019/3/19  | 4 | 0 | 15.33501320 | 76.46002400 | <a href="https://www.inaturalist.org/observations/116086414">https://www.inaturalist.org/observations/116086414</a> |
| 234 | Sturnus pagodarum | Brahminy Starling | 2022/7/31  | 3 | 0 | 15.33501320 | 76.46002400 | <a href="https://www.inaturalist.org/observations/129444587">https://www.inaturalist.org/observations/129444587</a> |
| 235 | Sturnus pagodarum | Brahminy Starling | 2022/10/28 | 2 | 0 | 15.33501320 | 76.46002400 | <a href="https://www.inaturalist.org/observations/141982366">https://www.inaturalist.org/observations/141982366</a> |
| 236 | Sturnus pagodarum | Brahminy Starling | 2022/10/28 | 2 | 0 | 15.33501320 | 76.46002400 | <a href="https://www.inaturalist.org/observations/142220783">https://www.inaturalist.org/observations/142220783</a> |
| 237 | Sturnus pagodarum | Brahminy Starling | 2022/10/28 | 2 | 0 | 15.33501320 | 76.46002400 | <a href="https://www.inaturalist.org/observations/142220798">https://www.inaturalist.org/observations/142220798</a> |
| 238 | Sturnus pagodarum | Brahminy Starling | 2022/7/22  | 3 | 0 | 15.33503666 | 76.46002382 | <a href="https://www.inaturalist.org/observations/127468265">https://www.inaturalist.org/observations/127468265</a> |
| 239 | Sturnus pagodarum | Brahminy Starling | 2020/12/30 | 1 | 0 | 15.33591306 | 76.46059306 | <a href="https://www.inaturalist.org/observations/88432294">https://www.inaturalist.org/observations/88432294</a>   |
| 240 | Sturnus pagodarum | Brahminy Starling | 2020/2/5   | 2 | 0 | 15.34151198 | 76.47804254 | <a href="https://www.inaturalist.org/observations/67404825">https://www.inaturalist.org/observations/67404825</a>   |
| 241 | Sturnus pagodarum | Brahminy Starling | 2016/4/30  | 4 | 0 | 15.38457047 | 75.10404198 | <a href="https://www.inaturalist.org/observations/57623029">https://www.inaturalist.org/observations/57623029</a>   |
| 242 | Sturnus pagodarum | Brahminy Starling | 2015/9/10  | 4 | 0 | 15.39131900 | 76.47650444 | <a href="https://www.inaturalist.org/observations/16126722">https://www.inaturalist.org/observations/16126722</a>   |
| 243 | Sturnus pagodarum | Brahminy Starling | 2020/12/6  | 1 | 0 | 15.42218000 | 75.01581500 | <a href="https://www.inaturalist.org/observations/90238858">https://www.inaturalist.org/observations/90238858</a>   |
| 244 | Sturnus pagodarum | Brahminy Starling | 2015/5/6   | 5 | 0 | 15.45892400 | 75.00780800 | <a href="http://www.inaturalist.org/observations/1463509">http://www.inaturalist.org/observations/1463509</a>       |
| 245 | Sturnus pagodarum | Brahminy Starling | 2021/5/12  | 4 | 0 | 15.45904614 | 75.00780813 | <a href="https://www.inaturalist.org/observations/128266233">https://www.inaturalist.org/observations/128266233</a> |
| 246 | Sturnus pagodarum | Brahminy Starling | 1999/11/29 | 1 | 0 | 15.56408571 | 73.75518348 | <a href="https://www.inaturalist.org/observations/42317827">https://www.inaturalist.org/observations/42317827</a>   |
| 247 | Sturnus pagodarum | Brahminy Starling | 2022/10/22 | 2 | 0 | 15.82320186 | 74.48357809 | <a href="https://www.inaturalist.org/observations/139592627">https://www.inaturalist.org/observations/139592627</a> |
| 248 | Sturnus pagodarum | Brahminy Starling | 2016/12/12 | 1 | 0 | 15.91665060 | 75.69100430 | <a href="https://www.inaturalist.org/observations/82685116">https://www.inaturalist.org/observations/82685116</a>   |
| 249 | Sturnus pagodarum | Brahminy Starling | 2015/12/31 | 1 | 0 | 15.94881800 | 75.81635200 | <a href="https://www.inaturalist.org/observations/46196291">https://www.inaturalist.org/observations/46196291</a>   |
| 250 | Sturnus pagodarum | Brahminy Starling | 2020/3/8   | 1 | 0 | 16.14903760 | 77.35073486 | <a href="https://www.inaturalist.org/observations/95628193">https://www.inaturalist.org/observations/95628193</a>   |
| 251 | Sturnus pagodarum | Brahminy Starling | 2020/10/23 | 3 | 0 | 16.16910489 | 75.66150270 | <a href="https://www.inaturalist.org/observations/64435247">https://www.inaturalist.org/observations/64435247</a>   |
| 252 | Sturnus pagodarum | Brahminy Starling | 2020/4/6   | 2 | 0 | 16.20270966 | 77.36287147 | <a href="https://www.inaturalist.org/observations/81855122">https://www.inaturalist.org/observations/81855122</a>   |

|     |                          |                   |            |   |   |             |             |                                                                                                                     |
|-----|--------------------------|-------------------|------------|---|---|-------------|-------------|---------------------------------------------------------------------------------------------------------------------|
| 253 | <i>Sturnus pagodarum</i> | Brahminy Starling | 2018/12/16 | 3 | 0 | 16.22091644 | 74.74896446 | <a href="https://www.inaturalist.org/observations/90276726">https://www.inaturalist.org/observations/90276726</a>   |
| 254 | <i>Sturnus pagodarum</i> | Brahminy Starling | 2019/2/17  | 2 | 0 | 16.35570560 | 78.83346130 | <a href="https://www.inaturalist.org/observations/63621562">https://www.inaturalist.org/observations/63621562</a>   |
| 255 | <i>Sturnus pagodarum</i> | Brahminy Starling | 2022/10/27 | 2 | 0 | 16.35579612 | 74.29781271 | <a href="https://www.inaturalist.org/observations/140219363">https://www.inaturalist.org/observations/140219363</a> |
| 256 | <i>Sturnus pagodarum</i> | Brahminy Starling | 2021/12/26 | 2 | 0 | 16.38153544 | 81.58766080 | <a href="https://www.inaturalist.org/observations/104907642">https://www.inaturalist.org/observations/104907642</a> |
| 257 | <i>Sturnus pagodarum</i> | Brahminy Starling | 2022/11/27 | 2 | 0 | 16.38635333 | 81.58981667 | <a href="https://www.inaturalist.org/observations/143026573">https://www.inaturalist.org/observations/143026573</a> |
| 258 | <i>Sturnus pagodarum</i> | Brahminy Starling | 2013/12/1  | 3 | 0 | 16.40966969 | 80.70889656 | <a href="https://www.inaturalist.org/observations/88106306">https://www.inaturalist.org/observations/88106306</a>   |
| 259 | <i>Sturnus pagodarum</i> | Brahminy Starling | 2020/12/20 | 2 | 0 | 16.55772920 | 80.72698540 | <a href="https://www.inaturalist.org/observations/92475023">https://www.inaturalist.org/observations/92475023</a>   |
| 260 | <i>Sturnus pagodarum</i> | Brahminy Starling | 2020/12/6  | 3 | 0 | 16.55921794 | 80.76100097 | <a href="https://www.inaturalist.org/observations/92452640">https://www.inaturalist.org/observations/92452640</a>   |
| 261 | <i>Sturnus pagodarum</i> | Brahminy Starling | 2020/12/1  | 2 | 0 | 16.55956663 | 80.76008636 | <a href="https://www.inaturalist.org/observations/92473426">https://www.inaturalist.org/observations/92473426</a>   |
| 262 | <i>Sturnus pagodarum</i> | Brahminy Starling | 2021/12/5  | 3 | 0 | 16.57559146 | 80.68230191 | <a href="https://www.inaturalist.org/observations/104498334">https://www.inaturalist.org/observations/104498334</a> |
| 263 | <i>Sturnus pagodarum</i> | Brahminy Starling | 2020/11/29 | 2 | 0 | 16.57589266 | 80.68862217 | <a href="https://www.inaturalist.org/observations/92670069">https://www.inaturalist.org/observations/92670069</a>   |
| 264 | <i>Sturnus pagodarum</i> | Brahminy Starling | 2020/8/31  | 2 | 0 | 16.57911333 | 80.70136500 | <a href="https://www.inaturalist.org/observations/58122838">https://www.inaturalist.org/observations/58122838</a>   |
| 265 | <i>Sturnus pagodarum</i> | Brahminy Starling | 2021/12/29 | 2 | 0 | 16.59055924 | 80.82735576 | <a href="https://www.inaturalist.org/observations/103879227">https://www.inaturalist.org/observations/103879227</a> |
| 266 | <i>Sturnus pagodarum</i> | Brahminy Starling | 2020/12/27 | 2 | 0 | 16.59577924 | 80.61818580 | <a href="https://www.inaturalist.org/observations/90049768">https://www.inaturalist.org/observations/90049768</a>   |
| 267 | <i>Sturnus pagodarum</i> | Brahminy Starling | 2022/1/9   | 3 | 0 | 16.59776527 | 80.61998585 | <a href="https://www.inaturalist.org/observations/104863272">https://www.inaturalist.org/observations/104863272</a> |
| 268 | <i>Sturnus pagodarum</i> | Brahminy Starling | 2014/3/2   | 3 | 0 | 16.63942370 | 80.79750281 | <a href="https://www.inaturalist.org/observations/89171354">https://www.inaturalist.org/observations/89171354</a>   |
| 269 | <i>Sturnus pagodarum</i> | Brahminy Starling | 2022/3/13  | 4 | 0 | 16.66112798 | 80.47830352 | <a href="https://www.inaturalist.org/observations/108944373">https://www.inaturalist.org/observations/108944373</a> |
| 270 | <i>Sturnus pagodarum</i> | Brahminy Starling | 2022/1/4   | 1 | 0 | 16.68999444 | 80.77381944 | <a href="https://www.inaturalist.org/observations/104401543">https://www.inaturalist.org/observations/104401543</a> |
| 271 | <i>Sturnus pagodarum</i> | Brahminy Starling | 2022/2/8   | 2 | 0 | 16.69006111 | 80.77379167 | <a href="https://www.inaturalist.org/observations/106383271">https://www.inaturalist.org/observations/106383271</a> |
| 272 | <i>Sturnus pagodarum</i> | Brahminy Starling | 2021/12/27 | 1 | 0 | 16.69378611 | 80.77235833 | <a href="https://www.inaturalist.org/observations/103754012">https://www.inaturalist.org/observations/103754012</a> |
| 273 | <i>Sturnus pagodarum</i> | Brahminy Starling | 2022/1/5   | 3 | 0 | 16.69654722 | 80.76982778 | <a href="https://www.inaturalist.org/observations/104401816">https://www.inaturalist.org/observations/104401816</a> |
| 274 | <i>Sturnus pagodarum</i> | Brahminy Starling | 2021/12/22 | 3 | 0 | 16.69786043 | 82.12057114 | <a href="https://www.inaturalist.org/observations/103876500">https://www.inaturalist.org/observations/103876500</a> |
| 275 | <i>Sturnus pagodarum</i> | Brahminy Starling | 2021/10/24 | 3 | 0 | 16.73503224 | 80.65353531 | <a href="https://www.inaturalist.org/observations/99225832">https://www.inaturalist.org/observations/99225832</a>   |

|     |                   |                   |            |   |   |             |             |                                                                                                                     |
|-----|-------------------|-------------------|------------|---|---|-------------|-------------|---------------------------------------------------------------------------------------------------------------------|
| 276 | Sturnus pagodarum | Brahminy Starling | 2016/11/12 | 4 | 0 | 16.79660260 | 74.29103570 | <a href="https://www.inaturalist.org/observations/30795835">https://www.inaturalist.org/observations/30795835</a>   |
| 277 | Sturnus pagodarum | Brahminy Starling | 2016/11/14 | 4 | 0 | 16.79660260 | 74.29103570 | <a href="https://www.inaturalist.org/observations/30796604">https://www.inaturalist.org/observations/30796604</a>   |
| 278 | Sturnus pagodarum | Brahminy Starling | 2020/4/4   | 1 | 0 | 17.02988897 | 74.61172645 | <a href="https://www.inaturalist.org/observations/41347814">https://www.inaturalist.org/observations/41347814</a>   |
| 279 | Sturnus pagodarum | Brahminy Starling | 2010/11/6  | 1 | 0 | 17.27769300 | 74.18435350 | <a href="https://www.inaturalist.org/observations/42480929">https://www.inaturalist.org/observations/42480929</a>   |
| 280 | Sturnus pagodarum | Brahminy Starling | 2022/5/22  | 2 | 0 | 17.31234335 | 77.84826880 | <a href="https://www.inaturalist.org/observations/118330932">https://www.inaturalist.org/observations/118330932</a> |
| 281 | Sturnus pagodarum | Brahminy Starling | 2022/5/22  | 2 | 0 | 17.31234335 | 77.84826880 | <a href="https://www.inaturalist.org/observations/118330936">https://www.inaturalist.org/observations/118330936</a> |
| 282 | Sturnus pagodarum | Brahminy Starling | 2022/5/22  | 2 | 0 | 17.31234335 | 77.84826880 | <a href="https://www.inaturalist.org/observations/118330941">https://www.inaturalist.org/observations/118330941</a> |
| 283 | Sturnus pagodarum | Brahminy Starling | 2022/1/2   | 1 | 0 | 17.31866950 | 78.35862240 | <a href="https://www.inaturalist.org/observations/104171395">https://www.inaturalist.org/observations/104171395</a> |
| 284 | Sturnus pagodarum | Brahminy Starling | 2022/1/2   | 2 | 0 | 17.31866950 | 78.35862240 | <a href="https://www.inaturalist.org/observations/104905973">https://www.inaturalist.org/observations/104905973</a> |
| 285 | Sturnus pagodarum | Brahminy Starling | 2022/1/2   | 4 | 0 | 17.31866950 | 78.35862240 | <a href="https://www.inaturalist.org/observations/104905974">https://www.inaturalist.org/observations/104905974</a> |
| 286 | Sturnus pagodarum | Brahminy Starling | 2022/1/2   | 3 | 0 | 17.31866950 | 78.35862240 | <a href="https://www.inaturalist.org/observations/104905978">https://www.inaturalist.org/observations/104905978</a> |
| 287 | Sturnus pagodarum | Brahminy Starling | 2021/12/26 | 3 | 0 | 17.37626560 | 78.29886370 | <a href="https://www.inaturalist.org/observations/104752861">https://www.inaturalist.org/observations/104752861</a> |
| 288 | Sturnus pagodarum | Brahminy Starling | 2021/12/26 | 2 | 0 | 17.37626560 | 78.29886370 | <a href="https://www.inaturalist.org/observations/104752876">https://www.inaturalist.org/observations/104752876</a> |
| 289 | Sturnus pagodarum | Brahminy Starling | 2021/12/26 | 2 | 0 | 17.37626560 | 78.29886370 | <a href="https://www.inaturalist.org/observations/104753080">https://www.inaturalist.org/observations/104753080</a> |
| 290 | Sturnus pagodarum | Brahminy Starling | 2021/12/26 | 4 | 0 | 17.37626560 | 78.29886370 | <a href="https://www.inaturalist.org/observations/104753341">https://www.inaturalist.org/observations/104753341</a> |
| 291 | Sturnus pagodarum | Brahminy Starling | 2021/12/26 | 2 | 0 | 17.38066800 | 78.31718980 | <a href="https://www.inaturalist.org/observations/104691697">https://www.inaturalist.org/observations/104691697</a> |
| 292 | Sturnus pagodarum | Brahminy Starling | 2021/12/26 | 3 | 0 | 17.38066800 | 78.31718980 | <a href="https://www.inaturalist.org/observations/104692618">https://www.inaturalist.org/observations/104692618</a> |
| 293 | Sturnus pagodarum | Brahminy Starling | 2022/7/31  | 4 | 0 | 17.43207510 | 78.47538770 | <a href="https://www.inaturalist.org/observations/130092332">https://www.inaturalist.org/observations/130092332</a> |
| 294 | Sturnus pagodarum | Brahminy Starling | 2022/10/12 | 2 | 0 | 17.45677890 | 78.23337430 | <a href="https://www.inaturalist.org/observations/138803140">https://www.inaturalist.org/observations/138803140</a> |
| 295 | Sturnus pagodarum | Brahminy Starling | 2022/10/12 | 1 | 0 | 17.45677890 | 78.23337430 | <a href="https://www.inaturalist.org/observations/138803160">https://www.inaturalist.org/observations/138803160</a> |
| 296 | Sturnus pagodarum | Brahminy Starling | 2020/12/3  | 3 | 0 | 17.47234320 | 78.79742500 | <a href="https://www.inaturalist.org/observations/67861302">https://www.inaturalist.org/observations/67861302</a>   |
| 297 | Sturnus pagodarum | Brahminy Starling | 2022/6/25  | 1 | 0 | 17.49513825 | 78.40061143 | <a href="https://www.inaturalist.org/observations/123361347">https://www.inaturalist.org/observations/123361347</a> |
| 298 | Sturnus pagodarum | Brahminy Starling | 2020/6/24  | 1 | 0 | 17.54839900 | 78.46781740 | <a href="https://www.inaturalist.org/observations/50747425">https://www.inaturalist.org/observations/50747425</a>   |

|     |                   |                   |            |   |   |             |             |                                                                                                                     |
|-----|-------------------|-------------------|------------|---|---|-------------|-------------|---------------------------------------------------------------------------------------------------------------------|
| 299 | Sturnus pagodarum | Brahminy Starling | 2020/3/10  | 1 | 0 | 17.57122191 | 76.90757765 | <a href="https://www.inaturalist.org/observations/95631483">https://www.inaturalist.org/observations/95631483</a>   |
| 300 | Sturnus pagodarum | Brahminy Starling | 2021/12/19 | 4 | 0 | 17.64045667 | 78.06637500 | <a href="https://www.inaturalist.org/observations/121718387">https://www.inaturalist.org/observations/121718387</a> |
| 301 | Sturnus pagodarum | Brahminy Starling | 2021/12/19 | 4 | 0 | 17.64084167 | 78.06885500 | <a href="https://www.inaturalist.org/observations/121718361">https://www.inaturalist.org/observations/121718361</a> |
| 302 | Sturnus pagodarum | Brahminy Starling | 2022/1/21  | 2 | 0 | 17.65524480 | 78.07606880 | <a href="https://www.inaturalist.org/observations/105428153">https://www.inaturalist.org/observations/105428153</a> |
| 303 | Sturnus pagodarum | Brahminy Starling | 2020/4/3   | 6 | 0 | 17.68045874 | 74.01826110 | <a href="https://www.inaturalist.org/observations/66384200">https://www.inaturalist.org/observations/66384200</a>   |
| 304 | Sturnus pagodarum | Brahminy Starling | 2020/7/8   | 4 | 0 | 17.68046390 | 74.01826100 | <a href="https://www.inaturalist.org/observations/52527770">https://www.inaturalist.org/observations/52527770</a>   |
| 305 | Sturnus pagodarum | Brahminy Starling | 2020/7/8   | 2 | 0 | 17.68046390 | 74.01826100 | <a href="https://www.inaturalist.org/observations/52529145">https://www.inaturalist.org/observations/52529145</a>   |
| 306 | Sturnus pagodarum | Brahminy Starling | 2020/11/13 | 2 | 0 | 17.68046390 | 74.01826100 | <a href="https://www.inaturalist.org/observations/71119195">https://www.inaturalist.org/observations/71119195</a>   |
| 307 | Sturnus pagodarum | Brahminy Starling | 2020/11/13 | 1 | 0 | 17.68046390 | 74.01826100 | <a href="https://www.inaturalist.org/observations/105498330">https://www.inaturalist.org/observations/105498330</a> |
| 308 | Sturnus pagodarum | Brahminy Starling | 2013/2/22  | 4 | 0 | 17.68058160 | 75.31550350 | <a href="https://www.inaturalist.org/observations/66917702">https://www.inaturalist.org/observations/66917702</a>   |
| 309 | Sturnus pagodarum | Brahminy Starling | 2022/6/26  | 3 | 0 | 17.68662580 | 78.32732450 | <a href="https://www.inaturalist.org/observations/123486402">https://www.inaturalist.org/observations/123486402</a> |
| 310 | Sturnus pagodarum | Brahminy Starling | 2022/6/26  | 3 | 0 | 17.68662580 | 78.32732450 | <a href="https://www.inaturalist.org/observations/123486410">https://www.inaturalist.org/observations/123486410</a> |
| 311 | Sturnus pagodarum | Brahminy Starling | 2022/6/26  | 2 | 0 | 17.68662580 | 78.32732450 | <a href="https://www.inaturalist.org/observations/123486413">https://www.inaturalist.org/observations/123486413</a> |
| 312 | Sturnus pagodarum | Brahminy Starling | 2022/6/26  | 4 | 0 | 17.68662580 | 78.32732450 | <a href="https://www.inaturalist.org/observations/123486414">https://www.inaturalist.org/observations/123486414</a> |
| 313 | Sturnus pagodarum | Brahminy Starling | 2015/3/15  | 4 | 0 | 17.82522113 | 75.86484911 | <a href="https://www.inaturalist.org/observations/66421016">https://www.inaturalist.org/observations/66421016</a>   |
| 314 | Sturnus pagodarum | Brahminy Starling | 2017/4/27  | 2 | 0 | 17.82818757 | 75.86145125 | <a href="https://www.inaturalist.org/observations/65517339">https://www.inaturalist.org/observations/65517339</a>   |
| 315 | Sturnus pagodarum | Brahminy Starling | 2021/8/22  | 1 | 0 | 17.93341333 | 83.37913833 | <a href="https://www.inaturalist.org/observations/92532078">https://www.inaturalist.org/observations/92532078</a>   |
| 316 | Sturnus pagodarum | Brahminy Starling | 2021/8/29  | 2 | 0 | 18.05051356 | 83.43898918 | <a href="https://www.inaturalist.org/observations/92895828">https://www.inaturalist.org/observations/92895828</a>   |
| 317 | Sturnus pagodarum | Brahminy Starling | 2021/10/16 | 2 | 0 | 18.05293432 | 78.26185305 | <a href="https://www.inaturalist.org/observations/100763125">https://www.inaturalist.org/observations/100763125</a> |
| 318 | Sturnus pagodarum | Brahminy Starling | 2021/10/16 | 2 | 0 | 18.05293432 | 78.26185305 | <a href="https://www.inaturalist.org/observations/100764535">https://www.inaturalist.org/observations/100764535</a> |
| 319 | Sturnus pagodarum | Brahminy Starling | 2021/8/29  | 1 | 0 | 18.06337120 | 83.41365304 | <a href="https://www.inaturalist.org/observations/92904388">https://www.inaturalist.org/observations/92904388</a>   |
| 320 | Sturnus pagodarum | Brahminy Starling | 2018/7/19  | 5 | 0 | 18.11243720 | 79.01929970 | <a href="https://www.inaturalist.org/observations/63558554">https://www.inaturalist.org/observations/63558554</a>   |
| 321 | Sturnus pagodarum | Brahminy Starling | 2021/6/11  | 2 | 0 | 18.14612333 | 73.84378833 | <a href="https://www.inaturalist.org/observations/82637692">https://www.inaturalist.org/observations/82637692</a>   |

|     |                          |                   |            |   |   |             |             |                                                                                                                     |
|-----|--------------------------|-------------------|------------|---|---|-------------|-------------|---------------------------------------------------------------------------------------------------------------------|
| 322 | <i>Sturnus pagodarum</i> | Brahminy Starling | 2021/6/16  | 2 | 0 | 18.15077440 | 74.08728920 | <a href="https://www.inaturalist.org/observations/83913922">https://www.inaturalist.org/observations/83913922</a>   |
| 323 | <i>Sturnus pagodarum</i> | Brahminy Starling | 2020/11/15 | 3 | 0 | 18.15437575 | 74.59256161 | <a href="https://www.inaturalist.org/observations/67232172">https://www.inaturalist.org/observations/67232172</a>   |
| 324 | <i>Sturnus pagodarum</i> | Brahminy Starling | 2018/7/22  | 2 | 0 | 18.17728139 | 74.95116306 | <a href="https://www.inaturalist.org/observations/54378737">https://www.inaturalist.org/observations/54378737</a>   |
| 325 | <i>Sturnus pagodarum</i> | Brahminy Starling | 2018/7/3   | 2 | 0 | 18.17766500 | 74.95500306 | <a href="https://www.inaturalist.org/observations/54374220">https://www.inaturalist.org/observations/54374220</a>   |
| 326 | <i>Sturnus pagodarum</i> | Brahminy Starling | 2018/9/1   | 1 | 0 | 18.17806306 | 74.96137639 | <a href="https://www.inaturalist.org/observations/54154824">https://www.inaturalist.org/observations/54154824</a>   |
| 327 | <i>Sturnus pagodarum</i> | Brahminy Starling | 2018/11/20 | 1 | 0 | 18.17809000 | 74.96276167 | <a href="https://www.inaturalist.org/observations/53711189">https://www.inaturalist.org/observations/53711189</a>   |
| 328 | <i>Sturnus pagodarum</i> | Brahminy Starling | 2020/10/2  | 6 | 0 | 18.17917625 | 74.60779689 | <a href="https://www.inaturalist.org/observations/61546345">https://www.inaturalist.org/observations/61546345</a>   |
| 329 | <i>Sturnus pagodarum</i> | Brahminy Starling | 2020/7/11  | 4 | 0 | 18.17917912 | 74.60779723 | <a href="https://www.inaturalist.org/observations/57982361">https://www.inaturalist.org/observations/57982361</a>   |
| 330 | <i>Sturnus pagodarum</i> | Brahminy Starling | 2020/2/22  | 0 | 0 | 18.26338600 | 74.80422700 | <a href="https://www.inaturalist.org/observations/39575324">https://www.inaturalist.org/observations/39575324</a>   |
| 331 | <i>Sturnus pagodarum</i> | Brahminy Starling | 2018/12/12 | 1 | 0 | 18.26439328 | 74.76938926 | <a href="https://www.inaturalist.org/observations/53452053">https://www.inaturalist.org/observations/53452053</a>   |
| 332 | <i>Sturnus pagodarum</i> | Brahminy Starling | 2018/2/3   | 2 | 0 | 18.27139188 | 74.79532800 | <a href="https://www.inaturalist.org/observations/56114816">https://www.inaturalist.org/observations/56114816</a>   |
| 333 | <i>Sturnus pagodarum</i> | Brahminy Starling | 2021/1/13  | 2 | 0 | 18.27264780 | 74.32062080 | <a href="https://www.inaturalist.org/observations/70932608">https://www.inaturalist.org/observations/70932608</a>   |
| 334 | <i>Sturnus pagodarum</i> | Brahminy Starling | 2021/10/25 | 3 | 0 | 18.27264780 | 74.32062080 | <a href="https://www.inaturalist.org/observations/121383463">https://www.inaturalist.org/observations/121383463</a> |
| 335 | <i>Sturnus pagodarum</i> | Brahminy Starling | 2020/8/31  | 1 | 0 | 18.27303995 | 84.00484376 | <a href="https://www.inaturalist.org/observations/95508134">https://www.inaturalist.org/observations/95508134</a>   |
| 336 | <i>Sturnus pagodarum</i> | Brahminy Starling | 2020/8/31  | 2 | 0 | 18.27303995 | 84.00484376 | <a href="https://www.inaturalist.org/observations/95645356">https://www.inaturalist.org/observations/95645356</a>   |
| 337 | <i>Sturnus pagodarum</i> | Brahminy Starling | 2017/11/16 | 2 | 0 | 18.27328806 | 74.75735306 | <a href="https://www.inaturalist.org/observations/55011463">https://www.inaturalist.org/observations/55011463</a>   |
| 338 | <i>Sturnus pagodarum</i> | Brahminy Starling | 2014/3/16  | 3 | 0 | 18.27891820 | 74.78029550 | <a href="https://www.inaturalist.org/observations/55372888">https://www.inaturalist.org/observations/55372888</a>   |
| 339 | <i>Sturnus pagodarum</i> | Brahminy Starling | 2016/2/3   | 4 | 0 | 18.29144000 | 74.77390900 | <a href="http://www.inaturalist.org/observations/2649257">http://www.inaturalist.org/observations/2649257</a>       |
| 340 | <i>Sturnus pagodarum</i> | Brahminy Starling | 2011/3/6   | 2 | 0 | 18.29158270 | 74.77408000 | <a href="https://www.inaturalist.org/observations/56006666">https://www.inaturalist.org/observations/56006666</a>   |
| 341 | <i>Sturnus pagodarum</i> | Brahminy Starling | 2012/3/10  | 2 | 0 | 18.29158270 | 74.77408000 | <a href="https://www.inaturalist.org/observations/56113762">https://www.inaturalist.org/observations/56113762</a>   |
| 342 | <i>Sturnus pagodarum</i> | Brahminy Starling | 2012/3/10  | 2 | 0 | 18.29158300 | 74.77408000 | <a href="https://www.inaturalist.org/observations/55702055">https://www.inaturalist.org/observations/55702055</a>   |
| 343 | <i>Sturnus pagodarum</i> | Brahminy Starling | 2014/1/5   | 3 | 0 | 18.29894780 | 74.75425710 | <a href="https://www.inaturalist.org/observations/41029765">https://www.inaturalist.org/observations/41029765</a>   |
| 344 | <i>Sturnus pagodarum</i> | Brahminy Starling | 2021/12/20 | 2 | 0 | 18.31899690 | 73.87596292 | <a href="https://www.inaturalist.org/observations/105859673">https://www.inaturalist.org/observations/105859673</a> |

|     |                          |                   |            |   |   |             |             |                                                                                                                     |
|-----|--------------------------|-------------------|------------|---|---|-------------|-------------|---------------------------------------------------------------------------------------------------------------------|
| 345 | <i>Sturnus pagodarum</i> | Brahminy Starling | 2021/1/28  | 3 | 0 | 18.33481840 | 73.67215150 | <a href="https://www.inaturalist.org/observations/70931505">https://www.inaturalist.org/observations/70931505</a>   |
| 346 | <i>Sturnus pagodarum</i> | Brahminy Starling | 2018/10/7  | 5 | 0 | 18.34631300 | 74.03018300 | <a href="https://www.inaturalist.org/observations/19463415">https://www.inaturalist.org/observations/19463415</a>   |
| 347 | <i>Sturnus pagodarum</i> | Brahminy Starling | 2020/9/28  | 4 | 0 | 18.34807574 | 75.97382348 | <a href="https://www.inaturalist.org/observations/61317291">https://www.inaturalist.org/observations/61317291</a>   |
| 348 | <i>Sturnus pagodarum</i> | Brahminy Starling | 2019/9/30  | 3 | 0 | 18.35098139 | 74.35528306 | <a href="https://www.inaturalist.org/observations/52245739">https://www.inaturalist.org/observations/52245739</a>   |
| 349 | <i>Sturnus pagodarum</i> | Brahminy Starling | 2017/10/28 | 3 | 0 | 18.35154150 | 74.36754460 | <a href="https://www.inaturalist.org/observations/42755852">https://www.inaturalist.org/observations/42755852</a>   |
| 350 | <i>Sturnus pagodarum</i> | Brahminy Starling | 2021/1/6   | 1 | 0 | 18.35154150 | 74.36754460 | <a href="https://www.inaturalist.org/observations/70980201">https://www.inaturalist.org/observations/70980201</a>   |
| 351 | <i>Sturnus pagodarum</i> | Brahminy Starling | 2012/11/25 | 4 | 0 | 18.36527342 | 73.70661791 | <a href="https://www.inaturalist.org/observations/19405252">https://www.inaturalist.org/observations/19405252</a>   |
| 352 | <i>Sturnus pagodarum</i> | Brahminy Starling | 2017/11/12 | 3 | 0 | 18.37389901 | 74.06659464 | <a href="https://www.inaturalist.org/observations/8860131">https://www.inaturalist.org/observations/8860131</a>     |
| 353 | <i>Sturnus pagodarum</i> | Brahminy Starling | 2022/8/6   | 1 | 0 | 18.37586280 | 73.76916470 | <a href="https://www.inaturalist.org/observations/137316648">https://www.inaturalist.org/observations/137316648</a> |
| 354 | <i>Sturnus pagodarum</i> | Brahminy Starling | 2018/2/5   | 5 | 0 | 18.37586300 | 73.76916500 | <a href="https://www.inaturalist.org/observations/33243081">https://www.inaturalist.org/observations/33243081</a>   |
| 355 | <i>Sturnus pagodarum</i> | Brahminy Starling | 2017/4/1   | 2 | 0 | 18.38027930 | 73.76764300 | <a href="https://www.inaturalist.org/observations/41811000">https://www.inaturalist.org/observations/41811000</a>   |
| 356 | <i>Sturnus pagodarum</i> | Brahminy Starling | 2021/10/15 | 3 | 0 | 18.41206170 | 74.04945000 | <a href="https://www.inaturalist.org/observations/98586791">https://www.inaturalist.org/observations/98586791</a>   |
| 357 | <i>Sturnus pagodarum</i> | Brahminy Starling | 2020/7/15  | 4 | 0 | 18.46809050 | 73.92936630 | <a href="https://www.inaturalist.org/observations/54617876">https://www.inaturalist.org/observations/54617876</a>   |
| 358 | <i>Sturnus pagodarum</i> | Brahminy Starling | 2019/7/16  | 2 | 0 | 18.47464060 | 73.91126201 | <a href="https://www.inaturalist.org/observations/56002324">https://www.inaturalist.org/observations/56002324</a>   |
| 359 | <i>Sturnus pagodarum</i> | Brahminy Starling | 2013/4/3   | 3 | 0 | 18.47802300 | 73.84043600 | <a href="https://www.inaturalist.org/observations/122174349">https://www.inaturalist.org/observations/122174349</a> |
| 360 | <i>Sturnus pagodarum</i> | Brahminy Starling | 2016/1/20  | 4 | 0 | 18.48126541 | 73.83204103 | <a href="http://www.inaturalist.org/observations/3735655">http://www.inaturalist.org/observations/3735655</a>       |
| 361 | <i>Sturnus pagodarum</i> | Brahminy Starling | 2011/5/15  | 2 | 0 | 18.48184261 | 73.81061714 | <a href="https://www.inaturalist.org/observations/68086453">https://www.inaturalist.org/observations/68086453</a>   |
| 362 | <i>Sturnus pagodarum</i> | Brahminy Starling | 2020/6/11  | 1 | 0 | 18.48379500 | 73.89529500 | <a href="https://www.inaturalist.org/observations/49194777">https://www.inaturalist.org/observations/49194777</a>   |
| 363 | <i>Sturnus pagodarum</i> | Brahminy Starling | 2019/6/29  | 7 | 0 | 18.49268310 | 73.78751190 | <a href="https://www.inaturalist.org/observations/32817309">https://www.inaturalist.org/observations/32817309</a>   |
| 364 | <i>Sturnus pagodarum</i> | Brahminy Starling | 2021/6/14  | 2 | 0 | 18.49736978 | 73.90093177 | <a href="https://www.inaturalist.org/observations/88495993">https://www.inaturalist.org/observations/88495993</a>   |
| 365 | <i>Sturnus pagodarum</i> | Brahminy Starling | 2014/10/11 | 4 | 0 | 18.51770300 | 73.82297500 | <a href="http://www.inaturalist.org/observations/3923271">http://www.inaturalist.org/observations/3923271</a>       |
| 366 | <i>Sturnus pagodarum</i> | Brahminy Starling | 2022/7/16  | 2 | 0 | 18.52853621 | 73.81250520 | <a href="https://www.inaturalist.org/observations/126456149">https://www.inaturalist.org/observations/126456149</a> |
| 367 | <i>Sturnus pagodarum</i> | Brahminy Starling | 2020/11/10 | 6 | 0 | 18.54301526 | 73.78889277 | <a href="https://www.inaturalist.org/observations/64783799">https://www.inaturalist.org/observations/64783799</a>   |



|     |                   |                   |            |   |   |             |             |                                                                                                                     |
|-----|-------------------|-------------------|------------|---|---|-------------|-------------|---------------------------------------------------------------------------------------------------------------------|
| 368 | Sturnus pagodarum | Brahminy Starling | 2022/5/20  | 6 | 0 | 18.55380500 | 73.84229150 | <a href="https://www.inaturalist.org/observations/117873669">https://www.inaturalist.org/observations/117873669</a> |
| 369 | Sturnus pagodarum | Brahminy Starling | 2016/3/9   | 2 | 0 | 18.55403120 | 73.79045760 | <a href="https://www.inaturalist.org/observations/141622188">https://www.inaturalist.org/observations/141622188</a> |
| 370 | Sturnus pagodarum | Brahminy Starling | 2021/4/2   | 2 | 0 | 18.55525360 | 73.77869828 | <a href="https://www.inaturalist.org/observations/72783743">https://www.inaturalist.org/observations/72783743</a>   |
| 371 | Sturnus pagodarum | Brahminy Starling | 2014/4/30  | 2 | 0 | 18.55808650 | 73.78454730 | <a href="https://www.inaturalist.org/observations/141622187">https://www.inaturalist.org/observations/141622187</a> |
| 372 | Sturnus pagodarum | Brahminy Starling | 2020/6/21  | 2 | 0 | 18.57902320 | 73.78599120 | <a href="https://www.inaturalist.org/observations/50369975">https://www.inaturalist.org/observations/50369975</a>   |
| 373 | Sturnus pagodarum | Brahminy Starling | 2022/8/11  | 2 | 0 | 18.57979200 | 73.78994900 | <a href="https://www.inaturalist.org/observations/130460378">https://www.inaturalist.org/observations/130460378</a> |
| 374 | Sturnus pagodarum | Brahminy Starling | 2020/6/27  | 2 | 0 | 18.58311100 | 73.78616100 | <a href="https://www.inaturalist.org/observations/51189364">https://www.inaturalist.org/observations/51189364</a>   |
| 375 | Sturnus pagodarum | Brahminy Starling | 2020/3/17  | 4 | 0 | 18.58449835 | 73.73891439 | <a href="https://www.inaturalist.org/observations/40124580">https://www.inaturalist.org/observations/40124580</a>   |
| 376 | Sturnus pagodarum | Brahminy Starling | 2022/6/21  | 5 | 0 | 18.58800103 | 73.97943377 | <a href="https://www.inaturalist.org/observations/122820792">https://www.inaturalist.org/observations/122820792</a> |
| 377 | Sturnus pagodarum | Brahminy Starling | 2022/12/11 | 2 | 0 | 18.60326575 | 73.89715575 | <a href="https://www.inaturalist.org/observations/144136321">https://www.inaturalist.org/observations/144136321</a> |
| 378 | Sturnus pagodarum | Brahminy Starling | 2020/1/17  | 1 | 0 | 18.62066316 | 73.73172717 | <a href="https://www.inaturalist.org/observations/37706392">https://www.inaturalist.org/observations/37706392</a>   |
| 379 | Sturnus pagodarum | Brahminy Starling | 2014/3/3   | 3 | 0 | 18.62182959 | 72.89190161 | <a href="https://www.inaturalist.org/observations/53128971">https://www.inaturalist.org/observations/53128971</a>   |
| 380 | Sturnus pagodarum | Brahminy Starling | 2019/1/16  | 3 | 0 | 18.62426000 | 73.67040000 | <a href="https://www.inaturalist.org/observations/53333734">https://www.inaturalist.org/observations/53333734</a>   |
| 381 | Sturnus pagodarum | Brahminy Starling | 2021/3/27  | 6 | 0 | 18.63584057 | 74.02088446 | <a href="https://www.inaturalist.org/observations/121120207">https://www.inaturalist.org/observations/121120207</a> |
| 382 | Sturnus pagodarum | Brahminy Starling | 2010/1/16  | 3 | 0 | 18.64917810 | 73.77068180 | <a href="https://www.inaturalist.org/observations/81737990">https://www.inaturalist.org/observations/81737990</a>   |
| 383 | Sturnus pagodarum | Brahminy Starling | 2019/9/20  | 3 | 0 | 18.65839890 | 72.87733460 | <a href="https://www.inaturalist.org/observations/101310141">https://www.inaturalist.org/observations/101310141</a> |
| 384 | Sturnus pagodarum | Brahminy Starling | 2010/4/1   | 3 | 0 | 18.65840439 | 73.85193718 | <a href="https://www.inaturalist.org/observations/58140353">https://www.inaturalist.org/observations/58140353</a>   |
| 385 | Sturnus pagodarum | Brahminy Starling | 2015/3/25  | 1 | 0 | 18.77826659 | 74.28176031 | <a href="https://www.inaturalist.org/observations/82316779">https://www.inaturalist.org/observations/82316779</a>   |
| 386 | Sturnus pagodarum | Brahminy Starling | 2022/11/27 | 0 | 0 | 18.77866000 | 81.99711080 | <a href="https://www.inaturalist.org/observations/144013998">https://www.inaturalist.org/observations/144013998</a> |
| 387 | Sturnus pagodarum | Brahminy Starling | 2019/5/1   | 5 | 0 | 18.79199106 | 81.98299695 | <a href="https://www.inaturalist.org/observations/24276761">https://www.inaturalist.org/observations/24276761</a>   |
| 388 | Sturnus pagodarum | Brahminy Starling | 2012/9/26  | 3 | 0 | 18.81808760 | 74.15629900 | <a href="https://www.inaturalist.org/observations/122264284">https://www.inaturalist.org/observations/122264284</a> |
| 389 | Sturnus pagodarum | Brahminy Starling | 2022/3/19  | 5 | 0 | 18.96530630 | 73.22607085 | <a href="https://www.inaturalist.org/observations/109206572">https://www.inaturalist.org/observations/109206572</a> |
| 390 | Sturnus pagodarum | Brahminy Starling | 2020/10/28 | 2 | 0 | 18.99034551 | 75.72751790 | <a href="https://www.inaturalist.org/observations/63685016">https://www.inaturalist.org/observations/63685016</a>   |

|     |                   |                   |            |   |   |             |             |                                                                                                                     |
|-----|-------------------|-------------------|------------|---|---|-------------|-------------|---------------------------------------------------------------------------------------------------------------------|
| 391 | Sturnus pagodarum | Brahminy Starling | 2020/10/28 | 2 | 0 | 18.99238272 | 75.75412206 | <a href="https://www.inaturalist.org/observations/63685004">https://www.inaturalist.org/observations/63685004</a>   |
| 392 | Sturnus pagodarum | Brahminy Starling | 2018/4/1   | 5 | 0 | 19.08585050 | 73.74043060 | <a href="https://www.inaturalist.org/observations/30471754">https://www.inaturalist.org/observations/30471754</a>   |
| 393 | Sturnus pagodarum | Brahminy Starling | 2018/7/7   | 5 | 0 | 19.08862900 | 74.43976700 | <a href="https://www.inaturalist.org/observations/14127187">https://www.inaturalist.org/observations/14127187</a>   |
| 394 | Sturnus pagodarum | Brahminy Starling | 2020/3/1   | 1 | 0 | 19.09482870 | 74.74797890 | <a href="https://www.inaturalist.org/observations/55131999">https://www.inaturalist.org/observations/55131999</a>   |
| 395 | Sturnus pagodarum | Brahminy Starling | 2020/9/27  | 5 | 0 | 19.13940104 | 82.10490905 | <a href="https://www.inaturalist.org/observations/61079037">https://www.inaturalist.org/observations/61079037</a>   |
| 396 | Sturnus pagodarum | Brahminy Starling | 2020/9/27  | 4 | 0 | 19.13940104 | 82.10490905 | <a href="https://www.inaturalist.org/observations/61079198">https://www.inaturalist.org/observations/61079198</a>   |
| 397 | Sturnus pagodarum | Brahminy Starling | 2020/3/29  | 3 | 0 | 19.14022852 | 74.72464536 | <a href="https://www.inaturalist.org/observations/42006750">https://www.inaturalist.org/observations/42006750</a>   |
| 398 | Sturnus pagodarum | Brahminy Starling | 2018/9/21  | 2 | 0 | 19.14192483 | 72.96462536 | <a href="https://www.inaturalist.org/observations/56299976">https://www.inaturalist.org/observations/56299976</a>   |
| 399 | Sturnus pagodarum | Brahminy Starling | 2018/9/29  | 2 | 0 | 19.14192483 | 72.96462536 | <a href="https://www.inaturalist.org/observations/56299981">https://www.inaturalist.org/observations/56299981</a>   |
| 400 | Sturnus pagodarum | Brahminy Starling | 2022/10/2  | 1 | 0 | 19.14639878 | 72.96264544 | <a href="https://www.inaturalist.org/observations/137278812">https://www.inaturalist.org/observations/137278812</a> |
| 401 | Sturnus pagodarum | Brahminy Starling | 2014/10/5  | 3 | 0 | 19.15055340 | 72.95648930 | <a href="https://www.inaturalist.org/observations/41423274">https://www.inaturalist.org/observations/41423274</a>   |
| 402 | Sturnus pagodarum | Brahminy Starling | 2015/8/13  | 5 | 0 | 19.17881600 | 72.95766400 | <a href="http://www.inaturalist.org/observations/1866231">http://www.inaturalist.org/observations/1866231</a>       |
| 403 | Sturnus pagodarum | Brahminy Starling | 2018/10/6  | 2 | 0 | 19.19094485 | 72.98145019 | <a href="https://www.inaturalist.org/observations/136795771">https://www.inaturalist.org/observations/136795771</a> |
| 404 | Sturnus pagodarum | Brahminy Starling | 2022/11/10 | 2 | 0 | 19.22619435 | 73.11445791 | <a href="https://www.inaturalist.org/observations/142048667">https://www.inaturalist.org/observations/142048667</a> |
| 405 | Sturnus pagodarum | Brahminy Starling | 2018/2/18  | 4 | 0 | 19.23119238 | 72.87062366 | <a href="https://www.inaturalist.org/observations/11732922">https://www.inaturalist.org/observations/11732922</a>   |
| 406 | Sturnus pagodarum | Brahminy Starling | 2020/10/22 | 2 | 0 | 19.24617639 | 72.86224511 | <a href="https://www.inaturalist.org/observations/63566285">https://www.inaturalist.org/observations/63566285</a>   |
| 407 | Sturnus pagodarum | Brahminy Starling | 2017/10/8  | 2 | 0 | 19.38246770 | 72.77177750 | <a href="https://www.inaturalist.org/observations/42584095">https://www.inaturalist.org/observations/42584095</a>   |
| 408 | Sturnus pagodarum | Brahminy Starling | 2018/6/3   | 1 | 0 | 19.47694673 | 73.26611102 | <a href="https://www.inaturalist.org/observations/54235435">https://www.inaturalist.org/observations/54235435</a>   |
| 409 | Sturnus pagodarum | Brahminy Starling | 2022/4/12  | 1 | 0 | 19.50804444 | 73.01498897 | <a href="https://www.inaturalist.org/observations/111430873">https://www.inaturalist.org/observations/111430873</a> |
| 410 | Sturnus pagodarum | Brahminy Starling | 2022/7/9   | 2 | 0 | 19.58783191 | 81.74497317 | <a href="https://www.inaturalist.org/observations/125435790">https://www.inaturalist.org/observations/125435790</a> |
| 411 | Sturnus pagodarum | Brahminy Starling | 2019/10/16 | 5 | 0 | 19.74957269 | 81.39759377 | <a href="https://www.inaturalist.org/observations/34870606">https://www.inaturalist.org/observations/34870606</a>   |
| 412 | Sturnus pagodarum | Brahminy Starling | 2016/7/12  | 4 | 0 | 19.79388769 | 75.53366493 | <a href="http://www.inaturalist.org/observations/3665049">http://www.inaturalist.org/observations/3665049</a>       |
| 413 | Sturnus pagodarum | Brahminy Starling | 2019/11/12 | 4 | 0 | 19.85178330 | 82.57295380 | <a href="https://www.inaturalist.org/observations/35602314">https://www.inaturalist.org/observations/35602314</a>   |

|     |                          |                   |            |   |   |             |             |                                                                                                                     |
|-----|--------------------------|-------------------|------------|---|---|-------------|-------------|---------------------------------------------------------------------------------------------------------------------|
| 414 | <i>Sturnus pagodarum</i> | Brahminy Starling | 2022/2/5   | 1 | 0 | 19.88155000 | 75.32180200 | <a href="https://www.inaturalist.org/observations/106156451">https://www.inaturalist.org/observations/106156451</a> |
| 415 | <i>Sturnus pagodarum</i> | Brahminy Starling | 2018/4/29  | 6 | 0 | 19.89595106 | 82.66551858 | <a href="https://www.inaturalist.org/observations/15995005">https://www.inaturalist.org/observations/15995005</a>   |
| 416 | <i>Sturnus pagodarum</i> | Brahminy Starling | 2021/5/20  | 3 | 0 | 19.91370362 | 82.64322940 | <a href="https://www.inaturalist.org/observations/79511338">https://www.inaturalist.org/observations/79511338</a>   |
| 417 | <i>Sturnus pagodarum</i> | Brahminy Starling | 2021/5/20  | 2 | 0 | 19.91370362 | 82.64322940 | <a href="https://www.inaturalist.org/observations/79512503">https://www.inaturalist.org/observations/79512503</a>   |
| 418 | <i>Sturnus pagodarum</i> | Brahminy Starling | 2021/5/21  | 5 | 0 | 19.91370362 | 82.64322940 | <a href="https://www.inaturalist.org/observations/79633308">https://www.inaturalist.org/observations/79633308</a>   |
| 419 | <i>Sturnus pagodarum</i> | Brahminy Starling | 2021/5/21  | 2 | 0 | 19.91370362 | 82.64322940 | <a href="https://www.inaturalist.org/observations/79633331">https://www.inaturalist.org/observations/79633331</a>   |
| 420 | <i>Sturnus pagodarum</i> | Brahminy Starling | 2014/12/3  | 1 | 0 | 19.92030268 | 82.64342721 | <a href="https://www.inaturalist.org/observations/37634478">https://www.inaturalist.org/observations/37634478</a>   |
| 421 | <i>Sturnus pagodarum</i> | Brahminy Starling | 2021/5/1   | 2 | 0 | 19.94954675 | 73.75447959 | <a href="https://www.inaturalist.org/observations/77216035">https://www.inaturalist.org/observations/77216035</a>   |
| 422 | <i>Sturnus pagodarum</i> | Brahminy Starling | 2019/5/7   | 2 | 0 | 19.97775833 | 79.36187000 | <a href="https://www.inaturalist.org/observations/68926815">https://www.inaturalist.org/observations/68926815</a>   |
| 423 | <i>Sturnus pagodarum</i> | Brahminy Starling | 2018/7/1   | 3 | 0 | 20.06107167 | 74.07043333 | <a href="https://www.inaturalist.org/observations/21643106">https://www.inaturalist.org/observations/21643106</a>   |
| 424 | <i>Sturnus pagodarum</i> | Brahminy Starling | 2022/5/13  | 4 | 0 | 20.09757400 | 78.53379800 | <a href="https://www.inaturalist.org/observations/129688172">https://www.inaturalist.org/observations/129688172</a> |
| 425 | <i>Sturnus pagodarum</i> | Brahminy Starling | 2015/6/17  | 5 | 0 | 20.22773101 | 79.35905495 | <a href="https://www.inaturalist.org/observations/12188961">https://www.inaturalist.org/observations/12188961</a>   |
| 426 | <i>Sturnus pagodarum</i> | Brahminy Starling | 2010/5/23  | 2 | 0 | 20.24838270 | 79.36068900 | <a href="https://www.inaturalist.org/observations/55252616">https://www.inaturalist.org/observations/55252616</a>   |
| 427 | <i>Sturnus pagodarum</i> | Brahminy Starling | 2016/6/12  | 3 | 0 | 20.24838270 | 79.36068900 | <a href="https://www.inaturalist.org/observations/58942638">https://www.inaturalist.org/observations/58942638</a>   |
| 428 | <i>Sturnus pagodarum</i> | Brahminy Starling | 2014/3/13  | 1 | 0 | 20.33728167 | 79.30447833 | <a href="https://www.inaturalist.org/observations/37713595">https://www.inaturalist.org/observations/37713595</a>   |
| 429 | <i>Sturnus pagodarum</i> | Brahminy Starling | 2014/6/24  | 4 | 0 | 20.34002560 | 79.30590060 | <a href="https://www.inaturalist.org/observations/58578973">https://www.inaturalist.org/observations/58578973</a>   |
| 430 | <i>Sturnus pagodarum</i> | Brahminy Starling | 2019/5/27  | 5 | 0 | 20.39696859 | 79.36176000 | <a href="https://www.inaturalist.org/observations/28291076">https://www.inaturalist.org/observations/28291076</a>   |
| 431 | <i>Sturnus pagodarum</i> | Brahminy Starling | 2018/4/22  | 5 | 0 | 20.43386500 | 79.37371000 | <a href="https://www.inaturalist.org/observations/31326013">https://www.inaturalist.org/observations/31326013</a>   |
| 432 | <i>Sturnus pagodarum</i> | Brahminy Starling | 2021/9/20  | 1 | 0 | 20.46251066 | 85.88298921 | <a href="https://www.inaturalist.org/observations/95553471">https://www.inaturalist.org/observations/95553471</a>   |
| 433 | <i>Sturnus pagodarum</i> | Brahminy Starling | 2018/8/16  | 3 | 0 | 20.55185820 | 75.70325196 | <a href="https://www.inaturalist.org/observations/134020622">https://www.inaturalist.org/observations/134020622</a> |
| 434 | <i>Sturnus pagodarum</i> | Brahminy Starling | 2020/10/26 | 4 | 0 | 20.58213290 | 79.68882144 | <a href="https://www.inaturalist.org/observations/63569265">https://www.inaturalist.org/observations/63569265</a>   |
| 435 | <i>Sturnus pagodarum</i> | Brahminy Starling | 2020/10/24 | 4 | 0 | 20.63999485 | 79.64073647 | <a href="https://www.inaturalist.org/observations/63378218">https://www.inaturalist.org/observations/63378218</a>   |
| 436 | <i>Sturnus pagodarum</i> | Brahminy Starling | 2020/10/31 | 4 | 0 | 20.66714959 | 77.11365304 | <a href="https://www.inaturalist.org/observations/63877546">https://www.inaturalist.org/observations/63877546</a>   |

|     |                   |                   |            |   |   |             |             |                                                                                                                     |
|-----|-------------------|-------------------|------------|---|---|-------------|-------------|---------------------------------------------------------------------------------------------------------------------|
| 437 | Sturnus pagodarum | Brahminy Starling | 2020/10/31 | 2 | 0 | 20.67023191 | 77.09094906 | <a href="https://www.inaturalist.org/observations/63876629">https://www.inaturalist.org/observations/63876629</a>   |
| 438 | Sturnus pagodarum | Brahminy Starling | 2021/2/27  | 3 | 0 | 20.67389178 | 81.57873943 | <a href="https://www.inaturalist.org/observations/82512232">https://www.inaturalist.org/observations/82512232</a>   |
| 439 | Sturnus pagodarum | Brahminy Starling | 2020/10/30 | 3 | 0 | 20.69251565 | 77.01767435 | <a href="https://www.inaturalist.org/observations/63805763">https://www.inaturalist.org/observations/63805763</a>   |
| 440 | Sturnus pagodarum | Brahminy Starling | 2016/3/22  | 3 | 0 | 20.73693667 | 82.44619833 | <a href="https://www.inaturalist.org/observations/61469219">https://www.inaturalist.org/observations/61469219</a>   |
| 441 | Sturnus pagodarum | Brahminy Starling | 2017/8/3   | 3 | 0 | 20.74922679 | 78.60007190 | <a href="https://www.inaturalist.org/observations/58982756">https://www.inaturalist.org/observations/58982756</a>   |
| 442 | Sturnus pagodarum | Brahminy Starling | 2017/8/1   | 3 | 0 | 20.75000381 | 78.59854889 | <a href="https://www.inaturalist.org/observations/58982752">https://www.inaturalist.org/observations/58982752</a>   |
| 443 | Sturnus pagodarum | Brahminy Starling | 2017/7/29  | 3 | 0 | 20.75002669 | 78.59890744 | <a href="https://www.inaturalist.org/observations/58982748">https://www.inaturalist.org/observations/58982748</a>   |
| 444 | Sturnus pagodarum | Brahminy Starling | 2017/7/30  | 3 | 0 | 20.75002669 | 78.59890744 | <a href="https://www.inaturalist.org/observations/58982750">https://www.inaturalist.org/observations/58982750</a>   |
| 445 | Sturnus pagodarum | Brahminy Starling | 2021/5/27  | 1 | 0 | 20.78994569 | 81.94478658 | <a href="https://www.inaturalist.org/observations/80470959">https://www.inaturalist.org/observations/80470959</a>   |
| 446 | Sturnus pagodarum | Brahminy Starling | 2020/4/1   | 2 | 0 | 20.79200373 | 78.13800372 | <a href="https://www.inaturalist.org/observations/41214139">https://www.inaturalist.org/observations/41214139</a>   |
| 447 | Sturnus pagodarum | Brahminy Starling | 2020/9/21  | 3 | 0 | 20.83460333 | 81.71864833 | <a href="https://www.inaturalist.org/observations/60302584">https://www.inaturalist.org/observations/60302584</a>   |
| 448 | Sturnus pagodarum | Brahminy Starling | 2020/9/20  | 3 | 0 | 20.83469500 | 81.71886000 | <a href="https://www.inaturalist.org/observations/60160842">https://www.inaturalist.org/observations/60160842</a>   |
| 449 | Sturnus pagodarum | Brahminy Starling | 2020/12/16 | 1 | 0 | 20.98186032 | 75.53844295 | <a href="https://www.inaturalist.org/observations/66960484">https://www.inaturalist.org/observations/66960484</a>   |
| 450 | Sturnus pagodarum | Brahminy Starling | 2021/3/15  | 4 | 0 | 20.98462279 | 75.53618079 | <a href="https://www.inaturalist.org/observations/71348149">https://www.inaturalist.org/observations/71348149</a>   |
| 451 | Sturnus pagodarum | Brahminy Starling | 2021/3/25  | 3 | 0 | 20.98462279 | 75.53618079 | <a href="https://www.inaturalist.org/observations/72079124">https://www.inaturalist.org/observations/72079124</a>   |
| 452 | Sturnus pagodarum | Brahminy Starling | 2020/12/14 | 2 | 0 | 20.98611643 | 75.53506203 | <a href="https://www.inaturalist.org/observations/66575159">https://www.inaturalist.org/observations/66575159</a>   |
| 453 | Sturnus pagodarum | Brahminy Starling | 2020/12/31 | 3 | 0 | 20.98960524 | 75.54502911 | <a href="https://www.inaturalist.org/observations/67352102">https://www.inaturalist.org/observations/67352102</a>   |
| 454 | Sturnus pagodarum | Brahminy Starling | 2020/12/31 | 4 | 0 | 20.98960524 | 75.54502911 | <a href="https://www.inaturalist.org/observations/67354146">https://www.inaturalist.org/observations/67354146</a>   |
| 455 | Sturnus pagodarum | Brahminy Starling | 2021/1/16  | 3 | 0 | 20.98963028 | 75.54377920 | <a href="https://www.inaturalist.org/observations/70596680">https://www.inaturalist.org/observations/70596680</a>   |
| 456 | Sturnus pagodarum | Brahminy Starling | 2021/3/13  | 3 | 0 | 20.99093930 | 75.53067092 | <a href="https://www.inaturalist.org/observations/71116325">https://www.inaturalist.org/observations/71116325</a>   |
| 457 | Sturnus pagodarum | Brahminy Starling | 2021/1/28  | 2 | 0 | 20.99520391 | 81.50424846 | <a href="https://www.inaturalist.org/observations/68724532">https://www.inaturalist.org/observations/68724532</a>   |
| 458 | Sturnus pagodarum | Brahminy Starling | 2021/12/9  | 1 | 0 | 21.01207667 | 78.22368333 | <a href="https://www.inaturalist.org/observations/102761043">https://www.inaturalist.org/observations/102761043</a> |
| 459 | Sturnus pagodarum | Brahminy Starling | 2021/12/8  | 1 | 0 | 21.01222138 | 78.22364096 | <a href="https://www.inaturalist.org/observations/102694318">https://www.inaturalist.org/observations/102694318</a> |

|     |                          |                   |            |   |   |             |             |                                                                                                                     |
|-----|--------------------------|-------------------|------------|---|---|-------------|-------------|---------------------------------------------------------------------------------------------------------------------|
| 460 | <i>Sturnus pagodarum</i> | Brahminy Starling | 2021/12/9  | 2 | 0 | 21.01226333 | 78.22352000 | <a href="https://www.inaturalist.org/observations/102761036">https://www.inaturalist.org/observations/102761036</a> |
| 461 | <i>Sturnus pagodarum</i> | Brahminy Starling | 2021/6/19  | 3 | 0 | 21.04115872 | 81.53543718 | <a href="https://www.inaturalist.org/observations/83754640">https://www.inaturalist.org/observations/83754640</a>   |
| 462 | <i>Sturnus pagodarum</i> | Brahminy Starling | 2020/6/4   | 4 | 0 | 21.04831568 | 75.84103737 | <a href="https://www.inaturalist.org/observations/50949806">https://www.inaturalist.org/observations/50949806</a>   |
| 463 | <i>Sturnus pagodarum</i> | Brahminy Starling | 2021/1/28  | 1 | 0 | 21.05220535 | 81.46011254 | <a href="https://www.inaturalist.org/observations/68719682">https://www.inaturalist.org/observations/68719682</a>   |
| 464 | <i>Sturnus pagodarum</i> | Brahminy Starling | 2021/4/5   | 2 | 0 | 21.08470186 | 81.04141384 | <a href="https://www.inaturalist.org/observations/72986531">https://www.inaturalist.org/observations/72986531</a>   |
| 465 | <i>Sturnus pagodarum</i> | Brahminy Starling | 2020/10/23 | 5 | 0 | 21.08993500 | 79.12437697 | <a href="https://www.inaturalist.org/observations/63308035">https://www.inaturalist.org/observations/63308035</a>   |
| 466 | <i>Sturnus pagodarum</i> | Brahminy Starling | 2021/6/7   | 2 | 0 | 21.09147222 | 79.99029444 | <a href="https://www.inaturalist.org/observations/82392329">https://www.inaturalist.org/observations/82392329</a>   |
| 467 | <i>Sturnus pagodarum</i> | Brahminy Starling | 2018/6/2   | 5 | 0 | 21.12425570 | 79.04596653 | <a href="https://www.inaturalist.org/observations/13184906">https://www.inaturalist.org/observations/13184906</a>   |
| 468 | <i>Sturnus pagodarum</i> | Brahminy Starling | 2020/2/29  | 2 | 0 | 21.12430540 | 70.82415070 | <a href="https://www.inaturalist.org/observations/137947529">https://www.inaturalist.org/observations/137947529</a> |
| 469 | <i>Sturnus pagodarum</i> | Brahminy Starling | 2018/7/6   | 3 | 0 | 21.14452950 | 79.05796966 | <a href="https://www.inaturalist.org/observations/21644342">https://www.inaturalist.org/observations/21644342</a>   |
| 470 | <i>Sturnus pagodarum</i> | Brahminy Starling | 2018/7/6   | 3 | 0 | 21.14452950 | 79.05796966 | <a href="https://www.inaturalist.org/observations/21644358">https://www.inaturalist.org/observations/21644358</a>   |
| 471 | <i>Sturnus pagodarum</i> | Brahminy Starling | 2021/5/12  | 1 | 0 | 21.16028900 | 79.63494650 | <a href="https://www.inaturalist.org/observations/78582584">https://www.inaturalist.org/observations/78582584</a>   |
| 472 | <i>Sturnus pagodarum</i> | Brahminy Starling | 2021/3/10  | 2 | 0 | 21.16652857 | 81.24198407 | <a href="https://www.inaturalist.org/observations/87371145">https://www.inaturalist.org/observations/87371145</a>   |
| 473 | <i>Sturnus pagodarum</i> | Brahminy Starling | 2019/3/25  | 3 | 0 | 21.17227540 | 79.03494883 | <a href="https://www.inaturalist.org/observations/46680472">https://www.inaturalist.org/observations/46680472</a>   |
| 474 | <i>Sturnus pagodarum</i> | Brahminy Starling | 2019/1/11  | 5 | 0 | 21.17739330 | 81.77364718 | <a href="https://www.inaturalist.org/observations/23018542">https://www.inaturalist.org/observations/23018542</a>   |
| 475 | <i>Sturnus pagodarum</i> | Brahminy Starling | 2021/1/27  | 1 | 0 | 21.18773686 | 81.35820884 | <a href="https://www.inaturalist.org/observations/68667764">https://www.inaturalist.org/observations/68667764</a>   |
| 476 | <i>Sturnus pagodarum</i> | Brahminy Starling | 2021/1/17  | 2 | 0 | 21.19838267 | 80.76030593 | <a href="https://www.inaturalist.org/observations/68212506">https://www.inaturalist.org/observations/68212506</a>   |
| 477 | <i>Sturnus pagodarum</i> | Brahminy Starling | 2021/3/18  | 3 | 0 | 21.20309738 | 81.35703843 | <a href="https://www.inaturalist.org/observations/71463438">https://www.inaturalist.org/observations/71463438</a>   |
| 478 | <i>Sturnus pagodarum</i> | Brahminy Starling | 2019/5/25  | 3 | 0 | 21.20517289 | 78.98499504 | <a href="https://www.inaturalist.org/observations/65210755">https://www.inaturalist.org/observations/65210755</a>   |
| 479 | <i>Sturnus pagodarum</i> | Brahminy Starling | 2022/8/28  | 2 | 0 | 21.20575620 | 81.60818640 | <a href="https://www.inaturalist.org/observations/134176947">https://www.inaturalist.org/observations/134176947</a> |
| 480 | <i>Sturnus pagodarum</i> | Brahminy Starling | 2022/8/28  | 2 | 0 | 21.20575620 | 81.60818640 | <a href="https://www.inaturalist.org/observations/134176955">https://www.inaturalist.org/observations/134176955</a> |
| 481 | <i>Sturnus pagodarum</i> | Brahminy Starling | 2021/2/3   | 1 | 0 | 21.20948261 | 81.43681504 | <a href="https://www.inaturalist.org/observations/140751601">https://www.inaturalist.org/observations/140751601</a> |
| 482 | <i>Sturnus pagodarum</i> | Brahminy Starling | 2020/6/9   | 2 | 0 | 21.22941515 | 80.78620400 | <a href="https://www.inaturalist.org/observations/49047211">https://www.inaturalist.org/observations/49047211</a>   |

|     |                   |                   |            |   |   |             |             |                                                                                                                     |
|-----|-------------------|-------------------|------------|---|---|-------------|-------------|---------------------------------------------------------------------------------------------------------------------|
| 483 | Sturnus pagodarum | Brahminy Starling | 2022/6/15  | 4 | 0 | 21.24685990 | 81.59744520 | <a href="https://www.inaturalist.org/observations/121903010">https://www.inaturalist.org/observations/121903010</a> |
| 484 | Sturnus pagodarum | Brahminy Starling | 2022/8/7   | 5 | 0 | 21.24742480 | 81.64579940 | <a href="https://www.inaturalist.org/observations/129995200">https://www.inaturalist.org/observations/129995200</a> |
| 485 | Sturnus pagodarum | Brahminy Starling | 2022/7/5   | 3 | 0 | 21.25876286 | 81.62378308 | <a href="https://www.inaturalist.org/observations/124861751">https://www.inaturalist.org/observations/124861751</a> |
| 486 | Sturnus pagodarum | Brahminy Starling | 2022/7/7   | 1 | 0 | 21.25876286 | 81.62378308 | <a href="https://www.inaturalist.org/observations/125801582">https://www.inaturalist.org/observations/125801582</a> |
| 487 | Sturnus pagodarum | Brahminy Starling | 2022/7/12  | 3 | 0 | 21.25876286 | 81.62378308 | <a href="https://www.inaturalist.org/observations/129098891">https://www.inaturalist.org/observations/129098891</a> |
| 488 | Sturnus pagodarum | Brahminy Starling | 2022/8/11  | 4 | 0 | 21.25876286 | 81.62378308 | <a href="https://www.inaturalist.org/observations/130389043">https://www.inaturalist.org/observations/130389043</a> |
| 489 | Sturnus pagodarum | Brahminy Starling | 2022/8/11  | 4 | 0 | 21.25876286 | 81.62378308 | <a href="https://www.inaturalist.org/observations/130389047">https://www.inaturalist.org/observations/130389047</a> |
| 490 | Sturnus pagodarum | Brahminy Starling | 2022/8/11  | 4 | 0 | 21.25876286 | 81.62378308 | <a href="https://www.inaturalist.org/observations/130389048">https://www.inaturalist.org/observations/130389048</a> |
| 491 | Sturnus pagodarum | Brahminy Starling | 2022/8/12  | 3 | 0 | 21.25876286 | 81.62378308 | <a href="https://www.inaturalist.org/observations/130532448">https://www.inaturalist.org/observations/130532448</a> |
| 492 | Sturnus pagodarum | Brahminy Starling | 2022/8/12  | 2 | 0 | 21.25876286 | 81.62378308 | <a href="https://www.inaturalist.org/observations/130532449">https://www.inaturalist.org/observations/130532449</a> |
| 493 | Sturnus pagodarum | Brahminy Starling | 2022/8/21  | 4 | 0 | 21.25876286 | 81.62378308 | <a href="https://www.inaturalist.org/observations/131788468">https://www.inaturalist.org/observations/131788468</a> |
| 494 | Sturnus pagodarum | Brahminy Starling | 2021/8/18  | 1 | 0 | 21.26001460 | 81.35850325 | <a href="https://www.inaturalist.org/observations/93377992">https://www.inaturalist.org/observations/93377992</a>   |
| 495 | Sturnus pagodarum | Brahminy Starling | 2022/7/8   | 2 | 0 | 21.27667700 | 81.64460490 | <a href="https://www.inaturalist.org/observations/125802359">https://www.inaturalist.org/observations/125802359</a> |
| 496 | Sturnus pagodarum | Brahminy Starling | 2022/7/8   | 2 | 0 | 21.27667700 | 81.64460490 | <a href="https://www.inaturalist.org/observations/125802361">https://www.inaturalist.org/observations/125802361</a> |
| 497 | Sturnus pagodarum | Brahminy Starling | 2018/2/17  | 5 | 0 | 21.28480333 | 81.68136333 | <a href="https://www.inaturalist.org/observations/10257227">https://www.inaturalist.org/observations/10257227</a>   |
| 498 | Sturnus pagodarum | Brahminy Starling | 2021/9/21  | 3 | 0 | 21.29296160 | 81.38125340 | <a href="https://www.inaturalist.org/observations/121445455">https://www.inaturalist.org/observations/121445455</a> |
| 499 | Sturnus pagodarum | Brahminy Starling | 2020/9/26  | 5 | 0 | 21.29743334 | 80.33759180 | <a href="https://www.inaturalist.org/observations/60807442">https://www.inaturalist.org/observations/60807442</a>   |
| 500 | Sturnus pagodarum | Brahminy Starling | 2020/10/8  | 6 | 0 | 21.29786389 | 80.33801111 | <a href="https://www.inaturalist.org/observations/63224146">https://www.inaturalist.org/observations/63224146</a>   |
| 501 | Sturnus pagodarum | Brahminy Starling | 2020/10/31 | 2 | 0 | 21.29795000 | 80.33799167 | <a href="https://www.inaturalist.org/observations/63862077">https://www.inaturalist.org/observations/63862077</a>   |
| 502 | Sturnus pagodarum | Brahminy Starling | 2020/9/11  | 4 | 0 | 21.29811484 | 80.33807443 | <a href="https://www.inaturalist.org/observations/59188961">https://www.inaturalist.org/observations/59188961</a>   |
| 503 | Sturnus pagodarum | Brahminy Starling | 2020/10/25 | 7 | 0 | 21.29917703 | 80.34442037 | <a href="https://www.inaturalist.org/observations/63498536">https://www.inaturalist.org/observations/63498536</a>   |
| 504 | Sturnus pagodarum | Brahminy Starling | 2019/2/9   | 1 | 0 | 21.30396780 | 80.49104700 | <a href="https://www.inaturalist.org/observations/90532319">https://www.inaturalist.org/observations/90532319</a>   |
| 505 | Sturnus pagodarum | Brahminy Starling | 2021/2/23  | 1 | 0 | 21.49425275 | 81.69074278 | <a href="https://www.inaturalist.org/observations/70022402">https://www.inaturalist.org/observations/70022402</a>   |

|     |                   |                   |            |   |   |             |             |                                                                                                                     |
|-----|-------------------|-------------------|------------|---|---|-------------|-------------|---------------------------------------------------------------------------------------------------------------------|
| 506 | Sturnus pagodarum | Brahminy Starling | 2018/6/8   | 3 | 0 | 21.63591260 | 79.23227860 | <a href="https://www.inaturalist.org/observations/56209647">https://www.inaturalist.org/observations/56209647</a>   |
| 507 | Sturnus pagodarum | Brahminy Starling | 2014/5/10  | 2 | 0 | 21.63591260 | 79.23227860 | <a href="https://www.inaturalist.org/observations/56218677">https://www.inaturalist.org/observations/56218677</a>   |
| 508 | Sturnus pagodarum | Brahminy Starling | 2020/11/7  | 1 | 0 | 21.63882833 | 87.55034667 | <a href="https://www.inaturalist.org/observations/145037120">https://www.inaturalist.org/observations/145037120</a> |
| 509 | Sturnus pagodarum | Brahminy Starling | 2020/5/17  | 3 | 0 | 21.66611111 | 71.85472222 | <a href="https://www.inaturalist.org/observations/47700271">https://www.inaturalist.org/observations/47700271</a>   |
| 510 | Sturnus pagodarum | Brahminy Starling | 2022/1/30  | 3 | 0 | 21.67311494 | 81.31010111 | <a href="https://www.inaturalist.org/observations/107025156">https://www.inaturalist.org/observations/107025156</a> |
| 511 | Sturnus pagodarum | Brahminy Starling | 2017/6/5   | 4 | 0 | 21.74516604 | 72.96657251 | <a href="https://www.inaturalist.org/observations/6560457">https://www.inaturalist.org/observations/6560457</a>     |
| 512 | Sturnus pagodarum | Brahminy Starling | 2014/1/3   | 2 | 0 | 21.75604860 | 72.12570720 | <a href="https://www.inaturalist.org/observations/39746138">https://www.inaturalist.org/observations/39746138</a>   |
| 513 | Sturnus pagodarum | Brahminy Starling | 2020/10/27 | 5 | 0 | 21.77398110 | 87.87584504 | <a href="https://www.inaturalist.org/observations/144669454">https://www.inaturalist.org/observations/144669454</a> |
| 514 | Sturnus pagodarum | Brahminy Starling | 2021/5/21  | 5 | 0 | 21.80647450 | 83.30023138 | <a href="https://www.inaturalist.org/observations/79793941">https://www.inaturalist.org/observations/79793941</a>   |
| 515 | Sturnus pagodarum | Brahminy Starling | 2021/5/18  | 2 | 0 | 21.80803032 | 83.30533683 | <a href="https://www.inaturalist.org/observations/79667408">https://www.inaturalist.org/observations/79667408</a>   |
| 516 | Sturnus pagodarum | Brahminy Starling | 2019/4/11  | 4 | 0 | 21.84337000 | 79.47858500 | <a href="https://www.inaturalist.org/observations/122260926">https://www.inaturalist.org/observations/122260926</a> |
| 517 | Sturnus pagodarum | Brahminy Starling | 2021/8/27  | 2 | 0 | 21.85094423 | 83.29285374 | <a href="https://www.inaturalist.org/observations/92756166">https://www.inaturalist.org/observations/92756166</a>   |
| 518 | Sturnus pagodarum | Brahminy Starling | 2021/8/7   | 2 | 0 | 21.85284500 | 83.29309833 | <a href="https://www.inaturalist.org/observations/91033508">https://www.inaturalist.org/observations/91033508</a>   |
| 519 | Sturnus pagodarum | Brahminy Starling | 2017/3/12  | 4 | 0 | 22.00740148 | 79.80473432 | <a href="https://www.inaturalist.org/observations/5547744">https://www.inaturalist.org/observations/5547744</a>     |
| 520 | Sturnus pagodarum | Brahminy Starling | 2021/3/9   | 1 | 0 | 22.01608917 | 83.37870117 | <a href="https://www.inaturalist.org/observations/79762488">https://www.inaturalist.org/observations/79762488</a>   |
| 521 | Sturnus pagodarum | Brahminy Starling | 2021/3/14  | 1 | 0 | 22.02199943 | 83.38026490 | <a href="https://www.inaturalist.org/observations/81179166">https://www.inaturalist.org/observations/81179166</a>   |
| 522 | Sturnus pagodarum | Brahminy Starling | 2017/4/16  | 2 | 0 | 22.02701726 | 73.09037989 | <a href="https://www.inaturalist.org/observations/89290552">https://www.inaturalist.org/observations/89290552</a>   |
| 523 | Sturnus pagodarum | Brahminy Starling | 2010/5/13  | 2 | 0 | 22.04100240 | 79.44157490 | <a href="https://www.inaturalist.org/observations/55249442">https://www.inaturalist.org/observations/55249442</a>   |
| 524 | Sturnus pagodarum | Brahminy Starling | 2010/5/13  | 2 | 0 | 22.04100240 | 79.44157490 | <a href="https://www.inaturalist.org/observations/55249443">https://www.inaturalist.org/observations/55249443</a>   |
| 525 | Sturnus pagodarum | Brahminy Starling | 2022/5/17  | 3 | 0 | 22.05506400 | 77.86490100 | <a href="https://www.inaturalist.org/observations/129802114">https://www.inaturalist.org/observations/129802114</a> |
| 526 | Sturnus pagodarum | Brahminy Starling | 2021/9/5   | 1 | 0 | 22.06009167 | 82.20110000 | <a href="https://www.inaturalist.org/observations/93744389">https://www.inaturalist.org/observations/93744389</a>   |
| 527 | Sturnus pagodarum | Brahminy Starling | 2021/8/15  | 1 | 0 | 22.06620000 | 82.21142833 | <a href="https://www.inaturalist.org/observations/93617544">https://www.inaturalist.org/observations/93617544</a>   |
| 528 | Sturnus pagodarum | Brahminy Starling | 2021/8/15  | 1 | 0 | 22.06740500 | 82.20358000 | <a href="https://www.inaturalist.org/observations/93615062">https://www.inaturalist.org/observations/93615062</a>   |

|     |                   |                   |            |   |   |             |             |                                                                                                                     |
|-----|-------------------|-------------------|------------|---|---|-------------|-------------|---------------------------------------------------------------------------------------------------------------------|
| 529 | Sturnus pagodarum | Brahminy Starling | 2021/12/26 | 1 | 0 | 22.07596639 | 81.55972306 | <a href="https://www.inaturalist.org/observations/106623457">https://www.inaturalist.org/observations/106623457</a> |
| 530 | Sturnus pagodarum | Brahminy Starling | 2019/10/2  | 3 | 0 | 22.07965450 | 82.14091520 | <a href="https://www.inaturalist.org/observations/60433154">https://www.inaturalist.org/observations/60433154</a>   |
| 531 | Sturnus pagodarum | Brahminy Starling | 2017/2/9   | 4 | 0 | 22.07965450 | 82.14091520 | <a href="https://www.inaturalist.org/observations/60975778">https://www.inaturalist.org/observations/60975778</a>   |
| 532 | Sturnus pagodarum | Brahminy Starling | 2019/9/11  | 4 | 0 | 22.13023950 | 82.13692356 | <a href="https://www.inaturalist.org/observations/32634523">https://www.inaturalist.org/observations/32634523</a>   |
| 533 | Sturnus pagodarum | Brahminy Starling | 2021/8/31  | 0 | 0 | 22.13072167 | 82.13716500 | <a href="https://www.inaturalist.org/observations/93439088">https://www.inaturalist.org/observations/93439088</a>   |
| 534 | Sturnus pagodarum | Brahminy Starling | 2019/9/11  | 4 | 0 | 22.13194921 | 82.13915918 | <a href="https://www.inaturalist.org/observations/32974252">https://www.inaturalist.org/observations/32974252</a>   |
| 535 | Sturnus pagodarum | Brahminy Starling | 2022/6/27  | 3 | 0 | 22.15321934 | 71.31711602 | <a href="https://www.inaturalist.org/observations/123620963">https://www.inaturalist.org/observations/123620963</a> |
| 536 | Sturnus pagodarum | Brahminy Starling | 2021/8/4   | 3 | 0 | 22.17024929 | 75.58753137 | <a href="https://www.inaturalist.org/observations/107754746">https://www.inaturalist.org/observations/107754746</a> |
| 537 | Sturnus pagodarum | Brahminy Starling | 2020/7/18  | 1 | 0 | 22.18611111 | 76.06388889 | <a href="https://www.inaturalist.org/observations/53468832">https://www.inaturalist.org/observations/53468832</a>   |
| 538 | Sturnus pagodarum | Brahminy Starling | 2021/11/20 | 2 | 0 | 22.20558378 | 81.39996383 | <a href="https://www.inaturalist.org/observations/102643442">https://www.inaturalist.org/observations/102643442</a> |
| 539 | Sturnus pagodarum | Brahminy Starling | 2021/4/17  | 2 | 0 | 22.23070704 | 81.42031141 | <a href="https://www.inaturalist.org/observations/80220840">https://www.inaturalist.org/observations/80220840</a>   |
| 540 | Sturnus pagodarum | Brahminy Starling | 2021/9/3   | 1 | 0 | 22.28255667 | 82.06666667 | <a href="https://www.inaturalist.org/observations/93622495">https://www.inaturalist.org/observations/93622495</a>   |
| 541 | Sturnus pagodarum | Brahminy Starling | 2021/9/1   | 1 | 0 | 22.29788500 | 82.08831167 | <a href="https://www.inaturalist.org/observations/93446706">https://www.inaturalist.org/observations/93446706</a>   |
| 542 | Sturnus pagodarum | Brahminy Starling | 2021/9/1   | 1 | 0 | 22.29788500 | 82.08831167 | <a href="https://www.inaturalist.org/observations/93446707">https://www.inaturalist.org/observations/93446707</a>   |
| 543 | Sturnus pagodarum | Brahminy Starling | 2021/9/1   | 1 | 0 | 22.29797000 | 82.08824000 | <a href="https://www.inaturalist.org/observations/93440834">https://www.inaturalist.org/observations/93440834</a>   |
| 544 | Sturnus pagodarum | Brahminy Starling | 2021/9/1   | 1 | 0 | 22.30192667 | 82.08517667 | <a href="https://www.inaturalist.org/observations/93442888">https://www.inaturalist.org/observations/93442888</a>   |
| 545 | Sturnus pagodarum | Brahminy Starling | 2021/4/13  | 4 | 0 | 22.31271588 | 73.28538168 | <a href="https://www.inaturalist.org/observations/105208834">https://www.inaturalist.org/observations/105208834</a> |
| 546 | Sturnus pagodarum | Brahminy Starling | 2019/2/13  | 1 | 0 | 22.34446500 | 80.45526990 | <a href="https://www.inaturalist.org/observations/90508028">https://www.inaturalist.org/observations/90508028</a>   |
| 547 | Sturnus pagodarum | Brahminy Starling | 2022/6/10  | 5 | 0 | 22.36570667 | 80.53910167 | <a href="https://www.inaturalist.org/observations/121596136">https://www.inaturalist.org/observations/121596136</a> |
| 548 | Sturnus pagodarum | Brahminy Starling | 2016/6/5   | 2 | 0 | 22.37015650 | 70.10390320 | <a href="https://www.inaturalist.org/observations/137947530">https://www.inaturalist.org/observations/137947530</a> |
| 549 | Sturnus pagodarum | Brahminy Starling | 2020/12/11 | 1 | 0 | 22.38098147 | 69.83286001 | <a href="https://www.inaturalist.org/observations/66459516">https://www.inaturalist.org/observations/66459516</a>   |
| 550 | Sturnus pagodarum | Brahminy Starling | 2022/2/20  | 4 | 0 | 22.41889400 | 74.56501400 | <a href="https://www.inaturalist.org/observations/126818947">https://www.inaturalist.org/observations/126818947</a> |
| 551 | Sturnus pagodarum | Brahminy Starling | 2022/2/20  | 3 | 0 | 22.42425167 | 73.60961333 | <a href="https://www.inaturalist.org/observations/120020534">https://www.inaturalist.org/observations/120020534</a> |



|     |                   |                   |            |   |   |             |              |                                                                                                                     |
|-----|-------------------|-------------------|------------|---|---|-------------|--------------|---------------------------------------------------------------------------------------------------------------------|
| 552 | Sturnus pagodarum | Brahminy Starling | 2022/2/20  | 3 | 0 | 22.42459667 | 73.60990000  | <a href="https://www.inaturalist.org/observations/120020528">https://www.inaturalist.org/observations/120020528</a> |
| 553 | Sturnus pagodarum | Brahminy Starling | 2022/10/25 | 6 | 0 | 22.46644500 | 73.48081333  | <a href="https://www.inaturalist.org/observations/140639636">https://www.inaturalist.org/observations/140639636</a> |
| 554 | Sturnus pagodarum | Brahminy Starling | 2022/4/5   | 2 | 0 | 22.48092000 | 73.49486833  | <a href="https://www.inaturalist.org/observations/119413930">https://www.inaturalist.org/observations/119413930</a> |
| 555 | Sturnus pagodarum | Brahminy Starling | 2022/4/5   | 2 | 0 | 22.48092500 | 73.49481167  | <a href="https://www.inaturalist.org/observations/119413920">https://www.inaturalist.org/observations/119413920</a> |
| 556 | Sturnus pagodarum | Brahminy Starling | 2022/6/5   | 2 | 0 | 22.48228000 | 73.52048333  | <a href="https://www.inaturalist.org/observations/120643904">https://www.inaturalist.org/observations/120643904</a> |
| 557 | Sturnus pagodarum | Brahminy Starling | 2016/5/7   | 2 | 0 | 22.50333100 | 78.43585080  | <a href="https://www.inaturalist.org/observations/55504320">https://www.inaturalist.org/observations/55504320</a>   |
| 558 | Sturnus pagodarum | Brahminy Starling | 2021/3/25  | 1 | 0 | 22.50881333 | 73.47400833  | <a href="https://www.inaturalist.org/observations/97887893">https://www.inaturalist.org/observations/97887893</a>   |
| 559 | Sturnus pagodarum | Brahminy Starling | 2022/2/8   | 3 | 0 | 22.50905500 | 73.47402833  | <a href="https://www.inaturalist.org/observations/120502454">https://www.inaturalist.org/observations/120502454</a> |
| 560 | Sturnus pagodarum | Brahminy Starling | 2022/2/8   | 3 | 0 | 22.50924833 | 73.47420667  | <a href="https://www.inaturalist.org/observations/120502450">https://www.inaturalist.org/observations/120502450</a> |
| 561 | Sturnus pagodarum | Brahminy Starling | 2022/7/3   | 4 | 0 | 22.54068700 | 72.96746350  | <a href="https://www.inaturalist.org/observations/124504602">https://www.inaturalist.org/observations/124504602</a> |
| 562 | Sturnus pagodarum | Brahminy Starling | 2021/9/22  | 1 | 0 | 22.55859095 | 78.48225038  | <a href="https://www.inaturalist.org/observations/96865693">https://www.inaturalist.org/observations/96865693</a>   |
| 563 | Sturnus pagodarum | Brahminy Starling | 2021/7/11  | 1 | 0 | 22.59588034 | 120.35727250 | <a href="https://www.inaturalist.org/observations/86520167">https://www.inaturalist.org/observations/86520167</a>   |
| 564 | Sturnus pagodarum | Brahminy Starling | 2020/12/27 | 1 | 0 | 22.66964531 | 85.62969206  | <a href="https://www.inaturalist.org/observations/99643647">https://www.inaturalist.org/observations/99643647</a>   |
| 565 | Sturnus pagodarum | Brahminy Starling | 2011/6/8   | 4 | 0 | 22.71872910 | 71.63766940  | <a href="https://www.inaturalist.org/observations/32860639">https://www.inaturalist.org/observations/32860639</a>   |
| 566 | Sturnus pagodarum | Brahminy Starling | 2022/1/9   | 2 | 0 | 22.74866167 | 74.33485333  | <a href="https://www.inaturalist.org/observations/120793610">https://www.inaturalist.org/observations/120793610</a> |
| 567 | Sturnus pagodarum | Brahminy Starling | 2022/10/24 | 3 | 0 | 22.76333305 | 86.45125897  | <a href="https://www.inaturalist.org/observations/142660208">https://www.inaturalist.org/observations/142660208</a> |
| 568 | Sturnus pagodarum | Brahminy Starling | 2020/8/2   | 3 | 0 | 22.80481964 | 86.20284028  | <a href="https://www.inaturalist.org/observations/55386248">https://www.inaturalist.org/observations/55386248</a>   |
| 569 | Sturnus pagodarum | Brahminy Starling | 2021/12/18 | 3 | 0 | 22.91295408 | 83.92232493  | <a href="https://www.inaturalist.org/observations/105911893">https://www.inaturalist.org/observations/105911893</a> |
| 570 | Sturnus pagodarum | Brahminy Starling | 2021/4/18  | 4 | 0 | 22.97715962 | 83.03382911  | <a href="https://www.inaturalist.org/observations/79672940">https://www.inaturalist.org/observations/79672940</a>   |
| 571 | Sturnus pagodarum | Brahminy Starling | 2020/4/16  | 6 | 0 | 22.98918582 | 87.00715633  | <a href="https://www.inaturalist.org/observations/42942142">https://www.inaturalist.org/observations/42942142</a>   |
| 572 | Sturnus pagodarum | Brahminy Starling | 2020/3/7   | 1 | 0 | 22.98967966 | 87.00827213  | <a href="https://www.inaturalist.org/observations/40590549">https://www.inaturalist.org/observations/40590549</a>   |
| 573 | Sturnus pagodarum | Brahminy Starling | 2020/4/6   | 3 | 0 | 22.98968126 | 87.00751440  | <a href="https://www.inaturalist.org/observations/42086358">https://www.inaturalist.org/observations/42086358</a>   |
| 574 | Sturnus pagodarum | Brahminy Starling | 2018/4/4   | 4 | 0 | 22.98969309 | 87.00769545  | <a href="https://www.inaturalist.org/observations/21107623">https://www.inaturalist.org/observations/21107623</a>   |

|     |                   |                   |            |   |   |             |             |                                                                                                                     |
|-----|-------------------|-------------------|------------|---|---|-------------|-------------|---------------------------------------------------------------------------------------------------------------------|
| 575 | Sturnus pagodarum | Brahminy Starling | 2018/4/13  | 2 | 0 | 22.98970339 | 87.00751191 | <a href="https://www.inaturalist.org/observations/50587897">https://www.inaturalist.org/observations/50587897</a>   |
| 576 | Sturnus pagodarum | Brahminy Starling | 2018/4/13  | 2 | 0 | 22.98970339 | 87.00751191 | <a href="https://www.inaturalist.org/observations/50587911">https://www.inaturalist.org/observations/50587911</a>   |
| 577 | Sturnus pagodarum | Brahminy Starling | 2018/5/14  | 1 | 0 | 22.99045004 | 87.00867982 | <a href="https://www.inaturalist.org/observations/54556971">https://www.inaturalist.org/observations/54556971</a>   |
| 578 | Sturnus pagodarum | Brahminy Starling | 2018/5/15  | 1 | 0 | 22.99045004 | 87.00867982 | <a href="https://www.inaturalist.org/observations/54556973">https://www.inaturalist.org/observations/54556973</a>   |
| 579 | Sturnus pagodarum | Brahminy Starling | 2019/5/25  | 2 | 0 | 23.01236553 | 72.50395361 | <a href="https://www.inaturalist.org/observations/139519785">https://www.inaturalist.org/observations/139519785</a> |
| 580 | Sturnus pagodarum | Brahminy Starling | 2020/10/18 | 5 | 0 | 23.02296084 | 72.57136188 | <a href="https://www.inaturalist.org/observations/62870675">https://www.inaturalist.org/observations/62870675</a>   |
| 581 | Sturnus pagodarum | Brahminy Starling | 2019/5/25  | 4 | 0 | 23.14013739 | 72.39283908 | <a href="https://www.inaturalist.org/observations/124542168">https://www.inaturalist.org/observations/124542168</a> |
| 582 | Sturnus pagodarum | Brahminy Starling | 2019/5/26  | 4 | 0 | 23.14056223 | 72.40599364 | <a href="https://www.inaturalist.org/observations/25788070">https://www.inaturalist.org/observations/25788070</a>   |
| 583 | Sturnus pagodarum | Brahminy Starling | 2020/1/5   | 4 | 0 | 23.14637500 | 72.42105556 | <a href="https://www.inaturalist.org/observations/37344200">https://www.inaturalist.org/observations/37344200</a>   |
| 584 | Sturnus pagodarum | Brahminy Starling | 2018/11/15 | 2 | 0 | 23.15283350 | 71.39578430 | <a href="https://www.inaturalist.org/observations/56308545">https://www.inaturalist.org/observations/56308545</a>   |
| 585 | Sturnus pagodarum | Brahminy Starling | 2020/2/22  | 5 | 0 | 23.15433302 | 86.74763516 | <a href="https://www.inaturalist.org/observations/39227928">https://www.inaturalist.org/observations/39227928</a>   |
| 586 | Sturnus pagodarum | Brahminy Starling | 2021/12/26 | 0 | 0 | 23.18779333 | 87.97023196 | <a href="https://www.inaturalist.org/observations/111617297">https://www.inaturalist.org/observations/111617297</a> |
| 587 | Sturnus pagodarum | Brahminy Starling | 2022/1/13  | 2 | 0 | 23.19126600 | 77.40443700 | <a href="https://www.inaturalist.org/observations/105020224">https://www.inaturalist.org/observations/105020224</a> |
| 588 | Sturnus pagodarum | Brahminy Starling | 2012/2/29  | 4 | 0 | 23.20188699 | 75.76545101 | <a href="https://www.inaturalist.org/observations/34000101">https://www.inaturalist.org/observations/34000101</a>   |
| 589 | Sturnus pagodarum | Brahminy Starling | 2021/11/5  | 4 | 0 | 23.23420087 | 87.05475781 | <a href="https://www.inaturalist.org/observations/133196192">https://www.inaturalist.org/observations/133196192</a> |
| 590 | Sturnus pagodarum | Brahminy Starling | 2022/10/24 | 3 | 0 | 23.25201463 | 87.06437462 | <a href="https://www.inaturalist.org/observations/139852277">https://www.inaturalist.org/observations/139852277</a> |
| 591 | Sturnus pagodarum | Brahminy Starling | 2018/8/19  | 2 | 0 | 23.25222222 | 87.06500000 | <a href="https://www.inaturalist.org/observations/136253044">https://www.inaturalist.org/observations/136253044</a> |
| 592 | Sturnus pagodarum | Brahminy Starling | 2022/10/27 | 2 | 0 | 23.25229366 | 87.06447931 | <a href="https://www.inaturalist.org/observations/140131423">https://www.inaturalist.org/observations/140131423</a> |
| 593 | Sturnus pagodarum | Brahminy Starling | 2021/5/23  | 2 | 0 | 23.25975327 | 69.37745295 | <a href="https://www.inaturalist.org/observations/136010841">https://www.inaturalist.org/observations/136010841</a> |
| 594 | Sturnus pagodarum | Brahminy Starling | 2022/10/18 | 1 | 0 | 23.26096643 | 71.73752351 | <a href="https://www.inaturalist.org/observations/139719667">https://www.inaturalist.org/observations/139719667</a> |
| 595 | Sturnus pagodarum | Brahminy Starling | 2017/6/12  | 4 | 0 | 23.31688780 | 86.37077860 | <a href="https://www.inaturalist.org/observations/16761403">https://www.inaturalist.org/observations/16761403</a>   |
| 596 | Sturnus pagodarum | Brahminy Starling | 2021/5/21  | 3 | 0 | 23.34159183 | 82.57640585 | <a href="https://www.inaturalist.org/observations/79650038">https://www.inaturalist.org/observations/79650038</a>   |
| 597 | Sturnus pagodarum | Brahminy Starling | 2021/9/4   | 2 | 0 | 23.34694546 | 77.78071333 | <a href="https://www.inaturalist.org/observations/93734776">https://www.inaturalist.org/observations/93734776</a>   |

|     |                          |                   |            |   |   |             |             |                                                                                                                     |
|-----|--------------------------|-------------------|------------|---|---|-------------|-------------|---------------------------------------------------------------------------------------------------------------------|
| 598 | <i>Sturnus pagodarum</i> | Brahminy Starling | 2019/9/29  | 2 | 0 | 23.36521925 | 69.26935303 | <a href="https://www.inaturalist.org/observations/137607992">https://www.inaturalist.org/observations/137607992</a> |
| 599 | <i>Sturnus pagodarum</i> | Brahminy Starling | 2021/2/5   | 1 | 0 | 23.37515227 | 72.03994621 | <a href="https://www.inaturalist.org/observations/69196699">https://www.inaturalist.org/observations/69196699</a>   |
| 600 | <i>Sturnus pagodarum</i> | Brahminy Starling | 2014/1/4   | 2 | 0 | 23.39192948 | 69.25922243 | <a href="https://www.inaturalist.org/observations/36295235">https://www.inaturalist.org/observations/36295235</a>   |
| 601 | <i>Sturnus pagodarum</i> | Brahminy Starling | 2016/12/17 | 2 | 0 | 23.46182050 | 71.28742090 | <a href="https://www.inaturalist.org/observations/91123939">https://www.inaturalist.org/observations/91123939</a>   |
| 602 | <i>Sturnus pagodarum</i> | Brahminy Starling | 2022/2/10  | 4 | 0 | 23.48325600 | 77.50461000 | <a href="https://www.inaturalist.org/observations/107295102">https://www.inaturalist.org/observations/107295102</a> |
| 603 | <i>Sturnus pagodarum</i> | Brahminy Starling | 2015/5/6   | 4 | 0 | 23.48333000 | 87.31667000 | <a href="http://www.inaturalist.org/observations/1464410">http://www.inaturalist.org/observations/1464410</a>       |
| 604 | <i>Sturnus pagodarum</i> | Brahminy Starling | 2016/8/18  | 4 | 0 | 23.48644200 | 87.30025000 | <a href="http://www.inaturalist.org/observations/3960710">http://www.inaturalist.org/observations/3960710</a>       |
| 605 | <i>Sturnus pagodarum</i> | Brahminy Starling | 2014/7/5   | 5 | 0 | 23.49177500 | 87.30574300 | <a href="http://www.inaturalist.org/observations/769791">http://www.inaturalist.org/observations/769791</a>         |
| 606 | <i>Sturnus pagodarum</i> | Brahminy Starling | 2019/3/17  | 4 | 0 | 23.51517414 | 87.37993222 | <a href="https://www.inaturalist.org/observations/21319280">https://www.inaturalist.org/observations/21319280</a>   |
| 607 | <i>Sturnus pagodarum</i> | Brahminy Starling | 2017/1/17  | 2 | 0 | 23.52044430 | 87.31192270 | <a href="https://www.inaturalist.org/observations/6127444">https://www.inaturalist.org/observations/6127444</a>     |
| 608 | <i>Sturnus pagodarum</i> | Brahminy Starling | 2021/6/30  | 1 | 0 | 23.54014500 | 72.71786167 | <a href="https://www.inaturalist.org/observations/96565674">https://www.inaturalist.org/observations/96565674</a>   |
| 609 | <i>Sturnus pagodarum</i> | Brahminy Starling | 2019/8/11  | 1 | 0 | 23.58142388 | 86.94135972 | <a href="https://www.inaturalist.org/observations/97655729">https://www.inaturalist.org/observations/97655729</a>   |
| 610 | <i>Sturnus pagodarum</i> | Brahminy Starling | 2021/11/6  | 1 | 0 | 23.66021030 | 86.94684950 | <a href="https://www.inaturalist.org/observations/100487419">https://www.inaturalist.org/observations/100487419</a> |
| 611 | <i>Sturnus pagodarum</i> | Brahminy Starling | 2015/2/26  | 3 | 0 | 23.68555030 | 81.02581680 | <a href="https://www.inaturalist.org/observations/69187551">https://www.inaturalist.org/observations/69187551</a>   |
| 612 | <i>Sturnus pagodarum</i> | Brahminy Starling | 2015/2/22  | 3 | 0 | 23.68555030 | 81.02581680 | <a href="https://www.inaturalist.org/observations/69229855">https://www.inaturalist.org/observations/69229855</a>   |
| 613 | <i>Sturnus pagodarum</i> | Brahminy Starling | 2015/5/25  | 2 | 0 | 23.69778206 | 81.04236917 | <a href="https://www.inaturalist.org/observations/139900518">https://www.inaturalist.org/observations/139900518</a> |
| 614 | <i>Sturnus pagodarum</i> | Brahminy Starling | 2017/3/5   | 4 | 0 | 23.70658852 | 81.02660656 | <a href="https://www.inaturalist.org/observations/5860496">https://www.inaturalist.org/observations/5860496</a>     |
| 615 | <i>Sturnus pagodarum</i> | Brahminy Starling | 2021/6/15  | 3 | 0 | 23.72221060 | 81.02327100 | <a href="https://www.inaturalist.org/observations/83608154">https://www.inaturalist.org/observations/83608154</a>   |
| 616 | <i>Sturnus pagodarum</i> | Brahminy Starling | 2022/1/11  | 4 | 0 | 23.73982264 | 86.94924138 | <a href="https://www.inaturalist.org/observations/104768166">https://www.inaturalist.org/observations/104768166</a> |
| 617 | <i>Sturnus pagodarum</i> | Brahminy Starling | 2018/5/27  | 5 | 0 | 23.81931333 | 86.25328000 | <a href="https://www.inaturalist.org/observations/12852548">https://www.inaturalist.org/observations/12852548</a>   |
| 618 | <i>Sturnus pagodarum</i> | Brahminy Starling | 2020/9/8   | 3 | 0 | 23.82550960 | 86.45462520 | <a href="https://www.inaturalist.org/observations/59019193">https://www.inaturalist.org/observations/59019193</a>   |
| 619 | <i>Sturnus pagodarum</i> | Brahminy Starling | 2020/10/19 | 2 | 0 | 23.84950665 | 77.93709688 | <a href="https://www.inaturalist.org/observations/64918300">https://www.inaturalist.org/observations/64918300</a>   |
| 620 | <i>Sturnus pagodarum</i> | Brahminy Starling | 2022/3/6   | 2 | 0 | 23.96961167 | 72.99303833 | <a href="https://www.inaturalist.org/observations/120128416">https://www.inaturalist.org/observations/120128416</a> |

|     |                          |                   |            |   |   |             |             |                                                                                                                     |
|-----|--------------------------|-------------------|------------|---|---|-------------|-------------|---------------------------------------------------------------------------------------------------------------------|
| 621 | <i>Sturnus pagodarum</i> | Brahminy Starling | 2022/3/5   | 2 | 0 | 23.98740333 | 72.96817833 | <a href="https://www.inaturalist.org/observations/120122870">https://www.inaturalist.org/observations/120122870</a> |
| 622 | <i>Sturnus pagodarum</i> | Brahminy Starling | 2019/7/27  | 4 | 0 | 23.99049333 | 79.39657833 | <a href="https://www.inaturalist.org/observations/29625045">https://www.inaturalist.org/observations/29625045</a>   |
| 623 | <i>Sturnus pagodarum</i> | Brahminy Starling | 2014/2/4   | 2 | 0 | 24.04542860 | 70.14558050 | <a href="https://www.inaturalist.org/observations/139685262">https://www.inaturalist.org/observations/139685262</a> |
| 624 | <i>Sturnus pagodarum</i> | Brahminy Starling | 2021/11/16 | 0 | 0 | 24.06749153 | 73.69206238 | <a href="https://www.inaturalist.org/observations/101253027">https://www.inaturalist.org/observations/101253027</a> |
| 625 | <i>Sturnus pagodarum</i> | Brahminy Starling | 2020/5/23  | 4 | 0 | 24.09147701 | 72.20644433 | <a href="https://www.inaturalist.org/observations/47215057">https://www.inaturalist.org/observations/47215057</a>   |
| 626 | <i>Sturnus pagodarum</i> | Brahminy Starling | 2020/7/16  | 2 | 0 | 24.21068667 | 82.86453500 | <a href="https://www.inaturalist.org/observations/72995532">https://www.inaturalist.org/observations/72995532</a>   |
| 627 | <i>Sturnus pagodarum</i> | Brahminy Starling | 2022/3/9   | 5 | 0 | 24.50151111 | 73.66327222 | <a href="https://www.inaturalist.org/observations/108240905">https://www.inaturalist.org/observations/108240905</a> |
| 628 | <i>Sturnus pagodarum</i> | Brahminy Starling | 2014/11/15 | 1 | 0 | 24.58544500 | 73.71247900 | <a href="https://www.inaturalist.org/observations/95916244">https://www.inaturalist.org/observations/95916244</a>   |
| 629 | <i>Sturnus pagodarum</i> | Brahminy Starling | 2010/5/15  | 6 | 0 | 24.60168500 | 73.66032600 | <a href="http://www.inaturalist.org/observations/326651">http://www.inaturalist.org/observations/326651</a>         |
| 630 | <i>Sturnus pagodarum</i> | Brahminy Starling | 2016/9/22  | 2 | 0 | 24.62410000 | 73.65060000 | <a href="https://www.inaturalist.org/observations/73924398">https://www.inaturalist.org/observations/73924398</a>   |
| 631 | <i>Sturnus pagodarum</i> | Brahminy Starling | 2019/12/19 | 5 | 0 | 24.67228273 | 77.13952395 | <a href="https://www.inaturalist.org/observations/66196649">https://www.inaturalist.org/observations/66196649</a>   |
| 632 | <i>Sturnus pagodarum</i> | Brahminy Starling | 2021/7/5   | 1 | 0 | 24.78022167 | 71.64398000 | <a href="https://www.inaturalist.org/observations/85756177">https://www.inaturalist.org/observations/85756177</a>   |
| 633 | <i>Sturnus pagodarum</i> | Brahminy Starling | 2020/5/20  | 2 | 0 | 24.78437064 | 85.00080463 | <a href="https://www.inaturalist.org/observations/47003821">https://www.inaturalist.org/observations/47003821</a>   |
| 634 | <i>Sturnus pagodarum</i> | Brahminy Starling | 2018/10/26 | 4 | 0 | 24.84387500 | 79.92421300 | <a href="https://www.inaturalist.org/observations/126892870">https://www.inaturalist.org/observations/126892870</a> |
| 635 | <i>Sturnus pagodarum</i> | Brahminy Starling | 2019/4/10  | 3 | 0 | 24.85786333 | 79.92194500 | <a href="https://www.inaturalist.org/observations/36820907">https://www.inaturalist.org/observations/36820907</a>   |
| 636 | <i>Sturnus pagodarum</i> | Brahminy Starling | 2009/10/13 | 2 | 0 | 24.88512903 | 73.69412794 | <a href="https://www.inaturalist.org/observations/135534403">https://www.inaturalist.org/observations/135534403</a> |
| 637 | <i>Sturnus pagodarum</i> | Brahminy Starling | 2019/2/14  | 5 | 0 | 24.93059540 | 75.59092590 | <a href="https://www.inaturalist.org/observations/20335919">https://www.inaturalist.org/observations/20335919</a>   |
| 638 | <i>Sturnus pagodarum</i> | Brahminy Starling | 2019/2/14  | 5 | 0 | 24.93059540 | 75.59092590 | <a href="https://www.inaturalist.org/observations/20339540">https://www.inaturalist.org/observations/20339540</a>   |
| 639 | <i>Sturnus pagodarum</i> | Brahminy Starling | 2021/4/14  | 1 | 0 | 25.01979577 | 85.42531047 | <a href="https://www.inaturalist.org/observations/73939609">https://www.inaturalist.org/observations/73939609</a>   |
| 640 | <i>Sturnus pagodarum</i> | Brahminy Starling | 2020/6/28  | 2 | 0 | 25.02161591 | 74.87999316 | <a href="https://www.inaturalist.org/observations/51335138">https://www.inaturalist.org/observations/51335138</a>   |
| 641 | <i>Sturnus pagodarum</i> | Brahminy Starling | 2020/3/11  | 4 | 0 | 25.05580498 | 73.14152305 | <a href="https://www.inaturalist.org/observations/66088768">https://www.inaturalist.org/observations/66088768</a>   |
| 642 | <i>Sturnus pagodarum</i> | Brahminy Starling | 2018/7/8   | 1 | 0 | 25.11604070 | 73.47252700 | <a href="https://www.inaturalist.org/observations/46895829">https://www.inaturalist.org/observations/46895829</a>   |
| 643 | <i>Sturnus pagodarum</i> | Brahminy Starling | 2014/12/27 | 5 | 0 | 25.23000000 | 73.23000000 | <a href="http://www.inaturalist.org/observations/1160782">http://www.inaturalist.org/observations/1160782</a>       |

|     |                   |                   |            |   |   |             |             |                                                                                                                     |
|-----|-------------------|-------------------|------------|---|---|-------------|-------------|---------------------------------------------------------------------------------------------------------------------|
| 644 | Sturnus pagodarum | Brahminy Starling | 2020/12/29 | 3 | 0 | 25.24245305 | 86.98422544 | <a href="https://www.inaturalist.org/observations/67242846">https://www.inaturalist.org/observations/67242846</a>   |
| 645 | Sturnus pagodarum | Brahminy Starling | 2015/1/18  | 4 | 0 | 25.35145000 | 78.64071000 | <a href="http://www.inaturalist.org/observations/1555470">http://www.inaturalist.org/observations/1555470</a>       |
| 646 | Sturnus pagodarum | Brahminy Starling | 2021/9/11  | 3 | 0 | 25.41010684 | 81.84946451 | <a href="https://www.inaturalist.org/observations/94902995">https://www.inaturalist.org/observations/94902995</a>   |
| 647 | Sturnus pagodarum | Brahminy Starling | 2018/11/5  | 4 | 0 | 25.45395470 | 81.84786224 | <a href="https://www.inaturalist.org/observations/18124383">https://www.inaturalist.org/observations/18124383</a>   |
| 648 | Sturnus pagodarum | Brahminy Starling | 2011/10/31 | 1 | 0 | 25.45756382 | 75.64539819 | <a href="https://www.inaturalist.org/observations/45506126">https://www.inaturalist.org/observations/45506126</a>   |
| 649 | Sturnus pagodarum | Brahminy Starling | 2020/5/10  | 2 | 0 | 25.61641281 | 81.62320208 | <a href="https://www.inaturalist.org/observations/45429276">https://www.inaturalist.org/observations/45429276</a>   |
| 650 | Sturnus pagodarum | Brahminy Starling | 2022/4/30  | 3 | 0 | 25.88823833 | 77.07762667 | <a href="https://www.inaturalist.org/observations/118519141">https://www.inaturalist.org/observations/118519141</a> |
| 651 | Sturnus pagodarum | Brahminy Starling | 2022/5/1   | 5 | 0 | 25.89155000 | 77.01548000 | <a href="https://www.inaturalist.org/observations/118519154">https://www.inaturalist.org/observations/118519154</a> |
| 652 | Sturnus pagodarum | Brahminy Starling | 2022/5/1   | 4 | 0 | 25.89178667 | 77.02279500 | <a href="https://www.inaturalist.org/observations/118519145">https://www.inaturalist.org/observations/118519145</a> |
| 653 | Sturnus pagodarum | Brahminy Starling | 2022/4/30  | 4 | 0 | 25.89573167 | 77.04153000 | <a href="https://www.inaturalist.org/observations/118519056">https://www.inaturalist.org/observations/118519056</a> |
| 654 | Sturnus pagodarum | Brahminy Starling | 2022/4/30  | 4 | 0 | 25.89865167 | 77.04303000 | <a href="https://www.inaturalist.org/observations/118519066">https://www.inaturalist.org/observations/118519066</a> |
| 655 | Sturnus pagodarum | Brahminy Starling | 2015/5/24  | 3 | 0 | 25.93936626 | 76.37314689 | <a href="https://www.inaturalist.org/observations/140578245">https://www.inaturalist.org/observations/140578245</a> |
| 656 | Sturnus pagodarum | Brahminy Starling | 2018/9/25  | 3 | 0 | 26.01601500 | 76.50401970 | <a href="https://www.inaturalist.org/observations/20249853">https://www.inaturalist.org/observations/20249853</a>   |
| 657 | Sturnus pagodarum | Brahminy Starling | 2014/5/28  | 2 | 0 | 26.01732740 | 76.50257420 | <a href="https://www.inaturalist.org/observations/55378871">https://www.inaturalist.org/observations/55378871</a>   |
| 658 | Sturnus pagodarum | Brahminy Starling | 2014/5/29  | 2 | 0 | 26.01732740 | 76.50257420 | <a href="https://www.inaturalist.org/observations/55379509">https://www.inaturalist.org/observations/55379509</a>   |
| 659 | Sturnus pagodarum | Brahminy Starling | 2015/5/27  | 2 | 0 | 26.01732740 | 76.50257420 | <a href="https://www.inaturalist.org/observations/55474962">https://www.inaturalist.org/observations/55474962</a>   |
| 660 | Sturnus pagodarum | Brahminy Starling | 2016/4/21  | 2 | 0 | 26.01732740 | 76.50257420 | <a href="https://www.inaturalist.org/observations/55500710">https://www.inaturalist.org/observations/55500710</a>   |
| 661 | Sturnus pagodarum | Brahminy Starling | 2015/5/24  | 2 | 0 | 26.01732740 | 76.50257420 | <a href="https://www.inaturalist.org/observations/56407968">https://www.inaturalist.org/observations/56407968</a>   |
| 662 | Sturnus pagodarum | Brahminy Starling | 2015/5/26  | 2 | 0 | 26.01732740 | 76.50257420 | <a href="https://www.inaturalist.org/observations/56408062">https://www.inaturalist.org/observations/56408062</a>   |
| 663 | Sturnus pagodarum | Brahminy Starling | 2018/5/28  | 3 | 0 | 26.01732740 | 76.50257420 | <a href="https://www.inaturalist.org/observations/56627053">https://www.inaturalist.org/observations/56627053</a>   |
| 664 | Sturnus pagodarum | Brahminy Starling | 2018/5/28  | 2 | 0 | 26.01732740 | 76.50257420 | <a href="https://www.inaturalist.org/observations/56627062">https://www.inaturalist.org/observations/56627062</a>   |
| 665 | Sturnus pagodarum | Brahminy Starling | 2022/6/5   | 5 | 0 | 26.01732740 | 76.50257420 | <a href="https://www.inaturalist.org/observations/130130700">https://www.inaturalist.org/observations/130130700</a> |
| 666 | Sturnus pagodarum | Brahminy Starling | 2019/12/29 | 5 | 0 | 26.01859798 | 76.37501493 | <a href="https://www.inaturalist.org/observations/37098127">https://www.inaturalist.org/observations/37098127</a>   |

|     |                          |                   |            |   |   |             |             |                                                                                                                       |
|-----|--------------------------|-------------------|------------|---|---|-------------|-------------|-----------------------------------------------------------------------------------------------------------------------|
| 667 | <i>Sturnus pagodarum</i> | Brahminy Starling | 2015/11/12 | 4 | 0 | 26.02089961 | 76.38034987 | <a href="http://conabio.inaturalist.org/observations/5522966">http://conabio.inaturalist.org/observations/5522966</a> |
| 668 | <i>Sturnus pagodarum</i> | Brahminy Starling | 2019/12/28 | 2 | 0 | 26.02126050 | 76.45208040 | <a href="https://www.inaturalist.org/observations/37780309">https://www.inaturalist.org/observations/37780309</a>     |
| 669 | <i>Sturnus pagodarum</i> | Brahminy Starling | 2019/11/17 | 3 | 0 | 26.02220641 | 76.45388807 | <a href="https://www.inaturalist.org/observations/36216216">https://www.inaturalist.org/observations/36216216</a>     |
| 670 | <i>Sturnus pagodarum</i> | Brahminy Starling | 2014/8/22  | 2 | 0 | 26.02914524 | 76.44600112 | <a href="https://www.inaturalist.org/observations/64933300">https://www.inaturalist.org/observations/64933300</a>     |
| 671 | <i>Sturnus pagodarum</i> | Brahminy Starling | 2017/6/5   | 2 | 0 | 26.03292110 | 76.50572583 | <a href="https://www.inaturalist.org/observations/54063947">https://www.inaturalist.org/observations/54063947</a>     |
| 672 | <i>Sturnus pagodarum</i> | Brahminy Starling | 2014/8/20  | 2 | 0 | 26.05614200 | 76.42516800 | <a href="https://www.inaturalist.org/observations/64930888">https://www.inaturalist.org/observations/64930888</a>     |
| 673 | <i>Sturnus pagodarum</i> | Brahminy Starling | 2019/8/17  | 3 | 0 | 26.21658570 | 74.86825690 | <a href="https://www.inaturalist.org/observations/31340173">https://www.inaturalist.org/observations/31340173</a>     |
| 674 | <i>Sturnus pagodarum</i> | Brahminy Starling | 2020/2/20  | 1 | 0 | 26.21855298 | 78.18283081 | <a href="https://www.inaturalist.org/observations/95512510">https://www.inaturalist.org/observations/95512510</a>     |
| 675 | <i>Sturnus pagodarum</i> | Brahminy Starling | 2019/8/17  | 1 | 0 | 26.45009294 | 74.63991635 | <a href="https://www.inaturalist.org/observations/101817762">https://www.inaturalist.org/observations/101817762</a>   |
| 676 | <i>Sturnus pagodarum</i> | Brahminy Starling | 2019/11/14 | 3 | 0 | 26.45034239 | 74.63991635 | <a href="https://www.inaturalist.org/observations/37034233">https://www.inaturalist.org/observations/37034233</a>     |
| 677 | <i>Sturnus pagodarum</i> | Brahminy Starling | 2019/10/12 | 2 | 0 | 26.48974900 | 74.55108560 | <a href="https://www.inaturalist.org/observations/60390318">https://www.inaturalist.org/observations/60390318</a>     |
| 678 | <i>Sturnus pagodarum</i> | Brahminy Starling | 2019/10/12 | 2 | 0 | 26.48974900 | 74.55108560 | <a href="https://www.inaturalist.org/observations/60390341">https://www.inaturalist.org/observations/60390341</a>     |
| 679 | <i>Sturnus pagodarum</i> | Brahminy Starling | 2019/10/12 | 2 | 0 | 26.49012453 | 74.55287342 | <a href="https://www.inaturalist.org/observations/44347970">https://www.inaturalist.org/observations/44347970</a>     |
| 680 | <i>Sturnus pagodarum</i> | Brahminy Starling | 2022/10/23 | 2 | 0 | 26.69377250 | 75.87953780 | <a href="https://www.inaturalist.org/observations/139717084">https://www.inaturalist.org/observations/139717084</a>   |
| 681 | <i>Sturnus pagodarum</i> | Brahminy Starling | 2013/12/23 | 4 | 0 | 26.78729922 | 78.47877502 | <a href="https://www.inaturalist.org/observations/11402832">https://www.inaturalist.org/observations/11402832</a>     |
| 682 | <i>Sturnus pagodarum</i> | Brahminy Starling | 2019/8/2   | 4 | 0 | 26.80590833 | 75.81154167 | <a href="https://www.inaturalist.org/observations/30142203">https://www.inaturalist.org/observations/30142203</a>     |
| 683 | <i>Sturnus pagodarum</i> | Brahminy Starling | 2016/12/19 | 2 | 0 | 26.80698780 | 80.94841950 | <a href="https://www.inaturalist.org/observations/71553975">https://www.inaturalist.org/observations/71553975</a>     |
| 684 | <i>Sturnus pagodarum</i> | Brahminy Starling | 2022/7/5   | 3 | 0 | 26.81367778 | 75.84281667 | <a href="https://www.inaturalist.org/observations/124831885">https://www.inaturalist.org/observations/124831885</a>   |
| 685 | <i>Sturnus pagodarum</i> | Brahminy Starling | 2016/9/20  | 1 | 0 | 26.84203461 | 75.82252537 | <a href="https://www.inaturalist.org/observations/74110510">https://www.inaturalist.org/observations/74110510</a>     |
| 686 | <i>Sturnus pagodarum</i> | Brahminy Starling | 2016/9/20  | 2 | 0 | 26.84203461 | 75.82252537 | <a href="https://www.inaturalist.org/observations/74110512">https://www.inaturalist.org/observations/74110512</a>     |
| 687 | <i>Sturnus pagodarum</i> | Brahminy Starling | 2022/3/15  | 1 | 0 | 26.84724150 | 75.74126900 | <a href="https://www.inaturalist.org/observations/111075782">https://www.inaturalist.org/observations/111075782</a>   |
| 688 | <i>Sturnus pagodarum</i> | Brahminy Starling | 2022/3/15  | 1 | 0 | 26.84724150 | 75.74126900 | <a href="https://www.inaturalist.org/observations/111075783">https://www.inaturalist.org/observations/111075783</a>   |
| 689 | <i>Sturnus pagodarum</i> | Brahminy Starling | 2022/3/15  | 1 | 0 | 26.84738310 | 75.73988480 | <a href="https://www.inaturalist.org/observations/111077891">https://www.inaturalist.org/observations/111077891</a>   |

|     |                   |                   |            |   |   |             |             |                                                                                                                     |
|-----|-------------------|-------------------|------------|---|---|-------------|-------------|---------------------------------------------------------------------------------------------------------------------|
| 690 | Sturnus pagodarum | Brahminy Starling | 2022/8/15  | 3 | 0 | 26.85491140 | 75.83284110 | <a href="https://www.inaturalist.org/observations/132146938">https://www.inaturalist.org/observations/132146938</a> |
| 691 | Sturnus pagodarum | Brahminy Starling | 2022/8/15  | 4 | 0 | 26.85491140 | 75.83284110 | <a href="https://www.inaturalist.org/observations/132146943">https://www.inaturalist.org/observations/132146943</a> |
| 692 | Sturnus pagodarum | Brahminy Starling | 2022/7/19  | 2 | 0 | 26.85544160 | 75.83234180 | <a href="https://www.inaturalist.org/observations/129019092">https://www.inaturalist.org/observations/129019092</a> |
| 693 | Sturnus pagodarum | Brahminy Starling | 2019/5/11  | 2 | 0 | 26.85779228 | 80.97396386 | <a href="https://www.inaturalist.org/observations/48326215">https://www.inaturalist.org/observations/48326215</a>   |
| 694 | Sturnus pagodarum | Brahminy Starling | 2020/3/10  | 2 | 0 | 26.86428460 | 80.96917638 | <a href="https://www.inaturalist.org/observations/69848186">https://www.inaturalist.org/observations/69848186</a>   |
| 695 | Sturnus pagodarum | Brahminy Starling | 2010/7/17  | 3 | 0 | 26.87553495 | 75.78299150 | <a href="https://www.inaturalist.org/observations/80290161">https://www.inaturalist.org/observations/80290161</a>   |
| 696 | Sturnus pagodarum | Brahminy Starling | 2018/4/15  | 2 | 0 | 26.87703720 | 75.81594930 | <a href="https://www.inaturalist.org/observations/55582797">https://www.inaturalist.org/observations/55582797</a>   |
| 697 | Sturnus pagodarum | Brahminy Starling | 2019/7/7   | 4 | 0 | 26.87703729 | 75.81594933 | <a href="https://www.inaturalist.org/observations/38450073">https://www.inaturalist.org/observations/38450073</a>   |
| 698 | Sturnus pagodarum | Brahminy Starling | 2019/7/7   | 3 | 0 | 26.87703729 | 75.81594933 | <a href="https://www.inaturalist.org/observations/40858922">https://www.inaturalist.org/observations/40858922</a>   |
| 699 | Sturnus pagodarum | Brahminy Starling | 2013/10/23 | 3 | 0 | 26.89324887 | 78.34378163 | <a href="https://www.inaturalist.org/observations/69357554">https://www.inaturalist.org/observations/69357554</a>   |
| 700 | Sturnus pagodarum | Brahminy Starling | 2018/3/14  | 4 | 0 | 26.90448699 | 75.80751646 | <a href="https://www.inaturalist.org/observations/10585586">https://www.inaturalist.org/observations/10585586</a>   |
| 701 | Sturnus pagodarum | Brahminy Starling | 2022/7/12  | 2 | 0 | 26.91236591 | 75.78727081 | <a href="https://www.inaturalist.org/observations/125888595">https://www.inaturalist.org/observations/125888595</a> |
| 702 | Sturnus pagodarum | Brahminy Starling | 2016/7/13  | 3 | 0 | 26.91277011 | 75.78727081 | <a href="https://www.inaturalist.org/observations/140983452">https://www.inaturalist.org/observations/140983452</a> |
| 703 | Sturnus pagodarum | Brahminy Starling | 2022/7/18  | 3 | 0 | 26.91686047 | 75.86473536 | <a href="https://www.inaturalist.org/observations/128741850">https://www.inaturalist.org/observations/128741850</a> |
| 704 | Sturnus pagodarum | Brahminy Starling | 2022/7/18  | 3 | 0 | 26.91686047 | 75.86473536 | <a href="https://www.inaturalist.org/observations/128741851">https://www.inaturalist.org/observations/128741851</a> |
| 705 | Sturnus pagodarum | Brahminy Starling | 2022/7/18  | 3 | 0 | 26.91686047 | 75.86473536 | <a href="https://www.inaturalist.org/observations/128741852">https://www.inaturalist.org/observations/128741852</a> |
| 706 | Sturnus pagodarum | Brahminy Starling | 2022/7/18  | 3 | 0 | 26.91686047 | 75.86473536 | <a href="https://www.inaturalist.org/observations/128741855">https://www.inaturalist.org/observations/128741855</a> |
| 707 | Sturnus pagodarum | Brahminy Starling | 2022/3/25  | 6 | 0 | 26.91693580 | 75.85896961 | <a href="https://www.inaturalist.org/observations/109449733">https://www.inaturalist.org/observations/109449733</a> |
| 708 | Sturnus pagodarum | Brahminy Starling | 2022/6/29  | 3 | 0 | 26.91759486 | 75.85433645 | <a href="https://www.inaturalist.org/observations/123970313">https://www.inaturalist.org/observations/123970313</a> |
| 709 | Sturnus pagodarum | Brahminy Starling | 2022/3/26  | 3 | 0 | 26.92518901 | 75.80162298 | <a href="https://www.inaturalist.org/observations/109506952">https://www.inaturalist.org/observations/109506952</a> |
| 710 | Sturnus pagodarum | Brahminy Starling | 2014/5/26  | 2 | 0 | 26.92577193 | 75.82365632 | <a href="https://www.inaturalist.org/observations/69292333">https://www.inaturalist.org/observations/69292333</a>   |
| 711 | Sturnus pagodarum | Brahminy Starling | 2012/2/19  | 3 | 0 | 26.93731300 | 75.81552600 | <a href="https://www.inaturalist.org/observations/104812169">https://www.inaturalist.org/observations/104812169</a> |
| 712 | Sturnus pagodarum | Brahminy Starling | 2013/12/24 | 2 | 0 | 26.96699140 | 75.84833530 | <a href="https://www.inaturalist.org/observations/66942002">https://www.inaturalist.org/observations/66942002</a>   |

|     |                          |                   |            |   |   |             |             |                                                                                                                     |
|-----|--------------------------|-------------------|------------|---|---|-------------|-------------|---------------------------------------------------------------------------------------------------------------------|
| 713 | <i>Sturnus pagodarum</i> | Brahminy Starling | 2022/7/19  | 4 | 0 | 27.09640516 | 76.28617074 | <a href="https://www.inaturalist.org/observations/130084755">https://www.inaturalist.org/observations/130084755</a> |
| 714 | <i>Sturnus pagodarum</i> | Brahminy Starling | 2020/6/30  | 1 | 0 | 27.15175687 | 77.52402403 | <a href="https://www.inaturalist.org/observations/51487166">https://www.inaturalist.org/observations/51487166</a>   |
| 715 | <i>Sturnus pagodarum</i> | Brahminy Starling | 2016/2/9   | 3 | 0 | 27.15691986 | 77.52365112 | <a href="https://www.inaturalist.org/observations/47798497">https://www.inaturalist.org/observations/47798497</a>   |
| 716 | <i>Sturnus pagodarum</i> | Brahminy Starling | 2011/1/27  | 5 | 0 | 27.15692000 | 77.52365100 | <a href="https://www.inaturalist.org/observations/24371111">https://www.inaturalist.org/observations/24371111</a>   |
| 717 | <i>Sturnus pagodarum</i> | Brahminy Starling | 2011/1/27  | 5 | 0 | 27.15692000 | 77.52365100 | <a href="https://www.inaturalist.org/observations/24371125">https://www.inaturalist.org/observations/24371125</a>   |
| 718 | <i>Sturnus pagodarum</i> | Brahminy Starling | 2016/12/19 | 3 | 0 | 27.15692000 | 77.52365100 | <a href="https://www.inaturalist.org/observations/41366706">https://www.inaturalist.org/observations/41366706</a>   |
| 719 | <i>Sturnus pagodarum</i> | Brahminy Starling | 2016/12/20 | 3 | 0 | 27.15692000 | 77.52365100 | <a href="https://www.inaturalist.org/observations/41366784">https://www.inaturalist.org/observations/41366784</a>   |
| 720 | <i>Sturnus pagodarum</i> | Brahminy Starling | 2010/8/30  | 3 | 0 | 27.15692000 | 77.52365100 | <a href="https://www.inaturalist.org/observations/42171303">https://www.inaturalist.org/observations/42171303</a>   |
| 721 | <i>Sturnus pagodarum</i> | Brahminy Starling | 2019/3/12  | 3 | 0 | 27.15692000 | 77.52365100 | <a href="https://www.inaturalist.org/observations/42552829">https://www.inaturalist.org/observations/42552829</a>   |
| 722 | <i>Sturnus pagodarum</i> | Brahminy Starling | 2014/12/6  | 4 | 0 | 27.15692000 | 77.52365100 | <a href="https://www.inaturalist.org/observations/42928688">https://www.inaturalist.org/observations/42928688</a>   |
| 723 | <i>Sturnus pagodarum</i> | Brahminy Starling | 2019/12/16 | 1 | 0 | 27.15692000 | 77.52365100 | <a href="https://www.inaturalist.org/observations/105767535">https://www.inaturalist.org/observations/105767535</a> |
| 724 | <i>Sturnus pagodarum</i> | Brahminy Starling | 2016/12/10 | 1 | 0 | 27.15692000 | 77.52365100 | <a href="https://www.inaturalist.org/observations/105767702">https://www.inaturalist.org/observations/105767702</a> |
| 725 | <i>Sturnus pagodarum</i> | Brahminy Starling | 2017/2/4   | 4 | 0 | 27.15692463 | 77.52365112 | <a href="https://www.inaturalist.org/observations/61104240">https://www.inaturalist.org/observations/61104240</a>   |
| 726 | <i>Sturnus pagodarum</i> | Brahminy Starling | 2019/1/4   | 5 | 0 | 27.15911519 | 77.52113996 | <a href="https://www.inaturalist.org/observations/120664038">https://www.inaturalist.org/observations/120664038</a> |
| 727 | <i>Sturnus pagodarum</i> | Brahminy Starling | 2019/12/17 | 1 | 0 | 27.15925594 | 77.52319984 | <a href="https://www.inaturalist.org/observations/92876009">https://www.inaturalist.org/observations/92876009</a>   |
| 728 | <i>Sturnus pagodarum</i> | Brahminy Starling | 2017/2/8   | 2 | 0 | 27.15925594 | 77.52319984 | <a href="https://www.inaturalist.org/observations/106900610">https://www.inaturalist.org/observations/106900610</a> |
| 729 | <i>Sturnus pagodarum</i> | Brahminy Starling | 2017/2/6   | 3 | 0 | 27.15925594 | 77.52319984 | <a href="https://www.inaturalist.org/observations/106962130">https://www.inaturalist.org/observations/106962130</a> |
| 730 | <i>Sturnus pagodarum</i> | Brahminy Starling | 2016/2/3   | 3 | 0 | 27.15925594 | 77.52319984 | <a href="https://www.inaturalist.org/observations/106962141">https://www.inaturalist.org/observations/106962141</a> |
| 731 | <i>Sturnus pagodarum</i> | Brahminy Starling | 2016/1/31  | 1 | 0 | 27.15925594 | 77.52319984 | <a href="https://www.inaturalist.org/observations/107034478">https://www.inaturalist.org/observations/107034478</a> |
| 732 | <i>Sturnus pagodarum</i> | Brahminy Starling | 2017/2/7   | 6 | 0 | 27.15925594 | 77.52319984 | <a href="https://www.inaturalist.org/observations/109024851">https://www.inaturalist.org/observations/109024851</a> |
| 733 | <i>Sturnus pagodarum</i> | Brahminy Starling | 2019/11/14 | 4 | 0 | 27.15926900 | 77.52319990 | <a href="https://www.inaturalist.org/observations/35983125">https://www.inaturalist.org/observations/35983125</a>   |
| 734 | <i>Sturnus pagodarum</i> | Brahminy Starling | 2009/11/20 | 4 | 0 | 27.15926900 | 77.52319990 | <a href="https://www.inaturalist.org/observations/36401135">https://www.inaturalist.org/observations/36401135</a>   |
| 735 | <i>Sturnus pagodarum</i> | Brahminy Starling | 2015/3/3   | 3 | 0 | 27.15926900 | 77.52319990 | <a href="https://www.inaturalist.org/observations/43871461">https://www.inaturalist.org/observations/43871461</a>   |



|     |                          |                   |            |   |   |             |             |                                                                                                                     |
|-----|--------------------------|-------------------|------------|---|---|-------------|-------------|---------------------------------------------------------------------------------------------------------------------|
| 736 | <i>Sturnus pagodarum</i> | Brahminy Starling | 2008/12/1  | 2 | 0 | 27.15926900 | 77.52319990 | <a href="https://www.inaturalist.org/observations/55245702">https://www.inaturalist.org/observations/55245702</a>   |
| 737 | <i>Sturnus pagodarum</i> | Brahminy Starling | 2008/12/2  | 4 | 0 | 27.15926900 | 77.52319990 | <a href="https://www.inaturalist.org/observations/59031734">https://www.inaturalist.org/observations/59031734</a>   |
| 738 | <i>Sturnus pagodarum</i> | Brahminy Starling | 2008/12/3  | 2 | 0 | 27.15926900 | 77.52319990 | <a href="https://www.inaturalist.org/observations/59033271">https://www.inaturalist.org/observations/59033271</a>   |
| 739 | <i>Sturnus pagodarum</i> | Brahminy Starling | 2014/12/16 | 3 | 0 | 27.15926900 | 77.52319990 | <a href="https://www.inaturalist.org/observations/69152004">https://www.inaturalist.org/observations/69152004</a>   |
| 740 | <i>Sturnus pagodarum</i> | Brahminy Starling | 2014/12/15 | 3 | 0 | 27.15926900 | 77.52319990 | <a href="https://www.inaturalist.org/observations/69152042">https://www.inaturalist.org/observations/69152042</a>   |
| 741 | <i>Sturnus pagodarum</i> | Brahminy Starling | 2022/3/12  | 0 | 0 | 27.15926900 | 77.52319990 | <a href="https://www.inaturalist.org/observations/109822518">https://www.inaturalist.org/observations/109822518</a> |
| 742 | <i>Sturnus pagodarum</i> | Brahminy Starling | 2022/3/13  | 1 | 0 | 27.15926900 | 77.52319990 | <a href="https://www.inaturalist.org/observations/111064388">https://www.inaturalist.org/observations/111064388</a> |
| 743 | <i>Sturnus pagodarum</i> | Brahminy Starling | 2015/11/29 | 3 | 0 | 27.15926900 | 77.52319990 | <a href="https://www.inaturalist.org/observations/120790973">https://www.inaturalist.org/observations/120790973</a> |
| 744 | <i>Sturnus pagodarum</i> | Brahminy Starling | 2020/2/18  | 3 | 0 | 27.15926900 | 77.52319990 | <a href="https://www.inaturalist.org/observations/122774011">https://www.inaturalist.org/observations/122774011</a> |
| 745 | <i>Sturnus pagodarum</i> | Brahminy Starling | 2018/3/5   | 1 | 0 | 27.15926900 | 77.52319990 | <a href="https://www.inaturalist.org/observations/133425324">https://www.inaturalist.org/observations/133425324</a> |
| 746 | <i>Sturnus pagodarum</i> | Brahminy Starling | 2012/10/17 | 2 | 0 | 27.15926900 | 77.52319990 | <a href="https://www.inaturalist.org/observations/139746113">https://www.inaturalist.org/observations/139746113</a> |
| 747 | <i>Sturnus pagodarum</i> | Brahminy Starling | 2005/12/14 | 3 | 0 | 27.15936423 | 77.52296448 | <a href="https://www.inaturalist.org/observations/54715052">https://www.inaturalist.org/observations/54715052</a>   |
| 748 | <i>Sturnus pagodarum</i> | Brahminy Starling | 2017/3/3   | 1 | 0 | 27.15936423 | 77.52313614 | <a href="https://www.inaturalist.org/observations/105808008">https://www.inaturalist.org/observations/105808008</a> |
| 749 | <i>Sturnus pagodarum</i> | Brahminy Starling | 2022/2/8   | 2 | 0 | 27.15943314 | 77.52319984 | <a href="https://www.inaturalist.org/observations/106907796">https://www.inaturalist.org/observations/106907796</a> |
| 750 | <i>Sturnus pagodarum</i> | Brahminy Starling | 2012/4/27  | 5 | 0 | 27.15960850 | 77.52181270 | <a href="http://www.inaturalist.org/observations/105910">http://www.inaturalist.org/observations/105910</a>         |
| 751 | <i>Sturnus pagodarum</i> | Brahminy Starling | 2020/1/18  | 2 | 0 | 27.16415376 | 77.52865363 | <a href="https://www.inaturalist.org/observations/56724086">https://www.inaturalist.org/observations/56724086</a>   |
| 752 | <i>Sturnus pagodarum</i> | Brahminy Starling | 2016/8/28  | 5 | 0 | 27.16516797 | 77.52502441 | <a href="https://www.inaturalist.org/observations/17872953">https://www.inaturalist.org/observations/17872953</a>   |
| 753 | <i>Sturnus pagodarum</i> | Brahminy Starling | 2020/3/17  | 3 | 0 | 27.16598500 | 77.52460000 | <a href="https://www.inaturalist.org/observations/48646163">https://www.inaturalist.org/observations/48646163</a>   |
| 754 | <i>Sturnus pagodarum</i> | Brahminy Starling | 2006/1/10  | 4 | 0 | 27.16700000 | 77.51800000 | <a href="https://www.inaturalist.org/observations/9772238">https://www.inaturalist.org/observations/9772238</a>     |
| 755 | <i>Sturnus pagodarum</i> | Brahminy Starling | 2011/12/11 | 4 | 0 | 27.16758710 | 77.51501676 | <a href="https://www.inaturalist.org/observations/22011627">https://www.inaturalist.org/observations/22011627</a>   |
| 756 | <i>Sturnus pagodarum</i> | Brahminy Starling | 2014/11/24 | 2 | 0 | 27.16761123 | 77.51918830 | <a href="https://www.inaturalist.org/observations/142941249">https://www.inaturalist.org/observations/142941249</a> |
| 757 | <i>Sturnus pagodarum</i> | Brahminy Starling | 2016/12/28 | 4 | 0 | 27.16801944 | 78.04891389 | <a href="https://www.inaturalist.org/observations/69059255">https://www.inaturalist.org/observations/69059255</a>   |
| 758 | <i>Sturnus pagodarum</i> | Brahminy Starling | 2017/11/17 | 3 | 0 | 27.16857623 | 77.51730025 | <a href="https://www.inaturalist.org/observations/65745580">https://www.inaturalist.org/observations/65745580</a>   |

|     |                          |                   |            |   |   |             |             |                                                                                                                     |
|-----|--------------------------|-------------------|------------|---|---|-------------|-------------|---------------------------------------------------------------------------------------------------------------------|
| 759 | <i>Sturnus pagodarum</i> | Brahminy Starling | 2018/8/10  | 3 | 0 | 27.17042133 | 78.03267310 | <a href="https://www.inaturalist.org/observations/59385738">https://www.inaturalist.org/observations/59385738</a>   |
| 760 | <i>Sturnus pagodarum</i> | Brahminy Starling | 2017/11/27 | 2 | 0 | 27.17070000 | 78.04810000 | <a href="https://www.inaturalist.org/observations/69972826">https://www.inaturalist.org/observations/69972826</a>   |
| 761 | <i>Sturnus pagodarum</i> | Brahminy Starling | 2021/11/9  | 2 | 0 | 27.17131900 | 78.04864600 | <a href="https://www.inaturalist.org/observations/100676217">https://www.inaturalist.org/observations/100676217</a> |
| 762 | <i>Sturnus pagodarum</i> | Brahminy Starling | 2018/11/24 | 4 | 0 | 27.17177000 | 77.52163900 | <a href="https://www.inaturalist.org/observations/36473751">https://www.inaturalist.org/observations/36473751</a>   |
| 763 | <i>Sturnus pagodarum</i> | Brahminy Starling | 2020/2/24  | 4 | 0 | 27.17309500 | 77.52094667 | <a href="https://www.inaturalist.org/observations/39505511">https://www.inaturalist.org/observations/39505511</a>   |
| 764 | <i>Sturnus pagodarum</i> | Brahminy Starling | 2017/3/1   | 4 | 0 | 27.17451447 | 78.04761008 | <a href="https://www.inaturalist.org/observations/5383819">https://www.inaturalist.org/observations/5383819</a>     |
| 765 | <i>Sturnus pagodarum</i> | Brahminy Starling | 2022/5/18  | 1 | 0 | 27.17654579 | 83.49675827 | <a href="https://www.inaturalist.org/observations/139892635">https://www.inaturalist.org/observations/139892635</a> |
| 766 | <i>Sturnus pagodarum</i> | Brahminy Starling | 2007/12/17 | 5 | 0 | 27.17820707 | 77.50328159 | <a href="https://www.inaturalist.org/observations/7427714">https://www.inaturalist.org/observations/7427714</a>     |
| 767 | <i>Sturnus pagodarum</i> | Brahminy Starling | 2016/10/19 | 5 | 0 | 27.17868593 | 77.51810542 | <a href="https://www.inaturalist.org/observations/20027072">https://www.inaturalist.org/observations/20027072</a>   |
| 768 | <i>Sturnus pagodarum</i> | Brahminy Starling | 2020/2/15  | 3 | 0 | 27.17894370 | 77.51706000 | <a href="https://www.inaturalist.org/observations/62542539">https://www.inaturalist.org/observations/62542539</a>   |
| 769 | <i>Sturnus pagodarum</i> | Brahminy Starling | 2019/12/30 | 7 | 0 | 27.18128855 | 77.50292832 | <a href="https://www.inaturalist.org/observations/37098182">https://www.inaturalist.org/observations/37098182</a>   |
| 770 | <i>Sturnus pagodarum</i> | Brahminy Starling | 2002/1/17  | 6 | 0 | 27.18492539 | 77.50809370 | <a href="https://www.inaturalist.org/observations/40258468">https://www.inaturalist.org/observations/40258468</a>   |
| 771 | <i>Sturnus pagodarum</i> | Brahminy Starling | 2011/11/9  | 3 | 0 | 27.18970932 | 77.51294391 | <a href="https://www.inaturalist.org/observations/37304740">https://www.inaturalist.org/observations/37304740</a>   |
| 772 | <i>Sturnus pagodarum</i> | Brahminy Starling | 2017/3/2   | 5 | 0 | 27.19162257 | 77.51448260 | <a href="https://www.inaturalist.org/observations/5384793">https://www.inaturalist.org/observations/5384793</a>     |
| 773 | <i>Sturnus pagodarum</i> | Brahminy Starling | 2012/2/7   | 5 | 0 | 27.19234170 | 77.51078688 | <a href="https://www.inaturalist.org/observations/18317242">https://www.inaturalist.org/observations/18317242</a>   |
| 774 | <i>Sturnus pagodarum</i> | Brahminy Starling | 2011/2/22  | 5 | 0 | 27.19296000 | 77.50988900 | <a href="https://www.inaturalist.org/observations/17691648">https://www.inaturalist.org/observations/17691648</a>   |
| 775 | <i>Sturnus pagodarum</i> | Brahminy Starling | 2013/12/27 | 3 | 0 | 27.19815205 | 77.50672057 | <a href="https://www.inaturalist.org/observations/67045980">https://www.inaturalist.org/observations/67045980</a>   |
| 776 | <i>Sturnus pagodarum</i> | Brahminy Starling | 2020/2/24  | 2 | 0 | 27.20018667 | 77.50748333 | <a href="https://www.inaturalist.org/observations/39251510">https://www.inaturalist.org/observations/39251510</a>   |
| 777 | <i>Sturnus pagodarum</i> | Brahminy Starling | 2002/1/15  | 2 | 0 | 27.20052946 | 77.50447389 | <a href="https://www.inaturalist.org/observations/104685904">https://www.inaturalist.org/observations/104685904</a> |
| 778 | <i>Sturnus pagodarum</i> | Brahminy Starling | 2017/2/14  | 5 | 0 | 27.20177167 | 77.50752000 | <a href="https://www.inaturalist.org/observations/5235268">https://www.inaturalist.org/observations/5235268</a>     |
| 779 | <i>Sturnus pagodarum</i> | Brahminy Starling | 2017/2/14  | 5 | 0 | 27.20183167 | 77.50746333 | <a href="https://www.inaturalist.org/observations/5235269">https://www.inaturalist.org/observations/5235269</a>     |
| 780 | <i>Sturnus pagodarum</i> | Brahminy Starling | 2022/9/4   | 3 | 0 | 27.21518172 | 77.50299945 | <a href="https://www.inaturalist.org/observations/133725985">https://www.inaturalist.org/observations/133725985</a> |
| 781 | <i>Sturnus pagodarum</i> | Brahminy Starling | 2014/2/3   | 9 | 0 | 27.21731000 | 77.49009000 | <a href="http://www.inaturalist.org/observations/1464581">http://www.inaturalist.org/observations/1464581</a>       |

|     |                          |                   |            |   |   |             |             |                                                                                                                     |
|-----|--------------------------|-------------------|------------|---|---|-------------|-------------|---------------------------------------------------------------------------------------------------------------------|
| 782 | <i>Sturnus pagodarum</i> | Brahminy Starling | 2019/1/18  | 5 | 0 | 27.39170820 | 76.37565390 | <a href="https://www.inaturalist.org/observations/19775112">https://www.inaturalist.org/observations/19775112</a>   |
| 783 | <i>Sturnus pagodarum</i> | Brahminy Starling | 2022/3/15  | 5 | 0 | 27.46868062 | 70.22892673 | <a href="https://www.inaturalist.org/observations/108646557">https://www.inaturalist.org/observations/108646557</a> |
| 784 | <i>Sturnus pagodarum</i> | Brahminy Starling | 2021/4/26  | 5 | 0 | 27.54301375 | 75.13829794 | <a href="https://www.inaturalist.org/observations/75281091">https://www.inaturalist.org/observations/75281091</a>   |
| 785 | <i>Sturnus pagodarum</i> | Brahminy Starling | 2017/10/2  | 1 | 0 | 27.79715585 | 74.43376755 | <a href="https://www.inaturalist.org/observations/72170679">https://www.inaturalist.org/observations/72170679</a>   |
| 786 | <i>Sturnus pagodarum</i> | Brahminy Starling | 2015/4/4   | 5 | 0 | 28.04965600 | 76.12129600 | <a href="http://www.inaturalist.org/observations/1387124">http://www.inaturalist.org/observations/1387124</a>       |
| 787 | <i>Sturnus pagodarum</i> | Brahminy Starling | 2017/6/16  | 3 | 0 | 28.28839768 | 79.40163899 | <a href="https://www.inaturalist.org/observations/6689433">https://www.inaturalist.org/observations/6689433</a>     |
| 788 | <i>Sturnus pagodarum</i> | Brahminy Starling | 2021/6/26  | 2 | 0 | 28.35031350 | 77.06277145 | <a href="https://www.inaturalist.org/observations/89445321">https://www.inaturalist.org/observations/89445321</a>   |
| 789 | <i>Sturnus pagodarum</i> | Brahminy Starling | 2016/10/21 | 5 | 0 | 28.46855700 | 77.29069500 | <a href="http://www.inaturalist.org/observations/4407861">http://www.inaturalist.org/observations/4407861</a>       |
| 790 | <i>Sturnus pagodarum</i> | Brahminy Starling | 2017/1/5   | 4 | 0 | 28.46927400 | 77.28904500 | <a href="https://www.inaturalist.org/observations/4941409">https://www.inaturalist.org/observations/4941409</a>     |
| 791 | <i>Sturnus pagodarum</i> | Brahminy Starling | 2022/6/1   | 4 | 0 | 28.52631616 | 77.16528694 | <a href="https://www.inaturalist.org/observations/119691965">https://www.inaturalist.org/observations/119691965</a> |
| 792 | <i>Sturnus pagodarum</i> | Brahminy Starling | 2020/7/14  | 3 | 0 | 28.53773869 | 77.24305786 | <a href="https://www.inaturalist.org/observations/53073165">https://www.inaturalist.org/observations/53073165</a>   |
| 793 | <i>Sturnus pagodarum</i> | Brahminy Starling | 2020/5/18  | 2 | 0 | 28.54128131 | 77.14341162 | <a href="https://www.inaturalist.org/observations/46587555">https://www.inaturalist.org/observations/46587555</a>   |
| 794 | <i>Sturnus pagodarum</i> | Brahminy Starling | 2020/5/18  | 4 | 0 | 28.54131791 | 77.14339928 | <a href="https://www.inaturalist.org/observations/46587378">https://www.inaturalist.org/observations/46587378</a>   |
| 795 | <i>Sturnus pagodarum</i> | Brahminy Starling | 2009/7/16  | 3 | 0 | 28.55407065 | 77.26079903 | <a href="https://www.inaturalist.org/observations/61556747">https://www.inaturalist.org/observations/61556747</a>   |
| 796 | <i>Sturnus pagodarum</i> | Brahminy Starling | 2020/4/20  | 1 | 0 | 28.55536467 | 77.20767632 | <a href="https://www.inaturalist.org/observations/59667058">https://www.inaturalist.org/observations/59667058</a>   |
| 797 | <i>Sturnus pagodarum</i> | Brahminy Starling | 2009/7/15  | 3 | 0 | 28.55720980 | 77.21278910 | <a href="https://www.inaturalist.org/observations/31583629">https://www.inaturalist.org/observations/31583629</a>   |
| 798 | <i>Sturnus pagodarum</i> | Brahminy Starling | 2011/9/1   | 4 | 0 | 28.55816600 | 77.19715000 | <a href="http://www.inaturalist.org/observations/30026">http://www.inaturalist.org/observations/30026</a>           |
| 799 | <i>Sturnus pagodarum</i> | Brahminy Starling | 2019/5/7   | 4 | 0 | 28.56373500 | 77.22919667 | <a href="https://www.inaturalist.org/observations/24882382">https://www.inaturalist.org/observations/24882382</a>   |
| 800 | <i>Sturnus pagodarum</i> | Brahminy Starling | 2022/5/10  | 1 | 0 | 28.59813497 | 77.22208897 | <a href="https://www.inaturalist.org/observations/116400758">https://www.inaturalist.org/observations/116400758</a> |
| 801 | <i>Sturnus pagodarum</i> | Brahminy Starling | 2020/5/9   | 2 | 0 | 28.59888667 | 77.19317000 | <a href="https://www.inaturalist.org/observations/45352061">https://www.inaturalist.org/observations/45352061</a>   |
| 802 | <i>Sturnus pagodarum</i> | Brahminy Starling | 2022/4/18  | 1 | 0 | 28.61705208 | 77.23802948 | <a href="https://www.inaturalist.org/observations/111897366">https://www.inaturalist.org/observations/111897366</a> |
| 803 | <i>Sturnus pagodarum</i> | Brahminy Starling | 2020/4/12  | 3 | 0 | 28.63625650 | 77.07911080 | <a href="https://www.inaturalist.org/observations/48093175">https://www.inaturalist.org/observations/48093175</a>   |
| 804 | <i>Sturnus pagodarum</i> | Brahminy Starling | 2021/10/19 | 1 | 0 | 28.74947929 | 76.97080994 | <a href="https://www.inaturalist.org/observations/100934277">https://www.inaturalist.org/observations/100934277</a> |

|     |                   |                   |            |   |   |             |             |                                                                                                                     |
|-----|-------------------|-------------------|------------|---|---|-------------|-------------|---------------------------------------------------------------------------------------------------------------------|
| 805 | Sturnus pagodarum | Brahminy Starling | 2020/4/9   | 2 | 0 | 28.89597315 | 76.60661090 | <a href="https://www.inaturalist.org/observations/44880134">https://www.inaturalist.org/observations/44880134</a>   |
| 806 | Sturnus pagodarum | Brahminy Starling | 2020/3/30  | 1 | 0 | 29.02286260 | 79.48794120 | <a href="https://www.inaturalist.org/observations/48679208">https://www.inaturalist.org/observations/48679208</a>   |
| 807 | Sturnus pagodarum | Brahminy Starling | 2021/7/21  | 2 | 0 | 29.21803066 | 79.47446767 | <a href="https://www.inaturalist.org/observations/88066042">https://www.inaturalist.org/observations/88066042</a>   |
| 808 | Sturnus pagodarum | Brahminy Starling | 2019/12/28 | 1 | 0 | 29.53001380 | 78.77466030 | <a href="https://www.inaturalist.org/observations/45902796">https://www.inaturalist.org/observations/45902796</a>   |
| 809 | Sturnus pagodarum | Brahminy Starling | 2021/5/3   | 3 | 0 | 29.61269140 | 78.81177360 | <a href="https://www.inaturalist.org/observations/79267802">https://www.inaturalist.org/observations/79267802</a>   |
| 810 | Sturnus pagodarum | Brahminy Starling | 2021/5/3   | 1 | 0 | 29.61269140 | 78.81177360 | <a href="https://www.inaturalist.org/observations/79741486">https://www.inaturalist.org/observations/79741486</a>   |
| 811 | Sturnus pagodarum | Brahminy Starling | 2019/12/7  | 2 | 0 | 29.80588790 | 78.22610910 | <a href="https://www.inaturalist.org/observations/91721318">https://www.inaturalist.org/observations/91721318</a>   |
| 812 | Sturnus pagodarum | Brahminy Starling | 2021/10/31 | 1 | 0 | 29.91538060 | 78.09690760 | <a href="https://www.inaturalist.org/observations/99987341">https://www.inaturalist.org/observations/99987341</a>   |
| 813 | Sturnus pagodarum | Brahminy Starling | 2022/10/24 | 2 | 0 | 29.91538060 | 78.09690760 | <a href="https://www.inaturalist.org/observations/140050330">https://www.inaturalist.org/observations/140050330</a> |
| 814 | Sturnus pagodarum | Brahminy Starling | 2017/10/8  | 1 | 0 | 29.95232895 | 78.08444380 | <a href="https://www.inaturalist.org/observations/67239295">https://www.inaturalist.org/observations/67239295</a>   |
| 815 | Sturnus pagodarum | Brahminy Starling | 2014/3/27  | 2 | 0 | 30.13018680 | 78.32305590 | <a href="https://www.inaturalist.org/observations/66447190">https://www.inaturalist.org/observations/66447190</a>   |
| 816 | Sturnus pagodarum | Brahminy Starling | 2020/9/22  | 3 | 0 | 30.31582622 | 78.05774264 | <a href="https://www.inaturalist.org/observations/63170313">https://www.inaturalist.org/observations/63170313</a>   |
| 817 | Sturnus pagodarum | Brahminy Starling | 2021/9/5   | 1 | 0 | 30.31770112 | 78.05934191 | <a href="https://www.inaturalist.org/observations/93693585">https://www.inaturalist.org/observations/93693585</a>   |
| 818 | Sturnus pagodarum | Brahminy Starling | 2015/5/17  | 4 | 0 | 30.37330100 | 78.09976800 | <a href="http://www.inaturalist.org/observations/1505634">http://www.inaturalist.org/observations/1505634</a>       |
| 819 | Sturnus pagodarum | Brahminy Starling | 2020/3/14  | 3 | 0 | 30.44826650 | 77.75495360 | <a href="https://www.inaturalist.org/observations/122466872">https://www.inaturalist.org/observations/122466872</a> |
| 820 | Sturnus pagodarum | Brahminy Starling | 2022/8/6   | 1 | 0 | 30.45425900 | 78.11612670 | <a href="https://www.inaturalist.org/observations/129766624">https://www.inaturalist.org/observations/129766624</a> |
| 821 | Sturnus pagodarum | Brahminy Starling | 2022/5/30  | 1 | 0 | 30.74768842 | 76.73369698 | <a href="https://www.inaturalist.org/observations/119420704">https://www.inaturalist.org/observations/119420704</a> |
| 822 | Sturnus pagodarum | Brahminy Starling | 2018/12/31 | 2 | 0 | 30.79931764 | 76.71473065 | <a href="https://www.inaturalist.org/observations/135485827">https://www.inaturalist.org/observations/135485827</a> |
| 823 | Sturnus pagodarum | Brahminy Starling | 2018/6/17  | 4 | 0 | 31.09426150 | 75.58879890 | <a href="https://www.inaturalist.org/observations/13884976">https://www.inaturalist.org/observations/13884976</a>   |
| 824 | Sturnus pagodarum | Brahminy Starling | 2020/2/5   | 3 | 0 | 31.28849660 | 75.62032830 | <a href="https://www.inaturalist.org/observations/38327279">https://www.inaturalist.org/observations/38327279</a>   |
| 825 | Sturnus pagodarum | Brahminy Starling | 2016/6/23  | 1 | 0 | 31.29735380 | 75.61993450 | <a href="https://www.inaturalist.org/observations/72139960">https://www.inaturalist.org/observations/72139960</a>   |
| 826 | Sturnus pagodarum | Brahminy Starling | 2022/6/18  | 2 | 0 | 31.56283019 | 75.92019405 | <a href="https://www.inaturalist.org/observations/122792465">https://www.inaturalist.org/observations/122792465</a> |
| 827 | Sturnus pagodarum | Brahminy Starling | 2022/4/23  | 0 | 0 | 31.56289972 | 76.86260000 | <a href="https://www.inaturalist.org/observations/112506927">https://www.inaturalist.org/observations/112506927</a> |

|     |                          |                   |           |   |   |             |             |                                                                                                                   |
|-----|--------------------------|-------------------|-----------|---|---|-------------|-------------|-------------------------------------------------------------------------------------------------------------------|
| 828 | <i>Sturnus pagodarum</i> | Brahminy Starling | 2021/4/9  | 2 | 0 | 32.18494009 | 75.97162065 | <a href="https://www.inaturalist.org/observations/74161746">https://www.inaturalist.org/observations/74161746</a> |
| 829 | <i>Sturnus pagodarum</i> | Brahminy Starling | 2016/6/16 | 4 | 0 | 33.63001889 | 78.31598443 | <a href="https://www.inaturalist.org/observations/10524029">https://www.inaturalist.org/observations/10524029</a> |

| No | scientific name      | common name  | date       | NIA | NID | latitude    | longitude    | url                                                                                                                 |
|----|----------------------|--------------|------------|-----|-----|-------------|--------------|---------------------------------------------------------------------------------------------------------------------|
| 1  | Zoothera dauma       | Scaly Thrush | 2021/4/9   | 0   | 0   | 20.34002560 | 79.30590060  | <a href="https://www.inaturalist.org/observations/137389874">https://www.inaturalist.org/observations/137389874</a> |
| 2  | Zoothera dauma       | Scaly Thrush | 2020/11/14 | 0   | 0   | 21.63864667 | 87.57434333  | <a href="https://www.inaturalist.org/observations/141870559">https://www.inaturalist.org/observations/141870559</a> |
| 3  | Zoothera dauma       | Scaly Thrush | 2019/10/30 | 1   | 0   | 21.92905200 | 101.25512300 | <a href="https://www.inaturalist.org/observations/35069928">https://www.inaturalist.org/observations/35069928</a>   |
| 4  | Zoothera dauma       | Scaly Thrush | 2017/11/22 | 1   | 0   | 22.16941035 | 80.60857377  | <a href="https://www.inaturalist.org/observations/75612543">https://www.inaturalist.org/observations/75612543</a>   |
| 5  | Zoothera dauma       | Scaly Thrush | 2020/12/27 | 2   | 0   | 22.68107330 | 88.31542690  | <a href="https://www.inaturalist.org/observations/97994069">https://www.inaturalist.org/observations/97994069</a>   |
| 6  | Zoothera dauma       | Scaly Thrush | 2020/11/15 | 3   | 0   | 22.80744803 | 88.33444928  | <a href="https://www.inaturalist.org/observations/97994044">https://www.inaturalist.org/observations/97994044</a>   |
| 7  | Zoothera dauma       | Scaly Thrush | 2020/11/15 | 0   | 0   | 22.82111100 | 88.32028660  | <a href="https://www.inaturalist.org/observations/100463691">https://www.inaturalist.org/observations/100463691</a> |
| 8  | Zoothera dauma dauma | Scaly Thrush | 2019/10/18 | 1   | 0   | 22.88960999 | 120.66336010 | <a href="https://www.inaturalist.org/observations/90024637">https://www.inaturalist.org/observations/90024637</a>   |
| 9  | Zoothera dauma       | Scaly Thrush | 2019/11/1  | 0   | 0   | 22.89845033 | 120.66470400 | <a href="https://www.inaturalist.org/observations/89329264">https://www.inaturalist.org/observations/89329264</a>   |
| 10 | Zoothera dauma dauma | Scaly Thrush | 2020/1/15  | 1   | 0   | 23.67195297 | 120.79705760 | <a href="https://www.inaturalist.org/observations/40705248">https://www.inaturalist.org/observations/40705248</a>   |
| 11 | Zoothera dauma dauma | Scaly Thrush | 2020/2/8   | 1   | 0   | 23.67210721 | 120.79768000 | <a href="https://www.inaturalist.org/observations/99598611">https://www.inaturalist.org/observations/99598611</a>   |
| 12 | Zoothera dauma       | Scaly Thrush | 2015/3/30  | 1   | 0   | 23.67226932 | 120.79663200 | <a href="https://www.inaturalist.org/observations/14408752">https://www.inaturalist.org/observations/14408752</a>   |
| 13 | Zoothera dauma       | Scaly Thrush | 2021/1/18  | 1   | 0   | 23.67451780 | 120.79725150 | <a href="https://www.inaturalist.org/observations/98774250">https://www.inaturalist.org/observations/98774250</a>   |
| 14 | Zoothera dauma       | Scaly Thrush | 2017/5/3   | 1   | 0   | 23.67451800 | 120.79725200 | <a href="https://www.inaturalist.org/observations/137201689">https://www.inaturalist.org/observations/137201689</a> |
| 15 | Zoothera dauma dauma | Scaly Thrush | 2015/1/11  | 2   | 0   | 23.67486277 | 120.79865200 | <a href="https://www.inaturalist.org/observations/15249883">https://www.inaturalist.org/observations/15249883</a>   |
| 16 | Zoothera dauma       | Scaly Thrush | 2018/3/18  | 1   | 0   | 23.70942042 | 80.96692001  | <a href="https://www.inaturalist.org/observations/13472061">https://www.inaturalist.org/observations/13472061</a>   |
| 17 | Zoothera dauma       | Scaly Thrush | 2020/2/7   | 0   | 0   | 23.71775833 | 121.39712500 | <a href="https://www.inaturalist.org/observations/38383440">https://www.inaturalist.org/observations/38383440</a>   |
| 18 | Zoothera dauma       | Scaly Thrush | 2021/12/1  | 0   | 0   | 23.92500833 | 121.53785000 | <a href="https://www.inaturalist.org/observations/109915966">https://www.inaturalist.org/observations/109915966</a> |
| 19 | Zoothera dauma       | Scaly Thrush | 2015/12/27 | 2   | 0   | 24.07827454 | 88.69165298  | <a href="https://www.inaturalist.org/observations/117576673">https://www.inaturalist.org/observations/117576673</a> |
| 20 | Zoothera dauma dauma | Scaly Thrush | 2022/7/4   | 1   | 0   | 24.22895139 | 120.98249310 | <a href="https://www.inaturalist.org/observations/124709913">https://www.inaturalist.org/observations/124709913</a> |
| 21 | Zoothera dauma dauma | Scaly Thrush | 2020/2/27  | 0   | 0   | 24.35235870 | 121.30859720 | <a href="https://www.inaturalist.org/observations/39560162">https://www.inaturalist.org/observations/39560162</a>   |
| 22 | Zoothera dauma       | Scaly Thrush | 2021/1/4   | 2   | 0   | 24.43202000 | 92.33068900  | <a href="https://www.inaturalist.org/observations/69311740">https://www.inaturalist.org/observations/69311740</a>   |

|    |                      |              |           |   |   |             |              |                                                                                                                     |
|----|----------------------|--------------|-----------|---|---|-------------|--------------|---------------------------------------------------------------------------------------------------------------------|
| 23 | Zoothera dauma       | Scaly Thrush | 2011/12/7 | 1 | 0 | 24.43202000 | 92.33068900  | <a href="https://www.inaturalist.org/observations/103677179">https://www.inaturalist.org/observations/103677179</a> |
| 24 | Zoothera dauma dauma | Scaly Thrush | 2011/3/8  | 2 | 0 | 24.51007938 | 121.61211230 | <a href="https://www.inaturalist.org/observations/55775025">https://www.inaturalist.org/observations/55775025</a>   |
| 25 | Zoothera dauma dauma | Scaly Thrush | 2004/4/18 | 1 | 0 | 24.58809400 | 121.43420360 | <a href="https://www.inaturalist.org/observations/16280096">https://www.inaturalist.org/observations/16280096</a>   |
| 26 | Zoothera dauma dauma | Scaly Thrush | 2020/2/9  | 1 | 0 | 24.75641799 | 121.59463280 | <a href="https://www.inaturalist.org/observations/60854868">https://www.inaturalist.org/observations/60854868</a>   |
| 27 | Zoothera dauma       | Scaly Thrush | 2018/5/18 | 1 | 0 | 25.65234300 | 94.02299200  | <a href="https://www.inaturalist.org/observations/14281227">https://www.inaturalist.org/observations/14281227</a>   |
| 28 | Zoothera dauma       | Scaly Thrush | 2022/1/24 | 3 | 0 | 26.85552014 | 75.84058440  | <a href="https://www.inaturalist.org/observations/106661401">https://www.inaturalist.org/observations/106661401</a> |
| 29 | Zoothera dauma       | Scaly Thrush | 2012/1/7  | 0 | 0 | 26.93240100 | 92.87721600  | <a href="https://www.inaturalist.org/observations/103804784">https://www.inaturalist.org/observations/103804784</a> |
| 30 | Zoothera dauma       | Scaly Thrush | 2014/1/15 | 4 | 0 | 26.93248900 | 92.87766400  | <a href="http://www.inaturalist.org/observations/548834">http://www.inaturalist.org/observations/548834</a>         |
| 31 | Zoothera dauma       | Scaly Thrush | 2014/3/20 | 2 | 0 | 26.94035937 | 92.85798903  | <a href="https://www.inaturalist.org/observations/7427098">https://www.inaturalist.org/observations/7427098</a>     |
| 32 | Zoothera dauma       | Scaly Thrush | 2022/1/1  | 1 | 0 | 26.94543922 | 94.16107312  | <a href="https://www.inaturalist.org/observations/104106880">https://www.inaturalist.org/observations/104106880</a> |
| 33 | Zoothera dauma       | Scaly Thrush | 2021/4/20 | 1 | 0 | 27.08326379 | 88.70029541  | <a href="https://www.inaturalist.org/observations/97787062">https://www.inaturalist.org/observations/97787062</a>   |
| 34 | Zoothera dauma       | Scaly Thrush | 2021/2/9  | 0 | 0 | 27.45433499 | 94.90310859  | <a href="https://www.inaturalist.org/observations/93234676">https://www.inaturalist.org/observations/93234676</a>   |
| 35 | Zoothera dauma       | Scaly Thrush | 2021/4/5  | 1 | 0 | 29.34430900 | 79.52943180  | <a href="https://www.inaturalist.org/observations/101930393">https://www.inaturalist.org/observations/101930393</a> |
| 36 | Zoothera dauma       | Scaly Thrush | 2016/1/22 | 2 | 0 | 29.34430900 | 79.52943180  | <a href="https://www.inaturalist.org/observations/127084473">https://www.inaturalist.org/observations/127084473</a> |
| 37 | Zoothera dauma       | Scaly Thrush | 2006/1/24 | 3 | 0 | 29.34730000 | 79.52920000  | <a href="https://www.inaturalist.org/observations/104735051">https://www.inaturalist.org/observations/104735051</a> |
| 38 | Zoothera dauma       | Scaly Thrush | 2017/3/15 | 3 | 0 | 29.36891903 | 79.57329595  | <a href="https://www.inaturalist.org/observations/109180484">https://www.inaturalist.org/observations/109180484</a> |
| 39 | Zoothera dauma       | Scaly Thrush | 2022/4/21 | 4 | 0 | 29.40366320 | 79.55927610  | <a href="https://www.inaturalist.org/observations/113278401">https://www.inaturalist.org/observations/113278401</a> |
| 40 | Zoothera dauma       | Scaly Thrush | 2016/12/4 | 1 | 0 | 29.97111100 | 78.20360300  | <a href="https://www.inaturalist.org/observations/19578120">https://www.inaturalist.org/observations/19578120</a>   |
| 41 | Zoothera dauma       | Scaly Thrush | 2019/3/15 | 2 | 0 | 29.99089574 | 78.29011934  | <a href="https://www.inaturalist.org/observations/87138102">https://www.inaturalist.org/observations/87138102</a>   |

| No | scientific name          | common name  | date       | NIA | NID | latitude    | longitude    | url                                                                                                                 |
|----|--------------------------|--------------|------------|-----|-----|-------------|--------------|---------------------------------------------------------------------------------------------------------------------|
| 1  | Corvus corone            | Carrion Crow | 2022/4/13  | 0   | 0   | 22.33959889 | 114.18926070 | <a href="https://www.inaturalist.org/observations/114768353">https://www.inaturalist.org/observations/114768353</a> |
| 2  | Corvus corone            | Carrion Crow | 2022/3/16  | 1   | 0   | 22.47581188 | 114.03583120 | <a href="https://www.inaturalist.org/observations/115135427">https://www.inaturalist.org/observations/115135427</a> |
| 3  | Corvus corone            | Carrion Crow | 2022/3/3   | 1   | 0   | 22.48713213 | 114.03205380 | <a href="https://www.inaturalist.org/observations/118537826">https://www.inaturalist.org/observations/118537826</a> |
| 4  | Corvus corone            | Carrion Crow | 2021/11/25 | 1   | 0   | 22.57641306 | 114.08196800 | <a href="https://www.inaturalist.org/observations/102084677">https://www.inaturalist.org/observations/102084677</a> |
| 5  | Corvus corone            | Carrion Crow | 2021/11/10 | 0   | 0   | 23.62802667 | 120.71205320 | <a href="https://www.inaturalist.org/observations/100741548">https://www.inaturalist.org/observations/100741548</a> |
| 6  | Corvus corone            | Carrion Crow | 2022/5/8   | 0   | 0   | 24.57724614 | 118.07133800 | <a href="https://www.inaturalist.org/observations/116055138">https://www.inaturalist.org/observations/116055138</a> |
| 7  | Corvus corone            | Carrion Crow | 2018/11/19 | 1   | 0   | 25.11146665 | 121.47095580 | <a href="https://www.inaturalist.org/observations/18493721">https://www.inaturalist.org/observations/18493721</a>   |
| 8  | Corvus corone orientalis | Carrion Crow | 2019/3/10  | 2   | 0   | 25.11403259 | 121.49048780 | <a href="https://www.inaturalist.org/observations/21144373">https://www.inaturalist.org/observations/21144373</a>   |
| 9  | Corvus corone            | Carrion Crow | 2018/11/20 | 1   | 0   | 25.11576333 | 121.47145830 | <a href="https://www.inaturalist.org/observations/18730617">https://www.inaturalist.org/observations/18730617</a>   |
| 10 | Corvus corone            | Carrion Crow | 2022/1/22  | 0   | 0   | 26.84449356 | 104.24263370 | <a href="https://www.inaturalist.org/observations/105712704">https://www.inaturalist.org/observations/105712704</a> |
| 11 | Corvus corone            | Carrion Crow | 2022/1/23  | 0   | 0   | 26.84449356 | 104.24263370 | <a href="https://www.inaturalist.org/observations/105716513">https://www.inaturalist.org/observations/105716513</a> |
| 12 | Corvus corone            | Carrion Crow | 2022/1/23  | 1   | 0   | 26.84449356 | 104.24263370 | <a href="https://www.inaturalist.org/observations/105758079">https://www.inaturalist.org/observations/105758079</a> |
| 13 | Corvus corone            | Carrion Crow | 2022/1/25  | 1   | 0   | 26.84449356 | 104.24263370 | <a href="https://www.inaturalist.org/observations/107757275">https://www.inaturalist.org/observations/107757275</a> |
| 14 | Corvus corone            | Carrion Crow | 2022/1/25  | 1   | 0   | 26.84449356 | 104.24263370 | <a href="https://www.inaturalist.org/observations/107757279">https://www.inaturalist.org/observations/107757279</a> |
| 15 | Corvus corone            | Carrion Crow | 2022/1/25  | 1   | 0   | 26.86281421 | 104.19353500 | <a href="https://www.inaturalist.org/observations/107757288">https://www.inaturalist.org/observations/107757288</a> |
| 16 | Corvus corone            | Carrion Crow | 2022/1/23  | 1   | 0   | 26.86900759 | 104.15914740 | <a href="https://www.inaturalist.org/observations/105758009">https://www.inaturalist.org/observations/105758009</a> |
| 17 | Corvus corone            | Carrion Crow | 2022/1/23  | 0   | 0   | 26.86900759 | 104.15914740 | <a href="https://www.inaturalist.org/observations/105758020">https://www.inaturalist.org/observations/105758020</a> |
| 18 | Corvus corone            | Carrion Crow | 2022/1/23  | 0   | 0   | 26.89363246 | 104.20629510 | <a href="https://www.inaturalist.org/observations/105757998">https://www.inaturalist.org/observations/105757998</a> |
| 19 | Corvus corone            | Carrion Crow | 2022/1/23  | 0   | 0   | 26.89363246 | 104.20629510 | <a href="https://www.inaturalist.org/observations/105758122">https://www.inaturalist.org/observations/105758122</a> |
| 20 | Corvus corone            | Carrion Crow | 2020/8/13  | 1   | 0   | 27.48112378 | 95.58913497  | <a href="https://www.inaturalist.org/observations/56377981">https://www.inaturalist.org/observations/56377981</a>   |
| 21 | Corvus corone orientalis | Carrion Crow | 2022/12/10 | 0   | 0   | 30.23864740 | 119.75016590 | <a href="https://www.inaturalist.org/observations/144144878">https://www.inaturalist.org/observations/144144878</a> |
| 22 | Corvus corone            | Carrion Crow | 2021/10/23 | 0   | 0   | 32.20363101 | 119.01338020 | <a href="https://www.inaturalist.org/observations/120273566">https://www.inaturalist.org/observations/120273566</a> |



|    |               |              |            |   |   |             |              |                                                                                                                     |
|----|---------------|--------------|------------|---|---|-------------|--------------|---------------------------------------------------------------------------------------------------------------------|
| 23 | Corvus corone | Carrion Crow | 2013/12/2  | 1 | 0 | 33.63001889 | 78.31598443  | <a href="https://www.inaturalist.org/observations/10524035">https://www.inaturalist.org/observations/10524035</a>   |
| 24 | Corvus corone | Carrion Crow | 2019/6/26  | 0 | 0 | 34.05699393 | 77.64361890  | <a href="https://www.inaturalist.org/observations/104204430">https://www.inaturalist.org/observations/104204430</a> |
| 25 | Corvus corone | Carrion Crow | 2019/6/26  | 0 | 0 | 34.08592744 | 77.60142859  | <a href="https://www.inaturalist.org/observations/104204421">https://www.inaturalist.org/observations/104204421</a> |
| 26 | Corvus corone | Carrion Crow | 2020/12/11 | 1 | 0 | 34.76016235 | 113.65845490 | <a href="https://www.inaturalist.org/observations/66412787">https://www.inaturalist.org/observations/66412787</a>   |
| 27 | Corvus corone | Carrion Crow | 2020/12/25 | 1 | 0 | 34.76357833 | 113.66932330 | <a href="https://www.inaturalist.org/observations/67039575">https://www.inaturalist.org/observations/67039575</a>   |
| 28 | Corvus corone | Carrion Crow | 2021/12/17 | 1 | 0 | 34.76360667 | 113.66957000 | <a href="https://www.inaturalist.org/observations/103193767">https://www.inaturalist.org/observations/103193767</a> |
| 29 | Corvus corone | Carrion Crow | 2021/12/17 | 1 | 0 | 34.76361667 | 113.66944330 | <a href="https://www.inaturalist.org/observations/103193768">https://www.inaturalist.org/observations/103193768</a> |
| 30 | Corvus corone | Carrion Crow | 2021/12/17 | 0 | 0 | 34.76365500 | 113.66898330 | <a href="https://www.inaturalist.org/observations/103193770">https://www.inaturalist.org/observations/103193770</a> |
| 31 | Corvus corone | Carrion Crow | 2021/1/13  | 1 | 0 | 34.81084167 | 113.71343830 | <a href="https://www.inaturalist.org/observations/68029887">https://www.inaturalist.org/observations/68029887</a>   |
| 32 | Corvus corone | Carrion Crow | 2021/1/10  | 0 | 0 | 34.81501333 | 113.70922830 | <a href="https://www.inaturalist.org/observations/67841450">https://www.inaturalist.org/observations/67841450</a>   |
| 33 | Corvus corone | Carrion Crow | 2021/12/3  | 1 | 0 | 34.81984667 | 113.70502670 | <a href="https://www.inaturalist.org/observations/102527238">https://www.inaturalist.org/observations/102527238</a> |
| 34 | Corvus corone | Carrion Crow | 2021/3/8   | 1 | 0 | 34.82228333 | 113.71604170 | <a href="https://www.inaturalist.org/observations/70811129">https://www.inaturalist.org/observations/70811129</a>   |
| 35 | Corvus corone | Carrion Crow | 2021/2/7   | 0 | 0 | 39.57724641 | 117.28704010 | <a href="https://www.inaturalist.org/observations/142867116">https://www.inaturalist.org/observations/142867116</a> |
| 36 | Corvus corone | Carrion Crow | 2022/11/17 | 1 | 0 | 39.73345924 | 116.02237780 | <a href="https://www.inaturalist.org/observations/142218289">https://www.inaturalist.org/observations/142218289</a> |
| 37 | Corvus corone | Carrion Crow | 2018/5/20  | 1 | 0 | 39.88152373 | 116.40669140 | <a href="https://www.inaturalist.org/observations/104980206">https://www.inaturalist.org/observations/104980206</a> |
| 38 | Corvus corone | Carrion Crow | 2022/2/19  | 1 | 0 | 39.94144568 | 116.33714370 | <a href="https://www.inaturalist.org/observations/125245088">https://www.inaturalist.org/observations/125245088</a> |
| 39 | Corvus corone | Carrion Crow | 2021/12/19 | 2 | 0 | 39.99966740 | 116.32644390 | <a href="https://www.inaturalist.org/observations/144057175">https://www.inaturalist.org/observations/144057175</a> |
| 40 | Corvus corone | Carrion Crow | 2021/2/7   | 0 | 0 | 40.00313439 | 116.33068750 | <a href="https://www.inaturalist.org/observations/69482932">https://www.inaturalist.org/observations/69482932</a>   |
| 41 | Corvus corone | Carrion Crow | 2021/2/17  | 1 | 0 | 40.13304615 | 116.31133980 | <a href="https://www.inaturalist.org/observations/122030264">https://www.inaturalist.org/observations/122030264</a> |
| 42 | Corvus corone | Carrion Crow | 2019/2/8   | 2 | 0 | 40.13791500 | 116.30024500 | <a href="https://www.inaturalist.org/observations/20201445">https://www.inaturalist.org/observations/20201445</a>   |
| 43 | Corvus corone | Carrion Crow | 2022/7/8   | 0 | 0 | 43.62929811 | 126.18407450 | <a href="https://www.inaturalist.org/observations/128546351">https://www.inaturalist.org/observations/128546351</a> |

| No | scientific name  | common name    | date       | NIA | NID | latitude    | longitude    | url                                                                                                                 |
|----|------------------|----------------|------------|-----|-----|-------------|--------------|---------------------------------------------------------------------------------------------------------------------|
| 1  | Emberiza rustica | Rustic Bunting | 2021/11/25 | 1   | 0   | 22.24893438 | 113.83398930 | <a href="https://www.inaturalist.org/observations/101873556">https://www.inaturalist.org/observations/101873556</a> |
| 2  | Emberiza rustica | Rustic Bunting | 2022/12/6  | 4   | 0   | 22.43561851 | 114.16662610 | <a href="https://www.inaturalist.org/observations/143777807">https://www.inaturalist.org/observations/143777807</a> |
| 3  | Emberiza rustica | Rustic Bunting | 2019/11/27 | 2   | 0   | 22.43962292 | 114.13033840 | <a href="https://www.inaturalist.org/observations/36126509">https://www.inaturalist.org/observations/36126509</a>   |
| 4  | Emberiza rustica | Rustic Bunting | 2020/11/29 | 1   | 0   | 22.45100631 | 114.19481980 | <a href="https://www.inaturalist.org/observations/69293527">https://www.inaturalist.org/observations/69293527</a>   |
| 5  | Emberiza rustica | Rustic Bunting | 2021/11/16 | 1   | 0   | 22.45698562 | 114.14424200 | <a href="https://www.inaturalist.org/observations/118537725">https://www.inaturalist.org/observations/118537725</a> |
| 6  | Emberiza rustica | Rustic Bunting | 2019/11/10 | 1   | 0   | 22.48119162 | 114.16244750 | <a href="https://www.inaturalist.org/observations/49838896">https://www.inaturalist.org/observations/49838896</a>   |
| 7  | Emberiza rustica | Rustic Bunting | 2021/11/23 | 1   | 0   | 22.49422885 | 114.03774380 | <a href="https://www.inaturalist.org/observations/115141212">https://www.inaturalist.org/observations/115141212</a> |
| 8  | Emberiza rustica | Rustic Bunting | 2019/11/20 | 3   | 0   | 22.50303437 | 114.08788210 | <a href="https://www.inaturalist.org/observations/35880957">https://www.inaturalist.org/observations/35880957</a>   |
| 9  | Emberiza rustica | Rustic Bunting | 2020/11/19 | 1   | 0   | 22.52557277 | 114.05825530 | <a href="https://www.inaturalist.org/observations/65223149">https://www.inaturalist.org/observations/65223149</a>   |
| 10 | Emberiza rustica | Rustic Bunting | 2020/11/14 | 1   | 0   | 22.53125789 | 114.16877760 | <a href="https://www.inaturalist.org/observations/65148415">https://www.inaturalist.org/observations/65148415</a>   |
| 11 | Emberiza rustica | Rustic Bunting | 2021/11/21 | 3   | 0   | 22.53969150 | 114.04483450 | <a href="https://www.inaturalist.org/observations/101701649">https://www.inaturalist.org/observations/101701649</a> |
| 12 | Emberiza rustica | Rustic Bunting | 2022/2/13  | 1   | 0   | 22.54311806 | 114.21139800 | <a href="https://www.inaturalist.org/observations/118537812">https://www.inaturalist.org/observations/118537812</a> |
| 13 | Emberiza rustica | Rustic Bunting | 2020/11/14 | 2   | 0   | 22.55346383 | 114.05861720 | <a href="https://www.inaturalist.org/observations/64848462">https://www.inaturalist.org/observations/64848462</a>   |
| 14 | Emberiza rustica | Rustic Bunting | 2021/11/26 | 1   | 0   | 22.56364055 | 114.12162540 | <a href="https://www.inaturalist.org/observations/101948854">https://www.inaturalist.org/observations/101948854</a> |
| 15 | Emberiza rustica | Rustic Bunting | 2020/12/8  | 1   | 0   | 22.56419333 | 114.10907670 | <a href="https://www.inaturalist.org/observations/70608829">https://www.inaturalist.org/observations/70608829</a>   |
| 16 | Emberiza rustica | Rustic Bunting | 2021/11/29 | 2   | 0   | 22.57981286 | 114.15711310 | <a href="https://www.inaturalist.org/observations/102171244">https://www.inaturalist.org/observations/102171244</a> |
| 17 | Emberiza rustica | Rustic Bunting | 2021/11/13 | 1   | 0   | 22.58300354 | 114.10753920 | <a href="https://www.inaturalist.org/observations/118537719">https://www.inaturalist.org/observations/118537719</a> |
| 18 | Emberiza rustica | Rustic Bunting | 2018/11/25 | 2   | 0   | 22.59467072 | 114.00421880 | <a href="https://www.inaturalist.org/observations/20970731">https://www.inaturalist.org/observations/20970731</a>   |
| 19 | Emberiza rustica | Rustic Bunting | 2022/12/2  | 1   | 0   | 22.59669824 | 114.12830620 | <a href="https://www.inaturalist.org/observations/143473333">https://www.inaturalist.org/observations/143473333</a> |
| 20 | Emberiza rustica | Rustic Bunting | 2021/12/3  | 2   | 0   | 23.89535679 | 121.59353950 | <a href="https://www.inaturalist.org/observations/103079123">https://www.inaturalist.org/observations/103079123</a> |
| 21 | Emberiza rustica | Rustic Bunting | 2021/12/17 | 2   | 0   | 23.95405760 | 121.57972210 | <a href="https://www.inaturalist.org/observations/103416924">https://www.inaturalist.org/observations/103416924</a> |
| 22 | Emberiza rustica | Rustic Bunting | 2021/12/3  | 1   | 0   | 23.96057053 | 121.54915480 | <a href="https://www.inaturalist.org/observations/103079124">https://www.inaturalist.org/observations/103079124</a> |

|    |                  |                |            |   |   |             |              |                                                                                                                     |
|----|------------------|----------------|------------|---|---|-------------|--------------|---------------------------------------------------------------------------------------------------------------------|
| 23 | Emberiza rustica | Rustic Bunting | 2021/12/3  | 2 | 0 | 23.98402975 | 121.40670510 | <a href="https://www.inaturalist.org/observations/103079125">https://www.inaturalist.org/observations/103079125</a> |
| 24 | Emberiza rustica | Rustic Bunting | 2017/11/2  | 1 | 0 | 25.06898776 | 121.19893420 | <a href="https://www.inaturalist.org/observations/50201466">https://www.inaturalist.org/observations/50201466</a>   |
| 25 | Emberiza rustica | Rustic Bunting | 2022/12/26 | 1 | 0 | 25.08668527 | 121.87151700 | <a href="https://www.inaturalist.org/observations/145104506">https://www.inaturalist.org/observations/145104506</a> |
| 26 | Emberiza rustica | Rustic Bunting | 2019/4/18  | 2 | 0 | 25.10208420 | 121.84127780 | <a href="https://www.inaturalist.org/observations/98798755">https://www.inaturalist.org/observations/98798755</a>   |
| 27 | Emberiza rustica | Rustic Bunting | 2019/12/14 | 2 | 0 | 28.62209091 | 116.04967290 | <a href="https://www.inaturalist.org/observations/36730236">https://www.inaturalist.org/observations/36730236</a>   |
| 28 | Emberiza rustica | Rustic Bunting | 2022/12/8  | 1 | 0 | 29.03413842 | 116.15885400 | <a href="https://www.inaturalist.org/observations/144411681">https://www.inaturalist.org/observations/144411681</a> |
| 29 | Emberiza rustica | Rustic Bunting | 2022/12/8  | 1 | 0 | 29.16312959 | 116.07781100 | <a href="https://www.inaturalist.org/observations/144411682">https://www.inaturalist.org/observations/144411682</a> |
| 30 | Emberiza rustica | Rustic Bunting | 2021/11/19 | 1 | 0 | 29.69745392 | 121.41095270 | <a href="https://www.inaturalist.org/observations/101608155">https://www.inaturalist.org/observations/101608155</a> |
| 31 | Emberiza rustica | Rustic Bunting | 2022/2/28  | 1 | 0 | 29.80196253 | 120.99164560 | <a href="https://www.inaturalist.org/observations/108161410">https://www.inaturalist.org/observations/108161410</a> |
| 32 | Emberiza rustica | Rustic Bunting | 2022/2/28  | 1 | 0 | 29.87134419 | 120.96567530 | <a href="https://www.inaturalist.org/observations/107693688">https://www.inaturalist.org/observations/107693688</a> |
| 33 | Emberiza rustica | Rustic Bunting | 2022/2/28  | 1 | 0 | 30.06516841 | 120.88677420 | <a href="https://www.inaturalist.org/observations/107693660">https://www.inaturalist.org/observations/107693660</a> |
| 34 | Emberiza rustica | Rustic Bunting | 2009/11/6  | 2 | 0 | 30.22091006 | 121.11751770 | <a href="https://www.inaturalist.org/observations/38630717">https://www.inaturalist.org/observations/38630717</a>   |
| 35 | Emberiza rustica | Rustic Bunting | 2022/1/17  | 1 | 0 | 30.22586642 | 119.81570300 | <a href="https://www.inaturalist.org/observations/105207194">https://www.inaturalist.org/observations/105207194</a> |
| 36 | Emberiza rustica | Rustic Bunting | 2021/12/6  | 1 | 0 | 30.22750061 | 119.91754730 | <a href="https://www.inaturalist.org/observations/102643311">https://www.inaturalist.org/observations/102643311</a> |
| 37 | Emberiza rustica | Rustic Bunting | 2021/12/18 | 1 | 0 | 30.22921826 | 119.92635530 | <a href="https://www.inaturalist.org/observations/103516928">https://www.inaturalist.org/observations/103516928</a> |
| 38 | Emberiza rustica | Rustic Bunting | 2022/1/17  | 1 | 0 | 30.23756161 | 119.88176850 | <a href="https://www.inaturalist.org/observations/105207193">https://www.inaturalist.org/observations/105207193</a> |
| 39 | Emberiza rustica | Rustic Bunting | 2021/12/15 | 1 | 0 | 30.24247150 | 119.86056030 | <a href="https://www.inaturalist.org/observations/103185409">https://www.inaturalist.org/observations/103185409</a> |
| 40 | Emberiza rustica | Rustic Bunting | 2022/2/5   | 1 | 0 | 30.25512650 | 119.80739300 | <a href="https://www.inaturalist.org/observations/106368213">https://www.inaturalist.org/observations/106368213</a> |
| 41 | Emberiza rustica | Rustic Bunting | 2022/12/25 | 1 | 0 | 30.27275375 | 119.91515270 | <a href="https://www.inaturalist.org/observations/145199396">https://www.inaturalist.org/observations/145199396</a> |
| 42 | Emberiza rustica | Rustic Bunting | 2022/2/14  | 1 | 0 | 30.27874971 | 119.80879900 | <a href="https://www.inaturalist.org/observations/107364053">https://www.inaturalist.org/observations/107364053</a> |
| 43 | Emberiza rustica | Rustic Bunting | 2022/12/25 | 1 | 0 | 30.27898113 | 120.16772610 | <a href="https://www.inaturalist.org/observations/145200082">https://www.inaturalist.org/observations/145200082</a> |
| 44 | Emberiza rustica | Rustic Bunting | 2021/12/15 | 1 | 0 | 30.28982228 | 119.95805470 | <a href="https://www.inaturalist.org/observations/103185408">https://www.inaturalist.org/observations/103185408</a> |
| 45 | Emberiza rustica | Rustic Bunting | 2021/12/6  | 1 | 0 | 30.29569142 | 119.84608440 | <a href="https://www.inaturalist.org/observations/102691272">https://www.inaturalist.org/observations/102691272</a> |

|    |                  |                |            |   |   |             |              |                                                                                                                     |
|----|------------------|----------------|------------|---|---|-------------|--------------|---------------------------------------------------------------------------------------------------------------------|
| 46 | Emberiza rustica | Rustic Bunting | 2022/11/1  | 1 | 0 | 30.30124407 | 120.13177070 | <a href="https://www.inaturalist.org/observations/141382128">https://www.inaturalist.org/observations/141382128</a> |
| 47 | Emberiza rustica | Rustic Bunting | 2021/12/27 | 2 | 0 | 30.32448010 | 119.85750250 | <a href="https://www.inaturalist.org/observations/103797441">https://www.inaturalist.org/observations/103797441</a> |
| 48 | Emberiza rustica | Rustic Bunting | 2021/12/15 | 1 | 0 | 30.32881614 | 119.87825060 | <a href="https://www.inaturalist.org/observations/103185406">https://www.inaturalist.org/observations/103185406</a> |
| 49 | Emberiza rustica | Rustic Bunting | 2021/12/15 | 1 | 0 | 30.32977169 | 119.88114440 | <a href="https://www.inaturalist.org/observations/103185410">https://www.inaturalist.org/observations/103185410</a> |
| 50 | Emberiza rustica | Rustic Bunting | 2021/12/6  | 1 | 0 | 30.33393964 | 119.85685100 | <a href="https://www.inaturalist.org/observations/102643309">https://www.inaturalist.org/observations/102643309</a> |
| 51 | Emberiza rustica | Rustic Bunting | 2021/1/7   | 2 | 0 | 30.34828723 | 119.96748630 | <a href="https://www.inaturalist.org/observations/143821771">https://www.inaturalist.org/observations/143821771</a> |
| 52 | Emberiza rustica | Rustic Bunting | 2021/12/18 | 1 | 0 | 30.36246987 | 119.97428960 | <a href="https://www.inaturalist.org/observations/103516328">https://www.inaturalist.org/observations/103516328</a> |
| 53 | Emberiza rustica | Rustic Bunting | 2022/1/17  | 1 | 0 | 30.37040115 | 119.87488700 | <a href="https://www.inaturalist.org/observations/106849320">https://www.inaturalist.org/observations/106849320</a> |
| 54 | Emberiza rustica | Rustic Bunting | 2022/1/17  | 1 | 0 | 30.37823485 | 119.81734200 | <a href="https://www.inaturalist.org/observations/105213234">https://www.inaturalist.org/observations/105213234</a> |
| 55 | Emberiza rustica | Rustic Bunting | 2021/12/27 | 1 | 0 | 30.38014700 | 119.98457220 | <a href="https://www.inaturalist.org/observations/103797437">https://www.inaturalist.org/observations/103797437</a> |
| 56 | Emberiza rustica | Rustic Bunting | 2022/12/3  | 2 | 0 | 30.38979096 | 119.83463170 | <a href="https://www.inaturalist.org/observations/143997018">https://www.inaturalist.org/observations/143997018</a> |
| 57 | Emberiza rustica | Rustic Bunting | 2021/12/15 | 1 | 0 | 30.39475355 | 119.84277280 | <a href="https://www.inaturalist.org/observations/103185404">https://www.inaturalist.org/observations/103185404</a> |
| 58 | Emberiza rustica | Rustic Bunting | 2019/12/22 | 1 | 0 | 30.68035473 | 114.16445320 | <a href="https://www.inaturalist.org/observations/109638778">https://www.inaturalist.org/observations/109638778</a> |
| 59 | Emberiza rustica | Rustic Bunting | 2018/1/20  | 1 | 0 | 30.98096460 | 121.89577630 | <a href="https://www.inaturalist.org/observations/9597444">https://www.inaturalist.org/observations/9597444</a>     |
| 60 | Emberiza rustica | Rustic Bunting | 2021/11/26 | 1 | 0 | 30.98922046 | 121.80978670 | <a href="https://www.inaturalist.org/observations/102001205">https://www.inaturalist.org/observations/102001205</a> |
| 61 | Emberiza rustica | Rustic Bunting | 2020/2/29  | 2 | 0 | 31.02865621 | 117.08116440 | <a href="https://www.inaturalist.org/observations/39348791">https://www.inaturalist.org/observations/39348791</a>   |
| 62 | Emberiza rustica | Rustic Bunting | 2021/1/12  | 1 | 0 | 31.43391688 | 120.42805150 | <a href="https://www.inaturalist.org/observations/67947916">https://www.inaturalist.org/observations/67947916</a>   |
| 63 | Emberiza rustica | Rustic Bunting | 2020/11/13 | 1 | 0 | 31.55830589 | 119.52041310 | <a href="https://www.inaturalist.org/observations/69653534">https://www.inaturalist.org/observations/69653534</a>   |
| 64 | Emberiza rustica | Rustic Bunting | 2022/1/16  | 1 | 0 | 31.83149443 | 118.73265560 | <a href="https://www.inaturalist.org/observations/120274289">https://www.inaturalist.org/observations/120274289</a> |
| 65 | Emberiza rustica | Rustic Bunting | 2022/2/19  | 2 | 0 | 31.98829776 | 118.71675840 | <a href="https://www.inaturalist.org/observations/112548804">https://www.inaturalist.org/observations/112548804</a> |
| 66 | Emberiza rustica | Rustic Bunting | 2022/2/19  | 2 | 0 | 32.06775501 | 118.40081390 | <a href="https://www.inaturalist.org/observations/112548404">https://www.inaturalist.org/observations/112548404</a> |
| 67 | Emberiza rustica | Rustic Bunting | 2022/2/2   | 2 | 0 | 32.26909422 | 119.15384350 | <a href="https://www.inaturalist.org/observations/112935693">https://www.inaturalist.org/observations/112935693</a> |
| 68 | Emberiza rustica | Rustic Bunting | 2021/1/3   | 1 | 0 | 32.35382147 | 119.18477160 | <a href="https://www.inaturalist.org/observations/88710623">https://www.inaturalist.org/observations/88710623</a>   |

|    |                  |                |            |   |   |             |              |                                                                                                                     |
|----|------------------|----------------|------------|---|---|-------------|--------------|---------------------------------------------------------------------------------------------------------------------|
| 69 | Emberiza rustica | Rustic Bunting | 2021/2/16  | 1 | 0 | 32.41572914 | 119.45830850 | <a href="https://www.inaturalist.org/observations/142645649">https://www.inaturalist.org/observations/142645649</a> |
| 70 | Emberiza rustica | Rustic Bunting | 2019/1/6   | 2 | 0 | 32.46609872 | 121.04112000 | <a href="https://www.inaturalist.org/observations/34010399">https://www.inaturalist.org/observations/34010399</a>   |
| 71 | Emberiza rustica | Rustic Bunting | 2017/12/2  | 1 | 0 | 33.47206701 | 120.45108470 | <a href="https://www.inaturalist.org/observations/10232408">https://www.inaturalist.org/observations/10232408</a>   |
| 72 | Emberiza rustica | Rustic Bunting | 2022/2/26  | 1 | 0 | 34.40075738 | 119.37009450 | <a href="https://www.inaturalist.org/observations/123573386">https://www.inaturalist.org/observations/123573386</a> |
| 73 | Emberiza rustica | Rustic Bunting | 2022/2/20  | 1 | 0 | 34.81672794 | 113.73792890 | <a href="https://www.inaturalist.org/observations/107090862">https://www.inaturalist.org/observations/107090862</a> |
| 74 | Emberiza rustica | Rustic Bunting | 2021/1/10  | 2 | 0 | 34.87432871 | 113.60887650 | <a href="https://www.inaturalist.org/observations/67841402">https://www.inaturalist.org/observations/67841402</a>   |
| 75 | Emberiza rustica | Rustic Bunting | 2022/2/20  | 1 | 0 | 34.92904251 | 113.66440220 | <a href="https://www.inaturalist.org/observations/107090863">https://www.inaturalist.org/observations/107090863</a> |
| 76 | Emberiza rustica | Rustic Bunting | 2020/11/1  | 1 | 0 | 36.21625635 | 120.63218270 | <a href="https://www.inaturalist.org/observations/105315430">https://www.inaturalist.org/observations/105315430</a> |
| 77 | Emberiza rustica | Rustic Bunting | 2021/11/16 | 2 | 0 | 36.39556897 | 120.33012700 | <a href="https://www.inaturalist.org/observations/103684205">https://www.inaturalist.org/observations/103684205</a> |
| 78 | Emberiza rustica | Rustic Bunting | 2021/2/26  | 1 | 0 | 39.12181143 | 117.00610730 | <a href="https://www.inaturalist.org/observations/142867365">https://www.inaturalist.org/observations/142867365</a> |
| 79 | Emberiza rustica | Rustic Bunting | 2021/2/7   | 1 | 0 | 39.51820006 | 118.03380250 | <a href="https://www.inaturalist.org/observations/78557330">https://www.inaturalist.org/observations/78557330</a>   |
| 80 | Emberiza rustica | Rustic Bunting | 2021/2/21  | 1 | 0 | 39.85170267 | 116.38153770 | <a href="https://www.inaturalist.org/observations/121418599">https://www.inaturalist.org/observations/121418599</a> |
| 81 | Emberiza rustica | Rustic Bunting | 2021/1/3   | 1 | 0 | 40.00314305 | 116.74687200 | <a href="https://www.inaturalist.org/observations/67959319">https://www.inaturalist.org/observations/67959319</a>   |
| 82 | Emberiza rustica | Rustic Bunting | 2022/12/4  | 1 | 0 | 40.02359303 | 116.77019800 | <a href="https://www.inaturalist.org/observations/143672701">https://www.inaturalist.org/observations/143672701</a> |
| 83 | Emberiza rustica | Rustic Bunting | 2019/2/5   | 1 | 0 | 40.04997745 | 116.78280110 | <a href="https://www.inaturalist.org/observations/20121205">https://www.inaturalist.org/observations/20121205</a>   |
| 84 | Emberiza rustica | Rustic Bunting | 2020/2/19  | 2 | 0 | 40.05726532 | 116.78294740 | <a href="https://www.inaturalist.org/observations/38832568">https://www.inaturalist.org/observations/38832568</a>   |
| 85 | Emberiza rustica | Rustic Bunting | 2018/12/31 | 2 | 0 | 40.07405730 | 116.86239340 | <a href="https://www.inaturalist.org/observations/19332654">https://www.inaturalist.org/observations/19332654</a>   |
| 86 | Emberiza rustica | Rustic Bunting | 2021/3/7   | 2 | 0 | 40.09758767 | 116.76317700 | <a href="https://www.inaturalist.org/observations/70879522">https://www.inaturalist.org/observations/70879522</a>   |
| 87 | Emberiza rustica | Rustic Bunting | 2022/10/30 | 1 | 0 | 40.16940623 | 116.75216280 | <a href="https://www.inaturalist.org/observations/140526911">https://www.inaturalist.org/observations/140526911</a> |
| 88 | Emberiza rustica | Rustic Bunting | 2022/1/15  | 1 | 0 | 40.17037687 | 116.72929260 | <a href="https://www.inaturalist.org/observations/105907339">https://www.inaturalist.org/observations/105907339</a> |
| 89 | Emberiza rustica | Rustic Bunting | 2020/2/18  | 0 | 0 | 40.17408300 | 116.61744740 | <a href="https://www.inaturalist.org/observations/38792387">https://www.inaturalist.org/observations/38792387</a>   |
| 90 | Emberiza rustica | Rustic Bunting | 2021/12/4  | 1 | 0 | 40.38778629 | 115.95554670 | <a href="https://www.inaturalist.org/observations/125272427">https://www.inaturalist.org/observations/125272427</a> |
| 91 | Emberiza rustica | Rustic Bunting | 2022/2/5   | 1 | 0 | 40.58324366 | 117.19322520 | <a href="https://www.inaturalist.org/observations/125106566">https://www.inaturalist.org/observations/125106566</a> |

|    |                         |                |            |   |   |             |              |                                                                                                                     |
|----|-------------------------|----------------|------------|---|---|-------------|--------------|---------------------------------------------------------------------------------------------------------------------|
| 92 | <i>Emberiza rustica</i> | Rustic Bunting | 2005/3/31  | 2 | 0 | 40.74748567 | 125.54014090 | <a href="https://www.inaturalist.org/observations/66610922">https://www.inaturalist.org/observations/66610922</a>   |
| 93 | <i>Emberiza rustica</i> | Rustic Bunting | 2005/3/31  | 2 | 0 | 40.77244964 | 125.45468820 | <a href="https://www.inaturalist.org/observations/66610923">https://www.inaturalist.org/observations/66610923</a>   |
| 94 | <i>Emberiza rustica</i> | Rustic Bunting | 2017/3/26  | 1 | 0 | 42.77044872 | 123.39467840 | <a href="https://www.inaturalist.org/observations/66884318">https://www.inaturalist.org/observations/66884318</a>   |
| 95 | <i>Emberiza rustica</i> | Rustic Bunting | 2017/3/27  | 2 | 0 | 42.77861513 | 123.39870480 | <a href="https://www.inaturalist.org/observations/66884565">https://www.inaturalist.org/observations/66884565</a>   |
| 96 | <i>Emberiza rustica</i> | Rustic Bunting | 2012/11/18 | 1 | 0 | 43.85099277 | 126.43259210 | <a href="https://www.inaturalist.org/observations/69409635">https://www.inaturalist.org/observations/69409635</a>   |
| 97 | <i>Emberiza rustica</i> | Rustic Bunting | 2022/4/1   | 2 | 0 | 49.28175457 | 129.65959600 | <a href="https://www.inaturalist.org/observations/110074823">https://www.inaturalist.org/observations/110074823</a> |

| No | scientific name       | common name         | date       | NIA | NID | latitude    | longitude    | url                                                                                                                 |
|----|-----------------------|---------------------|------------|-----|-----|-------------|--------------|---------------------------------------------------------------------------------------------------------------------|
| 1  | Emberiza spodocephala | Black-faced Bunting | 2021/1/11  | 1   | 0   | 21.69330820 | 111.76701700 | <a href="https://www.inaturalist.org/observations/67958988">https://www.inaturalist.org/observations/67958988</a>   |
| 2  | Emberiza spodocephala | Black-faced Bunting | 2021/2/14  | 1   | 0   | 22.11255174 | 113.57003870 | <a href="https://www.inaturalist.org/observations/88584092">https://www.inaturalist.org/observations/88584092</a>   |
| 3  | Emberiza spodocephala | Black-faced Bunting | 2021/12/12 | 1   | 0   | 22.12321530 | 113.56448680 | <a href="https://www.inaturalist.org/observations/102915202">https://www.inaturalist.org/observations/102915202</a> |
| 4  | Emberiza spodocephala | Black-faced Bunting | 2021/3/8   | 0   | 0   | 22.12552167 | 113.55976830 | <a href="https://www.inaturalist.org/observations/70813367">https://www.inaturalist.org/observations/70813367</a>   |
| 5  | Emberiza spodocephala | Black-faced Bunting | 2021/3/30  | 1   | 0   | 22.12583188 | 113.55993160 | <a href="https://www.inaturalist.org/observations/99561135">https://www.inaturalist.org/observations/99561135</a>   |
| 6  | Emberiza spodocephala | Black-faced Bunting | 2021/11/20 | 1   | 0   | 22.12602647 | 113.57483450 | <a href="https://www.inaturalist.org/observations/101520264">https://www.inaturalist.org/observations/101520264</a> |
| 7  | Emberiza spodocephala | Black-faced Bunting | 2021/4/10  | 1   | 0   | 22.15002763 | 114.33092760 | <a href="https://www.inaturalist.org/observations/75853246">https://www.inaturalist.org/observations/75853246</a>   |
| 8  | Emberiza spodocephala | Black-faced Bunting | 2021/3/1   | 1   | 0   | 22.15242688 | 113.55987130 | <a href="https://www.inaturalist.org/observations/92373915">https://www.inaturalist.org/observations/92373915</a>   |
| 9  | Emberiza spodocephala | Black-faced Bunting | 2021/4/24  | 2   | 0   | 22.16439223 | 114.25120640 | <a href="https://www.inaturalist.org/observations/92349294">https://www.inaturalist.org/observations/92349294</a>   |
| 10 | Emberiza spodocephala | Black-faced Bunting | 2021/12/2  | 0   | 0   | 22.16514256 | 114.25469200 | <a href="https://www.inaturalist.org/observations/108552291">https://www.inaturalist.org/observations/108552291</a> |
| 11 | Emberiza spodocephala | Black-faced Bunting | 2021/4/20  | 2   | 0   | 22.16521816 | 114.25422570 | <a href="https://www.inaturalist.org/observations/74690107">https://www.inaturalist.org/observations/74690107</a>   |
| 12 | Emberiza spodocephala | Black-faced Bunting | 2022/4/30  | 2   | 0   | 22.16522500 | 114.25263500 | <a href="https://www.inaturalist.org/observations/114144838">https://www.inaturalist.org/observations/114144838</a> |
| 13 | Emberiza spodocephala | Black-faced Bunting | 2009/12/25 | 1   | 0   | 22.16535700 | 114.25514300 | <a href="https://www.inaturalist.org/observations/36901446">https://www.inaturalist.org/observations/36901446</a>   |
| 14 | Emberiza spodocephala | Black-faced Bunting | 2009/12/25 | 1   | 0   | 22.16539700 | 114.25524000 | <a href="https://www.inaturalist.org/observations/36901536">https://www.inaturalist.org/observations/36901536</a>   |
| 15 | Emberiza spodocephala | Black-faced Bunting | 2022/4/30  | 1   | 0   | 22.16573067 | 114.25641470 | <a href="https://www.inaturalist.org/observations/115522447">https://www.inaturalist.org/observations/115522447</a> |
| 16 | Emberiza spodocephala | Black-faced Bunting | 2021/11/28 | 1   | 0   | 22.19599529 | 114.13798100 | <a href="https://www.inaturalist.org/observations/102273561">https://www.inaturalist.org/observations/102273561</a> |
| 17 | Emberiza spodocephala | Black-faced Bunting | 2022/2/12  | 1   | 0   | 22.20034479 | 113.54803200 | <a href="https://www.inaturalist.org/observations/106591272">https://www.inaturalist.org/observations/106591272</a> |
| 18 | Emberiza spodocephala | Black-faced Bunting | 2021/1/13  | 1   | 0   | 22.20046616 | 113.54779010 | <a href="https://www.inaturalist.org/observations/67997214">https://www.inaturalist.org/observations/67997214</a>   |
| 19 | Emberiza spodocephala | Black-faced Bunting | 2021/1/22  | 1   | 0   | 22.20052821 | 113.54794080 | <a href="https://www.inaturalist.org/observations/68442042">https://www.inaturalist.org/observations/68442042</a>   |
| 20 | Emberiza spodocephala | Black-faced Bunting | 2022/2/8   | 0   | 0   | 22.20054724 | 113.54801080 | <a href="https://www.inaturalist.org/observations/106379497">https://www.inaturalist.org/observations/106379497</a> |
| 21 | Emberiza spodocephala | Black-faced Bunting | 2021/11/19 | 0   | 0   | 22.20062072 | 113.54770900 | <a href="https://www.inaturalist.org/observations/101455438">https://www.inaturalist.org/observations/101455438</a> |
| 22 | Emberiza spodocephala | Black-faced Bunting | 2022/1/27  | 1   | 0   | 22.20062430 | 113.54785370 | <a href="https://www.inaturalist.org/observations/105651752">https://www.inaturalist.org/observations/105651752</a> |

|    |                       |                     |            |   |   |             |              |                                                                                                                     |
|----|-----------------------|---------------------|------------|---|---|-------------|--------------|---------------------------------------------------------------------------------------------------------------------|
| 23 | Emberiza spodocephala | Black-faced Bunting | 2021/11/23 | 1 | 0 | 22.21411297 | 114.12833900 | <a href="https://www.inaturalist.org/observations/101752403">https://www.inaturalist.org/observations/101752403</a> |
| 24 | Emberiza spodocephala | Black-faced Bunting | 2022/3/18  | 1 | 0 | 22.22147985 | 114.11543740 | <a href="https://www.inaturalist.org/observations/108913802">https://www.inaturalist.org/observations/108913802</a> |
| 25 | Emberiza spodocephala | Black-faced Bunting | 2020/1/4   | 1 | 0 | 22.22749210 | 113.99024770 | <a href="https://www.inaturalist.org/observations/37300752">https://www.inaturalist.org/observations/37300752</a>   |
| 26 | Emberiza spodocephala | Black-faced Bunting | 2022/2/11  | 3 | 0 | 22.24313370 | 114.19572100 | <a href="https://www.inaturalist.org/observations/118130550">https://www.inaturalist.org/observations/118130550</a> |
| 27 | Emberiza spodocephala | Black-faced Bunting | 2020/2/8   | 0 | 0 | 22.24670695 | 113.91811010 | <a href="https://www.inaturalist.org/observations/38662998">https://www.inaturalist.org/observations/38662998</a>   |
| 28 | Emberiza spodocephala | Black-faced Bunting | 2020/2/11  | 1 | 0 | 22.25529801 | 114.17167940 | <a href="https://www.inaturalist.org/observations/38537451">https://www.inaturalist.org/observations/38537451</a>   |
| 29 | Emberiza spodocephala | Black-faced Bunting | 2022/3/12  | 2 | 0 | 22.25757169 | 114.16153540 | <a href="https://www.inaturalist.org/observations/108422600">https://www.inaturalist.org/observations/108422600</a> |
| 30 | Emberiza spodocephala | Black-faced Bunting | 2019/11/9  | 1 | 0 | 22.27267587 | 114.14755230 | <a href="https://www.inaturalist.org/observations/35471624">https://www.inaturalist.org/observations/35471624</a>   |
| 31 | Emberiza spodocephala | Black-faced Bunting | 2022/3/1   | 1 | 0 | 22.27370900 | 114.21022600 | <a href="https://www.inaturalist.org/observations/107683022">https://www.inaturalist.org/observations/107683022</a> |
| 32 | Emberiza spodocephala | Black-faced Bunting | 2020/3/28  | 1 | 0 | 22.27430380 | 114.14366040 | <a href="https://www.inaturalist.org/observations/40870161">https://www.inaturalist.org/observations/40870161</a>   |
| 33 | Emberiza spodocephala | Black-faced Bunting | 2019/11/9  | 1 | 0 | 22.27486475 | 114.14417670 | <a href="https://www.inaturalist.org/observations/35486429">https://www.inaturalist.org/observations/35486429</a>   |
| 34 | Emberiza spodocephala | Black-faced Bunting | 2021/11/14 | 0 | 0 | 22.27607133 | 114.12159920 | <a href="https://www.inaturalist.org/observations/101078876">https://www.inaturalist.org/observations/101078876</a> |
| 35 | Emberiza spodocephala | Black-faced Bunting | 2013/4/7   | 1 | 0 | 22.27831510 | 114.17469500 | <a href="http://www.inaturalist.org/observations/3945736">http://www.inaturalist.org/observations/3945736</a>       |
| 36 | Emberiza spodocephala | Black-faced Bunting | 2021/3/21  | 1 | 0 | 22.28750434 | 114.00527780 | <a href="https://www.inaturalist.org/observations/71749132">https://www.inaturalist.org/observations/71749132</a>   |
| 37 | Emberiza spodocephala | Black-faced Bunting | 2021/3/28  | 0 | 0 | 22.28750434 | 114.00527780 | <a href="https://www.inaturalist.org/observations/72356474">https://www.inaturalist.org/observations/72356474</a>   |
| 38 | Emberiza spodocephala | Black-faced Bunting | 2020/3/18  | 1 | 0 | 22.28754342 | 114.00805530 | <a href="https://www.inaturalist.org/observations/40177639">https://www.inaturalist.org/observations/40177639</a>   |
| 39 | Emberiza spodocephala | Black-faced Bunting | 2019/3/9   | 1 | 0 | 22.31920110 | 114.16961210 | <a href="https://www.inaturalist.org/observations/21077514">https://www.inaturalist.org/observations/21077514</a>   |
| 40 | Emberiza spodocephala | Black-faced Bunting | 2022/2/15  | 2 | 0 | 22.34717996 | 114.23457380 | <a href="https://www.inaturalist.org/observations/106786625">https://www.inaturalist.org/observations/106786625</a> |
| 41 | Emberiza spodocephala | Black-faced Bunting | 2022/1/31  | 1 | 0 | 22.35125266 | 114.23890870 | <a href="https://www.inaturalist.org/observations/105961899">https://www.inaturalist.org/observations/105961899</a> |
| 42 | Emberiza spodocephala | Black-faced Bunting | 2022/1/22  | 1 | 0 | 22.35127361 | 114.23892130 | <a href="https://www.inaturalist.org/observations/105557971">https://www.inaturalist.org/observations/105557971</a> |
| 43 | Emberiza spodocephala | Black-faced Bunting | 2022/2/12  | 1 | 0 | 22.35211261 | 114.24141670 | <a href="https://www.inaturalist.org/observations/106683358">https://www.inaturalist.org/observations/106683358</a> |
| 44 | Emberiza spodocephala | Black-faced Bunting | 2022/2/10  | 1 | 0 | 22.35306282 | 114.09658190 | <a href="https://www.inaturalist.org/observations/106791765">https://www.inaturalist.org/observations/106791765</a> |
| 45 | Emberiza spodocephala | Black-faced Bunting | 2020/2/22  | 1 | 0 | 22.37775102 | 114.09291000 | <a href="https://www.inaturalist.org/observations/101690510">https://www.inaturalist.org/observations/101690510</a> |



|    |                       |                     |            |   |   |             |              |                                                                                                                     |
|----|-----------------------|---------------------|------------|---|---|-------------|--------------|---------------------------------------------------------------------------------------------------------------------|
| 46 | Emberiza spodocephala | Black-faced Bunting | 2021/2/19  | 2 | 0 | 22.38162500 | 114.22233900 | <a href="https://www.inaturalist.org/observations/104332973">https://www.inaturalist.org/observations/104332973</a> |
| 47 | Emberiza spodocephala | Black-faced Bunting | 2018/12/16 | 3 | 0 | 22.39093100 | 114.23404400 | <a href="https://www.inaturalist.org/observations/19063497">https://www.inaturalist.org/observations/19063497</a>   |
| 48 | Emberiza spodocephala | Black-faced Bunting | 2020/1/10  | 1 | 0 | 22.39200271 | 114.23383980 | <a href="https://www.inaturalist.org/observations/37451714">https://www.inaturalist.org/observations/37451714</a>   |
| 49 | Emberiza spodocephala | Black-faced Bunting | 2019/11/25 | 1 | 0 | 22.40673188 | 114.07116900 | <a href="https://www.inaturalist.org/observations/36173898">https://www.inaturalist.org/observations/36173898</a>   |
| 50 | Emberiza spodocephala | Black-faced Bunting | 2020/12/21 | 1 | 0 | 22.40696207 | 113.95337870 | <a href="https://www.inaturalist.org/observations/70609434">https://www.inaturalist.org/observations/70609434</a>   |
| 51 | Emberiza spodocephala | Black-faced Bunting | 2021/11/25 | 1 | 0 | 22.40746970 | 113.95228980 | <a href="https://www.inaturalist.org/observations/101882236">https://www.inaturalist.org/observations/101882236</a> |
| 52 | Emberiza spodocephala | Black-faced Bunting | 2022/2/16  | 1 | 0 | 22.40746971 | 113.95104520 | <a href="https://www.inaturalist.org/observations/106953675">https://www.inaturalist.org/observations/106953675</a> |
| 53 | Emberiza spodocephala | Black-faced Bunting | 2021/12/25 | 1 | 0 | 22.40760856 | 113.95208590 | <a href="https://www.inaturalist.org/observations/103662756">https://www.inaturalist.org/observations/103662756</a> |
| 54 | Emberiza spodocephala | Black-faced Bunting | 2019/1/8   | 2 | 0 | 22.40853554 | 114.07316390 | <a href="https://www.inaturalist.org/observations/19509993">https://www.inaturalist.org/observations/19509993</a>   |
| 55 | Emberiza spodocephala | Black-faced Bunting | 2021/12/21 | 1 | 0 | 22.40874630 | 114.11112350 | <a href="https://www.inaturalist.org/observations/103405508">https://www.inaturalist.org/observations/103405508</a> |
| 56 | Emberiza spodocephala | Black-faced Bunting | 2020/2/10  | 0 | 0 | 22.40884640 | 114.13794990 | <a href="https://www.inaturalist.org/observations/38624616">https://www.inaturalist.org/observations/38624616</a>   |
| 57 | Emberiza spodocephala | Black-faced Bunting | 2018/2/15  | 1 | 0 | 22.40884640 | 114.13794990 | <a href="https://www.inaturalist.org/observations/58928480">https://www.inaturalist.org/observations/58928480</a>   |
| 58 | Emberiza spodocephala | Black-faced Bunting | 2018/2/15  | 1 | 0 | 22.40884640 | 114.13794990 | <a href="https://www.inaturalist.org/observations/58928481">https://www.inaturalist.org/observations/58928481</a>   |
| 59 | Emberiza spodocephala | Black-faced Bunting | 2018/11/2  | 1 | 0 | 22.41839716 | 114.08317890 | <a href="https://www.inaturalist.org/observations/18087779">https://www.inaturalist.org/observations/18087779</a>   |
| 60 | Emberiza spodocephala | Black-faced Bunting | 2022/2/2   | 2 | 0 | 22.41877651 | 114.04568800 | <a href="https://www.inaturalist.org/observations/106115528">https://www.inaturalist.org/observations/106115528</a> |
| 61 | Emberiza spodocephala | Black-faced Bunting | 2018/11/2  | 1 | 0 | 22.41881992 | 114.08242620 | <a href="https://www.inaturalist.org/observations/18087629">https://www.inaturalist.org/observations/18087629</a>   |
| 62 | Emberiza spodocephala | Black-faced Bunting | 2022/4/24  | 1 | 0 | 22.42135060 | 114.14197220 | <a href="https://www.inaturalist.org/observations/112930955">https://www.inaturalist.org/observations/112930955</a> |
| 63 | Emberiza spodocephala | Black-faced Bunting | 2019/12/18 | 1 | 0 | 22.42172204 | 113.92153930 | <a href="https://www.inaturalist.org/observations/37116602">https://www.inaturalist.org/observations/37116602</a>   |
| 64 | Emberiza spodocephala | Black-faced Bunting | 2022/2/27  | 2 | 0 | 22.42211833 | 114.08748210 | <a href="https://www.inaturalist.org/observations/107564127">https://www.inaturalist.org/observations/107564127</a> |
| 65 | Emberiza spodocephala | Black-faced Bunting | 2018/11/13 | 1 | 0 | 22.42330152 | 114.08222970 | <a href="https://www.inaturalist.org/observations/18423051">https://www.inaturalist.org/observations/18423051</a>   |
| 66 | Emberiza spodocephala | Black-faced Bunting | 2013/1/26  | 1 | 0 | 22.42709800 | 114.15947400 | <a href="https://www.inaturalist.org/observations/29955344">https://www.inaturalist.org/observations/29955344</a>   |
| 67 | Emberiza spodocephala | Black-faced Bunting | 2021/3/20  | 1 | 0 | 22.43134804 | 114.09112960 | <a href="https://www.inaturalist.org/observations/71685900">https://www.inaturalist.org/observations/71685900</a>   |
| 68 | Emberiza spodocephala | Black-faced Bunting | 2021/1/11  | 2 | 0 | 22.43250167 | 114.08892330 | <a href="https://www.inaturalist.org/observations/69042285">https://www.inaturalist.org/observations/69042285</a>   |

|    |                       |                     |            |   |   |             |              |                                                                                                                     |
|----|-----------------------|---------------------|------------|---|---|-------------|--------------|---------------------------------------------------------------------------------------------------------------------|
| 69 | Emberiza spodocephala | Black-faced Bunting | 2022/1/31  | 1 | 0 | 22.43266475 | 114.08245720 | <a href="https://www.inaturalist.org/observations/105901157">https://www.inaturalist.org/observations/105901157</a> |
| 70 | Emberiza spodocephala | Black-faced Bunting | 2022/1/31  | 2 | 0 | 22.43268670 | 114.08392090 | <a href="https://www.inaturalist.org/observations/105954696">https://www.inaturalist.org/observations/105954696</a> |
| 71 | Emberiza spodocephala | Black-faced Bunting | 2021/1/19  | 1 | 0 | 22.43403360 | 114.01718720 | <a href="https://www.inaturalist.org/observations/68404074">https://www.inaturalist.org/observations/68404074</a>   |
| 72 | Emberiza spodocephala | Black-faced Bunting | 2021/1/10  | 1 | 0 | 22.43485670 | 114.08495820 | <a href="https://www.inaturalist.org/observations/67957005">https://www.inaturalist.org/observations/67957005</a>   |
| 73 | Emberiza spodocephala | Black-faced Bunting | 2022/2/2   | 1 | 0 | 22.43579172 | 114.05189600 | <a href="https://www.inaturalist.org/observations/106021124">https://www.inaturalist.org/observations/106021124</a> |
| 74 | Emberiza spodocephala | Black-faced Bunting | 2021/12/13 | 1 | 0 | 22.43852376 | 120.58027190 | <a href="https://www.inaturalist.org/observations/102973769">https://www.inaturalist.org/observations/102973769</a> |
| 75 | Emberiza spodocephala | Black-faced Bunting | 2022/4/2   | 2 | 0 | 22.43882323 | 114.03063320 | <a href="https://www.inaturalist.org/observations/110243253">https://www.inaturalist.org/observations/110243253</a> |
| 76 | Emberiza spodocephala | Black-faced Bunting | 2021/2/15  | 1 | 0 | 22.44196483 | 114.02008280 | <a href="https://www.inaturalist.org/observations/69769953">https://www.inaturalist.org/observations/69769953</a>   |
| 77 | Emberiza spodocephala | Black-faced Bunting | 2020/3/28  | 1 | 0 | 22.44590940 | 114.14028140 | <a href="https://www.inaturalist.org/observations/40882429">https://www.inaturalist.org/observations/40882429</a>   |
| 78 | Emberiza spodocephala | Black-faced Bunting | 2020/2/21  | 1 | 0 | 22.44601277 | 114.13775490 | <a href="https://www.inaturalist.org/observations/44839084">https://www.inaturalist.org/observations/44839084</a>   |
| 79 | Emberiza spodocephala | Black-faced Bunting | 2019/11/24 | 1 | 0 | 22.44637100 | 114.13815900 | <a href="https://www.inaturalist.org/observations/36661350">https://www.inaturalist.org/observations/36661350</a>   |
| 80 | Emberiza spodocephala | Black-faced Bunting | 2019/1/2   | 2 | 0 | 22.44711886 | 114.05116840 | <a href="https://www.inaturalist.org/observations/19371339">https://www.inaturalist.org/observations/19371339</a>   |
| 81 | Emberiza spodocephala | Black-faced Bunting | 2019/11/17 | 1 | 0 | 22.44732325 | 114.14108970 | <a href="https://www.inaturalist.org/observations/35773350">https://www.inaturalist.org/observations/35773350</a>   |
| 82 | Emberiza spodocephala | Black-faced Bunting | 2021/2/18  | 1 | 0 | 22.45268130 | 114.05272340 | <a href="https://www.inaturalist.org/observations/69803725">https://www.inaturalist.org/observations/69803725</a>   |
| 83 | Emberiza spodocephala | Black-faced Bunting | 2022/3/26  | 1 | 0 | 22.45339167 | 114.05228520 | <a href="https://www.inaturalist.org/observations/109817172">https://www.inaturalist.org/observations/109817172</a> |
| 84 | Emberiza spodocephala | Black-faced Bunting | 2021/3/10  | 1 | 0 | 22.45372945 | 114.05251280 | <a href="https://www.inaturalist.org/observations/71061818">https://www.inaturalist.org/observations/71061818</a>   |
| 85 | Emberiza spodocephala | Black-faced Bunting | 2022/1/29  | 1 | 0 | 22.45808321 | 114.02913220 | <a href="https://www.inaturalist.org/observations/105955062">https://www.inaturalist.org/observations/105955062</a> |
| 86 | Emberiza spodocephala | Black-faced Bunting | 2021/1/27  | 1 | 0 | 22.45867304 | 114.03848010 | <a href="https://www.inaturalist.org/observations/70610374">https://www.inaturalist.org/observations/70610374</a>   |
| 87 | Emberiza spodocephala | Black-faced Bunting | 2021/12/2  | 1 | 0 | 22.46211310 | 114.15134060 | <a href="https://www.inaturalist.org/observations/102392135">https://www.inaturalist.org/observations/102392135</a> |
| 88 | Emberiza spodocephala | Black-faced Bunting | 2021/3/12  | 1 | 0 | 22.46521357 | 114.17793020 | <a href="https://www.inaturalist.org/observations/71493464">https://www.inaturalist.org/observations/71493464</a>   |
| 89 | Emberiza spodocephala | Black-faced Bunting | 2022/1/29  | 0 | 0 | 22.46569500 | 114.01693620 | <a href="https://www.inaturalist.org/observations/105956800">https://www.inaturalist.org/observations/105956800</a> |
| 90 | Emberiza spodocephala | Black-faced Bunting | 2021/11/5  | 0 | 0 | 22.46842628 | 114.01638060 | <a href="https://www.inaturalist.org/observations/100329662">https://www.inaturalist.org/observations/100329662</a> |
| 91 | Emberiza spodocephala | Black-faced Bunting | 2022/2/26  | 1 | 0 | 22.46882417 | 114.01676060 | <a href="https://www.inaturalist.org/observations/107463832">https://www.inaturalist.org/observations/107463832</a> |

|     |                       |                     |            |   |   |             |              |                                                                                                                     |
|-----|-----------------------|---------------------|------------|---|---|-------------|--------------|---------------------------------------------------------------------------------------------------------------------|
| 92  | Emberiza spodocephala | Black-faced Bunting | 2022/1/9   | 1 | 0 | 22.46983906 | 114.02096700 | <a href="https://www.inaturalist.org/observations/104967214">https://www.inaturalist.org/observations/104967214</a> |
| 93  | Emberiza spodocephala | Black-faced Bunting | 2012/1/11  | 1 | 0 | 22.47062472 | 114.00607030 | <a href="https://www.inaturalist.org/observations/105007098">https://www.inaturalist.org/observations/105007098</a> |
| 94  | Emberiza spodocephala | Black-faced Bunting | 2021/11/27 | 1 | 0 | 22.47110406 | 114.01758040 | <a href="https://www.inaturalist.org/observations/102004282">https://www.inaturalist.org/observations/102004282</a> |
| 95  | Emberiza spodocephala | Black-faced Bunting | 2021/11/27 | 1 | 0 | 22.47110406 | 114.01758040 | <a href="https://www.inaturalist.org/observations/102004712">https://www.inaturalist.org/observations/102004712</a> |
| 96  | Emberiza spodocephala | Black-faced Bunting | 2022/2/10  | 2 | 0 | 22.47110406 | 114.01758040 | <a href="https://www.inaturalist.org/observations/106478044">https://www.inaturalist.org/observations/106478044</a> |
| 97  | Emberiza spodocephala | Black-faced Bunting | 2022/4/2   | 1 | 0 | 22.47110406 | 114.01758040 | <a href="https://www.inaturalist.org/observations/110159683">https://www.inaturalist.org/observations/110159683</a> |
| 98  | Emberiza spodocephala | Black-faced Bunting | 2022/4/2   | 2 | 0 | 22.47110406 | 114.01758040 | <a href="https://www.inaturalist.org/observations/110159689">https://www.inaturalist.org/observations/110159689</a> |
| 99  | Emberiza spodocephala | Black-faced Bunting | 2021/1/1   | 3 | 0 | 22.47110430 | 114.01758040 | <a href="https://www.inaturalist.org/observations/67439505">https://www.inaturalist.org/observations/67439505</a>   |
| 100 | Emberiza spodocephala | Black-faced Bunting | 2022/4/12  | 1 | 0 | 22.47110430 | 114.01758040 | <a href="https://www.inaturalist.org/observations/111203447">https://www.inaturalist.org/observations/111203447</a> |
| 101 | Emberiza spodocephala | Black-faced Bunting | 2021/11/15 | 2 | 0 | 22.47112110 | 114.01758040 | <a href="https://www.inaturalist.org/observations/101235449">https://www.inaturalist.org/observations/101235449</a> |
| 102 | Emberiza spodocephala | Black-faced Bunting | 2022/1/9   | 1 | 0 | 22.47138454 | 114.02265920 | <a href="https://www.inaturalist.org/observations/104967212">https://www.inaturalist.org/observations/104967212</a> |
| 103 | Emberiza spodocephala | Black-faced Bunting | 2021/2/13  | 1 | 0 | 22.47212007 | 114.01257280 | <a href="https://www.inaturalist.org/observations/69551255">https://www.inaturalist.org/observations/69551255</a>   |
| 104 | Emberiza spodocephala | Black-faced Bunting | 2020/1/19  | 0 | 0 | 22.47313319 | 114.18297150 | <a href="https://www.inaturalist.org/observations/37738773">https://www.inaturalist.org/observations/37738773</a>   |
| 105 | Emberiza spodocephala | Black-faced Bunting | 2021/11/20 | 1 | 0 | 22.47341986 | 114.01537090 | <a href="https://www.inaturalist.org/observations/101548044">https://www.inaturalist.org/observations/101548044</a> |
| 106 | Emberiza spodocephala | Black-faced Bunting | 2021/11/27 | 1 | 0 | 22.47359891 | 114.01599490 | <a href="https://www.inaturalist.org/observations/102002223">https://www.inaturalist.org/observations/102002223</a> |
| 107 | Emberiza spodocephala | Black-faced Bunting | 2021/11/27 | 1 | 0 | 22.47359891 | 114.01599490 | <a href="https://www.inaturalist.org/observations/102002224">https://www.inaturalist.org/observations/102002224</a> |
| 108 | Emberiza spodocephala | Black-faced Bunting | 2020/1/11  | 1 | 0 | 22.47387808 | 113.99562180 | <a href="https://www.inaturalist.org/observations/37484189">https://www.inaturalist.org/observations/37484189</a>   |
| 109 | Emberiza spodocephala | Black-faced Bunting | 2021/12/18 | 1 | 0 | 22.47399801 | 114.03639880 | <a href="https://www.inaturalist.org/observations/103254019">https://www.inaturalist.org/observations/103254019</a> |
| 110 | Emberiza spodocephala | Black-faced Bunting | 2022/2/27  | 1 | 0 | 22.47445656 | 114.12378400 | <a href="https://www.inaturalist.org/observations/107564161">https://www.inaturalist.org/observations/107564161</a> |
| 111 | Emberiza spodocephala | Black-faced Bunting | 2020/12/24 | 1 | 0 | 22.47524833 | 114.00944080 | <a href="https://www.inaturalist.org/observations/67003702">https://www.inaturalist.org/observations/67003702</a>   |
| 112 | Emberiza spodocephala | Black-faced Bunting | 2020/2/9   | 0 | 0 | 22.47589775 | 114.00826020 | <a href="https://www.inaturalist.org/observations/38456638">https://www.inaturalist.org/observations/38456638</a>   |
| 113 | Emberiza spodocephala | Black-faced Bunting | 2022/4/3   | 1 | 0 | 22.47590069 | 114.04195630 | <a href="https://www.inaturalist.org/observations/110261693">https://www.inaturalist.org/observations/110261693</a> |
| 114 | Emberiza spodocephala | Black-faced Bunting | 2020/3/28  | 1 | 0 | 22.47612036 | 114.00825550 | <a href="https://www.inaturalist.org/observations/40871647">https://www.inaturalist.org/observations/40871647</a>   |

|     |                       |                     |            |   |   |             |              |                                                                                                                     |
|-----|-----------------------|---------------------|------------|---|---|-------------|--------------|---------------------------------------------------------------------------------------------------------------------|
| 115 | Emberiza spodocephala | Black-faced Bunting | 2020/2/2   | 0 | 0 | 22.48224153 | 114.01154550 | <a href="https://www.inaturalist.org/observations/38662992">https://www.inaturalist.org/observations/38662992</a>   |
| 116 | Emberiza spodocephala | Black-faced Bunting | 2017/3/21  | 1 | 0 | 22.48419600 | 114.10110600 | <a href="https://www.inaturalist.org/observations/5463266">https://www.inaturalist.org/observations/5463266</a>     |
| 117 | Emberiza spodocephala | Black-faced Bunting | 2020/11/15 | 2 | 0 | 22.48439674 | 114.03109950 | <a href="https://www.inaturalist.org/observations/65072689">https://www.inaturalist.org/observations/65072689</a>   |
| 118 | Emberiza spodocephala | Black-faced Bunting | 2020/11/15 | 2 | 0 | 22.48439674 | 114.03109950 | <a href="https://www.inaturalist.org/observations/65072693">https://www.inaturalist.org/observations/65072693</a>   |
| 119 | Emberiza spodocephala | Black-faced Bunting | 2022/1/12  | 1 | 0 | 22.48494641 | 114.04350500 | <a href="https://www.inaturalist.org/observations/104808196">https://www.inaturalist.org/observations/104808196</a> |
| 120 | Emberiza spodocephala | Black-faced Bunting | 2022/1/23  | 1 | 0 | 22.48658208 | 114.04099880 | <a href="https://www.inaturalist.org/observations/105427880">https://www.inaturalist.org/observations/105427880</a> |
| 121 | Emberiza spodocephala | Black-faced Bunting | 2021/12/29 | 1 | 0 | 22.48784197 | 114.04187960 | <a href="https://www.inaturalist.org/observations/103885716">https://www.inaturalist.org/observations/103885716</a> |
| 122 | Emberiza spodocephala | Black-faced Bunting | 2022/2/1   | 1 | 0 | 22.49145858 | 114.04413270 | <a href="https://www.inaturalist.org/observations/106065667">https://www.inaturalist.org/observations/106065667</a> |
| 123 | Emberiza spodocephala | Black-faced Bunting | 2022/3/7   | 1 | 0 | 22.49173572 | 114.04491500 | <a href="https://www.inaturalist.org/observations/115135437">https://www.inaturalist.org/observations/115135437</a> |
| 124 | Emberiza spodocephala | Black-faced Bunting | 2019/11/30 | 1 | 0 | 22.49177367 | 114.04434760 | <a href="https://www.inaturalist.org/observations/36214291">https://www.inaturalist.org/observations/36214291</a>   |
| 125 | Emberiza spodocephala | Black-faced Bunting | 2016/4/2   | 1 | 0 | 22.49184506 | 114.03517880 | <a href="https://www.inaturalist.org/observations/58912848">https://www.inaturalist.org/observations/58912848</a>   |
| 126 | Emberiza spodocephala | Black-faced Bunting | 2016/3/9   | 3 | 0 | 22.49210500 | 114.04454000 | <a href="https://www.inaturalist.org/observations/12632303">https://www.inaturalist.org/observations/12632303</a>   |
| 127 | Emberiza spodocephala | Black-faced Bunting | 2020/12/17 | 1 | 0 | 22.49249053 | 114.04478380 | <a href="https://www.inaturalist.org/observations/74344271">https://www.inaturalist.org/observations/74344271</a>   |
| 128 | Emberiza spodocephala | Black-faced Bunting | 2012/3/4   | 1 | 0 | 22.49293600 | 114.04499900 | <a href="https://www.inaturalist.org/observations/35906172">https://www.inaturalist.org/observations/35906172</a>   |
| 129 | Emberiza spodocephala | Black-faced Bunting | 2022/4/6   | 2 | 0 | 22.49338700 | 114.04526700 | <a href="https://www.inaturalist.org/observations/110659229">https://www.inaturalist.org/observations/110659229</a> |
| 130 | Emberiza spodocephala | Black-faced Bunting | 2022/1/7   | 1 | 0 | 22.49344408 | 114.04566840 | <a href="https://www.inaturalist.org/observations/104533236">https://www.inaturalist.org/observations/104533236</a> |
| 131 | Emberiza spodocephala | Black-faced Bunting | 2019/12/6  | 1 | 0 | 22.49348232 | 114.03410140 | <a href="https://www.inaturalist.org/observations/36556883">https://www.inaturalist.org/observations/36556883</a>   |
| 132 | Emberiza spodocephala | Black-faced Bunting | 2022/4/16  | 1 | 0 | 22.49381760 | 114.03468380 | <a href="https://www.inaturalist.org/observations/111737490">https://www.inaturalist.org/observations/111737490</a> |
| 133 | Emberiza spodocephala | Black-faced Bunting | 2021/4/4   | 1 | 0 | 22.49384622 | 114.17161370 | <a href="https://www.inaturalist.org/observations/75421978">https://www.inaturalist.org/observations/75421978</a>   |
| 134 | Emberiza spodocephala | Black-faced Bunting | 2018/4/2   | 1 | 0 | 22.49419514 | 114.04608430 | <a href="https://www.inaturalist.org/observations/10770109">https://www.inaturalist.org/observations/10770109</a>   |
| 135 | Emberiza spodocephala | Black-faced Bunting | 2021/12/9  | 1 | 0 | 22.49448333 | 114.04639450 | <a href="https://www.inaturalist.org/observations/102861124">https://www.inaturalist.org/observations/102861124</a> |
| 136 | Emberiza spodocephala | Black-faced Bunting | 2022/4/9   | 1 | 0 | 22.49452167 | 114.04641670 | <a href="https://www.inaturalist.org/observations/111086373">https://www.inaturalist.org/observations/111086373</a> |
| 137 | Emberiza spodocephala | Black-faced Bunting | 2022/1/31  | 2 | 0 | 22.49505690 | 114.03393420 | <a href="https://www.inaturalist.org/observations/107483605">https://www.inaturalist.org/observations/107483605</a> |

|     |                       |                     |            |   |   |             |              |                                                                                                                     |
|-----|-----------------------|---------------------|------------|---|---|-------------|--------------|---------------------------------------------------------------------------------------------------------------------|
| 138 | Emberiza spodocephala | Black-faced Bunting | 2021/2/21  | 2 | 0 | 22.49506125 | 114.03393420 | <a href="https://www.inaturalist.org/observations/69916919">https://www.inaturalist.org/observations/69916919</a>   |
| 139 | Emberiza spodocephala | Black-faced Bunting | 2022/1/27  | 1 | 0 | 22.49506125 | 114.03393420 | <a href="https://www.inaturalist.org/observations/105696868">https://www.inaturalist.org/observations/105696868</a> |
| 140 | Emberiza spodocephala | Black-faced Bunting | 2022/3/5   | 1 | 0 | 22.49506125 | 114.03393420 | <a href="https://www.inaturalist.org/observations/108227561">https://www.inaturalist.org/observations/108227561</a> |
| 141 | Emberiza spodocephala | Black-faced Bunting | 2022/2/27  | 1 | 0 | 22.49530405 | 114.12601880 | <a href="https://www.inaturalist.org/observations/107564139">https://www.inaturalist.org/observations/107564139</a> |
| 142 | Emberiza spodocephala | Black-faced Bunting | 2020/5/1   | 1 | 0 | 22.49849306 | 114.03948450 | <a href="https://www.inaturalist.org/observations/44816750">https://www.inaturalist.org/observations/44816750</a>   |
| 143 | Emberiza spodocephala | Black-faced Bunting | 2021/11/24 | 1 | 0 | 22.49857516 | 114.04498160 | <a href="https://www.inaturalist.org/observations/102240498">https://www.inaturalist.org/observations/102240498</a> |
| 144 | Emberiza spodocephala | Black-faced Bunting | 2019/11/30 | 1 | 0 | 22.49861267 | 114.04336850 | <a href="https://www.inaturalist.org/observations/36252238">https://www.inaturalist.org/observations/36252238</a>   |
| 145 | Emberiza spodocephala | Black-faced Bunting | 2022/1/2   | 1 | 0 | 22.49883848 | 114.04582750 | <a href="https://www.inaturalist.org/observations/104166075">https://www.inaturalist.org/observations/104166075</a> |
| 146 | Emberiza spodocephala | Black-faced Bunting | 2021/11/15 | 1 | 0 | 22.50004095 | 114.11666660 | <a href="https://www.inaturalist.org/observations/101187381">https://www.inaturalist.org/observations/101187381</a> |
| 147 | Emberiza spodocephala | Black-faced Bunting | 2013/1/19  | 1 | 0 | 22.50879520 | 114.11297710 | <a href="https://www.inaturalist.org/observations/29955493">https://www.inaturalist.org/observations/29955493</a>   |
| 148 | Emberiza spodocephala | Black-faced Bunting | 2020/11/23 | 1 | 0 | 22.50879520 | 114.11297710 | <a href="https://www.inaturalist.org/observations/65474073">https://www.inaturalist.org/observations/65474073</a>   |
| 149 | Emberiza spodocephala | Black-faced Bunting | 2022/4/4   | 1 | 0 | 22.50991806 | 114.08150550 | <a href="https://www.inaturalist.org/observations/110798382">https://www.inaturalist.org/observations/110798382</a> |
| 150 | Emberiza spodocephala | Black-faced Bunting | 2022/2/27  | 1 | 0 | 22.51158461 | 114.09094890 | <a href="https://www.inaturalist.org/observations/107564109">https://www.inaturalist.org/observations/107564109</a> |
| 151 | Emberiza spodocephala | Black-faced Bunting | 2022/1/25  | 1 | 0 | 22.51179700 | 114.06972000 | <a href="https://www.inaturalist.org/observations/105554099">https://www.inaturalist.org/observations/105554099</a> |
| 152 | Emberiza spodocephala | Black-faced Bunting | 2022/1/17  | 1 | 0 | 22.51398760 | 114.07001480 | <a href="https://www.inaturalist.org/observations/105100619">https://www.inaturalist.org/observations/105100619</a> |
| 153 | Emberiza spodocephala | Black-faced Bunting | 2021/3/17  | 1 | 0 | 22.52330736 | 114.08897700 | <a href="https://www.inaturalist.org/observations/91070530">https://www.inaturalist.org/observations/91070530</a>   |
| 154 | Emberiza spodocephala | Black-faced Bunting | 2020/12/8  | 1 | 0 | 22.52601690 | 114.11515610 | <a href="https://www.inaturalist.org/observations/66695792">https://www.inaturalist.org/observations/66695792</a>   |
| 155 | Emberiza spodocephala | Black-faced Bunting | 2021/11/21 | 1 | 0 | 22.53075558 | 114.19811940 | <a href="https://www.inaturalist.org/observations/101617212">https://www.inaturalist.org/observations/101617212</a> |
| 156 | Emberiza spodocephala | Black-faced Bunting | 2022/2/2   | 1 | 0 | 22.53106317 | 114.10793930 | <a href="https://www.inaturalist.org/observations/106021141">https://www.inaturalist.org/observations/106021141</a> |
| 157 | Emberiza spodocephala | Black-faced Bunting | 2022/4/13  | 1 | 0 | 22.54841064 | 114.02600210 | <a href="https://www.inaturalist.org/observations/111392823">https://www.inaturalist.org/observations/111392823</a> |
| 158 | Emberiza spodocephala | Black-faced Bunting | 2022/2/2   | 1 | 0 | 22.55812721 | 114.10004980 | <a href="https://www.inaturalist.org/observations/106021140">https://www.inaturalist.org/observations/106021140</a> |
| 159 | Emberiza spodocephala | Black-faced Bunting | 2022/2/2   | 1 | 0 | 22.57682493 | 114.00149850 | <a href="https://www.inaturalist.org/observations/106021123">https://www.inaturalist.org/observations/106021123</a> |
| 160 | Emberiza spodocephala | Black-faced Bunting | 2021/3/11  | 1 | 0 | 22.62605182 | 120.59678850 | <a href="https://www.inaturalist.org/observations/70994421">https://www.inaturalist.org/observations/70994421</a>   |

|     |                       |                     |            |   |   |             |              |                                                                                                                     |
|-----|-----------------------|---------------------|------------|---|---|-------------|--------------|---------------------------------------------------------------------------------------------------------------------|
| 161 | Emberiza spodocephala | Black-faced Bunting | 2021/2/25  | 1 | 0 | 22.62654295 | 120.59707760 | <a href="https://www.inaturalist.org/observations/70249058">https://www.inaturalist.org/observations/70249058</a>   |
| 162 | Emberiza spodocephala | Black-faced Bunting | 2022/1/2   | 2 | 0 | 22.67296671 | 120.44341330 | <a href="https://www.inaturalist.org/observations/134935099">https://www.inaturalist.org/observations/134935099</a> |
| 163 | Emberiza spodocephala | Black-faced Bunting | 2022/1/8   | 1 | 0 | 22.68700071 | 120.45736010 | <a href="https://www.inaturalist.org/observations/121970103">https://www.inaturalist.org/observations/121970103</a> |
| 164 | Emberiza spodocephala | Black-faced Bunting | 2020/3/18  | 2 | 0 | 22.69308793 | 120.45967130 | <a href="https://www.inaturalist.org/observations/40168623">https://www.inaturalist.org/observations/40168623</a>   |
| 165 | Emberiza spodocephala | Black-faced Bunting | 2021/3/20  | 1 | 0 | 22.69631333 | 121.05742670 | <a href="https://www.inaturalist.org/observations/73725790">https://www.inaturalist.org/observations/73725790</a>   |
| 166 | Emberiza spodocephala | Black-faced Bunting | 2020/3/16  | 1 | 0 | 22.70137932 | 120.46323290 | <a href="https://www.inaturalist.org/observations/40064903">https://www.inaturalist.org/observations/40064903</a>   |
| 167 | Emberiza spodocephala | Black-faced Bunting | 2005/4/4   | 1 | 0 | 22.87319939 | 120.51048350 | <a href="https://www.inaturalist.org/observations/19192465">https://www.inaturalist.org/observations/19192465</a>   |
| 168 | Emberiza spodocephala | Black-faced Bunting | 2022/1/1   | 1 | 0 | 23.30167409 | 121.29887920 | <a href="https://www.inaturalist.org/observations/105137910">https://www.inaturalist.org/observations/105137910</a> |
| 169 | Emberiza spodocephala | Black-faced Bunting | 2022/2/10  | 1 | 0 | 23.44956500 | 121.39770170 | <a href="https://www.inaturalist.org/observations/106475670">https://www.inaturalist.org/observations/106475670</a> |
| 170 | Emberiza spodocephala | Black-faced Bunting | 2022/2/10  | 1 | 0 | 23.44966021 | 121.39744320 | <a href="https://www.inaturalist.org/observations/106475674">https://www.inaturalist.org/observations/106475674</a> |
| 171 | Emberiza spodocephala | Black-faced Bunting | 2021/11/23 | 3 | 0 | 23.45271405 | 116.73373030 | <a href="https://www.inaturalist.org/observations/101763319">https://www.inaturalist.org/observations/101763319</a> |
| 172 | Emberiza spodocephala | Black-faced Bunting | 2019/11/16 | 2 | 0 | 23.54899018 | 119.60679400 | <a href="https://www.inaturalist.org/observations/102816346">https://www.inaturalist.org/observations/102816346</a> |
| 173 | Emberiza spodocephala | Black-faced Bunting | 2019/11/2  | 2 | 0 | 23.55760528 | 119.61450440 | <a href="https://www.inaturalist.org/observations/102816347">https://www.inaturalist.org/observations/102816347</a> |
| 174 | Emberiza spodocephala | Black-faced Bunting | 2019/11/9  | 1 | 0 | 23.55761234 | 119.61447000 | <a href="https://www.inaturalist.org/observations/102816344">https://www.inaturalist.org/observations/102816344</a> |
| 175 | Emberiza spodocephala | Black-faced Bunting | 2019/11/9  | 1 | 0 | 23.55767472 | 119.61440310 | <a href="https://www.inaturalist.org/observations/102816348">https://www.inaturalist.org/observations/102816348</a> |
| 176 | Emberiza spodocephala | Black-faced Bunting | 2021/11/10 | 1 | 0 | 23.57839500 | 119.65962830 | <a href="https://www.inaturalist.org/observations/118890107">https://www.inaturalist.org/observations/118890107</a> |
| 177 | Emberiza spodocephala | Black-faced Bunting | 2022/4/15  | 2 | 0 | 23.61784897 | 120.26066360 | <a href="https://www.inaturalist.org/observations/118892575">https://www.inaturalist.org/observations/118892575</a> |
| 178 | Emberiza spodocephala | Black-faced Bunting | 2014/1/11  | 1 | 0 | 23.62321935 | 120.48650720 | <a href="https://www.inaturalist.org/observations/122142920">https://www.inaturalist.org/observations/122142920</a> |
| 179 | Emberiza spodocephala | Black-faced Bunting | 2019/12/14 | 2 | 0 | 23.63584042 | 120.52596730 | <a href="https://www.inaturalist.org/observations/36630143">https://www.inaturalist.org/observations/36630143</a>   |
| 180 | Emberiza spodocephala | Black-faced Bunting | 2020/3/22  | 2 | 0 | 23.65233551 | 120.49228650 | <a href="https://www.inaturalist.org/observations/45155867">https://www.inaturalist.org/observations/45155867</a>   |
| 181 | Emberiza spodocephala | Black-faced Bunting | 2020/11/28 | 1 | 0 | 23.67985914 | 120.17317960 | <a href="https://www.inaturalist.org/observations/65741379">https://www.inaturalist.org/observations/65741379</a>   |
| 182 | Emberiza spodocephala | Black-faced Bunting | 2014/3/19  | 1 | 0 | 23.68464100 | 120.32053900 | <a href="https://www.inaturalist.org/observations/15536684">https://www.inaturalist.org/observations/15536684</a>   |
| 183 | Emberiza spodocephala | Black-faced Bunting | 2012/12/18 | 1 | 0 | 23.72519640 | 120.62359190 | <a href="https://www.inaturalist.org/observations/19485205">https://www.inaturalist.org/observations/19485205</a>   |

|     |                       |                     |            |   |   |             |              |                                                                                                                     |
|-----|-----------------------|---------------------|------------|---|---|-------------|--------------|---------------------------------------------------------------------------------------------------------------------|
| 184 | Emberiza spodocephala | Black-faced Bunting | 2018/2/24  | 1 | 0 | 23.73131278 | 120.37956860 | <a href="https://www.inaturalist.org/observations/18502116">https://www.inaturalist.org/observations/18502116</a>   |
| 185 | Emberiza spodocephala | Black-faced Bunting | 2022/4/17  | 1 | 0 | 23.74397667 | 121.46425170 | <a href="https://www.inaturalist.org/observations/120114171">https://www.inaturalist.org/observations/120114171</a> |
| 186 | Emberiza spodocephala | Black-faced Bunting | 2022/4/17  | 1 | 0 | 23.75759752 | 121.47268830 | <a href="https://www.inaturalist.org/observations/126179591">https://www.inaturalist.org/observations/126179591</a> |
| 187 | Emberiza spodocephala | Black-faced Bunting | 2019/3/8   | 1 | 0 | 23.77041210 | 121.47132650 | <a href="https://www.inaturalist.org/observations/24596973">https://www.inaturalist.org/observations/24596973</a>   |
| 188 | Emberiza spodocephala | Black-faced Bunting | 2017/12/7  | 1 | 0 | 23.79820461 | 120.22152240 | <a href="https://www.inaturalist.org/observations/18672516">https://www.inaturalist.org/observations/18672516</a>   |
| 189 | Emberiza spodocephala | Black-faced Bunting | 2021/12/20 | 1 | 0 | 23.80263582 | 120.22774620 | <a href="https://www.inaturalist.org/observations/103941156">https://www.inaturalist.org/observations/103941156</a> |
| 190 | Emberiza spodocephala | Black-faced Bunting | 2021/12/17 | 1 | 0 | 23.85256220 | 121.51257440 | <a href="https://www.inaturalist.org/observations/103416918">https://www.inaturalist.org/observations/103416918</a> |
| 191 | Emberiza spodocephala | Black-faced Bunting | 2022/4/9   | 1 | 0 | 23.88816464 | 121.54787370 | <a href="https://www.inaturalist.org/observations/114310156">https://www.inaturalist.org/observations/114310156</a> |
| 192 | Emberiza spodocephala | Black-faced Bunting | 2021/3/28  | 1 | 0 | 23.90963967 | 121.54208610 | <a href="https://www.inaturalist.org/observations/72773114">https://www.inaturalist.org/observations/72773114</a>   |
| 193 | Emberiza spodocephala | Black-faced Bunting | 2018/12/23 | 1 | 0 | 23.91597636 | 121.56030040 | <a href="https://www.inaturalist.org/observations/109835827">https://www.inaturalist.org/observations/109835827</a> |
| 194 | Emberiza spodocephala | Black-faced Bunting | 2021/12/21 | 1 | 0 | 23.91663862 | 121.55969600 | <a href="https://www.inaturalist.org/observations/103416928">https://www.inaturalist.org/observations/103416928</a> |
| 195 | Emberiza spodocephala | Black-faced Bunting | 2021/12/21 | 1 | 0 | 23.91665529 | 121.55966190 | <a href="https://www.inaturalist.org/observations/103416929">https://www.inaturalist.org/observations/103416929</a> |
| 196 | Emberiza spodocephala | Black-faced Bunting | 2020/1/8   | 1 | 0 | 23.91745360 | 121.55954670 | <a href="https://www.inaturalist.org/observations/107315227">https://www.inaturalist.org/observations/107315227</a> |
| 197 | Emberiza spodocephala | Black-faced Bunting | 2020/1/6   | 1 | 0 | 23.91766600 | 121.54793900 | <a href="https://www.inaturalist.org/observations/37395068">https://www.inaturalist.org/observations/37395068</a>   |
| 198 | Emberiza spodocephala | Black-faced Bunting | 2021/11/16 | 1 | 0 | 23.94745683 | 121.59455940 | <a href="https://www.inaturalist.org/observations/101257543">https://www.inaturalist.org/observations/101257543</a> |
| 199 | Emberiza spodocephala | Black-faced Bunting | 2019/1/4   | 1 | 0 | 23.95734201 | 120.84366860 | <a href="https://www.inaturalist.org/observations/19414090">https://www.inaturalist.org/observations/19414090</a>   |
| 200 | Emberiza spodocephala | Black-faced Bunting | 2021/12/3  | 1 | 0 | 23.99641876 | 121.43236400 | <a href="https://www.inaturalist.org/observations/103079127">https://www.inaturalist.org/observations/103079127</a> |
| 201 | Emberiza spodocephala | Black-faced Bunting | 2020/4/15  | 1 | 0 | 23.99881376 | 120.57519760 | <a href="https://www.inaturalist.org/observations/42245677">https://www.inaturalist.org/observations/42245677</a>   |
| 202 | Emberiza spodocephala | Black-faced Bunting | 2014/3/19  | 1 | 0 | 24.02858215 | 121.16448590 | <a href="https://www.inaturalist.org/observations/92973737">https://www.inaturalist.org/observations/92973737</a>   |
| 203 | Emberiza spodocephala | Black-faced Bunting | 2013/11/15 | 1 | 0 | 24.04068100 | 121.15689900 | <a href="https://www.inaturalist.org/observations/8674286">https://www.inaturalist.org/observations/8674286</a>     |
| 204 | Emberiza spodocephala | Black-faced Bunting | 2021/11/28 | 1 | 0 | 24.18405415 | 120.63506190 | <a href="https://www.inaturalist.org/observations/102069503">https://www.inaturalist.org/observations/102069503</a> |
| 205 | Emberiza spodocephala | Black-faced Bunting | 2020/11/11 | 1 | 0 | 24.19625568 | 121.42729690 | <a href="https://www.inaturalist.org/observations/64664858">https://www.inaturalist.org/observations/64664858</a>   |
| 206 | Emberiza spodocephala | Black-faced Bunting | 2020/3/28  | 1 | 0 | 24.20698244 | 120.50437230 | <a href="https://www.inaturalist.org/observations/40869061">https://www.inaturalist.org/observations/40869061</a>   |

|     |                       |                     |            |   |   |             |              |                                                                                                                     |
|-----|-----------------------|---------------------|------------|---|---|-------------|--------------|---------------------------------------------------------------------------------------------------------------------|
| 207 | Emberiza spodocephala | Black-faced Bunting | 2022/1/8   | 1 | 0 | 24.20824683 | 120.59664730 | <a href="https://www.inaturalist.org/observations/120297884">https://www.inaturalist.org/observations/120297884</a> |
| 208 | Emberiza spodocephala | Black-faced Bunting | 2021/12/12 | 1 | 0 | 24.29148740 | 121.45107880 | <a href="https://www.inaturalist.org/observations/103079147">https://www.inaturalist.org/observations/103079147</a> |
| 209 | Emberiza spodocephala | Black-faced Bunting | 2018/4/4   | 2 | 0 | 24.31293399 | 120.54593470 | <a href="https://www.inaturalist.org/observations/51749855">https://www.inaturalist.org/observations/51749855</a>   |
| 210 | Emberiza spodocephala | Black-faced Bunting | 2021/3/14  | 1 | 0 | 24.32838045 | 121.31083690 | <a href="https://www.inaturalist.org/observations/71287716">https://www.inaturalist.org/observations/71287716</a>   |
| 211 | Emberiza spodocephala | Black-faced Bunting | 2019/3/1   | 0 | 0 | 24.35235870 | 121.30859720 | <a href="https://www.inaturalist.org/observations/37993295">https://www.inaturalist.org/observations/37993295</a>   |
| 212 | Emberiza spodocephala | Black-faced Bunting | 2019/11/30 | 1 | 0 | 24.38262723 | 121.30559800 | <a href="https://www.inaturalist.org/observations/36467794">https://www.inaturalist.org/observations/36467794</a>   |
| 213 | Emberiza spodocephala | Black-faced Bunting | 2021/12/10 | 1 | 0 | 24.41482396 | 118.28899700 | <a href="https://www.inaturalist.org/observations/133921789">https://www.inaturalist.org/observations/133921789</a> |
| 214 | Emberiza spodocephala | Black-faced Bunting | 2021/12/10 | 1 | 0 | 24.41485389 | 118.28901510 | <a href="https://www.inaturalist.org/observations/133977383">https://www.inaturalist.org/observations/133977383</a> |
| 215 | Emberiza spodocephala | Black-faced Bunting | 2021/1/21  | 1 | 0 | 24.42499458 | 118.30404420 | <a href="https://www.inaturalist.org/observations/68912266">https://www.inaturalist.org/observations/68912266</a>   |
| 216 | Emberiza spodocephala | Black-faced Bunting | 2019/2/12  | 1 | 0 | 24.43820403 | 118.37250970 | <a href="https://www.inaturalist.org/observations/135127227">https://www.inaturalist.org/observations/135127227</a> |
| 217 | Emberiza spodocephala | Black-faced Bunting | 2014/12/27 | 1 | 0 | 24.43916050 | 118.37251380 | <a href="https://www.inaturalist.org/observations/57535447">https://www.inaturalist.org/observations/57535447</a>   |
| 218 | Emberiza spodocephala | Black-faced Bunting | 2020/12/29 | 1 | 0 | 24.44383281 | 118.37524300 | <a href="https://www.inaturalist.org/observations/67349816">https://www.inaturalist.org/observations/67349816</a>   |
| 219 | Emberiza spodocephala | Black-faced Bunting | 2017/2/6   | 1 | 0 | 24.44713762 | 118.44883840 | <a href="https://www.inaturalist.org/observations/57000560">https://www.inaturalist.org/observations/57000560</a>   |
| 220 | Emberiza spodocephala | Black-faced Bunting | 2013/2/17  | 1 | 0 | 24.44839901 | 118.37920810 | <a href="https://www.inaturalist.org/observations/56706647">https://www.inaturalist.org/observations/56706647</a>   |
| 221 | Emberiza spodocephala | Black-faced Bunting | 2014/12/17 | 1 | 0 | 24.44937260 | 118.37663520 | <a href="https://www.inaturalist.org/observations/16787707">https://www.inaturalist.org/observations/16787707</a>   |
| 222 | Emberiza spodocephala | Black-faced Bunting | 2019/1/3   | 1 | 0 | 24.45516371 | 118.39649120 | <a href="https://www.inaturalist.org/observations/19466281">https://www.inaturalist.org/observations/19466281</a>   |
| 223 | Emberiza spodocephala | Black-faced Bunting | 2019/1/3   | 1 | 0 | 24.45542167 | 118.39607170 | <a href="https://www.inaturalist.org/observations/29001496">https://www.inaturalist.org/observations/29001496</a>   |
| 224 | Emberiza spodocephala | Black-faced Bunting | 2021/12/6  | 1 | 0 | 24.47088634 | 118.29140550 | <a href="https://www.inaturalist.org/observations/133072369">https://www.inaturalist.org/observations/133072369</a> |
| 225 | Emberiza spodocephala | Black-faced Bunting | 2021/12/6  | 1 | 0 | 24.47088634 | 118.29140550 | <a href="https://www.inaturalist.org/observations/133072370">https://www.inaturalist.org/observations/133072370</a> |
| 226 | Emberiza spodocephala | Black-faced Bunting | 2021/12/6  | 1 | 0 | 24.47088634 | 118.29140550 | <a href="https://www.inaturalist.org/observations/133072371">https://www.inaturalist.org/observations/133072371</a> |
| 227 | Emberiza spodocephala | Black-faced Bunting | 2021/12/6  | 1 | 0 | 24.47088634 | 118.29140550 | <a href="https://www.inaturalist.org/observations/133072374">https://www.inaturalist.org/observations/133072374</a> |
| 228 | Emberiza spodocephala | Black-faced Bunting | 2021/4/6   | 1 | 0 | 24.47355000 | 118.29054330 | <a href="https://www.inaturalist.org/observations/73697432">https://www.inaturalist.org/observations/73697432</a>   |
| 229 | Emberiza spodocephala | Black-faced Bunting | 2015/2/23  | 1 | 0 | 24.47412600 | 118.32324420 | <a href="https://www.inaturalist.org/observations/57606451">https://www.inaturalist.org/observations/57606451</a>   |



|     |                       |                     |            |   |   |             |              |                                                                                                                     |
|-----|-----------------------|---------------------|------------|---|---|-------------|--------------|---------------------------------------------------------------------------------------------------------------------|
| 230 | Emberiza spodocephala | Black-faced Bunting | 2010/11/7  | 1 | 0 | 24.49340088 | 121.53592060 | <a href="https://www.inaturalist.org/observations/55753344">https://www.inaturalist.org/observations/55753344</a>   |
| 231 | Emberiza spodocephala | Black-faced Bunting | 2021/3/31  | 1 | 0 | 24.50591200 | 121.11406780 | <a href="https://www.inaturalist.org/observations/72672959">https://www.inaturalist.org/observations/72672959</a>   |
| 232 | Emberiza spodocephala | Black-faced Bunting | 2021/12/8  | 1 | 0 | 24.50874748 | 118.40754050 | <a href="https://www.inaturalist.org/observations/133925125">https://www.inaturalist.org/observations/133925125</a> |
| 233 | Emberiza spodocephala | Black-faced Bunting | 2022/4/9   | 1 | 0 | 24.53779012 | 120.70910210 | <a href="https://www.inaturalist.org/observations/110845675">https://www.inaturalist.org/observations/110845675</a> |
| 234 | Emberiza spodocephala | Black-faced Bunting | 2022/3/12  | 1 | 0 | 24.61332544 | 120.83118140 | <a href="https://www.inaturalist.org/observations/118570545">https://www.inaturalist.org/observations/118570545</a> |
| 235 | Emberiza spodocephala | Black-faced Bunting | 2019/2/25  | 1 | 0 | 24.61553606 | 121.84666460 | <a href="https://www.inaturalist.org/observations/70640506">https://www.inaturalist.org/observations/70640506</a>   |
| 236 | Emberiza spodocephala | Black-faced Bunting | 2022/3/17  | 1 | 0 | 24.64897000 | 121.60018800 | <a href="https://www.inaturalist.org/observations/123178541">https://www.inaturalist.org/observations/123178541</a> |
| 237 | Emberiza spodocephala | Black-faced Bunting | 2021/12/20 | 1 | 0 | 24.65416424 | 121.82215630 | <a href="https://www.inaturalist.org/observations/105309371">https://www.inaturalist.org/observations/105309371</a> |
| 238 | Emberiza spodocephala | Black-faced Bunting | 2021/12/20 | 1 | 0 | 24.65416424 | 121.82215630 | <a href="https://www.inaturalist.org/observations/105309372">https://www.inaturalist.org/observations/105309372</a> |
| 239 | Emberiza spodocephala | Black-faced Bunting | 2019/3/25  | 1 | 0 | 24.65490061 | 121.81748900 | <a href="https://www.inaturalist.org/observations/22230593">https://www.inaturalist.org/observations/22230593</a>   |
| 240 | Emberiza spodocephala | Black-faced Bunting | 2022/4/17  | 0 | 0 | 24.65900858 | 121.14062940 | <a href="https://www.inaturalist.org/observations/111715172">https://www.inaturalist.org/observations/111715172</a> |
| 241 | Emberiza spodocephala | Black-faced Bunting | 2021/1/2   | 1 | 0 | 24.66184797 | 121.81866380 | <a href="https://www.inaturalist.org/observations/67477990">https://www.inaturalist.org/observations/67477990</a>   |
| 242 | Emberiza spodocephala | Black-faced Bunting | 2020/3/29  | 1 | 0 | 24.66316422 | 121.81805670 | <a href="https://www.inaturalist.org/observations/49709152">https://www.inaturalist.org/observations/49709152</a>   |
| 243 | Emberiza spodocephala | Black-faced Bunting | 2019/12/21 | 1 | 0 | 24.66494600 | 121.81942800 | <a href="https://www.inaturalist.org/observations/55162432">https://www.inaturalist.org/observations/55162432</a>   |
| 244 | Emberiza spodocephala | Black-faced Bunting | 2021/3/31  | 1 | 0 | 24.66788573 | 121.81971500 | <a href="https://www.inaturalist.org/observations/79005003">https://www.inaturalist.org/observations/79005003</a>   |
| 245 | Emberiza spodocephala | Black-faced Bunting | 2022/3/19  | 1 | 0 | 24.67855926 | 120.83685850 | <a href="https://www.inaturalist.org/observations/112803571">https://www.inaturalist.org/observations/112803571</a> |
| 246 | Emberiza spodocephala | Black-faced Bunting | 2022/3/12  | 1 | 0 | 24.70987132 | 120.98042630 | <a href="https://www.inaturalist.org/observations/118570546">https://www.inaturalist.org/observations/118570546</a> |
| 247 | Emberiza spodocephala | Black-faced Bunting | 2021/11/19 | 1 | 0 | 24.71767148 | 121.81084070 | <a href="https://www.inaturalist.org/observations/101521320">https://www.inaturalist.org/observations/101521320</a> |
| 248 | Emberiza spodocephala | Black-faced Bunting | 2021/11/25 | 1 | 0 | 24.71904199 | 121.81301450 | <a href="https://www.inaturalist.org/observations/101934633">https://www.inaturalist.org/observations/101934633</a> |
| 249 | Emberiza spodocephala | Black-faced Bunting | 2014/3/25  | 1 | 0 | 24.73081428 | 121.75357380 | <a href="https://www.inaturalist.org/observations/60852423">https://www.inaturalist.org/observations/60852423</a>   |
| 250 | Emberiza spodocephala | Black-faced Bunting | 2022/1/8   | 2 | 0 | 24.73458659 | 121.74636840 | <a href="https://www.inaturalist.org/observations/105745256">https://www.inaturalist.org/observations/105745256</a> |
| 251 | Emberiza spodocephala | Black-faced Bunting | 2022/1/8   | 2 | 0 | 24.73458659 | 121.74636840 | <a href="https://www.inaturalist.org/observations/105745261">https://www.inaturalist.org/observations/105745261</a> |
| 252 | Emberiza spodocephala | Black-faced Bunting | 2020/1/4   | 1 | 0 | 24.73637878 | 121.77082580 | <a href="https://www.inaturalist.org/observations/37298647">https://www.inaturalist.org/observations/37298647</a>   |

|     |                       |                     |            |   |   |             |              |                                                                                                                     |
|-----|-----------------------|---------------------|------------|---|---|-------------|--------------|---------------------------------------------------------------------------------------------------------------------|
| 253 | Emberiza spodocephala | Black-faced Bunting | 2018/11/15 | 2 | 0 | 24.74771200 | 121.63895500 | <a href="https://www.inaturalist.org/observations/18428888">https://www.inaturalist.org/observations/18428888</a>   |
| 254 | Emberiza spodocephala | Black-faced Bunting | 2021/2/20  | 1 | 0 | 24.74900500 | 121.63821000 | <a href="https://www.inaturalist.org/observations/69924038">https://www.inaturalist.org/observations/69924038</a>   |
| 255 | Emberiza spodocephala | Black-faced Bunting | 2021/12/5  | 2 | 0 | 24.74914614 | 121.64021530 | <a href="https://www.inaturalist.org/observations/102523885">https://www.inaturalist.org/observations/102523885</a> |
| 256 | Emberiza spodocephala | Black-faced Bunting | 2021/12/5  | 2 | 0 | 24.75226399 | 121.63646020 | <a href="https://www.inaturalist.org/observations/102524709">https://www.inaturalist.org/observations/102524709</a> |
| 257 | Emberiza spodocephala | Black-faced Bunting | 2021/12/5  | 2 | 0 | 24.75226399 | 121.63646020 | <a href="https://www.inaturalist.org/observations/102524711">https://www.inaturalist.org/observations/102524711</a> |
| 258 | Emberiza spodocephala | Black-faced Bunting | 2018/11/15 | 3 | 0 | 24.75295700 | 121.63788100 | <a href="https://www.inaturalist.org/observations/18428898">https://www.inaturalist.org/observations/18428898</a>   |
| 259 | Emberiza spodocephala | Black-faced Bunting | 2019/4/6   | 2 | 0 | 24.75477620 | 121.63754530 | <a href="https://www.inaturalist.org/observations/22345924">https://www.inaturalist.org/observations/22345924</a>   |
| 260 | Emberiza spodocephala | Black-faced Bunting | 2021/1/12  | 1 | 0 | 24.78171410 | 118.67394200 | <a href="https://www.inaturalist.org/observations/69035988">https://www.inaturalist.org/observations/69035988</a>   |
| 261 | Emberiza spodocephala | Black-faced Bunting | 2022/1/10  | 2 | 0 | 24.79811027 | 121.03601910 | <a href="https://www.inaturalist.org/observations/105137934">https://www.inaturalist.org/observations/105137934</a> |
| 262 | Emberiza spodocephala | Black-faced Bunting | 2013/2/16  | 1 | 0 | 24.82503080 | 121.79718820 | <a href="https://www.inaturalist.org/observations/56703185">https://www.inaturalist.org/observations/56703185</a>   |
| 263 | Emberiza spodocephala | Black-faced Bunting | 2013/2/16  | 1 | 0 | 24.82503080 | 121.79718820 | <a href="https://www.inaturalist.org/observations/56703190">https://www.inaturalist.org/observations/56703190</a>   |
| 264 | Emberiza spodocephala | Black-faced Bunting | 2021/4/5   | 1 | 0 | 24.82578679 | 121.40911870 | <a href="https://www.inaturalist.org/observations/72983196">https://www.inaturalist.org/observations/72983196</a>   |
| 265 | Emberiza spodocephala | Black-faced Bunting | 2022/4/3   | 1 | 0 | 24.83636803 | 121.81363350 | <a href="https://www.inaturalist.org/observations/110268710">https://www.inaturalist.org/observations/110268710</a> |
| 266 | Emberiza spodocephala | Black-faced Bunting | 2022/3/16  | 1 | 0 | 24.89550833 | 121.10747330 | <a href="https://www.inaturalist.org/observations/109990313">https://www.inaturalist.org/observations/109990313</a> |
| 267 | Emberiza spodocephala | Black-faced Bunting | 2022/4/13  | 2 | 0 | 24.97287902 | 121.42444590 | <a href="https://www.inaturalist.org/observations/113349215">https://www.inaturalist.org/observations/113349215</a> |
| 268 | Emberiza spodocephala | Black-faced Bunting | 2019/4/20  | 1 | 0 | 24.99983040 | 121.43860320 | <a href="https://www.inaturalist.org/observations/23911448">https://www.inaturalist.org/observations/23911448</a>   |
| 269 | Emberiza spodocephala | Black-faced Bunting | 2021/11/25 | 1 | 0 | 25.00735021 | 121.59072590 | <a href="https://www.inaturalist.org/observations/101934375">https://www.inaturalist.org/observations/101934375</a> |
| 270 | Emberiza spodocephala | Black-faced Bunting | 2013/4/28  | 1 | 0 | 25.01120790 | 121.92426050 | <a href="https://www.inaturalist.org/observations/45677047">https://www.inaturalist.org/observations/45677047</a>   |
| 271 | Emberiza spodocephala | Black-faced Bunting | 2020/11/26 | 2 | 0 | 25.01160118 | 121.92338300 | <a href="https://www.inaturalist.org/observations/65625997">https://www.inaturalist.org/observations/65625997</a>   |
| 272 | Emberiza spodocephala | Black-faced Bunting | 2021/11/3  | 1 | 0 | 25.01325123 | 121.92070210 | <a href="https://www.inaturalist.org/observations/134571088">https://www.inaturalist.org/observations/134571088</a> |
| 273 | Emberiza spodocephala | Black-faced Bunting | 2021/12/13 | 1 | 0 | 25.01472023 | 121.91945910 | <a href="https://www.inaturalist.org/observations/103051049">https://www.inaturalist.org/observations/103051049</a> |
| 274 | Emberiza spodocephala | Black-faced Bunting | 2019/4/8   | 1 | 0 | 25.01482600 | 121.44341000 | <a href="https://www.inaturalist.org/observations/65251147">https://www.inaturalist.org/observations/65251147</a>   |
| 275 | Emberiza spodocephala | Black-faced Bunting | 2019/4/19  | 1 | 0 | 25.01621667 | 121.92254830 | <a href="https://www.inaturalist.org/observations/22752906">https://www.inaturalist.org/observations/22752906</a>   |

|     |                       |                     |            |   |   |             |              |                                                                                                                     |
|-----|-----------------------|---------------------|------------|---|---|-------------|--------------|---------------------------------------------------------------------------------------------------------------------|
| 276 | Emberiza spodocephala | Black-faced Bunting | 2019/4/26  | 2 | 0 | 25.01692409 | 121.92605230 | <a href="https://www.inaturalist.org/observations/48523520">https://www.inaturalist.org/observations/48523520</a>   |
| 277 | Emberiza spodocephala | Black-faced Bunting | 2020/11/15 | 1 | 0 | 25.01718928 | 121.92434570 | <a href="https://www.inaturalist.org/observations/65402744">https://www.inaturalist.org/observations/65402744</a>   |
| 278 | Emberiza spodocephala | Black-faced Bunting | 2021/11/5  | 1 | 0 | 25.01764479 | 121.92217680 | <a href="https://www.inaturalist.org/observations/100305655">https://www.inaturalist.org/observations/100305655</a> |
| 279 | Emberiza spodocephala | Black-faced Bunting | 2021/11/5  | 1 | 0 | 25.01777262 | 121.92252180 | <a href="https://www.inaturalist.org/observations/100305654">https://www.inaturalist.org/observations/100305654</a> |
| 280 | Emberiza spodocephala | Black-faced Bunting | 2014/11/2  | 1 | 0 | 25.01789152 | 121.92384010 | <a href="https://www.inaturalist.org/observations/57529100">https://www.inaturalist.org/observations/57529100</a>   |
| 281 | Emberiza spodocephala | Black-faced Bunting | 2020/11/7  | 1 | 0 | 25.01818528 | 121.92341420 | <a href="https://www.inaturalist.org/observations/64453431">https://www.inaturalist.org/observations/64453431</a>   |
| 282 | Emberiza spodocephala | Black-faced Bunting | 2020/11/30 | 1 | 0 | 25.01867783 | 121.54324500 | <a href="https://www.inaturalist.org/observations/65876252">https://www.inaturalist.org/observations/65876252</a>   |
| 283 | Emberiza spodocephala | Black-faced Bunting | 2015/1/1   | 1 | 0 | 25.01868650 | 121.92372340 | <a href="https://www.inaturalist.org/observations/57601456">https://www.inaturalist.org/observations/57601456</a>   |
| 284 | Emberiza spodocephala | Black-faced Bunting | 2021/4/11  | 1 | 0 | 25.01937778 | 121.92177310 | <a href="https://www.inaturalist.org/observations/73718710">https://www.inaturalist.org/observations/73718710</a>   |
| 285 | Emberiza spodocephala | Black-faced Bunting | 2010/11/6  | 1 | 0 | 25.01954809 | 121.92353430 | <a href="https://www.inaturalist.org/observations/55753956">https://www.inaturalist.org/observations/55753956</a>   |
| 286 | Emberiza spodocephala | Black-faced Bunting | 2021/4/11  | 1 | 0 | 25.01958056 | 121.92188670 | <a href="https://www.inaturalist.org/observations/73718688">https://www.inaturalist.org/observations/73718688</a>   |
| 287 | Emberiza spodocephala | Black-faced Bunting | 2020/11/26 | 1 | 0 | 25.02010058 | 121.92247920 | <a href="https://www.inaturalist.org/observations/65625991">https://www.inaturalist.org/observations/65625991</a>   |
| 288 | Emberiza spodocephala | Black-faced Bunting | 2021/11/15 | 2 | 0 | 25.02016117 | 121.92233670 | <a href="https://www.inaturalist.org/observations/101236167">https://www.inaturalist.org/observations/101236167</a> |
| 289 | Emberiza spodocephala | Black-faced Bunting | 2017/2/18  | 1 | 0 | 25.02232745 | 121.92491450 | <a href="https://www.inaturalist.org/observations/91611965">https://www.inaturalist.org/observations/91611965</a>   |
| 290 | Emberiza spodocephala | Black-faced Bunting | 2022/4/23  | 1 | 0 | 25.02888928 | 121.93027640 | <a href="https://www.inaturalist.org/observations/121399482">https://www.inaturalist.org/observations/121399482</a> |
| 291 | Emberiza spodocephala | Black-faced Bunting | 2020/11/14 | 1 | 0 | 25.03317071 | 121.26205840 | <a href="https://www.inaturalist.org/observations/68752394">https://www.inaturalist.org/observations/68752394</a>   |
| 292 | Emberiza spodocephala | Black-faced Bunting | 2019/3/26  | 2 | 0 | 25.03802831 | 121.49104370 | <a href="https://www.inaturalist.org/observations/21730990">https://www.inaturalist.org/observations/21730990</a>   |
| 293 | Emberiza spodocephala | Black-faced Bunting | 2021/12/28 | 1 | 0 | 25.03933241 | 121.49342780 | <a href="https://www.inaturalist.org/observations/103886646">https://www.inaturalist.org/observations/103886646</a> |
| 294 | Emberiza spodocephala | Black-faced Bunting | 2022/2/2   | 1 | 0 | 25.03994958 | 121.49686700 | <a href="https://www.inaturalist.org/observations/106064399">https://www.inaturalist.org/observations/106064399</a> |
| 295 | Emberiza spodocephala | Black-faced Bunting | 2019/12/24 | 1 | 0 | 25.06504667 | 121.23542670 | <a href="https://www.inaturalist.org/observations/66245515">https://www.inaturalist.org/observations/66245515</a>   |
| 296 | Emberiza spodocephala | Black-faced Bunting | 2022/2/9   | 3 | 0 | 25.06744681 | 121.53918740 | <a href="https://www.inaturalist.org/observations/106579702">https://www.inaturalist.org/observations/106579702</a> |
| 297 | Emberiza spodocephala | Black-faced Bunting | 2019/5/10  | 1 | 0 | 25.06849705 | 121.61980170 | <a href="https://www.inaturalist.org/observations/24884004">https://www.inaturalist.org/observations/24884004</a>   |
| 298 | Emberiza spodocephala | Black-faced Bunting | 2020/11/16 | 0 | 0 | 25.07095300 | 121.78063900 | <a href="https://www.inaturalist.org/observations/66328374">https://www.inaturalist.org/observations/66328374</a>   |

|     |                       |                     |            |   |   |             |              |                                                                                                                     |
|-----|-----------------------|---------------------|------------|---|---|-------------|--------------|---------------------------------------------------------------------------------------------------------------------|
| 299 | Emberiza spodocephala | Black-faced Bunting | 2020/12/31 | 1 | 0 | 25.08365945 | 121.18321190 | <a href="https://www.inaturalist.org/observations/67353630">https://www.inaturalist.org/observations/67353630</a>   |
| 300 | Emberiza spodocephala | Black-faced Bunting | 2021/4/5   | 1 | 0 | 25.08674268 | 121.17516760 | <a href="https://www.inaturalist.org/observations/73082284">https://www.inaturalist.org/observations/73082284</a>   |
| 301 | Emberiza spodocephala | Black-faced Bunting | 2022/3/30  | 1 | 0 | 25.08733380 | 121.17625240 | <a href="https://www.inaturalist.org/observations/113782307">https://www.inaturalist.org/observations/113782307</a> |
| 302 | Emberiza spodocephala | Black-faced Bunting | 2022/4/17  | 1 | 0 | 25.08938432 | 121.45177710 | <a href="https://www.inaturalist.org/observations/112129502">https://www.inaturalist.org/observations/112129502</a> |
| 303 | Emberiza spodocephala | Black-faced Bunting | 2021/11/9  | 1 | 0 | 25.09137421 | 121.58301580 | <a href="https://www.inaturalist.org/observations/100671722">https://www.inaturalist.org/observations/100671722</a> |
| 304 | Emberiza spodocephala | Black-faced Bunting | 2019/12/14 | 1 | 0 | 25.09849587 | 121.45511260 | <a href="https://www.inaturalist.org/observations/37191642">https://www.inaturalist.org/observations/37191642</a>   |
| 305 | Emberiza spodocephala | Black-faced Bunting | 2021/12/5  | 1 | 0 | 25.09862461 | 121.45505780 | <a href="https://www.inaturalist.org/observations/105604604">https://www.inaturalist.org/observations/105604604</a> |
| 306 | Emberiza spodocephala | Black-faced Bunting | 2019/4/10  | 1 | 0 | 25.09906251 | 121.45755740 | <a href="https://www.inaturalist.org/observations/22651438">https://www.inaturalist.org/observations/22651438</a>   |
| 307 | Emberiza spodocephala | Black-faced Bunting | 2019/4/19  | 2 | 0 | 25.10168979 | 121.45466700 | <a href="https://www.inaturalist.org/observations/24286239">https://www.inaturalist.org/observations/24286239</a>   |
| 308 | Emberiza spodocephala | Black-faced Bunting | 2020/1/27  | 0 | 0 | 25.10822500 | 121.86374170 | <a href="https://www.inaturalist.org/observations/38028982">https://www.inaturalist.org/observations/38028982</a>   |
| 309 | Emberiza spodocephala | Black-faced Bunting | 2019/1/5   | 0 | 0 | 25.10868732 | 121.45620550 | <a href="https://www.inaturalist.org/observations/19530961">https://www.inaturalist.org/observations/19530961</a>   |
| 310 | Emberiza spodocephala | Black-faced Bunting | 2020/4/4   | 1 | 0 | 25.11230933 | 121.49062700 | <a href="https://www.inaturalist.org/observations/63752551">https://www.inaturalist.org/observations/63752551</a>   |
| 311 | Emberiza spodocephala | Black-faced Bunting | 2020/4/4   | 1 | 0 | 25.11230933 | 121.49062700 | <a href="https://www.inaturalist.org/observations/63752552">https://www.inaturalist.org/observations/63752552</a>   |
| 312 | Emberiza spodocephala | Black-faced Bunting | 2019/12/7  | 1 | 0 | 25.11326041 | 121.48979340 | <a href="https://www.inaturalist.org/observations/54244186">https://www.inaturalist.org/observations/54244186</a>   |
| 313 | Emberiza spodocephala | Black-faced Bunting | 2019/12/7  | 1 | 0 | 25.11327831 | 121.48971040 | <a href="https://www.inaturalist.org/observations/54244192">https://www.inaturalist.org/observations/54244192</a>   |
| 314 | Emberiza spodocephala | Black-faced Bunting | 2021/1/21  | 1 | 0 | 25.11543667 | 121.47226330 | <a href="https://www.inaturalist.org/observations/68633932">https://www.inaturalist.org/observations/68633932</a>   |
| 315 | Emberiza spodocephala | Black-faced Bunting | 2022/5/1   | 1 | 0 | 25.12345161 | 121.86994440 | <a href="https://www.inaturalist.org/observations/114637789">https://www.inaturalist.org/observations/114637789</a> |
| 316 | Emberiza spodocephala | Black-faced Bunting | 2020/12/10 | 1 | 0 | 25.12532500 | 121.48161670 | <a href="https://www.inaturalist.org/observations/66454343">https://www.inaturalist.org/observations/66454343</a>   |
| 317 | Emberiza spodocephala | Black-faced Bunting | 2020/12/10 | 1 | 0 | 25.12606611 | 121.48518500 | <a href="https://www.inaturalist.org/observations/66453453">https://www.inaturalist.org/observations/66453453</a>   |
| 318 | Emberiza spodocephala | Black-faced Bunting | 2020/12/10 | 0 | 0 | 25.12607694 | 121.48509420 | <a href="https://www.inaturalist.org/observations/66453450">https://www.inaturalist.org/observations/66453450</a>   |
| 319 | Emberiza spodocephala | Black-faced Bunting | 2020/12/10 | 1 | 0 | 25.12608861 | 121.48507280 | <a href="https://www.inaturalist.org/observations/66453451">https://www.inaturalist.org/observations/66453451</a>   |
| 320 | Emberiza spodocephala | Black-faced Bunting | 2020/12/10 | 0 | 0 | 25.12615278 | 121.48534670 | <a href="https://www.inaturalist.org/observations/66453449">https://www.inaturalist.org/observations/66453449</a>   |
| 321 | Emberiza spodocephala | Black-faced Bunting | 2021/4/2   | 1 | 0 | 25.12623167 | 121.48549360 | <a href="https://www.inaturalist.org/observations/72706563">https://www.inaturalist.org/observations/72706563</a>   |

|     |                       |                     |            |   |   |             |              |                                                                                                                     |
|-----|-----------------------|---------------------|------------|---|---|-------------|--------------|---------------------------------------------------------------------------------------------------------------------|
| 322 | Emberiza spodocephala | Black-faced Bunting | 2019/11/24 | 1 | 0 | 25.12914628 | 121.47698750 | <a href="https://www.inaturalist.org/observations/36012650">https://www.inaturalist.org/observations/36012650</a>   |
| 323 | Emberiza spodocephala | Black-faced Bunting | 2021/1/26  | 1 | 0 | 25.13011000 | 121.48831130 | <a href="https://www.inaturalist.org/observations/68685492">https://www.inaturalist.org/observations/68685492</a>   |
| 324 | Emberiza spodocephala | Black-faced Bunting | 2021/1/26  | 1 | 0 | 25.13011000 | 121.48831130 | <a href="https://www.inaturalist.org/observations/68685496">https://www.inaturalist.org/observations/68685496</a>   |
| 325 | Emberiza spodocephala | Black-faced Bunting | 2021/1/26  | 1 | 0 | 25.13011000 | 121.48831130 | <a href="https://www.inaturalist.org/observations/68685497">https://www.inaturalist.org/observations/68685497</a>   |
| 326 | Emberiza spodocephala | Black-faced Bunting | 2021/1/26  | 1 | 0 | 25.13011000 | 121.48831130 | <a href="https://www.inaturalist.org/observations/68685498">https://www.inaturalist.org/observations/68685498</a>   |
| 327 | Emberiza spodocephala | Black-faced Bunting | 2021/1/26  | 1 | 0 | 25.13011000 | 121.48831130 | <a href="https://www.inaturalist.org/observations/68685508">https://www.inaturalist.org/observations/68685508</a>   |
| 328 | Emberiza spodocephala | Black-faced Bunting | 2022/2/12  | 2 | 0 | 25.13096667 | 121.49022830 | <a href="https://www.inaturalist.org/observations/106598859">https://www.inaturalist.org/observations/106598859</a> |
| 329 | Emberiza spodocephala | Black-faced Bunting | 2021/12/18 | 1 | 0 | 25.13375809 | 121.48921320 | <a href="https://www.inaturalist.org/observations/134568322">https://www.inaturalist.org/observations/134568322</a> |
| 330 | Emberiza spodocephala | Black-faced Bunting | 2020/3/9   | 1 | 0 | 25.13881574 | 121.52380940 | <a href="https://www.inaturalist.org/observations/49694634">https://www.inaturalist.org/observations/49694634</a>   |
| 331 | Emberiza spodocephala | Black-faced Bunting | 2019/4/14  | 2 | 0 | 25.14451943 | 121.46347260 | <a href="https://www.inaturalist.org/observations/30657019">https://www.inaturalist.org/observations/30657019</a>   |
| 332 | Emberiza spodocephala | Black-faced Bunting | 2022/5/5   | 1 | 0 | 25.14580360 | 121.79830340 | <a href="https://www.inaturalist.org/observations/115639458">https://www.inaturalist.org/observations/115639458</a> |
| 333 | Emberiza spodocephala | Black-faced Bunting | 2022/5/17  | 1 | 0 | 25.14644167 | 121.79724440 | <a href="https://www.inaturalist.org/observations/117472265">https://www.inaturalist.org/observations/117472265</a> |
| 334 | Emberiza spodocephala | Black-faced Bunting | 2010/3/14  | 1 | 0 | 25.15690148 | 121.54647220 | <a href="https://www.inaturalist.org/observations/55473167">https://www.inaturalist.org/observations/55473167</a>   |
| 335 | Emberiza spodocephala | Black-faced Bunting | 2017/11/15 | 1 | 0 | 25.16946720 | 121.55556740 | <a href="https://www.inaturalist.org/observations/14127757">https://www.inaturalist.org/observations/14127757</a>   |
| 336 | Emberiza spodocephala | Black-faced Bunting | 2021/1/18  | 1 | 0 | 25.22344286 | 121.64123960 | <a href="https://www.inaturalist.org/observations/68264494">https://www.inaturalist.org/observations/68264494</a>   |
| 337 | Emberiza spodocephala | Black-faced Bunting | 2019/11/10 | 1 | 0 | 25.22397383 | 121.64182210 | <a href="https://www.inaturalist.org/observations/35524276">https://www.inaturalist.org/observations/35524276</a>   |
| 338 | Emberiza spodocephala | Black-faced Bunting | 2022/3/7   | 2 | 0 | 25.22594741 | 121.64086150 | <a href="https://www.inaturalist.org/observations/131190608">https://www.inaturalist.org/observations/131190608</a> |
| 339 | Emberiza spodocephala | Black-faced Bunting | 2022/3/6   | 1 | 0 | 25.22608158 | 121.64126490 | <a href="https://www.inaturalist.org/observations/131190598">https://www.inaturalist.org/observations/131190598</a> |
| 340 | Emberiza spodocephala | Black-faced Bunting | 2022/4/16  | 2 | 0 | 25.22639195 | 121.63994360 | <a href="https://www.inaturalist.org/observations/111762899">https://www.inaturalist.org/observations/111762899</a> |
| 341 | Emberiza spodocephala | Black-faced Bunting | 2021/4/7   | 1 | 0 | 25.22639694 | 121.64164830 | <a href="https://www.inaturalist.org/observations/73207479">https://www.inaturalist.org/observations/73207479</a>   |
| 342 | Emberiza spodocephala | Black-faced Bunting | 2022/4/16  | 2 | 0 | 25.22646503 | 121.64152860 | <a href="https://www.inaturalist.org/observations/111762904">https://www.inaturalist.org/observations/111762904</a> |
| 343 | Emberiza spodocephala | Black-faced Bunting | 2021/11/16 | 1 | 0 | 25.22646814 | 121.64116350 | <a href="https://www.inaturalist.org/observations/104805315">https://www.inaturalist.org/observations/104805315</a> |
| 344 | Emberiza spodocephala | Black-faced Bunting | 2012/3/25  | 1 | 0 | 25.22656088 | 121.64161200 | <a href="https://www.inaturalist.org/observations/56213510">https://www.inaturalist.org/observations/56213510</a>   |

|     |                       |                     |            |   |   |             |              |                                                                                                                     |
|-----|-----------------------|---------------------|------------|---|---|-------------|--------------|---------------------------------------------------------------------------------------------------------------------|
| 345 | Emberiza spodocephala | Black-faced Bunting | 2013/3/12  | 1 | 0 | 25.22667963 | 121.64127010 | <a href="https://www.inaturalist.org/observations/41172780">https://www.inaturalist.org/observations/41172780</a>   |
| 346 | Emberiza spodocephala | Black-faced Bunting | 2013/3/12  | 1 | 0 | 25.22667963 | 121.64127010 | <a href="https://www.inaturalist.org/observations/41172781">https://www.inaturalist.org/observations/41172781</a>   |
| 347 | Emberiza spodocephala | Black-faced Bunting | 2022/4/3   | 1 | 0 | 25.22700759 | 121.64128280 | <a href="https://www.inaturalist.org/observations/110276592">https://www.inaturalist.org/observations/110276592</a> |
| 348 | Emberiza spodocephala | Black-faced Bunting | 2021/3/1   | 1 | 0 | 25.22716561 | 121.64243180 | <a href="https://www.inaturalist.org/observations/70393019">https://www.inaturalist.org/observations/70393019</a>   |
| 349 | Emberiza spodocephala | Black-faced Bunting | 2018/3/6   | 1 | 0 | 25.22777012 | 121.63993270 | <a href="https://www.inaturalist.org/observations/103242161">https://www.inaturalist.org/observations/103242161</a> |
| 350 | Emberiza spodocephala | Black-faced Bunting | 2020/11/20 | 1 | 0 | 25.22965000 | 121.63826100 | <a href="https://www.inaturalist.org/observations/65456622">https://www.inaturalist.org/observations/65456622</a>   |
| 351 | Emberiza spodocephala | Black-faced Bunting | 2019/12/11 | 0 | 0 | 25.23028167 | 121.64592270 | <a href="https://www.inaturalist.org/observations/36555972">https://www.inaturalist.org/observations/36555972</a>   |
| 352 | Emberiza spodocephala | Black-faced Bunting | 2013/4/20  | 1 | 0 | 25.23229915 | 121.63363620 | <a href="https://www.inaturalist.org/observations/56722412">https://www.inaturalist.org/observations/56722412</a>   |
| 353 | Emberiza spodocephala | Black-faced Bunting | 2022/2/9   | 1 | 0 | 25.23662196 | 121.55095950 | <a href="https://www.inaturalist.org/observations/106580058">https://www.inaturalist.org/observations/106580058</a> |
| 354 | Emberiza spodocephala | Black-faced Bunting | 2020/4/26  | 1 | 0 | 25.24593316 | 121.62843990 | <a href="https://www.inaturalist.org/observations/107175242">https://www.inaturalist.org/observations/107175242</a> |
| 355 | Emberiza spodocephala | Black-faced Bunting | 2020/4/20  | 2 | 0 | 25.25970470 | 121.47582790 | <a href="https://www.inaturalist.org/observations/42660893">https://www.inaturalist.org/observations/42660893</a>   |
| 356 | Emberiza spodocephala | Black-faced Bunting | 2021/2/8   | 1 | 0 | 25.26169016 | 121.62010930 | <a href="https://www.inaturalist.org/observations/69298960">https://www.inaturalist.org/observations/69298960</a>   |
| 357 | Emberiza spodocephala | Black-faced Bunting | 2022/4/18  | 2 | 0 | 25.96788494 | 119.93370400 | <a href="https://www.inaturalist.org/observations/115350650">https://www.inaturalist.org/observations/115350650</a> |
| 358 | Emberiza spodocephala | Black-faced Bunting | 2022/4/18  | 2 | 0 | 25.96831285 | 119.93341570 | <a href="https://www.inaturalist.org/observations/115350652">https://www.inaturalist.org/observations/115350652</a> |
| 359 | Emberiza spodocephala | Black-faced Bunting | 2022/4/18  | 2 | 0 | 25.97014400 | 119.93332600 | <a href="https://www.inaturalist.org/observations/115350644">https://www.inaturalist.org/observations/115350644</a> |
| 360 | Emberiza spodocephala | Black-faced Bunting | 2014/3/29  | 0 | 0 | 26.15259872 | 119.28760990 | <a href="https://www.inaturalist.org/observations/39030440">https://www.inaturalist.org/observations/39030440</a>   |
| 361 | Emberiza spodocephala | Black-faced Bunting | 2021/12/12 | 1 | 0 | 26.15677600 | 119.95203900 | <a href="https://www.inaturalist.org/observations/103087341">https://www.inaturalist.org/observations/103087341</a> |
| 362 | Emberiza spodocephala | Black-faced Bunting | 2018/4/29  | 1 | 0 | 26.15695553 | 119.95160670 | <a href="https://www.inaturalist.org/observations/56821672">https://www.inaturalist.org/observations/56821672</a>   |
| 363 | Emberiza spodocephala | Black-faced Bunting | 2019/4/29  | 1 | 0 | 26.21612500 | 119.97563830 | <a href="https://www.inaturalist.org/observations/24835024">https://www.inaturalist.org/observations/24835024</a>   |
| 364 | Emberiza spodocephala | Black-faced Bunting | 2019/4/29  | 1 | 0 | 26.21612500 | 119.97563830 | <a href="https://www.inaturalist.org/observations/24835025">https://www.inaturalist.org/observations/24835025</a>   |
| 365 | Emberiza spodocephala | Black-faced Bunting | 2019/4/29  | 1 | 0 | 26.21612500 | 119.97563830 | <a href="https://www.inaturalist.org/observations/24835031">https://www.inaturalist.org/observations/24835031</a>   |
| 366 | Emberiza spodocephala | Black-faced Bunting | 2019/4/29  | 1 | 0 | 26.21612500 | 119.97563830 | <a href="https://www.inaturalist.org/observations/24835035">https://www.inaturalist.org/observations/24835035</a>   |
| 367 | Emberiza spodocephala | Black-faced Bunting | 2019/4/29  | 1 | 0 | 26.21612500 | 119.97563830 | <a href="https://www.inaturalist.org/observations/24835036">https://www.inaturalist.org/observations/24835036</a>   |

|     |                                       |                     |           |   |   |             |              |                                                                                                                     |
|-----|---------------------------------------|---------------------|-----------|---|---|-------------|--------------|---------------------------------------------------------------------------------------------------------------------|
| 368 | Emberiza spodocephala                 | Black-faced Bunting | 2019/4/28 | 1 | 0 | 26.21655333 | 119.97501670 | <a href="https://www.inaturalist.org/observations/24820025">https://www.inaturalist.org/observations/24820025</a>   |
| 369 | Emberiza spodocephala                 | Black-faced Bunting | 2019/4/29 | 1 | 0 | 26.21710333 | 119.97473500 | <a href="https://www.inaturalist.org/observations/24835012">https://www.inaturalist.org/observations/24835012</a>   |
| 370 | Emberiza spodocephala                 | Black-faced Bunting | 2019/4/28 | 2 | 0 | 26.21719000 | 119.97513830 | <a href="https://www.inaturalist.org/observations/24820032">https://www.inaturalist.org/observations/24820032</a>   |
| 371 | Emberiza spodocephala                 | Black-faced Bunting | 2019/4/29 | 1 | 0 | 26.21719000 | 119.97520000 | <a href="https://www.inaturalist.org/observations/24835018">https://www.inaturalist.org/observations/24835018</a>   |
| 372 | Emberiza spodocephala<br>spodocephala | Black-faced Bunting | 2019/4/28 | 1 | 0 | 26.21722000 | 119.97514000 | <a href="https://www.inaturalist.org/observations/24820034">https://www.inaturalist.org/observations/24820034</a>   |
| 373 | Emberiza spodocephala                 | Black-faced Bunting | 2015/4/5  | 1 | 0 | 26.36967470 | 120.49624170 | <a href="https://www.inaturalist.org/observations/57625625">https://www.inaturalist.org/observations/57625625</a>   |
| 374 | Emberiza spodocephala                 | Black-faced Bunting | 2017/4/23 | 1 | 0 | 26.37148800 | 120.48603900 | <a href="https://www.inaturalist.org/observations/15321017">https://www.inaturalist.org/observations/15321017</a>   |
| 375 | Emberiza spodocephala                 | Black-faced Bunting | 2022/4/22 | 1 | 0 | 26.42342173 | 106.36952590 | <a href="https://www.inaturalist.org/observations/112481382">https://www.inaturalist.org/observations/112481382</a> |
| 376 | Emberiza spodocephala                 | Black-faced Bunting | 2022/4/22 | 2 | 0 | 26.42342173 | 106.36952590 | <a href="https://www.inaturalist.org/observations/112481405">https://www.inaturalist.org/observations/112481405</a> |
| 377 | Emberiza spodocephala                 | Black-faced Bunting | 2021/5/21 | 1 | 0 | 26.44083862 | 106.48329400 | <a href="https://www.inaturalist.org/observations/80365494">https://www.inaturalist.org/observations/80365494</a>   |
| 378 | Emberiza spodocephala                 | Black-faced Bunting | 2020/4/28 | 1 | 0 | 26.44292183 | 106.67568310 | <a href="https://www.inaturalist.org/observations/44117158">https://www.inaturalist.org/observations/44117158</a>   |
| 379 | Emberiza spodocephala                 | Black-faced Bunting | 2020/7/15 | 1 | 0 | 26.46259214 | 106.67465200 | <a href="https://www.inaturalist.org/observations/53155162">https://www.inaturalist.org/observations/53155162</a>   |
| 380 | Emberiza spodocephala                 | Black-faced Bunting | 2021/4/2  | 1 | 0 | 26.46619599 | 106.67869760 | <a href="https://www.inaturalist.org/observations/74017562">https://www.inaturalist.org/observations/74017562</a>   |
| 381 | Emberiza spodocephala                 | Black-faced Bunting | 2021/4/2  | 1 | 0 | 26.46619599 | 106.67869760 | <a href="https://www.inaturalist.org/observations/74017570">https://www.inaturalist.org/observations/74017570</a>   |
| 382 | Emberiza spodocephala                 | Black-faced Bunting | 2021/4/16 | 1 | 0 | 26.46619599 | 106.67869760 | <a href="https://www.inaturalist.org/observations/74530128">https://www.inaturalist.org/observations/74530128</a>   |
| 383 | Emberiza spodocephala                 | Black-faced Bunting | 2021/4/16 | 1 | 0 | 26.46619599 | 106.67869760 | <a href="https://www.inaturalist.org/observations/74530158">https://www.inaturalist.org/observations/74530158</a>   |
| 384 | Emberiza spodocephala                 | Black-faced Bunting | 2021/4/23 | 0 | 0 | 26.46619599 | 106.67869760 | <a href="https://www.inaturalist.org/observations/75181123">https://www.inaturalist.org/observations/75181123</a>   |
| 385 | Emberiza spodocephala                 | Black-faced Bunting | 2021/4/23 | 1 | 0 | 26.46619599 | 106.67869760 | <a href="https://www.inaturalist.org/observations/75181128">https://www.inaturalist.org/observations/75181128</a>   |
| 386 | Emberiza spodocephala                 | Black-faced Bunting | 2021/5/8  | 1 | 0 | 26.46619599 | 106.67869760 | <a href="https://www.inaturalist.org/observations/78349369">https://www.inaturalist.org/observations/78349369</a>   |
| 387 | Emberiza spodocephala                 | Black-faced Bunting | 2021/9/3  | 2 | 0 | 26.46619599 | 106.67869760 | <a href="https://www.inaturalist.org/observations/94074823">https://www.inaturalist.org/observations/94074823</a>   |
| 388 | Emberiza spodocephala                 | Black-faced Bunting | 2022/4/4  | 1 | 0 | 26.46619599 | 106.67869760 | <a href="https://www.inaturalist.org/observations/110573711">https://www.inaturalist.org/observations/110573711</a> |
| 389 | Emberiza spodocephala                 | Black-faced Bunting | 2022/4/14 | 1 | 0 | 26.46619599 | 106.67869760 | <a href="https://www.inaturalist.org/observations/112055220">https://www.inaturalist.org/observations/112055220</a> |
| 390 | Emberiza spodocephala                 | Black-faced Bunting | 2022/2/11 | 1 | 0 | 26.50934121 | 106.64975520 | <a href="https://www.inaturalist.org/observations/108662408">https://www.inaturalist.org/observations/108662408</a> |

|     |                       |                     |            |   |   |             |              |                                                                                                                     |
|-----|-----------------------|---------------------|------------|---|---|-------------|--------------|---------------------------------------------------------------------------------------------------------------------|
| 391 | Emberiza spodocephala | Black-faced Bunting | 2022/2/12  | 1 | 0 | 26.50934121 | 106.64975520 | <a href="https://www.inaturalist.org/observations/108779840">https://www.inaturalist.org/observations/108779840</a> |
| 392 | Emberiza spodocephala | Black-faced Bunting | 2022/4/11  | 1 | 0 | 26.50934121 | 106.64975520 | <a href="https://www.inaturalist.org/observations/112045231">https://www.inaturalist.org/observations/112045231</a> |
| 393 | Emberiza spodocephala | Black-faced Bunting | 2022/5/6   | 1 | 0 | 26.50934121 | 106.64975520 | <a href="https://www.inaturalist.org/observations/117731333">https://www.inaturalist.org/observations/117731333</a> |
| 394 | Emberiza spodocephala | Black-faced Bunting | 2022/6/9   | 1 | 0 | 26.50934121 | 106.64975520 | <a href="https://www.inaturalist.org/observations/125022333">https://www.inaturalist.org/observations/125022333</a> |
| 395 | Emberiza spodocephala | Black-faced Bunting | 2015/3/10  | 2 | 0 | 26.66259870 | 94.35360990  | <a href="https://www.inaturalist.org/observations/58330051">https://www.inaturalist.org/observations/58330051</a>   |
| 396 | Emberiza spodocephala | Black-faced Bunting | 2022/1/22  | 1 | 0 | 26.84449356 | 104.24263370 | <a href="https://www.inaturalist.org/observations/105712655">https://www.inaturalist.org/observations/105712655</a> |
| 397 | Emberiza spodocephala | Black-faced Bunting | 2022/1/22  | 0 | 0 | 26.84449356 | 104.24263370 | <a href="https://www.inaturalist.org/observations/105712682">https://www.inaturalist.org/observations/105712682</a> |
| 398 | Emberiza spodocephala | Black-faced Bunting | 2022/1/22  | 1 | 0 | 26.84449356 | 104.24263370 | <a href="https://www.inaturalist.org/observations/105712686">https://www.inaturalist.org/observations/105712686</a> |
| 399 | Emberiza spodocephala | Black-faced Bunting | 2022/1/23  | 2 | 0 | 26.84449356 | 104.24263370 | <a href="https://www.inaturalist.org/observations/105758107">https://www.inaturalist.org/observations/105758107</a> |
| 400 | Emberiza spodocephala | Black-faced Bunting | 2020/4/1   | 1 | 0 | 26.92666766 | 112.61178700 | <a href="https://www.inaturalist.org/observations/43062166">https://www.inaturalist.org/observations/43062166</a>   |
| 401 | Emberiza spodocephala | Black-faced Bunting | 2021/3/3   | 1 | 0 | 27.57563090 | 95.39526400  | <a href="https://www.inaturalist.org/observations/101927042">https://www.inaturalist.org/observations/101927042</a> |
| 402 | Emberiza spodocephala | Black-faced Bunting | 2016/12/18 | 1 | 0 | 27.57563090 | 95.39526400  | <a href="https://www.inaturalist.org/observations/106175140">https://www.inaturalist.org/observations/106175140</a> |
| 403 | Emberiza spodocephala | Black-faced Bunting | 2016/4/17  | 1 | 0 | 27.57886829 | 95.39174592  | <a href="https://www.inaturalist.org/observations/19516787">https://www.inaturalist.org/observations/19516787</a>   |
| 404 | Emberiza spodocephala | Black-faced Bunting | 2016/12/18 | 1 | 0 | 27.58080467 | 95.39286074  | <a href="https://www.inaturalist.org/observations/106175149">https://www.inaturalist.org/observations/106175149</a> |
| 405 | Emberiza spodocephala | Black-faced Bunting | 2018/12/30 | 2 | 0 | 28.06598806 | 95.71248806  | <a href="https://www.inaturalist.org/observations/103046272">https://www.inaturalist.org/observations/103046272</a> |
| 406 | Emberiza spodocephala | Black-faced Bunting | 2022/2/14  | 0 | 0 | 28.10095799 | 112.98501720 | <a href="https://www.inaturalist.org/observations/106739736">https://www.inaturalist.org/observations/106739736</a> |
| 407 | Emberiza spodocephala | Black-faced Bunting | 2022/2/22  | 1 | 0 | 28.12676842 | 112.92630950 | <a href="https://www.inaturalist.org/observations/107551041">https://www.inaturalist.org/observations/107551041</a> |
| 408 | Emberiza spodocephala | Black-faced Bunting | 2022/2/22  | 1 | 0 | 28.12676842 | 112.92630950 | <a href="https://www.inaturalist.org/observations/107551042">https://www.inaturalist.org/observations/107551042</a> |
| 409 | Emberiza spodocephala | Black-faced Bunting | 2022/2/27  | 2 | 0 | 28.45137800 | 119.92535400 | <a href="https://www.inaturalist.org/observations/136556284">https://www.inaturalist.org/observations/136556284</a> |
| 410 | Emberiza spodocephala | Black-faced Bunting | 2021/4/16  | 2 | 0 | 28.79970644 | 119.07782430 | <a href="https://www.inaturalist.org/observations/74818469">https://www.inaturalist.org/observations/74818469</a>   |
| 411 | Emberiza spodocephala | Black-faced Bunting | 2021/4/16  | 1 | 0 | 28.79976333 | 119.07779500 | <a href="https://www.inaturalist.org/observations/74820256">https://www.inaturalist.org/observations/74820256</a>   |
| 412 | Emberiza spodocephala | Black-faced Bunting | 2017/12/14 | 1 | 0 | 28.86685762 | 116.40463770 | <a href="https://www.inaturalist.org/observations/10413753">https://www.inaturalist.org/observations/10413753</a>   |
| 413 | Emberiza spodocephala | Black-faced Bunting | 2021/12/18 | 1 | 0 | 29.07812000 | 119.64759000 | <a href="https://www.inaturalist.org/observations/119071490">https://www.inaturalist.org/observations/119071490</a> |



|     |                       |                     |            |   |   |             |              |                                                                                                                     |
|-----|-----------------------|---------------------|------------|---|---|-------------|--------------|---------------------------------------------------------------------------------------------------------------------|
| 414 | Emberiza spodocephala | Black-faced Bunting | 2005/12/10 | 1 | 0 | 29.24808500 | 117.86179700 | <a href="https://www.inaturalist.org/observations/66185296">https://www.inaturalist.org/observations/66185296</a>   |
| 415 | Emberiza spodocephala | Black-faced Bunting | 2019/1/11  | 1 | 0 | 29.24883400 | 117.85029600 | <a href="https://www.inaturalist.org/observations/34113740">https://www.inaturalist.org/observations/34113740</a>   |
| 416 | Emberiza spodocephala | Black-faced Bunting | 2019/1/2   | 1 | 0 | 29.78778924 | 115.67092840 | <a href="https://www.inaturalist.org/observations/36380616">https://www.inaturalist.org/observations/36380616</a>   |
| 417 | Emberiza spodocephala | Black-faced Bunting | 2021/3/29  | 1 | 0 | 29.79924456 | 121.56018250 | <a href="https://www.inaturalist.org/observations/72518913">https://www.inaturalist.org/observations/72518913</a>   |
| 418 | Emberiza spodocephala | Black-faced Bunting | 2021/3/6   | 1 | 0 | 29.79929053 | 121.56345520 | <a href="https://www.inaturalist.org/observations/70651365">https://www.inaturalist.org/observations/70651365</a>   |
| 419 | Emberiza spodocephala | Black-faced Bunting | 2021/4/10  | 1 | 0 | 29.79954248 | 121.56407780 | <a href="https://www.inaturalist.org/observations/73593488">https://www.inaturalist.org/observations/73593488</a>   |
| 420 | Emberiza spodocephala | Black-faced Bunting | 2021/3/20  | 1 | 0 | 29.80084153 | 121.56173550 | <a href="https://www.inaturalist.org/observations/71604484">https://www.inaturalist.org/observations/71604484</a>   |
| 421 | Emberiza spodocephala | Black-faced Bunting | 2021/3/21  | 1 | 0 | 29.80108854 | 121.56185930 | <a href="https://www.inaturalist.org/observations/71673588">https://www.inaturalist.org/observations/71673588</a>   |
| 422 | Emberiza spodocephala | Black-faced Bunting | 2021/1/29  | 2 | 0 | 29.80166081 | 121.56172410 | <a href="https://www.inaturalist.org/observations/69806297">https://www.inaturalist.org/observations/69806297</a>   |
| 423 | Emberiza spodocephala | Black-faced Bunting | 2021/3/14  | 1 | 0 | 29.80201808 | 121.56351920 | <a href="https://www.inaturalist.org/observations/71201803">https://www.inaturalist.org/observations/71201803</a>   |
| 424 | Emberiza spodocephala | Black-faced Bunting | 2021/11/14 | 2 | 0 | 29.81181746 | 121.53410980 | <a href="https://www.inaturalist.org/observations/101296732">https://www.inaturalist.org/observations/101296732</a> |
| 425 | Emberiza spodocephala | Black-faced Bunting | 2021/5/2   | 1 | 0 | 29.81215928 | 121.54695590 | <a href="https://www.inaturalist.org/observations/76394881">https://www.inaturalist.org/observations/76394881</a>   |
| 426 | Emberiza spodocephala | Black-faced Bunting | 2021/11/3  | 1 | 0 | 29.81235884 | 121.52950110 | <a href="https://www.inaturalist.org/observations/100187007">https://www.inaturalist.org/observations/100187007</a> |
| 427 | Emberiza spodocephala | Black-faced Bunting | 2021/3/15  | 2 | 0 | 29.81281294 | 121.53784740 | <a href="https://www.inaturalist.org/observations/71297546">https://www.inaturalist.org/observations/71297546</a>   |
| 428 | Emberiza spodocephala | Black-faced Bunting | 2021/12/9  | 2 | 0 | 30.08487167 | 116.70894170 | <a href="https://www.inaturalist.org/observations/104350924">https://www.inaturalist.org/observations/104350924</a> |
| 429 | Emberiza spodocephala | Black-faced Bunting | 2017/5/22  | 2 | 0 | 30.13161700 | 103.18451600 | <a href="https://www.inaturalist.org/observations/36149383">https://www.inaturalist.org/observations/36149383</a>   |
| 430 | Emberiza spodocephala | Black-faced Bunting | 2022/2/3   | 1 | 0 | 30.20844227 | 120.14087790 | <a href="https://www.inaturalist.org/observations/106355830">https://www.inaturalist.org/observations/106355830</a> |
| 431 | Emberiza spodocephala | Black-faced Bunting | 2022/2/24  | 1 | 0 | 30.20844227 | 120.14087790 | <a href="https://www.inaturalist.org/observations/107551061">https://www.inaturalist.org/observations/107551061</a> |
| 432 | Emberiza spodocephala | Black-faced Bunting | 2021/3/29  | 2 | 0 | 30.20971277 | 119.33037090 | <a href="https://www.inaturalist.org/observations/72599513">https://www.inaturalist.org/observations/72599513</a>   |
| 433 | Emberiza spodocephala | Black-faced Bunting | 2021/3/15  | 1 | 0 | 30.23679364 | 119.75188260 | <a href="https://www.inaturalist.org/observations/73608370">https://www.inaturalist.org/observations/73608370</a>   |
| 434 | Emberiza spodocephala | Black-faced Bunting | 2021/2/20  | 1 | 0 | 30.23736825 | 119.75422160 | <a href="https://www.inaturalist.org/observations/69875868">https://www.inaturalist.org/observations/69875868</a>   |
| 435 | Emberiza spodocephala | Black-faced Bunting | 2021/1/4   | 1 | 0 | 30.23798011 | 119.76158130 | <a href="https://www.inaturalist.org/observations/68362667">https://www.inaturalist.org/observations/68362667</a>   |
| 436 | Emberiza spodocephala | Black-faced Bunting | 2021/1/29  | 1 | 0 | 30.23798011 | 119.76158130 | <a href="https://www.inaturalist.org/observations/68851525">https://www.inaturalist.org/observations/68851525</a>   |

|     |                       |                     |            |   |   |             |              |                                                                                                                     |
|-----|-----------------------|---------------------|------------|---|---|-------------|--------------|---------------------------------------------------------------------------------------------------------------------|
| 437 | Emberiza spodocephala | Black-faced Bunting | 2021/2/3   | 1 | 0 | 30.23798011 | 119.76158130 | <a href="https://www.inaturalist.org/observations/69033880">https://www.inaturalist.org/observations/69033880</a>   |
| 438 | Emberiza spodocephala | Black-faced Bunting | 2022/1/3   | 1 | 0 | 30.23864740 | 119.75016590 | <a href="https://www.inaturalist.org/observations/104278488">https://www.inaturalist.org/observations/104278488</a> |
| 439 | Emberiza spodocephala | Black-faced Bunting | 2022/1/3   | 1 | 0 | 30.23864740 | 119.75016590 | <a href="https://www.inaturalist.org/observations/104278532">https://www.inaturalist.org/observations/104278532</a> |
| 440 | Emberiza spodocephala | Black-faced Bunting | 2022/1/3   | 1 | 0 | 30.23864740 | 119.75016590 | <a href="https://www.inaturalist.org/observations/104278665">https://www.inaturalist.org/observations/104278665</a> |
| 441 | Emberiza spodocephala | Black-faced Bunting | 2022/1/11  | 1 | 0 | 30.23864740 | 119.75016590 | <a href="https://www.inaturalist.org/observations/104852811">https://www.inaturalist.org/observations/104852811</a> |
| 442 | Emberiza spodocephala | Black-faced Bunting | 2022/1/11  | 1 | 0 | 30.23864740 | 119.75016590 | <a href="https://www.inaturalist.org/observations/104852814">https://www.inaturalist.org/observations/104852814</a> |
| 443 | Emberiza spodocephala | Black-faced Bunting | 2022/1/21  | 1 | 0 | 30.23864740 | 119.75016590 | <a href="https://www.inaturalist.org/observations/105413452">https://www.inaturalist.org/observations/105413452</a> |
| 444 | Emberiza spodocephala | Black-faced Bunting | 2022/2/5   | 1 | 0 | 30.23864740 | 119.75016590 | <a href="https://www.inaturalist.org/observations/106368231">https://www.inaturalist.org/observations/106368231</a> |
| 445 | Emberiza spodocephala | Black-faced Bunting | 2022/3/8   | 1 | 0 | 30.23864740 | 119.75016590 | <a href="https://www.inaturalist.org/observations/108295547">https://www.inaturalist.org/observations/108295547</a> |
| 446 | Emberiza spodocephala | Black-faced Bunting | 2022/3/29  | 2 | 0 | 30.23864740 | 119.75016590 | <a href="https://www.inaturalist.org/observations/111363788">https://www.inaturalist.org/observations/111363788</a> |
| 447 | Emberiza spodocephala | Black-faced Bunting | 2021/12/20 | 1 | 0 | 30.23900000 | 119.76300000 | <a href="https://www.inaturalist.org/observations/103575874">https://www.inaturalist.org/observations/103575874</a> |
| 448 | Emberiza spodocephala | Black-faced Bunting | 2021/4/19  | 1 | 0 | 30.23985140 | 120.12789460 | <a href="https://www.inaturalist.org/observations/75434734">https://www.inaturalist.org/observations/75434734</a>   |
| 449 | Emberiza spodocephala | Black-faced Bunting | 2022/4/4   | 1 | 0 | 30.23985140 | 120.12789460 | <a href="https://www.inaturalist.org/observations/112541064">https://www.inaturalist.org/observations/112541064</a> |
| 450 | Emberiza spodocephala | Black-faced Bunting | 2022/2/20  | 1 | 0 | 30.25100000 | 120.11300000 | <a href="https://www.inaturalist.org/observations/107103749">https://www.inaturalist.org/observations/107103749</a> |
| 451 | Emberiza spodocephala | Black-faced Bunting | 2022/1/7   | 1 | 0 | 30.25100000 | 120.11300000 | <a href="https://www.inaturalist.org/observations/131045139">https://www.inaturalist.org/observations/131045139</a> |
| 452 | Emberiza spodocephala | Black-faced Bunting | 2021/10/25 | 2 | 0 | 30.25140029 | 119.90746640 | <a href="https://www.inaturalist.org/observations/99610871">https://www.inaturalist.org/observations/99610871</a>   |
| 453 | Emberiza spodocephala | Black-faced Bunting | 2021/10/25 | 1 | 0 | 30.25140029 | 119.90746640 | <a href="https://www.inaturalist.org/observations/99610880">https://www.inaturalist.org/observations/99610880</a>   |
| 454 | Emberiza spodocephala | Black-faced Bunting | 2021/3/12  | 1 | 0 | 30.25287500 | 120.11697780 | <a href="https://www.inaturalist.org/observations/73090701">https://www.inaturalist.org/observations/73090701</a>   |
| 455 | Emberiza spodocephala | Black-faced Bunting | 2021/3/12  | 1 | 0 | 30.25287500 | 120.11697780 | <a href="https://www.inaturalist.org/observations/73090702">https://www.inaturalist.org/observations/73090702</a>   |
| 456 | Emberiza spodocephala | Black-faced Bunting | 2022/2/19  | 1 | 0 | 30.25351764 | 120.11996840 | <a href="https://www.inaturalist.org/observations/107103928">https://www.inaturalist.org/observations/107103928</a> |
| 457 | Emberiza spodocephala | Black-faced Bunting | 2021/11/19 | 1 | 0 | 30.25418228 | 120.12014610 | <a href="https://www.inaturalist.org/observations/101611137">https://www.inaturalist.org/observations/101611137</a> |
| 458 | Emberiza spodocephala | Black-faced Bunting | 2022/2/19  | 1 | 0 | 30.25418228 | 120.12014610 | <a href="https://www.inaturalist.org/observations/107367606">https://www.inaturalist.org/observations/107367606</a> |
| 459 | Emberiza spodocephala | Black-faced Bunting | 2022/2/20  | 1 | 0 | 30.25418228 | 120.12014610 | <a href="https://www.inaturalist.org/observations/107367647">https://www.inaturalist.org/observations/107367647</a> |

|     |                       |                     |            |   |   |             |              |                                                                                                                     |
|-----|-----------------------|---------------------|------------|---|---|-------------|--------------|---------------------------------------------------------------------------------------------------------------------|
| 460 | Emberiza spodocephala | Black-faced Bunting | 2022/2/5   | 1 | 0 | 30.25472961 | 119.91609230 | <a href="https://www.inaturalist.org/observations/106368216">https://www.inaturalist.org/observations/106368216</a> |
| 461 | Emberiza spodocephala | Black-faced Bunting | 2022/3/15  | 0 | 0 | 30.25472961 | 119.91609230 | <a href="https://www.inaturalist.org/observations/108719643">https://www.inaturalist.org/observations/108719643</a> |
| 462 | Emberiza spodocephala | Black-faced Bunting | 2022/3/15  | 1 | 0 | 30.25472961 | 119.91609230 | <a href="https://www.inaturalist.org/observations/108719646">https://www.inaturalist.org/observations/108719646</a> |
| 463 | Emberiza spodocephala | Black-faced Bunting | 2022/3/29  | 1 | 0 | 30.25472961 | 119.91609230 | <a href="https://www.inaturalist.org/observations/110656218">https://www.inaturalist.org/observations/110656218</a> |
| 464 | Emberiza spodocephala | Black-faced Bunting | 2021/10/25 | 2 | 0 | 30.25722790 | 119.91305830 | <a href="https://www.inaturalist.org/observations/99610893">https://www.inaturalist.org/observations/99610893</a>   |
| 465 | Emberiza spodocephala | Black-faced Bunting | 2022/1/17  | 1 | 0 | 30.25933000 | 119.91529000 | <a href="https://www.inaturalist.org/observations/107363964">https://www.inaturalist.org/observations/107363964</a> |
| 466 | Emberiza spodocephala | Black-faced Bunting | 2021/10/25 | 2 | 0 | 30.26404689 | 119.91855860 | <a href="https://www.inaturalist.org/observations/99610897">https://www.inaturalist.org/observations/99610897</a>   |
| 467 | Emberiza spodocephala | Black-faced Bunting | 2021/10/25 | 2 | 0 | 30.26404689 | 119.91855860 | <a href="https://www.inaturalist.org/observations/99610898">https://www.inaturalist.org/observations/99610898</a>   |
| 468 | Emberiza spodocephala | Black-faced Bunting | 2021/10/25 | 2 | 0 | 30.26404689 | 119.91855860 | <a href="https://www.inaturalist.org/observations/99610900">https://www.inaturalist.org/observations/99610900</a>   |
| 469 | Emberiza spodocephala | Black-faced Bunting | 2021/4/6   | 1 | 0 | 30.26433033 | 119.93016870 | <a href="https://www.inaturalist.org/observations/75429046">https://www.inaturalist.org/observations/75429046</a>   |
| 470 | Emberiza spodocephala | Black-faced Bunting | 2022/1/17  | 1 | 0 | 30.26433033 | 119.93016870 | <a href="https://www.inaturalist.org/observations/105213233">https://www.inaturalist.org/observations/105213233</a> |
| 471 | Emberiza spodocephala | Black-faced Bunting | 2021/3/18  | 1 | 0 | 30.30204987 | 120.08709080 | <a href="https://www.inaturalist.org/observations/71610771">https://www.inaturalist.org/observations/71610771</a>   |
| 472 | Emberiza spodocephala | Black-faced Bunting | 2021/1/16  | 1 | 0 | 30.31777220 | 113.83765220 | <a href="https://www.inaturalist.org/observations/120634659">https://www.inaturalist.org/observations/120634659</a> |
| 473 | Emberiza spodocephala | Black-faced Bunting | 2022/1/17  | 1 | 0 | 30.32795000 | 119.90878000 | <a href="https://www.inaturalist.org/observations/106849668">https://www.inaturalist.org/observations/106849668</a> |
| 474 | Emberiza spodocephala | Black-faced Bunting | 2022/1/17  | 1 | 0 | 30.33300005 | 119.92555030 | <a href="https://www.inaturalist.org/observations/105207230">https://www.inaturalist.org/observations/105207230</a> |
| 475 | Emberiza spodocephala | Black-faced Bunting | 2021/12/15 | 1 | 0 | 30.34818400 | 119.94872400 | <a href="https://www.inaturalist.org/observations/103185122">https://www.inaturalist.org/observations/103185122</a> |
| 476 | Emberiza spodocephala | Black-faced Bunting | 2021/12/15 | 1 | 0 | 30.34818400 | 119.94872400 | <a href="https://www.inaturalist.org/observations/103185123">https://www.inaturalist.org/observations/103185123</a> |
| 477 | Emberiza spodocephala | Black-faced Bunting | 2021/12/18 | 1 | 0 | 30.34818400 | 119.94872400 | <a href="https://www.inaturalist.org/observations/103516327">https://www.inaturalist.org/observations/103516327</a> |
| 478 | Emberiza spodocephala | Black-faced Bunting | 2022/1/17  | 1 | 0 | 30.34818400 | 119.94872400 | <a href="https://www.inaturalist.org/observations/106849321">https://www.inaturalist.org/observations/106849321</a> |
| 479 | Emberiza spodocephala | Black-faced Bunting | 2022/1/17  | 1 | 0 | 30.34818400 | 119.94872400 | <a href="https://www.inaturalist.org/observations/106849322">https://www.inaturalist.org/observations/106849322</a> |
| 480 | Emberiza spodocephala | Black-faced Bunting | 2022/1/17  | 1 | 0 | 30.34818400 | 119.94872400 | <a href="https://www.inaturalist.org/observations/106849323">https://www.inaturalist.org/observations/106849323</a> |
| 481 | Emberiza spodocephala | Black-faced Bunting | 2022/2/14  | 1 | 0 | 30.34818400 | 119.94872400 | <a href="https://www.inaturalist.org/observations/107364061">https://www.inaturalist.org/observations/107364061</a> |
| 482 | Emberiza spodocephala | Black-faced Bunting | 2021/12/6  | 1 | 0 | 30.35211150 | 119.93181640 | <a href="https://www.inaturalist.org/observations/102643310">https://www.inaturalist.org/observations/102643310</a> |

|     |                       |                     |            |   |   |             |              |                                                                                                                     |
|-----|-----------------------|---------------------|------------|---|---|-------------|--------------|---------------------------------------------------------------------------------------------------------------------|
| 483 | Emberiza spodocephala | Black-faced Bunting | 2022/1/17  | 1 | 0 | 30.35211150 | 119.93181640 | <a href="https://www.inaturalist.org/observations/105207195">https://www.inaturalist.org/observations/105207195</a> |
| 484 | Emberiza spodocephala | Black-faced Bunting | 2022/1/17  | 1 | 0 | 30.35211150 | 119.93181640 | <a href="https://www.inaturalist.org/observations/105207198">https://www.inaturalist.org/observations/105207198</a> |
| 485 | Emberiza spodocephala | Black-faced Bunting | 2022/1/17  | 1 | 0 | 30.35211150 | 119.93181640 | <a href="https://www.inaturalist.org/observations/105207217">https://www.inaturalist.org/observations/105207217</a> |
| 486 | Emberiza spodocephala | Black-faced Bunting | 2022/1/17  | 1 | 0 | 30.35211150 | 119.93181640 | <a href="https://www.inaturalist.org/observations/105207222">https://www.inaturalist.org/observations/105207222</a> |
| 487 | Emberiza spodocephala | Black-faced Bunting | 2022/1/17  | 1 | 0 | 30.35211150 | 119.93181640 | <a href="https://www.inaturalist.org/observations/105207225">https://www.inaturalist.org/observations/105207225</a> |
| 488 | Emberiza spodocephala | Black-faced Bunting | 2022/4/14  | 1 | 0 | 30.38425336 | 119.98458850 | <a href="https://www.inaturalist.org/observations/111401833">https://www.inaturalist.org/observations/111401833</a> |
| 489 | Emberiza spodocephala | Black-faced Bunting | 2019/7/30  | 2 | 0 | 30.46179632 | 109.17712830 | <a href="https://www.inaturalist.org/observations/30539557">https://www.inaturalist.org/observations/30539557</a>   |
| 490 | Emberiza spodocephala | Black-faced Bunting | 2020/1/6   | 1 | 0 | 30.47192559 | 114.36207730 | <a href="https://www.inaturalist.org/observations/109638779">https://www.inaturalist.org/observations/109638779</a> |
| 491 | Emberiza spodocephala | Black-faced Bunting | 2019/12/2  | 1 | 0 | 30.47336454 | 114.36214520 | <a href="https://www.inaturalist.org/observations/109636534">https://www.inaturalist.org/observations/109636534</a> |
| 492 | Emberiza spodocephala | Black-faced Bunting | 2021/3/4   | 1 | 0 | 30.51394500 | 120.05323800 | <a href="https://www.inaturalist.org/observations/98361718">https://www.inaturalist.org/observations/98361718</a>   |
| 493 | Emberiza spodocephala | Black-faced Bunting | 2021/3/4   | 2 | 0 | 30.51989538 | 120.05109640 | <a href="https://www.inaturalist.org/observations/70646652">https://www.inaturalist.org/observations/70646652</a>   |
| 494 | Emberiza spodocephala | Black-faced Bunting | 2021/3/4   | 1 | 0 | 30.52094886 | 120.05652520 | <a href="https://www.inaturalist.org/observations/70646644">https://www.inaturalist.org/observations/70646644</a>   |
| 495 | Emberiza spodocephala | Black-faced Bunting | 2022/3/2   | 1 | 0 | 30.60786246 | 119.43257910 | <a href="https://www.inaturalist.org/observations/107817580">https://www.inaturalist.org/observations/107817580</a> |
| 496 | Emberiza spodocephala | Black-faced Bunting | 2022/3/2   | 1 | 0 | 30.60900400 | 119.46580960 | <a href="https://www.inaturalist.org/observations/108643522">https://www.inaturalist.org/observations/108643522</a> |
| 497 | Emberiza spodocephala | Black-faced Bunting | 2020/4/22  | 1 | 0 | 30.85457954 | 120.48811510 | <a href="https://www.inaturalist.org/observations/42830277">https://www.inaturalist.org/observations/42830277</a>   |
| 498 | Emberiza spodocephala | Black-faced Bunting | 2020/12/30 | 1 | 0 | 30.90413000 | 119.60569200 | <a href="https://www.inaturalist.org/observations/67907339">https://www.inaturalist.org/observations/67907339</a>   |
| 499 | Emberiza spodocephala | Black-faced Bunting | 2016/11/24 | 1 | 0 | 31.02448241 | 121.44864030 | <a href="https://www.inaturalist.org/observations/19692352">https://www.inaturalist.org/observations/19692352</a>   |
| 500 | Emberiza spodocephala | Black-faced Bunting | 2017/11/1  | 1 | 0 | 31.04646308 | 121.22481820 | <a href="https://www.inaturalist.org/observations/8641956">https://www.inaturalist.org/observations/8641956</a>     |
| 501 | Emberiza spodocephala | Black-faced Bunting | 2017/11/1  | 1 | 0 | 31.04665835 | 121.22464230 | <a href="https://www.inaturalist.org/observations/8641959">https://www.inaturalist.org/observations/8641959</a>     |
| 502 | Emberiza spodocephala | Black-faced Bunting | 2017/10/23 | 1 | 0 | 31.07460200 | 121.18206600 | <a href="https://www.inaturalist.org/observations/8554991">https://www.inaturalist.org/observations/8554991</a>     |
| 503 | Emberiza spodocephala | Black-faced Bunting | 2022/2/18  | 1 | 0 | 31.07612998 | 121.17615160 | <a href="https://www.inaturalist.org/observations/108301797">https://www.inaturalist.org/observations/108301797</a> |
| 504 | Emberiza spodocephala | Black-faced Bunting | 2014/3/29  | 2 | 0 | 31.14697656 | 121.44440080 | <a href="https://www.inaturalist.org/observations/93592614">https://www.inaturalist.org/observations/93592614</a>   |
| 505 | Emberiza spodocephala | Black-faced Bunting | 2022/4/2   | 2 | 0 | 31.18613948 | 120.96015980 | <a href="https://www.inaturalist.org/observations/110160372">https://www.inaturalist.org/observations/110160372</a> |

|     |                                 |                     |            |   |   |             |              |                                                                                                                     |
|-----|---------------------------------|---------------------|------------|---|---|-------------|--------------|---------------------------------------------------------------------------------------------------------------------|
| 506 | Emberiza spodocephala           | Black-faced Bunting | 2022/3/4   | 1 | 0 | 31.21213400 | 121.54372400 | <a href="https://www.inaturalist.org/observations/109542422">https://www.inaturalist.org/observations/109542422</a> |
| 507 | Emberiza spodocephala personata | Black-faced Bunting | 2006/3/24  | 0 | 0 | 31.21522181 | 121.55213990 | <a href="https://www.inaturalist.org/observations/91612183">https://www.inaturalist.org/observations/91612183</a>   |
| 508 | Emberiza spodocephala           | Black-faced Bunting | 2019/1/19  | 1 | 0 | 31.21539400 | 121.55215700 | <a href="https://www.inaturalist.org/observations/19726558">https://www.inaturalist.org/observations/19726558</a>   |
| 509 | Emberiza spodocephala           | Black-faced Bunting | 2021/2/3   | 1 | 0 | 31.21539400 | 121.55215700 | <a href="https://www.inaturalist.org/observations/68994999">https://www.inaturalist.org/observations/68994999</a>   |
| 510 | Emberiza spodocephala           | Black-faced Bunting | 2021/2/9   | 1 | 0 | 31.21539400 | 121.55215700 | <a href="https://www.inaturalist.org/observations/69301598">https://www.inaturalist.org/observations/69301598</a>   |
| 511 | Emberiza spodocephala           | Black-faced Bunting | 2021/4/16  | 1 | 0 | 31.21539400 | 121.55215700 | <a href="https://www.inaturalist.org/observations/74239847">https://www.inaturalist.org/observations/74239847</a>   |
| 512 | Emberiza spodocephala           | Black-faced Bunting | 2021/11/3  | 2 | 0 | 31.21539400 | 121.55215700 | <a href="https://www.inaturalist.org/observations/101882591">https://www.inaturalist.org/observations/101882591</a> |
| 513 | Emberiza spodocephala           | Black-faced Bunting | 2022/1/8   | 1 | 0 | 31.21539400 | 121.55215700 | <a href="https://www.inaturalist.org/observations/104705264">https://www.inaturalist.org/observations/104705264</a> |
| 514 | Emberiza spodocephala           | Black-faced Bunting | 2022/2/10  | 1 | 0 | 31.21637304 | 121.55577290 | <a href="https://www.inaturalist.org/observations/106607997">https://www.inaturalist.org/observations/106607997</a> |
| 515 | Emberiza spodocephala           | Black-faced Bunting | 2022/2/10  | 1 | 0 | 31.21665154 | 121.55572730 | <a href="https://www.inaturalist.org/observations/106607874">https://www.inaturalist.org/observations/106607874</a> |
| 516 | Emberiza spodocephala           | Black-faced Bunting | 2022/2/9   | 1 | 0 | 31.21716974 | 121.55518890 | <a href="https://www.inaturalist.org/observations/106604674">https://www.inaturalist.org/observations/106604674</a> |
| 517 | Emberiza spodocephala           | Black-faced Bunting | 2022/2/24  | 1 | 0 | 31.36246888 | 120.68288700 | <a href="https://www.inaturalist.org/observations/107445915">https://www.inaturalist.org/observations/107445915</a> |
| 518 | Emberiza spodocephala           | Black-faced Bunting | 2018/2/1   | 1 | 0 | 31.38484070 | 121.52915000 | <a href="https://www.inaturalist.org/observations/9691161">https://www.inaturalist.org/observations/9691161</a>     |
| 519 | Emberiza spodocephala           | Black-faced Bunting | 2019/4/10  | 2 | 0 | 31.41543296 | 120.89790320 | <a href="https://www.inaturalist.org/observations/22271795">https://www.inaturalist.org/observations/22271795</a>   |
| 520 | Emberiza spodocephala           | Black-faced Bunting | 2021/1/11  | 1 | 0 | 31.45706529 | 120.34806290 | <a href="https://www.inaturalist.org/observations/67900590">https://www.inaturalist.org/observations/67900590</a>   |
| 521 | Emberiza spodocephala           | Black-faced Bunting | 2021/11/28 | 1 | 0 | 31.49410828 | 121.34581120 | <a href="https://www.inaturalist.org/observations/102227672">https://www.inaturalist.org/observations/102227672</a> |
| 522 | Emberiza spodocephala           | Black-faced Bunting | 2021/5/3   | 1 | 0 | 31.64968004 | 119.21509050 | <a href="https://www.inaturalist.org/observations/77310272">https://www.inaturalist.org/observations/77310272</a>   |
| 523 | Emberiza spodocephala           | Black-faced Bunting | 2021/5/2   | 1 | 0 | 31.65490872 | 119.22105170 | <a href="https://www.inaturalist.org/observations/77309625">https://www.inaturalist.org/observations/77309625</a>   |
| 524 | Emberiza spodocephala           | Black-faced Bunting | 2020/4/21  | 1 | 0 | 31.70969776 | 119.57638730 | <a href="https://www.inaturalist.org/observations/42756272">https://www.inaturalist.org/observations/42756272</a>   |
| 525 | Emberiza spodocephala           | Black-faced Bunting | 2021/2/12  | 1 | 0 | 31.90253115 | 118.91454360 | <a href="https://www.inaturalist.org/observations/101876193">https://www.inaturalist.org/observations/101876193</a> |
| 526 | Emberiza spodocephala           | Black-faced Bunting | 2022/2/19  | 1 | 0 | 32.13896500 | 118.52879170 | <a href="https://www.inaturalist.org/observations/112548346">https://www.inaturalist.org/observations/112548346</a> |
| 527 | Emberiza spodocephala           | Black-faced Bunting | 2022/4/30  | 1 | 0 | 32.20946833 | 119.01806830 | <a href="https://www.inaturalist.org/observations/114084117">https://www.inaturalist.org/observations/114084117</a> |
| 528 | Emberiza spodocephala           | Black-faced Bunting | 2022/4/30  | 0 | 0 | 32.21337833 | 119.01424500 | <a href="https://www.inaturalist.org/observations/114084176">https://www.inaturalist.org/observations/114084176</a> |

|     |                       |                     |            |   |   |             |              |                                                                                                                     |
|-----|-----------------------|---------------------|------------|---|---|-------------|--------------|---------------------------------------------------------------------------------------------------------------------|
| 529 | Emberiza spodocephala | Black-faced Bunting | 2017/12/2  | 1 | 0 | 33.58902600 | 120.50139400 | <a href="https://www.inaturalist.org/observations/10232413">https://www.inaturalist.org/observations/10232413</a>   |
| 530 | Emberiza spodocephala | Black-faced Bunting | 2019/1/8   | 1 | 0 | 33.60056600 | 120.50859000 | <a href="https://www.inaturalist.org/observations/34012686">https://www.inaturalist.org/observations/34012686</a>   |
| 531 | Emberiza spodocephala | Black-faced Bunting | 2021/12/20 | 1 | 0 | 34.81488797 | 113.70426350 | <a href="https://www.inaturalist.org/observations/103410858">https://www.inaturalist.org/observations/103410858</a> |
| 532 | Emberiza spodocephala | Black-faced Bunting | 2021/10/29 | 1 | 0 | 34.81809000 | 113.70654500 | <a href="https://www.inaturalist.org/observations/99704407">https://www.inaturalist.org/observations/99704407</a>   |
| 533 | Emberiza spodocephala | Black-faced Bunting | 2021/1/10  | 1 | 0 | 34.82312167 | 113.70414500 | <a href="https://www.inaturalist.org/observations/67841408">https://www.inaturalist.org/observations/67841408</a>   |
| 534 | Emberiza spodocephala | Black-faced Bunting | 2021/1/13  | 1 | 0 | 34.82332500 | 113.70526330 | <a href="https://www.inaturalist.org/observations/68029829">https://www.inaturalist.org/observations/68029829</a>   |
| 535 | Emberiza spodocephala | Black-faced Bunting | 2021/1/10  | 2 | 0 | 34.82345167 | 113.70284170 | <a href="https://www.inaturalist.org/observations/67841401">https://www.inaturalist.org/observations/67841401</a>   |
| 536 | Emberiza spodocephala | Black-faced Bunting | 2021/12/20 | 1 | 0 | 34.82432500 | 113.70668000 | <a href="https://www.inaturalist.org/observations/103443263">https://www.inaturalist.org/observations/103443263</a> |
| 537 | Emberiza spodocephala | Black-faced Bunting | 2021/1/13  | 1 | 0 | 34.82465000 | 113.70965000 | <a href="https://www.inaturalist.org/observations/68029852">https://www.inaturalist.org/observations/68029852</a>   |
| 538 | Emberiza spodocephala | Black-faced Bunting | 2019/4/11  | 0 | 0 | 36.06284000 | 120.34510000 | <a href="https://www.inaturalist.org/observations/134868743">https://www.inaturalist.org/observations/134868743</a> |
| 539 | Emberiza spodocephala | Black-faced Bunting | 2019/4/11  | 1 | 0 | 36.06395000 | 120.34636000 | <a href="https://www.inaturalist.org/observations/134868681">https://www.inaturalist.org/observations/134868681</a> |
| 540 | Emberiza spodocephala | Black-faced Bunting | 2022/4/8   | 1 | 0 | 36.15036625 | 120.36829030 | <a href="https://www.inaturalist.org/observations/111034974">https://www.inaturalist.org/observations/111034974</a> |
| 541 | Emberiza spodocephala | Black-faced Bunting | 2018/10/14 | 1 | 0 | 36.15932000 | 120.50131000 | <a href="https://www.inaturalist.org/observations/133339662">https://www.inaturalist.org/observations/133339662</a> |
| 542 | Emberiza spodocephala | Black-faced Bunting | 2018/10/14 | 1 | 0 | 36.15939000 | 120.50127000 | <a href="https://www.inaturalist.org/observations/133339664">https://www.inaturalist.org/observations/133339664</a> |
| 543 | Emberiza spodocephala | Black-faced Bunting | 2018/10/14 | 1 | 0 | 36.15965000 | 120.50117000 | <a href="https://www.inaturalist.org/observations/133339897">https://www.inaturalist.org/observations/133339897</a> |
| 544 | Emberiza spodocephala | Black-faced Bunting | 2020/4/16  | 1 | 0 | 36.17858167 | 120.39747670 | <a href="https://www.inaturalist.org/observations/42467953">https://www.inaturalist.org/observations/42467953</a>   |
| 545 | Emberiza spodocephala | Black-faced Bunting | 2019/10/23 | 0 | 0 | 36.36735600 | 120.68541500 | <a href="https://www.inaturalist.org/observations/107476095">https://www.inaturalist.org/observations/107476095</a> |
| 546 | Emberiza spodocephala | Black-faced Bunting | 2020/9/30  | 0 | 0 | 36.36737600 | 120.68514300 | <a href="https://www.inaturalist.org/observations/105300874">https://www.inaturalist.org/observations/105300874</a> |
| 547 | Emberiza spodocephala | Black-faced Bunting | 2019/4/14  | 0 | 0 | 36.36854000 | 120.67865000 | <a href="https://www.inaturalist.org/observations/134872931">https://www.inaturalist.org/observations/134872931</a> |
| 548 | Emberiza spodocephala | Black-faced Bunting | 2021/4/18  | 1 | 0 | 36.37044600 | 120.68158000 | <a href="https://www.inaturalist.org/observations/105410258">https://www.inaturalist.org/observations/105410258</a> |
| 549 | Emberiza spodocephala | Black-faced Bunting | 2020/10/5  | 0 | 0 | 36.37159200 | 120.67989600 | <a href="https://www.inaturalist.org/observations/105308925">https://www.inaturalist.org/observations/105308925</a> |
| 550 | Emberiza spodocephala | Black-faced Bunting | 2021/1/1   | 1 | 0 | 36.37511100 | 120.68414300 | <a href="https://www.inaturalist.org/observations/105354154">https://www.inaturalist.org/observations/105354154</a> |
| 551 | Emberiza spodocephala | Black-faced Bunting | 2022/5/12  | 1 | 0 | 39.88382680 | 116.36450740 | <a href="https://www.inaturalist.org/observations/125387988">https://www.inaturalist.org/observations/125387988</a> |

|     |                       |                     |           |   |   |             |              |                                                                                                                     |
|-----|-----------------------|---------------------|-----------|---|---|-------------|--------------|---------------------------------------------------------------------------------------------------------------------|
| 552 | Emberiza spodocephala | Black-faced Bunting | 2021/10/6 | 1 | 0 | 39.97891990 | 119.77606000 | <a href="https://www.inaturalist.org/observations/123573408">https://www.inaturalist.org/observations/123573408</a> |
| 553 | Emberiza spodocephala | Black-faced Bunting | 2022/10/1 | 1 | 0 | 40.01354379 | 116.37954950 | <a href="https://www.inaturalist.org/observations/137158747">https://www.inaturalist.org/observations/137158747</a> |
| 554 | Emberiza spodocephala | Black-faced Bunting | 2022/1/7  | 1 | 0 | 40.01643167 | 116.37702670 | <a href="https://www.inaturalist.org/observations/125272413">https://www.inaturalist.org/observations/125272413</a> |
| 555 | Emberiza spodocephala | Black-faced Bunting | 2022/1/10 | 1 | 0 | 40.01821529 | 116.38538950 | <a href="https://www.inaturalist.org/observations/122024980">https://www.inaturalist.org/observations/122024980</a> |
| 556 | Emberiza spodocephala | Black-faced Bunting | 2022/5/12 | 1 | 0 | 40.07971223 | 116.47367790 | <a href="https://www.inaturalist.org/observations/116787262">https://www.inaturalist.org/observations/116787262</a> |
| 557 | Emberiza spodocephala | Black-faced Bunting | 2019/5/19 | 3 | 0 | 40.11598500 | 116.70157170 | <a href="https://www.inaturalist.org/observations/25624786">https://www.inaturalist.org/observations/25624786</a>   |
| 558 | Emberiza spodocephala | Black-faced Bunting | 2019/11/2 | 1 | 0 | 40.12162833 | 116.69463670 | <a href="https://www.inaturalist.org/observations/35193830">https://www.inaturalist.org/observations/35193830</a>   |
| 559 | Emberiza spodocephala | Black-faced Bunting | 2022/5/7  | 1 | 0 | 40.13797161 | 116.31906060 | <a href="https://www.inaturalist.org/observations/117040051">https://www.inaturalist.org/observations/117040051</a> |
| 560 | Emberiza spodocephala | Black-faced Bunting | 2022/5/7  | 1 | 0 | 40.13810754 | 116.31962820 | <a href="https://www.inaturalist.org/observations/117039985">https://www.inaturalist.org/observations/117039985</a> |
| 561 | Emberiza spodocephala | Black-faced Bunting | 2021/10/5 | 2 | 0 | 40.18056583 | 116.68115900 | <a href="https://www.inaturalist.org/observations/100235781">https://www.inaturalist.org/observations/100235781</a> |
| 562 | Emberiza spodocephala | Black-faced Bunting | 2021/10/5 | 2 | 0 | 40.18056583 | 116.68115900 | <a href="https://www.inaturalist.org/observations/100235782">https://www.inaturalist.org/observations/100235782</a> |
| 563 | Emberiza spodocephala | Black-faced Bunting | 2021/10/5 | 1 | 0 | 40.18056583 | 116.68115900 | <a href="https://www.inaturalist.org/observations/100235787">https://www.inaturalist.org/observations/100235787</a> |
| 564 | Emberiza spodocephala | Black-faced Bunting | 2015/4/14 | 1 | 0 | 42.70462190 | 123.19261430 | <a href="https://www.inaturalist.org/observations/64268886">https://www.inaturalist.org/observations/64268886</a>   |
| 565 | Emberiza spodocephala | Black-faced Bunting | 2013/6/5  | 1 | 0 | 45.40412771 | 127.66336200 | <a href="https://www.inaturalist.org/observations/18903570">https://www.inaturalist.org/observations/18903570</a>   |
| 566 | Emberiza spodocephala | Black-faced Bunting | 2007/5/21 | 1 | 0 | 47.02839700 | 129.02079300 | <a href="https://www.inaturalist.org/observations/65334527">https://www.inaturalist.org/observations/65334527</a>   |
| 567 | Emberiza spodocephala | Black-faced Bunting | 2006/6/1  | 1 | 0 | 47.02839700 | 129.02079300 | <a href="https://www.inaturalist.org/observations/65470647">https://www.inaturalist.org/observations/65470647</a>   |
| 568 | Emberiza spodocephala | Black-faced Bunting | 2005/7/1  | 1 | 0 | 47.04063990 | 129.10726990 | <a href="https://www.inaturalist.org/observations/110660117">https://www.inaturalist.org/observations/110660117</a> |

| No | scientific name   | common name      | date       | NIA | NID | latitude    | longitude    | url                                                                                                                 |
|----|-------------------|------------------|------------|-----|-----|-------------|--------------|---------------------------------------------------------------------------------------------------------------------|
| 1  | Halcyon coromanda | Ruddy Kingfisher | 2022/2/21  | 5   | 0   | 11.79615407 | 92.71869267  | <a href="https://www.inaturalist.org/observations/107877471">https://www.inaturalist.org/observations/107877471</a> |
| 2  | Halcyon coromanda | Ruddy Kingfisher | 2020/2/22  | 1   | 0   | 11.83116810 | 92.65864010  | <a href="https://www.inaturalist.org/observations/102092125">https://www.inaturalist.org/observations/102092125</a> |
| 3  | Halcyon coromanda | Ruddy Kingfisher | 2017/12/13 | 5   | 0   | 11.84390466 | 92.72980121  | <a href="https://www.inaturalist.org/observations/9558297">https://www.inaturalist.org/observations/9558297</a>     |
| 4  | Halcyon coromanda | Ruddy Kingfisher | 2019/10/15 | 3   | 0   | 22.75834493 | 121.14518980 | <a href="https://www.inaturalist.org/observations/44369220">https://www.inaturalist.org/observations/44369220</a>   |
| 5  | Halcyon coromanda | Ruddy Kingfisher | 2018/4/28  | 4   | 0   | 22.80673652 | 120.34529760 | <a href="https://www.inaturalist.org/observations/14162966">https://www.inaturalist.org/observations/14162966</a>   |
| 6  | Halcyon coromanda | Ruddy Kingfisher | 2018/4/28  | 3   | 0   | 22.99182678 | 120.22505330 | <a href="https://www.inaturalist.org/observations/14538315">https://www.inaturalist.org/observations/14538315</a>   |
| 7  | Halcyon coromanda | Ruddy Kingfisher | 2013/4/3   | 3   | 0   | 23.72642984 | 120.62768110 | <a href="https://www.inaturalist.org/observations/19485348">https://www.inaturalist.org/observations/19485348</a>   |
| 8  | Halcyon coromanda | Ruddy Kingfisher | 2005/4/30  | 4   | 0   | 23.74206450 | 120.62574230 | <a href="https://www.inaturalist.org/observations/13697374">https://www.inaturalist.org/observations/13697374</a>   |
| 9  | Halcyon coromanda | Ruddy Kingfisher | 2020/4/28  | 1   | 0   | 23.94987953 | 121.48016720 | <a href="https://www.inaturalist.org/observations/44125258">https://www.inaturalist.org/observations/44125258</a>   |
| 10 | Halcyon coromanda | Ruddy Kingfisher | 2021/3/22  | 1   | 0   | 24.08236403 | 120.60645340 | <a href="https://www.inaturalist.org/observations/72250684">https://www.inaturalist.org/observations/72250684</a>   |
| 11 | Halcyon coromanda | Ruddy Kingfisher | 2022/5/2   | 2   | 0   | 24.61194167 | 121.73056110 | <a href="https://www.inaturalist.org/observations/116994232">https://www.inaturalist.org/observations/116994232</a> |
| 12 | Halcyon coromanda | Ruddy Kingfisher | 2020/5/16  | 2   | 0   | 24.65471198 | 121.65404980 | <a href="https://www.inaturalist.org/observations/46048706">https://www.inaturalist.org/observations/46048706</a>   |
| 13 | Halcyon coromanda | Ruddy Kingfisher | 2022/5/2   | 3   | 0   | 24.68038337 | 121.68187050 | <a href="https://www.inaturalist.org/observations/115576219">https://www.inaturalist.org/observations/115576219</a> |
| 14 | Halcyon coromanda | Ruddy Kingfisher | 2020/10/25 | 2   | 0   | 24.68383866 | 121.77445330 | <a href="https://www.inaturalist.org/observations/63490826">https://www.inaturalist.org/observations/63490826</a>   |
| 15 | Halcyon coromanda | Ruddy Kingfisher | 2019/10/8  | 3   | 0   | 25.03253921 | 121.50968990 | <a href="https://www.inaturalist.org/observations/34107701">https://www.inaturalist.org/observations/34107701</a>   |
| 16 | Halcyon coromanda | Ruddy Kingfisher | 2021/9/26  | 2   | 0   | 25.06072217 | 121.49875500 | <a href="https://www.inaturalist.org/observations/96212541">https://www.inaturalist.org/observations/96212541</a>   |
| 17 | Halcyon coromanda | Ruddy Kingfisher | 2021/5/25  | 1   | 0   | 25.15186200 | 121.49077000 | <a href="https://www.inaturalist.org/observations/80176009">https://www.inaturalist.org/observations/80176009</a>   |
| 18 | Halcyon coromanda | Ruddy Kingfisher | 2022/4/22  | 5   | 0   | 26.64733550 | 89.54833710  | <a href="https://www.inaturalist.org/observations/127829143">https://www.inaturalist.org/observations/127829143</a> |
| 19 | Halcyon coromanda | Ruddy Kingfisher | 2022/5/10  | 3   | 0   | 26.75635740 | 88.79747930  | <a href="https://www.inaturalist.org/observations/118380497">https://www.inaturalist.org/observations/118380497</a> |
| 20 | Halcyon coromanda | Ruddy Kingfisher | 2022/5/10  | 6   | 0   | 26.76176968 | 88.83392036  | <a href="https://www.inaturalist.org/observations/119778630">https://www.inaturalist.org/observations/119778630</a> |
| 21 | Halcyon coromanda | Ruddy Kingfisher | 2022/5/28  | 4   | 0   | 26.85108540 | 88.85510190  | <a href="https://www.inaturalist.org/observations/119361493">https://www.inaturalist.org/observations/119361493</a> |
| 22 | Halcyon coromanda | Ruddy Kingfisher | 2022/4/21  | 3   | 0   | 27.09835550 | 92.81782910  | <a href="https://www.inaturalist.org/observations/115542967">https://www.inaturalist.org/observations/115542967</a> |



|    |                   |                  |           |   |   |             |             |                                                                                                                     |
|----|-------------------|------------------|-----------|---|---|-------------|-------------|---------------------------------------------------------------------------------------------------------------------|
| 23 | Halcyon coromanda | Ruddy Kingfisher | 2022/4/23 | 4 | 0 | 27.09835550 | 92.81782910 | <a href="https://www.inaturalist.org/observations/115543654">https://www.inaturalist.org/observations/115543654</a> |
| 24 | Halcyon coromanda | Ruddy Kingfisher | 2017/5/1  | 4 | 0 | 27.34694687 | 95.50881958 | <a href="https://www.inaturalist.org/observations/6271982">https://www.inaturalist.org/observations/6271982</a>     |

| No | scientific name | common name | date       | NIA | NID | latitude    | longitude    | url                                                                                                                 |
|----|-----------------|-------------|------------|-----|-----|-------------|--------------|---------------------------------------------------------------------------------------------------------------------|
| 1  | Pitta nympha    | Fairy Pitta | 2022/9/16  | 1   | 0   | 22.18382150 | 113.52210480 | <a href="https://www.inaturalist.org/observations/136389590">https://www.inaturalist.org/observations/136389590</a> |
| 2  | Pitta nympha    | Fairy Pitta | 2020/9/16  | 1   | 0   | 22.20078448 | 114.15539130 | <a href="https://www.inaturalist.org/observations/118553086">https://www.inaturalist.org/observations/118553086</a> |
| 3  | Pitta nympha    | Fairy Pitta | 2020/9/16  | 1   | 0   | 22.20416479 | 114.05716170 | <a href="https://www.inaturalist.org/observations/110850976">https://www.inaturalist.org/observations/110850976</a> |
| 4  | Pitta nympha    | Fairy Pitta | 2020/10/12 | 3   | 0   | 22.21644179 | 114.18454080 | <a href="https://www.inaturalist.org/observations/62754568">https://www.inaturalist.org/observations/62754568</a>   |
| 5  | Pitta nympha    | Fairy Pitta | 2020/10/2  | 4   | 0   | 22.27234533 | 113.41073390 | <a href="https://www.inaturalist.org/observations/62252790">https://www.inaturalist.org/observations/62252790</a>   |
| 6  | Pitta nympha    | Fairy Pitta | 2020/10/2  | 3   | 0   | 22.27736192 | 113.51916830 | <a href="https://www.inaturalist.org/observations/62252792">https://www.inaturalist.org/observations/62252792</a>   |
| 7  | Pitta nympha    | Fairy Pitta | 2020/10/1  | 3   | 0   | 22.35307364 | 113.43537050 | <a href="https://www.inaturalist.org/observations/61474729">https://www.inaturalist.org/observations/61474729</a>   |
| 8  | Pitta nympha    | Fairy Pitta | 2022/5/17  | 4   | 0   | 22.36376094 | 114.30576010 | <a href="https://www.inaturalist.org/observations/117539579">https://www.inaturalist.org/observations/117539579</a> |
| 9  | Pitta nympha    | Fairy Pitta | 2019/10/2  | 7   | 0   | 22.53525823 | 114.11682390 | <a href="https://www.inaturalist.org/observations/33739744">https://www.inaturalist.org/observations/33739744</a>   |
| 10 | Pitta nympha    | Fairy Pitta | 2017/5/23  | 4   | 0   | 22.75163221 | 120.60252860 | <a href="https://www.inaturalist.org/observations/14020025">https://www.inaturalist.org/observations/14020025</a>   |
| 11 | Pitta nympha    | Fairy Pitta | 2018/5/16  | 4   | 0   | 22.78721537 | 120.73202180 | <a href="https://www.inaturalist.org/observations/14538312">https://www.inaturalist.org/observations/14538312</a>   |
| 12 | Pitta nympha    | Fairy Pitta | 2018/5/16  | 3   | 0   | 22.78996524 | 120.63413060 | <a href="https://www.inaturalist.org/observations/43326461">https://www.inaturalist.org/observations/43326461</a>   |
| 13 | Pitta nympha    | Fairy Pitta | 2017/5/23  | 4   | 0   | 22.79605714 | 120.64745830 | <a href="https://www.inaturalist.org/observations/14163345">https://www.inaturalist.org/observations/14163345</a>   |
| 14 | Pitta nympha    | Fairy Pitta | 2014/4/27  | 2   | 0   | 23.01074072 | 113.26538700 | <a href="https://www.inaturalist.org/observations/32843872">https://www.inaturalist.org/observations/32843872</a>   |
| 15 | Pitta nympha    | Fairy Pitta | 2019/5/7   | 2   | 0   | 23.01651805 | 113.27794720 | <a href="https://www.inaturalist.org/observations/98606512">https://www.inaturalist.org/observations/98606512</a>   |
| 16 | Pitta nympha    | Fairy Pitta | 2022/5/15  | 1   | 0   | 23.11886891 | 120.33251220 | <a href="https://www.inaturalist.org/observations/117059767">https://www.inaturalist.org/observations/117059767</a> |
| 17 | Pitta nympha    | Fairy Pitta | 2022/5/15  | 1   | 0   | 23.17141518 | 120.21877020 | <a href="https://www.inaturalist.org/observations/117052198">https://www.inaturalist.org/observations/117052198</a> |
| 18 | Pitta nympha    | Fairy Pitta | 2020/6/7   | 5   | 0   | 23.41503871 | 120.44246670 | <a href="https://www.inaturalist.org/observations/48749463">https://www.inaturalist.org/observations/48749463</a>   |
| 19 | Pitta nympha    | Fairy Pitta | 2014/6/4   | 1   | 0   | 23.42574805 | 111.93653500 | <a href="https://www.inaturalist.org/observations/33482183">https://www.inaturalist.org/observations/33482183</a>   |
| 20 | Pitta nympha    | Fairy Pitta | 2007/5/19  | 5   | 0   | 23.55011757 | 120.20829640 | <a href="https://www.inaturalist.org/observations/18754337">https://www.inaturalist.org/observations/18754337</a>   |
| 21 | Pitta nympha    | Fairy Pitta | 2020/6/18  | 2   | 0   | 23.61068274 | 120.70010270 | <a href="https://www.inaturalist.org/observations/50373210">https://www.inaturalist.org/observations/50373210</a>   |
| 22 | Pitta nympha    | Fairy Pitta | 2022/4/28  | 1   | 0   | 23.65397303 | 120.79219410 | <a href="https://www.inaturalist.org/observations/113157164">https://www.inaturalist.org/observations/113157164</a> |

|    |              |             |           |   |   |             |              |                                                                                                                     |
|----|--------------|-------------|-----------|---|---|-------------|--------------|---------------------------------------------------------------------------------------------------------------------|
| 23 | Pitta nympha | Fairy Pitta | 2020/7/18 | 3 | 0 | 23.68247507 | 120.76660050 | <a href="https://www.inaturalist.org/observations/53443969">https://www.inaturalist.org/observations/53443969</a>   |
| 24 | Pitta nympha | Fairy Pitta | 2022/4/28 | 1 | 0 | 23.69053526 | 120.70228510 | <a href="https://www.inaturalist.org/observations/113160089">https://www.inaturalist.org/observations/113160089</a> |
| 25 | Pitta nympha | Fairy Pitta | 2021/5/6  | 1 | 0 | 23.69974905 | 121.54322510 | <a href="https://www.inaturalist.org/observations/77556865">https://www.inaturalist.org/observations/77556865</a>   |
| 26 | Pitta nympha | Fairy Pitta | 2020/6/7  | 3 | 0 | 23.70338259 | 120.81717160 | <a href="https://www.inaturalist.org/observations/48716434">https://www.inaturalist.org/observations/48716434</a>   |
| 27 | Pitta nympha | Fairy Pitta | 2015/7/22 | 2 | 0 | 23.70742676 | 120.70069170 | <a href="https://www.inaturalist.org/observations/48617761">https://www.inaturalist.org/observations/48617761</a>   |
| 28 | Pitta nympha | Fairy Pitta | 2013/5/29 | 1 | 0 | 23.71673164 | 120.63632760 | <a href="https://www.inaturalist.org/observations/38376610">https://www.inaturalist.org/observations/38376610</a>   |
| 29 | Pitta nympha | Fairy Pitta | 2021/5/3  | 2 | 0 | 23.73070559 | 120.74055290 | <a href="https://www.inaturalist.org/observations/98284196">https://www.inaturalist.org/observations/98284196</a>   |
| 30 | Pitta nympha | Fairy Pitta | 2014/5/5  | 3 | 0 | 23.73567506 | 120.70015870 | <a href="https://www.inaturalist.org/observations/19484487">https://www.inaturalist.org/observations/19484487</a>   |
| 31 | Pitta nympha | Fairy Pitta | 2005/6/4  | 7 | 0 | 23.73915767 | 120.74921830 | <a href="https://www.inaturalist.org/observations/13783836">https://www.inaturalist.org/observations/13783836</a>   |
| 32 | Pitta nympha | Fairy Pitta | 2015/7/22 | 3 | 0 | 23.76623594 | 120.71973450 | <a href="https://www.inaturalist.org/observations/81540293">https://www.inaturalist.org/observations/81540293</a>   |
| 33 | Pitta nympha | Fairy Pitta | 2019/4/24 | 4 | 0 | 23.76709362 | 113.76587330 | <a href="https://www.inaturalist.org/observations/24716465">https://www.inaturalist.org/observations/24716465</a>   |
| 34 | Pitta nympha | Fairy Pitta | 2022/4/30 | 2 | 0 | 23.76900361 | 120.72147350 | <a href="https://www.inaturalist.org/observations/113609134">https://www.inaturalist.org/observations/113609134</a> |
| 35 | Pitta nympha | Fairy Pitta | 2013/8/8  | 5 | 0 | 23.79164958 | 120.61785410 | <a href="http://www.inaturalist.org/observations/3518419">http://www.inaturalist.org/observations/3518419</a>       |
| 36 | Pitta nympha | Fairy Pitta | 2015/7/18 | 5 | 0 | 23.79558836 | 120.63314610 | <a href="https://www.inaturalist.org/observations/20070310">https://www.inaturalist.org/observations/20070310</a>   |
| 37 | Pitta nympha | Fairy Pitta | 2019/4/19 | 1 | 0 | 23.91012459 | 120.65397390 | <a href="https://www.inaturalist.org/observations/22874451">https://www.inaturalist.org/observations/22874451</a>   |
| 38 | Pitta nympha | Fairy Pitta | 2022/4/27 | 1 | 0 | 23.94844787 | 121.46455870 | <a href="https://www.inaturalist.org/observations/113065962">https://www.inaturalist.org/observations/113065962</a> |
| 39 | Pitta nympha | Fairy Pitta | 2021/6/23 | 1 | 0 | 23.95012854 | 120.62211240 | <a href="https://www.inaturalist.org/observations/84141348">https://www.inaturalist.org/observations/84141348</a>   |
| 40 | Pitta nympha | Fairy Pitta | 2019/6/19 | 4 | 0 | 24.11753778 | 121.46619950 | <a href="https://www.inaturalist.org/observations/28168757">https://www.inaturalist.org/observations/28168757</a>   |
| 41 | Pitta nympha | Fairy Pitta | 2022/6/14 | 2 | 0 | 24.61801862 | 121.78634180 | <a href="https://www.inaturalist.org/observations/121678530">https://www.inaturalist.org/observations/121678530</a> |
| 42 | Pitta nympha | Fairy Pitta | 2011/7/2  | 2 | 0 | 24.65026756 | 121.75514490 | <a href="https://www.inaturalist.org/observations/55872786">https://www.inaturalist.org/observations/55872786</a>   |
| 43 | Pitta nympha | Fairy Pitta | 2020/5/31 | 2 | 0 | 24.67109133 | 121.67128150 | <a href="https://www.inaturalist.org/observations/48909587">https://www.inaturalist.org/observations/48909587</a>   |
| 44 | Pitta nympha | Fairy Pitta | 2019/5/25 | 5 | 0 | 24.73595046 | 121.18039690 | <a href="https://www.inaturalist.org/observations/25942021">https://www.inaturalist.org/observations/25942021</a>   |
| 45 | Pitta nympha | Fairy Pitta | 2017/6/6  | 4 | 0 | 24.77060256 | 121.62663370 | <a href="https://www.inaturalist.org/observations/65250026">https://www.inaturalist.org/observations/65250026</a>   |

|    |              |             |           |   |   |             |              |                                                                                                                     |
|----|--------------|-------------|-----------|---|---|-------------|--------------|---------------------------------------------------------------------------------------------------------------------|
| 46 | Pitta nympha | Fairy Pitta | 2011/6/26 | 6 | 0 | 24.77689934 | 121.61073890 | <a href="https://www.inaturalist.org/observations/83232048">https://www.inaturalist.org/observations/83232048</a>   |
| 47 | Pitta nympha | Fairy Pitta | 2017/6/9  | 5 | 0 | 24.77851035 | 121.68214390 | <a href="https://www.inaturalist.org/observations/40126214">https://www.inaturalist.org/observations/40126214</a>   |
| 48 | Pitta nympha | Fairy Pitta | 2020/5/24 | 2 | 0 | 24.86297876 | 121.30806500 | <a href="https://www.inaturalist.org/observations/47103197">https://www.inaturalist.org/observations/47103197</a>   |
| 49 | Pitta nympha | Fairy Pitta | 2021/5/21 | 2 | 0 | 24.98580718 | 121.29844910 | <a href="https://www.inaturalist.org/observations/79661089">https://www.inaturalist.org/observations/79661089</a>   |
| 50 | Pitta nympha | Fairy Pitta | 2011/6/27 | 3 | 0 | 29.22686052 | 118.09414180 | <a href="https://www.inaturalist.org/observations/27037787">https://www.inaturalist.org/observations/27037787</a>   |
| 51 | Pitta nympha | Fairy Pitta | 2013/5/18 | 1 | 0 | 30.08440191 | 120.07739470 | <a href="https://www.inaturalist.org/observations/33482182">https://www.inaturalist.org/observations/33482182</a>   |
| 52 | Pitta nympha | Fairy Pitta | 2022/9/3  | 2 | 0 | 31.20653631 | 121.57776780 | <a href="https://www.inaturalist.org/observations/133912168">https://www.inaturalist.org/observations/133912168</a> |
| 53 | Pitta nympha | Fairy Pitta | 2021/7/4  | 0 | 0 | 31.66920147 | 104.41802250 | <a href="https://www.inaturalist.org/observations/128600559">https://www.inaturalist.org/observations/128600559</a> |
| 54 | Pitta nympha | Fairy Pitta | 2021/5/29 | 3 | 0 | 32.12220463 | 118.45548840 | <a href="https://www.inaturalist.org/observations/88350785">https://www.inaturalist.org/observations/88350785</a>   |
| 55 | Pitta nympha | Fairy Pitta | 2021/5/28 | 1 | 0 | 32.16120987 | 118.62771680 | <a href="https://www.inaturalist.org/observations/115531952">https://www.inaturalist.org/observations/115531952</a> |

| No | scientific name             | common name          | date       | NIA | NID | latitude   | longitude   | url                                                                                                                 |
|----|-----------------------------|----------------------|------------|-----|-----|------------|-------------|---------------------------------------------------------------------------------------------------------------------|
| 1  | <i>Spilopelia chinensis</i> | Eastern Spotted Dove | 2022/2/4   | 2   | 0   | 5.94673667 | 80.46399667 | <a href="https://www.inaturalist.org/observations/106111278">https://www.inaturalist.org/observations/106111278</a> |
| 2  | <i>Spilopelia chinensis</i> | Eastern Spotted Dove | 2019/4/9   | 6   | 0   | 5.94684006 | 80.63111349 | <a href="https://www.inaturalist.org/observations/61253530">https://www.inaturalist.org/observations/61253530</a>   |
| 3  | <i>Spilopelia chinensis</i> | Eastern Spotted Dove | 2022/1/25  | 2   | 0   | 5.95895500 | 80.41196333 | <a href="https://www.inaturalist.org/observations/113957574">https://www.inaturalist.org/observations/113957574</a> |
| 4  | <i>Spilopelia chinensis</i> | Eastern Spotted Dove | 2021/6/18  | 4   | 0   | 5.97667239 | 80.53462788 | <a href="https://www.inaturalist.org/observations/84189424">https://www.inaturalist.org/observations/84189424</a>   |
| 5  | <i>Spilopelia chinensis</i> | Eastern Spotted Dove | 2017/2/6   | 5   | 0   | 6.00333768 | 80.34324412 | <a href="https://www.inaturalist.org/observations/5061582">https://www.inaturalist.org/observations/5061582</a>     |
| 6  | <i>Spilopelia chinensis</i> | Eastern Spotted Dove | 2022/2/7   | 2   | 0   | 6.00415278 | 80.31827500 | <a href="https://www.inaturalist.org/observations/106307577">https://www.inaturalist.org/observations/106307577</a> |
| 7  | <i>Spilopelia chinensis</i> | Eastern Spotted Dove | 2022/4/14  | 1   | 0   | 6.01166790 | 80.24819445 | <a href="https://www.inaturalist.org/observations/111423442">https://www.inaturalist.org/observations/111423442</a> |
| 8  | <i>Spilopelia chinensis</i> | Eastern Spotted Dove | 2019/12/16 | 6   | 0   | 6.01496485 | 80.24786272 | <a href="https://www.inaturalist.org/observations/90042026">https://www.inaturalist.org/observations/90042026</a>   |
| 9  | <i>Spilopelia chinensis</i> | Eastern Spotted Dove | 2019/12/25 | 5   | 0   | 6.01744658 | 80.24885964 | <a href="https://www.inaturalist.org/observations/65523660">https://www.inaturalist.org/observations/65523660</a>   |
| 10 | <i>Spilopelia chinensis</i> | Eastern Spotted Dove | 2020/3/3   | 3   | 0   | 6.02690420 | 80.21496569 | <a href="https://www.inaturalist.org/observations/39494153">https://www.inaturalist.org/observations/39494153</a>   |
| 11 | <i>Spilopelia chinensis</i> | Eastern Spotted Dove | 2017/7/26  | 5   | 0   | 6.03868822 | 80.21718979 | <a href="https://www.inaturalist.org/observations/10297257">https://www.inaturalist.org/observations/10297257</a>   |
| 12 | <i>Spilopelia chinensis</i> | Eastern Spotted Dove | 2019/3/7   | 3   | 0   | 6.04717777 | 80.85577803 | <a href="https://www.inaturalist.org/observations/22137718">https://www.inaturalist.org/observations/22137718</a>   |
| 13 | <i>Spilopelia chinensis</i> | Eastern Spotted Dove | 2019/3/10  | 3   | 0   | 6.04728366 | 80.85555994 | <a href="https://www.inaturalist.org/observations/22205222">https://www.inaturalist.org/observations/22205222</a>   |
| 14 | <i>Spilopelia chinensis</i> | Eastern Spotted Dove | 2019/7/25  | 3   | 0   | 6.11225000 | 81.06211667 | <a href="https://www.inaturalist.org/observations/51229568">https://www.inaturalist.org/observations/51229568</a>   |
| 15 | <i>Spilopelia chinensis</i> | Eastern Spotted Dove | 2019/7/25  | 5   | 0   | 6.11225000 | 81.06211667 | <a href="https://www.inaturalist.org/observations/51814334">https://www.inaturalist.org/observations/51814334</a>   |
| 16 | <i>Spilopelia chinensis</i> | Eastern Spotted Dove | 2017/8/25  | 6   | 0   | 6.11605966 | 81.06306912 | <a href="https://www.inaturalist.org/observations/69669113">https://www.inaturalist.org/observations/69669113</a>   |
| 17 | <i>Spilopelia chinensis</i> | Eastern Spotted Dove | 2021/12/24 | 2   | 0   | 6.12333050 | 80.11516667 | <a href="https://www.inaturalist.org/observations/103575607">https://www.inaturalist.org/observations/103575607</a> |
| 18 | <i>Spilopelia chinensis</i> | Eastern Spotted Dove | 2022/3/9   | 3   | 0   | 6.12555539 | 80.10881760 | <a href="https://www.inaturalist.org/observations/108236408">https://www.inaturalist.org/observations/108236408</a> |
| 19 | <i>Spilopelia chinensis</i> | Eastern Spotted Dove | 2014/2/15  | 3   | 0   | 6.13946760 | 80.10628610 | <a href="https://www.inaturalist.org/observations/39273175">https://www.inaturalist.org/observations/39273175</a>   |
| 20 | <i>Spilopelia chinensis</i> | Eastern Spotted Dove | 2022/2/4   | 1   | 0   | 6.14547204 | 80.10472108 | <a href="https://www.inaturalist.org/observations/106154904">https://www.inaturalist.org/observations/106154904</a> |
| 21 | <i>Spilopelia chinensis</i> | Eastern Spotted Dove | 2018/12/12 | 4   | 0   | 6.18032866 | 81.22043736 | <a href="https://www.inaturalist.org/observations/19441734">https://www.inaturalist.org/observations/19441734</a>   |
| 22 | <i>Spilopelia chinensis</i> | Eastern Spotted Dove | 2007/7/25  | 4   | 0   | 6.18600000 | 81.19400000 | <a href="https://www.inaturalist.org/observations/53893540">https://www.inaturalist.org/observations/53893540</a>   |

|    |                             |                      |            |   |   |            |             |                                                                                                                     |
|----|-----------------------------|----------------------|------------|---|---|------------|-------------|---------------------------------------------------------------------------------------------------------------------|
| 23 | <i>Spilopelia chinensis</i> | Eastern Spotted Dove | 2019/11/28 | 3 | 0 | 6.18706169 | 81.22094283 | <a href="https://www.inaturalist.org/observations/37123137">https://www.inaturalist.org/observations/37123137</a>   |
| 24 | <i>Spilopelia chinensis</i> | Eastern Spotted Dove | 2015/11/11 | 2 | 0 | 6.19742233 | 81.21126595 | <a href="https://www.inaturalist.org/observations/63709887">https://www.inaturalist.org/observations/63709887</a>   |
| 25 | <i>Spilopelia chinensis</i> | Eastern Spotted Dove | 2019/11/28 | 2 | 0 | 6.19900930 | 81.21015260 | <a href="https://www.inaturalist.org/observations/36898330">https://www.inaturalist.org/observations/36898330</a>   |
| 26 | <i>Spilopelia chinensis</i> | Eastern Spotted Dove | 2019/7/17  | 6 | 0 | 6.23066000 | 80.11067167 | <a href="https://www.inaturalist.org/observations/29967779">https://www.inaturalist.org/observations/29967779</a>   |
| 27 | <i>Spilopelia chinensis</i> | Eastern Spotted Dove | 2019/8/11  | 3 | 0 | 6.23466944 | 81.36834722 | <a href="https://www.inaturalist.org/observations/32796746">https://www.inaturalist.org/observations/32796746</a>   |
| 28 | <i>Spilopelia chinensis</i> | Eastern Spotted Dove | 2019/8/11  | 4 | 0 | 6.23467778 | 81.36833333 | <a href="https://www.inaturalist.org/observations/32796736">https://www.inaturalist.org/observations/32796736</a>   |
| 29 | <i>Spilopelia chinensis</i> | Eastern Spotted Dove | 2013/1/2   | 4 | 0 | 6.25222222 | 81.37138889 | <a href="https://www.inaturalist.org/observations/45713396">https://www.inaturalist.org/observations/45713396</a>   |
| 30 | <i>Spilopelia chinensis</i> | Eastern Spotted Dove | 2018/10/24 | 5 | 0 | 6.26103443 | 81.40035821 | <a href="https://www.inaturalist.org/observations/17979122">https://www.inaturalist.org/observations/17979122</a>   |
| 31 | <i>Spilopelia chinensis</i> | Eastern Spotted Dove | 2019/12/21 | 4 | 0 | 6.26496022 | 81.41133988 | <a href="https://www.inaturalist.org/observations/36826139">https://www.inaturalist.org/observations/36826139</a>   |
| 32 | <i>Spilopelia chinensis</i> | Eastern Spotted Dove | 2017/3/26  | 3 | 0 | 6.26575960 | 81.40837669 | <a href="https://www.inaturalist.org/observations/5505218">https://www.inaturalist.org/observations/5505218</a>     |
| 33 | <i>Spilopelia chinensis</i> | Eastern Spotted Dove | 2018/10/24 | 3 | 0 | 6.26918778 | 81.39203637 | <a href="https://www.inaturalist.org/observations/18136632">https://www.inaturalist.org/observations/18136632</a>   |
| 34 | <i>Spilopelia chinensis</i> | Eastern Spotted Dove | 2016/1/6   | 4 | 0 | 6.27615077 | 81.29917366 | <a href="https://www.inaturalist.org/observations/119056129">https://www.inaturalist.org/observations/119056129</a> |
| 35 | <i>Spilopelia chinensis</i> | Eastern Spotted Dove | 2020/7/3   | 5 | 0 | 6.27841172 | 81.40194096 | <a href="https://www.inaturalist.org/observations/63234158">https://www.inaturalist.org/observations/63234158</a>   |
| 36 | <i>Spilopelia chinensis</i> | Eastern Spotted Dove | 2020/1/31  | 5 | 0 | 6.27842205 | 81.40193224 | <a href="https://www.inaturalist.org/observations/40045581">https://www.inaturalist.org/observations/40045581</a>   |
| 37 | <i>Spilopelia chinensis</i> | Eastern Spotted Dove | 2019/11/28 | 2 | 0 | 6.28958180 | 81.28216470 | <a href="https://www.inaturalist.org/observations/37123393">https://www.inaturalist.org/observations/37123393</a>   |
| 38 | <i>Spilopelia chinensis</i> | Eastern Spotted Dove | 2011/1/21  | 4 | 0 | 6.29302248 | 81.26677764 | <a href="https://www.inaturalist.org/observations/57910362">https://www.inaturalist.org/observations/57910362</a>   |
| 39 | <i>Spilopelia chinensis</i> | Eastern Spotted Dove | 2019/8/12  | 4 | 0 | 6.30466389 | 81.44143611 | <a href="https://www.inaturalist.org/observations/32800811">https://www.inaturalist.org/observations/32800811</a>   |
| 40 | <i>Spilopelia chinensis</i> | Eastern Spotted Dove | 2019/11/29 | 3 | 0 | 6.30527804 | 81.44139801 | <a href="https://www.inaturalist.org/observations/37258623">https://www.inaturalist.org/observations/37258623</a>   |
| 41 | <i>Spilopelia chinensis</i> | Eastern Spotted Dove | 2014/4/22  | 3 | 0 | 6.31166951 | 80.03226144 | <a href="https://www.inaturalist.org/observations/19174672">https://www.inaturalist.org/observations/19174672</a>   |
| 42 | <i>Spilopelia chinensis</i> | Eastern Spotted Dove | 2019/11/29 | 3 | 0 | 6.31223484 | 81.42931703 | <a href="https://www.inaturalist.org/observations/37258622">https://www.inaturalist.org/observations/37258622</a>   |
| 43 | <i>Spilopelia chinensis</i> | Eastern Spotted Dove | 2022/4/25  | 5 | 0 | 6.31255320 | 81.40243271 | <a href="https://www.inaturalist.org/observations/116614968">https://www.inaturalist.org/observations/116614968</a> |
| 44 | <i>Spilopelia chinensis</i> | Eastern Spotted Dove | 2015/11/10 | 4 | 0 | 6.31774392 | 81.36216974 | <a href="https://www.inaturalist.org/observations/63415554">https://www.inaturalist.org/observations/63415554</a>   |
| 45 | <i>Spilopelia chinensis</i> | Eastern Spotted Dove | 2019/4/2   | 4 | 0 | 6.34351255 | 80.56191462 | <a href="https://www.inaturalist.org/observations/50934658">https://www.inaturalist.org/observations/50934658</a>   |

|    |                             |                      |            |   |   |            |             |                                                                                                                     |
|----|-----------------------------|----------------------|------------|---|---|------------|-------------|---------------------------------------------------------------------------------------------------------------------|
| 46 | <i>Spilopelia chinensis</i> | Eastern Spotted Dove | 2019/2/4   | 3 | 0 | 6.34420365 | 81.49715712 | <a href="https://www.inaturalist.org/observations/20671961">https://www.inaturalist.org/observations/20671961</a>   |
| 47 | <i>Spilopelia chinensis</i> | Eastern Spotted Dove | 2018/10/24 | 4 | 0 | 6.34767843 | 80.02230336 | <a href="https://www.inaturalist.org/observations/18278809">https://www.inaturalist.org/observations/18278809</a>   |
| 48 | <i>Spilopelia chinensis</i> | Eastern Spotted Dove | 2017/7/14  | 7 | 0 | 6.35436496 | 80.73593043 | <a href="https://www.inaturalist.org/observations/67201114">https://www.inaturalist.org/observations/67201114</a>   |
| 49 | <i>Spilopelia chinensis</i> | Eastern Spotted Dove | 2022/2/23  | 3 | 0 | 6.35548632 | 80.49008079 | <a href="https://www.inaturalist.org/observations/109444889">https://www.inaturalist.org/observations/109444889</a> |
| 50 | <i>Spilopelia chinensis</i> | Eastern Spotted Dove | 2014/2/14  | 5 | 0 | 6.36224000 | 81.45610167 | <a href="https://www.inaturalist.org/observations/37174040">https://www.inaturalist.org/observations/37174040</a>   |
| 51 | <i>Spilopelia chinensis</i> | Eastern Spotted Dove | 2019/10/6  | 6 | 0 | 6.36286807 | 81.51891084 | <a href="https://www.inaturalist.org/observations/34450168">https://www.inaturalist.org/observations/34450168</a>   |
| 52 | <i>Spilopelia chinensis</i> | Eastern Spotted Dove | 2019/7/16  | 3 | 0 | 6.36582857 | 81.24188161 | <a href="https://www.inaturalist.org/observations/51872421">https://www.inaturalist.org/observations/51872421</a>   |
| 53 | <i>Spilopelia chinensis</i> | Eastern Spotted Dove | 2014/4/18  | 2 | 0 | 6.37241551 | 81.50028828 | <a href="https://www.inaturalist.org/observations/19157598">https://www.inaturalist.org/observations/19157598</a>   |
| 54 | <i>Spilopelia chinensis</i> | Eastern Spotted Dove | 2016/6/12  | 4 | 0 | 6.37277778 | 81.51694444 | <a href="https://www.inaturalist.org/observations/14250213">https://www.inaturalist.org/observations/14250213</a>   |
| 55 | <i>Spilopelia chinensis</i> | Eastern Spotted Dove | 2020/1/25  | 3 | 0 | 6.38972300 | 80.50138900 | <a href="https://www.inaturalist.org/observations/38297522">https://www.inaturalist.org/observations/38297522</a>   |
| 56 | <i>Spilopelia chinensis</i> | Eastern Spotted Dove | 2014/2/14  | 4 | 0 | 6.39029333 | 81.47000667 | <a href="https://www.inaturalist.org/observations/37118825">https://www.inaturalist.org/observations/37118825</a>   |
| 57 | <i>Spilopelia chinensis</i> | Eastern Spotted Dove | 2019/2/4   | 3 | 0 | 6.39547128 | 81.47917813 | <a href="https://www.inaturalist.org/observations/20671994">https://www.inaturalist.org/observations/20671994</a>   |
| 58 | <i>Spilopelia chinensis</i> | Eastern Spotted Dove | 2019/12/7  | 3 | 0 | 6.41595000 | 80.81806111 | <a href="https://www.inaturalist.org/observations/104809865">https://www.inaturalist.org/observations/104809865</a> |
| 59 | <i>Spilopelia chinensis</i> | Eastern Spotted Dove | 2019/4/13  | 3 | 0 | 6.41726635 | 81.57324359 | <a href="https://www.inaturalist.org/observations/22556970">https://www.inaturalist.org/observations/22556970</a>   |
| 60 | <i>Spilopelia chinensis</i> | Eastern Spotted Dove | 2019/2/10  | 2 | 0 | 6.41855041 | 80.82393799 | <a href="https://www.inaturalist.org/observations/89523116">https://www.inaturalist.org/observations/89523116</a>   |
| 61 | <i>Spilopelia chinensis</i> | Eastern Spotted Dove | 2019/9/3   | 4 | 0 | 6.42606810 | 80.85650437 | <a href="https://www.inaturalist.org/observations/67640438">https://www.inaturalist.org/observations/67640438</a>   |
| 62 | <i>Spilopelia chinensis</i> | Eastern Spotted Dove | 2014/11/21 | 2 | 0 | 6.42677800 | 81.30804700 | <a href="https://www.inaturalist.org/observations/70878401">https://www.inaturalist.org/observations/70878401</a>   |
| 63 | <i>Spilopelia chinensis</i> | Eastern Spotted Dove | 2016/9/18  | 5 | 0 | 6.42678442 | 81.30804688 | <a href="https://www.inaturalist.org/observations/100019069">https://www.inaturalist.org/observations/100019069</a> |
| 64 | <i>Spilopelia chinensis</i> | Eastern Spotted Dove | 2016/4/15  | 4 | 0 | 6.43485967 | 80.90633426 | <a href="https://www.inaturalist.org/observations/58177919">https://www.inaturalist.org/observations/58177919</a>   |
| 65 | <i>Spilopelia chinensis</i> | Eastern Spotted Dove | 2019/3/13  | 5 | 0 | 6.43814260 | 80.88861140 | <a href="https://www.inaturalist.org/observations/54360187">https://www.inaturalist.org/observations/54360187</a>   |
| 66 | <i>Spilopelia chinensis</i> | Eastern Spotted Dove | 2020/4/25  | 5 | 0 | 6.43814869 | 80.88861141 | <a href="https://www.inaturalist.org/observations/43293200">https://www.inaturalist.org/observations/43293200</a>   |
| 67 | <i>Spilopelia chinensis</i> | Eastern Spotted Dove | 2012/12/8  | 4 | 0 | 6.43815136 | 80.88861108 | <a href="https://www.inaturalist.org/observations/54633158">https://www.inaturalist.org/observations/54633158</a>   |
| 68 | <i>Spilopelia chinensis</i> | Eastern Spotted Dove | 2021/12/28 | 3 | 0 | 6.43847024 | 79.98995125 | <a href="https://www.inaturalist.org/observations/105034168">https://www.inaturalist.org/observations/105034168</a> |

|    |                             |                      |            |   |   |            |             |                                                                                                                     |
|----|-----------------------------|----------------------|------------|---|---|------------|-------------|---------------------------------------------------------------------------------------------------------------------|
| 69 | <i>Spilopelia chinensis</i> | Eastern Spotted Dove | 2020/1/27  | 4 | 0 | 6.44049000 | 80.89069010 | <a href="https://www.inaturalist.org/observations/38023208">https://www.inaturalist.org/observations/38023208</a>   |
| 70 | <i>Spilopelia chinensis</i> | Eastern Spotted Dove | 2019/12/1  | 4 | 0 | 6.44325068 | 80.41702039 | <a href="https://www.inaturalist.org/observations/37422045">https://www.inaturalist.org/observations/37422045</a>   |
| 71 | <i>Spilopelia chinensis</i> | Eastern Spotted Dove | 2019/11/30 | 4 | 0 | 6.44336806 | 80.41758632 | <a href="https://www.inaturalist.org/observations/37422044">https://www.inaturalist.org/observations/37422044</a>   |
| 72 | <i>Spilopelia chinensis</i> | Eastern Spotted Dove | 2018/3/6   | 4 | 0 | 6.45126443 | 80.31057358 | <a href="https://www.inaturalist.org/observations/10180287">https://www.inaturalist.org/observations/10180287</a>   |
| 73 | <i>Spilopelia chinensis</i> | Eastern Spotted Dove | 2013/11/26 | 4 | 0 | 6.45194600 | 80.89472600 | <a href="https://www.inaturalist.org/observations/13634051">https://www.inaturalist.org/observations/13634051</a>   |
| 74 | <i>Spilopelia chinensis</i> | Eastern Spotted Dove | 2018/11/30 | 4 | 0 | 6.45219793 | 80.30811299 | <a href="https://www.inaturalist.org/observations/125268774">https://www.inaturalist.org/observations/125268774</a> |
| 75 | <i>Spilopelia chinensis</i> | Eastern Spotted Dove | 2018/3/6   | 4 | 0 | 6.45223000 | 80.30824167 | <a href="https://www.inaturalist.org/observations/10179840">https://www.inaturalist.org/observations/10179840</a>   |
| 76 | <i>Spilopelia chinensis</i> | Eastern Spotted Dove | 2015/11/26 | 3 | 0 | 6.45323147 | 80.89513081 | <a href="https://www.inaturalist.org/observations/37617560">https://www.inaturalist.org/observations/37617560</a>   |
| 77 | <i>Spilopelia chinensis</i> | Eastern Spotted Dove | 2022/3/14  | 4 | 0 | 6.45385217 | 80.89094731 | <a href="https://www.inaturalist.org/observations/109189520">https://www.inaturalist.org/observations/109189520</a> |
| 78 | <i>Spilopelia chinensis</i> | Eastern Spotted Dove | 2012/3/5   | 4 | 0 | 6.45460310 | 80.89238783 | <a href="https://www.inaturalist.org/observations/64525814">https://www.inaturalist.org/observations/64525814</a>   |
| 79 | <i>Spilopelia chinensis</i> | Eastern Spotted Dove | 2022/3/14  | 4 | 0 | 6.45577114 | 80.89090438 | <a href="https://www.inaturalist.org/observations/109186573">https://www.inaturalist.org/observations/109186573</a> |
| 80 | <i>Spilopelia chinensis</i> | Eastern Spotted Dove | 2018/1/15  | 4 | 0 | 6.45741500 | 80.89007833 | <a href="https://www.inaturalist.org/observations/41520151">https://www.inaturalist.org/observations/41520151</a>   |
| 81 | <i>Spilopelia chinensis</i> | Eastern Spotted Dove | 2016/4/5   | 4 | 0 | 6.46562611 | 80.92092611 | <a href="https://www.inaturalist.org/observations/127139882">https://www.inaturalist.org/observations/127139882</a> |
| 82 | <i>Spilopelia chinensis</i> | Eastern Spotted Dove | 2021/5/28  | 5 | 0 | 6.47091375 | 79.98069003 | <a href="https://www.inaturalist.org/observations/99856621">https://www.inaturalist.org/observations/99856621</a>   |
| 83 | <i>Spilopelia chinensis</i> | Eastern Spotted Dove | 2017/7/28  | 3 | 0 | 6.47382494 | 80.89112237 | <a href="https://www.inaturalist.org/observations/7655761">https://www.inaturalist.org/observations/7655761</a>     |
| 84 | <i>Spilopelia chinensis</i> | Eastern Spotted Dove | 2018/7/16  | 5 | 0 | 6.47468800 | 80.89882600 | <a href="https://www.inaturalist.org/observations/15036727">https://www.inaturalist.org/observations/15036727</a>   |
| 85 | <i>Spilopelia chinensis</i> | Eastern Spotted Dove | 2018/7/16  | 5 | 0 | 6.47468800 | 80.89882600 | <a href="https://www.inaturalist.org/observations/15037545">https://www.inaturalist.org/observations/15037545</a>   |
| 86 | <i>Spilopelia chinensis</i> | Eastern Spotted Dove | 2019/1/19  | 5 | 0 | 6.47468840 | 80.89882570 | <a href="https://www.inaturalist.org/observations/24798655">https://www.inaturalist.org/observations/24798655</a>   |
| 87 | <i>Spilopelia chinensis</i> | Eastern Spotted Dove | 2017/7/28  | 4 | 0 | 6.47764135 | 80.90509131 | <a href="https://www.inaturalist.org/observations/7655750">https://www.inaturalist.org/observations/7655750</a>     |
| 88 | <i>Spilopelia chinensis</i> | Eastern Spotted Dove | 2017/12/27 | 4 | 0 | 6.48910000 | 80.86580000 | <a href="https://www.inaturalist.org/observations/10793938">https://www.inaturalist.org/observations/10793938</a>   |
| 89 | <i>Spilopelia chinensis</i> | Eastern Spotted Dove | 2018/3/5   | 3 | 0 | 6.52433667 | 80.21452500 | <a href="https://www.inaturalist.org/observations/10168603">https://www.inaturalist.org/observations/10168603</a>   |
| 90 | <i>Spilopelia chinensis</i> | Eastern Spotted Dove | 2018/3/7   | 4 | 0 | 6.52652667 | 80.09291667 | <a href="https://www.inaturalist.org/observations/10183063">https://www.inaturalist.org/observations/10183063</a>   |
| 91 | <i>Spilopelia chinensis</i> | Eastern Spotted Dove | 2020/3/27  | 3 | 0 | 6.53332500 | 80.14109167 | <a href="https://www.inaturalist.org/observations/41679064">https://www.inaturalist.org/observations/41679064</a>   |



|     |                             |                      |            |   |   |            |             |                                                                                                                     |
|-----|-----------------------------|----------------------|------------|---|---|------------|-------------|---------------------------------------------------------------------------------------------------------------------|
| 92  | <i>Spilopelia chinensis</i> | Eastern Spotted Dove | 2022/7/17  | 2 | 0 | 6.55800315 | 80.15292768 | <a href="https://www.inaturalist.org/observations/127082890">https://www.inaturalist.org/observations/127082890</a> |
| 93  | <i>Spilopelia chinensis</i> | Eastern Spotted Dove | 2018/7/17  | 5 | 0 | 6.58539500 | 79.96074000 | <a href="https://www.inaturalist.org/observations/15081758">https://www.inaturalist.org/observations/15081758</a>   |
| 94  | <i>Spilopelia chinensis</i> | Eastern Spotted Dove | 2018/7/19  | 5 | 0 | 6.58539500 | 79.96074000 | <a href="https://www.inaturalist.org/observations/15082054">https://www.inaturalist.org/observations/15082054</a>   |
| 95  | <i>Spilopelia chinensis</i> | Eastern Spotted Dove | 2018/7/19  | 4 | 0 | 6.58539500 | 79.96074000 | <a href="https://www.inaturalist.org/observations/15082184">https://www.inaturalist.org/observations/15082184</a>   |
| 96  | <i>Spilopelia chinensis</i> | Eastern Spotted Dove | 2020/3/25  | 3 | 0 | 6.60139190 | 79.95274525 | <a href="https://www.inaturalist.org/observations/40861627">https://www.inaturalist.org/observations/40861627</a>   |
| 97  | <i>Spilopelia chinensis</i> | Eastern Spotted Dove | 2020/3/27  | 4 | 0 | 6.60141322 | 79.95274525 | <a href="https://www.inaturalist.org/observations/40862285">https://www.inaturalist.org/observations/40862285</a>   |
| 98  | <i>Spilopelia chinensis</i> | Eastern Spotted Dove | 2020/3/28  | 4 | 0 | 6.60145585 | 79.95285254 | <a href="https://www.inaturalist.org/observations/40937175">https://www.inaturalist.org/observations/40937175</a>   |
| 99  | <i>Spilopelia chinensis</i> | Eastern Spotted Dove | 2020/3/28  | 6 | 0 | 6.60149848 | 79.95285254 | <a href="https://www.inaturalist.org/observations/40938817">https://www.inaturalist.org/observations/40938817</a>   |
| 100 | <i>Spilopelia chinensis</i> | Eastern Spotted Dove | 2020/3/25  | 3 | 0 | 6.60150836 | 79.95289911 | <a href="https://www.inaturalist.org/observations/40861087">https://www.inaturalist.org/observations/40861087</a>   |
| 101 | <i>Spilopelia chinensis</i> | Eastern Spotted Dove | 2021/7/13  | 3 | 0 | 6.60157847 | 79.95263567 | <a href="https://www.inaturalist.org/observations/87234415">https://www.inaturalist.org/observations/87234415</a>   |
| 102 | <i>Spilopelia chinensis</i> | Eastern Spotted Dove | 2020/5/8   | 6 | 0 | 6.60163391 | 79.95267637 | <a href="https://www.inaturalist.org/observations/46439969">https://www.inaturalist.org/observations/46439969</a>   |
| 103 | <i>Spilopelia chinensis</i> | Eastern Spotted Dove | 2020/3/25  | 5 | 0 | 6.60163779 | 79.95273879 | <a href="https://www.inaturalist.org/observations/41276508">https://www.inaturalist.org/observations/41276508</a>   |
| 104 | <i>Spilopelia chinensis</i> | Eastern Spotted Dove | 2020/5/3   | 7 | 0 | 6.60166373 | 79.95272150 | <a href="https://www.inaturalist.org/observations/44845758">https://www.inaturalist.org/observations/44845758</a>   |
| 105 | <i>Spilopelia chinensis</i> | Eastern Spotted Dove | 2022/8/21  | 4 | 0 | 6.60352860 | 80.15960410 | <a href="https://www.inaturalist.org/observations/131889002">https://www.inaturalist.org/observations/131889002</a> |
| 106 | <i>Spilopelia chinensis</i> | Eastern Spotted Dove | 2019/4/20  | 2 | 0 | 6.62693100 | 79.94398600 | <a href="https://www.inaturalist.org/observations/22749945">https://www.inaturalist.org/observations/22749945</a>   |
| 107 | <i>Spilopelia chinensis</i> | Eastern Spotted Dove | 2019/5/19  | 5 | 0 | 6.66686110 | 80.70480840 | <a href="https://www.inaturalist.org/observations/33367881">https://www.inaturalist.org/observations/33367881</a>   |
| 108 | <i>Spilopelia chinensis</i> | Eastern Spotted Dove | 2015/1/18  | 3 | 0 | 6.70557400 | 80.38473400 | <a href="https://www.inaturalist.org/observations/35098378">https://www.inaturalist.org/observations/35098378</a>   |
| 109 | <i>Spilopelia chinensis</i> | Eastern Spotted Dove | 2020/4/24  | 6 | 0 | 6.71141528 | 79.90742616 | <a href="https://www.inaturalist.org/observations/43274164">https://www.inaturalist.org/observations/43274164</a>   |
| 110 | <i>Spilopelia chinensis</i> | Eastern Spotted Dove | 2020/1/29  | 6 | 0 | 6.76541360 | 80.95256550 | <a href="https://www.inaturalist.org/observations/39831107">https://www.inaturalist.org/observations/39831107</a>   |
| 111 | <i>Spilopelia chinensis</i> | Eastern Spotted Dove | 2016/8/2   | 6 | 0 | 6.77103244 | 80.93688548 | <a href="https://www.inaturalist.org/observations/16337280">https://www.inaturalist.org/observations/16337280</a>   |
| 112 | <i>Spilopelia chinensis</i> | Eastern Spotted Dove | 2022/3/19  | 4 | 0 | 6.78034333 | 80.90363333 | <a href="https://www.inaturalist.org/observations/110185511">https://www.inaturalist.org/observations/110185511</a> |
| 113 | <i>Spilopelia chinensis</i> | Eastern Spotted Dove | 2020/12/22 | 6 | 0 | 6.78086352 | 80.11302574 | <a href="https://www.inaturalist.org/observations/67578815">https://www.inaturalist.org/observations/67578815</a>   |
| 114 | <i>Spilopelia chinensis</i> | Eastern Spotted Dove | 2020/12/16 | 5 | 0 | 6.79710426 | 80.09433372 | <a href="https://www.inaturalist.org/observations/67578823">https://www.inaturalist.org/observations/67578823</a>   |

|     |                             |                      |            |   |   |            |             |                                                                                                                     |
|-----|-----------------------------|----------------------|------------|---|---|------------|-------------|---------------------------------------------------------------------------------------------------------------------|
| 115 | <i>Spilopelia chinensis</i> | Eastern Spotted Dove | 2021/8/9   | 1 | 0 | 6.80163343 | 79.89233103 | <a href="https://www.inaturalist.org/observations/92234342">https://www.inaturalist.org/observations/92234342</a>   |
| 116 | <i>Spilopelia chinensis</i> | Eastern Spotted Dove | 2020/12/23 | 2 | 0 | 6.81011155 | 79.96188683 | <a href="https://www.inaturalist.org/observations/66959933">https://www.inaturalist.org/observations/66959933</a>   |
| 117 | <i>Spilopelia chinensis</i> | Eastern Spotted Dove | 2021/2/3   | 5 | 0 | 6.83294522 | 80.09039971 | <a href="https://www.inaturalist.org/observations/71321542">https://www.inaturalist.org/observations/71321542</a>   |
| 118 | <i>Spilopelia chinensis</i> | Eastern Spotted Dove | 2021/10/5  | 5 | 0 | 6.83667750 | 80.09696419 | <a href="https://www.inaturalist.org/observations/129535313">https://www.inaturalist.org/observations/129535313</a> |
| 119 | <i>Spilopelia chinensis</i> | Eastern Spotted Dove | 2018/7/22  | 4 | 0 | 6.83726482 | 79.89177547 | <a href="https://www.inaturalist.org/observations/16213199">https://www.inaturalist.org/observations/16213199</a>   |
| 120 | <i>Spilopelia chinensis</i> | Eastern Spotted Dove | 2018/7/21  | 5 | 0 | 6.84116600 | 79.90247800 | <a href="https://www.inaturalist.org/observations/15095495">https://www.inaturalist.org/observations/15095495</a>   |
| 121 | <i>Spilopelia chinensis</i> | Eastern Spotted Dove | 2018/7/21  | 5 | 0 | 6.84116600 | 79.90247800 | <a href="https://www.inaturalist.org/observations/15103568">https://www.inaturalist.org/observations/15103568</a>   |
| 122 | <i>Spilopelia chinensis</i> | Eastern Spotted Dove | 2018/7/21  | 5 | 0 | 6.84116600 | 79.90247800 | <a href="https://www.inaturalist.org/observations/15104202">https://www.inaturalist.org/observations/15104202</a>   |
| 123 | <i>Spilopelia chinensis</i> | Eastern Spotted Dove | 2021/2/21  | 6 | 0 | 6.84522740 | 79.98896640 | <a href="https://www.inaturalist.org/observations/69915047">https://www.inaturalist.org/observations/69915047</a>   |
| 124 | <i>Spilopelia chinensis</i> | Eastern Spotted Dove | 2020/8/29  | 5 | 0 | 6.84880985 | 79.95625962 | <a href="https://www.inaturalist.org/observations/57894068">https://www.inaturalist.org/observations/57894068</a>   |
| 125 | <i>Spilopelia chinensis</i> | Eastern Spotted Dove | 2021/11/21 | 4 | 0 | 6.84893894 | 79.95642090 | <a href="https://www.inaturalist.org/observations/101605145">https://www.inaturalist.org/observations/101605145</a> |
| 126 | <i>Spilopelia chinensis</i> | Eastern Spotted Dove | 2020/4/30  | 5 | 0 | 6.84919700 | 79.95633729 | <a href="https://www.inaturalist.org/observations/44352006">https://www.inaturalist.org/observations/44352006</a>   |
| 127 | <i>Spilopelia chinensis</i> | Eastern Spotted Dove | 2021/3/18  | 2 | 0 | 6.85029500 | 79.98678667 | <a href="https://www.inaturalist.org/observations/71482788">https://www.inaturalist.org/observations/71482788</a>   |
| 128 | <i>Spilopelia chinensis</i> | Eastern Spotted Dove | 2020/1/30  | 5 | 0 | 6.85083030 | 81.05236060 | <a href="https://www.inaturalist.org/observations/39960521">https://www.inaturalist.org/observations/39960521</a>   |
| 129 | <i>Spilopelia chinensis</i> | Eastern Spotted Dove | 2021/2/19  | 4 | 0 | 6.85267167 | 79.90075500 | <a href="https://www.inaturalist.org/observations/69799700">https://www.inaturalist.org/observations/69799700</a>   |
| 130 | <i>Spilopelia chinensis</i> | Eastern Spotted Dove | 2021/2/20  | 4 | 0 | 6.85457000 | 79.90374667 | <a href="https://www.inaturalist.org/observations/69847908">https://www.inaturalist.org/observations/69847908</a>   |
| 131 | <i>Spilopelia chinensis</i> | Eastern Spotted Dove | 2019/4/7   | 2 | 0 | 6.85915800 | 79.92777200 | <a href="https://www.inaturalist.org/observations/22255831">https://www.inaturalist.org/observations/22255831</a>   |
| 132 | <i>Spilopelia chinensis</i> | Eastern Spotted Dove | 2018/4/8   | 5 | 0 | 6.86113589 | 81.05050452 | <a href="https://www.inaturalist.org/observations/10698964">https://www.inaturalist.org/observations/10698964</a>   |
| 133 | <i>Spilopelia chinensis</i> | Eastern Spotted Dove | 2022/2/21  | 0 | 0 | 6.86260748 | 81.03906250 | <a href="https://www.inaturalist.org/observations/108435849">https://www.inaturalist.org/observations/108435849</a> |
| 134 | <i>Spilopelia chinensis</i> | Eastern Spotted Dove | 2012/3/30  | 3 | 0 | 6.86361005 | 81.04639077 | <a href="https://www.inaturalist.org/observations/39463108">https://www.inaturalist.org/observations/39463108</a>   |
| 135 | <i>Spilopelia chinensis</i> | Eastern Spotted Dove | 2019/4/18  | 5 | 0 | 6.86669880 | 81.04655300 | <a href="https://www.inaturalist.org/observations/49864972">https://www.inaturalist.org/observations/49864972</a>   |
| 136 | <i>Spilopelia chinensis</i> | Eastern Spotted Dove | 2018/12/24 | 3 | 0 | 6.86677091 | 81.04681049 | <a href="https://www.inaturalist.org/observations/19461978">https://www.inaturalist.org/observations/19461978</a>   |
| 137 | <i>Spilopelia chinensis</i> | Eastern Spotted Dove | 2020/1/29  | 5 | 0 | 6.86752453 | 81.04689766 | <a href="https://www.inaturalist.org/observations/39919629">https://www.inaturalist.org/observations/39919629</a>   |

|     |                             |                      |            |   |   |            |             |                                                                                                                     |
|-----|-----------------------------|----------------------|------------|---|---|------------|-------------|---------------------------------------------------------------------------------------------------------------------|
| 138 | <i>Spilopelia chinensis</i> | Eastern Spotted Dove | 2020/2/13  | 3 | 0 | 6.86886101 | 81.06062253 | <a href="https://www.inaturalist.org/observations/39425600">https://www.inaturalist.org/observations/39425600</a>   |
| 139 | <i>Spilopelia chinensis</i> | Eastern Spotted Dove | 2019/9/1   | 3 | 0 | 6.87058346 | 81.05276965 | <a href="https://www.inaturalist.org/observations/41473828">https://www.inaturalist.org/observations/41473828</a>   |
| 140 | <i>Spilopelia chinensis</i> | Eastern Spotted Dove | 2022/2/22  | 3 | 0 | 6.87065667 | 81.05662333 | <a href="https://www.inaturalist.org/observations/107418445">https://www.inaturalist.org/observations/107418445</a> |
| 141 | <i>Spilopelia chinensis</i> | Eastern Spotted Dove | 2022/4/9   | 1 | 0 | 6.87162000 | 81.04839450 | <a href="https://www.inaturalist.org/observations/110927519">https://www.inaturalist.org/observations/110927519</a> |
| 142 | <i>Spilopelia chinensis</i> | Eastern Spotted Dove | 2019/8/30  | 3 | 0 | 6.87174251 | 81.05686069 | <a href="https://www.inaturalist.org/observations/39900970">https://www.inaturalist.org/observations/39900970</a>   |
| 143 | <i>Spilopelia chinensis</i> | Eastern Spotted Dove | 2019/12/27 | 4 | 0 | 6.87180667 | 81.04754000 | <a href="https://www.inaturalist.org/observations/37194962">https://www.inaturalist.org/observations/37194962</a>   |
| 144 | <i>Spilopelia chinensis</i> | Eastern Spotted Dove | 2022/7/25  | 3 | 0 | 6.87977953 | 79.92923990 | <a href="https://www.inaturalist.org/observations/127857549">https://www.inaturalist.org/observations/127857549</a> |
| 145 | <i>Spilopelia chinensis</i> | Eastern Spotted Dove | 2022/1/15  | 2 | 0 | 6.88536167 | 79.85597167 | <a href="https://www.inaturalist.org/observations/104959029">https://www.inaturalist.org/observations/104959029</a> |
| 146 | <i>Spilopelia chinensis</i> | Eastern Spotted Dove | 2022/2/13  | 2 | 0 | 6.88676126 | 79.94759995 | <a href="https://www.inaturalist.org/observations/107409377">https://www.inaturalist.org/observations/107409377</a> |
| 147 | <i>Spilopelia chinensis</i> | Eastern Spotted Dove | 2021/12/12 | 3 | 0 | 6.89485855 | 79.97509311 | <a href="https://www.inaturalist.org/observations/102912335">https://www.inaturalist.org/observations/102912335</a> |
| 148 | <i>Spilopelia chinensis</i> | Eastern Spotted Dove | 2021/10/22 | 2 | 0 | 6.90349667 | 79.89177000 | <a href="https://www.inaturalist.org/observations/98945126">https://www.inaturalist.org/observations/98945126</a>   |
| 149 | <i>Spilopelia chinensis</i> | Eastern Spotted Dove | 2020/11/8  | 6 | 0 | 6.90955833 | 79.87546667 | <a href="https://www.inaturalist.org/observations/64428506">https://www.inaturalist.org/observations/64428506</a>   |
| 150 | <i>Spilopelia chinensis</i> | Eastern Spotted Dove | 2020/11/10 | 5 | 0 | 6.91002500 | 79.87536667 | <a href="https://www.inaturalist.org/observations/64566135">https://www.inaturalist.org/observations/64566135</a>   |
| 151 | <i>Spilopelia chinensis</i> | Eastern Spotted Dove | 2020/4/1   | 3 | 0 | 6.91573758 | 79.87411934 | <a href="https://www.inaturalist.org/observations/45271961">https://www.inaturalist.org/observations/45271961</a>   |
| 152 | <i>Spilopelia chinensis</i> | Eastern Spotted Dove | 2020/4/17  | 4 | 0 | 6.91575888 | 79.87411934 | <a href="https://www.inaturalist.org/observations/45271971">https://www.inaturalist.org/observations/45271971</a>   |
| 153 | <i>Spilopelia chinensis</i> | Eastern Spotted Dove | 2020/11/6  | 2 | 0 | 6.91577820 | 79.87416270 | <a href="https://www.inaturalist.org/observations/64281295">https://www.inaturalist.org/observations/64281295</a>   |
| 154 | <i>Spilopelia chinensis</i> | Eastern Spotted Dove | 2020/11/6  | 5 | 0 | 6.91637500 | 79.87429167 | <a href="https://www.inaturalist.org/observations/64280088">https://www.inaturalist.org/observations/64280088</a>   |
| 155 | <i>Spilopelia chinensis</i> | Eastern Spotted Dove | 2020/4/18  | 5 | 0 | 6.91893281 | 79.99478303 | <a href="https://www.inaturalist.org/observations/42606224">https://www.inaturalist.org/observations/42606224</a>   |
| 156 | <i>Spilopelia chinensis</i> | Eastern Spotted Dove | 2012/8/22  | 5 | 0 | 6.92122207 | 80.92041118 | <a href="https://www.inaturalist.org/observations/31923872">https://www.inaturalist.org/observations/31923872</a>   |
| 157 | <i>Spilopelia chinensis</i> | Eastern Spotted Dove | 2012/1/2   | 5 | 0 | 6.93158472 | 80.10586567 | <a href="https://www.inaturalist.org/observations/18998192">https://www.inaturalist.org/observations/18998192</a>   |
| 158 | <i>Spilopelia chinensis</i> | Eastern Spotted Dove | 2022/7/27  | 4 | 0 | 6.93397103 | 79.92867999 | <a href="https://www.inaturalist.org/observations/128168620">https://www.inaturalist.org/observations/128168620</a> |
| 159 | <i>Spilopelia chinensis</i> | Eastern Spotted Dove | 2016/1/23  | 3 | 0 | 6.94971660 | 80.78910680 | <a href="https://www.inaturalist.org/observations/42007769">https://www.inaturalist.org/observations/42007769</a>   |
| 160 | <i>Spilopelia chinensis</i> | Eastern Spotted Dove | 2019/11/26 | 3 | 0 | 6.97912225 | 80.76372739 | <a href="https://www.inaturalist.org/observations/36640036">https://www.inaturalist.org/observations/36640036</a>   |

|     |                             |                      |            |   |   |            |             |                                                                                                                     |
|-----|-----------------------------|----------------------|------------|---|---|------------|-------------|---------------------------------------------------------------------------------------------------------------------|
| 161 | <i>Spilopelia chinensis</i> | Eastern Spotted Dove | 2017/6/22  | 5 | 0 | 6.98278610 | 80.42374134 | <a href="https://www.inaturalist.org/observations/6870245">https://www.inaturalist.org/observations/6870245</a>     |
| 162 | <i>Spilopelia chinensis</i> | Eastern Spotted Dove | 2021/9/19  | 4 | 0 | 6.98515215 | 80.87780938 | <a href="https://www.inaturalist.org/observations/95411287">https://www.inaturalist.org/observations/95411287</a>   |
| 163 | <i>Spilopelia chinensis</i> | Eastern Spotted Dove | 2015/1/15  | 3 | 0 | 6.98654700 | 80.42404200 | <a href="https://www.inaturalist.org/observations/35084692">https://www.inaturalist.org/observations/35084692</a>   |
| 164 | <i>Spilopelia chinensis</i> | Eastern Spotted Dove | 2018/10/10 | 4 | 0 | 7.00013667 | 79.86842167 | <a href="https://www.inaturalist.org/observations/67193173">https://www.inaturalist.org/observations/67193173</a>   |
| 165 | <i>Spilopelia chinensis</i> | Eastern Spotted Dove | 2020/4/20  | 5 | 0 | 7.06679840 | 79.90409320 | <a href="https://www.inaturalist.org/observations/42735219">https://www.inaturalist.org/observations/42735219</a>   |
| 166 | <i>Spilopelia chinensis</i> | Eastern Spotted Dove | 2021/5/12  | 3 | 0 | 7.06679840 | 79.90409320 | <a href="https://www.inaturalist.org/observations/102456837">https://www.inaturalist.org/observations/102456837</a> |
| 167 | <i>Spilopelia chinensis</i> | Eastern Spotted Dove | 2022/5/29  | 5 | 0 | 7.06679840 | 79.90409320 | <a href="https://www.inaturalist.org/observations/119963070">https://www.inaturalist.org/observations/119963070</a> |
| 168 | <i>Spilopelia chinensis</i> | Eastern Spotted Dove | 2019/4/5   | 2 | 0 | 7.15338200 | 80.03156400 | <a href="https://www.inaturalist.org/observations/22186762">https://www.inaturalist.org/observations/22186762</a>   |
| 169 | <i>Spilopelia chinensis</i> | Eastern Spotted Dove | 2019/7/9   | 6 | 0 | 7.21444927 | 80.78309331 | <a href="https://www.inaturalist.org/observations/62040735">https://www.inaturalist.org/observations/62040735</a>   |
| 170 | <i>Spilopelia chinensis</i> | Eastern Spotted Dove | 2019/4/23  | 2 | 0 | 7.22534700 | 80.53311100 | <a href="https://www.inaturalist.org/observations/22982384">https://www.inaturalist.org/observations/22982384</a>   |
| 171 | <i>Spilopelia chinensis</i> | Eastern Spotted Dove | 2020/2/10  | 3 | 0 | 7.26305031 | 80.60792300 | <a href="https://www.inaturalist.org/observations/39424819">https://www.inaturalist.org/observations/39424819</a>   |
| 172 | <i>Spilopelia chinensis</i> | Eastern Spotted Dove | 2019/4/6   | 3 | 0 | 7.26343163 | 80.59625110 | <a href="https://www.inaturalist.org/observations/22773290">https://www.inaturalist.org/observations/22773290</a>   |
| 173 | <i>Spilopelia chinensis</i> | Eastern Spotted Dove | 2017/7/2   | 5 | 0 | 7.26521900 | 80.58611565 | <a href="https://www.inaturalist.org/observations/37120093">https://www.inaturalist.org/observations/37120093</a>   |
| 174 | <i>Spilopelia chinensis</i> | Eastern Spotted Dove | 2019/4/17  | 4 | 0 | 7.26605060 | 80.59470060 | <a href="https://www.inaturalist.org/observations/22989523">https://www.inaturalist.org/observations/22989523</a>   |
| 175 | <i>Spilopelia chinensis</i> | Eastern Spotted Dove | 2018/12/14 | 4 | 0 | 7.26797481 | 80.59464635 | <a href="https://www.inaturalist.org/observations/19568130">https://www.inaturalist.org/observations/19568130</a>   |
| 176 | <i>Spilopelia chinensis</i> | Eastern Spotted Dove | 2019/12/24 | 3 | 0 | 7.26885667 | 80.59538833 | <a href="https://www.inaturalist.org/observations/37193763">https://www.inaturalist.org/observations/37193763</a>   |
| 177 | <i>Spilopelia chinensis</i> | Eastern Spotted Dove | 2020/2/11  | 3 | 0 | 7.26903524 | 80.59586895 | <a href="https://www.inaturalist.org/observations/39425292">https://www.inaturalist.org/observations/39425292</a>   |
| 178 | <i>Spilopelia chinensis</i> | Eastern Spotted Dove | 2022/2/2   | 1 | 0 | 7.26976052 | 80.59663008 | <a href="https://www.inaturalist.org/observations/106520170">https://www.inaturalist.org/observations/106520170</a> |
| 179 | <i>Spilopelia chinensis</i> | Eastern Spotted Dove | 2017/7/7   | 2 | 0 | 7.27195860 | 80.59533940 | <a href="https://www.inaturalist.org/observations/11672830">https://www.inaturalist.org/observations/11672830</a>   |
| 180 | <i>Spilopelia chinensis</i> | Eastern Spotted Dove | 2017/7/7   | 3 | 0 | 7.28597528 | 80.62884168 | <a href="https://www.inaturalist.org/observations/40832431">https://www.inaturalist.org/observations/40832431</a>   |
| 181 | <i>Spilopelia chinensis</i> | Eastern Spotted Dove | 2013/4/16  | 4 | 0 | 7.28955507 | 80.64567672 | <a href="https://www.inaturalist.org/observations/97041700">https://www.inaturalist.org/observations/97041700</a>   |
| 182 | <i>Spilopelia chinensis</i> | Eastern Spotted Dove | 2014/3/4   | 4 | 0 | 7.29057150 | 80.63372620 | <a href="https://www.inaturalist.org/observations/39241101">https://www.inaturalist.org/observations/39241101</a>   |
| 183 | <i>Spilopelia chinensis</i> | Eastern Spotted Dove | 2018/10/27 | 4 | 0 | 7.29244862 | 79.84277656 | <a href="https://www.inaturalist.org/observations/18355031">https://www.inaturalist.org/observations/18355031</a>   |

|     |                             |                      |            |   |   |            |             |                                                                                                                     |
|-----|-----------------------------|----------------------|------------|---|---|------------|-------------|---------------------------------------------------------------------------------------------------------------------|
| 184 | <i>Spilopelia chinensis</i> | Eastern Spotted Dove | 2018/11/21 | 4 | 0 | 7.29530810 | 80.66321030 | <a href="https://www.inaturalist.org/observations/52446277">https://www.inaturalist.org/observations/52446277</a>   |
| 185 | <i>Spilopelia chinensis</i> | Eastern Spotted Dove | 2021/12/16 | 2 | 0 | 7.29746303 | 79.88218792 | <a href="https://www.inaturalist.org/observations/103134517">https://www.inaturalist.org/observations/103134517</a> |
| 186 | <i>Spilopelia chinensis</i> | Eastern Spotted Dove | 2019/12/28 | 4 | 0 | 7.30559132 | 80.62346564 | <a href="https://www.inaturalist.org/observations/37051863">https://www.inaturalist.org/observations/37051863</a>   |
| 187 | <i>Spilopelia chinensis</i> | Eastern Spotted Dove | 2019/4/22  | 2 | 0 | 7.30684500 | 80.73315900 | <a href="https://www.inaturalist.org/observations/22990334">https://www.inaturalist.org/observations/22990334</a>   |
| 188 | <i>Spilopelia chinensis</i> | Eastern Spotted Dove | 2021/12/25 | 1 | 0 | 7.31260158 | 80.66383995 | <a href="https://www.inaturalist.org/observations/103636453">https://www.inaturalist.org/observations/103636453</a> |
| 189 | <i>Spilopelia chinensis</i> | Eastern Spotted Dove | 2022/2/4   | 1 | 0 | 7.31261489 | 80.66390432 | <a href="https://www.inaturalist.org/observations/106177659">https://www.inaturalist.org/observations/106177659</a> |
| 190 | <i>Spilopelia chinensis</i> | Eastern Spotted Dove | 2021/12/25 | 2 | 0 | 7.31265080 | 80.66382151 | <a href="https://www.inaturalist.org/observations/103718086">https://www.inaturalist.org/observations/103718086</a> |
| 191 | <i>Spilopelia chinensis</i> | Eastern Spotted Dove | 2019/5/18  | 3 | 0 | 7.31266653 | 80.66381395 | <a href="https://www.inaturalist.org/observations/29313414">https://www.inaturalist.org/observations/29313414</a>   |
| 192 | <i>Spilopelia chinensis</i> | Eastern Spotted Dove | 2022/7/6   | 3 | 0 | 7.34061830 | 79.84823082 | <a href="https://www.inaturalist.org/observations/125019621">https://www.inaturalist.org/observations/125019621</a> |
| 193 | <i>Spilopelia chinensis</i> | Eastern Spotted Dove | 2022/7/8   | 4 | 0 | 7.34936171 | 79.83527675 | <a href="https://www.inaturalist.org/observations/125398539">https://www.inaturalist.org/observations/125398539</a> |
| 194 | <i>Spilopelia chinensis</i> | Eastern Spotted Dove | 2019/12/29 | 4 | 0 | 7.39313225 | 80.72407551 | <a href="https://www.inaturalist.org/observations/37294899">https://www.inaturalist.org/observations/37294899</a>   |
| 195 | <i>Spilopelia chinensis</i> | Eastern Spotted Dove | 2019/12/31 | 3 | 0 | 7.39320063 | 80.72405115 | <a href="https://www.inaturalist.org/observations/37294906">https://www.inaturalist.org/observations/37294906</a>   |
| 196 | <i>Spilopelia chinensis</i> | Eastern Spotted Dove | 2022/6/28  | 4 | 0 | 7.47792896 | 80.32702951 | <a href="https://www.inaturalist.org/observations/123856676">https://www.inaturalist.org/observations/123856676</a> |
| 197 | <i>Spilopelia chinensis</i> | Eastern Spotted Dove | 2022/7/10  | 2 | 0 | 7.68441194 | 79.92579695 | <a href="https://www.inaturalist.org/observations/125744883">https://www.inaturalist.org/observations/125744883</a> |
| 198 | <i>Spilopelia chinensis</i> | Eastern Spotted Dove | 2019/4/28  | 2 | 0 | 7.71000700 | 80.24504800 | <a href="https://www.inaturalist.org/observations/24170045">https://www.inaturalist.org/observations/24170045</a>   |
| 199 | <i>Spilopelia chinensis</i> | Eastern Spotted Dove | 2021/10/24 | 2 | 0 | 7.79911724 | 80.80455668 | <a href="https://www.inaturalist.org/observations/99186254">https://www.inaturalist.org/observations/99186254</a>   |
| 200 | <i>Spilopelia chinensis</i> | Eastern Spotted Dove | 2017/11/27 | 4 | 0 | 7.87305400 | 80.77179700 | <a href="https://www.inaturalist.org/observations/9951459">https://www.inaturalist.org/observations/9951459</a>     |
| 201 | <i>Spilopelia chinensis</i> | Eastern Spotted Dove | 2017/11/29 | 4 | 0 | 7.87305400 | 80.77179700 | <a href="https://www.inaturalist.org/observations/9951568">https://www.inaturalist.org/observations/9951568</a>     |
| 202 | <i>Spilopelia chinensis</i> | Eastern Spotted Dove | 2017/11/29 | 2 | 0 | 7.87305400 | 80.77179700 | <a href="https://www.inaturalist.org/observations/9951570">https://www.inaturalist.org/observations/9951570</a>     |
| 203 | <i>Spilopelia chinensis</i> | Eastern Spotted Dove | 2017/8/7   | 4 | 0 | 7.88756401 | 80.77179685 | <a href="https://www.inaturalist.org/observations/44566311">https://www.inaturalist.org/observations/44566311</a>   |
| 204 | <i>Spilopelia chinensis</i> | Eastern Spotted Dove | 2018/8/12  | 5 | 0 | 7.92848803 | 80.72167656 | <a href="https://www.inaturalist.org/observations/68680934">https://www.inaturalist.org/observations/68680934</a>   |
| 205 | <i>Spilopelia chinensis</i> | Eastern Spotted Dove | 2019/9/6   | 4 | 0 | 7.93169333 | 80.01829158 | <a href="https://www.inaturalist.org/observations/32899331">https://www.inaturalist.org/observations/32899331</a>   |
| 206 | <i>Spilopelia chinensis</i> | Eastern Spotted Dove | 2019/8/28  | 2 | 0 | 7.93606963 | 80.71342561 | <a href="https://www.inaturalist.org/observations/38547937">https://www.inaturalist.org/observations/38547937</a>   |

|     |                             |                      |            |   |   |            |             |                                                                                                                     |
|-----|-----------------------------|----------------------|------------|---|---|------------|-------------|---------------------------------------------------------------------------------------------------------------------|
| 207 | <i>Spilopelia chinensis</i> | Eastern Spotted Dove | 2019/8/27  | 3 | 0 | 7.93986146 | 80.72236542 | <a href="https://www.inaturalist.org/observations/37646496">https://www.inaturalist.org/observations/37646496</a>   |
| 208 | <i>Spilopelia chinensis</i> | Eastern Spotted Dove | 2019/8/29  | 3 | 0 | 7.94074375 | 80.72161272 | <a href="https://www.inaturalist.org/observations/38579922">https://www.inaturalist.org/observations/38579922</a>   |
| 209 | <i>Spilopelia chinensis</i> | Eastern Spotted Dove | 2020/1/21  | 0 | 0 | 7.95027309 | 80.74905591 | <a href="https://www.inaturalist.org/observations/38806291">https://www.inaturalist.org/observations/38806291</a>   |
| 210 | <i>Spilopelia chinensis</i> | Eastern Spotted Dove | 2022/3/12  | 1 | 0 | 7.95080228 | 80.75952857 | <a href="https://www.inaturalist.org/observations/109821202">https://www.inaturalist.org/observations/109821202</a> |
| 211 | <i>Spilopelia chinensis</i> | Eastern Spotted Dove | 2012/8/28  | 5 | 0 | 7.95183000 | 80.76187100 | <a href="https://www.inaturalist.org/observations/25933817">https://www.inaturalist.org/observations/25933817</a>   |
| 212 | <i>Spilopelia chinensis</i> | Eastern Spotted Dove | 2021/8/9   | 3 | 0 | 7.95308690 | 80.48413250 | <a href="https://www.inaturalist.org/observations/91718121">https://www.inaturalist.org/observations/91718121</a>   |
| 213 | <i>Spilopelia chinensis</i> | Eastern Spotted Dove | 2010/4/29  | 3 | 0 | 7.95410800 | 80.75469800 | <a href="https://www.inaturalist.org/observations/134848413">https://www.inaturalist.org/observations/134848413</a> |
| 214 | <i>Spilopelia chinensis</i> | Eastern Spotted Dove | 2020/1/26  | 5 | 0 | 7.95608031 | 80.75367071 | <a href="https://www.inaturalist.org/observations/39528338">https://www.inaturalist.org/observations/39528338</a>   |
| 215 | <i>Spilopelia chinensis</i> | Eastern Spotted Dove | 2012/12/25 | 6 | 0 | 7.95672721 | 80.75886726 | <a href="http://www.inaturalist.org/observations/183274">http://www.inaturalist.org/observations/183274</a>         |
| 216 | <i>Spilopelia chinensis</i> | Eastern Spotted Dove | 2016/1/19  | 5 | 0 | 7.95811600 | 81.00554500 | <a href="http://www.inaturalist.org/observations/2969420">http://www.inaturalist.org/observations/2969420</a>       |
| 217 | <i>Spilopelia chinensis</i> | Eastern Spotted Dove | 2020/2/7   | 2 | 0 | 7.99457500 | 80.73264000 | <a href="https://www.inaturalist.org/observations/39243513">https://www.inaturalist.org/observations/39243513</a>   |
| 218 | <i>Spilopelia chinensis</i> | Eastern Spotted Dove | 2016/3/28  | 4 | 0 | 7.99975028 | 80.74644194 | <a href="https://www.inaturalist.org/observations/127139812">https://www.inaturalist.org/observations/127139812</a> |
| 219 | <i>Spilopelia chinensis</i> | Eastern Spotted Dove | 2014/1/22  | 2 | 0 | 8.02700528 | 80.75095374 | <a href="https://www.inaturalist.org/observations/92594207">https://www.inaturalist.org/observations/92594207</a>   |
| 220 | <i>Spilopelia chinensis</i> | Eastern Spotted Dove | 2016/9/13  | 3 | 0 | 8.03298297 | 80.82443252 | <a href="https://www.inaturalist.org/observations/100476606">https://www.inaturalist.org/observations/100476606</a> |
| 221 | <i>Spilopelia chinensis</i> | Eastern Spotted Dove | 2019/4/12  | 3 | 0 | 8.03441100 | 80.90706500 | <a href="https://www.inaturalist.org/observations/22384724">https://www.inaturalist.org/observations/22384724</a>   |
| 222 | <i>Spilopelia chinensis</i> | Eastern Spotted Dove | 2019/7/30  | 3 | 0 | 8.04100550 | 79.71232000 | <a href="https://www.inaturalist.org/observations/29836479">https://www.inaturalist.org/observations/29836479</a>   |
| 223 | <i>Spilopelia chinensis</i> | Eastern Spotted Dove | 2019/7/28  | 1 | 0 | 8.04124667 | 79.71228667 | <a href="https://www.inaturalist.org/observations/29910028">https://www.inaturalist.org/observations/29910028</a>   |
| 224 | <i>Spilopelia chinensis</i> | Eastern Spotted Dove | 2019/4/11  | 5 | 0 | 8.12391300 | 79.70800900 | <a href="https://www.inaturalist.org/observations/22320258">https://www.inaturalist.org/observations/22320258</a>   |
| 225 | <i>Spilopelia chinensis</i> | Eastern Spotted Dove | 2015/11/7  | 6 | 0 | 8.16152787 | 80.91296138 | <a href="https://www.inaturalist.org/observations/63261120">https://www.inaturalist.org/observations/63261120</a>   |
| 226 | <i>Spilopelia chinensis</i> | Eastern Spotted Dove | 2020/2/3   | 1 | 0 | 8.20802833 | 80.07042333 | <a href="https://www.inaturalist.org/observations/39206832">https://www.inaturalist.org/observations/39206832</a>   |
| 227 | <i>Spilopelia chinensis</i> | Eastern Spotted Dove | 2020/2/5   | 2 | 0 | 8.20961000 | 80.07441833 | <a href="https://www.inaturalist.org/observations/39242241">https://www.inaturalist.org/observations/39242241</a>   |
| 228 | <i>Spilopelia chinensis</i> | Eastern Spotted Dove | 2021/11/10 | 2 | 0 | 8.21746076 | 77.44944949 | <a href="https://www.inaturalist.org/observations/104865078">https://www.inaturalist.org/observations/104865078</a> |
| 229 | <i>Spilopelia chinensis</i> | Eastern Spotted Dove | 2018/6/13  | 2 | 0 | 8.21794281 | 77.40831140 | <a href="https://www.inaturalist.org/observations/135099708">https://www.inaturalist.org/observations/135099708</a> |

|     |                             |                      |            |   |   |            |             |                                                                                                                     |
|-----|-----------------------------|----------------------|------------|---|---|------------|-------------|---------------------------------------------------------------------------------------------------------------------|
| 230 | <i>Spilopelia chinensis</i> | Eastern Spotted Dove | 2021/12/5  | 2 | 0 | 8.22188889 | 77.57524609 | <a href="https://www.inaturalist.org/observations/104167103">https://www.inaturalist.org/observations/104167103</a> |
| 231 | <i>Spilopelia chinensis</i> | Eastern Spotted Dove | 2021/12/5  | 2 | 0 | 8.22922137 | 77.55943419 | <a href="https://www.inaturalist.org/observations/104167104">https://www.inaturalist.org/observations/104167104</a> |
| 232 | <i>Spilopelia chinensis</i> | Eastern Spotted Dove | 2021/11/10 | 2 | 0 | 8.22946396 | 77.45999953 | <a href="https://www.inaturalist.org/observations/104865071">https://www.inaturalist.org/observations/104865071</a> |
| 233 | <i>Spilopelia chinensis</i> | Eastern Spotted Dove | 2021/12/5  | 2 | 0 | 8.26312017 | 77.45656672 | <a href="https://www.inaturalist.org/observations/104167102">https://www.inaturalist.org/observations/104167102</a> |
| 234 | <i>Spilopelia chinensis</i> | Eastern Spotted Dove | 2021/11/9  | 1 | 0 | 8.27456406 | 77.48428570 | <a href="https://www.inaturalist.org/observations/105084457">https://www.inaturalist.org/observations/105084457</a> |
| 235 | <i>Spilopelia chinensis</i> | Eastern Spotted Dove | 2021/12/6  | 2 | 0 | 8.30225570 | 77.55617174 | <a href="https://www.inaturalist.org/observations/103956039">https://www.inaturalist.org/observations/103956039</a> |
| 236 | <i>Spilopelia chinensis</i> | Eastern Spotted Dove | 2019/3/2   | 2 | 0 | 8.32763000 | 80.37745000 | <a href="https://www.inaturalist.org/observations/20866297">https://www.inaturalist.org/observations/20866297</a>   |
| 237 | <i>Spilopelia chinensis</i> | Eastern Spotted Dove | 2020/2/4   | 1 | 0 | 8.33318500 | 80.13050000 | <a href="https://www.inaturalist.org/observations/39205801">https://www.inaturalist.org/observations/39205801</a>   |
| 238 | <i>Spilopelia chinensis</i> | Eastern Spotted Dove | 2019/3/2   | 3 | 0 | 8.33472167 | 80.39051167 | <a href="https://www.inaturalist.org/observations/20928693">https://www.inaturalist.org/observations/20928693</a>   |
| 239 | <i>Spilopelia chinensis</i> | Eastern Spotted Dove | 2019/2/15  | 3 | 0 | 8.34870695 | 80.40429913 | <a href="https://www.inaturalist.org/observations/20733712">https://www.inaturalist.org/observations/20733712</a>   |
| 240 | <i>Spilopelia chinensis</i> | Eastern Spotted Dove | 2018/12/2  | 5 | 0 | 8.36041766 | 80.10764256 | <a href="https://www.inaturalist.org/observations/108580515">https://www.inaturalist.org/observations/108580515</a> |
| 241 | <i>Spilopelia chinensis</i> | Eastern Spotted Dove | 2019/4/25  | 3 | 0 | 8.36229700 | 80.41896200 | <a href="https://www.inaturalist.org/observations/23105032">https://www.inaturalist.org/observations/23105032</a>   |
| 242 | <i>Spilopelia chinensis</i> | Eastern Spotted Dove | 2021/12/24 | 1 | 0 | 8.37647059 | 78.05625200 | <a href="https://www.inaturalist.org/observations/104153017">https://www.inaturalist.org/observations/104153017</a> |
| 243 | <i>Spilopelia chinensis</i> | Eastern Spotted Dove | 2022/3/26  | 4 | 0 | 8.38833300 | 77.52138900 | <a href="https://www.inaturalist.org/observations/109844670">https://www.inaturalist.org/observations/109844670</a> |
| 244 | <i>Spilopelia chinensis</i> | Eastern Spotted Dove | 2021/10/19 | 2 | 0 | 8.44482054 | 77.50892826 | <a href="https://www.inaturalist.org/observations/102859016">https://www.inaturalist.org/observations/102859016</a> |
| 245 | <i>Spilopelia chinensis</i> | Eastern Spotted Dove | 2022/1/28  | 1 | 0 | 8.45637230 | 80.04763830 | <a href="https://www.inaturalist.org/observations/107418491">https://www.inaturalist.org/observations/107418491</a> |
| 246 | <i>Spilopelia chinensis</i> | Eastern Spotted Dove | 2019/12/18 | 5 | 0 | 8.47767467 | 80.13976979 | <a href="https://www.inaturalist.org/observations/69579871">https://www.inaturalist.org/observations/69579871</a>   |
| 247 | <i>Spilopelia chinensis</i> | Eastern Spotted Dove | 2022/2/12  | 1 | 0 | 8.49590833 | 77.75911000 | <a href="https://www.inaturalist.org/observations/106982270">https://www.inaturalist.org/observations/106982270</a> |
| 248 | <i>Spilopelia chinensis</i> | Eastern Spotted Dove | 2022/2/12  | 1 | 0 | 8.49593667 | 77.75913833 | <a href="https://www.inaturalist.org/observations/106982273">https://www.inaturalist.org/observations/106982273</a> |
| 249 | <i>Spilopelia chinensis</i> | Eastern Spotted Dove | 2017/11/14 | 2 | 0 | 8.49622960 | 77.75593700 | <a href="https://www.inaturalist.org/observations/92338200">https://www.inaturalist.org/observations/92338200</a>   |
| 250 | <i>Spilopelia chinensis</i> | Eastern Spotted Dove | 2016/2/5   | 5 | 0 | 8.50883014 | 80.54077807 | <a href="https://www.inaturalist.org/observations/33178927">https://www.inaturalist.org/observations/33178927</a>   |
| 251 | <i>Spilopelia chinensis</i> | Eastern Spotted Dove | 2021/11/12 | 4 | 0 | 8.55916003 | 77.46961960 | <a href="https://www.inaturalist.org/observations/104509437">https://www.inaturalist.org/observations/104509437</a> |
| 252 | <i>Spilopelia chinensis</i> | Eastern Spotted Dove | 2020/5/14  | 3 | 0 | 8.57546817 | 77.02952553 | <a href="https://www.inaturalist.org/observations/81547789">https://www.inaturalist.org/observations/81547789</a>   |

|     |                             |                      |            |   |   |            |             |                                                                                                                     |
|-----|-----------------------------|----------------------|------------|---|---|------------|-------------|---------------------------------------------------------------------------------------------------------------------|
| 253 | <i>Spilopelia chinensis</i> | Eastern Spotted Dove | 2021/11/12 | 4 | 0 | 8.58137654 | 77.51437398 | <a href="https://www.inaturalist.org/observations/104509438">https://www.inaturalist.org/observations/104509438</a> |
| 254 | <i>Spilopelia chinensis</i> | Eastern Spotted Dove | 2021/1/23  | 0 | 0 | 8.59184197 | 81.18810654 | <a href="https://www.inaturalist.org/observations/68539400">https://www.inaturalist.org/observations/68539400</a>   |
| 255 | <i>Spilopelia chinensis</i> | Eastern Spotted Dove | 2019/11/16 | 5 | 0 | 8.63204447 | 76.92037437 | <a href="https://www.inaturalist.org/observations/59487280">https://www.inaturalist.org/observations/59487280</a>   |
| 256 | <i>Spilopelia chinensis</i> | Eastern Spotted Dove | 2019/12/24 | 1 | 0 | 8.65577000 | 77.44803200 | <a href="https://www.inaturalist.org/observations/56766344">https://www.inaturalist.org/observations/56766344</a>   |
| 257 | <i>Spilopelia chinensis</i> | Eastern Spotted Dove | 2020/8/27  | 2 | 0 | 8.65577000 | 77.44803200 | <a href="https://www.inaturalist.org/observations/58132925">https://www.inaturalist.org/observations/58132925</a>   |
| 258 | <i>Spilopelia chinensis</i> | Eastern Spotted Dove | 2011/8/2   | 5 | 0 | 8.65616235 | 77.44776821 | <a href="https://www.inaturalist.org/observations/66742950">https://www.inaturalist.org/observations/66742950</a>   |
| 259 | <i>Spilopelia chinensis</i> | Eastern Spotted Dove | 2018/12/2  | 2 | 0 | 8.65777711 | 77.44755741 | <a href="https://www.inaturalist.org/observations/63620919">https://www.inaturalist.org/observations/63620919</a>   |
| 260 | <i>Spilopelia chinensis</i> | Eastern Spotted Dove | 2021/6/19  | 1 | 0 | 8.65948037 | 77.40341715 | <a href="https://www.inaturalist.org/observations/84734324">https://www.inaturalist.org/observations/84734324</a>   |
| 261 | <i>Spilopelia chinensis</i> | Eastern Spotted Dove | 2014/9/29  | 2 | 0 | 8.69969770 | 77.63132000 | <a href="https://www.inaturalist.org/observations/23914844">https://www.inaturalist.org/observations/23914844</a>   |
| 262 | <i>Spilopelia chinensis</i> | Eastern Spotted Dove | 2019/9/19  | 5 | 0 | 8.70518112 | 77.73418427 | <a href="https://www.inaturalist.org/observations/32988947">https://www.inaturalist.org/observations/32988947</a>   |
| 263 | <i>Spilopelia chinensis</i> | Eastern Spotted Dove | 2019/8/26  | 3 | 0 | 8.71182948 | 81.18337277 | <a href="https://www.inaturalist.org/observations/36542666">https://www.inaturalist.org/observations/36542666</a>   |
| 264 | <i>Spilopelia chinensis</i> | Eastern Spotted Dove | 2021/10/31 | 2 | 0 | 8.72714200 | 77.73027500 | <a href="https://www.inaturalist.org/observations/102397621">https://www.inaturalist.org/observations/102397621</a> |
| 265 | <i>Spilopelia chinensis</i> | Eastern Spotted Dove | 2022/7/5   | 3 | 0 | 8.78171805 | 76.95558946 | <a href="https://www.inaturalist.org/observations/127968722">https://www.inaturalist.org/observations/127968722</a> |
| 266 | <i>Spilopelia chinensis</i> | Eastern Spotted Dove | 2011/9/7   | 3 | 0 | 8.78406613 | 77.32605083 | <a href="https://www.inaturalist.org/observations/66659978">https://www.inaturalist.org/observations/66659978</a>   |
| 267 | <i>Spilopelia chinensis</i> | Eastern Spotted Dove | 2018/1/20  | 3 | 0 | 8.95867959 | 77.14746329 | <a href="https://www.inaturalist.org/observations/65983835">https://www.inaturalist.org/observations/65983835</a>   |
| 268 | <i>Spilopelia chinensis</i> | Eastern Spotted Dove | 2022/3/2   | 4 | 0 | 8.96151150 | 77.03464350 | <a href="https://www.inaturalist.org/observations/111746858">https://www.inaturalist.org/observations/111746858</a> |
| 269 | <i>Spilopelia chinensis</i> | Eastern Spotted Dove | 2014/1/28  | 7 | 0 | 8.97506300 | 77.14944100 | <a href="http://www.inaturalist.org/observations/520156">http://www.inaturalist.org/observations/520156</a>         |
| 270 | <i>Spilopelia chinensis</i> | Eastern Spotted Dove | 2022/2/5   | 2 | 0 | 9.01330607 | 76.66644484 | <a href="https://www.inaturalist.org/observations/106829268">https://www.inaturalist.org/observations/106829268</a> |
| 271 | <i>Spilopelia chinensis</i> | Eastern Spotted Dove | 2020/1/22  | 1 | 0 | 9.01761170 | 76.92609360 | <a href="https://www.inaturalist.org/observations/42019478">https://www.inaturalist.org/observations/42019478</a>   |
| 272 | <i>Spilopelia chinensis</i> | Eastern Spotted Dove | 2021/12/17 | 4 | 0 | 9.01761170 | 76.92609360 | <a href="https://www.inaturalist.org/observations/103241421">https://www.inaturalist.org/observations/103241421</a> |
| 273 | <i>Spilopelia chinensis</i> | Eastern Spotted Dove | 2021/9/3   | 3 | 0 | 9.17041874 | 76.55848694 | <a href="https://www.inaturalist.org/observations/95231809">https://www.inaturalist.org/observations/95231809</a>   |
| 274 | <i>Spilopelia chinensis</i> | Eastern Spotted Dove | 2019/4/14  | 4 | 0 | 9.21122903 | 76.65644376 | <a href="https://www.inaturalist.org/observations/33358901">https://www.inaturalist.org/observations/33358901</a>   |
| 275 | <i>Spilopelia chinensis</i> | Eastern Spotted Dove | 2016/12/3  | 5 | 0 | 9.46215500 | 77.23684740 | <a href="https://www.inaturalist.org/observations/33246784">https://www.inaturalist.org/observations/33246784</a>   |



|     |                             |                      |            |   |   |            |             |                                                                                                                     |
|-----|-----------------------------|----------------------|------------|---|---|------------|-------------|---------------------------------------------------------------------------------------------------------------------|
| 276 | <i>Spilopelia chinensis</i> | Eastern Spotted Dove | 2021/3/1   | 3 | 0 | 9.49368750 | 77.48022980 | <a href="https://www.inaturalist.org/observations/71935032">https://www.inaturalist.org/observations/71935032</a>   |
| 277 | <i>Spilopelia chinensis</i> | Eastern Spotted Dove | 2021/3/1   | 2 | 0 | 9.49368750 | 77.48022980 | <a href="https://www.inaturalist.org/observations/71938092">https://www.inaturalist.org/observations/71938092</a>   |
| 278 | <i>Spilopelia chinensis</i> | Eastern Spotted Dove | 2015/1/27  | 4 | 0 | 9.51498100 | 77.18191600 | <a href="https://www.inaturalist.org/observations/35239521">https://www.inaturalist.org/observations/35239521</a>   |
| 279 | <i>Spilopelia chinensis</i> | Eastern Spotted Dove | 2018/7/28  | 1 | 0 | 9.57682514 | 77.17989349 | <a href="https://www.inaturalist.org/observations/55931112">https://www.inaturalist.org/observations/55931112</a>   |
| 280 | <i>Spilopelia chinensis</i> | Eastern Spotted Dove | 2012/8/14  | 4 | 0 | 9.58391637 | 77.11829323 | <a href="https://www.inaturalist.org/observations/98477822">https://www.inaturalist.org/observations/98477822</a>   |
| 281 | <i>Spilopelia chinensis</i> | Eastern Spotted Dove | 2018/5/11  | 2 | 0 | 9.59454362 | 77.16532329 | <a href="https://www.inaturalist.org/observations/42821636">https://www.inaturalist.org/observations/42821636</a>   |
| 282 | <i>Spilopelia chinensis</i> | Eastern Spotted Dove | 2022/5/12  | 3 | 0 | 9.60310828 | 77.16145802 | <a href="https://www.inaturalist.org/observations/118884283">https://www.inaturalist.org/observations/118884283</a> |
| 283 | <i>Spilopelia chinensis</i> | Eastern Spotted Dove | 2020/1/24  | 3 | 0 | 9.60468091 | 77.17219293 | <a href="https://www.inaturalist.org/observations/59451167">https://www.inaturalist.org/observations/59451167</a>   |
| 284 | <i>Spilopelia chinensis</i> | Eastern Spotted Dove | 2020/1/24  | 3 | 0 | 9.60471129 | 77.17202757 | <a href="https://www.inaturalist.org/observations/59451148">https://www.inaturalist.org/observations/59451148</a>   |
| 285 | <i>Spilopelia chinensis</i> | Eastern Spotted Dove | 2021/4/4   | 3 | 0 | 9.64575218 | 77.17881747 | <a href="https://www.inaturalist.org/observations/73600023">https://www.inaturalist.org/observations/73600023</a>   |
| 286 | <i>Spilopelia chinensis</i> | Eastern Spotted Dove | 2019/6/25  | 3 | 0 | 9.65635000 | 77.62782167 | <a href="https://www.inaturalist.org/observations/27611020">https://www.inaturalist.org/observations/27611020</a>   |
| 287 | <i>Spilopelia chinensis</i> | Eastern Spotted Dove | 2015/12/26 | 2 | 0 | 9.81380760 | 76.92973540 | <a href="https://www.inaturalist.org/observations/91676775">https://www.inaturalist.org/observations/91676775</a>   |
| 288 | <i>Spilopelia chinensis</i> | Eastern Spotted Dove | 2022/4/17  | 3 | 0 | 9.83123041 | 76.78898888 | <a href="https://www.inaturalist.org/observations/114303459">https://www.inaturalist.org/observations/114303459</a> |
| 289 | <i>Spilopelia chinensis</i> | Eastern Spotted Dove | 2022/4/16  | 2 | 0 | 9.84003461 | 76.78300106 | <a href="https://www.inaturalist.org/observations/114299900">https://www.inaturalist.org/observations/114299900</a> |
| 290 | <i>Spilopelia chinensis</i> | Eastern Spotted Dove | 2019/5/29  | 2 | 0 | 9.88330103 | 78.07305409 | <a href="https://www.inaturalist.org/observations/60396719">https://www.inaturalist.org/observations/60396719</a>   |
| 291 | <i>Spilopelia chinensis</i> | Eastern Spotted Dove | 2021/7/26  | 2 | 0 | 9.89081268 | 76.69041719 | <a href="https://www.inaturalist.org/observations/88714655">https://www.inaturalist.org/observations/88714655</a>   |
| 292 | <i>Spilopelia chinensis</i> | Eastern Spotted Dove | 2021/8/10  | 1 | 0 | 9.89081268 | 76.69041719 | <a href="https://www.inaturalist.org/observations/91750829">https://www.inaturalist.org/observations/91750829</a>   |
| 293 | <i>Spilopelia chinensis</i> | Eastern Spotted Dove | 2021/9/10  | 3 | 0 | 9.89081268 | 76.69041719 | <a href="https://www.inaturalist.org/observations/94352477">https://www.inaturalist.org/observations/94352477</a>   |
| 294 | <i>Spilopelia chinensis</i> | Eastern Spotted Dove | 2021/9/25  | 1 | 0 | 9.89081268 | 76.69041719 | <a href="https://www.inaturalist.org/observations/96106958">https://www.inaturalist.org/observations/96106958</a>   |
| 295 | <i>Spilopelia chinensis</i> | Eastern Spotted Dove | 2021/10/20 | 3 | 0 | 9.89081268 | 76.69041719 | <a href="https://www.inaturalist.org/observations/98805722">https://www.inaturalist.org/observations/98805722</a>   |
| 296 | <i>Spilopelia chinensis</i> | Eastern Spotted Dove | 2021/11/10 | 3 | 0 | 9.89081268 | 76.69041719 | <a href="https://www.inaturalist.org/observations/100763458">https://www.inaturalist.org/observations/100763458</a> |
| 297 | <i>Spilopelia chinensis</i> | Eastern Spotted Dove | 2022/4/7   | 2 | 0 | 9.89081268 | 76.69041719 | <a href="https://www.inaturalist.org/observations/114273754">https://www.inaturalist.org/observations/114273754</a> |
| 298 | <i>Spilopelia chinensis</i> | Eastern Spotted Dove | 2022/4/19  | 2 | 0 | 9.89081268 | 76.69041719 | <a href="https://www.inaturalist.org/observations/114307668">https://www.inaturalist.org/observations/114307668</a> |

|     |                             |                      |            |   |   |             |             |                                                                                                                     |
|-----|-----------------------------|----------------------|------------|---|---|-------------|-------------|---------------------------------------------------------------------------------------------------------------------|
| 299 | <i>Spilopelia chinensis</i> | Eastern Spotted Dove | 2021/11/26 | 1 | 0 | 9.94155833  | 78.15813333 | <a href="https://www.inaturalist.org/observations/101932547">https://www.inaturalist.org/observations/101932547</a> |
| 300 | <i>Spilopelia chinensis</i> | Eastern Spotted Dove | 2021/1/5   | 4 | 0 | 9.94835159  | 78.14931694 | <a href="https://www.inaturalist.org/observations/67621520">https://www.inaturalist.org/observations/67621520</a>   |
| 301 | <i>Spilopelia chinensis</i> | Eastern Spotted Dove | 2022/3/25  | 2 | 0 | 10.05215922 | 76.33863608 | <a href="https://www.inaturalist.org/observations/110468623">https://www.inaturalist.org/observations/110468623</a> |
| 302 | <i>Spilopelia chinensis</i> | Eastern Spotted Dove | 2020/1/31  | 2 | 0 | 10.05349167 | 76.34194000 | <a href="https://www.inaturalist.org/observations/67019341">https://www.inaturalist.org/observations/67019341</a>   |
| 303 | <i>Spilopelia chinensis</i> | Eastern Spotted Dove | 2014/12/31 | 2 | 0 | 10.05414773 | 77.06824755 | <a href="https://www.inaturalist.org/observations/79699655">https://www.inaturalist.org/observations/79699655</a>   |
| 304 | <i>Spilopelia chinensis</i> | Eastern Spotted Dove | 2022/4/3   | 4 | 0 | 10.06025360 | 77.00739190 | <a href="https://www.inaturalist.org/observations/110418049">https://www.inaturalist.org/observations/110418049</a> |
| 305 | <i>Spilopelia chinensis</i> | Eastern Spotted Dove | 2021/3/1   | 2 | 0 | 10.06120630 | 76.34652816 | <a href="https://www.inaturalist.org/observations/70401194">https://www.inaturalist.org/observations/70401194</a>   |
| 306 | <i>Spilopelia chinensis</i> | Eastern Spotted Dove | 2020/1/28  | 3 | 0 | 10.08732307 | 77.07113081 | <a href="https://www.inaturalist.org/observations/66773424">https://www.inaturalist.org/observations/66773424</a>   |
| 307 | <i>Spilopelia chinensis</i> | Eastern Spotted Dove | 2016/4/17  | 6 | 0 | 10.08893300 | 77.05952500 | <a href="http://www.inaturalist.org/observations/3594665">http://www.inaturalist.org/observations/3594665</a>       |
| 308 | <i>Spilopelia chinensis</i> | Eastern Spotted Dove | 2017/4/1   | 2 | 0 | 10.08893330 | 77.05952480 | <a href="https://www.inaturalist.org/observations/64363248">https://www.inaturalist.org/observations/64363248</a>   |
| 309 | <i>Spilopelia chinensis</i> | Eastern Spotted Dove | 2017/3/30  | 2 | 0 | 10.08893330 | 77.05952480 | <a href="https://www.inaturalist.org/observations/64365106">https://www.inaturalist.org/observations/64365106</a>   |
| 310 | <i>Spilopelia chinensis</i> | Eastern Spotted Dove | 2021/1/31  | 1 | 0 | 10.08897943 | 77.05952469 | <a href="https://www.inaturalist.org/observations/68922144">https://www.inaturalist.org/observations/68922144</a>   |
| 311 | <i>Spilopelia chinensis</i> | Eastern Spotted Dove | 2020/2/7   | 5 | 0 | 10.08980405 | 77.05986946 | <a href="https://www.inaturalist.org/observations/81605845">https://www.inaturalist.org/observations/81605845</a>   |
| 312 | <i>Spilopelia chinensis</i> | Eastern Spotted Dove | 2020/1/26  | 2 | 0 | 10.09031211 | 76.78242894 | <a href="https://www.inaturalist.org/observations/39200897">https://www.inaturalist.org/observations/39200897</a>   |
| 313 | <i>Spilopelia chinensis</i> | Eastern Spotted Dove | 2020/5/12  | 8 | 0 | 10.09379346 | 77.05295563 | <a href="https://www.inaturalist.org/observations/45659613">https://www.inaturalist.org/observations/45659613</a>   |
| 314 | <i>Spilopelia chinensis</i> | Eastern Spotted Dove | 2019/1/26  | 1 | 0 | 10.09489859 | 76.92231587 | <a href="https://www.inaturalist.org/observations/49152745">https://www.inaturalist.org/observations/49152745</a>   |
| 315 | <i>Spilopelia chinensis</i> | Eastern Spotted Dove | 2019/1/27  | 4 | 0 | 10.09522520 | 76.93191555 | <a href="https://www.inaturalist.org/observations/121761011">https://www.inaturalist.org/observations/121761011</a> |
| 316 | <i>Spilopelia chinensis</i> | Eastern Spotted Dove | 2020/12/31 | 4 | 0 | 10.10398010 | 76.70046039 | <a href="https://www.inaturalist.org/observations/129569752">https://www.inaturalist.org/observations/129569752</a> |
| 317 | <i>Spilopelia chinensis</i> | Eastern Spotted Dove | 2018/12/15 | 3 | 0 | 10.10398030 | 76.70046050 | <a href="https://www.inaturalist.org/observations/32153134">https://www.inaturalist.org/observations/32153134</a>   |
| 318 | <i>Spilopelia chinensis</i> | Eastern Spotted Dove | 2020/1/19  | 4 | 0 | 10.10398030 | 76.70046050 | <a href="https://www.inaturalist.org/observations/51566614">https://www.inaturalist.org/observations/51566614</a>   |
| 319 | <i>Spilopelia chinensis</i> | Eastern Spotted Dove | 2019/9/13  | 3 | 0 | 10.11054025 | 77.05457398 | <a href="https://www.inaturalist.org/observations/36405621">https://www.inaturalist.org/observations/36405621</a>   |
| 320 | <i>Spilopelia chinensis</i> | Eastern Spotted Dove | 2020/12/12 | 1 | 0 | 10.11595215 | 76.67348356 | <a href="https://www.inaturalist.org/observations/66516990">https://www.inaturalist.org/observations/66516990</a>   |
| 321 | <i>Spilopelia chinensis</i> | Eastern Spotted Dove | 2020/12/12 | 1 | 0 | 10.11609644 | 76.67469755 | <a href="https://www.inaturalist.org/observations/66996865">https://www.inaturalist.org/observations/66996865</a>   |

|     |                             |                      |            |   |   |             |             |                                                                                                                     |
|-----|-----------------------------|----------------------|------------|---|---|-------------|-------------|---------------------------------------------------------------------------------------------------------------------|
| 322 | <i>Spilopelia chinensis</i> | Eastern Spotted Dove | 2022/5/10  | 4 | 0 | 10.11746540 | 76.67468556 | <a href="https://www.inaturalist.org/observations/117595407">https://www.inaturalist.org/observations/117595407</a> |
| 323 | <i>Spilopelia chinensis</i> | Eastern Spotted Dove | 2020/12/31 | 5 | 0 | 10.12979136 | 76.68711841 | <a href="https://www.inaturalist.org/observations/125054337">https://www.inaturalist.org/observations/125054337</a> |
| 324 | <i>Spilopelia chinensis</i> | Eastern Spotted Dove | 2022/2/12  | 5 | 0 | 10.13022505 | 76.68713752 | <a href="https://www.inaturalist.org/observations/106656304">https://www.inaturalist.org/observations/106656304</a> |
| 325 | <i>Spilopelia chinensis</i> | Eastern Spotted Dove | 2020/2/21  | 2 | 0 | 10.13098780 | 76.24104930 | <a href="https://www.inaturalist.org/observations/41221484">https://www.inaturalist.org/observations/41221484</a>   |
| 326 | <i>Spilopelia chinensis</i> | Eastern Spotted Dove | 2021/3/4   | 4 | 0 | 10.18497500 | 77.25920000 | <a href="https://www.inaturalist.org/observations/70883502">https://www.inaturalist.org/observations/70883502</a>   |
| 327 | <i>Spilopelia chinensis</i> | Eastern Spotted Dove | 2022/9/11  | 2 | 0 | 10.18715861 | 77.25441809 | <a href="https://www.inaturalist.org/observations/136777088">https://www.inaturalist.org/observations/136777088</a> |
| 328 | <i>Spilopelia chinensis</i> | Eastern Spotted Dove | 2022/8/15  | 4 | 0 | 10.19553878 | 76.49679188 | <a href="https://www.inaturalist.org/observations/130948602">https://www.inaturalist.org/observations/130948602</a> |
| 329 | <i>Spilopelia chinensis</i> | Eastern Spotted Dove | 2021/11/7  | 5 | 0 | 10.20606635 | 76.50078937 | <a href="https://www.inaturalist.org/observations/100844677">https://www.inaturalist.org/observations/100844677</a> |
| 330 | <i>Spilopelia chinensis</i> | Eastern Spotted Dove | 2014/1/3   | 2 | 0 | 10.21351920 | 77.19721950 | <a href="https://www.inaturalist.org/observations/48609801">https://www.inaturalist.org/observations/48609801</a>   |
| 331 | <i>Spilopelia chinensis</i> | Eastern Spotted Dove | 2019/3/1   | 2 | 0 | 10.21425843 | 77.48530928 | <a href="https://www.inaturalist.org/observations/21225592">https://www.inaturalist.org/observations/21225592</a>   |
| 332 | <i>Spilopelia chinensis</i> | Eastern Spotted Dove | 2020/2/10  | 0 | 0 | 10.22988667 | 77.49367500 | <a href="https://www.inaturalist.org/observations/38502739">https://www.inaturalist.org/observations/38502739</a>   |
| 333 | <i>Spilopelia chinensis</i> | Eastern Spotted Dove | 2015/6/8   | 3 | 0 | 10.23004080 | 77.49363590 | <a href="https://www.inaturalist.org/observations/22598335">https://www.inaturalist.org/observations/22598335</a>   |
| 334 | <i>Spilopelia chinensis</i> | Eastern Spotted Dove | 2018/5/6   | 5 | 0 | 10.23033140 | 77.48435790 | <a href="https://www.inaturalist.org/observations/12668041">https://www.inaturalist.org/observations/12668041</a>   |
| 335 | <i>Spilopelia chinensis</i> | Eastern Spotted Dove | 2017/7/1   | 3 | 0 | 10.23088455 | 77.49417877 | <a href="https://www.inaturalist.org/observations/20845853">https://www.inaturalist.org/observations/20845853</a>   |
| 336 | <i>Spilopelia chinensis</i> | Eastern Spotted Dove | 2010/3/22  | 1 | 0 | 10.23212102 | 77.49460726 | <a href="https://www.inaturalist.org/observations/93533748">https://www.inaturalist.org/observations/93533748</a>   |
| 337 | <i>Spilopelia chinensis</i> | Eastern Spotted Dove | 2019/3/16  | 4 | 0 | 10.23270306 | 77.45959863 | <a href="https://www.inaturalist.org/observations/64726885">https://www.inaturalist.org/observations/64726885</a>   |
| 338 | <i>Spilopelia chinensis</i> | Eastern Spotted Dove | 2018/8/14  | 6 | 0 | 10.23315949 | 77.49429362 | <a href="https://www.inaturalist.org/observations/15841363">https://www.inaturalist.org/observations/15841363</a>   |
| 339 | <i>Spilopelia chinensis</i> | Eastern Spotted Dove | 2022/4/17  | 3 | 0 | 10.23487186 | 77.48770142 | <a href="https://www.inaturalist.org/observations/111767734">https://www.inaturalist.org/observations/111767734</a> |
| 340 | <i>Spilopelia chinensis</i> | Eastern Spotted Dove | 2020/11/28 | 2 | 0 | 10.23537962 | 77.18615849 | <a href="https://www.inaturalist.org/observations/66173783">https://www.inaturalist.org/observations/66173783</a>   |
| 341 | <i>Spilopelia chinensis</i> | Eastern Spotted Dove | 2019/8/11  | 4 | 0 | 10.23811360 | 77.48918220 | <a href="https://www.inaturalist.org/observations/31532726">https://www.inaturalist.org/observations/31532726</a>   |
| 342 | <i>Spilopelia chinensis</i> | Eastern Spotted Dove | 2016/12/19 | 1 | 0 | 10.23811360 | 77.48918220 | <a href="https://www.inaturalist.org/observations/92319674">https://www.inaturalist.org/observations/92319674</a>   |
| 343 | <i>Spilopelia chinensis</i> | Eastern Spotted Dove | 2019/4/8   | 3 | 0 | 10.26038230 | 77.16759130 | <a href="https://www.inaturalist.org/observations/22191597">https://www.inaturalist.org/observations/22191597</a>   |
| 344 | <i>Spilopelia chinensis</i> | Eastern Spotted Dove | 2020/11/2  | 3 | 0 | 10.26754555 | 77.50030920 | <a href="https://www.inaturalist.org/observations/64029148">https://www.inaturalist.org/observations/64029148</a>   |

|     |                             |                      |            |   |   |             |             |                                                                                                                     |
|-----|-----------------------------|----------------------|------------|---|---|-------------|-------------|---------------------------------------------------------------------------------------------------------------------|
| 345 | <i>Spilopelia chinensis</i> | Eastern Spotted Dove | 2022/7/2   | 2 | 0 | 10.26882500 | 77.15628167 | <a href="https://www.inaturalist.org/observations/126917626">https://www.inaturalist.org/observations/126917626</a> |
| 346 | <i>Spilopelia chinensis</i> | Eastern Spotted Dove | 2021/4/30  | 3 | 0 | 10.27630211 | 77.16136150 | <a href="https://www.inaturalist.org/observations/117098421">https://www.inaturalist.org/observations/117098421</a> |
| 347 | <i>Spilopelia chinensis</i> | Eastern Spotted Dove | 2021/11/9  | 3 | 0 | 10.29247036 | 76.39274865 | <a href="https://www.inaturalist.org/observations/103521661">https://www.inaturalist.org/observations/103521661</a> |
| 348 | <i>Spilopelia chinensis</i> | Eastern Spotted Dove | 2020/10/3  | 3 | 0 | 10.29525960 | 77.36546110 | <a href="https://www.inaturalist.org/observations/62098293">https://www.inaturalist.org/observations/62098293</a>   |
| 349 | <i>Spilopelia chinensis</i> | Eastern Spotted Dove | 2020/10/2  | 3 | 0 | 10.29525960 | 77.36546110 | <a href="https://www.inaturalist.org/observations/62098309">https://www.inaturalist.org/observations/62098309</a>   |
| 350 | <i>Spilopelia chinensis</i> | Eastern Spotted Dove | 2021/12/25 | 1 | 0 | 10.29600337 | 79.81704712 | <a href="https://www.inaturalist.org/observations/103956411">https://www.inaturalist.org/observations/103956411</a> |
| 351 | <i>Spilopelia chinensis</i> | Eastern Spotted Dove | 2021/9/12  | 1 | 0 | 10.29911739 | 79.84560728 | <a href="https://www.inaturalist.org/observations/94714092">https://www.inaturalist.org/observations/94714092</a>   |
| 352 | <i>Spilopelia chinensis</i> | Eastern Spotted Dove | 2021/11/26 | 5 | 0 | 10.30214265 | 76.42738435 | <a href="https://www.inaturalist.org/observations/101949013">https://www.inaturalist.org/observations/101949013</a> |
| 353 | <i>Spilopelia chinensis</i> | Eastern Spotted Dove | 2021/12/31 | 3 | 0 | 10.30214265 | 76.42738435 | <a href="https://www.inaturalist.org/observations/104025514">https://www.inaturalist.org/observations/104025514</a> |
| 354 | <i>Spilopelia chinensis</i> | Eastern Spotted Dove | 2022/1/12  | 4 | 0 | 10.30214265 | 76.42738435 | <a href="https://www.inaturalist.org/observations/104817256">https://www.inaturalist.org/observations/104817256</a> |
| 355 | <i>Spilopelia chinensis</i> | Eastern Spotted Dove | 2022/2/25  | 5 | 0 | 10.30214265 | 76.42738435 | <a href="https://www.inaturalist.org/observations/107414818">https://www.inaturalist.org/observations/107414818</a> |
| 356 | <i>Spilopelia chinensis</i> | Eastern Spotted Dove | 2022/2/27  | 5 | 0 | 10.30214265 | 76.42738435 | <a href="https://www.inaturalist.org/observations/107550901">https://www.inaturalist.org/observations/107550901</a> |
| 357 | <i>Spilopelia chinensis</i> | Eastern Spotted Dove | 2022/3/7   | 4 | 0 | 10.30214265 | 76.42738435 | <a href="https://www.inaturalist.org/observations/108105666">https://www.inaturalist.org/observations/108105666</a> |
| 358 | <i>Spilopelia chinensis</i> | Eastern Spotted Dove | 2022/9/14  | 2 | 0 | 10.30219148 | 76.42738435 | <a href="https://www.inaturalist.org/observations/135078926">https://www.inaturalist.org/observations/135078926</a> |
| 359 | <i>Spilopelia chinensis</i> | Eastern Spotted Dove | 2022/9/28  | 2 | 0 | 10.30219148 | 76.42738435 | <a href="https://www.inaturalist.org/observations/136812237">https://www.inaturalist.org/observations/136812237</a> |
| 360 | <i>Spilopelia chinensis</i> | Eastern Spotted Dove | 2022/9/28  | 2 | 0 | 10.30219148 | 76.42738435 | <a href="https://www.inaturalist.org/observations/136887142">https://www.inaturalist.org/observations/136887142</a> |
| 361 | <i>Spilopelia chinensis</i> | Eastern Spotted Dove | 2022/9/28  | 2 | 0 | 10.30219148 | 76.42738435 | <a href="https://www.inaturalist.org/observations/136887352">https://www.inaturalist.org/observations/136887352</a> |
| 362 | <i>Spilopelia chinensis</i> | Eastern Spotted Dove | 2015/6/4   | 4 | 0 | 10.30679740 | 77.20602410 | <a href="https://www.inaturalist.org/observations/12149091">https://www.inaturalist.org/observations/12149091</a>   |
| 363 | <i>Spilopelia chinensis</i> | Eastern Spotted Dove | 2013/11/29 | 2 | 0 | 10.30679740 | 77.20602410 | <a href="https://www.inaturalist.org/observations/81671689">https://www.inaturalist.org/observations/81671689</a>   |
| 364 | <i>Spilopelia chinensis</i> | Eastern Spotted Dove | 2021/11/12 | 1 | 0 | 10.30679740 | 77.20602410 | <a href="https://www.inaturalist.org/observations/129437031">https://www.inaturalist.org/observations/129437031</a> |
| 365 | <i>Spilopelia chinensis</i> | Eastern Spotted Dove | 2013/11/29 | 3 | 0 | 10.30681260 | 77.20601320 | <a href="https://www.inaturalist.org/observations/81671708">https://www.inaturalist.org/observations/81671708</a>   |
| 366 | <i>Spilopelia chinensis</i> | Eastern Spotted Dove | 2016/12/24 | 2 | 0 | 10.30986500 | 76.92666500 | <a href="https://www.inaturalist.org/observations/64753825">https://www.inaturalist.org/observations/64753825</a>   |
| 367 | <i>Spilopelia chinensis</i> | Eastern Spotted Dove | 2021/12/25 | 1 | 0 | 10.31622667 | 79.83669829 | <a href="https://www.inaturalist.org/observations/103752063">https://www.inaturalist.org/observations/103752063</a> |

|     |                             |                      |            |   |   |             |             |                                                                                                                     |
|-----|-----------------------------|----------------------|------------|---|---|-------------|-------------|---------------------------------------------------------------------------------------------------------------------|
| 368 | <i>Spilopelia chinensis</i> | Eastern Spotted Dove | 2020/1/29  | 1 | 0 | 10.32359080 | 76.95100300 | <a href="https://www.inaturalist.org/observations/44604300">https://www.inaturalist.org/observations/44604300</a>   |
| 369 | <i>Spilopelia chinensis</i> | Eastern Spotted Dove | 2019/10/12 | 2 | 0 | 10.32697340 | 76.95539670 | <a href="https://www.inaturalist.org/observations/56023063">https://www.inaturalist.org/observations/56023063</a>   |
| 370 | <i>Spilopelia chinensis</i> | Eastern Spotted Dove | 2021/3/29  | 3 | 0 | 10.32697340 | 76.95539670 | <a href="https://www.inaturalist.org/observations/105206848">https://www.inaturalist.org/observations/105206848</a> |
| 371 | <i>Spilopelia chinensis</i> | Eastern Spotted Dove | 2021/3/29  | 2 | 0 | 10.32697340 | 76.95539670 | <a href="https://www.inaturalist.org/observations/105256382">https://www.inaturalist.org/observations/105256382</a> |
| 372 | <i>Spilopelia chinensis</i> | Eastern Spotted Dove | 2021/2/3   | 1 | 0 | 10.33630520 | 76.95485350 | <a href="https://www.inaturalist.org/observations/79244228">https://www.inaturalist.org/observations/79244228</a>   |
| 373 | <i>Spilopelia chinensis</i> | Eastern Spotted Dove | 2022/5/1   | 2 | 0 | 10.36569167 | 76.24873500 | <a href="https://www.inaturalist.org/observations/114746624">https://www.inaturalist.org/observations/114746624</a> |
| 374 | <i>Spilopelia chinensis</i> | Eastern Spotted Dove | 2021/3/27  | 3 | 0 | 10.36828538 | 76.33538727 | <a href="https://www.inaturalist.org/observations/73264079">https://www.inaturalist.org/observations/73264079</a>   |
| 375 | <i>Spilopelia chinensis</i> | Eastern Spotted Dove | 2019/8/3   | 2 | 0 | 10.39286550 | 76.77562192 | <a href="https://www.inaturalist.org/observations/48201809">https://www.inaturalist.org/observations/48201809</a>   |
| 376 | <i>Spilopelia chinensis</i> | Eastern Spotted Dove | 2020/1/7   | 2 | 0 | 10.39720500 | 76.22623167 | <a href="https://www.inaturalist.org/observations/44164574">https://www.inaturalist.org/observations/44164574</a>   |
| 377 | <i>Spilopelia chinensis</i> | Eastern Spotted Dove | 2011/2/13  | 1 | 0 | 10.42409900 | 77.12556000 | <a href="https://www.inaturalist.org/observations/91250216">https://www.inaturalist.org/observations/91250216</a>   |
| 378 | <i>Spilopelia chinensis</i> | Eastern Spotted Dove | 2021/5/13  | 4 | 0 | 10.44361120 | 76.23179633 | <a href="https://www.inaturalist.org/observations/99608887">https://www.inaturalist.org/observations/99608887</a>   |
| 379 | <i>Spilopelia chinensis</i> | Eastern Spotted Dove | 2021/10/31 | 2 | 0 | 10.44464520 | 76.23342779 | <a href="https://www.inaturalist.org/observations/99965658">https://www.inaturalist.org/observations/99965658</a>   |
| 380 | <i>Spilopelia chinensis</i> | Eastern Spotted Dove | 2020/11/29 | 4 | 0 | 10.46857731 | 76.15747782 | <a href="https://www.inaturalist.org/observations/67708507">https://www.inaturalist.org/observations/67708507</a>   |
| 381 | <i>Spilopelia chinensis</i> | Eastern Spotted Dove | 2014/12/29 | 2 | 0 | 10.46937591 | 76.84236702 | <a href="https://www.inaturalist.org/observations/45472982">https://www.inaturalist.org/observations/45472982</a>   |
| 382 | <i>Spilopelia chinensis</i> | Eastern Spotted Dove | 2019/9/9   | 4 | 0 | 10.47282333 | 76.19793000 | <a href="https://www.inaturalist.org/observations/32704976">https://www.inaturalist.org/observations/32704976</a>   |
| 383 | <i>Spilopelia chinensis</i> | Eastern Spotted Dove | 2020/1/13  | 2 | 0 | 10.52820000 | 76.27412500 | <a href="https://www.inaturalist.org/observations/67014874">https://www.inaturalist.org/observations/67014874</a>   |
| 384 | <i>Spilopelia chinensis</i> | Eastern Spotted Dove | 2021/2/27  | 3 | 0 | 10.53029080 | 76.34731870 | <a href="https://www.inaturalist.org/observations/100293353">https://www.inaturalist.org/observations/100293353</a> |
| 385 | <i>Spilopelia chinensis</i> | Eastern Spotted Dove | 2021/12/2  | 2 | 0 | 10.53029087 | 76.34731840 | <a href="https://www.inaturalist.org/observations/104843180">https://www.inaturalist.org/observations/104843180</a> |
| 386 | <i>Spilopelia chinensis</i> | Eastern Spotted Dove | 2020/3/20  | 2 | 0 | 10.53029449 | 76.34731840 | <a href="https://www.inaturalist.org/observations/100075231">https://www.inaturalist.org/observations/100075231</a> |
| 387 | <i>Spilopelia chinensis</i> | Eastern Spotted Dove | 2020/1/30  | 3 | 0 | 10.54093167 | 76.24092167 | <a href="https://www.inaturalist.org/observations/67019392">https://www.inaturalist.org/observations/67019392</a>   |
| 388 | <i>Spilopelia chinensis</i> | Eastern Spotted Dove | 2020/1/5   | 2 | 0 | 10.54161833 | 76.15446667 | <a href="https://www.inaturalist.org/observations/44104671">https://www.inaturalist.org/observations/44104671</a>   |
| 389 | <i>Spilopelia chinensis</i> | Eastern Spotted Dove | 2019/10/4  | 3 | 0 | 10.54213922 | 76.15429484 | <a href="https://www.inaturalist.org/observations/34218259">https://www.inaturalist.org/observations/34218259</a>   |
| 390 | <i>Spilopelia chinensis</i> | Eastern Spotted Dove | 2019/9/15  | 4 | 0 | 10.54911500 | 76.28487333 | <a href="https://www.inaturalist.org/observations/33021464">https://www.inaturalist.org/observations/33021464</a>   |

|     |                             |                      |            |   |   |             |             |                                                                                                                     |
|-----|-----------------------------|----------------------|------------|---|---|-------------|-------------|---------------------------------------------------------------------------------------------------------------------|
| 391 | <i>Spilopelia chinensis</i> | Eastern Spotted Dove | 2014/5/14  | 3 | 0 | 10.58321956 | 76.14201026 | <a href="https://www.inaturalist.org/observations/30260282">https://www.inaturalist.org/observations/30260282</a>   |
| 392 | <i>Spilopelia chinensis</i> | Eastern Spotted Dove | 2017/6/18  | 1 | 0 | 10.59842855 | 76.03892364 | <a href="https://www.inaturalist.org/observations/30260541">https://www.inaturalist.org/observations/30260541</a>   |
| 393 | <i>Spilopelia chinensis</i> | Eastern Spotted Dove | 2021/5/14  | 3 | 0 | 10.61399875 | 76.19414621 | <a href="https://www.inaturalist.org/observations/107045211">https://www.inaturalist.org/observations/107045211</a> |
| 394 | <i>Spilopelia chinensis</i> | Eastern Spotted Dove | 2020/12/11 | 2 | 0 | 10.61491000 | 76.19266333 | <a href="https://www.inaturalist.org/observations/67002155">https://www.inaturalist.org/observations/67002155</a>   |
| 395 | <i>Spilopelia chinensis</i> | Eastern Spotted Dove | 2020/6/30  | 1 | 0 | 10.61566106 | 76.19416515 | <a href="https://www.inaturalist.org/observations/51495315">https://www.inaturalist.org/observations/51495315</a>   |
| 396 | <i>Spilopelia chinensis</i> | Eastern Spotted Dove | 2020/4/18  | 3 | 0 | 10.61582030 | 76.19352223 | <a href="https://www.inaturalist.org/observations/48353977">https://www.inaturalist.org/observations/48353977</a>   |
| 397 | <i>Spilopelia chinensis</i> | Eastern Spotted Dove | 2019/1/24  | 5 | 0 | 10.63750217 | 76.30570555 | <a href="https://www.inaturalist.org/observations/19876518">https://www.inaturalist.org/observations/19876518</a>   |
| 398 | <i>Spilopelia chinensis</i> | Eastern Spotted Dove | 2022/8/17  | 3 | 0 | 10.64121920 | 76.30836602 | <a href="https://www.inaturalist.org/observations/132082252">https://www.inaturalist.org/observations/132082252</a> |
| 399 | <i>Spilopelia chinensis</i> | Eastern Spotted Dove | 2021/8/30  | 2 | 0 | 10.68515779 | 76.52486357 | <a href="https://www.inaturalist.org/observations/93924815">https://www.inaturalist.org/observations/93924815</a>   |
| 400 | <i>Spilopelia chinensis</i> | Eastern Spotted Dove | 2021/8/30  | 2 | 0 | 10.68515779 | 76.52486357 | <a href="https://www.inaturalist.org/observations/93924837">https://www.inaturalist.org/observations/93924837</a>   |
| 401 | <i>Spilopelia chinensis</i> | Eastern Spotted Dove | 2019/9/12  | 1 | 0 | 10.69413692 | 76.34636220 | <a href="https://www.inaturalist.org/observations/78827708">https://www.inaturalist.org/observations/78827708</a>   |
| 402 | <i>Spilopelia chinensis</i> | Eastern Spotted Dove | 2021/12/24 | 1 | 0 | 10.70020365 | 79.32311940 | <a href="https://www.inaturalist.org/observations/103949682">https://www.inaturalist.org/observations/103949682</a> |
| 403 | <i>Spilopelia chinensis</i> | Eastern Spotted Dove | 2021/12/24 | 2 | 0 | 10.70075000 | 79.32228667 | <a href="https://www.inaturalist.org/observations/103745301">https://www.inaturalist.org/observations/103745301</a> |
| 404 | <i>Spilopelia chinensis</i> | Eastern Spotted Dove | 2016/12/29 | 2 | 0 | 10.74712700 | 76.46723400 | <a href="https://www.inaturalist.org/observations/87008575">https://www.inaturalist.org/observations/87008575</a>   |
| 405 | <i>Spilopelia chinensis</i> | Eastern Spotted Dove | 2016/12/30 | 2 | 0 | 10.74723400 | 76.46719600 | <a href="https://www.inaturalist.org/observations/87008596">https://www.inaturalist.org/observations/87008596</a>   |
| 406 | <i>Spilopelia chinensis</i> | Eastern Spotted Dove | 2016/12/18 | 2 | 0 | 10.74744183 | 76.46735703 | <a href="https://www.inaturalist.org/observations/65605239">https://www.inaturalist.org/observations/65605239</a>   |
| 407 | <i>Spilopelia chinensis</i> | Eastern Spotted Dove | 2021/1/24  | 2 | 0 | 10.74960298 | 76.37829512 | <a href="https://www.inaturalist.org/observations/99718444">https://www.inaturalist.org/observations/99718444</a>   |
| 408 | <i>Spilopelia chinensis</i> | Eastern Spotted Dove | 2020/8/22  | 2 | 0 | 10.74974237 | 76.37860390 | <a href="https://www.inaturalist.org/observations/61872152">https://www.inaturalist.org/observations/61872152</a>   |
| 409 | <i>Spilopelia chinensis</i> | Eastern Spotted Dove | 2014/5/24  | 2 | 0 | 10.74974237 | 76.37860390 | <a href="https://www.inaturalist.org/observations/98113865">https://www.inaturalist.org/observations/98113865</a>   |
| 410 | <i>Spilopelia chinensis</i> | Eastern Spotted Dove | 2021/3/10  | 4 | 0 | 10.75818940 | 76.11749880 | <a href="https://www.inaturalist.org/observations/71037451">https://www.inaturalist.org/observations/71037451</a>   |
| 411 | <i>Spilopelia chinensis</i> | Eastern Spotted Dove | 2022/8/22  | 4 | 0 | 10.79878611 | 79.13876944 | <a href="https://www.inaturalist.org/observations/131962735">https://www.inaturalist.org/observations/131962735</a> |
| 412 | <i>Spilopelia chinensis</i> | Eastern Spotted Dove | 2022/2/9   | 1 | 0 | 10.80113333 | 78.76062500 | <a href="https://www.inaturalist.org/observations/106411137">https://www.inaturalist.org/observations/106411137</a> |
| 413 | <i>Spilopelia chinensis</i> | Eastern Spotted Dove | 2021/12/26 | 2 | 0 | 10.80336050 | 76.08453635 | <a href="https://www.inaturalist.org/observations/103888775">https://www.inaturalist.org/observations/103888775</a> |

|     |                             |                      |            |   |   |             |             |                                                                                                                     |
|-----|-----------------------------|----------------------|------------|---|---|-------------|-------------|---------------------------------------------------------------------------------------------------------------------|
| 414 | <i>Spilopelia chinensis</i> | Eastern Spotted Dove | 2021/11/11 | 2 | 0 | 10.82377949 | 76.68334320 | <a href="https://www.inaturalist.org/observations/101502208">https://www.inaturalist.org/observations/101502208</a> |
| 415 | <i>Spilopelia chinensis</i> | Eastern Spotted Dove | 2020/11/8  | 3 | 0 | 10.83880570 | 76.69035700 | <a href="https://www.inaturalist.org/observations/67399674">https://www.inaturalist.org/observations/67399674</a>   |
| 416 | <i>Spilopelia chinensis</i> | Eastern Spotted Dove | 2022/3/14  | 4 | 0 | 10.84015309 | 76.83562236 | <a href="https://www.inaturalist.org/observations/115189882">https://www.inaturalist.org/observations/115189882</a> |
| 417 | <i>Spilopelia chinensis</i> | Eastern Spotted Dove | 2022/4/2   | 2 | 0 | 10.84320590 | 76.84617680 | <a href="https://www.inaturalist.org/observations/110561991">https://www.inaturalist.org/observations/110561991</a> |
| 418 | <i>Spilopelia chinensis</i> | Eastern Spotted Dove | 2019/12/23 | 2 | 0 | 10.84845193 | 76.43446589 | <a href="https://www.inaturalist.org/observations/52681584">https://www.inaturalist.org/observations/52681584</a>   |
| 419 | <i>Spilopelia chinensis</i> | Eastern Spotted Dove | 2022/4/3   | 2 | 0 | 10.86576010 | 76.65920730 | <a href="https://www.inaturalist.org/observations/110563600">https://www.inaturalist.org/observations/110563600</a> |
| 420 | <i>Spilopelia chinensis</i> | Eastern Spotted Dove | 2022/3/15  | 3 | 0 | 10.86624972 | 76.64740575 | <a href="https://www.inaturalist.org/observations/115064230">https://www.inaturalist.org/observations/115064230</a> |
| 421 | <i>Spilopelia chinensis</i> | Eastern Spotted Dove | 2015/3/5   | 1 | 0 | 10.87917342 | 78.70316722 | <a href="https://www.inaturalist.org/observations/72021976">https://www.inaturalist.org/observations/72021976</a>   |
| 422 | <i>Spilopelia chinensis</i> | Eastern Spotted Dove | 2021/5/9   | 1 | 0 | 10.88471926 | 76.06608879 | <a href="https://www.inaturalist.org/observations/78016353">https://www.inaturalist.org/observations/78016353</a>   |
| 423 | <i>Spilopelia chinensis</i> | Eastern Spotted Dove | 2021/6/10  | 1 | 0 | 10.88505740 | 76.06598720 | <a href="https://www.inaturalist.org/observations/82398998">https://www.inaturalist.org/observations/82398998</a>   |
| 424 | <i>Spilopelia chinensis</i> | Eastern Spotted Dove | 2021/12/31 | 1 | 0 | 10.88709380 | 76.06606850 | <a href="https://www.inaturalist.org/observations/104009232">https://www.inaturalist.org/observations/104009232</a> |
| 425 | <i>Spilopelia chinensis</i> | Eastern Spotted Dove | 2021/8/24  | 2 | 0 | 10.88748260 | 76.06472830 | <a href="https://www.inaturalist.org/observations/92324098">https://www.inaturalist.org/observations/92324098</a>   |
| 426 | <i>Spilopelia chinensis</i> | Eastern Spotted Dove | 2021/7/6   | 2 | 0 | 10.88749857 | 76.06633992 | <a href="https://www.inaturalist.org/observations/85893816">https://www.inaturalist.org/observations/85893816</a>   |
| 427 | <i>Spilopelia chinensis</i> | Eastern Spotted Dove | 2022/8/6   | 4 | 0 | 10.88791500 | 76.06467400 | <a href="https://www.inaturalist.org/observations/129642778">https://www.inaturalist.org/observations/129642778</a> |
| 428 | <i>Spilopelia chinensis</i> | Eastern Spotted Dove | 2021/7/11  | 3 | 0 | 10.88826110 | 76.06684090 | <a href="https://www.inaturalist.org/observations/86531885">https://www.inaturalist.org/observations/86531885</a>   |
| 429 | <i>Spilopelia chinensis</i> | Eastern Spotted Dove | 2020/10/17 | 1 | 0 | 10.98630000 | 76.90633900 | <a href="https://www.inaturalist.org/observations/107245276">https://www.inaturalist.org/observations/107245276</a> |
| 430 | <i>Spilopelia chinensis</i> | Eastern Spotted Dove | 2020/8/29  | 2 | 0 | 11.01684450 | 76.95583210 | <a href="https://www.inaturalist.org/observations/118348924">https://www.inaturalist.org/observations/118348924</a> |
| 431 | <i>Spilopelia chinensis</i> | Eastern Spotted Dove | 2019/1/24  | 2 | 0 | 11.01684450 | 76.95583210 | <a href="https://www.inaturalist.org/observations/135547289">https://www.inaturalist.org/observations/135547289</a> |
| 432 | <i>Spilopelia chinensis</i> | Eastern Spotted Dove | 2021/12/9  | 5 | 0 | 11.01717987 | 76.95583183 | <a href="https://www.inaturalist.org/observations/132372649">https://www.inaturalist.org/observations/132372649</a> |
| 433 | <i>Spilopelia chinensis</i> | Eastern Spotted Dove | 2020/3/28  | 2 | 0 | 11.07894586 | 79.83002432 | <a href="https://www.inaturalist.org/observations/48747971">https://www.inaturalist.org/observations/48747971</a>   |
| 434 | <i>Spilopelia chinensis</i> | Eastern Spotted Dove | 2020/6/14  | 2 | 0 | 11.07894586 | 79.83002432 | <a href="https://www.inaturalist.org/observations/49541132">https://www.inaturalist.org/observations/49541132</a>   |
| 435 | <i>Spilopelia chinensis</i> | Eastern Spotted Dove | 2018/1/27  | 4 | 0 | 11.08598366 | 76.46006088 | <a href="https://www.inaturalist.org/observations/65743568">https://www.inaturalist.org/observations/65743568</a>   |
| 436 | <i>Spilopelia chinensis</i> | Eastern Spotted Dove | 2018/1/28  | 3 | 0 | 11.09079800 | 76.44972183 | <a href="https://www.inaturalist.org/observations/65725302">https://www.inaturalist.org/observations/65725302</a>   |

|     |                             |                      |            |   |   |             |             |                                                                                                                     |
|-----|-----------------------------|----------------------|------------|---|---|-------------|-------------|---------------------------------------------------------------------------------------------------------------------|
| 437 | <i>Spilopelia chinensis</i> | Eastern Spotted Dove | 2022/6/5   | 5 | 0 | 11.10741096 | 79.78331365 | <a href="https://www.inaturalist.org/observations/120295771">https://www.inaturalist.org/observations/120295771</a> |
| 438 | <i>Spilopelia chinensis</i> | Eastern Spotted Dove | 2021/8/1   | 1 | 0 | 11.11049397 | 79.70172353 | <a href="https://www.inaturalist.org/observations/89437931">https://www.inaturalist.org/observations/89437931</a>   |
| 439 | <i>Spilopelia chinensis</i> | Eastern Spotted Dove | 2022/4/2   | 2 | 0 | 11.13291820 | 75.89125469 | <a href="https://www.inaturalist.org/observations/110278078">https://www.inaturalist.org/observations/110278078</a> |
| 440 | <i>Spilopelia chinensis</i> | Eastern Spotted Dove | 2020/11/25 | 2 | 0 | 11.13389588 | 75.89402609 | <a href="https://www.inaturalist.org/observations/70706994">https://www.inaturalist.org/observations/70706994</a>   |
| 441 | <i>Spilopelia chinensis</i> | Eastern Spotted Dove | 2020/4/27  | 4 | 0 | 11.18829610 | 76.26094630 | <a href="https://www.inaturalist.org/observations/58726979">https://www.inaturalist.org/observations/58726979</a>   |
| 442 | <i>Spilopelia chinensis</i> | Eastern Spotted Dove | 2019/10/29 | 3 | 0 | 11.23409110 | 77.65862357 | <a href="https://www.inaturalist.org/observations/37123165">https://www.inaturalist.org/observations/37123165</a>   |
| 443 | <i>Spilopelia chinensis</i> | Eastern Spotted Dove | 2022/2/13  | 3 | 0 | 11.25282833 | 77.65826667 | <a href="https://www.inaturalist.org/observations/106983071">https://www.inaturalist.org/observations/106983071</a> |
| 444 | <i>Spilopelia chinensis</i> | Eastern Spotted Dove | 2021/1/14  | 1 | 0 | 11.32303840 | 79.24335279 | <a href="https://www.inaturalist.org/observations/68127316">https://www.inaturalist.org/observations/68127316</a>   |
| 445 | <i>Spilopelia chinensis</i> | Eastern Spotted Dove | 2020/11/12 | 4 | 0 | 11.32304662 | 79.24335279 | <a href="https://www.inaturalist.org/observations/66090919">https://www.inaturalist.org/observations/66090919</a>   |
| 446 | <i>Spilopelia chinensis</i> | Eastern Spotted Dove | 2021/7/20  | 2 | 0 | 11.32304662 | 79.24335279 | <a href="https://www.inaturalist.org/observations/89325462">https://www.inaturalist.org/observations/89325462</a>   |
| 447 | <i>Spilopelia chinensis</i> | Eastern Spotted Dove | 2021/7/20  | 2 | 0 | 11.32304662 | 79.24335279 | <a href="https://www.inaturalist.org/observations/89329497">https://www.inaturalist.org/observations/89329497</a>   |
| 448 | <i>Spilopelia chinensis</i> | Eastern Spotted Dove | 2022/8/17  | 2 | 0 | 11.32304662 | 79.24335279 | <a href="https://www.inaturalist.org/observations/131674468">https://www.inaturalist.org/observations/131674468</a> |
| 449 | <i>Spilopelia chinensis</i> | Eastern Spotted Dove | 2022/8/15  | 3 | 0 | 11.32304662 | 79.24335279 | <a href="https://www.inaturalist.org/observations/131713270">https://www.inaturalist.org/observations/131713270</a> |
| 450 | <i>Spilopelia chinensis</i> | Eastern Spotted Dove | 2022/8/15  | 5 | 0 | 11.32304662 | 79.24335279 | <a href="https://www.inaturalist.org/observations/131737241">https://www.inaturalist.org/observations/131737241</a> |
| 451 | <i>Spilopelia chinensis</i> | Eastern Spotted Dove | 2016/12/29 | 1 | 0 | 11.32598793 | 79.24508952 | <a href="https://www.inaturalist.org/observations/54542317">https://www.inaturalist.org/observations/54542317</a>   |
| 452 | <i>Spilopelia chinensis</i> | Eastern Spotted Dove | 2022/7/10  | 1 | 0 | 11.33563200 | 76.81587400 | <a href="https://www.inaturalist.org/observations/136108411">https://www.inaturalist.org/observations/136108411</a> |
| 453 | <i>Spilopelia chinensis</i> | Eastern Spotted Dove | 2021/1/18  | 1 | 0 | 11.33996667 | 76.75147500 | <a href="https://www.inaturalist.org/observations/68271527">https://www.inaturalist.org/observations/68271527</a>   |
| 454 | <i>Spilopelia chinensis</i> | Eastern Spotted Dove | 2019/1/2   | 3 | 0 | 11.34094277 | 76.86998347 | <a href="https://www.inaturalist.org/observations/19781704">https://www.inaturalist.org/observations/19781704</a>   |
| 455 | <i>Spilopelia chinensis</i> | Eastern Spotted Dove | 2021/7/9   | 4 | 0 | 11.37319358 | 75.84196169 | <a href="https://www.inaturalist.org/observations/87826445">https://www.inaturalist.org/observations/87826445</a>   |
| 456 | <i>Spilopelia chinensis</i> | Eastern Spotted Dove | 2022/7/1   | 5 | 0 | 11.39116287 | 79.70322781 | <a href="https://www.inaturalist.org/observations/124579094">https://www.inaturalist.org/observations/124579094</a> |
| 457 | <i>Spilopelia chinensis</i> | Eastern Spotted Dove | 2020/4/4   | 2 | 0 | 11.41214736 | 76.80158705 | <a href="https://www.inaturalist.org/observations/41353502">https://www.inaturalist.org/observations/41353502</a>   |
| 458 | <i>Spilopelia chinensis</i> | Eastern Spotted Dove | 2020/10/16 | 3 | 0 | 11.41522053 | 76.71850059 | <a href="https://www.inaturalist.org/observations/63328212">https://www.inaturalist.org/observations/63328212</a>   |
| 459 | <i>Spilopelia chinensis</i> | Eastern Spotted Dove | 2021/6/30  | 1 | 0 | 11.41522053 | 76.71850059 | <a href="https://www.inaturalist.org/observations/86871868">https://www.inaturalist.org/observations/86871868</a>   |



|     |                             |                      |            |   |   |             |             |                                                                                                                     |
|-----|-----------------------------|----------------------|------------|---|---|-------------|-------------|---------------------------------------------------------------------------------------------------------------------|
| 460 | <i>Spilopelia chinensis</i> | Eastern Spotted Dove | 2021/7/21  | 4 | 0 | 11.41522053 | 76.71850059 | <a href="https://www.inaturalist.org/observations/88105066">https://www.inaturalist.org/observations/88105066</a>   |
| 461 | <i>Spilopelia chinensis</i> | Eastern Spotted Dove | 2020/1/17  | 3 | 0 | 11.42188896 | 76.86172754 | <a href="https://www.inaturalist.org/observations/55793634">https://www.inaturalist.org/observations/55793634</a>   |
| 462 | <i>Spilopelia chinensis</i> | Eastern Spotted Dove | 2019/3/24  | 3 | 0 | 11.47320910 | 76.67901380 | <a href="https://www.inaturalist.org/observations/23016008">https://www.inaturalist.org/observations/23016008</a>   |
| 463 | <i>Spilopelia chinensis</i> | Eastern Spotted Dove | 2019/3/24  | 2 | 0 | 11.47320910 | 76.67901380 | <a href="https://www.inaturalist.org/observations/23017490">https://www.inaturalist.org/observations/23017490</a>   |
| 464 | <i>Spilopelia chinensis</i> | Eastern Spotted Dove | 2019/1/27  | 1 | 0 | 11.53107778 | 76.64257222 | <a href="https://www.inaturalist.org/observations/102544364">https://www.inaturalist.org/observations/102544364</a> |
| 465 | <i>Spilopelia chinensis</i> | Eastern Spotted Dove | 2015/1/6   | 1 | 0 | 11.53526164 | 76.65010023 | <a href="https://www.inaturalist.org/observations/80580030">https://www.inaturalist.org/observations/80580030</a>   |
| 466 | <i>Spilopelia chinensis</i> | Eastern Spotted Dove | 2011/3/3   | 6 | 0 | 11.56614300 | 76.64794900 | <a href="https://www.inaturalist.org/observations/17690584">https://www.inaturalist.org/observations/17690584</a>   |
| 467 | <i>Spilopelia chinensis</i> | Eastern Spotted Dove | 2016/4/15  | 3 | 0 | 11.57500960 | 76.55543800 | <a href="https://www.inaturalist.org/observations/34053159">https://www.inaturalist.org/observations/34053159</a>   |
| 468 | <i>Spilopelia chinensis</i> | Eastern Spotted Dove | 2014/12/22 | 7 | 0 | 11.57598200 | 78.69927400 | <a href="http://www.inaturalist.org/observations/1555397">http://www.inaturalist.org/observations/1555397</a>       |
| 469 | <i>Spilopelia chinensis</i> | Eastern Spotted Dove | 2013/11/7  | 6 | 0 | 11.57823125 | 76.65370137 | <a href="https://www.inaturalist.org/observations/9896943">https://www.inaturalist.org/observations/9896943</a>     |
| 470 | <i>Spilopelia chinensis</i> | Eastern Spotted Dove | 2014/8/2   | 4 | 0 | 11.57922579 | 76.58381220 | <a href="https://www.inaturalist.org/observations/20034214">https://www.inaturalist.org/observations/20034214</a>   |
| 471 | <i>Spilopelia chinensis</i> | Eastern Spotted Dove | 2018/12/29 | 1 | 0 | 11.58161710 | 76.99886690 | <a href="https://www.inaturalist.org/observations/92214309">https://www.inaturalist.org/observations/92214309</a>   |
| 472 | <i>Spilopelia chinensis</i> | Eastern Spotted Dove | 2011/8/21  | 6 | 0 | 11.60346600 | 76.14237200 | <a href="http://www.inaturalist.org/observations/29919">http://www.inaturalist.org/observations/29919</a>           |
| 473 | <i>Spilopelia chinensis</i> | Eastern Spotted Dove | 2020/10/17 | 3 | 0 | 11.61821948 | 76.17221508 | <a href="https://www.inaturalist.org/observations/63304022">https://www.inaturalist.org/observations/63304022</a>   |
| 474 | <i>Spilopelia chinensis</i> | Eastern Spotted Dove | 2018/9/14  | 5 | 0 | 11.63759180 | 76.52570070 | <a href="https://www.inaturalist.org/observations/17124436">https://www.inaturalist.org/observations/17124436</a>   |
| 475 | <i>Spilopelia chinensis</i> | Eastern Spotted Dove | 2021/7/3   | 1 | 0 | 11.63784405 | 76.52570073 | <a href="https://www.inaturalist.org/observations/86954445">https://www.inaturalist.org/observations/86954445</a>   |
| 476 | <i>Spilopelia chinensis</i> | Eastern Spotted Dove | 2019/5/6   | 2 | 0 | 11.64951111 | 76.05216111 | <a href="https://www.inaturalist.org/observations/78674223">https://www.inaturalist.org/observations/78674223</a>   |
| 477 | <i>Spilopelia chinensis</i> | Eastern Spotted Dove | 2018/10/22 | 2 | 0 | 11.65302908 | 76.60661090 | <a href="https://www.inaturalist.org/observations/37091507">https://www.inaturalist.org/observations/37091507</a>   |
| 478 | <i>Spilopelia chinensis</i> | Eastern Spotted Dove | 2017/8/21  | 2 | 0 | 11.67683741 | 75.95238330 | <a href="https://www.inaturalist.org/observations/65888348">https://www.inaturalist.org/observations/65888348</a>   |
| 479 | <i>Spilopelia chinensis</i> | Eastern Spotted Dove | 2021/4/9   | 1 | 0 | 11.69837952 | 76.48135376 | <a href="https://www.inaturalist.org/observations/74604938">https://www.inaturalist.org/observations/74604938</a>   |
| 480 | <i>Spilopelia chinensis</i> | Eastern Spotted Dove | 2020/10/24 | 2 | 0 | 11.70175426 | 79.75943897 | <a href="https://www.inaturalist.org/observations/67136720">https://www.inaturalist.org/observations/67136720</a>   |
| 481 | <i>Spilopelia chinensis</i> | Eastern Spotted Dove | 2022/4/9   | 3 | 0 | 11.70910400 | 78.18970129 | <a href="https://www.inaturalist.org/observations/110841594">https://www.inaturalist.org/observations/110841594</a> |
| 482 | <i>Spilopelia chinensis</i> | Eastern Spotted Dove | 2021/8/22  | 2 | 0 | 11.73561617 | 78.20203878 | <a href="https://www.inaturalist.org/observations/92074334">https://www.inaturalist.org/observations/92074334</a>   |

|     |                             |                      |            |   |   |             |             |                                                                                                                     |
|-----|-----------------------------|----------------------|------------|---|---|-------------|-------------|---------------------------------------------------------------------------------------------------------------------|
| 483 | <i>Spilopelia chinensis</i> | Eastern Spotted Dove | 2022/7/24  | 4 | 0 | 11.73561617 | 78.20203878 | <a href="https://www.inaturalist.org/observations/128550995">https://www.inaturalist.org/observations/128550995</a> |
| 484 | <i>Spilopelia chinensis</i> | Eastern Spotted Dove | 2021/12/18 | 1 | 0 | 11.74613203 | 78.17025661 | <a href="https://www.inaturalist.org/observations/103635692">https://www.inaturalist.org/observations/103635692</a> |
| 485 | <i>Spilopelia chinensis</i> | Eastern Spotted Dove | 2017/8/20  | 1 | 0 | 11.74613235 | 78.17025661 | <a href="https://www.inaturalist.org/observations/81318815">https://www.inaturalist.org/observations/81318815</a>   |
| 486 | <i>Spilopelia chinensis</i> | Eastern Spotted Dove | 2021/8/29  | 3 | 0 | 11.75915032 | 75.55387102 | <a href="https://www.inaturalist.org/observations/107238389">https://www.inaturalist.org/observations/107238389</a> |
| 487 | <i>Spilopelia chinensis</i> | Eastern Spotted Dove | 2021/1/13  | 3 | 0 | 11.80617155 | 76.02141023 | <a href="https://www.inaturalist.org/observations/68047954">https://www.inaturalist.org/observations/68047954</a>   |
| 488 | <i>Spilopelia chinensis</i> | Eastern Spotted Dove | 2020/7/15  | 1 | 0 | 11.80868214 | 76.02043457 | <a href="https://www.inaturalist.org/observations/56095949">https://www.inaturalist.org/observations/56095949</a>   |
| 489 | <i>Spilopelia chinensis</i> | Eastern Spotted Dove | 2021/9/19  | 2 | 0 | 11.80880581 | 76.05844919 | <a href="https://www.inaturalist.org/observations/95505941">https://www.inaturalist.org/observations/95505941</a>   |
| 490 | <i>Spilopelia chinensis</i> | Eastern Spotted Dove | 2022/8/3   | 4 | 0 | 11.80927800 | 76.05887886 | <a href="https://www.inaturalist.org/observations/129238516">https://www.inaturalist.org/observations/129238516</a> |
| 491 | <i>Spilopelia chinensis</i> | Eastern Spotted Dove | 2022/7/10  | 4 | 0 | 11.81961070 | 78.26983630 | <a href="https://www.inaturalist.org/observations/132934459">https://www.inaturalist.org/observations/132934459</a> |
| 492 | <i>Spilopelia chinensis</i> | Eastern Spotted Dove | 2020/7/6   | 4 | 0 | 11.84297340 | 75.55311727 | <a href="https://www.inaturalist.org/observations/52183362">https://www.inaturalist.org/observations/52183362</a>   |
| 493 | <i>Spilopelia chinensis</i> | Eastern Spotted Dove | 2021/8/19  | 1 | 0 | 11.84425186 | 75.55307278 | <a href="https://www.inaturalist.org/observations/93126467">https://www.inaturalist.org/observations/93126467</a>   |
| 494 | <i>Spilopelia chinensis</i> | Eastern Spotted Dove | 2018/6/15  | 2 | 0 | 11.87245961 | 76.27940882 | <a href="https://www.inaturalist.org/observations/97920242">https://www.inaturalist.org/observations/97920242</a>   |
| 495 | <i>Spilopelia chinensis</i> | Eastern Spotted Dove | 2015/3/13  | 2 | 0 | 11.88517097 | 76.17806269 | <a href="https://www.inaturalist.org/observations/62471641">https://www.inaturalist.org/observations/62471641</a>   |
| 496 | <i>Spilopelia chinensis</i> | Eastern Spotted Dove | 2019/7/6   | 4 | 0 | 11.90304137 | 77.12219417 | <a href="https://www.inaturalist.org/observations/28556248">https://www.inaturalist.org/observations/28556248</a>   |
| 497 | <i>Spilopelia chinensis</i> | Eastern Spotted Dove | 2015/3/13  | 2 | 0 | 11.93864094 | 76.24365709 | <a href="https://www.inaturalist.org/observations/62471638">https://www.inaturalist.org/observations/62471638</a>   |
| 498 | <i>Spilopelia chinensis</i> | Eastern Spotted Dove | 2018/3/26  | 6 | 0 | 11.93892500 | 76.27041667 | <a href="https://www.inaturalist.org/observations/66384402">https://www.inaturalist.org/observations/66384402</a>   |
| 499 | <i>Spilopelia chinensis</i> | Eastern Spotted Dove | 2015/3/14  | 2 | 0 | 11.93942070 | 76.21612846 | <a href="https://www.inaturalist.org/observations/62471640">https://www.inaturalist.org/observations/62471640</a>   |
| 500 | <i>Spilopelia chinensis</i> | Eastern Spotted Dove | 2022/6/6   | 1 | 0 | 11.94468432 | 75.38493812 | <a href="https://www.inaturalist.org/observations/121998345">https://www.inaturalist.org/observations/121998345</a> |
| 501 | <i>Spilopelia chinensis</i> | Eastern Spotted Dove | 2021/6/2   | 4 | 0 | 11.94468432 | 75.38493812 | <a href="https://www.inaturalist.org/observations/126191291">https://www.inaturalist.org/observations/126191291</a> |
| 502 | <i>Spilopelia chinensis</i> | Eastern Spotted Dove | 2022/7/15  | 1 | 0 | 11.94468432 | 75.38493812 | <a href="https://www.inaturalist.org/observations/127094489">https://www.inaturalist.org/observations/127094489</a> |
| 503 | <i>Spilopelia chinensis</i> | Eastern Spotted Dove | 2022/7/16  | 2 | 0 | 11.94468432 | 75.38493812 | <a href="https://www.inaturalist.org/observations/127098692">https://www.inaturalist.org/observations/127098692</a> |
| 504 | <i>Spilopelia chinensis</i> | Eastern Spotted Dove | 2022/7/15  | 4 | 0 | 11.94468432 | 75.38493812 | <a href="https://www.inaturalist.org/observations/127101796">https://www.inaturalist.org/observations/127101796</a> |
| 505 | <i>Spilopelia chinensis</i> | Eastern Spotted Dove | 2021/6/2   | 2 | 0 | 11.94468432 | 75.38493812 | <a href="https://www.inaturalist.org/observations/127203772">https://www.inaturalist.org/observations/127203772</a> |

|     |                             |                      |            |   |   |             |             |                                                                                                                     |
|-----|-----------------------------|----------------------|------------|---|---|-------------|-------------|---------------------------------------------------------------------------------------------------------------------|
| 506 | <i>Spilopelia chinensis</i> | Eastern Spotted Dove | 2021/6/4   | 1 | 0 | 11.94468432 | 75.38493812 | <a href="https://www.inaturalist.org/observations/127349417">https://www.inaturalist.org/observations/127349417</a> |
| 507 | <i>Spilopelia chinensis</i> | Eastern Spotted Dove | 2021/6/4   | 1 | 0 | 11.94468432 | 75.38493812 | <a href="https://www.inaturalist.org/observations/127349682">https://www.inaturalist.org/observations/127349682</a> |
| 508 | <i>Spilopelia chinensis</i> | Eastern Spotted Dove | 2022/7/5   | 2 | 0 | 11.94468432 | 75.38493812 | <a href="https://www.inaturalist.org/observations/127470815">https://www.inaturalist.org/observations/127470815</a> |
| 509 | <i>Spilopelia chinensis</i> | Eastern Spotted Dove | 2022/7/5   | 2 | 0 | 11.94468432 | 75.38493812 | <a href="https://www.inaturalist.org/observations/127470878">https://www.inaturalist.org/observations/127470878</a> |
| 510 | <i>Spilopelia chinensis</i> | Eastern Spotted Dove | 2022/6/6   | 2 | 0 | 11.94468432 | 75.38493812 | <a href="https://www.inaturalist.org/observations/127975758">https://www.inaturalist.org/observations/127975758</a> |
| 511 | <i>Spilopelia chinensis</i> | Eastern Spotted Dove | 2022/6/6   | 1 | 0 | 11.94468432 | 75.38493812 | <a href="https://www.inaturalist.org/observations/127975851">https://www.inaturalist.org/observations/127975851</a> |
| 512 | <i>Spilopelia chinensis</i> | Eastern Spotted Dove | 2022/6/6   | 2 | 0 | 11.94468432 | 75.38493812 | <a href="https://www.inaturalist.org/observations/127975927">https://www.inaturalist.org/observations/127975927</a> |
| 513 | <i>Spilopelia chinensis</i> | Eastern Spotted Dove | 2022/8/20  | 3 | 0 | 11.94468432 | 75.38493812 | <a href="https://www.inaturalist.org/observations/135645245">https://www.inaturalist.org/observations/135645245</a> |
| 514 | <i>Spilopelia chinensis</i> | Eastern Spotted Dove | 2022/8/25  | 2 | 0 | 11.94468432 | 75.38493812 | <a href="https://www.inaturalist.org/observations/135886775">https://www.inaturalist.org/observations/135886775</a> |
| 515 | <i>Spilopelia chinensis</i> | Eastern Spotted Dove | 2022/8/25  | 2 | 0 | 11.94468432 | 75.38493812 | <a href="https://www.inaturalist.org/observations/135886782">https://www.inaturalist.org/observations/135886782</a> |
| 516 | <i>Spilopelia chinensis</i> | Eastern Spotted Dove | 2022/8/25  | 2 | 0 | 11.94468432 | 75.38493812 | <a href="https://www.inaturalist.org/observations/135886802">https://www.inaturalist.org/observations/135886802</a> |
| 517 | <i>Spilopelia chinensis</i> | Eastern Spotted Dove | 2020/5/9   | 3 | 0 | 11.94474565 | 75.38493812 | <a href="https://www.inaturalist.org/observations/45592396">https://www.inaturalist.org/observations/45592396</a>   |
| 518 | <i>Spilopelia chinensis</i> | Eastern Spotted Dove | 2022/8/5   | 3 | 0 | 11.95245630 | 77.04970618 | <a href="https://www.inaturalist.org/observations/129807841">https://www.inaturalist.org/observations/129807841</a> |
| 519 | <i>Spilopelia chinensis</i> | Eastern Spotted Dove | 2017/7/14  | 2 | 0 | 11.98427631 | 75.39945457 | <a href="https://www.inaturalist.org/observations/44400493">https://www.inaturalist.org/observations/44400493</a>   |
| 520 | <i>Spilopelia chinensis</i> | Eastern Spotted Dove | 2020/11/7  | 4 | 0 | 11.98741331 | 75.32260627 | <a href="https://www.inaturalist.org/observations/64352649">https://www.inaturalist.org/observations/64352649</a>   |
| 521 | <i>Spilopelia chinensis</i> | Eastern Spotted Dove | 2021/4/28  | 1 | 0 | 11.98810401 | 75.32233771 | <a href="https://www.inaturalist.org/observations/75516536">https://www.inaturalist.org/observations/75516536</a>   |
| 522 | <i>Spilopelia chinensis</i> | Eastern Spotted Dove | 2021/4/27  | 2 | 0 | 11.98831423 | 75.32184117 | <a href="https://www.inaturalist.org/observations/75403030">https://www.inaturalist.org/observations/75403030</a>   |
| 523 | <i>Spilopelia chinensis</i> | Eastern Spotted Dove | 2021/7/7   | 2 | 0 | 11.98838573 | 75.32161318 | <a href="https://www.inaturalist.org/observations/86027940">https://www.inaturalist.org/observations/86027940</a>   |
| 524 | <i>Spilopelia chinensis</i> | Eastern Spotted Dove | 2019/12/28 | 1 | 0 | 11.98977400 | 76.37704100 | <a href="https://www.inaturalist.org/observations/40870655">https://www.inaturalist.org/observations/40870655</a>   |
| 525 | <i>Spilopelia chinensis</i> | Eastern Spotted Dove | 2020/10/5  | 3 | 0 | 11.99509856 | 79.82263435 | <a href="https://www.inaturalist.org/observations/62022723">https://www.inaturalist.org/observations/62022723</a>   |
| 526 | <i>Spilopelia chinensis</i> | Eastern Spotted Dove | 2006/8/29  | 5 | 0 | 11.99877500 | 77.13983110 | <a href="https://www.inaturalist.org/observations/31928286">https://www.inaturalist.org/observations/31928286</a>   |
| 527 | <i>Spilopelia chinensis</i> | Eastern Spotted Dove | 2014/6/23  | 1 | 0 | 11.99877500 | 77.13983110 | <a href="https://www.inaturalist.org/observations/86172370">https://www.inaturalist.org/observations/86172370</a>   |
| 528 | <i>Spilopelia chinensis</i> | Eastern Spotted Dove | 2015/10/31 | 1 | 0 | 11.99877500 | 77.13983110 | <a href="https://www.inaturalist.org/observations/86172395">https://www.inaturalist.org/observations/86172395</a>   |

|     |                             |                      |            |   |   |             |             |                                                                                                                     |
|-----|-----------------------------|----------------------|------------|---|---|-------------|-------------|---------------------------------------------------------------------------------------------------------------------|
| 529 | <i>Spilopelia chinensis</i> | Eastern Spotted Dove | 2019/6/3   | 7 | 0 | 12.02524960 | 75.50335765 | <a href="https://www.inaturalist.org/observations/26528233">https://www.inaturalist.org/observations/26528233</a>   |
| 530 | <i>Spilopelia chinensis</i> | Eastern Spotted Dove | 2022/6/22  | 2 | 0 | 12.02665167 | 75.26125000 | <a href="https://www.inaturalist.org/observations/126932680">https://www.inaturalist.org/observations/126932680</a> |
| 531 | <i>Spilopelia chinensis</i> | Eastern Spotted Dove | 2019/5/4   | 5 | 0 | 12.02960500 | 75.25159000 | <a href="https://www.inaturalist.org/observations/29242844">https://www.inaturalist.org/observations/29242844</a>   |
| 532 | <i>Spilopelia chinensis</i> | Eastern Spotted Dove | 2017/3/17  | 3 | 0 | 12.03000078 | 75.20706394 | <a href="https://www.inaturalist.org/observations/30603887">https://www.inaturalist.org/observations/30603887</a>   |
| 533 | <i>Spilopelia chinensis</i> | Eastern Spotted Dove | 2017/3/17  | 3 | 0 | 12.03000078 | 75.20706394 | <a href="https://www.inaturalist.org/observations/30603894">https://www.inaturalist.org/observations/30603894</a>   |
| 534 | <i>Spilopelia chinensis</i> | Eastern Spotted Dove | 2022/6/25  | 3 | 0 | 12.03004333 | 75.25172000 | <a href="https://www.inaturalist.org/observations/126933068">https://www.inaturalist.org/observations/126933068</a> |
| 535 | <i>Spilopelia chinensis</i> | Eastern Spotted Dove | 2019/9/5   | 3 | 0 | 12.03083000 | 75.25211333 | <a href="https://www.inaturalist.org/observations/32201060">https://www.inaturalist.org/observations/32201060</a>   |
| 536 | <i>Spilopelia chinensis</i> | Eastern Spotted Dove | 2022/6/12  | 2 | 0 | 12.03234633 | 75.25665645 | <a href="https://www.inaturalist.org/observations/130749587">https://www.inaturalist.org/observations/130749587</a> |
| 537 | <i>Spilopelia chinensis</i> | Eastern Spotted Dove | 2019/10/15 | 3 | 0 | 12.03234670 | 75.25665640 | <a href="https://www.inaturalist.org/observations/34574260">https://www.inaturalist.org/observations/34574260</a>   |
| 538 | <i>Spilopelia chinensis</i> | Eastern Spotted Dove | 2021/9/11  | 1 | 0 | 12.03234670 | 75.25665640 | <a href="https://www.inaturalist.org/observations/94542605">https://www.inaturalist.org/observations/94542605</a>   |
| 539 | <i>Spilopelia chinensis</i> | Eastern Spotted Dove | 2017/5/18  | 3 | 0 | 12.03391833 | 75.19422833 | <a href="https://www.inaturalist.org/observations/30658452">https://www.inaturalist.org/observations/30658452</a>   |
| 540 | <i>Spilopelia chinensis</i> | Eastern Spotted Dove | 2017/3/25  | 5 | 0 | 12.03414500 | 75.19368333 | <a href="https://www.inaturalist.org/observations/30664118">https://www.inaturalist.org/observations/30664118</a>   |
| 541 | <i>Spilopelia chinensis</i> | Eastern Spotted Dove | 2022/6/22  | 3 | 0 | 12.03574333 | 75.25799000 | <a href="https://www.inaturalist.org/observations/126932770">https://www.inaturalist.org/observations/126932770</a> |
| 542 | <i>Spilopelia chinensis</i> | Eastern Spotted Dove | 2020/4/6   | 2 | 0 | 12.03683768 | 75.24725094 | <a href="https://www.inaturalist.org/observations/45573604">https://www.inaturalist.org/observations/45573604</a>   |
| 543 | <i>Spilopelia chinensis</i> | Eastern Spotted Dove | 2022/6/22  | 2 | 0 | 12.03728833 | 75.25807167 | <a href="https://www.inaturalist.org/observations/126932743">https://www.inaturalist.org/observations/126932743</a> |
| 544 | <i>Spilopelia chinensis</i> | Eastern Spotted Dove | 2022/6/22  | 3 | 0 | 12.03824167 | 75.25788167 | <a href="https://www.inaturalist.org/observations/126932708">https://www.inaturalist.org/observations/126932708</a> |
| 545 | <i>Spilopelia chinensis</i> | Eastern Spotted Dove | 2020/2/6   | 4 | 0 | 12.03997500 | 75.25872833 | <a href="https://www.inaturalist.org/observations/67039944">https://www.inaturalist.org/observations/67039944</a>   |
| 546 | <i>Spilopelia chinensis</i> | Eastern Spotted Dove | 2021/2/21  | 3 | 0 | 12.04009244 | 75.29748503 | <a href="https://www.inaturalist.org/observations/82039107">https://www.inaturalist.org/observations/82039107</a>   |
| 547 | <i>Spilopelia chinensis</i> | Eastern Spotted Dove | 2019/9/5   | 3 | 0 | 12.04595500 | 75.29944833 | <a href="https://www.inaturalist.org/observations/32201148">https://www.inaturalist.org/observations/32201148</a>   |
| 548 | <i>Spilopelia chinensis</i> | Eastern Spotted Dove | 2013/10/30 | 7 | 0 | 12.05128200 | 79.87603400 | <a href="http://www.inaturalist.org/observations/444342">http://www.inaturalist.org/observations/444342</a>         |
| 549 | <i>Spilopelia chinensis</i> | Eastern Spotted Dove | 2017/1/1   | 4 | 0 | 12.05498333 | 75.20164833 | <a href="https://www.inaturalist.org/observations/30660607">https://www.inaturalist.org/observations/30660607</a>   |
| 550 | <i>Spilopelia chinensis</i> | Eastern Spotted Dove | 2017/2/18  | 4 | 0 | 12.05517667 | 75.20043500 | <a href="https://www.inaturalist.org/observations/30660629">https://www.inaturalist.org/observations/30660629</a>   |
| 551 | <i>Spilopelia chinensis</i> | Eastern Spotted Dove | 2020/4/29  | 1 | 0 | 12.05749173 | 75.20062657 | <a href="https://www.inaturalist.org/observations/44273916">https://www.inaturalist.org/observations/44273916</a>   |

|     |                             |                      |            |   |   |             |             |                                                                                                                     |
|-----|-----------------------------|----------------------|------------|---|---|-------------|-------------|---------------------------------------------------------------------------------------------------------------------|
| 552 | <i>Spilopelia chinensis</i> | Eastern Spotted Dove | 2017/10/18 | 4 | 0 | 12.06395452 | 75.19410296 | <a href="https://www.inaturalist.org/observations/30601933">https://www.inaturalist.org/observations/30601933</a>   |
| 553 | <i>Spilopelia chinensis</i> | Eastern Spotted Dove | 2014/10/25 | 1 | 0 | 12.08230054 | 76.71351780 | <a href="https://www.inaturalist.org/observations/95515519">https://www.inaturalist.org/observations/95515519</a>   |
| 554 | <i>Spilopelia chinensis</i> | Eastern Spotted Dove | 2019/7/4   | 3 | 0 | 12.10229667 | 75.23720500 | <a href="https://www.inaturalist.org/observations/29236194">https://www.inaturalist.org/observations/29236194</a>   |
| 555 | <i>Spilopelia chinensis</i> | Eastern Spotted Dove | 2020/2/17  | 1 | 0 | 12.10328000 | 75.23647833 | <a href="https://www.inaturalist.org/observations/39321568">https://www.inaturalist.org/observations/39321568</a>   |
| 556 | <i>Spilopelia chinensis</i> | Eastern Spotted Dove | 2021/10/2  | 0 | 0 | 12.10347138 | 75.23360022 | <a href="https://www.inaturalist.org/observations/96904677">https://www.inaturalist.org/observations/96904677</a>   |
| 557 | <i>Spilopelia chinensis</i> | Eastern Spotted Dove | 2021/2/18  | 1 | 0 | 12.14058883 | 75.21942017 | <a href="https://www.inaturalist.org/observations/69754910">https://www.inaturalist.org/observations/69754910</a>   |
| 558 | <i>Spilopelia chinensis</i> | Eastern Spotted Dove | 2022/7/22  | 2 | 0 | 12.14382373 | 75.93982179 | <a href="https://www.inaturalist.org/observations/127330147">https://www.inaturalist.org/observations/127330147</a> |
| 559 | <i>Spilopelia chinensis</i> | Eastern Spotted Dove | 2020/2/3   | 0 | 0 | 12.14454516 | 75.93820442 | <a href="https://www.inaturalist.org/observations/38260190">https://www.inaturalist.org/observations/38260190</a>   |
| 560 | <i>Spilopelia chinensis</i> | Eastern Spotted Dove | 2022/3/8   | 3 | 0 | 12.14945333 | 75.19513833 | <a href="https://www.inaturalist.org/observations/115189684">https://www.inaturalist.org/observations/115189684</a> |
| 561 | <i>Spilopelia chinensis</i> | Eastern Spotted Dove | 2021/9/12  | 1 | 0 | 12.14979833 | 75.19504502 | <a href="https://www.inaturalist.org/observations/95049462">https://www.inaturalist.org/observations/95049462</a>   |
| 562 | <i>Spilopelia chinensis</i> | Eastern Spotted Dove | 2018/5/5   | 2 | 0 | 12.15093825 | 76.52898616 | <a href="https://www.inaturalist.org/observations/90641715">https://www.inaturalist.org/observations/90641715</a>   |
| 563 | <i>Spilopelia chinensis</i> | Eastern Spotted Dove | 2022/3/8   | 3 | 0 | 12.15114500 | 75.19610500 | <a href="https://www.inaturalist.org/observations/115189701">https://www.inaturalist.org/observations/115189701</a> |
| 564 | <i>Spilopelia chinensis</i> | Eastern Spotted Dove | 2022/1/20  | 1 | 0 | 12.15146074 | 75.94302770 | <a href="https://www.inaturalist.org/observations/106382747">https://www.inaturalist.org/observations/106382747</a> |
| 565 | <i>Spilopelia chinensis</i> | Eastern Spotted Dove | 2022/4/14  | 3 | 0 | 12.15150466 | 75.94302770 | <a href="https://www.inaturalist.org/observations/131546366">https://www.inaturalist.org/observations/131546366</a> |
| 566 | <i>Spilopelia chinensis</i> | Eastern Spotted Dove | 2012/9/2   | 7 | 0 | 12.20010501 | 77.58948561 | <a href="https://www.inaturalist.org/observations/66363228">https://www.inaturalist.org/observations/66363228</a>   |
| 567 | <i>Spilopelia chinensis</i> | Eastern Spotted Dove | 2021/9/10  | 1 | 0 | 12.20925291 | 75.73551352 | <a href="https://www.inaturalist.org/observations/95252412">https://www.inaturalist.org/observations/95252412</a>   |
| 568 | <i>Spilopelia chinensis</i> | Eastern Spotted Dove | 2016/1/3   | 1 | 0 | 12.22528410 | 79.07469570 | <a href="https://www.inaturalist.org/observations/96338221">https://www.inaturalist.org/observations/96338221</a>   |
| 569 | <i>Spilopelia chinensis</i> | Eastern Spotted Dove | 2020/12/20 | 2 | 0 | 12.25227833 | 75.27653833 | <a href="https://www.inaturalist.org/observations/66994047">https://www.inaturalist.org/observations/66994047</a>   |
| 570 | <i>Spilopelia chinensis</i> | Eastern Spotted Dove | 2018/3/8   | 5 | 0 | 12.26937200 | 76.61197800 | <a href="https://www.inaturalist.org/observations/10138018">https://www.inaturalist.org/observations/10138018</a>   |
| 571 | <i>Spilopelia chinensis</i> | Eastern Spotted Dove | 2018/1/20  | 1 | 0 | 12.26937200 | 76.61197800 | <a href="https://www.inaturalist.org/observations/93867733">https://www.inaturalist.org/observations/93867733</a>   |
| 572 | <i>Spilopelia chinensis</i> | Eastern Spotted Dove | 2012/1/14  | 1 | 0 | 12.26937200 | 76.61197800 | <a href="https://www.inaturalist.org/observations/94711066">https://www.inaturalist.org/observations/94711066</a>   |
| 573 | <i>Spilopelia chinensis</i> | Eastern Spotted Dove | 2014/9/6   | 1 | 0 | 12.26937200 | 76.61197800 | <a href="https://www.inaturalist.org/observations/94790685">https://www.inaturalist.org/observations/94790685</a>   |
| 574 | <i>Spilopelia chinensis</i> | Eastern Spotted Dove | 2014/6/8   | 1 | 0 | 12.26937200 | 76.61197800 | <a href="https://www.inaturalist.org/observations/94817201">https://www.inaturalist.org/observations/94817201</a>   |

|     |                             |                      |            |   |   |             |             |                                                                                                                     |
|-----|-----------------------------|----------------------|------------|---|---|-------------|-------------|---------------------------------------------------------------------------------------------------------------------|
| 575 | <i>Spilopelia chinensis</i> | Eastern Spotted Dove | 2009/12/31 | 1 | 0 | 12.26937200 | 76.61197800 | <a href="https://www.inaturalist.org/observations/94821397">https://www.inaturalist.org/observations/94821397</a>   |
| 576 | <i>Spilopelia chinensis</i> | Eastern Spotted Dove | 2014/5/25  | 2 | 0 | 12.26937200 | 76.61197800 | <a href="https://www.inaturalist.org/observations/94834958">https://www.inaturalist.org/observations/94834958</a>   |
| 577 | <i>Spilopelia chinensis</i> | Eastern Spotted Dove | 2021/12/16 | 3 | 0 | 12.26937200 | 76.61197800 | <a href="https://www.inaturalist.org/observations/103140743">https://www.inaturalist.org/observations/103140743</a> |
| 578 | <i>Spilopelia chinensis</i> | Eastern Spotted Dove | 2022/1/30  | 1 | 0 | 12.26937200 | 76.61197800 | <a href="https://www.inaturalist.org/observations/105954078">https://www.inaturalist.org/observations/105954078</a> |
| 579 | <i>Spilopelia chinensis</i> | Eastern Spotted Dove | 2021/9/8   | 2 | 0 | 12.27042491 | 76.77563072 | <a href="https://www.inaturalist.org/observations/94095180">https://www.inaturalist.org/observations/94095180</a>   |
| 580 | <i>Spilopelia chinensis</i> | Eastern Spotted Dove | 2018/2/24  | 4 | 0 | 12.27057398 | 76.61383270 | <a href="https://www.inaturalist.org/observations/10030289">https://www.inaturalist.org/observations/10030289</a>   |
| 581 | <i>Spilopelia chinensis</i> | Eastern Spotted Dove | 2018/12/30 | 4 | 0 | 12.27238500 | 76.61419667 | <a href="https://www.inaturalist.org/observations/19331415">https://www.inaturalist.org/observations/19331415</a>   |
| 582 | <i>Spilopelia chinensis</i> | Eastern Spotted Dove | 2014/7/26  | 2 | 0 | 12.27525460 | 76.67014750 | <a href="https://www.inaturalist.org/observations/87711998">https://www.inaturalist.org/observations/87711998</a>   |
| 583 | <i>Spilopelia chinensis</i> | Eastern Spotted Dove | 2017/9/21  | 3 | 0 | 12.27525460 | 76.67014750 | <a href="https://www.inaturalist.org/observations/88501806">https://www.inaturalist.org/observations/88501806</a>   |
| 584 | <i>Spilopelia chinensis</i> | Eastern Spotted Dove | 2020/10/22 | 2 | 0 | 12.27525460 | 76.67014750 | <a href="https://www.inaturalist.org/observations/88506960">https://www.inaturalist.org/observations/88506960</a>   |
| 585 | <i>Spilopelia chinensis</i> | Eastern Spotted Dove | 2019/2/25  | 5 | 0 | 12.27677739 | 76.61203234 | <a href="https://www.inaturalist.org/observations/69669064">https://www.inaturalist.org/observations/69669064</a>   |
| 586 | <i>Spilopelia chinensis</i> | Eastern Spotted Dove | 2020/6/13  | 2 | 0 | 12.27936203 | 76.58896975 | <a href="https://www.inaturalist.org/observations/92779670">https://www.inaturalist.org/observations/92779670</a>   |
| 587 | <i>Spilopelia chinensis</i> | Eastern Spotted Dove | 2022/9/21  | 2 | 0 | 12.28217170 | 76.59072926 | <a href="https://www.inaturalist.org/observations/136249232">https://www.inaturalist.org/observations/136249232</a> |
| 588 | <i>Spilopelia chinensis</i> | Eastern Spotted Dove | 2018/2/12  | 5 | 0 | 12.28300014 | 76.61500451 | <a href="https://www.inaturalist.org/observations/9864526">https://www.inaturalist.org/observations/9864526</a>     |
| 589 | <i>Spilopelia chinensis</i> | Eastern Spotted Dove | 2020/7/24  | 1 | 0 | 12.28607705 | 76.61092624 | <a href="https://www.inaturalist.org/observations/95925083">https://www.inaturalist.org/observations/95925083</a>   |
| 590 | <i>Spilopelia chinensis</i> | Eastern Spotted Dove | 2022/9/4   | 3 | 0 | 12.28706207 | 77.84838524 | <a href="https://www.inaturalist.org/observations/133581614">https://www.inaturalist.org/observations/133581614</a> |
| 591 | <i>Spilopelia chinensis</i> | Eastern Spotted Dove | 2015/5/23  | 6 | 0 | 12.28919600 | 76.56372100 | <a href="http://www.inaturalist.org/observations/1530071">http://www.inaturalist.org/observations/1530071</a>       |
| 592 | <i>Spilopelia chinensis</i> | Eastern Spotted Dove | 2020/8/17  | 1 | 0 | 12.28966880 | 76.60732135 | <a href="https://www.inaturalist.org/observations/96066508">https://www.inaturalist.org/observations/96066508</a>   |
| 593 | <i>Spilopelia chinensis</i> | Eastern Spotted Dove | 2022/6/18  | 5 | 0 | 12.29248167 | 76.61502833 | <a href="https://www.inaturalist.org/observations/123187192">https://www.inaturalist.org/observations/123187192</a> |
| 594 | <i>Spilopelia chinensis</i> | Eastern Spotted Dove | 2021/11/5  | 1 | 0 | 12.29355833 | 76.57409451 | <a href="https://www.inaturalist.org/observations/100308392">https://www.inaturalist.org/observations/100308392</a> |
| 595 | <i>Spilopelia chinensis</i> | Eastern Spotted Dove | 2019/10/6  | 2 | 0 | 12.29581040 | 76.63938050 | <a href="https://www.inaturalist.org/observations/100075203">https://www.inaturalist.org/observations/100075203</a> |
| 596 | <i>Spilopelia chinensis</i> | Eastern Spotted Dove | 2019/1/20  | 3 | 0 | 12.30753930 | 76.63534507 | <a href="https://www.inaturalist.org/observations/19780268">https://www.inaturalist.org/observations/19780268</a>   |
| 597 | <i>Spilopelia chinensis</i> | Eastern Spotted Dove | 2016/12/25 | 1 | 0 | 12.31016778 | 76.63113076 | <a href="https://www.inaturalist.org/observations/93559164">https://www.inaturalist.org/observations/93559164</a>   |

|     |                             |                      |            |   |   |             |             |                                                                                                                     |
|-----|-----------------------------|----------------------|------------|---|---|-------------|-------------|---------------------------------------------------------------------------------------------------------------------|
| 598 | <i>Spilopelia chinensis</i> | Eastern Spotted Dove | 2019/5/20  | 1 | 0 | 12.31016778 | 76.63113076 | <a href="https://www.inaturalist.org/observations/93559531">https://www.inaturalist.org/observations/93559531</a>   |
| 599 | <i>Spilopelia chinensis</i> | Eastern Spotted Dove | 2021/8/20  | 2 | 0 | 12.31193100 | 77.27692050 | <a href="https://www.inaturalist.org/observations/106424529">https://www.inaturalist.org/observations/106424529</a> |
| 600 | <i>Spilopelia chinensis</i> | Eastern Spotted Dove | 2018/5/26  | 4 | 0 | 12.31404667 | 76.62966000 | <a href="https://www.inaturalist.org/observations/12820451">https://www.inaturalist.org/observations/12820451</a>   |
| 601 | <i>Spilopelia chinensis</i> | Eastern Spotted Dove | 2018/7/22  | 2 | 0 | 12.31685280 | 76.59830560 | <a href="https://www.inaturalist.org/observations/86150189">https://www.inaturalist.org/observations/86150189</a>   |
| 602 | <i>Spilopelia chinensis</i> | Eastern Spotted Dove | 2021/8/30  | 1 | 0 | 12.31685280 | 76.59830560 | <a href="https://www.inaturalist.org/observations/93030178">https://www.inaturalist.org/observations/93030178</a>   |
| 603 | <i>Spilopelia chinensis</i> | Eastern Spotted Dove | 2020/2/17  | 1 | 0 | 12.31716500 | 75.10982500 | <a href="https://www.inaturalist.org/observations/39321536">https://www.inaturalist.org/observations/39321536</a>   |
| 604 | <i>Spilopelia chinensis</i> | Eastern Spotted Dove | 2012/2/18  | 1 | 0 | 12.32531077 | 76.67042708 | <a href="https://www.inaturalist.org/observations/48926219">https://www.inaturalist.org/observations/48926219</a>   |
| 605 | <i>Spilopelia chinensis</i> | Eastern Spotted Dove | 2020/4/2   | 2 | 0 | 12.32630220 | 76.61146101 | <a href="https://www.inaturalist.org/observations/41348861">https://www.inaturalist.org/observations/41348861</a>   |
| 606 | <i>Spilopelia chinensis</i> | Eastern Spotted Dove | 2022/7/30  | 3 | 0 | 12.35073910 | 77.64725740 | <a href="https://www.inaturalist.org/observations/128611422">https://www.inaturalist.org/observations/128611422</a> |
| 607 | <i>Spilopelia chinensis</i> | Eastern Spotted Dove | 2019/5/17  | 1 | 0 | 12.35806928 | 76.61007194 | <a href="https://www.inaturalist.org/observations/91852316">https://www.inaturalist.org/observations/91852316</a>   |
| 608 | <i>Spilopelia chinensis</i> | Eastern Spotted Dove | 2020/3/1   | 2 | 0 | 12.36009865 | 76.54254396 | <a href="https://www.inaturalist.org/observations/39528543">https://www.inaturalist.org/observations/39528543</a>   |
| 609 | <i>Spilopelia chinensis</i> | Eastern Spotted Dove | 2012/5/4   | 8 | 0 | 12.36012451 | 76.61109924 | <a href="http://www.inaturalist.org/observations/122109">http://www.inaturalist.org/observations/122109</a>         |
| 610 | <i>Spilopelia chinensis</i> | Eastern Spotted Dove | 2011/6/24  | 1 | 0 | 12.37043930 | 76.48801310 | <a href="https://www.inaturalist.org/observations/96097670">https://www.inaturalist.org/observations/96097670</a>   |
| 611 | <i>Spilopelia chinensis</i> | Eastern Spotted Dove | 2019/12/23 | 1 | 0 | 12.39444281 | 76.77467678 | <a href="https://www.inaturalist.org/observations/38053177">https://www.inaturalist.org/observations/38053177</a>   |
| 612 | <i>Spilopelia chinensis</i> | Eastern Spotted Dove | 2011/6/19  | 2 | 0 | 12.41666670 | 77.75000000 | <a href="https://www.inaturalist.org/observations/63564395">https://www.inaturalist.org/observations/63564395</a>   |
| 613 | <i>Spilopelia chinensis</i> | Eastern Spotted Dove | 2011/6/19  | 4 | 0 | 12.41666670 | 77.75000000 | <a href="https://www.inaturalist.org/observations/64120797">https://www.inaturalist.org/observations/64120797</a>   |
| 614 | <i>Spilopelia chinensis</i> | Eastern Spotted Dove | 2013/6/19  | 2 | 0 | 12.41666670 | 77.75000000 | <a href="https://www.inaturalist.org/observations/64164551">https://www.inaturalist.org/observations/64164551</a>   |
| 615 | <i>Spilopelia chinensis</i> | Eastern Spotted Dove | 2019/12/25 | 1 | 0 | 12.42183100 | 75.91892400 | <a href="https://www.inaturalist.org/observations/40687912">https://www.inaturalist.org/observations/40687912</a>   |
| 616 | <i>Spilopelia chinensis</i> | Eastern Spotted Dove | 2019/1/22  | 4 | 0 | 12.42370709 | 76.65633436 | <a href="https://www.inaturalist.org/observations/19820748">https://www.inaturalist.org/observations/19820748</a>   |
| 617 | <i>Spilopelia chinensis</i> | Eastern Spotted Dove | 2020/11/22 | 4 | 0 | 12.42738666 | 77.65511524 | <a href="https://www.inaturalist.org/observations/65467262">https://www.inaturalist.org/observations/65467262</a>   |
| 618 | <i>Spilopelia chinensis</i> | Eastern Spotted Dove | 2016/8/14  | 0 | 0 | 12.42952672 | 77.65473184 | <a href="https://www.inaturalist.org/observations/65137436">https://www.inaturalist.org/observations/65137436</a>   |
| 619 | <i>Spilopelia chinensis</i> | Eastern Spotted Dove | 2022/2/6   | 1 | 0 | 12.43756642 | 75.74141583 | <a href="https://www.inaturalist.org/observations/112939324">https://www.inaturalist.org/observations/112939324</a> |
| 620 | <i>Spilopelia chinensis</i> | Eastern Spotted Dove | 2017/9/22  | 3 | 0 | 12.45551770 | 75.95702340 | <a href="https://www.inaturalist.org/observations/109829864">https://www.inaturalist.org/observations/109829864</a> |

|     |                             |                      |            |   |   |             |             |                                                                                                                     |
|-----|-----------------------------|----------------------|------------|---|---|-------------|-------------|---------------------------------------------------------------------------------------------------------------------|
| 621 | <i>Spilopelia chinensis</i> | Eastern Spotted Dove | 2015/3/15  | 6 | 0 | 12.46700000 | 75.96700000 | <a href="http://www.inaturalist.org/observations/1366852">http://www.inaturalist.org/observations/1366852</a>       |
| 622 | <i>Spilopelia chinensis</i> | Eastern Spotted Dove | 2021/11/16 | 2 | 0 | 12.48648902 | 75.67278439 | <a href="https://www.inaturalist.org/observations/102292452">https://www.inaturalist.org/observations/102292452</a> |
| 623 | <i>Spilopelia chinensis</i> | Eastern Spotted Dove | 2022/8/5   | 3 | 0 | 12.50065167 | 77.61493833 | <a href="https://www.inaturalist.org/observations/129513545">https://www.inaturalist.org/observations/129513545</a> |
| 624 | <i>Spilopelia chinensis</i> | Eastern Spotted Dove | 2020/12/13 | 2 | 0 | 12.53765667 | 80.10910342 | <a href="https://www.inaturalist.org/observations/78228076">https://www.inaturalist.org/observations/78228076</a>   |
| 625 | <i>Spilopelia chinensis</i> | Eastern Spotted Dove | 2022/2/20  | 5 | 0 | 12.54341786 | 74.96370022 | <a href="https://www.inaturalist.org/observations/107700577">https://www.inaturalist.org/observations/107700577</a> |
| 626 | <i>Spilopelia chinensis</i> | Eastern Spotted Dove | 2021/11/16 | 2 | 0 | 12.56258631 | 75.71239223 | <a href="https://www.inaturalist.org/observations/102292470">https://www.inaturalist.org/observations/102292470</a> |
| 627 | <i>Spilopelia chinensis</i> | Eastern Spotted Dove | 2018/7/27  | 4 | 0 | 12.57606639 | 79.82380306 | <a href="https://www.inaturalist.org/observations/22503061">https://www.inaturalist.org/observations/22503061</a>   |
| 628 | <i>Spilopelia chinensis</i> | Eastern Spotted Dove | 2022/6/22  | 4 | 0 | 12.58107667 | 76.17493667 | <a href="https://www.inaturalist.org/observations/124899537">https://www.inaturalist.org/observations/124899537</a> |
| 629 | <i>Spilopelia chinensis</i> | Eastern Spotted Dove | 2021/10/16 | 1 | 0 | 12.59844046 | 77.94741365 | <a href="https://www.inaturalist.org/observations/98356348">https://www.inaturalist.org/observations/98356348</a>   |
| 630 | <i>Spilopelia chinensis</i> | Eastern Spotted Dove | 2022/6/21  | 5 | 0 | 12.61327000 | 76.08523000 | <a href="https://www.inaturalist.org/observations/124086970">https://www.inaturalist.org/observations/124086970</a> |
| 631 | <i>Spilopelia chinensis</i> | Eastern Spotted Dove | 2021/7/2   | 1 | 0 | 12.61706667 | 77.73832333 | <a href="https://www.inaturalist.org/observations/85582630">https://www.inaturalist.org/observations/85582630</a>   |
| 632 | <i>Spilopelia chinensis</i> | Eastern Spotted Dove | 2022/6/21  | 4 | 0 | 12.62108333 | 76.05286833 | <a href="https://www.inaturalist.org/observations/123239332">https://www.inaturalist.org/observations/123239332</a> |
| 633 | <i>Spilopelia chinensis</i> | Eastern Spotted Dove | 2021/11/28 | 1 | 0 | 12.62326582 | 77.94588290 | <a href="https://www.inaturalist.org/observations/102135378">https://www.inaturalist.org/observations/102135378</a> |
| 634 | <i>Spilopelia chinensis</i> | Eastern Spotted Dove | 2021/10/3  | 2 | 0 | 12.62829834 | 74.94471985 | <a href="https://www.inaturalist.org/observations/97151857">https://www.inaturalist.org/observations/97151857</a>   |
| 635 | <i>Spilopelia chinensis</i> | Eastern Spotted Dove | 2020/4/26  | 3 | 0 | 12.63000000 | 74.98000000 | <a href="https://www.inaturalist.org/observations/44238322">https://www.inaturalist.org/observations/44238322</a>   |
| 636 | <i>Spilopelia chinensis</i> | Eastern Spotted Dove | 2020/7/25  | 1 | 0 | 12.63000000 | 74.98000000 | <a href="https://www.inaturalist.org/observations/54363432">https://www.inaturalist.org/observations/54363432</a>   |
| 637 | <i>Spilopelia chinensis</i> | Eastern Spotted Dove | 2021/9/8   | 2 | 0 | 12.65550130 | 77.66681110 | <a href="https://www.inaturalist.org/observations/103202534">https://www.inaturalist.org/observations/103202534</a> |
| 638 | <i>Spilopelia chinensis</i> | Eastern Spotted Dove | 2021/10/3  | 2 | 0 | 12.67749487 | 77.91260335 | <a href="https://www.inaturalist.org/observations/96993885">https://www.inaturalist.org/observations/96993885</a>   |
| 639 | <i>Spilopelia chinensis</i> | Eastern Spotted Dove | 2021/10/10 | 2 | 0 | 12.68003667 | 77.91864667 | <a href="https://www.inaturalist.org/observations/97753486">https://www.inaturalist.org/observations/97753486</a>   |
| 640 | <i>Spilopelia chinensis</i> | Eastern Spotted Dove | 2022/8/14  | 3 | 0 | 12.68004333 | 77.91831000 | <a href="https://www.inaturalist.org/observations/130746563">https://www.inaturalist.org/observations/130746563</a> |
| 641 | <i>Spilopelia chinensis</i> | Eastern Spotted Dove | 2020/3/26  | 3 | 0 | 12.68371110 | 77.81224680 | <a href="https://www.inaturalist.org/observations/55927205">https://www.inaturalist.org/observations/55927205</a>   |
| 642 | <i>Spilopelia chinensis</i> | Eastern Spotted Dove | 2022/2/19  | 2 | 0 | 12.71264500 | 77.80773333 | <a href="https://www.inaturalist.org/observations/107120038">https://www.inaturalist.org/observations/107120038</a> |
| 643 | <i>Spilopelia chinensis</i> | Eastern Spotted Dove | 2022/5/8   | 2 | 0 | 12.71382000 | 77.81439167 | <a href="https://www.inaturalist.org/observations/119070837">https://www.inaturalist.org/observations/119070837</a> |



|     |                             |                      |            |   |   |             |             |                                                                                                                     |
|-----|-----------------------------|----------------------|------------|---|---|-------------|-------------|---------------------------------------------------------------------------------------------------------------------|
| 644 | <i>Spilopelia chinensis</i> | Eastern Spotted Dove | 2022/1/21  | 1 | 0 | 12.71384972 | 77.81438833 | <a href="https://www.inaturalist.org/observations/106980828">https://www.inaturalist.org/observations/106980828</a> |
| 645 | <i>Spilopelia chinensis</i> | Eastern Spotted Dove | 2022/1/21  | 1 | 0 | 12.71384972 | 77.81438833 | <a href="https://www.inaturalist.org/observations/106980831">https://www.inaturalist.org/observations/106980831</a> |
| 646 | <i>Spilopelia chinensis</i> | Eastern Spotted Dove | 2022/1/29  | 1 | 0 | 12.71384972 | 77.81438833 | <a href="https://www.inaturalist.org/observations/106980862">https://www.inaturalist.org/observations/106980862</a> |
| 647 | <i>Spilopelia chinensis</i> | Eastern Spotted Dove | 2022/5/7   | 2 | 0 | 12.71385167 | 77.81439500 | <a href="https://www.inaturalist.org/observations/115847657">https://www.inaturalist.org/observations/115847657</a> |
| 648 | <i>Spilopelia chinensis</i> | Eastern Spotted Dove | 2022/5/8   | 2 | 0 | 12.71385833 | 77.81434500 | <a href="https://www.inaturalist.org/observations/119070824">https://www.inaturalist.org/observations/119070824</a> |
| 649 | <i>Spilopelia chinensis</i> | Eastern Spotted Dove | 2022/5/7   | 4 | 0 | 12.71387333 | 77.81437667 | <a href="https://www.inaturalist.org/observations/115847636">https://www.inaturalist.org/observations/115847636</a> |
| 650 | <i>Spilopelia chinensis</i> | Eastern Spotted Dove | 2015/4/4   | 4 | 0 | 12.72048776 | 77.56077331 | <a href="https://www.inaturalist.org/observations/52037607">https://www.inaturalist.org/observations/52037607</a>   |
| 651 | <i>Spilopelia chinensis</i> | Eastern Spotted Dove | 2021/6/25  | 1 | 0 | 12.72654817 | 77.99171190 | <a href="https://www.inaturalist.org/observations/84660636">https://www.inaturalist.org/observations/84660636</a>   |
| 652 | <i>Spilopelia chinensis</i> | Eastern Spotted Dove | 2020/12/31 | 4 | 0 | 12.75320165 | 77.30136741 | <a href="https://www.inaturalist.org/observations/67378418">https://www.inaturalist.org/observations/67378418</a>   |
| 653 | <i>Spilopelia chinensis</i> | Eastern Spotted Dove | 2022/5/7   | 4 | 0 | 12.75736983 | 77.86978615 | <a href="https://www.inaturalist.org/observations/119229940">https://www.inaturalist.org/observations/119229940</a> |
| 654 | <i>Spilopelia chinensis</i> | Eastern Spotted Dove | 2022/4/24  | 0 | 0 | 12.76971000 | 77.87755833 | <a href="https://www.inaturalist.org/observations/112636769">https://www.inaturalist.org/observations/112636769</a> |
| 655 | <i>Spilopelia chinensis</i> | Eastern Spotted Dove | 2022/7/6   | 3 | 0 | 12.77371074 | 77.61810542 | <a href="https://www.inaturalist.org/observations/124990229">https://www.inaturalist.org/observations/124990229</a> |
| 656 | <i>Spilopelia chinensis</i> | Eastern Spotted Dove | 2021/12/12 | 1 | 0 | 12.77821635 | 77.82059743 | <a href="https://www.inaturalist.org/observations/102921100">https://www.inaturalist.org/observations/102921100</a> |
| 657 | <i>Spilopelia chinensis</i> | Eastern Spotted Dove | 2021/12/12 | 1 | 0 | 12.78532306 | 77.95126050 | <a href="https://www.inaturalist.org/observations/102917205">https://www.inaturalist.org/observations/102917205</a> |
| 658 | <i>Spilopelia chinensis</i> | Eastern Spotted Dove | 2021/10/29 | 2 | 0 | 12.78806036 | 76.93665770 | <a href="https://www.inaturalist.org/observations/99774533">https://www.inaturalist.org/observations/99774533</a>   |
| 659 | <i>Spilopelia chinensis</i> | Eastern Spotted Dove | 2022/5/4   | 3 | 0 | 12.79134284 | 77.82513249 | <a href="https://www.inaturalist.org/observations/119229904">https://www.inaturalist.org/observations/119229904</a> |
| 660 | <i>Spilopelia chinensis</i> | Eastern Spotted Dove | 2022/7/28  | 3 | 0 | 12.80324282 | 77.56302930 | <a href="https://www.inaturalist.org/observations/128593115">https://www.inaturalist.org/observations/128593115</a> |
| 661 | <i>Spilopelia chinensis</i> | Eastern Spotted Dove | 2022/6/30  | 4 | 0 | 12.80725762 | 77.56099720 | <a href="https://www.inaturalist.org/observations/124705284">https://www.inaturalist.org/observations/124705284</a> |
| 662 | <i>Spilopelia chinensis</i> | Eastern Spotted Dove | 2019/8/12  | 1 | 0 | 12.80738909 | 76.73563921 | <a href="https://www.inaturalist.org/observations/95275792">https://www.inaturalist.org/observations/95275792</a>   |
| 663 | <i>Spilopelia chinensis</i> | Eastern Spotted Dove | 2017/6/11  | 5 | 0 | 12.80783943 | 77.56465430 | <a href="https://www.inaturalist.org/observations/69361758">https://www.inaturalist.org/observations/69361758</a>   |
| 664 | <i>Spilopelia chinensis</i> | Eastern Spotted Dove | 2022/2/9   | 2 | 0 | 12.80834931 | 77.52646055 | <a href="https://www.inaturalist.org/observations/106440952">https://www.inaturalist.org/observations/106440952</a> |
| 665 | <i>Spilopelia chinensis</i> | Eastern Spotted Dove | 2022/2/3   | 1 | 0 | 12.80880063 | 77.52785474 | <a href="https://www.inaturalist.org/observations/106078045">https://www.inaturalist.org/observations/106078045</a> |
| 666 | <i>Spilopelia chinensis</i> | Eastern Spotted Dove | 2021/10/2  | 1 | 0 | 12.80965801 | 77.62658456 | <a href="https://www.inaturalist.org/observations/97729377">https://www.inaturalist.org/observations/97729377</a>   |

|     |                             |                      |            |   |   |             |             |                                                                                                                     |
|-----|-----------------------------|----------------------|------------|---|---|-------------|-------------|---------------------------------------------------------------------------------------------------------------------|
| 667 | <i>Spilopelia chinensis</i> | Eastern Spotted Dove | 2018/1/14  | 0 | 0 | 12.81385331 | 76.94609644 | <a href="https://www.inaturalist.org/observations/96773263">https://www.inaturalist.org/observations/96773263</a>   |
| 668 | <i>Spilopelia chinensis</i> | Eastern Spotted Dove | 2020/6/1   | 2 | 0 | 12.81385331 | 76.94609644 | <a href="https://www.inaturalist.org/observations/96783997">https://www.inaturalist.org/observations/96783997</a>   |
| 669 | <i>Spilopelia chinensis</i> | Eastern Spotted Dove | 2019/4/22  | 2 | 0 | 12.82552510 | 77.03485730 | <a href="https://www.inaturalist.org/observations/92326550">https://www.inaturalist.org/observations/92326550</a>   |
| 670 | <i>Spilopelia chinensis</i> | Eastern Spotted Dove | 2019/6/9   | 2 | 0 | 12.82552510 | 77.03485730 | <a href="https://www.inaturalist.org/observations/92329138">https://www.inaturalist.org/observations/92329138</a>   |
| 671 | <i>Spilopelia chinensis</i> | Eastern Spotted Dove | 2022/6/26  | 2 | 0 | 12.82565567 | 77.73247457 | <a href="https://www.inaturalist.org/observations/127757533">https://www.inaturalist.org/observations/127757533</a> |
| 672 | <i>Spilopelia chinensis</i> | Eastern Spotted Dove | 2020/8/16  | 3 | 0 | 12.83853523 | 77.65206955 | <a href="https://www.inaturalist.org/observations/84542209">https://www.inaturalist.org/observations/84542209</a>   |
| 673 | <i>Spilopelia chinensis</i> | Eastern Spotted Dove | 2020/8/25  | 3 | 0 | 12.83864704 | 77.65198675 | <a href="https://www.inaturalist.org/observations/84538562">https://www.inaturalist.org/observations/84538562</a>   |
| 674 | <i>Spilopelia chinensis</i> | Eastern Spotted Dove | 2022/2/26  | 1 | 0 | 12.84162626 | 77.77524635 | <a href="https://www.inaturalist.org/observations/107467074">https://www.inaturalist.org/observations/107467074</a> |
| 675 | <i>Spilopelia chinensis</i> | Eastern Spotted Dove | 2022/7/29  | 6 | 0 | 12.84240270 | 77.72698600 | <a href="https://www.inaturalist.org/observations/132941581">https://www.inaturalist.org/observations/132941581</a> |
| 676 | <i>Spilopelia chinensis</i> | Eastern Spotted Dove | 2021/8/16  | 1 | 0 | 12.84275000 | 77.72446300 | <a href="https://www.inaturalist.org/observations/92644365">https://www.inaturalist.org/observations/92644365</a>   |
| 677 | <i>Spilopelia chinensis</i> | Eastern Spotted Dove | 2022/1/5   | 5 | 0 | 12.84275000 | 77.72446300 | <a href="https://www.inaturalist.org/observations/104404248">https://www.inaturalist.org/observations/104404248</a> |
| 678 | <i>Spilopelia chinensis</i> | Eastern Spotted Dove | 2022/2/1   | 2 | 0 | 12.84275000 | 77.72446300 | <a href="https://www.inaturalist.org/observations/105953541">https://www.inaturalist.org/observations/105953541</a> |
| 679 | <i>Spilopelia chinensis</i> | Eastern Spotted Dove | 2017/8/13  | 2 | 0 | 12.84290300 | 77.47106450 | <a href="https://www.inaturalist.org/observations/66178140">https://www.inaturalist.org/observations/66178140</a>   |
| 680 | <i>Spilopelia chinensis</i> | Eastern Spotted Dove | 2021/11/21 | 1 | 0 | 12.84303427 | 80.17864268 | <a href="https://www.inaturalist.org/observations/101611060">https://www.inaturalist.org/observations/101611060</a> |
| 681 | <i>Spilopelia chinensis</i> | Eastern Spotted Dove | 2022/2/20  | 4 | 0 | 12.84463597 | 77.77340200 | <a href="https://www.inaturalist.org/observations/107361829">https://www.inaturalist.org/observations/107361829</a> |
| 682 | <i>Spilopelia chinensis</i> | Eastern Spotted Dove | 2022/4/3   | 1 | 0 | 12.84597197 | 77.77160997 | <a href="https://www.inaturalist.org/observations/110264381">https://www.inaturalist.org/observations/110264381</a> |
| 683 | <i>Spilopelia chinensis</i> | Eastern Spotted Dove | 2020/11/7  | 1 | 0 | 12.84849973 | 76.80860198 | <a href="https://www.inaturalist.org/observations/97213467">https://www.inaturalist.org/observations/97213467</a>   |
| 684 | <i>Spilopelia chinensis</i> | Eastern Spotted Dove | 2022/6/10  | 1 | 0 | 12.85061333 | 77.77928833 | <a href="https://www.inaturalist.org/observations/121093875">https://www.inaturalist.org/observations/121093875</a> |
| 685 | <i>Spilopelia chinensis</i> | Eastern Spotted Dove | 2021/7/27  | 1 | 0 | 12.85081333 | 77.78189667 | <a href="https://www.inaturalist.org/observations/88785764">https://www.inaturalist.org/observations/88785764</a>   |
| 686 | <i>Spilopelia chinensis</i> | Eastern Spotted Dove | 2018/8/5   | 4 | 0 | 12.85312333 | 77.50383833 | <a href="https://www.inaturalist.org/observations/15161513">https://www.inaturalist.org/observations/15161513</a>   |
| 687 | <i>Spilopelia chinensis</i> | Eastern Spotted Dove | 2020/2/1   | 2 | 0 | 12.85400090 | 77.50871148 | <a href="https://www.inaturalist.org/observations/61773024">https://www.inaturalist.org/observations/61773024</a>   |
| 688 | <i>Spilopelia chinensis</i> | Eastern Spotted Dove | 2022/1/2   | 1 | 0 | 12.85529794 | 77.50802483 | <a href="https://www.inaturalist.org/observations/104173252">https://www.inaturalist.org/observations/104173252</a> |
| 689 | <i>Spilopelia chinensis</i> | Eastern Spotted Dove | 2021/3/21  | 3 | 0 | 12.85718650 | 77.50891100 | <a href="https://www.inaturalist.org/observations/71692536">https://www.inaturalist.org/observations/71692536</a>   |

|     |                             |                      |            |   |   |             |             |                                                                                                                     |
|-----|-----------------------------|----------------------|------------|---|---|-------------|-------------|---------------------------------------------------------------------------------------------------------------------|
| 690 | <i>Spilopelia chinensis</i> | Eastern Spotted Dove | 2021/10/31 | 1 | 0 | 12.85718650 | 77.50891100 | <a href="https://www.inaturalist.org/observations/99861613">https://www.inaturalist.org/observations/99861613</a>   |
| 691 | <i>Spilopelia chinensis</i> | Eastern Spotted Dove | 2020/11/8  | 2 | 0 | 12.86523000 | 77.56809333 | <a href="https://www.inaturalist.org/observations/64535854">https://www.inaturalist.org/observations/64535854</a>   |
| 692 | <i>Spilopelia chinensis</i> | Eastern Spotted Dove | 2020/9/26  | 2 | 0 | 12.86877172 | 77.64412656 | <a href="https://www.inaturalist.org/observations/60988373">https://www.inaturalist.org/observations/60988373</a>   |
| 693 | <i>Spilopelia chinensis</i> | Eastern Spotted Dove | 2022/5/1   | 1 | 0 | 12.87381851 | 77.52592295 | <a href="https://www.inaturalist.org/observations/114142704">https://www.inaturalist.org/observations/114142704</a> |
| 694 | <i>Spilopelia chinensis</i> | Eastern Spotted Dove | 2020/12/12 | 1 | 0 | 12.87407590 | 77.52710920 | <a href="https://www.inaturalist.org/observations/66456722">https://www.inaturalist.org/observations/66456722</a>   |
| 695 | <i>Spilopelia chinensis</i> | Eastern Spotted Dove | 2021/12/21 | 0 | 0 | 12.87414820 | 75.76445320 | <a href="https://www.inaturalist.org/observations/103677707">https://www.inaturalist.org/observations/103677707</a> |
| 696 | <i>Spilopelia chinensis</i> | Eastern Spotted Dove | 2021/12/21 | 1 | 0 | 12.87414820 | 75.76445320 | <a href="https://www.inaturalist.org/observations/103677716">https://www.inaturalist.org/observations/103677716</a> |
| 697 | <i>Spilopelia chinensis</i> | Eastern Spotted Dove | 2021/12/21 | 1 | 0 | 12.87414820 | 75.76445320 | <a href="https://www.inaturalist.org/observations/103678231">https://www.inaturalist.org/observations/103678231</a> |
| 698 | <i>Spilopelia chinensis</i> | Eastern Spotted Dove | 2021/12/24 | 2 | 0 | 12.87414820 | 75.76445320 | <a href="https://www.inaturalist.org/observations/103683690">https://www.inaturalist.org/observations/103683690</a> |
| 699 | <i>Spilopelia chinensis</i> | Eastern Spotted Dove | 2020/12/25 | 2 | 0 | 12.87420550 | 77.52724260 | <a href="https://www.inaturalist.org/observations/67044249">https://www.inaturalist.org/observations/67044249</a>   |
| 700 | <i>Spilopelia chinensis</i> | Eastern Spotted Dove | 2020/6/6   | 1 | 0 | 12.87470852 | 77.52157137 | <a href="https://www.inaturalist.org/observations/48625202">https://www.inaturalist.org/observations/48625202</a>   |
| 701 | <i>Spilopelia chinensis</i> | Eastern Spotted Dove | 2020/12/20 | 4 | 0 | 12.87498745 | 77.62998562 | <a href="https://www.inaturalist.org/observations/66882289">https://www.inaturalist.org/observations/66882289</a>   |
| 702 | <i>Spilopelia chinensis</i> | Eastern Spotted Dove | 2020/10/25 | 4 | 0 | 12.87502333 | 77.58001833 | <a href="https://www.inaturalist.org/observations/63558285">https://www.inaturalist.org/observations/63558285</a>   |
| 703 | <i>Spilopelia chinensis</i> | Eastern Spotted Dove | 2021/8/28  | 2 | 0 | 12.87864161 | 77.52998391 | <a href="https://www.inaturalist.org/observations/92778168">https://www.inaturalist.org/observations/92778168</a>   |
| 704 | <i>Spilopelia chinensis</i> | Eastern Spotted Dove | 2020/12/26 | 4 | 0 | 12.87884033 | 77.52970496 | <a href="https://www.inaturalist.org/observations/67081939">https://www.inaturalist.org/observations/67081939</a>   |
| 705 | <i>Spilopelia chinensis</i> | Eastern Spotted Dove | 2021/2/7   | 2 | 0 | 12.87888216 | 77.53004828 | <a href="https://www.inaturalist.org/observations/69198756">https://www.inaturalist.org/observations/69198756</a>   |
| 706 | <i>Spilopelia chinensis</i> | Eastern Spotted Dove | 2018/8/4   | 4 | 0 | 12.87888700 | 77.52640200 | <a href="https://www.inaturalist.org/observations/15102177">https://www.inaturalist.org/observations/15102177</a>   |
| 707 | <i>Spilopelia chinensis</i> | Eastern Spotted Dove | 2021/7/31  | 2 | 0 | 12.87890308 | 77.52986589 | <a href="https://www.inaturalist.org/observations/89328262">https://www.inaturalist.org/observations/89328262</a>   |
| 708 | <i>Spilopelia chinensis</i> | Eastern Spotted Dove | 2021/2/28  | 1 | 0 | 12.87892400 | 77.53009120 | <a href="https://www.inaturalist.org/observations/70749990">https://www.inaturalist.org/observations/70749990</a>   |
| 709 | <i>Spilopelia chinensis</i> | Eastern Spotted Dove | 2021/3/12  | 3 | 0 | 12.87892400 | 77.53009120 | <a href="https://www.inaturalist.org/observations/71202352">https://www.inaturalist.org/observations/71202352</a>   |
| 710 | <i>Spilopelia chinensis</i> | Eastern Spotted Dove | 2021/3/20  | 2 | 0 | 12.87892400 | 77.53009120 | <a href="https://www.inaturalist.org/observations/71611421">https://www.inaturalist.org/observations/71611421</a>   |
| 711 | <i>Spilopelia chinensis</i> | Eastern Spotted Dove | 2021/7/3   | 2 | 0 | 12.87892400 | 77.53009120 | <a href="https://www.inaturalist.org/observations/85460239">https://www.inaturalist.org/observations/85460239</a>   |
| 712 | <i>Spilopelia chinensis</i> | Eastern Spotted Dove | 2022/2/5   | 2 | 0 | 12.87892400 | 77.53009120 | <a href="https://www.inaturalist.org/observations/106171517">https://www.inaturalist.org/observations/106171517</a> |

|     |                             |                      |            |   |   |             |             |                                                                                                                   |
|-----|-----------------------------|----------------------|------------|---|---|-------------|-------------|-------------------------------------------------------------------------------------------------------------------|
| 713 | <i>Spilopelia chinensis</i> | Eastern Spotted Dove | 2020/9/26  | 5 | 0 | 12.87894620 | 77.52977930 | <a href="https://www.inaturalist.org/observations/60814569">https://www.inaturalist.org/observations/60814569</a> |
| 714 | <i>Spilopelia chinensis</i> | Eastern Spotted Dove | 2020/10/10 | 2 | 0 | 12.87894620 | 77.52977930 | <a href="https://www.inaturalist.org/observations/62180986">https://www.inaturalist.org/observations/62180986</a> |
| 715 | <i>Spilopelia chinensis</i> | Eastern Spotted Dove | 2021/4/3   | 2 | 0 | 12.87896584 | 77.52959767 | <a href="https://www.inaturalist.org/observations/72766381">https://www.inaturalist.org/observations/72766381</a> |
| 716 | <i>Spilopelia chinensis</i> | Eastern Spotted Dove | 2020/11/28 | 2 | 0 | 12.87941685 | 77.52982221 | <a href="https://www.inaturalist.org/observations/65761552">https://www.inaturalist.org/observations/65761552</a> |
| 717 | <i>Spilopelia chinensis</i> | Eastern Spotted Dove | 2020/12/29 | 4 | 0 | 12.87946786 | 77.52971569 | <a href="https://www.inaturalist.org/observations/67245052">https://www.inaturalist.org/observations/67245052</a> |
| 718 | <i>Spilopelia chinensis</i> | Eastern Spotted Dove | 2020/10/2  | 3 | 0 | 12.87950540 | 79.40612680 | <a href="https://www.inaturalist.org/observations/83090792">https://www.inaturalist.org/observations/83090792</a> |
| 719 | <i>Spilopelia chinensis</i> | Eastern Spotted Dove | 2021/10/24 | 2 | 0 | 12.88013724 | 77.52939383 | <a href="https://www.inaturalist.org/observations/99234731">https://www.inaturalist.org/observations/99234731</a> |
| 720 | <i>Spilopelia chinensis</i> | Eastern Spotted Dove | 2020/10/24 | 3 | 0 | 12.88028500 | 77.52939300 | <a href="https://www.inaturalist.org/observations/63388634">https://www.inaturalist.org/observations/63388634</a> |
| 721 | <i>Spilopelia chinensis</i> | Eastern Spotted Dove | 2019/1/12  | 3 | 0 | 12.88035796 | 77.52937493 | <a href="https://www.inaturalist.org/observations/19590306">https://www.inaturalist.org/observations/19590306</a> |
| 722 | <i>Spilopelia chinensis</i> | Eastern Spotted Dove | 2021/1/24  | 3 | 0 | 12.88158836 | 79.12976425 | <a href="https://www.inaturalist.org/observations/68551387">https://www.inaturalist.org/observations/68551387</a> |
| 723 | <i>Spilopelia chinensis</i> | Eastern Spotted Dove | 2017/3/4   | 2 | 0 | 12.88259664 | 77.52360254 | <a href="https://www.inaturalist.org/observations/64917453">https://www.inaturalist.org/observations/64917453</a> |
| 724 | <i>Spilopelia chinensis</i> | Eastern Spotted Dove | 2021/8/28  | 2 | 0 | 12.88458640 | 77.46480580 | <a href="https://www.inaturalist.org/observations/93390133">https://www.inaturalist.org/observations/93390133</a> |
| 725 | <i>Spilopelia chinensis</i> | Eastern Spotted Dove | 2021/5/22  | 2 | 0 | 12.88541756 | 77.46574592 | <a href="https://www.inaturalist.org/observations/80154185">https://www.inaturalist.org/observations/80154185</a> |
| 726 | <i>Spilopelia chinensis</i> | Eastern Spotted Dove | 2016/4/16  | 1 | 0 | 12.88662979 | 77.67267399 | <a href="https://www.inaturalist.org/observations/79310223">https://www.inaturalist.org/observations/79310223</a> |
| 727 | <i>Spilopelia chinensis</i> | Eastern Spotted Dove | 2012/3/8   | 1 | 0 | 12.89041400 | 77.58719000 | <a href="https://www.inaturalist.org/observations/86257060">https://www.inaturalist.org/observations/86257060</a> |
| 728 | <i>Spilopelia chinensis</i> | Eastern Spotted Dove | 2021/4/18  | 1 | 0 | 12.89050000 | 77.56400000 | <a href="https://www.inaturalist.org/observations/80296053">https://www.inaturalist.org/observations/80296053</a> |
| 729 | <i>Spilopelia chinensis</i> | Eastern Spotted Dove | 2021/4/18  | 2 | 0 | 12.89050000 | 77.56400000 | <a href="https://www.inaturalist.org/observations/80296054">https://www.inaturalist.org/observations/80296054</a> |
| 730 | <i>Spilopelia chinensis</i> | Eastern Spotted Dove | 2019/9/15  | 2 | 0 | 12.89180091 | 79.10718043 | <a href="https://www.inaturalist.org/observations/73587009">https://www.inaturalist.org/observations/73587009</a> |
| 731 | <i>Spilopelia chinensis</i> | Eastern Spotted Dove | 2019/8/4   | 3 | 0 | 12.89308790 | 79.28769389 | <a href="https://www.inaturalist.org/observations/69613684">https://www.inaturalist.org/observations/69613684</a> |
| 732 | <i>Spilopelia chinensis</i> | Eastern Spotted Dove | 2021/8/6   | 1 | 0 | 12.89859382 | 77.54075289 | <a href="https://www.inaturalist.org/observations/90119343">https://www.inaturalist.org/observations/90119343</a> |
| 733 | <i>Spilopelia chinensis</i> | Eastern Spotted Dove | 2021/8/13  | 2 | 0 | 12.89861768 | 77.54075859 | <a href="https://www.inaturalist.org/observations/90987745">https://www.inaturalist.org/observations/90987745</a> |
| 734 | <i>Spilopelia chinensis</i> | Eastern Spotted Dove | 2021/6/30  | 2 | 0 | 12.89863958 | 77.54074886 | <a href="https://www.inaturalist.org/observations/86963658">https://www.inaturalist.org/observations/86963658</a> |
| 735 | <i>Spilopelia chinensis</i> | Eastern Spotted Dove | 2021/6/28  | 2 | 0 | 12.89864089 | 77.54076764 | <a href="https://www.inaturalist.org/observations/86955123">https://www.inaturalist.org/observations/86955123</a> |

|     |                             |                      |            |   |   |             |             |                                                                                                                     |
|-----|-----------------------------|----------------------|------------|---|---|-------------|-------------|---------------------------------------------------------------------------------------------------------------------|
| 736 | <i>Spilopelia chinensis</i> | Eastern Spotted Dove | 2021/8/16  | 1 | 0 | 12.89864415 | 77.54073646 | <a href="https://www.inaturalist.org/observations/91394409">https://www.inaturalist.org/observations/91394409</a>   |
| 737 | <i>Spilopelia chinensis</i> | Eastern Spotted Dove | 2020/2/22  | 0 | 0 | 12.89878109 | 77.54062884 | <a href="https://www.inaturalist.org/observations/39250637">https://www.inaturalist.org/observations/39250637</a>   |
| 738 | <i>Spilopelia chinensis</i> | Eastern Spotted Dove | 2020/6/1   | 3 | 0 | 12.89917930 | 77.66699090 | <a href="https://www.inaturalist.org/observations/48154026">https://www.inaturalist.org/observations/48154026</a>   |
| 739 | <i>Spilopelia chinensis</i> | Eastern Spotted Dove | 2021/6/26  | 1 | 0 | 12.89950401 | 77.54156694 | <a href="https://www.inaturalist.org/observations/86955015">https://www.inaturalist.org/observations/86955015</a>   |
| 740 | <i>Spilopelia chinensis</i> | Eastern Spotted Dove | 2020/9/26  | 2 | 0 | 12.90080270 | 80.21644568 | <a href="https://www.inaturalist.org/observations/60819473">https://www.inaturalist.org/observations/60819473</a>   |
| 741 | <i>Spilopelia chinensis</i> | Eastern Spotted Dove | 2015/8/25  | 8 | 0 | 12.90206794 | 77.62719807 | <a href="https://www.inaturalist.org/observations/17836220">https://www.inaturalist.org/observations/17836220</a>   |
| 742 | <i>Spilopelia chinensis</i> | Eastern Spotted Dove | 2020/8/20  | 3 | 0 | 12.90263889 | 79.11374722 | <a href="https://www.inaturalist.org/observations/57304466">https://www.inaturalist.org/observations/57304466</a>   |
| 743 | <i>Spilopelia chinensis</i> | Eastern Spotted Dove | 2018/6/4   | 6 | 0 | 12.90470726 | 77.43077496 | <a href="https://www.inaturalist.org/observations/13368640">https://www.inaturalist.org/observations/13368640</a>   |
| 744 | <i>Spilopelia chinensis</i> | Eastern Spotted Dove | 2022/9/11  | 0 | 0 | 12.90529248 | 80.20354606 | <a href="https://www.inaturalist.org/observations/134604815">https://www.inaturalist.org/observations/134604815</a> |
| 745 | <i>Spilopelia chinensis</i> | Eastern Spotted Dove | 2020/12/27 | 2 | 0 | 12.90556861 | 77.66945167 | <a href="https://www.inaturalist.org/observations/67501563">https://www.inaturalist.org/observations/67501563</a>   |
| 746 | <i>Spilopelia chinensis</i> | Eastern Spotted Dove | 2020/7/9   | 2 | 0 | 12.90657222 | 77.67716389 | <a href="https://www.inaturalist.org/observations/52433433">https://www.inaturalist.org/observations/52433433</a>   |
| 747 | <i>Spilopelia chinensis</i> | Eastern Spotted Dove | 2020/8/1   | 1 | 0 | 12.90666103 | 77.67614775 | <a href="https://www.inaturalist.org/observations/55006703">https://www.inaturalist.org/observations/55006703</a>   |
| 748 | <i>Spilopelia chinensis</i> | Eastern Spotted Dove | 2022/4/28  | 2 | 0 | 12.90701639 | 75.66369139 | <a href="https://www.inaturalist.org/observations/114661907">https://www.inaturalist.org/observations/114661907</a> |
| 749 | <i>Spilopelia chinensis</i> | Eastern Spotted Dove | 2020/2/1   | 1 | 0 | 12.90893832 | 77.66249299 | <a href="https://www.inaturalist.org/observations/38172927">https://www.inaturalist.org/observations/38172927</a>   |
| 750 | <i>Spilopelia chinensis</i> | Eastern Spotted Dove | 2020/4/15  | 2 | 0 | 12.90898530 | 77.49020970 | <a href="https://www.inaturalist.org/observations/44570211">https://www.inaturalist.org/observations/44570211</a>   |
| 751 | <i>Spilopelia chinensis</i> | Eastern Spotted Dove | 2020/4/15  | 4 | 0 | 12.90898530 | 77.49020970 | <a href="https://www.inaturalist.org/observations/44573067">https://www.inaturalist.org/observations/44573067</a>   |
| 752 | <i>Spilopelia chinensis</i> | Eastern Spotted Dove | 2019/12/15 | 4 | 0 | 12.91236155 | 77.67258916 | <a href="https://www.inaturalist.org/observations/58830509">https://www.inaturalist.org/observations/58830509</a>   |
| 753 | <i>Spilopelia chinensis</i> | Eastern Spotted Dove | 2020/9/6   | 1 | 0 | 12.91269250 | 77.67329750 | <a href="https://www.inaturalist.org/observations/58689211">https://www.inaturalist.org/observations/58689211</a>   |
| 754 | <i>Spilopelia chinensis</i> | Eastern Spotted Dove | 2019/9/26  | 2 | 0 | 12.91506285 | 77.66319036 | <a href="https://www.inaturalist.org/observations/52767401">https://www.inaturalist.org/observations/52767401</a>   |
| 755 | <i>Spilopelia chinensis</i> | Eastern Spotted Dove | 2021/10/2  | 1 | 0 | 12.91509453 | 77.46969799 | <a href="https://www.inaturalist.org/observations/96892170">https://www.inaturalist.org/observations/96892170</a>   |
| 756 | <i>Spilopelia chinensis</i> | Eastern Spotted Dove | 2021/3/3   | 3 | 0 | 12.91732262 | 77.66494074 | <a href="https://www.inaturalist.org/observations/70548849">https://www.inaturalist.org/observations/70548849</a>   |
| 757 | <i>Spilopelia chinensis</i> | Eastern Spotted Dove | 2019/6/30  | 5 | 0 | 12.91769500 | 77.66520500 | <a href="https://www.inaturalist.org/observations/28348835">https://www.inaturalist.org/observations/28348835</a>   |
| 758 | <i>Spilopelia chinensis</i> | Eastern Spotted Dove | 2018/11/18 | 2 | 0 | 12.91831260 | 77.68009700 | <a href="https://www.inaturalist.org/observations/65007294">https://www.inaturalist.org/observations/65007294</a>   |

|     |                             |                      |            |   |   |             |             |                                                                                                                     |
|-----|-----------------------------|----------------------|------------|---|---|-------------|-------------|---------------------------------------------------------------------------------------------------------------------|
| 759 | <i>Spilopelia chinensis</i> | Eastern Spotted Dove | 2021/8/1   | 3 | 0 | 12.91889375 | 77.67817280 | <a href="https://www.inaturalist.org/observations/90113590">https://www.inaturalist.org/observations/90113590</a>   |
| 760 | <i>Spilopelia chinensis</i> | Eastern Spotted Dove | 2021/6/18  | 2 | 0 | 12.92001561 | 77.64769351 | <a href="https://www.inaturalist.org/observations/83630610">https://www.inaturalist.org/observations/83630610</a>   |
| 761 | <i>Spilopelia chinensis</i> | Eastern Spotted Dove | 2021/4/18  | 2 | 0 | 12.92002500 | 77.64769476 | <a href="https://www.inaturalist.org/observations/80872080">https://www.inaturalist.org/observations/80872080</a>   |
| 762 | <i>Spilopelia chinensis</i> | Eastern Spotted Dove | 2022/4/29  | 2 | 0 | 12.92006810 | 77.64772743 | <a href="https://www.inaturalist.org/observations/114628052">https://www.inaturalist.org/observations/114628052</a> |
| 763 | <i>Spilopelia chinensis</i> | Eastern Spotted Dove | 2022/8/30  | 4 | 0 | 12.92024716 | 77.64776576 | <a href="https://www.inaturalist.org/observations/133574277">https://www.inaturalist.org/observations/133574277</a> |
| 764 | <i>Spilopelia chinensis</i> | Eastern Spotted Dove | 2022/9/26  | 2 | 0 | 12.92046917 | 77.69176472 | <a href="https://www.inaturalist.org/observations/136768833">https://www.inaturalist.org/observations/136768833</a> |
| 765 | <i>Spilopelia chinensis</i> | Eastern Spotted Dove | 2020/7/15  | 3 | 0 | 12.92288978 | 77.58277573 | <a href="https://www.inaturalist.org/observations/53132419">https://www.inaturalist.org/observations/53132419</a>   |
| 766 | <i>Spilopelia chinensis</i> | Eastern Spotted Dove | 2021/5/19  | 6 | 0 | 12.92459872 | 77.58783361 | <a href="https://www.inaturalist.org/observations/109357389">https://www.inaturalist.org/observations/109357389</a> |
| 767 | <i>Spilopelia chinensis</i> | Eastern Spotted Dove | 2021/5/23  | 5 | 0 | 12.92462954 | 77.58797965 | <a href="https://www.inaturalist.org/observations/109361810">https://www.inaturalist.org/observations/109361810</a> |
| 768 | <i>Spilopelia chinensis</i> | Eastern Spotted Dove | 2021/5/23  | 4 | 0 | 12.92464382 | 77.58797711 | <a href="https://www.inaturalist.org/observations/109357390">https://www.inaturalist.org/observations/109357390</a> |
| 769 | <i>Spilopelia chinensis</i> | Eastern Spotted Dove | 2021/5/23  | 5 | 0 | 12.92467029 | 77.58798047 | <a href="https://www.inaturalist.org/observations/109357391">https://www.inaturalist.org/observations/109357391</a> |
| 770 | <i>Spilopelia chinensis</i> | Eastern Spotted Dove | 2021/1/11  | 4 | 0 | 12.93276500 | 77.53203101 | <a href="https://www.inaturalist.org/observations/67946913">https://www.inaturalist.org/observations/67946913</a>   |
| 771 | <i>Spilopelia chinensis</i> | Eastern Spotted Dove | 2021/7/19  | 2 | 0 | 12.93297849 | 77.73646203 | <a href="https://www.inaturalist.org/observations/87703117">https://www.inaturalist.org/observations/87703117</a>   |
| 772 | <i>Spilopelia chinensis</i> | Eastern Spotted Dove | 2021/1/21  | 2 | 0 | 12.93334577 | 79.23422425 | <a href="https://www.inaturalist.org/observations/71931103">https://www.inaturalist.org/observations/71931103</a>   |
| 773 | <i>Spilopelia chinensis</i> | Eastern Spotted Dove | 2022/4/14  | 2 | 0 | 12.93441683 | 77.60601707 | <a href="https://www.inaturalist.org/observations/111481483">https://www.inaturalist.org/observations/111481483</a> |
| 774 | <i>Spilopelia chinensis</i> | Eastern Spotted Dove | 2019/2/2   | 1 | 0 | 12.93489120 | 80.21371240 | <a href="https://www.inaturalist.org/observations/64436363">https://www.inaturalist.org/observations/64436363</a>   |
| 775 | <i>Spilopelia chinensis</i> | Eastern Spotted Dove | 2020/5/13  | 2 | 0 | 12.93531446 | 77.62448072 | <a href="https://www.inaturalist.org/observations/46572173">https://www.inaturalist.org/observations/46572173</a>   |
| 776 | <i>Spilopelia chinensis</i> | Eastern Spotted Dove | 2022/8/9   | 1 | 0 | 12.93697740 | 77.56838990 | <a href="https://www.inaturalist.org/observations/133053990">https://www.inaturalist.org/observations/133053990</a> |
| 777 | <i>Spilopelia chinensis</i> | Eastern Spotted Dove | 2020/2/14  | 0 | 0 | 12.94242500 | 77.51245833 | <a href="https://www.inaturalist.org/observations/38954370">https://www.inaturalist.org/observations/38954370</a>   |
| 778 | <i>Spilopelia chinensis</i> | Eastern Spotted Dove | 2020/11/11 | 3 | 0 | 12.94270833 | 77.57262500 | <a href="https://www.inaturalist.org/observations/64785260">https://www.inaturalist.org/observations/64785260</a>   |
| 779 | <i>Spilopelia chinensis</i> | Eastern Spotted Dove | 2013/2/2   | 6 | 0 | 12.94415110 | 75.78656530 | <a href="https://www.inaturalist.org/observations/28936142">https://www.inaturalist.org/observations/28936142</a>   |
| 780 | <i>Spilopelia chinensis</i> | Eastern Spotted Dove | 2021/7/20  | 3 | 0 | 12.94621080 | 74.92069340 | <a href="https://www.inaturalist.org/observations/87958430">https://www.inaturalist.org/observations/87958430</a>   |
| 781 | <i>Spilopelia chinensis</i> | Eastern Spotted Dove | 2014/3/20  | 3 | 0 | 12.94657610 | 80.22376600 | <a href="https://www.inaturalist.org/observations/22692267">https://www.inaturalist.org/observations/22692267</a>   |

|     |                             |                      |            |   |   |             |             |                                                                                                                     |
|-----|-----------------------------|----------------------|------------|---|---|-------------|-------------|---------------------------------------------------------------------------------------------------------------------|
| 782 | <i>Spilopelia chinensis</i> | Eastern Spotted Dove | 2020/12/29 | 3 | 0 | 12.94835134 | 79.11517912 | <a href="https://www.inaturalist.org/observations/73007451">https://www.inaturalist.org/observations/73007451</a>   |
| 783 | <i>Spilopelia chinensis</i> | Eastern Spotted Dove | 2017/10/12 | 5 | 0 | 12.94883393 | 77.58704702 | <a href="https://www.inaturalist.org/observations/8385069">https://www.inaturalist.org/observations/8385069</a>     |
| 784 | <i>Spilopelia chinensis</i> | Eastern Spotted Dove | 2020/2/12  | 0 | 0 | 12.95117500 | 77.51457500 | <a href="https://www.inaturalist.org/observations/38945613">https://www.inaturalist.org/observations/38945613</a>   |
| 785 | <i>Spilopelia chinensis</i> | Eastern Spotted Dove | 2020/6/29  | 1 | 0 | 12.95785678 | 77.70670158 | <a href="https://www.inaturalist.org/observations/51351769">https://www.inaturalist.org/observations/51351769</a>   |
| 786 | <i>Spilopelia chinensis</i> | Eastern Spotted Dove | 2020/6/30  | 1 | 0 | 12.95793950 | 77.70674475 | <a href="https://www.inaturalist.org/observations/51463150">https://www.inaturalist.org/observations/51463150</a>   |
| 787 | <i>Spilopelia chinensis</i> | Eastern Spotted Dove | 2020/8/9   | 3 | 0 | 12.95796323 | 77.70672023 | <a href="https://www.inaturalist.org/observations/55903009">https://www.inaturalist.org/observations/55903009</a>   |
| 788 | <i>Spilopelia chinensis</i> | Eastern Spotted Dove | 2020/8/8   | 1 | 0 | 12.95803981 | 77.70664598 | <a href="https://www.inaturalist.org/observations/55768708">https://www.inaturalist.org/observations/55768708</a>   |
| 789 | <i>Spilopelia chinensis</i> | Eastern Spotted Dove | 2020/11/2  | 1 | 0 | 12.96765063 | 77.71209542 | <a href="https://www.inaturalist.org/observations/64338017">https://www.inaturalist.org/observations/64338017</a>   |
| 790 | <i>Spilopelia chinensis</i> | Eastern Spotted Dove | 2018/9/14  | 4 | 0 | 12.97159870 | 77.59456270 | <a href="https://www.inaturalist.org/observations/37222806">https://www.inaturalist.org/observations/37222806</a>   |
| 791 | <i>Spilopelia chinensis</i> | Eastern Spotted Dove | 2019/4/7   | 1 | 0 | 12.97159870 | 77.59456270 | <a href="https://www.inaturalist.org/observations/56023058">https://www.inaturalist.org/observations/56023058</a>   |
| 792 | <i>Spilopelia chinensis</i> | Eastern Spotted Dove | 2019/4/7   | 1 | 0 | 12.97159870 | 77.59456270 | <a href="https://www.inaturalist.org/observations/56023060">https://www.inaturalist.org/observations/56023060</a>   |
| 793 | <i>Spilopelia chinensis</i> | Eastern Spotted Dove | 2020/4/24  | 2 | 0 | 12.97159870 | 77.59456270 | <a href="https://www.inaturalist.org/observations/56023062">https://www.inaturalist.org/observations/56023062</a>   |
| 794 | <i>Spilopelia chinensis</i> | Eastern Spotted Dove | 2021/9/15  | 4 | 0 | 12.97159870 | 77.59456270 | <a href="https://www.inaturalist.org/observations/121526733">https://www.inaturalist.org/observations/121526733</a> |
| 795 | <i>Spilopelia chinensis</i> | Eastern Spotted Dove | 2022/8/17  | 1 | 0 | 12.97159870 | 77.59456270 | <a href="https://www.inaturalist.org/observations/136245327">https://www.inaturalist.org/observations/136245327</a> |
| 796 | <i>Spilopelia chinensis</i> | Eastern Spotted Dove | 2021/1/10  | 2 | 0 | 12.97227898 | 77.59456269 | <a href="https://www.inaturalist.org/observations/81796486">https://www.inaturalist.org/observations/81796486</a>   |
| 797 | <i>Spilopelia chinensis</i> | Eastern Spotted Dove | 2021/7/5   | 1 | 0 | 12.97262171 | 77.86725249 | <a href="https://www.inaturalist.org/observations/85714024">https://www.inaturalist.org/observations/85714024</a>   |
| 798 | <i>Spilopelia chinensis</i> | Eastern Spotted Dove | 2022/5/10  | 3 | 0 | 12.97512424 | 77.68837206 | <a href="https://www.inaturalist.org/observations/120647803">https://www.inaturalist.org/observations/120647803</a> |
| 799 | <i>Spilopelia chinensis</i> | Eastern Spotted Dove | 2022/3/26  | 3 | 0 | 12.97615437 | 77.61759751 | <a href="https://www.inaturalist.org/observations/109637715">https://www.inaturalist.org/observations/109637715</a> |
| 800 | <i>Spilopelia chinensis</i> | Eastern Spotted Dove | 2018/9/29  | 4 | 0 | 12.97757833 | 77.68486167 | <a href="https://www.inaturalist.org/observations/17019963">https://www.inaturalist.org/observations/17019963</a>   |
| 801 | <i>Spilopelia chinensis</i> | Eastern Spotted Dove | 2019/2/17  | 3 | 0 | 12.98141060 | 77.67007660 | <a href="https://www.inaturalist.org/observations/20420922">https://www.inaturalist.org/observations/20420922</a>   |
| 802 | <i>Spilopelia chinensis</i> | Eastern Spotted Dove | 2021/9/30  | 1 | 0 | 12.98363483 | 77.67974094 | <a href="https://www.inaturalist.org/observations/98024476">https://www.inaturalist.org/observations/98024476</a>   |
| 803 | <i>Spilopelia chinensis</i> | Eastern Spotted Dove | 2021/9/30  | 3 | 0 | 12.98363510 | 77.67974110 | <a href="https://www.inaturalist.org/observations/96888560">https://www.inaturalist.org/observations/96888560</a>   |
| 804 | <i>Spilopelia chinensis</i> | Eastern Spotted Dove | 2021/12/9  | 3 | 0 | 12.98471949 | 77.57670287 | <a href="https://www.inaturalist.org/observations/102762216">https://www.inaturalist.org/observations/102762216</a> |

|     |                             |                      |            |   |   |             |             |                                                                                                                     |
|-----|-----------------------------|----------------------|------------|---|---|-------------|-------------|---------------------------------------------------------------------------------------------------------------------|
| 805 | <i>Spilopelia chinensis</i> | Eastern Spotted Dove | 2016/2/16  | 4 | 0 | 12.98587333 | 77.59097500 | <a href="http://www.inaturalist.org/observations/2727266">http://www.inaturalist.org/observations/2727266</a>       |
| 806 | <i>Spilopelia chinensis</i> | Eastern Spotted Dove | 2018/10/14 | 3 | 0 | 12.99298331 | 77.61977043 | <a href="https://www.inaturalist.org/observations/51035189">https://www.inaturalist.org/observations/51035189</a>   |
| 807 | <i>Spilopelia chinensis</i> | Eastern Spotted Dove | 2022/4/12  | 2 | 0 | 12.99801073 | 77.66139714 | <a href="https://www.inaturalist.org/observations/111167127">https://www.inaturalist.org/observations/111167127</a> |
| 808 | <i>Spilopelia chinensis</i> | Eastern Spotted Dove | 2022/2/15  | 2 | 0 | 13.00029229 | 80.26669834 | <a href="https://www.inaturalist.org/observations/106842084">https://www.inaturalist.org/observations/106842084</a> |
| 809 | <i>Spilopelia chinensis</i> | Eastern Spotted Dove | 2020/10/17 | 3 | 0 | 13.00352740 | 77.57794138 | <a href="https://www.inaturalist.org/observations/62777959">https://www.inaturalist.org/observations/62777959</a>   |
| 810 | <i>Spilopelia chinensis</i> | Eastern Spotted Dove | 2021/9/23  | 1 | 0 | 13.00482500 | 77.61914667 | <a href="https://www.inaturalist.org/observations/95831112">https://www.inaturalist.org/observations/95831112</a>   |
| 811 | <i>Spilopelia chinensis</i> | Eastern Spotted Dove | 2019/12/13 | 1 | 0 | 13.00980441 | 80.27526124 | <a href="https://www.inaturalist.org/observations/45147403">https://www.inaturalist.org/observations/45147403</a>   |
| 812 | <i>Spilopelia chinensis</i> | Eastern Spotted Dove | 2021/11/26 | 1 | 0 | 13.01075039 | 77.55653253 | <a href="https://www.inaturalist.org/observations/101989239">https://www.inaturalist.org/observations/101989239</a> |
| 813 | <i>Spilopelia chinensis</i> | Eastern Spotted Dove | 2021/3/17  | 1 | 0 | 13.01745305 | 77.56859344 | <a href="https://www.inaturalist.org/observations/105159382">https://www.inaturalist.org/observations/105159382</a> |
| 814 | <i>Spilopelia chinensis</i> | Eastern Spotted Dove | 2019/9/1   | 1 | 0 | 13.01833608 | 78.33677237 | <a href="https://www.inaturalist.org/observations/93050158">https://www.inaturalist.org/observations/93050158</a>   |
| 815 | <i>Spilopelia chinensis</i> | Eastern Spotted Dove | 2016/2/19  | 4 | 0 | 13.02182500 | 77.57092833 | <a href="http://www.inaturalist.org/observations/2729051">http://www.inaturalist.org/observations/2729051</a>       |
| 816 | <i>Spilopelia chinensis</i> | Eastern Spotted Dove | 2021/9/22  | 1 | 0 | 13.02692379 | 77.54651225 | <a href="https://www.inaturalist.org/observations/95724175">https://www.inaturalist.org/observations/95724175</a>   |
| 817 | <i>Spilopelia chinensis</i> | Eastern Spotted Dove | 2019/1/21  | 4 | 0 | 13.03353630 | 77.57907133 | <a href="https://www.inaturalist.org/observations/108354716">https://www.inaturalist.org/observations/108354716</a> |
| 818 | <i>Spilopelia chinensis</i> | Eastern Spotted Dove | 2022/3/2   | 4 | 0 | 13.03387070 | 77.57297736 | <a href="https://www.inaturalist.org/observations/109911012">https://www.inaturalist.org/observations/109911012</a> |
| 819 | <i>Spilopelia chinensis</i> | Eastern Spotted Dove | 2021/2/14  | 1 | 0 | 13.03448965 | 77.57224044 | <a href="https://www.inaturalist.org/observations/105090561">https://www.inaturalist.org/observations/105090561</a> |
| 820 | <i>Spilopelia chinensis</i> | Eastern Spotted Dove | 2021/2/17  | 1 | 0 | 13.03448965 | 77.57224044 | <a href="https://www.inaturalist.org/observations/105090565">https://www.inaturalist.org/observations/105090565</a> |
| 821 | <i>Spilopelia chinensis</i> | Eastern Spotted Dove | 2022/3/28  | 3 | 0 | 13.03468610 | 77.57302024 | <a href="https://www.inaturalist.org/observations/113195994">https://www.inaturalist.org/observations/113195994</a> |
| 822 | <i>Spilopelia chinensis</i> | Eastern Spotted Dove | 2021/2/8   | 1 | 0 | 13.04125000 | 77.56901389 | <a href="https://www.inaturalist.org/observations/69235732">https://www.inaturalist.org/observations/69235732</a>   |
| 823 | <i>Spilopelia chinensis</i> | Eastern Spotted Dove | 2019/1/21  | 2 | 0 | 13.05054078 | 77.55335501 | <a href="https://www.inaturalist.org/observations/103525132">https://www.inaturalist.org/observations/103525132</a> |
| 824 | <i>Spilopelia chinensis</i> | Eastern Spotted Dove | 2021/9/19  | 1 | 0 | 13.05092740 | 77.60715710 | <a href="https://www.inaturalist.org/observations/95376241">https://www.inaturalist.org/observations/95376241</a>   |
| 825 | <i>Spilopelia chinensis</i> | Eastern Spotted Dove | 2021/6/1   | 1 | 0 | 13.05633384 | 77.40826762 | <a href="https://www.inaturalist.org/observations/81312781">https://www.inaturalist.org/observations/81312781</a>   |
| 826 | <i>Spilopelia chinensis</i> | Eastern Spotted Dove | 2022/1/14  | 4 | 0 | 13.05686824 | 77.53580153 | <a href="https://www.inaturalist.org/observations/109361216">https://www.inaturalist.org/observations/109361216</a> |
| 827 | <i>Spilopelia chinensis</i> | Eastern Spotted Dove | 2021/3/26  | 1 | 0 | 13.05956388 | 77.42572173 | <a href="https://www.inaturalist.org/observations/72059782">https://www.inaturalist.org/observations/72059782</a>   |



|     |                             |                      |            |   |   |             |             |                                                                                                                     |
|-----|-----------------------------|----------------------|------------|---|---|-------------|-------------|---------------------------------------------------------------------------------------------------------------------|
| 828 | <i>Spilopelia chinensis</i> | Eastern Spotted Dove | 2022/7/20  | 1 | 0 | 13.06038369 | 77.65698319 | <a href="https://www.inaturalist.org/observations/127202229">https://www.inaturalist.org/observations/127202229</a> |
| 829 | <i>Spilopelia chinensis</i> | Eastern Spotted Dove | 2021/7/28  | 2 | 0 | 13.06045580 | 77.65708400 | <a href="https://www.inaturalist.org/observations/88934139">https://www.inaturalist.org/observations/88934139</a>   |
| 830 | <i>Spilopelia chinensis</i> | Eastern Spotted Dove | 2021/2/28  | 1 | 0 | 13.06275397 | 77.74924837 | <a href="https://www.inaturalist.org/observations/97246787">https://www.inaturalist.org/observations/97246787</a>   |
| 831 | <i>Spilopelia chinensis</i> | Eastern Spotted Dove | 2022/9/30  | 2 | 0 | 13.06373181 | 77.56247643 | <a href="https://www.inaturalist.org/observations/136985544">https://www.inaturalist.org/observations/136985544</a> |
| 832 | <i>Spilopelia chinensis</i> | Eastern Spotted Dove | 2021/3/20  | 3 | 0 | 13.06506800 | 77.64797197 | <a href="https://www.inaturalist.org/observations/71608407">https://www.inaturalist.org/observations/71608407</a>   |
| 833 | <i>Spilopelia chinensis</i> | Eastern Spotted Dove | 2021/3/22  | 1 | 0 | 13.06510600 | 77.64790800 | <a href="https://www.inaturalist.org/observations/71786915">https://www.inaturalist.org/observations/71786915</a>   |
| 834 | <i>Spilopelia chinensis</i> | Eastern Spotted Dove | 2016/3/27  | 3 | 0 | 13.06528285 | 77.56265280 | <a href="https://www.inaturalist.org/observations/34053174">https://www.inaturalist.org/observations/34053174</a>   |
| 835 | <i>Spilopelia chinensis</i> | Eastern Spotted Dove | 2020/7/22  | 1 | 0 | 13.06529510 | 77.61480870 | <a href="https://www.inaturalist.org/observations/53914647">https://www.inaturalist.org/observations/53914647</a>   |
| 836 | <i>Spilopelia chinensis</i> | Eastern Spotted Dove | 2021/9/1   | 1 | 0 | 13.06681667 | 77.55715278 | <a href="https://www.inaturalist.org/observations/93447701">https://www.inaturalist.org/observations/93447701</a>   |
| 837 | <i>Spilopelia chinensis</i> | Eastern Spotted Dove | 2018/10/27 | 5 | 0 | 13.07029150 | 77.76952550 | <a href="https://www.inaturalist.org/observations/18056071">https://www.inaturalist.org/observations/18056071</a>   |
| 838 | <i>Spilopelia chinensis</i> | Eastern Spotted Dove | 2016/9/24  | 5 | 0 | 13.07765910 | 77.58046590 | <a href="http://www.inaturalist.org/observations/4211992">http://www.inaturalist.org/observations/4211992</a>       |
| 839 | <i>Spilopelia chinensis</i> | Eastern Spotted Dove | 2021/12/13 | 2 | 0 | 13.07847503 | 77.57789612 | <a href="https://www.inaturalist.org/observations/103039170">https://www.inaturalist.org/observations/103039170</a> |
| 840 | <i>Spilopelia chinensis</i> | Eastern Spotted Dove | 2015/1/14  | 5 | 0 | 13.07989186 | 77.58415235 | <a href="https://www.inaturalist.org/observations/29638300">https://www.inaturalist.org/observations/29638300</a>   |
| 841 | <i>Spilopelia chinensis</i> | Eastern Spotted Dove | 2015/2/7   | 5 | 0 | 13.07997751 | 77.58384121 | <a href="https://www.inaturalist.org/observations/29640354">https://www.inaturalist.org/observations/29640354</a>   |
| 842 | <i>Spilopelia chinensis</i> | Eastern Spotted Dove | 2020/4/24  | 2 | 0 | 13.08128186 | 77.64389231 | <a href="https://www.inaturalist.org/observations/43871337">https://www.inaturalist.org/observations/43871337</a>   |
| 843 | <i>Spilopelia chinensis</i> | Eastern Spotted Dove | 2020/4/24  | 1 | 0 | 13.08157653 | 77.64400058 | <a href="https://www.inaturalist.org/observations/43871351">https://www.inaturalist.org/observations/43871351</a>   |
| 844 | <i>Spilopelia chinensis</i> | Eastern Spotted Dove | 2020/4/24  | 1 | 0 | 13.08164169 | 77.64403733 | <a href="https://www.inaturalist.org/observations/43871354">https://www.inaturalist.org/observations/43871354</a>   |
| 845 | <i>Spilopelia chinensis</i> | Eastern Spotted Dove | 2021/8/1   | 2 | 0 | 13.08268020 | 80.27071840 | <a href="https://www.inaturalist.org/observations/89616121">https://www.inaturalist.org/observations/89616121</a>   |
| 846 | <i>Spilopelia chinensis</i> | Eastern Spotted Dove | 2021/9/19  | 2 | 0 | 13.08308237 | 80.27071830 | <a href="https://www.inaturalist.org/observations/96450563">https://www.inaturalist.org/observations/96450563</a>   |
| 847 | <i>Spilopelia chinensis</i> | Eastern Spotted Dove | 2020/4/26  | 1 | 0 | 13.08336590 | 77.64049230 | <a href="https://www.inaturalist.org/observations/43874998">https://www.inaturalist.org/observations/43874998</a>   |
| 848 | <i>Spilopelia chinensis</i> | Eastern Spotted Dove | 2020/4/26  | 1 | 0 | 13.08336590 | 77.64049230 | <a href="https://www.inaturalist.org/observations/43875002">https://www.inaturalist.org/observations/43875002</a>   |
| 849 | <i>Spilopelia chinensis</i> | Eastern Spotted Dove | 2020/4/26  | 1 | 0 | 13.08336590 | 77.64049230 | <a href="https://www.inaturalist.org/observations/43875004">https://www.inaturalist.org/observations/43875004</a>   |
| 850 | <i>Spilopelia chinensis</i> | Eastern Spotted Dove | 2019/12/20 | 3 | 0 | 13.08736710 | 77.60993500 | <a href="https://www.inaturalist.org/observations/45945919">https://www.inaturalist.org/observations/45945919</a>   |

|     |                             |                      |            |   |   |             |             |                                                                                                                     |
|-----|-----------------------------|----------------------|------------|---|---|-------------|-------------|---------------------------------------------------------------------------------------------------------------------|
| 851 | <i>Spilopelia chinensis</i> | Eastern Spotted Dove | 2019/12/20 | 3 | 0 | 13.08736710 | 77.60993500 | <a href="https://www.inaturalist.org/observations/45950756">https://www.inaturalist.org/observations/45950756</a>   |
| 852 | <i>Spilopelia chinensis</i> | Eastern Spotted Dove | 2019/12/20 | 3 | 0 | 13.08736710 | 77.60993500 | <a href="https://www.inaturalist.org/observations/45950757">https://www.inaturalist.org/observations/45950757</a>   |
| 853 | <i>Spilopelia chinensis</i> | Eastern Spotted Dove | 2020/5/2   | 1 | 0 | 13.10567783 | 74.97238833 | <a href="https://www.inaturalist.org/observations/64839814">https://www.inaturalist.org/observations/64839814</a>   |
| 854 | <i>Spilopelia chinensis</i> | Eastern Spotted Dove | 2018/12/15 | 1 | 0 | 13.11538315 | 77.50293732 | <a href="https://www.inaturalist.org/observations/22642969">https://www.inaturalist.org/observations/22642969</a>   |
| 855 | <i>Spilopelia chinensis</i> | Eastern Spotted Dove | 2016/8/19  | 2 | 0 | 13.11841849 | 76.93742144 | <a href="https://www.inaturalist.org/observations/92438078">https://www.inaturalist.org/observations/92438078</a>   |
| 856 | <i>Spilopelia chinensis</i> | Eastern Spotted Dove | 2021/7/30  | 2 | 0 | 13.13003667 | 80.19144000 | <a href="https://www.inaturalist.org/observations/89427952">https://www.inaturalist.org/observations/89427952</a>   |
| 857 | <i>Spilopelia chinensis</i> | Eastern Spotted Dove | 2020/10/22 | 2 | 0 | 13.13443751 | 79.19192172 | <a href="https://www.inaturalist.org/observations/75296741">https://www.inaturalist.org/observations/75296741</a>   |
| 858 | <i>Spilopelia chinensis</i> | Eastern Spotted Dove | 2021/2/18  | 1 | 0 | 13.13581669 | 77.52574988 | <a href="https://www.inaturalist.org/observations/69754159">https://www.inaturalist.org/observations/69754159</a>   |
| 859 | <i>Spilopelia chinensis</i> | Eastern Spotted Dove | 2020/12/30 | 2 | 0 | 13.13628397 | 77.57092097 | <a href="https://www.inaturalist.org/observations/69502975">https://www.inaturalist.org/observations/69502975</a>   |
| 860 | <i>Spilopelia chinensis</i> | Eastern Spotted Dove | 2021/3/8   | 2 | 0 | 13.15004332 | 77.49000013 | <a href="https://www.inaturalist.org/observations/70800822">https://www.inaturalist.org/observations/70800822</a>   |
| 861 | <i>Spilopelia chinensis</i> | Eastern Spotted Dove | 2022/8/20  | 2 | 0 | 13.17101800 | 76.43101400 | <a href="https://www.inaturalist.org/observations/131689605">https://www.inaturalist.org/observations/131689605</a> |
| 862 | <i>Spilopelia chinensis</i> | Eastern Spotted Dove | 2020/9/18  | 3 | 0 | 13.22328762 | 77.19087549 | <a href="https://www.inaturalist.org/observations/62285161">https://www.inaturalist.org/observations/62285161</a>   |
| 863 | <i>Spilopelia chinensis</i> | Eastern Spotted Dove | 2019/12/21 | 3 | 0 | 13.22648167 | 77.67459937 | <a href="https://www.inaturalist.org/observations/46056422">https://www.inaturalist.org/observations/46056422</a>   |
| 864 | <i>Spilopelia chinensis</i> | Eastern Spotted Dove | 2021/11/7  | 1 | 0 | 13.25283620 | 76.52105530 | <a href="https://www.inaturalist.org/observations/100492013">https://www.inaturalist.org/observations/100492013</a> |
| 865 | <i>Spilopelia chinensis</i> | Eastern Spotted Dove | 2020/1/15  | 2 | 0 | 13.30336660 | 77.18673830 | <a href="https://www.inaturalist.org/observations/38358223">https://www.inaturalist.org/observations/38358223</a>   |
| 866 | <i>Spilopelia chinensis</i> | Eastern Spotted Dove | 2020/10/20 | 3 | 0 | 13.31296638 | 77.54213657 | <a href="https://www.inaturalist.org/observations/115744722">https://www.inaturalist.org/observations/115744722</a> |
| 867 | <i>Spilopelia chinensis</i> | Eastern Spotted Dove | 2019/12/22 | 4 | 0 | 13.37041630 | 77.68430732 | <a href="https://www.inaturalist.org/observations/46067013">https://www.inaturalist.org/observations/46067013</a>   |
| 868 | <i>Spilopelia chinensis</i> | Eastern Spotted Dove | 2020/12/27 | 2 | 0 | 13.50266350 | 75.09031540 | <a href="https://www.inaturalist.org/observations/67999060">https://www.inaturalist.org/observations/67999060</a>   |
| 869 | <i>Spilopelia chinensis</i> | Eastern Spotted Dove | 2022/3/23  | 1 | 0 | 13.51900000 | 79.32344167 | <a href="https://www.inaturalist.org/observations/111898679">https://www.inaturalist.org/observations/111898679</a> |
| 870 | <i>Spilopelia chinensis</i> | Eastern Spotted Dove | 2022/9/24  | 1 | 0 | 13.56304800 | 79.30651000 | <a href="https://www.inaturalist.org/observations/136408152">https://www.inaturalist.org/observations/136408152</a> |
| 871 | <i>Spilopelia chinensis</i> | Eastern Spotted Dove | 2017/10/24 | 1 | 0 | 13.56508150 | 74.93695220 | <a href="https://www.inaturalist.org/observations/41211257">https://www.inaturalist.org/observations/41211257</a>   |
| 872 | <i>Spilopelia chinensis</i> | Eastern Spotted Dove | 2021/9/11  | 2 | 0 | 13.57885933 | 79.37742871 | <a href="https://www.inaturalist.org/observations/94405371">https://www.inaturalist.org/observations/94405371</a>   |
| 873 | <i>Spilopelia chinensis</i> | Eastern Spotted Dove | 2022/6/10  | 3 | 0 | 13.62492572 | 74.69310723 | <a href="https://www.inaturalist.org/observations/125133102">https://www.inaturalist.org/observations/125133102</a> |

|     |                             |                      |            |   |   |             |             |                                                                                                                     |
|-----|-----------------------------|----------------------|------------|---|---|-------------|-------------|---------------------------------------------------------------------------------------------------------------------|
| 874 | <i>Spilopelia chinensis</i> | Eastern Spotted Dove | 2022/2/7   | 3 | 0 | 13.62813000 | 79.37454000 | <a href="https://www.inaturalist.org/observations/112129140">https://www.inaturalist.org/observations/112129140</a> |
| 875 | <i>Spilopelia chinensis</i> | Eastern Spotted Dove | 2022/3/26  | 3 | 0 | 13.63040397 | 79.38621380 | <a href="https://www.inaturalist.org/observations/111534944">https://www.inaturalist.org/observations/111534944</a> |
| 876 | <i>Spilopelia chinensis</i> | Eastern Spotted Dove | 2022/3/26  | 3 | 0 | 13.63043218 | 79.38603503 | <a href="https://www.inaturalist.org/observations/111534945">https://www.inaturalist.org/observations/111534945</a> |
| 877 | <i>Spilopelia chinensis</i> | Eastern Spotted Dove | 2022/2/20  | 2 | 0 | 13.64311965 | 79.39796805 | <a href="https://www.inaturalist.org/observations/108231004">https://www.inaturalist.org/observations/108231004</a> |
| 878 | <i>Spilopelia chinensis</i> | Eastern Spotted Dove | 2022/3/9   | 3 | 0 | 13.65038429 | 79.46692914 | <a href="https://www.inaturalist.org/observations/108228629">https://www.inaturalist.org/observations/108228629</a> |
| 879 | <i>Spilopelia chinensis</i> | Eastern Spotted Dove | 2022/2/21  | 3 | 0 | 13.65048015 | 79.33129025 | <a href="https://www.inaturalist.org/observations/109821256">https://www.inaturalist.org/observations/109821256</a> |
| 880 | <i>Spilopelia chinensis</i> | Eastern Spotted Dove | 2022/6/12  | 3 | 0 | 13.65191802 | 79.41631128 | <a href="https://www.inaturalist.org/observations/121892196">https://www.inaturalist.org/observations/121892196</a> |
| 881 | <i>Spilopelia chinensis</i> | Eastern Spotted Dove | 2022/6/13  | 5 | 0 | 13.65322548 | 79.41788422 | <a href="https://www.inaturalist.org/observations/122601849">https://www.inaturalist.org/observations/122601849</a> |
| 882 | <i>Spilopelia chinensis</i> | Eastern Spotted Dove | 2020/3/23  | 2 | 0 | 13.65384647 | 74.93372638 | <a href="https://www.inaturalist.org/observations/51989288">https://www.inaturalist.org/observations/51989288</a>   |
| 883 | <i>Spilopelia chinensis</i> | Eastern Spotted Dove | 2022/2/21  | 2 | 0 | 13.65620078 | 79.33500272 | <a href="https://www.inaturalist.org/observations/112250410">https://www.inaturalist.org/observations/112250410</a> |
| 884 | <i>Spilopelia chinensis</i> | Eastern Spotted Dove | 2021/5/2   | 1 | 0 | 13.65668000 | 79.26958000 | <a href="https://www.inaturalist.org/observations/76480507">https://www.inaturalist.org/observations/76480507</a>   |
| 885 | <i>Spilopelia chinensis</i> | Eastern Spotted Dove | 2021/5/2   | 1 | 0 | 13.65682600 | 79.26944000 | <a href="https://www.inaturalist.org/observations/76480522">https://www.inaturalist.org/observations/76480522</a>   |
| 886 | <i>Spilopelia chinensis</i> | Eastern Spotted Dove | 2021/5/2   | 2 | 0 | 13.65752400 | 79.27092100 | <a href="https://www.inaturalist.org/observations/76480502">https://www.inaturalist.org/observations/76480502</a>   |
| 887 | <i>Spilopelia chinensis</i> | Eastern Spotted Dove | 2019/2/17  | 1 | 0 | 13.65793887 | 79.48242778 | <a href="https://www.inaturalist.org/observations/55892158">https://www.inaturalist.org/observations/55892158</a>   |
| 888 | <i>Spilopelia chinensis</i> | Eastern Spotted Dove | 2022/9/27  | 3 | 0 | 13.74163700 | 79.60654500 | <a href="https://www.inaturalist.org/observations/136707945">https://www.inaturalist.org/observations/136707945</a> |
| 889 | <i>Spilopelia chinensis</i> | Eastern Spotted Dove | 2021/4/18  | 1 | 0 | 13.76268300 | 79.46905100 | <a href="https://www.inaturalist.org/observations/74357759">https://www.inaturalist.org/observations/74357759</a>   |
| 890 | <i>Spilopelia chinensis</i> | Eastern Spotted Dove | 2017/4/8   | 2 | 0 | 13.84077511 | 75.51342264 | <a href="https://www.inaturalist.org/observations/50272830">https://www.inaturalist.org/observations/50272830</a>   |
| 891 | <i>Spilopelia chinensis</i> | Eastern Spotted Dove | 2019/5/22  | 4 | 0 | 13.85308382 | 76.45052411 | <a href="https://www.inaturalist.org/observations/132921971">https://www.inaturalist.org/observations/132921971</a> |
| 892 | <i>Spilopelia chinensis</i> | Eastern Spotted Dove | 2016/4/26  | 5 | 0 | 13.85362750 | 75.52241470 | <a href="https://www.inaturalist.org/observations/9989173">https://www.inaturalist.org/observations/9989173</a>     |
| 893 | <i>Spilopelia chinensis</i> | Eastern Spotted Dove | 2022/6/29  | 3 | 0 | 13.87184500 | 75.55673333 | <a href="https://www.inaturalist.org/observations/125886469">https://www.inaturalist.org/observations/125886469</a> |
| 894 | <i>Spilopelia chinensis</i> | Eastern Spotted Dove | 2011/9/18  | 2 | 0 | 14.22943890 | 74.81252290 | <a href="https://www.inaturalist.org/observations/92573231">https://www.inaturalist.org/observations/92573231</a>   |
| 895 | <i>Spilopelia chinensis</i> | Eastern Spotted Dove | 2020/3/19  | 5 | 0 | 14.23268336 | 74.44286149 | <a href="https://www.inaturalist.org/observations/40276694">https://www.inaturalist.org/observations/40276694</a>   |
| 896 | <i>Spilopelia chinensis</i> | Eastern Spotted Dove | 2019/12/24 | 2 | 0 | 14.23533847 | 74.44059804 | <a href="https://www.inaturalist.org/observations/36934756">https://www.inaturalist.org/observations/36934756</a>   |

|     |                             |                      |            |   |   |             |             |                                                                                                                     |
|-----|-----------------------------|----------------------|------------|---|---|-------------|-------------|---------------------------------------------------------------------------------------------------------------------|
| 897 | <i>Spilopelia chinensis</i> | Eastern Spotted Dove | 2021/11/10 | 2 | 0 | 14.24893722 | 74.65306990 | <a href="https://www.inaturalist.org/observations/100778538">https://www.inaturalist.org/observations/100778538</a> |
| 898 | <i>Spilopelia chinensis</i> | Eastern Spotted Dove | 2020/11/8  | 3 | 0 | 14.64665467 | 74.90408605 | <a href="https://www.inaturalist.org/observations/64510565">https://www.inaturalist.org/observations/64510565</a>   |
| 899 | <i>Spilopelia chinensis</i> | Eastern Spotted Dove | 2020/12/5  | 1 | 0 | 14.73555335 | 75.62983056 | <a href="https://www.inaturalist.org/observations/90235001">https://www.inaturalist.org/observations/90235001</a>   |
| 900 | <i>Spilopelia chinensis</i> | Eastern Spotted Dove | 2022/8/29  | 3 | 0 | 14.75865909 | 74.92655497 | <a href="https://www.inaturalist.org/observations/132908314">https://www.inaturalist.org/observations/132908314</a> |
| 901 | <i>Spilopelia chinensis</i> | Eastern Spotted Dove | 2022/1/2   | 4 | 0 | 14.79370650 | 74.68688150 | <a href="https://www.inaturalist.org/observations/121135396">https://www.inaturalist.org/observations/121135396</a> |
| 902 | <i>Spilopelia chinensis</i> | Eastern Spotted Dove | 2021/2/13  | 1 | 0 | 14.99809980 | 74.35874730 | <a href="https://www.inaturalist.org/observations/70862968">https://www.inaturalist.org/observations/70862968</a>   |
| 903 | <i>Spilopelia chinensis</i> | Eastern Spotted Dove | 2020/2/16  | 2 | 0 | 15.21376257 | 73.93572807 | <a href="https://www.inaturalist.org/observations/39694712">https://www.inaturalist.org/observations/39694712</a>   |
| 904 | <i>Spilopelia chinensis</i> | Eastern Spotted Dove | 2020/4/15  | 1 | 0 | 15.21376257 | 73.93572807 | <a href="https://www.inaturalist.org/observations/42250323">https://www.inaturalist.org/observations/42250323</a>   |
| 905 | <i>Spilopelia chinensis</i> | Eastern Spotted Dove | 2019/2/16  | 6 | 0 | 15.24967750 | 74.61737380 | <a href="https://www.inaturalist.org/observations/30354683">https://www.inaturalist.org/observations/30354683</a>   |
| 906 | <i>Spilopelia chinensis</i> | Eastern Spotted Dove | 2018/11/13 | 6 | 0 | 15.29200100 | 74.52086100 | <a href="https://www.inaturalist.org/observations/18586210">https://www.inaturalist.org/observations/18586210</a>   |
| 907 | <i>Spilopelia chinensis</i> | Eastern Spotted Dove | 2019/11/23 | 1 | 0 | 15.29932665 | 74.12399612 | <a href="https://www.inaturalist.org/observations/36174574">https://www.inaturalist.org/observations/36174574</a>   |
| 908 | <i>Spilopelia chinensis</i> | Eastern Spotted Dove | 2008/11/9  | 2 | 0 | 15.39934400 | 73.84417300 | <a href="https://www.inaturalist.org/observations/57421341">https://www.inaturalist.org/observations/57421341</a>   |
| 909 | <i>Spilopelia chinensis</i> | Eastern Spotted Dove | 2018/12/14 | 5 | 0 | 15.51577572 | 73.89166781 | <a href="https://www.inaturalist.org/observations/20104377">https://www.inaturalist.org/observations/20104377</a>   |
| 910 | <i>Spilopelia chinensis</i> | Eastern Spotted Dove | 2015/12/31 | 1 | 0 | 15.91731100 | 75.68585400 | <a href="https://www.inaturalist.org/observations/46196284">https://www.inaturalist.org/observations/46196284</a>   |
| 911 | <i>Spilopelia chinensis</i> | Eastern Spotted Dove | 2019/9/1   | 3 | 0 | 16.05845255 | 73.65312260 | <a href="https://www.inaturalist.org/observations/32323179">https://www.inaturalist.org/observations/32323179</a>   |
| 912 | <i>Spilopelia chinensis</i> | Eastern Spotted Dove | 2021/12/6  | 2 | 0 | 16.26581320 | 78.85631371 | <a href="https://www.inaturalist.org/observations/106477082">https://www.inaturalist.org/observations/106477082</a> |
| 913 | <i>Spilopelia chinensis</i> | Eastern Spotted Dove | 2020/10/18 | 3 | 0 | 16.26615778 | 73.68010919 | <a href="https://www.inaturalist.org/observations/63060145">https://www.inaturalist.org/observations/63060145</a>   |
| 914 | <i>Spilopelia chinensis</i> | Eastern Spotted Dove | 2019/8/19  | 4 | 0 | 16.30165617 | 80.43817928 | <a href="https://www.inaturalist.org/observations/31401811">https://www.inaturalist.org/observations/31401811</a>   |
| 915 | <i>Spilopelia chinensis</i> | Eastern Spotted Dove | 2019/3/1   | 1 | 0 | 16.35570560 | 78.83346130 | <a href="https://www.inaturalist.org/observations/87986710">https://www.inaturalist.org/observations/87986710</a>   |
| 916 | <i>Spilopelia chinensis</i> | Eastern Spotted Dove | 2020/7/18  | 2 | 0 | 16.36097700 | 74.29613500 | <a href="https://www.inaturalist.org/observations/53445864">https://www.inaturalist.org/observations/53445864</a>   |
| 917 | <i>Spilopelia chinensis</i> | Eastern Spotted Dove | 2021/10/9  | 2 | 0 | 16.38617960 | 81.47662170 | <a href="https://www.inaturalist.org/observations/97902113">https://www.inaturalist.org/observations/97902113</a>   |
| 918 | <i>Spilopelia chinensis</i> | Eastern Spotted Dove | 2013/9/30  | 2 | 0 | 16.41060994 | 80.70892527 | <a href="https://www.inaturalist.org/observations/88105648">https://www.inaturalist.org/observations/88105648</a>   |
| 919 | <i>Spilopelia chinensis</i> | Eastern Spotted Dove | 2012/9/1   | 1 | 0 | 16.49730598 | 80.59512800 | <a href="https://www.inaturalist.org/observations/93610164">https://www.inaturalist.org/observations/93610164</a>   |

|     |                             |                      |            |   |   |             |             |                                                                                                                     |
|-----|-----------------------------|----------------------|------------|---|---|-------------|-------------|---------------------------------------------------------------------------------------------------------------------|
| 920 | <i>Spilopelia chinensis</i> | Eastern Spotted Dove | 2012/3/29  | 2 | 0 | 16.49979669 | 80.59578562 | <a href="https://www.inaturalist.org/observations/93593891">https://www.inaturalist.org/observations/93593891</a>   |
| 921 | <i>Spilopelia chinensis</i> | Eastern Spotted Dove | 2021/12/28 | 2 | 0 | 16.51799610 | 80.66480390 | <a href="https://www.inaturalist.org/observations/103803529">https://www.inaturalist.org/observations/103803529</a> |
| 922 | <i>Spilopelia chinensis</i> | Eastern Spotted Dove | 2022/1/2   | 1 | 0 | 16.51898000 | 81.51410000 | <a href="https://www.inaturalist.org/observations/111197908">https://www.inaturalist.org/observations/111197908</a> |
| 923 | <i>Spilopelia chinensis</i> | Eastern Spotted Dove | 2022/1/2   | 2 | 0 | 16.51903333 | 81.51410000 | <a href="https://www.inaturalist.org/observations/104192847">https://www.inaturalist.org/observations/104192847</a> |
| 924 | <i>Spilopelia chinensis</i> | Eastern Spotted Dove | 2022/1/2   | 2 | 0 | 16.51903333 | 81.51410000 | <a href="https://www.inaturalist.org/observations/104348364">https://www.inaturalist.org/observations/104348364</a> |
| 925 | <i>Spilopelia chinensis</i> | Eastern Spotted Dove | 2022/1/2   | 2 | 0 | 16.51903333 | 81.51410000 | <a href="https://www.inaturalist.org/observations/104411677">https://www.inaturalist.org/observations/104411677</a> |
| 926 | <i>Spilopelia chinensis</i> | Eastern Spotted Dove | 2021/7/6   | 2 | 0 | 16.51980013 | 80.67626028 | <a href="https://www.inaturalist.org/observations/85859941">https://www.inaturalist.org/observations/85859941</a>   |
| 927 | <i>Spilopelia chinensis</i> | Eastern Spotted Dove | 2020/8/26  | 1 | 0 | 16.52000000 | 80.67600000 | <a href="https://www.inaturalist.org/observations/57607256">https://www.inaturalist.org/observations/57607256</a>   |
| 928 | <i>Spilopelia chinensis</i> | Eastern Spotted Dove | 2022/7/24  | 4 | 0 | 16.52264888 | 73.53148177 | <a href="https://www.inaturalist.org/observations/129242595">https://www.inaturalist.org/observations/129242595</a> |
| 929 | <i>Spilopelia chinensis</i> | Eastern Spotted Dove | 2021/7/18  | 1 | 0 | 16.52274471 | 80.63134938 | <a href="https://www.inaturalist.org/observations/95113834">https://www.inaturalist.org/observations/95113834</a>   |
| 930 | <i>Spilopelia chinensis</i> | Eastern Spotted Dove | 2021/12/20 | 1 | 0 | 16.52359650 | 80.63777792 | <a href="https://www.inaturalist.org/observations/103360156">https://www.inaturalist.org/observations/103360156</a> |
| 931 | <i>Spilopelia chinensis</i> | Eastern Spotted Dove | 2018/1/6   | 1 | 0 | 16.52925276 | 80.67580696 | <a href="https://www.inaturalist.org/observations/49218867">https://www.inaturalist.org/observations/49218867</a>   |
| 932 | <i>Spilopelia chinensis</i> | Eastern Spotted Dove | 2020/4/13  | 2 | 0 | 16.52943607 | 80.59093245 | <a href="https://www.inaturalist.org/observations/42163773">https://www.inaturalist.org/observations/42163773</a>   |
| 933 | <i>Spilopelia chinensis</i> | Eastern Spotted Dove | 2022/5/6   | 4 | 0 | 16.53181896 | 80.60471401 | <a href="https://www.inaturalist.org/observations/117331089">https://www.inaturalist.org/observations/117331089</a> |
| 934 | <i>Spilopelia chinensis</i> | Eastern Spotted Dove | 2022/3/15  | 5 | 0 | 16.53690333 | 81.55579667 | <a href="https://www.inaturalist.org/observations/108648093">https://www.inaturalist.org/observations/108648093</a> |
| 935 | <i>Spilopelia chinensis</i> | Eastern Spotted Dove | 2022/3/15  | 1 | 0 | 16.53690333 | 81.55579667 | <a href="https://www.inaturalist.org/observations/114316822">https://www.inaturalist.org/observations/114316822</a> |
| 936 | <i>Spilopelia chinensis</i> | Eastern Spotted Dove | 2022/3/15  | 2 | 0 | 16.53710167 | 81.55571333 | <a href="https://www.inaturalist.org/observations/114289989">https://www.inaturalist.org/observations/114289989</a> |
| 937 | <i>Spilopelia chinensis</i> | Eastern Spotted Dove | 2021/12/31 | 2 | 0 | 16.53965944 | 81.50560364 | <a href="https://www.inaturalist.org/observations/104111778">https://www.inaturalist.org/observations/104111778</a> |
| 938 | <i>Spilopelia chinensis</i> | Eastern Spotted Dove | 2022/1/2   | 1 | 0 | 16.53968001 | 81.50569115 | <a href="https://www.inaturalist.org/observations/104166652">https://www.inaturalist.org/observations/104166652</a> |
| 939 | <i>Spilopelia chinensis</i> | Eastern Spotted Dove | 2021/12/23 | 1 | 0 | 16.54489085 | 81.52124092 | <a href="https://www.inaturalist.org/observations/103530579">https://www.inaturalist.org/observations/103530579</a> |
| 940 | <i>Spilopelia chinensis</i> | Eastern Spotted Dove | 2021/12/31 | 2 | 0 | 16.55703790 | 81.49404097 | <a href="https://www.inaturalist.org/observations/104023134">https://www.inaturalist.org/observations/104023134</a> |
| 941 | <i>Spilopelia chinensis</i> | Eastern Spotted Dove | 2021/12/23 | 2 | 0 | 16.55704167 | 81.49411000 | <a href="https://www.inaturalist.org/observations/106079131">https://www.inaturalist.org/observations/106079131</a> |
| 942 | <i>Spilopelia chinensis</i> | Eastern Spotted Dove | 2021/12/23 | 3 | 0 | 16.55704167 | 81.49411000 | <a href="https://www.inaturalist.org/observations/111966881">https://www.inaturalist.org/observations/111966881</a> |

|     |                             |                      |            |   |   |             |             |                                                                                                                     |
|-----|-----------------------------|----------------------|------------|---|---|-------------|-------------|---------------------------------------------------------------------------------------------------------------------|
| 943 | <i>Spilopelia chinensis</i> | Eastern Spotted Dove | 2021/12/23 | 1 | 0 | 16.55704500 | 81.49412667 | <a href="https://www.inaturalist.org/observations/104648173">https://www.inaturalist.org/observations/104648173</a> |
| 944 | <i>Spilopelia chinensis</i> | Eastern Spotted Dove | 2021/12/23 | 1 | 0 | 16.55705833 | 81.49408833 | <a href="https://www.inaturalist.org/observations/103760743">https://www.inaturalist.org/observations/103760743</a> |
| 945 | <i>Spilopelia chinensis</i> | Eastern Spotted Dove | 2021/12/23 | 1 | 0 | 16.55705833 | 81.49408833 | <a href="https://www.inaturalist.org/observations/104352325">https://www.inaturalist.org/observations/104352325</a> |
| 946 | <i>Spilopelia chinensis</i> | Eastern Spotted Dove | 2022/2/6   | 1 | 0 | 16.55730667 | 81.49229500 | <a href="https://www.inaturalist.org/observations/106237081">https://www.inaturalist.org/observations/106237081</a> |
| 947 | <i>Spilopelia chinensis</i> | Eastern Spotted Dove | 2021/9/1   | 1 | 0 | 16.55745279 | 81.49806127 | <a href="https://www.inaturalist.org/observations/95744321">https://www.inaturalist.org/observations/95744321</a>   |
| 948 | <i>Spilopelia chinensis</i> | Eastern Spotted Dove | 2020/12/20 | 1 | 0 | 16.55772920 | 80.72698540 | <a href="https://www.inaturalist.org/observations/92475075">https://www.inaturalist.org/observations/92475075</a>   |
| 949 | <i>Spilopelia chinensis</i> | Eastern Spotted Dove | 2021/10/10 | 2 | 0 | 16.55811900 | 81.49816353 | <a href="https://www.inaturalist.org/observations/97895462">https://www.inaturalist.org/observations/97895462</a>   |
| 950 | <i>Spilopelia chinensis</i> | Eastern Spotted Dove | 2021/10/28 | 2 | 0 | 16.55811900 | 81.49816353 | <a href="https://www.inaturalist.org/observations/101397653">https://www.inaturalist.org/observations/101397653</a> |
| 951 | <i>Spilopelia chinensis</i> | Eastern Spotted Dove | 2021/12/31 | 1 | 0 | 16.55879167 | 81.49852000 | <a href="https://www.inaturalist.org/observations/104118228">https://www.inaturalist.org/observations/104118228</a> |
| 952 | <i>Spilopelia chinensis</i> | Eastern Spotted Dove | 2021/12/31 | 1 | 0 | 16.55879167 | 81.49852000 | <a href="https://www.inaturalist.org/observations/104348072">https://www.inaturalist.org/observations/104348072</a> |
| 953 | <i>Spilopelia chinensis</i> | Eastern Spotted Dove | 2021/12/31 | 1 | 0 | 16.55879167 | 81.49852000 | <a href="https://www.inaturalist.org/observations/104411437">https://www.inaturalist.org/observations/104411437</a> |
| 954 | <i>Spilopelia chinensis</i> | Eastern Spotted Dove | 2020/12/1  | 1 | 0 | 16.55956663 | 80.76008636 | <a href="https://www.inaturalist.org/observations/92473424">https://www.inaturalist.org/observations/92473424</a>   |
| 955 | <i>Spilopelia chinensis</i> | Eastern Spotted Dove | 2020/11/22 | 3 | 0 | 16.56399833 | 80.74516500 | <a href="https://www.inaturalist.org/observations/65397649">https://www.inaturalist.org/observations/65397649</a>   |
| 956 | <i>Spilopelia chinensis</i> | Eastern Spotted Dove | 2020/11/29 | 1 | 0 | 16.57589266 | 80.68862217 | <a href="https://www.inaturalist.org/observations/92670130">https://www.inaturalist.org/observations/92670130</a>   |
| 957 | <i>Spilopelia chinensis</i> | Eastern Spotted Dove | 2020/9/18  | 3 | 0 | 16.62166000 | 80.51394000 | <a href="https://www.inaturalist.org/observations/59955410">https://www.inaturalist.org/observations/59955410</a>   |
| 958 | <i>Spilopelia chinensis</i> | Eastern Spotted Dove | 2021/7/24  | 3 | 0 | 16.62166000 | 80.51394000 | <a href="https://www.inaturalist.org/observations/88412710">https://www.inaturalist.org/observations/88412710</a>   |
| 959 | <i>Spilopelia chinensis</i> | Eastern Spotted Dove | 2021/12/28 | 1 | 0 | 16.62712500 | 80.78196111 | <a href="https://www.inaturalist.org/observations/103819850">https://www.inaturalist.org/observations/103819850</a> |
| 960 | <i>Spilopelia chinensis</i> | Eastern Spotted Dove | 2017/12/22 | 4 | 0 | 16.62928639 | 73.34324139 | <a href="https://www.inaturalist.org/observations/30800922">https://www.inaturalist.org/observations/30800922</a>   |
| 961 | <i>Spilopelia chinensis</i> | Eastern Spotted Dove | 2018/8/6   | 5 | 0 | 16.63080806 | 73.35558972 | <a href="https://www.inaturalist.org/observations/30916429">https://www.inaturalist.org/observations/30916429</a>   |
| 962 | <i>Spilopelia chinensis</i> | Eastern Spotted Dove | 2020/11/8  | 1 | 0 | 16.63578069 | 80.79800606 | <a href="https://www.inaturalist.org/observations/92484764">https://www.inaturalist.org/observations/92484764</a>   |
| 963 | <i>Spilopelia chinensis</i> | Eastern Spotted Dove | 2021/6/20  | 1 | 0 | 16.63773941 | 80.79677278 | <a href="https://www.inaturalist.org/observations/91646598">https://www.inaturalist.org/observations/91646598</a>   |
| 964 | <i>Spilopelia chinensis</i> | Eastern Spotted Dove | 2017/12/22 | 5 | 0 | 16.64066639 | 73.35301139 | <a href="https://www.inaturalist.org/observations/30800876">https://www.inaturalist.org/observations/30800876</a>   |
| 965 | <i>Spilopelia chinensis</i> | Eastern Spotted Dove | 2021/8/15  | 1 | 0 | 16.64249177 | 80.48667067 | <a href="https://www.inaturalist.org/observations/91540414">https://www.inaturalist.org/observations/91540414</a>   |

|     |                             |                      |            |   |   |             |             |                                                                                                                     |
|-----|-----------------------------|----------------------|------------|---|---|-------------|-------------|---------------------------------------------------------------------------------------------------------------------|
| 966 | <i>Spilopelia chinensis</i> | Eastern Spotted Dove | 2021/9/12  | 2 | 0 | 16.64309974 | 80.48695564 | <a href="https://www.inaturalist.org/observations/94807578">https://www.inaturalist.org/observations/94807578</a>   |
| 967 | <i>Spilopelia chinensis</i> | Eastern Spotted Dove | 2021/9/24  | 1 | 0 | 16.64336083 | 80.48831037 | <a href="https://www.inaturalist.org/observations/95970265">https://www.inaturalist.org/observations/95970265</a>   |
| 968 | <i>Spilopelia chinensis</i> | Eastern Spotted Dove | 2021/8/15  | 1 | 0 | 16.64457999 | 80.48804998 | <a href="https://www.inaturalist.org/observations/91255062">https://www.inaturalist.org/observations/91255062</a>   |
| 969 | <i>Spilopelia chinensis</i> | Eastern Spotted Dove | 2021/8/22  | 1 | 0 | 16.64467134 | 80.48805617 | <a href="https://www.inaturalist.org/observations/92343646">https://www.inaturalist.org/observations/92343646</a>   |
| 970 | <i>Spilopelia chinensis</i> | Eastern Spotted Dove | 2021/7/4   | 2 | 0 | 16.64507460 | 80.48777312 | <a href="https://www.inaturalist.org/observations/90636951">https://www.inaturalist.org/observations/90636951</a>   |
| 971 | <i>Spilopelia chinensis</i> | Eastern Spotted Dove | 2018/8/6   | 5 | 0 | 16.64598306 | 73.36884000 | <a href="https://www.inaturalist.org/observations/30916161">https://www.inaturalist.org/observations/30916161</a>   |
| 972 | <i>Spilopelia chinensis</i> | Eastern Spotted Dove | 2022/2/19  | 3 | 0 | 16.64950208 | 80.49085768 | <a href="https://www.inaturalist.org/observations/108083315">https://www.inaturalist.org/observations/108083315</a> |
| 973 | <i>Spilopelia chinensis</i> | Eastern Spotted Dove | 2022/3/6   | 5 | 0 | 16.65391605 | 80.46723317 | <a href="https://www.inaturalist.org/observations/108249515">https://www.inaturalist.org/observations/108249515</a> |
| 974 | <i>Spilopelia chinensis</i> | Eastern Spotted Dove | 2020/12/13 | 1 | 0 | 16.65462089 | 80.46307863 | <a href="https://www.inaturalist.org/observations/92659377">https://www.inaturalist.org/observations/92659377</a>   |
| 975 | <i>Spilopelia chinensis</i> | Eastern Spotted Dove | 2020/12/18 | 3 | 0 | 16.66244810 | 80.69972200 | <a href="https://www.inaturalist.org/observations/67304121">https://www.inaturalist.org/observations/67304121</a>   |
| 976 | <i>Spilopelia chinensis</i> | Eastern Spotted Dove | 2017/10/20 | 1 | 0 | 16.66497301 | 81.18106842 | <a href="https://www.inaturalist.org/observations/98112207">https://www.inaturalist.org/observations/98112207</a>   |
| 977 | <i>Spilopelia chinensis</i> | Eastern Spotted Dove | 2018/2/18  | 1 | 0 | 16.66497301 | 81.18106842 | <a href="https://www.inaturalist.org/observations/98114809">https://www.inaturalist.org/observations/98114809</a>   |
| 978 | <i>Spilopelia chinensis</i> | Eastern Spotted Dove | 2021/12/22 | 3 | 0 | 16.69786043 | 82.12057114 | <a href="https://www.inaturalist.org/observations/103876501">https://www.inaturalist.org/observations/103876501</a> |
| 979 | <i>Spilopelia chinensis</i> | Eastern Spotted Dove | 2022/1/5   | 2 | 0 | 16.69901389 | 80.76662500 | <a href="https://www.inaturalist.org/observations/104401864">https://www.inaturalist.org/observations/104401864</a> |
| 980 | <i>Spilopelia chinensis</i> | Eastern Spotted Dove | 2022/2/17  | 2 | 0 | 16.69901944 | 80.76675833 | <a href="https://www.inaturalist.org/observations/106913151">https://www.inaturalist.org/observations/106913151</a> |
| 981 | <i>Spilopelia chinensis</i> | Eastern Spotted Dove | 2022/3/8   | 3 | 0 | 16.69909444 | 80.76635833 | <a href="https://www.inaturalist.org/observations/108172041">https://www.inaturalist.org/observations/108172041</a> |
| 982 | <i>Spilopelia chinensis</i> | Eastern Spotted Dove | 2022/3/11  | 2 | 0 | 16.69921111 | 80.76580278 | <a href="https://www.inaturalist.org/observations/108362233">https://www.inaturalist.org/observations/108362233</a> |
| 983 | <i>Spilopelia chinensis</i> | Eastern Spotted Dove | 2022/1/4   | 1 | 0 | 16.70608889 | 80.75481944 | <a href="https://www.inaturalist.org/observations/104401164">https://www.inaturalist.org/observations/104401164</a> |
| 984 | <i>Spilopelia chinensis</i> | Eastern Spotted Dove | 2022/1/27  | 1 | 0 | 16.70613333 | 80.75464167 | <a href="https://www.inaturalist.org/observations/105713284">https://www.inaturalist.org/observations/105713284</a> |
| 985 | <i>Spilopelia chinensis</i> | Eastern Spotted Dove | 2021/4/24  | 3 | 0 | 16.71195833 | 73.34098333 | <a href="https://www.inaturalist.org/observations/75036618">https://www.inaturalist.org/observations/75036618</a>   |
| 986 | <i>Spilopelia chinensis</i> | Eastern Spotted Dove | 2021/3/1   | 3 | 0 | 16.71956910 | 73.35530210 | <a href="https://www.inaturalist.org/observations/71128071">https://www.inaturalist.org/observations/71128071</a>   |
| 987 | <i>Spilopelia chinensis</i> | Eastern Spotted Dove | 2020/6/28  | 1 | 0 | 16.94133758 | 73.67566681 | <a href="https://www.inaturalist.org/observations/51194044">https://www.inaturalist.org/observations/51194044</a>   |
| 988 | <i>Spilopelia chinensis</i> | Eastern Spotted Dove | 2015/1/26  | 4 | 0 | 16.94806230 | 73.51523810 | <a href="https://www.inaturalist.org/observations/107811354">https://www.inaturalist.org/observations/107811354</a> |

|      |                             |                      |            |   |   |             |             |                                                                                                                     |
|------|-----------------------------|----------------------|------------|---|---|-------------|-------------|---------------------------------------------------------------------------------------------------------------------|
| 989  | <i>Spilopelia chinensis</i> | Eastern Spotted Dove | 2022/7/29  | 2 | 0 | 17.09470270 | 74.02088550 | <a href="https://www.inaturalist.org/observations/129520497">https://www.inaturalist.org/observations/129520497</a> |
| 990  | <i>Spilopelia chinensis</i> | Eastern Spotted Dove | 2020/6/26  | 2 | 0 | 17.17096167 | 73.53648333 | <a href="https://www.inaturalist.org/observations/52009085">https://www.inaturalist.org/observations/52009085</a>   |
| 991  | <i>Spilopelia chinensis</i> | Eastern Spotted Dove | 2021/7/31  | 1 | 0 | 17.18129697 | 78.80309701 | <a href="https://www.inaturalist.org/observations/90165653">https://www.inaturalist.org/observations/90165653</a>   |
| 992  | <i>Spilopelia chinensis</i> | Eastern Spotted Dove | 2021/12/12 | 1 | 0 | 17.26026167 | 81.50225167 | <a href="https://www.inaturalist.org/observations/103527522">https://www.inaturalist.org/observations/103527522</a> |
| 993  | <i>Spilopelia chinensis</i> | Eastern Spotted Dove | 2022/5/22  | 3 | 0 | 17.31234335 | 77.84826880 | <a href="https://www.inaturalist.org/observations/118331011">https://www.inaturalist.org/observations/118331011</a> |
| 994  | <i>Spilopelia chinensis</i> | Eastern Spotted Dove | 2022/9/28  | 1 | 0 | 17.32109100 | 78.39382120 | <a href="https://www.inaturalist.org/observations/137013590">https://www.inaturalist.org/observations/137013590</a> |
| 995  | <i>Spilopelia chinensis</i> | Eastern Spotted Dove | 2022/9/21  | 3 | 0 | 17.35067800 | 78.45130680 | <a href="https://www.inaturalist.org/observations/137030959">https://www.inaturalist.org/observations/137030959</a> |
| 996  | <i>Spilopelia chinensis</i> | Eastern Spotted Dove | 2017/12/1  | 6 | 0 | 17.35731065 | 78.47317632 | <a href="https://www.inaturalist.org/observations/9014975">https://www.inaturalist.org/observations/9014975</a>     |
| 997  | <i>Spilopelia chinensis</i> | Eastern Spotted Dove | 2017/11/29 | 6 | 0 | 17.35923703 | 78.30090299 | <a href="https://www.inaturalist.org/observations/9111397">https://www.inaturalist.org/observations/9111397</a>     |
| 998  | <i>Spilopelia chinensis</i> | Eastern Spotted Dove | 2021/4/29  | 2 | 0 | 17.37000604 | 78.35701879 | <a href="https://www.inaturalist.org/observations/75614477">https://www.inaturalist.org/observations/75614477</a>   |
| 999  | <i>Spilopelia chinensis</i> | Eastern Spotted Dove | 2017/10/27 | 2 | 0 | 17.37272613 | 73.22309182 | <a href="https://www.inaturalist.org/observations/55030548">https://www.inaturalist.org/observations/55030548</a>   |
| 1000 | <i>Spilopelia chinensis</i> | Eastern Spotted Dove | 2020/12/6  | 5 | 0 | 17.37587568 | 73.21191296 | <a href="https://www.inaturalist.org/observations/66288088">https://www.inaturalist.org/observations/66288088</a>   |
| 1001 | <i>Spilopelia chinensis</i> | Eastern Spotted Dove | 2021/10/20 | 3 | 0 | 17.37595760 | 78.53705600 | <a href="https://www.inaturalist.org/observations/99893677">https://www.inaturalist.org/observations/99893677</a>   |
| 1002 | <i>Spilopelia chinensis</i> | Eastern Spotted Dove | 2019/5/13  | 3 | 0 | 17.37908314 | 78.30266370 | <a href="https://www.inaturalist.org/observations/25072327">https://www.inaturalist.org/observations/25072327</a>   |
| 1003 | <i>Spilopelia chinensis</i> | Eastern Spotted Dove | 2020/8/25  | 3 | 0 | 17.38494038 | 78.48667111 | <a href="https://www.inaturalist.org/observations/65020906">https://www.inaturalist.org/observations/65020906</a>   |
| 1004 | <i>Spilopelia chinensis</i> | Eastern Spotted Dove | 2021/1/31  | 0 | 0 | 17.38494038 | 78.48667111 | <a href="https://www.inaturalist.org/observations/96977340">https://www.inaturalist.org/observations/96977340</a>   |
| 1005 | <i>Spilopelia chinensis</i> | Eastern Spotted Dove | 2012/10/9  | 6 | 0 | 17.38504400 | 78.48667100 | <a href="https://www.inaturalist.org/observations/19189587">https://www.inaturalist.org/observations/19189587</a>   |
| 1006 | <i>Spilopelia chinensis</i> | Eastern Spotted Dove | 2021/10/18 | 1 | 0 | 17.39327770 | 78.34114480 | <a href="https://www.inaturalist.org/observations/99242580">https://www.inaturalist.org/observations/99242580</a>   |
| 1007 | <i>Spilopelia chinensis</i> | Eastern Spotted Dove | 2021/5/23  | 3 | 0 | 17.39578470 | 78.43119440 | <a href="https://www.inaturalist.org/observations/80241347">https://www.inaturalist.org/observations/80241347</a>   |
| 1008 | <i>Spilopelia chinensis</i> | Eastern Spotted Dove | 2019/6/1   | 3 | 0 | 17.39694100 | 78.51966600 | <a href="https://www.inaturalist.org/observations/26165313">https://www.inaturalist.org/observations/26165313</a>   |
| 1009 | <i>Spilopelia chinensis</i> | Eastern Spotted Dove | 2019/5/31  | 3 | 0 | 17.39698500 | 78.51975000 | <a href="https://www.inaturalist.org/observations/26162134">https://www.inaturalist.org/observations/26162134</a>   |
| 1010 | <i>Spilopelia chinensis</i> | Eastern Spotted Dove | 2012/4/8   | 1 | 0 | 17.40534260 | 73.54174400 | <a href="https://www.inaturalist.org/observations/41611272">https://www.inaturalist.org/observations/41611272</a>   |
| 1011 | <i>Spilopelia chinensis</i> | Eastern Spotted Dove | 2012/4/8   | 1 | 0 | 17.40534260 | 73.54174400 | <a href="https://www.inaturalist.org/observations/41611311">https://www.inaturalist.org/observations/41611311</a>   |



|      |                             |                      |            |   |   |             |             |                                                                                                                     |
|------|-----------------------------|----------------------|------------|---|---|-------------|-------------|---------------------------------------------------------------------------------------------------------------------|
| 1012 | <i>Spilopelia chinensis</i> | Eastern Spotted Dove | 2019/1/17  | 5 | 0 | 17.40602427 | 78.39477960 | <a href="https://www.inaturalist.org/observations/19898711">https://www.inaturalist.org/observations/19898711</a>   |
| 1013 | <i>Spilopelia chinensis</i> | Eastern Spotted Dove | 2007/3/4   | 6 | 0 | 17.42450200 | 78.46375400 | <a href="https://www.inaturalist.org/observations/18798203">https://www.inaturalist.org/observations/18798203</a>   |
| 1014 | <i>Spilopelia chinensis</i> | Eastern Spotted Dove | 2020/8/5   | 1 | 0 | 17.43041121 | 78.45883369 | <a href="https://www.inaturalist.org/observations/56042387">https://www.inaturalist.org/observations/56042387</a>   |
| 1015 | <i>Spilopelia chinensis</i> | Eastern Spotted Dove | 2022/7/31  | 4 | 0 | 17.43207510 | 78.47538770 | <a href="https://www.inaturalist.org/observations/130092333">https://www.inaturalist.org/observations/130092333</a> |
| 1016 | <i>Spilopelia chinensis</i> | Eastern Spotted Dove | 2022/7/31  | 4 | 0 | 17.43207510 | 78.47538770 | <a href="https://www.inaturalist.org/observations/130092334">https://www.inaturalist.org/observations/130092334</a> |
| 1017 | <i>Spilopelia chinensis</i> | Eastern Spotted Dove | 2020/2/6   | 0 | 0 | 17.43427833 | 78.38288000 | <a href="https://www.inaturalist.org/observations/38530057">https://www.inaturalist.org/observations/38530057</a>   |
| 1018 | <i>Spilopelia chinensis</i> | Eastern Spotted Dove | 2017/12/1  | 6 | 0 | 17.43774264 | 78.38744466 | <a href="https://www.inaturalist.org/observations/9014942">https://www.inaturalist.org/observations/9014942</a>     |
| 1019 | <i>Spilopelia chinensis</i> | Eastern Spotted Dove | 2022/4/10  | 2 | 0 | 17.44147023 | 81.52410083 | <a href="https://www.inaturalist.org/observations/111893967">https://www.inaturalist.org/observations/111893967</a> |
| 1020 | <i>Spilopelia chinensis</i> | Eastern Spotted Dove | 2017/11/30 | 4 | 0 | 17.44159224 | 78.38192850 | <a href="https://www.inaturalist.org/observations/9112336">https://www.inaturalist.org/observations/9112336</a>     |
| 1021 | <i>Spilopelia chinensis</i> | Eastern Spotted Dove | 2019/10/15 | 4 | 0 | 17.44275982 | 78.36853687 | <a href="https://www.inaturalist.org/observations/34398169">https://www.inaturalist.org/observations/34398169</a>   |
| 1022 | <i>Spilopelia chinensis</i> | Eastern Spotted Dove | 2021/1/17  | 1 | 0 | 17.44952640 | 78.36371697 | <a href="https://www.inaturalist.org/observations/115310214">https://www.inaturalist.org/observations/115310214</a> |
| 1023 | <i>Spilopelia chinensis</i> | Eastern Spotted Dove | 2022/8/8   | 4 | 0 | 17.45104722 | 78.39385000 | <a href="https://www.inaturalist.org/observations/130074068">https://www.inaturalist.org/observations/130074068</a> |
| 1024 | <i>Spilopelia chinensis</i> | Eastern Spotted Dove | 2019/1/13  | 3 | 0 | 17.45189108 | 78.23120478 | <a href="https://www.inaturalist.org/observations/19788110">https://www.inaturalist.org/observations/19788110</a>   |
| 1025 | <i>Spilopelia chinensis</i> | Eastern Spotted Dove | 2021/1/31  | 1 | 0 | 17.45398981 | 78.35721463 | <a href="https://www.inaturalist.org/observations/98784320">https://www.inaturalist.org/observations/98784320</a>   |
| 1026 | <i>Spilopelia chinensis</i> | Eastern Spotted Dove | 2020/4/30  | 4 | 0 | 17.45426231 | 78.54788516 | <a href="https://www.inaturalist.org/observations/62920320">https://www.inaturalist.org/observations/62920320</a>   |
| 1027 | <i>Spilopelia chinensis</i> | Eastern Spotted Dove | 2022/8/28  | 3 | 0 | 17.45436626 | 78.35679285 | <a href="https://www.inaturalist.org/observations/132780547">https://www.inaturalist.org/observations/132780547</a> |
| 1028 | <i>Spilopelia chinensis</i> | Eastern Spotted Dove | 2019/1/17  | 5 | 0 | 17.45517541 | 78.25529616 | <a href="https://www.inaturalist.org/observations/19834026">https://www.inaturalist.org/observations/19834026</a>   |
| 1029 | <i>Spilopelia chinensis</i> | Eastern Spotted Dove | 2022/9/6   | 3 | 0 | 17.45673625 | 78.32638767 | <a href="https://www.inaturalist.org/observations/133929580">https://www.inaturalist.org/observations/133929580</a> |
| 1030 | <i>Spilopelia chinensis</i> | Eastern Spotted Dove | 2018/12/3  | 3 | 0 | 17.45805239 | 78.37074126 | <a href="https://www.inaturalist.org/observations/18791361">https://www.inaturalist.org/observations/18791361</a>   |
| 1031 | <i>Spilopelia chinensis</i> | Eastern Spotted Dove | 2012/10/9  | 6 | 0 | 17.47336200 | 78.37290200 | <a href="http://www.inaturalist.org/observations/250788">http://www.inaturalist.org/observations/250788</a>         |
| 1032 | <i>Spilopelia chinensis</i> | Eastern Spotted Dove | 2019/1/13  | 4 | 0 | 17.47431526 | 78.27746772 | <a href="https://www.inaturalist.org/observations/19766292">https://www.inaturalist.org/observations/19766292</a>   |
| 1033 | <i>Spilopelia chinensis</i> | Eastern Spotted Dove | 2020/1/9   | 3 | 0 | 17.48342117 | 78.59797824 | <a href="https://www.inaturalist.org/observations/37422776">https://www.inaturalist.org/observations/37422776</a>   |
| 1034 | <i>Spilopelia chinensis</i> | Eastern Spotted Dove | 2021/2/2   | 2 | 0 | 17.48377370 | 78.31583351 | <a href="https://www.inaturalist.org/observations/68949238">https://www.inaturalist.org/observations/68949238</a>   |

|      |                             |                      |            |   |   |             |             |                                                                                                                     |
|------|-----------------------------|----------------------|------------|---|---|-------------|-------------|---------------------------------------------------------------------------------------------------------------------|
| 1035 | <i>Spilopelia chinensis</i> | Eastern Spotted Dove | 2022/3/5   | 3 | 0 | 17.48463980 | 78.24298670 | <a href="https://www.inaturalist.org/observations/107946729">https://www.inaturalist.org/observations/107946729</a> |
| 1036 | <i>Spilopelia chinensis</i> | Eastern Spotted Dove | 2021/12/4  | 1 | 0 | 17.48571797 | 78.34817200 | <a href="https://www.inaturalist.org/observations/102462559">https://www.inaturalist.org/observations/102462559</a> |
| 1037 | <i>Spilopelia chinensis</i> | Eastern Spotted Dove | 2022/2/5   | 2 | 0 | 17.48605690 | 78.34653110 | <a href="https://www.inaturalist.org/observations/106486633">https://www.inaturalist.org/observations/106486633</a> |
| 1038 | <i>Spilopelia chinensis</i> | Eastern Spotted Dove | 2022/9/3   | 2 | 0 | 17.48605690 | 78.34653110 | <a href="https://www.inaturalist.org/observations/133431105">https://www.inaturalist.org/observations/133431105</a> |
| 1039 | <i>Spilopelia chinensis</i> | Eastern Spotted Dove | 2022/9/3   | 5 | 0 | 17.48605690 | 78.34653110 | <a href="https://www.inaturalist.org/observations/133432807">https://www.inaturalist.org/observations/133432807</a> |
| 1040 | <i>Spilopelia chinensis</i> | Eastern Spotted Dove | 2021/12/4  | 2 | 0 | 17.48605696 | 78.34653106 | <a href="https://www.inaturalist.org/observations/102468513">https://www.inaturalist.org/observations/102468513</a> |
| 1041 | <i>Spilopelia chinensis</i> | Eastern Spotted Dove | 2021/12/4  | 2 | 0 | 17.48605696 | 78.34653106 | <a href="https://www.inaturalist.org/observations/102472284">https://www.inaturalist.org/observations/102472284</a> |
| 1042 | <i>Spilopelia chinensis</i> | Eastern Spotted Dove | 2021/8/20  | 2 | 0 | 17.48907377 | 78.34631749 | <a href="https://www.inaturalist.org/observations/91843911">https://www.inaturalist.org/observations/91843911</a>   |
| 1043 | <i>Spilopelia chinensis</i> | Eastern Spotted Dove | 2020/6/2   | 5 | 0 | 17.49002352 | 78.53177642 | <a href="https://www.inaturalist.org/observations/48202672">https://www.inaturalist.org/observations/48202672</a>   |
| 1044 | <i>Spilopelia chinensis</i> | Eastern Spotted Dove | 2021/1/31  | 4 | 0 | 17.49004289 | 78.53207728 | <a href="https://www.inaturalist.org/observations/68844797">https://www.inaturalist.org/observations/68844797</a>   |
| 1045 | <i>Spilopelia chinensis</i> | Eastern Spotted Dove | 2021/7/28  | 2 | 0 | 17.49087167 | 78.53409500 | <a href="https://www.inaturalist.org/observations/88931486">https://www.inaturalist.org/observations/88931486</a>   |
| 1046 | <i>Spilopelia chinensis</i> | Eastern Spotted Dove | 2021/3/13  | 2 | 0 | 17.49127997 | 78.33826100 | <a href="https://www.inaturalist.org/observations/86250684">https://www.inaturalist.org/observations/86250684</a>   |
| 1047 | <i>Spilopelia chinensis</i> | Eastern Spotted Dove | 2022/9/2   | 4 | 0 | 17.49230278 | 78.33621667 | <a href="https://www.inaturalist.org/observations/133321221">https://www.inaturalist.org/observations/133321221</a> |
| 1048 | <i>Spilopelia chinensis</i> | Eastern Spotted Dove | 2022/9/2   | 2 | 0 | 17.49230278 | 78.33621667 | <a href="https://www.inaturalist.org/observations/133321272">https://www.inaturalist.org/observations/133321272</a> |
| 1049 | <i>Spilopelia chinensis</i> | Eastern Spotted Dove | 2022/8/29  | 4 | 0 | 17.49263889 | 78.33600556 | <a href="https://www.inaturalist.org/observations/132782776">https://www.inaturalist.org/observations/132782776</a> |
| 1050 | <i>Spilopelia chinensis</i> | Eastern Spotted Dove | 2022/9/4   | 2 | 0 | 17.49281389 | 78.33744444 | <a href="https://www.inaturalist.org/observations/133566588">https://www.inaturalist.org/observations/133566588</a> |
| 1051 | <i>Spilopelia chinensis</i> | Eastern Spotted Dove | 2022/2/25  | 3 | 0 | 17.49368560 | 78.34012930 | <a href="https://www.inaturalist.org/observations/108249076">https://www.inaturalist.org/observations/108249076</a> |
| 1052 | <i>Spilopelia chinensis</i> | Eastern Spotted Dove | 2021/11/24 | 1 | 0 | 17.49670160 | 78.50662330 | <a href="https://www.inaturalist.org/observations/103686994">https://www.inaturalist.org/observations/103686994</a> |
| 1053 | <i>Spilopelia chinensis</i> | Eastern Spotted Dove | 2014/12/11 | 5 | 0 | 17.50002296 | 81.38143463 | <a href="https://www.inaturalist.org/observations/66881019">https://www.inaturalist.org/observations/66881019</a>   |
| 1054 | <i>Spilopelia chinensis</i> | Eastern Spotted Dove | 2021/12/2  | 2 | 0 | 17.51635452 | 78.32887843 | <a href="https://www.inaturalist.org/observations/105550210">https://www.inaturalist.org/observations/105550210</a> |
| 1055 | <i>Spilopelia chinensis</i> | Eastern Spotted Dove | 2022/6/5   | 3 | 0 | 17.51714280 | 78.31574200 | <a href="https://www.inaturalist.org/observations/120287100">https://www.inaturalist.org/observations/120287100</a> |
| 1056 | <i>Spilopelia chinensis</i> | Eastern Spotted Dove | 2022/1/16  | 3 | 0 | 17.52246770 | 78.33443850 | <a href="https://www.inaturalist.org/observations/105039242">https://www.inaturalist.org/observations/105039242</a> |
| 1057 | <i>Spilopelia chinensis</i> | Eastern Spotted Dove | 2022/4/17  | 1 | 0 | 17.52246770 | 78.33443850 | <a href="https://www.inaturalist.org/observations/111761122">https://www.inaturalist.org/observations/111761122</a> |

|      |                             |                      |            |   |   |             |             |                                                                                                                     |
|------|-----------------------------|----------------------|------------|---|---|-------------|-------------|---------------------------------------------------------------------------------------------------------------------|
| 1058 | <i>Spilopelia chinensis</i> | Eastern Spotted Dove | 2020/9/27  | 4 | 0 | 17.53266850 | 78.37488537 | <a href="https://www.inaturalist.org/observations/61297003">https://www.inaturalist.org/observations/61297003</a>   |
| 1059 | <i>Spilopelia chinensis</i> | Eastern Spotted Dove | 2019/1/17  | 4 | 0 | 17.53325935 | 78.23338502 | <a href="https://www.inaturalist.org/observations/19834044">https://www.inaturalist.org/observations/19834044</a>   |
| 1060 | <i>Spilopelia chinensis</i> | Eastern Spotted Dove | 2021/12/10 | 2 | 0 | 17.59550124 | 81.68398600 | <a href="https://www.inaturalist.org/observations/103412889">https://www.inaturalist.org/observations/103412889</a> |
| 1061 | <i>Spilopelia chinensis</i> | Eastern Spotted Dove | 2018/9/21  | 4 | 0 | 17.59927845 | 81.68741867 | <a href="https://www.inaturalist.org/observations/64935902">https://www.inaturalist.org/observations/64935902</a>   |
| 1062 | <i>Spilopelia chinensis</i> | Eastern Spotted Dove | 2022/6/24  | 4 | 0 | 17.63509667 | 78.53748833 | <a href="https://www.inaturalist.org/observations/123211316">https://www.inaturalist.org/observations/123211316</a> |
| 1063 | <i>Spilopelia chinensis</i> | Eastern Spotted Dove | 2019/11/2  | 1 | 0 | 17.67067090 | 81.70914260 | <a href="https://www.inaturalist.org/observations/92889162">https://www.inaturalist.org/observations/92889162</a>   |
| 1064 | <i>Spilopelia chinensis</i> | Eastern Spotted Dove | 2020/11/13 | 1 | 0 | 17.68046390 | 74.01826100 | <a href="https://www.inaturalist.org/observations/71119196">https://www.inaturalist.org/observations/71119196</a>   |
| 1065 | <i>Spilopelia chinensis</i> | Eastern Spotted Dove | 2020/11/13 | 1 | 0 | 17.68046390 | 74.01826100 | <a href="https://www.inaturalist.org/observations/105498334">https://www.inaturalist.org/observations/105498334</a> |
| 1066 | <i>Spilopelia chinensis</i> | Eastern Spotted Dove | 2020/11/13 | 1 | 0 | 17.68046390 | 74.01826100 | <a href="https://www.inaturalist.org/observations/105498338">https://www.inaturalist.org/observations/105498338</a> |
| 1067 | <i>Spilopelia chinensis</i> | Eastern Spotted Dove | 2021/12/12 | 4 | 0 | 17.68661679 | 78.32732443 | <a href="https://www.inaturalist.org/observations/104472223">https://www.inaturalist.org/observations/104472223</a> |
| 1068 | <i>Spilopelia chinensis</i> | Eastern Spotted Dove | 2022/2/27  | 3 | 0 | 17.68662580 | 78.32732450 | <a href="https://www.inaturalist.org/observations/107689546">https://www.inaturalist.org/observations/107689546</a> |
| 1069 | <i>Spilopelia chinensis</i> | Eastern Spotted Dove | 2022/6/26  | 2 | 0 | 17.68662580 | 78.32732450 | <a href="https://www.inaturalist.org/observations/123486419">https://www.inaturalist.org/observations/123486419</a> |
| 1070 | <i>Spilopelia chinensis</i> | Eastern Spotted Dove | 2021/7/30  | 2 | 0 | 17.73106766 | 83.33222961 | <a href="https://www.inaturalist.org/observations/89175274">https://www.inaturalist.org/observations/89175274</a>   |
| 1071 | <i>Spilopelia chinensis</i> | Eastern Spotted Dove | 2022/6/24  | 5 | 0 | 17.73940000 | 83.32820000 | <a href="https://www.inaturalist.org/observations/123199095">https://www.inaturalist.org/observations/123199095</a> |
| 1072 | <i>Spilopelia chinensis</i> | Eastern Spotted Dove | 2021/9/1   | 1 | 0 | 17.74200161 | 83.32744885 | <a href="https://www.inaturalist.org/observations/93376040">https://www.inaturalist.org/observations/93376040</a>   |
| 1073 | <i>Spilopelia chinensis</i> | Eastern Spotted Dove | 2020/12/24 | 3 | 0 | 17.76913300 | 73.74210180 | <a href="https://www.inaturalist.org/observations/68050059">https://www.inaturalist.org/observations/68050059</a>   |
| 1074 | <i>Spilopelia chinensis</i> | Eastern Spotted Dove | 2021/7/31  | 1 | 0 | 17.86485518 | 82.69698718 | <a href="https://www.inaturalist.org/observations/90024042">https://www.inaturalist.org/observations/90024042</a>   |
| 1075 | <i>Spilopelia chinensis</i> | Eastern Spotted Dove | 2017/10/1  | 2 | 0 | 17.98149900 | 73.79544500 | <a href="https://www.inaturalist.org/observations/45665898">https://www.inaturalist.org/observations/45665898</a>   |
| 1076 | <i>Spilopelia chinensis</i> | Eastern Spotted Dove | 2022/1/2   | 1 | 0 | 17.99041898 | 82.97922067 | <a href="https://www.inaturalist.org/observations/104173476">https://www.inaturalist.org/observations/104173476</a> |
| 1077 | <i>Spilopelia chinensis</i> | Eastern Spotted Dove | 2020/10/2  | 2 | 0 | 18.09901203 | 83.41638275 | <a href="https://www.inaturalist.org/observations/61467895">https://www.inaturalist.org/observations/61467895</a>   |
| 1078 | <i>Spilopelia chinensis</i> | Eastern Spotted Dove | 2018/7/7   | 3 | 0 | 18.11243720 | 79.01929970 | <a href="https://www.inaturalist.org/observations/63556665">https://www.inaturalist.org/observations/63556665</a>   |
| 1079 | <i>Spilopelia chinensis</i> | Eastern Spotted Dove | 2016/10/29 | 4 | 0 | 18.11243720 | 79.01929970 | <a href="https://www.inaturalist.org/observations/63558506">https://www.inaturalist.org/observations/63558506</a>   |
| 1080 | <i>Spilopelia chinensis</i> | Eastern Spotted Dove | 2022/3/1   | 2 | 0 | 18.14128328 | 73.79158091 | <a href="https://www.inaturalist.org/observations/111675249">https://www.inaturalist.org/observations/111675249</a> |

|      |                             |                      |            |   |   |             |              |                                                                                                                     |
|------|-----------------------------|----------------------|------------|---|---|-------------|--------------|---------------------------------------------------------------------------------------------------------------------|
| 1081 | <i>Spilopelia chinensis</i> | Eastern Spotted Dove | 2018/12/23 | 3 | 0 | 18.16823210 | 72.99018980  | <a href="https://www.inaturalist.org/observations/67147398">https://www.inaturalist.org/observations/67147398</a>   |
| 1082 | <i>Spilopelia chinensis</i> | Eastern Spotted Dove | 2017/10/12 | 4 | 0 | 18.19868240 | 109.48975330 | <a href="https://www.inaturalist.org/observations/8382926">https://www.inaturalist.org/observations/8382926</a>     |
| 1083 | <i>Spilopelia chinensis</i> | Eastern Spotted Dove | 2017/11/13 | 3 | 0 | 18.20059851 | 109.48977480 | <a href="https://www.inaturalist.org/observations/8802099">https://www.inaturalist.org/observations/8802099</a>     |
| 1084 | <i>Spilopelia chinensis</i> | Eastern Spotted Dove | 2017/3/10  | 4 | 0 | 18.22663796 | 109.50661180 | <a href="https://www.inaturalist.org/observations/5400841">https://www.inaturalist.org/observations/5400841</a>     |
| 1085 | <i>Spilopelia chinensis</i> | Eastern Spotted Dove | 2016/12/7  | 4 | 0 | 18.25284700 | 109.51190900 | <a href="http://www.inaturalist.org/observations/4735422">http://www.inaturalist.org/observations/4735422</a>       |
| 1086 | <i>Spilopelia chinensis</i> | Eastern Spotted Dove | 2017/6/12  | 4 | 0 | 18.25284700 | 109.51190900 | <a href="https://www.inaturalist.org/observations/6620149">https://www.inaturalist.org/observations/6620149</a>     |
| 1087 | <i>Spilopelia chinensis</i> | Eastern Spotted Dove | 2017/6/22  | 4 | 0 | 18.25284700 | 109.51190900 | <a href="https://www.inaturalist.org/observations/6764332">https://www.inaturalist.org/observations/6764332</a>     |
| 1088 | <i>Spilopelia chinensis</i> | Eastern Spotted Dove | 2019/4/26  | 1 | 0 | 18.25902284 | 109.53557980 | <a href="https://www.inaturalist.org/observations/24882983">https://www.inaturalist.org/observations/24882983</a>   |
| 1089 | <i>Spilopelia chinensis</i> | Eastern Spotted Dove | 2022/2/17  | 1 | 0 | 18.28877980 | 73.13136383  | <a href="https://www.inaturalist.org/observations/107090522">https://www.inaturalist.org/observations/107090522</a> |
| 1090 | <i>Spilopelia chinensis</i> | Eastern Spotted Dove | 2022/1/15  | 4 | 0 | 18.28911907 | 73.13576672  | <a href="https://www.inaturalist.org/observations/104970709">https://www.inaturalist.org/observations/104970709</a> |
| 1091 | <i>Spilopelia chinensis</i> | Eastern Spotted Dove | 2021/9/15  | 1 | 0 | 18.28939792 | 73.13555751  | <a href="https://www.inaturalist.org/observations/95295581">https://www.inaturalist.org/observations/95295581</a>   |
| 1092 | <i>Spilopelia chinensis</i> | Eastern Spotted Dove | 2021/9/3   | 2 | 0 | 18.29018231 | 73.13359413  | <a href="https://www.inaturalist.org/observations/95023184">https://www.inaturalist.org/observations/95023184</a>   |
| 1093 | <i>Spilopelia chinensis</i> | Eastern Spotted Dove | 2022/4/10  | 3 | 0 | 18.32106860 | 73.66612970  | <a href="https://www.inaturalist.org/observations/121449012">https://www.inaturalist.org/observations/121449012</a> |
| 1094 | <i>Spilopelia chinensis</i> | Eastern Spotted Dove | 2021/1/28  | 2 | 0 | 18.33481840 | 73.67215150  | <a href="https://www.inaturalist.org/observations/70931525">https://www.inaturalist.org/observations/70931525</a>   |
| 1095 | <i>Spilopelia chinensis</i> | Eastern Spotted Dove | 2019/2/14  | 3 | 0 | 18.33760984 | 109.58740490 | <a href="https://www.inaturalist.org/observations/20339260">https://www.inaturalist.org/observations/20339260</a>   |
| 1096 | <i>Spilopelia chinensis</i> | Eastern Spotted Dove | 2019/2/14  | 2 | 0 | 18.33760984 | 109.58740490 | <a href="https://www.inaturalist.org/observations/20339261">https://www.inaturalist.org/observations/20339261</a>   |
| 1097 | <i>Spilopelia chinensis</i> | Eastern Spotted Dove | 2020/11/29 | 3 | 0 | 18.35312390 | 75.63916110  | <a href="https://www.inaturalist.org/observations/75145437">https://www.inaturalist.org/observations/75145437</a>   |
| 1098 | <i>Spilopelia chinensis</i> | Eastern Spotted Dove | 2020/10/27 | 1 | 0 | 18.35425091 | 75.96868370  | <a href="https://www.inaturalist.org/observations/63619800">https://www.inaturalist.org/observations/63619800</a>   |
| 1099 | <i>Spilopelia chinensis</i> | Eastern Spotted Dove | 2012/1/29  | 3 | 0 | 18.37499735 | 73.76974406  | <a href="https://www.inaturalist.org/observations/128263448">https://www.inaturalist.org/observations/128263448</a> |
| 1100 | <i>Spilopelia chinensis</i> | Eastern Spotted Dove | 2018/3/31  | 2 | 0 | 18.37586280 | 73.76916470  | <a href="https://www.inaturalist.org/observations/44360082">https://www.inaturalist.org/observations/44360082</a>   |
| 1101 | <i>Spilopelia chinensis</i> | Eastern Spotted Dove | 2017/10/29 | 4 | 0 | 18.37586280 | 73.76916470  | <a href="https://www.inaturalist.org/observations/44361547">https://www.inaturalist.org/observations/44361547</a>   |
| 1102 | <i>Spilopelia chinensis</i> | Eastern Spotted Dove | 2018/3/31  | 2 | 0 | 18.37586280 | 73.76916470  | <a href="https://www.inaturalist.org/observations/67006336">https://www.inaturalist.org/observations/67006336</a>   |
| 1103 | <i>Spilopelia chinensis</i> | Eastern Spotted Dove | 2017/10/29 | 3 | 0 | 18.37586280 | 73.76916470  | <a href="https://www.inaturalist.org/observations/67006886">https://www.inaturalist.org/observations/67006886</a>   |

|      |                             |                      |            |   |   |             |              |                                                                                                                     |
|------|-----------------------------|----------------------|------------|---|---|-------------|--------------|---------------------------------------------------------------------------------------------------------------------|
| 1104 | <i>Spilopelia chinensis</i> | Eastern Spotted Dove | 2021/3/12  | 3 | 0 | 18.37586280 | 73.76916470  | <a href="https://www.inaturalist.org/observations/71121908">https://www.inaturalist.org/observations/71121908</a>   |
| 1105 | <i>Spilopelia chinensis</i> | Eastern Spotted Dove | 2021/2/13  | 2 | 0 | 18.37586280 | 73.76916470  | <a href="https://www.inaturalist.org/observations/75058833">https://www.inaturalist.org/observations/75058833</a>   |
| 1106 | <i>Spilopelia chinensis</i> | Eastern Spotted Dove | 2022/3/22  | 6 | 0 | 18.37586782 | 73.76915932  | <a href="https://www.inaturalist.org/observations/109300968">https://www.inaturalist.org/observations/109300968</a> |
| 1107 | <i>Spilopelia chinensis</i> | Eastern Spotted Dove | 2016/4/9   | 3 | 0 | 18.37846650 | 73.76782250  | <a href="https://www.inaturalist.org/observations/44859673">https://www.inaturalist.org/observations/44859673</a>   |
| 1108 | <i>Spilopelia chinensis</i> | Eastern Spotted Dove | 2017/4/1   | 2 | 0 | 18.38027930 | 73.76764300  | <a href="https://www.inaturalist.org/observations/41810990">https://www.inaturalist.org/observations/41810990</a>   |
| 1109 | <i>Spilopelia chinensis</i> | Eastern Spotted Dove | 2022/2/24  | 2 | 0 | 18.38027930 | 73.76764300  | <a href="https://www.inaturalist.org/observations/121368356">https://www.inaturalist.org/observations/121368356</a> |
| 1110 | <i>Spilopelia chinensis</i> | Eastern Spotted Dove | 2022/4/12  | 2 | 0 | 18.44690320 | 73.43054390  | <a href="https://www.inaturalist.org/observations/135571079">https://www.inaturalist.org/observations/135571079</a> |
| 1111 | <i>Spilopelia chinensis</i> | Eastern Spotted Dove | 2022/4/12  | 2 | 0 | 18.44690320 | 73.43054390  | <a href="https://www.inaturalist.org/observations/135571080">https://www.inaturalist.org/observations/135571080</a> |
| 1112 | <i>Spilopelia chinensis</i> | Eastern Spotted Dove | 2017/10/29 | 5 | 0 | 18.45127779 | 73.77890110  | <a href="https://www.inaturalist.org/observations/8601144">https://www.inaturalist.org/observations/8601144</a>     |
| 1113 | <i>Spilopelia chinensis</i> | Eastern Spotted Dove | 2017/11/5  | 4 | 0 | 18.45640707 | 73.78134727  | <a href="https://www.inaturalist.org/observations/8705776">https://www.inaturalist.org/observations/8705776</a>     |
| 1114 | <i>Spilopelia chinensis</i> | Eastern Spotted Dove | 2012/9/2   | 5 | 0 | 18.46009619 | 73.45490601  | <a href="https://www.inaturalist.org/observations/17446520">https://www.inaturalist.org/observations/17446520</a>   |
| 1115 | <i>Spilopelia chinensis</i> | Eastern Spotted Dove | 2016/12/15 | 2 | 0 | 18.46571306 | 73.46555472  | <a href="https://www.inaturalist.org/observations/94905371">https://www.inaturalist.org/observations/94905371</a>   |
| 1116 | <i>Spilopelia chinensis</i> | Eastern Spotted Dove | 2016/6/15  | 1 | 0 | 18.47670806 | 73.47459000  | <a href="https://www.inaturalist.org/observations/95640141">https://www.inaturalist.org/observations/95640141</a>   |
| 1117 | <i>Spilopelia chinensis</i> | Eastern Spotted Dove | 2015/8/16  | 5 | 0 | 18.52548990 | 73.81538450  | <a href="http://www.inaturalist.org/observations/3910577">http://www.inaturalist.org/observations/3910577</a>       |
| 1118 | <i>Spilopelia chinensis</i> | Eastern Spotted Dove | 2019/8/16  | 4 | 0 | 18.54137667 | 82.61475500  | <a href="https://www.inaturalist.org/observations/35539469">https://www.inaturalist.org/observations/35539469</a>   |
| 1119 | <i>Spilopelia chinensis</i> | Eastern Spotted Dove | 2019/8/15  | 4 | 0 | 18.57338167 | 82.49817167  | <a href="https://www.inaturalist.org/observations/35537312">https://www.inaturalist.org/observations/35537312</a>   |
| 1120 | <i>Spilopelia chinensis</i> | Eastern Spotted Dove | 2019/8/15  | 4 | 0 | 18.57451000 | 82.49688667  | <a href="https://www.inaturalist.org/observations/35537633">https://www.inaturalist.org/observations/35537633</a>   |
| 1121 | <i>Spilopelia chinensis</i> | Eastern Spotted Dove | 2018/2/9   | 2 | 0 | 18.60315524 | 108.71063240 | <a href="https://www.inaturalist.org/observations/10243251">https://www.inaturalist.org/observations/10243251</a>   |
| 1122 | <i>Spilopelia chinensis</i> | Eastern Spotted Dove | 2013/4/3   | 4 | 0 | 18.69415352 | 72.93129234  | <a href="https://www.inaturalist.org/observations/104699133">https://www.inaturalist.org/observations/104699133</a> |
| 1123 | <i>Spilopelia chinensis</i> | Eastern Spotted Dove | 2022/9/23  | 2 | 0 | 18.70543726 | 73.45919974  | <a href="https://www.inaturalist.org/observations/136671772">https://www.inaturalist.org/observations/136671772</a> |
| 1124 | <i>Spilopelia chinensis</i> | Eastern Spotted Dove | 2022/8/11  | 5 | 0 | 18.73185333 | 73.47917167  | <a href="https://www.inaturalist.org/observations/130368229">https://www.inaturalist.org/observations/130368229</a> |
| 1125 | <i>Spilopelia chinensis</i> | Eastern Spotted Dove | 2011/12/21 | 1 | 0 | 18.74218140 | 72.86276575  | <a href="https://www.inaturalist.org/observations/70428982">https://www.inaturalist.org/observations/70428982</a>   |
| 1126 | <i>Spilopelia chinensis</i> | Eastern Spotted Dove | 2010/2/26  | 1 | 0 | 18.75572370 | 73.40907570  | <a href="https://www.inaturalist.org/observations/38153616">https://www.inaturalist.org/observations/38153616</a>   |

|      |                             |                      |            |   |   |             |             |                                                                                                                     |
|------|-----------------------------|----------------------|------------|---|---|-------------|-------------|---------------------------------------------------------------------------------------------------------------------|
| 1127 | <i>Spilopelia chinensis</i> | Eastern Spotted Dove | 2010/2/26  | 3 | 0 | 18.76510960 | 73.40783550 | <a href="https://www.inaturalist.org/observations/69552804">https://www.inaturalist.org/observations/69552804</a>   |
| 1128 | <i>Spilopelia chinensis</i> | Eastern Spotted Dove | 2019/12/16 | 2 | 0 | 18.89103790 | 73.12191850 | <a href="https://www.inaturalist.org/observations/52641370">https://www.inaturalist.org/observations/52641370</a>   |
| 1129 | <i>Spilopelia chinensis</i> | Eastern Spotted Dove | 2016/10/30 | 4 | 0 | 18.89992803 | 72.95202702 | <a href="https://www.inaturalist.org/observations/64533141">https://www.inaturalist.org/observations/64533141</a>   |
| 1130 | <i>Spilopelia chinensis</i> | Eastern Spotted Dove | 2016/10/23 | 1 | 0 | 18.89992803 | 72.95202702 | <a href="https://www.inaturalist.org/observations/100514836">https://www.inaturalist.org/observations/100514836</a> |
| 1131 | <i>Spilopelia chinensis</i> | Eastern Spotted Dove | 2022/3/23  | 4 | 0 | 18.90064326 | 73.25803565 | <a href="https://www.inaturalist.org/observations/110304527">https://www.inaturalist.org/observations/110304527</a> |
| 1132 | <i>Spilopelia chinensis</i> | Eastern Spotted Dove | 2019/8/11  | 3 | 0 | 18.90524167 | 83.46250667 | <a href="https://www.inaturalist.org/observations/34634576">https://www.inaturalist.org/observations/34634576</a>   |
| 1133 | <i>Spilopelia chinensis</i> | Eastern Spotted Dove | 2020/4/17  | 2 | 0 | 18.91921965 | 81.83882955 | <a href="https://www.inaturalist.org/observations/42957217">https://www.inaturalist.org/observations/42957217</a>   |
| 1134 | <i>Spilopelia chinensis</i> | Eastern Spotted Dove | 2020/9/18  | 1 | 0 | 18.93908882 | 84.58715057 | <a href="https://www.inaturalist.org/observations/79110245">https://www.inaturalist.org/observations/79110245</a>   |
| 1135 | <i>Spilopelia chinensis</i> | Eastern Spotted Dove | 2020/2/20  | 2 | 0 | 18.98912191 | 82.15650482 | <a href="https://www.inaturalist.org/observations/39064776">https://www.inaturalist.org/observations/39064776</a>   |
| 1136 | <i>Spilopelia chinensis</i> | Eastern Spotted Dove | 2019/12/29 | 1 | 0 | 19.01659084 | 73.00593976 | <a href="https://www.inaturalist.org/observations/104542980">https://www.inaturalist.org/observations/104542980</a> |
| 1137 | <i>Spilopelia chinensis</i> | Eastern Spotted Dove | 2016/1/26  | 2 | 0 | 19.01828952 | 73.00556157 | <a href="https://www.inaturalist.org/observations/68670391">https://www.inaturalist.org/observations/68670391</a>   |
| 1138 | <i>Spilopelia chinensis</i> | Eastern Spotted Dove | 2021/2/2   | 2 | 0 | 19.03197498 | 73.03356249 | <a href="https://www.inaturalist.org/observations/69174507">https://www.inaturalist.org/observations/69174507</a>   |
| 1139 | <i>Spilopelia chinensis</i> | Eastern Spotted Dove | 2019/8/14  | 4 | 0 | 19.03617333 | 83.16652667 | <a href="https://www.inaturalist.org/observations/34638530">https://www.inaturalist.org/observations/34638530</a>   |
| 1140 | <i>Spilopelia chinensis</i> | Eastern Spotted Dove | 2019/8/12  | 3 | 0 | 19.11192167 | 83.85526333 | <a href="https://www.inaturalist.org/observations/34635612">https://www.inaturalist.org/observations/34635612</a>   |
| 1141 | <i>Spilopelia chinensis</i> | Eastern Spotted Dove | 2012/11/8  | 3 | 0 | 19.11480815 | 73.56371228 | <a href="https://www.inaturalist.org/observations/108014658">https://www.inaturalist.org/observations/108014658</a> |
| 1142 | <i>Spilopelia chinensis</i> | Eastern Spotted Dove | 2019/12/22 | 4 | 0 | 19.14190380 | 72.96462540 | <a href="https://www.inaturalist.org/observations/36905324">https://www.inaturalist.org/observations/36905324</a>   |
| 1143 | <i>Spilopelia chinensis</i> | Eastern Spotted Dove | 2021/11/21 | 1 | 0 | 19.14190551 | 72.96462838 | <a href="https://www.inaturalist.org/observations/101681346">https://www.inaturalist.org/observations/101681346</a> |
| 1144 | <i>Spilopelia chinensis</i> | Eastern Spotted Dove | 2019/11/30 | 4 | 0 | 19.14191121 | 72.96462536 | <a href="https://www.inaturalist.org/observations/36458970">https://www.inaturalist.org/observations/36458970</a>   |
| 1145 | <i>Spilopelia chinensis</i> | Eastern Spotted Dove | 2017/10/7  | 2 | 0 | 19.14192483 | 72.96462536 | <a href="https://www.inaturalist.org/observations/56393936">https://www.inaturalist.org/observations/56393936</a>   |
| 1146 | <i>Spilopelia chinensis</i> | Eastern Spotted Dove | 2017/11/12 | 2 | 0 | 19.14192483 | 72.96462536 | <a href="https://www.inaturalist.org/observations/56404031">https://www.inaturalist.org/observations/56404031</a>   |
| 1147 | <i>Spilopelia chinensis</i> | Eastern Spotted Dove | 2017/11/26 | 2 | 0 | 19.14192483 | 72.96462536 | <a href="https://www.inaturalist.org/observations/56404336">https://www.inaturalist.org/observations/56404336</a>   |
| 1148 | <i>Spilopelia chinensis</i> | Eastern Spotted Dove | 2017/12/2  | 2 | 0 | 19.14192483 | 72.96462536 | <a href="https://www.inaturalist.org/observations/56406574">https://www.inaturalist.org/observations/56406574</a>   |
| 1149 | <i>Spilopelia chinensis</i> | Eastern Spotted Dove | 2020/10/2  | 2 | 0 | 19.14192483 | 72.96462536 | <a href="https://www.inaturalist.org/observations/62011527">https://www.inaturalist.org/observations/62011527</a>   |

|      |                             |                      |            |   |   |             |             |                                                                                                                     |
|------|-----------------------------|----------------------|------------|---|---|-------------|-------------|---------------------------------------------------------------------------------------------------------------------|
| 1150 | <i>Spilopelia chinensis</i> | Eastern Spotted Dove | 2021/10/15 | 1 | 0 | 19.14192483 | 72.96462536 | <a href="https://www.inaturalist.org/observations/98696877">https://www.inaturalist.org/observations/98696877</a>   |
| 1151 | <i>Spilopelia chinensis</i> | Eastern Spotted Dove | 2020/12/12 | 3 | 0 | 19.14951660 | 73.15698430 | <a href="https://www.inaturalist.org/observations/66466945">https://www.inaturalist.org/observations/66466945</a>   |
| 1152 | <i>Spilopelia chinensis</i> | Eastern Spotted Dove | 2021/10/31 | 3 | 0 | 19.16457805 | 73.31106415 | <a href="https://www.inaturalist.org/observations/132288285">https://www.inaturalist.org/observations/132288285</a> |
| 1153 | <i>Spilopelia chinensis</i> | Eastern Spotted Dove | 2017/9/11  | 3 | 0 | 19.18916729 | 72.98159990 | <a href="https://www.inaturalist.org/observations/136710765">https://www.inaturalist.org/observations/136710765</a> |
| 1154 | <i>Spilopelia chinensis</i> | Eastern Spotted Dove | 2019/8/12  | 4 | 0 | 19.18984500 | 83.72661333 | <a href="https://www.inaturalist.org/observations/34635249">https://www.inaturalist.org/observations/34635249</a>   |
| 1155 | <i>Spilopelia chinensis</i> | Eastern Spotted Dove | 2019/8/12  | 3 | 0 | 19.19120167 | 83.72539167 | <a href="https://www.inaturalist.org/observations/34635192">https://www.inaturalist.org/observations/34635192</a>   |
| 1156 | <i>Spilopelia chinensis</i> | Eastern Spotted Dove | 2019/8/12  | 3 | 0 | 19.19143333 | 83.72515167 | <a href="https://www.inaturalist.org/observations/34635107">https://www.inaturalist.org/observations/34635107</a>   |
| 1157 | <i>Spilopelia chinensis</i> | Eastern Spotted Dove | 2020/11/21 | 3 | 0 | 19.19257320 | 73.33353690 | <a href="https://www.inaturalist.org/observations/65591039">https://www.inaturalist.org/observations/65591039</a>   |
| 1158 | <i>Spilopelia chinensis</i> | Eastern Spotted Dove | 2020/11/22 | 3 | 0 | 19.19257320 | 73.33353690 | <a href="https://www.inaturalist.org/observations/65591042">https://www.inaturalist.org/observations/65591042</a>   |
| 1159 | <i>Spilopelia chinensis</i> | Eastern Spotted Dove | 2020/11/23 | 4 | 0 | 19.19257320 | 73.33353690 | <a href="https://www.inaturalist.org/observations/65638454">https://www.inaturalist.org/observations/65638454</a>   |
| 1160 | <i>Spilopelia chinensis</i> | Eastern Spotted Dove | 2013/3/27  | 1 | 0 | 19.20571630 | 73.01624180 | <a href="https://www.inaturalist.org/observations/41678088">https://www.inaturalist.org/observations/41678088</a>   |
| 1161 | <i>Spilopelia chinensis</i> | Eastern Spotted Dove | 2020/11/7  | 3 | 0 | 19.21942330 | 73.12483440 | <a href="https://www.inaturalist.org/observations/64660732">https://www.inaturalist.org/observations/64660732</a>   |
| 1162 | <i>Spilopelia chinensis</i> | Eastern Spotted Dove | 2021/11/27 | 2 | 0 | 19.23196227 | 73.11217636 | <a href="https://www.inaturalist.org/observations/102156563">https://www.inaturalist.org/observations/102156563</a> |
| 1163 | <i>Spilopelia chinensis</i> | Eastern Spotted Dove | 2020/3/7   | 2 | 0 | 19.23376500 | 72.94458020 | <a href="https://www.inaturalist.org/observations/39641097">https://www.inaturalist.org/observations/39641097</a>   |
| 1164 | <i>Spilopelia chinensis</i> | Eastern Spotted Dove | 2021/3/6   | 3 | 0 | 19.23376500 | 72.94458020 | <a href="https://www.inaturalist.org/observations/70659871">https://www.inaturalist.org/observations/70659871</a>   |
| 1165 | <i>Spilopelia chinensis</i> | Eastern Spotted Dove | 2022/4/23  | 1 | 0 | 19.23376500 | 72.94458020 | <a href="https://www.inaturalist.org/observations/112497239">https://www.inaturalist.org/observations/112497239</a> |
| 1166 | <i>Spilopelia chinensis</i> | Eastern Spotted Dove | 2021/7/31  | 1 | 0 | 19.23595411 | 73.47399998 | <a href="https://www.inaturalist.org/observations/89747256">https://www.inaturalist.org/observations/89747256</a>   |
| 1167 | <i>Spilopelia chinensis</i> | Eastern Spotted Dove | 2010/1/10  | 2 | 0 | 19.23675100 | 72.96424900 | <a href="https://www.inaturalist.org/observations/70255694">https://www.inaturalist.org/observations/70255694</a>   |
| 1168 | <i>Spilopelia chinensis</i> | Eastern Spotted Dove | 2010/1/10  | 1 | 0 | 19.23821100 | 72.96496100 | <a href="https://www.inaturalist.org/observations/70297506">https://www.inaturalist.org/observations/70297506</a>   |
| 1169 | <i>Spilopelia chinensis</i> | Eastern Spotted Dove | 2018/10/28 | 5 | 0 | 19.23979254 | 72.99714843 | <a href="https://www.inaturalist.org/observations/17900020">https://www.inaturalist.org/observations/17900020</a>   |
| 1170 | <i>Spilopelia chinensis</i> | Eastern Spotted Dove | 2021/3/14  | 2 | 0 | 19.24161420 | 72.99651240 | <a href="https://www.inaturalist.org/observations/71205854">https://www.inaturalist.org/observations/71205854</a>   |
| 1171 | <i>Spilopelia chinensis</i> | Eastern Spotted Dove | 2018/10/28 | 2 | 0 | 19.24515270 | 72.99792940 | <a href="https://www.inaturalist.org/observations/75050245">https://www.inaturalist.org/observations/75050245</a>   |
| 1172 | <i>Spilopelia chinensis</i> | Eastern Spotted Dove | 2019/8/19  | 4 | 0 | 19.25161833 | 84.90056833 | <a href="https://www.inaturalist.org/observations/35542210">https://www.inaturalist.org/observations/35542210</a>   |

|      |                             |                      |            |   |   |             |              |                                                                                                                     |
|------|-----------------------------|----------------------|------------|---|---|-------------|--------------|---------------------------------------------------------------------------------------------------------------------|
| 1173 | <i>Spilopelia chinensis</i> | Eastern Spotted Dove | 2020/9/19  | 4 | 0 | 19.25727500 | 73.64362008  | <a href="https://www.inaturalist.org/observations/60504560">https://www.inaturalist.org/observations/60504560</a>   |
| 1174 | <i>Spilopelia chinensis</i> | Eastern Spotted Dove | 2019/8/18  | 4 | 0 | 19.25749500 | 84.89829667  | <a href="https://www.inaturalist.org/observations/35541429">https://www.inaturalist.org/observations/35541429</a>   |
| 1175 | <i>Spilopelia chinensis</i> | Eastern Spotted Dove | 2019/8/18  | 5 | 0 | 19.25757500 | 84.89850667  | <a href="https://www.inaturalist.org/observations/35541408">https://www.inaturalist.org/observations/35541408</a>   |
| 1176 | <i>Spilopelia chinensis</i> | Eastern Spotted Dove | 2019/10/23 | 1 | 0 | 19.25834100 | 110.47464800 | <a href="https://www.inaturalist.org/observations/64989407">https://www.inaturalist.org/observations/64989407</a>   |
| 1177 | <i>Spilopelia chinensis</i> | Eastern Spotted Dove | 2022/4/30  | 1 | 0 | 19.26258900 | 73.21923874  | <a href="https://www.inaturalist.org/observations/113773663">https://www.inaturalist.org/observations/113773663</a> |
| 1178 | <i>Spilopelia chinensis</i> | Eastern Spotted Dove | 2012/12/16 | 3 | 0 | 19.26803820 | 73.14045390  | <a href="https://www.inaturalist.org/observations/41427646">https://www.inaturalist.org/observations/41427646</a>   |
| 1179 | <i>Spilopelia chinensis</i> | Eastern Spotted Dove | 2019/8/13  | 5 | 0 | 19.28452333 | 83.43202667  | <a href="https://www.inaturalist.org/observations/34636532">https://www.inaturalist.org/observations/34636532</a>   |
| 1180 | <i>Spilopelia chinensis</i> | Eastern Spotted Dove | 2021/8/5   | 2 | 0 | 19.33218279 | 84.80703078  | <a href="https://www.inaturalist.org/observations/90020289">https://www.inaturalist.org/observations/90020289</a>   |
| 1181 | <i>Spilopelia chinensis</i> | Eastern Spotted Dove | 2021/8/4   | 0 | 0 | 19.33309647 | 84.81291857  | <a href="https://www.inaturalist.org/observations/89992765">https://www.inaturalist.org/observations/89992765</a>   |
| 1182 | <i>Spilopelia chinensis</i> | Eastern Spotted Dove | 2018/10/14 | 2 | 0 | 19.38246770 | 72.77177750  | <a href="https://www.inaturalist.org/observations/42587045">https://www.inaturalist.org/observations/42587045</a>   |
| 1183 | <i>Spilopelia chinensis</i> | Eastern Spotted Dove | 2021/3/18  | 3 | 0 | 19.40330945 | 72.95786753  | <a href="https://www.inaturalist.org/observations/72062809">https://www.inaturalist.org/observations/72062809</a>   |
| 1184 | <i>Spilopelia chinensis</i> | Eastern Spotted Dove | 2022/8/31  | 1 | 0 | 19.40409623 | 81.79774224  | <a href="https://www.inaturalist.org/observations/133053627">https://www.inaturalist.org/observations/133053627</a> |
| 1185 | <i>Spilopelia chinensis</i> | Eastern Spotted Dove | 2015/3/9   | 4 | 0 | 19.42437300 | 80.56492700  | <a href="http://www.inaturalist.org/observations/3360185">http://www.inaturalist.org/observations/3360185</a>       |
| 1186 | <i>Spilopelia chinensis</i> | Eastern Spotted Dove | 2019/8/14  | 5 | 0 | 19.42660667 | 83.45390000  | <a href="https://www.inaturalist.org/observations/34638301">https://www.inaturalist.org/observations/34638301</a>   |
| 1187 | <i>Spilopelia chinensis</i> | Eastern Spotted Dove | 2019/1/27  | 1 | 0 | 19.43723083 | 108.84164990 | <a href="https://www.inaturalist.org/observations/39043228">https://www.inaturalist.org/observations/39043228</a>   |
| 1188 | <i>Spilopelia chinensis</i> | Eastern Spotted Dove | 2019/8/13  | 4 | 0 | 19.48814833 | 83.46916667  | <a href="https://www.inaturalist.org/observations/34636885">https://www.inaturalist.org/observations/34636885</a>   |
| 1189 | <i>Spilopelia chinensis</i> | Eastern Spotted Dove | 2019/8/13  | 4 | 0 | 19.48817333 | 83.46922500  | <a href="https://www.inaturalist.org/observations/34636821">https://www.inaturalist.org/observations/34636821</a>   |
| 1190 | <i>Spilopelia chinensis</i> | Eastern Spotted Dove | 2022/6/2   | 2 | 0 | 19.50195557 | 73.01743948  | <a href="https://www.inaturalist.org/observations/119882697">https://www.inaturalist.org/observations/119882697</a> |
| 1191 | <i>Spilopelia chinensis</i> | Eastern Spotted Dove | 2022/7/21  | 4 | 0 | 19.50842894 | 73.01576235  | <a href="https://www.inaturalist.org/observations/130097464">https://www.inaturalist.org/observations/130097464</a> |
| 1192 | <i>Spilopelia chinensis</i> | Eastern Spotted Dove | 2022/3/27  | 4 | 0 | 19.58225707 | 81.66132230  | <a href="https://www.inaturalist.org/observations/109836406">https://www.inaturalist.org/observations/109836406</a> |
| 1193 | <i>Spilopelia chinensis</i> | Eastern Spotted Dove | 2021/5/19  | 2 | 0 | 19.64109996 | 81.47324044  | <a href="https://www.inaturalist.org/observations/79425427">https://www.inaturalist.org/observations/79425427</a>   |
| 1194 | <i>Spilopelia chinensis</i> | Eastern Spotted Dove | 2017/3/27  | 4 | 0 | 19.74710870 | 73.19064280  | <a href="https://www.inaturalist.org/observations/8600239">https://www.inaturalist.org/observations/8600239</a>     |
| 1195 | <i>Spilopelia chinensis</i> | Eastern Spotted Dove | 2019/10/16 | 4 | 0 | 19.74750643 | 81.41837921  | <a href="https://www.inaturalist.org/observations/34865318">https://www.inaturalist.org/observations/34865318</a>   |



|      |                             |                      |            |   |   |             |              |                                                                                                                     |
|------|-----------------------------|----------------------|------------|---|---|-------------|--------------|---------------------------------------------------------------------------------------------------------------------|
| 1196 | <i>Spilopelia chinensis</i> | Eastern Spotted Dove | 2019/10/16 | 4 | 0 | 19.75422043 | 81.38775777  | <a href="https://www.inaturalist.org/observations/34865548">https://www.inaturalist.org/observations/34865548</a>   |
| 1197 | <i>Spilopelia chinensis</i> | Eastern Spotted Dove | 2019/1/14  | 3 | 0 | 19.88722848 | 82.69527767  | <a href="https://www.inaturalist.org/observations/19639636">https://www.inaturalist.org/observations/19639636</a>   |
| 1198 | <i>Spilopelia chinensis</i> | Eastern Spotted Dove | 2019/8/20  | 6 | 0 | 19.88737167 | 86.09672667  | <a href="https://www.inaturalist.org/observations/35545828">https://www.inaturalist.org/observations/35545828</a>   |
| 1199 | <i>Spilopelia chinensis</i> | Eastern Spotted Dove | 2019/12/17 | 4 | 0 | 19.88759530 | 86.09453640  | <a href="https://www.inaturalist.org/observations/40360266">https://www.inaturalist.org/observations/40360266</a>   |
| 1200 | <i>Spilopelia chinensis</i> | Eastern Spotted Dove | 2016/12/12 | 3 | 0 | 19.89071839 | 86.09029370  | <a href="https://www.inaturalist.org/observations/110214498">https://www.inaturalist.org/observations/110214498</a> |
| 1201 | <i>Spilopelia chinensis</i> | Eastern Spotted Dove | 2019/8/19  | 6 | 0 | 19.89520000 | 85.43975167  | <a href="https://www.inaturalist.org/observations/35543660">https://www.inaturalist.org/observations/35543660</a>   |
| 1202 | <i>Spilopelia chinensis</i> | Eastern Spotted Dove | 2020/9/29  | 3 | 0 | 19.90581986 | 75.31999178  | <a href="https://www.inaturalist.org/observations/61234907">https://www.inaturalist.org/observations/61234907</a>   |
| 1203 | <i>Spilopelia chinensis</i> | Eastern Spotted Dove | 2021/5/21  | 3 | 0 | 19.91370362 | 82.64322940  | <a href="https://www.inaturalist.org/observations/79633065">https://www.inaturalist.org/observations/79633065</a>   |
| 1204 | <i>Spilopelia chinensis</i> | Eastern Spotted Dove | 2021/12/25 | 1 | 0 | 19.94971085 | 110.12321470 | <a href="https://www.inaturalist.org/observations/103622679">https://www.inaturalist.org/observations/103622679</a> |
| 1205 | <i>Spilopelia chinensis</i> | Eastern Spotted Dove | 2019/1/23  | 0 | 0 | 20.01766302 | 110.24571840 | <a href="https://www.inaturalist.org/observations/39138030">https://www.inaturalist.org/observations/39138030</a>   |
| 1206 | <i>Spilopelia chinensis</i> | Eastern Spotted Dove | 2022/1/2   | 1 | 0 | 20.03119119 | 110.30215220 | <a href="https://www.inaturalist.org/observations/104328604">https://www.inaturalist.org/observations/104328604</a> |
| 1207 | <i>Spilopelia chinensis</i> | Eastern Spotted Dove | 2022/1/2   | 1 | 0 | 20.03119119 | 110.30215220 | <a href="https://www.inaturalist.org/observations/104328609">https://www.inaturalist.org/observations/104328609</a> |
| 1208 | <i>Spilopelia chinensis</i> | Eastern Spotted Dove | 2022/2/19  | 2 | 0 | 20.03751807 | 110.31572560 | <a href="https://www.inaturalist.org/observations/107033962">https://www.inaturalist.org/observations/107033962</a> |
| 1209 | <i>Spilopelia chinensis</i> | Eastern Spotted Dove | 2021/2/16  | 1 | 0 | 20.04540390 | 110.20894590 | <a href="https://www.inaturalist.org/observations/69651313">https://www.inaturalist.org/observations/69651313</a>   |
| 1210 | <i>Spilopelia chinensis</i> | Eastern Spotted Dove | 2020/5/18  | 1 | 0 | 20.04707100 | 110.22265230 | <a href="https://www.inaturalist.org/observations/46323599">https://www.inaturalist.org/observations/46323599</a>   |
| 1211 | <i>Spilopelia chinensis</i> | Eastern Spotted Dove | 2022/7/31  | 5 | 0 | 20.12782020 | 73.24778580  | <a href="https://www.inaturalist.org/observations/130125633">https://www.inaturalist.org/observations/130125633</a> |
| 1212 | <i>Spilopelia chinensis</i> | Eastern Spotted Dove | 2015/6/17  | 5 | 0 | 20.22998607 | 79.35905457  | <a href="https://www.inaturalist.org/observations/12189129">https://www.inaturalist.org/observations/12189129</a>   |
| 1213 | <i>Spilopelia chinensis</i> | Eastern Spotted Dove | 2017/5/2   | 1 | 0 | 20.24838270 | 79.36068900  | <a href="https://www.inaturalist.org/observations/57004999">https://www.inaturalist.org/observations/57004999</a>   |
| 1214 | <i>Spilopelia chinensis</i> | Eastern Spotted Dove | 2011/4/14  | 2 | 0 | 20.34002560 | 79.30590060  | <a href="https://www.inaturalist.org/observations/41762177">https://www.inaturalist.org/observations/41762177</a>   |
| 1215 | <i>Spilopelia chinensis</i> | Eastern Spotted Dove | 2017/5/1   | 1 | 0 | 20.34002560 | 79.30590060  | <a href="https://www.inaturalist.org/observations/56308251">https://www.inaturalist.org/observations/56308251</a>   |
| 1216 | <i>Spilopelia chinensis</i> | Eastern Spotted Dove | 2014/6/24  | 3 | 0 | 20.34002560 | 79.30590060  | <a href="https://www.inaturalist.org/observations/58578970">https://www.inaturalist.org/observations/58578970</a>   |
| 1217 | <i>Spilopelia chinensis</i> | Eastern Spotted Dove | 2016/12/19 | 1 | 0 | 20.40032712 | 85.82660573  | <a href="https://www.inaturalist.org/observations/110214499">https://www.inaturalist.org/observations/110214499</a> |
| 1218 | <i>Spilopelia chinensis</i> | Eastern Spotted Dove | 2022/9/25  | 2 | 0 | 20.50353906 | 84.90677811  | <a href="https://www.inaturalist.org/observations/136394229">https://www.inaturalist.org/observations/136394229</a> |

|      |                             |                      |            |   |   |             |             |                                                                                                                     |
|------|-----------------------------|----------------------|------------|---|---|-------------|-------------|---------------------------------------------------------------------------------------------------------------------|
| 1219 | <i>Spilopelia chinensis</i> | Eastern Spotted Dove | 2022/2/23  | 3 | 0 | 20.52056100 | 81.64409120 | <a href="https://www.inaturalist.org/observations/107305784">https://www.inaturalist.org/observations/107305784</a> |
| 1220 | <i>Spilopelia chinensis</i> | Eastern Spotted Dove | 2021/2/28  | 4 | 0 | 20.60345828 | 81.52928855 | <a href="https://www.inaturalist.org/observations/70540289">https://www.inaturalist.org/observations/70540289</a>   |
| 1221 | <i>Spilopelia chinensis</i> | Eastern Spotted Dove | 2020/9/18  | 3 | 0 | 20.63999485 | 79.64073647 | <a href="https://www.inaturalist.org/observations/60070247">https://www.inaturalist.org/observations/60070247</a>   |
| 1222 | <i>Spilopelia chinensis</i> | Eastern Spotted Dove | 2020/10/31 | 2 | 0 | 20.66697517 | 77.11278282 | <a href="https://www.inaturalist.org/observations/63877544">https://www.inaturalist.org/observations/63877544</a>   |
| 1223 | <i>Spilopelia chinensis</i> | Eastern Spotted Dove | 2020/10/31 | 3 | 0 | 20.67094429 | 77.08813961 | <a href="https://www.inaturalist.org/observations/63876623">https://www.inaturalist.org/observations/63876623</a>   |
| 1224 | <i>Spilopelia chinensis</i> | Eastern Spotted Dove | 2021/9/15  | 1 | 0 | 20.72258215 | 81.19167522 | <a href="https://www.inaturalist.org/observations/94900512">https://www.inaturalist.org/observations/94900512</a>   |
| 1225 | <i>Spilopelia chinensis</i> | Eastern Spotted Dove | 2021/9/26  | 1 | 0 | 20.72311493 | 81.18983388 | <a href="https://www.inaturalist.org/observations/96327081">https://www.inaturalist.org/observations/96327081</a>   |
| 1226 | <i>Spilopelia chinensis</i> | Eastern Spotted Dove | 2018/9/18  | 1 | 0 | 20.72709677 | 81.20557979 | <a href="https://www.inaturalist.org/observations/95794352">https://www.inaturalist.org/observations/95794352</a>   |
| 1227 | <i>Spilopelia chinensis</i> | Eastern Spotted Dove | 2016/3/21  | 3 | 0 | 20.73274500 | 82.43611833 | <a href="https://www.inaturalist.org/observations/61468465">https://www.inaturalist.org/observations/61468465</a>   |
| 1228 | <i>Spilopelia chinensis</i> | Eastern Spotted Dove | 2020/9/18  | 1 | 0 | 20.78376283 | 79.45872111 | <a href="https://www.inaturalist.org/observations/60070123">https://www.inaturalist.org/observations/60070123</a>   |
| 1229 | <i>Spilopelia chinensis</i> | Eastern Spotted Dove | 2022/8/23  | 3 | 0 | 20.79071700 | 82.06450960 | <a href="https://www.inaturalist.org/observations/133784637">https://www.inaturalist.org/observations/133784637</a> |
| 1230 | <i>Spilopelia chinensis</i> | Eastern Spotted Dove | 2022/8/23  | 3 | 0 | 20.79071700 | 82.06450960 | <a href="https://www.inaturalist.org/observations/133784639">https://www.inaturalist.org/observations/133784639</a> |
| 1231 | <i>Spilopelia chinensis</i> | Eastern Spotted Dove | 2022/8/23  | 3 | 0 | 20.79071700 | 82.06450960 | <a href="https://www.inaturalist.org/observations/133784641">https://www.inaturalist.org/observations/133784641</a> |
| 1232 | <i>Spilopelia chinensis</i> | Eastern Spotted Dove | 2022/8/23  | 2 | 0 | 20.79071700 | 82.06450960 | <a href="https://www.inaturalist.org/observations/133784645">https://www.inaturalist.org/observations/133784645</a> |
| 1233 | <i>Spilopelia chinensis</i> | Eastern Spotted Dove | 2022/8/23  | 3 | 0 | 20.79071700 | 82.06450960 | <a href="https://www.inaturalist.org/observations/133784646">https://www.inaturalist.org/observations/133784646</a> |
| 1234 | <i>Spilopelia chinensis</i> | Eastern Spotted Dove | 2022/8/23  | 4 | 0 | 20.79071700 | 82.06450960 | <a href="https://www.inaturalist.org/observations/133784649">https://www.inaturalist.org/observations/133784649</a> |
| 1235 | <i>Spilopelia chinensis</i> | Eastern Spotted Dove | 2022/8/23  | 4 | 0 | 20.79071700 | 82.06450960 | <a href="https://www.inaturalist.org/observations/133784650">https://www.inaturalist.org/observations/133784650</a> |
| 1236 | <i>Spilopelia chinensis</i> | Eastern Spotted Dove | 2022/8/23  | 4 | 0 | 20.79071700 | 82.06450960 | <a href="https://www.inaturalist.org/observations/133784651">https://www.inaturalist.org/observations/133784651</a> |
| 1237 | <i>Spilopelia chinensis</i> | Eastern Spotted Dove | 2017/12/2  | 4 | 0 | 20.82537810 | 73.70070880 | <a href="https://www.inaturalist.org/observations/31116453">https://www.inaturalist.org/observations/31116453</a>   |
| 1238 | <i>Spilopelia chinensis</i> | Eastern Spotted Dove | 2018/3/30  | 5 | 0 | 20.90834153 | 85.00923279 | <a href="https://www.inaturalist.org/observations/13185076">https://www.inaturalist.org/observations/13185076</a>   |
| 1239 | <i>Spilopelia chinensis</i> | Eastern Spotted Dove | 2021/5/2   | 2 | 0 | 20.94526962 | 72.95346905 | <a href="https://www.inaturalist.org/observations/89026327">https://www.inaturalist.org/observations/89026327</a>   |
| 1240 | <i>Spilopelia chinensis</i> | Eastern Spotted Dove | 2020/1/13  | 2 | 0 | 20.94531409 | 72.95325011 | <a href="https://www.inaturalist.org/observations/79400567">https://www.inaturalist.org/observations/79400567</a>   |
| 1241 | <i>Spilopelia chinensis</i> | Eastern Spotted Dove | 2013/2/12  | 1 | 0 | 20.97549643 | 77.49699674 | <a href="https://www.inaturalist.org/observations/85625277">https://www.inaturalist.org/observations/85625277</a>   |

|      |                             |                      |            |   |   |             |             |                                                                                                                     |
|------|-----------------------------|----------------------|------------|---|---|-------------|-------------|---------------------------------------------------------------------------------------------------------------------|
| 1242 | <i>Spilopelia chinensis</i> | Eastern Spotted Dove | 2017/1/4   | 1 | 0 | 21.00490556 | 70.75978889 | <a href="https://www.inaturalist.org/observations/74618073">https://www.inaturalist.org/observations/74618073</a>   |
| 1243 | <i>Spilopelia chinensis</i> | Eastern Spotted Dove | 2020/2/23  | 3 | 0 | 21.05405500 | 75.88339500 | <a href="https://www.inaturalist.org/observations/51030027">https://www.inaturalist.org/observations/51030027</a>   |
| 1244 | <i>Spilopelia chinensis</i> | Eastern Spotted Dove | 2021/7/10  | 1 | 0 | 21.06592278 | 81.24488153 | <a href="https://www.inaturalist.org/observations/86421007">https://www.inaturalist.org/observations/86421007</a>   |
| 1245 | <i>Spilopelia chinensis</i> | Eastern Spotted Dove | 2021/2/2   | 3 | 0 | 21.07782947 | 75.94527975 | <a href="https://www.inaturalist.org/observations/70595951">https://www.inaturalist.org/observations/70595951</a>   |
| 1246 | <i>Spilopelia chinensis</i> | Eastern Spotted Dove | 2021/5/19  | 2 | 0 | 21.08411468 | 80.66351205 | <a href="https://www.inaturalist.org/observations/79376197">https://www.inaturalist.org/observations/79376197</a>   |
| 1247 | <i>Spilopelia chinensis</i> | Eastern Spotted Dove | 2021/1/11  | 2 | 0 | 21.09352478 | 80.15796897 | <a href="https://www.inaturalist.org/observations/68052622">https://www.inaturalist.org/observations/68052622</a>   |
| 1248 | <i>Spilopelia chinensis</i> | Eastern Spotted Dove | 2019/12/11 | 4 | 0 | 21.14819293 | 80.65339711 | <a href="https://www.inaturalist.org/observations/41443032">https://www.inaturalist.org/observations/41443032</a>   |
| 1249 | <i>Spilopelia chinensis</i> | Eastern Spotted Dove | 2020/9/27  | 4 | 0 | 21.17244392 | 80.76369758 | <a href="https://www.inaturalist.org/observations/61300035">https://www.inaturalist.org/observations/61300035</a>   |
| 1250 | <i>Spilopelia chinensis</i> | Eastern Spotted Dove | 2019/1/17  | 4 | 0 | 21.18293953 | 72.80736542 | <a href="https://www.inaturalist.org/observations/19690900">https://www.inaturalist.org/observations/19690900</a>   |
| 1251 | <i>Spilopelia chinensis</i> | Eastern Spotted Dove | 2016/2/5   | 7 | 0 | 21.18700646 | 80.60116611 | <a href="https://www.inaturalist.org/observations/6546062">https://www.inaturalist.org/observations/6546062</a>     |
| 1252 | <i>Spilopelia chinensis</i> | Eastern Spotted Dove | 2020/8/7   | 2 | 0 | 21.18708525 | 80.76186363 | <a href="https://www.inaturalist.org/observations/56762385">https://www.inaturalist.org/observations/56762385</a>   |
| 1253 | <i>Spilopelia chinensis</i> | Eastern Spotted Dove | 2019/10/9  | 2 | 0 | 21.19335583 | 79.04573869 | <a href="https://www.inaturalist.org/observations/34104768">https://www.inaturalist.org/observations/34104768</a>   |
| 1254 | <i>Spilopelia chinensis</i> | Eastern Spotted Dove | 2020/3/15  | 2 | 0 | 21.20567301 | 81.17750578 | <a href="https://www.inaturalist.org/observations/51234023">https://www.inaturalist.org/observations/51234023</a>   |
| 1255 | <i>Spilopelia chinensis</i> | Eastern Spotted Dove | 2013/2/10  | 1 | 0 | 21.40703127 | 77.16112333 | <a href="https://www.inaturalist.org/observations/85331563">https://www.inaturalist.org/observations/85331563</a>   |
| 1256 | <i>Spilopelia chinensis</i> | Eastern Spotted Dove | 2021/8/25  | 1 | 0 | 21.45841973 | 83.17351327 | <a href="https://www.inaturalist.org/observations/92514921">https://www.inaturalist.org/observations/92514921</a>   |
| 1257 | <i>Spilopelia chinensis</i> | Eastern Spotted Dove | 2022/2/8   | 1 | 0 | 21.47974470 | 82.53135810 | <a href="https://www.inaturalist.org/observations/135563690">https://www.inaturalist.org/observations/135563690</a> |
| 1258 | <i>Spilopelia chinensis</i> | Eastern Spotted Dove | 2018/10/8  | 6 | 0 | 21.54234452 | 81.80025201 | <a href="https://www.inaturalist.org/observations/17315783">https://www.inaturalist.org/observations/17315783</a>   |
| 1259 | <i>Spilopelia chinensis</i> | Eastern Spotted Dove | 2021/12/12 | 3 | 0 | 21.60331639 | 82.72325139 | <a href="https://www.inaturalist.org/observations/106690456">https://www.inaturalist.org/observations/106690456</a> |
| 1260 | <i>Spilopelia chinensis</i> | Eastern Spotted Dove | 2022/8/12  | 5 | 0 | 21.75938167 | 83.09079167 | <a href="https://www.inaturalist.org/observations/131690245">https://www.inaturalist.org/observations/131690245</a> |
| 1261 | <i>Spilopelia chinensis</i> | Eastern Spotted Dove | 2021/5/8   | 2 | 0 | 21.80517459 | 83.30696690 | <a href="https://www.inaturalist.org/observations/79921752">https://www.inaturalist.org/observations/79921752</a>   |
| 1262 | <i>Spilopelia chinensis</i> | Eastern Spotted Dove | 2021/5/8   | 2 | 0 | 21.80558180 | 83.30273190 | <a href="https://www.inaturalist.org/observations/79921751">https://www.inaturalist.org/observations/79921751</a>   |
| 1263 | <i>Spilopelia chinensis</i> | Eastern Spotted Dove | 2021/8/4   | 1 | 0 | 21.81894667 | 83.32227500 | <a href="https://www.inaturalist.org/observations/89949311">https://www.inaturalist.org/observations/89949311</a>   |
| 1264 | <i>Spilopelia chinensis</i> | Eastern Spotted Dove | 2021/2/20  | 1 | 0 | 21.83584645 | 88.88420105 | <a href="https://www.inaturalist.org/observations/81275846">https://www.inaturalist.org/observations/81275846</a>   |

|      |                             |                      |            |   |   |             |              |                                                                                                                     |
|------|-----------------------------|----------------------|------------|---|---|-------------|--------------|---------------------------------------------------------------------------------------------------------------------|
| 1265 | <i>Spilopelia chinensis</i> | Eastern Spotted Dove | 2017/1/27  | 2 | 0 | 21.83585950 | 88.88420110  | <a href="https://www.inaturalist.org/observations/54038632">https://www.inaturalist.org/observations/54038632</a>   |
| 1266 | <i>Spilopelia chinensis</i> | Eastern Spotted Dove | 2011/12/26 | 2 | 0 | 21.83585950 | 88.88420110  | <a href="https://www.inaturalist.org/observations/55264897">https://www.inaturalist.org/observations/55264897</a>   |
| 1267 | <i>Spilopelia chinensis</i> | Eastern Spotted Dove | 2011/12/26 | 2 | 0 | 21.83585950 | 88.88420110  | <a href="https://www.inaturalist.org/observations/55264905">https://www.inaturalist.org/observations/55264905</a>   |
| 1268 | <i>Spilopelia chinensis</i> | Eastern Spotted Dove | 2022/3/9   | 4 | 0 | 21.83585950 | 88.88420110  | <a href="https://www.inaturalist.org/observations/132027162">https://www.inaturalist.org/observations/132027162</a> |
| 1269 | <i>Spilopelia chinensis</i> | Eastern Spotted Dove | 2021/8/26  | 0 | 0 | 21.84819180 | 83.29253761  | <a href="https://www.inaturalist.org/observations/92915791">https://www.inaturalist.org/observations/92915791</a>   |
| 1270 | <i>Spilopelia chinensis</i> | Eastern Spotted Dove | 2021/8/7   | 1 | 0 | 21.87114667 | 83.26999167  | <a href="https://www.inaturalist.org/observations/91651982">https://www.inaturalist.org/observations/91651982</a>   |
| 1271 | <i>Spilopelia chinensis</i> | Eastern Spotted Dove | 2022/7/1   | 2 | 0 | 21.88590710 | 69.76369070  | <a href="https://www.inaturalist.org/observations/136883480">https://www.inaturalist.org/observations/136883480</a> |
| 1272 | <i>Spilopelia chinensis</i> | Eastern Spotted Dove | 2009/9/26  | 2 | 0 | 21.94414553 | 120.81257710 | <a href="https://www.inaturalist.org/observations/14756987">https://www.inaturalist.org/observations/14756987</a>   |
| 1273 | <i>Spilopelia chinensis</i> | Eastern Spotted Dove | 2011/6/15  | 1 | 0 | 21.95305816 | 120.72614870 | <a href="https://www.inaturalist.org/observations/21294625">https://www.inaturalist.org/observations/21294625</a>   |
| 1274 | <i>Spilopelia chinensis</i> | Eastern Spotted Dove | 2022/4/17  | 1 | 0 | 21.99853500 | 73.47864000  | <a href="https://www.inaturalist.org/observations/119406716">https://www.inaturalist.org/observations/119406716</a> |
| 1275 | <i>Spilopelia chinensis</i> | Eastern Spotted Dove | 2019/10/22 | 2 | 0 | 22.00244363 | 120.74333410 | <a href="https://www.inaturalist.org/observations/35709288">https://www.inaturalist.org/observations/35709288</a>   |
| 1276 | <i>Spilopelia chinensis</i> | Eastern Spotted Dove | 2014/3/13  | 2 | 0 | 22.02162625 | 120.75537970 | <a href="https://www.inaturalist.org/observations/92882864">https://www.inaturalist.org/observations/92882864</a>   |
| 1277 | <i>Spilopelia chinensis</i> | Eastern Spotted Dove | 2019/10/20 | 0 | 0 | 22.02698667 | 120.85553670 | <a href="https://www.inaturalist.org/observations/38184064">https://www.inaturalist.org/observations/38184064</a>   |
| 1278 | <i>Spilopelia chinensis</i> | Eastern Spotted Dove | 2021/9/4   | 1 | 0 | 22.05899167 | 82.05880333  | <a href="https://www.inaturalist.org/observations/93748701">https://www.inaturalist.org/observations/93748701</a>   |
| 1279 | <i>Spilopelia chinensis</i> | Eastern Spotted Dove | 2019/12/19 | 3 | 0 | 22.07965450 | 82.14091520  | <a href="https://www.inaturalist.org/observations/60917720">https://www.inaturalist.org/observations/60917720</a>   |
| 1280 | <i>Spilopelia chinensis</i> | Eastern Spotted Dove | 2022/4/17  | 1 | 0 | 22.08876152 | 88.75787269  | <a href="https://www.inaturalist.org/observations/112352274">https://www.inaturalist.org/observations/112352274</a> |
| 1281 | <i>Spilopelia chinensis</i> | Eastern Spotted Dove | 2022/4/2   | 4 | 0 | 22.09058134 | 88.76197813  | <a href="https://www.inaturalist.org/observations/115794877">https://www.inaturalist.org/observations/115794877</a> |
| 1282 | <i>Spilopelia chinensis</i> | Eastern Spotted Dove | 2022/4/16  | 1 | 0 | 22.09079617 | 88.76220349  | <a href="https://www.inaturalist.org/observations/112496648">https://www.inaturalist.org/observations/112496648</a> |
| 1283 | <i>Spilopelia chinensis</i> | Eastern Spotted Dove | 2022/4/16  | 2 | 0 | 22.09083500 | 88.76131333  | <a href="https://www.inaturalist.org/observations/112701785">https://www.inaturalist.org/observations/112701785</a> |
| 1284 | <i>Spilopelia chinensis</i> | Eastern Spotted Dove | 2022/4/16  | 2 | 0 | 22.09085000 | 88.76130500  | <a href="https://www.inaturalist.org/observations/112701792">https://www.inaturalist.org/observations/112701792</a> |
| 1285 | <i>Spilopelia chinensis</i> | Eastern Spotted Dove | 2022/4/17  | 2 | 0 | 22.09094310 | 88.76133710  | <a href="https://www.inaturalist.org/observations/115079208">https://www.inaturalist.org/observations/115079208</a> |
| 1286 | <i>Spilopelia chinensis</i> | Eastern Spotted Dove | 2022/4/16  | 3 | 0 | 22.09751674 | 88.76416656  | <a href="https://www.inaturalist.org/observations/112254730">https://www.inaturalist.org/observations/112254730</a> |
| 1287 | <i>Spilopelia chinensis</i> | Eastern Spotted Dove | 2021/9/4   | 0 | 0 | 22.09932500 | 82.07050333  | <a href="https://www.inaturalist.org/observations/93748643">https://www.inaturalist.org/observations/93748643</a>   |

|      |                             |                      |            |   |   |             |              |                                                                                                                     |
|------|-----------------------------|----------------------|------------|---|---|-------------|--------------|---------------------------------------------------------------------------------------------------------------------|
| 1288 | <i>Spilopelia chinensis</i> | Eastern Spotted Dove | 2022/2/13  | 1 | 0 | 22.11026780 | 113.55442910 | <a href="https://www.inaturalist.org/observations/106670999">https://www.inaturalist.org/observations/106670999</a> |
| 1289 | <i>Spilopelia chinensis</i> | Eastern Spotted Dove | 2021/2/14  | 1 | 0 | 22.11502599 | 113.57226470 | <a href="https://www.inaturalist.org/observations/88584072">https://www.inaturalist.org/observations/88584072</a>   |
| 1290 | <i>Spilopelia chinensis</i> | Eastern Spotted Dove | 2021/9/6   | 1 | 0 | 22.11783422 | 113.56453500 | <a href="https://www.inaturalist.org/observations/93933538">https://www.inaturalist.org/observations/93933538</a>   |
| 1291 | <i>Spilopelia chinensis</i> | Eastern Spotted Dove | 2021/4/3   | 1 | 0 | 22.11961222 | 113.56992460 | <a href="https://www.inaturalist.org/observations/72759253">https://www.inaturalist.org/observations/72759253</a>   |
| 1292 | <i>Spilopelia chinensis</i> | Eastern Spotted Dove | 2021/12/20 | 1 | 0 | 22.12435266 | 88.83100009  | <a href="https://www.inaturalist.org/observations/103967910">https://www.inaturalist.org/observations/103967910</a> |
| 1293 | <i>Spilopelia chinensis</i> | Eastern Spotted Dove | 2021/8/30  | 1 | 0 | 22.12473333 | 82.14267333  | <a href="https://www.inaturalist.org/observations/93207095">https://www.inaturalist.org/observations/93207095</a>   |
| 1294 | <i>Spilopelia chinensis</i> | Eastern Spotted Dove | 2021/8/30  | 1 | 0 | 22.12476333 | 82.14378667  | <a href="https://www.inaturalist.org/observations/93207105">https://www.inaturalist.org/observations/93207105</a>   |
| 1295 | <i>Spilopelia chinensis</i> | Eastern Spotted Dove | 2021/8/30  | 0 | 0 | 22.12572500 | 82.14075000  | <a href="https://www.inaturalist.org/observations/93207063">https://www.inaturalist.org/observations/93207063</a>   |
| 1296 | <i>Spilopelia chinensis</i> | Eastern Spotted Dove | 2020/11/28 | 1 | 0 | 22.12597533 | 113.57635530 | <a href="https://www.inaturalist.org/observations/75069785">https://www.inaturalist.org/observations/75069785</a>   |
| 1297 | <i>Spilopelia chinensis</i> | Eastern Spotted Dove | 2019/9/11  | 3 | 0 | 22.12975656 | 82.13542353  | <a href="https://www.inaturalist.org/observations/32520019">https://www.inaturalist.org/observations/32520019</a>   |
| 1298 | <i>Spilopelia chinensis</i> | Eastern Spotted Dove | 2021/8/31  | 3 | 0 | 22.13044167 | 82.13685833  | <a href="https://www.inaturalist.org/observations/93448483">https://www.inaturalist.org/observations/93448483</a>   |
| 1299 | <i>Spilopelia chinensis</i> | Eastern Spotted Dove | 2021/8/31  | 3 | 0 | 22.13044167 | 82.13685833  | <a href="https://www.inaturalist.org/observations/93448484">https://www.inaturalist.org/observations/93448484</a>   |
| 1300 | <i>Spilopelia chinensis</i> | Eastern Spotted Dove | 2019/9/5   | 4 | 0 | 22.13223090 | 82.13859692  | <a href="https://www.inaturalist.org/observations/32274628">https://www.inaturalist.org/observations/32274628</a>   |
| 1301 | <i>Spilopelia chinensis</i> | Eastern Spotted Dove | 2021/12/20 | 2 | 0 | 22.13613162 | 88.79021687  | <a href="https://www.inaturalist.org/observations/103961597">https://www.inaturalist.org/observations/103961597</a> |
| 1302 | <i>Spilopelia chinensis</i> | Eastern Spotted Dove | 2021/12/20 | 1 | 0 | 22.13613162 | 88.79021687  | <a href="https://www.inaturalist.org/observations/103961606">https://www.inaturalist.org/observations/103961606</a> |
| 1303 | <i>Spilopelia chinensis</i> | Eastern Spotted Dove | 2021/12/20 | 1 | 0 | 22.13613162 | 88.79021687  | <a href="https://www.inaturalist.org/observations/103961610">https://www.inaturalist.org/observations/103961610</a> |
| 1304 | <i>Spilopelia chinensis</i> | Eastern Spotted Dove | 2021/12/20 | 2 | 0 | 22.13613162 | 88.79021687  | <a href="https://www.inaturalist.org/observations/103961615">https://www.inaturalist.org/observations/103961615</a> |
| 1305 | <i>Spilopelia chinensis</i> | Eastern Spotted Dove | 2021/5/3   | 2 | 0 | 22.15408281 | 113.56082020 | <a href="https://www.inaturalist.org/observations/77315133">https://www.inaturalist.org/observations/77315133</a>   |
| 1306 | <i>Spilopelia chinensis</i> | Eastern Spotted Dove | 2021/2/1   | 2 | 0 | 22.15420348 | 113.56105970 | <a href="https://www.inaturalist.org/observations/85112920">https://www.inaturalist.org/observations/85112920</a>   |
| 1307 | <i>Spilopelia chinensis</i> | Eastern Spotted Dove | 2021/5/22  | 3 | 0 | 22.15619167 | 113.55691670 | <a href="https://www.inaturalist.org/observations/80362087">https://www.inaturalist.org/observations/80362087</a>   |
| 1308 | <i>Spilopelia chinensis</i> | Eastern Spotted Dove | 2019/4/27  | 1 | 0 | 22.15629450 | 113.55706170 | <a href="https://www.inaturalist.org/observations/23331972">https://www.inaturalist.org/observations/23331972</a>   |
| 1309 | <i>Spilopelia chinensis</i> | Eastern Spotted Dove | 2019/7/8   | 3 | 0 | 22.15636731 | 113.55712980 | <a href="https://www.inaturalist.org/observations/28418258">https://www.inaturalist.org/observations/28418258</a>   |
| 1310 | <i>Spilopelia chinensis</i> | Eastern Spotted Dove | 2022/5/7   | 2 | 0 | 22.15649690 | 113.55699320 | <a href="https://www.inaturalist.org/observations/115860849">https://www.inaturalist.org/observations/115860849</a> |

|      |                             |                      |            |   |   |             |              |                                                                                                                     |
|------|-----------------------------|----------------------|------------|---|---|-------------|--------------|---------------------------------------------------------------------------------------------------------------------|
| 1311 | <i>Spilopelia chinensis</i> | Eastern Spotted Dove | 2019/6/2   | 1 | 0 | 22.15740437 | 113.56678710 | <a href="https://www.inaturalist.org/observations/26389507">https://www.inaturalist.org/observations/26389507</a>   |
| 1312 | <i>Spilopelia chinensis</i> | Eastern Spotted Dove | 2022/5/14  | 3 | 0 | 22.15814158 | 113.54852660 | <a href="https://www.inaturalist.org/observations/116948679">https://www.inaturalist.org/observations/116948679</a> |
| 1313 | <i>Spilopelia chinensis</i> | Eastern Spotted Dove | 2019/10/24 | 2 | 0 | 22.15815000 | 113.55313000 | <a href="https://www.inaturalist.org/observations/34820882">https://www.inaturalist.org/observations/34820882</a>   |
| 1314 | <i>Spilopelia chinensis</i> | Eastern Spotted Dove | 2022/5/6   | 3 | 0 | 22.15847200 | 113.55456300 | <a href="https://www.inaturalist.org/observations/115708891">https://www.inaturalist.org/observations/115708891</a> |
| 1315 | <i>Spilopelia chinensis</i> | Eastern Spotted Dove | 2022/4/21  | 3 | 0 | 22.15857896 | 113.55667440 | <a href="https://www.inaturalist.org/observations/115322003">https://www.inaturalist.org/observations/115322003</a> |
| 1316 | <i>Spilopelia chinensis</i> | Eastern Spotted Dove | 2022/5/5   | 2 | 0 | 22.15858211 | 113.55679290 | <a href="https://www.inaturalist.org/observations/115731710">https://www.inaturalist.org/observations/115731710</a> |
| 1317 | <i>Spilopelia chinensis</i> | Eastern Spotted Dove | 2021/4/5   | 2 | 0 | 22.15858786 | 113.55422090 | <a href="https://www.inaturalist.org/observations/72992063">https://www.inaturalist.org/observations/72992063</a>   |
| 1318 | <i>Spilopelia chinensis</i> | Eastern Spotted Dove | 2021/3/17  | 1 | 0 | 22.15867639 | 113.56320070 | <a href="https://www.inaturalist.org/observations/71677981">https://www.inaturalist.org/observations/71677981</a>   |
| 1319 | <i>Spilopelia chinensis</i> | Eastern Spotted Dove | 2021/5/26  | 2 | 0 | 22.15956875 | 113.55391270 | <a href="https://www.inaturalist.org/observations/80345761">https://www.inaturalist.org/observations/80345761</a>   |
| 1320 | <i>Spilopelia chinensis</i> | Eastern Spotted Dove | 2022/4/30  | 2 | 0 | 22.16072138 | 113.55853320 | <a href="https://www.inaturalist.org/observations/113781757">https://www.inaturalist.org/observations/113781757</a> |
| 1321 | <i>Spilopelia chinensis</i> | Eastern Spotted Dove | 2021/1/23  | 1 | 0 | 22.16288754 | 113.55470590 | <a href="https://www.inaturalist.org/observations/76903835">https://www.inaturalist.org/observations/76903835</a>   |
| 1322 | <i>Spilopelia chinensis</i> | Eastern Spotted Dove | 2020/8/30  | 1 | 0 | 22.16466639 | 113.55552550 | <a href="https://www.inaturalist.org/observations/61467276">https://www.inaturalist.org/observations/61467276</a>   |
| 1323 | <i>Spilopelia chinensis</i> | Eastern Spotted Dove | 2021/3/28  | 1 | 0 | 22.16466750 | 114.25612150 | <a href="https://www.inaturalist.org/observations/72335901">https://www.inaturalist.org/observations/72335901</a>   |
| 1324 | <i>Spilopelia chinensis</i> | Eastern Spotted Dove | 2020/8/30  | 1 | 0 | 22.16522312 | 113.55552630 | <a href="https://www.inaturalist.org/observations/61414336">https://www.inaturalist.org/observations/61414336</a>   |
| 1325 | <i>Spilopelia chinensis</i> | Eastern Spotted Dove | 2022/2/20  | 1 | 0 | 22.16751500 | 73.49982333  | <a href="https://www.inaturalist.org/observations/120020368">https://www.inaturalist.org/observations/120020368</a> |
| 1326 | <i>Spilopelia chinensis</i> | Eastern Spotted Dove | 2021/8/26  | 1 | 0 | 22.16927353 | 114.25985330 | <a href="https://www.inaturalist.org/observations/92559901">https://www.inaturalist.org/observations/92559901</a>   |
| 1327 | <i>Spilopelia chinensis</i> | Eastern Spotted Dove | 2022/4/5   | 1 | 0 | 22.18047525 | 113.47738140 | <a href="https://www.inaturalist.org/observations/110498268">https://www.inaturalist.org/observations/110498268</a> |
| 1328 | <i>Spilopelia chinensis</i> | Eastern Spotted Dove | 2019/10/13 | 2 | 0 | 22.18796626 | 113.54644720 | <a href="https://www.inaturalist.org/observations/34576650">https://www.inaturalist.org/observations/34576650</a>   |
| 1329 | <i>Spilopelia chinensis</i> | Eastern Spotted Dove | 2021/5/2   | 1 | 0 | 22.18808611 | 113.55136940 | <a href="https://www.inaturalist.org/observations/76534238">https://www.inaturalist.org/observations/76534238</a>   |
| 1330 | <i>Spilopelia chinensis</i> | Eastern Spotted Dove | 2021/5/2   | 1 | 0 | 22.18831389 | 113.55123060 | <a href="https://www.inaturalist.org/observations/76534076">https://www.inaturalist.org/observations/76534076</a>   |
| 1331 | <i>Spilopelia chinensis</i> | Eastern Spotted Dove | 2021/5/2   | 1 | 0 | 22.18872778 | 113.55062780 | <a href="https://www.inaturalist.org/observations/76534075">https://www.inaturalist.org/observations/76534075</a>   |
| 1332 | <i>Spilopelia chinensis</i> | Eastern Spotted Dove | 2022/4/16  | 2 | 0 | 22.18880369 | 113.55097190 | <a href="https://www.inaturalist.org/observations/111624413">https://www.inaturalist.org/observations/111624413</a> |
| 1333 | <i>Spilopelia chinensis</i> | Eastern Spotted Dove | 2021/3/13  | 1 | 0 | 22.19263010 | 113.54503780 | <a href="https://www.inaturalist.org/observations/71109178">https://www.inaturalist.org/observations/71109178</a>   |

|      |                             |                      |           |   |   |             |              |                                                                                                                     |
|------|-----------------------------|----------------------|-----------|---|---|-------------|--------------|---------------------------------------------------------------------------------------------------------------------|
| 1334 | <i>Spilopelia chinensis</i> | Eastern Spotted Dove | 2021/3/13 | 1 | 0 | 22.19270740 | 113.54494700 | <a href="https://www.inaturalist.org/observations/71110239">https://www.inaturalist.org/observations/71110239</a>   |
| 1335 | <i>Spilopelia chinensis</i> | Eastern Spotted Dove | 2021/10/6 | 2 | 0 | 22.19388889 | 113.54111110 | <a href="https://www.inaturalist.org/observations/97457917">https://www.inaturalist.org/observations/97457917</a>   |
| 1336 | <i>Spilopelia chinensis</i> | Eastern Spotted Dove | 2021/3/28 | 2 | 0 | 22.19627073 | 113.54652250 | <a href="https://www.inaturalist.org/observations/72234851">https://www.inaturalist.org/observations/72234851</a>   |
| 1337 | <i>Spilopelia chinensis</i> | Eastern Spotted Dove | 2020/1/29 | 1 | 0 | 22.19663811 | 113.54473880 | <a href="https://www.inaturalist.org/observations/43346223">https://www.inaturalist.org/observations/43346223</a>   |
| 1338 | <i>Spilopelia chinensis</i> | Eastern Spotted Dove | 2020/4/26 | 1 | 0 | 22.19671440 | 113.54496770 | <a href="https://www.inaturalist.org/observations/43568991">https://www.inaturalist.org/observations/43568991</a>   |
| 1339 | <i>Spilopelia chinensis</i> | Eastern Spotted Dove | 2010/6/6  | 1 | 0 | 22.19687969 | 113.54210240 | <a href="https://www.inaturalist.org/observations/120204808">https://www.inaturalist.org/observations/120204808</a> |
| 1340 | <i>Spilopelia chinensis</i> | Eastern Spotted Dove | 2022/5/2  | 2 | 0 | 22.19691849 | 113.54089360 | <a href="https://www.inaturalist.org/observations/114610813">https://www.inaturalist.org/observations/114610813</a> |
| 1341 | <i>Spilopelia chinensis</i> | Eastern Spotted Dove | 2020/10/3 | 1 | 0 | 22.19694444 | 113.54944440 | <a href="https://www.inaturalist.org/observations/61550074">https://www.inaturalist.org/observations/61550074</a>   |
| 1342 | <i>Spilopelia chinensis</i> | Eastern Spotted Dove | 2020/4/4  | 1 | 0 | 22.19709899 | 113.54620300 | <a href="https://www.inaturalist.org/observations/43631694">https://www.inaturalist.org/observations/43631694</a>   |
| 1343 | <i>Spilopelia chinensis</i> | Eastern Spotted Dove | 2019/11/5 | 2 | 0 | 22.19717284 | 113.54095400 | <a href="https://www.inaturalist.org/observations/36617813">https://www.inaturalist.org/observations/36617813</a>   |
| 1344 | <i>Spilopelia chinensis</i> | Eastern Spotted Dove | 2021/4/2  | 1 | 0 | 22.19724722 | 113.55157500 | <a href="https://www.inaturalist.org/observations/72760120">https://www.inaturalist.org/observations/72760120</a>   |
| 1345 | <i>Spilopelia chinensis</i> | Eastern Spotted Dove | 2022/3/13 | 2 | 0 | 22.19775833 | 113.55251330 | <a href="https://www.inaturalist.org/observations/108490393">https://www.inaturalist.org/observations/108490393</a> |
| 1346 | <i>Spilopelia chinensis</i> | Eastern Spotted Dove | 2020/3/14 | 1 | 0 | 22.19777778 | 113.55000000 | <a href="https://www.inaturalist.org/observations/56125937">https://www.inaturalist.org/observations/56125937</a>   |
| 1347 | <i>Spilopelia chinensis</i> | Eastern Spotted Dove | 2022/3/8  | 2 | 0 | 22.19848854 | 113.55149640 | <a href="https://www.inaturalist.org/observations/110086116">https://www.inaturalist.org/observations/110086116</a> |
| 1348 | <i>Spilopelia chinensis</i> | Eastern Spotted Dove | 2022/4/3  | 1 | 0 | 22.19879549 | 113.55172470 | <a href="https://www.inaturalist.org/observations/110390957">https://www.inaturalist.org/observations/110390957</a> |
| 1349 | <i>Spilopelia chinensis</i> | Eastern Spotted Dove | 2022/3/21 | 1 | 0 | 22.19882000 | 113.54869170 | <a href="https://www.inaturalist.org/observations/109626660">https://www.inaturalist.org/observations/109626660</a> |
| 1350 | <i>Spilopelia chinensis</i> | Eastern Spotted Dove | 2022/3/27 | 1 | 0 | 22.19884426 | 113.55149780 | <a href="https://www.inaturalist.org/observations/109739184">https://www.inaturalist.org/observations/109739184</a> |
| 1351 | <i>Spilopelia chinensis</i> | Eastern Spotted Dove | 2021/4/2  | 2 | 0 | 22.19889874 | 113.55268120 | <a href="https://www.inaturalist.org/observations/72749734">https://www.inaturalist.org/observations/72749734</a>   |
| 1352 | <i>Spilopelia chinensis</i> | Eastern Spotted Dove | 2022/3/31 | 1 | 0 | 22.19921000 | 113.54484600 | <a href="https://www.inaturalist.org/observations/110142990">https://www.inaturalist.org/observations/110142990</a> |
| 1353 | <i>Spilopelia chinensis</i> | Eastern Spotted Dove | 2019/6/3  | 1 | 0 | 22.19948667 | 113.55165000 | <a href="https://www.inaturalist.org/observations/26415958">https://www.inaturalist.org/observations/26415958</a>   |
| 1354 | <i>Spilopelia chinensis</i> | Eastern Spotted Dove | 2019/6/1  | 2 | 0 | 22.19962883 | 113.55156710 | <a href="https://www.inaturalist.org/observations/26166817">https://www.inaturalist.org/observations/26166817</a>   |
| 1355 | <i>Spilopelia chinensis</i> | Eastern Spotted Dove | 2019/5/18 | 1 | 0 | 22.19971765 | 113.55158800 | <a href="https://www.inaturalist.org/observations/26148613">https://www.inaturalist.org/observations/26148613</a>   |
| 1356 | <i>Spilopelia chinensis</i> | Eastern Spotted Dove | 2019/5/18 | 2 | 0 | 22.19972339 | 113.55157240 | <a href="https://www.inaturalist.org/observations/26174290">https://www.inaturalist.org/observations/26174290</a>   |

|      |                             |                      |            |   |   |             |              |                                                                                                                     |
|------|-----------------------------|----------------------|------------|---|---|-------------|--------------|---------------------------------------------------------------------------------------------------------------------|
| 1357 | <i>Spilopelia chinensis</i> | Eastern Spotted Dove | 2019/5/18  | 2 | 0 | 22.19973324 | 113.55146470 | <a href="https://www.inaturalist.org/observations/26148594">https://www.inaturalist.org/observations/26148594</a>   |
| 1358 | <i>Spilopelia chinensis</i> | Eastern Spotted Dove | 2019/5/18  | 2 | 0 | 22.19979286 | 113.55152130 | <a href="https://www.inaturalist.org/observations/25299198">https://www.inaturalist.org/observations/25299198</a>   |
| 1359 | <i>Spilopelia chinensis</i> | Eastern Spotted Dove | 2019/6/7   | 2 | 0 | 22.19981947 | 113.55355210 | <a href="https://www.inaturalist.org/observations/26539543">https://www.inaturalist.org/observations/26539543</a>   |
| 1360 | <i>Spilopelia chinensis</i> | Eastern Spotted Dove | 2019/6/6   | 2 | 0 | 22.19989881 | 113.55128480 | <a href="https://www.inaturalist.org/observations/26493594">https://www.inaturalist.org/observations/26493594</a>   |
| 1361 | <i>Spilopelia chinensis</i> | Eastern Spotted Dove | 2020/8/8   | 1 | 0 | 22.20000000 | 113.55000000 | <a href="https://www.inaturalist.org/observations/55767535">https://www.inaturalist.org/observations/55767535</a>   |
| 1362 | <i>Spilopelia chinensis</i> | Eastern Spotted Dove | 2019/7/7   | 2 | 0 | 22.20000560 | 114.13501730 | <a href="https://www.inaturalist.org/observations/28719478">https://www.inaturalist.org/observations/28719478</a>   |
| 1363 | <i>Spilopelia chinensis</i> | Eastern Spotted Dove | 2015/12/12 | 2 | 0 | 22.20000560 | 114.13501730 | <a href="https://www.inaturalist.org/observations/59101089">https://www.inaturalist.org/observations/59101089</a>   |
| 1364 | <i>Spilopelia chinensis</i> | Eastern Spotted Dove | 2021/5/2   | 1 | 0 | 22.20000560 | 114.13501730 | <a href="https://www.inaturalist.org/observations/76837192">https://www.inaturalist.org/observations/76837192</a>   |
| 1365 | <i>Spilopelia chinensis</i> | Eastern Spotted Dove | 2022/4/3   | 2 | 0 | 22.20009500 | 113.55196400 | <a href="https://www.inaturalist.org/observations/110733730">https://www.inaturalist.org/observations/110733730</a> |
| 1366 | <i>Spilopelia chinensis</i> | Eastern Spotted Dove | 2021/3/28  | 1 | 0 | 22.20017833 | 113.54819500 | <a href="https://www.inaturalist.org/observations/78853818">https://www.inaturalist.org/observations/78853818</a>   |
| 1367 | <i>Spilopelia chinensis</i> | Eastern Spotted Dove | 2021/3/28  | 1 | 0 | 22.20019667 | 113.54830830 | <a href="https://www.inaturalist.org/observations/76493537">https://www.inaturalist.org/observations/76493537</a>   |
| 1368 | <i>Spilopelia chinensis</i> | Eastern Spotted Dove | 2021/2/18  | 1 | 0 | 22.20025983 | 113.55146080 | <a href="https://www.inaturalist.org/observations/69767784">https://www.inaturalist.org/observations/69767784</a>   |
| 1369 | <i>Spilopelia chinensis</i> | Eastern Spotted Dove | 2019/6/3   | 1 | 0 | 22.20026333 | 113.55379500 | <a href="https://www.inaturalist.org/observations/26317084">https://www.inaturalist.org/observations/26317084</a>   |
| 1370 | <i>Spilopelia chinensis</i> | Eastern Spotted Dove | 2019/6/3   | 2 | 0 | 22.20026333 | 113.55379500 | <a href="https://www.inaturalist.org/observations/26438380">https://www.inaturalist.org/observations/26438380</a>   |
| 1371 | <i>Spilopelia chinensis</i> | Eastern Spotted Dove | 2020/3/6   | 1 | 0 | 22.20027939 | 113.55142590 | <a href="https://www.inaturalist.org/observations/67285491">https://www.inaturalist.org/observations/67285491</a>   |
| 1372 | <i>Spilopelia chinensis</i> | Eastern Spotted Dove | 2021/5/8   | 0 | 0 | 22.20029428 | 113.55104480 | <a href="https://www.inaturalist.org/observations/77839953">https://www.inaturalist.org/observations/77839953</a>   |
| 1373 | <i>Spilopelia chinensis</i> | Eastern Spotted Dove | 2022/3/28  | 2 | 0 | 22.20030753 | 113.54739340 | <a href="https://www.inaturalist.org/observations/109740342">https://www.inaturalist.org/observations/109740342</a> |
| 1374 | <i>Spilopelia chinensis</i> | Eastern Spotted Dove | 2021/2/28  | 0 | 0 | 22.20030911 | 113.55379820 | <a href="https://www.inaturalist.org/observations/70292641">https://www.inaturalist.org/observations/70292641</a>   |
| 1375 | <i>Spilopelia chinensis</i> | Eastern Spotted Dove | 2019/1/2   | 1 | 0 | 22.20031416 | 113.54797590 | <a href="https://www.inaturalist.org/observations/23901197">https://www.inaturalist.org/observations/23901197</a>   |
| 1376 | <i>Spilopelia chinensis</i> | Eastern Spotted Dove | 2020/12/28 | 1 | 0 | 22.20035716 | 113.54758380 | <a href="https://www.inaturalist.org/observations/67182263">https://www.inaturalist.org/observations/67182263</a>   |
| 1377 | <i>Spilopelia chinensis</i> | Eastern Spotted Dove | 2022/3/31  | 2 | 0 | 22.20041333 | 113.54741670 | <a href="https://www.inaturalist.org/observations/110017798">https://www.inaturalist.org/observations/110017798</a> |
| 1378 | <i>Spilopelia chinensis</i> | Eastern Spotted Dove | 2021/5/8   | 2 | 0 | 22.20045937 | 113.55069440 | <a href="https://www.inaturalist.org/observations/78823854">https://www.inaturalist.org/observations/78823854</a>   |
| 1379 | <i>Spilopelia chinensis</i> | Eastern Spotted Dove | 2021/5/8   | 3 | 0 | 22.20046842 | 113.55095840 | <a href="https://www.inaturalist.org/observations/77849077">https://www.inaturalist.org/observations/77849077</a>   |



|      |                             |                      |           |   |   |             |              |                                                                                                                     |
|------|-----------------------------|----------------------|-----------|---|---|-------------|--------------|---------------------------------------------------------------------------------------------------------------------|
| 1380 | <i>Spilopelia chinensis</i> | Eastern Spotted Dove | 2019/6/2  | 2 | 0 | 22.20049327 | 113.54830930 | <a href="https://www.inaturalist.org/observations/26239371">https://www.inaturalist.org/observations/26239371</a>   |
| 1381 | <i>Spilopelia chinensis</i> | Eastern Spotted Dove | 2021/5/8  | 1 | 0 | 22.20050500 | 113.55086330 | <a href="https://www.inaturalist.org/observations/77849109">https://www.inaturalist.org/observations/77849109</a>   |
| 1382 | <i>Spilopelia chinensis</i> | Eastern Spotted Dove | 2022/2/2  | 1 | 0 | 22.20059167 | 113.54829170 | <a href="https://www.inaturalist.org/observations/106694696">https://www.inaturalist.org/observations/106694696</a> |
| 1383 | <i>Spilopelia chinensis</i> | Eastern Spotted Dove | 2021/4/30 | 1 | 0 | 22.20066544 | 113.55135230 | <a href="https://www.inaturalist.org/observations/75781300">https://www.inaturalist.org/observations/75781300</a>   |
| 1384 | <i>Spilopelia chinensis</i> | Eastern Spotted Dove | 2021/3/27 | 1 | 0 | 22.20068550 | 113.54907230 | <a href="https://www.inaturalist.org/observations/72132024">https://www.inaturalist.org/observations/72132024</a>   |
| 1385 | <i>Spilopelia chinensis</i> | Eastern Spotted Dove | 2022/6/18 | 1 | 0 | 22.20073555 | 113.54781630 | <a href="https://www.inaturalist.org/observations/122356694">https://www.inaturalist.org/observations/122356694</a> |
| 1386 | <i>Spilopelia chinensis</i> | Eastern Spotted Dove | 2021/5/8  | 2 | 0 | 22.20074100 | 113.55110960 | <a href="https://www.inaturalist.org/observations/77842221">https://www.inaturalist.org/observations/77842221</a>   |
| 1387 | <i>Spilopelia chinensis</i> | Eastern Spotted Dove | 2022/3/28 | 2 | 0 | 22.20075082 | 113.54828290 | <a href="https://www.inaturalist.org/observations/109740115">https://www.inaturalist.org/observations/109740115</a> |
| 1388 | <i>Spilopelia chinensis</i> | Eastern Spotted Dove | 2022/3/28 | 1 | 0 | 22.20078833 | 113.55140000 | <a href="https://www.inaturalist.org/observations/110002735">https://www.inaturalist.org/observations/110002735</a> |
| 1389 | <i>Spilopelia chinensis</i> | Eastern Spotted Dove | 2019/6/1  | 1 | 0 | 22.20080500 | 113.54837000 | <a href="https://www.inaturalist.org/observations/26165541">https://www.inaturalist.org/observations/26165541</a>   |
| 1390 | <i>Spilopelia chinensis</i> | Eastern Spotted Dove | 2021/5/8  | 1 | 0 | 22.20085736 | 113.55180810 | <a href="https://www.inaturalist.org/observations/78552803">https://www.inaturalist.org/observations/78552803</a>   |
| 1391 | <i>Spilopelia chinensis</i> | Eastern Spotted Dove | 2022/3/24 | 2 | 0 | 22.20095650 | 113.54821730 | <a href="https://www.inaturalist.org/observations/109611366">https://www.inaturalist.org/observations/109611366</a> |
| 1392 | <i>Spilopelia chinensis</i> | Eastern Spotted Dove | 2022/3/24 | 2 | 0 | 22.20099899 | 113.54809820 | <a href="https://www.inaturalist.org/observations/109348342">https://www.inaturalist.org/observations/109348342</a> |
| 1393 | <i>Spilopelia chinensis</i> | Eastern Spotted Dove | 2022/3/24 | 1 | 0 | 22.20103833 | 113.54812500 | <a href="https://www.inaturalist.org/observations/109348659">https://www.inaturalist.org/observations/109348659</a> |
| 1394 | <i>Spilopelia chinensis</i> | Eastern Spotted Dove | 2021/3/26 | 1 | 0 | 22.20226900 | 114.13047700 | <a href="https://www.inaturalist.org/observations/72141056">https://www.inaturalist.org/observations/72141056</a>   |
| 1395 | <i>Spilopelia chinensis</i> | Eastern Spotted Dove | 2019/4/26 | 1 | 0 | 22.20383871 | 113.54909850 | <a href="https://www.inaturalist.org/observations/23101330">https://www.inaturalist.org/observations/23101330</a>   |
| 1396 | <i>Spilopelia chinensis</i> | Eastern Spotted Dove | 2020/6/21 | 2 | 0 | 22.20388000 | 113.54927000 | <a href="https://www.inaturalist.org/observations/50367862">https://www.inaturalist.org/observations/50367862</a>   |
| 1397 | <i>Spilopelia chinensis</i> | Eastern Spotted Dove | 2021/4/2  | 1 | 0 | 22.20411333 | 113.55259670 | <a href="https://www.inaturalist.org/observations/72685824">https://www.inaturalist.org/observations/72685824</a>   |
| 1398 | <i>Spilopelia chinensis</i> | Eastern Spotted Dove | 2022/4/5  | 2 | 0 | 22.20421667 | 113.55221670 | <a href="https://www.inaturalist.org/observations/110636079">https://www.inaturalist.org/observations/110636079</a> |
| 1399 | <i>Spilopelia chinensis</i> | Eastern Spotted Dove | 2022/4/5  | 2 | 0 | 22.20428075 | 113.55253880 | <a href="https://www.inaturalist.org/observations/110575538">https://www.inaturalist.org/observations/110575538</a> |
| 1400 | <i>Spilopelia chinensis</i> | Eastern Spotted Dove | 2022/6/11 | 2 | 0 | 22.20428838 | 113.55219230 | <a href="https://www.inaturalist.org/observations/121204909">https://www.inaturalist.org/observations/121204909</a> |
| 1401 | <i>Spilopelia chinensis</i> | Eastern Spotted Dove | 2022/4/3  | 1 | 0 | 22.20436000 | 113.55258000 | <a href="https://www.inaturalist.org/observations/110473093">https://www.inaturalist.org/observations/110473093</a> |
| 1402 | <i>Spilopelia chinensis</i> | Eastern Spotted Dove | 2022/4/3  | 2 | 0 | 22.20436730 | 113.55259230 | <a href="https://www.inaturalist.org/observations/110379701">https://www.inaturalist.org/observations/110379701</a> |

|      |                             |                      |            |   |   |             |              |                                                                                                                     |
|------|-----------------------------|----------------------|------------|---|---|-------------|--------------|---------------------------------------------------------------------------------------------------------------------|
| 1403 | <i>Spilopelia chinensis</i> | Eastern Spotted Dove | 2022/4/3   | 2 | 0 | 22.20443333 | 113.55221670 | <a href="https://www.inaturalist.org/observations/110284426">https://www.inaturalist.org/observations/110284426</a> |
| 1404 | <i>Spilopelia chinensis</i> | Eastern Spotted Dove | 2022/4/5   | 2 | 0 | 22.20443333 | 113.55286330 | <a href="https://www.inaturalist.org/observations/110468382">https://www.inaturalist.org/observations/110468382</a> |
| 1405 | <i>Spilopelia chinensis</i> | Eastern Spotted Dove | 2022/4/3   | 2 | 0 | 22.20447114 | 113.55256270 | <a href="https://www.inaturalist.org/observations/110581045">https://www.inaturalist.org/observations/110581045</a> |
| 1406 | <i>Spilopelia chinensis</i> | Eastern Spotted Dove | 2022/4/3   | 2 | 0 | 22.20447833 | 113.55298670 | <a href="https://www.inaturalist.org/observations/110285216">https://www.inaturalist.org/observations/110285216</a> |
| 1407 | <i>Spilopelia chinensis</i> | Eastern Spotted Dove | 2022/4/5   | 2 | 0 | 22.20449667 | 113.55291170 | <a href="https://www.inaturalist.org/observations/110642698">https://www.inaturalist.org/observations/110642698</a> |
| 1408 | <i>Spilopelia chinensis</i> | Eastern Spotted Dove | 2021/4/2   | 1 | 0 | 22.20455342 | 113.55248520 | <a href="https://www.inaturalist.org/observations/72978007">https://www.inaturalist.org/observations/72978007</a>   |
| 1409 | <i>Spilopelia chinensis</i> | Eastern Spotted Dove | 2021/4/2   | 1 | 0 | 22.20460400 | 113.55272300 | <a href="https://www.inaturalist.org/observations/73032200">https://www.inaturalist.org/observations/73032200</a>   |
| 1410 | <i>Spilopelia chinensis</i> | Eastern Spotted Dove | 2020/12/25 | 1 | 0 | 22.20469167 | 113.55243000 | <a href="https://www.inaturalist.org/observations/67223617">https://www.inaturalist.org/observations/67223617</a>   |
| 1411 | <i>Spilopelia chinensis</i> | Eastern Spotted Dove | 2021/3/11  | 1 | 0 | 22.20554700 | 114.13146800 | <a href="https://www.inaturalist.org/observations/71008471">https://www.inaturalist.org/observations/71008471</a>   |
| 1412 | <i>Spilopelia chinensis</i> | Eastern Spotted Dove | 2017/5/10  | 3 | 0 | 22.20615989 | 114.02418140 | <a href="https://www.inaturalist.org/observations/6244832">https://www.inaturalist.org/observations/6244832</a>     |
| 1413 | <i>Spilopelia chinensis</i> | Eastern Spotted Dove | 2019/5/4   | 2 | 0 | 22.20656057 | 113.54867360 | <a href="https://www.inaturalist.org/observations/24501908">https://www.inaturalist.org/observations/24501908</a>   |
| 1414 | <i>Spilopelia chinensis</i> | Eastern Spotted Dove | 2021/5/9   | 1 | 0 | 22.20691077 | 113.54724600 | <a href="https://www.inaturalist.org/observations/78046119">https://www.inaturalist.org/observations/78046119</a>   |
| 1415 | <i>Spilopelia chinensis</i> | Eastern Spotted Dove | 2020/3/7   | 1 | 0 | 22.20700203 | 113.54733760 | <a href="https://www.inaturalist.org/observations/41826796">https://www.inaturalist.org/observations/41826796</a>   |
| 1416 | <i>Spilopelia chinensis</i> | Eastern Spotted Dove | 2021/2/17  | 2 | 0 | 22.20729430 | 113.54885390 | <a href="https://www.inaturalist.org/observations/69709237">https://www.inaturalist.org/observations/69709237</a>   |
| 1417 | <i>Spilopelia chinensis</i> | Eastern Spotted Dove | 2022/4/30  | 2 | 0 | 22.20756746 | 114.12334430 | <a href="https://www.inaturalist.org/observations/115135599">https://www.inaturalist.org/observations/115135599</a> |
| 1418 | <i>Spilopelia chinensis</i> | Eastern Spotted Dove | 2019/5/11  | 1 | 0 | 22.20795176 | 113.54717510 | <a href="https://www.inaturalist.org/observations/24933536">https://www.inaturalist.org/observations/24933536</a>   |
| 1419 | <i>Spilopelia chinensis</i> | Eastern Spotted Dove | 2021/3/20  | 1 | 0 | 22.20797267 | 113.55239960 | <a href="https://www.inaturalist.org/observations/71578579">https://www.inaturalist.org/observations/71578579</a>   |
| 1420 | <i>Spilopelia chinensis</i> | Eastern Spotted Dove | 2021/4/2   | 1 | 0 | 22.20800276 | 113.54818210 | <a href="https://www.inaturalist.org/observations/72699071">https://www.inaturalist.org/observations/72699071</a>   |
| 1421 | <i>Spilopelia chinensis</i> | Eastern Spotted Dove | 2022/4/3   | 2 | 0 | 22.20804667 | 113.54733330 | <a href="https://www.inaturalist.org/observations/110635903">https://www.inaturalist.org/observations/110635903</a> |
| 1422 | <i>Spilopelia chinensis</i> | Eastern Spotted Dove | 2022/4/3   | 2 | 0 | 22.20807500 | 113.54725500 | <a href="https://www.inaturalist.org/observations/110368408">https://www.inaturalist.org/observations/110368408</a> |
| 1423 | <i>Spilopelia chinensis</i> | Eastern Spotted Dove | 2019/11/6  | 2 | 0 | 22.20816452 | 114.13583020 | <a href="https://www.inaturalist.org/observations/35392948">https://www.inaturalist.org/observations/35392948</a>   |
| 1424 | <i>Spilopelia chinensis</i> | Eastern Spotted Dove | 2019/5/9   | 2 | 0 | 22.20841212 | 113.54820020 | <a href="https://www.inaturalist.org/observations/24834168">https://www.inaturalist.org/observations/24834168</a>   |
| 1425 | <i>Spilopelia chinensis</i> | Eastern Spotted Dove | 2021/4/5   | 1 | 0 | 22.20861126 | 113.54735610 | <a href="https://www.inaturalist.org/observations/72997985">https://www.inaturalist.org/observations/72997985</a>   |

|      |                             |                      |            |   |   |             |              |                                                                                                                     |
|------|-----------------------------|----------------------|------------|---|---|-------------|--------------|---------------------------------------------------------------------------------------------------------------------|
| 1426 | <i>Spilopelia chinensis</i> | Eastern Spotted Dove | 2018/5/1   | 4 | 0 | 22.20870274 | 114.02881620 | <a href="https://www.inaturalist.org/observations/12060663">https://www.inaturalist.org/observations/12060663</a>   |
| 1427 | <i>Spilopelia chinensis</i> | Eastern Spotted Dove | 2019/6/2   | 1 | 0 | 22.20878333 | 113.55395500 | <a href="https://www.inaturalist.org/observations/26380397">https://www.inaturalist.org/observations/26380397</a>   |
| 1428 | <i>Spilopelia chinensis</i> | Eastern Spotted Dove | 2019/5/27  | 3 | 0 | 22.21030617 | 113.55294040 | <a href="https://www.inaturalist.org/observations/25865911">https://www.inaturalist.org/observations/25865911</a>   |
| 1429 | <i>Spilopelia chinensis</i> | Eastern Spotted Dove | 2019/5/27  | 1 | 0 | 22.21030617 | 113.55294040 | <a href="https://www.inaturalist.org/observations/25866036">https://www.inaturalist.org/observations/25866036</a>   |
| 1430 | <i>Spilopelia chinensis</i> | Eastern Spotted Dove | 2021/4/30  | 1 | 0 | 22.21083333 | 113.55326170 | <a href="https://www.inaturalist.org/observations/76884676">https://www.inaturalist.org/observations/76884676</a>   |
| 1431 | <i>Spilopelia chinensis</i> | Eastern Spotted Dove | 2019/6/9   | 2 | 0 | 22.21109370 | 113.55220540 | <a href="https://www.inaturalist.org/observations/26660304">https://www.inaturalist.org/observations/26660304</a>   |
| 1432 | <i>Spilopelia chinensis</i> | Eastern Spotted Dove | 2019/6/1   | 1 | 0 | 22.21118000 | 113.55255000 | <a href="https://www.inaturalist.org/observations/26150134">https://www.inaturalist.org/observations/26150134</a>   |
| 1433 | <i>Spilopelia chinensis</i> | Eastern Spotted Dove | 2019/6/5   | 1 | 0 | 22.21131667 | 113.55252000 | <a href="https://www.inaturalist.org/observations/26432842">https://www.inaturalist.org/observations/26432842</a>   |
| 1434 | <i>Spilopelia chinensis</i> | Eastern Spotted Dove | 2021/4/26  | 2 | 0 | 22.21133318 | 113.55283100 | <a href="https://www.inaturalist.org/observations/75308017">https://www.inaturalist.org/observations/75308017</a>   |
| 1435 | <i>Spilopelia chinensis</i> | Eastern Spotted Dove | 2019/6/5   | 2 | 0 | 22.21138055 | 113.54290790 | <a href="https://www.inaturalist.org/observations/26434169">https://www.inaturalist.org/observations/26434169</a>   |
| 1436 | <i>Spilopelia chinensis</i> | Eastern Spotted Dove | 2021/11/30 | 1 | 0 | 22.21155128 | 113.54264840 | <a href="https://www.inaturalist.org/observations/104395892">https://www.inaturalist.org/observations/104395892</a> |
| 1437 | <i>Spilopelia chinensis</i> | Eastern Spotted Dove | 2020/12/10 | 1 | 0 | 22.21281075 | 114.19749950 | <a href="https://www.inaturalist.org/observations/66418065">https://www.inaturalist.org/observations/66418065</a>   |
| 1438 | <i>Spilopelia chinensis</i> | Eastern Spotted Dove | 2019/6/5   | 1 | 0 | 22.21472100 | 113.54723600 | <a href="https://www.inaturalist.org/observations/26430086">https://www.inaturalist.org/observations/26430086</a>   |
| 1439 | <i>Spilopelia chinensis</i> | Eastern Spotted Dove | 2019/6/2   | 2 | 0 | 22.21585575 | 113.54636280 | <a href="https://www.inaturalist.org/observations/26237839">https://www.inaturalist.org/observations/26237839</a>   |
| 1440 | <i>Spilopelia chinensis</i> | Eastern Spotted Dove | 2019/6/2   | 2 | 0 | 22.21585587 | 113.54643500 | <a href="https://www.inaturalist.org/observations/26237871">https://www.inaturalist.org/observations/26237871</a>   |
| 1441 | <i>Spilopelia chinensis</i> | Eastern Spotted Dove | 2019/6/5   | 2 | 0 | 22.21608000 | 113.54592830 | <a href="https://www.inaturalist.org/observations/26488500">https://www.inaturalist.org/observations/26488500</a>   |
| 1442 | <i>Spilopelia chinensis</i> | Eastern Spotted Dove | 2019/6/5   | 0 | 0 | 22.21615196 | 113.54594240 | <a href="https://www.inaturalist.org/observations/26430084">https://www.inaturalist.org/observations/26430084</a>   |
| 1443 | <i>Spilopelia chinensis</i> | Eastern Spotted Dove | 2019/5/13  | 1 | 0 | 22.21620561 | 113.54600950 | <a href="https://www.inaturalist.org/observations/25042974">https://www.inaturalist.org/observations/25042974</a>   |
| 1444 | <i>Spilopelia chinensis</i> | Eastern Spotted Dove | 2021/6/11  | 1 | 0 | 22.21638333 | 113.54535000 | <a href="https://www.inaturalist.org/observations/82524235">https://www.inaturalist.org/observations/82524235</a>   |
| 1445 | <i>Spilopelia chinensis</i> | Eastern Spotted Dove | 2012/12/26 | 4 | 0 | 22.21744777 | 114.12029730 | <a href="http://www.inaturalist.org/observations/166874">http://www.inaturalist.org/observations/166874</a>         |
| 1446 | <i>Spilopelia chinensis</i> | Eastern Spotted Dove | 2019/4/28  | 2 | 0 | 22.21771485 | 114.21013910 | <a href="https://www.inaturalist.org/observations/23649827">https://www.inaturalist.org/observations/23649827</a>   |
| 1447 | <i>Spilopelia chinensis</i> | Eastern Spotted Dove | 2022/7/29  | 2 | 0 | 22.21774667 | 114.20970330 | <a href="https://www.inaturalist.org/observations/128388202">https://www.inaturalist.org/observations/128388202</a> |
| 1448 | <i>Spilopelia chinensis</i> | Eastern Spotted Dove | 2019/3/18  | 2 | 0 | 22.21817500 | 114.21203670 | <a href="https://www.inaturalist.org/observations/51286954">https://www.inaturalist.org/observations/51286954</a>   |

|      |                             |                      |            |   |   |             |              |                                                                                                                     |
|------|-----------------------------|----------------------|------------|---|---|-------------|--------------|---------------------------------------------------------------------------------------------------------------------|
| 1449 | <i>Spilopelia chinensis</i> | Eastern Spotted Dove | 2017/3/7   | 1 | 0 | 22.21829571 | 114.03137780 | <a href="https://www.inaturalist.org/observations/73209500">https://www.inaturalist.org/observations/73209500</a>   |
| 1450 | <i>Spilopelia chinensis</i> | Eastern Spotted Dove | 2022/7/23  | 2 | 0 | 22.21831640 | 114.20699330 | <a href="https://www.inaturalist.org/observations/127469551">https://www.inaturalist.org/observations/127469551</a> |
| 1451 | <i>Spilopelia chinensis</i> | Eastern Spotted Dove | 2021/11/18 | 1 | 0 | 22.21874619 | 114.21015170 | <a href="https://www.inaturalist.org/observations/101393409">https://www.inaturalist.org/observations/101393409</a> |
| 1452 | <i>Spilopelia chinensis</i> | Eastern Spotted Dove | 2021/3/26  | 2 | 0 | 22.21930200 | 114.11890900 | <a href="https://www.inaturalist.org/observations/73364231">https://www.inaturalist.org/observations/73364231</a>   |
| 1453 | <i>Spilopelia chinensis</i> | Eastern Spotted Dove | 2021/4/26  | 1 | 0 | 22.21979113 | 113.54821730 | <a href="https://www.inaturalist.org/observations/75246499">https://www.inaturalist.org/observations/75246499</a>   |
| 1454 | <i>Spilopelia chinensis</i> | Eastern Spotted Dove | 2020/5/3   | 1 | 0 | 22.22261054 | 113.91454910 | <a href="https://www.inaturalist.org/observations/45149503">https://www.inaturalist.org/observations/45149503</a>   |
| 1455 | <i>Spilopelia chinensis</i> | Eastern Spotted Dove | 2022/5/2   | 2 | 0 | 22.22280261 | 114.11891990 | <a href="https://www.inaturalist.org/observations/116055019">https://www.inaturalist.org/observations/116055019</a> |
| 1456 | <i>Spilopelia chinensis</i> | Eastern Spotted Dove | 2018/4/29  | 3 | 0 | 22.22361183 | 114.11389160 | <a href="https://www.inaturalist.org/observations/11825945">https://www.inaturalist.org/observations/11825945</a>   |
| 1457 | <i>Spilopelia chinensis</i> | Eastern Spotted Dove | 2020/4/24  | 2 | 0 | 22.22388374 | 114.11245690 | <a href="https://www.inaturalist.org/observations/43028912">https://www.inaturalist.org/observations/43028912</a>   |
| 1458 | <i>Spilopelia chinensis</i> | Eastern Spotted Dove | 2019/4/27  | 2 | 0 | 22.22394900 | 114.11513420 | <a href="https://www.inaturalist.org/observations/23322441">https://www.inaturalist.org/observations/23322441</a>   |
| 1459 | <i>Spilopelia chinensis</i> | Eastern Spotted Dove | 2020/10/16 | 1 | 0 | 22.22406282 | 114.11218730 | <a href="https://www.inaturalist.org/observations/62750619">https://www.inaturalist.org/observations/62750619</a>   |
| 1460 | <i>Spilopelia chinensis</i> | Eastern Spotted Dove | 2021/2/4   | 1 | 0 | 22.22418400 | 114.11423700 | <a href="https://www.inaturalist.org/observations/69048910">https://www.inaturalist.org/observations/69048910</a>   |
| 1461 | <i>Spilopelia chinensis</i> | Eastern Spotted Dove | 2019/5/13  | 1 | 0 | 22.22430333 | 114.11504450 | <a href="https://www.inaturalist.org/observations/25050778">https://www.inaturalist.org/observations/25050778</a>   |
| 1462 | <i>Spilopelia chinensis</i> | Eastern Spotted Dove | 2018/5/7   | 4 | 0 | 22.22445000 | 114.11074720 | <a href="https://www.inaturalist.org/observations/12318255">https://www.inaturalist.org/observations/12318255</a>   |
| 1463 | <i>Spilopelia chinensis</i> | Eastern Spotted Dove | 2020/4/25  | 1 | 0 | 22.22450086 | 114.11589220 | <a href="https://www.inaturalist.org/observations/43592619">https://www.inaturalist.org/observations/43592619</a>   |
| 1464 | <i>Spilopelia chinensis</i> | Eastern Spotted Dove | 2018/4/29  | 5 | 0 | 22.22455500 | 114.11315280 | <a href="https://www.inaturalist.org/observations/11727794">https://www.inaturalist.org/observations/11727794</a>   |
| 1465 | <i>Spilopelia chinensis</i> | Eastern Spotted Dove | 2021/3/12  | 1 | 0 | 22.22478777 | 114.30043100 | <a href="https://www.inaturalist.org/observations/71494581">https://www.inaturalist.org/observations/71494581</a>   |
| 1466 | <i>Spilopelia chinensis</i> | Eastern Spotted Dove | 2018/4/28  | 2 | 0 | 22.22514365 | 114.11509320 | <a href="https://www.inaturalist.org/observations/11569153">https://www.inaturalist.org/observations/11569153</a>   |
| 1467 | <i>Spilopelia chinensis</i> | Eastern Spotted Dove | 2012/10/14 | 4 | 0 | 22.22683346 | 114.11340940 | <a href="http://www.inaturalist.org/observations/135100">http://www.inaturalist.org/observations/135100</a>         |
| 1468 | <i>Spilopelia chinensis</i> | Eastern Spotted Dove | 2014/6/9   | 5 | 0 | 22.22769800 | 114.11426100 | <a href="http://www.inaturalist.org/observations/725738">http://www.inaturalist.org/observations/725738</a>         |
| 1469 | <i>Spilopelia chinensis</i> | Eastern Spotted Dove | 2018/4/27  | 3 | 0 | 22.22913008 | 114.11570110 | <a href="https://www.inaturalist.org/observations/11468618">https://www.inaturalist.org/observations/11468618</a>   |
| 1470 | <i>Spilopelia chinensis</i> | Eastern Spotted Dove | 2020/7/21  | 2 | 0 | 22.22978900 | 113.93190000 | <a href="https://www.inaturalist.org/observations/53787473">https://www.inaturalist.org/observations/53787473</a>   |
| 1471 | <i>Spilopelia chinensis</i> | Eastern Spotted Dove | 2020/3/29  | 1 | 0 | 22.22991090 | 114.11026640 | <a href="https://www.inaturalist.org/observations/44865344">https://www.inaturalist.org/observations/44865344</a>   |

|      |                             |                      |            |   |   |             |              |                                                                                                                     |
|------|-----------------------------|----------------------|------------|---|---|-------------|--------------|---------------------------------------------------------------------------------------------------------------------|
| 1472 | <i>Spilopelia chinensis</i> | Eastern Spotted Dove | 2018/4/27  | 5 | 0 | 22.23289143 | 114.17155270 | <a href="https://www.inaturalist.org/observations/11482287">https://www.inaturalist.org/observations/11482287</a>   |
| 1473 | <i>Spilopelia chinensis</i> | Eastern Spotted Dove | 2018/4/27  | 1 | 0 | 22.23377000 | 114.17086670 | <a href="https://www.inaturalist.org/observations/11503913">https://www.inaturalist.org/observations/11503913</a>   |
| 1474 | <i>Spilopelia chinensis</i> | Eastern Spotted Dove | 2022/8/27  | 2 | 0 | 22.23669241 | 114.16496950 | <a href="https://www.inaturalist.org/observations/132898696">https://www.inaturalist.org/observations/132898696</a> |
| 1475 | <i>Spilopelia chinensis</i> | Eastern Spotted Dove | 2021/6/8   | 3 | 0 | 22.23910333 | 114.19608330 | <a href="https://www.inaturalist.org/observations/83011474">https://www.inaturalist.org/observations/83011474</a>   |
| 1476 | <i>Spilopelia chinensis</i> | Eastern Spotted Dove | 2021/12/7  | 1 | 0 | 22.24060633 | 113.97595920 | <a href="https://www.inaturalist.org/observations/102689739">https://www.inaturalist.org/observations/102689739</a> |
| 1477 | <i>Spilopelia chinensis</i> | Eastern Spotted Dove | 2021/5/3   | 2 | 0 | 22.24060833 | 114.22370830 | <a href="https://www.inaturalist.org/observations/76851800">https://www.inaturalist.org/observations/76851800</a>   |
| 1478 | <i>Spilopelia chinensis</i> | Eastern Spotted Dove | 2021/4/11  | 1 | 0 | 22.24071431 | 114.15021120 | <a href="https://www.inaturalist.org/observations/78538321">https://www.inaturalist.org/observations/78538321</a>   |
| 1479 | <i>Spilopelia chinensis</i> | Eastern Spotted Dove | 2022/5/2   | 1 | 0 | 22.24114836 | 114.15002280 | <a href="https://www.inaturalist.org/observations/114617805">https://www.inaturalist.org/observations/114617805</a> |
| 1480 | <i>Spilopelia chinensis</i> | Eastern Spotted Dove | 2018/4/21  | 5 | 0 | 22.24120833 | 114.15521950 | <a href="https://www.inaturalist.org/observations/11251747">https://www.inaturalist.org/observations/11251747</a>   |
| 1481 | <i>Spilopelia chinensis</i> | Eastern Spotted Dove | 2016/3/20  | 2 | 0 | 22.24144884 | 113.97766630 | <a href="https://www.inaturalist.org/observations/49217091">https://www.inaturalist.org/observations/49217091</a>   |
| 1482 | <i>Spilopelia chinensis</i> | Eastern Spotted Dove | 2020/4/25  | 2 | 0 | 22.24159477 | 113.97451770 | <a href="https://www.inaturalist.org/observations/43307581">https://www.inaturalist.org/observations/43307581</a>   |
| 1483 | <i>Spilopelia chinensis</i> | Eastern Spotted Dove | 2021/11/17 | 2 | 0 | 22.24249359 | 113.97847970 | <a href="https://www.inaturalist.org/observations/101521526">https://www.inaturalist.org/observations/101521526</a> |
| 1484 | <i>Spilopelia chinensis</i> | Eastern Spotted Dove | 2018/4/29  | 3 | 0 | 22.24250208 | 114.14736720 | <a href="https://www.inaturalist.org/observations/11883638">https://www.inaturalist.org/observations/11883638</a>   |
| 1485 | <i>Spilopelia chinensis</i> | Eastern Spotted Dove | 2018/4/28  | 4 | 0 | 22.24326893 | 114.14703670 | <a href="https://www.inaturalist.org/observations/11579055">https://www.inaturalist.org/observations/11579055</a>   |
| 1486 | <i>Spilopelia chinensis</i> | Eastern Spotted Dove | 2020/2/22  | 1 | 0 | 22.24337600 | 113.97534900 | <a href="https://www.inaturalist.org/observations/41153303">https://www.inaturalist.org/observations/41153303</a>   |
| 1487 | <i>Spilopelia chinensis</i> | Eastern Spotted Dove | 2021/3/27  | 1 | 0 | 22.24425797 | 114.15272300 | <a href="https://www.inaturalist.org/observations/72141772">https://www.inaturalist.org/observations/72141772</a>   |
| 1488 | <i>Spilopelia chinensis</i> | Eastern Spotted Dove | 2020/10/8  | 1 | 0 | 22.24429167 | 114.16405550 | <a href="https://www.inaturalist.org/observations/62010977">https://www.inaturalist.org/observations/62010977</a>   |
| 1489 | <i>Spilopelia chinensis</i> | Eastern Spotted Dove | 2018/4/29  | 6 | 0 | 22.24438073 | 114.17536940 | <a href="https://www.inaturalist.org/observations/11879201">https://www.inaturalist.org/observations/11879201</a>   |
| 1490 | <i>Spilopelia chinensis</i> | Eastern Spotted Dove | 2021/3/27  | 1 | 0 | 22.24451144 | 114.15404060 | <a href="https://www.inaturalist.org/observations/72142138">https://www.inaturalist.org/observations/72142138</a>   |
| 1491 | <i>Spilopelia chinensis</i> | Eastern Spotted Dove | 2021/5/2   | 2 | 0 | 22.24451284 | 114.15399430 | <a href="https://www.inaturalist.org/observations/76455896">https://www.inaturalist.org/observations/76455896</a>   |
| 1492 | <i>Spilopelia chinensis</i> | Eastern Spotted Dove | 2020/11/12 | 1 | 0 | 22.24456993 | 114.17642870 | <a href="https://www.inaturalist.org/observations/64716735">https://www.inaturalist.org/observations/64716735</a>   |
| 1493 | <i>Spilopelia chinensis</i> | Eastern Spotted Dove | 2020/4/27  | 1 | 0 | 22.24459521 | 114.17660370 | <a href="https://www.inaturalist.org/observations/44049316">https://www.inaturalist.org/observations/44049316</a>   |
| 1494 | <i>Spilopelia chinensis</i> | Eastern Spotted Dove | 2020/4/10  | 2 | 0 | 22.24461506 | 114.17649640 | <a href="https://www.inaturalist.org/observations/41808866">https://www.inaturalist.org/observations/41808866</a>   |

|      |                             |                      |            |   |   |             |              |                                                                                                                   |
|------|-----------------------------|----------------------|------------|---|---|-------------|--------------|-------------------------------------------------------------------------------------------------------------------|
| 1495 | <i>Spilopelia chinensis</i> | Eastern Spotted Dove | 2018/4/29  | 2 | 0 | 22.24467833 | 114.17662830 | <a href="https://www.inaturalist.org/observations/11763601">https://www.inaturalist.org/observations/11763601</a> |
| 1496 | <i>Spilopelia chinensis</i> | Eastern Spotted Dove | 2020/11/9  | 1 | 0 | 22.24473430 | 114.14933090 | <a href="https://www.inaturalist.org/observations/64501593">https://www.inaturalist.org/observations/64501593</a> |
| 1497 | <i>Spilopelia chinensis</i> | Eastern Spotted Dove | 2020/11/27 | 1 | 0 | 22.24485400 | 114.15069800 | <a href="https://www.inaturalist.org/observations/65662582">https://www.inaturalist.org/observations/65662582</a> |
| 1498 | <i>Spilopelia chinensis</i> | Eastern Spotted Dove | 2020/11/27 | 1 | 0 | 22.24485400 | 114.15069800 | <a href="https://www.inaturalist.org/observations/65662830">https://www.inaturalist.org/observations/65662830</a> |
| 1499 | <i>Spilopelia chinensis</i> | Eastern Spotted Dove | 2021/5/2   | 1 | 0 | 22.24491916 | 114.15281640 | <a href="https://www.inaturalist.org/observations/76454317">https://www.inaturalist.org/observations/76454317</a> |
| 1500 | <i>Spilopelia chinensis</i> | Eastern Spotted Dove | 2020/11/27 | 1 | 0 | 22.24495997 | 114.15059800 | <a href="https://www.inaturalist.org/observations/65662546">https://www.inaturalist.org/observations/65662546</a> |
| 1501 | <i>Spilopelia chinensis</i> | Eastern Spotted Dove | 2020/11/18 | 2 | 0 | 22.24496040 | 114.15021860 | <a href="https://www.inaturalist.org/observations/65113596">https://www.inaturalist.org/observations/65113596</a> |
| 1502 | <i>Spilopelia chinensis</i> | Eastern Spotted Dove | 2019/11/1  | 1 | 0 | 22.24498758 | 114.17621870 | <a href="https://www.inaturalist.org/observations/35185103">https://www.inaturalist.org/observations/35185103</a> |
| 1503 | <i>Spilopelia chinensis</i> | Eastern Spotted Dove | 2020/3/29  | 1 | 0 | 22.24511157 | 114.17623890 | <a href="https://www.inaturalist.org/observations/41218876">https://www.inaturalist.org/observations/41218876</a> |
| 1504 | <i>Spilopelia chinensis</i> | Eastern Spotted Dove | 2019/11/7  | 2 | 0 | 22.24513985 | 114.14927360 | <a href="https://www.inaturalist.org/observations/35397127">https://www.inaturalist.org/observations/35397127</a> |
| 1505 | <i>Spilopelia chinensis</i> | Eastern Spotted Dove | 2019/11/7  | 1 | 0 | 22.24515439 | 114.14931090 | <a href="https://www.inaturalist.org/observations/35397165">https://www.inaturalist.org/observations/35397165</a> |
| 1506 | <i>Spilopelia chinensis</i> | Eastern Spotted Dove | 2018/11/6  | 2 | 0 | 22.24517666 | 114.14903480 | <a href="https://www.inaturalist.org/observations/18157695">https://www.inaturalist.org/observations/18157695</a> |
| 1507 | <i>Spilopelia chinensis</i> | Eastern Spotted Dove | 2019/4/26  | 1 | 0 | 22.24518833 | 114.17607830 | <a href="https://www.inaturalist.org/observations/23097773">https://www.inaturalist.org/observations/23097773</a> |
| 1508 | <i>Spilopelia chinensis</i> | Eastern Spotted Dove | 2019/11/7  | 4 | 0 | 22.24520615 | 114.14921190 | <a href="https://www.inaturalist.org/observations/35402313">https://www.inaturalist.org/observations/35402313</a> |
| 1509 | <i>Spilopelia chinensis</i> | Eastern Spotted Dove | 2020/11/26 | 1 | 0 | 22.24523997 | 114.15076600 | <a href="https://www.inaturalist.org/observations/65608344">https://www.inaturalist.org/observations/65608344</a> |
| 1510 | <i>Spilopelia chinensis</i> | Eastern Spotted Dove | 2019/4/26  | 2 | 0 | 22.24524123 | 114.17603990 | <a href="https://www.inaturalist.org/observations/23097782">https://www.inaturalist.org/observations/23097782</a> |
| 1511 | <i>Spilopelia chinensis</i> | Eastern Spotted Dove | 2019/4/26  | 1 | 0 | 22.24524169 | 114.17610920 | <a href="https://www.inaturalist.org/observations/23108293">https://www.inaturalist.org/observations/23108293</a> |
| 1512 | <i>Spilopelia chinensis</i> | Eastern Spotted Dove | 2018/4/29  | 3 | 0 | 22.24524667 | 114.17614670 | <a href="https://www.inaturalist.org/observations/11759317">https://www.inaturalist.org/observations/11759317</a> |
| 1513 | <i>Spilopelia chinensis</i> | Eastern Spotted Dove | 2019/4/26  | 1 | 0 | 22.24525500 | 114.17606330 | <a href="https://www.inaturalist.org/observations/23097861">https://www.inaturalist.org/observations/23097861</a> |
| 1514 | <i>Spilopelia chinensis</i> | Eastern Spotted Dove | 2019/4/26  | 1 | 0 | 22.24526667 | 114.17604170 | <a href="https://www.inaturalist.org/observations/23098114">https://www.inaturalist.org/observations/23098114</a> |
| 1515 | <i>Spilopelia chinensis</i> | Eastern Spotted Dove | 2020/6/24  | 2 | 0 | 22.24585333 | 114.18608000 | <a href="https://www.inaturalist.org/observations/50859982">https://www.inaturalist.org/observations/50859982</a> |
| 1516 | <i>Spilopelia chinensis</i> | Eastern Spotted Dove | 2021/5/2   | 1 | 0 | 22.24603269 | 114.18633430 | <a href="https://www.inaturalist.org/observations/76458422">https://www.inaturalist.org/observations/76458422</a> |
| 1517 | <i>Spilopelia chinensis</i> | Eastern Spotted Dove | 2021/5/2   | 2 | 0 | 22.24612500 | 114.18635500 | <a href="https://www.inaturalist.org/observations/76868685">https://www.inaturalist.org/observations/76868685</a> |

|      |                             |                      |            |   |   |             |              |                                                                                                                     |
|------|-----------------------------|----------------------|------------|---|---|-------------|--------------|---------------------------------------------------------------------------------------------------------------------|
| 1518 | <i>Spilopelia chinensis</i> | Eastern Spotted Dove | 2020/10/20 | 1 | 0 | 22.24667667 | 113.86154670 | <a href="https://www.inaturalist.org/observations/63103832">https://www.inaturalist.org/observations/63103832</a>   |
| 1519 | <i>Spilopelia chinensis</i> | Eastern Spotted Dove | 2018/4/11  | 1 | 0 | 22.24680633 | 114.17493430 | <a href="https://www.inaturalist.org/observations/10771692">https://www.inaturalist.org/observations/10771692</a>   |
| 1520 | <i>Spilopelia chinensis</i> | Eastern Spotted Dove | 2021/4/25  | 1 | 0 | 22.24718225 | 114.15417380 | <a href="https://www.inaturalist.org/observations/75160597">https://www.inaturalist.org/observations/75160597</a>   |
| 1521 | <i>Spilopelia chinensis</i> | Eastern Spotted Dove | 2020/12/14 | 1 | 0 | 22.24722833 | 114.16136950 | <a href="https://www.inaturalist.org/observations/66558004">https://www.inaturalist.org/observations/66558004</a>   |
| 1522 | <i>Spilopelia chinensis</i> | Eastern Spotted Dove | 2018/4/1   | 3 | 0 | 22.24731333 | 114.15878330 | <a href="https://www.inaturalist.org/observations/10540559">https://www.inaturalist.org/observations/10540559</a>   |
| 1523 | <i>Spilopelia chinensis</i> | Eastern Spotted Dove | 2019/11/12 | 2 | 0 | 22.24747239 | 114.15259340 | <a href="https://www.inaturalist.org/observations/35603188">https://www.inaturalist.org/observations/35603188</a>   |
| 1524 | <i>Spilopelia chinensis</i> | Eastern Spotted Dove | 2020/10/20 | 1 | 0 | 22.24787889 | 113.86467860 | <a href="https://www.inaturalist.org/observations/63105596">https://www.inaturalist.org/observations/63105596</a>   |
| 1525 | <i>Spilopelia chinensis</i> | Eastern Spotted Dove | 2018/1/10  | 4 | 0 | 22.24810833 | 114.15414440 | <a href="https://www.inaturalist.org/observations/16276737">https://www.inaturalist.org/observations/16276737</a>   |
| 1526 | <i>Spilopelia chinensis</i> | Eastern Spotted Dove | 2019/4/18  | 2 | 0 | 22.24830500 | 114.15683050 | <a href="https://www.inaturalist.org/observations/22783816">https://www.inaturalist.org/observations/22783816</a>   |
| 1527 | <i>Spilopelia chinensis</i> | Eastern Spotted Dove | 2019/8/26  | 3 | 0 | 22.24830680 | 114.15243980 | <a href="https://www.inaturalist.org/observations/31597819">https://www.inaturalist.org/observations/31597819</a>   |
| 1528 | <i>Spilopelia chinensis</i> | Eastern Spotted Dove | 2021/2/12  | 1 | 0 | 22.24853000 | 114.15679830 | <a href="https://www.inaturalist.org/observations/97978506">https://www.inaturalist.org/observations/97978506</a>   |
| 1529 | <i>Spilopelia chinensis</i> | Eastern Spotted Dove | 2020/12/14 | 2 | 0 | 22.24928672 | 114.13602310 | <a href="https://www.inaturalist.org/observations/66563574">https://www.inaturalist.org/observations/66563574</a>   |
| 1530 | <i>Spilopelia chinensis</i> | Eastern Spotted Dove | 2020/12/14 | 2 | 0 | 22.24929758 | 114.13599660 | <a href="https://www.inaturalist.org/observations/66564283">https://www.inaturalist.org/observations/66564283</a>   |
| 1531 | <i>Spilopelia chinensis</i> | Eastern Spotted Dove | 2022/2/27  | 2 | 0 | 22.24989680 | 114.15624400 | <a href="https://www.inaturalist.org/observations/107530331">https://www.inaturalist.org/observations/107530331</a> |
| 1532 | <i>Spilopelia chinensis</i> | Eastern Spotted Dove | 2019/4/10  | 1 | 0 | 22.25019500 | 114.15678330 | <a href="https://www.inaturalist.org/observations/22262412">https://www.inaturalist.org/observations/22262412</a>   |
| 1533 | <i>Spilopelia chinensis</i> | Eastern Spotted Dove | 2019/2/7   | 3 | 0 | 22.25073300 | 114.13712160 | <a href="https://www.inaturalist.org/observations/20173544">https://www.inaturalist.org/observations/20173544</a>   |
| 1534 | <i>Spilopelia chinensis</i> | Eastern Spotted Dove | 2022/1/23  | 2 | 0 | 22.25151094 | 114.18414840 | <a href="https://www.inaturalist.org/observations/105487060">https://www.inaturalist.org/observations/105487060</a> |
| 1535 | <i>Spilopelia chinensis</i> | Eastern Spotted Dove | 2020/9/10  | 2 | 0 | 22.25231950 | 113.86611950 | <a href="https://www.inaturalist.org/observations/115532166">https://www.inaturalist.org/observations/115532166</a> |
| 1536 | <i>Spilopelia chinensis</i> | Eastern Spotted Dove | 2021/5/7   | 1 | 0 | 22.25274460 | 114.13430970 | <a href="https://www.inaturalist.org/observations/77687463">https://www.inaturalist.org/observations/77687463</a>   |
| 1537 | <i>Spilopelia chinensis</i> | Eastern Spotted Dove | 2019/11/4  | 1 | 0 | 22.25292434 | 114.15852470 | <a href="https://www.inaturalist.org/observations/35265636">https://www.inaturalist.org/observations/35265636</a>   |
| 1538 | <i>Spilopelia chinensis</i> | Eastern Spotted Dove | 2022/8/16  | 3 | 0 | 22.25323548 | 114.15842420 | <a href="https://www.inaturalist.org/observations/131157219">https://www.inaturalist.org/observations/131157219</a> |
| 1539 | <i>Spilopelia chinensis</i> | Eastern Spotted Dove | 2013/6/30  | 3 | 0 | 22.25397172 | 113.91109000 | <a href="https://www.inaturalist.org/observations/17165294">https://www.inaturalist.org/observations/17165294</a>   |
| 1540 | <i>Spilopelia chinensis</i> | Eastern Spotted Dove | 2018/11/9  | 3 | 0 | 22.25438604 | 114.23916770 | <a href="https://www.inaturalist.org/observations/18410532">https://www.inaturalist.org/observations/18410532</a>   |

|      |                             |                      |            |   |   |             |              |                                                                                                                     |
|------|-----------------------------|----------------------|------------|---|---|-------------|--------------|---------------------------------------------------------------------------------------------------------------------|
| 1541 | <i>Spilopelia chinensis</i> | Eastern Spotted Dove | 2021/6/28  | 1 | 0 | 22.25455500 | 113.86095330 | <a href="https://www.inaturalist.org/observations/84839871">https://www.inaturalist.org/observations/84839871</a>   |
| 1542 | <i>Spilopelia chinensis</i> | Eastern Spotted Dove | 2012/5/13  | 1 | 0 | 22.25505524 | 113.90473480 | <a href="https://www.inaturalist.org/observations/108242945">https://www.inaturalist.org/observations/108242945</a> |
| 1543 | <i>Spilopelia chinensis</i> | Eastern Spotted Dove | 2019/8/22  | 1 | 0 | 22.25513333 | 113.90651670 | <a href="https://www.inaturalist.org/observations/132517942">https://www.inaturalist.org/observations/132517942</a> |
| 1544 | <i>Spilopelia chinensis</i> | Eastern Spotted Dove | 2018/5/26  | 4 | 0 | 22.25549370 | 114.13854590 | <a href="https://www.inaturalist.org/observations/12823929">https://www.inaturalist.org/observations/12823929</a>   |
| 1545 | <i>Spilopelia chinensis</i> | Eastern Spotted Dove | 2021/9/8   | 1 | 0 | 22.25564300 | 113.86682600 | <a href="https://www.inaturalist.org/observations/94099624">https://www.inaturalist.org/observations/94099624</a>   |
| 1546 | <i>Spilopelia chinensis</i> | Eastern Spotted Dove | 2018/3/30  | 1 | 0 | 22.25566795 | 114.16108360 | <a href="https://www.inaturalist.org/observations/10506663">https://www.inaturalist.org/observations/10506663</a>   |
| 1547 | <i>Spilopelia chinensis</i> | Eastern Spotted Dove | 2018/12/31 | 5 | 0 | 22.25580000 | 113.90777000 | <a href="https://www.inaturalist.org/observations/19393529">https://www.inaturalist.org/observations/19393529</a>   |
| 1548 | <i>Spilopelia chinensis</i> | Eastern Spotted Dove | 2018/3/29  | 2 | 0 | 22.25604527 | 114.16099780 | <a href="https://www.inaturalist.org/observations/10506564">https://www.inaturalist.org/observations/10506564</a>   |
| 1549 | <i>Spilopelia chinensis</i> | Eastern Spotted Dove | 2021/5/1   | 1 | 0 | 22.25670833 | 114.13160000 | <a href="https://www.inaturalist.org/observations/76020831">https://www.inaturalist.org/observations/76020831</a>   |
| 1550 | <i>Spilopelia chinensis</i> | Eastern Spotted Dove | 2021/5/2   | 1 | 0 | 22.25673872 | 114.16443580 | <a href="https://www.inaturalist.org/observations/77238741">https://www.inaturalist.org/observations/77238741</a>   |
| 1551 | <i>Spilopelia chinensis</i> | Eastern Spotted Dove | 2022/3/31  | 1 | 0 | 22.25685009 | 114.21064250 | <a href="https://www.inaturalist.org/observations/110003433">https://www.inaturalist.org/observations/110003433</a> |
| 1552 | <i>Spilopelia chinensis</i> | Eastern Spotted Dove | 2022/3/31  | 2 | 0 | 22.25685009 | 114.21064250 | <a href="https://www.inaturalist.org/observations/110003604">https://www.inaturalist.org/observations/110003604</a> |
| 1553 | <i>Spilopelia chinensis</i> | Eastern Spotted Dove | 2019/8/10  | 4 | 0 | 22.25685901 | 113.85802820 | <a href="https://www.inaturalist.org/observations/30573163">https://www.inaturalist.org/observations/30573163</a>   |
| 1554 | <i>Spilopelia chinensis</i> | Eastern Spotted Dove | 2022/4/29  | 2 | 0 | 22.25686929 | 114.13188730 | <a href="https://www.inaturalist.org/observations/113348627">https://www.inaturalist.org/observations/113348627</a> |
| 1555 | <i>Spilopelia chinensis</i> | Eastern Spotted Dove | 2018/10/11 | 4 | 0 | 22.25789269 | 114.13921660 | <a href="https://www.inaturalist.org/observations/17451634">https://www.inaturalist.org/observations/17451634</a>   |
| 1556 | <i>Spilopelia chinensis</i> | Eastern Spotted Dove | 2020/4/2   | 1 | 0 | 22.25795474 | 114.13898260 | <a href="https://www.inaturalist.org/observations/41221168">https://www.inaturalist.org/observations/41221168</a>   |
| 1557 | <i>Spilopelia chinensis</i> | Eastern Spotted Dove | 2020/5/2   | 1 | 0 | 22.25801804 | 114.13913010 | <a href="https://www.inaturalist.org/observations/44572676">https://www.inaturalist.org/observations/44572676</a>   |
| 1558 | <i>Spilopelia chinensis</i> | Eastern Spotted Dove | 2018/5/6   | 4 | 0 | 22.25827790 | 114.13854460 | <a href="https://www.inaturalist.org/observations/12179456">https://www.inaturalist.org/observations/12179456</a>   |
| 1559 | <i>Spilopelia chinensis</i> | Eastern Spotted Dove | 2022/6/24  | 2 | 0 | 22.25902167 | 114.12962220 | <a href="https://www.inaturalist.org/observations/123207412">https://www.inaturalist.org/observations/123207412</a> |
| 1560 | <i>Spilopelia chinensis</i> | Eastern Spotted Dove | 2019/5/25  | 3 | 0 | 22.25908638 | 114.13981710 | <a href="https://www.inaturalist.org/observations/25733440">https://www.inaturalist.org/observations/25733440</a>   |
| 1561 | <i>Spilopelia chinensis</i> | Eastern Spotted Dove | 2020/4/25  | 2 | 0 | 22.26020467 | 114.13685900 | <a href="https://www.inaturalist.org/observations/43292184">https://www.inaturalist.org/observations/43292184</a>   |
| 1562 | <i>Spilopelia chinensis</i> | Eastern Spotted Dove | 2021/5/1   | 2 | 0 | 22.26072976 | 114.16675390 | <a href="https://www.inaturalist.org/observations/76071924">https://www.inaturalist.org/observations/76071924</a>   |
| 1563 | <i>Spilopelia chinensis</i> | Eastern Spotted Dove | 2018/12/26 | 3 | 0 | 22.26082866 | 114.14047560 | <a href="https://www.inaturalist.org/observations/19228465">https://www.inaturalist.org/observations/19228465</a>   |



|      |                             |                      |            |   |   |             |              |                                                                                                                     |
|------|-----------------------------|----------------------|------------|---|---|-------------|--------------|---------------------------------------------------------------------------------------------------------------------|
| 1564 | <i>Spilopelia chinensis</i> | Eastern Spotted Dove | 2016/12/5  | 2 | 0 | 22.26102743 | 114.25068860 | <a href="https://www.inaturalist.org/observations/9006960">https://www.inaturalist.org/observations/9006960</a>     |
| 1565 | <i>Spilopelia chinensis</i> | Eastern Spotted Dove | 2021/5/1   | 1 | 0 | 22.26126667 | 114.13179720 | <a href="https://www.inaturalist.org/observations/76022823">https://www.inaturalist.org/observations/76022823</a>   |
| 1566 | <i>Spilopelia chinensis</i> | Eastern Spotted Dove | 2022/2/13  | 2 | 0 | 22.26154376 | 114.26821190 | <a href="https://www.inaturalist.org/observations/106663350">https://www.inaturalist.org/observations/106663350</a> |
| 1567 | <i>Spilopelia chinensis</i> | Eastern Spotted Dove | 2020/4/26  | 1 | 0 | 22.26188000 | 114.24975500 | <a href="https://www.inaturalist.org/observations/43532674">https://www.inaturalist.org/observations/43532674</a>   |
| 1568 | <i>Spilopelia chinensis</i> | Eastern Spotted Dove | 2019/4/27  | 2 | 0 | 22.26203649 | 114.25251480 | <a href="https://www.inaturalist.org/observations/23325971">https://www.inaturalist.org/observations/23325971</a>   |
| 1569 | <i>Spilopelia chinensis</i> | Eastern Spotted Dove | 2019/11/4  | 3 | 0 | 22.26258741 | 114.25397040 | <a href="https://www.inaturalist.org/observations/35280650">https://www.inaturalist.org/observations/35280650</a>   |
| 1570 | <i>Spilopelia chinensis</i> | Eastern Spotted Dove | 2018/11/8  | 3 | 0 | 22.26285769 | 114.24842280 | <a href="https://www.inaturalist.org/observations/18222329">https://www.inaturalist.org/observations/18222329</a>   |
| 1571 | <i>Spilopelia chinensis</i> | Eastern Spotted Dove | 2018/11/19 | 5 | 0 | 22.26286258 | 114.23898910 | <a href="https://www.inaturalist.org/observations/18491303">https://www.inaturalist.org/observations/18491303</a>   |
| 1572 | <i>Spilopelia chinensis</i> | Eastern Spotted Dove | 2018/11/8  | 4 | 0 | 22.26298249 | 114.24973390 | <a href="https://www.inaturalist.org/observations/18245306">https://www.inaturalist.org/observations/18245306</a>   |
| 1573 | <i>Spilopelia chinensis</i> | Eastern Spotted Dove | 2021/10/11 | 1 | 0 | 22.26298588 | 114.24904310 | <a href="https://www.inaturalist.org/observations/97868515">https://www.inaturalist.org/observations/97868515</a>   |
| 1574 | <i>Spilopelia chinensis</i> | Eastern Spotted Dove | 2020/11/29 | 1 | 0 | 22.26304023 | 114.25380200 | <a href="https://www.inaturalist.org/observations/65816375">https://www.inaturalist.org/observations/65816375</a>   |
| 1575 | <i>Spilopelia chinensis</i> | Eastern Spotted Dove | 2020/11/16 | 2 | 0 | 22.26312907 | 114.24911690 | <a href="https://www.inaturalist.org/observations/64999587">https://www.inaturalist.org/observations/64999587</a>   |
| 1576 | <i>Spilopelia chinensis</i> | Eastern Spotted Dove | 2018/11/8  | 4 | 0 | 22.26322653 | 114.24971490 | <a href="https://www.inaturalist.org/observations/18245913">https://www.inaturalist.org/observations/18245913</a>   |
| 1577 | <i>Spilopelia chinensis</i> | Eastern Spotted Dove | 2018/11/8  | 4 | 0 | 22.26324765 | 114.24966760 | <a href="https://www.inaturalist.org/observations/18245301">https://www.inaturalist.org/observations/18245301</a>   |
| 1578 | <i>Spilopelia chinensis</i> | Eastern Spotted Dove | 2020/11/8  | 1 | 0 | 22.26324780 | 114.15879830 | <a href="https://www.inaturalist.org/observations/96349505">https://www.inaturalist.org/observations/96349505</a>   |
| 1579 | <i>Spilopelia chinensis</i> | Eastern Spotted Dove | 2020/11/4  | 2 | 0 | 22.26327374 | 114.24921100 | <a href="https://www.inaturalist.org/observations/64136848">https://www.inaturalist.org/observations/64136848</a>   |
| 1580 | <i>Spilopelia chinensis</i> | Eastern Spotted Dove | 2020/12/28 | 1 | 0 | 22.26329167 | 114.18747000 | <a href="https://www.inaturalist.org/observations/67238048">https://www.inaturalist.org/observations/67238048</a>   |
| 1581 | <i>Spilopelia chinensis</i> | Eastern Spotted Dove | 2019/11/9  | 3 | 0 | 22.26330313 | 114.25368680 | <a href="https://www.inaturalist.org/observations/35484221">https://www.inaturalist.org/observations/35484221</a>   |
| 1582 | <i>Spilopelia chinensis</i> | Eastern Spotted Dove | 2021/3/25  | 1 | 0 | 22.26334724 | 114.23613860 | <a href="https://www.inaturalist.org/observations/72000341">https://www.inaturalist.org/observations/72000341</a>   |
| 1583 | <i>Spilopelia chinensis</i> | Eastern Spotted Dove | 2018/11/8  | 4 | 0 | 22.26335846 | 114.24941610 | <a href="https://www.inaturalist.org/observations/18241495">https://www.inaturalist.org/observations/18241495</a>   |
| 1584 | <i>Spilopelia chinensis</i> | Eastern Spotted Dove | 2021/9/30  | 1 | 0 | 22.26336567 | 113.99293560 | <a href="https://www.inaturalist.org/observations/96703867">https://www.inaturalist.org/observations/96703867</a>   |
| 1585 | <i>Spilopelia chinensis</i> | Eastern Spotted Dove | 2019/11/9  | 3 | 0 | 22.26338773 | 114.25362780 | <a href="https://www.inaturalist.org/observations/35484223">https://www.inaturalist.org/observations/35484223</a>   |
| 1586 | <i>Spilopelia chinensis</i> | Eastern Spotted Dove | 2022/6/3   | 2 | 0 | 22.26350891 | 114.24838100 | <a href="https://www.inaturalist.org/observations/119984867">https://www.inaturalist.org/observations/119984867</a> |

|      |                             |                      |            |   |   |             |              |                                                                                                                     |
|------|-----------------------------|----------------------|------------|---|---|-------------|--------------|---------------------------------------------------------------------------------------------------------------------|
| 1587 | <i>Spilopelia chinensis</i> | Eastern Spotted Dove | 2019/3/21  | 2 | 0 | 22.26355430 | 114.13695330 | <a href="https://www.inaturalist.org/observations/21447816">https://www.inaturalist.org/observations/21447816</a>   |
| 1588 | <i>Spilopelia chinensis</i> | Eastern Spotted Dove | 2019/11/9  | 5 | 0 | 22.26355511 | 114.25347360 | <a href="https://www.inaturalist.org/observations/35484479">https://www.inaturalist.org/observations/35484479</a>   |
| 1589 | <i>Spilopelia chinensis</i> | Eastern Spotted Dove | 2019/11/9  | 6 | 0 | 22.26364944 | 114.25345620 | <a href="https://www.inaturalist.org/observations/35484486">https://www.inaturalist.org/observations/35484486</a>   |
| 1590 | <i>Spilopelia chinensis</i> | Eastern Spotted Dove | 2020/11/26 | 1 | 0 | 22.26365442 | 114.24910640 | <a href="https://www.inaturalist.org/observations/65628154">https://www.inaturalist.org/observations/65628154</a>   |
| 1591 | <i>Spilopelia chinensis</i> | Eastern Spotted Dove | 2019/3/21  | 2 | 0 | 22.26367490 | 114.13688730 | <a href="https://www.inaturalist.org/observations/21437037">https://www.inaturalist.org/observations/21437037</a>   |
| 1592 | <i>Spilopelia chinensis</i> | Eastern Spotted Dove | 2021/11/12 | 0 | 0 | 22.26372249 | 114.25267560 | <a href="https://www.inaturalist.org/observations/100913112">https://www.inaturalist.org/observations/100913112</a> |
| 1593 | <i>Spilopelia chinensis</i> | Eastern Spotted Dove | 2019/11/9  | 4 | 0 | 22.26373462 | 114.25343470 | <a href="https://www.inaturalist.org/observations/35484467">https://www.inaturalist.org/observations/35484467</a>   |
| 1594 | <i>Spilopelia chinensis</i> | Eastern Spotted Dove | 2022/4/30  | 2 | 0 | 22.26375375 | 114.24819980 | <a href="https://www.inaturalist.org/observations/113711930">https://www.inaturalist.org/observations/113711930</a> |
| 1595 | <i>Spilopelia chinensis</i> | Eastern Spotted Dove | 2020/11/29 | 1 | 0 | 22.26386812 | 114.25198360 | <a href="https://www.inaturalist.org/observations/65816102">https://www.inaturalist.org/observations/65816102</a>   |
| 1596 | <i>Spilopelia chinensis</i> | Eastern Spotted Dove | 2020/11/29 | 1 | 0 | 22.26388798 | 114.25197890 | <a href="https://www.inaturalist.org/observations/65816101">https://www.inaturalist.org/observations/65816101</a>   |
| 1597 | <i>Spilopelia chinensis</i> | Eastern Spotted Dove | 2020/11/22 | 2 | 0 | 22.26391729 | 114.25334800 | <a href="https://www.inaturalist.org/observations/65397105">https://www.inaturalist.org/observations/65397105</a>   |
| 1598 | <i>Spilopelia chinensis</i> | Eastern Spotted Dove | 2020/5/6   | 1 | 0 | 22.26394453 | 114.13773000 | <a href="https://www.inaturalist.org/observations/45065463">https://www.inaturalist.org/observations/45065463</a>   |
| 1599 | <i>Spilopelia chinensis</i> | Eastern Spotted Dove | 2019/11/9  | 5 | 0 | 22.26396155 | 114.25252780 | <a href="https://www.inaturalist.org/observations/35474864">https://www.inaturalist.org/observations/35474864</a>   |
| 1600 | <i>Spilopelia chinensis</i> | Eastern Spotted Dove | 2020/11/18 | 1 | 0 | 22.26400250 | 114.24970850 | <a href="https://www.inaturalist.org/observations/65114444">https://www.inaturalist.org/observations/65114444</a>   |
| 1601 | <i>Spilopelia chinensis</i> | Eastern Spotted Dove | 2021/11/12 | 1 | 0 | 22.26400300 | 114.24987600 | <a href="https://www.inaturalist.org/observations/100889056">https://www.inaturalist.org/observations/100889056</a> |
| 1602 | <i>Spilopelia chinensis</i> | Eastern Spotted Dove | 2016/10/10 | 4 | 0 | 22.26400800 | 114.14278900 | <a href="http://www.inaturalist.org/observations/4312079">http://www.inaturalist.org/observations/4312079</a>       |
| 1603 | <i>Spilopelia chinensis</i> | Eastern Spotted Dove | 2020/11/13 | 1 | 0 | 22.26403265 | 114.24909700 | <a href="https://www.inaturalist.org/observations/64774620">https://www.inaturalist.org/observations/64774620</a>   |
| 1604 | <i>Spilopelia chinensis</i> | Eastern Spotted Dove | 2021/11/12 | 1 | 0 | 22.26404464 | 114.25328660 | <a href="https://www.inaturalist.org/observations/100919014">https://www.inaturalist.org/observations/100919014</a> |
| 1605 | <i>Spilopelia chinensis</i> | Eastern Spotted Dove | 2021/11/12 | 1 | 0 | 22.26404464 | 114.25328660 | <a href="https://www.inaturalist.org/observations/100919015">https://www.inaturalist.org/observations/100919015</a> |
| 1606 | <i>Spilopelia chinensis</i> | Eastern Spotted Dove | 2018/11/7  | 5 | 0 | 22.26404507 | 114.24989490 | <a href="https://www.inaturalist.org/observations/18189953">https://www.inaturalist.org/observations/18189953</a>   |
| 1607 | <i>Spilopelia chinensis</i> | Eastern Spotted Dove | 2019/11/8  | 4 | 0 | 22.26405531 | 114.24951080 | <a href="https://www.inaturalist.org/observations/35441735">https://www.inaturalist.org/observations/35441735</a>   |
| 1608 | <i>Spilopelia chinensis</i> | Eastern Spotted Dove | 2018/11/7  | 2 | 0 | 22.26406908 | 114.24963570 | <a href="https://www.inaturalist.org/observations/18185115">https://www.inaturalist.org/observations/18185115</a>   |
| 1609 | <i>Spilopelia chinensis</i> | Eastern Spotted Dove | 2019/11/4  | 2 | 0 | 22.26407160 | 114.24937280 | <a href="https://www.inaturalist.org/observations/35267412">https://www.inaturalist.org/observations/35267412</a>   |

|      |                             |                      |            |   |   |             |              |                                                                                                                     |
|------|-----------------------------|----------------------|------------|---|---|-------------|--------------|---------------------------------------------------------------------------------------------------------------------|
| 1610 | <i>Spilopelia chinensis</i> | Eastern Spotted Dove | 2021/11/9  | 1 | 0 | 22.26408713 | 114.24953370 | <a href="https://www.inaturalist.org/observations/100683170">https://www.inaturalist.org/observations/100683170</a> |
| 1611 | <i>Spilopelia chinensis</i> | Eastern Spotted Dove | 2020/11/18 | 1 | 0 | 22.26409300 | 114.24892900 | <a href="https://www.inaturalist.org/observations/65136205">https://www.inaturalist.org/observations/65136205</a>   |
| 1612 | <i>Spilopelia chinensis</i> | Eastern Spotted Dove | 2021/11/11 | 1 | 0 | 22.26413098 | 114.24918610 | <a href="https://www.inaturalist.org/observations/100808155">https://www.inaturalist.org/observations/100808155</a> |
| 1613 | <i>Spilopelia chinensis</i> | Eastern Spotted Dove | 2021/11/9  | 1 | 0 | 22.26413638 | 114.24953770 | <a href="https://www.inaturalist.org/observations/100676315">https://www.inaturalist.org/observations/100676315</a> |
| 1614 | <i>Spilopelia chinensis</i> | Eastern Spotted Dove | 2021/11/11 | 2 | 0 | 22.26417189 | 114.24941060 | <a href="https://www.inaturalist.org/observations/100808338">https://www.inaturalist.org/observations/100808338</a> |
| 1615 | <i>Spilopelia chinensis</i> | Eastern Spotted Dove | 2021/11/9  | 1 | 0 | 22.26417732 | 114.24964090 | <a href="https://www.inaturalist.org/observations/100676326">https://www.inaturalist.org/observations/100676326</a> |
| 1616 | <i>Spilopelia chinensis</i> | Eastern Spotted Dove | 2021/11/9  | 1 | 0 | 22.26417732 | 114.24964090 | <a href="https://www.inaturalist.org/observations/100676328">https://www.inaturalist.org/observations/100676328</a> |
| 1617 | <i>Spilopelia chinensis</i> | Eastern Spotted Dove | 2018/4/30  | 4 | 0 | 22.26417991 | 114.25274850 | <a href="https://www.inaturalist.org/observations/11870979">https://www.inaturalist.org/observations/11870979</a>   |
| 1618 | <i>Spilopelia chinensis</i> | Eastern Spotted Dove | 2019/11/5  | 4 | 0 | 22.26418170 | 114.24962870 | <a href="https://www.inaturalist.org/observations/35306363">https://www.inaturalist.org/observations/35306363</a>   |
| 1619 | <i>Spilopelia chinensis</i> | Eastern Spotted Dove | 2021/11/12 | 1 | 0 | 22.26418612 | 114.24978900 | <a href="https://www.inaturalist.org/observations/100919001">https://www.inaturalist.org/observations/100919001</a> |
| 1620 | <i>Spilopelia chinensis</i> | Eastern Spotted Dove | 2019/11/8  | 6 | 0 | 22.26422956 | 114.24930940 | <a href="https://www.inaturalist.org/observations/35447852">https://www.inaturalist.org/observations/35447852</a>   |
| 1621 | <i>Spilopelia chinensis</i> | Eastern Spotted Dove | 2019/11/8  | 7 | 0 | 22.26422956 | 114.24930940 | <a href="https://www.inaturalist.org/observations/35447853">https://www.inaturalist.org/observations/35447853</a>   |
| 1622 | <i>Spilopelia chinensis</i> | Eastern Spotted Dove | 2021/11/9  | 1 | 0 | 22.26423565 | 114.24959800 | <a href="https://www.inaturalist.org/observations/100676316">https://www.inaturalist.org/observations/100676316</a> |
| 1623 | <i>Spilopelia chinensis</i> | Eastern Spotted Dove | 2021/11/9  | 1 | 0 | 22.26423565 | 114.24959800 | <a href="https://www.inaturalist.org/observations/100676320">https://www.inaturalist.org/observations/100676320</a> |
| 1624 | <i>Spilopelia chinensis</i> | Eastern Spotted Dove | 2021/11/12 | 1 | 0 | 22.26424398 | 114.24933110 | <a href="https://www.inaturalist.org/observations/100918962">https://www.inaturalist.org/observations/100918962</a> |
| 1625 | <i>Spilopelia chinensis</i> | Eastern Spotted Dove | 2020/11/22 | 3 | 0 | 22.26426203 | 114.25244570 | <a href="https://www.inaturalist.org/observations/65397037">https://www.inaturalist.org/observations/65397037</a>   |
| 1626 | <i>Spilopelia chinensis</i> | Eastern Spotted Dove | 2021/11/11 | 1 | 0 | 22.26426995 | 114.24924560 | <a href="https://www.inaturalist.org/observations/100807575">https://www.inaturalist.org/observations/100807575</a> |
| 1627 | <i>Spilopelia chinensis</i> | Eastern Spotted Dove | 2021/11/11 | 1 | 0 | 22.26427477 | 114.24922360 | <a href="https://www.inaturalist.org/observations/100807731">https://www.inaturalist.org/observations/100807731</a> |
| 1628 | <i>Spilopelia chinensis</i> | Eastern Spotted Dove | 2020/11/29 | 1 | 0 | 22.26427622 | 114.25334800 | <a href="https://www.inaturalist.org/observations/65816356">https://www.inaturalist.org/observations/65816356</a>   |
| 1629 | <i>Spilopelia chinensis</i> | Eastern Spotted Dove | 2021/11/11 | 1 | 0 | 22.26428344 | 114.24921820 | <a href="https://www.inaturalist.org/observations/100807608">https://www.inaturalist.org/observations/100807608</a> |
| 1630 | <i>Spilopelia chinensis</i> | Eastern Spotted Dove | 2019/11/5  | 3 | 0 | 22.26429060 | 114.24947600 | <a href="https://www.inaturalist.org/observations/35312916">https://www.inaturalist.org/observations/35312916</a>   |
| 1631 | <i>Spilopelia chinensis</i> | Eastern Spotted Dove | 2021/11/11 | 1 | 0 | 22.26429896 | 114.24919180 | <a href="https://www.inaturalist.org/observations/100807752">https://www.inaturalist.org/observations/100807752</a> |
| 1632 | <i>Spilopelia chinensis</i> | Eastern Spotted Dove | 2021/11/9  | 2 | 0 | 22.26430143 | 114.24971740 | <a href="https://www.inaturalist.org/observations/100676339">https://www.inaturalist.org/observations/100676339</a> |

|      |                             |                      |            |   |   |             |              |                                                                                                                     |
|------|-----------------------------|----------------------|------------|---|---|-------------|--------------|---------------------------------------------------------------------------------------------------------------------|
| 1633 | <i>Spilopelia chinensis</i> | Eastern Spotted Dove | 2021/11/9  | 1 | 0 | 22.26430143 | 114.24971740 | <a href="https://www.inaturalist.org/observations/100676343">https://www.inaturalist.org/observations/100676343</a> |
| 1634 | <i>Spilopelia chinensis</i> | Eastern Spotted Dove | 2021/11/11 | 2 | 0 | 22.26430741 | 114.24922800 | <a href="https://www.inaturalist.org/observations/100807519">https://www.inaturalist.org/observations/100807519</a> |
| 1635 | <i>Spilopelia chinensis</i> | Eastern Spotted Dove | 2021/11/11 | 2 | 0 | 22.26431074 | 114.24931020 | <a href="https://www.inaturalist.org/observations/100808320">https://www.inaturalist.org/observations/100808320</a> |
| 1636 | <i>Spilopelia chinensis</i> | Eastern Spotted Dove | 2021/11/9  | 2 | 0 | 22.26431386 | 114.24980320 | <a href="https://www.inaturalist.org/observations/100676303">https://www.inaturalist.org/observations/100676303</a> |
| 1637 | <i>Spilopelia chinensis</i> | Eastern Spotted Dove | 2021/11/9  | 1 | 0 | 22.26431386 | 114.24980320 | <a href="https://www.inaturalist.org/observations/100676304">https://www.inaturalist.org/observations/100676304</a> |
| 1638 | <i>Spilopelia chinensis</i> | Eastern Spotted Dove | 2021/11/11 | 1 | 0 | 22.26431870 | 114.24937250 | <a href="https://www.inaturalist.org/observations/100807521">https://www.inaturalist.org/observations/100807521</a> |
| 1639 | <i>Spilopelia chinensis</i> | Eastern Spotted Dove | 2021/11/11 | 2 | 0 | 22.26431966 | 114.24926560 | <a href="https://www.inaturalist.org/observations/100807532">https://www.inaturalist.org/observations/100807532</a> |
| 1640 | <i>Spilopelia chinensis</i> | Eastern Spotted Dove | 2018/4/28  | 6 | 0 | 22.26436889 | 113.98956300 | <a href="https://www.inaturalist.org/observations/11592974">https://www.inaturalist.org/observations/11592974</a>   |
| 1641 | <i>Spilopelia chinensis</i> | Eastern Spotted Dove | 2020/11/26 | 1 | 0 | 22.26442463 | 114.24929730 | <a href="https://www.inaturalist.org/observations/65630791">https://www.inaturalist.org/observations/65630791</a>   |
| 1642 | <i>Spilopelia chinensis</i> | Eastern Spotted Dove | 2019/11/7  | 4 | 0 | 22.26443190 | 114.25155750 | <a href="https://www.inaturalist.org/observations/35403211">https://www.inaturalist.org/observations/35403211</a>   |
| 1643 | <i>Spilopelia chinensis</i> | Eastern Spotted Dove | 2020/12/26 | 1 | 0 | 22.26444710 | 73.04697050  | <a href="https://www.inaturalist.org/observations/67847754">https://www.inaturalist.org/observations/67847754</a>   |
| 1644 | <i>Spilopelia chinensis</i> | Eastern Spotted Dove | 2021/11/4  | 1 | 0 | 22.26444713 | 114.24912420 | <a href="https://www.inaturalist.org/observations/100211165">https://www.inaturalist.org/observations/100211165</a> |
| 1645 | <i>Spilopelia chinensis</i> | Eastern Spotted Dove | 2019/11/4  | 3 | 0 | 22.26444736 | 114.25004550 | <a href="https://www.inaturalist.org/observations/35266855">https://www.inaturalist.org/observations/35266855</a>   |
| 1646 | <i>Spilopelia chinensis</i> | Eastern Spotted Dove | 2020/12/14 | 2 | 0 | 22.26444802 | 114.24918580 | <a href="https://www.inaturalist.org/observations/66560955">https://www.inaturalist.org/observations/66560955</a>   |
| 1647 | <i>Spilopelia chinensis</i> | Eastern Spotted Dove | 2019/11/8  | 4 | 0 | 22.26446270 | 114.24922510 | <a href="https://www.inaturalist.org/observations/35438265">https://www.inaturalist.org/observations/35438265</a>   |
| 1648 | <i>Spilopelia chinensis</i> | Eastern Spotted Dove | 2021/11/2  | 1 | 0 | 22.26446651 | 114.24967230 | <a href="https://www.inaturalist.org/observations/100055801">https://www.inaturalist.org/observations/100055801</a> |
| 1649 | <i>Spilopelia chinensis</i> | Eastern Spotted Dove | 2021/11/23 | 1 | 0 | 22.26448534 | 114.24825970 | <a href="https://www.inaturalist.org/observations/101746323">https://www.inaturalist.org/observations/101746323</a> |
| 1650 | <i>Spilopelia chinensis</i> | Eastern Spotted Dove | 2021/11/11 | 1 | 0 | 22.26449333 | 114.24924670 | <a href="https://www.inaturalist.org/observations/100807711">https://www.inaturalist.org/observations/100807711</a> |
| 1651 | <i>Spilopelia chinensis</i> | Eastern Spotted Dove | 2019/11/4  | 2 | 0 | 22.26450217 | 114.25009480 | <a href="https://www.inaturalist.org/observations/35266908">https://www.inaturalist.org/observations/35266908</a>   |
| 1652 | <i>Spilopelia chinensis</i> | Eastern Spotted Dove | 2021/11/8  | 2 | 0 | 22.26451359 | 114.24934110 | <a href="https://www.inaturalist.org/observations/100544427">https://www.inaturalist.org/observations/100544427</a> |
| 1653 | <i>Spilopelia chinensis</i> | Eastern Spotted Dove | 2018/11/8  | 3 | 0 | 22.26452573 | 114.25246640 | <a href="https://www.inaturalist.org/observations/18232517">https://www.inaturalist.org/observations/18232517</a>   |
| 1654 | <i>Spilopelia chinensis</i> | Eastern Spotted Dove | 2020/11/7  | 1 | 0 | 22.26452672 | 114.25214220 | <a href="https://www.inaturalist.org/observations/64345155">https://www.inaturalist.org/observations/64345155</a>   |
| 1655 | <i>Spilopelia chinensis</i> | Eastern Spotted Dove | 2019/11/4  | 4 | 0 | 22.26453590 | 114.24980580 | <a href="https://www.inaturalist.org/observations/35266808">https://www.inaturalist.org/observations/35266808</a>   |

|      |                             |                      |            |   |   |             |              |                                                                                                                     |
|------|-----------------------------|----------------------|------------|---|---|-------------|--------------|---------------------------------------------------------------------------------------------------------------------|
| 1656 | <i>Spilopelia chinensis</i> | Eastern Spotted Dove | 2019/11/4  | 4 | 0 | 22.26454970 | 114.24977710 | <a href="https://www.inaturalist.org/observations/35266812">https://www.inaturalist.org/observations/35266812</a>   |
| 1657 | <i>Spilopelia chinensis</i> | Eastern Spotted Dove | 2019/11/4  | 2 | 0 | 22.26456591 | 114.24925290 | <a href="https://www.inaturalist.org/observations/35266875">https://www.inaturalist.org/observations/35266875</a>   |
| 1658 | <i>Spilopelia chinensis</i> | Eastern Spotted Dove | 2019/11/4  | 3 | 0 | 22.26456680 | 114.24977430 | <a href="https://www.inaturalist.org/observations/35266795">https://www.inaturalist.org/observations/35266795</a>   |
| 1659 | <i>Spilopelia chinensis</i> | Eastern Spotted Dove | 2021/10/11 | 1 | 0 | 22.26457167 | 114.24769670 | <a href="https://www.inaturalist.org/observations/97868537">https://www.inaturalist.org/observations/97868537</a>   |
| 1660 | <i>Spilopelia chinensis</i> | Eastern Spotted Dove | 2020/11/23 | 1 | 0 | 22.26459880 | 114.24913400 | <a href="https://www.inaturalist.org/observations/65458894">https://www.inaturalist.org/observations/65458894</a>   |
| 1661 | <i>Spilopelia chinensis</i> | Eastern Spotted Dove | 2019/11/7  | 4 | 0 | 22.26460733 | 114.25299020 | <a href="https://www.inaturalist.org/observations/35408719">https://www.inaturalist.org/observations/35408719</a>   |
| 1662 | <i>Spilopelia chinensis</i> | Eastern Spotted Dove | 2019/11/7  | 4 | 0 | 22.26460733 | 114.25299020 | <a href="https://www.inaturalist.org/observations/35408721">https://www.inaturalist.org/observations/35408721</a>   |
| 1663 | <i>Spilopelia chinensis</i> | Eastern Spotted Dove | 2021/11/8  | 1 | 0 | 22.26460977 | 114.24932230 | <a href="https://www.inaturalist.org/observations/100544473">https://www.inaturalist.org/observations/100544473</a> |
| 1664 | <i>Spilopelia chinensis</i> | Eastern Spotted Dove | 2019/11/8  | 4 | 0 | 22.26462334 | 114.25189110 | <a href="https://www.inaturalist.org/observations/35446395">https://www.inaturalist.org/observations/35446395</a>   |
| 1665 | <i>Spilopelia chinensis</i> | Eastern Spotted Dove | 2019/11/4  | 4 | 0 | 22.26462639 | 114.25033310 | <a href="https://www.inaturalist.org/observations/35266790">https://www.inaturalist.org/observations/35266790</a>   |
| 1666 | <i>Spilopelia chinensis</i> | Eastern Spotted Dove | 2019/11/4  | 2 | 0 | 22.26464056 | 114.24999040 | <a href="https://www.inaturalist.org/observations/35266821">https://www.inaturalist.org/observations/35266821</a>   |
| 1667 | <i>Spilopelia chinensis</i> | Eastern Spotted Dove | 2020/11/26 | 1 | 0 | 22.26464803 | 114.24943820 | <a href="https://www.inaturalist.org/observations/65630790">https://www.inaturalist.org/observations/65630790</a>   |
| 1668 | <i>Spilopelia chinensis</i> | Eastern Spotted Dove | 2021/11/10 | 1 | 0 | 22.26468356 | 114.24945920 | <a href="https://www.inaturalist.org/observations/100731959">https://www.inaturalist.org/observations/100731959</a> |
| 1669 | <i>Spilopelia chinensis</i> | Eastern Spotted Dove | 2020/11/19 | 2 | 0 | 22.26468833 | 114.24934000 | <a href="https://www.inaturalist.org/observations/65182928">https://www.inaturalist.org/observations/65182928</a>   |
| 1670 | <i>Spilopelia chinensis</i> | Eastern Spotted Dove | 2021/11/8  | 1 | 0 | 22.26471898 | 114.24943510 | <a href="https://www.inaturalist.org/observations/100544015">https://www.inaturalist.org/observations/100544015</a> |
| 1671 | <i>Spilopelia chinensis</i> | Eastern Spotted Dove | 2019/11/4  | 2 | 0 | 22.26473205 | 114.25215230 | <a href="https://www.inaturalist.org/observations/35278689">https://www.inaturalist.org/observations/35278689</a>   |
| 1672 | <i>Spilopelia chinensis</i> | Eastern Spotted Dove | 2020/11/22 | 2 | 0 | 22.26473449 | 114.25231290 | <a href="https://www.inaturalist.org/observations/65397048">https://www.inaturalist.org/observations/65397048</a>   |
| 1673 | <i>Spilopelia chinensis</i> | Eastern Spotted Dove | 2019/11/5  | 3 | 0 | 22.26474687 | 114.25292390 | <a href="https://www.inaturalist.org/observations/35320296">https://www.inaturalist.org/observations/35320296</a>   |
| 1674 | <i>Spilopelia chinensis</i> | Eastern Spotted Dove | 2020/11/23 | 3 | 0 | 22.26475833 | 114.24945000 | <a href="https://www.inaturalist.org/observations/65458931">https://www.inaturalist.org/observations/65458931</a>   |
| 1675 | <i>Spilopelia chinensis</i> | Eastern Spotted Dove | 2021/11/12 | 1 | 0 | 22.26475837 | 114.25309530 | <a href="https://www.inaturalist.org/observations/100919838">https://www.inaturalist.org/observations/100919838</a> |
| 1676 | <i>Spilopelia chinensis</i> | Eastern Spotted Dove | 2020/12/1  | 2 | 0 | 22.26476333 | 114.25288330 | <a href="https://www.inaturalist.org/observations/65937652">https://www.inaturalist.org/observations/65937652</a>   |
| 1677 | <i>Spilopelia chinensis</i> | Eastern Spotted Dove | 2020/11/22 | 1 | 0 | 22.26476406 | 114.25226170 | <a href="https://www.inaturalist.org/observations/65397046">https://www.inaturalist.org/observations/65397046</a>   |
| 1678 | <i>Spilopelia chinensis</i> | Eastern Spotted Dove | 2021/11/12 | 1 | 0 | 22.26476522 | 114.25296840 | <a href="https://www.inaturalist.org/observations/100919805">https://www.inaturalist.org/observations/100919805</a> |

|      |                             |                      |            |   |   |             |              |                                                                                                                     |
|------|-----------------------------|----------------------|------------|---|---|-------------|--------------|---------------------------------------------------------------------------------------------------------------------|
| 1679 | <i>Spilopelia chinensis</i> | Eastern Spotted Dove | 2020/11/17 | 1 | 0 | 22.26478833 | 114.25304500 | <a href="https://www.inaturalist.org/observations/65179493">https://www.inaturalist.org/observations/65179493</a>   |
| 1680 | <i>Spilopelia chinensis</i> | Eastern Spotted Dove | 2020/11/7  | 0 | 0 | 22.26479800 | 114.25238220 | <a href="https://www.inaturalist.org/observations/64344839">https://www.inaturalist.org/observations/64344839</a>   |
| 1681 | <i>Spilopelia chinensis</i> | Eastern Spotted Dove | 2020/11/22 | 1 | 0 | 22.26480688 | 114.25226110 | <a href="https://www.inaturalist.org/observations/65397050">https://www.inaturalist.org/observations/65397050</a>   |
| 1682 | <i>Spilopelia chinensis</i> | Eastern Spotted Dove | 2020/12/1  | 1 | 0 | 22.26482000 | 114.25288330 | <a href="https://www.inaturalist.org/observations/65937323">https://www.inaturalist.org/observations/65937323</a>   |
| 1683 | <i>Spilopelia chinensis</i> | Eastern Spotted Dove | 2019/11/23 | 1 | 0 | 22.26483099 | 114.25295420 | <a href="https://www.inaturalist.org/observations/36404578">https://www.inaturalist.org/observations/36404578</a>   |
| 1684 | <i>Spilopelia chinensis</i> | Eastern Spotted Dove | 2021/11/12 | 1 | 0 | 22.26483703 | 114.25294430 | <a href="https://www.inaturalist.org/observations/100919804">https://www.inaturalist.org/observations/100919804</a> |
| 1685 | <i>Spilopelia chinensis</i> | Eastern Spotted Dove | 2019/11/5  | 3 | 0 | 22.26484776 | 114.24955600 | <a href="https://www.inaturalist.org/observations/35315065">https://www.inaturalist.org/observations/35315065</a>   |
| 1686 | <i>Spilopelia chinensis</i> | Eastern Spotted Dove | 2020/12/1  | 1 | 0 | 22.26496333 | 114.25248670 | <a href="https://www.inaturalist.org/observations/65937641">https://www.inaturalist.org/observations/65937641</a>   |
| 1687 | <i>Spilopelia chinensis</i> | Eastern Spotted Dove | 2020/11/29 | 1 | 0 | 22.26498112 | 114.25290010 | <a href="https://www.inaturalist.org/observations/65816318">https://www.inaturalist.org/observations/65816318</a>   |
| 1688 | <i>Spilopelia chinensis</i> | Eastern Spotted Dove | 2019/11/7  | 4 | 0 | 22.26500649 | 114.25238450 | <a href="https://www.inaturalist.org/observations/35403866">https://www.inaturalist.org/observations/35403866</a>   |
| 1689 | <i>Spilopelia chinensis</i> | Eastern Spotted Dove | 2020/11/29 | 1 | 0 | 22.26502355 | 114.25289010 | <a href="https://www.inaturalist.org/observations/65816320">https://www.inaturalist.org/observations/65816320</a>   |
| 1690 | <i>Spilopelia chinensis</i> | Eastern Spotted Dove | 2020/11/29 | 1 | 0 | 22.26504722 | 114.25289400 | <a href="https://www.inaturalist.org/observations/65816323">https://www.inaturalist.org/observations/65816323</a>   |
| 1691 | <i>Spilopelia chinensis</i> | Eastern Spotted Dove | 2020/11/29 | 1 | 0 | 22.26504837 | 114.25286730 | <a href="https://www.inaturalist.org/observations/65816317">https://www.inaturalist.org/observations/65816317</a>   |
| 1692 | <i>Spilopelia chinensis</i> | Eastern Spotted Dove | 2022/5/3   | 2 | 0 | 22.26508331 | 114.25184630 | <a href="https://www.inaturalist.org/observations/115005524">https://www.inaturalist.org/observations/115005524</a> |
| 1693 | <i>Spilopelia chinensis</i> | Eastern Spotted Dove | 2019/11/7  | 5 | 0 | 22.26509530 | 114.25185650 | <a href="https://www.inaturalist.org/observations/35403424">https://www.inaturalist.org/observations/35403424</a>   |
| 1694 | <i>Spilopelia chinensis</i> | Eastern Spotted Dove | 2019/11/7  | 5 | 0 | 22.26512237 | 114.25227470 | <a href="https://www.inaturalist.org/observations/35405128">https://www.inaturalist.org/observations/35405128</a>   |
| 1695 | <i>Spilopelia chinensis</i> | Eastern Spotted Dove | 2022/9/10  | 1 | 0 | 22.26514371 | 114.25275700 | <a href="https://www.inaturalist.org/observations/134584745">https://www.inaturalist.org/observations/134584745</a> |
| 1696 | <i>Spilopelia chinensis</i> | Eastern Spotted Dove | 2019/11/7  | 4 | 0 | 22.26515337 | 114.25228160 | <a href="https://www.inaturalist.org/observations/35408711">https://www.inaturalist.org/observations/35408711</a>   |
| 1697 | <i>Spilopelia chinensis</i> | Eastern Spotted Dove | 2019/11/7  | 5 | 0 | 22.26525029 | 114.25235010 | <a href="https://www.inaturalist.org/observations/35408698">https://www.inaturalist.org/observations/35408698</a>   |
| 1698 | <i>Spilopelia chinensis</i> | Eastern Spotted Dove | 2019/11/7  | 4 | 0 | 22.26525029 | 114.25235010 | <a href="https://www.inaturalist.org/observations/35408700">https://www.inaturalist.org/observations/35408700</a>   |
| 1699 | <i>Spilopelia chinensis</i> | Eastern Spotted Dove | 2020/11/7  | 2 | 0 | 22.26525400 | 114.25147600 | <a href="https://www.inaturalist.org/observations/64345159">https://www.inaturalist.org/observations/64345159</a>   |
| 1700 | <i>Spilopelia chinensis</i> | Eastern Spotted Dove | 2019/11/8  | 4 | 0 | 22.26528649 | 114.25004990 | <a href="https://www.inaturalist.org/observations/35443697">https://www.inaturalist.org/observations/35443697</a>   |
| 1701 | <i>Spilopelia chinensis</i> | Eastern Spotted Dove | 2020/4/10  | 1 | 0 | 22.26539167 | 114.13745000 | <a href="https://www.inaturalist.org/observations/41817518">https://www.inaturalist.org/observations/41817518</a>   |

|      |                             |                      |            |   |   |             |              |                                                                                                                     |
|------|-----------------------------|----------------------|------------|---|---|-------------|--------------|---------------------------------------------------------------------------------------------------------------------|
| 1702 | <i>Spilopelia chinensis</i> | Eastern Spotted Dove | 2020/4/26  | 1 | 0 | 22.26539167 | 114.13745000 | <a href="https://www.inaturalist.org/observations/43588432">https://www.inaturalist.org/observations/43588432</a>   |
| 1703 | <i>Spilopelia chinensis</i> | Eastern Spotted Dove | 2020/5/2   | 1 | 0 | 22.26539167 | 114.13745000 | <a href="https://www.inaturalist.org/observations/44572561">https://www.inaturalist.org/observations/44572561</a>   |
| 1704 | <i>Spilopelia chinensis</i> | Eastern Spotted Dove | 2021/11/4  | 2 | 0 | 22.26548333 | 114.25020500 | <a href="https://www.inaturalist.org/observations/100210589">https://www.inaturalist.org/observations/100210589</a> |
| 1705 | <i>Spilopelia chinensis</i> | Eastern Spotted Dove | 2021/5/7   | 1 | 0 | 22.26554167 | 114.23870170 | <a href="https://www.inaturalist.org/observations/77849462">https://www.inaturalist.org/observations/77849462</a>   |
| 1706 | <i>Spilopelia chinensis</i> | Eastern Spotted Dove | 2020/11/22 | 1 | 0 | 22.26559630 | 114.23895360 | <a href="https://www.inaturalist.org/observations/65390405">https://www.inaturalist.org/observations/65390405</a>   |
| 1707 | <i>Spilopelia chinensis</i> | Eastern Spotted Dove | 2018/12/25 | 3 | 0 | 22.26560909 | 113.99319960 | <a href="https://www.inaturalist.org/observations/19221694">https://www.inaturalist.org/observations/19221694</a>   |
| 1708 | <i>Spilopelia chinensis</i> | Eastern Spotted Dove | 2019/11/7  | 2 | 0 | 22.26564770 | 114.25146040 | <a href="https://www.inaturalist.org/observations/35403244">https://www.inaturalist.org/observations/35403244</a>   |
| 1709 | <i>Spilopelia chinensis</i> | Eastern Spotted Dove | 2018/11/8  | 4 | 0 | 22.26573205 | 114.25127090 | <a href="https://www.inaturalist.org/observations/18258598">https://www.inaturalist.org/observations/18258598</a>   |
| 1710 | <i>Spilopelia chinensis</i> | Eastern Spotted Dove | 2018/11/8  | 4 | 0 | 22.26588619 | 114.25133520 | <a href="https://www.inaturalist.org/observations/18253768">https://www.inaturalist.org/observations/18253768</a>   |
| 1711 | <i>Spilopelia chinensis</i> | Eastern Spotted Dove | 2018/11/8  | 2 | 0 | 22.26588833 | 114.25127500 | <a href="https://www.inaturalist.org/observations/18250410">https://www.inaturalist.org/observations/18250410</a>   |
| 1712 | <i>Spilopelia chinensis</i> | Eastern Spotted Dove | 2018/11/8  | 3 | 0 | 22.26597600 | 114.25128240 | <a href="https://www.inaturalist.org/observations/18250469">https://www.inaturalist.org/observations/18250469</a>   |
| 1713 | <i>Spilopelia chinensis</i> | Eastern Spotted Dove | 2022/5/2   | 2 | 0 | 22.26604464 | 114.24108370 | <a href="https://www.inaturalist.org/observations/114944169">https://www.inaturalist.org/observations/114944169</a> |
| 1714 | <i>Spilopelia chinensis</i> | Eastern Spotted Dove | 2022/9/28  | 2 | 0 | 22.26608333 | 114.25007500 | <a href="https://www.inaturalist.org/observations/136914981">https://www.inaturalist.org/observations/136914981</a> |
| 1715 | <i>Spilopelia chinensis</i> | Eastern Spotted Dove | 2020/11/27 | 2 | 0 | 22.26613617 | 114.23751060 | <a href="https://www.inaturalist.org/observations/65672269">https://www.inaturalist.org/observations/65672269</a>   |
| 1716 | <i>Spilopelia chinensis</i> | Eastern Spotted Dove | 2021/11/13 | 3 | 0 | 22.26624586 | 114.25087160 | <a href="https://www.inaturalist.org/observations/101190356">https://www.inaturalist.org/observations/101190356</a> |
| 1717 | <i>Spilopelia chinensis</i> | Eastern Spotted Dove | 2021/11/13 | 2 | 0 | 22.26624586 | 114.25087160 | <a href="https://www.inaturalist.org/observations/101190385">https://www.inaturalist.org/observations/101190385</a> |
| 1718 | <i>Spilopelia chinensis</i> | Eastern Spotted Dove | 2017/8/26  | 1 | 0 | 22.26627283 | 114.14089700 | <a href="https://www.inaturalist.org/observations/67517817">https://www.inaturalist.org/observations/67517817</a>   |
| 1719 | <i>Spilopelia chinensis</i> | Eastern Spotted Dove | 2019/4/19  | 1 | 0 | 22.26633613 | 113.99900410 | <a href="https://www.inaturalist.org/observations/22694601">https://www.inaturalist.org/observations/22694601</a>   |
| 1720 | <i>Spilopelia chinensis</i> | Eastern Spotted Dove | 2022/4/26  | 2 | 0 | 22.26636572 | 114.24767880 | <a href="https://www.inaturalist.org/observations/112940414">https://www.inaturalist.org/observations/112940414</a> |
| 1721 | <i>Spilopelia chinensis</i> | Eastern Spotted Dove | 2022/5/22  | 3 | 0 | 22.26638756 | 114.24845670 | <a href="https://www.inaturalist.org/observations/118118052">https://www.inaturalist.org/observations/118118052</a> |
| 1722 | <i>Spilopelia chinensis</i> | Eastern Spotted Dove | 2022/4/30  | 2 | 0 | 22.26646987 | 114.19130080 | <a href="https://www.inaturalist.org/observations/113698520">https://www.inaturalist.org/observations/113698520</a> |
| 1723 | <i>Spilopelia chinensis</i> | Eastern Spotted Dove | 2020/11/26 | 2 | 0 | 22.26669500 | 114.23762500 | <a href="https://www.inaturalist.org/observations/65620517">https://www.inaturalist.org/observations/65620517</a>   |
| 1724 | <i>Spilopelia chinensis</i> | Eastern Spotted Dove | 2021/11/2  | 1 | 0 | 22.26677586 | 114.23875020 | <a href="https://www.inaturalist.org/observations/100040164">https://www.inaturalist.org/observations/100040164</a> |

|      |                             |                      |            |   |   |             |              |                                                                                                                     |
|------|-----------------------------|----------------------|------------|---|---|-------------|--------------|---------------------------------------------------------------------------------------------------------------------|
| 1725 | <i>Spilopelia chinensis</i> | Eastern Spotted Dove | 2022/9/24  | 2 | 0 | 22.26677799 | 113.94175100 | <a href="https://www.inaturalist.org/observations/136374206">https://www.inaturalist.org/observations/136374206</a> |
| 1726 | <i>Spilopelia chinensis</i> | Eastern Spotted Dove | 2021/11/2  | 2 | 0 | 22.26682312 | 114.23893240 | <a href="https://www.inaturalist.org/observations/100038469">https://www.inaturalist.org/observations/100038469</a> |
| 1727 | <i>Spilopelia chinensis</i> | Eastern Spotted Dove | 2021/11/2  | 1 | 0 | 22.26684203 | 114.23768040 | <a href="https://www.inaturalist.org/observations/100035415">https://www.inaturalist.org/observations/100035415</a> |
| 1728 | <i>Spilopelia chinensis</i> | Eastern Spotted Dove | 2020/11/26 | 2 | 0 | 22.26689485 | 114.23794180 | <a href="https://www.inaturalist.org/observations/65620651">https://www.inaturalist.org/observations/65620651</a>   |
| 1729 | <i>Spilopelia chinensis</i> | Eastern Spotted Dove | 2021/11/2  | 2 | 0 | 22.26694294 | 114.23861080 | <a href="https://www.inaturalist.org/observations/100040645">https://www.inaturalist.org/observations/100040645</a> |
| 1730 | <i>Spilopelia chinensis</i> | Eastern Spotted Dove | 2021/11/2  | 2 | 0 | 22.26695365 | 114.23870490 | <a href="https://www.inaturalist.org/observations/100040606">https://www.inaturalist.org/observations/100040606</a> |
| 1731 | <i>Spilopelia chinensis</i> | Eastern Spotted Dove | 2022/1/31  | 2 | 0 | 22.26699500 | 114.24761170 | <a href="https://www.inaturalist.org/observations/105902118">https://www.inaturalist.org/observations/105902118</a> |
| 1732 | <i>Spilopelia chinensis</i> | Eastern Spotted Dove | 2021/11/2  | 1 | 0 | 22.26699805 | 114.23875750 | <a href="https://www.inaturalist.org/observations/100037336">https://www.inaturalist.org/observations/100037336</a> |
| 1733 | <i>Spilopelia chinensis</i> | Eastern Spotted Dove | 2021/11/2  | 1 | 0 | 22.26700881 | 114.23854620 | <a href="https://www.inaturalist.org/observations/100040649">https://www.inaturalist.org/observations/100040649</a> |
| 1734 | <i>Spilopelia chinensis</i> | Eastern Spotted Dove | 2021/11/2  | 2 | 0 | 22.26701577 | 114.23859680 | <a href="https://www.inaturalist.org/observations/100040673">https://www.inaturalist.org/observations/100040673</a> |
| 1735 | <i>Spilopelia chinensis</i> | Eastern Spotted Dove | 2020/11/26 | 1 | 0 | 22.26704450 | 114.23943930 | <a href="https://www.inaturalist.org/observations/65670837">https://www.inaturalist.org/observations/65670837</a>   |
| 1736 | <i>Spilopelia chinensis</i> | Eastern Spotted Dove | 2021/11/2  | 2 | 0 | 22.26712952 | 114.23905210 | <a href="https://www.inaturalist.org/observations/100040184">https://www.inaturalist.org/observations/100040184</a> |
| 1737 | <i>Spilopelia chinensis</i> | Eastern Spotted Dove | 2019/1/27  | 2 | 0 | 22.26717012 | 114.15291450 | <a href="https://www.inaturalist.org/observations/19925205">https://www.inaturalist.org/observations/19925205</a>   |
| 1738 | <i>Spilopelia chinensis</i> | Eastern Spotted Dove | 2021/11/2  | 1 | 0 | 22.26719864 | 114.23881140 | <a href="https://www.inaturalist.org/observations/100038797">https://www.inaturalist.org/observations/100038797</a> |
| 1739 | <i>Spilopelia chinensis</i> | Eastern Spotted Dove | 2020/11/26 | 2 | 0 | 22.26720240 | 114.23768780 | <a href="https://www.inaturalist.org/observations/65618580">https://www.inaturalist.org/observations/65618580</a>   |
| 1740 | <i>Spilopelia chinensis</i> | Eastern Spotted Dove | 2018/3/23  | 3 | 0 | 22.26747180 | 114.12441780 | <a href="https://www.inaturalist.org/observations/10371894">https://www.inaturalist.org/observations/10371894</a>   |
| 1741 | <i>Spilopelia chinensis</i> | Eastern Spotted Dove | 2019/11/18 | 2 | 0 | 22.26748930 | 114.24141900 | <a href="https://www.inaturalist.org/observations/35810980">https://www.inaturalist.org/observations/35810980</a>   |
| 1742 | <i>Spilopelia chinensis</i> | Eastern Spotted Dove | 2021/5/3   | 2 | 0 | 22.26760855 | 113.99820430 | <a href="https://www.inaturalist.org/observations/76877520">https://www.inaturalist.org/observations/76877520</a>   |
| 1743 | <i>Spilopelia chinensis</i> | Eastern Spotted Dove | 2018/4/29  | 5 | 0 | 22.26764360 | 114.24993660 | <a href="https://www.inaturalist.org/observations/11724472">https://www.inaturalist.org/observations/11724472</a>   |
| 1744 | <i>Spilopelia chinensis</i> | Eastern Spotted Dove | 2020/3/22  | 1 | 0 | 22.26770333 | 114.16863830 | <a href="https://www.inaturalist.org/observations/40485275">https://www.inaturalist.org/observations/40485275</a>   |
| 1745 | <i>Spilopelia chinensis</i> | Eastern Spotted Dove | 2022/4/2   | 2 | 0 | 22.26783943 | 114.23607760 | <a href="https://www.inaturalist.org/observations/110215514">https://www.inaturalist.org/observations/110215514</a> |
| 1746 | <i>Spilopelia chinensis</i> | Eastern Spotted Dove | 2022/4/2   | 2 | 0 | 22.26783943 | 114.23607760 | <a href="https://www.inaturalist.org/observations/110215889">https://www.inaturalist.org/observations/110215889</a> |
| 1747 | <i>Spilopelia chinensis</i> | Eastern Spotted Dove | 2021/11/2  | 0 | 0 | 22.26831667 | 114.23809170 | <a href="https://www.inaturalist.org/observations/100038332">https://www.inaturalist.org/observations/100038332</a> |



|      |                             |                      |            |   |   |             |              |                                                                                                                     |
|------|-----------------------------|----------------------|------------|---|---|-------------|--------------|---------------------------------------------------------------------------------------------------------------------|
| 1748 | <i>Spilopelia chinensis</i> | Eastern Spotted Dove | 2019/2/5   | 3 | 0 | 22.26872550 | 114.18616370 | <a href="https://www.inaturalist.org/observations/20100164">https://www.inaturalist.org/observations/20100164</a>   |
| 1749 | <i>Spilopelia chinensis</i> | Eastern Spotted Dove | 2011/12/26 | 1 | 0 | 22.26913500 | 113.99211800 | <a href="https://www.inaturalist.org/observations/112245088">https://www.inaturalist.org/observations/112245088</a> |
| 1750 | <i>Spilopelia chinensis</i> | Eastern Spotted Dove | 2020/11/6  | 1 | 0 | 22.26954300 | 113.88800900 | <a href="https://www.inaturalist.org/observations/64284263">https://www.inaturalist.org/observations/64284263</a>   |
| 1751 | <i>Spilopelia chinensis</i> | Eastern Spotted Dove | 2022/1/6   | 1 | 0 | 22.26980099 | 114.07341990 | <a href="https://www.inaturalist.org/observations/104465766">https://www.inaturalist.org/observations/104465766</a> |
| 1752 | <i>Spilopelia chinensis</i> | Eastern Spotted Dove | 2022/5/2   | 1 | 0 | 22.27002845 | 114.18395710 | <a href="https://www.inaturalist.org/observations/114619985">https://www.inaturalist.org/observations/114619985</a> |
| 1753 | <i>Spilopelia chinensis</i> | Eastern Spotted Dove | 2021/12/30 | 1 | 0 | 22.27005712 | 114.21345390 | <a href="https://www.inaturalist.org/observations/103940280">https://www.inaturalist.org/observations/103940280</a> |
| 1754 | <i>Spilopelia chinensis</i> | Eastern Spotted Dove | 2019/4/28  | 3 | 0 | 22.27009667 | 114.18384000 | <a href="https://www.inaturalist.org/observations/24290044">https://www.inaturalist.org/observations/24290044</a>   |
| 1755 | <i>Spilopelia chinensis</i> | Eastern Spotted Dove | 2021/11/9  | 2 | 0 | 22.27014500 | 114.18468670 | <a href="https://www.inaturalist.org/observations/100737026">https://www.inaturalist.org/observations/100737026</a> |
| 1756 | <i>Spilopelia chinensis</i> | Eastern Spotted Dove | 2019/1/25  | 2 | 0 | 22.27020200 | 114.18407000 | <a href="https://www.inaturalist.org/observations/19924205">https://www.inaturalist.org/observations/19924205</a>   |
| 1757 | <i>Spilopelia chinensis</i> | Eastern Spotted Dove | 2020/11/23 | 2 | 0 | 22.27066466 | 114.18479120 | <a href="https://www.inaturalist.org/observations/65566105">https://www.inaturalist.org/observations/65566105</a>   |
| 1758 | <i>Spilopelia chinensis</i> | Eastern Spotted Dove | 2018/4/28  | 3 | 0 | 22.27068291 | 114.17179150 | <a href="https://www.inaturalist.org/observations/11586642">https://www.inaturalist.org/observations/11586642</a>   |
| 1759 | <i>Spilopelia chinensis</i> | Eastern Spotted Dove | 2022/5/2   | 1 | 0 | 22.27071040 | 114.18480570 | <a href="https://www.inaturalist.org/observations/114556380">https://www.inaturalist.org/observations/114556380</a> |
| 1760 | <i>Spilopelia chinensis</i> | Eastern Spotted Dove | 2020/11/23 | 2 | 0 | 22.27077461 | 114.18489840 | <a href="https://www.inaturalist.org/observations/65566319">https://www.inaturalist.org/observations/65566319</a>   |
| 1761 | <i>Spilopelia chinensis</i> | Eastern Spotted Dove | 2020/11/23 | 2 | 0 | 22.27077461 | 114.18489840 | <a href="https://www.inaturalist.org/observations/65566320">https://www.inaturalist.org/observations/65566320</a>   |
| 1762 | <i>Spilopelia chinensis</i> | Eastern Spotted Dove | 2020/11/23 | 2 | 0 | 22.27077461 | 114.18489840 | <a href="https://www.inaturalist.org/observations/65566323">https://www.inaturalist.org/observations/65566323</a>   |
| 1763 | <i>Spilopelia chinensis</i> | Eastern Spotted Dove | 2020/11/23 | 2 | 0 | 22.27077461 | 114.18489840 | <a href="https://www.inaturalist.org/observations/65566324">https://www.inaturalist.org/observations/65566324</a>   |
| 1764 | <i>Spilopelia chinensis</i> | Eastern Spotted Dove | 2020/11/23 | 2 | 0 | 22.27077461 | 114.18489840 | <a href="https://www.inaturalist.org/observations/65566325">https://www.inaturalist.org/observations/65566325</a>   |
| 1765 | <i>Spilopelia chinensis</i> | Eastern Spotted Dove | 2020/11/23 | 2 | 0 | 22.27077461 | 114.18489840 | <a href="https://www.inaturalist.org/observations/65566326">https://www.inaturalist.org/observations/65566326</a>   |
| 1766 | <i>Spilopelia chinensis</i> | Eastern Spotted Dove | 2020/11/23 | 2 | 0 | 22.27077461 | 114.18489840 | <a href="https://www.inaturalist.org/observations/65566327">https://www.inaturalist.org/observations/65566327</a>   |
| 1767 | <i>Spilopelia chinensis</i> | Eastern Spotted Dove | 2020/11/23 | 2 | 0 | 22.27077461 | 114.18489840 | <a href="https://www.inaturalist.org/observations/65566328">https://www.inaturalist.org/observations/65566328</a>   |
| 1768 | <i>Spilopelia chinensis</i> | Eastern Spotted Dove | 2020/11/23 | 2 | 0 | 22.27077461 | 114.18489840 | <a href="https://www.inaturalist.org/observations/65566329">https://www.inaturalist.org/observations/65566329</a>   |
| 1769 | <i>Spilopelia chinensis</i> | Eastern Spotted Dove | 2020/11/23 | 2 | 0 | 22.27077461 | 114.18489840 | <a href="https://www.inaturalist.org/observations/65566330">https://www.inaturalist.org/observations/65566330</a>   |
| 1770 | <i>Spilopelia chinensis</i> | Eastern Spotted Dove | 2020/11/23 | 2 | 0 | 22.27082244 | 114.18485300 | <a href="https://www.inaturalist.org/observations/65566243">https://www.inaturalist.org/observations/65566243</a>   |

|      |                             |                      |            |   |   |             |              |                                                                                                                     |
|------|-----------------------------|----------------------|------------|---|---|-------------|--------------|---------------------------------------------------------------------------------------------------------------------|
| 1771 | <i>Spilopelia chinensis</i> | Eastern Spotted Dove | 2009/7/13  | 3 | 0 | 22.27085900 | 114.14950200 | <a href="https://www.inaturalist.org/observations/9775677">https://www.inaturalist.org/observations/9775677</a>     |
| 1772 | <i>Spilopelia chinensis</i> | Eastern Spotted Dove | 2020/11/23 | 2 | 0 | 22.27094523 | 114.18416080 | <a href="https://www.inaturalist.org/observations/65459881">https://www.inaturalist.org/observations/65459881</a>   |
| 1773 | <i>Spilopelia chinensis</i> | Eastern Spotted Dove | 2020/11/23 | 2 | 0 | 22.27100885 | 114.18436800 | <a href="https://www.inaturalist.org/observations/65567770">https://www.inaturalist.org/observations/65567770</a>   |
| 1774 | <i>Spilopelia chinensis</i> | Eastern Spotted Dove | 2020/11/23 | 2 | 0 | 22.27100885 | 114.18436800 | <a href="https://www.inaturalist.org/observations/65567771">https://www.inaturalist.org/observations/65567771</a>   |
| 1775 | <i>Spilopelia chinensis</i> | Eastern Spotted Dove | 2020/11/23 | 2 | 0 | 22.27100885 | 114.18436800 | <a href="https://www.inaturalist.org/observations/65567772">https://www.inaturalist.org/observations/65567772</a>   |
| 1776 | <i>Spilopelia chinensis</i> | Eastern Spotted Dove | 2021/11/11 | 2 | 0 | 22.27103130 | 114.18548010 | <a href="https://www.inaturalist.org/observations/100805951">https://www.inaturalist.org/observations/100805951</a> |
| 1777 | <i>Spilopelia chinensis</i> | Eastern Spotted Dove | 2020/3/26  | 1 | 0 | 22.27103333 | 114.18653830 | <a href="https://www.inaturalist.org/observations/40738548">https://www.inaturalist.org/observations/40738548</a>   |
| 1778 | <i>Spilopelia chinensis</i> | Eastern Spotted Dove | 2021/11/11 | 1 | 0 | 22.27104299 | 114.18561920 | <a href="https://www.inaturalist.org/observations/100805932">https://www.inaturalist.org/observations/100805932</a> |
| 1779 | <i>Spilopelia chinensis</i> | Eastern Spotted Dove | 2020/11/23 | 2 | 0 | 22.27104360 | 114.18461210 | <a href="https://www.inaturalist.org/observations/65567762">https://www.inaturalist.org/observations/65567762</a>   |
| 1780 | <i>Spilopelia chinensis</i> | Eastern Spotted Dove | 2020/11/23 | 2 | 0 | 22.27104360 | 114.18461210 | <a href="https://www.inaturalist.org/observations/65567763">https://www.inaturalist.org/observations/65567763</a>   |
| 1781 | <i>Spilopelia chinensis</i> | Eastern Spotted Dove | 2021/6/20  | 1 | 0 | 22.27105500 | 114.17333830 | <a href="https://www.inaturalist.org/observations/83755736">https://www.inaturalist.org/observations/83755736</a>   |
| 1782 | <i>Spilopelia chinensis</i> | Eastern Spotted Dove | 2020/4/12  | 1 | 0 | 22.27114131 | 114.18694110 | <a href="https://www.inaturalist.org/observations/41982860">https://www.inaturalist.org/observations/41982860</a>   |
| 1783 | <i>Spilopelia chinensis</i> | Eastern Spotted Dove | 2020/11/23 | 2 | 0 | 22.27118208 | 114.18454290 | <a href="https://www.inaturalist.org/observations/65567610">https://www.inaturalist.org/observations/65567610</a>   |
| 1784 | <i>Spilopelia chinensis</i> | Eastern Spotted Dove | 2020/11/23 | 2 | 0 | 22.27118208 | 114.18454290 | <a href="https://www.inaturalist.org/observations/65567611">https://www.inaturalist.org/observations/65567611</a>   |
| 1785 | <i>Spilopelia chinensis</i> | Eastern Spotted Dove | 2020/11/23 | 2 | 0 | 22.27118208 | 114.18454290 | <a href="https://www.inaturalist.org/observations/65567612">https://www.inaturalist.org/observations/65567612</a>   |
| 1786 | <i>Spilopelia chinensis</i> | Eastern Spotted Dove | 2020/11/23 | 2 | 0 | 22.27118208 | 114.18454290 | <a href="https://www.inaturalist.org/observations/65567613">https://www.inaturalist.org/observations/65567613</a>   |
| 1787 | <i>Spilopelia chinensis</i> | Eastern Spotted Dove | 2022/7/7   | 2 | 0 | 22.27122167 | 114.17186670 | <a href="https://www.inaturalist.org/observations/125154448">https://www.inaturalist.org/observations/125154448</a> |
| 1788 | <i>Spilopelia chinensis</i> | Eastern Spotted Dove | 2018/4/27  | 3 | 0 | 22.27141165 | 113.99528500 | <a href="https://www.inaturalist.org/observations/11585414">https://www.inaturalist.org/observations/11585414</a>   |
| 1789 | <i>Spilopelia chinensis</i> | Eastern Spotted Dove | 2020/11/23 | 2 | 0 | 22.27155155 | 114.18439370 | <a href="https://www.inaturalist.org/observations/65567716">https://www.inaturalist.org/observations/65567716</a>   |
| 1790 | <i>Spilopelia chinensis</i> | Eastern Spotted Dove | 2020/11/23 | 2 | 0 | 22.27155155 | 114.18439370 | <a href="https://www.inaturalist.org/observations/65567717">https://www.inaturalist.org/observations/65567717</a>   |
| 1791 | <i>Spilopelia chinensis</i> | Eastern Spotted Dove | 2020/11/23 | 2 | 0 | 22.27170047 | 114.18446340 | <a href="https://www.inaturalist.org/observations/65567706">https://www.inaturalist.org/observations/65567706</a>   |
| 1792 | <i>Spilopelia chinensis</i> | Eastern Spotted Dove | 2020/11/23 | 2 | 0 | 22.27170047 | 114.18446340 | <a href="https://www.inaturalist.org/observations/65567707">https://www.inaturalist.org/observations/65567707</a>   |
| 1793 | <i>Spilopelia chinensis</i> | Eastern Spotted Dove | 2020/11/23 | 2 | 0 | 22.27170047 | 114.18446340 | <a href="https://www.inaturalist.org/observations/65567709">https://www.inaturalist.org/observations/65567709</a>   |

|      |                             |                      |            |   |   |             |              |                                                                                                                     |
|------|-----------------------------|----------------------|------------|---|---|-------------|--------------|---------------------------------------------------------------------------------------------------------------------|
| 1794 | <i>Spilopelia chinensis</i> | Eastern Spotted Dove | 2020/11/23 | 2 | 0 | 22.27170047 | 114.18446340 | <a href="https://www.inaturalist.org/observations/65567710">https://www.inaturalist.org/observations/65567710</a>   |
| 1795 | <i>Spilopelia chinensis</i> | Eastern Spotted Dove | 2020/11/23 | 2 | 0 | 22.27170047 | 114.18446340 | <a href="https://www.inaturalist.org/observations/65567711">https://www.inaturalist.org/observations/65567711</a>   |
| 1796 | <i>Spilopelia chinensis</i> | Eastern Spotted Dove | 2020/11/23 | 1 | 0 | 22.27180408 | 114.18452530 | <a href="https://www.inaturalist.org/observations/65566293">https://www.inaturalist.org/observations/65566293</a>   |
| 1797 | <i>Spilopelia chinensis</i> | Eastern Spotted Dove | 2020/11/23 | 1 | 0 | 22.27180408 | 114.18452530 | <a href="https://www.inaturalist.org/observations/65566294">https://www.inaturalist.org/observations/65566294</a>   |
| 1798 | <i>Spilopelia chinensis</i> | Eastern Spotted Dove | 2020/11/23 | 2 | 0 | 22.27203735 | 114.18334430 | <a href="https://www.inaturalist.org/observations/65459886">https://www.inaturalist.org/observations/65459886</a>   |
| 1799 | <i>Spilopelia chinensis</i> | Eastern Spotted Dove | 2021/5/1   | 2 | 0 | 22.27204671 | 114.17268520 | <a href="https://www.inaturalist.org/observations/76071990">https://www.inaturalist.org/observations/76071990</a>   |
| 1800 | <i>Spilopelia chinensis</i> | Eastern Spotted Dove | 2021/11/5  | 1 | 0 | 22.27210456 | 114.18455830 | <a href="https://www.inaturalist.org/observations/100280296">https://www.inaturalist.org/observations/100280296</a> |
| 1801 | <i>Spilopelia chinensis</i> | Eastern Spotted Dove | 2021/11/11 | 1 | 0 | 22.27211196 | 114.18451790 | <a href="https://www.inaturalist.org/observations/100813978">https://www.inaturalist.org/observations/100813978</a> |
| 1802 | <i>Spilopelia chinensis</i> | Eastern Spotted Dove | 2021/11/4  | 1 | 0 | 22.27211542 | 114.18454700 | <a href="https://www.inaturalist.org/observations/100217070">https://www.inaturalist.org/observations/100217070</a> |
| 1803 | <i>Spilopelia chinensis</i> | Eastern Spotted Dove | 2020/11/23 | 2 | 0 | 22.27212908 | 114.18389920 | <a href="https://www.inaturalist.org/observations/65567575">https://www.inaturalist.org/observations/65567575</a>   |
| 1804 | <i>Spilopelia chinensis</i> | Eastern Spotted Dove | 2020/11/23 | 2 | 0 | 22.27212908 | 114.18389920 | <a href="https://www.inaturalist.org/observations/65567576">https://www.inaturalist.org/observations/65567576</a>   |
| 1805 | <i>Spilopelia chinensis</i> | Eastern Spotted Dove | 2020/11/23 | 2 | 0 | 22.27212908 | 114.18389920 | <a href="https://www.inaturalist.org/observations/65567577">https://www.inaturalist.org/observations/65567577</a>   |
| 1806 | <i>Spilopelia chinensis</i> | Eastern Spotted Dove | 2020/11/23 | 2 | 0 | 22.27212908 | 114.18389920 | <a href="https://www.inaturalist.org/observations/65567578">https://www.inaturalist.org/observations/65567578</a>   |
| 1807 | <i>Spilopelia chinensis</i> | Eastern Spotted Dove | 2020/11/23 | 2 | 0 | 22.27212908 | 114.18389920 | <a href="https://www.inaturalist.org/observations/65567579">https://www.inaturalist.org/observations/65567579</a>   |
| 1808 | <i>Spilopelia chinensis</i> | Eastern Spotted Dove | 2020/11/23 | 2 | 0 | 22.27212908 | 114.18389920 | <a href="https://www.inaturalist.org/observations/65567580">https://www.inaturalist.org/observations/65567580</a>   |
| 1809 | <i>Spilopelia chinensis</i> | Eastern Spotted Dove | 2020/11/23 | 2 | 0 | 22.27212908 | 114.18389920 | <a href="https://www.inaturalist.org/observations/65567581">https://www.inaturalist.org/observations/65567581</a>   |
| 1810 | <i>Spilopelia chinensis</i> | Eastern Spotted Dove | 2020/11/23 | 2 | 0 | 22.27212908 | 114.18389920 | <a href="https://www.inaturalist.org/observations/65567582">https://www.inaturalist.org/observations/65567582</a>   |
| 1811 | <i>Spilopelia chinensis</i> | Eastern Spotted Dove | 2020/11/23 | 2 | 0 | 22.27212908 | 114.18389920 | <a href="https://www.inaturalist.org/observations/65567583">https://www.inaturalist.org/observations/65567583</a>   |
| 1812 | <i>Spilopelia chinensis</i> | Eastern Spotted Dove | 2020/11/23 | 2 | 0 | 22.27212908 | 114.18389920 | <a href="https://www.inaturalist.org/observations/65567584">https://www.inaturalist.org/observations/65567584</a>   |
| 1813 | <i>Spilopelia chinensis</i> | Eastern Spotted Dove | 2020/11/23 | 2 | 0 | 22.27212908 | 114.18389920 | <a href="https://www.inaturalist.org/observations/65567585">https://www.inaturalist.org/observations/65567585</a>   |
| 1814 | <i>Spilopelia chinensis</i> | Eastern Spotted Dove | 2020/11/23 | 2 | 0 | 22.27212908 | 114.18389920 | <a href="https://www.inaturalist.org/observations/65567586">https://www.inaturalist.org/observations/65567586</a>   |
| 1815 | <i>Spilopelia chinensis</i> | Eastern Spotted Dove | 2020/11/23 | 2 | 0 | 22.27212908 | 114.18389920 | <a href="https://www.inaturalist.org/observations/65567587">https://www.inaturalist.org/observations/65567587</a>   |
| 1816 | <i>Spilopelia chinensis</i> | Eastern Spotted Dove | 2020/11/23 | 2 | 0 | 22.27212908 | 114.18389920 | <a href="https://www.inaturalist.org/observations/65567588">https://www.inaturalist.org/observations/65567588</a>   |

|      |                             |                      |            |   |   |             |              |                                                                                                                     |
|------|-----------------------------|----------------------|------------|---|---|-------------|--------------|---------------------------------------------------------------------------------------------------------------------|
| 1817 | <i>Spilopelia chinensis</i> | Eastern Spotted Dove | 2020/11/23 | 2 | 0 | 22.27212908 | 114.18389920 | <a href="https://www.inaturalist.org/observations/65567589">https://www.inaturalist.org/observations/65567589</a>   |
| 1818 | <i>Spilopelia chinensis</i> | Eastern Spotted Dove | 2020/11/23 | 2 | 0 | 22.27212908 | 114.18389920 | <a href="https://www.inaturalist.org/observations/65567590">https://www.inaturalist.org/observations/65567590</a>   |
| 1819 | <i>Spilopelia chinensis</i> | Eastern Spotted Dove | 2020/11/23 | 2 | 0 | 22.27212908 | 114.18389920 | <a href="https://www.inaturalist.org/observations/65567592">https://www.inaturalist.org/observations/65567592</a>   |
| 1820 | <i>Spilopelia chinensis</i> | Eastern Spotted Dove | 2020/11/23 | 2 | 0 | 22.27212908 | 114.18389920 | <a href="https://www.inaturalist.org/observations/65567593">https://www.inaturalist.org/observations/65567593</a>   |
| 1821 | <i>Spilopelia chinensis</i> | Eastern Spotted Dove | 2020/11/23 | 2 | 0 | 22.27212908 | 114.18389920 | <a href="https://www.inaturalist.org/observations/65567594">https://www.inaturalist.org/observations/65567594</a>   |
| 1822 | <i>Spilopelia chinensis</i> | Eastern Spotted Dove | 2020/11/23 | 2 | 0 | 22.27212908 | 114.18389920 | <a href="https://www.inaturalist.org/observations/65567595">https://www.inaturalist.org/observations/65567595</a>   |
| 1823 | <i>Spilopelia chinensis</i> | Eastern Spotted Dove | 2020/11/23 | 2 | 0 | 22.27212908 | 114.18389920 | <a href="https://www.inaturalist.org/observations/65567596">https://www.inaturalist.org/observations/65567596</a>   |
| 1824 | <i>Spilopelia chinensis</i> | Eastern Spotted Dove | 2021/11/11 | 1 | 0 | 22.27212933 | 114.18450010 | <a href="https://www.inaturalist.org/observations/100814140">https://www.inaturalist.org/observations/100814140</a> |
| 1825 | <i>Spilopelia chinensis</i> | Eastern Spotted Dove | 2021/3/27  | 2 | 0 | 22.27213477 | 114.17254850 | <a href="https://www.inaturalist.org/observations/72139354">https://www.inaturalist.org/observations/72139354</a>   |
| 1826 | <i>Spilopelia chinensis</i> | Eastern Spotted Dove | 2021/11/11 | 1 | 0 | 22.27213553 | 114.18446880 | <a href="https://www.inaturalist.org/observations/100812919">https://www.inaturalist.org/observations/100812919</a> |
| 1827 | <i>Spilopelia chinensis</i> | Eastern Spotted Dove | 2021/11/11 | 1 | 0 | 22.27214633 | 114.18444590 | <a href="https://www.inaturalist.org/observations/100812932">https://www.inaturalist.org/observations/100812932</a> |
| 1828 | <i>Spilopelia chinensis</i> | Eastern Spotted Dove | 2021/11/11 | 1 | 0 | 22.27214809 | 114.18454510 | <a href="https://www.inaturalist.org/observations/100836790">https://www.inaturalist.org/observations/100836790</a> |
| 1829 | <i>Spilopelia chinensis</i> | Eastern Spotted Dove | 2021/11/9  | 1 | 0 | 22.27216950 | 114.18451180 | <a href="https://www.inaturalist.org/observations/100638985">https://www.inaturalist.org/observations/100638985</a> |
| 1830 | <i>Spilopelia chinensis</i> | Eastern Spotted Dove | 2021/11/9  | 1 | 0 | 22.27216976 | 114.18451270 | <a href="https://www.inaturalist.org/observations/100639261">https://www.inaturalist.org/observations/100639261</a> |
| 1831 | <i>Spilopelia chinensis</i> | Eastern Spotted Dove | 2021/11/11 | 1 | 0 | 22.27217070 | 114.18447690 | <a href="https://www.inaturalist.org/observations/100810676">https://www.inaturalist.org/observations/100810676</a> |
| 1832 | <i>Spilopelia chinensis</i> | Eastern Spotted Dove | 2021/11/9  | 1 | 0 | 22.27217493 | 114.18451670 | <a href="https://www.inaturalist.org/observations/100642505">https://www.inaturalist.org/observations/100642505</a> |
| 1833 | <i>Spilopelia chinensis</i> | Eastern Spotted Dove | 2021/11/5  | 1 | 0 | 22.27222167 | 114.18459500 | <a href="https://www.inaturalist.org/observations/100274313">https://www.inaturalist.org/observations/100274313</a> |
| 1834 | <i>Spilopelia chinensis</i> | Eastern Spotted Dove | 2021/11/10 | 1 | 0 | 22.27224838 | 114.18443670 | <a href="https://www.inaturalist.org/observations/100810567">https://www.inaturalist.org/observations/100810567</a> |
| 1835 | <i>Spilopelia chinensis</i> | Eastern Spotted Dove | 2018/12/20 | 3 | 0 | 22.27227000 | 114.18070900 | <a href="https://www.inaturalist.org/observations/19129029">https://www.inaturalist.org/observations/19129029</a>   |
| 1836 | <i>Spilopelia chinensis</i> | Eastern Spotted Dove | 2021/10/27 | 1 | 0 | 22.27228000 | 114.18451670 | <a href="https://www.inaturalist.org/observations/100115806">https://www.inaturalist.org/observations/100115806</a> |
| 1837 | <i>Spilopelia chinensis</i> | Eastern Spotted Dove | 2021/11/4  | 1 | 0 | 22.27232000 | 114.18460830 | <a href="https://www.inaturalist.org/observations/100194350">https://www.inaturalist.org/observations/100194350</a> |
| 1838 | <i>Spilopelia chinensis</i> | Eastern Spotted Dove | 2020/11/23 | 2 | 0 | 22.27232691 | 114.18377040 | <a href="https://www.inaturalist.org/observations/65567651">https://www.inaturalist.org/observations/65567651</a>   |
| 1839 | <i>Spilopelia chinensis</i> | Eastern Spotted Dove | 2020/11/23 | 2 | 0 | 22.27232691 | 114.18377040 | <a href="https://www.inaturalist.org/observations/65567652">https://www.inaturalist.org/observations/65567652</a>   |

|      |                             |                      |            |   |   |             |              |                                                                                                                     |
|------|-----------------------------|----------------------|------------|---|---|-------------|--------------|---------------------------------------------------------------------------------------------------------------------|
| 1840 | <i>Spilopelia chinensis</i> | Eastern Spotted Dove | 2020/11/23 | 2 | 0 | 22.27232691 | 114.18377040 | <a href="https://www.inaturalist.org/observations/65567653">https://www.inaturalist.org/observations/65567653</a>   |
| 1841 | <i>Spilopelia chinensis</i> | Eastern Spotted Dove | 2020/11/23 | 2 | 0 | 22.27232691 | 114.18377040 | <a href="https://www.inaturalist.org/observations/65567655">https://www.inaturalist.org/observations/65567655</a>   |
| 1842 | <i>Spilopelia chinensis</i> | Eastern Spotted Dove | 2020/11/23 | 2 | 0 | 22.27232691 | 114.18377040 | <a href="https://www.inaturalist.org/observations/65567656">https://www.inaturalist.org/observations/65567656</a>   |
| 1843 | <i>Spilopelia chinensis</i> | Eastern Spotted Dove | 2020/11/23 | 2 | 0 | 22.27232691 | 114.18377040 | <a href="https://www.inaturalist.org/observations/65567657">https://www.inaturalist.org/observations/65567657</a>   |
| 1844 | <i>Spilopelia chinensis</i> | Eastern Spotted Dove | 2018/11/6  | 2 | 0 | 22.27244768 | 114.23232680 | <a href="https://www.inaturalist.org/observations/18208971">https://www.inaturalist.org/observations/18208971</a>   |
| 1845 | <i>Spilopelia chinensis</i> | Eastern Spotted Dove | 2021/11/3  | 1 | 0 | 22.27256167 | 114.18460000 | <a href="https://www.inaturalist.org/observations/100121744">https://www.inaturalist.org/observations/100121744</a> |
| 1846 | <i>Spilopelia chinensis</i> | Eastern Spotted Dove | 2020/11/16 | 1 | 0 | 22.27262152 | 114.23220630 | <a href="https://www.inaturalist.org/observations/65002417">https://www.inaturalist.org/observations/65002417</a>   |
| 1847 | <i>Spilopelia chinensis</i> | Eastern Spotted Dove | 2020/11/11 | 3 | 0 | 22.27264717 | 114.23237330 | <a href="https://www.inaturalist.org/observations/64664824">https://www.inaturalist.org/observations/64664824</a>   |
| 1848 | <i>Spilopelia chinensis</i> | Eastern Spotted Dove | 2018/11/5  | 5 | 0 | 22.27266863 | 114.23214640 | <a href="https://www.inaturalist.org/observations/18169170">https://www.inaturalist.org/observations/18169170</a>   |
| 1849 | <i>Spilopelia chinensis</i> | Eastern Spotted Dove | 2020/11/21 | 2 | 0 | 22.27267345 | 114.23217120 | <a href="https://www.inaturalist.org/observations/65315614">https://www.inaturalist.org/observations/65315614</a>   |
| 1850 | <i>Spilopelia chinensis</i> | Eastern Spotted Dove | 2018/11/5  | 2 | 0 | 22.27273762 | 114.23224390 | <a href="https://www.inaturalist.org/observations/18253057">https://www.inaturalist.org/observations/18253057</a>   |
| 1851 | <i>Spilopelia chinensis</i> | Eastern Spotted Dove | 2018/11/5  | 3 | 0 | 22.27275600 | 114.23217700 | <a href="https://www.inaturalist.org/observations/18235734">https://www.inaturalist.org/observations/18235734</a>   |
| 1852 | <i>Spilopelia chinensis</i> | Eastern Spotted Dove | 2018/11/6  | 6 | 0 | 22.27279960 | 114.23233460 | <a href="https://www.inaturalist.org/observations/18170588">https://www.inaturalist.org/observations/18170588</a>   |
| 1853 | <i>Spilopelia chinensis</i> | Eastern Spotted Dove | 2018/11/6  | 6 | 0 | 22.27286480 | 114.23226680 | <a href="https://www.inaturalist.org/observations/18209795">https://www.inaturalist.org/observations/18209795</a>   |
| 1854 | <i>Spilopelia chinensis</i> | Eastern Spotted Dove | 2018/11/6  | 5 | 0 | 22.27294517 | 114.23205280 | <a href="https://www.inaturalist.org/observations/18169186">https://www.inaturalist.org/observations/18169186</a>   |
| 1855 | <i>Spilopelia chinensis</i> | Eastern Spotted Dove | 2021/5/1   | 1 | 0 | 22.27306666 | 114.21047300 | <a href="https://www.inaturalist.org/observations/77155946">https://www.inaturalist.org/observations/77155946</a>   |
| 1856 | <i>Spilopelia chinensis</i> | Eastern Spotted Dove | 2021/11/9  | 1 | 0 | 22.27309500 | 114.23234400 | <a href="https://www.inaturalist.org/observations/100644174">https://www.inaturalist.org/observations/100644174</a> |
| 1857 | <i>Spilopelia chinensis</i> | Eastern Spotted Dove | 2019/3/21  | 1 | 0 | 22.27330911 | 114.13898960 | <a href="https://www.inaturalist.org/observations/21446366">https://www.inaturalist.org/observations/21446366</a>   |
| 1858 | <i>Spilopelia chinensis</i> | Eastern Spotted Dove | 2021/11/3  | 1 | 0 | 22.27338539 | 114.18441630 | <a href="https://www.inaturalist.org/observations/100117006">https://www.inaturalist.org/observations/100117006</a> |
| 1859 | <i>Spilopelia chinensis</i> | Eastern Spotted Dove | 2020/11/6  | 2 | 0 | 22.27367619 | 114.17610860 | <a href="https://www.inaturalist.org/observations/64272419">https://www.inaturalist.org/observations/64272419</a>   |
| 1860 | <i>Spilopelia chinensis</i> | Eastern Spotted Dove | 2020/11/6  | 1 | 0 | 22.27369480 | 114.17604790 | <a href="https://www.inaturalist.org/observations/64272169">https://www.inaturalist.org/observations/64272169</a>   |
| 1861 | <i>Spilopelia chinensis</i> | Eastern Spotted Dove | 2020/11/6  | 2 | 0 | 22.27373760 | 114.17563020 | <a href="https://www.inaturalist.org/observations/64272531">https://www.inaturalist.org/observations/64272531</a>   |
| 1862 | <i>Spilopelia chinensis</i> | Eastern Spotted Dove | 2020/11/6  | 2 | 0 | 22.27376813 | 114.17601770 | <a href="https://www.inaturalist.org/observations/64272290">https://www.inaturalist.org/observations/64272290</a>   |

|      |                             |                      |            |   |   |             |              |                                                                                                                     |
|------|-----------------------------|----------------------|------------|---|---|-------------|--------------|---------------------------------------------------------------------------------------------------------------------|
| 1863 | <i>Spilopelia chinensis</i> | Eastern Spotted Dove | 2020/11/6  | 2 | 0 | 22.27387580 | 114.17630180 | <a href="https://www.inaturalist.org/observations/64272226">https://www.inaturalist.org/observations/64272226</a>   |
| 1864 | <i>Spilopelia chinensis</i> | Eastern Spotted Dove | 2020/11/6  | 2 | 0 | 22.27389142 | 114.17560270 | <a href="https://www.inaturalist.org/observations/64273053">https://www.inaturalist.org/observations/64273053</a>   |
| 1865 | <i>Spilopelia chinensis</i> | Eastern Spotted Dove | 2020/11/6  | 2 | 0 | 22.27389917 | 114.17618970 | <a href="https://www.inaturalist.org/observations/64272488">https://www.inaturalist.org/observations/64272488</a>   |
| 1866 | <i>Spilopelia chinensis</i> | Eastern Spotted Dove | 2020/4/19  | 1 | 0 | 22.27392013 | 114.15527210 | <a href="https://www.inaturalist.org/observations/42541700">https://www.inaturalist.org/observations/42541700</a>   |
| 1867 | <i>Spilopelia chinensis</i> | Eastern Spotted Dove | 2019/2/21  | 1 | 0 | 22.27397500 | 114.18362600 | <a href="https://www.inaturalist.org/observations/20582403">https://www.inaturalist.org/observations/20582403</a>   |
| 1868 | <i>Spilopelia chinensis</i> | Eastern Spotted Dove | 2020/4/19  | 1 | 0 | 22.27398403 | 114.15537380 | <a href="https://www.inaturalist.org/observations/42543483">https://www.inaturalist.org/observations/42543483</a>   |
| 1869 | <i>Spilopelia chinensis</i> | Eastern Spotted Dove | 2021/5/1   | 1 | 0 | 22.27422167 | 114.15924720 | <a href="https://www.inaturalist.org/observations/76433031">https://www.inaturalist.org/observations/76433031</a>   |
| 1870 | <i>Spilopelia chinensis</i> | Eastern Spotted Dove | 2020/4/19  | 1 | 0 | 22.27426536 | 114.15467280 | <a href="https://www.inaturalist.org/observations/42541510">https://www.inaturalist.org/observations/42541510</a>   |
| 1871 | <i>Spilopelia chinensis</i> | Eastern Spotted Dove | 2018/5/1   | 4 | 0 | 22.27427000 | 114.16010280 | <a href="https://www.inaturalist.org/observations/11944385">https://www.inaturalist.org/observations/11944385</a>   |
| 1872 | <i>Spilopelia chinensis</i> | Eastern Spotted Dove | 2019/5/11  | 2 | 0 | 22.27427385 | 114.14421560 | <a href="https://www.inaturalist.org/observations/24923212">https://www.inaturalist.org/observations/24923212</a>   |
| 1873 | <i>Spilopelia chinensis</i> | Eastern Spotted Dove | 2020/11/6  | 2 | 0 | 22.27431088 | 114.17590170 | <a href="https://www.inaturalist.org/observations/64272477">https://www.inaturalist.org/observations/64272477</a>   |
| 1874 | <i>Spilopelia chinensis</i> | Eastern Spotted Dove | 2020/8/16  | 1 | 0 | 22.27437440 | 114.14458780 | <a href="https://www.inaturalist.org/observations/56594352">https://www.inaturalist.org/observations/56594352</a>   |
| 1875 | <i>Spilopelia chinensis</i> | Eastern Spotted Dove | 2020/11/9  | 2 | 0 | 22.27444613 | 114.17621840 | <a href="https://www.inaturalist.org/observations/64500953">https://www.inaturalist.org/observations/64500953</a>   |
| 1876 | <i>Spilopelia chinensis</i> | Eastern Spotted Dove | 2020/11/9  | 1 | 0 | 22.27446922 | 114.17630890 | <a href="https://www.inaturalist.org/observations/64500896">https://www.inaturalist.org/observations/64500896</a>   |
| 1877 | <i>Spilopelia chinensis</i> | Eastern Spotted Dove | 2018/11/6  | 3 | 0 | 22.27457518 | 114.18967950 | <a href="https://www.inaturalist.org/observations/18165169">https://www.inaturalist.org/observations/18165169</a>   |
| 1878 | <i>Spilopelia chinensis</i> | Eastern Spotted Dove | 2018/11/6  | 4 | 0 | 22.27457777 | 114.18966810 | <a href="https://www.inaturalist.org/observations/18165183">https://www.inaturalist.org/observations/18165183</a>   |
| 1879 | <i>Spilopelia chinensis</i> | Eastern Spotted Dove | 2018/11/6  | 5 | 0 | 22.27457911 | 114.18974490 | <a href="https://www.inaturalist.org/observations/18165578">https://www.inaturalist.org/observations/18165578</a>   |
| 1880 | <i>Spilopelia chinensis</i> | Eastern Spotted Dove | 2018/11/6  | 4 | 0 | 22.27460157 | 114.18970010 | <a href="https://www.inaturalist.org/observations/18165752">https://www.inaturalist.org/observations/18165752</a>   |
| 1881 | <i>Spilopelia chinensis</i> | Eastern Spotted Dove | 2018/11/6  | 5 | 0 | 22.27460167 | 114.18967000 | <a href="https://www.inaturalist.org/observations/18168340">https://www.inaturalist.org/observations/18168340</a>   |
| 1882 | <i>Spilopelia chinensis</i> | Eastern Spotted Dove | 2018/11/6  | 5 | 0 | 22.27461184 | 114.18973590 | <a href="https://www.inaturalist.org/observations/18165562">https://www.inaturalist.org/observations/18165562</a>   |
| 1883 | <i>Spilopelia chinensis</i> | Eastern Spotted Dove | 2021/3/14  | 2 | 0 | 22.27464652 | 114.15763630 | <a href="https://www.inaturalist.org/observations/71181389">https://www.inaturalist.org/observations/71181389</a>   |
| 1884 | <i>Spilopelia chinensis</i> | Eastern Spotted Dove | 2017/12/16 | 1 | 0 | 22.27472687 | 114.17369080 | <a href="https://www.inaturalist.org/observations/12033294">https://www.inaturalist.org/observations/12033294</a>   |
| 1885 | <i>Spilopelia chinensis</i> | Eastern Spotted Dove | 2022/1/23  | 1 | 0 | 22.27473632 | 114.14875800 | <a href="https://www.inaturalist.org/observations/105482534">https://www.inaturalist.org/observations/105482534</a> |

|      |                             |                      |            |   |   |             |              |                                                                                                                     |
|------|-----------------------------|----------------------|------------|---|---|-------------|--------------|---------------------------------------------------------------------------------------------------------------------|
| 1886 | <i>Spilopelia chinensis</i> | Eastern Spotted Dove | 2018/11/6  | 4 | 0 | 22.27479314 | 114.18975590 | <a href="https://www.inaturalist.org/observations/18165186">https://www.inaturalist.org/observations/18165186</a>   |
| 1887 | <i>Spilopelia chinensis</i> | Eastern Spotted Dove | 2020/11/9  | 1 | 0 | 22.27484322 | 114.17604730 | <a href="https://www.inaturalist.org/observations/64500972">https://www.inaturalist.org/observations/64500972</a>   |
| 1888 | <i>Spilopelia chinensis</i> | Eastern Spotted Dove | 2019/3/21  | 1 | 0 | 22.27507479 | 114.13938430 | <a href="https://www.inaturalist.org/observations/21448241">https://www.inaturalist.org/observations/21448241</a>   |
| 1889 | <i>Spilopelia chinensis</i> | Eastern Spotted Dove | 2018/11/6  | 1 | 0 | 22.27510732 | 114.17670290 | <a href="https://www.inaturalist.org/observations/18163696">https://www.inaturalist.org/observations/18163696</a>   |
| 1890 | <i>Spilopelia chinensis</i> | Eastern Spotted Dove | 2018/11/6  | 3 | 0 | 22.27514350 | 114.17653700 | <a href="https://www.inaturalist.org/observations/18163693">https://www.inaturalist.org/observations/18163693</a>   |
| 1891 | <i>Spilopelia chinensis</i> | Eastern Spotted Dove | 2020/11/10 | 2 | 0 | 22.27517077 | 114.17730380 | <a href="https://www.inaturalist.org/observations/64580486">https://www.inaturalist.org/observations/64580486</a>   |
| 1892 | <i>Spilopelia chinensis</i> | Eastern Spotted Dove | 2020/11/10 | 2 | 0 | 22.27517092 | 114.17714380 | <a href="https://www.inaturalist.org/observations/64580664">https://www.inaturalist.org/observations/64580664</a>   |
| 1893 | <i>Spilopelia chinensis</i> | Eastern Spotted Dove | 2020/11/10 | 2 | 0 | 22.27517417 | 114.17641230 | <a href="https://www.inaturalist.org/observations/64578825">https://www.inaturalist.org/observations/64578825</a>   |
| 1894 | <i>Spilopelia chinensis</i> | Eastern Spotted Dove | 2020/11/10 | 2 | 0 | 22.27518208 | 114.17729550 | <a href="https://www.inaturalist.org/observations/64579070">https://www.inaturalist.org/observations/64579070</a>   |
| 1895 | <i>Spilopelia chinensis</i> | Eastern Spotted Dove | 2020/11/10 | 1 | 0 | 22.27519572 | 114.17728530 | <a href="https://www.inaturalist.org/observations/64575757">https://www.inaturalist.org/observations/64575757</a>   |
| 1896 | <i>Spilopelia chinensis</i> | Eastern Spotted Dove | 2020/11/10 | 2 | 0 | 22.27519853 | 114.17736260 | <a href="https://www.inaturalist.org/observations/64580442">https://www.inaturalist.org/observations/64580442</a>   |
| 1897 | <i>Spilopelia chinensis</i> | Eastern Spotted Dove | 2020/11/10 | 2 | 0 | 22.27520671 | 114.17719820 | <a href="https://www.inaturalist.org/observations/64580743">https://www.inaturalist.org/observations/64580743</a>   |
| 1898 | <i>Spilopelia chinensis</i> | Eastern Spotted Dove | 2020/11/10 | 2 | 0 | 22.27521094 | 114.17729140 | <a href="https://www.inaturalist.org/observations/64579787">https://www.inaturalist.org/observations/64579787</a>   |
| 1899 | <i>Spilopelia chinensis</i> | Eastern Spotted Dove | 2020/11/10 | 2 | 0 | 22.27521500 | 114.17726040 | <a href="https://www.inaturalist.org/observations/64575669">https://www.inaturalist.org/observations/64575669</a>   |
| 1900 | <i>Spilopelia chinensis</i> | Eastern Spotted Dove | 2020/11/6  | 2 | 0 | 22.27522397 | 114.17696410 | <a href="https://www.inaturalist.org/observations/64290420">https://www.inaturalist.org/observations/64290420</a>   |
| 1901 | <i>Spilopelia chinensis</i> | Eastern Spotted Dove | 2020/11/10 | 2 | 0 | 22.27522922 | 114.17714850 | <a href="https://www.inaturalist.org/observations/64579761">https://www.inaturalist.org/observations/64579761</a>   |
| 1902 | <i>Spilopelia chinensis</i> | Eastern Spotted Dove | 2020/11/10 | 2 | 0 | 22.27523557 | 114.17686110 | <a href="https://www.inaturalist.org/observations/65006813">https://www.inaturalist.org/observations/65006813</a>   |
| 1903 | <i>Spilopelia chinensis</i> | Eastern Spotted Dove | 2020/11/10 | 2 | 0 | 22.27526209 | 114.17687220 | <a href="https://www.inaturalist.org/observations/64580242">https://www.inaturalist.org/observations/64580242</a>   |
| 1904 | <i>Spilopelia chinensis</i> | Eastern Spotted Dove | 2021/11/11 | 1 | 0 | 22.27527606 | 114.17565220 | <a href="https://www.inaturalist.org/observations/100837198">https://www.inaturalist.org/observations/100837198</a> |
| 1905 | <i>Spilopelia chinensis</i> | Eastern Spotted Dove | 2020/1/15  | 2 | 0 | 22.27528344 | 114.17578950 | <a href="https://www.inaturalist.org/observations/37603553">https://www.inaturalist.org/observations/37603553</a>   |
| 1906 | <i>Spilopelia chinensis</i> | Eastern Spotted Dove | 2020/11/10 | 2 | 0 | 22.27530349 | 114.17577650 | <a href="https://www.inaturalist.org/observations/64571662">https://www.inaturalist.org/observations/64571662</a>   |
| 1907 | <i>Spilopelia chinensis</i> | Eastern Spotted Dove | 2020/11/10 | 2 | 0 | 22.27530752 | 114.17685090 | <a href="https://www.inaturalist.org/observations/64580514">https://www.inaturalist.org/observations/64580514</a>   |
| 1908 | <i>Spilopelia chinensis</i> | Eastern Spotted Dove | 2020/11/10 | 1 | 0 | 22.27533496 | 114.17593780 | <a href="https://www.inaturalist.org/observations/64580193">https://www.inaturalist.org/observations/64580193</a>   |

|      |                             |                      |            |   |   |             |              |                                                                                                                     |
|------|-----------------------------|----------------------|------------|---|---|-------------|--------------|---------------------------------------------------------------------------------------------------------------------|
| 1909 | <i>Spilopelia chinensis</i> | Eastern Spotted Dove | 2021/11/11 | 2 | 0 | 22.27533667 | 114.17579670 | <a href="https://www.inaturalist.org/observations/100837155">https://www.inaturalist.org/observations/100837155</a> |
| 1910 | <i>Spilopelia chinensis</i> | Eastern Spotted Dove | 2021/11/11 | 2 | 0 | 22.27533886 | 114.17565480 | <a href="https://www.inaturalist.org/observations/100838833">https://www.inaturalist.org/observations/100838833</a> |
| 1911 | <i>Spilopelia chinensis</i> | Eastern Spotted Dove | 2021/3/8   | 1 | 0 | 22.27534667 | 114.17260830 | <a href="https://www.inaturalist.org/observations/70809841">https://www.inaturalist.org/observations/70809841</a>   |
| 1912 | <i>Spilopelia chinensis</i> | Eastern Spotted Dove | 2020/11/11 | 1 | 0 | 22.27534800 | 114.17575400 | <a href="https://www.inaturalist.org/observations/64653436">https://www.inaturalist.org/observations/64653436</a>   |
| 1913 | <i>Spilopelia chinensis</i> | Eastern Spotted Dove | 2021/11/11 | 2 | 0 | 22.27537570 | 114.17589410 | <a href="https://www.inaturalist.org/observations/100837121">https://www.inaturalist.org/observations/100837121</a> |
| 1914 | <i>Spilopelia chinensis</i> | Eastern Spotted Dove | 2020/11/10 | 2 | 0 | 22.27538600 | 114.17708060 | <a href="https://www.inaturalist.org/observations/64578171">https://www.inaturalist.org/observations/64578171</a>   |
| 1915 | <i>Spilopelia chinensis</i> | Eastern Spotted Dove | 2019/4/26  | 2 | 0 | 22.27538667 | 114.18247170 | <a href="https://www.inaturalist.org/observations/23119583">https://www.inaturalist.org/observations/23119583</a>   |
| 1916 | <i>Spilopelia chinensis</i> | Eastern Spotted Dove | 2021/11/4  | 2 | 0 | 22.27538707 | 114.17591920 | <a href="https://www.inaturalist.org/observations/100218786">https://www.inaturalist.org/observations/100218786</a> |
| 1917 | <i>Spilopelia chinensis</i> | Eastern Spotted Dove | 2019/11/4  | 3 | 0 | 22.27539442 | 114.17641570 | <a href="https://www.inaturalist.org/observations/35282152">https://www.inaturalist.org/observations/35282152</a>   |
| 1918 | <i>Spilopelia chinensis</i> | Eastern Spotted Dove | 2020/1/15  | 2 | 0 | 22.27539515 | 114.17575640 | <a href="https://www.inaturalist.org/observations/37604080">https://www.inaturalist.org/observations/37604080</a>   |
| 1919 | <i>Spilopelia chinensis</i> | Eastern Spotted Dove | 2019/11/4  | 3 | 0 | 22.27539707 | 114.17600280 | <a href="https://www.inaturalist.org/observations/35280412">https://www.inaturalist.org/observations/35280412</a>   |
| 1920 | <i>Spilopelia chinensis</i> | Eastern Spotted Dove | 2021/5/23  | 2 | 0 | 22.27541400 | 114.15782590 | <a href="https://www.inaturalist.org/observations/79900360">https://www.inaturalist.org/observations/79900360</a>   |
| 1921 | <i>Spilopelia chinensis</i> | Eastern Spotted Dove | 2021/11/11 | 2 | 0 | 22.27541797 | 114.17568340 | <a href="https://www.inaturalist.org/observations/100837109">https://www.inaturalist.org/observations/100837109</a> |
| 1922 | <i>Spilopelia chinensis</i> | Eastern Spotted Dove | 2020/11/11 | 1 | 0 | 22.27542610 | 114.17597480 | <a href="https://www.inaturalist.org/observations/64653429">https://www.inaturalist.org/observations/64653429</a>   |
| 1923 | <i>Spilopelia chinensis</i> | Eastern Spotted Dove | 2019/11/4  | 2 | 0 | 22.27544055 | 114.17608580 | <a href="https://www.inaturalist.org/observations/35280000">https://www.inaturalist.org/observations/35280000</a>   |
| 1924 | <i>Spilopelia chinensis</i> | Eastern Spotted Dove | 2021/12/5  | 2 | 0 | 22.27548402 | 114.15840510 | <a href="https://www.inaturalist.org/observations/102533431">https://www.inaturalist.org/observations/102533431</a> |
| 1925 | <i>Spilopelia chinensis</i> | Eastern Spotted Dove | 2021/11/11 | 3 | 0 | 22.27550486 | 114.17614500 | <a href="https://www.inaturalist.org/observations/100838908">https://www.inaturalist.org/observations/100838908</a> |
| 1926 | <i>Spilopelia chinensis</i> | Eastern Spotted Dove | 2020/11/10 | 2 | 0 | 22.27551580 | 114.17612300 | <a href="https://www.inaturalist.org/observations/64578446">https://www.inaturalist.org/observations/64578446</a>   |
| 1927 | <i>Spilopelia chinensis</i> | Eastern Spotted Dove | 2020/11/10 | 2 | 0 | 22.27554075 | 114.17610090 | <a href="https://www.inaturalist.org/observations/64574796">https://www.inaturalist.org/observations/64574796</a>   |
| 1928 | <i>Spilopelia chinensis</i> | Eastern Spotted Dove | 2021/11/4  | 2 | 0 | 22.27554380 | 114.17606800 | <a href="https://www.inaturalist.org/observations/100218646">https://www.inaturalist.org/observations/100218646</a> |
| 1929 | <i>Spilopelia chinensis</i> | Eastern Spotted Dove | 2021/3/29  | 2 | 0 | 22.27554668 | 114.15330180 | <a href="https://www.inaturalist.org/observations/72347136">https://www.inaturalist.org/observations/72347136</a>   |
| 1930 | <i>Spilopelia chinensis</i> | Eastern Spotted Dove | 2020/11/10 | 1 | 0 | 22.27557005 | 114.17625620 | <a href="https://www.inaturalist.org/observations/64567677">https://www.inaturalist.org/observations/64567677</a>   |
| 1931 | <i>Spilopelia chinensis</i> | Eastern Spotted Dove | 2020/11/10 | 2 | 0 | 22.27557051 | 114.17729420 | <a href="https://www.inaturalist.org/observations/64575580">https://www.inaturalist.org/observations/64575580</a>   |



|      |                             |                      |            |   |   |             |              |                                                                                                                     |
|------|-----------------------------|----------------------|------------|---|---|-------------|--------------|---------------------------------------------------------------------------------------------------------------------|
| 1932 | <i>Spilopelia chinensis</i> | Eastern Spotted Dove | 2022/5/8   | 2 | 0 | 22.27557812 | 114.20953800 | <a href="https://www.inaturalist.org/observations/116054547">https://www.inaturalist.org/observations/116054547</a> |
| 1933 | <i>Spilopelia chinensis</i> | Eastern Spotted Dove | 2020/11/7  | 1 | 0 | 22.27559182 | 114.17619380 | <a href="https://www.inaturalist.org/observations/64346430">https://www.inaturalist.org/observations/64346430</a>   |
| 1934 | <i>Spilopelia chinensis</i> | Eastern Spotted Dove | 2020/1/15  | 2 | 0 | 22.27560783 | 114.17593560 | <a href="https://www.inaturalist.org/observations/37604803">https://www.inaturalist.org/observations/37604803</a>   |
| 1935 | <i>Spilopelia chinensis</i> | Eastern Spotted Dove | 2020/11/10 | 2 | 0 | 22.27561620 | 114.17603480 | <a href="https://www.inaturalist.org/observations/64567665">https://www.inaturalist.org/observations/64567665</a>   |
| 1936 | <i>Spilopelia chinensis</i> | Eastern Spotted Dove | 2020/11/10 | 2 | 0 | 22.27561855 | 114.17610270 | <a href="https://www.inaturalist.org/observations/64567683">https://www.inaturalist.org/observations/64567683</a>   |
| 1937 | <i>Spilopelia chinensis</i> | Eastern Spotted Dove | 2021/11/4  | 2 | 0 | 22.27562680 | 114.17618540 | <a href="https://www.inaturalist.org/observations/100217393">https://www.inaturalist.org/observations/100217393</a> |
| 1938 | <i>Spilopelia chinensis</i> | Eastern Spotted Dove | 2019/4/25  | 2 | 0 | 22.27562833 | 114.15570830 | <a href="https://www.inaturalist.org/observations/23060455">https://www.inaturalist.org/observations/23060455</a>   |
| 1939 | <i>Spilopelia chinensis</i> | Eastern Spotted Dove | 2020/11/10 | 2 | 0 | 22.27563232 | 114.17622770 | <a href="https://www.inaturalist.org/observations/64579280">https://www.inaturalist.org/observations/64579280</a>   |
| 1940 | <i>Spilopelia chinensis</i> | Eastern Spotted Dove | 2021/11/4  | 2 | 0 | 22.27563451 | 114.17937850 | <a href="https://www.inaturalist.org/observations/100218853">https://www.inaturalist.org/observations/100218853</a> |
| 1941 | <i>Spilopelia chinensis</i> | Eastern Spotted Dove | 2020/11/10 | 1 | 0 | 22.27564695 | 114.17614490 | <a href="https://www.inaturalist.org/observations/64580797">https://www.inaturalist.org/observations/64580797</a>   |
| 1942 | <i>Spilopelia chinensis</i> | Eastern Spotted Dove | 2019/11/4  | 3 | 0 | 22.27575500 | 114.17596330 | <a href="https://www.inaturalist.org/observations/35281426">https://www.inaturalist.org/observations/35281426</a>   |
| 1943 | <i>Spilopelia chinensis</i> | Eastern Spotted Dove | 2020/11/10 | 1 | 0 | 22.27576201 | 114.17595930 | <a href="https://www.inaturalist.org/observations/64575108">https://www.inaturalist.org/observations/64575108</a>   |
| 1944 | <i>Spilopelia chinensis</i> | Eastern Spotted Dove | 2021/11/4  | 2 | 0 | 22.27579594 | 114.17787550 | <a href="https://www.inaturalist.org/observations/100217833">https://www.inaturalist.org/observations/100217833</a> |
| 1945 | <i>Spilopelia chinensis</i> | Eastern Spotted Dove | 2021/11/4  | 1 | 0 | 22.27580244 | 114.17929350 | <a href="https://www.inaturalist.org/observations/100215659">https://www.inaturalist.org/observations/100215659</a> |
| 1946 | <i>Spilopelia chinensis</i> | Eastern Spotted Dove | 2021/11/4  | 2 | 0 | 22.27580788 | 114.17595500 | <a href="https://www.inaturalist.org/observations/100218907">https://www.inaturalist.org/observations/100218907</a> |
| 1947 | <i>Spilopelia chinensis</i> | Eastern Spotted Dove | 2022/5/9   | 2 | 0 | 22.27581168 | 114.15734520 | <a href="https://www.inaturalist.org/observations/116233420">https://www.inaturalist.org/observations/116233420</a> |
| 1948 | <i>Spilopelia chinensis</i> | Eastern Spotted Dove | 2019/11/4  | 3 | 0 | 22.27582998 | 114.17593890 | <a href="https://www.inaturalist.org/observations/35281504">https://www.inaturalist.org/observations/35281504</a>   |
| 1949 | <i>Spilopelia chinensis</i> | Eastern Spotted Dove | 2020/8/16  | 1 | 0 | 22.27588350 | 114.14553200 | <a href="https://www.inaturalist.org/observations/63813378">https://www.inaturalist.org/observations/63813378</a>   |
| 1950 | <i>Spilopelia chinensis</i> | Eastern Spotted Dove | 2019/11/4  | 3 | 0 | 22.27592005 | 114.17594180 | <a href="https://www.inaturalist.org/observations/35280394">https://www.inaturalist.org/observations/35280394</a>   |
| 1951 | <i>Spilopelia chinensis</i> | Eastern Spotted Dove | 2021/11/4  | 2 | 0 | 22.27598000 | 114.17604170 | <a href="https://www.inaturalist.org/observations/100219055">https://www.inaturalist.org/observations/100219055</a> |
| 1952 | <i>Spilopelia chinensis</i> | Eastern Spotted Dove | 2019/11/4  | 2 | 0 | 22.27598882 | 114.17578500 | <a href="https://www.inaturalist.org/observations/35280397">https://www.inaturalist.org/observations/35280397</a>   |
| 1953 | <i>Spilopelia chinensis</i> | Eastern Spotted Dove | 2017/12/4  | 2 | 0 | 22.27599500 | 114.17227170 | <a href="https://www.inaturalist.org/observations/9038493">https://www.inaturalist.org/observations/9038493</a>     |
| 1954 | <i>Spilopelia chinensis</i> | Eastern Spotted Dove | 2019/9/28  | 2 | 0 | 22.27601860 | 114.15212530 | <a href="https://www.inaturalist.org/observations/33514337">https://www.inaturalist.org/observations/33514337</a>   |

|      |                             |                      |            |   |   |             |              |                                                                                                                     |
|------|-----------------------------|----------------------|------------|---|---|-------------|--------------|---------------------------------------------------------------------------------------------------------------------|
| 1955 | <i>Spilopelia chinensis</i> | Eastern Spotted Dove | 2020/6/20  | 1 | 0 | 22.27602200 | 114.17514710 | <a href="https://www.inaturalist.org/observations/50419086">https://www.inaturalist.org/observations/50419086</a>   |
| 1956 | <i>Spilopelia chinensis</i> | Eastern Spotted Dove | 2020/2/22  | 3 | 0 | 22.27603000 | 114.18024500 | <a href="https://www.inaturalist.org/observations/39034396">https://www.inaturalist.org/observations/39034396</a>   |
| 1957 | <i>Spilopelia chinensis</i> | Eastern Spotted Dove | 2021/11/4  | 2 | 0 | 22.27609472 | 114.17609100 | <a href="https://www.inaturalist.org/observations/100217864">https://www.inaturalist.org/observations/100217864</a> |
| 1958 | <i>Spilopelia chinensis</i> | Eastern Spotted Dove | 2017/11/21 | 4 | 0 | 22.27611315 | 114.14097350 | <a href="https://www.inaturalist.org/observations/8884365">https://www.inaturalist.org/observations/8884365</a>     |
| 1959 | <i>Spilopelia chinensis</i> | Eastern Spotted Dove | 2020/4/26  | 1 | 0 | 22.27632110 | 114.24144770 | <a href="https://www.inaturalist.org/observations/43559137">https://www.inaturalist.org/observations/43559137</a>   |
| 1960 | <i>Spilopelia chinensis</i> | Eastern Spotted Dove | 2019/11/10 | 1 | 0 | 22.27632363 | 114.20853380 | <a href="https://www.inaturalist.org/observations/35510362">https://www.inaturalist.org/observations/35510362</a>   |
| 1961 | <i>Spilopelia chinensis</i> | Eastern Spotted Dove | 2021/5/1   | 1 | 0 | 22.27648285 | 114.15174270 | <a href="https://www.inaturalist.org/observations/76001324">https://www.inaturalist.org/observations/76001324</a>   |
| 1962 | <i>Spilopelia chinensis</i> | Eastern Spotted Dove | 2020/4/27  | 2 | 0 | 22.27650880 | 114.15793600 | <a href="https://www.inaturalist.org/observations/43860800">https://www.inaturalist.org/observations/43860800</a>   |
| 1963 | <i>Spilopelia chinensis</i> | Eastern Spotted Dove | 2020/6/10  | 2 | 0 | 22.27651000 | 114.15956300 | <a href="https://www.inaturalist.org/observations/49330995">https://www.inaturalist.org/observations/49330995</a>   |
| 1964 | <i>Spilopelia chinensis</i> | Eastern Spotted Dove | 2020/8/26  | 1 | 0 | 22.27651716 | 114.15956280 | <a href="https://www.inaturalist.org/observations/57617721">https://www.inaturalist.org/observations/57617721</a>   |
| 1965 | <i>Spilopelia chinensis</i> | Eastern Spotted Dove | 2020/4/26  | 2 | 0 | 22.27653946 | 114.24100200 | <a href="https://www.inaturalist.org/observations/43544243">https://www.inaturalist.org/observations/43544243</a>   |
| 1966 | <i>Spilopelia chinensis</i> | Eastern Spotted Dove | 2020/8/27  | 2 | 0 | 22.27655333 | 114.16055280 | <a href="https://www.inaturalist.org/observations/57711426">https://www.inaturalist.org/observations/57711426</a>   |
| 1967 | <i>Spilopelia chinensis</i> | Eastern Spotted Dove | 2021/5/3   | 2 | 0 | 22.27655833 | 114.16074450 | <a href="https://www.inaturalist.org/observations/76876376">https://www.inaturalist.org/observations/76876376</a>   |
| 1968 | <i>Spilopelia chinensis</i> | Eastern Spotted Dove | 2020/12/15 | 2 | 0 | 22.27658600 | 114.16038190 | <a href="https://www.inaturalist.org/observations/66604423">https://www.inaturalist.org/observations/66604423</a>   |
| 1969 | <i>Spilopelia chinensis</i> | Eastern Spotted Dove | 2019/7/10  | 3 | 0 | 22.27659000 | 114.15988000 | <a href="https://www.inaturalist.org/observations/32318457">https://www.inaturalist.org/observations/32318457</a>   |
| 1970 | <i>Spilopelia chinensis</i> | Eastern Spotted Dove | 2020/12/15 | 1 | 0 | 22.27661167 | 114.16045280 | <a href="https://www.inaturalist.org/observations/66603370">https://www.inaturalist.org/observations/66603370</a>   |
| 1971 | <i>Spilopelia chinensis</i> | Eastern Spotted Dove | 2020/8/24  | 2 | 0 | 22.27668603 | 114.16081480 | <a href="https://www.inaturalist.org/observations/57422336">https://www.inaturalist.org/observations/57422336</a>   |
| 1972 | <i>Spilopelia chinensis</i> | Eastern Spotted Dove | 2018/11/7  | 6 | 0 | 22.27670540 | 114.16003630 | <a href="https://www.inaturalist.org/observations/18276187">https://www.inaturalist.org/observations/18276187</a>   |
| 1973 | <i>Spilopelia chinensis</i> | Eastern Spotted Dove | 2018/4/28  | 2 | 0 | 22.27673914 | 114.16368940 | <a href="https://www.inaturalist.org/observations/11580032">https://www.inaturalist.org/observations/11580032</a>   |
| 1974 | <i>Spilopelia chinensis</i> | Eastern Spotted Dove | 2020/8/24  | 2 | 0 | 22.27674535 | 114.16041260 | <a href="https://www.inaturalist.org/observations/57422102">https://www.inaturalist.org/observations/57422102</a>   |
| 1975 | <i>Spilopelia chinensis</i> | Eastern Spotted Dove | 2021/5/1   | 1 | 0 | 22.27677500 | 114.15605800 | <a href="https://www.inaturalist.org/observations/76408664">https://www.inaturalist.org/observations/76408664</a>   |
| 1976 | <i>Spilopelia chinensis</i> | Eastern Spotted Dove | 2018/3/1   | 0 | 0 | 22.27679856 | 114.15972950 | <a href="https://www.inaturalist.org/observations/38613525">https://www.inaturalist.org/observations/38613525</a>   |
| 1977 | <i>Spilopelia chinensis</i> | Eastern Spotted Dove | 2019/4/26  | 1 | 0 | 22.27681333 | 114.18274670 | <a href="https://www.inaturalist.org/observations/23086158">https://www.inaturalist.org/observations/23086158</a>   |

|      |                             |                      |            |   |   |             |              |                                                                                                                     |
|------|-----------------------------|----------------------|------------|---|---|-------------|--------------|---------------------------------------------------------------------------------------------------------------------|
| 1978 | <i>Spilopelia chinensis</i> | Eastern Spotted Dove | 2022/5/15  | 1 | 0 | 22.27682877 | 114.16045380 | <a href="https://www.inaturalist.org/observations/117101841">https://www.inaturalist.org/observations/117101841</a> |
| 1979 | <i>Spilopelia chinensis</i> | Eastern Spotted Dove | 2021/4/30  | 1 | 0 | 22.27685000 | 114.16884670 | <a href="https://www.inaturalist.org/observations/75715609">https://www.inaturalist.org/observations/75715609</a>   |
| 1980 | <i>Spilopelia chinensis</i> | Eastern Spotted Dove | 2022/4/5   | 1 | 0 | 22.27686333 | 114.16154450 | <a href="https://www.inaturalist.org/observations/110450283">https://www.inaturalist.org/observations/110450283</a> |
| 1981 | <i>Spilopelia chinensis</i> | Eastern Spotted Dove | 2021/11/28 | 1 | 0 | 22.27687000 | 114.15521120 | <a href="https://www.inaturalist.org/observations/102076893">https://www.inaturalist.org/observations/102076893</a> |
| 1982 | <i>Spilopelia chinensis</i> | Eastern Spotted Dove | 2018/11/6  | 2 | 0 | 22.27690189 | 114.19128860 | <a href="https://www.inaturalist.org/observations/18165526">https://www.inaturalist.org/observations/18165526</a>   |
| 1983 | <i>Spilopelia chinensis</i> | Eastern Spotted Dove | 2017/9/14  | 2 | 0 | 22.27690713 | 114.16220230 | <a href="https://www.inaturalist.org/observations/33545515">https://www.inaturalist.org/observations/33545515</a>   |
| 1984 | <i>Spilopelia chinensis</i> | Eastern Spotted Dove | 2020/4/18  | 1 | 0 | 22.27697112 | 114.16053080 | <a href="https://www.inaturalist.org/observations/42448713">https://www.inaturalist.org/observations/42448713</a>   |
| 1985 | <i>Spilopelia chinensis</i> | Eastern Spotted Dove | 2020/4/18  | 1 | 0 | 22.27699360 | 114.16005500 | <a href="https://www.inaturalist.org/observations/42445757">https://www.inaturalist.org/observations/42445757</a>   |
| 1986 | <i>Spilopelia chinensis</i> | Eastern Spotted Dove | 2022/5/6   | 1 | 0 | 22.27701851 | 114.16133030 | <a href="https://www.inaturalist.org/observations/115700184">https://www.inaturalist.org/observations/115700184</a> |
| 1987 | <i>Spilopelia chinensis</i> | Eastern Spotted Dove | 2021/5/2   | 2 | 0 | 22.27703513 | 114.16026830 | <a href="https://www.inaturalist.org/observations/76413914">https://www.inaturalist.org/observations/76413914</a>   |
| 1988 | <i>Spilopelia chinensis</i> | Eastern Spotted Dove | 2020/3/21  | 1 | 0 | 22.27704255 | 114.15941000 | <a href="https://www.inaturalist.org/observations/40339996">https://www.inaturalist.org/observations/40339996</a>   |
| 1989 | <i>Spilopelia chinensis</i> | Eastern Spotted Dove | 2021/4/5   | 1 | 0 | 22.27707167 | 114.16060550 | <a href="https://www.inaturalist.org/observations/72999878">https://www.inaturalist.org/observations/72999878</a>   |
| 1990 | <i>Spilopelia chinensis</i> | Eastern Spotted Dove | 2018/4/28  | 5 | 0 | 22.27711311 | 114.16174390 | <a href="https://www.inaturalist.org/observations/11573096">https://www.inaturalist.org/observations/11573096</a>   |
| 1991 | <i>Spilopelia chinensis</i> | Eastern Spotted Dove | 2021/5/29  | 2 | 0 | 22.27716370 | 114.16085220 | <a href="https://www.inaturalist.org/observations/81667080">https://www.inaturalist.org/observations/81667080</a>   |
| 1992 | <i>Spilopelia chinensis</i> | Eastern Spotted Dove | 2022/4/29  | 2 | 0 | 22.27716373 | 114.16085200 | <a href="https://www.inaturalist.org/observations/113399105">https://www.inaturalist.org/observations/113399105</a> |
| 1993 | <i>Spilopelia chinensis</i> | Eastern Spotted Dove | 2021/9/5   | 2 | 0 | 22.27716373 | 114.16085230 | <a href="https://www.inaturalist.org/observations/93684354">https://www.inaturalist.org/observations/93684354</a>   |
| 1994 | <i>Spilopelia chinensis</i> | Eastern Spotted Dove | 2022/6/28  | 1 | 0 | 22.27716807 | 114.16085200 | <a href="https://www.inaturalist.org/observations/123808914">https://www.inaturalist.org/observations/123808914</a> |
| 1995 | <i>Spilopelia chinensis</i> | Eastern Spotted Dove | 2020/8/26  | 1 | 0 | 22.27719874 | 114.16144970 | <a href="https://www.inaturalist.org/observations/57617918">https://www.inaturalist.org/observations/57617918</a>   |
| 1996 | <i>Spilopelia chinensis</i> | Eastern Spotted Dove | 2019/8/2   | 4 | 0 | 22.27719983 | 114.16383290 | <a href="https://www.inaturalist.org/observations/30029385">https://www.inaturalist.org/observations/30029385</a>   |
| 1997 | <i>Spilopelia chinensis</i> | Eastern Spotted Dove | 2020/8/24  | 2 | 0 | 22.27726645 | 114.16135150 | <a href="https://www.inaturalist.org/observations/57421818">https://www.inaturalist.org/observations/57421818</a>   |
| 1998 | <i>Spilopelia chinensis</i> | Eastern Spotted Dove | 2019/1/5   | 1 | 0 | 22.27726806 | 114.15534920 | <a href="https://www.inaturalist.org/observations/53983417">https://www.inaturalist.org/observations/53983417</a>   |
| 1999 | <i>Spilopelia chinensis</i> | Eastern Spotted Dove | 2020/8/27  | 2 | 0 | 22.27727699 | 114.16083530 | <a href="https://www.inaturalist.org/observations/57711433">https://www.inaturalist.org/observations/57711433</a>   |
| 2000 | <i>Spilopelia chinensis</i> | Eastern Spotted Dove | 2019/6/6   | 1 | 0 | 22.27728061 | 114.21380940 | <a href="https://www.inaturalist.org/observations/26484929">https://www.inaturalist.org/observations/26484929</a>   |

|      |                             |                      |            |   |   |             |              |                                                                                                                     |
|------|-----------------------------|----------------------|------------|---|---|-------------|--------------|---------------------------------------------------------------------------------------------------------------------|
| 2001 | <i>Spilopelia chinensis</i> | Eastern Spotted Dove | 2020/8/24  | 2 | 0 | 22.27728360 | 114.16139340 | <a href="https://www.inaturalist.org/observations/57421793">https://www.inaturalist.org/observations/57421793</a>   |
| 2002 | <i>Spilopelia chinensis</i> | Eastern Spotted Dove | 2022/7/19  | 2 | 0 | 22.27730333 | 114.15684450 | <a href="https://www.inaturalist.org/observations/127087135">https://www.inaturalist.org/observations/127087135</a> |
| 2003 | <i>Spilopelia chinensis</i> | Eastern Spotted Dove | 2019/1/20  | 1 | 0 | 22.27732603 | 114.16141790 | <a href="https://www.inaturalist.org/observations/19750002">https://www.inaturalist.org/observations/19750002</a>   |
| 2004 | <i>Spilopelia chinensis</i> | Eastern Spotted Dove | 2020/4/24  | 3 | 0 | 22.27732617 | 114.16159740 | <a href="https://www.inaturalist.org/observations/43036475">https://www.inaturalist.org/observations/43036475</a>   |
| 2005 | <i>Spilopelia chinensis</i> | Eastern Spotted Dove | 2017/12/18 | 4 | 0 | 22.27733500 | 114.13576050 | <a href="https://www.inaturalist.org/observations/9189997">https://www.inaturalist.org/observations/9189997</a>     |
| 2006 | <i>Spilopelia chinensis</i> | Eastern Spotted Dove | 2018/3/1   | 3 | 0 | 22.27733500 | 114.13576050 | <a href="https://www.inaturalist.org/observations/10042206">https://www.inaturalist.org/observations/10042206</a>   |
| 2007 | <i>Spilopelia chinensis</i> | Eastern Spotted Dove | 2020/3/21  | 2 | 0 | 22.27734036 | 114.16140630 | <a href="https://www.inaturalist.org/observations/40342849">https://www.inaturalist.org/observations/40342849</a>   |
| 2008 | <i>Spilopelia chinensis</i> | Eastern Spotted Dove | 2022/6/29  | 1 | 0 | 22.27734175 | 114.16136700 | <a href="https://www.inaturalist.org/observations/123999308">https://www.inaturalist.org/observations/123999308</a> |
| 2009 | <i>Spilopelia chinensis</i> | Eastern Spotted Dove | 2020/8/25  | 1 | 0 | 22.27735500 | 114.16139170 | <a href="https://www.inaturalist.org/observations/57520533">https://www.inaturalist.org/observations/57520533</a>   |
| 2010 | <i>Spilopelia chinensis</i> | Eastern Spotted Dove | 2019/8/8   | 2 | 0 | 22.27736198 | 114.16219710 | <a href="https://www.inaturalist.org/observations/30399035">https://www.inaturalist.org/observations/30399035</a>   |
| 2011 | <i>Spilopelia chinensis</i> | Eastern Spotted Dove | 2020/8/24  | 2 | 0 | 22.27736725 | 114.16150410 | <a href="https://www.inaturalist.org/observations/57421772">https://www.inaturalist.org/observations/57421772</a>   |
| 2012 | <i>Spilopelia chinensis</i> | Eastern Spotted Dove | 2020/8/24  | 2 | 0 | 22.27736725 | 114.16150410 | <a href="https://www.inaturalist.org/observations/57421786">https://www.inaturalist.org/observations/57421786</a>   |
| 2013 | <i>Spilopelia chinensis</i> | Eastern Spotted Dove | 2020/8/24  | 2 | 0 | 22.27736728 | 114.16150420 | <a href="https://www.inaturalist.org/observations/57421777">https://www.inaturalist.org/observations/57421777</a>   |
| 2014 | <i>Spilopelia chinensis</i> | Eastern Spotted Dove | 2018/10/26 | 1 | 0 | 22.27737419 | 114.19545360 | <a href="https://www.inaturalist.org/observations/89684706">https://www.inaturalist.org/observations/89684706</a>   |
| 2015 | <i>Spilopelia chinensis</i> | Eastern Spotted Dove | 2018/10/26 | 2 | 0 | 22.27737419 | 114.19545360 | <a href="https://www.inaturalist.org/observations/89684709">https://www.inaturalist.org/observations/89684709</a>   |
| 2016 | <i>Spilopelia chinensis</i> | Eastern Spotted Dove | 2020/3/14  | 1 | 0 | 22.27737918 | 114.16140840 | <a href="https://www.inaturalist.org/observations/40071937">https://www.inaturalist.org/observations/40071937</a>   |
| 2017 | <i>Spilopelia chinensis</i> | Eastern Spotted Dove | 2021/1/13  | 1 | 0 | 22.27737988 | 114.21111650 | <a href="https://www.inaturalist.org/observations/67992771">https://www.inaturalist.org/observations/67992771</a>   |
| 2018 | <i>Spilopelia chinensis</i> | Eastern Spotted Dove | 2018/3/1   | 0 | 0 | 22.27738367 | 114.16112940 | <a href="https://www.inaturalist.org/observations/38613534">https://www.inaturalist.org/observations/38613534</a>   |
| 2019 | <i>Spilopelia chinensis</i> | Eastern Spotted Dove | 2019/1/20  | 2 | 0 | 22.27739157 | 114.16133960 | <a href="https://www.inaturalist.org/observations/19750199">https://www.inaturalist.org/observations/19750199</a>   |
| 2020 | <i>Spilopelia chinensis</i> | Eastern Spotted Dove | 2007/5/13  | 1 | 0 | 22.27742900 | 114.16222200 | <a href="https://www.inaturalist.org/observations/98667509">https://www.inaturalist.org/observations/98667509</a>   |
| 2021 | <i>Spilopelia chinensis</i> | Eastern Spotted Dove | 2021/7/31  | 1 | 0 | 22.27742921 | 114.16141000 | <a href="https://www.inaturalist.org/observations/89273509">https://www.inaturalist.org/observations/89273509</a>   |
| 2022 | <i>Spilopelia chinensis</i> | Eastern Spotted Dove | 2020/5/4   | 1 | 0 | 22.27747524 | 114.16046720 | <a href="https://www.inaturalist.org/observations/45237500">https://www.inaturalist.org/observations/45237500</a>   |
| 2023 | <i>Spilopelia chinensis</i> | Eastern Spotted Dove | 2021/7/31  | 1 | 0 | 22.27748667 | 114.16140000 | <a href="https://www.inaturalist.org/observations/89277993">https://www.inaturalist.org/observations/89277993</a>   |

|      |                             |                      |            |   |   |             |              |                                                                                                                     |
|------|-----------------------------|----------------------|------------|---|---|-------------|--------------|---------------------------------------------------------------------------------------------------------------------|
| 2024 | <i>Spilopelia chinensis</i> | Eastern Spotted Dove | 2021/10/31 | 1 | 0 | 22.27749167 | 114.16143880 | <a href="https://www.inaturalist.org/observations/100311511">https://www.inaturalist.org/observations/100311511</a> |
| 2025 | <i>Spilopelia chinensis</i> | Eastern Spotted Dove | 2018/1/27  | 3 | 0 | 22.27749470 | 114.15890080 | <a href="https://www.inaturalist.org/observations/9627115">https://www.inaturalist.org/observations/9627115</a>     |
| 2026 | <i>Spilopelia chinensis</i> | Eastern Spotted Dove | 2021/7/31  | 2 | 0 | 22.27749492 | 114.16143470 | <a href="https://www.inaturalist.org/observations/89273475">https://www.inaturalist.org/observations/89273475</a>   |
| 2027 | <i>Spilopelia chinensis</i> | Eastern Spotted Dove | 2021/11/28 | 1 | 0 | 22.27750333 | 114.15718880 | <a href="https://www.inaturalist.org/observations/102081078">https://www.inaturalist.org/observations/102081078</a> |
| 2028 | <i>Spilopelia chinensis</i> | Eastern Spotted Dove | 2021/5/3   | 1 | 0 | 22.27750644 | 114.16155840 | <a href="https://www.inaturalist.org/observations/76889966">https://www.inaturalist.org/observations/76889966</a>   |
| 2029 | <i>Spilopelia chinensis</i> | Eastern Spotted Dove | 2012/1/4   | 1 | 0 | 22.27751620 | 114.16168690 | <a href="https://www.inaturalist.org/observations/104952893">https://www.inaturalist.org/observations/104952893</a> |
| 2030 | <i>Spilopelia chinensis</i> | Eastern Spotted Dove | 2022/1/30  | 1 | 0 | 22.27752500 | 114.16140280 | <a href="https://www.inaturalist.org/observations/105840568">https://www.inaturalist.org/observations/105840568</a> |
| 2031 | <i>Spilopelia chinensis</i> | Eastern Spotted Dove | 2020/2/18  | 0 | 0 | 22.27753130 | 114.15628810 | <a href="https://www.inaturalist.org/observations/38790346">https://www.inaturalist.org/observations/38790346</a>   |
| 2032 | <i>Spilopelia chinensis</i> | Eastern Spotted Dove | 2021/7/31  | 2 | 0 | 22.27754992 | 114.16142760 | <a href="https://www.inaturalist.org/observations/89273493">https://www.inaturalist.org/observations/89273493</a>   |
| 2033 | <i>Spilopelia chinensis</i> | Eastern Spotted Dove | 2021/10/17 | 1 | 0 | 22.27755899 | 114.21376730 | <a href="https://www.inaturalist.org/observations/98553561">https://www.inaturalist.org/observations/98553561</a>   |
| 2034 | <i>Spilopelia chinensis</i> | Eastern Spotted Dove | 2021/5/2   | 2 | 0 | 22.27756597 | 114.16127400 | <a href="https://www.inaturalist.org/observations/76489049">https://www.inaturalist.org/observations/76489049</a>   |
| 2035 | <i>Spilopelia chinensis</i> | Eastern Spotted Dove | 2021/5/1   | 1 | 0 | 22.27758340 | 114.16122690 | <a href="https://www.inaturalist.org/observations/76520525">https://www.inaturalist.org/observations/76520525</a>   |
| 2036 | <i>Spilopelia chinensis</i> | Eastern Spotted Dove | 2021/4/24  | 1 | 0 | 22.27759000 | 114.16129870 | <a href="https://www.inaturalist.org/observations/75027510">https://www.inaturalist.org/observations/75027510</a>   |
| 2037 | <i>Spilopelia chinensis</i> | Eastern Spotted Dove | 2018/4/28  | 2 | 0 | 22.27761333 | 114.16117670 | <a href="https://www.inaturalist.org/observations/11577764">https://www.inaturalist.org/observations/11577764</a>   |
| 2038 | <i>Spilopelia chinensis</i> | Eastern Spotted Dove | 2007/4/9   | 1 | 0 | 22.27761900 | 114.15603100 | <a href="https://www.inaturalist.org/observations/102653479">https://www.inaturalist.org/observations/102653479</a> |
| 2039 | <i>Spilopelia chinensis</i> | Eastern Spotted Dove | 2018/5/13  | 3 | 0 | 22.27762040 | 114.16191920 | <a href="https://www.inaturalist.org/observations/12407789">https://www.inaturalist.org/observations/12407789</a>   |
| 2040 | <i>Spilopelia chinensis</i> | Eastern Spotted Dove | 2021/5/1   | 1 | 0 | 22.27762311 | 114.16126980 | <a href="https://www.inaturalist.org/observations/76520524">https://www.inaturalist.org/observations/76520524</a>   |
| 2041 | <i>Spilopelia chinensis</i> | Eastern Spotted Dove | 2022/5/2   | 1 | 0 | 22.27763104 | 114.15577050 | <a href="https://www.inaturalist.org/observations/114593057">https://www.inaturalist.org/observations/114593057</a> |
| 2042 | <i>Spilopelia chinensis</i> | Eastern Spotted Dove | 2022/7/20  | 1 | 0 | 22.27763128 | 114.16296220 | <a href="https://www.inaturalist.org/observations/127067787">https://www.inaturalist.org/observations/127067787</a> |
| 2043 | <i>Spilopelia chinensis</i> | Eastern Spotted Dove | 2021/1/1   | 1 | 0 | 22.27763802 | 114.21247910 | <a href="https://www.inaturalist.org/observations/67387682">https://www.inaturalist.org/observations/67387682</a>   |
| 2044 | <i>Spilopelia chinensis</i> | Eastern Spotted Dove | 2013/2/22  | 5 | 0 | 22.27768112 | 114.16268550 | <a href="http://www.inaturalist.org/observations/202830">http://www.inaturalist.org/observations/202830</a>         |
| 2045 | <i>Spilopelia chinensis</i> | Eastern Spotted Dove | 2020/4/18  | 1 | 0 | 22.27772500 | 114.16189830 | <a href="https://www.inaturalist.org/observations/42443197">https://www.inaturalist.org/observations/42443197</a>   |
| 2046 | <i>Spilopelia chinensis</i> | Eastern Spotted Dove | 2022/5/2   | 1 | 0 | 22.27773833 | 114.15598620 | <a href="https://www.inaturalist.org/observations/114617830">https://www.inaturalist.org/observations/114617830</a> |

|      |                             |                      |            |   |   |             |              |                                                                                                                     |
|------|-----------------------------|----------------------|------------|---|---|-------------|--------------|---------------------------------------------------------------------------------------------------------------------|
| 2047 | <i>Spilopelia chinensis</i> | Eastern Spotted Dove | 2021/5/2   | 2 | 0 | 22.27774167 | 114.15664720 | <a href="https://www.inaturalist.org/observations/76466644">https://www.inaturalist.org/observations/76466644</a>   |
| 2048 | <i>Spilopelia chinensis</i> | Eastern Spotted Dove | 2021/8/21  | 1 | 0 | 22.27774449 | 114.21325150 | <a href="https://www.inaturalist.org/observations/91920195">https://www.inaturalist.org/observations/91920195</a>   |
| 2049 | <i>Spilopelia chinensis</i> | Eastern Spotted Dove | 2019/4/28  | 2 | 0 | 22.27775413 | 114.16357510 | <a href="https://www.inaturalist.org/observations/23566212">https://www.inaturalist.org/observations/23566212</a>   |
| 2050 | <i>Spilopelia chinensis</i> | Eastern Spotted Dove | 2020/4/18  | 1 | 0 | 22.27775567 | 114.16040860 | <a href="https://www.inaturalist.org/observations/42446097">https://www.inaturalist.org/observations/42446097</a>   |
| 2051 | <i>Spilopelia chinensis</i> | Eastern Spotted Dove | 2019/4/28  | 2 | 0 | 22.27776167 | 114.16165170 | <a href="https://www.inaturalist.org/observations/23553605">https://www.inaturalist.org/observations/23553605</a>   |
| 2052 | <i>Spilopelia chinensis</i> | Eastern Spotted Dove | 2021/5/1   | 1 | 0 | 22.27779973 | 114.15598270 | <a href="https://www.inaturalist.org/observations/76006930">https://www.inaturalist.org/observations/76006930</a>   |
| 2053 | <i>Spilopelia chinensis</i> | Eastern Spotted Dove | 2019/4/28  | 2 | 0 | 22.27782350 | 114.16089800 | <a href="https://www.inaturalist.org/observations/23553307">https://www.inaturalist.org/observations/23553307</a>   |
| 2054 | <i>Spilopelia chinensis</i> | Eastern Spotted Dove | 2020/3/21  | 1 | 0 | 22.27782833 | 114.16175000 | <a href="https://www.inaturalist.org/observations/40343383">https://www.inaturalist.org/observations/40343383</a>   |
| 2055 | <i>Spilopelia chinensis</i> | Eastern Spotted Dove | 2022/4/30  | 2 | 0 | 22.27784799 | 114.15752550 | <a href="https://www.inaturalist.org/observations/113914159">https://www.inaturalist.org/observations/113914159</a> |
| 2056 | <i>Spilopelia chinensis</i> | Eastern Spotted Dove | 2021/2/3   | 1 | 0 | 22.27785730 | 114.20991900 | <a href="https://www.inaturalist.org/observations/68993093">https://www.inaturalist.org/observations/68993093</a>   |
| 2057 | <i>Spilopelia chinensis</i> | Eastern Spotted Dove | 2019/1/20  | 2 | 0 | 22.27786187 | 114.16155950 | <a href="https://www.inaturalist.org/observations/19750458">https://www.inaturalist.org/observations/19750458</a>   |
| 2058 | <i>Spilopelia chinensis</i> | Eastern Spotted Dove | 2022/6/28  | 2 | 0 | 22.27787100 | 114.16218900 | <a href="https://www.inaturalist.org/observations/123829913">https://www.inaturalist.org/observations/123829913</a> |
| 2059 | <i>Spilopelia chinensis</i> | Eastern Spotted Dove | 2022/5/2   | 1 | 0 | 22.27788667 | 114.20976330 | <a href="https://www.inaturalist.org/observations/114616363">https://www.inaturalist.org/observations/114616363</a> |
| 2060 | <i>Spilopelia chinensis</i> | Eastern Spotted Dove | 2022/8/13  | 2 | 0 | 22.27788853 | 114.20957300 | <a href="https://www.inaturalist.org/observations/130605082">https://www.inaturalist.org/observations/130605082</a> |
| 2061 | <i>Spilopelia chinensis</i> | Eastern Spotted Dove | 2022/7/20  | 1 | 0 | 22.27790150 | 114.16147790 | <a href="https://www.inaturalist.org/observations/127183969">https://www.inaturalist.org/observations/127183969</a> |
| 2062 | <i>Spilopelia chinensis</i> | Eastern Spotted Dove | 2020/3/21  | 2 | 0 | 22.27790833 | 114.16175830 | <a href="https://www.inaturalist.org/observations/40343674">https://www.inaturalist.org/observations/40343674</a>   |
| 2063 | <i>Spilopelia chinensis</i> | Eastern Spotted Dove | 2018/4/28  | 3 | 0 | 22.27793333 | 114.16222780 | <a href="https://www.inaturalist.org/observations/11603740">https://www.inaturalist.org/observations/11603740</a>   |
| 2064 | <i>Spilopelia chinensis</i> | Eastern Spotted Dove | 2019/10/11 | 2 | 0 | 22.27794377 | 114.16166720 | <a href="https://www.inaturalist.org/observations/34193530">https://www.inaturalist.org/observations/34193530</a>   |
| 2065 | <i>Spilopelia chinensis</i> | Eastern Spotted Dove | 2022/5/15  | 1 | 0 | 22.27794667 | 114.16201670 | <a href="https://www.inaturalist.org/observations/117108552">https://www.inaturalist.org/observations/117108552</a> |
| 2066 | <i>Spilopelia chinensis</i> | Eastern Spotted Dove | 2022/2/27  | 1 | 0 | 22.27796167 | 114.20991330 | <a href="https://www.inaturalist.org/observations/107553015">https://www.inaturalist.org/observations/107553015</a> |
| 2067 | <i>Spilopelia chinensis</i> | Eastern Spotted Dove | 2022/5/2   | 1 | 0 | 22.27796759 | 114.15641430 | <a href="https://www.inaturalist.org/observations/114651195">https://www.inaturalist.org/observations/114651195</a> |
| 2068 | <i>Spilopelia chinensis</i> | Eastern Spotted Dove | 2022/7/20  | 1 | 0 | 22.27798310 | 114.16214950 | <a href="https://www.inaturalist.org/observations/127184074">https://www.inaturalist.org/observations/127184074</a> |
| 2069 | <i>Spilopelia chinensis</i> | Eastern Spotted Dove | 2019/4/28  | 2 | 0 | 22.27804419 | 114.16185110 | <a href="https://www.inaturalist.org/observations/23552938">https://www.inaturalist.org/observations/23552938</a>   |

|      |                             |                      |            |   |   |             |              |                                                                                                                     |
|------|-----------------------------|----------------------|------------|---|---|-------------|--------------|---------------------------------------------------------------------------------------------------------------------|
| 2070 | <i>Spilopelia chinensis</i> | Eastern Spotted Dove | 2018/5/13  | 4 | 0 | 22.27804600 | 114.15639920 | <a href="https://www.inaturalist.org/observations/12422208">https://www.inaturalist.org/observations/12422208</a>   |
| 2071 | <i>Spilopelia chinensis</i> | Eastern Spotted Dove | 2020/12/15 | 2 | 0 | 22.27805265 | 114.16231950 | <a href="https://www.inaturalist.org/observations/66605567">https://www.inaturalist.org/observations/66605567</a>   |
| 2072 | <i>Spilopelia chinensis</i> | Eastern Spotted Dove | 2022/4/16  | 1 | 0 | 22.27812397 | 114.22786500 | <a href="https://www.inaturalist.org/observations/111601390">https://www.inaturalist.org/observations/111601390</a> |
| 2073 | <i>Spilopelia chinensis</i> | Eastern Spotted Dove | 2021/5/2   | 2 | 0 | 22.27815083 | 114.16269610 | <a href="https://www.inaturalist.org/observations/76533031">https://www.inaturalist.org/observations/76533031</a>   |
| 2074 | <i>Spilopelia chinensis</i> | Eastern Spotted Dove | 2012/5/4   | 5 | 0 | 22.27815400 | 114.15602800 | <a href="http://www.inaturalist.org/observations/627327">http://www.inaturalist.org/observations/627327</a>         |
| 2075 | <i>Spilopelia chinensis</i> | Eastern Spotted Dove | 2019/4/27  | 2 | 0 | 22.27822572 | 114.23925130 | <a href="https://www.inaturalist.org/observations/23920079">https://www.inaturalist.org/observations/23920079</a>   |
| 2076 | <i>Spilopelia chinensis</i> | Eastern Spotted Dove | 2020/3/21  | 2 | 0 | 22.27826920 | 114.16120670 | <a href="https://www.inaturalist.org/observations/40341129">https://www.inaturalist.org/observations/40341129</a>   |
| 2077 | <i>Spilopelia chinensis</i> | Eastern Spotted Dove | 2018/12/31 | 2 | 0 | 22.27827167 | 114.16224720 | <a href="https://www.inaturalist.org/observations/19350784">https://www.inaturalist.org/observations/19350784</a>   |
| 2078 | <i>Spilopelia chinensis</i> | Eastern Spotted Dove | 2018/7/9   | 4 | 0 | 22.27829318 | 114.16597970 | <a href="https://www.inaturalist.org/observations/14191909">https://www.inaturalist.org/observations/14191909</a>   |
| 2079 | <i>Spilopelia chinensis</i> | Eastern Spotted Dove | 2016/3/12  | 4 | 0 | 22.27831510 | 114.17469500 | <a href="http://www.inaturalist.org/observations/3904279">http://www.inaturalist.org/observations/3904279</a>       |
| 2080 | <i>Spilopelia chinensis</i> | Eastern Spotted Dove | 2020/5/22  | 1 | 0 | 22.27834100 | 114.16422300 | <a href="https://www.inaturalist.org/observations/46933920">https://www.inaturalist.org/observations/46933920</a>   |
| 2081 | <i>Spilopelia chinensis</i> | Eastern Spotted Dove | 2021/5/2   | 1 | 0 | 22.27834237 | 114.15834520 | <a href="https://www.inaturalist.org/observations/76412708">https://www.inaturalist.org/observations/76412708</a>   |
| 2082 | <i>Spilopelia chinensis</i> | Eastern Spotted Dove | 2021/10/30 | 1 | 0 | 22.27837753 | 114.15608220 | <a href="https://www.inaturalist.org/observations/99770747">https://www.inaturalist.org/observations/99770747</a>   |
| 2083 | <i>Spilopelia chinensis</i> | Eastern Spotted Dove | 2021/5/1   | 1 | 0 | 22.27840420 | 114.23995610 | <a href="https://www.inaturalist.org/observations/76090870">https://www.inaturalist.org/observations/76090870</a>   |
| 2084 | <i>Spilopelia chinensis</i> | Eastern Spotted Dove | 2019/11/13 | 2 | 0 | 22.27850446 | 114.23921760 | <a href="https://www.inaturalist.org/observations/35628233">https://www.inaturalist.org/observations/35628233</a>   |
| 2085 | <i>Spilopelia chinensis</i> | Eastern Spotted Dove | 2018/4/7   | 4 | 0 | 22.27853340 | 114.24043340 | <a href="https://www.inaturalist.org/observations/10675036">https://www.inaturalist.org/observations/10675036</a>   |
| 2086 | <i>Spilopelia chinensis</i> | Eastern Spotted Dove | 2020/11/30 | 1 | 0 | 22.27854892 | 114.17647710 | <a href="https://www.inaturalist.org/observations/65888099">https://www.inaturalist.org/observations/65888099</a>   |
| 2087 | <i>Spilopelia chinensis</i> | Eastern Spotted Dove | 2020/8/26  | 1 | 0 | 22.27858833 | 114.16216380 | <a href="https://www.inaturalist.org/observations/57616780">https://www.inaturalist.org/observations/57616780</a>   |
| 2088 | <i>Spilopelia chinensis</i> | Eastern Spotted Dove | 2022/4/29  | 1 | 0 | 22.27870640 | 114.22745280 | <a href="https://www.inaturalist.org/observations/113300041">https://www.inaturalist.org/observations/113300041</a> |
| 2089 | <i>Spilopelia chinensis</i> | Eastern Spotted Dove | 2021/4/30  | 1 | 0 | 22.27877973 | 114.21312280 | <a href="https://www.inaturalist.org/observations/75772314">https://www.inaturalist.org/observations/75772314</a>   |
| 2090 | <i>Spilopelia chinensis</i> | Eastern Spotted Dove | 2021/10/26 | 1 | 0 | 22.27877973 | 114.21312280 | <a href="https://www.inaturalist.org/observations/99440734">https://www.inaturalist.org/observations/99440734</a>   |
| 2091 | <i>Spilopelia chinensis</i> | Eastern Spotted Dove | 2022/3/28  | 3 | 0 | 22.27896193 | 114.15482300 | <a href="https://www.inaturalist.org/observations/109739485">https://www.inaturalist.org/observations/109739485</a> |
| 2092 | <i>Spilopelia chinensis</i> | Eastern Spotted Dove | 2018/4/30  | 5 | 0 | 22.27916785 | 114.13877670 | <a href="https://www.inaturalist.org/observations/11864017">https://www.inaturalist.org/observations/11864017</a>   |

|      |                             |                      |            |   |   |             |              |                                                                                                                     |
|------|-----------------------------|----------------------|------------|---|---|-------------|--------------|---------------------------------------------------------------------------------------------------------------------|
| 2093 | <i>Spilopelia chinensis</i> | Eastern Spotted Dove | 2022/1/31  | 1 | 0 | 22.27919500 | 114.23002500 | <a href="https://www.inaturalist.org/observations/107825096">https://www.inaturalist.org/observations/107825096</a> |
| 2094 | <i>Spilopelia chinensis</i> | Eastern Spotted Dove | 2020/4/24  | 1 | 0 | 22.27922305 | 114.15937560 | <a href="https://www.inaturalist.org/observations/44699751">https://www.inaturalist.org/observations/44699751</a>   |
| 2095 | <i>Spilopelia chinensis</i> | Eastern Spotted Dove | 2021/4/30  | 1 | 0 | 22.27924883 | 114.24038770 | <a href="https://www.inaturalist.org/observations/75798311">https://www.inaturalist.org/observations/75798311</a>   |
| 2096 | <i>Spilopelia chinensis</i> | Eastern Spotted Dove | 2020/4/24  | 1 | 0 | 22.27926619 | 114.15931020 | <a href="https://www.inaturalist.org/observations/44726956">https://www.inaturalist.org/observations/44726956</a>   |
| 2097 | <i>Spilopelia chinensis</i> | Eastern Spotted Dove | 2020/4/24  | 1 | 0 | 22.27928108 | 114.15932090 | <a href="https://www.inaturalist.org/observations/44727013">https://www.inaturalist.org/observations/44727013</a>   |
| 2098 | <i>Spilopelia chinensis</i> | Eastern Spotted Dove | 2018/4/27  | 5 | 0 | 22.27932163 | 114.15965140 | <a href="https://www.inaturalist.org/observations/11477092">https://www.inaturalist.org/observations/11477092</a>   |
| 2099 | <i>Spilopelia chinensis</i> | Eastern Spotted Dove | 2022/9/28  | 2 | 0 | 22.27932834 | 114.13650360 | <a href="https://www.inaturalist.org/observations/136810224">https://www.inaturalist.org/observations/136810224</a> |
| 2100 | <i>Spilopelia chinensis</i> | Eastern Spotted Dove | 2020/5/20  | 1 | 0 | 22.27936588 | 114.15920480 | <a href="https://www.inaturalist.org/observations/46570367">https://www.inaturalist.org/observations/46570367</a>   |
| 2101 | <i>Spilopelia chinensis</i> | Eastern Spotted Dove | 2018/11/17 | 4 | 0 | 22.27939415 | 114.15962980 | <a href="https://www.inaturalist.org/observations/18449299">https://www.inaturalist.org/observations/18449299</a>   |
| 2102 | <i>Spilopelia chinensis</i> | Eastern Spotted Dove | 2022/4/4   | 2 | 0 | 22.27944897 | 114.21382100 | <a href="https://www.inaturalist.org/observations/110368344">https://www.inaturalist.org/observations/110368344</a> |
| 2103 | <i>Spilopelia chinensis</i> | Eastern Spotted Dove | 2021/3/10  | 0 | 0 | 22.27945000 | 114.18367830 | <a href="https://www.inaturalist.org/observations/70914534">https://www.inaturalist.org/observations/70914534</a>   |
| 2104 | <i>Spilopelia chinensis</i> | Eastern Spotted Dove | 2018/10/27 | 1 | 0 | 22.27953432 | 114.15931230 | <a href="https://www.inaturalist.org/observations/23550689">https://www.inaturalist.org/observations/23550689</a>   |
| 2105 | <i>Spilopelia chinensis</i> | Eastern Spotted Dove | 2021/3/30  | 1 | 0 | 22.27970550 | 114.16590750 | <a href="https://www.inaturalist.org/observations/77614937">https://www.inaturalist.org/observations/77614937</a>   |
| 2106 | <i>Spilopelia chinensis</i> | Eastern Spotted Dove | 2021/7/28  | 1 | 0 | 22.27983856 | 114.16113280 | <a href="https://www.inaturalist.org/observations/88908593">https://www.inaturalist.org/observations/88908593</a>   |
| 2107 | <i>Spilopelia chinensis</i> | Eastern Spotted Dove | 2018/4/27  | 1 | 0 | 22.27992110 | 113.92973490 | <a href="https://www.inaturalist.org/observations/11472861">https://www.inaturalist.org/observations/11472861</a>   |
| 2108 | <i>Spilopelia chinensis</i> | Eastern Spotted Dove | 2020/4/19  | 2 | 0 | 22.28001097 | 114.16022800 | <a href="https://www.inaturalist.org/observations/42569525">https://www.inaturalist.org/observations/42569525</a>   |
| 2109 | <i>Spilopelia chinensis</i> | Eastern Spotted Dove | 2020/9/12  | 1 | 0 | 22.28003500 | 113.93285300 | <a href="https://www.inaturalist.org/observations/61376861">https://www.inaturalist.org/observations/61376861</a>   |
| 2110 | <i>Spilopelia chinensis</i> | Eastern Spotted Dove | 2021/5/1   | 1 | 0 | 22.28004252 | 114.15876390 | <a href="https://www.inaturalist.org/observations/76524354">https://www.inaturalist.org/observations/76524354</a>   |
| 2111 | <i>Spilopelia chinensis</i> | Eastern Spotted Dove | 2020/5/11  | 2 | 0 | 22.28008362 | 114.21354920 | <a href="https://www.inaturalist.org/observations/45942504">https://www.inaturalist.org/observations/45942504</a>   |
| 2112 | <i>Spilopelia chinensis</i> | Eastern Spotted Dove | 2019/2/21  | 2 | 0 | 22.28017000 | 114.21339500 | <a href="https://www.inaturalist.org/observations/20524679">https://www.inaturalist.org/observations/20524679</a>   |
| 2113 | <i>Spilopelia chinensis</i> | Eastern Spotted Dove | 2021/4/2   | 1 | 0 | 22.28020705 | 114.20799590 | <a href="https://www.inaturalist.org/observations/72676477">https://www.inaturalist.org/observations/72676477</a>   |
| 2114 | <i>Spilopelia chinensis</i> | Eastern Spotted Dove | 2021/12/4  | 1 | 0 | 22.28020705 | 114.20799590 | <a href="https://www.inaturalist.org/observations/102454947">https://www.inaturalist.org/observations/102454947</a> |
| 2115 | <i>Spilopelia chinensis</i> | Eastern Spotted Dove | 2022/1/18  | 2 | 0 | 22.28020705 | 114.20799590 | <a href="https://www.inaturalist.org/observations/105139877">https://www.inaturalist.org/observations/105139877</a> |



|      |                             |                      |            |   |   |             |              |                                                                                                                     |
|------|-----------------------------|----------------------|------------|---|---|-------------|--------------|---------------------------------------------------------------------------------------------------------------------|
| 2116 | <i>Spilopelia chinensis</i> | Eastern Spotted Dove | 2021/5/1   | 3 | 0 | 22.28038410 | 114.18202060 | <a href="https://www.inaturalist.org/observations/76088201">https://www.inaturalist.org/observations/76088201</a>   |
| 2117 | <i>Spilopelia chinensis</i> | Eastern Spotted Dove | 2014/2/14  | 2 | 0 | 22.28044947 | 114.17069230 | <a href="https://www.inaturalist.org/observations/55906142">https://www.inaturalist.org/observations/55906142</a>   |
| 2118 | <i>Spilopelia chinensis</i> | Eastern Spotted Dove | 2018/12/31 | 2 | 0 | 22.28046500 | 114.16122300 | <a href="https://www.inaturalist.org/observations/98117336">https://www.inaturalist.org/observations/98117336</a>   |
| 2119 | <i>Spilopelia chinensis</i> | Eastern Spotted Dove | 2020/5/17  | 1 | 0 | 22.28063422 | 114.23130340 | <a href="https://www.inaturalist.org/observations/46204031">https://www.inaturalist.org/observations/46204031</a>   |
| 2120 | <i>Spilopelia chinensis</i> | Eastern Spotted Dove | 2018/10/29 | 4 | 0 | 22.28076616 | 114.13708550 | <a href="https://www.inaturalist.org/observations/17929999">https://www.inaturalist.org/observations/17929999</a>   |
| 2121 | <i>Spilopelia chinensis</i> | Eastern Spotted Dove | 2019/9/30  | 2 | 0 | 22.28081379 | 114.21164300 | <a href="https://www.inaturalist.org/observations/33640737">https://www.inaturalist.org/observations/33640737</a>   |
| 2122 | <i>Spilopelia chinensis</i> | Eastern Spotted Dove | 2020/12/14 | 2 | 0 | 22.28097667 | 114.03952890 | <a href="https://www.inaturalist.org/observations/66568830">https://www.inaturalist.org/observations/66568830</a>   |
| 2123 | <i>Spilopelia chinensis</i> | Eastern Spotted Dove | 2021/7/18  | 2 | 0 | 22.28098833 | 114.18963830 | <a href="https://www.inaturalist.org/observations/87536297">https://www.inaturalist.org/observations/87536297</a>   |
| 2124 | <i>Spilopelia chinensis</i> | Eastern Spotted Dove | 2021/12/5  | 2 | 0 | 22.28100239 | 114.15986710 | <a href="https://www.inaturalist.org/observations/102521717">https://www.inaturalist.org/observations/102521717</a> |
| 2125 | <i>Spilopelia chinensis</i> | Eastern Spotted Dove | 2019/7/14  | 2 | 0 | 22.28103333 | 114.16724500 | <a href="https://www.inaturalist.org/observations/28809894">https://www.inaturalist.org/observations/28809894</a>   |
| 2126 | <i>Spilopelia chinensis</i> | Eastern Spotted Dove | 2009/10/4  | 1 | 0 | 22.28107000 | 114.13998300 | <a href="https://www.inaturalist.org/observations/66823987">https://www.inaturalist.org/observations/66823987</a>   |
| 2127 | <i>Spilopelia chinensis</i> | Eastern Spotted Dove | 2019/4/27  | 2 | 0 | 22.28112778 | 114.13825280 | <a href="https://www.inaturalist.org/observations/23364103">https://www.inaturalist.org/observations/23364103</a>   |
| 2128 | <i>Spilopelia chinensis</i> | Eastern Spotted Dove | 2019/4/26  | 1 | 0 | 22.28112859 | 114.13782730 | <a href="https://www.inaturalist.org/observations/23093779">https://www.inaturalist.org/observations/23093779</a>   |
| 2129 | <i>Spilopelia chinensis</i> | Eastern Spotted Dove | 2020/3/16  | 2 | 0 | 22.28115699 | 114.12796830 | <a href="https://www.inaturalist.org/observations/67032114">https://www.inaturalist.org/observations/67032114</a>   |
| 2130 | <i>Spilopelia chinensis</i> | Eastern Spotted Dove | 2019/4/26  | 3 | 0 | 22.28116617 | 114.13685670 | <a href="https://www.inaturalist.org/observations/24242188">https://www.inaturalist.org/observations/24242188</a>   |
| 2131 | <i>Spilopelia chinensis</i> | Eastern Spotted Dove | 2019/1/9   | 2 | 0 | 22.28122834 | 114.21114620 | <a href="https://www.inaturalist.org/observations/19527466">https://www.inaturalist.org/observations/19527466</a>   |
| 2132 | <i>Spilopelia chinensis</i> | Eastern Spotted Dove | 2020/4/28  | 1 | 0 | 22.28123667 | 114.12873880 | <a href="https://www.inaturalist.org/observations/44016222">https://www.inaturalist.org/observations/44016222</a>   |
| 2133 | <i>Spilopelia chinensis</i> | Eastern Spotted Dove | 2021/5/1   | 2 | 0 | 22.28124133 | 114.14818940 | <a href="https://www.inaturalist.org/observations/76548918">https://www.inaturalist.org/observations/76548918</a>   |
| 2134 | <i>Spilopelia chinensis</i> | Eastern Spotted Dove | 2019/11/4  | 3 | 0 | 22.28124840 | 113.93561710 | <a href="https://www.inaturalist.org/observations/35268153">https://www.inaturalist.org/observations/35268153</a>   |
| 2135 | <i>Spilopelia chinensis</i> | Eastern Spotted Dove | 2022/4/27  | 1 | 0 | 22.28128833 | 114.18935330 | <a href="https://www.inaturalist.org/observations/113055914">https://www.inaturalist.org/observations/113055914</a> |
| 2136 | <i>Spilopelia chinensis</i> | Eastern Spotted Dove | 2018/4/19  | 4 | 0 | 22.28135640 | 114.15051640 | <a href="https://www.inaturalist.org/observations/11158860">https://www.inaturalist.org/observations/11158860</a>   |
| 2137 | <i>Spilopelia chinensis</i> | Eastern Spotted Dove | 2017/10/22 | 4 | 0 | 22.28136292 | 114.13915160 | <a href="https://www.inaturalist.org/observations/8500363">https://www.inaturalist.org/observations/8500363</a>     |
| 2138 | <i>Spilopelia chinensis</i> | Eastern Spotted Dove | 2021/5/2   | 1 | 0 | 22.28137500 | 114.21140330 | <a href="https://www.inaturalist.org/observations/76435273">https://www.inaturalist.org/observations/76435273</a>   |

|      |                             |                      |            |   |   |             |              |                                                                                                                     |
|------|-----------------------------|----------------------|------------|---|---|-------------|--------------|---------------------------------------------------------------------------------------------------------------------|
| 2139 | <i>Spilopelia chinensis</i> | Eastern Spotted Dove | 2022/9/6   | 1 | 0 | 22.28143396 | 114.21081250 | <a href="https://www.inaturalist.org/observations/133894170">https://www.inaturalist.org/observations/133894170</a> |
| 2140 | <i>Spilopelia chinensis</i> | Eastern Spotted Dove | 2018/4/27  | 4 | 0 | 22.28146087 | 114.13760660 | <a href="https://www.inaturalist.org/observations/11484327">https://www.inaturalist.org/observations/11484327</a>   |
| 2141 | <i>Spilopelia chinensis</i> | Eastern Spotted Dove | 2018/4/29  | 5 | 0 | 22.28150939 | 114.16585810 | <a href="https://www.inaturalist.org/observations/11863840">https://www.inaturalist.org/observations/11863840</a>   |
| 2142 | <i>Spilopelia chinensis</i> | Eastern Spotted Dove | 2017/2/14  | 3 | 0 | 22.28161177 | 114.13774180 | <a href="https://www.inaturalist.org/observations/9919224">https://www.inaturalist.org/observations/9919224</a>     |
| 2143 | <i>Spilopelia chinensis</i> | Eastern Spotted Dove | 2020/4/26  | 1 | 0 | 22.28166358 | 114.21074920 | <a href="https://www.inaturalist.org/observations/43588630">https://www.inaturalist.org/observations/43588630</a>   |
| 2144 | <i>Spilopelia chinensis</i> | Eastern Spotted Dove | 2021/11/21 | 2 | 0 | 22.28179739 | 114.21081540 | <a href="https://www.inaturalist.org/observations/101600185">https://www.inaturalist.org/observations/101600185</a> |
| 2145 | <i>Spilopelia chinensis</i> | Eastern Spotted Dove | 2022/5/1   | 1 | 0 | 22.28180833 | 114.21086170 | <a href="https://www.inaturalist.org/observations/114105209">https://www.inaturalist.org/observations/114105209</a> |
| 2146 | <i>Spilopelia chinensis</i> | Eastern Spotted Dove | 2022/4/3   | 2 | 0 | 22.28183997 | 114.21257700 | <a href="https://www.inaturalist.org/observations/110259913">https://www.inaturalist.org/observations/110259913</a> |
| 2147 | <i>Spilopelia chinensis</i> | Eastern Spotted Dove | 2021/4/17  | 1 | 0 | 22.28186167 | 114.18830170 | <a href="https://www.inaturalist.org/observations/74327882">https://www.inaturalist.org/observations/74327882</a>   |
| 2148 | <i>Spilopelia chinensis</i> | Eastern Spotted Dove | 2018/4/28  | 4 | 0 | 22.28189743 | 114.21157780 | <a href="https://www.inaturalist.org/observations/11588288">https://www.inaturalist.org/observations/11588288</a>   |
| 2149 | <i>Spilopelia chinensis</i> | Eastern Spotted Dove | 2019/2/26  | 1 | 0 | 22.28189750 | 114.18860290 | <a href="https://www.inaturalist.org/observations/20770089">https://www.inaturalist.org/observations/20770089</a>   |
| 2150 | <i>Spilopelia chinensis</i> | Eastern Spotted Dove | 2018/4/28  | 6 | 0 | 22.28190120 | 114.22704380 | <a href="https://www.inaturalist.org/observations/11589334">https://www.inaturalist.org/observations/11589334</a>   |
| 2151 | <i>Spilopelia chinensis</i> | Eastern Spotted Dove | 2021/7/30  | 1 | 0 | 22.28192787 | 114.12963440 | <a href="https://www.inaturalist.org/observations/121391619">https://www.inaturalist.org/observations/121391619</a> |
| 2152 | <i>Spilopelia chinensis</i> | Eastern Spotted Dove | 2018/4/15  | 4 | 0 | 22.28195588 | 114.13958140 | <a href="https://www.inaturalist.org/observations/10950314">https://www.inaturalist.org/observations/10950314</a>   |
| 2153 | <i>Spilopelia chinensis</i> | Eastern Spotted Dove | 2018/12/30 | 2 | 0 | 22.28198063 | 114.21157900 | <a href="https://www.inaturalist.org/observations/19305295">https://www.inaturalist.org/observations/19305295</a>   |
| 2154 | <i>Spilopelia chinensis</i> | Eastern Spotted Dove | 2022/4/30  | 2 | 0 | 22.28199250 | 114.19249850 | <a href="https://www.inaturalist.org/observations/113724828">https://www.inaturalist.org/observations/113724828</a> |
| 2155 | <i>Spilopelia chinensis</i> | Eastern Spotted Dove | 2021/4/13  | 1 | 0 | 22.28201167 | 114.04071670 | <a href="https://www.inaturalist.org/observations/73925963">https://www.inaturalist.org/observations/73925963</a>   |
| 2156 | <i>Spilopelia chinensis</i> | Eastern Spotted Dove | 2018/4/15  | 4 | 0 | 22.28210000 | 114.13848150 | <a href="https://www.inaturalist.org/observations/10948777">https://www.inaturalist.org/observations/10948777</a>   |
| 2157 | <i>Spilopelia chinensis</i> | Eastern Spotted Dove | 2019/11/8  | 1 | 0 | 22.28215400 | 114.22478600 | <a href="https://www.inaturalist.org/observations/35439212">https://www.inaturalist.org/observations/35439212</a>   |
| 2158 | <i>Spilopelia chinensis</i> | Eastern Spotted Dove | 2021/4/30  | 2 | 0 | 22.28222768 | 113.93499570 | <a href="https://www.inaturalist.org/observations/75758326">https://www.inaturalist.org/observations/75758326</a>   |
| 2159 | <i>Spilopelia chinensis</i> | Eastern Spotted Dove | 2021/5/2   | 2 | 0 | 22.28225458 | 114.18907130 | <a href="https://www.inaturalist.org/observations/76400630">https://www.inaturalist.org/observations/76400630</a>   |
| 2160 | <i>Spilopelia chinensis</i> | Eastern Spotted Dove | 2019/2/26  | 2 | 0 | 22.28229454 | 114.19012070 | <a href="https://www.inaturalist.org/observations/20770133">https://www.inaturalist.org/observations/20770133</a>   |
| 2161 | <i>Spilopelia chinensis</i> | Eastern Spotted Dove | 2021/3/7   | 1 | 0 | 22.28235760 | 114.12662080 | <a href="https://www.inaturalist.org/observations/70734609">https://www.inaturalist.org/observations/70734609</a>   |

|      |                             |                      |            |   |   |             |              |                                                                                                                     |
|------|-----------------------------|----------------------|------------|---|---|-------------|--------------|---------------------------------------------------------------------------------------------------------------------|
| 2162 | <i>Spilopelia chinensis</i> | Eastern Spotted Dove | 2022/9/27  | 1 | 0 | 22.28236065 | 114.18869700 | <a href="https://www.inaturalist.org/observations/136878920">https://www.inaturalist.org/observations/136878920</a> |
| 2163 | <i>Spilopelia chinensis</i> | Eastern Spotted Dove | 2022/9/27  | 2 | 0 | 22.28236065 | 114.18869700 | <a href="https://www.inaturalist.org/observations/136878964">https://www.inaturalist.org/observations/136878964</a> |
| 2164 | <i>Spilopelia chinensis</i> | Eastern Spotted Dove | 2019/1/1   | 2 | 0 | 22.28240680 | 114.22308760 | <a href="https://www.inaturalist.org/observations/19346869">https://www.inaturalist.org/observations/19346869</a>   |
| 2165 | <i>Spilopelia chinensis</i> | Eastern Spotted Dove | 2021/7/10  | 2 | 0 | 22.28245950 | 114.15711750 | <a href="https://www.inaturalist.org/observations/86385383">https://www.inaturalist.org/observations/86385383</a>   |
| 2166 | <i>Spilopelia chinensis</i> | Eastern Spotted Dove | 2022/4/30  | 2 | 0 | 22.28246613 | 114.22856640 | <a href="https://www.inaturalist.org/observations/113728226">https://www.inaturalist.org/observations/113728226</a> |
| 2167 | <i>Spilopelia chinensis</i> | Eastern Spotted Dove | 2022/4/30  | 1 | 0 | 22.28246630 | 114.22856660 | <a href="https://www.inaturalist.org/observations/113678902">https://www.inaturalist.org/observations/113678902</a> |
| 2168 | <i>Spilopelia chinensis</i> | Eastern Spotted Dove | 2020/10/13 | 2 | 0 | 22.28246675 | 114.21481940 | <a href="https://www.inaturalist.org/observations/64999479">https://www.inaturalist.org/observations/64999479</a>   |
| 2169 | <i>Spilopelia chinensis</i> | Eastern Spotted Dove | 2019/11/7  | 2 | 0 | 22.28247389 | 114.22270340 | <a href="https://www.inaturalist.org/observations/100673000">https://www.inaturalist.org/observations/100673000</a> |
| 2170 | <i>Spilopelia chinensis</i> | Eastern Spotted Dove | 2021/11/12 | 2 | 0 | 22.28252193 | 114.22393260 | <a href="https://www.inaturalist.org/observations/100912020">https://www.inaturalist.org/observations/100912020</a> |
| 2171 | <i>Spilopelia chinensis</i> | Eastern Spotted Dove | 2021/11/12 | 2 | 0 | 22.28254556 | 114.22392480 | <a href="https://www.inaturalist.org/observations/100912033">https://www.inaturalist.org/observations/100912033</a> |
| 2172 | <i>Spilopelia chinensis</i> | Eastern Spotted Dove | 2020/11/23 | 1 | 0 | 22.28254692 | 113.93547880 | <a href="https://www.inaturalist.org/observations/65454342">https://www.inaturalist.org/observations/65454342</a>   |
| 2173 | <i>Spilopelia chinensis</i> | Eastern Spotted Dove | 2018/7/17  | 1 | 0 | 22.28255333 | 114.18874500 | <a href="https://www.inaturalist.org/observations/101389522">https://www.inaturalist.org/observations/101389522</a> |
| 2174 | <i>Spilopelia chinensis</i> | Eastern Spotted Dove | 2021/2/14  | 1 | 0 | 22.28260830 | 114.18793410 | <a href="https://www.inaturalist.org/observations/69544001">https://www.inaturalist.org/observations/69544001</a>   |
| 2175 | <i>Spilopelia chinensis</i> | Eastern Spotted Dove | 2020/11/21 | 2 | 0 | 22.28261648 | 114.13231110 | <a href="https://www.inaturalist.org/observations/65319037">https://www.inaturalist.org/observations/65319037</a>   |
| 2176 | <i>Spilopelia chinensis</i> | Eastern Spotted Dove | 2020/7/2   | 1 | 0 | 22.28263191 | 114.05235460 | <a href="https://www.inaturalist.org/observations/95150747">https://www.inaturalist.org/observations/95150747</a>   |
| 2177 | <i>Spilopelia chinensis</i> | Eastern Spotted Dove | 2022/3/4   | 2 | 0 | 22.28264804 | 114.21168990 | <a href="https://www.inaturalist.org/observations/110264610">https://www.inaturalist.org/observations/110264610</a> |
| 2178 | <i>Spilopelia chinensis</i> | Eastern Spotted Dove | 2021/5/1   | 2 | 0 | 22.28266384 | 114.22206330 | <a href="https://www.inaturalist.org/observations/76885787">https://www.inaturalist.org/observations/76885787</a>   |
| 2179 | <i>Spilopelia chinensis</i> | Eastern Spotted Dove | 2019/11/8  | 3 | 0 | 22.28269627 | 114.22467400 | <a href="https://www.inaturalist.org/observations/35440099">https://www.inaturalist.org/observations/35440099</a>   |
| 2180 | <i>Spilopelia chinensis</i> | Eastern Spotted Dove | 2018/4/15  | 4 | 0 | 22.28271290 | 114.13692790 | <a href="https://www.inaturalist.org/observations/10952229">https://www.inaturalist.org/observations/10952229</a>   |
| 2181 | <i>Spilopelia chinensis</i> | Eastern Spotted Dove | 2022/8/15  | 2 | 0 | 22.28272022 | 114.21230080 | <a href="https://www.inaturalist.org/observations/130937479">https://www.inaturalist.org/observations/130937479</a> |
| 2182 | <i>Spilopelia chinensis</i> | Eastern Spotted Dove | 2022/3/19  | 2 | 0 | 22.28277000 | 114.13823620 | <a href="https://www.inaturalist.org/observations/108934583">https://www.inaturalist.org/observations/108934583</a> |
| 2183 | <i>Spilopelia chinensis</i> | Eastern Spotted Dove | 2020/9/11  | 2 | 0 | 22.28277750 | 114.12930390 | <a href="https://www.inaturalist.org/observations/72519864">https://www.inaturalist.org/observations/72519864</a>   |
| 2184 | <i>Spilopelia chinensis</i> | Eastern Spotted Dove | 2022/5/2   | 2 | 0 | 22.28278400 | 114.22467200 | <a href="https://www.inaturalist.org/observations/114692684">https://www.inaturalist.org/observations/114692684</a> |

|      |                             |                      |            |   |   |             |              |                                                                                                                     |
|------|-----------------------------|----------------------|------------|---|---|-------------|--------------|---------------------------------------------------------------------------------------------------------------------|
| 2185 | <i>Spilopelia chinensis</i> | Eastern Spotted Dove | 2021/5/16  | 1 | 0 | 22.28278732 | 114.21337130 | <a href="https://www.inaturalist.org/observations/78969571">https://www.inaturalist.org/observations/78969571</a>   |
| 2186 | <i>Spilopelia chinensis</i> | Eastern Spotted Dove | 2019/11/8  | 3 | 0 | 22.28279609 | 114.22549890 | <a href="https://www.inaturalist.org/observations/35447889">https://www.inaturalist.org/observations/35447889</a>   |
| 2187 | <i>Spilopelia chinensis</i> | Eastern Spotted Dove | 2018/4/15  | 2 | 0 | 22.28283000 | 114.13814450 | <a href="https://www.inaturalist.org/observations/10948783">https://www.inaturalist.org/observations/10948783</a>   |
| 2188 | <i>Spilopelia chinensis</i> | Eastern Spotted Dove | 2018/4/8   | 3 | 0 | 22.28283107 | 114.13833650 | <a href="https://www.inaturalist.org/observations/10697642">https://www.inaturalist.org/observations/10697642</a>   |
| 2189 | <i>Spilopelia chinensis</i> | Eastern Spotted Dove | 2019/11/8  | 3 | 0 | 22.28283790 | 114.22465390 | <a href="https://www.inaturalist.org/observations/35441202">https://www.inaturalist.org/observations/35441202</a>   |
| 2190 | <i>Spilopelia chinensis</i> | Eastern Spotted Dove | 2020/11/23 | 2 | 0 | 22.28284218 | 113.93545100 | <a href="https://www.inaturalist.org/observations/65467073">https://www.inaturalist.org/observations/65467073</a>   |
| 2191 | <i>Spilopelia chinensis</i> | Eastern Spotted Dove | 2018/4/15  | 2 | 0 | 22.28285368 | 114.13809730 | <a href="https://www.inaturalist.org/observations/10939777">https://www.inaturalist.org/observations/10939777</a>   |
| 2192 | <i>Spilopelia chinensis</i> | Eastern Spotted Dove | 2019/4/29  | 1 | 0 | 22.28285450 | 114.13844200 | <a href="https://www.inaturalist.org/observations/23846873">https://www.inaturalist.org/observations/23846873</a>   |
| 2193 | <i>Spilopelia chinensis</i> | Eastern Spotted Dove | 2017/9/22  | 2 | 0 | 22.28285921 | 114.13835690 | <a href="https://www.inaturalist.org/observations/8033331">https://www.inaturalist.org/observations/8033331</a>     |
| 2194 | <i>Spilopelia chinensis</i> | Eastern Spotted Dove | 2019/4/29  | 3 | 0 | 22.28287246 | 114.22653650 | <a href="https://www.inaturalist.org/observations/23865998">https://www.inaturalist.org/observations/23865998</a>   |
| 2195 | <i>Spilopelia chinensis</i> | Eastern Spotted Dove | 2021/5/1   | 1 | 0 | 22.28288758 | 114.16405420 | <a href="https://www.inaturalist.org/observations/76119899">https://www.inaturalist.org/observations/76119899</a>   |
| 2196 | <i>Spilopelia chinensis</i> | Eastern Spotted Dove | 2018/3/16  | 3 | 0 | 22.28290406 | 114.13830180 | <a href="https://www.inaturalist.org/observations/10485545">https://www.inaturalist.org/observations/10485545</a>   |
| 2197 | <i>Spilopelia chinensis</i> | Eastern Spotted Dove | 2018/4/29  | 8 | 0 | 22.28290906 | 114.03802010 | <a href="https://www.inaturalist.org/observations/11718495">https://www.inaturalist.org/observations/11718495</a>   |
| 2198 | <i>Spilopelia chinensis</i> | Eastern Spotted Dove | 2022/4/29  | 1 | 0 | 22.28291333 | 114.22911170 | <a href="https://www.inaturalist.org/observations/113752419">https://www.inaturalist.org/observations/113752419</a> |
| 2199 | <i>Spilopelia chinensis</i> | Eastern Spotted Dove | 2018/4/15  | 1 | 0 | 22.28291538 | 114.13842740 | <a href="https://www.inaturalist.org/observations/10949170">https://www.inaturalist.org/observations/10949170</a>   |
| 2200 | <i>Spilopelia chinensis</i> | Eastern Spotted Dove | 2019/11/4  | 3 | 0 | 22.28292120 | 113.93632290 | <a href="https://www.inaturalist.org/observations/35277012">https://www.inaturalist.org/observations/35277012</a>   |
| 2201 | <i>Spilopelia chinensis</i> | Eastern Spotted Dove | 2019/4/29  | 1 | 0 | 22.28292950 | 114.13365840 | <a href="https://www.inaturalist.org/observations/23839116">https://www.inaturalist.org/observations/23839116</a>   |
| 2202 | <i>Spilopelia chinensis</i> | Eastern Spotted Dove | 2020/7/26  | 1 | 0 | 22.28295833 | 114.13948880 | <a href="https://www.inaturalist.org/observations/54343230">https://www.inaturalist.org/observations/54343230</a>   |
| 2203 | <i>Spilopelia chinensis</i> | Eastern Spotted Dove | 2019/11/4  | 2 | 0 | 22.28296469 | 113.93572180 | <a href="https://www.inaturalist.org/observations/35277022">https://www.inaturalist.org/observations/35277022</a>   |
| 2204 | <i>Spilopelia chinensis</i> | Eastern Spotted Dove | 2021/5/3   | 2 | 0 | 22.28297617 | 113.93602650 | <a href="https://www.inaturalist.org/observations/76892626">https://www.inaturalist.org/observations/76892626</a>   |
| 2205 | <i>Spilopelia chinensis</i> | Eastern Spotted Dove | 2022/4/1   | 2 | 0 | 22.28299102 | 114.16561230 | <a href="https://www.inaturalist.org/observations/110077660">https://www.inaturalist.org/observations/110077660</a> |
| 2206 | <i>Spilopelia chinensis</i> | Eastern Spotted Dove | 2018/4/15  | 2 | 0 | 22.28299328 | 114.13872320 | <a href="https://www.inaturalist.org/observations/10941132">https://www.inaturalist.org/observations/10941132</a>   |
| 2207 | <i>Spilopelia chinensis</i> | Eastern Spotted Dove | 2019/11/4  | 3 | 0 | 22.28299620 | 113.93625120 | <a href="https://www.inaturalist.org/observations/35277026">https://www.inaturalist.org/observations/35277026</a>   |

|      |                             |                      |            |   |   |             |              |                                                                                                                     |
|------|-----------------------------|----------------------|------------|---|---|-------------|--------------|---------------------------------------------------------------------------------------------------------------------|
| 2208 | <i>Spilopelia chinensis</i> | Eastern Spotted Dove | 2018/4/15  | 2 | 0 | 22.28299900 | 114.13708500 | <a href="https://www.inaturalist.org/observations/10952716">https://www.inaturalist.org/observations/10952716</a>   |
| 2209 | <i>Spilopelia chinensis</i> | Eastern Spotted Dove | 2019/11/4  | 3 | 0 | 22.28300090 | 113.93629160 | <a href="https://www.inaturalist.org/observations/35264937">https://www.inaturalist.org/observations/35264937</a>   |
| 2210 | <i>Spilopelia chinensis</i> | Eastern Spotted Dove | 2018/4/15  | 2 | 0 | 22.28300170 | 114.13854740 | <a href="https://www.inaturalist.org/observations/10943470">https://www.inaturalist.org/observations/10943470</a>   |
| 2211 | <i>Spilopelia chinensis</i> | Eastern Spotted Dove | 2019/4/29  | 3 | 0 | 22.28302395 | 114.13671700 | <a href="https://www.inaturalist.org/observations/23792659">https://www.inaturalist.org/observations/23792659</a>   |
| 2212 | <i>Spilopelia chinensis</i> | Eastern Spotted Dove | 2020/10/24 | 1 | 0 | 22.28305964 | 114.21357120 | <a href="https://www.inaturalist.org/observations/63359333">https://www.inaturalist.org/observations/63359333</a>   |
| 2213 | <i>Spilopelia chinensis</i> | Eastern Spotted Dove | 2019/2/26  | 1 | 0 | 22.28307865 | 114.18932460 | <a href="https://www.inaturalist.org/observations/20770243">https://www.inaturalist.org/observations/20770243</a>   |
| 2214 | <i>Spilopelia chinensis</i> | Eastern Spotted Dove | 2018/4/15  | 1 | 0 | 22.28309015 | 114.13710800 | <a href="https://www.inaturalist.org/observations/10949102">https://www.inaturalist.org/observations/10949102</a>   |
| 2215 | <i>Spilopelia chinensis</i> | Eastern Spotted Dove | 2018/11/5  | 5 | 0 | 22.28309488 | 113.93608970 | <a href="https://www.inaturalist.org/observations/18116698">https://www.inaturalist.org/observations/18116698</a>   |
| 2216 | <i>Spilopelia chinensis</i> | Eastern Spotted Dove | 2020/11/25 | 1 | 0 | 22.28310031 | 114.15324330 | <a href="https://www.inaturalist.org/observations/65570727">https://www.inaturalist.org/observations/65570727</a>   |
| 2217 | <i>Spilopelia chinensis</i> | Eastern Spotted Dove | 2021/11/16 | 1 | 0 | 22.28315689 | 114.15330090 | <a href="https://www.inaturalist.org/observations/101239212">https://www.inaturalist.org/observations/101239212</a> |
| 2218 | <i>Spilopelia chinensis</i> | Eastern Spotted Dove | 2018/4/29  | 4 | 0 | 22.28322128 | 114.14668320 | <a href="https://www.inaturalist.org/observations/11712205">https://www.inaturalist.org/observations/11712205</a>   |
| 2219 | <i>Spilopelia chinensis</i> | Eastern Spotted Dove | 2018/11/6  | 3 | 0 | 22.28322849 | 114.14378870 | <a href="https://www.inaturalist.org/observations/18209063">https://www.inaturalist.org/observations/18209063</a>   |
| 2220 | <i>Spilopelia chinensis</i> | Eastern Spotted Dove | 2022/5/14  | 3 | 0 | 22.28326183 | 114.18761260 | <a href="https://www.inaturalist.org/observations/116923781">https://www.inaturalist.org/observations/116923781</a> |
| 2221 | <i>Spilopelia chinensis</i> | Eastern Spotted Dove | 2022/4/29  | 1 | 0 | 22.28327322 | 114.22479320 | <a href="https://www.inaturalist.org/observations/113438716">https://www.inaturalist.org/observations/113438716</a> |
| 2222 | <i>Spilopelia chinensis</i> | Eastern Spotted Dove | 2020/4/25  | 3 | 0 | 22.28330110 | 113.93614950 | <a href="https://www.inaturalist.org/observations/43266814">https://www.inaturalist.org/observations/43266814</a>   |
| 2223 | <i>Spilopelia chinensis</i> | Eastern Spotted Dove | 2020/11/28 | 1 | 0 | 22.28330812 | 114.15286970 | <a href="https://www.inaturalist.org/observations/65737375">https://www.inaturalist.org/observations/65737375</a>   |
| 2224 | <i>Spilopelia chinensis</i> | Eastern Spotted Dove | 2018/4/15  | 1 | 0 | 22.28332570 | 114.13808980 | <a href="https://www.inaturalist.org/observations/10943167">https://www.inaturalist.org/observations/10943167</a>   |
| 2225 | <i>Spilopelia chinensis</i> | Eastern Spotted Dove | 2018/11/6  | 1 | 0 | 22.28333036 | 114.14385460 | <a href="https://www.inaturalist.org/observations/18158933">https://www.inaturalist.org/observations/18158933</a>   |
| 2226 | <i>Spilopelia chinensis</i> | Eastern Spotted Dove | 2019/9/27  | 1 | 0 | 22.28334114 | 114.13634580 | <a href="https://www.inaturalist.org/observations/33469891">https://www.inaturalist.org/observations/33469891</a>   |
| 2227 | <i>Spilopelia chinensis</i> | Eastern Spotted Dove | 2020/12/27 | 1 | 0 | 22.28336373 | 114.15295260 | <a href="https://www.inaturalist.org/observations/67347541">https://www.inaturalist.org/observations/67347541</a>   |
| 2228 | <i>Spilopelia chinensis</i> | Eastern Spotted Dove | 2019/4/28  | 3 | 0 | 22.28337000 | 114.03993330 | <a href="https://www.inaturalist.org/observations/23591958">https://www.inaturalist.org/observations/23591958</a>   |
| 2229 | <i>Spilopelia chinensis</i> | Eastern Spotted Dove | 2020/2/26  | 1 | 0 | 22.28338056 | 114.16472530 | <a href="https://www.inaturalist.org/observations/39908162">https://www.inaturalist.org/observations/39908162</a>   |
| 2230 | <i>Spilopelia chinensis</i> | Eastern Spotted Dove | 2018/11/6  | 5 | 0 | 22.28338547 | 114.22292170 | <a href="https://www.inaturalist.org/observations/18153429">https://www.inaturalist.org/observations/18153429</a>   |

|      |                             |                      |            |   |   |             |              |                                                                                                                     |
|------|-----------------------------|----------------------|------------|---|---|-------------|--------------|---------------------------------------------------------------------------------------------------------------------|
| 2231 | <i>Spilopelia chinensis</i> | Eastern Spotted Dove | 2021/5/2   | 1 | 0 | 22.28341831 | 114.14908190 | <a href="https://www.inaturalist.org/observations/76402415">https://www.inaturalist.org/observations/76402415</a>   |
| 2232 | <i>Spilopelia chinensis</i> | Eastern Spotted Dove | 2018/11/6  | 5 | 0 | 22.28342943 | 114.22287730 | <a href="https://www.inaturalist.org/observations/18153033">https://www.inaturalist.org/observations/18153033</a>   |
| 2233 | <i>Spilopelia chinensis</i> | Eastern Spotted Dove | 2019/11/9  | 2 | 0 | 22.28345054 | 113.93686900 | <a href="https://www.inaturalist.org/observations/35481385">https://www.inaturalist.org/observations/35481385</a>   |
| 2234 | <i>Spilopelia chinensis</i> | Eastern Spotted Dove | 2021/3/7   | 1 | 0 | 22.28346852 | 114.18838110 | <a href="https://www.inaturalist.org/observations/70720726">https://www.inaturalist.org/observations/70720726</a>   |
| 2235 | <i>Spilopelia chinensis</i> | Eastern Spotted Dove | 2022/1/23  | 1 | 0 | 22.28347479 | 114.17559790 | <a href="https://www.inaturalist.org/observations/105487065">https://www.inaturalist.org/observations/105487065</a> |
| 2236 | <i>Spilopelia chinensis</i> | Eastern Spotted Dove | 2021/1/27  | 1 | 0 | 22.28348000 | 114.18931670 | <a href="https://www.inaturalist.org/observations/68677955">https://www.inaturalist.org/observations/68677955</a>   |
| 2237 | <i>Spilopelia chinensis</i> | Eastern Spotted Dove | 2020/4/25  | 2 | 0 | 22.28348833 | 114.04146670 | <a href="https://www.inaturalist.org/observations/43251352">https://www.inaturalist.org/observations/43251352</a>   |
| 2238 | <i>Spilopelia chinensis</i> | Eastern Spotted Dove | 2019/1/19  | 1 | 0 | 22.28348892 | 114.18934640 | <a href="https://www.inaturalist.org/observations/19725434">https://www.inaturalist.org/observations/19725434</a>   |
| 2239 | <i>Spilopelia chinensis</i> | Eastern Spotted Dove | 2019/11/4  | 3 | 0 | 22.28349059 | 114.14406960 | <a href="https://www.inaturalist.org/observations/35278154">https://www.inaturalist.org/observations/35278154</a>   |
| 2240 | <i>Spilopelia chinensis</i> | Eastern Spotted Dove | 2019/4/29  | 2 | 0 | 22.28349112 | 114.13375100 | <a href="https://www.inaturalist.org/observations/23855843">https://www.inaturalist.org/observations/23855843</a>   |
| 2241 | <i>Spilopelia chinensis</i> | Eastern Spotted Dove | 2018/11/6  | 5 | 0 | 22.28349273 | 114.14385130 | <a href="https://www.inaturalist.org/observations/18166975">https://www.inaturalist.org/observations/18166975</a>   |
| 2242 | <i>Spilopelia chinensis</i> | Eastern Spotted Dove | 2018/11/7  | 3 | 0 | 22.28353708 | 114.14401170 | <a href="https://www.inaturalist.org/observations/18208286">https://www.inaturalist.org/observations/18208286</a>   |
| 2243 | <i>Spilopelia chinensis</i> | Eastern Spotted Dove | 2022/5/2   | 1 | 0 | 22.28354132 | 114.18837070 | <a href="https://www.inaturalist.org/observations/119723515">https://www.inaturalist.org/observations/119723515</a> |
| 2244 | <i>Spilopelia chinensis</i> | Eastern Spotted Dove | 2020/11/27 | 1 | 0 | 22.28354366 | 114.14324720 | <a href="https://www.inaturalist.org/observations/65693384">https://www.inaturalist.org/observations/65693384</a>   |
| 2245 | <i>Spilopelia chinensis</i> | Eastern Spotted Dove | 2018/11/7  | 2 | 0 | 22.28355730 | 114.14341440 | <a href="https://www.inaturalist.org/observations/18199040">https://www.inaturalist.org/observations/18199040</a>   |
| 2246 | <i>Spilopelia chinensis</i> | Eastern Spotted Dove | 2018/11/7  | 1 | 0 | 22.28356430 | 114.14333480 | <a href="https://www.inaturalist.org/observations/18195895">https://www.inaturalist.org/observations/18195895</a>   |
| 2247 | <i>Spilopelia chinensis</i> | Eastern Spotted Dove | 2020/7/20  | 1 | 0 | 22.28356667 | 114.13551380 | <a href="https://www.inaturalist.org/observations/53714224">https://www.inaturalist.org/observations/53714224</a>   |
| 2248 | <i>Spilopelia chinensis</i> | Eastern Spotted Dove | 2018/11/6  | 3 | 0 | 22.28357005 | 114.14520810 | <a href="https://www.inaturalist.org/observations/18210723">https://www.inaturalist.org/observations/18210723</a>   |
| 2249 | <i>Spilopelia chinensis</i> | Eastern Spotted Dove | 2018/4/28  | 4 | 0 | 22.28357280 | 114.14671980 | <a href="https://www.inaturalist.org/observations/11591023">https://www.inaturalist.org/observations/11591023</a>   |
| 2250 | <i>Spilopelia chinensis</i> | Eastern Spotted Dove | 2022/5/27  | 1 | 0 | 22.28357500 | 114.13813880 | <a href="https://www.inaturalist.org/observations/118880488">https://www.inaturalist.org/observations/118880488</a> |
| 2251 | <i>Spilopelia chinensis</i> | Eastern Spotted Dove | 2022/5/28  | 1 | 0 | 22.28358500 | 114.12664240 | <a href="https://www.inaturalist.org/observations/119034543">https://www.inaturalist.org/observations/119034543</a> |
| 2252 | <i>Spilopelia chinensis</i> | Eastern Spotted Dove | 2021/11/13 | 2 | 0 | 22.28358920 | 114.14316420 | <a href="https://www.inaturalist.org/observations/100997242">https://www.inaturalist.org/observations/100997242</a> |
| 2253 | <i>Spilopelia chinensis</i> | Eastern Spotted Dove | 2018/11/7  | 1 | 0 | 22.28359500 | 114.14320280 | <a href="https://www.inaturalist.org/observations/18207601">https://www.inaturalist.org/observations/18207601</a>   |

|      |                             |                      |            |   |   |             |              |                                                                                                                     |
|------|-----------------------------|----------------------|------------|---|---|-------------|--------------|---------------------------------------------------------------------------------------------------------------------|
| 2254 | <i>Spilopelia chinensis</i> | Eastern Spotted Dove | 2021/11/1  | 1 | 0 | 22.28361900 | 114.14565600 | <a href="https://www.inaturalist.org/observations/99933364">https://www.inaturalist.org/observations/99933364</a>   |
| 2255 | <i>Spilopelia chinensis</i> | Eastern Spotted Dove | 2021/4/30  | 2 | 0 | 22.28362033 | 113.93695250 | <a href="https://www.inaturalist.org/observations/75764323">https://www.inaturalist.org/observations/75764323</a>   |
| 2256 | <i>Spilopelia chinensis</i> | Eastern Spotted Dove | 2018/11/5  | 4 | 0 | 22.28364720 | 114.14340920 | <a href="https://www.inaturalist.org/observations/18114537">https://www.inaturalist.org/observations/18114537</a>   |
| 2257 | <i>Spilopelia chinensis</i> | Eastern Spotted Dove | 2018/11/6  | 2 | 0 | 22.28366795 | 114.14350020 | <a href="https://www.inaturalist.org/observations/18209023">https://www.inaturalist.org/observations/18209023</a>   |
| 2258 | <i>Spilopelia chinensis</i> | Eastern Spotted Dove | 2020/4/25  | 2 | 0 | 22.28367601 | 114.15327540 | <a href="https://www.inaturalist.org/observations/43230188">https://www.inaturalist.org/observations/43230188</a>   |
| 2259 | <i>Spilopelia chinensis</i> | Eastern Spotted Dove | 2022/4/30  | 2 | 0 | 22.28367754 | 114.22266100 | <a href="https://www.inaturalist.org/observations/115063435">https://www.inaturalist.org/observations/115063435</a> |
| 2260 | <i>Spilopelia chinensis</i> | Eastern Spotted Dove | 2021/9/3   | 1 | 0 | 22.28368000 | 82.06671000  | <a href="https://www.inaturalist.org/observations/93701616">https://www.inaturalist.org/observations/93701616</a>   |
| 2261 | <i>Spilopelia chinensis</i> | Eastern Spotted Dove | 2021/9/17  | 2 | 0 | 22.28368793 | 114.22287480 | <a href="https://www.inaturalist.org/observations/95120942">https://www.inaturalist.org/observations/95120942</a>   |
| 2262 | <i>Spilopelia chinensis</i> | Eastern Spotted Dove | 2019/11/4  | 1 | 0 | 22.28369845 | 114.14388270 | <a href="https://www.inaturalist.org/observations/35264449">https://www.inaturalist.org/observations/35264449</a>   |
| 2263 | <i>Spilopelia chinensis</i> | Eastern Spotted Dove | 2021/9/17  | 1 | 0 | 22.28370500 | 114.22305500 | <a href="https://www.inaturalist.org/observations/95121025">https://www.inaturalist.org/observations/95121025</a>   |
| 2264 | <i>Spilopelia chinensis</i> | Eastern Spotted Dove | 2018/11/7  | 1 | 0 | 22.28370820 | 114.14276740 | <a href="https://www.inaturalist.org/observations/18194972">https://www.inaturalist.org/observations/18194972</a>   |
| 2265 | <i>Spilopelia chinensis</i> | Eastern Spotted Dove | 2021/9/17  | 1 | 0 | 22.28370927 | 114.22306910 | <a href="https://www.inaturalist.org/observations/95120084">https://www.inaturalist.org/observations/95120084</a>   |
| 2266 | <i>Spilopelia chinensis</i> | Eastern Spotted Dove | 2018/11/7  | 2 | 0 | 22.28372439 | 114.14406450 | <a href="https://www.inaturalist.org/observations/18199702">https://www.inaturalist.org/observations/18199702</a>   |
| 2267 | <i>Spilopelia chinensis</i> | Eastern Spotted Dove | 2019/11/4  | 2 | 0 | 22.28372902 | 114.14387780 | <a href="https://www.inaturalist.org/observations/35264442">https://www.inaturalist.org/observations/35264442</a>   |
| 2268 | <i>Spilopelia chinensis</i> | Eastern Spotted Dove | 2017/8/5   | 2 | 0 | 22.28376111 | 114.18672220 | <a href="https://www.inaturalist.org/observations/7371089">https://www.inaturalist.org/observations/7371089</a>     |
| 2269 | <i>Spilopelia chinensis</i> | Eastern Spotted Dove | 2015/10/12 | 2 | 0 | 22.28377415 | 114.18940760 | <a href="https://www.inaturalist.org/observations/32096315">https://www.inaturalist.org/observations/32096315</a>   |
| 2270 | <i>Spilopelia chinensis</i> | Eastern Spotted Dove | 2019/11/4  | 3 | 0 | 22.28377550 | 114.14376740 | <a href="https://www.inaturalist.org/observations/35264531">https://www.inaturalist.org/observations/35264531</a>   |
| 2271 | <i>Spilopelia chinensis</i> | Eastern Spotted Dove | 2019/11/4  | 3 | 0 | 22.28378708 | 114.14366030 | <a href="https://www.inaturalist.org/observations/35282273">https://www.inaturalist.org/observations/35282273</a>   |
| 2272 | <i>Spilopelia chinensis</i> | Eastern Spotted Dove | 2019/11/4  | 3 | 0 | 22.28379065 | 114.14386350 | <a href="https://www.inaturalist.org/observations/35264467">https://www.inaturalist.org/observations/35264467</a>   |
| 2273 | <i>Spilopelia chinensis</i> | Eastern Spotted Dove | 2019/11/4  | 2 | 0 | 22.28381127 | 114.14386110 | <a href="https://www.inaturalist.org/observations/35264425">https://www.inaturalist.org/observations/35264425</a>   |
| 2274 | <i>Spilopelia chinensis</i> | Eastern Spotted Dove | 2019/11/4  | 2 | 0 | 22.28381454 | 114.14391950 | <a href="https://www.inaturalist.org/observations/35264508">https://www.inaturalist.org/observations/35264508</a>   |
| 2275 | <i>Spilopelia chinensis</i> | Eastern Spotted Dove | 2021/11/8  | 2 | 0 | 22.28381836 | 114.22299560 | <a href="https://www.inaturalist.org/observations/100545844">https://www.inaturalist.org/observations/100545844</a> |
| 2276 | <i>Spilopelia chinensis</i> | Eastern Spotted Dove | 2019/11/4  | 1 | 0 | 22.28383558 | 114.14384240 | <a href="https://www.inaturalist.org/observations/35264448">https://www.inaturalist.org/observations/35264448</a>   |

|      |                             |                      |            |   |   |             |              |                                                                                                                     |
|------|-----------------------------|----------------------|------------|---|---|-------------|--------------|---------------------------------------------------------------------------------------------------------------------|
| 2277 | <i>Spilopelia chinensis</i> | Eastern Spotted Dove | 2021/11/8  | 0 | 0 | 22.28384498 | 114.22316630 | <a href="https://www.inaturalist.org/observations/100545887">https://www.inaturalist.org/observations/100545887</a> |
| 2278 | <i>Spilopelia chinensis</i> | Eastern Spotted Dove | 2018/11/5  | 6 | 0 | 22.28385905 | 114.14337870 | <a href="https://www.inaturalist.org/observations/18114607">https://www.inaturalist.org/observations/18114607</a>   |
| 2279 | <i>Spilopelia chinensis</i> | Eastern Spotted Dove | 2020/11/25 | 2 | 0 | 22.28386333 | 114.14338050 | <a href="https://www.inaturalist.org/observations/65576519">https://www.inaturalist.org/observations/65576519</a>   |
| 2280 | <i>Spilopelia chinensis</i> | Eastern Spotted Dove | 2019/11/4  | 3 | 0 | 22.28389200 | 114.14377320 | <a href="https://www.inaturalist.org/observations/35264511">https://www.inaturalist.org/observations/35264511</a>   |
| 2281 | <i>Spilopelia chinensis</i> | Eastern Spotted Dove | 2019/11/4  | 2 | 0 | 22.28390128 | 114.14384740 | <a href="https://www.inaturalist.org/observations/35264473">https://www.inaturalist.org/observations/35264473</a>   |
| 2282 | <i>Spilopelia chinensis</i> | Eastern Spotted Dove | 2019/11/4  | 2 | 0 | 22.28393700 | 114.14374050 | <a href="https://www.inaturalist.org/observations/35264457">https://www.inaturalist.org/observations/35264457</a>   |
| 2283 | <i>Spilopelia chinensis</i> | Eastern Spotted Dove | 2020/11/8  | 1 | 0 | 22.28398632 | 113.93694500 | <a href="https://www.inaturalist.org/observations/64588740">https://www.inaturalist.org/observations/64588740</a>   |
| 2284 | <i>Spilopelia chinensis</i> | Eastern Spotted Dove | 2019/9/17  | 2 | 0 | 22.28401205 | 114.13385560 | <a href="https://www.inaturalist.org/observations/32876598">https://www.inaturalist.org/observations/32876598</a>   |
| 2285 | <i>Spilopelia chinensis</i> | Eastern Spotted Dove | 2017/8/19  | 1 | 0 | 22.28405271 | 114.15196100 | <a href="https://www.inaturalist.org/observations/7553251">https://www.inaturalist.org/observations/7553251</a>     |
| 2286 | <i>Spilopelia chinensis</i> | Eastern Spotted Dove | 2019/11/4  | 1 | 0 | 22.28406197 | 114.14356360 | <a href="https://www.inaturalist.org/observations/35264572">https://www.inaturalist.org/observations/35264572</a>   |
| 2287 | <i>Spilopelia chinensis</i> | Eastern Spotted Dove | 2018/4/27  | 3 | 0 | 22.28419355 | 114.13976970 | <a href="https://www.inaturalist.org/observations/11471032">https://www.inaturalist.org/observations/11471032</a>   |
| 2288 | <i>Spilopelia chinensis</i> | Eastern Spotted Dove | 2019/1/26  | 1 | 0 | 22.28426705 | 114.18960540 | <a href="https://www.inaturalist.org/observations/19876363">https://www.inaturalist.org/observations/19876363</a>   |
| 2289 | <i>Spilopelia chinensis</i> | Eastern Spotted Dove | 2022/4/2   | 2 | 0 | 22.28427199 | 113.93756820 | <a href="https://www.inaturalist.org/observations/110156290">https://www.inaturalist.org/observations/110156290</a> |
| 2290 | <i>Spilopelia chinensis</i> | Eastern Spotted Dove | 2022/9/24  | 3 | 0 | 22.28433182 | 113.93747830 | <a href="https://www.inaturalist.org/observations/136219304">https://www.inaturalist.org/observations/136219304</a> |
| 2291 | <i>Spilopelia chinensis</i> | Eastern Spotted Dove | 2020/8/18  | 1 | 0 | 22.28435200 | 114.14556600 | <a href="https://www.inaturalist.org/observations/66506540">https://www.inaturalist.org/observations/66506540</a>   |
| 2292 | <i>Spilopelia chinensis</i> | Eastern Spotted Dove | 2021/11/11 | 2 | 0 | 22.28435469 | 114.14812340 | <a href="https://www.inaturalist.org/observations/100992437">https://www.inaturalist.org/observations/100992437</a> |
| 2293 | <i>Spilopelia chinensis</i> | Eastern Spotted Dove | 2018/4/28  | 4 | 0 | 22.28439500 | 114.21183830 | <a href="https://www.inaturalist.org/observations/11592092">https://www.inaturalist.org/observations/11592092</a>   |
| 2294 | <i>Spilopelia chinensis</i> | Eastern Spotted Dove | 2021/5/2   | 0 | 0 | 22.28442131 | 114.03826380 | <a href="https://www.inaturalist.org/observations/76381626">https://www.inaturalist.org/observations/76381626</a>   |
| 2295 | <i>Spilopelia chinensis</i> | Eastern Spotted Dove | 2019/4/29  | 1 | 0 | 22.28443271 | 114.13781670 | <a href="https://www.inaturalist.org/observations/23861733">https://www.inaturalist.org/observations/23861733</a>   |
| 2296 | <i>Spilopelia chinensis</i> | Eastern Spotted Dove | 2019/11/9  | 2 | 0 | 22.28444978 | 114.22207960 | <a href="https://www.inaturalist.org/observations/35472069">https://www.inaturalist.org/observations/35472069</a>   |
| 2297 | <i>Spilopelia chinensis</i> | Eastern Spotted Dove | 2018/4/28  | 1 | 0 | 22.28445207 | 114.13252120 | <a href="https://www.inaturalist.org/observations/11591176">https://www.inaturalist.org/observations/11591176</a>   |
| 2298 | <i>Spilopelia chinensis</i> | Eastern Spotted Dove | 2021/11/10 | 2 | 0 | 22.28447571 | 114.22456730 | <a href="https://www.inaturalist.org/observations/101095031">https://www.inaturalist.org/observations/101095031</a> |
| 2299 | <i>Spilopelia chinensis</i> | Eastern Spotted Dove | 2018/4/8   | 3 | 0 | 22.28449061 | 114.13782610 | <a href="https://www.inaturalist.org/observations/10698010">https://www.inaturalist.org/observations/10698010</a>   |



|      |                             |                      |            |   |   |             |              |                                                                                                                     |
|------|-----------------------------|----------------------|------------|---|---|-------------|--------------|---------------------------------------------------------------------------------------------------------------------|
| 2300 | <i>Spilopelia chinensis</i> | Eastern Spotted Dove | 2018/4/8   | 4 | 0 | 22.28450203 | 114.13775630 | <a href="https://www.inaturalist.org/observations/10698248">https://www.inaturalist.org/observations/10698248</a>   |
| 2301 | <i>Spilopelia chinensis</i> | Eastern Spotted Dove | 2018/4/8   | 3 | 0 | 22.28450203 | 114.13775630 | <a href="https://www.inaturalist.org/observations/10705347">https://www.inaturalist.org/observations/10705347</a>   |
| 2302 | <i>Spilopelia chinensis</i> | Eastern Spotted Dove | 2018/4/8   | 3 | 0 | 22.28451367 | 114.13764730 | <a href="https://www.inaturalist.org/observations/10697977">https://www.inaturalist.org/observations/10697977</a>   |
| 2303 | <i>Spilopelia chinensis</i> | Eastern Spotted Dove | 2018/4/8   | 2 | 0 | 22.28453167 | 114.13773500 | <a href="https://www.inaturalist.org/observations/10698151">https://www.inaturalist.org/observations/10698151</a>   |
| 2304 | <i>Spilopelia chinensis</i> | Eastern Spotted Dove | 2021/11/10 | 2 | 0 | 22.28453337 | 114.22433300 | <a href="https://www.inaturalist.org/observations/101095345">https://www.inaturalist.org/observations/101095345</a> |
| 2305 | <i>Spilopelia chinensis</i> | Eastern Spotted Dove | 2022/4/2   | 1 | 0 | 22.28454274 | 113.93576260 | <a href="https://www.inaturalist.org/observations/110274532">https://www.inaturalist.org/observations/110274532</a> |
| 2306 | <i>Spilopelia chinensis</i> | Eastern Spotted Dove | 2021/11/10 | 2 | 0 | 22.28459988 | 114.22404330 | <a href="https://www.inaturalist.org/observations/101094690">https://www.inaturalist.org/observations/101094690</a> |
| 2307 | <i>Spilopelia chinensis</i> | Eastern Spotted Dove | 2018/4/8   | 1 | 0 | 22.28461283 | 114.13775480 | <a href="https://www.inaturalist.org/observations/10697900">https://www.inaturalist.org/observations/10697900</a>   |
| 2308 | <i>Spilopelia chinensis</i> | Eastern Spotted Dove | 2018/4/8   | 1 | 0 | 22.28461744 | 114.13788310 | <a href="https://www.inaturalist.org/observations/10698008">https://www.inaturalist.org/observations/10698008</a>   |
| 2309 | <i>Spilopelia chinensis</i> | Eastern Spotted Dove | 2018/11/7  | 6 | 0 | 22.28462000 | 114.22329670 | <a href="https://www.inaturalist.org/observations/18193255">https://www.inaturalist.org/observations/18193255</a>   |
| 2310 | <i>Spilopelia chinensis</i> | Eastern Spotted Dove | 2018/4/28  | 1 | 0 | 22.28463169 | 114.19729420 | <a href="https://www.inaturalist.org/observations/11557462">https://www.inaturalist.org/observations/11557462</a>   |
| 2311 | <i>Spilopelia chinensis</i> | Eastern Spotted Dove | 2018/4/8   | 3 | 0 | 22.28474334 | 114.13758690 | <a href="https://www.inaturalist.org/observations/10697890">https://www.inaturalist.org/observations/10697890</a>   |
| 2312 | <i>Spilopelia chinensis</i> | Eastern Spotted Dove | 2018/4/8   | 4 | 0 | 22.28478981 | 114.13789030 | <a href="https://www.inaturalist.org/observations/10697951">https://www.inaturalist.org/observations/10697951</a>   |
| 2313 | <i>Spilopelia chinensis</i> | Eastern Spotted Dove | 2022/8/21  | 1 | 0 | 22.28482056 | 114.12916560 | <a href="https://www.inaturalist.org/observations/131697985">https://www.inaturalist.org/observations/131697985</a> |
| 2314 | <i>Spilopelia chinensis</i> | Eastern Spotted Dove | 2018/4/8   | 1 | 0 | 22.28499243 | 114.13768120 | <a href="https://www.inaturalist.org/observations/10698135">https://www.inaturalist.org/observations/10698135</a>   |
| 2315 | <i>Spilopelia chinensis</i> | Eastern Spotted Dove | 2021/11/6  | 1 | 0 | 22.28503333 | 114.15665550 | <a href="https://www.inaturalist.org/observations/100372780">https://www.inaturalist.org/observations/100372780</a> |
| 2316 | <i>Spilopelia chinensis</i> | Eastern Spotted Dove | 2019/2/27  | 1 | 0 | 22.28506700 | 114.13116000 | <a href="https://www.inaturalist.org/observations/21251342">https://www.inaturalist.org/observations/21251342</a>   |
| 2317 | <i>Spilopelia chinensis</i> | Eastern Spotted Dove | 2021/11/4  | 1 | 0 | 22.28509800 | 114.19533000 | <a href="https://www.inaturalist.org/observations/100220206">https://www.inaturalist.org/observations/100220206</a> |
| 2318 | <i>Spilopelia chinensis</i> | Eastern Spotted Dove | 2021/11/9  | 2 | 0 | 22.28513585 | 114.22275150 | <a href="https://www.inaturalist.org/observations/100765538">https://www.inaturalist.org/observations/100765538</a> |
| 2319 | <i>Spilopelia chinensis</i> | Eastern Spotted Dove | 2018/11/8  | 4 | 0 | 22.28514790 | 114.22419530 | <a href="https://www.inaturalist.org/observations/18259978">https://www.inaturalist.org/observations/18259978</a>   |
| 2320 | <i>Spilopelia chinensis</i> | Eastern Spotted Dove | 2019/4/18  | 1 | 0 | 22.28515682 | 114.14555070 | <a href="https://www.inaturalist.org/observations/22641617">https://www.inaturalist.org/observations/22641617</a>   |
| 2321 | <i>Spilopelia chinensis</i> | Eastern Spotted Dove | 2019/4/28  | 1 | 0 | 22.28517512 | 114.15322710 | <a href="https://www.inaturalist.org/observations/23885803">https://www.inaturalist.org/observations/23885803</a>   |
| 2322 | <i>Spilopelia chinensis</i> | Eastern Spotted Dove | 2022/4/30  | 1 | 0 | 22.28521390 | 114.13135540 | <a href="https://www.inaturalist.org/observations/113767141">https://www.inaturalist.org/observations/113767141</a> |

|      |                             |                      |            |   |   |             |              |                                                                                                                     |
|------|-----------------------------|----------------------|------------|---|---|-------------|--------------|---------------------------------------------------------------------------------------------------------------------|
| 2323 | <i>Spilopelia chinensis</i> | Eastern Spotted Dove | 2022/5/2   | 1 | 0 | 22.28530500 | 114.15425830 | <a href="https://www.inaturalist.org/observations/114545583">https://www.inaturalist.org/observations/114545583</a> |
| 2324 | <i>Spilopelia chinensis</i> | Eastern Spotted Dove | 2019/3/15  | 1 | 0 | 22.28535833 | 114.15865280 | <a href="https://www.inaturalist.org/observations/21252681">https://www.inaturalist.org/observations/21252681</a>   |
| 2325 | <i>Spilopelia chinensis</i> | Eastern Spotted Dove | 2021/3/9   | 1 | 0 | 22.28541667 | 114.19182000 | <a href="https://www.inaturalist.org/observations/70855507">https://www.inaturalist.org/observations/70855507</a>   |
| 2326 | <i>Spilopelia chinensis</i> | Eastern Spotted Dove | 2018/4/28  | 3 | 0 | 22.28542362 | 114.15660270 | <a href="https://www.inaturalist.org/observations/13329409">https://www.inaturalist.org/observations/13329409</a>   |
| 2327 | <i>Spilopelia chinensis</i> | Eastern Spotted Dove | 2021/3/7   | 2 | 0 | 22.28549328 | 114.15884290 | <a href="https://www.inaturalist.org/observations/70714453">https://www.inaturalist.org/observations/70714453</a>   |
| 2328 | <i>Spilopelia chinensis</i> | Eastern Spotted Dove | 2019/11/29 | 1 | 0 | 22.28549580 | 114.15899660 | <a href="https://www.inaturalist.org/observations/38745725">https://www.inaturalist.org/observations/38745725</a>   |
| 2329 | <i>Spilopelia chinensis</i> | Eastern Spotted Dove | 2021/11/8  | 2 | 0 | 22.28556718 | 114.22373390 | <a href="https://www.inaturalist.org/observations/100562953">https://www.inaturalist.org/observations/100562953</a> |
| 2330 | <i>Spilopelia chinensis</i> | Eastern Spotted Dove | 2019/4/28  | 2 | 0 | 22.28565570 | 114.15880700 | <a href="https://www.inaturalist.org/observations/23576101">https://www.inaturalist.org/observations/23576101</a>   |
| 2331 | <i>Spilopelia chinensis</i> | Eastern Spotted Dove | 2018/4/27  | 3 | 0 | 22.28568103 | 114.14832090 | <a href="https://www.inaturalist.org/observations/11510891">https://www.inaturalist.org/observations/11510891</a>   |
| 2332 | <i>Spilopelia chinensis</i> | Eastern Spotted Dove | 2019/11/7  | 3 | 0 | 22.28574802 | 114.22240650 | <a href="https://www.inaturalist.org/observations/35394865">https://www.inaturalist.org/observations/35394865</a>   |
| 2333 | <i>Spilopelia chinensis</i> | Eastern Spotted Dove | 2019/11/7  | 4 | 0 | 22.28578000 | 114.22241170 | <a href="https://www.inaturalist.org/observations/35403493">https://www.inaturalist.org/observations/35403493</a>   |
| 2334 | <i>Spilopelia chinensis</i> | Eastern Spotted Dove | 2018/11/7  | 5 | 0 | 22.28580071 | 114.22234930 | <a href="https://www.inaturalist.org/observations/18208110">https://www.inaturalist.org/observations/18208110</a>   |
| 2335 | <i>Spilopelia chinensis</i> | Eastern Spotted Dove | 2021/11/19 | 1 | 0 | 22.28581060 | 114.14462770 | <a href="https://www.inaturalist.org/observations/101544248">https://www.inaturalist.org/observations/101544248</a> |
| 2336 | <i>Spilopelia chinensis</i> | Eastern Spotted Dove | 2021/11/11 | 2 | 0 | 22.28584419 | 114.22256320 | <a href="https://www.inaturalist.org/observations/100837268">https://www.inaturalist.org/observations/100837268</a> |
| 2337 | <i>Spilopelia chinensis</i> | Eastern Spotted Dove | 2018/11/7  | 2 | 0 | 22.28586420 | 114.19532560 | <a href="https://www.inaturalist.org/observations/18204566">https://www.inaturalist.org/observations/18204566</a>   |
| 2338 | <i>Spilopelia chinensis</i> | Eastern Spotted Dove | 2019/11/7  | 3 | 0 | 22.28587167 | 114.22219170 | <a href="https://www.inaturalist.org/observations/35447427">https://www.inaturalist.org/observations/35447427</a>   |
| 2339 | <i>Spilopelia chinensis</i> | Eastern Spotted Dove | 2019/11/7  | 3 | 0 | 22.28588333 | 114.22228330 | <a href="https://www.inaturalist.org/observations/35394111">https://www.inaturalist.org/observations/35394111</a>   |
| 2340 | <i>Spilopelia chinensis</i> | Eastern Spotted Dove | 2019/11/7  | 2 | 0 | 22.28588889 | 114.22213060 | <a href="https://www.inaturalist.org/observations/35510387">https://www.inaturalist.org/observations/35510387</a>   |
| 2341 | <i>Spilopelia chinensis</i> | Eastern Spotted Dove | 2019/11/7  | 2 | 0 | 22.28588889 | 114.22213060 | <a href="https://www.inaturalist.org/observations/35510388">https://www.inaturalist.org/observations/35510388</a>   |
| 2342 | <i>Spilopelia chinensis</i> | Eastern Spotted Dove | 2021/11/10 | 2 | 0 | 22.28591066 | 114.22243880 | <a href="https://www.inaturalist.org/observations/100756611">https://www.inaturalist.org/observations/100756611</a> |
| 2343 | <i>Spilopelia chinensis</i> | Eastern Spotted Dove | 2019/11/7  | 3 | 0 | 22.28592778 | 114.22217500 | <a href="https://www.inaturalist.org/observations/35510389">https://www.inaturalist.org/observations/35510389</a>   |
| 2344 | <i>Spilopelia chinensis</i> | Eastern Spotted Dove | 2019/11/7  | 2 | 0 | 22.28592778 | 114.22217500 | <a href="https://www.inaturalist.org/observations/35510746">https://www.inaturalist.org/observations/35510746</a>   |
| 2345 | <i>Spilopelia chinensis</i> | Eastern Spotted Dove | 2021/2/14  | 1 | 0 | 22.28593000 | 114.21903830 | <a href="https://www.inaturalist.org/observations/69545509">https://www.inaturalist.org/observations/69545509</a>   |

|      |                             |                      |            |   |   |             |              |                                                                                                                     |
|------|-----------------------------|----------------------|------------|---|---|-------------|--------------|---------------------------------------------------------------------------------------------------------------------|
| 2346 | <i>Spilopelia chinensis</i> | Eastern Spotted Dove | 2019/11/8  | 3 | 0 | 22.28593333 | 114.19623670 | <a href="https://www.inaturalist.org/observations/35427531">https://www.inaturalist.org/observations/35427531</a>   |
| 2347 | <i>Spilopelia chinensis</i> | Eastern Spotted Dove | 2022/8/21  | 1 | 0 | 22.28599041 | 114.19149190 | <a href="https://www.inaturalist.org/observations/131709619">https://www.inaturalist.org/observations/131709619</a> |
| 2348 | <i>Spilopelia chinensis</i> | Eastern Spotted Dove | 2019/4/27  | 2 | 0 | 22.28599167 | 114.16113330 | <a href="https://www.inaturalist.org/observations/23645801">https://www.inaturalist.org/observations/23645801</a>   |
| 2349 | <i>Spilopelia chinensis</i> | Eastern Spotted Dove | 2019/11/6  | 3 | 0 | 22.28600903 | 114.19597150 | <a href="https://www.inaturalist.org/observations/35365353">https://www.inaturalist.org/observations/35365353</a>   |
| 2350 | <i>Spilopelia chinensis</i> | Eastern Spotted Dove | 2019/11/7  | 1 | 0 | 22.28601340 | 114.22230790 | <a href="https://www.inaturalist.org/observations/35394726">https://www.inaturalist.org/observations/35394726</a>   |
| 2351 | <i>Spilopelia chinensis</i> | Eastern Spotted Dove | 2021/11/10 | 2 | 0 | 22.28602599 | 114.22317100 | <a href="https://www.inaturalist.org/observations/100727965">https://www.inaturalist.org/observations/100727965</a> |
| 2352 | <i>Spilopelia chinensis</i> | Eastern Spotted Dove | 2019/11/7  | 4 | 0 | 22.28604167 | 114.22255000 | <a href="https://www.inaturalist.org/observations/35438385">https://www.inaturalist.org/observations/35438385</a>   |
| 2353 | <i>Spilopelia chinensis</i> | Eastern Spotted Dove | 2021/5/1   | 1 | 0 | 22.28604923 | 114.20163770 | <a href="https://www.inaturalist.org/observations/76082158">https://www.inaturalist.org/observations/76082158</a>   |
| 2354 | <i>Spilopelia chinensis</i> | Eastern Spotted Dove | 2021/11/8  | 2 | 0 | 22.28605737 | 114.22277240 | <a href="https://www.inaturalist.org/observations/100562152">https://www.inaturalist.org/observations/100562152</a> |
| 2355 | <i>Spilopelia chinensis</i> | Eastern Spotted Dove | 2019/11/8  | 3 | 0 | 22.28606167 | 114.22280830 | <a href="https://www.inaturalist.org/observations/35449470">https://www.inaturalist.org/observations/35449470</a>   |
| 2356 | <i>Spilopelia chinensis</i> | Eastern Spotted Dove | 2019/11/7  | 4 | 0 | 22.28606242 | 114.22235310 | <a href="https://www.inaturalist.org/observations/35438309">https://www.inaturalist.org/observations/35438309</a>   |
| 2357 | <i>Spilopelia chinensis</i> | Eastern Spotted Dove | 2018/4/2   | 3 | 0 | 22.28608410 | 114.15337570 | <a href="https://www.inaturalist.org/observations/10566638">https://www.inaturalist.org/observations/10566638</a>   |
| 2358 | <i>Spilopelia chinensis</i> | Eastern Spotted Dove | 2022/4/12  | 2 | 0 | 22.28610432 | 114.16273240 | <a href="https://www.inaturalist.org/observations/111183339">https://www.inaturalist.org/observations/111183339</a> |
| 2359 | <i>Spilopelia chinensis</i> | Eastern Spotted Dove | 2019/11/8  | 4 | 0 | 22.28611403 | 114.22289680 | <a href="https://www.inaturalist.org/observations/35441083">https://www.inaturalist.org/observations/35441083</a>   |
| 2360 | <i>Spilopelia chinensis</i> | Eastern Spotted Dove | 2018/11/6  | 3 | 0 | 22.28614100 | 114.19605600 | <a href="https://www.inaturalist.org/observations/18161660">https://www.inaturalist.org/observations/18161660</a>   |
| 2361 | <i>Spilopelia chinensis</i> | Eastern Spotted Dove | 2021/3/5   | 1 | 0 | 22.28616569 | 114.21654080 | <a href="https://www.inaturalist.org/observations/70741227">https://www.inaturalist.org/observations/70741227</a>   |
| 2362 | <i>Spilopelia chinensis</i> | Eastern Spotted Dove | 2021/5/5   | 1 | 0 | 22.28618833 | 114.21405000 | <a href="https://www.inaturalist.org/observations/77376156">https://www.inaturalist.org/observations/77376156</a>   |
| 2363 | <i>Spilopelia chinensis</i> | Eastern Spotted Dove | 2021/3/8   | 2 | 0 | 22.28622657 | 114.21654180 | <a href="https://www.inaturalist.org/observations/70797159">https://www.inaturalist.org/observations/70797159</a>   |
| 2364 | <i>Spilopelia chinensis</i> | Eastern Spotted Dove | 2021/4/25  | 2 | 0 | 22.28624714 | 114.20118130 | <a href="https://www.inaturalist.org/observations/75149980">https://www.inaturalist.org/observations/75149980</a>   |
| 2365 | <i>Spilopelia chinensis</i> | Eastern Spotted Dove | 2020/10/23 | 2 | 0 | 22.28624821 | 114.16142700 | <a href="https://www.inaturalist.org/observations/63630287">https://www.inaturalist.org/observations/63630287</a>   |
| 2366 | <i>Spilopelia chinensis</i> | Eastern Spotted Dove | 2021/8/11  | 2 | 0 | 22.28625800 | 114.16176300 | <a href="https://www.inaturalist.org/observations/90766190">https://www.inaturalist.org/observations/90766190</a>   |
| 2367 | <i>Spilopelia chinensis</i> | Eastern Spotted Dove | 2022/7/14  | 1 | 0 | 22.28641876 | 114.20147760 | <a href="https://www.inaturalist.org/observations/126332801">https://www.inaturalist.org/observations/126332801</a> |
| 2368 | <i>Spilopelia chinensis</i> | Eastern Spotted Dove | 2022/5/2   | 1 | 0 | 22.28651333 | 114.15207780 | <a href="https://www.inaturalist.org/observations/114546311">https://www.inaturalist.org/observations/114546311</a> |

|      |                             |                      |            |   |   |             |              |                                                                                                                     |
|------|-----------------------------|----------------------|------------|---|---|-------------|--------------|---------------------------------------------------------------------------------------------------------------------|
| 2369 | <i>Spilopelia chinensis</i> | Eastern Spotted Dove | 2021/3/7   | 2 | 0 | 22.28654710 | 114.21898830 | <a href="https://www.inaturalist.org/observations/70734279">https://www.inaturalist.org/observations/70734279</a>   |
| 2370 | <i>Spilopelia chinensis</i> | Eastern Spotted Dove | 2022/1/29  | 1 | 0 | 22.28658416 | 114.20217240 | <a href="https://www.inaturalist.org/observations/105808077">https://www.inaturalist.org/observations/105808077</a> |
| 2371 | <i>Spilopelia chinensis</i> | Eastern Spotted Dove | 2018/11/7  | 2 | 0 | 22.28661553 | 114.19599400 | <a href="https://www.inaturalist.org/observations/18207985">https://www.inaturalist.org/observations/18207985</a>   |
| 2372 | <i>Spilopelia chinensis</i> | Eastern Spotted Dove | 2019/4/29  | 3 | 0 | 22.28678513 | 114.15869900 | <a href="https://www.inaturalist.org/observations/24058155">https://www.inaturalist.org/observations/24058155</a>   |
| 2373 | <i>Spilopelia chinensis</i> | Eastern Spotted Dove | 2020/11/15 | 2 | 0 | 22.28682403 | 114.22357410 | <a href="https://www.inaturalist.org/observations/64911912">https://www.inaturalist.org/observations/64911912</a>   |
| 2374 | <i>Spilopelia chinensis</i> | Eastern Spotted Dove | 2020/11/11 | 2 | 0 | 22.28685410 | 114.19528780 | <a href="https://www.inaturalist.org/observations/64654151">https://www.inaturalist.org/observations/64654151</a>   |
| 2375 | <i>Spilopelia chinensis</i> | Eastern Spotted Dove | 2020/11/27 | 2 | 0 | 22.28690233 | 114.19559180 | <a href="https://www.inaturalist.org/observations/65681263">https://www.inaturalist.org/observations/65681263</a>   |
| 2376 | <i>Spilopelia chinensis</i> | Eastern Spotted Dove | 2022/7/26  | 2 | 0 | 22.28693838 | 114.15460700 | <a href="https://www.inaturalist.org/observations/127950860">https://www.inaturalist.org/observations/127950860</a> |
| 2377 | <i>Spilopelia chinensis</i> | Eastern Spotted Dove | 2020/8/5   | 2 | 0 | 22.28699797 | 114.14234000 | <a href="https://www.inaturalist.org/observations/55468986">https://www.inaturalist.org/observations/55468986</a>   |
| 2378 | <i>Spilopelia chinensis</i> | Eastern Spotted Dove | 2021/8/28  | 1 | 0 | 22.28705000 | 114.16001950 | <a href="https://www.inaturalist.org/observations/92757630">https://www.inaturalist.org/observations/92757630</a>   |
| 2379 | <i>Spilopelia chinensis</i> | Eastern Spotted Dove | 2021/4/15  | 0 | 0 | 22.28709328 | 114.16123220 | <a href="https://www.inaturalist.org/observations/74187691">https://www.inaturalist.org/observations/74187691</a>   |
| 2380 | <i>Spilopelia chinensis</i> | Eastern Spotted Dove | 2021/11/9  | 2 | 0 | 22.28711881 | 114.21447920 | <a href="https://www.inaturalist.org/observations/100835551">https://www.inaturalist.org/observations/100835551</a> |
| 2381 | <i>Spilopelia chinensis</i> | Eastern Spotted Dove | 2019/4/28  | 2 | 0 | 22.28715000 | 114.15947780 | <a href="https://www.inaturalist.org/observations/23581483">https://www.inaturalist.org/observations/23581483</a>   |
| 2382 | <i>Spilopelia chinensis</i> | Eastern Spotted Dove | 2019/11/4  | 2 | 0 | 22.28718296 | 114.19561480 | <a href="https://www.inaturalist.org/observations/35368934">https://www.inaturalist.org/observations/35368934</a>   |
| 2383 | <i>Spilopelia chinensis</i> | Eastern Spotted Dove | 2019/2/16  | 1 | 0 | 22.28718810 | 114.14527930 | <a href="https://www.inaturalist.org/observations/20380140">https://www.inaturalist.org/observations/20380140</a>   |
| 2384 | <i>Spilopelia chinensis</i> | Eastern Spotted Dove | 2019/5/16  | 5 | 0 | 22.28719166 | 114.00956380 | <a href="https://www.inaturalist.org/observations/25306202">https://www.inaturalist.org/observations/25306202</a>   |
| 2385 | <i>Spilopelia chinensis</i> | Eastern Spotted Dove | 2021/5/16  | 1 | 0 | 22.28719167 | 114.21356170 | <a href="https://www.inaturalist.org/observations/78945213">https://www.inaturalist.org/observations/78945213</a>   |
| 2386 | <i>Spilopelia chinensis</i> | Eastern Spotted Dove | 2020/11/11 | 1 | 0 | 22.28721167 | 114.20221670 | <a href="https://www.inaturalist.org/observations/64659269">https://www.inaturalist.org/observations/64659269</a>   |
| 2387 | <i>Spilopelia chinensis</i> | Eastern Spotted Dove | 2019/4/28  | 3 | 0 | 22.28723333 | 114.15943880 | <a href="https://www.inaturalist.org/observations/23581515">https://www.inaturalist.org/observations/23581515</a>   |
| 2388 | <i>Spilopelia chinensis</i> | Eastern Spotted Dove | 2021/4/25  | 2 | 0 | 22.28726353 | 114.21436180 | <a href="https://www.inaturalist.org/observations/75144866">https://www.inaturalist.org/observations/75144866</a>   |
| 2389 | <i>Spilopelia chinensis</i> | Eastern Spotted Dove | 2020/11/11 | 1 | 0 | 22.28731702 | 114.16127620 | <a href="https://www.inaturalist.org/observations/64654732">https://www.inaturalist.org/observations/64654732</a>   |
| 2390 | <i>Spilopelia chinensis</i> | Eastern Spotted Dove | 2021/6/12  | 2 | 0 | 22.28737990 | 114.15764710 | <a href="https://www.inaturalist.org/observations/82649083">https://www.inaturalist.org/observations/82649083</a>   |
| 2391 | <i>Spilopelia chinensis</i> | Eastern Spotted Dove | 2021/11/5  | 2 | 0 | 22.28740833 | 114.15415830 | <a href="https://www.inaturalist.org/observations/100909354">https://www.inaturalist.org/observations/100909354</a> |

|      |                             |                      |           |   |   |             |              |                                                                                                                   |
|------|-----------------------------|----------------------|-----------|---|---|-------------|--------------|-------------------------------------------------------------------------------------------------------------------|
| 2392 | <i>Spilopelia chinensis</i> | Eastern Spotted Dove | 2018/1/11 | 2 | 0 | 22.28746835 | 114.20056340 | <a href="https://www.inaturalist.org/observations/9439806">https://www.inaturalist.org/observations/9439806</a>   |
| 2393 | <i>Spilopelia chinensis</i> | Eastern Spotted Dove | 2019/11/9 | 4 | 0 | 22.28747460 | 114.14147820 | <a href="https://www.inaturalist.org/observations/35473696">https://www.inaturalist.org/observations/35473696</a> |
| 2394 | <i>Spilopelia chinensis</i> | Eastern Spotted Dove | 2018/11/8 | 4 | 0 | 22.28747747 | 114.22189670 | <a href="https://www.inaturalist.org/observations/18230070">https://www.inaturalist.org/observations/18230070</a> |
| 2395 | <i>Spilopelia chinensis</i> | Eastern Spotted Dove | 2021/1/23 | 2 | 0 | 22.28750664 | 114.22089650 | <a href="https://www.inaturalist.org/observations/68478762">https://www.inaturalist.org/observations/68478762</a> |
| 2396 | <i>Spilopelia chinensis</i> | Eastern Spotted Dove | 2021/4/18 | 1 | 0 | 22.28750667 | 114.21537830 | <a href="https://www.inaturalist.org/observations/74351638">https://www.inaturalist.org/observations/74351638</a> |
| 2397 | <i>Spilopelia chinensis</i> | Eastern Spotted Dove | 2018/11/8 | 4 | 0 | 22.28750674 | 114.22190030 | <a href="https://www.inaturalist.org/observations/18230082">https://www.inaturalist.org/observations/18230082</a> |
| 2398 | <i>Spilopelia chinensis</i> | Eastern Spotted Dove | 2018/11/8 | 4 | 0 | 22.28755211 | 114.22183890 | <a href="https://www.inaturalist.org/observations/18230089">https://www.inaturalist.org/observations/18230089</a> |
| 2399 | <i>Spilopelia chinensis</i> | Eastern Spotted Dove | 2018/11/8 | 6 | 0 | 22.28755218 | 114.22184090 | <a href="https://www.inaturalist.org/observations/18283658">https://www.inaturalist.org/observations/18283658</a> |
| 2400 | <i>Spilopelia chinensis</i> | Eastern Spotted Dove | 2018/11/8 | 5 | 0 | 22.28755974 | 114.22206760 | <a href="https://www.inaturalist.org/observations/18231538">https://www.inaturalist.org/observations/18231538</a> |
| 2401 | <i>Spilopelia chinensis</i> | Eastern Spotted Dove | 2018/11/8 | 1 | 0 | 22.28756641 | 114.22189110 | <a href="https://www.inaturalist.org/observations/18230183">https://www.inaturalist.org/observations/18230183</a> |
| 2402 | <i>Spilopelia chinensis</i> | Eastern Spotted Dove | 2018/11/8 | 2 | 0 | 22.28758116 | 114.22186290 | <a href="https://www.inaturalist.org/observations/18230229">https://www.inaturalist.org/observations/18230229</a> |
| 2403 | <i>Spilopelia chinensis</i> | Eastern Spotted Dove | 2018/11/8 | 2 | 0 | 22.28760333 | 114.22203830 | <a href="https://www.inaturalist.org/observations/18255902">https://www.inaturalist.org/observations/18255902</a> |
| 2404 | <i>Spilopelia chinensis</i> | Eastern Spotted Dove | 2018/11/8 | 4 | 0 | 22.28760585 | 114.22191000 | <a href="https://www.inaturalist.org/observations/18230067">https://www.inaturalist.org/observations/18230067</a> |
| 2405 | <i>Spilopelia chinensis</i> | Eastern Spotted Dove | 2018/11/8 | 4 | 0 | 22.28763803 | 114.22190520 | <a href="https://www.inaturalist.org/observations/18230168">https://www.inaturalist.org/observations/18230168</a> |
| 2406 | <i>Spilopelia chinensis</i> | Eastern Spotted Dove | 2018/11/8 | 5 | 0 | 22.28764050 | 114.22183440 | <a href="https://www.inaturalist.org/observations/18233226">https://www.inaturalist.org/observations/18233226</a> |
| 2407 | <i>Spilopelia chinensis</i> | Eastern Spotted Dove | 2021/3/7  | 2 | 0 | 22.28768692 | 114.21357080 | <a href="https://www.inaturalist.org/observations/70723445">https://www.inaturalist.org/observations/70723445</a> |
| 2408 | <i>Spilopelia chinensis</i> | Eastern Spotted Dove | 2020/11/8 | 1 | 0 | 22.28775190 | 114.15753680 | <a href="https://www.inaturalist.org/observations/64435907">https://www.inaturalist.org/observations/64435907</a> |
| 2409 | <i>Spilopelia chinensis</i> | Eastern Spotted Dove | 2019/4/27 | 3 | 0 | 22.28778714 | 114.15773800 | <a href="https://www.inaturalist.org/observations/23251513">https://www.inaturalist.org/observations/23251513</a> |
| 2410 | <i>Spilopelia chinensis</i> | Eastern Spotted Dove | 2021/5/3  | 2 | 0 | 22.28779376 | 114.15356190 | <a href="https://www.inaturalist.org/observations/76887461">https://www.inaturalist.org/observations/76887461</a> |
| 2411 | <i>Spilopelia chinensis</i> | Eastern Spotted Dove | 2018/11/8 | 3 | 0 | 22.28781130 | 114.22164570 | <a href="https://www.inaturalist.org/observations/18257076">https://www.inaturalist.org/observations/18257076</a> |
| 2412 | <i>Spilopelia chinensis</i> | Eastern Spotted Dove | 2018/11/8 | 2 | 0 | 22.28781778 | 114.22184170 | <a href="https://www.inaturalist.org/observations/18230267">https://www.inaturalist.org/observations/18230267</a> |
| 2413 | <i>Spilopelia chinensis</i> | Eastern Spotted Dove | 2021/9/3  | 2 | 0 | 22.28783167 | 82.06554833  | <a href="https://www.inaturalist.org/observations/93701644">https://www.inaturalist.org/observations/93701644</a> |
| 2414 | <i>Spilopelia chinensis</i> | Eastern Spotted Dove | 2020/4/24 | 1 | 0 | 22.28785281 | 114.20076380 | <a href="https://www.inaturalist.org/observations/43356426">https://www.inaturalist.org/observations/43356426</a> |

|      |                             |                      |            |   |   |             |              |                                                                                                                     |
|------|-----------------------------|----------------------|------------|---|---|-------------|--------------|---------------------------------------------------------------------------------------------------------------------|
| 2415 | <i>Spilopelia chinensis</i> | Eastern Spotted Dove | 2017/5/14  | 2 | 0 | 22.28788530 | 114.22183870 | <a href="https://www.inaturalist.org/observations/8125312">https://www.inaturalist.org/observations/8125312</a>     |
| 2416 | <i>Spilopelia chinensis</i> | Eastern Spotted Dove | 2021/2/12  | 1 | 0 | 22.28795833 | 114.15734170 | <a href="https://www.inaturalist.org/observations/69448523">https://www.inaturalist.org/observations/69448523</a>   |
| 2417 | <i>Spilopelia chinensis</i> | Eastern Spotted Dove | 2018/11/6  | 5 | 0 | 22.28800000 | 114.22155830 | <a href="https://www.inaturalist.org/observations/18160689">https://www.inaturalist.org/observations/18160689</a>   |
| 2418 | <i>Spilopelia chinensis</i> | Eastern Spotted Dove | 2021/11/1  | 1 | 0 | 22.28800822 | 114.22200040 | <a href="https://www.inaturalist.org/observations/99934393">https://www.inaturalist.org/observations/99934393</a>   |
| 2419 | <i>Spilopelia chinensis</i> | Eastern Spotted Dove | 2021/11/1  | 2 | 0 | 22.28801722 | 114.22201670 | <a href="https://www.inaturalist.org/observations/99934445">https://www.inaturalist.org/observations/99934445</a>   |
| 2420 | <i>Spilopelia chinensis</i> | Eastern Spotted Dove | 2015/10/19 | 4 | 0 | 22.28802700 | 114.15637700 | <a href="http://www.inaturalist.org/observations/2194467">http://www.inaturalist.org/observations/2194467</a>       |
| 2421 | <i>Spilopelia chinensis</i> | Eastern Spotted Dove | 2019/4/29  | 3 | 0 | 22.28803768 | 114.21784700 | <a href="https://www.inaturalist.org/observations/23864741">https://www.inaturalist.org/observations/23864741</a>   |
| 2422 | <i>Spilopelia chinensis</i> | Eastern Spotted Dove | 2019/4/5   | 2 | 0 | 22.28804500 | 114.15440000 | <a href="https://www.inaturalist.org/observations/22010478">https://www.inaturalist.org/observations/22010478</a>   |
| 2423 | <i>Spilopelia chinensis</i> | Eastern Spotted Dove | 2019/2/24  | 1 | 0 | 22.28808531 | 114.15598470 | <a href="https://www.inaturalist.org/observations/20723938">https://www.inaturalist.org/observations/20723938</a>   |
| 2424 | <i>Spilopelia chinensis</i> | Eastern Spotted Dove | 2019/4/29  | 2 | 0 | 22.28814252 | 114.21470470 | <a href="https://www.inaturalist.org/observations/23851002">https://www.inaturalist.org/observations/23851002</a>   |
| 2425 | <i>Spilopelia chinensis</i> | Eastern Spotted Dove | 2020/11/20 | 2 | 0 | 22.28814462 | 114.22195540 | <a href="https://www.inaturalist.org/observations/65260905">https://www.inaturalist.org/observations/65260905</a>   |
| 2426 | <i>Spilopelia chinensis</i> | Eastern Spotted Dove | 2020/11/20 | 2 | 0 | 22.28818648 | 114.22171700 | <a href="https://www.inaturalist.org/observations/65260792">https://www.inaturalist.org/observations/65260792</a>   |
| 2427 | <i>Spilopelia chinensis</i> | Eastern Spotted Dove | 2020/11/20 | 2 | 0 | 22.28824429 | 114.22179940 | <a href="https://www.inaturalist.org/observations/65260924">https://www.inaturalist.org/observations/65260924</a>   |
| 2428 | <i>Spilopelia chinensis</i> | Eastern Spotted Dove | 2019/2/24  | 1 | 0 | 22.28825690 | 114.15069840 | <a href="https://www.inaturalist.org/observations/20723774">https://www.inaturalist.org/observations/20723774</a>   |
| 2429 | <i>Spilopelia chinensis</i> | Eastern Spotted Dove | 2019/4/29  | 3 | 0 | 22.28831537 | 114.21799830 | <a href="https://www.inaturalist.org/observations/23864801">https://www.inaturalist.org/observations/23864801</a>   |
| 2430 | <i>Spilopelia chinensis</i> | Eastern Spotted Dove | 2022/5/2   | 2 | 0 | 22.28832240 | 114.21822200 | <a href="https://www.inaturalist.org/observations/114683016">https://www.inaturalist.org/observations/114683016</a> |
| 2431 | <i>Spilopelia chinensis</i> | Eastern Spotted Dove | 2019/4/30  | 1 | 0 | 22.28834944 | 114.21464920 | <a href="https://www.inaturalist.org/observations/24098546">https://www.inaturalist.org/observations/24098546</a>   |
| 2432 | <i>Spilopelia chinensis</i> | Eastern Spotted Dove | 2019/4/30  | 1 | 0 | 22.28835849 | 114.21448400 | <a href="https://www.inaturalist.org/observations/24100111">https://www.inaturalist.org/observations/24100111</a>   |
| 2433 | <i>Spilopelia chinensis</i> | Eastern Spotted Dove | 2019/4/29  | 3 | 0 | 22.28836707 | 114.21799910 | <a href="https://www.inaturalist.org/observations/23864730">https://www.inaturalist.org/observations/23864730</a>   |
| 2434 | <i>Spilopelia chinensis</i> | Eastern Spotted Dove | 2022/9/14  | 2 | 0 | 22.28842602 | 114.21545070 | <a href="https://www.inaturalist.org/observations/135100592">https://www.inaturalist.org/observations/135100592</a> |
| 2435 | <i>Spilopelia chinensis</i> | Eastern Spotted Dove | 2019/4/17  | 2 | 0 | 22.28845859 | 114.21814580 | <a href="https://www.inaturalist.org/observations/22597903">https://www.inaturalist.org/observations/22597903</a>   |
| 2436 | <i>Spilopelia chinensis</i> | Eastern Spotted Dove | 2021/4/6   | 2 | 0 | 22.28846800 | 114.19280300 | <a href="https://www.inaturalist.org/observations/75530129">https://www.inaturalist.org/observations/75530129</a>   |
| 2437 | <i>Spilopelia chinensis</i> | Eastern Spotted Dove | 2021/2/11  | 1 | 0 | 22.28847167 | 114.21677500 | <a href="https://www.inaturalist.org/observations/69437250">https://www.inaturalist.org/observations/69437250</a>   |

|      |                             |                      |            |   |   |             |              |                                                                                                                     |
|------|-----------------------------|----------------------|------------|---|---|-------------|--------------|---------------------------------------------------------------------------------------------------------------------|
| 2438 | <i>Spilopelia chinensis</i> | Eastern Spotted Dove | 2019/11/5  | 4 | 0 | 22.28848868 | 114.21808140 | <a href="https://www.inaturalist.org/observations/35312018">https://www.inaturalist.org/observations/35312018</a>   |
| 2439 | <i>Spilopelia chinensis</i> | Eastern Spotted Dove | 2021/11/14 | 1 | 0 | 22.28849830 | 114.19280280 | <a href="https://www.inaturalist.org/observations/101251484">https://www.inaturalist.org/observations/101251484</a> |
| 2440 | <i>Spilopelia chinensis</i> | Eastern Spotted Dove | 2021/11/19 | 1 | 0 | 22.28849830 | 114.19280280 | <a href="https://www.inaturalist.org/observations/101457584">https://www.inaturalist.org/observations/101457584</a> |
| 2441 | <i>Spilopelia chinensis</i> | Eastern Spotted Dove | 2021/5/3   | 3 | 0 | 22.28856190 | 114.14630510 | <a href="https://www.inaturalist.org/observations/77877196">https://www.inaturalist.org/observations/77877196</a>   |
| 2442 | <i>Spilopelia chinensis</i> | Eastern Spotted Dove | 2019/11/6  | 3 | 0 | 22.28861179 | 114.21619450 | <a href="https://www.inaturalist.org/observations/35357964">https://www.inaturalist.org/observations/35357964</a>   |
| 2443 | <i>Spilopelia chinensis</i> | Eastern Spotted Dove | 2019/4/29  | 3 | 0 | 22.28868833 | 114.21638900 | <a href="https://www.inaturalist.org/observations/23824082">https://www.inaturalist.org/observations/23824082</a>   |
| 2444 | <i>Spilopelia chinensis</i> | Eastern Spotted Dove | 2019/11/5  | 2 | 0 | 22.28875161 | 114.21460610 | <a href="https://www.inaturalist.org/observations/35315849">https://www.inaturalist.org/observations/35315849</a>   |
| 2445 | <i>Spilopelia chinensis</i> | Eastern Spotted Dove | 2018/11/12 | 3 | 0 | 22.28876678 | 114.21154980 | <a href="https://www.inaturalist.org/observations/18343894">https://www.inaturalist.org/observations/18343894</a>   |
| 2446 | <i>Spilopelia chinensis</i> | Eastern Spotted Dove | 2022/4/1   | 2 | 0 | 22.28877375 | 114.15802980 | <a href="https://www.inaturalist.org/observations/110074519">https://www.inaturalist.org/observations/110074519</a> |
| 2447 | <i>Spilopelia chinensis</i> | Eastern Spotted Dove | 2019/11/6  | 2 | 0 | 22.28878316 | 114.21468880 | <a href="https://www.inaturalist.org/observations/35358912">https://www.inaturalist.org/observations/35358912</a>   |
| 2448 | <i>Spilopelia chinensis</i> | Eastern Spotted Dove | 2018/11/12 | 2 | 0 | 22.28879523 | 114.21156430 | <a href="https://www.inaturalist.org/observations/18343848">https://www.inaturalist.org/observations/18343848</a>   |
| 2449 | <i>Spilopelia chinensis</i> | Eastern Spotted Dove | 2022/5/2   | 1 | 0 | 22.28882686 | 114.22013490 | <a href="https://www.inaturalist.org/observations/114593261">https://www.inaturalist.org/observations/114593261</a> |
| 2450 | <i>Spilopelia chinensis</i> | Eastern Spotted Dove | 2019/11/5  | 1 | 0 | 22.28887000 | 114.21547000 | <a href="https://www.inaturalist.org/observations/35315770">https://www.inaturalist.org/observations/35315770</a>   |
| 2451 | <i>Spilopelia chinensis</i> | Eastern Spotted Dove | 2019/11/9  | 2 | 0 | 22.28887838 | 114.21980990 | <a href="https://www.inaturalist.org/observations/35478987">https://www.inaturalist.org/observations/35478987</a>   |
| 2452 | <i>Spilopelia chinensis</i> | Eastern Spotted Dove | 2019/11/5  | 1 | 0 | 22.28889667 | 114.21540000 | <a href="https://www.inaturalist.org/observations/35315765">https://www.inaturalist.org/observations/35315765</a>   |
| 2453 | <i>Spilopelia chinensis</i> | Eastern Spotted Dove | 2019/11/9  | 4 | 0 | 22.28891086 | 114.21934260 | <a href="https://www.inaturalist.org/observations/35478953">https://www.inaturalist.org/observations/35478953</a>   |
| 2454 | <i>Spilopelia chinensis</i> | Eastern Spotted Dove | 2019/11/9  | 2 | 0 | 22.28892193 | 114.21984450 | <a href="https://www.inaturalist.org/observations/35478973">https://www.inaturalist.org/observations/35478973</a>   |
| 2455 | <i>Spilopelia chinensis</i> | Eastern Spotted Dove | 2019/11/8  | 1 | 0 | 22.28907204 | 113.94053650 | <a href="https://www.inaturalist.org/observations/35490408">https://www.inaturalist.org/observations/35490408</a>   |
| 2456 | <i>Spilopelia chinensis</i> | Eastern Spotted Dove | 2021/9/3   | 1 | 0 | 22.28910500 | 82.09877000  | <a href="https://www.inaturalist.org/observations/93730349">https://www.inaturalist.org/observations/93730349</a>   |
| 2457 | <i>Spilopelia chinensis</i> | Eastern Spotted Dove | 2021/2/11  | 1 | 0 | 22.28917834 | 114.21864500 | <a href="https://www.inaturalist.org/observations/69810263">https://www.inaturalist.org/observations/69810263</a>   |
| 2458 | <i>Spilopelia chinensis</i> | Eastern Spotted Dove | 2018/12/8  | 1 | 0 | 22.28926667 | 114.14485830 | <a href="https://www.inaturalist.org/observations/18891134">https://www.inaturalist.org/observations/18891134</a>   |
| 2459 | <i>Spilopelia chinensis</i> | Eastern Spotted Dove | 2019/11/9  | 3 | 0 | 22.28929480 | 114.21949710 | <a href="https://www.inaturalist.org/observations/35474352">https://www.inaturalist.org/observations/35474352</a>   |
| 2460 | <i>Spilopelia chinensis</i> | Eastern Spotted Dove | 2015/10/10 | 2 | 0 | 22.28931955 | 114.14458670 | <a href="https://www.inaturalist.org/observations/32067150">https://www.inaturalist.org/observations/32067150</a>   |

|      |                             |                      |            |   |   |             |              |                                                                                                                     |
|------|-----------------------------|----------------------|------------|---|---|-------------|--------------|---------------------------------------------------------------------------------------------------------------------|
| 2461 | <i>Spilopelia chinensis</i> | Eastern Spotted Dove | 2020/11/3  | 2 | 0 | 22.28939643 | 114.14587960 | <a href="https://www.inaturalist.org/observations/64096171">https://www.inaturalist.org/observations/64096171</a>   |
| 2462 | <i>Spilopelia chinensis</i> | Eastern Spotted Dove | 2022/6/3   | 2 | 0 | 22.28939667 | 114.14463050 | <a href="https://www.inaturalist.org/observations/120007136">https://www.inaturalist.org/observations/120007136</a> |
| 2463 | <i>Spilopelia chinensis</i> | Eastern Spotted Dove | 2022/5/1   | 1 | 0 | 22.28949440 | 114.30000230 | <a href="https://www.inaturalist.org/observations/114734000">https://www.inaturalist.org/observations/114734000</a> |
| 2464 | <i>Spilopelia chinensis</i> | Eastern Spotted Dove | 2021/5/1   | 1 | 0 | 22.28956367 | 114.21762870 | <a href="https://www.inaturalist.org/observations/76078896">https://www.inaturalist.org/observations/76078896</a>   |
| 2465 | <i>Spilopelia chinensis</i> | Eastern Spotted Dove | 2019/4/29  | 1 | 0 | 22.28967013 | 114.19362330 | <a href="https://www.inaturalist.org/observations/23923765">https://www.inaturalist.org/observations/23923765</a>   |
| 2466 | <i>Spilopelia chinensis</i> | Eastern Spotted Dove | 2022/4/28  | 1 | 0 | 22.28972816 | 114.14524840 | <a href="https://www.inaturalist.org/observations/113172560">https://www.inaturalist.org/observations/113172560</a> |
| 2467 | <i>Spilopelia chinensis</i> | Eastern Spotted Dove | 2022/5/19  | 1 | 0 | 22.28981667 | 114.14595830 | <a href="https://www.inaturalist.org/observations/117710123">https://www.inaturalist.org/observations/117710123</a> |
| 2468 | <i>Spilopelia chinensis</i> | Eastern Spotted Dove | 2020/4/7   | 1 | 0 | 22.28989167 | 114.19758670 | <a href="https://www.inaturalist.org/observations/53324763">https://www.inaturalist.org/observations/53324763</a>   |
| 2469 | <i>Spilopelia chinensis</i> | Eastern Spotted Dove | 2021/3/29  | 2 | 0 | 22.29001167 | 114.19759500 | <a href="https://www.inaturalist.org/observations/72331270">https://www.inaturalist.org/observations/72331270</a>   |
| 2470 | <i>Spilopelia chinensis</i> | Eastern Spotted Dove | 2022/5/2   | 1 | 0 | 22.29008407 | 114.21043880 | <a href="https://www.inaturalist.org/observations/114579135">https://www.inaturalist.org/observations/114579135</a> |
| 2471 | <i>Spilopelia chinensis</i> | Eastern Spotted Dove | 2022/5/2   | 2 | 0 | 22.29010610 | 114.21174720 | <a href="https://www.inaturalist.org/observations/114583465">https://www.inaturalist.org/observations/114583465</a> |
| 2472 | <i>Spilopelia chinensis</i> | Eastern Spotted Dove | 2022/7/8   | 2 | 0 | 22.29025833 | 114.14605000 | <a href="https://www.inaturalist.org/observations/125269656">https://www.inaturalist.org/observations/125269656</a> |
| 2473 | <i>Spilopelia chinensis</i> | Eastern Spotted Dove | 2020/12/4  | 1 | 0 | 22.29027500 | 114.20203600 | <a href="https://www.inaturalist.org/observations/66070117">https://www.inaturalist.org/observations/66070117</a>   |
| 2474 | <i>Spilopelia chinensis</i> | Eastern Spotted Dove | 2021/4/12  | 2 | 0 | 22.29038000 | 114.14415000 | <a href="https://www.inaturalist.org/observations/73728752">https://www.inaturalist.org/observations/73728752</a>   |
| 2475 | <i>Spilopelia chinensis</i> | Eastern Spotted Dove | 2020/11/6  | 2 | 0 | 22.29055386 | 114.20435270 | <a href="https://www.inaturalist.org/observations/64280051">https://www.inaturalist.org/observations/64280051</a>   |
| 2476 | <i>Spilopelia chinensis</i> | Eastern Spotted Dove | 2022/2/16  | 1 | 0 | 22.29063572 | 114.19419440 | <a href="https://www.inaturalist.org/observations/106844866">https://www.inaturalist.org/observations/106844866</a> |
| 2477 | <i>Spilopelia chinensis</i> | Eastern Spotted Dove | 2022/5/3   | 1 | 0 | 22.29070073 | 114.21272250 | <a href="https://www.inaturalist.org/observations/115062603">https://www.inaturalist.org/observations/115062603</a> |
| 2478 | <i>Spilopelia chinensis</i> | Eastern Spotted Dove | 2019/4/13  | 1 | 0 | 22.29090728 | 114.17449080 | <a href="https://www.inaturalist.org/observations/113367547">https://www.inaturalist.org/observations/113367547</a> |
| 2479 | <i>Spilopelia chinensis</i> | Eastern Spotted Dove | 2022/1/30  | 1 | 0 | 22.29122922 | 114.20027160 | <a href="https://www.inaturalist.org/observations/105893849">https://www.inaturalist.org/observations/105893849</a> |
| 2480 | <i>Spilopelia chinensis</i> | Eastern Spotted Dove | 2022/3/11  | 2 | 0 | 22.29123686 | 114.19995880 | <a href="https://www.inaturalist.org/observations/108337553">https://www.inaturalist.org/observations/108337553</a> |
| 2481 | <i>Spilopelia chinensis</i> | Eastern Spotted Dove | 2020/11/11 | 2 | 0 | 22.29133717 | 114.15071940 | <a href="https://www.inaturalist.org/observations/64634406">https://www.inaturalist.org/observations/64634406</a>   |
| 2482 | <i>Spilopelia chinensis</i> | Eastern Spotted Dove | 2022/3/4   | 1 | 0 | 22.29143643 | 114.20045850 | <a href="https://www.inaturalist.org/observations/107877024">https://www.inaturalist.org/observations/107877024</a> |
| 2483 | <i>Spilopelia chinensis</i> | Eastern Spotted Dove | 2022/4/30  | 1 | 0 | 22.29143784 | 114.01835500 | <a href="https://www.inaturalist.org/observations/113718320">https://www.inaturalist.org/observations/113718320</a> |



|      |                             |                      |            |   |   |             |              |                                                                                                                     |
|------|-----------------------------|----------------------|------------|---|---|-------------|--------------|---------------------------------------------------------------------------------------------------------------------|
| 2484 | <i>Spilopelia chinensis</i> | Eastern Spotted Dove | 2020/12/15 | 1 | 0 | 22.29149563 | 113.95041430 | <a href="https://www.inaturalist.org/observations/66604893">https://www.inaturalist.org/observations/66604893</a>   |
| 2485 | <i>Spilopelia chinensis</i> | Eastern Spotted Dove | 2022/3/4   | 1 | 0 | 22.29191044 | 114.20029150 | <a href="https://www.inaturalist.org/observations/107877079">https://www.inaturalist.org/observations/107877079</a> |
| 2486 | <i>Spilopelia chinensis</i> | Eastern Spotted Dove | 2021/11/11 | 1 | 0 | 22.29196770 | 114.19643860 | <a href="https://www.inaturalist.org/observations/100840753">https://www.inaturalist.org/observations/100840753</a> |
| 2487 | <i>Spilopelia chinensis</i> | Eastern Spotted Dove | 2021/11/11 | 2 | 0 | 22.29202985 | 114.19808720 | <a href="https://www.inaturalist.org/observations/100840572">https://www.inaturalist.org/observations/100840572</a> |
| 2488 | <i>Spilopelia chinensis</i> | Eastern Spotted Dove | 2021/3/10  | 1 | 0 | 22.29214100 | 114.01014700 | <a href="https://www.inaturalist.org/observations/70931123">https://www.inaturalist.org/observations/70931123</a>   |
| 2489 | <i>Spilopelia chinensis</i> | Eastern Spotted Dove | 2020/12/31 | 1 | 0 | 22.29223500 | 114.01890670 | <a href="https://www.inaturalist.org/observations/67350445">https://www.inaturalist.org/observations/67350445</a>   |
| 2490 | <i>Spilopelia chinensis</i> | Eastern Spotted Dove | 2021/5/3   | 1 | 0 | 22.29238541 | 114.19666320 | <a href="https://www.inaturalist.org/observations/76863837">https://www.inaturalist.org/observations/76863837</a>   |
| 2491 | <i>Spilopelia chinensis</i> | Eastern Spotted Dove | 2021/9/3   | 1 | 0 | 22.29293000 | 82.09659167  | <a href="https://www.inaturalist.org/observations/93701628">https://www.inaturalist.org/observations/93701628</a>   |
| 2492 | <i>Spilopelia chinensis</i> | Eastern Spotted Dove | 2017/1/25  | 6 | 0 | 22.29304367 | 73.19111075  | <a href="https://www.inaturalist.org/observations/65928047">https://www.inaturalist.org/observations/65928047</a>   |
| 2493 | <i>Spilopelia chinensis</i> | Eastern Spotted Dove | 2021/11/26 | 2 | 0 | 22.29306333 | 114.19893670 | <a href="https://www.inaturalist.org/observations/102227477">https://www.inaturalist.org/observations/102227477</a> |
| 2494 | <i>Spilopelia chinensis</i> | Eastern Spotted Dove | 2021/2/27  | 1 | 0 | 22.29311167 | 113.94188000 | <a href="https://www.inaturalist.org/observations/70234302">https://www.inaturalist.org/observations/70234302</a>   |
| 2495 | <i>Spilopelia chinensis</i> | Eastern Spotted Dove | 2021/4/19  | 2 | 0 | 22.29317167 | 114.20037830 | <a href="https://www.inaturalist.org/observations/74497114">https://www.inaturalist.org/observations/74497114</a>   |
| 2496 | <i>Spilopelia chinensis</i> | Eastern Spotted Dove | 2022/5/1   | 2 | 0 | 22.29373063 | 114.01682910 | <a href="https://www.inaturalist.org/observations/114038169">https://www.inaturalist.org/observations/114038169</a> |
| 2497 | <i>Spilopelia chinensis</i> | Eastern Spotted Dove | 2020/9/23  | 1 | 0 | 22.29383000 | 114.01950800 | <a href="https://www.inaturalist.org/observations/61939656">https://www.inaturalist.org/observations/61939656</a>   |
| 2498 | <i>Spilopelia chinensis</i> | Eastern Spotted Dove | 2018/5/1   | 4 | 0 | 22.29391140 | 114.01746100 | <a href="https://www.inaturalist.org/observations/11961084">https://www.inaturalist.org/observations/11961084</a>   |
| 2499 | <i>Spilopelia chinensis</i> | Eastern Spotted Dove | 2021/3/5   | 1 | 0 | 22.29422985 | 114.01617490 | <a href="https://www.inaturalist.org/observations/70596396">https://www.inaturalist.org/observations/70596396</a>   |
| 2500 | <i>Spilopelia chinensis</i> | Eastern Spotted Dove | 2021/3/7   | 1 | 0 | 22.29449167 | 114.01180280 | <a href="https://www.inaturalist.org/observations/70717519">https://www.inaturalist.org/observations/70717519</a>   |
| 2501 | <i>Spilopelia chinensis</i> | Eastern Spotted Dove | 2021/3/7   | 1 | 0 | 22.29461333 | 114.01197780 | <a href="https://www.inaturalist.org/observations/70717936">https://www.inaturalist.org/observations/70717936</a>   |
| 2502 | <i>Spilopelia chinensis</i> | Eastern Spotted Dove | 2017/10/14 | 4 | 0 | 22.29471167 | 114.02029450 | <a href="https://www.inaturalist.org/observations/8393771">https://www.inaturalist.org/observations/8393771</a>     |
| 2503 | <i>Spilopelia chinensis</i> | Eastern Spotted Dove | 2022/9/3   | 2 | 0 | 22.29509046 | 114.01200940 | <a href="https://www.inaturalist.org/observations/133886344">https://www.inaturalist.org/observations/133886344</a> |
| 2504 | <i>Spilopelia chinensis</i> | Eastern Spotted Dove | 2021/3/9   | 1 | 0 | 22.29511542 | 114.01245700 | <a href="https://www.inaturalist.org/observations/70865458">https://www.inaturalist.org/observations/70865458</a>   |
| 2505 | <i>Spilopelia chinensis</i> | Eastern Spotted Dove | 2021/10/1  | 1 | 0 | 22.29527749 | 114.01460990 | <a href="https://www.inaturalist.org/observations/97217246">https://www.inaturalist.org/observations/97217246</a>   |
| 2506 | <i>Spilopelia chinensis</i> | Eastern Spotted Dove | 2021/2/22  | 2 | 0 | 22.29567833 | 114.01673880 | <a href="https://www.inaturalist.org/observations/70026163">https://www.inaturalist.org/observations/70026163</a>   |

|      |                             |                      |            |   |   |             |              |                                                                                                                   |
|------|-----------------------------|----------------------|------------|---|---|-------------|--------------|-------------------------------------------------------------------------------------------------------------------|
| 2507 | <i>Spilopelia chinensis</i> | Eastern Spotted Dove | 2020/10/29 | 1 | 0 | 22.29585556 | 114.01833360 | <a href="https://www.inaturalist.org/observations/63762130">https://www.inaturalist.org/observations/63762130</a> |
| 2508 | <i>Spilopelia chinensis</i> | Eastern Spotted Dove | 2021/3/13  | 0 | 0 | 22.29595752 | 114.01847510 | <a href="https://www.inaturalist.org/observations/71114104">https://www.inaturalist.org/observations/71114104</a> |
| 2509 | <i>Spilopelia chinensis</i> | Eastern Spotted Dove | 2019/8/9   | 2 | 0 | 22.29627174 | 114.01734940 | <a href="https://www.inaturalist.org/observations/30532149">https://www.inaturalist.org/observations/30532149</a> |
| 2510 | <i>Spilopelia chinensis</i> | Eastern Spotted Dove | 2021/4/2   | 3 | 0 | 22.29675823 | 114.23970910 | <a href="https://www.inaturalist.org/observations/72662397">https://www.inaturalist.org/observations/72662397</a> |
| 2511 | <i>Spilopelia chinensis</i> | Eastern Spotted Dove | 2020/12/12 | 2 | 0 | 22.29682922 | 114.15696720 | <a href="https://www.inaturalist.org/observations/66451158">https://www.inaturalist.org/observations/66451158</a> |
| 2512 | <i>Spilopelia chinensis</i> | Eastern Spotted Dove | 2021/3/7   | 1 | 0 | 22.29706667 | 114.01188610 | <a href="https://www.inaturalist.org/observations/70702792">https://www.inaturalist.org/observations/70702792</a> |
| 2513 | <i>Spilopelia chinensis</i> | Eastern Spotted Dove | 2021/9/1   | 1 | 0 | 22.29776333 | 82.08858833  | <a href="https://www.inaturalist.org/observations/93446725">https://www.inaturalist.org/observations/93446725</a> |
| 2514 | <i>Spilopelia chinensis</i> | Eastern Spotted Dove | 2021/10/6  | 1 | 0 | 22.29796044 | 114.24988000 | <a href="https://www.inaturalist.org/observations/97344690">https://www.inaturalist.org/observations/97344690</a> |
| 2515 | <i>Spilopelia chinensis</i> | Eastern Spotted Dove | 2021/9/1   | 1 | 0 | 22.29797000 | 82.08824000  | <a href="https://www.inaturalist.org/observations/93440790">https://www.inaturalist.org/observations/93440790</a> |
| 2516 | <i>Spilopelia chinensis</i> | Eastern Spotted Dove | 2019/1/12  | 3 | 0 | 22.29802513 | 114.18534090 | <a href="https://www.inaturalist.org/observations/24709965">https://www.inaturalist.org/observations/24709965</a> |
| 2517 | <i>Spilopelia chinensis</i> | Eastern Spotted Dove | 2019/4/6   | 1 | 0 | 22.29817155 | 113.48649120 | <a href="https://www.inaturalist.org/observations/67287047">https://www.inaturalist.org/observations/67287047</a> |
| 2518 | <i>Spilopelia chinensis</i> | Eastern Spotted Dove | 2020/12/9  | 2 | 0 | 22.29855500 | 114.17013670 | <a href="https://www.inaturalist.org/observations/66552992">https://www.inaturalist.org/observations/66552992</a> |
| 2519 | <i>Spilopelia chinensis</i> | Eastern Spotted Dove | 2020/12/9  | 1 | 0 | 22.29856167 | 114.17014500 | <a href="https://www.inaturalist.org/observations/66688988">https://www.inaturalist.org/observations/66688988</a> |
| 2520 | <i>Spilopelia chinensis</i> | Eastern Spotted Dove | 2020/12/9  | 1 | 0 | 22.29860134 | 114.17017260 | <a href="https://www.inaturalist.org/observations/66638230">https://www.inaturalist.org/observations/66638230</a> |
| 2521 | <i>Spilopelia chinensis</i> | Eastern Spotted Dove | 2019/11/4  | 1 | 0 | 22.29865901 | 114.17022030 | <a href="https://www.inaturalist.org/observations/36617534">https://www.inaturalist.org/observations/36617534</a> |
| 2522 | <i>Spilopelia chinensis</i> | Eastern Spotted Dove | 2018/10/28 | 4 | 0 | 22.29885500 | 114.16852000 | <a href="https://www.inaturalist.org/observations/17899034">https://www.inaturalist.org/observations/17899034</a> |
| 2523 | <i>Spilopelia chinensis</i> | Eastern Spotted Dove | 2019/4/29  | 4 | 0 | 22.29894549 | 114.17075010 | <a href="https://www.inaturalist.org/observations/23827664">https://www.inaturalist.org/observations/23827664</a> |
| 2524 | <i>Spilopelia chinensis</i> | Eastern Spotted Dove | 2008/6/9   | 1 | 0 | 22.29903600 | 114.17039200 | <a href="https://www.inaturalist.org/observations/40740420">https://www.inaturalist.org/observations/40740420</a> |
| 2525 | <i>Spilopelia chinensis</i> | Eastern Spotted Dove | 2018/4/28  | 3 | 0 | 22.29926305 | 114.16846030 | <a href="https://www.inaturalist.org/observations/11579109">https://www.inaturalist.org/observations/11579109</a> |
| 2526 | <i>Spilopelia chinensis</i> | Eastern Spotted Dove | 2021/6/21  | 2 | 0 | 22.29932174 | 114.17077450 | <a href="https://www.inaturalist.org/observations/84033639">https://www.inaturalist.org/observations/84033639</a> |
| 2527 | <i>Spilopelia chinensis</i> | Eastern Spotted Dove | 2020/12/14 | 1 | 0 | 22.29934667 | 114.17069170 | <a href="https://www.inaturalist.org/observations/66570089">https://www.inaturalist.org/observations/66570089</a> |
| 2528 | <i>Spilopelia chinensis</i> | Eastern Spotted Dove | 2017/6/24  | 3 | 0 | 22.29968660 | 114.17029070 | <a href="https://www.inaturalist.org/observations/10388084">https://www.inaturalist.org/observations/10388084</a> |
| 2529 | <i>Spilopelia chinensis</i> | Eastern Spotted Dove | 2018/4/28  | 3 | 0 | 22.29978336 | 114.16815150 | <a href="https://www.inaturalist.org/observations/11579053">https://www.inaturalist.org/observations/11579053</a> |

|      |                             |                      |            |   |   |             |              |                                                                                                                     |
|------|-----------------------------|----------------------|------------|---|---|-------------|--------------|---------------------------------------------------------------------------------------------------------------------|
| 2530 | <i>Spilopelia chinensis</i> | Eastern Spotted Dove | 2020/1/19  | 0 | 0 | 22.29981944 | 114.17013060 | <a href="https://www.inaturalist.org/observations/38146927">https://www.inaturalist.org/observations/38146927</a>   |
| 2531 | <i>Spilopelia chinensis</i> | Eastern Spotted Dove | 2019/4/26  | 1 | 0 | 22.29985090 | 114.17886260 | <a href="https://www.inaturalist.org/observations/23142463">https://www.inaturalist.org/observations/23142463</a>   |
| 2532 | <i>Spilopelia chinensis</i> | Eastern Spotted Dove | 2022/4/6   | 1 | 0 | 22.29996806 | 114.18685140 | <a href="https://www.inaturalist.org/observations/110554490">https://www.inaturalist.org/observations/110554490</a> |
| 2533 | <i>Spilopelia chinensis</i> | Eastern Spotted Dove | 2021/11/3  | 2 | 0 | 22.29997899 | 114.23773250 | <a href="https://www.inaturalist.org/observations/100132537">https://www.inaturalist.org/observations/100132537</a> |
| 2534 | <i>Spilopelia chinensis</i> | Eastern Spotted Dove | 2015/1/26  | 6 | 0 | 22.30000000 | 73.20000000  | <a href="http://www.inaturalist.org/observations/1247833">http://www.inaturalist.org/observations/1247833</a>       |
| 2535 | <i>Spilopelia chinensis</i> | Eastern Spotted Dove | 2021/2/9   | 1 | 0 | 22.30000000 | 114.19000000 | <a href="https://www.inaturalist.org/observations/69293638">https://www.inaturalist.org/observations/69293638</a>   |
| 2536 | <i>Spilopelia chinensis</i> | Eastern Spotted Dove | 2018/12/13 | 2 | 0 | 22.30000766 | 114.17068400 | <a href="https://www.inaturalist.org/observations/93972493">https://www.inaturalist.org/observations/93972493</a>   |
| 2537 | <i>Spilopelia chinensis</i> | Eastern Spotted Dove | 2021/11/3  | 1 | 0 | 22.30001261 | 114.23723810 | <a href="https://www.inaturalist.org/observations/100132342">https://www.inaturalist.org/observations/100132342</a> |
| 2538 | <i>Spilopelia chinensis</i> | Eastern Spotted Dove | 2018/1/3   | 4 | 0 | 22.30001576 | 114.17012930 | <a href="https://www.inaturalist.org/observations/10042649">https://www.inaturalist.org/observations/10042649</a>   |
| 2539 | <i>Spilopelia chinensis</i> | Eastern Spotted Dove | 2021/3/27  | 1 | 0 | 22.30002940 | 114.17121590 | <a href="https://www.inaturalist.org/observations/91553564">https://www.inaturalist.org/observations/91553564</a>   |
| 2540 | <i>Spilopelia chinensis</i> | Eastern Spotted Dove | 2021/11/3  | 1 | 0 | 22.30003574 | 114.23752500 | <a href="https://www.inaturalist.org/observations/100132402">https://www.inaturalist.org/observations/100132402</a> |
| 2541 | <i>Spilopelia chinensis</i> | Eastern Spotted Dove | 2021/11/3  | 2 | 0 | 22.30007267 | 114.23754420 | <a href="https://www.inaturalist.org/observations/100132413">https://www.inaturalist.org/observations/100132413</a> |
| 2542 | <i>Spilopelia chinensis</i> | Eastern Spotted Dove | 2021/11/3  | 2 | 0 | 22.30007668 | 114.23730600 | <a href="https://www.inaturalist.org/observations/100132530">https://www.inaturalist.org/observations/100132530</a> |
| 2543 | <i>Spilopelia chinensis</i> | Eastern Spotted Dove | 2021/11/3  | 2 | 0 | 22.30009475 | 114.23766810 | <a href="https://www.inaturalist.org/observations/101390858">https://www.inaturalist.org/observations/101390858</a> |
| 2544 | <i>Spilopelia chinensis</i> | Eastern Spotted Dove | 2021/11/3  | 2 | 0 | 22.30011729 | 114.23762570 | <a href="https://www.inaturalist.org/observations/101390861">https://www.inaturalist.org/observations/101390861</a> |
| 2545 | <i>Spilopelia chinensis</i> | Eastern Spotted Dove | 2012/3/28  | 1 | 0 | 22.30013500 | 114.17052200 | <a href="https://www.inaturalist.org/observations/64853200">https://www.inaturalist.org/observations/64853200</a>   |
| 2546 | <i>Spilopelia chinensis</i> | Eastern Spotted Dove | 2020/12/9  | 1 | 0 | 22.30013998 | 114.17032630 | <a href="https://www.inaturalist.org/observations/66676219">https://www.inaturalist.org/observations/66676219</a>   |
| 2547 | <i>Spilopelia chinensis</i> | Eastern Spotted Dove | 2021/11/3  | 2 | 0 | 22.30015250 | 114.23691320 | <a href="https://www.inaturalist.org/observations/100132417">https://www.inaturalist.org/observations/100132417</a> |
| 2548 | <i>Spilopelia chinensis</i> | Eastern Spotted Dove | 2022/5/6   | 2 | 0 | 22.30016387 | 114.18718520 | <a href="https://www.inaturalist.org/observations/115688578">https://www.inaturalist.org/observations/115688578</a> |
| 2549 | <i>Spilopelia chinensis</i> | Eastern Spotted Dove | 2021/11/3  | 1 | 0 | 22.30020068 | 114.23753440 | <a href="https://www.inaturalist.org/observations/101390872">https://www.inaturalist.org/observations/101390872</a> |
| 2550 | <i>Spilopelia chinensis</i> | Eastern Spotted Dove | 2021/11/3  | 2 | 0 | 22.30020095 | 114.23751410 | <a href="https://www.inaturalist.org/observations/100132518">https://www.inaturalist.org/observations/100132518</a> |
| 2551 | <i>Spilopelia chinensis</i> | Eastern Spotted Dove | 2011/4/14  | 1 | 0 | 22.30022673 | 114.17027720 | <a href="https://www.inaturalist.org/observations/44763804">https://www.inaturalist.org/observations/44763804</a>   |
| 2552 | <i>Spilopelia chinensis</i> | Eastern Spotted Dove | 2021/11/3  | 1 | 0 | 22.30023624 | 114.23746460 | <a href="https://www.inaturalist.org/observations/100132478">https://www.inaturalist.org/observations/100132478</a> |

|      |                             |                      |            |   |   |             |              |                                                                                                                     |
|------|-----------------------------|----------------------|------------|---|---|-------------|--------------|---------------------------------------------------------------------------------------------------------------------|
| 2553 | <i>Spilopelia chinensis</i> | Eastern Spotted Dove | 2021/11/3  | 1 | 0 | 22.30024680 | 114.23696110 | <a href="https://www.inaturalist.org/observations/100133291">https://www.inaturalist.org/observations/100133291</a> |
| 2554 | <i>Spilopelia chinensis</i> | Eastern Spotted Dove | 2021/11/3  | 2 | 0 | 22.30025781 | 114.23727350 | <a href="https://www.inaturalist.org/observations/100133003">https://www.inaturalist.org/observations/100133003</a> |
| 2555 | <i>Spilopelia chinensis</i> | Eastern Spotted Dove | 2022/4/29  | 2 | 0 | 22.30025904 | 114.17022070 | <a href="https://www.inaturalist.org/observations/115398319">https://www.inaturalist.org/observations/115398319</a> |
| 2556 | <i>Spilopelia chinensis</i> | Eastern Spotted Dove | 2021/11/3  | 1 | 0 | 22.30026210 | 114.23688100 | <a href="https://www.inaturalist.org/observations/100132532">https://www.inaturalist.org/observations/100132532</a> |
| 2557 | <i>Spilopelia chinensis</i> | Eastern Spotted Dove | 2021/11/3  | 2 | 0 | 22.30026333 | 114.23728050 | <a href="https://www.inaturalist.org/observations/100132854">https://www.inaturalist.org/observations/100132854</a> |
| 2558 | <i>Spilopelia chinensis</i> | Eastern Spotted Dove | 2021/11/3  | 1 | 0 | 22.30027852 | 114.23746080 | <a href="https://www.inaturalist.org/observations/100137143">https://www.inaturalist.org/observations/100137143</a> |
| 2559 | <i>Spilopelia chinensis</i> | Eastern Spotted Dove | 2021/11/3  | 1 | 0 | 22.30030150 | 114.23700430 | <a href="https://www.inaturalist.org/observations/100133050">https://www.inaturalist.org/observations/100133050</a> |
| 2560 | <i>Spilopelia chinensis</i> | Eastern Spotted Dove | 2020/12/15 | 1 | 0 | 22.30030396 | 114.17040530 | <a href="https://www.inaturalist.org/observations/66601811">https://www.inaturalist.org/observations/66601811</a>   |
| 2561 | <i>Spilopelia chinensis</i> | Eastern Spotted Dove | 2016/3/8   | 1 | 0 | 22.30031841 | 114.17021990 | <a href="https://www.inaturalist.org/observations/105009465">https://www.inaturalist.org/observations/105009465</a> |
| 2562 | <i>Spilopelia chinensis</i> | Eastern Spotted Dove | 2019/8/25  | 2 | 0 | 22.30032049 | 114.18758590 | <a href="https://www.inaturalist.org/observations/32289615">https://www.inaturalist.org/observations/32289615</a>   |
| 2563 | <i>Spilopelia chinensis</i> | Eastern Spotted Dove | 2021/11/3  | 1 | 0 | 22.30033014 | 114.23755610 | <a href="https://www.inaturalist.org/observations/100132881">https://www.inaturalist.org/observations/100132881</a> |
| 2564 | <i>Spilopelia chinensis</i> | Eastern Spotted Dove | 2021/11/3  | 2 | 0 | 22.30033014 | 114.23755610 | <a href="https://www.inaturalist.org/observations/100371150">https://www.inaturalist.org/observations/100371150</a> |
| 2565 | <i>Spilopelia chinensis</i> | Eastern Spotted Dove | 2021/11/8  | 2 | 0 | 22.30033014 | 114.23755610 | <a href="https://www.inaturalist.org/observations/100852379">https://www.inaturalist.org/observations/100852379</a> |
| 2566 | <i>Spilopelia chinensis</i> | Eastern Spotted Dove | 2021/11/3  | 1 | 0 | 22.30033760 | 114.23697350 | <a href="https://www.inaturalist.org/observations/100133354">https://www.inaturalist.org/observations/100133354</a> |
| 2567 | <i>Spilopelia chinensis</i> | Eastern Spotted Dove | 2021/11/3  | 1 | 0 | 22.30035077 | 114.23696640 | <a href="https://www.inaturalist.org/observations/100133092">https://www.inaturalist.org/observations/100133092</a> |
| 2568 | <i>Spilopelia chinensis</i> | Eastern Spotted Dove | 2021/11/3  | 2 | 0 | 22.30038780 | 114.23697260 | <a href="https://www.inaturalist.org/observations/100132856">https://www.inaturalist.org/observations/100132856</a> |
| 2569 | <i>Spilopelia chinensis</i> | Eastern Spotted Dove | 2013/3/26  | 2 | 0 | 22.30039280 | 114.17079290 | <a href="https://www.inaturalist.org/observations/60161988">https://www.inaturalist.org/observations/60161988</a>   |
| 2570 | <i>Spilopelia chinensis</i> | Eastern Spotted Dove | 2020/3/27  | 1 | 0 | 22.30041400 | 114.18095900 | <a href="https://www.inaturalist.org/observations/40858772">https://www.inaturalist.org/observations/40858772</a>   |
| 2571 | <i>Spilopelia chinensis</i> | Eastern Spotted Dove | 2022/5/4   | 2 | 0 | 22.30046456 | 114.18767340 | <a href="https://www.inaturalist.org/observations/115302611">https://www.inaturalist.org/observations/115302611</a> |
| 2572 | <i>Spilopelia chinensis</i> | Eastern Spotted Dove | 2020/6/30  | 1 | 0 | 22.30047904 | 114.18824810 | <a href="https://www.inaturalist.org/observations/64162812">https://www.inaturalist.org/observations/64162812</a>   |
| 2573 | <i>Spilopelia chinensis</i> | Eastern Spotted Dove | 2022/6/17  | 1 | 0 | 22.30050500 | 114.15867500 | <a href="https://www.inaturalist.org/observations/122185086">https://www.inaturalist.org/observations/122185086</a> |
| 2574 | <i>Spilopelia chinensis</i> | Eastern Spotted Dove | 2019/8/25  | 2 | 0 | 22.30053446 | 114.18805600 | <a href="https://www.inaturalist.org/observations/32289606">https://www.inaturalist.org/observations/32289606</a>   |
| 2575 | <i>Spilopelia chinensis</i> | Eastern Spotted Dove | 2021/11/3  | 1 | 0 | 22.30054163 | 114.23706220 | <a href="https://www.inaturalist.org/observations/100132980">https://www.inaturalist.org/observations/100132980</a> |

|      |                             |                      |            |   |   |             |              |                                                                                                                     |
|------|-----------------------------|----------------------|------------|---|---|-------------|--------------|---------------------------------------------------------------------------------------------------------------------|
| 2576 | <i>Spilopelia chinensis</i> | Eastern Spotted Dove | 2021/12/3  | 1 | 0 | 22.30064435 | 114.17106220 | <a href="https://www.inaturalist.org/observations/102394209">https://www.inaturalist.org/observations/102394209</a> |
| 2577 | <i>Spilopelia chinensis</i> | Eastern Spotted Dove | 2020/1/19  | 0 | 0 | 22.30070556 | 114.17090560 | <a href="https://www.inaturalist.org/observations/38217003">https://www.inaturalist.org/observations/38217003</a>   |
| 2578 | <i>Spilopelia chinensis</i> | Eastern Spotted Dove | 2019/1/11  | 1 | 0 | 22.30073300 | 114.17007000 | <a href="https://www.inaturalist.org/observations/39438330">https://www.inaturalist.org/observations/39438330</a>   |
| 2579 | <i>Spilopelia chinensis</i> | Eastern Spotted Dove | 2020/5/2   | 1 | 0 | 22.30073340 | 114.17000600 | <a href="https://www.inaturalist.org/observations/44686637">https://www.inaturalist.org/observations/44686637</a>   |
| 2580 | <i>Spilopelia chinensis</i> | Eastern Spotted Dove | 2018/12/18 | 5 | 0 | 22.30076333 | 114.17016670 | <a href="https://www.inaturalist.org/observations/19079592">https://www.inaturalist.org/observations/19079592</a>   |
| 2581 | <i>Spilopelia chinensis</i> | Eastern Spotted Dove | 2019/9/25  | 2 | 0 | 22.30082321 | 114.16973880 | <a href="https://www.inaturalist.org/observations/33353205">https://www.inaturalist.org/observations/33353205</a>   |
| 2582 | <i>Spilopelia chinensis</i> | Eastern Spotted Dove | 2019/9/25  | 2 | 0 | 22.30082321 | 114.16973880 | <a href="https://www.inaturalist.org/observations/33354227">https://www.inaturalist.org/observations/33354227</a>   |
| 2583 | <i>Spilopelia chinensis</i> | Eastern Spotted Dove | 2021/10/23 | 1 | 0 | 22.30086719 | 114.17037260 | <a href="https://www.inaturalist.org/observations/99038601">https://www.inaturalist.org/observations/99038601</a>   |
| 2584 | <i>Spilopelia chinensis</i> | Eastern Spotted Dove | 2020/1/19  | 0 | 0 | 22.30104722 | 114.16934440 | <a href="https://www.inaturalist.org/observations/38180878">https://www.inaturalist.org/observations/38180878</a>   |
| 2585 | <i>Spilopelia chinensis</i> | Eastern Spotted Dove | 2019/9/23  | 4 | 0 | 22.30117684 | 114.17817560 | <a href="https://www.inaturalist.org/observations/34729259">https://www.inaturalist.org/observations/34729259</a>   |
| 2586 | <i>Spilopelia chinensis</i> | Eastern Spotted Dove | 2021/11/26 | 1 | 0 | 22.30118254 | 114.16983920 | <a href="https://www.inaturalist.org/observations/101925658">https://www.inaturalist.org/observations/101925658</a> |
| 2587 | <i>Spilopelia chinensis</i> | Eastern Spotted Dove | 2021/11/26 | 1 | 0 | 22.30120309 | 114.16982770 | <a href="https://www.inaturalist.org/observations/101925628">https://www.inaturalist.org/observations/101925628</a> |
| 2588 | <i>Spilopelia chinensis</i> | Eastern Spotted Dove | 2021/11/26 | 1 | 0 | 22.30120456 | 114.17008230 | <a href="https://www.inaturalist.org/observations/101925621">https://www.inaturalist.org/observations/101925621</a> |
| 2589 | <i>Spilopelia chinensis</i> | Eastern Spotted Dove | 2022/6/3   | 1 | 0 | 22.30137833 | 114.18920830 | <a href="https://www.inaturalist.org/observations/119979576">https://www.inaturalist.org/observations/119979576</a> |
| 2590 | <i>Spilopelia chinensis</i> | Eastern Spotted Dove | 2018/11/23 | 6 | 0 | 22.30145000 | 114.16918000 | <a href="https://www.inaturalist.org/observations/18573893">https://www.inaturalist.org/observations/18573893</a>   |
| 2591 | <i>Spilopelia chinensis</i> | Eastern Spotted Dove | 2018/11/23 | 6 | 0 | 22.30146667 | 114.16922830 | <a href="https://www.inaturalist.org/observations/18573891">https://www.inaturalist.org/observations/18573891</a>   |
| 2592 | <i>Spilopelia chinensis</i> | Eastern Spotted Dove | 2021/9/27  | 1 | 0 | 22.30162960 | 114.26270050 | <a href="https://www.inaturalist.org/observations/96364547">https://www.inaturalist.org/observations/96364547</a>   |
| 2593 | <i>Spilopelia chinensis</i> | Eastern Spotted Dove | 2021/6/5   | 4 | 0 | 22.30221366 | 114.25678460 | <a href="https://www.inaturalist.org/observations/81666793">https://www.inaturalist.org/observations/81666793</a>   |
| 2594 | <i>Spilopelia chinensis</i> | Eastern Spotted Dove | 2021/4/30  | 2 | 0 | 22.30241982 | 114.19014560 | <a href="https://www.inaturalist.org/observations/76836970">https://www.inaturalist.org/observations/76836970</a>   |
| 2595 | <i>Spilopelia chinensis</i> | Eastern Spotted Dove | 2018/4/29  | 3 | 0 | 22.30265765 | 114.18968400 | <a href="https://www.inaturalist.org/observations/11726235">https://www.inaturalist.org/observations/11726235</a>   |
| 2596 | <i>Spilopelia chinensis</i> | Eastern Spotted Dove | 2018/4/29  | 6 | 0 | 22.30268333 | 114.25394500 | <a href="https://www.inaturalist.org/observations/11848272">https://www.inaturalist.org/observations/11848272</a>   |
| 2597 | <i>Spilopelia chinensis</i> | Eastern Spotted Dove | 2018/6/2   | 3 | 0 | 22.30290234 | 114.17467410 | <a href="https://www.inaturalist.org/observations/13034919">https://www.inaturalist.org/observations/13034919</a>   |
| 2598 | <i>Spilopelia chinensis</i> | Eastern Spotted Dove | 2019/11/9  | 4 | 0 | 22.30292000 | 114.18654670 | <a href="https://www.inaturalist.org/observations/35590968">https://www.inaturalist.org/observations/35590968</a>   |

|      |                             |                      |            |   |   |             |              |                                                                                                                     |
|------|-----------------------------|----------------------|------------|---|---|-------------|--------------|---------------------------------------------------------------------------------------------------------------------|
| 2599 | <i>Spilopelia chinensis</i> | Eastern Spotted Dove | 2019/1/4   | 1 | 0 | 22.30318411 | 114.18982780 | <a href="https://www.inaturalist.org/observations/53944929">https://www.inaturalist.org/observations/53944929</a>   |
| 2600 | <i>Spilopelia chinensis</i> | Eastern Spotted Dove | 2019/11/13 | 2 | 0 | 22.30344500 | 114.25291330 | <a href="https://www.inaturalist.org/observations/45045989">https://www.inaturalist.org/observations/45045989</a>   |
| 2601 | <i>Spilopelia chinensis</i> | Eastern Spotted Dove | 2020/11/19 | 1 | 0 | 22.30348390 | 114.25805530 | <a href="https://www.inaturalist.org/observations/65273640">https://www.inaturalist.org/observations/65273640</a>   |
| 2602 | <i>Spilopelia chinensis</i> | Eastern Spotted Dove | 2020/11/19 | 2 | 0 | 22.30357991 | 114.25793610 | <a href="https://www.inaturalist.org/observations/65182356">https://www.inaturalist.org/observations/65182356</a>   |
| 2603 | <i>Spilopelia chinensis</i> | Eastern Spotted Dove | 2020/11/19 | 3 | 0 | 22.30361111 | 114.25750000 | <a href="https://www.inaturalist.org/observations/65201633">https://www.inaturalist.org/observations/65201633</a>   |
| 2604 | <i>Spilopelia chinensis</i> | Eastern Spotted Dove | 2020/11/19 | 2 | 0 | 22.30361111 | 114.25750000 | <a href="https://www.inaturalist.org/observations/65201641">https://www.inaturalist.org/observations/65201641</a>   |
| 2605 | <i>Spilopelia chinensis</i> | Eastern Spotted Dove | 2020/11/19 | 2 | 0 | 22.30361552 | 114.25791390 | <a href="https://www.inaturalist.org/observations/65181846">https://www.inaturalist.org/observations/65181846</a>   |
| 2606 | <i>Spilopelia chinensis</i> | Eastern Spotted Dove | 2020/11/19 | 1 | 0 | 22.30363003 | 114.25794680 | <a href="https://www.inaturalist.org/observations/65181254">https://www.inaturalist.org/observations/65181254</a>   |
| 2607 | <i>Spilopelia chinensis</i> | Eastern Spotted Dove | 2020/11/19 | 1 | 0 | 22.30363261 | 114.25791550 | <a href="https://www.inaturalist.org/observations/65181709">https://www.inaturalist.org/observations/65181709</a>   |
| 2608 | <i>Spilopelia chinensis</i> | Eastern Spotted Dove | 2020/11/19 | 2 | 0 | 22.30364783 | 114.25793100 | <a href="https://www.inaturalist.org/observations/65182257">https://www.inaturalist.org/observations/65182257</a>   |
| 2609 | <i>Spilopelia chinensis</i> | Eastern Spotted Dove | 2020/11/19 | 2 | 0 | 22.30365860 | 114.25781340 | <a href="https://www.inaturalist.org/observations/65182053">https://www.inaturalist.org/observations/65182053</a>   |
| 2610 | <i>Spilopelia chinensis</i> | Eastern Spotted Dove | 2020/11/19 | 1 | 0 | 22.30365964 | 114.25810580 | <a href="https://www.inaturalist.org/observations/65182244">https://www.inaturalist.org/observations/65182244</a>   |
| 2611 | <i>Spilopelia chinensis</i> | Eastern Spotted Dove | 2021/3/9   | 2 | 0 | 22.30366486 | 114.16214700 | <a href="https://www.inaturalist.org/observations/70867801">https://www.inaturalist.org/observations/70867801</a>   |
| 2612 | <i>Spilopelia chinensis</i> | Eastern Spotted Dove | 2020/11/19 | 2 | 0 | 22.30366699 | 114.25802440 | <a href="https://www.inaturalist.org/observations/65181385">https://www.inaturalist.org/observations/65181385</a>   |
| 2613 | <i>Spilopelia chinensis</i> | Eastern Spotted Dove | 2022/6/21  | 2 | 0 | 22.30367167 | 114.25217500 | <a href="https://www.inaturalist.org/observations/122956420">https://www.inaturalist.org/observations/122956420</a> |
| 2614 | <i>Spilopelia chinensis</i> | Eastern Spotted Dove | 2020/11/19 | 2 | 0 | 22.30367762 | 114.25794500 | <a href="https://www.inaturalist.org/observations/65182115">https://www.inaturalist.org/observations/65182115</a>   |
| 2615 | <i>Spilopelia chinensis</i> | Eastern Spotted Dove | 2020/11/19 | 1 | 0 | 22.30368564 | 114.25801590 | <a href="https://www.inaturalist.org/observations/65182266">https://www.inaturalist.org/observations/65182266</a>   |
| 2616 | <i>Spilopelia chinensis</i> | Eastern Spotted Dove | 2020/11/19 | 2 | 0 | 22.30368930 | 114.25884080 | <a href="https://www.inaturalist.org/observations/65182288">https://www.inaturalist.org/observations/65182288</a>   |
| 2617 | <i>Spilopelia chinensis</i> | Eastern Spotted Dove | 2020/11/19 | 1 | 0 | 22.30371200 | 114.25788780 | <a href="https://www.inaturalist.org/observations/65182378">https://www.inaturalist.org/observations/65182378</a>   |
| 2618 | <i>Spilopelia chinensis</i> | Eastern Spotted Dove | 2020/11/19 | 1 | 0 | 22.30371687 | 114.25796680 | <a href="https://www.inaturalist.org/observations/65181737">https://www.inaturalist.org/observations/65181737</a>   |
| 2619 | <i>Spilopelia chinensis</i> | Eastern Spotted Dove | 2020/11/19 | 1 | 0 | 22.30372251 | 114.25798540 | <a href="https://www.inaturalist.org/observations/65181625">https://www.inaturalist.org/observations/65181625</a>   |
| 2620 | <i>Spilopelia chinensis</i> | Eastern Spotted Dove | 2020/11/19 | 2 | 0 | 22.30378053 | 114.25788940 | <a href="https://www.inaturalist.org/observations/65181163">https://www.inaturalist.org/observations/65181163</a>   |
| 2621 | <i>Spilopelia chinensis</i> | Eastern Spotted Dove | 2020/11/19 | 2 | 0 | 22.30388727 | 114.25790600 | <a href="https://www.inaturalist.org/observations/65181953">https://www.inaturalist.org/observations/65181953</a>   |

|      |                             |                      |            |   |   |             |              |                                                                                                                     |
|------|-----------------------------|----------------------|------------|---|---|-------------|--------------|---------------------------------------------------------------------------------------------------------------------|
| 2622 | <i>Spilopelia chinensis</i> | Eastern Spotted Dove | 2020/11/19 | 3 | 0 | 22.30395187 | 114.25859220 | <a href="https://www.inaturalist.org/observations/65205406">https://www.inaturalist.org/observations/65205406</a>   |
| 2623 | <i>Spilopelia chinensis</i> | Eastern Spotted Dove | 2020/11/19 | 2 | 0 | 22.30403064 | 114.25863650 | <a href="https://www.inaturalist.org/observations/65184548">https://www.inaturalist.org/observations/65184548</a>   |
| 2624 | <i>Spilopelia chinensis</i> | Eastern Spotted Dove | 2020/11/19 | 1 | 0 | 22.30409855 | 114.25873770 | <a href="https://www.inaturalist.org/observations/65188815">https://www.inaturalist.org/observations/65188815</a>   |
| 2625 | <i>Spilopelia chinensis</i> | Eastern Spotted Dove | 2020/11/19 | 2 | 0 | 22.30409858 | 114.25773870 | <a href="https://www.inaturalist.org/observations/65181145">https://www.inaturalist.org/observations/65181145</a>   |
| 2626 | <i>Spilopelia chinensis</i> | Eastern Spotted Dove | 2020/11/19 | 2 | 0 | 22.30411748 | 114.25883320 | <a href="https://www.inaturalist.org/observations/65184757">https://www.inaturalist.org/observations/65184757</a>   |
| 2627 | <i>Spilopelia chinensis</i> | Eastern Spotted Dove | 2021/11/11 | 2 | 0 | 22.30416412 | 114.25789460 | <a href="https://www.inaturalist.org/observations/100818922">https://www.inaturalist.org/observations/100818922</a> |
| 2628 | <i>Spilopelia chinensis</i> | Eastern Spotted Dove | 2020/11/19 | 2 | 0 | 22.30417983 | 114.25763350 | <a href="https://www.inaturalist.org/observations/65188868">https://www.inaturalist.org/observations/65188868</a>   |
| 2629 | <i>Spilopelia chinensis</i> | Eastern Spotted Dove | 2020/11/19 | 1 | 0 | 22.30421308 | 114.25798860 | <a href="https://www.inaturalist.org/observations/65181413">https://www.inaturalist.org/observations/65181413</a>   |
| 2630 | <i>Spilopelia chinensis</i> | Eastern Spotted Dove | 2020/11/19 | 2 | 0 | 22.30423017 | 114.25858110 | <a href="https://www.inaturalist.org/observations/65184586">https://www.inaturalist.org/observations/65184586</a>   |
| 2631 | <i>Spilopelia chinensis</i> | Eastern Spotted Dove | 2020/11/19 | 2 | 0 | 22.30424601 | 114.25766600 | <a href="https://www.inaturalist.org/observations/65188861">https://www.inaturalist.org/observations/65188861</a>   |
| 2632 | <i>Spilopelia chinensis</i> | Eastern Spotted Dove | 2020/11/1  | 1 | 0 | 22.30442222 | 114.01387500 | <a href="https://www.inaturalist.org/observations/65509752">https://www.inaturalist.org/observations/65509752</a>   |
| 2633 | <i>Spilopelia chinensis</i> | Eastern Spotted Dove | 2022/1/7   | 3 | 0 | 22.30459595 | 114.17885590 | <a href="https://www.inaturalist.org/observations/104506156">https://www.inaturalist.org/observations/104506156</a> |
| 2634 | <i>Spilopelia chinensis</i> | Eastern Spotted Dove | 2020/11/19 | 2 | 0 | 22.30459840 | 114.25899730 | <a href="https://www.inaturalist.org/observations/65188914">https://www.inaturalist.org/observations/65188914</a>   |
| 2635 | <i>Spilopelia chinensis</i> | Eastern Spotted Dove | 2019/5/8   | 2 | 0 | 22.30463758 | 114.18024410 | <a href="https://www.inaturalist.org/observations/24771737">https://www.inaturalist.org/observations/24771737</a>   |
| 2636 | <i>Spilopelia chinensis</i> | Eastern Spotted Dove | 2020/8/12  | 2 | 0 | 22.30473613 | 114.01223780 | <a href="https://www.inaturalist.org/observations/56192275">https://www.inaturalist.org/observations/56192275</a>   |
| 2637 | <i>Spilopelia chinensis</i> | Eastern Spotted Dove | 2020/11/19 | 2 | 0 | 22.30476587 | 114.25873210 | <a href="https://www.inaturalist.org/observations/65188898">https://www.inaturalist.org/observations/65188898</a>   |
| 2638 | <i>Spilopelia chinensis</i> | Eastern Spotted Dove | 2020/11/19 | 2 | 0 | 22.30479935 | 114.25983270 | <a href="https://www.inaturalist.org/observations/65188927">https://www.inaturalist.org/observations/65188927</a>   |
| 2639 | <i>Spilopelia chinensis</i> | Eastern Spotted Dove | 2022/3/27  | 1 | 0 | 22.30481800 | 114.01340100 | <a href="https://www.inaturalist.org/observations/109745600">https://www.inaturalist.org/observations/109745600</a> |
| 2640 | <i>Spilopelia chinensis</i> | Eastern Spotted Dove | 2022/5/2   | 1 | 0 | 22.30485172 | 114.28320430 | <a href="https://www.inaturalist.org/observations/115021218">https://www.inaturalist.org/observations/115021218</a> |
| 2641 | <i>Spilopelia chinensis</i> | Eastern Spotted Dove | 2021/11/17 | 1 | 0 | 22.30494971 | 114.26659690 | <a href="https://www.inaturalist.org/observations/101338756">https://www.inaturalist.org/observations/101338756</a> |
| 2642 | <i>Spilopelia chinensis</i> | Eastern Spotted Dove | 2020/11/19 | 2 | 0 | 22.30495319 | 114.25450260 | <a href="https://www.inaturalist.org/observations/65186108">https://www.inaturalist.org/observations/65186108</a>   |
| 2643 | <i>Spilopelia chinensis</i> | Eastern Spotted Dove | 2020/11/19 | 2 | 0 | 22.30498172 | 114.25882780 | <a href="https://www.inaturalist.org/observations/65185664">https://www.inaturalist.org/observations/65185664</a>   |
| 2644 | <i>Spilopelia chinensis</i> | Eastern Spotted Dove | 2022/5/20  | 1 | 0 | 22.30499047 | 114.18493110 | <a href="https://www.inaturalist.org/observations/117821668">https://www.inaturalist.org/observations/117821668</a> |

|      |                             |                      |            |   |   |             |              |                                                                                                                     |
|------|-----------------------------|----------------------|------------|---|---|-------------|--------------|---------------------------------------------------------------------------------------------------------------------|
| 2645 | <i>Spilopelia chinensis</i> | Eastern Spotted Dove | 2018/4/29  | 2 | 0 | 22.30503859 | 114.18561210 | <a href="https://www.inaturalist.org/observations/11744416">https://www.inaturalist.org/observations/11744416</a>   |
| 2646 | <i>Spilopelia chinensis</i> | Eastern Spotted Dove | 2022/4/23  | 1 | 0 | 22.30506811 | 114.18533110 | <a href="https://www.inaturalist.org/observations/112503067">https://www.inaturalist.org/observations/112503067</a> |
| 2647 | <i>Spilopelia chinensis</i> | Eastern Spotted Dove | 2020/11/1  | 1 | 0 | 22.30509444 | 114.01193330 | <a href="https://www.inaturalist.org/observations/65519334">https://www.inaturalist.org/observations/65519334</a>   |
| 2648 | <i>Spilopelia chinensis</i> | Eastern Spotted Dove | 2022/5/1   | 2 | 0 | 22.30511711 | 114.16201670 | <a href="https://www.inaturalist.org/observations/114048381">https://www.inaturalist.org/observations/114048381</a> |
| 2649 | <i>Spilopelia chinensis</i> | Eastern Spotted Dove | 2021/9/5   | 1 | 0 | 22.30516753 | 114.26677820 | <a href="https://www.inaturalist.org/observations/93736128">https://www.inaturalist.org/observations/93736128</a>   |
| 2650 | <i>Spilopelia chinensis</i> | Eastern Spotted Dove | 2020/7/15  | 1 | 0 | 22.30525833 | 114.01137220 | <a href="https://www.inaturalist.org/observations/53447280">https://www.inaturalist.org/observations/53447280</a>   |
| 2651 | <i>Spilopelia chinensis</i> | Eastern Spotted Dove | 2020/11/29 | 1 | 0 | 22.30526345 | 114.01240880 | <a href="https://www.inaturalist.org/observations/65805137">https://www.inaturalist.org/observations/65805137</a>   |
| 2652 | <i>Spilopelia chinensis</i> | Eastern Spotted Dove | 2020/11/1  | 1 | 0 | 22.30529444 | 114.01252780 | <a href="https://www.inaturalist.org/observations/65519006">https://www.inaturalist.org/observations/65519006</a>   |
| 2653 | <i>Spilopelia chinensis</i> | Eastern Spotted Dove | 2020/11/19 | 2 | 0 | 22.30531733 | 114.25982190 | <a href="https://www.inaturalist.org/observations/65188054">https://www.inaturalist.org/observations/65188054</a>   |
| 2654 | <i>Spilopelia chinensis</i> | Eastern Spotted Dove | 2020/7/13  | 2 | 0 | 22.30533333 | 114.01234170 | <a href="https://www.inaturalist.org/observations/53331963">https://www.inaturalist.org/observations/53331963</a>   |
| 2655 | <i>Spilopelia chinensis</i> | Eastern Spotted Dove | 2021/8/10  | 2 | 0 | 22.30535091 | 114.26704430 | <a href="https://www.inaturalist.org/observations/90675700">https://www.inaturalist.org/observations/90675700</a>   |
| 2656 | <i>Spilopelia chinensis</i> | Eastern Spotted Dove | 2022/9/28  | 1 | 0 | 22.30544209 | 114.26666260 | <a href="https://www.inaturalist.org/observations/136869551">https://www.inaturalist.org/observations/136869551</a> |
| 2657 | <i>Spilopelia chinensis</i> | Eastern Spotted Dove | 2020/7/15  | 1 | 0 | 22.30546111 | 114.01140280 | <a href="https://www.inaturalist.org/observations/53446716">https://www.inaturalist.org/observations/53446716</a>   |
| 2658 | <i>Spilopelia chinensis</i> | Eastern Spotted Dove | 2019/4/18  | 2 | 0 | 22.30546345 | 114.16159860 | <a href="https://www.inaturalist.org/observations/22645171">https://www.inaturalist.org/observations/22645171</a>   |
| 2659 | <i>Spilopelia chinensis</i> | Eastern Spotted Dove | 2020/11/19 | 2 | 0 | 22.30546907 | 114.25981420 | <a href="https://www.inaturalist.org/observations/65181985">https://www.inaturalist.org/observations/65181985</a>   |
| 2660 | <i>Spilopelia chinensis</i> | Eastern Spotted Dove | 2017/1/3   | 3 | 0 | 22.30556600 | 114.18872300 | <a href="https://www.inaturalist.org/observations/5306227">https://www.inaturalist.org/observations/5306227</a>     |
| 2661 | <i>Spilopelia chinensis</i> | Eastern Spotted Dove | 2022/4/16  | 2 | 0 | 22.30561920 | 114.26708810 | <a href="https://www.inaturalist.org/observations/111642227">https://www.inaturalist.org/observations/111642227</a> |
| 2662 | <i>Spilopelia chinensis</i> | Eastern Spotted Dove | 2020/7/15  | 2 | 0 | 22.30573889 | 114.01555000 | <a href="https://www.inaturalist.org/observations/53583531">https://www.inaturalist.org/observations/53583531</a>   |
| 2663 | <i>Spilopelia chinensis</i> | Eastern Spotted Dove | 2021/3/10  | 1 | 0 | 22.30580500 | 114.01383330 | <a href="https://www.inaturalist.org/observations/70932304">https://www.inaturalist.org/observations/70932304</a>   |
| 2664 | <i>Spilopelia chinensis</i> | Eastern Spotted Dove | 2020/11/29 | 3 | 0 | 22.30587198 | 114.01145770 | <a href="https://www.inaturalist.org/observations/65805144">https://www.inaturalist.org/observations/65805144</a>   |
| 2665 | <i>Spilopelia chinensis</i> | Eastern Spotted Dove | 2018/9/8   | 3 | 0 | 22.30608136 | 114.16167580 | <a href="https://www.inaturalist.org/observations/16312473">https://www.inaturalist.org/observations/16312473</a>   |
| 2666 | <i>Spilopelia chinensis</i> | Eastern Spotted Dove | 2021/11/21 | 1 | 0 | 22.30613105 | 114.17491030 | <a href="https://www.inaturalist.org/observations/101596252">https://www.inaturalist.org/observations/101596252</a> |
| 2667 | <i>Spilopelia chinensis</i> | Eastern Spotted Dove | 2019/10/8  | 1 | 0 | 22.30620833 | 114.25461330 | <a href="https://www.inaturalist.org/observations/88154147">https://www.inaturalist.org/observations/88154147</a>   |



|      |                             |                      |            |   |   |             |              |                                                                                                                     |
|------|-----------------------------|----------------------|------------|---|---|-------------|--------------|---------------------------------------------------------------------------------------------------------------------|
| 2668 | <i>Spilopelia chinensis</i> | Eastern Spotted Dove | 2020/7/17  | 2 | 0 | 22.30631389 | 114.01573610 | <a href="https://www.inaturalist.org/observations/54917780">https://www.inaturalist.org/observations/54917780</a>   |
| 2669 | <i>Spilopelia chinensis</i> | Eastern Spotted Dove | 2022/5/2   | 2 | 0 | 22.30644667 | 114.19238830 | <a href="https://www.inaturalist.org/observations/114611358">https://www.inaturalist.org/observations/114611358</a> |
| 2670 | <i>Spilopelia chinensis</i> | Eastern Spotted Dove | 2020/11/29 | 2 | 0 | 22.30660000 | 114.25486170 | <a href="https://www.inaturalist.org/observations/65812546">https://www.inaturalist.org/observations/65812546</a>   |
| 2671 | <i>Spilopelia chinensis</i> | Eastern Spotted Dove | 2021/6/30  | 1 | 0 | 22.30673749 | 114.22899590 | <a href="https://www.inaturalist.org/observations/85186088">https://www.inaturalist.org/observations/85186088</a>   |
| 2672 | <i>Spilopelia chinensis</i> | Eastern Spotted Dove | 2019/5/19  | 2 | 0 | 22.30674553 | 114.18962860 | <a href="https://www.inaturalist.org/observations/25418754">https://www.inaturalist.org/observations/25418754</a>   |
| 2673 | <i>Spilopelia chinensis</i> | Eastern Spotted Dove | 2019/9/17  | 1 | 0 | 22.30688472 | 114.19122940 | <a href="https://www.inaturalist.org/observations/78498222">https://www.inaturalist.org/observations/78498222</a>   |
| 2674 | <i>Spilopelia chinensis</i> | Eastern Spotted Dove | 2021/9/16  | 2 | 0 | 22.30690500 | 114.25995000 | <a href="https://www.inaturalist.org/observations/95012264">https://www.inaturalist.org/observations/95012264</a>   |
| 2675 | <i>Spilopelia chinensis</i> | Eastern Spotted Dove | 2018/4/28  | 3 | 0 | 22.30693460 | 114.01237670 | <a href="https://www.inaturalist.org/observations/11548553">https://www.inaturalist.org/observations/11548553</a>   |
| 2676 | <i>Spilopelia chinensis</i> | Eastern Spotted Dove | 2022/1/23  | 1 | 0 | 22.30696237 | 114.22645110 | <a href="https://www.inaturalist.org/observations/105429467">https://www.inaturalist.org/observations/105429467</a> |
| 2677 | <i>Spilopelia chinensis</i> | Eastern Spotted Dove | 2020/4/18  | 1 | 0 | 22.30699500 | 114.17643000 | <a href="https://www.inaturalist.org/observations/42439342">https://www.inaturalist.org/observations/42439342</a>   |
| 2678 | <i>Spilopelia chinensis</i> | Eastern Spotted Dove | 2019/2/2   | 1 | 0 | 22.30705816 | 114.26434520 | <a href="https://www.inaturalist.org/observations/20529138">https://www.inaturalist.org/observations/20529138</a>   |
| 2679 | <i>Spilopelia chinensis</i> | Eastern Spotted Dove | 2019/7/9   | 1 | 0 | 22.30707195 | 114.19077280 | <a href="https://www.inaturalist.org/observations/61702466">https://www.inaturalist.org/observations/61702466</a>   |
| 2680 | <i>Spilopelia chinensis</i> | Eastern Spotted Dove | 2021/4/30  | 1 | 0 | 22.30708667 | 114.22162500 | <a href="https://www.inaturalist.org/observations/75751403">https://www.inaturalist.org/observations/75751403</a>   |
| 2681 | <i>Spilopelia chinensis</i> | Eastern Spotted Dove | 2021/3/11  | 1 | 0 | 22.30712500 | 114.01058890 | <a href="https://www.inaturalist.org/observations/70996373">https://www.inaturalist.org/observations/70996373</a>   |
| 2682 | <i>Spilopelia chinensis</i> | Eastern Spotted Dove | 2021/3/17  | 1 | 0 | 22.30718833 | 114.01187780 | <a href="https://www.inaturalist.org/observations/71406234">https://www.inaturalist.org/observations/71406234</a>   |
| 2683 | <i>Spilopelia chinensis</i> | Eastern Spotted Dove | 2019/4/26  | 4 | 0 | 22.30728948 | 114.26120340 | <a href="https://www.inaturalist.org/observations/23082363">https://www.inaturalist.org/observations/23082363</a>   |
| 2684 | <i>Spilopelia chinensis</i> | Eastern Spotted Dove | 2019/2/2   | 1 | 0 | 22.30733300 | 114.26726900 | <a href="https://www.inaturalist.org/observations/20505416">https://www.inaturalist.org/observations/20505416</a>   |
| 2685 | <i>Spilopelia chinensis</i> | Eastern Spotted Dove | 2019/7/9   | 1 | 0 | 22.30738528 | 114.19087530 | <a href="https://www.inaturalist.org/observations/61702464">https://www.inaturalist.org/observations/61702464</a>   |
| 2686 | <i>Spilopelia chinensis</i> | Eastern Spotted Dove | 2020/11/25 | 3 | 0 | 22.30741333 | 114.23677000 | <a href="https://www.inaturalist.org/observations/65576453">https://www.inaturalist.org/observations/65576453</a>   |
| 2687 | <i>Spilopelia chinensis</i> | Eastern Spotted Dove | 2018/4/28  | 4 | 0 | 22.30750147 | 114.23097570 | <a href="https://www.inaturalist.org/observations/11612614">https://www.inaturalist.org/observations/11612614</a>   |
| 2688 | <i>Spilopelia chinensis</i> | Eastern Spotted Dove | 2020/4/20  | 1 | 0 | 22.30755710 | 114.25869300 | <a href="https://www.inaturalist.org/observations/42843661">https://www.inaturalist.org/observations/42843661</a>   |
| 2689 | <i>Spilopelia chinensis</i> | Eastern Spotted Dove | 2021/4/30  | 1 | 0 | 22.30757167 | 114.01108610 | <a href="https://www.inaturalist.org/observations/76111928">https://www.inaturalist.org/observations/76111928</a>   |
| 2690 | <i>Spilopelia chinensis</i> | Eastern Spotted Dove | 2022/4/30  | 2 | 0 | 22.30758915 | 114.26589790 | <a href="https://www.inaturalist.org/observations/113749975">https://www.inaturalist.org/observations/113749975</a> |

|      |                             |                      |            |   |   |             |              |                                                                                                                     |
|------|-----------------------------|----------------------|------------|---|---|-------------|--------------|---------------------------------------------------------------------------------------------------------------------|
| 2691 | <i>Spilopelia chinensis</i> | Eastern Spotted Dove | 2019/7/9   | 1 | 0 | 22.30762195 | 114.19104750 | <a href="https://www.inaturalist.org/observations/61702456">https://www.inaturalist.org/observations/61702456</a>   |
| 2692 | <i>Spilopelia chinensis</i> | Eastern Spotted Dove | 2020/1/21  | 1 | 0 | 22.30763000 | 114.25648670 | <a href="https://www.inaturalist.org/observations/43084627">https://www.inaturalist.org/observations/43084627</a>   |
| 2693 | <i>Spilopelia chinensis</i> | Eastern Spotted Dove | 2020/11/2  | 1 | 0 | 22.30768014 | 114.23696880 | <a href="https://www.inaturalist.org/observations/64011096">https://www.inaturalist.org/observations/64011096</a>   |
| 2694 | <i>Spilopelia chinensis</i> | Eastern Spotted Dove | 2020/7/1   | 1 | 0 | 22.30768864 | 114.22543940 | <a href="https://www.inaturalist.org/observations/60685440">https://www.inaturalist.org/observations/60685440</a>   |
| 2695 | <i>Spilopelia chinensis</i> | Eastern Spotted Dove | 2022/4/30  | 2 | 0 | 22.30783393 | 114.16520380 | <a href="https://www.inaturalist.org/observations/113691050">https://www.inaturalist.org/observations/113691050</a> |
| 2696 | <i>Spilopelia chinensis</i> | Eastern Spotted Dove | 2022/4/29  | 1 | 0 | 22.30784167 | 114.22120500 | <a href="https://www.inaturalist.org/observations/113322774">https://www.inaturalist.org/observations/113322774</a> |
| 2697 | <i>Spilopelia chinensis</i> | Eastern Spotted Dove | 2021/12/30 | 1 | 0 | 22.30792400 | 114.19050000 | <a href="https://www.inaturalist.org/observations/103945373">https://www.inaturalist.org/observations/103945373</a> |
| 2698 | <i>Spilopelia chinensis</i> | Eastern Spotted Dove | 2019/7/9   | 1 | 0 | 22.30800611 | 114.19156530 | <a href="https://www.inaturalist.org/observations/61702398">https://www.inaturalist.org/observations/61702398</a>   |
| 2699 | <i>Spilopelia chinensis</i> | Eastern Spotted Dove | 2022/1/30  | 2 | 0 | 22.30801990 | 114.23756380 | <a href="https://www.inaturalist.org/observations/110748097">https://www.inaturalist.org/observations/110748097</a> |
| 2700 | <i>Spilopelia chinensis</i> | Eastern Spotted Dove | 2022/4/30  | 1 | 0 | 22.30802306 | 114.19063470 | <a href="https://www.inaturalist.org/observations/113736339">https://www.inaturalist.org/observations/113736339</a> |
| 2701 | <i>Spilopelia chinensis</i> | Eastern Spotted Dove | 2018/12/12 | 5 | 0 | 22.30802536 | 114.17236330 | <a href="https://www.inaturalist.org/observations/18998442">https://www.inaturalist.org/observations/18998442</a>   |
| 2702 | <i>Spilopelia chinensis</i> | Eastern Spotted Dove | 2019/7/9   | 2 | 0 | 22.30802695 | 114.19095000 | <a href="https://www.inaturalist.org/observations/61702476">https://www.inaturalist.org/observations/61702476</a>   |
| 2703 | <i>Spilopelia chinensis</i> | Eastern Spotted Dove | 2022/3/4   | 3 | 0 | 22.30819984 | 114.26430460 | <a href="https://www.inaturalist.org/observations/107872786">https://www.inaturalist.org/observations/107872786</a> |
| 2704 | <i>Spilopelia chinensis</i> | Eastern Spotted Dove | 2022/4/6   | 3 | 0 | 22.30823146 | 114.23838730 | <a href="https://www.inaturalist.org/observations/110545475">https://www.inaturalist.org/observations/110545475</a> |
| 2705 | <i>Spilopelia chinensis</i> | Eastern Spotted Dove | 2021/7/13  | 1 | 0 | 22.30832873 | 114.26540040 | <a href="https://www.inaturalist.org/observations/86857512">https://www.inaturalist.org/observations/86857512</a>   |
| 2706 | <i>Spilopelia chinensis</i> | Eastern Spotted Dove | 2021/8/16  | 1 | 0 | 22.30848360 | 114.26533580 | <a href="https://www.inaturalist.org/observations/91421614">https://www.inaturalist.org/observations/91421614</a>   |
| 2707 | <i>Spilopelia chinensis</i> | Eastern Spotted Dove | 2022/1/12  | 2 | 0 | 22.30851709 | 114.26522790 | <a href="https://www.inaturalist.org/observations/104813659">https://www.inaturalist.org/observations/104813659</a> |
| 2708 | <i>Spilopelia chinensis</i> | Eastern Spotted Dove | 2018/11/5  | 5 | 0 | 22.30854381 | 114.25977590 | <a href="https://www.inaturalist.org/observations/18121814">https://www.inaturalist.org/observations/18121814</a>   |
| 2709 | <i>Spilopelia chinensis</i> | Eastern Spotted Dove | 2022/3/12  | 3 | 0 | 22.30873092 | 114.26511170 | <a href="https://www.inaturalist.org/observations/108505454">https://www.inaturalist.org/observations/108505454</a> |
| 2710 | <i>Spilopelia chinensis</i> | Eastern Spotted Dove | 2021/3/8   | 2 | 0 | 22.30935141 | 114.25876310 | <a href="https://www.inaturalist.org/observations/70805167">https://www.inaturalist.org/observations/70805167</a>   |
| 2711 | <i>Spilopelia chinensis</i> | Eastern Spotted Dove | 2019/1/30  | 4 | 0 | 22.30938667 | 114.25893330 | <a href="https://www.inaturalist.org/observations/19957082">https://www.inaturalist.org/observations/19957082</a>   |
| 2712 | <i>Spilopelia chinensis</i> | Eastern Spotted Dove | 2021/2/2   | 1 | 0 | 22.30957044 | 114.23585270 | <a href="https://www.inaturalist.org/observations/68953625">https://www.inaturalist.org/observations/68953625</a>   |
| 2713 | <i>Spilopelia chinensis</i> | Eastern Spotted Dove | 2018/11/5  | 2 | 0 | 22.30959109 | 114.26015170 | <a href="https://www.inaturalist.org/observations/18118810">https://www.inaturalist.org/observations/18118810</a>   |

|      |                             |                      |            |   |   |             |              |                                                                                                                     |
|------|-----------------------------|----------------------|------------|---|---|-------------|--------------|---------------------------------------------------------------------------------------------------------------------|
| 2714 | <i>Spilopelia chinensis</i> | Eastern Spotted Dove | 2018/4/14  | 3 | 0 | 22.30972290 | 114.18611150 | <a href="https://www.inaturalist.org/observations/10894319">https://www.inaturalist.org/observations/10894319</a>   |
| 2715 | <i>Spilopelia chinensis</i> | Eastern Spotted Dove | 2018/12/5  | 5 | 0 | 22.30974167 | 114.23747170 | <a href="https://www.inaturalist.org/observations/18836275">https://www.inaturalist.org/observations/18836275</a>   |
| 2716 | <i>Spilopelia chinensis</i> | Eastern Spotted Dove | 2019/11/5  | 1 | 0 | 22.30978667 | 114.23885330 | <a href="https://www.inaturalist.org/observations/35314534">https://www.inaturalist.org/observations/35314534</a>   |
| 2717 | <i>Spilopelia chinensis</i> | Eastern Spotted Dove | 2019/5/25  | 4 | 0 | 22.30985109 | 114.25883260 | <a href="https://www.inaturalist.org/observations/26377383">https://www.inaturalist.org/observations/26377383</a>   |
| 2718 | <i>Spilopelia chinensis</i> | Eastern Spotted Dove | 2018/6/21  | 4 | 0 | 22.30985405 | 114.25962440 | <a href="https://www.inaturalist.org/observations/18254905">https://www.inaturalist.org/observations/18254905</a>   |
| 2719 | <i>Spilopelia chinensis</i> | Eastern Spotted Dove | 2020/12/13 | 1 | 0 | 22.30991667 | 114.23847170 | <a href="https://www.inaturalist.org/observations/66562017">https://www.inaturalist.org/observations/66562017</a>   |
| 2720 | <i>Spilopelia chinensis</i> | Eastern Spotted Dove | 2018/11/8  | 5 | 0 | 22.30998502 | 114.25939570 | <a href="https://www.inaturalist.org/observations/18231790">https://www.inaturalist.org/observations/18231790</a>   |
| 2721 | <i>Spilopelia chinensis</i> | Eastern Spotted Dove | 2019/11/4  | 3 | 0 | 22.30999500 | 114.23888330 | <a href="https://www.inaturalist.org/observations/35276391">https://www.inaturalist.org/observations/35276391</a>   |
| 2722 | <i>Spilopelia chinensis</i> | Eastern Spotted Dove | 2019/11/5  | 0 | 0 | 22.31008333 | 114.23865500 | <a href="https://www.inaturalist.org/observations/35314525">https://www.inaturalist.org/observations/35314525</a>   |
| 2723 | <i>Spilopelia chinensis</i> | Eastern Spotted Dove | 2019/6/1   | 2 | 0 | 22.31011276 | 114.25881740 | <a href="https://www.inaturalist.org/observations/26377373">https://www.inaturalist.org/observations/26377373</a>   |
| 2724 | <i>Spilopelia chinensis</i> | Eastern Spotted Dove | 2019/5/30  | 3 | 0 | 22.31013460 | 114.25948080 | <a href="https://www.inaturalist.org/observations/26184007">https://www.inaturalist.org/observations/26184007</a>   |
| 2725 | <i>Spilopelia chinensis</i> | Eastern Spotted Dove | 2018/11/8  | 2 | 0 | 22.31017789 | 114.25994820 | <a href="https://www.inaturalist.org/observations/18226993">https://www.inaturalist.org/observations/18226993</a>   |
| 2726 | <i>Spilopelia chinensis</i> | Eastern Spotted Dove | 2019/11/7  | 2 | 0 | 22.31019167 | 114.23898330 | <a href="https://www.inaturalist.org/observations/35402654">https://www.inaturalist.org/observations/35402654</a>   |
| 2727 | <i>Spilopelia chinensis</i> | Eastern Spotted Dove | 2019/11/4  | 2 | 0 | 22.31020833 | 114.23857830 | <a href="https://www.inaturalist.org/observations/35276349">https://www.inaturalist.org/observations/35276349</a>   |
| 2728 | <i>Spilopelia chinensis</i> | Eastern Spotted Dove | 2019/11/7  | 3 | 0 | 22.31021372 | 114.23900770 | <a href="https://www.inaturalist.org/observations/35402539">https://www.inaturalist.org/observations/35402539</a>   |
| 2729 | <i>Spilopelia chinensis</i> | Eastern Spotted Dove | 2020/12/12 | 1 | 0 | 22.31035818 | 114.18108370 | <a href="https://www.inaturalist.org/observations/66478571">https://www.inaturalist.org/observations/66478571</a>   |
| 2730 | <i>Spilopelia chinensis</i> | Eastern Spotted Dove | 2019/11/7  | 3 | 0 | 22.31038941 | 114.23901450 | <a href="https://www.inaturalist.org/observations/35402627">https://www.inaturalist.org/observations/35402627</a>   |
| 2731 | <i>Spilopelia chinensis</i> | Eastern Spotted Dove | 2022/1/31  | 3 | 0 | 22.31044230 | 114.25894740 | <a href="https://www.inaturalist.org/observations/105957943">https://www.inaturalist.org/observations/105957943</a> |
| 2732 | <i>Spilopelia chinensis</i> | Eastern Spotted Dove | 2019/12/9  | 1 | 0 | 22.31046749 | 114.23952350 | <a href="https://www.inaturalist.org/observations/36506055">https://www.inaturalist.org/observations/36506055</a>   |
| 2733 | <i>Spilopelia chinensis</i> | Eastern Spotted Dove | 2018/11/5  | 1 | 0 | 22.31048421 | 114.25998740 | <a href="https://www.inaturalist.org/observations/18111892">https://www.inaturalist.org/observations/18111892</a>   |
| 2734 | <i>Spilopelia chinensis</i> | Eastern Spotted Dove | 2018/11/8  | 5 | 0 | 22.31058000 | 114.25943830 | <a href="https://www.inaturalist.org/observations/18245529">https://www.inaturalist.org/observations/18245529</a>   |
| 2735 | <i>Spilopelia chinensis</i> | Eastern Spotted Dove | 2019/4/27  | 2 | 0 | 22.31069633 | 114.24051760 | <a href="https://www.inaturalist.org/observations/23340790">https://www.inaturalist.org/observations/23340790</a>   |
| 2736 | <i>Spilopelia chinensis</i> | Eastern Spotted Dove | 2019/11/11 | 3 | 0 | 22.31087727 | 114.24174250 | <a href="https://www.inaturalist.org/observations/35607431">https://www.inaturalist.org/observations/35607431</a>   |

|      |                             |                      |            |   |   |             |              |                                                                                                                     |
|------|-----------------------------|----------------------|------------|---|---|-------------|--------------|---------------------------------------------------------------------------------------------------------------------|
| 2737 | <i>Spilopelia chinensis</i> | Eastern Spotted Dove | 2022/4/2   | 1 | 0 | 22.31096774 | 114.17025110 | <a href="https://www.inaturalist.org/observations/111170640">https://www.inaturalist.org/observations/111170640</a> |
| 2738 | <i>Spilopelia chinensis</i> | Eastern Spotted Dove | 2020/4/9   | 1 | 0 | 22.31101857 | 114.00424420 | <a href="https://www.inaturalist.org/observations/104761194">https://www.inaturalist.org/observations/104761194</a> |
| 2739 | <i>Spilopelia chinensis</i> | Eastern Spotted Dove | 2021/4/10  | 2 | 0 | 22.31102963 | 114.24017250 | <a href="https://www.inaturalist.org/observations/73596446">https://www.inaturalist.org/observations/73596446</a>   |
| 2740 | <i>Spilopelia chinensis</i> | Eastern Spotted Dove | 2019/11/14 | 1 | 0 | 22.31135317 | 114.26186480 | <a href="https://www.inaturalist.org/observations/35666682">https://www.inaturalist.org/observations/35666682</a>   |
| 2741 | <i>Spilopelia chinensis</i> | Eastern Spotted Dove | 2021/1/7   | 1 | 0 | 22.31137466 | 114.25701900 | <a href="https://www.inaturalist.org/observations/67701214">https://www.inaturalist.org/observations/67701214</a>   |
| 2742 | <i>Spilopelia chinensis</i> | Eastern Spotted Dove | 2020/5/23  | 1 | 0 | 22.31154932 | 114.17280160 | <a href="https://www.inaturalist.org/observations/46938533">https://www.inaturalist.org/observations/46938533</a>   |
| 2743 | <i>Spilopelia chinensis</i> | Eastern Spotted Dove | 2018/4/7   | 1 | 0 | 22.31160205 | 114.17537480 | <a href="https://www.inaturalist.org/observations/93121293">https://www.inaturalist.org/observations/93121293</a>   |
| 2744 | <i>Spilopelia chinensis</i> | Eastern Spotted Dove | 2018/4/7   | 1 | 0 | 22.31160205 | 114.17537480 | <a href="https://www.inaturalist.org/observations/93121294">https://www.inaturalist.org/observations/93121294</a>   |
| 2745 | <i>Spilopelia chinensis</i> | Eastern Spotted Dove | 2019/9/16  | 2 | 0 | 22.31163979 | 114.17778020 | <a href="https://www.inaturalist.org/observations/33362512">https://www.inaturalist.org/observations/33362512</a>   |
| 2746 | <i>Spilopelia chinensis</i> | Eastern Spotted Dove | 2020/11/14 | 1 | 0 | 22.31192500 | 114.22769170 | <a href="https://www.inaturalist.org/observations/66505048">https://www.inaturalist.org/observations/66505048</a>   |
| 2747 | <i>Spilopelia chinensis</i> | Eastern Spotted Dove | 2020/11/19 | 1 | 0 | 22.31193548 | 114.25687780 | <a href="https://www.inaturalist.org/observations/65183875">https://www.inaturalist.org/observations/65183875</a>   |
| 2748 | <i>Spilopelia chinensis</i> | Eastern Spotted Dove | 2020/4/16  | 1 | 0 | 22.31193570 | 114.25687760 | <a href="https://www.inaturalist.org/observations/42299353">https://www.inaturalist.org/observations/42299353</a>   |
| 2749 | <i>Spilopelia chinensis</i> | Eastern Spotted Dove | 2020/5/8   | 2 | 0 | 22.31193570 | 114.25687760 | <a href="https://www.inaturalist.org/observations/45261906">https://www.inaturalist.org/observations/45261906</a>   |
| 2750 | <i>Spilopelia chinensis</i> | Eastern Spotted Dove | 2020/5/9   | 1 | 0 | 22.31193570 | 114.25687760 | <a href="https://www.inaturalist.org/observations/45337131">https://www.inaturalist.org/observations/45337131</a>   |
| 2751 | <i>Spilopelia chinensis</i> | Eastern Spotted Dove | 2020/5/9   | 1 | 0 | 22.31193570 | 114.25687760 | <a href="https://www.inaturalist.org/observations/45463172">https://www.inaturalist.org/observations/45463172</a>   |
| 2752 | <i>Spilopelia chinensis</i> | Eastern Spotted Dove | 2020/5/14  | 1 | 0 | 22.31193570 | 114.25687760 | <a href="https://www.inaturalist.org/observations/45871299">https://www.inaturalist.org/observations/45871299</a>   |
| 2753 | <i>Spilopelia chinensis</i> | Eastern Spotted Dove | 2020/5/15  | 1 | 0 | 22.31193570 | 114.25687760 | <a href="https://www.inaturalist.org/observations/46843328">https://www.inaturalist.org/observations/46843328</a>   |
| 2754 | <i>Spilopelia chinensis</i> | Eastern Spotted Dove | 2020/5/15  | 1 | 0 | 22.31193570 | 114.25687760 | <a href="https://www.inaturalist.org/observations/46843335">https://www.inaturalist.org/observations/46843335</a>   |
| 2755 | <i>Spilopelia chinensis</i> | Eastern Spotted Dove | 2020/5/16  | 1 | 0 | 22.31193570 | 114.25687760 | <a href="https://www.inaturalist.org/observations/46843341">https://www.inaturalist.org/observations/46843341</a>   |
| 2756 | <i>Spilopelia chinensis</i> | Eastern Spotted Dove | 2020/5/25  | 1 | 0 | 22.31193570 | 114.25687760 | <a href="https://www.inaturalist.org/observations/47509726">https://www.inaturalist.org/observations/47509726</a>   |
| 2757 | <i>Spilopelia chinensis</i> | Eastern Spotted Dove | 2020/5/27  | 1 | 0 | 22.31193570 | 114.25687760 | <a href="https://www.inaturalist.org/observations/47509731">https://www.inaturalist.org/observations/47509731</a>   |
| 2758 | <i>Spilopelia chinensis</i> | Eastern Spotted Dove | 2020/5/30  | 1 | 0 | 22.31193570 | 114.25687760 | <a href="https://www.inaturalist.org/observations/47957318">https://www.inaturalist.org/observations/47957318</a>   |
| 2759 | <i>Spilopelia chinensis</i> | Eastern Spotted Dove | 2020/6/24  | 1 | 0 | 22.31193570 | 114.25687760 | <a href="https://www.inaturalist.org/observations/51908060">https://www.inaturalist.org/observations/51908060</a>   |

|      |                             |                      |            |   |   |             |              |                                                                                                                     |
|------|-----------------------------|----------------------|------------|---|---|-------------|--------------|---------------------------------------------------------------------------------------------------------------------|
| 2760 | <i>Spilopelia chinensis</i> | Eastern Spotted Dove | 2020/7/4   | 1 | 0 | 22.31193570 | 114.25687760 | <a href="https://www.inaturalist.org/observations/52255654">https://www.inaturalist.org/observations/52255654</a>   |
| 2761 | <i>Spilopelia chinensis</i> | Eastern Spotted Dove | 2020/7/22  | 2 | 0 | 22.31193570 | 114.25687760 | <a href="https://www.inaturalist.org/observations/63813359">https://www.inaturalist.org/observations/63813359</a>   |
| 2762 | <i>Spilopelia chinensis</i> | Eastern Spotted Dove | 2020/7/29  | 2 | 0 | 22.31193570 | 114.25687760 | <a href="https://www.inaturalist.org/observations/63813360">https://www.inaturalist.org/observations/63813360</a>   |
| 2763 | <i>Spilopelia chinensis</i> | Eastern Spotted Dove | 2020/8/4   | 1 | 0 | 22.31193570 | 114.25687760 | <a href="https://www.inaturalist.org/observations/63813366">https://www.inaturalist.org/observations/63813366</a>   |
| 2764 | <i>Spilopelia chinensis</i> | Eastern Spotted Dove | 2021/5/1   | 1 | 0 | 22.31193570 | 114.25687760 | <a href="https://www.inaturalist.org/observations/76407772">https://www.inaturalist.org/observations/76407772</a>   |
| 2765 | <i>Spilopelia chinensis</i> | Eastern Spotted Dove | 2021/5/12  | 2 | 0 | 22.31193570 | 114.25687760 | <a href="https://www.inaturalist.org/observations/78549613">https://www.inaturalist.org/observations/78549613</a>   |
| 2766 | <i>Spilopelia chinensis</i> | Eastern Spotted Dove | 2021/5/17  | 1 | 0 | 22.31193570 | 114.25687760 | <a href="https://www.inaturalist.org/observations/79243452">https://www.inaturalist.org/observations/79243452</a>   |
| 2767 | <i>Spilopelia chinensis</i> | Eastern Spotted Dove | 2021/5/15  | 2 | 0 | 22.31193570 | 114.25687760 | <a href="https://www.inaturalist.org/observations/79243458">https://www.inaturalist.org/observations/79243458</a>   |
| 2768 | <i>Spilopelia chinensis</i> | Eastern Spotted Dove | 2021/6/9   | 2 | 0 | 22.31193570 | 114.25687760 | <a href="https://www.inaturalist.org/observations/83762062">https://www.inaturalist.org/observations/83762062</a>   |
| 2769 | <i>Spilopelia chinensis</i> | Eastern Spotted Dove | 2021/7/8   | 1 | 0 | 22.31193570 | 114.25687760 | <a href="https://www.inaturalist.org/observations/86242495">https://www.inaturalist.org/observations/86242495</a>   |
| 2770 | <i>Spilopelia chinensis</i> | Eastern Spotted Dove | 2021/8/21  | 4 | 0 | 22.31193570 | 114.25687760 | <a href="https://www.inaturalist.org/observations/91950138">https://www.inaturalist.org/observations/91950138</a>   |
| 2771 | <i>Spilopelia chinensis</i> | Eastern Spotted Dove | 2020/4/5   | 1 | 0 | 22.31200989 | 114.22950350 | <a href="https://www.inaturalist.org/observations/41605824">https://www.inaturalist.org/observations/41605824</a>   |
| 2772 | <i>Spilopelia chinensis</i> | Eastern Spotted Dove | 2019/12/6  | 2 | 0 | 22.31205622 | 114.26200860 | <a href="https://www.inaturalist.org/observations/36395006">https://www.inaturalist.org/observations/36395006</a>   |
| 2773 | <i>Spilopelia chinensis</i> | Eastern Spotted Dove | 2019/9/16  | 1 | 0 | 22.31214523 | 114.17729950 | <a href="https://www.inaturalist.org/observations/33362516">https://www.inaturalist.org/observations/33362516</a>   |
| 2774 | <i>Spilopelia chinensis</i> | Eastern Spotted Dove | 2020/11/21 | 2 | 0 | 22.31231040 | 114.22693400 | <a href="https://www.inaturalist.org/observations/65307449">https://www.inaturalist.org/observations/65307449</a>   |
| 2775 | <i>Spilopelia chinensis</i> | Eastern Spotted Dove | 2021/4/1   | 1 | 0 | 22.31240633 | 114.16961610 | <a href="https://www.inaturalist.org/observations/77604028">https://www.inaturalist.org/observations/77604028</a>   |
| 2776 | <i>Spilopelia chinensis</i> | Eastern Spotted Dove | 2021/10/11 | 2 | 0 | 22.31247248 | 114.17331510 | <a href="https://www.inaturalist.org/observations/97916339">https://www.inaturalist.org/observations/97916339</a>   |
| 2777 | <i>Spilopelia chinensis</i> | Eastern Spotted Dove | 2020/4/25  | 2 | 0 | 22.31273155 | 114.26563510 | <a href="https://www.inaturalist.org/observations/43560159">https://www.inaturalist.org/observations/43560159</a>   |
| 2778 | <i>Spilopelia chinensis</i> | Eastern Spotted Dove | 2018/4/27  | 1 | 0 | 22.31275155 | 114.17391970 | <a href="https://www.inaturalist.org/observations/11481827">https://www.inaturalist.org/observations/11481827</a>   |
| 2779 | <i>Spilopelia chinensis</i> | Eastern Spotted Dove | 2021/4/9   | 1 | 0 | 22.31278394 | 114.16866430 | <a href="https://www.inaturalist.org/observations/73368228">https://www.inaturalist.org/observations/73368228</a>   |
| 2780 | <i>Spilopelia chinensis</i> | Eastern Spotted Dove | 2018/12/8  | 1 | 0 | 22.31281234 | 114.18288160 | <a href="https://www.inaturalist.org/observations/19726900">https://www.inaturalist.org/observations/19726900</a>   |
| 2781 | <i>Spilopelia chinensis</i> | Eastern Spotted Dove | 2021/11/30 | 3 | 0 | 22.31294580 | 114.26528550 | <a href="https://www.inaturalist.org/observations/102228200">https://www.inaturalist.org/observations/102228200</a> |
| 2782 | <i>Spilopelia chinensis</i> | Eastern Spotted Dove | 2018/11/11 | 3 | 0 | 22.31296836 | 114.18310120 | <a href="https://www.inaturalist.org/observations/19727140">https://www.inaturalist.org/observations/19727140</a>   |

|      |                             |                      |            |   |   |             |              |                                                                                                                     |
|------|-----------------------------|----------------------|------------|---|---|-------------|--------------|---------------------------------------------------------------------------------------------------------------------|
| 2783 | <i>Spilopelia chinensis</i> | Eastern Spotted Dove | 2021/10/16 | 2 | 0 | 22.31303438 | 114.25690620 | <a href="https://www.inaturalist.org/observations/98379105">https://www.inaturalist.org/observations/98379105</a>   |
| 2784 | <i>Spilopelia chinensis</i> | Eastern Spotted Dove | 2019/4/27  | 1 | 0 | 22.31304270 | 114.26364030 | <a href="https://www.inaturalist.org/observations/23305638">https://www.inaturalist.org/observations/23305638</a>   |
| 2785 | <i>Spilopelia chinensis</i> | Eastern Spotted Dove | 2021/12/2  | 1 | 0 | 22.31318955 | 114.26536530 | <a href="https://www.inaturalist.org/observations/102341165">https://www.inaturalist.org/observations/102341165</a> |
| 2786 | <i>Spilopelia chinensis</i> | Eastern Spotted Dove | 2022/7/19  | 3 | 0 | 22.31323883 | 114.26542260 | <a href="https://www.inaturalist.org/observations/127469031">https://www.inaturalist.org/observations/127469031</a> |
| 2787 | <i>Spilopelia chinensis</i> | Eastern Spotted Dove | 2020/1/16  | 2 | 0 | 22.31326786 | 114.26577540 | <a href="https://www.inaturalist.org/observations/37636890">https://www.inaturalist.org/observations/37636890</a>   |
| 2788 | <i>Spilopelia chinensis</i> | Eastern Spotted Dove | 2018/4/29  | 4 | 0 | 22.31327927 | 114.17156490 | <a href="https://www.inaturalist.org/observations/11718414">https://www.inaturalist.org/observations/11718414</a>   |
| 2789 | <i>Spilopelia chinensis</i> | Eastern Spotted Dove | 2018/4/27  | 3 | 0 | 22.31328194 | 114.17380240 | <a href="https://www.inaturalist.org/observations/11479083">https://www.inaturalist.org/observations/11479083</a>   |
| 2790 | <i>Spilopelia chinensis</i> | Eastern Spotted Dove | 2019/9/16  | 2 | 0 | 22.31328392 | 114.17736820 | <a href="https://www.inaturalist.org/observations/33425300">https://www.inaturalist.org/observations/33425300</a>   |
| 2791 | <i>Spilopelia chinensis</i> | Eastern Spotted Dove | 2020/1/29  | 1 | 0 | 22.31334442 | 114.26484740 | <a href="https://www.inaturalist.org/observations/67323930">https://www.inaturalist.org/observations/67323930</a>   |
| 2792 | <i>Spilopelia chinensis</i> | Eastern Spotted Dove | 2020/1/16  | 2 | 0 | 22.31336576 | 114.26516960 | <a href="https://www.inaturalist.org/observations/37637159">https://www.inaturalist.org/observations/37637159</a>   |
| 2793 | <i>Spilopelia chinensis</i> | Eastern Spotted Dove | 2021/5/2   | 1 | 0 | 22.31339190 | 114.03976570 | <a href="https://www.inaturalist.org/observations/76469369">https://www.inaturalist.org/observations/76469369</a>   |
| 2794 | <i>Spilopelia chinensis</i> | Eastern Spotted Dove | 2021/3/5   | 2 | 0 | 22.31342075 | 114.26520020 | <a href="https://www.inaturalist.org/observations/70597876">https://www.inaturalist.org/observations/70597876</a>   |
| 2795 | <i>Spilopelia chinensis</i> | Eastern Spotted Dove | 2020/1/16  | 1 | 0 | 22.31342287 | 114.26534930 | <a href="https://www.inaturalist.org/observations/37636953">https://www.inaturalist.org/observations/37636953</a>   |
| 2796 | <i>Spilopelia chinensis</i> | Eastern Spotted Dove | 2021/11/30 | 2 | 0 | 22.31355418 | 114.26537280 | <a href="https://www.inaturalist.org/observations/102228060">https://www.inaturalist.org/observations/102228060</a> |
| 2797 | <i>Spilopelia chinensis</i> | Eastern Spotted Dove | 2021/12/4  | 1 | 0 | 22.31358524 | 114.26167130 | <a href="https://www.inaturalist.org/observations/102456122">https://www.inaturalist.org/observations/102456122</a> |
| 2798 | <i>Spilopelia chinensis</i> | Eastern Spotted Dove | 2019/9/15  | 2 | 0 | 22.31359100 | 114.17895510 | <a href="https://www.inaturalist.org/observations/33313109">https://www.inaturalist.org/observations/33313109</a>   |
| 2799 | <i>Spilopelia chinensis</i> | Eastern Spotted Dove | 2018/11/21 | 1 | 0 | 22.31361198 | 114.26472470 | <a href="https://www.inaturalist.org/observations/18526801">https://www.inaturalist.org/observations/18526801</a>   |
| 2800 | <i>Spilopelia chinensis</i> | Eastern Spotted Dove | 2020/1/16  | 2 | 0 | 22.31365617 | 114.26550330 | <a href="https://www.inaturalist.org/observations/37636959">https://www.inaturalist.org/observations/37636959</a>   |
| 2801 | <i>Spilopelia chinensis</i> | Eastern Spotted Dove | 2020/1/16  | 1 | 0 | 22.31365663 | 114.26606260 | <a href="https://www.inaturalist.org/observations/37632663">https://www.inaturalist.org/observations/37632663</a>   |
| 2802 | <i>Spilopelia chinensis</i> | Eastern Spotted Dove | 2022/2/10  | 1 | 0 | 22.31367634 | 114.04403410 | <a href="https://www.inaturalist.org/observations/106528094">https://www.inaturalist.org/observations/106528094</a> |
| 2803 | <i>Spilopelia chinensis</i> | Eastern Spotted Dove | 2020/1/16  | 2 | 0 | 22.31367684 | 114.26478530 | <a href="https://www.inaturalist.org/observations/37639621">https://www.inaturalist.org/observations/37639621</a>   |
| 2804 | <i>Spilopelia chinensis</i> | Eastern Spotted Dove | 2019/4/28  | 1 | 0 | 22.31369200 | 114.18627030 | <a href="https://www.inaturalist.org/observations/23568964">https://www.inaturalist.org/observations/23568964</a>   |
| 2805 | <i>Spilopelia chinensis</i> | Eastern Spotted Dove | 2021/12/4  | 1 | 0 | 22.31371640 | 114.26165860 | <a href="https://www.inaturalist.org/observations/102456224">https://www.inaturalist.org/observations/102456224</a> |

|      |                             |                      |            |   |   |             |              |                                                                                                                     |
|------|-----------------------------|----------------------|------------|---|---|-------------|--------------|---------------------------------------------------------------------------------------------------------------------|
| 2806 | <i>Spilopelia chinensis</i> | Eastern Spotted Dove | 2022/9/27  | 2 | 0 | 22.31378287 | 114.26161750 | <a href="https://www.inaturalist.org/observations/136868201">https://www.inaturalist.org/observations/136868201</a> |
| 2807 | <i>Spilopelia chinensis</i> | Eastern Spotted Dove | 2019/1/7   | 3 | 0 | 22.31388855 | 114.26499940 | <a href="https://www.inaturalist.org/observations/19479257">https://www.inaturalist.org/observations/19479257</a>   |
| 2808 | <i>Spilopelia chinensis</i> | Eastern Spotted Dove | 2020/5/23  | 1 | 0 | 22.31388863 | 114.26607490 | <a href="https://www.inaturalist.org/observations/46905844">https://www.inaturalist.org/observations/46905844</a>   |
| 2809 | <i>Spilopelia chinensis</i> | Eastern Spotted Dove | 2022/9/8   | 1 | 0 | 22.31389860 | 114.26213640 | <a href="https://www.inaturalist.org/observations/134148934">https://www.inaturalist.org/observations/134148934</a> |
| 2810 | <i>Spilopelia chinensis</i> | Eastern Spotted Dove | 2021/7/31  | 2 | 0 | 22.31395439 | 114.26114720 | <a href="https://www.inaturalist.org/observations/89284078">https://www.inaturalist.org/observations/89284078</a>   |
| 2811 | <i>Spilopelia chinensis</i> | Eastern Spotted Dove | 2021/5/3   | 2 | 0 | 22.31396167 | 114.26065000 | <a href="https://www.inaturalist.org/observations/76794308">https://www.inaturalist.org/observations/76794308</a>   |
| 2812 | <i>Spilopelia chinensis</i> | Eastern Spotted Dove | 2020/3/25  | 1 | 0 | 22.31399000 | 114.26074170 | <a href="https://www.inaturalist.org/observations/40859650">https://www.inaturalist.org/observations/40859650</a>   |
| 2813 | <i>Spilopelia chinensis</i> | Eastern Spotted Dove | 2020/8/14  | 2 | 0 | 22.31427906 | 114.16274900 | <a href="https://www.inaturalist.org/observations/56391744">https://www.inaturalist.org/observations/56391744</a>   |
| 2814 | <i>Spilopelia chinensis</i> | Eastern Spotted Dove | 2019/9/6   | 1 | 0 | 22.31455170 | 114.26509090 | <a href="https://www.inaturalist.org/observations/32194291">https://www.inaturalist.org/observations/32194291</a>   |
| 2815 | <i>Spilopelia chinensis</i> | Eastern Spotted Dove | 2022/9/15  | 1 | 0 | 22.31462199 | 114.25978050 | <a href="https://www.inaturalist.org/observations/135257981">https://www.inaturalist.org/observations/135257981</a> |
| 2816 | <i>Spilopelia chinensis</i> | Eastern Spotted Dove | 2019/10/1  | 1 | 0 | 22.31469631 | 114.26632810 | <a href="https://www.inaturalist.org/observations/33691495">https://www.inaturalist.org/observations/33691495</a>   |
| 2817 | <i>Spilopelia chinensis</i> | Eastern Spotted Dove | 2021/8/29  | 2 | 0 | 22.31470385 | 114.25972290 | <a href="https://www.inaturalist.org/observations/93030687">https://www.inaturalist.org/observations/93030687</a>   |
| 2818 | <i>Spilopelia chinensis</i> | Eastern Spotted Dove | 2018/11/5  | 4 | 0 | 22.31472206 | 114.26472470 | <a href="https://www.inaturalist.org/observations/18183700">https://www.inaturalist.org/observations/18183700</a>   |
| 2819 | <i>Spilopelia chinensis</i> | Eastern Spotted Dove | 2021/5/15  | 2 | 0 | 22.31484700 | 114.26257900 | <a href="https://www.inaturalist.org/observations/78967888">https://www.inaturalist.org/observations/78967888</a>   |
| 2820 | <i>Spilopelia chinensis</i> | Eastern Spotted Dove | 2020/10/3  | 1 | 0 | 22.31487825 | 114.19249280 | <a href="https://www.inaturalist.org/observations/61564384">https://www.inaturalist.org/observations/61564384</a>   |
| 2821 | <i>Spilopelia chinensis</i> | Eastern Spotted Dove | 2021/1/14  | 1 | 0 | 22.31487844 | 114.26627350 | <a href="https://www.inaturalist.org/observations/68029053">https://www.inaturalist.org/observations/68029053</a>   |
| 2822 | <i>Spilopelia chinensis</i> | Eastern Spotted Dove | 2020/11/12 | 1 | 0 | 22.31504167 | 114.23375830 | <a href="https://www.inaturalist.org/observations/64717849">https://www.inaturalist.org/observations/64717849</a>   |
| 2823 | <i>Spilopelia chinensis</i> | Eastern Spotted Dove | 2021/9/7   | 2 | 0 | 22.31509734 | 114.27830830 | <a href="https://www.inaturalist.org/observations/94002131">https://www.inaturalist.org/observations/94002131</a>   |
| 2824 | <i>Spilopelia chinensis</i> | Eastern Spotted Dove | 2021/9/18  | 1 | 0 | 22.31513704 | 114.27796490 | <a href="https://www.inaturalist.org/observations/95363440">https://www.inaturalist.org/observations/95363440</a>   |
| 2825 | <i>Spilopelia chinensis</i> | Eastern Spotted Dove | 2021/5/11  | 3 | 0 | 22.31513704 | 114.27817950 | <a href="https://www.inaturalist.org/observations/78864561">https://www.inaturalist.org/observations/78864561</a>   |
| 2826 | <i>Spilopelia chinensis</i> | Eastern Spotted Dove | 2021/5/12  | 1 | 0 | 22.31513704 | 114.27822240 | <a href="https://www.inaturalist.org/observations/78993750">https://www.inaturalist.org/observations/78993750</a>   |
| 2827 | <i>Spilopelia chinensis</i> | Eastern Spotted Dove | 2022/5/2   | 2 | 0 | 22.31514668 | 114.21453270 | <a href="https://www.inaturalist.org/observations/114619940">https://www.inaturalist.org/observations/114619940</a> |
| 2828 | <i>Spilopelia chinensis</i> | Eastern Spotted Dove | 2020/11/9  | 1 | 0 | 22.31517674 | 114.27766450 | <a href="https://www.inaturalist.org/observations/65889047">https://www.inaturalist.org/observations/65889047</a>   |

|      |                             |                      |            |   |   |             |              |                                                                                                                     |
|------|-----------------------------|----------------------|------------|---|---|-------------|--------------|---------------------------------------------------------------------------------------------------------------------|
| 2829 | <i>Spilopelia chinensis</i> | Eastern Spotted Dove | 2020/11/9  | 1 | 0 | 22.31517674 | 114.27766450 | <a href="https://www.inaturalist.org/observations/65889437">https://www.inaturalist.org/observations/65889437</a>   |
| 2830 | <i>Spilopelia chinensis</i> | Eastern Spotted Dove | 2020/11/25 | 1 | 0 | 22.31517674 | 114.27766450 | <a href="https://www.inaturalist.org/observations/67459804">https://www.inaturalist.org/observations/67459804</a>   |
| 2831 | <i>Spilopelia chinensis</i> | Eastern Spotted Dove | 2020/11/28 | 1 | 0 | 22.31517674 | 114.27766450 | <a href="https://www.inaturalist.org/observations/67792401">https://www.inaturalist.org/observations/67792401</a>   |
| 2832 | <i>Spilopelia chinensis</i> | Eastern Spotted Dove | 2020/11/28 | 1 | 0 | 22.31517674 | 114.27766450 | <a href="https://www.inaturalist.org/observations/67792665">https://www.inaturalist.org/observations/67792665</a>   |
| 2833 | <i>Spilopelia chinensis</i> | Eastern Spotted Dove | 2020/11/29 | 1 | 0 | 22.31517674 | 114.27766450 | <a href="https://www.inaturalist.org/observations/67851988">https://www.inaturalist.org/observations/67851988</a>   |
| 2834 | <i>Spilopelia chinensis</i> | Eastern Spotted Dove | 2020/11/29 | 1 | 0 | 22.31517674 | 114.27766450 | <a href="https://www.inaturalist.org/observations/67865064">https://www.inaturalist.org/observations/67865064</a>   |
| 2835 | <i>Spilopelia chinensis</i> | Eastern Spotted Dove | 2020/12/9  | 1 | 0 | 22.31517674 | 114.27766450 | <a href="https://www.inaturalist.org/observations/68915569">https://www.inaturalist.org/observations/68915569</a>   |
| 2836 | <i>Spilopelia chinensis</i> | Eastern Spotted Dove | 2020/12/9  | 1 | 0 | 22.31517674 | 114.27766450 | <a href="https://www.inaturalist.org/observations/68915582">https://www.inaturalist.org/observations/68915582</a>   |
| 2837 | <i>Spilopelia chinensis</i> | Eastern Spotted Dove | 2020/12/10 | 1 | 0 | 22.31517674 | 114.27766450 | <a href="https://www.inaturalist.org/observations/69143461">https://www.inaturalist.org/observations/69143461</a>   |
| 2838 | <i>Spilopelia chinensis</i> | Eastern Spotted Dove | 2020/12/12 | 1 | 0 | 22.31517674 | 114.27766450 | <a href="https://www.inaturalist.org/observations/69507892">https://www.inaturalist.org/observations/69507892</a>   |
| 2839 | <i>Spilopelia chinensis</i> | Eastern Spotted Dove | 2020/12/12 | 1 | 0 | 22.31517674 | 114.27766450 | <a href="https://www.inaturalist.org/observations/69507893">https://www.inaturalist.org/observations/69507893</a>   |
| 2840 | <i>Spilopelia chinensis</i> | Eastern Spotted Dove | 2020/12/12 | 0 | 0 | 22.31517674 | 114.27766450 | <a href="https://www.inaturalist.org/observations/69514783">https://www.inaturalist.org/observations/69514783</a>   |
| 2841 | <i>Spilopelia chinensis</i> | Eastern Spotted Dove | 2021/11/3  | 1 | 0 | 22.31517674 | 114.27766450 | <a href="https://www.inaturalist.org/observations/100598779">https://www.inaturalist.org/observations/100598779</a> |
| 2842 | <i>Spilopelia chinensis</i> | Eastern Spotted Dove | 2021/11/18 | 1 | 0 | 22.31517674 | 114.27766450 | <a href="https://www.inaturalist.org/observations/101464453">https://www.inaturalist.org/observations/101464453</a> |
| 2843 | <i>Spilopelia chinensis</i> | Eastern Spotted Dove | 2021/12/2  | 1 | 0 | 22.31517674 | 114.27766450 | <a href="https://www.inaturalist.org/observations/102354875">https://www.inaturalist.org/observations/102354875</a> |
| 2844 | <i>Spilopelia chinensis</i> | Eastern Spotted Dove | 2021/12/8  | 1 | 0 | 22.31517674 | 114.27766450 | <a href="https://www.inaturalist.org/observations/102810765">https://www.inaturalist.org/observations/102810765</a> |
| 2845 | <i>Spilopelia chinensis</i> | Eastern Spotted Dove | 2022/1/12  | 1 | 0 | 22.31517674 | 114.27766450 | <a href="https://www.inaturalist.org/observations/105354674">https://www.inaturalist.org/observations/105354674</a> |
| 2846 | <i>Spilopelia chinensis</i> | Eastern Spotted Dove | 2022/1/29  | 2 | 0 | 22.31517674 | 114.27766450 | <a href="https://www.inaturalist.org/observations/105776363">https://www.inaturalist.org/observations/105776363</a> |
| 2847 | <i>Spilopelia chinensis</i> | Eastern Spotted Dove | 2022/3/31  | 1 | 0 | 22.31517674 | 114.27766450 | <a href="https://www.inaturalist.org/observations/110474884">https://www.inaturalist.org/observations/110474884</a> |
| 2848 | <i>Spilopelia chinensis</i> | Eastern Spotted Dove | 2022/4/30  | 1 | 0 | 22.31517674 | 114.27766450 | <a href="https://www.inaturalist.org/observations/114682438">https://www.inaturalist.org/observations/114682438</a> |
| 2849 | <i>Spilopelia chinensis</i> | Eastern Spotted Dove | 2022/5/22  | 2 | 0 | 22.31517674 | 114.27766450 | <a href="https://www.inaturalist.org/observations/118402321">https://www.inaturalist.org/observations/118402321</a> |
| 2850 | <i>Spilopelia chinensis</i> | Eastern Spotted Dove | 2021/4/24  | 1 | 0 | 22.31517674 | 114.27817950 | <a href="https://www.inaturalist.org/observations/76161105">https://www.inaturalist.org/observations/76161105</a>   |
| 2851 | <i>Spilopelia chinensis</i> | Eastern Spotted Dove | 2021/9/22  | 2 | 0 | 22.31517674 | 114.27817950 | <a href="https://www.inaturalist.org/observations/95858741">https://www.inaturalist.org/observations/95858741</a>   |



|      |                             |                      |            |   |   |             |              |                                                                                                                     |
|------|-----------------------------|----------------------|------------|---|---|-------------|--------------|---------------------------------------------------------------------------------------------------------------------|
| 2852 | <i>Spilopelia chinensis</i> | Eastern Spotted Dove | 2021/9/3   | 1 | 0 | 22.31517674 | 114.27830830 | <a href="https://www.inaturalist.org/observations/94216560">https://www.inaturalist.org/observations/94216560</a>   |
| 2853 | <i>Spilopelia chinensis</i> | Eastern Spotted Dove | 2020/11/12 | 2 | 0 | 22.31519380 | 114.23340000 | <a href="https://www.inaturalist.org/observations/64717797">https://www.inaturalist.org/observations/64717797</a>   |
| 2854 | <i>Spilopelia chinensis</i> | Eastern Spotted Dove | 2017/5/14  | 1 | 0 | 22.31519597 | 114.19176550 | <a href="https://www.inaturalist.org/observations/47389890">https://www.inaturalist.org/observations/47389890</a>   |
| 2855 | <i>Spilopelia chinensis</i> | Eastern Spotted Dove | 2021/8/30  | 1 | 0 | 22.31521645 | 114.27817950 | <a href="https://www.inaturalist.org/observations/93254323">https://www.inaturalist.org/observations/93254323</a>   |
| 2856 | <i>Spilopelia chinensis</i> | Eastern Spotted Dove | 2021/5/9   | 1 | 0 | 22.31521645 | 114.27830830 | <a href="https://www.inaturalist.org/observations/78086386">https://www.inaturalist.org/observations/78086386</a>   |
| 2857 | <i>Spilopelia chinensis</i> | Eastern Spotted Dove | 2020/11/12 | 1 | 0 | 22.31524036 | 114.23295220 | <a href="https://www.inaturalist.org/observations/64717792">https://www.inaturalist.org/observations/64717792</a>   |
| 2858 | <i>Spilopelia chinensis</i> | Eastern Spotted Dove | 2020/11/12 | 1 | 0 | 22.31529277 | 114.23333970 | <a href="https://www.inaturalist.org/observations/64718272">https://www.inaturalist.org/observations/64718272</a>   |
| 2859 | <i>Spilopelia chinensis</i> | Eastern Spotted Dove | 2018/12/1  | 4 | 0 | 22.31530774 | 114.26647420 | <a href="https://www.inaturalist.org/observations/18748434">https://www.inaturalist.org/observations/18748434</a>   |
| 2860 | <i>Spilopelia chinensis</i> | Eastern Spotted Dove | 2018/12/1  | 5 | 0 | 22.31530774 | 114.26647420 | <a href="https://www.inaturalist.org/observations/18748439">https://www.inaturalist.org/observations/18748439</a>   |
| 2861 | <i>Spilopelia chinensis</i> | Eastern Spotted Dove | 2020/11/12 | 2 | 0 | 22.31539026 | 114.23330920 | <a href="https://www.inaturalist.org/observations/64717965">https://www.inaturalist.org/observations/64717965</a>   |
| 2862 | <i>Spilopelia chinensis</i> | Eastern Spotted Dove | 2022/6/10  | 1 | 0 | 22.31541200 | 114.03988100 | <a href="https://www.inaturalist.org/observations/121858287">https://www.inaturalist.org/observations/121858287</a> |
| 2863 | <i>Spilopelia chinensis</i> | Eastern Spotted Dove | 2020/11/12 | 1 | 0 | 22.31542293 | 114.23328020 | <a href="https://www.inaturalist.org/observations/64717801">https://www.inaturalist.org/observations/64717801</a>   |
| 2864 | <i>Spilopelia chinensis</i> | Eastern Spotted Dove | 2018/4/28  | 1 | 0 | 22.31552060 | 114.16378460 | <a href="https://www.inaturalist.org/observations/11585437">https://www.inaturalist.org/observations/11585437</a>   |
| 2865 | <i>Spilopelia chinensis</i> | Eastern Spotted Dove | 2020/11/12 | 1 | 0 | 22.31555484 | 114.23270740 | <a href="https://www.inaturalist.org/observations/64717781">https://www.inaturalist.org/observations/64717781</a>   |
| 2866 | <i>Spilopelia chinensis</i> | Eastern Spotted Dove | 2022/4/29  | 2 | 0 | 22.31574295 | 114.16515670 | <a href="https://www.inaturalist.org/observations/115402224">https://www.inaturalist.org/observations/115402224</a> |
| 2867 | <i>Spilopelia chinensis</i> | Eastern Spotted Dove | 2020/11/12 | 1 | 0 | 22.31576393 | 114.23276050 | <a href="https://www.inaturalist.org/observations/64718063">https://www.inaturalist.org/observations/64718063</a>   |
| 2868 | <i>Spilopelia chinensis</i> | Eastern Spotted Dove | 2020/11/21 | 2 | 0 | 22.31577052 | 114.22749870 | <a href="https://www.inaturalist.org/observations/65307484">https://www.inaturalist.org/observations/65307484</a>   |
| 2869 | <i>Spilopelia chinensis</i> | Eastern Spotted Dove | 2021/11/8  | 2 | 0 | 22.31623515 | 114.22372800 | <a href="https://www.inaturalist.org/observations/100994975">https://www.inaturalist.org/observations/100994975</a> |
| 2870 | <i>Spilopelia chinensis</i> | Eastern Spotted Dove | 2021/10/31 | 2 | 0 | 22.31670500 | 114.16330400 | <a href="https://www.inaturalist.org/observations/99841171">https://www.inaturalist.org/observations/99841171</a>   |
| 2871 | <i>Spilopelia chinensis</i> | Eastern Spotted Dove | 2021/2/13  | 2 | 0 | 22.31688857 | 114.16555960 | <a href="https://www.inaturalist.org/observations/69497916">https://www.inaturalist.org/observations/69497916</a>   |
| 2872 | <i>Spilopelia chinensis</i> | Eastern Spotted Dove | 2021/3/14  | 1 | 0 | 22.31690588 | 114.26335220 | <a href="https://www.inaturalist.org/observations/71201023">https://www.inaturalist.org/observations/71201023</a>   |
| 2873 | <i>Spilopelia chinensis</i> | Eastern Spotted Dove | 2020/8/31  | 1 | 0 | 22.31691243 | 114.18445870 | <a href="https://www.inaturalist.org/observations/58221361">https://www.inaturalist.org/observations/58221361</a>   |
| 2874 | <i>Spilopelia chinensis</i> | Eastern Spotted Dove | 2020/4/24  | 2 | 0 | 22.31693781 | 114.24534980 | <a href="https://www.inaturalist.org/observations/43090956">https://www.inaturalist.org/observations/43090956</a>   |

|      |                             |                      |            |   |   |             |              |                                                                                                                     |
|------|-----------------------------|----------------------|------------|---|---|-------------|--------------|---------------------------------------------------------------------------------------------------------------------|
| 2875 | <i>Spilopelia chinensis</i> | Eastern Spotted Dove | 2022/5/1   | 3 | 0 | 22.31693905 | 114.15722530 | <a href="https://www.inaturalist.org/observations/116278183">https://www.inaturalist.org/observations/116278183</a> |
| 2876 | <i>Spilopelia chinensis</i> | Eastern Spotted Dove | 2017/4/27  | 2 | 0 | 22.31696825 | 114.05562000 | <a href="https://www.inaturalist.org/observations/6020101">https://www.inaturalist.org/observations/6020101</a>     |
| 2877 | <i>Spilopelia chinensis</i> | Eastern Spotted Dove | 2022/5/1   | 2 | 0 | 22.31706123 | 114.15631340 | <a href="https://www.inaturalist.org/observations/116278182">https://www.inaturalist.org/observations/116278182</a> |
| 2878 | <i>Spilopelia chinensis</i> | Eastern Spotted Dove | 2021/3/13  | 1 | 0 | 22.31712499 | 114.15811400 | <a href="https://www.inaturalist.org/observations/71133476">https://www.inaturalist.org/observations/71133476</a>   |
| 2879 | <i>Spilopelia chinensis</i> | Eastern Spotted Dove | 2020/11/21 | 1 | 0 | 22.31724066 | 114.22681420 | <a href="https://www.inaturalist.org/observations/65309163">https://www.inaturalist.org/observations/65309163</a>   |
| 2880 | <i>Spilopelia chinensis</i> | Eastern Spotted Dove | 2022/4/29  | 1 | 0 | 22.31731060 | 114.23486470 | <a href="https://www.inaturalist.org/observations/113781426">https://www.inaturalist.org/observations/113781426</a> |
| 2881 | <i>Spilopelia chinensis</i> | Eastern Spotted Dove | 2021/11/14 | 3 | 0 | 22.31739667 | 114.26313000 | <a href="https://www.inaturalist.org/observations/101067888">https://www.inaturalist.org/observations/101067888</a> |
| 2882 | <i>Spilopelia chinensis</i> | Eastern Spotted Dove | 2020/11/21 | 2 | 0 | 22.31741116 | 114.22650660 | <a href="https://www.inaturalist.org/observations/65307932">https://www.inaturalist.org/observations/65307932</a>   |
| 2883 | <i>Spilopelia chinensis</i> | Eastern Spotted Dove | 2020/11/21 | 2 | 0 | 22.31747480 | 114.22670100 | <a href="https://www.inaturalist.org/observations/65309133">https://www.inaturalist.org/observations/65309133</a>   |
| 2884 | <i>Spilopelia chinensis</i> | Eastern Spotted Dove | 2020/11/21 | 0 | 0 | 22.31748470 | 114.22667500 | <a href="https://www.inaturalist.org/observations/65310953">https://www.inaturalist.org/observations/65310953</a>   |
| 2885 | <i>Spilopelia chinensis</i> | Eastern Spotted Dove | 2022/5/6   | 2 | 0 | 22.31750500 | 114.16224720 | <a href="https://www.inaturalist.org/observations/115691040">https://www.inaturalist.org/observations/115691040</a> |
| 2886 | <i>Spilopelia chinensis</i> | Eastern Spotted Dove | 2020/11/21 | 2 | 0 | 22.31751440 | 114.22665940 | <a href="https://www.inaturalist.org/observations/65309099">https://www.inaturalist.org/observations/65309099</a>   |
| 2887 | <i>Spilopelia chinensis</i> | Eastern Spotted Dove | 2018/4/29  | 4 | 0 | 22.31762960 | 114.22659700 | <a href="https://www.inaturalist.org/observations/11724705">https://www.inaturalist.org/observations/11724705</a>   |
| 2888 | <i>Spilopelia chinensis</i> | Eastern Spotted Dove | 2020/11/21 | 1 | 0 | 22.31762976 | 114.22826850 | <a href="https://www.inaturalist.org/observations/65313488">https://www.inaturalist.org/observations/65313488</a>   |
| 2889 | <i>Spilopelia chinensis</i> | Eastern Spotted Dove | 2021/5/17  | 2 | 0 | 22.31765746 | 114.16551700 | <a href="https://www.inaturalist.org/observations/79120083">https://www.inaturalist.org/observations/79120083</a>   |
| 2890 | <i>Spilopelia chinensis</i> | Eastern Spotted Dove | 2020/10/17 | 1 | 0 | 22.31772686 | 114.16660990 | <a href="https://www.inaturalist.org/observations/112673339">https://www.inaturalist.org/observations/112673339</a> |
| 2891 | <i>Spilopelia chinensis</i> | Eastern Spotted Dove | 2022/9/10  | 1 | 0 | 22.31780730 | 114.18432110 | <a href="https://www.inaturalist.org/observations/134831765">https://www.inaturalist.org/observations/134831765</a> |
| 2892 | <i>Spilopelia chinensis</i> | Eastern Spotted Dove | 2021/5/1   | 1 | 0 | 22.31780781 | 114.18372200 | <a href="https://www.inaturalist.org/observations/76593200">https://www.inaturalist.org/observations/76593200</a>   |
| 2893 | <i>Spilopelia chinensis</i> | Eastern Spotted Dove | 2020/11/7  | 2 | 0 | 22.31782954 | 114.26327920 | <a href="https://www.inaturalist.org/observations/64332373">https://www.inaturalist.org/observations/64332373</a>   |
| 2894 | <i>Spilopelia chinensis</i> | Eastern Spotted Dove | 2020/10/24 | 1 | 0 | 22.31784400 | 114.18404100 | <a href="https://www.inaturalist.org/observations/63633574">https://www.inaturalist.org/observations/63633574</a>   |
| 2895 | <i>Spilopelia chinensis</i> | Eastern Spotted Dove | 2022/4/9   | 2 | 0 | 22.31785000 | 114.23278670 | <a href="https://www.inaturalist.org/observations/110816707">https://www.inaturalist.org/observations/110816707</a> |
| 2896 | <i>Spilopelia chinensis</i> | Eastern Spotted Dove | 2020/11/7  | 2 | 0 | 22.31791920 | 114.26331090 | <a href="https://www.inaturalist.org/observations/64334883">https://www.inaturalist.org/observations/64334883</a>   |
| 2897 | <i>Spilopelia chinensis</i> | Eastern Spotted Dove | 2020/11/7  | 2 | 0 | 22.31794153 | 114.26327860 | <a href="https://www.inaturalist.org/observations/64332345">https://www.inaturalist.org/observations/64332345</a>   |

|      |                             |                      |            |   |   |             |              |                                                                                                                     |
|------|-----------------------------|----------------------|------------|---|---|-------------|--------------|---------------------------------------------------------------------------------------------------------------------|
| 2898 | <i>Spilopelia chinensis</i> | Eastern Spotted Dove | 2020/11/7  | 2 | 0 | 22.31796649 | 114.26331330 | <a href="https://www.inaturalist.org/observations/64332438">https://www.inaturalist.org/observations/64332438</a>   |
| 2899 | <i>Spilopelia chinensis</i> | Eastern Spotted Dove | 2022/5/2   | 3 | 0 | 22.31798000 | 114.26143670 | <a href="https://www.inaturalist.org/observations/114689900">https://www.inaturalist.org/observations/114689900</a> |
| 2900 | <i>Spilopelia chinensis</i> | Eastern Spotted Dove | 2020/11/7  | 0 | 0 | 22.31799510 | 114.26340050 | <a href="https://www.inaturalist.org/observations/64332369">https://www.inaturalist.org/observations/64332369</a>   |
| 2901 | <i>Spilopelia chinensis</i> | Eastern Spotted Dove | 2020/11/7  | 2 | 0 | 22.31807366 | 114.26336550 | <a href="https://www.inaturalist.org/observations/64332404">https://www.inaturalist.org/observations/64332404</a>   |
| 2902 | <i>Spilopelia chinensis</i> | Eastern Spotted Dove | 2020/11/21 | 1 | 0 | 22.31820430 | 114.22748750 | <a href="https://www.inaturalist.org/observations/65309394">https://www.inaturalist.org/observations/65309394</a>   |
| 2903 | <i>Spilopelia chinensis</i> | Eastern Spotted Dove | 2018/4/28  | 3 | 0 | 22.31823000 | 114.18336330 | <a href="https://www.inaturalist.org/observations/11577496">https://www.inaturalist.org/observations/11577496</a>   |
| 2904 | <i>Spilopelia chinensis</i> | Eastern Spotted Dove | 2021/4/10  | 1 | 0 | 22.31827485 | 114.18466730 | <a href="https://www.inaturalist.org/observations/73596441">https://www.inaturalist.org/observations/73596441</a>   |
| 2905 | <i>Spilopelia chinensis</i> | Eastern Spotted Dove | 2022/7/30  | 3 | 0 | 22.31830601 | 87.86356855  | <a href="https://www.inaturalist.org/observations/133232907">https://www.inaturalist.org/observations/133232907</a> |
| 2906 | <i>Spilopelia chinensis</i> | Eastern Spotted Dove | 2022/4/30  | 1 | 0 | 22.31838138 | 114.18419730 | <a href="https://www.inaturalist.org/observations/114192349">https://www.inaturalist.org/observations/114192349</a> |
| 2907 | <i>Spilopelia chinensis</i> | Eastern Spotted Dove | 2021/4/7   | 2 | 0 | 22.31840330 | 114.18395360 | <a href="https://www.inaturalist.org/observations/73189981">https://www.inaturalist.org/observations/73189981</a>   |
| 2908 | <i>Spilopelia chinensis</i> | Eastern Spotted Dove | 2022/3/26  | 2 | 0 | 22.31853087 | 114.17553370 | <a href="https://www.inaturalist.org/observations/109520027">https://www.inaturalist.org/observations/109520027</a> |
| 2909 | <i>Spilopelia chinensis</i> | Eastern Spotted Dove | 2020/11/14 | 2 | 0 | 22.31856350 | 114.26375530 | <a href="https://www.inaturalist.org/observations/64830263">https://www.inaturalist.org/observations/64830263</a>   |
| 2910 | <i>Spilopelia chinensis</i> | Eastern Spotted Dove | 2018/11/9  | 5 | 0 | 22.31858530 | 114.26794610 | <a href="https://www.inaturalist.org/observations/18279804">https://www.inaturalist.org/observations/18279804</a>   |
| 2911 | <i>Spilopelia chinensis</i> | Eastern Spotted Dove | 2020/11/21 | 2 | 0 | 22.31858980 | 114.22859690 | <a href="https://www.inaturalist.org/observations/65312108">https://www.inaturalist.org/observations/65312108</a>   |
| 2912 | <i>Spilopelia chinensis</i> | Eastern Spotted Dove | 2022/4/9   | 2 | 0 | 22.31862826 | 114.23489670 | <a href="https://www.inaturalist.org/observations/110814683">https://www.inaturalist.org/observations/110814683</a> |
| 2913 | <i>Spilopelia chinensis</i> | Eastern Spotted Dove | 2021/9/11  | 3 | 0 | 22.31866921 | 114.18378240 | <a href="https://www.inaturalist.org/observations/94699384">https://www.inaturalist.org/observations/94699384</a>   |
| 2914 | <i>Spilopelia chinensis</i> | Eastern Spotted Dove | 2021/10/4  | 2 | 0 | 22.31868600 | 114.18504800 | <a href="https://www.inaturalist.org/observations/97128579">https://www.inaturalist.org/observations/97128579</a>   |
| 2915 | <i>Spilopelia chinensis</i> | Eastern Spotted Dove | 2020/11/21 | 2 | 0 | 22.31873066 | 114.22866490 | <a href="https://www.inaturalist.org/observations/65307087">https://www.inaturalist.org/observations/65307087</a>   |
| 2916 | <i>Spilopelia chinensis</i> | Eastern Spotted Dove | 2021/11/19 | 1 | 0 | 22.31874395 | 114.17960570 | <a href="https://www.inaturalist.org/observations/101582240">https://www.inaturalist.org/observations/101582240</a> |
| 2917 | <i>Spilopelia chinensis</i> | Eastern Spotted Dove | 2021/11/19 | 3 | 0 | 22.31874395 | 114.17960570 | <a href="https://www.inaturalist.org/observations/101582255">https://www.inaturalist.org/observations/101582255</a> |
| 2918 | <i>Spilopelia chinensis</i> | Eastern Spotted Dove | 2021/11/19 | 1 | 0 | 22.31874395 | 114.17960570 | <a href="https://www.inaturalist.org/observations/101582350">https://www.inaturalist.org/observations/101582350</a> |
| 2919 | <i>Spilopelia chinensis</i> | Eastern Spotted Dove | 2018/11/8  | 5 | 0 | 22.31889469 | 114.26826100 | <a href="https://www.inaturalist.org/observations/18253378">https://www.inaturalist.org/observations/18253378</a>   |
| 2920 | <i>Spilopelia chinensis</i> | Eastern Spotted Dove | 2021/5/1   | 1 | 0 | 22.31893505 | 114.26082710 | <a href="https://www.inaturalist.org/observations/76066778">https://www.inaturalist.org/observations/76066778</a>   |

|      |                             |                      |            |   |   |             |              |                                                                                                                     |
|------|-----------------------------|----------------------|------------|---|---|-------------|--------------|---------------------------------------------------------------------------------------------------------------------|
| 2921 | <i>Spilopelia chinensis</i> | Eastern Spotted Dove | 2021/4/5   | 1 | 0 | 22.31897044 | 114.18355070 | <a href="https://www.inaturalist.org/observations/72986629">https://www.inaturalist.org/observations/72986629</a>   |
| 2922 | <i>Spilopelia chinensis</i> | Eastern Spotted Dove | 2021/3/18  | 1 | 0 | 22.31919151 | 114.19349380 | <a href="https://www.inaturalist.org/observations/71484029">https://www.inaturalist.org/observations/71484029</a>   |
| 2923 | <i>Spilopelia chinensis</i> | Eastern Spotted Dove | 2018/4/30  | 5 | 0 | 22.31920110 | 114.16961210 | <a href="https://www.inaturalist.org/observations/11875472">https://www.inaturalist.org/observations/11875472</a>   |
| 2924 | <i>Spilopelia chinensis</i> | Eastern Spotted Dove | 2019/4/28  | 2 | 0 | 22.31930390 | 114.16936110 | <a href="https://www.inaturalist.org/observations/24281010">https://www.inaturalist.org/observations/24281010</a>   |
| 2925 | <i>Spilopelia chinensis</i> | Eastern Spotted Dove | 2019/7/12  | 4 | 0 | 22.31930390 | 114.16936110 | <a href="https://www.inaturalist.org/observations/31176321">https://www.inaturalist.org/observations/31176321</a>   |
| 2926 | <i>Spilopelia chinensis</i> | Eastern Spotted Dove | 2019/12/22 | 0 | 0 | 22.31930390 | 114.16936110 | <a href="https://www.inaturalist.org/observations/37749197">https://www.inaturalist.org/observations/37749197</a>   |
| 2927 | <i>Spilopelia chinensis</i> | Eastern Spotted Dove | 2021/3/14  | 2 | 0 | 22.31930390 | 114.16936110 | <a href="https://www.inaturalist.org/observations/71196158">https://www.inaturalist.org/observations/71196158</a>   |
| 2928 | <i>Spilopelia chinensis</i> | Eastern Spotted Dove | 2022/5/2   | 3 | 0 | 22.31930390 | 114.16936110 | <a href="https://www.inaturalist.org/observations/114638508">https://www.inaturalist.org/observations/114638508</a> |
| 2929 | <i>Spilopelia chinensis</i> | Eastern Spotted Dove | 2019/4/27  | 2 | 0 | 22.31930400 | 114.16936100 | <a href="https://www.inaturalist.org/observations/23355350">https://www.inaturalist.org/observations/23355350</a>   |
| 2930 | <i>Spilopelia chinensis</i> | Eastern Spotted Dove | 2018/11/9  | 2 | 0 | 22.31940833 | 114.26762500 | <a href="https://www.inaturalist.org/observations/18279280">https://www.inaturalist.org/observations/18279280</a>   |
| 2931 | <i>Spilopelia chinensis</i> | Eastern Spotted Dove | 2018/11/9  | 4 | 0 | 22.31942981 | 114.26763200 | <a href="https://www.inaturalist.org/observations/18279656">https://www.inaturalist.org/observations/18279656</a>   |
| 2932 | <i>Spilopelia chinensis</i> | Eastern Spotted Dove | 2021/5/6   | 2 | 0 | 22.31958678 | 114.15522090 | <a href="https://www.inaturalist.org/observations/77582840">https://www.inaturalist.org/observations/77582840</a>   |
| 2933 | <i>Spilopelia chinensis</i> | Eastern Spotted Dove | 2022/8/17  | 1 | 0 | 22.31969569 | 114.21574000 | <a href="https://www.inaturalist.org/observations/136782911">https://www.inaturalist.org/observations/136782911</a> |
| 2934 | <i>Spilopelia chinensis</i> | Eastern Spotted Dove | 2020/12/1  | 1 | 0 | 22.31974035 | 114.24491350 | <a href="https://www.inaturalist.org/observations/65937947">https://www.inaturalist.org/observations/65937947</a>   |
| 2935 | <i>Spilopelia chinensis</i> | Eastern Spotted Dove | 2021/3/5   | 1 | 0 | 22.31976983 | 114.25997390 | <a href="https://www.inaturalist.org/observations/70638119">https://www.inaturalist.org/observations/70638119</a>   |
| 2936 | <i>Spilopelia chinensis</i> | Eastern Spotted Dove | 2020/12/1  | 2 | 0 | 22.31977207 | 114.24494900 | <a href="https://www.inaturalist.org/observations/65932354">https://www.inaturalist.org/observations/65932354</a>   |
| 2937 | <i>Spilopelia chinensis</i> | Eastern Spotted Dove | 2022/9/28  | 2 | 0 | 22.31988533 | 114.16936100 | <a href="https://www.inaturalist.org/observations/136757716">https://www.inaturalist.org/observations/136757716</a> |
| 2938 | <i>Spilopelia chinensis</i> | Eastern Spotted Dove | 2018/11/9  | 5 | 0 | 22.32018000 | 114.26676170 | <a href="https://www.inaturalist.org/observations/18279845">https://www.inaturalist.org/observations/18279845</a>   |
| 2939 | <i>Spilopelia chinensis</i> | Eastern Spotted Dove | 2021/7/20  | 3 | 0 | 22.32047339 | 114.22644120 | <a href="https://www.inaturalist.org/observations/97638749">https://www.inaturalist.org/observations/97638749</a>   |
| 2940 | <i>Spilopelia chinensis</i> | Eastern Spotted Dove | 2022/6/1   | 1 | 0 | 22.32060400 | 114.17720800 | <a href="https://www.inaturalist.org/observations/119704767">https://www.inaturalist.org/observations/119704767</a> |
| 2941 | <i>Spilopelia chinensis</i> | Eastern Spotted Dove | 2019/4/28  | 2 | 0 | 22.32060791 | 114.17695570 | <a href="https://www.inaturalist.org/observations/23589648">https://www.inaturalist.org/observations/23589648</a>   |
| 2942 | <i>Spilopelia chinensis</i> | Eastern Spotted Dove | 2021/5/3   | 2 | 0 | 22.32081087 | 114.21787020 | <a href="https://www.inaturalist.org/observations/76900143">https://www.inaturalist.org/observations/76900143</a>   |
| 2943 | <i>Spilopelia chinensis</i> | Eastern Spotted Dove | 2018/4/29  | 5 | 0 | 22.32097555 | 114.18796180 | <a href="https://www.inaturalist.org/observations/11712585">https://www.inaturalist.org/observations/11712585</a>   |

|      |                             |                      |            |   |   |             |              |                                                                                                                     |
|------|-----------------------------|----------------------|------------|---|---|-------------|--------------|---------------------------------------------------------------------------------------------------------------------|
| 2944 | <i>Spilopelia chinensis</i> | Eastern Spotted Dove | 2022/8/11  | 1 | 0 | 22.32101120 | 114.15679180 | <a href="https://www.inaturalist.org/observations/132089500">https://www.inaturalist.org/observations/132089500</a> |
| 2945 | <i>Spilopelia chinensis</i> | Eastern Spotted Dove | 2022/4/30  | 1 | 0 | 22.32141389 | 114.16228610 | <a href="https://www.inaturalist.org/observations/113734134">https://www.inaturalist.org/observations/113734134</a> |
| 2946 | <i>Spilopelia chinensis</i> | Eastern Spotted Dove | 2021/6/12  | 3 | 0 | 22.32164500 | 114.19077400 | <a href="https://www.inaturalist.org/observations/82634191">https://www.inaturalist.org/observations/82634191</a>   |
| 2947 | <i>Spilopelia chinensis</i> | Eastern Spotted Dove | 2021/9/13  | 1 | 0 | 22.32179088 | 114.22246960 | <a href="https://www.inaturalist.org/observations/94666327">https://www.inaturalist.org/observations/94666327</a>   |
| 2948 | <i>Spilopelia chinensis</i> | Eastern Spotted Dove | 2021/9/13  | 1 | 0 | 22.32179088 | 114.22246960 | <a href="https://www.inaturalist.org/observations/94666334">https://www.inaturalist.org/observations/94666334</a>   |
| 2949 | <i>Spilopelia chinensis</i> | Eastern Spotted Dove | 2020/11/20 | 1 | 0 | 22.32185917 | 114.18243320 | <a href="https://www.inaturalist.org/observations/65247449">https://www.inaturalist.org/observations/65247449</a>   |
| 2950 | <i>Spilopelia chinensis</i> | Eastern Spotted Dove | 2019/11/8  | 1 | 0 | 22.32209841 | 114.18182230 | <a href="https://www.inaturalist.org/observations/35429756">https://www.inaturalist.org/observations/35429756</a>   |
| 2951 | <i>Spilopelia chinensis</i> | Eastern Spotted Dove | 2019/4/23  | 2 | 0 | 22.32255075 | 114.15948750 | <a href="https://www.inaturalist.org/observations/22925372">https://www.inaturalist.org/observations/22925372</a>   |
| 2952 | <i>Spilopelia chinensis</i> | Eastern Spotted Dove | 2021/11/11 | 1 | 0 | 22.32256227 | 114.21659530 | <a href="https://www.inaturalist.org/observations/100816382">https://www.inaturalist.org/observations/100816382</a> |
| 2953 | <i>Spilopelia chinensis</i> | Eastern Spotted Dove | 2022/5/13  | 2 | 0 | 22.32301571 | 114.26347460 | <a href="https://www.inaturalist.org/observations/116796963">https://www.inaturalist.org/observations/116796963</a> |
| 2954 | <i>Spilopelia chinensis</i> | Eastern Spotted Dove | 2020/4/27  | 1 | 0 | 22.32303433 | 114.20998010 | <a href="https://www.inaturalist.org/observations/43849754">https://www.inaturalist.org/observations/43849754</a>   |
| 2955 | <i>Spilopelia chinensis</i> | Eastern Spotted Dove | 2020/11/30 | 0 | 0 | 22.32312293 | 114.19091290 | <a href="https://www.inaturalist.org/observations/65865657">https://www.inaturalist.org/observations/65865657</a>   |
| 2956 | <i>Spilopelia chinensis</i> | Eastern Spotted Dove | 2020/11/30 | 0 | 0 | 22.32313350 | 114.19079060 | <a href="https://www.inaturalist.org/observations/65865233">https://www.inaturalist.org/observations/65865233</a>   |
| 2957 | <i>Spilopelia chinensis</i> | Eastern Spotted Dove | 2020/11/30 | 0 | 0 | 22.32314687 | 114.19074530 | <a href="https://www.inaturalist.org/observations/65865051">https://www.inaturalist.org/observations/65865051</a>   |
| 2958 | <i>Spilopelia chinensis</i> | Eastern Spotted Dove | 2020/11/30 | 1 | 0 | 22.32320240 | 114.19067310 | <a href="https://www.inaturalist.org/observations/65880322">https://www.inaturalist.org/observations/65880322</a>   |
| 2959 | <i>Spilopelia chinensis</i> | Eastern Spotted Dove | 2020/11/30 | 1 | 0 | 22.32326890 | 114.19070800 | <a href="https://www.inaturalist.org/observations/65880401">https://www.inaturalist.org/observations/65880401</a>   |
| 2960 | <i>Spilopelia chinensis</i> | Eastern Spotted Dove | 2020/11/27 | 1 | 0 | 22.32329541 | 114.18757750 | <a href="https://www.inaturalist.org/observations/65683729">https://www.inaturalist.org/observations/65683729</a>   |
| 2961 | <i>Spilopelia chinensis</i> | Eastern Spotted Dove | 2020/11/24 | 1 | 0 | 22.32331447 | 114.18714200 | <a href="https://www.inaturalist.org/observations/65519481">https://www.inaturalist.org/observations/65519481</a>   |
| 2962 | <i>Spilopelia chinensis</i> | Eastern Spotted Dove | 2020/11/30 | 0 | 0 | 22.32333924 | 114.19056140 | <a href="https://www.inaturalist.org/observations/65864189">https://www.inaturalist.org/observations/65864189</a>   |
| 2963 | <i>Spilopelia chinensis</i> | Eastern Spotted Dove | 2021/1/13  | 1 | 0 | 22.32345550 | 114.15569410 | <a href="https://www.inaturalist.org/observations/67981748">https://www.inaturalist.org/observations/67981748</a>   |
| 2964 | <i>Spilopelia chinensis</i> | Eastern Spotted Dove | 2014/11/14 | 3 | 0 | 22.32348000 | 114.21307300 | <a href="http://www.inaturalist.org/observations/1072315">http://www.inaturalist.org/observations/1072315</a>       |
| 2965 | <i>Spilopelia chinensis</i> | Eastern Spotted Dove | 2022/7/15  | 1 | 0 | 22.32348527 | 114.21839840 | <a href="https://www.inaturalist.org/observations/127194350">https://www.inaturalist.org/observations/127194350</a> |
| 2966 | <i>Spilopelia chinensis</i> | Eastern Spotted Dove | 2020/11/27 | 1 | 0 | 22.32354940 | 114.18756630 | <a href="https://www.inaturalist.org/observations/65683842">https://www.inaturalist.org/observations/65683842</a>   |

|      |                             |                      |            |   |   |             |              |                                                                                                                     |
|------|-----------------------------|----------------------|------------|---|---|-------------|--------------|---------------------------------------------------------------------------------------------------------------------|
| 2967 | <i>Spilopelia chinensis</i> | Eastern Spotted Dove | 2021/3/6   | 1 | 0 | 22.32361142 | 114.15740970 | <a href="https://www.inaturalist.org/observations/70798329">https://www.inaturalist.org/observations/70798329</a>   |
| 2968 | <i>Spilopelia chinensis</i> | Eastern Spotted Dove | 2020/11/26 | 1 | 0 | 22.32370080 | 114.18781840 | <a href="https://www.inaturalist.org/observations/65609433">https://www.inaturalist.org/observations/65609433</a>   |
| 2969 | <i>Spilopelia chinensis</i> | Eastern Spotted Dove | 2020/11/13 | 2 | 0 | 22.32373856 | 114.18730990 | <a href="https://www.inaturalist.org/observations/64769687">https://www.inaturalist.org/observations/64769687</a>   |
| 2970 | <i>Spilopelia chinensis</i> | Eastern Spotted Dove | 2020/11/30 | 0 | 0 | 22.32374005 | 114.18990570 | <a href="https://www.inaturalist.org/observations/65863116">https://www.inaturalist.org/observations/65863116</a>   |
| 2971 | <i>Spilopelia chinensis</i> | Eastern Spotted Dove | 2020/11/13 | 1 | 0 | 22.32378833 | 114.18738830 | <a href="https://www.inaturalist.org/observations/64769894">https://www.inaturalist.org/observations/64769894</a>   |
| 2972 | <i>Spilopelia chinensis</i> | Eastern Spotted Dove | 2020/11/24 | 0 | 0 | 22.32382665 | 114.18734560 | <a href="https://www.inaturalist.org/observations/65518352">https://www.inaturalist.org/observations/65518352</a>   |
| 2973 | <i>Spilopelia chinensis</i> | Eastern Spotted Dove | 2020/11/13 | 1 | 0 | 22.32383846 | 114.18749750 | <a href="https://www.inaturalist.org/observations/64769588">https://www.inaturalist.org/observations/64769588</a>   |
| 2974 | <i>Spilopelia chinensis</i> | Eastern Spotted Dove | 2020/11/30 | 1 | 0 | 22.32390940 | 114.18983150 | <a href="https://www.inaturalist.org/observations/65878807">https://www.inaturalist.org/observations/65878807</a>   |
| 2975 | <i>Spilopelia chinensis</i> | Eastern Spotted Dove | 2017/12/20 | 3 | 0 | 22.32393018 | 114.22395230 | <a href="https://www.inaturalist.org/observations/9216510">https://www.inaturalist.org/observations/9216510</a>     |
| 2976 | <i>Spilopelia chinensis</i> | Eastern Spotted Dove | 2022/6/21  | 1 | 0 | 22.32395900 | 114.21801700 | <a href="https://www.inaturalist.org/observations/122915358">https://www.inaturalist.org/observations/122915358</a> |
| 2977 | <i>Spilopelia chinensis</i> | Eastern Spotted Dove | 2020/11/24 | 1 | 0 | 22.32398000 | 114.18796170 | <a href="https://www.inaturalist.org/observations/65513848">https://www.inaturalist.org/observations/65513848</a>   |
| 2978 | <i>Spilopelia chinensis</i> | Eastern Spotted Dove | 2020/11/7  | 0 | 0 | 22.32400613 | 114.18752200 | <a href="https://www.inaturalist.org/observations/64334098">https://www.inaturalist.org/observations/64334098</a>   |
| 2979 | <i>Spilopelia chinensis</i> | Eastern Spotted Dove | 2020/11/26 | 1 | 0 | 22.32403357 | 114.18795490 | <a href="https://www.inaturalist.org/observations/65609419">https://www.inaturalist.org/observations/65609419</a>   |
| 2980 | <i>Spilopelia chinensis</i> | Eastern Spotted Dove | 2020/11/10 | 1 | 0 | 22.32404385 | 114.18793020 | <a href="https://www.inaturalist.org/observations/64559031">https://www.inaturalist.org/observations/64559031</a>   |
| 2981 | <i>Spilopelia chinensis</i> | Eastern Spotted Dove | 2020/11/26 | 1 | 0 | 22.32405307 | 114.18797080 | <a href="https://www.inaturalist.org/observations/65609425">https://www.inaturalist.org/observations/65609425</a>   |
| 2982 | <i>Spilopelia chinensis</i> | Eastern Spotted Dove | 2017/1/27  | 4 | 0 | 22.32405700 | 114.21286600 | <a href="https://www.inaturalist.org/observations/5280488">https://www.inaturalist.org/observations/5280488</a>     |
| 2983 | <i>Spilopelia chinensis</i> | Eastern Spotted Dove | 2020/11/10 | 1 | 0 | 22.32408304 | 114.18785830 | <a href="https://www.inaturalist.org/observations/64558981">https://www.inaturalist.org/observations/64558981</a>   |
| 2984 | <i>Spilopelia chinensis</i> | Eastern Spotted Dove | 2020/11/24 | 1 | 0 | 22.32409000 | 114.18767170 | <a href="https://www.inaturalist.org/observations/65498979">https://www.inaturalist.org/observations/65498979</a>   |
| 2985 | <i>Spilopelia chinensis</i> | Eastern Spotted Dove | 2020/11/26 | 2 | 0 | 22.32411900 | 114.18774830 | <a href="https://www.inaturalist.org/observations/65609480">https://www.inaturalist.org/observations/65609480</a>   |
| 2986 | <i>Spilopelia chinensis</i> | Eastern Spotted Dove | 2021/3/6   | 2 | 0 | 22.32412538 | 114.15726710 | <a href="https://www.inaturalist.org/observations/70797234">https://www.inaturalist.org/observations/70797234</a>   |
| 2987 | <i>Spilopelia chinensis</i> | Eastern Spotted Dove | 2020/11/13 | 1 | 0 | 22.32414000 | 114.18758330 | <a href="https://www.inaturalist.org/observations/64768494">https://www.inaturalist.org/observations/64768494</a>   |
| 2988 | <i>Spilopelia chinensis</i> | Eastern Spotted Dove | 2021/3/6   | 3 | 0 | 22.32417056 | 114.15728660 | <a href="https://www.inaturalist.org/observations/71048246">https://www.inaturalist.org/observations/71048246</a>   |
| 2989 | <i>Spilopelia chinensis</i> | Eastern Spotted Dove | 2020/11/26 | 0 | 0 | 22.32425547 | 114.18796530 | <a href="https://www.inaturalist.org/observations/65609528">https://www.inaturalist.org/observations/65609528</a>   |

|      |                             |                      |            |   |   |             |              |                                                                                                                     |
|------|-----------------------------|----------------------|------------|---|---|-------------|--------------|---------------------------------------------------------------------------------------------------------------------|
| 2990 | <i>Spilopelia chinensis</i> | Eastern Spotted Dove | 2021/9/17  | 1 | 0 | 22.32463871 | 114.21252980 | <a href="https://www.inaturalist.org/observations/95132196">https://www.inaturalist.org/observations/95132196</a>   |
| 2991 | <i>Spilopelia chinensis</i> | Eastern Spotted Dove | 2020/11/7  | 0 | 0 | 22.32482386 | 114.18789140 | <a href="https://www.inaturalist.org/observations/64334955">https://www.inaturalist.org/observations/64334955</a>   |
| 2992 | <i>Spilopelia chinensis</i> | Eastern Spotted Dove | 2022/4/30  | 1 | 0 | 22.32498611 | 114.18959170 | <a href="https://www.inaturalist.org/observations/113739679">https://www.inaturalist.org/observations/113739679</a> |
| 2993 | <i>Spilopelia chinensis</i> | Eastern Spotted Dove | 2021/5/1   | 1 | 0 | 22.32520752 | 114.15646790 | <a href="https://www.inaturalist.org/observations/76029912">https://www.inaturalist.org/observations/76029912</a>   |
| 2994 | <i>Spilopelia chinensis</i> | Eastern Spotted Dove | 2021/4/30  | 2 | 0 | 22.32534038 | 114.25773250 | <a href="https://www.inaturalist.org/observations/75752046">https://www.inaturalist.org/observations/75752046</a>   |
| 2995 | <i>Spilopelia chinensis</i> | Eastern Spotted Dove | 2021/4/28  | 2 | 0 | 22.32549167 | 114.18446330 | <a href="https://www.inaturalist.org/observations/75534808">https://www.inaturalist.org/observations/75534808</a>   |
| 2996 | <i>Spilopelia chinensis</i> | Eastern Spotted Dove | 2021/12/1  | 1 | 0 | 22.32558452 | 114.21280230 | <a href="https://www.inaturalist.org/observations/102595412">https://www.inaturalist.org/observations/102595412</a> |
| 2997 | <i>Spilopelia chinensis</i> | Eastern Spotted Dove | 2020/4/27  | 1 | 0 | 22.32579342 | 114.16041440 | <a href="https://www.inaturalist.org/observations/43855350">https://www.inaturalist.org/observations/43855350</a>   |
| 2998 | <i>Spilopelia chinensis</i> | Eastern Spotted Dove | 2020/11/27 | 1 | 0 | 22.32590833 | 114.18675170 | <a href="https://www.inaturalist.org/observations/65662574">https://www.inaturalist.org/observations/65662574</a>   |
| 2999 | <i>Spilopelia chinensis</i> | Eastern Spotted Dove | 2019/4/26  | 1 | 0 | 22.32615305 | 114.20942990 | <a href="https://www.inaturalist.org/observations/23104676">https://www.inaturalist.org/observations/23104676</a>   |
| 3000 | <i>Spilopelia chinensis</i> | Eastern Spotted Dove | 2022/8/3   | 1 | 0 | 22.32617569 | 114.16791530 | <a href="https://www.inaturalist.org/observations/129229092">https://www.inaturalist.org/observations/129229092</a> |
| 3001 | <i>Spilopelia chinensis</i> | Eastern Spotted Dove | 2020/11/12 | 1 | 0 | 22.32620667 | 114.18866000 | <a href="https://www.inaturalist.org/observations/64698042">https://www.inaturalist.org/observations/64698042</a>   |
| 3002 | <i>Spilopelia chinensis</i> | Eastern Spotted Dove | 2021/4/30  | 1 | 0 | 22.32632341 | 114.21112500 | <a href="https://www.inaturalist.org/observations/75756912">https://www.inaturalist.org/observations/75756912</a>   |
| 3003 | <i>Spilopelia chinensis</i> | Eastern Spotted Dove | 2022/4/29  | 1 | 0 | 22.32632341 | 114.21112500 | <a href="https://www.inaturalist.org/observations/113337146">https://www.inaturalist.org/observations/113337146</a> |
| 3004 | <i>Spilopelia chinensis</i> | Eastern Spotted Dove | 2021/3/20  | 1 | 0 | 22.32696297 | 114.21679900 | <a href="https://www.inaturalist.org/observations/71600930">https://www.inaturalist.org/observations/71600930</a>   |
| 3005 | <i>Spilopelia chinensis</i> | Eastern Spotted Dove | 2021/5/2   | 1 | 0 | 22.32847796 | 114.20957570 | <a href="https://www.inaturalist.org/observations/76363967">https://www.inaturalist.org/observations/76363967</a>   |
| 3006 | <i>Spilopelia chinensis</i> | Eastern Spotted Dove | 2021/5/6   | 1 | 0 | 22.32859057 | 114.21028370 | <a href="https://www.inaturalist.org/observations/77578064">https://www.inaturalist.org/observations/77578064</a>   |
| 3007 | <i>Spilopelia chinensis</i> | Eastern Spotted Dove | 2018/11/10 | 3 | 0 | 22.32881312 | 114.16744810 | <a href="https://www.inaturalist.org/observations/18299526">https://www.inaturalist.org/observations/18299526</a>   |
| 3008 | <i>Spilopelia chinensis</i> | Eastern Spotted Dove | 2022/4/30  | 3 | 0 | 22.32889106 | 114.18446250 | <a href="https://www.inaturalist.org/observations/113726812">https://www.inaturalist.org/observations/113726812</a> |
| 3009 | <i>Spilopelia chinensis</i> | Eastern Spotted Dove | 2021/8/21  | 1 | 0 | 22.32998276 | 114.21451570 | <a href="https://www.inaturalist.org/observations/91929345">https://www.inaturalist.org/observations/91929345</a>   |
| 3010 | <i>Spilopelia chinensis</i> | Eastern Spotted Dove | 2018/11/25 | 4 | 0 | 22.33029610 | 114.22083400 | <a href="https://www.inaturalist.org/observations/18619862">https://www.inaturalist.org/observations/18619862</a>   |
| 3011 | <i>Spilopelia chinensis</i> | Eastern Spotted Dove | 2020/12/12 | 1 | 0 | 22.33031300 | 114.22096300 | <a href="https://www.inaturalist.org/observations/66454719">https://www.inaturalist.org/observations/66454719</a>   |
| 3012 | <i>Spilopelia chinensis</i> | Eastern Spotted Dove | 2020/11/19 | 2 | 0 | 22.33076182 | 114.20453910 | <a href="https://www.inaturalist.org/observations/65205377">https://www.inaturalist.org/observations/65205377</a>   |

|      |                             |                      |           |   |   |             |              |                                                                                                                     |
|------|-----------------------------|----------------------|-----------|---|---|-------------|--------------|---------------------------------------------------------------------------------------------------------------------|
| 3013 | <i>Spilopelia chinensis</i> | Eastern Spotted Dove | 2020/6/16 | 1 | 0 | 22.33078350 | 114.18510050 | <a href="https://www.inaturalist.org/observations/50018965">https://www.inaturalist.org/observations/50018965</a>   |
| 3014 | <i>Spilopelia chinensis</i> | Eastern Spotted Dove | 2020/12/8 | 1 | 0 | 22.33080703 | 114.18893650 | <a href="https://www.inaturalist.org/observations/66283994">https://www.inaturalist.org/observations/66283994</a>   |
| 3015 | <i>Spilopelia chinensis</i> | Eastern Spotted Dove | 2020/11/8 | 2 | 0 | 22.33083470 | 114.20391100 | <a href="https://www.inaturalist.org/observations/64432898">https://www.inaturalist.org/observations/64432898</a>   |
| 3016 | <i>Spilopelia chinensis</i> | Eastern Spotted Dove | 2021/3/14 | 1 | 0 | 22.33086667 | 114.18491390 | <a href="https://www.inaturalist.org/observations/71203262">https://www.inaturalist.org/observations/71203262</a>   |
| 3017 | <i>Spilopelia chinensis</i> | Eastern Spotted Dove | 2022/4/29 | 1 | 0 | 22.33103333 | 114.16483330 | <a href="https://www.inaturalist.org/observations/113337197">https://www.inaturalist.org/observations/113337197</a> |
| 3018 | <i>Spilopelia chinensis</i> | Eastern Spotted Dove | 2022/2/2  | 1 | 0 | 22.33107300 | 114.18299190 | <a href="https://www.inaturalist.org/observations/106017804">https://www.inaturalist.org/observations/106017804</a> |
| 3019 | <i>Spilopelia chinensis</i> | Eastern Spotted Dove | 2018/11/6 | 6 | 0 | 22.33117405 | 114.21490750 | <a href="https://www.inaturalist.org/observations/18149455">https://www.inaturalist.org/observations/18149455</a>   |
| 3020 | <i>Spilopelia chinensis</i> | Eastern Spotted Dove | 2018/11/6 | 5 | 0 | 22.33118667 | 114.21494880 | <a href="https://www.inaturalist.org/observations/18149496">https://www.inaturalist.org/observations/18149496</a>   |
| 3021 | <i>Spilopelia chinensis</i> | Eastern Spotted Dove | 2018/11/6 | 5 | 0 | 22.33119773 | 114.21493710 | <a href="https://www.inaturalist.org/observations/18149469">https://www.inaturalist.org/observations/18149469</a>   |
| 3022 | <i>Spilopelia chinensis</i> | Eastern Spotted Dove | 2018/11/5 | 7 | 0 | 22.33121359 | 114.21474160 | <a href="https://www.inaturalist.org/observations/18109693">https://www.inaturalist.org/observations/18109693</a>   |
| 3023 | <i>Spilopelia chinensis</i> | Eastern Spotted Dove | 2018/11/5 | 3 | 0 | 22.33121896 | 114.21456810 | <a href="https://www.inaturalist.org/observations/18109685">https://www.inaturalist.org/observations/18109685</a>   |
| 3024 | <i>Spilopelia chinensis</i> | Eastern Spotted Dove | 2018/11/6 | 4 | 0 | 22.33123013 | 114.21490300 | <a href="https://www.inaturalist.org/observations/18149502">https://www.inaturalist.org/observations/18149502</a>   |
| 3025 | <i>Spilopelia chinensis</i> | Eastern Spotted Dove | 2018/11/5 | 4 | 0 | 22.33125385 | 114.21429580 | <a href="https://www.inaturalist.org/observations/18109681">https://www.inaturalist.org/observations/18109681</a>   |
| 3026 | <i>Spilopelia chinensis</i> | Eastern Spotted Dove | 2020/12/8 | 1 | 0 | 22.33144355 | 114.18884600 | <a href="https://www.inaturalist.org/observations/66283482">https://www.inaturalist.org/observations/66283482</a>   |
| 3027 | <i>Spilopelia chinensis</i> | Eastern Spotted Dove | 2021/5/3  | 1 | 0 | 22.33145330 | 114.22170840 | <a href="https://www.inaturalist.org/observations/76872421">https://www.inaturalist.org/observations/76872421</a>   |
| 3028 | <i>Spilopelia chinensis</i> | Eastern Spotted Dove | 2020/12/8 | 1 | 0 | 22.33154516 | 114.18859630 | <a href="https://www.inaturalist.org/observations/66283508">https://www.inaturalist.org/observations/66283508</a>   |
| 3029 | <i>Spilopelia chinensis</i> | Eastern Spotted Dove | 2022/5/1  | 1 | 0 | 22.33155833 | 114.18883670 | <a href="https://www.inaturalist.org/observations/114607976">https://www.inaturalist.org/observations/114607976</a> |
| 3030 | <i>Spilopelia chinensis</i> | Eastern Spotted Dove | 2013/3/9  | 4 | 0 | 22.33162267 | 114.19036120 | <a href="http://www.inaturalist.org/observations/213543">http://www.inaturalist.org/observations/213543</a>         |
| 3031 | <i>Spilopelia chinensis</i> | Eastern Spotted Dove | 2020/12/8 | 1 | 0 | 22.33162350 | 114.18878950 | <a href="https://www.inaturalist.org/observations/66284202">https://www.inaturalist.org/observations/66284202</a>   |
| 3032 | <i>Spilopelia chinensis</i> | Eastern Spotted Dove | 2018/11/6 | 5 | 0 | 22.33179860 | 114.21469160 | <a href="https://www.inaturalist.org/observations/18149491">https://www.inaturalist.org/observations/18149491</a>   |
| 3033 | <i>Spilopelia chinensis</i> | Eastern Spotted Dove | 2018/11/8 | 1 | 0 | 22.33187424 | 114.21585810 | <a href="https://www.inaturalist.org/observations/18230612">https://www.inaturalist.org/observations/18230612</a>   |
| 3034 | <i>Spilopelia chinensis</i> | Eastern Spotted Dove | 2018/11/5 | 3 | 0 | 22.33188291 | 114.21516240 | <a href="https://www.inaturalist.org/observations/18119799">https://www.inaturalist.org/observations/18119799</a>   |
| 3035 | <i>Spilopelia chinensis</i> | Eastern Spotted Dove | 2019/7/8  | 1 | 0 | 22.33188855 | 114.16118230 | <a href="https://www.inaturalist.org/observations/61702477">https://www.inaturalist.org/observations/61702477</a>   |



|      |                             |                      |            |   |   |             |              |                                                                                                                     |
|------|-----------------------------|----------------------|------------|---|---|-------------|--------------|---------------------------------------------------------------------------------------------------------------------|
| 3036 | <i>Spilopelia chinensis</i> | Eastern Spotted Dove | 2017/12/9  | 4 | 0 | 22.33198900 | 114.24443200 | <a href="https://www.inaturalist.org/observations/9109515">https://www.inaturalist.org/observations/9109515</a>     |
| 3037 | <i>Spilopelia chinensis</i> | Eastern Spotted Dove | 2021/3/14  | 2 | 0 | 22.33198938 | 114.19117960 | <a href="https://www.inaturalist.org/observations/71196140">https://www.inaturalist.org/observations/71196140</a>   |
| 3038 | <i>Spilopelia chinensis</i> | Eastern Spotted Dove | 2020/12/13 | 1 | 0 | 22.33201167 | 114.18968830 | <a href="https://www.inaturalist.org/observations/66523446">https://www.inaturalist.org/observations/66523446</a>   |
| 3039 | <i>Spilopelia chinensis</i> | Eastern Spotted Dove | 2020/12/8  | 2 | 0 | 22.33210575 | 114.19137870 | <a href="https://www.inaturalist.org/observations/66283769">https://www.inaturalist.org/observations/66283769</a>   |
| 3040 | <i>Spilopelia chinensis</i> | Eastern Spotted Dove | 2020/7/1   | 1 | 0 | 22.33212960 | 114.19032850 | <a href="https://www.inaturalist.org/observations/96345054">https://www.inaturalist.org/observations/96345054</a>   |
| 3041 | <i>Spilopelia chinensis</i> | Eastern Spotted Dove | 2022/9/8   | 1 | 0 | 22.33214106 | 114.18301330 | <a href="https://www.inaturalist.org/observations/134145044">https://www.inaturalist.org/observations/134145044</a> |
| 3042 | <i>Spilopelia chinensis</i> | Eastern Spotted Dove | 2018/11/8  | 1 | 0 | 22.33214657 | 114.21556080 | <a href="https://www.inaturalist.org/observations/18228826">https://www.inaturalist.org/observations/18228826</a>   |
| 3043 | <i>Spilopelia chinensis</i> | Eastern Spotted Dove | 2021/5/6   | 2 | 0 | 22.33215890 | 114.15681410 | <a href="https://www.inaturalist.org/observations/77587858">https://www.inaturalist.org/observations/77587858</a>   |
| 3044 | <i>Spilopelia chinensis</i> | Eastern Spotted Dove | 2022/6/26  | 2 | 0 | 22.33216133 | 114.19037730 | <a href="https://www.inaturalist.org/observations/123718481">https://www.inaturalist.org/observations/123718481</a> |
| 3045 | <i>Spilopelia chinensis</i> | Eastern Spotted Dove | 2022/1/27  | 1 | 0 | 22.33218580 | 114.18401890 | <a href="https://www.inaturalist.org/observations/105662243">https://www.inaturalist.org/observations/105662243</a> |
| 3046 | <i>Spilopelia chinensis</i> | Eastern Spotted Dove | 2019/3/7   | 1 | 0 | 22.33223000 | 114.18949170 | <a href="https://www.inaturalist.org/observations/71402107">https://www.inaturalist.org/observations/71402107</a>   |
| 3047 | <i>Spilopelia chinensis</i> | Eastern Spotted Dove | 2020/11/23 | 1 | 0 | 22.33225959 | 114.19105400 | <a href="https://www.inaturalist.org/observations/65463685">https://www.inaturalist.org/observations/65463685</a>   |
| 3048 | <i>Spilopelia chinensis</i> | Eastern Spotted Dove | 2018/11/8  | 2 | 0 | 22.33233304 | 114.21565620 | <a href="https://www.inaturalist.org/observations/18230119">https://www.inaturalist.org/observations/18230119</a>   |
| 3049 | <i>Spilopelia chinensis</i> | Eastern Spotted Dove | 2018/11/8  | 5 | 0 | 22.33233746 | 114.21512670 | <a href="https://www.inaturalist.org/observations/18229498">https://www.inaturalist.org/observations/18229498</a>   |
| 3050 | <i>Spilopelia chinensis</i> | Eastern Spotted Dove | 2018/11/8  | 2 | 0 | 22.33233908 | 114.21563190 | <a href="https://www.inaturalist.org/observations/18230544">https://www.inaturalist.org/observations/18230544</a>   |
| 3051 | <i>Spilopelia chinensis</i> | Eastern Spotted Dove | 2018/11/6  | 3 | 0 | 22.33237304 | 114.21498790 | <a href="https://www.inaturalist.org/observations/18155293">https://www.inaturalist.org/observations/18155293</a>   |
| 3052 | <i>Spilopelia chinensis</i> | Eastern Spotted Dove | 2018/11/6  | 4 | 0 | 22.33239739 | 114.21544580 | <a href="https://www.inaturalist.org/observations/18148595">https://www.inaturalist.org/observations/18148595</a>   |
| 3053 | <i>Spilopelia chinensis</i> | Eastern Spotted Dove | 2018/11/5  | 2 | 0 | 22.33241918 | 114.21631660 | <a href="https://www.inaturalist.org/observations/18119460">https://www.inaturalist.org/observations/18119460</a>   |
| 3054 | <i>Spilopelia chinensis</i> | Eastern Spotted Dove | 2018/11/6  | 2 | 0 | 22.33243797 | 114.21501100 | <a href="https://www.inaturalist.org/observations/18155066">https://www.inaturalist.org/observations/18155066</a>   |
| 3055 | <i>Spilopelia chinensis</i> | Eastern Spotted Dove | 2021/8/26  | 3 | 0 | 22.33246310 | 114.26654110 | <a href="https://www.inaturalist.org/observations/92587871">https://www.inaturalist.org/observations/92587871</a>   |
| 3056 | <i>Spilopelia chinensis</i> | Eastern Spotted Dove | 2018/11/6  | 3 | 0 | 22.33247199 | 114.21554350 | <a href="https://www.inaturalist.org/observations/18149774">https://www.inaturalist.org/observations/18149774</a>   |
| 3057 | <i>Spilopelia chinensis</i> | Eastern Spotted Dove | 2018/11/8  | 4 | 0 | 22.33247895 | 114.21510360 | <a href="https://www.inaturalist.org/observations/18229481">https://www.inaturalist.org/observations/18229481</a>   |
| 3058 | <i>Spilopelia chinensis</i> | Eastern Spotted Dove | 2018/11/8  | 2 | 0 | 22.33249473 | 114.21517630 | <a href="https://www.inaturalist.org/observations/18229648">https://www.inaturalist.org/observations/18229648</a>   |

|      |                             |                      |            |   |   |             |              |                                                                                                                     |
|------|-----------------------------|----------------------|------------|---|---|-------------|--------------|---------------------------------------------------------------------------------------------------------------------|
| 3059 | <i>Spilopelia chinensis</i> | Eastern Spotted Dove | 2021/11/26 | 2 | 0 | 22.33250400 | 114.19009900 | <a href="https://www.inaturalist.org/observations/101926411">https://www.inaturalist.org/observations/101926411</a> |
| 3060 | <i>Spilopelia chinensis</i> | Eastern Spotted Dove | 2018/11/6  | 2 | 0 | 22.33250826 | 114.21499210 | <a href="https://www.inaturalist.org/observations/18155290">https://www.inaturalist.org/observations/18155290</a>   |
| 3061 | <i>Spilopelia chinensis</i> | Eastern Spotted Dove | 2018/11/8  | 1 | 0 | 22.33252322 | 114.21542950 | <a href="https://www.inaturalist.org/observations/18229276">https://www.inaturalist.org/observations/18229276</a>   |
| 3062 | <i>Spilopelia chinensis</i> | Eastern Spotted Dove | 2018/11/8  | 2 | 0 | 22.33253470 | 114.21539760 | <a href="https://www.inaturalist.org/observations/18229569">https://www.inaturalist.org/observations/18229569</a>   |
| 3063 | <i>Spilopelia chinensis</i> | Eastern Spotted Dove | 2021/12/21 | 1 | 0 | 22.33257139 | 114.15678330 | <a href="https://www.inaturalist.org/observations/103395848">https://www.inaturalist.org/observations/103395848</a> |
| 3064 | <i>Spilopelia chinensis</i> | Eastern Spotted Dove | 2020/11/3  | 1 | 0 | 22.33264500 | 114.18257170 | <a href="https://www.inaturalist.org/observations/64095049">https://www.inaturalist.org/observations/64095049</a>   |
| 3065 | <i>Spilopelia chinensis</i> | Eastern Spotted Dove | 2020/11/8  | 1 | 0 | 22.33276356 | 114.21245040 | <a href="https://www.inaturalist.org/observations/64421703">https://www.inaturalist.org/observations/64421703</a>   |
| 3066 | <i>Spilopelia chinensis</i> | Eastern Spotted Dove | 2021/9/3   | 2 | 0 | 22.33302791 | 114.21636400 | <a href="https://www.inaturalist.org/observations/93445169">https://www.inaturalist.org/observations/93445169</a>   |
| 3067 | <i>Spilopelia chinensis</i> | Eastern Spotted Dove | 2022/1/3   | 2 | 0 | 22.33310900 | 114.18255900 | <a href="https://www.inaturalist.org/observations/104341175">https://www.inaturalist.org/observations/104341175</a> |
| 3068 | <i>Spilopelia chinensis</i> | Eastern Spotted Dove | 2022/9/23  | 2 | 0 | 22.33338417 | 114.18296050 | <a href="https://www.inaturalist.org/observations/136172698">https://www.inaturalist.org/observations/136172698</a> |
| 3069 | <i>Spilopelia chinensis</i> | Eastern Spotted Dove | 2019/9/27  | 3 | 0 | 22.33345040 | 114.19657010 | <a href="https://www.inaturalist.org/observations/34293208">https://www.inaturalist.org/observations/34293208</a>   |
| 3070 | <i>Spilopelia chinensis</i> | Eastern Spotted Dove | 2022/3/9   | 1 | 0 | 22.33352222 | 114.18759170 | <a href="https://www.inaturalist.org/observations/108229869">https://www.inaturalist.org/observations/108229869</a> |
| 3071 | <i>Spilopelia chinensis</i> | Eastern Spotted Dove | 2021/12/3  | 1 | 0 | 22.33369499 | 114.13948790 | <a href="https://www.inaturalist.org/observations/102399729">https://www.inaturalist.org/observations/102399729</a> |
| 3072 | <i>Spilopelia chinensis</i> | Eastern Spotted Dove | 2020/11/28 | 1 | 0 | 22.33372037 | 114.13970880 | <a href="https://www.inaturalist.org/observations/65739133">https://www.inaturalist.org/observations/65739133</a>   |
| 3073 | <i>Spilopelia chinensis</i> | Eastern Spotted Dove | 2022/7/23  | 2 | 0 | 22.33373252 | 114.14012840 | <a href="https://www.inaturalist.org/observations/127466760">https://www.inaturalist.org/observations/127466760</a> |
| 3074 | <i>Spilopelia chinensis</i> | Eastern Spotted Dove | 2022/7/23  | 1 | 0 | 22.33379748 | 114.13974900 | <a href="https://www.inaturalist.org/observations/127467106">https://www.inaturalist.org/observations/127467106</a> |
| 3075 | <i>Spilopelia chinensis</i> | Eastern Spotted Dove | 2022/7/23  | 2 | 0 | 22.33385832 | 114.14065710 | <a href="https://www.inaturalist.org/observations/127466646">https://www.inaturalist.org/observations/127466646</a> |
| 3076 | <i>Spilopelia chinensis</i> | Eastern Spotted Dove | 2020/11/21 | 2 | 0 | 22.33386238 | 114.14114080 | <a href="https://www.inaturalist.org/observations/65315342">https://www.inaturalist.org/observations/65315342</a>   |
| 3077 | <i>Spilopelia chinensis</i> | Eastern Spotted Dove | 2020/7/13  | 1 | 0 | 22.33399085 | 114.14049700 | <a href="https://www.inaturalist.org/observations/53116966">https://www.inaturalist.org/observations/53116966</a>   |
| 3078 | <i>Spilopelia chinensis</i> | Eastern Spotted Dove | 2017/8/5   | 2 | 0 | 22.33399100 | 114.14049700 | <a href="https://www.inaturalist.org/observations/30588526">https://www.inaturalist.org/observations/30588526</a>   |
| 3079 | <i>Spilopelia chinensis</i> | Eastern Spotted Dove | 2020/8/28  | 1 | 0 | 22.33399100 | 114.14049700 | <a href="https://www.inaturalist.org/observations/57890013">https://www.inaturalist.org/observations/57890013</a>   |
| 3080 | <i>Spilopelia chinensis</i> | Eastern Spotted Dove | 2022/9/29  | 2 | 0 | 22.33404306 | 114.18704340 | <a href="https://www.inaturalist.org/observations/136890993">https://www.inaturalist.org/observations/136890993</a> |
| 3081 | <i>Spilopelia chinensis</i> | Eastern Spotted Dove | 2022/7/23  | 2 | 0 | 22.33405240 | 114.14021910 | <a href="https://www.inaturalist.org/observations/127466724">https://www.inaturalist.org/observations/127466724</a> |

|      |                             |                      |            |   |   |             |              |                                                                                                                     |
|------|-----------------------------|----------------------|------------|---|---|-------------|--------------|---------------------------------------------------------------------------------------------------------------------|
| 3082 | <i>Spilopelia chinensis</i> | Eastern Spotted Dove | 2022/7/21  | 2 | 0 | 22.33411410 | 114.13853760 | <a href="https://www.inaturalist.org/observations/127190567">https://www.inaturalist.org/observations/127190567</a> |
| 3083 | <i>Spilopelia chinensis</i> | Eastern Spotted Dove | 2022/6/24  | 1 | 0 | 22.33413333 | 114.13948830 | <a href="https://www.inaturalist.org/observations/123221101">https://www.inaturalist.org/observations/123221101</a> |
| 3084 | <i>Spilopelia chinensis</i> | Eastern Spotted Dove | 2022/5/2   | 2 | 0 | 22.33413880 | 114.16402330 | <a href="https://www.inaturalist.org/observations/114551065">https://www.inaturalist.org/observations/114551065</a> |
| 3085 | <i>Spilopelia chinensis</i> | Eastern Spotted Dove | 2019/4/17  | 1 | 0 | 22.33418085 | 114.17906740 | <a href="https://www.inaturalist.org/observations/22684522">https://www.inaturalist.org/observations/22684522</a>   |
| 3086 | <i>Spilopelia chinensis</i> | Eastern Spotted Dove | 2020/3/7   | 0 | 0 | 22.33423625 | 114.13977460 | <a href="https://www.inaturalist.org/observations/39688205">https://www.inaturalist.org/observations/39688205</a>   |
| 3087 | <i>Spilopelia chinensis</i> | Eastern Spotted Dove | 2020/11/28 | 1 | 0 | 22.33427406 | 114.13873690 | <a href="https://www.inaturalist.org/observations/65739033">https://www.inaturalist.org/observations/65739033</a>   |
| 3088 | <i>Spilopelia chinensis</i> | Eastern Spotted Dove | 2020/11/28 | 2 | 0 | 22.33434097 | 114.13865690 | <a href="https://www.inaturalist.org/observations/65739046">https://www.inaturalist.org/observations/65739046</a>   |
| 3089 | <i>Spilopelia chinensis</i> | Eastern Spotted Dove | 2022/7/23  | 1 | 0 | 22.33438612 | 114.14060680 | <a href="https://www.inaturalist.org/observations/127466964">https://www.inaturalist.org/observations/127466964</a> |
| 3090 | <i>Spilopelia chinensis</i> | Eastern Spotted Dove | 2019/9/16  | 1 | 0 | 22.33449554 | 114.20740510 | <a href="https://www.inaturalist.org/observations/33646463">https://www.inaturalist.org/observations/33646463</a>   |
| 3091 | <i>Spilopelia chinensis</i> | Eastern Spotted Dove | 2020/3/3   | 1 | 0 | 22.33451320 | 80.61151300  | <a href="https://www.inaturalist.org/observations/40695868">https://www.inaturalist.org/observations/40695868</a>   |
| 3092 | <i>Spilopelia chinensis</i> | Eastern Spotted Dove | 2020/11/28 | 2 | 0 | 22.33452183 | 114.13763950 | <a href="https://www.inaturalist.org/observations/65738883">https://www.inaturalist.org/observations/65738883</a>   |
| 3093 | <i>Spilopelia chinensis</i> | Eastern Spotted Dove | 2009/4/4   | 4 | 0 | 22.33453700 | 114.13901600 | <a href="https://www.inaturalist.org/observations/30157691">https://www.inaturalist.org/observations/30157691</a>   |
| 3094 | <i>Spilopelia chinensis</i> | Eastern Spotted Dove | 2022/5/2   | 2 | 0 | 22.33469135 | 114.17427970 | <a href="https://www.inaturalist.org/observations/114558232">https://www.inaturalist.org/observations/114558232</a> |
| 3095 | <i>Spilopelia chinensis</i> | Eastern Spotted Dove | 2022/5/21  | 2 | 0 | 22.33477000 | 114.14012780 | <a href="https://www.inaturalist.org/observations/118128186">https://www.inaturalist.org/observations/118128186</a> |
| 3096 | <i>Spilopelia chinensis</i> | Eastern Spotted Dove | 2022/5/2   | 2 | 0 | 22.33483439 | 114.16407000 | <a href="https://www.inaturalist.org/observations/114603443">https://www.inaturalist.org/observations/114603443</a> |
| 3097 | <i>Spilopelia chinensis</i> | Eastern Spotted Dove | 2019/4/27  | 2 | 0 | 22.33483507 | 114.16767630 | <a href="https://www.inaturalist.org/observations/23300769">https://www.inaturalist.org/observations/23300769</a>   |
| 3098 | <i>Spilopelia chinensis</i> | Eastern Spotted Dove | 2019/9/16  | 2 | 0 | 22.33485794 | 114.20728300 | <a href="https://www.inaturalist.org/observations/33646177">https://www.inaturalist.org/observations/33646177</a>   |
| 3099 | <i>Spilopelia chinensis</i> | Eastern Spotted Dove | 2022/7/22  | 1 | 0 | 22.33486106 | 114.14158400 | <a href="https://www.inaturalist.org/observations/127334604">https://www.inaturalist.org/observations/127334604</a> |
| 3100 | <i>Spilopelia chinensis</i> | Eastern Spotted Dove | 2020/12/10 | 1 | 0 | 22.33535113 | 114.13709820 | <a href="https://www.inaturalist.org/observations/66364949">https://www.inaturalist.org/observations/66364949</a>   |
| 3101 | <i>Spilopelia chinensis</i> | Eastern Spotted Dove | 2021/3/14  | 2 | 0 | 22.33536774 | 114.18430740 | <a href="https://www.inaturalist.org/observations/71207266">https://www.inaturalist.org/observations/71207266</a>   |
| 3102 | <i>Spilopelia chinensis</i> | Eastern Spotted Dove | 2020/11/28 | 1 | 0 | 22.33542980 | 114.13764220 | <a href="https://www.inaturalist.org/observations/65738454">https://www.inaturalist.org/observations/65738454</a>   |
| 3103 | <i>Spilopelia chinensis</i> | Eastern Spotted Dove | 2018/11/6  | 3 | 0 | 22.33546487 | 114.17751650 | <a href="https://www.inaturalist.org/observations/18161943">https://www.inaturalist.org/observations/18161943</a>   |
| 3104 | <i>Spilopelia chinensis</i> | Eastern Spotted Dove | 2019/4/26  | 4 | 0 | 22.33558333 | 114.21910720 | <a href="https://www.inaturalist.org/observations/23109216">https://www.inaturalist.org/observations/23109216</a>   |

|      |                             |                      |            |   |   |             |              |                                                                                                                     |
|------|-----------------------------|----------------------|------------|---|---|-------------|--------------|---------------------------------------------------------------------------------------------------------------------|
| 3105 | <i>Spilopelia chinensis</i> | Eastern Spotted Dove | 2021/7/22  | 1 | 0 | 22.33584200 | 114.16316200 | <a href="https://www.inaturalist.org/observations/88417103">https://www.inaturalist.org/observations/88417103</a>   |
| 3106 | <i>Spilopelia chinensis</i> | Eastern Spotted Dove | 2020/6/4   | 1 | 0 | 22.33602470 | 114.18595600 | <a href="https://www.inaturalist.org/observations/48502653">https://www.inaturalist.org/observations/48502653</a>   |
| 3107 | <i>Spilopelia chinensis</i> | Eastern Spotted Dove | 2021/3/13  | 2 | 0 | 22.33620000 | 114.18475280 | <a href="https://www.inaturalist.org/observations/71126400">https://www.inaturalist.org/observations/71126400</a>   |
| 3108 | <i>Spilopelia chinensis</i> | Eastern Spotted Dove | 2022/3/9   | 3 | 0 | 22.33620000 | 114.18475280 | <a href="https://www.inaturalist.org/observations/116273016">https://www.inaturalist.org/observations/116273016</a> |
| 3109 | <i>Spilopelia chinensis</i> | Eastern Spotted Dove | 2021/3/13  | 1 | 0 | 22.33625022 | 114.18504490 | <a href="https://www.inaturalist.org/observations/71129083">https://www.inaturalist.org/observations/71129083</a>   |
| 3110 | <i>Spilopelia chinensis</i> | Eastern Spotted Dove | 2022/3/26  | 3 | 0 | 22.33637617 | 114.20477110 | <a href="https://www.inaturalist.org/observations/109515570">https://www.inaturalist.org/observations/109515570</a> |
| 3111 | <i>Spilopelia chinensis</i> | Eastern Spotted Dove | 2021/3/13  | 1 | 0 | 22.33638031 | 114.18525450 | <a href="https://www.inaturalist.org/observations/71127479">https://www.inaturalist.org/observations/71127479</a>   |
| 3112 | <i>Spilopelia chinensis</i> | Eastern Spotted Dove | 2019/4/27  | 2 | 0 | 22.33642481 | 114.16804940 | <a href="https://www.inaturalist.org/observations/23296347">https://www.inaturalist.org/observations/23296347</a>   |
| 3113 | <i>Spilopelia chinensis</i> | Eastern Spotted Dove | 2021/7/9   | 2 | 0 | 22.33688253 | 114.13700210 | <a href="https://www.inaturalist.org/observations/86273195">https://www.inaturalist.org/observations/86273195</a>   |
| 3114 | <i>Spilopelia chinensis</i> | Eastern Spotted Dove | 2019/4/28  | 4 | 0 | 22.33691205 | 114.26483030 | <a href="https://www.inaturalist.org/observations/23935954">https://www.inaturalist.org/observations/23935954</a>   |
| 3115 | <i>Spilopelia chinensis</i> | Eastern Spotted Dove | 2019/11/8  | 1 | 0 | 22.33706837 | 114.19275490 | <a href="https://www.inaturalist.org/observations/35471690">https://www.inaturalist.org/observations/35471690</a>   |
| 3116 | <i>Spilopelia chinensis</i> | Eastern Spotted Dove | 2021/1/24  | 2 | 0 | 22.33716167 | 114.13671830 | <a href="https://www.inaturalist.org/observations/97131145">https://www.inaturalist.org/observations/97131145</a>   |
| 3117 | <i>Spilopelia chinensis</i> | Eastern Spotted Dove | 2018/5/1   | 4 | 0 | 22.33720333 | 114.19380170 | <a href="https://www.inaturalist.org/observations/11977691">https://www.inaturalist.org/observations/11977691</a>   |
| 3118 | <i>Spilopelia chinensis</i> | Eastern Spotted Dove | 2021/3/20  | 2 | 0 | 22.33732097 | 114.13705100 | <a href="https://www.inaturalist.org/observations/71616381">https://www.inaturalist.org/observations/71616381</a>   |
| 3119 | <i>Spilopelia chinensis</i> | Eastern Spotted Dove | 2019/11/9  | 2 | 0 | 22.33752239 | 114.19175530 | <a href="https://www.inaturalist.org/observations/35473602">https://www.inaturalist.org/observations/35473602</a>   |
| 3120 | <i>Spilopelia chinensis</i> | Eastern Spotted Dove | 2018/11/8  | 6 | 0 | 22.33780323 | 114.17480010 | <a href="https://www.inaturalist.org/observations/18253342">https://www.inaturalist.org/observations/18253342</a>   |
| 3121 | <i>Spilopelia chinensis</i> | Eastern Spotted Dove | 2021/5/1   | 1 | 0 | 22.33781865 | 114.20201900 | <a href="https://www.inaturalist.org/observations/76855427">https://www.inaturalist.org/observations/76855427</a>   |
| 3122 | <i>Spilopelia chinensis</i> | Eastern Spotted Dove | 2020/5/3   | 1 | 0 | 22.33784444 | 114.17471390 | <a href="https://www.inaturalist.org/observations/96047112">https://www.inaturalist.org/observations/96047112</a>   |
| 3123 | <i>Spilopelia chinensis</i> | Eastern Spotted Dove | 2021/4/29  | 2 | 0 | 22.33788340 | 114.17776730 | <a href="https://www.inaturalist.org/observations/75609249">https://www.inaturalist.org/observations/75609249</a>   |
| 3124 | <i>Spilopelia chinensis</i> | Eastern Spotted Dove | 2018/11/6  | 2 | 0 | 22.33789563 | 114.17466960 | <a href="https://www.inaturalist.org/observations/18163051">https://www.inaturalist.org/observations/18163051</a>   |
| 3125 | <i>Spilopelia chinensis</i> | Eastern Spotted Dove | 2021/12/15 | 2 | 0 | 22.33790673 | 114.13746310 | <a href="https://www.inaturalist.org/observations/103173498">https://www.inaturalist.org/observations/103173498</a> |
| 3126 | <i>Spilopelia chinensis</i> | Eastern Spotted Dove | 2018/11/6  | 4 | 0 | 22.33792153 | 114.17442980 | <a href="https://www.inaturalist.org/observations/18163071">https://www.inaturalist.org/observations/18163071</a>   |
| 3127 | <i>Spilopelia chinensis</i> | Eastern Spotted Dove | 2018/11/6  | 3 | 0 | 22.33792283 | 114.17443660 | <a href="https://www.inaturalist.org/observations/18163078">https://www.inaturalist.org/observations/18163078</a>   |

|      |                             |                      |            |   |   |             |              |                                                                                                                     |
|------|-----------------------------|----------------------|------------|---|---|-------------|--------------|---------------------------------------------------------------------------------------------------------------------|
| 3128 | <i>Spilopelia chinensis</i> | Eastern Spotted Dove | 2018/11/6  | 2 | 0 | 22.33794550 | 114.17463620 | <a href="https://www.inaturalist.org/observations/18163041">https://www.inaturalist.org/observations/18163041</a>   |
| 3129 | <i>Spilopelia chinensis</i> | Eastern Spotted Dove | 2018/11/6  | 4 | 0 | 22.33795166 | 114.17457970 | <a href="https://www.inaturalist.org/observations/18163037">https://www.inaturalist.org/observations/18163037</a>   |
| 3130 | <i>Spilopelia chinensis</i> | Eastern Spotted Dove | 2018/11/6  | 2 | 0 | 22.33797308 | 114.17436160 | <a href="https://www.inaturalist.org/observations/18163095">https://www.inaturalist.org/observations/18163095</a>   |
| 3131 | <i>Spilopelia chinensis</i> | Eastern Spotted Dove | 2018/11/6  | 4 | 0 | 22.33800568 | 114.17458170 | <a href="https://www.inaturalist.org/observations/18163067">https://www.inaturalist.org/observations/18163067</a>   |
| 3132 | <i>Spilopelia chinensis</i> | Eastern Spotted Dove | 2019/5/12  | 3 | 0 | 22.33801810 | 114.17458970 | <a href="https://www.inaturalist.org/observations/24984446">https://www.inaturalist.org/observations/24984446</a>   |
| 3133 | <i>Spilopelia chinensis</i> | Eastern Spotted Dove | 2018/11/6  | 5 | 0 | 22.33802903 | 114.17457480 | <a href="https://www.inaturalist.org/observations/18163080">https://www.inaturalist.org/observations/18163080</a>   |
| 3134 | <i>Spilopelia chinensis</i> | Eastern Spotted Dove | 2018/11/6  | 3 | 0 | 22.33803401 | 114.17439080 | <a href="https://www.inaturalist.org/observations/18163063">https://www.inaturalist.org/observations/18163063</a>   |
| 3135 | <i>Spilopelia chinensis</i> | Eastern Spotted Dove | 2018/11/6  | 5 | 0 | 22.33803506 | 114.17451270 | <a href="https://www.inaturalist.org/observations/18163085">https://www.inaturalist.org/observations/18163085</a>   |
| 3136 | <i>Spilopelia chinensis</i> | Eastern Spotted Dove | 2018/11/6  | 5 | 0 | 22.33807756 | 114.17438470 | <a href="https://www.inaturalist.org/observations/18163414">https://www.inaturalist.org/observations/18163414</a>   |
| 3137 | <i>Spilopelia chinensis</i> | Eastern Spotted Dove | 2018/11/6  | 5 | 0 | 22.33808074 | 114.17449640 | <a href="https://www.inaturalist.org/observations/18163135">https://www.inaturalist.org/observations/18163135</a>   |
| 3138 | <i>Spilopelia chinensis</i> | Eastern Spotted Dove | 2018/11/6  | 5 | 0 | 22.33814545 | 114.17436700 | <a href="https://www.inaturalist.org/observations/18163424">https://www.inaturalist.org/observations/18163424</a>   |
| 3139 | <i>Spilopelia chinensis</i> | Eastern Spotted Dove | 2021/11/1  | 2 | 0 | 22.33833333 | 114.13750000 | <a href="https://www.inaturalist.org/observations/100136791">https://www.inaturalist.org/observations/100136791</a> |
| 3140 | <i>Spilopelia chinensis</i> | Eastern Spotted Dove | 2019/4/27  | 3 | 0 | 22.33859706 | 114.17413760 | <a href="https://www.inaturalist.org/observations/23527457">https://www.inaturalist.org/observations/23527457</a>   |
| 3141 | <i>Spilopelia chinensis</i> | Eastern Spotted Dove | 2018/11/6  | 6 | 0 | 22.33864078 | 114.19483840 | <a href="https://www.inaturalist.org/observations/18164006">https://www.inaturalist.org/observations/18164006</a>   |
| 3142 | <i>Spilopelia chinensis</i> | Eastern Spotted Dove | 2019/10/10 | 3 | 0 | 22.33866853 | 114.17389630 | <a href="https://www.inaturalist.org/observations/34151718">https://www.inaturalist.org/observations/34151718</a>   |
| 3143 | <i>Spilopelia chinensis</i> | Eastern Spotted Dove | 2013/2/23  | 4 | 0 | 22.33867257 | 114.13735610 | <a href="http://www.inaturalist.org/observations/203717">http://www.inaturalist.org/observations/203717</a>         |
| 3144 | <i>Spilopelia chinensis</i> | Eastern Spotted Dove | 2019/10/10 | 2 | 0 | 22.33873667 | 114.17400130 | <a href="https://www.inaturalist.org/observations/34150984">https://www.inaturalist.org/observations/34150984</a>   |
| 3145 | <i>Spilopelia chinensis</i> | Eastern Spotted Dove | 2019/10/10 | 2 | 0 | 22.33874174 | 114.17382360 | <a href="https://www.inaturalist.org/observations/34151007">https://www.inaturalist.org/observations/34151007</a>   |
| 3146 | <i>Spilopelia chinensis</i> | Eastern Spotted Dove | 2019/10/18 | 3 | 0 | 22.33881881 | 114.18419100 | <a href="https://www.inaturalist.org/observations/34526807">https://www.inaturalist.org/observations/34526807</a>   |
| 3147 | <i>Spilopelia chinensis</i> | Eastern Spotted Dove | 2019/4/26  | 2 | 0 | 22.33882779 | 114.17393850 | <a href="https://www.inaturalist.org/observations/23098889">https://www.inaturalist.org/observations/23098889</a>   |
| 3148 | <i>Spilopelia chinensis</i> | Eastern Spotted Dove | 2018/11/6  | 4 | 0 | 22.33884907 | 114.19473920 | <a href="https://www.inaturalist.org/observations/18164078">https://www.inaturalist.org/observations/18164078</a>   |
| 3149 | <i>Spilopelia chinensis</i> | Eastern Spotted Dove | 2018/4/28  | 3 | 0 | 22.33887375 | 114.13777450 | <a href="https://www.inaturalist.org/observations/11589141">https://www.inaturalist.org/observations/11589141</a>   |
| 3150 | <i>Spilopelia chinensis</i> | Eastern Spotted Dove | 2019/4/8   | 2 | 0 | 22.33890833 | 114.17380500 | <a href="https://www.inaturalist.org/observations/22182989">https://www.inaturalist.org/observations/22182989</a>   |

|      |                             |                      |            |   |   |             |              |                                                                                                                     |
|------|-----------------------------|----------------------|------------|---|---|-------------|--------------|---------------------------------------------------------------------------------------------------------------------|
| 3151 | <i>Spilopelia chinensis</i> | Eastern Spotted Dove | 2018/11/6  | 5 | 0 | 22.33892625 | 114.19471480 | <a href="https://www.inaturalist.org/observations/18164875">https://www.inaturalist.org/observations/18164875</a>   |
| 3152 | <i>Spilopelia chinensis</i> | Eastern Spotted Dove | 2018/11/6  | 5 | 0 | 22.33893628 | 114.15933550 | <a href="https://www.inaturalist.org/observations/18162466">https://www.inaturalist.org/observations/18162466</a>   |
| 3153 | <i>Spilopelia chinensis</i> | Eastern Spotted Dove | 2018/11/6  | 5 | 0 | 22.33899387 | 114.19463580 | <a href="https://www.inaturalist.org/observations/18164866">https://www.inaturalist.org/observations/18164866</a>   |
| 3154 | <i>Spilopelia chinensis</i> | Eastern Spotted Dove | 2021/7/30  | 3 | 0 | 22.33903890 | 114.13745990 | <a href="https://www.inaturalist.org/observations/89178135">https://www.inaturalist.org/observations/89178135</a>   |
| 3155 | <i>Spilopelia chinensis</i> | Eastern Spotted Dove | 2020/12/12 | 1 | 0 | 22.33912189 | 114.19078600 | <a href="https://www.inaturalist.org/observations/66455936">https://www.inaturalist.org/observations/66455936</a>   |
| 3156 | <i>Spilopelia chinensis</i> | Eastern Spotted Dove | 2019/10/18 | 2 | 0 | 22.33914424 | 114.18354410 | <a href="https://www.inaturalist.org/observations/34526397">https://www.inaturalist.org/observations/34526397</a>   |
| 3157 | <i>Spilopelia chinensis</i> | Eastern Spotted Dove | 2015/10/18 | 1 | 0 | 22.33922275 | 114.20496960 | <a href="https://www.inaturalist.org/observations/32101503">https://www.inaturalist.org/observations/32101503</a>   |
| 3158 | <i>Spilopelia chinensis</i> | Eastern Spotted Dove | 2019/10/18 | 2 | 0 | 22.33923757 | 114.18349740 | <a href="https://www.inaturalist.org/observations/34526392">https://www.inaturalist.org/observations/34526392</a>   |
| 3159 | <i>Spilopelia chinensis</i> | Eastern Spotted Dove | 2019/1/22  | 2 | 0 | 22.33923912 | 114.18334200 | <a href="https://www.inaturalist.org/observations/19798529">https://www.inaturalist.org/observations/19798529</a>   |
| 3160 | <i>Spilopelia chinensis</i> | Eastern Spotted Dove | 2020/11/28 | 2 | 0 | 22.33924683 | 114.18997740 | <a href="https://www.inaturalist.org/observations/65739020">https://www.inaturalist.org/observations/65739020</a>   |
| 3161 | <i>Spilopelia chinensis</i> | Eastern Spotted Dove | 2019/10/10 | 2 | 0 | 22.33925102 | 114.17368470 | <a href="https://www.inaturalist.org/observations/34150972">https://www.inaturalist.org/observations/34150972</a>   |
| 3162 | <i>Spilopelia chinensis</i> | Eastern Spotted Dove | 2018/2/11  | 2 | 0 | 22.33926167 | 114.20569670 | <a href="https://www.inaturalist.org/observations/9820472">https://www.inaturalist.org/observations/9820472</a>     |
| 3163 | <i>Spilopelia chinensis</i> | Eastern Spotted Dove | 2021/3/9   | 1 | 0 | 22.33930012 | 114.00865860 | <a href="https://www.inaturalist.org/observations/70861937">https://www.inaturalist.org/observations/70861937</a>   |
| 3164 | <i>Spilopelia chinensis</i> | Eastern Spotted Dove | 2021/3/24  | 3 | 0 | 22.33932500 | 114.20509500 | <a href="https://www.inaturalist.org/observations/72005587">https://www.inaturalist.org/observations/72005587</a>   |
| 3165 | <i>Spilopelia chinensis</i> | Eastern Spotted Dove | 2019/10/18 | 2 | 0 | 22.33934459 | 114.18352520 | <a href="https://www.inaturalist.org/observations/34526785">https://www.inaturalist.org/observations/34526785</a>   |
| 3166 | <i>Spilopelia chinensis</i> | Eastern Spotted Dove | 2018/11/5  | 5 | 0 | 22.33936359 | 114.15959010 | <a href="https://www.inaturalist.org/observations/18123160">https://www.inaturalist.org/observations/18123160</a>   |
| 3167 | <i>Spilopelia chinensis</i> | Eastern Spotted Dove | 2019/4/8   | 2 | 0 | 22.33936832 | 114.17304060 | <a href="https://www.inaturalist.org/observations/22183000">https://www.inaturalist.org/observations/22183000</a>   |
| 3168 | <i>Spilopelia chinensis</i> | Eastern Spotted Dove | 2021/11/2  | 2 | 0 | 22.33938940 | 114.19043680 | <a href="https://www.inaturalist.org/observations/100045263">https://www.inaturalist.org/observations/100045263</a> |
| 3169 | <i>Spilopelia chinensis</i> | Eastern Spotted Dove | 2020/12/15 | 4 | 0 | 22.33942500 | 114.18975830 | <a href="https://www.inaturalist.org/observations/66602851">https://www.inaturalist.org/observations/66602851</a>   |
| 3170 | <i>Spilopelia chinensis</i> | Eastern Spotted Dove | 2021/5/2   | 2 | 0 | 22.33946799 | 114.20399770 | <a href="https://www.inaturalist.org/observations/76435082">https://www.inaturalist.org/observations/76435082</a>   |
| 3171 | <i>Spilopelia chinensis</i> | Eastern Spotted Dove | 2018/11/8  | 5 | 0 | 22.33949552 | 114.15998350 | <a href="https://www.inaturalist.org/observations/18222901">https://www.inaturalist.org/observations/18222901</a>   |
| 3172 | <i>Spilopelia chinensis</i> | Eastern Spotted Dove | 2021/11/2  | 1 | 0 | 22.33966110 | 114.18923180 | <a href="https://www.inaturalist.org/observations/100040501">https://www.inaturalist.org/observations/100040501</a> |
| 3173 | <i>Spilopelia chinensis</i> | Eastern Spotted Dove | 2019/4/27  | 2 | 0 | 22.33986240 | 114.20125920 | <a href="https://www.inaturalist.org/observations/23326239">https://www.inaturalist.org/observations/23326239</a>   |

|      |                             |                      |            |   |   |             |              |                                                                                                                     |
|------|-----------------------------|----------------------|------------|---|---|-------------|--------------|---------------------------------------------------------------------------------------------------------------------|
| 3174 | <i>Spilopelia chinensis</i> | Eastern Spotted Dove | 2020/11/6  | 1 | 0 | 22.33993500 | 114.20570600 | <a href="https://www.inaturalist.org/observations/64778553">https://www.inaturalist.org/observations/64778553</a>   |
| 3175 | <i>Spilopelia chinensis</i> | Eastern Spotted Dove | 2021/11/2  | 2 | 0 | 22.34008388 | 114.18988860 | <a href="https://www.inaturalist.org/observations/100044510">https://www.inaturalist.org/observations/100044510</a> |
| 3176 | <i>Spilopelia chinensis</i> | Eastern Spotted Dove | 2020/12/12 | 1 | 0 | 22.34013839 | 114.19067960 | <a href="https://www.inaturalist.org/observations/66455836">https://www.inaturalist.org/observations/66455836</a>   |
| 3177 | <i>Spilopelia chinensis</i> | Eastern Spotted Dove | 2021/11/2  | 2 | 0 | 22.34018238 | 114.19089890 | <a href="https://www.inaturalist.org/observations/100045220">https://www.inaturalist.org/observations/100045220</a> |
| 3178 | <i>Spilopelia chinensis</i> | Eastern Spotted Dove | 2021/11/2  | 2 | 0 | 22.34024959 | 114.19071130 | <a href="https://www.inaturalist.org/observations/100045210">https://www.inaturalist.org/observations/100045210</a> |
| 3179 | <i>Spilopelia chinensis</i> | Eastern Spotted Dove | 2021/11/2  | 1 | 0 | 22.34029661 | 114.19086940 | <a href="https://www.inaturalist.org/observations/100045213">https://www.inaturalist.org/observations/100045213</a> |
| 3180 | <i>Spilopelia chinensis</i> | Eastern Spotted Dove | 2021/11/2  | 2 | 0 | 22.34037138 | 114.19061220 | <a href="https://www.inaturalist.org/observations/100045212">https://www.inaturalist.org/observations/100045212</a> |
| 3181 | <i>Spilopelia chinensis</i> | Eastern Spotted Dove | 2021/11/2  | 2 | 0 | 22.34037638 | 114.19060710 | <a href="https://www.inaturalist.org/observations/100045197">https://www.inaturalist.org/observations/100045197</a> |
| 3182 | <i>Spilopelia chinensis</i> | Eastern Spotted Dove | 2021/11/2  | 2 | 0 | 22.34042244 | 114.18964670 | <a href="https://www.inaturalist.org/observations/100045533">https://www.inaturalist.org/observations/100045533</a> |
| 3183 | <i>Spilopelia chinensis</i> | Eastern Spotted Dove | 2018/11/7  | 3 | 0 | 22.34093000 | 114.15932840 | <a href="https://www.inaturalist.org/observations/18192111">https://www.inaturalist.org/observations/18192111</a>   |
| 3184 | <i>Spilopelia chinensis</i> | Eastern Spotted Dove | 2021/11/3  | 1 | 0 | 22.34097500 | 114.18782000 | <a href="https://www.inaturalist.org/observations/100110256">https://www.inaturalist.org/observations/100110256</a> |
| 3185 | <i>Spilopelia chinensis</i> | Eastern Spotted Dove | 2020/11/17 | 1 | 0 | 22.34105207 | 114.18255640 | <a href="https://www.inaturalist.org/observations/65042477">https://www.inaturalist.org/observations/65042477</a>   |
| 3186 | <i>Spilopelia chinensis</i> | Eastern Spotted Dove | 2021/11/2  | 1 | 0 | 22.34115333 | 114.18902000 | <a href="https://www.inaturalist.org/observations/100047991">https://www.inaturalist.org/observations/100047991</a> |
| 3187 | <i>Spilopelia chinensis</i> | Eastern Spotted Dove | 2018/11/7  | 4 | 0 | 22.34118226 | 114.15924850 | <a href="https://www.inaturalist.org/observations/18191649">https://www.inaturalist.org/observations/18191649</a>   |
| 3188 | <i>Spilopelia chinensis</i> | Eastern Spotted Dove | 2021/4/9   | 1 | 0 | 22.34156167 | 114.19546330 | <a href="https://www.inaturalist.org/observations/73376507">https://www.inaturalist.org/observations/73376507</a>   |
| 3189 | <i>Spilopelia chinensis</i> | Eastern Spotted Dove | 2022/2/15  | 2 | 0 | 22.34186920 | 114.21031390 | <a href="https://www.inaturalist.org/observations/110946793">https://www.inaturalist.org/observations/110946793</a> |
| 3190 | <i>Spilopelia chinensis</i> | Eastern Spotted Dove | 2021/11/2  | 1 | 0 | 22.34190874 | 114.18868630 | <a href="https://www.inaturalist.org/observations/100045235">https://www.inaturalist.org/observations/100045235</a> |
| 3191 | <i>Spilopelia chinensis</i> | Eastern Spotted Dove | 2021/3/26  | 1 | 0 | 22.34196425 | 114.19567510 | <a href="https://www.inaturalist.org/observations/72069862">https://www.inaturalist.org/observations/72069862</a>   |
| 3192 | <i>Spilopelia chinensis</i> | Eastern Spotted Dove | 2019/6/15  | 2 | 0 | 22.34237855 | 114.19345400 | <a href="https://www.inaturalist.org/observations/27087941">https://www.inaturalist.org/observations/27087941</a>   |
| 3193 | <i>Spilopelia chinensis</i> | Eastern Spotted Dove | 2015/10/10 | 2 | 0 | 22.34254809 | 114.19329810 | <a href="https://www.inaturalist.org/observations/32067649">https://www.inaturalist.org/observations/32067649</a>   |
| 3194 | <i>Spilopelia chinensis</i> | Eastern Spotted Dove | 2021/4/10  | 1 | 0 | 22.34273083 | 114.19799890 | <a href="https://www.inaturalist.org/observations/73467531">https://www.inaturalist.org/observations/73467531</a>   |
| 3195 | <i>Spilopelia chinensis</i> | Eastern Spotted Dove | 2017/4/7   | 3 | 0 | 22.34292992 | 114.19318330 | <a href="https://www.inaturalist.org/observations/8867909">https://www.inaturalist.org/observations/8867909</a>     |
| 3196 | <i>Spilopelia chinensis</i> | Eastern Spotted Dove | 2022/5/14  | 1 | 0 | 22.34305000 | 114.20056400 | <a href="https://www.inaturalist.org/observations/117022320">https://www.inaturalist.org/observations/117022320</a> |

|      |                             |                      |            |   |   |             |              |                                                                                                                     |
|------|-----------------------------|----------------------|------------|---|---|-------------|--------------|---------------------------------------------------------------------------------------------------------------------|
| 3197 | <i>Spilopelia chinensis</i> | Eastern Spotted Dove | 2021/2/28  | 1 | 0 | 22.34365935 | 114.20035200 | <a href="https://www.inaturalist.org/observations/70326503">https://www.inaturalist.org/observations/70326503</a>   |
| 3198 | <i>Spilopelia chinensis</i> | Eastern Spotted Dove | 2021/3/19  | 1 | 0 | 22.34385500 | 114.19248830 | <a href="https://www.inaturalist.org/observations/71600036">https://www.inaturalist.org/observations/71600036</a>   |
| 3199 | <i>Spilopelia chinensis</i> | Eastern Spotted Dove | 2019/2/13  | 1 | 0 | 22.34446500 | 80.45526990  | <a href="https://www.inaturalist.org/observations/90508034">https://www.inaturalist.org/observations/90508034</a>   |
| 3200 | <i>Spilopelia chinensis</i> | Eastern Spotted Dove | 2022/5/2   | 2 | 0 | 22.34542534 | 114.19065760 | <a href="https://www.inaturalist.org/observations/114574249">https://www.inaturalist.org/observations/114574249</a> |
| 3201 | <i>Spilopelia chinensis</i> | Eastern Spotted Dove | 2020/2/20  | 1 | 0 | 22.34557465 | 114.20276730 | <a href="https://www.inaturalist.org/observations/38953289">https://www.inaturalist.org/observations/38953289</a>   |
| 3202 | <i>Spilopelia chinensis</i> | Eastern Spotted Dove | 2020/11/10 | 1 | 0 | 22.34581430 | 87.33173680  | <a href="https://www.inaturalist.org/observations/88668518">https://www.inaturalist.org/observations/88668518</a>   |
| 3203 | <i>Spilopelia chinensis</i> | Eastern Spotted Dove | 2021/7/10  | 1 | 0 | 22.34582380 | 114.19374470 | <a href="https://www.inaturalist.org/observations/86591316">https://www.inaturalist.org/observations/86591316</a>   |
| 3204 | <i>Spilopelia chinensis</i> | Eastern Spotted Dove | 2018/4/28  | 3 | 0 | 22.34594752 | 114.18389050 | <a href="https://www.inaturalist.org/observations/11572882">https://www.inaturalist.org/observations/11572882</a>   |
| 3205 | <i>Spilopelia chinensis</i> | Eastern Spotted Dove | 2020/12/18 | 1 | 0 | 22.34596458 | 114.20215140 | <a href="https://www.inaturalist.org/observations/66720873">https://www.inaturalist.org/observations/66720873</a>   |
| 3206 | <i>Spilopelia chinensis</i> | Eastern Spotted Dove | 2020/8/28  | 1 | 0 | 22.34726440 | 114.12796880 | <a href="https://www.inaturalist.org/observations/57881533">https://www.inaturalist.org/observations/57881533</a>   |
| 3207 | <i>Spilopelia chinensis</i> | Eastern Spotted Dove | 2020/10/19 | 2 | 0 | 22.34734575 | 114.19971180 | <a href="https://www.inaturalist.org/observations/62994514">https://www.inaturalist.org/observations/62994514</a>   |
| 3208 | <i>Spilopelia chinensis</i> | Eastern Spotted Dove | 2020/12/31 | 1 | 0 | 22.34762601 | 114.19567520 | <a href="https://www.inaturalist.org/observations/67348346">https://www.inaturalist.org/observations/67348346</a>   |
| 3209 | <i>Spilopelia chinensis</i> | Eastern Spotted Dove | 2020/12/17 | 2 | 0 | 22.34843400 | 114.18430420 | <a href="https://www.inaturalist.org/observations/66724447">https://www.inaturalist.org/observations/66724447</a>   |
| 3210 | <i>Spilopelia chinensis</i> | Eastern Spotted Dove | 2019/5/3   | 2 | 0 | 22.34872500 | 114.20324670 | <a href="https://www.inaturalist.org/observations/24428099">https://www.inaturalist.org/observations/24428099</a>   |
| 3211 | <i>Spilopelia chinensis</i> | Eastern Spotted Dove | 2018/7/7   | 4 | 0 | 22.34880171 | 114.09787000 | <a href="https://www.inaturalist.org/observations/14118088">https://www.inaturalist.org/observations/14118088</a>   |
| 3212 | <i>Spilopelia chinensis</i> | Eastern Spotted Dove | 2021/2/24  | 1 | 0 | 22.34891600 | 114.15241900 | <a href="https://www.inaturalist.org/observations/70237066">https://www.inaturalist.org/observations/70237066</a>   |
| 3213 | <i>Spilopelia chinensis</i> | Eastern Spotted Dove | 2021/3/30  | 1 | 0 | 22.34918461 | 114.19861180 | <a href="https://www.inaturalist.org/observations/72420566">https://www.inaturalist.org/observations/72420566</a>   |
| 3214 | <i>Spilopelia chinensis</i> | Eastern Spotted Dove | 2021/3/30  | 1 | 0 | 22.34919763 | 114.19830230 | <a href="https://www.inaturalist.org/observations/72420419">https://www.inaturalist.org/observations/72420419</a>   |
| 3215 | <i>Spilopelia chinensis</i> | Eastern Spotted Dove | 2016/10/28 | 2 | 0 | 22.34923323 | 114.15248840 | <a href="https://www.inaturalist.org/observations/42234429">https://www.inaturalist.org/observations/42234429</a>   |
| 3216 | <i>Spilopelia chinensis</i> | Eastern Spotted Dove | 2021/3/26  | 1 | 0 | 22.34939516 | 114.19844750 | <a href="https://www.inaturalist.org/observations/72070397">https://www.inaturalist.org/observations/72070397</a>   |
| 3217 | <i>Spilopelia chinensis</i> | Eastern Spotted Dove | 2018/11/7  | 2 | 0 | 22.34945500 | 114.09938050 | <a href="https://www.inaturalist.org/observations/18206536">https://www.inaturalist.org/observations/18206536</a>   |
| 3218 | <i>Spilopelia chinensis</i> | Eastern Spotted Dove | 2019/5/1   | 3 | 0 | 22.34953333 | 114.20401670 | <a href="https://www.inaturalist.org/observations/24261911">https://www.inaturalist.org/observations/24261911</a>   |
| 3219 | <i>Spilopelia chinensis</i> | Eastern Spotted Dove | 2018/11/7  | 4 | 0 | 22.34955500 | 114.09942500 | <a href="https://www.inaturalist.org/observations/18256413">https://www.inaturalist.org/observations/18256413</a>   |



|      |                             |                      |            |   |   |             |              |                                                                                                                     |
|------|-----------------------------|----------------------|------------|---|---|-------------|--------------|---------------------------------------------------------------------------------------------------------------------|
| 3220 | <i>Spilopelia chinensis</i> | Eastern Spotted Dove | 2018/11/7  | 2 | 0 | 22.34960323 | 114.10004400 | <a href="https://www.inaturalist.org/observations/18209916">https://www.inaturalist.org/observations/18209916</a>   |
| 3221 | <i>Spilopelia chinensis</i> | Eastern Spotted Dove | 2021/3/30  | 1 | 0 | 22.34966711 | 114.19802340 | <a href="https://www.inaturalist.org/observations/72421921">https://www.inaturalist.org/observations/72421921</a>   |
| 3222 | <i>Spilopelia chinensis</i> | Eastern Spotted Dove | 2021/5/2   | 1 | 0 | 22.34976602 | 114.10359390 | <a href="https://www.inaturalist.org/observations/76424949">https://www.inaturalist.org/observations/76424949</a>   |
| 3223 | <i>Spilopelia chinensis</i> | Eastern Spotted Dove | 2019/6/30  | 2 | 0 | 22.35001373 | 114.06184390 | <a href="https://www.inaturalist.org/observations/27980787">https://www.inaturalist.org/observations/27980787</a>   |
| 3224 | <i>Spilopelia chinensis</i> | Eastern Spotted Dove | 2020/11/1  | 1 | 0 | 22.35017913 | 114.20105290 | <a href="https://www.inaturalist.org/observations/63945050">https://www.inaturalist.org/observations/63945050</a>   |
| 3225 | <i>Spilopelia chinensis</i> | Eastern Spotted Dove | 2018/11/7  | 2 | 0 | 22.35035435 | 114.09767200 | <a href="https://www.inaturalist.org/observations/18200421">https://www.inaturalist.org/observations/18200421</a>   |
| 3226 | <i>Spilopelia chinensis</i> | Eastern Spotted Dove | 2022/1/9   | 1 | 0 | 22.35035639 | 114.15622560 | <a href="https://www.inaturalist.org/observations/104640401">https://www.inaturalist.org/observations/104640401</a> |
| 3227 | <i>Spilopelia chinensis</i> | Eastern Spotted Dove | 2020/1/9   | 1 | 0 | 22.35155901 | 114.09925430 | <a href="https://www.inaturalist.org/observations/37574052">https://www.inaturalist.org/observations/37574052</a>   |
| 3228 | <i>Spilopelia chinensis</i> | Eastern Spotted Dove | 2022/6/15  | 2 | 0 | 22.35180066 | 114.10316960 | <a href="https://www.inaturalist.org/observations/129247919">https://www.inaturalist.org/observations/129247919</a> |
| 3229 | <i>Spilopelia chinensis</i> | Eastern Spotted Dove | 2020/11/2  | 1 | 0 | 22.35181447 | 114.10948300 | <a href="https://www.inaturalist.org/observations/64170838">https://www.inaturalist.org/observations/64170838</a>   |
| 3230 | <i>Spilopelia chinensis</i> | Eastern Spotted Dove | 2021/12/15 | 2 | 0 | 22.35284500 | 114.06095830 | <a href="https://www.inaturalist.org/observations/103094190">https://www.inaturalist.org/observations/103094190</a> |
| 3231 | <i>Spilopelia chinensis</i> | Eastern Spotted Dove | 2021/3/10  | 1 | 0 | 22.35301600 | 114.10149200 | <a href="https://www.inaturalist.org/observations/71097607">https://www.inaturalist.org/observations/71097607</a>   |
| 3232 | <i>Spilopelia chinensis</i> | Eastern Spotted Dove | 2018/11/8  | 5 | 0 | 22.35334964 | 114.09872020 | <a href="https://www.inaturalist.org/observations/18243571">https://www.inaturalist.org/observations/18243571</a>   |
| 3233 | <i>Spilopelia chinensis</i> | Eastern Spotted Dove | 2016/9/11  | 4 | 0 | 22.35497200 | 114.13215600 | <a href="https://www.inaturalist.org/observations/9205466">https://www.inaturalist.org/observations/9205466</a>     |
| 3234 | <i>Spilopelia chinensis</i> | Eastern Spotted Dove | 2021/10/23 | 1 | 0 | 22.35522100 | 114.16741460 | <a href="https://www.inaturalist.org/observations/99079055">https://www.inaturalist.org/observations/99079055</a>   |
| 3235 | <i>Spilopelia chinensis</i> | Eastern Spotted Dove | 2021/3/13  | 2 | 0 | 22.35527833 | 114.10544720 | <a href="https://www.inaturalist.org/observations/71112027">https://www.inaturalist.org/observations/71112027</a>   |
| 3236 | <i>Spilopelia chinensis</i> | Eastern Spotted Dove | 2020/12/9  | 1 | 0 | 22.35552725 | 114.10491670 | <a href="https://www.inaturalist.org/observations/66324119">https://www.inaturalist.org/observations/66324119</a>   |
| 3237 | <i>Spilopelia chinensis</i> | Eastern Spotted Dove | 2021/11/21 | 1 | 0 | 22.35582475 | 114.10600420 | <a href="https://www.inaturalist.org/observations/101604628">https://www.inaturalist.org/observations/101604628</a> |
| 3238 | <i>Spilopelia chinensis</i> | Eastern Spotted Dove | 2022/7/21  | 1 | 0 | 22.35583077 | 114.10632590 | <a href="https://www.inaturalist.org/observations/127172780">https://www.inaturalist.org/observations/127172780</a> |
| 3239 | <i>Spilopelia chinensis</i> | Eastern Spotted Dove | 2020/4/27  | 1 | 0 | 22.35589830 | 114.10562990 | <a href="https://www.inaturalist.org/observations/43866389">https://www.inaturalist.org/observations/43866389</a>   |
| 3240 | <i>Spilopelia chinensis</i> | Eastern Spotted Dove | 2022/1/19  | 1 | 0 | 22.35589830 | 114.10562990 | <a href="https://www.inaturalist.org/observations/105296599">https://www.inaturalist.org/observations/105296599</a> |
| 3241 | <i>Spilopelia chinensis</i> | Eastern Spotted Dove | 2020/12/5  | 2 | 0 | 22.35590319 | 114.10562970 | <a href="https://www.inaturalist.org/observations/66461833">https://www.inaturalist.org/observations/66461833</a>   |
| 3242 | <i>Spilopelia chinensis</i> | Eastern Spotted Dove | 2022/1/4   | 2 | 0 | 22.35590350 | 114.10563000 | <a href="https://www.inaturalist.org/observations/104814059">https://www.inaturalist.org/observations/104814059</a> |

|      |                             |                      |            |   |   |             |              |                                                                                                                     |
|------|-----------------------------|----------------------|------------|---|---|-------------|--------------|---------------------------------------------------------------------------------------------------------------------|
| 3243 | <i>Spilopelia chinensis</i> | Eastern Spotted Dove | 2020/1/13  | 1 | 0 | 22.35591283 | 114.10608440 | <a href="https://www.inaturalist.org/observations/37548097">https://www.inaturalist.org/observations/37548097</a>   |
| 3244 | <i>Spilopelia chinensis</i> | Eastern Spotted Dove | 2022/5/15  | 1 | 0 | 22.35594907 | 114.13288690 | <a href="https://www.inaturalist.org/observations/117098227">https://www.inaturalist.org/observations/117098227</a> |
| 3245 | <i>Spilopelia chinensis</i> | Eastern Spotted Dove | 2022/7/21  | 1 | 0 | 22.35600333 | 114.10646670 | <a href="https://www.inaturalist.org/observations/127170332">https://www.inaturalist.org/observations/127170332</a> |
| 3246 | <i>Spilopelia chinensis</i> | Eastern Spotted Dove | 2018/12/31 | 1 | 0 | 22.35609177 | 114.10585340 | <a href="https://www.inaturalist.org/observations/68890974">https://www.inaturalist.org/observations/68890974</a>   |
| 3247 | <i>Spilopelia chinensis</i> | Eastern Spotted Dove | 2020/12/15 | 1 | 0 | 22.35614651 | 114.10877450 | <a href="https://www.inaturalist.org/observations/66606001">https://www.inaturalist.org/observations/66606001</a>   |
| 3248 | <i>Spilopelia chinensis</i> | Eastern Spotted Dove | 2022/7/21  | 1 | 0 | 22.35615894 | 114.10507180 | <a href="https://www.inaturalist.org/observations/127170697">https://www.inaturalist.org/observations/127170697</a> |
| 3249 | <i>Spilopelia chinensis</i> | Eastern Spotted Dove | 2022/7/21  | 1 | 0 | 22.35621206 | 114.10639420 | <a href="https://www.inaturalist.org/observations/127172874">https://www.inaturalist.org/observations/127172874</a> |
| 3250 | <i>Spilopelia chinensis</i> | Eastern Spotted Dove | 2019/12/10 | 2 | 0 | 22.35622552 | 114.10573600 | <a href="https://www.inaturalist.org/observations/36525873">https://www.inaturalist.org/observations/36525873</a>   |
| 3251 | <i>Spilopelia chinensis</i> | Eastern Spotted Dove | 2020/1/13  | 2 | 0 | 22.35629011 | 114.10566600 | <a href="https://www.inaturalist.org/observations/37548474">https://www.inaturalist.org/observations/37548474</a>   |
| 3252 | <i>Spilopelia chinensis</i> | Eastern Spotted Dove | 2021/2/12  | 1 | 0 | 22.35641238 | 114.10544410 | <a href="https://www.inaturalist.org/observations/69448210">https://www.inaturalist.org/observations/69448210</a>   |
| 3253 | <i>Spilopelia chinensis</i> | Eastern Spotted Dove | 2018/4/27  | 4 | 0 | 22.35644300 | 114.10671600 | <a href="https://www.inaturalist.org/observations/11484573">https://www.inaturalist.org/observations/11484573</a>   |
| 3254 | <i>Spilopelia chinensis</i> | Eastern Spotted Dove | 2021/3/13  | 1 | 0 | 22.35651333 | 114.10551380 | <a href="https://www.inaturalist.org/observations/71110589">https://www.inaturalist.org/observations/71110589</a>   |
| 3255 | <i>Spilopelia chinensis</i> | Eastern Spotted Dove | 2022/5/1   | 1 | 0 | 22.35654062 | 114.10622110 | <a href="https://www.inaturalist.org/observations/114136386">https://www.inaturalist.org/observations/114136386</a> |
| 3256 | <i>Spilopelia chinensis</i> | Eastern Spotted Dove | 2020/11/24 | 2 | 0 | 22.35667674 | 114.09575250 | <a href="https://www.inaturalist.org/observations/65516609">https://www.inaturalist.org/observations/65516609</a>   |
| 3257 | <i>Spilopelia chinensis</i> | Eastern Spotted Dove | 2020/11/26 | 1 | 0 | 22.35691940 | 114.09513020 | <a href="https://www.inaturalist.org/observations/65627043">https://www.inaturalist.org/observations/65627043</a>   |
| 3258 | <i>Spilopelia chinensis</i> | Eastern Spotted Dove | 2022/5/2   | 2 | 0 | 22.35697531 | 114.10887840 | <a href="https://www.inaturalist.org/observations/114593889">https://www.inaturalist.org/observations/114593889</a> |
| 3259 | <i>Spilopelia chinensis</i> | Eastern Spotted Dove | 2020/11/24 | 2 | 0 | 22.35707904 | 114.09586610 | <a href="https://www.inaturalist.org/observations/65519964">https://www.inaturalist.org/observations/65519964</a>   |
| 3260 | <i>Spilopelia chinensis</i> | Eastern Spotted Dove | 2020/11/24 | 2 | 0 | 22.35710246 | 114.09599690 | <a href="https://www.inaturalist.org/observations/65519933">https://www.inaturalist.org/observations/65519933</a>   |
| 3261 | <i>Spilopelia chinensis</i> | Eastern Spotted Dove | 2020/11/24 | 1 | 0 | 22.35716232 | 114.09585000 | <a href="https://www.inaturalist.org/observations/65519943">https://www.inaturalist.org/observations/65519943</a>   |
| 3262 | <i>Spilopelia chinensis</i> | Eastern Spotted Dove | 2020/12/13 | 2 | 0 | 22.35726680 | 114.10602320 | <a href="https://www.inaturalist.org/observations/66505046">https://www.inaturalist.org/observations/66505046</a>   |
| 3263 | <i>Spilopelia chinensis</i> | Eastern Spotted Dove | 2020/11/24 | 1 | 0 | 22.35740011 | 114.09554550 | <a href="https://www.inaturalist.org/observations/65519990">https://www.inaturalist.org/observations/65519990</a>   |
| 3264 | <i>Spilopelia chinensis</i> | Eastern Spotted Dove | 2020/11/24 | 2 | 0 | 22.35744311 | 114.09553160 | <a href="https://www.inaturalist.org/observations/65519958">https://www.inaturalist.org/observations/65519958</a>   |
| 3265 | <i>Spilopelia chinensis</i> | Eastern Spotted Dove | 2020/11/24 | 1 | 0 | 22.35744491 | 114.09546360 | <a href="https://www.inaturalist.org/observations/65519961">https://www.inaturalist.org/observations/65519961</a>   |

|      |                             |                      |            |   |   |             |              |                                                                                                                     |
|------|-----------------------------|----------------------|------------|---|---|-------------|--------------|---------------------------------------------------------------------------------------------------------------------|
| 3266 | <i>Spilopelia chinensis</i> | Eastern Spotted Dove | 2022/9/16  | 1 | 0 | 22.35785567 | 114.13299770 | <a href="https://www.inaturalist.org/observations/135259470">https://www.inaturalist.org/observations/135259470</a> |
| 3267 | <i>Spilopelia chinensis</i> | Eastern Spotted Dove | 2021/3/14  | 2 | 0 | 22.35939486 | 114.10677170 | <a href="https://www.inaturalist.org/observations/71198181">https://www.inaturalist.org/observations/71198181</a>   |
| 3268 | <i>Spilopelia chinensis</i> | Eastern Spotted Dove | 2019/5/12  | 1 | 0 | 22.36134834 | 114.12664280 | <a href="https://www.inaturalist.org/observations/24970700">https://www.inaturalist.org/observations/24970700</a>   |
| 3269 | <i>Spilopelia chinensis</i> | Eastern Spotted Dove | 2022/5/2   | 1 | 0 | 22.36204675 | 114.09893220 | <a href="https://www.inaturalist.org/observations/114543030">https://www.inaturalist.org/observations/114543030</a> |
| 3270 | <i>Spilopelia chinensis</i> | Eastern Spotted Dove | 2022/7/5   | 1 | 0 | 22.36262167 | 114.17113670 | <a href="https://www.inaturalist.org/observations/124808458">https://www.inaturalist.org/observations/124808458</a> |
| 3271 | <i>Spilopelia chinensis</i> | Eastern Spotted Dove | 2021/10/14 | 1 | 0 | 22.36306167 | 114.10535550 | <a href="https://www.inaturalist.org/observations/98169513">https://www.inaturalist.org/observations/98169513</a>   |
| 3272 | <i>Spilopelia chinensis</i> | Eastern Spotted Dove | 2020/10/25 | 1 | 0 | 22.36330100 | 114.17109730 | <a href="https://www.inaturalist.org/observations/63447640">https://www.inaturalist.org/observations/63447640</a>   |
| 3273 | <i>Spilopelia chinensis</i> | Eastern Spotted Dove | 2019/4/28  | 1 | 0 | 22.36347342 | 114.11321960 | <a href="https://www.inaturalist.org/observations/23582741">https://www.inaturalist.org/observations/23582741</a>   |
| 3274 | <i>Spilopelia chinensis</i> | Eastern Spotted Dove | 2018/10/9  | 4 | 0 | 22.36402500 | 114.12711380 | <a href="https://www.inaturalist.org/observations/17344203">https://www.inaturalist.org/observations/17344203</a>   |
| 3275 | <i>Spilopelia chinensis</i> | Eastern Spotted Dove | 2019/4/28  | 3 | 0 | 22.36433321 | 114.13169900 | <a href="https://www.inaturalist.org/observations/23593143">https://www.inaturalist.org/observations/23593143</a>   |
| 3276 | <i>Spilopelia chinensis</i> | Eastern Spotted Dove | 2020/5/1   | 1 | 0 | 22.36517618 | 114.11245650 | <a href="https://www.inaturalist.org/observations/58820121">https://www.inaturalist.org/observations/58820121</a>   |
| 3277 | <i>Spilopelia chinensis</i> | Eastern Spotted Dove | 2020/5/1   | 1 | 0 | 22.36517618 | 114.11245650 | <a href="https://www.inaturalist.org/observations/58820122">https://www.inaturalist.org/observations/58820122</a>   |
| 3278 | <i>Spilopelia chinensis</i> | Eastern Spotted Dove | 2020/10/23 | 1 | 0 | 22.36525231 | 114.11273300 | <a href="https://www.inaturalist.org/observations/82000482">https://www.inaturalist.org/observations/82000482</a>   |
| 3279 | <i>Spilopelia chinensis</i> | Eastern Spotted Dove | 2020/10/26 | 2 | 0 | 22.36535261 | 114.14083860 | <a href="https://www.inaturalist.org/observations/63564672">https://www.inaturalist.org/observations/63564672</a>   |
| 3280 | <i>Spilopelia chinensis</i> | Eastern Spotted Dove | 2015/8/15  | 1 | 0 | 22.36549064 | 114.19852580 | <a href="https://www.inaturalist.org/observations/22551425">https://www.inaturalist.org/observations/22551425</a>   |
| 3281 | <i>Spilopelia chinensis</i> | Eastern Spotted Dove | 2015/9/12  | 1 | 0 | 22.36549064 | 114.19852580 | <a href="https://www.inaturalist.org/observations/22845919">https://www.inaturalist.org/observations/22845919</a>   |
| 3282 | <i>Spilopelia chinensis</i> | Eastern Spotted Dove | 2016/4/3   | 1 | 0 | 22.36549064 | 114.19852580 | <a href="https://www.inaturalist.org/observations/25865068">https://www.inaturalist.org/observations/25865068</a>   |
| 3283 | <i>Spilopelia chinensis</i> | Eastern Spotted Dove | 2016/5/22  | 2 | 0 | 22.36549064 | 114.19852580 | <a href="https://www.inaturalist.org/observations/25929017">https://www.inaturalist.org/observations/25929017</a>   |
| 3284 | <i>Spilopelia chinensis</i> | Eastern Spotted Dove | 2018/1/13  | 2 | 0 | 22.36549064 | 114.19852580 | <a href="https://www.inaturalist.org/observations/31537030">https://www.inaturalist.org/observations/31537030</a>   |
| 3285 | <i>Spilopelia chinensis</i> | Eastern Spotted Dove | 2020/1/29  | 0 | 0 | 22.36549064 | 114.19852580 | <a href="https://www.inaturalist.org/observations/38142935">https://www.inaturalist.org/observations/38142935</a>   |
| 3286 | <i>Spilopelia chinensis</i> | Eastern Spotted Dove | 2018/7/19  | 1 | 0 | 22.36549100 | 114.19852600 | <a href="https://www.inaturalist.org/observations/32679788">https://www.inaturalist.org/observations/32679788</a>   |
| 3287 | <i>Spilopelia chinensis</i> | Eastern Spotted Dove | 2020/3/25  | 1 | 0 | 22.36550333 | 113.98969170 | <a href="https://www.inaturalist.org/observations/41151145">https://www.inaturalist.org/observations/41151145</a>   |
| 3288 | <i>Spilopelia chinensis</i> | Eastern Spotted Dove | 2020/3/22  | 1 | 0 | 22.36551660 | 113.98966630 | <a href="https://www.inaturalist.org/observations/40508990">https://www.inaturalist.org/observations/40508990</a>   |

|      |                             |                      |            |   |   |             |              |                                                                                                                     |
|------|-----------------------------|----------------------|------------|---|---|-------------|--------------|---------------------------------------------------------------------------------------------------------------------|
| 3289 | <i>Spilopelia chinensis</i> | Eastern Spotted Dove | 2019/4/28  | 2 | 0 | 22.36558457 | 114.11201950 | <a href="https://www.inaturalist.org/observations/23578262">https://www.inaturalist.org/observations/23578262</a>   |
| 3290 | <i>Spilopelia chinensis</i> | Eastern Spotted Dove | 2021/2/10  | 2 | 0 | 22.36560737 | 114.11201030 | <a href="https://www.inaturalist.org/observations/86124442">https://www.inaturalist.org/observations/86124442</a>   |
| 3291 | <i>Spilopelia chinensis</i> | Eastern Spotted Dove | 2020/4/7   | 1 | 0 | 22.36564924 | 114.11296680 | <a href="https://www.inaturalist.org/observations/58818147">https://www.inaturalist.org/observations/58818147</a>   |
| 3292 | <i>Spilopelia chinensis</i> | Eastern Spotted Dove | 2019/9/28  | 1 | 0 | 22.36588775 | 114.11177530 | <a href="https://www.inaturalist.org/observations/33518923">https://www.inaturalist.org/observations/33518923</a>   |
| 3293 | <i>Spilopelia chinensis</i> | Eastern Spotted Dove | 2022/5/22  | 1 | 0 | 22.36595358 | 114.11344020 | <a href="https://www.inaturalist.org/observations/118765850">https://www.inaturalist.org/observations/118765850</a> |
| 3294 | <i>Spilopelia chinensis</i> | Eastern Spotted Dove | 2020/8/7   | 2 | 0 | 22.36604839 | 114.11138210 | <a href="https://www.inaturalist.org/observations/66913989">https://www.inaturalist.org/observations/66913989</a>   |
| 3295 | <i>Spilopelia chinensis</i> | Eastern Spotted Dove | 2019/12/27 | 2 | 0 | 22.36614672 | 114.11183660 | <a href="https://www.inaturalist.org/observations/36988543">https://www.inaturalist.org/observations/36988543</a>   |
| 3296 | <i>Spilopelia chinensis</i> | Eastern Spotted Dove | 2020/9/28  | 3 | 0 | 22.36617313 | 114.11190090 | <a href="https://www.inaturalist.org/observations/81013894">https://www.inaturalist.org/observations/81013894</a>   |
| 3297 | <i>Spilopelia chinensis</i> | Eastern Spotted Dove | 2021/6/19  | 1 | 0 | 22.36617688 | 114.11141480 | <a href="https://www.inaturalist.org/observations/95643592">https://www.inaturalist.org/observations/95643592</a>   |
| 3298 | <i>Spilopelia chinensis</i> | Eastern Spotted Dove | 2020/12/12 | 1 | 0 | 22.36617720 | 114.17245190 | <a href="https://www.inaturalist.org/observations/66506441">https://www.inaturalist.org/observations/66506441</a>   |
| 3299 | <i>Spilopelia chinensis</i> | Eastern Spotted Dove | 2021/5/3   | 2 | 0 | 22.36624965 | 114.15977780 | <a href="https://www.inaturalist.org/observations/77738897">https://www.inaturalist.org/observations/77738897</a>   |
| 3300 | <i>Spilopelia chinensis</i> | Eastern Spotted Dove | 2020/2/10  | 0 | 0 | 22.36629201 | 114.19419950 | <a href="https://www.inaturalist.org/observations/38500581">https://www.inaturalist.org/observations/38500581</a>   |
| 3301 | <i>Spilopelia chinensis</i> | Eastern Spotted Dove | 2020/1/30  | 0 | 0 | 22.36630299 | 114.18903860 | <a href="https://www.inaturalist.org/observations/38114655">https://www.inaturalist.org/observations/38114655</a>   |
| 3302 | <i>Spilopelia chinensis</i> | Eastern Spotted Dove | 2020/12/29 | 1 | 0 | 22.36634043 | 114.11153380 | <a href="https://www.inaturalist.org/observations/83616711">https://www.inaturalist.org/observations/83616711</a>   |
| 3303 | <i>Spilopelia chinensis</i> | Eastern Spotted Dove | 2020/4/24  | 1 | 0 | 22.36635913 | 114.11114390 | <a href="https://www.inaturalist.org/observations/43545414">https://www.inaturalist.org/observations/43545414</a>   |
| 3304 | <i>Spilopelia chinensis</i> | Eastern Spotted Dove | 2019/6/21  | 0 | 0 | 22.36636728 | 114.11138410 | <a href="https://www.inaturalist.org/observations/35811429">https://www.inaturalist.org/observations/35811429</a>   |
| 3305 | <i>Spilopelia chinensis</i> | Eastern Spotted Dove | 2020/12/10 | 2 | 0 | 22.36637500 | 114.11320550 | <a href="https://www.inaturalist.org/observations/66366322">https://www.inaturalist.org/observations/66366322</a>   |
| 3306 | <i>Spilopelia chinensis</i> | Eastern Spotted Dove | 2021/3/28  | 1 | 0 | 22.36639047 | 114.06134060 | <a href="https://www.inaturalist.org/observations/72249353">https://www.inaturalist.org/observations/72249353</a>   |
| 3307 | <i>Spilopelia chinensis</i> | Eastern Spotted Dove | 2020/4/7   | 1 | 0 | 22.36643540 | 114.11136850 | <a href="https://www.inaturalist.org/observations/58818148">https://www.inaturalist.org/observations/58818148</a>   |
| 3308 | <i>Spilopelia chinensis</i> | Eastern Spotted Dove | 2022/5/2   | 1 | 0 | 22.36643597 | 114.11186790 | <a href="https://www.inaturalist.org/observations/114601437">https://www.inaturalist.org/observations/114601437</a> |
| 3309 | <i>Spilopelia chinensis</i> | Eastern Spotted Dove | 2017/4/7   | 3 | 0 | 22.36654182 | 114.18412550 | <a href="https://www.inaturalist.org/observations/6955007">https://www.inaturalist.org/observations/6955007</a>     |
| 3310 | <i>Spilopelia chinensis</i> | Eastern Spotted Dove | 2017/9/2   | 1 | 0 | 22.36655867 | 114.11268410 | <a href="https://www.inaturalist.org/observations/35665878">https://www.inaturalist.org/observations/35665878</a>   |
| 3311 | <i>Spilopelia chinensis</i> | Eastern Spotted Dove | 2021/3/15  | 1 | 0 | 22.36667110 | 114.11086640 | <a href="https://www.inaturalist.org/observations/94695105">https://www.inaturalist.org/observations/94695105</a>   |

|      |                             |                      |            |   |   |             |              |                                                                                                                     |
|------|-----------------------------|----------------------|------------|---|---|-------------|--------------|---------------------------------------------------------------------------------------------------------------------|
| 3312 | <i>Spilopelia chinensis</i> | Eastern Spotted Dove | 2020/6/20  | 1 | 0 | 22.36668211 | 114.11121470 | <a href="https://www.inaturalist.org/observations/60684418">https://www.inaturalist.org/observations/60684418</a>   |
| 3313 | <i>Spilopelia chinensis</i> | Eastern Spotted Dove | 2022/4/30  | 1 | 0 | 22.36669007 | 114.13268920 | <a href="https://www.inaturalist.org/observations/113586947">https://www.inaturalist.org/observations/113586947</a> |
| 3314 | <i>Spilopelia chinensis</i> | Eastern Spotted Dove | 2022/4/29  | 2 | 0 | 22.36677521 | 114.11485820 | <a href="https://www.inaturalist.org/observations/113336084">https://www.inaturalist.org/observations/113336084</a> |
| 3315 | <i>Spilopelia chinensis</i> | Eastern Spotted Dove | 2022/5/4   | 2 | 0 | 22.36687000 | 114.05880000 | <a href="https://www.inaturalist.org/observations/115720475">https://www.inaturalist.org/observations/115720475</a> |
| 3316 | <i>Spilopelia chinensis</i> | Eastern Spotted Dove | 2020/10/20 | 1 | 0 | 22.36690024 | 114.13025900 | <a href="https://www.inaturalist.org/observations/63075288">https://www.inaturalist.org/observations/63075288</a>   |
| 3317 | <i>Spilopelia chinensis</i> | Eastern Spotted Dove | 2020/12/10 | 2 | 0 | 22.36692167 | 114.11301380 | <a href="https://www.inaturalist.org/observations/66366085">https://www.inaturalist.org/observations/66366085</a>   |
| 3318 | <i>Spilopelia chinensis</i> | Eastern Spotted Dove | 2020/12/10 | 2 | 0 | 22.36693000 | 114.11327500 | <a href="https://www.inaturalist.org/observations/66366091">https://www.inaturalist.org/observations/66366091</a>   |
| 3319 | <i>Spilopelia chinensis</i> | Eastern Spotted Dove | 2020/10/19 | 1 | 0 | 22.36695016 | 114.13025900 | <a href="https://www.inaturalist.org/observations/62990772">https://www.inaturalist.org/observations/62990772</a>   |
| 3320 | <i>Spilopelia chinensis</i> | Eastern Spotted Dove | 2020/6/14  | 1 | 0 | 22.36696606 | 114.11350100 | <a href="https://www.inaturalist.org/observations/60300227">https://www.inaturalist.org/observations/60300227</a>   |
| 3321 | <i>Spilopelia chinensis</i> | Eastern Spotted Dove | 2022/5/4   | 1 | 0 | 22.36702833 | 114.06242500 | <a href="https://www.inaturalist.org/observations/115719908">https://www.inaturalist.org/observations/115719908</a> |
| 3322 | <i>Spilopelia chinensis</i> | Eastern Spotted Dove | 2020/12/10 | 2 | 0 | 22.36702833 | 114.11409720 | <a href="https://www.inaturalist.org/observations/66366452">https://www.inaturalist.org/observations/66366452</a>   |
| 3323 | <i>Spilopelia chinensis</i> | Eastern Spotted Dove | 2020/12/10 | 2 | 0 | 22.36708333 | 114.11286120 | <a href="https://www.inaturalist.org/observations/66366077">https://www.inaturalist.org/observations/66366077</a>   |
| 3324 | <i>Spilopelia chinensis</i> | Eastern Spotted Dove | 2021/12/29 | 1 | 0 | 22.36711393 | 114.11097750 | <a href="https://www.inaturalist.org/observations/121565913">https://www.inaturalist.org/observations/121565913</a> |
| 3325 | <i>Spilopelia chinensis</i> | Eastern Spotted Dove | 2020/12/14 | 1 | 0 | 22.36716667 | 114.11276120 | <a href="https://www.inaturalist.org/observations/66572680">https://www.inaturalist.org/observations/66572680</a>   |
| 3326 | <i>Spilopelia chinensis</i> | Eastern Spotted Dove | 2022/5/2   | 2 | 0 | 22.36722518 | 114.11135720 | <a href="https://www.inaturalist.org/observations/114663720">https://www.inaturalist.org/observations/114663720</a> |
| 3327 | <i>Spilopelia chinensis</i> | Eastern Spotted Dove | 2021/10/17 | 2 | 0 | 22.36723393 | 114.11380770 | <a href="https://www.inaturalist.org/observations/120935080">https://www.inaturalist.org/observations/120935080</a> |
| 3328 | <i>Spilopelia chinensis</i> | Eastern Spotted Dove | 2020/12/10 | 1 | 0 | 22.36727833 | 114.11278620 | <a href="https://www.inaturalist.org/observations/66365942">https://www.inaturalist.org/observations/66365942</a>   |
| 3329 | <i>Spilopelia chinensis</i> | Eastern Spotted Dove | 2021/5/1   | 2 | 0 | 22.36727834 | 114.11280350 | <a href="https://www.inaturalist.org/observations/76078278">https://www.inaturalist.org/observations/76078278</a>   |
| 3330 | <i>Spilopelia chinensis</i> | Eastern Spotted Dove | 2021/4/11  | 2 | 0 | 22.36729167 | 114.17457500 | <a href="https://www.inaturalist.org/observations/74067785">https://www.inaturalist.org/observations/74067785</a>   |
| 3331 | <i>Spilopelia chinensis</i> | Eastern Spotted Dove | 2020/11/6  | 2 | 0 | 22.36733741 | 114.11348590 | <a href="https://www.inaturalist.org/observations/64287212">https://www.inaturalist.org/observations/64287212</a>   |
| 3332 | <i>Spilopelia chinensis</i> | Eastern Spotted Dove | 2020/12/10 | 1 | 0 | 22.36734167 | 114.11003880 | <a href="https://www.inaturalist.org/observations/66366469">https://www.inaturalist.org/observations/66366469</a>   |
| 3333 | <i>Spilopelia chinensis</i> | Eastern Spotted Dove | 2022/4/30  | 2 | 0 | 22.36734167 | 114.11266940 | <a href="https://www.inaturalist.org/observations/115651476">https://www.inaturalist.org/observations/115651476</a> |
| 3334 | <i>Spilopelia chinensis</i> | Eastern Spotted Dove | 2021/2/11  | 1 | 0 | 22.36740262 | 114.06092030 | <a href="https://www.inaturalist.org/observations/69544708">https://www.inaturalist.org/observations/69544708</a>   |

|      |                             |                      |            |   |   |             |              |                                                                                                                     |
|------|-----------------------------|----------------------|------------|---|---|-------------|--------------|---------------------------------------------------------------------------------------------------------------------|
| 3335 | <i>Spilopelia chinensis</i> | Eastern Spotted Dove | 2022/5/5   | 1 | 0 | 22.36740500 | 114.11317500 | <a href="https://www.inaturalist.org/observations/115834691">https://www.inaturalist.org/observations/115834691</a> |
| 3336 | <i>Spilopelia chinensis</i> | Eastern Spotted Dove | 2018/4/27  | 3 | 0 | 22.36741667 | 114.11293050 | <a href="https://www.inaturalist.org/observations/11479079">https://www.inaturalist.org/observations/11479079</a>   |
| 3337 | <i>Spilopelia chinensis</i> | Eastern Spotted Dove | 2021/1/2   | 1 | 0 | 22.36749446 | 114.06165520 | <a href="https://www.inaturalist.org/observations/67443686">https://www.inaturalist.org/observations/67443686</a>   |
| 3338 | <i>Spilopelia chinensis</i> | Eastern Spotted Dove | 2018/12/24 | 3 | 0 | 22.36754938 | 114.11413490 | <a href="https://www.inaturalist.org/observations/19243712">https://www.inaturalist.org/observations/19243712</a>   |
| 3339 | <i>Spilopelia chinensis</i> | Eastern Spotted Dove | 2020/12/10 | 2 | 0 | 22.36759167 | 114.11248880 | <a href="https://www.inaturalist.org/observations/66365858">https://www.inaturalist.org/observations/66365858</a>   |
| 3340 | <i>Spilopelia chinensis</i> | Eastern Spotted Dove | 2020/6/7   | 1 | 0 | 22.36764859 | 114.11364700 | <a href="https://www.inaturalist.org/observations/59197798">https://www.inaturalist.org/observations/59197798</a>   |
| 3341 | <i>Spilopelia chinensis</i> | Eastern Spotted Dove | 2021/1/2   | 1 | 0 | 22.36778545 | 114.06176870 | <a href="https://www.inaturalist.org/observations/67444165">https://www.inaturalist.org/observations/67444165</a>   |
| 3342 | <i>Spilopelia chinensis</i> | Eastern Spotted Dove | 2020/12/10 | 1 | 0 | 22.36785333 | 114.11296950 | <a href="https://www.inaturalist.org/observations/66365603">https://www.inaturalist.org/observations/66365603</a>   |
| 3343 | <i>Spilopelia chinensis</i> | Eastern Spotted Dove | 2020/12/24 | 2 | 0 | 22.36785590 | 114.06180390 | <a href="https://www.inaturalist.org/observations/67123577">https://www.inaturalist.org/observations/67123577</a>   |
| 3344 | <i>Spilopelia chinensis</i> | Eastern Spotted Dove | 2020/12/10 | 2 | 0 | 22.36787000 | 114.11342500 | <a href="https://www.inaturalist.org/observations/66365631">https://www.inaturalist.org/observations/66365631</a>   |
| 3345 | <i>Spilopelia chinensis</i> | Eastern Spotted Dove | 2022/6/3   | 1 | 0 | 22.36793667 | 114.10932220 | <a href="https://www.inaturalist.org/observations/119991193">https://www.inaturalist.org/observations/119991193</a> |
| 3346 | <i>Spilopelia chinensis</i> | Eastern Spotted Dove | 2019/12/15 | 1 | 0 | 22.36804546 | 114.11371140 | <a href="https://www.inaturalist.org/observations/49702180">https://www.inaturalist.org/observations/49702180</a>   |
| 3347 | <i>Spilopelia chinensis</i> | Eastern Spotted Dove | 2021/11/5  | 1 | 0 | 22.36808333 | 114.11306670 | <a href="https://www.inaturalist.org/observations/100302562">https://www.inaturalist.org/observations/100302562</a> |
| 3348 | <i>Spilopelia chinensis</i> | Eastern Spotted Dove | 2018/11/13 | 2 | 0 | 22.36810916 | 114.13996850 | <a href="https://www.inaturalist.org/observations/18360887">https://www.inaturalist.org/observations/18360887</a>   |
| 3349 | <i>Spilopelia chinensis</i> | Eastern Spotted Dove | 2019/4/27  | 2 | 0 | 22.36815208 | 114.11367840 | <a href="https://www.inaturalist.org/observations/23857649">https://www.inaturalist.org/observations/23857649</a>   |
| 3350 | <i>Spilopelia chinensis</i> | Eastern Spotted Dove | 2022/6/3   | 2 | 0 | 22.36818833 | 114.10898620 | <a href="https://www.inaturalist.org/observations/119991128">https://www.inaturalist.org/observations/119991128</a> |
| 3351 | <i>Spilopelia chinensis</i> | Eastern Spotted Dove | 2022/5/2   | 1 | 0 | 22.36819500 | 114.10886380 | <a href="https://www.inaturalist.org/observations/114605109">https://www.inaturalist.org/observations/114605109</a> |
| 3352 | <i>Spilopelia chinensis</i> | Eastern Spotted Dove | 2020/10/20 | 2 | 0 | 22.36827709 | 114.14034670 | <a href="https://www.inaturalist.org/observations/63062695">https://www.inaturalist.org/observations/63062695</a>   |
| 3353 | <i>Spilopelia chinensis</i> | Eastern Spotted Dove | 2021/11/26 | 1 | 0 | 22.36829180 | 114.17702890 | <a href="https://www.inaturalist.org/observations/101930947">https://www.inaturalist.org/observations/101930947</a> |
| 3354 | <i>Spilopelia chinensis</i> | Eastern Spotted Dove | 2022/5/2   | 1 | 0 | 22.36830018 | 114.01361560 | <a href="https://www.inaturalist.org/observations/114599993">https://www.inaturalist.org/observations/114599993</a> |
| 3355 | <i>Spilopelia chinensis</i> | Eastern Spotted Dove | 2021/11/26 | 3 | 0 | 22.36830429 | 114.17703950 | <a href="https://www.inaturalist.org/observations/101930914">https://www.inaturalist.org/observations/101930914</a> |
| 3356 | <i>Spilopelia chinensis</i> | Eastern Spotted Dove | 2022/6/11  | 5 | 0 | 22.36834333 | 80.53721000  | <a href="https://www.inaturalist.org/observations/121596193">https://www.inaturalist.org/observations/121596193</a> |
| 3357 | <i>Spilopelia chinensis</i> | Eastern Spotted Dove | 2018/10/14 | 3 | 0 | 22.36863630 | 114.17513150 | <a href="https://www.inaturalist.org/observations/17496379">https://www.inaturalist.org/observations/17496379</a>   |

|      |                             |                      |            |   |   |             |              |                                                                                                                     |
|------|-----------------------------|----------------------|------------|---|---|-------------|--------------|---------------------------------------------------------------------------------------------------------------------|
| 3358 | <i>Spilopelia chinensis</i> | Eastern Spotted Dove | 2022/3/26  | 2 | 0 | 22.36869384 | 114.19435990 | <a href="https://www.inaturalist.org/observations/109525453">https://www.inaturalist.org/observations/109525453</a> |
| 3359 | <i>Spilopelia chinensis</i> | Eastern Spotted Dove | 2021/11/9  | 2 | 0 | 22.36875017 | 114.14074620 | <a href="https://www.inaturalist.org/observations/100660842">https://www.inaturalist.org/observations/100660842</a> |
| 3360 | <i>Spilopelia chinensis</i> | Eastern Spotted Dove | 2021/4/30  | 2 | 0 | 22.36891300 | 114.17174500 | <a href="https://www.inaturalist.org/observations/77611887">https://www.inaturalist.org/observations/77611887</a>   |
| 3361 | <i>Spilopelia chinensis</i> | Eastern Spotted Dove | 2021/11/5  | 1 | 0 | 22.36896642 | 114.14005890 | <a href="https://www.inaturalist.org/observations/100290686">https://www.inaturalist.org/observations/100290686</a> |
| 3362 | <i>Spilopelia chinensis</i> | Eastern Spotted Dove | 2020/4/8   | 1 | 0 | 22.36901333 | 114.17647000 | <a href="https://www.inaturalist.org/observations/41762941">https://www.inaturalist.org/observations/41762941</a>   |
| 3363 | <i>Spilopelia chinensis</i> | Eastern Spotted Dove | 2020/11/28 | 1 | 0 | 22.36923667 | 114.17997000 | <a href="https://www.inaturalist.org/observations/65756681">https://www.inaturalist.org/observations/65756681</a>   |
| 3364 | <i>Spilopelia chinensis</i> | Eastern Spotted Dove | 2020/11/22 | 1 | 0 | 22.36925462 | 114.11170990 | <a href="https://www.inaturalist.org/observations/66463963">https://www.inaturalist.org/observations/66463963</a>   |
| 3365 | <i>Spilopelia chinensis</i> | Eastern Spotted Dove | 2020/10/13 | 1 | 0 | 22.36926167 | 114.10831380 | <a href="https://www.inaturalist.org/observations/64523729">https://www.inaturalist.org/observations/64523729</a>   |
| 3366 | <i>Spilopelia chinensis</i> | Eastern Spotted Dove | 2020/10/20 | 1 | 0 | 22.36928919 | 114.14060550 | <a href="https://www.inaturalist.org/observations/63063864">https://www.inaturalist.org/observations/63063864</a>   |
| 3367 | <i>Spilopelia chinensis</i> | Eastern Spotted Dove | 2020/11/9  | 2 | 0 | 22.36933899 | 114.14027260 | <a href="https://www.inaturalist.org/observations/64636952">https://www.inaturalist.org/observations/64636952</a>   |
| 3368 | <i>Spilopelia chinensis</i> | Eastern Spotted Dove | 2018/10/22 | 2 | 0 | 22.36934360 | 114.17499150 | <a href="https://www.inaturalist.org/observations/17874947">https://www.inaturalist.org/observations/17874947</a>   |
| 3369 | <i>Spilopelia chinensis</i> | Eastern Spotted Dove | 2018/10/14 | 4 | 0 | 22.36935090 | 114.17469790 | <a href="https://www.inaturalist.org/observations/17496240">https://www.inaturalist.org/observations/17496240</a>   |
| 3370 | <i>Spilopelia chinensis</i> | Eastern Spotted Dove | 2020/10/20 | 1 | 0 | 22.36935219 | 114.14035070 | <a href="https://www.inaturalist.org/observations/63064855">https://www.inaturalist.org/observations/63064855</a>   |
| 3371 | <i>Spilopelia chinensis</i> | Eastern Spotted Dove | 2014/3/11  | 4 | 0 | 22.36938060 | 73.71410460  | <a href="https://www.inaturalist.org/observations/39916036">https://www.inaturalist.org/observations/39916036</a>   |
| 3372 | <i>Spilopelia chinensis</i> | Eastern Spotted Dove | 2021/11/10 | 2 | 0 | 22.36961633 | 114.14039190 | <a href="https://www.inaturalist.org/observations/100743358">https://www.inaturalist.org/observations/100743358</a> |
| 3373 | <i>Spilopelia chinensis</i> | Eastern Spotted Dove | 2020/11/9  | 1 | 0 | 22.36964024 | 114.14071200 | <a href="https://www.inaturalist.org/observations/64497213">https://www.inaturalist.org/observations/64497213</a>   |
| 3374 | <i>Spilopelia chinensis</i> | Eastern Spotted Dove | 2020/11/9  | 2 | 0 | 22.36965668 | 114.14070650 | <a href="https://www.inaturalist.org/observations/64491287">https://www.inaturalist.org/observations/64491287</a>   |
| 3375 | <i>Spilopelia chinensis</i> | Eastern Spotted Dove | 2021/11/10 | 1 | 0 | 22.36966402 | 114.14072500 | <a href="https://www.inaturalist.org/observations/100738401">https://www.inaturalist.org/observations/100738401</a> |
| 3376 | <i>Spilopelia chinensis</i> | Eastern Spotted Dove | 2021/11/10 | 2 | 0 | 22.36973000 | 114.14048050 | <a href="https://www.inaturalist.org/observations/100743635">https://www.inaturalist.org/observations/100743635</a> |
| 3377 | <i>Spilopelia chinensis</i> | Eastern Spotted Dove | 2020/10/27 | 1 | 0 | 22.36978268 | 114.17510710 | <a href="https://www.inaturalist.org/observations/63800491">https://www.inaturalist.org/observations/63800491</a>   |
| 3378 | <i>Spilopelia chinensis</i> | Eastern Spotted Dove | 2020/11/6  | 2 | 0 | 22.36978486 | 114.14051680 | <a href="https://www.inaturalist.org/observations/64278341">https://www.inaturalist.org/observations/64278341</a>   |
| 3379 | <i>Spilopelia chinensis</i> | Eastern Spotted Dove | 2021/11/5  | 0 | 0 | 22.36981080 | 114.14062570 | <a href="https://www.inaturalist.org/observations/100289582">https://www.inaturalist.org/observations/100289582</a> |
| 3380 | <i>Spilopelia chinensis</i> | Eastern Spotted Dove | 2020/11/20 | 2 | 0 | 22.36984775 | 114.14082310 | <a href="https://www.inaturalist.org/observations/65257670">https://www.inaturalist.org/observations/65257670</a>   |

|      |                             |                      |            |   |   |             |              |                                                                                                                     |
|------|-----------------------------|----------------------|------------|---|---|-------------|--------------|---------------------------------------------------------------------------------------------------------------------|
| 3381 | <i>Spilopelia chinensis</i> | Eastern Spotted Dove | 2021/11/5  | 2 | 0 | 22.36984954 | 114.14076270 | <a href="https://www.inaturalist.org/observations/100278604">https://www.inaturalist.org/observations/100278604</a> |
| 3382 | <i>Spilopelia chinensis</i> | Eastern Spotted Dove | 2020/4/18  | 0 | 0 | 22.36991143 | 114.11443070 | <a href="https://www.inaturalist.org/observations/70721375">https://www.inaturalist.org/observations/70721375</a>   |
| 3383 | <i>Spilopelia chinensis</i> | Eastern Spotted Dove | 2020/10/8  | 1 | 0 | 22.36991220 | 114.11443060 | <a href="https://www.inaturalist.org/observations/62368746">https://www.inaturalist.org/observations/62368746</a>   |
| 3384 | <i>Spilopelia chinensis</i> | Eastern Spotted Dove | 2020/11/20 | 2 | 0 | 22.36992671 | 114.14061520 | <a href="https://www.inaturalist.org/observations/65257184">https://www.inaturalist.org/observations/65257184</a>   |
| 3385 | <i>Spilopelia chinensis</i> | Eastern Spotted Dove | 2019/4/28  | 2 | 0 | 22.37005716 | 114.12303590 | <a href="https://www.inaturalist.org/observations/23909310">https://www.inaturalist.org/observations/23909310</a>   |
| 3386 | <i>Spilopelia chinensis</i> | Eastern Spotted Dove | 2019/4/28  | 3 | 0 | 22.37007018 | 114.12282160 | <a href="https://www.inaturalist.org/observations/23910255">https://www.inaturalist.org/observations/23910255</a>   |
| 3387 | <i>Spilopelia chinensis</i> | Eastern Spotted Dove | 2022/5/9   | 3 | 0 | 22.37007690 | 114.18175690 | <a href="https://www.inaturalist.org/observations/116226665">https://www.inaturalist.org/observations/116226665</a> |
| 3388 | <i>Spilopelia chinensis</i> | Eastern Spotted Dove | 2021/5/2   | 1 | 0 | 22.37010118 | 114.11835810 | <a href="https://www.inaturalist.org/observations/76470386">https://www.inaturalist.org/observations/76470386</a>   |
| 3389 | <i>Spilopelia chinensis</i> | Eastern Spotted Dove | 2020/6/1   | 1 | 0 | 22.37018503 | 114.11202740 | <a href="https://www.inaturalist.org/observations/52032470">https://www.inaturalist.org/observations/52032470</a>   |
| 3390 | <i>Spilopelia chinensis</i> | Eastern Spotted Dove | 2019/11/3  | 2 | 0 | 22.37034368 | 114.11270970 | <a href="https://www.inaturalist.org/observations/35225182">https://www.inaturalist.org/observations/35225182</a>   |
| 3391 | <i>Spilopelia chinensis</i> | Eastern Spotted Dove | 2021/11/19 | 1 | 0 | 22.37042430 | 114.12341490 | <a href="https://www.inaturalist.org/observations/101826005">https://www.inaturalist.org/observations/101826005</a> |
| 3392 | <i>Spilopelia chinensis</i> | Eastern Spotted Dove | 2021/11/19 | 1 | 0 | 22.37042430 | 114.12341490 | <a href="https://www.inaturalist.org/observations/101826006">https://www.inaturalist.org/observations/101826006</a> |
| 3393 | <i>Spilopelia chinensis</i> | Eastern Spotted Dove | 2022/5/2   | 1 | 0 | 22.37046547 | 114.11845680 | <a href="https://www.inaturalist.org/observations/114585609">https://www.inaturalist.org/observations/114585609</a> |
| 3394 | <i>Spilopelia chinensis</i> | Eastern Spotted Dove | 2021/11/28 | 1 | 0 | 22.37046827 | 114.17906150 | <a href="https://www.inaturalist.org/observations/102053675">https://www.inaturalist.org/observations/102053675</a> |
| 3395 | <i>Spilopelia chinensis</i> | Eastern Spotted Dove | 2020/9/13  | 3 | 0 | 22.37063333 | 114.11236670 | <a href="https://www.inaturalist.org/observations/59644220">https://www.inaturalist.org/observations/59644220</a>   |
| 3396 | <i>Spilopelia chinensis</i> | Eastern Spotted Dove | 2019/11/24 | 2 | 0 | 22.37063684 | 114.11248500 | <a href="https://www.inaturalist.org/observations/35998609">https://www.inaturalist.org/observations/35998609</a>   |
| 3397 | <i>Spilopelia chinensis</i> | Eastern Spotted Dove | 2022/5/2   | 1 | 0 | 22.37072500 | 114.10371050 | <a href="https://www.inaturalist.org/observations/114582175">https://www.inaturalist.org/observations/114582175</a> |
| 3398 | <i>Spilopelia chinensis</i> | Eastern Spotted Dove | 2019/3/19  | 1 | 0 | 22.37117200 | 114.20041100 | <a href="https://www.inaturalist.org/observations/21469469">https://www.inaturalist.org/observations/21469469</a>   |
| 3399 | <i>Spilopelia chinensis</i> | Eastern Spotted Dove | 2022/5/2   | 1 | 0 | 22.37133594 | 114.12261540 | <a href="https://www.inaturalist.org/observations/114590376">https://www.inaturalist.org/observations/114590376</a> |
| 3400 | <i>Spilopelia chinensis</i> | Eastern Spotted Dove | 2021/3/7   | 2 | 0 | 22.37148855 | 114.17666160 | <a href="https://www.inaturalist.org/observations/70708914">https://www.inaturalist.org/observations/70708914</a>   |
| 3401 | <i>Spilopelia chinensis</i> | Eastern Spotted Dove | 2021/12/1  | 2 | 0 | 22.37155100 | 114.13740620 | <a href="https://www.inaturalist.org/observations/102288347">https://www.inaturalist.org/observations/102288347</a> |
| 3402 | <i>Spilopelia chinensis</i> | Eastern Spotted Dove | 2018/10/14 | 4 | 0 | 22.37160000 | 114.17729900 | <a href="https://www.inaturalist.org/observations/17496447">https://www.inaturalist.org/observations/17496447</a>   |
| 3403 | <i>Spilopelia chinensis</i> | Eastern Spotted Dove | 2021/12/1  | 2 | 0 | 22.37168645 | 114.13727250 | <a href="https://www.inaturalist.org/observations/102290569">https://www.inaturalist.org/observations/102290569</a> |



|      |                             |                      |            |   |   |             |              |                                                                                                                     |
|------|-----------------------------|----------------------|------------|---|---|-------------|--------------|---------------------------------------------------------------------------------------------------------------------|
| 3404 | <i>Spilopelia chinensis</i> | Eastern Spotted Dove | 2021/2/11  | 1 | 0 | 22.37170717 | 114.10202080 | <a href="https://www.inaturalist.org/observations/69440911">https://www.inaturalist.org/observations/69440911</a>   |
| 3405 | <i>Spilopelia chinensis</i> | Eastern Spotted Dove | 2020/5/6   | 2 | 0 | 22.37174135 | 114.18088860 | <a href="https://www.inaturalist.org/observations/45056363">https://www.inaturalist.org/observations/45056363</a>   |
| 3406 | <i>Spilopelia chinensis</i> | Eastern Spotted Dove | 2022/5/9   | 3 | 0 | 22.37177336 | 114.10581600 | <a href="https://www.inaturalist.org/observations/116243139">https://www.inaturalist.org/observations/116243139</a> |
| 3407 | <i>Spilopelia chinensis</i> | Eastern Spotted Dove | 2018/4/28  | 4 | 0 | 22.37177839 | 114.17746000 | <a href="https://www.inaturalist.org/observations/11589570">https://www.inaturalist.org/observations/11589570</a>   |
| 3408 | <i>Spilopelia chinensis</i> | Eastern Spotted Dove | 2021/12/1  | 2 | 0 | 22.37177921 | 114.13724030 | <a href="https://www.inaturalist.org/observations/102288116">https://www.inaturalist.org/observations/102288116</a> |
| 3409 | <i>Spilopelia chinensis</i> | Eastern Spotted Dove | 2021/4/15  | 2 | 0 | 22.37178209 | 114.11552080 | <a href="https://www.inaturalist.org/observations/74169027">https://www.inaturalist.org/observations/74169027</a>   |
| 3410 | <i>Spilopelia chinensis</i> | Eastern Spotted Dove | 2019/2/5   | 3 | 0 | 22.37180470 | 114.11748020 | <a href="https://www.inaturalist.org/observations/20107254">https://www.inaturalist.org/observations/20107254</a>   |
| 3411 | <i>Spilopelia chinensis</i> | Eastern Spotted Dove | 2022/4/10  | 1 | 0 | 22.37182640 | 114.12997680 | <a href="https://www.inaturalist.org/observations/113640626">https://www.inaturalist.org/observations/113640626</a> |
| 3412 | <i>Spilopelia chinensis</i> | Eastern Spotted Dove | 2021/1/30  | 2 | 0 | 22.37194825 | 114.11552950 | <a href="https://www.inaturalist.org/observations/86124436">https://www.inaturalist.org/observations/86124436</a>   |
| 3413 | <i>Spilopelia chinensis</i> | Eastern Spotted Dove | 2022/4/5   | 1 | 0 | 22.37198773 | 114.10229220 | <a href="https://www.inaturalist.org/observations/110468236">https://www.inaturalist.org/observations/110468236</a> |
| 3414 | <i>Spilopelia chinensis</i> | Eastern Spotted Dove | 2020/11/15 | 2 | 0 | 22.37213707 | 114.13835700 | <a href="https://www.inaturalist.org/observations/64917187">https://www.inaturalist.org/observations/64917187</a>   |
| 3415 | <i>Spilopelia chinensis</i> | Eastern Spotted Dove | 2022/3/1   | 2 | 0 | 22.37215936 | 114.14274050 | <a href="https://www.inaturalist.org/observations/107688004">https://www.inaturalist.org/observations/107688004</a> |
| 3416 | <i>Spilopelia chinensis</i> | Eastern Spotted Dove | 2021/1/9   | 1 | 0 | 22.37224158 | 114.10405930 | <a href="https://www.inaturalist.org/observations/67954165">https://www.inaturalist.org/observations/67954165</a>   |
| 3417 | <i>Spilopelia chinensis</i> | Eastern Spotted Dove | 2020/11/15 | 1 | 0 | 22.37227378 | 114.13828500 | <a href="https://www.inaturalist.org/observations/64917213">https://www.inaturalist.org/observations/64917213</a>   |
| 3418 | <i>Spilopelia chinensis</i> | Eastern Spotted Dove | 2022/5/2   | 2 | 0 | 22.37234873 | 114.10505910 | <a href="https://www.inaturalist.org/observations/114576625">https://www.inaturalist.org/observations/114576625</a> |
| 3419 | <i>Spilopelia chinensis</i> | Eastern Spotted Dove | 2021/7/11  | 2 | 0 | 22.37247264 | 114.11532690 | <a href="https://www.inaturalist.org/observations/119039235">https://www.inaturalist.org/observations/119039235</a> |
| 3420 | <i>Spilopelia chinensis</i> | Eastern Spotted Dove | 2020/11/14 | 2 | 0 | 22.37249268 | 114.20104220 | <a href="https://www.inaturalist.org/observations/64844436">https://www.inaturalist.org/observations/64844436</a>   |
| 3421 | <i>Spilopelia chinensis</i> | Eastern Spotted Dove | 2021/3/17  | 2 | 0 | 22.37260500 | 114.18229670 | <a href="https://www.inaturalist.org/observations/71391883">https://www.inaturalist.org/observations/71391883</a>   |
| 3422 | <i>Spilopelia chinensis</i> | Eastern Spotted Dove | 2018/4/28  | 5 | 0 | 22.37285141 | 114.11978370 | <a href="https://www.inaturalist.org/observations/11577492">https://www.inaturalist.org/observations/11577492</a>   |
| 3423 | <i>Spilopelia chinensis</i> | Eastern Spotted Dove | 2018/4/28  | 5 | 0 | 22.37288000 | 114.11994170 | <a href="https://www.inaturalist.org/observations/11580185">https://www.inaturalist.org/observations/11580185</a>   |
| 3424 | <i>Spilopelia chinensis</i> | Eastern Spotted Dove | 2022/7/1   | 2 | 0 | 22.37333333 | 113.95847170 | <a href="https://www.inaturalist.org/observations/124990292">https://www.inaturalist.org/observations/124990292</a> |
| 3425 | <i>Spilopelia chinensis</i> | Eastern Spotted Dove | 2020/11/7  | 1 | 0 | 22.37350399 | 114.12295520 | <a href="https://www.inaturalist.org/observations/64345921">https://www.inaturalist.org/observations/64345921</a>   |
| 3426 | <i>Spilopelia chinensis</i> | Eastern Spotted Dove | 2019/8/11  | 2 | 0 | 22.37354952 | 114.11995440 | <a href="https://www.inaturalist.org/observations/30600651">https://www.inaturalist.org/observations/30600651</a>   |

|      |                             |                      |            |   |   |             |              |                                                                                                                     |
|------|-----------------------------|----------------------|------------|---|---|-------------|--------------|---------------------------------------------------------------------------------------------------------------------|
| 3427 | <i>Spilopelia chinensis</i> | Eastern Spotted Dove | 2021/5/19  | 1 | 0 | 22.37358353 | 114.26439250 | <a href="https://www.inaturalist.org/observations/79376381">https://www.inaturalist.org/observations/79376381</a>   |
| 3428 | <i>Spilopelia chinensis</i> | Eastern Spotted Dove | 2020/1/26  | 0 | 0 | 22.37367000 | 114.18206670 | <a href="https://www.inaturalist.org/observations/38416464">https://www.inaturalist.org/observations/38416464</a>   |
| 3429 | <i>Spilopelia chinensis</i> | Eastern Spotted Dove | 2020/11/27 | 2 | 0 | 22.37367420 | 114.12289270 | <a href="https://www.inaturalist.org/observations/65662953">https://www.inaturalist.org/observations/65662953</a>   |
| 3430 | <i>Spilopelia chinensis</i> | Eastern Spotted Dove | 2020/11/27 | 2 | 0 | 22.37370887 | 114.12278550 | <a href="https://www.inaturalist.org/observations/65663032">https://www.inaturalist.org/observations/65663032</a>   |
| 3431 | <i>Spilopelia chinensis</i> | Eastern Spotted Dove | 2018/4/27  | 2 | 0 | 22.37371167 | 114.11998620 | <a href="https://www.inaturalist.org/observations/11478223">https://www.inaturalist.org/observations/11478223</a>   |
| 3432 | <i>Spilopelia chinensis</i> | Eastern Spotted Dove | 2021/5/9   | 1 | 0 | 22.37373814 | 114.10334930 | <a href="https://www.inaturalist.org/observations/78205891">https://www.inaturalist.org/observations/78205891</a>   |
| 3433 | <i>Spilopelia chinensis</i> | Eastern Spotted Dove | 2020/7/24  | 1 | 0 | 22.37379500 | 114.16309000 | <a href="https://www.inaturalist.org/observations/54135313">https://www.inaturalist.org/observations/54135313</a>   |
| 3434 | <i>Spilopelia chinensis</i> | Eastern Spotted Dove | 2021/5/4   | 2 | 0 | 22.37384890 | 114.17696850 | <a href="https://www.inaturalist.org/observations/77223904">https://www.inaturalist.org/observations/77223904</a>   |
| 3435 | <i>Spilopelia chinensis</i> | Eastern Spotted Dove | 2022/4/15  | 1 | 0 | 22.37389600 | 114.18189000 | <a href="https://www.inaturalist.org/observations/111514313">https://www.inaturalist.org/observations/111514313</a> |
| 3436 | <i>Spilopelia chinensis</i> | Eastern Spotted Dove | 2019/6/26  | 2 | 0 | 22.37404056 | 114.26421660 | <a href="https://www.inaturalist.org/observations/27683869">https://www.inaturalist.org/observations/27683869</a>   |
| 3437 | <i>Spilopelia chinensis</i> | Eastern Spotted Dove | 2021/2/12  | 0 | 0 | 22.37406059 | 114.26194550 | <a href="https://www.inaturalist.org/observations/69435485">https://www.inaturalist.org/observations/69435485</a>   |
| 3438 | <i>Spilopelia chinensis</i> | Eastern Spotted Dove | 2020/6/7   | 1 | 0 | 22.37407590 | 113.95870230 | <a href="https://www.inaturalist.org/observations/49102705">https://www.inaturalist.org/observations/49102705</a>   |
| 3439 | <i>Spilopelia chinensis</i> | Eastern Spotted Dove | 2020/6/21  | 1 | 0 | 22.37408880 | 114.26505400 | <a href="https://www.inaturalist.org/observations/50630001">https://www.inaturalist.org/observations/50630001</a>   |
| 3440 | <i>Spilopelia chinensis</i> | Eastern Spotted Dove | 2016/2/6   | 1 | 0 | 22.37408880 | 114.26505400 | <a href="https://www.inaturalist.org/observations/69683918">https://www.inaturalist.org/observations/69683918</a>   |
| 3441 | <i>Spilopelia chinensis</i> | Eastern Spotted Dove | 2018/4/21  | 2 | 0 | 22.37408900 | 114.26505400 | <a href="https://www.inaturalist.org/observations/11356211">https://www.inaturalist.org/observations/11356211</a>   |
| 3442 | <i>Spilopelia chinensis</i> | Eastern Spotted Dove | 2021/4/30  | 1 | 0 | 22.37409945 | 114.26532690 | <a href="https://www.inaturalist.org/observations/75752970">https://www.inaturalist.org/observations/75752970</a>   |
| 3443 | <i>Spilopelia chinensis</i> | Eastern Spotted Dove | 2015/3/1   | 4 | 0 | 22.37415200 | 114.12473000 | <a href="https://www.inaturalist.org/observations/12856844">https://www.inaturalist.org/observations/12856844</a>   |
| 3444 | <i>Spilopelia chinensis</i> | Eastern Spotted Dove | 2022/5/25  | 1 | 0 | 22.37418885 | 114.18268360 | <a href="https://www.inaturalist.org/observations/118665054">https://www.inaturalist.org/observations/118665054</a> |
| 3445 | <i>Spilopelia chinensis</i> | Eastern Spotted Dove | 2018/10/19 | 2 | 0 | 22.37421864 | 114.12521190 | <a href="https://www.inaturalist.org/observations/17643220">https://www.inaturalist.org/observations/17643220</a>   |
| 3446 | <i>Spilopelia chinensis</i> | Eastern Spotted Dove | 2018/10/19 | 2 | 0 | 22.37422947 | 114.12477750 | <a href="https://www.inaturalist.org/observations/17643326">https://www.inaturalist.org/observations/17643326</a>   |
| 3447 | <i>Spilopelia chinensis</i> | Eastern Spotted Dove | 2018/11/8  | 2 | 0 | 22.37423318 | 114.12367260 | <a href="https://www.inaturalist.org/observations/18249983">https://www.inaturalist.org/observations/18249983</a>   |
| 3448 | <i>Spilopelia chinensis</i> | Eastern Spotted Dove | 2022/5/1   | 1 | 0 | 22.37426657 | 114.26415110 | <a href="https://www.inaturalist.org/observations/114144579">https://www.inaturalist.org/observations/114144579</a> |
| 3449 | <i>Spilopelia chinensis</i> | Eastern Spotted Dove | 2021/3/31  | 1 | 0 | 22.37429941 | 114.26515530 | <a href="https://www.inaturalist.org/observations/72590462">https://www.inaturalist.org/observations/72590462</a>   |

|      |                             |                      |            |   |   |             |              |                                                                                                                     |
|------|-----------------------------|----------------------|------------|---|---|-------------|--------------|---------------------------------------------------------------------------------------------------------------------|
| 3450 | <i>Spilopelia chinensis</i> | Eastern Spotted Dove | 2018/11/8  | 3 | 0 | 22.37430850 | 114.12389300 | <a href="https://www.inaturalist.org/observations/18234664">https://www.inaturalist.org/observations/18234664</a>   |
| 3451 | <i>Spilopelia chinensis</i> | Eastern Spotted Dove | 2021/3/13  | 2 | 0 | 22.37432100 | 114.26447670 | <a href="https://www.inaturalist.org/observations/71183198">https://www.inaturalist.org/observations/71183198</a>   |
| 3452 | <i>Spilopelia chinensis</i> | Eastern Spotted Dove | 2022/5/2   | 3 | 0 | 22.37433294 | 114.26490810 | <a href="https://www.inaturalist.org/observations/114635747">https://www.inaturalist.org/observations/114635747</a> |
| 3453 | <i>Spilopelia chinensis</i> | Eastern Spotted Dove | 2020/3/22  | 1 | 0 | 22.37436674 | 114.12487680 | <a href="https://www.inaturalist.org/observations/40489029">https://www.inaturalist.org/observations/40489029</a>   |
| 3454 | <i>Spilopelia chinensis</i> | Eastern Spotted Dove | 2022/5/22  | 4 | 0 | 22.37437500 | 114.18092200 | <a href="https://www.inaturalist.org/observations/118309586">https://www.inaturalist.org/observations/118309586</a> |
| 3455 | <i>Spilopelia chinensis</i> | Eastern Spotted Dove | 2021/5/1   | 1 | 0 | 22.37444232 | 114.26521410 | <a href="https://www.inaturalist.org/observations/76008019">https://www.inaturalist.org/observations/76008019</a>   |
| 3456 | <i>Spilopelia chinensis</i> | Eastern Spotted Dove | 2020/4/26  | 1 | 0 | 22.37444966 | 114.26518770 | <a href="https://www.inaturalist.org/observations/43546397">https://www.inaturalist.org/observations/43546397</a>   |
| 3457 | <i>Spilopelia chinensis</i> | Eastern Spotted Dove | 2022/5/1   | 2 | 0 | 22.37445289 | 114.26306490 | <a href="https://www.inaturalist.org/observations/114144607">https://www.inaturalist.org/observations/114144607</a> |
| 3458 | <i>Spilopelia chinensis</i> | Eastern Spotted Dove | 2020/8/28  | 1 | 0 | 22.37446407 | 114.26388500 | <a href="https://www.inaturalist.org/observations/57824579">https://www.inaturalist.org/observations/57824579</a>   |
| 3459 | <i>Spilopelia chinensis</i> | Eastern Spotted Dove | 2020/11/30 | 2 | 0 | 22.37448987 | 114.12393540 | <a href="https://www.inaturalist.org/observations/65848912">https://www.inaturalist.org/observations/65848912</a>   |
| 3460 | <i>Spilopelia chinensis</i> | Eastern Spotted Dove | 2020/11/10 | 2 | 0 | 22.37462069 | 114.12473190 | <a href="https://www.inaturalist.org/observations/64587573">https://www.inaturalist.org/observations/64587573</a>   |
| 3461 | <i>Spilopelia chinensis</i> | Eastern Spotted Dove | 2020/11/20 | 2 | 0 | 22.37464236 | 114.12556360 | <a href="https://www.inaturalist.org/observations/65252844">https://www.inaturalist.org/observations/65252844</a>   |
| 3462 | <i>Spilopelia chinensis</i> | Eastern Spotted Dove | 2019/9/21  | 3 | 0 | 22.37467690 | 114.12538180 | <a href="https://www.inaturalist.org/observations/33106543">https://www.inaturalist.org/observations/33106543</a>   |
| 3463 | <i>Spilopelia chinensis</i> | Eastern Spotted Dove | 2018/11/8  | 2 | 0 | 22.37468665 | 114.12544100 | <a href="https://www.inaturalist.org/observations/18248427">https://www.inaturalist.org/observations/18248427</a>   |
| 3464 | <i>Spilopelia chinensis</i> | Eastern Spotted Dove | 2019/12/21 | 1 | 0 | 22.37472809 | 114.12541200 | <a href="https://www.inaturalist.org/observations/36814271">https://www.inaturalist.org/observations/36814271</a>   |
| 3465 | <i>Spilopelia chinensis</i> | Eastern Spotted Dove | 2020/3/22  | 1 | 0 | 22.37473752 | 114.26454600 | <a href="https://www.inaturalist.org/observations/77418637">https://www.inaturalist.org/observations/77418637</a>   |
| 3466 | <i>Spilopelia chinensis</i> | Eastern Spotted Dove | 2021/12/3  | 1 | 0 | 22.37480107 | 114.12534660 | <a href="https://www.inaturalist.org/observations/102480421">https://www.inaturalist.org/observations/102480421</a> |
| 3467 | <i>Spilopelia chinensis</i> | Eastern Spotted Dove | 2020/12/20 | 1 | 0 | 22.37480430 | 114.12550430 | <a href="https://www.inaturalist.org/observations/66806500">https://www.inaturalist.org/observations/66806500</a>   |
| 3468 | <i>Spilopelia chinensis</i> | Eastern Spotted Dove | 2021/12/3  | 1 | 0 | 22.37483115 | 114.12530130 | <a href="https://www.inaturalist.org/observations/102480649">https://www.inaturalist.org/observations/102480649</a> |
| 3469 | <i>Spilopelia chinensis</i> | Eastern Spotted Dove | 2022/5/2   | 3 | 0 | 22.37484718 | 114.26456420 | <a href="https://www.inaturalist.org/observations/114612153">https://www.inaturalist.org/observations/114612153</a> |
| 3470 | <i>Spilopelia chinensis</i> | Eastern Spotted Dove | 2019/8/19  | 3 | 0 | 22.37485138 | 114.12659750 | <a href="https://www.inaturalist.org/observations/31091136">https://www.inaturalist.org/observations/31091136</a>   |
| 3471 | <i>Spilopelia chinensis</i> | Eastern Spotted Dove | 2020/5/16  | 2 | 0 | 22.37486731 | 114.12507010 | <a href="https://www.inaturalist.org/observations/46045121">https://www.inaturalist.org/observations/46045121</a>   |
| 3472 | <i>Spilopelia chinensis</i> | Eastern Spotted Dove | 2022/5/1   | 3 | 0 | 22.37487163 | 114.26420840 | <a href="https://www.inaturalist.org/observations/114151294">https://www.inaturalist.org/observations/114151294</a> |

|      |                             |                      |            |   |   |             |              |                                                                                                                     |
|------|-----------------------------|----------------------|------------|---|---|-------------|--------------|---------------------------------------------------------------------------------------------------------------------|
| 3473 | <i>Spilopelia chinensis</i> | Eastern Spotted Dove | 2018/11/8  | 3 | 0 | 22.37487512 | 114.12484230 | <a href="https://www.inaturalist.org/observations/18249206">https://www.inaturalist.org/observations/18249206</a>   |
| 3474 | <i>Spilopelia chinensis</i> | Eastern Spotted Dove | 2022/3/13  | 3 | 0 | 22.37488667 | 114.26432170 | <a href="https://www.inaturalist.org/observations/108507867">https://www.inaturalist.org/observations/108507867</a> |
| 3475 | <i>Spilopelia chinensis</i> | Eastern Spotted Dove | 2020/4/10  | 2 | 0 | 22.37489000 | 114.16774500 | <a href="https://www.inaturalist.org/observations/42302121">https://www.inaturalist.org/observations/42302121</a>   |
| 3476 | <i>Spilopelia chinensis</i> | Eastern Spotted Dove | 2020/11/10 | 4 | 0 | 22.37493650 | 114.12398650 | <a href="https://www.inaturalist.org/observations/64587670">https://www.inaturalist.org/observations/64587670</a>   |
| 3477 | <i>Spilopelia chinensis</i> | Eastern Spotted Dove | 2019/7/21  | 3 | 0 | 22.37494352 | 114.12656480 | <a href="https://www.inaturalist.org/observations/29222387">https://www.inaturalist.org/observations/29222387</a>   |
| 3478 | <i>Spilopelia chinensis</i> | Eastern Spotted Dove | 2021/1/3   | 1 | 0 | 22.37494833 | 114.26471170 | <a href="https://www.inaturalist.org/observations/96746958">https://www.inaturalist.org/observations/96746958</a>   |
| 3479 | <i>Spilopelia chinensis</i> | Eastern Spotted Dove | 2017/3/26  | 5 | 0 | 22.37497600 | 114.12556700 | <a href="https://www.inaturalist.org/observations/5539389">https://www.inaturalist.org/observations/5539389</a>     |
| 3480 | <i>Spilopelia chinensis</i> | Eastern Spotted Dove | 2020/11/10 | 3 | 0 | 22.37502597 | 114.12488010 | <a href="https://www.inaturalist.org/observations/64587660">https://www.inaturalist.org/observations/64587660</a>   |
| 3481 | <i>Spilopelia chinensis</i> | Eastern Spotted Dove | 2022/5/4   | 3 | 0 | 22.37502674 | 114.19446300 | <a href="https://www.inaturalist.org/observations/115486389">https://www.inaturalist.org/observations/115486389</a> |
| 3482 | <i>Spilopelia chinensis</i> | Eastern Spotted Dove | 2019/7/21  | 3 | 0 | 22.37502836 | 114.12673610 | <a href="https://www.inaturalist.org/observations/29222450">https://www.inaturalist.org/observations/29222450</a>   |
| 3483 | <i>Spilopelia chinensis</i> | Eastern Spotted Dove | 2022/3/13  | 1 | 0 | 22.37503029 | 114.26491010 | <a href="https://www.inaturalist.org/observations/108476559">https://www.inaturalist.org/observations/108476559</a> |
| 3484 | <i>Spilopelia chinensis</i> | Eastern Spotted Dove | 2019/7/23  | 2 | 0 | 22.37508221 | 114.12656710 | <a href="https://www.inaturalist.org/observations/29350904">https://www.inaturalist.org/observations/29350904</a>   |
| 3485 | <i>Spilopelia chinensis</i> | Eastern Spotted Dove | 2022/5/28  | 2 | 0 | 22.37511453 | 114.12693890 | <a href="https://www.inaturalist.org/observations/119022545">https://www.inaturalist.org/observations/119022545</a> |
| 3486 | <i>Spilopelia chinensis</i> | Eastern Spotted Dove | 2020/11/20 | 2 | 0 | 22.37512630 | 114.12632490 | <a href="https://www.inaturalist.org/observations/65253544">https://www.inaturalist.org/observations/65253544</a>   |
| 3487 | <i>Spilopelia chinensis</i> | Eastern Spotted Dove | 2019/11/6  | 3 | 0 | 22.37513449 | 114.12468880 | <a href="https://www.inaturalist.org/observations/35362797">https://www.inaturalist.org/observations/35362797</a>   |
| 3488 | <i>Spilopelia chinensis</i> | Eastern Spotted Dove | 2018/4/27  | 3 | 0 | 22.37513667 | 114.12484720 | <a href="https://www.inaturalist.org/observations/11477329">https://www.inaturalist.org/observations/11477329</a>   |
| 3489 | <i>Spilopelia chinensis</i> | Eastern Spotted Dove | 2019/9/7   | 2 | 0 | 22.37514135 | 114.12559910 | <a href="https://www.inaturalist.org/observations/32245021">https://www.inaturalist.org/observations/32245021</a>   |
| 3490 | <i>Spilopelia chinensis</i> | Eastern Spotted Dove | 2019/11/6  | 2 | 0 | 22.37515029 | 114.12484530 | <a href="https://www.inaturalist.org/observations/35362786">https://www.inaturalist.org/observations/35362786</a>   |
| 3491 | <i>Spilopelia chinensis</i> | Eastern Spotted Dove | 2019/11/6  | 3 | 0 | 22.37515092 | 114.12494430 | <a href="https://www.inaturalist.org/observations/35363667">https://www.inaturalist.org/observations/35363667</a>   |
| 3492 | <i>Spilopelia chinensis</i> | Eastern Spotted Dove | 2019/7/18  | 2 | 0 | 22.37519980 | 114.12562600 | <a href="https://www.inaturalist.org/observations/29025887">https://www.inaturalist.org/observations/29025887</a>   |
| 3493 | <i>Spilopelia chinensis</i> | Eastern Spotted Dove | 2022/1/30  | 2 | 0 | 22.37525470 | 114.12513320 | <a href="https://www.inaturalist.org/observations/105820305">https://www.inaturalist.org/observations/105820305</a> |
| 3494 | <i>Spilopelia chinensis</i> | Eastern Spotted Dove | 2018/11/8  | 3 | 0 | 22.37526370 | 114.12371620 | <a href="https://www.inaturalist.org/observations/18249610">https://www.inaturalist.org/observations/18249610</a>   |
| 3495 | <i>Spilopelia chinensis</i> | Eastern Spotted Dove | 2018/10/19 | 4 | 0 | 22.37533085 | 114.12603300 | <a href="https://www.inaturalist.org/observations/17643001">https://www.inaturalist.org/observations/17643001</a>   |

|      |                             |                      |            |   |   |             |              |                                                                                                                     |
|------|-----------------------------|----------------------|------------|---|---|-------------|--------------|---------------------------------------------------------------------------------------------------------------------|
| 3496 | <i>Spilopelia chinensis</i> | Eastern Spotted Dove | 2019/11/6  | 3 | 0 | 22.37534309 | 114.12504520 | <a href="https://www.inaturalist.org/observations/35362985">https://www.inaturalist.org/observations/35362985</a>   |
| 3497 | <i>Spilopelia chinensis</i> | Eastern Spotted Dove | 2020/8/30  | 2 | 0 | 22.37539690 | 114.12568250 | <a href="https://www.inaturalist.org/observations/57986076">https://www.inaturalist.org/observations/57986076</a>   |
| 3498 | <i>Spilopelia chinensis</i> | Eastern Spotted Dove | 2021/2/15  | 2 | 0 | 22.37542927 | 114.26361860 | <a href="https://www.inaturalist.org/observations/69626766">https://www.inaturalist.org/observations/69626766</a>   |
| 3499 | <i>Spilopelia chinensis</i> | Eastern Spotted Dove | 2021/7/9   | 1 | 0 | 22.37548511 | 114.12651520 | <a href="https://www.inaturalist.org/observations/86250249">https://www.inaturalist.org/observations/86250249</a>   |
| 3500 | <i>Spilopelia chinensis</i> | Eastern Spotted Dove | 2009/12/5  | 3 | 0 | 22.37549600 | 114.12685400 | <a href="https://www.inaturalist.org/observations/30157376">https://www.inaturalist.org/observations/30157376</a>   |
| 3501 | <i>Spilopelia chinensis</i> | Eastern Spotted Dove | 2018/4/27  | 1 | 0 | 22.37556667 | 114.12678620 | <a href="https://www.inaturalist.org/observations/11477737">https://www.inaturalist.org/observations/11477737</a>   |
| 3502 | <i>Spilopelia chinensis</i> | Eastern Spotted Dove | 2021/12/3  | 1 | 0 | 22.37558546 | 114.12638960 | <a href="https://www.inaturalist.org/observations/102480873">https://www.inaturalist.org/observations/102480873</a> |
| 3503 | <i>Spilopelia chinensis</i> | Eastern Spotted Dove | 2019/11/23 | 1 | 0 | 22.37563880 | 114.12405530 | <a href="https://www.inaturalist.org/observations/35964883">https://www.inaturalist.org/observations/35964883</a>   |
| 3504 | <i>Spilopelia chinensis</i> | Eastern Spotted Dove | 2020/11/8  | 1 | 0 | 22.37581129 | 114.12455540 | <a href="https://www.inaturalist.org/observations/64412700">https://www.inaturalist.org/observations/64412700</a>   |
| 3505 | <i>Spilopelia chinensis</i> | Eastern Spotted Dove | 2021/11/14 | 2 | 0 | 22.37581364 | 114.16752060 | <a href="https://www.inaturalist.org/observations/101081550">https://www.inaturalist.org/observations/101081550</a> |
| 3506 | <i>Spilopelia chinensis</i> | Eastern Spotted Dove | 2022/6/1   | 1 | 0 | 22.37582119 | 114.17682710 | <a href="https://www.inaturalist.org/observations/119735701">https://www.inaturalist.org/observations/119735701</a> |
| 3507 | <i>Spilopelia chinensis</i> | Eastern Spotted Dove | 2021/8/31  | 1 | 0 | 22.37584729 | 114.17687810 | <a href="https://www.inaturalist.org/observations/93132227">https://www.inaturalist.org/observations/93132227</a>   |
| 3508 | <i>Spilopelia chinensis</i> | Eastern Spotted Dove | 2022/4/29  | 2 | 0 | 22.37599020 | 114.10167570 | <a href="https://www.inaturalist.org/observations/113291986">https://www.inaturalist.org/observations/113291986</a> |
| 3509 | <i>Spilopelia chinensis</i> | Eastern Spotted Dove | 2021/5/2   | 1 | 0 | 22.37635140 | 114.12674750 | <a href="https://www.inaturalist.org/observations/76405801">https://www.inaturalist.org/observations/76405801</a>   |
| 3510 | <i>Spilopelia chinensis</i> | Eastern Spotted Dove | 2021/1/7   | 1 | 0 | 22.37652600 | 114.16880400 | <a href="https://www.inaturalist.org/observations/67705145">https://www.inaturalist.org/observations/67705145</a>   |
| 3511 | <i>Spilopelia chinensis</i> | Eastern Spotted Dove | 2020/7/1   | 1 | 0 | 22.37653855 | 113.98947070 | <a href="https://www.inaturalist.org/observations/51565398">https://www.inaturalist.org/observations/51565398</a>   |
| 3512 | <i>Spilopelia chinensis</i> | Eastern Spotted Dove | 2021/10/4  | 1 | 0 | 22.37666500 | 114.17761480 | <a href="https://www.inaturalist.org/observations/97160713">https://www.inaturalist.org/observations/97160713</a>   |
| 3513 | <i>Spilopelia chinensis</i> | Eastern Spotted Dove | 2021/5/3   | 1 | 0 | 22.37667404 | 114.16947610 | <a href="https://www.inaturalist.org/observations/77317268">https://www.inaturalist.org/observations/77317268</a>   |
| 3514 | <i>Spilopelia chinensis</i> | Eastern Spotted Dove | 2009/3/21  | 1 | 0 | 22.37686500 | 114.17542000 | <a href="https://www.inaturalist.org/observations/36246906">https://www.inaturalist.org/observations/36246906</a>   |
| 3515 | <i>Spilopelia chinensis</i> | Eastern Spotted Dove | 2008/4/13  | 1 | 0 | 22.37690200 | 114.17534500 | <a href="https://www.inaturalist.org/observations/40740699">https://www.inaturalist.org/observations/40740699</a>   |
| 3516 | <i>Spilopelia chinensis</i> | Eastern Spotted Dove | 2020/12/14 | 1 | 0 | 22.37690340 | 114.13633020 | <a href="https://www.inaturalist.org/observations/66561191">https://www.inaturalist.org/observations/66561191</a>   |
| 3517 | <i>Spilopelia chinensis</i> | Eastern Spotted Dove | 2020/12/17 | 1 | 0 | 22.37712755 | 114.19743970 | <a href="https://www.inaturalist.org/observations/66697327">https://www.inaturalist.org/observations/66697327</a>   |
| 3518 | <i>Spilopelia chinensis</i> | Eastern Spotted Dove | 2020/4/26  | 1 | 0 | 22.37724667 | 114.17201000 | <a href="https://www.inaturalist.org/observations/44345206">https://www.inaturalist.org/observations/44345206</a>   |

|      |                             |                      |            |   |   |             |              |                                                                                                                     |
|------|-----------------------------|----------------------|------------|---|---|-------------|--------------|---------------------------------------------------------------------------------------------------------------------|
| 3519 | <i>Spilopelia chinensis</i> | Eastern Spotted Dove | 2018/3/12  | 5 | 0 | 22.37729528 | 114.18781820 | <a href="https://www.inaturalist.org/observations/11595224">https://www.inaturalist.org/observations/11595224</a>   |
| 3520 | <i>Spilopelia chinensis</i> | Eastern Spotted Dove | 2022/8/12  | 2 | 0 | 22.37730600 | 114.18764400 | <a href="https://www.inaturalist.org/observations/130496157">https://www.inaturalist.org/observations/130496157</a> |
| 3521 | <i>Spilopelia chinensis</i> | Eastern Spotted Dove | 2022/7/9   | 1 | 0 | 22.37732900 | 114.17119400 | <a href="https://www.inaturalist.org/observations/125414789">https://www.inaturalist.org/observations/125414789</a> |
| 3522 | <i>Spilopelia chinensis</i> | Eastern Spotted Dove | 2022/4/24  | 1 | 0 | 22.37734400 | 114.17143800 | <a href="https://www.inaturalist.org/observations/112645645">https://www.inaturalist.org/observations/112645645</a> |
| 3523 | <i>Spilopelia chinensis</i> | Eastern Spotted Dove | 2022/5/1   | 1 | 0 | 22.37737053 | 114.11093930 | <a href="https://www.inaturalist.org/observations/114135851">https://www.inaturalist.org/observations/114135851</a> |
| 3524 | <i>Spilopelia chinensis</i> | Eastern Spotted Dove | 2022/5/1   | 2 | 0 | 22.37755000 | 114.17178830 | <a href="https://www.inaturalist.org/observations/115689853">https://www.inaturalist.org/observations/115689853</a> |
| 3525 | <i>Spilopelia chinensis</i> | Eastern Spotted Dove | 2020/12/19 | 1 | 0 | 22.37759509 | 114.27137410 | <a href="https://www.inaturalist.org/observations/66773636">https://www.inaturalist.org/observations/66773636</a>   |
| 3526 | <i>Spilopelia chinensis</i> | Eastern Spotted Dove | 2021/10/19 | 2 | 0 | 22.37760333 | 114.18707670 | <a href="https://www.inaturalist.org/observations/98684905">https://www.inaturalist.org/observations/98684905</a>   |
| 3527 | <i>Spilopelia chinensis</i> | Eastern Spotted Dove | 2021/3/8   | 2 | 0 | 22.37764500 | 113.98318670 | <a href="https://www.inaturalist.org/observations/70811354">https://www.inaturalist.org/observations/70811354</a>   |
| 3528 | <i>Spilopelia chinensis</i> | Eastern Spotted Dove | 2020/6/22  | 1 | 0 | 22.37768114 | 114.18780270 | <a href="https://www.inaturalist.org/observations/50505984">https://www.inaturalist.org/observations/50505984</a>   |
| 3529 | <i>Spilopelia chinensis</i> | Eastern Spotted Dove | 2020/6/22  | 2 | 0 | 22.37770301 | 114.18783930 | <a href="https://www.inaturalist.org/observations/50512661">https://www.inaturalist.org/observations/50512661</a>   |
| 3530 | <i>Spilopelia chinensis</i> | Eastern Spotted Dove | 2022/4/15  | 3 | 0 | 22.37771723 | 114.10490080 | <a href="https://www.inaturalist.org/observations/111501588">https://www.inaturalist.org/observations/111501588</a> |
| 3531 | <i>Spilopelia chinensis</i> | Eastern Spotted Dove | 2020/12/13 | 2 | 0 | 22.37771739 | 114.19331310 | <a href="https://www.inaturalist.org/observations/66610373">https://www.inaturalist.org/observations/66610373</a>   |
| 3532 | <i>Spilopelia chinensis</i> | Eastern Spotted Dove | 2021/4/3   | 1 | 0 | 22.37781250 | 114.18682530 | <a href="https://www.inaturalist.org/observations/72863748">https://www.inaturalist.org/observations/72863748</a>   |
| 3533 | <i>Spilopelia chinensis</i> | Eastern Spotted Dove | 2020/4/4   | 1 | 0 | 22.37794800 | 114.18770200 | <a href="https://www.inaturalist.org/observations/41442507">https://www.inaturalist.org/observations/41442507</a>   |
| 3534 | <i>Spilopelia chinensis</i> | Eastern Spotted Dove | 2021/4/9   | 1 | 0 | 22.37795006 | 114.18834900 | <a href="https://www.inaturalist.org/observations/73366099">https://www.inaturalist.org/observations/73366099</a>   |
| 3535 | <i>Spilopelia chinensis</i> | Eastern Spotted Dove | 2020/1/22  | 0 | 0 | 22.37800241 | 114.18726190 | <a href="https://www.inaturalist.org/observations/37903389">https://www.inaturalist.org/observations/37903389</a>   |
| 3536 | <i>Spilopelia chinensis</i> | Eastern Spotted Dove | 2019/6/16  | 1 | 0 | 22.37808983 | 113.96324560 | <a href="https://www.inaturalist.org/observations/42391033">https://www.inaturalist.org/observations/42391033</a>   |
| 3537 | <i>Spilopelia chinensis</i> | Eastern Spotted Dove | 2022/4/14  | 1 | 0 | 22.37815300 | 114.17494100 | <a href="https://www.inaturalist.org/observations/111405704">https://www.inaturalist.org/observations/111405704</a> |
| 3538 | <i>Spilopelia chinensis</i> | Eastern Spotted Dove | 2008/10/12 | 4 | 0 | 22.37817900 | 114.18754700 | <a href="https://www.inaturalist.org/observations/30157810">https://www.inaturalist.org/observations/30157810</a>   |
| 3539 | <i>Spilopelia chinensis</i> | Eastern Spotted Dove | 2021/1/2   | 1 | 0 | 22.37818667 | 114.18695000 | <a href="https://www.inaturalist.org/observations/67556437">https://www.inaturalist.org/observations/67556437</a>   |
| 3540 | <i>Spilopelia chinensis</i> | Eastern Spotted Dove | 2020/12/15 | 1 | 0 | 22.37826396 | 114.18786900 | <a href="https://www.inaturalist.org/observations/66600349">https://www.inaturalist.org/observations/66600349</a>   |
| 3541 | <i>Spilopelia chinensis</i> | Eastern Spotted Dove | 2020/6/22  | 2 | 0 | 22.37828799 | 114.18699850 | <a href="https://www.inaturalist.org/observations/50547149">https://www.inaturalist.org/observations/50547149</a>   |

|      |                             |                      |            |   |   |             |              |                                                                                                                     |
|------|-----------------------------|----------------------|------------|---|---|-------------|--------------|---------------------------------------------------------------------------------------------------------------------|
| 3542 | <i>Spilopelia chinensis</i> | Eastern Spotted Dove | 2020/12/13 | 2 | 0 | 22.37837254 | 114.19317490 | <a href="https://www.inaturalist.org/observations/66610354">https://www.inaturalist.org/observations/66610354</a>   |
| 3543 | <i>Spilopelia chinensis</i> | Eastern Spotted Dove | 2020/6/22  | 2 | 0 | 22.37838843 | 114.18777800 | <a href="https://www.inaturalist.org/observations/50547134">https://www.inaturalist.org/observations/50547134</a>   |
| 3544 | <i>Spilopelia chinensis</i> | Eastern Spotted Dove | 2020/4/25  | 2 | 0 | 22.37844928 | 114.15455530 | <a href="https://www.inaturalist.org/observations/43333663">https://www.inaturalist.org/observations/43333663</a>   |
| 3545 | <i>Spilopelia chinensis</i> | Eastern Spotted Dove | 2020/4/4   | 1 | 0 | 22.37847900 | 114.17846100 | <a href="https://www.inaturalist.org/observations/41359536">https://www.inaturalist.org/observations/41359536</a>   |
| 3546 | <i>Spilopelia chinensis</i> | Eastern Spotted Dove | 2020/3/16  | 1 | 0 | 22.37849780 | 114.26461580 | <a href="https://www.inaturalist.org/observations/40070958">https://www.inaturalist.org/observations/40070958</a>   |
| 3547 | <i>Spilopelia chinensis</i> | Eastern Spotted Dove | 2021/6/3   | 2 | 0 | 22.37853900 | 114.17541400 | <a href="https://www.inaturalist.org/observations/81428172">https://www.inaturalist.org/observations/81428172</a>   |
| 3548 | <i>Spilopelia chinensis</i> | Eastern Spotted Dove | 2021/2/18  | 1 | 0 | 22.37865300 | 114.17884400 | <a href="https://www.inaturalist.org/observations/69763527">https://www.inaturalist.org/observations/69763527</a>   |
| 3549 | <i>Spilopelia chinensis</i> | Eastern Spotted Dove | 2022/4/29  | 1 | 0 | 22.37865800 | 114.17566800 | <a href="https://www.inaturalist.org/observations/113348390">https://www.inaturalist.org/observations/113348390</a> |
| 3550 | <i>Spilopelia chinensis</i> | Eastern Spotted Dove | 2020/6/22  | 1 | 0 | 22.37886758 | 114.18901810 | <a href="https://www.inaturalist.org/observations/50501503">https://www.inaturalist.org/observations/50501503</a>   |
| 3551 | <i>Spilopelia chinensis</i> | Eastern Spotted Dove | 2022/4/29  | 2 | 0 | 22.37902000 | 114.17375830 | <a href="https://www.inaturalist.org/observations/115677716">https://www.inaturalist.org/observations/115677716</a> |
| 3552 | <i>Spilopelia chinensis</i> | Eastern Spotted Dove | 2020/6/22  | 2 | 0 | 22.37902833 | 114.18927000 | <a href="https://www.inaturalist.org/observations/50502917">https://www.inaturalist.org/observations/50502917</a>   |
| 3553 | <i>Spilopelia chinensis</i> | Eastern Spotted Dove | 2020/6/22  | 2 | 0 | 22.37902833 | 114.18927000 | <a href="https://www.inaturalist.org/observations/50524418">https://www.inaturalist.org/observations/50524418</a>   |
| 3554 | <i>Spilopelia chinensis</i> | Eastern Spotted Dove | 2020/4/9   | 1 | 0 | 22.37914600 | 114.17648600 | <a href="https://www.inaturalist.org/observations/41980690">https://www.inaturalist.org/observations/41980690</a>   |
| 3555 | <i>Spilopelia chinensis</i> | Eastern Spotted Dove | 2020/6/22  | 2 | 0 | 22.37926667 | 114.18898000 | <a href="https://www.inaturalist.org/observations/50499343">https://www.inaturalist.org/observations/50499343</a>   |
| 3556 | <i>Spilopelia chinensis</i> | Eastern Spotted Dove | 2020/6/22  | 1 | 0 | 22.37927333 | 114.18889490 | <a href="https://www.inaturalist.org/observations/50499847">https://www.inaturalist.org/observations/50499847</a>   |
| 3557 | <i>Spilopelia chinensis</i> | Eastern Spotted Dove | 2020/1/5   | 1 | 0 | 22.37930600 | 114.17717200 | <a href="https://www.inaturalist.org/observations/37291954">https://www.inaturalist.org/observations/37291954</a>   |
| 3558 | <i>Spilopelia chinensis</i> | Eastern Spotted Dove | 2021/6/8   | 4 | 0 | 22.37932700 | 114.17723400 | <a href="https://www.inaturalist.org/observations/82135194">https://www.inaturalist.org/observations/82135194</a>   |
| 3559 | <i>Spilopelia chinensis</i> | Eastern Spotted Dove | 2020/6/22  | 1 | 0 | 22.37933794 | 114.18880990 | <a href="https://www.inaturalist.org/observations/50498578">https://www.inaturalist.org/observations/50498578</a>   |
| 3560 | <i>Spilopelia chinensis</i> | Eastern Spotted Dove | 2020/6/22  | 2 | 0 | 22.37934167 | 114.18882830 | <a href="https://www.inaturalist.org/observations/50498609">https://www.inaturalist.org/observations/50498609</a>   |
| 3561 | <i>Spilopelia chinensis</i> | Eastern Spotted Dove | 2020/6/22  | 2 | 0 | 22.37936167 | 114.18878000 | <a href="https://www.inaturalist.org/observations/50524703">https://www.inaturalist.org/observations/50524703</a>   |
| 3562 | <i>Spilopelia chinensis</i> | Eastern Spotted Dove | 2019/4/29  | 3 | 0 | 22.37941446 | 114.17760130 | <a href="https://www.inaturalist.org/observations/24293650">https://www.inaturalist.org/observations/24293650</a>   |
| 3563 | <i>Spilopelia chinensis</i> | Eastern Spotted Dove | 2020/6/22  | 2 | 0 | 22.37944500 | 114.18946170 | <a href="https://www.inaturalist.org/observations/50540441">https://www.inaturalist.org/observations/50540441</a>   |
| 3564 | <i>Spilopelia chinensis</i> | Eastern Spotted Dove | 2020/12/10 | 1 | 0 | 22.37950654 | 114.18914960 | <a href="https://www.inaturalist.org/observations/66366563">https://www.inaturalist.org/observations/66366563</a>   |

|      |                             |                      |            |   |   |             |              |                                                                                                                     |
|------|-----------------------------|----------------------|------------|---|---|-------------|--------------|---------------------------------------------------------------------------------------------------------------------|
| 3565 | <i>Spilopelia chinensis</i> | Eastern Spotted Dove | 2020/6/22  | 1 | 0 | 22.37952003 | 114.18972900 | <a href="https://www.inaturalist.org/observations/50531557">https://www.inaturalist.org/observations/50531557</a>   |
| 3566 | <i>Spilopelia chinensis</i> | Eastern Spotted Dove | 2020/6/22  | 2 | 0 | 22.37954638 | 114.19008540 | <a href="https://www.inaturalist.org/observations/50524096">https://www.inaturalist.org/observations/50524096</a>   |
| 3567 | <i>Spilopelia chinensis</i> | Eastern Spotted Dove | 2019/4/26  | 2 | 0 | 22.37955962 | 114.13426500 | <a href="https://www.inaturalist.org/observations/23103021">https://www.inaturalist.org/observations/23103021</a>   |
| 3568 | <i>Spilopelia chinensis</i> | Eastern Spotted Dove | 2020/6/22  | 2 | 0 | 22.37957769 | 114.19014340 | <a href="https://www.inaturalist.org/observations/50511900">https://www.inaturalist.org/observations/50511900</a>   |
| 3569 | <i>Spilopelia chinensis</i> | Eastern Spotted Dove | 2020/6/22  | 1 | 0 | 22.37957769 | 114.19014340 | <a href="https://www.inaturalist.org/observations/50547185">https://www.inaturalist.org/observations/50547185</a>   |
| 3570 | <i>Spilopelia chinensis</i> | Eastern Spotted Dove | 2021/5/29  | 1 | 0 | 22.37957770 | 114.19014340 | <a href="https://www.inaturalist.org/observations/80736911">https://www.inaturalist.org/observations/80736911</a>   |
| 3571 | <i>Spilopelia chinensis</i> | Eastern Spotted Dove | 2021/5/29  | 1 | 0 | 22.37957770 | 114.19014340 | <a href="https://www.inaturalist.org/observations/80748185">https://www.inaturalist.org/observations/80748185</a>   |
| 3572 | <i>Spilopelia chinensis</i> | Eastern Spotted Dove | 2021/5/29  | 2 | 0 | 22.37957770 | 114.19014340 | <a href="https://www.inaturalist.org/observations/80899476">https://www.inaturalist.org/observations/80899476</a>   |
| 3573 | <i>Spilopelia chinensis</i> | Eastern Spotted Dove | 2020/6/22  | 2 | 0 | 22.37958017 | 114.18926260 | <a href="https://www.inaturalist.org/observations/50497778">https://www.inaturalist.org/observations/50497778</a>   |
| 3574 | <i>Spilopelia chinensis</i> | Eastern Spotted Dove | 2020/12/10 | 1 | 0 | 22.37958172 | 114.19014340 | <a href="https://www.inaturalist.org/observations/66378861">https://www.inaturalist.org/observations/66378861</a>   |
| 3575 | <i>Spilopelia chinensis</i> | Eastern Spotted Dove | 2020/6/22  | 1 | 0 | 22.37958327 | 114.19013500 | <a href="https://www.inaturalist.org/observations/50536951">https://www.inaturalist.org/observations/50536951</a>   |
| 3576 | <i>Spilopelia chinensis</i> | Eastern Spotted Dove | 2020/6/22  | 1 | 0 | 22.37960311 | 114.19013500 | <a href="https://www.inaturalist.org/observations/50528134">https://www.inaturalist.org/observations/50528134</a>   |
| 3577 | <i>Spilopelia chinensis</i> | Eastern Spotted Dove | 2019/3/13  | 2 | 0 | 22.37968279 | 114.18927740 | <a href="https://www.inaturalist.org/observations/21198472">https://www.inaturalist.org/observations/21198472</a>   |
| 3578 | <i>Spilopelia chinensis</i> | Eastern Spotted Dove | 2020/12/6  | 2 | 0 | 22.37974500 | 114.18987170 | <a href="https://www.inaturalist.org/observations/66179749">https://www.inaturalist.org/observations/66179749</a>   |
| 3579 | <i>Spilopelia chinensis</i> | Eastern Spotted Dove | 2020/2/29  | 0 | 0 | 22.37975000 | 114.11943830 | <a href="https://www.inaturalist.org/observations/39397263">https://www.inaturalist.org/observations/39397263</a>   |
| 3580 | <i>Spilopelia chinensis</i> | Eastern Spotted Dove | 2020/9/4   | 1 | 0 | 22.37991057 | 113.96323400 | <a href="https://www.inaturalist.org/observations/58490886">https://www.inaturalist.org/observations/58490886</a>   |
| 3581 | <i>Spilopelia chinensis</i> | Eastern Spotted Dove | 2019/3/13  | 1 | 0 | 22.37992000 | 114.18980000 | <a href="https://www.inaturalist.org/observations/21198062">https://www.inaturalist.org/observations/21198062</a>   |
| 3582 | <i>Spilopelia chinensis</i> | Eastern Spotted Dove | 2020/6/22  | 1 | 0 | 22.37996073 | 114.18962100 | <a href="https://www.inaturalist.org/observations/50497487">https://www.inaturalist.org/observations/50497487</a>   |
| 3583 | <i>Spilopelia chinensis</i> | Eastern Spotted Dove | 2022/4/30  | 2 | 0 | 22.37998333 | 114.20416330 | <a href="https://www.inaturalist.org/observations/113712964">https://www.inaturalist.org/observations/113712964</a> |
| 3584 | <i>Spilopelia chinensis</i> | Eastern Spotted Dove | 2020/12/4  | 2 | 0 | 22.38004166 | 114.19045440 | <a href="https://www.inaturalist.org/observations/66082665">https://www.inaturalist.org/observations/66082665</a>   |
| 3585 | <i>Spilopelia chinensis</i> | Eastern Spotted Dove | 2022/5/8   | 2 | 0 | 22.38015310 | 114.20445310 | <a href="https://www.inaturalist.org/observations/116042660">https://www.inaturalist.org/observations/116042660</a> |
| 3586 | <i>Spilopelia chinensis</i> | Eastern Spotted Dove | 2020/2/22  | 1 | 0 | 22.38019809 | 114.13597590 | <a href="https://www.inaturalist.org/observations/39035652">https://www.inaturalist.org/observations/39035652</a>   |
| 3587 | <i>Spilopelia chinensis</i> | Eastern Spotted Dove | 2021/3/17  | 0 | 0 | 22.38025540 | 113.96691150 | <a href="https://www.inaturalist.org/observations/71415159">https://www.inaturalist.org/observations/71415159</a>   |



|      |                             |                      |            |   |   |             |              |                                                                                                                   |
|------|-----------------------------|----------------------|------------|---|---|-------------|--------------|-------------------------------------------------------------------------------------------------------------------|
| 3588 | <i>Spilopelia chinensis</i> | Eastern Spotted Dove | 2020/6/22  | 1 | 0 | 22.38027234 | 114.19058240 | <a href="https://www.inaturalist.org/observations/50541820">https://www.inaturalist.org/observations/50541820</a> |
| 3589 | <i>Spilopelia chinensis</i> | Eastern Spotted Dove | 2021/2/25  | 1 | 0 | 22.38048667 | 114.19079670 | <a href="https://www.inaturalist.org/observations/73737201">https://www.inaturalist.org/observations/73737201</a> |
| 3590 | <i>Spilopelia chinensis</i> | Eastern Spotted Dove | 2020/6/22  | 2 | 0 | 22.38051190 | 114.19097350 | <a href="https://www.inaturalist.org/observations/50517176">https://www.inaturalist.org/observations/50517176</a> |
| 3591 | <i>Spilopelia chinensis</i> | Eastern Spotted Dove | 2018/4/27  | 6 | 0 | 22.38051896 | 114.17526480 | <a href="https://www.inaturalist.org/observations/11487061">https://www.inaturalist.org/observations/11487061</a> |
| 3592 | <i>Spilopelia chinensis</i> | Eastern Spotted Dove | 2018/5/23  | 5 | 0 | 22.38055000 | 114.19804500 | <a href="https://www.inaturalist.org/observations/12728326">https://www.inaturalist.org/observations/12728326</a> |
| 3593 | <i>Spilopelia chinensis</i> | Eastern Spotted Dove | 2017/2/23  | 4 | 0 | 22.38064400 | 114.19125900 | <a href="https://www.inaturalist.org/observations/5197839">https://www.inaturalist.org/observations/5197839</a>   |
| 3594 | <i>Spilopelia chinensis</i> | Eastern Spotted Dove | 2020/12/17 | 2 | 0 | 22.38065000 | 114.18853830 | <a href="https://www.inaturalist.org/observations/66703032">https://www.inaturalist.org/observations/66703032</a> |
| 3595 | <i>Spilopelia chinensis</i> | Eastern Spotted Dove | 2020/6/22  | 2 | 0 | 22.38067029 | 114.19086480 | <a href="https://www.inaturalist.org/observations/50541824">https://www.inaturalist.org/observations/50541824</a> |
| 3596 | <i>Spilopelia chinensis</i> | Eastern Spotted Dove | 2020/12/17 | 1 | 0 | 22.38073667 | 114.18853000 | <a href="https://www.inaturalist.org/observations/66690990">https://www.inaturalist.org/observations/66690990</a> |
| 3597 | <i>Spilopelia chinensis</i> | Eastern Spotted Dove | 2021/3/17  | 1 | 0 | 22.38094458 | 113.96670060 | <a href="https://www.inaturalist.org/observations/71415025">https://www.inaturalist.org/observations/71415025</a> |
| 3598 | <i>Spilopelia chinensis</i> | Eastern Spotted Dove | 2020/1/29  | 1 | 0 | 22.38098180 | 113.97842860 | <a href="https://www.inaturalist.org/observations/38081032">https://www.inaturalist.org/observations/38081032</a> |
| 3599 | <i>Spilopelia chinensis</i> | Eastern Spotted Dove | 2021/5/1   | 1 | 0 | 22.38111847 | 114.26518070 | <a href="https://www.inaturalist.org/observations/76822771">https://www.inaturalist.org/observations/76822771</a> |
| 3600 | <i>Spilopelia chinensis</i> | Eastern Spotted Dove | 2021/4/30  | 1 | 0 | 22.38118000 | 114.26915310 | <a href="https://www.inaturalist.org/observations/76067170">https://www.inaturalist.org/observations/76067170</a> |
| 3601 | <i>Spilopelia chinensis</i> | Eastern Spotted Dove | 2021/4/24  | 1 | 0 | 22.38118398 | 114.19108840 | <a href="https://www.inaturalist.org/observations/75159215">https://www.inaturalist.org/observations/75159215</a> |
| 3602 | <i>Spilopelia chinensis</i> | Eastern Spotted Dove | 2019/10/22 | 2 | 0 | 22.38145798 | 114.22114510 | <a href="https://www.inaturalist.org/observations/34757888">https://www.inaturalist.org/observations/34757888</a> |
| 3603 | <i>Spilopelia chinensis</i> | Eastern Spotted Dove | 2019/10/25 | 2 | 0 | 22.38145798 | 114.22114510 | <a href="https://www.inaturalist.org/observations/34891358">https://www.inaturalist.org/observations/34891358</a> |
| 3604 | <i>Spilopelia chinensis</i> | Eastern Spotted Dove | 2019/10/25 | 2 | 0 | 22.38145798 | 114.22114510 | <a href="https://www.inaturalist.org/observations/34907023">https://www.inaturalist.org/observations/34907023</a> |
| 3605 | <i>Spilopelia chinensis</i> | Eastern Spotted Dove | 2019/10/28 | 1 | 0 | 22.38145798 | 114.22114510 | <a href="https://www.inaturalist.org/observations/35034286">https://www.inaturalist.org/observations/35034286</a> |
| 3606 | <i>Spilopelia chinensis</i> | Eastern Spotted Dove | 2019/11/7  | 1 | 0 | 22.38145798 | 114.22114510 | <a href="https://www.inaturalist.org/observations/35429119">https://www.inaturalist.org/observations/35429119</a> |
| 3607 | <i>Spilopelia chinensis</i> | Eastern Spotted Dove | 2019/11/11 | 2 | 0 | 22.38145798 | 114.22114510 | <a href="https://www.inaturalist.org/observations/35591985">https://www.inaturalist.org/observations/35591985</a> |
| 3608 | <i>Spilopelia chinensis</i> | Eastern Spotted Dove | 2019/11/15 | 1 | 0 | 22.38145798 | 114.22114510 | <a href="https://www.inaturalist.org/observations/35720115">https://www.inaturalist.org/observations/35720115</a> |
| 3609 | <i>Spilopelia chinensis</i> | Eastern Spotted Dove | 2019/11/22 | 1 | 0 | 22.38145798 | 114.22114510 | <a href="https://www.inaturalist.org/observations/35961366">https://www.inaturalist.org/observations/35961366</a> |
| 3610 | <i>Spilopelia chinensis</i> | Eastern Spotted Dove | 2019/11/22 | 1 | 0 | 22.38145798 | 114.22114510 | <a href="https://www.inaturalist.org/observations/35966617">https://www.inaturalist.org/observations/35966617</a> |

|      |                             |                      |            |   |   |             |              |                                                                                                                   |
|------|-----------------------------|----------------------|------------|---|---|-------------|--------------|-------------------------------------------------------------------------------------------------------------------|
| 3611 | <i>Spilopelia chinensis</i> | Eastern Spotted Dove | 2019/11/29 | 1 | 0 | 22.38145798 | 114.22114510 | <a href="https://www.inaturalist.org/observations/36212472">https://www.inaturalist.org/observations/36212472</a> |
| 3612 | <i>Spilopelia chinensis</i> | Eastern Spotted Dove | 2019/12/2  | 1 | 0 | 22.38145798 | 114.22114510 | <a href="https://www.inaturalist.org/observations/36308020">https://www.inaturalist.org/observations/36308020</a> |
| 3613 | <i>Spilopelia chinensis</i> | Eastern Spotted Dove | 2019/12/4  | 1 | 0 | 22.38145798 | 114.22114510 | <a href="https://www.inaturalist.org/observations/36362837">https://www.inaturalist.org/observations/36362837</a> |
| 3614 | <i>Spilopelia chinensis</i> | Eastern Spotted Dove | 2019/12/4  | 1 | 0 | 22.38145798 | 114.22114510 | <a href="https://www.inaturalist.org/observations/36362952">https://www.inaturalist.org/observations/36362952</a> |
| 3615 | <i>Spilopelia chinensis</i> | Eastern Spotted Dove | 2019/12/6  | 1 | 0 | 22.38145798 | 114.22114510 | <a href="https://www.inaturalist.org/observations/36419100">https://www.inaturalist.org/observations/36419100</a> |
| 3616 | <i>Spilopelia chinensis</i> | Eastern Spotted Dove | 2019/12/11 | 1 | 0 | 22.38145798 | 114.22114510 | <a href="https://www.inaturalist.org/observations/36574155">https://www.inaturalist.org/observations/36574155</a> |
| 3617 | <i>Spilopelia chinensis</i> | Eastern Spotted Dove | 2019/12/13 | 1 | 0 | 22.38145798 | 114.22114510 | <a href="https://www.inaturalist.org/observations/36635124">https://www.inaturalist.org/observations/36635124</a> |
| 3618 | <i>Spilopelia chinensis</i> | Eastern Spotted Dove | 2019/12/20 | 1 | 0 | 22.38145798 | 114.22114510 | <a href="https://www.inaturalist.org/observations/36815064">https://www.inaturalist.org/observations/36815064</a> |
| 3619 | <i>Spilopelia chinensis</i> | Eastern Spotted Dove | 2019/12/20 | 1 | 0 | 22.38145798 | 114.22114510 | <a href="https://www.inaturalist.org/observations/36815269">https://www.inaturalist.org/observations/36815269</a> |
| 3620 | <i>Spilopelia chinensis</i> | Eastern Spotted Dove | 2019/12/22 | 1 | 0 | 22.38145798 | 114.22114510 | <a href="https://www.inaturalist.org/observations/36873846">https://www.inaturalist.org/observations/36873846</a> |
| 3621 | <i>Spilopelia chinensis</i> | Eastern Spotted Dove | 2019/12/27 | 1 | 0 | 22.38145798 | 114.22114510 | <a href="https://www.inaturalist.org/observations/37015636">https://www.inaturalist.org/observations/37015636</a> |
| 3622 | <i>Spilopelia chinensis</i> | Eastern Spotted Dove | 2020/1/8   | 1 | 0 | 22.38145798 | 114.22114510 | <a href="https://www.inaturalist.org/observations/37421337">https://www.inaturalist.org/observations/37421337</a> |
| 3623 | <i>Spilopelia chinensis</i> | Eastern Spotted Dove | 2020/1/20  | 0 | 0 | 22.38145798 | 114.22114510 | <a href="https://www.inaturalist.org/observations/37799003">https://www.inaturalist.org/observations/37799003</a> |
| 3624 | <i>Spilopelia chinensis</i> | Eastern Spotted Dove | 2020/1/20  | 0 | 0 | 22.38145798 | 114.22114510 | <a href="https://www.inaturalist.org/observations/37799912">https://www.inaturalist.org/observations/37799912</a> |
| 3625 | <i>Spilopelia chinensis</i> | Eastern Spotted Dove | 2020/1/24  | 1 | 0 | 22.38145798 | 114.22114510 | <a href="https://www.inaturalist.org/observations/37935074">https://www.inaturalist.org/observations/37935074</a> |
| 3626 | <i>Spilopelia chinensis</i> | Eastern Spotted Dove | 2020/1/24  | 0 | 0 | 22.38145798 | 114.22114510 | <a href="https://www.inaturalist.org/observations/37944291">https://www.inaturalist.org/observations/37944291</a> |
| 3627 | <i>Spilopelia chinensis</i> | Eastern Spotted Dove | 2020/1/30  | 0 | 0 | 22.38145798 | 114.22114510 | <a href="https://www.inaturalist.org/observations/38143504">https://www.inaturalist.org/observations/38143504</a> |
| 3628 | <i>Spilopelia chinensis</i> | Eastern Spotted Dove | 2020/2/10  | 0 | 0 | 22.38145798 | 114.22114510 | <a href="https://www.inaturalist.org/observations/38527508">https://www.inaturalist.org/observations/38527508</a> |
| 3629 | <i>Spilopelia chinensis</i> | Eastern Spotted Dove | 2020/2/26  | 0 | 0 | 22.38145798 | 114.22114510 | <a href="https://www.inaturalist.org/observations/39298116">https://www.inaturalist.org/observations/39298116</a> |
| 3630 | <i>Spilopelia chinensis</i> | Eastern Spotted Dove | 2020/3/9   | 1 | 0 | 22.38145798 | 114.22114510 | <a href="https://www.inaturalist.org/observations/39831966">https://www.inaturalist.org/observations/39831966</a> |
| 3631 | <i>Spilopelia chinensis</i> | Eastern Spotted Dove | 2020/3/13  | 1 | 0 | 22.38145798 | 114.22114510 | <a href="https://www.inaturalist.org/observations/40012678">https://www.inaturalist.org/observations/40012678</a> |
| 3632 | <i>Spilopelia chinensis</i> | Eastern Spotted Dove | 2020/4/1   | 1 | 0 | 22.38145798 | 114.22114510 | <a href="https://www.inaturalist.org/observations/41367219">https://www.inaturalist.org/observations/41367219</a> |
| 3633 | <i>Spilopelia chinensis</i> | Eastern Spotted Dove | 2020/4/3   | 1 | 0 | 22.38145798 | 114.22114510 | <a href="https://www.inaturalist.org/observations/41406740">https://www.inaturalist.org/observations/41406740</a> |

|      |                             |                      |            |   |   |             |              |                                                                                                                   |
|------|-----------------------------|----------------------|------------|---|---|-------------|--------------|-------------------------------------------------------------------------------------------------------------------|
| 3634 | <i>Spilopelia chinensis</i> | Eastern Spotted Dove | 2020/4/14  | 1 | 0 | 22.38145798 | 114.22114510 | <a href="https://www.inaturalist.org/observations/42291128">https://www.inaturalist.org/observations/42291128</a> |
| 3635 | <i>Spilopelia chinensis</i> | Eastern Spotted Dove | 2020/4/14  | 1 | 0 | 22.38145798 | 114.22114510 | <a href="https://www.inaturalist.org/observations/42444408">https://www.inaturalist.org/observations/42444408</a> |
| 3636 | <i>Spilopelia chinensis</i> | Eastern Spotted Dove | 2020/4/15  | 1 | 0 | 22.38145798 | 114.22114510 | <a href="https://www.inaturalist.org/observations/42451590">https://www.inaturalist.org/observations/42451590</a> |
| 3637 | <i>Spilopelia chinensis</i> | Eastern Spotted Dove | 2020/4/23  | 1 | 0 | 22.38145798 | 114.22114510 | <a href="https://www.inaturalist.org/observations/43006247">https://www.inaturalist.org/observations/43006247</a> |
| 3638 | <i>Spilopelia chinensis</i> | Eastern Spotted Dove | 2020/4/27  | 1 | 0 | 22.38145798 | 114.22114510 | <a href="https://www.inaturalist.org/observations/44322428">https://www.inaturalist.org/observations/44322428</a> |
| 3639 | <i>Spilopelia chinensis</i> | Eastern Spotted Dove | 2020/5/4   | 1 | 0 | 22.38145798 | 114.22114510 | <a href="https://www.inaturalist.org/observations/44941375">https://www.inaturalist.org/observations/44941375</a> |
| 3640 | <i>Spilopelia chinensis</i> | Eastern Spotted Dove | 2020/5/4   | 2 | 0 | 22.38145798 | 114.22114510 | <a href="https://www.inaturalist.org/observations/44968018">https://www.inaturalist.org/observations/44968018</a> |
| 3641 | <i>Spilopelia chinensis</i> | Eastern Spotted Dove | 2020/5/11  | 1 | 0 | 22.38145798 | 114.22114510 | <a href="https://www.inaturalist.org/observations/45853533">https://www.inaturalist.org/observations/45853533</a> |
| 3642 | <i>Spilopelia chinensis</i> | Eastern Spotted Dove | 2020/5/15  | 1 | 0 | 22.38145798 | 114.22114510 | <a href="https://www.inaturalist.org/observations/46197751">https://www.inaturalist.org/observations/46197751</a> |
| 3643 | <i>Spilopelia chinensis</i> | Eastern Spotted Dove | 2020/6/11  | 1 | 0 | 22.38145798 | 114.22114510 | <a href="https://www.inaturalist.org/observations/49417093">https://www.inaturalist.org/observations/49417093</a> |
| 3644 | <i>Spilopelia chinensis</i> | Eastern Spotted Dove | 2020/8/24  | 1 | 0 | 22.38145798 | 114.22114510 | <a href="https://www.inaturalist.org/observations/57496321">https://www.inaturalist.org/observations/57496321</a> |
| 3645 | <i>Spilopelia chinensis</i> | Eastern Spotted Dove | 2020/11/5  | 1 | 0 | 22.38145798 | 114.22114510 | <a href="https://www.inaturalist.org/observations/64267461">https://www.inaturalist.org/observations/64267461</a> |
| 3646 | <i>Spilopelia chinensis</i> | Eastern Spotted Dove | 2020/11/5  | 1 | 0 | 22.38145798 | 114.22114510 | <a href="https://www.inaturalist.org/observations/64285384">https://www.inaturalist.org/observations/64285384</a> |
| 3647 | <i>Spilopelia chinensis</i> | Eastern Spotted Dove | 2020/11/9  | 1 | 0 | 22.38145798 | 114.22114510 | <a href="https://www.inaturalist.org/observations/64512400">https://www.inaturalist.org/observations/64512400</a> |
| 3648 | <i>Spilopelia chinensis</i> | Eastern Spotted Dove | 2020/11/9  | 2 | 0 | 22.38145798 | 114.22114510 | <a href="https://www.inaturalist.org/observations/64515841">https://www.inaturalist.org/observations/64515841</a> |
| 3649 | <i>Spilopelia chinensis</i> | Eastern Spotted Dove | 2020/11/16 | 1 | 0 | 22.38145798 | 114.22114510 | <a href="https://www.inaturalist.org/observations/65069819">https://www.inaturalist.org/observations/65069819</a> |
| 3650 | <i>Spilopelia chinensis</i> | Eastern Spotted Dove | 2020/11/16 | 1 | 0 | 22.38145798 | 114.22114510 | <a href="https://www.inaturalist.org/observations/65069996">https://www.inaturalist.org/observations/65069996</a> |
| 3651 | <i>Spilopelia chinensis</i> | Eastern Spotted Dove | 2020/11/19 | 1 | 0 | 22.38145798 | 114.22114510 | <a href="https://www.inaturalist.org/observations/65216325">https://www.inaturalist.org/observations/65216325</a> |
| 3652 | <i>Spilopelia chinensis</i> | Eastern Spotted Dove | 2020/12/3  | 1 | 0 | 22.38145798 | 114.22114510 | <a href="https://www.inaturalist.org/observations/66066693">https://www.inaturalist.org/observations/66066693</a> |
| 3653 | <i>Spilopelia chinensis</i> | Eastern Spotted Dove | 2020/12/8  | 1 | 0 | 22.38145798 | 114.22114510 | <a href="https://www.inaturalist.org/observations/66317243">https://www.inaturalist.org/observations/66317243</a> |
| 3654 | <i>Spilopelia chinensis</i> | Eastern Spotted Dove | 2020/12/17 | 2 | 0 | 22.38145798 | 114.22114510 | <a href="https://www.inaturalist.org/observations/66693690">https://www.inaturalist.org/observations/66693690</a> |
| 3655 | <i>Spilopelia chinensis</i> | Eastern Spotted Dove | 2020/12/17 | 1 | 0 | 22.38145798 | 114.22114510 | <a href="https://www.inaturalist.org/observations/66696893">https://www.inaturalist.org/observations/66696893</a> |
| 3656 | <i>Spilopelia chinensis</i> | Eastern Spotted Dove | 2020/12/22 | 1 | 0 | 22.38145798 | 114.22114510 | <a href="https://www.inaturalist.org/observations/66921541">https://www.inaturalist.org/observations/66921541</a> |

|      |                             |                      |            |   |   |             |              |                                                                                                                     |
|------|-----------------------------|----------------------|------------|---|---|-------------|--------------|---------------------------------------------------------------------------------------------------------------------|
| 3657 | <i>Spilopelia chinensis</i> | Eastern Spotted Dove | 2021/1/6   | 2 | 0 | 22.38145798 | 114.22114510 | <a href="https://www.inaturalist.org/observations/67662338">https://www.inaturalist.org/observations/67662338</a>   |
| 3658 | <i>Spilopelia chinensis</i> | Eastern Spotted Dove | 2021/1/11  | 1 | 0 | 22.38145798 | 114.22114510 | <a href="https://www.inaturalist.org/observations/67905823">https://www.inaturalist.org/observations/67905823</a>   |
| 3659 | <i>Spilopelia chinensis</i> | Eastern Spotted Dove | 2018/11/7  | 3 | 0 | 22.38150695 | 114.21514560 | <a href="https://www.inaturalist.org/observations/18223724">https://www.inaturalist.org/observations/18223724</a>   |
| 3660 | <i>Spilopelia chinensis</i> | Eastern Spotted Dove | 2020/11/11 | 2 | 0 | 22.38168879 | 114.27353330 | <a href="https://www.inaturalist.org/observations/64653686">https://www.inaturalist.org/observations/64653686</a>   |
| 3661 | <i>Spilopelia chinensis</i> | Eastern Spotted Dove | 2022/9/26  | 2 | 0 | 22.38172908 | 114.22189110 | <a href="https://www.inaturalist.org/observations/136553669">https://www.inaturalist.org/observations/136553669</a> |
| 3662 | <i>Spilopelia chinensis</i> | Eastern Spotted Dove | 2021/11/29 | 2 | 0 | 22.38178975 | 114.19187680 | <a href="https://www.inaturalist.org/observations/102154729">https://www.inaturalist.org/observations/102154729</a> |
| 3663 | <i>Spilopelia chinensis</i> | Eastern Spotted Dove | 2009/5/16  | 1 | 0 | 22.38182900 | 114.22102900 | <a href="https://www.inaturalist.org/observations/68907309">https://www.inaturalist.org/observations/68907309</a>   |
| 3664 | <i>Spilopelia chinensis</i> | Eastern Spotted Dove | 2020/12/8  | 2 | 0 | 22.38191660 | 114.19223070 | <a href="https://www.inaturalist.org/observations/66282091">https://www.inaturalist.org/observations/66282091</a>   |
| 3665 | <i>Spilopelia chinensis</i> | Eastern Spotted Dove | 2018/10/14 | 4 | 0 | 22.38220983 | 114.19537990 | <a href="https://www.inaturalist.org/observations/17493497">https://www.inaturalist.org/observations/17493497</a>   |
| 3666 | <i>Spilopelia chinensis</i> | Eastern Spotted Dove | 2018/11/5  | 2 | 0 | 22.38225676 | 114.21371890 | <a href="https://www.inaturalist.org/observations/18121857">https://www.inaturalist.org/observations/18121857</a>   |
| 3667 | <i>Spilopelia chinensis</i> | Eastern Spotted Dove | 2018/6/3   | 4 | 0 | 22.38230180 | 114.19644470 | <a href="https://www.inaturalist.org/observations/13075990">https://www.inaturalist.org/observations/13075990</a>   |
| 3668 | <i>Spilopelia chinensis</i> | Eastern Spotted Dove | 2010/9/18  | 1 | 0 | 22.38249600 | 114.22281300 | <a href="https://www.inaturalist.org/observations/102702804">https://www.inaturalist.org/observations/102702804</a> |
| 3669 | <i>Spilopelia chinensis</i> | Eastern Spotted Dove | 2021/8/24  | 1 | 0 | 22.38252362 | 114.27449080 | <a href="https://www.inaturalist.org/observations/92431356">https://www.inaturalist.org/observations/92431356</a>   |
| 3670 | <i>Spilopelia chinensis</i> | Eastern Spotted Dove | 2021/4/9   | 1 | 0 | 22.38253591 | 114.19353910 | <a href="https://www.inaturalist.org/observations/73362623">https://www.inaturalist.org/observations/73362623</a>   |
| 3671 | <i>Spilopelia chinensis</i> | Eastern Spotted Dove | 2019/11/5  | 2 | 0 | 22.38270269 | 113.98391840 | <a href="https://www.inaturalist.org/observations/35321045">https://www.inaturalist.org/observations/35321045</a>   |
| 3672 | <i>Spilopelia chinensis</i> | Eastern Spotted Dove | 2019/11/5  | 2 | 0 | 22.38271944 | 113.98375750 | <a href="https://www.inaturalist.org/observations/35320772">https://www.inaturalist.org/observations/35320772</a>   |
| 3673 | <i>Spilopelia chinensis</i> | Eastern Spotted Dove | 2019/11/5  | 1 | 0 | 22.38272595 | 113.98390460 | <a href="https://www.inaturalist.org/observations/35326585">https://www.inaturalist.org/observations/35326585</a>   |
| 3674 | <i>Spilopelia chinensis</i> | Eastern Spotted Dove | 2022/8/19  | 2 | 0 | 22.38272715 | 114.27100510 | <a href="https://www.inaturalist.org/observations/131426203">https://www.inaturalist.org/observations/131426203</a> |
| 3675 | <i>Spilopelia chinensis</i> | Eastern Spotted Dove | 2019/11/9  | 2 | 0 | 22.38272966 | 114.21387740 | <a href="https://www.inaturalist.org/observations/35482800">https://www.inaturalist.org/observations/35482800</a>   |
| 3676 | <i>Spilopelia chinensis</i> | Eastern Spotted Dove | 2018/9/22  | 4 | 0 | 22.38309517 | 114.21592980 | <a href="https://www.inaturalist.org/observations/16791447">https://www.inaturalist.org/observations/16791447</a>   |
| 3677 | <i>Spilopelia chinensis</i> | Eastern Spotted Dove | 2018/5/12  | 6 | 0 | 22.38334084 | 113.97571560 | <a href="https://www.inaturalist.org/observations/12372362">https://www.inaturalist.org/observations/12372362</a>   |
| 3678 | <i>Spilopelia chinensis</i> | Eastern Spotted Dove | 2021/4/29  | 2 | 0 | 22.38338935 | 113.97555250 | <a href="https://www.inaturalist.org/observations/75635404">https://www.inaturalist.org/observations/75635404</a>   |
| 3679 | <i>Spilopelia chinensis</i> | Eastern Spotted Dove | 2017/3/12  | 1 | 0 | 22.38366612 | 114.19702380 | <a href="https://www.inaturalist.org/observations/29142938">https://www.inaturalist.org/observations/29142938</a>   |

|      |                             |                      |            |   |   |             |              |                                                                                                                   |
|------|-----------------------------|----------------------|------------|---|---|-------------|--------------|-------------------------------------------------------------------------------------------------------------------|
| 3680 | <i>Spilopelia chinensis</i> | Eastern Spotted Dove | 2017/5/6   | 2 | 0 | 22.38366612 | 114.19702380 | <a href="https://www.inaturalist.org/observations/30013324">https://www.inaturalist.org/observations/30013324</a> |
| 3681 | <i>Spilopelia chinensis</i> | Eastern Spotted Dove | 2017/10/22 | 3 | 0 | 22.38366612 | 114.19702380 | <a href="https://www.inaturalist.org/observations/31027416">https://www.inaturalist.org/observations/31027416</a> |
| 3682 | <i>Spilopelia chinensis</i> | Eastern Spotted Dove | 2018/1/20  | 2 | 0 | 22.38366612 | 114.19702380 | <a href="https://www.inaturalist.org/observations/31539165">https://www.inaturalist.org/observations/31539165</a> |
| 3683 | <i>Spilopelia chinensis</i> | Eastern Spotted Dove | 2018/3/2   | 2 | 0 | 22.38366612 | 114.19702380 | <a href="https://www.inaturalist.org/observations/31768381">https://www.inaturalist.org/observations/31768381</a> |
| 3684 | <i>Spilopelia chinensis</i> | Eastern Spotted Dove | 2018/3/2   | 2 | 0 | 22.38366612 | 114.19702380 | <a href="https://www.inaturalist.org/observations/31768816">https://www.inaturalist.org/observations/31768816</a> |
| 3685 | <i>Spilopelia chinensis</i> | Eastern Spotted Dove | 2018/3/22  | 2 | 0 | 22.38366612 | 114.19702380 | <a href="https://www.inaturalist.org/observations/31834698">https://www.inaturalist.org/observations/31834698</a> |
| 3686 | <i>Spilopelia chinensis</i> | Eastern Spotted Dove | 2018/3/30  | 2 | 0 | 22.38366612 | 114.19702380 | <a href="https://www.inaturalist.org/observations/31880671">https://www.inaturalist.org/observations/31880671</a> |
| 3687 | <i>Spilopelia chinensis</i> | Eastern Spotted Dove | 2018/5/5   | 2 | 0 | 22.38366612 | 114.19702380 | <a href="https://www.inaturalist.org/observations/32078489">https://www.inaturalist.org/observations/32078489</a> |
| 3688 | <i>Spilopelia chinensis</i> | Eastern Spotted Dove | 2018/7/19  | 1 | 0 | 22.38366612 | 114.19702380 | <a href="https://www.inaturalist.org/observations/32677398">https://www.inaturalist.org/observations/32677398</a> |
| 3689 | <i>Spilopelia chinensis</i> | Eastern Spotted Dove | 2018/8/3   | 2 | 0 | 22.38366612 | 114.19702380 | <a href="https://www.inaturalist.org/observations/32747835">https://www.inaturalist.org/observations/32747835</a> |
| 3690 | <i>Spilopelia chinensis</i> | Eastern Spotted Dove | 2018/9/23  | 2 | 0 | 22.38366612 | 114.19702380 | <a href="https://www.inaturalist.org/observations/32980699">https://www.inaturalist.org/observations/32980699</a> |
| 3691 | <i>Spilopelia chinensis</i> | Eastern Spotted Dove | 2018/10/25 | 2 | 0 | 22.38366612 | 114.19702380 | <a href="https://www.inaturalist.org/observations/33363068">https://www.inaturalist.org/observations/33363068</a> |
| 3692 | <i>Spilopelia chinensis</i> | Eastern Spotted Dove | 2018/11/15 | 1 | 0 | 22.38366612 | 114.19702380 | <a href="https://www.inaturalist.org/observations/33515602">https://www.inaturalist.org/observations/33515602</a> |
| 3693 | <i>Spilopelia chinensis</i> | Eastern Spotted Dove | 2019/2/22  | 2 | 0 | 22.38366612 | 114.19702380 | <a href="https://www.inaturalist.org/observations/33737583">https://www.inaturalist.org/observations/33737583</a> |
| 3694 | <i>Spilopelia chinensis</i> | Eastern Spotted Dove | 2019/3/3   | 1 | 0 | 22.38366612 | 114.19702380 | <a href="https://www.inaturalist.org/observations/33779297">https://www.inaturalist.org/observations/33779297</a> |
| 3695 | <i>Spilopelia chinensis</i> | Eastern Spotted Dove | 2020/1/21  | 0 | 0 | 22.38366612 | 114.19702380 | <a href="https://www.inaturalist.org/observations/37813573">https://www.inaturalist.org/observations/37813573</a> |
| 3696 | <i>Spilopelia chinensis</i> | Eastern Spotted Dove | 2020/12/31 | 1 | 0 | 22.38366612 | 114.19702380 | <a href="https://www.inaturalist.org/observations/67346068">https://www.inaturalist.org/observations/67346068</a> |
| 3697 | <i>Spilopelia chinensis</i> | Eastern Spotted Dove | 2020/4/18  | 1 | 0 | 22.38381286 | 114.21450490 | <a href="https://www.inaturalist.org/observations/42459565">https://www.inaturalist.org/observations/42459565</a> |
| 3698 | <i>Spilopelia chinensis</i> | Eastern Spotted Dove | 2020/4/27  | 2 | 0 | 22.38381286 | 114.21450490 | <a href="https://www.inaturalist.org/observations/44238302">https://www.inaturalist.org/observations/44238302</a> |
| 3699 | <i>Spilopelia chinensis</i> | Eastern Spotted Dove | 2020/4/12  | 1 | 0 | 22.38395609 | 114.19404870 | <a href="https://www.inaturalist.org/observations/44545045">https://www.inaturalist.org/observations/44545045</a> |
| 3700 | <i>Spilopelia chinensis</i> | Eastern Spotted Dove | 2021/4/9   | 1 | 0 | 22.38403719 | 114.19447990 | <a href="https://www.inaturalist.org/observations/73362137">https://www.inaturalist.org/observations/73362137</a> |
| 3701 | <i>Spilopelia chinensis</i> | Eastern Spotted Dove | 2020/2/13  | 0 | 0 | 22.38425512 | 114.14065010 | <a href="https://www.inaturalist.org/observations/38624185">https://www.inaturalist.org/observations/38624185</a> |
| 3702 | <i>Spilopelia chinensis</i> | Eastern Spotted Dove | 2021/3/25  | 1 | 0 | 22.38447792 | 114.27012950 | <a href="https://www.inaturalist.org/observations/72005991">https://www.inaturalist.org/observations/72005991</a> |

|      |                             |                      |            |   |   |             |              |                                                                                                                     |
|------|-----------------------------|----------------------|------------|---|---|-------------|--------------|---------------------------------------------------------------------------------------------------------------------|
| 3703 | <i>Spilopelia chinensis</i> | Eastern Spotted Dove | 2022/5/25  | 1 | 0 | 22.38463240 | 114.27010480 | <a href="https://www.inaturalist.org/observations/118612055">https://www.inaturalist.org/observations/118612055</a> |
| 3704 | <i>Spilopelia chinensis</i> | Eastern Spotted Dove | 2020/12/11 | 1 | 0 | 22.38495539 | 114.14220380 | <a href="https://www.inaturalist.org/observations/66422514">https://www.inaturalist.org/observations/66422514</a>   |
| 3705 | <i>Spilopelia chinensis</i> | Eastern Spotted Dove | 2020/11/13 | 2 | 0 | 22.38499961 | 114.27314460 | <a href="https://www.inaturalist.org/observations/64756681">https://www.inaturalist.org/observations/64756681</a>   |
| 3706 | <i>Spilopelia chinensis</i> | Eastern Spotted Dove | 2020/11/23 | 1 | 0 | 22.38504563 | 114.27301490 | <a href="https://www.inaturalist.org/observations/65447132">https://www.inaturalist.org/observations/65447132</a>   |
| 3707 | <i>Spilopelia chinensis</i> | Eastern Spotted Dove | 2020/11/19 | 2 | 0 | 22.38527641 | 114.27360340 | <a href="https://www.inaturalist.org/observations/65175634">https://www.inaturalist.org/observations/65175634</a>   |
| 3708 | <i>Spilopelia chinensis</i> | Eastern Spotted Dove | 2021/4/29  | 2 | 0 | 22.38558333 | 114.19231330 | <a href="https://www.inaturalist.org/observations/75636944">https://www.inaturalist.org/observations/75636944</a>   |
| 3709 | <i>Spilopelia chinensis</i> | Eastern Spotted Dove | 2021/11/6  | 2 | 0 | 22.38559500 | 114.26061170 | <a href="https://www.inaturalist.org/observations/100381463">https://www.inaturalist.org/observations/100381463</a> |
| 3710 | <i>Spilopelia chinensis</i> | Eastern Spotted Dove | 2019/4/29  | 2 | 0 | 22.38618660 | 114.18759160 | <a href="https://www.inaturalist.org/observations/23850698">https://www.inaturalist.org/observations/23850698</a>   |
| 3711 | <i>Spilopelia chinensis</i> | Eastern Spotted Dove | 2020/4/28  | 1 | 0 | 22.38654466 | 114.19542140 | <a href="https://www.inaturalist.org/observations/44205225">https://www.inaturalist.org/observations/44205225</a>   |
| 3712 | <i>Spilopelia chinensis</i> | Eastern Spotted Dove | 2020/1/31  | 0 | 0 | 22.38726235 | 113.98392170 | <a href="https://www.inaturalist.org/observations/38323769">https://www.inaturalist.org/observations/38323769</a>   |
| 3713 | <i>Spilopelia chinensis</i> | Eastern Spotted Dove | 2020/4/28  | 1 | 0 | 22.38732362 | 114.20582290 | <a href="https://www.inaturalist.org/observations/44466716">https://www.inaturalist.org/observations/44466716</a>   |
| 3714 | <i>Spilopelia chinensis</i> | Eastern Spotted Dove | 2014/7/5   | 3 | 0 | 22.38795170 | 114.20071450 | <a href="https://www.inaturalist.org/observations/19683594">https://www.inaturalist.org/observations/19683594</a>   |
| 3715 | <i>Spilopelia chinensis</i> | Eastern Spotted Dove | 2019/3/20  | 2 | 0 | 22.38795170 | 114.20071450 | <a href="https://www.inaturalist.org/observations/21413507">https://www.inaturalist.org/observations/21413507</a>   |
| 3716 | <i>Spilopelia chinensis</i> | Eastern Spotted Dove | 2019/3/29  | 1 | 0 | 22.38795170 | 114.20071450 | <a href="https://www.inaturalist.org/observations/21729459">https://www.inaturalist.org/observations/21729459</a>   |
| 3717 | <i>Spilopelia chinensis</i> | Eastern Spotted Dove | 2019/4/28  | 2 | 0 | 22.38795170 | 114.20071450 | <a href="https://www.inaturalist.org/observations/23905940">https://www.inaturalist.org/observations/23905940</a>   |
| 3718 | <i>Spilopelia chinensis</i> | Eastern Spotted Dove | 2016/3/27  | 3 | 0 | 22.38795170 | 114.20071450 | <a href="https://www.inaturalist.org/observations/25431778">https://www.inaturalist.org/observations/25431778</a>   |
| 3719 | <i>Spilopelia chinensis</i> | Eastern Spotted Dove | 2016/3/13  | 2 | 0 | 22.38795170 | 114.20071450 | <a href="https://www.inaturalist.org/observations/25436730">https://www.inaturalist.org/observations/25436730</a>   |
| 3720 | <i>Spilopelia chinensis</i> | Eastern Spotted Dove | 2016/4/5   | 2 | 0 | 22.38795170 | 114.20071450 | <a href="https://www.inaturalist.org/observations/25862635">https://www.inaturalist.org/observations/25862635</a>   |
| 3721 | <i>Spilopelia chinensis</i> | Eastern Spotted Dove | 2016/8/14  | 2 | 0 | 22.38795170 | 114.20071450 | <a href="https://www.inaturalist.org/observations/27531924">https://www.inaturalist.org/observations/27531924</a>   |
| 3722 | <i>Spilopelia chinensis</i> | Eastern Spotted Dove | 2016/12/27 | 3 | 0 | 22.38795170 | 114.20071450 | <a href="https://www.inaturalist.org/observations/28413438">https://www.inaturalist.org/observations/28413438</a>   |
| 3723 | <i>Spilopelia chinensis</i> | Eastern Spotted Dove | 2016/12/17 | 3 | 0 | 22.38795170 | 114.20071450 | <a href="https://www.inaturalist.org/observations/28545020">https://www.inaturalist.org/observations/28545020</a>   |
| 3724 | <i>Spilopelia chinensis</i> | Eastern Spotted Dove | 2020/1/16  | 0 | 0 | 22.38812912 | 113.98363840 | <a href="https://www.inaturalist.org/observations/37741422">https://www.inaturalist.org/observations/37741422</a>   |
| 3725 | <i>Spilopelia chinensis</i> | Eastern Spotted Dove | 2019/5/4   | 1 | 0 | 22.38833580 | 113.97786310 | <a href="https://www.inaturalist.org/observations/24500844">https://www.inaturalist.org/observations/24500844</a>   |

|      |                             |                      |            |   |   |             |              |                                                                                                                     |
|------|-----------------------------|----------------------|------------|---|---|-------------|--------------|---------------------------------------------------------------------------------------------------------------------|
| 3726 | <i>Spilopelia chinensis</i> | Eastern Spotted Dove | 2019/11/12 | 1 | 0 | 22.38904270 | 113.98321060 | <a href="https://www.inaturalist.org/observations/35774709">https://www.inaturalist.org/observations/35774709</a>   |
| 3727 | <i>Spilopelia chinensis</i> | Eastern Spotted Dove | 2020/11/13 | 0 | 0 | 22.38922833 | 114.19847830 | <a href="https://www.inaturalist.org/observations/64778899">https://www.inaturalist.org/observations/64778899</a>   |
| 3728 | <i>Spilopelia chinensis</i> | Eastern Spotted Dove | 2019/5/11  | 1 | 0 | 22.38947299 | 113.97873900 | <a href="https://www.inaturalist.org/observations/24925774">https://www.inaturalist.org/observations/24925774</a>   |
| 3729 | <i>Spilopelia chinensis</i> | Eastern Spotted Dove | 2021/12/1  | 2 | 0 | 22.39002096 | 113.97316650 | <a href="https://www.inaturalist.org/observations/102276982">https://www.inaturalist.org/observations/102276982</a> |
| 3730 | <i>Spilopelia chinensis</i> | Eastern Spotted Dove | 2019/3/26  | 3 | 0 | 22.39011872 | 113.97367000 | <a href="https://www.inaturalist.org/observations/25101006">https://www.inaturalist.org/observations/25101006</a>   |
| 3731 | <i>Spilopelia chinensis</i> | Eastern Spotted Dove | 2020/12/8  | 1 | 0 | 22.39048407 | 113.97290020 | <a href="https://www.inaturalist.org/observations/66607856">https://www.inaturalist.org/observations/66607856</a>   |
| 3732 | <i>Spilopelia chinensis</i> | Eastern Spotted Dove | 2020/10/11 | 1 | 0 | 22.39055482 | 113.97437660 | <a href="https://www.inaturalist.org/observations/62276468">https://www.inaturalist.org/observations/62276468</a>   |
| 3733 | <i>Spilopelia chinensis</i> | Eastern Spotted Dove | 2021/11/17 | 0 | 0 | 22.39073252 | 114.19815280 | <a href="https://www.inaturalist.org/observations/101451277">https://www.inaturalist.org/observations/101451277</a> |
| 3734 | <i>Spilopelia chinensis</i> | Eastern Spotted Dove | 2022/4/15  | 2 | 0 | 22.39080373 | 113.97367020 | <a href="https://www.inaturalist.org/observations/111494877">https://www.inaturalist.org/observations/111494877</a> |
| 3735 | <i>Spilopelia chinensis</i> | Eastern Spotted Dove | 2020/4/11  | 2 | 0 | 22.39081532 | 113.97154040 | <a href="https://www.inaturalist.org/observations/41892239">https://www.inaturalist.org/observations/41892239</a>   |
| 3736 | <i>Spilopelia chinensis</i> | Eastern Spotted Dove | 2022/5/1   | 2 | 0 | 22.39082950 | 113.97251260 | <a href="https://www.inaturalist.org/observations/115765845">https://www.inaturalist.org/observations/115765845</a> |
| 3737 | <i>Spilopelia chinensis</i> | Eastern Spotted Dove | 2020/9/17  | 2 | 0 | 22.39083470 | 81.88383340  | <a href="https://www.inaturalist.org/observations/59875994">https://www.inaturalist.org/observations/59875994</a>   |
| 3738 | <i>Spilopelia chinensis</i> | Eastern Spotted Dove | 2019/4/26  | 1 | 0 | 22.39088833 | 114.20419500 | <a href="https://www.inaturalist.org/observations/23100376">https://www.inaturalist.org/observations/23100376</a>   |
| 3739 | <i>Spilopelia chinensis</i> | Eastern Spotted Dove | 2022/4/8   | 1 | 0 | 22.39098667 | 113.97416170 | <a href="https://www.inaturalist.org/observations/110748004">https://www.inaturalist.org/observations/110748004</a> |
| 3740 | <i>Spilopelia chinensis</i> | Eastern Spotted Dove | 2022/7/23  | 1 | 0 | 22.39099155 | 113.97356810 | <a href="https://www.inaturalist.org/observations/127475052">https://www.inaturalist.org/observations/127475052</a> |
| 3741 | <i>Spilopelia chinensis</i> | Eastern Spotted Dove | 2021/1/16  | 1 | 0 | 22.39112000 | 114.06650000 | <a href="https://www.inaturalist.org/observations/68142587">https://www.inaturalist.org/observations/68142587</a>   |
| 3742 | <i>Spilopelia chinensis</i> | Eastern Spotted Dove | 2021/12/1  | 2 | 0 | 22.39114852 | 113.97398570 | <a href="https://www.inaturalist.org/observations/102275158">https://www.inaturalist.org/observations/102275158</a> |
| 3743 | <i>Spilopelia chinensis</i> | Eastern Spotted Dove | 2021/12/1  | 2 | 0 | 22.39118091 | 113.97321140 | <a href="https://www.inaturalist.org/observations/102276008">https://www.inaturalist.org/observations/102276008</a> |
| 3744 | <i>Spilopelia chinensis</i> | Eastern Spotted Dove | 2021/12/1  | 1 | 0 | 22.39121306 | 113.97355550 | <a href="https://www.inaturalist.org/observations/102275476">https://www.inaturalist.org/observations/102275476</a> |
| 3745 | <i>Spilopelia chinensis</i> | Eastern Spotted Dove | 2020/11/5  | 0 | 0 | 22.39124039 | 114.18503060 | <a href="https://www.inaturalist.org/observations/64224308">https://www.inaturalist.org/observations/64224308</a>   |
| 3746 | <i>Spilopelia chinensis</i> | Eastern Spotted Dove | 2021/12/1  | 2 | 0 | 22.39129525 | 113.97351450 | <a href="https://www.inaturalist.org/observations/102275232">https://www.inaturalist.org/observations/102275232</a> |
| 3747 | <i>Spilopelia chinensis</i> | Eastern Spotted Dove | 2021/4/16  | 1 | 0 | 22.39130610 | 114.20691210 | <a href="https://www.inaturalist.org/observations/74192767">https://www.inaturalist.org/observations/74192767</a>   |
| 3748 | <i>Spilopelia chinensis</i> | Eastern Spotted Dove | 2021/12/1  | 2 | 0 | 22.39134398 | 113.97358590 | <a href="https://www.inaturalist.org/observations/102275012">https://www.inaturalist.org/observations/102275012</a> |

|      |                             |                      |            |   |   |             |              |                                                                                                                     |
|------|-----------------------------|----------------------|------------|---|---|-------------|--------------|---------------------------------------------------------------------------------------------------------------------|
| 3749 | <i>Spilopelia chinensis</i> | Eastern Spotted Dove | 2022/4/30  | 2 | 0 | 22.39134898 | 113.97334700 | <a href="https://www.inaturalist.org/observations/113679465">https://www.inaturalist.org/observations/113679465</a> |
| 3750 | <i>Spilopelia chinensis</i> | Eastern Spotted Dove | 2019/1/31  | 1 | 0 | 22.39135155 | 113.97310840 | <a href="https://www.inaturalist.org/observations/19981595">https://www.inaturalist.org/observations/19981595</a>   |
| 3751 | <i>Spilopelia chinensis</i> | Eastern Spotted Dove | 2020/12/15 | 1 | 0 | 22.39143333 | 113.97360330 | <a href="https://www.inaturalist.org/observations/66598706">https://www.inaturalist.org/observations/66598706</a>   |
| 3752 | <i>Spilopelia chinensis</i> | Eastern Spotted Dove | 2021/12/1  | 2 | 0 | 22.39148122 | 113.97363100 | <a href="https://www.inaturalist.org/observations/102275375">https://www.inaturalist.org/observations/102275375</a> |
| 3753 | <i>Spilopelia chinensis</i> | Eastern Spotted Dove | 2022/5/2   | 1 | 0 | 22.39155749 | 113.97451850 | <a href="https://www.inaturalist.org/observations/114615779">https://www.inaturalist.org/observations/114615779</a> |
| 3754 | <i>Spilopelia chinensis</i> | Eastern Spotted Dove | 2017/11/17 | 3 | 0 | 22.39156703 | 114.20030460 | <a href="https://www.inaturalist.org/observations/8884982">https://www.inaturalist.org/observations/8884982</a>     |
| 3755 | <i>Spilopelia chinensis</i> | Eastern Spotted Dove | 2021/12/1  | 2 | 0 | 22.39162005 | 113.97394270 | <a href="https://www.inaturalist.org/observations/102275913">https://www.inaturalist.org/observations/102275913</a> |
| 3756 | <i>Spilopelia chinensis</i> | Eastern Spotted Dove | 2021/12/1  | 2 | 0 | 22.39163084 | 113.97448610 | <a href="https://www.inaturalist.org/observations/102275965">https://www.inaturalist.org/observations/102275965</a> |
| 3757 | <i>Spilopelia chinensis</i> | Eastern Spotted Dove | 2020/6/19  | 1 | 0 | 22.39169920 | 114.19786960 | <a href="https://www.inaturalist.org/observations/50131935">https://www.inaturalist.org/observations/50131935</a>   |
| 3758 | <i>Spilopelia chinensis</i> | Eastern Spotted Dove | 2022/4/15  | 2 | 0 | 22.39171933 | 113.97327210 | <a href="https://www.inaturalist.org/observations/111495888">https://www.inaturalist.org/observations/111495888</a> |
| 3759 | <i>Spilopelia chinensis</i> | Eastern Spotted Dove | 2021/4/2   | 1 | 0 | 22.39173616 | 113.97371090 | <a href="https://www.inaturalist.org/observations/73089006">https://www.inaturalist.org/observations/73089006</a>   |
| 3760 | <i>Spilopelia chinensis</i> | Eastern Spotted Dove | 2021/11/11 | 2 | 0 | 22.39177707 | 114.18568750 | <a href="https://www.inaturalist.org/observations/100836355">https://www.inaturalist.org/observations/100836355</a> |
| 3761 | <i>Spilopelia chinensis</i> | Eastern Spotted Dove | 2021/12/1  | 2 | 0 | 22.39185203 | 113.97439320 | <a href="https://www.inaturalist.org/observations/102275815">https://www.inaturalist.org/observations/102275815</a> |
| 3762 | <i>Spilopelia chinensis</i> | Eastern Spotted Dove | 2020/11/9  | 1 | 0 | 22.39187000 | 114.18541670 | <a href="https://www.inaturalist.org/observations/64505369">https://www.inaturalist.org/observations/64505369</a>   |
| 3763 | <i>Spilopelia chinensis</i> | Eastern Spotted Dove | 2021/11/11 | 2 | 0 | 22.39189322 | 114.18582020 | <a href="https://www.inaturalist.org/observations/101324696">https://www.inaturalist.org/observations/101324696</a> |
| 3764 | <i>Spilopelia chinensis</i> | Eastern Spotted Dove | 2019/1/31  | 4 | 0 | 22.39203478 | 113.97372570 | <a href="https://www.inaturalist.org/observations/19981389">https://www.inaturalist.org/observations/19981389</a>   |
| 3765 | <i>Spilopelia chinensis</i> | Eastern Spotted Dove | 2020/12/14 | 0 | 0 | 22.39210714 | 113.97466290 | <a href="https://www.inaturalist.org/observations/66563024">https://www.inaturalist.org/observations/66563024</a>   |
| 3766 | <i>Spilopelia chinensis</i> | Eastern Spotted Dove | 2022/5/2   | 2 | 0 | 22.39210984 | 113.97511340 | <a href="https://www.inaturalist.org/observations/114615000">https://www.inaturalist.org/observations/114615000</a> |
| 3767 | <i>Spilopelia chinensis</i> | Eastern Spotted Dove | 2019/1/31  | 1 | 0 | 22.39214345 | 113.97541050 | <a href="https://www.inaturalist.org/observations/19981555">https://www.inaturalist.org/observations/19981555</a>   |
| 3768 | <i>Spilopelia chinensis</i> | Eastern Spotted Dove | 2022/7/19  | 1 | 0 | 22.39214703 | 113.97358790 | <a href="https://www.inaturalist.org/observations/127068299">https://www.inaturalist.org/observations/127068299</a> |
| 3769 | <i>Spilopelia chinensis</i> | Eastern Spotted Dove | 2022/7/19  | 2 | 0 | 22.39214703 | 113.97358790 | <a href="https://www.inaturalist.org/observations/127068798">https://www.inaturalist.org/observations/127068798</a> |
| 3770 | <i>Spilopelia chinensis</i> | Eastern Spotted Dove | 2021/12/1  | 1 | 0 | 22.39214708 | 113.97420570 | <a href="https://www.inaturalist.org/observations/102275450">https://www.inaturalist.org/observations/102275450</a> |
| 3771 | <i>Spilopelia chinensis</i> | Eastern Spotted Dove | 2017/11/17 | 3 | 0 | 22.39215106 | 114.19960120 | <a href="https://www.inaturalist.org/observations/8885072">https://www.inaturalist.org/observations/8885072</a>     |



|      |                             |                      |            |   |   |             |              |                                                                                                                     |
|------|-----------------------------|----------------------|------------|---|---|-------------|--------------|---------------------------------------------------------------------------------------------------------------------|
| 3772 | <i>Spilopelia chinensis</i> | Eastern Spotted Dove | 2021/12/1  | 2 | 0 | 22.39224358 | 113.97421840 | <a href="https://www.inaturalist.org/observations/102275233">https://www.inaturalist.org/observations/102275233</a> |
| 3773 | <i>Spilopelia chinensis</i> | Eastern Spotted Dove | 2021/12/1  | 2 | 0 | 22.39224777 | 113.97471100 | <a href="https://www.inaturalist.org/observations/102275688">https://www.inaturalist.org/observations/102275688</a> |
| 3774 | <i>Spilopelia chinensis</i> | Eastern Spotted Dove | 2021/11/4  | 0 | 0 | 22.39229435 | 114.18878550 | <a href="https://www.inaturalist.org/observations/100216916">https://www.inaturalist.org/observations/100216916</a> |
| 3775 | <i>Spilopelia chinensis</i> | Eastern Spotted Dove | 2019/1/31  | 3 | 0 | 22.39238381 | 113.97362050 | <a href="https://www.inaturalist.org/observations/19982255">https://www.inaturalist.org/observations/19982255</a>   |
| 3776 | <i>Spilopelia chinensis</i> | Eastern Spotted Dove | 2022/4/15  | 1 | 0 | 22.39247460 | 113.97365980 | <a href="https://www.inaturalist.org/observations/111495562">https://www.inaturalist.org/observations/111495562</a> |
| 3777 | <i>Spilopelia chinensis</i> | Eastern Spotted Dove | 2019/1/31  | 1 | 0 | 22.39251341 | 113.97343130 | <a href="https://www.inaturalist.org/observations/19981495">https://www.inaturalist.org/observations/19981495</a>   |
| 3778 | <i>Spilopelia chinensis</i> | Eastern Spotted Dove | 2021/12/1  | 1 | 0 | 22.39265207 | 113.97293590 | <a href="https://www.inaturalist.org/observations/102275657">https://www.inaturalist.org/observations/102275657</a> |
| 3779 | <i>Spilopelia chinensis</i> | Eastern Spotted Dove | 2021/12/1  | 2 | 0 | 22.39269594 | 113.97473040 | <a href="https://www.inaturalist.org/observations/102275510">https://www.inaturalist.org/observations/102275510</a> |
| 3780 | <i>Spilopelia chinensis</i> | Eastern Spotted Dove | 2022/4/10  | 2 | 0 | 22.39274000 | 113.97345000 | <a href="https://www.inaturalist.org/observations/110936881">https://www.inaturalist.org/observations/110936881</a> |
| 3781 | <i>Spilopelia chinensis</i> | Eastern Spotted Dove | 2020/12/8  | 1 | 0 | 22.39274755 | 113.97330310 | <a href="https://www.inaturalist.org/observations/66680943">https://www.inaturalist.org/observations/66680943</a>   |
| 3782 | <i>Spilopelia chinensis</i> | Eastern Spotted Dove | 2019/1/31  | 2 | 0 | 22.39274809 | 113.97341980 | <a href="https://www.inaturalist.org/observations/19981462">https://www.inaturalist.org/observations/19981462</a>   |
| 3783 | <i>Spilopelia chinensis</i> | Eastern Spotted Dove | 2022/5/2   | 2 | 0 | 22.39277443 | 113.97457350 | <a href="https://www.inaturalist.org/observations/114613371">https://www.inaturalist.org/observations/114613371</a> |
| 3784 | <i>Spilopelia chinensis</i> | Eastern Spotted Dove | 2019/1/31  | 2 | 0 | 22.39279478 | 113.97334820 | <a href="https://www.inaturalist.org/observations/19981358">https://www.inaturalist.org/observations/19981358</a>   |
| 3785 | <i>Spilopelia chinensis</i> | Eastern Spotted Dove | 2021/2/23  | 1 | 0 | 22.39309796 | 113.97434170 | <a href="https://www.inaturalist.org/observations/70024885">https://www.inaturalist.org/observations/70024885</a>   |
| 3786 | <i>Spilopelia chinensis</i> | Eastern Spotted Dove | 2020/11/4  | 1 | 0 | 22.39319885 | 114.18875500 | <a href="https://www.inaturalist.org/observations/65742628">https://www.inaturalist.org/observations/65742628</a>   |
| 3787 | <i>Spilopelia chinensis</i> | Eastern Spotted Dove | 2020/11/18 | 2 | 0 | 22.39328833 | 114.18731670 | <a href="https://www.inaturalist.org/observations/65127168">https://www.inaturalist.org/observations/65127168</a>   |
| 3788 | <i>Spilopelia chinensis</i> | Eastern Spotted Dove | 2022/7/21  | 1 | 0 | 22.39331006 | 113.97343570 | <a href="https://www.inaturalist.org/observations/127195367">https://www.inaturalist.org/observations/127195367</a> |
| 3789 | <i>Spilopelia chinensis</i> | Eastern Spotted Dove | 2019/1/31  | 2 | 0 | 22.39332712 | 113.97528940 | <a href="https://www.inaturalist.org/observations/19981584">https://www.inaturalist.org/observations/19981584</a>   |
| 3790 | <i>Spilopelia chinensis</i> | Eastern Spotted Dove | 2019/1/31  | 2 | 0 | 22.39338593 | 113.97530840 | <a href="https://www.inaturalist.org/observations/19979802">https://www.inaturalist.org/observations/19979802</a>   |
| 3791 | <i>Spilopelia chinensis</i> | Eastern Spotted Dove | 2020/11/8  | 2 | 0 | 22.39338719 | 114.18835130 | <a href="https://www.inaturalist.org/observations/64421859">https://www.inaturalist.org/observations/64421859</a>   |
| 3792 | <i>Spilopelia chinensis</i> | Eastern Spotted Dove | 2021/3/26  | 2 | 0 | 22.39343401 | 113.97371520 | <a href="https://www.inaturalist.org/observations/72077364">https://www.inaturalist.org/observations/72077364</a>   |
| 3793 | <i>Spilopelia chinensis</i> | Eastern Spotted Dove | 2020/12/3  | 1 | 0 | 22.39344400 | 113.97438440 | <a href="https://www.inaturalist.org/observations/66720494">https://www.inaturalist.org/observations/66720494</a>   |
| 3794 | <i>Spilopelia chinensis</i> | Eastern Spotted Dove | 2021/11/10 | 0 | 0 | 22.39363333 | 114.18850000 | <a href="https://www.inaturalist.org/observations/100739092">https://www.inaturalist.org/observations/100739092</a> |

|      |                             |                      |            |   |   |             |              |                                                                                                                     |
|------|-----------------------------|----------------------|------------|---|---|-------------|--------------|---------------------------------------------------------------------------------------------------------------------|
| 3795 | <i>Spilopelia chinensis</i> | Eastern Spotted Dove | 2021/10/20 | 2 | 0 | 22.39398193 | 114.19355010 | <a href="https://www.inaturalist.org/observations/98773776">https://www.inaturalist.org/observations/98773776</a>   |
| 3796 | <i>Spilopelia chinensis</i> | Eastern Spotted Dove | 2020/4/21  | 1 | 0 | 22.39434489 | 113.98045530 | <a href="https://www.inaturalist.org/observations/42747761">https://www.inaturalist.org/observations/42747761</a>   |
| 3797 | <i>Spilopelia chinensis</i> | Eastern Spotted Dove | 2022/2/2   | 1 | 0 | 22.39435278 | 120.60240560 | <a href="https://www.inaturalist.org/observations/109641776">https://www.inaturalist.org/observations/109641776</a> |
| 3798 | <i>Spilopelia chinensis</i> | Eastern Spotted Dove | 2019/2/19  | 2 | 0 | 22.39445891 | 113.98200650 | <a href="https://www.inaturalist.org/observations/20507878">https://www.inaturalist.org/observations/20507878</a>   |
| 3799 | <i>Spilopelia chinensis</i> | Eastern Spotted Dove | 2010/8/15  | 4 | 0 | 22.39642800 | 114.10949700 | <a href="http://www.inaturalist.org/observations/2395310">http://www.inaturalist.org/observations/2395310</a>       |
| 3800 | <i>Spilopelia chinensis</i> | Eastern Spotted Dove | 2019/12/3  | 1 | 0 | 22.39705390 | 114.31956880 | <a href="https://www.inaturalist.org/observations/36321154">https://www.inaturalist.org/observations/36321154</a>   |
| 3801 | <i>Spilopelia chinensis</i> | Eastern Spotted Dove | 2020/11/26 | 2 | 0 | 22.39715171 | 114.28566940 | <a href="https://www.inaturalist.org/observations/65629512">https://www.inaturalist.org/observations/65629512</a>   |
| 3802 | <i>Spilopelia chinensis</i> | Eastern Spotted Dove | 2020/7/4   | 2 | 0 | 22.39782833 | 114.20024170 | <a href="https://www.inaturalist.org/observations/51884599">https://www.inaturalist.org/observations/51884599</a>   |
| 3803 | <i>Spilopelia chinensis</i> | Eastern Spotted Dove | 2019/9/5   | 2 | 0 | 22.39872904 | 114.18418680 | <a href="https://www.inaturalist.org/observations/32154760">https://www.inaturalist.org/observations/32154760</a>   |
| 3804 | <i>Spilopelia chinensis</i> | Eastern Spotted Dove | 2020/11/15 | 2 | 0 | 22.39878667 | 114.32110500 | <a href="https://www.inaturalist.org/observations/64896670">https://www.inaturalist.org/observations/64896670</a>   |
| 3805 | <i>Spilopelia chinensis</i> | Eastern Spotted Dove | 2022/4/30  | 2 | 0 | 22.39892500 | 114.20603000 | <a href="https://www.inaturalist.org/observations/114654441">https://www.inaturalist.org/observations/114654441</a> |
| 3806 | <i>Spilopelia chinensis</i> | Eastern Spotted Dove | 2022/4/30  | 2 | 0 | 22.39893493 | 114.20605450 | <a href="https://www.inaturalist.org/observations/113693327">https://www.inaturalist.org/observations/113693327</a> |
| 3807 | <i>Spilopelia chinensis</i> | Eastern Spotted Dove | 2022/4/30  | 2 | 0 | 22.39893554 | 114.20602650 | <a href="https://www.inaturalist.org/observations/113693320">https://www.inaturalist.org/observations/113693320</a> |
| 3808 | <i>Spilopelia chinensis</i> | Eastern Spotted Dove | 2020/11/3  | 2 | 0 | 22.39920500 | 114.20054670 | <a href="https://www.inaturalist.org/observations/64081669">https://www.inaturalist.org/observations/64081669</a>   |
| 3809 | <i>Spilopelia chinensis</i> | Eastern Spotted Dove | 2022/4/10  | 2 | 0 | 22.39922670 | 113.97494010 | <a href="https://www.inaturalist.org/observations/110935368">https://www.inaturalist.org/observations/110935368</a> |
| 3810 | <i>Spilopelia chinensis</i> | Eastern Spotted Dove | 2009/1/17  | 1 | 0 | 22.39943340 | 114.20677380 | <a href="https://www.inaturalist.org/observations/39915941">https://www.inaturalist.org/observations/39915941</a>   |
| 3811 | <i>Spilopelia chinensis</i> | Eastern Spotted Dove | 2021/11/13 | 2 | 0 | 22.39968248 | 114.19781190 | <a href="https://www.inaturalist.org/observations/100995569">https://www.inaturalist.org/observations/100995569</a> |
| 3812 | <i>Spilopelia chinensis</i> | Eastern Spotted Dove | 2021/11/13 | 2 | 0 | 22.39970810 | 114.19771640 | <a href="https://www.inaturalist.org/observations/100995497">https://www.inaturalist.org/observations/100995497</a> |
| 3813 | <i>Spilopelia chinensis</i> | Eastern Spotted Dove | 2021/11/13 | 2 | 0 | 22.39974916 | 114.19776980 | <a href="https://www.inaturalist.org/observations/100995463">https://www.inaturalist.org/observations/100995463</a> |
| 3814 | <i>Spilopelia chinensis</i> | Eastern Spotted Dove | 2020/11/7  | 1 | 0 | 22.40000372 | 114.19792530 | <a href="https://www.inaturalist.org/observations/64343369">https://www.inaturalist.org/observations/64343369</a>   |
| 3815 | <i>Spilopelia chinensis</i> | Eastern Spotted Dove | 2020/11/7  | 1 | 0 | 22.40006877 | 114.19774970 | <a href="https://www.inaturalist.org/observations/64348242">https://www.inaturalist.org/observations/64348242</a>   |
| 3816 | <i>Spilopelia chinensis</i> | Eastern Spotted Dove | 2021/11/2  | 1 | 0 | 22.40009400 | 114.19783580 | <a href="https://www.inaturalist.org/observations/100067698">https://www.inaturalist.org/observations/100067698</a> |
| 3817 | <i>Spilopelia chinensis</i> | Eastern Spotted Dove | 2020/11/18 | 1 | 0 | 22.40010691 | 114.19784690 | <a href="https://www.inaturalist.org/observations/65116388">https://www.inaturalist.org/observations/65116388</a>   |

|      |                             |                      |            |   |   |             |              |                                                                                                                     |
|------|-----------------------------|----------------------|------------|---|---|-------------|--------------|---------------------------------------------------------------------------------------------------------------------|
| 3818 | <i>Spilopelia chinensis</i> | Eastern Spotted Dove | 2020/11/19 | 1 | 0 | 22.40011047 | 114.19782930 | <a href="https://www.inaturalist.org/observations/65205953">https://www.inaturalist.org/observations/65205953</a>   |
| 3819 | <i>Spilopelia chinensis</i> | Eastern Spotted Dove | 2021/11/9  | 1 | 0 | 22.40011277 | 114.19832610 | <a href="https://www.inaturalist.org/observations/100979613">https://www.inaturalist.org/observations/100979613</a> |
| 3820 | <i>Spilopelia chinensis</i> | Eastern Spotted Dove | 2022/5/1   | 2 | 0 | 22.40012167 | 113.98641200 | <a href="https://www.inaturalist.org/observations/114106621">https://www.inaturalist.org/observations/114106621</a> |
| 3821 | <i>Spilopelia chinensis</i> | Eastern Spotted Dove | 2020/11/3  | 0 | 0 | 22.40012386 | 114.19791410 | <a href="https://www.inaturalist.org/observations/64095233">https://www.inaturalist.org/observations/64095233</a>   |
| 3822 | <i>Spilopelia chinensis</i> | Eastern Spotted Dove | 2020/11/7  | 1 | 0 | 22.40013008 | 114.19784980 | <a href="https://www.inaturalist.org/observations/64343621">https://www.inaturalist.org/observations/64343621</a>   |
| 3823 | <i>Spilopelia chinensis</i> | Eastern Spotted Dove | 2021/11/6  | 2 | 0 | 22.40013322 | 114.19813400 | <a href="https://www.inaturalist.org/observations/100606196">https://www.inaturalist.org/observations/100606196</a> |
| 3824 | <i>Spilopelia chinensis</i> | Eastern Spotted Dove | 2020/11/20 | 2 | 0 | 22.40014127 | 114.19781980 | <a href="https://www.inaturalist.org/observations/65279980">https://www.inaturalist.org/observations/65279980</a>   |
| 3825 | <i>Spilopelia chinensis</i> | Eastern Spotted Dove | 2021/11/9  | 1 | 0 | 22.40014812 | 114.19835350 | <a href="https://www.inaturalist.org/observations/101008062">https://www.inaturalist.org/observations/101008062</a> |
| 3826 | <i>Spilopelia chinensis</i> | Eastern Spotted Dove | 2020/11/20 | 1 | 0 | 22.40014823 | 114.19731450 | <a href="https://www.inaturalist.org/observations/65464753">https://www.inaturalist.org/observations/65464753</a>   |
| 3827 | <i>Spilopelia chinensis</i> | Eastern Spotted Dove | 2020/11/23 | 2 | 0 | 22.40015430 | 114.19808910 | <a href="https://www.inaturalist.org/observations/65463650">https://www.inaturalist.org/observations/65463650</a>   |
| 3828 | <i>Spilopelia chinensis</i> | Eastern Spotted Dove | 2020/11/23 | 1 | 0 | 22.40015767 | 114.19772700 | <a href="https://www.inaturalist.org/observations/65502516">https://www.inaturalist.org/observations/65502516</a>   |
| 3829 | <i>Spilopelia chinensis</i> | Eastern Spotted Dove | 2020/11/8  | 1 | 0 | 22.40017606 | 114.19779600 | <a href="https://www.inaturalist.org/observations/64443144">https://www.inaturalist.org/observations/64443144</a>   |
| 3830 | <i>Spilopelia chinensis</i> | Eastern Spotted Dove | 2021/11/4  | 1 | 0 | 22.40018333 | 114.19773830 | <a href="https://www.inaturalist.org/observations/100215944">https://www.inaturalist.org/observations/100215944</a> |
| 3831 | <i>Spilopelia chinensis</i> | Eastern Spotted Dove | 2021/11/12 | 0 | 0 | 22.40018509 | 114.19790400 | <a href="https://www.inaturalist.org/observations/100903046">https://www.inaturalist.org/observations/100903046</a> |
| 3832 | <i>Spilopelia chinensis</i> | Eastern Spotted Dove | 2020/11/13 | 1 | 0 | 22.40021721 | 114.19798710 | <a href="https://www.inaturalist.org/observations/64758632">https://www.inaturalist.org/observations/64758632</a>   |
| 3833 | <i>Spilopelia chinensis</i> | Eastern Spotted Dove | 2021/11/11 | 1 | 0 | 22.40022833 | 114.19770830 | <a href="https://www.inaturalist.org/observations/100843021">https://www.inaturalist.org/observations/100843021</a> |
| 3834 | <i>Spilopelia chinensis</i> | Eastern Spotted Dove | 2020/11/18 | 1 | 0 | 22.40030500 | 114.19813670 | <a href="https://www.inaturalist.org/observations/65212516">https://www.inaturalist.org/observations/65212516</a>   |
| 3835 | <i>Spilopelia chinensis</i> | Eastern Spotted Dove | 2020/11/1  | 1 | 0 | 22.40030833 | 114.19851670 | <a href="https://www.inaturalist.org/observations/63947367">https://www.inaturalist.org/observations/63947367</a>   |
| 3836 | <i>Spilopelia chinensis</i> | Eastern Spotted Dove | 2020/11/20 | 1 | 0 | 22.40033555 | 114.19789780 | <a href="https://www.inaturalist.org/observations/65469237">https://www.inaturalist.org/observations/65469237</a>   |
| 3837 | <i>Spilopelia chinensis</i> | Eastern Spotted Dove | 2020/11/15 | 1 | 0 | 22.40037198 | 114.19813320 | <a href="https://www.inaturalist.org/observations/64921072">https://www.inaturalist.org/observations/64921072</a>   |
| 3838 | <i>Spilopelia chinensis</i> | Eastern Spotted Dove | 2021/11/13 | 0 | 0 | 22.40038065 | 114.19790370 | <a href="https://www.inaturalist.org/observations/100982817">https://www.inaturalist.org/observations/100982817</a> |
| 3839 | <i>Spilopelia chinensis</i> | Eastern Spotted Dove | 2020/11/18 | 2 | 0 | 22.40041167 | 114.20203330 | <a href="https://www.inaturalist.org/observations/65143525">https://www.inaturalist.org/observations/65143525</a>   |
| 3840 | <i>Spilopelia chinensis</i> | Eastern Spotted Dove | 2021/11/6  | 2 | 0 | 22.40041197 | 114.19790930 | <a href="https://www.inaturalist.org/observations/100366578">https://www.inaturalist.org/observations/100366578</a> |

|      |                             |                      |            |   |   |             |              |                                                                                                                     |
|------|-----------------------------|----------------------|------------|---|---|-------------|--------------|---------------------------------------------------------------------------------------------------------------------|
| 3841 | <i>Spilopelia chinensis</i> | Eastern Spotted Dove | 2020/11/18 | 1 | 0 | 22.40043333 | 114.19810500 | <a href="https://www.inaturalist.org/observations/65143263">https://www.inaturalist.org/observations/65143263</a>   |
| 3842 | <i>Spilopelia chinensis</i> | Eastern Spotted Dove | 2020/11/2  | 2 | 0 | 22.40055378 | 114.19793900 | <a href="https://www.inaturalist.org/observations/64033270">https://www.inaturalist.org/observations/64033270</a>   |
| 3843 | <i>Spilopelia chinensis</i> | Eastern Spotted Dove | 2020/11/18 | 1 | 0 | 22.40055500 | 114.19780000 | <a href="https://www.inaturalist.org/observations/65136008">https://www.inaturalist.org/observations/65136008</a>   |
| 3844 | <i>Spilopelia chinensis</i> | Eastern Spotted Dove | 2020/11/18 | 1 | 0 | 22.40056167 | 114.19778330 | <a href="https://www.inaturalist.org/observations/65143191">https://www.inaturalist.org/observations/65143191</a>   |
| 3845 | <i>Spilopelia chinensis</i> | Eastern Spotted Dove | 2020/11/18 | 1 | 0 | 22.40062500 | 114.19775330 | <a href="https://www.inaturalist.org/observations/65212589">https://www.inaturalist.org/observations/65212589</a>   |
| 3846 | <i>Spilopelia chinensis</i> | Eastern Spotted Dove | 2021/11/7  | 2 | 0 | 22.40067539 | 114.19782430 | <a href="https://www.inaturalist.org/observations/100465238">https://www.inaturalist.org/observations/100465238</a> |
| 3847 | <i>Spilopelia chinensis</i> | Eastern Spotted Dove | 2021/11/12 | 1 | 0 | 22.40084096 | 114.19854420 | <a href="https://www.inaturalist.org/observations/101093838">https://www.inaturalist.org/observations/101093838</a> |
| 3848 | <i>Spilopelia chinensis</i> | Eastern Spotted Dove | 2021/6/6   | 2 | 0 | 22.40122403 | 114.24259430 | <a href="https://www.inaturalist.org/observations/82020130">https://www.inaturalist.org/observations/82020130</a>   |
| 3849 | <i>Spilopelia chinensis</i> | Eastern Spotted Dove | 2021/11/12 | 1 | 0 | 22.40138398 | 114.19782390 | <a href="https://www.inaturalist.org/observations/101093415">https://www.inaturalist.org/observations/101093415</a> |
| 3850 | <i>Spilopelia chinensis</i> | Eastern Spotted Dove | 2020/9/26  | 1 | 0 | 22.40141333 | 114.20141330 | <a href="https://www.inaturalist.org/observations/60786546">https://www.inaturalist.org/observations/60786546</a>   |
| 3851 | <i>Spilopelia chinensis</i> | Eastern Spotted Dove | 2021/3/7   | 2 | 0 | 22.40172844 | 113.97725040 | <a href="https://www.inaturalist.org/observations/70741853">https://www.inaturalist.org/observations/70741853</a>   |
| 3852 | <i>Spilopelia chinensis</i> | Eastern Spotted Dove | 2022/2/8   | 1 | 0 | 22.40198450 | 113.96197790 | <a href="https://www.inaturalist.org/observations/106380903">https://www.inaturalist.org/observations/106380903</a> |
| 3853 | <i>Spilopelia chinensis</i> | Eastern Spotted Dove | 2022/3/4   | 1 | 0 | 22.40198450 | 113.96197790 | <a href="https://www.inaturalist.org/observations/107874000">https://www.inaturalist.org/observations/107874000</a> |
| 3854 | <i>Spilopelia chinensis</i> | Eastern Spotted Dove | 2021/3/19  | 0 | 0 | 22.40220925 | 113.96876310 | <a href="https://www.inaturalist.org/observations/71524321">https://www.inaturalist.org/observations/71524321</a>   |
| 3855 | <i>Spilopelia chinensis</i> | Eastern Spotted Dove | 2020/4/24  | 2 | 0 | 22.40243169 | 114.20193500 | <a href="https://www.inaturalist.org/observations/43060087">https://www.inaturalist.org/observations/43060087</a>   |
| 3856 | <i>Spilopelia chinensis</i> | Eastern Spotted Dove | 2022/8/7   | 2 | 0 | 22.40349770 | 114.10101700 | <a href="https://www.inaturalist.org/observations/129836680">https://www.inaturalist.org/observations/129836680</a> |
| 3857 | <i>Spilopelia chinensis</i> | Eastern Spotted Dove | 2020/12/6  | 2 | 0 | 22.40364678 | 114.22494940 | <a href="https://www.inaturalist.org/observations/66170024">https://www.inaturalist.org/observations/66170024</a>   |
| 3858 | <i>Spilopelia chinensis</i> | Eastern Spotted Dove | 2019/4/27  | 5 | 0 | 22.40377810 | 113.96129160 | <a href="https://www.inaturalist.org/observations/23880042">https://www.inaturalist.org/observations/23880042</a>   |
| 3859 | <i>Spilopelia chinensis</i> | Eastern Spotted Dove | 2022/5/27  | 1 | 0 | 22.40407833 | 113.96687170 | <a href="https://www.inaturalist.org/observations/119244841">https://www.inaturalist.org/observations/119244841</a> |
| 3860 | <i>Spilopelia chinensis</i> | Eastern Spotted Dove | 2018/11/12 | 4 | 0 | 22.40439708 | 114.22564220 | <a href="https://www.inaturalist.org/observations/18622719">https://www.inaturalist.org/observations/18622719</a>   |
| 3861 | <i>Spilopelia chinensis</i> | Eastern Spotted Dove | 2022/5/2   | 2 | 0 | 22.40450396 | 113.96797550 | <a href="https://www.inaturalist.org/observations/115059644">https://www.inaturalist.org/observations/115059644</a> |
| 3862 | <i>Spilopelia chinensis</i> | Eastern Spotted Dove | 2020/4/24  | 2 | 0 | 22.40462208 | 113.97187730 | <a href="https://www.inaturalist.org/observations/43089140">https://www.inaturalist.org/observations/43089140</a>   |
| 3863 | <i>Spilopelia chinensis</i> | Eastern Spotted Dove | 2018/11/12 | 4 | 0 | 22.40465962 | 114.22209870 | <a href="https://www.inaturalist.org/observations/18622695">https://www.inaturalist.org/observations/18622695</a>   |

|      |                             |                      |            |   |   |             |              |                                                                                                                     |
|------|-----------------------------|----------------------|------------|---|---|-------------|--------------|---------------------------------------------------------------------------------------------------------------------|
| 3864 | <i>Spilopelia chinensis</i> | Eastern Spotted Dove | 2020/12/27 | 2 | 0 | 22.40529709 | 114.21743280 | <a href="https://www.inaturalist.org/observations/67127142">https://www.inaturalist.org/observations/67127142</a>   |
| 3865 | <i>Spilopelia chinensis</i> | Eastern Spotted Dove | 2020/12/14 | 1 | 0 | 22.40670782 | 113.96839200 | <a href="https://www.inaturalist.org/observations/66560532">https://www.inaturalist.org/observations/66560532</a>   |
| 3866 | <i>Spilopelia chinensis</i> | Eastern Spotted Dove | 2021/10/31 | 1 | 0 | 22.40671588 | 113.95394200 | <a href="https://www.inaturalist.org/observations/100066118">https://www.inaturalist.org/observations/100066118</a> |
| 3867 | <i>Spilopelia chinensis</i> | Eastern Spotted Dove | 2022/2/10  | 1 | 0 | 22.40715230 | 113.95286910 | <a href="https://www.inaturalist.org/observations/106549081">https://www.inaturalist.org/observations/106549081</a> |
| 3868 | <i>Spilopelia chinensis</i> | Eastern Spotted Dove | 2021/3/19  | 1 | 0 | 22.40722340 | 113.96687910 | <a href="https://www.inaturalist.org/observations/71541472">https://www.inaturalist.org/observations/71541472</a>   |
| 3869 | <i>Spilopelia chinensis</i> | Eastern Spotted Dove | 2020/11/8  | 1 | 0 | 22.40731167 | 113.96341670 | <a href="https://www.inaturalist.org/observations/64416829">https://www.inaturalist.org/observations/64416829</a>   |
| 3870 | <i>Spilopelia chinensis</i> | Eastern Spotted Dove | 2022/4/27  | 1 | 0 | 22.40743611 | 113.96622500 | <a href="https://www.inaturalist.org/observations/113173407">https://www.inaturalist.org/observations/113173407</a> |
| 3871 | <i>Spilopelia chinensis</i> | Eastern Spotted Dove | 2021/12/25 | 1 | 0 | 22.40778711 | 113.95228980 | <a href="https://www.inaturalist.org/observations/103662571">https://www.inaturalist.org/observations/103662571</a> |
| 3872 | <i>Spilopelia chinensis</i> | Eastern Spotted Dove | 2020/11/21 | 1 | 0 | 22.40848667 | 114.23697830 | <a href="https://www.inaturalist.org/observations/65320971">https://www.inaturalist.org/observations/65320971</a>   |
| 3873 | <i>Spilopelia chinensis</i> | Eastern Spotted Dove | 2021/4/30  | 2 | 0 | 22.40892599 | 113.96282010 | <a href="https://www.inaturalist.org/observations/75753519">https://www.inaturalist.org/observations/75753519</a>   |
| 3874 | <i>Spilopelia chinensis</i> | Eastern Spotted Dove | 2021/9/3   | 1 | 0 | 22.40923914 | 113.98123030 | <a href="https://www.inaturalist.org/observations/94122113">https://www.inaturalist.org/observations/94122113</a>   |
| 3875 | <i>Spilopelia chinensis</i> | Eastern Spotted Dove | 2018/4/29  | 5 | 0 | 22.40979520 | 113.96410110 | <a href="https://www.inaturalist.org/observations/11751030">https://www.inaturalist.org/observations/11751030</a>   |
| 3876 | <i>Spilopelia chinensis</i> | Eastern Spotted Dove | 2021/8/26  | 2 | 0 | 22.40995328 | 113.98020840 | <a href="https://www.inaturalist.org/observations/93235789">https://www.inaturalist.org/observations/93235789</a>   |
| 3877 | <i>Spilopelia chinensis</i> | Eastern Spotted Dove | 2021/8/26  | 2 | 0 | 22.40995328 | 113.98020840 | <a href="https://www.inaturalist.org/observations/93235792">https://www.inaturalist.org/observations/93235792</a>   |
| 3878 | <i>Spilopelia chinensis</i> | Eastern Spotted Dove | 2021/9/1   | 2 | 0 | 22.40995328 | 113.98020840 | <a href="https://www.inaturalist.org/observations/93236770">https://www.inaturalist.org/observations/93236770</a>   |
| 3879 | <i>Spilopelia chinensis</i> | Eastern Spotted Dove | 2021/9/7   | 2 | 0 | 22.40995328 | 113.98020840 | <a href="https://www.inaturalist.org/observations/94122158">https://www.inaturalist.org/observations/94122158</a>   |
| 3880 | <i>Spilopelia chinensis</i> | Eastern Spotted Dove | 2018/4/28  | 7 | 0 | 22.41003330 | 113.96367190 | <a href="https://www.inaturalist.org/observations/11750343">https://www.inaturalist.org/observations/11750343</a>   |
| 3881 | <i>Spilopelia chinensis</i> | Eastern Spotted Dove | 2021/5/1   | 2 | 0 | 22.41066667 | 113.96756170 | <a href="https://www.inaturalist.org/observations/75957276">https://www.inaturalist.org/observations/75957276</a>   |
| 3882 | <i>Spilopelia chinensis</i> | Eastern Spotted Dove | 2021/8/26  | 1 | 0 | 22.41116904 | 113.98000190 | <a href="https://www.inaturalist.org/observations/93235786">https://www.inaturalist.org/observations/93235786</a>   |
| 3883 | <i>Spilopelia chinensis</i> | Eastern Spotted Dove | 2022/4/8   | 1 | 0 | 22.41129167 | 113.98447500 | <a href="https://www.inaturalist.org/observations/110936141">https://www.inaturalist.org/observations/110936141</a> |
| 3884 | <i>Spilopelia chinensis</i> | Eastern Spotted Dove | 2021/9/6   | 1 | 0 | 22.41183779 | 113.98014940 | <a href="https://www.inaturalist.org/observations/94122143">https://www.inaturalist.org/observations/94122143</a>   |
| 3885 | <i>Spilopelia chinensis</i> | Eastern Spotted Dove | 2021/5/1   | 1 | 0 | 22.41185833 | 113.96825330 | <a href="https://www.inaturalist.org/observations/75957704">https://www.inaturalist.org/observations/75957704</a>   |
| 3886 | <i>Spilopelia chinensis</i> | Eastern Spotted Dove | 2022/4/7   | 1 | 0 | 22.41223667 | 113.98278830 | <a href="https://www.inaturalist.org/observations/111168665">https://www.inaturalist.org/observations/111168665</a> |

|      |                             |                      |            |   |   |             |              |                                                                                                                     |
|------|-----------------------------|----------------------|------------|---|---|-------------|--------------|---------------------------------------------------------------------------------------------------------------------|
| 3887 | <i>Spilopelia chinensis</i> | Eastern Spotted Dove | 2016/4/16  | 2 | 0 | 22.41334495 | 114.24191330 | <a href="https://www.inaturalist.org/observations/25662654">https://www.inaturalist.org/observations/25662654</a>   |
| 3888 | <i>Spilopelia chinensis</i> | Eastern Spotted Dove | 2022/9/14  | 1 | 0 | 22.41555786 | 114.20762630 | <a href="https://www.inaturalist.org/observations/134950102">https://www.inaturalist.org/observations/134950102</a> |
| 3889 | <i>Spilopelia chinensis</i> | Eastern Spotted Dove | 2018/12/30 | 3 | 0 | 22.41555789 | 114.20997880 | <a href="https://www.inaturalist.org/observations/19503923">https://www.inaturalist.org/observations/19503923</a>   |
| 3890 | <i>Spilopelia chinensis</i> | Eastern Spotted Dove | 2018/3/18  | 3 | 0 | 22.41626540 | 114.21092750 | <a href="https://www.inaturalist.org/observations/10289001">https://www.inaturalist.org/observations/10289001</a>   |
| 3891 | <i>Spilopelia chinensis</i> | Eastern Spotted Dove | 2018/8/24  | 4 | 0 | 22.41682732 | 114.08272020 | <a href="https://www.inaturalist.org/observations/15834382">https://www.inaturalist.org/observations/15834382</a>   |
| 3892 | <i>Spilopelia chinensis</i> | Eastern Spotted Dove | 2020/11/4  | 2 | 0 | 22.41794165 | 114.22230500 | <a href="https://www.inaturalist.org/observations/64207722">https://www.inaturalist.org/observations/64207722</a>   |
| 3893 | <i>Spilopelia chinensis</i> | Eastern Spotted Dove | 2022/3/4   | 2 | 0 | 22.41809500 | 114.23247020 | <a href="https://www.inaturalist.org/observations/107941568">https://www.inaturalist.org/observations/107941568</a> |
| 3894 | <i>Spilopelia chinensis</i> | Eastern Spotted Dove | 2021/8/13  | 2 | 0 | 22.41902353 | 114.08018300 | <a href="https://www.inaturalist.org/observations/91410752">https://www.inaturalist.org/observations/91410752</a>   |
| 3895 | <i>Spilopelia chinensis</i> | Eastern Spotted Dove | 2018/12/10 | 3 | 0 | 22.41908685 | 114.22502950 | <a href="https://www.inaturalist.org/observations/18929459">https://www.inaturalist.org/observations/18929459</a>   |
| 3896 | <i>Spilopelia chinensis</i> | Eastern Spotted Dove | 2018/12/11 | 1 | 0 | 22.42025533 | 114.22889480 | <a href="https://www.inaturalist.org/observations/18955531">https://www.inaturalist.org/observations/18955531</a>   |
| 3897 | <i>Spilopelia chinensis</i> | Eastern Spotted Dove | 2021/5/1   | 1 | 0 | 22.42146678 | 114.03151320 | <a href="https://www.inaturalist.org/observations/77242226">https://www.inaturalist.org/observations/77242226</a>   |
| 3898 | <i>Spilopelia chinensis</i> | Eastern Spotted Dove | 2020/4/13  | 3 | 0 | 22.42209713 | 114.17897700 | <a href="https://www.inaturalist.org/observations/42080101">https://www.inaturalist.org/observations/42080101</a>   |
| 3899 | <i>Spilopelia chinensis</i> | Eastern Spotted Dove | 2018/2/28  | 2 | 0 | 22.42263802 | 88.28889149  | <a href="https://www.inaturalist.org/observations/69906742">https://www.inaturalist.org/observations/69906742</a>   |
| 3900 | <i>Spilopelia chinensis</i> | Eastern Spotted Dove | 2022/5/2   | 2 | 0 | 22.42287217 | 114.22890360 | <a href="https://www.inaturalist.org/observations/114734722">https://www.inaturalist.org/observations/114734722</a> |
| 3901 | <i>Spilopelia chinensis</i> | Eastern Spotted Dove | 2018/3/1   | 2 | 0 | 22.42310000 | 88.28730000  | <a href="https://www.inaturalist.org/observations/69906675">https://www.inaturalist.org/observations/69906675</a>   |
| 3902 | <i>Spilopelia chinensis</i> | Eastern Spotted Dove | 2019/4/25  | 1 | 0 | 22.42310751 | 114.22513210 | <a href="https://www.inaturalist.org/observations/23032684">https://www.inaturalist.org/observations/23032684</a>   |
| 3903 | <i>Spilopelia chinensis</i> | Eastern Spotted Dove | 2019/3/18  | 1 | 0 | 22.42313044 | 114.22626400 | <a href="https://www.inaturalist.org/observations/21351195">https://www.inaturalist.org/observations/21351195</a>   |
| 3904 | <i>Spilopelia chinensis</i> | Eastern Spotted Dove | 2018/4/15  | 5 | 0 | 22.42334500 | 114.23187170 | <a href="https://www.inaturalist.org/observations/10984346">https://www.inaturalist.org/observations/10984346</a>   |
| 3905 | <i>Spilopelia chinensis</i> | Eastern Spotted Dove | 2019/11/16 | 1 | 0 | 22.42341217 | 114.22605650 | <a href="https://www.inaturalist.org/observations/35769237">https://www.inaturalist.org/observations/35769237</a>   |
| 3906 | <i>Spilopelia chinensis</i> | Eastern Spotted Dove | 2022/4/24  | 1 | 0 | 22.42397958 | 114.22543150 | <a href="https://www.inaturalist.org/observations/112633462">https://www.inaturalist.org/observations/112633462</a> |
| 3907 | <i>Spilopelia chinensis</i> | Eastern Spotted Dove | 2022/4/24  | 2 | 0 | 22.42404868 | 114.22546030 | <a href="https://www.inaturalist.org/observations/112633425">https://www.inaturalist.org/observations/112633425</a> |
| 3908 | <i>Spilopelia chinensis</i> | Eastern Spotted Dove | 2022/4/24  | 2 | 0 | 22.42405540 | 114.22546040 | <a href="https://www.inaturalist.org/observations/112633362">https://www.inaturalist.org/observations/112633362</a> |
| 3909 | <i>Spilopelia chinensis</i> | Eastern Spotted Dove | 2022/4/13  | 1 | 0 | 22.42405833 | 114.22535830 | <a href="https://www.inaturalist.org/observations/112486347">https://www.inaturalist.org/observations/112486347</a> |

|      |                             |                      |            |   |   |             |              |                                                                                                                     |
|------|-----------------------------|----------------------|------------|---|---|-------------|--------------|---------------------------------------------------------------------------------------------------------------------|
| 3910 | <i>Spilopelia chinensis</i> | Eastern Spotted Dove | 2020/3/4   | 2 | 0 | 22.42432976 | 114.23113250 | <a href="https://www.inaturalist.org/observations/49602948">https://www.inaturalist.org/observations/49602948</a>   |
| 3911 | <i>Spilopelia chinensis</i> | Eastern Spotted Dove | 2021/3/10  | 1 | 0 | 22.42454529 | 114.22577670 | <a href="https://www.inaturalist.org/observations/70984827">https://www.inaturalist.org/observations/70984827</a>   |
| 3912 | <i>Spilopelia chinensis</i> | Eastern Spotted Dove | 2021/3/11  | 0 | 0 | 22.42471504 | 114.22585300 | <a href="https://www.inaturalist.org/observations/70982082">https://www.inaturalist.org/observations/70982082</a>   |
| 3913 | <i>Spilopelia chinensis</i> | Eastern Spotted Dove | 2016/10/22 | 4 | 0 | 22.42476333 | 114.23233000 | <a href="https://www.inaturalist.org/observations/15777211">https://www.inaturalist.org/observations/15777211</a>   |
| 3914 | <i>Spilopelia chinensis</i> | Eastern Spotted Dove | 2021/8/8   | 1 | 0 | 22.42497109 | 114.22872270 | <a href="https://www.inaturalist.org/observations/90354207">https://www.inaturalist.org/observations/90354207</a>   |
| 3915 | <i>Spilopelia chinensis</i> | Eastern Spotted Dove | 2018/9/26  | 3 | 0 | 22.42535588 | 114.23199930 | <a href="https://www.inaturalist.org/observations/16926613">https://www.inaturalist.org/observations/16926613</a>   |
| 3916 | <i>Spilopelia chinensis</i> | Eastern Spotted Dove | 2019/11/15 | 1 | 0 | 22.42540405 | 114.22698920 | <a href="https://www.inaturalist.org/observations/36339245">https://www.inaturalist.org/observations/36339245</a>   |
| 3917 | <i>Spilopelia chinensis</i> | Eastern Spotted Dove | 2018/4/29  | 3 | 0 | 22.42574680 | 114.18120860 | <a href="https://www.inaturalist.org/observations/11763636">https://www.inaturalist.org/observations/11763636</a>   |
| 3918 | <i>Spilopelia chinensis</i> | Eastern Spotted Dove | 2018/4/29  | 4 | 0 | 22.42574680 | 114.18120860 | <a href="https://www.inaturalist.org/observations/11863632">https://www.inaturalist.org/observations/11863632</a>   |
| 3919 | <i>Spilopelia chinensis</i> | Eastern Spotted Dove | 2020/4/4   | 1 | 0 | 22.42574680 | 114.18120860 | <a href="https://www.inaturalist.org/observations/41362090">https://www.inaturalist.org/observations/41362090</a>   |
| 3920 | <i>Spilopelia chinensis</i> | Eastern Spotted Dove | 2019/4/14  | 1 | 0 | 22.42574680 | 114.18120860 | <a href="https://www.inaturalist.org/observations/58930808">https://www.inaturalist.org/observations/58930808</a>   |
| 3921 | <i>Spilopelia chinensis</i> | Eastern Spotted Dove | 2021/2/5   | 1 | 0 | 22.42574680 | 114.18120860 | <a href="https://www.inaturalist.org/observations/69084876">https://www.inaturalist.org/observations/69084876</a>   |
| 3922 | <i>Spilopelia chinensis</i> | Eastern Spotted Dove | 2021/3/12  | 1 | 0 | 22.42574680 | 114.18120860 | <a href="https://www.inaturalist.org/observations/71059937">https://www.inaturalist.org/observations/71059937</a>   |
| 3923 | <i>Spilopelia chinensis</i> | Eastern Spotted Dove | 2021/4/20  | 1 | 0 | 22.42574680 | 114.18120860 | <a href="https://www.inaturalist.org/observations/74624037">https://www.inaturalist.org/observations/74624037</a>   |
| 3924 | <i>Spilopelia chinensis</i> | Eastern Spotted Dove | 2021/11/28 | 1 | 0 | 22.42574680 | 114.18120860 | <a href="https://www.inaturalist.org/observations/102070856">https://www.inaturalist.org/observations/102070856</a> |
| 3925 | <i>Spilopelia chinensis</i> | Eastern Spotted Dove | 2021/12/22 | 1 | 0 | 22.42574680 | 114.18120860 | <a href="https://www.inaturalist.org/observations/103461510">https://www.inaturalist.org/observations/103461510</a> |
| 3926 | <i>Spilopelia chinensis</i> | Eastern Spotted Dove | 2022/4/29  | 1 | 0 | 22.42574680 | 114.18120860 | <a href="https://www.inaturalist.org/observations/114558712">https://www.inaturalist.org/observations/114558712</a> |
| 3927 | <i>Spilopelia chinensis</i> | Eastern Spotted Dove | 2022/5/2   | 1 | 0 | 22.42574680 | 114.18120860 | <a href="https://www.inaturalist.org/observations/114656665">https://www.inaturalist.org/observations/114656665</a> |
| 3928 | <i>Spilopelia chinensis</i> | Eastern Spotted Dove | 2022/5/2   | 1 | 0 | 22.42574680 | 114.18120860 | <a href="https://www.inaturalist.org/observations/114725264">https://www.inaturalist.org/observations/114725264</a> |
| 3929 | <i>Spilopelia chinensis</i> | Eastern Spotted Dove | 2019/4/28  | 4 | 0 | 22.42574682 | 114.18120860 | <a href="https://www.inaturalist.org/observations/23673037">https://www.inaturalist.org/observations/23673037</a>   |
| 3930 | <i>Spilopelia chinensis</i> | Eastern Spotted Dove | 2020/4/26  | 1 | 0 | 22.42574682 | 114.18120860 | <a href="https://www.inaturalist.org/observations/43668569">https://www.inaturalist.org/observations/43668569</a>   |
| 3931 | <i>Spilopelia chinensis</i> | Eastern Spotted Dove | 2022/5/6   | 2 | 0 | 22.42574700 | 114.18120900 | <a href="https://www.inaturalist.org/observations/116417756">https://www.inaturalist.org/observations/116417756</a> |
| 3932 | <i>Spilopelia chinensis</i> | Eastern Spotted Dove | 2021/10/22 | 1 | 0 | 22.42585157 | 114.18120830 | <a href="https://www.inaturalist.org/observations/99294848">https://www.inaturalist.org/observations/99294848</a>   |

|      |                             |                      |            |   |   |             |              |                                                                                                                     |
|------|-----------------------------|----------------------|------------|---|---|-------------|--------------|---------------------------------------------------------------------------------------------------------------------|
| 3933 | <i>Spilopelia chinensis</i> | Eastern Spotted Dove | 2021/4/6   | 1 | 0 | 22.42628511 | 114.10445430 | <a href="https://www.inaturalist.org/observations/73092167">https://www.inaturalist.org/observations/73092167</a>   |
| 3934 | <i>Spilopelia chinensis</i> | Eastern Spotted Dove | 2021/11/3  | 1 | 0 | 22.42644101 | 114.23527590 | <a href="https://www.inaturalist.org/observations/100129146">https://www.inaturalist.org/observations/100129146</a> |
| 3935 | <i>Spilopelia chinensis</i> | Eastern Spotted Dove | 2021/11/7  | 1 | 0 | 22.42648058 | 114.23586110 | <a href="https://www.inaturalist.org/observations/100472657">https://www.inaturalist.org/observations/100472657</a> |
| 3936 | <i>Spilopelia chinensis</i> | Eastern Spotted Dove | 2021/4/17  | 1 | 0 | 22.42654169 | 114.23021340 | <a href="https://www.inaturalist.org/observations/74214646">https://www.inaturalist.org/observations/74214646</a>   |
| 3937 | <i>Spilopelia chinensis</i> | Eastern Spotted Dove | 2021/3/4   | 2 | 0 | 22.42658333 | 114.23442830 | <a href="https://www.inaturalist.org/observations/70992150">https://www.inaturalist.org/observations/70992150</a>   |
| 3938 | <i>Spilopelia chinensis</i> | Eastern Spotted Dove | 2021/12/11 | 2 | 0 | 22.42662793 | 114.26976140 | <a href="https://www.inaturalist.org/observations/102868801">https://www.inaturalist.org/observations/102868801</a> |
| 3939 | <i>Spilopelia chinensis</i> | Eastern Spotted Dove | 2022/5/1   | 1 | 0 | 22.42684500 | 114.23087170 | <a href="https://www.inaturalist.org/observations/114190647">https://www.inaturalist.org/observations/114190647</a> |
| 3940 | <i>Spilopelia chinensis</i> | Eastern Spotted Dove | 2012/10/10 | 4 | 0 | 22.42689807 | 114.23053350 | <a href="http://www.inaturalist.org/observations/133475">http://www.inaturalist.org/observations/133475</a>         |
| 3941 | <i>Spilopelia chinensis</i> | Eastern Spotted Dove | 2012/10/11 | 4 | 0 | 22.42699725 | 114.23910580 | <a href="http://www.inaturalist.org/observations/133921">http://www.inaturalist.org/observations/133921</a>         |
| 3942 | <i>Spilopelia chinensis</i> | Eastern Spotted Dove | 2021/5/31  | 2 | 0 | 22.42754364 | 114.23261260 | <a href="https://www.inaturalist.org/observations/81423584">https://www.inaturalist.org/observations/81423584</a>   |
| 3943 | <i>Spilopelia chinensis</i> | Eastern Spotted Dove | 2019/4/21  | 1 | 0 | 22.42767600 | 114.07297400 | <a href="https://www.inaturalist.org/observations/23036690">https://www.inaturalist.org/observations/23036690</a>   |
| 3944 | <i>Spilopelia chinensis</i> | Eastern Spotted Dove | 2021/5/2   | 1 | 0 | 22.42772782 | 114.24027520 | <a href="https://www.inaturalist.org/observations/76520802">https://www.inaturalist.org/observations/76520802</a>   |
| 3945 | <i>Spilopelia chinensis</i> | Eastern Spotted Dove | 2012/7/13  | 3 | 0 | 22.42786568 | 114.23429770 | <a href="http://www.inaturalist.org/observations/101222">http://www.inaturalist.org/observations/101222</a>         |
| 3946 | <i>Spilopelia chinensis</i> | Eastern Spotted Dove | 2022/1/15  | 1 | 0 | 22.42809791 | 114.18075380 | <a href="https://www.inaturalist.org/observations/104967336">https://www.inaturalist.org/observations/104967336</a> |
| 3947 | <i>Spilopelia chinensis</i> | Eastern Spotted Dove | 2022/2/27  | 1 | 0 | 22.42832376 | 114.08158870 | <a href="https://www.inaturalist.org/observations/117273652">https://www.inaturalist.org/observations/117273652</a> |
| 3948 | <i>Spilopelia chinensis</i> | Eastern Spotted Dove | 2021/1/2   | 2 | 0 | 22.42838485 | 114.23095330 | <a href="https://www.inaturalist.org/observations/67490765">https://www.inaturalist.org/observations/67490765</a>   |
| 3949 | <i>Spilopelia chinensis</i> | Eastern Spotted Dove | 2021/5/19  | 1 | 0 | 22.42868840 | 114.18212410 | <a href="https://www.inaturalist.org/observations/79784366">https://www.inaturalist.org/observations/79784366</a>   |
| 3950 | <i>Spilopelia chinensis</i> | Eastern Spotted Dove | 2022/5/8   | 1 | 0 | 22.42905778 | 114.18151780 | <a href="https://www.inaturalist.org/observations/116084992">https://www.inaturalist.org/observations/116084992</a> |
| 3951 | <i>Spilopelia chinensis</i> | Eastern Spotted Dove | 2021/2/9   | 1 | 0 | 22.42910688 | 114.07790400 | <a href="https://www.inaturalist.org/observations/69971635">https://www.inaturalist.org/observations/69971635</a>   |
| 3952 | <i>Spilopelia chinensis</i> | Eastern Spotted Dove | 2021/11/6  | 0 | 0 | 22.42922307 | 114.18450580 | <a href="https://www.inaturalist.org/observations/100380448">https://www.inaturalist.org/observations/100380448</a> |
| 3953 | <i>Spilopelia chinensis</i> | Eastern Spotted Dove | 2021/10/7  | 1 | 0 | 22.42931963 | 114.18098870 | <a href="https://www.inaturalist.org/observations/97621691">https://www.inaturalist.org/observations/97621691</a>   |
| 3954 | <i>Spilopelia chinensis</i> | Eastern Spotted Dove | 2021/8/22  | 1 | 0 | 22.42951943 | 114.18103120 | <a href="https://www.inaturalist.org/observations/92219252">https://www.inaturalist.org/observations/92219252</a>   |
| 3955 | <i>Spilopelia chinensis</i> | Eastern Spotted Dove | 2021/11/8  | 1 | 0 | 22.42955300 | 114.18242500 | <a href="https://www.inaturalist.org/observations/100990434">https://www.inaturalist.org/observations/100990434</a> |



|      |                             |                      |            |   |   |             |              |                                                                                                                     |
|------|-----------------------------|----------------------|------------|---|---|-------------|--------------|---------------------------------------------------------------------------------------------------------------------|
| 3956 | <i>Spilopelia chinensis</i> | Eastern Spotted Dove | 2020/2/20  | 0 | 0 | 22.42956400 | 114.18288000 | <a href="https://www.inaturalist.org/observations/39072982">https://www.inaturalist.org/observations/39072982</a>   |
| 3957 | <i>Spilopelia chinensis</i> | Eastern Spotted Dove | 2010/7/31  | 1 | 0 | 22.42964000 | 114.18091300 | <a href="https://www.inaturalist.org/observations/65061657">https://www.inaturalist.org/observations/65061657</a>   |
| 3958 | <i>Spilopelia chinensis</i> | Eastern Spotted Dove | 2022/1/1   | 1 | 0 | 22.42966833 | 114.18332690 | <a href="https://www.inaturalist.org/observations/104091669">https://www.inaturalist.org/observations/104091669</a> |
| 3959 | <i>Spilopelia chinensis</i> | Eastern Spotted Dove | 2021/5/30  | 2 | 0 | 22.43005267 | 114.18355270 | <a href="https://www.inaturalist.org/observations/80848326">https://www.inaturalist.org/observations/80848326</a>   |
| 3960 | <i>Spilopelia chinensis</i> | Eastern Spotted Dove | 2021/2/21  | 1 | 0 | 22.43010944 | 114.18341320 | <a href="https://www.inaturalist.org/observations/75768097">https://www.inaturalist.org/observations/75768097</a>   |
| 3961 | <i>Spilopelia chinensis</i> | Eastern Spotted Dove | 2022/6/25  | 1 | 0 | 22.43019194 | 114.18394270 | <a href="https://www.inaturalist.org/observations/124089426">https://www.inaturalist.org/observations/124089426</a> |
| 3962 | <i>Spilopelia chinensis</i> | Eastern Spotted Dove | 2021/11/20 | 1 | 0 | 22.43020024 | 114.18365580 | <a href="https://www.inaturalist.org/observations/101553155">https://www.inaturalist.org/observations/101553155</a> |
| 3963 | <i>Spilopelia chinensis</i> | Eastern Spotted Dove | 2020/12/7  | 2 | 0 | 22.43027500 | 114.18358670 | <a href="https://www.inaturalist.org/observations/66242244">https://www.inaturalist.org/observations/66242244</a>   |
| 3964 | <i>Spilopelia chinensis</i> | Eastern Spotted Dove | 2021/4/11  | 1 | 0 | 22.43070412 | 114.24111180 | <a href="https://www.inaturalist.org/observations/73602189">https://www.inaturalist.org/observations/73602189</a>   |
| 3965 | <i>Spilopelia chinensis</i> | Eastern Spotted Dove | 2010/9/8   | 1 | 0 | 22.43091100 | 114.18126700 | <a href="https://www.inaturalist.org/observations/103616029">https://www.inaturalist.org/observations/103616029</a> |
| 3966 | <i>Spilopelia chinensis</i> | Eastern Spotted Dove | 2020/11/6  | 1 | 0 | 22.43115044 | 114.24030300 | <a href="https://www.inaturalist.org/observations/64363632">https://www.inaturalist.org/observations/64363632</a>   |
| 3967 | <i>Spilopelia chinensis</i> | Eastern Spotted Dove | 2022/2/11  | 1 | 0 | 22.43125709 | 120.49262540 | <a href="https://www.inaturalist.org/observations/106549421">https://www.inaturalist.org/observations/106549421</a> |
| 3968 | <i>Spilopelia chinensis</i> | Eastern Spotted Dove | 2018/4/29  | 3 | 0 | 22.43136557 | 114.11834200 | <a href="https://www.inaturalist.org/observations/11967674">https://www.inaturalist.org/observations/11967674</a>   |
| 3969 | <i>Spilopelia chinensis</i> | Eastern Spotted Dove | 2020/10/18 | 1 | 0 | 22.43157886 | 114.18498270 | <a href="https://www.inaturalist.org/observations/62874860">https://www.inaturalist.org/observations/62874860</a>   |
| 3970 | <i>Spilopelia chinensis</i> | Eastern Spotted Dove | 2018/4/28  | 5 | 0 | 22.43184464 | 114.18483820 | <a href="https://www.inaturalist.org/observations/11606309">https://www.inaturalist.org/observations/11606309</a>   |
| 3971 | <i>Spilopelia chinensis</i> | Eastern Spotted Dove | 2017/5/3   | 1 | 0 | 22.43200475 | 114.06776060 | <a href="https://www.inaturalist.org/observations/47389625">https://www.inaturalist.org/observations/47389625</a>   |
| 3972 | <i>Spilopelia chinensis</i> | Eastern Spotted Dove | 2022/1/1   | 1 | 0 | 22.43218139 | 114.18569440 | <a href="https://www.inaturalist.org/observations/104091688">https://www.inaturalist.org/observations/104091688</a> |
| 3973 | <i>Spilopelia chinensis</i> | Eastern Spotted Dove | 2022/8/21  | 1 | 0 | 22.43275583 | 114.24324750 | <a href="https://www.inaturalist.org/observations/131670003">https://www.inaturalist.org/observations/131670003</a> |
| 3974 | <i>Spilopelia chinensis</i> | Eastern Spotted Dove | 2021/3/30  | 1 | 0 | 22.43276262 | 113.99853400 | <a href="https://www.inaturalist.org/observations/72423896">https://www.inaturalist.org/observations/72423896</a>   |
| 3975 | <i>Spilopelia chinensis</i> | Eastern Spotted Dove | 2020/10/20 | 2 | 0 | 22.43348000 | 113.99820830 | <a href="https://www.inaturalist.org/observations/63075544">https://www.inaturalist.org/observations/63075544</a>   |
| 3976 | <i>Spilopelia chinensis</i> | Eastern Spotted Dove | 2022/4/30  | 2 | 0 | 22.43351333 | 114.16496670 | <a href="https://www.inaturalist.org/observations/113685116">https://www.inaturalist.org/observations/113685116</a> |
| 3977 | <i>Spilopelia chinensis</i> | Eastern Spotted Dove | 2018/4/29  | 6 | 0 | 22.43368964 | 88.39524238  | <a href="https://www.inaturalist.org/observations/11748183">https://www.inaturalist.org/observations/11748183</a>   |
| 3978 | <i>Spilopelia chinensis</i> | Eastern Spotted Dove | 2020/4/30  | 1 | 0 | 22.43624966 | 114.06361690 | <a href="https://www.inaturalist.org/observations/44349597">https://www.inaturalist.org/observations/44349597</a>   |

|      |                             |                      |            |   |   |             |              |                                                                                                                     |
|------|-----------------------------|----------------------|------------|---|---|-------------|--------------|---------------------------------------------------------------------------------------------------------------------|
| 3979 | <i>Spilopelia chinensis</i> | Eastern Spotted Dove | 2019/11/24 | 1 | 0 | 22.43625672 | 114.06347200 | <a href="https://www.inaturalist.org/observations/36053507">https://www.inaturalist.org/observations/36053507</a>   |
| 3980 | <i>Spilopelia chinensis</i> | Eastern Spotted Dove | 2018/5/12  | 4 | 0 | 22.43677001 | 114.01172170 | <a href="https://www.inaturalist.org/observations/12536412">https://www.inaturalist.org/observations/12536412</a>   |
| 3981 | <i>Spilopelia chinensis</i> | Eastern Spotted Dove | 2021/6/23  | 2 | 0 | 22.43683556 | 114.06380520 | <a href="https://www.inaturalist.org/observations/84149392">https://www.inaturalist.org/observations/84149392</a>   |
| 3982 | <i>Spilopelia chinensis</i> | Eastern Spotted Dove | 2014/2/15  | 1 | 0 | 22.43835800 | 114.07006600 | <a href="https://www.inaturalist.org/observations/70133597">https://www.inaturalist.org/observations/70133597</a>   |
| 3983 | <i>Spilopelia chinensis</i> | Eastern Spotted Dove | 2021/12/9  | 1 | 0 | 22.43865572 | 114.06017970 | <a href="https://www.inaturalist.org/observations/102770381">https://www.inaturalist.org/observations/102770381</a> |
| 3984 | <i>Spilopelia chinensis</i> | Eastern Spotted Dove | 2020/4/29  | 1 | 0 | 22.44067087 | 114.00838320 | <a href="https://www.inaturalist.org/observations/44371669">https://www.inaturalist.org/observations/44371669</a>   |
| 3985 | <i>Spilopelia chinensis</i> | Eastern Spotted Dove | 2018/5/27  | 3 | 0 | 22.44092596 | 114.01887260 | <a href="https://www.inaturalist.org/observations/12856241">https://www.inaturalist.org/observations/12856241</a>   |
| 3986 | <i>Spilopelia chinensis</i> | Eastern Spotted Dove | 2020/3/17  | 1 | 0 | 22.44102400 | 114.01858100 | <a href="https://www.inaturalist.org/observations/40520895">https://www.inaturalist.org/observations/40520895</a>   |
| 3987 | <i>Spilopelia chinensis</i> | Eastern Spotted Dove | 2021/12/15 | 1 | 0 | 22.44108800 | 114.05791800 | <a href="https://www.inaturalist.org/observations/103143554">https://www.inaturalist.org/observations/103143554</a> |
| 3988 | <i>Spilopelia chinensis</i> | Eastern Spotted Dove | 2020/12/13 | 1 | 0 | 22.44109552 | 114.01956650 | <a href="https://www.inaturalist.org/observations/66507364">https://www.inaturalist.org/observations/66507364</a>   |
| 3989 | <i>Spilopelia chinensis</i> | Eastern Spotted Dove | 2020/4/15  | 2 | 0 | 22.44131300 | 114.01873800 | <a href="https://www.inaturalist.org/observations/42308472">https://www.inaturalist.org/observations/42308472</a>   |
| 3990 | <i>Spilopelia chinensis</i> | Eastern Spotted Dove | 2020/12/13 | 1 | 0 | 22.44131700 | 114.01967440 | <a href="https://www.inaturalist.org/observations/66507358">https://www.inaturalist.org/observations/66507358</a>   |
| 3991 | <i>Spilopelia chinensis</i> | Eastern Spotted Dove | 2020/12/14 | 1 | 0 | 22.44133154 | 114.01941520 | <a href="https://www.inaturalist.org/observations/66561071">https://www.inaturalist.org/observations/66561071</a>   |
| 3992 | <i>Spilopelia chinensis</i> | Eastern Spotted Dove | 2019/3/10  | 2 | 0 | 22.44133507 | 114.15681010 | <a href="https://www.inaturalist.org/observations/21824333">https://www.inaturalist.org/observations/21824333</a>   |
| 3993 | <i>Spilopelia chinensis</i> | Eastern Spotted Dove | 2020/12/13 | 1 | 0 | 22.44134076 | 114.01972310 | <a href="https://www.inaturalist.org/observations/66507363">https://www.inaturalist.org/observations/66507363</a>   |
| 3994 | <i>Spilopelia chinensis</i> | Eastern Spotted Dove | 2020/12/17 | 1 | 0 | 22.44134667 | 114.05758880 | <a href="https://www.inaturalist.org/observations/66687603">https://www.inaturalist.org/observations/66687603</a>   |
| 3995 | <i>Spilopelia chinensis</i> | Eastern Spotted Dove | 2020/12/13 | 2 | 0 | 22.44134755 | 114.01966730 | <a href="https://www.inaturalist.org/observations/66507374">https://www.inaturalist.org/observations/66507374</a>   |
| 3996 | <i>Spilopelia chinensis</i> | Eastern Spotted Dove | 2021/6/12  | 3 | 0 | 22.44137081 | 114.16057170 | <a href="https://www.inaturalist.org/observations/82643008">https://www.inaturalist.org/observations/82643008</a>   |
| 3997 | <i>Spilopelia chinensis</i> | Eastern Spotted Dove | 2018/5/10  | 4 | 0 | 22.44148000 | 114.02628330 | <a href="https://www.inaturalist.org/observations/12311274">https://www.inaturalist.org/observations/12311274</a>   |
| 3998 | <i>Spilopelia chinensis</i> | Eastern Spotted Dove | 2012/10/6  | 1 | 0 | 22.44154300 | 114.28666600 | <a href="https://www.inaturalist.org/observations/106052471">https://www.inaturalist.org/observations/106052471</a> |
| 3999 | <i>Spilopelia chinensis</i> | Eastern Spotted Dove | 2021/2/7   | 2 | 0 | 22.44178900 | 114.01878400 | <a href="https://www.inaturalist.org/observations/69304799">https://www.inaturalist.org/observations/69304799</a>   |
| 4000 | <i>Spilopelia chinensis</i> | Eastern Spotted Dove | 2020/4/14  | 2 | 0 | 22.44185833 | 114.01950670 | <a href="https://www.inaturalist.org/observations/42650794">https://www.inaturalist.org/observations/42650794</a>   |
| 4001 | <i>Spilopelia chinensis</i> | Eastern Spotted Dove | 2021/5/12  | 1 | 0 | 22.44188623 | 114.01949350 | <a href="https://www.inaturalist.org/observations/78489181">https://www.inaturalist.org/observations/78489181</a>   |

|      |                             |                      |            |   |   |             |              |                                                                                                                     |
|------|-----------------------------|----------------------|------------|---|---|-------------|--------------|---------------------------------------------------------------------------------------------------------------------|
| 4002 | <i>Spilopelia chinensis</i> | Eastern Spotted Dove | 2019/11/10 | 1 | 0 | 22.44198973 | 114.02837940 | <a href="https://www.inaturalist.org/observations/35515530">https://www.inaturalist.org/observations/35515530</a>   |
| 4003 | <i>Spilopelia chinensis</i> | Eastern Spotted Dove | 2019/11/10 | 1 | 0 | 22.44208717 | 114.02843990 | <a href="https://www.inaturalist.org/observations/35515720">https://www.inaturalist.org/observations/35515720</a>   |
| 4004 | <i>Spilopelia chinensis</i> | Eastern Spotted Dove | 2020/12/8  | 4 | 0 | 22.44223833 | 114.01888330 | <a href="https://www.inaturalist.org/observations/66288556">https://www.inaturalist.org/observations/66288556</a>   |
| 4005 | <i>Spilopelia chinensis</i> | Eastern Spotted Dove | 2021/4/29  | 1 | 0 | 22.44224600 | 114.02527310 | <a href="https://www.inaturalist.org/observations/75761627">https://www.inaturalist.org/observations/75761627</a>   |
| 4006 | <i>Spilopelia chinensis</i> | Eastern Spotted Dove | 2020/12/8  | 4 | 0 | 22.44225500 | 114.01902780 | <a href="https://www.inaturalist.org/observations/66288484">https://www.inaturalist.org/observations/66288484</a>   |
| 4007 | <i>Spilopelia chinensis</i> | Eastern Spotted Dove | 2021/2/28  | 1 | 0 | 22.44230701 | 114.01842420 | <a href="https://www.inaturalist.org/observations/70307438">https://www.inaturalist.org/observations/70307438</a>   |
| 4008 | <i>Spilopelia chinensis</i> | Eastern Spotted Dove | 2020/11/16 | 2 | 0 | 22.44232039 | 114.16550630 | <a href="https://www.inaturalist.org/observations/65005690">https://www.inaturalist.org/observations/65005690</a>   |
| 4009 | <i>Spilopelia chinensis</i> | Eastern Spotted Dove | 2021/7/12  | 2 | 0 | 22.44232039 | 114.16550630 | <a href="https://www.inaturalist.org/observations/86817092">https://www.inaturalist.org/observations/86817092</a>   |
| 4010 | <i>Spilopelia chinensis</i> | Eastern Spotted Dove | 2021/5/11  | 1 | 0 | 22.44232039 | 114.16550630 | <a href="https://www.inaturalist.org/observations/87683584">https://www.inaturalist.org/observations/87683584</a>   |
| 4011 | <i>Spilopelia chinensis</i> | Eastern Spotted Dove | 2012/10/27 | 1 | 0 | 22.44232180 | 114.16550640 | <a href="https://www.inaturalist.org/observations/22799872">https://www.inaturalist.org/observations/22799872</a>   |
| 4012 | <i>Spilopelia chinensis</i> | Eastern Spotted Dove | 2021/2/6   | 1 | 0 | 22.44232180 | 114.16550640 | <a href="https://www.inaturalist.org/observations/97978492">https://www.inaturalist.org/observations/97978492</a>   |
| 4013 | <i>Spilopelia chinensis</i> | Eastern Spotted Dove | 2021/2/28  | 1 | 0 | 22.44232180 | 114.16550640 | <a href="https://www.inaturalist.org/observations/97978558">https://www.inaturalist.org/observations/97978558</a>   |
| 4014 | <i>Spilopelia chinensis</i> | Eastern Spotted Dove | 2020/12/15 | 1 | 0 | 22.44252900 | 114.01901400 | <a href="https://www.inaturalist.org/observations/66605102">https://www.inaturalist.org/observations/66605102</a>   |
| 4015 | <i>Spilopelia chinensis</i> | Eastern Spotted Dove | 2020/11/25 | 1 | 0 | 22.44258431 | 114.02454720 | <a href="https://www.inaturalist.org/observations/65570317">https://www.inaturalist.org/observations/65570317</a>   |
| 4016 | <i>Spilopelia chinensis</i> | Eastern Spotted Dove | 2022/7/17  | 1 | 0 | 22.44267202 | 114.01857750 | <a href="https://www.inaturalist.org/observations/127088579">https://www.inaturalist.org/observations/127088579</a> |
| 4017 | <i>Spilopelia chinensis</i> | Eastern Spotted Dove | 2021/5/12  | 1 | 0 | 22.44268768 | 114.01961540 | <a href="https://www.inaturalist.org/observations/78489175">https://www.inaturalist.org/observations/78489175</a>   |
| 4018 | <i>Spilopelia chinensis</i> | Eastern Spotted Dove | 2020/12/3  | 1 | 0 | 22.44293030 | 114.18129170 | <a href="https://www.inaturalist.org/observations/66047495">https://www.inaturalist.org/observations/66047495</a>   |
| 4019 | <i>Spilopelia chinensis</i> | Eastern Spotted Dove | 2022/1/28  | 2 | 0 | 22.44305154 | 114.01943850 | <a href="https://www.inaturalist.org/observations/105708881">https://www.inaturalist.org/observations/105708881</a> |
| 4020 | <i>Spilopelia chinensis</i> | Eastern Spotted Dove | 2022/3/14  | 1 | 0 | 22.44305378 | 114.03097810 | <a href="https://www.inaturalist.org/observations/128428379">https://www.inaturalist.org/observations/128428379</a> |
| 4021 | <i>Spilopelia chinensis</i> | Eastern Spotted Dove | 2021/5/2   | 2 | 0 | 22.44307129 | 114.01970440 | <a href="https://www.inaturalist.org/observations/76399478">https://www.inaturalist.org/observations/76399478</a>   |
| 4022 | <i>Spilopelia chinensis</i> | Eastern Spotted Dove | 2020/4/28  | 2 | 0 | 22.44312960 | 114.16925330 | <a href="https://www.inaturalist.org/observations/44030551">https://www.inaturalist.org/observations/44030551</a>   |
| 4023 | <i>Spilopelia chinensis</i> | Eastern Spotted Dove | 2020/12/6  | 6 | 0 | 22.44320958 | 88.30743541  | <a href="https://www.inaturalist.org/observations/66297784">https://www.inaturalist.org/observations/66297784</a>   |
| 4024 | <i>Spilopelia chinensis</i> | Eastern Spotted Dove | 2020/12/6  | 6 | 0 | 22.44320958 | 88.30743541  | <a href="https://www.inaturalist.org/observations/66298087">https://www.inaturalist.org/observations/66298087</a>   |

|      |                             |                      |            |   |   |             |              |                                                                                                                     |
|------|-----------------------------|----------------------|------------|---|---|-------------|--------------|---------------------------------------------------------------------------------------------------------------------|
| 4025 | <i>Spilopelia chinensis</i> | Eastern Spotted Dove | 2022/1/28  | 1 | 0 | 22.44337730 | 114.01974870 | <a href="https://www.inaturalist.org/observations/105708884">https://www.inaturalist.org/observations/105708884</a> |
| 4026 | <i>Spilopelia chinensis</i> | Eastern Spotted Dove | 2019/11/19 | 1 | 0 | 22.44338556 | 120.48759280 | <a href="https://www.inaturalist.org/observations/36124650">https://www.inaturalist.org/observations/36124650</a>   |
| 4027 | <i>Spilopelia chinensis</i> | Eastern Spotted Dove | 2021/12/23 | 1 | 0 | 22.44339581 | 114.01958160 | <a href="https://www.inaturalist.org/observations/104097448">https://www.inaturalist.org/observations/104097448</a> |
| 4028 | <i>Spilopelia chinensis</i> | Eastern Spotted Dove | 2021/5/12  | 1 | 0 | 22.44352253 | 114.01902850 | <a href="https://www.inaturalist.org/observations/78489174">https://www.inaturalist.org/observations/78489174</a>   |
| 4029 | <i>Spilopelia chinensis</i> | Eastern Spotted Dove | 2019/11/20 | 1 | 0 | 22.44413000 | 120.48984610 | <a href="https://www.inaturalist.org/observations/36124413">https://www.inaturalist.org/observations/36124413</a>   |
| 4030 | <i>Spilopelia chinensis</i> | Eastern Spotted Dove | 2020/1/21  | 0 | 0 | 22.44422167 | 114.13856330 | <a href="https://www.inaturalist.org/observations/37836119">https://www.inaturalist.org/observations/37836119</a>   |
| 4031 | <i>Spilopelia chinensis</i> | Eastern Spotted Dove | 2019/12/16 | 1 | 0 | 22.44450333 | 114.13847330 | <a href="https://www.inaturalist.org/observations/36742630">https://www.inaturalist.org/observations/36742630</a>   |
| 4032 | <i>Spilopelia chinensis</i> | Eastern Spotted Dove | 2021/5/16  | 1 | 0 | 22.44453800 | 114.02220800 | <a href="https://www.inaturalist.org/observations/78946784">https://www.inaturalist.org/observations/78946784</a>   |
| 4033 | <i>Spilopelia chinensis</i> | Eastern Spotted Dove | 2021/5/16  | 1 | 0 | 22.44453800 | 114.02220800 | <a href="https://www.inaturalist.org/observations/78946788">https://www.inaturalist.org/observations/78946788</a>   |
| 4034 | <i>Spilopelia chinensis</i> | Eastern Spotted Dove | 2019/8/24  | 2 | 0 | 22.44455333 | 114.16872500 | <a href="https://www.inaturalist.org/observations/31390461">https://www.inaturalist.org/observations/31390461</a>   |
| 4035 | <i>Spilopelia chinensis</i> | Eastern Spotted Dove | 2019/2/16  | 1 | 0 | 22.44457600 | 114.13743600 | <a href="https://www.inaturalist.org/observations/20416478">https://www.inaturalist.org/observations/20416478</a>   |
| 4036 | <i>Spilopelia chinensis</i> | Eastern Spotted Dove | 2019/4/29  | 3 | 0 | 22.44477985 | 114.17856980 | <a href="https://www.inaturalist.org/observations/23868638">https://www.inaturalist.org/observations/23868638</a>   |
| 4037 | <i>Spilopelia chinensis</i> | Eastern Spotted Dove | 2018/4/28  | 3 | 0 | 22.44479822 | 114.13893280 | <a href="https://www.inaturalist.org/observations/11583197">https://www.inaturalist.org/observations/11583197</a>   |
| 4038 | <i>Spilopelia chinensis</i> | Eastern Spotted Dove | 2020/3/28  | 1 | 0 | 22.44483949 | 114.14008310 | <a href="https://www.inaturalist.org/observations/40884344">https://www.inaturalist.org/observations/40884344</a>   |
| 4039 | <i>Spilopelia chinensis</i> | Eastern Spotted Dove | 2021/2/20  | 1 | 0 | 22.44505000 | 114.13665800 | <a href="https://www.inaturalist.org/observations/69860598">https://www.inaturalist.org/observations/69860598</a>   |
| 4040 | <i>Spilopelia chinensis</i> | Eastern Spotted Dove | 2019/9/21  | 2 | 0 | 22.44513200 | 114.13850500 | <a href="https://www.inaturalist.org/observations/34590757">https://www.inaturalist.org/observations/34590757</a>   |
| 4041 | <i>Spilopelia chinensis</i> | Eastern Spotted Dove | 2019/4/26  | 2 | 0 | 22.44515790 | 114.14014490 | <a href="https://www.inaturalist.org/observations/23091483">https://www.inaturalist.org/observations/23091483</a>   |
| 4042 | <i>Spilopelia chinensis</i> | Eastern Spotted Dove | 2019/7/20  | 3 | 0 | 22.44516400 | 114.13859600 | <a href="https://www.inaturalist.org/observations/29501078">https://www.inaturalist.org/observations/29501078</a>   |
| 4043 | <i>Spilopelia chinensis</i> | Eastern Spotted Dove | 2020/2/23  | 0 | 0 | 22.44519972 | 114.13897800 | <a href="https://www.inaturalist.org/observations/39088958">https://www.inaturalist.org/observations/39088958</a>   |
| 4044 | <i>Spilopelia chinensis</i> | Eastern Spotted Dove | 2019/4/21  | 1 | 0 | 22.44520416 | 114.13877070 | <a href="https://www.inaturalist.org/observations/22864419">https://www.inaturalist.org/observations/22864419</a>   |
| 4045 | <i>Spilopelia chinensis</i> | Eastern Spotted Dove | 2021/11/7  | 1 | 0 | 22.44527778 | 114.01944440 | <a href="https://www.inaturalist.org/observations/100818399">https://www.inaturalist.org/observations/100818399</a> |
| 4046 | <i>Spilopelia chinensis</i> | Eastern Spotted Dove | 2019/2/16  | 1 | 0 | 22.44527903 | 114.13867760 | <a href="https://www.inaturalist.org/observations/20386404">https://www.inaturalist.org/observations/20386404</a>   |
| 4047 | <i>Spilopelia chinensis</i> | Eastern Spotted Dove | 2019/10/6  | 2 | 0 | 22.44533853 | 114.13874190 | <a href="https://www.inaturalist.org/observations/34164266">https://www.inaturalist.org/observations/34164266</a>   |

|      |                             |                      |            |   |   |             |              |                                                                                                                     |
|------|-----------------------------|----------------------|------------|---|---|-------------|--------------|---------------------------------------------------------------------------------------------------------------------|
| 4048 | <i>Spilopelia chinensis</i> | Eastern Spotted Dove | 2019/3/30  | 2 | 0 | 22.44541500 | 114.13884580 | <a href="https://www.inaturalist.org/observations/21908466">https://www.inaturalist.org/observations/21908466</a>   |
| 4049 | <i>Spilopelia chinensis</i> | Eastern Spotted Dove | 2020/3/14  | 1 | 0 | 22.44546763 | 114.13772120 | <a href="https://www.inaturalist.org/observations/48794970">https://www.inaturalist.org/observations/48794970</a>   |
| 4050 | <i>Spilopelia chinensis</i> | Eastern Spotted Dove | 2019/6/23  | 2 | 0 | 22.44553900 | 114.13857300 | <a href="https://www.inaturalist.org/observations/28123532">https://www.inaturalist.org/observations/28123532</a>   |
| 4051 | <i>Spilopelia chinensis</i> | Eastern Spotted Dove | 2019/11/24 | 1 | 0 | 22.44559821 | 114.13786970 | <a href="https://www.inaturalist.org/observations/44219015">https://www.inaturalist.org/observations/44219015</a>   |
| 4052 | <i>Spilopelia chinensis</i> | Eastern Spotted Dove | 2020/1/15  | 1 | 0 | 22.44561736 | 114.13939470 | <a href="https://www.inaturalist.org/observations/44223726">https://www.inaturalist.org/observations/44223726</a>   |
| 4053 | <i>Spilopelia chinensis</i> | Eastern Spotted Dove | 2018/5/22  | 3 | 0 | 22.44570700 | 114.13877600 | <a href="https://www.inaturalist.org/observations/12760017">https://www.inaturalist.org/observations/12760017</a>   |
| 4054 | <i>Spilopelia chinensis</i> | Eastern Spotted Dove | 2019/1/10  | 2 | 0 | 22.44570949 | 114.13853720 | <a href="https://www.inaturalist.org/observations/19549302">https://www.inaturalist.org/observations/19549302</a>   |
| 4055 | <i>Spilopelia chinensis</i> | Eastern Spotted Dove | 2021/3/14  | 1 | 0 | 22.44572759 | 114.13809280 | <a href="https://www.inaturalist.org/observations/71290768">https://www.inaturalist.org/observations/71290768</a>   |
| 4056 | <i>Spilopelia chinensis</i> | Eastern Spotted Dove | 2020/3/14  | 1 | 0 | 22.44573518 | 114.13814070 | <a href="https://www.inaturalist.org/observations/45144515">https://www.inaturalist.org/observations/45144515</a>   |
| 4057 | <i>Spilopelia chinensis</i> | Eastern Spotted Dove | 2021/4/30  | 1 | 0 | 22.44579436 | 114.17843890 | <a href="https://www.inaturalist.org/observations/75736294">https://www.inaturalist.org/observations/75736294</a>   |
| 4058 | <i>Spilopelia chinensis</i> | Eastern Spotted Dove | 2021/1/31  | 1 | 0 | 22.44587075 | 114.13815300 | <a href="https://www.inaturalist.org/observations/68850600">https://www.inaturalist.org/observations/68850600</a>   |
| 4059 | <i>Spilopelia chinensis</i> | Eastern Spotted Dove | 2022/7/22  | 1 | 0 | 22.44590684 | 114.17220200 | <a href="https://www.inaturalist.org/observations/127332722">https://www.inaturalist.org/observations/127332722</a> |
| 4060 | <i>Spilopelia chinensis</i> | Eastern Spotted Dove | 2022/6/5   | 2 | 0 | 22.44592119 | 114.17882750 | <a href="https://www.inaturalist.org/observations/120277902">https://www.inaturalist.org/observations/120277902</a> |
| 4061 | <i>Spilopelia chinensis</i> | Eastern Spotted Dove | 2019/4/28  | 3 | 0 | 22.44601237 | 114.16912610 | <a href="https://www.inaturalist.org/observations/23538079">https://www.inaturalist.org/observations/23538079</a>   |
| 4062 | <i>Spilopelia chinensis</i> | Eastern Spotted Dove | 2019/4/28  | 2 | 0 | 22.44622465 | 114.02377830 | <a href="https://www.inaturalist.org/observations/23590891">https://www.inaturalist.org/observations/23590891</a>   |
| 4063 | <i>Spilopelia chinensis</i> | Eastern Spotted Dove | 2021/11/27 | 1 | 0 | 22.44623600 | 114.16981800 | <a href="https://www.inaturalist.org/observations/102003256">https://www.inaturalist.org/observations/102003256</a> |
| 4064 | <i>Spilopelia chinensis</i> | Eastern Spotted Dove | 2019/11/24 | 1 | 0 | 22.44637100 | 114.13815900 | <a href="https://www.inaturalist.org/observations/36660859">https://www.inaturalist.org/observations/36660859</a>   |
| 4065 | <i>Spilopelia chinensis</i> | Eastern Spotted Dove | 2021/6/6   | 1 | 0 | 22.44648846 | 114.13780670 | <a href="https://www.inaturalist.org/observations/81830596">https://www.inaturalist.org/observations/81830596</a>   |
| 4066 | <i>Spilopelia chinensis</i> | Eastern Spotted Dove | 2018/12/29 | 2 | 0 | 22.44662643 | 114.00607140 | <a href="https://www.inaturalist.org/observations/19286756">https://www.inaturalist.org/observations/19286756</a>   |
| 4067 | <i>Spilopelia chinensis</i> | Eastern Spotted Dove | 2020/4/24  | 2 | 0 | 22.44664599 | 114.03938500 | <a href="https://www.inaturalist.org/observations/43031544">https://www.inaturalist.org/observations/43031544</a>   |
| 4068 | <i>Spilopelia chinensis</i> | Eastern Spotted Dove | 2019/2/23  | 1 | 0 | 22.44666247 | 114.06308450 | <a href="https://www.inaturalist.org/observations/20624599">https://www.inaturalist.org/observations/20624599</a>   |
| 4069 | <i>Spilopelia chinensis</i> | Eastern Spotted Dove | 2021/4/19  | 1 | 0 | 22.44704000 | 120.50691830 | <a href="https://www.inaturalist.org/observations/74566718">https://www.inaturalist.org/observations/74566718</a>   |
| 4070 | <i>Spilopelia chinensis</i> | Eastern Spotted Dove | 2020/8/6   | 1 | 0 | 22.44732397 | 114.04053440 | <a href="https://www.inaturalist.org/observations/55575171">https://www.inaturalist.org/observations/55575171</a>   |

|      |                             |                      |            |   |   |             |              |                                                                                                                     |
|------|-----------------------------|----------------------|------------|---|---|-------------|--------------|---------------------------------------------------------------------------------------------------------------------|
| 4071 | <i>Spilopelia chinensis</i> | Eastern Spotted Dove | 2019/4/26  | 1 | 0 | 22.44770188 | 114.02831130 | <a href="https://www.inaturalist.org/observations/23088642">https://www.inaturalist.org/observations/23088642</a>   |
| 4072 | <i>Spilopelia chinensis</i> | Eastern Spotted Dove | 2019/3/2   | 1 | 0 | 22.44789677 | 114.00894700 | <a href="https://www.inaturalist.org/observations/20879081">https://www.inaturalist.org/observations/20879081</a>   |
| 4073 | <i>Spilopelia chinensis</i> | Eastern Spotted Dove | 2019/12/16 | 1 | 0 | 22.44807000 | 114.13655500 | <a href="https://www.inaturalist.org/observations/36768213">https://www.inaturalist.org/observations/36768213</a>   |
| 4074 | <i>Spilopelia chinensis</i> | Eastern Spotted Dove | 2020/3/14  | 1 | 0 | 22.44813839 | 114.17703980 | <a href="https://www.inaturalist.org/observations/39952161">https://www.inaturalist.org/observations/39952161</a>   |
| 4075 | <i>Spilopelia chinensis</i> | Eastern Spotted Dove | 2022/6/5   | 2 | 0 | 22.44824186 | 114.17731860 | <a href="https://www.inaturalist.org/observations/120270330">https://www.inaturalist.org/observations/120270330</a> |
| 4076 | <i>Spilopelia chinensis</i> | Eastern Spotted Dove | 2020/3/14  | 2 | 0 | 22.44826053 | 114.17736730 | <a href="https://www.inaturalist.org/observations/39952760">https://www.inaturalist.org/observations/39952760</a>   |
| 4077 | <i>Spilopelia chinensis</i> | Eastern Spotted Dove | 2019/10/13 | 2 | 0 | 22.44829823 | 114.02830900 | <a href="https://www.inaturalist.org/observations/34728501">https://www.inaturalist.org/observations/34728501</a>   |
| 4078 | <i>Spilopelia chinensis</i> | Eastern Spotted Dove | 2020/2/10  | 0 | 0 | 22.44834746 | 114.04213050 | <a href="https://www.inaturalist.org/observations/38502201">https://www.inaturalist.org/observations/38502201</a>   |
| 4079 | <i>Spilopelia chinensis</i> | Eastern Spotted Dove | 2020/1/21  | 1 | 0 | 22.44842100 | 114.13596400 | <a href="https://www.inaturalist.org/observations/37815191">https://www.inaturalist.org/observations/37815191</a>   |
| 4080 | <i>Spilopelia chinensis</i> | Eastern Spotted Dove | 2020/11/22 | 2 | 0 | 22.44859900 | 114.17454430 | <a href="https://www.inaturalist.org/observations/65383928">https://www.inaturalist.org/observations/65383928</a>   |
| 4081 | <i>Spilopelia chinensis</i> | Eastern Spotted Dove | 2019/3/16  | 1 | 0 | 22.44860500 | 114.17732300 | <a href="https://www.inaturalist.org/observations/21284890">https://www.inaturalist.org/observations/21284890</a>   |
| 4082 | <i>Spilopelia chinensis</i> | Eastern Spotted Dove | 2020/10/31 | 1 | 0 | 22.44872167 | 114.00603580 | <a href="https://www.inaturalist.org/observations/63894331">https://www.inaturalist.org/observations/63894331</a>   |
| 4083 | <i>Spilopelia chinensis</i> | Eastern Spotted Dove | 2019/11/9  | 2 | 0 | 22.44926333 | 114.02335280 | <a href="https://www.inaturalist.org/observations/35478605">https://www.inaturalist.org/observations/35478605</a>   |
| 4084 | <i>Spilopelia chinensis</i> | Eastern Spotted Dove | 2020/10/18 | 1 | 0 | 22.44931167 | 114.02355280 | <a href="https://www.inaturalist.org/observations/62876757">https://www.inaturalist.org/observations/62876757</a>   |
| 4085 | <i>Spilopelia chinensis</i> | Eastern Spotted Dove | 2021/11/14 | 2 | 0 | 22.44952958 | 114.02095950 | <a href="https://www.inaturalist.org/observations/101084384">https://www.inaturalist.org/observations/101084384</a> |
| 4086 | <i>Spilopelia chinensis</i> | Eastern Spotted Dove | 2020/12/9  | 1 | 0 | 22.44956833 | 114.17825660 | <a href="https://www.inaturalist.org/observations/66456813">https://www.inaturalist.org/observations/66456813</a>   |
| 4087 | <i>Spilopelia chinensis</i> | Eastern Spotted Dove | 2020/11/26 | 1 | 0 | 22.44977000 | 114.02381120 | <a href="https://www.inaturalist.org/observations/65724762">https://www.inaturalist.org/observations/65724762</a>   |
| 4088 | <i>Spilopelia chinensis</i> | Eastern Spotted Dove | 2019/4/30  | 2 | 0 | 22.44979706 | 114.02305570 | <a href="https://www.inaturalist.org/observations/24164900">https://www.inaturalist.org/observations/24164900</a>   |
| 4089 | <i>Spilopelia chinensis</i> | Eastern Spotted Dove | 2021/11/2  | 1 | 0 | 22.44989268 | 114.02425740 | <a href="https://www.inaturalist.org/observations/100050302">https://www.inaturalist.org/observations/100050302</a> |
| 4090 | <i>Spilopelia chinensis</i> | Eastern Spotted Dove | 2019/11/9  | 0 | 0 | 22.44989667 | 114.02436120 | <a href="https://www.inaturalist.org/observations/35477502">https://www.inaturalist.org/observations/35477502</a>   |
| 4091 | <i>Spilopelia chinensis</i> | Eastern Spotted Dove | 2019/11/9  | 2 | 0 | 22.44994500 | 114.02439170 | <a href="https://www.inaturalist.org/observations/35479519">https://www.inaturalist.org/observations/35479519</a>   |
| 4092 | <i>Spilopelia chinensis</i> | Eastern Spotted Dove | 2019/11/9  | 2 | 0 | 22.44994500 | 114.02440000 | <a href="https://www.inaturalist.org/observations/35478313">https://www.inaturalist.org/observations/35478313</a>   |
| 4093 | <i>Spilopelia chinensis</i> | Eastern Spotted Dove | 2021/11/4  | 1 | 0 | 22.44995156 | 114.15962370 | <a href="https://www.inaturalist.org/observations/100207977">https://www.inaturalist.org/observations/100207977</a> |

|      |                             |                      |            |   |   |             |              |                                                                                                                     |
|------|-----------------------------|----------------------|------------|---|---|-------------|--------------|---------------------------------------------------------------------------------------------------------------------|
| 4094 | <i>Spilopelia chinensis</i> | Eastern Spotted Dove | 2021/11/3  | 2 | 0 | 22.45002810 | 114.15969210 | <a href="https://www.inaturalist.org/observations/100126076">https://www.inaturalist.org/observations/100126076</a> |
| 4095 | <i>Spilopelia chinensis</i> | Eastern Spotted Dove | 2022/4/30  | 1 | 0 | 22.45003007 | 114.13749730 | <a href="https://www.inaturalist.org/observations/113774618">https://www.inaturalist.org/observations/113774618</a> |
| 4096 | <i>Spilopelia chinensis</i> | Eastern Spotted Dove | 2020/11/5  | 2 | 0 | 22.45014980 | 114.02392820 | <a href="https://www.inaturalist.org/observations/64598207">https://www.inaturalist.org/observations/64598207</a>   |
| 4097 | <i>Spilopelia chinensis</i> | Eastern Spotted Dove | 2021/11/14 | 2 | 0 | 22.45022654 | 114.02322150 | <a href="https://www.inaturalist.org/observations/101081771">https://www.inaturalist.org/observations/101081771</a> |
| 4098 | <i>Spilopelia chinensis</i> | Eastern Spotted Dove | 2021/11/10 | 1 | 0 | 22.45023643 | 114.02376430 | <a href="https://www.inaturalist.org/observations/100884615">https://www.inaturalist.org/observations/100884615</a> |
| 4099 | <i>Spilopelia chinensis</i> | Eastern Spotted Dove | 2020/11/14 | 1 | 0 | 22.45026667 | 114.02355280 | <a href="https://www.inaturalist.org/observations/64833884">https://www.inaturalist.org/observations/64833884</a>   |
| 4100 | <i>Spilopelia chinensis</i> | Eastern Spotted Dove | 2020/11/28 | 1 | 0 | 22.45029131 | 114.02295190 | <a href="https://www.inaturalist.org/observations/65731082">https://www.inaturalist.org/observations/65731082</a>   |
| 4101 | <i>Spilopelia chinensis</i> | Eastern Spotted Dove | 2022/6/5   | 2 | 0 | 22.45029625 | 114.17854450 | <a href="https://www.inaturalist.org/observations/120273089">https://www.inaturalist.org/observations/120273089</a> |
| 4102 | <i>Spilopelia chinensis</i> | Eastern Spotted Dove | 2022/6/5   | 2 | 0 | 22.45031330 | 114.17851050 | <a href="https://www.inaturalist.org/observations/120273055">https://www.inaturalist.org/observations/120273055</a> |
| 4103 | <i>Spilopelia chinensis</i> | Eastern Spotted Dove | 2021/11/6  | 3 | 0 | 22.45032000 | 114.02378880 | <a href="https://www.inaturalist.org/observations/100367971">https://www.inaturalist.org/observations/100367971</a> |
| 4104 | <i>Spilopelia chinensis</i> | Eastern Spotted Dove | 2019/11/4  | 2 | 0 | 22.45044838 | 114.02349190 | <a href="https://www.inaturalist.org/observations/35273234">https://www.inaturalist.org/observations/35273234</a>   |
| 4105 | <i>Spilopelia chinensis</i> | Eastern Spotted Dove | 2021/3/31  | 2 | 0 | 22.45058758 | 114.16392410 | <a href="https://www.inaturalist.org/observations/72519739">https://www.inaturalist.org/observations/72519739</a>   |
| 4106 | <i>Spilopelia chinensis</i> | Eastern Spotted Dove | 2020/12/13 | 1 | 0 | 22.45064027 | 114.17938980 | <a href="https://www.inaturalist.org/observations/66502878">https://www.inaturalist.org/observations/66502878</a>   |
| 4107 | <i>Spilopelia chinensis</i> | Eastern Spotted Dove | 2019/11/9  | 2 | 0 | 22.45064667 | 114.02409450 | <a href="https://www.inaturalist.org/observations/35479304">https://www.inaturalist.org/observations/35479304</a>   |
| 4108 | <i>Spilopelia chinensis</i> | Eastern Spotted Dove | 2020/11/7  | 1 | 0 | 22.45065885 | 114.02531660 | <a href="https://www.inaturalist.org/observations/64409868">https://www.inaturalist.org/observations/64409868</a>   |
| 4109 | <i>Spilopelia chinensis</i> | Eastern Spotted Dove | 2019/11/9  | 3 | 0 | 22.45073000 | 114.02384170 | <a href="https://www.inaturalist.org/observations/35477596">https://www.inaturalist.org/observations/35477596</a>   |
| 4110 | <i>Spilopelia chinensis</i> | Eastern Spotted Dove | 2019/11/9  | 4 | 0 | 22.45073000 | 114.02384170 | <a href="https://www.inaturalist.org/observations/35479497">https://www.inaturalist.org/observations/35479497</a>   |
| 4111 | <i>Spilopelia chinensis</i> | Eastern Spotted Dove | 2022/6/5   | 1 | 0 | 22.45074167 | 114.17827000 | <a href="https://www.inaturalist.org/observations/120291811">https://www.inaturalist.org/observations/120291811</a> |
| 4112 | <i>Spilopelia chinensis</i> | Eastern Spotted Dove | 2020/11/25 | 1 | 0 | 22.45077869 | 114.02531790 | <a href="https://www.inaturalist.org/observations/65571406">https://www.inaturalist.org/observations/65571406</a>   |
| 4113 | <i>Spilopelia chinensis</i> | Eastern Spotted Dove | 2019/11/9  | 3 | 0 | 22.45079667 | 114.02405550 | <a href="https://www.inaturalist.org/observations/35477096">https://www.inaturalist.org/observations/35477096</a>   |
| 4114 | <i>Spilopelia chinensis</i> | Eastern Spotted Dove | 2019/11/9  | 3 | 0 | 22.45080333 | 114.02401670 | <a href="https://www.inaturalist.org/observations/35479982">https://www.inaturalist.org/observations/35479982</a>   |
| 4115 | <i>Spilopelia chinensis</i> | Eastern Spotted Dove | 2021/11/2  | 1 | 0 | 22.45080940 | 114.02422930 | <a href="https://www.inaturalist.org/observations/100042335">https://www.inaturalist.org/observations/100042335</a> |
| 4116 | <i>Spilopelia chinensis</i> | Eastern Spotted Dove | 2019/11/9  | 4 | 0 | 22.45082833 | 114.02406950 | <a href="https://www.inaturalist.org/observations/35478219">https://www.inaturalist.org/observations/35478219</a>   |

|      |                             |                      |            |   |   |             |              |                                                                                                                     |
|------|-----------------------------|----------------------|------------|---|---|-------------|--------------|---------------------------------------------------------------------------------------------------------------------|
| 4117 | <i>Spilopelia chinensis</i> | Eastern Spotted Dove | 2020/12/9  | 1 | 0 | 22.45082833 | 114.17925330 | <a href="https://www.inaturalist.org/observations/66528209">https://www.inaturalist.org/observations/66528209</a>   |
| 4118 | <i>Spilopelia chinensis</i> | Eastern Spotted Dove | 2021/11/6  | 2 | 0 | 22.45085480 | 114.02379330 | <a href="https://www.inaturalist.org/observations/100354610">https://www.inaturalist.org/observations/100354610</a> |
| 4119 | <i>Spilopelia chinensis</i> | Eastern Spotted Dove | 2019/11/9  | 1 | 0 | 22.45087500 | 114.02405550 | <a href="https://www.inaturalist.org/observations/35478119">https://www.inaturalist.org/observations/35478119</a>   |
| 4120 | <i>Spilopelia chinensis</i> | Eastern Spotted Dove | 2021/11/6  | 1 | 0 | 22.45089715 | 114.02383210 | <a href="https://www.inaturalist.org/observations/100372532">https://www.inaturalist.org/observations/100372532</a> |
| 4121 | <i>Spilopelia chinensis</i> | Eastern Spotted Dove | 2021/11/2  | 0 | 0 | 22.45090670 | 114.02408150 | <a href="https://www.inaturalist.org/observations/100045836">https://www.inaturalist.org/observations/100045836</a> |
| 4122 | <i>Spilopelia chinensis</i> | Eastern Spotted Dove | 2021/11/6  | 2 | 0 | 22.45092000 | 114.02471950 | <a href="https://www.inaturalist.org/observations/100369649">https://www.inaturalist.org/observations/100369649</a> |
| 4123 | <i>Spilopelia chinensis</i> | Eastern Spotted Dove | 2020/11/25 | 1 | 0 | 22.45096798 | 114.02517120 | <a href="https://www.inaturalist.org/observations/65571193">https://www.inaturalist.org/observations/65571193</a>   |
| 4124 | <i>Spilopelia chinensis</i> | Eastern Spotted Dove | 2019/11/9  | 3 | 0 | 22.45096986 | 114.02399790 | <a href="https://www.inaturalist.org/observations/35521958">https://www.inaturalist.org/observations/35521958</a>   |
| 4125 | <i>Spilopelia chinensis</i> | Eastern Spotted Dove | 2021/11/30 | 1 | 0 | 22.45098339 | 114.15636680 | <a href="https://www.inaturalist.org/observations/102245787">https://www.inaturalist.org/observations/102245787</a> |
| 4126 | <i>Spilopelia chinensis</i> | Eastern Spotted Dove | 2020/11/14 | 2 | 0 | 22.45099500 | 114.02303330 | <a href="https://www.inaturalist.org/observations/64840204">https://www.inaturalist.org/observations/64840204</a>   |
| 4127 | <i>Spilopelia chinensis</i> | Eastern Spotted Dove | 2021/11/2  | 1 | 0 | 22.45101484 | 114.02429370 | <a href="https://www.inaturalist.org/observations/100046233">https://www.inaturalist.org/observations/100046233</a> |
| 4128 | <i>Spilopelia chinensis</i> | Eastern Spotted Dove | 2021/11/6  | 2 | 0 | 22.45102701 | 114.02399650 | <a href="https://www.inaturalist.org/observations/100372931">https://www.inaturalist.org/observations/100372931</a> |
| 4129 | <i>Spilopelia chinensis</i> | Eastern Spotted Dove | 2021/11/6  | 2 | 0 | 22.45103773 | 114.02488800 | <a href="https://www.inaturalist.org/observations/100366405">https://www.inaturalist.org/observations/100366405</a> |
| 4130 | <i>Spilopelia chinensis</i> | Eastern Spotted Dove | 2021/11/6  | 2 | 0 | 22.45104217 | 114.02459850 | <a href="https://www.inaturalist.org/observations/100397001">https://www.inaturalist.org/observations/100397001</a> |
| 4131 | <i>Spilopelia chinensis</i> | Eastern Spotted Dove | 2020/11/26 | 1 | 0 | 22.45105158 | 114.02450540 | <a href="https://www.inaturalist.org/observations/65624178">https://www.inaturalist.org/observations/65624178</a>   |
| 4132 | <i>Spilopelia chinensis</i> | Eastern Spotted Dove | 2020/11/14 | 1 | 0 | 22.45108776 | 114.02338080 | <a href="https://www.inaturalist.org/observations/64832482">https://www.inaturalist.org/observations/64832482</a>   |
| 4133 | <i>Spilopelia chinensis</i> | Eastern Spotted Dove | 2020/11/23 | 1 | 0 | 22.45108885 | 114.02394220 | <a href="https://www.inaturalist.org/observations/65461930">https://www.inaturalist.org/observations/65461930</a>   |
| 4134 | <i>Spilopelia chinensis</i> | Eastern Spotted Dove | 2019/11/8  | 2 | 0 | 22.45110084 | 114.02510170 | <a href="https://www.inaturalist.org/observations/35437439">https://www.inaturalist.org/observations/35437439</a>   |
| 4135 | <i>Spilopelia chinensis</i> | Eastern Spotted Dove | 2019/11/9  | 2 | 0 | 22.45111770 | 114.02392280 | <a href="https://www.inaturalist.org/observations/35521955">https://www.inaturalist.org/observations/35521955</a>   |
| 4136 | <i>Spilopelia chinensis</i> | Eastern Spotted Dove | 2021/11/2  | 1 | 0 | 22.45112453 | 114.02424440 | <a href="https://www.inaturalist.org/observations/100046036">https://www.inaturalist.org/observations/100046036</a> |
| 4137 | <i>Spilopelia chinensis</i> | Eastern Spotted Dove | 2021/11/2  | 1 | 0 | 22.45112453 | 114.02424440 | <a href="https://www.inaturalist.org/observations/100046862">https://www.inaturalist.org/observations/100046862</a> |
| 4138 | <i>Spilopelia chinensis</i> | Eastern Spotted Dove | 2021/11/6  | 1 | 0 | 22.45112460 | 114.02410200 | <a href="https://www.inaturalist.org/observations/100638316">https://www.inaturalist.org/observations/100638316</a> |
| 4139 | <i>Spilopelia chinensis</i> | Eastern Spotted Dove | 2021/11/2  | 1 | 0 | 22.45112546 | 114.02424340 | <a href="https://www.inaturalist.org/observations/100046873">https://www.inaturalist.org/observations/100046873</a> |



|      |                             |                      |            |   |   |             |              |                                                                                                                     |
|------|-----------------------------|----------------------|------------|---|---|-------------|--------------|---------------------------------------------------------------------------------------------------------------------|
| 4140 | <i>Spilopelia chinensis</i> | Eastern Spotted Dove | 2019/11/9  | 2 | 0 | 22.45113688 | 114.02395500 | <a href="https://www.inaturalist.org/observations/35521957">https://www.inaturalist.org/observations/35521957</a>   |
| 4141 | <i>Spilopelia chinensis</i> | Eastern Spotted Dove | 2021/11/8  | 2 | 0 | 22.45117814 | 114.02439410 | <a href="https://www.inaturalist.org/observations/100642697">https://www.inaturalist.org/observations/100642697</a> |
| 4142 | <i>Spilopelia chinensis</i> | Eastern Spotted Dove | 2020/11/27 | 1 | 0 | 22.45117851 | 114.02352270 | <a href="https://www.inaturalist.org/observations/65680788">https://www.inaturalist.org/observations/65680788</a>   |
| 4143 | <i>Spilopelia chinensis</i> | Eastern Spotted Dove | 2021/11/3  | 1 | 0 | 22.45118000 | 114.02284170 | <a href="https://www.inaturalist.org/observations/100975005">https://www.inaturalist.org/observations/100975005</a> |
| 4144 | <i>Spilopelia chinensis</i> | Eastern Spotted Dove | 2010/12/8  | 1 | 0 | 22.45118000 | 114.15668300 | <a href="https://www.inaturalist.org/observations/56104244">https://www.inaturalist.org/observations/56104244</a>   |
| 4145 | <i>Spilopelia chinensis</i> | Eastern Spotted Dove | 2022/7/20  | 1 | 0 | 22.45119146 | 114.19275090 | <a href="https://www.inaturalist.org/observations/127062720">https://www.inaturalist.org/observations/127062720</a> |
| 4146 | <i>Spilopelia chinensis</i> | Eastern Spotted Dove | 2021/11/2  | 1 | 0 | 22.45119667 | 114.02371950 | <a href="https://www.inaturalist.org/observations/100976586">https://www.inaturalist.org/observations/100976586</a> |
| 4147 | <i>Spilopelia chinensis</i> | Eastern Spotted Dove | 2019/4/29  | 3 | 0 | 22.45120907 | 114.02371140 | <a href="https://www.inaturalist.org/observations/23799268">https://www.inaturalist.org/observations/23799268</a>   |
| 4148 | <i>Spilopelia chinensis</i> | Eastern Spotted Dove | 2020/11/26 | 1 | 0 | 22.45121649 | 114.02456990 | <a href="https://www.inaturalist.org/observations/65624210">https://www.inaturalist.org/observations/65624210</a>   |
| 4149 | <i>Spilopelia chinensis</i> | Eastern Spotted Dove | 2020/11/27 | 1 | 0 | 22.45121910 | 114.02414480 | <a href="https://www.inaturalist.org/observations/65678717">https://www.inaturalist.org/observations/65678717</a>   |
| 4150 | <i>Spilopelia chinensis</i> | Eastern Spotted Dove | 2020/11/25 | 1 | 0 | 22.45122500 | 114.02468880 | <a href="https://www.inaturalist.org/observations/65885997">https://www.inaturalist.org/observations/65885997</a>   |
| 4151 | <i>Spilopelia chinensis</i> | Eastern Spotted Dove | 2022/7/20  | 1 | 0 | 22.45123530 | 114.19278440 | <a href="https://www.inaturalist.org/observations/127062716">https://www.inaturalist.org/observations/127062716</a> |
| 4152 | <i>Spilopelia chinensis</i> | Eastern Spotted Dove | 2020/1/4   | 1 | 0 | 22.45123903 | 114.02377970 | <a href="https://www.inaturalist.org/observations/37243000">https://www.inaturalist.org/observations/37243000</a>   |
| 4153 | <i>Spilopelia chinensis</i> | Eastern Spotted Dove | 2020/11/6  | 1 | 0 | 22.45124526 | 114.02456310 | <a href="https://www.inaturalist.org/observations/64335822">https://www.inaturalist.org/observations/64335822</a>   |
| 4154 | <i>Spilopelia chinensis</i> | Eastern Spotted Dove | 2021/5/1   | 1 | 0 | 22.45126333 | 114.00640830 | <a href="https://www.inaturalist.org/observations/76045020">https://www.inaturalist.org/observations/76045020</a>   |
| 4155 | <i>Spilopelia chinensis</i> | Eastern Spotted Dove | 2020/11/27 | 1 | 0 | 22.45126422 | 114.02396890 | <a href="https://www.inaturalist.org/observations/65678557">https://www.inaturalist.org/observations/65678557</a>   |
| 4156 | <i>Spilopelia chinensis</i> | Eastern Spotted Dove | 2020/12/13 | 1 | 0 | 22.45128447 | 114.17952070 | <a href="https://www.inaturalist.org/observations/66505863">https://www.inaturalist.org/observations/66505863</a>   |
| 4157 | <i>Spilopelia chinensis</i> | Eastern Spotted Dove | 2020/11/27 | 1 | 0 | 22.45129154 | 114.02394100 | <a href="https://www.inaturalist.org/observations/65679326">https://www.inaturalist.org/observations/65679326</a>   |
| 4158 | <i>Spilopelia chinensis</i> | Eastern Spotted Dove | 2021/11/6  | 2 | 0 | 22.45130850 | 114.02369550 | <a href="https://www.inaturalist.org/observations/100371853">https://www.inaturalist.org/observations/100371853</a> |
| 4159 | <i>Spilopelia chinensis</i> | Eastern Spotted Dove | 2021/11/14 | 2 | 0 | 22.45132997 | 114.02425810 | <a href="https://www.inaturalist.org/observations/101081496">https://www.inaturalist.org/observations/101081496</a> |
| 4160 | <i>Spilopelia chinensis</i> | Eastern Spotted Dove | 2019/11/9  | 3 | 0 | 22.45133333 | 114.02378050 | <a href="https://www.inaturalist.org/observations/35480187">https://www.inaturalist.org/observations/35480187</a>   |
| 4161 | <i>Spilopelia chinensis</i> | Eastern Spotted Dove | 2021/11/2  | 1 | 0 | 22.45135910 | 114.02366670 | <a href="https://www.inaturalist.org/observations/100140097">https://www.inaturalist.org/observations/100140097</a> |
| 4162 | <i>Spilopelia chinensis</i> | Eastern Spotted Dove | 2021/11/6  | 2 | 0 | 22.45136320 | 114.02335710 | <a href="https://www.inaturalist.org/observations/100355141">https://www.inaturalist.org/observations/100355141</a> |

|      |                             |                      |            |   |   |             |              |                                                                                                                     |
|------|-----------------------------|----------------------|------------|---|---|-------------|--------------|---------------------------------------------------------------------------------------------------------------------|
| 4163 | <i>Spilopelia chinensis</i> | Eastern Spotted Dove | 2020/12/9  | 1 | 0 | 22.45136925 | 114.18007230 | <a href="https://www.inaturalist.org/observations/66561175">https://www.inaturalist.org/observations/66561175</a>   |
| 4164 | <i>Spilopelia chinensis</i> | Eastern Spotted Dove | 2020/11/14 | 2 | 0 | 22.45137253 | 114.02492460 | <a href="https://www.inaturalist.org/observations/64830695">https://www.inaturalist.org/observations/64830695</a>   |
| 4165 | <i>Spilopelia chinensis</i> | Eastern Spotted Dove | 2020/11/14 | 1 | 0 | 22.45139645 | 114.02375810 | <a href="https://www.inaturalist.org/observations/64839011">https://www.inaturalist.org/observations/64839011</a>   |
| 4166 | <i>Spilopelia chinensis</i> | Eastern Spotted Dove | 2020/11/14 | 2 | 0 | 22.45139645 | 114.02375810 | <a href="https://www.inaturalist.org/observations/64839026">https://www.inaturalist.org/observations/64839026</a>   |
| 4167 | <i>Spilopelia chinensis</i> | Eastern Spotted Dove | 2020/11/14 | 2 | 0 | 22.45139645 | 114.02375810 | <a href="https://www.inaturalist.org/observations/64839027">https://www.inaturalist.org/observations/64839027</a>   |
| 4168 | <i>Spilopelia chinensis</i> | Eastern Spotted Dove | 2021/11/6  | 1 | 0 | 22.45139921 | 114.02385800 | <a href="https://www.inaturalist.org/observations/100973915">https://www.inaturalist.org/observations/100973915</a> |
| 4169 | <i>Spilopelia chinensis</i> | Eastern Spotted Dove | 2020/11/27 | 1 | 0 | 22.45140114 | 114.02398730 | <a href="https://www.inaturalist.org/observations/65678568">https://www.inaturalist.org/observations/65678568</a>   |
| 4170 | <i>Spilopelia chinensis</i> | Eastern Spotted Dove | 2019/11/13 | 1 | 0 | 22.45140983 | 114.02353950 | <a href="https://www.inaturalist.org/observations/35632996">https://www.inaturalist.org/observations/35632996</a>   |
| 4171 | <i>Spilopelia chinensis</i> | Eastern Spotted Dove | 2020/11/23 | 1 | 0 | 22.45144365 | 114.02360640 | <a href="https://www.inaturalist.org/observations/65465340">https://www.inaturalist.org/observations/65465340</a>   |
| 4172 | <i>Spilopelia chinensis</i> | Eastern Spotted Dove | 2020/5/20  | 1 | 0 | 22.45145415 | 114.02362530 | <a href="https://www.inaturalist.org/observations/46580119">https://www.inaturalist.org/observations/46580119</a>   |
| 4173 | <i>Spilopelia chinensis</i> | Eastern Spotted Dove | 2020/11/12 | 1 | 0 | 22.45145825 | 114.02368420 | <a href="https://www.inaturalist.org/observations/65886501">https://www.inaturalist.org/observations/65886501</a>   |
| 4174 | <i>Spilopelia chinensis</i> | Eastern Spotted Dove | 2020/11/12 | 1 | 0 | 22.45145949 | 114.02372870 | <a href="https://www.inaturalist.org/observations/65888475">https://www.inaturalist.org/observations/65888475</a>   |
| 4175 | <i>Spilopelia chinensis</i> | Eastern Spotted Dove | 2021/1/22  | 1 | 0 | 22.45146321 | 114.05123210 | <a href="https://www.inaturalist.org/observations/68482130">https://www.inaturalist.org/observations/68482130</a>   |
| 4176 | <i>Spilopelia chinensis</i> | Eastern Spotted Dove | 2021/9/28  | 3 | 0 | 22.45147333 | 73.53753833  | <a href="https://www.inaturalist.org/observations/122171477">https://www.inaturalist.org/observations/122171477</a> |
| 4177 | <i>Spilopelia chinensis</i> | Eastern Spotted Dove | 2021/11/6  | 2 | 0 | 22.45148444 | 114.02387360 | <a href="https://www.inaturalist.org/observations/100974198">https://www.inaturalist.org/observations/100974198</a> |
| 4178 | <i>Spilopelia chinensis</i> | Eastern Spotted Dove | 2020/11/27 | 1 | 0 | 22.45148563 | 114.02367950 | <a href="https://www.inaturalist.org/observations/65890541">https://www.inaturalist.org/observations/65890541</a>   |
| 4179 | <i>Spilopelia chinensis</i> | Eastern Spotted Dove | 2020/11/14 | 1 | 0 | 22.45148862 | 114.02352190 | <a href="https://www.inaturalist.org/observations/64834537">https://www.inaturalist.org/observations/64834537</a>   |
| 4180 | <i>Spilopelia chinensis</i> | Eastern Spotted Dove | 2015/7/8   | 3 | 0 | 22.45149556 | 114.02363550 | <a href="https://www.inaturalist.org/observations/27005030">https://www.inaturalist.org/observations/27005030</a>   |
| 4181 | <i>Spilopelia chinensis</i> | Eastern Spotted Dove | 2020/11/19 | 1 | 0 | 22.45151078 | 114.02350770 | <a href="https://www.inaturalist.org/observations/65205216">https://www.inaturalist.org/observations/65205216</a>   |
| 4182 | <i>Spilopelia chinensis</i> | Eastern Spotted Dove | 2020/10/10 | 1 | 0 | 22.45151708 | 114.02366790 | <a href="https://www.inaturalist.org/observations/62173120">https://www.inaturalist.org/observations/62173120</a>   |
| 4183 | <i>Spilopelia chinensis</i> | Eastern Spotted Dove | 2021/11/6  | 2 | 0 | 22.45152284 | 114.02402850 | <a href="https://www.inaturalist.org/observations/100974136">https://www.inaturalist.org/observations/100974136</a> |
| 4184 | <i>Spilopelia chinensis</i> | Eastern Spotted Dove | 2020/11/25 | 1 | 0 | 22.45154462 | 114.02362030 | <a href="https://www.inaturalist.org/observations/65607475">https://www.inaturalist.org/observations/65607475</a>   |
| 4185 | <i>Spilopelia chinensis</i> | Eastern Spotted Dove | 2020/11/30 | 1 | 0 | 22.45154604 | 114.02355080 | <a href="https://www.inaturalist.org/observations/65861006">https://www.inaturalist.org/observations/65861006</a>   |

|      |                             |                      |            |   |   |             |              |                                                                                                                     |
|------|-----------------------------|----------------------|------------|---|---|-------------|--------------|---------------------------------------------------------------------------------------------------------------------|
| 4186 | <i>Spilopelia chinensis</i> | Eastern Spotted Dove | 2020/11/27 | 1 | 0 | 22.45154753 | 114.02367030 | <a href="https://www.inaturalist.org/observations/65890602">https://www.inaturalist.org/observations/65890602</a>   |
| 4187 | <i>Spilopelia chinensis</i> | Eastern Spotted Dove | 2019/7/25  | 1 | 0 | 22.45155115 | 114.02356840 | <a href="https://www.inaturalist.org/observations/29544686">https://www.inaturalist.org/observations/29544686</a>   |
| 4188 | <i>Spilopelia chinensis</i> | Eastern Spotted Dove | 2020/11/14 | 1 | 0 | 22.45155500 | 114.02475830 | <a href="https://www.inaturalist.org/observations/64832240">https://www.inaturalist.org/observations/64832240</a>   |
| 4189 | <i>Spilopelia chinensis</i> | Eastern Spotted Dove | 2020/11/23 | 1 | 0 | 22.45155541 | 114.02360170 | <a href="https://www.inaturalist.org/observations/65465335">https://www.inaturalist.org/observations/65465335</a>   |
| 4190 | <i>Spilopelia chinensis</i> | Eastern Spotted Dove | 2019/9/19  | 3 | 0 | 22.45156108 | 114.02359160 | <a href="https://www.inaturalist.org/observations/33004168">https://www.inaturalist.org/observations/33004168</a>   |
| 4191 | <i>Spilopelia chinensis</i> | Eastern Spotted Dove | 2020/11/30 | 2 | 0 | 22.45156108 | 114.02392140 | <a href="https://www.inaturalist.org/observations/65880274">https://www.inaturalist.org/observations/65880274</a>   |
| 4192 | <i>Spilopelia chinensis</i> | Eastern Spotted Dove | 2020/11/30 | 2 | 0 | 22.45156108 | 114.02392140 | <a href="https://www.inaturalist.org/observations/65880282">https://www.inaturalist.org/observations/65880282</a>   |
| 4193 | <i>Spilopelia chinensis</i> | Eastern Spotted Dove | 2020/11/30 | 2 | 0 | 22.45156108 | 114.02392140 | <a href="https://www.inaturalist.org/observations/65880312">https://www.inaturalist.org/observations/65880312</a>   |
| 4194 | <i>Spilopelia chinensis</i> | Eastern Spotted Dove | 2020/11/30 | 3 | 0 | 22.45156108 | 114.02392140 | <a href="https://www.inaturalist.org/observations/65880335">https://www.inaturalist.org/observations/65880335</a>   |
| 4195 | <i>Spilopelia chinensis</i> | Eastern Spotted Dove | 2020/11/30 | 2 | 0 | 22.45156108 | 114.02392140 | <a href="https://www.inaturalist.org/observations/65880337">https://www.inaturalist.org/observations/65880337</a>   |
| 4196 | <i>Spilopelia chinensis</i> | Eastern Spotted Dove | 2019/11/9  | 5 | 0 | 22.45156218 | 114.02395240 | <a href="https://www.inaturalist.org/observations/35630194">https://www.inaturalist.org/observations/35630194</a>   |
| 4197 | <i>Spilopelia chinensis</i> | Eastern Spotted Dove | 2019/7/25  | 1 | 0 | 22.45156334 | 114.02359780 | <a href="https://www.inaturalist.org/observations/29494543">https://www.inaturalist.org/observations/29494543</a>   |
| 4198 | <i>Spilopelia chinensis</i> | Eastern Spotted Dove | 2020/11/26 | 1 | 0 | 22.45156703 | 114.02356700 | <a href="https://www.inaturalist.org/observations/65890834">https://www.inaturalist.org/observations/65890834</a>   |
| 4199 | <i>Spilopelia chinensis</i> | Eastern Spotted Dove | 2020/12/11 | 1 | 0 | 22.45156993 | 114.02355780 | <a href="https://www.inaturalist.org/observations/66416291">https://www.inaturalist.org/observations/66416291</a>   |
| 4200 | <i>Spilopelia chinensis</i> | Eastern Spotted Dove | 2019/7/25  | 1 | 0 | 22.45158848 | 114.02364670 | <a href="https://www.inaturalist.org/observations/29544644">https://www.inaturalist.org/observations/29544644</a>   |
| 4201 | <i>Spilopelia chinensis</i> | Eastern Spotted Dove | 2021/11/11 | 1 | 0 | 22.45159080 | 114.02360980 | <a href="https://www.inaturalist.org/observations/100822917">https://www.inaturalist.org/observations/100822917</a> |
| 4202 | <i>Spilopelia chinensis</i> | Eastern Spotted Dove | 2020/11/25 | 1 | 0 | 22.45159174 | 114.02362140 | <a href="https://www.inaturalist.org/observations/65607521">https://www.inaturalist.org/observations/65607521</a>   |
| 4203 | <i>Spilopelia chinensis</i> | Eastern Spotted Dove | 2020/11/21 | 1 | 0 | 22.45160237 | 114.02364080 | <a href="https://www.inaturalist.org/observations/65321632">https://www.inaturalist.org/observations/65321632</a>   |
| 4204 | <i>Spilopelia chinensis</i> | Eastern Spotted Dove | 2020/11/4  | 2 | 0 | 22.45160929 | 114.02366870 | <a href="https://www.inaturalist.org/observations/65893310">https://www.inaturalist.org/observations/65893310</a>   |
| 4205 | <i>Spilopelia chinensis</i> | Eastern Spotted Dove | 2020/11/4  | 2 | 0 | 22.45160929 | 114.02366870 | <a href="https://www.inaturalist.org/observations/65893392">https://www.inaturalist.org/observations/65893392</a>   |
| 4206 | <i>Spilopelia chinensis</i> | Eastern Spotted Dove | 2020/11/7  | 2 | 0 | 22.45160929 | 114.02366870 | <a href="https://www.inaturalist.org/observations/65893487">https://www.inaturalist.org/observations/65893487</a>   |
| 4207 | <i>Spilopelia chinensis</i> | Eastern Spotted Dove | 2020/11/25 | 1 | 0 | 22.45161698 | 114.02364520 | <a href="https://www.inaturalist.org/observations/65607491">https://www.inaturalist.org/observations/65607491</a>   |
| 4208 | <i>Spilopelia chinensis</i> | Eastern Spotted Dove | 2020/12/9  | 1 | 0 | 22.45162274 | 114.17865650 | <a href="https://www.inaturalist.org/observations/66465153">https://www.inaturalist.org/observations/66465153</a>   |

|      |                             |                      |            |   |   |             |              |                                                                                                                     |
|------|-----------------------------|----------------------|------------|---|---|-------------|--------------|---------------------------------------------------------------------------------------------------------------------|
| 4209 | <i>Spilopelia chinensis</i> | Eastern Spotted Dove | 2020/11/25 | 2 | 0 | 22.45162356 | 114.02368790 | <a href="https://www.inaturalist.org/observations/65585664">https://www.inaturalist.org/observations/65585664</a>   |
| 4210 | <i>Spilopelia chinensis</i> | Eastern Spotted Dove | 2020/11/21 | 1 | 0 | 22.45162495 | 114.02361950 | <a href="https://www.inaturalist.org/observations/65321642">https://www.inaturalist.org/observations/65321642</a>   |
| 4211 | <i>Spilopelia chinensis</i> | Eastern Spotted Dove | 2020/11/3  | 1 | 0 | 22.45162500 | 114.02363370 | <a href="https://www.inaturalist.org/observations/64106541">https://www.inaturalist.org/observations/64106541</a>   |
| 4212 | <i>Spilopelia chinensis</i> | Eastern Spotted Dove | 2020/11/25 | 2 | 0 | 22.45162574 | 114.02361330 | <a href="https://www.inaturalist.org/observations/66002153">https://www.inaturalist.org/observations/66002153</a>   |
| 4213 | <i>Spilopelia chinensis</i> | Eastern Spotted Dove | 2020/11/23 | 1 | 0 | 22.45162962 | 114.02361050 | <a href="https://www.inaturalist.org/observations/65465347">https://www.inaturalist.org/observations/65465347</a>   |
| 4214 | <i>Spilopelia chinensis</i> | Eastern Spotted Dove | 2020/11/23 | 1 | 0 | 22.45163208 | 114.02365200 | <a href="https://www.inaturalist.org/observations/65465356">https://www.inaturalist.org/observations/65465356</a>   |
| 4215 | <i>Spilopelia chinensis</i> | Eastern Spotted Dove | 2020/11/2  | 1 | 0 | 22.45163301 | 114.02360550 | <a href="https://www.inaturalist.org/observations/64014664">https://www.inaturalist.org/observations/64014664</a>   |
| 4216 | <i>Spilopelia chinensis</i> | Eastern Spotted Dove | 2019/11/7  | 5 | 0 | 22.45163457 | 114.02363520 | <a href="https://www.inaturalist.org/observations/35398083">https://www.inaturalist.org/observations/35398083</a>   |
| 4217 | <i>Spilopelia chinensis</i> | Eastern Spotted Dove | 2020/10/7  | 1 | 0 | 22.45163651 | 114.02359370 | <a href="https://www.inaturalist.org/observations/61948378">https://www.inaturalist.org/observations/61948378</a>   |
| 4218 | <i>Spilopelia chinensis</i> | Eastern Spotted Dove | 2020/11/27 | 1 | 0 | 22.45163929 | 114.02363550 | <a href="https://www.inaturalist.org/observations/65686817">https://www.inaturalist.org/observations/65686817</a>   |
| 4219 | <i>Spilopelia chinensis</i> | Eastern Spotted Dove | 2020/11/30 | 1 | 0 | 22.45164307 | 114.02365040 | <a href="https://www.inaturalist.org/observations/65860746">https://www.inaturalist.org/observations/65860746</a>   |
| 4220 | <i>Spilopelia chinensis</i> | Eastern Spotted Dove | 2021/11/9  | 1 | 0 | 22.45164360 | 114.02359030 | <a href="https://www.inaturalist.org/observations/100686066">https://www.inaturalist.org/observations/100686066</a> |
| 4221 | <i>Spilopelia chinensis</i> | Eastern Spotted Dove | 2020/11/30 | 1 | 0 | 22.45164542 | 114.02366110 | <a href="https://www.inaturalist.org/observations/65860909">https://www.inaturalist.org/observations/65860909</a>   |
| 4222 | <i>Spilopelia chinensis</i> | Eastern Spotted Dove | 2021/11/9  | 1 | 0 | 22.45165192 | 114.02363590 | <a href="https://www.inaturalist.org/observations/100667679">https://www.inaturalist.org/observations/100667679</a> |
| 4223 | <i>Spilopelia chinensis</i> | Eastern Spotted Dove | 2020/11/24 | 2 | 0 | 22.45165378 | 114.02363420 | <a href="https://www.inaturalist.org/observations/65883020">https://www.inaturalist.org/observations/65883020</a>   |
| 4224 | <i>Spilopelia chinensis</i> | Eastern Spotted Dove | 2020/11/24 | 2 | 0 | 22.45165378 | 114.02363420 | <a href="https://www.inaturalist.org/observations/65883022">https://www.inaturalist.org/observations/65883022</a>   |
| 4225 | <i>Spilopelia chinensis</i> | Eastern Spotted Dove | 2020/11/24 | 2 | 0 | 22.45165378 | 114.02363420 | <a href="https://www.inaturalist.org/observations/65883023">https://www.inaturalist.org/observations/65883023</a>   |
| 4226 | <i>Spilopelia chinensis</i> | Eastern Spotted Dove | 2020/11/24 | 2 | 0 | 22.45165378 | 114.02363420 | <a href="https://www.inaturalist.org/observations/65883026">https://www.inaturalist.org/observations/65883026</a>   |
| 4227 | <i>Spilopelia chinensis</i> | Eastern Spotted Dove | 2020/11/24 | 2 | 0 | 22.45165378 | 114.02363420 | <a href="https://www.inaturalist.org/observations/65883027">https://www.inaturalist.org/observations/65883027</a>   |
| 4228 | <i>Spilopelia chinensis</i> | Eastern Spotted Dove | 2020/11/24 | 2 | 0 | 22.45165378 | 114.02363420 | <a href="https://www.inaturalist.org/observations/65883028">https://www.inaturalist.org/observations/65883028</a>   |
| 4229 | <i>Spilopelia chinensis</i> | Eastern Spotted Dove | 2020/11/24 | 2 | 0 | 22.45165378 | 114.02363420 | <a href="https://www.inaturalist.org/observations/65883029">https://www.inaturalist.org/observations/65883029</a>   |
| 4230 | <i>Spilopelia chinensis</i> | Eastern Spotted Dove | 2020/11/24 | 2 | 0 | 22.45165378 | 114.02363420 | <a href="https://www.inaturalist.org/observations/65883051">https://www.inaturalist.org/observations/65883051</a>   |
| 4231 | <i>Spilopelia chinensis</i> | Eastern Spotted Dove | 2020/11/24 | 2 | 0 | 22.45165378 | 114.02363420 | <a href="https://www.inaturalist.org/observations/65883052">https://www.inaturalist.org/observations/65883052</a>   |

|      |                             |                      |            |   |   |             |              |                                                                                                                   |
|------|-----------------------------|----------------------|------------|---|---|-------------|--------------|-------------------------------------------------------------------------------------------------------------------|
| 4232 | <i>Spilopelia chinensis</i> | Eastern Spotted Dove | 2020/11/25 | 2 | 0 | 22.45165378 | 114.02363420 | <a href="https://www.inaturalist.org/observations/65883062">https://www.inaturalist.org/observations/65883062</a> |
| 4233 | <i>Spilopelia chinensis</i> | Eastern Spotted Dove | 2020/11/25 | 2 | 0 | 22.45165378 | 114.02363420 | <a href="https://www.inaturalist.org/observations/65883063">https://www.inaturalist.org/observations/65883063</a> |
| 4234 | <i>Spilopelia chinensis</i> | Eastern Spotted Dove | 2020/11/25 | 2 | 0 | 22.45165378 | 114.02363420 | <a href="https://www.inaturalist.org/observations/65883067">https://www.inaturalist.org/observations/65883067</a> |
| 4235 | <i>Spilopelia chinensis</i> | Eastern Spotted Dove | 2020/11/25 | 2 | 0 | 22.45165378 | 114.02363420 | <a href="https://www.inaturalist.org/observations/65883070">https://www.inaturalist.org/observations/65883070</a> |
| 4236 | <i>Spilopelia chinensis</i> | Eastern Spotted Dove | 2020/11/26 | 2 | 0 | 22.45165378 | 114.02363420 | <a href="https://www.inaturalist.org/observations/65883100">https://www.inaturalist.org/observations/65883100</a> |
| 4237 | <i>Spilopelia chinensis</i> | Eastern Spotted Dove | 2020/11/26 | 2 | 0 | 22.45165378 | 114.02363420 | <a href="https://www.inaturalist.org/observations/65883101">https://www.inaturalist.org/observations/65883101</a> |
| 4238 | <i>Spilopelia chinensis</i> | Eastern Spotted Dove | 2020/11/26 | 2 | 0 | 22.45165378 | 114.02363420 | <a href="https://www.inaturalist.org/observations/65883106">https://www.inaturalist.org/observations/65883106</a> |
| 4239 | <i>Spilopelia chinensis</i> | Eastern Spotted Dove | 2020/11/26 | 2 | 0 | 22.45165378 | 114.02363420 | <a href="https://www.inaturalist.org/observations/65883109">https://www.inaturalist.org/observations/65883109</a> |
| 4240 | <i>Spilopelia chinensis</i> | Eastern Spotted Dove | 2020/11/26 | 2 | 0 | 22.45165378 | 114.02363420 | <a href="https://www.inaturalist.org/observations/65883130">https://www.inaturalist.org/observations/65883130</a> |
| 4241 | <i>Spilopelia chinensis</i> | Eastern Spotted Dove | 2020/11/26 | 2 | 0 | 22.45165378 | 114.02363420 | <a href="https://www.inaturalist.org/observations/65883136">https://www.inaturalist.org/observations/65883136</a> |
| 4242 | <i>Spilopelia chinensis</i> | Eastern Spotted Dove | 2020/11/27 | 2 | 0 | 22.45165378 | 114.02363420 | <a href="https://www.inaturalist.org/observations/65883160">https://www.inaturalist.org/observations/65883160</a> |
| 4243 | <i>Spilopelia chinensis</i> | Eastern Spotted Dove | 2020/11/28 | 2 | 0 | 22.45165378 | 114.02363420 | <a href="https://www.inaturalist.org/observations/65883317">https://www.inaturalist.org/observations/65883317</a> |
| 4244 | <i>Spilopelia chinensis</i> | Eastern Spotted Dove | 2020/11/28 | 2 | 0 | 22.45165378 | 114.02363420 | <a href="https://www.inaturalist.org/observations/65883326">https://www.inaturalist.org/observations/65883326</a> |
| 4245 | <i>Spilopelia chinensis</i> | Eastern Spotted Dove | 2020/11/28 | 2 | 0 | 22.45165378 | 114.02363420 | <a href="https://www.inaturalist.org/observations/65883327">https://www.inaturalist.org/observations/65883327</a> |
| 4246 | <i>Spilopelia chinensis</i> | Eastern Spotted Dove | 2020/11/28 | 2 | 0 | 22.45165378 | 114.02363420 | <a href="https://www.inaturalist.org/observations/65883332">https://www.inaturalist.org/observations/65883332</a> |
| 4247 | <i>Spilopelia chinensis</i> | Eastern Spotted Dove | 2015/6/12  | 2 | 0 | 22.45165873 | 114.02363420 | <a href="https://www.inaturalist.org/observations/13764551">https://www.inaturalist.org/observations/13764551</a> |
| 4248 | <i>Spilopelia chinensis</i> | Eastern Spotted Dove | 2020/11/14 | 1 | 0 | 22.45165873 | 114.02363420 | <a href="https://www.inaturalist.org/observations/64836289">https://www.inaturalist.org/observations/64836289</a> |
| 4249 | <i>Spilopelia chinensis</i> | Eastern Spotted Dove | 2020/11/24 | 2 | 0 | 22.45165873 | 114.02363420 | <a href="https://www.inaturalist.org/observations/65887551">https://www.inaturalist.org/observations/65887551</a> |
| 4250 | <i>Spilopelia chinensis</i> | Eastern Spotted Dove | 2020/11/24 | 2 | 0 | 22.45165873 | 114.02363420 | <a href="https://www.inaturalist.org/observations/65887554">https://www.inaturalist.org/observations/65887554</a> |
| 4251 | <i>Spilopelia chinensis</i> | Eastern Spotted Dove | 2020/11/25 | 2 | 0 | 22.45165873 | 114.02363420 | <a href="https://www.inaturalist.org/observations/65887596">https://www.inaturalist.org/observations/65887596</a> |
| 4252 | <i>Spilopelia chinensis</i> | Eastern Spotted Dove | 2020/11/28 | 2 | 0 | 22.45165873 | 114.02363420 | <a href="https://www.inaturalist.org/observations/65887818">https://www.inaturalist.org/observations/65887818</a> |
| 4253 | <i>Spilopelia chinensis</i> | Eastern Spotted Dove | 2020/11/28 | 2 | 0 | 22.45165873 | 114.02363420 | <a href="https://www.inaturalist.org/observations/65887822">https://www.inaturalist.org/observations/65887822</a> |
| 4254 | <i>Spilopelia chinensis</i> | Eastern Spotted Dove | 2020/11/30 | 2 | 0 | 22.45165873 | 114.02363420 | <a href="https://www.inaturalist.org/observations/65887862">https://www.inaturalist.org/observations/65887862</a> |

|      |                             |                      |            |   |   |             |              |                                                                                                                     |
|------|-----------------------------|----------------------|------------|---|---|-------------|--------------|---------------------------------------------------------------------------------------------------------------------|
| 4255 | <i>Spilopelia chinensis</i> | Eastern Spotted Dove | 2020/11/9  | 0 | 0 | 22.45166093 | 114.02360540 | <a href="https://www.inaturalist.org/observations/64493460">https://www.inaturalist.org/observations/64493460</a>   |
| 4256 | <i>Spilopelia chinensis</i> | Eastern Spotted Dove | 2020/11/25 | 1 | 0 | 22.45166116 | 114.02361280 | <a href="https://www.inaturalist.org/observations/65607445">https://www.inaturalist.org/observations/65607445</a>   |
| 4257 | <i>Spilopelia chinensis</i> | Eastern Spotted Dove | 2020/11/10 | 1 | 0 | 22.45166136 | 114.02367540 | <a href="https://www.inaturalist.org/observations/64587163">https://www.inaturalist.org/observations/64587163</a>   |
| 4258 | <i>Spilopelia chinensis</i> | Eastern Spotted Dove | 2020/11/14 | 2 | 0 | 22.45166300 | 114.02358120 | <a href="https://www.inaturalist.org/observations/65394923">https://www.inaturalist.org/observations/65394923</a>   |
| 4259 | <i>Spilopelia chinensis</i> | Eastern Spotted Dove | 2020/11/14 | 1 | 0 | 22.45166300 | 114.02358120 | <a href="https://www.inaturalist.org/observations/65394968">https://www.inaturalist.org/observations/65394968</a>   |
| 4260 | <i>Spilopelia chinensis</i> | Eastern Spotted Dove | 2020/11/14 | 1 | 0 | 22.45166300 | 114.02358120 | <a href="https://www.inaturalist.org/observations/65395017">https://www.inaturalist.org/observations/65395017</a>   |
| 4261 | <i>Spilopelia chinensis</i> | Eastern Spotted Dove | 2020/11/24 | 1 | 0 | 22.45166389 | 114.02360660 | <a href="https://www.inaturalist.org/observations/65499560">https://www.inaturalist.org/observations/65499560</a>   |
| 4262 | <i>Spilopelia chinensis</i> | Eastern Spotted Dove | 2020/10/15 | 1 | 0 | 22.45166769 | 114.02359630 | <a href="https://www.inaturalist.org/observations/62633126">https://www.inaturalist.org/observations/62633126</a>   |
| 4263 | <i>Spilopelia chinensis</i> | Eastern Spotted Dove | 2020/11/14 | 1 | 0 | 22.45166865 | 114.02362350 | <a href="https://www.inaturalist.org/observations/64835047">https://www.inaturalist.org/observations/64835047</a>   |
| 4264 | <i>Spilopelia chinensis</i> | Eastern Spotted Dove | 2020/11/9  | 1 | 0 | 22.45166877 | 114.02359680 | <a href="https://www.inaturalist.org/observations/64554643">https://www.inaturalist.org/observations/64554643</a>   |
| 4265 | <i>Spilopelia chinensis</i> | Eastern Spotted Dove | 2020/11/23 | 1 | 0 | 22.45167065 | 114.02361350 | <a href="https://www.inaturalist.org/observations/65465351">https://www.inaturalist.org/observations/65465351</a>   |
| 4266 | <i>Spilopelia chinensis</i> | Eastern Spotted Dove | 2021/2/8   | 1 | 0 | 22.45167337 | 114.02370020 | <a href="https://www.inaturalist.org/observations/69283614">https://www.inaturalist.org/observations/69283614</a>   |
| 4267 | <i>Spilopelia chinensis</i> | Eastern Spotted Dove | 2020/11/13 | 1 | 0 | 22.45167389 | 114.02360280 | <a href="https://www.inaturalist.org/observations/64778502">https://www.inaturalist.org/observations/64778502</a>   |
| 4268 | <i>Spilopelia chinensis</i> | Eastern Spotted Dove | 2020/11/24 | 1 | 0 | 22.45167513 | 114.02366210 | <a href="https://www.inaturalist.org/observations/65499550">https://www.inaturalist.org/observations/65499550</a>   |
| 4269 | <i>Spilopelia chinensis</i> | Eastern Spotted Dove | 2020/11/25 | 1 | 0 | 22.45167569 | 114.02348400 | <a href="https://www.inaturalist.org/observations/65607550">https://www.inaturalist.org/observations/65607550</a>   |
| 4270 | <i>Spilopelia chinensis</i> | Eastern Spotted Dove | 2020/11/19 | 1 | 0 | 22.45167773 | 114.02358300 | <a href="https://www.inaturalist.org/observations/65205056">https://www.inaturalist.org/observations/65205056</a>   |
| 4271 | <i>Spilopelia chinensis</i> | Eastern Spotted Dove | 2019/11/9  | 3 | 0 | 22.45167822 | 114.02363550 | <a href="https://www.inaturalist.org/observations/35521951">https://www.inaturalist.org/observations/35521951</a>   |
| 4272 | <i>Spilopelia chinensis</i> | Eastern Spotted Dove | 2019/11/9  | 4 | 0 | 22.45167822 | 114.02363550 | <a href="https://www.inaturalist.org/observations/35630178">https://www.inaturalist.org/observations/35630178</a>   |
| 4273 | <i>Spilopelia chinensis</i> | Eastern Spotted Dove | 2020/11/20 | 1 | 0 | 22.45167862 | 114.02364770 | <a href="https://www.inaturalist.org/observations/65264713">https://www.inaturalist.org/observations/65264713</a>   |
| 4274 | <i>Spilopelia chinensis</i> | Eastern Spotted Dove | 2020/11/25 | 1 | 0 | 22.45168262 | 114.02364480 | <a href="https://www.inaturalist.org/observations/65607456">https://www.inaturalist.org/observations/65607456</a>   |
| 4275 | <i>Spilopelia chinensis</i> | Eastern Spotted Dove | 2020/11/23 | 2 | 0 | 22.45168354 | 114.02360740 | <a href="https://www.inaturalist.org/observations/65464081">https://www.inaturalist.org/observations/65464081</a>   |
| 4276 | <i>Spilopelia chinensis</i> | Eastern Spotted Dove | 2020/11/25 | 1 | 0 | 22.45168359 | 114.02367730 | <a href="https://www.inaturalist.org/observations/65883639">https://www.inaturalist.org/observations/65883639</a>   |
| 4277 | <i>Spilopelia chinensis</i> | Eastern Spotted Dove | 2021/11/6  | 2 | 0 | 22.45168724 | 114.02355240 | <a href="https://www.inaturalist.org/observations/100383089">https://www.inaturalist.org/observations/100383089</a> |

|      |                             |                      |            |   |   |             |              |                                                                                                                     |
|------|-----------------------------|----------------------|------------|---|---|-------------|--------------|---------------------------------------------------------------------------------------------------------------------|
| 4278 | <i>Spilopelia chinensis</i> | Eastern Spotted Dove | 2021/11/6  | 2 | 0 | 22.45168724 | 114.02355240 | <a href="https://www.inaturalist.org/observations/100383093">https://www.inaturalist.org/observations/100383093</a> |
| 4279 | <i>Spilopelia chinensis</i> | Eastern Spotted Dove | 2020/11/24 | 1 | 0 | 22.45168749 | 114.02361030 | <a href="https://www.inaturalist.org/observations/65499566">https://www.inaturalist.org/observations/65499566</a>   |
| 4280 | <i>Spilopelia chinensis</i> | Eastern Spotted Dove | 2019/1/9   | 2 | 0 | 22.45168833 | 114.02345280 | <a href="https://www.inaturalist.org/observations/100371453">https://www.inaturalist.org/observations/100371453</a> |
| 4281 | <i>Spilopelia chinensis</i> | Eastern Spotted Dove | 2021/11/6  | 1 | 0 | 22.45168848 | 114.02354840 | <a href="https://www.inaturalist.org/observations/100383808">https://www.inaturalist.org/observations/100383808</a> |
| 4282 | <i>Spilopelia chinensis</i> | Eastern Spotted Dove | 2021/11/6  | 2 | 0 | 22.45168848 | 114.02354840 | <a href="https://www.inaturalist.org/observations/100383811">https://www.inaturalist.org/observations/100383811</a> |
| 4283 | <i>Spilopelia chinensis</i> | Eastern Spotted Dove | 2021/11/6  | 2 | 0 | 22.45168848 | 114.02354840 | <a href="https://www.inaturalist.org/observations/100383813">https://www.inaturalist.org/observations/100383813</a> |
| 4284 | <i>Spilopelia chinensis</i> | Eastern Spotted Dove | 2021/11/6  | 2 | 0 | 22.45168848 | 114.02354840 | <a href="https://www.inaturalist.org/observations/100383835">https://www.inaturalist.org/observations/100383835</a> |
| 4285 | <i>Spilopelia chinensis</i> | Eastern Spotted Dove | 2021/11/6  | 2 | 0 | 22.45168848 | 114.02354840 | <a href="https://www.inaturalist.org/observations/100383836">https://www.inaturalist.org/observations/100383836</a> |
| 4286 | <i>Spilopelia chinensis</i> | Eastern Spotted Dove | 2021/11/12 | 1 | 0 | 22.45168848 | 114.02354840 | <a href="https://www.inaturalist.org/observations/100976408">https://www.inaturalist.org/observations/100976408</a> |
| 4287 | <i>Spilopelia chinensis</i> | Eastern Spotted Dove | 2021/11/12 | 1 | 0 | 22.45168848 | 114.02354840 | <a href="https://www.inaturalist.org/observations/100976445">https://www.inaturalist.org/observations/100976445</a> |
| 4288 | <i>Spilopelia chinensis</i> | Eastern Spotted Dove | 2021/11/12 | 1 | 0 | 22.45168848 | 114.02354840 | <a href="https://www.inaturalist.org/observations/100976446">https://www.inaturalist.org/observations/100976446</a> |
| 4289 | <i>Spilopelia chinensis</i> | Eastern Spotted Dove | 2021/11/10 | 1 | 0 | 22.45168848 | 114.02354840 | <a href="https://www.inaturalist.org/observations/100981041">https://www.inaturalist.org/observations/100981041</a> |
| 4290 | <i>Spilopelia chinensis</i> | Eastern Spotted Dove | 2021/11/10 | 1 | 0 | 22.45168848 | 114.02354840 | <a href="https://www.inaturalist.org/observations/100981095">https://www.inaturalist.org/observations/100981095</a> |
| 4291 | <i>Spilopelia chinensis</i> | Eastern Spotted Dove | 2021/11/10 | 1 | 0 | 22.45168848 | 114.02354840 | <a href="https://www.inaturalist.org/observations/100981097">https://www.inaturalist.org/observations/100981097</a> |
| 4292 | <i>Spilopelia chinensis</i> | Eastern Spotted Dove | 2021/11/10 | 1 | 0 | 22.45168848 | 114.02354840 | <a href="https://www.inaturalist.org/observations/100981103">https://www.inaturalist.org/observations/100981103</a> |
| 4293 | <i>Spilopelia chinensis</i> | Eastern Spotted Dove | 2021/11/10 | 1 | 0 | 22.45168848 | 114.02354840 | <a href="https://www.inaturalist.org/observations/100981118">https://www.inaturalist.org/observations/100981118</a> |
| 4294 | <i>Spilopelia chinensis</i> | Eastern Spotted Dove | 2021/11/10 | 1 | 0 | 22.45168848 | 114.02354840 | <a href="https://www.inaturalist.org/observations/100981120">https://www.inaturalist.org/observations/100981120</a> |
| 4295 | <i>Spilopelia chinensis</i> | Eastern Spotted Dove | 2021/11/12 | 1 | 0 | 22.45168848 | 114.02354840 | <a href="https://www.inaturalist.org/observations/100981177">https://www.inaturalist.org/observations/100981177</a> |
| 4296 | <i>Spilopelia chinensis</i> | Eastern Spotted Dove | 2021/11/12 | 1 | 0 | 22.45168848 | 114.02354840 | <a href="https://www.inaturalist.org/observations/100981180">https://www.inaturalist.org/observations/100981180</a> |
| 4297 | <i>Spilopelia chinensis</i> | Eastern Spotted Dove | 2021/11/12 | 1 | 0 | 22.45168848 | 114.02354840 | <a href="https://www.inaturalist.org/observations/100981182">https://www.inaturalist.org/observations/100981182</a> |
| 4298 | <i>Spilopelia chinensis</i> | Eastern Spotted Dove | 2021/11/6  | 1 | 0 | 22.45168848 | 114.02354840 | <a href="https://www.inaturalist.org/observations/100984312">https://www.inaturalist.org/observations/100984312</a> |
| 4299 | <i>Spilopelia chinensis</i> | Eastern Spotted Dove | 2021/11/6  | 1 | 0 | 22.45168848 | 114.02354840 | <a href="https://www.inaturalist.org/observations/100984425">https://www.inaturalist.org/observations/100984425</a> |
| 4300 | <i>Spilopelia chinensis</i> | Eastern Spotted Dove | 2021/11/6  | 1 | 0 | 22.45168848 | 114.02354840 | <a href="https://www.inaturalist.org/observations/100984452">https://www.inaturalist.org/observations/100984452</a> |





|      |                             |                      |            |   |   |             |              |                                                                                                                     |
|------|-----------------------------|----------------------|------------|---|---|-------------|--------------|---------------------------------------------------------------------------------------------------------------------|
| 4324 | <i>Spilopelia chinensis</i> | Eastern Spotted Dove | 2021/11/4  | 1 | 0 | 22.45168848 | 114.02354840 | <a href="https://www.inaturalist.org/observations/100989889">https://www.inaturalist.org/observations/100989889</a> |
| 4325 | <i>Spilopelia chinensis</i> | Eastern Spotted Dove | 2020/11/14 | 1 | 0 | 22.45168878 | 114.02360710 | <a href="https://www.inaturalist.org/observations/64831654">https://www.inaturalist.org/observations/64831654</a>   |
| 4326 | <i>Spilopelia chinensis</i> | Eastern Spotted Dove | 2020/11/14 | 1 | 0 | 22.45169034 | 114.02369220 | <a href="https://www.inaturalist.org/observations/64830899">https://www.inaturalist.org/observations/64830899</a>   |
| 4327 | <i>Spilopelia chinensis</i> | Eastern Spotted Dove | 2019/11/6  | 2 | 0 | 22.45169467 | 114.02358370 | <a href="https://www.inaturalist.org/observations/35362739">https://www.inaturalist.org/observations/35362739</a>   |
| 4328 | <i>Spilopelia chinensis</i> | Eastern Spotted Dove | 2020/11/23 | 2 | 0 | 22.45169518 | 114.02363860 | <a href="https://www.inaturalist.org/observations/65464098">https://www.inaturalist.org/observations/65464098</a>   |
| 4329 | <i>Spilopelia chinensis</i> | Eastern Spotted Dove | 2019/11/4  | 2 | 0 | 22.45169617 | 114.02365450 | <a href="https://www.inaturalist.org/observations/35304450">https://www.inaturalist.org/observations/35304450</a>   |
| 4330 | <i>Spilopelia chinensis</i> | Eastern Spotted Dove | 2020/11/14 | 0 | 0 | 22.45169667 | 114.02329170 | <a href="https://www.inaturalist.org/observations/64834703">https://www.inaturalist.org/observations/64834703</a>   |
| 4331 | <i>Spilopelia chinensis</i> | Eastern Spotted Dove | 2020/1/2   | 1 | 0 | 22.45169703 | 114.02358680 | <a href="https://www.inaturalist.org/observations/37207122">https://www.inaturalist.org/observations/37207122</a>   |
| 4332 | <i>Spilopelia chinensis</i> | Eastern Spotted Dove | 2020/11/25 | 1 | 0 | 22.45169870 | 114.02364730 | <a href="https://www.inaturalist.org/observations/65607367">https://www.inaturalist.org/observations/65607367</a>   |
| 4333 | <i>Spilopelia chinensis</i> | Eastern Spotted Dove | 2020/11/14 | 2 | 0 | 22.45170165 | 114.02383520 | <a href="https://www.inaturalist.org/observations/65881365">https://www.inaturalist.org/observations/65881365</a>   |
| 4334 | <i>Spilopelia chinensis</i> | Eastern Spotted Dove | 2020/11/14 | 2 | 0 | 22.45170165 | 114.02383520 | <a href="https://www.inaturalist.org/observations/65881371">https://www.inaturalist.org/observations/65881371</a>   |
| 4335 | <i>Spilopelia chinensis</i> | Eastern Spotted Dove | 2021/11/4  | 1 | 0 | 22.45170333 | 114.02384170 | <a href="https://www.inaturalist.org/observations/100974718">https://www.inaturalist.org/observations/100974718</a> |
| 4336 | <i>Spilopelia chinensis</i> | Eastern Spotted Dove | 2020/4/24  | 1 | 0 | 22.45170722 | 114.02360790 | <a href="https://www.inaturalist.org/observations/43317269">https://www.inaturalist.org/observations/43317269</a>   |
| 4337 | <i>Spilopelia chinensis</i> | Eastern Spotted Dove | 2020/11/25 | 1 | 0 | 22.45170839 | 114.02357160 | <a href="https://www.inaturalist.org/observations/65607386">https://www.inaturalist.org/observations/65607386</a>   |
| 4338 | <i>Spilopelia chinensis</i> | Eastern Spotted Dove | 2021/11/6  | 1 | 0 | 22.45171097 | 114.02359500 | <a href="https://www.inaturalist.org/observations/100381265">https://www.inaturalist.org/observations/100381265</a> |
| 4339 | <i>Spilopelia chinensis</i> | Eastern Spotted Dove | 2020/11/25 | 1 | 0 | 22.45171198 | 114.02360000 | <a href="https://www.inaturalist.org/observations/65607505">https://www.inaturalist.org/observations/65607505</a>   |
| 4340 | <i>Spilopelia chinensis</i> | Eastern Spotted Dove | 2020/11/23 | 1 | 0 | 22.45171404 | 114.02361220 | <a href="https://www.inaturalist.org/observations/65462162">https://www.inaturalist.org/observations/65462162</a>   |
| 4341 | <i>Spilopelia chinensis</i> | Eastern Spotted Dove | 2020/1/4   | 0 | 0 | 22.45171460 | 114.02362350 | <a href="https://www.inaturalist.org/observations/37242979">https://www.inaturalist.org/observations/37242979</a>   |
| 4342 | <i>Spilopelia chinensis</i> | Eastern Spotted Dove | 2021/6/9   | 1 | 0 | 22.45171821 | 114.02363830 | <a href="https://www.inaturalist.org/observations/82355111">https://www.inaturalist.org/observations/82355111</a>   |
| 4343 | <i>Spilopelia chinensis</i> | Eastern Spotted Dove | 2019/12/21 | 1 | 0 | 22.45171865 | 114.02359950 | <a href="https://www.inaturalist.org/observations/36817003">https://www.inaturalist.org/observations/36817003</a>   |
| 4344 | <i>Spilopelia chinensis</i> | Eastern Spotted Dove | 2019/11/9  | 3 | 0 | 22.45171879 | 114.02348630 | <a href="https://www.inaturalist.org/observations/35477922">https://www.inaturalist.org/observations/35477922</a>   |
| 4345 | <i>Spilopelia chinensis</i> | Eastern Spotted Dove | 2019/11/6  | 2 | 0 | 22.45172691 | 114.02361430 | <a href="https://www.inaturalist.org/observations/35362967">https://www.inaturalist.org/observations/35362967</a>   |
| 4346 | <i>Spilopelia chinensis</i> | Eastern Spotted Dove | 2020/11/24 | 1 | 0 | 22.45172920 | 114.02361160 | <a href="https://www.inaturalist.org/observations/65525090">https://www.inaturalist.org/observations/65525090</a>   |

|      |                             |                      |            |   |   |             |              |                                                                                                                     |
|------|-----------------------------|----------------------|------------|---|---|-------------|--------------|---------------------------------------------------------------------------------------------------------------------|
| 4347 | <i>Spilopelia chinensis</i> | Eastern Spotted Dove | 2019/11/4  | 2 | 0 | 22.45173285 | 114.02360600 | <a href="https://www.inaturalist.org/observations/35304914">https://www.inaturalist.org/observations/35304914</a>   |
| 4348 | <i>Spilopelia chinensis</i> | Eastern Spotted Dove | 2019/11/4  | 2 | 0 | 22.45173755 | 114.02363200 | <a href="https://www.inaturalist.org/observations/35304851">https://www.inaturalist.org/observations/35304851</a>   |
| 4349 | <i>Spilopelia chinensis</i> | Eastern Spotted Dove | 2020/11/14 | 1 | 0 | 22.45173807 | 114.02379640 | <a href="https://www.inaturalist.org/observations/64832531">https://www.inaturalist.org/observations/64832531</a>   |
| 4350 | <i>Spilopelia chinensis</i> | Eastern Spotted Dove | 2020/11/14 | 2 | 0 | 22.45174500 | 114.02345280 | <a href="https://www.inaturalist.org/observations/64832208">https://www.inaturalist.org/observations/64832208</a>   |
| 4351 | <i>Spilopelia chinensis</i> | Eastern Spotted Dove | 2020/12/13 | 2 | 0 | 22.45174937 | 114.17994020 | <a href="https://www.inaturalist.org/observations/66505499">https://www.inaturalist.org/observations/66505499</a>   |
| 4352 | <i>Spilopelia chinensis</i> | Eastern Spotted Dove | 2021/11/4  | 1 | 0 | 22.45175000 | 114.02398050 | <a href="https://www.inaturalist.org/observations/100974892">https://www.inaturalist.org/observations/100974892</a> |
| 4353 | <i>Spilopelia chinensis</i> | Eastern Spotted Dove | 2020/7/28  | 1 | 0 | 22.45175205 | 114.02359760 | <a href="https://www.inaturalist.org/observations/54622770">https://www.inaturalist.org/observations/54622770</a>   |
| 4354 | <i>Spilopelia chinensis</i> | Eastern Spotted Dove | 2019/11/8  | 3 | 0 | 22.45176278 | 114.02353090 | <a href="https://www.inaturalist.org/observations/35445994">https://www.inaturalist.org/observations/35445994</a>   |
| 4355 | <i>Spilopelia chinensis</i> | Eastern Spotted Dove | 2020/12/9  | 1 | 0 | 22.45176603 | 114.17955950 | <a href="https://www.inaturalist.org/observations/66337039">https://www.inaturalist.org/observations/66337039</a>   |
| 4356 | <i>Spilopelia chinensis</i> | Eastern Spotted Dove | 2020/11/14 | 1 | 0 | 22.45177000 | 114.02352220 | <a href="https://www.inaturalist.org/observations/64832386">https://www.inaturalist.org/observations/64832386</a>   |
| 4357 | <i>Spilopelia chinensis</i> | Eastern Spotted Dove | 2020/12/13 | 1 | 0 | 22.45178132 | 114.17961990 | <a href="https://www.inaturalist.org/observations/66506164">https://www.inaturalist.org/observations/66506164</a>   |
| 4358 | <i>Spilopelia chinensis</i> | Eastern Spotted Dove | 2020/11/14 | 2 | 0 | 22.45178900 | 114.02410450 | <a href="https://www.inaturalist.org/observations/64833641">https://www.inaturalist.org/observations/64833641</a>   |
| 4359 | <i>Spilopelia chinensis</i> | Eastern Spotted Dove | 2020/11/14 | 2 | 0 | 22.45178966 | 114.02347940 | <a href="https://www.inaturalist.org/observations/64837022">https://www.inaturalist.org/observations/64837022</a>   |
| 4360 | <i>Spilopelia chinensis</i> | Eastern Spotted Dove | 2020/11/25 | 1 | 0 | 22.45179224 | 114.02393400 | <a href="https://www.inaturalist.org/observations/65883950">https://www.inaturalist.org/observations/65883950</a>   |
| 4361 | <i>Spilopelia chinensis</i> | Eastern Spotted Dove | 2021/11/8  | 1 | 0 | 22.45179282 | 114.02348060 | <a href="https://www.inaturalist.org/observations/100972317">https://www.inaturalist.org/observations/100972317</a> |
| 4362 | <i>Spilopelia chinensis</i> | Eastern Spotted Dove | 2020/11/25 | 1 | 0 | 22.45179428 | 114.02359590 | <a href="https://www.inaturalist.org/observations/65607237">https://www.inaturalist.org/observations/65607237</a>   |
| 4363 | <i>Spilopelia chinensis</i> | Eastern Spotted Dove | 2019/11/9  | 2 | 0 | 22.45179523 | 114.02334670 | <a href="https://www.inaturalist.org/observations/35477538">https://www.inaturalist.org/observations/35477538</a>   |
| 4364 | <i>Spilopelia chinensis</i> | Eastern Spotted Dove | 2020/11/14 | 1 | 0 | 22.45180007 | 114.02340170 | <a href="https://www.inaturalist.org/observations/64832360">https://www.inaturalist.org/observations/64832360</a>   |
| 4365 | <i>Spilopelia chinensis</i> | Eastern Spotted Dove | 2020/11/12 | 1 | 0 | 22.45180805 | 114.02364670 | <a href="https://www.inaturalist.org/observations/64715740">https://www.inaturalist.org/observations/64715740</a>   |
| 4366 | <i>Spilopelia chinensis</i> | Eastern Spotted Dove | 2020/11/14 | 1 | 0 | 22.45180871 | 114.02331150 | <a href="https://www.inaturalist.org/observations/64831614">https://www.inaturalist.org/observations/64831614</a>   |
| 4367 | <i>Spilopelia chinensis</i> | Eastern Spotted Dove | 2020/11/14 | 2 | 0 | 22.45181004 | 114.02339050 | <a href="https://www.inaturalist.org/observations/64831658">https://www.inaturalist.org/observations/64831658</a>   |
| 4368 | <i>Spilopelia chinensis</i> | Eastern Spotted Dove | 2021/11/12 | 2 | 0 | 22.45183333 | 114.02386380 | <a href="https://www.inaturalist.org/observations/100914317">https://www.inaturalist.org/observations/100914317</a> |
| 4369 | <i>Spilopelia chinensis</i> | Eastern Spotted Dove | 2021/11/3  | 1 | 0 | 22.45183534 | 114.02367490 | <a href="https://www.inaturalist.org/observations/100143165">https://www.inaturalist.org/observations/100143165</a> |

|      |                             |                      |            |   |   |             |              |                                                                                                                     |
|------|-----------------------------|----------------------|------------|---|---|-------------|--------------|---------------------------------------------------------------------------------------------------------------------|
| 4370 | <i>Spilopelia chinensis</i> | Eastern Spotted Dove | 2020/11/21 | 1 | 0 | 22.45185571 | 114.02374650 | <a href="https://www.inaturalist.org/observations/65321550">https://www.inaturalist.org/observations/65321550</a>   |
| 4371 | <i>Spilopelia chinensis</i> | Eastern Spotted Dove | 2020/12/13 | 1 | 0 | 22.45193836 | 114.17984180 | <a href="https://www.inaturalist.org/observations/66506960">https://www.inaturalist.org/observations/66506960</a>   |
| 4372 | <i>Spilopelia chinensis</i> | Eastern Spotted Dove | 2020/12/9  | 1 | 0 | 22.45198333 | 114.18003000 | <a href="https://www.inaturalist.org/observations/66458770">https://www.inaturalist.org/observations/66458770</a>   |
| 4373 | <i>Spilopelia chinensis</i> | Eastern Spotted Dove | 2019/11/9  | 1 | 0 | 22.45200000 | 114.02300000 | <a href="https://www.inaturalist.org/observations/35480119">https://www.inaturalist.org/observations/35480119</a>   |
| 4374 | <i>Spilopelia chinensis</i> | Eastern Spotted Dove | 2017/3/15  | 6 | 0 | 22.45208907 | 78.09884763  | <a href="https://www.inaturalist.org/observations/5407719">https://www.inaturalist.org/observations/5407719</a>     |
| 4375 | <i>Spilopelia chinensis</i> | Eastern Spotted Dove | 2021/11/6  | 1 | 0 | 22.45219167 | 114.02358880 | <a href="https://www.inaturalist.org/observations/100368129">https://www.inaturalist.org/observations/100368129</a> |
| 4376 | <i>Spilopelia chinensis</i> | Eastern Spotted Dove | 2020/5/31  | 1 | 0 | 22.45303900 | 114.16603400 | <a href="https://www.inaturalist.org/observations/47950775">https://www.inaturalist.org/observations/47950775</a>   |
| 4377 | <i>Spilopelia chinensis</i> | Eastern Spotted Dove | 2018/4/29  | 2 | 0 | 22.45324667 | 114.16213880 | <a href="https://www.inaturalist.org/observations/11874848">https://www.inaturalist.org/observations/11874848</a>   |
| 4378 | <i>Spilopelia chinensis</i> | Eastern Spotted Dove | 2020/11/17 | 1 | 0 | 22.45325718 | 114.17190780 | <a href="https://www.inaturalist.org/observations/65045814">https://www.inaturalist.org/observations/65045814</a>   |
| 4379 | <i>Spilopelia chinensis</i> | Eastern Spotted Dove | 2019/4/26  | 2 | 0 | 22.45362650 | 114.00183660 | <a href="https://www.inaturalist.org/observations/23109429">https://www.inaturalist.org/observations/23109429</a>   |
| 4380 | <i>Spilopelia chinensis</i> | Eastern Spotted Dove | 2020/8/23  | 1 | 0 | 22.45369508 | 114.05308820 | <a href="https://www.inaturalist.org/observations/58490462">https://www.inaturalist.org/observations/58490462</a>   |
| 4381 | <i>Spilopelia chinensis</i> | Eastern Spotted Dove | 2020/11/16 | 2 | 0 | 22.45429380 | 114.17102860 | <a href="https://www.inaturalist.org/observations/64981981">https://www.inaturalist.org/observations/64981981</a>   |
| 4382 | <i>Spilopelia chinensis</i> | Eastern Spotted Dove | 2021/11/11 | 2 | 0 | 22.45433793 | 114.17078550 | <a href="https://www.inaturalist.org/observations/100818039">https://www.inaturalist.org/observations/100818039</a> |
| 4383 | <i>Spilopelia chinensis</i> | Eastern Spotted Dove | 2020/11/16 | 1 | 0 | 22.45445487 | 114.17123930 | <a href="https://www.inaturalist.org/observations/64981271">https://www.inaturalist.org/observations/64981271</a>   |
| 4384 | <i>Spilopelia chinensis</i> | Eastern Spotted Dove | 2021/9/17  | 1 | 0 | 22.45457302 | 114.29992860 | <a href="https://www.inaturalist.org/observations/95155945">https://www.inaturalist.org/observations/95155945</a>   |
| 4385 | <i>Spilopelia chinensis</i> | Eastern Spotted Dove | 2020/11/16 | 1 | 0 | 22.45460050 | 114.17095850 | <a href="https://www.inaturalist.org/observations/64981932">https://www.inaturalist.org/observations/64981932</a>   |
| 4386 | <i>Spilopelia chinensis</i> | Eastern Spotted Dove | 2020/11/16 | 2 | 0 | 22.45465268 | 114.17097640 | <a href="https://www.inaturalist.org/observations/64981351">https://www.inaturalist.org/observations/64981351</a>   |
| 4387 | <i>Spilopelia chinensis</i> | Eastern Spotted Dove | 2020/11/16 | 2 | 0 | 22.45468450 | 114.17082650 | <a href="https://www.inaturalist.org/observations/64982266">https://www.inaturalist.org/observations/64982266</a>   |
| 4388 | <i>Spilopelia chinensis</i> | Eastern Spotted Dove | 2020/11/18 | 2 | 0 | 22.45469071 | 114.17133470 | <a href="https://www.inaturalist.org/observations/65138891">https://www.inaturalist.org/observations/65138891</a>   |
| 4389 | <i>Spilopelia chinensis</i> | Eastern Spotted Dove | 2020/11/16 | 2 | 0 | 22.45473704 | 114.17093100 | <a href="https://www.inaturalist.org/observations/64982140">https://www.inaturalist.org/observations/64982140</a>   |
| 4390 | <i>Spilopelia chinensis</i> | Eastern Spotted Dove | 2020/11/4  | 2 | 0 | 22.45477175 | 114.17185300 | <a href="https://www.inaturalist.org/observations/64155855">https://www.inaturalist.org/observations/64155855</a>   |
| 4391 | <i>Spilopelia chinensis</i> | Eastern Spotted Dove | 2020/11/17 | 1 | 0 | 22.45483420 | 114.17105730 | <a href="https://www.inaturalist.org/observations/65045949">https://www.inaturalist.org/observations/65045949</a>   |
| 4392 | <i>Spilopelia chinensis</i> | Eastern Spotted Dove | 2021/11/10 | 1 | 0 | 22.45489891 | 114.17097010 | <a href="https://www.inaturalist.org/observations/100728214">https://www.inaturalist.org/observations/100728214</a> |

|      |                             |                      |            |   |   |             |              |                                                                                                                     |
|------|-----------------------------|----------------------|------------|---|---|-------------|--------------|---------------------------------------------------------------------------------------------------------------------|
| 4393 | <i>Spilopelia chinensis</i> | Eastern Spotted Dove | 2020/11/18 | 2 | 0 | 22.45497036 | 114.17047400 | <a href="https://www.inaturalist.org/observations/65123082">https://www.inaturalist.org/observations/65123082</a>   |
| 4394 | <i>Spilopelia chinensis</i> | Eastern Spotted Dove | 2020/11/18 | 2 | 0 | 22.45497450 | 114.17055390 | <a href="https://www.inaturalist.org/observations/65123063">https://www.inaturalist.org/observations/65123063</a>   |
| 4395 | <i>Spilopelia chinensis</i> | Eastern Spotted Dove | 2020/11/16 | 1 | 0 | 22.45498078 | 114.17136440 | <a href="https://www.inaturalist.org/observations/64983392">https://www.inaturalist.org/observations/64983392</a>   |
| 4396 | <i>Spilopelia chinensis</i> | Eastern Spotted Dove | 2020/11/6  | 2 | 0 | 22.45498872 | 114.17162790 | <a href="https://www.inaturalist.org/observations/64648023">https://www.inaturalist.org/observations/64648023</a>   |
| 4397 | <i>Spilopelia chinensis</i> | Eastern Spotted Dove | 2019/11/4  | 3 | 0 | 22.45504249 | 114.16901480 | <a href="https://www.inaturalist.org/observations/35264195">https://www.inaturalist.org/observations/35264195</a>   |
| 4398 | <i>Spilopelia chinensis</i> | Eastern Spotted Dove | 2020/11/16 | 2 | 0 | 22.45506409 | 114.17142030 | <a href="https://www.inaturalist.org/observations/64983442">https://www.inaturalist.org/observations/64983442</a>   |
| 4399 | <i>Spilopelia chinensis</i> | Eastern Spotted Dove | 2021/4/7   | 1 | 0 | 22.45510920 | 114.17097200 | <a href="https://www.inaturalist.org/observations/73185558">https://www.inaturalist.org/observations/73185558</a>   |
| 4400 | <i>Spilopelia chinensis</i> | Eastern Spotted Dove | 2020/11/18 | 2 | 0 | 22.45511151 | 114.17066720 | <a href="https://www.inaturalist.org/observations/65123066">https://www.inaturalist.org/observations/65123066</a>   |
| 4401 | <i>Spilopelia chinensis</i> | Eastern Spotted Dove | 2020/4/30  | 1 | 0 | 22.45513639 | 114.00249250 | <a href="https://www.inaturalist.org/observations/44352578">https://www.inaturalist.org/observations/44352578</a>   |
| 4402 | <i>Spilopelia chinensis</i> | Eastern Spotted Dove | 2019/11/4  | 3 | 0 | 22.45516294 | 114.16942270 | <a href="https://www.inaturalist.org/observations/35265135">https://www.inaturalist.org/observations/35265135</a>   |
| 4403 | <i>Spilopelia chinensis</i> | Eastern Spotted Dove | 2019/11/4  | 4 | 0 | 22.45522190 | 114.16894520 | <a href="https://www.inaturalist.org/observations/35265100">https://www.inaturalist.org/observations/35265100</a>   |
| 4404 | <i>Spilopelia chinensis</i> | Eastern Spotted Dove | 2019/11/4  | 3 | 0 | 22.45536581 | 114.16985210 | <a href="https://www.inaturalist.org/observations/35263263">https://www.inaturalist.org/observations/35263263</a>   |
| 4405 | <i>Spilopelia chinensis</i> | Eastern Spotted Dove | 2019/11/4  | 4 | 0 | 22.45536716 | 114.16887640 | <a href="https://www.inaturalist.org/observations/35263837">https://www.inaturalist.org/observations/35263837</a>   |
| 4406 | <i>Spilopelia chinensis</i> | Eastern Spotted Dove | 2021/5/1   | 1 | 0 | 22.45547981 | 114.14547270 | <a href="https://www.inaturalist.org/observations/76121697">https://www.inaturalist.org/observations/76121697</a>   |
| 4407 | <i>Spilopelia chinensis</i> | Eastern Spotted Dove | 2022/5/14  | 1 | 0 | 22.45557222 | 114.00531110 | <a href="https://www.inaturalist.org/observations/117054574">https://www.inaturalist.org/observations/117054574</a> |
| 4408 | <i>Spilopelia chinensis</i> | Eastern Spotted Dove | 2020/11/18 | 1 | 0 | 22.45559002 | 114.17253250 | <a href="https://www.inaturalist.org/observations/65126973">https://www.inaturalist.org/observations/65126973</a>   |
| 4409 | <i>Spilopelia chinensis</i> | Eastern Spotted Dove | 2021/12/31 | 1 | 0 | 22.45568217 | 114.00373670 | <a href="https://www.inaturalist.org/observations/104015601">https://www.inaturalist.org/observations/104015601</a> |
| 4410 | <i>Spilopelia chinensis</i> | Eastern Spotted Dove | 2021/3/25  | 1 | 0 | 22.45576167 | 114.00309220 | <a href="https://www.inaturalist.org/observations/72095734">https://www.inaturalist.org/observations/72095734</a>   |
| 4411 | <i>Spilopelia chinensis</i> | Eastern Spotted Dove | 2021/3/25  | 1 | 0 | 22.45584333 | 114.00287690 | <a href="https://www.inaturalist.org/observations/72095768">https://www.inaturalist.org/observations/72095768</a>   |
| 4412 | <i>Spilopelia chinensis</i> | Eastern Spotted Dove | 2020/12/10 | 1 | 0 | 22.45608711 | 114.00053230 | <a href="https://www.inaturalist.org/observations/66362359">https://www.inaturalist.org/observations/66362359</a>   |
| 4413 | <i>Spilopelia chinensis</i> | Eastern Spotted Dove | 2021/3/25  | 2 | 0 | 22.45621583 | 114.00036330 | <a href="https://www.inaturalist.org/observations/72096264">https://www.inaturalist.org/observations/72096264</a>   |
| 4414 | <i>Spilopelia chinensis</i> | Eastern Spotted Dove | 2020/5/3   | 1 | 0 | 22.45627004 | 114.00206190 | <a href="https://www.inaturalist.org/observations/45077160">https://www.inaturalist.org/observations/45077160</a>   |
| 4415 | <i>Spilopelia chinensis</i> | Eastern Spotted Dove | 2020/5/3   | 1 | 0 | 22.45627004 | 114.00206190 | <a href="https://www.inaturalist.org/observations/45077272">https://www.inaturalist.org/observations/45077272</a>   |

|      |                             |                      |            |   |   |             |              |                                                                                                                     |
|------|-----------------------------|----------------------|------------|---|---|-------------|--------------|---------------------------------------------------------------------------------------------------------------------|
| 4416 | <i>Spilopelia chinensis</i> | Eastern Spotted Dove | 2021/5/1   | 2 | 0 | 22.45627167 | 114.00268890 | <a href="https://www.inaturalist.org/observations/76142243">https://www.inaturalist.org/observations/76142243</a>   |
| 4417 | <i>Spilopelia chinensis</i> | Eastern Spotted Dove | 2020/12/9  | 2 | 0 | 22.45629105 | 114.00090850 | <a href="https://www.inaturalist.org/observations/66320695">https://www.inaturalist.org/observations/66320695</a>   |
| 4418 | <i>Spilopelia chinensis</i> | Eastern Spotted Dove | 2022/4/8   | 2 | 0 | 22.45635230 | 114.17004870 | <a href="https://www.inaturalist.org/observations/110924655">https://www.inaturalist.org/observations/110924655</a> |
| 4419 | <i>Spilopelia chinensis</i> | Eastern Spotted Dove | 2020/11/18 | 1 | 0 | 22.45655096 | 114.17197380 | <a href="https://www.inaturalist.org/observations/65125682">https://www.inaturalist.org/observations/65125682</a>   |
| 4420 | <i>Spilopelia chinensis</i> | Eastern Spotted Dove | 2020/11/18 | 1 | 0 | 22.45662789 | 114.17197180 | <a href="https://www.inaturalist.org/observations/65127816">https://www.inaturalist.org/observations/65127816</a>   |
| 4421 | <i>Spilopelia chinensis</i> | Eastern Spotted Dove | 2020/11/18 | 0 | 0 | 22.45665333 | 114.17127170 | <a href="https://www.inaturalist.org/observations/65127004">https://www.inaturalist.org/observations/65127004</a>   |
| 4422 | <i>Spilopelia chinensis</i> | Eastern Spotted Dove | 2020/11/18 | 1 | 0 | 22.45673284 | 114.17147830 | <a href="https://www.inaturalist.org/observations/65135383">https://www.inaturalist.org/observations/65135383</a>   |
| 4423 | <i>Spilopelia chinensis</i> | Eastern Spotted Dove | 2019/11/4  | 1 | 0 | 22.45691210 | 114.00153940 | <a href="https://www.inaturalist.org/observations/35258523">https://www.inaturalist.org/observations/35258523</a>   |
| 4424 | <i>Spilopelia chinensis</i> | Eastern Spotted Dove | 2022/7/18  | 2 | 0 | 22.45707833 | 114.00196950 | <a href="https://www.inaturalist.org/observations/126789842">https://www.inaturalist.org/observations/126789842</a> |
| 4425 | <i>Spilopelia chinensis</i> | Eastern Spotted Dove | 2020/10/24 | 2 | 0 | 22.45711554 | 114.00191340 | <a href="https://www.inaturalist.org/observations/63366853">https://www.inaturalist.org/observations/63366853</a>   |
| 4426 | <i>Spilopelia chinensis</i> | Eastern Spotted Dove | 2020/11/18 | 2 | 0 | 22.45727365 | 114.17145680 | <a href="https://www.inaturalist.org/observations/65129895">https://www.inaturalist.org/observations/65129895</a>   |
| 4427 | <i>Spilopelia chinensis</i> | Eastern Spotted Dove | 2020/11/18 | 2 | 0 | 22.45728968 | 114.17158130 | <a href="https://www.inaturalist.org/observations/65129458">https://www.inaturalist.org/observations/65129458</a>   |
| 4428 | <i>Spilopelia chinensis</i> | Eastern Spotted Dove | 2020/12/11 | 1 | 0 | 22.45733300 | 114.00089300 | <a href="https://www.inaturalist.org/observations/66568720">https://www.inaturalist.org/observations/66568720</a>   |
| 4429 | <i>Spilopelia chinensis</i> | Eastern Spotted Dove | 2021/3/29  | 2 | 0 | 22.45751060 | 114.17128890 | <a href="https://www.inaturalist.org/observations/72334707">https://www.inaturalist.org/observations/72334707</a>   |
| 4430 | <i>Spilopelia chinensis</i> | Eastern Spotted Dove | 2020/12/14 | 1 | 0 | 22.45764624 | 114.00137660 | <a href="https://www.inaturalist.org/observations/66572023">https://www.inaturalist.org/observations/66572023</a>   |
| 4431 | <i>Spilopelia chinensis</i> | Eastern Spotted Dove | 2020/4/26  | 2 | 0 | 22.45765228 | 114.00774580 | <a href="https://www.inaturalist.org/observations/43587007">https://www.inaturalist.org/observations/43587007</a>   |
| 4432 | <i>Spilopelia chinensis</i> | Eastern Spotted Dove | 2022/5/2   | 3 | 0 | 22.45821450 | 114.03109850 | <a href="https://www.inaturalist.org/observations/115089524">https://www.inaturalist.org/observations/115089524</a> |
| 4433 | <i>Spilopelia chinensis</i> | Eastern Spotted Dove | 2021/3/30  | 0 | 0 | 22.45842724 | 114.17455730 | <a href="https://www.inaturalist.org/observations/72419786">https://www.inaturalist.org/observations/72419786</a>   |
| 4434 | <i>Spilopelia chinensis</i> | Eastern Spotted Dove | 2019/11/8  | 4 | 0 | 22.45981787 | 114.00348770 | <a href="https://www.inaturalist.org/observations/35443177">https://www.inaturalist.org/observations/35443177</a>   |
| 4435 | <i>Spilopelia chinensis</i> | Eastern Spotted Dove | 2021/11/14 | 1 | 0 | 22.45991333 | 114.00508890 | <a href="https://www.inaturalist.org/observations/101073786">https://www.inaturalist.org/observations/101073786</a> |
| 4436 | <i>Spilopelia chinensis</i> | Eastern Spotted Dove | 2022/8/30  | 2 | 0 | 22.45993100 | 114.00401700 | <a href="https://www.inaturalist.org/observations/132913088">https://www.inaturalist.org/observations/132913088</a> |
| 4437 | <i>Spilopelia chinensis</i> | Eastern Spotted Dove | 2020/4/27  | 2 | 0 | 22.46019849 | 114.03532150 | <a href="https://www.inaturalist.org/observations/44121354">https://www.inaturalist.org/observations/44121354</a>   |
| 4438 | <i>Spilopelia chinensis</i> | Eastern Spotted Dove | 2021/4/30  | 1 | 0 | 22.46042167 | 114.00076390 | <a href="https://www.inaturalist.org/observations/75844215">https://www.inaturalist.org/observations/75844215</a>   |

|      |                             |                      |            |   |   |             |              |                                                                                                                     |
|------|-----------------------------|----------------------|------------|---|---|-------------|--------------|---------------------------------------------------------------------------------------------------------------------|
| 4439 | <i>Spilopelia chinensis</i> | Eastern Spotted Dove | 2021/12/30 | 2 | 0 | 22.46059200 | 114.00673300 | <a href="https://www.inaturalist.org/observations/104092558">https://www.inaturalist.org/observations/104092558</a> |
| 4440 | <i>Spilopelia chinensis</i> | Eastern Spotted Dove | 2018/4/27  | 6 | 0 | 22.46063500 | 114.32998300 | <a href="https://www.inaturalist.org/observations/11745169">https://www.inaturalist.org/observations/11745169</a>   |
| 4441 | <i>Spilopelia chinensis</i> | Eastern Spotted Dove | 2018/4/27  | 6 | 0 | 22.46063500 | 114.32998300 | <a href="https://www.inaturalist.org/observations/11745171">https://www.inaturalist.org/observations/11745171</a>   |
| 4442 | <i>Spilopelia chinensis</i> | Eastern Spotted Dove | 2022/5/2   | 2 | 0 | 22.46063500 | 114.32998300 | <a href="https://www.inaturalist.org/observations/115048993">https://www.inaturalist.org/observations/115048993</a> |
| 4443 | <i>Spilopelia chinensis</i> | Eastern Spotted Dove | 2022/4/30  | 3 | 0 | 22.46063500 | 114.32998300 | <a href="https://www.inaturalist.org/observations/115288438">https://www.inaturalist.org/observations/115288438</a> |
| 4444 | <i>Spilopelia chinensis</i> | Eastern Spotted Dove | 2016/1/2   | 1 | 0 | 22.46064190 | 114.00419960 | <a href="https://www.inaturalist.org/observations/24696097">https://www.inaturalist.org/observations/24696097</a>   |
| 4445 | <i>Spilopelia chinensis</i> | Eastern Spotted Dove | 2016/2/20  | 2 | 0 | 22.46064190 | 114.00419960 | <a href="https://www.inaturalist.org/observations/24834779">https://www.inaturalist.org/observations/24834779</a>   |
| 4446 | <i>Spilopelia chinensis</i> | Eastern Spotted Dove | 2016/2/10  | 3 | 0 | 22.46064190 | 114.00419960 | <a href="https://www.inaturalist.org/observations/25206931">https://www.inaturalist.org/observations/25206931</a>   |
| 4447 | <i>Spilopelia chinensis</i> | Eastern Spotted Dove | 2016/2/6   | 2 | 0 | 22.46064190 | 114.00419960 | <a href="https://www.inaturalist.org/observations/25304998">https://www.inaturalist.org/observations/25304998</a>   |
| 4448 | <i>Spilopelia chinensis</i> | Eastern Spotted Dove | 2016/3/12  | 4 | 0 | 22.46064190 | 114.00419960 | <a href="https://www.inaturalist.org/observations/25530307">https://www.inaturalist.org/observations/25530307</a>   |
| 4449 | <i>Spilopelia chinensis</i> | Eastern Spotted Dove | 2016/3/5   | 3 | 0 | 22.46064190 | 114.00419960 | <a href="https://www.inaturalist.org/observations/25554308">https://www.inaturalist.org/observations/25554308</a>   |
| 4450 | <i>Spilopelia chinensis</i> | Eastern Spotted Dove | 2016/10/1  | 2 | 0 | 22.46064190 | 114.00419960 | <a href="https://www.inaturalist.org/observations/28153594">https://www.inaturalist.org/observations/28153594</a>   |
| 4451 | <i>Spilopelia chinensis</i> | Eastern Spotted Dove | 2016/11/5  | 3 | 0 | 22.46064190 | 114.00419960 | <a href="https://www.inaturalist.org/observations/28339396">https://www.inaturalist.org/observations/28339396</a>   |
| 4452 | <i>Spilopelia chinensis</i> | Eastern Spotted Dove | 2016/12/3  | 3 | 0 | 22.46064190 | 114.00419960 | <a href="https://www.inaturalist.org/observations/28590891">https://www.inaturalist.org/observations/28590891</a>   |
| 4453 | <i>Spilopelia chinensis</i> | Eastern Spotted Dove | 2017/2/18  | 2 | 0 | 22.46064190 | 114.00419960 | <a href="https://www.inaturalist.org/observations/28924742">https://www.inaturalist.org/observations/28924742</a>   |
| 4454 | <i>Spilopelia chinensis</i> | Eastern Spotted Dove | 2017/2/18  | 2 | 0 | 22.46064190 | 114.00419960 | <a href="https://www.inaturalist.org/observations/28974036">https://www.inaturalist.org/observations/28974036</a>   |
| 4455 | <i>Spilopelia chinensis</i> | Eastern Spotted Dove | 2017/10/7  | 4 | 0 | 22.46064190 | 114.00419960 | <a href="https://www.inaturalist.org/observations/30847150">https://www.inaturalist.org/observations/30847150</a>   |
| 4456 | <i>Spilopelia chinensis</i> | Eastern Spotted Dove | 2021/5/1   | 3 | 0 | 22.46064190 | 114.00419960 | <a href="https://www.inaturalist.org/observations/76110774">https://www.inaturalist.org/observations/76110774</a>   |
| 4457 | <i>Spilopelia chinensis</i> | Eastern Spotted Dove | 2021/11/16 | 2 | 0 | 22.46077063 | 88.36214960  | <a href="https://www.inaturalist.org/observations/115392408">https://www.inaturalist.org/observations/115392408</a> |
| 4458 | <i>Spilopelia chinensis</i> | Eastern Spotted Dove | 2020/4/26  | 2 | 0 | 22.46088833 | 114.00699450 | <a href="https://www.inaturalist.org/observations/43589199">https://www.inaturalist.org/observations/43589199</a>   |
| 4459 | <i>Spilopelia chinensis</i> | Eastern Spotted Dove | 2017/11/4  | 2 | 0 | 22.46095918 | 114.02651560 | <a href="https://www.inaturalist.org/observations/31328758">https://www.inaturalist.org/observations/31328758</a>   |
| 4460 | <i>Spilopelia chinensis</i> | Eastern Spotted Dove | 2021/4/14  | 1 | 0 | 22.46103833 | 114.03302500 | <a href="https://www.inaturalist.org/observations/74109427">https://www.inaturalist.org/observations/74109427</a>   |
| 4461 | <i>Spilopelia chinensis</i> | Eastern Spotted Dove | 2019/4/24  | 1 | 0 | 22.46119783 | 113.99466610 | <a href="https://www.inaturalist.org/observations/23032362">https://www.inaturalist.org/observations/23032362</a>   |

|      |                             |                      |            |   |   |             |              |                                                                                                                     |
|------|-----------------------------|----------------------|------------|---|---|-------------|--------------|---------------------------------------------------------------------------------------------------------------------|
| 4462 | <i>Spilopelia chinensis</i> | Eastern Spotted Dove | 2018/4/28  | 4 | 0 | 22.46140000 | 114.00768330 | <a href="https://www.inaturalist.org/observations/11629692">https://www.inaturalist.org/observations/11629692</a>   |
| 4463 | <i>Spilopelia chinensis</i> | Eastern Spotted Dove | 2021/5/2   | 2 | 0 | 22.46140234 | 114.00008470 | <a href="https://www.inaturalist.org/observations/76435060">https://www.inaturalist.org/observations/76435060</a>   |
| 4464 | <i>Spilopelia chinensis</i> | Eastern Spotted Dove | 2019/4/28  | 2 | 0 | 22.46151333 | 114.00748610 | <a href="https://www.inaturalist.org/observations/23672380">https://www.inaturalist.org/observations/23672380</a>   |
| 4465 | <i>Spilopelia chinensis</i> | Eastern Spotted Dove | 2021/2/16  | 1 | 0 | 22.46179360 | 114.03151410 | <a href="https://www.inaturalist.org/observations/69659975">https://www.inaturalist.org/observations/69659975</a>   |
| 4466 | <i>Spilopelia chinensis</i> | Eastern Spotted Dove | 2021/10/31 | 1 | 0 | 22.46187167 | 114.00556110 | <a href="https://www.inaturalist.org/observations/99840138">https://www.inaturalist.org/observations/99840138</a>   |
| 4467 | <i>Spilopelia chinensis</i> | Eastern Spotted Dove | 2020/4/26  | 2 | 0 | 22.46192440 | 114.00758370 | <a href="https://www.inaturalist.org/observations/43547656">https://www.inaturalist.org/observations/43547656</a>   |
| 4468 | <i>Spilopelia chinensis</i> | Eastern Spotted Dove | 2022/7/28  | 1 | 0 | 22.46193667 | 114.00762220 | <a href="https://www.inaturalist.org/observations/128225550">https://www.inaturalist.org/observations/128225550</a> |
| 4469 | <i>Spilopelia chinensis</i> | Eastern Spotted Dove | 2021/11/14 | 1 | 0 | 22.46205333 | 114.00454720 | <a href="https://www.inaturalist.org/observations/101059778">https://www.inaturalist.org/observations/101059778</a> |
| 4470 | <i>Spilopelia chinensis</i> | Eastern Spotted Dove | 2021/1/10  | 1 | 0 | 22.46224250 | 114.03839420 | <a href="https://www.inaturalist.org/observations/67905634">https://www.inaturalist.org/observations/67905634</a>   |
| 4471 | <i>Spilopelia chinensis</i> | Eastern Spotted Dove | 2021/7/1   | 1 | 0 | 22.46224300 | 114.03839400 | <a href="https://www.inaturalist.org/observations/85407337">https://www.inaturalist.org/observations/85407337</a>   |
| 4472 | <i>Spilopelia chinensis</i> | Eastern Spotted Dove | 2021/10/23 | 1 | 0 | 22.46224300 | 114.03839400 | <a href="https://www.inaturalist.org/observations/99207459">https://www.inaturalist.org/observations/99207459</a>   |
| 4473 | <i>Spilopelia chinensis</i> | Eastern Spotted Dove | 2021/11/7  | 1 | 0 | 22.46224300 | 114.03839400 | <a href="https://www.inaturalist.org/observations/101093987">https://www.inaturalist.org/observations/101093987</a> |
| 4474 | <i>Spilopelia chinensis</i> | Eastern Spotted Dove | 2020/4/27  | 2 | 0 | 22.46225812 | 114.03838630 | <a href="https://www.inaturalist.org/observations/43883491">https://www.inaturalist.org/observations/43883491</a>   |
| 4475 | <i>Spilopelia chinensis</i> | Eastern Spotted Dove | 2022/3/11  | 2 | 0 | 22.46227000 | 114.00377780 | <a href="https://www.inaturalist.org/observations/108355660">https://www.inaturalist.org/observations/108355660</a> |
| 4476 | <i>Spilopelia chinensis</i> | Eastern Spotted Dove | 2018/5/19  | 3 | 0 | 22.46263856 | 114.00217400 | <a href="https://www.inaturalist.org/observations/12605134">https://www.inaturalist.org/observations/12605134</a>   |
| 4477 | <i>Spilopelia chinensis</i> | Eastern Spotted Dove | 2022/4/3   | 1 | 0 | 22.46315868 | 114.02182660 | <a href="https://www.inaturalist.org/observations/110386668">https://www.inaturalist.org/observations/110386668</a> |
| 4478 | <i>Spilopelia chinensis</i> | Eastern Spotted Dove | 2022/8/8   | 1 | 0 | 22.46318667 | 114.00601110 | <a href="https://www.inaturalist.org/observations/129923907">https://www.inaturalist.org/observations/129923907</a> |
| 4479 | <i>Spilopelia chinensis</i> | Eastern Spotted Dove | 2018/4/29  | 3 | 0 | 22.46330833 | 113.99500330 | <a href="https://www.inaturalist.org/observations/11743026">https://www.inaturalist.org/observations/11743026</a>   |
| 4480 | <i>Spilopelia chinensis</i> | Eastern Spotted Dove | 2018/12/13 | 4 | 0 | 22.46344667 | 114.00162330 | <a href="https://www.inaturalist.org/observations/19008545">https://www.inaturalist.org/observations/19008545</a>   |
| 4481 | <i>Spilopelia chinensis</i> | Eastern Spotted Dove | 2018/4/29  | 2 | 0 | 22.46365333 | 113.99517830 | <a href="https://www.inaturalist.org/observations/11743309">https://www.inaturalist.org/observations/11743309</a>   |
| 4482 | <i>Spilopelia chinensis</i> | Eastern Spotted Dove | 2018/4/28  | 4 | 0 | 22.46370000 | 113.99546170 | <a href="https://www.inaturalist.org/observations/11580728">https://www.inaturalist.org/observations/11580728</a>   |
| 4483 | <i>Spilopelia chinensis</i> | Eastern Spotted Dove | 2021/4/30  | 1 | 0 | 22.46383333 | 113.99437670 | <a href="https://www.inaturalist.org/observations/76086377">https://www.inaturalist.org/observations/76086377</a>   |
| 4484 | <i>Spilopelia chinensis</i> | Eastern Spotted Dove | 2022/4/29  | 1 | 0 | 22.46397833 | 113.99443830 | <a href="https://www.inaturalist.org/observations/114202297">https://www.inaturalist.org/observations/114202297</a> |

|      |                             |                      |            |   |   |             |              |                                                                                                                     |
|------|-----------------------------|----------------------|------------|---|---|-------------|--------------|---------------------------------------------------------------------------------------------------------------------|
| 4485 | <i>Spilopelia chinensis</i> | Eastern Spotted Dove | 2018/4/28  | 1 | 0 | 22.46420016 | 113.99444900 | <a href="https://www.inaturalist.org/observations/11592794">https://www.inaturalist.org/observations/11592794</a>   |
| 4486 | <i>Spilopelia chinensis</i> | Eastern Spotted Dove | 2020/4/15  | 3 | 0 | 22.46421333 | 114.01812500 | <a href="https://www.inaturalist.org/observations/42664182">https://www.inaturalist.org/observations/42664182</a>   |
| 4487 | <i>Spilopelia chinensis</i> | Eastern Spotted Dove | 2020/4/27  | 1 | 0 | 22.46463168 | 114.03851930 | <a href="https://www.inaturalist.org/observations/44120446">https://www.inaturalist.org/observations/44120446</a>   |
| 4488 | <i>Spilopelia chinensis</i> | Eastern Spotted Dove | 2020/12/12 | 2 | 0 | 22.46465833 | 113.99796330 | <a href="https://www.inaturalist.org/observations/66694149">https://www.inaturalist.org/observations/66694149</a>   |
| 4489 | <i>Spilopelia chinensis</i> | Eastern Spotted Dove | 2021/1/17  | 2 | 0 | 22.46496833 | 114.03908670 | <a href="https://www.inaturalist.org/observations/97131106">https://www.inaturalist.org/observations/97131106</a>   |
| 4490 | <i>Spilopelia chinensis</i> | Eastern Spotted Dove | 2022/1/10  | 1 | 0 | 22.46542973 | 114.32637210 | <a href="https://www.inaturalist.org/observations/104704787">https://www.inaturalist.org/observations/104704787</a> |
| 4491 | <i>Spilopelia chinensis</i> | Eastern Spotted Dove | 2022/4/29  | 1 | 0 | 22.46553333 | 114.15556380 | <a href="https://www.inaturalist.org/observations/113314399">https://www.inaturalist.org/observations/113314399</a> |
| 4492 | <i>Spilopelia chinensis</i> | Eastern Spotted Dove | 2018/4/28  | 3 | 0 | 22.46557500 | 113.99595000 | <a href="https://www.inaturalist.org/observations/11585298">https://www.inaturalist.org/observations/11585298</a>   |
| 4493 | <i>Spilopelia chinensis</i> | Eastern Spotted Dove | 2020/5/17  | 1 | 0 | 22.46603191 | 114.00154150 | <a href="https://www.inaturalist.org/observations/46224221">https://www.inaturalist.org/observations/46224221</a>   |
| 4494 | <i>Spilopelia chinensis</i> | Eastern Spotted Dove | 2019/4/28  | 2 | 0 | 22.46621800 | 114.18005500 | <a href="https://www.inaturalist.org/observations/23578596">https://www.inaturalist.org/observations/23578596</a>   |
| 4495 | <i>Spilopelia chinensis</i> | Eastern Spotted Dove | 2010/2/16  | 1 | 0 | 22.46631900 | 114.02959700 | <a href="https://www.inaturalist.org/observations/137116605">https://www.inaturalist.org/observations/137116605</a> |
| 4496 | <i>Spilopelia chinensis</i> | Eastern Spotted Dove | 2022/8/22  | 2 | 0 | 22.46689689 | 114.17962830 | <a href="https://www.inaturalist.org/observations/131851606">https://www.inaturalist.org/observations/131851606</a> |
| 4497 | <i>Spilopelia chinensis</i> | Eastern Spotted Dove | 2022/8/22  | 1 | 0 | 22.46689694 | 114.17962830 | <a href="https://www.inaturalist.org/observations/131851034">https://www.inaturalist.org/observations/131851034</a> |
| 4498 | <i>Spilopelia chinensis</i> | Eastern Spotted Dove | 2022/5/2   | 2 | 0 | 22.46707128 | 114.19537080 | <a href="https://www.inaturalist.org/observations/116045403">https://www.inaturalist.org/observations/116045403</a> |
| 4499 | <i>Spilopelia chinensis</i> | Eastern Spotted Dove | 2022/7/22  | 2 | 0 | 22.46709372 | 114.00184530 | <a href="https://www.inaturalist.org/observations/127362341">https://www.inaturalist.org/observations/127362341</a> |
| 4500 | <i>Spilopelia chinensis</i> | Eastern Spotted Dove | 2021/10/31 | 1 | 0 | 22.46713560 | 114.17949120 | <a href="https://www.inaturalist.org/observations/99857696">https://www.inaturalist.org/observations/99857696</a>   |
| 4501 | <i>Spilopelia chinensis</i> | Eastern Spotted Dove | 2021/12/25 | 1 | 0 | 22.46713560 | 114.17949120 | <a href="https://www.inaturalist.org/observations/103624005">https://www.inaturalist.org/observations/103624005</a> |
| 4502 | <i>Spilopelia chinensis</i> | Eastern Spotted Dove | 2021/3/27  | 1 | 0 | 22.46724240 | 114.18088770 | <a href="https://www.inaturalist.org/observations/72249239">https://www.inaturalist.org/observations/72249239</a>   |
| 4503 | <i>Spilopelia chinensis</i> | Eastern Spotted Dove | 2020/5/13  | 2 | 0 | 22.46728455 | 113.99757920 | <a href="https://www.inaturalist.org/observations/45828345">https://www.inaturalist.org/observations/45828345</a>   |
| 4504 | <i>Spilopelia chinensis</i> | Eastern Spotted Dove | 2020/5/13  | 2 | 0 | 22.46728455 | 113.99757920 | <a href="https://www.inaturalist.org/observations/45828445">https://www.inaturalist.org/observations/45828445</a>   |
| 4505 | <i>Spilopelia chinensis</i> | Eastern Spotted Dove | 2018/12/21 | 2 | 0 | 22.46767318 | 114.00181970 | <a href="https://www.inaturalist.org/observations/19130222">https://www.inaturalist.org/observations/19130222</a>   |
| 4506 | <i>Spilopelia chinensis</i> | Eastern Spotted Dove | 2021/11/21 | 1 | 0 | 22.46770236 | 114.00958960 | <a href="https://www.inaturalist.org/observations/101760436">https://www.inaturalist.org/observations/101760436</a> |
| 4507 | <i>Spilopelia chinensis</i> | Eastern Spotted Dove | 2021/8/21  | 2 | 0 | 22.46829400 | 114.00447600 | <a href="https://www.inaturalist.org/observations/92553768">https://www.inaturalist.org/observations/92553768</a>   |



|      |                             |                      |            |   |   |             |              |                                                                                                                     |
|------|-----------------------------|----------------------|------------|---|---|-------------|--------------|---------------------------------------------------------------------------------------------------------------------|
| 4508 | <i>Spilopelia chinensis</i> | Eastern Spotted Dove | 2018/6/24  | 5 | 0 | 22.46831333 | 114.00363330 | <a href="https://www.inaturalist.org/observations/13732800">https://www.inaturalist.org/observations/13732800</a>   |
| 4509 | <i>Spilopelia chinensis</i> | Eastern Spotted Dove | 2022/6/18  | 1 | 0 | 22.46868342 | 113.99737370 | <a href="https://www.inaturalist.org/observations/123031470">https://www.inaturalist.org/observations/123031470</a> |
| 4510 | <i>Spilopelia chinensis</i> | Eastern Spotted Dove | 2019/1/11  | 0 | 0 | 22.46878944 | 114.00744140 | <a href="https://www.inaturalist.org/observations/39202537">https://www.inaturalist.org/observations/39202537</a>   |
| 4511 | <i>Spilopelia chinensis</i> | Eastern Spotted Dove | 2019/1/11  | 1 | 0 | 22.46878944 | 114.00744140 | <a href="https://www.inaturalist.org/observations/39202563">https://www.inaturalist.org/observations/39202563</a>   |
| 4512 | <i>Spilopelia chinensis</i> | Eastern Spotted Dove | 2019/5/1   | 4 | 0 | 22.46900286 | 114.19509270 | <a href="https://www.inaturalist.org/observations/24267952">https://www.inaturalist.org/observations/24267952</a>   |
| 4513 | <i>Spilopelia chinensis</i> | Eastern Spotted Dove | 2020/12/12 | 1 | 0 | 22.46912603 | 114.00894250 | <a href="https://www.inaturalist.org/observations/66464106">https://www.inaturalist.org/observations/66464106</a>   |
| 4514 | <i>Spilopelia chinensis</i> | Eastern Spotted Dove | 2019/11/20 | 1 | 0 | 22.46943288 | 81.78125057  | <a href="https://www.inaturalist.org/observations/77565768">https://www.inaturalist.org/observations/77565768</a>   |
| 4515 | <i>Spilopelia chinensis</i> | Eastern Spotted Dove | 2020/6/3   | 1 | 0 | 22.46950330 | 114.00731270 | <a href="https://www.inaturalist.org/observations/53844801">https://www.inaturalist.org/observations/53844801</a>   |
| 4516 | <i>Spilopelia chinensis</i> | Eastern Spotted Dove | 2021/7/11  | 1 | 0 | 22.46958800 | 114.00953450 | <a href="https://www.inaturalist.org/observations/86591347">https://www.inaturalist.org/observations/86591347</a>   |
| 4517 | <i>Spilopelia chinensis</i> | Eastern Spotted Dove | 2021/7/25  | 1 | 0 | 22.46962955 | 114.00948650 | <a href="https://www.inaturalist.org/observations/88510717">https://www.inaturalist.org/observations/88510717</a>   |
| 4518 | <i>Spilopelia chinensis</i> | Eastern Spotted Dove | 2021/11/21 | 2 | 0 | 22.46977556 | 114.00504500 | <a href="https://www.inaturalist.org/observations/101594298">https://www.inaturalist.org/observations/101594298</a> |
| 4519 | <i>Spilopelia chinensis</i> | Eastern Spotted Dove | 2022/7/21  | 1 | 0 | 22.46982694 | 114.00891780 | <a href="https://www.inaturalist.org/observations/127198112">https://www.inaturalist.org/observations/127198112</a> |
| 4520 | <i>Spilopelia chinensis</i> | Eastern Spotted Dove | 2020/5/1   | 1 | 0 | 22.47005841 | 114.00658310 | <a href="https://www.inaturalist.org/observations/44480635">https://www.inaturalist.org/observations/44480635</a>   |
| 4521 | <i>Spilopelia chinensis</i> | Eastern Spotted Dove | 2020/5/1   | 1 | 0 | 22.47005841 | 114.00658310 | <a href="https://www.inaturalist.org/observations/44488767">https://www.inaturalist.org/observations/44488767</a>   |
| 4522 | <i>Spilopelia chinensis</i> | Eastern Spotted Dove | 2021/11/21 | 1 | 0 | 22.47029357 | 114.00606440 | <a href="https://www.inaturalist.org/observations/101587140">https://www.inaturalist.org/observations/101587140</a> |
| 4523 | <i>Spilopelia chinensis</i> | Eastern Spotted Dove | 2021/3/14  | 1 | 0 | 22.47043489 | 114.00878080 | <a href="https://www.inaturalist.org/observations/71185645">https://www.inaturalist.org/observations/71185645</a>   |
| 4524 | <i>Spilopelia chinensis</i> | Eastern Spotted Dove | 2020/3/9   | 0 | 0 | 22.47043604 | 114.19559060 | <a href="https://www.inaturalist.org/observations/39734277">https://www.inaturalist.org/observations/39734277</a>   |
| 4525 | <i>Spilopelia chinensis</i> | Eastern Spotted Dove | 2020/3/13  | 1 | 0 | 22.47047552 | 114.19559600 | <a href="https://www.inaturalist.org/observations/39914272">https://www.inaturalist.org/observations/39914272</a>   |
| 4526 | <i>Spilopelia chinensis</i> | Eastern Spotted Dove | 2021/11/21 | 1 | 0 | 22.47049589 | 114.00628350 | <a href="https://www.inaturalist.org/observations/101587111">https://www.inaturalist.org/observations/101587111</a> |
| 4527 | <i>Spilopelia chinensis</i> | Eastern Spotted Dove | 2019/8/11  | 3 | 0 | 22.47057060 | 114.23356650 | <a href="https://www.inaturalist.org/observations/30611509">https://www.inaturalist.org/observations/30611509</a>   |
| 4528 | <i>Spilopelia chinensis</i> | Eastern Spotted Dove | 2018/9/1   | 3 | 0 | 22.47081300 | 114.01132200 | <a href="https://www.inaturalist.org/observations/16568070">https://www.inaturalist.org/observations/16568070</a>   |
| 4529 | <i>Spilopelia chinensis</i> | Eastern Spotted Dove | 2021/5/1   | 2 | 0 | 22.47097000 | 114.04270500 | <a href="https://www.inaturalist.org/observations/77910596">https://www.inaturalist.org/observations/77910596</a>   |
| 4530 | <i>Spilopelia chinensis</i> | Eastern Spotted Dove | 2021/11/22 | 1 | 0 | 22.47097000 | 114.04270500 | <a href="https://www.inaturalist.org/observations/101698977">https://www.inaturalist.org/observations/101698977</a> |

|      |                             |                      |            |   |   |             |              |                                                                                                                     |
|------|-----------------------------|----------------------|------------|---|---|-------------|--------------|---------------------------------------------------------------------------------------------------------------------|
| 4531 | <i>Spilopelia chinensis</i> | Eastern Spotted Dove | 2021/12/28 | 1 | 0 | 22.47097000 | 114.04270500 | <a href="https://www.inaturalist.org/observations/103809797">https://www.inaturalist.org/observations/103809797</a> |
| 4532 | <i>Spilopelia chinensis</i> | Eastern Spotted Dove | 2020/1/11  | 1 | 0 | 22.47097000 | 114.04270500 | <a href="https://www.inaturalist.org/observations/114508643">https://www.inaturalist.org/observations/114508643</a> |
| 4533 | <i>Spilopelia chinensis</i> | Eastern Spotted Dove | 2020/1/10  | 2 | 0 | 22.47097870 | 114.00036120 | <a href="https://www.inaturalist.org/observations/37455511">https://www.inaturalist.org/observations/37455511</a>   |
| 4534 | <i>Spilopelia chinensis</i> | Eastern Spotted Dove | 2021/7/4   | 1 | 0 | 22.47103667 | 114.00638610 | <a href="https://www.inaturalist.org/observations/85875995">https://www.inaturalist.org/observations/85875995</a>   |
| 4535 | <i>Spilopelia chinensis</i> | Eastern Spotted Dove | 2020/5/3   | 1 | 0 | 22.47110437 | 114.01758040 | <a href="https://www.inaturalist.org/observations/44775771">https://www.inaturalist.org/observations/44775771</a>   |
| 4536 | <i>Spilopelia chinensis</i> | Eastern Spotted Dove | 2021/11/21 | 1 | 0 | 22.47130000 | 114.00634720 | <a href="https://www.inaturalist.org/observations/101597259">https://www.inaturalist.org/observations/101597259</a> |
| 4537 | <i>Spilopelia chinensis</i> | Eastern Spotted Dove | 2021/11/21 | 1 | 0 | 22.47138441 | 114.00618300 | <a href="https://www.inaturalist.org/observations/101597232">https://www.inaturalist.org/observations/101597232</a> |
| 4538 | <i>Spilopelia chinensis</i> | Eastern Spotted Dove | 2021/11/21 | 1 | 0 | 22.47138956 | 114.00623230 | <a href="https://www.inaturalist.org/observations/101597227">https://www.inaturalist.org/observations/101597227</a> |
| 4539 | <i>Spilopelia chinensis</i> | Eastern Spotted Dove | 2021/7/3   | 2 | 0 | 22.47153470 | 114.22771890 | <a href="https://www.inaturalist.org/observations/85892914">https://www.inaturalist.org/observations/85892914</a>   |
| 4540 | <i>Spilopelia chinensis</i> | Eastern Spotted Dove | 2022/2/15  | 1 | 0 | 22.47186700 | 114.03207400 | <a href="https://www.inaturalist.org/observations/107541060">https://www.inaturalist.org/observations/107541060</a> |
| 4541 | <i>Spilopelia chinensis</i> | Eastern Spotted Dove | 2021/11/3  | 1 | 0 | 22.47210487 | 114.00534380 | <a href="https://www.inaturalist.org/observations/100416242">https://www.inaturalist.org/observations/100416242</a> |
| 4542 | <i>Spilopelia chinensis</i> | Eastern Spotted Dove | 2017/10/30 | 1 | 0 | 22.47212500 | 114.00691110 | <a href="https://www.inaturalist.org/observations/8652479">https://www.inaturalist.org/observations/8652479</a>     |
| 4543 | <i>Spilopelia chinensis</i> | Eastern Spotted Dove | 2021/1/26  | 3 | 0 | 22.47218619 | 88.32627118  | <a href="https://www.inaturalist.org/observations/68690028">https://www.inaturalist.org/observations/68690028</a>   |
| 4544 | <i>Spilopelia chinensis</i> | Eastern Spotted Dove | 2019/2/1   | 1 | 0 | 22.47238825 | 114.00712950 | <a href="https://www.inaturalist.org/observations/106128367">https://www.inaturalist.org/observations/106128367</a> |
| 4545 | <i>Spilopelia chinensis</i> | Eastern Spotted Dove | 2020/5/1   | 1 | 0 | 22.47259281 | 114.03131140 | <a href="https://www.inaturalist.org/observations/44472593">https://www.inaturalist.org/observations/44472593</a>   |
| 4546 | <i>Spilopelia chinensis</i> | Eastern Spotted Dove | 2021/11/24 | 1 | 0 | 22.47282500 | 114.19869170 | <a href="https://www.inaturalist.org/observations/101913781">https://www.inaturalist.org/observations/101913781</a> |
| 4547 | <i>Spilopelia chinensis</i> | Eastern Spotted Dove | 2022/4/8   | 1 | 0 | 22.47296400 | 114.04170000 | <a href="https://www.inaturalist.org/observations/111071811">https://www.inaturalist.org/observations/111071811</a> |
| 4548 | <i>Spilopelia chinensis</i> | Eastern Spotted Dove | 2021/3/21  | 1 | 0 | 22.47341848 | 114.04292000 | <a href="https://www.inaturalist.org/observations/71688216">https://www.inaturalist.org/observations/71688216</a>   |
| 4549 | <i>Spilopelia chinensis</i> | Eastern Spotted Dove | 2020/11/21 | 3 | 0 | 22.47353862 | 88.31306274  | <a href="https://www.inaturalist.org/observations/65335551">https://www.inaturalist.org/observations/65335551</a>   |
| 4550 | <i>Spilopelia chinensis</i> | Eastern Spotted Dove | 2020/11/21 | 3 | 0 | 22.47355101 | 88.31273014  | <a href="https://www.inaturalist.org/observations/65335547">https://www.inaturalist.org/observations/65335547</a>   |
| 4551 | <i>Spilopelia chinensis</i> | Eastern Spotted Dove | 2021/1/29  | 2 | 0 | 22.47355349 | 88.31300373  | <a href="https://www.inaturalist.org/observations/68810836">https://www.inaturalist.org/observations/68810836</a>   |
| 4552 | <i>Spilopelia chinensis</i> | Eastern Spotted Dove | 2020/5/4   | 2 | 0 | 22.47358321 | 88.31299212  | <a href="https://www.inaturalist.org/observations/131612746">https://www.inaturalist.org/observations/131612746</a> |
| 4553 | <i>Spilopelia chinensis</i> | Eastern Spotted Dove | 2020/5/14  | 4 | 0 | 22.47359188 | 88.31299748  | <a href="https://www.inaturalist.org/observations/132000748">https://www.inaturalist.org/observations/132000748</a> |

|      |                             |                      |            |   |   |             |             |                                                                                                                     |
|------|-----------------------------|----------------------|------------|---|---|-------------|-------------|---------------------------------------------------------------------------------------------------------------------|
| 4554 | <i>Spilopelia chinensis</i> | Eastern Spotted Dove | 2021/2/6   | 1 | 0 | 22.47359226 | 88.31289440 | <a href="https://www.inaturalist.org/observations/73374953">https://www.inaturalist.org/observations/73374953</a>   |
| 4555 | <i>Spilopelia chinensis</i> | Eastern Spotted Dove | 2021/6/27  | 2 | 0 | 22.47360675 | 88.31287913 | <a href="https://www.inaturalist.org/observations/84671922">https://www.inaturalist.org/observations/84671922</a>   |
| 4556 | <i>Spilopelia chinensis</i> | Eastern Spotted Dove | 2020/7/28  | 3 | 0 | 22.47360861 | 88.31287779 | <a href="https://www.inaturalist.org/observations/54604299">https://www.inaturalist.org/observations/54604299</a>   |
| 4557 | <i>Spilopelia chinensis</i> | Eastern Spotted Dove | 2021/7/4   | 2 | 0 | 22.47361580 | 88.31287965 | <a href="https://www.inaturalist.org/observations/85749220">https://www.inaturalist.org/observations/85749220</a>   |
| 4558 | <i>Spilopelia chinensis</i> | Eastern Spotted Dove | 2021/10/10 | 2 | 0 | 22.47361946 | 88.31287846 | <a href="https://www.inaturalist.org/observations/100676995">https://www.inaturalist.org/observations/100676995</a> |
| 4559 | <i>Spilopelia chinensis</i> | Eastern Spotted Dove | 2020/11/6  | 4 | 0 | 22.47363776 | 88.31293936 | <a href="https://www.inaturalist.org/observations/64299456">https://www.inaturalist.org/observations/64299456</a>   |
| 4560 | <i>Spilopelia chinensis</i> | Eastern Spotted Dove | 2020/11/11 | 3 | 0 | 22.47363776 | 88.31293936 | <a href="https://www.inaturalist.org/observations/64677968">https://www.inaturalist.org/observations/64677968</a>   |
| 4561 | <i>Spilopelia chinensis</i> | Eastern Spotted Dove | 2020/11/11 | 3 | 0 | 22.47363776 | 88.31293936 | <a href="https://www.inaturalist.org/observations/64677970">https://www.inaturalist.org/observations/64677970</a>   |
| 4562 | <i>Spilopelia chinensis</i> | Eastern Spotted Dove | 2020/11/11 | 3 | 0 | 22.47363776 | 88.31293936 | <a href="https://www.inaturalist.org/observations/64678386">https://www.inaturalist.org/observations/64678386</a>   |
| 4563 | <i>Spilopelia chinensis</i> | Eastern Spotted Dove | 2020/11/22 | 3 | 0 | 22.47363776 | 88.31296081 | <a href="https://www.inaturalist.org/observations/65416545">https://www.inaturalist.org/observations/65416545</a>   |
| 4564 | <i>Spilopelia chinensis</i> | Eastern Spotted Dove | 2020/4/19  | 6 | 0 | 22.47364269 | 88.31295054 | <a href="https://www.inaturalist.org/observations/131083068">https://www.inaturalist.org/observations/131083068</a> |
| 4565 | <i>Spilopelia chinensis</i> | Eastern Spotted Dove | 2021/5/11  | 3 | 0 | 22.47365756 | 88.31296664 | <a href="https://www.inaturalist.org/observations/83232016">https://www.inaturalist.org/observations/83232016</a>   |
| 4566 | <i>Spilopelia chinensis</i> | Eastern Spotted Dove | 2020/11/13 | 4 | 0 | 22.47370567 | 88.31307044 | <a href="https://www.inaturalist.org/observations/64946601">https://www.inaturalist.org/observations/64946601</a>   |
| 4567 | <i>Spilopelia chinensis</i> | Eastern Spotted Dove | 2020/12/1  | 4 | 0 | 22.47370592 | 88.31308822 | <a href="https://www.inaturalist.org/observations/65939195">https://www.inaturalist.org/observations/65939195</a>   |
| 4568 | <i>Spilopelia chinensis</i> | Eastern Spotted Dove | 2020/12/5  | 4 | 0 | 22.47371583 | 88.31308554 | <a href="https://www.inaturalist.org/observations/66137472">https://www.inaturalist.org/observations/66137472</a>   |
| 4569 | <i>Spilopelia chinensis</i> | Eastern Spotted Dove | 2020/3/15  | 3 | 0 | 22.47375175 | 88.31310745 | <a href="https://www.inaturalist.org/observations/130817738">https://www.inaturalist.org/observations/130817738</a> |
| 4570 | <i>Spilopelia chinensis</i> | Eastern Spotted Dove | 2020/11/28 | 3 | 0 | 22.47376044 | 88.31290717 | <a href="https://www.inaturalist.org/observations/65756976">https://www.inaturalist.org/observations/65756976</a>   |
| 4571 | <i>Spilopelia chinensis</i> | Eastern Spotted Dove | 2020/12/2  | 3 | 0 | 22.47376788 | 88.31290717 | <a href="https://www.inaturalist.org/observations/65994686">https://www.inaturalist.org/observations/65994686</a>   |
| 4572 | <i>Spilopelia chinensis</i> | Eastern Spotted Dove | 2020/3/29  | 3 | 0 | 22.47377071 | 88.31314250 | <a href="https://www.inaturalist.org/observations/65072920">https://www.inaturalist.org/observations/65072920</a>   |
| 4573 | <i>Spilopelia chinensis</i> | Eastern Spotted Dove | 2020/11/28 | 3 | 0 | 22.47377178 | 88.31291791 | <a href="https://www.inaturalist.org/observations/65759810">https://www.inaturalist.org/observations/65759810</a>   |
| 4574 | <i>Spilopelia chinensis</i> | Eastern Spotted Dove | 2020/3/15  | 2 | 0 | 22.47377195 | 88.31314385 | <a href="https://www.inaturalist.org/observations/64964476">https://www.inaturalist.org/observations/64964476</a>   |
| 4575 | <i>Spilopelia chinensis</i> | Eastern Spotted Dove | 2020/10/10 | 3 | 0 | 22.47377779 | 88.31315393 | <a href="https://www.inaturalist.org/observations/62322083">https://www.inaturalist.org/observations/62322083</a>   |
| 4576 | <i>Spilopelia chinensis</i> | Eastern Spotted Dove | 2020/12/5  | 4 | 0 | 22.47377903 | 88.31291522 | <a href="https://www.inaturalist.org/observations/66140819">https://www.inaturalist.org/observations/66140819</a>   |

|      |                             |                      |            |   |   |             |              |                                                                                                                     |
|------|-----------------------------|----------------------|------------|---|---|-------------|--------------|---------------------------------------------------------------------------------------------------------------------|
| 4577 | <i>Spilopelia chinensis</i> | Eastern Spotted Dove | 2020/11/28 | 2 | 0 | 22.47378647 | 88.31290717  | <a href="https://www.inaturalist.org/observations/65752799">https://www.inaturalist.org/observations/65752799</a>   |
| 4578 | <i>Spilopelia chinensis</i> | Eastern Spotted Dove | 2022/4/29  | 1 | 0 | 22.47411926 | 114.03702800 | <a href="https://www.inaturalist.org/observations/113723853">https://www.inaturalist.org/observations/113723853</a> |
| 4579 | <i>Spilopelia chinensis</i> | Eastern Spotted Dove | 2022/6/26  | 3 | 0 | 22.47432833 | 73.52211000  | <a href="https://www.inaturalist.org/observations/125051031">https://www.inaturalist.org/observations/125051031</a> |
| 4580 | <i>Spilopelia chinensis</i> | Eastern Spotted Dove | 2021/3/2   | 1 | 0 | 22.47652500 | 114.03462500 | <a href="https://www.inaturalist.org/observations/70544749">https://www.inaturalist.org/observations/70544749</a>   |
| 4581 | <i>Spilopelia chinensis</i> | Eastern Spotted Dove | 2022/6/5   | 1 | 0 | 22.48008333 | 73.52295500  | <a href="https://www.inaturalist.org/observations/120643921">https://www.inaturalist.org/observations/120643921</a> |
| 4582 | <i>Spilopelia chinensis</i> | Eastern Spotted Dove | 2022/1/23  | 3 | 0 | 22.48090500 | 73.52135833  | <a href="https://www.inaturalist.org/observations/120517064">https://www.inaturalist.org/observations/120517064</a> |
| 4583 | <i>Spilopelia chinensis</i> | Eastern Spotted Dove | 2021/3/5   | 1 | 0 | 22.48155132 | 113.90879810 | <a href="https://www.inaturalist.org/observations/77417750">https://www.inaturalist.org/observations/77417750</a>   |
| 4584 | <i>Spilopelia chinensis</i> | Eastern Spotted Dove | 2021/3/5   | 1 | 0 | 22.48155132 | 113.90879810 | <a href="https://www.inaturalist.org/observations/77417753">https://www.inaturalist.org/observations/77417753</a>   |
| 4585 | <i>Spilopelia chinensis</i> | Eastern Spotted Dove | 2020/12/31 | 1 | 0 | 22.48401042 | 113.90838730 | <a href="https://www.inaturalist.org/observations/67355880">https://www.inaturalist.org/observations/67355880</a>   |
| 4586 | <i>Spilopelia chinensis</i> | Eastern Spotted Dove | 2020/12/29 | 1 | 0 | 22.48413899 | 113.90969900 | <a href="https://www.inaturalist.org/observations/68137711">https://www.inaturalist.org/observations/68137711</a>   |
| 4587 | <i>Spilopelia chinensis</i> | Eastern Spotted Dove | 2021/10/30 | 1 | 0 | 22.48548000 | 113.89610330 | <a href="https://www.inaturalist.org/observations/101294675">https://www.inaturalist.org/observations/101294675</a> |
| 4588 | <i>Spilopelia chinensis</i> | Eastern Spotted Dove | 2020/2/7   | 1 | 0 | 22.48548667 | 113.89553830 | <a href="https://www.inaturalist.org/observations/42817399">https://www.inaturalist.org/observations/42817399</a>   |
| 4589 | <i>Spilopelia chinensis</i> | Eastern Spotted Dove | 2020/5/8   | 2 | 0 | 22.48594892 | 114.30657240 | <a href="https://www.inaturalist.org/observations/45243747">https://www.inaturalist.org/observations/45243747</a>   |
| 4590 | <i>Spilopelia chinensis</i> | Eastern Spotted Dove | 2022/4/17  | 1 | 0 | 22.48597890 | 114.01137580 | <a href="https://www.inaturalist.org/observations/111772741">https://www.inaturalist.org/observations/111772741</a> |
| 4591 | <i>Spilopelia chinensis</i> | Eastern Spotted Dove | 2022/5/2   | 1 | 0 | 22.48597890 | 114.01137580 | <a href="https://www.inaturalist.org/observations/114604802">https://www.inaturalist.org/observations/114604802</a> |
| 4592 | <i>Spilopelia chinensis</i> | Eastern Spotted Dove | 2022/2/5   | 2 | 0 | 22.48604361 | 114.00987940 | <a href="https://www.inaturalist.org/observations/106171678">https://www.inaturalist.org/observations/106171678</a> |
| 4593 | <i>Spilopelia chinensis</i> | Eastern Spotted Dove | 2022/1/15  | 1 | 0 | 22.48606167 | 114.00995190 | <a href="https://www.inaturalist.org/observations/104965765">https://www.inaturalist.org/observations/104965765</a> |
| 4594 | <i>Spilopelia chinensis</i> | Eastern Spotted Dove | 2019/10/25 | 3 | 0 | 22.48614436 | 113.90674140 | <a href="https://www.inaturalist.org/observations/34862968">https://www.inaturalist.org/observations/34862968</a>   |
| 4595 | <i>Spilopelia chinensis</i> | Eastern Spotted Dove | 2022/1/22  | 1 | 0 | 22.48618194 | 114.00861560 | <a href="https://www.inaturalist.org/observations/105499881">https://www.inaturalist.org/observations/105499881</a> |
| 4596 | <i>Spilopelia chinensis</i> | Eastern Spotted Dove | 2021/2/15  | 1 | 0 | 22.48635333 | 113.89362170 | <a href="https://www.inaturalist.org/observations/69969784">https://www.inaturalist.org/observations/69969784</a>   |
| 4597 | <i>Spilopelia chinensis</i> | Eastern Spotted Dove | 2022/1/10  | 1 | 0 | 22.48701800 | 114.04036800 | <a href="https://www.inaturalist.org/observations/104760058">https://www.inaturalist.org/observations/104760058</a> |
| 4598 | <i>Spilopelia chinensis</i> | Eastern Spotted Dove | 2022/2/23  | 1 | 0 | 22.48704567 | 114.00761050 | <a href="https://www.inaturalist.org/observations/107310959">https://www.inaturalist.org/observations/107310959</a> |
| 4599 | <i>Spilopelia chinensis</i> | Eastern Spotted Dove | 2013/12/15 | 1 | 0 | 22.48746712 | 114.04161160 | <a href="https://www.inaturalist.org/observations/51105622">https://www.inaturalist.org/observations/51105622</a>   |

|      |                             |                      |            |   |   |             |              |                                                                                                                     |
|------|-----------------------------|----------------------|------------|---|---|-------------|--------------|---------------------------------------------------------------------------------------------------------------------|
| 4600 | <i>Spilopelia chinensis</i> | Eastern Spotted Dove | 2013/3/4   | 1 | 0 | 22.48747400 | 114.04204800 | <a href="https://www.inaturalist.org/observations/55597072">https://www.inaturalist.org/observations/55597072</a>   |
| 4601 | <i>Spilopelia chinensis</i> | Eastern Spotted Dove | 2009/12/26 | 2 | 0 | 22.48776100 | 114.04283130 | <a href="https://www.inaturalist.org/observations/109440619">https://www.inaturalist.org/observations/109440619</a> |
| 4602 | <i>Spilopelia chinensis</i> | Eastern Spotted Dove | 2015/6/5   | 5 | 0 | 22.48776300 | 114.04197000 | <a href="https://www.inaturalist.org/observations/12816955">https://www.inaturalist.org/observations/12816955</a>   |
| 4603 | <i>Spilopelia chinensis</i> | Eastern Spotted Dove | 2012/1/29  | 2 | 0 | 22.48784200 | 114.04278100 | <a href="https://www.inaturalist.org/observations/28159997">https://www.inaturalist.org/observations/28159997</a>   |
| 4604 | <i>Spilopelia chinensis</i> | Eastern Spotted Dove | 2019/4/18  | 2 | 0 | 22.48846333 | 114.14112780 | <a href="https://www.inaturalist.org/observations/22649244">https://www.inaturalist.org/observations/22649244</a>   |
| 4605 | <i>Spilopelia chinensis</i> | Eastern Spotted Dove | 2022/1/23  | 2 | 0 | 22.48982890 | 114.04247070 | <a href="https://www.inaturalist.org/observations/105427986">https://www.inaturalist.org/observations/105427986</a> |
| 4606 | <i>Spilopelia chinensis</i> | Eastern Spotted Dove | 2019/3/6   | 2 | 0 | 22.49042736 | 88.26714135  | <a href="https://www.inaturalist.org/observations/62715397">https://www.inaturalist.org/observations/62715397</a>   |
| 4607 | <i>Spilopelia chinensis</i> | Eastern Spotted Dove | 2021/12/2  | 1 | 0 | 22.49082200 | 114.13761600 | <a href="https://www.inaturalist.org/observations/102396226">https://www.inaturalist.org/observations/102396226</a> |
| 4608 | <i>Spilopelia chinensis</i> | Eastern Spotted Dove | 2019/4/17  | 3 | 0 | 22.49085859 | 114.14053590 | <a href="https://www.inaturalist.org/observations/33244246">https://www.inaturalist.org/observations/33244246</a>   |
| 4609 | <i>Spilopelia chinensis</i> | Eastern Spotted Dove | 2018/4/27  | 3 | 0 | 22.49096787 | 114.14291500 | <a href="https://www.inaturalist.org/observations/11477116">https://www.inaturalist.org/observations/11477116</a>   |
| 4610 | <i>Spilopelia chinensis</i> | Eastern Spotted Dove | 2021/5/1   | 2 | 0 | 22.49147896 | 114.04421320 | <a href="https://www.inaturalist.org/observations/77576398">https://www.inaturalist.org/observations/77576398</a>   |
| 4611 | <i>Spilopelia chinensis</i> | Eastern Spotted Dove | 2018/4/30  | 3 | 0 | 22.49170211 | 114.04430330 | <a href="https://www.inaturalist.org/observations/11855424">https://www.inaturalist.org/observations/11855424</a>   |
| 4612 | <i>Spilopelia chinensis</i> | Eastern Spotted Dove | 2022/2/6   | 1 | 0 | 22.49205273 | 114.19314340 | <a href="https://www.inaturalist.org/observations/106355508">https://www.inaturalist.org/observations/106355508</a> |
| 4613 | <i>Spilopelia chinensis</i> | Eastern Spotted Dove | 2011/3/25  | 1 | 0 | 22.49236100 | 114.04478400 | <a href="https://www.inaturalist.org/observations/67988049">https://www.inaturalist.org/observations/67988049</a>   |
| 4614 | <i>Spilopelia chinensis</i> | Eastern Spotted Dove | 2022/4/15  | 1 | 0 | 22.49269617 | 114.03692540 | <a href="https://www.inaturalist.org/observations/111870011">https://www.inaturalist.org/observations/111870011</a> |
| 4615 | <i>Spilopelia chinensis</i> | Eastern Spotted Dove | 2018/8/4   | 3 | 0 | 22.49329784 | 114.10463620 | <a href="https://www.inaturalist.org/observations/15098939">https://www.inaturalist.org/observations/15098939</a>   |
| 4616 | <i>Spilopelia chinensis</i> | Eastern Spotted Dove | 2021/2/15  | 1 | 0 | 22.49347167 | 114.10482300 | <a href="https://www.inaturalist.org/observations/69651728">https://www.inaturalist.org/observations/69651728</a>   |
| 4617 | <i>Spilopelia chinensis</i> | Eastern Spotted Dove | 2009/6/21  | 1 | 0 | 22.49364900 | 114.04598600 | <a href="https://www.inaturalist.org/observations/36658733">https://www.inaturalist.org/observations/36658733</a>   |
| 4618 | <i>Spilopelia chinensis</i> | Eastern Spotted Dove | 2020/4/26  | 1 | 0 | 22.49386725 | 114.04037150 | <a href="https://www.inaturalist.org/observations/44143589">https://www.inaturalist.org/observations/44143589</a>   |
| 4619 | <i>Spilopelia chinensis</i> | Eastern Spotted Dove | 2021/5/1   | 1 | 0 | 22.49386725 | 114.04037150 | <a href="https://www.inaturalist.org/observations/76853080">https://www.inaturalist.org/observations/76853080</a>   |
| 4620 | <i>Spilopelia chinensis</i> | Eastern Spotted Dove | 2022/5/2   | 1 | 0 | 22.49386725 | 114.04037150 | <a href="https://www.inaturalist.org/observations/116034026">https://www.inaturalist.org/observations/116034026</a> |
| 4621 | <i>Spilopelia chinensis</i> | Eastern Spotted Dove | 2020/9/29  | 1 | 0 | 22.49421778 | 114.04602080 | <a href="https://www.inaturalist.org/observations/62711498">https://www.inaturalist.org/observations/62711498</a>   |
| 4622 | <i>Spilopelia chinensis</i> | Eastern Spotted Dove | 2010/11/10 | 1 | 0 | 22.49423400 | 114.04610700 | <a href="https://www.inaturalist.org/observations/135077514">https://www.inaturalist.org/observations/135077514</a> |

|      |                             |                      |            |   |   |             |              |                                                                                                                     |
|------|-----------------------------|----------------------|------------|---|---|-------------|--------------|---------------------------------------------------------------------------------------------------------------------|
| 4623 | <i>Spilopelia chinensis</i> | Eastern Spotted Dove | 2022/2/6   | 1 | 0 | 22.49434191 | 114.12867390 | <a href="https://www.inaturalist.org/observations/106355498">https://www.inaturalist.org/observations/106355498</a> |
| 4624 | <i>Spilopelia chinensis</i> | Eastern Spotted Dove | 2018/4/30  | 7 | 0 | 22.49444900 | 114.04700800 | <a href="https://www.inaturalist.org/observations/11978560">https://www.inaturalist.org/observations/11978560</a>   |
| 4625 | <i>Spilopelia chinensis</i> | Eastern Spotted Dove | 2022/5/2   | 1 | 0 | 22.49462167 | 114.10562780 | <a href="https://www.inaturalist.org/observations/114552854">https://www.inaturalist.org/observations/114552854</a> |
| 4626 | <i>Spilopelia chinensis</i> | Eastern Spotted Dove | 2018/4/28  | 7 | 0 | 22.49465885 | 114.04736820 | <a href="https://www.inaturalist.org/observations/11728276">https://www.inaturalist.org/observations/11728276</a>   |
| 4627 | <i>Spilopelia chinensis</i> | Eastern Spotted Dove | 2021/5/3   | 2 | 0 | 22.49477057 | 114.04739860 | <a href="https://www.inaturalist.org/observations/76847735">https://www.inaturalist.org/observations/76847735</a>   |
| 4628 | <i>Spilopelia chinensis</i> | Eastern Spotted Dove | 2022/4/30  | 1 | 0 | 22.49481980 | 114.10459930 | <a href="https://www.inaturalist.org/observations/113782608">https://www.inaturalist.org/observations/113782608</a> |
| 4629 | <i>Spilopelia chinensis</i> | Eastern Spotted Dove | 2018/9/1   | 3 | 0 | 22.49483495 | 114.05422960 | <a href="https://www.inaturalist.org/observations/30186623">https://www.inaturalist.org/observations/30186623</a>   |
| 4630 | <i>Spilopelia chinensis</i> | Eastern Spotted Dove | 2022/5/2   | 2 | 0 | 22.49498453 | 114.04721580 | <a href="https://www.inaturalist.org/observations/115529641">https://www.inaturalist.org/observations/115529641</a> |
| 4631 | <i>Spilopelia chinensis</i> | Eastern Spotted Dove | 2014/4/29  | 1 | 0 | 22.49501210 | 114.06961310 | <a href="https://www.inaturalist.org/observations/64232582">https://www.inaturalist.org/observations/64232582</a>   |
| 4632 | <i>Spilopelia chinensis</i> | Eastern Spotted Dove | 2010/9/29  | 2 | 0 | 22.49503900 | 114.04797300 | <a href="https://www.inaturalist.org/observations/30018116">https://www.inaturalist.org/observations/30018116</a>   |
| 4633 | <i>Spilopelia chinensis</i> | Eastern Spotted Dove | 2019/1/12  | 0 | 0 | 22.49505690 | 114.03393420 | <a href="https://www.inaturalist.org/observations/39199558">https://www.inaturalist.org/observations/39199558</a>   |
| 4634 | <i>Spilopelia chinensis</i> | Eastern Spotted Dove | 2020/4/25  | 2 | 0 | 22.49505690 | 114.03393420 | <a href="https://www.inaturalist.org/observations/43282776">https://www.inaturalist.org/observations/43282776</a>   |
| 4635 | <i>Spilopelia chinensis</i> | Eastern Spotted Dove | 2020/4/27  | 1 | 0 | 22.49505690 | 114.03393420 | <a href="https://www.inaturalist.org/observations/43843320">https://www.inaturalist.org/observations/43843320</a>   |
| 4636 | <i>Spilopelia chinensis</i> | Eastern Spotted Dove | 2009/10/16 | 1 | 0 | 22.49505690 | 114.03393420 | <a href="https://www.inaturalist.org/observations/91502298">https://www.inaturalist.org/observations/91502298</a>   |
| 4637 | <i>Spilopelia chinensis</i> | Eastern Spotted Dove | 2021/11/28 | 1 | 0 | 22.49505700 | 114.03393400 | <a href="https://www.inaturalist.org/observations/102656140">https://www.inaturalist.org/observations/102656140</a> |
| 4638 | <i>Spilopelia chinensis</i> | Eastern Spotted Dove | 2022/5/7   | 2 | 0 | 22.49506726 | 114.04966370 | <a href="https://www.inaturalist.org/observations/116412707">https://www.inaturalist.org/observations/116412707</a> |
| 4639 | <i>Spilopelia chinensis</i> | Eastern Spotted Dove | 2018/4/28  | 1 | 0 | 22.49514076 | 114.04802870 | <a href="https://www.inaturalist.org/observations/11618662">https://www.inaturalist.org/observations/11618662</a>   |
| 4640 | <i>Spilopelia chinensis</i> | Eastern Spotted Dove | 2013/9/27  | 1 | 0 | 22.49528200 | 114.04958400 | <a href="https://www.inaturalist.org/observations/82262519">https://www.inaturalist.org/observations/82262519</a>   |
| 4641 | <i>Spilopelia chinensis</i> | Eastern Spotted Dove | 2018/4/27  | 1 | 0 | 22.49530869 | 114.04829280 | <a href="https://www.inaturalist.org/observations/11478674">https://www.inaturalist.org/observations/11478674</a>   |
| 4642 | <i>Spilopelia chinensis</i> | Eastern Spotted Dove | 2019/4/27  | 2 | 0 | 22.49531518 | 114.04914660 | <a href="https://www.inaturalist.org/observations/23343485">https://www.inaturalist.org/observations/23343485</a>   |
| 4643 | <i>Spilopelia chinensis</i> | Eastern Spotted Dove | 2018/4/27  | 4 | 0 | 22.49533710 | 114.04918510 | <a href="https://www.inaturalist.org/observations/11830207">https://www.inaturalist.org/observations/11830207</a>   |
| 4644 | <i>Spilopelia chinensis</i> | Eastern Spotted Dove | 2018/4/28  | 1 | 0 | 22.49533768 | 114.04840270 | <a href="https://www.inaturalist.org/observations/11583858">https://www.inaturalist.org/observations/11583858</a>   |
| 4645 | <i>Spilopelia chinensis</i> | Eastern Spotted Dove | 2018/4/29  | 2 | 0 | 22.49537468 | 114.04917910 | <a href="https://www.inaturalist.org/observations/11758425">https://www.inaturalist.org/observations/11758425</a>   |

|      |                             |                      |            |   |   |             |              |                                                                                                                     |
|------|-----------------------------|----------------------|------------|---|---|-------------|--------------|---------------------------------------------------------------------------------------------------------------------|
| 4646 | <i>Spilopelia chinensis</i> | Eastern Spotted Dove | 2020/4/25  | 2 | 0 | 22.49545496 | 114.04887210 | <a href="https://www.inaturalist.org/observations/43529237">https://www.inaturalist.org/observations/43529237</a>   |
| 4647 | <i>Spilopelia chinensis</i> | Eastern Spotted Dove | 2018/4/27  | 1 | 0 | 22.49547176 | 114.04913550 | <a href="https://www.inaturalist.org/observations/11477705">https://www.inaturalist.org/observations/11477705</a>   |
| 4648 | <i>Spilopelia chinensis</i> | Eastern Spotted Dove | 2021/6/6   | 2 | 0 | 22.49548800 | 114.04859300 | <a href="https://www.inaturalist.org/observations/82001247">https://www.inaturalist.org/observations/82001247</a>   |
| 4649 | <i>Spilopelia chinensis</i> | Eastern Spotted Dove | 2019/4/27  | 2 | 0 | 22.49553264 | 114.05427610 | <a href="https://www.inaturalist.org/observations/23651947">https://www.inaturalist.org/observations/23651947</a>   |
| 4650 | <i>Spilopelia chinensis</i> | Eastern Spotted Dove | 2020/4/25  | 1 | 0 | 22.49553264 | 114.05427610 | <a href="https://www.inaturalist.org/observations/44098221">https://www.inaturalist.org/observations/44098221</a>   |
| 4651 | <i>Spilopelia chinensis</i> | Eastern Spotted Dove | 2009/10/16 | 2 | 0 | 22.49553270 | 114.03226050 | <a href="https://www.inaturalist.org/observations/90328766">https://www.inaturalist.org/observations/90328766</a>   |
| 4652 | <i>Spilopelia chinensis</i> | Eastern Spotted Dove | 2020/7/12  | 1 | 0 | 22.49558333 | 114.04892810 | <a href="https://www.inaturalist.org/observations/55774175">https://www.inaturalist.org/observations/55774175</a>   |
| 4653 | <i>Spilopelia chinensis</i> | Eastern Spotted Dove | 2021/11/3  | 1 | 0 | 22.49567900 | 114.04883200 | <a href="https://www.inaturalist.org/observations/100487006">https://www.inaturalist.org/observations/100487006</a> |
| 4654 | <i>Spilopelia chinensis</i> | Eastern Spotted Dove | 2020/11/1  | 1 | 0 | 22.49716343 | 114.16957240 | <a href="https://www.inaturalist.org/observations/63944241">https://www.inaturalist.org/observations/63944241</a>   |
| 4655 | <i>Spilopelia chinensis</i> | Eastern Spotted Dove | 2021/5/9   | 1 | 0 | 22.49876600 | 114.04582750 | <a href="https://www.inaturalist.org/observations/78057155">https://www.inaturalist.org/observations/78057155</a>   |
| 4656 | <i>Spilopelia chinensis</i> | Eastern Spotted Dove | 2021/5/9   | 1 | 0 | 22.49876600 | 114.04582750 | <a href="https://www.inaturalist.org/observations/78459361">https://www.inaturalist.org/observations/78459361</a>   |
| 4657 | <i>Spilopelia chinensis</i> | Eastern Spotted Dove | 2021/10/12 | 1 | 0 | 22.49876600 | 114.04582750 | <a href="https://www.inaturalist.org/observations/99761910">https://www.inaturalist.org/observations/99761910</a>   |
| 4658 | <i>Spilopelia chinensis</i> | Eastern Spotted Dove | 2011/12/28 | 2 | 0 | 22.49946700 | 114.17835100 | <a href="https://www.inaturalist.org/observations/37115794">https://www.inaturalist.org/observations/37115794</a>   |
| 4659 | <i>Spilopelia chinensis</i> | Eastern Spotted Dove | 2022/2/10  | 2 | 0 | 22.49950725 | 88.65461502  | <a href="https://www.inaturalist.org/observations/106595388">https://www.inaturalist.org/observations/106595388</a> |
| 4660 | <i>Spilopelia chinensis</i> | Eastern Spotted Dove | 2019/1/13  | 0 | 0 | 22.50000000 | 114.11666670 | <a href="https://www.inaturalist.org/observations/39140422">https://www.inaturalist.org/observations/39140422</a>   |
| 4661 | <i>Spilopelia chinensis</i> | Eastern Spotted Dove | 2019/1/10  | 2 | 0 | 22.50000000 | 114.11666670 | <a href="https://www.inaturalist.org/observations/39441313">https://www.inaturalist.org/observations/39441313</a>   |
| 4662 | <i>Spilopelia chinensis</i> | Eastern Spotted Dove | 2019/1/10  | 0 | 0 | 22.50000000 | 114.11666670 | <a href="https://www.inaturalist.org/observations/39441323">https://www.inaturalist.org/observations/39441323</a>   |
| 4663 | <i>Spilopelia chinensis</i> | Eastern Spotted Dove | 2022/8/8   | 1 | 0 | 22.50047560 | 114.14104610 | <a href="https://www.inaturalist.org/observations/132089366">https://www.inaturalist.org/observations/132089366</a> |
| 4664 | <i>Spilopelia chinensis</i> | Eastern Spotted Dove | 2021/1/23  | 1 | 0 | 22.50052441 | 114.17744390 | <a href="https://www.inaturalist.org/observations/68495753">https://www.inaturalist.org/observations/68495753</a>   |
| 4665 | <i>Spilopelia chinensis</i> | Eastern Spotted Dove | 2022/5/2   | 2 | 0 | 22.50108268 | 114.14476920 | <a href="https://www.inaturalist.org/observations/114635373">https://www.inaturalist.org/observations/114635373</a> |
| 4666 | <i>Spilopelia chinensis</i> | Eastern Spotted Dove | 2020/10/30 | 2 | 0 | 22.50143730 | 114.11182460 | <a href="https://www.inaturalist.org/observations/63808347">https://www.inaturalist.org/observations/63808347</a>   |
| 4667 | <i>Spilopelia chinensis</i> | Eastern Spotted Dove | 2021/10/18 | 1 | 0 | 22.50145549 | 114.11190750 | <a href="https://www.inaturalist.org/observations/98584211">https://www.inaturalist.org/observations/98584211</a>   |
| 4668 | <i>Spilopelia chinensis</i> | Eastern Spotted Dove | 2021/11/4  | 1 | 0 | 22.50175213 | 114.11195510 | <a href="https://www.inaturalist.org/observations/100218849">https://www.inaturalist.org/observations/100218849</a> |

|      |                             |                      |            |   |   |             |              |                                                                                                                     |
|------|-----------------------------|----------------------|------------|---|---|-------------|--------------|---------------------------------------------------------------------------------------------------------------------|
| 4669 | <i>Spilopelia chinensis</i> | Eastern Spotted Dove | 2021/12/10 | 2 | 0 | 22.50327167 | 114.12724170 | <a href="https://www.inaturalist.org/observations/102792633">https://www.inaturalist.org/observations/102792633</a> |
| 4670 | <i>Spilopelia chinensis</i> | Eastern Spotted Dove | 2020/4/9   | 1 | 0 | 22.50390560 | 114.14698340 | <a href="https://www.inaturalist.org/observations/41752911">https://www.inaturalist.org/observations/41752911</a>   |
| 4671 | <i>Spilopelia chinensis</i> | Eastern Spotted Dove | 2021/7/27  | 1 | 0 | 22.50399490 | 88.39898890  | <a href="https://www.inaturalist.org/observations/88904606">https://www.inaturalist.org/observations/88904606</a>   |
| 4672 | <i>Spilopelia chinensis</i> | Eastern Spotted Dove | 2021/9/12  | 1 | 0 | 22.50403023 | 88.39891568  | <a href="https://www.inaturalist.org/observations/94684267">https://www.inaturalist.org/observations/94684267</a>   |
| 4673 | <i>Spilopelia chinensis</i> | Eastern Spotted Dove | 2020/11/14 | 1 | 0 | 22.50421333 | 114.10599720 | <a href="https://www.inaturalist.org/observations/64840348">https://www.inaturalist.org/observations/64840348</a>   |
| 4674 | <i>Spilopelia chinensis</i> | Eastern Spotted Dove | 2019/11/23 | 1 | 0 | 22.50490703 | 114.11961440 | <a href="https://www.inaturalist.org/observations/47387491">https://www.inaturalist.org/observations/47387491</a>   |
| 4675 | <i>Spilopelia chinensis</i> | Eastern Spotted Dove | 2021/4/30  | 1 | 0 | 22.50582690 | 114.24414390 | <a href="https://www.inaturalist.org/observations/76402916">https://www.inaturalist.org/observations/76402916</a>   |
| 4676 | <i>Spilopelia chinensis</i> | Eastern Spotted Dove | 2022/6/17  | 3 | 0 | 22.50582690 | 114.24414390 | <a href="https://www.inaturalist.org/observations/122134168">https://www.inaturalist.org/observations/122134168</a> |
| 4677 | <i>Spilopelia chinensis</i> | Eastern Spotted Dove | 2022/4/29  | 1 | 0 | 22.50605700 | 114.24175600 | <a href="https://www.inaturalist.org/observations/114088108">https://www.inaturalist.org/observations/114088108</a> |
| 4678 | <i>Spilopelia chinensis</i> | Eastern Spotted Dove | 2021/4/30  | 1 | 0 | 22.50627236 | 114.24276160 | <a href="https://www.inaturalist.org/observations/76468229">https://www.inaturalist.org/observations/76468229</a>   |
| 4679 | <i>Spilopelia chinensis</i> | Eastern Spotted Dove | 2018/4/29  | 6 | 0 | 22.50661100 | 114.11243440 | <a href="https://www.inaturalist.org/observations/11945872">https://www.inaturalist.org/observations/11945872</a>   |
| 4680 | <i>Spilopelia chinensis</i> | Eastern Spotted Dove | 2020/8/29  | 1 | 0 | 22.50666333 | 114.13616130 | <a href="https://www.inaturalist.org/observations/57899342">https://www.inaturalist.org/observations/57899342</a>   |
| 4681 | <i>Spilopelia chinensis</i> | Eastern Spotted Dove | 2018/12/1  | 1 | 0 | 22.50744723 | 114.11516580 | <a href="https://www.inaturalist.org/observations/33560766">https://www.inaturalist.org/observations/33560766</a>   |
| 4682 | <i>Spilopelia chinensis</i> | Eastern Spotted Dove | 2020/4/26  | 2 | 0 | 22.50756452 | 114.11211000 | <a href="https://www.inaturalist.org/observations/43566969">https://www.inaturalist.org/observations/43566969</a>   |
| 4683 | <i>Spilopelia chinensis</i> | Eastern Spotted Dove | 2017/1/7   | 3 | 0 | 22.50810026 | 114.11486550 | <a href="https://www.inaturalist.org/observations/28778946">https://www.inaturalist.org/observations/28778946</a>   |
| 4684 | <i>Spilopelia chinensis</i> | Eastern Spotted Dove | 2017/4/1   | 3 | 0 | 22.50825998 | 114.11497270 | <a href="https://www.inaturalist.org/observations/29625457">https://www.inaturalist.org/observations/29625457</a>   |
| 4685 | <i>Spilopelia chinensis</i> | Eastern Spotted Dove | 2017/4/1   | 2 | 0 | 22.50825998 | 114.11497270 | <a href="https://www.inaturalist.org/observations/29689657">https://www.inaturalist.org/observations/29689657</a>   |
| 4686 | <i>Spilopelia chinensis</i> | Eastern Spotted Dove | 2022/2/3   | 1 | 0 | 22.50866908 | 114.11417760 | <a href="https://www.inaturalist.org/observations/106064032">https://www.inaturalist.org/observations/106064032</a> |
| 4687 | <i>Spilopelia chinensis</i> | Eastern Spotted Dove | 2017/5/6   | 1 | 0 | 22.50878982 | 114.11298820 | <a href="https://www.inaturalist.org/observations/72428788">https://www.inaturalist.org/observations/72428788</a>   |
| 4688 | <i>Spilopelia chinensis</i> | Eastern Spotted Dove | 2010/4/24  | 0 | 0 | 22.50879520 | 114.11297710 | <a href="https://www.inaturalist.org/observations/38703728">https://www.inaturalist.org/observations/38703728</a>   |
| 4689 | <i>Spilopelia chinensis</i> | Eastern Spotted Dove | 2013/1/19  | 1 | 0 | 22.50879520 | 114.11297710 | <a href="https://www.inaturalist.org/observations/56192344">https://www.inaturalist.org/observations/56192344</a>   |
| 4690 | <i>Spilopelia chinensis</i> | Eastern Spotted Dove | 2020/12/21 | 1 | 0 | 22.50918500 | 114.11201170 | <a href="https://www.inaturalist.org/observations/66915184">https://www.inaturalist.org/observations/66915184</a>   |
| 4691 | <i>Spilopelia chinensis</i> | Eastern Spotted Dove | 2020/4/27  | 1 | 0 | 22.50922413 | 114.11216170 | <a href="https://www.inaturalist.org/observations/43886012">https://www.inaturalist.org/observations/43886012</a>   |



|      |                             |                      |            |   |   |             |              |                                                                                                                     |
|------|-----------------------------|----------------------|------------|---|---|-------------|--------------|---------------------------------------------------------------------------------------------------------------------|
| 4692 | <i>Spilopelia chinensis</i> | Eastern Spotted Dove | 2020/4/28  | 1 | 0 | 22.50972117 | 114.11449260 | <a href="https://www.inaturalist.org/observations/44103827">https://www.inaturalist.org/observations/44103827</a>   |
| 4693 | <i>Spilopelia chinensis</i> | Eastern Spotted Dove | 2020/12/21 | 1 | 0 | 22.50974833 | 114.11405000 | <a href="https://www.inaturalist.org/observations/66915212">https://www.inaturalist.org/observations/66915212</a>   |
| 4694 | <i>Spilopelia chinensis</i> | Eastern Spotted Dove | 2020/10/17 | 1 | 0 | 22.50977380 | 114.11265350 | <a href="https://www.inaturalist.org/observations/62855702">https://www.inaturalist.org/observations/62855702</a>   |
| 4695 | <i>Spilopelia chinensis</i> | Eastern Spotted Dove | 2020/12/17 | 1 | 0 | 22.50981561 | 114.11282970 | <a href="https://www.inaturalist.org/observations/66735930">https://www.inaturalist.org/observations/66735930</a>   |
| 4696 | <i>Spilopelia chinensis</i> | Eastern Spotted Dove | 2017/12/7  | 4 | 0 | 22.51001413 | 114.11284750 | <a href="https://www.inaturalist.org/observations/11502922">https://www.inaturalist.org/observations/11502922</a>   |
| 4697 | <i>Spilopelia chinensis</i> | Eastern Spotted Dove | 2021/4/1   | 1 | 0 | 22.51005344 | 114.11438190 | <a href="https://www.inaturalist.org/observations/72592123">https://www.inaturalist.org/observations/72592123</a>   |
| 4698 | <i>Spilopelia chinensis</i> | Eastern Spotted Dove | 2020/10/6  | 2 | 0 | 22.51024771 | 114.11254470 | <a href="https://www.inaturalist.org/observations/61855118">https://www.inaturalist.org/observations/61855118</a>   |
| 4699 | <i>Spilopelia chinensis</i> | Eastern Spotted Dove | 2020/4/26  | 3 | 0 | 22.51027043 | 114.17807930 | <a href="https://www.inaturalist.org/observations/44083110">https://www.inaturalist.org/observations/44083110</a>   |
| 4700 | <i>Spilopelia chinensis</i> | Eastern Spotted Dove | 2018/11/26 | 1 | 0 | 22.51082540 | 114.11091920 | <a href="https://www.inaturalist.org/observations/18648377">https://www.inaturalist.org/observations/18648377</a>   |
| 4701 | <i>Spilopelia chinensis</i> | Eastern Spotted Dove | 2021/4/24  | 1 | 0 | 22.51120100 | 114.12609900 | <a href="https://www.inaturalist.org/observations/75645438">https://www.inaturalist.org/observations/75645438</a>   |
| 4702 | <i>Spilopelia chinensis</i> | Eastern Spotted Dove | 2021/4/24  | 1 | 0 | 22.51120100 | 114.12609900 | <a href="https://www.inaturalist.org/observations/75645443">https://www.inaturalist.org/observations/75645443</a>   |
| 4703 | <i>Spilopelia chinensis</i> | Eastern Spotted Dove | 2019/5/15  | 2 | 0 | 22.51132543 | 114.12830060 | <a href="https://www.inaturalist.org/observations/25189167">https://www.inaturalist.org/observations/25189167</a>   |
| 4704 | <i>Spilopelia chinensis</i> | Eastern Spotted Dove | 2019/2/21  | 1 | 0 | 22.51135126 | 114.12713900 | <a href="https://www.inaturalist.org/observations/20527953">https://www.inaturalist.org/observations/20527953</a>   |
| 4705 | <i>Spilopelia chinensis</i> | Eastern Spotted Dove | 2021/2/27  | 1 | 0 | 22.51245624 | 114.11397380 | <a href="https://www.inaturalist.org/observations/70383325">https://www.inaturalist.org/observations/70383325</a>   |
| 4706 | <i>Spilopelia chinensis</i> | Eastern Spotted Dove | 2022/5/3   | 2 | 0 | 22.51356914 | 88.35027784  | <a href="https://www.inaturalist.org/observations/115082900">https://www.inaturalist.org/observations/115082900</a> |
| 4707 | <i>Spilopelia chinensis</i> | Eastern Spotted Dove | 2020/5/26  | 1 | 0 | 22.51708278 | 120.35310140 | <a href="https://www.inaturalist.org/observations/49224318">https://www.inaturalist.org/observations/49224318</a>   |
| 4708 | <i>Spilopelia chinensis</i> | Eastern Spotted Dove | 2020/1/2   | 1 | 0 | 22.52003729 | 114.21027010 | <a href="https://www.inaturalist.org/observations/44711233">https://www.inaturalist.org/observations/44711233</a>   |
| 4709 | <i>Spilopelia chinensis</i> | Eastern Spotted Dove | 2020/12/6  | 1 | 0 | 22.52015500 | 114.11172500 | <a href="https://www.inaturalist.org/observations/66174593">https://www.inaturalist.org/observations/66174593</a>   |
| 4710 | <i>Spilopelia chinensis</i> | Eastern Spotted Dove | 2020/10/15 | 1 | 0 | 22.52116950 | 114.20956770 | <a href="https://www.inaturalist.org/observations/63560458">https://www.inaturalist.org/observations/63560458</a>   |
| 4711 | <i>Spilopelia chinensis</i> | Eastern Spotted Dove | 2019/4/27  | 3 | 0 | 22.52117711 | 114.21746170 | <a href="https://www.inaturalist.org/observations/24372138">https://www.inaturalist.org/observations/24372138</a>   |
| 4712 | <i>Spilopelia chinensis</i> | Eastern Spotted Dove | 2020/1/28  | 0 | 0 | 22.52155600 | 114.26504100 | <a href="https://www.inaturalist.org/observations/38107505">https://www.inaturalist.org/observations/38107505</a>   |
| 4713 | <i>Spilopelia chinensis</i> | Eastern Spotted Dove | 2020/6/18  | 1 | 0 | 22.52407105 | 114.21042740 | <a href="https://www.inaturalist.org/observations/50535813">https://www.inaturalist.org/observations/50535813</a>   |
| 4714 | <i>Spilopelia chinensis</i> | Eastern Spotted Dove | 2018/4/30  | 2 | 0 | 22.52642882 | 114.25960310 | <a href="https://www.inaturalist.org/observations/11875671">https://www.inaturalist.org/observations/11875671</a>   |

|      |                             |                      |            |   |   |             |              |                                                                                                                     |
|------|-----------------------------|----------------------|------------|---|---|-------------|--------------|---------------------------------------------------------------------------------------------------------------------|
| 4715 | <i>Spilopelia chinensis</i> | Eastern Spotted Dove | 2021/12/16 | 2 | 0 | 22.52679875 | 114.26053330 | <a href="https://www.inaturalist.org/observations/103134572">https://www.inaturalist.org/observations/103134572</a> |
| 4716 | <i>Spilopelia chinensis</i> | Eastern Spotted Dove | 2022/2/6   | 1 | 0 | 22.52851909 | 114.02500810 | <a href="https://www.inaturalist.org/observations/106355491">https://www.inaturalist.org/observations/106355491</a> |
| 4717 | <i>Spilopelia chinensis</i> | Eastern Spotted Dove | 2021/4/10  | 1 | 0 | 22.52907148 | 120.33566210 | <a href="https://www.inaturalist.org/observations/73610854">https://www.inaturalist.org/observations/73610854</a>   |
| 4718 | <i>Spilopelia chinensis</i> | Eastern Spotted Dove | 2019/4/28  | 1 | 0 | 22.53064205 | 114.23813530 | <a href="https://www.inaturalist.org/observations/24287134">https://www.inaturalist.org/observations/24287134</a>   |
| 4719 | <i>Spilopelia chinensis</i> | Eastern Spotted Dove | 2016/9/3   | 2 | 0 | 22.53277073 | 114.22979280 | <a href="https://www.inaturalist.org/observations/27740223">https://www.inaturalist.org/observations/27740223</a>   |
| 4720 | <i>Spilopelia chinensis</i> | Eastern Spotted Dove | 2019/2/22  | 2 | 0 | 22.53400320 | 72.98690920  | <a href="https://www.inaturalist.org/observations/54241961">https://www.inaturalist.org/observations/54241961</a>   |
| 4721 | <i>Spilopelia chinensis</i> | Eastern Spotted Dove | 2019/6/6   | 2 | 0 | 22.53644500 | 72.97951167  | <a href="https://www.inaturalist.org/observations/136017083">https://www.inaturalist.org/observations/136017083</a> |
| 4722 | <i>Spilopelia chinensis</i> | Eastern Spotted Dove | 2021/3/7   | 1 | 0 | 22.53744699 | 114.31456410 | <a href="https://www.inaturalist.org/observations/70705589">https://www.inaturalist.org/observations/70705589</a>   |
| 4723 | <i>Spilopelia chinensis</i> | Eastern Spotted Dove | 2020/4/18  | 1 | 0 | 22.53780036 | 120.39171960 | <a href="https://www.inaturalist.org/observations/42465816">https://www.inaturalist.org/observations/42465816</a>   |
| 4724 | <i>Spilopelia chinensis</i> | Eastern Spotted Dove | 2020/10/1  | 1 | 0 | 22.53872018 | 120.59035780 | <a href="https://www.inaturalist.org/observations/61565111">https://www.inaturalist.org/observations/61565111</a>   |
| 4725 | <i>Spilopelia chinensis</i> | Eastern Spotted Dove | 2020/4/20  | 1 | 0 | 22.53880694 | 120.58811090 | <a href="https://www.inaturalist.org/observations/42752774">https://www.inaturalist.org/observations/42752774</a>   |
| 4726 | <i>Spilopelia chinensis</i> | Eastern Spotted Dove | 2022/2/20  | 5 | 0 | 22.54046900 | 72.96651936  | <a href="https://www.inaturalist.org/observations/107187390">https://www.inaturalist.org/observations/107187390</a> |
| 4727 | <i>Spilopelia chinensis</i> | Eastern Spotted Dove | 2018/9/16  | 3 | 0 | 22.54068700 | 72.96746350  | <a href="https://www.inaturalist.org/observations/54242532">https://www.inaturalist.org/observations/54242532</a>   |
| 4728 | <i>Spilopelia chinensis</i> | Eastern Spotted Dove | 2022/4/9   | 4 | 0 | 22.54072664 | 72.96733475  | <a href="https://www.inaturalist.org/observations/110838683">https://www.inaturalist.org/observations/110838683</a> |
| 4729 | <i>Spilopelia chinensis</i> | Eastern Spotted Dove | 2021/12/21 | 1 | 0 | 22.54080390 | 88.35124110  | <a href="https://www.inaturalist.org/observations/104085328">https://www.inaturalist.org/observations/104085328</a> |
| 4730 | <i>Spilopelia chinensis</i> | Eastern Spotted Dove | 2021/12/21 | 1 | 0 | 22.54080390 | 88.35124110  | <a href="https://www.inaturalist.org/observations/104085331">https://www.inaturalist.org/observations/104085331</a> |
| 4731 | <i>Spilopelia chinensis</i> | Eastern Spotted Dove | 2021/12/21 | 2 | 0 | 22.54080390 | 88.35124110  | <a href="https://www.inaturalist.org/observations/104085339">https://www.inaturalist.org/observations/104085339</a> |
| 4732 | <i>Spilopelia chinensis</i> | Eastern Spotted Dove | 2021/12/21 | 2 | 0 | 22.54080390 | 88.35124110  | <a href="https://www.inaturalist.org/observations/104085352">https://www.inaturalist.org/observations/104085352</a> |
| 4733 | <i>Spilopelia chinensis</i> | Eastern Spotted Dove | 2021/12/22 | 1 | 0 | 22.54080390 | 88.35124110  | <a href="https://www.inaturalist.org/observations/104089721">https://www.inaturalist.org/observations/104089721</a> |
| 4734 | <i>Spilopelia chinensis</i> | Eastern Spotted Dove | 2021/12/22 | 1 | 0 | 22.54080390 | 88.35124110  | <a href="https://www.inaturalist.org/observations/104089729">https://www.inaturalist.org/observations/104089729</a> |
| 4735 | <i>Spilopelia chinensis</i> | Eastern Spotted Dove | 2021/12/23 | 2 | 0 | 22.54080390 | 88.35124110  | <a href="https://www.inaturalist.org/observations/104279482">https://www.inaturalist.org/observations/104279482</a> |
| 4736 | <i>Spilopelia chinensis</i> | Eastern Spotted Dove | 2021/12/23 | 2 | 0 | 22.54080390 | 88.35124110  | <a href="https://www.inaturalist.org/observations/104279483">https://www.inaturalist.org/observations/104279483</a> |
| 4737 | <i>Spilopelia chinensis</i> | Eastern Spotted Dove | 2021/12/23 | 2 | 0 | 22.54080390 | 88.35124110  | <a href="https://www.inaturalist.org/observations/104279488">https://www.inaturalist.org/observations/104279488</a> |

|      |                             |                      |            |   |   |             |              |                                                                                                                     |
|------|-----------------------------|----------------------|------------|---|---|-------------|--------------|---------------------------------------------------------------------------------------------------------------------|
| 4738 | <i>Spilopelia chinensis</i> | Eastern Spotted Dove | 2021/12/23 | 2 | 0 | 22.54080390 | 88.35124110  | <a href="https://www.inaturalist.org/observations/104279495">https://www.inaturalist.org/observations/104279495</a> |
| 4739 | <i>Spilopelia chinensis</i> | Eastern Spotted Dove | 2021/12/23 | 2 | 0 | 22.54080390 | 88.35124110  | <a href="https://www.inaturalist.org/observations/104279498">https://www.inaturalist.org/observations/104279498</a> |
| 4740 | <i>Spilopelia chinensis</i> | Eastern Spotted Dove | 2017/7/11  | 4 | 0 | 22.54087641 | 113.99744020 | <a href="https://www.inaturalist.org/observations/7303858">https://www.inaturalist.org/observations/7303858</a>     |
| 4741 | <i>Spilopelia chinensis</i> | Eastern Spotted Dove | 2021/10/30 | 1 | 0 | 22.54285990 | 114.05956000 | <a href="https://www.inaturalist.org/observations/106317502">https://www.inaturalist.org/observations/106317502</a> |
| 4742 | <i>Spilopelia chinensis</i> | Eastern Spotted Dove | 2021/5/9   | 1 | 0 | 22.54285990 | 114.05956000 | <a href="https://www.inaturalist.org/observations/106361423">https://www.inaturalist.org/observations/106361423</a> |
| 4743 | <i>Spilopelia chinensis</i> | Eastern Spotted Dove | 2020/9/26  | 1 | 0 | 22.54285990 | 114.05956000 | <a href="https://www.inaturalist.org/observations/106381503">https://www.inaturalist.org/observations/106381503</a> |
| 4744 | <i>Spilopelia chinensis</i> | Eastern Spotted Dove | 2021/12/21 | 1 | 0 | 22.54322276 | 88.34208574  | <a href="https://www.inaturalist.org/observations/104086487">https://www.inaturalist.org/observations/104086487</a> |
| 4745 | <i>Spilopelia chinensis</i> | Eastern Spotted Dove | 2019/4/18  | 2 | 0 | 22.54392020 | 88.36971310  | <a href="https://www.inaturalist.org/observations/23011045">https://www.inaturalist.org/observations/23011045</a>   |
| 4746 | <i>Spilopelia chinensis</i> | Eastern Spotted Dove | 2022/6/30  | 1 | 0 | 22.54727900 | 113.91839400 | <a href="https://www.inaturalist.org/observations/137035221">https://www.inaturalist.org/observations/137035221</a> |
| 4747 | <i>Spilopelia chinensis</i> | Eastern Spotted Dove | 2022/2/6   | 1 | 0 | 22.54782961 | 114.15723790 | <a href="https://www.inaturalist.org/observations/106355413">https://www.inaturalist.org/observations/106355413</a> |
| 4748 | <i>Spilopelia chinensis</i> | Eastern Spotted Dove | 2021/6/11  | 1 | 0 | 22.54803363 | 113.91971500 | <a href="https://www.inaturalist.org/observations/87684747">https://www.inaturalist.org/observations/87684747</a>   |
| 4749 | <i>Spilopelia chinensis</i> | Eastern Spotted Dove | 2022/3/13  | 1 | 0 | 22.54822469 | 114.00047930 | <a href="https://www.inaturalist.org/observations/108513811">https://www.inaturalist.org/observations/108513811</a> |
| 4750 | <i>Spilopelia chinensis</i> | Eastern Spotted Dove | 2021/6/13  | 3 | 0 | 22.54852383 | 114.02468970 | <a href="https://www.inaturalist.org/observations/83150470">https://www.inaturalist.org/observations/83150470</a>   |
| 4751 | <i>Spilopelia chinensis</i> | Eastern Spotted Dove | 2022/3/24  | 2 | 0 | 22.54863047 | 113.99994420 | <a href="https://www.inaturalist.org/observations/109429790">https://www.inaturalist.org/observations/109429790</a> |
| 4752 | <i>Spilopelia chinensis</i> | Eastern Spotted Dove | 2022/1/29  | 1 | 0 | 22.54871235 | 114.00059710 | <a href="https://www.inaturalist.org/observations/105760338">https://www.inaturalist.org/observations/105760338</a> |
| 4753 | <i>Spilopelia chinensis</i> | Eastern Spotted Dove | 2019/11/7  | 2 | 0 | 22.55005277 | 114.05806470 | <a href="https://www.inaturalist.org/observations/35404146">https://www.inaturalist.org/observations/35404146</a>   |
| 4754 | <i>Spilopelia chinensis</i> | Eastern Spotted Dove | 2020/9/20  | 2 | 0 | 22.55284130 | 88.45007890  | <a href="https://www.inaturalist.org/observations/100908924">https://www.inaturalist.org/observations/100908924</a> |
| 4755 | <i>Spilopelia chinensis</i> | Eastern Spotted Dove | 2022/9/27  | 3 | 0 | 22.55439915 | 120.31474190 | <a href="https://www.inaturalist.org/observations/136671949">https://www.inaturalist.org/observations/136671949</a> |
| 4756 | <i>Spilopelia chinensis</i> | Eastern Spotted Dove | 2019/3/14  | 1 | 0 | 22.55455760 | 120.42724470 | <a href="https://www.inaturalist.org/observations/21228594">https://www.inaturalist.org/observations/21228594</a>   |
| 4757 | <i>Spilopelia chinensis</i> | Eastern Spotted Dove | 2022/2/2   | 1 | 0 | 22.55520704 | 114.10529050 | <a href="https://www.inaturalist.org/observations/106021057">https://www.inaturalist.org/observations/106021057</a> |
| 4758 | <i>Spilopelia chinensis</i> | Eastern Spotted Dove | 2021/3/2   | 1 | 0 | 22.55556668 | 120.39246920 | <a href="https://www.inaturalist.org/observations/70495563">https://www.inaturalist.org/observations/70495563</a>   |
| 4759 | <i>Spilopelia chinensis</i> | Eastern Spotted Dove | 2022/9/25  | 2 | 0 | 22.55683419 | 88.29867501  | <a href="https://www.inaturalist.org/observations/136581523">https://www.inaturalist.org/observations/136581523</a> |
| 4760 | <i>Spilopelia chinensis</i> | Eastern Spotted Dove | 2022/2/2   | 1 | 0 | 22.55708858 | 114.13278540 | <a href="https://www.inaturalist.org/observations/106021071">https://www.inaturalist.org/observations/106021071</a> |

|      |                             |                      |            |   |   |             |              |                                                                                                                     |
|------|-----------------------------|----------------------|------------|---|---|-------------|--------------|---------------------------------------------------------------------------------------------------------------------|
| 4761 | <i>Spilopelia chinensis</i> | Eastern Spotted Dove | 2021/12/22 | 1 | 0 | 22.55709781 | 88.29194438  | <a href="https://www.inaturalist.org/observations/104275782">https://www.inaturalist.org/observations/104275782</a> |
| 4762 | <i>Spilopelia chinensis</i> | Eastern Spotted Dove | 2021/12/22 | 2 | 0 | 22.55710183 | 88.29172151  | <a href="https://www.inaturalist.org/observations/104274053">https://www.inaturalist.org/observations/104274053</a> |
| 4763 | <i>Spilopelia chinensis</i> | Eastern Spotted Dove | 2021/12/22 | 2 | 0 | 22.55710183 | 88.29172151  | <a href="https://www.inaturalist.org/observations/104274054">https://www.inaturalist.org/observations/104274054</a> |
| 4764 | <i>Spilopelia chinensis</i> | Eastern Spotted Dove | 2021/12/22 | 1 | 0 | 22.55769630 | 88.29215066  | <a href="https://www.inaturalist.org/observations/104095672">https://www.inaturalist.org/observations/104095672</a> |
| 4765 | <i>Spilopelia chinensis</i> | Eastern Spotted Dove | 2022/9/25  | 1 | 0 | 22.56160891 | 88.28997373  | <a href="https://www.inaturalist.org/observations/136587554">https://www.inaturalist.org/observations/136587554</a> |
| 4766 | <i>Spilopelia chinensis</i> | Eastern Spotted Dove | 2015/1/26  | 6 | 0 | 22.56263000 | 88.36304000  | <a href="http://www.inaturalist.org/observations/1514606">http://www.inaturalist.org/observations/1514606</a>       |
| 4767 | <i>Spilopelia chinensis</i> | Eastern Spotted Dove | 2022/1/6   | 2 | 0 | 22.56591787 | 114.32170260 | <a href="https://www.inaturalist.org/observations/104465748">https://www.inaturalist.org/observations/104465748</a> |
| 4768 | <i>Spilopelia chinensis</i> | Eastern Spotted Dove | 2020/12/20 | 3 | 0 | 22.56624167 | 120.33812000 | <a href="https://www.inaturalist.org/observations/68847226">https://www.inaturalist.org/observations/68847226</a>   |
| 4769 | <i>Spilopelia chinensis</i> | Eastern Spotted Dove | 2021/5/6   | 1 | 0 | 22.56734167 | 120.35064670 | <a href="https://www.inaturalist.org/observations/77566668">https://www.inaturalist.org/observations/77566668</a>   |
| 4770 | <i>Spilopelia chinensis</i> | Eastern Spotted Dove | 2020/10/28 | 1 | 0 | 22.56901194 | 120.34606890 | <a href="https://www.inaturalist.org/observations/63964333">https://www.inaturalist.org/observations/63964333</a>   |
| 4771 | <i>Spilopelia chinensis</i> | Eastern Spotted Dove | 2019/1/10  | 1 | 0 | 22.57007879 | 120.34775850 | <a href="https://www.inaturalist.org/observations/19606561">https://www.inaturalist.org/observations/19606561</a>   |
| 4772 | <i>Spilopelia chinensis</i> | Eastern Spotted Dove | 2022/4/15  | 3 | 0 | 22.57052990 | 78.14377380  | <a href="https://www.inaturalist.org/observations/132104368">https://www.inaturalist.org/observations/132104368</a> |
| 4773 | <i>Spilopelia chinensis</i> | Eastern Spotted Dove | 2020/10/27 | 1 | 0 | 22.57266222 | 120.33494750 | <a href="https://www.inaturalist.org/observations/63963937">https://www.inaturalist.org/observations/63963937</a>   |
| 4774 | <i>Spilopelia chinensis</i> | Eastern Spotted Dove | 2022/9/24  | 2 | 0 | 22.57333053 | 88.36389508  | <a href="https://www.inaturalist.org/observations/136234593">https://www.inaturalist.org/observations/136234593</a> |
| 4775 | <i>Spilopelia chinensis</i> | Eastern Spotted Dove | 2022/8/21  | 2 | 0 | 22.57492535 | 114.08870240 | <a href="https://www.inaturalist.org/observations/131690780">https://www.inaturalist.org/observations/131690780</a> |
| 4776 | <i>Spilopelia chinensis</i> | Eastern Spotted Dove | 2021/6/20  | 2 | 0 | 22.57626171 | 88.25126560  | <a href="https://www.inaturalist.org/observations/83759170">https://www.inaturalist.org/observations/83759170</a>   |
| 4777 | <i>Spilopelia chinensis</i> | Eastern Spotted Dove | 2019/6/2   | 4 | 0 | 22.57745022 | 88.45115061  | <a href="https://www.inaturalist.org/observations/26235858">https://www.inaturalist.org/observations/26235858</a>   |
| 4778 | <i>Spilopelia chinensis</i> | Eastern Spotted Dove | 2019/4/24  | 2 | 0 | 22.57745569 | 88.45113833  | <a href="https://www.inaturalist.org/observations/22992754">https://www.inaturalist.org/observations/22992754</a>   |
| 4779 | <i>Spilopelia chinensis</i> | Eastern Spotted Dove | 2019/5/4   | 2 | 0 | 22.57746138 | 88.45113081  | <a href="https://www.inaturalist.org/observations/24503038">https://www.inaturalist.org/observations/24503038</a>   |
| 4780 | <i>Spilopelia chinensis</i> | Eastern Spotted Dove | 2022/2/17  | 3 | 0 | 22.57844144 | 120.34607560 | <a href="https://www.inaturalist.org/observations/106908029">https://www.inaturalist.org/observations/106908029</a> |
| 4781 | <i>Spilopelia chinensis</i> | Eastern Spotted Dove | 2020/7/23  | 1 | 0 | 22.57948778 | 120.35050690 | <a href="https://www.inaturalist.org/observations/55113744">https://www.inaturalist.org/observations/55113744</a>   |
| 4782 | <i>Spilopelia chinensis</i> | Eastern Spotted Dove | 2021/9/12  | 2 | 0 | 22.58256020 | 88.45249583  | <a href="https://www.inaturalist.org/observations/96216453">https://www.inaturalist.org/observations/96216453</a>   |
| 4783 | <i>Spilopelia chinensis</i> | Eastern Spotted Dove | 2022/8/12  | 3 | 0 | 22.58282950 | 88.37119210  | <a href="https://www.inaturalist.org/observations/130485623">https://www.inaturalist.org/observations/130485623</a> |

|      |                             |                      |            |   |   |             |              |                                                                                                                     |
|------|-----------------------------|----------------------|------------|---|---|-------------|--------------|---------------------------------------------------------------------------------------------------------------------|
| 4784 | <i>Spilopelia chinensis</i> | Eastern Spotted Dove | 2020/5/28  | 1 | 0 | 22.58419250 | 120.39969830 | <a href="https://www.inaturalist.org/observations/49224064">https://www.inaturalist.org/observations/49224064</a>   |
| 4785 | <i>Spilopelia chinensis</i> | Eastern Spotted Dove | 2020/5/28  | 1 | 0 | 22.58558694 | 120.39372330 | <a href="https://www.inaturalist.org/observations/49224057">https://www.inaturalist.org/observations/49224057</a>   |
| 4786 | <i>Spilopelia chinensis</i> | Eastern Spotted Dove | 2022/2/27  | 1 | 0 | 22.58600335 | 120.35114970 | <a href="https://www.inaturalist.org/observations/107538272">https://www.inaturalist.org/observations/107538272</a> |
| 4787 | <i>Spilopelia chinensis</i> | Eastern Spotted Dove | 2022/4/11  | 1 | 0 | 22.58814459 | 114.15572750 | <a href="https://www.inaturalist.org/observations/111102193">https://www.inaturalist.org/observations/111102193</a> |
| 4788 | <i>Spilopelia chinensis</i> | Eastern Spotted Dove | 2020/10/28 | 1 | 0 | 22.58859944 | 120.36297530 | <a href="https://www.inaturalist.org/observations/63964613">https://www.inaturalist.org/observations/63964613</a>   |
| 4789 | <i>Spilopelia chinensis</i> | Eastern Spotted Dove | 2021/1/4   | 1 | 0 | 22.59489500 | 120.32836700 | <a href="https://www.inaturalist.org/observations/67559638">https://www.inaturalist.org/observations/67559638</a>   |
| 4790 | <i>Spilopelia chinensis</i> | Eastern Spotted Dove | 2022/5/5   | 2 | 0 | 22.59590218 | 120.35494920 | <a href="https://www.inaturalist.org/observations/115519642">https://www.inaturalist.org/observations/115519642</a> |
| 4791 | <i>Spilopelia chinensis</i> | Eastern Spotted Dove | 2019/2/10  | 4 | 0 | 22.59591800 | 120.33755600 | <a href="https://www.inaturalist.org/observations/20249105">https://www.inaturalist.org/observations/20249105</a>   |
| 4792 | <i>Spilopelia chinensis</i> | Eastern Spotted Dove | 2022/1/26  | 2 | 0 | 22.59786392 | 120.32580360 | <a href="https://www.inaturalist.org/observations/105604159">https://www.inaturalist.org/observations/105604159</a> |
| 4793 | <i>Spilopelia chinensis</i> | Eastern Spotted Dove | 2021/2/14  | 2 | 0 | 22.59867900 | 120.33926000 | <a href="https://www.inaturalist.org/observations/69545019">https://www.inaturalist.org/observations/69545019</a>   |
| 4794 | <i>Spilopelia chinensis</i> | Eastern Spotted Dove | 2022/2/8   | 2 | 0 | 22.59992520 | 120.35499500 | <a href="https://www.inaturalist.org/observations/106380345">https://www.inaturalist.org/observations/106380345</a> |
| 4795 | <i>Spilopelia chinensis</i> | Eastern Spotted Dove | 2020/1/18  | 2 | 0 | 22.59995944 | 120.35353720 | <a href="https://www.inaturalist.org/observations/66338137">https://www.inaturalist.org/observations/66338137</a>   |
| 4796 | <i>Spilopelia chinensis</i> | Eastern Spotted Dove | 2020/10/22 | 6 | 0 | 22.60207051 | 87.97722884  | <a href="https://www.inaturalist.org/observations/133465415">https://www.inaturalist.org/observations/133465415</a> |
| 4797 | <i>Spilopelia chinensis</i> | Eastern Spotted Dove | 2021/9/18  | 1 | 0 | 22.60598433 | 120.35539060 | <a href="https://www.inaturalist.org/observations/95393014">https://www.inaturalist.org/observations/95393014</a>   |
| 4798 | <i>Spilopelia chinensis</i> | Eastern Spotted Dove | 2020/4/24  | 1 | 0 | 22.60692833 | 120.30873000 | <a href="https://www.inaturalist.org/observations/43057149">https://www.inaturalist.org/observations/43057149</a>   |
| 4799 | <i>Spilopelia chinensis</i> | Eastern Spotted Dove | 2020/2/21  | 0 | 0 | 22.60725621 | 120.30930520 | <a href="https://www.inaturalist.org/observations/38953854">https://www.inaturalist.org/observations/38953854</a>   |
| 4800 | <i>Spilopelia chinensis</i> | Eastern Spotted Dove | 2021/5/8   | 2 | 0 | 22.60731373 | 120.38717470 | <a href="https://www.inaturalist.org/observations/78316566">https://www.inaturalist.org/observations/78316566</a>   |
| 4801 | <i>Spilopelia chinensis</i> | Eastern Spotted Dove | 2021/12/28 | 1 | 0 | 22.60755422 | 120.30904770 | <a href="https://www.inaturalist.org/observations/104404614">https://www.inaturalist.org/observations/104404614</a> |
| 4802 | <i>Spilopelia chinensis</i> | Eastern Spotted Dove | 2021/2/12  | 1 | 0 | 22.60763227 | 120.32778860 | <a href="https://www.inaturalist.org/observations/69446631">https://www.inaturalist.org/observations/69446631</a>   |
| 4803 | <i>Spilopelia chinensis</i> | Eastern Spotted Dove | 2022/8/14  | 2 | 0 | 22.60920330 | 88.46516630  | <a href="https://www.inaturalist.org/observations/130779620">https://www.inaturalist.org/observations/130779620</a> |
| 4804 | <i>Spilopelia chinensis</i> | Eastern Spotted Dove | 2020/8/6   | 1 | 0 | 22.61107908 | 88.47611576  | <a href="https://www.inaturalist.org/observations/55579861">https://www.inaturalist.org/observations/55579861</a>   |
| 4805 | <i>Spilopelia chinensis</i> | Eastern Spotted Dove | 2021/2/6   | 2 | 0 | 22.61117581 | 120.35758300 | <a href="https://www.inaturalist.org/observations/69196555">https://www.inaturalist.org/observations/69196555</a>   |
| 4806 | <i>Spilopelia chinensis</i> | Eastern Spotted Dove | 2021/1/23  | 1 | 0 | 22.61272707 | 120.26901410 | <a href="https://www.inaturalist.org/observations/68481060">https://www.inaturalist.org/observations/68481060</a>   |

|      |                             |                      |            |   |   |             |              |                                                                                                                     |
|------|-----------------------------|----------------------|------------|---|---|-------------|--------------|---------------------------------------------------------------------------------------------------------------------|
| 4807 | <i>Spilopelia chinensis</i> | Eastern Spotted Dove | 2022/5/31  | 1 | 0 | 22.61335141 | 120.26524680 | <a href="https://www.inaturalist.org/observations/119558952">https://www.inaturalist.org/observations/119558952</a> |
| 4808 | <i>Spilopelia chinensis</i> | Eastern Spotted Dove | 2021/3/16  | 1 | 0 | 22.61414953 | 120.36127570 | <a href="https://www.inaturalist.org/observations/71482000">https://www.inaturalist.org/observations/71482000</a>   |
| 4809 | <i>Spilopelia chinensis</i> | Eastern Spotted Dove | 2019/7/25  | 6 | 0 | 22.61440793 | 88.38777807  | <a href="https://www.inaturalist.org/observations/29498509">https://www.inaturalist.org/observations/29498509</a>   |
| 4810 | <i>Spilopelia chinensis</i> | Eastern Spotted Dove | 2022/3/21  | 1 | 0 | 22.61460000 | 120.37590560 | <a href="https://www.inaturalist.org/observations/109129544">https://www.inaturalist.org/observations/109129544</a> |
| 4811 | <i>Spilopelia chinensis</i> | Eastern Spotted Dove | 2022/3/21  | 2 | 0 | 22.61464444 | 120.37586110 | <a href="https://www.inaturalist.org/observations/109129490">https://www.inaturalist.org/observations/109129490</a> |
| 4812 | <i>Spilopelia chinensis</i> | Eastern Spotted Dove | 2020/5/24  | 1 | 0 | 22.61502445 | 120.26687520 | <a href="https://www.inaturalist.org/observations/47130838">https://www.inaturalist.org/observations/47130838</a>   |
| 4813 | <i>Spilopelia chinensis</i> | Eastern Spotted Dove | 2020/1/24  | 0 | 0 | 22.61607088 | 120.37693980 | <a href="https://www.inaturalist.org/observations/37907758">https://www.inaturalist.org/observations/37907758</a>   |
| 4814 | <i>Spilopelia chinensis</i> | Eastern Spotted Dove | 2020/5/19  | 1 | 0 | 22.61768726 | 120.37625860 | <a href="https://www.inaturalist.org/observations/46450581">https://www.inaturalist.org/observations/46450581</a>   |
| 4815 | <i>Spilopelia chinensis</i> | Eastern Spotted Dove | 2020/11/1  | 2 | 0 | 22.61795741 | 120.37599830 | <a href="https://www.inaturalist.org/observations/64032864">https://www.inaturalist.org/observations/64032864</a>   |
| 4816 | <i>Spilopelia chinensis</i> | Eastern Spotted Dove | 2020/3/17  | 4 | 0 | 22.61835007 | 78.13317082  | <a href="https://www.inaturalist.org/observations/66187597">https://www.inaturalist.org/observations/66187597</a>   |
| 4817 | <i>Spilopelia chinensis</i> | Eastern Spotted Dove | 2021/8/31  | 1 | 0 | 22.61850526 | 120.37744810 | <a href="https://www.inaturalist.org/observations/93247595">https://www.inaturalist.org/observations/93247595</a>   |
| 4818 | <i>Spilopelia chinensis</i> | Eastern Spotted Dove | 2020/8/17  | 2 | 0 | 22.61962955 | 120.33953140 | <a href="https://www.inaturalist.org/observations/56725331">https://www.inaturalist.org/observations/56725331</a>   |
| 4819 | <i>Spilopelia chinensis</i> | Eastern Spotted Dove | 2022/3/21  | 1 | 0 | 22.61974167 | 120.37659170 | <a href="https://www.inaturalist.org/observations/109129501">https://www.inaturalist.org/observations/109129501</a> |
| 4820 | <i>Spilopelia chinensis</i> | Eastern Spotted Dove | 2021/9/19  | 1 | 0 | 22.61976490 | 120.28135440 | <a href="https://www.inaturalist.org/observations/103728198">https://www.inaturalist.org/observations/103728198</a> |
| 4821 | <i>Spilopelia chinensis</i> | Eastern Spotted Dove | 2017/11/27 | 3 | 0 | 22.61976820 | 120.33955290 | <a href="https://www.inaturalist.org/observations/20022476">https://www.inaturalist.org/observations/20022476</a>   |
| 4822 | <i>Spilopelia chinensis</i> | Eastern Spotted Dove | 2021/9/14  | 1 | 0 | 22.61976820 | 120.33955290 | <a href="https://www.inaturalist.org/observations/94923790">https://www.inaturalist.org/observations/94923790</a>   |
| 4823 | <i>Spilopelia chinensis</i> | Eastern Spotted Dove | 2022/2/9   | 2 | 0 | 22.61976820 | 120.33955290 | <a href="https://www.inaturalist.org/observations/106414815">https://www.inaturalist.org/observations/106414815</a> |
| 4824 | <i>Spilopelia chinensis</i> | Eastern Spotted Dove | 2020/2/6   | 0 | 0 | 22.61976991 | 120.33954980 | <a href="https://www.inaturalist.org/observations/38354757">https://www.inaturalist.org/observations/38354757</a>   |
| 4825 | <i>Spilopelia chinensis</i> | Eastern Spotted Dove | 2018/6/23  | 3 | 0 | 22.61977486 | 120.33953910 | <a href="https://www.inaturalist.org/observations/13719671">https://www.inaturalist.org/observations/13719671</a>   |
| 4826 | <i>Spilopelia chinensis</i> | Eastern Spotted Dove | 2019/12/8  | 1 | 0 | 22.61977486 | 120.33954980 | <a href="https://www.inaturalist.org/observations/36460186">https://www.inaturalist.org/observations/36460186</a>   |
| 4827 | <i>Spilopelia chinensis</i> | Eastern Spotted Dove | 2022/4/1   | 2 | 0 | 22.61977486 | 120.33954980 | <a href="https://www.inaturalist.org/observations/110068252">https://www.inaturalist.org/observations/110068252</a> |
| 4828 | <i>Spilopelia chinensis</i> | Eastern Spotted Dove | 2021/11/17 | 2 | 0 | 22.61979467 | 120.33951760 | <a href="https://www.inaturalist.org/observations/101396217">https://www.inaturalist.org/observations/101396217</a> |
| 4829 | <i>Spilopelia chinensis</i> | Eastern Spotted Dove | 2018/1/11  | 1 | 0 | 22.61982117 | 120.34094510 | <a href="https://www.inaturalist.org/observations/123674624">https://www.inaturalist.org/observations/123674624</a> |

|      |                             |                      |            |   |   |             |              |                                                                                                                     |
|------|-----------------------------|----------------------|------------|---|---|-------------|--------------|---------------------------------------------------------------------------------------------------------------------|
| 4830 | <i>Spilopelia chinensis</i> | Eastern Spotted Dove | 2020/8/17  | 3 | 0 | 22.61992171 | 120.34044330 | <a href="https://www.inaturalist.org/observations/56725368">https://www.inaturalist.org/observations/56725368</a>   |
| 4831 | <i>Spilopelia chinensis</i> | Eastern Spotted Dove | 2021/11/30 | 1 | 0 | 22.62003652 | 120.38806030 | <a href="https://www.inaturalist.org/observations/102296159">https://www.inaturalist.org/observations/102296159</a> |
| 4832 | <i>Spilopelia chinensis</i> | Eastern Spotted Dove | 2019/12/21 | 2 | 0 | 22.62006063 | 120.28958040 | <a href="https://www.inaturalist.org/observations/37062894">https://www.inaturalist.org/observations/37062894</a>   |
| 4833 | <i>Spilopelia chinensis</i> | Eastern Spotted Dove | 2022/2/19  | 2 | 0 | 22.62008819 | 120.34173970 | <a href="https://www.inaturalist.org/observations/107094284">https://www.inaturalist.org/observations/107094284</a> |
| 4834 | <i>Spilopelia chinensis</i> | Eastern Spotted Dove | 2022/10/2  | 1 | 0 | 22.62015278 | 120.29951110 | <a href="https://www.inaturalist.org/observations/137248024">https://www.inaturalist.org/observations/137248024</a> |
| 4835 | <i>Spilopelia chinensis</i> | Eastern Spotted Dove | 2021/10/9  | 1 | 0 | 22.62015305 | 73.45790841  | <a href="https://www.inaturalist.org/observations/98607853">https://www.inaturalist.org/observations/98607853</a>   |
| 4836 | <i>Spilopelia chinensis</i> | Eastern Spotted Dove | 2022/4/21  | 2 | 0 | 22.62015305 | 73.45790841  | <a href="https://www.inaturalist.org/observations/119406731">https://www.inaturalist.org/observations/119406731</a> |
| 4837 | <i>Spilopelia chinensis</i> | Eastern Spotted Dove | 2022/4/21  | 2 | 0 | 22.62015305 | 73.45790841  | <a href="https://www.inaturalist.org/observations/119406738">https://www.inaturalist.org/observations/119406738</a> |
| 4838 | <i>Spilopelia chinensis</i> | Eastern Spotted Dove | 2022/4/27  | 2 | 0 | 22.62015305 | 73.45790841  | <a href="https://www.inaturalist.org/observations/119406780">https://www.inaturalist.org/observations/119406780</a> |
| 4839 | <i>Spilopelia chinensis</i> | Eastern Spotted Dove | 2022/1/15  | 4 | 0 | 22.62057000 | 73.45875333  | <a href="https://www.inaturalist.org/observations/120664996">https://www.inaturalist.org/observations/120664996</a> |
| 4840 | <i>Spilopelia chinensis</i> | Eastern Spotted Dove | 2015/11/2  | 1 | 0 | 22.62125084 | 120.35297670 | <a href="https://www.inaturalist.org/observations/82305091">https://www.inaturalist.org/observations/82305091</a>   |
| 4841 | <i>Spilopelia chinensis</i> | Eastern Spotted Dove | 2022/3/1   | 0 | 0 | 22.62253125 | 120.33931680 | <a href="https://www.inaturalist.org/observations/108228524">https://www.inaturalist.org/observations/108228524</a> |
| 4842 | <i>Spilopelia chinensis</i> | Eastern Spotted Dove | 2022/3/18  | 0 | 0 | 22.62253125 | 120.33931680 | <a href="https://www.inaturalist.org/observations/109148526">https://www.inaturalist.org/observations/109148526</a> |
| 4843 | <i>Spilopelia chinensis</i> | Eastern Spotted Dove | 2022/7/27  | 2 | 0 | 22.62263679 | 120.26886840 | <a href="https://www.inaturalist.org/observations/128133177">https://www.inaturalist.org/observations/128133177</a> |
| 4844 | <i>Spilopelia chinensis</i> | Eastern Spotted Dove | 2022/2/5   | 3 | 0 | 22.62269126 | 120.26893810 | <a href="https://www.inaturalist.org/observations/106160900">https://www.inaturalist.org/observations/106160900</a> |
| 4845 | <i>Spilopelia chinensis</i> | Eastern Spotted Dove | 2021/12/3  | 2 | 0 | 22.62273537 | 88.40931494  | <a href="https://www.inaturalist.org/observations/102400628">https://www.inaturalist.org/observations/102400628</a> |
| 4846 | <i>Spilopelia chinensis</i> | Eastern Spotted Dove | 2022/5/27  | 2 | 0 | 22.62295510 | 120.34295950 | <a href="https://www.inaturalist.org/observations/118886667">https://www.inaturalist.org/observations/118886667</a> |
| 4847 | <i>Spilopelia chinensis</i> | Eastern Spotted Dove | 2022/10/2  | 1 | 0 | 22.62301111 | 120.29926670 | <a href="https://www.inaturalist.org/observations/137248041">https://www.inaturalist.org/observations/137248041</a> |
| 4848 | <i>Spilopelia chinensis</i> | Eastern Spotted Dove | 2022/10/2  | 1 | 0 | 22.62302512 | 120.29899140 | <a href="https://www.inaturalist.org/observations/137235046">https://www.inaturalist.org/observations/137235046</a> |
| 4849 | <i>Spilopelia chinensis</i> | Eastern Spotted Dove | 2021/5/8   | 1 | 0 | 22.62318709 | 120.38629200 | <a href="https://www.inaturalist.org/observations/78316553">https://www.inaturalist.org/observations/78316553</a>   |
| 4850 | <i>Spilopelia chinensis</i> | Eastern Spotted Dove | 2022/10/2  | 2 | 0 | 22.62322110 | 120.29944570 | <a href="https://www.inaturalist.org/observations/137235714">https://www.inaturalist.org/observations/137235714</a> |
| 4851 | <i>Spilopelia chinensis</i> | Eastern Spotted Dove | 2020/10/3  | 3 | 0 | 22.62344701 | 120.28906320 | <a href="https://www.inaturalist.org/observations/63562982">https://www.inaturalist.org/observations/63562982</a>   |
| 4852 | <i>Spilopelia chinensis</i> | Eastern Spotted Dove | 2022/1/21  | 0 | 0 | 22.62344727 | 120.34377790 | <a href="https://www.inaturalist.org/observations/105643518">https://www.inaturalist.org/observations/105643518</a> |

|      |                             |                      |            |   |   |             |              |                                                                                                                     |
|------|-----------------------------|----------------------|------------|---|---|-------------|--------------|---------------------------------------------------------------------------------------------------------------------|
| 4853 | <i>Spilopelia chinensis</i> | Eastern Spotted Dove | 2022/2/14  | 3 | 0 | 22.62348708 | 120.36408940 | <a href="https://www.inaturalist.org/observations/106733995">https://www.inaturalist.org/observations/106733995</a> |
| 4854 | <i>Spilopelia chinensis</i> | Eastern Spotted Dove | 2020/4/24  | 2 | 0 | 22.62352022 | 120.33942670 | <a href="https://www.inaturalist.org/observations/44369455">https://www.inaturalist.org/observations/44369455</a>   |
| 4855 | <i>Spilopelia chinensis</i> | Eastern Spotted Dove | 2022/10/2  | 2 | 0 | 22.62353504 | 120.29947440 | <a href="https://www.inaturalist.org/observations/137237821">https://www.inaturalist.org/observations/137237821</a> |
| 4856 | <i>Spilopelia chinensis</i> | Eastern Spotted Dove | 2020/5/5   | 1 | 0 | 22.62369848 | 120.33984780 | <a href="https://www.inaturalist.org/observations/45064816">https://www.inaturalist.org/observations/45064816</a>   |
| 4857 | <i>Spilopelia chinensis</i> | Eastern Spotted Dove | 2022/10/2  | 1 | 0 | 22.62375833 | 120.29909440 | <a href="https://www.inaturalist.org/observations/137236714">https://www.inaturalist.org/observations/137236714</a> |
| 4858 | <i>Spilopelia chinensis</i> | Eastern Spotted Dove | 2022/10/2  | 3 | 0 | 22.62377629 | 120.29903900 | <a href="https://www.inaturalist.org/observations/137238115">https://www.inaturalist.org/observations/137238115</a> |
| 4859 | <i>Spilopelia chinensis</i> | Eastern Spotted Dove | 2022/10/2  | 4 | 0 | 22.62382833 | 120.29937830 | <a href="https://www.inaturalist.org/observations/137238405">https://www.inaturalist.org/observations/137238405</a> |
| 4860 | <i>Spilopelia chinensis</i> | Eastern Spotted Dove | 2022/8/17  | 0 | 0 | 22.62431667 | 120.30449720 | <a href="https://www.inaturalist.org/observations/131205569">https://www.inaturalist.org/observations/131205569</a> |
| 4861 | <i>Spilopelia chinensis</i> | Eastern Spotted Dove | 2020/10/23 | 2 | 0 | 22.62462221 | 120.29950070 | <a href="https://www.inaturalist.org/observations/63383262">https://www.inaturalist.org/observations/63383262</a>   |
| 4862 | <i>Spilopelia chinensis</i> | Eastern Spotted Dove | 2019/12/21 | 2 | 0 | 22.62463664 | 120.28868770 | <a href="https://www.inaturalist.org/observations/37062784">https://www.inaturalist.org/observations/37062784</a>   |
| 4863 | <i>Spilopelia chinensis</i> | Eastern Spotted Dove | 2022/10/2  | 2 | 0 | 22.62473799 | 120.29945750 | <a href="https://www.inaturalist.org/observations/137237320">https://www.inaturalist.org/observations/137237320</a> |
| 4864 | <i>Spilopelia chinensis</i> | Eastern Spotted Dove | 2019/12/23 | 1 | 0 | 22.62474105 | 120.29937190 | <a href="https://www.inaturalist.org/observations/36880788">https://www.inaturalist.org/observations/36880788</a>   |
| 4865 | <i>Spilopelia chinensis</i> | Eastern Spotted Dove | 2020/4/24  | 2 | 0 | 22.62496745 | 120.33786850 | <a href="https://www.inaturalist.org/observations/44372496">https://www.inaturalist.org/observations/44372496</a>   |
| 4866 | <i>Spilopelia chinensis</i> | Eastern Spotted Dove | 2020/10/3  | 3 | 0 | 22.62498077 | 120.28688260 | <a href="https://www.inaturalist.org/observations/63562932">https://www.inaturalist.org/observations/63562932</a>   |
| 4867 | <i>Spilopelia chinensis</i> | Eastern Spotted Dove | 2019/10/6  | 0 | 0 | 22.62508750 | 120.30055580 | <a href="https://www.inaturalist.org/observations/33927739">https://www.inaturalist.org/observations/33927739</a>   |
| 4868 | <i>Spilopelia chinensis</i> | Eastern Spotted Dove | 2022/7/3   | 1 | 0 | 22.62549744 | 120.35826590 | <a href="https://www.inaturalist.org/observations/124518564">https://www.inaturalist.org/observations/124518564</a> |
| 4869 | <i>Spilopelia chinensis</i> | Eastern Spotted Dove | 2020/10/16 | 1 | 0 | 22.62562773 | 120.28746130 | <a href="https://www.inaturalist.org/observations/62790374">https://www.inaturalist.org/observations/62790374</a>   |
| 4870 | <i>Spilopelia chinensis</i> | Eastern Spotted Dove | 2019/4/19  | 1 | 0 | 22.62580661 | 120.29992550 | <a href="https://www.inaturalist.org/observations/23430029">https://www.inaturalist.org/observations/23430029</a>   |
| 4871 | <i>Spilopelia chinensis</i> | Eastern Spotted Dove | 2016/7/15  | 1 | 0 | 22.62587509 | 120.36433970 | <a href="https://www.inaturalist.org/observations/80080680">https://www.inaturalist.org/observations/80080680</a>   |
| 4872 | <i>Spilopelia chinensis</i> | Eastern Spotted Dove | 2020/10/3  | 3 | 0 | 22.62587562 | 120.28758260 | <a href="https://www.inaturalist.org/observations/63562853">https://www.inaturalist.org/observations/63562853</a>   |
| 4873 | <i>Spilopelia chinensis</i> | Eastern Spotted Dove | 2020/3/22  | 2 | 0 | 22.62605441 | 120.32004120 | <a href="https://www.inaturalist.org/observations/40494725">https://www.inaturalist.org/observations/40494725</a>   |
| 4874 | <i>Spilopelia chinensis</i> | Eastern Spotted Dove | 2019/10/5  | 2 | 0 | 22.62651333 | 88.43654667  | <a href="https://www.inaturalist.org/observations/35817900">https://www.inaturalist.org/observations/35817900</a>   |
| 4875 | <i>Spilopelia chinensis</i> | Eastern Spotted Dove | 2014/6/22  | 2 | 0 | 22.62653219 | 120.26633840 | <a href="https://www.inaturalist.org/observations/19388962">https://www.inaturalist.org/observations/19388962</a>   |



|      |                             |                      |            |   |   |             |              |                                                                                                                     |
|------|-----------------------------|----------------------|------------|---|---|-------------|--------------|---------------------------------------------------------------------------------------------------------------------|
| 4876 | <i>Spilopelia chinensis</i> | Eastern Spotted Dove | 2020/9/11  | 3 | 0 | 22.62702407 | 120.36394720 | <a href="https://www.inaturalist.org/observations/59308529">https://www.inaturalist.org/observations/59308529</a>   |
| 4877 | <i>Spilopelia chinensis</i> | Eastern Spotted Dove | 2022/2/14  | 3 | 0 | 22.62723135 | 120.36555920 | <a href="https://www.inaturalist.org/observations/106733986">https://www.inaturalist.org/observations/106733986</a> |
| 4878 | <i>Spilopelia chinensis</i> | Eastern Spotted Dove | 2019/4/15  | 2 | 0 | 22.62766841 | 120.31473340 | <a href="https://www.inaturalist.org/observations/25471605">https://www.inaturalist.org/observations/25471605</a>   |
| 4879 | <i>Spilopelia chinensis</i> | Eastern Spotted Dove | 2022/2/14  | 2 | 0 | 22.62801369 | 120.36469020 | <a href="https://www.inaturalist.org/observations/106733969">https://www.inaturalist.org/observations/106733969</a> |
| 4880 | <i>Spilopelia chinensis</i> | Eastern Spotted Dove | 2022/2/14  | 2 | 0 | 22.62826620 | 120.36469020 | <a href="https://www.inaturalist.org/observations/106733964">https://www.inaturalist.org/observations/106733964</a> |
| 4881 | <i>Spilopelia chinensis</i> | Eastern Spotted Dove | 2022/8/6   | 2 | 0 | 22.62836111 | 120.31670280 | <a href="https://www.inaturalist.org/observations/129664385">https://www.inaturalist.org/observations/129664385</a> |
| 4882 | <i>Spilopelia chinensis</i> | Eastern Spotted Dove | 2021/12/24 | 1 | 0 | 22.62862587 | 120.34746300 | <a href="https://www.inaturalist.org/observations/103564990">https://www.inaturalist.org/observations/103564990</a> |
| 4883 | <i>Spilopelia chinensis</i> | Eastern Spotted Dove | 2022/6/4   | 1 | 0 | 22.62921944 | 120.34755830 | <a href="https://www.inaturalist.org/observations/120124361">https://www.inaturalist.org/observations/120124361</a> |
| 4884 | <i>Spilopelia chinensis</i> | Eastern Spotted Dove | 2022/2/14  | 3 | 0 | 22.62966747 | 120.36506570 | <a href="https://www.inaturalist.org/observations/106733980">https://www.inaturalist.org/observations/106733980</a> |
| 4885 | <i>Spilopelia chinensis</i> | Eastern Spotted Dove | 2021/11/26 | 3 | 0 | 22.63025201 | 120.34580050 | <a href="https://www.inaturalist.org/observations/101911417">https://www.inaturalist.org/observations/101911417</a> |
| 4886 | <i>Spilopelia chinensis</i> | Eastern Spotted Dove | 2021/12/11 | 3 | 0 | 22.63108456 | 120.35450340 | <a href="https://www.inaturalist.org/observations/102858791">https://www.inaturalist.org/observations/102858791</a> |
| 4887 | <i>Spilopelia chinensis</i> | Eastern Spotted Dove | 2022/4/3   | 3 | 0 | 22.63163363 | 120.28224270 | <a href="https://www.inaturalist.org/observations/120812020">https://www.inaturalist.org/observations/120812020</a> |
| 4888 | <i>Spilopelia chinensis</i> | Eastern Spotted Dove | 2019/12/16 | 2 | 0 | 22.63206888 | 120.36718930 | <a href="https://www.inaturalist.org/observations/36698209">https://www.inaturalist.org/observations/36698209</a>   |
| 4889 | <i>Spilopelia chinensis</i> | Eastern Spotted Dove | 2021/11/7  | 2 | 0 | 22.63365556 | 120.32879720 | <a href="https://www.inaturalist.org/observations/100470777">https://www.inaturalist.org/observations/100470777</a> |
| 4890 | <i>Spilopelia chinensis</i> | Eastern Spotted Dove | 2022/8/13  | 1 | 0 | 22.63388583 | 120.35781040 | <a href="https://www.inaturalist.org/observations/136363207">https://www.inaturalist.org/observations/136363207</a> |
| 4891 | <i>Spilopelia chinensis</i> | Eastern Spotted Dove | 2021/5/1   | 1 | 0 | 22.63408056 | 120.33228610 | <a href="https://www.inaturalist.org/observations/76759461">https://www.inaturalist.org/observations/76759461</a>   |
| 4892 | <i>Spilopelia chinensis</i> | Eastern Spotted Dove | 2022/1/9   | 3 | 0 | 22.63415556 | 120.33218330 | <a href="https://www.inaturalist.org/observations/108348660">https://www.inaturalist.org/observations/108348660</a> |
| 4893 | <i>Spilopelia chinensis</i> | Eastern Spotted Dove | 2020/4/5   | 1 | 0 | 22.63428639 | 120.33226220 | <a href="https://www.inaturalist.org/observations/42092416">https://www.inaturalist.org/observations/42092416</a>   |
| 4894 | <i>Spilopelia chinensis</i> | Eastern Spotted Dove | 2021/2/22  | 2 | 0 | 22.63458482 | 120.34211200 | <a href="https://www.inaturalist.org/observations/69971104">https://www.inaturalist.org/observations/69971104</a>   |
| 4895 | <i>Spilopelia chinensis</i> | Eastern Spotted Dove | 2022/8/13  | 3 | 0 | 22.63541770 | 120.35764380 | <a href="https://www.inaturalist.org/observations/134403417">https://www.inaturalist.org/observations/134403417</a> |
| 4896 | <i>Spilopelia chinensis</i> | Eastern Spotted Dove | 2022/8/13  | 2 | 0 | 22.63541770 | 120.35764380 | <a href="https://www.inaturalist.org/observations/134403419">https://www.inaturalist.org/observations/134403419</a> |
| 4897 | <i>Spilopelia chinensis</i> | Eastern Spotted Dove | 2022/8/13  | 3 | 0 | 22.63541770 | 120.35764380 | <a href="https://www.inaturalist.org/observations/134403421">https://www.inaturalist.org/observations/134403421</a> |
| 4898 | <i>Spilopelia chinensis</i> | Eastern Spotted Dove | 2019/1/21  | 1 | 0 | 22.63683734 | 120.30966590 | <a href="https://www.inaturalist.org/observations/19916906">https://www.inaturalist.org/observations/19916906</a>   |

|      |                             |                      |            |   |   |             |              |                                                                                                                     |
|------|-----------------------------|----------------------|------------|---|---|-------------|--------------|---------------------------------------------------------------------------------------------------------------------|
| 4899 | <i>Spilopelia chinensis</i> | Eastern Spotted Dove | 2019/1/21  | 2 | 0 | 22.63683734 | 120.30966590 | <a href="https://www.inaturalist.org/observations/19916911">https://www.inaturalist.org/observations/19916911</a>   |
| 4900 | <i>Spilopelia chinensis</i> | Eastern Spotted Dove | 2019/1/21  | 2 | 0 | 22.63683734 | 120.30966590 | <a href="https://www.inaturalist.org/observations/19916912">https://www.inaturalist.org/observations/19916912</a>   |
| 4901 | <i>Spilopelia chinensis</i> | Eastern Spotted Dove | 2019/1/21  | 2 | 0 | 22.63683734 | 120.30966590 | <a href="https://www.inaturalist.org/observations/19916913">https://www.inaturalist.org/observations/19916913</a>   |
| 4902 | <i>Spilopelia chinensis</i> | Eastern Spotted Dove | 2019/1/21  | 2 | 0 | 22.63683734 | 120.30966590 | <a href="https://www.inaturalist.org/observations/19916914">https://www.inaturalist.org/observations/19916914</a>   |
| 4903 | <i>Spilopelia chinensis</i> | Eastern Spotted Dove | 2021/4/18  | 1 | 0 | 22.63745308 | 120.29791260 | <a href="https://www.inaturalist.org/observations/74339649">https://www.inaturalist.org/observations/74339649</a>   |
| 4904 | <i>Spilopelia chinensis</i> | Eastern Spotted Dove | 2019/12/1  | 1 | 0 | 22.63764167 | 120.39390500 | <a href="https://www.inaturalist.org/observations/36238634">https://www.inaturalist.org/observations/36238634</a>   |
| 4905 | <i>Spilopelia chinensis</i> | Eastern Spotted Dove | 2022/7/1   | 3 | 0 | 22.63784649 | 120.27474550 | <a href="https://www.inaturalist.org/observations/124218648">https://www.inaturalist.org/observations/124218648</a> |
| 4906 | <i>Spilopelia chinensis</i> | Eastern Spotted Dove | 2021/8/31  | 1 | 0 | 22.63800333 | 114.40301970 | <a href="https://www.inaturalist.org/observations/98590471">https://www.inaturalist.org/observations/98590471</a>   |
| 4907 | <i>Spilopelia chinensis</i> | Eastern Spotted Dove | 2022/4/3   | 1 | 0 | 22.63802664 | 114.40191930 | <a href="https://www.inaturalist.org/observations/124847756">https://www.inaturalist.org/observations/124847756</a> |
| 4908 | <i>Spilopelia chinensis</i> | Eastern Spotted Dove | 2021/4/3   | 1 | 0 | 22.63831990 | 114.20740000 | <a href="https://www.inaturalist.org/observations/132151648">https://www.inaturalist.org/observations/132151648</a> |
| 4909 | <i>Spilopelia chinensis</i> | Eastern Spotted Dove | 2020/6/18  | 1 | 0 | 22.63853453 | 120.29685970 | <a href="https://www.inaturalist.org/observations/50014027">https://www.inaturalist.org/observations/50014027</a>   |
| 4910 | <i>Spilopelia chinensis</i> | Eastern Spotted Dove | 2018/3/29  | 2 | 0 | 22.63870000 | 120.29691300 | <a href="https://www.inaturalist.org/observations/15777794">https://www.inaturalist.org/observations/15777794</a>   |
| 4911 | <i>Spilopelia chinensis</i> | Eastern Spotted Dove | 2021/7/25  | 2 | 0 | 22.63873004 | 120.60553780 | <a href="https://www.inaturalist.org/observations/88936538">https://www.inaturalist.org/observations/88936538</a>   |
| 4912 | <i>Spilopelia chinensis</i> | Eastern Spotted Dove | 2019/6/23  | 1 | 0 | 22.63918411 | 120.27074250 | <a href="https://www.inaturalist.org/observations/27559722">https://www.inaturalist.org/observations/27559722</a>   |
| 4913 | <i>Spilopelia chinensis</i> | Eastern Spotted Dove | 2022/4/4   | 2 | 0 | 22.63934599 | 120.28165370 | <a href="https://www.inaturalist.org/observations/120815590">https://www.inaturalist.org/observations/120815590</a> |
| 4914 | <i>Spilopelia chinensis</i> | Eastern Spotted Dove | 2021/4/19  | 2 | 0 | 22.63939641 | 120.29741450 | <a href="https://www.inaturalist.org/observations/90744259">https://www.inaturalist.org/observations/90744259</a>   |
| 4915 | <i>Spilopelia chinensis</i> | Eastern Spotted Dove | 2021/9/18  | 1 | 0 | 22.63978764 | 114.39727630 | <a href="https://www.inaturalist.org/observations/100121910">https://www.inaturalist.org/observations/100121910</a> |
| 4916 | <i>Spilopelia chinensis</i> | Eastern Spotted Dove | 2022/1/8   | 2 | 0 | 22.63981389 | 120.32321670 | <a href="https://www.inaturalist.org/observations/108348658">https://www.inaturalist.org/observations/108348658</a> |
| 4917 | <i>Spilopelia chinensis</i> | Eastern Spotted Dove | 2018/11/25 | 4 | 0 | 22.63989333 | 120.34569760 | <a href="https://www.inaturalist.org/observations/18648955">https://www.inaturalist.org/observations/18648955</a>   |
| 4918 | <i>Spilopelia chinensis</i> | Eastern Spotted Dove | 2020/8/11  | 1 | 0 | 22.64007220 | 120.32185410 | <a href="https://www.inaturalist.org/observations/56100056">https://www.inaturalist.org/observations/56100056</a>   |
| 4919 | <i>Spilopelia chinensis</i> | Eastern Spotted Dove | 2021/3/11  | 1 | 0 | 22.64392198 | 120.32038450 | <a href="https://www.inaturalist.org/observations/122613502">https://www.inaturalist.org/observations/122613502</a> |
| 4920 | <i>Spilopelia chinensis</i> | Eastern Spotted Dove | 2019/8/18  | 6 | 0 | 22.64427900 | 88.41833018  | <a href="https://www.inaturalist.org/observations/31112948">https://www.inaturalist.org/observations/31112948</a>   |
| 4921 | <i>Spilopelia chinensis</i> | Eastern Spotted Dove | 2020/5/23  | 1 | 0 | 22.64517289 | 120.28591490 | <a href="https://www.inaturalist.org/observations/47062620">https://www.inaturalist.org/observations/47062620</a>   |

|      |                             |                      |            |   |   |             |              |                                                                                                                     |
|------|-----------------------------|----------------------|------------|---|---|-------------|--------------|---------------------------------------------------------------------------------------------------------------------|
| 4922 | <i>Spilopelia chinensis</i> | Eastern Spotted Dove | 2019/2/16  | 2 | 0 | 22.64554227 | 120.28610340 | <a href="https://www.inaturalist.org/observations/20385091">https://www.inaturalist.org/observations/20385091</a>   |
| 4923 | <i>Spilopelia chinensis</i> | Eastern Spotted Dove | 2021/12/18 | 1 | 0 | 22.64628207 | 120.36134190 | <a href="https://www.inaturalist.org/observations/103304151">https://www.inaturalist.org/observations/103304151</a> |
| 4924 | <i>Spilopelia chinensis</i> | Eastern Spotted Dove | 2018/2/24  | 2 | 0 | 22.64651760 | 120.28660560 | <a href="https://www.inaturalist.org/observations/18349850">https://www.inaturalist.org/observations/18349850</a>   |
| 4925 | <i>Spilopelia chinensis</i> | Eastern Spotted Dove | 2019/9/27  | 2 | 0 | 22.64716039 | 120.30975170 | <a href="https://www.inaturalist.org/observations/33521032">https://www.inaturalist.org/observations/33521032</a>   |
| 4926 | <i>Spilopelia chinensis</i> | Eastern Spotted Dove | 2020/11/12 | 1 | 0 | 22.64857801 | 120.29502400 | <a href="https://www.inaturalist.org/observations/64773584">https://www.inaturalist.org/observations/64773584</a>   |
| 4927 | <i>Spilopelia chinensis</i> | Eastern Spotted Dove | 2018/3/26  | 3 | 0 | 22.64866200 | 120.28549100 | <a href="https://www.inaturalist.org/observations/10428882">https://www.inaturalist.org/observations/10428882</a>   |
| 4928 | <i>Spilopelia chinensis</i> | Eastern Spotted Dove | 2021/9/9   | 2 | 0 | 22.64916167 | 120.28602500 | <a href="https://www.inaturalist.org/observations/94191984">https://www.inaturalist.org/observations/94191984</a>   |
| 4929 | <i>Spilopelia chinensis</i> | Eastern Spotted Dove | 2020/3/14  | 1 | 0 | 22.65117500 | 120.27215830 | <a href="https://www.inaturalist.org/observations/39963031">https://www.inaturalist.org/observations/39963031</a>   |
| 4930 | <i>Spilopelia chinensis</i> | Eastern Spotted Dove | 2015/11/19 | 2 | 0 | 22.65166639 | 120.35058520 | <a href="https://www.inaturalist.org/observations/132012030">https://www.inaturalist.org/observations/132012030</a> |
| 4931 | <i>Spilopelia chinensis</i> | Eastern Spotted Dove | 2022/3/19  | 1 | 0 | 22.65186833 | 120.30219330 | <a href="https://www.inaturalist.org/observations/113193814">https://www.inaturalist.org/observations/113193814</a> |
| 4932 | <i>Spilopelia chinensis</i> | Eastern Spotted Dove | 2022/3/19  | 2 | 0 | 22.65209882 | 120.30176310 | <a href="https://www.inaturalist.org/observations/108930459">https://www.inaturalist.org/observations/108930459</a> |
| 4933 | <i>Spilopelia chinensis</i> | Eastern Spotted Dove | 2022/2/7   | 3 | 0 | 22.65216640 | 120.35174790 | <a href="https://www.inaturalist.org/observations/106316127">https://www.inaturalist.org/observations/106316127</a> |
| 4934 | <i>Spilopelia chinensis</i> | Eastern Spotted Dove | 2022/9/30  | 2 | 0 | 22.65225556 | 120.26547500 | <a href="https://www.inaturalist.org/observations/137147309">https://www.inaturalist.org/observations/137147309</a> |
| 4935 | <i>Spilopelia chinensis</i> | Eastern Spotted Dove | 2020/11/24 | 1 | 0 | 22.65239907 | 120.34961960 | <a href="https://www.inaturalist.org/observations/65574942">https://www.inaturalist.org/observations/65574942</a>   |
| 4936 | <i>Spilopelia chinensis</i> | Eastern Spotted Dove | 2020/7/5   | 1 | 0 | 22.65260833 | 120.33239670 | <a href="https://www.inaturalist.org/observations/52253927">https://www.inaturalist.org/observations/52253927</a>   |
| 4937 | <i>Spilopelia chinensis</i> | Eastern Spotted Dove | 2021/10/2  | 2 | 0 | 22.65269610 | 120.34991460 | <a href="https://www.inaturalist.org/observations/97025960">https://www.inaturalist.org/observations/97025960</a>   |
| 4938 | <i>Spilopelia chinensis</i> | Eastern Spotted Dove | 2022/3/4   | 2 | 0 | 22.65290370 | 120.30540760 | <a href="https://www.inaturalist.org/observations/107858223">https://www.inaturalist.org/observations/107858223</a> |
| 4939 | <i>Spilopelia chinensis</i> | Eastern Spotted Dove | 2020/3/11  | 1 | 0 | 22.65309500 | 120.26890170 | <a href="https://www.inaturalist.org/observations/39875814">https://www.inaturalist.org/observations/39875814</a>   |
| 4940 | <i>Spilopelia chinensis</i> | Eastern Spotted Dove | 2021/5/10  | 1 | 0 | 22.65413170 | 120.29045890 | <a href="https://www.inaturalist.org/observations/78136332">https://www.inaturalist.org/observations/78136332</a>   |
| 4941 | <i>Spilopelia chinensis</i> | Eastern Spotted Dove | 2018/4/24  | 1 | 0 | 22.65536360 | 120.28643130 | <a href="https://www.inaturalist.org/observations/11388881">https://www.inaturalist.org/observations/11388881</a>   |
| 4942 | <i>Spilopelia chinensis</i> | Eastern Spotted Dove | 2019/12/1  | 1 | 0 | 22.65538556 | 120.34891300 | <a href="https://www.inaturalist.org/observations/36255170">https://www.inaturalist.org/observations/36255170</a>   |
| 4943 | <i>Spilopelia chinensis</i> | Eastern Spotted Dove | 2019/3/22  | 1 | 0 | 22.65559286 | 120.26387960 | <a href="https://www.inaturalist.org/observations/21508022">https://www.inaturalist.org/observations/21508022</a>   |
| 4944 | <i>Spilopelia chinensis</i> | Eastern Spotted Dove | 2018/2/21  | 3 | 0 | 22.65643230 | 120.28626300 | <a href="https://www.inaturalist.org/observations/9944509">https://www.inaturalist.org/observations/9944509</a>     |

|      |                             |                      |            |   |   |             |              |                                                                                                                     |
|------|-----------------------------|----------------------|------------|---|---|-------------|--------------|---------------------------------------------------------------------------------------------------------------------|
| 4945 | <i>Spilopelia chinensis</i> | Eastern Spotted Dove | 2018/3/13  | 4 | 0 | 22.65643230 | 120.28626300 | <a href="https://www.inaturalist.org/observations/10218414">https://www.inaturalist.org/observations/10218414</a>   |
| 4946 | <i>Spilopelia chinensis</i> | Eastern Spotted Dove | 2020/11/14 | 2 | 0 | 22.65795876 | 120.51210900 | <a href="https://www.inaturalist.org/observations/64842155">https://www.inaturalist.org/observations/64842155</a>   |
| 4947 | <i>Spilopelia chinensis</i> | Eastern Spotted Dove | 2021/10/15 | 1 | 0 | 22.65802197 | 120.27885500 | <a href="https://www.inaturalist.org/observations/98261392">https://www.inaturalist.org/observations/98261392</a>   |
| 4948 | <i>Spilopelia chinensis</i> | Eastern Spotted Dove | 2022/3/14  | 1 | 0 | 22.65845000 | 120.29981940 | <a href="https://www.inaturalist.org/observations/108569699">https://www.inaturalist.org/observations/108569699</a> |
| 4949 | <i>Spilopelia chinensis</i> | Eastern Spotted Dove | 2020/11/14 | 1 | 0 | 22.65851003 | 120.51256710 | <a href="https://www.inaturalist.org/observations/64842145">https://www.inaturalist.org/observations/64842145</a>   |
| 4950 | <i>Spilopelia chinensis</i> | Eastern Spotted Dove | 2022/3/14  | 1 | 0 | 22.65851944 | 120.29985280 | <a href="https://www.inaturalist.org/observations/108569701">https://www.inaturalist.org/observations/108569701</a> |
| 4951 | <i>Spilopelia chinensis</i> | Eastern Spotted Dove | 2019/7/23  | 2 | 0 | 22.65853119 | 120.30713650 | <a href="https://www.inaturalist.org/observations/29364108">https://www.inaturalist.org/observations/29364108</a>   |
| 4952 | <i>Spilopelia chinensis</i> | Eastern Spotted Dove | 2022/3/14  | 2 | 0 | 22.65856111 | 120.29978060 | <a href="https://www.inaturalist.org/observations/108569703">https://www.inaturalist.org/observations/108569703</a> |
| 4953 | <i>Spilopelia chinensis</i> | Eastern Spotted Dove | 2022/6/2   | 2 | 0 | 22.65905855 | 120.32420900 | <a href="https://www.inaturalist.org/observations/119839257">https://www.inaturalist.org/observations/119839257</a> |
| 4954 | <i>Spilopelia chinensis</i> | Eastern Spotted Dove | 2022/3/14  | 1 | 0 | 22.65908611 | 120.29798890 | <a href="https://www.inaturalist.org/observations/108569734">https://www.inaturalist.org/observations/108569734</a> |
| 4955 | <i>Spilopelia chinensis</i> | Eastern Spotted Dove | 2021/2/27  | 1 | 0 | 22.66010432 | 120.29607270 | <a href="https://www.inaturalist.org/observations/70436331">https://www.inaturalist.org/observations/70436331</a>   |
| 4956 | <i>Spilopelia chinensis</i> | Eastern Spotted Dove | 2022/2/14  | 3 | 0 | 22.66020695 | 72.76469551  | <a href="https://www.inaturalist.org/observations/106854984">https://www.inaturalist.org/observations/106854984</a> |
| 4957 | <i>Spilopelia chinensis</i> | Eastern Spotted Dove | 2022/1/4   | 2 | 0 | 22.66158747 | 88.38241372  | <a href="https://www.inaturalist.org/observations/104334426">https://www.inaturalist.org/observations/104334426</a> |
| 4958 | <i>Spilopelia chinensis</i> | Eastern Spotted Dove | 2020/10/3  | 1 | 0 | 22.66230107 | 120.31079500 | <a href="https://www.inaturalist.org/observations/61540039">https://www.inaturalist.org/observations/61540039</a>   |
| 4959 | <i>Spilopelia chinensis</i> | Eastern Spotted Dove | 2021/10/9  | 2 | 0 | 22.66326400 | 120.48668540 | <a href="https://www.inaturalist.org/observations/101606879">https://www.inaturalist.org/observations/101606879</a> |
| 4960 | <i>Spilopelia chinensis</i> | Eastern Spotted Dove | 2021/10/10 | 2 | 0 | 22.66326400 | 120.48668540 | <a href="https://www.inaturalist.org/observations/101606901">https://www.inaturalist.org/observations/101606901</a> |
| 4961 | <i>Spilopelia chinensis</i> | Eastern Spotted Dove | 2022/7/10  | 0 | 0 | 22.66397136 | 120.31060840 | <a href="https://www.inaturalist.org/observations/125546812">https://www.inaturalist.org/observations/125546812</a> |
| 4962 | <i>Spilopelia chinensis</i> | Eastern Spotted Dove | 2020/7/4   | 2 | 0 | 22.66442592 | 120.30115640 | <a href="https://www.inaturalist.org/observations/51876443">https://www.inaturalist.org/observations/51876443</a>   |
| 4963 | <i>Spilopelia chinensis</i> | Eastern Spotted Dove | 2022/4/30  | 1 | 0 | 22.66511605 | 120.31024050 | <a href="https://www.inaturalist.org/observations/113666382">https://www.inaturalist.org/observations/113666382</a> |
| 4964 | <i>Spilopelia chinensis</i> | Eastern Spotted Dove | 2022/5/9   | 2 | 0 | 22.66740294 | 120.30349790 | <a href="https://www.inaturalist.org/observations/116234954">https://www.inaturalist.org/observations/116234954</a> |
| 4965 | <i>Spilopelia chinensis</i> | Eastern Spotted Dove | 2022/3/27  | 1 | 0 | 22.66770141 | 120.30318990 | <a href="https://www.inaturalist.org/observations/109598917">https://www.inaturalist.org/observations/109598917</a> |
| 4966 | <i>Spilopelia chinensis</i> | Eastern Spotted Dove | 2019/6/21  | 2 | 0 | 22.66900276 | 120.49676580 | <a href="https://www.inaturalist.org/observations/32058115">https://www.inaturalist.org/observations/32058115</a>   |
| 4967 | <i>Spilopelia chinensis</i> | Eastern Spotted Dove | 2022/2/3   | 2 | 0 | 22.66960142 | 85.62966917  | <a href="https://www.inaturalist.org/observations/106054113">https://www.inaturalist.org/observations/106054113</a> |

|      |                             |                      |           |   |   |             |              |                                                                                                                     |
|------|-----------------------------|----------------------|-----------|---|---|-------------|--------------|---------------------------------------------------------------------------------------------------------------------|
| 4968 | <i>Spilopelia chinensis</i> | Eastern Spotted Dove | 2019/8/9  | 2 | 0 | 22.67604446 | 120.29373170 | <a href="https://www.inaturalist.org/observations/30603018">https://www.inaturalist.org/observations/30603018</a>   |
| 4969 | <i>Spilopelia chinensis</i> | Eastern Spotted Dove | 2020/4/24 | 3 | 0 | 22.67610833 | 120.29377500 | <a href="https://www.inaturalist.org/observations/43022121">https://www.inaturalist.org/observations/43022121</a>   |
| 4970 | <i>Spilopelia chinensis</i> | Eastern Spotted Dove | 2021/9/25 | 1 | 0 | 22.67628331 | 120.29062120 | <a href="https://www.inaturalist.org/observations/96373303">https://www.inaturalist.org/observations/96373303</a>   |
| 4971 | <i>Spilopelia chinensis</i> | Eastern Spotted Dove | 2022/3/16 | 3 | 0 | 22.67711310 | 120.50370130 | <a href="https://www.inaturalist.org/observations/108801632">https://www.inaturalist.org/observations/108801632</a> |
| 4972 | <i>Spilopelia chinensis</i> | Eastern Spotted Dove | 2022/1/26 | 2 | 0 | 22.67872793 | 120.29690270 | <a href="https://www.inaturalist.org/observations/105661988">https://www.inaturalist.org/observations/105661988</a> |
| 4973 | <i>Spilopelia chinensis</i> | Eastern Spotted Dove | 2022/7/28 | 1 | 0 | 22.67873739 | 120.30063260 | <a href="https://www.inaturalist.org/observations/132277720">https://www.inaturalist.org/observations/132277720</a> |
| 4974 | <i>Spilopelia chinensis</i> | Eastern Spotted Dove | 2020/12/1 | 2 | 0 | 22.67874167 | 120.29396110 | <a href="https://www.inaturalist.org/observations/66001276">https://www.inaturalist.org/observations/66001276</a>   |
| 4975 | <i>Spilopelia chinensis</i> | Eastern Spotted Dove | 2014/8/14 | 2 | 0 | 22.67877630 | 120.30101750 | <a href="https://www.inaturalist.org/observations/68913002">https://www.inaturalist.org/observations/68913002</a>   |
| 4976 | <i>Spilopelia chinensis</i> | Eastern Spotted Dove | 2021/11/3 | 2 | 0 | 22.67906097 | 120.29923180 | <a href="https://www.inaturalist.org/observations/106846568">https://www.inaturalist.org/observations/106846568</a> |
| 4977 | <i>Spilopelia chinensis</i> | Eastern Spotted Dove | 2021/11/3 | 2 | 0 | 22.67930474 | 120.29963680 | <a href="https://www.inaturalist.org/observations/106844566">https://www.inaturalist.org/observations/106844566</a> |
| 4978 | <i>Spilopelia chinensis</i> | Eastern Spotted Dove | 2020/12/1 | 1 | 0 | 22.67958333 | 120.29660830 | <a href="https://www.inaturalist.org/observations/65925393">https://www.inaturalist.org/observations/65925393</a>   |
| 4979 | <i>Spilopelia chinensis</i> | Eastern Spotted Dove | 2020/12/1 | 2 | 0 | 22.67958433 | 120.29653220 | <a href="https://www.inaturalist.org/observations/65925063">https://www.inaturalist.org/observations/65925063</a>   |
| 4980 | <i>Spilopelia chinensis</i> | Eastern Spotted Dove | 2020/12/1 | 1 | 0 | 22.67960564 | 120.29650630 | <a href="https://www.inaturalist.org/observations/65925103">https://www.inaturalist.org/observations/65925103</a>   |
| 4981 | <i>Spilopelia chinensis</i> | Eastern Spotted Dove | 2022/6/28 | 1 | 0 | 22.67969875 | 120.30119910 | <a href="https://www.inaturalist.org/observations/126630625">https://www.inaturalist.org/observations/126630625</a> |
| 4982 | <i>Spilopelia chinensis</i> | Eastern Spotted Dove | 2014/8/14 | 1 | 0 | 22.67980999 | 120.30051230 | <a href="https://www.inaturalist.org/observations/68913022">https://www.inaturalist.org/observations/68913022</a>   |
| 4983 | <i>Spilopelia chinensis</i> | Eastern Spotted Dove | 2022/6/28 | 1 | 0 | 22.67982249 | 120.30096710 | <a href="https://www.inaturalist.org/observations/126630626">https://www.inaturalist.org/observations/126630626</a> |
| 4984 | <i>Spilopelia chinensis</i> | Eastern Spotted Dove | 2014/8/14 | 2 | 0 | 22.67998723 | 120.30112440 | <a href="https://www.inaturalist.org/observations/68913001">https://www.inaturalist.org/observations/68913001</a>   |
| 4985 | <i>Spilopelia chinensis</i> | Eastern Spotted Dove | 2014/8/14 | 2 | 0 | 22.68007664 | 120.30080830 | <a href="https://www.inaturalist.org/observations/68913000">https://www.inaturalist.org/observations/68913000</a>   |
| 4986 | <i>Spilopelia chinensis</i> | Eastern Spotted Dove | 2021/11/3 | 3 | 0 | 22.68022908 | 120.30010620 | <a href="https://www.inaturalist.org/observations/106843807">https://www.inaturalist.org/observations/106843807</a> |
| 4987 | <i>Spilopelia chinensis</i> | Eastern Spotted Dove | 2018/5/19 | 2 | 0 | 22.68027716 | 120.29016760 | <a href="https://www.inaturalist.org/observations/12601688">https://www.inaturalist.org/observations/12601688</a>   |
| 4988 | <i>Spilopelia chinensis</i> | Eastern Spotted Dove | 2014/8/14 | 2 | 0 | 22.68038814 | 120.30113550 | <a href="https://www.inaturalist.org/observations/68912997">https://www.inaturalist.org/observations/68912997</a>   |
| 4989 | <i>Spilopelia chinensis</i> | Eastern Spotted Dove | 2020/2/7  | 0 | 0 | 22.68048999 | 120.29243950 | <a href="https://www.inaturalist.org/observations/38386681">https://www.inaturalist.org/observations/38386681</a>   |
| 4990 | <i>Spilopelia chinensis</i> | Eastern Spotted Dove | 2014/8/14 | 1 | 0 | 22.68071185 | 120.30062260 | <a href="https://www.inaturalist.org/observations/68912995">https://www.inaturalist.org/observations/68912995</a>   |

|      |                             |                      |            |   |   |             |              |                                                                                                                     |
|------|-----------------------------|----------------------|------------|---|---|-------------|--------------|---------------------------------------------------------------------------------------------------------------------|
| 4991 | <i>Spilopelia chinensis</i> | Eastern Spotted Dove | 2021/8/30  | 1 | 0 | 22.68101676 | 113.84885880 | <a href="https://www.inaturalist.org/observations/96875872">https://www.inaturalist.org/observations/96875872</a>   |
| 4992 | <i>Spilopelia chinensis</i> | Eastern Spotted Dove | 2021/11/3  | 2 | 0 | 22.68106184 | 120.30165120 | <a href="https://www.inaturalist.org/observations/106843620">https://www.inaturalist.org/observations/106843620</a> |
| 4993 | <i>Spilopelia chinensis</i> | Eastern Spotted Dove | 2022/7/28  | 1 | 0 | 22.68124819 | 120.30161500 | <a href="https://www.inaturalist.org/observations/132277718">https://www.inaturalist.org/observations/132277718</a> |
| 4994 | <i>Spilopelia chinensis</i> | Eastern Spotted Dove | 2020/7/19  | 1 | 0 | 22.68185748 | 120.30229890 | <a href="https://www.inaturalist.org/observations/54378664">https://www.inaturalist.org/observations/54378664</a>   |
| 4995 | <i>Spilopelia chinensis</i> | Eastern Spotted Dove | 2020/7/19  | 1 | 0 | 22.68188718 | 120.30240090 | <a href="https://www.inaturalist.org/observations/54378701">https://www.inaturalist.org/observations/54378701</a>   |
| 4996 | <i>Spilopelia chinensis</i> | Eastern Spotted Dove | 2019/3/3   | 2 | 0 | 22.68204550 | 120.29860260 | <a href="https://www.inaturalist.org/observations/20908797">https://www.inaturalist.org/observations/20908797</a>   |
| 4997 | <i>Spilopelia chinensis</i> | Eastern Spotted Dove | 2020/12/1  | 3 | 0 | 22.68324520 | 120.29758220 | <a href="https://www.inaturalist.org/observations/65936335">https://www.inaturalist.org/observations/65936335</a>   |
| 4998 | <i>Spilopelia chinensis</i> | Eastern Spotted Dove | 2020/12/20 | 3 | 0 | 22.68364621 | 88.32208366  | <a href="https://www.inaturalist.org/observations/67046465">https://www.inaturalist.org/observations/67046465</a>   |
| 4999 | <i>Spilopelia chinensis</i> | Eastern Spotted Dove | 2020/6/22  | 1 | 0 | 22.68393472 | 88.43342631  | <a href="https://www.inaturalist.org/observations/56505083">https://www.inaturalist.org/observations/56505083</a>   |
| 5000 | <i>Spilopelia chinensis</i> | Eastern Spotted Dove | 2020/12/20 | 2 | 0 | 22.68478600 | 88.32178800  | <a href="https://www.inaturalist.org/observations/67014325">https://www.inaturalist.org/observations/67014325</a>   |
| 5001 | <i>Spilopelia chinensis</i> | Eastern Spotted Dove | 2020/12/13 | 3 | 0 | 22.68577605 | 88.32132340  | <a href="https://www.inaturalist.org/observations/66576895">https://www.inaturalist.org/observations/66576895</a>   |
| 5002 | <i>Spilopelia chinensis</i> | Eastern Spotted Dove | 2020/12/13 | 3 | 0 | 22.68577605 | 88.32132340  | <a href="https://www.inaturalist.org/observations/66576898">https://www.inaturalist.org/observations/66576898</a>   |
| 5003 | <i>Spilopelia chinensis</i> | Eastern Spotted Dove | 2021/1/3   | 1 | 0 | 22.68588451 | 120.29611700 | <a href="https://www.inaturalist.org/observations/67570231">https://www.inaturalist.org/observations/67570231</a>   |
| 5004 | <i>Spilopelia chinensis</i> | Eastern Spotted Dove | 2022/1/26  | 2 | 0 | 22.68750585 | 120.32633270 | <a href="https://www.inaturalist.org/observations/105661982">https://www.inaturalist.org/observations/105661982</a> |
| 5005 | <i>Spilopelia chinensis</i> | Eastern Spotted Dove | 2020/2/16  | 4 | 0 | 22.68835871 | 88.31439686  | <a href="https://www.inaturalist.org/observations/111909596">https://www.inaturalist.org/observations/111909596</a> |
| 5006 | <i>Spilopelia chinensis</i> | Eastern Spotted Dove | 2020/1/12  | 1 | 0 | 22.68928760 | 120.35994160 | <a href="https://www.inaturalist.org/observations/37516391">https://www.inaturalist.org/observations/37516391</a>   |
| 5007 | <i>Spilopelia chinensis</i> | Eastern Spotted Dove | 2021/10/3  | 1 | 0 | 22.69961014 | 88.39156106  | <a href="https://www.inaturalist.org/observations/96986256">https://www.inaturalist.org/observations/96986256</a>   |
| 5008 | <i>Spilopelia chinensis</i> | Eastern Spotted Dove | 2021/10/6  | 1 | 0 | 22.69961509 | 88.39157280  | <a href="https://www.inaturalist.org/observations/97307539">https://www.inaturalist.org/observations/97307539</a>   |
| 5009 | <i>Spilopelia chinensis</i> | Eastern Spotted Dove | 2020/12/23 | 1 | 0 | 22.71972654 | 114.40057240 | <a href="https://www.inaturalist.org/observations/67304448">https://www.inaturalist.org/observations/67304448</a>   |
| 5010 | <i>Spilopelia chinensis</i> | Eastern Spotted Dove | 2020/3/19  | 1 | 0 | 22.72282113 | 120.34228060 | <a href="https://www.inaturalist.org/observations/40230588">https://www.inaturalist.org/observations/40230588</a>   |
| 5011 | <i>Spilopelia chinensis</i> | Eastern Spotted Dove | 2022/1/30  | 1 | 0 | 22.72698667 | 120.32585330 | <a href="https://www.inaturalist.org/observations/105817302">https://www.inaturalist.org/observations/105817302</a> |
| 5012 | <i>Spilopelia chinensis</i> | Eastern Spotted Dove | 2020/7/13  | 1 | 0 | 22.73272309 | 120.31400320 | <a href="https://www.inaturalist.org/observations/52937849">https://www.inaturalist.org/observations/52937849</a>   |
| 5013 | <i>Spilopelia chinensis</i> | Eastern Spotted Dove | 2022/2/8   | 1 | 0 | 22.75236736 | 120.31638360 | <a href="https://www.inaturalist.org/observations/106371281">https://www.inaturalist.org/observations/106371281</a> |

|      |                             |                      |            |   |   |             |              |                                                                                                                     |
|------|-----------------------------|----------------------|------------|---|---|-------------|--------------|---------------------------------------------------------------------------------------------------------------------|
| 5014 | <i>Spilopelia chinensis</i> | Eastern Spotted Dove | 2020/12/16 | 1 | 0 | 22.75305397 | 121.00457430 | <a href="https://www.inaturalist.org/observations/66644423">https://www.inaturalist.org/observations/66644423</a>   |
| 5015 | <i>Spilopelia chinensis</i> | Eastern Spotted Dove | 2021/3/28  | 2 | 0 | 22.75603880 | 121.14376490 | <a href="https://www.inaturalist.org/observations/90227892">https://www.inaturalist.org/observations/90227892</a>   |
| 5016 | <i>Spilopelia chinensis</i> | Eastern Spotted Dove | 2021/8/10  | 0 | 0 | 22.75740500 | 121.14733880 | <a href="https://www.inaturalist.org/observations/90602835">https://www.inaturalist.org/observations/90602835</a>   |
| 5017 | <i>Spilopelia chinensis</i> | Eastern Spotted Dove | 2022/7/22  | 4 | 0 | 22.75937000 | 121.09222830 | <a href="https://www.inaturalist.org/observations/127684705">https://www.inaturalist.org/observations/127684705</a> |
| 5018 | <i>Spilopelia chinensis</i> | Eastern Spotted Dove | 2021/4/23  | 3 | 0 | 22.76837126 | 121.12489130 | <a href="https://www.inaturalist.org/observations/74908216">https://www.inaturalist.org/observations/74908216</a>   |
| 5019 | <i>Spilopelia chinensis</i> | Eastern Spotted Dove | 2022/7/2   | 1 | 0 | 22.76877975 | 120.23948670 | <a href="https://www.inaturalist.org/observations/124316437">https://www.inaturalist.org/observations/124316437</a> |
| 5020 | <i>Spilopelia chinensis</i> | Eastern Spotted Dove | 2022/4/9   | 1 | 0 | 22.77052700 | 121.11942900 | <a href="https://www.inaturalist.org/observations/111020385">https://www.inaturalist.org/observations/111020385</a> |
| 5021 | <i>Spilopelia chinensis</i> | Eastern Spotted Dove | 2020/4/11  | 1 | 0 | 22.77179328 | 120.43011810 | <a href="https://www.inaturalist.org/observations/41954083">https://www.inaturalist.org/observations/41954083</a>   |
| 5022 | <i>Spilopelia chinensis</i> | Eastern Spotted Dove | 2016/8/31  | 2 | 0 | 22.77209468 | 114.30182490 | <a href="https://www.inaturalist.org/observations/116273438">https://www.inaturalist.org/observations/116273438</a> |
| 5023 | <i>Spilopelia chinensis</i> | Eastern Spotted Dove | 2015/9/16  | 7 | 0 | 22.77880400 | 73.61428000  | <a href="http://www.inaturalist.org/observations/2007774">http://www.inaturalist.org/observations/2007774</a>       |
| 5024 | <i>Spilopelia chinensis</i> | Eastern Spotted Dove | 2022/9/4   | 1 | 0 | 22.78673611 | 120.29434720 | <a href="https://www.inaturalist.org/observations/133561582">https://www.inaturalist.org/observations/133561582</a> |
| 5025 | <i>Spilopelia chinensis</i> | Eastern Spotted Dove | 2022/9/4   | 1 | 0 | 22.78757778 | 120.29418890 | <a href="https://www.inaturalist.org/observations/133561469">https://www.inaturalist.org/observations/133561469</a> |
| 5026 | <i>Spilopelia chinensis</i> | Eastern Spotted Dove | 2022/9/4   | 1 | 0 | 22.78782778 | 120.29498060 | <a href="https://www.inaturalist.org/observations/133561309">https://www.inaturalist.org/observations/133561309</a> |
| 5027 | <i>Spilopelia chinensis</i> | Eastern Spotted Dove | 2022/9/4   | 1 | 0 | 22.78783889 | 120.29497500 | <a href="https://www.inaturalist.org/observations/133561343">https://www.inaturalist.org/observations/133561343</a> |
| 5028 | <i>Spilopelia chinensis</i> | Eastern Spotted Dove | 2020/3/14  | 2 | 0 | 22.79506064 | 121.11776810 | <a href="https://www.inaturalist.org/observations/39959542">https://www.inaturalist.org/observations/39959542</a>   |
| 5029 | <i>Spilopelia chinensis</i> | Eastern Spotted Dove | 2022/1/3   | 1 | 0 | 22.79577403 | 121.12666060 | <a href="https://www.inaturalist.org/observations/106016355">https://www.inaturalist.org/observations/106016355</a> |
| 5030 | <i>Spilopelia chinensis</i> | Eastern Spotted Dove | 2020/6/7   | 1 | 0 | 22.79705528 | 120.29168030 | <a href="https://www.inaturalist.org/observations/48873900">https://www.inaturalist.org/observations/48873900</a>   |
| 5031 | <i>Spilopelia chinensis</i> | Eastern Spotted Dove | 2020/6/7   | 1 | 0 | 22.79708917 | 120.29192250 | <a href="https://www.inaturalist.org/observations/48874399">https://www.inaturalist.org/observations/48874399</a>   |
| 5032 | <i>Spilopelia chinensis</i> | Eastern Spotted Dove | 2021/11/28 | 1 | 0 | 22.80416658 | 88.33392341  | <a href="https://www.inaturalist.org/observations/126925559">https://www.inaturalist.org/observations/126925559</a> |
| 5033 | <i>Spilopelia chinensis</i> | Eastern Spotted Dove | 2009/3/4   | 3 | 0 | 22.80720797 | 108.38846110 | <a href="http://www.inaturalist.org/observations/4740761">http://www.inaturalist.org/observations/4740761</a>       |
| 5034 | <i>Spilopelia chinensis</i> | Eastern Spotted Dove | 2021/10/27 | 2 | 0 | 22.82710100 | 108.33481400 | <a href="https://www.inaturalist.org/observations/99801224">https://www.inaturalist.org/observations/99801224</a>   |
| 5035 | <i>Spilopelia chinensis</i> | Eastern Spotted Dove | 2020/4/17  | 1 | 0 | 22.83402280 | 120.21242750 | <a href="https://www.inaturalist.org/observations/42395507">https://www.inaturalist.org/observations/42395507</a>   |
| 5036 | <i>Spilopelia chinensis</i> | Eastern Spotted Dove | 2020/12/17 | 2 | 0 | 22.83484968 | 120.20946260 | <a href="https://www.inaturalist.org/observations/66732766">https://www.inaturalist.org/observations/66732766</a>   |

|      |                             |                      |            |   |   |             |              |                                                                                                                     |
|------|-----------------------------|----------------------|------------|---|---|-------------|--------------|---------------------------------------------------------------------------------------------------------------------|
| 5037 | <i>Spilopelia chinensis</i> | Eastern Spotted Dove | 2020/11/15 | 4 | 0 | 22.83565020 | 86.72545192  | <a href="https://www.inaturalist.org/observations/65216479">https://www.inaturalist.org/observations/65216479</a>   |
| 5038 | <i>Spilopelia chinensis</i> | Eastern Spotted Dove | 2022/2/3   | 1 | 0 | 22.83587803 | 120.21150110 | <a href="https://www.inaturalist.org/observations/106121045">https://www.inaturalist.org/observations/106121045</a> |
| 5039 | <i>Spilopelia chinensis</i> | Eastern Spotted Dove | 2014/4/17  | 2 | 0 | 22.84518286 | 88.36194579  | <a href="https://www.inaturalist.org/observations/98039998">https://www.inaturalist.org/observations/98039998</a>   |
| 5040 | <i>Spilopelia chinensis</i> | Eastern Spotted Dove | 2020/7/12  | 2 | 0 | 22.85468732 | 114.32708490 | <a href="https://www.inaturalist.org/observations/57098119">https://www.inaturalist.org/observations/57098119</a>   |
| 5041 | <i>Spilopelia chinensis</i> | Eastern Spotted Dove | 2020/5/19  | 0 | 0 | 22.85813297 | 120.55379620 | <a href="https://www.inaturalist.org/observations/47267637">https://www.inaturalist.org/observations/47267637</a>   |
| 5042 | <i>Spilopelia chinensis</i> | Eastern Spotted Dove | 2014/12/31 | 1 | 0 | 22.86259790 | 87.86273200  | <a href="https://www.inaturalist.org/observations/93134092">https://www.inaturalist.org/observations/93134092</a>   |
| 5043 | <i>Spilopelia chinensis</i> | Eastern Spotted Dove | 2019/3/3   | 2 | 0 | 22.86864831 | 113.76428770 | <a href="https://www.inaturalist.org/observations/20984413">https://www.inaturalist.org/observations/20984413</a>   |
| 5044 | <i>Spilopelia chinensis</i> | Eastern Spotted Dove | 2020/3/29  | 2 | 0 | 22.87127543 | 120.35162940 | <a href="https://www.inaturalist.org/observations/56410774">https://www.inaturalist.org/observations/56410774</a>   |
| 5045 | <i>Spilopelia chinensis</i> | Eastern Spotted Dove | 2019/2/20  | 1 | 0 | 22.89636060 | 113.88970430 | <a href="https://www.inaturalist.org/observations/20523720">https://www.inaturalist.org/observations/20523720</a>   |
| 5046 | <i>Spilopelia chinensis</i> | Eastern Spotted Dove | 2019/12/29 | 2 | 0 | 22.89659541 | 86.20610286  | <a href="https://www.inaturalist.org/observations/43557925">https://www.inaturalist.org/observations/43557925</a>   |
| 5047 | <i>Spilopelia chinensis</i> | Eastern Spotted Dove | 2021/12/18 | 1 | 0 | 22.90489143 | 83.90822791  | <a href="https://www.inaturalist.org/observations/105911582">https://www.inaturalist.org/observations/105911582</a> |
| 5048 | <i>Spilopelia chinensis</i> | Eastern Spotted Dove | 2019/1/14  | 1 | 0 | 22.90984666 | 121.14000790 | <a href="https://www.inaturalist.org/observations/21341402">https://www.inaturalist.org/observations/21341402</a>   |
| 5049 | <i>Spilopelia chinensis</i> | Eastern Spotted Dove | 2020/10/30 | 4 | 0 | 22.91035530 | 87.81935770  | <a href="https://www.inaturalist.org/observations/64867454">https://www.inaturalist.org/observations/64867454</a>   |
| 5050 | <i>Spilopelia chinensis</i> | Eastern Spotted Dove | 2021/9/23  | 1 | 0 | 22.91126802 | 120.55525470 | <a href="https://www.inaturalist.org/observations/96087087">https://www.inaturalist.org/observations/96087087</a>   |
| 5051 | <i>Spilopelia chinensis</i> | Eastern Spotted Dove | 2021/6/14  | 1 | 0 | 22.91428020 | 88.38737890  | <a href="https://www.inaturalist.org/observations/82925538">https://www.inaturalist.org/observations/82925538</a>   |
| 5052 | <i>Spilopelia chinensis</i> | Eastern Spotted Dove | 2021/6/10  | 1 | 0 | 22.91442085 | 88.38778932  | <a href="https://www.inaturalist.org/observations/82358654">https://www.inaturalist.org/observations/82358654</a>   |
| 5053 | <i>Spilopelia chinensis</i> | Eastern Spotted Dove | 2021/9/12  | 2 | 0 | 22.91777131 | 77.72229385  | <a href="https://www.inaturalist.org/observations/94725863">https://www.inaturalist.org/observations/94725863</a>   |
| 5054 | <i>Spilopelia chinensis</i> | Eastern Spotted Dove | 2020/4/25  | 2 | 0 | 22.91993200 | 120.26322800 | <a href="https://www.inaturalist.org/observations/44092963">https://www.inaturalist.org/observations/44092963</a>   |
| 5055 | <i>Spilopelia chinensis</i> | Eastern Spotted Dove | 2021/5/22  | 1 | 0 | 22.93113542 | 120.26603250 | <a href="https://www.inaturalist.org/observations/81534588">https://www.inaturalist.org/observations/81534588</a>   |
| 5056 | <i>Spilopelia chinensis</i> | Eastern Spotted Dove | 2021/10/3  | 1 | 0 | 22.93189222 | 120.26245060 | <a href="https://www.inaturalist.org/observations/101073948">https://www.inaturalist.org/observations/101073948</a> |
| 5057 | <i>Spilopelia chinensis</i> | Eastern Spotted Dove | 2022/4/4   | 2 | 0 | 22.93456080 | 120.22602680 | <a href="https://www.inaturalist.org/observations/135345263">https://www.inaturalist.org/observations/135345263</a> |
| 5058 | <i>Spilopelia chinensis</i> | Eastern Spotted Dove | 2020/3/13  | 2 | 0 | 22.93481827 | 120.22550200 | <a href="https://www.inaturalist.org/observations/43202970">https://www.inaturalist.org/observations/43202970</a>   |
| 5059 | <i>Spilopelia chinensis</i> | Eastern Spotted Dove | 2020/5/23  | 4 | 0 | 22.95459730 | 83.70510367  | <a href="https://www.inaturalist.org/observations/48088100">https://www.inaturalist.org/observations/48088100</a>   |



|      |                             |                      |            |   |   |             |              |                                                                                                                     |
|------|-----------------------------|----------------------|------------|---|---|-------------|--------------|---------------------------------------------------------------------------------------------------------------------|
| 5060 | <i>Spilopelia chinensis</i> | Eastern Spotted Dove | 2022/1/4   | 3 | 0 | 22.96444800 | 88.47601700  | <a href="https://www.inaturalist.org/observations/104329405">https://www.inaturalist.org/observations/104329405</a> |
| 5061 | <i>Spilopelia chinensis</i> | Eastern Spotted Dove | 2017/12/26 | 5 | 0 | 22.96473150 | 86.89544580  | <a href="https://www.inaturalist.org/observations/25660982">https://www.inaturalist.org/observations/25660982</a>   |
| 5062 | <i>Spilopelia chinensis</i> | Eastern Spotted Dove | 2017/12/26 | 5 | 0 | 22.96473150 | 86.89544580  | <a href="https://www.inaturalist.org/observations/25660987">https://www.inaturalist.org/observations/25660987</a>   |
| 5063 | <i>Spilopelia chinensis</i> | Eastern Spotted Dove | 2020/9/3   | 1 | 0 | 22.96760207 | 88.42910059  | <a href="https://www.inaturalist.org/observations/89541723">https://www.inaturalist.org/observations/89541723</a>   |
| 5064 | <i>Spilopelia chinensis</i> | Eastern Spotted Dove | 2018/1/16  | 2 | 0 | 22.97112808 | 86.98936935  | <a href="https://www.inaturalist.org/observations/50588528">https://www.inaturalist.org/observations/50588528</a>   |
| 5065 | <i>Spilopelia chinensis</i> | Eastern Spotted Dove | 2021/12/13 | 1 | 0 | 22.97193673 | 120.22190560 | <a href="https://www.inaturalist.org/observations/102971385">https://www.inaturalist.org/observations/102971385</a> |
| 5066 | <i>Spilopelia chinensis</i> | Eastern Spotted Dove | 2022/4/30  | 1 | 0 | 22.97195461 | 120.22405280 | <a href="https://www.inaturalist.org/observations/113679373">https://www.inaturalist.org/observations/113679373</a> |
| 5067 | <i>Spilopelia chinensis</i> | Eastern Spotted Dove | 2022/5/1   | 1 | 0 | 22.97199106 | 120.22341820 | <a href="https://www.inaturalist.org/observations/114680824">https://www.inaturalist.org/observations/114680824</a> |
| 5068 | <i>Spilopelia chinensis</i> | Eastern Spotted Dove | 2017/2/26  | 3 | 0 | 22.97199290 | 120.22258740 | <a href="https://www.inaturalist.org/observations/16286618">https://www.inaturalist.org/observations/16286618</a>   |
| 5069 | <i>Spilopelia chinensis</i> | Eastern Spotted Dove | 2021/4/30  | 1 | 0 | 22.97240871 | 120.22331790 | <a href="https://www.inaturalist.org/observations/75786049">https://www.inaturalist.org/observations/75786049</a>   |
| 5070 | <i>Spilopelia chinensis</i> | Eastern Spotted Dove | 2020/4/25  | 2 | 0 | 22.97260596 | 120.22301280 | <a href="https://www.inaturalist.org/observations/43252328">https://www.inaturalist.org/observations/43252328</a>   |
| 5071 | <i>Spilopelia chinensis</i> | Eastern Spotted Dove | 2021/12/13 | 1 | 0 | 22.97340641 | 120.22295240 | <a href="https://www.inaturalist.org/observations/102969130">https://www.inaturalist.org/observations/102969130</a> |
| 5072 | <i>Spilopelia chinensis</i> | Eastern Spotted Dove | 2019/2/24  | 2 | 0 | 22.97399240 | 120.22962110 | <a href="https://www.inaturalist.org/observations/81521612">https://www.inaturalist.org/observations/81521612</a>   |
| 5073 | <i>Spilopelia chinensis</i> | Eastern Spotted Dove | 2019/6/29  | 2 | 0 | 22.97403990 | 120.22960750 | <a href="https://www.inaturalist.org/observations/81521610">https://www.inaturalist.org/observations/81521610</a>   |
| 5074 | <i>Spilopelia chinensis</i> | Eastern Spotted Dove | 2020/6/24  | 2 | 0 | 22.97436978 | 83.04529924  | <a href="https://www.inaturalist.org/observations/79670359">https://www.inaturalist.org/observations/79670359</a>   |
| 5075 | <i>Spilopelia chinensis</i> | Eastern Spotted Dove | 2021/7/5   | 1 | 0 | 22.97576923 | 120.23582140 | <a href="https://www.inaturalist.org/observations/85724265">https://www.inaturalist.org/observations/85724265</a>   |
| 5076 | <i>Spilopelia chinensis</i> | Eastern Spotted Dove | 2021/7/3   | 2 | 0 | 22.97708000 | 120.23319170 | <a href="https://www.inaturalist.org/observations/85469499">https://www.inaturalist.org/observations/85469499</a>   |
| 5077 | <i>Spilopelia chinensis</i> | Eastern Spotted Dove | 2020/3/31  | 2 | 0 | 22.97942393 | 120.22310610 | <a href="https://www.inaturalist.org/observations/41078046">https://www.inaturalist.org/observations/41078046</a>   |
| 5078 | <i>Spilopelia chinensis</i> | Eastern Spotted Dove | 2020/9/5   | 5 | 0 | 22.98877100 | 87.00707050  | <a href="https://www.inaturalist.org/observations/58713332">https://www.inaturalist.org/observations/58713332</a>   |
| 5079 | <i>Spilopelia chinensis</i> | Eastern Spotted Dove | 2017/6/17  | 3 | 0 | 22.98886977 | 87.00689884  | <a href="https://www.inaturalist.org/observations/58763093">https://www.inaturalist.org/observations/58763093</a>   |
| 5080 | <i>Spilopelia chinensis</i> | Eastern Spotted Dove | 2020/10/16 | 3 | 0 | 22.98895592 | 87.00660891  | <a href="https://www.inaturalist.org/observations/62904296">https://www.inaturalist.org/observations/62904296</a>   |
| 5081 | <i>Spilopelia chinensis</i> | Eastern Spotted Dove | 2020/11/18 | 3 | 0 | 22.98918189 | 87.00677693  | <a href="https://www.inaturalist.org/observations/65161092">https://www.inaturalist.org/observations/65161092</a>   |
| 5082 | <i>Spilopelia chinensis</i> | Eastern Spotted Dove | 2018/1/12  | 1 | 0 | 22.98922533 | 87.00717779  | <a href="https://www.inaturalist.org/observations/50670023">https://www.inaturalist.org/observations/50670023</a>   |

|      |                             |                      |            |   |   |             |              |                                                                                                                     |
|------|-----------------------------|----------------------|------------|---|---|-------------|--------------|---------------------------------------------------------------------------------------------------------------------|
| 5083 | <i>Spilopelia chinensis</i> | Eastern Spotted Dove | 2018/1/14  | 1 | 0 | 22.98922533 | 87.00717779  | <a href="https://www.inaturalist.org/observations/50670032">https://www.inaturalist.org/observations/50670032</a>   |
| 5084 | <i>Spilopelia chinensis</i> | Eastern Spotted Dove | 2017/6/20  | 4 | 0 | 22.98962734 | 87.00704398  | <a href="https://www.inaturalist.org/observations/13358493">https://www.inaturalist.org/observations/13358493</a>   |
| 5085 | <i>Spilopelia chinensis</i> | Eastern Spotted Dove | 2019/5/15  | 3 | 0 | 22.98976067 | 87.00763943  | <a href="https://www.inaturalist.org/observations/25270118">https://www.inaturalist.org/observations/25270118</a>   |
| 5086 | <i>Spilopelia chinensis</i> | Eastern Spotted Dove | 2020/8/18  | 1 | 0 | 22.98985886 | 120.20394840 | <a href="https://www.inaturalist.org/observations/56915875">https://www.inaturalist.org/observations/56915875</a>   |
| 5087 | <i>Spilopelia chinensis</i> | Eastern Spotted Dove | 2020/10/18 | 3 | 0 | 22.98992398 | 86.99927070  | <a href="https://www.inaturalist.org/observations/62904344">https://www.inaturalist.org/observations/62904344</a>   |
| 5088 | <i>Spilopelia chinensis</i> | Eastern Spotted Dove | 2020/5/2   | 1 | 0 | 22.99021710 | 120.22399880 | <a href="https://www.inaturalist.org/observations/44565781">https://www.inaturalist.org/observations/44565781</a>   |
| 5089 | <i>Spilopelia chinensis</i> | Eastern Spotted Dove | 2020/10/19 | 4 | 0 | 22.99153022 | 87.00078332  | <a href="https://www.inaturalist.org/observations/63089152">https://www.inaturalist.org/observations/63089152</a>   |
| 5090 | <i>Spilopelia chinensis</i> | Eastern Spotted Dove | 2016/5/15  | 4 | 0 | 22.99223778 | 120.21470900 | <a href="https://www.inaturalist.org/observations/7959141">https://www.inaturalist.org/observations/7959141</a>     |
| 5091 | <i>Spilopelia chinensis</i> | Eastern Spotted Dove | 2020/11/21 | 3 | 0 | 22.99270251 | 87.00054282  | <a href="https://www.inaturalist.org/observations/65682910">https://www.inaturalist.org/observations/65682910</a>   |
| 5092 | <i>Spilopelia chinensis</i> | Eastern Spotted Dove | 2020/6/16  | 1 | 0 | 22.99384167 | 120.21955830 | <a href="https://www.inaturalist.org/observations/49797326">https://www.inaturalist.org/observations/49797326</a>   |
| 5093 | <i>Spilopelia chinensis</i> | Eastern Spotted Dove | 2019/10/25 | 3 | 0 | 22.99385781 | 120.21355550 | <a href="https://www.inaturalist.org/observations/34903928">https://www.inaturalist.org/observations/34903928</a>   |
| 5094 | <i>Spilopelia chinensis</i> | Eastern Spotted Dove | 2022/9/5   | 1 | 0 | 22.99543900 | 120.22195000 | <a href="https://www.inaturalist.org/observations/133741886">https://www.inaturalist.org/observations/133741886</a> |
| 5095 | <i>Spilopelia chinensis</i> | Eastern Spotted Dove | 2021/11/20 | 2 | 0 | 22.99552676 | 120.21885160 | <a href="https://www.inaturalist.org/observations/101698075">https://www.inaturalist.org/observations/101698075</a> |
| 5096 | <i>Spilopelia chinensis</i> | Eastern Spotted Dove | 2020/6/16  | 2 | 0 | 22.99589719 | 120.22049280 | <a href="https://www.inaturalist.org/observations/49812198">https://www.inaturalist.org/observations/49812198</a>   |
| 5097 | <i>Spilopelia chinensis</i> | Eastern Spotted Dove | 2020/6/9   | 2 | 0 | 22.99649880 | 120.21984580 | <a href="https://www.inaturalist.org/observations/48993436">https://www.inaturalist.org/observations/48993436</a>   |
| 5098 | <i>Spilopelia chinensis</i> | Eastern Spotted Dove | 2022/5/22  | 3 | 0 | 22.99683996 | 120.22337160 | <a href="https://www.inaturalist.org/observations/118149059">https://www.inaturalist.org/observations/118149059</a> |
| 5099 | <i>Spilopelia chinensis</i> | Eastern Spotted Dove | 2022/5/31  | 1 | 0 | 22.99691167 | 120.22008670 | <a href="https://www.inaturalist.org/observations/119839148">https://www.inaturalist.org/observations/119839148</a> |
| 5100 | <i>Spilopelia chinensis</i> | Eastern Spotted Dove | 2021/10/30 | 4 | 0 | 22.99703549 | 120.19501020 | <a href="https://www.inaturalist.org/observations/99770850">https://www.inaturalist.org/observations/99770850</a>   |
| 5101 | <i>Spilopelia chinensis</i> | Eastern Spotted Dove | 2019/11/11 | 3 | 0 | 22.99703933 | 120.19485370 | <a href="https://www.inaturalist.org/observations/35560168">https://www.inaturalist.org/observations/35560168</a>   |
| 5102 | <i>Spilopelia chinensis</i> | Eastern Spotted Dove | 2019/3/9   | 2 | 0 | 22.99720833 | 120.21773670 | <a href="https://www.inaturalist.org/observations/21073781">https://www.inaturalist.org/observations/21073781</a>   |
| 5103 | <i>Spilopelia chinensis</i> | Eastern Spotted Dove | 2021/9/1   | 2 | 0 | 22.99778900 | 120.23405900 | <a href="https://www.inaturalist.org/observations/105892904">https://www.inaturalist.org/observations/105892904</a> |
| 5104 | <i>Spilopelia chinensis</i> | Eastern Spotted Dove | 2020/6/10  | 2 | 0 | 22.99793656 | 120.22052510 | <a href="https://www.inaturalist.org/observations/49107857">https://www.inaturalist.org/observations/49107857</a>   |
| 5105 | <i>Spilopelia chinensis</i> | Eastern Spotted Dove | 2022/5/24  | 2 | 0 | 22.99802265 | 120.22275940 | <a href="https://www.inaturalist.org/observations/118561688">https://www.inaturalist.org/observations/118561688</a> |

|      |                             |                      |            |   |   |             |              |                                                                                                                     |
|------|-----------------------------|----------------------|------------|---|---|-------------|--------------|---------------------------------------------------------------------------------------------------------------------|
| 5106 | <i>Spilopelia chinensis</i> | Eastern Spotted Dove | 2019/5/28  | 2 | 0 | 22.99944912 | 120.21932800 | <a href="https://www.inaturalist.org/observations/26756112">https://www.inaturalist.org/observations/26756112</a>   |
| 5107 | <i>Spilopelia chinensis</i> | Eastern Spotted Dove | 2019/6/11  | 2 | 0 | 22.99961258 | 120.21942140 | <a href="https://www.inaturalist.org/observations/26866364">https://www.inaturalist.org/observations/26866364</a>   |
| 5108 | <i>Spilopelia chinensis</i> | Eastern Spotted Dove | 2022/5/23  | 2 | 0 | 22.99984564 | 120.21726360 | <a href="https://www.inaturalist.org/observations/118342145">https://www.inaturalist.org/observations/118342145</a> |
| 5109 | <i>Spilopelia chinensis</i> | Eastern Spotted Dove | 2022/5/24  | 3 | 0 | 23.00020000 | 120.22058000 | <a href="https://www.inaturalist.org/observations/118525460">https://www.inaturalist.org/observations/118525460</a> |
| 5110 | <i>Spilopelia chinensis</i> | Eastern Spotted Dove | 2018/11/4  | 3 | 0 | 23.00054779 | 120.21264110 | <a href="https://www.inaturalist.org/observations/18082309">https://www.inaturalist.org/observations/18082309</a>   |
| 5111 | <i>Spilopelia chinensis</i> | Eastern Spotted Dove | 2019/6/2   | 3 | 0 | 23.00200667 | 120.22050830 | <a href="https://www.inaturalist.org/observations/26216718">https://www.inaturalist.org/observations/26216718</a>   |
| 5112 | <i>Spilopelia chinensis</i> | Eastern Spotted Dove | 2019/11/24 | 1 | 0 | 23.00202667 | 120.15310330 | <a href="https://www.inaturalist.org/observations/36019288">https://www.inaturalist.org/observations/36019288</a>   |
| 5113 | <i>Spilopelia chinensis</i> | Eastern Spotted Dove | 2019/5/27  | 3 | 0 | 23.00203996 | 120.21659270 | <a href="https://www.inaturalist.org/observations/25843679">https://www.inaturalist.org/observations/25843679</a>   |
| 5114 | <i>Spilopelia chinensis</i> | Eastern Spotted Dove | 2020/11/20 | 1 | 0 | 23.00213382 | 120.21150110 | <a href="https://www.inaturalist.org/observations/65825654">https://www.inaturalist.org/observations/65825654</a>   |
| 5115 | <i>Spilopelia chinensis</i> | Eastern Spotted Dove | 2020/5/13  | 1 | 0 | 23.00216812 | 120.21759440 | <a href="https://www.inaturalist.org/observations/45759476">https://www.inaturalist.org/observations/45759476</a>   |
| 5116 | <i>Spilopelia chinensis</i> | Eastern Spotted Dove | 2020/6/14  | 2 | 0 | 23.00230000 | 120.21764170 | <a href="https://www.inaturalist.org/observations/49554678">https://www.inaturalist.org/observations/49554678</a>   |
| 5117 | <i>Spilopelia chinensis</i> | Eastern Spotted Dove | 2019/6/7   | 1 | 0 | 23.00230028 | 120.21604170 | <a href="https://www.inaturalist.org/observations/27019086">https://www.inaturalist.org/observations/27019086</a>   |
| 5118 | <i>Spilopelia chinensis</i> | Eastern Spotted Dove | 2022/5/22  | 2 | 0 | 23.00281388 | 120.21734670 | <a href="https://www.inaturalist.org/observations/119708702">https://www.inaturalist.org/observations/119708702</a> |
| 5119 | <i>Spilopelia chinensis</i> | Eastern Spotted Dove | 2019/6/7   | 3 | 0 | 23.00291724 | 120.21612730 | <a href="https://www.inaturalist.org/observations/26842387">https://www.inaturalist.org/observations/26842387</a>   |
| 5120 | <i>Spilopelia chinensis</i> | Eastern Spotted Dove | 2020/4/25  | 1 | 0 | 23.00331547 | 120.15492610 | <a href="https://www.inaturalist.org/observations/43607344">https://www.inaturalist.org/observations/43607344</a>   |
| 5121 | <i>Spilopelia chinensis</i> | Eastern Spotted Dove | 2019/2/23  | 1 | 0 | 23.00346871 | 120.15522530 | <a href="https://www.inaturalist.org/observations/20684650">https://www.inaturalist.org/observations/20684650</a>   |
| 5122 | <i>Spilopelia chinensis</i> | Eastern Spotted Dove | 2020/4/25  | 1 | 0 | 23.00391285 | 120.15627490 | <a href="https://www.inaturalist.org/observations/43607315">https://www.inaturalist.org/observations/43607315</a>   |
| 5123 | <i>Spilopelia chinensis</i> | Eastern Spotted Dove | 2018/10/13 | 3 | 0 | 23.00443286 | 120.15744320 | <a href="https://www.inaturalist.org/observations/17459544">https://www.inaturalist.org/observations/17459544</a>   |
| 5124 | <i>Spilopelia chinensis</i> | Eastern Spotted Dove | 2018/10/11 | 3 | 0 | 23.00576938 | 120.15210720 | <a href="https://www.inaturalist.org/observations/17432977">https://www.inaturalist.org/observations/17432977</a>   |
| 5125 | <i>Spilopelia chinensis</i> | Eastern Spotted Dove | 2020/2/8   | 1 | 0 | 23.00802419 | 120.17163910 | <a href="https://www.inaturalist.org/observations/38602611">https://www.inaturalist.org/observations/38602611</a>   |
| 5126 | <i>Spilopelia chinensis</i> | Eastern Spotted Dove | 2022/6/1   | 1 | 0 | 23.00861667 | 120.22126670 | <a href="https://www.inaturalist.org/observations/119734651">https://www.inaturalist.org/observations/119734651</a> |
| 5127 | <i>Spilopelia chinensis</i> | Eastern Spotted Dove | 2014/3/9   | 1 | 0 | 23.00993290 | 120.15848740 | <a href="https://www.inaturalist.org/observations/56906422">https://www.inaturalist.org/observations/56906422</a>   |
| 5128 | <i>Spilopelia chinensis</i> | Eastern Spotted Dove | 2014/6/1   | 2 | 0 | 23.01189197 | 120.20539940 | <a href="https://www.inaturalist.org/observations/115863513">https://www.inaturalist.org/observations/115863513</a> |

|      |                             |                      |            |   |   |             |              |                                                                                                                     |
|------|-----------------------------|----------------------|------------|---|---|-------------|--------------|---------------------------------------------------------------------------------------------------------------------|
| 5129 | <i>Spilopelia chinensis</i> | Eastern Spotted Dove | 2021/5/3   | 1 | 0 | 23.01481860 | 120.26441310 | <a href="https://www.inaturalist.org/observations/76859213">https://www.inaturalist.org/observations/76859213</a>   |
| 5130 | <i>Spilopelia chinensis</i> | Eastern Spotted Dove | 2015/3/3   | 1 | 0 | 23.01681922 | 120.22278890 | <a href="https://www.inaturalist.org/observations/106313988">https://www.inaturalist.org/observations/106313988</a> |
| 5131 | <i>Spilopelia chinensis</i> | Eastern Spotted Dove | 2021/1/13  | 1 | 0 | 23.02135074 | 120.19968600 | <a href="https://www.inaturalist.org/observations/68400609">https://www.inaturalist.org/observations/68400609</a>   |
| 5132 | <i>Spilopelia chinensis</i> | Eastern Spotted Dove | 2017/12/22 | 2 | 0 | 23.04054197 | 113.37217750 | <a href="https://www.inaturalist.org/observations/59197545">https://www.inaturalist.org/observations/59197545</a>   |
| 5133 | <i>Spilopelia chinensis</i> | Eastern Spotted Dove | 2017/4/25  | 3 | 0 | 23.04054197 | 113.37217750 | <a href="https://www.inaturalist.org/observations/59197569">https://www.inaturalist.org/observations/59197569</a>   |
| 5134 | <i>Spilopelia chinensis</i> | Eastern Spotted Dove | 2017/12/22 | 2 | 0 | 23.04054197 | 113.37217750 | <a href="https://www.inaturalist.org/observations/116230908">https://www.inaturalist.org/observations/116230908</a> |
| 5135 | <i>Spilopelia chinensis</i> | Eastern Spotted Dove | 2016/3/19  | 2 | 0 | 23.04635394 | 120.19748670 | <a href="https://www.inaturalist.org/observations/25857167">https://www.inaturalist.org/observations/25857167</a>   |
| 5136 | <i>Spilopelia chinensis</i> | Eastern Spotted Dove | 2021/5/3   | 2 | 0 | 23.04636647 | 120.09675640 | <a href="https://www.inaturalist.org/observations/76918604">https://www.inaturalist.org/observations/76918604</a>   |
| 5137 | <i>Spilopelia chinensis</i> | Eastern Spotted Dove | 2022/4/22  | 2 | 0 | 23.04871117 | 113.39898000 | <a href="https://www.inaturalist.org/observations/116788746">https://www.inaturalist.org/observations/116788746</a> |
| 5138 | <i>Spilopelia chinensis</i> | Eastern Spotted Dove | 2021/5/18  | 1 | 0 | 23.05390628 | 113.24307280 | <a href="https://www.inaturalist.org/observations/81388258">https://www.inaturalist.org/observations/81388258</a>   |
| 5139 | <i>Spilopelia chinensis</i> | Eastern Spotted Dove | 2019/6/25  | 1 | 0 | 23.05745851 | 121.24775690 | <a href="https://www.inaturalist.org/observations/107099060">https://www.inaturalist.org/observations/107099060</a> |
| 5140 | <i>Spilopelia chinensis</i> | Eastern Spotted Dove | 2021/6/30  | 1 | 0 | 23.06464494 | 120.19736870 | <a href="https://www.inaturalist.org/observations/85181175">https://www.inaturalist.org/observations/85181175</a>   |
| 5141 | <i>Spilopelia chinensis</i> | Eastern Spotted Dove | 2021/9/27  | 1 | 0 | 23.06522146 | 120.19705830 | <a href="https://www.inaturalist.org/observations/96338922">https://www.inaturalist.org/observations/96338922</a>   |
| 5142 | <i>Spilopelia chinensis</i> | Eastern Spotted Dove | 2021/9/24  | 1 | 0 | 23.06524133 | 120.19705190 | <a href="https://www.inaturalist.org/observations/95912407">https://www.inaturalist.org/observations/95912407</a>   |
| 5143 | <i>Spilopelia chinensis</i> | Eastern Spotted Dove | 2020/5/7   | 2 | 0 | 23.06537600 | 120.19708000 | <a href="https://www.inaturalist.org/observations/50362552">https://www.inaturalist.org/observations/50362552</a>   |
| 5144 | <i>Spilopelia chinensis</i> | Eastern Spotted Dove | 2019/7/28  | 2 | 0 | 23.06821753 | 120.19008870 | <a href="https://www.inaturalist.org/observations/29972902">https://www.inaturalist.org/observations/29972902</a>   |
| 5145 | <i>Spilopelia chinensis</i> | Eastern Spotted Dove | 2017/10/14 | 1 | 0 | 23.07372300 | 120.06741700 | <a href="https://www.inaturalist.org/observations/84555726">https://www.inaturalist.org/observations/84555726</a>   |
| 5146 | <i>Spilopelia chinensis</i> | Eastern Spotted Dove | 2014/2/17  | 1 | 0 | 23.07471660 | 121.30037690 | <a href="https://www.inaturalist.org/observations/81540411">https://www.inaturalist.org/observations/81540411</a>   |
| 5147 | <i>Spilopelia chinensis</i> | Eastern Spotted Dove | 2014/10/14 | 3 | 0 | 23.07766439 | 120.03782960 | <a href="https://www.inaturalist.org/observations/57529512">https://www.inaturalist.org/observations/57529512</a>   |
| 5148 | <i>Spilopelia chinensis</i> | Eastern Spotted Dove | 2021/8/29  | 3 | 0 | 23.09113530 | 120.11005830 | <a href="https://www.inaturalist.org/observations/92897036">https://www.inaturalist.org/observations/92897036</a>   |
| 5149 | <i>Spilopelia chinensis</i> | Eastern Spotted Dove | 2013/12/19 | 1 | 0 | 23.09583298 | 114.39046500 | <a href="https://www.inaturalist.org/observations/51109006">https://www.inaturalist.org/observations/51109006</a>   |
| 5150 | <i>Spilopelia chinensis</i> | Eastern Spotted Dove | 2022/1/12  | 1 | 0 | 23.09814262 | 113.29512020 | <a href="https://www.inaturalist.org/observations/104798122">https://www.inaturalist.org/observations/104798122</a> |
| 5151 | <i>Spilopelia chinensis</i> | Eastern Spotted Dove | 2021/9/18  | 1 | 0 | 23.11299800 | 88.04990897  | <a href="https://www.inaturalist.org/observations/95265385">https://www.inaturalist.org/observations/95265385</a>   |

|      |                             |                      |            |   |   |             |              |                                                                                                                     |
|------|-----------------------------|----------------------|------------|---|---|-------------|--------------|---------------------------------------------------------------------------------------------------------------------|
| 5152 | <i>Spilopelia chinensis</i> | Eastern Spotted Dove | 2021/7/13  | 1 | 0 | 23.11655550 | 113.36586170 | <a href="https://www.inaturalist.org/observations/86796688">https://www.inaturalist.org/observations/86796688</a>   |
| 5153 | <i>Spilopelia chinensis</i> | Eastern Spotted Dove | 2014/3/16  | 1 | 0 | 23.11951660 | 120.10118360 | <a href="https://www.inaturalist.org/observations/92899939">https://www.inaturalist.org/observations/92899939</a>   |
| 5154 | <i>Spilopelia chinensis</i> | Eastern Spotted Dove | 2021/3/9   | 2 | 0 | 23.12615270 | 121.36559890 | <a href="https://www.inaturalist.org/observations/74822053">https://www.inaturalist.org/observations/74822053</a>   |
| 5155 | <i>Spilopelia chinensis</i> | Eastern Spotted Dove | 2021/11/28 | 1 | 0 | 23.12906303 | 113.36644410 | <a href="https://www.inaturalist.org/observations/132782687">https://www.inaturalist.org/observations/132782687</a> |
| 5156 | <i>Spilopelia chinensis</i> | Eastern Spotted Dove | 2011/9/7   | 3 | 0 | 23.13496208 | 120.49353790 | <a href="https://www.inaturalist.org/observations/14643201">https://www.inaturalist.org/observations/14643201</a>   |
| 5157 | <i>Spilopelia chinensis</i> | Eastern Spotted Dove | 2012/6/13  | 4 | 0 | 23.13532829 | 120.49370570 | <a href="https://www.inaturalist.org/observations/14643245">https://www.inaturalist.org/observations/14643245</a>   |
| 5158 | <i>Spilopelia chinensis</i> | Eastern Spotted Dove | 2019/10/6  | 2 | 0 | 23.13970574 | 113.30389910 | <a href="https://www.inaturalist.org/observations/33940885">https://www.inaturalist.org/observations/33940885</a>   |
| 5159 | <i>Spilopelia chinensis</i> | Eastern Spotted Dove | 2021/5/22  | 1 | 0 | 23.14522783 | 113.26017000 | <a href="https://www.inaturalist.org/observations/130213914">https://www.inaturalist.org/observations/130213914</a> |
| 5160 | <i>Spilopelia chinensis</i> | Eastern Spotted Dove | 2021/1/19  | 2 | 0 | 23.16041190 | 120.13531830 | <a href="https://www.inaturalist.org/observations/73156573">https://www.inaturalist.org/observations/73156573</a>   |
| 5161 | <i>Spilopelia chinensis</i> | Eastern Spotted Dove | 2022/7/15  | 1 | 0 | 23.16417878 | 113.45096790 | <a href="https://www.inaturalist.org/observations/126313081">https://www.inaturalist.org/observations/126313081</a> |
| 5162 | <i>Spilopelia chinensis</i> | Eastern Spotted Dove | 2021/9/17  | 1 | 0 | 23.16770000 | 120.17444500 | <a href="https://www.inaturalist.org/observations/96192654">https://www.inaturalist.org/observations/96192654</a>   |
| 5163 | <i>Spilopelia chinensis</i> | Eastern Spotted Dove | 2019/3/27  | 3 | 0 | 23.17125560 | 86.80833760  | <a href="https://www.inaturalist.org/observations/22037640">https://www.inaturalist.org/observations/22037640</a>   |
| 5164 | <i>Spilopelia chinensis</i> | Eastern Spotted Dove | 2021/1/19  | 1 | 0 | 23.17336725 | 120.17702050 | <a href="https://www.inaturalist.org/observations/68318302">https://www.inaturalist.org/observations/68318302</a>   |
| 5165 | <i>Spilopelia chinensis</i> | Eastern Spotted Dove | 2016/12/1  | 7 | 0 | 23.17540800 | 87.95950300  | <a href="http://www.inaturalist.org/observations/4679991">http://www.inaturalist.org/observations/4679991</a>       |
| 5166 | <i>Spilopelia chinensis</i> | Eastern Spotted Dove | 2017/8/7   | 3 | 0 | 23.17913032 | 113.36693290 | <a href="https://www.inaturalist.org/observations/8067054">https://www.inaturalist.org/observations/8067054</a>     |
| 5167 | <i>Spilopelia chinensis</i> | Eastern Spotted Dove | 2017/8/7   | 3 | 0 | 23.17913032 | 113.36693290 | <a href="https://www.inaturalist.org/observations/8067055">https://www.inaturalist.org/observations/8067055</a>     |
| 5168 | <i>Spilopelia chinensis</i> | Eastern Spotted Dove | 2017/8/7   | 3 | 0 | 23.17913032 | 113.36693290 | <a href="https://www.inaturalist.org/observations/8067056">https://www.inaturalist.org/observations/8067056</a>     |
| 5169 | <i>Spilopelia chinensis</i> | Eastern Spotted Dove | 2019/7/18  | 2 | 0 | 23.18074500 | 113.36247000 | <a href="https://www.inaturalist.org/observations/30405428">https://www.inaturalist.org/observations/30405428</a>   |
| 5170 | <i>Spilopelia chinensis</i> | Eastern Spotted Dove | 2019/7/18  | 2 | 0 | 23.18088500 | 113.36225330 | <a href="https://www.inaturalist.org/observations/30405353">https://www.inaturalist.org/observations/30405353</a>   |
| 5171 | <i>Spilopelia chinensis</i> | Eastern Spotted Dove | 2021/2/13  | 1 | 0 | 23.18217590 | 120.48283940 | <a href="https://www.inaturalist.org/observations/69493535">https://www.inaturalist.org/observations/69493535</a>   |
| 5172 | <i>Spilopelia chinensis</i> | Eastern Spotted Dove | 2021/11/26 | 1 | 0 | 23.18378803 | 113.36790830 | <a href="https://www.inaturalist.org/observations/102218371">https://www.inaturalist.org/observations/102218371</a> |
| 5173 | <i>Spilopelia chinensis</i> | Eastern Spotted Dove | 2018/4/7   | 3 | 0 | 23.18716200 | 121.02180000 | <a href="https://www.inaturalist.org/observations/10678254">https://www.inaturalist.org/observations/10678254</a>   |
| 5174 | <i>Spilopelia chinensis</i> | Eastern Spotted Dove | 2019/7/16  | 2 | 0 | 23.18735667 | 113.36510500 | <a href="https://www.inaturalist.org/observations/30231781">https://www.inaturalist.org/observations/30231781</a>   |

|      |                             |                      |            |   |   |             |              |                                                                                                                     |
|------|-----------------------------|----------------------|------------|---|---|-------------|--------------|---------------------------------------------------------------------------------------------------------------------|
| 5175 | <i>Spilopelia chinensis</i> | Eastern Spotted Dove | 2022/2/10  | 3 | 0 | 23.19148268 | 77.37758154  | <a href="https://www.inaturalist.org/observations/107493516">https://www.inaturalist.org/observations/107493516</a> |
| 5176 | <i>Spilopelia chinensis</i> | Eastern Spotted Dove | 2019/4/9   | 2 | 0 | 23.20027740 | 86.12673230  | <a href="https://www.inaturalist.org/observations/22277414">https://www.inaturalist.org/observations/22277414</a>   |
| 5177 | <i>Spilopelia chinensis</i> | Eastern Spotted Dove | 2020/10/20 | 1 | 0 | 23.20136417 | 120.13398250 | <a href="https://www.inaturalist.org/observations/63144519">https://www.inaturalist.org/observations/63144519</a>   |
| 5178 | <i>Spilopelia chinensis</i> | Eastern Spotted Dove | 2022/4/5   | 1 | 0 | 23.20777972 | 120.35985000 | <a href="https://www.inaturalist.org/observations/110825947">https://www.inaturalist.org/observations/110825947</a> |
| 5179 | <i>Spilopelia chinensis</i> | Eastern Spotted Dove | 2019/2/10  | 2 | 0 | 23.20838321 | 120.36984930 | <a href="https://www.inaturalist.org/observations/20268967">https://www.inaturalist.org/observations/20268967</a>   |
| 5180 | <i>Spilopelia chinensis</i> | Eastern Spotted Dove | 2021/12/8  | 1 | 0 | 23.21158300 | 77.43110200  | <a href="https://www.inaturalist.org/observations/102770818">https://www.inaturalist.org/observations/102770818</a> |
| 5181 | <i>Spilopelia chinensis</i> | Eastern Spotted Dove | 2020/12/26 | 2 | 0 | 23.22397660 | 87.89792480  | <a href="https://www.inaturalist.org/observations/70434351">https://www.inaturalist.org/observations/70434351</a>   |
| 5182 | <i>Spilopelia chinensis</i> | Eastern Spotted Dove | 2019/2/7   | 3 | 0 | 23.22900000 | 87.07000000  | <a href="https://www.inaturalist.org/observations/22516515">https://www.inaturalist.org/observations/22516515</a>   |
| 5183 | <i>Spilopelia chinensis</i> | Eastern Spotted Dove | 2022/1/3   | 1 | 0 | 23.22900900 | 77.36402600  | <a href="https://www.inaturalist.org/observations/104274742">https://www.inaturalist.org/observations/104274742</a> |
| 5184 | <i>Spilopelia chinensis</i> | Eastern Spotted Dove | 2022/1/3   | 2 | 0 | 23.22900900 | 77.36402600  | <a href="https://www.inaturalist.org/observations/104274772">https://www.inaturalist.org/observations/104274772</a> |
| 5185 | <i>Spilopelia chinensis</i> | Eastern Spotted Dove | 2020/2/17  | 0 | 0 | 23.23259667 | 120.11533500 | <a href="https://www.inaturalist.org/observations/38745980">https://www.inaturalist.org/observations/38745980</a>   |
| 5186 | <i>Spilopelia chinensis</i> | Eastern Spotted Dove | 2020/12/12 | 2 | 0 | 23.23456934 | 87.87767563  | <a href="https://www.inaturalist.org/observations/66561621">https://www.inaturalist.org/observations/66561621</a>   |
| 5187 | <i>Spilopelia chinensis</i> | Eastern Spotted Dove | 2022/8/29  | 1 | 0 | 23.23586111 | 120.12656940 | <a href="https://www.inaturalist.org/observations/133180837">https://www.inaturalist.org/observations/133180837</a> |
| 5188 | <i>Spilopelia chinensis</i> | Eastern Spotted Dove | 2022/8/24  | 1 | 0 | 23.23622222 | 120.11356940 | <a href="https://www.inaturalist.org/observations/133210446">https://www.inaturalist.org/observations/133210446</a> |
| 5189 | <i>Spilopelia chinensis</i> | Eastern Spotted Dove | 2022/8/29  | 1 | 0 | 23.23690000 | 120.13172500 | <a href="https://www.inaturalist.org/observations/133180862">https://www.inaturalist.org/observations/133180862</a> |
| 5190 | <i>Spilopelia chinensis</i> | Eastern Spotted Dove | 2022/8/24  | 1 | 0 | 23.23690556 | 120.13171110 | <a href="https://www.inaturalist.org/observations/133294560">https://www.inaturalist.org/observations/133294560</a> |
| 5191 | <i>Spilopelia chinensis</i> | Eastern Spotted Dove | 2022/8/24  | 1 | 0 | 23.23704444 | 120.13220560 | <a href="https://www.inaturalist.org/observations/133294556">https://www.inaturalist.org/observations/133294556</a> |
| 5192 | <i>Spilopelia chinensis</i> | Eastern Spotted Dove | 2020/9/24  | 3 | 0 | 23.23778493 | 120.12397680 | <a href="https://www.inaturalist.org/observations/60688094">https://www.inaturalist.org/observations/60688094</a>   |
| 5193 | <i>Spilopelia chinensis</i> | Eastern Spotted Dove | 2022/8/29  | 1 | 0 | 23.23889444 | 120.12775560 | <a href="https://www.inaturalist.org/observations/133180828">https://www.inaturalist.org/observations/133180828</a> |
| 5194 | <i>Spilopelia chinensis</i> | Eastern Spotted Dove | 2021/7/4   | 1 | 0 | 23.24125789 | 120.14218130 | <a href="https://www.inaturalist.org/observations/98776670">https://www.inaturalist.org/observations/98776670</a>   |
| 5195 | <i>Spilopelia chinensis</i> | Eastern Spotted Dove | 2015/11/25 | 6 | 0 | 23.24152800 | 87.82372700  | <a href="http://www.inaturalist.org/observations/2425331">http://www.inaturalist.org/observations/2425331</a>       |
| 5196 | <i>Spilopelia chinensis</i> | Eastern Spotted Dove | 2021/8/24  | 2 | 0 | 23.24198627 | 120.12881200 | <a href="https://www.inaturalist.org/observations/92439888">https://www.inaturalist.org/observations/92439888</a>   |
| 5197 | <i>Spilopelia chinensis</i> | Eastern Spotted Dove | 2022/8/28  | 3 | 0 | 23.25214283 | 87.06455022  | <a href="https://www.inaturalist.org/observations/132757239">https://www.inaturalist.org/observations/132757239</a> |

|      |                             |                      |            |   |   |             |              |                                                                                                                     |
|------|-----------------------------|----------------------|------------|---|---|-------------|--------------|---------------------------------------------------------------------------------------------------------------------|
| 5198 | <i>Spilopelia chinensis</i> | Eastern Spotted Dove | 2022/6/11  | 4 | 0 | 23.25337965 | 87.06567675  | <a href="https://www.inaturalist.org/observations/121222494">https://www.inaturalist.org/observations/121222494</a> |
| 5199 | <i>Spilopelia chinensis</i> | Eastern Spotted Dove | 2017/9/24  | 5 | 0 | 23.25993300 | 77.41261500  | <a href="https://www.inaturalist.org/observations/9467903">https://www.inaturalist.org/observations/9467903</a>     |
| 5200 | <i>Spilopelia chinensis</i> | Eastern Spotted Dove | 2021/1/27  | 1 | 0 | 23.26022869 | 120.10981830 | <a href="https://www.inaturalist.org/observations/68720859">https://www.inaturalist.org/observations/68720859</a>   |
| 5201 | <i>Spilopelia chinensis</i> | Eastern Spotted Dove | 2019/8/19  | 2 | 0 | 23.29251000 | 77.27289500  | <a href="https://www.inaturalist.org/observations/31094121">https://www.inaturalist.org/observations/31094121</a>   |
| 5202 | <i>Spilopelia chinensis</i> | Eastern Spotted Dove | 2020/1/19  | 1 | 0 | 23.30053900 | 120.36496000 | <a href="https://www.inaturalist.org/observations/39443347">https://www.inaturalist.org/observations/39443347</a>   |
| 5203 | <i>Spilopelia chinensis</i> | Eastern Spotted Dove | 2019/6/1   | 3 | 0 | 23.30852257 | 120.31114730 | <a href="https://www.inaturalist.org/observations/26142985">https://www.inaturalist.org/observations/26142985</a>   |
| 5204 | <i>Spilopelia chinensis</i> | Eastern Spotted Dove | 2019/4/18  | 1 | 0 | 23.30923667 | 120.31086670 | <a href="https://www.inaturalist.org/observations/22640826">https://www.inaturalist.org/observations/22640826</a>   |
| 5205 | <i>Spilopelia chinensis</i> | Eastern Spotted Dove | 2020/4/24  | 2 | 0 | 23.30936000 | 120.31508800 | <a href="https://www.inaturalist.org/observations/43232275">https://www.inaturalist.org/observations/43232275</a>   |
| 5206 | <i>Spilopelia chinensis</i> | Eastern Spotted Dove | 2017/2/4   | 4 | 0 | 23.31418420 | 86.36634510  | <a href="https://www.inaturalist.org/observations/16761351">https://www.inaturalist.org/observations/16761351</a>   |
| 5207 | <i>Spilopelia chinensis</i> | Eastern Spotted Dove | 2017/2/4   | 6 | 0 | 23.31609003 | 86.36930622  | <a href="https://www.inaturalist.org/observations/17165243">https://www.inaturalist.org/observations/17165243</a>   |
| 5208 | <i>Spilopelia chinensis</i> | Eastern Spotted Dove | 2022/7/16  | 1 | 0 | 23.32594472 | 120.48024640 | <a href="https://www.inaturalist.org/observations/126668234">https://www.inaturalist.org/observations/126668234</a> |
| 5209 | <i>Spilopelia chinensis</i> | Eastern Spotted Dove | 2022/3/12  | 1 | 0 | 23.32868977 | 121.31684150 | <a href="https://www.inaturalist.org/observations/108430032">https://www.inaturalist.org/observations/108430032</a> |
| 5210 | <i>Spilopelia chinensis</i> | Eastern Spotted Dove | 2021/5/24  | 1 | 0 | 23.33035839 | 120.48164110 | <a href="https://www.inaturalist.org/observations/80069782">https://www.inaturalist.org/observations/80069782</a>   |
| 5211 | <i>Spilopelia chinensis</i> | Eastern Spotted Dove | 2020/4/25  | 1 | 0 | 23.34036900 | 120.32928000 | <a href="https://www.inaturalist.org/observations/43322448">https://www.inaturalist.org/observations/43322448</a>   |
| 5212 | <i>Spilopelia chinensis</i> | Eastern Spotted Dove | 2021/10/9  | 1 | 0 | 23.34141731 | 77.77904488  | <a href="https://www.inaturalist.org/observations/97668068">https://www.inaturalist.org/observations/97668068</a>   |
| 5213 | <i>Spilopelia chinensis</i> | Eastern Spotted Dove | 2021/9/15  | 2 | 0 | 23.34355085 | 77.77497889  | <a href="https://www.inaturalist.org/observations/94903099">https://www.inaturalist.org/observations/94903099</a>   |
| 5214 | <i>Spilopelia chinensis</i> | Eastern Spotted Dove | 2021/11/23 | 1 | 0 | 23.35223500 | 116.68323400 | <a href="https://www.inaturalist.org/observations/101766192">https://www.inaturalist.org/observations/101766192</a> |
| 5215 | <i>Spilopelia chinensis</i> | Eastern Spotted Dove | 2021/1/26  | 3 | 0 | 23.37208510 | 77.76218902  | <a href="https://www.inaturalist.org/observations/68640989">https://www.inaturalist.org/observations/68640989</a>   |
| 5216 | <i>Spilopelia chinensis</i> | Eastern Spotted Dove | 2019/4/27  | 3 | 0 | 23.39166500 | 120.51089500 | <a href="https://www.inaturalist.org/observations/23875185">https://www.inaturalist.org/observations/23875185</a>   |
| 5217 | <i>Spilopelia chinensis</i> | Eastern Spotted Dove | 2020/8/22  | 1 | 0 | 23.40637350 | 85.37304293  | <a href="https://www.inaturalist.org/observations/57192414">https://www.inaturalist.org/observations/57192414</a>   |
| 5218 | <i>Spilopelia chinensis</i> | Eastern Spotted Dove | 2019/4/27  | 3 | 0 | 23.41227022 | 120.50828940 | <a href="https://www.inaturalist.org/observations/24420244">https://www.inaturalist.org/observations/24420244</a>   |
| 5219 | <i>Spilopelia chinensis</i> | Eastern Spotted Dove | 2019/11/13 | 4 | 0 | 23.42521426 | 120.45499540 | <a href="https://www.inaturalist.org/observations/35701422">https://www.inaturalist.org/observations/35701422</a>   |
| 5220 | <i>Spilopelia chinensis</i> | Eastern Spotted Dove | 2019/11/13 | 1 | 0 | 23.42590922 | 120.45340620 | <a href="https://www.inaturalist.org/observations/37397900">https://www.inaturalist.org/observations/37397900</a>   |

|      |                             |                      |            |   |   |             |              |                                                                                                                     |
|------|-----------------------------|----------------------|------------|---|---|-------------|--------------|---------------------------------------------------------------------------------------------------------------------|
| 5221 | <i>Spilopelia chinensis</i> | Eastern Spotted Dove | 2020/10/25 | 2 | 0 | 23.42688833 | 88.39567500  | <a href="https://www.inaturalist.org/observations/63482809">https://www.inaturalist.org/observations/63482809</a>   |
| 5222 | <i>Spilopelia chinensis</i> | Eastern Spotted Dove | 2020/10/25 | 2 | 0 | 23.43086167 | 88.40870500  | <a href="https://www.inaturalist.org/observations/63854637">https://www.inaturalist.org/observations/63854637</a>   |
| 5223 | <i>Spilopelia chinensis</i> | Eastern Spotted Dove | 2019/4/28  | 1 | 0 | 23.43377888 | 120.58560810 | <a href="https://www.inaturalist.org/observations/23880129">https://www.inaturalist.org/observations/23880129</a>   |
| 5224 | <i>Spilopelia chinensis</i> | Eastern Spotted Dove | 2019/5/15  | 1 | 0 | 23.43585549 | 120.14795490 | <a href="https://www.inaturalist.org/observations/25184610">https://www.inaturalist.org/observations/25184610</a>   |
| 5225 | <i>Spilopelia chinensis</i> | Eastern Spotted Dove | 2021/2/14  | 1 | 0 | 23.43947962 | 116.28453430 | <a href="https://www.inaturalist.org/observations/69557485">https://www.inaturalist.org/observations/69557485</a>   |
| 5226 | <i>Spilopelia chinensis</i> | Eastern Spotted Dove | 2018/12/7  | 4 | 0 | 23.44002584 | 88.35977619  | <a href="https://www.inaturalist.org/observations/19906177">https://www.inaturalist.org/observations/19906177</a>   |
| 5227 | <i>Spilopelia chinensis</i> | Eastern Spotted Dove | 2021/2/6   | 1 | 0 | 23.45312200 | 120.55602800 | <a href="https://www.inaturalist.org/observations/69128978">https://www.inaturalist.org/observations/69128978</a>   |
| 5228 | <i>Spilopelia chinensis</i> | Eastern Spotted Dove | 2021/12/29 | 1 | 0 | 23.45317833 | 120.55983170 | <a href="https://www.inaturalist.org/observations/108573436">https://www.inaturalist.org/observations/108573436</a> |
| 5229 | <i>Spilopelia chinensis</i> | Eastern Spotted Dove | 2020/9/23  | 1 | 0 | 23.45347964 | 120.55923700 | <a href="https://www.inaturalist.org/observations/60689546">https://www.inaturalist.org/observations/60689546</a>   |
| 5230 | <i>Spilopelia chinensis</i> | Eastern Spotted Dove | 2019/11/6  | 1 | 0 | 23.45375163 | 120.55951930 | <a href="https://www.inaturalist.org/observations/42377284">https://www.inaturalist.org/observations/42377284</a>   |
| 5231 | <i>Spilopelia chinensis</i> | Eastern Spotted Dove | 2020/2/16  | 1 | 0 | 23.45472960 | 120.44465360 | <a href="https://www.inaturalist.org/observations/38688076">https://www.inaturalist.org/observations/38688076</a>   |
| 5232 | <i>Spilopelia chinensis</i> | Eastern Spotted Dove | 2020/2/16  | 1 | 0 | 23.45475160 | 120.44467720 | <a href="https://www.inaturalist.org/observations/38689211">https://www.inaturalist.org/observations/38689211</a>   |
| 5233 | <i>Spilopelia chinensis</i> | Eastern Spotted Dove | 2020/2/16  | 2 | 0 | 23.45476370 | 120.44456040 | <a href="https://www.inaturalist.org/observations/38687573">https://www.inaturalist.org/observations/38687573</a>   |
| 5234 | <i>Spilopelia chinensis</i> | Eastern Spotted Dove | 2021/3/7   | 1 | 0 | 23.45515967 | 120.45573160 | <a href="https://www.inaturalist.org/observations/70725832">https://www.inaturalist.org/observations/70725832</a>   |
| 5235 | <i>Spilopelia chinensis</i> | Eastern Spotted Dove | 2018/5/12  | 0 | 0 | 23.45559508 | 120.46592680 | <a href="https://www.inaturalist.org/observations/14283341">https://www.inaturalist.org/observations/14283341</a>   |
| 5236 | <i>Spilopelia chinensis</i> | Eastern Spotted Dove | 2021/8/6   | 2 | 0 | 23.45606755 | 120.47471680 | <a href="https://www.inaturalist.org/observations/90100503">https://www.inaturalist.org/observations/90100503</a>   |
| 5237 | <i>Spilopelia chinensis</i> | Eastern Spotted Dove | 2022/2/27  | 1 | 0 | 23.45905256 | 120.44297720 | <a href="https://www.inaturalist.org/observations/107744497">https://www.inaturalist.org/observations/107744497</a> |
| 5238 | <i>Spilopelia chinensis</i> | Eastern Spotted Dove | 2022/4/29  | 2 | 0 | 23.46032667 | 120.46958500 | <a href="https://www.inaturalist.org/observations/114552152">https://www.inaturalist.org/observations/114552152</a> |
| 5239 | <i>Spilopelia chinensis</i> | Eastern Spotted Dove | 2018/12/12 | 3 | 0 | 23.46158491 | 88.33980817  | <a href="https://www.inaturalist.org/observations/41976177">https://www.inaturalist.org/observations/41976177</a>   |
| 5240 | <i>Spilopelia chinensis</i> | Eastern Spotted Dove | 2020/11/29 | 1 | 0 | 23.46368590 | 120.47947390 | <a href="https://www.inaturalist.org/observations/65784650">https://www.inaturalist.org/observations/65784650</a>   |
| 5241 | <i>Spilopelia chinensis</i> | Eastern Spotted Dove | 2022/5/8   | 2 | 0 | 23.47244121 | 120.29168060 | <a href="https://www.inaturalist.org/observations/116942386">https://www.inaturalist.org/observations/116942386</a> |
| 5242 | <i>Spilopelia chinensis</i> | Eastern Spotted Dove | 2020/7/29  | 2 | 0 | 23.47312940 | 120.29271650 | <a href="https://www.inaturalist.org/observations/56627839">https://www.inaturalist.org/observations/56627839</a>   |
| 5243 | <i>Spilopelia chinensis</i> | Eastern Spotted Dove | 2019/4/25  | 5 | 0 | 23.47333493 | 87.30062822  | <a href="https://www.inaturalist.org/observations/25268043">https://www.inaturalist.org/observations/25268043</a>   |



|      |                             |                      |            |   |   |             |              |                                                                                                                     |
|------|-----------------------------|----------------------|------------|---|---|-------------|--------------|---------------------------------------------------------------------------------------------------------------------|
| 5244 | <i>Spilopelia chinensis</i> | Eastern Spotted Dove | 2020/10/31 | 1 | 0 | 23.47371750 | 120.45246250 | <a href="https://www.inaturalist.org/observations/63880754">https://www.inaturalist.org/observations/63880754</a>   |
| 5245 | <i>Spilopelia chinensis</i> | Eastern Spotted Dove | 2020/9/5   | 2 | 0 | 23.47459242 | 120.45100300 | <a href="https://www.inaturalist.org/observations/59101994">https://www.inaturalist.org/observations/59101994</a>   |
| 5246 | <i>Spilopelia chinensis</i> | Eastern Spotted Dove | 2022/3/15  | 1 | 0 | 23.47459829 | 120.45055410 | <a href="https://www.inaturalist.org/observations/108629800">https://www.inaturalist.org/observations/108629800</a> |
| 5247 | <i>Spilopelia chinensis</i> | Eastern Spotted Dove | 2019/10/13 | 1 | 0 | 23.47467589 | 120.45032050 | <a href="https://www.inaturalist.org/observations/34343099">https://www.inaturalist.org/observations/34343099</a>   |
| 5248 | <i>Spilopelia chinensis</i> | Eastern Spotted Dove | 2020/9/5   | 1 | 0 | 23.47477130 | 120.45107610 | <a href="https://www.inaturalist.org/observations/61548009">https://www.inaturalist.org/observations/61548009</a>   |
| 5249 | <i>Spilopelia chinensis</i> | Eastern Spotted Dove | 2020/10/8  | 1 | 0 | 23.47482250 | 120.45109780 | <a href="https://www.inaturalist.org/observations/62292277">https://www.inaturalist.org/observations/62292277</a>   |
| 5250 | <i>Spilopelia chinensis</i> | Eastern Spotted Dove | 2020/7/1   | 1 | 0 | 23.47497133 | 120.45168910 | <a href="https://www.inaturalist.org/observations/52340175">https://www.inaturalist.org/observations/52340175</a>   |
| 5251 | <i>Spilopelia chinensis</i> | Eastern Spotted Dove | 2020/6/16  | 1 | 0 | 23.47518861 | 120.45146690 | <a href="https://www.inaturalist.org/observations/51598950">https://www.inaturalist.org/observations/51598950</a>   |
| 5252 | <i>Spilopelia chinensis</i> | Eastern Spotted Dove | 2019/4/26  | 4 | 0 | 23.47534524 | 120.45092180 | <a href="https://www.inaturalist.org/observations/24178539">https://www.inaturalist.org/observations/24178539</a>   |
| 5253 | <i>Spilopelia chinensis</i> | Eastern Spotted Dove | 2019/4/26  | 3 | 0 | 23.47534524 | 120.45092180 | <a href="https://www.inaturalist.org/observations/24178553">https://www.inaturalist.org/observations/24178553</a>   |
| 5254 | <i>Spilopelia chinensis</i> | Eastern Spotted Dove | 2019/11/27 | 1 | 0 | 23.47593500 | 120.45129140 | <a href="https://www.inaturalist.org/observations/36123727">https://www.inaturalist.org/observations/36123727</a>   |
| 5255 | <i>Spilopelia chinensis</i> | Eastern Spotted Dove | 2019/12/8  | 1 | 0 | 23.47615005 | 120.45294820 | <a href="https://www.inaturalist.org/observations/36451559">https://www.inaturalist.org/observations/36451559</a>   |
| 5256 | <i>Spilopelia chinensis</i> | Eastern Spotted Dove | 2019/4/29  | 2 | 0 | 23.47637749 | 120.44612120 | <a href="https://www.inaturalist.org/observations/23869411">https://www.inaturalist.org/observations/23869411</a>   |
| 5257 | <i>Spilopelia chinensis</i> | Eastern Spotted Dove | 2022/8/14  | 1 | 0 | 23.47675330 | 120.44599470 | <a href="https://www.inaturalist.org/observations/130731451">https://www.inaturalist.org/observations/130731451</a> |
| 5258 | <i>Spilopelia chinensis</i> | Eastern Spotted Dove | 2019/4/29  | 3 | 0 | 23.47678000 | 120.44607500 | <a href="https://www.inaturalist.org/observations/23858893">https://www.inaturalist.org/observations/23858893</a>   |
| 5259 | <i>Spilopelia chinensis</i> | Eastern Spotted Dove | 2019/2/17  | 3 | 0 | 23.48173348 | 87.30354841  | <a href="https://www.inaturalist.org/observations/20418560">https://www.inaturalist.org/observations/20418560</a>   |
| 5260 | <i>Spilopelia chinensis</i> | Eastern Spotted Dove | 2019/8/11  | 2 | 0 | 23.48347880 | 120.46341590 | <a href="https://www.inaturalist.org/observations/30679301">https://www.inaturalist.org/observations/30679301</a>   |
| 5261 | <i>Spilopelia chinensis</i> | Eastern Spotted Dove | 2015/10/25 | 7 | 0 | 23.48733900 | 77.74182400  | <a href="http://www.inaturalist.org/observations/2347450">http://www.inaturalist.org/observations/2347450</a>       |
| 5262 | <i>Spilopelia chinensis</i> | Eastern Spotted Dove | 2019/4/28  | 2 | 0 | 23.49237522 | 120.44561000 | <a href="https://www.inaturalist.org/observations/23569516">https://www.inaturalist.org/observations/23569516</a>   |
| 5263 | <i>Spilopelia chinensis</i> | Eastern Spotted Dove | 2022/2/9   | 1 | 0 | 23.49498700 | 120.15692930 | <a href="https://www.inaturalist.org/observations/106479793">https://www.inaturalist.org/observations/106479793</a> |
| 5264 | <i>Spilopelia chinensis</i> | Eastern Spotted Dove | 2019/12/20 | 1 | 0 | 23.49776513 | 120.16694120 | <a href="https://www.inaturalist.org/observations/36797284">https://www.inaturalist.org/observations/36797284</a>   |
| 5265 | <i>Spilopelia chinensis</i> | Eastern Spotted Dove | 2021/12/14 | 1 | 0 | 23.49835300 | 120.16631990 | <a href="https://www.inaturalist.org/observations/103117208">https://www.inaturalist.org/observations/103117208</a> |
| 5266 | <i>Spilopelia chinensis</i> | Eastern Spotted Dove | 2013/6/14  | 6 | 0 | 23.49962700 | 87.30537800  | <a href="http://www.inaturalist.org/observations/610145">http://www.inaturalist.org/observations/610145</a>         |

|      |                             |                      |            |   |   |             |              |                                                                                                                     |
|------|-----------------------------|----------------------|------------|---|---|-------------|--------------|---------------------------------------------------------------------------------------------------------------------|
| 5267 | <i>Spilopelia chinensis</i> | Eastern Spotted Dove | 2020/10/25 | 1 | 0 | 23.50765919 | 116.35001500 | <a href="https://www.inaturalist.org/observations/63477243">https://www.inaturalist.org/observations/63477243</a>   |
| 5268 | <i>Spilopelia chinensis</i> | Eastern Spotted Dove | 2020/4/25  | 1 | 0 | 23.50803167 | 120.16054170 | <a href="https://www.inaturalist.org/observations/43889081">https://www.inaturalist.org/observations/43889081</a>   |
| 5269 | <i>Spilopelia chinensis</i> | Eastern Spotted Dove | 2022/2/9   | 2 | 0 | 23.51533483 | 120.15261830 | <a href="https://www.inaturalist.org/observations/106474556">https://www.inaturalist.org/observations/106474556</a> |
| 5270 | <i>Spilopelia chinensis</i> | Eastern Spotted Dove | 2021/5/5   | 1 | 0 | 23.51656667 | 120.14533000 | <a href="https://www.inaturalist.org/observations/79242401">https://www.inaturalist.org/observations/79242401</a>   |
| 5271 | <i>Spilopelia chinensis</i> | Eastern Spotted Dove | 2021/1/24  | 1 | 0 | 23.51670333 | 120.19340670 | <a href="https://www.inaturalist.org/observations/68637771">https://www.inaturalist.org/observations/68637771</a>   |
| 5272 | <i>Spilopelia chinensis</i> | Eastern Spotted Dove | 2021/12/14 | 3 | 0 | 23.51678384 | 120.14367600 | <a href="https://www.inaturalist.org/observations/103351396">https://www.inaturalist.org/observations/103351396</a> |
| 5273 | <i>Spilopelia chinensis</i> | Eastern Spotted Dove | 2017/1/16  | 4 | 0 | 23.52044430 | 87.31192270  | <a href="https://www.inaturalist.org/observations/6005616">https://www.inaturalist.org/observations/6005616</a>     |
| 5274 | <i>Spilopelia chinensis</i> | Eastern Spotted Dove | 2017/7/29  | 3 | 0 | 23.52044430 | 87.31192270  | <a href="https://www.inaturalist.org/observations/58762988">https://www.inaturalist.org/observations/58762988</a>   |
| 5275 | <i>Spilopelia chinensis</i> | Eastern Spotted Dove | 2022/1/23  | 1 | 0 | 23.52302778 | 120.22269820 | <a href="https://www.inaturalist.org/observations/107233822">https://www.inaturalist.org/observations/107233822</a> |
| 5276 | <i>Spilopelia chinensis</i> | Eastern Spotted Dove | 2017/4/26  | 2 | 0 | 23.52310438 | 81.10092064  | <a href="https://www.inaturalist.org/observations/63496261">https://www.inaturalist.org/observations/63496261</a>   |
| 5277 | <i>Spilopelia chinensis</i> | Eastern Spotted Dove | 2019/4/26  | 3 | 0 | 23.52677538 | 120.51856810 | <a href="https://www.inaturalist.org/observations/23108837">https://www.inaturalist.org/observations/23108837</a>   |
| 5278 | <i>Spilopelia chinensis</i> | Eastern Spotted Dove | 2019/5/10  | 1 | 0 | 23.53071859 | 120.17810850 | <a href="https://www.inaturalist.org/observations/25051319">https://www.inaturalist.org/observations/25051319</a>   |
| 5279 | <i>Spilopelia chinensis</i> | Eastern Spotted Dove | 2020/1/19  | 0 | 0 | 23.53310833 | 120.21730830 | <a href="https://www.inaturalist.org/observations/37772144">https://www.inaturalist.org/observations/37772144</a>   |
| 5280 | <i>Spilopelia chinensis</i> | Eastern Spotted Dove | 2019/10/26 | 1 | 0 | 23.53686842 | 120.18564850 | <a href="https://www.inaturalist.org/observations/34913453">https://www.inaturalist.org/observations/34913453</a>   |
| 5281 | <i>Spilopelia chinensis</i> | Eastern Spotted Dove | 2020/4/30  | 1 | 0 | 23.53851112 | 120.16913260 | <a href="https://www.inaturalist.org/observations/44407131">https://www.inaturalist.org/observations/44407131</a>   |
| 5282 | <i>Spilopelia chinensis</i> | Eastern Spotted Dove | 2021/12/21 | 2 | 0 | 23.54124721 | 120.17336330 | <a href="https://www.inaturalist.org/observations/103445227">https://www.inaturalist.org/observations/103445227</a> |
| 5283 | <i>Spilopelia chinensis</i> | Eastern Spotted Dove | 2020/10/29 | 1 | 0 | 23.54460709 | 116.39695770 | <a href="https://www.inaturalist.org/observations/63744859">https://www.inaturalist.org/observations/63744859</a>   |
| 5284 | <i>Spilopelia chinensis</i> | Eastern Spotted Dove | 2021/5/20  | 1 | 0 | 23.54515027 | 120.20965760 | <a href="https://www.inaturalist.org/observations/79636949">https://www.inaturalist.org/observations/79636949</a>   |
| 5285 | <i>Spilopelia chinensis</i> | Eastern Spotted Dove | 2020/8/6   | 1 | 0 | 23.54666580 | 116.39204290 | <a href="https://www.inaturalist.org/observations/55601464">https://www.inaturalist.org/observations/55601464</a>   |
| 5286 | <i>Spilopelia chinensis</i> | Eastern Spotted Dove | 2020/11/4  | 1 | 0 | 23.54746647 | 116.39347010 | <a href="https://www.inaturalist.org/observations/64165822">https://www.inaturalist.org/observations/64165822</a>   |
| 5287 | <i>Spilopelia chinensis</i> | Eastern Spotted Dove | 2017/12/10 | 1 | 0 | 23.55856063 | 119.61112060 | <a href="https://www.inaturalist.org/observations/108516113">https://www.inaturalist.org/observations/108516113</a> |
| 5288 | <i>Spilopelia chinensis</i> | Eastern Spotted Dove | 2022/4/30  | 0 | 0 | 23.55900248 | 120.16779530 | <a href="https://www.inaturalist.org/observations/113699014">https://www.inaturalist.org/observations/113699014</a> |
| 5289 | <i>Spilopelia chinensis</i> | Eastern Spotted Dove | 2022/6/3   | 1 | 0 | 23.56318217 | 119.56229580 | <a href="https://www.inaturalist.org/observations/120790031">https://www.inaturalist.org/observations/120790031</a> |

|      |                             |                      |            |   |   |             |              |                                                                                                                     |
|------|-----------------------------|----------------------|------------|---|---|-------------|--------------|---------------------------------------------------------------------------------------------------------------------|
| 5290 | <i>Spilopelia chinensis</i> | Eastern Spotted Dove | 2022/3/25  | 1 | 0 | 23.56662560 | 120.16464540 | <a href="https://www.inaturalist.org/observations/125135618">https://www.inaturalist.org/observations/125135618</a> |
| 5291 | <i>Spilopelia chinensis</i> | Eastern Spotted Dove | 2022/4/24  | 1 | 0 | 23.56717626 | 120.16472190 | <a href="https://www.inaturalist.org/observations/112810525">https://www.inaturalist.org/observations/112810525</a> |
| 5292 | <i>Spilopelia chinensis</i> | Eastern Spotted Dove | 2017/12/23 | 2 | 0 | 23.56749908 | 119.56585410 | <a href="https://www.inaturalist.org/observations/108516114">https://www.inaturalist.org/observations/108516114</a> |
| 5293 | <i>Spilopelia chinensis</i> | Eastern Spotted Dove | 2020/4/25  | 1 | 0 | 23.56758528 | 120.16587890 | <a href="https://www.inaturalist.org/observations/44296062">https://www.inaturalist.org/observations/44296062</a>   |
| 5294 | <i>Spilopelia chinensis</i> | Eastern Spotted Dove | 2022/4/30  | 1 | 0 | 23.56884780 | 120.17159420 | <a href="https://www.inaturalist.org/observations/114454869">https://www.inaturalist.org/observations/114454869</a> |
| 5295 | <i>Spilopelia chinensis</i> | Eastern Spotted Dove | 2021/4/20  | 1 | 0 | 23.56938037 | 120.17208940 | <a href="https://www.inaturalist.org/observations/74716772">https://www.inaturalist.org/observations/74716772</a>   |
| 5296 | <i>Spilopelia chinensis</i> | Eastern Spotted Dove | 2021/3/19  | 2 | 0 | 23.57003500 | 119.56663830 | <a href="https://www.inaturalist.org/observations/71601960">https://www.inaturalist.org/observations/71601960</a>   |
| 5297 | <i>Spilopelia chinensis</i> | Eastern Spotted Dove | 2021/4/20  | 1 | 0 | 23.57397173 | 120.17318970 | <a href="https://www.inaturalist.org/observations/74716806">https://www.inaturalist.org/observations/74716806</a>   |
| 5298 | <i>Spilopelia chinensis</i> | Eastern Spotted Dove | 2017/3/18  | 1 | 0 | 23.57452798 | 119.57857850 | <a href="https://www.inaturalist.org/observations/108516110">https://www.inaturalist.org/observations/108516110</a> |
| 5299 | <i>Spilopelia chinensis</i> | Eastern Spotted Dove | 2022/4/19  | 2 | 0 | 23.57520592 | 120.15688160 | <a href="https://www.inaturalist.org/observations/112033798">https://www.inaturalist.org/observations/112033798</a> |
| 5300 | <i>Spilopelia chinensis</i> | Eastern Spotted Dove | 2020/11/7  | 2 | 0 | 23.57574769 | 116.37565090 | <a href="https://www.inaturalist.org/observations/64338046">https://www.inaturalist.org/observations/64338046</a>   |
| 5301 | <i>Spilopelia chinensis</i> | Eastern Spotted Dove | 2020/4/15  | 1 | 0 | 23.57661500 | 120.19938500 | <a href="https://www.inaturalist.org/observations/42295371">https://www.inaturalist.org/observations/42295371</a>   |
| 5302 | <i>Spilopelia chinensis</i> | Eastern Spotted Dove | 2021/5/21  | 1 | 0 | 23.57689117 | 116.24927810 | <a href="https://www.inaturalist.org/observations/79610000">https://www.inaturalist.org/observations/79610000</a>   |
| 5303 | <i>Spilopelia chinensis</i> | Eastern Spotted Dove | 2019/3/23  | 1 | 0 | 23.57777015 | 119.57469160 | <a href="https://www.inaturalist.org/observations/108516117">https://www.inaturalist.org/observations/108516117</a> |
| 5304 | <i>Spilopelia chinensis</i> | Eastern Spotted Dove | 2020/4/17  | 1 | 0 | 23.57798833 | 120.21140500 | <a href="https://www.inaturalist.org/observations/42737923">https://www.inaturalist.org/observations/42737923</a>   |
| 5305 | <i>Spilopelia chinensis</i> | Eastern Spotted Dove | 2020/10/30 | 1 | 0 | 23.58090671 | 116.37577430 | <a href="https://www.inaturalist.org/observations/63817886">https://www.inaturalist.org/observations/63817886</a>   |
| 5306 | <i>Spilopelia chinensis</i> | Eastern Spotted Dove | 2017/10/22 | 1 | 0 | 23.58220717 | 119.58269270 | <a href="https://www.inaturalist.org/observations/108516111">https://www.inaturalist.org/observations/108516111</a> |
| 5307 | <i>Spilopelia chinensis</i> | Eastern Spotted Dove | 2018/3/4   | 2 | 0 | 23.58292971 | 119.58219190 | <a href="https://www.inaturalist.org/observations/108516116">https://www.inaturalist.org/observations/108516116</a> |
| 5308 | <i>Spilopelia chinensis</i> | Eastern Spotted Dove | 2015/5/20  | 1 | 0 | 23.58323763 | 119.58188490 | <a href="https://www.inaturalist.org/observations/108516109">https://www.inaturalist.org/observations/108516109</a> |
| 5309 | <i>Spilopelia chinensis</i> | Eastern Spotted Dove | 2022/3/3   | 1 | 0 | 23.58436667 | 120.17029900 | <a href="https://www.inaturalist.org/observations/108089872">https://www.inaturalist.org/observations/108089872</a> |
| 5310 | <i>Spilopelia chinensis</i> | Eastern Spotted Dove | 2018/2/28  | 1 | 0 | 23.58469743 | 119.58058730 | <a href="https://www.inaturalist.org/observations/108516115">https://www.inaturalist.org/observations/108516115</a> |
| 5311 | <i>Spilopelia chinensis</i> | Eastern Spotted Dove | 2022/3/2   | 2 | 0 | 23.58476624 | 120.24060290 | <a href="https://www.inaturalist.org/observations/107984121">https://www.inaturalist.org/observations/107984121</a> |
| 5312 | <i>Spilopelia chinensis</i> | Eastern Spotted Dove | 2022/5/4   | 2 | 0 | 23.58704620 | 120.15001580 | <a href="https://www.inaturalist.org/observations/116653221">https://www.inaturalist.org/observations/116653221</a> |

|      |                             |                      |            |   |   |             |              |                                                                                                                     |
|------|-----------------------------|----------------------|------------|---|---|-------------|--------------|---------------------------------------------------------------------------------------------------------------------|
| 5313 | <i>Spilopelia chinensis</i> | Eastern Spotted Dove | 2020/6/29  | 1 | 0 | 23.58754375 | 120.18434910 | <a href="https://www.inaturalist.org/observations/51318960">https://www.inaturalist.org/observations/51318960</a>   |
| 5314 | <i>Spilopelia chinensis</i> | Eastern Spotted Dove | 2018/6/24  | 4 | 0 | 23.59319300 | 120.30199900 | <a href="https://www.inaturalist.org/observations/13760604">https://www.inaturalist.org/observations/13760604</a>   |
| 5315 | <i>Spilopelia chinensis</i> | Eastern Spotted Dove | 2020/7/19  | 1 | 0 | 23.59562149 | 116.37110920 | <a href="https://www.inaturalist.org/observations/53552158">https://www.inaturalist.org/observations/53552158</a>   |
| 5316 | <i>Spilopelia chinensis</i> | Eastern Spotted Dove | 2021/12/21 | 1 | 0 | 23.59612940 | 120.24420940 | <a href="https://www.inaturalist.org/observations/103407933">https://www.inaturalist.org/observations/103407933</a> |
| 5317 | <i>Spilopelia chinensis</i> | Eastern Spotted Dove | 2020/7/19  | 1 | 0 | 23.59657763 | 116.37059420 | <a href="https://www.inaturalist.org/observations/53552040">https://www.inaturalist.org/observations/53552040</a>   |
| 5318 | <i>Spilopelia chinensis</i> | Eastern Spotted Dove | 2021/11/16 | 1 | 0 | 23.59723833 | 120.60187500 | <a href="https://www.inaturalist.org/observations/101265453">https://www.inaturalist.org/observations/101265453</a> |
| 5319 | <i>Spilopelia chinensis</i> | Eastern Spotted Dove | 2022/2/21  | 2 | 0 | 23.59742111 | 120.23377550 | <a href="https://www.inaturalist.org/observations/107210790">https://www.inaturalist.org/observations/107210790</a> |
| 5320 | <i>Spilopelia chinensis</i> | Eastern Spotted Dove | 2019/7/21  | 6 | 0 | 23.59905000 | 87.36302333  | <a href="https://www.inaturalist.org/observations/29856059">https://www.inaturalist.org/observations/29856059</a>   |
| 5321 | <i>Spilopelia chinensis</i> | Eastern Spotted Dove | 2019/1/28  | 1 | 0 | 23.59937185 | 120.24248070 | <a href="https://www.inaturalist.org/observations/19927431">https://www.inaturalist.org/observations/19927431</a>   |
| 5322 | <i>Spilopelia chinensis</i> | Eastern Spotted Dove | 2021/12/8  | 1 | 0 | 23.60069167 | 120.23820330 | <a href="https://www.inaturalist.org/observations/103066824">https://www.inaturalist.org/observations/103066824</a> |
| 5323 | <i>Spilopelia chinensis</i> | Eastern Spotted Dove | 2020/3/5   | 1 | 0 | 23.60297333 | 120.29020170 | <a href="https://www.inaturalist.org/observations/39604425">https://www.inaturalist.org/observations/39604425</a>   |
| 5324 | <i>Spilopelia chinensis</i> | Eastern Spotted Dove | 2022/4/30  | 0 | 0 | 23.60513545 | 120.63862270 | <a href="https://www.inaturalist.org/observations/113579178">https://www.inaturalist.org/observations/113579178</a> |
| 5325 | <i>Spilopelia chinensis</i> | Eastern Spotted Dove | 2021/12/2  | 1 | 0 | 23.60546143 | 120.24205890 | <a href="https://www.inaturalist.org/observations/102627989">https://www.inaturalist.org/observations/102627989</a> |
| 5326 | <i>Spilopelia chinensis</i> | Eastern Spotted Dove | 2020/2/5   | 0 | 0 | 23.60586500 | 120.68605830 | <a href="https://www.inaturalist.org/observations/38324908">https://www.inaturalist.org/observations/38324908</a>   |
| 5327 | <i>Spilopelia chinensis</i> | Eastern Spotted Dove | 2019/4/28  | 1 | 0 | 23.60863842 | 120.45902720 | <a href="https://www.inaturalist.org/observations/23589805">https://www.inaturalist.org/observations/23589805</a>   |
| 5328 | <i>Spilopelia chinensis</i> | Eastern Spotted Dove | 2021/5/21  | 1 | 0 | 23.61105874 | 120.60849190 | <a href="https://www.inaturalist.org/observations/87959764">https://www.inaturalist.org/observations/87959764</a>   |
| 5329 | <i>Spilopelia chinensis</i> | Eastern Spotted Dove | 2022/4/29  | 1 | 0 | 23.61283460 | 120.60508100 | <a href="https://www.inaturalist.org/observations/113295787">https://www.inaturalist.org/observations/113295787</a> |
| 5330 | <i>Spilopelia chinensis</i> | Eastern Spotted Dove | 2019/5/9   | 2 | 0 | 23.61326218 | 120.14591990 | <a href="https://www.inaturalist.org/observations/24831158">https://www.inaturalist.org/observations/24831158</a>   |
| 5331 | <i>Spilopelia chinensis</i> | Eastern Spotted Dove | 2020/1/15  | 0 | 0 | 23.61429000 | 120.24433830 | <a href="https://www.inaturalist.org/observations/37772500">https://www.inaturalist.org/observations/37772500</a>   |
| 5332 | <i>Spilopelia chinensis</i> | Eastern Spotted Dove | 2020/3/18  | 1 | 0 | 23.61443333 | 120.25093330 | <a href="https://www.inaturalist.org/observations/40279188">https://www.inaturalist.org/observations/40279188</a>   |
| 5333 | <i>Spilopelia chinensis</i> | Eastern Spotted Dove | 2019/10/23 | 2 | 0 | 23.61690967 | 120.57139460 | <a href="https://www.inaturalist.org/observations/35566918">https://www.inaturalist.org/observations/35566918</a>   |
| 5334 | <i>Spilopelia chinensis</i> | Eastern Spotted Dove | 2018/12/11 | 4 | 0 | 23.61698424 | 120.25868570 | <a href="https://www.inaturalist.org/observations/18966924">https://www.inaturalist.org/observations/18966924</a>   |
| 5335 | <i>Spilopelia chinensis</i> | Eastern Spotted Dove | 2021/5/10  | 1 | 0 | 23.61954021 | 120.26154660 | <a href="https://www.inaturalist.org/observations/78673608">https://www.inaturalist.org/observations/78673608</a>   |

|      |                             |                      |           |   |   |             |              |                                                                                                                     |
|------|-----------------------------|----------------------|-----------|---|---|-------------|--------------|---------------------------------------------------------------------------------------------------------------------|
| 5336 | <i>Spilopelia chinensis</i> | Eastern Spotted Dove | 2021/6/25 | 1 | 0 | 23.61955404 | 120.26144310 | <a href="https://www.inaturalist.org/observations/84822086">https://www.inaturalist.org/observations/84822086</a>   |
| 5337 | <i>Spilopelia chinensis</i> | Eastern Spotted Dove | 2022/3/18 | 1 | 0 | 23.61957737 | 120.26165190 | <a href="https://www.inaturalist.org/observations/108876602">https://www.inaturalist.org/observations/108876602</a> |
| 5338 | <i>Spilopelia chinensis</i> | Eastern Spotted Dove | 2020/3/9  | 1 | 0 | 23.61957833 | 120.26164830 | <a href="https://www.inaturalist.org/observations/39832548">https://www.inaturalist.org/observations/39832548</a>   |
| 5339 | <i>Spilopelia chinensis</i> | Eastern Spotted Dove | 2022/6/2  | 1 | 0 | 23.61961961 | 120.26126100 | <a href="https://www.inaturalist.org/observations/120969593">https://www.inaturalist.org/observations/120969593</a> |
| 5340 | <i>Spilopelia chinensis</i> | Eastern Spotted Dove | 2020/5/15 | 1 | 0 | 23.61974835 | 120.26105830 | <a href="https://www.inaturalist.org/observations/45949281">https://www.inaturalist.org/observations/45949281</a>   |
| 5341 | <i>Spilopelia chinensis</i> | Eastern Spotted Dove | 2022/3/21 | 1 | 0 | 23.61990802 | 120.26178600 | <a href="https://www.inaturalist.org/observations/109101773">https://www.inaturalist.org/observations/109101773</a> |
| 5342 | <i>Spilopelia chinensis</i> | Eastern Spotted Dove | 2021/1/21 | 1 | 0 | 23.61991833 | 120.26820830 | <a href="https://www.inaturalist.org/observations/68403687">https://www.inaturalist.org/observations/68403687</a>   |
| 5343 | <i>Spilopelia chinensis</i> | Eastern Spotted Dove | 2020/4/17 | 1 | 0 | 23.61997000 | 120.26204670 | <a href="https://www.inaturalist.org/observations/42736421">https://www.inaturalist.org/observations/42736421</a>   |
| 5344 | <i>Spilopelia chinensis</i> | Eastern Spotted Dove | 2020/4/8  | 1 | 0 | 23.61998500 | 120.26163830 | <a href="https://www.inaturalist.org/observations/41673538">https://www.inaturalist.org/observations/41673538</a>   |
| 5345 | <i>Spilopelia chinensis</i> | Eastern Spotted Dove | 2020/4/13 | 1 | 0 | 23.62002500 | 120.26134500 | <a href="https://www.inaturalist.org/observations/42155044">https://www.inaturalist.org/observations/42155044</a>   |
| 5346 | <i>Spilopelia chinensis</i> | Eastern Spotted Dove | 2020/4/28 | 1 | 0 | 23.62002987 | 120.26158710 | <a href="https://www.inaturalist.org/observations/44289409">https://www.inaturalist.org/observations/44289409</a>   |
| 5347 | <i>Spilopelia chinensis</i> | Eastern Spotted Dove | 2022/3/3  | 1 | 0 | 23.62012670 | 120.26117310 | <a href="https://www.inaturalist.org/observations/107797436">https://www.inaturalist.org/observations/107797436</a> |
| 5348 | <i>Spilopelia chinensis</i> | Eastern Spotted Dove | 2021/9/17 | 0 | 0 | 23.62014329 | 120.26174360 | <a href="https://www.inaturalist.org/observations/95104105">https://www.inaturalist.org/observations/95104105</a>   |
| 5349 | <i>Spilopelia chinensis</i> | Eastern Spotted Dove | 2021/2/23 | 1 | 0 | 23.62014502 | 120.26099880 | <a href="https://www.inaturalist.org/observations/70026072">https://www.inaturalist.org/observations/70026072</a>   |
| 5350 | <i>Spilopelia chinensis</i> | Eastern Spotted Dove | 2021/7/21 | 1 | 0 | 23.62015005 | 120.26142040 | <a href="https://www.inaturalist.org/observations/87926459">https://www.inaturalist.org/observations/87926459</a>   |
| 5351 | <i>Spilopelia chinensis</i> | Eastern Spotted Dove | 2021/4/30 | 1 | 0 | 23.62019146 | 120.26171270 | <a href="https://www.inaturalist.org/observations/75747899">https://www.inaturalist.org/observations/75747899</a>   |
| 5352 | <i>Spilopelia chinensis</i> | Eastern Spotted Dove | 2021/7/16 | 0 | 0 | 23.62020925 | 120.26160970 | <a href="https://www.inaturalist.org/observations/87225277">https://www.inaturalist.org/observations/87225277</a>   |
| 5353 | <i>Spilopelia chinensis</i> | Eastern Spotted Dove | 2022/8/10 | 1 | 0 | 23.62021425 | 120.26149910 | <a href="https://www.inaturalist.org/observations/130188747">https://www.inaturalist.org/observations/130188747</a> |
| 5354 | <i>Spilopelia chinensis</i> | Eastern Spotted Dove | 2021/6/22 | 1 | 0 | 23.62022478 | 120.26148350 | <a href="https://www.inaturalist.org/observations/83999860">https://www.inaturalist.org/observations/83999860</a>   |
| 5355 | <i>Spilopelia chinensis</i> | Eastern Spotted Dove | 2021/11/1 | 1 | 0 | 23.62023823 | 120.26161010 | <a href="https://www.inaturalist.org/observations/99931338">https://www.inaturalist.org/observations/99931338</a>   |
| 5356 | <i>Spilopelia chinensis</i> | Eastern Spotted Dove | 2022/3/15 | 1 | 0 | 23.62028328 | 120.26086230 | <a href="https://www.inaturalist.org/observations/108624595">https://www.inaturalist.org/observations/108624595</a> |
| 5357 | <i>Spilopelia chinensis</i> | Eastern Spotted Dove | 2021/4/26 | 1 | 0 | 23.62029167 | 120.26173170 | <a href="https://www.inaturalist.org/observations/75267299">https://www.inaturalist.org/observations/75267299</a>   |
| 5358 | <i>Spilopelia chinensis</i> | Eastern Spotted Dove | 2022/3/16 | 1 | 0 | 23.62032360 | 120.26118320 | <a href="https://www.inaturalist.org/observations/108694976">https://www.inaturalist.org/observations/108694976</a> |

|      |                             |                      |            |   |   |             |              |                                                                                                                     |
|------|-----------------------------|----------------------|------------|---|---|-------------|--------------|---------------------------------------------------------------------------------------------------------------------|
| 5359 | <i>Spilopelia chinensis</i> | Eastern Spotted Dove | 2022/5/9   | 1 | 0 | 23.62035882 | 120.26093640 | <a href="https://www.inaturalist.org/observations/116205005">https://www.inaturalist.org/observations/116205005</a> |
| 5360 | <i>Spilopelia chinensis</i> | Eastern Spotted Dove | 2021/7/2   | 1 | 0 | 23.62036456 | 120.26111740 | <a href="https://www.inaturalist.org/observations/85281454">https://www.inaturalist.org/observations/85281454</a>   |
| 5361 | <i>Spilopelia chinensis</i> | Eastern Spotted Dove | 2022/5/2   | 1 | 0 | 23.62036755 | 120.26143510 | <a href="https://www.inaturalist.org/observations/114493128">https://www.inaturalist.org/observations/114493128</a> |
| 5362 | <i>Spilopelia chinensis</i> | Eastern Spotted Dove | 2019/10/9  | 1 | 0 | 23.62039797 | 120.26144640 | <a href="https://www.inaturalist.org/observations/34105928">https://www.inaturalist.org/observations/34105928</a>   |
| 5363 | <i>Spilopelia chinensis</i> | Eastern Spotted Dove | 2022/1/17  | 2 | 0 | 23.62043274 | 120.26128580 | <a href="https://www.inaturalist.org/observations/108110623">https://www.inaturalist.org/observations/108110623</a> |
| 5364 | <i>Spilopelia chinensis</i> | Eastern Spotted Dove | 2020/6/5   | 1 | 0 | 23.62044466 | 120.26125860 | <a href="https://www.inaturalist.org/observations/49629213">https://www.inaturalist.org/observations/49629213</a>   |
| 5365 | <i>Spilopelia chinensis</i> | Eastern Spotted Dove | 2022/3/9   | 1 | 0 | 23.62045656 | 120.26145470 | <a href="https://www.inaturalist.org/observations/108209715">https://www.inaturalist.org/observations/108209715</a> |
| 5366 | <i>Spilopelia chinensis</i> | Eastern Spotted Dove | 2022/6/7   | 1 | 0 | 23.62047383 | 120.26132310 | <a href="https://www.inaturalist.org/observations/120638968">https://www.inaturalist.org/observations/120638968</a> |
| 5367 | <i>Spilopelia chinensis</i> | Eastern Spotted Dove | 2021/3/24  | 1 | 0 | 23.62047415 | 120.26147860 | <a href="https://www.inaturalist.org/observations/71934978">https://www.inaturalist.org/observations/71934978</a>   |
| 5368 | <i>Spilopelia chinensis</i> | Eastern Spotted Dove | 2021/4/28  | 1 | 0 | 23.62049227 | 120.26120710 | <a href="https://www.inaturalist.org/observations/75522203">https://www.inaturalist.org/observations/75522203</a>   |
| 5369 | <i>Spilopelia chinensis</i> | Eastern Spotted Dove | 2022/1/6   | 1 | 0 | 23.62050229 | 120.26103160 | <a href="https://www.inaturalist.org/observations/104506260">https://www.inaturalist.org/observations/104506260</a> |
| 5370 | <i>Spilopelia chinensis</i> | Eastern Spotted Dove | 2021/4/30  | 1 | 0 | 23.62050667 | 120.26146670 | <a href="https://www.inaturalist.org/observations/75770522">https://www.inaturalist.org/observations/75770522</a>   |
| 5371 | <i>Spilopelia chinensis</i> | Eastern Spotted Dove | 2018/9/25  | 2 | 0 | 23.62051650 | 120.26130970 | <a href="https://www.inaturalist.org/observations/18872599">https://www.inaturalist.org/observations/18872599</a>   |
| 5372 | <i>Spilopelia chinensis</i> | Eastern Spotted Dove | 2021/10/29 | 1 | 0 | 23.62054528 | 120.26139760 | <a href="https://www.inaturalist.org/observations/99683393">https://www.inaturalist.org/observations/99683393</a>   |
| 5373 | <i>Spilopelia chinensis</i> | Eastern Spotted Dove | 2021/6/24  | 1 | 0 | 23.62054896 | 120.26152350 | <a href="https://www.inaturalist.org/observations/84255102">https://www.inaturalist.org/observations/84255102</a>   |
| 5374 | <i>Spilopelia chinensis</i> | Eastern Spotted Dove | 2021/5/4   | 2 | 0 | 23.62090500 | 120.26193500 | <a href="https://www.inaturalist.org/observations/78402319">https://www.inaturalist.org/observations/78402319</a>   |
| 5375 | <i>Spilopelia chinensis</i> | Eastern Spotted Dove | 2018/12/23 | 1 | 0 | 23.62108832 | 120.25499500 | <a href="https://www.inaturalist.org/observations/19171001">https://www.inaturalist.org/observations/19171001</a>   |
| 5376 | <i>Spilopelia chinensis</i> | Eastern Spotted Dove | 2020/2/25  | 1 | 0 | 23.62136333 | 120.25891000 | <a href="https://www.inaturalist.org/observations/39198207">https://www.inaturalist.org/observations/39198207</a>   |
| 5377 | <i>Spilopelia chinensis</i> | Eastern Spotted Dove | 2020/2/21  | 0 | 0 | 23.62178744 | 120.25976880 | <a href="https://www.inaturalist.org/observations/38948419">https://www.inaturalist.org/observations/38948419</a>   |
| 5378 | <i>Spilopelia chinensis</i> | Eastern Spotted Dove | 2021/12/4  | 2 | 0 | 23.62195890 | 120.49390220 | <a href="https://www.inaturalist.org/observations/102454804">https://www.inaturalist.org/observations/102454804</a> |
| 5379 | <i>Spilopelia chinensis</i> | Eastern Spotted Dove | 2020/4/8   | 1 | 0 | 23.62258000 | 120.25952170 | <a href="https://www.inaturalist.org/observations/41673615">https://www.inaturalist.org/observations/41673615</a>   |
| 5380 | <i>Spilopelia chinensis</i> | Eastern Spotted Dove | 2020/5/7   | 1 | 0 | 23.62392333 | 120.27909000 | <a href="https://www.inaturalist.org/observations/45247351">https://www.inaturalist.org/observations/45247351</a>   |
| 5381 | <i>Spilopelia chinensis</i> | Eastern Spotted Dove | 2021/3/16  | 1 | 0 | 23.62404667 | 120.25865670 | <a href="https://www.inaturalist.org/observations/71338388">https://www.inaturalist.org/observations/71338388</a>   |

|      |                             |                      |            |   |   |             |              |                                                                                                                     |
|------|-----------------------------|----------------------|------------|---|---|-------------|--------------|---------------------------------------------------------------------------------------------------------------------|
| 5382 | <i>Spilopelia chinensis</i> | Eastern Spotted Dove | 2020/3/10  | 0 | 0 | 23.62519384 | 120.54553200 | <a href="https://www.inaturalist.org/observations/39791144">https://www.inaturalist.org/observations/39791144</a>   |
| 5383 | <i>Spilopelia chinensis</i> | Eastern Spotted Dove | 2019/12/25 | 1 | 0 | 23.62684418 | 120.23472860 | <a href="https://www.inaturalist.org/observations/36987671">https://www.inaturalist.org/observations/36987671</a>   |
| 5384 | <i>Spilopelia chinensis</i> | Eastern Spotted Dove | 2022/6/10  | 2 | 0 | 23.62763628 | 120.24563080 | <a href="https://www.inaturalist.org/observations/121064292">https://www.inaturalist.org/observations/121064292</a> |
| 5385 | <i>Spilopelia chinensis</i> | Eastern Spotted Dove | 2022/1/14  | 1 | 0 | 23.62794000 | 120.19817600 | <a href="https://www.inaturalist.org/observations/108104674">https://www.inaturalist.org/observations/108104674</a> |
| 5386 | <i>Spilopelia chinensis</i> | Eastern Spotted Dove | 2022/3/24  | 1 | 0 | 23.62966193 | 120.25472690 | <a href="https://www.inaturalist.org/observations/109342094">https://www.inaturalist.org/observations/109342094</a> |
| 5387 | <i>Spilopelia chinensis</i> | Eastern Spotted Dove | 2020/5/29  | 1 | 0 | 23.63008901 | 120.19408000 | <a href="https://www.inaturalist.org/observations/47766617">https://www.inaturalist.org/observations/47766617</a>   |
| 5388 | <i>Spilopelia chinensis</i> | Eastern Spotted Dove | 2022/3/2   | 2 | 0 | 23.63021963 | 120.23972450 | <a href="https://www.inaturalist.org/observations/107981020">https://www.inaturalist.org/observations/107981020</a> |
| 5389 | <i>Spilopelia chinensis</i> | Eastern Spotted Dove | 2022/7/15  | 1 | 0 | 23.63103280 | 120.25544560 | <a href="https://www.inaturalist.org/observations/126308990">https://www.inaturalist.org/observations/126308990</a> |
| 5390 | <i>Spilopelia chinensis</i> | Eastern Spotted Dove | 2020/2/12  | 0 | 0 | 23.63211167 | 120.14642330 | <a href="https://www.inaturalist.org/observations/38625857">https://www.inaturalist.org/observations/38625857</a>   |
| 5391 | <i>Spilopelia chinensis</i> | Eastern Spotted Dove | 2020/5/11  | 1 | 0 | 23.63321500 | 120.29185170 | <a href="https://www.inaturalist.org/observations/45622707">https://www.inaturalist.org/observations/45622707</a>   |
| 5392 | <i>Spilopelia chinensis</i> | Eastern Spotted Dove | 2021/2/2   | 1 | 0 | 23.63376500 | 120.28137670 | <a href="https://www.inaturalist.org/observations/68974237">https://www.inaturalist.org/observations/68974237</a>   |
| 5393 | <i>Spilopelia chinensis</i> | Eastern Spotted Dove | 2022/7/17  | 0 | 0 | 23.63383200 | 120.56118800 | <a href="https://www.inaturalist.org/observations/126618893">https://www.inaturalist.org/observations/126618893</a> |
| 5394 | <i>Spilopelia chinensis</i> | Eastern Spotted Dove | 2021/3/30  | 2 | 0 | 23.63408842 | 120.50557450 | <a href="https://www.inaturalist.org/observations/72432008">https://www.inaturalist.org/observations/72432008</a>   |
| 5395 | <i>Spilopelia chinensis</i> | Eastern Spotted Dove | 2022/2/17  | 2 | 0 | 23.63434108 | 120.51555210 | <a href="https://www.inaturalist.org/observations/106906138">https://www.inaturalist.org/observations/106906138</a> |
| 5396 | <i>Spilopelia chinensis</i> | Eastern Spotted Dove | 2020/8/22  | 2 | 0 | 23.63657888 | 120.54212310 | <a href="https://www.inaturalist.org/observations/57219592">https://www.inaturalist.org/observations/57219592</a>   |
| 5397 | <i>Spilopelia chinensis</i> | Eastern Spotted Dove | 2022/2/24  | 2 | 0 | 23.63721500 | 120.27353800 | <a href="https://www.inaturalist.org/observations/108137658">https://www.inaturalist.org/observations/108137658</a> |
| 5398 | <i>Spilopelia chinensis</i> | Eastern Spotted Dove | 2020/8/27  | 2 | 0 | 23.63787929 | 120.53554930 | <a href="https://www.inaturalist.org/observations/57720341">https://www.inaturalist.org/observations/57720341</a>   |
| 5399 | <i>Spilopelia chinensis</i> | Eastern Spotted Dove | 2021/5/15  | 2 | 0 | 23.63847167 | 120.59068170 | <a href="https://www.inaturalist.org/observations/78779116">https://www.inaturalist.org/observations/78779116</a>   |
| 5400 | <i>Spilopelia chinensis</i> | Eastern Spotted Dove | 2021/6/9   | 2 | 0 | 23.63867140 | 120.51750090 | <a href="https://www.inaturalist.org/observations/82658728">https://www.inaturalist.org/observations/82658728</a>   |
| 5401 | <i>Spilopelia chinensis</i> | Eastern Spotted Dove | 2021/10/6  | 0 | 0 | 23.63938380 | 120.51837870 | <a href="https://www.inaturalist.org/observations/97330607">https://www.inaturalist.org/observations/97330607</a>   |
| 5402 | <i>Spilopelia chinensis</i> | Eastern Spotted Dove | 2020/2/12  | 1 | 0 | 23.64008619 | 120.15885150 | <a href="https://www.inaturalist.org/observations/38625840">https://www.inaturalist.org/observations/38625840</a>   |
| 5403 | <i>Spilopelia chinensis</i> | Eastern Spotted Dove | 2020/5/18  | 1 | 0 | 23.64316740 | 120.26689040 | <a href="https://www.inaturalist.org/observations/48580295">https://www.inaturalist.org/observations/48580295</a>   |
| 5404 | <i>Spilopelia chinensis</i> | Eastern Spotted Dove | 2021/8/31  | 1 | 0 | 23.64474722 | 120.56199720 | <a href="https://www.inaturalist.org/observations/93208099">https://www.inaturalist.org/observations/93208099</a>   |

|      |                             |                      |           |   |   |             |              |                                                                                                                     |
|------|-----------------------------|----------------------|-----------|---|---|-------------|--------------|---------------------------------------------------------------------------------------------------------------------|
| 5405 | <i>Spilopelia chinensis</i> | Eastern Spotted Dove | 2022/2/9  | 2 | 0 | 23.64586306 | 120.32527000 | <a href="https://www.inaturalist.org/observations/107169344">https://www.inaturalist.org/observations/107169344</a> |
| 5406 | <i>Spilopelia chinensis</i> | Eastern Spotted Dove | 2020/2/20 | 0 | 0 | 23.65034167 | 120.27297500 | <a href="https://www.inaturalist.org/observations/38948898">https://www.inaturalist.org/observations/38948898</a>   |
| 5407 | <i>Spilopelia chinensis</i> | Eastern Spotted Dove | 2020/5/7  | 1 | 0 | 23.65124167 | 120.28668500 | <a href="https://www.inaturalist.org/observations/45246385">https://www.inaturalist.org/observations/45246385</a>   |
| 5408 | <i>Spilopelia chinensis</i> | Eastern Spotted Dove | 2020/9/7  | 1 | 0 | 23.65148056 | 120.54168060 | <a href="https://www.inaturalist.org/observations/58819890">https://www.inaturalist.org/observations/58819890</a>   |
| 5409 | <i>Spilopelia chinensis</i> | Eastern Spotted Dove | 2020/4/8  | 1 | 0 | 23.65161667 | 120.30861830 | <a href="https://www.inaturalist.org/observations/41673554">https://www.inaturalist.org/observations/41673554</a>   |
| 5410 | <i>Spilopelia chinensis</i> | Eastern Spotted Dove | 2020/3/3  | 0 | 0 | 23.65169881 | 120.25481690 | <a href="https://www.inaturalist.org/observations/39517427">https://www.inaturalist.org/observations/39517427</a>   |
| 5411 | <i>Spilopelia chinensis</i> | Eastern Spotted Dove | 2020/8/18 | 1 | 0 | 23.65229722 | 120.31028610 | <a href="https://www.inaturalist.org/observations/56806377">https://www.inaturalist.org/observations/56806377</a>   |
| 5412 | <i>Spilopelia chinensis</i> | Eastern Spotted Dove | 2020/2/18 | 0 | 0 | 23.65352090 | 120.22183880 | <a href="https://www.inaturalist.org/observations/38816312">https://www.inaturalist.org/observations/38816312</a>   |
| 5413 | <i>Spilopelia chinensis</i> | Eastern Spotted Dove | 2021/12/9 | 1 | 0 | 23.65382333 | 120.26583670 | <a href="https://www.inaturalist.org/observations/103114145">https://www.inaturalist.org/observations/103114145</a> |
| 5414 | <i>Spilopelia chinensis</i> | Eastern Spotted Dove | 2020/2/14 | 0 | 0 | 23.65391500 | 120.26244170 | <a href="https://www.inaturalist.org/observations/38633074">https://www.inaturalist.org/observations/38633074</a>   |
| 5415 | <i>Spilopelia chinensis</i> | Eastern Spotted Dove | 2017/9/3  | 1 | 0 | 23.65719515 | 120.54214690 | <a href="https://www.inaturalist.org/observations/41588932">https://www.inaturalist.org/observations/41588932</a>   |
| 5416 | <i>Spilopelia chinensis</i> | Eastern Spotted Dove | 2021/3/23 | 0 | 0 | 23.65853833 | 120.51307670 | <a href="https://www.inaturalist.org/observations/71934191">https://www.inaturalist.org/observations/71934191</a>   |
| 5417 | <i>Spilopelia chinensis</i> | Eastern Spotted Dove | 1980/1/1  | 3 | 0 | 23.65869050 | 121.42060670 | <a href="https://www.inaturalist.org/observations/68856497">https://www.inaturalist.org/observations/68856497</a>   |
| 5418 | <i>Spilopelia chinensis</i> | Eastern Spotted Dove | 2011/2/1  | 3 | 0 | 23.65870400 | 120.33660800 | <a href="https://www.inaturalist.org/observations/13666972">https://www.inaturalist.org/observations/13666972</a>   |
| 5419 | <i>Spilopelia chinensis</i> | Eastern Spotted Dove | 2022/1/24 | 1 | 0 | 23.65913907 | 120.62756490 | <a href="https://www.inaturalist.org/observations/105488766">https://www.inaturalist.org/observations/105488766</a> |
| 5420 | <i>Spilopelia chinensis</i> | Eastern Spotted Dove | 2022/1/23 | 1 | 0 | 23.66008233 | 120.30635130 | <a href="https://www.inaturalist.org/observations/106494561">https://www.inaturalist.org/observations/106494561</a> |
| 5421 | <i>Spilopelia chinensis</i> | Eastern Spotted Dove | 2022/3/2  | 1 | 0 | 23.66116429 | 120.55033240 | <a href="https://www.inaturalist.org/observations/107731197">https://www.inaturalist.org/observations/107731197</a> |
| 5422 | <i>Spilopelia chinensis</i> | Eastern Spotted Dove | 2022/3/2  | 1 | 0 | 23.66140444 | 120.54962950 | <a href="https://www.inaturalist.org/observations/107827463">https://www.inaturalist.org/observations/107827463</a> |
| 5423 | <i>Spilopelia chinensis</i> | Eastern Spotted Dove | 2022/2/13 | 3 | 0 | 23.66227770 | 86.93533680  | <a href="https://www.inaturalist.org/observations/106665741">https://www.inaturalist.org/observations/106665741</a> |
| 5424 | <i>Spilopelia chinensis</i> | Eastern Spotted Dove | 2021/2/17 | 2 | 0 | 23.66788667 | 120.27752500 | <a href="https://www.inaturalist.org/observations/69720501">https://www.inaturalist.org/observations/69720501</a>   |
| 5425 | <i>Spilopelia chinensis</i> | Eastern Spotted Dove | 2022/3/19 | 2 | 0 | 23.67288750 | 91.32032810  | <a href="https://www.inaturalist.org/observations/111089974">https://www.inaturalist.org/observations/111089974</a> |
| 5426 | <i>Spilopelia chinensis</i> | Eastern Spotted Dove | 2020/6/3  | 1 | 0 | 23.67767444 | 120.53077180 | <a href="https://www.inaturalist.org/observations/49631605">https://www.inaturalist.org/observations/49631605</a>   |
| 5427 | <i>Spilopelia chinensis</i> | Eastern Spotted Dove | 2022/4/29 | 2 | 0 | 23.67830518 | 120.55736210 | <a href="https://www.inaturalist.org/observations/115488393">https://www.inaturalist.org/observations/115488393</a> |



|      |                             |                      |            |   |   |             |              |                                                                                                                     |
|------|-----------------------------|----------------------|------------|---|---|-------------|--------------|---------------------------------------------------------------------------------------------------------------------|
| 5428 | <i>Spilopelia chinensis</i> | Eastern Spotted Dove | 2019/11/1  | 4 | 0 | 23.67862970 | 120.55644120 | <a href="https://www.inaturalist.org/observations/35161615">https://www.inaturalist.org/observations/35161615</a>   |
| 5429 | <i>Spilopelia chinensis</i> | Eastern Spotted Dove | 2020/8/12  | 1 | 0 | 23.67881011 | 120.47352850 | <a href="https://www.inaturalist.org/observations/56167828">https://www.inaturalist.org/observations/56167828</a>   |
| 5430 | <i>Spilopelia chinensis</i> | Eastern Spotted Dove | 2021/5/2   | 2 | 0 | 23.67911369 | 120.36956920 | <a href="https://www.inaturalist.org/observations/76432011">https://www.inaturalist.org/observations/76432011</a>   |
| 5431 | <i>Spilopelia chinensis</i> | Eastern Spotted Dove | 2019/9/19  | 6 | 0 | 23.67926092 | 120.55613080 | <a href="https://www.inaturalist.org/observations/33001874">https://www.inaturalist.org/observations/33001874</a>   |
| 5432 | <i>Spilopelia chinensis</i> | Eastern Spotted Dove | 2019/9/19  | 4 | 0 | 23.67964104 | 120.55525400 | <a href="https://www.inaturalist.org/observations/33110552">https://www.inaturalist.org/observations/33110552</a>   |
| 5433 | <i>Spilopelia chinensis</i> | Eastern Spotted Dove | 2019/9/19  | 2 | 0 | 23.67965889 | 120.55649570 | <a href="https://www.inaturalist.org/observations/33241509">https://www.inaturalist.org/observations/33241509</a>   |
| 5434 | <i>Spilopelia chinensis</i> | Eastern Spotted Dove | 2013/12/7  | 3 | 0 | 23.67974500 | 120.55653500 | <a href="https://www.inaturalist.org/observations/16714032">https://www.inaturalist.org/observations/16714032</a>   |
| 5435 | <i>Spilopelia chinensis</i> | Eastern Spotted Dove | 2022/4/30  | 1 | 0 | 23.67985291 | 120.55314110 | <a href="https://www.inaturalist.org/observations/113875464">https://www.inaturalist.org/observations/113875464</a> |
| 5436 | <i>Spilopelia chinensis</i> | Eastern Spotted Dove | 2018/10/11 | 3 | 0 | 23.68048235 | 120.55772470 | <a href="https://www.inaturalist.org/observations/18000640">https://www.inaturalist.org/observations/18000640</a>   |
| 5437 | <i>Spilopelia chinensis</i> | Eastern Spotted Dove | 2022/4/29  | 1 | 0 | 23.68054252 | 120.55384600 | <a href="https://www.inaturalist.org/observations/113593274">https://www.inaturalist.org/observations/113593274</a> |
| 5438 | <i>Spilopelia chinensis</i> | Eastern Spotted Dove | 2021/5/13  | 1 | 0 | 23.68056433 | 116.30960250 | <a href="https://www.inaturalist.org/observations/78545963">https://www.inaturalist.org/observations/78545963</a>   |
| 5439 | <i>Spilopelia chinensis</i> | Eastern Spotted Dove | 2021/2/4   | 1 | 0 | 23.68068333 | 120.30325830 | <a href="https://www.inaturalist.org/observations/69369992">https://www.inaturalist.org/observations/69369992</a>   |
| 5440 | <i>Spilopelia chinensis</i> | Eastern Spotted Dove | 2021/1/15  | 1 | 0 | 23.68081814 | 120.55569180 | <a href="https://www.inaturalist.org/observations/68104285">https://www.inaturalist.org/observations/68104285</a>   |
| 5441 | <i>Spilopelia chinensis</i> | Eastern Spotted Dove | 2019/11/9  | 2 | 0 | 23.68081887 | 120.56083970 | <a href="https://www.inaturalist.org/observations/35599744">https://www.inaturalist.org/observations/35599744</a>   |
| 5442 | <i>Spilopelia chinensis</i> | Eastern Spotted Dove | 2019/10/17 | 2 | 0 | 23.68123001 | 120.55882940 | <a href="https://www.inaturalist.org/observations/34485608">https://www.inaturalist.org/observations/34485608</a>   |
| 5443 | <i>Spilopelia chinensis</i> | Eastern Spotted Dove | 2020/2/16  | 0 | 0 | 23.68182000 | 120.56853830 | <a href="https://www.inaturalist.org/observations/38745498">https://www.inaturalist.org/observations/38745498</a>   |
| 5444 | <i>Spilopelia chinensis</i> | Eastern Spotted Dove | 2019/11/9  | 4 | 0 | 23.68186098 | 120.56360170 | <a href="https://www.inaturalist.org/observations/35471794">https://www.inaturalist.org/observations/35471794</a>   |
| 5445 | <i>Spilopelia chinensis</i> | Eastern Spotted Dove | 2007/12/13 | 2 | 0 | 23.68676644 | 81.02938747  | <a href="https://www.inaturalist.org/observations/103822388">https://www.inaturalist.org/observations/103822388</a> |
| 5446 | <i>Spilopelia chinensis</i> | Eastern Spotted Dove | 2021/3/18  | 1 | 0 | 23.68728064 | 120.58655480 | <a href="https://www.inaturalist.org/observations/71934648">https://www.inaturalist.org/observations/71934648</a>   |
| 5447 | <i>Spilopelia chinensis</i> | Eastern Spotted Dove | 2021/3/18  | 1 | 0 | 23.68755667 | 120.58653330 | <a href="https://www.inaturalist.org/observations/71706145">https://www.inaturalist.org/observations/71706145</a>   |
| 5448 | <i>Spilopelia chinensis</i> | Eastern Spotted Dove | 2020/2/10  | 0 | 0 | 23.69460786 | 120.37611010 | <a href="https://www.inaturalist.org/observations/38528135">https://www.inaturalist.org/observations/38528135</a>   |
| 5449 | <i>Spilopelia chinensis</i> | Eastern Spotted Dove | 2018/12/12 | 4 | 0 | 23.69677285 | 120.53229560 | <a href="https://www.inaturalist.org/observations/18978973">https://www.inaturalist.org/observations/18978973</a>   |
| 5450 | <i>Spilopelia chinensis</i> | Eastern Spotted Dove | 2021/2/22  | 1 | 0 | 23.69786645 | 120.53942910 | <a href="https://www.inaturalist.org/observations/70025439">https://www.inaturalist.org/observations/70025439</a>   |

|      |                             |                      |            |   |   |             |              |                                                                                                                     |
|------|-----------------------------|----------------------|------------|---|---|-------------|--------------|---------------------------------------------------------------------------------------------------------------------|
| 5451 | <i>Spilopelia chinensis</i> | Eastern Spotted Dove | 2020/2/21  | 0 | 0 | 23.69810833 | 120.32921830 | <a href="https://www.inaturalist.org/observations/39198200">https://www.inaturalist.org/observations/39198200</a>   |
| 5452 | <i>Spilopelia chinensis</i> | Eastern Spotted Dove | 2020/12/7  | 2 | 0 | 23.70569555 | 120.54219530 | <a href="https://www.inaturalist.org/observations/66906279">https://www.inaturalist.org/observations/66906279</a>   |
| 5453 | <i>Spilopelia chinensis</i> | Eastern Spotted Dove | 2020/5/4   | 1 | 0 | 23.70641552 | 120.35341940 | <a href="https://www.inaturalist.org/observations/45627900">https://www.inaturalist.org/observations/45627900</a>   |
| 5454 | <i>Spilopelia chinensis</i> | Eastern Spotted Dove | 2018/1/21  | 3 | 0 | 23.70658224 | 120.53908170 | <a href="https://www.inaturalist.org/observations/18926004">https://www.inaturalist.org/observations/18926004</a>   |
| 5455 | <i>Spilopelia chinensis</i> | Eastern Spotted Dove | 2020/5/3   | 1 | 0 | 23.70672241 | 120.35317020 | <a href="https://www.inaturalist.org/observations/44691836">https://www.inaturalist.org/observations/44691836</a>   |
| 5456 | <i>Spilopelia chinensis</i> | Eastern Spotted Dove | 2021/9/3   | 1 | 0 | 23.70683956 | 120.35325200 | <a href="https://www.inaturalist.org/observations/93423309">https://www.inaturalist.org/observations/93423309</a>   |
| 5457 | <i>Spilopelia chinensis</i> | Eastern Spotted Dove | 2022/4/30  | 1 | 0 | 23.71349667 | 120.42034500 | <a href="https://www.inaturalist.org/observations/119558297">https://www.inaturalist.org/observations/119558297</a> |
| 5458 | <i>Spilopelia chinensis</i> | Eastern Spotted Dove | 2019/6/25  | 1 | 0 | 23.71394399 | 120.33562930 | <a href="https://www.inaturalist.org/observations/27633132">https://www.inaturalist.org/observations/27633132</a>   |
| 5459 | <i>Spilopelia chinensis</i> | Eastern Spotted Dove | 2021/6/27  | 1 | 0 | 23.71521923 | 120.36382470 | <a href="https://www.inaturalist.org/observations/84821486">https://www.inaturalist.org/observations/84821486</a>   |
| 5460 | <i>Spilopelia chinensis</i> | Eastern Spotted Dove | 2022/7/7   | 3 | 0 | 23.71800000 | 120.60800000 | <a href="https://www.inaturalist.org/observations/125165361">https://www.inaturalist.org/observations/125165361</a> |
| 5461 | <i>Spilopelia chinensis</i> | Eastern Spotted Dove | 2020/4/14  | 1 | 0 | 23.72187833 | 120.36861670 | <a href="https://www.inaturalist.org/observations/42155832">https://www.inaturalist.org/observations/42155832</a>   |
| 5462 | <i>Spilopelia chinensis</i> | Eastern Spotted Dove | 2008/10/2  | 3 | 0 | 23.72221060 | 81.02327100  | <a href="https://www.inaturalist.org/observations/55156326">https://www.inaturalist.org/observations/55156326</a>   |
| 5463 | <i>Spilopelia chinensis</i> | Eastern Spotted Dove | 2022/5/18  | 3 | 0 | 23.72381403 | 81.02348697  | <a href="https://www.inaturalist.org/observations/118790863">https://www.inaturalist.org/observations/118790863</a> |
| 5464 | <i>Spilopelia chinensis</i> | Eastern Spotted Dove | 2022/3/30  | 1 | 0 | 23.72483560 | 120.31969180 | <a href="https://www.inaturalist.org/observations/109876721">https://www.inaturalist.org/observations/109876721</a> |
| 5465 | <i>Spilopelia chinensis</i> | Eastern Spotted Dove | 2022/4/4   | 1 | 0 | 23.72528500 | 120.42371310 | <a href="https://www.inaturalist.org/observations/110356159">https://www.inaturalist.org/observations/110356159</a> |
| 5466 | <i>Spilopelia chinensis</i> | Eastern Spotted Dove | 2021/2/15  | 1 | 0 | 23.72575159 | 120.42396860 | <a href="https://www.inaturalist.org/observations/69598390">https://www.inaturalist.org/observations/69598390</a>   |
| 5467 | <i>Spilopelia chinensis</i> | Eastern Spotted Dove | 2017/11/13 | 2 | 0 | 23.72615944 | 120.62146170 | <a href="https://www.inaturalist.org/observations/19485201">https://www.inaturalist.org/observations/19485201</a>   |
| 5468 | <i>Spilopelia chinensis</i> | Eastern Spotted Dove | 2022/8/14  | 1 | 0 | 23.72641140 | 120.62125890 | <a href="https://www.inaturalist.org/observations/133047372">https://www.inaturalist.org/observations/133047372</a> |
| 5469 | <i>Spilopelia chinensis</i> | Eastern Spotted Dove | 2021/4/9   | 1 | 0 | 23.72645225 | 120.62138220 | <a href="https://www.inaturalist.org/observations/73472488">https://www.inaturalist.org/observations/73472488</a>   |
| 5470 | <i>Spilopelia chinensis</i> | Eastern Spotted Dove | 2022/4/30  | 1 | 0 | 23.72682263 | 120.62394640 | <a href="https://www.inaturalist.org/observations/114204834">https://www.inaturalist.org/observations/114204834</a> |
| 5471 | <i>Spilopelia chinensis</i> | Eastern Spotted Dove | 2021/5/29  | 2 | 0 | 23.72768148 | 120.42322970 | <a href="https://www.inaturalist.org/observations/80808244">https://www.inaturalist.org/observations/80808244</a>   |
| 5472 | <i>Spilopelia chinensis</i> | Eastern Spotted Dove | 2019/8/22  | 2 | 0 | 23.72788952 | 120.62208850 | <a href="https://www.inaturalist.org/observations/32399537">https://www.inaturalist.org/observations/32399537</a>   |
| 5473 | <i>Spilopelia chinensis</i> | Eastern Spotted Dove | 2022/3/10  | 2 | 0 | 23.72869381 | 120.36419050 | <a href="https://www.inaturalist.org/observations/108308103">https://www.inaturalist.org/observations/108308103</a> |

|      |                             |                      |            |   |   |             |              |                                                                                                                     |
|------|-----------------------------|----------------------|------------|---|---|-------------|--------------|---------------------------------------------------------------------------------------------------------------------|
| 5474 | <i>Spilopelia chinensis</i> | Eastern Spotted Dove | 2017/3/4   | 6 | 0 | 23.73148926 | 80.99116802  | <a href="https://www.inaturalist.org/observations/5249524">https://www.inaturalist.org/observations/5249524</a>     |
| 5475 | <i>Spilopelia chinensis</i> | Eastern Spotted Dove | 2019/11/19 | 1 | 0 | 23.73176630 | 120.37952060 | <a href="https://www.inaturalist.org/observations/35846567">https://www.inaturalist.org/observations/35846567</a>   |
| 5476 | <i>Spilopelia chinensis</i> | Eastern Spotted Dove | 2021/3/9   | 2 | 0 | 23.73249342 | 120.48814770 | <a href="https://www.inaturalist.org/observations/70883259">https://www.inaturalist.org/observations/70883259</a>   |
| 5477 | <i>Spilopelia chinensis</i> | Eastern Spotted Dove | 2019/1/25  | 2 | 0 | 23.73299656 | 120.38219250 | <a href="https://www.inaturalist.org/observations/19872293">https://www.inaturalist.org/observations/19872293</a>   |
| 5478 | <i>Spilopelia chinensis</i> | Eastern Spotted Dove | 2020/3/10  | 2 | 0 | 23.73305000 | 120.43511500 | <a href="https://www.inaturalist.org/observations/39832927">https://www.inaturalist.org/observations/39832927</a>   |
| 5479 | <i>Spilopelia chinensis</i> | Eastern Spotted Dove | 2022/3/13  | 1 | 0 | 23.73328445 | 120.38241850 | <a href="https://www.inaturalist.org/observations/108490244">https://www.inaturalist.org/observations/108490244</a> |
| 5480 | <i>Spilopelia chinensis</i> | Eastern Spotted Dove | 2021/12/4  | 1 | 0 | 23.73398333 | 120.37980500 | <a href="https://www.inaturalist.org/observations/102628877">https://www.inaturalist.org/observations/102628877</a> |
| 5481 | <i>Spilopelia chinensis</i> | Eastern Spotted Dove | 2021/10/7  | 2 | 0 | 23.73642339 | 113.16178700 | <a href="https://www.inaturalist.org/observations/97433817">https://www.inaturalist.org/observations/97433817</a>   |
| 5482 | <i>Spilopelia chinensis</i> | Eastern Spotted Dove | 2022/3/13  | 1 | 0 | 23.73722946 | 120.35120180 | <a href="https://www.inaturalist.org/observations/108574452">https://www.inaturalist.org/observations/108574452</a> |
| 5483 | <i>Spilopelia chinensis</i> | Eastern Spotted Dove | 2020/12/8  | 1 | 0 | 23.73975972 | 120.34641560 | <a href="https://www.inaturalist.org/observations/66280026">https://www.inaturalist.org/observations/66280026</a>   |
| 5484 | <i>Spilopelia chinensis</i> | Eastern Spotted Dove | 2021/10/5  | 0 | 0 | 23.73989169 | 86.94939226  | <a href="https://www.inaturalist.org/observations/97329156">https://www.inaturalist.org/observations/97329156</a>   |
| 5485 | <i>Spilopelia chinensis</i> | Eastern Spotted Dove | 2022/7/3   | 2 | 0 | 23.75394667 | 120.25127830 | <a href="https://www.inaturalist.org/observations/124474919">https://www.inaturalist.org/observations/124474919</a> |
| 5486 | <i>Spilopelia chinensis</i> | Eastern Spotted Dove | 2021/1/21  | 0 | 0 | 23.75580223 | 120.61556690 | <a href="https://www.inaturalist.org/observations/68408309">https://www.inaturalist.org/observations/68408309</a>   |
| 5487 | <i>Spilopelia chinensis</i> | Eastern Spotted Dove | 2022/1/13  | 1 | 0 | 23.75584505 | 120.52469590 | <a href="https://www.inaturalist.org/observations/108103919">https://www.inaturalist.org/observations/108103919</a> |
| 5488 | <i>Spilopelia chinensis</i> | Eastern Spotted Dove | 2020/4/5   | 1 | 0 | 23.75644333 | 120.37328500 | <a href="https://www.inaturalist.org/observations/41439984">https://www.inaturalist.org/observations/41439984</a>   |
| 5489 | <i>Spilopelia chinensis</i> | Eastern Spotted Dove | 2019/4/14  | 1 | 0 | 23.75869370 | 120.48715210 | <a href="https://www.inaturalist.org/observations/24642144">https://www.inaturalist.org/observations/24642144</a>   |
| 5490 | <i>Spilopelia chinensis</i> | Eastern Spotted Dove | 2022/2/22  | 1 | 0 | 23.76298200 | 120.52847530 | <a href="https://www.inaturalist.org/observations/107298423">https://www.inaturalist.org/observations/107298423</a> |
| 5491 | <i>Spilopelia chinensis</i> | Eastern Spotted Dove | 2020/3/30  | 1 | 0 | 23.76353235 | 120.69511850 | <a href="https://www.inaturalist.org/observations/41023723">https://www.inaturalist.org/observations/41023723</a>   |
| 5492 | <i>Spilopelia chinensis</i> | Eastern Spotted Dove | 2022/2/22  | 1 | 0 | 23.76641740 | 120.52190840 | <a href="https://www.inaturalist.org/observations/107298080">https://www.inaturalist.org/observations/107298080</a> |
| 5493 | <i>Spilopelia chinensis</i> | Eastern Spotted Dove | 2021/11/17 | 1 | 0 | 23.77961000 | 120.21176830 | <a href="https://www.inaturalist.org/observations/101317835">https://www.inaturalist.org/observations/101317835</a> |
| 5494 | <i>Spilopelia chinensis</i> | Eastern Spotted Dove | 2021/3/27  | 3 | 0 | 23.79243488 | 120.31218710 | <a href="https://www.inaturalist.org/observations/72158886">https://www.inaturalist.org/observations/72158886</a>   |
| 5495 | <i>Spilopelia chinensis</i> | Eastern Spotted Dove | 2019/8/27  | 3 | 0 | 23.79492500 | 120.47020320 | <a href="https://www.inaturalist.org/observations/31593420">https://www.inaturalist.org/observations/31593420</a>   |
| 5496 | <i>Spilopelia chinensis</i> | Eastern Spotted Dove | 2019/10/9  | 1 | 0 | 23.79499171 | 120.46956960 | <a href="https://www.inaturalist.org/observations/35510948">https://www.inaturalist.org/observations/35510948</a>   |

|      |                             |                      |            |   |   |             |              |                                                                                                                     |
|------|-----------------------------|----------------------|------------|---|---|-------------|--------------|---------------------------------------------------------------------------------------------------------------------|
| 5497 | <i>Spilopelia chinensis</i> | Eastern Spotted Dove | 2018/4/24  | 1 | 0 | 23.80044653 | 120.45163440 | <a href="https://www.inaturalist.org/observations/22994290">https://www.inaturalist.org/observations/22994290</a>   |
| 5498 | <i>Spilopelia chinensis</i> | Eastern Spotted Dove | 2021/9/17  | 1 | 0 | 23.80264351 | 120.22775220 | <a href="https://www.inaturalist.org/observations/98659420">https://www.inaturalist.org/observations/98659420</a>   |
| 5499 | <i>Spilopelia chinensis</i> | Eastern Spotted Dove | 2022/3/4   | 1 | 0 | 23.82508488 | 120.80271230 | <a href="https://www.inaturalist.org/observations/108028542">https://www.inaturalist.org/observations/108028542</a> |
| 5500 | <i>Spilopelia chinensis</i> | Eastern Spotted Dove | 2020/9/16  | 2 | 0 | 23.82585200 | 86.45336069  | <a href="https://www.inaturalist.org/observations/59760069">https://www.inaturalist.org/observations/59760069</a>   |
| 5501 | <i>Spilopelia chinensis</i> | Eastern Spotted Dove | 2020/10/11 | 2 | 0 | 23.82858229 | 120.80182070 | <a href="https://www.inaturalist.org/observations/70607987">https://www.inaturalist.org/observations/70607987</a>   |
| 5502 | <i>Spilopelia chinensis</i> | Eastern Spotted Dove | 2015/6/30  | 3 | 0 | 23.83034100 | 120.52790800 | <a href="https://www.inaturalist.org/observations/13519118">https://www.inaturalist.org/observations/13519118</a>   |
| 5503 | <i>Spilopelia chinensis</i> | Eastern Spotted Dove | 2016/11/21 | 2 | 0 | 23.83240751 | 120.52473660 | <a href="https://www.inaturalist.org/observations/13519115">https://www.inaturalist.org/observations/13519115</a>   |
| 5504 | <i>Spilopelia chinensis</i> | Eastern Spotted Dove | 2021/3/21  | 0 | 0 | 23.83287003 | 120.78889470 | <a href="https://www.inaturalist.org/observations/71934450">https://www.inaturalist.org/observations/71934450</a>   |
| 5505 | <i>Spilopelia chinensis</i> | Eastern Spotted Dove | 2020/4/25  | 1 | 0 | 23.84103314 | 121.52313830 | <a href="https://www.inaturalist.org/observations/43284193">https://www.inaturalist.org/observations/43284193</a>   |
| 5506 | <i>Spilopelia chinensis</i> | Eastern Spotted Dove | 2019/4/23  | 0 | 0 | 23.84121832 | 121.52316840 | <a href="https://www.inaturalist.org/observations/39334029">https://www.inaturalist.org/observations/39334029</a>   |
| 5507 | <i>Spilopelia chinensis</i> | Eastern Spotted Dove | 2020/2/27  | 0 | 0 | 23.84253304 | 120.69174750 | <a href="https://www.inaturalist.org/observations/39312775">https://www.inaturalist.org/observations/39312775</a>   |
| 5508 | <i>Spilopelia chinensis</i> | Eastern Spotted Dove | 2022/7/11  | 2 | 0 | 23.84574127 | 121.50042330 | <a href="https://www.inaturalist.org/observations/125767524">https://www.inaturalist.org/observations/125767524</a> |
| 5509 | <i>Spilopelia chinensis</i> | Eastern Spotted Dove | 2021/3/30  | 1 | 0 | 23.84727026 | 120.93242800 | <a href="https://www.inaturalist.org/observations/72947036">https://www.inaturalist.org/observations/72947036</a>   |
| 5510 | <i>Spilopelia chinensis</i> | Eastern Spotted Dove | 2022/1/23  | 2 | 0 | 23.85038817 | 121.47712430 | <a href="https://www.inaturalist.org/observations/105482722">https://www.inaturalist.org/observations/105482722</a> |
| 5511 | <i>Spilopelia chinensis</i> | Eastern Spotted Dove | 2022/1/23  | 1 | 0 | 23.85140854 | 121.50991160 | <a href="https://www.inaturalist.org/observations/105475856">https://www.inaturalist.org/observations/105475856</a> |
| 5512 | <i>Spilopelia chinensis</i> | Eastern Spotted Dove | 2020/2/16  | 0 | 0 | 23.85424537 | 120.76781070 | <a href="https://www.inaturalist.org/observations/38696024">https://www.inaturalist.org/observations/38696024</a>   |
| 5513 | <i>Spilopelia chinensis</i> | Eastern Spotted Dove | 2021/4/19  | 1 | 0 | 23.85702879 | 120.77997860 | <a href="https://www.inaturalist.org/observations/74705022">https://www.inaturalist.org/observations/74705022</a>   |
| 5514 | <i>Spilopelia chinensis</i> | Eastern Spotted Dove | 2018/3/8   | 3 | 0 | 23.85785444 | 120.59151940 | <a href="https://www.inaturalist.org/observations/10138126">https://www.inaturalist.org/observations/10138126</a>   |
| 5515 | <i>Spilopelia chinensis</i> | Eastern Spotted Dove | 2022/3/17  | 1 | 0 | 23.85971115 | 92.61791110  | <a href="https://www.inaturalist.org/observations/111080745">https://www.inaturalist.org/observations/111080745</a> |
| 5516 | <i>Spilopelia chinensis</i> | Eastern Spotted Dove | 2022/8/26  | 2 | 0 | 23.86180919 | 120.95038860 | <a href="https://www.inaturalist.org/observations/132371783">https://www.inaturalist.org/observations/132371783</a> |
| 5517 | <i>Spilopelia chinensis</i> | Eastern Spotted Dove | 2022/7/30  | 0 | 0 | 23.86454186 | 120.91111160 | <a href="https://www.inaturalist.org/observations/128515575">https://www.inaturalist.org/observations/128515575</a> |
| 5518 | <i>Spilopelia chinensis</i> | Eastern Spotted Dove | 2021/3/23  | 2 | 0 | 23.86711457 | 120.86007240 | <a href="https://www.inaturalist.org/observations/71943736">https://www.inaturalist.org/observations/71943736</a>   |
| 5519 | <i>Spilopelia chinensis</i> | Eastern Spotted Dove | 2019/12/12 | 1 | 0 | 23.87066664 | 120.77842190 | <a href="https://www.inaturalist.org/observations/36587152">https://www.inaturalist.org/observations/36587152</a>   |

|      |                             |                      |            |   |   |             |              |                                                                                                                     |
|------|-----------------------------|----------------------|------------|---|---|-------------|--------------|---------------------------------------------------------------------------------------------------------------------|
| 5520 | <i>Spilopelia chinensis</i> | Eastern Spotted Dove | 2020/3/8   | 0 | 0 | 23.87380676 | 120.77549660 | <a href="https://www.inaturalist.org/observations/39689950">https://www.inaturalist.org/observations/39689950</a>   |
| 5521 | <i>Spilopelia chinensis</i> | Eastern Spotted Dove | 2020/10/12 | 1 | 0 | 23.87717154 | 120.59751560 | <a href="https://www.inaturalist.org/observations/62375309">https://www.inaturalist.org/observations/62375309</a>   |
| 5522 | <i>Spilopelia chinensis</i> | Eastern Spotted Dove | 2021/4/24  | 1 | 0 | 23.88491284 | 120.61430170 | <a href="https://www.inaturalist.org/observations/76776362">https://www.inaturalist.org/observations/76776362</a>   |
| 5523 | <i>Spilopelia chinensis</i> | Eastern Spotted Dove | 2020/4/25  | 1 | 0 | 23.88565074 | 120.61359670 | <a href="https://www.inaturalist.org/observations/43888464">https://www.inaturalist.org/observations/43888464</a>   |
| 5524 | <i>Spilopelia chinensis</i> | Eastern Spotted Dove | 2019/4/19  | 1 | 0 | 23.88599740 | 120.61343160 | <a href="https://www.inaturalist.org/observations/22871754">https://www.inaturalist.org/observations/22871754</a>   |
| 5525 | <i>Spilopelia chinensis</i> | Eastern Spotted Dove | 2021/3/15  | 2 | 0 | 23.89176455 | 121.54039680 | <a href="https://www.inaturalist.org/observations/71301092">https://www.inaturalist.org/observations/71301092</a>   |
| 5526 | <i>Spilopelia chinensis</i> | Eastern Spotted Dove | 2020/9/23  | 2 | 0 | 23.89213333 | 121.54169830 | <a href="https://www.inaturalist.org/observations/60485467">https://www.inaturalist.org/observations/60485467</a>   |
| 5527 | <i>Spilopelia chinensis</i> | Eastern Spotted Dove | 2020/10/21 | 1 | 0 | 23.89241588 | 121.53734950 | <a href="https://www.inaturalist.org/observations/63469481">https://www.inaturalist.org/observations/63469481</a>   |
| 5528 | <i>Spilopelia chinensis</i> | Eastern Spotted Dove | 2020/9/28  | 1 | 0 | 23.89277662 | 121.53695950 | <a href="https://www.inaturalist.org/observations/61108755">https://www.inaturalist.org/observations/61108755</a>   |
| 5529 | <i>Spilopelia chinensis</i> | Eastern Spotted Dove | 2020/9/28  | 1 | 0 | 23.89280822 | 121.53787160 | <a href="https://www.inaturalist.org/observations/61108750">https://www.inaturalist.org/observations/61108750</a>   |
| 5530 | <i>Spilopelia chinensis</i> | Eastern Spotted Dove | 2020/9/28  | 1 | 0 | 23.89311242 | 121.53703590 | <a href="https://www.inaturalist.org/observations/61108749">https://www.inaturalist.org/observations/61108749</a>   |
| 5531 | <i>Spilopelia chinensis</i> | Eastern Spotted Dove | 2021/3/13  | 2 | 0 | 23.89356986 | 121.54868960 | <a href="https://www.inaturalist.org/observations/71273640">https://www.inaturalist.org/observations/71273640</a>   |
| 5532 | <i>Spilopelia chinensis</i> | Eastern Spotted Dove | 2022/3/11  | 1 | 0 | 23.89505900 | 120.63632140 | <a href="https://www.inaturalist.org/observations/108487184">https://www.inaturalist.org/observations/108487184</a> |
| 5533 | <i>Spilopelia chinensis</i> | Eastern Spotted Dove | 2018/4/13  | 1 | 0 | 23.89620399 | 121.54826350 | <a href="https://www.inaturalist.org/observations/12256505">https://www.inaturalist.org/observations/12256505</a>   |
| 5534 | <i>Spilopelia chinensis</i> | Eastern Spotted Dove | 2020/9/23  | 1 | 0 | 23.89643000 | 121.53365170 | <a href="https://www.inaturalist.org/observations/60485463">https://www.inaturalist.org/observations/60485463</a>   |
| 5535 | <i>Spilopelia chinensis</i> | Eastern Spotted Dove | 2021/6/20  | 0 | 0 | 23.89665580 | 121.53429320 | <a href="https://www.inaturalist.org/observations/93224663">https://www.inaturalist.org/observations/93224663</a>   |
| 5536 | <i>Spilopelia chinensis</i> | Eastern Spotted Dove | 2021/5/21  | 2 | 0 | 23.89665709 | 121.53430120 | <a href="https://www.inaturalist.org/observations/81182382">https://www.inaturalist.org/observations/81182382</a>   |
| 5537 | <i>Spilopelia chinensis</i> | Eastern Spotted Dove | 2020/4/17  | 1 | 0 | 23.89704198 | 121.53390680 | <a href="https://www.inaturalist.org/observations/44458376">https://www.inaturalist.org/observations/44458376</a>   |
| 5538 | <i>Spilopelia chinensis</i> | Eastern Spotted Dove | 2021/3/16  | 0 | 0 | 23.89818110 | 121.53558770 | <a href="https://www.inaturalist.org/observations/71351906">https://www.inaturalist.org/observations/71351906</a>   |
| 5539 | <i>Spilopelia chinensis</i> | Eastern Spotted Dove | 2018/4/30  | 1 | 0 | 23.89915657 | 121.54467010 | <a href="https://www.inaturalist.org/observations/12255326">https://www.inaturalist.org/observations/12255326</a>   |
| 5540 | <i>Spilopelia chinensis</i> | Eastern Spotted Dove | 2020/4/10  | 3 | 0 | 23.90108135 | 121.54550060 | <a href="https://www.inaturalist.org/observations/41809530">https://www.inaturalist.org/observations/41809530</a>   |
| 5541 | <i>Spilopelia chinensis</i> | Eastern Spotted Dove | 2020/4/10  | 3 | 0 | 23.90108283 | 121.54543560 | <a href="https://www.inaturalist.org/observations/42749762">https://www.inaturalist.org/observations/42749762</a>   |
| 5542 | <i>Spilopelia chinensis</i> | Eastern Spotted Dove | 2019/11/22 | 3 | 0 | 23.90195755 | 121.54721480 | <a href="https://www.inaturalist.org/observations/35930613">https://www.inaturalist.org/observations/35930613</a>   |

|      |                             |                      |            |   |   |             |              |                                                                                                                     |
|------|-----------------------------|----------------------|------------|---|---|-------------|--------------|---------------------------------------------------------------------------------------------------------------------|
| 5543 | <i>Spilopelia chinensis</i> | Eastern Spotted Dove | 2021/5/30  | 1 | 0 | 23.90244274 | 121.53674740 | <a href="https://www.inaturalist.org/observations/80836725">https://www.inaturalist.org/observations/80836725</a>   |
| 5544 | <i>Spilopelia chinensis</i> | Eastern Spotted Dove | 2020/11/17 | 1 | 0 | 23.91184053 | 121.56277330 | <a href="https://www.inaturalist.org/observations/65076951">https://www.inaturalist.org/observations/65076951</a>   |
| 5545 | <i>Spilopelia chinensis</i> | Eastern Spotted Dove | 2022/6/15  | 2 | 0 | 23.93633116 | 121.57555640 | <a href="https://www.inaturalist.org/observations/124198887">https://www.inaturalist.org/observations/124198887</a> |
| 5546 | <i>Spilopelia chinensis</i> | Eastern Spotted Dove | 2020/4/14  | 1 | 0 | 23.93951000 | 120.31646000 | <a href="https://www.inaturalist.org/observations/42155837">https://www.inaturalist.org/observations/42155837</a>   |
| 5547 | <i>Spilopelia chinensis</i> | Eastern Spotted Dove | 2019/1/4   | 2 | 0 | 23.95734201 | 120.84366860 | <a href="https://www.inaturalist.org/observations/19414089">https://www.inaturalist.org/observations/19414089</a>   |
| 5548 | <i>Spilopelia chinensis</i> | Eastern Spotted Dove | 2018/7/9   | 1 | 0 | 23.96251511 | 120.56707340 | <a href="https://www.inaturalist.org/observations/82638565">https://www.inaturalist.org/observations/82638565</a>   |
| 5549 | <i>Spilopelia chinensis</i> | Eastern Spotted Dove | 2020/10/28 | 1 | 0 | 23.96513710 | 120.96737680 | <a href="https://www.inaturalist.org/observations/63690128">https://www.inaturalist.org/observations/63690128</a>   |
| 5550 | <i>Spilopelia chinensis</i> | Eastern Spotted Dove | 2020/10/28 | 1 | 0 | 23.96513710 | 120.96737680 | <a href="https://www.inaturalist.org/observations/63690134">https://www.inaturalist.org/observations/63690134</a>   |
| 5551 | <i>Spilopelia chinensis</i> | Eastern Spotted Dove | 2020/10/28 | 1 | 0 | 23.96513710 | 120.96737680 | <a href="https://www.inaturalist.org/observations/63690136">https://www.inaturalist.org/observations/63690136</a>   |
| 5552 | <i>Spilopelia chinensis</i> | Eastern Spotted Dove | 2020/10/31 | 2 | 0 | 23.96513710 | 120.96737680 | <a href="https://www.inaturalist.org/observations/63877459">https://www.inaturalist.org/observations/63877459</a>   |
| 5553 | <i>Spilopelia chinensis</i> | Eastern Spotted Dove | 2020/11/19 | 1 | 0 | 23.96513710 | 120.96737680 | <a href="https://www.inaturalist.org/observations/65207112">https://www.inaturalist.org/observations/65207112</a>   |
| 5554 | <i>Spilopelia chinensis</i> | Eastern Spotted Dove | 2020/11/24 | 1 | 0 | 23.96513710 | 120.96737680 | <a href="https://www.inaturalist.org/observations/65522769">https://www.inaturalist.org/observations/65522769</a>   |
| 5555 | <i>Spilopelia chinensis</i> | Eastern Spotted Dove | 2020/11/27 | 1 | 0 | 23.96513710 | 120.96737680 | <a href="https://www.inaturalist.org/observations/65686017">https://www.inaturalist.org/observations/65686017</a>   |
| 5556 | <i>Spilopelia chinensis</i> | Eastern Spotted Dove | 2020/12/8  | 1 | 0 | 23.96513710 | 120.96737680 | <a href="https://www.inaturalist.org/observations/66285056">https://www.inaturalist.org/observations/66285056</a>   |
| 5557 | <i>Spilopelia chinensis</i> | Eastern Spotted Dove | 2020/12/26 | 3 | 0 | 23.96513710 | 120.96737680 | <a href="https://www.inaturalist.org/observations/67295485">https://www.inaturalist.org/observations/67295485</a>   |
| 5558 | <i>Spilopelia chinensis</i> | Eastern Spotted Dove | 2021/1/15  | 1 | 0 | 23.96513710 | 120.96737680 | <a href="https://www.inaturalist.org/observations/68627143">https://www.inaturalist.org/observations/68627143</a>   |
| 5559 | <i>Spilopelia chinensis</i> | Eastern Spotted Dove | 2021/2/4   | 2 | 0 | 23.96513710 | 120.96737680 | <a href="https://www.inaturalist.org/observations/69611348">https://www.inaturalist.org/observations/69611348</a>   |
| 5560 | <i>Spilopelia chinensis</i> | Eastern Spotted Dove | 2020/3/14  | 1 | 0 | 23.97322833 | 120.94276500 | <a href="https://www.inaturalist.org/observations/40013334">https://www.inaturalist.org/observations/40013334</a>   |
| 5561 | <i>Spilopelia chinensis</i> | Eastern Spotted Dove | 2022/4/20  | 2 | 0 | 23.97342788 | 121.56459110 | <a href="https://www.inaturalist.org/observations/112120848">https://www.inaturalist.org/observations/112120848</a> |
| 5562 | <i>Spilopelia chinensis</i> | Eastern Spotted Dove | 2021/11/11 | 2 | 0 | 23.97387722 | 121.56467420 | <a href="https://www.inaturalist.org/observations/104397988">https://www.inaturalist.org/observations/104397988</a> |
| 5563 | <i>Spilopelia chinensis</i> | Eastern Spotted Dove | 2019/6/16  | 1 | 0 | 23.97441333 | 120.68388330 | <a href="https://www.inaturalist.org/observations/27077158">https://www.inaturalist.org/observations/27077158</a>   |
| 5564 | <i>Spilopelia chinensis</i> | Eastern Spotted Dove | 2019/7/22  | 1 | 0 | 23.98025500 | 120.69767830 | <a href="https://www.inaturalist.org/observations/29301358">https://www.inaturalist.org/observations/29301358</a>   |
| 5565 | <i>Spilopelia chinensis</i> | Eastern Spotted Dove | 2021/5/8   | 2 | 0 | 23.98797000 | 121.58117830 | <a href="https://www.inaturalist.org/observations/77846335">https://www.inaturalist.org/observations/77846335</a>   |

|      |                             |                      |            |   |   |             |              |                                                                                                                     |
|------|-----------------------------|----------------------|------------|---|---|-------------|--------------|---------------------------------------------------------------------------------------------------------------------|
| 5566 | <i>Spilopelia chinensis</i> | Eastern Spotted Dove | 2020/10/24 | 1 | 0 | 23.99560098 | 121.62872390 | <a href="https://www.inaturalist.org/observations/66509344">https://www.inaturalist.org/observations/66509344</a>   |
| 5567 | <i>Spilopelia chinensis</i> | Eastern Spotted Dove | 2019/4/14  | 1 | 0 | 23.99774079 | 120.59692920 | <a href="https://www.inaturalist.org/observations/22454360">https://www.inaturalist.org/observations/22454360</a>   |
| 5568 | <i>Spilopelia chinensis</i> | Eastern Spotted Dove | 2022/9/25  | 0 | 0 | 24.00037898 | 121.07926660 | <a href="https://www.inaturalist.org/observations/136365130">https://www.inaturalist.org/observations/136365130</a> |
| 5569 | <i>Spilopelia chinensis</i> | Eastern Spotted Dove | 2019/11/9  | 3 | 0 | 24.00111000 | 120.53464300 | <a href="https://www.inaturalist.org/observations/35474873">https://www.inaturalist.org/observations/35474873</a>   |
| 5570 | <i>Spilopelia chinensis</i> | Eastern Spotted Dove | 2019/5/4   | 2 | 0 | 24.00190667 | 120.53328500 | <a href="https://www.inaturalist.org/observations/24486598">https://www.inaturalist.org/observations/24486598</a>   |
| 5571 | <i>Spilopelia chinensis</i> | Eastern Spotted Dove | 2022/3/16  | 1 | 0 | 24.00312833 | 120.73774330 | <a href="https://www.inaturalist.org/observations/109641351">https://www.inaturalist.org/observations/109641351</a> |
| 5572 | <i>Spilopelia chinensis</i> | Eastern Spotted Dove | 2014/4/5   | 1 | 0 | 24.01352233 | 120.36949050 | <a href="https://www.inaturalist.org/observations/56920800">https://www.inaturalist.org/observations/56920800</a>   |
| 5573 | <i>Spilopelia chinensis</i> | Eastern Spotted Dove | 2021/2/7   | 1 | 0 | 24.01576438 | 120.75317820 | <a href="https://www.inaturalist.org/observations/69200515">https://www.inaturalist.org/observations/69200515</a>   |
| 5574 | <i>Spilopelia chinensis</i> | Eastern Spotted Dove | 2020/1/23  | 0 | 0 | 24.01714256 | 120.46505340 | <a href="https://www.inaturalist.org/observations/37869625">https://www.inaturalist.org/observations/37869625</a>   |
| 5575 | <i>Spilopelia chinensis</i> | Eastern Spotted Dove | 2019/12/7  | 1 | 0 | 24.01734856 | 121.60312570 | <a href="https://www.inaturalist.org/observations/36427763">https://www.inaturalist.org/observations/36427763</a>   |
| 5576 | <i>Spilopelia chinensis</i> | Eastern Spotted Dove | 2020/3/25  | 2 | 0 | 24.02095500 | 121.08767670 | <a href="https://www.inaturalist.org/observations/40735595">https://www.inaturalist.org/observations/40735595</a>   |
| 5577 | <i>Spilopelia chinensis</i> | Eastern Spotted Dove | 2021/3/16  | 2 | 0 | 24.02265893 | 121.18711540 | <a href="https://www.inaturalist.org/observations/71346146">https://www.inaturalist.org/observations/71346146</a>   |
| 5578 | <i>Spilopelia chinensis</i> | Eastern Spotted Dove | 2022/4/12  | 3 | 0 | 24.02719170 | 120.72113720 | <a href="https://www.inaturalist.org/observations/115074007">https://www.inaturalist.org/observations/115074007</a> |
| 5579 | <i>Spilopelia chinensis</i> | Eastern Spotted Dove | 2021/8/4   | 1 | 0 | 24.02812539 | 120.47346870 | <a href="https://www.inaturalist.org/observations/89884527">https://www.inaturalist.org/observations/89884527</a>   |
| 5580 | <i>Spilopelia chinensis</i> | Eastern Spotted Dove | 2022/1/5   | 2 | 0 | 24.03228748 | 121.61645600 | <a href="https://www.inaturalist.org/observations/106596886">https://www.inaturalist.org/observations/106596886</a> |
| 5581 | <i>Spilopelia chinensis</i> | Eastern Spotted Dove | 2019/4/8   | 1 | 0 | 24.04096725 | 120.38582040 | <a href="https://www.inaturalist.org/observations/22189906">https://www.inaturalist.org/observations/22189906</a>   |
| 5582 | <i>Spilopelia chinensis</i> | Eastern Spotted Dove | 2021/8/4   | 1 | 0 | 24.04376950 | 120.68869600 | <a href="https://www.inaturalist.org/observations/89903727">https://www.inaturalist.org/observations/89903727</a>   |
| 5583 | <i>Spilopelia chinensis</i> | Eastern Spotted Dove | 2021/4/11  | 1 | 0 | 24.05009248 | 120.70623990 | <a href="https://www.inaturalist.org/observations/73612923">https://www.inaturalist.org/observations/73612923</a>   |
| 5584 | <i>Spilopelia chinensis</i> | Eastern Spotted Dove | 2019/11/12 | 2 | 0 | 24.05360513 | 121.59854420 | <a href="https://www.inaturalist.org/observations/35604290">https://www.inaturalist.org/observations/35604290</a>   |
| 5585 | <i>Spilopelia chinensis</i> | Eastern Spotted Dove | 2019/8/25  | 2 | 0 | 24.06130882 | 120.53322800 | <a href="https://www.inaturalist.org/observations/31457468">https://www.inaturalist.org/observations/31457468</a>   |
| 5586 | <i>Spilopelia chinensis</i> | Eastern Spotted Dove | 2019/3/15  | 1 | 0 | 24.06333504 | 120.59059510 | <a href="https://www.inaturalist.org/observations/21254379">https://www.inaturalist.org/observations/21254379</a>   |
| 5587 | <i>Spilopelia chinensis</i> | Eastern Spotted Dove | 2019/3/17  | 2 | 0 | 24.06395718 | 120.58567120 | <a href="https://www.inaturalist.org/observations/21316696">https://www.inaturalist.org/observations/21316696</a>   |
| 5588 | <i>Spilopelia chinensis</i> | Eastern Spotted Dove | 2021/3/13  | 2 | 0 | 24.06648883 | 120.54077830 | <a href="https://www.inaturalist.org/observations/71111403">https://www.inaturalist.org/observations/71111403</a>   |

|      |                             |                      |            |   |   |             |              |                                                                                                                     |
|------|-----------------------------|----------------------|------------|---|---|-------------|--------------|---------------------------------------------------------------------------------------------------------------------|
| 5589 | <i>Spilopelia chinensis</i> | Eastern Spotted Dove | 2020/4/16  | 1 | 0 | 24.06973630 | 120.58037740 | <a href="https://www.inaturalist.org/observations/42312213">https://www.inaturalist.org/observations/42312213</a>   |
| 5590 | <i>Spilopelia chinensis</i> | Eastern Spotted Dove | 2019/1/3   | 1 | 0 | 24.07048398 | 120.54750190 | <a href="https://www.inaturalist.org/observations/19675647">https://www.inaturalist.org/observations/19675647</a>   |
| 5591 | <i>Spilopelia chinensis</i> | Eastern Spotted Dove | 2021/5/1   | 1 | 0 | 24.07758978 | 120.69600400 | <a href="https://www.inaturalist.org/observations/76032994">https://www.inaturalist.org/observations/76032994</a>   |
| 5592 | <i>Spilopelia chinensis</i> | Eastern Spotted Dove | 2018/12/24 | 2 | 0 | 24.08283617 | 120.70171330 | <a href="https://www.inaturalist.org/observations/19187180">https://www.inaturalist.org/observations/19187180</a>   |
| 5593 | <i>Spilopelia chinensis</i> | Eastern Spotted Dove | 2022/6/29  | 1 | 0 | 24.08440046 | 120.62114470 | <a href="https://www.inaturalist.org/observations/133440446">https://www.inaturalist.org/observations/133440446</a> |
| 5594 | <i>Spilopelia chinensis</i> | Eastern Spotted Dove | 2021/12/18 | 1 | 0 | 24.08590000 | 120.54930280 | <a href="https://www.inaturalist.org/observations/103224269">https://www.inaturalist.org/observations/103224269</a> |
| 5595 | <i>Spilopelia chinensis</i> | Eastern Spotted Dove | 2015/2/22  | 2 | 0 | 24.08605910 | 88.24229180  | <a href="https://www.inaturalist.org/observations/117572402">https://www.inaturalist.org/observations/117572402</a> |
| 5596 | <i>Spilopelia chinensis</i> | Eastern Spotted Dove | 2022/2/2   | 1 | 0 | 24.08696000 | 120.70062100 | <a href="https://www.inaturalist.org/observations/106000525">https://www.inaturalist.org/observations/106000525</a> |
| 5597 | <i>Spilopelia chinensis</i> | Eastern Spotted Dove | 2020/4/25  | 1 | 0 | 24.09119095 | 120.53790280 | <a href="https://www.inaturalist.org/observations/43276098">https://www.inaturalist.org/observations/43276098</a>   |
| 5598 | <i>Spilopelia chinensis</i> | Eastern Spotted Dove | 2022/6/29  | 1 | 0 | 24.09556263 | 120.67173760 | <a href="https://www.inaturalist.org/observations/133440448">https://www.inaturalist.org/observations/133440448</a> |
| 5599 | <i>Spilopelia chinensis</i> | Eastern Spotted Dove | 2021/2/15  | 2 | 0 | 24.10222415 | 120.67910540 | <a href="https://www.inaturalist.org/observations/69864236">https://www.inaturalist.org/observations/69864236</a>   |
| 5600 | <i>Spilopelia chinensis</i> | Eastern Spotted Dove | 2021/2/15  | 2 | 0 | 24.10222632 | 120.67908340 | <a href="https://www.inaturalist.org/observations/69864237">https://www.inaturalist.org/observations/69864237</a>   |
| 5601 | <i>Spilopelia chinensis</i> | Eastern Spotted Dove | 2022/9/5   | 2 | 0 | 24.10457608 | 120.63661960 | <a href="https://www.inaturalist.org/observations/133691934">https://www.inaturalist.org/observations/133691934</a> |
| 5602 | <i>Spilopelia chinensis</i> | Eastern Spotted Dove | 2022/4/21  | 2 | 0 | 24.10472232 | 120.69644380 | <a href="https://www.inaturalist.org/observations/112240449">https://www.inaturalist.org/observations/112240449</a> |
| 5603 | <i>Spilopelia chinensis</i> | Eastern Spotted Dove | 2022/4/20  | 2 | 0 | 24.10486567 | 120.69653580 | <a href="https://www.inaturalist.org/observations/112143312">https://www.inaturalist.org/observations/112143312</a> |
| 5604 | <i>Spilopelia chinensis</i> | Eastern Spotted Dove | 2016/12/24 | 1 | 0 | 24.10551913 | 120.69119980 | <a href="https://www.inaturalist.org/observations/16202112">https://www.inaturalist.org/observations/16202112</a>   |
| 5605 | <i>Spilopelia chinensis</i> | Eastern Spotted Dove | 2021/11/26 | 1 | 0 | 24.10971833 | 120.73201000 | <a href="https://www.inaturalist.org/observations/102338764">https://www.inaturalist.org/observations/102338764</a> |
| 5606 | <i>Spilopelia chinensis</i> | Eastern Spotted Dove | 2021/5/1   | 1 | 0 | 24.10980212 | 120.50562040 | <a href="https://www.inaturalist.org/observations/76049418">https://www.inaturalist.org/observations/76049418</a>   |
| 5607 | <i>Spilopelia chinensis</i> | Eastern Spotted Dove | 2020/4/30  | 1 | 0 | 24.11209452 | 120.49230060 | <a href="https://www.inaturalist.org/observations/44320502">https://www.inaturalist.org/observations/44320502</a>   |
| 5608 | <i>Spilopelia chinensis</i> | Eastern Spotted Dove | 2021/1/29  | 1 | 0 | 24.11214101 | 120.49390790 | <a href="https://www.inaturalist.org/observations/68753981">https://www.inaturalist.org/observations/68753981</a>   |
| 5609 | <i>Spilopelia chinensis</i> | Eastern Spotted Dove | 2022/2/22  | 1 | 0 | 24.11273561 | 120.49333590 | <a href="https://www.inaturalist.org/observations/107235901">https://www.inaturalist.org/observations/107235901</a> |
| 5610 | <i>Spilopelia chinensis</i> | Eastern Spotted Dove | 2021/4/13  | 1 | 0 | 24.11288128 | 120.49315490 | <a href="https://www.inaturalist.org/observations/73823270">https://www.inaturalist.org/observations/73823270</a>   |
| 5611 | <i>Spilopelia chinensis</i> | Eastern Spotted Dove | 2020/11/19 | 1 | 0 | 24.11306428 | 120.49321250 | <a href="https://www.inaturalist.org/observations/65181359">https://www.inaturalist.org/observations/65181359</a>   |



|      |                             |                      |            |   |   |             |              |                                                                                                                     |
|------|-----------------------------|----------------------|------------|---|---|-------------|--------------|---------------------------------------------------------------------------------------------------------------------|
| 5612 | <i>Spilopelia chinensis</i> | Eastern Spotted Dove | 2021/11/10 | 2 | 0 | 24.11312830 | 120.49362390 | <a href="https://www.inaturalist.org/observations/100756417">https://www.inaturalist.org/observations/100756417</a> |
| 5613 | <i>Spilopelia chinensis</i> | Eastern Spotted Dove | 2020/3/5   | 2 | 0 | 24.11868907 | 120.65209390 | <a href="https://www.inaturalist.org/observations/98722263">https://www.inaturalist.org/observations/98722263</a>   |
| 5614 | <i>Spilopelia chinensis</i> | Eastern Spotted Dove | 2020/4/16  | 1 | 0 | 24.11914119 | 120.66129490 | <a href="https://www.inaturalist.org/observations/43256417">https://www.inaturalist.org/observations/43256417</a>   |
| 5615 | <i>Spilopelia chinensis</i> | Eastern Spotted Dove | 2021/10/27 | 1 | 0 | 24.12014631 | 120.67606780 | <a href="https://www.inaturalist.org/observations/99518598">https://www.inaturalist.org/observations/99518598</a>   |
| 5616 | <i>Spilopelia chinensis</i> | Eastern Spotted Dove | 2020/11/3  | 1 | 0 | 24.12019519 | 120.58745490 | <a href="https://www.inaturalist.org/observations/66869894">https://www.inaturalist.org/observations/66869894</a>   |
| 5617 | <i>Spilopelia chinensis</i> | Eastern Spotted Dove | 2021/12/10 | 1 | 0 | 24.12028333 | 120.58702500 | <a href="https://www.inaturalist.org/observations/102816577">https://www.inaturalist.org/observations/102816577</a> |
| 5618 | <i>Spilopelia chinensis</i> | Eastern Spotted Dove | 2021/11/9  | 3 | 0 | 24.12066950 | 120.67463000 | <a href="https://www.inaturalist.org/observations/103739922">https://www.inaturalist.org/observations/103739922</a> |
| 5619 | <i>Spilopelia chinensis</i> | Eastern Spotted Dove | 2021/1/29  | 2 | 0 | 24.12122123 | 120.67761320 | <a href="https://www.inaturalist.org/observations/68748164">https://www.inaturalist.org/observations/68748164</a>   |
| 5620 | <i>Spilopelia chinensis</i> | Eastern Spotted Dove | 2020/12/13 | 3 | 0 | 24.12143703 | 120.67321420 | <a href="https://www.inaturalist.org/observations/66509293">https://www.inaturalist.org/observations/66509293</a>   |
| 5621 | <i>Spilopelia chinensis</i> | Eastern Spotted Dove | 2021/12/6  | 2 | 0 | 24.12152240 | 120.67746920 | <a href="https://www.inaturalist.org/observations/102582156">https://www.inaturalist.org/observations/102582156</a> |
| 5622 | <i>Spilopelia chinensis</i> | Eastern Spotted Dove | 2020/9/15  | 1 | 0 | 24.12157783 | 120.67501170 | <a href="https://www.inaturalist.org/observations/59657638">https://www.inaturalist.org/observations/59657638</a>   |
| 5623 | <i>Spilopelia chinensis</i> | Eastern Spotted Dove | 2020/12/13 | 1 | 0 | 24.12170722 | 120.67780250 | <a href="https://www.inaturalist.org/observations/66504884">https://www.inaturalist.org/observations/66504884</a>   |
| 5624 | <i>Spilopelia chinensis</i> | Eastern Spotted Dove | 2021/12/3  | 1 | 0 | 24.12236383 | 120.67523000 | <a href="https://www.inaturalist.org/observations/103731257">https://www.inaturalist.org/observations/103731257</a> |
| 5625 | <i>Spilopelia chinensis</i> | Eastern Spotted Dove | 2020/1/2   | 3 | 0 | 24.12248306 | 120.67162640 | <a href="https://www.inaturalist.org/observations/37187387">https://www.inaturalist.org/observations/37187387</a>   |
| 5626 | <i>Spilopelia chinensis</i> | Eastern Spotted Dove | 2020/4/17  | 1 | 0 | 24.12338524 | 120.68529710 | <a href="https://www.inaturalist.org/observations/43265275">https://www.inaturalist.org/observations/43265275</a>   |
| 5627 | <i>Spilopelia chinensis</i> | Eastern Spotted Dove | 2019/1/5   | 2 | 0 | 24.12339421 | 120.67669260 | <a href="https://www.inaturalist.org/observations/19435597">https://www.inaturalist.org/observations/19435597</a>   |
| 5628 | <i>Spilopelia chinensis</i> | Eastern Spotted Dove | 2021/5/2   | 1 | 0 | 24.12358108 | 120.68521660 | <a href="https://www.inaturalist.org/observations/80100636">https://www.inaturalist.org/observations/80100636</a>   |
| 5629 | <i>Spilopelia chinensis</i> | Eastern Spotted Dove | 2021/12/19 | 2 | 0 | 24.12371117 | 120.67810830 | <a href="https://www.inaturalist.org/observations/103290329">https://www.inaturalist.org/observations/103290329</a> |
| 5630 | <i>Spilopelia chinensis</i> | Eastern Spotted Dove | 2021/10/10 | 1 | 0 | 24.12445385 | 120.67641550 | <a href="https://www.inaturalist.org/observations/97721553">https://www.inaturalist.org/observations/97721553</a>   |
| 5631 | <i>Spilopelia chinensis</i> | Eastern Spotted Dove | 2021/12/14 | 2 | 0 | 24.12448934 | 120.67352770 | <a href="https://www.inaturalist.org/observations/103035639">https://www.inaturalist.org/observations/103035639</a> |
| 5632 | <i>Spilopelia chinensis</i> | Eastern Spotted Dove | 2021/10/11 | 1 | 0 | 24.12455697 | 120.67682400 | <a href="https://www.inaturalist.org/observations/97867884">https://www.inaturalist.org/observations/97867884</a>   |
| 5633 | <i>Spilopelia chinensis</i> | Eastern Spotted Dove | 2018/12/9  | 2 | 0 | 24.12803333 | 120.71726170 | <a href="https://www.inaturalist.org/observations/18912953">https://www.inaturalist.org/observations/18912953</a>   |
| 5634 | <i>Spilopelia chinensis</i> | Eastern Spotted Dove | 2022/4/12  | 3 | 0 | 24.12844000 | 120.64070220 | <a href="https://www.inaturalist.org/observations/115074029">https://www.inaturalist.org/observations/115074029</a> |

|      |                             |                      |            |   |   |             |              |                                                                                                                     |
|------|-----------------------------|----------------------|------------|---|---|-------------|--------------|---------------------------------------------------------------------------------------------------------------------|
| 5635 | <i>Spilopelia chinensis</i> | Eastern Spotted Dove | 2021/3/25  | 1 | 0 | 24.13149667 | 120.64296830 | <a href="https://www.inaturalist.org/observations/72368052">https://www.inaturalist.org/observations/72368052</a>   |
| 5636 | <i>Spilopelia chinensis</i> | Eastern Spotted Dove | 2021/10/9  | 3 | 0 | 24.13566490 | 120.65023890 | <a href="https://www.inaturalist.org/observations/102397295">https://www.inaturalist.org/observations/102397295</a> |
| 5637 | <i>Spilopelia chinensis</i> | Eastern Spotted Dove | 2022/7/20  | 1 | 0 | 24.13707495 | 120.70971920 | <a href="https://www.inaturalist.org/observations/127362423">https://www.inaturalist.org/observations/127362423</a> |
| 5638 | <i>Spilopelia chinensis</i> | Eastern Spotted Dove | 2018/9/20  | 4 | 0 | 24.13710833 | 120.68164170 | <a href="https://www.inaturalist.org/observations/16702424">https://www.inaturalist.org/observations/16702424</a>   |
| 5639 | <i>Spilopelia chinensis</i> | Eastern Spotted Dove | 2020/5/16  | 1 | 0 | 24.13725930 | 120.68666590 | <a href="https://www.inaturalist.org/observations/53580356">https://www.inaturalist.org/observations/53580356</a>   |
| 5640 | <i>Spilopelia chinensis</i> | Eastern Spotted Dove | 2019/10/15 | 2 | 0 | 24.13806946 | 120.70915170 | <a href="https://www.inaturalist.org/observations/34455195">https://www.inaturalist.org/observations/34455195</a>   |
| 5641 | <i>Spilopelia chinensis</i> | Eastern Spotted Dove | 2021/12/3  | 1 | 0 | 24.13826824 | 120.73132740 | <a href="https://www.inaturalist.org/observations/105769912">https://www.inaturalist.org/observations/105769912</a> |
| 5642 | <i>Spilopelia chinensis</i> | Eastern Spotted Dove | 2019/8/14  | 2 | 0 | 24.13903697 | 120.66887410 | <a href="https://www.inaturalist.org/observations/30815889">https://www.inaturalist.org/observations/30815889</a>   |
| 5643 | <i>Spilopelia chinensis</i> | Eastern Spotted Dove | 2021/4/30  | 1 | 0 | 24.13910360 | 120.66876500 | <a href="https://www.inaturalist.org/observations/77600686">https://www.inaturalist.org/observations/77600686</a>   |
| 5644 | <i>Spilopelia chinensis</i> | Eastern Spotted Dove | 2021/4/30  | 1 | 0 | 24.13910360 | 120.66876500 | <a href="https://www.inaturalist.org/observations/77600690">https://www.inaturalist.org/observations/77600690</a>   |
| 5645 | <i>Spilopelia chinensis</i> | Eastern Spotted Dove | 2021/4/30  | 1 | 0 | 24.13910360 | 120.66876500 | <a href="https://www.inaturalist.org/observations/77600703">https://www.inaturalist.org/observations/77600703</a>   |
| 5646 | <i>Spilopelia chinensis</i> | Eastern Spotted Dove | 2021/9/30  | 2 | 0 | 24.13980238 | 120.64684290 | <a href="https://www.inaturalist.org/observations/98085461">https://www.inaturalist.org/observations/98085461</a>   |
| 5647 | <i>Spilopelia chinensis</i> | Eastern Spotted Dove | 2022/6/29  | 1 | 0 | 24.14032351 | 120.78830590 | <a href="https://www.inaturalist.org/observations/133440453">https://www.inaturalist.org/observations/133440453</a> |
| 5648 | <i>Spilopelia chinensis</i> | Eastern Spotted Dove | 2017/6/19  | 1 | 0 | 24.14045711 | 120.64093620 | <a href="https://www.inaturalist.org/observations/77590759">https://www.inaturalist.org/observations/77590759</a>   |
| 5649 | <i>Spilopelia chinensis</i> | Eastern Spotted Dove | 2022/1/2   | 3 | 0 | 24.14045778 | 120.66492150 | <a href="https://www.inaturalist.org/observations/104169679">https://www.inaturalist.org/observations/104169679</a> |
| 5650 | <i>Spilopelia chinensis</i> | Eastern Spotted Dove | 2020/12/6  | 1 | 0 | 24.14118598 | 120.66330850 | <a href="https://www.inaturalist.org/observations/66179191">https://www.inaturalist.org/observations/66179191</a>   |
| 5651 | <i>Spilopelia chinensis</i> | Eastern Spotted Dove | 2020/4/22  | 2 | 0 | 24.14251337 | 120.67694210 | <a href="https://www.inaturalist.org/observations/42824530">https://www.inaturalist.org/observations/42824530</a>   |
| 5652 | <i>Spilopelia chinensis</i> | Eastern Spotted Dove | 2020/3/26  | 2 | 0 | 24.14320833 | 120.67315830 | <a href="https://www.inaturalist.org/observations/40738043">https://www.inaturalist.org/observations/40738043</a>   |
| 5653 | <i>Spilopelia chinensis</i> | Eastern Spotted Dove | 2020/3/26  | 2 | 0 | 24.14323050 | 120.67289500 | <a href="https://www.inaturalist.org/observations/40738040">https://www.inaturalist.org/observations/40738040</a>   |
| 5654 | <i>Spilopelia chinensis</i> | Eastern Spotted Dove | 2020/2/21  | 0 | 0 | 24.14337217 | 120.67332500 | <a href="https://www.inaturalist.org/observations/39037833">https://www.inaturalist.org/observations/39037833</a>   |
| 5655 | <i>Spilopelia chinensis</i> | Eastern Spotted Dove | 2020/2/17  | 1 | 0 | 24.14347783 | 120.67330330 | <a href="https://www.inaturalist.org/observations/38749756">https://www.inaturalist.org/observations/38749756</a>   |
| 5656 | <i>Spilopelia chinensis</i> | Eastern Spotted Dove | 2020/4/16  | 1 | 0 | 24.14354722 | 120.67266940 | <a href="https://www.inaturalist.org/observations/42370876">https://www.inaturalist.org/observations/42370876</a>   |
| 5657 | <i>Spilopelia chinensis</i> | Eastern Spotted Dove | 2022/1/28  | 1 | 0 | 24.14372397 | 120.68437900 | <a href="https://www.inaturalist.org/observations/105704362">https://www.inaturalist.org/observations/105704362</a> |

|      |                             |                      |            |   |   |             |              |                                                                                                                     |
|------|-----------------------------|----------------------|------------|---|---|-------------|--------------|---------------------------------------------------------------------------------------------------------------------|
| 5658 | <i>Spilopelia chinensis</i> | Eastern Spotted Dove | 2019/3/15  | 2 | 0 | 24.14386580 | 120.68501730 | <a href="https://www.inaturalist.org/observations/21405787">https://www.inaturalist.org/observations/21405787</a>   |
| 5659 | <i>Spilopelia chinensis</i> | Eastern Spotted Dove | 2022/1/28  | 1 | 0 | 24.14387500 | 120.68415830 | <a href="https://www.inaturalist.org/observations/105704355">https://www.inaturalist.org/observations/105704355</a> |
| 5660 | <i>Spilopelia chinensis</i> | Eastern Spotted Dove | 2021/11/8  | 1 | 0 | 24.14439730 | 120.68345000 | <a href="https://www.inaturalist.org/observations/100571648">https://www.inaturalist.org/observations/100571648</a> |
| 5661 | <i>Spilopelia chinensis</i> | Eastern Spotted Dove | 2022/1/5   | 1 | 0 | 24.14441538 | 120.43889150 | <a href="https://www.inaturalist.org/observations/104387366">https://www.inaturalist.org/observations/104387366</a> |
| 5662 | <i>Spilopelia chinensis</i> | Eastern Spotted Dove | 2021/10/18 | 0 | 0 | 24.14470520 | 120.64701830 | <a href="https://www.inaturalist.org/observations/98583043">https://www.inaturalist.org/observations/98583043</a>   |
| 5663 | <i>Spilopelia chinensis</i> | Eastern Spotted Dove | 2019/4/19  | 5 | 0 | 24.14481850 | 120.68447620 | <a href="https://www.inaturalist.org/observations/26482898">https://www.inaturalist.org/observations/26482898</a>   |
| 5664 | <i>Spilopelia chinensis</i> | Eastern Spotted Dove | 2021/4/26  | 2 | 0 | 24.14536579 | 120.68575850 | <a href="https://www.inaturalist.org/observations/75260731">https://www.inaturalist.org/observations/75260731</a>   |
| 5665 | <i>Spilopelia chinensis</i> | Eastern Spotted Dove | 2020/1/24  | 1 | 0 | 24.14821614 | 120.72813700 | <a href="https://www.inaturalist.org/observations/38082000">https://www.inaturalist.org/observations/38082000</a>   |
| 5666 | <i>Spilopelia chinensis</i> | Eastern Spotted Dove | 2019/7/1   | 1 | 0 | 24.15152580 | 120.66149320 | <a href="https://www.inaturalist.org/observations/27985772">https://www.inaturalist.org/observations/27985772</a>   |
| 5667 | <i>Spilopelia chinensis</i> | Eastern Spotted Dove | 2020/2/15  | 2 | 0 | 24.15391667 | 120.68318830 | <a href="https://www.inaturalist.org/observations/42858877">https://www.inaturalist.org/observations/42858877</a>   |
| 5668 | <i>Spilopelia chinensis</i> | Eastern Spotted Dove | 2019/3/22  | 2 | 0 | 24.15409303 | 120.62677070 | <a href="https://www.inaturalist.org/observations/21512399">https://www.inaturalist.org/observations/21512399</a>   |
| 5669 | <i>Spilopelia chinensis</i> | Eastern Spotted Dove | 2021/12/5  | 1 | 0 | 24.15428561 | 120.66049390 | <a href="https://www.inaturalist.org/observations/103354097">https://www.inaturalist.org/observations/103354097</a> |
| 5670 | <i>Spilopelia chinensis</i> | Eastern Spotted Dove | 2020/4/3   | 1 | 0 | 24.15502222 | 120.66420560 | <a href="https://www.inaturalist.org/observations/41332335">https://www.inaturalist.org/observations/41332335</a>   |
| 5671 | <i>Spilopelia chinensis</i> | Eastern Spotted Dove | 2022/3/21  | 1 | 0 | 24.15521714 | 120.73528220 | <a href="https://www.inaturalist.org/observations/109141829">https://www.inaturalist.org/observations/109141829</a> |
| 5672 | <i>Spilopelia chinensis</i> | Eastern Spotted Dove | 2021/1/16  | 1 | 0 | 24.15560833 | 120.66694670 | <a href="https://www.inaturalist.org/observations/68143084">https://www.inaturalist.org/observations/68143084</a>   |
| 5673 | <i>Spilopelia chinensis</i> | Eastern Spotted Dove | 2019/9/3   | 2 | 0 | 24.15614416 | 120.72355280 | <a href="https://www.inaturalist.org/observations/32041479">https://www.inaturalist.org/observations/32041479</a>   |
| 5674 | <i>Spilopelia chinensis</i> | Eastern Spotted Dove | 2022/7/7   | 2 | 0 | 24.15644450 | 120.68194500 | <a href="https://www.inaturalist.org/observations/125131489">https://www.inaturalist.org/observations/125131489</a> |
| 5675 | <i>Spilopelia chinensis</i> | Eastern Spotted Dove | 2020/7/15  | 1 | 0 | 24.15693280 | 120.66710790 | <a href="https://www.inaturalist.org/observations/53126203">https://www.inaturalist.org/observations/53126203</a>   |
| 5676 | <i>Spilopelia chinensis</i> | Eastern Spotted Dove | 2019/12/25 | 1 | 0 | 24.15715806 | 120.66696810 | <a href="https://www.inaturalist.org/observations/36955592">https://www.inaturalist.org/observations/36955592</a>   |
| 5677 | <i>Spilopelia chinensis</i> | Eastern Spotted Dove | 2019/4/19  | 3 | 0 | 24.15723350 | 120.66606060 | <a href="https://www.inaturalist.org/observations/26421328">https://www.inaturalist.org/observations/26421328</a>   |
| 5678 | <i>Spilopelia chinensis</i> | Eastern Spotted Dove | 2021/11/3  | 2 | 0 | 24.15734510 | 120.67418360 | <a href="https://www.inaturalist.org/observations/104335349">https://www.inaturalist.org/observations/104335349</a> |
| 5679 | <i>Spilopelia chinensis</i> | Eastern Spotted Dove | 2022/2/5   | 1 | 0 | 24.15735072 | 120.67136850 | <a href="https://www.inaturalist.org/observations/109830762">https://www.inaturalist.org/observations/109830762</a> |
| 5680 | <i>Spilopelia chinensis</i> | Eastern Spotted Dove | 2020/2/1   | 0 | 0 | 24.15735197 | 120.66926700 | <a href="https://www.inaturalist.org/observations/38469402">https://www.inaturalist.org/observations/38469402</a>   |

|      |                             |                      |            |   |   |             |              |                                                                                                                     |
|------|-----------------------------|----------------------|------------|---|---|-------------|--------------|---------------------------------------------------------------------------------------------------------------------|
| 5681 | <i>Spilopelia chinensis</i> | Eastern Spotted Dove | 2020/1/31  | 0 | 0 | 24.15739955 | 120.67131660 | <a href="https://www.inaturalist.org/observations/38143546">https://www.inaturalist.org/observations/38143546</a>   |
| 5682 | <i>Spilopelia chinensis</i> | Eastern Spotted Dove | 2022/2/4   | 1 | 0 | 24.15830811 | 120.67130550 | <a href="https://www.inaturalist.org/observations/106110658">https://www.inaturalist.org/observations/106110658</a> |
| 5683 | <i>Spilopelia chinensis</i> | Eastern Spotted Dove | 2022/2/8   | 1 | 0 | 24.15852779 | 120.67143230 | <a href="https://www.inaturalist.org/observations/109830784">https://www.inaturalist.org/observations/109830784</a> |
| 5684 | <i>Spilopelia chinensis</i> | Eastern Spotted Dove | 2015/2/5   | 1 | 0 | 24.15857430 | 120.66834200 | <a href="https://www.inaturalist.org/observations/110630678">https://www.inaturalist.org/observations/110630678</a> |
| 5685 | <i>Spilopelia chinensis</i> | Eastern Spotted Dove | 2020/12/20 | 1 | 0 | 24.16012119 | 120.73588030 | <a href="https://www.inaturalist.org/observations/67501776">https://www.inaturalist.org/observations/67501776</a>   |
| 5686 | <i>Spilopelia chinensis</i> | Eastern Spotted Dove | 2021/4/30  | 2 | 0 | 24.16071471 | 120.65496460 | <a href="https://www.inaturalist.org/observations/75749811">https://www.inaturalist.org/observations/75749811</a>   |
| 5687 | <i>Spilopelia chinensis</i> | Eastern Spotted Dove | 2019/4/18  | 2 | 0 | 24.16087089 | 120.65765220 | <a href="https://www.inaturalist.org/observations/73918045">https://www.inaturalist.org/observations/73918045</a>   |
| 5688 | <i>Spilopelia chinensis</i> | Eastern Spotted Dove | 2020/4/24  | 1 | 0 | 24.16320000 | 120.57310000 | <a href="https://www.inaturalist.org/observations/44700872">https://www.inaturalist.org/observations/44700872</a>   |
| 5689 | <i>Spilopelia chinensis</i> | Eastern Spotted Dove | 2020/4/24  | 2 | 0 | 24.16479360 | 120.57078550 | <a href="https://www.inaturalist.org/observations/44379127">https://www.inaturalist.org/observations/44379127</a>   |
| 5690 | <i>Spilopelia chinensis</i> | Eastern Spotted Dove | 2018/12/13 | 1 | 0 | 24.16588883 | 120.62618330 | <a href="https://www.inaturalist.org/observations/18989981">https://www.inaturalist.org/observations/18989981</a>   |
| 5691 | <i>Spilopelia chinensis</i> | Eastern Spotted Dove | 2019/9/10  | 2 | 0 | 24.16916333 | 120.68767500 | <a href="https://www.inaturalist.org/observations/32463165">https://www.inaturalist.org/observations/32463165</a>   |
| 5692 | <i>Spilopelia chinensis</i> | Eastern Spotted Dove | 2021/2/12  | 1 | 0 | 24.17054974 | 120.62542310 | <a href="https://www.inaturalist.org/observations/69863465">https://www.inaturalist.org/observations/69863465</a>   |
| 5693 | <i>Spilopelia chinensis</i> | Eastern Spotted Dove | 2019/5/5   | 2 | 0 | 24.17159783 | 120.67923930 | <a href="https://www.inaturalist.org/observations/24886875">https://www.inaturalist.org/observations/24886875</a>   |
| 5694 | <i>Spilopelia chinensis</i> | Eastern Spotted Dove | 2019/2/17  | 1 | 0 | 24.17292524 | 120.78549420 | <a href="https://www.inaturalist.org/observations/20415895">https://www.inaturalist.org/observations/20415895</a>   |
| 5695 | <i>Spilopelia chinensis</i> | Eastern Spotted Dove | 2018/9/16  | 3 | 0 | 24.17543920 | 120.68777150 | <a href="https://www.inaturalist.org/observations/16580424">https://www.inaturalist.org/observations/16580424</a>   |
| 5696 | <i>Spilopelia chinensis</i> | Eastern Spotted Dove | 2021/10/21 | 2 | 0 | 24.17681333 | 120.68705830 | <a href="https://www.inaturalist.org/observations/98837381">https://www.inaturalist.org/observations/98837381</a>   |
| 5697 | <i>Spilopelia chinensis</i> | Eastern Spotted Dove | 2020/10/1  | 1 | 0 | 24.17691430 | 120.66626160 | <a href="https://www.inaturalist.org/observations/61364975">https://www.inaturalist.org/observations/61364975</a>   |
| 5698 | <i>Spilopelia chinensis</i> | Eastern Spotted Dove | 2018/12/20 | 0 | 0 | 24.17717195 | 120.63604800 | <a href="https://www.inaturalist.org/observations/19108277">https://www.inaturalist.org/observations/19108277</a>   |
| 5699 | <i>Spilopelia chinensis</i> | Eastern Spotted Dove | 2018/12/13 | 1 | 0 | 24.17721667 | 120.63562830 | <a href="https://www.inaturalist.org/observations/18989988">https://www.inaturalist.org/observations/18989988</a>   |
| 5700 | <i>Spilopelia chinensis</i> | Eastern Spotted Dove | 2019/2/20  | 2 | 0 | 24.17773667 | 120.59953330 | <a href="https://www.inaturalist.org/observations/20505481">https://www.inaturalist.org/observations/20505481</a>   |
| 5701 | <i>Spilopelia chinensis</i> | Eastern Spotted Dove | 2018/12/19 | 1 | 0 | 24.17779500 | 120.59942500 | <a href="https://www.inaturalist.org/observations/19100369">https://www.inaturalist.org/observations/19100369</a>   |
| 5702 | <i>Spilopelia chinensis</i> | Eastern Spotted Dove | 2018/10/30 | 1 | 0 | 24.17784167 | 120.59970000 | <a href="https://www.inaturalist.org/observations/17955447">https://www.inaturalist.org/observations/17955447</a>   |
| 5703 | <i>Spilopelia chinensis</i> | Eastern Spotted Dove | 2021/11/20 | 2 | 0 | 24.17861890 | 120.59658760 | <a href="https://www.inaturalist.org/observations/101494052">https://www.inaturalist.org/observations/101494052</a> |

|      |                             |                      |            |   |   |             |              |                                                                                                                     |
|------|-----------------------------|----------------------|------------|---|---|-------------|--------------|---------------------------------------------------------------------------------------------------------------------|
| 5704 | <i>Spilopelia chinensis</i> | Eastern Spotted Dove | 2022/9/13  | 1 | 0 | 24.17866333 | 120.65576170 | <a href="https://www.inaturalist.org/observations/134829890">https://www.inaturalist.org/observations/134829890</a> |
| 5705 | <i>Spilopelia chinensis</i> | Eastern Spotted Dove | 2022/9/20  | 1 | 0 | 24.17893777 | 120.65590080 | <a href="https://www.inaturalist.org/observations/135741398">https://www.inaturalist.org/observations/135741398</a> |
| 5706 | <i>Spilopelia chinensis</i> | Eastern Spotted Dove | 2022/8/9   | 2 | 0 | 24.17896512 | 120.65585050 | <a href="https://www.inaturalist.org/observations/130090215">https://www.inaturalist.org/observations/130090215</a> |
| 5707 | <i>Spilopelia chinensis</i> | Eastern Spotted Dove | 2022/9/13  | 1 | 0 | 24.17900503 | 120.65570670 | <a href="https://www.inaturalist.org/observations/134822717">https://www.inaturalist.org/observations/134822717</a> |
| 5708 | <i>Spilopelia chinensis</i> | Eastern Spotted Dove | 2020/9/29  | 2 | 0 | 24.17902320 | 120.59693610 | <a href="https://www.inaturalist.org/observations/61191613">https://www.inaturalist.org/observations/61191613</a>   |
| 5709 | <i>Spilopelia chinensis</i> | Eastern Spotted Dove | 2020/9/29  | 2 | 0 | 24.17904375 | 120.59693120 | <a href="https://www.inaturalist.org/observations/61189825">https://www.inaturalist.org/observations/61189825</a>   |
| 5710 | <i>Spilopelia chinensis</i> | Eastern Spotted Dove | 2022/8/16  | 2 | 0 | 24.17906582 | 120.65554010 | <a href="https://www.inaturalist.org/observations/131028486">https://www.inaturalist.org/observations/131028486</a> |
| 5711 | <i>Spilopelia chinensis</i> | Eastern Spotted Dove | 2022/9/13  | 1 | 0 | 24.17910777 | 120.65594440 | <a href="https://www.inaturalist.org/observations/134822249">https://www.inaturalist.org/observations/134822249</a> |
| 5712 | <i>Spilopelia chinensis</i> | Eastern Spotted Dove | 2022/9/13  | 1 | 0 | 24.17922518 | 120.65573390 | <a href="https://www.inaturalist.org/observations/134829847">https://www.inaturalist.org/observations/134829847</a> |
| 5713 | <i>Spilopelia chinensis</i> | Eastern Spotted Dove | 2019/10/8  | 0 | 0 | 24.17925616 | 120.60584080 | <a href="https://www.inaturalist.org/observations/34039121">https://www.inaturalist.org/observations/34039121</a>   |
| 5714 | <i>Spilopelia chinensis</i> | Eastern Spotted Dove | 2022/9/20  | 1 | 0 | 24.17950500 | 120.65582170 | <a href="https://www.inaturalist.org/observations/135767565">https://www.inaturalist.org/observations/135767565</a> |
| 5715 | <i>Spilopelia chinensis</i> | Eastern Spotted Dove | 2022/8/30  | 1 | 0 | 24.17951811 | 120.65578800 | <a href="https://www.inaturalist.org/observations/132916592">https://www.inaturalist.org/observations/132916592</a> |
| 5716 | <i>Spilopelia chinensis</i> | Eastern Spotted Dove | 2021/3/8   | 2 | 0 | 24.17953667 | 120.59702170 | <a href="https://www.inaturalist.org/observations/71286763">https://www.inaturalist.org/observations/71286763</a>   |
| 5717 | <i>Spilopelia chinensis</i> | Eastern Spotted Dove | 2022/9/27  | 1 | 0 | 24.17954306 | 120.65668890 | <a href="https://www.inaturalist.org/observations/136690765">https://www.inaturalist.org/observations/136690765</a> |
| 5718 | <i>Spilopelia chinensis</i> | Eastern Spotted Dove | 2022/9/27  | 2 | 0 | 24.17959162 | 120.65662440 | <a href="https://www.inaturalist.org/observations/136656325">https://www.inaturalist.org/observations/136656325</a> |
| 5719 | <i>Spilopelia chinensis</i> | Eastern Spotted Dove | 2022/8/30  | 1 | 0 | 24.17973333 | 120.65573830 | <a href="https://www.inaturalist.org/observations/132922807">https://www.inaturalist.org/observations/132922807</a> |
| 5720 | <i>Spilopelia chinensis</i> | Eastern Spotted Dove | 2018/10/7  | 3 | 0 | 24.17978804 | 120.62472230 | <a href="https://www.inaturalist.org/observations/17710053">https://www.inaturalist.org/observations/17710053</a>   |
| 5721 | <i>Spilopelia chinensis</i> | Eastern Spotted Dove | 2022/7/26  | 3 | 0 | 24.17988088 | 120.65549560 | <a href="https://www.inaturalist.org/observations/127956734">https://www.inaturalist.org/observations/127956734</a> |
| 5722 | <i>Spilopelia chinensis</i> | Eastern Spotted Dove | 2021/11/23 | 1 | 0 | 24.18017000 | 120.59728330 | <a href="https://www.inaturalist.org/observations/101746794">https://www.inaturalist.org/observations/101746794</a> |
| 5723 | <i>Spilopelia chinensis</i> | Eastern Spotted Dove | 2020/12/29 | 2 | 0 | 24.18029386 | 120.59565050 | <a href="https://www.inaturalist.org/observations/67235301">https://www.inaturalist.org/observations/67235301</a>   |
| 5724 | <i>Spilopelia chinensis</i> | Eastern Spotted Dove | 2020/12/29 | 1 | 0 | 24.18040006 | 120.59547900 | <a href="https://www.inaturalist.org/observations/67235296">https://www.inaturalist.org/observations/67235296</a>   |
| 5725 | <i>Spilopelia chinensis</i> | Eastern Spotted Dove | 2021/10/20 | 4 | 0 | 24.18046167 | 120.68737830 | <a href="https://www.inaturalist.org/observations/98749652">https://www.inaturalist.org/observations/98749652</a>   |
| 5726 | <i>Spilopelia chinensis</i> | Eastern Spotted Dove | 2022/1/13  | 3 | 0 | 24.18048298 | 120.60071650 | <a href="https://www.inaturalist.org/observations/104865310">https://www.inaturalist.org/observations/104865310</a> |

|      |                             |                      |            |   |   |             |              |                                                                                                                     |
|------|-----------------------------|----------------------|------------|---|---|-------------|--------------|---------------------------------------------------------------------------------------------------------------------|
| 5727 | <i>Spilopelia chinensis</i> | Eastern Spotted Dove | 2022/6/28  | 1 | 0 | 24.18050583 | 120.65555620 | <a href="https://www.inaturalist.org/observations/123777781">https://www.inaturalist.org/observations/123777781</a> |
| 5728 | <i>Spilopelia chinensis</i> | Eastern Spotted Dove | 2020/12/24 | 1 | 0 | 24.18120689 | 120.65586590 | <a href="https://www.inaturalist.org/observations/67016930">https://www.inaturalist.org/observations/67016930</a>   |
| 5729 | <i>Spilopelia chinensis</i> | Eastern Spotted Dove | 2020/12/24 | 1 | 0 | 24.18166169 | 120.65601880 | <a href="https://www.inaturalist.org/observations/67017912">https://www.inaturalist.org/observations/67017912</a>   |
| 5730 | <i>Spilopelia chinensis</i> | Eastern Spotted Dove | 2021/12/28 | 2 | 0 | 24.18246890 | 120.60254740 | <a href="https://www.inaturalist.org/observations/103816735">https://www.inaturalist.org/observations/103816735</a> |
| 5731 | <i>Spilopelia chinensis</i> | Eastern Spotted Dove | 2021/10/28 | 2 | 0 | 24.18416667 | 120.69410830 | <a href="https://www.inaturalist.org/observations/99607220">https://www.inaturalist.org/observations/99607220</a>   |
| 5732 | <i>Spilopelia chinensis</i> | Eastern Spotted Dove | 2021/9/7   | 1 | 0 | 24.18419421 | 120.69438560 | <a href="https://www.inaturalist.org/observations/93964206">https://www.inaturalist.org/observations/93964206</a>   |
| 5733 | <i>Spilopelia chinensis</i> | Eastern Spotted Dove | 2022/7/12  | 1 | 0 | 24.18611219 | 120.65403320 | <a href="https://www.inaturalist.org/observations/125899982">https://www.inaturalist.org/observations/125899982</a> |
| 5734 | <i>Spilopelia chinensis</i> | Eastern Spotted Dove | 2019/3/30  | 1 | 0 | 24.18687312 | 120.62822860 | <a href="https://www.inaturalist.org/observations/21909426">https://www.inaturalist.org/observations/21909426</a>   |
| 5735 | <i>Spilopelia chinensis</i> | Eastern Spotted Dove | 2022/9/6   | 1 | 0 | 24.18717500 | 120.68645500 | <a href="https://www.inaturalist.org/observations/133851463">https://www.inaturalist.org/observations/133851463</a> |
| 5736 | <i>Spilopelia chinensis</i> | Eastern Spotted Dove | 2021/10/27 | 3 | 0 | 24.18803175 | 120.66581910 | <a href="https://www.inaturalist.org/observations/99630846">https://www.inaturalist.org/observations/99630846</a>   |
| 5737 | <i>Spilopelia chinensis</i> | Eastern Spotted Dove | 2020/2/21  | 0 | 0 | 24.18984490 | 120.71207210 | <a href="https://www.inaturalist.org/observations/38981439">https://www.inaturalist.org/observations/38981439</a>   |
| 5738 | <i>Spilopelia chinensis</i> | Eastern Spotted Dove | 2022/8/23  | 1 | 0 | 24.18997033 | 120.65307600 | <a href="https://www.inaturalist.org/observations/131984261">https://www.inaturalist.org/observations/131984261</a> |
| 5739 | <i>Spilopelia chinensis</i> | Eastern Spotted Dove | 2022/8/23  | 1 | 0 | 24.19017299 | 120.65340110 | <a href="https://www.inaturalist.org/observations/131980170">https://www.inaturalist.org/observations/131980170</a> |
| 5740 | <i>Spilopelia chinensis</i> | Eastern Spotted Dove | 2022/9/27  | 2 | 0 | 24.19805264 | 120.77368290 | <a href="https://www.inaturalist.org/observations/136667165">https://www.inaturalist.org/observations/136667165</a> |
| 5741 | <i>Spilopelia chinensis</i> | Eastern Spotted Dove | 2019/10/10 | 2 | 0 | 24.20374078 | 121.00671870 | <a href="https://www.inaturalist.org/observations/34452718">https://www.inaturalist.org/observations/34452718</a>   |
| 5742 | <i>Spilopelia chinensis</i> | Eastern Spotted Dove | 2022/4/3   | 3 | 0 | 24.20659576 | 120.59993640 | <a href="https://www.inaturalist.org/observations/120297527">https://www.inaturalist.org/observations/120297527</a> |
| 5743 | <i>Spilopelia chinensis</i> | Eastern Spotted Dove | 2021/1/29  | 1 | 0 | 24.20964667 | 120.59753670 | <a href="https://www.inaturalist.org/observations/68745882">https://www.inaturalist.org/observations/68745882</a>   |
| 5744 | <i>Spilopelia chinensis</i> | Eastern Spotted Dove | 2022/1/29  | 3 | 0 | 24.21030569 | 120.59710520 | <a href="https://www.inaturalist.org/observations/120297962">https://www.inaturalist.org/observations/120297962</a> |
| 5745 | <i>Spilopelia chinensis</i> | Eastern Spotted Dove | 2020/4/7   | 1 | 0 | 24.21043772 | 120.60909140 | <a href="https://www.inaturalist.org/observations/42234077">https://www.inaturalist.org/observations/42234077</a>   |
| 5746 | <i>Spilopelia chinensis</i> | Eastern Spotted Dove | 2019/9/7   | 2 | 0 | 24.21160365 | 120.59491490 | <a href="https://www.inaturalist.org/observations/33520175">https://www.inaturalist.org/observations/33520175</a>   |
| 5747 | <i>Spilopelia chinensis</i> | Eastern Spotted Dove | 2018/2/2   | 1 | 0 | 24.21248650 | 120.72333070 | <a href="https://www.inaturalist.org/observations/14196979">https://www.inaturalist.org/observations/14196979</a>   |
| 5748 | <i>Spilopelia chinensis</i> | Eastern Spotted Dove | 2019/2/11  | 1 | 0 | 24.21386188 | 120.55844420 | <a href="https://www.inaturalist.org/observations/20278065">https://www.inaturalist.org/observations/20278065</a>   |
| 5749 | <i>Spilopelia chinensis</i> | Eastern Spotted Dove | 2020/9/15  | 2 | 0 | 24.21593371 | 120.52133560 | <a href="https://www.inaturalist.org/observations/59645340">https://www.inaturalist.org/observations/59645340</a>   |

|      |                             |                      |            |   |   |             |              |                                                                                                                     |
|------|-----------------------------|----------------------|------------|---|---|-------------|--------------|---------------------------------------------------------------------------------------------------------------------|
| 5750 | <i>Spilopelia chinensis</i> | Eastern Spotted Dove | 2020/11/6  | 1 | 0 | 24.23446359 | 120.62232940 | <a href="https://www.inaturalist.org/observations/73578771">https://www.inaturalist.org/observations/73578771</a>   |
| 5751 | <i>Spilopelia chinensis</i> | Eastern Spotted Dove | 2022/5/28  | 1 | 0 | 24.23943667 | 120.69554330 | <a href="https://www.inaturalist.org/observations/119232931">https://www.inaturalist.org/observations/119232931</a> |
| 5752 | <i>Spilopelia chinensis</i> | Eastern Spotted Dove | 2018/3/20  | 3 | 0 | 24.24123200 | 120.87059500 | <a href="https://www.inaturalist.org/observations/34161756">https://www.inaturalist.org/observations/34161756</a>   |
| 5753 | <i>Spilopelia chinensis</i> | Eastern Spotted Dove | 2021/12/18 | 1 | 0 | 24.24431280 | 120.84074760 | <a href="https://www.inaturalist.org/observations/103241478">https://www.inaturalist.org/observations/103241478</a> |
| 5754 | <i>Spilopelia chinensis</i> | Eastern Spotted Dove | 2022/6/28  | 1 | 0 | 24.24473102 | 120.69771080 | <a href="https://www.inaturalist.org/observations/123812663">https://www.inaturalist.org/observations/123812663</a> |
| 5755 | <i>Spilopelia chinensis</i> | Eastern Spotted Dove | 2019/1/26  | 2 | 0 | 24.24503576 | 120.75647250 | <a href="https://www.inaturalist.org/observations/19881325">https://www.inaturalist.org/observations/19881325</a>   |
| 5756 | <i>Spilopelia chinensis</i> | Eastern Spotted Dove | 2014/3/21  | 2 | 0 | 24.24731779 | 120.83196240 | <a href="https://www.inaturalist.org/observations/93244099">https://www.inaturalist.org/observations/93244099</a>   |
| 5757 | <i>Spilopelia chinensis</i> | Eastern Spotted Dove | 2021/9/30  | 2 | 0 | 24.25005056 | 120.71156520 | <a href="https://www.inaturalist.org/observations/96655339">https://www.inaturalist.org/observations/96655339</a>   |
| 5758 | <i>Spilopelia chinensis</i> | Eastern Spotted Dove | 2018/10/10 | 3 | 0 | 24.26599738 | 120.70076630 | <a href="https://www.inaturalist.org/observations/18006890">https://www.inaturalist.org/observations/18006890</a>   |
| 5759 | <i>Spilopelia chinensis</i> | Eastern Spotted Dove | 2018/9/25  | 3 | 0 | 24.26766422 | 120.55945840 | <a href="https://www.inaturalist.org/observations/17052668">https://www.inaturalist.org/observations/17052668</a>   |
| 5760 | <i>Spilopelia chinensis</i> | Eastern Spotted Dove | 2019/8/4   | 2 | 0 | 24.31041690 | 116.13796370 | <a href="https://www.inaturalist.org/observations/31743213">https://www.inaturalist.org/observations/31743213</a>   |
| 5761 | <i>Spilopelia chinensis</i> | Eastern Spotted Dove | 2020/9/9   | 3 | 0 | 24.35270526 | 92.34394893  | <a href="https://www.inaturalist.org/observations/59785133">https://www.inaturalist.org/observations/59785133</a>   |
| 5762 | <i>Spilopelia chinensis</i> | Eastern Spotted Dove | 2019/10/24 | 1 | 0 | 24.41574674 | 118.23149690 | <a href="https://www.inaturalist.org/observations/49029493">https://www.inaturalist.org/observations/49029493</a>   |
| 5763 | <i>Spilopelia chinensis</i> | Eastern Spotted Dove | 2022/7/3   | 3 | 0 | 24.42448020 | 118.30477010 | <a href="https://www.inaturalist.org/observations/125040547">https://www.inaturalist.org/observations/125040547</a> |
| 5764 | <i>Spilopelia chinensis</i> | Eastern Spotted Dove | 2019/1/18  | 4 | 0 | 24.42548700 | 92.33836800  | <a href="https://www.inaturalist.org/observations/19795657">https://www.inaturalist.org/observations/19795657</a>   |
| 5765 | <i>Spilopelia chinensis</i> | Eastern Spotted Dove | 2019/1/21  | 4 | 0 | 24.42552300 | 92.33872800  | <a href="https://www.inaturalist.org/observations/19796212">https://www.inaturalist.org/observations/19796212</a>   |
| 5766 | <i>Spilopelia chinensis</i> | Eastern Spotted Dove | 2019/9/28  | 3 | 0 | 24.42563331 | 92.33881554  | <a href="https://www.inaturalist.org/observations/33881570">https://www.inaturalist.org/observations/33881570</a>   |
| 5767 | <i>Spilopelia chinensis</i> | Eastern Spotted Dove | 2021/1/26  | 1 | 0 | 24.42563331 | 92.33881554  | <a href="https://www.inaturalist.org/observations/69973648">https://www.inaturalist.org/observations/69973648</a>   |
| 5768 | <i>Spilopelia chinensis</i> | Eastern Spotted Dove | 2018/6/3   | 4 | 0 | 24.42617300 | 92.33898000  | <a href="https://www.inaturalist.org/observations/14537999">https://www.inaturalist.org/observations/14537999</a>   |
| 5769 | <i>Spilopelia chinensis</i> | Eastern Spotted Dove | 2019/2/3   | 3 | 0 | 24.42802800 | 92.33556000  | <a href="https://www.inaturalist.org/observations/20340334">https://www.inaturalist.org/observations/20340334</a>   |
| 5770 | <i>Spilopelia chinensis</i> | Eastern Spotted Dove | 2020/2/28  | 4 | 0 | 24.42813514 | 92.33542255  | <a href="https://www.inaturalist.org/observations/46585226">https://www.inaturalist.org/observations/46585226</a>   |
| 5771 | <i>Spilopelia chinensis</i> | Eastern Spotted Dove | 2018/5/27  | 3 | 0 | 24.42813514 | 92.33542255  | <a href="https://www.inaturalist.org/observations/49305638">https://www.inaturalist.org/observations/49305638</a>   |
| 5772 | <i>Spilopelia chinensis</i> | Eastern Spotted Dove | 2018/6/24  | 5 | 0 | 24.42930900 | 92.33479300  | <a href="https://www.inaturalist.org/observations/14564623">https://www.inaturalist.org/observations/14564623</a>   |

|      |                             |                      |            |   |   |             |              |                                                                                                                     |
|------|-----------------------------|----------------------|------------|---|---|-------------|--------------|---------------------------------------------------------------------------------------------------------------------|
| 5773 | <i>Spilopelia chinensis</i> | Eastern Spotted Dove | 2018/3/14  | 5 | 0 | 24.42980400 | 92.33460400  | <a href="https://www.inaturalist.org/observations/14281933">https://www.inaturalist.org/observations/14281933</a>   |
| 5774 | <i>Spilopelia chinensis</i> | Eastern Spotted Dove | 2019/10/20 | 5 | 0 | 24.42988777 | 92.33448792  | <a href="https://www.inaturalist.org/observations/34644395">https://www.inaturalist.org/observations/34644395</a>   |
| 5775 | <i>Spilopelia chinensis</i> | Eastern Spotted Dove | 2020/2/23  | 6 | 0 | 24.43024967 | 92.33067345  | <a href="https://www.inaturalist.org/observations/46580814">https://www.inaturalist.org/observations/46580814</a>   |
| 5776 | <i>Spilopelia chinensis</i> | Eastern Spotted Dove | 2019/9/28  | 3 | 0 | 24.43075214 | 92.33362699  | <a href="https://www.inaturalist.org/observations/34046349">https://www.inaturalist.org/observations/34046349</a>   |
| 5777 | <i>Spilopelia chinensis</i> | Eastern Spotted Dove | 2020/2/23  | 2 | 0 | 24.43130817 | 92.32775442  | <a href="https://www.inaturalist.org/observations/39648996">https://www.inaturalist.org/observations/39648996</a>   |
| 5778 | <i>Spilopelia chinensis</i> | Eastern Spotted Dove | 2018/3/16  | 1 | 0 | 24.43159380 | 118.40117370 | <a href="https://www.inaturalist.org/observations/78952471">https://www.inaturalist.org/observations/78952471</a>   |
| 5779 | <i>Spilopelia chinensis</i> | Eastern Spotted Dove | 2012/6/11  | 6 | 0 | 24.43201970 | 92.33068940  | <a href="http://www.inaturalist.org/observations/120484">http://www.inaturalist.org/observations/120484</a>         |
| 5780 | <i>Spilopelia chinensis</i> | Eastern Spotted Dove | 2012/5/21  | 7 | 0 | 24.43201970 | 92.33068940  | <a href="http://www.inaturalist.org/observations/127704">http://www.inaturalist.org/observations/127704</a>         |
| 5781 | <i>Spilopelia chinensis</i> | Eastern Spotted Dove | 2013/2/26  | 6 | 0 | 24.43201970 | 92.33068940  | <a href="http://www.inaturalist.org/observations/214776">http://www.inaturalist.org/observations/214776</a>         |
| 5782 | <i>Spilopelia chinensis</i> | Eastern Spotted Dove | 2018/5/26  | 5 | 0 | 24.43201970 | 92.33068940  | <a href="https://www.inaturalist.org/observations/14281966">https://www.inaturalist.org/observations/14281966</a>   |
| 5783 | <i>Spilopelia chinensis</i> | Eastern Spotted Dove | 2017/8/22  | 5 | 0 | 24.43201970 | 92.33068940  | <a href="https://www.inaturalist.org/observations/14281975">https://www.inaturalist.org/observations/14281975</a>   |
| 5784 | <i>Spilopelia chinensis</i> | Eastern Spotted Dove | 2019/2/14  | 4 | 0 | 24.43201970 | 92.33068940  | <a href="https://www.inaturalist.org/observations/20445749">https://www.inaturalist.org/observations/20445749</a>   |
| 5785 | <i>Spilopelia chinensis</i> | Eastern Spotted Dove | 2019/2/24  | 2 | 0 | 24.43201970 | 92.33068940  | <a href="https://www.inaturalist.org/observations/20990048">https://www.inaturalist.org/observations/20990048</a>   |
| 5786 | <i>Spilopelia chinensis</i> | Eastern Spotted Dove | 2021/3/31  | 1 | 0 | 24.43201971 | 92.33068943  | <a href="https://www.inaturalist.org/observations/72541627">https://www.inaturalist.org/observations/72541627</a>   |
| 5787 | <i>Spilopelia chinensis</i> | Eastern Spotted Dove | 2018/8/18  | 5 | 0 | 24.43202000 | 92.33068900  | <a href="https://www.inaturalist.org/observations/15775533">https://www.inaturalist.org/observations/15775533</a>   |
| 5788 | <i>Spilopelia chinensis</i> | Eastern Spotted Dove | 2021/6/13  | 2 | 0 | 24.43202000 | 92.33068900  | <a href="https://www.inaturalist.org/observations/86019575">https://www.inaturalist.org/observations/86019575</a>   |
| 5789 | <i>Spilopelia chinensis</i> | Eastern Spotted Dove | 2010/6/16  | 2 | 0 | 24.43202000 | 92.33068900  | <a href="https://www.inaturalist.org/observations/103466252">https://www.inaturalist.org/observations/103466252</a> |
| 5790 | <i>Spilopelia chinensis</i> | Eastern Spotted Dove | 2010/4/16  | 1 | 0 | 24.43202000 | 92.33068900  | <a href="https://www.inaturalist.org/observations/103479611">https://www.inaturalist.org/observations/103479611</a> |
| 5791 | <i>Spilopelia chinensis</i> | Eastern Spotted Dove | 2010/8/20  | 2 | 0 | 24.43202000 | 92.33068900  | <a href="https://www.inaturalist.org/observations/103510035">https://www.inaturalist.org/observations/103510035</a> |
| 5792 | <i>Spilopelia chinensis</i> | Eastern Spotted Dove | 2010/8/20  | 1 | 0 | 24.43202000 | 92.33068900  | <a href="https://www.inaturalist.org/observations/103510088">https://www.inaturalist.org/observations/103510088</a> |
| 5793 | <i>Spilopelia chinensis</i> | Eastern Spotted Dove | 2010/10/10 | 2 | 0 | 24.43202000 | 92.33068900  | <a href="https://www.inaturalist.org/observations/103616404">https://www.inaturalist.org/observations/103616404</a> |
| 5794 | <i>Spilopelia chinensis</i> | Eastern Spotted Dove | 2011/3/5   | 1 | 0 | 24.43202000 | 92.33068900  | <a href="https://www.inaturalist.org/observations/103625752">https://www.inaturalist.org/observations/103625752</a> |
| 5795 | <i>Spilopelia chinensis</i> | Eastern Spotted Dove | 2011/4/23  | 1 | 0 | 24.43202000 | 92.33068900  | <a href="https://www.inaturalist.org/observations/103634498">https://www.inaturalist.org/observations/103634498</a> |



|      |                             |                      |            |   |   |             |              |                                                                                                                     |
|------|-----------------------------|----------------------|------------|---|---|-------------|--------------|---------------------------------------------------------------------------------------------------------------------|
| 5796 | <i>Spilopelia chinensis</i> | Eastern Spotted Dove | 2011/7/23  | 1 | 0 | 24.43202000 | 92.33068900  | <a href="https://www.inaturalist.org/observations/103638627">https://www.inaturalist.org/observations/103638627</a> |
| 5797 | <i>Spilopelia chinensis</i> | Eastern Spotted Dove | 2011/9/9   | 1 | 0 | 24.43202000 | 92.33068900  | <a href="https://www.inaturalist.org/observations/103671415">https://www.inaturalist.org/observations/103671415</a> |
| 5798 | <i>Spilopelia chinensis</i> | Eastern Spotted Dove | 2021/1/26  | 3 | 0 | 24.43202674 | 92.33068943  | <a href="https://www.inaturalist.org/observations/68789661">https://www.inaturalist.org/observations/68789661</a>   |
| 5799 | <i>Spilopelia chinensis</i> | Eastern Spotted Dove | 2021/4/12  | 3 | 0 | 24.43202674 | 92.33068943  | <a href="https://www.inaturalist.org/observations/73835798">https://www.inaturalist.org/observations/73835798</a>   |
| 5800 | <i>Spilopelia chinensis</i> | Eastern Spotted Dove | 2022/3/26  | 2 | 0 | 24.43277400 | 118.31870970 | <a href="https://www.inaturalist.org/observations/110648833">https://www.inaturalist.org/observations/110648833</a> |
| 5801 | <i>Spilopelia chinensis</i> | Eastern Spotted Dove | 2020/2/29  | 1 | 0 | 24.43369982 | 92.33005844  | <a href="https://www.inaturalist.org/observations/39515121">https://www.inaturalist.org/observations/39515121</a>   |
| 5802 | <i>Spilopelia chinensis</i> | Eastern Spotted Dove | 2019/8/29  | 3 | 0 | 24.43432186 | 92.32267080  | <a href="https://www.inaturalist.org/observations/32259027">https://www.inaturalist.org/observations/32259027</a>   |
| 5803 | <i>Spilopelia chinensis</i> | Eastern Spotted Dove | 2020/3/15  | 3 | 0 | 24.43581609 | 92.32859697  | <a href="https://www.inaturalist.org/observations/46191967">https://www.inaturalist.org/observations/46191967</a>   |
| 5804 | <i>Spilopelia chinensis</i> | Eastern Spotted Dove | 2021/7/23  | 1 | 0 | 24.43629151 | 118.10297250 | <a href="https://www.inaturalist.org/observations/114514785">https://www.inaturalist.org/observations/114514785</a> |
| 5805 | <i>Spilopelia chinensis</i> | Eastern Spotted Dove | 2022/3/24  | 1 | 0 | 24.43674651 | 118.42720860 | <a href="https://www.inaturalist.org/observations/110648811">https://www.inaturalist.org/observations/110648811</a> |
| 5806 | <i>Spilopelia chinensis</i> | Eastern Spotted Dove | 2019/1/28  | 1 | 0 | 24.43836500 | 118.33213170 | <a href="https://www.inaturalist.org/observations/20718837">https://www.inaturalist.org/observations/20718837</a>   |
| 5807 | <i>Spilopelia chinensis</i> | Eastern Spotted Dove | 2022/5/25  | 2 | 0 | 24.43908511 | 118.10224290 | <a href="https://www.inaturalist.org/observations/118612679">https://www.inaturalist.org/observations/118612679</a> |
| 5808 | <i>Spilopelia chinensis</i> | Eastern Spotted Dove | 2022/2/24  | 1 | 0 | 24.43925435 | 118.09849470 | <a href="https://www.inaturalist.org/observations/112514812">https://www.inaturalist.org/observations/112514812</a> |
| 5809 | <i>Spilopelia chinensis</i> | Eastern Spotted Dove | 2022/1/9   | 2 | 0 | 24.44137053 | 92.31218027  | <a href="https://www.inaturalist.org/observations/110644589">https://www.inaturalist.org/observations/110644589</a> |
| 5810 | <i>Spilopelia chinensis</i> | Eastern Spotted Dove | 2022/7/11  | 1 | 0 | 24.44221583 | 118.09736250 | <a href="https://www.inaturalist.org/observations/125894172">https://www.inaturalist.org/observations/125894172</a> |
| 5811 | <i>Spilopelia chinensis</i> | Eastern Spotted Dove | 2010/11/1  | 1 | 0 | 24.44380351 | 118.37936580 | <a href="https://www.inaturalist.org/observations/55690247">https://www.inaturalist.org/observations/55690247</a>   |
| 5812 | <i>Spilopelia chinensis</i> | Eastern Spotted Dove | 2021/1/1   | 2 | 0 | 24.44642169 | 118.44700250 | <a href="https://www.inaturalist.org/observations/67560887">https://www.inaturalist.org/observations/67560887</a>   |
| 5813 | <i>Spilopelia chinensis</i> | Eastern Spotted Dove | 2018/12/29 | 2 | 0 | 24.44647020 | 118.44712000 | <a href="https://www.inaturalist.org/observations/19330587">https://www.inaturalist.org/observations/19330587</a>   |
| 5814 | <i>Spilopelia chinensis</i> | Eastern Spotted Dove | 2022/7/29  | 2 | 0 | 24.44657323 | 118.25467200 | <a href="https://www.inaturalist.org/observations/130086540">https://www.inaturalist.org/observations/130086540</a> |
| 5815 | <i>Spilopelia chinensis</i> | Eastern Spotted Dove | 2019/4/29  | 1 | 0 | 24.45033333 | 118.33454170 | <a href="https://www.inaturalist.org/observations/28994644">https://www.inaturalist.org/observations/28994644</a>   |
| 5816 | <i>Spilopelia chinensis</i> | Eastern Spotted Dove | 2021/5/1   | 1 | 0 | 24.45093558 | 118.43784940 | <a href="https://www.inaturalist.org/observations/76841671">https://www.inaturalist.org/observations/76841671</a>   |
| 5817 | <i>Spilopelia chinensis</i> | Eastern Spotted Dove | 2019/5/19  | 2 | 0 | 24.45148860 | 118.43790390 | <a href="https://www.inaturalist.org/observations/25556841">https://www.inaturalist.org/observations/25556841</a>   |
| 5818 | <i>Spilopelia chinensis</i> | Eastern Spotted Dove | 2019/1/25  | 5 | 0 | 24.45575100 | 97.62672100  | <a href="https://www.inaturalist.org/observations/34221145">https://www.inaturalist.org/observations/34221145</a>   |

|      |                             |                      |            |   |   |             |              |                                                                                                                     |
|------|-----------------------------|----------------------|------------|---|---|-------------|--------------|---------------------------------------------------------------------------------------------------------------------|
| 5819 | <i>Spilopelia chinensis</i> | Eastern Spotted Dove | 2020/11/8  | 1 | 0 | 24.45678833 | 118.39700000 | <a href="https://www.inaturalist.org/observations/66419097">https://www.inaturalist.org/observations/66419097</a>   |
| 5820 | <i>Spilopelia chinensis</i> | Eastern Spotted Dove | 2016/7/23  | 2 | 0 | 24.45705333 | 118.39656170 | <a href="https://www.inaturalist.org/observations/29149292">https://www.inaturalist.org/observations/29149292</a>   |
| 5821 | <i>Spilopelia chinensis</i> | Eastern Spotted Dove | 2018/12/29 | 1 | 0 | 24.45906960 | 118.44221690 | <a href="https://www.inaturalist.org/observations/19331922">https://www.inaturalist.org/observations/19331922</a>   |
| 5822 | <i>Spilopelia chinensis</i> | Eastern Spotted Dove | 2021/3/16  | 1 | 0 | 24.45944118 | 121.79799920 | <a href="https://www.inaturalist.org/observations/78240890">https://www.inaturalist.org/observations/78240890</a>   |
| 5823 | <i>Spilopelia chinensis</i> | Eastern Spotted Dove | 2019/5/18  | 2 | 0 | 24.45976787 | 118.44243680 | <a href="https://www.inaturalist.org/observations/25556840">https://www.inaturalist.org/observations/25556840</a>   |
| 5824 | <i>Spilopelia chinensis</i> | Eastern Spotted Dove | 2021/9/28  | 1 | 0 | 24.46260541 | 117.84560640 | <a href="https://www.inaturalist.org/observations/96446935">https://www.inaturalist.org/observations/96446935</a>   |
| 5825 | <i>Spilopelia chinensis</i> | Eastern Spotted Dove | 2018/3/15  | 5 | 0 | 24.47510800 | 92.29876800  | <a href="https://www.inaturalist.org/observations/14281948">https://www.inaturalist.org/observations/14281948</a>   |
| 5826 | <i>Spilopelia chinensis</i> | Eastern Spotted Dove | 2018/8/15  | 6 | 0 | 24.47525800 | 92.30218000  | <a href="https://www.inaturalist.org/observations/15558549">https://www.inaturalist.org/observations/15558549</a>   |
| 5827 | <i>Spilopelia chinensis</i> | Eastern Spotted Dove | 2018/8/15  | 5 | 0 | 24.47555700 | 92.30760100  | <a href="https://www.inaturalist.org/observations/15604581">https://www.inaturalist.org/observations/15604581</a>   |
| 5828 | <i>Spilopelia chinensis</i> | Eastern Spotted Dove | 2020/8/20  | 1 | 0 | 24.47643000 | 118.31538580 | <a href="https://www.inaturalist.org/observations/57416031">https://www.inaturalist.org/observations/57416031</a>   |
| 5829 | <i>Spilopelia chinensis</i> | Eastern Spotted Dove | 2020/2/5   | 3 | 0 | 24.48294400 | 92.29071229  | <a href="https://www.inaturalist.org/observations/46358126">https://www.inaturalist.org/observations/46358126</a>   |
| 5830 | <i>Spilopelia chinensis</i> | Eastern Spotted Dove | 2021/12/5  | 3 | 0 | 24.48294400 | 92.29071229  | <a href="https://www.inaturalist.org/observations/105083871">https://www.inaturalist.org/observations/105083871</a> |
| 5831 | <i>Spilopelia chinensis</i> | Eastern Spotted Dove | 2017/2/6   | 1 | 0 | 24.48464798 | 118.41075200 | <a href="https://www.inaturalist.org/observations/57000429">https://www.inaturalist.org/observations/57000429</a>   |
| 5832 | <i>Spilopelia chinensis</i> | Eastern Spotted Dove | 2019/5/18  | 1 | 0 | 24.49265690 | 118.44997500 | <a href="https://www.inaturalist.org/observations/25554656">https://www.inaturalist.org/observations/25554656</a>   |
| 5833 | <i>Spilopelia chinensis</i> | Eastern Spotted Dove | 2020/5/23  | 2 | 0 | 24.49729826 | 92.31674463  | <a href="https://www.inaturalist.org/observations/47105410">https://www.inaturalist.org/observations/47105410</a>   |
| 5834 | <i>Spilopelia chinensis</i> | Eastern Spotted Dove | 2018/3/14  | 4 | 0 | 24.49770100 | 92.31476800  | <a href="https://www.inaturalist.org/observations/10306300">https://www.inaturalist.org/observations/10306300</a>   |
| 5835 | <i>Spilopelia chinensis</i> | Eastern Spotted Dove | 2018/3/15  | 5 | 0 | 24.49770100 | 92.31476800  | <a href="https://www.inaturalist.org/observations/13226450">https://www.inaturalist.org/observations/13226450</a>   |
| 5836 | <i>Spilopelia chinensis</i> | Eastern Spotted Dove | 2021/5/5   | 1 | 0 | 24.50379590 | 118.03077580 | <a href="https://www.inaturalist.org/observations/77426184">https://www.inaturalist.org/observations/77426184</a>   |
| 5837 | <i>Spilopelia chinensis</i> | Eastern Spotted Dove | 2020/11/6  | 1 | 0 | 24.50422000 | 118.43733830 | <a href="https://www.inaturalist.org/observations/66419041">https://www.inaturalist.org/observations/66419041</a>   |
| 5838 | <i>Spilopelia chinensis</i> | Eastern Spotted Dove | 2020/5/14  | 2 | 0 | 24.50569375 | 118.15286960 | <a href="https://www.inaturalist.org/observations/70174763">https://www.inaturalist.org/observations/70174763</a>   |
| 5839 | <i>Spilopelia chinensis</i> | Eastern Spotted Dove | 2021/1/22  | 2 | 0 | 24.50760369 | 118.40757260 | <a href="https://www.inaturalist.org/observations/69812959">https://www.inaturalist.org/observations/69812959</a>   |
| 5840 | <i>Spilopelia chinensis</i> | Eastern Spotted Dove | 2021/5/1   | 1 | 0 | 24.51565540 | 118.17443570 | <a href="https://www.inaturalist.org/observations/83480341">https://www.inaturalist.org/observations/83480341</a>   |
| 5841 | <i>Spilopelia chinensis</i> | Eastern Spotted Dove | 2021/8/10  | 1 | 0 | 24.51870890 | 92.29741565  | <a href="https://www.inaturalist.org/observations/95631438">https://www.inaturalist.org/observations/95631438</a>   |

|      |                             |                      |            |   |   |             |              |                                                                                                                     |
|------|-----------------------------|----------------------|------------|---|---|-------------|--------------|---------------------------------------------------------------------------------------------------------------------|
| 5842 | <i>Spilopelia chinensis</i> | Eastern Spotted Dove | 2022/1/23  | 1 | 0 | 24.52442861 | 118.41132690 | <a href="https://www.inaturalist.org/observations/106253498">https://www.inaturalist.org/observations/106253498</a> |
| 5843 | <i>Spilopelia chinensis</i> | Eastern Spotted Dove | 2011/4/24  | 1 | 0 | 24.54564200 | 92.28520100  | <a href="https://www.inaturalist.org/observations/103755716">https://www.inaturalist.org/observations/103755716</a> |
| 5844 | <i>Spilopelia chinensis</i> | Eastern Spotted Dove | 2022/5/14  | 1 | 0 | 24.55290310 | 120.81530700 | <a href="https://www.inaturalist.org/observations/116981673">https://www.inaturalist.org/observations/116981673</a> |
| 5845 | <i>Spilopelia chinensis</i> | Eastern Spotted Dove | 2022/5/14  | 2 | 0 | 24.55290310 | 120.81530700 | <a href="https://www.inaturalist.org/observations/116982019">https://www.inaturalist.org/observations/116982019</a> |
| 5846 | <i>Spilopelia chinensis</i> | Eastern Spotted Dove | 2021/5/2   | 1 | 0 | 24.55300000 | 118.23400000 | <a href="https://www.inaturalist.org/observations/105898502">https://www.inaturalist.org/observations/105898502</a> |
| 5847 | <i>Spilopelia chinensis</i> | Eastern Spotted Dove | 2022/3/16  | 1 | 0 | 24.55933750 | 93.81465260  | <a href="https://www.inaturalist.org/observations/111079790">https://www.inaturalist.org/observations/111079790</a> |
| 5848 | <i>Spilopelia chinensis</i> | Eastern Spotted Dove | 2020/5/31  | 2 | 0 | 24.56149500 | 120.82080000 | <a href="https://www.inaturalist.org/observations/47935487">https://www.inaturalist.org/observations/47935487</a>   |
| 5849 | <i>Spilopelia chinensis</i> | Eastern Spotted Dove | 2020/2/8   | 1 | 0 | 24.56248667 | 120.82513330 | <a href="https://www.inaturalist.org/observations/38416112">https://www.inaturalist.org/observations/38416112</a>   |
| 5850 | <i>Spilopelia chinensis</i> | Eastern Spotted Dove | 2019/12/31 | 1 | 0 | 24.56836260 | 120.83057980 | <a href="https://www.inaturalist.org/observations/37125720">https://www.inaturalist.org/observations/37125720</a>   |
| 5851 | <i>Spilopelia chinensis</i> | Eastern Spotted Dove | 2018/2/16  | 2 | 0 | 24.57311259 | 73.69376777  | <a href="https://www.inaturalist.org/observations/22086006">https://www.inaturalist.org/observations/22086006</a>   |
| 5852 | <i>Spilopelia chinensis</i> | Eastern Spotted Dove | 2022/4/29  | 1 | 0 | 24.58018236 | 118.07448000 | <a href="https://www.inaturalist.org/observations/113344313">https://www.inaturalist.org/observations/113344313</a> |
| 5853 | <i>Spilopelia chinensis</i> | Eastern Spotted Dove | 2014/11/16 | 1 | 0 | 24.58544500 | 73.71247900  | <a href="https://www.inaturalist.org/observations/95917303">https://www.inaturalist.org/observations/95917303</a>   |
| 5854 | <i>Spilopelia chinensis</i> | Eastern Spotted Dove | 2014/11/13 | 1 | 0 | 24.59259090 | 72.71562740  | <a href="https://www.inaturalist.org/observations/95912853">https://www.inaturalist.org/observations/95912853</a>   |
| 5855 | <i>Spilopelia chinensis</i> | Eastern Spotted Dove | 2015/5/24  | 6 | 0 | 24.60054800 | 92.38136200  | <a href="http://www.inaturalist.org/observations/1575679">http://www.inaturalist.org/observations/1575679</a>       |
| 5856 | <i>Spilopelia chinensis</i> | Eastern Spotted Dove | 2021/9/14  | 1 | 0 | 24.61116901 | 121.84189330 | <a href="https://www.inaturalist.org/observations/94771240">https://www.inaturalist.org/observations/94771240</a>   |
| 5857 | <i>Spilopelia chinensis</i> | Eastern Spotted Dove | 2021/9/9   | 1 | 0 | 24.61160886 | 121.84240120 | <a href="https://www.inaturalist.org/observations/94199955">https://www.inaturalist.org/observations/94199955</a>   |
| 5858 | <i>Spilopelia chinensis</i> | Eastern Spotted Dove | 2021/9/14  | 1 | 0 | 24.61208833 | 121.84209440 | <a href="https://www.inaturalist.org/observations/94776955">https://www.inaturalist.org/observations/94776955</a>   |
| 5859 | <i>Spilopelia chinensis</i> | Eastern Spotted Dove | 2020/4/24  | 3 | 0 | 24.62643869 | 121.73359720 | <a href="https://www.inaturalist.org/observations/43098771">https://www.inaturalist.org/observations/43098771</a>   |
| 5860 | <i>Spilopelia chinensis</i> | Eastern Spotted Dove | 2021/8/11  | 1 | 0 | 24.62955852 | 121.79057490 | <a href="https://www.inaturalist.org/observations/94083171">https://www.inaturalist.org/observations/94083171</a>   |
| 5861 | <i>Spilopelia chinensis</i> | Eastern Spotted Dove | 2022/6/15  | 1 | 0 | 24.62960901 | 121.79053700 | <a href="https://www.inaturalist.org/observations/126186151">https://www.inaturalist.org/observations/126186151</a> |
| 5862 | <i>Spilopelia chinensis</i> | Eastern Spotted Dove | 2022/5/27  | 2 | 0 | 24.62960944 | 121.79046490 | <a href="https://www.inaturalist.org/observations/119077721">https://www.inaturalist.org/observations/119077721</a> |
| 5863 | <i>Spilopelia chinensis</i> | Eastern Spotted Dove | 2020/4/14  | 1 | 0 | 24.63351078 | 121.76181890 | <a href="https://www.inaturalist.org/observations/42768939">https://www.inaturalist.org/observations/42768939</a>   |
| 5864 | <i>Spilopelia chinensis</i> | Eastern Spotted Dove | 2020/9/15  | 2 | 0 | 24.63358967 | 121.76188450 | <a href="https://www.inaturalist.org/observations/59657126">https://www.inaturalist.org/observations/59657126</a>   |

|      |                             |                      |            |   |   |             |              |                                                                                                                     |
|------|-----------------------------|----------------------|------------|---|---|-------------|--------------|---------------------------------------------------------------------------------------------------------------------|
| 5865 | <i>Spilopelia chinensis</i> | Eastern Spotted Dove | 2018/9/16  | 1 | 0 | 24.63362900 | 121.71595000 | <a href="https://www.inaturalist.org/observations/16582670">https://www.inaturalist.org/observations/16582670</a>   |
| 5866 | <i>Spilopelia chinensis</i> | Eastern Spotted Dove | 2020/10/25 | 1 | 0 | 24.65663511 | 121.72843440 | <a href="https://www.inaturalist.org/observations/65139450">https://www.inaturalist.org/observations/65139450</a>   |
| 5867 | <i>Spilopelia chinensis</i> | Eastern Spotted Dove | 2020/6/29  | 1 | 0 | 24.65673637 | 121.81636670 | <a href="https://www.inaturalist.org/observations/53135037">https://www.inaturalist.org/observations/53135037</a>   |
| 5868 | <i>Spilopelia chinensis</i> | Eastern Spotted Dove | 2021/3/31  | 1 | 0 | 24.66117980 | 121.81744350 | <a href="https://www.inaturalist.org/observations/79004974">https://www.inaturalist.org/observations/79004974</a>   |
| 5869 | <i>Spilopelia chinensis</i> | Eastern Spotted Dove | 2018/6/18  | 1 | 0 | 24.67147730 | 121.67492760 | <a href="https://www.inaturalist.org/observations/50844232">https://www.inaturalist.org/observations/50844232</a>   |
| 5870 | <i>Spilopelia chinensis</i> | Eastern Spotted Dove | 2021/5/13  | 1 | 0 | 24.67638990 | 121.73139420 | <a href="https://www.inaturalist.org/observations/78544416">https://www.inaturalist.org/observations/78544416</a>   |
| 5871 | <i>Spilopelia chinensis</i> | Eastern Spotted Dove | 2022/6/10  | 2 | 0 | 24.67671560 | 121.67833830 | <a href="https://www.inaturalist.org/observations/121230457">https://www.inaturalist.org/observations/121230457</a> |
| 5872 | <i>Spilopelia chinensis</i> | Eastern Spotted Dove | 2020/9/2   | 1 | 0 | 24.67873172 | 121.74642880 | <a href="https://www.inaturalist.org/observations/58318409">https://www.inaturalist.org/observations/58318409</a>   |
| 5873 | <i>Spilopelia chinensis</i> | Eastern Spotted Dove | 2020/8/24  | 1 | 0 | 24.67908957 | 121.75583180 | <a href="https://www.inaturalist.org/observations/58128440">https://www.inaturalist.org/observations/58128440</a>   |
| 5874 | <i>Spilopelia chinensis</i> | Eastern Spotted Dove | 2021/6/24  | 2 | 0 | 24.67925900 | 121.75597670 | <a href="https://www.inaturalist.org/observations/85884340">https://www.inaturalist.org/observations/85884340</a>   |
| 5875 | <i>Spilopelia chinensis</i> | Eastern Spotted Dove | 2021/7/8   | 2 | 0 | 24.67947657 | 121.75597620 | <a href="https://www.inaturalist.org/observations/92432471">https://www.inaturalist.org/observations/92432471</a>   |
| 5876 | <i>Spilopelia chinensis</i> | Eastern Spotted Dove | 2020/10/1  | 3 | 0 | 24.67965096 | 121.75600560 | <a href="https://www.inaturalist.org/observations/62012004">https://www.inaturalist.org/observations/62012004</a>   |
| 5877 | <i>Spilopelia chinensis</i> | Eastern Spotted Dove | 2021/6/8   | 1 | 0 | 24.67992372 | 121.75605650 | <a href="https://www.inaturalist.org/observations/83908145">https://www.inaturalist.org/observations/83908145</a>   |
| 5878 | <i>Spilopelia chinensis</i> | Eastern Spotted Dove | 2022/1/7   | 1 | 0 | 24.68128050 | 121.77719840 | <a href="https://www.inaturalist.org/observations/104555129">https://www.inaturalist.org/observations/104555129</a> |
| 5879 | <i>Spilopelia chinensis</i> | Eastern Spotted Dove | 2018/9/11  | 3 | 0 | 24.68291820 | 121.75319730 | <a href="https://www.inaturalist.org/observations/16553809">https://www.inaturalist.org/observations/16553809</a>   |
| 5880 | <i>Spilopelia chinensis</i> | Eastern Spotted Dove | 2021/3/6   | 2 | 0 | 24.68293200 | 121.75728000 | <a href="https://www.inaturalist.org/observations/109428353">https://www.inaturalist.org/observations/109428353</a> |
| 5881 | <i>Spilopelia chinensis</i> | Eastern Spotted Dove | 2020/2/7   | 2 | 0 | 24.68623774 | 92.75199607  | <a href="https://www.inaturalist.org/observations/38394613">https://www.inaturalist.org/observations/38394613</a>   |
| 5882 | <i>Spilopelia chinensis</i> | Eastern Spotted Dove | 2019/1/20  | 1 | 0 | 24.68726995 | 97.94599903  | <a href="https://www.inaturalist.org/observations/109519706">https://www.inaturalist.org/observations/109519706</a> |
| 5883 | <i>Spilopelia chinensis</i> | Eastern Spotted Dove | 2007/4/2   | 2 | 0 | 24.68984944 | 92.73805026  | <a href="https://www.inaturalist.org/observations/61748428">https://www.inaturalist.org/observations/61748428</a>   |
| 5884 | <i>Spilopelia chinensis</i> | Eastern Spotted Dove | 2020/9/17  | 1 | 0 | 24.69272959 | 121.75661100 | <a href="https://www.inaturalist.org/observations/61280217">https://www.inaturalist.org/observations/61280217</a>   |
| 5885 | <i>Spilopelia chinensis</i> | Eastern Spotted Dove | 2021/9/20  | 2 | 0 | 24.69407816 | 121.82218000 | <a href="https://www.inaturalist.org/observations/95525462">https://www.inaturalist.org/observations/95525462</a>   |
| 5886 | <i>Spilopelia chinensis</i> | Eastern Spotted Dove | 2021/9/20  | 1 | 0 | 24.69407816 | 121.82218000 | <a href="https://www.inaturalist.org/observations/95525523">https://www.inaturalist.org/observations/95525523</a>   |
| 5887 | <i>Spilopelia chinensis</i> | Eastern Spotted Dove | 2020/2/2   | 2 | 0 | 24.69440802 | 75.56989093  | <a href="https://www.inaturalist.org/observations/40595435">https://www.inaturalist.org/observations/40595435</a>   |

|      |                             |                      |            |   |   |             |              |                                                                                                                     |
|------|-----------------------------|----------------------|------------|---|---|-------------|--------------|---------------------------------------------------------------------------------------------------------------------|
| 5888 | <i>Spilopelia chinensis</i> | Eastern Spotted Dove | 2020/7/3   | 1 | 0 | 24.69698455 | 121.76369850 | <a href="https://www.inaturalist.org/observations/53371816">https://www.inaturalist.org/observations/53371816</a>   |
| 5889 | <i>Spilopelia chinensis</i> | Eastern Spotted Dove | 2020/10/14 | 1 | 0 | 24.70166437 | 121.75478050 | <a href="https://www.inaturalist.org/observations/62697658">https://www.inaturalist.org/observations/62697658</a>   |
| 5890 | <i>Spilopelia chinensis</i> | Eastern Spotted Dove | 2017/11/25 | 3 | 0 | 24.70387167 | 121.18147500 | <a href="https://www.inaturalist.org/observations/30296536">https://www.inaturalist.org/observations/30296536</a>   |
| 5891 | <i>Spilopelia chinensis</i> | Eastern Spotted Dove | 2022/4/30  | 1 | 0 | 24.70442010 | 121.15530740 | <a href="https://www.inaturalist.org/observations/113799990">https://www.inaturalist.org/observations/113799990</a> |
| 5892 | <i>Spilopelia chinensis</i> | Eastern Spotted Dove | 2019/5/20  | 1 | 0 | 24.70527495 | 121.18365460 | <a href="https://www.inaturalist.org/observations/25421988">https://www.inaturalist.org/observations/25421988</a>   |
| 5893 | <i>Spilopelia chinensis</i> | Eastern Spotted Dove | 2015/3/22  | 1 | 0 | 24.70588471 | 121.15837110 | <a href="https://www.inaturalist.org/observations/44468658">https://www.inaturalist.org/observations/44468658</a>   |
| 5894 | <i>Spilopelia chinensis</i> | Eastern Spotted Dove | 2020/9/14  | 1 | 0 | 24.70613727 | 121.76265730 | <a href="https://www.inaturalist.org/observations/61279453">https://www.inaturalist.org/observations/61279453</a>   |
| 5895 | <i>Spilopelia chinensis</i> | Eastern Spotted Dove | 2020/3/20  | 1 | 0 | 24.70788990 | 121.75714020 | <a href="https://www.inaturalist.org/observations/40527512">https://www.inaturalist.org/observations/40527512</a>   |
| 5896 | <i>Spilopelia chinensis</i> | Eastern Spotted Dove | 2020/2/19  | 2 | 0 | 24.71185641 | 121.75358820 | <a href="https://www.inaturalist.org/observations/46691545">https://www.inaturalist.org/observations/46691545</a>   |
| 5897 | <i>Spilopelia chinensis</i> | Eastern Spotted Dove | 2022/5/1   | 2 | 0 | 24.71806078 | 121.74346680 | <a href="https://www.inaturalist.org/observations/114184382">https://www.inaturalist.org/observations/114184382</a> |
| 5898 | <i>Spilopelia chinensis</i> | Eastern Spotted Dove | 2017/4/15  | 4 | 0 | 24.71880519 | 121.81067560 | <a href="https://www.inaturalist.org/observations/9264037">https://www.inaturalist.org/observations/9264037</a>     |
| 5899 | <i>Spilopelia chinensis</i> | Eastern Spotted Dove | 2022/1/16  | 1 | 0 | 24.71977000 | 121.81333170 | <a href="https://www.inaturalist.org/observations/109820350">https://www.inaturalist.org/observations/109820350</a> |
| 5900 | <i>Spilopelia chinensis</i> | Eastern Spotted Dove | 2022/3/16  | 1 | 0 | 24.72027980 | 93.84779776  | <a href="https://www.inaturalist.org/observations/111079665">https://www.inaturalist.org/observations/111079665</a> |
| 5901 | <i>Spilopelia chinensis</i> | Eastern Spotted Dove | 2022/9/25  | 2 | 0 | 24.72363294 | 121.69520850 | <a href="https://www.inaturalist.org/observations/136392639">https://www.inaturalist.org/observations/136392639</a> |
| 5902 | <i>Spilopelia chinensis</i> | Eastern Spotted Dove | 2021/12/16 | 1 | 0 | 24.72476116 | 121.71362040 | <a href="https://www.inaturalist.org/observations/105306628">https://www.inaturalist.org/observations/105306628</a> |
| 5903 | <i>Spilopelia chinensis</i> | Eastern Spotted Dove | 2022/9/25  | 2 | 0 | 24.72989760 | 121.71282690 | <a href="https://www.inaturalist.org/observations/136394148">https://www.inaturalist.org/observations/136394148</a> |
| 5904 | <i>Spilopelia chinensis</i> | Eastern Spotted Dove | 2022/6/4   | 1 | 0 | 24.73240167 | 121.76049500 | <a href="https://www.inaturalist.org/observations/120147152">https://www.inaturalist.org/observations/120147152</a> |
| 5905 | <i>Spilopelia chinensis</i> | Eastern Spotted Dove | 2021/6/13  | 3 | 0 | 24.73754694 | 121.73877480 | <a href="https://www.inaturalist.org/observations/83590884">https://www.inaturalist.org/observations/83590884</a>   |
| 5906 | <i>Spilopelia chinensis</i> | Eastern Spotted Dove | 2019/5/27  | 1 | 0 | 24.74053855 | 97.56930587  | <a href="https://www.inaturalist.org/observations/26157047">https://www.inaturalist.org/observations/26157047</a>   |
| 5907 | <i>Spilopelia chinensis</i> | Eastern Spotted Dove | 2022/9/10  | 2 | 0 | 24.74375400 | 121.69702100 | <a href="https://www.inaturalist.org/observations/134406449">https://www.inaturalist.org/observations/134406449</a> |
| 5908 | <i>Spilopelia chinensis</i> | Eastern Spotted Dove | 2022/9/10  | 2 | 0 | 24.74375400 | 121.69702100 | <a href="https://www.inaturalist.org/observations/134455408">https://www.inaturalist.org/observations/134455408</a> |
| 5909 | <i>Spilopelia chinensis</i> | Eastern Spotted Dove | 2022/9/10  | 1 | 0 | 24.74375400 | 121.69702100 | <a href="https://www.inaturalist.org/observations/134455411">https://www.inaturalist.org/observations/134455411</a> |
| 5910 | <i>Spilopelia chinensis</i> | Eastern Spotted Dove | 2021/7/10  | 2 | 0 | 24.74399474 | 121.73503450 | <a href="https://www.inaturalist.org/observations/88254697">https://www.inaturalist.org/observations/88254697</a>   |

|      |                             |                      |            |   |   |             |              |                                                                                                                     |
|------|-----------------------------|----------------------|------------|---|---|-------------|--------------|---------------------------------------------------------------------------------------------------------------------|
| 5911 | <i>Spilopelia chinensis</i> | Eastern Spotted Dove | 2021/6/17  | 2 | 0 | 24.74479374 | 121.73359680 | <a href="https://www.inaturalist.org/observations/89900582">https://www.inaturalist.org/observations/89900582</a>   |
| 5912 | <i>Spilopelia chinensis</i> | Eastern Spotted Dove | 2022/2/4   | 1 | 0 | 24.74488208 | 121.74211100 | <a href="https://www.inaturalist.org/observations/106292080">https://www.inaturalist.org/observations/106292080</a> |
| 5913 | <i>Spilopelia chinensis</i> | Eastern Spotted Dove | 2021/2/5   | 2 | 0 | 24.74539140 | 121.75337300 | <a href="https://www.inaturalist.org/observations/69237245">https://www.inaturalist.org/observations/69237245</a>   |
| 5914 | <i>Spilopelia chinensis</i> | Eastern Spotted Dove | 2022/4/30  | 1 | 0 | 24.74563323 | 121.74228870 | <a href="https://www.inaturalist.org/observations/113713791">https://www.inaturalist.org/observations/113713791</a> |
| 5915 | <i>Spilopelia chinensis</i> | Eastern Spotted Dove | 2020/4/4   | 2 | 0 | 24.74607170 | 121.74060430 | <a href="https://www.inaturalist.org/observations/59369895">https://www.inaturalist.org/observations/59369895</a>   |
| 5916 | <i>Spilopelia chinensis</i> | Eastern Spotted Dove | 2020/8/9   | 2 | 0 | 24.74624620 | 121.74770070 | <a href="https://www.inaturalist.org/observations/57429779">https://www.inaturalist.org/observations/57429779</a>   |
| 5917 | <i>Spilopelia chinensis</i> | Eastern Spotted Dove | 2021/4/2   | 1 | 0 | 24.74624620 | 121.74770070 | <a href="https://www.inaturalist.org/observations/75522648">https://www.inaturalist.org/observations/75522648</a>   |
| 5918 | <i>Spilopelia chinensis</i> | Eastern Spotted Dove | 2019/9/25  | 2 | 0 | 24.74626950 | 121.74890710 | <a href="https://www.inaturalist.org/observations/33584774">https://www.inaturalist.org/observations/33584774</a>   |
| 5919 | <i>Spilopelia chinensis</i> | Eastern Spotted Dove | 2022/9/25  | 2 | 0 | 24.74632460 | 121.72920800 | <a href="https://www.inaturalist.org/observations/136395374">https://www.inaturalist.org/observations/136395374</a> |
| 5920 | <i>Spilopelia chinensis</i> | Eastern Spotted Dove | 2021/1/17  | 2 | 0 | 24.74871810 | 121.74550960 | <a href="https://www.inaturalist.org/observations/68320877">https://www.inaturalist.org/observations/68320877</a>   |
| 5921 | <i>Spilopelia chinensis</i> | Eastern Spotted Dove | 2021/6/15  | 2 | 0 | 24.74905590 | 121.74527440 | <a href="https://www.inaturalist.org/observations/89899138">https://www.inaturalist.org/observations/89899138</a>   |
| 5922 | <i>Spilopelia chinensis</i> | Eastern Spotted Dove | 2021/6/7   | 1 | 0 | 24.74909950 | 121.74686020 | <a href="https://www.inaturalist.org/observations/83589579">https://www.inaturalist.org/observations/83589579</a>   |
| 5923 | <i>Spilopelia chinensis</i> | Eastern Spotted Dove | 2022/9/2   | 1 | 0 | 24.74953035 | 121.67286620 | <a href="https://www.inaturalist.org/observations/135110821">https://www.inaturalist.org/observations/135110821</a> |
| 5924 | <i>Spilopelia chinensis</i> | Eastern Spotted Dove | 2020/10/20 | 1 | 0 | 24.74969390 | 121.76700950 | <a href="https://www.inaturalist.org/observations/66509751">https://www.inaturalist.org/observations/66509751</a>   |
| 5925 | <i>Spilopelia chinensis</i> | Eastern Spotted Dove | 2020/4/24  | 1 | 0 | 24.74982607 | 121.76639180 | <a href="https://www.inaturalist.org/observations/43037384">https://www.inaturalist.org/observations/43037384</a>   |
| 5926 | <i>Spilopelia chinensis</i> | Eastern Spotted Dove | 2022/4/13  | 1 | 0 | 24.75003988 | 121.76686250 | <a href="https://www.inaturalist.org/observations/122277791">https://www.inaturalist.org/observations/122277791</a> |
| 5927 | <i>Spilopelia chinensis</i> | Eastern Spotted Dove | 2021/6/27  | 0 | 0 | 24.75096597 | 84.37156797  | <a href="https://www.inaturalist.org/observations/84687536">https://www.inaturalist.org/observations/84687536</a>   |
| 5928 | <i>Spilopelia chinensis</i> | Eastern Spotted Dove | 2019/10/21 | 2 | 0 | 24.75304139 | 80.01942806  | <a href="https://www.inaturalist.org/observations/41026566">https://www.inaturalist.org/observations/41026566</a>   |
| 5929 | <i>Spilopelia chinensis</i> | Eastern Spotted Dove | 2022/9/25  | 1 | 0 | 24.75419444 | 121.75488060 | <a href="https://www.inaturalist.org/observations/136397920">https://www.inaturalist.org/observations/136397920</a> |
| 5930 | <i>Spilopelia chinensis</i> | Eastern Spotted Dove | 2020/6/30  | 2 | 0 | 24.75464340 | 121.75804760 | <a href="https://www.inaturalist.org/observations/56791706">https://www.inaturalist.org/observations/56791706</a>   |
| 5931 | <i>Spilopelia chinensis</i> | Eastern Spotted Dove | 2022/2/8   | 3 | 0 | 24.75465901 | 121.76062410 | <a href="https://www.inaturalist.org/observations/106372626">https://www.inaturalist.org/observations/106372626</a> |
| 5932 | <i>Spilopelia chinensis</i> | Eastern Spotted Dove | 2019/4/27  | 2 | 0 | 24.76458984 | 121.10761270 | <a href="https://www.inaturalist.org/observations/24320345">https://www.inaturalist.org/observations/24320345</a>   |
| 5933 | <i>Spilopelia chinensis</i> | Eastern Spotted Dove | 2022/1/16  | 2 | 0 | 24.76956900 | 121.79931680 | <a href="https://www.inaturalist.org/observations/105750621">https://www.inaturalist.org/observations/105750621</a> |

|      |                             |                      |            |   |   |             |              |                                                                                                                     |
|------|-----------------------------|----------------------|------------|---|---|-------------|--------------|---------------------------------------------------------------------------------------------------------------------|
| 5934 | <i>Spilopelia chinensis</i> | Eastern Spotted Dove | 2022/1/30  | 2 | 0 | 24.77229637 | 121.77778270 | <a href="https://www.inaturalist.org/observations/110237342">https://www.inaturalist.org/observations/110237342</a> |
| 5935 | <i>Spilopelia chinensis</i> | Eastern Spotted Dove | 2020/2/22  | 0 | 0 | 24.79137421 | 121.73971560 | <a href="https://www.inaturalist.org/observations/39062041">https://www.inaturalist.org/observations/39062041</a>   |
| 5936 | <i>Spilopelia chinensis</i> | Eastern Spotted Dove | 2020/1/23  | 1 | 0 | 24.79373451 | 120.98099440 | <a href="https://www.inaturalist.org/observations/37986334">https://www.inaturalist.org/observations/37986334</a>   |
| 5937 | <i>Spilopelia chinensis</i> | Eastern Spotted Dove | 2020/4/29  | 1 | 0 | 24.79401600 | 120.98178400 | <a href="https://www.inaturalist.org/observations/44259453">https://www.inaturalist.org/observations/44259453</a>   |
| 5938 | <i>Spilopelia chinensis</i> | Eastern Spotted Dove | 2019/12/20 | 1 | 0 | 24.79719386 | 120.97890590 | <a href="https://www.inaturalist.org/observations/36787404">https://www.inaturalist.org/observations/36787404</a>   |
| 5939 | <i>Spilopelia chinensis</i> | Eastern Spotted Dove | 2020/4/26  | 2 | 0 | 24.79837060 | 121.78713350 | <a href="https://www.inaturalist.org/observations/43587076">https://www.inaturalist.org/observations/43587076</a>   |
| 5940 | <i>Spilopelia chinensis</i> | Eastern Spotted Dove | 2020/2/6   | 1 | 0 | 24.81160140 | 121.03447280 | <a href="https://www.inaturalist.org/observations/66946548">https://www.inaturalist.org/observations/66946548</a>   |
| 5941 | <i>Spilopelia chinensis</i> | Eastern Spotted Dove | 2021/2/21  | 1 | 0 | 24.81371395 | 121.42247730 | <a href="https://www.inaturalist.org/observations/70027454">https://www.inaturalist.org/observations/70027454</a>   |
| 5942 | <i>Spilopelia chinensis</i> | Eastern Spotted Dove | 2021/9/20  | 2 | 0 | 24.81382870 | 120.96747980 | <a href="https://www.inaturalist.org/observations/125936569">https://www.inaturalist.org/observations/125936569</a> |
| 5943 | <i>Spilopelia chinensis</i> | Eastern Spotted Dove | 2021/11/27 | 1 | 0 | 24.83212170 | 102.82338020 | <a href="https://www.inaturalist.org/observations/101985396">https://www.inaturalist.org/observations/101985396</a> |
| 5944 | <i>Spilopelia chinensis</i> | Eastern Spotted Dove | 2022/3/28  | 1 | 0 | 24.83319657 | 102.82999570 | <a href="https://www.inaturalist.org/observations/109812493">https://www.inaturalist.org/observations/109812493</a> |
| 5945 | <i>Spilopelia chinensis</i> | Eastern Spotted Dove | 2019/4/10  | 3 | 0 | 24.85284667 | 79.91999167  | <a href="https://www.inaturalist.org/observations/36739774">https://www.inaturalist.org/observations/36739774</a>   |
| 5946 | <i>Spilopelia chinensis</i> | Eastern Spotted Dove | 2020/10/18 | 1 | 0 | 24.86488120 | 102.80399710 | <a href="https://www.inaturalist.org/observations/62893898">https://www.inaturalist.org/observations/62893898</a>   |
| 5947 | <i>Spilopelia chinensis</i> | Eastern Spotted Dove | 2021/6/29  | 2 | 0 | 24.92767594 | 121.55969680 | <a href="https://www.inaturalist.org/observations/84957451">https://www.inaturalist.org/observations/84957451</a>   |
| 5948 | <i>Spilopelia chinensis</i> | Eastern Spotted Dove | 2019/2/16  | 3 | 0 | 24.93059540 | 75.59092590  | <a href="https://www.inaturalist.org/observations/20377662">https://www.inaturalist.org/observations/20377662</a>   |
| 5949 | <i>Spilopelia chinensis</i> | Eastern Spotted Dove | 2021/5/13  | 2 | 0 | 24.93404489 | 121.28668790 | <a href="https://www.inaturalist.org/observations/78543843">https://www.inaturalist.org/observations/78543843</a>   |
| 5950 | <i>Spilopelia chinensis</i> | Eastern Spotted Dove | 2019/10/28 | 1 | 0 | 24.94160680 | 121.36876520 | <a href="https://www.inaturalist.org/observations/34997529">https://www.inaturalist.org/observations/34997529</a>   |
| 5951 | <i>Spilopelia chinensis</i> | Eastern Spotted Dove | 2019/10/25 | 2 | 0 | 24.94184603 | 121.36836090 | <a href="https://www.inaturalist.org/observations/34864023">https://www.inaturalist.org/observations/34864023</a>   |
| 5952 | <i>Spilopelia chinensis</i> | Eastern Spotted Dove | 2019/10/24 | 1 | 0 | 24.94201088 | 121.36863710 | <a href="https://www.inaturalist.org/observations/34866385">https://www.inaturalist.org/observations/34866385</a>   |
| 5953 | <i>Spilopelia chinensis</i> | Eastern Spotted Dove | 2019/10/23 | 3 | 0 | 24.94201851 | 121.36520390 | <a href="https://www.inaturalist.org/observations/34819998">https://www.inaturalist.org/observations/34819998</a>   |
| 5954 | <i>Spilopelia chinensis</i> | Eastern Spotted Dove | 2019/10/23 | 0 | 0 | 24.94218844 | 121.36754730 | <a href="https://www.inaturalist.org/observations/34774158">https://www.inaturalist.org/observations/34774158</a>   |
| 5955 | <i>Spilopelia chinensis</i> | Eastern Spotted Dove | 2019/10/23 | 1 | 0 | 24.94218866 | 121.36755160 | <a href="https://www.inaturalist.org/observations/34773645">https://www.inaturalist.org/observations/34773645</a>   |
| 5956 | <i>Spilopelia chinensis</i> | Eastern Spotted Dove | 2019/10/23 | 1 | 0 | 24.94222000 | 121.36760000 | <a href="https://www.inaturalist.org/observations/35076877">https://www.inaturalist.org/observations/35076877</a>   |

|      |                             |                      |            |   |   |             |              |                                                                                                                     |
|------|-----------------------------|----------------------|------------|---|---|-------------|--------------|---------------------------------------------------------------------------------------------------------------------|
| 5957 | <i>Spilopelia chinensis</i> | Eastern Spotted Dove | 2019/10/23 | 0 | 0 | 24.94224514 | 121.36757190 | <a href="https://www.inaturalist.org/observations/34774133">https://www.inaturalist.org/observations/34774133</a>   |
| 5958 | <i>Spilopelia chinensis</i> | Eastern Spotted Dove | 2019/10/23 | 1 | 0 | 24.94226074 | 121.36767400 | <a href="https://www.inaturalist.org/observations/34774101">https://www.inaturalist.org/observations/34774101</a>   |
| 5959 | <i>Spilopelia chinensis</i> | Eastern Spotted Dove | 2019/10/23 | 1 | 0 | 24.94228833 | 121.36795830 | <a href="https://www.inaturalist.org/observations/34774299">https://www.inaturalist.org/observations/34774299</a>   |
| 5960 | <i>Spilopelia chinensis</i> | Eastern Spotted Dove | 2019/10/23 | 1 | 0 | 24.94229789 | 121.36765620 | <a href="https://www.inaturalist.org/observations/34774049">https://www.inaturalist.org/observations/34774049</a>   |
| 5961 | <i>Spilopelia chinensis</i> | Eastern Spotted Dove | 2019/10/23 | 2 | 0 | 24.94230094 | 121.36798770 | <a href="https://www.inaturalist.org/observations/34774325">https://www.inaturalist.org/observations/34774325</a>   |
| 5962 | <i>Spilopelia chinensis</i> | Eastern Spotted Dove | 2019/10/23 | 1 | 0 | 24.94231425 | 121.36768860 | <a href="https://www.inaturalist.org/observations/34773556">https://www.inaturalist.org/observations/34773556</a>   |
| 5963 | <i>Spilopelia chinensis</i> | Eastern Spotted Dove | 2019/10/23 | 1 | 0 | 24.94232075 | 121.36761020 | <a href="https://www.inaturalist.org/observations/34774100">https://www.inaturalist.org/observations/34774100</a>   |
| 5964 | <i>Spilopelia chinensis</i> | Eastern Spotted Dove | 2019/10/23 | 2 | 0 | 24.94232833 | 121.36771330 | <a href="https://www.inaturalist.org/observations/34774043">https://www.inaturalist.org/observations/34774043</a>   |
| 5965 | <i>Spilopelia chinensis</i> | Eastern Spotted Dove | 2019/10/23 | 1 | 0 | 24.94233322 | 121.36773680 | <a href="https://www.inaturalist.org/observations/34896230">https://www.inaturalist.org/observations/34896230</a>   |
| 5966 | <i>Spilopelia chinensis</i> | Eastern Spotted Dove | 2019/10/23 | 1 | 0 | 24.94233333 | 121.36772170 | <a href="https://www.inaturalist.org/observations/34774320">https://www.inaturalist.org/observations/34774320</a>   |
| 5967 | <i>Spilopelia chinensis</i> | Eastern Spotted Dove | 2019/10/4  | 1 | 0 | 24.94262576 | 121.37115220 | <a href="https://www.inaturalist.org/observations/33833502">https://www.inaturalist.org/observations/33833502</a>   |
| 5968 | <i>Spilopelia chinensis</i> | Eastern Spotted Dove | 2019/10/23 | 1 | 0 | 24.94270361 | 121.36894300 | <a href="https://www.inaturalist.org/observations/34930528">https://www.inaturalist.org/observations/34930528</a>   |
| 5969 | <i>Spilopelia chinensis</i> | Eastern Spotted Dove | 2019/10/23 | 1 | 0 | 24.94272119 | 121.37126580 | <a href="https://www.inaturalist.org/observations/34772877">https://www.inaturalist.org/observations/34772877</a>   |
| 5970 | <i>Spilopelia chinensis</i> | Eastern Spotted Dove | 2019/10/23 | 1 | 0 | 24.94276167 | 121.37136170 | <a href="https://www.inaturalist.org/observations/34773101">https://www.inaturalist.org/observations/34773101</a>   |
| 5971 | <i>Spilopelia chinensis</i> | Eastern Spotted Dove | 2022/1/11  | 2 | 0 | 24.94278000 | 121.31120830 | <a href="https://www.inaturalist.org/observations/104743595">https://www.inaturalist.org/observations/104743595</a> |
| 5972 | <i>Spilopelia chinensis</i> | Eastern Spotted Dove | 2020/5/30  | 1 | 0 | 24.94283833 | 121.37697000 | <a href="https://www.inaturalist.org/observations/47804660">https://www.inaturalist.org/observations/47804660</a>   |
| 5973 | <i>Spilopelia chinensis</i> | Eastern Spotted Dove | 2022/1/11  | 2 | 0 | 24.94285167 | 121.31238000 | <a href="https://www.inaturalist.org/observations/104743590">https://www.inaturalist.org/observations/104743590</a> |
| 5974 | <i>Spilopelia chinensis</i> | Eastern Spotted Dove | 2022/1/11  | 2 | 0 | 24.94286167 | 121.31121330 | <a href="https://www.inaturalist.org/observations/104743592">https://www.inaturalist.org/observations/104743592</a> |
| 5975 | <i>Spilopelia chinensis</i> | Eastern Spotted Dove | 2019/10/26 | 2 | 0 | 24.94292547 | 121.36851290 | <a href="https://www.inaturalist.org/observations/34896974">https://www.inaturalist.org/observations/34896974</a>   |
| 5976 | <i>Spilopelia chinensis</i> | Eastern Spotted Dove | 2022/2/21  | 1 | 0 | 24.94303167 | 121.31141830 | <a href="https://www.inaturalist.org/observations/112932915">https://www.inaturalist.org/observations/112932915</a> |
| 5977 | <i>Spilopelia chinensis</i> | Eastern Spotted Dove | 2020/4/9   | 1 | 0 | 24.94305500 | 121.36952700 | <a href="https://www.inaturalist.org/observations/41810822">https://www.inaturalist.org/observations/41810822</a>   |
| 5978 | <i>Spilopelia chinensis</i> | Eastern Spotted Dove | 2019/10/23 | 0 | 0 | 24.94310914 | 121.36805840 | <a href="https://www.inaturalist.org/observations/34771401">https://www.inaturalist.org/observations/34771401</a>   |
| 5979 | <i>Spilopelia chinensis</i> | Eastern Spotted Dove | 2022/3/21  | 2 | 0 | 24.94312167 | 121.31218500 | <a href="https://www.inaturalist.org/observations/112932909">https://www.inaturalist.org/observations/112932909</a> |



|      |                             |                      |            |   |   |             |              |                                                                                                                     |
|------|-----------------------------|----------------------|------------|---|---|-------------|--------------|---------------------------------------------------------------------------------------------------------------------|
| 5980 | <i>Spilopelia chinensis</i> | Eastern Spotted Dove | 2019/10/23 | 1 | 0 | 24.94316864 | 121.36809540 | <a href="https://www.inaturalist.org/observations/34816312">https://www.inaturalist.org/observations/34816312</a>   |
| 5981 | <i>Spilopelia chinensis</i> | Eastern Spotted Dove | 2019/10/23 | 0 | 0 | 24.94317070 | 121.36814000 | <a href="https://www.inaturalist.org/observations/34772347">https://www.inaturalist.org/observations/34772347</a>   |
| 5982 | <i>Spilopelia chinensis</i> | Eastern Spotted Dove | 2019/10/23 | 0 | 0 | 24.94319146 | 121.36958780 | <a href="https://www.inaturalist.org/observations/34774395">https://www.inaturalist.org/observations/34774395</a>   |
| 5983 | <i>Spilopelia chinensis</i> | Eastern Spotted Dove | 2019/10/23 | 0 | 0 | 24.94322000 | 121.36968330 | <a href="https://www.inaturalist.org/observations/34772625">https://www.inaturalist.org/observations/34772625</a>   |
| 5984 | <i>Spilopelia chinensis</i> | Eastern Spotted Dove | 2019/10/23 | 2 | 0 | 24.94330333 | 121.37055330 | <a href="https://www.inaturalist.org/observations/34775783">https://www.inaturalist.org/observations/34775783</a>   |
| 5985 | <i>Spilopelia chinensis</i> | Eastern Spotted Dove | 2019/10/23 | 0 | 0 | 24.94332213 | 121.36973800 | <a href="https://www.inaturalist.org/observations/34772614">https://www.inaturalist.org/observations/34772614</a>   |
| 5986 | <i>Spilopelia chinensis</i> | Eastern Spotted Dove | 2019/10/11 | 2 | 0 | 24.94333199 | 121.37042030 | <a href="https://www.inaturalist.org/observations/34816381">https://www.inaturalist.org/observations/34816381</a>   |
| 5987 | <i>Spilopelia chinensis</i> | Eastern Spotted Dove | 2019/10/23 | 2 | 0 | 24.94338187 | 121.37164550 | <a href="https://www.inaturalist.org/observations/34774889">https://www.inaturalist.org/observations/34774889</a>   |
| 5988 | <i>Spilopelia chinensis</i> | Eastern Spotted Dove | 2019/10/24 | 2 | 0 | 24.94338833 | 121.36874500 | <a href="https://www.inaturalist.org/observations/34816243">https://www.inaturalist.org/observations/34816243</a>   |
| 5989 | <i>Spilopelia chinensis</i> | Eastern Spotted Dove | 2019/10/31 | 1 | 0 | 24.94339459 | 121.37054400 | <a href="https://www.inaturalist.org/observations/35116054">https://www.inaturalist.org/observations/35116054</a>   |
| 5990 | <i>Spilopelia chinensis</i> | Eastern Spotted Dove | 2019/10/29 | 1 | 0 | 24.94360210 | 121.37034940 | <a href="https://www.inaturalist.org/observations/35037153">https://www.inaturalist.org/observations/35037153</a>   |
| 5991 | <i>Spilopelia chinensis</i> | Eastern Spotted Dove | 2019/10/24 | 2 | 0 | 24.94388254 | 121.37075860 | <a href="https://www.inaturalist.org/observations/34808901">https://www.inaturalist.org/observations/34808901</a>   |
| 5992 | <i>Spilopelia chinensis</i> | Eastern Spotted Dove | 2019/10/23 | 1 | 0 | 24.94389252 | 121.37101510 | <a href="https://www.inaturalist.org/observations/34774097">https://www.inaturalist.org/observations/34774097</a>   |
| 5993 | <i>Spilopelia chinensis</i> | Eastern Spotted Dove | 2019/10/23 | 0 | 0 | 24.94410615 | 121.37098900 | <a href="https://www.inaturalist.org/observations/34772925">https://www.inaturalist.org/observations/34772925</a>   |
| 5994 | <i>Spilopelia chinensis</i> | Eastern Spotted Dove | 2019/10/4  | 2 | 0 | 24.94410987 | 121.37277060 | <a href="https://www.inaturalist.org/observations/33831944">https://www.inaturalist.org/observations/33831944</a>   |
| 5995 | <i>Spilopelia chinensis</i> | Eastern Spotted Dove | 2019/10/23 | 1 | 0 | 24.94413707 | 121.37095140 | <a href="https://www.inaturalist.org/observations/34773352">https://www.inaturalist.org/observations/34773352</a>   |
| 5996 | <i>Spilopelia chinensis</i> | Eastern Spotted Dove | 2020/5/8   | 2 | 0 | 24.94427431 | 121.37133930 | <a href="https://www.inaturalist.org/observations/45248660">https://www.inaturalist.org/observations/45248660</a>   |
| 5997 | <i>Spilopelia chinensis</i> | Eastern Spotted Dove | 2019/6/28  | 2 | 0 | 24.94546191 | 121.49983460 | <a href="https://www.inaturalist.org/observations/27810394">https://www.inaturalist.org/observations/27810394</a>   |
| 5998 | <i>Spilopelia chinensis</i> | Eastern Spotted Dove | 2019/10/25 | 1 | 0 | 24.94546290 | 121.36922750 | <a href="https://www.inaturalist.org/observations/34862656">https://www.inaturalist.org/observations/34862656</a>   |
| 5999 | <i>Spilopelia chinensis</i> | Eastern Spotted Dove | 2019/10/25 | 2 | 0 | 24.94604716 | 121.37436420 | <a href="https://www.inaturalist.org/observations/34862763">https://www.inaturalist.org/observations/34862763</a>   |
| 6000 | <i>Spilopelia chinensis</i> | Eastern Spotted Dove | 2022/5/8   | 4 | 0 | 24.94624421 | 121.50014750 | <a href="https://www.inaturalist.org/observations/116044076">https://www.inaturalist.org/observations/116044076</a> |
| 6001 | <i>Spilopelia chinensis</i> | Eastern Spotted Dove | 2019/10/25 | 2 | 0 | 24.94627984 | 121.37534730 | <a href="https://www.inaturalist.org/observations/34850923">https://www.inaturalist.org/observations/34850923</a>   |
| 6002 | <i>Spilopelia chinensis</i> | Eastern Spotted Dove | 2019/10/29 | 1 | 0 | 24.94686956 | 121.37151960 | <a href="https://www.inaturalist.org/observations/35031080">https://www.inaturalist.org/observations/35031080</a>   |

|      |                             |                      |            |   |   |             |              |                                                                                                                     |
|------|-----------------------------|----------------------|------------|---|---|-------------|--------------|---------------------------------------------------------------------------------------------------------------------|
| 6003 | <i>Spilopelia chinensis</i> | Eastern Spotted Dove | 2019/10/25 | 1 | 0 | 24.94712627 | 121.37155630 | <a href="https://www.inaturalist.org/observations/34862036">https://www.inaturalist.org/observations/34862036</a>   |
| 6004 | <i>Spilopelia chinensis</i> | Eastern Spotted Dove | 2019/10/25 | 2 | 0 | 24.94773498 | 121.37270620 | <a href="https://www.inaturalist.org/observations/34853758">https://www.inaturalist.org/observations/34853758</a>   |
| 6005 | <i>Spilopelia chinensis</i> | Eastern Spotted Dove | 2019/10/25 | 3 | 0 | 24.94778035 | 121.37235610 | <a href="https://www.inaturalist.org/observations/34853825">https://www.inaturalist.org/observations/34853825</a>   |
| 6006 | <i>Spilopelia chinensis</i> | Eastern Spotted Dove | 2019/10/14 | 4 | 0 | 24.94844924 | 121.49937610 | <a href="https://www.inaturalist.org/observations/34345644">https://www.inaturalist.org/observations/34345644</a>   |
| 6007 | <i>Spilopelia chinensis</i> | Eastern Spotted Dove | 2021/9/29  | 2 | 0 | 24.94919557 | 121.49447260 | <a href="https://www.inaturalist.org/observations/96544377">https://www.inaturalist.org/observations/96544377</a>   |
| 6008 | <i>Spilopelia chinensis</i> | Eastern Spotted Dove | 2021/9/17  | 1 | 0 | 24.95018310 | 121.23348330 | <a href="https://www.inaturalist.org/observations/95124656">https://www.inaturalist.org/observations/95124656</a>   |
| 6009 | <i>Spilopelia chinensis</i> | Eastern Spotted Dove | 2020/5/17  | 1 | 0 | 24.95053826 | 121.53339700 | <a href="https://www.inaturalist.org/observations/46494019">https://www.inaturalist.org/observations/46494019</a>   |
| 6010 | <i>Spilopelia chinensis</i> | Eastern Spotted Dove | 2021/12/19 | 2 | 0 | 24.95120660 | 121.22782230 | <a href="https://www.inaturalist.org/observations/103573429">https://www.inaturalist.org/observations/103573429</a> |
| 6011 | <i>Spilopelia chinensis</i> | Eastern Spotted Dove | 2021/9/23  | 1 | 0 | 24.95134003 | 121.22816760 | <a href="https://www.inaturalist.org/observations/95933021">https://www.inaturalist.org/observations/95933021</a>   |
| 6012 | <i>Spilopelia chinensis</i> | Eastern Spotted Dove | 2021/11/25 | 1 | 0 | 24.95144161 | 121.22816850 | <a href="https://www.inaturalist.org/observations/101865853">https://www.inaturalist.org/observations/101865853</a> |
| 6013 | <i>Spilopelia chinensis</i> | Eastern Spotted Dove | 2021/11/20 | 1 | 0 | 24.95147902 | 121.22810800 | <a href="https://www.inaturalist.org/observations/101694607">https://www.inaturalist.org/observations/101694607</a> |
| 6014 | <i>Spilopelia chinensis</i> | Eastern Spotted Dove | 2022/2/16  | 1 | 0 | 24.95162701 | 121.22806480 | <a href="https://www.inaturalist.org/observations/106850989">https://www.inaturalist.org/observations/106850989</a> |
| 6015 | <i>Spilopelia chinensis</i> | Eastern Spotted Dove | 2021/11/20 | 1 | 0 | 24.95175620 | 121.22736320 | <a href="https://www.inaturalist.org/observations/101694488">https://www.inaturalist.org/observations/101694488</a> |
| 6016 | <i>Spilopelia chinensis</i> | Eastern Spotted Dove | 2021/11/19 | 1 | 0 | 24.95178427 | 121.22818450 | <a href="https://www.inaturalist.org/observations/101460592">https://www.inaturalist.org/observations/101460592</a> |
| 6017 | <i>Spilopelia chinensis</i> | Eastern Spotted Dove | 2022/5/4   | 2 | 0 | 24.95183740 | 121.21672530 | <a href="https://www.inaturalist.org/observations/115508784">https://www.inaturalist.org/observations/115508784</a> |
| 6018 | <i>Spilopelia chinensis</i> | Eastern Spotted Dove | 2021/9/15  | 1 | 0 | 24.95185511 | 121.22749650 | <a href="https://www.inaturalist.org/observations/95014023">https://www.inaturalist.org/observations/95014023</a>   |
| 6019 | <i>Spilopelia chinensis</i> | Eastern Spotted Dove | 2021/9/14  | 1 | 0 | 24.95193399 | 121.22864920 | <a href="https://www.inaturalist.org/observations/94815193">https://www.inaturalist.org/observations/94815193</a>   |
| 6020 | <i>Spilopelia chinensis</i> | Eastern Spotted Dove | 2021/10/1  | 1 | 0 | 24.95193809 | 121.22825410 | <a href="https://www.inaturalist.org/observations/96764262">https://www.inaturalist.org/observations/96764262</a>   |
| 6021 | <i>Spilopelia chinensis</i> | Eastern Spotted Dove | 2021/10/7  | 1 | 0 | 24.95196226 | 121.22835460 | <a href="https://www.inaturalist.org/observations/98684811">https://www.inaturalist.org/observations/98684811</a>   |
| 6022 | <i>Spilopelia chinensis</i> | Eastern Spotted Dove | 2021/12/3  | 1 | 0 | 24.95249799 | 121.22881670 | <a href="https://www.inaturalist.org/observations/102808913">https://www.inaturalist.org/observations/102808913</a> |
| 6023 | <i>Spilopelia chinensis</i> | Eastern Spotted Dove | 2021/1/22  | 2 | 0 | 24.95364697 | 121.50063440 | <a href="https://www.inaturalist.org/observations/68437071">https://www.inaturalist.org/observations/68437071</a>   |
| 6024 | <i>Spilopelia chinensis</i> | Eastern Spotted Dove | 2013/7/14  | 2 | 0 | 24.95580338 | 121.24566820 | <a href="https://www.inaturalist.org/observations/105654691">https://www.inaturalist.org/observations/105654691</a> |
| 6025 | <i>Spilopelia chinensis</i> | Eastern Spotted Dove | 2013/3/9   | 3 | 0 | 24.95596655 | 121.24314440 | <a href="https://www.inaturalist.org/observations/105601536">https://www.inaturalist.org/observations/105601536</a> |

|      |                             |                      |            |   |   |             |              |                                                                                                                     |
|------|-----------------------------|----------------------|------------|---|---|-------------|--------------|---------------------------------------------------------------------------------------------------------------------|
| 6026 | <i>Spilopelia chinensis</i> | Eastern Spotted Dove | 2022/1/27  | 2 | 0 | 24.95598943 | 121.53650430 | <a href="https://www.inaturalist.org/observations/105666151">https://www.inaturalist.org/observations/105666151</a> |
| 6027 | <i>Spilopelia chinensis</i> | Eastern Spotted Dove | 2012/9/8   | 1 | 0 | 24.95602235 | 121.24309690 | <a href="https://www.inaturalist.org/observations/105591940">https://www.inaturalist.org/observations/105591940</a> |
| 6028 | <i>Spilopelia chinensis</i> | Eastern Spotted Dove | 2021/4/2   | 2 | 0 | 24.95927353 | 121.22576160 | <a href="https://www.inaturalist.org/observations/72669000">https://www.inaturalist.org/observations/72669000</a>   |
| 6029 | <i>Spilopelia chinensis</i> | Eastern Spotted Dove | 2014/3/22  | 2 | 0 | 24.96167412 | 121.20986320 | <a href="https://www.inaturalist.org/observations/105655901">https://www.inaturalist.org/observations/105655901</a> |
| 6030 | <i>Spilopelia chinensis</i> | Eastern Spotted Dove | 2022/3/23  | 3 | 0 | 24.96292953 | 121.21753740 | <a href="https://www.inaturalist.org/observations/109273309">https://www.inaturalist.org/observations/109273309</a> |
| 6031 | <i>Spilopelia chinensis</i> | Eastern Spotted Dove | 2022/1/12  | 2 | 0 | 24.96382000 | 121.51344500 | <a href="https://www.inaturalist.org/observations/104787376">https://www.inaturalist.org/observations/104787376</a> |
| 6032 | <i>Spilopelia chinensis</i> | Eastern Spotted Dove | 2022/3/16  | 2 | 0 | 24.96388000 | 121.51311330 | <a href="https://www.inaturalist.org/observations/108691952">https://www.inaturalist.org/observations/108691952</a> |
| 6033 | <i>Spilopelia chinensis</i> | Eastern Spotted Dove | 2022/2/16  | 2 | 0 | 24.96562778 | 121.29803610 | <a href="https://www.inaturalist.org/observations/106844968">https://www.inaturalist.org/observations/106844968</a> |
| 6034 | <i>Spilopelia chinensis</i> | Eastern Spotted Dove | 2018/2/1   | 4 | 0 | 24.97369726 | 121.54151960 | <a href="https://www.inaturalist.org/observations/18616334">https://www.inaturalist.org/observations/18616334</a>   |
| 6035 | <i>Spilopelia chinensis</i> | Eastern Spotted Dove | 2021/5/9   | 2 | 0 | 24.97442500 | 121.52988610 | <a href="https://www.inaturalist.org/observations/78039908">https://www.inaturalist.org/observations/78039908</a>   |
| 6036 | <i>Spilopelia chinensis</i> | Eastern Spotted Dove | 2019/12/22 | 1 | 0 | 24.97879434 | 121.27672470 | <a href="https://www.inaturalist.org/observations/40932271">https://www.inaturalist.org/observations/40932271</a>   |
| 6037 | <i>Spilopelia chinensis</i> | Eastern Spotted Dove | 2022/7/15  | 1 | 0 | 24.98122167 | 121.55597000 | <a href="https://www.inaturalist.org/observations/126410609">https://www.inaturalist.org/observations/126410609</a> |
| 6038 | <i>Spilopelia chinensis</i> | Eastern Spotted Dove | 2022/5/20  | 1 | 0 | 24.98154497 | 121.52240430 | <a href="https://www.inaturalist.org/observations/117934389">https://www.inaturalist.org/observations/117934389</a> |
| 6039 | <i>Spilopelia chinensis</i> | Eastern Spotted Dove | 2021/3/1   | 1 | 0 | 24.98213655 | 121.53701250 | <a href="https://www.inaturalist.org/observations/70375244">https://www.inaturalist.org/observations/70375244</a>   |
| 6040 | <i>Spilopelia chinensis</i> | Eastern Spotted Dove | 2021/12/7  | 1 | 0 | 24.98492560 | 121.57263400 | <a href="https://www.inaturalist.org/observations/102671348">https://www.inaturalist.org/observations/102671348</a> |
| 6041 | <i>Spilopelia chinensis</i> | Eastern Spotted Dove | 2021/5/3   | 1 | 0 | 24.98526333 | 121.53647000 | <a href="https://www.inaturalist.org/observations/76882042">https://www.inaturalist.org/observations/76882042</a>   |
| 6042 | <i>Spilopelia chinensis</i> | Eastern Spotted Dove | 2020/8/27  | 2 | 0 | 24.98577070 | 102.71706600 | <a href="https://www.inaturalist.org/observations/62279975">https://www.inaturalist.org/observations/62279975</a>   |
| 6043 | <i>Spilopelia chinensis</i> | Eastern Spotted Dove | 2020/4/18  | 1 | 0 | 24.98714456 | 121.55860010 | <a href="https://www.inaturalist.org/observations/42442850">https://www.inaturalist.org/observations/42442850</a>   |
| 6044 | <i>Spilopelia chinensis</i> | Eastern Spotted Dove | 2020/4/30  | 1 | 0 | 24.99153090 | 121.42723800 | <a href="https://www.inaturalist.org/observations/44459696">https://www.inaturalist.org/observations/44459696</a>   |
| 6045 | <i>Spilopelia chinensis</i> | Eastern Spotted Dove | 2020/4/30  | 1 | 0 | 24.99153090 | 121.42723800 | <a href="https://www.inaturalist.org/observations/44459697">https://www.inaturalist.org/observations/44459697</a>   |
| 6046 | <i>Spilopelia chinensis</i> | Eastern Spotted Dove | 2022/3/12  | 1 | 0 | 24.99226306 | 121.54399820 | <a href="https://www.inaturalist.org/observations/108443724">https://www.inaturalist.org/observations/108443724</a> |
| 6047 | <i>Spilopelia chinensis</i> | Eastern Spotted Dove | 2021/10/4  | 1 | 0 | 24.99281654 | 121.54445910 | <a href="https://www.inaturalist.org/observations/98586343">https://www.inaturalist.org/observations/98586343</a>   |
| 6048 | <i>Spilopelia chinensis</i> | Eastern Spotted Dove | 2021/8/28  | 1 | 0 | 24.99315354 | 121.15756870 | <a href="https://www.inaturalist.org/observations/95403677">https://www.inaturalist.org/observations/95403677</a>   |

|      |                             |                      |            |   |   |             |              |                                                                                                                     |
|------|-----------------------------|----------------------|------------|---|---|-------------|--------------|---------------------------------------------------------------------------------------------------------------------|
| 6049 | <i>Spilopelia chinensis</i> | Eastern Spotted Dove | 2009/11/20 | 1 | 0 | 24.99339645 | 121.32087420 | <a href="https://www.inaturalist.org/observations/55451632">https://www.inaturalist.org/observations/55451632</a>   |
| 6050 | <i>Spilopelia chinensis</i> | Eastern Spotted Dove | 2018/11/17 | 4 | 0 | 24.99392262 | 121.52201610 | <a href="https://www.inaturalist.org/observations/18554327">https://www.inaturalist.org/observations/18554327</a>   |
| 6051 | <i>Spilopelia chinensis</i> | Eastern Spotted Dove | 2021/4/22  | 1 | 0 | 24.99463467 | 121.32131950 | <a href="https://www.inaturalist.org/observations/74813586">https://www.inaturalist.org/observations/74813586</a>   |
| 6052 | <i>Spilopelia chinensis</i> | Eastern Spotted Dove | 2021/6/15  | 2 | 0 | 24.99466457 | 121.54706900 | <a href="https://www.inaturalist.org/observations/83100067">https://www.inaturalist.org/observations/83100067</a>   |
| 6053 | <i>Spilopelia chinensis</i> | Eastern Spotted Dove | 2021/12/24 | 1 | 0 | 24.99594879 | 121.45395660 | <a href="https://www.inaturalist.org/observations/103556047">https://www.inaturalist.org/observations/103556047</a> |
| 6054 | <i>Spilopelia chinensis</i> | Eastern Spotted Dove | 2020/8/6   | 1 | 0 | 24.99605833 | 121.53794170 | <a href="https://www.inaturalist.org/observations/55571458">https://www.inaturalist.org/observations/55571458</a>   |
| 6055 | <i>Spilopelia chinensis</i> | Eastern Spotted Dove | 2021/4/15  | 1 | 0 | 24.99612617 | 121.45365140 | <a href="https://www.inaturalist.org/observations/73998119">https://www.inaturalist.org/observations/73998119</a>   |
| 6056 | <i>Spilopelia chinensis</i> | Eastern Spotted Dove | 2021/4/8   | 1 | 0 | 24.99693554 | 121.32551600 | <a href="https://www.inaturalist.org/observations/75647239">https://www.inaturalist.org/observations/75647239</a>   |
| 6057 | <i>Spilopelia chinensis</i> | Eastern Spotted Dove | 2016/5/28  | 3 | 0 | 24.99842534 | 121.50641400 | <a href="https://www.inaturalist.org/observations/18494016">https://www.inaturalist.org/observations/18494016</a>   |
| 6058 | <i>Spilopelia chinensis</i> | Eastern Spotted Dove | 2022/4/19  | 1 | 0 | 24.99879500 | 121.44809170 | <a href="https://www.inaturalist.org/observations/112025273">https://www.inaturalist.org/observations/112025273</a> |
| 6059 | <i>Spilopelia chinensis</i> | Eastern Spotted Dove | 2022/4/19  | 1 | 0 | 24.99879732 | 121.44809110 | <a href="https://www.inaturalist.org/observations/112020279">https://www.inaturalist.org/observations/112020279</a> |
| 6060 | <i>Spilopelia chinensis</i> | Eastern Spotted Dove | 2022/2/15  | 2 | 0 | 24.99954579 | 121.46856830 | <a href="https://www.inaturalist.org/observations/106788480">https://www.inaturalist.org/observations/106788480</a> |
| 6061 | <i>Spilopelia chinensis</i> | Eastern Spotted Dove | 2021/4/18  | 1 | 0 | 24.99983233 | 121.43860100 | <a href="https://www.inaturalist.org/observations/74526225">https://www.inaturalist.org/observations/74526225</a>   |
| 6062 | <i>Spilopelia chinensis</i> | Eastern Spotted Dove | 2021/8/14  | 1 | 0 | 25.00033611 | 121.45987830 | <a href="https://www.inaturalist.org/observations/91079750">https://www.inaturalist.org/observations/91079750</a>   |
| 6063 | <i>Spilopelia chinensis</i> | Eastern Spotted Dove | 2022/9/6   | 2 | 0 | 25.00048487 | 121.51144610 | <a href="https://www.inaturalist.org/observations/133863281">https://www.inaturalist.org/observations/133863281</a> |
| 6064 | <i>Spilopelia chinensis</i> | Eastern Spotted Dove | 2022/9/8   | 1 | 0 | 25.00057030 | 121.45539860 | <a href="https://www.inaturalist.org/observations/134123531">https://www.inaturalist.org/observations/134123531</a> |
| 6065 | <i>Spilopelia chinensis</i> | Eastern Spotted Dove | 2022/2/17  | 1 | 0 | 25.00060081 | 121.51594540 | <a href="https://www.inaturalist.org/observations/106902825">https://www.inaturalist.org/observations/106902825</a> |
| 6066 | <i>Spilopelia chinensis</i> | Eastern Spotted Dove | 2020/4/26  | 1 | 0 | 25.00107969 | 121.45633930 | <a href="https://www.inaturalist.org/observations/43544741">https://www.inaturalist.org/observations/43544741</a>   |
| 6067 | <i>Spilopelia chinensis</i> | Eastern Spotted Dove | 2009/10/22 | 2 | 0 | 25.00111912 | 121.32868850 | <a href="https://www.inaturalist.org/observations/55378198">https://www.inaturalist.org/observations/55378198</a>   |
| 6068 | <i>Spilopelia chinensis</i> | Eastern Spotted Dove | 2019/7/20  | 2 | 0 | 25.00158500 | 121.32008830 | <a href="https://www.inaturalist.org/observations/65881797">https://www.inaturalist.org/observations/65881797</a>   |
| 6069 | <i>Spilopelia chinensis</i> | Eastern Spotted Dove | 2020/11/15 | 1 | 0 | 25.00280864 | 121.50891610 | <a href="https://www.inaturalist.org/observations/66691233">https://www.inaturalist.org/observations/66691233</a>   |
| 6070 | <i>Spilopelia chinensis</i> | Eastern Spotted Dove | 2021/10/14 | 1 | 0 | 25.00560014 | 121.53616240 | <a href="https://www.inaturalist.org/observations/98800901">https://www.inaturalist.org/observations/98800901</a>   |
| 6071 | <i>Spilopelia chinensis</i> | Eastern Spotted Dove | 2022/3/5   | 2 | 0 | 25.00784167 | 121.46241170 | <a href="https://www.inaturalist.org/observations/107924204">https://www.inaturalist.org/observations/107924204</a> |

|      |                             |                      |            |   |   |             |              |                                                                                                                     |
|------|-----------------------------|----------------------|------------|---|---|-------------|--------------|---------------------------------------------------------------------------------------------------------------------|
| 6072 | <i>Spilopelia chinensis</i> | Eastern Spotted Dove | 2019/7/2   | 3 | 0 | 25.00918063 | 121.46862970 | <a href="https://www.inaturalist.org/observations/28038118">https://www.inaturalist.org/observations/28038118</a>   |
| 6073 | <i>Spilopelia chinensis</i> | Eastern Spotted Dove | 2022/3/14  | 3 | 0 | 25.00921945 | 121.33091670 | <a href="https://www.inaturalist.org/observations/108558205">https://www.inaturalist.org/observations/108558205</a> |
| 6074 | <i>Spilopelia chinensis</i> | Eastern Spotted Dove | 2022/3/15  | 3 | 0 | 25.00931397 | 121.47177100 | <a href="https://www.inaturalist.org/observations/108633486">https://www.inaturalist.org/observations/108633486</a> |
| 6075 | <i>Spilopelia chinensis</i> | Eastern Spotted Dove | 2022/4/20  | 1 | 0 | 25.00945300 | 121.47178700 | <a href="https://www.inaturalist.org/observations/112124436">https://www.inaturalist.org/observations/112124436</a> |
| 6076 | <i>Spilopelia chinensis</i> | Eastern Spotted Dove | 2022/4/8   | 3 | 0 | 25.00945623 | 121.47178830 | <a href="https://www.inaturalist.org/observations/110718459">https://www.inaturalist.org/observations/110718459</a> |
| 6077 | <i>Spilopelia chinensis</i> | Eastern Spotted Dove | 2022/7/18  | 2 | 0 | 25.00949167 | 121.42645330 | <a href="https://www.inaturalist.org/observations/126789503">https://www.inaturalist.org/observations/126789503</a> |
| 6078 | <i>Spilopelia chinensis</i> | Eastern Spotted Dove | 2022/9/9   | 1 | 0 | 25.01078159 | 121.53255600 | <a href="https://www.inaturalist.org/observations/134759941">https://www.inaturalist.org/observations/134759941</a> |
| 6079 | <i>Spilopelia chinensis</i> | Eastern Spotted Dove | 2018/12/18 | 1 | 0 | 25.01088889 | 121.52853330 | <a href="https://www.inaturalist.org/observations/19248683">https://www.inaturalist.org/observations/19248683</a>   |
| 6080 | <i>Spilopelia chinensis</i> | Eastern Spotted Dove | 2020/12/6  | 1 | 0 | 25.01112704 | 121.45459840 | <a href="https://www.inaturalist.org/observations/66738337">https://www.inaturalist.org/observations/66738337</a>   |
| 6081 | <i>Spilopelia chinensis</i> | Eastern Spotted Dove | 2022/5/20  | 1 | 0 | 25.01390163 | 121.47673730 | <a href="https://www.inaturalist.org/observations/117956643">https://www.inaturalist.org/observations/117956643</a> |
| 6082 | <i>Spilopelia chinensis</i> | Eastern Spotted Dove | 2022/1/15  | 1 | 0 | 25.01411119 | 121.53854380 | <a href="https://www.inaturalist.org/observations/104956962">https://www.inaturalist.org/observations/104956962</a> |
| 6083 | <i>Spilopelia chinensis</i> | Eastern Spotted Dove | 2022/1/25  | 1 | 0 | 25.01485656 | 121.47626020 | <a href="https://www.inaturalist.org/observations/105597992">https://www.inaturalist.org/observations/105597992</a> |
| 6084 | <i>Spilopelia chinensis</i> | Eastern Spotted Dove | 2019/6/10  | 2 | 0 | 25.01594912 | 121.31351120 | <a href="https://www.inaturalist.org/observations/26741466">https://www.inaturalist.org/observations/26741466</a>   |
| 6085 | <i>Spilopelia chinensis</i> | Eastern Spotted Dove | 2019/2/26  | 2 | 0 | 25.01703605 | 121.29190760 | <a href="https://www.inaturalist.org/observations/20766461">https://www.inaturalist.org/observations/20766461</a>   |
| 6086 | <i>Spilopelia chinensis</i> | Eastern Spotted Dove | 2021/3/27  | 2 | 0 | 25.01747900 | 121.54498200 | <a href="https://www.inaturalist.org/observations/97558162">https://www.inaturalist.org/observations/97558162</a>   |
| 6087 | <i>Spilopelia chinensis</i> | Eastern Spotted Dove | 2022/3/18  | 2 | 0 | 25.01801323 | 121.55568970 | <a href="https://www.inaturalist.org/observations/110067857">https://www.inaturalist.org/observations/110067857</a> |
| 6088 | <i>Spilopelia chinensis</i> | Eastern Spotted Dove | 2022/4/27  | 2 | 0 | 25.01834097 | 85.38262697  | <a href="https://www.inaturalist.org/observations/113071287">https://www.inaturalist.org/observations/113071287</a> |
| 6089 | <i>Spilopelia chinensis</i> | Eastern Spotted Dove | 2022/3/26  | 2 | 0 | 25.01947853 | 121.58528440 | <a href="https://www.inaturalist.org/observations/118580252">https://www.inaturalist.org/observations/118580252</a> |
| 6090 | <i>Spilopelia chinensis</i> | Eastern Spotted Dove | 2021/9/27  | 2 | 0 | 25.01991183 | 121.54479100 | <a href="https://www.inaturalist.org/observations/97425661">https://www.inaturalist.org/observations/97425661</a>   |
| 6091 | <i>Spilopelia chinensis</i> | Eastern Spotted Dove | 2022/9/27  | 2 | 0 | 25.02014638 | 121.46077580 | <a href="https://www.inaturalist.org/observations/136631423">https://www.inaturalist.org/observations/136631423</a> |
| 6092 | <i>Spilopelia chinensis</i> | Eastern Spotted Dove | 2020/9/10  | 2 | 0 | 25.02038740 | 121.30324080 | <a href="https://www.inaturalist.org/observations/60391135">https://www.inaturalist.org/observations/60391135</a>   |
| 6093 | <i>Spilopelia chinensis</i> | Eastern Spotted Dove | 2020/3/4   | 1 | 0 | 25.02136390 | 121.54532660 | <a href="https://www.inaturalist.org/observations/64854039">https://www.inaturalist.org/observations/64854039</a>   |
| 6094 | <i>Spilopelia chinensis</i> | Eastern Spotted Dove | 2018/9/11  | 3 | 0 | 25.02185944 | 121.50448770 | <a href="https://www.inaturalist.org/observations/16407782">https://www.inaturalist.org/observations/16407782</a>   |

|      |                             |                      |            |   |   |             |              |                                                                                                                     |
|------|-----------------------------|----------------------|------------|---|---|-------------|--------------|---------------------------------------------------------------------------------------------------------------------|
| 6095 | <i>Spilopelia chinensis</i> | Eastern Spotted Dove | 2019/3/13  | 2 | 0 | 25.02233088 | 121.46546010 | <a href="https://www.inaturalist.org/observations/21198278">https://www.inaturalist.org/observations/21198278</a>   |
| 6096 | <i>Spilopelia chinensis</i> | Eastern Spotted Dove | 2018/9/16  | 1 | 0 | 25.02245550 | 121.50708440 | <a href="https://www.inaturalist.org/observations/16577427">https://www.inaturalist.org/observations/16577427</a>   |
| 6097 | <i>Spilopelia chinensis</i> | Eastern Spotted Dove | 2017/2/5   | 1 | 0 | 25.02252630 | 121.52860510 | <a href="https://www.inaturalist.org/observations/29163341">https://www.inaturalist.org/observations/29163341</a>   |
| 6098 | <i>Spilopelia chinensis</i> | Eastern Spotted Dove | 2022/5/13  | 2 | 0 | 25.02258480 | 121.29822900 | <a href="https://www.inaturalist.org/observations/124551708">https://www.inaturalist.org/observations/124551708</a> |
| 6099 | <i>Spilopelia chinensis</i> | Eastern Spotted Dove | 2022/1/4   | 2 | 0 | 25.02269390 | 121.54105230 | <a href="https://www.inaturalist.org/observations/104391334">https://www.inaturalist.org/observations/104391334</a> |
| 6100 | <i>Spilopelia chinensis</i> | Eastern Spotted Dove | 2021/2/8   | 1 | 0 | 25.02275083 | 121.53013610 | <a href="https://www.inaturalist.org/observations/69237279">https://www.inaturalist.org/observations/69237279</a>   |
| 6101 | <i>Spilopelia chinensis</i> | Eastern Spotted Dove | 2018/7/11  | 2 | 0 | 25.02286760 | 121.50526960 | <a href="https://www.inaturalist.org/observations/14254480">https://www.inaturalist.org/observations/14254480</a>   |
| 6102 | <i>Spilopelia chinensis</i> | Eastern Spotted Dove | 2018/12/31 | 2 | 0 | 25.02305560 | 121.50527780 | <a href="https://www.inaturalist.org/observations/19351290">https://www.inaturalist.org/observations/19351290</a>   |
| 6103 | <i>Spilopelia chinensis</i> | Eastern Spotted Dove | 2018/12/31 | 2 | 0 | 25.02305560 | 121.50527780 | <a href="https://www.inaturalist.org/observations/19351291">https://www.inaturalist.org/observations/19351291</a>   |
| 6104 | <i>Spilopelia chinensis</i> | Eastern Spotted Dove | 2018/12/9  | 4 | 0 | 25.02306477 | 121.50527000 | <a href="https://www.inaturalist.org/observations/18917970">https://www.inaturalist.org/observations/18917970</a>   |
| 6105 | <i>Spilopelia chinensis</i> | Eastern Spotted Dove | 2022/6/25  | 1 | 0 | 25.02310860 | 121.50457120 | <a href="https://www.inaturalist.org/observations/123315741">https://www.inaturalist.org/observations/123315741</a> |
| 6106 | <i>Spilopelia chinensis</i> | Eastern Spotted Dove | 2021/1/1   | 2 | 0 | 25.02321080 | 121.55484870 | <a href="https://www.inaturalist.org/observations/67392201">https://www.inaturalist.org/observations/67392201</a>   |
| 6107 | <i>Spilopelia chinensis</i> | Eastern Spotted Dove | 2019/7/10  | 1 | 0 | 25.02398804 | 121.54629240 | <a href="https://www.inaturalist.org/observations/28544426">https://www.inaturalist.org/observations/28544426</a>   |
| 6108 | <i>Spilopelia chinensis</i> | Eastern Spotted Dove | 2020/2/19  | 1 | 0 | 25.02403252 | 121.50579280 | <a href="https://www.inaturalist.org/observations/38885566">https://www.inaturalist.org/observations/38885566</a>   |
| 6109 | <i>Spilopelia chinensis</i> | Eastern Spotted Dove | 2017/2/9   | 0 | 0 | 25.02454190 | 121.52936600 | <a href="https://www.inaturalist.org/observations/68372045">https://www.inaturalist.org/observations/68372045</a>   |
| 6110 | <i>Spilopelia chinensis</i> | Eastern Spotted Dove | 2019/1/18  | 1 | 0 | 25.02461667 | 121.50584500 | <a href="https://www.inaturalist.org/observations/19705049">https://www.inaturalist.org/observations/19705049</a>   |
| 6111 | <i>Spilopelia chinensis</i> | Eastern Spotted Dove | 2021/10/28 | 2 | 0 | 25.02478025 | 121.53150940 | <a href="https://www.inaturalist.org/observations/99931213">https://www.inaturalist.org/observations/99931213</a>   |
| 6112 | <i>Spilopelia chinensis</i> | Eastern Spotted Dove | 2020/6/9   | 2 | 0 | 25.02483502 | 121.59652840 | <a href="https://www.inaturalist.org/observations/49004754">https://www.inaturalist.org/observations/49004754</a>   |
| 6113 | <i>Spilopelia chinensis</i> | Eastern Spotted Dove | 2019/2/3   | 2 | 0 | 25.02508163 | 121.50684360 | <a href="https://www.inaturalist.org/observations/20049003">https://www.inaturalist.org/observations/20049003</a>   |
| 6114 | <i>Spilopelia chinensis</i> | Eastern Spotted Dove | 2018/10/25 | 3 | 0 | 25.02512783 | 121.50468330 | <a href="https://www.inaturalist.org/observations/17810988">https://www.inaturalist.org/observations/17810988</a>   |
| 6115 | <i>Spilopelia chinensis</i> | Eastern Spotted Dove | 2022/8/12  | 1 | 0 | 25.02593966 | 102.72796720 | <a href="https://www.inaturalist.org/observations/130443511">https://www.inaturalist.org/observations/130443511</a> |
| 6116 | <i>Spilopelia chinensis</i> | Eastern Spotted Dove | 2022/5/15  | 2 | 0 | 25.02603651 | 121.45484760 | <a href="https://www.inaturalist.org/observations/117097073">https://www.inaturalist.org/observations/117097073</a> |
| 6117 | <i>Spilopelia chinensis</i> | Eastern Spotted Dove | 2020/5/6   | 1 | 0 | 25.02613009 | 121.50946320 | <a href="https://www.inaturalist.org/observations/46460534">https://www.inaturalist.org/observations/46460534</a>   |

|      |                             |                      |            |   |   |             |              |                                                                                                                     |
|------|-----------------------------|----------------------|------------|---|---|-------------|--------------|---------------------------------------------------------------------------------------------------------------------|
| 6118 | <i>Spilopelia chinensis</i> | Eastern Spotted Dove | 2019/12/23 | 1 | 0 | 25.02623059 | 121.50986310 | <a href="https://www.inaturalist.org/observations/36867719">https://www.inaturalist.org/observations/36867719</a>   |
| 6119 | <i>Spilopelia chinensis</i> | Eastern Spotted Dove | 2019/2/13  | 1 | 0 | 25.02624556 | 121.50964890 | <a href="https://www.inaturalist.org/observations/22322905">https://www.inaturalist.org/observations/22322905</a>   |
| 6120 | <i>Spilopelia chinensis</i> | Eastern Spotted Dove | 2020/4/8   | 1 | 0 | 25.02625105 | 121.50980560 | <a href="https://www.inaturalist.org/observations/41671194">https://www.inaturalist.org/observations/41671194</a>   |
| 6121 | <i>Spilopelia chinensis</i> | Eastern Spotted Dove | 2020/1/22  | 2 | 0 | 25.02641097 | 121.47653600 | <a href="https://www.inaturalist.org/observations/71921386">https://www.inaturalist.org/observations/71921386</a>   |
| 6122 | <i>Spilopelia chinensis</i> | Eastern Spotted Dove | 2020/1/22  | 0 | 0 | 25.02641106 | 121.47653960 | <a href="https://www.inaturalist.org/observations/37834651">https://www.inaturalist.org/observations/37834651</a>   |
| 6123 | <i>Spilopelia chinensis</i> | Eastern Spotted Dove | 2018/11/24 | 3 | 0 | 25.02644722 | 121.54317500 | <a href="https://www.inaturalist.org/observations/18594143">https://www.inaturalist.org/observations/18594143</a>   |
| 6124 | <i>Spilopelia chinensis</i> | Eastern Spotted Dove | 2022/6/12  | 2 | 0 | 25.02659717 | 121.55854670 | <a href="https://www.inaturalist.org/observations/121363299">https://www.inaturalist.org/observations/121363299</a> |
| 6125 | <i>Spilopelia chinensis</i> | Eastern Spotted Dove | 2022/4/3   | 2 | 0 | 25.02718170 | 121.55116740 | <a href="https://www.inaturalist.org/observations/110267625">https://www.inaturalist.org/observations/110267625</a> |
| 6126 | <i>Spilopelia chinensis</i> | Eastern Spotted Dove | 2021/5/3   | 1 | 0 | 25.02728269 | 121.52867890 | <a href="https://www.inaturalist.org/observations/77681709">https://www.inaturalist.org/observations/77681709</a>   |
| 6127 | <i>Spilopelia chinensis</i> | Eastern Spotted Dove | 2021/11/7  | 2 | 0 | 25.02748963 | 121.42485890 | <a href="https://www.inaturalist.org/observations/100790487">https://www.inaturalist.org/observations/100790487</a> |
| 6128 | <i>Spilopelia chinensis</i> | Eastern Spotted Dove | 2017/7/21  | 3 | 0 | 25.02766158 | 121.54255710 | <a href="https://www.inaturalist.org/observations/13260046">https://www.inaturalist.org/observations/13260046</a>   |
| 6129 | <i>Spilopelia chinensis</i> | Eastern Spotted Dove | 2020/1/12  | 1 | 0 | 25.02775900 | 121.53632800 | <a href="https://www.inaturalist.org/observations/37617148">https://www.inaturalist.org/observations/37617148</a>   |
| 6130 | <i>Spilopelia chinensis</i> | Eastern Spotted Dove | 2020/2/23  | 2 | 0 | 25.02794626 | 121.50793020 | <a href="https://www.inaturalist.org/observations/39336832">https://www.inaturalist.org/observations/39336832</a>   |
| 6131 | <i>Spilopelia chinensis</i> | Eastern Spotted Dove | 2020/4/27  | 1 | 0 | 25.02833000 | 121.52148410 | <a href="https://www.inaturalist.org/observations/43864169">https://www.inaturalist.org/observations/43864169</a>   |
| 6132 | <i>Spilopelia chinensis</i> | Eastern Spotted Dove | 2022/1/24  | 2 | 0 | 25.02839730 | 121.53601080 | <a href="https://www.inaturalist.org/observations/105486373">https://www.inaturalist.org/observations/105486373</a> |
| 6133 | <i>Spilopelia chinensis</i> | Eastern Spotted Dove | 2018/8/20  | 2 | 0 | 25.02894942 | 121.50879940 | <a href="https://www.inaturalist.org/observations/15715285">https://www.inaturalist.org/observations/15715285</a>   |
| 6134 | <i>Spilopelia chinensis</i> | Eastern Spotted Dove | 2018/5/30  | 3 | 0 | 25.02923889 | 121.53510280 | <a href="https://www.inaturalist.org/observations/13055539">https://www.inaturalist.org/observations/13055539</a>   |
| 6135 | <i>Spilopelia chinensis</i> | Eastern Spotted Dove | 2016/10/10 | 4 | 0 | 25.02932545 | 121.53597590 | <a href="http://www.inaturalist.org/observations/4340643">http://www.inaturalist.org/observations/4340643</a>       |
| 6136 | <i>Spilopelia chinensis</i> | Eastern Spotted Dove | 2012/9/29  | 4 | 0 | 25.02949600 | 121.53564600 | <a href="http://www.inaturalist.org/observations/807101">http://www.inaturalist.org/observations/807101</a>         |
| 6137 | <i>Spilopelia chinensis</i> | Eastern Spotted Dove | 2021/5/2   | 1 | 0 | 25.02953050 | 121.47234500 | <a href="https://www.inaturalist.org/observations/76494483">https://www.inaturalist.org/observations/76494483</a>   |
| 6138 | <i>Spilopelia chinensis</i> | Eastern Spotted Dove | 2021/5/1   | 3 | 0 | 25.02975250 | 121.55156630 | <a href="https://www.inaturalist.org/observations/97557532">https://www.inaturalist.org/observations/97557532</a>   |
| 6139 | <i>Spilopelia chinensis</i> | Eastern Spotted Dove | 2014/3/15  | 4 | 0 | 25.03000600 | 121.53588500 | <a href="http://www.inaturalist.org/observations/570994">http://www.inaturalist.org/observations/570994</a>         |
| 6140 | <i>Spilopelia chinensis</i> | Eastern Spotted Dove | 2016/10/13 | 5 | 0 | 25.03041424 | 121.53490840 | <a href="http://www.inaturalist.org/observations/4347977">http://www.inaturalist.org/observations/4347977</a>       |

|      |                             |                      |            |   |   |             |              |                                                                                                                     |
|------|-----------------------------|----------------------|------------|---|---|-------------|--------------|---------------------------------------------------------------------------------------------------------------------|
| 6141 | <i>Spilopelia chinensis</i> | Eastern Spotted Dove | 2021/7/13  | 1 | 0 | 25.03043115 | 121.54098810 | <a href="https://www.inaturalist.org/observations/86799901">https://www.inaturalist.org/observations/86799901</a>   |
| 6142 | <i>Spilopelia chinensis</i> | Eastern Spotted Dove | 2020/4/26  | 1 | 0 | 25.03047217 | 121.50048830 | <a href="https://www.inaturalist.org/observations/43525439">https://www.inaturalist.org/observations/43525439</a>   |
| 6143 | <i>Spilopelia chinensis</i> | Eastern Spotted Dove | 2022/3/25  | 1 | 0 | 25.03123429 | 121.50909920 | <a href="https://www.inaturalist.org/observations/109447456">https://www.inaturalist.org/observations/109447456</a> |
| 6144 | <i>Spilopelia chinensis</i> | Eastern Spotted Dove | 2020/9/15  | 2 | 0 | 25.03133580 | 121.50879400 | <a href="https://www.inaturalist.org/observations/59648495">https://www.inaturalist.org/observations/59648495</a>   |
| 6145 | <i>Spilopelia chinensis</i> | Eastern Spotted Dove | 2022/9/1   | 1 | 0 | 25.03136389 | 121.54955280 | <a href="https://www.inaturalist.org/observations/133184101">https://www.inaturalist.org/observations/133184101</a> |
| 6146 | <i>Spilopelia chinensis</i> | Eastern Spotted Dove | 2009/12/9  | 1 | 0 | 25.03144142 | 121.50834970 | <a href="https://www.inaturalist.org/observations/32038339">https://www.inaturalist.org/observations/32038339</a>   |
| 6147 | <i>Spilopelia chinensis</i> | Eastern Spotted Dove | 2018/2/1   | 1 | 0 | 25.03157775 | 121.50879450 | <a href="https://www.inaturalist.org/observations/44831403">https://www.inaturalist.org/observations/44831403</a>   |
| 6148 | <i>Spilopelia chinensis</i> | Eastern Spotted Dove | 2018/8/1   | 2 | 0 | 25.03199956 | 121.55471210 | <a href="https://www.inaturalist.org/observations/15010112">https://www.inaturalist.org/observations/15010112</a>   |
| 6149 | <i>Spilopelia chinensis</i> | Eastern Spotted Dove | 2009/11/28 | 1 | 0 | 25.03203771 | 121.50971980 | <a href="https://www.inaturalist.org/observations/55452672">https://www.inaturalist.org/observations/55452672</a>   |
| 6150 | <i>Spilopelia chinensis</i> | Eastern Spotted Dove | 2022/1/23  | 2 | 0 | 25.03206543 | 121.50962100 | <a href="https://www.inaturalist.org/observations/106112405">https://www.inaturalist.org/observations/106112405</a> |
| 6151 | <i>Spilopelia chinensis</i> | Eastern Spotted Dove | 2010/2/8   | 1 | 0 | 25.03214464 | 121.50936040 | <a href="https://www.inaturalist.org/observations/55471647">https://www.inaturalist.org/observations/55471647</a>   |
| 6152 | <i>Spilopelia chinensis</i> | Eastern Spotted Dove | 2022/1/23  | 2 | 0 | 25.03218604 | 121.50951510 | <a href="https://www.inaturalist.org/observations/110065004">https://www.inaturalist.org/observations/110065004</a> |
| 6153 | <i>Spilopelia chinensis</i> | Eastern Spotted Dove | 2014/1/2   | 4 | 0 | 25.03223994 | 121.50954510 | <a href="https://www.inaturalist.org/observations/116253155">https://www.inaturalist.org/observations/116253155</a> |
| 6154 | <i>Spilopelia chinensis</i> | Eastern Spotted Dove | 2018/8/23  | 1 | 0 | 25.03229635 | 121.55453620 | <a href="https://www.inaturalist.org/observations/15806064">https://www.inaturalist.org/observations/15806064</a>   |
| 6155 | <i>Spilopelia chinensis</i> | Eastern Spotted Dove | 2020/10/4  | 1 | 0 | 25.03238678 | 121.50801850 | <a href="https://www.inaturalist.org/observations/61647442">https://www.inaturalist.org/observations/61647442</a>   |
| 6156 | <i>Spilopelia chinensis</i> | Eastern Spotted Dove | 2018/12/26 | 1 | 0 | 25.03262320 | 121.51052800 | <a href="https://www.inaturalist.org/observations/19350978">https://www.inaturalist.org/observations/19350978</a>   |
| 6157 | <i>Spilopelia chinensis</i> | Eastern Spotted Dove | 2021/5/2   | 2 | 0 | 25.03284998 | 121.51093650 | <a href="https://www.inaturalist.org/observations/76423955">https://www.inaturalist.org/observations/76423955</a>   |
| 6158 | <i>Spilopelia chinensis</i> | Eastern Spotted Dove | 2022/2/2   | 1 | 0 | 25.03317418 | 121.50884680 | <a href="https://www.inaturalist.org/observations/106056479">https://www.inaturalist.org/observations/106056479</a> |
| 6159 | <i>Spilopelia chinensis</i> | Eastern Spotted Dove | 2021/5/2   | 1 | 0 | 25.03327842 | 121.51060710 | <a href="https://www.inaturalist.org/observations/76420417">https://www.inaturalist.org/observations/76420417</a>   |
| 6160 | <i>Spilopelia chinensis</i> | Eastern Spotted Dove | 2021/5/2   | 2 | 0 | 25.03345475 | 121.51061090 | <a href="https://www.inaturalist.org/observations/76422817">https://www.inaturalist.org/observations/76422817</a>   |
| 6161 | <i>Spilopelia chinensis</i> | Eastern Spotted Dove | 2021/11/10 | 2 | 0 | 25.03392783 | 121.44981330 | <a href="https://www.inaturalist.org/observations/100752514">https://www.inaturalist.org/observations/100752514</a> |
| 6162 | <i>Spilopelia chinensis</i> | Eastern Spotted Dove | 2021/5/2   | 1 | 0 | 25.03397186 | 121.50861890 | <a href="https://www.inaturalist.org/observations/77412116">https://www.inaturalist.org/observations/77412116</a>   |
| 6163 | <i>Spilopelia chinensis</i> | Eastern Spotted Dove | 2021/5/2   | 2 | 0 | 25.03397186 | 121.50861890 | <a href="https://www.inaturalist.org/observations/77412128">https://www.inaturalist.org/observations/77412128</a>   |



|      |                             |                      |            |   |   |             |              |                                                                                                                     |
|------|-----------------------------|----------------------|------------|---|---|-------------|--------------|---------------------------------------------------------------------------------------------------------------------|
| 6164 | <i>Spilopelia chinensis</i> | Eastern Spotted Dove | 2020/1/24  | 0 | 0 | 25.03422811 | 121.53777660 | <a href="https://www.inaturalist.org/observations/37911240">https://www.inaturalist.org/observations/37911240</a>   |
| 6165 | <i>Spilopelia chinensis</i> | Eastern Spotted Dove | 2020/11/10 | 1 | 0 | 25.03535614 | 121.53568140 | <a href="https://www.inaturalist.org/observations/64580804">https://www.inaturalist.org/observations/64580804</a>   |
| 6166 | <i>Spilopelia chinensis</i> | Eastern Spotted Dove | 2022/3/1   | 1 | 0 | 25.03567704 | 121.45293970 | <a href="https://www.inaturalist.org/observations/107689927">https://www.inaturalist.org/observations/107689927</a> |
| 6167 | <i>Spilopelia chinensis</i> | Eastern Spotted Dove | 2022/4/10  | 1 | 0 | 25.03617380 | 121.50647430 | <a href="https://www.inaturalist.org/observations/111106510">https://www.inaturalist.org/observations/111106510</a> |
| 6168 | <i>Spilopelia chinensis</i> | Eastern Spotted Dove | 2021/12/1  | 1 | 0 | 25.03630346 | 121.48032780 | <a href="https://www.inaturalist.org/observations/102463284">https://www.inaturalist.org/observations/102463284</a> |
| 6169 | <i>Spilopelia chinensis</i> | Eastern Spotted Dove | 2021/3/21  | 2 | 0 | 25.03658883 | 121.54628000 | <a href="https://www.inaturalist.org/observations/71676562">https://www.inaturalist.org/observations/71676562</a>   |
| 6170 | <i>Spilopelia chinensis</i> | Eastern Spotted Dove | 2019/10/7  | 1 | 0 | 25.03838000 | 121.49322200 | <a href="https://www.inaturalist.org/observations/34068085">https://www.inaturalist.org/observations/34068085</a>   |
| 6171 | <i>Spilopelia chinensis</i> | Eastern Spotted Dove | 2021/9/10  | 3 | 0 | 25.03841667 | 121.29293060 | <a href="https://www.inaturalist.org/observations/94407737">https://www.inaturalist.org/observations/94407737</a>   |
| 6172 | <i>Spilopelia chinensis</i> | Eastern Spotted Dove | 2020/1/22  | 0 | 0 | 25.03870250 | 121.49522080 | <a href="https://www.inaturalist.org/observations/37881079">https://www.inaturalist.org/observations/37881079</a>   |
| 6173 | <i>Spilopelia chinensis</i> | Eastern Spotted Dove | 2019/3/25  | 2 | 0 | 25.03905244 | 121.49324670 | <a href="https://www.inaturalist.org/observations/26529974">https://www.inaturalist.org/observations/26529974</a>   |
| 6174 | <i>Spilopelia chinensis</i> | Eastern Spotted Dove | 2017/5/27  | 2 | 0 | 25.03916987 | 121.86301240 | <a href="https://www.inaturalist.org/observations/115745055">https://www.inaturalist.org/observations/115745055</a> |
| 6175 | <i>Spilopelia chinensis</i> | Eastern Spotted Dove | 2021/11/20 | 1 | 0 | 25.03939717 | 121.49554500 | <a href="https://www.inaturalist.org/observations/101607106">https://www.inaturalist.org/observations/101607106</a> |
| 6176 | <i>Spilopelia chinensis</i> | Eastern Spotted Dove | 2021/10/23 | 3 | 0 | 25.03979970 | 121.50799610 | <a href="https://www.inaturalist.org/observations/99079458">https://www.inaturalist.org/observations/99079458</a>   |
| 6177 | <i>Spilopelia chinensis</i> | Eastern Spotted Dove | 2018/12/30 | 2 | 0 | 25.04050240 | 121.51462110 | <a href="https://www.inaturalist.org/observations/19351553">https://www.inaturalist.org/observations/19351553</a>   |
| 6178 | <i>Spilopelia chinensis</i> | Eastern Spotted Dove | 2020/3/14  | 2 | 0 | 25.04090556 | 121.55648610 | <a href="https://www.inaturalist.org/observations/39957236">https://www.inaturalist.org/observations/39957236</a>   |
| 6179 | <i>Spilopelia chinensis</i> | Eastern Spotted Dove | 2017/12/25 | 4 | 0 | 25.04136066 | 121.55067970 | <a href="https://www.inaturalist.org/observations/10107794">https://www.inaturalist.org/observations/10107794</a>   |
| 6180 | <i>Spilopelia chinensis</i> | Eastern Spotted Dove | 2020/8/1   | 1 | 0 | 25.04178820 | 121.53285240 | <a href="https://www.inaturalist.org/observations/56386017">https://www.inaturalist.org/observations/56386017</a>   |
| 6181 | <i>Spilopelia chinensis</i> | Eastern Spotted Dove | 2021/3/27  | 1 | 0 | 25.04181289 | 121.51543390 | <a href="https://www.inaturalist.org/observations/72149667">https://www.inaturalist.org/observations/72149667</a>   |
| 6182 | <i>Spilopelia chinensis</i> | Eastern Spotted Dove | 2021/3/27  | 1 | 0 | 25.04188055 | 121.51545460 | <a href="https://www.inaturalist.org/observations/72149635">https://www.inaturalist.org/observations/72149635</a>   |
| 6183 | <i>Spilopelia chinensis</i> | Eastern Spotted Dove | 2020/3/1   | 0 | 0 | 25.04225574 | 121.51433410 | <a href="https://www.inaturalist.org/observations/39441817">https://www.inaturalist.org/observations/39441817</a>   |
| 6184 | <i>Spilopelia chinensis</i> | Eastern Spotted Dove | 2014/3/9   | 4 | 0 | 25.04226100 | 121.51433900 | <a href="http://www.inaturalist.org/observations/559550">http://www.inaturalist.org/observations/559550</a>         |
| 6185 | <i>Spilopelia chinensis</i> | Eastern Spotted Dove | 2020/1/26  | 1 | 0 | 25.04241077 | 121.51436310 | <a href="https://www.inaturalist.org/observations/37982949">https://www.inaturalist.org/observations/37982949</a>   |
| 6186 | <i>Spilopelia chinensis</i> | Eastern Spotted Dove | 2019/7/28  | 1 | 0 | 25.04243050 | 121.54554670 | <a href="https://www.inaturalist.org/observations/29689382">https://www.inaturalist.org/observations/29689382</a>   |

|      |                             |                      |            |   |   |             |              |                                                                                                                     |
|------|-----------------------------|----------------------|------------|---|---|-------------|--------------|---------------------------------------------------------------------------------------------------------------------|
| 6187 | <i>Spilopelia chinensis</i> | Eastern Spotted Dove | 2018/4/29  | 3 | 0 | 25.04299070 | 121.54812850 | <a href="https://www.inaturalist.org/observations/11721535">https://www.inaturalist.org/observations/11721535</a>   |
| 6188 | <i>Spilopelia chinensis</i> | Eastern Spotted Dove | 2018/4/29  | 3 | 0 | 25.04299130 | 121.54812830 | <a href="https://www.inaturalist.org/observations/11721554">https://www.inaturalist.org/observations/11721554</a>   |
| 6189 | <i>Spilopelia chinensis</i> | Eastern Spotted Dove | 2022/5/16  | 0 | 0 | 25.04330426 | 121.51951550 | <a href="https://www.inaturalist.org/observations/117244736">https://www.inaturalist.org/observations/117244736</a> |
| 6190 | <i>Spilopelia chinensis</i> | Eastern Spotted Dove | 2020/7/16  | 3 | 0 | 25.04353571 | 121.56218320 | <a href="https://www.inaturalist.org/observations/53467476">https://www.inaturalist.org/observations/53467476</a>   |
| 6191 | <i>Spilopelia chinensis</i> | Eastern Spotted Dove | 2021/11/30 | 1 | 0 | 25.04394608 | 121.56149140 | <a href="https://www.inaturalist.org/observations/105768702">https://www.inaturalist.org/observations/105768702</a> |
| 6192 | <i>Spilopelia chinensis</i> | Eastern Spotted Dove | 2021/9/28  | 1 | 0 | 25.04403617 | 121.51045330 | <a href="https://www.inaturalist.org/observations/96550866">https://www.inaturalist.org/observations/96550866</a>   |
| 6193 | <i>Spilopelia chinensis</i> | Eastern Spotted Dove | 2022/7/2   | 1 | 0 | 25.04423333 | 121.53846170 | <a href="https://www.inaturalist.org/observations/126284636">https://www.inaturalist.org/observations/126284636</a> |
| 6194 | <i>Spilopelia chinensis</i> | Eastern Spotted Dove | 2021/11/30 | 1 | 0 | 25.04466294 | 121.55918210 | <a href="https://www.inaturalist.org/observations/105769224">https://www.inaturalist.org/observations/105769224</a> |
| 6195 | <i>Spilopelia chinensis</i> | Eastern Spotted Dove | 2022/6/15  | 1 | 0 | 25.04532386 | 121.29275460 | <a href="https://www.inaturalist.org/observations/121877373">https://www.inaturalist.org/observations/121877373</a> |
| 6196 | <i>Spilopelia chinensis</i> | Eastern Spotted Dove | 2020/10/13 | 1 | 0 | 25.04554778 | 121.52753530 | <a href="https://www.inaturalist.org/observations/64013233">https://www.inaturalist.org/observations/64013233</a>   |
| 6197 | <i>Spilopelia chinensis</i> | Eastern Spotted Dove | 2018/10/2  | 4 | 0 | 25.04595454 | 121.50932710 | <a href="https://www.inaturalist.org/observations/17147213">https://www.inaturalist.org/observations/17147213</a>   |
| 6198 | <i>Spilopelia chinensis</i> | Eastern Spotted Dove | 2016/11/24 | 2 | 0 | 25.04638863 | 121.51750180 | <a href="http://www.inaturalist.org/observations/4663331">http://www.inaturalist.org/observations/4663331</a>       |
| 6199 | <i>Spilopelia chinensis</i> | Eastern Spotted Dove | 2018/7/5   | 2 | 0 | 25.04707593 | 121.44757220 | <a href="https://www.inaturalist.org/observations/14134064">https://www.inaturalist.org/observations/14134064</a>   |
| 6200 | <i>Spilopelia chinensis</i> | Eastern Spotted Dove | 2018/10/6  | 3 | 0 | 25.04852783 | 121.55253670 | <a href="https://www.inaturalist.org/observations/17228739">https://www.inaturalist.org/observations/17228739</a>   |
| 6201 | <i>Spilopelia chinensis</i> | Eastern Spotted Dove | 2019/8/19  | 2 | 0 | 25.04919146 | 102.70130350 | <a href="https://www.inaturalist.org/observations/31201080">https://www.inaturalist.org/observations/31201080</a>   |
| 6202 | <i>Spilopelia chinensis</i> | Eastern Spotted Dove | 2019/5/23  | 4 | 0 | 25.05008125 | 121.56227870 | <a href="https://www.inaturalist.org/observations/27398125">https://www.inaturalist.org/observations/27398125</a>   |
| 6203 | <i>Spilopelia chinensis</i> | Eastern Spotted Dove | 2019/7/13  | 2 | 0 | 25.05048720 | 121.44482000 | <a href="https://www.inaturalist.org/observations/28709118">https://www.inaturalist.org/observations/28709118</a>   |
| 6204 | <i>Spilopelia chinensis</i> | Eastern Spotted Dove | 2022/9/6   | 2 | 0 | 25.05067564 | 121.52381970 | <a href="https://www.inaturalist.org/observations/133892605">https://www.inaturalist.org/observations/133892605</a> |
| 6205 | <i>Spilopelia chinensis</i> | Eastern Spotted Dove | 2021/8/20  | 2 | 0 | 25.05074488 | 121.58928510 | <a href="https://www.inaturalist.org/observations/91821351">https://www.inaturalist.org/observations/91821351</a>   |
| 6206 | <i>Spilopelia chinensis</i> | Eastern Spotted Dove | 2016/1/31  | 4 | 0 | 25.05090278 | 121.56376670 | <a href="https://www.inaturalist.org/observations/27098020">https://www.inaturalist.org/observations/27098020</a>   |
| 6207 | <i>Spilopelia chinensis</i> | Eastern Spotted Dove | 2020/5/23  | 2 | 0 | 25.05124717 | 121.51321330 | <a href="https://www.inaturalist.org/observations/46919792">https://www.inaturalist.org/observations/46919792</a>   |
| 6208 | <i>Spilopelia chinensis</i> | Eastern Spotted Dove | 2021/1/14  | 1 | 0 | 25.05134717 | 121.55842000 | <a href="https://www.inaturalist.org/observations/68026885">https://www.inaturalist.org/observations/68026885</a>   |
| 6209 | <i>Spilopelia chinensis</i> | Eastern Spotted Dove | 2021/8/27  | 2 | 0 | 25.05224949 | 121.52109400 | <a href="https://www.inaturalist.org/observations/92630742">https://www.inaturalist.org/observations/92630742</a>   |

|      |                             |                      |            |   |   |             |              |                                                                                                                     |
|------|-----------------------------|----------------------|------------|---|---|-------------|--------------|---------------------------------------------------------------------------------------------------------------------|
| 6210 | <i>Spilopelia chinensis</i> | Eastern Spotted Dove | 2018/12/17 | 2 | 0 | 25.05250000 | 121.52611110 | <a href="https://www.inaturalist.org/observations/19201068">https://www.inaturalist.org/observations/19201068</a>   |
| 6211 | <i>Spilopelia chinensis</i> | Eastern Spotted Dove | 2022/4/29  | 1 | 0 | 25.05311111 | 121.53991390 | <a href="https://www.inaturalist.org/observations/113304229">https://www.inaturalist.org/observations/113304229</a> |
| 6212 | <i>Spilopelia chinensis</i> | Eastern Spotted Dove | 2019/12/2  | 1 | 0 | 25.05395597 | 121.58183300 | <a href="https://www.inaturalist.org/observations/36405032">https://www.inaturalist.org/observations/36405032</a>   |
| 6213 | <i>Spilopelia chinensis</i> | Eastern Spotted Dove | 2013/3/5   | 1 | 0 | 25.05471820 | 102.71274710 | <a href="https://www.inaturalist.org/observations/67977634">https://www.inaturalist.org/observations/67977634</a>   |
| 6214 | <i>Spilopelia chinensis</i> | Eastern Spotted Dove | 2019/1/20  | 3 | 0 | 25.05474167 | 121.55935500 | <a href="https://www.inaturalist.org/observations/19753099">https://www.inaturalist.org/observations/19753099</a>   |
| 6215 | <i>Spilopelia chinensis</i> | Eastern Spotted Dove | 2019/11/3  | 2 | 0 | 25.05520833 | 121.51930000 | <a href="https://www.inaturalist.org/observations/35264726">https://www.inaturalist.org/observations/35264726</a>   |
| 6216 | <i>Spilopelia chinensis</i> | Eastern Spotted Dove | 2020/5/11  | 2 | 0 | 25.05538333 | 121.51518830 | <a href="https://www.inaturalist.org/observations/45608844">https://www.inaturalist.org/observations/45608844</a>   |
| 6217 | <i>Spilopelia chinensis</i> | Eastern Spotted Dove | 2021/7/5   | 1 | 0 | 25.05687558 | 121.59623710 | <a href="https://www.inaturalist.org/observations/100101017">https://www.inaturalist.org/observations/100101017</a> |
| 6218 | <i>Spilopelia chinensis</i> | Eastern Spotted Dove | 2019/10/3  | 1 | 0 | 25.05857217 | 121.52069670 | <a href="https://www.inaturalist.org/observations/33790159">https://www.inaturalist.org/observations/33790159</a>   |
| 6219 | <i>Spilopelia chinensis</i> | Eastern Spotted Dove | 2021/3/1   | 1 | 0 | 25.05950583 | 121.50110500 | <a href="https://www.inaturalist.org/observations/70388320">https://www.inaturalist.org/observations/70388320</a>   |
| 6220 | <i>Spilopelia chinensis</i> | Eastern Spotted Dove | 2019/9/17  | 1 | 0 | 25.06090498 | 121.54210850 | <a href="https://www.inaturalist.org/observations/32869006">https://www.inaturalist.org/observations/32869006</a>   |
| 6221 | <i>Spilopelia chinensis</i> | Eastern Spotted Dove | 2021/10/24 | 1 | 0 | 25.06172410 | 102.69447000 | <a href="https://www.inaturalist.org/observations/99190199">https://www.inaturalist.org/observations/99190199</a>   |
| 6222 | <i>Spilopelia chinensis</i> | Eastern Spotted Dove | 2020/4/10  | 1 | 0 | 25.06176667 | 121.55480830 | <a href="https://www.inaturalist.org/observations/41789943">https://www.inaturalist.org/observations/41789943</a>   |
| 6223 | <i>Spilopelia chinensis</i> | Eastern Spotted Dove | 2022/2/27  | 2 | 0 | 25.06210374 | 121.45988720 | <a href="https://www.inaturalist.org/observations/107635150">https://www.inaturalist.org/observations/107635150</a> |
| 6224 | <i>Spilopelia chinensis</i> | Eastern Spotted Dove | 2020/7/19  | 2 | 0 | 25.06268201 | 121.54470720 | <a href="https://www.inaturalist.org/observations/54534374">https://www.inaturalist.org/observations/54534374</a>   |
| 6225 | <i>Spilopelia chinensis</i> | Eastern Spotted Dove | 2022/2/22  | 1 | 0 | 25.06353899 | 121.45812040 | <a href="https://www.inaturalist.org/observations/107480302">https://www.inaturalist.org/observations/107480302</a> |
| 6226 | <i>Spilopelia chinensis</i> | Eastern Spotted Dove | 2022/4/11  | 1 | 0 | 25.06391481 | 121.45836230 | <a href="https://www.inaturalist.org/observations/111952931">https://www.inaturalist.org/observations/111952931</a> |
| 6227 | <i>Spilopelia chinensis</i> | Eastern Spotted Dove | 2022/4/12  | 1 | 0 | 25.06392003 | 121.45836040 | <a href="https://www.inaturalist.org/observations/111952938">https://www.inaturalist.org/observations/111952938</a> |
| 6228 | <i>Spilopelia chinensis</i> | Eastern Spotted Dove | 2022/4/18  | 1 | 0 | 25.06392945 | 121.45836800 | <a href="https://www.inaturalist.org/observations/111952960">https://www.inaturalist.org/observations/111952960</a> |
| 6229 | <i>Spilopelia chinensis</i> | Eastern Spotted Dove | 2021/11/22 | 2 | 0 | 25.06445550 | 121.65580000 | <a href="https://www.inaturalist.org/observations/101691747">https://www.inaturalist.org/observations/101691747</a> |
| 6230 | <i>Spilopelia chinensis</i> | Eastern Spotted Dove | 2021/11/22 | 2 | 0 | 25.06489450 | 121.65708000 | <a href="https://www.inaturalist.org/observations/101691649">https://www.inaturalist.org/observations/101691649</a> |
| 6231 | <i>Spilopelia chinensis</i> | Eastern Spotted Dove | 2019/7/30  | 1 | 0 | 25.06490833 | 121.24153500 | <a href="https://www.inaturalist.org/observations/66043210">https://www.inaturalist.org/observations/66043210</a>   |
| 6232 | <i>Spilopelia chinensis</i> | Eastern Spotted Dove | 2022/5/9   | 3 | 0 | 25.06500543 | 121.45574830 | <a href="https://www.inaturalist.org/observations/116314440">https://www.inaturalist.org/observations/116314440</a> |

|      |                             |                      |            |   |   |             |              |                                                                                                                     |
|------|-----------------------------|----------------------|------------|---|---|-------------|--------------|---------------------------------------------------------------------------------------------------------------------|
| 6233 | <i>Spilopelia chinensis</i> | Eastern Spotted Dove | 2022/2/24  | 1 | 0 | 25.06702416 | 121.45880220 | <a href="https://www.inaturalist.org/observations/107480303">https://www.inaturalist.org/observations/107480303</a> |
| 6234 | <i>Spilopelia chinensis</i> | Eastern Spotted Dove | 2020/4/20  | 2 | 0 | 25.06718130 | 121.51359780 | <a href="https://www.inaturalist.org/observations/42653596">https://www.inaturalist.org/observations/42653596</a>   |
| 6235 | <i>Spilopelia chinensis</i> | Eastern Spotted Dove | 2019/8/16  | 3 | 0 | 25.07082841 | 121.52046200 | <a href="https://www.inaturalist.org/observations/31777001">https://www.inaturalist.org/observations/31777001</a>   |
| 6236 | <i>Spilopelia chinensis</i> | Eastern Spotted Dove | 2022/2/6   | 2 | 0 | 25.07333050 | 121.66009500 | <a href="https://www.inaturalist.org/observations/106238780">https://www.inaturalist.org/observations/106238780</a> |
| 6237 | <i>Spilopelia chinensis</i> | Eastern Spotted Dove | 2020/12/20 | 2 | 0 | 25.07368353 | 121.50112460 | <a href="https://www.inaturalist.org/observations/66801805">https://www.inaturalist.org/observations/66801805</a>   |
| 6238 | <i>Spilopelia chinensis</i> | Eastern Spotted Dove | 2021/4/16  | 2 | 0 | 25.07638050 | 121.67410330 | <a href="https://www.inaturalist.org/observations/74132155">https://www.inaturalist.org/observations/74132155</a>   |
| 6239 | <i>Spilopelia chinensis</i> | Eastern Spotted Dove | 2020/7/5   | 1 | 0 | 25.07678480 | 121.46711520 | <a href="https://www.inaturalist.org/observations/51979441">https://www.inaturalist.org/observations/51979441</a>   |
| 6240 | <i>Spilopelia chinensis</i> | Eastern Spotted Dove | 2020/12/4  | 1 | 0 | 25.07838879 | 121.57373670 | <a href="https://www.inaturalist.org/observations/66066371">https://www.inaturalist.org/observations/66066371</a>   |
| 6241 | <i>Spilopelia chinensis</i> | Eastern Spotted Dove | 2021/5/20  | 1 | 0 | 25.07911395 | 84.97653667  | <a href="https://www.inaturalist.org/observations/79507629">https://www.inaturalist.org/observations/79507629</a>   |
| 6242 | <i>Spilopelia chinensis</i> | Eastern Spotted Dove | 2021/5/6   | 1 | 0 | 25.07972783 | 121.49192000 | <a href="https://www.inaturalist.org/observations/77536088">https://www.inaturalist.org/observations/77536088</a>   |
| 6243 | <i>Spilopelia chinensis</i> | Eastern Spotted Dove | 2021/3/21  | 1 | 0 | 25.08210261 | 121.50808630 | <a href="https://www.inaturalist.org/observations/71679725">https://www.inaturalist.org/observations/71679725</a>   |
| 6244 | <i>Spilopelia chinensis</i> | Eastern Spotted Dove | 2021/9/1   | 2 | 0 | 25.08211247 | 121.67485370 | <a href="https://www.inaturalist.org/observations/93313322">https://www.inaturalist.org/observations/93313322</a>   |
| 6245 | <i>Spilopelia chinensis</i> | Eastern Spotted Dove | 2018/5/24  | 4 | 0 | 25.08641667 | 121.48953830 | <a href="https://www.inaturalist.org/observations/14679880">https://www.inaturalist.org/observations/14679880</a>   |
| 6246 | <i>Spilopelia chinensis</i> | Eastern Spotted Dove | 2020/6/5   | 1 | 0 | 25.08724993 | 121.55515880 | <a href="https://www.inaturalist.org/observations/48909405">https://www.inaturalist.org/observations/48909405</a>   |
| 6247 | <i>Spilopelia chinensis</i> | Eastern Spotted Dove | 2022/3/14  | 3 | 0 | 25.09119250 | 121.43169140 | <a href="https://www.inaturalist.org/observations/108949937">https://www.inaturalist.org/observations/108949937</a> |
| 6248 | <i>Spilopelia chinensis</i> | Eastern Spotted Dove | 2022/1/10  | 1 | 0 | 25.09144593 | 121.46500950 | <a href="https://www.inaturalist.org/observations/104706080">https://www.inaturalist.org/observations/104706080</a> |
| 6249 | <i>Spilopelia chinensis</i> | Eastern Spotted Dove | 2020/5/24  | 1 | 0 | 25.09255869 | 121.50354630 | <a href="https://www.inaturalist.org/observations/47101561">https://www.inaturalist.org/observations/47101561</a>   |
| 6250 | <i>Spilopelia chinensis</i> | Eastern Spotted Dove | 2020/3/15  | 1 | 0 | 25.09282000 | 121.52647000 | <a href="https://www.inaturalist.org/observations/40170319">https://www.inaturalist.org/observations/40170319</a>   |
| 6251 | <i>Spilopelia chinensis</i> | Eastern Spotted Dove | 2022/6/3   | 1 | 0 | 25.09290240 | 121.50401880 | <a href="https://www.inaturalist.org/observations/119987579">https://www.inaturalist.org/observations/119987579</a> |
| 6252 | <i>Spilopelia chinensis</i> | Eastern Spotted Dove | 2022/10/2  | 1 | 0 | 25.09298378 | 121.50369090 | <a href="https://www.inaturalist.org/observations/137216251">https://www.inaturalist.org/observations/137216251</a> |
| 6253 | <i>Spilopelia chinensis</i> | Eastern Spotted Dove | 2020/5/4   | 1 | 0 | 25.09305635 | 121.50426590 | <a href="https://www.inaturalist.org/observations/45447141">https://www.inaturalist.org/observations/45447141</a>   |
| 6254 | <i>Spilopelia chinensis</i> | Eastern Spotted Dove | 2019/5/18  | 2 | 0 | 25.09311100 | 121.45424300 | <a href="https://www.inaturalist.org/observations/26800854">https://www.inaturalist.org/observations/26800854</a>   |
| 6255 | <i>Spilopelia chinensis</i> | Eastern Spotted Dove | 2018/11/25 | 3 | 0 | 25.09312857 | 121.50443910 | <a href="https://www.inaturalist.org/observations/18615164">https://www.inaturalist.org/observations/18615164</a>   |

|      |                             |                      |            |   |   |             |              |                                                                                                                     |
|------|-----------------------------|----------------------|------------|---|---|-------------|--------------|---------------------------------------------------------------------------------------------------------------------|
| 6256 | <i>Spilopelia chinensis</i> | Eastern Spotted Dove | 2018/12/8  | 3 | 0 | 25.09313050 | 121.50457000 | <a href="https://www.inaturalist.org/observations/18891480">https://www.inaturalist.org/observations/18891480</a>   |
| 6257 | <i>Spilopelia chinensis</i> | Eastern Spotted Dove | 2022/6/11  | 2 | 0 | 25.09445171 | 121.51705580 | <a href="https://www.inaturalist.org/observations/121148000">https://www.inaturalist.org/observations/121148000</a> |
| 6258 | <i>Spilopelia chinensis</i> | Eastern Spotted Dove | 2022/4/17  | 2 | 0 | 25.09494809 | 121.45447260 | <a href="https://www.inaturalist.org/observations/112129504">https://www.inaturalist.org/observations/112129504</a> |
| 6259 | <i>Spilopelia chinensis</i> | Eastern Spotted Dove | 2021/4/24  | 1 | 0 | 25.09529167 | 121.51683330 | <a href="https://www.inaturalist.org/observations/75022199">https://www.inaturalist.org/observations/75022199</a>   |
| 6260 | <i>Spilopelia chinensis</i> | Eastern Spotted Dove | 2021/5/18  | 1 | 0 | 25.09557865 | 121.51646820 | <a href="https://www.inaturalist.org/observations/79250950">https://www.inaturalist.org/observations/79250950</a>   |
| 6261 | <i>Spilopelia chinensis</i> | Eastern Spotted Dove | 2021/2/8   | 1 | 0 | 25.09585095 | 121.51742340 | <a href="https://www.inaturalist.org/observations/69247483">https://www.inaturalist.org/observations/69247483</a>   |
| 6262 | <i>Spilopelia chinensis</i> | Eastern Spotted Dove | 2021/7/15  | 3 | 0 | 25.09608011 | 121.51589520 | <a href="https://www.inaturalist.org/observations/87113572">https://www.inaturalist.org/observations/87113572</a>   |
| 6263 | <i>Spilopelia chinensis</i> | Eastern Spotted Dove | 2021/4/26  | 0 | 0 | 25.09618404 | 121.51589130 | <a href="https://www.inaturalist.org/observations/75267830">https://www.inaturalist.org/observations/75267830</a>   |
| 6264 | <i>Spilopelia chinensis</i> | Eastern Spotted Dove | 2021/6/10  | 2 | 0 | 25.09639318 | 121.51738060 | <a href="https://www.inaturalist.org/observations/82394407">https://www.inaturalist.org/observations/82394407</a>   |
| 6265 | <i>Spilopelia chinensis</i> | Eastern Spotted Dove | 2021/5/27  | 1 | 0 | 25.09648067 | 121.51624360 | <a href="https://www.inaturalist.org/observations/80457377">https://www.inaturalist.org/observations/80457377</a>   |
| 6266 | <i>Spilopelia chinensis</i> | Eastern Spotted Dove | 2021/3/3   | 1 | 0 | 25.09750322 | 121.45701920 | <a href="https://www.inaturalist.org/observations/71684634">https://www.inaturalist.org/observations/71684634</a>   |
| 6267 | <i>Spilopelia chinensis</i> | Eastern Spotted Dove | 2008/11/21 | 2 | 0 | 25.09768200 | 121.51525140 | <a href="https://www.inaturalist.org/observations/81249810">https://www.inaturalist.org/observations/81249810</a>   |
| 6268 | <i>Spilopelia chinensis</i> | Eastern Spotted Dove | 2021/6/3   | 1 | 0 | 25.09771012 | 121.51828850 | <a href="https://www.inaturalist.org/observations/81384681">https://www.inaturalist.org/observations/81384681</a>   |
| 6269 | <i>Spilopelia chinensis</i> | Eastern Spotted Dove | 2014/4/4   | 1 | 0 | 25.10188057 | 121.21853090 | <a href="https://www.inaturalist.org/observations/56920212">https://www.inaturalist.org/observations/56920212</a>   |
| 6270 | <i>Spilopelia chinensis</i> | Eastern Spotted Dove | 2019/7/22  | 2 | 0 | 25.10716117 | 121.52958670 | <a href="https://www.inaturalist.org/observations/29286875">https://www.inaturalist.org/observations/29286875</a>   |
| 6271 | <i>Spilopelia chinensis</i> | Eastern Spotted Dove | 2020/1/12  | 1 | 0 | 25.11230933 | 121.49062700 | <a href="https://www.inaturalist.org/observations/53812164">https://www.inaturalist.org/observations/53812164</a>   |
| 6272 | <i>Spilopelia chinensis</i> | Eastern Spotted Dove | 2020/4/4   | 1 | 0 | 25.11230933 | 121.49062700 | <a href="https://www.inaturalist.org/observations/56193375">https://www.inaturalist.org/observations/56193375</a>   |
| 6273 | <i>Spilopelia chinensis</i> | Eastern Spotted Dove | 2022/7/26  | 2 | 0 | 25.11339333 | 121.48928830 | <a href="https://www.inaturalist.org/observations/128015384">https://www.inaturalist.org/observations/128015384</a> |
| 6274 | <i>Spilopelia chinensis</i> | Eastern Spotted Dove | 2020/12/14 | 1 | 0 | 25.11433302 | 121.49893580 | <a href="https://www.inaturalist.org/observations/67247914">https://www.inaturalist.org/observations/67247914</a>   |
| 6275 | <i>Spilopelia chinensis</i> | Eastern Spotted Dove | 2021/4/16  | 2 | 0 | 25.11793333 | 121.51303000 | <a href="https://www.inaturalist.org/observations/74206931">https://www.inaturalist.org/observations/74206931</a>   |
| 6276 | <i>Spilopelia chinensis</i> | Eastern Spotted Dove | 2021/3/4   | 1 | 0 | 25.11851118 | 121.53363000 | <a href="https://www.inaturalist.org/observations/71298535">https://www.inaturalist.org/observations/71298535</a>   |
| 6277 | <i>Spilopelia chinensis</i> | Eastern Spotted Dove | 2021/7/5   | 1 | 0 | 25.11858643 | 121.53368340 | <a href="https://www.inaturalist.org/observations/85742255">https://www.inaturalist.org/observations/85742255</a>   |
| 6278 | <i>Spilopelia chinensis</i> | Eastern Spotted Dove | 2021/6/28  | 2 | 0 | 25.11863112 | 121.53369650 | <a href="https://www.inaturalist.org/observations/84817258">https://www.inaturalist.org/observations/84817258</a>   |

|      |                             |                      |            |   |   |             |              |                                                                                                                     |
|------|-----------------------------|----------------------|------------|---|---|-------------|--------------|---------------------------------------------------------------------------------------------------------------------|
| 6279 | <i>Spilopelia chinensis</i> | Eastern Spotted Dove | 2021/7/13  | 2 | 0 | 25.11865757 | 121.53362010 | <a href="https://www.inaturalist.org/observations/86826406">https://www.inaturalist.org/observations/86826406</a>   |
| 6280 | <i>Spilopelia chinensis</i> | Eastern Spotted Dove | 2021/5/3   | 1 | 0 | 25.11969450 | 121.53418000 | <a href="https://www.inaturalist.org/observations/76862199">https://www.inaturalist.org/observations/76862199</a>   |
| 6281 | <i>Spilopelia chinensis</i> | Eastern Spotted Dove | 2021/5/3   | 1 | 0 | 25.12068883 | 121.53425500 | <a href="https://www.inaturalist.org/observations/76864722">https://www.inaturalist.org/observations/76864722</a>   |
| 6282 | <i>Spilopelia chinensis</i> | Eastern Spotted Dove | 2008/10/8  | 1 | 0 | 25.13029362 | 121.49871850 | <a href="https://www.inaturalist.org/observations/79223147">https://www.inaturalist.org/observations/79223147</a>   |
| 6283 | <i>Spilopelia chinensis</i> | Eastern Spotted Dove | 2021/3/20  | 2 | 0 | 25.13304550 | 121.74061570 | <a href="https://www.inaturalist.org/observations/90233437">https://www.inaturalist.org/observations/90233437</a>   |
| 6284 | <i>Spilopelia chinensis</i> | Eastern Spotted Dove | 2022/5/20  | 0 | 0 | 25.13498500 | 121.54602800 | <a href="https://www.inaturalist.org/observations/117817738">https://www.inaturalist.org/observations/117817738</a> |
| 6285 | <i>Spilopelia chinensis</i> | Eastern Spotted Dove | 2021/5/14  | 1 | 0 | 25.13999167 | 121.77957830 | <a href="https://www.inaturalist.org/observations/78668573">https://www.inaturalist.org/observations/78668573</a>   |
| 6286 | <i>Spilopelia chinensis</i> | Eastern Spotted Dove | 2007/3/20  | 3 | 0 | 25.14132858 | 121.79606890 | <a href="https://www.inaturalist.org/observations/36766646">https://www.inaturalist.org/observations/36766646</a>   |
| 6287 | <i>Spilopelia chinensis</i> | Eastern Spotted Dove | 2013/4/10  | 5 | 0 | 25.14353657 | 102.74198050 | <a href="http://www.inaturalist.org/observations/233628">http://www.inaturalist.org/observations/233628</a>         |
| 6288 | <i>Spilopelia chinensis</i> | Eastern Spotted Dove | 2021/4/6   | 2 | 0 | 25.15502769 | 121.50468730 | <a href="https://www.inaturalist.org/observations/73091770">https://www.inaturalist.org/observations/73091770</a>   |
| 6289 | <i>Spilopelia chinensis</i> | Eastern Spotted Dove | 2022/7/13  | 2 | 0 | 25.15538959 | 121.43945510 | <a href="https://www.inaturalist.org/observations/127336823">https://www.inaturalist.org/observations/127336823</a> |
| 6290 | <i>Spilopelia chinensis</i> | Eastern Spotted Dove | 2009/11/3  | 1 | 0 | 25.16027722 | 121.55461830 | <a href="https://www.inaturalist.org/observations/55451005">https://www.inaturalist.org/observations/55451005</a>   |
| 6291 | <i>Spilopelia chinensis</i> | Eastern Spotted Dove | 2022/4/26  | 1 | 0 | 25.17909331 | 121.57958610 | <a href="https://www.inaturalist.org/observations/112919371">https://www.inaturalist.org/observations/112919371</a> |
| 6292 | <i>Spilopelia chinensis</i> | Eastern Spotted Dove | 2020/11/20 | 1 | 0 | 25.18117067 | 121.57931180 | <a href="https://www.inaturalist.org/observations/68998271">https://www.inaturalist.org/observations/68998271</a>   |
| 6293 | <i>Spilopelia chinensis</i> | Eastern Spotted Dove | 2019/9/11  | 1 | 0 | 25.18732783 | 121.45486780 | <a href="https://www.inaturalist.org/observations/32510935">https://www.inaturalist.org/observations/32510935</a>   |
| 6294 | <i>Spilopelia chinensis</i> | Eastern Spotted Dove | 2019/9/11  | 2 | 0 | 25.18733870 | 121.45482190 | <a href="https://www.inaturalist.org/observations/32510901">https://www.inaturalist.org/observations/32510901</a>   |
| 6295 | <i>Spilopelia chinensis</i> | Eastern Spotted Dove | 2019/9/11  | 2 | 0 | 25.18748667 | 121.45484170 | <a href="https://www.inaturalist.org/observations/32510927">https://www.inaturalist.org/observations/32510927</a>   |
| 6296 | <i>Spilopelia chinensis</i> | Eastern Spotted Dove | 2019/1/7   | 0 | 0 | 25.23447900 | 110.17995300 | <a href="https://www.inaturalist.org/observations/39445674">https://www.inaturalist.org/observations/39445674</a>   |
| 6297 | <i>Spilopelia chinensis</i> | Eastern Spotted Dove | 2020/12/29 | 1 | 0 | 25.24245305 | 86.98422544  | <a href="https://www.inaturalist.org/observations/67233048">https://www.inaturalist.org/observations/67233048</a>   |
| 6298 | <i>Spilopelia chinensis</i> | Eastern Spotted Dove | 2020/12/30 | 1 | 0 | 25.24245305 | 86.98422544  | <a href="https://www.inaturalist.org/observations/67294546">https://www.inaturalist.org/observations/67294546</a>   |
| 6299 | <i>Spilopelia chinensis</i> | Eastern Spotted Dove | 2020/11/3  | 3 | 0 | 25.26771874 | 82.99125809  | <a href="https://www.inaturalist.org/observations/64946159">https://www.inaturalist.org/observations/64946159</a>   |
| 6300 | <i>Spilopelia chinensis</i> | Eastern Spotted Dove | 2019/1/17  | 2 | 0 | 25.27318013 | 85.46794251  | <a href="https://www.inaturalist.org/observations/21472659">https://www.inaturalist.org/observations/21472659</a>   |
| 6301 | <i>Spilopelia chinensis</i> | Eastern Spotted Dove | 2019/1/18  | 4 | 0 | 25.31970514 | 85.41937575  | <a href="https://www.inaturalist.org/observations/21445230">https://www.inaturalist.org/observations/21445230</a>   |

|      |                             |                      |            |   |   |             |              |                                                                                                                     |
|------|-----------------------------|----------------------|------------|---|---|-------------|--------------|---------------------------------------------------------------------------------------------------------------------|
| 6302 | <i>Spilopelia chinensis</i> | Eastern Spotted Dove | 2011/9/8   | 5 | 0 | 25.42329000 | 77.65363300  | <a href="https://www.inaturalist.org/observations/32859520">https://www.inaturalist.org/observations/32859520</a>   |
| 6303 | <i>Spilopelia chinensis</i> | Eastern Spotted Dove | 2020/4/14  | 2 | 0 | 25.52323610 | 90.15779972  | <a href="https://www.inaturalist.org/observations/45451065">https://www.inaturalist.org/observations/45451065</a>   |
| 6304 | <i>Spilopelia chinensis</i> | Eastern Spotted Dove | 2022/1/24  | 3 | 0 | 25.57467454 | 91.93025541  | <a href="https://www.inaturalist.org/observations/105663687">https://www.inaturalist.org/observations/105663687</a> |
| 6305 | <i>Spilopelia chinensis</i> | Eastern Spotted Dove | 2021/12/11 | 2 | 0 | 25.57471173 | 91.93068992  | <a href="https://www.inaturalist.org/observations/102919585">https://www.inaturalist.org/observations/102919585</a> |
| 6306 | <i>Spilopelia chinensis</i> | Eastern Spotted Dove | 2017/3/5   | 6 | 0 | 25.60200400 | 85.10903200  | <a href="https://www.inaturalist.org/observations/5242343">https://www.inaturalist.org/observations/5242343</a>     |
| 6307 | <i>Spilopelia chinensis</i> | Eastern Spotted Dove | 2021/8/13  | 1 | 0 | 25.60604177 | 85.89015607  | <a href="https://www.inaturalist.org/observations/91000109">https://www.inaturalist.org/observations/91000109</a>   |
| 6308 | <i>Spilopelia chinensis</i> | Eastern Spotted Dove | 2021/8/3   | 1 | 0 | 25.60618085 | 85.88224556  | <a href="https://www.inaturalist.org/observations/89766315">https://www.inaturalist.org/observations/89766315</a>   |
| 6309 | <i>Spilopelia chinensis</i> | Eastern Spotted Dove | 2021/9/25  | 1 | 0 | 25.60625765 | 85.88226166  | <a href="https://www.inaturalist.org/observations/96055806">https://www.inaturalist.org/observations/96055806</a>   |
| 6310 | <i>Spilopelia chinensis</i> | Eastern Spotted Dove | 2021/8/16  | 1 | 0 | 25.60635047 | 85.88228479  | <a href="https://www.inaturalist.org/observations/91368223">https://www.inaturalist.org/observations/91368223</a>   |
| 6311 | <i>Spilopelia chinensis</i> | Eastern Spotted Dove | 2021/10/1  | 0 | 0 | 25.60904526 | 85.05882718  | <a href="https://www.inaturalist.org/observations/96798948">https://www.inaturalist.org/observations/96798948</a>   |
| 6312 | <i>Spilopelia chinensis</i> | Eastern Spotted Dove | 2022/4/14  | 1 | 0 | 25.62807756 | 88.13035782  | <a href="https://www.inaturalist.org/observations/112112424">https://www.inaturalist.org/observations/112112424</a> |
| 6313 | <i>Spilopelia chinensis</i> | Eastern Spotted Dove | 2017/9/5   | 2 | 0 | 25.63092790 | 88.12852860  | <a href="https://www.inaturalist.org/observations/57898818">https://www.inaturalist.org/observations/57898818</a>   |
| 6314 | <i>Spilopelia chinensis</i> | Eastern Spotted Dove | 2022/7/6   | 2 | 0 | 25.70000000 | 100.10000000 | <a href="https://www.inaturalist.org/observations/130515783">https://www.inaturalist.org/observations/130515783</a> |
| 6315 | <i>Spilopelia chinensis</i> | Eastern Spotted Dove | 2022/4/21  | 1 | 0 | 25.71878433 | 119.34768680 | <a href="https://www.inaturalist.org/observations/112363979">https://www.inaturalist.org/observations/112363979</a> |
| 6316 | <i>Spilopelia chinensis</i> | Eastern Spotted Dove | 2020/8/3   | 1 | 0 | 25.82752403 | 118.48122640 | <a href="https://www.inaturalist.org/observations/55689831">https://www.inaturalist.org/observations/55689831</a>   |
| 6317 | <i>Spilopelia chinensis</i> | Eastern Spotted Dove | 2020/7/29  | 1 | 0 | 25.82925903 | 118.47987630 | <a href="https://www.inaturalist.org/observations/55689817">https://www.inaturalist.org/observations/55689817</a>   |
| 6318 | <i>Spilopelia chinensis</i> | Eastern Spotted Dove | 2020/7/23  | 1 | 0 | 25.82991488 | 118.47724740 | <a href="https://www.inaturalist.org/observations/55689806">https://www.inaturalist.org/observations/55689806</a>   |
| 6319 | <i>Spilopelia chinensis</i> | Eastern Spotted Dove | 2022/4/30  | 4 | 0 | 25.89873000 | 77.04291167  | <a href="https://www.inaturalist.org/observations/118519059">https://www.inaturalist.org/observations/118519059</a> |
| 6320 | <i>Spilopelia chinensis</i> | Eastern Spotted Dove | 2022/4/30  | 4 | 0 | 25.90131833 | 77.04969000  | <a href="https://www.inaturalist.org/observations/118519119">https://www.inaturalist.org/observations/118519119</a> |
| 6321 | <i>Spilopelia chinensis</i> | Eastern Spotted Dove | 2018/3/31  | 1 | 0 | 25.90914060 | 93.72656050  | <a href="https://www.inaturalist.org/observations/95150357">https://www.inaturalist.org/observations/95150357</a>   |
| 6322 | <i>Spilopelia chinensis</i> | Eastern Spotted Dove | 2021/5/14  | 1 | 0 | 25.95215022 | 119.96783980 | <a href="https://www.inaturalist.org/observations/83946077">https://www.inaturalist.org/observations/83946077</a>   |
| 6323 | <i>Spilopelia chinensis</i> | Eastern Spotted Dove | 2019/4/27  | 1 | 0 | 25.97069833 | 119.93242170 | <a href="https://www.inaturalist.org/observations/24719250">https://www.inaturalist.org/observations/24719250</a>   |
| 6324 | <i>Spilopelia chinensis</i> | Eastern Spotted Dove | 2019/4/27  | 1 | 0 | 25.97412333 | 119.92829830 | <a href="https://www.inaturalist.org/observations/24719252">https://www.inaturalist.org/observations/24719252</a>   |

|      |                             |                      |            |   |   |             |              |                                                                                                                     |
|------|-----------------------------|----------------------|------------|---|---|-------------|--------------|---------------------------------------------------------------------------------------------------------------------|
| 6325 | <i>Spilopelia chinensis</i> | Eastern Spotted Dove | 2020/2/27  | 1 | 0 | 26.01732740 | 76.50257420  | <a href="https://www.inaturalist.org/observations/104675830">https://www.inaturalist.org/observations/104675830</a> |
| 6326 | <i>Spilopelia chinensis</i> | Eastern Spotted Dove | 2006/1/17  | 1 | 0 | 26.01930000 | 76.45610000  | <a href="https://www.inaturalist.org/observations/104669321">https://www.inaturalist.org/observations/104669321</a> |
| 6327 | <i>Spilopelia chinensis</i> | Eastern Spotted Dove | 2022/6/3   | 1 | 0 | 26.02032667 | 119.63112000 | <a href="https://www.inaturalist.org/observations/132116140">https://www.inaturalist.org/observations/132116140</a> |
| 6328 | <i>Spilopelia chinensis</i> | Eastern Spotted Dove | 2022/6/3   | 1 | 0 | 26.02166831 | 119.63443990 | <a href="https://www.inaturalist.org/observations/132116174">https://www.inaturalist.org/observations/132116174</a> |
| 6329 | <i>Spilopelia chinensis</i> | Eastern Spotted Dove | 2021/6/2   | 1 | 0 | 26.05489800 | 119.18821500 | <a href="https://www.inaturalist.org/observations/81385520">https://www.inaturalist.org/observations/81385520</a>   |
| 6330 | <i>Spilopelia chinensis</i> | Eastern Spotted Dove | 2021/5/29  | 1 | 0 | 26.05859697 | 119.18756200 | <a href="https://www.inaturalist.org/observations/80687738">https://www.inaturalist.org/observations/80687738</a>   |
| 6331 | <i>Spilopelia chinensis</i> | Eastern Spotted Dove | 2021/12/24 | 1 | 0 | 26.05871897 | 119.18761600 | <a href="https://www.inaturalist.org/observations/103584009">https://www.inaturalist.org/observations/103584009</a> |
| 6332 | <i>Spilopelia chinensis</i> | Eastern Spotted Dove | 2021/12/29 | 1 | 0 | 26.06111500 | 119.18999700 | <a href="https://www.inaturalist.org/observations/103952813">https://www.inaturalist.org/observations/103952813</a> |
| 6333 | <i>Spilopelia chinensis</i> | Eastern Spotted Dove | 2021/11/26 | 1 | 0 | 26.06465400 | 119.19183000 | <a href="https://www.inaturalist.org/observations/101993854">https://www.inaturalist.org/observations/101993854</a> |
| 6334 | <i>Spilopelia chinensis</i> | Eastern Spotted Dove | 2020/8/1   | 2 | 0 | 26.10985227 | 91.59690934  | <a href="https://www.inaturalist.org/observations/55904198">https://www.inaturalist.org/observations/55904198</a>   |
| 6335 | <i>Spilopelia chinensis</i> | Eastern Spotted Dove | 2019/9/9   | 4 | 0 | 26.11904540 | 91.61264430  | <a href="https://www.inaturalist.org/observations/32763528">https://www.inaturalist.org/observations/32763528</a>   |
| 6336 | <i>Spilopelia chinensis</i> | Eastern Spotted Dove | 2021/9/20  | 1 | 0 | 26.12131800 | 91.81290500  | <a href="https://www.inaturalist.org/observations/98006507">https://www.inaturalist.org/observations/98006507</a>   |
| 6337 | <i>Spilopelia chinensis</i> | Eastern Spotted Dove | 2019/3/4   | 1 | 0 | 26.12466900 | 117.97642000 | <a href="https://www.inaturalist.org/observations/62686498">https://www.inaturalist.org/observations/62686498</a>   |
| 6338 | <i>Spilopelia chinensis</i> | Eastern Spotted Dove | 2019/10/26 | 3 | 0 | 26.14782262 | 91.73913058  | <a href="https://www.inaturalist.org/observations/41108678">https://www.inaturalist.org/observations/41108678</a>   |
| 6339 | <i>Spilopelia chinensis</i> | Eastern Spotted Dove | 2022/6/3   | 1 | 0 | 26.15163164 | 119.28528990 | <a href="https://www.inaturalist.org/observations/132105861">https://www.inaturalist.org/observations/132105861</a> |
| 6340 | <i>Spilopelia chinensis</i> | Eastern Spotted Dove | 2008/5/4   | 4 | 0 | 26.15203300 | 91.67346900  | <a href="https://www.inaturalist.org/observations/59121181">https://www.inaturalist.org/observations/59121181</a>   |
| 6341 | <i>Spilopelia chinensis</i> | Eastern Spotted Dove | 2020/7/27  | 1 | 0 | 26.15276495 | 91.80624012  | <a href="https://www.inaturalist.org/observations/55929821">https://www.inaturalist.org/observations/55929821</a>   |
| 6342 | <i>Spilopelia chinensis</i> | Eastern Spotted Dove | 2021/12/13 | 1 | 0 | 26.15343610 | 119.93068630 | <a href="https://www.inaturalist.org/observations/103088715">https://www.inaturalist.org/observations/103088715</a> |
| 6343 | <i>Spilopelia chinensis</i> | Eastern Spotted Dove | 2020/7/25  | 1 | 0 | 26.15370580 | 119.93667920 | <a href="https://www.inaturalist.org/observations/106739646">https://www.inaturalist.org/observations/106739646</a> |
| 6344 | <i>Spilopelia chinensis</i> | Eastern Spotted Dove | 2010/1/16  | 2 | 0 | 26.15431990 | 91.66316790  | <a href="https://www.inaturalist.org/observations/60356249">https://www.inaturalist.org/observations/60356249</a>   |
| 6345 | <i>Spilopelia chinensis</i> | Eastern Spotted Dove | 2020/12/5  | 3 | 0 | 26.15613633 | 92.62656017  | <a href="https://www.inaturalist.org/observations/70597480">https://www.inaturalist.org/observations/70597480</a>   |
| 6346 | <i>Spilopelia chinensis</i> | Eastern Spotted Dove | 2018/4/29  | 1 | 0 | 26.15707200 | 119.95155050 | <a href="https://www.inaturalist.org/observations/56821671">https://www.inaturalist.org/observations/56821671</a>   |
| 6347 | <i>Spilopelia chinensis</i> | Eastern Spotted Dove | 2015/4/5   | 2 | 0 | 26.15962093 | 119.94338160 | <a href="https://www.inaturalist.org/observations/57625612">https://www.inaturalist.org/observations/57625612</a>   |



|      |                             |                      |            |   |   |             |              |                                                                                                                     |
|------|-----------------------------|----------------------|------------|---|---|-------------|--------------|---------------------------------------------------------------------------------------------------------------------|
| 6348 | <i>Spilopelia chinensis</i> | Eastern Spotted Dove | 2018/11/29 | 4 | 0 | 26.16046393 | 119.95022680 | <a href="https://www.inaturalist.org/observations/18787597">https://www.inaturalist.org/observations/18787597</a>   |
| 6349 | <i>Spilopelia chinensis</i> | Eastern Spotted Dove | 2018/9/8   | 5 | 0 | 26.16351900 | 91.78072500  | <a href="https://www.inaturalist.org/observations/16414456">https://www.inaturalist.org/observations/16414456</a>   |
| 6350 | <i>Spilopelia chinensis</i> | Eastern Spotted Dove | 2018/9/6   | 4 | 0 | 26.18307380 | 91.74049770  | <a href="https://www.inaturalist.org/observations/19439572">https://www.inaturalist.org/observations/19439572</a>   |
| 6351 | <i>Spilopelia chinensis</i> | Eastern Spotted Dove | 2020/2/19  | 4 | 0 | 26.18307380 | 91.74049770  | <a href="https://www.inaturalist.org/observations/46574307">https://www.inaturalist.org/observations/46574307</a>   |
| 6352 | <i>Spilopelia chinensis</i> | Eastern Spotted Dove | 2018/9/6   | 5 | 0 | 26.18492800 | 91.74044400  | <a href="https://www.inaturalist.org/observations/16411997">https://www.inaturalist.org/observations/16411997</a>   |
| 6353 | <i>Spilopelia chinensis</i> | Eastern Spotted Dove | 2021/4/2   | 1 | 0 | 26.18780800 | 91.69158300  | <a href="https://www.inaturalist.org/observations/84203634">https://www.inaturalist.org/observations/84203634</a>   |
| 6354 | <i>Spilopelia chinensis</i> | Eastern Spotted Dove | 2022/6/4   | 1 | 0 | 26.19807500 | 119.35241160 | <a href="https://www.inaturalist.org/observations/132242255">https://www.inaturalist.org/observations/132242255</a> |
| 6355 | <i>Spilopelia chinensis</i> | Eastern Spotted Dove | 2018/5/19  | 1 | 0 | 26.22082951 | 119.98895390 | <a href="https://www.inaturalist.org/observations/33997784">https://www.inaturalist.org/observations/33997784</a>   |
| 6356 | <i>Spilopelia chinensis</i> | Eastern Spotted Dove | 2017/12/23 | 3 | 0 | 26.28233361 | 93.40782166  | <a href="https://www.inaturalist.org/observations/32853318">https://www.inaturalist.org/observations/32853318</a>   |
| 6357 | <i>Spilopelia chinensis</i> | Eastern Spotted Dove | 2020/2/8   | 2 | 0 | 26.32696320 | 89.66942490  | <a href="https://www.inaturalist.org/observations/38418830">https://www.inaturalist.org/observations/38418830</a>   |
| 6358 | <i>Spilopelia chinensis</i> | Eastern Spotted Dove | 2022/6/4   | 1 | 0 | 26.38297328 | 119.64410660 | <a href="https://www.inaturalist.org/observations/132249398">https://www.inaturalist.org/observations/132249398</a> |
| 6359 | <i>Spilopelia chinensis</i> | Eastern Spotted Dove | 2022/6/4   | 1 | 0 | 26.38778000 | 119.65110170 | <a href="https://www.inaturalist.org/observations/132249412">https://www.inaturalist.org/observations/132249412</a> |
| 6360 | <i>Spilopelia chinensis</i> | Eastern Spotted Dove | 2019/3/22  | 0 | 0 | 26.39101057 | 106.22485960 | <a href="https://www.inaturalist.org/observations/38791738">https://www.inaturalist.org/observations/38791738</a>   |
| 6361 | <i>Spilopelia chinensis</i> | Eastern Spotted Dove | 2018/9/15  | 1 | 0 | 26.41853392 | 106.67018220 | <a href="https://www.inaturalist.org/observations/39605268">https://www.inaturalist.org/observations/39605268</a>   |
| 6362 | <i>Spilopelia chinensis</i> | Eastern Spotted Dove | 2018/9/23  | 1 | 0 | 26.42028441 | 106.67712340 | <a href="https://www.inaturalist.org/observations/39604996">https://www.inaturalist.org/observations/39604996</a>   |
| 6363 | <i>Spilopelia chinensis</i> | Eastern Spotted Dove | 2021/5/21  | 1 | 0 | 26.42342173 | 106.36952590 | <a href="https://www.inaturalist.org/observations/80365534">https://www.inaturalist.org/observations/80365534</a>   |
| 6364 | <i>Spilopelia chinensis</i> | Eastern Spotted Dove | 2022/2/25  | 1 | 0 | 26.42342173 | 106.36952590 | <a href="https://www.inaturalist.org/observations/109923791">https://www.inaturalist.org/observations/109923791</a> |
| 6365 | <i>Spilopelia chinensis</i> | Eastern Spotted Dove | 2022/5/14  | 2 | 0 | 26.42342173 | 106.36952590 | <a href="https://www.inaturalist.org/observations/118212044">https://www.inaturalist.org/observations/118212044</a> |
| 6366 | <i>Spilopelia chinensis</i> | Eastern Spotted Dove | 2021/9/11  | 2 | 0 | 26.44122924 | 91.43663330  | <a href="https://www.inaturalist.org/observations/94393566">https://www.inaturalist.org/observations/94393566</a>   |
| 6367 | <i>Spilopelia chinensis</i> | Eastern Spotted Dove | 2020/4/26  | 1 | 0 | 26.44292183 | 106.67568310 | <a href="https://www.inaturalist.org/observations/43606645">https://www.inaturalist.org/observations/43606645</a>   |
| 6368 | <i>Spilopelia chinensis</i> | Eastern Spotted Dove | 2020/6/21  | 1 | 0 | 26.44292183 | 106.67568310 | <a href="https://www.inaturalist.org/observations/50406816">https://www.inaturalist.org/observations/50406816</a>   |
| 6369 | <i>Spilopelia chinensis</i> | Eastern Spotted Dove | 2018/8/29  | 0 | 0 | 26.44655398 | 106.67523410 | <a href="https://www.inaturalist.org/observations/39606128">https://www.inaturalist.org/observations/39606128</a>   |
| 6370 | <i>Spilopelia chinensis</i> | Eastern Spotted Dove | 2020/4/12  | 2 | 0 | 26.45291434 | 106.67688380 | <a href="https://www.inaturalist.org/observations/42065601">https://www.inaturalist.org/observations/42065601</a>   |

|      |                             |                      |            |   |   |             |              |                                                                                                                     |
|------|-----------------------------|----------------------|------------|---|---|-------------|--------------|---------------------------------------------------------------------------------------------------------------------|
| 6371 | <i>Spilopelia chinensis</i> | Eastern Spotted Dove | 2020/7/15  | 1 | 0 | 26.46259214 | 106.67465200 | <a href="https://www.inaturalist.org/observations/53155141">https://www.inaturalist.org/observations/53155141</a>   |
| 6372 | <i>Spilopelia chinensis</i> | Eastern Spotted Dove | 2021/3/19  | 1 | 0 | 26.46619599 | 106.67869760 | <a href="https://www.inaturalist.org/observations/71794840">https://www.inaturalist.org/observations/71794840</a>   |
| 6373 | <i>Spilopelia chinensis</i> | Eastern Spotted Dove | 2021/4/2   | 1 | 0 | 26.46619599 | 106.67869760 | <a href="https://www.inaturalist.org/observations/74017541">https://www.inaturalist.org/observations/74017541</a>   |
| 6374 | <i>Spilopelia chinensis</i> | Eastern Spotted Dove | 2021/4/16  | 1 | 0 | 26.46619599 | 106.67869760 | <a href="https://www.inaturalist.org/observations/74529970">https://www.inaturalist.org/observations/74529970</a>   |
| 6375 | <i>Spilopelia chinensis</i> | Eastern Spotted Dove | 2021/4/23  | 1 | 0 | 26.46619599 | 106.67869760 | <a href="https://www.inaturalist.org/observations/75181160">https://www.inaturalist.org/observations/75181160</a>   |
| 6376 | <i>Spilopelia chinensis</i> | Eastern Spotted Dove | 2021/5/8   | 1 | 0 | 26.46619599 | 106.67869760 | <a href="https://www.inaturalist.org/observations/78349344">https://www.inaturalist.org/observations/78349344</a>   |
| 6377 | <i>Spilopelia chinensis</i> | Eastern Spotted Dove | 2021/8/7   | 1 | 0 | 26.46619599 | 106.67869760 | <a href="https://www.inaturalist.org/observations/92869267">https://www.inaturalist.org/observations/92869267</a>   |
| 6378 | <i>Spilopelia chinensis</i> | Eastern Spotted Dove | 2021/8/7   | 1 | 0 | 26.46619599 | 106.67869760 | <a href="https://www.inaturalist.org/observations/92869312">https://www.inaturalist.org/observations/92869312</a>   |
| 6379 | <i>Spilopelia chinensis</i> | Eastern Spotted Dove | 2021/11/19 | 1 | 0 | 26.46619599 | 106.67869760 | <a href="https://www.inaturalist.org/observations/102601573">https://www.inaturalist.org/observations/102601573</a> |
| 6380 | <i>Spilopelia chinensis</i> | Eastern Spotted Dove | 2022/3/5   | 1 | 0 | 26.46619599 | 106.67869760 | <a href="https://www.inaturalist.org/observations/109998671">https://www.inaturalist.org/observations/109998671</a> |
| 6381 | <i>Spilopelia chinensis</i> | Eastern Spotted Dove | 2022/3/5   | 1 | 0 | 26.46619599 | 106.67869760 | <a href="https://www.inaturalist.org/observations/109998676">https://www.inaturalist.org/observations/109998676</a> |
| 6382 | <i>Spilopelia chinensis</i> | Eastern Spotted Dove | 2022/3/5   | 1 | 0 | 26.46619599 | 106.67869760 | <a href="https://www.inaturalist.org/observations/109998697">https://www.inaturalist.org/observations/109998697</a> |
| 6383 | <i>Spilopelia chinensis</i> | Eastern Spotted Dove | 2022/3/28  | 1 | 0 | 26.46619599 | 106.67869760 | <a href="https://www.inaturalist.org/observations/110564277">https://www.inaturalist.org/observations/110564277</a> |
| 6384 | <i>Spilopelia chinensis</i> | Eastern Spotted Dove | 2022/4/4   | 1 | 0 | 26.46619599 | 106.67869760 | <a href="https://www.inaturalist.org/observations/110573698">https://www.inaturalist.org/observations/110573698</a> |
| 6385 | <i>Spilopelia chinensis</i> | Eastern Spotted Dove | 2022/4/14  | 1 | 0 | 26.46619599 | 106.67869760 | <a href="https://www.inaturalist.org/observations/112055148">https://www.inaturalist.org/observations/112055148</a> |
| 6386 | <i>Spilopelia chinensis</i> | Eastern Spotted Dove | 2022/4/14  | 1 | 0 | 26.46619599 | 106.67869760 | <a href="https://www.inaturalist.org/observations/112055185">https://www.inaturalist.org/observations/112055185</a> |
| 6387 | <i>Spilopelia chinensis</i> | Eastern Spotted Dove | 2020/5/9   | 1 | 0 | 26.46889170 | 106.67842690 | <a href="https://www.inaturalist.org/observations/45377497">https://www.inaturalist.org/observations/45377497</a>   |
| 6388 | <i>Spilopelia chinensis</i> | Eastern Spotted Dove | 2012/4/22  | 4 | 0 | 26.49700352 | 88.33631107  | <a href="https://www.inaturalist.org/observations/57968926">https://www.inaturalist.org/observations/57968926</a>   |
| 6389 | <i>Spilopelia chinensis</i> | Eastern Spotted Dove | 2021/12/26 | 1 | 0 | 26.49964081 | 106.75491710 | <a href="https://www.inaturalist.org/observations/104507862">https://www.inaturalist.org/observations/104507862</a> |
| 6390 | <i>Spilopelia chinensis</i> | Eastern Spotted Dove | 2020/4/22  | 1 | 0 | 26.50300467 | 90.55357240  | <a href="https://www.inaturalist.org/observations/64188717">https://www.inaturalist.org/observations/64188717</a>   |
| 6391 | <i>Spilopelia chinensis</i> | Eastern Spotted Dove | 2022/4/18  | 2 | 0 | 26.50311748 | 93.97333458  | <a href="https://www.inaturalist.org/observations/113236797">https://www.inaturalist.org/observations/113236797</a> |
| 6392 | <i>Spilopelia chinensis</i> | Eastern Spotted Dove | 2022/4/20  | 2 | 0 | 26.50311748 | 93.97333458  | <a href="https://www.inaturalist.org/observations/113236990">https://www.inaturalist.org/observations/113236990</a> |
| 6393 | <i>Spilopelia chinensis</i> | Eastern Spotted Dove | 2019/12/9  | 3 | 0 | 26.52528130 | 92.99380800  | <a href="https://www.inaturalist.org/observations/39897379">https://www.inaturalist.org/observations/39897379</a>   |

|      |                             |                      |            |   |   |             |              |                                                                                                                     |
|------|-----------------------------|----------------------|------------|---|---|-------------|--------------|---------------------------------------------------------------------------------------------------------------------|
| 6394 | <i>Spilopelia chinensis</i> | Eastern Spotted Dove | 2012/2/18  | 3 | 0 | 26.52528130 | 92.99380800  | <a href="https://www.inaturalist.org/observations/41044435">https://www.inaturalist.org/observations/41044435</a>   |
| 6395 | <i>Spilopelia chinensis</i> | Eastern Spotted Dove | 2014/3/1   | 3 | 0 | 26.52528130 | 92.99380800  | <a href="https://www.inaturalist.org/observations/58495818">https://www.inaturalist.org/observations/58495818</a>   |
| 6396 | <i>Spilopelia chinensis</i> | Eastern Spotted Dove | 2022/3/3   | 1 | 0 | 26.53287577 | 106.77619230 | <a href="https://www.inaturalist.org/observations/109997238">https://www.inaturalist.org/observations/109997238</a> |
| 6397 | <i>Spilopelia chinensis</i> | Eastern Spotted Dove | 2022/3/3   | 1 | 0 | 26.53287577 | 106.77619230 | <a href="https://www.inaturalist.org/observations/109997240">https://www.inaturalist.org/observations/109997240</a> |
| 6398 | <i>Spilopelia chinensis</i> | Eastern Spotted Dove | 2021/2/24  | 1 | 0 | 26.53514703 | 106.66125660 | <a href="https://www.inaturalist.org/observations/70138084">https://www.inaturalist.org/observations/70138084</a>   |
| 6399 | <i>Spilopelia chinensis</i> | Eastern Spotted Dove | 2021/3/28  | 1 | 0 | 26.53514703 | 106.66125660 | <a href="https://www.inaturalist.org/observations/72522351">https://www.inaturalist.org/observations/72522351</a>   |
| 6400 | <i>Spilopelia chinensis</i> | Eastern Spotted Dove | 2022/2/6   | 1 | 0 | 26.53514703 | 106.66125660 | <a href="https://www.inaturalist.org/observations/108174101">https://www.inaturalist.org/observations/108174101</a> |
| 6401 | <i>Spilopelia chinensis</i> | Eastern Spotted Dove | 2022/2/7   | 1 | 0 | 26.53514703 | 106.66125660 | <a href="https://www.inaturalist.org/observations/108175345">https://www.inaturalist.org/observations/108175345</a> |
| 6402 | <i>Spilopelia chinensis</i> | Eastern Spotted Dove | 2022/1/18  | 1 | 0 | 26.56800428 | 106.70628330 | <a href="https://www.inaturalist.org/observations/105694947">https://www.inaturalist.org/observations/105694947</a> |
| 6403 | <i>Spilopelia chinensis</i> | Eastern Spotted Dove | 2022/3/12  | 1 | 0 | 26.56800428 | 106.70628330 | <a href="https://www.inaturalist.org/observations/110287252">https://www.inaturalist.org/observations/110287252</a> |
| 6404 | <i>Spilopelia chinensis</i> | Eastern Spotted Dove | 2014/2/28  | 2 | 0 | 26.57753100 | 93.17112200  | <a href="https://www.inaturalist.org/observations/55374696">https://www.inaturalist.org/observations/55374696</a>   |
| 6405 | <i>Spilopelia chinensis</i> | Eastern Spotted Dove | 2017/11/8  | 2 | 0 | 26.57753100 | 93.17112200  | <a href="https://www.inaturalist.org/observations/82655840">https://www.inaturalist.org/observations/82655840</a>   |
| 6406 | <i>Spilopelia chinensis</i> | Eastern Spotted Dove | 2021/9/12  | 1 | 0 | 26.58306376 | 106.85014140 | <a href="https://www.inaturalist.org/observations/94910213">https://www.inaturalist.org/observations/94910213</a>   |
| 6407 | <i>Spilopelia chinensis</i> | Eastern Spotted Dove | 2021/2/18  | 1 | 0 | 26.58377018 | 106.68543440 | <a href="https://www.inaturalist.org/observations/69765777">https://www.inaturalist.org/observations/69765777</a>   |
| 6408 | <i>Spilopelia chinensis</i> | Eastern Spotted Dove | 2019/11/4  | 3 | 0 | 26.58391500 | 93.41685639  | <a href="https://www.inaturalist.org/observations/40798085">https://www.inaturalist.org/observations/40798085</a>   |
| 6409 | <i>Spilopelia chinensis</i> | Eastern Spotted Dove | 2018/11/28 | 4 | 0 | 26.58940167 | 93.41573833  | <a href="https://www.inaturalist.org/observations/19629770">https://www.inaturalist.org/observations/19629770</a>   |
| 6410 | <i>Spilopelia chinensis</i> | Eastern Spotted Dove | 2020/5/3   | 1 | 0 | 26.58974731 | 106.76541230 | <a href="https://www.inaturalist.org/observations/44892982">https://www.inaturalist.org/observations/44892982</a>   |
| 6411 | <i>Spilopelia chinensis</i> | Eastern Spotted Dove | 2017/3/30  | 2 | 0 | 26.61599790 | 89.53239320  | <a href="https://www.inaturalist.org/observations/44231175">https://www.inaturalist.org/observations/44231175</a>   |
| 6412 | <i>Spilopelia chinensis</i> | Eastern Spotted Dove | 2020/3/8   | 2 | 0 | 26.61838537 | 80.65322503  | <a href="https://www.inaturalist.org/observations/69850555">https://www.inaturalist.org/observations/69850555</a>   |
| 6413 | <i>Spilopelia chinensis</i> | Eastern Spotted Dove | 2021/5/1   | 1 | 0 | 26.62044801 | 106.77535830 | <a href="https://www.inaturalist.org/observations/78231399">https://www.inaturalist.org/observations/78231399</a>   |
| 6414 | <i>Spilopelia chinensis</i> | Eastern Spotted Dove | 2022/1/11  | 1 | 0 | 26.62361328 | 106.64307760 | <a href="https://www.inaturalist.org/observations/105699119">https://www.inaturalist.org/observations/105699119</a> |
| 6415 | <i>Spilopelia chinensis</i> | Eastern Spotted Dove | 2018/1/11  | 4 | 0 | 26.62630086 | 92.78581180  | <a href="https://www.inaturalist.org/observations/49100128">https://www.inaturalist.org/observations/49100128</a>   |
| 6416 | <i>Spilopelia chinensis</i> | Eastern Spotted Dove | 2021/12/10 | 1 | 0 | 26.62737412 | 106.69537800 | <a href="https://www.inaturalist.org/observations/104507287">https://www.inaturalist.org/observations/104507287</a> |

|      |                             |                      |            |   |   |             |              |                                                                                                                     |
|------|-----------------------------|----------------------|------------|---|---|-------------|--------------|---------------------------------------------------------------------------------------------------------------------|
| 6417 | <i>Spilopelia chinensis</i> | Eastern Spotted Dove | 2021/5/5   | 1 | 0 | 26.62737778 | 106.70395640 | <a href="https://www.inaturalist.org/observations/78334487">https://www.inaturalist.org/observations/78334487</a>   |
| 6418 | <i>Spilopelia chinensis</i> | Eastern Spotted Dove | 2012/3/3   | 4 | 0 | 26.63598200 | 92.80242800  | <a href="https://www.inaturalist.org/observations/66785229">https://www.inaturalist.org/observations/66785229</a>   |
| 6419 | <i>Spilopelia chinensis</i> | Eastern Spotted Dove | 2021/12/8  | 2 | 0 | 26.64099267 | 94.19139314  | <a href="https://www.inaturalist.org/observations/105602120">https://www.inaturalist.org/observations/105602120</a> |
| 6420 | <i>Spilopelia chinensis</i> | Eastern Spotted Dove | 2013/2/14  | 5 | 0 | 26.64377600 | 93.39820800  | <a href="https://www.inaturalist.org/observations/9788892">https://www.inaturalist.org/observations/9788892</a>     |
| 6421 | <i>Spilopelia chinensis</i> | Eastern Spotted Dove | 2021/8/24  | 1 | 0 | 26.64680980 | 106.54746180 | <a href="https://www.inaturalist.org/observations/92891738">https://www.inaturalist.org/observations/92891738</a>   |
| 6422 | <i>Spilopelia chinensis</i> | Eastern Spotted Dove | 2021/9/4   | 1 | 0 | 26.65257925 | 106.92761420 | <a href="https://www.inaturalist.org/observations/94208933">https://www.inaturalist.org/observations/94208933</a>   |
| 6423 | <i>Spilopelia chinensis</i> | Eastern Spotted Dove | 2020/8/25  | 1 | 0 | 26.65575829 | 106.52780560 | <a href="https://www.inaturalist.org/observations/58008287">https://www.inaturalist.org/observations/58008287</a>   |
| 6424 | <i>Spilopelia chinensis</i> | Eastern Spotted Dove | 2015/3/10  | 4 | 0 | 26.66259870 | 94.35360990  | <a href="https://www.inaturalist.org/observations/58316910">https://www.inaturalist.org/observations/58316910</a>   |
| 6425 | <i>Spilopelia chinensis</i> | Eastern Spotted Dove | 2022/1/14  | 1 | 0 | 26.66958497 | 105.77535550 | <a href="https://www.inaturalist.org/observations/105705312">https://www.inaturalist.org/observations/105705312</a> |
| 6426 | <i>Spilopelia chinensis</i> | Eastern Spotted Dove | 2022/5/3   | 1 | 0 | 26.67219030 | 106.61805870 | <a href="https://www.inaturalist.org/observations/117726960">https://www.inaturalist.org/observations/117726960</a> |
| 6427 | <i>Spilopelia chinensis</i> | Eastern Spotted Dove | 2022/4/18  | 4 | 0 | 26.67523928 | 88.37157223  | <a href="https://www.inaturalist.org/observations/111924729">https://www.inaturalist.org/observations/111924729</a> |
| 6428 | <i>Spilopelia chinensis</i> | Eastern Spotted Dove | 2016/3/20  | 2 | 0 | 26.67694006 | 93.55016280  | <a href="https://www.inaturalist.org/observations/107580184">https://www.inaturalist.org/observations/107580184</a> |
| 6429 | <i>Spilopelia chinensis</i> | Eastern Spotted Dove | 2022/4/9   | 4 | 0 | 26.69696087 | 93.98132153  | <a href="https://www.inaturalist.org/observations/111942619">https://www.inaturalist.org/observations/111942619</a> |
| 6430 | <i>Spilopelia chinensis</i> | Eastern Spotted Dove | 2021/7/22  | 2 | 0 | 26.69715407 | 93.97717819  | <a href="https://www.inaturalist.org/observations/91493838">https://www.inaturalist.org/observations/91493838</a>   |
| 6431 | <i>Spilopelia chinensis</i> | Eastern Spotted Dove | 2020/10/24 | 1 | 0 | 26.70000000 | 92.49000000  | <a href="https://www.inaturalist.org/observations/63357014">https://www.inaturalist.org/observations/63357014</a>   |
| 6432 | <i>Spilopelia chinensis</i> | Eastern Spotted Dove | 2020/9/17  | 4 | 0 | 26.70029613 | 92.83076014  | <a href="https://www.inaturalist.org/observations/59862572">https://www.inaturalist.org/observations/59862572</a>   |
| 6433 | <i>Spilopelia chinensis</i> | Eastern Spotted Dove | 2021/12/7  | 2 | 0 | 26.70794440 | 88.70622220  | <a href="https://www.inaturalist.org/observations/104292218">https://www.inaturalist.org/observations/104292218</a> |
| 6434 | <i>Spilopelia chinensis</i> | Eastern Spotted Dove | 2021/4/1   | 1 | 0 | 26.70824625 | 91.10091841  | <a href="https://www.inaturalist.org/observations/73921017">https://www.inaturalist.org/observations/73921017</a>   |
| 6435 | <i>Spilopelia chinensis</i> | Eastern Spotted Dove | 2020/9/8   | 2 | 0 | 26.74228837 | 83.37973049  | <a href="https://www.inaturalist.org/observations/58911541">https://www.inaturalist.org/observations/58911541</a>   |
| 6436 | <i>Spilopelia chinensis</i> | Eastern Spotted Dove | 2019/11/5  | 3 | 0 | 26.75635740 | 88.79747930  | <a href="https://www.inaturalist.org/observations/44696940">https://www.inaturalist.org/observations/44696940</a>   |
| 6437 | <i>Spilopelia chinensis</i> | Eastern Spotted Dove | 2020/9/3   | 4 | 0 | 26.78856434 | 94.21399679  | <a href="https://www.inaturalist.org/observations/58398875">https://www.inaturalist.org/observations/58398875</a>   |
| 6438 | <i>Spilopelia chinensis</i> | Eastern Spotted Dove | 2021/11/18 | 1 | 0 | 26.78933100 | 81.06937100  | <a href="https://www.inaturalist.org/observations/101483014">https://www.inaturalist.org/observations/101483014</a> |
| 6439 | <i>Spilopelia chinensis</i> | Eastern Spotted Dove | 2021/5/2   | 1 | 0 | 26.79601294 | 106.89834910 | <a href="https://www.inaturalist.org/observations/78328297">https://www.inaturalist.org/observations/78328297</a>   |

|      |                             |                      |            |   |   |             |              |                                                                                                                     |
|------|-----------------------------|----------------------|------------|---|---|-------------|--------------|---------------------------------------------------------------------------------------------------------------------|
| 6440 | <i>Spilopelia chinensis</i> | Eastern Spotted Dove | 2016/12/13 | 3 | 0 | 26.80698780 | 80.94841950  | <a href="https://www.inaturalist.org/observations/71553885">https://www.inaturalist.org/observations/71553885</a>   |
| 6441 | <i>Spilopelia chinensis</i> | Eastern Spotted Dove | 2017/12/21 | 2 | 0 | 26.80717974 | 94.17600463  | <a href="https://www.inaturalist.org/observations/45854449">https://www.inaturalist.org/observations/45854449</a>   |
| 6442 | <i>Spilopelia chinensis</i> | Eastern Spotted Dove | 2019/3/10  | 3 | 0 | 26.84124381 | 88.82682055  | <a href="https://www.inaturalist.org/observations/26904663">https://www.inaturalist.org/observations/26904663</a>   |
| 6443 | <i>Spilopelia chinensis</i> | Eastern Spotted Dove | 2022/1/22  | 1 | 0 | 26.84449356 | 104.24263370 | <a href="https://www.inaturalist.org/observations/105712653">https://www.inaturalist.org/observations/105712653</a> |
| 6444 | <i>Spilopelia chinensis</i> | Eastern Spotted Dove | 2022/1/22  | 1 | 0 | 26.84449356 | 104.24263370 | <a href="https://www.inaturalist.org/observations/105712665">https://www.inaturalist.org/observations/105712665</a> |
| 6445 | <i>Spilopelia chinensis</i> | Eastern Spotted Dove | 2022/3/26  | 3 | 0 | 26.84699430 | 80.94616592  | <a href="https://www.inaturalist.org/observations/124892056">https://www.inaturalist.org/observations/124892056</a> |
| 6446 | <i>Spilopelia chinensis</i> | Eastern Spotted Dove | 2020/7/18  | 3 | 0 | 26.85024619 | 92.77331628  | <a href="https://www.inaturalist.org/observations/64360613">https://www.inaturalist.org/observations/64360613</a>   |
| 6447 | <i>Spilopelia chinensis</i> | Eastern Spotted Dove | 2020/2/28  | 3 | 0 | 26.85029780 | 80.98442010  | <a href="https://www.inaturalist.org/observations/47956713">https://www.inaturalist.org/observations/47956713</a>   |
| 6448 | <i>Spilopelia chinensis</i> | Eastern Spotted Dove | 2021/6/1   | 2 | 0 | 26.85567766 | 80.99711649  | <a href="https://www.inaturalist.org/observations/81811162">https://www.inaturalist.org/observations/81811162</a>   |
| 6449 | <i>Spilopelia chinensis</i> | Eastern Spotted Dove | 2019/5/11  | 2 | 0 | 26.85779228 | 80.97396386  | <a href="https://www.inaturalist.org/observations/48326216">https://www.inaturalist.org/observations/48326216</a>   |
| 6450 | <i>Spilopelia chinensis</i> | Eastern Spotted Dove | 2018/12/1  | 1 | 0 | 26.85943541 | 104.25209060 | <a href="https://www.inaturalist.org/observations/39566054">https://www.inaturalist.org/observations/39566054</a>   |
| 6451 | <i>Spilopelia chinensis</i> | Eastern Spotted Dove | 2018/11/1  | 4 | 0 | 26.86558910 | 80.93787810  | <a href="https://www.inaturalist.org/observations/18001920">https://www.inaturalist.org/observations/18001920</a>   |
| 6452 | <i>Spilopelia chinensis</i> | Eastern Spotted Dove | 2020/3/10  | 2 | 0 | 26.86711116 | 80.96852650  | <a href="https://www.inaturalist.org/observations/69848207">https://www.inaturalist.org/observations/69848207</a>   |
| 6453 | <i>Spilopelia chinensis</i> | Eastern Spotted Dove | 2020/4/11  | 2 | 0 | 26.88609500 | 88.27666167  | <a href="https://www.inaturalist.org/observations/128005147">https://www.inaturalist.org/observations/128005147</a> |
| 6454 | <i>Spilopelia chinensis</i> | Eastern Spotted Dove | 2022/9/10  | 2 | 0 | 26.88901467 | 80.99361643  | <a href="https://www.inaturalist.org/observations/134408699">https://www.inaturalist.org/observations/134408699</a> |
| 6455 | <i>Spilopelia chinensis</i> | Eastern Spotted Dove | 2021/4/5   | 3 | 0 | 26.89511350 | 80.98597350  | <a href="https://www.inaturalist.org/observations/72995005">https://www.inaturalist.org/observations/72995005</a>   |
| 6456 | <i>Spilopelia chinensis</i> | Eastern Spotted Dove | 2016/2/25  | 3 | 0 | 26.92351833 | 92.82967000  | <a href="https://www.inaturalist.org/observations/31976065">https://www.inaturalist.org/observations/31976065</a>   |
| 6457 | <i>Spilopelia chinensis</i> | Eastern Spotted Dove | 2020/4/16  | 1 | 0 | 26.92361041 | 112.61243270 | <a href="https://www.inaturalist.org/observations/43059723">https://www.inaturalist.org/observations/43059723</a>   |
| 6458 | <i>Spilopelia chinensis</i> | Eastern Spotted Dove | 2018/11/12 | 1 | 0 | 26.93240080 | 92.87721630  | <a href="https://www.inaturalist.org/observations/100654581">https://www.inaturalist.org/observations/100654581</a> |
| 6459 | <i>Spilopelia chinensis</i> | Eastern Spotted Dove | 2017/11/26 | 1 | 0 | 26.94465108 | 94.15948156  | <a href="https://www.inaturalist.org/observations/93614267">https://www.inaturalist.org/observations/93614267</a>   |
| 6460 | <i>Spilopelia chinensis</i> | Eastern Spotted Dove | 2021/8/19  | 2 | 0 | 26.94755645 | 88.16261206  | <a href="https://www.inaturalist.org/observations/91723725">https://www.inaturalist.org/observations/91723725</a>   |
| 6461 | <i>Spilopelia chinensis</i> | Eastern Spotted Dove | 2022/8/24  | 4 | 0 | 26.94817004 | 94.15728014  | <a href="https://www.inaturalist.org/observations/132111678">https://www.inaturalist.org/observations/132111678</a> |
| 6462 | <i>Spilopelia chinensis</i> | Eastern Spotted Dove | 2020/2/25  | 2 | 0 | 26.95396740 | 80.92356918  | <a href="https://www.inaturalist.org/observations/47944966">https://www.inaturalist.org/observations/47944966</a>   |

|      |                             |                      |            |   |   |             |              |                                                                                                                     |
|------|-----------------------------|----------------------|------------|---|---|-------------|--------------|---------------------------------------------------------------------------------------------------------------------|
| 6463 | <i>Spilopelia chinensis</i> | Eastern Spotted Dove | 2020/2/25  | 2 | 0 | 26.95396740 | 80.92356918  | <a href="https://www.inaturalist.org/observations/47944981">https://www.inaturalist.org/observations/47944981</a>   |
| 6464 | <i>Spilopelia chinensis</i> | Eastern Spotted Dove | 2020/2/25  | 2 | 0 | 26.95396740 | 80.92356918  | <a href="https://www.inaturalist.org/observations/47944992">https://www.inaturalist.org/observations/47944992</a>   |
| 6465 | <i>Spilopelia chinensis</i> | Eastern Spotted Dove | 2019/7/30  | 2 | 0 | 26.95597833 | 117.18697500 | <a href="https://www.inaturalist.org/observations/31740234">https://www.inaturalist.org/observations/31740234</a>   |
| 6466 | <i>Spilopelia chinensis</i> | Eastern Spotted Dove | 2021/10/13 | 1 | 0 | 26.97415838 | 80.82105666  | <a href="https://www.inaturalist.org/observations/98195856">https://www.inaturalist.org/observations/98195856</a>   |
| 6467 | <i>Spilopelia chinensis</i> | Eastern Spotted Dove | 2018/10/25 | 1 | 0 | 27.00161700 | 94.22429800  | <a href="https://www.inaturalist.org/observations/85097572">https://www.inaturalist.org/observations/85097572</a>   |
| 6468 | <i>Spilopelia chinensis</i> | Eastern Spotted Dove | 2018/10/24 | 4 | 0 | 27.00161720 | 94.22429810  | <a href="https://www.inaturalist.org/observations/20028182">https://www.inaturalist.org/observations/20028182</a>   |
| 6469 | <i>Spilopelia chinensis</i> | Eastern Spotted Dove | 2018/10/25 | 3 | 0 | 27.00161720 | 94.22429810  | <a href="https://www.inaturalist.org/observations/48523999">https://www.inaturalist.org/observations/48523999</a>   |
| 6470 | <i>Spilopelia chinensis</i> | Eastern Spotted Dove | 2022/4/20  | 2 | 0 | 27.09835550 | 92.81782910  | <a href="https://www.inaturalist.org/observations/115542829">https://www.inaturalist.org/observations/115542829</a> |
| 6471 | <i>Spilopelia chinensis</i> | Eastern Spotted Dove | 2022/5/4   | 1 | 0 | 27.10125230 | 88.68027440  | <a href="https://www.inaturalist.org/observations/117620583">https://www.inaturalist.org/observations/117620583</a> |
| 6472 | <i>Spilopelia chinensis</i> | Eastern Spotted Dove | 2021/9/20  | 2 | 0 | 27.10256435 | 88.83588742  | <a href="https://www.inaturalist.org/observations/95512369">https://www.inaturalist.org/observations/95512369</a>   |
| 6473 | <i>Spilopelia chinensis</i> | Eastern Spotted Dove | 2022/9/24  | 0 | 0 | 27.14749300 | 113.91147100 | <a href="https://www.inaturalist.org/observations/136244791">https://www.inaturalist.org/observations/136244791</a> |
| 6474 | <i>Spilopelia chinensis</i> | Eastern Spotted Dove | 2016/11/16 | 2 | 0 | 27.19426217 | 92.60986941  | <a href="https://www.inaturalist.org/observations/33832918">https://www.inaturalist.org/observations/33832918</a>   |
| 6475 | <i>Spilopelia chinensis</i> | Eastern Spotted Dove | 2018/4/15  | 4 | 0 | 27.32376333 | 88.59799167  | <a href="https://www.inaturalist.org/observations/10958703">https://www.inaturalist.org/observations/10958703</a>   |
| 6476 | <i>Spilopelia chinensis</i> | Eastern Spotted Dove | 2022/4/11  | 2 | 0 | 27.33834404 | 88.60567077  | <a href="https://www.inaturalist.org/observations/116759189">https://www.inaturalist.org/observations/116759189</a> |
| 6477 | <i>Spilopelia chinensis</i> | Eastern Spotted Dove | 2022/9/17  | 1 | 0 | 27.37127333 | 95.57803500  | <a href="https://www.inaturalist.org/observations/135363374">https://www.inaturalist.org/observations/135363374</a> |
| 6478 | <i>Spilopelia chinensis</i> | Eastern Spotted Dove | 2022/9/17  | 1 | 0 | 27.37127333 | 95.57803500  | <a href="https://www.inaturalist.org/observations/135507040">https://www.inaturalist.org/observations/135507040</a> |
| 6479 | <i>Spilopelia chinensis</i> | Eastern Spotted Dove | 2021/1/9   | 5 | 0 | 27.39794560 | 95.62247180  | <a href="https://www.inaturalist.org/observations/67797218">https://www.inaturalist.org/observations/67797218</a>   |
| 6480 | <i>Spilopelia chinensis</i> | Eastern Spotted Dove | 2021/3/17  | 4 | 0 | 27.40070675 | 95.60780235  | <a href="https://www.inaturalist.org/observations/71416818">https://www.inaturalist.org/observations/71416818</a>   |
| 6481 | <i>Spilopelia chinensis</i> | Eastern Spotted Dove | 2011/5/25  | 1 | 0 | 27.45236245 | 95.57959701  | <a href="https://www.inaturalist.org/observations/106158946">https://www.inaturalist.org/observations/106158946</a> |
| 6482 | <i>Spilopelia chinensis</i> | Eastern Spotted Dove | 2021/5/4   | 1 | 0 | 27.50777778 | 94.31222222  | <a href="https://www.inaturalist.org/observations/77224545">https://www.inaturalist.org/observations/77224545</a>   |
| 6483 | <i>Spilopelia chinensis</i> | Eastern Spotted Dove | 2019/7/24  | 2 | 0 | 27.65511333 | 117.97007170 | <a href="https://www.inaturalist.org/observations/31564615">https://www.inaturalist.org/observations/31564615</a>   |
| 6484 | <i>Spilopelia chinensis</i> | Eastern Spotted Dove | 2021/9/14  | 1 | 0 | 27.65999059 | 95.48434563  | <a href="https://www.inaturalist.org/observations/94819279">https://www.inaturalist.org/observations/94819279</a>   |
| 6485 | <i>Spilopelia chinensis</i> | Eastern Spotted Dove | 2022/5/21  | 2 | 0 | 27.70494800 | 117.98833200 | <a href="https://www.inaturalist.org/observations/117983644">https://www.inaturalist.org/observations/117983644</a> |

|      |                             |                      |            |   |   |             |              |                                                                                                                     |
|------|-----------------------------|----------------------|------------|---|---|-------------|--------------|---------------------------------------------------------------------------------------------------------------------|
| 6486 | <i>Spilopelia chinensis</i> | Eastern Spotted Dove | 2018/4/6   | 3 | 0 | 27.71624970 | 95.61031460  | <a href="https://www.inaturalist.org/observations/31592287">https://www.inaturalist.org/observations/31592287</a>   |
| 6487 | <i>Spilopelia chinensis</i> | Eastern Spotted Dove | 2021/7/18  | 1 | 0 | 27.92382293 | 108.69952510 | <a href="https://www.inaturalist.org/observations/88336176">https://www.inaturalist.org/observations/88336176</a>   |
| 6488 | <i>Spilopelia chinensis</i> | Eastern Spotted Dove | 2021/7/18  | 1 | 0 | 27.92382293 | 108.69952510 | <a href="https://www.inaturalist.org/observations/88336203">https://www.inaturalist.org/observations/88336203</a>   |
| 6489 | <i>Spilopelia chinensis</i> | Eastern Spotted Dove | 2022/7/28  | 1 | 0 | 27.92382293 | 108.69952510 | <a href="https://www.inaturalist.org/observations/130076437">https://www.inaturalist.org/observations/130076437</a> |
| 6490 | <i>Spilopelia chinensis</i> | Eastern Spotted Dove | 2022/2/21  | 1 | 0 | 28.06277749 | 112.88188360 | <a href="https://www.inaturalist.org/observations/107410923">https://www.inaturalist.org/observations/107410923</a> |
| 6491 | <i>Spilopelia chinensis</i> | Eastern Spotted Dove | 2013/1/30  | 0 | 0 | 28.10314600 | 113.03053000 | <a href="https://www.inaturalist.org/observations/92053946">https://www.inaturalist.org/observations/92053946</a>   |
| 6492 | <i>Spilopelia chinensis</i> | Eastern Spotted Dove | 2017/7/19  | 3 | 0 | 28.10797032 | 114.48891160 | <a href="https://www.inaturalist.org/observations/7528882">https://www.inaturalist.org/observations/7528882</a>     |
| 6493 | <i>Spilopelia chinensis</i> | Eastern Spotted Dove | 2019/7/20  | 1 | 0 | 28.10880167 | 114.48925830 | <a href="https://www.inaturalist.org/observations/30426513">https://www.inaturalist.org/observations/30426513</a>   |
| 6494 | <i>Spilopelia chinensis</i> | Eastern Spotted Dove | 2017/7/18  | 2 | 0 | 28.10952421 | 114.48834300 | <a href="https://www.inaturalist.org/observations/7489618">https://www.inaturalist.org/observations/7489618</a>     |
| 6495 | <i>Spilopelia chinensis</i> | Eastern Spotted Dove | 2021/5/4   | 1 | 0 | 28.12544000 | 112.98617400 | <a href="https://www.inaturalist.org/observations/77611098">https://www.inaturalist.org/observations/77611098</a>   |
| 6496 | <i>Spilopelia chinensis</i> | Eastern Spotted Dove | 2021/5/5   | 1 | 0 | 28.12676842 | 112.92630950 | <a href="https://www.inaturalist.org/observations/77629740">https://www.inaturalist.org/observations/77629740</a>   |
| 6497 | <i>Spilopelia chinensis</i> | Eastern Spotted Dove | 2022/2/22  | 1 | 0 | 28.12676842 | 112.92630950 | <a href="https://www.inaturalist.org/observations/107551052">https://www.inaturalist.org/observations/107551052</a> |
| 6498 | <i>Spilopelia chinensis</i> | Eastern Spotted Dove | 2020/11/21 | 1 | 0 | 28.13336500 | 112.92553700 | <a href="https://www.inaturalist.org/observations/66878392">https://www.inaturalist.org/observations/66878392</a>   |
| 6499 | <i>Spilopelia chinensis</i> | Eastern Spotted Dove | 2022/2/22  | 1 | 0 | 28.15393075 | 113.03824310 | <a href="https://www.inaturalist.org/observations/107549441">https://www.inaturalist.org/observations/107549441</a> |
| 6500 | <i>Spilopelia chinensis</i> | Eastern Spotted Dove | 2020/12/9  | 2 | 0 | 28.17793597 | 112.83933400 | <a href="https://www.inaturalist.org/observations/67663543">https://www.inaturalist.org/observations/67663543</a>   |
| 6501 | <i>Spilopelia chinensis</i> | Eastern Spotted Dove | 2020/12/8  | 1 | 0 | 28.18095397 | 112.86091600 | <a href="https://www.inaturalist.org/observations/67664815">https://www.inaturalist.org/observations/67664815</a>   |
| 6502 | <i>Spilopelia chinensis</i> | Eastern Spotted Dove | 2018/3/1   | 2 | 0 | 28.18441326 | 112.89062330 | <a href="https://www.inaturalist.org/observations/109067117">https://www.inaturalist.org/observations/109067117</a> |
| 6503 | <i>Spilopelia chinensis</i> | Eastern Spotted Dove | 2021/7/26  | 1 | 0 | 28.18667342 | 112.93576030 | <a href="https://www.inaturalist.org/observations/106372862">https://www.inaturalist.org/observations/106372862</a> |
| 6504 | <i>Spilopelia chinensis</i> | Eastern Spotted Dove | 2022/4/11  | 1 | 0 | 28.19191185 | 112.82128080 | <a href="https://www.inaturalist.org/observations/111184287">https://www.inaturalist.org/observations/111184287</a> |
| 6505 | <i>Spilopelia chinensis</i> | Eastern Spotted Dove | 2019/8/1   | 2 | 0 | 28.20067307 | 80.27366983  | <a href="https://www.inaturalist.org/observations/29965108">https://www.inaturalist.org/observations/29965108</a>   |
| 6506 | <i>Spilopelia chinensis</i> | Eastern Spotted Dove | 2019/6/5   | 1 | 0 | 28.20081317 | 112.92293280 | <a href="https://www.inaturalist.org/observations/26433463">https://www.inaturalist.org/observations/26433463</a>   |
| 6507 | <i>Spilopelia chinensis</i> | Eastern Spotted Dove | 2019/6/5   | 3 | 0 | 28.20241181 | 112.92243850 | <a href="https://www.inaturalist.org/observations/26487304">https://www.inaturalist.org/observations/26487304</a>   |
| 6508 | <i>Spilopelia chinensis</i> | Eastern Spotted Dove | 2019/5/16  | 2 | 0 | 28.20293044 | 112.92317160 | <a href="https://www.inaturalist.org/observations/25206368">https://www.inaturalist.org/observations/25206368</a>   |

|      |                             |                      |            |   |   |             |              |                                                                                                                     |
|------|-----------------------------|----------------------|------------|---|---|-------------|--------------|---------------------------------------------------------------------------------------------------------------------|
| 6509 | <i>Spilopelia chinensis</i> | Eastern Spotted Dove | 2019/4/24  | 1 | 0 | 28.20478805 | 112.92519160 | <a href="https://www.inaturalist.org/observations/25203751">https://www.inaturalist.org/observations/25203751</a>   |
| 6510 | <i>Spilopelia chinensis</i> | Eastern Spotted Dove | 2022/2/21  | 1 | 0 | 28.20974673 | 112.99805850 | <a href="https://www.inaturalist.org/observations/107411306">https://www.inaturalist.org/observations/107411306</a> |
| 6511 | <i>Spilopelia chinensis</i> | Eastern Spotted Dove | 2021/10/19 | 1 | 0 | 28.26656196 | 106.03988420 | <a href="https://www.inaturalist.org/observations/100859258">https://www.inaturalist.org/observations/100859258</a> |
| 6512 | <i>Spilopelia chinensis</i> | Eastern Spotted Dove | 2022/9/23  | 1 | 0 | 28.45000600 | 119.91861700 | <a href="https://www.inaturalist.org/observations/136150450">https://www.inaturalist.org/observations/136150450</a> |
| 6513 | <i>Spilopelia chinensis</i> | Eastern Spotted Dove | 2011/2/5   | 4 | 0 | 28.46959980 | 76.97955317  | <a href="https://www.inaturalist.org/observations/31497890">https://www.inaturalist.org/observations/31497890</a>   |
| 6514 | <i>Spilopelia chinensis</i> | Eastern Spotted Dove | 2021/10/2  | 1 | 0 | 28.47154547 | 105.66732750 | <a href="https://www.inaturalist.org/observations/97438766">https://www.inaturalist.org/observations/97438766</a>   |
| 6515 | <i>Spilopelia chinensis</i> | Eastern Spotted Dove | 2021/10/2  | 1 | 0 | 28.47154547 | 105.66732750 | <a href="https://www.inaturalist.org/observations/97438770">https://www.inaturalist.org/observations/97438770</a>   |
| 6516 | <i>Spilopelia chinensis</i> | Eastern Spotted Dove | 2021/8/4   | 1 | 0 | 28.56514315 | 108.49819240 | <a href="https://www.inaturalist.org/observations/90111509">https://www.inaturalist.org/observations/90111509</a>   |
| 6517 | <i>Spilopelia chinensis</i> | Eastern Spotted Dove | 2022/1/10  | 4 | 0 | 28.58013430 | 77.58233108  | <a href="https://www.inaturalist.org/observations/104699849">https://www.inaturalist.org/observations/104699849</a> |
| 6518 | <i>Spilopelia chinensis</i> | Eastern Spotted Dove | 2021/3/22  | 1 | 0 | 28.61326923 | 115.88935930 | <a href="https://www.inaturalist.org/observations/71769558">https://www.inaturalist.org/observations/71769558</a>   |
| 6519 | <i>Spilopelia chinensis</i> | Eastern Spotted Dove | 2019/3/19  | 1 | 0 | 28.79734993 | 113.07387540 | <a href="https://www.inaturalist.org/observations/21371502">https://www.inaturalist.org/observations/21371502</a>   |
| 6520 | <i>Spilopelia chinensis</i> | Eastern Spotted Dove | 2021/4/16  | 1 | 0 | 28.79953625 | 119.07791960 | <a href="https://www.inaturalist.org/observations/74820224">https://www.inaturalist.org/observations/74820224</a>   |
| 6521 | <i>Spilopelia chinensis</i> | Eastern Spotted Dove | 2021/4/16  | 1 | 0 | 28.79953625 | 119.07791960 | <a href="https://www.inaturalist.org/observations/74820237">https://www.inaturalist.org/observations/74820237</a>   |
| 6522 | <i>Spilopelia chinensis</i> | Eastern Spotted Dove | 2021/4/16  | 1 | 0 | 28.79970644 | 119.07782430 | <a href="https://www.inaturalist.org/observations/74818470">https://www.inaturalist.org/observations/74818470</a>   |
| 6523 | <i>Spilopelia chinensis</i> | Eastern Spotted Dove | 2019/6/29  | 1 | 0 | 28.80271912 | 113.07544710 | <a href="https://www.inaturalist.org/observations/27857630">https://www.inaturalist.org/observations/27857630</a>   |
| 6524 | <i>Spilopelia chinensis</i> | Eastern Spotted Dove | 2022/3/29  | 1 | 0 | 28.80634117 | 113.08351140 | <a href="https://www.inaturalist.org/observations/109822254">https://www.inaturalist.org/observations/109822254</a> |
| 6525 | <i>Spilopelia chinensis</i> | Eastern Spotted Dove | 2022/3/24  | 1 | 0 | 28.80974960 | 113.08268740 | <a href="https://www.inaturalist.org/observations/109326914">https://www.inaturalist.org/observations/109326914</a> |
| 6526 | <i>Spilopelia chinensis</i> | Eastern Spotted Dove | 2022/9/10  | 0 | 0 | 28.90555556 | 105.44777780 | <a href="https://www.inaturalist.org/observations/134382278">https://www.inaturalist.org/observations/134382278</a> |
| 6527 | <i>Spilopelia chinensis</i> | Eastern Spotted Dove | 2022/8/31  | 0 | 0 | 28.90583700 | 105.44782300 | <a href="https://www.inaturalist.org/observations/133073823">https://www.inaturalist.org/observations/133073823</a> |
| 6528 | <i>Spilopelia chinensis</i> | Eastern Spotted Dove | 2021/5/3   | 2 | 0 | 28.92600582 | 79.95382033  | <a href="https://www.inaturalist.org/observations/76838179">https://www.inaturalist.org/observations/76838179</a>   |
| 6529 | <i>Spilopelia chinensis</i> | Eastern Spotted Dove | 2021/5/1   | 1 | 0 | 28.94097972 | 79.81566679  | <a href="https://www.inaturalist.org/observations/76122877">https://www.inaturalist.org/observations/76122877</a>   |
| 6530 | <i>Spilopelia chinensis</i> | Eastern Spotted Dove | 2018/12/31 | 1 | 0 | 28.94543910 | 116.35842790 | <a href="https://www.inaturalist.org/observations/36380972">https://www.inaturalist.org/observations/36380972</a>   |
| 6531 | <i>Spilopelia chinensis</i> | Eastern Spotted Dove | 2021/5/3   | 1 | 0 | 28.95071197 | 79.77100297  | <a href="https://www.inaturalist.org/observations/76855388">https://www.inaturalist.org/observations/76855388</a>   |



|      |                             |                      |            |   |   |             |              |                                                                                                                     |
|------|-----------------------------|----------------------|------------|---|---|-------------|--------------|---------------------------------------------------------------------------------------------------------------------|
| 6532 | <i>Spilopelia chinensis</i> | Eastern Spotted Dove | 2021/4/30  | 1 | 0 | 28.95277197 | 79.75558397  | <a href="https://www.inaturalist.org/observations/75757175">https://www.inaturalist.org/observations/75757175</a>   |
| 6533 | <i>Spilopelia chinensis</i> | Eastern Spotted Dove | 2021/4/30  | 1 | 0 | 28.95344141 | 79.79994200  | <a href="https://www.inaturalist.org/observations/77580913">https://www.inaturalist.org/observations/77580913</a>   |
| 6534 | <i>Spilopelia chinensis</i> | Eastern Spotted Dove | 2020/9/28  | 3 | 0 | 28.95350507 | 79.79999565  | <a href="https://www.inaturalist.org/observations/61774315">https://www.inaturalist.org/observations/61774315</a>   |
| 6535 | <i>Spilopelia chinensis</i> | Eastern Spotted Dove | 2020/9/24  | 3 | 0 | 28.95518889 | 79.80247222  | <a href="https://www.inaturalist.org/observations/60602971">https://www.inaturalist.org/observations/60602971</a>   |
| 6536 | <i>Spilopelia chinensis</i> | Eastern Spotted Dove | 2020/9/13  | 2 | 0 | 28.95652528 | 79.80740860  | <a href="https://www.inaturalist.org/observations/59408762">https://www.inaturalist.org/observations/59408762</a>   |
| 6537 | <i>Spilopelia chinensis</i> | Eastern Spotted Dove | 2021/5/1   | 2 | 0 | 28.95771632 | 79.84648034  | <a href="https://www.inaturalist.org/observations/76190512">https://www.inaturalist.org/observations/76190512</a>   |
| 6538 | <i>Spilopelia chinensis</i> | Eastern Spotted Dove | 2021/5/3   | 1 | 0 | 28.96279497 | 79.75488300  | <a href="https://www.inaturalist.org/observations/76978933">https://www.inaturalist.org/observations/76978933</a>   |
| 6539 | <i>Spilopelia chinensis</i> | Eastern Spotted Dove | 2021/7/29  | 1 | 0 | 28.96358949 | 79.80493661  | <a href="https://www.inaturalist.org/observations/89136856">https://www.inaturalist.org/observations/89136856</a>   |
| 6540 | <i>Spilopelia chinensis</i> | Eastern Spotted Dove | 2021/8/2   | 2 | 0 | 28.96404417 | 79.80418157  | <a href="https://www.inaturalist.org/observations/89639942">https://www.inaturalist.org/observations/89639942</a>   |
| 6541 | <i>Spilopelia chinensis</i> | Eastern Spotted Dove | 2021/5/13  | 1 | 0 | 28.96415217 | 79.80419983  | <a href="https://www.inaturalist.org/observations/78554911">https://www.inaturalist.org/observations/78554911</a>   |
| 6542 | <i>Spilopelia chinensis</i> | Eastern Spotted Dove | 2020/9/13  | 2 | 0 | 28.97215094 | 79.80805281  | <a href="https://www.inaturalist.org/observations/59429620">https://www.inaturalist.org/observations/59429620</a>   |
| 6543 | <i>Spilopelia chinensis</i> | Eastern Spotted Dove | 2021/5/1   | 1 | 0 | 28.98023778 | 79.80508417  | <a href="https://www.inaturalist.org/observations/76474158">https://www.inaturalist.org/observations/76474158</a>   |
| 6544 | <i>Spilopelia chinensis</i> | Eastern Spotted Dove | 2019/5/18  | 1 | 0 | 29.02286260 | 79.48794120  | <a href="https://www.inaturalist.org/observations/48679091">https://www.inaturalist.org/observations/48679091</a>   |
| 6545 | <i>Spilopelia chinensis</i> | Eastern Spotted Dove | 2021/12/1  | 1 | 0 | 29.15699613 | 120.31559500 | <a href="https://www.inaturalist.org/observations/102293271">https://www.inaturalist.org/observations/102293271</a> |
| 6546 | <i>Spilopelia chinensis</i> | Eastern Spotted Dove | 2017/9/27  | 6 | 0 | 29.18330193 | 78.94941711  | <a href="https://www.inaturalist.org/observations/8119922">https://www.inaturalist.org/observations/8119922</a>     |
| 6547 | <i>Spilopelia chinensis</i> | Eastern Spotted Dove | 2020/4/20  | 3 | 0 | 29.23199378 | 79.00753131  | <a href="https://www.inaturalist.org/observations/42655746">https://www.inaturalist.org/observations/42655746</a>   |
| 6548 | <i>Spilopelia chinensis</i> | Eastern Spotted Dove | 2020/5/12  | 3 | 0 | 29.23300581 | 79.00772575  | <a href="https://www.inaturalist.org/observations/45754743">https://www.inaturalist.org/observations/45754743</a>   |
| 6549 | <i>Spilopelia chinensis</i> | Eastern Spotted Dove | 2021/9/17  | 2 | 0 | 29.23451569 | 79.58492111  | <a href="https://www.inaturalist.org/observations/99870722">https://www.inaturalist.org/observations/99870722</a>   |
| 6550 | <i>Spilopelia chinensis</i> | Eastern Spotted Dove | 2021/9/10  | 0 | 0 | 29.25378036 | 79.19133845  | <a href="https://www.inaturalist.org/observations/94281350">https://www.inaturalist.org/observations/94281350</a>   |
| 6551 | <i>Spilopelia chinensis</i> | Eastern Spotted Dove | 2021/1/18  | 2 | 0 | 29.25608973 | 79.54383194  | <a href="https://www.inaturalist.org/observations/68257138">https://www.inaturalist.org/observations/68257138</a>   |
| 6552 | <i>Spilopelia chinensis</i> | Eastern Spotted Dove | 2021/10/19 | 3 | 0 | 29.26936179 | 79.54411961  | <a href="https://www.inaturalist.org/observations/99504689">https://www.inaturalist.org/observations/99504689</a>   |
| 6553 | <i>Spilopelia chinensis</i> | Eastern Spotted Dove | 2022/4/14  | 2 | 0 | 29.28685907 | 79.54690918  | <a href="https://www.inaturalist.org/observations/111643523">https://www.inaturalist.org/observations/111643523</a> |
| 6554 | <i>Spilopelia chinensis</i> | Eastern Spotted Dove | 2022/7/1   | 1 | 0 | 29.30290300 | 117.20175100 | <a href="https://www.inaturalist.org/observations/125136005">https://www.inaturalist.org/observations/125136005</a> |

|      |                             |                      |           |   |   |             |              |                                                                                                                     |
|------|-----------------------------|----------------------|-----------|---|---|-------------|--------------|---------------------------------------------------------------------------------------------------------------------|
| 6555 | <i>Spilopelia chinensis</i> | Eastern Spotted Dove | 2022/8/29 | 1 | 0 | 29.32763464 | 121.94197660 | <a href="https://www.inaturalist.org/observations/133447862">https://www.inaturalist.org/observations/133447862</a> |
| 6556 | <i>Spilopelia chinensis</i> | Eastern Spotted Dove | 2017/7/24 | 4 | 0 | 29.32928482 | 117.92707440 | <a href="https://www.inaturalist.org/observations/7804267">https://www.inaturalist.org/observations/7804267</a>     |
| 6557 | <i>Spilopelia chinensis</i> | Eastern Spotted Dove | 2017/7/23 | 3 | 0 | 29.33013038 | 117.92733190 | <a href="https://www.inaturalist.org/observations/7552585">https://www.inaturalist.org/observations/7552585</a>     |
| 6558 | <i>Spilopelia chinensis</i> | Eastern Spotted Dove | 2016/1/21 | 5 | 0 | 29.33203390 | 79.39301240  | <a href="https://www.inaturalist.org/observations/124971413">https://www.inaturalist.org/observations/124971413</a> |
| 6559 | <i>Spilopelia chinensis</i> | Eastern Spotted Dove | 2015/5/28 | 3 | 0 | 29.33203390 | 79.39301240  | <a href="https://www.inaturalist.org/observations/127090565">https://www.inaturalist.org/observations/127090565</a> |
| 6560 | <i>Spilopelia chinensis</i> | Eastern Spotted Dove | 2019/6/7  | 1 | 0 | 29.33239645 | 113.15570930 | <a href="https://www.inaturalist.org/observations/38598552">https://www.inaturalist.org/observations/38598552</a>   |
| 6561 | <i>Spilopelia chinensis</i> | Eastern Spotted Dove | 2015/5/31 | 3 | 0 | 29.34430900 | 79.52943180  | <a href="https://www.inaturalist.org/observations/124971409">https://www.inaturalist.org/observations/124971409</a> |
| 6562 | <i>Spilopelia chinensis</i> | Eastern Spotted Dove | 2021/4/5  | 3 | 0 | 29.34844990 | 79.53189110  | <a href="https://www.inaturalist.org/observations/90776748">https://www.inaturalist.org/observations/90776748</a>   |
| 6563 | <i>Spilopelia chinensis</i> | Eastern Spotted Dove | 2018/4/25 | 3 | 0 | 29.35310667 | 79.52578167  | <a href="https://www.inaturalist.org/observations/129516498">https://www.inaturalist.org/observations/129516498</a> |
| 6564 | <i>Spilopelia chinensis</i> | Eastern Spotted Dove | 2022/7/5  | 4 | 0 | 29.35550333 | 79.52697500  | <a href="https://www.inaturalist.org/observations/133662377">https://www.inaturalist.org/observations/133662377</a> |
| 6565 | <i>Spilopelia chinensis</i> | Eastern Spotted Dove | 2022/7/6  | 5 | 0 | 29.36033500 | 79.53020667  | <a href="https://www.inaturalist.org/observations/133826383">https://www.inaturalist.org/observations/133826383</a> |
| 6566 | <i>Spilopelia chinensis</i> | Eastern Spotted Dove | 2022/7/6  | 4 | 0 | 29.36035667 | 79.53016333  | <a href="https://www.inaturalist.org/observations/133824405">https://www.inaturalist.org/observations/133824405</a> |
| 6567 | <i>Spilopelia chinensis</i> | Eastern Spotted Dove | 2018/4/26 | 3 | 0 | 29.36060000 | 79.53106833  | <a href="https://www.inaturalist.org/observations/129870535">https://www.inaturalist.org/observations/129870535</a> |
| 6568 | <i>Spilopelia chinensis</i> | Eastern Spotted Dove | 2018/4/26 | 5 | 0 | 29.36126500 | 79.53036500  | <a href="https://www.inaturalist.org/observations/129881493">https://www.inaturalist.org/observations/129881493</a> |
| 6569 | <i>Spilopelia chinensis</i> | Eastern Spotted Dove | 2018/4/26 | 5 | 0 | 29.36141333 | 79.53041000  | <a href="https://www.inaturalist.org/observations/129881461">https://www.inaturalist.org/observations/129881461</a> |
| 6570 | <i>Spilopelia chinensis</i> | Eastern Spotted Dove | 2019/6/7  | 1 | 0 | 29.36957427 | 113.01723060 | <a href="https://www.inaturalist.org/observations/38599074">https://www.inaturalist.org/observations/38599074</a>   |
| 6571 | <i>Spilopelia chinensis</i> | Eastern Spotted Dove | 2013/1/25 | 4 | 0 | 29.38030390 | 79.46356580  | <a href="https://www.inaturalist.org/observations/31520510">https://www.inaturalist.org/observations/31520510</a>   |
| 6572 | <i>Spilopelia chinensis</i> | Eastern Spotted Dove | 2021/5/2  | 2 | 0 | 29.41560610 | 78.99386200  | <a href="https://www.inaturalist.org/observations/78356590">https://www.inaturalist.org/observations/78356590</a>   |
| 6573 | <i>Spilopelia chinensis</i> | Eastern Spotted Dove | 2021/5/6  | 2 | 0 | 29.41560610 | 78.99386200  | <a href="https://www.inaturalist.org/observations/80627703">https://www.inaturalist.org/observations/80627703</a>   |
| 6574 | <i>Spilopelia chinensis</i> | Eastern Spotted Dove | 2017/3/13 | 1 | 0 | 29.42275658 | 79.42601987  | <a href="https://www.inaturalist.org/observations/102607565">https://www.inaturalist.org/observations/102607565</a> |
| 6575 | <i>Spilopelia chinensis</i> | Eastern Spotted Dove | 2017/3/13 | 2 | 0 | 29.42326410 | 79.42617260  | <a href="https://www.inaturalist.org/observations/84652189">https://www.inaturalist.org/observations/84652189</a>   |
| 6576 | <i>Spilopelia chinensis</i> | Eastern Spotted Dove | 2022/8/30 | 0 | 0 | 29.43450309 | 121.96621800 | <a href="https://www.inaturalist.org/observations/133476220">https://www.inaturalist.org/observations/133476220</a> |
| 6577 | <i>Spilopelia chinensis</i> | Eastern Spotted Dove | 2022/7/4  | 2 | 0 | 29.43537833 | 78.96050667  | <a href="https://www.inaturalist.org/observations/133097074">https://www.inaturalist.org/observations/133097074</a> |

|      |                             |                      |           |   |   |             |              |                                                                                                                     |
|------|-----------------------------|----------------------|-----------|---|---|-------------|--------------|---------------------------------------------------------------------------------------------------------------------|
| 6578 | <i>Spilopelia chinensis</i> | Eastern Spotted Dove | 2021/5/20 | 1 | 0 | 29.43765878 | 79.65451095  | <a href="https://www.inaturalist.org/observations/81394255">https://www.inaturalist.org/observations/81394255</a>   |
| 6579 | <i>Spilopelia chinensis</i> | Eastern Spotted Dove | 2021/9/22 | 1 | 0 | 29.43771893 | 79.65487741  | <a href="https://www.inaturalist.org/observations/95744457">https://www.inaturalist.org/observations/95744457</a>   |
| 6580 | <i>Spilopelia chinensis</i> | Eastern Spotted Dove | 2021/9/21 | 1 | 0 | 29.43788215 | 79.65415388  | <a href="https://www.inaturalist.org/observations/95636472">https://www.inaturalist.org/observations/95636472</a>   |
| 6581 | <i>Spilopelia chinensis</i> | Eastern Spotted Dove | 2021/9/21 | 1 | 0 | 29.43788478 | 79.65415053  | <a href="https://www.inaturalist.org/observations/95636454">https://www.inaturalist.org/observations/95636454</a>   |
| 6582 | <i>Spilopelia chinensis</i> | Eastern Spotted Dove | 2020/8/6  | 1 | 0 | 29.43845847 | 79.63483992  | <a href="https://www.inaturalist.org/observations/55676648">https://www.inaturalist.org/observations/55676648</a>   |
| 6583 | <i>Spilopelia chinensis</i> | Eastern Spotted Dove | 2020/8/1  | 3 | 0 | 29.44060558 | 79.58834877  | <a href="https://www.inaturalist.org/observations/55162224">https://www.inaturalist.org/observations/55162224</a>   |
| 6584 | <i>Spilopelia chinensis</i> | Eastern Spotted Dove | 2020/8/9  | 2 | 0 | 29.44061831 | 79.58834538  | <a href="https://www.inaturalist.org/observations/55908567">https://www.inaturalist.org/observations/55908567</a>   |
| 6585 | <i>Spilopelia chinensis</i> | Eastern Spotted Dove | 2020/9/24 | 3 | 0 | 29.44187957 | 79.58750297  | <a href="https://www.inaturalist.org/observations/60605433">https://www.inaturalist.org/observations/60605433</a>   |
| 6586 | <i>Spilopelia chinensis</i> | Eastern Spotted Dove | 2020/9/28 | 2 | 0 | 29.44187957 | 79.58750297  | <a href="https://www.inaturalist.org/observations/61217389">https://www.inaturalist.org/observations/61217389</a>   |
| 6587 | <i>Spilopelia chinensis</i> | Eastern Spotted Dove | 2021/6/28 | 1 | 0 | 29.44187957 | 79.58750297  | <a href="https://www.inaturalist.org/observations/87904489">https://www.inaturalist.org/observations/87904489</a>   |
| 6588 | <i>Spilopelia chinensis</i> | Eastern Spotted Dove | 2022/9/7  | 0 | 0 | 29.45705789 | 118.56986130 | <a href="https://www.inaturalist.org/observations/134372310">https://www.inaturalist.org/observations/134372310</a> |
| 6589 | <i>Spilopelia chinensis</i> | Eastern Spotted Dove | 2021/9/25 | 1 | 0 | 29.45756380 | 79.65500687  | <a href="https://www.inaturalist.org/observations/96204994">https://www.inaturalist.org/observations/96204994</a>   |
| 6590 | <i>Spilopelia chinensis</i> | Eastern Spotted Dove | 2021/6/10 | 2 | 0 | 29.46041326 | 79.65582423  | <a href="https://www.inaturalist.org/observations/82538439">https://www.inaturalist.org/observations/82538439</a>   |
| 6591 | <i>Spilopelia chinensis</i> | Eastern Spotted Dove | 2021/7/15 | 4 | 0 | 29.46041326 | 79.65582423  | <a href="https://www.inaturalist.org/observations/87101353">https://www.inaturalist.org/observations/87101353</a>   |
| 6592 | <i>Spilopelia chinensis</i> | Eastern Spotted Dove | 2022/7/21 | 4 | 0 | 29.46041326 | 79.65582423  | <a href="https://www.inaturalist.org/observations/127230318">https://www.inaturalist.org/observations/127230318</a> |
| 6593 | <i>Spilopelia chinensis</i> | Eastern Spotted Dove | 2022/3/30 | 3 | 0 | 29.46549632 | 79.64960144  | <a href="https://www.inaturalist.org/observations/110095618">https://www.inaturalist.org/observations/110095618</a> |
| 6594 | <i>Spilopelia chinensis</i> | Eastern Spotted Dove | 2019/5/5  | 3 | 0 | 29.47110410 | 79.15134330  | <a href="https://www.inaturalist.org/observations/24727136">https://www.inaturalist.org/observations/24727136</a>   |
| 6595 | <i>Spilopelia chinensis</i> | Eastern Spotted Dove | 2022/9/16 | 0 | 0 | 29.47148140 | 118.66986560 | <a href="https://www.inaturalist.org/observations/135502946">https://www.inaturalist.org/observations/135502946</a> |
| 6596 | <i>Spilopelia chinensis</i> | Eastern Spotted Dove | 2022/9/24 | 2 | 0 | 29.47682183 | 79.65454649  | <a href="https://www.inaturalist.org/observations/136373679">https://www.inaturalist.org/observations/136373679</a> |
| 6597 | <i>Spilopelia chinensis</i> | Eastern Spotted Dove | 2022/9/24 | 2 | 0 | 29.47682183 | 79.65454649  | <a href="https://www.inaturalist.org/observations/136373889">https://www.inaturalist.org/observations/136373889</a> |
| 6598 | <i>Spilopelia chinensis</i> | Eastern Spotted Dove | 2022/5/15 | 1 | 0 | 29.49525272 | 120.89435570 | <a href="https://www.inaturalist.org/observations/117095930">https://www.inaturalist.org/observations/117095930</a> |
| 6599 | <i>Spilopelia chinensis</i> | Eastern Spotted Dove | 2022/5/10 | 1 | 0 | 29.50135427 | 120.98384090 | <a href="https://www.inaturalist.org/observations/116417645">https://www.inaturalist.org/observations/116417645</a> |
| 6600 | <i>Spilopelia chinensis</i> | Eastern Spotted Dove | 2021/7/16 | 2 | 0 | 29.50714750 | 79.61922580  | <a href="https://www.inaturalist.org/observations/87412527">https://www.inaturalist.org/observations/87412527</a>   |

|      |                             |                      |           |   |   |             |              |                                                                                                                     |
|------|-----------------------------|----------------------|-----------|---|---|-------------|--------------|---------------------------------------------------------------------------------------------------------------------|
| 6601 | <i>Spilopelia chinensis</i> | Eastern Spotted Dove | 2021/8/13 | 1 | 0 | 29.51741667 | 79.62417778  | <a href="https://www.inaturalist.org/observations/90980341">https://www.inaturalist.org/observations/90980341</a>   |
| 6602 | <i>Spilopelia chinensis</i> | Eastern Spotted Dove | 2020/6/11 | 1 | 0 | 29.52349663 | 106.56673430 | <a href="https://www.inaturalist.org/observations/49270024">https://www.inaturalist.org/observations/49270024</a>   |
| 6603 | <i>Spilopelia chinensis</i> | Eastern Spotted Dove | 2017/1/28 | 3 | 0 | 29.53001369 | 78.77466023  | <a href="https://www.inaturalist.org/observations/40874463">https://www.inaturalist.org/observations/40874463</a>   |
| 6604 | <i>Spilopelia chinensis</i> | Eastern Spotted Dove | 2008/5/29 | 3 | 0 | 29.53001380 | 78.77466030  | <a href="https://www.inaturalist.org/observations/55248053">https://www.inaturalist.org/observations/55248053</a>   |
| 6605 | <i>Spilopelia chinensis</i> | Eastern Spotted Dove | 2010/5/21 | 6 | 0 | 29.53097300 | 78.77823800  | <a href="http://www.inaturalist.org/observations/330558">http://www.inaturalist.org/observations/330558</a>         |
| 6606 | <i>Spilopelia chinensis</i> | Eastern Spotted Dove | 2020/6/20 | 3 | 0 | 29.53657800 | 106.47375900 | <a href="https://www.inaturalist.org/observations/50253164">https://www.inaturalist.org/observations/50253164</a>   |
| 6607 | <i>Spilopelia chinensis</i> | Eastern Spotted Dove | 2022/5/12 | 2 | 0 | 29.53957783 | 106.52128040 | <a href="https://www.inaturalist.org/observations/117834651">https://www.inaturalist.org/observations/117834651</a> |
| 6608 | <i>Spilopelia chinensis</i> | Eastern Spotted Dove | 2020/8/8  | 3 | 0 | 29.56098260 | 79.38738260  | <a href="https://www.inaturalist.org/observations/56113836">https://www.inaturalist.org/observations/56113836</a>   |
| 6609 | <i>Spilopelia chinensis</i> | Eastern Spotted Dove | 2019/2/17 | 1 | 0 | 29.57514239 | 106.72975470 | <a href="https://www.inaturalist.org/observations/38904885">https://www.inaturalist.org/observations/38904885</a>   |
| 6610 | <i>Spilopelia chinensis</i> | Eastern Spotted Dove | 2018/4/22 | 1 | 0 | 29.57879167 | 78.86780833  | <a href="https://www.inaturalist.org/observations/129014946">https://www.inaturalist.org/observations/129014946</a> |
| 6611 | <i>Spilopelia chinensis</i> | Eastern Spotted Dove | 2017/2/9  | 6 | 0 | 29.58452000 | 78.86367500  | <a href="https://www.inaturalist.org/observations/5226304">https://www.inaturalist.org/observations/5226304</a>     |
| 6612 | <i>Spilopelia chinensis</i> | Eastern Spotted Dove | 2017/3/8  | 1 | 0 | 29.58542393 | 78.86159672  | <a href="https://www.inaturalist.org/observations/102481696">https://www.inaturalist.org/observations/102481696</a> |
| 6613 | <i>Spilopelia chinensis</i> | Eastern Spotted Dove | 2021/5/3  | 0 | 0 | 29.58547839 | 78.86243854  | <a href="https://www.inaturalist.org/observations/79275735">https://www.inaturalist.org/observations/79275735</a>   |
| 6614 | <i>Spilopelia chinensis</i> | Eastern Spotted Dove | 2021/5/3  | 0 | 0 | 29.58547839 | 78.86243854  | <a href="https://www.inaturalist.org/observations/79275736">https://www.inaturalist.org/observations/79275736</a>   |
| 6615 | <i>Spilopelia chinensis</i> | Eastern Spotted Dove | 2020/6/14 | 1 | 0 | 29.58945915 | 79.64290139  | <a href="https://www.inaturalist.org/observations/50775124">https://www.inaturalist.org/observations/50775124</a>   |
| 6616 | <i>Spilopelia chinensis</i> | Eastern Spotted Dove | 2013/7/5  | 1 | 0 | 29.59191109 | 79.04433193  | <a href="https://www.inaturalist.org/observations/79898548">https://www.inaturalist.org/observations/79898548</a>   |
| 6617 | <i>Spilopelia chinensis</i> | Eastern Spotted Dove | 2018/7/7  | 4 | 0 | 29.60075352 | 79.07790646  | <a href="https://www.inaturalist.org/observations/24419327">https://www.inaturalist.org/observations/24419327</a>   |
| 6618 | <i>Spilopelia chinensis</i> | Eastern Spotted Dove | 2021/5/3  | 2 | 0 | 29.61269140 | 78.81177360  | <a href="https://www.inaturalist.org/observations/79267800">https://www.inaturalist.org/observations/79267800</a>   |
| 6619 | <i>Spilopelia chinensis</i> | Eastern Spotted Dove | 2021/5/3  | 2 | 0 | 29.61269140 | 78.81177360  | <a href="https://www.inaturalist.org/observations/79267854">https://www.inaturalist.org/observations/79267854</a>   |
| 6620 | <i>Spilopelia chinensis</i> | Eastern Spotted Dove | 2021/5/3  | 2 | 0 | 29.61269140 | 78.81177360  | <a href="https://www.inaturalist.org/observations/79741487">https://www.inaturalist.org/observations/79741487</a>   |
| 6621 | <i>Spilopelia chinensis</i> | Eastern Spotted Dove | 2021/5/3  | 1 | 0 | 29.61269140 | 78.81177360  | <a href="https://www.inaturalist.org/observations/79741862">https://www.inaturalist.org/observations/79741862</a>   |
| 6622 | <i>Spilopelia chinensis</i> | Eastern Spotted Dove | 2015/4/13 | 3 | 0 | 29.61269140 | 78.81177360  | <a href="https://www.inaturalist.org/observations/127090564">https://www.inaturalist.org/observations/127090564</a> |
| 6623 | <i>Spilopelia chinensis</i> | Eastern Spotted Dove | 2021/4/25 | 1 | 0 | 29.61310333 | 79.65602231  | <a href="https://www.inaturalist.org/observations/78716207">https://www.inaturalist.org/observations/78716207</a>   |

|      |                             |                      |            |   |   |             |              |                                                                                                                     |
|------|-----------------------------|----------------------|------------|---|---|-------------|--------------|---------------------------------------------------------------------------------------------------------------------|
| 6624 | <i>Spilopelia chinensis</i> | Eastern Spotted Dove | 2015/5/28  | 3 | 0 | 29.70537330 | 79.75518060  | <a href="https://www.inaturalist.org/observations/124971408">https://www.inaturalist.org/observations/124971408</a> |
| 6625 | <i>Spilopelia chinensis</i> | Eastern Spotted Dove | 2016/10/31 | 5 | 0 | 29.70744970 | 79.07203350  | <a href="https://www.inaturalist.org/observations/4948699">https://www.inaturalist.org/observations/4948699</a>     |
| 6626 | <i>Spilopelia chinensis</i> | Eastern Spotted Dove | 2012/4/10  | 8 | 0 | 29.74679200 | 79.75507700  | <a href="http://www.inaturalist.org/observations/485279">http://www.inaturalist.org/observations/485279</a>         |
| 6627 | <i>Spilopelia chinensis</i> | Eastern Spotted Dove | 2021/4/25  | 1 | 0 | 29.77164449 | 121.33808290 | <a href="https://www.inaturalist.org/observations/75158072">https://www.inaturalist.org/observations/75158072</a>   |
| 6628 | <i>Spilopelia chinensis</i> | Eastern Spotted Dove | 2021/7/24  | 1 | 0 | 29.77686154 | 78.25074434  | <a href="https://www.inaturalist.org/observations/88382867">https://www.inaturalist.org/observations/88382867</a>   |
| 6629 | <i>Spilopelia chinensis</i> | Eastern Spotted Dove | 2021/7/17  | 1 | 0 | 29.78952079 | 79.55975833  | <a href="https://www.inaturalist.org/observations/87395996">https://www.inaturalist.org/observations/87395996</a>   |
| 6630 | <i>Spilopelia chinensis</i> | Eastern Spotted Dove | 2021/7/17  | 2 | 0 | 29.78952079 | 79.55975833  | <a href="https://www.inaturalist.org/observations/87396000">https://www.inaturalist.org/observations/87396000</a>   |
| 6631 | <i>Spilopelia chinensis</i> | Eastern Spotted Dove | 2021/7/17  | 2 | 0 | 29.78952079 | 79.55975833  | <a href="https://www.inaturalist.org/observations/87396009">https://www.inaturalist.org/observations/87396009</a>   |
| 6632 | <i>Spilopelia chinensis</i> | Eastern Spotted Dove | 2021/7/17  | 1 | 0 | 29.78952079 | 79.55975833  | <a href="https://www.inaturalist.org/observations/87396016">https://www.inaturalist.org/observations/87396016</a>   |
| 6633 | <i>Spilopelia chinensis</i> | Eastern Spotted Dove | 2021/7/17  | 2 | 0 | 29.78968554 | 79.55999198  | <a href="https://www.inaturalist.org/observations/87376220">https://www.inaturalist.org/observations/87376220</a>   |
| 6634 | <i>Spilopelia chinensis</i> | Eastern Spotted Dove | 2020/10/1  | 3 | 0 | 29.79024471 | 79.55910573  | <a href="https://www.inaturalist.org/observations/62026364">https://www.inaturalist.org/observations/62026364</a>   |
| 6635 | <i>Spilopelia chinensis</i> | Eastern Spotted Dove | 2020/10/11 | 2 | 0 | 29.79043268 | 79.55953890  | <a href="https://www.inaturalist.org/observations/62294519">https://www.inaturalist.org/observations/62294519</a>   |
| 6636 | <i>Spilopelia chinensis</i> | Eastern Spotted Dove | 2021/7/17  | 2 | 0 | 29.79152317 | 79.55955387  | <a href="https://www.inaturalist.org/observations/87374892">https://www.inaturalist.org/observations/87374892</a>   |
| 6637 | <i>Spilopelia chinensis</i> | Eastern Spotted Dove | 2019/11/6  | 2 | 0 | 29.79750122 | 78.22070966  | <a href="https://www.inaturalist.org/observations/48337158">https://www.inaturalist.org/observations/48337158</a>   |
| 6638 | <i>Spilopelia chinensis</i> | Eastern Spotted Dove | 2021/3/14  | 1 | 0 | 29.79836183 | 121.56225450 | <a href="https://www.inaturalist.org/observations/71201745">https://www.inaturalist.org/observations/71201745</a>   |
| 6639 | <i>Spilopelia chinensis</i> | Eastern Spotted Dove | 2021/4/16  | 1 | 0 | 29.79911538 | 121.56099660 | <a href="https://www.inaturalist.org/observations/74226342">https://www.inaturalist.org/observations/74226342</a>   |
| 6640 | <i>Spilopelia chinensis</i> | Eastern Spotted Dove | 2019/11/6  | 2 | 0 | 29.80162282 | 78.19007811  | <a href="https://www.inaturalist.org/observations/48337299">https://www.inaturalist.org/observations/48337299</a>   |
| 6641 | <i>Spilopelia chinensis</i> | Eastern Spotted Dove | 2021/4/10  | 1 | 0 | 29.80204310 | 121.56440530 | <a href="https://www.inaturalist.org/observations/73593503">https://www.inaturalist.org/observations/73593503</a>   |
| 6642 | <i>Spilopelia chinensis</i> | Eastern Spotted Dove | 2021/3/7   | 1 | 0 | 29.81142735 | 121.54903090 | <a href="https://www.inaturalist.org/observations/70731514">https://www.inaturalist.org/observations/70731514</a>   |
| 6643 | <i>Spilopelia chinensis</i> | Eastern Spotted Dove | 2021/3/15  | 1 | 0 | 29.81237425 | 121.53744110 | <a href="https://www.inaturalist.org/observations/71297482">https://www.inaturalist.org/observations/71297482</a>   |
| 6644 | <i>Spilopelia chinensis</i> | Eastern Spotted Dove | 2021/5/26  | 1 | 0 | 29.85666096 | 79.77448469  | <a href="https://www.inaturalist.org/observations/81685389">https://www.inaturalist.org/observations/81685389</a>   |
| 6645 | <i>Spilopelia chinensis</i> | Eastern Spotted Dove | 2020/8/24  | 2 | 0 | 29.87430295 | 114.30174730 | <a href="https://www.inaturalist.org/observations/57423339">https://www.inaturalist.org/observations/57423339</a>   |
| 6646 | <i>Spilopelia chinensis</i> | Eastern Spotted Dove | 2019/12/3  | 1 | 0 | 29.87892765 | 122.40741730 | <a href="https://www.inaturalist.org/observations/36881764">https://www.inaturalist.org/observations/36881764</a>   |

|      |                             |                      |            |   |   |             |              |                                                                                                                     |
|------|-----------------------------|----------------------|------------|---|---|-------------|--------------|---------------------------------------------------------------------------------------------------------------------|
| 6647 | <i>Spilopelia chinensis</i> | Eastern Spotted Dove | 2017/7/9   | 5 | 0 | 29.89706510 | 79.60844200  | <a href="https://www.inaturalist.org/observations/7306993">https://www.inaturalist.org/observations/7306993</a>     |
| 6648 | <i>Spilopelia chinensis</i> | Eastern Spotted Dove | 2018/4/7   | 5 | 0 | 29.94569060 | 78.16424780  | <a href="https://www.inaturalist.org/observations/12189216">https://www.inaturalist.org/observations/12189216</a>   |
| 6649 | <i>Spilopelia chinensis</i> | Eastern Spotted Dove | 2021/8/18  | 1 | 0 | 29.95498361 | 80.30331167  | <a href="https://www.inaturalist.org/observations/91930215">https://www.inaturalist.org/observations/91930215</a>   |
| 6650 | <i>Spilopelia chinensis</i> | Eastern Spotted Dove | 2021/8/18  | 1 | 0 | 29.95509900 | 80.30326800  | <a href="https://www.inaturalist.org/observations/92872131">https://www.inaturalist.org/observations/92872131</a>   |
| 6651 | <i>Spilopelia chinensis</i> | Eastern Spotted Dove | 2019/3/15  | 6 | 0 | 29.96848567 | 78.21663092  | <a href="https://www.inaturalist.org/observations/35639648">https://www.inaturalist.org/observations/35639648</a>   |
| 6652 | <i>Spilopelia chinensis</i> | Eastern Spotted Dove | 2021/10/2  | 1 | 0 | 29.97228444 | 117.99559970 | <a href="https://www.inaturalist.org/observations/97425516">https://www.inaturalist.org/observations/97425516</a>   |
| 6653 | <i>Spilopelia chinensis</i> | Eastern Spotted Dove | 2019/3/15  | 4 | 0 | 29.99181289 | 78.28926086  | <a href="https://www.inaturalist.org/observations/41028839">https://www.inaturalist.org/observations/41028839</a>   |
| 6654 | <i>Spilopelia chinensis</i> | Eastern Spotted Dove | 2022/5/23  | 1 | 0 | 30.01743617 | 122.11780550 | <a href="https://www.inaturalist.org/observations/118637920">https://www.inaturalist.org/observations/118637920</a> |
| 6655 | <i>Spilopelia chinensis</i> | Eastern Spotted Dove | 2022/9/21  | 0 | 0 | 30.03762110 | 119.59635120 | <a href="https://www.inaturalist.org/observations/136009912">https://www.inaturalist.org/observations/136009912</a> |
| 6656 | <i>Spilopelia chinensis</i> | Eastern Spotted Dove | 2018/11/23 | 6 | 0 | 30.03976130 | 80.15506920  | <a href="https://www.inaturalist.org/observations/19435792">https://www.inaturalist.org/observations/19435792</a>   |
| 6657 | <i>Spilopelia chinensis</i> | Eastern Spotted Dove | 2020/6/27  | 1 | 0 | 30.04679633 | 80.34534117  | <a href="https://www.inaturalist.org/observations/51134087">https://www.inaturalist.org/observations/51134087</a>   |
| 6658 | <i>Spilopelia chinensis</i> | Eastern Spotted Dove | 2018/4/2   | 4 | 0 | 30.06675300 | 79.01929970  | <a href="https://www.inaturalist.org/observations/10732907">https://www.inaturalist.org/observations/10732907</a>   |
| 6659 | <i>Spilopelia chinensis</i> | Eastern Spotted Dove | 2021/8/3   | 2 | 0 | 30.07020417 | 80.23734111  | <a href="https://www.inaturalist.org/observations/89758029">https://www.inaturalist.org/observations/89758029</a>   |
| 6660 | <i>Spilopelia chinensis</i> | Eastern Spotted Dove | 2021/8/3   | 1 | 0 | 30.07086639 | 80.23805250  | <a href="https://www.inaturalist.org/observations/89757846">https://www.inaturalist.org/observations/89757846</a>   |
| 6661 | <i>Spilopelia chinensis</i> | Eastern Spotted Dove | 2021/8/15  | 2 | 0 | 30.07924000 | 80.25983556  | <a href="https://www.inaturalist.org/observations/91259043">https://www.inaturalist.org/observations/91259043</a>   |
| 6662 | <i>Spilopelia chinensis</i> | Eastern Spotted Dove | 2021/8/15  | 1 | 0 | 30.07924000 | 80.25983556  | <a href="https://www.inaturalist.org/observations/91367528">https://www.inaturalist.org/observations/91367528</a>   |
| 6663 | <i>Spilopelia chinensis</i> | Eastern Spotted Dove | 2021/12/9  | 1 | 0 | 30.08581833 | 116.74285170 | <a href="https://www.inaturalist.org/observations/104350906">https://www.inaturalist.org/observations/104350906</a> |
| 6664 | <i>Spilopelia chinensis</i> | Eastern Spotted Dove | 2021/12/9  | 1 | 0 | 30.08681500 | 116.74368330 | <a href="https://www.inaturalist.org/observations/104350905">https://www.inaturalist.org/observations/104350905</a> |
| 6665 | <i>Spilopelia chinensis</i> | Eastern Spotted Dove | 2016/5/3   | 7 | 0 | 30.08692800 | 78.26761200  | <a href="http://www.inaturalist.org/observations/3501197">http://www.inaturalist.org/observations/3501197</a>       |
| 6666 | <i>Spilopelia chinensis</i> | Eastern Spotted Dove | 2022/4/18  | 1 | 0 | 30.09477333 | 120.13362380 | <a href="https://www.inaturalist.org/observations/112541191">https://www.inaturalist.org/observations/112541191</a> |
| 6667 | <i>Spilopelia chinensis</i> | Eastern Spotted Dove | 2021/8/6   | 2 | 0 | 30.09778000 | 80.24489889  | <a href="https://www.inaturalist.org/observations/90116300">https://www.inaturalist.org/observations/90116300</a>   |
| 6668 | <i>Spilopelia chinensis</i> | Eastern Spotted Dove | 2021/8/6   | 1 | 0 | 30.09778000 | 80.24489889  | <a href="https://www.inaturalist.org/observations/90116770">https://www.inaturalist.org/observations/90116770</a>   |
| 6669 | <i>Spilopelia chinensis</i> | Eastern Spotted Dove | 2021/9/11  | 3 | 0 | 30.11082748 | 78.37788373  | <a href="https://www.inaturalist.org/observations/98391054">https://www.inaturalist.org/observations/98391054</a>   |

|      |                             |                      |            |   |   |             |              |                                                                                                                     |
|------|-----------------------------|----------------------|------------|---|---|-------------|--------------|---------------------------------------------------------------------------------------------------------------------|
| 6670 | <i>Spilopelia chinensis</i> | Eastern Spotted Dove | 2019/3/13  | 3 | 0 | 30.12004064 | 78.34584525  | <a href="https://www.inaturalist.org/observations/22697140">https://www.inaturalist.org/observations/22697140</a>   |
| 6671 | <i>Spilopelia chinensis</i> | Eastern Spotted Dove | 2019/1/21  | 3 | 0 | 30.13036390 | 77.29013532  | <a href="https://www.inaturalist.org/observations/20366204">https://www.inaturalist.org/observations/20366204</a>   |
| 6672 | <i>Spilopelia chinensis</i> | Eastern Spotted Dove | 2021/10/1  | 1 | 0 | 30.20022895 | 120.10487500 | <a href="https://www.inaturalist.org/observations/97206945">https://www.inaturalist.org/observations/97206945</a>   |
| 6673 | <i>Spilopelia chinensis</i> | Eastern Spotted Dove | 2022/1/8   | 1 | 0 | 30.20541462 | 120.08857010 | <a href="https://www.inaturalist.org/observations/104623746">https://www.inaturalist.org/observations/104623746</a> |
| 6674 | <i>Spilopelia chinensis</i> | Eastern Spotted Dove | 2020/12/12 | 1 | 0 | 30.20783034 | 120.14222970 | <a href="https://www.inaturalist.org/observations/66943202">https://www.inaturalist.org/observations/66943202</a>   |
| 6675 | <i>Spilopelia chinensis</i> | Eastern Spotted Dove | 2021/1/30  | 1 | 0 | 30.20783034 | 120.14222970 | <a href="https://www.inaturalist.org/observations/68802372">https://www.inaturalist.org/observations/68802372</a>   |
| 6676 | <i>Spilopelia chinensis</i> | Eastern Spotted Dove | 2022/1/9   | 1 | 0 | 30.20783034 | 120.14222970 | <a href="https://www.inaturalist.org/observations/131429382">https://www.inaturalist.org/observations/131429382</a> |
| 6677 | <i>Spilopelia chinensis</i> | Eastern Spotted Dove | 2022/1/2   | 1 | 0 | 30.20844227 | 120.14087790 | <a href="https://www.inaturalist.org/observations/104175839">https://www.inaturalist.org/observations/104175839</a> |
| 6678 | <i>Spilopelia chinensis</i> | Eastern Spotted Dove | 2022/1/30  | 1 | 0 | 30.20844227 | 120.14087790 | <a href="https://www.inaturalist.org/observations/105842605">https://www.inaturalist.org/observations/105842605</a> |
| 6679 | <i>Spilopelia chinensis</i> | Eastern Spotted Dove | 2022/2/11  | 1 | 0 | 30.20844227 | 120.14087790 | <a href="https://www.inaturalist.org/observations/106541831">https://www.inaturalist.org/observations/106541831</a> |
| 6680 | <i>Spilopelia chinensis</i> | Eastern Spotted Dove | 2022/2/24  | 1 | 0 | 30.20844227 | 120.14087790 | <a href="https://www.inaturalist.org/observations/107551069">https://www.inaturalist.org/observations/107551069</a> |
| 6681 | <i>Spilopelia chinensis</i> | Eastern Spotted Dove | 2022/7/17  | 1 | 0 | 30.20844227 | 120.14087790 | <a href="https://www.inaturalist.org/observations/127487034">https://www.inaturalist.org/observations/127487034</a> |
| 6682 | <i>Spilopelia chinensis</i> | Eastern Spotted Dove | 2020/12/19 | 3 | 0 | 30.21283539 | 78.94950669  | <a href="https://www.inaturalist.org/observations/66763235">https://www.inaturalist.org/observations/66763235</a>   |
| 6683 | <i>Spilopelia chinensis</i> | Eastern Spotted Dove | 2022/1/8   | 2 | 0 | 30.21420206 | 120.09502850 | <a href="https://www.inaturalist.org/observations/104623717">https://www.inaturalist.org/observations/104623717</a> |
| 6684 | <i>Spilopelia chinensis</i> | Eastern Spotted Dove | 2021/8/2   | 1 | 0 | 30.22246900 | 78.76955597  | <a href="https://www.inaturalist.org/observations/89597432">https://www.inaturalist.org/observations/89597432</a>   |
| 6685 | <i>Spilopelia chinensis</i> | Eastern Spotted Dove | 2021/2/16  | 1 | 0 | 30.22455038 | 120.14978850 | <a href="https://www.inaturalist.org/observations/69657153">https://www.inaturalist.org/observations/69657153</a>   |
| 6686 | <i>Spilopelia chinensis</i> | Eastern Spotted Dove | 2022/6/6   | 1 | 0 | 30.22759787 | 120.19554000 | <a href="https://www.inaturalist.org/observations/120477924">https://www.inaturalist.org/observations/120477924</a> |
| 6687 | <i>Spilopelia chinensis</i> | Eastern Spotted Dove | 2021/1/16  | 1 | 0 | 30.22769766 | 120.09455790 | <a href="https://www.inaturalist.org/observations/68143292">https://www.inaturalist.org/observations/68143292</a>   |
| 6688 | <i>Spilopelia chinensis</i> | Eastern Spotted Dove | 2022/3/26  | 1 | 0 | 30.22778509 | 120.13110290 | <a href="https://www.inaturalist.org/observations/109763023">https://www.inaturalist.org/observations/109763023</a> |
| 6689 | <i>Spilopelia chinensis</i> | Eastern Spotted Dove | 2019/8/10  | 2 | 0 | 30.22835273 | 120.13372440 | <a href="https://www.inaturalist.org/observations/106066668">https://www.inaturalist.org/observations/106066668</a> |
| 6690 | <i>Spilopelia chinensis</i> | Eastern Spotted Dove | 2022/4/3   | 1 | 0 | 30.22939383 | 120.14040720 | <a href="https://www.inaturalist.org/observations/112423753">https://www.inaturalist.org/observations/112423753</a> |
| 6691 | <i>Spilopelia chinensis</i> | Eastern Spotted Dove | 2017/10/27 | 3 | 0 | 30.22945545 | 120.14844930 | <a href="https://www.inaturalist.org/observations/17738791">https://www.inaturalist.org/observations/17738791</a>   |
| 6692 | <i>Spilopelia chinensis</i> | Eastern Spotted Dove | 2022/5/28  | 1 | 0 | 30.23000000 | 120.14100000 | <a href="https://www.inaturalist.org/observations/119391764">https://www.inaturalist.org/observations/119391764</a> |

|      |                             |                      |           |   |   |             |              |                                                                                                                     |
|------|-----------------------------|----------------------|-----------|---|---|-------------|--------------|---------------------------------------------------------------------------------------------------------------------|
| 6693 | <i>Spilopelia chinensis</i> | Eastern Spotted Dove | 2021/11/2 | 1 | 0 | 30.23081250 | 120.13908270 | <a href="https://www.inaturalist.org/observations/102343335">https://www.inaturalist.org/observations/102343335</a> |
| 6694 | <i>Spilopelia chinensis</i> | Eastern Spotted Dove | 2022/6/15 | 2 | 0 | 30.23377666 | 120.20322250 | <a href="https://www.inaturalist.org/observations/121883700">https://www.inaturalist.org/observations/121883700</a> |
| 6695 | <i>Spilopelia chinensis</i> | Eastern Spotted Dove | 2021/1/16 | 1 | 0 | 30.23452255 | 78.20846646  | <a href="https://www.inaturalist.org/observations/68138797">https://www.inaturalist.org/observations/68138797</a>   |
| 6696 | <i>Spilopelia chinensis</i> | Eastern Spotted Dove | 2020/9/15 | 2 | 0 | 30.23460767 | 78.20850371  | <a href="https://www.inaturalist.org/observations/59640178">https://www.inaturalist.org/observations/59640178</a>   |
| 6697 | <i>Spilopelia chinensis</i> | Eastern Spotted Dove | 2022/5/27 | 1 | 0 | 30.23525833 | 120.19870560 | <a href="https://www.inaturalist.org/observations/118885956">https://www.inaturalist.org/observations/118885956</a> |
| 6698 | <i>Spilopelia chinensis</i> | Eastern Spotted Dove | 2021/2/3  | 1 | 0 | 30.23679364 | 119.75188260 | <a href="https://www.inaturalist.org/observations/69001781">https://www.inaturalist.org/observations/69001781</a>   |
| 6699 | <i>Spilopelia chinensis</i> | Eastern Spotted Dove | 2021/3/15 | 1 | 0 | 30.23679364 | 119.75188260 | <a href="https://www.inaturalist.org/observations/73608358">https://www.inaturalist.org/observations/73608358</a>   |
| 6700 | <i>Spilopelia chinensis</i> | Eastern Spotted Dove | 2021/1/9  | 1 | 0 | 30.23733562 | 120.14005010 | <a href="https://www.inaturalist.org/observations/68321284">https://www.inaturalist.org/observations/68321284</a>   |
| 6701 | <i>Spilopelia chinensis</i> | Eastern Spotted Dove | 2021/2/20 | 1 | 0 | 30.23736825 | 119.75422160 | <a href="https://www.inaturalist.org/observations/69875905">https://www.inaturalist.org/observations/69875905</a>   |
| 6702 | <i>Spilopelia chinensis</i> | Eastern Spotted Dove | 2020/6/2  | 0 | 0 | 30.23750037 | 120.13358040 | <a href="https://www.inaturalist.org/observations/112860694">https://www.inaturalist.org/observations/112860694</a> |
| 6703 | <i>Spilopelia chinensis</i> | Eastern Spotted Dove | 2021/1/24 | 1 | 0 | 30.23798011 | 119.76158130 | <a href="https://www.inaturalist.org/observations/68590300">https://www.inaturalist.org/observations/68590300</a>   |
| 6704 | <i>Spilopelia chinensis</i> | Eastern Spotted Dove | 2021/2/20 | 1 | 0 | 30.23798011 | 119.76158130 | <a href="https://www.inaturalist.org/observations/70020283">https://www.inaturalist.org/observations/70020283</a>   |
| 6705 | <i>Spilopelia chinensis</i> | Eastern Spotted Dove | 2022/1/3  | 1 | 0 | 30.23864740 | 119.75016590 | <a href="https://www.inaturalist.org/observations/104278651">https://www.inaturalist.org/observations/104278651</a> |
| 6706 | <i>Spilopelia chinensis</i> | Eastern Spotted Dove | 2022/1/11 | 1 | 0 | 30.23864740 | 119.75016590 | <a href="https://www.inaturalist.org/observations/104852794">https://www.inaturalist.org/observations/104852794</a> |
| 6707 | <i>Spilopelia chinensis</i> | Eastern Spotted Dove | 2022/2/5  | 1 | 0 | 30.23864740 | 119.75016590 | <a href="https://www.inaturalist.org/observations/106368252">https://www.inaturalist.org/observations/106368252</a> |
| 6708 | <i>Spilopelia chinensis</i> | Eastern Spotted Dove | 2022/3/8  | 1 | 0 | 30.23864740 | 119.75016590 | <a href="https://www.inaturalist.org/observations/108295536">https://www.inaturalist.org/observations/108295536</a> |
| 6709 | <i>Spilopelia chinensis</i> | Eastern Spotted Dove | 2022/4/6  | 1 | 0 | 30.23864740 | 119.75016590 | <a href="https://www.inaturalist.org/observations/112098897">https://www.inaturalist.org/observations/112098897</a> |
| 6710 | <i>Spilopelia chinensis</i> | Eastern Spotted Dove | 2021/8/2  | 1 | 0 | 30.23877283 | 120.12540930 | <a href="https://www.inaturalist.org/observations/89760931">https://www.inaturalist.org/observations/89760931</a>   |
| 6711 | <i>Spilopelia chinensis</i> | Eastern Spotted Dove | 2021/4/16 | 1 | 0 | 30.23985140 | 120.12789460 | <a href="https://www.inaturalist.org/observations/74131444">https://www.inaturalist.org/observations/74131444</a>   |
| 6712 | <i>Spilopelia chinensis</i> | Eastern Spotted Dove | 2021/4/24 | 1 | 0 | 30.23985140 | 120.12789460 | <a href="https://www.inaturalist.org/observations/75008282">https://www.inaturalist.org/observations/75008282</a>   |
| 6713 | <i>Spilopelia chinensis</i> | Eastern Spotted Dove | 2022/4/4  | 1 | 0 | 30.23985140 | 120.12789460 | <a href="https://www.inaturalist.org/observations/112541068">https://www.inaturalist.org/observations/112541068</a> |
| 6714 | <i>Spilopelia chinensis</i> | Eastern Spotted Dove | 2022/4/16 | 1 | 0 | 30.24067200 | 120.13057300 | <a href="https://www.inaturalist.org/observations/111759196">https://www.inaturalist.org/observations/111759196</a> |
| 6715 | <i>Spilopelia chinensis</i> | Eastern Spotted Dove | 2022/9/25 | 2 | 0 | 30.24067200 | 120.13057300 | <a href="https://www.inaturalist.org/observations/136406226">https://www.inaturalist.org/observations/136406226</a> |



|      |                             |                      |            |   |   |             |              |                                                                                                                     |
|------|-----------------------------|----------------------|------------|---|---|-------------|--------------|---------------------------------------------------------------------------------------------------------------------|
| 6716 | <i>Spilopelia chinensis</i> | Eastern Spotted Dove | 2022/2/6   | 2 | 0 | 30.24131330 | 120.15639090 | <a href="https://www.inaturalist.org/observations/106368683">https://www.inaturalist.org/observations/106368683</a> |
| 6717 | <i>Spilopelia chinensis</i> | Eastern Spotted Dove | 2022/4/10  | 1 | 0 | 30.24268170 | 119.77445120 | <a href="https://www.inaturalist.org/observations/111167114">https://www.inaturalist.org/observations/111167114</a> |
| 6718 | <i>Spilopelia chinensis</i> | Eastern Spotted Dove | 2021/2/20  | 1 | 0 | 30.24346552 | 119.73905280 | <a href="https://www.inaturalist.org/observations/69875857">https://www.inaturalist.org/observations/69875857</a>   |
| 6719 | <i>Spilopelia chinensis</i> | Eastern Spotted Dove | 2021/2/28  | 1 | 0 | 30.24981761 | 120.12899370 | <a href="https://www.inaturalist.org/observations/70299467">https://www.inaturalist.org/observations/70299467</a>   |
| 6720 | <i>Spilopelia chinensis</i> | Eastern Spotted Dove | 2021/4/11  | 1 | 0 | 30.24981761 | 120.12899370 | <a href="https://www.inaturalist.org/observations/74398266">https://www.inaturalist.org/observations/74398266</a>   |
| 6721 | <i>Spilopelia chinensis</i> | Eastern Spotted Dove | 2021/12/9  | 1 | 0 | 30.25100000 | 120.11300000 | <a href="https://www.inaturalist.org/observations/102767717">https://www.inaturalist.org/observations/102767717</a> |
| 6722 | <i>Spilopelia chinensis</i> | Eastern Spotted Dove | 2021/12/23 | 1 | 0 | 30.25100000 | 120.11300000 | <a href="https://www.inaturalist.org/observations/103514706">https://www.inaturalist.org/observations/103514706</a> |
| 6723 | <i>Spilopelia chinensis</i> | Eastern Spotted Dove | 2022/3/13  | 1 | 0 | 30.25100000 | 120.11300000 | <a href="https://www.inaturalist.org/observations/108574936">https://www.inaturalist.org/observations/108574936</a> |
| 6724 | <i>Spilopelia chinensis</i> | Eastern Spotted Dove | 2021/10/25 | 1 | 0 | 30.25140029 | 119.90746640 | <a href="https://www.inaturalist.org/observations/99610869">https://www.inaturalist.org/observations/99610869</a>   |
| 6725 | <i>Spilopelia chinensis</i> | Eastern Spotted Dove | 2021/10/25 | 1 | 0 | 30.25140029 | 119.90746640 | <a href="https://www.inaturalist.org/observations/99610873">https://www.inaturalist.org/observations/99610873</a>   |
| 6726 | <i>Spilopelia chinensis</i> | Eastern Spotted Dove | 2020/10/13 | 2 | 0 | 30.25143905 | 120.12275330 | <a href="https://www.inaturalist.org/observations/62474839">https://www.inaturalist.org/observations/62474839</a>   |
| 6727 | <i>Spilopelia chinensis</i> | Eastern Spotted Dove | 2022/2/14  | 1 | 0 | 30.25146977 | 120.14238630 | <a href="https://www.inaturalist.org/observations/107410018">https://www.inaturalist.org/observations/107410018</a> |
| 6728 | <i>Spilopelia chinensis</i> | Eastern Spotted Dove | 2021/3/2   | 1 | 0 | 30.25159840 | 120.13666910 | <a href="https://www.inaturalist.org/observations/70442812">https://www.inaturalist.org/observations/70442812</a>   |
| 6729 | <i>Spilopelia chinensis</i> | Eastern Spotted Dove | 2021/3/20  | 1 | 0 | 30.25170664 | 120.14228470 | <a href="https://www.inaturalist.org/observations/71609669">https://www.inaturalist.org/observations/71609669</a>   |
| 6730 | <i>Spilopelia chinensis</i> | Eastern Spotted Dove | 2021/5/5   | 1 | 0 | 30.25170664 | 120.14228470 | <a href="https://www.inaturalist.org/observations/79227842">https://www.inaturalist.org/observations/79227842</a>   |
| 6731 | <i>Spilopelia chinensis</i> | Eastern Spotted Dove | 2021/4/4   | 1 | 0 | 30.25170664 | 120.14228470 | <a href="https://www.inaturalist.org/observations/98086807">https://www.inaturalist.org/observations/98086807</a>   |
| 6732 | <i>Spilopelia chinensis</i> | Eastern Spotted Dove | 2021/10/23 | 1 | 0 | 30.25170664 | 120.14228470 | <a href="https://www.inaturalist.org/observations/99063461">https://www.inaturalist.org/observations/99063461</a>   |
| 6733 | <i>Spilopelia chinensis</i> | Eastern Spotted Dove | 2021/9/21  | 1 | 0 | 30.25170664 | 120.14228470 | <a href="https://www.inaturalist.org/observations/99077873">https://www.inaturalist.org/observations/99077873</a>   |
| 6734 | <i>Spilopelia chinensis</i> | Eastern Spotted Dove | 2021/11/13 | 1 | 0 | 30.25170664 | 120.14228470 | <a href="https://www.inaturalist.org/observations/101697888">https://www.inaturalist.org/observations/101697888</a> |
| 6735 | <i>Spilopelia chinensis</i> | Eastern Spotted Dove | 2022/3/6   | 1 | 0 | 30.25170664 | 120.14228470 | <a href="https://www.inaturalist.org/observations/111172375">https://www.inaturalist.org/observations/111172375</a> |
| 6736 | <i>Spilopelia chinensis</i> | Eastern Spotted Dove | 2021/2/27  | 1 | 0 | 30.25228241 | 120.12025340 | <a href="https://www.inaturalist.org/observations/70253343">https://www.inaturalist.org/observations/70253343</a>   |
| 6737 | <i>Spilopelia chinensis</i> | Eastern Spotted Dove | 2021/2/2   | 1 | 0 | 30.25351764 | 120.11996840 | <a href="https://www.inaturalist.org/observations/68957010">https://www.inaturalist.org/observations/68957010</a>   |
| 6738 | <i>Spilopelia chinensis</i> | Eastern Spotted Dove | 2021/3/14  | 1 | 0 | 30.25351764 | 120.11996840 | <a href="https://www.inaturalist.org/observations/71274598">https://www.inaturalist.org/observations/71274598</a>   |

|      |                             |                      |            |   |   |             |              |                                                                                                                     |
|------|-----------------------------|----------------------|------------|---|---|-------------|--------------|---------------------------------------------------------------------------------------------------------------------|
| 6739 | <i>Spilopelia chinensis</i> | Eastern Spotted Dove | 2021/3/14  | 1 | 0 | 30.25351764 | 120.11996840 | <a href="https://www.inaturalist.org/observations/71274943">https://www.inaturalist.org/observations/71274943</a>   |
| 6740 | <i>Spilopelia chinensis</i> | Eastern Spotted Dove | 2020/11/29 | 1 | 0 | 30.25351764 | 120.11996840 | <a href="https://www.inaturalist.org/observations/98086134">https://www.inaturalist.org/observations/98086134</a>   |
| 6741 | <i>Spilopelia chinensis</i> | Eastern Spotted Dove | 2021/11/9  | 2 | 0 | 30.25351764 | 120.11996840 | <a href="https://www.inaturalist.org/observations/100667932">https://www.inaturalist.org/observations/100667932</a> |
| 6742 | <i>Spilopelia chinensis</i> | Eastern Spotted Dove | 2022/2/20  | 1 | 0 | 30.25351764 | 120.11996840 | <a href="https://www.inaturalist.org/observations/107103752">https://www.inaturalist.org/observations/107103752</a> |
| 6743 | <i>Spilopelia chinensis</i> | Eastern Spotted Dove | 2022/2/19  | 1 | 0 | 30.25351764 | 120.11996840 | <a href="https://www.inaturalist.org/observations/107103930">https://www.inaturalist.org/observations/107103930</a> |
| 6744 | <i>Spilopelia chinensis</i> | Eastern Spotted Dove | 2022/5/16  | 1 | 0 | 30.25351764 | 120.11996840 | <a href="https://www.inaturalist.org/observations/117301079">https://www.inaturalist.org/observations/117301079</a> |
| 6745 | <i>Spilopelia chinensis</i> | Eastern Spotted Dove | 2021/2/27  | 1 | 0 | 30.25392279 | 120.12038220 | <a href="https://www.inaturalist.org/observations/70235771">https://www.inaturalist.org/observations/70235771</a>   |
| 6746 | <i>Spilopelia chinensis</i> | Eastern Spotted Dove | 2021/2/2   | 1 | 0 | 30.25399693 | 120.11930930 | <a href="https://www.inaturalist.org/observations/68984231">https://www.inaturalist.org/observations/68984231</a>   |
| 6747 | <i>Spilopelia chinensis</i> | Eastern Spotted Dove | 2021/3/14  | 1 | 0 | 30.25411741 | 120.12210950 | <a href="https://www.inaturalist.org/observations/73608324">https://www.inaturalist.org/observations/73608324</a>   |
| 6748 | <i>Spilopelia chinensis</i> | Eastern Spotted Dove | 2021/11/1  | 1 | 0 | 30.25418228 | 120.12014610 | <a href="https://www.inaturalist.org/observations/100117574">https://www.inaturalist.org/observations/100117574</a> |
| 6749 | <i>Spilopelia chinensis</i> | Eastern Spotted Dove | 2021/11/19 | 1 | 0 | 30.25418228 | 120.12014610 | <a href="https://www.inaturalist.org/observations/101611131">https://www.inaturalist.org/observations/101611131</a> |
| 6750 | <i>Spilopelia chinensis</i> | Eastern Spotted Dove | 2021/12/23 | 1 | 0 | 30.25418228 | 120.12014610 | <a href="https://www.inaturalist.org/observations/103794942">https://www.inaturalist.org/observations/103794942</a> |
| 6751 | <i>Spilopelia chinensis</i> | Eastern Spotted Dove | 2022/1/1   | 1 | 0 | 30.25418228 | 120.12014610 | <a href="https://www.inaturalist.org/observations/104091052">https://www.inaturalist.org/observations/104091052</a> |
| 6752 | <i>Spilopelia chinensis</i> | Eastern Spotted Dove | 2022/1/12  | 1 | 0 | 30.25418228 | 120.12014610 | <a href="https://www.inaturalist.org/observations/104855364">https://www.inaturalist.org/observations/104855364</a> |
| 6753 | <i>Spilopelia chinensis</i> | Eastern Spotted Dove | 2022/1/15  | 1 | 0 | 30.25418228 | 120.12014610 | <a href="https://www.inaturalist.org/observations/105041440">https://www.inaturalist.org/observations/105041440</a> |
| 6754 | <i>Spilopelia chinensis</i> | Eastern Spotted Dove | 2022/1/20  | 1 | 0 | 30.25418228 | 120.12014610 | <a href="https://www.inaturalist.org/observations/105413428">https://www.inaturalist.org/observations/105413428</a> |
| 6755 | <i>Spilopelia chinensis</i> | Eastern Spotted Dove | 2022/2/19  | 1 | 0 | 30.25418228 | 120.12014610 | <a href="https://www.inaturalist.org/observations/107367569">https://www.inaturalist.org/observations/107367569</a> |
| 6756 | <i>Spilopelia chinensis</i> | Eastern Spotted Dove | 2022/2/19  | 1 | 0 | 30.25418228 | 120.12014610 | <a href="https://www.inaturalist.org/observations/107367607">https://www.inaturalist.org/observations/107367607</a> |
| 6757 | <i>Spilopelia chinensis</i> | Eastern Spotted Dove | 2022/2/20  | 1 | 0 | 30.25418228 | 120.12014610 | <a href="https://www.inaturalist.org/observations/107367621">https://www.inaturalist.org/observations/107367621</a> |
| 6758 | <i>Spilopelia chinensis</i> | Eastern Spotted Dove | 2022/2/20  | 1 | 0 | 30.25418228 | 120.12014610 | <a href="https://www.inaturalist.org/observations/107367640">https://www.inaturalist.org/observations/107367640</a> |
| 6759 | <i>Spilopelia chinensis</i> | Eastern Spotted Dove | 2022/2/14  | 1 | 0 | 30.25418228 | 120.12014610 | <a href="https://www.inaturalist.org/observations/107409996">https://www.inaturalist.org/observations/107409996</a> |
| 6760 | <i>Spilopelia chinensis</i> | Eastern Spotted Dove | 2022/3/5   | 1 | 0 | 30.25418228 | 120.12014610 | <a href="https://www.inaturalist.org/observations/108295492">https://www.inaturalist.org/observations/108295492</a> |
| 6761 | <i>Spilopelia chinensis</i> | Eastern Spotted Dove | 2022/3/19  | 1 | 0 | 30.25418228 | 120.12014610 | <a href="https://www.inaturalist.org/observations/110396763">https://www.inaturalist.org/observations/110396763</a> |

|      |                             |                      |            |   |   |             |              |                                                                                                                     |
|------|-----------------------------|----------------------|------------|---|---|-------------|--------------|---------------------------------------------------------------------------------------------------------------------|
| 6762 | <i>Spilopelia chinensis</i> | Eastern Spotted Dove | 2022/4/11  | 1 | 0 | 30.25418228 | 120.12014610 | <a href="https://www.inaturalist.org/observations/111076148">https://www.inaturalist.org/observations/111076148</a> |
| 6763 | <i>Spilopelia chinensis</i> | Eastern Spotted Dove | 2022/4/3   | 1 | 0 | 30.25418228 | 120.12014610 | <a href="https://www.inaturalist.org/observations/112027491">https://www.inaturalist.org/observations/112027491</a> |
| 6764 | <i>Spilopelia chinensis</i> | Eastern Spotted Dove | 2022/5/12  | 1 | 0 | 30.25418228 | 120.12014610 | <a href="https://www.inaturalist.org/observations/125908917">https://www.inaturalist.org/observations/125908917</a> |
| 6765 | <i>Spilopelia chinensis</i> | Eastern Spotted Dove | 2022/6/2   | 1 | 0 | 30.25418228 | 120.12014610 | <a href="https://www.inaturalist.org/observations/125908971">https://www.inaturalist.org/observations/125908971</a> |
| 6766 | <i>Spilopelia chinensis</i> | Eastern Spotted Dove | 2022/9/18  | 1 | 0 | 30.25418228 | 120.12014610 | <a href="https://www.inaturalist.org/observations/135505679">https://www.inaturalist.org/observations/135505679</a> |
| 6767 | <i>Spilopelia chinensis</i> | Eastern Spotted Dove | 2022/9/24  | 1 | 0 | 30.25418228 | 120.12014610 | <a href="https://www.inaturalist.org/observations/136785564">https://www.inaturalist.org/observations/136785564</a> |
| 6768 | <i>Spilopelia chinensis</i> | Eastern Spotted Dove | 2021/3/20  | 1 | 0 | 30.25471053 | 120.12273180 | <a href="https://www.inaturalist.org/observations/73729634">https://www.inaturalist.org/observations/73729634</a>   |
| 6769 | <i>Spilopelia chinensis</i> | Eastern Spotted Dove | 2022/3/15  | 1 | 0 | 30.25472961 | 119.91609230 | <a href="https://www.inaturalist.org/observations/108719662">https://www.inaturalist.org/observations/108719662</a> |
| 6770 | <i>Spilopelia chinensis</i> | Eastern Spotted Dove | 2022/3/29  | 2 | 0 | 30.25472961 | 119.91609230 | <a href="https://www.inaturalist.org/observations/110656220">https://www.inaturalist.org/observations/110656220</a> |
| 6771 | <i>Spilopelia chinensis</i> | Eastern Spotted Dove | 2021/3/17  | 1 | 0 | 30.25636333 | 120.11053330 | <a href="https://www.inaturalist.org/observations/71414192">https://www.inaturalist.org/observations/71414192</a>   |
| 6772 | <i>Spilopelia chinensis</i> | Eastern Spotted Dove | 2022/1/20  | 1 | 0 | 30.26019562 | 120.14557900 | <a href="https://www.inaturalist.org/observations/105413422">https://www.inaturalist.org/observations/105413422</a> |
| 6773 | <i>Spilopelia chinensis</i> | Eastern Spotted Dove | 2021/2/7   | 1 | 0 | 30.26084422 | 120.14253200 | <a href="https://www.inaturalist.org/observations/69187633">https://www.inaturalist.org/observations/69187633</a>   |
| 6774 | <i>Spilopelia chinensis</i> | Eastern Spotted Dove | 2021/2/14  | 1 | 0 | 30.26084422 | 120.14253200 | <a href="https://www.inaturalist.org/observations/69640677">https://www.inaturalist.org/observations/69640677</a>   |
| 6775 | <i>Spilopelia chinensis</i> | Eastern Spotted Dove | 2020/9/12  | 2 | 0 | 30.26239500 | 120.04948500 | <a href="https://www.inaturalist.org/observations/59885749">https://www.inaturalist.org/observations/59885749</a>   |
| 6776 | <i>Spilopelia chinensis</i> | Eastern Spotted Dove | 2021/4/6   | 1 | 0 | 30.26433033 | 119.93016870 | <a href="https://www.inaturalist.org/observations/75429062">https://www.inaturalist.org/observations/75429062</a>   |
| 6777 | <i>Spilopelia chinensis</i> | Eastern Spotted Dove | 2022/1/17  | 1 | 0 | 30.26433033 | 119.93016870 | <a href="https://www.inaturalist.org/observations/105213248">https://www.inaturalist.org/observations/105213248</a> |
| 6778 | <i>Spilopelia chinensis</i> | Eastern Spotted Dove | 2021/10/17 | 2 | 0 | 30.26433514 | 120.08178970 | <a href="https://www.inaturalist.org/observations/98770400">https://www.inaturalist.org/observations/98770400</a>   |
| 6779 | <i>Spilopelia chinensis</i> | Eastern Spotted Dove | 2021/2/3   | 1 | 0 | 30.26447800 | 120.13105260 | <a href="https://www.inaturalist.org/observations/69001768">https://www.inaturalist.org/observations/69001768</a>   |
| 6780 | <i>Spilopelia chinensis</i> | Eastern Spotted Dove | 2021/6/5   | 1 | 0 | 30.26459769 | 120.08403170 | <a href="https://www.inaturalist.org/observations/81733721">https://www.inaturalist.org/observations/81733721</a>   |
| 6781 | <i>Spilopelia chinensis</i> | Eastern Spotted Dove | 2022/4/4   | 2 | 0 | 30.26459769 | 120.08403170 | <a href="https://www.inaturalist.org/observations/112099007">https://www.inaturalist.org/observations/112099007</a> |
| 6782 | <i>Spilopelia chinensis</i> | Eastern Spotted Dove | 2022/8/4   | 0 | 0 | 30.26459769 | 120.08403170 | <a href="https://www.inaturalist.org/observations/129811451">https://www.inaturalist.org/observations/129811451</a> |
| 6783 | <i>Spilopelia chinensis</i> | Eastern Spotted Dove | 2019/7/14  | 1 | 0 | 30.26716595 | 120.06251350 | <a href="https://www.inaturalist.org/observations/39644649">https://www.inaturalist.org/observations/39644649</a>   |
| 6784 | <i>Spilopelia chinensis</i> | Eastern Spotted Dove | 2019/5/4   | 0 | 0 | 30.26917652 | 120.06650910 | <a href="https://www.inaturalist.org/observations/38790336">https://www.inaturalist.org/observations/38790336</a>   |

|      |                             |                      |            |   |   |             |              |                                                                                                                     |
|------|-----------------------------|----------------------|------------|---|---|-------------|--------------|---------------------------------------------------------------------------------------------------------------------|
| 6785 | <i>Spilopelia chinensis</i> | Eastern Spotted Dove | 2022/9/19  | 1 | 0 | 30.27179167 | 120.09102500 | <a href="https://www.inaturalist.org/observations/135626518">https://www.inaturalist.org/observations/135626518</a> |
| 6786 | <i>Spilopelia chinensis</i> | Eastern Spotted Dove | 2021/11/12 | 1 | 0 | 30.27625261 | 120.08663510 | <a href="https://www.inaturalist.org/observations/100920180">https://www.inaturalist.org/observations/100920180</a> |
| 6787 | <i>Spilopelia chinensis</i> | Eastern Spotted Dove | 2021/3/6   | 1 | 0 | 30.27690919 | 120.16335480 | <a href="https://www.inaturalist.org/observations/70729956">https://www.inaturalist.org/observations/70729956</a>   |
| 6788 | <i>Spilopelia chinensis</i> | Eastern Spotted Dove | 2021/2/2   | 1 | 0 | 30.27750823 | 120.16387620 | <a href="https://www.inaturalist.org/observations/68984209">https://www.inaturalist.org/observations/68984209</a>   |
| 6789 | <i>Spilopelia chinensis</i> | Eastern Spotted Dove | 2022/7/22  | 1 | 0 | 30.27858370 | 120.02644680 | <a href="https://www.inaturalist.org/observations/127949750">https://www.inaturalist.org/observations/127949750</a> |
| 6790 | <i>Spilopelia chinensis</i> | Eastern Spotted Dove | 2022/8/27  | 1 | 0 | 30.27858370 | 120.02644680 | <a href="https://www.inaturalist.org/observations/132528950">https://www.inaturalist.org/observations/132528950</a> |
| 6791 | <i>Spilopelia chinensis</i> | Eastern Spotted Dove | 2015/4/24  | 5 | 0 | 30.28300800 | 77.97285300  | <a href="http://www.inaturalist.org/observations/1429854">http://www.inaturalist.org/observations/1429854</a>       |
| 6792 | <i>Spilopelia chinensis</i> | Eastern Spotted Dove | 2017/5/11  | 4 | 0 | 30.28603095 | 77.97423984  | <a href="https://www.inaturalist.org/observations/6191063">https://www.inaturalist.org/observations/6191063</a>     |
| 6793 | <i>Spilopelia chinensis</i> | Eastern Spotted Dove | 2021/1/6   | 3 | 0 | 30.28819949 | 79.15756568  | <a href="https://www.inaturalist.org/observations/67653007">https://www.inaturalist.org/observations/67653007</a>   |
| 6794 | <i>Spilopelia chinensis</i> | Eastern Spotted Dove | 2021/6/24  | 1 | 0 | 30.28821976 | 79.15745404  | <a href="https://www.inaturalist.org/observations/84726439">https://www.inaturalist.org/observations/84726439</a>   |
| 6795 | <i>Spilopelia chinensis</i> | Eastern Spotted Dove | 2015/5/17  | 6 | 0 | 30.29744400 | 78.04973400  | <a href="http://www.inaturalist.org/observations/1505637">http://www.inaturalist.org/observations/1505637</a>       |
| 6796 | <i>Spilopelia chinensis</i> | Eastern Spotted Dove | 2015/3/11  | 6 | 0 | 30.29915800 | 78.05108500  | <a href="http://www.inaturalist.org/observations/1515124">http://www.inaturalist.org/observations/1515124</a>       |
| 6797 | <i>Spilopelia chinensis</i> | Eastern Spotted Dove | 2021/2/24  | 1 | 0 | 30.30428629 | 120.12240420 | <a href="https://www.inaturalist.org/observations/70076066">https://www.inaturalist.org/observations/70076066</a>   |
| 6798 | <i>Spilopelia chinensis</i> | Eastern Spotted Dove | 2020/11/12 | 2 | 0 | 30.31185833 | 120.08310000 | <a href="https://www.inaturalist.org/observations/64716495">https://www.inaturalist.org/observations/64716495</a>   |
| 6799 | <i>Spilopelia chinensis</i> | Eastern Spotted Dove | 2022/5/1   | 2 | 0 | 30.31336111 | 120.32063060 | <a href="https://www.inaturalist.org/observations/114186122">https://www.inaturalist.org/observations/114186122</a> |
| 6800 | <i>Spilopelia chinensis</i> | Eastern Spotted Dove | 2020/2/19  | 2 | 0 | 30.31582622 | 78.05774264  | <a href="https://www.inaturalist.org/observations/51215678">https://www.inaturalist.org/observations/51215678</a>   |
| 6801 | <i>Spilopelia chinensis</i> | Eastern Spotted Dove | 2022/9/3   | 0 | 0 | 30.31978611 | 120.08498060 | <a href="https://www.inaturalist.org/observations/133509652">https://www.inaturalist.org/observations/133509652</a> |
| 6802 | <i>Spilopelia chinensis</i> | Eastern Spotted Dove | 2019/6/22  | 2 | 0 | 30.32510511 | 78.00009720  | <a href="https://www.inaturalist.org/observations/55890704">https://www.inaturalist.org/observations/55890704</a>   |
| 6803 | <i>Spilopelia chinensis</i> | Eastern Spotted Dove | 2019/1/24  | 2 | 0 | 30.32510511 | 78.00009720  | <a href="https://www.inaturalist.org/observations/55890705">https://www.inaturalist.org/observations/55890705</a>   |
| 6804 | <i>Spilopelia chinensis</i> | Eastern Spotted Dove | 2021/2/12  | 1 | 0 | 30.32872332 | 120.13031860 | <a href="https://www.inaturalist.org/observations/69600912">https://www.inaturalist.org/observations/69600912</a>   |
| 6805 | <i>Spilopelia chinensis</i> | Eastern Spotted Dove | 2021/2/13  | 1 | 0 | 30.33087264 | 120.13337300 | <a href="https://www.inaturalist.org/observations/69600917">https://www.inaturalist.org/observations/69600917</a>   |
| 6806 | <i>Spilopelia chinensis</i> | Eastern Spotted Dove | 2022/2/2   | 1 | 0 | 30.33122548 | 120.13444080 | <a href="https://www.inaturalist.org/observations/106176085">https://www.inaturalist.org/observations/106176085</a> |
| 6807 | <i>Spilopelia chinensis</i> | Eastern Spotted Dove | 2022/1/17  | 1 | 0 | 30.34818400 | 119.94872400 | <a href="https://www.inaturalist.org/observations/106849318">https://www.inaturalist.org/observations/106849318</a> |

|      |                             |                      |            |   |   |             |              |                                                                                                                     |
|------|-----------------------------|----------------------|------------|---|---|-------------|--------------|---------------------------------------------------------------------------------------------------------------------|
| 6808 | <i>Spilopelia chinensis</i> | Eastern Spotted Dove | 2021/12/6  | 1 | 0 | 30.35211150 | 119.93181640 | <a href="https://www.inaturalist.org/observations/102643308">https://www.inaturalist.org/observations/102643308</a> |
| 6809 | <i>Spilopelia chinensis</i> | Eastern Spotted Dove | 2022/6/27  | 0 | 0 | 30.35211150 | 119.93181640 | <a href="https://www.inaturalist.org/observations/125913135">https://www.inaturalist.org/observations/125913135</a> |
| 6810 | <i>Spilopelia chinensis</i> | Eastern Spotted Dove | 2022/7/31  | 0 | 0 | 30.35416667 | 120.06777780 | <a href="https://www.inaturalist.org/observations/130452988">https://www.inaturalist.org/observations/130452988</a> |
| 6811 | <i>Spilopelia chinensis</i> | Eastern Spotted Dove | 2022/3/5   | 1 | 0 | 30.35575356 | 120.19777860 | <a href="https://www.inaturalist.org/observations/108295504">https://www.inaturalist.org/observations/108295504</a> |
| 6812 | <i>Spilopelia chinensis</i> | Eastern Spotted Dove | 2020/9/21  | 1 | 0 | 30.43672050 | 104.23727980 | <a href="https://www.inaturalist.org/observations/60291679">https://www.inaturalist.org/observations/60291679</a>   |
| 6813 | <i>Spilopelia chinensis</i> | Eastern Spotted Dove | 2020/3/26  | 4 | 0 | 30.44824690 | 77.75494910  | <a href="https://www.inaturalist.org/observations/130763183">https://www.inaturalist.org/observations/130763183</a> |
| 6814 | <i>Spilopelia chinensis</i> | Eastern Spotted Dove | 2020/8/11  | 2 | 0 | 30.44824690 | 77.75494910  | <a href="https://www.inaturalist.org/observations/135496589">https://www.inaturalist.org/observations/135496589</a> |
| 6815 | <i>Spilopelia chinensis</i> | Eastern Spotted Dove | 2018/2/13  | 6 | 0 | 30.44826650 | 77.75495360  | <a href="https://www.inaturalist.org/observations/10018479">https://www.inaturalist.org/observations/10018479</a>   |
| 6816 | <i>Spilopelia chinensis</i> | Eastern Spotted Dove | 2020/2/6   | 7 | 0 | 30.44826650 | 77.75495360  | <a href="https://www.inaturalist.org/observations/108967008">https://www.inaturalist.org/observations/108967008</a> |
| 6817 | <i>Spilopelia chinensis</i> | Eastern Spotted Dove | 2022/9/16  | 0 | 0 | 30.46484000 | 112.56582000 | <a href="https://www.inaturalist.org/observations/136996955">https://www.inaturalist.org/observations/136996955</a> |
| 6818 | <i>Spilopelia chinensis</i> | Eastern Spotted Dove | 2020/6/5   | 2 | 0 | 30.54203464 | 78.19491550  | <a href="https://www.inaturalist.org/observations/62613812">https://www.inaturalist.org/observations/62613812</a>   |
| 6819 | <i>Spilopelia chinensis</i> | Eastern Spotted Dove | 2021/4/7   | 1 | 0 | 30.55810000 | 104.07932220 | <a href="https://www.inaturalist.org/observations/73174880">https://www.inaturalist.org/observations/73174880</a>   |
| 6820 | <i>Spilopelia chinensis</i> | Eastern Spotted Dove | 2020/7/10  | 1 | 0 | 30.57038796 | 104.05395290 | <a href="https://www.inaturalist.org/observations/52505585">https://www.inaturalist.org/observations/52505585</a>   |
| 6821 | <i>Spilopelia chinensis</i> | Eastern Spotted Dove | 2021/3/22  | 1 | 0 | 30.57385833 | 104.04847670 | <a href="https://www.inaturalist.org/observations/73174637">https://www.inaturalist.org/observations/73174637</a>   |
| 6822 | <i>Spilopelia chinensis</i> | Eastern Spotted Dove | 2021/6/22  | 1 | 0 | 30.58334483 | 103.52306490 | <a href="https://www.inaturalist.org/observations/84051567">https://www.inaturalist.org/observations/84051567</a>   |
| 6823 | <i>Spilopelia chinensis</i> | Eastern Spotted Dove | 2020/2/2   | 4 | 0 | 30.59016333 | 114.29570830 | <a href="https://www.inaturalist.org/observations/38558342">https://www.inaturalist.org/observations/38558342</a>   |
| 6824 | <i>Spilopelia chinensis</i> | Eastern Spotted Dove | 2019/7/7   | 3 | 0 | 30.59284900 | 114.30553900 | <a href="https://www.inaturalist.org/observations/39643946">https://www.inaturalist.org/observations/39643946</a>   |
| 6825 | <i>Spilopelia chinensis</i> | Eastern Spotted Dove | 2021/6/19  | 1 | 0 | 30.60157289 | 104.14284390 | <a href="https://www.inaturalist.org/observations/88221733">https://www.inaturalist.org/observations/88221733</a>   |
| 6826 | <i>Spilopelia chinensis</i> | Eastern Spotted Dove | 2021/11/5  | 1 | 0 | 30.63251297 | 104.06873000 | <a href="https://www.inaturalist.org/observations/100308118">https://www.inaturalist.org/observations/100308118</a> |
| 6827 | <i>Spilopelia chinensis</i> | Eastern Spotted Dove | 2016/12/28 | 4 | 0 | 30.63618631 | 104.08741000 | <a href="https://www.inaturalist.org/observations/7791623">https://www.inaturalist.org/observations/7791623</a>     |
| 6828 | <i>Spilopelia chinensis</i> | Eastern Spotted Dove | 2022/9/17  | 1 | 0 | 30.63857000 | 104.03196670 | <a href="https://www.inaturalist.org/observations/136143545">https://www.inaturalist.org/observations/136143545</a> |
| 6829 | <i>Spilopelia chinensis</i> | Eastern Spotted Dove | 2019/8/23  | 2 | 0 | 30.64184100 | 104.18657800 | <a href="https://www.inaturalist.org/observations/39690892">https://www.inaturalist.org/observations/39690892</a>   |
| 6830 | <i>Spilopelia chinensis</i> | Eastern Spotted Dove | 2022/9/21  | 1 | 0 | 30.64281333 | 104.03575000 | <a href="https://www.inaturalist.org/observations/135879827">https://www.inaturalist.org/observations/135879827</a> |

|      |                             |                      |           |   |   |             |              |                                                                                                                     |
|------|-----------------------------|----------------------|-----------|---|---|-------------|--------------|---------------------------------------------------------------------------------------------------------------------|
| 6831 | <i>Spilopelia chinensis</i> | Eastern Spotted Dove | 2019/7/23 | 0 | 0 | 30.65545531 | 104.07084870 | <a href="https://www.inaturalist.org/observations/39645871">https://www.inaturalist.org/observations/39645871</a>   |
| 6832 | <i>Spilopelia chinensis</i> | Eastern Spotted Dove | 2016/3/13 | 5 | 0 | 30.65714400 | 104.05725500 | <a href="http://www.inaturalist.org/observations/3307629">http://www.inaturalist.org/observations/3307629</a>       |
| 6833 | <i>Spilopelia chinensis</i> | Eastern Spotted Dove | 2021/6/15 | 1 | 0 | 30.65914607 | 104.05642010 | <a href="https://www.inaturalist.org/observations/83106960">https://www.inaturalist.org/observations/83106960</a>   |
| 6834 | <i>Spilopelia chinensis</i> | Eastern Spotted Dove | 2011/6/17 | 1 | 0 | 30.65999215 | 104.02630130 | <a href="https://www.inaturalist.org/observations/69830642">https://www.inaturalist.org/observations/69830642</a>   |
| 6835 | <i>Spilopelia chinensis</i> | Eastern Spotted Dove | 2019/4/8  | 4 | 0 | 30.66886894 | 114.56536810 | <a href="https://www.inaturalist.org/observations/22223396">https://www.inaturalist.org/observations/22223396</a>   |
| 6836 | <i>Spilopelia chinensis</i> | Eastern Spotted Dove | 2021/3/5  | 1 | 0 | 30.67063084 | 103.81130200 | <a href="https://www.inaturalist.org/observations/71048605">https://www.inaturalist.org/observations/71048605</a>   |
| 6837 | <i>Spilopelia chinensis</i> | Eastern Spotted Dove | 2021/3/6  | 1 | 0 | 30.67063084 | 103.81130200 | <a href="https://www.inaturalist.org/observations/71048608">https://www.inaturalist.org/observations/71048608</a>   |
| 6838 | <i>Spilopelia chinensis</i> | Eastern Spotted Dove | 2021/3/7  | 1 | 0 | 30.67063084 | 103.81130200 | <a href="https://www.inaturalist.org/observations/71048627">https://www.inaturalist.org/observations/71048627</a>   |
| 6839 | <i>Spilopelia chinensis</i> | Eastern Spotted Dove | 2021/2/28 | 1 | 0 | 30.67063167 | 103.81130170 | <a href="https://www.inaturalist.org/observations/70306174">https://www.inaturalist.org/observations/70306174</a>   |
| 6840 | <i>Spilopelia chinensis</i> | Eastern Spotted Dove | 2021/2/26 | 1 | 0 | 30.67327527 | 103.81051720 | <a href="https://www.inaturalist.org/observations/70186947">https://www.inaturalist.org/observations/70186947</a>   |
| 6841 | <i>Spilopelia chinensis</i> | Eastern Spotted Dove | 2021/3/18 | 1 | 0 | 30.67371288 | 103.81065740 | <a href="https://www.inaturalist.org/observations/72591362">https://www.inaturalist.org/observations/72591362</a>   |
| 6842 | <i>Spilopelia chinensis</i> | Eastern Spotted Dove | 2021/2/26 | 1 | 0 | 30.67375667 | 103.81054000 | <a href="https://www.inaturalist.org/observations/70186901">https://www.inaturalist.org/observations/70186901</a>   |
| 6843 | <i>Spilopelia chinensis</i> | Eastern Spotted Dove | 2021/2/26 | 1 | 0 | 30.67375667 | 103.81054000 | <a href="https://www.inaturalist.org/observations/70187092">https://www.inaturalist.org/observations/70187092</a>   |
| 6844 | <i>Spilopelia chinensis</i> | Eastern Spotted Dove | 2021/2/26 | 1 | 0 | 30.67375667 | 103.81054000 | <a href="https://www.inaturalist.org/observations/70187144">https://www.inaturalist.org/observations/70187144</a>   |
| 6845 | <i>Spilopelia chinensis</i> | Eastern Spotted Dove | 2021/2/26 | 1 | 0 | 30.67435000 | 103.80949000 | <a href="https://www.inaturalist.org/observations/70229206">https://www.inaturalist.org/observations/70229206</a>   |
| 6846 | <i>Spilopelia chinensis</i> | Eastern Spotted Dove | 2020/6/30 | 2 | 0 | 30.67465500 | 104.07274700 | <a href="https://www.inaturalist.org/observations/51536888">https://www.inaturalist.org/observations/51536888</a>   |
| 6847 | <i>Spilopelia chinensis</i> | Eastern Spotted Dove | 2019/9/25 | 1 | 0 | 30.67477100 | 104.07194800 | <a href="https://www.inaturalist.org/observations/67141881">https://www.inaturalist.org/observations/67141881</a>   |
| 6848 | <i>Spilopelia chinensis</i> | Eastern Spotted Dove | 2018/4/22 | 2 | 0 | 30.67495874 | 104.07184480 | <a href="https://www.inaturalist.org/observations/11388308">https://www.inaturalist.org/observations/11388308</a>   |
| 6849 | <i>Spilopelia chinensis</i> | Eastern Spotted Dove | 2020/5/9  | 2 | 0 | 30.68525833 | 104.03643880 | <a href="https://www.inaturalist.org/observations/45334203">https://www.inaturalist.org/observations/45334203</a>   |
| 6850 | <i>Spilopelia chinensis</i> | Eastern Spotted Dove | 2019/6/1  | 1 | 0 | 30.68546667 | 104.00916390 | <a href="https://www.inaturalist.org/observations/26157713">https://www.inaturalist.org/observations/26157713</a>   |
| 6851 | <i>Spilopelia chinensis</i> | Eastern Spotted Dove | 2022/9/15 | 1 | 0 | 30.69288473 | 104.07920780 | <a href="https://www.inaturalist.org/observations/135106571">https://www.inaturalist.org/observations/135106571</a> |
| 6852 | <i>Spilopelia chinensis</i> | Eastern Spotted Dove | 2014/8/13 | 1 | 0 | 30.70941796 | 104.10581520 | <a href="https://www.inaturalist.org/observations/122129732">https://www.inaturalist.org/observations/122129732</a> |
| 6853 | <i>Spilopelia chinensis</i> | Eastern Spotted Dove | 2020/5/29 | 1 | 0 | 30.71329620 | 104.10525570 | <a href="https://www.inaturalist.org/observations/47881566">https://www.inaturalist.org/observations/47881566</a>   |

|      |                             |                      |            |   |   |             |              |                                                                                                                     |
|------|-----------------------------|----------------------|------------|---|---|-------------|--------------|---------------------------------------------------------------------------------------------------------------------|
| 6854 | <i>Spilopelia chinensis</i> | Eastern Spotted Dove | 2020/10/17 | 2 | 0 | 30.71873333 | 103.59427830 | <a href="https://www.inaturalist.org/observations/69676225">https://www.inaturalist.org/observations/69676225</a>   |
| 6855 | <i>Spilopelia chinensis</i> | Eastern Spotted Dove | 2019/10/31 | 2 | 0 | 30.72613009 | 76.87990724  | <a href="https://www.inaturalist.org/observations/36247437">https://www.inaturalist.org/observations/36247437</a>   |
| 6856 | <i>Spilopelia chinensis</i> | Eastern Spotted Dove | 2021/11/16 | 1 | 0 | 30.72898333 | 103.94679170 | <a href="https://www.inaturalist.org/observations/134885485">https://www.inaturalist.org/observations/134885485</a> |
| 6857 | <i>Spilopelia chinensis</i> | Eastern Spotted Dove | 2019/4/4   | 2 | 0 | 30.74051285 | 76.67573547  | <a href="https://www.inaturalist.org/observations/21983513">https://www.inaturalist.org/observations/21983513</a>   |
| 6858 | <i>Spilopelia chinensis</i> | Eastern Spotted Dove | 2022/3/28  | 1 | 0 | 30.74096400 | 119.69316600 | <a href="https://www.inaturalist.org/observations/110568908">https://www.inaturalist.org/observations/110568908</a> |
| 6859 | <i>Spilopelia chinensis</i> | Eastern Spotted Dove | 2022/6/6   | 3 | 0 | 30.74768500 | 76.73369720  | <a href="https://www.inaturalist.org/observations/120512151">https://www.inaturalist.org/observations/120512151</a> |
| 6860 | <i>Spilopelia chinensis</i> | Eastern Spotted Dove | 2017/2/9   | 2 | 0 | 30.77039880 | 114.20385720 | <a href="https://www.inaturalist.org/observations/5084208">https://www.inaturalist.org/observations/5084208</a>     |
| 6861 | <i>Spilopelia chinensis</i> | Eastern Spotted Dove | 2021/4/21  | 2 | 0 | 30.82201412 | 106.06509490 | <a href="https://www.inaturalist.org/observations/74693410">https://www.inaturalist.org/observations/74693410</a>   |
| 6862 | <i>Spilopelia chinensis</i> | Eastern Spotted Dove | 2021/8/17  | 2 | 0 | 30.85771394 | 77.17841551  | <a href="https://www.inaturalist.org/observations/91556956">https://www.inaturalist.org/observations/91556956</a>   |
| 6863 | <i>Spilopelia chinensis</i> | Eastern Spotted Dove | 2022/5/16  | 2 | 0 | 30.88837268 | 77.07659259  | <a href="https://www.inaturalist.org/observations/117324653">https://www.inaturalist.org/observations/117324653</a> |
| 6864 | <i>Spilopelia chinensis</i> | Eastern Spotted Dove | 2021/9/5   | 2 | 0 | 30.91947306 | 77.19642640  | <a href="https://www.inaturalist.org/observations/93711388">https://www.inaturalist.org/observations/93711388</a>   |
| 6865 | <i>Spilopelia chinensis</i> | Eastern Spotted Dove | 2022/5/15  | 2 | 0 | 30.96767355 | 77.19164964  | <a href="https://www.inaturalist.org/observations/117088333">https://www.inaturalist.org/observations/117088333</a> |
| 6866 | <i>Spilopelia chinensis</i> | Eastern Spotted Dove | 2021/8/15  | 1 | 0 | 30.98977135 | 77.09814889  | <a href="https://www.inaturalist.org/observations/91267832">https://www.inaturalist.org/observations/91267832</a>   |
| 6867 | <i>Spilopelia chinensis</i> | Eastern Spotted Dove | 2021/2/21  | 1 | 0 | 30.99051097 | 103.92770600 | <a href="https://www.inaturalist.org/observations/69914673">https://www.inaturalist.org/observations/69914673</a>   |
| 6868 | <i>Spilopelia chinensis</i> | Eastern Spotted Dove | 2021/8/21  | 3 | 0 | 30.99569062 | 77.11404784  | <a href="https://www.inaturalist.org/observations/92082656">https://www.inaturalist.org/observations/92082656</a>   |
| 6869 | <i>Spilopelia chinensis</i> | Eastern Spotted Dove | 2016/12/1  | 3 | 0 | 31.02522010 | 121.43377840 | <a href="https://www.inaturalist.org/observations/9457511">https://www.inaturalist.org/observations/9457511</a>     |
| 6870 | <i>Spilopelia chinensis</i> | Eastern Spotted Dove | 2016/11/10 | 4 | 0 | 31.03482034 | 121.45957690 | <a href="https://www.inaturalist.org/observations/16548863">https://www.inaturalist.org/observations/16548863</a>   |
| 6871 | <i>Spilopelia chinensis</i> | Eastern Spotted Dove | 2021/8/14  | 1 | 0 | 31.04562387 | 103.97836540 | <a href="https://www.inaturalist.org/observations/91092303">https://www.inaturalist.org/observations/91092303</a>   |
| 6872 | <i>Spilopelia chinensis</i> | Eastern Spotted Dove | 2019/6/16  | 5 | 0 | 31.04872204 | 77.18525558  | <a href="https://www.inaturalist.org/observations/28934975">https://www.inaturalist.org/observations/28934975</a>   |
| 6873 | <i>Spilopelia chinensis</i> | Eastern Spotted Dove | 2022/9/11  | 1 | 0 | 31.05370000 | 121.00683000 | <a href="https://www.inaturalist.org/observations/134591821">https://www.inaturalist.org/observations/134591821</a> |
| 6874 | <i>Spilopelia chinensis</i> | Eastern Spotted Dove | 2017/4/27  | 1 | 0 | 31.05627055 | 121.71842720 | <a href="https://www.inaturalist.org/observations/82273731">https://www.inaturalist.org/observations/82273731</a>   |
| 6875 | <i>Spilopelia chinensis</i> | Eastern Spotted Dove | 2018/4/27  | 3 | 0 | 31.06320088 | 119.85805640 | <a href="https://www.inaturalist.org/observations/16203031">https://www.inaturalist.org/observations/16203031</a>   |
| 6876 | <i>Spilopelia chinensis</i> | Eastern Spotted Dove | 2018/3/25  | 2 | 0 | 31.07155178 | 121.45444230 | <a href="https://www.inaturalist.org/observations/42806352">https://www.inaturalist.org/observations/42806352</a>   |

|      |                             |                      |            |   |   |             |              |                                                                                                                     |
|------|-----------------------------|----------------------|------------|---|---|-------------|--------------|---------------------------------------------------------------------------------------------------------------------|
| 6877 | <i>Spilopelia chinensis</i> | Eastern Spotted Dove | 2021/4/13  | 1 | 0 | 31.07463876 | 121.18292430 | <a href="https://www.inaturalist.org/observations/75434675">https://www.inaturalist.org/observations/75434675</a>   |
| 6878 | <i>Spilopelia chinensis</i> | Eastern Spotted Dove | 2012/10/23 | 1 | 0 | 31.08725214 | 120.42744080 | <a href="https://www.inaturalist.org/observations/69826398">https://www.inaturalist.org/observations/69826398</a>   |
| 6879 | <i>Spilopelia chinensis</i> | Eastern Spotted Dove | 2012/10/23 | 1 | 0 | 31.08725214 | 120.42744080 | <a href="https://www.inaturalist.org/observations/69826407">https://www.inaturalist.org/observations/69826407</a>   |
| 6880 | <i>Spilopelia chinensis</i> | Eastern Spotted Dove | 2022/3/13  | 1 | 0 | 31.13961667 | 121.55828000 | <a href="https://www.inaturalist.org/observations/108495355">https://www.inaturalist.org/observations/108495355</a> |
| 6881 | <i>Spilopelia chinensis</i> | Eastern Spotted Dove | 2021/5/31  | 1 | 0 | 31.14514167 | 121.65878330 | <a href="https://www.inaturalist.org/observations/81009102">https://www.inaturalist.org/observations/81009102</a>   |
| 6882 | <i>Spilopelia chinensis</i> | Eastern Spotted Dove | 2020/1/7   | 0 | 0 | 31.14655863 | 121.44751320 | <a href="https://www.inaturalist.org/observations/37393604">https://www.inaturalist.org/observations/37393604</a>   |
| 6883 | <i>Spilopelia chinensis</i> | Eastern Spotted Dove | 2021/2/21  | 1 | 0 | 31.14737163 | 121.44246310 | <a href="https://www.inaturalist.org/observations/69938343">https://www.inaturalist.org/observations/69938343</a>   |
| 6884 | <i>Spilopelia chinensis</i> | Eastern Spotted Dove | 2022/2/27  | 2 | 0 | 31.14744164 | 121.43778170 | <a href="https://www.inaturalist.org/observations/118162572">https://www.inaturalist.org/observations/118162572</a> |
| 6885 | <i>Spilopelia chinensis</i> | Eastern Spotted Dove | 2022/2/27  | 2 | 0 | 31.14855333 | 121.43908660 | <a href="https://www.inaturalist.org/observations/118162558">https://www.inaturalist.org/observations/118162558</a> |
| 6886 | <i>Spilopelia chinensis</i> | Eastern Spotted Dove | 2019/7/21  | 1 | 0 | 31.14892298 | 121.44404280 | <a href="https://www.inaturalist.org/observations/29806964">https://www.inaturalist.org/observations/29806964</a>   |
| 6887 | <i>Spilopelia chinensis</i> | Eastern Spotted Dove | 2020/10/3  | 2 | 0 | 31.15966034 | 121.33918000 | <a href="https://www.inaturalist.org/observations/61536963">https://www.inaturalist.org/observations/61536963</a>   |
| 6888 | <i>Spilopelia chinensis</i> | Eastern Spotted Dove | 2021/4/16  | 1 | 0 | 31.16123009 | 121.42929840 | <a href="https://www.inaturalist.org/observations/78562202">https://www.inaturalist.org/observations/78562202</a>   |
| 6889 | <i>Spilopelia chinensis</i> | Eastern Spotted Dove | 2020/1/12  | 1 | 0 | 31.16715457 | 121.35380390 | <a href="https://www.inaturalist.org/observations/37520907">https://www.inaturalist.org/observations/37520907</a>   |
| 6890 | <i>Spilopelia chinensis</i> | Eastern Spotted Dove | 2020/4/22  | 1 | 0 | 31.16721234 | 121.37116640 | <a href="https://www.inaturalist.org/observations/42829657">https://www.inaturalist.org/observations/42829657</a>   |
| 6891 | <i>Spilopelia chinensis</i> | Eastern Spotted Dove | 2021/5/4   | 2 | 0 | 31.16803932 | 121.40208440 | <a href="https://www.inaturalist.org/observations/77178169">https://www.inaturalist.org/observations/77178169</a>   |
| 6892 | <i>Spilopelia chinensis</i> | Eastern Spotted Dove | 2020/11/21 | 1 | 0 | 31.17124748 | 121.49826050 | <a href="https://www.inaturalist.org/observations/65453048">https://www.inaturalist.org/observations/65453048</a>   |
| 6893 | <i>Spilopelia chinensis</i> | Eastern Spotted Dove | 2020/9/18  | 1 | 0 | 31.17427800 | 121.45193100 | <a href="https://www.inaturalist.org/observations/60145293">https://www.inaturalist.org/observations/60145293</a>   |
| 6894 | <i>Spilopelia chinensis</i> | Eastern Spotted Dove | 2019/9/14  | 5 | 0 | 31.17903349 | 121.41457380 | <a href="https://www.inaturalist.org/observations/32763994">https://www.inaturalist.org/observations/32763994</a>   |
| 6895 | <i>Spilopelia chinensis</i> | Eastern Spotted Dove | 2019/9/14  | 5 | 0 | 31.17903349 | 121.41457380 | <a href="https://www.inaturalist.org/observations/32763995">https://www.inaturalist.org/observations/32763995</a>   |
| 6896 | <i>Spilopelia chinensis</i> | Eastern Spotted Dove | 2020/10/26 | 1 | 0 | 31.18142600 | 121.50561200 | <a href="https://www.inaturalist.org/observations/63559856">https://www.inaturalist.org/observations/63559856</a>   |
| 6897 | <i>Spilopelia chinensis</i> | Eastern Spotted Dove | 2021/8/6   | 1 | 0 | 31.18519234 | 121.47681360 | <a href="https://www.inaturalist.org/observations/90124809">https://www.inaturalist.org/observations/90124809</a>   |
| 6898 | <i>Spilopelia chinensis</i> | Eastern Spotted Dove | 2021/5/14  | 2 | 0 | 31.18678752 | 121.43823270 | <a href="https://www.inaturalist.org/observations/78960089">https://www.inaturalist.org/observations/78960089</a>   |
| 6899 | <i>Spilopelia chinensis</i> | Eastern Spotted Dove | 2017/5/20  | 2 | 0 | 31.19292913 | 121.58907830 | <a href="https://www.inaturalist.org/observations/7516273">https://www.inaturalist.org/observations/7516273</a>     |



|      |                             |                      |            |   |   |             |              |                                                                                                                     |
|------|-----------------------------|----------------------|------------|---|---|-------------|--------------|---------------------------------------------------------------------------------------------------------------------|
| 6900 | <i>Spilopelia chinensis</i> | Eastern Spotted Dove | 2017/3/30  | 2 | 0 | 31.19302800 | 121.58891900 | <a href="https://www.inaturalist.org/observations/5517686">https://www.inaturalist.org/observations/5517686</a>     |
| 6901 | <i>Spilopelia chinensis</i> | Eastern Spotted Dove | 2018/9/3   | 1 | 0 | 31.19351389 | 121.47696390 | <a href="https://www.inaturalist.org/observations/25144439">https://www.inaturalist.org/observations/25144439</a>   |
| 6902 | <i>Spilopelia chinensis</i> | Eastern Spotted Dove | 2018/9/3   | 2 | 0 | 31.19483333 | 121.48138330 | <a href="https://www.inaturalist.org/observations/16189405">https://www.inaturalist.org/observations/16189405</a>   |
| 6903 | <i>Spilopelia chinensis</i> | Eastern Spotted Dove | 2020/5/5   | 1 | 0 | 31.19586137 | 121.36755470 | <a href="https://www.inaturalist.org/observations/45176035">https://www.inaturalist.org/observations/45176035</a>   |
| 6904 | <i>Spilopelia chinensis</i> | Eastern Spotted Dove | 2020/1/4   | 1 | 0 | 31.19876417 | 121.39058280 | <a href="https://www.inaturalist.org/observations/125807527">https://www.inaturalist.org/observations/125807527</a> |
| 6905 | <i>Spilopelia chinensis</i> | Eastern Spotted Dove | 2020/1/4   | 1 | 0 | 31.20105195 | 121.39810500 | <a href="https://www.inaturalist.org/observations/125807576">https://www.inaturalist.org/observations/125807576</a> |
| 6906 | <i>Spilopelia chinensis</i> | Eastern Spotted Dove | 2021/10/25 | 1 | 0 | 31.20139435 | 121.49417220 | <a href="https://www.inaturalist.org/observations/99429157">https://www.inaturalist.org/observations/99429157</a>   |
| 6907 | <i>Spilopelia chinensis</i> | Eastern Spotted Dove | 2021/8/11  | 1 | 0 | 31.20194858 | 121.49459450 | <a href="https://www.inaturalist.org/observations/92076257">https://www.inaturalist.org/observations/92076257</a>   |
| 6908 | <i>Spilopelia chinensis</i> | Eastern Spotted Dove | 2021/12/22 | 1 | 0 | 31.20198290 | 121.50004120 | <a href="https://www.inaturalist.org/observations/103453281">https://www.inaturalist.org/observations/103453281</a> |
| 6909 | <i>Spilopelia chinensis</i> | Eastern Spotted Dove | 2021/11/3  | 1 | 0 | 31.20208570 | 121.49487110 | <a href="https://www.inaturalist.org/observations/100230660">https://www.inaturalist.org/observations/100230660</a> |
| 6910 | <i>Spilopelia chinensis</i> | Eastern Spotted Dove | 2020/1/4   | 1 | 0 | 31.20220445 | 121.39834640 | <a href="https://www.inaturalist.org/observations/125807548">https://www.inaturalist.org/observations/125807548</a> |
| 6911 | <i>Spilopelia chinensis</i> | Eastern Spotted Dove | 2021/8/26  | 1 | 0 | 31.20274928 | 121.49478200 | <a href="https://www.inaturalist.org/observations/92640885">https://www.inaturalist.org/observations/92640885</a>   |
| 6912 | <i>Spilopelia chinensis</i> | Eastern Spotted Dove | 2021/8/17  | 1 | 0 | 31.20280225 | 121.49493310 | <a href="https://www.inaturalist.org/observations/92076201">https://www.inaturalist.org/observations/92076201</a>   |
| 6913 | <i>Spilopelia chinensis</i> | Eastern Spotted Dove | 2017/6/5   | 1 | 0 | 31.20505300 | 121.37449000 | <a href="https://www.inaturalist.org/observations/6501604">https://www.inaturalist.org/observations/6501604</a>     |
| 6914 | <i>Spilopelia chinensis</i> | Eastern Spotted Dove | 2017/6/5   | 2 | 0 | 31.20505300 | 121.37449000 | <a href="https://www.inaturalist.org/observations/6561424">https://www.inaturalist.org/observations/6561424</a>     |
| 6915 | <i>Spilopelia chinensis</i> | Eastern Spotted Dove | 2021/10/18 | 1 | 0 | 31.20632028 | 121.49165490 | <a href="https://www.inaturalist.org/observations/98679401">https://www.inaturalist.org/observations/98679401</a>   |
| 6916 | <i>Spilopelia chinensis</i> | Eastern Spotted Dove | 2021/12/2  | 1 | 0 | 31.20647777 | 121.49146550 | <a href="https://www.inaturalist.org/observations/102342132">https://www.inaturalist.org/observations/102342132</a> |
| 6917 | <i>Spilopelia chinensis</i> | Eastern Spotted Dove | 2021/7/6   | 2 | 0 | 31.20675327 | 121.49257710 | <a href="https://www.inaturalist.org/observations/86015327">https://www.inaturalist.org/observations/86015327</a>   |
| 6918 | <i>Spilopelia chinensis</i> | Eastern Spotted Dove | 2019/12/19 | 2 | 0 | 31.21105833 | 121.36610330 | <a href="https://www.inaturalist.org/observations/36765165">https://www.inaturalist.org/observations/36765165</a>   |
| 6919 | <i>Spilopelia chinensis</i> | Eastern Spotted Dove | 2022/4/18  | 2 | 0 | 31.21173412 | 121.49014960 | <a href="https://www.inaturalist.org/observations/111888449">https://www.inaturalist.org/observations/111888449</a> |
| 6920 | <i>Spilopelia chinensis</i> | Eastern Spotted Dove | 2017/4/29  | 3 | 0 | 31.21539400 | 121.55215700 | <a href="https://www.inaturalist.org/observations/6885499">https://www.inaturalist.org/observations/6885499</a>     |
| 6921 | <i>Spilopelia chinensis</i> | Eastern Spotted Dove | 2021/7/18  | 1 | 0 | 31.21539400 | 121.55215700 | <a href="https://www.inaturalist.org/observations/87732724">https://www.inaturalist.org/observations/87732724</a>   |
| 6922 | <i>Spilopelia chinensis</i> | Eastern Spotted Dove | 2017/11/26 | 3 | 0 | 31.21599042 | 121.55215610 | <a href="https://www.inaturalist.org/observations/8973019">https://www.inaturalist.org/observations/8973019</a>     |

|      |                             |                      |            |   |   |             |              |                                                                                                                     |
|------|-----------------------------|----------------------|------------|---|---|-------------|--------------|---------------------------------------------------------------------------------------------------------------------|
| 6923 | <i>Spilopelia chinensis</i> | Eastern Spotted Dove | 2017/12/4  | 3 | 0 | 31.21628404 | 121.55207160 | <a href="https://www.inaturalist.org/observations/10259273">https://www.inaturalist.org/observations/10259273</a>   |
| 6924 | <i>Spilopelia chinensis</i> | Eastern Spotted Dove | 2022/2/9   | 1 | 0 | 31.21655962 | 121.55573300 | <a href="https://www.inaturalist.org/observations/106604457">https://www.inaturalist.org/observations/106604457</a> |
| 6925 | <i>Spilopelia chinensis</i> | Eastern Spotted Dove | 2021/2/8   | 3 | 0 | 31.21681647 | 121.61826080 | <a href="https://www.inaturalist.org/observations/69295418">https://www.inaturalist.org/observations/69295418</a>   |
| 6926 | <i>Spilopelia chinensis</i> | Eastern Spotted Dove | 2022/7/3   | 1 | 0 | 31.21697716 | 121.45062720 | <a href="https://www.inaturalist.org/observations/128127795">https://www.inaturalist.org/observations/128127795</a> |
| 6927 | <i>Spilopelia chinensis</i> | Eastern Spotted Dove | 2020/5/9   | 1 | 0 | 31.21808333 | 121.27768000 | <a href="https://www.inaturalist.org/observations/45345395">https://www.inaturalist.org/observations/45345395</a>   |
| 6928 | <i>Spilopelia chinensis</i> | Eastern Spotted Dove | 2021/9/29  | 2 | 0 | 31.21986167 | 121.45184500 | <a href="https://www.inaturalist.org/observations/96549970">https://www.inaturalist.org/observations/96549970</a>   |
| 6929 | <i>Spilopelia chinensis</i> | Eastern Spotted Dove | 2022/4/6   | 1 | 0 | 31.22019344 | 121.49119590 | <a href="https://www.inaturalist.org/observations/110567985">https://www.inaturalist.org/observations/110567985</a> |
| 6930 | <i>Spilopelia chinensis</i> | Eastern Spotted Dove | 2022/5/15  | 3 | 0 | 31.22116199 | 121.43941500 | <a href="https://www.inaturalist.org/observations/117105248">https://www.inaturalist.org/observations/117105248</a> |
| 6931 | <i>Spilopelia chinensis</i> | Eastern Spotted Dove | 2018/9/4   | 2 | 0 | 31.22244940 | 121.41521990 | <a href="https://www.inaturalist.org/observations/25152482">https://www.inaturalist.org/observations/25152482</a>   |
| 6932 | <i>Spilopelia chinensis</i> | Eastern Spotted Dove | 2022/6/7   | 1 | 0 | 31.22296369 | 121.43241790 | <a href="https://www.inaturalist.org/observations/120641858">https://www.inaturalist.org/observations/120641858</a> |
| 6933 | <i>Spilopelia chinensis</i> | Eastern Spotted Dove | 2019/5/21  | 1 | 0 | 31.22557742 | 121.43784500 | <a href="https://www.inaturalist.org/observations/25480464">https://www.inaturalist.org/observations/25480464</a>   |
| 6934 | <i>Spilopelia chinensis</i> | Eastern Spotted Dove | 2021/10/22 | 2 | 0 | 31.23049164 | 121.52445980 | <a href="https://www.inaturalist.org/observations/98956997">https://www.inaturalist.org/observations/98956997</a>   |
| 6935 | <i>Spilopelia chinensis</i> | Eastern Spotted Dove | 2013/3/23  | 1 | 0 | 31.23217778 | 121.47352220 | <a href="https://www.inaturalist.org/observations/53052359">https://www.inaturalist.org/observations/53052359</a>   |
| 6936 | <i>Spilopelia chinensis</i> | Eastern Spotted Dove | 2013/3/27  | 1 | 0 | 31.23217778 | 121.47352220 | <a href="https://www.inaturalist.org/observations/107799782">https://www.inaturalist.org/observations/107799782</a> |
| 6937 | <i>Spilopelia chinensis</i> | Eastern Spotted Dove | 2021/6/26  | 2 | 0 | 31.23362969 | 121.43970460 | <a href="https://www.inaturalist.org/observations/103864811">https://www.inaturalist.org/observations/103864811</a> |
| 6938 | <i>Spilopelia chinensis</i> | Eastern Spotted Dove | 2018/4/14  | 4 | 0 | 31.23455483 | 121.46063800 | <a href="https://www.inaturalist.org/observations/11388377">https://www.inaturalist.org/observations/11388377</a>   |
| 6939 | <i>Spilopelia chinensis</i> | Eastern Spotted Dove | 2021/8/13  | 1 | 0 | 31.23689331 | 121.42872830 | <a href="https://www.inaturalist.org/observations/90967810">https://www.inaturalist.org/observations/90967810</a>   |
| 6940 | <i>Spilopelia chinensis</i> | Eastern Spotted Dove | 2020/11/29 | 1 | 0 | 31.23846667 | 121.42426330 | <a href="https://www.inaturalist.org/observations/101389849">https://www.inaturalist.org/observations/101389849</a> |
| 6941 | <i>Spilopelia chinensis</i> | Eastern Spotted Dove | 2021/8/22  | 1 | 0 | 31.23849167 | 121.42432500 | <a href="https://www.inaturalist.org/observations/92058160">https://www.inaturalist.org/observations/92058160</a>   |
| 6942 | <i>Spilopelia chinensis</i> | Eastern Spotted Dove | 2020/11/29 | 1 | 0 | 31.23865000 | 121.42417170 | <a href="https://www.inaturalist.org/observations/101389853">https://www.inaturalist.org/observations/101389853</a> |
| 6943 | <i>Spilopelia chinensis</i> | Eastern Spotted Dove | 2018/10/18 | 2 | 0 | 31.24282000 | 121.48635000 | <a href="https://www.inaturalist.org/observations/17616359">https://www.inaturalist.org/observations/17616359</a>   |
| 6944 | <i>Spilopelia chinensis</i> | Eastern Spotted Dove | 2017/10/4  | 3 | 0 | 31.24781500 | 121.49835100 | <a href="https://www.inaturalist.org/observations/8280881">https://www.inaturalist.org/observations/8280881</a>     |
| 6945 | <i>Spilopelia chinensis</i> | Eastern Spotted Dove | 2019/8/12  | 7 | 0 | 31.25093912 | 76.99764803  | <a href="https://www.inaturalist.org/observations/30915730">https://www.inaturalist.org/observations/30915730</a>   |

|      |                             |                      |            |   |   |             |              |                                                                                                                     |
|------|-----------------------------|----------------------|------------|---|---|-------------|--------------|---------------------------------------------------------------------------------------------------------------------|
| 6946 | <i>Spilopelia chinensis</i> | Eastern Spotted Dove | 2019/2/3   | 1 | 0 | 31.26330333 | 121.50560830 | <a href="https://www.inaturalist.org/observations/20051244">https://www.inaturalist.org/observations/20051244</a>   |
| 6947 | <i>Spilopelia chinensis</i> | Eastern Spotted Dove | 2022/5/15  | 0 | 0 | 31.27018307 | 121.43903320 | <a href="https://www.inaturalist.org/observations/130341046">https://www.inaturalist.org/observations/130341046</a> |
| 6948 | <i>Spilopelia chinensis</i> | Eastern Spotted Dove | 2021/10/23 | 1 | 0 | 31.27447319 | 121.43749240 | <a href="https://www.inaturalist.org/observations/111620059">https://www.inaturalist.org/observations/111620059</a> |
| 6949 | <i>Spilopelia chinensis</i> | Eastern Spotted Dove | 2021/4/28  | 1 | 0 | 31.28366167 | 121.49843670 | <a href="https://www.inaturalist.org/observations/75524390">https://www.inaturalist.org/observations/75524390</a>   |
| 6950 | <i>Spilopelia chinensis</i> | Eastern Spotted Dove | 2019/5/1   | 1 | 0 | 31.28538000 | 121.48627500 | <a href="https://www.inaturalist.org/observations/24265042">https://www.inaturalist.org/observations/24265042</a>   |
| 6951 | <i>Spilopelia chinensis</i> | Eastern Spotted Dove | 2020/4/30  | 1 | 0 | 31.28649675 | 121.43800250 | <a href="https://www.inaturalist.org/observations/47705222">https://www.inaturalist.org/observations/47705222</a>   |
| 6952 | <i>Spilopelia chinensis</i> | Eastern Spotted Dove | 2021/4/26  | 0 | 0 | 31.28667167 | 121.50168670 | <a href="https://www.inaturalist.org/observations/75294999">https://www.inaturalist.org/observations/75294999</a>   |
| 6953 | <i>Spilopelia chinensis</i> | Eastern Spotted Dove | 2021/4/23  | 2 | 0 | 31.28690000 | 121.50197500 | <a href="https://www.inaturalist.org/observations/74910026">https://www.inaturalist.org/observations/74910026</a>   |
| 6954 | <i>Spilopelia chinensis</i> | Eastern Spotted Dove | 2022/3/11  | 1 | 0 | 31.28871491 | 121.21754770 | <a href="https://www.inaturalist.org/observations/108360463">https://www.inaturalist.org/observations/108360463</a> |
| 6955 | <i>Spilopelia chinensis</i> | Eastern Spotted Dove | 2019/2/3   | 2 | 0 | 31.29036333 | 121.51342000 | <a href="https://www.inaturalist.org/observations/20051241">https://www.inaturalist.org/observations/20051241</a>   |
| 6956 | <i>Spilopelia chinensis</i> | Eastern Spotted Dove | 2021/5/1   | 2 | 0 | 31.29577446 | 120.65677640 | <a href="https://www.inaturalist.org/observations/76161245">https://www.inaturalist.org/observations/76161245</a>   |
| 6957 | <i>Spilopelia chinensis</i> | Eastern Spotted Dove | 2017/4/23  | 3 | 0 | 31.29585100 | 120.66769100 | <a href="https://www.inaturalist.org/observations/6885407">https://www.inaturalist.org/observations/6885407</a>     |
| 6958 | <i>Spilopelia chinensis</i> | Eastern Spotted Dove | 2017/6/23  | 3 | 0 | 31.29891397 | 121.49757210 | <a href="https://www.inaturalist.org/observations/8846368">https://www.inaturalist.org/observations/8846368</a>     |
| 6959 | <i>Spilopelia chinensis</i> | Eastern Spotted Dove | 2020/8/7   | 1 | 0 | 31.30348769 | 121.39027180 | <a href="https://www.inaturalist.org/observations/55657063">https://www.inaturalist.org/observations/55657063</a>   |
| 6960 | <i>Spilopelia chinensis</i> | Eastern Spotted Dove | 2020/5/20  | 2 | 0 | 31.30885720 | 120.67641200 | <a href="https://www.inaturalist.org/observations/46712067">https://www.inaturalist.org/observations/46712067</a>   |
| 6961 | <i>Spilopelia chinensis</i> | Eastern Spotted Dove | 2021/4/1   | 1 | 0 | 31.31208333 | 120.66990500 | <a href="https://www.inaturalist.org/observations/72594106">https://www.inaturalist.org/observations/72594106</a>   |
| 6962 | <i>Spilopelia chinensis</i> | Eastern Spotted Dove | 2021/7/10  | 1 | 0 | 31.31779265 | 121.54922790 | <a href="https://www.inaturalist.org/observations/86547071">https://www.inaturalist.org/observations/86547071</a>   |
| 6963 | <i>Spilopelia chinensis</i> | Eastern Spotted Dove | 2022/2/25  | 2 | 0 | 31.32026833 | 121.54483160 | <a href="https://www.inaturalist.org/observations/118162535">https://www.inaturalist.org/observations/118162535</a> |
| 6964 | <i>Spilopelia chinensis</i> | Eastern Spotted Dove | 2021/10/1  | 2 | 0 | 31.34957363 | 121.36292940 | <a href="https://www.inaturalist.org/observations/96774723">https://www.inaturalist.org/observations/96774723</a>   |
| 6965 | <i>Spilopelia chinensis</i> | Eastern Spotted Dove | 2021/4/23  | 1 | 0 | 31.35145203 | 121.37194520 | <a href="https://www.inaturalist.org/observations/74933262">https://www.inaturalist.org/observations/74933262</a>   |
| 6966 | <i>Spilopelia chinensis</i> | Eastern Spotted Dove | 2022/2/4   | 1 | 0 | 31.35262812 | 118.43741380 | <a href="https://www.inaturalist.org/observations/106118831">https://www.inaturalist.org/observations/106118831</a> |
| 6967 | <i>Spilopelia chinensis</i> | Eastern Spotted Dove | 2022/2/24  | 1 | 0 | 31.36076258 | 120.67657740 | <a href="https://www.inaturalist.org/observations/107445863">https://www.inaturalist.org/observations/107445863</a> |
| 6968 | <i>Spilopelia chinensis</i> | Eastern Spotted Dove | 2021/3/23  | 2 | 0 | 31.38326389 | 121.52450280 | <a href="https://www.inaturalist.org/observations/84507301">https://www.inaturalist.org/observations/84507301</a>   |

|      |                             |                      |            |   |   |             |              |                                                                                                                     |
|------|-----------------------------|----------------------|------------|---|---|-------------|--------------|---------------------------------------------------------------------------------------------------------------------|
| 6969 | <i>Spilopelia chinensis</i> | Eastern Spotted Dove | 2022/5/9   | 1 | 0 | 31.38982980 | 121.39997760 | <a href="https://www.inaturalist.org/observations/116217232">https://www.inaturalist.org/observations/116217232</a> |
| 6970 | <i>Spilopelia chinensis</i> | Eastern Spotted Dove | 2018/3/1   | 2 | 0 | 31.39762200 | 117.20890100 | <a href="https://www.inaturalist.org/observations/10142802">https://www.inaturalist.org/observations/10142802</a>   |
| 6971 | <i>Spilopelia chinensis</i> | Eastern Spotted Dove | 2022/5/12  | 3 | 0 | 31.40077000 | 78.33727400  | <a href="https://www.inaturalist.org/observations/116671989">https://www.inaturalist.org/observations/116671989</a> |
| 6972 | <i>Spilopelia chinensis</i> | Eastern Spotted Dove | 2018/10/24 | 3 | 0 | 31.41344315 | 120.89663490 | <a href="https://www.inaturalist.org/observations/17786498">https://www.inaturalist.org/observations/17786498</a>   |
| 6973 | <i>Spilopelia chinensis</i> | Eastern Spotted Dove | 2019/1/23  | 2 | 0 | 31.41506602 | 120.89862410 | <a href="https://www.inaturalist.org/observations/19812768">https://www.inaturalist.org/observations/19812768</a>   |
| 6974 | <i>Spilopelia chinensis</i> | Eastern Spotted Dove | 2018/10/23 | 1 | 0 | 31.41547441 | 120.89670000 | <a href="https://www.inaturalist.org/observations/22294784">https://www.inaturalist.org/observations/22294784</a>   |
| 6975 | <i>Spilopelia chinensis</i> | Eastern Spotted Dove | 2019/11/3  | 2 | 0 | 31.41700517 | 120.89870920 | <a href="https://www.inaturalist.org/observations/35231829">https://www.inaturalist.org/observations/35231829</a>   |
| 6976 | <i>Spilopelia chinensis</i> | Eastern Spotted Dove | 2018/9/30  | 2 | 0 | 31.41708107 | 120.89380360 | <a href="https://www.inaturalist.org/observations/17054460">https://www.inaturalist.org/observations/17054460</a>   |
| 6977 | <i>Spilopelia chinensis</i> | Eastern Spotted Dove | 2018/9/30  | 1 | 0 | 31.41709544 | 120.89366990 | <a href="https://www.inaturalist.org/observations/17054446">https://www.inaturalist.org/observations/17054446</a>   |
| 6978 | <i>Spilopelia chinensis</i> | Eastern Spotted Dove | 2018/9/30  | 1 | 0 | 31.41715315 | 120.89357130 | <a href="https://www.inaturalist.org/observations/17054092">https://www.inaturalist.org/observations/17054092</a>   |
| 6979 | <i>Spilopelia chinensis</i> | Eastern Spotted Dove | 2021/10/4  | 1 | 0 | 31.47000000 | 119.58000000 | <a href="https://www.inaturalist.org/observations/98054444">https://www.inaturalist.org/observations/98054444</a>   |
| 6980 | <i>Spilopelia chinensis</i> | Eastern Spotted Dove | 2020/5/20  | 1 | 0 | 31.49762391 | 120.44113480 | <a href="https://www.inaturalist.org/observations/65411820">https://www.inaturalist.org/observations/65411820</a>   |
| 6981 | <i>Spilopelia chinensis</i> | Eastern Spotted Dove | 2021/1/1   | 1 | 0 | 31.53286965 | 120.30677140 | <a href="https://www.inaturalist.org/observations/67377375">https://www.inaturalist.org/observations/67377375</a>   |
| 6982 | <i>Spilopelia chinensis</i> | Eastern Spotted Dove | 2021/8/8   | 3 | 0 | 31.56640000 | 76.86080000  | <a href="https://www.inaturalist.org/observations/90746048">https://www.inaturalist.org/observations/90746048</a>   |
| 6983 | <i>Spilopelia chinensis</i> | Eastern Spotted Dove | 2021/8/29  | 2 | 0 | 31.56650000 | 76.86069972  | <a href="https://www.inaturalist.org/observations/92864346">https://www.inaturalist.org/observations/92864346</a>   |
| 6984 | <i>Spilopelia chinensis</i> | Eastern Spotted Dove | 2019/4/5   | 1 | 0 | 31.59973842 | 120.84942020 | <a href="https://www.inaturalist.org/observations/69711436">https://www.inaturalist.org/observations/69711436</a>   |
| 6985 | <i>Spilopelia chinensis</i> | Eastern Spotted Dove | 2019/7/28  | 3 | 0 | 31.64852929 | 77.38259830  | <a href="https://www.inaturalist.org/observations/105030579">https://www.inaturalist.org/observations/105030579</a> |
| 6986 | <i>Spilopelia chinensis</i> | Eastern Spotted Dove | 2021/5/3   | 1 | 0 | 31.64882141 | 119.21777790 | <a href="https://www.inaturalist.org/observations/77310404">https://www.inaturalist.org/observations/77310404</a>   |
| 6987 | <i>Spilopelia chinensis</i> | Eastern Spotted Dove | 2021/5/2   | 1 | 0 | 31.64955579 | 119.21899860 | <a href="https://www.inaturalist.org/observations/77293848">https://www.inaturalist.org/observations/77293848</a>   |
| 6988 | <i>Spilopelia chinensis</i> | Eastern Spotted Dove | 2020/3/7   | 2 | 0 | 31.66172167 | 120.74470500 | <a href="https://www.inaturalist.org/observations/41275462">https://www.inaturalist.org/observations/41275462</a>   |
| 6989 | <i>Spilopelia chinensis</i> | Eastern Spotted Dove | 2021/1/10  | 0 | 0 | 31.68012722 | 121.48662810 | <a href="https://www.inaturalist.org/observations/129136089">https://www.inaturalist.org/observations/129136089</a> |
| 6990 | <i>Spilopelia chinensis</i> | Eastern Spotted Dove | 2018/6/13  | 3 | 0 | 31.74558697 | 120.92711270 | <a href="https://www.inaturalist.org/observations/13417425">https://www.inaturalist.org/observations/13417425</a>   |
| 6991 | <i>Spilopelia chinensis</i> | Eastern Spotted Dove | 2020/4/8   | 1 | 0 | 31.75044633 | 119.59864440 | <a href="https://www.inaturalist.org/observations/41888019">https://www.inaturalist.org/observations/41888019</a>   |

|      |                             |                      |            |   |   |             |              |                                                                                                                     |
|------|-----------------------------|----------------------|------------|---|---|-------------|--------------|---------------------------------------------------------------------------------------------------------------------|
| 6992 | <i>Spilopelia chinensis</i> | Eastern Spotted Dove | 2022/1/4   | 1 | 0 | 31.84111063 | 117.29611620 | <a href="https://www.inaturalist.org/observations/106356887">https://www.inaturalist.org/observations/106356887</a> |
| 6993 | <i>Spilopelia chinensis</i> | Eastern Spotted Dove | 2021/4/17  | 1 | 0 | 31.84224833 | 117.25020330 | <a href="https://www.inaturalist.org/observations/74216270">https://www.inaturalist.org/observations/74216270</a>   |
| 6994 | <i>Spilopelia chinensis</i> | Eastern Spotted Dove | 2021/9/7   | 1 | 0 | 31.85697333 | 109.38890670 | <a href="https://www.inaturalist.org/observations/112126173">https://www.inaturalist.org/observations/112126173</a> |
| 6995 | <i>Spilopelia chinensis</i> | Eastern Spotted Dove | 2021/9/7   | 1 | 0 | 31.85793833 | 109.38817170 | <a href="https://www.inaturalist.org/observations/112126134">https://www.inaturalist.org/observations/112126134</a> |
| 6996 | <i>Spilopelia chinensis</i> | Eastern Spotted Dove | 2020/5/11  | 2 | 0 | 31.87613451 | 120.52153570 | <a href="https://www.inaturalist.org/observations/45570259">https://www.inaturalist.org/observations/45570259</a>   |
| 6997 | <i>Spilopelia chinensis</i> | Eastern Spotted Dove | 2021/2/7   | 1 | 0 | 31.90322329 | 118.91554390 | <a href="https://www.inaturalist.org/observations/101876179">https://www.inaturalist.org/observations/101876179</a> |
| 6998 | <i>Spilopelia chinensis</i> | Eastern Spotted Dove | 2022/5/22  | 1 | 0 | 31.97504333 | 118.63080000 | <a href="https://www.inaturalist.org/observations/118484258">https://www.inaturalist.org/observations/118484258</a> |
| 6999 | <i>Spilopelia chinensis</i> | Eastern Spotted Dove | 2021/10/21 | 1 | 0 | 31.98497000 | 118.77953330 | <a href="https://www.inaturalist.org/observations/98957743">https://www.inaturalist.org/observations/98957743</a>   |
| 7000 | <i>Spilopelia chinensis</i> | Eastern Spotted Dove | 2021/6/19  | 1 | 0 | 31.99188333 | 119.61417500 | <a href="https://www.inaturalist.org/observations/83579102">https://www.inaturalist.org/observations/83579102</a>   |
| 7001 | <i>Spilopelia chinensis</i> | Eastern Spotted Dove | 2013/6/14  | 1 | 0 | 31.99877670 | 77.12961380  | <a href="https://www.inaturalist.org/observations/93560429">https://www.inaturalist.org/observations/93560429</a>   |
| 7002 | <i>Spilopelia chinensis</i> | Eastern Spotted Dove | 2022/5/8   | 1 | 0 | 32.00415333 | 118.63668660 | <a href="https://www.inaturalist.org/observations/117969700">https://www.inaturalist.org/observations/117969700</a> |
| 7003 | <i>Spilopelia chinensis</i> | Eastern Spotted Dove | 2022/5/8   | 1 | 0 | 32.00415333 | 118.63668660 | <a href="https://www.inaturalist.org/observations/117969703">https://www.inaturalist.org/observations/117969703</a> |
| 7004 | <i>Spilopelia chinensis</i> | Eastern Spotted Dove | 2022/5/8   | 1 | 0 | 32.00745833 | 118.63901500 | <a href="https://www.inaturalist.org/observations/117969620">https://www.inaturalist.org/observations/117969620</a> |
| 7005 | <i>Spilopelia chinensis</i> | Eastern Spotted Dove | 2014/7/4   | 1 | 0 | 32.01151571 | 105.26289640 | <a href="https://www.inaturalist.org/observations/20003674">https://www.inaturalist.org/observations/20003674</a>   |
| 7006 | <i>Spilopelia chinensis</i> | Eastern Spotted Dove | 2021/11/7  | 1 | 0 | 32.04285800 | 118.78077000 | <a href="https://www.inaturalist.org/observations/100509555">https://www.inaturalist.org/observations/100509555</a> |
| 7007 | <i>Spilopelia chinensis</i> | Eastern Spotted Dove | 2020/8/25  | 2 | 0 | 32.04438307 | 118.81259600 | <a href="https://www.inaturalist.org/observations/57514459">https://www.inaturalist.org/observations/57514459</a>   |
| 7008 | <i>Spilopelia chinensis</i> | Eastern Spotted Dove | 2019/10/25 | 2 | 0 | 32.04990400 | 118.80189000 | <a href="https://www.inaturalist.org/observations/34862079">https://www.inaturalist.org/observations/34862079</a>   |
| 7009 | <i>Spilopelia chinensis</i> | Eastern Spotted Dove | 2022/7/15  | 1 | 0 | 32.05837990 | 118.79647000 | <a href="https://www.inaturalist.org/observations/126652556">https://www.inaturalist.org/observations/126652556</a> |
| 7010 | <i>Spilopelia chinensis</i> | Eastern Spotted Dove | 2018/4/25  | 3 | 0 | 32.07343833 | 118.80221830 | <a href="https://www.inaturalist.org/observations/12162929">https://www.inaturalist.org/observations/12162929</a>   |
| 7011 | <i>Spilopelia chinensis</i> | Eastern Spotted Dove | 2018/4/25  | 3 | 0 | 32.07368833 | 118.80240500 | <a href="https://www.inaturalist.org/observations/12162927">https://www.inaturalist.org/observations/12162927</a>   |
| 7012 | <i>Spilopelia chinensis</i> | Eastern Spotted Dove | 2018/4/25  | 3 | 0 | 32.07376667 | 118.80277670 | <a href="https://www.inaturalist.org/observations/12162922">https://www.inaturalist.org/observations/12162922</a>   |
| 7013 | <i>Spilopelia chinensis</i> | Eastern Spotted Dove | 2018/4/25  | 2 | 0 | 32.07376667 | 118.80277670 | <a href="https://www.inaturalist.org/observations/12162924">https://www.inaturalist.org/observations/12162924</a>   |
| 7014 | <i>Spilopelia chinensis</i> | Eastern Spotted Dove | 2021/4/1   | 1 | 0 | 32.07637640 | 118.81484880 | <a href="https://www.inaturalist.org/observations/72585587">https://www.inaturalist.org/observations/72585587</a>   |

|      |                             |                      |            |   |   |             |              |                                                                                                                     |
|------|-----------------------------|----------------------|------------|---|---|-------------|--------------|---------------------------------------------------------------------------------------------------------------------|
| 7015 | <i>Spilopelia chinensis</i> | Eastern Spotted Dove | 2021/4/1   | 1 | 0 | 32.07637640 | 118.81484880 | <a href="https://www.inaturalist.org/observations/72585588">https://www.inaturalist.org/observations/72585588</a>   |
| 7016 | <i>Spilopelia chinensis</i> | Eastern Spotted Dove | 2022/4/21  | 1 | 0 | 32.07799667 | 118.81709330 | <a href="https://www.inaturalist.org/observations/113100234">https://www.inaturalist.org/observations/113100234</a> |
| 7017 | <i>Spilopelia chinensis</i> | Eastern Spotted Dove | 2022/4/18  | 1 | 0 | 32.07839773 | 118.81257520 | <a href="https://www.inaturalist.org/observations/111908453">https://www.inaturalist.org/observations/111908453</a> |
| 7018 | <i>Spilopelia chinensis</i> | Eastern Spotted Dove | 2022/5/15  | 1 | 0 | 32.07894167 | 118.81142830 | <a href="https://www.inaturalist.org/observations/117965325">https://www.inaturalist.org/observations/117965325</a> |
| 7019 | <i>Spilopelia chinensis</i> | Eastern Spotted Dove | 2022/5/1   | 1 | 0 | 32.08084506 | 118.81646270 | <a href="https://www.inaturalist.org/observations/114000335">https://www.inaturalist.org/observations/114000335</a> |
| 7020 | <i>Spilopelia chinensis</i> | Eastern Spotted Dove | 2022/4/21  | 1 | 0 | 32.08147997 | 118.81863670 | <a href="https://www.inaturalist.org/observations/113100248">https://www.inaturalist.org/observations/113100248</a> |
| 7021 | <i>Spilopelia chinensis</i> | Eastern Spotted Dove | 2022/5/4   | 1 | 0 | 32.08188714 | 118.81802040 | <a href="https://www.inaturalist.org/observations/115292128">https://www.inaturalist.org/observations/115292128</a> |
| 7022 | <i>Spilopelia chinensis</i> | Eastern Spotted Dove | 2021/4/3   | 1 | 0 | 32.08458500 | 118.81453170 | <a href="https://www.inaturalist.org/observations/72864446">https://www.inaturalist.org/observations/72864446</a>   |
| 7023 | <i>Spilopelia chinensis</i> | Eastern Spotted Dove | 2020/4/26  | 1 | 0 | 32.10449842 | 118.90464040 | <a href="https://www.inaturalist.org/observations/43566881">https://www.inaturalist.org/observations/43566881</a>   |
| 7024 | <i>Spilopelia chinensis</i> | Eastern Spotted Dove | 2022/5/6   | 4 | 0 | 32.10753642 | 76.57359861  | <a href="https://www.inaturalist.org/observations/116646946">https://www.inaturalist.org/observations/116646946</a> |
| 7025 | <i>Spilopelia chinensis</i> | Eastern Spotted Dove | 2021/10/28 | 1 | 0 | 32.11583304 | 118.91638670 | <a href="https://www.inaturalist.org/observations/99608411">https://www.inaturalist.org/observations/99608411</a>   |
| 7026 | <i>Spilopelia chinensis</i> | Eastern Spotted Dove | 2022/6/22  | 1 | 0 | 32.14116391 | 118.76307000 | <a href="https://www.inaturalist.org/observations/123032921">https://www.inaturalist.org/observations/123032921</a> |
| 7027 | <i>Spilopelia chinensis</i> | Eastern Spotted Dove | 2015/6/21  | 3 | 0 | 32.21904200 | 76.32340370  | <a href="https://www.inaturalist.org/observations/30503350">https://www.inaturalist.org/observations/30503350</a>   |
| 7028 | <i>Spilopelia chinensis</i> | Eastern Spotted Dove | 2020/5/28  | 2 | 0 | 32.22772104 | 76.32171986  | <a href="https://www.inaturalist.org/observations/47601501">https://www.inaturalist.org/observations/47601501</a>   |
| 7029 | <i>Spilopelia chinensis</i> | Eastern Spotted Dove | 2020/3/8   | 2 | 0 | 32.28440461 | 115.39069040 | <a href="https://www.inaturalist.org/observations/39683658">https://www.inaturalist.org/observations/39683658</a>   |
| 7030 | <i>Spilopelia chinensis</i> | Eastern Spotted Dove | 2021/6/12  | 1 | 0 | 32.39911850 | 119.44362000 | <a href="https://www.inaturalist.org/observations/82677654">https://www.inaturalist.org/observations/82677654</a>   |
| 7031 | <i>Spilopelia chinensis</i> | Eastern Spotted Dove | 2021/7/17  | 1 | 0 | 33.10746167 | 114.22772000 | <a href="https://www.inaturalist.org/observations/91264560">https://www.inaturalist.org/observations/91264560</a>   |
| 7032 | <i>Spilopelia chinensis</i> | Eastern Spotted Dove | 2022/3/20  | 2 | 0 | 33.21121216 | 120.47279360 | <a href="https://www.inaturalist.org/observations/109132802">https://www.inaturalist.org/observations/109132802</a> |
| 7033 | <i>Spilopelia chinensis</i> | Eastern Spotted Dove | 2015/11/11 | 5 | 0 | 33.63001889 | 78.31598443  | <a href="https://www.inaturalist.org/observations/10524118">https://www.inaturalist.org/observations/10524118</a>   |
| 7034 | <i>Spilopelia chinensis</i> | Eastern Spotted Dove | 2022/8/29  | 1 | 0 | 34.43156127 | 115.64720430 | <a href="https://www.inaturalist.org/observations/133103146">https://www.inaturalist.org/observations/133103146</a> |
| 7035 | <i>Spilopelia chinensis</i> | Eastern Spotted Dove | 2022/8/24  | 2 | 0 | 34.43176233 | 115.64728590 | <a href="https://www.inaturalist.org/observations/132254847">https://www.inaturalist.org/observations/132254847</a> |
| 7036 | <i>Spilopelia chinensis</i> | Eastern Spotted Dove | 2022/2/3   | 1 | 0 | 34.51927500 | 113.73421000 | <a href="https://www.inaturalist.org/observations/106220713">https://www.inaturalist.org/observations/106220713</a> |
| 7037 | <i>Spilopelia chinensis</i> | Eastern Spotted Dove | 2021/10/23 | 1 | 0 | 34.58399833 | 113.85261670 | <a href="https://www.inaturalist.org/observations/99325944">https://www.inaturalist.org/observations/99325944</a>   |

|      |                             |                      |            |   |   |             |              |                                                                                                                     |
|------|-----------------------------|----------------------|------------|---|---|-------------|--------------|---------------------------------------------------------------------------------------------------------------------|
| 7038 | <i>Spilopelia chinensis</i> | Eastern Spotted Dove | 2022/9/10  | 1 | 0 | 34.58457333 | 113.85297670 | <a href="https://www.inaturalist.org/observations/134864586">https://www.inaturalist.org/observations/134864586</a> |
| 7039 | <i>Spilopelia chinensis</i> | Eastern Spotted Dove | 2022/8/27  | 2 | 0 | 34.58854833 | 113.85244170 | <a href="https://www.inaturalist.org/observations/132942177">https://www.inaturalist.org/observations/132942177</a> |
| 7040 | <i>Spilopelia chinensis</i> | Eastern Spotted Dove | 2021/3/1   | 1 | 0 | 34.58922558 | 113.84826890 | <a href="https://www.inaturalist.org/observations/70385269">https://www.inaturalist.org/observations/70385269</a>   |
| 7041 | <i>Spilopelia chinensis</i> | Eastern Spotted Dove | 2022/3/5   | 2 | 0 | 34.58939600 | 113.85319740 | <a href="https://www.inaturalist.org/observations/108298184">https://www.inaturalist.org/observations/108298184</a> |
| 7042 | <i>Spilopelia chinensis</i> | Eastern Spotted Dove | 2021/8/21  | 1 | 0 | 34.58979167 | 113.84964500 | <a href="https://www.inaturalist.org/observations/92213515">https://www.inaturalist.org/observations/92213515</a>   |
| 7043 | <i>Spilopelia chinensis</i> | Eastern Spotted Dove | 2021/11/13 | 1 | 0 | 34.59531167 | 113.84863000 | <a href="https://www.inaturalist.org/observations/101692099">https://www.inaturalist.org/observations/101692099</a> |
| 7044 | <i>Spilopelia chinensis</i> | Eastern Spotted Dove | 2022/2/4   | 1 | 0 | 34.59535833 | 113.84853330 | <a href="https://www.inaturalist.org/observations/106220755">https://www.inaturalist.org/observations/106220755</a> |
| 7045 | <i>Spilopelia chinensis</i> | Eastern Spotted Dove | 2022/3/26  | 1 | 0 | 34.59655167 | 113.85637670 | <a href="https://www.inaturalist.org/observations/109647167">https://www.inaturalist.org/observations/109647167</a> |
| 7046 | <i>Spilopelia chinensis</i> | Eastern Spotted Dove | 2022/1/3   | 2 | 0 | 34.59678981 | 113.85105960 | <a href="https://www.inaturalist.org/observations/104337641">https://www.inaturalist.org/observations/104337641</a> |
| 7047 | <i>Spilopelia chinensis</i> | Eastern Spotted Dove | 2022/6/25  | 1 | 0 | 34.59690750 | 113.85094200 | <a href="https://www.inaturalist.org/observations/123362230">https://www.inaturalist.org/observations/123362230</a> |
| 7048 | <i>Spilopelia chinensis</i> | Eastern Spotted Dove | 2022/5/21  | 1 | 0 | 34.59754500 | 113.85116670 | <a href="https://www.inaturalist.org/observations/117961128">https://www.inaturalist.org/observations/117961128</a> |
| 7049 | <i>Spilopelia chinensis</i> | Eastern Spotted Dove | 2022/3/20  | 1 | 0 | 34.59769833 | 113.85334000 | <a href="https://www.inaturalist.org/observations/109223647">https://www.inaturalist.org/observations/109223647</a> |
| 7050 | <i>Spilopelia chinensis</i> | Eastern Spotted Dove | 2022/6/12  | 1 | 0 | 34.59803656 | 113.85141140 | <a href="https://www.inaturalist.org/observations/121852681">https://www.inaturalist.org/observations/121852681</a> |
| 7051 | <i>Spilopelia chinensis</i> | Eastern Spotted Dove | 2021/9/20  | 1 | 0 | 34.59824251 | 113.85253040 | <a href="https://www.inaturalist.org/observations/95646222">https://www.inaturalist.org/observations/95646222</a>   |
| 7052 | <i>Spilopelia chinensis</i> | Eastern Spotted Dove | 2021/6/13  | 1 | 0 | 34.59825167 | 113.85238170 | <a href="https://www.inaturalist.org/observations/83085359">https://www.inaturalist.org/observations/83085359</a>   |
| 7053 | <i>Spilopelia chinensis</i> | Eastern Spotted Dove | 2021/4/27  | 1 | 0 | 34.59827667 | 113.85116330 | <a href="https://www.inaturalist.org/observations/75423868">https://www.inaturalist.org/observations/75423868</a>   |
| 7054 | <i>Spilopelia chinensis</i> | Eastern Spotted Dove | 2021/5/29  | 1 | 0 | 34.59829833 | 113.85232500 | <a href="https://www.inaturalist.org/observations/81031594">https://www.inaturalist.org/observations/81031594</a>   |
| 7055 | <i>Spilopelia chinensis</i> | Eastern Spotted Dove | 2022/2/19  | 1 | 0 | 34.59830333 | 113.85175500 | <a href="https://www.inaturalist.org/observations/107089959">https://www.inaturalist.org/observations/107089959</a> |
| 7056 | <i>Spilopelia chinensis</i> | Eastern Spotted Dove | 2021/2/21  | 1 | 0 | 34.59831333 | 113.85226000 | <a href="https://www.inaturalist.org/observations/69912142">https://www.inaturalist.org/observations/69912142</a>   |
| 7057 | <i>Spilopelia chinensis</i> | Eastern Spotted Dove | 2021/4/5   | 1 | 0 | 34.59833167 | 113.85239830 | <a href="https://www.inaturalist.org/observations/73103674">https://www.inaturalist.org/observations/73103674</a>   |
| 7058 | <i>Spilopelia chinensis</i> | Eastern Spotted Dove | 2022/2/12  | 1 | 0 | 34.59854667 | 113.85330170 | <a href="https://www.inaturalist.org/observations/106674803">https://www.inaturalist.org/observations/106674803</a> |
| 7059 | <i>Spilopelia chinensis</i> | Eastern Spotted Dove | 2021/4/10  | 1 | 0 | 34.59855333 | 113.85351000 | <a href="https://www.inaturalist.org/observations/73486517">https://www.inaturalist.org/observations/73486517</a>   |
| 7060 | <i>Spilopelia chinensis</i> | Eastern Spotted Dove | 2022/6/19  | 1 | 0 | 34.59855738 | 113.85184690 | <a href="https://www.inaturalist.org/observations/123362213">https://www.inaturalist.org/observations/123362213</a> |

|      |                             |                      |            |   |   |             |              |                                                                                                                     |
|------|-----------------------------|----------------------|------------|---|---|-------------|--------------|---------------------------------------------------------------------------------------------------------------------|
| 7061 | <i>Spilopelia chinensis</i> | Eastern Spotted Dove | 2021/3/21  | 1 | 0 | 34.59860167 | 113.85181170 | <a href="https://www.inaturalist.org/observations/72008612">https://www.inaturalist.org/observations/72008612</a>   |
| 7062 | <i>Spilopelia chinensis</i> | Eastern Spotted Dove | 2021/6/27  | 1 | 0 | 34.59861667 | 113.85243670 | <a href="https://www.inaturalist.org/observations/84913813">https://www.inaturalist.org/observations/84913813</a>   |
| 7063 | <i>Spilopelia chinensis</i> | Eastern Spotted Dove | 2022/7/24  | 2 | 0 | 34.59862333 | 113.85289670 | <a href="https://www.inaturalist.org/observations/128277662">https://www.inaturalist.org/observations/128277662</a> |
| 7064 | <i>Spilopelia chinensis</i> | Eastern Spotted Dove | 2022/1/23  | 1 | 0 | 34.59862500 | 113.85285500 | <a href="https://www.inaturalist.org/observations/105713109">https://www.inaturalist.org/observations/105713109</a> |
| 7065 | <i>Spilopelia chinensis</i> | Eastern Spotted Dove | 2020/12/27 | 1 | 0 | 34.59869167 | 113.85278000 | <a href="https://www.inaturalist.org/observations/67123715">https://www.inaturalist.org/observations/67123715</a>   |
| 7066 | <i>Spilopelia chinensis</i> | Eastern Spotted Dove | 2021/3/7   | 1 | 0 | 34.59883167 | 113.85233170 | <a href="https://www.inaturalist.org/observations/70729935">https://www.inaturalist.org/observations/70729935</a>   |
| 7067 | <i>Spilopelia chinensis</i> | Eastern Spotted Dove | 2020/9/4   | 2 | 0 | 34.59897597 | 113.85044050 | <a href="https://www.inaturalist.org/observations/58559111">https://www.inaturalist.org/observations/58559111</a>   |
| 7068 | <i>Spilopelia chinensis</i> | Eastern Spotted Dove | 2020/12/12 | 1 | 0 | 34.59899139 | 113.85161590 | <a href="https://www.inaturalist.org/observations/66457728">https://www.inaturalist.org/observations/66457728</a>   |
| 7069 | <i>Spilopelia chinensis</i> | Eastern Spotted Dove | 2022/1/15  | 1 | 0 | 34.59899191 | 113.85127830 | <a href="https://www.inaturalist.org/observations/105713103">https://www.inaturalist.org/observations/105713103</a> |
| 7070 | <i>Spilopelia chinensis</i> | Eastern Spotted Dove | 2022/3/26  | 1 | 0 | 34.59901667 | 113.85251670 | <a href="https://www.inaturalist.org/observations/109647137">https://www.inaturalist.org/observations/109647137</a> |
| 7071 | <i>Spilopelia chinensis</i> | Eastern Spotted Dove | 2021/1/2   | 1 | 0 | 34.59903667 | 113.85274330 | <a href="https://www.inaturalist.org/observations/67440585">https://www.inaturalist.org/observations/67440585</a>   |
| 7072 | <i>Spilopelia chinensis</i> | Eastern Spotted Dove | 2022/9/11  | 1 | 0 | 34.59916219 | 113.85053070 | <a href="https://www.inaturalist.org/observations/134864633">https://www.inaturalist.org/observations/134864633</a> |
| 7073 | <i>Spilopelia chinensis</i> | Eastern Spotted Dove | 2022/6/3   | 1 | 0 | 34.59934833 | 113.85205830 | <a href="https://www.inaturalist.org/observations/120114064">https://www.inaturalist.org/observations/120114064</a> |
| 7074 | <i>Spilopelia chinensis</i> | Eastern Spotted Dove | 2022/1/15  | 1 | 0 | 34.59944231 | 113.85176110 | <a href="https://www.inaturalist.org/observations/105713105">https://www.inaturalist.org/observations/105713105</a> |
| 7075 | <i>Spilopelia chinensis</i> | Eastern Spotted Dove | 2021/2/23  | 1 | 0 | 34.59946699 | 113.85089970 | <a href="https://www.inaturalist.org/observations/70035193">https://www.inaturalist.org/observations/70035193</a>   |
| 7076 | <i>Spilopelia chinensis</i> | Eastern Spotted Dove | 2022/5/29  | 1 | 0 | 34.59961000 | 113.85829830 | <a href="https://www.inaturalist.org/observations/119173224">https://www.inaturalist.org/observations/119173224</a> |
| 7077 | <i>Spilopelia chinensis</i> | Eastern Spotted Dove | 2022/1/28  | 1 | 0 | 34.59981500 | 113.85241670 | <a href="https://www.inaturalist.org/observations/105713114">https://www.inaturalist.org/observations/105713114</a> |
| 7078 | <i>Spilopelia chinensis</i> | Eastern Spotted Dove | 2020/12/19 | 2 | 0 | 34.60000333 | 113.85243830 | <a href="https://www.inaturalist.org/observations/66765784">https://www.inaturalist.org/observations/66765784</a>   |
| 7079 | <i>Spilopelia chinensis</i> | Eastern Spotted Dove | 2022/9/24  | 1 | 0 | 34.60081667 | 113.85822830 | <a href="https://www.inaturalist.org/observations/136537989">https://www.inaturalist.org/observations/136537989</a> |
| 7080 | <i>Spilopelia chinensis</i> | Eastern Spotted Dove | 2022/5/14  | 1 | 0 | 34.60116333 | 113.85707670 | <a href="https://www.inaturalist.org/observations/116967045">https://www.inaturalist.org/observations/116967045</a> |
| 7081 | <i>Spilopelia chinensis</i> | Eastern Spotted Dove | 2022/2/26  | 1 | 0 | 34.60149500 | 113.85257170 | <a href="https://www.inaturalist.org/observations/107553417">https://www.inaturalist.org/observations/107553417</a> |
| 7082 | <i>Spilopelia chinensis</i> | Eastern Spotted Dove | 2022/5/1   | 1 | 0 | 34.66872833 | 113.56040000 | <a href="https://www.inaturalist.org/observations/114143522">https://www.inaturalist.org/observations/114143522</a> |
| 7083 | <i>Spilopelia chinensis</i> | Eastern Spotted Dove | 2021/12/17 | 1 | 0 | 34.74495833 | 113.67727330 | <a href="https://www.inaturalist.org/observations/103193753">https://www.inaturalist.org/observations/103193753</a> |



|      |                             |                      |            |   |   |             |              |                                                                                                                     |
|------|-----------------------------|----------------------|------------|---|---|-------------|--------------|---------------------------------------------------------------------------------------------------------------------|
| 7084 | <i>Spilopelia chinensis</i> | Eastern Spotted Dove | 2022/4/26  | 1 | 0 | 34.74537500 | 113.63388500 | <a href="https://www.inaturalist.org/observations/112943767">https://www.inaturalist.org/observations/112943767</a> |
| 7085 | <i>Spilopelia chinensis</i> | Eastern Spotted Dove | 2021/12/17 | 1 | 0 | 34.74585000 | 113.67747330 | <a href="https://www.inaturalist.org/observations/103193715">https://www.inaturalist.org/observations/103193715</a> |
| 7086 | <i>Spilopelia chinensis</i> | Eastern Spotted Dove | 2021/1/4   | 1 | 0 | 34.75027491 | 113.62387840 | <a href="https://www.inaturalist.org/observations/67564346">https://www.inaturalist.org/observations/67564346</a>   |
| 7087 | <i>Spilopelia chinensis</i> | Eastern Spotted Dove | 2022/4/16  | 1 | 0 | 34.75061226 | 113.56189760 | <a href="https://www.inaturalist.org/observations/111642572">https://www.inaturalist.org/observations/111642572</a> |
| 7088 | <i>Spilopelia chinensis</i> | Eastern Spotted Dove | 2021/1/4   | 1 | 0 | 34.75173833 | 113.62457000 | <a href="https://www.inaturalist.org/observations/67564355">https://www.inaturalist.org/observations/67564355</a>   |
| 7089 | <i>Spilopelia chinensis</i> | Eastern Spotted Dove | 2022/9/4   | 1 | 0 | 34.75200833 | 113.56480000 | <a href="https://www.inaturalist.org/observations/133603141">https://www.inaturalist.org/observations/133603141</a> |
| 7090 | <i>Spilopelia chinensis</i> | Eastern Spotted Dove | 2022/2/28  | 1 | 0 | 34.75497333 | 113.56328500 | <a href="https://www.inaturalist.org/observations/107627837">https://www.inaturalist.org/observations/107627837</a> |
| 7091 | <i>Spilopelia chinensis</i> | Eastern Spotted Dove | 2022/1/29  | 1 | 0 | 34.75906333 | 113.65850170 | <a href="https://www.inaturalist.org/observations/105835389">https://www.inaturalist.org/observations/105835389</a> |
| 7092 | <i>Spilopelia chinensis</i> | Eastern Spotted Dove | 2022/4/7   | 1 | 0 | 34.75938833 | 113.56819830 | <a href="https://www.inaturalist.org/observations/110657814">https://www.inaturalist.org/observations/110657814</a> |
| 7093 | <i>Spilopelia chinensis</i> | Eastern Spotted Dove | 2020/12/23 | 1 | 0 | 34.76089261 | 113.65884300 | <a href="https://www.inaturalist.org/observations/66956193">https://www.inaturalist.org/observations/66956193</a>   |
| 7094 | <i>Spilopelia chinensis</i> | Eastern Spotted Dove | 2021/4/27  | 1 | 0 | 34.76093500 | 113.65778000 | <a href="https://www.inaturalist.org/observations/75423856">https://www.inaturalist.org/observations/75423856</a>   |
| 7095 | <i>Spilopelia chinensis</i> | Eastern Spotted Dove | 2021/1/1   | 1 | 0 | 34.76097667 | 113.65898170 | <a href="https://www.inaturalist.org/observations/67393667">https://www.inaturalist.org/observations/67393667</a>   |
| 7096 | <i>Spilopelia chinensis</i> | Eastern Spotted Dove | 2020/12/21 | 2 | 0 | 34.76110833 | 113.65876170 | <a href="https://www.inaturalist.org/observations/66869604">https://www.inaturalist.org/observations/66869604</a>   |
| 7097 | <i>Spilopelia chinensis</i> | Eastern Spotted Dove | 2022/8/11  | 2 | 0 | 34.76145500 | 113.68867650 | <a href="https://www.inaturalist.org/observations/130342922">https://www.inaturalist.org/observations/130342922</a> |
| 7098 | <i>Spilopelia chinensis</i> | Eastern Spotted Dove | 2022/8/15  | 1 | 0 | 34.76145500 | 113.68867650 | <a href="https://www.inaturalist.org/observations/130922657">https://www.inaturalist.org/observations/130922657</a> |
| 7099 | <i>Spilopelia chinensis</i> | Eastern Spotted Dove | 2022/9/22  | 0 | 0 | 34.76145500 | 113.68867650 | <a href="https://www.inaturalist.org/observations/136108624">https://www.inaturalist.org/observations/136108624</a> |
| 7100 | <i>Spilopelia chinensis</i> | Eastern Spotted Dove | 2021/9/22  | 1 | 0 | 34.76151167 | 113.65905000 | <a href="https://www.inaturalist.org/observations/95745657">https://www.inaturalist.org/observations/95745657</a>   |
| 7101 | <i>Spilopelia chinensis</i> | Eastern Spotted Dove | 2022/9/28  | 1 | 0 | 34.76151667 | 113.65856330 | <a href="https://www.inaturalist.org/observations/137142611">https://www.inaturalist.org/observations/137142611</a> |
| 7102 | <i>Spilopelia chinensis</i> | Eastern Spotted Dove | 2020/12/17 | 1 | 0 | 34.76170269 | 113.68451910 | <a href="https://www.inaturalist.org/observations/66691753">https://www.inaturalist.org/observations/66691753</a>   |
| 7103 | <i>Spilopelia chinensis</i> | Eastern Spotted Dove | 2021/1/22  | 1 | 0 | 34.76209281 | 113.65651960 | <a href="https://www.inaturalist.org/observations/68444072">https://www.inaturalist.org/observations/68444072</a>   |
| 7104 | <i>Spilopelia chinensis</i> | Eastern Spotted Dove | 2020/12/11 | 2 | 0 | 34.76215822 | 113.66487560 | <a href="https://www.inaturalist.org/observations/66414347">https://www.inaturalist.org/observations/66414347</a>   |
| 7105 | <i>Spilopelia chinensis</i> | Eastern Spotted Dove | 2020/12/17 | 1 | 0 | 34.76234611 | 113.68478930 | <a href="https://www.inaturalist.org/observations/66691736">https://www.inaturalist.org/observations/66691736</a>   |
| 7106 | <i>Spilopelia chinensis</i> | Eastern Spotted Dove | 2021/12/20 | 1 | 0 | 34.76240333 | 113.68315000 | <a href="https://www.inaturalist.org/observations/103455370">https://www.inaturalist.org/observations/103455370</a> |

|      |                             |                      |            |   |   |             |              |                                                                                                                     |
|------|-----------------------------|----------------------|------------|---|---|-------------|--------------|---------------------------------------------------------------------------------------------------------------------|
| 7107 | <i>Spilopelia chinensis</i> | Eastern Spotted Dove | 2021/12/30 | 1 | 0 | 34.76241099 | 113.65753450 | <a href="https://www.inaturalist.org/observations/104327351">https://www.inaturalist.org/observations/104327351</a> |
| 7108 | <i>Spilopelia chinensis</i> | Eastern Spotted Dove | 2022/9/1   | 2 | 0 | 34.76253259 | 113.68028690 | <a href="https://www.inaturalist.org/observations/133195942">https://www.inaturalist.org/observations/133195942</a> |
| 7109 | <i>Spilopelia chinensis</i> | Eastern Spotted Dove | 2022/2/24  | 1 | 0 | 34.76267500 | 113.68275500 | <a href="https://www.inaturalist.org/observations/107553381">https://www.inaturalist.org/observations/107553381</a> |
| 7110 | <i>Spilopelia chinensis</i> | Eastern Spotted Dove | 2021/12/6  | 1 | 0 | 34.76268667 | 113.68158830 | <a href="https://www.inaturalist.org/observations/102594063">https://www.inaturalist.org/observations/102594063</a> |
| 7111 | <i>Spilopelia chinensis</i> | Eastern Spotted Dove | 2022/8/2   | 1 | 0 | 34.76269693 | 113.68273350 | <a href="https://www.inaturalist.org/observations/129271019">https://www.inaturalist.org/observations/129271019</a> |
| 7112 | <i>Spilopelia chinensis</i> | Eastern Spotted Dove | 2022/4/13  | 1 | 0 | 34.76270167 | 113.68138830 | <a href="https://www.inaturalist.org/observations/111413979">https://www.inaturalist.org/observations/111413979</a> |
| 7113 | <i>Spilopelia chinensis</i> | Eastern Spotted Dove | 2021/10/22 | 1 | 0 | 34.76272833 | 113.67848000 | <a href="https://www.inaturalist.org/observations/99286581">https://www.inaturalist.org/observations/99286581</a>   |
| 7114 | <i>Spilopelia chinensis</i> | Eastern Spotted Dove | 2021/6/7   | 1 | 0 | 34.76279000 | 113.68249670 | <a href="https://www.inaturalist.org/observations/81994368">https://www.inaturalist.org/observations/81994368</a>   |
| 7115 | <i>Spilopelia chinensis</i> | Eastern Spotted Dove | 2021/3/3   | 3 | 0 | 34.76279232 | 113.67881890 | <a href="https://www.inaturalist.org/observations/70495660">https://www.inaturalist.org/observations/70495660</a>   |
| 7116 | <i>Spilopelia chinensis</i> | Eastern Spotted Dove | 2022/9/15  | 1 | 0 | 34.76287631 | 113.67795600 | <a href="https://www.inaturalist.org/observations/135229778">https://www.inaturalist.org/observations/135229778</a> |
| 7117 | <i>Spilopelia chinensis</i> | Eastern Spotted Dove | 2022/6/9   | 1 | 0 | 34.76292000 | 113.65909000 | <a href="https://www.inaturalist.org/observations/121852579">https://www.inaturalist.org/observations/121852579</a> |
| 7118 | <i>Spilopelia chinensis</i> | Eastern Spotted Dove | 2021/9/7   | 1 | 0 | 34.76292685 | 113.65906110 | <a href="https://www.inaturalist.org/observations/93968887">https://www.inaturalist.org/observations/93968887</a>   |
| 7119 | <i>Spilopelia chinensis</i> | Eastern Spotted Dove | 2021/10/18 | 1 | 0 | 34.76293333 | 113.68141000 | <a href="https://www.inaturalist.org/observations/98588639">https://www.inaturalist.org/observations/98588639</a>   |
| 7120 | <i>Spilopelia chinensis</i> | Eastern Spotted Dove | 2021/12/2  | 1 | 0 | 34.76295500 | 113.68084500 | <a href="https://www.inaturalist.org/observations/102343841">https://www.inaturalist.org/observations/102343841</a> |
| 7121 | <i>Spilopelia chinensis</i> | Eastern Spotted Dove | 2022/9/15  | 1 | 0 | 34.76299333 | 113.67909670 | <a href="https://www.inaturalist.org/observations/135229774">https://www.inaturalist.org/observations/135229774</a> |
| 7122 | <i>Spilopelia chinensis</i> | Eastern Spotted Dove | 2020/12/25 | 1 | 0 | 34.76299833 | 113.68112170 | <a href="https://www.inaturalist.org/observations/67039559">https://www.inaturalist.org/observations/67039559</a>   |
| 7123 | <i>Spilopelia chinensis</i> | Eastern Spotted Dove | 2022/9/23  | 2 | 0 | 34.76302333 | 113.67895830 | <a href="https://www.inaturalist.org/observations/136540698">https://www.inaturalist.org/observations/136540698</a> |
| 7124 | <i>Spilopelia chinensis</i> | Eastern Spotted Dove | 2021/10/18 | 1 | 0 | 34.76303167 | 113.67933500 | <a href="https://www.inaturalist.org/observations/98588633">https://www.inaturalist.org/observations/98588633</a>   |
| 7125 | <i>Spilopelia chinensis</i> | Eastern Spotted Dove | 2022/3/28  | 1 | 0 | 34.76304000 | 113.67939330 | <a href="https://www.inaturalist.org/observations/109740040">https://www.inaturalist.org/observations/109740040</a> |
| 7126 | <i>Spilopelia chinensis</i> | Eastern Spotted Dove | 2021/10/25 | 1 | 0 | 34.76305667 | 113.67143500 | <a href="https://www.inaturalist.org/observations/99338693">https://www.inaturalist.org/observations/99338693</a>   |
| 7127 | <i>Spilopelia chinensis</i> | Eastern Spotted Dove | 2021/12/6  | 1 | 0 | 34.76309000 | 113.67908330 | <a href="https://www.inaturalist.org/observations/102594058">https://www.inaturalist.org/observations/102594058</a> |
| 7128 | <i>Spilopelia chinensis</i> | Eastern Spotted Dove | 2021/9/8   | 1 | 0 | 34.76313173 | 113.68096200 | <a href="https://www.inaturalist.org/observations/94083048">https://www.inaturalist.org/observations/94083048</a>   |
| 7129 | <i>Spilopelia chinensis</i> | Eastern Spotted Dove | 2021/12/6  | 1 | 0 | 34.76313500 | 113.67890500 | <a href="https://www.inaturalist.org/observations/102594054">https://www.inaturalist.org/observations/102594054</a> |

|      |                             |                      |            |   |   |             |              |                                                                                                                     |
|------|-----------------------------|----------------------|------------|---|---|-------------|--------------|---------------------------------------------------------------------------------------------------------------------|
| 7130 | <i>Spilopelia chinensis</i> | Eastern Spotted Dove | 2021/12/2  | 1 | 0 | 34.76313500 | 113.67925000 | <a href="https://www.inaturalist.org/observations/102343836">https://www.inaturalist.org/observations/102343836</a> |
| 7131 | <i>Spilopelia chinensis</i> | Eastern Spotted Dove | 2022/9/8   | 1 | 0 | 34.76327167 | 113.66789500 | <a href="https://www.inaturalist.org/observations/134864391">https://www.inaturalist.org/observations/134864391</a> |
| 7132 | <i>Spilopelia chinensis</i> | Eastern Spotted Dove | 2022/9/21  | 2 | 0 | 34.76329833 | 113.66807830 | <a href="https://www.inaturalist.org/observations/136539516">https://www.inaturalist.org/observations/136539516</a> |
| 7133 | <i>Spilopelia chinensis</i> | Eastern Spotted Dove | 2021/12/6  | 1 | 0 | 34.76333667 | 113.67847830 | <a href="https://www.inaturalist.org/observations/102594046">https://www.inaturalist.org/observations/102594046</a> |
| 7134 | <i>Spilopelia chinensis</i> | Eastern Spotted Dove | 2020/12/30 | 1 | 0 | 34.76333833 | 113.68044830 | <a href="https://www.inaturalist.org/observations/67293446">https://www.inaturalist.org/observations/67293446</a>   |
| 7135 | <i>Spilopelia chinensis</i> | Eastern Spotted Dove | 2020/12/24 | 1 | 0 | 34.76340671 | 113.67175500 | <a href="https://www.inaturalist.org/observations/66999369">https://www.inaturalist.org/observations/66999369</a>   |
| 7136 | <i>Spilopelia chinensis</i> | Eastern Spotted Dove | 2021/12/17 | 1 | 0 | 34.76349500 | 113.67073830 | <a href="https://www.inaturalist.org/observations/103193766">https://www.inaturalist.org/observations/103193766</a> |
| 7137 | <i>Spilopelia chinensis</i> | Eastern Spotted Dove | 2022/9/21  | 2 | 0 | 34.76349667 | 113.66784670 | <a href="https://www.inaturalist.org/observations/136539517">https://www.inaturalist.org/observations/136539517</a> |
| 7138 | <i>Spilopelia chinensis</i> | Eastern Spotted Dove | 2021/10/25 | 1 | 0 | 34.76349667 | 113.67165170 | <a href="https://www.inaturalist.org/observations/99338699">https://www.inaturalist.org/observations/99338699</a>   |
| 7139 | <i>Spilopelia chinensis</i> | Eastern Spotted Dove | 2021/7/12  | 1 | 0 | 34.76352500 | 113.68292500 | <a href="https://www.inaturalist.org/observations/86686745">https://www.inaturalist.org/observations/86686745</a>   |
| 7140 | <i>Spilopelia chinensis</i> | Eastern Spotted Dove | 2021/6/9   | 1 | 0 | 34.76353500 | 113.67151330 | <a href="https://www.inaturalist.org/observations/82264813">https://www.inaturalist.org/observations/82264813</a>   |
| 7141 | <i>Spilopelia chinensis</i> | Eastern Spotted Dove | 2021/3/22  | 1 | 0 | 34.76355333 | 113.67153170 | <a href="https://www.inaturalist.org/observations/72067589">https://www.inaturalist.org/observations/72067589</a>   |
| 7142 | <i>Spilopelia chinensis</i> | Eastern Spotted Dove | 2022/9/8   | 1 | 0 | 34.76361667 | 113.66565330 | <a href="https://www.inaturalist.org/observations/134864382">https://www.inaturalist.org/observations/134864382</a> |
| 7143 | <i>Spilopelia chinensis</i> | Eastern Spotted Dove | 2021/10/18 | 1 | 0 | 34.76362333 | 113.68308830 | <a href="https://www.inaturalist.org/observations/98760149">https://www.inaturalist.org/observations/98760149</a>   |
| 7144 | <i>Spilopelia chinensis</i> | Eastern Spotted Dove | 2021/6/7   | 1 | 0 | 34.76363667 | 113.67742500 | <a href="https://www.inaturalist.org/observations/81994317">https://www.inaturalist.org/observations/81994317</a>   |
| 7145 | <i>Spilopelia chinensis</i> | Eastern Spotted Dove | 2021/12/2  | 1 | 0 | 34.76364667 | 113.68389670 | <a href="https://www.inaturalist.org/observations/102343856">https://www.inaturalist.org/observations/102343856</a> |
| 7146 | <i>Spilopelia chinensis</i> | Eastern Spotted Dove | 2021/6/9   | 1 | 0 | 34.76367667 | 113.66806000 | <a href="https://www.inaturalist.org/observations/82264806">https://www.inaturalist.org/observations/82264806</a>   |
| 7147 | <i>Spilopelia chinensis</i> | Eastern Spotted Dove | 2021/12/2  | 1 | 0 | 34.76368500 | 113.68378670 | <a href="https://www.inaturalist.org/observations/102343857">https://www.inaturalist.org/observations/102343857</a> |
| 7148 | <i>Spilopelia chinensis</i> | Eastern Spotted Dove | 2021/2/25  | 1 | 0 | 34.76368667 | 113.66865170 | <a href="https://www.inaturalist.org/observations/70138423">https://www.inaturalist.org/observations/70138423</a>   |
| 7149 | <i>Spilopelia chinensis</i> | Eastern Spotted Dove | 2022/9/8   | 1 | 0 | 34.76391576 | 113.66450870 | <a href="https://www.inaturalist.org/observations/134864377">https://www.inaturalist.org/observations/134864377</a> |
| 7150 | <i>Spilopelia chinensis</i> | Eastern Spotted Dove | 2021/12/6  | 1 | 0 | 34.76391667 | 113.68365330 | <a href="https://www.inaturalist.org/observations/102594073">https://www.inaturalist.org/observations/102594073</a> |
| 7151 | <i>Spilopelia chinensis</i> | Eastern Spotted Dove | 2022/9/21  | 2 | 0 | 34.76394420 | 113.66614410 | <a href="https://www.inaturalist.org/observations/136539530">https://www.inaturalist.org/observations/136539530</a> |
| 7152 | <i>Spilopelia chinensis</i> | Eastern Spotted Dove | 2022/4/26  | 1 | 0 | 34.76397500 | 113.66180170 | <a href="https://www.inaturalist.org/observations/113368844">https://www.inaturalist.org/observations/113368844</a> |

|      |                             |                      |            |   |   |             |              |                                                                                                                     |
|------|-----------------------------|----------------------|------------|---|---|-------------|--------------|---------------------------------------------------------------------------------------------------------------------|
| 7153 | <i>Spilopelia chinensis</i> | Eastern Spotted Dove | 2020/10/31 | 2 | 0 | 34.76413005 | 113.63845820 | <a href="https://www.inaturalist.org/observations/63927001">https://www.inaturalist.org/observations/63927001</a>   |
| 7154 | <i>Spilopelia chinensis</i> | Eastern Spotted Dove | 2021/6/9   | 1 | 0 | 34.76426000 | 113.66287330 | <a href="https://www.inaturalist.org/observations/82264757">https://www.inaturalist.org/observations/82264757</a>   |
| 7155 | <i>Spilopelia chinensis</i> | Eastern Spotted Dove | 2021/3/11  | 1 | 0 | 34.76428854 | 113.66382660 | <a href="https://www.inaturalist.org/observations/70984193">https://www.inaturalist.org/observations/70984193</a>   |
| 7156 | <i>Spilopelia chinensis</i> | Eastern Spotted Dove | 2020/12/25 | 1 | 0 | 34.76437333 | 113.67702170 | <a href="https://www.inaturalist.org/observations/67039550">https://www.inaturalist.org/observations/67039550</a>   |
| 7157 | <i>Spilopelia chinensis</i> | Eastern Spotted Dove | 2020/12/21 | 1 | 0 | 34.76439167 | 113.65549170 | <a href="https://www.inaturalist.org/observations/66869581">https://www.inaturalist.org/observations/66869581</a>   |
| 7158 | <i>Spilopelia chinensis</i> | Eastern Spotted Dove | 2021/10/22 | 1 | 0 | 34.76442833 | 113.67733500 | <a href="https://www.inaturalist.org/observations/99286615">https://www.inaturalist.org/observations/99286615</a>   |
| 7159 | <i>Spilopelia chinensis</i> | Eastern Spotted Dove | 2021/10/26 | 1 | 0 | 34.76450000 | 113.65524000 | <a href="https://www.inaturalist.org/observations/99434725">https://www.inaturalist.org/observations/99434725</a>   |
| 7160 | <i>Spilopelia chinensis</i> | Eastern Spotted Dove | 2022/1/31  | 1 | 0 | 34.77583667 | 113.70769000 | <a href="https://www.inaturalist.org/observations/105905332">https://www.inaturalist.org/observations/105905332</a> |
| 7161 | <i>Spilopelia chinensis</i> | Eastern Spotted Dove | 2021/1/12  | 1 | 0 | 34.77671500 | 113.70919830 | <a href="https://www.inaturalist.org/observations/67952483">https://www.inaturalist.org/observations/67952483</a>   |
| 7162 | <i>Spilopelia chinensis</i> | Eastern Spotted Dove | 2020/12/22 | 1 | 0 | 34.77881667 | 113.72209670 | <a href="https://www.inaturalist.org/observations/66912205">https://www.inaturalist.org/observations/66912205</a>   |
| 7163 | <i>Spilopelia chinensis</i> | Eastern Spotted Dove | 2021/1/12  | 1 | 0 | 34.77918625 | 113.70596310 | <a href="https://www.inaturalist.org/observations/68095571">https://www.inaturalist.org/observations/68095571</a>   |
| 7164 | <i>Spilopelia chinensis</i> | Eastern Spotted Dove | 2021/1/12  | 1 | 0 | 34.77958667 | 113.71326330 | <a href="https://www.inaturalist.org/observations/67952474">https://www.inaturalist.org/observations/67952474</a>   |
| 7165 | <i>Spilopelia chinensis</i> | Eastern Spotted Dove | 2022/4/7   | 1 | 0 | 34.78037000 | 113.57996330 | <a href="https://www.inaturalist.org/observations/110657803">https://www.inaturalist.org/observations/110657803</a> |
| 7166 | <i>Spilopelia chinensis</i> | Eastern Spotted Dove | 2020/3/7   | 2 | 0 | 34.78110379 | 113.67327110 | <a href="https://www.inaturalist.org/observations/39688421">https://www.inaturalist.org/observations/39688421</a>   |
| 7167 | <i>Spilopelia chinensis</i> | Eastern Spotted Dove | 2020/11/4  | 2 | 0 | 34.78128543 | 113.67215210 | <a href="https://www.inaturalist.org/observations/64207060">https://www.inaturalist.org/observations/64207060</a>   |
| 7168 | <i>Spilopelia chinensis</i> | Eastern Spotted Dove | 2022/4/21  | 1 | 0 | 34.78143441 | 113.67498290 | <a href="https://www.inaturalist.org/observations/112232038">https://www.inaturalist.org/observations/112232038</a> |
| 7169 | <i>Spilopelia chinensis</i> | Eastern Spotted Dove | 2021/2/22  | 2 | 0 | 34.78152935 | 113.67391090 | <a href="https://www.inaturalist.org/observations/69959666">https://www.inaturalist.org/observations/69959666</a>   |
| 7170 | <i>Spilopelia chinensis</i> | Eastern Spotted Dove | 2021/7/19  | 1 | 0 | 34.78165150 | 113.67349270 | <a href="https://www.inaturalist.org/observations/87789230">https://www.inaturalist.org/observations/87789230</a>   |
| 7171 | <i>Spilopelia chinensis</i> | Eastern Spotted Dove | 2021/7/23  | 1 | 0 | 34.78167034 | 113.67291320 | <a href="https://www.inaturalist.org/observations/88244444">https://www.inaturalist.org/observations/88244444</a>   |
| 7172 | <i>Spilopelia chinensis</i> | Eastern Spotted Dove | 2021/2/19  | 1 | 0 | 34.78171845 | 113.67390020 | <a href="https://www.inaturalist.org/observations/69805495">https://www.inaturalist.org/observations/69805495</a>   |
| 7173 | <i>Spilopelia chinensis</i> | Eastern Spotted Dove | 2021/7/23  | 1 | 0 | 34.78172506 | 113.67395120 | <a href="https://www.inaturalist.org/observations/88244445">https://www.inaturalist.org/observations/88244445</a>   |
| 7174 | <i>Spilopelia chinensis</i> | Eastern Spotted Dove | 2020/12/6  | 1 | 0 | 34.78181046 | 113.67338070 | <a href="https://www.inaturalist.org/observations/66162023">https://www.inaturalist.org/observations/66162023</a>   |
| 7175 | <i>Spilopelia chinensis</i> | Eastern Spotted Dove | 2020/12/7  | 1 | 0 | 34.78183253 | 113.67344200 | <a href="https://www.inaturalist.org/observations/66228785">https://www.inaturalist.org/observations/66228785</a>   |

|      |                             |                      |            |   |   |             |              |                                                                                                                     |
|------|-----------------------------|----------------------|------------|---|---|-------------|--------------|---------------------------------------------------------------------------------------------------------------------|
| 7176 | <i>Spilopelia chinensis</i> | Eastern Spotted Dove | 2020/12/7  | 2 | 0 | 34.78186843 | 113.67344880 | <a href="https://www.inaturalist.org/observations/66241830">https://www.inaturalist.org/observations/66241830</a>   |
| 7177 | <i>Spilopelia chinensis</i> | Eastern Spotted Dove | 2020/10/31 | 2 | 0 | 34.78188101 | 113.66472240 | <a href="https://www.inaturalist.org/observations/63927003">https://www.inaturalist.org/observations/63927003</a>   |
| 7178 | <i>Spilopelia chinensis</i> | Eastern Spotted Dove | 2020/12/17 | 1 | 0 | 34.78188641 | 113.67347710 | <a href="https://www.inaturalist.org/observations/66679159">https://www.inaturalist.org/observations/66679159</a>   |
| 7179 | <i>Spilopelia chinensis</i> | Eastern Spotted Dove | 2018/1/10  | 3 | 0 | 34.78192651 | 113.67299530 | <a href="https://www.inaturalist.org/observations/16423260">https://www.inaturalist.org/observations/16423260</a>   |
| 7180 | <i>Spilopelia chinensis</i> | Eastern Spotted Dove | 2021/2/19  | 1 | 0 | 34.78194351 | 113.67392170 | <a href="https://www.inaturalist.org/observations/69805493">https://www.inaturalist.org/observations/69805493</a>   |
| 7181 | <i>Spilopelia chinensis</i> | Eastern Spotted Dove | 2021/1/7   | 1 | 0 | 34.78195111 | 113.67390040 | <a href="https://www.inaturalist.org/observations/67691120">https://www.inaturalist.org/observations/67691120</a>   |
| 7182 | <i>Spilopelia chinensis</i> | Eastern Spotted Dove | 2019/3/17  | 1 | 0 | 34.78195216 | 113.67346320 | <a href="https://www.inaturalist.org/observations/21342459">https://www.inaturalist.org/observations/21342459</a>   |
| 7183 | <i>Spilopelia chinensis</i> | Eastern Spotted Dove | 2021/6/18  | 2 | 0 | 34.78206086 | 113.67380780 | <a href="https://www.inaturalist.org/observations/83483414">https://www.inaturalist.org/observations/83483414</a>   |
| 7184 | <i>Spilopelia chinensis</i> | Eastern Spotted Dove | 2021/2/21  | 1 | 0 | 34.78206688 | 113.67277370 | <a href="https://www.inaturalist.org/observations/69913756">https://www.inaturalist.org/observations/69913756</a>   |
| 7185 | <i>Spilopelia chinensis</i> | Eastern Spotted Dove | 2021/2/10  | 1 | 0 | 34.78208504 | 113.67327230 | <a href="https://www.inaturalist.org/observations/69358745">https://www.inaturalist.org/observations/69358745</a>   |
| 7186 | <i>Spilopelia chinensis</i> | Eastern Spotted Dove | 2021/2/20  | 1 | 0 | 34.78209902 | 113.67339420 | <a href="https://www.inaturalist.org/observations/69842235">https://www.inaturalist.org/observations/69842235</a>   |
| 7187 | <i>Spilopelia chinensis</i> | Eastern Spotted Dove | 2020/12/18 | 1 | 0 | 34.78214497 | 113.67354630 | <a href="https://www.inaturalist.org/observations/66719072">https://www.inaturalist.org/observations/66719072</a>   |
| 7188 | <i>Spilopelia chinensis</i> | Eastern Spotted Dove | 2021/2/22  | 1 | 0 | 34.78215500 | 113.67248400 | <a href="https://www.inaturalist.org/observations/69961755">https://www.inaturalist.org/observations/69961755</a>   |
| 7189 | <i>Spilopelia chinensis</i> | Eastern Spotted Dove | 2020/12/14 | 1 | 0 | 34.78219320 | 113.67340250 | <a href="https://www.inaturalist.org/observations/66550585">https://www.inaturalist.org/observations/66550585</a>   |
| 7190 | <i>Spilopelia chinensis</i> | Eastern Spotted Dove | 2021/11/26 | 4 | 0 | 34.78222510 | 113.67331890 | <a href="https://www.inaturalist.org/observations/101926779">https://www.inaturalist.org/observations/101926779</a> |
| 7191 | <i>Spilopelia chinensis</i> | Eastern Spotted Dove | 2021/2/2   | 1 | 0 | 34.78227125 | 113.67342430 | <a href="https://www.inaturalist.org/observations/68955726">https://www.inaturalist.org/observations/68955726</a>   |
| 7192 | <i>Spilopelia chinensis</i> | Eastern Spotted Dove | 2022/8/29  | 2 | 0 | 34.78232700 | 113.67352000 | <a href="https://www.inaturalist.org/observations/132942092">https://www.inaturalist.org/observations/132942092</a> |
| 7193 | <i>Spilopelia chinensis</i> | Eastern Spotted Dove | 2020/12/14 | 1 | 0 | 34.78242221 | 113.67335140 | <a href="https://www.inaturalist.org/observations/66555416">https://www.inaturalist.org/observations/66555416</a>   |
| 7194 | <i>Spilopelia chinensis</i> | Eastern Spotted Dove | 2022/5/20  | 1 | 0 | 34.78269020 | 113.67197720 | <a href="https://www.inaturalist.org/observations/117863262">https://www.inaturalist.org/observations/117863262</a> |
| 7195 | <i>Spilopelia chinensis</i> | Eastern Spotted Dove | 2021/1/9   | 1 | 0 | 34.78272247 | 113.66609950 | <a href="https://www.inaturalist.org/observations/68259090">https://www.inaturalist.org/observations/68259090</a>   |
| 7196 | <i>Spilopelia chinensis</i> | Eastern Spotted Dove | 2021/11/17 | 1 | 0 | 34.78285333 | 113.66719670 | <a href="https://www.inaturalist.org/observations/101310326">https://www.inaturalist.org/observations/101310326</a> |
| 7197 | <i>Spilopelia chinensis</i> | Eastern Spotted Dove | 2021/8/31  | 1 | 0 | 34.78297000 | 113.66724500 | <a href="https://www.inaturalist.org/observations/93119599">https://www.inaturalist.org/observations/93119599</a>   |
| 7198 | <i>Spilopelia chinensis</i> | Eastern Spotted Dove | 2022/5/6   | 2 | 0 | 34.78298000 | 113.66724500 | <a href="https://www.inaturalist.org/observations/115710259">https://www.inaturalist.org/observations/115710259</a> |

|      |                             |                      |            |   |   |             |              |                                                                                                                     |
|------|-----------------------------|----------------------|------------|---|---|-------------|--------------|---------------------------------------------------------------------------------------------------------------------|
| 7199 | <i>Spilopelia chinensis</i> | Eastern Spotted Dove | 2018/1/8   | 4 | 0 | 34.78298000 | 113.66765500 | <a href="https://www.inaturalist.org/observations/15753295">https://www.inaturalist.org/observations/15753295</a>   |
| 7200 | <i>Spilopelia chinensis</i> | Eastern Spotted Dove | 2021/9/26  | 1 | 0 | 34.78299667 | 113.66723670 | <a href="https://www.inaturalist.org/observations/96164025">https://www.inaturalist.org/observations/96164025</a>   |
| 7201 | <i>Spilopelia chinensis</i> | Eastern Spotted Dove | 2021/1/26  | 1 | 0 | 34.78300095 | 113.66729740 | <a href="https://www.inaturalist.org/observations/68624643">https://www.inaturalist.org/observations/68624643</a>   |
| 7202 | <i>Spilopelia chinensis</i> | Eastern Spotted Dove | 2021/6/28  | 1 | 0 | 34.78302000 | 113.66723670 | <a href="https://www.inaturalist.org/observations/84928357">https://www.inaturalist.org/observations/84928357</a>   |
| 7203 | <i>Spilopelia chinensis</i> | Eastern Spotted Dove | 2020/12/13 | 1 | 0 | 34.78303909 | 113.66735080 | <a href="https://www.inaturalist.org/observations/66496630">https://www.inaturalist.org/observations/66496630</a>   |
| 7204 | <i>Spilopelia chinensis</i> | Eastern Spotted Dove | 2020/12/9  | 1 | 0 | 34.78303909 | 113.66735840 | <a href="https://www.inaturalist.org/observations/66317278">https://www.inaturalist.org/observations/66317278</a>   |
| 7205 | <i>Spilopelia chinensis</i> | Eastern Spotted Dove | 2021/1/22  | 1 | 0 | 34.78306198 | 113.66677860 | <a href="https://www.inaturalist.org/observations/68474085">https://www.inaturalist.org/observations/68474085</a>   |
| 7206 | <i>Spilopelia chinensis</i> | Eastern Spotted Dove | 2022/8/15  | 1 | 0 | 34.78309167 | 113.66725830 | <a href="https://www.inaturalist.org/observations/130872381">https://www.inaturalist.org/observations/130872381</a> |
| 7207 | <i>Spilopelia chinensis</i> | Eastern Spotted Dove | 2021/3/12  | 1 | 0 | 34.78310000 | 113.66725330 | <a href="https://www.inaturalist.org/observations/71049783">https://www.inaturalist.org/observations/71049783</a>   |
| 7208 | <i>Spilopelia chinensis</i> | Eastern Spotted Dove | 2020/12/13 | 1 | 0 | 34.78314209 | 113.66665650 | <a href="https://www.inaturalist.org/observations/66508424">https://www.inaturalist.org/observations/66508424</a>   |
| 7209 | <i>Spilopelia chinensis</i> | Eastern Spotted Dove | 2015/4/26  | 2 | 0 | 34.78335536 | 113.69545000 | <a href="https://www.inaturalist.org/observations/54343176">https://www.inaturalist.org/observations/54343176</a>   |
| 7210 | <i>Spilopelia chinensis</i> | Eastern Spotted Dove | 2022/6/28  | 1 | 0 | 34.78430170 | 113.67458170 | <a href="https://www.inaturalist.org/observations/126328393">https://www.inaturalist.org/observations/126328393</a> |
| 7211 | <i>Spilopelia chinensis</i> | Eastern Spotted Dove | 2020/12/13 | 1 | 0 | 34.78502655 | 113.66613770 | <a href="https://www.inaturalist.org/observations/66508052">https://www.inaturalist.org/observations/66508052</a>   |
| 7212 | <i>Spilopelia chinensis</i> | Eastern Spotted Dove | 2022/3/18  | 2 | 0 | 34.78847167 | 113.67973500 | <a href="https://www.inaturalist.org/observations/108919348">https://www.inaturalist.org/observations/108919348</a> |
| 7213 | <i>Spilopelia chinensis</i> | Eastern Spotted Dove | 2022/3/18  | 2 | 0 | 34.78849000 | 113.67991670 | <a href="https://www.inaturalist.org/observations/108919350">https://www.inaturalist.org/observations/108919350</a> |
| 7214 | <i>Spilopelia chinensis</i> | Eastern Spotted Dove | 2022/3/18  | 1 | 0 | 34.78853833 | 113.67907000 | <a href="https://www.inaturalist.org/observations/108919346">https://www.inaturalist.org/observations/108919346</a> |
| 7215 | <i>Spilopelia chinensis</i> | Eastern Spotted Dove | 2022/3/18  | 2 | 0 | 34.78916500 | 113.67788830 | <a href="https://www.inaturalist.org/observations/108919345">https://www.inaturalist.org/observations/108919345</a> |
| 7216 | <i>Spilopelia chinensis</i> | Eastern Spotted Dove | 2022/5/26  | 1 | 0 | 34.80983333 | 113.73763500 | <a href="https://www.inaturalist.org/observations/118785135">https://www.inaturalist.org/observations/118785135</a> |
| 7217 | <i>Spilopelia chinensis</i> | Eastern Spotted Dove | 2022/4/18  | 1 | 0 | 34.81136225 | 113.70961210 | <a href="https://www.inaturalist.org/observations/112232026">https://www.inaturalist.org/observations/112232026</a> |
| 7218 | <i>Spilopelia chinensis</i> | Eastern Spotted Dove | 2022/4/18  | 1 | 0 | 34.81379344 | 113.70806710 | <a href="https://www.inaturalist.org/observations/112232031">https://www.inaturalist.org/observations/112232031</a> |
| 7219 | <i>Spilopelia chinensis</i> | Eastern Spotted Dove | 2021/10/29 | 1 | 0 | 34.81750167 | 113.70685170 | <a href="https://www.inaturalist.org/observations/99704455">https://www.inaturalist.org/observations/99704455</a>   |
| 7220 | <i>Spilopelia chinensis</i> | Eastern Spotted Dove | 2021/1/13  | 1 | 0 | 34.81781167 | 113.70604500 | <a href="https://www.inaturalist.org/observations/68029861">https://www.inaturalist.org/observations/68029861</a>   |
| 7221 | <i>Spilopelia chinensis</i> | Eastern Spotted Dove | 2022/4/29  | 1 | 0 | 34.81960833 | 113.69682670 | <a href="https://www.inaturalist.org/observations/113368829">https://www.inaturalist.org/observations/113368829</a> |

|      |                             |                      |            |   |   |             |              |                                                                                                                     |
|------|-----------------------------|----------------------|------------|---|---|-------------|--------------|---------------------------------------------------------------------------------------------------------------------|
| 7222 | <i>Spilopelia chinensis</i> | Eastern Spotted Dove | 2021/1/10  | 1 | 0 | 34.82185000 | 113.70529670 | <a href="https://www.inaturalist.org/observations/67841417">https://www.inaturalist.org/observations/67841417</a>   |
| 7223 | <i>Spilopelia chinensis</i> | Eastern Spotted Dove | 2022/4/22  | 2 | 0 | 34.82224333 | 113.70518500 | <a href="https://www.inaturalist.org/observations/112476289">https://www.inaturalist.org/observations/112476289</a> |
| 7224 | <i>Spilopelia chinensis</i> | Eastern Spotted Dove | 2021/12/20 | 1 | 0 | 34.82261135 | 113.70746610 | <a href="https://www.inaturalist.org/observations/103410845">https://www.inaturalist.org/observations/103410845</a> |
| 7225 | <i>Spilopelia chinensis</i> | Eastern Spotted Dove | 2022/2/22  | 2 | 0 | 34.82275850 | 113.71157800 | <a href="https://www.inaturalist.org/observations/107252818">https://www.inaturalist.org/observations/107252818</a> |
| 7226 | <i>Spilopelia chinensis</i> | Eastern Spotted Dove | 2022/4/22  | 1 | 0 | 34.82374500 | 113.70695330 | <a href="https://www.inaturalist.org/observations/112476264">https://www.inaturalist.org/observations/112476264</a> |
| 7227 | <i>Spilopelia chinensis</i> | Eastern Spotted Dove | 2021/1/13  | 1 | 0 | 34.82384500 | 113.70659000 | <a href="https://www.inaturalist.org/observations/68029835">https://www.inaturalist.org/observations/68029835</a>   |
| 7228 | <i>Spilopelia chinensis</i> | Eastern Spotted Dove | 2022/3/29  | 1 | 0 | 34.91507500 | 113.52782170 | <a href="https://www.inaturalist.org/observations/109828644">https://www.inaturalist.org/observations/109828644</a> |
| 7229 | <i>Spilopelia chinensis</i> | Eastern Spotted Dove | 2018/5/25  | 1 | 0 | 34.94609217 | 113.42212620 | <a href="https://www.inaturalist.org/observations/110621128">https://www.inaturalist.org/observations/110621128</a> |
| 7230 | <i>Spilopelia chinensis</i> | Eastern Spotted Dove | 2018/10/11 | 3 | 0 | 35.46981989 | 113.77014760 | <a href="https://www.inaturalist.org/observations/17609280">https://www.inaturalist.org/observations/17609280</a>   |
| 7231 | <i>Spilopelia chinensis</i> | Eastern Spotted Dove | 2019/3/29  | 1 | 0 | 36.05400013 | 120.39219410 | <a href="https://www.inaturalist.org/observations/21768262">https://www.inaturalist.org/observations/21768262</a>   |
| 7232 | <i>Spilopelia chinensis</i> | Eastern Spotted Dove | 2021/11/24 | 2 | 0 | 36.06442448 | 120.35194080 | <a href="https://www.inaturalist.org/observations/103625066">https://www.inaturalist.org/observations/103625066</a> |
| 7233 | <i>Spilopelia chinensis</i> | Eastern Spotted Dove | 2019/10/30 | 3 | 0 | 36.07971893 | 120.44955610 | <a href="https://www.inaturalist.org/observations/35081390">https://www.inaturalist.org/observations/35081390</a>   |
| 7234 | <i>Spilopelia chinensis</i> | Eastern Spotted Dove | 2018/10/28 | 1 | 0 | 36.08076000 | 120.42278000 | <a href="https://www.inaturalist.org/observations/134432137">https://www.inaturalist.org/observations/134432137</a> |
| 7235 | <i>Spilopelia chinensis</i> | Eastern Spotted Dove | 2019/3/10  | 2 | 0 | 36.08734690 | 120.38713750 | <a href="https://www.inaturalist.org/observations/21108772">https://www.inaturalist.org/observations/21108772</a>   |
| 7236 | <i>Spilopelia chinensis</i> | Eastern Spotted Dove | 2020/9/19  | 2 | 0 | 36.08763388 | 120.36219110 | <a href="https://www.inaturalist.org/observations/60147819">https://www.inaturalist.org/observations/60147819</a>   |
| 7237 | <i>Spilopelia chinensis</i> | Eastern Spotted Dove | 2021/5/25  | 1 | 0 | 36.12385833 | 120.62488330 | <a href="https://www.inaturalist.org/observations/87864108">https://www.inaturalist.org/observations/87864108</a>   |
| 7238 | <i>Spilopelia chinensis</i> | Eastern Spotted Dove | 2020/3/8   | 0 | 0 | 36.19029333 | 120.39858500 | <a href="https://www.inaturalist.org/observations/39694952">https://www.inaturalist.org/observations/39694952</a>   |
| 7239 | <i>Spilopelia chinensis</i> | Eastern Spotted Dove | 2020/3/14  | 1 | 0 | 36.19150500 | 120.39819330 | <a href="https://www.inaturalist.org/observations/40019150">https://www.inaturalist.org/observations/40019150</a>   |
| 7240 | <i>Spilopelia chinensis</i> | Eastern Spotted Dove | 2022/5/1   | 2 | 0 | 36.36267661 | 120.68633750 | <a href="https://www.inaturalist.org/observations/114157429">https://www.inaturalist.org/observations/114157429</a> |
| 7241 | <i>Spilopelia chinensis</i> | Eastern Spotted Dove | 2021/10/20 | 1 | 0 | 36.37030600 | 120.68053800 | <a href="https://www.inaturalist.org/observations/105564308">https://www.inaturalist.org/observations/105564308</a> |
| 7242 | <i>Spilopelia chinensis</i> | Eastern Spotted Dove | 2020/11/9  | 1 | 0 | 36.37034800 | 120.68623100 | <a href="https://www.inaturalist.org/observations/105315837">https://www.inaturalist.org/observations/105315837</a> |
| 7243 | <i>Spilopelia chinensis</i> | Eastern Spotted Dove | 2017/7/10  | 1 | 0 | 36.64621389 | 116.99596390 | <a href="https://www.inaturalist.org/observations/104044810">https://www.inaturalist.org/observations/104044810</a> |
| 7244 | <i>Spilopelia chinensis</i> | Eastern Spotted Dove | 2019/2/2   | 4 | 0 | 37.31620026 | 114.57364650 | <a href="https://www.inaturalist.org/observations/20028505">https://www.inaturalist.org/observations/20028505</a>   |

|      |                             |                      |            |   |   |             |              |                                                                                                                     |
|------|-----------------------------|----------------------|------------|---|---|-------------|--------------|---------------------------------------------------------------------------------------------------------------------|
| 7245 | <i>Spilopelia chinensis</i> | Eastern Spotted Dove | 2019/12/6  | 2 | 0 | 37.53331813 | 121.40391180 | <a href="https://www.inaturalist.org/observations/36399913">https://www.inaturalist.org/observations/36399913</a>   |
| 7246 | <i>Spilopelia chinensis</i> | Eastern Spotted Dove | 2019/10/30 | 2 | 0 | 37.63319177 | 115.58142830 | <a href="https://www.inaturalist.org/observations/35088326">https://www.inaturalist.org/observations/35088326</a>   |
| 7247 | <i>Spilopelia chinensis</i> | Eastern Spotted Dove | 2019/10/25 | 3 | 0 | 37.63352047 | 115.58176930 | <a href="https://www.inaturalist.org/observations/34860726">https://www.inaturalist.org/observations/34860726</a>   |
| 7248 | <i>Spilopelia chinensis</i> | Eastern Spotted Dove | 2019/10/25 | 3 | 0 | 37.63368403 | 115.58168210 | <a href="https://www.inaturalist.org/observations/34860577">https://www.inaturalist.org/observations/34860577</a>   |
| 7249 | <i>Spilopelia chinensis</i> | Eastern Spotted Dove | 2018/10/23 | 3 | 0 | 37.64192620 | 115.64693350 | <a href="https://www.inaturalist.org/observations/17766096">https://www.inaturalist.org/observations/17766096</a>   |
| 7250 | <i>Spilopelia chinensis</i> | Eastern Spotted Dove | 2021/5/4   | 1 | 0 | 38.02325637 | 114.47246580 | <a href="https://www.inaturalist.org/observations/92709632">https://www.inaturalist.org/observations/92709632</a>   |
| 7251 | <i>Spilopelia chinensis</i> | Eastern Spotted Dove | 2021/7/6   | 1 | 0 | 38.59188167 | 117.32681830 | <a href="https://www.inaturalist.org/observations/88373751">https://www.inaturalist.org/observations/88373751</a>   |
| 7252 | <i>Spilopelia chinensis</i> | Eastern Spotted Dove | 2021/5/12  | 1 | 0 | 38.64935333 | 117.40808670 | <a href="https://www.inaturalist.org/observations/78454827">https://www.inaturalist.org/observations/78454827</a>   |
| 7253 | <i>Spilopelia chinensis</i> | Eastern Spotted Dove | 2018/6/5   | 1 | 0 | 38.86779280 | 116.04729950 | <a href="https://www.inaturalist.org/observations/80829728">https://www.inaturalist.org/observations/80829728</a>   |
| 7254 | <i>Spilopelia chinensis</i> | Eastern Spotted Dove | 2022/7/6   | 0 | 0 | 38.97766277 | 117.65152340 | <a href="https://www.inaturalist.org/observations/125123992">https://www.inaturalist.org/observations/125123992</a> |
| 7255 | <i>Spilopelia chinensis</i> | Eastern Spotted Dove | 2020/4/26  | 1 | 0 | 39.01455232 | 117.38782550 | <a href="https://www.inaturalist.org/observations/43554165">https://www.inaturalist.org/observations/43554165</a>   |
| 7256 | <i>Spilopelia chinensis</i> | Eastern Spotted Dove | 2021/9/6   | 1 | 0 | 39.03727798 | 117.25126100 | <a href="https://www.inaturalist.org/observations/93817528">https://www.inaturalist.org/observations/93817528</a>   |
| 7257 | <i>Spilopelia chinensis</i> | Eastern Spotted Dove | 2021/4/2   | 2 | 0 | 39.07286729 | 117.22648500 | <a href="https://www.inaturalist.org/observations/72661422">https://www.inaturalist.org/observations/72661422</a>   |
| 7258 | <i>Spilopelia chinensis</i> | Eastern Spotted Dove | 2020/2/21  | 1 | 0 | 39.07362500 | 117.14026670 | <a href="https://www.inaturalist.org/observations/38949297">https://www.inaturalist.org/observations/38949297</a>   |
| 7259 | <i>Spilopelia chinensis</i> | Eastern Spotted Dove | 2022/6/28  | 1 | 0 | 39.07819717 | 117.14881120 | <a href="https://www.inaturalist.org/observations/123935662">https://www.inaturalist.org/observations/123935662</a> |
| 7260 | <i>Spilopelia chinensis</i> | Eastern Spotted Dove | 2020/4/24  | 1 | 0 | 39.11257749 | 117.02708280 | <a href="https://www.inaturalist.org/observations/43046174">https://www.inaturalist.org/observations/43046174</a>   |
| 7261 | <i>Spilopelia chinensis</i> | Eastern Spotted Dove | 2021/10/3  | 1 | 0 | 39.11540348 | 118.35830590 | <a href="https://www.inaturalist.org/observations/125283752">https://www.inaturalist.org/observations/125283752</a> |
| 7262 | <i>Spilopelia chinensis</i> | Eastern Spotted Dove | 2021/5/24  | 1 | 0 | 39.23866000 | 118.19356500 | <a href="https://www.inaturalist.org/observations/80347899">https://www.inaturalist.org/observations/80347899</a>   |
| 7263 | <i>Spilopelia chinensis</i> | Eastern Spotted Dove | 2019/9/10  | 1 | 0 | 39.76274885 | 116.39548990 | <a href="https://www.inaturalist.org/observations/32589202">https://www.inaturalist.org/observations/32589202</a>   |
| 7264 | <i>Spilopelia chinensis</i> | Eastern Spotted Dove | 2022/3/8   | 2 | 0 | 39.80242985 | 116.61181190 | <a href="https://www.inaturalist.org/observations/108630704">https://www.inaturalist.org/observations/108630704</a> |
| 7265 | <i>Spilopelia chinensis</i> | Eastern Spotted Dove | 2022/3/7   | 1 | 0 | 39.80850722 | 116.50106230 | <a href="https://www.inaturalist.org/observations/108096810">https://www.inaturalist.org/observations/108096810</a> |
| 7266 | <i>Spilopelia chinensis</i> | Eastern Spotted Dove | 2019/9/11  | 3 | 0 | 39.80945710 | 116.37939010 | <a href="https://www.inaturalist.org/observations/32580506">https://www.inaturalist.org/observations/32580506</a>   |
| 7267 | <i>Spilopelia chinensis</i> | Eastern Spotted Dove | 2022/1/14  | 1 | 0 | 39.81007237 | 116.50740620 | <a href="https://www.inaturalist.org/observations/104922357">https://www.inaturalist.org/observations/104922357</a> |



|      |                             |                      |            |   |   |             |              |                                                                                                                     |
|------|-----------------------------|----------------------|------------|---|---|-------------|--------------|---------------------------------------------------------------------------------------------------------------------|
| 7268 | <i>Spilopelia chinensis</i> | Eastern Spotted Dove | 2022/3/5   | 1 | 0 | 39.81030700 | 116.50822500 | <a href="https://www.inaturalist.org/observations/107956342">https://www.inaturalist.org/observations/107956342</a> |
| 7269 | <i>Spilopelia chinensis</i> | Eastern Spotted Dove | 2021/11/3  | 1 | 0 | 39.81030700 | 116.50822500 | <a href="https://www.inaturalist.org/observations/107956348">https://www.inaturalist.org/observations/107956348</a> |
| 7270 | <i>Spilopelia chinensis</i> | Eastern Spotted Dove | 2022/4/9   | 1 | 0 | 39.81030700 | 116.50822500 | <a href="https://www.inaturalist.org/observations/111791788">https://www.inaturalist.org/observations/111791788</a> |
| 7271 | <i>Spilopelia chinensis</i> | Eastern Spotted Dove | 2019/8/12  | 3 | 0 | 39.81745125 | 116.37559220 | <a href="https://www.inaturalist.org/observations/30799994">https://www.inaturalist.org/observations/30799994</a>   |
| 7272 | <i>Spilopelia chinensis</i> | Eastern Spotted Dove | 2021/1/10  | 1 | 0 | 39.84369378 | 116.48622030 | <a href="https://www.inaturalist.org/observations/67848816">https://www.inaturalist.org/observations/67848816</a>   |
| 7273 | <i>Spilopelia chinensis</i> | Eastern Spotted Dove | 2020/1/14  | 4 | 0 | 39.87842560 | 116.40263370 | <a href="https://www.inaturalist.org/observations/37706014">https://www.inaturalist.org/observations/37706014</a>   |
| 7274 | <i>Spilopelia chinensis</i> | Eastern Spotted Dove | 2018/8/23  | 3 | 0 | 39.87857631 | 116.40578680 | <a href="https://www.inaturalist.org/observations/15824079">https://www.inaturalist.org/observations/15824079</a>   |
| 7275 | <i>Spilopelia chinensis</i> | Eastern Spotted Dove | 2020/2/16  | 2 | 0 | 39.87941167 | 116.39646830 | <a href="https://www.inaturalist.org/observations/38705946">https://www.inaturalist.org/observations/38705946</a>   |
| 7276 | <i>Spilopelia chinensis</i> | Eastern Spotted Dove | 2013/10/7  | 1 | 0 | 39.88057660 | 116.40710990 | <a href="https://www.inaturalist.org/observations/35887355">https://www.inaturalist.org/observations/35887355</a>   |
| 7277 | <i>Spilopelia chinensis</i> | Eastern Spotted Dove | 2017/9/27  | 3 | 0 | 39.88126597 | 116.40273440 | <a href="https://www.inaturalist.org/observations/56510644">https://www.inaturalist.org/observations/56510644</a>   |
| 7278 | <i>Spilopelia chinensis</i> | Eastern Spotted Dove | 2018/9/22  | 1 | 0 | 39.88218024 | 116.40660560 | <a href="https://www.inaturalist.org/observations/98381082">https://www.inaturalist.org/observations/98381082</a>   |
| 7279 | <i>Spilopelia chinensis</i> | Eastern Spotted Dove | 2022/1/12  | 1 | 0 | 39.88233861 | 116.41071490 | <a href="https://www.inaturalist.org/observations/121597815">https://www.inaturalist.org/observations/121597815</a> |
| 7280 | <i>Spilopelia chinensis</i> | Eastern Spotted Dove | 2021/2/16  | 1 | 0 | 39.88257548 | 116.40988860 | <a href="https://www.inaturalist.org/observations/70663216">https://www.inaturalist.org/observations/70663216</a>   |
| 7281 | <i>Spilopelia chinensis</i> | Eastern Spotted Dove | 2019/7/20  | 0 | 0 | 39.88266216 | 116.41117350 | <a href="https://www.inaturalist.org/observations/39645501">https://www.inaturalist.org/observations/39645501</a>   |
| 7282 | <i>Spilopelia chinensis</i> | Eastern Spotted Dove | 2020/6/30  | 1 | 0 | 39.89668481 | 116.37609110 | <a href="https://www.inaturalist.org/observations/51426454">https://www.inaturalist.org/observations/51426454</a>   |
| 7283 | <i>Spilopelia chinensis</i> | Eastern Spotted Dove | 2019/3/3   | 2 | 0 | 39.91046002 | 116.39422230 | <a href="https://www.inaturalist.org/observations/21021733">https://www.inaturalist.org/observations/21021733</a>   |
| 7284 | <i>Spilopelia chinensis</i> | Eastern Spotted Dove | 2022/5/20  | 2 | 0 | 39.91179601 | 116.29939070 | <a href="https://www.inaturalist.org/observations/117842669">https://www.inaturalist.org/observations/117842669</a> |
| 7285 | <i>Spilopelia chinensis</i> | Eastern Spotted Dove | 2021/9/26  | 1 | 0 | 39.91284336 | 116.40703850 | <a href="https://www.inaturalist.org/observations/96188296">https://www.inaturalist.org/observations/96188296</a>   |
| 7286 | <i>Spilopelia chinensis</i> | Eastern Spotted Dove | 2021/2/17  | 1 | 0 | 39.91501346 | 116.31320740 | <a href="https://www.inaturalist.org/observations/69711773">https://www.inaturalist.org/observations/69711773</a>   |
| 7287 | <i>Spilopelia chinensis</i> | Eastern Spotted Dove | 2016/5/8   | 3 | 0 | 39.91835191 | 116.38349710 | <a href="https://www.inaturalist.org/observations/39487458">https://www.inaturalist.org/observations/39487458</a>   |
| 7288 | <i>Spilopelia chinensis</i> | Eastern Spotted Dove | 2020/10/29 | 1 | 0 | 39.92032453 | 116.40668480 | <a href="https://www.inaturalist.org/observations/63746670">https://www.inaturalist.org/observations/63746670</a>   |
| 7289 | <i>Spilopelia chinensis</i> | Eastern Spotted Dove | 2019/9/8   | 2 | 0 | 39.92408719 | 116.37873170 | <a href="https://www.inaturalist.org/observations/32338298">https://www.inaturalist.org/observations/32338298</a>   |
| 7290 | <i>Spilopelia chinensis</i> | Eastern Spotted Dove | 2021/1/7   | 1 | 0 | 39.92535135 | 116.39736840 | <a href="https://www.inaturalist.org/observations/67693785">https://www.inaturalist.org/observations/67693785</a>   |

|      |                             |                      |            |   |   |             |              |                                                                                                                     |
|------|-----------------------------|----------------------|------------|---|---|-------------|--------------|---------------------------------------------------------------------------------------------------------------------|
| 7291 | <i>Spilopelia chinensis</i> | Eastern Spotted Dove | 2021/1/19  | 2 | 0 | 39.92576015 | 116.33960440 | <a href="https://www.inaturalist.org/observations/68318130">https://www.inaturalist.org/observations/68318130</a>   |
| 7292 | <i>Spilopelia chinensis</i> | Eastern Spotted Dove | 2022/4/18  | 1 | 0 | 39.92637089 | 116.40638940 | <a href="https://www.inaturalist.org/observations/111889435">https://www.inaturalist.org/observations/111889435</a> |
| 7293 | <i>Spilopelia chinensis</i> | Eastern Spotted Dove | 2019/12/6  | 2 | 0 | 39.92776167 | 116.34140000 | <a href="https://www.inaturalist.org/observations/42930370">https://www.inaturalist.org/observations/42930370</a>   |
| 7294 | <i>Spilopelia chinensis</i> | Eastern Spotted Dove | 2021/4/15  | 1 | 0 | 39.93215111 | 116.40126730 | <a href="https://www.inaturalist.org/observations/74018041">https://www.inaturalist.org/observations/74018041</a>   |
| 7295 | <i>Spilopelia chinensis</i> | Eastern Spotted Dove | 2022/2/14  | 1 | 0 | 39.93283052 | 116.39051000 | <a href="https://www.inaturalist.org/observations/125101797">https://www.inaturalist.org/observations/125101797</a> |
| 7296 | <i>Spilopelia chinensis</i> | Eastern Spotted Dove | 2020/11/13 | 3 | 0 | 39.93926602 | 116.42828390 | <a href="https://www.inaturalist.org/observations/64761987">https://www.inaturalist.org/observations/64761987</a>   |
| 7297 | <i>Spilopelia chinensis</i> | Eastern Spotted Dove | 2021/3/20  | 1 | 0 | 39.94092500 | 116.41956330 | <a href="https://www.inaturalist.org/observations/71609053">https://www.inaturalist.org/observations/71609053</a>   |
| 7298 | <i>Spilopelia chinensis</i> | Eastern Spotted Dove | 2018/10/28 | 3 | 0 | 39.94109333 | 116.32610670 | <a href="https://www.inaturalist.org/observations/17903444">https://www.inaturalist.org/observations/17903444</a>   |
| 7299 | <i>Spilopelia chinensis</i> | Eastern Spotted Dove | 2008/4/22  | 1 | 0 | 39.94179233 | 116.33573050 | <a href="https://www.inaturalist.org/observations/70167253">https://www.inaturalist.org/observations/70167253</a>   |
| 7300 | <i>Spilopelia chinensis</i> | Eastern Spotted Dove | 2019/6/21  | 2 | 0 | 39.94267083 | 116.47558860 | <a href="https://www.inaturalist.org/observations/61383474">https://www.inaturalist.org/observations/61383474</a>   |
| 7301 | <i>Spilopelia chinensis</i> | Eastern Spotted Dove | 2021/7/3   | 1 | 0 | 39.94405497 | 116.33407800 | <a href="https://www.inaturalist.org/observations/85459987">https://www.inaturalist.org/observations/85459987</a>   |
| 7302 | <i>Spilopelia chinensis</i> | Eastern Spotted Dove | 2018/1/20  | 2 | 0 | 39.94514468 | 116.41721700 | <a href="https://www.inaturalist.org/observations/66871930">https://www.inaturalist.org/observations/66871930</a>   |
| 7303 | <i>Spilopelia chinensis</i> | Eastern Spotted Dove | 2019/3/24  | 1 | 0 | 39.94524696 | 116.45161630 | <a href="https://www.inaturalist.org/observations/21768072">https://www.inaturalist.org/observations/21768072</a>   |
| 7304 | <i>Spilopelia chinensis</i> | Eastern Spotted Dove | 2018/10/7  | 3 | 0 | 39.94853817 | 116.47060700 | <a href="https://www.inaturalist.org/observations/17273599">https://www.inaturalist.org/observations/17273599</a>   |
| 7305 | <i>Spilopelia chinensis</i> | Eastern Spotted Dove | 2022/4/23  | 2 | 0 | 39.95786766 | 116.35805340 | <a href="https://www.inaturalist.org/observations/112477316">https://www.inaturalist.org/observations/112477316</a> |
| 7306 | <i>Spilopelia chinensis</i> | Eastern Spotted Dove | 2022/5/3   | 1 | 0 | 39.95800979 | 116.35528580 | <a href="https://www.inaturalist.org/observations/114993180">https://www.inaturalist.org/observations/114993180</a> |
| 7307 | <i>Spilopelia chinensis</i> | Eastern Spotted Dove | 2021/4/9   | 1 | 0 | 39.96095003 | 116.45462040 | <a href="https://www.inaturalist.org/observations/82511257">https://www.inaturalist.org/observations/82511257</a>   |
| 7308 | <i>Spilopelia chinensis</i> | Eastern Spotted Dove | 2017/12/15 | 3 | 0 | 39.97099167 | 116.30805830 | <a href="https://www.inaturalist.org/observations/9158908">https://www.inaturalist.org/observations/9158908</a>     |
| 7309 | <i>Spilopelia chinensis</i> | Eastern Spotted Dove | 2019/10/17 | 1 | 0 | 39.97153500 | 116.30982900 | <a href="https://www.inaturalist.org/observations/35042939">https://www.inaturalist.org/observations/35042939</a>   |
| 7310 | <i>Spilopelia chinensis</i> | Eastern Spotted Dove | 2013/9/30  | 1 | 0 | 39.97281466 | 116.47332120 | <a href="https://www.inaturalist.org/observations/35859064">https://www.inaturalist.org/observations/35859064</a>   |
| 7311 | <i>Spilopelia chinensis</i> | Eastern Spotted Dove | 2022/4/24  | 2 | 0 | 39.97463618 | 116.31531920 | <a href="https://www.inaturalist.org/observations/112648728">https://www.inaturalist.org/observations/112648728</a> |
| 7312 | <i>Spilopelia chinensis</i> | Eastern Spotted Dove | 2019/11/28 | 1 | 0 | 39.98703819 | 116.20995180 | <a href="https://www.inaturalist.org/observations/59853733">https://www.inaturalist.org/observations/59853733</a>   |
| 7313 | <i>Spilopelia chinensis</i> | Eastern Spotted Dove | 2019/11/28 | 1 | 0 | 39.98876393 | 116.21133250 | <a href="https://www.inaturalist.org/observations/59853729">https://www.inaturalist.org/observations/59853729</a>   |

|      |                             |                      |            |   |   |             |              |                                                                                                                     |
|------|-----------------------------|----------------------|------------|---|---|-------------|--------------|---------------------------------------------------------------------------------------------------------------------|
| 7314 | <i>Spilopelia chinensis</i> | Eastern Spotted Dove | 2014/9/20  | 1 | 0 | 39.99045411 | 116.19009730 | <a href="https://www.inaturalist.org/observations/21706913">https://www.inaturalist.org/observations/21706913</a>   |
| 7315 | <i>Spilopelia chinensis</i> | Eastern Spotted Dove | 2018/7/28  | 3 | 0 | 39.99182509 | 116.30798380 | <a href="https://www.inaturalist.org/observations/14825935">https://www.inaturalist.org/observations/14825935</a>   |
| 7316 | <i>Spilopelia chinensis</i> | Eastern Spotted Dove | 2022/4/15  | 1 | 0 | 39.99602204 | 116.28026120 | <a href="https://www.inaturalist.org/observations/111652133">https://www.inaturalist.org/observations/111652133</a> |
| 7317 | <i>Spilopelia chinensis</i> | Eastern Spotted Dove | 2021/2/11  | 1 | 0 | 39.99615469 | 116.32215660 | <a href="https://www.inaturalist.org/observations/69483500">https://www.inaturalist.org/observations/69483500</a>   |
| 7318 | <i>Spilopelia chinensis</i> | Eastern Spotted Dove | 2021/12/20 | 2 | 0 | 39.99939592 | 116.41029440 | <a href="https://www.inaturalist.org/observations/103350908">https://www.inaturalist.org/observations/103350908</a> |
| 7319 | <i>Spilopelia chinensis</i> | Eastern Spotted Dove | 2022/9/4   | 1 | 0 | 39.99966740 | 116.32644390 | <a href="https://www.inaturalist.org/observations/133598001">https://www.inaturalist.org/observations/133598001</a> |
| 7320 | <i>Spilopelia chinensis</i> | Eastern Spotted Dove | 2021/2/21  | 1 | 0 | 40.00341053 | 116.32425020 | <a href="https://www.inaturalist.org/observations/69963027">https://www.inaturalist.org/observations/69963027</a>   |
| 7321 | <i>Spilopelia chinensis</i> | Eastern Spotted Dove | 2022/6/27  | 1 | 0 | 40.00364644 | 116.20877930 | <a href="https://www.inaturalist.org/observations/125040282">https://www.inaturalist.org/observations/125040282</a> |
| 7322 | <i>Spilopelia chinensis</i> | Eastern Spotted Dove | 2021/10/16 | 2 | 0 | 40.01097332 | 116.30429110 | <a href="https://www.inaturalist.org/observations/125284611">https://www.inaturalist.org/observations/125284611</a> |
| 7323 | <i>Spilopelia chinensis</i> | Eastern Spotted Dove | 2013/6/2   | 1 | 0 | 40.01703757 | 116.38461310 | <a href="https://www.inaturalist.org/observations/49263861">https://www.inaturalist.org/observations/49263861</a>   |
| 7324 | <i>Spilopelia chinensis</i> | Eastern Spotted Dove | 2018/12/21 | 1 | 0 | 40.02900226 | 116.28713880 | <a href="https://www.inaturalist.org/observations/19129715">https://www.inaturalist.org/observations/19129715</a>   |
| 7325 | <i>Spilopelia chinensis</i> | Eastern Spotted Dove | 2021/2/15  | 1 | 0 | 40.08973753 | 116.39921300 | <a href="https://www.inaturalist.org/observations/69611821">https://www.inaturalist.org/observations/69611821</a>   |
| 7326 | <i>Spilopelia chinensis</i> | Eastern Spotted Dove | 2022/5/1   | 1 | 0 | 40.09024020 | 116.31052850 | <a href="https://www.inaturalist.org/observations/114188659">https://www.inaturalist.org/observations/114188659</a> |
| 7327 | <i>Spilopelia chinensis</i> | Eastern Spotted Dove | 2021/1/2   | 1 | 0 | 40.12037814 | 116.65922060 | <a href="https://www.inaturalist.org/observations/67437542">https://www.inaturalist.org/observations/67437542</a>   |
| 7328 | <i>Spilopelia chinensis</i> | Eastern Spotted Dove | 2018/8/19  | 1 | 0 | 40.13034700 | 116.65465000 | <a href="https://www.inaturalist.org/observations/39608140">https://www.inaturalist.org/observations/39608140</a>   |
| 7329 | <i>Spilopelia chinensis</i> | Eastern Spotted Dove | 2021/7/7   | 1 | 0 | 40.63158833 | 117.36343670 | <a href="https://www.inaturalist.org/observations/87821222">https://www.inaturalist.org/observations/87821222</a>   |
| 7330 | <i>Spilopelia chinensis</i> | Eastern Spotted Dove | 2019/10/26 | 2 | 0 | 45.75940833 | 126.65423890 | <a href="https://www.inaturalist.org/observations/121026538">https://www.inaturalist.org/observations/121026538</a> |
| 7331 | <i>Spilopelia chinensis</i> | Eastern Spotted Dove | 2019/10/26 | 2 | 0 | 45.75940833 | 126.65423890 | <a href="https://www.inaturalist.org/observations/121026539">https://www.inaturalist.org/observations/121026539</a> |

| No | scientific name   | common name        | date       | NIA | NID | latitude    | longitude    | url                                                                                                                 |
|----|-------------------|--------------------|------------|-----|-----|-------------|--------------|---------------------------------------------------------------------------------------------------------------------|
| 1  | Turdus hortulorum | Grey-backed Thrush | 2022/2/25  | 1   | 0   | 22.12257866 | 113.55810710 | <a href="https://www.inaturalist.org/observations/107421538">https://www.inaturalist.org/observations/107421538</a> |
| 2  | Turdus hortulorum | Grey-backed Thrush | 2019/11/24 | 1   | 0   | 22.12599023 | 113.56509780 | <a href="https://www.inaturalist.org/observations/49835314">https://www.inaturalist.org/observations/49835314</a>   |
| 3  | Turdus hortulorum | Grey-backed Thrush | 2021/2/1   | 1   | 0   | 22.15410827 | 113.56110110 | <a href="https://www.inaturalist.org/observations/84728423">https://www.inaturalist.org/observations/84728423</a>   |
| 4  | Turdus hortulorum | Grey-backed Thrush | 2022/1/20  | 1   | 0   | 22.20048924 | 113.54772390 | <a href="https://www.inaturalist.org/observations/105250718">https://www.inaturalist.org/observations/105250718</a> |
| 5  | Turdus hortulorum | Grey-backed Thrush | 2021/2/9   | 1   | 0   | 22.20054889 | 113.54802160 | <a href="https://www.inaturalist.org/observations/69297561">https://www.inaturalist.org/observations/69297561</a>   |
| 6  | Turdus hortulorum | Grey-backed Thrush | 2016/2/17  | 1   | 0   | 22.20818358 | 114.03055620 | <a href="https://www.inaturalist.org/observations/69682555">https://www.inaturalist.org/observations/69682555</a>   |
| 7  | Turdus hortulorum | Grey-backed Thrush | 2016/2/8   | 1   | 0   | 22.23694500 | 114.24297000 | <a href="https://www.inaturalist.org/observations/102530604">https://www.inaturalist.org/observations/102530604</a> |
| 8  | Turdus hortulorum | Grey-backed Thrush | 2020/2/8   | 0   | 0   | 22.23928493 | 113.95488400 | <a href="https://www.inaturalist.org/observations/38663000">https://www.inaturalist.org/observations/38663000</a>   |
| 9  | Turdus hortulorum | Grey-backed Thrush | 2010/1/1   | 3   | 0   | 22.24067500 | 113.97731700 | <a href="https://www.inaturalist.org/observations/30404946">https://www.inaturalist.org/observations/30404946</a>   |
| 10 | Turdus hortulorum | Grey-backed Thrush | 2020/2/8   | 0   | 0   | 22.25831279 | 113.92532670 | <a href="https://www.inaturalist.org/observations/38662994">https://www.inaturalist.org/observations/38662994</a>   |
| 11 | Turdus hortulorum | Grey-backed Thrush | 2020/1/31  | 0   | 0   | 22.26655706 | 114.13858740 | <a href="https://www.inaturalist.org/observations/38172412">https://www.inaturalist.org/observations/38172412</a>   |
| 12 | Turdus hortulorum | Grey-backed Thrush | 2007/1/6   | 2   | 0   | 22.26656974 | 114.13653930 | <a href="https://www.inaturalist.org/observations/65272939">https://www.inaturalist.org/observations/65272939</a>   |
| 13 | Turdus hortulorum | Grey-backed Thrush | 2020/1/29  | 0   | 0   | 22.26968013 | 114.13600120 | <a href="https://www.inaturalist.org/observations/38091111">https://www.inaturalist.org/observations/38091111</a>   |
| 14 | Turdus hortulorum | Grey-backed Thrush | 2018/2/6   | 1   | 0   | 22.27142760 | 114.15047000 | <a href="https://www.inaturalist.org/observations/9747775">https://www.inaturalist.org/observations/9747775</a>     |
| 15 | Turdus hortulorum | Grey-backed Thrush | 2014/1/30  | 2   | 0   | 22.27382901 | 114.13785930 | <a href="https://www.inaturalist.org/observations/13073466">https://www.inaturalist.org/observations/13073466</a>   |
| 16 | Turdus hortulorum | Grey-backed Thrush | 2016/3/11  | 1   | 0   | 22.27411475 | 114.14383560 | <a href="https://www.inaturalist.org/observations/105012443">https://www.inaturalist.org/observations/105012443</a> |
| 17 | Turdus hortulorum | Grey-backed Thrush | 2018/1/31  | 1   | 0   | 22.27427710 | 114.14399200 | <a href="https://www.inaturalist.org/observations/9677844">https://www.inaturalist.org/observations/9677844</a>     |
| 18 | Turdus hortulorum | Grey-backed Thrush | 2021/2/17  | 1   | 0   | 22.27449106 | 114.21032530 | <a href="https://www.inaturalist.org/observations/69709176">https://www.inaturalist.org/observations/69709176</a>   |
| 19 | Turdus hortulorum | Grey-backed Thrush | 2018/2/4   | 1   | 0   | 22.27665014 | 114.13377640 | <a href="https://www.inaturalist.org/observations/9918978">https://www.inaturalist.org/observations/9918978</a>     |
| 20 | Turdus hortulorum | Grey-backed Thrush | 2020/2/1   | 1   | 0   | 22.27696579 | 114.12066180 | <a href="https://www.inaturalist.org/observations/70236989">https://www.inaturalist.org/observations/70236989</a>   |
| 21 | Turdus hortulorum | Grey-backed Thrush | 2021/1/13  | 1   | 0   | 22.27773729 | 114.21130960 | <a href="https://www.inaturalist.org/observations/67992809">https://www.inaturalist.org/observations/67992809</a>   |
| 22 | Turdus hortulorum | Grey-backed Thrush | 2020/1/25  | 0   | 0   | 22.27831412 | 114.13524330 | <a href="https://www.inaturalist.org/observations/37982209">https://www.inaturalist.org/observations/37982209</a>   |

|    |                   |                    |            |   |   |             |              |                                                                                                                     |
|----|-------------------|--------------------|------------|---|---|-------------|--------------|---------------------------------------------------------------------------------------------------------------------|
| 23 | Turdus hortulorum | Grey-backed Thrush | 2012/12/30 | 2 | 0 | 22.27831510 | 114.17469500 | <a href="http://www.inaturalist.org/observations/3972206">http://www.inaturalist.org/observations/3972206</a>       |
| 24 | Turdus hortulorum | Grey-backed Thrush | 2018/2/18  | 1 | 0 | 22.27931130 | 114.13650370 | <a href="https://www.inaturalist.org/observations/9903403">https://www.inaturalist.org/observations/9903403</a>     |
| 25 | Turdus hortulorum | Grey-backed Thrush | 2021/1/30  | 2 | 0 | 22.27965338 | 114.20802660 | <a href="https://www.inaturalist.org/observations/68794980">https://www.inaturalist.org/observations/68794980</a>   |
| 26 | Turdus hortulorum | Grey-backed Thrush | 2017/3/13  | 1 | 0 | 22.28151945 | 114.13755300 | <a href="https://www.inaturalist.org/observations/8613940">https://www.inaturalist.org/observations/8613940</a>     |
| 27 | Turdus hortulorum | Grey-backed Thrush | 2016/3/16  | 1 | 0 | 22.31278478 | 114.24341820 | <a href="https://www.inaturalist.org/observations/32696814">https://www.inaturalist.org/observations/32696814</a>   |
| 28 | Turdus hortulorum | Grey-backed Thrush | 2018/12/4  | 2 | 0 | 22.31833316 | 114.18328540 | <a href="https://www.inaturalist.org/observations/29618629">https://www.inaturalist.org/observations/29618629</a>   |
| 29 | Turdus hortulorum | Grey-backed Thrush | 2022/2/5   | 1 | 0 | 22.34842546 | 114.14464120 | <a href="https://www.inaturalist.org/observations/107926723">https://www.inaturalist.org/observations/107926723</a> |
| 30 | Turdus hortulorum | Grey-backed Thrush | 2013/1/20  | 2 | 0 | 22.35567100 | 114.13263700 | <a href="https://www.inaturalist.org/observations/19815287">https://www.inaturalist.org/observations/19815287</a>   |
| 31 | Turdus hortulorum | Grey-backed Thrush | 2011/3/24  | 2 | 0 | 22.35567100 | 114.13263700 | <a href="https://www.inaturalist.org/observations/27791768">https://www.inaturalist.org/observations/27791768</a>   |
| 32 | Turdus hortulorum | Grey-backed Thrush | 2015/1/3   | 2 | 0 | 22.35733800 | 114.13321600 | <a href="https://www.inaturalist.org/observations/12688228">https://www.inaturalist.org/observations/12688228</a>   |
| 33 | Turdus hortulorum | Grey-backed Thrush | 2016/2/7   | 2 | 0 | 22.36549064 | 114.19852580 | <a href="https://www.inaturalist.org/observations/25237951">https://www.inaturalist.org/observations/25237951</a>   |
| 34 | Turdus hortulorum | Grey-backed Thrush | 2019/1/28  | 1 | 0 | 22.38390019 | 113.96392960 | <a href="https://www.inaturalist.org/observations/20362958">https://www.inaturalist.org/observations/20362958</a>   |
| 35 | Turdus hortulorum | Grey-backed Thrush | 2021/1/26  | 1 | 0 | 22.38514653 | 114.14689010 | <a href="https://www.inaturalist.org/observations/68684089">https://www.inaturalist.org/observations/68684089</a>   |
| 36 | Turdus hortulorum | Grey-backed Thrush | 2020/1/19  | 1 | 0 | 22.39401692 | 113.98106620 | <a href="https://www.inaturalist.org/observations/37773867">https://www.inaturalist.org/observations/37773867</a>   |
| 37 | Turdus hortulorum | Grey-backed Thrush | 2020/2/1   | 0 | 0 | 22.39408883 | 113.98214340 | <a href="https://www.inaturalist.org/observations/38173271">https://www.inaturalist.org/observations/38173271</a>   |
| 38 | Turdus hortulorum | Grey-backed Thrush | 2020/1/31  | 0 | 0 | 22.39419609 | 113.98232920 | <a href="https://www.inaturalist.org/observations/38137642">https://www.inaturalist.org/observations/38137642</a>   |
| 39 | Turdus hortulorum | Grey-backed Thrush | 2019/2/5   | 1 | 0 | 22.39430376 | 113.98171540 | <a href="https://www.inaturalist.org/observations/20202371">https://www.inaturalist.org/observations/20202371</a>   |
| 40 | Turdus hortulorum | Grey-backed Thrush | 2018/12/23 | 1 | 0 | 22.39438586 | 113.98223460 | <a href="https://www.inaturalist.org/observations/19167795">https://www.inaturalist.org/observations/19167795</a>   |
| 41 | Turdus hortulorum | Grey-backed Thrush | 2017/3/2   | 1 | 0 | 22.39440074 | 113.96598940 | <a href="https://www.inaturalist.org/observations/5309646">https://www.inaturalist.org/observations/5309646</a>     |
| 42 | Turdus hortulorum | Grey-backed Thrush | 2021/1/9   | 2 | 0 | 22.39444500 | 114.24107830 | <a href="https://www.inaturalist.org/observations/67782729">https://www.inaturalist.org/observations/67782729</a>   |
| 43 | Turdus hortulorum | Grey-backed Thrush | 2019/12/9  | 1 | 0 | 22.39768300 | 114.32231900 | <a href="https://www.inaturalist.org/observations/36519986">https://www.inaturalist.org/observations/36519986</a>   |
| 44 | Turdus hortulorum | Grey-backed Thrush | 2019/12/28 | 1 | 0 | 22.40960582 | 113.96315440 | <a href="https://www.inaturalist.org/observations/42312026">https://www.inaturalist.org/observations/42312026</a>   |
| 45 | Turdus hortulorum | Grey-backed Thrush | 2018/2/9   | 1 | 0 | 22.40961677 | 113.96382190 | <a href="https://www.inaturalist.org/observations/9972266">https://www.inaturalist.org/observations/9972266</a>     |

|    |                   |                    |            |   |   |             |              |                                                                                                                     |
|----|-------------------|--------------------|------------|---|---|-------------|--------------|---------------------------------------------------------------------------------------------------------------------|
| 46 | Turdus hortulorum | Grey-backed Thrush | 2014/12/16 | 2 | 0 | 22.40970600 | 114.03178300 | <a href="https://www.inaturalist.org/observations/15313075">https://www.inaturalist.org/observations/15313075</a>   |
| 47 | Turdus hortulorum | Grey-backed Thrush | 2012/12/25 | 1 | 0 | 22.40990400 | 114.03239500 | <a href="https://www.inaturalist.org/observations/19985500">https://www.inaturalist.org/observations/19985500</a>   |
| 48 | Turdus hortulorum | Grey-backed Thrush | 2015/12/29 | 1 | 0 | 22.40994900 | 114.03241600 | <a href="https://www.inaturalist.org/observations/15120152">https://www.inaturalist.org/observations/15120152</a>   |
| 49 | Turdus hortulorum | Grey-backed Thrush | 2014/2/1   | 1 | 0 | 22.40995400 | 114.03250900 | <a href="https://www.inaturalist.org/observations/70607260">https://www.inaturalist.org/observations/70607260</a>   |
| 50 | Turdus hortulorum | Grey-backed Thrush | 2011/2/24  | 1 | 0 | 22.41227500 | 114.02917500 | <a href="https://www.inaturalist.org/observations/30090970">https://www.inaturalist.org/observations/30090970</a>   |
| 51 | Turdus hortulorum | Grey-backed Thrush | 2013/1/11  | 2 | 0 | 22.42365140 | 114.18555050 | <a href="http://www.inaturalist.org/observations/178397">http://www.inaturalist.org/observations/178397</a>         |
| 52 | Turdus hortulorum | Grey-backed Thrush | 2018/12/11 | 1 | 0 | 22.42574680 | 114.18120860 | <a href="https://www.inaturalist.org/observations/20970725">https://www.inaturalist.org/observations/20970725</a>   |
| 53 | Turdus hortulorum | Grey-backed Thrush | 2011/2/5   | 1 | 0 | 22.42908400 | 114.18066100 | <a href="https://www.inaturalist.org/observations/104805444">https://www.inaturalist.org/observations/104805444</a> |
| 54 | Turdus hortulorum | Grey-backed Thrush | 2011/2/13  | 1 | 0 | 22.43261100 | 114.07842900 | <a href="https://www.inaturalist.org/observations/104803032">https://www.inaturalist.org/observations/104803032</a> |
| 55 | Turdus hortulorum | Grey-backed Thrush | 2018/2/21  | 1 | 0 | 22.43266000 | 114.08136900 | <a href="https://www.inaturalist.org/observations/9976423">https://www.inaturalist.org/observations/9976423</a>     |
| 56 | Turdus hortulorum | Grey-backed Thrush | 2014/1/31  | 2 | 0 | 22.43278700 | 114.07887600 | <a href="https://www.inaturalist.org/observations/15438607">https://www.inaturalist.org/observations/15438607</a>   |
| 57 | Turdus hortulorum | Grey-backed Thrush | 2013/1/1   | 1 | 0 | 22.43733800 | 114.07347900 | <a href="https://www.inaturalist.org/observations/19815688">https://www.inaturalist.org/observations/19815688</a>   |
| 58 | Turdus hortulorum | Grey-backed Thrush | 2019/12/21 | 1 | 0 | 22.44131034 | 114.01882240 | <a href="https://www.inaturalist.org/observations/36850612">https://www.inaturalist.org/observations/36850612</a>   |
| 59 | Turdus hortulorum | Grey-backed Thrush | 2019/12/13 | 1 | 0 | 22.44131138 | 114.01852160 | <a href="https://www.inaturalist.org/observations/36642256">https://www.inaturalist.org/observations/36642256</a>   |
| 60 | Turdus hortulorum | Grey-backed Thrush | 2020/3/17  | 1 | 0 | 22.44178500 | 114.01832670 | <a href="https://www.inaturalist.org/observations/40460936">https://www.inaturalist.org/observations/40460936</a>   |
| 61 | Turdus hortulorum | Grey-backed Thrush | 2019/12/27 | 1 | 0 | 22.44178925 | 114.01878410 | <a href="https://www.inaturalist.org/observations/101689878">https://www.inaturalist.org/observations/101689878</a> |
| 62 | Turdus hortulorum | Grey-backed Thrush | 2019/12/27 | 2 | 0 | 22.44178925 | 114.01878410 | <a href="https://www.inaturalist.org/observations/101689967">https://www.inaturalist.org/observations/101689967</a> |
| 63 | Turdus hortulorum | Grey-backed Thrush | 2019/12/29 | 1 | 0 | 22.44215677 | 114.01777520 | <a href="https://www.inaturalist.org/observations/37061476">https://www.inaturalist.org/observations/37061476</a>   |
| 64 | Turdus hortulorum | Grey-backed Thrush | 2019/1/10  | 2 | 0 | 22.44536224 | 114.13723360 | <a href="https://www.inaturalist.org/observations/19549294">https://www.inaturalist.org/observations/19549294</a>   |
| 65 | Turdus hortulorum | Grey-backed Thrush | 2016/2/29  | 1 | 0 | 22.46057700 | 114.03335200 | <a href="https://www.inaturalist.org/observations/15119849">https://www.inaturalist.org/observations/15119849</a>   |
| 66 | Turdus hortulorum | Grey-backed Thrush | 2010/2/16  | 1 | 0 | 22.46578400 | 114.02926500 | <a href="https://www.inaturalist.org/observations/137117200">https://www.inaturalist.org/observations/137117200</a> |
| 67 | Turdus hortulorum | Grey-backed Thrush | 2022/2/14  | 2 | 0 | 22.46652951 | 114.30939760 | <a href="https://www.inaturalist.org/observations/106738016">https://www.inaturalist.org/observations/106738016</a> |
| 68 | Turdus hortulorum | Grey-backed Thrush | 2013/12/21 | 2 | 0 | 22.46978000 | 114.00917100 | <a href="https://www.inaturalist.org/observations/51114989">https://www.inaturalist.org/observations/51114989</a>   |

|    |                   |                    |            |   |   |             |              |                                                                                                                     |
|----|-------------------|--------------------|------------|---|---|-------------|--------------|---------------------------------------------------------------------------------------------------------------------|
| 69 | Turdus hortulorum | Grey-backed Thrush | 2013/12/21 | 1 | 0 | 22.46978000 | 114.00917100 | <a href="https://www.inaturalist.org/observations/51119473">https://www.inaturalist.org/observations/51119473</a>   |
| 70 | Turdus hortulorum | Grey-backed Thrush | 2013/2/23  | 1 | 0 | 22.47005200 | 114.00900300 | <a href="https://www.inaturalist.org/observations/15929633">https://www.inaturalist.org/observations/15929633</a>   |
| 71 | Turdus hortulorum | Grey-backed Thrush | 2020/1/28  | 0 | 0 | 22.47059664 | 114.00611110 | <a href="https://www.inaturalist.org/observations/38052777">https://www.inaturalist.org/observations/38052777</a>   |
| 72 | Turdus hortulorum | Grey-backed Thrush | 2022/2/14  | 2 | 0 | 22.47511913 | 114.24254020 | <a href="https://www.inaturalist.org/observations/106738022">https://www.inaturalist.org/observations/106738022</a> |
| 73 | Turdus hortulorum | Grey-backed Thrush | 2022/2/1   | 2 | 0 | 22.47590750 | 114.36169450 | <a href="https://www.inaturalist.org/observations/105957447">https://www.inaturalist.org/observations/105957447</a> |
| 74 | Turdus hortulorum | Grey-backed Thrush | 2021/11/26 | 1 | 0 | 22.49307212 | 114.03512670 | <a href="https://www.inaturalist.org/observations/102070981">https://www.inaturalist.org/observations/102070981</a> |
| 75 | Turdus hortulorum | Grey-backed Thrush | 2020/1/24  | 2 | 0 | 22.53833683 | 114.00431350 | <a href="https://www.inaturalist.org/observations/40177983">https://www.inaturalist.org/observations/40177983</a>   |
| 76 | Turdus hortulorum | Grey-backed Thrush | 2022/2/15  | 1 | 0 | 22.56392860 | 113.97499080 | <a href="https://www.inaturalist.org/observations/106847496">https://www.inaturalist.org/observations/106847496</a> |
| 77 | Turdus hortulorum | Grey-backed Thrush | 2010/12/28 | 1 | 0 | 22.58061567 | 114.20012410 | <a href="https://www.inaturalist.org/observations/116431007">https://www.inaturalist.org/observations/116431007</a> |
| 78 | Turdus hortulorum | Grey-backed Thrush | 2022/1/17  | 1 | 0 | 22.67456939 | 113.85405010 | <a href="https://www.inaturalist.org/observations/105077554">https://www.inaturalist.org/observations/105077554</a> |
| 79 | Turdus hortulorum | Grey-backed Thrush | 2017/12/22 | 1 | 0 | 23.04054197 | 113.37217750 | <a href="https://www.inaturalist.org/observations/59197546">https://www.inaturalist.org/observations/59197546</a>   |
| 80 | Turdus hortulorum | Grey-backed Thrush | 2017/12/22 | 1 | 0 | 23.04054197 | 113.37217750 | <a href="https://www.inaturalist.org/observations/116230910">https://www.inaturalist.org/observations/116230910</a> |
| 81 | Turdus hortulorum | Grey-backed Thrush | 2010/2/2   | 5 | 0 | 24.40841711 | 118.30094510 | <a href="https://www.inaturalist.org/observations/18932422">https://www.inaturalist.org/observations/18932422</a>   |
| 82 | Turdus hortulorum | Grey-backed Thrush | 2013/2/17  | 2 | 0 | 24.44839901 | 118.37920810 | <a href="https://www.inaturalist.org/observations/56706681">https://www.inaturalist.org/observations/56706681</a>   |
| 83 | Turdus hortulorum | Grey-backed Thrush | 2018/12/27 | 4 | 0 | 24.46192262 | 118.30382130 | <a href="https://www.inaturalist.org/observations/25203907">https://www.inaturalist.org/observations/25203907</a>   |
| 84 | Turdus hortulorum | Grey-backed Thrush | 2021/2/14  | 1 | 0 | 24.88637540 | 118.66075180 | <a href="https://www.inaturalist.org/observations/69597736">https://www.inaturalist.org/observations/69597736</a>   |
| 85 | Turdus hortulorum | Grey-backed Thrush | 2021/12/22 | 1 | 0 | 24.99671173 | 113.02322180 | <a href="https://www.inaturalist.org/observations/103631537">https://www.inaturalist.org/observations/103631537</a> |
| 86 | Turdus hortulorum | Grey-backed Thrush | 2021/12/9  | 2 | 0 | 25.03185110 | 121.50945930 | <a href="https://www.inaturalist.org/observations/102766898">https://www.inaturalist.org/observations/102766898</a> |
| 87 | Turdus hortulorum | Grey-backed Thrush | 2022/3/18  | 2 | 0 | 25.03185509 | 121.50945930 | <a href="https://www.inaturalist.org/observations/108861369">https://www.inaturalist.org/observations/108861369</a> |
| 88 | Turdus hortulorum | Grey-backed Thrush | 2022/3/25  | 0 | 0 | 25.03198420 | 121.50951860 | <a href="https://www.inaturalist.org/observations/109448232">https://www.inaturalist.org/observations/109448232</a> |
| 89 | Turdus hortulorum | Grey-backed Thrush | 2018/10/17 | 1 | 0 | 25.98576300 | 105.66899440 | <a href="https://www.inaturalist.org/observations/17640315">https://www.inaturalist.org/observations/17640315</a>   |
| 90 | Turdus hortulorum | Grey-backed Thrush | 2014/4/3   | 1 | 0 | 26.15154730 | 119.29753300 | <a href="http://inaturalist.ca/observations/5277937">http://inaturalist.ca/observations/5277937</a>                 |
| 91 | Turdus hortulorum | Grey-backed Thrush | 2019/4/15  | 2 | 0 | 26.15558702 | 119.93311540 | <a href="https://www.inaturalist.org/observations/22945865">https://www.inaturalist.org/observations/22945865</a>   |

|     |                   |                    |            |   |   |             |              |                                                                                                                     |
|-----|-------------------|--------------------|------------|---|---|-------------|--------------|---------------------------------------------------------------------------------------------------------------------|
| 92  | Turdus hortulorum | Grey-backed Thrush | 2022/4/8   | 1 | 0 | 26.44171589 | 106.61461920 | <a href="https://www.inaturalist.org/observations/112042643">https://www.inaturalist.org/observations/112042643</a> |
| 93  | Turdus hortulorum | Grey-backed Thrush | 2021/2/1   | 1 | 0 | 26.91528667 | 112.67231670 | <a href="https://www.inaturalist.org/observations/69599234">https://www.inaturalist.org/observations/69599234</a>   |
| 94  | Turdus hortulorum | Grey-backed Thrush | 2022/2/11  | 1 | 0 | 28.10281989 | 112.98402670 | <a href="https://www.inaturalist.org/observations/106541910">https://www.inaturalist.org/observations/106541910</a> |
| 95  | Turdus hortulorum | Grey-backed Thrush | 2022/2/21  | 1 | 0 | 28.10557752 | 112.99843470 | <a href="https://www.inaturalist.org/observations/107410938">https://www.inaturalist.org/observations/107410938</a> |
| 96  | Turdus hortulorum | Grey-backed Thrush | 2022/2/22  | 1 | 0 | 28.17604483 | 112.93631230 | <a href="https://www.inaturalist.org/observations/107411325">https://www.inaturalist.org/observations/107411325</a> |
| 97  | Turdus hortulorum | Grey-backed Thrush | 2022/2/21  | 1 | 0 | 28.20974673 | 112.99805850 | <a href="https://www.inaturalist.org/observations/107411309">https://www.inaturalist.org/observations/107411309</a> |
| 98  | Turdus hortulorum | Grey-backed Thrush | 2022/2/22  | 1 | 0 | 28.20974673 | 112.99805850 | <a href="https://www.inaturalist.org/observations/107549450">https://www.inaturalist.org/observations/107549450</a> |
| 99  | Turdus hortulorum | Grey-backed Thrush | 2008/11/16 | 1 | 0 | 28.37804400 | 117.44958800 | <a href="https://www.inaturalist.org/observations/65073345">https://www.inaturalist.org/observations/65073345</a>   |
| 100 | Turdus hortulorum | Grey-backed Thrush | 2022/2/17  | 1 | 0 | 29.21918306 | 117.86957180 | <a href="https://www.inaturalist.org/observations/107461198">https://www.inaturalist.org/observations/107461198</a> |
| 101 | Turdus hortulorum | Grey-backed Thrush | 2021/1/2   | 1 | 0 | 29.24790990 | 117.86192000 | <a href="https://www.inaturalist.org/observations/124003925">https://www.inaturalist.org/observations/124003925</a> |
| 102 | Turdus hortulorum | Grey-backed Thrush | 2019/1/10  | 1 | 0 | 29.39184900 | 118.03154700 | <a href="https://www.inaturalist.org/observations/34113064">https://www.inaturalist.org/observations/34113064</a>   |
| 103 | Turdus hortulorum | Grey-backed Thrush | 2021/11/6  | 1 | 0 | 29.79859459 | 121.56284760 | <a href="https://www.inaturalist.org/observations/100375871">https://www.inaturalist.org/observations/100375871</a> |
| 104 | Turdus hortulorum | Grey-backed Thrush | 2021/4/5   | 1 | 0 | 29.79869089 | 121.56304180 | <a href="https://www.inaturalist.org/observations/73255844">https://www.inaturalist.org/observations/73255844</a>   |
| 105 | Turdus hortulorum | Grey-backed Thrush | 2021/4/3   | 1 | 0 | 30.20783034 | 120.14222970 | <a href="https://www.inaturalist.org/observations/98085939">https://www.inaturalist.org/observations/98085939</a>   |
| 106 | Turdus hortulorum | Grey-backed Thrush | 2022/1/2   | 1 | 0 | 30.20844227 | 120.14087790 | <a href="https://www.inaturalist.org/observations/104175862">https://www.inaturalist.org/observations/104175862</a> |
| 107 | Turdus hortulorum | Grey-backed Thrush | 2022/1/4   | 1 | 0 | 30.20844227 | 120.14087790 | <a href="https://www.inaturalist.org/observations/104399887">https://www.inaturalist.org/observations/104399887</a> |
| 108 | Turdus hortulorum | Grey-backed Thrush | 2022/1/25  | 1 | 0 | 30.20844227 | 120.14087790 | <a href="https://www.inaturalist.org/observations/105666786">https://www.inaturalist.org/observations/105666786</a> |
| 109 | Turdus hortulorum | Grey-backed Thrush | 2022/1/30  | 1 | 0 | 30.20844227 | 120.14087790 | <a href="https://www.inaturalist.org/observations/105842595">https://www.inaturalist.org/observations/105842595</a> |
| 110 | Turdus hortulorum | Grey-backed Thrush | 2022/2/3   | 1 | 0 | 30.20844227 | 120.14087790 | <a href="https://www.inaturalist.org/observations/106355823">https://www.inaturalist.org/observations/106355823</a> |
| 111 | Turdus hortulorum | Grey-backed Thrush | 2022/2/11  | 1 | 0 | 30.20844227 | 120.14087790 | <a href="https://www.inaturalist.org/observations/106541833">https://www.inaturalist.org/observations/106541833</a> |
| 112 | Turdus hortulorum | Grey-backed Thrush | 2022/2/15  | 1 | 0 | 30.20844227 | 120.14087790 | <a href="https://www.inaturalist.org/observations/107367515">https://www.inaturalist.org/observations/107367515</a> |
| 113 | Turdus hortulorum | Grey-backed Thrush | 2022/3/19  | 1 | 0 | 30.20844227 | 120.14087790 | <a href="https://www.inaturalist.org/observations/110396710">https://www.inaturalist.org/observations/110396710</a> |
| 114 | Turdus hortulorum | Grey-backed Thrush | 2022/3/19  | 1 | 0 | 30.20844227 | 120.14087790 | <a href="https://www.inaturalist.org/observations/110396723">https://www.inaturalist.org/observations/110396723</a> |



|     |                   |                    |            |   |   |             |              |                                                                                                                     |
|-----|-------------------|--------------------|------------|---|---|-------------|--------------|---------------------------------------------------------------------------------------------------------------------|
| 115 | Turdus hortulorum | Grey-backed Thrush | 2022/4/7   | 1 | 0 | 30.20844227 | 120.14087790 | <a href="https://www.inaturalist.org/observations/112098976">https://www.inaturalist.org/observations/112098976</a> |
| 116 | Turdus hortulorum | Grey-backed Thrush | 2020/12/22 | 1 | 0 | 30.23166008 | 120.13327380 | <a href="https://www.inaturalist.org/observations/67171268">https://www.inaturalist.org/observations/67171268</a>   |
| 117 | Turdus hortulorum | Grey-backed Thrush | 2021/3/2   | 1 | 0 | 30.25146977 | 120.14238630 | <a href="https://www.inaturalist.org/observations/70442823">https://www.inaturalist.org/observations/70442823</a>   |
| 118 | Turdus hortulorum | Grey-backed Thrush | 2022/2/14  | 1 | 0 | 30.25146977 | 120.14238630 | <a href="https://www.inaturalist.org/observations/107410016">https://www.inaturalist.org/observations/107410016</a> |
| 119 | Turdus hortulorum | Grey-backed Thrush | 2021/3/20  | 1 | 0 | 30.25170664 | 120.14228470 | <a href="https://www.inaturalist.org/observations/71609647">https://www.inaturalist.org/observations/71609647</a>   |
| 120 | Turdus hortulorum | Grey-backed Thrush | 2021/4/4   | 1 | 0 | 30.25170664 | 120.14228470 | <a href="https://www.inaturalist.org/observations/98086800">https://www.inaturalist.org/observations/98086800</a>   |
| 121 | Turdus hortulorum | Grey-backed Thrush | 2021/2/27  | 1 | 0 | 30.25228241 | 120.12025340 | <a href="https://www.inaturalist.org/observations/70253333">https://www.inaturalist.org/observations/70253333</a>   |
| 122 | Turdus hortulorum | Grey-backed Thrush | 2021/3/24  | 1 | 0 | 30.25287338 | 120.12054200 | <a href="https://www.inaturalist.org/observations/74008077">https://www.inaturalist.org/observations/74008077</a>   |
| 123 | Turdus hortulorum | Grey-backed Thrush | 2011/2/26  | 1 | 0 | 30.25403400 | 120.12351500 | <a href="https://www.inaturalist.org/observations/27002663">https://www.inaturalist.org/observations/27002663</a>   |
| 124 | Turdus hortulorum | Grey-backed Thrush | 2012/3/13  | 1 | 0 | 30.25403400 | 120.12351500 | <a href="https://www.inaturalist.org/observations/27190863">https://www.inaturalist.org/observations/27190863</a>   |
| 125 | Turdus hortulorum | Grey-backed Thrush | 2022/1/1   | 1 | 0 | 30.25418228 | 120.12014610 | <a href="https://www.inaturalist.org/observations/104091079">https://www.inaturalist.org/observations/104091079</a> |
| 126 | Turdus hortulorum | Grey-backed Thrush | 2022/2/19  | 1 | 0 | 30.25418228 | 120.12014610 | <a href="https://www.inaturalist.org/observations/107367587">https://www.inaturalist.org/observations/107367587</a> |
| 127 | Turdus hortulorum | Grey-backed Thrush | 2022/4/11  | 1 | 0 | 30.25418228 | 120.12014610 | <a href="https://www.inaturalist.org/observations/111076118">https://www.inaturalist.org/observations/111076118</a> |
| 128 | Turdus hortulorum | Grey-backed Thrush | 2022/4/3   | 1 | 0 | 30.25418228 | 120.12014610 | <a href="https://www.inaturalist.org/observations/112027490">https://www.inaturalist.org/observations/112027490</a> |
| 129 | Turdus hortulorum | Grey-backed Thrush | 2022/4/4   | 1 | 0 | 30.25418228 | 120.12014610 | <a href="https://www.inaturalist.org/observations/112423762">https://www.inaturalist.org/observations/112423762</a> |
| 130 | Turdus hortulorum | Grey-backed Thrush | 2021/1/18  | 1 | 0 | 30.25428443 | 120.11703180 | <a href="https://www.inaturalist.org/observations/68394451">https://www.inaturalist.org/observations/68394451</a>   |
| 131 | Turdus hortulorum | Grey-backed Thrush | 2021/3/22  | 1 | 0 | 30.25461785 | 120.12195930 | <a href="https://www.inaturalist.org/observations/73729921">https://www.inaturalist.org/observations/73729921</a>   |
| 132 | Turdus hortulorum | Grey-backed Thrush | 2021/4/4   | 1 | 0 | 30.25465493 | 120.12171260 | <a href="https://www.inaturalist.org/observations/75429020">https://www.inaturalist.org/observations/75429020</a>   |
| 133 | Turdus hortulorum | Grey-backed Thrush | 2021/3/20  | 1 | 0 | 30.25471053 | 120.12273180 | <a href="https://www.inaturalist.org/observations/73729638">https://www.inaturalist.org/observations/73729638</a>   |
| 134 | Turdus hortulorum | Grey-backed Thrush | 2021/3/10  | 1 | 0 | 30.25737840 | 120.13768250 | <a href="https://www.inaturalist.org/observations/70916286">https://www.inaturalist.org/observations/70916286</a>   |
| 135 | Turdus hortulorum | Grey-backed Thrush | 2021/3/15  | 1 | 0 | 30.25737840 | 120.13768250 | <a href="https://www.inaturalist.org/observations/73728371">https://www.inaturalist.org/observations/73728371</a>   |
| 136 | Turdus hortulorum | Grey-backed Thrush | 2021/4/9   | 1 | 0 | 30.25737840 | 120.13768250 | <a href="https://www.inaturalist.org/observations/74398322">https://www.inaturalist.org/observations/74398322</a>   |
| 137 | Turdus hortulorum | Grey-backed Thrush | 2021/3/25  | 1 | 0 | 30.25737840 | 120.13768250 | <a href="https://www.inaturalist.org/observations/74707948">https://www.inaturalist.org/observations/74707948</a>   |

|     |                   |                    |            |   |   |             |              |                                                                                                                     |
|-----|-------------------|--------------------|------------|---|---|-------------|--------------|---------------------------------------------------------------------------------------------------------------------|
| 138 | Turdus hortulorum | Grey-backed Thrush | 2022/1/8   | 1 | 0 | 30.25737840 | 120.13768250 | <a href="https://www.inaturalist.org/observations/104623757">https://www.inaturalist.org/observations/104623757</a> |
| 139 | Turdus hortulorum | Grey-backed Thrush | 2022/1/19  | 0 | 0 | 30.25737840 | 120.13768250 | <a href="https://www.inaturalist.org/observations/105213275">https://www.inaturalist.org/observations/105213275</a> |
| 140 | Turdus hortulorum | Grey-backed Thrush | 2022/1/31  | 1 | 0 | 30.25737840 | 120.13768250 | <a href="https://www.inaturalist.org/observations/105970820">https://www.inaturalist.org/observations/105970820</a> |
| 141 | Turdus hortulorum | Grey-backed Thrush | 2021/3/2   | 1 | 0 | 30.26084422 | 120.14253200 | <a href="https://www.inaturalist.org/observations/70442430">https://www.inaturalist.org/observations/70442430</a>   |
| 142 | Turdus hortulorum | Grey-backed Thrush | 2022/2/2   | 1 | 0 | 30.33122548 | 120.13444080 | <a href="https://www.inaturalist.org/observations/106176083">https://www.inaturalist.org/observations/106176083</a> |
| 143 | Turdus hortulorum | Grey-backed Thrush | 2021/12/27 | 1 | 0 | 30.42819300 | 120.00581300 | <a href="https://www.inaturalist.org/observations/103751041">https://www.inaturalist.org/observations/103751041</a> |
| 144 | Turdus hortulorum | Grey-backed Thrush | 2020/12/9  | 1 | 0 | 30.53783998 | 114.36024900 | <a href="https://www.inaturalist.org/observations/113690199">https://www.inaturalist.org/observations/113690199</a> |
| 145 | Turdus hortulorum | Grey-backed Thrush | 2020/12/9  | 1 | 0 | 30.53783998 | 114.36024900 | <a href="https://www.inaturalist.org/observations/113690204">https://www.inaturalist.org/observations/113690204</a> |
| 146 | Turdus hortulorum | Grey-backed Thrush | 2018/3/6   | 1 | 0 | 31.04636417 | 121.22477100 | <a href="https://www.inaturalist.org/observations/10112399">https://www.inaturalist.org/observations/10112399</a>   |
| 147 | Turdus hortulorum | Grey-backed Thrush | 2019/4/17  | 1 | 0 | 31.14326700 | 121.44169700 | <a href="https://www.inaturalist.org/observations/22599286">https://www.inaturalist.org/observations/22599286</a>   |
| 148 | Turdus hortulorum | Grey-backed Thrush | 2021/4/5   | 1 | 0 | 31.14702600 | 121.44347520 | <a href="https://www.inaturalist.org/observations/73005089">https://www.inaturalist.org/observations/73005089</a>   |
| 149 | Turdus hortulorum | Grey-backed Thrush | 2022/1/21  | 1 | 0 | 31.21213400 | 121.54372400 | <a href="https://www.inaturalist.org/observations/105314255">https://www.inaturalist.org/observations/105314255</a> |
| 150 | Turdus hortulorum | Grey-backed Thrush | 2022/2/15  | 1 | 0 | 31.21213400 | 121.54372400 | <a href="https://www.inaturalist.org/observations/106788488">https://www.inaturalist.org/observations/106788488</a> |
| 151 | Turdus hortulorum | Grey-backed Thrush | 2020/11/15 | 1 | 0 | 31.21213400 | 121.54372400 | <a href="https://www.inaturalist.org/observations/109445420">https://www.inaturalist.org/observations/109445420</a> |
| 152 | Turdus hortulorum | Grey-backed Thrush | 2017/11/13 | 1 | 0 | 31.21524193 | 121.55261750 | <a href="https://www.inaturalist.org/observations/8847544">https://www.inaturalist.org/observations/8847544</a>     |
| 153 | Turdus hortulorum | Grey-backed Thrush | 2018/3/23  | 1 | 0 | 31.21539400 | 121.55215700 | <a href="https://www.inaturalist.org/observations/10373440">https://www.inaturalist.org/observations/10373440</a>   |
| 154 | Turdus hortulorum | Grey-backed Thrush | 2021/2/19  | 1 | 0 | 31.21539400 | 121.55215700 | <a href="https://www.inaturalist.org/observations/69812841">https://www.inaturalist.org/observations/69812841</a>   |
| 155 | Turdus hortulorum | Grey-backed Thrush | 2005/1/19  | 1 | 0 | 31.21539400 | 121.55215700 | <a href="https://www.inaturalist.org/observations/89739237">https://www.inaturalist.org/observations/89739237</a>   |
| 156 | Turdus hortulorum | Grey-backed Thrush | 2022/2/9   | 1 | 0 | 31.21743620 | 121.55574410 | <a href="https://www.inaturalist.org/observations/106604707">https://www.inaturalist.org/observations/106604707</a> |
| 157 | Turdus hortulorum | Grey-backed Thrush | 2019/2/24  | 1 | 0 | 31.24746369 | 121.49986000 | <a href="https://www.inaturalist.org/observations/21203767">https://www.inaturalist.org/observations/21203767</a>   |
| 158 | Turdus hortulorum | Grey-backed Thrush | 2022/2/1   | 1 | 0 | 31.25089922 | 121.44029740 | <a href="https://www.inaturalist.org/observations/105957234">https://www.inaturalist.org/observations/105957234</a> |
| 159 | Turdus hortulorum | Grey-backed Thrush | 2018/1/5   | 1 | 0 | 31.27265900 | 121.48354100 | <a href="https://www.inaturalist.org/observations/9371577">https://www.inaturalist.org/observations/9371577</a>     |
| 160 | Turdus hortulorum | Grey-backed Thrush | 2019/11/20 | 0 | 0 | 31.27312554 | 121.59144320 | <a href="https://www.inaturalist.org/observations/126947533">https://www.inaturalist.org/observations/126947533</a> |

|     |                   |                    |            |   |   |             |              |                                                                                                                     |
|-----|-------------------|--------------------|------------|---|---|-------------|--------------|---------------------------------------------------------------------------------------------------------------------|
| 161 | Turdus hortulorum | Grey-backed Thrush | 2022/3/10  | 1 | 0 | 31.28787000 | 121.49819170 | <a href="https://www.inaturalist.org/observations/108295076">https://www.inaturalist.org/observations/108295076</a> |
| 162 | Turdus hortulorum | Grey-backed Thrush | 2022/2/25  | 1 | 0 | 31.31755331 | 121.54290000 | <a href="https://www.inaturalist.org/observations/118162464">https://www.inaturalist.org/observations/118162464</a> |
| 163 | Turdus hortulorum | Grey-backed Thrush | 2022/2/25  | 1 | 0 | 31.31755331 | 121.54290000 | <a href="https://www.inaturalist.org/observations/118162467">https://www.inaturalist.org/observations/118162467</a> |
| 164 | Turdus hortulorum | Grey-backed Thrush | 2022/2/25  | 1 | 0 | 31.31755331 | 121.54290000 | <a href="https://www.inaturalist.org/observations/118162474">https://www.inaturalist.org/observations/118162474</a> |
| 165 | Turdus hortulorum | Grey-backed Thrush | 2021/12/2  | 1 | 0 | 31.31772900 | 121.54868630 | <a href="https://www.inaturalist.org/observations/102868004">https://www.inaturalist.org/observations/102868004</a> |
| 166 | Turdus hortulorum | Grey-backed Thrush | 2021/6/8   | 1 | 0 | 31.31772900 | 121.54868630 | <a href="https://www.inaturalist.org/observations/109620426">https://www.inaturalist.org/observations/109620426</a> |
| 167 | Turdus hortulorum | Grey-backed Thrush | 2013/3/29  | 1 | 0 | 31.31812222 | 121.54807220 | <a href="https://www.inaturalist.org/observations/53053135">https://www.inaturalist.org/observations/53053135</a>   |
| 168 | Turdus hortulorum | Grey-backed Thrush | 2022/2/25  | 1 | 0 | 31.32026833 | 121.54483160 | <a href="https://www.inaturalist.org/observations/118162522">https://www.inaturalist.org/observations/118162522</a> |
| 169 | Turdus hortulorum | Grey-backed Thrush | 2022/2/25  | 1 | 0 | 31.32026833 | 121.54483160 | <a href="https://www.inaturalist.org/observations/118162530">https://www.inaturalist.org/observations/118162530</a> |
| 170 | Turdus hortulorum | Grey-backed Thrush | 2022/2/25  | 1 | 0 | 31.32215664 | 121.54447000 | <a href="https://www.inaturalist.org/observations/118162515">https://www.inaturalist.org/observations/118162515</a> |
| 171 | Turdus hortulorum | Grey-backed Thrush | 2021/10/9  | 0 | 0 | 31.37517000 | 121.39860400 | <a href="https://www.inaturalist.org/observations/97623360">https://www.inaturalist.org/observations/97623360</a>   |
| 172 | Turdus hortulorum | Grey-backed Thrush | 2021/2/24  | 2 | 0 | 31.38438401 | 121.52799110 | <a href="https://www.inaturalist.org/observations/70084003">https://www.inaturalist.org/observations/70084003</a>   |
| 173 | Turdus hortulorum | Grey-backed Thrush | 2018/2/1   | 1 | 0 | 31.38484070 | 121.52915000 | <a href="https://www.inaturalist.org/observations/9691160">https://www.inaturalist.org/observations/9691160</a>     |
| 174 | Turdus hortulorum | Grey-backed Thrush | 2022/2/28  | 1 | 0 | 31.38500497 | 121.52632670 | <a href="https://www.inaturalist.org/observations/118162607">https://www.inaturalist.org/observations/118162607</a> |
| 175 | Turdus hortulorum | Grey-backed Thrush | 2022/2/28  | 1 | 0 | 31.38811500 | 121.52207330 | <a href="https://www.inaturalist.org/observations/118162644">https://www.inaturalist.org/observations/118162644</a> |
| 176 | Turdus hortulorum | Grey-backed Thrush | 2022/2/28  | 1 | 0 | 31.38836000 | 121.52247160 | <a href="https://www.inaturalist.org/observations/118162639">https://www.inaturalist.org/observations/118162639</a> |
| 177 | Turdus hortulorum | Grey-backed Thrush | 2022/2/28  | 1 | 0 | 31.38885997 | 121.52288830 | <a href="https://www.inaturalist.org/observations/118162637">https://www.inaturalist.org/observations/118162637</a> |
| 178 | Turdus hortulorum | Grey-backed Thrush | 2021/1/3   | 0 | 0 | 31.40000000 | 119.40000000 | <a href="https://www.inaturalist.org/observations/69644765">https://www.inaturalist.org/observations/69644765</a>   |
| 179 | Turdus hortulorum | Grey-backed Thrush | 2021/1/13  | 1 | 0 | 31.44935538 | 120.32471440 | <a href="https://www.inaturalist.org/observations/67995854">https://www.inaturalist.org/observations/67995854</a>   |
| 180 | Turdus hortulorum | Grey-backed Thrush | 2021/1/13  | 1 | 0 | 31.90472969 | 118.88530120 | <a href="https://www.inaturalist.org/observations/101868137">https://www.inaturalist.org/observations/101868137</a> |
| 181 | Turdus hortulorum | Grey-backed Thrush | 2021/10/9  | 1 | 0 | 31.98323667 | 118.77949500 | <a href="https://www.inaturalist.org/observations/97652192">https://www.inaturalist.org/observations/97652192</a>   |
| 182 | Turdus hortulorum | Grey-backed Thrush | 2021/10/18 | 1 | 0 | 31.98334500 | 118.77963830 | <a href="https://www.inaturalist.org/observations/98588573">https://www.inaturalist.org/observations/98588573</a>   |
| 183 | Turdus hortulorum | Grey-backed Thrush | 2021/10/13 | 1 | 0 | 31.98379667 | 118.78027170 | <a href="https://www.inaturalist.org/observations/98077064">https://www.inaturalist.org/observations/98077064</a>   |

|     |                   |                    |            |   |   |             |              |                                                                                                                     |
|-----|-------------------|--------------------|------------|---|---|-------------|--------------|---------------------------------------------------------------------------------------------------------------------|
| 184 | Turdus hortulorum | Grey-backed Thrush | 2021/11/15 | 1 | 0 | 31.98453667 | 118.77990830 | <a href="https://www.inaturalist.org/observations/101175538">https://www.inaturalist.org/observations/101175538</a> |
| 185 | Turdus hortulorum | Grey-backed Thrush | 2021/12/2  | 1 | 0 | 32.00324861 | 118.78205080 | <a href="https://www.inaturalist.org/observations/102340921">https://www.inaturalist.org/observations/102340921</a> |
| 186 | Turdus hortulorum | Grey-backed Thrush | 2022/1/15  | 1 | 0 | 32.05179967 | 118.83541840 | <a href="https://www.inaturalist.org/observations/105187908">https://www.inaturalist.org/observations/105187908</a> |
| 187 | Turdus hortulorum | Grey-backed Thrush | 2021/1/11  | 1 | 0 | 32.05591333 | 118.83087670 | <a href="https://www.inaturalist.org/observations/88345511">https://www.inaturalist.org/observations/88345511</a>   |
| 188 | Turdus hortulorum | Grey-backed Thrush | 2021/10/12 | 1 | 0 | 32.05611667 | 118.73667830 | <a href="https://www.inaturalist.org/observations/98006741">https://www.inaturalist.org/observations/98006741</a>   |
| 189 | Turdus hortulorum | Grey-backed Thrush | 2022/1/15  | 1 | 0 | 32.05664279 | 118.83203070 | <a href="https://www.inaturalist.org/observations/105187913">https://www.inaturalist.org/observations/105187913</a> |
| 190 | Turdus hortulorum | Grey-backed Thrush | 2021/1/9   | 1 | 0 | 32.05842333 | 118.82998000 | <a href="https://www.inaturalist.org/observations/88345500">https://www.inaturalist.org/observations/88345500</a>   |
| 191 | Turdus hortulorum | Grey-backed Thrush | 2020/12/22 | 1 | 0 | 32.05857333 | 118.83292500 | <a href="https://www.inaturalist.org/observations/67798982">https://www.inaturalist.org/observations/67798982</a>   |
| 192 | Turdus hortulorum | Grey-backed Thrush | 2022/2/8   | 1 | 0 | 32.05952615 | 118.82296060 | <a href="https://www.inaturalist.org/observations/106380309">https://www.inaturalist.org/observations/106380309</a> |
| 193 | Turdus hortulorum | Grey-backed Thrush | 2022/2/12  | 1 | 0 | 32.06036907 | 118.82822000 | <a href="https://www.inaturalist.org/observations/106613364">https://www.inaturalist.org/observations/106613364</a> |
| 194 | Turdus hortulorum | Grey-backed Thrush | 2021/2/14  | 1 | 0 | 32.06687910 | 118.80432600 | <a href="https://www.inaturalist.org/observations/109620198">https://www.inaturalist.org/observations/109620198</a> |
| 195 | Turdus hortulorum | Grey-backed Thrush | 2020/4/12  | 1 | 0 | 36.20801333 | 120.40738330 | <a href="https://www.inaturalist.org/observations/41991914">https://www.inaturalist.org/observations/41991914</a>   |
| 196 | Turdus hortulorum | Grey-backed Thrush | 2019/10/11 | 1 | 0 | 36.36326900 | 120.68139100 | <a href="https://www.inaturalist.org/observations/104643973">https://www.inaturalist.org/observations/104643973</a> |
| 197 | Turdus hortulorum | Grey-backed Thrush | 2021/4/28  | 1 | 0 | 36.37422700 | 120.68453300 | <a href="https://www.inaturalist.org/observations/105426700">https://www.inaturalist.org/observations/105426700</a> |
| 198 | Turdus hortulorum | Grey-backed Thrush | 2022/2/8   | 1 | 0 | 39.92548799 | 116.38796420 | <a href="https://www.inaturalist.org/observations/116657618">https://www.inaturalist.org/observations/116657618</a> |
| 199 | Turdus hortulorum | Grey-backed Thrush | 2022/2/14  | 1 | 0 | 39.92855571 | 116.38940410 | <a href="https://www.inaturalist.org/observations/108574739">https://www.inaturalist.org/observations/108574739</a> |
| 200 | Turdus hortulorum | Grey-backed Thrush | 2018/8/29  | 1 | 0 | 43.28955533 | 129.81919210 | <a href="https://www.inaturalist.org/observations/16277813">https://www.inaturalist.org/observations/16277813</a>   |
| 201 | Turdus hortulorum | Grey-backed Thrush | 2018/8/29  | 1 | 0 | 43.32842146 | 129.75879400 | <a href="https://www.inaturalist.org/observations/16276930">https://www.inaturalist.org/observations/16276930</a>   |
| 202 | Turdus hortulorum | Grey-backed Thrush | 2018/9/3   | 2 | 0 | 43.32978704 | 129.75699050 | <a href="https://www.inaturalist.org/observations/16359451">https://www.inaturalist.org/observations/16359451</a>   |
| 203 | Turdus hortulorum | Grey-backed Thrush | 2013/6/5   | 1 | 0 | 45.40421921 | 127.65730360 | <a href="https://www.inaturalist.org/observations/18903547">https://www.inaturalist.org/observations/18903547</a>   |

| No | scientific name | common name      | date       | NIA | NID | latitude    | longitude    | url                                                                                                                 |
|----|-----------------|------------------|------------|-----|-----|-------------|--------------|---------------------------------------------------------------------------------------------------------------------|
| 1  | Turdus naumanni | Naumann's Thrush | 2021/1/7   | 1   | 0   | 21.85857188 | 111.97283500 | <a href="https://www.inaturalist.org/observations/67705382">https://www.inaturalist.org/observations/67705382</a>   |
| 2  | Turdus naumanni | Naumann's Thrush | 2021/12/28 | 2   | 0   | 22.11443415 | 113.57138600 | <a href="https://www.inaturalist.org/observations/106483846">https://www.inaturalist.org/observations/106483846</a> |
| 3  | Turdus naumanni | Naumann's Thrush | 2021/12/28 | 1   | 0   | 22.20062836 | 113.54794170 | <a href="https://www.inaturalist.org/observations/103810388">https://www.inaturalist.org/observations/103810388</a> |
| 4  | Turdus naumanni | Naumann's Thrush | 2020/2/11  | 0   | 0   | 22.70424470 | 120.29787860 | <a href="https://www.inaturalist.org/observations/38534283">https://www.inaturalist.org/observations/38534283</a>   |
| 5  | Turdus naumanni | Naumann's Thrush | 2020/2/23  | 2   | 0   | 22.92370365 | 120.30688820 | <a href="https://www.inaturalist.org/observations/43312574">https://www.inaturalist.org/observations/43312574</a>   |
| 6  | Turdus naumanni | Naumann's Thrush | 2021/12/14 | 3   | 0   | 23.02638692 | 113.42542350 | <a href="https://www.inaturalist.org/observations/103045502">https://www.inaturalist.org/observations/103045502</a> |
| 7  | Turdus naumanni | Naumann's Thrush | 2002/11/27 | 1   | 0   | 23.62036608 | 120.26168070 | <a href="https://www.inaturalist.org/observations/13942614">https://www.inaturalist.org/observations/13942614</a>   |
| 8  | Turdus naumanni | Naumann's Thrush | 2013/9/19  | 1   | 0   | 24.34500520 | 121.30820540 | <a href="https://www.inaturalist.org/observations/81721149">https://www.inaturalist.org/observations/81721149</a>   |
| 9  | Turdus naumanni | Naumann's Thrush | 2014/12/31 | 0   | 0   | 24.86637210 | 121.54978010 | <a href="https://www.inaturalist.org/observations/38755100">https://www.inaturalist.org/observations/38755100</a>   |
| 10 | Turdus naumanni | Naumann's Thrush | 2015/1/1   | 2   | 0   | 25.01868650 | 121.92372340 | <a href="https://www.inaturalist.org/observations/57601455">https://www.inaturalist.org/observations/57601455</a>   |
| 11 | Turdus naumanni | Naumann's Thrush | 2021/12/19 | 1   | 0   | 25.04101972 | 121.59267820 | <a href="https://www.inaturalist.org/observations/134568330">https://www.inaturalist.org/observations/134568330</a> |
| 12 | Turdus naumanni | Naumann's Thrush | 2017/3/18  | 1   | 0   | 25.09154318 | 121.55153450 | <a href="https://www.inaturalist.org/observations/16294672">https://www.inaturalist.org/observations/16294672</a>   |
| 13 | Turdus naumanni | Naumann's Thrush | 2004/12/5  | 1   | 0   | 25.14194162 | 121.79614760 | <a href="https://www.inaturalist.org/observations/27020445">https://www.inaturalist.org/observations/27020445</a>   |
| 14 | Turdus naumanni | Naumann's Thrush | 2020/2/12  | 0   | 0   | 25.22542102 | 121.64198990 | <a href="https://www.inaturalist.org/observations/38564904">https://www.inaturalist.org/observations/38564904</a>   |
| 15 | Turdus naumanni | Naumann's Thrush | 2020/2/13  | 2   | 0   | 25.22542193 | 121.64197680 | <a href="https://www.inaturalist.org/observations/40640433">https://www.inaturalist.org/observations/40640433</a>   |
| 16 | Turdus naumanni | Naumann's Thrush | 2022/3/7   | 1   | 0   | 25.22542555 | 121.64082890 | <a href="https://www.inaturalist.org/observations/131190601">https://www.inaturalist.org/observations/131190601</a> |
| 17 | Turdus naumanni | Naumann's Thrush | 2021/11/12 | 1   | 0   | 25.22568399 | 121.64205190 | <a href="https://www.inaturalist.org/observations/100932504">https://www.inaturalist.org/observations/100932504</a> |
| 18 | Turdus naumanni | Naumann's Thrush | 2020/2/22  | 2   | 0   | 25.22648390 | 121.64163520 | <a href="https://www.inaturalist.org/observations/110839827">https://www.inaturalist.org/observations/110839827</a> |
| 19 | Turdus naumanni | Naumann's Thrush | 2010/11/13 | 2   | 0   | 25.22652275 | 121.64174320 | <a href="https://www.inaturalist.org/observations/55754501">https://www.inaturalist.org/observations/55754501</a>   |
| 20 | Turdus naumanni | Naumann's Thrush | 2021/12/31 | 1   | 0   | 25.22667361 | 121.64093980 | <a href="https://www.inaturalist.org/observations/104337060">https://www.inaturalist.org/observations/104337060</a> |
| 21 | Turdus naumanni | Naumann's Thrush | 2020/2/23  | 1   | 0   | 25.22704666 | 121.64140540 | <a href="https://www.inaturalist.org/observations/39081665">https://www.inaturalist.org/observations/39081665</a>   |
| 22 | Turdus naumanni | Naumann's Thrush | 2022/2/25  | 1   | 0   | 26.42342173 | 106.36952590 | <a href="https://www.inaturalist.org/observations/109923793">https://www.inaturalist.org/observations/109923793</a> |

|    |                 |                  |            |   |   |             |              |                                                                                                                     |
|----|-----------------|------------------|------------|---|---|-------------|--------------|---------------------------------------------------------------------------------------------------------------------|
| 23 | Turdus naumanni | Naumann's Thrush | 2022/3/5   | 1 | 0 | 26.46619599 | 106.67869760 | <a href="https://www.inaturalist.org/observations/109998680">https://www.inaturalist.org/observations/109998680</a> |
| 24 | Turdus naumanni | Naumann's Thrush | 2022/3/28  | 0 | 0 | 26.46619599 | 106.67869760 | <a href="https://www.inaturalist.org/observations/110564288">https://www.inaturalist.org/observations/110564288</a> |
| 25 | Turdus naumanni | Naumann's Thrush | 2022/2/12  | 1 | 0 | 26.50934121 | 106.64975520 | <a href="https://www.inaturalist.org/observations/108779845">https://www.inaturalist.org/observations/108779845</a> |
| 26 | Turdus naumanni | Naumann's Thrush | 2022/1/26  | 1 | 0 | 29.55507900 | 106.63076600 | <a href="https://www.inaturalist.org/observations/118744008">https://www.inaturalist.org/observations/118744008</a> |
| 27 | Turdus naumanni | Naumann's Thrush | 2021/12/19 | 2 | 0 | 29.78793641 | 121.47344630 | <a href="https://www.inaturalist.org/observations/103338872">https://www.inaturalist.org/observations/103338872</a> |
| 28 | Turdus naumanni | Naumann's Thrush | 2022/1/10  | 1 | 0 | 30.20783034 | 120.14222970 | <a href="https://www.inaturalist.org/observations/104696988">https://www.inaturalist.org/observations/104696988</a> |
| 29 | Turdus naumanni | Naumann's Thrush | 2022/1/10  | 1 | 0 | 30.20783034 | 120.14222970 | <a href="https://www.inaturalist.org/observations/104696989">https://www.inaturalist.org/observations/104696989</a> |
| 30 | Turdus naumanni | Naumann's Thrush | 2022/1/10  | 1 | 0 | 30.20783034 | 120.14222970 | <a href="https://www.inaturalist.org/observations/104696996">https://www.inaturalist.org/observations/104696996</a> |
| 31 | Turdus naumanni | Naumann's Thrush | 2022/1/4   | 1 | 0 | 30.20844227 | 120.14087790 | <a href="https://www.inaturalist.org/observations/104399926">https://www.inaturalist.org/observations/104399926</a> |
| 32 | Turdus naumanni | Naumann's Thrush | 2022/1/25  | 1 | 0 | 30.20844227 | 120.14087790 | <a href="https://www.inaturalist.org/observations/105666762">https://www.inaturalist.org/observations/105666762</a> |
| 33 | Turdus naumanni | Naumann's Thrush | 2022/1/30  | 2 | 0 | 30.20844227 | 120.14087790 | <a href="https://www.inaturalist.org/observations/105842583">https://www.inaturalist.org/observations/105842583</a> |
| 34 | Turdus naumanni | Naumann's Thrush | 2022/2/3   | 0 | 0 | 30.20844227 | 120.14087790 | <a href="https://www.inaturalist.org/observations/106355828">https://www.inaturalist.org/observations/106355828</a> |
| 35 | Turdus naumanni | Naumann's Thrush | 2022/2/6   | 2 | 0 | 30.20844227 | 120.14087790 | <a href="https://www.inaturalist.org/observations/106368649">https://www.inaturalist.org/observations/106368649</a> |
| 36 | Turdus naumanni | Naumann's Thrush | 2022/2/11  | 1 | 0 | 30.20844227 | 120.14087790 | <a href="https://www.inaturalist.org/observations/106541813">https://www.inaturalist.org/observations/106541813</a> |
| 37 | Turdus naumanni | Naumann's Thrush | 2022/2/15  | 1 | 0 | 30.20844227 | 120.14087790 | <a href="https://www.inaturalist.org/observations/107367534">https://www.inaturalist.org/observations/107367534</a> |
| 38 | Turdus naumanni | Naumann's Thrush | 2022/3/11  | 1 | 0 | 30.20844227 | 120.14087790 | <a href="https://www.inaturalist.org/observations/108490827">https://www.inaturalist.org/observations/108490827</a> |
| 39 | Turdus naumanni | Naumann's Thrush | 2022/1/11  | 1 | 0 | 30.23864740 | 119.75016590 | <a href="https://www.inaturalist.org/observations/104852791">https://www.inaturalist.org/observations/104852791</a> |
| 40 | Turdus naumanni | Naumann's Thrush | 2021/12/23 | 2 | 0 | 30.25100000 | 120.11300000 | <a href="https://www.inaturalist.org/observations/103514709">https://www.inaturalist.org/observations/103514709</a> |
| 41 | Turdus naumanni | Naumann's Thrush | 2021/12/23 | 2 | 0 | 30.25100000 | 120.11300000 | <a href="https://www.inaturalist.org/observations/103514710">https://www.inaturalist.org/observations/103514710</a> |
| 42 | Turdus naumanni | Naumann's Thrush | 2021/2/2   | 1 | 0 | 30.25351764 | 120.11996840 | <a href="https://www.inaturalist.org/observations/68957006">https://www.inaturalist.org/observations/68957006</a>   |
| 43 | Turdus naumanni | Naumann's Thrush | 2022/1/16  | 2 | 0 | 30.25351764 | 120.11996840 | <a href="https://www.inaturalist.org/observations/106848894">https://www.inaturalist.org/observations/106848894</a> |
| 44 | Turdus naumanni | Naumann's Thrush | 2022/2/20  | 1 | 0 | 30.25351764 | 120.11996840 | <a href="https://www.inaturalist.org/observations/107103745">https://www.inaturalist.org/observations/107103745</a> |
| 45 | Turdus naumanni | Naumann's Thrush | 2021/12/23 | 1 | 0 | 30.25418228 | 120.12014610 | <a href="https://www.inaturalist.org/observations/103794938">https://www.inaturalist.org/observations/103794938</a> |

|    |                 |                  |            |   |   |             |              |                                                                                                                     |
|----|-----------------|------------------|------------|---|---|-------------|--------------|---------------------------------------------------------------------------------------------------------------------|
| 46 | Turdus naumanni | Naumann's Thrush | 2022/1/12  | 1 | 0 | 30.25418228 | 120.12014610 | <a href="https://www.inaturalist.org/observations/104855366">https://www.inaturalist.org/observations/104855366</a> |
| 47 | Turdus naumanni | Naumann's Thrush | 2022/1/12  | 1 | 0 | 30.25418228 | 120.12014610 | <a href="https://www.inaturalist.org/observations/104855386">https://www.inaturalist.org/observations/104855386</a> |
| 48 | Turdus naumanni | Naumann's Thrush | 2022/1/15  | 1 | 0 | 30.25418228 | 120.12014610 | <a href="https://www.inaturalist.org/observations/105041481">https://www.inaturalist.org/observations/105041481</a> |
| 49 | Turdus naumanni | Naumann's Thrush | 2022/1/20  | 1 | 0 | 30.25418228 | 120.12014610 | <a href="https://www.inaturalist.org/observations/105413426">https://www.inaturalist.org/observations/105413426</a> |
| 50 | Turdus naumanni | Naumann's Thrush | 2022/2/20  | 1 | 0 | 30.25418228 | 120.12014610 | <a href="https://www.inaturalist.org/observations/107367644">https://www.inaturalist.org/observations/107367644</a> |
| 51 | Turdus naumanni | Naumann's Thrush | 2021/1/20  | 2 | 0 | 30.25498524 | 120.11662890 | <a href="https://www.inaturalist.org/observations/68363400">https://www.inaturalist.org/observations/68363400</a>   |
| 52 | Turdus naumanni | Naumann's Thrush | 2021/12/15 | 2 | 0 | 30.34818400 | 119.94872400 | <a href="https://www.inaturalist.org/observations/103185124">https://www.inaturalist.org/observations/103185124</a> |
| 53 | Turdus naumanni | Naumann's Thrush | 2021/12/27 | 1 | 0 | 30.42819300 | 120.00581300 | <a href="https://www.inaturalist.org/observations/103751036">https://www.inaturalist.org/observations/103751036</a> |
| 54 | Turdus naumanni | Naumann's Thrush | 2019/11/9  | 1 | 0 | 30.52529055 | 114.43839150 | <a href="https://www.inaturalist.org/observations/109448390">https://www.inaturalist.org/observations/109448390</a> |
| 55 | Turdus naumanni | Naumann's Thrush | 2021/3/25  | 1 | 0 | 30.64171333 | 104.19906000 | <a href="https://www.inaturalist.org/observations/73201129">https://www.inaturalist.org/observations/73201129</a>   |
| 56 | Turdus naumanni | Naumann's Thrush | 2021/3/25  | 1 | 0 | 30.64171333 | 104.19906000 | <a href="https://www.inaturalist.org/observations/73201131">https://www.inaturalist.org/observations/73201131</a>   |
| 57 | Turdus naumanni | Naumann's Thrush | 2020/3/3   | 2 | 0 | 31.11642014 | 117.17876210 | <a href="https://www.inaturalist.org/observations/39490993">https://www.inaturalist.org/observations/39490993</a>   |
| 58 | Turdus naumanni | Naumann's Thrush | 2022/3/29  | 1 | 0 | 31.16397887 | 120.56726970 | <a href="https://www.inaturalist.org/observations/109965394">https://www.inaturalist.org/observations/109965394</a> |
| 59 | Turdus naumanni | Naumann's Thrush | 2022/2/10  | 2 | 0 | 31.21617185 | 121.55760510 | <a href="https://www.inaturalist.org/observations/106608156">https://www.inaturalist.org/observations/106608156</a> |
| 60 | Turdus naumanni | Naumann's Thrush | 2004/12/29 | 2 | 0 | 31.21763282 | 121.54915290 | <a href="https://www.inaturalist.org/observations/89754359">https://www.inaturalist.org/observations/89754359</a>   |
| 61 | Turdus naumanni | Naumann's Thrush | 2021/12/2  | 2 | 0 | 31.31772900 | 121.54868630 | <a href="https://www.inaturalist.org/observations/102867969">https://www.inaturalist.org/observations/102867969</a> |
| 62 | Turdus naumanni | Naumann's Thrush | 2022/2/4   | 2 | 0 | 31.34684204 | 118.44266510 | <a href="https://www.inaturalist.org/observations/106167210">https://www.inaturalist.org/observations/106167210</a> |
| 63 | Turdus naumanni | Naumann's Thrush | 2017/12/18 | 1 | 0 | 31.38316349 | 121.52881020 | <a href="https://www.inaturalist.org/observations/9200658">https://www.inaturalist.org/observations/9200658</a>     |
| 64 | Turdus naumanni | Naumann's Thrush | 2022/2/8   | 1 | 0 | 32.05952615 | 118.82296060 | <a href="https://www.inaturalist.org/observations/106380311">https://www.inaturalist.org/observations/106380311</a> |
| 65 | Turdus naumanni | Naumann's Thrush | 2022/2/16  | 2 | 0 | 32.06135600 | 118.85054900 | <a href="https://www.inaturalist.org/observations/106863062">https://www.inaturalist.org/observations/106863062</a> |
| 66 | Turdus naumanni | Naumann's Thrush | 2022/2/4   | 2 | 0 | 32.06592500 | 118.85107660 | <a href="https://www.inaturalist.org/observations/106126541">https://www.inaturalist.org/observations/106126541</a> |
| 67 | Turdus naumanni | Naumann's Thrush | 2022/2/4   | 2 | 0 | 32.06607828 | 118.85119160 | <a href="https://www.inaturalist.org/observations/106126542">https://www.inaturalist.org/observations/106126542</a> |
| 68 | Turdus naumanni | Naumann's Thrush | 2022/2/4   | 1 | 0 | 32.06618905 | 118.85115420 | <a href="https://www.inaturalist.org/observations/106110730">https://www.inaturalist.org/observations/106110730</a> |

|    |                 |                  |            |   |   |             |              |                                                                                                                     |
|----|-----------------|------------------|------------|---|---|-------------|--------------|---------------------------------------------------------------------------------------------------------------------|
| 69 | Turdus naumanni | Naumann's Thrush | 2022/2/4   | 1 | 0 | 32.06775331 | 118.85122160 | <a href="https://www.inaturalist.org/observations/106126537">https://www.inaturalist.org/observations/106126537</a> |
| 70 | Turdus naumanni | Naumann's Thrush | 2021/12/18 | 1 | 0 | 34.58995167 | 113.85027000 | <a href="https://www.inaturalist.org/observations/103303890">https://www.inaturalist.org/observations/103303890</a> |
| 71 | Turdus naumanni | Naumann's Thrush | 2021/12/18 | 2 | 0 | 34.59027833 | 113.84974830 | <a href="https://www.inaturalist.org/observations/103303904">https://www.inaturalist.org/observations/103303904</a> |
| 72 | Turdus naumanni | Naumann's Thrush | 2022/2/26  | 1 | 0 | 34.59668990 | 119.22295000 | <a href="https://www.inaturalist.org/observations/123641099">https://www.inaturalist.org/observations/123641099</a> |
| 73 | Turdus naumanni | Naumann's Thrush | 2021/1/29  | 1 | 0 | 34.76790997 | 113.62367730 | <a href="https://www.inaturalist.org/observations/68754689">https://www.inaturalist.org/observations/68754689</a>   |
| 74 | Turdus naumanni | Naumann's Thrush | 2022/1/31  | 2 | 0 | 34.77861500 | 113.72159000 | <a href="https://www.inaturalist.org/observations/105905320">https://www.inaturalist.org/observations/105905320</a> |
| 75 | Turdus naumanni | Naumann's Thrush | 2022/3/4   | 1 | 0 | 34.81490167 | 113.70883330 | <a href="https://www.inaturalist.org/observations/108234002">https://www.inaturalist.org/observations/108234002</a> |
| 76 | Turdus naumanni | Naumann's Thrush | 2021/1/13  | 1 | 0 | 34.81545833 | 113.70822670 | <a href="https://www.inaturalist.org/observations/68029902">https://www.inaturalist.org/observations/68029902</a>   |
| 77 | Turdus naumanni | Naumann's Thrush | 2021/1/13  | 1 | 0 | 34.81562081 | 113.71037950 | <a href="https://www.inaturalist.org/observations/68029899">https://www.inaturalist.org/observations/68029899</a>   |
| 78 | Turdus naumanni | Naumann's Thrush | 2021/1/10  | 1 | 0 | 34.81588333 | 113.70836330 | <a href="https://www.inaturalist.org/observations/67841451">https://www.inaturalist.org/observations/67841451</a>   |
| 79 | Turdus naumanni | Naumann's Thrush | 2022/3/9   | 1 | 0 | 36.05959247 | 120.35637690 | <a href="https://www.inaturalist.org/observations/108353590">https://www.inaturalist.org/observations/108353590</a> |
| 80 | Turdus naumanni | Naumann's Thrush | 2021/11/9  | 1 | 0 | 36.06377077 | 120.36223750 | <a href="https://www.inaturalist.org/observations/103674550">https://www.inaturalist.org/observations/103674550</a> |
| 81 | Turdus naumanni | Naumann's Thrush | 2022/2/27  | 1 | 0 | 36.36150833 | 120.68352500 | <a href="https://www.inaturalist.org/observations/107545042">https://www.inaturalist.org/observations/107545042</a> |
| 82 | Turdus naumanni | Naumann's Thrush | 2022/1/6   | 1 | 0 | 36.36588333 | 120.68325830 | <a href="https://www.inaturalist.org/observations/104442047">https://www.inaturalist.org/observations/104442047</a> |
| 83 | Turdus naumanni | Naumann's Thrush | 2022/2/22  | 1 | 0 | 36.36680000 | 120.68242000 | <a href="https://www.inaturalist.org/observations/109511647">https://www.inaturalist.org/observations/109511647</a> |
| 84 | Turdus naumanni | Naumann's Thrush | 2020/12/22 | 1 | 0 | 36.37624100 | 120.68065900 | <a href="https://www.inaturalist.org/observations/105353916">https://www.inaturalist.org/observations/105353916</a> |
| 85 | Turdus naumanni | Naumann's Thrush | 2021/2/10  | 2 | 0 | 39.56733554 | 118.14572130 | <a href="https://www.inaturalist.org/observations/78557337">https://www.inaturalist.org/observations/78557337</a>   |
| 86 | Turdus naumanni | Naumann's Thrush | 2022/1/12  | 1 | 0 | 39.88222674 | 116.41067190 | <a href="https://www.inaturalist.org/observations/121597812">https://www.inaturalist.org/observations/121597812</a> |
| 87 | Turdus naumanni | Naumann's Thrush | 2022/5/2   | 1 | 0 | 39.88727332 | 116.41028880 | <a href="https://www.inaturalist.org/observations/115225627">https://www.inaturalist.org/observations/115225627</a> |
| 88 | Turdus naumanni | Naumann's Thrush | 2022/4/17  | 1 | 0 | 39.88748448 | 116.40919310 | <a href="https://www.inaturalist.org/observations/114949096">https://www.inaturalist.org/observations/114949096</a> |
| 89 | Turdus naumanni | Naumann's Thrush | 2020/1/5   | 2 | 0 | 39.91488311 | 116.32693900 | <a href="https://www.inaturalist.org/observations/37422996">https://www.inaturalist.org/observations/37422996</a>   |
| 90 | Turdus naumanni | Naumann's Thrush | 2019/11/28 | 2 | 0 | 39.99415920 | 116.20725660 | <a href="https://www.inaturalist.org/observations/36187502">https://www.inaturalist.org/observations/36187502</a>   |
| 91 | Turdus naumanni | Naumann's Thrush | 2021/2/21  | 1 | 0 | 39.99421162 | 116.20549010 | <a href="https://www.inaturalist.org/observations/69986320">https://www.inaturalist.org/observations/69986320</a>   |



|     |                 |                  |            |   |   |             |              |                                                                                                                     |
|-----|-----------------|------------------|------------|---|---|-------------|--------------|---------------------------------------------------------------------------------------------------------------------|
| 92  | Turdus naumanni | Naumann's Thrush | 2019/11/28 | 2 | 0 | 39.99550487 | 116.20556410 | <a href="https://www.inaturalist.org/observations/36187507">https://www.inaturalist.org/observations/36187507</a>   |
| 93  | Turdus naumanni | Naumann's Thrush | 2022/1/27  | 1 | 0 | 40.00331587 | 116.20978110 | <a href="https://www.inaturalist.org/observations/116657470">https://www.inaturalist.org/observations/116657470</a> |
| 94  | Turdus naumanni | Naumann's Thrush | 2021/2/7   | 1 | 0 | 40.00345684 | 116.32293160 | <a href="https://www.inaturalist.org/observations/69483384">https://www.inaturalist.org/observations/69483384</a>   |
| 95  | Turdus naumanni | Naumann's Thrush | 2021/2/15  | 1 | 0 | 40.01083171 | 116.30049980 | <a href="https://www.inaturalist.org/observations/69921392">https://www.inaturalist.org/observations/69921392</a>   |
| 96  | Turdus naumanni | Naumann's Thrush | 2019/11/24 | 1 | 0 | 40.01388159 | 116.38902280 | <a href="https://www.inaturalist.org/observations/67797376">https://www.inaturalist.org/observations/67797376</a>   |
| 97  | Turdus naumanni | Naumann's Thrush | 2019/11/24 | 1 | 0 | 40.01398406 | 116.38894440 | <a href="https://www.inaturalist.org/observations/67797374">https://www.inaturalist.org/observations/67797374</a>   |
| 98  | Turdus naumanni | Naumann's Thrush | 2020/1/4   | 2 | 0 | 40.01496486 | 116.38761500 | <a href="https://www.inaturalist.org/observations/37397866">https://www.inaturalist.org/observations/37397866</a>   |
| 99  | Turdus naumanni | Naumann's Thrush | 2017/11/26 | 1 | 0 | 40.01505130 | 116.38009900 | <a href="https://www.inaturalist.org/observations/64268574">https://www.inaturalist.org/observations/64268574</a>   |
| 100 | Turdus naumanni | Naumann's Thrush | 2022/3/26  | 1 | 0 | 40.01539835 | 116.66084750 | <a href="https://www.inaturalist.org/observations/109527490">https://www.inaturalist.org/observations/109527490</a> |
| 101 | Turdus naumanni | Naumann's Thrush | 2022/3/26  | 1 | 0 | 40.01548159 | 116.66016250 | <a href="https://www.inaturalist.org/observations/109527480">https://www.inaturalist.org/observations/109527480</a> |
| 102 | Turdus naumanni | Naumann's Thrush | 2021/2/27  | 1 | 0 | 40.13396191 | 116.26977790 | <a href="https://www.inaturalist.org/observations/70657632">https://www.inaturalist.org/observations/70657632</a>   |
| 103 | Turdus naumanni | Naumann's Thrush | 2018/11/10 | 1 | 0 | 40.17350667 | 116.79314170 | <a href="https://www.inaturalist.org/observations/18326804">https://www.inaturalist.org/observations/18326804</a>   |
| 104 | Turdus naumanni | Naumann's Thrush | 2022/1/30  | 2 | 0 | 40.23233385 | 116.68778720 | <a href="https://www.inaturalist.org/observations/105887367">https://www.inaturalist.org/observations/105887367</a> |
| 105 | Turdus naumanni | Naumann's Thrush | 2019/2/6   | 2 | 0 | 40.26764333 | 116.82756670 | <a href="https://www.inaturalist.org/observations/20152587">https://www.inaturalist.org/observations/20152587</a>   |
| 106 | Turdus naumanni | Naumann's Thrush | 2020/1/5   | 1 | 0 | 40.27967833 | 116.83536170 | <a href="https://www.inaturalist.org/observations/37299557">https://www.inaturalist.org/observations/37299557</a>   |
| 107 | Turdus naumanni | Naumann's Thrush | 2019/2/6   | 1 | 0 | 40.28013667 | 116.82893330 | <a href="https://www.inaturalist.org/observations/20152543">https://www.inaturalist.org/observations/20152543</a>   |
| 108 | Turdus naumanni | Naumann's Thrush | 2019/3/17  | 1 | 0 | 40.28044452 | 116.83515140 | <a href="https://www.inaturalist.org/observations/21316305">https://www.inaturalist.org/observations/21316305</a>   |
| 109 | Turdus naumanni | Naumann's Thrush | 2018/11/24 | 1 | 0 | 40.28168833 | 116.83399830 | <a href="https://www.inaturalist.org/observations/18597117">https://www.inaturalist.org/observations/18597117</a>   |
| 110 | Turdus naumanni | Naumann's Thrush | 2021/2/10  | 2 | 0 | 40.55339293 | 116.91408860 | <a href="https://www.inaturalist.org/observations/69360613">https://www.inaturalist.org/observations/69360613</a>   |
| 111 | Turdus naumanni | Naumann's Thrush | 2017/3/31  | 1 | 0 | 40.55604332 | 122.41676280 | <a href="https://www.inaturalist.org/observations/76991042">https://www.inaturalist.org/observations/76991042</a>   |
| 112 | Turdus naumanni | Naumann's Thrush | 2022/2/5   | 1 | 0 | 40.58656757 | 117.13826510 | <a href="https://www.inaturalist.org/observations/125106563">https://www.inaturalist.org/observations/125106563</a> |

| No | scientific name | common name | date       | NIA | NID | latitude    | longitude    | url                                                                                                                 |
|----|-----------------|-------------|------------|-----|-----|-------------|--------------|---------------------------------------------------------------------------------------------------------------------|
| 1  | Turdus pallidus | Pale Thrush | 2019/12/27 | 0   | 0   | 21.96188014 | 120.81089970 | <a href="https://www.inaturalist.org/observations/37395291">https://www.inaturalist.org/observations/37395291</a>   |
| 2  | Turdus pallidus | Pale Thrush | 2014/3/10  | 1   | 0   | 22.02192062 | 121.56798740 | <a href="https://www.inaturalist.org/observations/92678648">https://www.inaturalist.org/observations/92678648</a>   |
| 3  | Turdus pallidus | Pale Thrush | 2021/11/27 | 1   | 0   | 22.16509096 | 114.25485530 | <a href="https://www.inaturalist.org/observations/102013256">https://www.inaturalist.org/observations/102013256</a> |
| 4  | Turdus pallidus | Pale Thrush | 2021/11/30 | 1   | 0   | 22.16881059 | 114.25871910 | <a href="https://www.inaturalist.org/observations/102232722">https://www.inaturalist.org/observations/102232722</a> |
| 5  | Turdus pallidus | Pale Thrush | 2018/2/18  | 1   | 0   | 22.27733500 | 114.13576050 | <a href="https://www.inaturalist.org/observations/9903380">https://www.inaturalist.org/observations/9903380</a>     |
| 6  | Turdus pallidus | Pale Thrush | 2016/3/3   | 2   | 0   | 22.28166737 | 114.13736630 | <a href="https://www.inaturalist.org/observations/9876152">https://www.inaturalist.org/observations/9876152</a>     |
| 7  | Turdus pallidus | Pale Thrush | 2022/2/19  | 1   | 0   | 22.33594676 | 114.13686670 | <a href="https://www.inaturalist.org/observations/107926772">https://www.inaturalist.org/observations/107926772</a> |
| 8  | Turdus pallidus | Pale Thrush | 2011/3/24  | 1   | 0   | 22.35567100 | 114.13263700 | <a href="https://www.inaturalist.org/observations/27792148">https://www.inaturalist.org/observations/27792148</a>   |
| 9  | Turdus pallidus | Pale Thrush | 2022/2/26  | 1   | 0   | 22.40279667 | 114.16622500 | <a href="https://www.inaturalist.org/observations/107463119">https://www.inaturalist.org/observations/107463119</a> |
| 10 | Turdus pallidus | Pale Thrush | 2011/2/24  | 1   | 0   | 22.40865000 | 114.03307500 | <a href="https://www.inaturalist.org/observations/30091273">https://www.inaturalist.org/observations/30091273</a>   |
| 11 | Turdus pallidus | Pale Thrush | 2011/1/30  | 1   | 0   | 22.43815000 | 114.07151600 | <a href="https://www.inaturalist.org/observations/30287296">https://www.inaturalist.org/observations/30287296</a>   |
| 12 | Turdus pallidus | Pale Thrush | 2022/2/16  | 2   | 0   | 22.44453760 | 114.02220760 | <a href="https://www.inaturalist.org/observations/136893309">https://www.inaturalist.org/observations/136893309</a> |
| 13 | Turdus pallidus | Pale Thrush | 2022/3/30  | 2   | 0   | 22.45258057 | 114.18453790 | <a href="https://www.inaturalist.org/observations/109909575">https://www.inaturalist.org/observations/109909575</a> |
| 14 | Turdus pallidus | Pale Thrush | 2013/1/19  | 1   | 0   | 22.50879520 | 114.11297710 | <a href="https://www.inaturalist.org/observations/19815419">https://www.inaturalist.org/observations/19815419</a>   |
| 15 | Turdus pallidus | Pale Thrush | 2020/2/7   | 0   | 0   | 22.61410225 | 120.26509420 | <a href="https://www.inaturalist.org/observations/38386671">https://www.inaturalist.org/observations/38386671</a>   |
| 16 | Turdus pallidus | Pale Thrush | 2021/2/2   | 1   | 0   | 22.61607088 | 120.37693980 | <a href="https://www.inaturalist.org/observations/69001849">https://www.inaturalist.org/observations/69001849</a>   |
| 17 | Turdus pallidus | Pale Thrush | 2020/2/22  | 1   | 0   | 22.63981081 | 120.27409250 | <a href="https://www.inaturalist.org/observations/80225491">https://www.inaturalist.org/observations/80225491</a>   |
| 18 | Turdus pallidus | Pale Thrush | 2021/12/23 | 2   | 0   | 22.65825277 | 120.28459990 | <a href="https://www.inaturalist.org/observations/134935520">https://www.inaturalist.org/observations/134935520</a> |
| 19 | Turdus pallidus | Pale Thrush | 2017/1/22  | 1   | 0   | 22.73145107 | 120.31274550 | <a href="https://www.inaturalist.org/observations/14442416">https://www.inaturalist.org/observations/14442416</a>   |
| 20 | Turdus pallidus | Pale Thrush | 2019/12/7  | 1   | 0   | 22.89845033 | 120.66470400 | <a href="https://www.inaturalist.org/observations/89329258">https://www.inaturalist.org/observations/89329258</a>   |
| 21 | Turdus pallidus | Pale Thrush | 2020/4/16  | 1   | 0   | 22.90554958 | 120.66434060 | <a href="https://www.inaturalist.org/observations/90026905">https://www.inaturalist.org/observations/90026905</a>   |
| 22 | Turdus pallidus | Pale Thrush | 2017/3/26  | 1   | 0   | 23.00276800 | 120.15415150 | <a href="https://www.inaturalist.org/observations/16286628">https://www.inaturalist.org/observations/16286628</a>   |

|    |                 |             |            |   |   |             |              |                                                                                                                     |
|----|-----------------|-------------|------------|---|---|-------------|--------------|---------------------------------------------------------------------------------------------------------------------|
| 23 | Turdus pallidus | Pale Thrush | 2019/4/13  | 1 | 0 | 23.26773080 | 120.50119040 | <a href="https://www.inaturalist.org/observations/22407262">https://www.inaturalist.org/observations/22407262</a>   |
| 24 | Turdus pallidus | Pale Thrush | 2022/4/10  | 1 | 0 | 23.33695639 | 121.31001760 | <a href="https://www.inaturalist.org/observations/112095199">https://www.inaturalist.org/observations/112095199</a> |
| 25 | Turdus pallidus | Pale Thrush | 2015/1/28  | 1 | 0 | 23.40655910 | 120.65028920 | <a href="https://www.inaturalist.org/observations/35295918">https://www.inaturalist.org/observations/35295918</a>   |
| 26 | Turdus pallidus | Pale Thrush | 2021/3/5   | 2 | 0 | 23.45327587 | 120.56029010 | <a href="https://www.inaturalist.org/observations/70604808">https://www.inaturalist.org/observations/70604808</a>   |
| 27 | Turdus pallidus | Pale Thrush | 2021/1/13  | 1 | 0 | 23.46278000 | 120.49626170 | <a href="https://www.inaturalist.org/observations/67984695">https://www.inaturalist.org/observations/67984695</a>   |
| 28 | Turdus pallidus | Pale Thrush | 2017/2/2   | 1 | 0 | 23.47773728 | 120.70685980 | <a href="https://www.inaturalist.org/observations/91251793">https://www.inaturalist.org/observations/91251793</a>   |
| 29 | Turdus pallidus | Pale Thrush | 2017/2/2   | 1 | 0 | 23.47777665 | 120.70602300 | <a href="https://www.inaturalist.org/observations/91251794">https://www.inaturalist.org/observations/91251794</a>   |
| 30 | Turdus pallidus | Pale Thrush | 2021/1/31  | 2 | 0 | 23.50713139 | 120.82317810 | <a href="https://www.inaturalist.org/observations/68849815">https://www.inaturalist.org/observations/68849815</a>   |
| 31 | Turdus pallidus | Pale Thrush | 2021/1/31  | 1 | 0 | 23.50794500 | 120.82322310 | <a href="https://www.inaturalist.org/observations/68850013">https://www.inaturalist.org/observations/68850013</a>   |
| 32 | Turdus pallidus | Pale Thrush | 2020/12/26 | 1 | 0 | 23.51006806 | 120.82349310 | <a href="https://www.inaturalist.org/observations/67194528">https://www.inaturalist.org/observations/67194528</a>   |
| 33 | Turdus pallidus | Pale Thrush | 2013/2/17  | 1 | 0 | 23.51598466 | 120.81033260 | <a href="https://www.inaturalist.org/observations/56710789">https://www.inaturalist.org/observations/56710789</a>   |
| 34 | Turdus pallidus | Pale Thrush | 2020/12/3  | 2 | 0 | 23.58633100 | 120.69443600 | <a href="https://www.inaturalist.org/observations/66024361">https://www.inaturalist.org/observations/66024361</a>   |
| 35 | Turdus pallidus | Pale Thrush | 2013/2/8   | 1 | 0 | 23.62002270 | 120.26090940 | <a href="https://www.inaturalist.org/observations/13203113">https://www.inaturalist.org/observations/13203113</a>   |
| 36 | Turdus pallidus | Pale Thrush | 2021/1/27  | 1 | 0 | 23.62034500 | 120.26121670 | <a href="https://www.inaturalist.org/observations/85719378">https://www.inaturalist.org/observations/85719378</a>   |
| 37 | Turdus pallidus | Pale Thrush | 2013/2/8   | 1 | 0 | 23.62044466 | 120.26125860 | <a href="https://www.inaturalist.org/observations/51957250">https://www.inaturalist.org/observations/51957250</a>   |
| 38 | Turdus pallidus | Pale Thrush | 2021/2/4   | 1 | 0 | 23.62048378 | 120.26137330 | <a href="https://www.inaturalist.org/observations/69036816">https://www.inaturalist.org/observations/69036816</a>   |
| 39 | Turdus pallidus | Pale Thrush | 2021/1/8   | 1 | 0 | 23.62051667 | 120.26140500 | <a href="https://www.inaturalist.org/observations/67746147">https://www.inaturalist.org/observations/67746147</a>   |
| 40 | Turdus pallidus | Pale Thrush | 2021/1/18  | 1 | 0 | 23.62051962 | 120.26141550 | <a href="https://www.inaturalist.org/observations/68253486">https://www.inaturalist.org/observations/68253486</a>   |
| 41 | Turdus pallidus | Pale Thrush | 2015/1/27  | 1 | 0 | 23.72630777 | 120.62325220 | <a href="https://www.inaturalist.org/observations/19484911">https://www.inaturalist.org/observations/19484911</a>   |
| 42 | Turdus pallidus | Pale Thrush | 2016/4/9   | 1 | 0 | 23.74208311 | 119.61385510 | <a href="https://www.inaturalist.org/observations/42367993">https://www.inaturalist.org/observations/42367993</a>   |
| 43 | Turdus pallidus | Pale Thrush | 2022/4/5   | 2 | 0 | 23.80257759 | 120.22779760 | <a href="https://www.inaturalist.org/observations/110577794">https://www.inaturalist.org/observations/110577794</a> |
| 44 | Turdus pallidus | Pale Thrush | 2022/1/13  | 2 | 0 | 23.82682884 | 120.80187180 | <a href="https://www.inaturalist.org/observations/105646949">https://www.inaturalist.org/observations/105646949</a> |
| 45 | Turdus pallidus | Pale Thrush | 2020/4/18  | 2 | 0 | 23.88868992 | 121.53631500 | <a href="https://www.inaturalist.org/observations/47110747">https://www.inaturalist.org/observations/47110747</a>   |

|    |                 |             |            |   |   |             |              |                                                                                                                     |
|----|-----------------|-------------|------------|---|---|-------------|--------------|---------------------------------------------------------------------------------------------------------------------|
| 46 | Turdus pallidus | Pale Thrush | 2021/3/23  | 1 | 0 | 23.88905601 | 121.53599350 | <a href="https://www.inaturalist.org/observations/72773059">https://www.inaturalist.org/observations/72773059</a>   |
| 47 | Turdus pallidus | Pale Thrush | 2021/3/18  | 1 | 0 | 23.88941473 | 121.53569020 | <a href="https://www.inaturalist.org/observations/71473137">https://www.inaturalist.org/observations/71473137</a>   |
| 48 | Turdus pallidus | Pale Thrush | 2020/4/3   | 1 | 0 | 23.89704026 | 121.53388740 | <a href="https://www.inaturalist.org/observations/44592463">https://www.inaturalist.org/observations/44592463</a>   |
| 49 | Turdus pallidus | Pale Thrush | 2021/3/12  | 1 | 0 | 23.89706500 | 121.53974200 | <a href="https://www.inaturalist.org/observations/71120497">https://www.inaturalist.org/observations/71120497</a>   |
| 50 | Turdus pallidus | Pale Thrush | 2020/1/7   | 1 | 0 | 23.89924000 | 121.54105600 | <a href="https://www.inaturalist.org/observations/37395075">https://www.inaturalist.org/observations/37395075</a>   |
| 51 | Turdus pallidus | Pale Thrush | 2020/1/7   | 1 | 0 | 23.89942500 | 121.54095300 | <a href="https://www.inaturalist.org/observations/37395072">https://www.inaturalist.org/observations/37395072</a>   |
| 52 | Turdus pallidus | Pale Thrush | 2020/1/2   | 1 | 0 | 23.89967700 | 121.54086600 | <a href="https://www.inaturalist.org/observations/37395056">https://www.inaturalist.org/observations/37395056</a>   |
| 53 | Turdus pallidus | Pale Thrush | 2020/12/30 | 2 | 0 | 23.90142722 | 121.54233290 | <a href="https://www.inaturalist.org/observations/67300791">https://www.inaturalist.org/observations/67300791</a>   |
| 54 | Turdus pallidus | Pale Thrush | 2019/12/27 | 1 | 0 | 23.92463414 | 121.60584660 | <a href="https://www.inaturalist.org/observations/107694204">https://www.inaturalist.org/observations/107694204</a> |
| 55 | Turdus pallidus | Pale Thrush | 2011/3/9   | 1 | 0 | 24.08612429 | 121.17514460 | <a href="https://www.inaturalist.org/observations/55775016">https://www.inaturalist.org/observations/55775016</a>   |
| 56 | Turdus pallidus | Pale Thrush | 2010/3/27  | 1 | 0 | 24.08614386 | 121.17494070 | <a href="https://www.inaturalist.org/observations/55478525">https://www.inaturalist.org/observations/55478525</a>   |
| 57 | Turdus pallidus | Pale Thrush | 2020/2/18  | 1 | 0 | 24.08754324 | 121.17669360 | <a href="https://www.inaturalist.org/observations/39701357">https://www.inaturalist.org/observations/39701357</a>   |
| 58 | Turdus pallidus | Pale Thrush | 2021/2/8   | 1 | 0 | 24.08776710 | 121.17439530 | <a href="https://www.inaturalist.org/observations/106418591">https://www.inaturalist.org/observations/106418591</a> |
| 59 | Turdus pallidus | Pale Thrush | 2020/2/18  | 0 | 0 | 24.08913432 | 121.17411910 | <a href="https://www.inaturalist.org/observations/38777862">https://www.inaturalist.org/observations/38777862</a>   |
| 60 | Turdus pallidus | Pale Thrush | 2020/2/18  | 0 | 0 | 24.08995858 | 121.17396350 | <a href="https://www.inaturalist.org/observations/39701349">https://www.inaturalist.org/observations/39701349</a>   |
| 61 | Turdus pallidus | Pale Thrush | 2021/2/21  | 1 | 0 | 24.09135333 | 121.03261330 | <a href="https://www.inaturalist.org/observations/94082826">https://www.inaturalist.org/observations/94082826</a>   |
| 62 | Turdus pallidus | Pale Thrush | 2021/1/23  | 2 | 0 | 24.14272333 | 120.74481830 | <a href="https://www.inaturalist.org/observations/68552656">https://www.inaturalist.org/observations/68552656</a>   |
| 63 | Turdus pallidus | Pale Thrush | 2007/2/11  | 1 | 0 | 24.15857430 | 120.66834200 | <a href="https://www.inaturalist.org/observations/110636249">https://www.inaturalist.org/observations/110636249</a> |
| 64 | Turdus pallidus | Pale Thrush | 2021/1/4   | 1 | 0 | 24.17053333 | 121.57443330 | <a href="https://www.inaturalist.org/observations/67558854">https://www.inaturalist.org/observations/67558854</a>   |
| 65 | Turdus pallidus | Pale Thrush | 2019/12/12 | 1 | 0 | 24.17063883 | 121.57260480 | <a href="https://www.inaturalist.org/observations/36608458">https://www.inaturalist.org/observations/36608458</a>   |
| 66 | Turdus pallidus | Pale Thrush | 2019/12/12 | 1 | 0 | 24.17063883 | 121.57260480 | <a href="https://www.inaturalist.org/observations/37474885">https://www.inaturalist.org/observations/37474885</a>   |
| 67 | Turdus pallidus | Pale Thrush | 2014/1/12  | 1 | 0 | 24.17074636 | 121.57365760 | <a href="https://www.inaturalist.org/observations/56900201">https://www.inaturalist.org/observations/56900201</a>   |
| 68 | Turdus pallidus | Pale Thrush | 2020/1/7   | 1 | 0 | 24.17075000 | 121.57426670 | <a href="https://www.inaturalist.org/observations/37362777">https://www.inaturalist.org/observations/37362777</a>   |

|    |                 |             |            |   |   |             |              |                                                                                                                     |
|----|-----------------|-------------|------------|---|---|-------------|--------------|---------------------------------------------------------------------------------------------------------------------|
| 69 | Turdus pallidus | Pale Thrush | 2014/1/28  | 1 | 0 | 24.17079329 | 121.57413230 | <a href="https://www.inaturalist.org/observations/56899844">https://www.inaturalist.org/observations/56899844</a>   |
| 70 | Turdus pallidus | Pale Thrush | 2019/12/8  | 1 | 0 | 24.17081476 | 121.57324520 | <a href="https://www.inaturalist.org/observations/36470534">https://www.inaturalist.org/observations/36470534</a>   |
| 71 | Turdus pallidus | Pale Thrush | 2021/1/13  | 1 | 0 | 24.17096737 | 121.57390920 | <a href="https://www.inaturalist.org/observations/69850340">https://www.inaturalist.org/observations/69850340</a>   |
| 72 | Turdus pallidus | Pale Thrush | 2021/1/13  | 1 | 0 | 24.17151687 | 121.57438090 | <a href="https://www.inaturalist.org/observations/69850343">https://www.inaturalist.org/observations/69850343</a>   |
| 73 | Turdus pallidus | Pale Thrush | 2019/3/2   | 2 | 0 | 24.17742158 | 120.69084090 | <a href="https://www.inaturalist.org/observations/30581147">https://www.inaturalist.org/observations/30581147</a>   |
| 74 | Turdus pallidus | Pale Thrush | 2021/4/6   | 1 | 0 | 24.17751606 | 120.60590280 | <a href="https://www.inaturalist.org/observations/94617837">https://www.inaturalist.org/observations/94617837</a>   |
| 75 | Turdus pallidus | Pale Thrush | 2015/2/8   | 1 | 0 | 24.18475952 | 121.00135800 | <a href="https://www.inaturalist.org/observations/12348638">https://www.inaturalist.org/observations/12348638</a>   |
| 76 | Turdus pallidus | Pale Thrush | 2015/1/18  | 2 | 0 | 24.20519476 | 120.59987870 | <a href="https://www.inaturalist.org/observations/120285449">https://www.inaturalist.org/observations/120285449</a> |
| 77 | Turdus pallidus | Pale Thrush | 2021/11/24 | 1 | 0 | 24.20578153 | 120.59994170 | <a href="https://www.inaturalist.org/observations/101821997">https://www.inaturalist.org/observations/101821997</a> |
| 78 | Turdus pallidus | Pale Thrush | 2022/2/19  | 2 | 0 | 24.20761913 | 120.60156990 | <a href="https://www.inaturalist.org/observations/120297943">https://www.inaturalist.org/observations/120297943</a> |
| 79 | Turdus pallidus | Pale Thrush | 2021/1/18  | 1 | 0 | 24.20782902 | 120.59864040 | <a href="https://www.inaturalist.org/observations/68255132">https://www.inaturalist.org/observations/68255132</a>   |
| 80 | Turdus pallidus | Pale Thrush | 2021/1/18  | 1 | 0 | 24.20782902 | 120.59864040 | <a href="https://www.inaturalist.org/observations/68255134">https://www.inaturalist.org/observations/68255134</a>   |
| 81 | Turdus pallidus | Pale Thrush | 2020/1/14  | 1 | 0 | 24.20782902 | 120.59881210 | <a href="https://www.inaturalist.org/observations/37585061">https://www.inaturalist.org/observations/37585061</a>   |
| 82 | Turdus pallidus | Pale Thrush | 2021/1/29  | 1 | 0 | 24.20988667 | 120.59919500 | <a href="https://www.inaturalist.org/observations/68741537">https://www.inaturalist.org/observations/68741537</a>   |
| 83 | Turdus pallidus | Pale Thrush | 2021/1/4   | 1 | 0 | 24.24461676 | 120.97509380 | <a href="https://www.inaturalist.org/observations/67567076">https://www.inaturalist.org/observations/67567076</a>   |
| 84 | Turdus pallidus | Pale Thrush | 2011/2/11  | 2 | 0 | 24.24465580 | 120.97473110 | <a href="https://www.inaturalist.org/observations/13828590">https://www.inaturalist.org/observations/13828590</a>   |
| 85 | Turdus pallidus | Pale Thrush | 2011/2/5   | 1 | 0 | 24.24632631 | 120.93478690 | <a href="https://www.inaturalist.org/observations/55761073">https://www.inaturalist.org/observations/55761073</a>   |
| 86 | Turdus pallidus | Pale Thrush | 2021/2/1   | 1 | 0 | 24.24750955 | 120.96691790 | <a href="https://www.inaturalist.org/observations/68939535">https://www.inaturalist.org/observations/68939535</a>   |
| 87 | Turdus pallidus | Pale Thrush | 2019/12/31 | 2 | 0 | 24.26563602 | 120.98217800 | <a href="https://www.inaturalist.org/observations/37128011">https://www.inaturalist.org/observations/37128011</a>   |
| 88 | Turdus pallidus | Pale Thrush | 2013/4/14  | 1 | 0 | 24.37096719 | 121.30644970 | <a href="https://www.inaturalist.org/observations/56721952">https://www.inaturalist.org/observations/56721952</a>   |
| 89 | Turdus pallidus | Pale Thrush | 2021/1/22  | 1 | 0 | 24.43800315 | 118.35305660 | <a href="https://www.inaturalist.org/observations/69814978">https://www.inaturalist.org/observations/69814978</a>   |
| 90 | Turdus pallidus | Pale Thrush | 2020/12/12 | 1 | 0 | 24.44375844 | 118.35239920 | <a href="https://www.inaturalist.org/observations/66509644">https://www.inaturalist.org/observations/66509644</a>   |
| 91 | Turdus pallidus | Pale Thrush | 2013/2/17  | 1 | 0 | 24.44839901 | 118.37920810 | <a href="https://www.inaturalist.org/observations/56706648">https://www.inaturalist.org/observations/56706648</a>   |

|     |                 |             |            |   |   |             |              |                                                                                                                     |
|-----|-----------------|-------------|------------|---|---|-------------|--------------|---------------------------------------------------------------------------------------------------------------------|
| 92  | Turdus pallidus | Pale Thrush | 2013/2/17  | 1 | 0 | 24.44839901 | 118.37920810 | <a href="https://www.inaturalist.org/observations/56706677">https://www.inaturalist.org/observations/56706677</a>   |
| 93  | Turdus pallidus | Pale Thrush | 2021/12/9  | 1 | 0 | 24.45516817 | 118.39762010 | <a href="https://www.inaturalist.org/observations/133977356">https://www.inaturalist.org/observations/133977356</a> |
| 94  | Turdus pallidus | Pale Thrush | 2021/2/10  | 2 | 0 | 24.45602333 | 118.39702830 | <a href="https://www.inaturalist.org/observations/70725187">https://www.inaturalist.org/observations/70725187</a>   |
| 95  | Turdus pallidus | Pale Thrush | 2014/12/18 | 1 | 0 | 24.46315750 | 118.44433180 | <a href="https://www.inaturalist.org/observations/16787495">https://www.inaturalist.org/observations/16787495</a>   |
| 96  | Turdus pallidus | Pale Thrush | 2021/1/24  | 1 | 0 | 24.46837194 | 121.79375530 | <a href="https://www.inaturalist.org/observations/68587726">https://www.inaturalist.org/observations/68587726</a>   |
| 97  | Turdus pallidus | Pale Thrush | 2021/1/24  | 1 | 0 | 24.46852833 | 121.79374250 | <a href="https://www.inaturalist.org/observations/68587730">https://www.inaturalist.org/observations/68587730</a>   |
| 98  | Turdus pallidus | Pale Thrush | 2019/12/1  | 1 | 0 | 24.50533667 | 121.11365000 | <a href="https://www.inaturalist.org/observations/36248645">https://www.inaturalist.org/observations/36248645</a>   |
| 99  | Turdus pallidus | Pale Thrush | 2019/12/1  | 1 | 0 | 24.50591200 | 121.11406780 | <a href="https://www.inaturalist.org/observations/36250729">https://www.inaturalist.org/observations/36250729</a>   |
| 100 | Turdus pallidus | Pale Thrush | 2019/12/1  | 1 | 0 | 24.50660875 | 121.11452140 | <a href="https://www.inaturalist.org/observations/36243447">https://www.inaturalist.org/observations/36243447</a>   |
| 101 | Turdus pallidus | Pale Thrush | 2020/12/31 | 1 | 0 | 24.59648353 | 121.84117920 | <a href="https://www.inaturalist.org/observations/67659185">https://www.inaturalist.org/observations/67659185</a>   |
| 102 | Turdus pallidus | Pale Thrush | 2021/2/16  | 1 | 0 | 24.61327472 | 121.85323680 | <a href="https://www.inaturalist.org/observations/69658434">https://www.inaturalist.org/observations/69658434</a>   |
| 103 | Turdus pallidus | Pale Thrush | 2009/12/27 | 1 | 0 | 24.62451327 | 121.75804800 | <a href="https://www.inaturalist.org/observations/55455326">https://www.inaturalist.org/observations/55455326</a>   |
| 104 | Turdus pallidus | Pale Thrush | 2021/2/16  | 1 | 0 | 24.63143166 | 121.76023380 | <a href="https://www.inaturalist.org/observations/70184138">https://www.inaturalist.org/observations/70184138</a>   |
| 105 | Turdus pallidus | Pale Thrush | 2020/12/23 | 1 | 0 | 24.63148987 | 121.76019720 | <a href="https://www.inaturalist.org/observations/66951482">https://www.inaturalist.org/observations/66951482</a>   |
| 106 | Turdus pallidus | Pale Thrush | 2021/1/2   | 1 | 0 | 24.63151974 | 121.76021130 | <a href="https://www.inaturalist.org/observations/77698468">https://www.inaturalist.org/observations/77698468</a>   |
| 107 | Turdus pallidus | Pale Thrush | 2021/2/15  | 1 | 0 | 24.63152940 | 121.76029040 | <a href="https://www.inaturalist.org/observations/69686141">https://www.inaturalist.org/observations/69686141</a>   |
| 108 | Turdus pallidus | Pale Thrush | 2020/12/18 | 1 | 0 | 24.63161563 | 121.76026050 | <a href="https://www.inaturalist.org/observations/66974660">https://www.inaturalist.org/observations/66974660</a>   |
| 109 | Turdus pallidus | Pale Thrush | 2020/1/21  | 0 | 0 | 24.67852573 | 121.82156440 | <a href="https://www.inaturalist.org/observations/37888240">https://www.inaturalist.org/observations/37888240</a>   |
| 110 | Turdus pallidus | Pale Thrush | 2009/12/27 | 1 | 0 | 24.68318617 | 121.77388150 | <a href="https://www.inaturalist.org/observations/55455306">https://www.inaturalist.org/observations/55455306</a>   |
| 111 | Turdus pallidus | Pale Thrush | 2009/12/26 | 1 | 0 | 24.68350786 | 121.77402630 | <a href="https://www.inaturalist.org/observations/55454584">https://www.inaturalist.org/observations/55454584</a>   |
| 112 | Turdus pallidus | Pale Thrush | 2020/2/8   | 1 | 0 | 24.68427801 | 121.77235800 | <a href="https://www.inaturalist.org/observations/38602997">https://www.inaturalist.org/observations/38602997</a>   |
| 113 | Turdus pallidus | Pale Thrush | 2021/2/18  | 2 | 0 | 24.70283758 | 121.75817380 | <a href="https://www.inaturalist.org/observations/73192847">https://www.inaturalist.org/observations/73192847</a>   |
| 114 | Turdus pallidus | Pale Thrush | 2020/3/11  | 1 | 0 | 24.70398833 | 121.80699000 | <a href="https://www.inaturalist.org/observations/40854981">https://www.inaturalist.org/observations/40854981</a>   |

|     |                 |             |            |   |   |             |              |                                                                                                                     |
|-----|-----------------|-------------|------------|---|---|-------------|--------------|---------------------------------------------------------------------------------------------------------------------|
| 115 | Turdus pallidus | Pale Thrush | 2010/1/19  | 1 | 0 | 24.70741261 | 121.43038220 | <a href="https://www.inaturalist.org/observations/55460654">https://www.inaturalist.org/observations/55460654</a>   |
| 116 | Turdus pallidus | Pale Thrush | 2022/3/14  | 1 | 0 | 24.71864249 | 121.11492560 | <a href="https://www.inaturalist.org/observations/108567164">https://www.inaturalist.org/observations/108567164</a> |
| 117 | Turdus pallidus | Pale Thrush | 2014/12/16 | 1 | 0 | 24.72122500 | 121.70662720 | <a href="https://www.inaturalist.org/observations/31715770">https://www.inaturalist.org/observations/31715770</a>   |
| 118 | Turdus pallidus | Pale Thrush | 2021/2/21  | 1 | 0 | 24.72502602 | 121.76498030 | <a href="https://www.inaturalist.org/observations/69930512">https://www.inaturalist.org/observations/69930512</a>   |
| 119 | Turdus pallidus | Pale Thrush | 2020/12/19 | 1 | 0 | 24.72517707 | 121.76460810 | <a href="https://www.inaturalist.org/observations/66818126">https://www.inaturalist.org/observations/66818126</a>   |
| 120 | Turdus pallidus | Pale Thrush | 2021/2/18  | 1 | 0 | 24.72870500 | 121.76276500 | <a href="https://www.inaturalist.org/observations/69924059">https://www.inaturalist.org/observations/69924059</a>   |
| 121 | Turdus pallidus | Pale Thrush | 2011/1/10  | 1 | 0 | 24.73249882 | 121.08795570 | <a href="https://www.inaturalist.org/observations/17151197">https://www.inaturalist.org/observations/17151197</a>   |
| 122 | Turdus pallidus | Pale Thrush | 2020/11/12 | 2 | 0 | 24.73826019 | 120.98766540 | <a href="https://www.inaturalist.org/observations/65003169">https://www.inaturalist.org/observations/65003169</a>   |
| 123 | Turdus pallidus | Pale Thrush | 2020/11/12 | 2 | 0 | 24.73827992 | 120.98773840 | <a href="https://www.inaturalist.org/observations/65003142">https://www.inaturalist.org/observations/65003142</a>   |
| 124 | Turdus pallidus | Pale Thrush | 2021/1/19  | 1 | 0 | 24.74974710 | 121.76645040 | <a href="https://www.inaturalist.org/observations/68320422">https://www.inaturalist.org/observations/68320422</a>   |
| 125 | Turdus pallidus | Pale Thrush | 2021/2/20  | 1 | 0 | 24.75238333 | 121.63585670 | <a href="https://www.inaturalist.org/observations/69924031">https://www.inaturalist.org/observations/69924031</a>   |
| 126 | Turdus pallidus | Pale Thrush | 2021/12/31 | 2 | 0 | 24.75378500 | 121.63574520 | <a href="https://www.inaturalist.org/observations/104013438">https://www.inaturalist.org/observations/104013438</a> |
| 127 | Turdus pallidus | Pale Thrush | 2021/1/21  | 1 | 0 | 24.76425553 | 121.75186490 | <a href="https://www.inaturalist.org/observations/68397394">https://www.inaturalist.org/observations/68397394</a>   |
| 128 | Turdus pallidus | Pale Thrush | 2020/12/3  | 1 | 0 | 24.78171410 | 118.67394200 | <a href="https://www.inaturalist.org/observations/66956060">https://www.inaturalist.org/observations/66956060</a>   |
| 129 | Turdus pallidus | Pale Thrush | 2017/12/23 | 1 | 0 | 24.81797784 | 120.91740240 | <a href="https://www.inaturalist.org/observations/43319879">https://www.inaturalist.org/observations/43319879</a>   |
| 130 | Turdus pallidus | Pale Thrush | 2020/3/26  | 1 | 0 | 24.84308839 | 120.92429300 | <a href="https://www.inaturalist.org/observations/40751873">https://www.inaturalist.org/observations/40751873</a>   |
| 131 | Turdus pallidus | Pale Thrush | 2020/4/10  | 1 | 0 | 24.94299231 | 121.36810310 | <a href="https://www.inaturalist.org/observations/41829010">https://www.inaturalist.org/observations/41829010</a>   |
| 132 | Turdus pallidus | Pale Thrush | 2020/11/30 | 1 | 0 | 24.96178016 | 121.73658700 | <a href="https://www.inaturalist.org/observations/66460208">https://www.inaturalist.org/observations/66460208</a>   |
| 133 | Turdus pallidus | Pale Thrush | 2019/12/8  | 1 | 0 | 24.97879434 | 121.27672470 | <a href="https://www.inaturalist.org/observations/40931425">https://www.inaturalist.org/observations/40931425</a>   |
| 134 | Turdus pallidus | Pale Thrush | 2020/1/15  | 0 | 0 | 24.98231833 | 121.52894500 | <a href="https://www.inaturalist.org/observations/37710367">https://www.inaturalist.org/observations/37710367</a>   |
| 135 | Turdus pallidus | Pale Thrush | 2019/12/5  | 2 | 0 | 24.98937476 | 121.55538640 | <a href="https://www.inaturalist.org/observations/40159528">https://www.inaturalist.org/observations/40159528</a>   |
| 136 | Turdus pallidus | Pale Thrush | 2020/1/16  | 1 | 0 | 24.99284701 | 121.53784740 | <a href="https://www.inaturalist.org/observations/37738347">https://www.inaturalist.org/observations/37738347</a>   |
| 137 | Turdus pallidus | Pale Thrush | 2020/1/16  | 1 | 0 | 24.99303532 | 121.53788360 | <a href="https://www.inaturalist.org/observations/37738417">https://www.inaturalist.org/observations/37738417</a>   |

|     |                 |             |            |   |   |             |              |                                                                                                                     |
|-----|-----------------|-------------|------------|---|---|-------------|--------------|---------------------------------------------------------------------------------------------------------------------|
| 138 | Turdus pallidus | Pale Thrush | 2020/1/16  | 1 | 0 | 24.99313815 | 121.53782200 | <a href="https://www.inaturalist.org/observations/37738420">https://www.inaturalist.org/observations/37738420</a>   |
| 139 | Turdus pallidus | Pale Thrush | 2020/1/16  | 1 | 0 | 24.99323503 | 121.53781120 | <a href="https://www.inaturalist.org/observations/37738426">https://www.inaturalist.org/observations/37738426</a>   |
| 140 | Turdus pallidus | Pale Thrush | 2011/2/11  | 1 | 0 | 25.00194652 | 121.32758360 | <a href="https://www.inaturalist.org/observations/55762737">https://www.inaturalist.org/observations/55762737</a>   |
| 141 | Turdus pallidus | Pale Thrush | 2021/11/10 | 1 | 0 | 25.00886087 | 121.59321750 | <a href="https://www.inaturalist.org/observations/101275592">https://www.inaturalist.org/observations/101275592</a> |
| 142 | Turdus pallidus | Pale Thrush | 2020/1/7   | 1 | 0 | 25.01278749 | 121.53005400 | <a href="https://www.inaturalist.org/observations/39631302">https://www.inaturalist.org/observations/39631302</a>   |
| 143 | Turdus pallidus | Pale Thrush | 2014/11/17 | 1 | 0 | 25.01450242 | 121.29544280 | <a href="https://www.inaturalist.org/observations/28560629">https://www.inaturalist.org/observations/28560629</a>   |
| 144 | Turdus pallidus | Pale Thrush | 2021/4/11  | 1 | 0 | 25.01454944 | 121.92417280 | <a href="https://www.inaturalist.org/observations/73718683">https://www.inaturalist.org/observations/73718683</a>   |
| 145 | Turdus pallidus | Pale Thrush | 2018/3/27  | 1 | 0 | 25.01578840 | 121.53880500 | <a href="https://www.inaturalist.org/observations/10446819">https://www.inaturalist.org/observations/10446819</a>   |
| 146 | Turdus pallidus | Pale Thrush | 2021/12/14 | 1 | 0 | 25.01636667 | 121.90770000 | <a href="https://www.inaturalist.org/observations/103022895">https://www.inaturalist.org/observations/103022895</a> |
| 147 | Turdus pallidus | Pale Thrush | 2021/1/1   | 1 | 0 | 25.02064983 | 121.92834800 | <a href="https://www.inaturalist.org/observations/67391377">https://www.inaturalist.org/observations/67391377</a>   |
| 148 | Turdus pallidus | Pale Thrush | 2020/11/14 | 1 | 0 | 25.02605851 | 121.53619790 | <a href="https://www.inaturalist.org/observations/64851758">https://www.inaturalist.org/observations/64851758</a>   |
| 149 | Turdus pallidus | Pale Thrush | 2019/12/15 | 1 | 0 | 25.02712004 | 121.53622350 | <a href="https://www.inaturalist.org/observations/36670070">https://www.inaturalist.org/observations/36670070</a>   |
| 150 | Turdus pallidus | Pale Thrush | 2020/12/15 | 1 | 0 | 25.02940394 | 121.53577440 | <a href="https://www.inaturalist.org/observations/91990582">https://www.inaturalist.org/observations/91990582</a>   |
| 151 | Turdus pallidus | Pale Thrush | 2020/12/23 | 1 | 0 | 25.03003251 | 121.53585020 | <a href="https://www.inaturalist.org/observations/98211140">https://www.inaturalist.org/observations/98211140</a>   |
| 152 | Turdus pallidus | Pale Thrush | 2011/1/26  | 1 | 0 | 25.03003980 | 121.53563560 | <a href="https://www.inaturalist.org/observations/66652092">https://www.inaturalist.org/observations/66652092</a>   |
| 153 | Turdus pallidus | Pale Thrush | 2011/3/25  | 1 | 0 | 25.03016582 | 121.53614060 | <a href="https://www.inaturalist.org/observations/66992435">https://www.inaturalist.org/observations/66992435</a>   |
| 154 | Turdus pallidus | Pale Thrush | 2020/3/31  | 1 | 0 | 25.03049535 | 121.53565370 | <a href="https://www.inaturalist.org/observations/91990583">https://www.inaturalist.org/observations/91990583</a>   |
| 155 | Turdus pallidus | Pale Thrush | 2019/3/24  | 1 | 0 | 25.03093950 | 121.50874610 | <a href="https://www.inaturalist.org/observations/26680870">https://www.inaturalist.org/observations/26680870</a>   |
| 156 | Turdus pallidus | Pale Thrush | 2021/2/8   | 1 | 0 | 25.03111092 | 121.53532780 | <a href="https://www.inaturalist.org/observations/69255230">https://www.inaturalist.org/observations/69255230</a>   |
| 157 | Turdus pallidus | Pale Thrush | 2022/3/21  | 1 | 0 | 25.03187241 | 121.50943280 | <a href="https://www.inaturalist.org/observations/109608585">https://www.inaturalist.org/observations/109608585</a> |
| 158 | Turdus pallidus | Pale Thrush | 2020/12/4  | 1 | 0 | 25.03206908 | 121.50950260 | <a href="https://www.inaturalist.org/observations/98211138">https://www.inaturalist.org/observations/98211138</a>   |
| 159 | Turdus pallidus | Pale Thrush | 2011/2/16  | 1 | 0 | 25.03214464 | 121.50965010 | <a href="https://www.inaturalist.org/observations/55773472">https://www.inaturalist.org/observations/55773472</a>   |
| 160 | Turdus pallidus | Pale Thrush | 2015/1/25  | 3 | 0 | 25.03214500 | 121.50938500 | <a href="http://www.inaturalist.org/observations/1192731">http://www.inaturalist.org/observations/1192731</a>       |



|     |                 |             |            |   |   |             |              |                                                                                                                     |
|-----|-----------------|-------------|------------|---|---|-------------|--------------|---------------------------------------------------------------------------------------------------------------------|
| 161 | Turdus pallidus | Pale Thrush | 2011/3/16  | 1 | 0 | 25.03218353 | 121.50950520 | <a href="https://www.inaturalist.org/observations/55776035">https://www.inaturalist.org/observations/55776035</a>   |
| 162 | Turdus pallidus | Pale Thrush | 2011/3/16  | 1 | 0 | 25.03218353 | 121.50950520 | <a href="https://www.inaturalist.org/observations/55776045">https://www.inaturalist.org/observations/55776045</a>   |
| 163 | Turdus pallidus | Pale Thrush | 2011/3/16  | 1 | 0 | 25.03218353 | 121.50950520 | <a href="https://www.inaturalist.org/observations/55776048">https://www.inaturalist.org/observations/55776048</a>   |
| 164 | Turdus pallidus | Pale Thrush | 2016/2/12  | 2 | 0 | 25.03223700 | 121.50921000 | <a href="http://www.inaturalist.org/observations/2672618">http://www.inaturalist.org/observations/2672618</a>       |
| 165 | Turdus pallidus | Pale Thrush | 2021/12/1  | 1 | 0 | 25.03235336 | 121.51066460 | <a href="https://www.inaturalist.org/observations/102463707">https://www.inaturalist.org/observations/102463707</a> |
| 166 | Turdus pallidus | Pale Thrush | 2015/4/3   | 1 | 0 | 25.03244231 | 121.50988580 | <a href="https://www.inaturalist.org/observations/18614804">https://www.inaturalist.org/observations/18614804</a>   |
| 167 | Turdus pallidus | Pale Thrush | 2015/3/10  | 2 | 0 | 25.03296360 | 121.56542680 | <a href="http://www.inaturalist.org/observations/4414093">http://www.inaturalist.org/observations/4414093</a>       |
| 168 | Turdus pallidus | Pale Thrush | 2011/3/4   | 1 | 0 | 25.03573951 | 121.52019310 | <a href="https://www.inaturalist.org/observations/55774181">https://www.inaturalist.org/observations/55774181</a>   |
| 169 | Turdus pallidus | Pale Thrush | 2020/2/26  | 1 | 0 | 25.04184009 | 121.51498760 | <a href="https://www.inaturalist.org/observations/39266945">https://www.inaturalist.org/observations/39266945</a>   |
| 170 | Turdus pallidus | Pale Thrush | 2019/12/13 | 2 | 0 | 25.04417610 | 121.61776730 | <a href="https://www.inaturalist.org/observations/36631772">https://www.inaturalist.org/observations/36631772</a>   |
| 171 | Turdus pallidus | Pale Thrush | 2014/12/6  | 1 | 0 | 25.04529956 | 121.61358930 | <a href="https://www.inaturalist.org/observations/21208244">https://www.inaturalist.org/observations/21208244</a>   |
| 172 | Turdus pallidus | Pale Thrush | 2022/3/24  | 1 | 0 | 25.07992940 | 121.69834130 | <a href="https://www.inaturalist.org/observations/111485993">https://www.inaturalist.org/observations/111485993</a> |
| 173 | Turdus pallidus | Pale Thrush | 2021/1/10  | 1 | 0 | 25.08883487 | 121.59406420 | <a href="https://www.inaturalist.org/observations/67824238">https://www.inaturalist.org/observations/67824238</a>   |
| 174 | Turdus pallidus | Pale Thrush | 2017/3/18  | 1 | 0 | 25.09154318 | 121.55153450 | <a href="https://www.inaturalist.org/observations/16294674">https://www.inaturalist.org/observations/16294674</a>   |
| 175 | Turdus pallidus | Pale Thrush | 2016/12/13 | 1 | 0 | 25.11517590 | 121.51501800 | <a href="https://www.inaturalist.org/observations/4923113">https://www.inaturalist.org/observations/4923113</a>     |
| 176 | Turdus pallidus | Pale Thrush | 2021/1/12  | 1 | 0 | 25.11610792 | 121.47257230 | <a href="https://www.inaturalist.org/observations/67955907">https://www.inaturalist.org/observations/67955907</a>   |
| 177 | Turdus pallidus | Pale Thrush | 2017/2/11  | 1 | 0 | 25.11904698 | 121.47086260 | <a href="https://www.inaturalist.org/observations/5134724">https://www.inaturalist.org/observations/5134724</a>     |
| 178 | Turdus pallidus | Pale Thrush | 2014/3/1   | 2 | 0 | 25.11915900 | 121.47057700 | <a href="http://www.inaturalist.org/observations/548253">http://www.inaturalist.org/observations/548253</a>         |
| 179 | Turdus pallidus | Pale Thrush | 2021/1/2   | 1 | 0 | 25.11928921 | 121.47155480 | <a href="https://www.inaturalist.org/observations/67732033">https://www.inaturalist.org/observations/67732033</a>   |
| 180 | Turdus pallidus | Pale Thrush | 2019/12/18 | 1 | 0 | 25.11937000 | 121.47303670 | <a href="https://www.inaturalist.org/observations/122145582">https://www.inaturalist.org/observations/122145582</a> |
| 181 | Turdus pallidus | Pale Thrush | 2010/12/8  | 1 | 0 | 25.14939746 | 121.77351440 | <a href="https://www.inaturalist.org/observations/32106889">https://www.inaturalist.org/observations/32106889</a>   |
| 182 | Turdus pallidus | Pale Thrush | 2020/2/13  | 1 | 0 | 25.22542193 | 121.64197680 | <a href="https://www.inaturalist.org/observations/40640431">https://www.inaturalist.org/observations/40640431</a>   |
| 183 | Turdus pallidus | Pale Thrush | 2020/12/16 | 2 | 0 | 25.22562700 | 121.64090900 | <a href="https://www.inaturalist.org/observations/66656624">https://www.inaturalist.org/observations/66656624</a>   |

|     |                 |             |            |   |   |             |              |                                                                                                                     |
|-----|-----------------|-------------|------------|---|---|-------------|--------------|---------------------------------------------------------------------------------------------------------------------|
| 184 | Turdus pallidus | Pale Thrush | 2020/12/16 | 1 | 0 | 25.22626875 | 121.64296120 | <a href="https://www.inaturalist.org/observations/66645923">https://www.inaturalist.org/observations/66645923</a>   |
| 185 | Turdus pallidus | Pale Thrush | 2020/2/22  | 2 | 0 | 25.22634845 | 121.64161490 | <a href="https://www.inaturalist.org/observations/110839829">https://www.inaturalist.org/observations/110839829</a> |
| 186 | Turdus pallidus | Pale Thrush | 2011/3/24  | 1 | 0 | 25.22641598 | 121.64165740 | <a href="https://www.inaturalist.org/observations/55779814">https://www.inaturalist.org/observations/55779814</a>   |
| 187 | Turdus pallidus | Pale Thrush | 2020/2/23  | 0 | 0 | 25.22645432 | 121.64120760 | <a href="https://www.inaturalist.org/observations/39081660">https://www.inaturalist.org/observations/39081660</a>   |
| 188 | Turdus pallidus | Pale Thrush | 2010/11/13 | 1 | 0 | 25.22652275 | 121.64174320 | <a href="https://www.inaturalist.org/observations/55754491">https://www.inaturalist.org/observations/55754491</a>   |
| 189 | Turdus pallidus | Pale Thrush | 2021/12/31 | 1 | 0 | 25.22667361 | 121.64093980 | <a href="https://www.inaturalist.org/observations/104337058">https://www.inaturalist.org/observations/104337058</a> |
| 190 | Turdus pallidus | Pale Thrush | 2013/3/12  | 2 | 0 | 25.22667963 | 121.64127010 | <a href="https://www.inaturalist.org/observations/41172787">https://www.inaturalist.org/observations/41172787</a>   |
| 191 | Turdus pallidus | Pale Thrush | 2020/12/18 | 1 | 0 | 25.22668791 | 121.64030980 | <a href="https://www.inaturalist.org/observations/66759401">https://www.inaturalist.org/observations/66759401</a>   |
| 192 | Turdus pallidus | Pale Thrush | 2020/12/13 | 1 | 0 | 25.22708556 | 121.64282530 | <a href="https://www.inaturalist.org/observations/66577942">https://www.inaturalist.org/observations/66577942</a>   |
| 193 | Turdus pallidus | Pale Thrush | 2021/12/15 | 1 | 0 | 25.22783430 | 121.64062370 | <a href="https://www.inaturalist.org/observations/106488095">https://www.inaturalist.org/observations/106488095</a> |
| 194 | Turdus pallidus | Pale Thrush | 2021/3/1   | 1 | 0 | 25.22784591 | 121.64296460 | <a href="https://www.inaturalist.org/observations/70393663">https://www.inaturalist.org/observations/70393663</a>   |
| 195 | Turdus pallidus | Pale Thrush | 2014/4/3   | 0 | 0 | 26.15259872 | 119.28760990 | <a href="https://www.inaturalist.org/observations/39030473">https://www.inaturalist.org/observations/39030473</a>   |
| 196 | Turdus pallidus | Pale Thrush | 2021/3/29  | 1 | 0 | 26.15691008 | 119.95224410 | <a href="https://www.inaturalist.org/observations/73068951">https://www.inaturalist.org/observations/73068951</a>   |
| 197 | Turdus pallidus | Pale Thrush | 2021/3/27  | 1 | 0 | 26.15696069 | 119.95204840 | <a href="https://www.inaturalist.org/observations/73068668">https://www.inaturalist.org/observations/73068668</a>   |
| 198 | Turdus pallidus | Pale Thrush | 2021/3/26  | 2 | 0 | 26.15808936 | 119.94906410 | <a href="https://www.inaturalist.org/observations/73068396">https://www.inaturalist.org/observations/73068396</a>   |
| 199 | Turdus pallidus | Pale Thrush | 2021/3/26  | 1 | 0 | 26.16315850 | 119.95311940 | <a href="https://www.inaturalist.org/observations/73068387">https://www.inaturalist.org/observations/73068387</a>   |
| 200 | Turdus pallidus | Pale Thrush | 2021/3/21  | 1 | 0 | 29.80078945 | 121.56136200 | <a href="https://www.inaturalist.org/observations/71673619">https://www.inaturalist.org/observations/71673619</a>   |
| 201 | Turdus pallidus | Pale Thrush | 2021/3/20  | 1 | 0 | 29.80082553 | 121.56172250 | <a href="https://www.inaturalist.org/observations/71604517">https://www.inaturalist.org/observations/71604517</a>   |
| 202 | Turdus pallidus | Pale Thrush | 2021/4/10  | 1 | 0 | 29.80173704 | 121.56412100 | <a href="https://www.inaturalist.org/observations/73593171">https://www.inaturalist.org/observations/73593171</a>   |
| 203 | Turdus pallidus | Pale Thrush | 2021/11/7  | 1 | 0 | 29.81238647 | 121.53323070 | <a href="https://www.inaturalist.org/observations/100476665">https://www.inaturalist.org/observations/100476665</a> |
| 204 | Turdus pallidus | Pale Thrush | 2021/1/10  | 2 | 0 | 30.20783034 | 120.14222970 | <a href="https://www.inaturalist.org/observations/68442316">https://www.inaturalist.org/observations/68442316</a>   |
| 205 | Turdus pallidus | Pale Thrush | 2021/4/3   | 1 | 0 | 30.20783034 | 120.14222970 | <a href="https://www.inaturalist.org/observations/98085943">https://www.inaturalist.org/observations/98085943</a>   |
| 206 | Turdus pallidus | Pale Thrush | 2022/1/4   | 1 | 0 | 30.20783034 | 120.14222970 | <a href="https://www.inaturalist.org/observations/104562160">https://www.inaturalist.org/observations/104562160</a> |

|     |                 |             |           |   |   |             |              |                                                                                                                     |
|-----|-----------------|-------------|-----------|---|---|-------------|--------------|---------------------------------------------------------------------------------------------------------------------|
| 207 | Turdus pallidus | Pale Thrush | 2022/1/4  | 1 | 0 | 30.20783034 | 120.14222970 | <a href="https://www.inaturalist.org/observations/104562169">https://www.inaturalist.org/observations/104562169</a> |
| 208 | Turdus pallidus | Pale Thrush | 2022/1/4  | 1 | 0 | 30.20783034 | 120.14222970 | <a href="https://www.inaturalist.org/observations/104562172">https://www.inaturalist.org/observations/104562172</a> |
| 209 | Turdus pallidus | Pale Thrush | 2022/1/4  | 1 | 0 | 30.20783034 | 120.14222970 | <a href="https://www.inaturalist.org/observations/104562174">https://www.inaturalist.org/observations/104562174</a> |
| 210 | Turdus pallidus | Pale Thrush | 2022/1/4  | 1 | 0 | 30.20844227 | 120.14087790 | <a href="https://www.inaturalist.org/observations/104399885">https://www.inaturalist.org/observations/104399885</a> |
| 211 | Turdus pallidus | Pale Thrush | 2022/1/30 | 1 | 0 | 30.20844227 | 120.14087790 | <a href="https://www.inaturalist.org/observations/105842590">https://www.inaturalist.org/observations/105842590</a> |
| 212 | Turdus pallidus | Pale Thrush | 2022/2/3  | 1 | 0 | 30.20844227 | 120.14087790 | <a href="https://www.inaturalist.org/observations/106355824">https://www.inaturalist.org/observations/106355824</a> |
| 213 | Turdus pallidus | Pale Thrush | 2022/2/11 | 1 | 0 | 30.20844227 | 120.14087790 | <a href="https://www.inaturalist.org/observations/106541826">https://www.inaturalist.org/observations/106541826</a> |
| 214 | Turdus pallidus | Pale Thrush | 2022/2/15 | 1 | 0 | 30.20844227 | 120.14087790 | <a href="https://www.inaturalist.org/observations/107367518">https://www.inaturalist.org/observations/107367518</a> |
| 215 | Turdus pallidus | Pale Thrush | 2022/3/24 | 1 | 0 | 30.20844227 | 120.14087790 | <a href="https://www.inaturalist.org/observations/110567313">https://www.inaturalist.org/observations/110567313</a> |
| 216 | Turdus pallidus | Pale Thrush | 2022/3/31 | 1 | 0 | 30.20844227 | 120.14087790 | <a href="https://www.inaturalist.org/observations/111073095">https://www.inaturalist.org/observations/111073095</a> |
| 217 | Turdus pallidus | Pale Thrush | 2021/12/9 | 1 | 0 | 30.25100000 | 120.11300000 | <a href="https://www.inaturalist.org/observations/102767735">https://www.inaturalist.org/observations/102767735</a> |
| 218 | Turdus pallidus | Pale Thrush | 2021/12/9 | 1 | 0 | 30.25100000 | 120.11300000 | <a href="https://www.inaturalist.org/observations/102767738">https://www.inaturalist.org/observations/102767738</a> |
| 219 | Turdus pallidus | Pale Thrush | 2021/3/2  | 1 | 0 | 30.25146977 | 120.14238630 | <a href="https://www.inaturalist.org/observations/70442825">https://www.inaturalist.org/observations/70442825</a>   |
| 220 | Turdus pallidus | Pale Thrush | 2021/1/18 | 2 | 0 | 30.25327475 | 120.11688900 | <a href="https://www.inaturalist.org/observations/68394479">https://www.inaturalist.org/observations/68394479</a>   |
| 221 | Turdus pallidus | Pale Thrush | 2011/3/10 | 1 | 0 | 30.25403400 | 120.12351500 | <a href="https://www.inaturalist.org/observations/27003266">https://www.inaturalist.org/observations/27003266</a>   |
| 222 | Turdus pallidus | Pale Thrush | 2022/1/1  | 1 | 0 | 30.25418228 | 120.12014610 | <a href="https://www.inaturalist.org/observations/104091078">https://www.inaturalist.org/observations/104091078</a> |
| 223 | Turdus pallidus | Pale Thrush | 2022/1/20 | 1 | 0 | 30.25418228 | 120.12014610 | <a href="https://www.inaturalist.org/observations/105413430">https://www.inaturalist.org/observations/105413430</a> |
| 224 | Turdus pallidus | Pale Thrush | 2022/4/11 | 1 | 0 | 30.25418228 | 120.12014610 | <a href="https://www.inaturalist.org/observations/111076114">https://www.inaturalist.org/observations/111076114</a> |
| 225 | Turdus pallidus | Pale Thrush | 2021/3/18 | 1 | 0 | 30.25439544 | 120.12126190 | <a href="https://www.inaturalist.org/observations/73728409">https://www.inaturalist.org/observations/73728409</a>   |
| 226 | Turdus pallidus | Pale Thrush | 2021/2/23 | 1 | 0 | 30.25670000 | 120.12250000 | <a href="https://www.inaturalist.org/observations/105767312">https://www.inaturalist.org/observations/105767312</a> |
| 227 | Turdus pallidus | Pale Thrush | 2021/3/10 | 1 | 0 | 30.25737840 | 120.13768250 | <a href="https://www.inaturalist.org/observations/70916293">https://www.inaturalist.org/observations/70916293</a>   |
| 228 | Turdus pallidus | Pale Thrush | 2021/3/15 | 1 | 0 | 30.25737840 | 120.13768250 | <a href="https://www.inaturalist.org/observations/73728370">https://www.inaturalist.org/observations/73728370</a>   |
| 229 | Turdus pallidus | Pale Thrush | 2021/3/25 | 1 | 0 | 30.25737840 | 120.13768250 | <a href="https://www.inaturalist.org/observations/74707934">https://www.inaturalist.org/observations/74707934</a>   |

|     |                 |             |            |   |   |             |              |                                                                                                                     |
|-----|-----------------|-------------|------------|---|---|-------------|--------------|---------------------------------------------------------------------------------------------------------------------|
| 230 | Turdus pallidus | Pale Thrush | 2022/1/8   | 1 | 0 | 30.25737840 | 120.13768250 | <a href="https://www.inaturalist.org/observations/104623759">https://www.inaturalist.org/observations/104623759</a> |
| 231 | Turdus pallidus | Pale Thrush | 2022/1/8   | 1 | 0 | 30.25737840 | 120.13768250 | <a href="https://www.inaturalist.org/observations/104623764">https://www.inaturalist.org/observations/104623764</a> |
| 232 | Turdus pallidus | Pale Thrush | 2022/1/19  | 1 | 0 | 30.25737840 | 120.13768250 | <a href="https://www.inaturalist.org/observations/105213260">https://www.inaturalist.org/observations/105213260</a> |
| 233 | Turdus pallidus | Pale Thrush | 2022/1/19  | 1 | 0 | 30.25737840 | 120.13768250 | <a href="https://www.inaturalist.org/observations/105213277">https://www.inaturalist.org/observations/105213277</a> |
| 234 | Turdus pallidus | Pale Thrush | 2022/1/31  | 1 | 0 | 30.25737840 | 120.13768250 | <a href="https://www.inaturalist.org/observations/105970824">https://www.inaturalist.org/observations/105970824</a> |
| 235 | Turdus pallidus | Pale Thrush | 2022/3/1   | 1 | 0 | 30.25737840 | 120.13768250 | <a href="https://www.inaturalist.org/observations/107694707">https://www.inaturalist.org/observations/107694707</a> |
| 236 | Turdus pallidus | Pale Thrush | 2021/3/20  | 1 | 0 | 30.25830728 | 120.13811430 | <a href="https://www.inaturalist.org/observations/71609916">https://www.inaturalist.org/observations/71609916</a>   |
| 237 | Turdus pallidus | Pale Thrush | 2021/3/2   | 1 | 0 | 30.26084422 | 120.14253200 | <a href="https://www.inaturalist.org/observations/70442432">https://www.inaturalist.org/observations/70442432</a>   |
| 238 | Turdus pallidus | Pale Thrush | 2021/12/27 | 1 | 0 | 30.42819300 | 120.00581300 | <a href="https://www.inaturalist.org/observations/103751042">https://www.inaturalist.org/observations/103751042</a> |
| 239 | Turdus pallidus | Pale Thrush | 2020/1/6   | 1 | 0 | 30.47451876 | 114.36149860 | <a href="https://www.inaturalist.org/observations/109638780">https://www.inaturalist.org/observations/109638780</a> |
| 240 | Turdus pallidus | Pale Thrush | 2021/2/24  | 1 | 0 | 31.07465700 | 121.14870900 | <a href="https://www.inaturalist.org/observations/70143754">https://www.inaturalist.org/observations/70143754</a>   |
| 241 | Turdus pallidus | Pale Thrush | 2016/12/27 | 1 | 0 | 31.14432230 | 121.36860300 | <a href="https://www.inaturalist.org/observations/6144989">https://www.inaturalist.org/observations/6144989</a>     |
| 242 | Turdus pallidus | Pale Thrush | 2005/11/18 | 1 | 0 | 31.14697654 | 121.44414330 | <a href="https://www.inaturalist.org/observations/89765768">https://www.inaturalist.org/observations/89765768</a>   |
| 243 | Turdus pallidus | Pale Thrush | 2014/3/29  | 1 | 0 | 31.14697656 | 121.44440080 | <a href="https://www.inaturalist.org/observations/93592603">https://www.inaturalist.org/observations/93592603</a>   |
| 244 | Turdus pallidus | Pale Thrush | 2017/3/26  | 1 | 0 | 31.20634600 | 121.57942400 | <a href="https://www.inaturalist.org/observations/5517719">https://www.inaturalist.org/observations/5517719</a>     |
| 245 | Turdus pallidus | Pale Thrush | 2020/11/15 | 1 | 0 | 31.21213400 | 121.54372400 | <a href="https://www.inaturalist.org/observations/109445416">https://www.inaturalist.org/observations/109445416</a> |
| 246 | Turdus pallidus | Pale Thrush | 2017/11/13 | 1 | 0 | 31.21506463 | 121.55264930 | <a href="https://www.inaturalist.org/observations/8847490">https://www.inaturalist.org/observations/8847490</a>     |
| 247 | Turdus pallidus | Pale Thrush | 2005/4/7   | 1 | 0 | 31.21530880 | 121.54670660 | <a href="https://www.inaturalist.org/observations/89765901">https://www.inaturalist.org/observations/89765901</a>   |
| 248 | Turdus pallidus | Pale Thrush | 2018/3/23  | 1 | 0 | 31.21539400 | 121.55215700 | <a href="https://www.inaturalist.org/observations/10373439">https://www.inaturalist.org/observations/10373439</a>   |
| 249 | Turdus pallidus | Pale Thrush | 2021/11/3  | 1 | 0 | 31.21539400 | 121.55215700 | <a href="https://www.inaturalist.org/observations/100143111">https://www.inaturalist.org/observations/100143111</a> |
| 250 | Turdus pallidus | Pale Thrush | 2013/3/25  | 1 | 0 | 31.21566389 | 121.54535280 | <a href="https://www.inaturalist.org/observations/107799792">https://www.inaturalist.org/observations/107799792</a> |
| 251 | Turdus pallidus | Pale Thrush | 2017/11/28 | 1 | 0 | 31.21603264 | 121.55215610 | <a href="https://www.inaturalist.org/observations/8973028">https://www.inaturalist.org/observations/8973028</a>     |
| 252 | Turdus pallidus | Pale Thrush | 2017/12/4  | 1 | 0 | 31.21628404 | 121.55207160 | <a href="https://www.inaturalist.org/observations/10259282">https://www.inaturalist.org/observations/10259282</a>   |

|     |                 |             |            |   |   |             |              |                                                                                                                     |
|-----|-----------------|-------------|------------|---|---|-------------|--------------|---------------------------------------------------------------------------------------------------------------------|
| 253 | Turdus pallidus | Pale Thrush | 2021/11/15 | 1 | 0 | 31.28630833 | 121.49744500 | <a href="https://www.inaturalist.org/observations/110076637">https://www.inaturalist.org/observations/110076637</a> |
| 254 | Turdus pallidus | Pale Thrush | 2013/3/29  | 1 | 0 | 31.29538900 | 121.53338300 | <a href="https://www.inaturalist.org/observations/21542208">https://www.inaturalist.org/observations/21542208</a>   |
| 255 | Turdus pallidus | Pale Thrush | 2013/3/29  | 1 | 0 | 31.31812222 | 121.54807220 | <a href="https://www.inaturalist.org/observations/53053134">https://www.inaturalist.org/observations/53053134</a>   |
| 256 | Turdus pallidus | Pale Thrush | 2013/3/26  | 1 | 0 | 31.32103056 | 120.68264720 | <a href="https://www.inaturalist.org/observations/107799788">https://www.inaturalist.org/observations/107799788</a> |
| 257 | Turdus pallidus | Pale Thrush | 2022/2/25  | 1 | 0 | 31.32162500 | 121.54351660 | <a href="https://www.inaturalist.org/observations/118162540">https://www.inaturalist.org/observations/118162540</a> |
| 258 | Turdus pallidus | Pale Thrush | 2022/2/25  | 1 | 0 | 31.32162500 | 121.54351660 | <a href="https://www.inaturalist.org/observations/118162552">https://www.inaturalist.org/observations/118162552</a> |
| 259 | Turdus pallidus | Pale Thrush | 2021/4/20  | 1 | 0 | 31.34376193 | 121.35554800 | <a href="https://www.inaturalist.org/observations/74616289">https://www.inaturalist.org/observations/74616289</a>   |
| 260 | Turdus pallidus | Pale Thrush | 2020/4/5   | 1 | 0 | 31.35626717 | 121.40429340 | <a href="https://www.inaturalist.org/observations/42828543">https://www.inaturalist.org/observations/42828543</a>   |
| 261 | Turdus pallidus | Pale Thrush | 2021/2/24  | 2 | 0 | 31.38036938 | 121.52794610 | <a href="https://www.inaturalist.org/observations/72680348">https://www.inaturalist.org/observations/72680348</a>   |
| 262 | Turdus pallidus | Pale Thrush | 2022/2/28  | 1 | 0 | 31.38136833 | 121.52373990 | <a href="https://www.inaturalist.org/observations/118162594">https://www.inaturalist.org/observations/118162594</a> |
| 263 | Turdus pallidus | Pale Thrush | 2022/2/28  | 1 | 0 | 31.38136833 | 121.52373990 | <a href="https://www.inaturalist.org/observations/118162595">https://www.inaturalist.org/observations/118162595</a> |
| 264 | Turdus pallidus | Pale Thrush | 2022/2/28  | 1 | 0 | 31.38136833 | 121.52373990 | <a href="https://www.inaturalist.org/observations/118162602">https://www.inaturalist.org/observations/118162602</a> |
| 265 | Turdus pallidus | Pale Thrush | 2017/12/18 | 1 | 0 | 31.38316349 | 121.52881020 | <a href="https://www.inaturalist.org/observations/9200659">https://www.inaturalist.org/observations/9200659</a>     |
| 266 | Turdus pallidus | Pale Thrush | 2022/2/28  | 1 | 0 | 31.38561500 | 121.52904330 | <a href="https://www.inaturalist.org/observations/118162612">https://www.inaturalist.org/observations/118162612</a> |
| 267 | Turdus pallidus | Pale Thrush | 2021/3/23  | 2 | 0 | 31.38687778 | 121.51691110 | <a href="https://www.inaturalist.org/observations/84506436">https://www.inaturalist.org/observations/84506436</a>   |
| 268 | Turdus pallidus | Pale Thrush | 2021/3/23  | 2 | 0 | 31.38743889 | 121.51487780 | <a href="https://www.inaturalist.org/observations/84506602">https://www.inaturalist.org/observations/84506602</a>   |
| 269 | Turdus pallidus | Pale Thrush | 2021/3/23  | 2 | 0 | 31.38769814 | 121.51495970 | <a href="https://www.inaturalist.org/observations/84506742">https://www.inaturalist.org/observations/84506742</a>   |
| 270 | Turdus pallidus | Pale Thrush | 2022/2/28  | 2 | 0 | 31.38811500 | 121.52207330 | <a href="https://www.inaturalist.org/observations/118162642">https://www.inaturalist.org/observations/118162642</a> |
| 271 | Turdus pallidus | Pale Thrush | 2022/2/28  | 1 | 0 | 31.38811500 | 121.52207330 | <a href="https://www.inaturalist.org/observations/118162645">https://www.inaturalist.org/observations/118162645</a> |
| 272 | Turdus pallidus | Pale Thrush | 2021/3/23  | 2 | 0 | 31.38877778 | 121.52332220 | <a href="https://www.inaturalist.org/observations/84505095">https://www.inaturalist.org/observations/84505095</a>   |
| 273 | Turdus pallidus | Pale Thrush | 2022/2/27  | 1 | 0 | 31.40278486 | 120.75340630 | <a href="https://www.inaturalist.org/observations/107664271">https://www.inaturalist.org/observations/107664271</a> |
| 274 | Turdus pallidus | Pale Thrush | 2021/1/13  | 1 | 0 | 31.45079158 | 120.32680270 | <a href="https://www.inaturalist.org/observations/67995856">https://www.inaturalist.org/observations/67995856</a>   |
| 275 | Turdus pallidus | Pale Thrush | 2020/12/31 | 1 | 0 | 32.05446667 | 118.83150500 | <a href="https://www.inaturalist.org/observations/67797894">https://www.inaturalist.org/observations/67797894</a>   |

|     |                 |             |           |   |   |             |              |                                                                                                                     |
|-----|-----------------|-------------|-----------|---|---|-------------|--------------|---------------------------------------------------------------------------------------------------------------------|
| 276 | Turdus pallidus | Pale Thrush | 2021/1/29 | 1 | 0 | 32.05468927 | 118.82847610 | <a href="https://www.inaturalist.org/observations/88346090">https://www.inaturalist.org/observations/88346090</a>   |
| 277 | Turdus pallidus | Pale Thrush | 2022/2/18 | 1 | 0 | 32.06033831 | 118.81972990 | <a href="https://www.inaturalist.org/observations/106962192">https://www.inaturalist.org/observations/106962192</a> |
| 278 | Turdus pallidus | Pale Thrush | 2022/2/4  | 1 | 0 | 32.06775331 | 118.85122160 | <a href="https://www.inaturalist.org/observations/106126533">https://www.inaturalist.org/observations/106126533</a> |
| 279 | Turdus pallidus | Pale Thrush | 2021/11/9 | 1 | 0 | 36.06399599 | 120.36288620 | <a href="https://www.inaturalist.org/observations/103630747">https://www.inaturalist.org/observations/103630747</a> |
| 280 | Turdus pallidus | Pale Thrush | 2019/4/17 | 0 | 0 | 36.06518000 | 120.38120000 | <a href="https://www.inaturalist.org/observations/134973045">https://www.inaturalist.org/observations/134973045</a> |
| 281 | Turdus pallidus | Pale Thrush | 2019/4/11 | 0 | 0 | 36.06549000 | 120.34787000 | <a href="https://www.inaturalist.org/observations/134868538">https://www.inaturalist.org/observations/134868538</a> |
| 282 | Turdus pallidus | Pale Thrush | 2022/2/22 | 1 | 0 | 40.01567100 | 116.40020790 | <a href="https://www.inaturalist.org/observations/108574030">https://www.inaturalist.org/observations/108574030</a> |
| 283 | Turdus pallidus | Pale Thrush | 2022/1/7  | 1 | 0 | 40.01674167 | 116.37692830 | <a href="https://www.inaturalist.org/observations/125272414">https://www.inaturalist.org/observations/125272414</a> |
| 284 | Turdus pallidus | Pale Thrush | 2007/5/23 | 1 | 0 | 47.02839700 | 129.02079300 | <a href="https://www.inaturalist.org/observations/65335715">https://www.inaturalist.org/observations/65335715</a>   |
| 285 | Turdus pallidus | Pale Thrush | 2007/5/23 | 1 | 0 | 47.02839700 | 129.02079300 | <a href="https://www.inaturalist.org/observations/65335722">https://www.inaturalist.org/observations/65335722</a>   |

| No | scientific name | common name    | date       | NIA | NID | latitude    | longitude    | url                                                                                                                 |
|----|-----------------|----------------|------------|-----|-----|-------------|--------------|---------------------------------------------------------------------------------------------------------------------|
| 1  | Zoothera aurea  | White's Thrush | 2013/9/7   | 1   | 0   | 21.92563357 | 101.25803950 | <a href="https://www.inaturalist.org/observations/9061236">https://www.inaturalist.org/observations/9061236</a>     |
| 2  | Zoothera aurea  | White's Thrush | 2022/2/25  | 1   | 0   | 22.12608910 | 113.56392200 | <a href="https://www.inaturalist.org/observations/107466957">https://www.inaturalist.org/observations/107466957</a> |
| 3  | Zoothera aurea  | White's Thrush | 2019/11/8  | 1   | 0   | 22.12616904 | 113.56721640 | <a href="https://www.inaturalist.org/observations/35711968">https://www.inaturalist.org/observations/35711968</a>   |
| 4  | Zoothera aurea  | White's Thrush | 2021/12/21 | 1   | 0   | 22.22282833 | 113.91457500 | <a href="https://www.inaturalist.org/observations/103414609">https://www.inaturalist.org/observations/103414609</a> |
| 5  | Zoothera aurea  | White's Thrush | 2019/10/1  | 1   | 0   | 22.27387284 | 114.14375870 | <a href="https://www.inaturalist.org/observations/33684952">https://www.inaturalist.org/observations/33684952</a>   |
| 6  | Zoothera aurea  | White's Thrush | 2015/3/26  | 1   | 0   | 22.27954150 | 114.13252120 | <a href="https://www.inaturalist.org/observations/8613951">https://www.inaturalist.org/observations/8613951</a>     |
| 7  | Zoothera aurea  | White's Thrush | 2020/4/4   | 2   | 0   | 22.31783486 | 114.18379810 | <a href="https://www.inaturalist.org/observations/45759868">https://www.inaturalist.org/observations/45759868</a>   |
| 8  | Zoothera aurea  | White's Thrush | 2021/11/14 | 1   | 0   | 22.35794912 | 114.16898130 | <a href="https://www.inaturalist.org/observations/101337169">https://www.inaturalist.org/observations/101337169</a> |
| 9  | Zoothera aurea  | White's Thrush | 2018/1/31  | 2   | 0   | 22.37473200 | 114.01519930 | <a href="https://www.inaturalist.org/observations/9677883">https://www.inaturalist.org/observations/9677883</a>     |
| 10 | Zoothera aurea  | White's Thrush | 2020/1/19  | 0   | 0   | 22.39411208 | 113.98123010 | <a href="https://www.inaturalist.org/observations/37773783">https://www.inaturalist.org/observations/37773783</a>   |
| 11 | Zoothera aurea  | White's Thrush | 2020/1/12  | 1   | 0   | 22.39415796 | 113.98131770 | <a href="https://www.inaturalist.org/observations/37515693">https://www.inaturalist.org/observations/37515693</a>   |
| 12 | Zoothera aurea  | White's Thrush | 2014/1/4   | 1   | 0   | 22.39626900 | 114.15253100 | <a href="https://www.inaturalist.org/observations/15478957">https://www.inaturalist.org/observations/15478957</a>   |
| 13 | Zoothera aurea  | White's Thrush | 2019/10/30 | 1   | 0   | 22.40380765 | 114.09415220 | <a href="https://www.inaturalist.org/observations/35077084">https://www.inaturalist.org/observations/35077084</a>   |
| 14 | Zoothera aurea  | White's Thrush | 2019/10/30 | 1   | 0   | 22.40597433 | 114.09296490 | <a href="https://www.inaturalist.org/observations/35077082">https://www.inaturalist.org/observations/35077082</a>   |
| 15 | Zoothera aurea  | White's Thrush | 2019/11/6  | 1   | 0   | 22.40941427 | 114.10023570 | <a href="https://www.inaturalist.org/observations/35358440">https://www.inaturalist.org/observations/35358440</a>   |
| 16 | Zoothera aurea  | White's Thrush | 2019/11/7  | 1   | 0   | 22.40942450 | 114.10033770 | <a href="https://www.inaturalist.org/observations/35569422">https://www.inaturalist.org/observations/35569422</a>   |
| 17 | Zoothera aurea  | White's Thrush | 2019/10/21 | 1   | 0   | 22.40961575 | 114.10125870 | <a href="https://www.inaturalist.org/observations/34777610">https://www.inaturalist.org/observations/34777610</a>   |
| 18 | Zoothera aurea  | White's Thrush | 2014/12/16 | 1   | 0   | 22.40970600 | 114.03178300 | <a href="https://www.inaturalist.org/observations/15313096">https://www.inaturalist.org/observations/15313096</a>   |
| 19 | Zoothera aurea  | White's Thrush | 2015/12/29 | 1   | 0   | 22.40994900 | 114.03241600 | <a href="https://www.inaturalist.org/observations/15120243">https://www.inaturalist.org/observations/15120243</a>   |
| 20 | Zoothera aurea  | White's Thrush | 2011/2/24  | 2   | 0   | 22.41060900 | 114.03086000 | <a href="https://www.inaturalist.org/observations/30091164">https://www.inaturalist.org/observations/30091164</a>   |
| 21 | Zoothera aurea  | White's Thrush | 2016/3/17  | 1   | 0   | 22.41851793 | 114.16886310 | <a href="https://www.inaturalist.org/observations/105057375">https://www.inaturalist.org/observations/105057375</a> |
| 22 | Zoothera aurea  | White's Thrush | 2019/12/7  | 1   | 0   | 22.42080833 | 114.17852830 | <a href="https://www.inaturalist.org/observations/36455637">https://www.inaturalist.org/observations/36455637</a>   |

|    |                |                |            |   |   |             |              |                                                                                                                     |
|----|----------------|----------------|------------|---|---|-------------|--------------|---------------------------------------------------------------------------------------------------------------------|
| 23 | Zoothera aurea | White's Thrush | 2010/2/28  | 1 | 0 | 22.43279700 | 114.08576200 | <a href="https://www.inaturalist.org/observations/30288017">https://www.inaturalist.org/observations/30288017</a>   |
| 24 | Zoothera aurea | White's Thrush | 2019/12/7  | 1 | 0 | 22.43373790 | 114.07618970 | <a href="https://www.inaturalist.org/observations/36585415">https://www.inaturalist.org/observations/36585415</a>   |
| 25 | Zoothera aurea | White's Thrush | 2019/12/14 | 1 | 0 | 22.44133196 | 114.01849930 | <a href="https://www.inaturalist.org/observations/36640908">https://www.inaturalist.org/observations/36640908</a>   |
| 26 | Zoothera aurea | White's Thrush | 2022/2/10  | 2 | 0 | 22.51695374 | 114.21787900 | <a href="https://www.inaturalist.org/observations/106680076">https://www.inaturalist.org/observations/106680076</a> |
| 27 | Zoothera aurea | White's Thrush | 2020/1/24  | 0 | 0 | 22.61607088 | 120.37693980 | <a href="https://www.inaturalist.org/observations/37907754">https://www.inaturalist.org/observations/37907754</a>   |
| 28 | Zoothera aurea | White's Thrush | 2018/1/27  | 1 | 0 | 22.61607862 | 120.37668760 | <a href="https://www.inaturalist.org/observations/14019879">https://www.inaturalist.org/observations/14019879</a>   |
| 29 | Zoothera aurea | White's Thrush | 2019/12/24 | 0 | 0 | 22.64102745 | 120.27661900 | <a href="https://www.inaturalist.org/observations/36900358">https://www.inaturalist.org/observations/36900358</a>   |
| 30 | Zoothera aurea | White's Thrush | 2022/1/15  | 1 | 0 | 22.69671773 | 120.30867070 | <a href="https://www.inaturalist.org/observations/105097490">https://www.inaturalist.org/observations/105097490</a> |
| 31 | Zoothera aurea | White's Thrush | 2022/1/2   | 1 | 0 | 22.70027643 | 120.31226660 | <a href="https://www.inaturalist.org/observations/104345555">https://www.inaturalist.org/observations/104345555</a> |
| 32 | Zoothera aurea | White's Thrush | 2022/3/25  | 1 | 0 | 22.70064722 | 120.31330280 | <a href="https://www.inaturalist.org/observations/109439694">https://www.inaturalist.org/observations/109439694</a> |
| 33 | Zoothera aurea | White's Thrush | 2019/12/10 | 1 | 0 | 22.88960999 | 120.66336010 | <a href="https://www.inaturalist.org/observations/90024635">https://www.inaturalist.org/observations/90024635</a>   |
| 34 | Zoothera aurea | White's Thrush | 2019/12/12 | 1 | 0 | 22.89845033 | 120.66470400 | <a href="https://www.inaturalist.org/observations/89329255">https://www.inaturalist.org/observations/89329255</a>   |
| 35 | Zoothera aurea | White's Thrush | 2020/2/1   | 1 | 0 | 22.90554958 | 120.66434060 | <a href="https://www.inaturalist.org/observations/90026904">https://www.inaturalist.org/observations/90026904</a>   |
| 36 | Zoothera aurea | White's Thrush | 2019/11/4  | 1 | 0 | 23.09653840 | 113.29888300 | <a href="https://www.inaturalist.org/observations/35360751">https://www.inaturalist.org/observations/35360751</a>   |
| 37 | Zoothera aurea | White's Thrush | 2019/11/4  | 0 | 0 | 23.09653840 | 113.29888300 | <a href="https://www.inaturalist.org/observations/39616172">https://www.inaturalist.org/observations/39616172</a>   |
| 38 | Zoothera aurea | White's Thrush | 2021/11/15 | 1 | 0 | 23.15599765 | 113.36169770 | <a href="https://www.inaturalist.org/observations/101205399">https://www.inaturalist.org/observations/101205399</a> |
| 39 | Zoothera aurea | White's Thrush | 2018/3/28  | 1 | 0 | 23.47583520 | 120.89999320 | <a href="https://www.inaturalist.org/observations/67957679">https://www.inaturalist.org/observations/67957679</a>   |
| 40 | Zoothera aurea | White's Thrush | 2017/2/2   | 4 | 0 | 23.47779633 | 120.70746060 | <a href="https://www.inaturalist.org/observations/91251796">https://www.inaturalist.org/observations/91251796</a>   |
| 41 | Zoothera aurea | White's Thrush | 2017/2/2   | 4 | 0 | 23.47809155 | 120.70771810 | <a href="https://www.inaturalist.org/observations/91251795">https://www.inaturalist.org/observations/91251795</a>   |
| 42 | Zoothera aurea | White's Thrush | 2019/12/19 | 2 | 0 | 23.48228719 | 120.86817900 | <a href="https://www.inaturalist.org/observations/36775275">https://www.inaturalist.org/observations/36775275</a>   |
| 43 | Zoothera aurea | White's Thrush | 2020/1/18  | 0 | 0 | 23.48248333 | 120.86836170 | <a href="https://www.inaturalist.org/observations/37744373">https://www.inaturalist.org/observations/37744373</a>   |
| 44 | Zoothera aurea | White's Thrush | 2007/3/25  | 1 | 0 | 23.49413788 | 120.78133960 | <a href="https://www.inaturalist.org/observations/16706998">https://www.inaturalist.org/observations/16706998</a>   |
| 45 | Zoothera aurea | White's Thrush | 2018/1/5   | 1 | 0 | 23.50669202 | 120.82334280 | <a href="https://www.inaturalist.org/observations/25616119">https://www.inaturalist.org/observations/25616119</a>   |



|    |                       |                |            |   |   |             |              |                                                                                                                     |
|----|-----------------------|----------------|------------|---|---|-------------|--------------|---------------------------------------------------------------------------------------------------------------------|
| 46 | <i>Zoothera aurea</i> | White's Thrush | 2022/1/8   | 2 | 0 | 23.50699056 | 120.82375610 | <a href="https://www.inaturalist.org/observations/104576304">https://www.inaturalist.org/observations/104576304</a> |
| 47 | <i>Zoothera aurea</i> | White's Thrush | 2020/12/26 | 1 | 0 | 23.51117500 | 120.82257470 | <a href="https://www.inaturalist.org/observations/67190574">https://www.inaturalist.org/observations/67190574</a>   |
| 48 | <i>Zoothera aurea</i> | White's Thrush | 2019/12/24 | 1 | 0 | 23.51173746 | 120.80360410 | <a href="https://www.inaturalist.org/observations/36933537">https://www.inaturalist.org/observations/36933537</a>   |
| 49 | <i>Zoothera aurea</i> | White's Thrush | 2020/12/17 | 1 | 0 | 23.51227363 | 120.81279440 | <a href="https://www.inaturalist.org/observations/66733410">https://www.inaturalist.org/observations/66733410</a>   |
| 50 | <i>Zoothera aurea</i> | White's Thrush | 2021/3/25  | 1 | 0 | 23.51230857 | 120.87579910 | <a href="https://www.inaturalist.org/observations/107245447">https://www.inaturalist.org/observations/107245447</a> |
| 51 | <i>Zoothera aurea</i> | White's Thrush | 2022/1/8   | 1 | 0 | 23.51281592 | 120.81609710 | <a href="https://www.inaturalist.org/observations/104572649">https://www.inaturalist.org/observations/104572649</a> |
| 52 | <i>Zoothera aurea</i> | White's Thrush | 2013/2/17  | 1 | 0 | 23.51598466 | 120.81033260 | <a href="https://www.inaturalist.org/observations/56710788">https://www.inaturalist.org/observations/56710788</a>   |
| 53 | <i>Zoothera aurea</i> | White's Thrush | 2021/3/24  | 1 | 0 | 23.58462920 | 120.90227820 | <a href="https://www.inaturalist.org/observations/107245446">https://www.inaturalist.org/observations/107245446</a> |
| 54 | <i>Zoothera aurea</i> | White's Thrush | 2022/1/28  | 1 | 0 | 23.63684420 | 120.79492250 | <a href="https://www.inaturalist.org/observations/105691783">https://www.inaturalist.org/observations/105691783</a> |
| 55 | <i>Zoothera aurea</i> | White's Thrush | 2018/2/17  | 1 | 0 | 23.67268906 | 120.91691300 | <a href="https://www.inaturalist.org/observations/93401540">https://www.inaturalist.org/observations/93401540</a>   |
| 56 | <i>Zoothera aurea</i> | White's Thrush | 2021/3/10  | 1 | 0 | 23.74202333 | 120.41147170 | <a href="https://www.inaturalist.org/observations/71341402">https://www.inaturalist.org/observations/71341402</a>   |
| 57 | <i>Zoothera aurea</i> | White's Thrush | 2021/3/18  | 1 | 0 | 23.88888062 | 121.53606510 | <a href="https://www.inaturalist.org/observations/71473141">https://www.inaturalist.org/observations/71473141</a>   |
| 58 | <i>Zoothera aurea</i> | White's Thrush | 2021/3/11  | 1 | 0 | 23.88890671 | 121.53593710 | <a href="https://www.inaturalist.org/observations/71000697">https://www.inaturalist.org/observations/71000697</a>   |
| 59 | <i>Zoothera aurea</i> | White's Thrush | 2021/3/1   | 1 | 0 | 23.88894687 | 121.53638290 | <a href="https://www.inaturalist.org/observations/70378393">https://www.inaturalist.org/observations/70378393</a>   |
| 60 | <i>Zoothera aurea</i> | White's Thrush | 2021/3/14  | 1 | 0 | 23.89063793 | 121.53559020 | <a href="https://www.inaturalist.org/observations/71209600">https://www.inaturalist.org/observations/71209600</a>   |
| 61 | <i>Zoothera aurea</i> | White's Thrush | 2020/3/16  | 2 | 0 | 23.89753850 | 121.54180180 | <a href="https://www.inaturalist.org/observations/88245665">https://www.inaturalist.org/observations/88245665</a>   |
| 62 | <i>Zoothera aurea</i> | White's Thrush | 2022/3/12  | 2 | 0 | 23.89788000 | 121.53952000 | <a href="https://www.inaturalist.org/observations/108399193">https://www.inaturalist.org/observations/108399193</a> |
| 63 | <i>Zoothera aurea</i> | White's Thrush | 2020/3/17  | 2 | 0 | 23.90055012 | 121.54892440 | <a href="https://www.inaturalist.org/observations/40936208">https://www.inaturalist.org/observations/40936208</a>   |
| 64 | <i>Zoothera aurea</i> | White's Thrush | 2020/3/17  | 2 | 0 | 23.90059167 | 121.54882330 | <a href="https://www.inaturalist.org/observations/42749956">https://www.inaturalist.org/observations/42749956</a>   |
| 65 | <i>Zoothera aurea</i> | White's Thrush | 2020/3/27  | 2 | 0 | 23.90170051 | 121.54430120 | <a href="https://www.inaturalist.org/observations/40800128">https://www.inaturalist.org/observations/40800128</a>   |
| 66 | <i>Zoothera aurea</i> | White's Thrush | 2018/10/29 | 1 | 0 | 23.93513604 | 121.59768590 | <a href="https://www.inaturalist.org/observations/17930687">https://www.inaturalist.org/observations/17930687</a>   |
| 67 | <i>Zoothera aurea</i> | White's Thrush | 2020/1/23  | 2 | 0 | 23.94826180 | 120.61548640 | <a href="https://www.inaturalist.org/observations/52145017">https://www.inaturalist.org/observations/52145017</a>   |
| 68 | <i>Zoothera aurea</i> | White's Thrush | 2020/10/27 | 1 | 0 | 24.04103651 | 121.62151100 | <a href="https://www.inaturalist.org/observations/66509984">https://www.inaturalist.org/observations/66509984</a>   |

|    |                       |                |            |   |   |             |              |                                                                                                                     |
|----|-----------------------|----------------|------------|---|---|-------------|--------------|---------------------------------------------------------------------------------------------------------------------|
| 69 | <i>Zoothera aurea</i> | White's Thrush | 2011/2/9   | 1 | 0 | 24.04673220 | 121.23619680 | <a href="https://www.inaturalist.org/observations/15272387">https://www.inaturalist.org/observations/15272387</a>   |
| 70 | <i>Zoothera aurea</i> | White's Thrush | 2017/10/21 | 1 | 0 | 24.06275548 | 121.16695810 | <a href="https://www.inaturalist.org/observations/80594916">https://www.inaturalist.org/observations/80594916</a>   |
| 71 | <i>Zoothera aurea</i> | White's Thrush | 2014/3/18  | 1 | 0 | 24.08348849 | 121.14993790 | <a href="https://www.inaturalist.org/observations/92941154">https://www.inaturalist.org/observations/92941154</a>   |
| 72 | <i>Zoothera aurea</i> | White's Thrush | 2011/3/9   | 1 | 0 | 24.08612429 | 121.17514460 | <a href="https://www.inaturalist.org/observations/55775014">https://www.inaturalist.org/observations/55775014</a>   |
| 73 | <i>Zoothera aurea</i> | White's Thrush | 2021/12/9  | 1 | 0 | 24.08771947 | 121.17339180 | <a href="https://www.inaturalist.org/observations/102842467">https://www.inaturalist.org/observations/102842467</a> |
| 74 | <i>Zoothera aurea</i> | White's Thrush | 2013/12/29 | 2 | 0 | 24.15816960 | 120.66729630 | <a href="https://www.inaturalist.org/observations/110631978">https://www.inaturalist.org/observations/110631978</a> |
| 75 | <i>Zoothera aurea</i> | White's Thrush | 2021/1/8   | 1 | 0 | 24.17071744 | 121.57260420 | <a href="https://www.inaturalist.org/observations/67800153">https://www.inaturalist.org/observations/67800153</a>   |
| 76 | <i>Zoothera aurea</i> | White's Thrush | 2016/2/10  | 2 | 0 | 24.18210921 | 121.00527340 | <a href="https://www.inaturalist.org/observations/10506865">https://www.inaturalist.org/observations/10506865</a>   |
| 77 | <i>Zoothera aurea</i> | White's Thrush | 2014/12/5  | 2 | 0 | 24.19068700 | 121.01383300 | <a href="https://www.inaturalist.org/observations/81011322">https://www.inaturalist.org/observations/81011322</a>   |
| 78 | <i>Zoothera aurea</i> | White's Thrush | 2022/1/11  | 1 | 0 | 24.23704481 | 120.94928340 | <a href="https://www.inaturalist.org/observations/104783388">https://www.inaturalist.org/observations/104783388</a> |
| 79 | <i>Zoothera aurea</i> | White's Thrush | 2021/2/28  | 1 | 0 | 24.24257686 | 120.93864010 | <a href="https://www.inaturalist.org/observations/94112579">https://www.inaturalist.org/observations/94112579</a>   |
| 80 | <i>Zoothera aurea</i> | White's Thrush | 2017/2/13  | 1 | 0 | 24.24401520 | 120.91288900 | <a href="https://www.inaturalist.org/observations/89727898">https://www.inaturalist.org/observations/89727898</a>   |
| 81 | <i>Zoothera aurea</i> | White's Thrush | 2018/3/19  | 1 | 0 | 24.24424892 | 120.92209030 | <a href="https://www.inaturalist.org/observations/65098762">https://www.inaturalist.org/observations/65098762</a>   |
| 82 | <i>Zoothera aurea</i> | White's Thrush | 2018/3/20  | 0 | 0 | 24.24446000 | 120.97498900 | <a href="https://www.inaturalist.org/observations/34161710">https://www.inaturalist.org/observations/34161710</a>   |
| 83 | <i>Zoothera aurea</i> | White's Thrush | 2018/4/2   | 1 | 0 | 24.24446010 | 120.97498860 | <a href="https://www.inaturalist.org/observations/51749946">https://www.inaturalist.org/observations/51749946</a>   |
| 84 | <i>Zoothera aurea</i> | White's Thrush | 2020/1/2   | 2 | 0 | 24.24446758 | 120.97498860 | <a href="https://www.inaturalist.org/observations/53402415">https://www.inaturalist.org/observations/53402415</a>   |
| 85 | <i>Zoothera aurea</i> | White's Thrush | 2021/1/4   | 1 | 0 | 24.24461676 | 120.97509380 | <a href="https://www.inaturalist.org/observations/67567081">https://www.inaturalist.org/observations/67567081</a>   |
| 86 | <i>Zoothera aurea</i> | White's Thrush | 2022/2/19  | 1 | 0 | 24.24465871 | 120.93432880 | <a href="https://www.inaturalist.org/observations/107181581">https://www.inaturalist.org/observations/107181581</a> |
| 87 | <i>Zoothera aurea</i> | White's Thrush | 2011/2/5   | 1 | 0 | 24.24632631 | 120.93478690 | <a href="https://www.inaturalist.org/observations/55761072">https://www.inaturalist.org/observations/55761072</a>   |
| 88 | <i>Zoothera aurea</i> | White's Thrush | 2016/1/10  | 1 | 0 | 24.24870437 | 120.91536610 | <a href="https://www.inaturalist.org/observations/115733248">https://www.inaturalist.org/observations/115733248</a> |
| 89 | <i>Zoothera aurea</i> | White's Thrush | 2017/8/27  | 1 | 0 | 24.25528327 | 121.00700640 | <a href="https://www.inaturalist.org/observations/80576272">https://www.inaturalist.org/observations/80576272</a>   |
| 90 | <i>Zoothera aurea</i> | White's Thrush | 2018/3/30  | 1 | 0 | 24.25713692 | 121.00898480 | <a href="https://www.inaturalist.org/observations/66621303">https://www.inaturalist.org/observations/66621303</a>   |
| 91 | <i>Zoothera aurea</i> | White's Thrush | 2019/12/15 | 1 | 0 | 24.27904151 | 121.02586740 | <a href="https://www.inaturalist.org/observations/36963176">https://www.inaturalist.org/observations/36963176</a>   |

|     |                       |                |            |   |   |             |              |                                                                                                                     |
|-----|-----------------------|----------------|------------|---|---|-------------|--------------|---------------------------------------------------------------------------------------------------------------------|
| 92  | <i>Zoothera aurea</i> | White's Thrush | 2020/2/20  | 1 | 0 | 24.35235870 | 121.30859720 | <a href="https://www.inaturalist.org/observations/39273374">https://www.inaturalist.org/observations/39273374</a>   |
| 93  | <i>Zoothera aurea</i> | White's Thrush | 2020/2/27  | 2 | 0 | 24.35235870 | 121.30859720 | <a href="https://www.inaturalist.org/observations/42228270">https://www.inaturalist.org/observations/42228270</a>   |
| 94  | <i>Zoothera aurea</i> | White's Thrush | 2013/10/10 | 2 | 0 | 24.35411805 | 121.31130080 | <a href="https://www.inaturalist.org/observations/56828464">https://www.inaturalist.org/observations/56828464</a>   |
| 95  | <i>Zoothera aurea</i> | White's Thrush | 2014/2/23  | 2 | 0 | 24.35556460 | 121.31205180 | <a href="https://www.inaturalist.org/observations/56900964">https://www.inaturalist.org/observations/56900964</a>   |
| 96  | <i>Zoothera aurea</i> | White's Thrush | 2011/2/23  | 1 | 0 | 24.35626836 | 121.31142970 | <a href="https://www.inaturalist.org/observations/55772571">https://www.inaturalist.org/observations/55772571</a>   |
| 97  | <i>Zoothera aurea</i> | White's Thrush | 2020/1/5   | 2 | 0 | 24.36436881 | 120.64542320 | <a href="https://www.inaturalist.org/observations/119964046">https://www.inaturalist.org/observations/119964046</a> |
| 98  | <i>Zoothera aurea</i> | White's Thrush | 2013/4/14  | 2 | 0 | 24.37096719 | 121.30644970 | <a href="https://www.inaturalist.org/observations/56721904">https://www.inaturalist.org/observations/56721904</a>   |
| 99  | <i>Zoothera aurea</i> | White's Thrush | 2022/1/4   | 1 | 0 | 24.40504561 | 120.75969520 | <a href="https://www.inaturalist.org/observations/105646969">https://www.inaturalist.org/observations/105646969</a> |
| 100 | <i>Zoothera aurea</i> | White's Thrush | 2022/1/6   | 1 | 0 | 24.40511471 | 120.75977240 | <a href="https://www.inaturalist.org/observations/105646962">https://www.inaturalist.org/observations/105646962</a> |
| 101 | <i>Zoothera aurea</i> | White's Thrush | 2010/3/17  | 1 | 0 | 24.49376213 | 121.53656430 | <a href="https://www.inaturalist.org/observations/55475360">https://www.inaturalist.org/observations/55475360</a>   |
| 102 | <i>Zoothera aurea</i> | White's Thrush | 2009/12/28 | 1 | 0 | 24.61068613 | 121.81482540 | <a href="https://www.inaturalist.org/observations/55456337">https://www.inaturalist.org/observations/55456337</a>   |
| 103 | <i>Zoothera aurea</i> | White's Thrush | 2022/9/28  | 0 | 0 | 24.62867167 | 121.08319720 | <a href="https://www.inaturalist.org/observations/136789938">https://www.inaturalist.org/observations/136789938</a> |
| 104 | <i>Zoothera aurea</i> | White's Thrush | 2009/12/26 | 1 | 0 | 24.68291820 | 121.75319730 | <a href="https://www.inaturalist.org/observations/55454610">https://www.inaturalist.org/observations/55454610</a>   |
| 105 | <i>Zoothera aurea</i> | White's Thrush | 2020/2/8   | 4 | 0 | 24.68427801 | 121.77235800 | <a href="https://www.inaturalist.org/observations/38605658">https://www.inaturalist.org/observations/38605658</a>   |
| 106 | <i>Zoothera aurea</i> | White's Thrush | 2010/1/20  | 1 | 0 | 24.84000909 | 121.29862150 | <a href="https://www.inaturalist.org/observations/55470788">https://www.inaturalist.org/observations/55470788</a>   |
| 107 | <i>Zoothera aurea</i> | White's Thrush | 2020/1/27  | 1 | 0 | 24.84331721 | 120.92499320 | <a href="https://www.inaturalist.org/observations/40735797">https://www.inaturalist.org/observations/40735797</a>   |
| 108 | <i>Zoothera aurea</i> | White's Thrush | 2016/12/18 | 1 | 0 | 24.99605812 | 121.80002870 | <a href="https://www.inaturalist.org/observations/5304483">https://www.inaturalist.org/observations/5304483</a>     |
| 109 | <i>Zoothera aurea</i> | White's Thrush | 2021/1/1   | 1 | 0 | 25.01015810 | 121.44113190 | <a href="https://www.inaturalist.org/observations/67705600">https://www.inaturalist.org/observations/67705600</a>   |
| 110 | <i>Zoothera aurea</i> | White's Thrush | 2021/3/10  | 1 | 0 | 25.01585402 | 121.53754000 | <a href="https://www.inaturalist.org/observations/72004283">https://www.inaturalist.org/observations/72004283</a>   |
| 111 | <i>Zoothera aurea</i> | White's Thrush | 2021/2/26  | 1 | 0 | 25.01607845 | 121.53763460 | <a href="https://www.inaturalist.org/observations/70193295">https://www.inaturalist.org/observations/70193295</a>   |
| 112 | <i>Zoothera aurea</i> | White's Thrush | 2021/2/24  | 2 | 0 | 25.01734050 | 121.53975180 | <a href="https://www.inaturalist.org/observations/98775562">https://www.inaturalist.org/observations/98775562</a>   |
| 113 | <i>Zoothera aurea</i> | White's Thrush | 2013/2/7   | 2 | 0 | 25.03228069 | 121.50932000 | <a href="https://www.inaturalist.org/observations/66992544">https://www.inaturalist.org/observations/66992544</a>   |
| 114 | <i>Zoothera aurea</i> | White's Thrush | 2010/1/24  | 1 | 0 | 25.03263922 | 121.53720230 | <a href="https://www.inaturalist.org/observations/45342791">https://www.inaturalist.org/observations/45342791</a>   |

|     |                |                |            |   |   |             |              |                                                                                                                     |
|-----|----------------|----------------|------------|---|---|-------------|--------------|---------------------------------------------------------------------------------------------------------------------|
| 115 | Zoothera aurea | White's Thrush | 2020/1/19  | 0 | 0 | 25.03956604 | 121.61454010 | <a href="https://www.inaturalist.org/observations/37742511">https://www.inaturalist.org/observations/37742511</a>   |
| 116 | Zoothera aurea | White's Thrush | 2019/12/12 | 1 | 0 | 25.07761012 | 121.58511540 | <a href="https://www.inaturalist.org/observations/36586829">https://www.inaturalist.org/observations/36586829</a>   |
| 117 | Zoothera aurea | White's Thrush | 2011/3/4   | 1 | 0 | 25.15107107 | 121.54838510 | <a href="https://www.inaturalist.org/observations/55774188">https://www.inaturalist.org/observations/55774188</a>   |
| 118 | Zoothera aurea | White's Thrush | 2020/3/26  | 1 | 0 | 25.16519774 | 121.57152200 | <a href="https://www.inaturalist.org/observations/40957139">https://www.inaturalist.org/observations/40957139</a>   |
| 119 | Zoothera aurea | White's Thrush | 2020/2/12  | 1 | 0 | 25.22542102 | 121.64198990 | <a href="https://www.inaturalist.org/observations/38564855">https://www.inaturalist.org/observations/38564855</a>   |
| 120 | Zoothera aurea | White's Thrush | 2003/2/20  | 1 | 0 | 25.22549367 | 121.64059190 | <a href="https://www.inaturalist.org/observations/35643271">https://www.inaturalist.org/observations/35643271</a>   |
| 121 | Zoothera aurea | White's Thrush | 2019/12/18 | 1 | 0 | 25.22602325 | 121.64265060 | <a href="https://www.inaturalist.org/observations/37950343">https://www.inaturalist.org/observations/37950343</a>   |
| 122 | Zoothera aurea | White's Thrush | 2021/1/31  | 1 | 0 | 25.22673630 | 121.64189730 | <a href="https://www.inaturalist.org/observations/68865947">https://www.inaturalist.org/observations/68865947</a>   |
| 123 | Zoothera aurea | White's Thrush | 2020/2/28  | 0 | 0 | 25.22735821 | 121.64092100 | <a href="https://www.inaturalist.org/observations/39315916">https://www.inaturalist.org/observations/39315916</a>   |
| 124 | Zoothera aurea | White's Thrush | 2022/2/24  | 0 | 0 | 26.65318980 | 106.67011590 | <a href="https://www.inaturalist.org/observations/108790893">https://www.inaturalist.org/observations/108790893</a> |
| 125 | Zoothera aurea | White's Thrush | 2022/2/22  | 1 | 0 | 28.17604483 | 112.93631230 | <a href="https://www.inaturalist.org/observations/107411326">https://www.inaturalist.org/observations/107411326</a> |
| 126 | Zoothera aurea | White's Thrush | 2022/2/21  | 1 | 0 | 28.20974673 | 112.99805850 | <a href="https://www.inaturalist.org/observations/107411314">https://www.inaturalist.org/observations/107411314</a> |
| 127 | Zoothera aurea | White's Thrush | 2022/2/22  | 1 | 0 | 28.20974673 | 112.99805850 | <a href="https://www.inaturalist.org/observations/107549453">https://www.inaturalist.org/observations/107549453</a> |
| 128 | Zoothera aurea | White's Thrush | 2020/2/16  | 1 | 0 | 29.48469577 | 119.29692110 | <a href="https://www.inaturalist.org/observations/74913178">https://www.inaturalist.org/observations/74913178</a>   |
| 129 | Zoothera aurea | White's Thrush | 2021/3/10  | 1 | 0 | 29.96809336 | 120.60270340 | <a href="https://www.inaturalist.org/observations/71554749">https://www.inaturalist.org/observations/71554749</a>   |
| 130 | Zoothera aurea | White's Thrush | 2021/12/24 | 1 | 0 | 30.12673667 | 118.18094170 | <a href="https://www.inaturalist.org/observations/103674876">https://www.inaturalist.org/observations/103674876</a> |
| 131 | Zoothera aurea | White's Thrush | 2021/12/24 | 1 | 0 | 30.12673667 | 118.18094170 | <a href="https://www.inaturalist.org/observations/103675233">https://www.inaturalist.org/observations/103675233</a> |
| 132 | Zoothera aurea | White's Thrush | 2022/2/3   | 1 | 0 | 30.20678354 | 120.14750850 | <a href="https://www.inaturalist.org/observations/106355834">https://www.inaturalist.org/observations/106355834</a> |
| 133 | Zoothera aurea | White's Thrush | 2022/1/10  | 1 | 0 | 30.20783034 | 120.14222970 | <a href="https://www.inaturalist.org/observations/104697777">https://www.inaturalist.org/observations/104697777</a> |
| 134 | Zoothera aurea | White's Thrush | 2022/2/6   | 1 | 0 | 30.20844227 | 120.14087790 | <a href="https://www.inaturalist.org/observations/106368656">https://www.inaturalist.org/observations/106368656</a> |
| 135 | Zoothera aurea | White's Thrush | 2022/2/15  | 1 | 0 | 30.20844227 | 120.14087790 | <a href="https://www.inaturalist.org/observations/107367536">https://www.inaturalist.org/observations/107367536</a> |
| 136 | Zoothera aurea | White's Thrush | 2022/3/14  | 1 | 0 | 30.20844227 | 120.14087790 | <a href="https://www.inaturalist.org/observations/108573001">https://www.inaturalist.org/observations/108573001</a> |
| 137 | Zoothera aurea | White's Thrush | 2020/4/1   | 1 | 0 | 30.22392478 | 120.09867420 | <a href="https://www.inaturalist.org/observations/68099481">https://www.inaturalist.org/observations/68099481</a>   |

|     |                |                |            |   |   |             |              |                                                                                                                     |
|-----|----------------|----------------|------------|---|---|-------------|--------------|---------------------------------------------------------------------------------------------------------------------|
| 138 | Zoothera aurea | White's Thrush | 2021/10/23 | 1 | 0 | 30.25160197 | 120.10859700 | <a href="https://www.inaturalist.org/observations/99219434">https://www.inaturalist.org/observations/99219434</a>   |
| 139 | Zoothera aurea | White's Thrush | 2021/3/12  | 1 | 0 | 30.25287500 | 120.11697780 | <a href="https://www.inaturalist.org/observations/72896573">https://www.inaturalist.org/observations/72896573</a>   |
| 140 | Zoothera aurea | White's Thrush | 2016/12/4  | 1 | 0 | 30.25346220 | 120.11911220 | <a href="https://www.inaturalist.org/observations/19708901">https://www.inaturalist.org/observations/19708901</a>   |
| 141 | Zoothera aurea | White's Thrush | 2011/3/5   | 1 | 0 | 30.25403400 | 120.12351500 | <a href="https://www.inaturalist.org/observations/27003259">https://www.inaturalist.org/observations/27003259</a>   |
| 142 | Zoothera aurea | White's Thrush | 2022/4/11  | 1 | 0 | 30.25418228 | 120.12014610 | <a href="https://www.inaturalist.org/observations/111076151">https://www.inaturalist.org/observations/111076151</a> |
| 143 | Zoothera aurea | White's Thrush | 2021/10/23 | 0 | 0 | 30.25424095 | 120.11714970 | <a href="https://www.inaturalist.org/observations/133909128">https://www.inaturalist.org/observations/133909128</a> |
| 144 | Zoothera aurea | White's Thrush | 2022/1/19  | 1 | 0 | 30.25737840 | 120.13768250 | <a href="https://www.inaturalist.org/observations/105213274">https://www.inaturalist.org/observations/105213274</a> |
| 145 | Zoothera aurea | White's Thrush | 2022/1/19  | 1 | 0 | 30.25737840 | 120.13768250 | <a href="https://www.inaturalist.org/observations/105213287">https://www.inaturalist.org/observations/105213287</a> |
| 146 | Zoothera aurea | White's Thrush | 2022/1/31  | 1 | 0 | 30.25737840 | 120.13768250 | <a href="https://www.inaturalist.org/observations/105970817">https://www.inaturalist.org/observations/105970817</a> |
| 147 | Zoothera aurea | White's Thrush | 2022/2/27  | 1 | 0 | 30.25737840 | 120.13768250 | <a href="https://www.inaturalist.org/observations/107689082">https://www.inaturalist.org/observations/107689082</a> |
| 148 | Zoothera aurea | White's Thrush | 2022/3/1   | 1 | 0 | 30.25737840 | 120.13768250 | <a href="https://www.inaturalist.org/observations/107694708">https://www.inaturalist.org/observations/107694708</a> |
| 149 | Zoothera aurea | White's Thrush | 2022/4/8   | 1 | 0 | 30.28109400 | 119.72922100 | <a href="https://www.inaturalist.org/observations/111167586">https://www.inaturalist.org/observations/111167586</a> |
| 150 | Zoothera aurea | White's Thrush | 2022/2/2   | 1 | 0 | 30.33122548 | 120.13444080 | <a href="https://www.inaturalist.org/observations/106176082">https://www.inaturalist.org/observations/106176082</a> |
| 151 | Zoothera aurea | White's Thrush | 2021/1/15  | 1 | 0 | 30.35851389 | 120.17592820 | <a href="https://www.inaturalist.org/observations/68098524">https://www.inaturalist.org/observations/68098524</a>   |
| 152 | Zoothera aurea | White's Thrush | 2021/1/12  | 1 | 0 | 30.52356518 | 114.44154650 | <a href="https://www.inaturalist.org/observations/113685910">https://www.inaturalist.org/observations/113685910</a> |
| 153 | Zoothera aurea | White's Thrush | 2016/12/2  | 1 | 0 | 31.01541222 | 121.47992080 | <a href="https://www.inaturalist.org/observations/19692771">https://www.inaturalist.org/observations/19692771</a>   |
| 154 | Zoothera aurea | White's Thrush | 2021/2/24  | 1 | 0 | 31.07465700 | 121.14870900 | <a href="https://www.inaturalist.org/observations/70143753">https://www.inaturalist.org/observations/70143753</a>   |
| 155 | Zoothera aurea | White's Thrush | 2021/1/17  | 1 | 0 | 31.14836516 | 121.44568050 | <a href="https://www.inaturalist.org/observations/71601602">https://www.inaturalist.org/observations/71601602</a>   |
| 156 | Zoothera aurea | White's Thrush | 2021/1/15  | 1 | 0 | 31.15002500 | 121.44989400 | <a href="https://www.inaturalist.org/observations/68097563">https://www.inaturalist.org/observations/68097563</a>   |
| 157 | Zoothera aurea | White's Thrush | 2020/11/15 | 1 | 0 | 31.21213400 | 121.54372400 | <a href="https://www.inaturalist.org/observations/109445421">https://www.inaturalist.org/observations/109445421</a> |
| 158 | Zoothera aurea | White's Thrush | 2017/12/14 | 1 | 0 | 31.21479167 | 121.54532500 | <a href="https://www.inaturalist.org/observations/9185055">https://www.inaturalist.org/observations/9185055</a>     |
| 159 | Zoothera aurea | White's Thrush | 2021/12/10 | 1 | 0 | 31.21544000 | 121.55208000 | <a href="https://www.inaturalist.org/observations/102867965">https://www.inaturalist.org/observations/102867965</a> |
| 160 | Zoothera aurea | White's Thrush | 2004/11/14 | 1 | 0 | 31.21670124 | 121.46905700 | <a href="https://www.inaturalist.org/observations/89727750">https://www.inaturalist.org/observations/89727750</a>   |

|     |                       |                |            |   |   |             |              |                                                                                                                     |
|-----|-----------------------|----------------|------------|---|---|-------------|--------------|---------------------------------------------------------------------------------------------------------------------|
| 161 | <i>Zoothera aurea</i> | White's Thrush | 2012/10/9  | 3 | 0 | 31.29678663 | 120.62318880 | <a href="http://www.inaturalist.org/observations/139526">http://www.inaturalist.org/observations/139526</a>         |
| 162 | <i>Zoothera aurea</i> | White's Thrush | 2018/2/17  | 1 | 0 | 31.32118560 | 121.55055870 | <a href="https://www.inaturalist.org/observations/9890514">https://www.inaturalist.org/observations/9890514</a>     |
| 163 | <i>Zoothera aurea</i> | White's Thrush | 2017/12/18 | 1 | 0 | 31.38316349 | 121.52881020 | <a href="https://www.inaturalist.org/observations/9200662">https://www.inaturalist.org/observations/9200662</a>     |
| 164 | <i>Zoothera aurea</i> | White's Thrush | 2018/2/1   | 1 | 0 | 31.38484070 | 121.52915000 | <a href="https://www.inaturalist.org/observations/9691162">https://www.inaturalist.org/observations/9691162</a>     |
| 165 | <i>Zoothera aurea</i> | White's Thrush | 2021/2/24  | 1 | 0 | 31.38492531 | 121.52638120 | <a href="https://www.inaturalist.org/observations/70084214">https://www.inaturalist.org/observations/70084214</a>   |
| 166 | <i>Zoothera aurea</i> | White's Thrush | 2019/10/8  | 1 | 0 | 31.38735180 | 121.43822190 | <a href="https://www.inaturalist.org/observations/126948160">https://www.inaturalist.org/observations/126948160</a> |
| 167 | <i>Zoothera aurea</i> | White's Thrush | 2022/2/28  | 1 | 0 | 31.38795667 | 121.52143670 | <a href="https://www.inaturalist.org/observations/118162648">https://www.inaturalist.org/observations/118162648</a> |
| 168 | <i>Zoothera aurea</i> | White's Thrush | 2022/2/28  | 1 | 0 | 31.38883500 | 121.52426200 | <a href="https://www.inaturalist.org/observations/108792124">https://www.inaturalist.org/observations/108792124</a> |
| 169 | <i>Zoothera aurea</i> | White's Thrush | 2022/2/28  | 1 | 0 | 31.38884497 | 121.52398800 | <a href="https://www.inaturalist.org/observations/107623585">https://www.inaturalist.org/observations/107623585</a> |
| 170 | <i>Zoothera aurea</i> | White's Thrush | 2022/2/28  | 1 | 0 | 31.40027363 | 120.74680110 | <a href="https://www.inaturalist.org/observations/107629063">https://www.inaturalist.org/observations/107629063</a> |
| 171 | <i>Zoothera aurea</i> | White's Thrush | 2021/1/24  | 0 | 0 | 31.80000000 | 118.90000000 | <a href="https://www.inaturalist.org/observations/69658532">https://www.inaturalist.org/observations/69658532</a>   |
| 172 | <i>Zoothera aurea</i> | White's Thrush | 2022/9/25  | 1 | 0 | 31.84155994 | 117.17212210 | <a href="https://www.inaturalist.org/observations/136770507">https://www.inaturalist.org/observations/136770507</a> |
| 173 | <i>Zoothera aurea</i> | White's Thrush | 2021/1/13  | 1 | 0 | 31.90217941 | 118.88427120 | <a href="https://www.inaturalist.org/observations/101868139">https://www.inaturalist.org/observations/101868139</a> |
| 174 | <i>Zoothera aurea</i> | White's Thrush | 2021/10/13 | 1 | 0 | 31.98412167 | 118.77963330 | <a href="https://www.inaturalist.org/observations/98077263">https://www.inaturalist.org/observations/98077263</a>   |
| 175 | <i>Zoothera aurea</i> | White's Thrush | 2022/3/3   | 1 | 0 | 32.05834859 | 118.82560700 | <a href="https://www.inaturalist.org/observations/107871257">https://www.inaturalist.org/observations/107871257</a> |
| 176 | <i>Zoothera aurea</i> | White's Thrush | 2020/12/20 | 2 | 0 | 32.05891833 | 118.83318830 | <a href="https://www.inaturalist.org/observations/67799040">https://www.inaturalist.org/observations/67799040</a>   |
| 177 | <i>Zoothera aurea</i> | White's Thrush | 2022/2/18  | 0 | 0 | 32.06033831 | 118.81972990 | <a href="https://www.inaturalist.org/observations/106962193">https://www.inaturalist.org/observations/106962193</a> |
| 178 | <i>Zoothera aurea</i> | White's Thrush | 2021/12/25 | 1 | 0 | 32.06527333 | 118.86391830 | <a href="https://www.inaturalist.org/observations/120274727">https://www.inaturalist.org/observations/120274727</a> |
| 179 | <i>Zoothera aurea</i> | White's Thrush | 2022/2/14  | 0 | 0 | 32.08549810 | 118.83909810 | <a href="https://www.inaturalist.org/observations/106771823">https://www.inaturalist.org/observations/106771823</a> |
| 180 | <i>Zoothera aurea</i> | White's Thrush | 2022/3/8   | 1 | 0 | 36.06405054 | 120.36346850 | <a href="https://www.inaturalist.org/observations/108363590">https://www.inaturalist.org/observations/108363590</a> |
| 181 | <i>Zoothera aurea</i> | White's Thrush | 2019/4/17  | 0 | 0 | 36.06554000 | 120.34862000 | <a href="https://www.inaturalist.org/observations/134973160">https://www.inaturalist.org/observations/134973160</a> |
| 182 | <i>Zoothera aurea</i> | White's Thrush | 2019/4/15  | 2 | 0 | 36.06577000 | 120.34908000 | <a href="https://www.inaturalist.org/observations/134962816">https://www.inaturalist.org/observations/134962816</a> |
| 183 | <i>Zoothera aurea</i> | White's Thrush | 2020/10/11 | 1 | 0 | 36.36502600 | 120.68463200 | <a href="https://www.inaturalist.org/observations/106162173">https://www.inaturalist.org/observations/106162173</a> |

|     |                       |                |           |   |   |             |              |                                                                                                                     |
|-----|-----------------------|----------------|-----------|---|---|-------------|--------------|---------------------------------------------------------------------------------------------------------------------|
| 184 | <i>Zoothera aurea</i> | White's Thrush | 2021/9/20 | 1 | 0 | 39.88201323 | 116.41035550 | <a href="https://www.inaturalist.org/observations/122050252">https://www.inaturalist.org/observations/122050252</a> |
| 185 | <i>Zoothera aurea</i> | White's Thrush | 2022/4/25 | 1 | 0 | 39.88684339 | 116.41458120 | <a href="https://www.inaturalist.org/observations/113804401">https://www.inaturalist.org/observations/113804401</a> |
| 186 | <i>Zoothera aurea</i> | White's Thrush | 2021/9/30 | 2 | 0 | 39.98691300 | 116.30587390 | <a href="https://www.inaturalist.org/observations/101971108">https://www.inaturalist.org/observations/101971108</a> |
| 187 | <i>Zoothera aurea</i> | White's Thrush | 2021/5/10 | 1 | 0 | 39.98965011 | 116.35781600 | <a href="https://www.inaturalist.org/observations/78169633">https://www.inaturalist.org/observations/78169633</a>   |
| 188 | <i>Zoothera aurea</i> | White's Thrush | 2022/9/29 | 1 | 0 | 39.99966740 | 116.32644390 | <a href="https://www.inaturalist.org/observations/136897854">https://www.inaturalist.org/observations/136897854</a> |
| 189 | <i>Zoothera aurea</i> | White's Thrush | 2022/10/1 | 0 | 0 | 40.01354379 | 116.37954950 | <a href="https://www.inaturalist.org/observations/137158453">https://www.inaturalist.org/observations/137158453</a> |
| 190 | <i>Zoothera aurea</i> | White's Thrush | 2013/6/5  | 1 | 0 | 45.40421921 | 127.65730360 | <a href="https://www.inaturalist.org/observations/18903551">https://www.inaturalist.org/observations/18903551</a>   |

| No | scientific name  | common name | date       | NIA | NID | latitude    | longitude   | url                                                                                                                 |
|----|------------------|-------------|------------|-----|-----|-------------|-------------|---------------------------------------------------------------------------------------------------------------------|
| 1  | Accipiter badius | Shikra      | 2015/11/4  | 1   | 0   | -7.81367721 | 35.76309174 | <a href="https://www.inaturalist.org/observations/10434095">https://www.inaturalist.org/observations/10434095</a>   |
| 2  | Accipiter badius | Shikra      | 2021/4/8   | 0   | 0   | -7.74698814 | 34.96530857 | <a href="https://www.inaturalist.org/observations/73281284">https://www.inaturalist.org/observations/73281284</a>   |
| 3  | Accipiter badius | Shikra      | 2022/1/9   | 3   | 0   | -3.70684491 | 38.77615680 | <a href="https://www.inaturalist.org/observations/105519907">https://www.inaturalist.org/observations/105519907</a> |
| 4  | Accipiter badius | Shikra      | 2020/10/26 | 3   | 0   | -3.31486492 | 37.68706020 | <a href="https://www.inaturalist.org/observations/63690157">https://www.inaturalist.org/observations/63690157</a>   |
| 5  | Accipiter badius | Shikra      | 2020/10/2  | 2   | 0   | -3.30698168 | 37.68877681 | <a href="https://www.inaturalist.org/observations/62796568">https://www.inaturalist.org/observations/62796568</a>   |
| 6  | Accipiter badius | Shikra      | 2021/8/23  | 1   | 0   | -3.30698168 | 37.68877681 | <a href="https://www.inaturalist.org/observations/92552018">https://www.inaturalist.org/observations/92552018</a>   |
| 7  | Accipiter badius | Shikra      | 2022/7/11  | 1   | 0   | -3.30698168 | 37.68877681 | <a href="https://www.inaturalist.org/observations/127061640">https://www.inaturalist.org/observations/127061640</a> |
| 8  | Accipiter badius | Shikra      | 2018/12/2  | 1   | 0   | -3.05415864 | 38.23436413 | <a href="https://www.inaturalist.org/observations/19081730">https://www.inaturalist.org/observations/19081730</a>   |
| 9  | Accipiter badius | Shikra      | 2007/12/9  | 1   | 0   | -3.01431270 | 38.21096420 | <a href="https://www.inaturalist.org/observations/8529458">https://www.inaturalist.org/observations/8529458</a>     |
| 10 | Accipiter badius | Shikra      | 2019/5/19  | 1   | 0   | -1.86484034 | 37.24691064 | <a href="https://www.inaturalist.org/observations/30804972">https://www.inaturalist.org/observations/30804972</a>   |
| 11 | Accipiter badius | Shikra      | 2019/4/3   | 1   | 0   | -1.86474274 | 37.24698197 | <a href="https://www.inaturalist.org/observations/21970282">https://www.inaturalist.org/observations/21970282</a>   |
| 12 | Accipiter badius | Shikra      | 2021/12/22 | 1   | 0   | -1.44109147 | 35.20779890 | <a href="https://www.inaturalist.org/observations/112651591">https://www.inaturalist.org/observations/112651591</a> |
| 13 | Accipiter badius | Shikra      | 2022/1/1   | 1   | 0   | -1.25026613 | 36.76592003 | <a href="https://www.inaturalist.org/observations/104530169">https://www.inaturalist.org/observations/104530169</a> |
| 14 | Accipiter badius | Shikra      | 2015/5/7   | 1   | 0   | -0.43751715 | 31.83779564 | <a href="https://www.inaturalist.org/observations/19778397">https://www.inaturalist.org/observations/19778397</a>   |
| 15 | Accipiter badius | Shikra      | 2022/4/13  | 2   | 0   | 0.05118392  | 32.46370777 | <a href="https://www.inaturalist.org/observations/111960082">https://www.inaturalist.org/observations/111960082</a> |
| 16 | Accipiter badius | Shikra      | 2021/7/19  | 1   | 0   | 0.05320404  | 32.46478937 | <a href="https://www.inaturalist.org/observations/96566296">https://www.inaturalist.org/observations/96566296</a>   |
| 17 | Accipiter badius | Shikra      | 2018/6/22  | 1   | 0   | 0.06201090  | 32.47927440 | <a href="https://www.inaturalist.org/observations/44391788">https://www.inaturalist.org/observations/44391788</a>   |
| 18 | Accipiter badius | Shikra      | 2018/8/10  | 1   | 0   | 0.06265101  | 32.47813942 | <a href="https://www.inaturalist.org/observations/16137213">https://www.inaturalist.org/observations/16137213</a>   |
| 19 | Accipiter badius | Shikra      | 2020/1/15  | 1   | 0   | 0.06280174  | 32.47905480 | <a href="https://www.inaturalist.org/observations/38285248">https://www.inaturalist.org/observations/38285248</a>   |
| 20 | Accipiter badius | Shikra      | 2015/10/18 | 2   | 0   | 0.07098833  | 34.48841833 | <a href="https://www.inaturalist.org/observations/7216393">https://www.inaturalist.org/observations/7216393</a>     |
| 21 | Accipiter badius | Shikra      | 2019/8/10  | 1   | 0   | 0.07620600  | 32.47976500 | <a href="https://www.inaturalist.org/observations/32251388">https://www.inaturalist.org/observations/32251388</a>   |
| 22 | Accipiter badius | Shikra      | 2015/8/6   | 1   | 0   | 0.08333319  | 32.33333331 | <a href="https://www.inaturalist.org/observations/47052650">https://www.inaturalist.org/observations/47052650</a>   |



|    |                               |        |            |   |   |            |             |                                                                                                                     |
|----|-------------------------------|--------|------------|---|---|------------|-------------|---------------------------------------------------------------------------------------------------------------------|
| 23 | Accipiter badius              | Shikra | 2016/1/6   | 1 | 0 | 0.08808280 | 38.18997820 | <a href="https://www.inaturalist.org/observations/36782406">https://www.inaturalist.org/observations/36782406</a>   |
| 24 | Accipiter badius              | Shikra | 2015/2/27  | 2 | 0 | 0.20575387 | 32.58255277 | <a href="https://www.inaturalist.org/observations/23391132">https://www.inaturalist.org/observations/23391132</a>   |
| 25 | Accipiter badius              | Shikra | 2020/11/17 | 1 | 0 | 0.21937773 | 32.55071607 | <a href="https://www.inaturalist.org/observations/65332707">https://www.inaturalist.org/observations/65332707</a>   |
| 26 | Accipiter badius              | Shikra | 2020/11/18 | 1 | 0 | 0.21945283 | 32.55068388 | <a href="https://www.inaturalist.org/observations/65333664">https://www.inaturalist.org/observations/65333664</a>   |
| 27 | Accipiter badius<br>sphenurus | Shikra | 2022/7/22  | 1 | 0 | 0.23034099 | 32.61744394 | <a href="https://www.inaturalist.org/observations/133664264">https://www.inaturalist.org/observations/133664264</a> |
| 28 | Accipiter badius              | Shikra | 2021/12/6  | 1 | 0 | 0.23145831 | 32.56218796 | <a href="https://www.inaturalist.org/observations/110261089">https://www.inaturalist.org/observations/110261089</a> |
| 29 | Accipiter badius              | Shikra | 2020/6/15  | 1 | 0 | 0.23958333 | 32.56258833 | <a href="https://www.inaturalist.org/observations/49820591">https://www.inaturalist.org/observations/49820591</a>   |
| 30 | Accipiter badius              | Shikra | 2018/8/2   | 1 | 0 | 0.25503100 | 36.09970870 | <a href="https://www.inaturalist.org/observations/37426088">https://www.inaturalist.org/observations/37426088</a>   |
| 31 | Accipiter badius              | Shikra | 2017/6/14  | 1 | 0 | 0.29427000 | 32.61499000 | <a href="https://www.inaturalist.org/observations/17853850">https://www.inaturalist.org/observations/17853850</a>   |
| 32 | Accipiter badius              | Shikra | 2021/4/3   | 0 | 0 | 0.39414358 | 32.63187408 | <a href="https://www.inaturalist.org/observations/72989490">https://www.inaturalist.org/observations/72989490</a>   |
| 33 | Accipiter badius              | Shikra | 2020/1/12  | 0 | 0 | 0.54342667 | 33.08933500 | <a href="https://www.inaturalist.org/observations/37680084">https://www.inaturalist.org/observations/37680084</a>   |
| 34 | Accipiter badius              | Shikra | 2009/8/8   | 1 | 0 | 0.62638173 | 31.58715000 | <a href="https://www.inaturalist.org/observations/35425713">https://www.inaturalist.org/observations/35425713</a>   |
| 35 | Accipiter badius              | Shikra | 2014/12/30 | 1 | 0 | 1.16593989 | 31.02594660 | <a href="https://www.inaturalist.org/observations/37495812">https://www.inaturalist.org/observations/37495812</a>   |
| 36 | Accipiter badius              | Shikra | 2004/6/8   | 1 | 0 | 1.37333300 | 32.29027500 | <a href="https://www.inaturalist.org/observations/18335477">https://www.inaturalist.org/observations/18335477</a>   |
| 37 | Accipiter badius              | Shikra | 2019/9/2   | 1 | 0 | 1.46974750 | 32.06520460 | <a href="https://www.inaturalist.org/observations/132939045">https://www.inaturalist.org/observations/132939045</a> |
| 38 | Accipiter badius              | Shikra | 2019/9/1   | 1 | 0 | 1.48575160 | 32.09541370 | <a href="https://www.inaturalist.org/observations/132932825">https://www.inaturalist.org/observations/132932825</a> |
| 39 | Accipiter badius              | Shikra | 2021/8/17  | 1 | 0 | 1.72917735 | 37.28212381 | <a href="https://www.inaturalist.org/observations/97397736">https://www.inaturalist.org/observations/97397736</a>   |
| 40 | Accipiter badius              | Shikra | 2014/7/19  | 1 | 0 | 2.26540120 | 31.50472002 | <a href="https://www.inaturalist.org/observations/106766761">https://www.inaturalist.org/observations/106766761</a> |
| 41 | Accipiter badius              | Shikra | 2008/7/13  | 1 | 0 | 2.26612350 | 31.52343750 | <a href="https://www.inaturalist.org/observations/28961371">https://www.inaturalist.org/observations/28961371</a>   |
| 42 | Accipiter badius              | Shikra | 2021/6/16  | 1 | 0 | 3.41028000 | 33.02231333 | <a href="https://www.inaturalist.org/observations/85468996">https://www.inaturalist.org/observations/85468996</a>   |
| 43 | Accipiter badius              | Shikra | 2021/6/17  | 0 | 0 | 3.71287833 | 33.67057333 | <a href="https://www.inaturalist.org/observations/85735117">https://www.inaturalist.org/observations/85735117</a>   |
| 44 | Accipiter badius              | Shikra | 2017/2/4   | 1 | 0 | 3.72256896 | 33.70687293 | <a href="https://www.inaturalist.org/observations/68337904">https://www.inaturalist.org/observations/68337904</a>   |
| 45 | Accipiter badius              | Shikra | 2011/8/19  | 2 | 0 | 7.67303400 | 36.84050000 | <a href="http://www.inaturalist.org/observations/487004">http://www.inaturalist.org/observations/487004</a>         |

|    |                            |        |            |   |   |             |             |                                                                                                                     |
|----|----------------------------|--------|------------|---|---|-------------|-------------|---------------------------------------------------------------------------------------------------------------------|
| 46 | Accipiter badius           | Shikra | 2014/1/19  | 2 | 0 | 9.14500000  | 40.48967300 | <a href="https://www.inaturalist.org/observations/128197963">https://www.inaturalist.org/observations/128197963</a> |
| 47 | Accipiter badius           | Shikra | 2019/11/9  | 0 | 0 | 9.71071642  | 38.84567953 | <a href="https://www.inaturalist.org/observations/68691419">https://www.inaturalist.org/observations/68691419</a>   |
| 48 | Accipiter badius           | Shikra | 2022/3/24  | 2 | 0 | 11.57420860 | 37.36135330 | <a href="https://www.inaturalist.org/observations/109358042">https://www.inaturalist.org/observations/109358042</a> |
| 49 | Accipiter badius           | Shikra | 2020/2/22  | 1 | 0 | 14.15703240 | 38.83681600 | <a href="https://www.inaturalist.org/observations/40226707">https://www.inaturalist.org/observations/40226707</a>   |
| 50 | Accipiter badius           | Shikra | 2021/8/6   | 2 | 0 | 5.94017934  | 80.56672689 | <a href="https://www.inaturalist.org/observations/90735374">https://www.inaturalist.org/observations/90735374</a>   |
| 51 | Accipiter badius           | Shikra | 2015/3/14  | 2 | 0 | 5.94245833  | 80.45219000 | <a href="https://www.inaturalist.org/observations/18943797">https://www.inaturalist.org/observations/18943797</a>   |
| 52 | Accipiter badius           | Shikra | 2019/8/1   | 3 | 0 | 5.96812498  | 80.42332593 | <a href="https://www.inaturalist.org/observations/51214915">https://www.inaturalist.org/observations/51214915</a>   |
| 53 | Accipiter badius           | Shikra | 2017/3/30  | 1 | 0 | 6.02379190  | 80.25466985 | <a href="https://www.inaturalist.org/observations/66578526">https://www.inaturalist.org/observations/66578526</a>   |
| 54 | Accipiter badius           | Shikra | 2018/12/9  | 3 | 0 | 6.04136561  | 80.19493143 | <a href="https://www.inaturalist.org/observations/19099513">https://www.inaturalist.org/observations/19099513</a>   |
| 55 | Accipiter badius           | Shikra | 2020/12/5  | 4 | 0 | 6.04742500  | 80.85427167 | <a href="https://www.inaturalist.org/observations/66115237">https://www.inaturalist.org/observations/66115237</a>   |
| 56 | Accipiter badius           | Shikra | 2022/2/16  | 0 | 0 | 6.17164833  | 81.20200507 | <a href="https://www.inaturalist.org/observations/107707179">https://www.inaturalist.org/observations/107707179</a> |
| 57 | Accipiter badius<br>badius | Shikra | 2019/9/2   | 3 | 0 | 6.17997325  | 81.23019174 | <a href="https://www.inaturalist.org/observations/45920859">https://www.inaturalist.org/observations/45920859</a>   |
| 58 | Accipiter badius           | Shikra | 2020/2/16  | 3 | 0 | 6.20088833  | 81.22064000 | <a href="https://www.inaturalist.org/observations/39488341">https://www.inaturalist.org/observations/39488341</a>   |
| 59 | Accipiter badius           | Shikra | 2014/11/21 | 1 | 0 | 6.20194481  | 81.21154493 | <a href="https://www.inaturalist.org/observations/71070229">https://www.inaturalist.org/observations/71070229</a>   |
| 60 | Accipiter badius           | Shikra | 2013/4/19  | 3 | 0 | 6.27895236  | 81.28911857 | <a href="https://www.inaturalist.org/observations/97333215">https://www.inaturalist.org/observations/97333215</a>   |
| 61 | Accipiter badius           | Shikra | 2015/11/10 | 3 | 0 | 6.31774392  | 81.36216974 | <a href="https://www.inaturalist.org/observations/63415458">https://www.inaturalist.org/observations/63415458</a>   |
| 62 | Accipiter badius           | Shikra | 2018/7/28  | 2 | 0 | 6.35621831  | 80.49002510 | <a href="https://www.inaturalist.org/observations/16282053">https://www.inaturalist.org/observations/16282053</a>   |
| 63 | Accipiter badius           | Shikra | 2016/2/8   | 1 | 0 | 6.38972220  | 80.50138890 | <a href="https://www.inaturalist.org/observations/35667025">https://www.inaturalist.org/observations/35667025</a>   |
| 64 | Accipiter badius           | Shikra | 2017/2/7   | 3 | 0 | 6.42677800  | 81.30804700 | <a href="https://www.inaturalist.org/observations/56921107">https://www.inaturalist.org/observations/56921107</a>   |
| 65 | Accipiter badius           | Shikra | 2017/2/6   | 3 | 0 | 6.42681243  | 81.30790313 | <a href="https://www.inaturalist.org/observations/54041242">https://www.inaturalist.org/observations/54041242</a>   |
| 66 | Accipiter badius           | Shikra | 2013/4/23  | 4 | 0 | 6.43778698  | 80.41386819 | <a href="https://www.inaturalist.org/observations/51947855">https://www.inaturalist.org/observations/51947855</a>   |
| 67 | Accipiter badius           | Shikra | 2017/7/22  | 3 | 0 | 6.43985136  | 80.42172892 | <a href="https://www.inaturalist.org/observations/7188322">https://www.inaturalist.org/observations/7188322</a>     |
| 68 | Accipiter badius           | Shikra | 2021/6/21  | 2 | 0 | 6.47093874  | 79.98066287 | <a href="https://www.inaturalist.org/observations/99856627">https://www.inaturalist.org/observations/99856627</a>   |

|    |                            |        |            |   |   |            |             |                                                                                                                     |
|----|----------------------------|--------|------------|---|---|------------|-------------|---------------------------------------------------------------------------------------------------------------------|
| 69 | Accipiter badius           | Shikra | 2012/3/8   | 5 | 0 | 6.53929742 | 81.17899035 | <a href="https://www.inaturalist.org/observations/64607963">https://www.inaturalist.org/observations/64607963</a>   |
| 70 | Accipiter badius           | Shikra | 2020/5/3   | 4 | 0 | 6.60162110 | 79.95274296 | <a href="https://www.inaturalist.org/observations/44845853">https://www.inaturalist.org/observations/44845853</a>   |
| 71 | Accipiter badius           | Shikra | 2019/4/2   | 3 | 0 | 6.73923748 | 79.89385822 | <a href="https://www.inaturalist.org/observations/21906634">https://www.inaturalist.org/observations/21906634</a>   |
| 72 | Accipiter badius           | Shikra | 2020/11/6  | 1 | 0 | 6.81153360 | 79.89158873 | <a href="https://www.inaturalist.org/observations/113335121">https://www.inaturalist.org/observations/113335121</a> |
| 73 | Accipiter badius           | Shikra | 2021/1/8   | 3 | 0 | 6.83181487 | 79.86638846 | <a href="https://www.inaturalist.org/observations/92880032">https://www.inaturalist.org/observations/92880032</a>   |
| 74 | Accipiter badius           | Shikra | 2021/6/13  | 3 | 0 | 6.84291333 | 79.91886167 | <a href="https://www.inaturalist.org/observations/84057871">https://www.inaturalist.org/observations/84057871</a>   |
| 75 | Accipiter badius           | Shikra | 2019/4/17  | 2 | 0 | 6.85668700 | 79.92506500 | <a href="https://www.inaturalist.org/observations/22744445">https://www.inaturalist.org/observations/22744445</a>   |
| 76 | Accipiter badius           | Shikra | 2015/1/22  | 5 | 0 | 6.86298992 | 79.90738352 | <a href="https://www.inaturalist.org/observations/100067769">https://www.inaturalist.org/observations/100067769</a> |
| 77 | Accipiter badius<br>badius | Shikra | 2020/6/8   | 2 | 0 | 6.86961167 | 79.93221333 | <a href="https://www.inaturalist.org/observations/48875899">https://www.inaturalist.org/observations/48875899</a>   |
| 78 | Accipiter badius           | Shikra | 2022/1/16  | 4 | 0 | 6.88248956 | 79.88270541 | <a href="https://www.inaturalist.org/observations/131973081">https://www.inaturalist.org/observations/131973081</a> |
| 79 | Accipiter badius           | Shikra | 2022/6/24  | 2 | 0 | 6.89485637 | 79.97523503 | <a href="https://www.inaturalist.org/observations/123474874">https://www.inaturalist.org/observations/123474874</a> |
| 80 | Accipiter badius           | Shikra | 2022/1/1   | 2 | 0 | 6.89489067 | 79.97515259 | <a href="https://www.inaturalist.org/observations/104172573">https://www.inaturalist.org/observations/104172573</a> |
| 81 | Accipiter badius           | Shikra | 2021/12/6  | 4 | 0 | 6.89489513 | 79.97515179 | <a href="https://www.inaturalist.org/observations/102601402">https://www.inaturalist.org/observations/102601402</a> |
| 82 | Accipiter badius           | Shikra | 2021/7/20  | 4 | 0 | 6.90942748 | 79.94500576 | <a href="https://www.inaturalist.org/observations/87818680">https://www.inaturalist.org/observations/87818680</a>   |
| 83 | Accipiter badius           | Shikra | 2019/3/29  | 6 | 0 | 6.91481060 | 79.85439270 | <a href="https://www.inaturalist.org/observations/61253547">https://www.inaturalist.org/observations/61253547</a>   |
| 84 | Accipiter badius           | Shikra | 2020/7/19  | 3 | 0 | 6.92707853 | 79.86124288 | <a href="https://www.inaturalist.org/observations/53748293">https://www.inaturalist.org/observations/53748293</a>   |
| 85 | Accipiter badius           | Shikra | 2017/12/22 | 2 | 0 | 6.99038973 | 80.43271167 | <a href="https://www.inaturalist.org/observations/10464403">https://www.inaturalist.org/observations/10464403</a>   |
| 86 | Accipiter badius           | Shikra | 2021/8/23  | 2 | 0 | 7.06679840 | 79.90409320 | <a href="https://www.inaturalist.org/observations/111415895">https://www.inaturalist.org/observations/111415895</a> |
| 87 | Accipiter badius           | Shikra | 2022/7/19  | 2 | 0 | 7.06679840 | 79.90409320 | <a href="https://www.inaturalist.org/observations/126899238">https://www.inaturalist.org/observations/126899238</a> |
| 88 | Accipiter badius           | Shikra | 2018/5/27  | 2 | 0 | 7.14323611 | 79.86882500 | <a href="https://www.inaturalist.org/observations/14249482">https://www.inaturalist.org/observations/14249482</a>   |
| 89 | Accipiter badius           | Shikra | 2019/8/11  | 6 | 0 | 7.19334426 | 81.39639013 | <a href="https://www.inaturalist.org/observations/62030837">https://www.inaturalist.org/observations/62030837</a>   |
| 90 | Accipiter badius           | Shikra | 2020/12/15 | 6 | 0 | 7.23646231 | 80.31257283 | <a href="https://www.inaturalist.org/observations/89150620">https://www.inaturalist.org/observations/89150620</a>   |
| 91 | Accipiter badius           | Shikra | 2019/5/21  | 3 | 0 | 7.26605368 | 80.58691774 | <a href="https://www.inaturalist.org/observations/25512292">https://www.inaturalist.org/observations/25512292</a>   |

|     |                  |        |            |   |   |            |             |                                                                                                                     |
|-----|------------------|--------|------------|---|---|------------|-------------|---------------------------------------------------------------------------------------------------------------------|
| 92  | Accipiter badius | Shikra | 2012/12/27 | 5 | 0 | 7.28882900 | 80.63737400 | <a href="http://www.inaturalist.org/observations/288165">http://www.inaturalist.org/observations/288165</a>         |
| 93  | Accipiter badius | Shikra | 2018/12/13 | 2 | 0 | 7.29000000 | 80.63000000 | <a href="https://www.inaturalist.org/observations/19091911">https://www.inaturalist.org/observations/19091911</a>   |
| 94  | Accipiter badius | Shikra | 2016/12/13 | 2 | 0 | 7.29530810 | 80.66321030 | <a href="https://www.inaturalist.org/observations/52444990">https://www.inaturalist.org/observations/52444990</a>   |
| 95  | Accipiter badius | Shikra | 2021/5/8   | 4 | 0 | 7.31257199 | 80.66386677 | <a href="https://www.inaturalist.org/observations/77869480">https://www.inaturalist.org/observations/77869480</a>   |
| 96  | Accipiter badius | Shikra | 2022/9/24  | 2 | 0 | 7.31261489 | 80.66381883 | <a href="https://www.inaturalist.org/observations/136413999">https://www.inaturalist.org/observations/136413999</a> |
| 97  | Accipiter badius | Shikra | 2022/7/8   | 2 | 0 | 7.34381954 | 79.85635858 | <a href="https://www.inaturalist.org/observations/125399683">https://www.inaturalist.org/observations/125399683</a> |
| 98  | Accipiter badius | Shikra | 2022/6/30  | 1 | 0 | 7.34936171 | 79.83527675 | <a href="https://www.inaturalist.org/observations/124283914">https://www.inaturalist.org/observations/124283914</a> |
| 99  | Accipiter badius | Shikra | 2022/6/30  | 3 | 0 | 7.34936171 | 79.83527675 | <a href="https://www.inaturalist.org/observations/124286325">https://www.inaturalist.org/observations/124286325</a> |
| 100 | Accipiter badius | Shikra | 2022/5/4   | 2 | 0 | 7.36119496 | 80.70198350 | <a href="https://www.inaturalist.org/observations/115812026">https://www.inaturalist.org/observations/115812026</a> |
| 101 | Accipiter badius | Shikra | 2012/10/18 | 4 | 0 | 7.41694200 | 79.81764700 | <a href="https://www.inaturalist.org/observations/65330078">https://www.inaturalist.org/observations/65330078</a>   |
| 102 | Accipiter badius | Shikra | 2019/5/26  | 1 | 0 | 7.53085516 | 80.31821347 | <a href="https://www.inaturalist.org/observations/33309030">https://www.inaturalist.org/observations/33309030</a>   |
| 103 | Accipiter badius | Shikra | 2019/5/12  | 2 | 0 | 7.53090919 | 80.31824133 | <a href="https://www.inaturalist.org/observations/25090292">https://www.inaturalist.org/observations/25090292</a>   |
| 104 | Accipiter badius | Shikra | 2019/5/26  | 2 | 0 | 7.53092906 | 80.31815868 | <a href="https://www.inaturalist.org/observations/33309036">https://www.inaturalist.org/observations/33309036</a>   |
| 105 | Accipiter badius | Shikra | 2018/11/30 | 1 | 0 | 7.83009849 | 80.66942380 | <a href="https://www.inaturalist.org/observations/121601125">https://www.inaturalist.org/observations/121601125</a> |
| 106 | Accipiter badius | Shikra | 2022/3/13  | 2 | 0 | 7.92580500 | 80.70950000 | <a href="https://www.inaturalist.org/observations/109855088">https://www.inaturalist.org/observations/109855088</a> |
| 107 | Accipiter badius | Shikra | 2019/3/29  | 4 | 0 | 7.95589121 | 80.75743774 | <a href="https://www.inaturalist.org/observations/49176242">https://www.inaturalist.org/observations/49176242</a>   |
| 108 | Accipiter badius | Shikra | 2019/8/28  | 1 | 0 | 7.95593129 | 80.75742222 | <a href="https://www.inaturalist.org/observations/38167045">https://www.inaturalist.org/observations/38167045</a>   |
| 109 | Accipiter badius | Shikra | 2021/12/30 | 3 | 0 | 7.95662207 | 80.75130148 | <a href="https://www.inaturalist.org/observations/105560947">https://www.inaturalist.org/observations/105560947</a> |
| 110 | Accipiter badius | Shikra | 2016/2/9   | 2 | 0 | 8.00235640 | 80.92492120 | <a href="https://www.inaturalist.org/observations/83167146">https://www.inaturalist.org/observations/83167146</a>   |
| 111 | Accipiter badius | Shikra | 2019/4/5   | 4 | 0 | 8.09754700 | 80.44145100 | <a href="https://www.inaturalist.org/observations/22086310">https://www.inaturalist.org/observations/22086310</a>   |
| 112 | Accipiter badius | Shikra | 2021/2/4   | 4 | 0 | 8.18676950 | 77.42470440 | <a href="https://www.inaturalist.org/observations/129709009">https://www.inaturalist.org/observations/129709009</a> |
| 113 | Accipiter badius | Shikra | 2018/10/12 | 2 | 0 | 8.34458000 | 80.39841500 | <a href="https://www.inaturalist.org/observations/101999682">https://www.inaturalist.org/observations/101999682</a> |
| 114 | Accipiter badius | Shikra | 2019/8/25  | 1 | 0 | 8.36090528 | 80.09356845 | <a href="https://www.inaturalist.org/observations/36139379">https://www.inaturalist.org/observations/36139379</a>   |

|     |                  |        |            |   |   |            |             |                                                                                                                     |
|-----|------------------|--------|------------|---|---|------------|-------------|---------------------------------------------------------------------------------------------------------------------|
| 115 | Accipiter badius | Shikra | 2017/2/25  | 3 | 0 | 8.39155773 | 76.97343503 | <a href="https://www.inaturalist.org/observations/62402916">https://www.inaturalist.org/observations/62402916</a>   |
| 116 | Accipiter badius | Shikra | 2021/10/8  | 1 | 0 | 8.40364027 | 81.31661719 | <a href="https://www.inaturalist.org/observations/97519889">https://www.inaturalist.org/observations/97519889</a>   |
| 117 | Accipiter badius | Shikra | 2012/3/2   | 1 | 0 | 8.41320720 | 77.39190100 | <a href="https://www.inaturalist.org/observations/90253725">https://www.inaturalist.org/observations/90253725</a>   |
| 118 | Accipiter badius | Shikra | 2017/11/29 | 2 | 0 | 8.42201552 | 80.00673294 | <a href="https://www.inaturalist.org/observations/9275927">https://www.inaturalist.org/observations/9275927</a>     |
| 119 | Accipiter badius | Shikra | 2021/3/28  | 1 | 0 | 8.42942645 | 76.97655458 | <a href="https://www.inaturalist.org/observations/72241694">https://www.inaturalist.org/observations/72241694</a>   |
| 120 | Accipiter badius | Shikra | 2021/8/16  | 2 | 0 | 8.42948781 | 76.97635811 | <a href="https://www.inaturalist.org/observations/91423635">https://www.inaturalist.org/observations/91423635</a>   |
| 121 | Accipiter badius | Shikra | 2020/4/30  | 1 | 0 | 8.43497963 | 77.56711330 | <a href="https://www.inaturalist.org/observations/44557003">https://www.inaturalist.org/observations/44557003</a>   |
| 122 | Accipiter badius | Shikra | 2022/3/1   | 6 | 0 | 8.44269438 | 76.97023463 | <a href="https://www.inaturalist.org/observations/107750400">https://www.inaturalist.org/observations/107750400</a> |
| 123 | Accipiter badius | Shikra | 2022/2/28  | 4 | 0 | 8.44948371 | 76.98343512 | <a href="https://www.inaturalist.org/observations/107683759">https://www.inaturalist.org/observations/107683759</a> |
| 124 | Accipiter badius | Shikra | 2021/7/27  | 2 | 0 | 8.45018181 | 76.97743937 | <a href="https://www.inaturalist.org/observations/88918895">https://www.inaturalist.org/observations/88918895</a>   |
| 125 | Accipiter badius | Shikra | 2022/2/7   | 3 | 0 | 8.45047000 | 76.97580289 | <a href="https://www.inaturalist.org/observations/106361146">https://www.inaturalist.org/observations/106361146</a> |
| 126 | Accipiter badius | Shikra | 2014/7/26  | 3 | 0 | 8.45255400 | 76.97438700 | <a href="http://www.inaturalist.org/observations/803766">http://www.inaturalist.org/observations/803766</a>         |
| 127 | Accipiter badius | Shikra | 2021/10/19 | 2 | 0 | 8.45528359 | 77.42044294 | <a href="https://www.inaturalist.org/observations/102909735">https://www.inaturalist.org/observations/102909735</a> |
| 128 | Accipiter badius | Shikra | 2019/1/5   | 1 | 0 | 8.49270650 | 77.75093030 | <a href="https://www.inaturalist.org/observations/88811153">https://www.inaturalist.org/observations/88811153</a>   |
| 129 | Accipiter badius | Shikra | 2021/12/7  | 3 | 0 | 8.51804924 | 77.45540472 | <a href="https://www.inaturalist.org/observations/103938030">https://www.inaturalist.org/observations/103938030</a> |
| 130 | Accipiter badius | Shikra | 2020/1/19  | 2 | 0 | 8.52338333 | 76.90354333 | <a href="https://www.inaturalist.org/observations/67015574">https://www.inaturalist.org/observations/67015574</a>   |
| 131 | Accipiter badius | Shikra | 2014/4/18  | 2 | 0 | 8.53505000 | 77.17224200 | <a href="http://www.inaturalist.org/observations/640766">http://www.inaturalist.org/observations/640766</a>         |
| 132 | Accipiter badius | Shikra | 2020/11/14 | 3 | 0 | 8.54149698 | 76.96128745 | <a href="https://www.inaturalist.org/observations/65062129">https://www.inaturalist.org/observations/65062129</a>   |
| 133 | Accipiter badius | Shikra | 2022/2/19  | 5 | 0 | 8.54930360 | 76.97726750 | <a href="https://www.inaturalist.org/observations/108239284">https://www.inaturalist.org/observations/108239284</a> |
| 134 | Accipiter badius | Shikra | 2015/2/17  | 4 | 0 | 8.54930400 | 76.97726700 | <a href="http://www.inaturalist.org/observations/1286410">http://www.inaturalist.org/observations/1286410</a>       |
| 135 | Accipiter badius | Shikra | 2014/11/16 | 3 | 0 | 8.56754500 | 77.13916900 | <a href="http://www.inaturalist.org/observations/1116033">http://www.inaturalist.org/observations/1116033</a>       |
| 136 | Accipiter badius | Shikra | 2021/2/18  | 5 | 0 | 8.58648534 | 77.02859949 | <a href="https://www.inaturalist.org/observations/80857627">https://www.inaturalist.org/observations/80857627</a>   |
| 137 | Accipiter badius | Shikra | 2018/11/25 | 4 | 0 | 8.67302083 | 77.14060299 | <a href="https://www.inaturalist.org/observations/36013764">https://www.inaturalist.org/observations/36013764</a>   |

|     |                  |        |            |   |   |            |             |                                                                                                                     |
|-----|------------------|--------|------------|---|---|------------|-------------|---------------------------------------------------------------------------------------------------------------------|
| 138 | Accipiter badius | Shikra | 2019/8/26  | 1 | 0 | 8.71309181 | 81.18515074 | <a href="https://www.inaturalist.org/observations/36542271">https://www.inaturalist.org/observations/36542271</a>   |
| 139 | Accipiter badius | Shikra | 2021/6/5   | 2 | 0 | 8.73770560 | 76.70390640 | <a href="https://www.inaturalist.org/observations/81647137">https://www.inaturalist.org/observations/81647137</a>   |
| 140 | Accipiter badius | Shikra | 2017/8/3   | 3 | 0 | 8.87008239 | 76.60144493 | <a href="https://www.inaturalist.org/observations/65979311">https://www.inaturalist.org/observations/65979311</a>   |
| 141 | Accipiter badius | Shikra | 2017/4/17  | 5 | 0 | 8.87009007 | 76.60146729 | <a href="https://www.inaturalist.org/observations/66359229">https://www.inaturalist.org/observations/66359229</a>   |
| 142 | Accipiter badius | Shikra | 2017/5/20  | 5 | 0 | 8.87009811 | 76.60144538 | <a href="https://www.inaturalist.org/observations/66360570">https://www.inaturalist.org/observations/66360570</a>   |
| 143 | Accipiter badius | Shikra | 2017/8/10  | 2 | 0 | 8.87009839 | 76.60142159 | <a href="https://www.inaturalist.org/observations/66074979">https://www.inaturalist.org/observations/66074979</a>   |
| 144 | Accipiter badius | Shikra | 2017/4/17  | 5 | 0 | 8.87009842 | 76.60144049 | <a href="https://www.inaturalist.org/observations/66359230">https://www.inaturalist.org/observations/66359230</a>   |
| 145 | Accipiter badius | Shikra | 2017/8/24  | 2 | 0 | 8.87010197 | 76.60162733 | <a href="https://www.inaturalist.org/observations/65888263">https://www.inaturalist.org/observations/65888263</a>   |
| 146 | Accipiter badius | Shikra | 2017/7/24  | 2 | 0 | 8.87010512 | 76.60163967 | <a href="https://www.inaturalist.org/observations/65978867">https://www.inaturalist.org/observations/65978867</a>   |
| 147 | Accipiter badius | Shikra | 2017/7/14  | 3 | 0 | 8.87011207 | 76.60139354 | <a href="https://www.inaturalist.org/observations/66074477">https://www.inaturalist.org/observations/66074477</a>   |
| 148 | Accipiter badius | Shikra | 2019/10/17 | 3 | 0 | 9.00053543 | 76.71200629 | <a href="https://www.inaturalist.org/observations/59204917">https://www.inaturalist.org/observations/59204917</a>   |
| 149 | Accipiter badius | Shikra | 2013/7/18  | 4 | 0 | 9.00184830 | 76.87858190 | <a href="https://www.inaturalist.org/observations/31284733">https://www.inaturalist.org/observations/31284733</a>   |
| 150 | Accipiter badius | Shikra | 2014/11/23 | 2 | 0 | 9.44047800 | 77.16034700 | <a href="http://www.inaturalist.org/observations/1120905">http://www.inaturalist.org/observations/1120905</a>       |
| 151 | Accipiter badius | Shikra | 2018/4/28  | 4 | 0 | 9.45953350 | 76.53924950 | <a href="https://www.inaturalist.org/observations/28477578">https://www.inaturalist.org/observations/28477578</a>   |
| 152 | Accipiter badius | Shikra | 2021/4/8   | 3 | 0 | 9.49736245 | 78.13797053 | <a href="https://www.inaturalist.org/observations/85361092">https://www.inaturalist.org/observations/85361092</a>   |
| 153 | Accipiter badius | Shikra | 2020/10/4  | 3 | 0 | 9.49806217 | 76.33884832 | <a href="https://www.inaturalist.org/observations/62466462">https://www.inaturalist.org/observations/62466462</a>   |
| 154 | Accipiter badius | Shikra | 2019/1/27  | 1 | 0 | 9.53460861 | 77.52900682 | <a href="https://www.inaturalist.org/observations/103563502">https://www.inaturalist.org/observations/103563502</a> |
| 155 | Accipiter badius | Shikra | 2022/8/5   | 1 | 0 | 9.56165030 | 76.49051080 | <a href="https://www.inaturalist.org/observations/129962812">https://www.inaturalist.org/observations/129962812</a> |
| 156 | Accipiter badius | Shikra | 2021/4/25  | 5 | 0 | 9.56447574 | 76.53512869 | <a href="https://www.inaturalist.org/observations/75169062">https://www.inaturalist.org/observations/75169062</a>   |
| 157 | Accipiter badius | Shikra | 2018/12/30 | 2 | 0 | 9.57030407 | 76.43968673 | <a href="https://www.inaturalist.org/observations/66031472">https://www.inaturalist.org/observations/66031472</a>   |
| 158 | Accipiter badius | Shikra | 2022/5/2   | 2 | 0 | 9.57617729 | 76.43586305 | <a href="https://www.inaturalist.org/observations/124515098">https://www.inaturalist.org/observations/124515098</a> |
| 159 | Accipiter badius | Shikra | 2017/2/2   | 5 | 0 | 9.58453790 | 76.53313790 | <a href="https://www.inaturalist.org/observations/29969194">https://www.inaturalist.org/observations/29969194</a>   |
| 160 | Accipiter badius | Shikra | 2019/6/14  | 2 | 0 | 9.59738910 | 76.51104880 | <a href="https://www.inaturalist.org/observations/31296925">https://www.inaturalist.org/observations/31296925</a>   |

|     |                  |        |            |   |   |            |             |                                                                                                                     |
|-----|------------------|--------|------------|---|---|------------|-------------|---------------------------------------------------------------------------------------------------------------------|
| 161 | Accipiter badius | Shikra | 2019/9/7   | 2 | 0 | 9.59766245 | 76.51108997 | <a href="https://www.inaturalist.org/observations/43030659">https://www.inaturalist.org/observations/43030659</a>   |
| 162 | Accipiter badius | Shikra | 2019/8/12  | 3 | 0 | 9.59766245 | 76.51108997 | <a href="https://www.inaturalist.org/observations/43040600">https://www.inaturalist.org/observations/43040600</a>   |
| 163 | Accipiter badius | Shikra | 2020/6/1   | 5 | 0 | 9.59766245 | 76.51108997 | <a href="https://www.inaturalist.org/observations/48350328">https://www.inaturalist.org/observations/48350328</a>   |
| 164 | Accipiter badius | Shikra | 2020/6/11  | 6 | 0 | 9.59766245 | 76.51108997 | <a href="https://www.inaturalist.org/observations/49709874">https://www.inaturalist.org/observations/49709874</a>   |
| 165 | Accipiter badius | Shikra | 2021/6/20  | 4 | 0 | 9.59766245 | 76.51108997 | <a href="https://www.inaturalist.org/observations/87348791">https://www.inaturalist.org/observations/87348791</a>   |
| 166 | Accipiter badius | Shikra | 2019/3/23  | 3 | 0 | 9.59776214 | 76.51110884 | <a href="https://www.inaturalist.org/observations/41048158">https://www.inaturalist.org/observations/41048158</a>   |
| 167 | Accipiter badius | Shikra | 2020/10/4  | 3 | 0 | 9.60058630 | 76.35793995 | <a href="https://www.inaturalist.org/observations/62467732">https://www.inaturalist.org/observations/62467732</a>   |
| 168 | Accipiter badius | Shikra | 2018/6/11  | 3 | 0 | 9.60094530 | 76.51684800 | <a href="https://www.inaturalist.org/observations/13331574">https://www.inaturalist.org/observations/13331574</a>   |
| 169 | Accipiter badius | Shikra | 2020/10/24 | 3 | 0 | 9.61754068 | 76.43009473 | <a href="https://www.inaturalist.org/observations/130053476">https://www.inaturalist.org/observations/130053476</a> |
| 170 | Accipiter badius | Shikra | 2022/6/29  | 3 | 0 | 9.64729787 | 77.17673188 | <a href="https://www.inaturalist.org/observations/124256789">https://www.inaturalist.org/observations/124256789</a> |
| 171 | Accipiter badius | Shikra | 2019/2/16  | 2 | 0 | 9.66811579 | 76.32196281 | <a href="https://www.inaturalist.org/observations/48611772">https://www.inaturalist.org/observations/48611772</a>   |
| 172 | Accipiter badius | Shikra | 2019/8/26  | 4 | 0 | 9.66817434 | 76.32183677 | <a href="https://www.inaturalist.org/observations/31857156">https://www.inaturalist.org/observations/31857156</a>   |
| 173 | Accipiter badius | Shikra | 2020/8/1   | 2 | 0 | 9.66820801 | 76.32178914 | <a href="https://www.inaturalist.org/observations/57234358">https://www.inaturalist.org/observations/57234358</a>   |
| 174 | Accipiter badius | Shikra | 2019/11/12 | 3 | 0 | 9.67013655 | 76.32743351 | <a href="https://www.inaturalist.org/observations/49538503">https://www.inaturalist.org/observations/49538503</a>   |
| 175 | Accipiter badius | Shikra | 2022/9/11  | 3 | 0 | 9.67413630 | 76.34009630 | <a href="https://www.inaturalist.org/observations/134608075">https://www.inaturalist.org/observations/134608075</a> |
| 176 | Accipiter badius | Shikra | 2022/9/21  | 3 | 0 | 9.67413630 | 76.34009630 | <a href="https://www.inaturalist.org/observations/135903208">https://www.inaturalist.org/observations/135903208</a> |
| 177 | Accipiter badius | Shikra | 2022/9/25  | 2 | 0 | 9.67413630 | 76.34009630 | <a href="https://www.inaturalist.org/observations/136413981">https://www.inaturalist.org/observations/136413981</a> |
| 178 | Accipiter badius | Shikra | 2022/9/27  | 0 | 0 | 9.67413630 | 76.34009630 | <a href="https://www.inaturalist.org/observations/136666506">https://www.inaturalist.org/observations/136666506</a> |
| 179 | Accipiter badius | Shikra | 2020/7/19  | 4 | 0 | 9.68680174 | 80.02592460 | <a href="https://www.inaturalist.org/observations/88552824">https://www.inaturalist.org/observations/88552824</a>   |
| 180 | Accipiter badius | Shikra | 2021/10/22 | 1 | 0 | 9.68696966 | 80.02603856 | <a href="https://www.inaturalist.org/observations/98963818">https://www.inaturalist.org/observations/98963818</a>   |
| 181 | Accipiter badius | Shikra | 2020/8/19  | 1 | 0 | 9.71581949 | 76.31925277 | <a href="https://www.inaturalist.org/observations/56928008">https://www.inaturalist.org/observations/56928008</a>   |
| 182 | Accipiter badius | Shikra | 2021/11/7  | 2 | 0 | 9.73000000 | 76.87000000 | <a href="https://www.inaturalist.org/observations/100518061">https://www.inaturalist.org/observations/100518061</a> |
| 183 | Accipiter badius | Shikra | 2022/3/12  | 4 | 0 | 9.75227019 | 76.84708163 | <a href="https://www.inaturalist.org/observations/109025715">https://www.inaturalist.org/observations/109025715</a> |

|     |                  |        |            |   |   |            |             |                                                                                                                     |
|-----|------------------|--------|------------|---|---|------------|-------------|---------------------------------------------------------------------------------------------------------------------|
| 184 | Accipiter badius | Shikra | 2019/6/10  | 2 | 0 | 9.79039639 | 76.30461000 | <a href="https://www.inaturalist.org/observations/48678075">https://www.inaturalist.org/observations/48678075</a>   |
| 185 | Accipiter badius | Shikra | 2019/6/10  | 3 | 0 | 9.79039639 | 76.30461000 | <a href="https://www.inaturalist.org/observations/50810496">https://www.inaturalist.org/observations/50810496</a>   |
| 186 | Accipiter badius | Shikra | 2020/5/31  | 4 | 0 | 9.79047306 | 76.30435972 | <a href="https://www.inaturalist.org/observations/48013640">https://www.inaturalist.org/observations/48013640</a>   |
| 187 | Accipiter badius | Shikra | 2019/6/29  | 1 | 0 | 9.79733306 | 76.28338000 | <a href="https://www.inaturalist.org/observations/48939200">https://www.inaturalist.org/observations/48939200</a>   |
| 188 | Accipiter badius | Shikra | 2022/2/18  | 5 | 0 | 9.85744490 | 76.75899810 | <a href="https://www.inaturalist.org/observations/108242403">https://www.inaturalist.org/observations/108242403</a> |
| 189 | Accipiter badius | Shikra | 2019/1/2   | 1 | 0 | 9.85884422 | 76.73804458 | <a href="https://www.inaturalist.org/observations/96383128">https://www.inaturalist.org/observations/96383128</a>   |
| 190 | Accipiter badius | Shikra | 2018/12/4  | 1 | 0 | 9.86664515 | 76.77424705 | <a href="https://www.inaturalist.org/observations/88147641">https://www.inaturalist.org/observations/88147641</a>   |
| 191 | Accipiter badius | Shikra | 2012/3/4   | 1 | 0 | 9.88868643 | 76.72812668 | <a href="https://www.inaturalist.org/observations/80345371">https://www.inaturalist.org/observations/80345371</a>   |
| 192 | Accipiter badius | Shikra | 2018/7/23  | 1 | 0 | 9.88868643 | 76.72812668 | <a href="https://www.inaturalist.org/observations/83953074">https://www.inaturalist.org/observations/83953074</a>   |
| 193 | Accipiter badius | Shikra | 2018/5/10  | 2 | 0 | 9.88868643 | 76.72812668 | <a href="https://www.inaturalist.org/observations/84065779">https://www.inaturalist.org/observations/84065779</a>   |
| 194 | Accipiter badius | Shikra | 2018/11/9  | 1 | 0 | 9.88868643 | 76.72812668 | <a href="https://www.inaturalist.org/observations/87099661">https://www.inaturalist.org/observations/87099661</a>   |
| 195 | Accipiter badius | Shikra | 2021/8/4   | 1 | 0 | 9.88868643 | 76.72812668 | <a href="https://www.inaturalist.org/observations/91730189">https://www.inaturalist.org/observations/91730189</a>   |
| 196 | Accipiter badius | Shikra | 2021/11/5  | 2 | 0 | 9.88868643 | 76.72812668 | <a href="https://www.inaturalist.org/observations/100513430">https://www.inaturalist.org/observations/100513430</a> |
| 197 | Accipiter badius | Shikra | 2022/4/30  | 4 | 0 | 9.88881459 | 76.72799528 | <a href="https://www.inaturalist.org/observations/115135935">https://www.inaturalist.org/observations/115135935</a> |
| 198 | Accipiter badius | Shikra | 2022/2/26  | 3 | 0 | 9.89068057 | 76.68863629 | <a href="https://www.inaturalist.org/observations/108286756">https://www.inaturalist.org/observations/108286756</a> |
| 199 | Accipiter badius | Shikra | 2021/12/1  | 2 | 0 | 9.89081268 | 76.69041719 | <a href="https://www.inaturalist.org/observations/102417148">https://www.inaturalist.org/observations/102417148</a> |
| 200 | Accipiter badius | Shikra | 2021/11/27 | 2 | 0 | 9.89555351 | 76.74879118 | <a href="https://www.inaturalist.org/observations/102414447">https://www.inaturalist.org/observations/102414447</a> |
| 201 | Accipiter badius | Shikra | 2016/2/17  | 2 | 0 | 9.90143090 | 76.79712470 | <a href="https://www.inaturalist.org/observations/91649462">https://www.inaturalist.org/observations/91649462</a>   |
| 202 | Accipiter badius | Shikra | 2021/1/3   | 2 | 0 | 9.91042159 | 78.10583733 | <a href="https://www.inaturalist.org/observations/86156037">https://www.inaturalist.org/observations/86156037</a>   |
| 203 | Accipiter badius | Shikra | 2020/4/9   | 2 | 0 | 9.95043160 | 76.32903300 | <a href="https://www.inaturalist.org/observations/41738853">https://www.inaturalist.org/observations/41738853</a>   |
| 204 | Accipiter badius | Shikra | 2016/1/27  | 1 | 0 | 9.95205500 | 76.31138429 | <a href="https://www.inaturalist.org/observations/48517289">https://www.inaturalist.org/observations/48517289</a>   |
| 205 | Accipiter badius | Shikra | 2014/1/23  | 3 | 0 | 9.95205500 | 76.31138429 | <a href="https://www.inaturalist.org/observations/48609816">https://www.inaturalist.org/observations/48609816</a>   |
| 206 | Accipiter badius | Shikra | 2021/10/23 | 1 | 0 | 9.95453155 | 78.13356768 | <a href="https://www.inaturalist.org/observations/99172442">https://www.inaturalist.org/observations/99172442</a>   |



|     |                  |        |            |   |   |             |             |                                                                                                                     |
|-----|------------------|--------|------------|---|---|-------------|-------------|---------------------------------------------------------------------------------------------------------------------|
| 207 | Accipiter badius | Shikra | 2020/12/25 | 1 | 0 | 10.02917766 | 76.35938575 | <a href="https://www.inaturalist.org/observations/67045551">https://www.inaturalist.org/observations/67045551</a>   |
| 208 | Accipiter badius | Shikra | 2022/7/28  | 3 | 0 | 10.03373749 | 76.62105393 | <a href="https://www.inaturalist.org/observations/128338150">https://www.inaturalist.org/observations/128338150</a> |
| 209 | Accipiter badius | Shikra | 2021/5/9   | 1 | 0 | 10.03418022 | 76.62014466 | <a href="https://www.inaturalist.org/observations/79648049">https://www.inaturalist.org/observations/79648049</a>   |
| 210 | Accipiter badius | Shikra | 2019/5/2   | 2 | 0 | 10.08487591 | 77.04426874 | <a href="https://www.inaturalist.org/observations/92918719">https://www.inaturalist.org/observations/92918719</a>   |
| 211 | Accipiter badius | Shikra | 2019/5/2   | 2 | 0 | 10.08487591 | 77.04426874 | <a href="https://www.inaturalist.org/observations/92918720">https://www.inaturalist.org/observations/92918720</a>   |
| 212 | Accipiter badius | Shikra | 2020/9/8   | 1 | 0 | 10.09271935 | 78.77793655 | <a href="https://www.inaturalist.org/observations/61461135">https://www.inaturalist.org/observations/61461135</a>   |
| 213 | Accipiter badius | Shikra | 2014/11/2  | 2 | 0 | 10.10398030 | 76.70046050 | <a href="https://www.inaturalist.org/observations/71070178">https://www.inaturalist.org/observations/71070178</a>   |
| 214 | Accipiter badius | Shikra | 2014/1/30  | 2 | 0 | 10.12734596 | 76.68594674 | <a href="https://www.inaturalist.org/observations/68455412">https://www.inaturalist.org/observations/68455412</a>   |
| 215 | Accipiter badius | Shikra | 2019/1/16  | 4 | 0 | 10.13062048 | 76.68611525 | <a href="https://www.inaturalist.org/observations/30248848">https://www.inaturalist.org/observations/30248848</a>   |
| 216 | Accipiter badius | Shikra | 2020/3/22  | 2 | 0 | 10.13098780 | 76.24104930 | <a href="https://www.inaturalist.org/observations/41220642">https://www.inaturalist.org/observations/41220642</a>   |
| 217 | Accipiter badius | Shikra | 2019/12/15 | 2 | 0 | 10.13098780 | 76.24104930 | <a href="https://www.inaturalist.org/observations/41278743">https://www.inaturalist.org/observations/41278743</a>   |
| 218 | Accipiter badius | Shikra | 2014/1/5   | 1 | 0 | 10.28890313 | 76.49852113 | <a href="https://www.inaturalist.org/observations/46836923">https://www.inaturalist.org/observations/46836923</a>   |
| 219 | Accipiter badius | Shikra | 2021/5/18  | 2 | 0 | 10.29141672 | 76.23458650 | <a href="https://www.inaturalist.org/observations/82054452">https://www.inaturalist.org/observations/82054452</a>   |
| 220 | Accipiter badius | Shikra | 2015/7/12  | 2 | 0 | 10.29247319 | 76.48057230 | <a href="https://www.inaturalist.org/observations/46835948">https://www.inaturalist.org/observations/46835948</a>   |
| 221 | Accipiter badius | Shikra | 2021/5/11  | 3 | 0 | 10.29552175 | 76.23140372 | <a href="https://www.inaturalist.org/observations/80211688">https://www.inaturalist.org/observations/80211688</a>   |
| 222 | Accipiter badius | Shikra | 2021/5/12  | 1 | 0 | 10.29552175 | 76.23140372 | <a href="https://www.inaturalist.org/observations/80243140">https://www.inaturalist.org/observations/80243140</a>   |
| 223 | Accipiter badius | Shikra | 2021/5/12  | 1 | 0 | 10.29552175 | 76.23140372 | <a href="https://www.inaturalist.org/observations/80243448">https://www.inaturalist.org/observations/80243448</a>   |
| 224 | Accipiter badius | Shikra | 2021/5/13  | 3 | 0 | 10.29552175 | 76.23140372 | <a href="https://www.inaturalist.org/observations/80267205">https://www.inaturalist.org/observations/80267205</a>   |
| 225 | Accipiter badius | Shikra | 2021/5/27  | 2 | 0 | 10.29552175 | 76.23140372 | <a href="https://www.inaturalist.org/observations/80487191">https://www.inaturalist.org/observations/80487191</a>   |
| 226 | Accipiter badius | Shikra | 2021/6/6   | 2 | 0 | 10.29552175 | 76.23140372 | <a href="https://www.inaturalist.org/observations/82049381">https://www.inaturalist.org/observations/82049381</a>   |
| 227 | Accipiter badius | Shikra | 2021/1/4   | 1 | 0 | 10.33141665 | 76.40064893 | <a href="https://www.inaturalist.org/observations/67577587">https://www.inaturalist.org/observations/67577587</a>   |
| 228 | Accipiter badius | Shikra | 2021/11/27 | 1 | 0 | 10.33141665 | 76.40064893 | <a href="https://www.inaturalist.org/observations/102089894">https://www.inaturalist.org/observations/102089894</a> |
| 229 | Accipiter badius | Shikra | 2020/4/13  | 3 | 0 | 10.33682799 | 76.26623992 | <a href="https://www.inaturalist.org/observations/45454738">https://www.inaturalist.org/observations/45454738</a>   |

|     |                  |        |            |   |   |             |             |                                                                                                                     |
|-----|------------------|--------|------------|---|---|-------------|-------------|---------------------------------------------------------------------------------------------------------------------|
| 230 | Accipiter badius | Shikra | 2020/5/10  | 3 | 0 | 10.33683525 | 76.26631469 | <a href="https://www.inaturalist.org/observations/45469256">https://www.inaturalist.org/observations/45469256</a>   |
| 231 | Accipiter badius | Shikra | 2021/10/31 | 1 | 0 | 10.41757988 | 76.22965783 | <a href="https://www.inaturalist.org/observations/99880869">https://www.inaturalist.org/observations/99880869</a>   |
| 232 | Accipiter badius | Shikra | 2021/10/31 | 2 | 0 | 10.41757988 | 76.22965783 | <a href="https://www.inaturalist.org/observations/99880870">https://www.inaturalist.org/observations/99880870</a>   |
| 233 | Accipiter badius | Shikra | 2021/10/31 | 3 | 0 | 10.41761695 | 76.22967660 | <a href="https://www.inaturalist.org/observations/100250392">https://www.inaturalist.org/observations/100250392</a> |
| 234 | Accipiter badius | Shikra | 2021/10/31 | 3 | 0 | 10.41761695 | 76.22967660 | <a href="https://www.inaturalist.org/observations/100250394">https://www.inaturalist.org/observations/100250394</a> |
| 235 | Accipiter badius | Shikra | 2021/10/31 | 5 | 0 | 10.41837600 | 76.22999400 | <a href="https://www.inaturalist.org/observations/100123997">https://www.inaturalist.org/observations/100123997</a> |
| 236 | Accipiter badius | Shikra | 2019/9/27  | 2 | 0 | 10.42018500 | 76.26984333 | <a href="https://www.inaturalist.org/observations/34207534">https://www.inaturalist.org/observations/34207534</a>   |
| 237 | Accipiter badius | Shikra | 2014/6/6   | 1 | 0 | 10.51469866 | 76.04685932 | <a href="https://www.inaturalist.org/observations/30260188">https://www.inaturalist.org/observations/30260188</a>   |
| 238 | Accipiter badius | Shikra | 2017/5/22  | 2 | 0 | 10.51842807 | 76.08664799 | <a href="https://www.inaturalist.org/observations/30260230">https://www.inaturalist.org/observations/30260230</a>   |
| 239 | Accipiter badius | Shikra | 2020/4/18  | 4 | 0 | 10.52764162 | 76.21443506 | <a href="https://www.inaturalist.org/observations/44338870">https://www.inaturalist.org/observations/44338870</a>   |
| 240 | Accipiter badius | Shikra | 2020/7/20  | 3 | 0 | 10.53328640 | 76.34332474 | <a href="https://www.inaturalist.org/observations/63171747">https://www.inaturalist.org/observations/63171747</a>   |
| 241 | Accipiter badius | Shikra | 2020/6/3   | 3 | 0 | 10.53328640 | 76.34332474 | <a href="https://www.inaturalist.org/observations/63644945">https://www.inaturalist.org/observations/63644945</a>   |
| 242 | Accipiter badius | Shikra | 2020/1/29  | 1 | 0 | 10.53551667 | 76.10023333 | <a href="https://www.inaturalist.org/observations/67019424">https://www.inaturalist.org/observations/67019424</a>   |
| 243 | Accipiter badius | Shikra | 2022/6/1   | 3 | 0 | 10.58910039 | 76.02966841 | <a href="https://www.inaturalist.org/observations/119807552">https://www.inaturalist.org/observations/119807552</a> |
| 244 | Accipiter badius | Shikra | 2019/8/31  | 4 | 0 | 10.60295875 | 76.26071874 | <a href="https://www.inaturalist.org/observations/101204394">https://www.inaturalist.org/observations/101204394</a> |
| 245 | Accipiter badius | Shikra | 2021/5/13  | 1 | 0 | 10.61382704 | 76.19477921 | <a href="https://www.inaturalist.org/observations/107043484">https://www.inaturalist.org/observations/107043484</a> |
| 246 | Accipiter badius | Shikra | 2019/5/28  | 1 | 0 | 10.61455167 | 76.19223333 | <a href="https://www.inaturalist.org/observations/29234784">https://www.inaturalist.org/observations/29234784</a>   |
| 247 | Accipiter badius | Shikra | 2020/8/15  | 1 | 0 | 10.67290952 | 75.99185832 | <a href="https://www.inaturalist.org/observations/56496053">https://www.inaturalist.org/observations/56496053</a>   |
| 248 | Accipiter badius | Shikra | 2016/2/2   | 4 | 0 | 10.73114376 | 76.78414430 | <a href="https://www.inaturalist.org/observations/59860959">https://www.inaturalist.org/observations/59860959</a>   |
| 249 | Accipiter badius | Shikra | 2016/12/17 | 2 | 0 | 10.74738184 | 76.46735865 | <a href="https://www.inaturalist.org/observations/65507693">https://www.inaturalist.org/observations/65507693</a>   |
| 250 | Accipiter badius | Shikra | 2016/12/17 | 1 | 0 | 10.74738184 | 76.46735865 | <a href="https://www.inaturalist.org/observations/65507694">https://www.inaturalist.org/observations/65507694</a>   |
| 251 | Accipiter badius | Shikra | 2016/12/18 | 2 | 0 | 10.74739225 | 76.46737321 | <a href="https://www.inaturalist.org/observations/65605241">https://www.inaturalist.org/observations/65605241</a>   |
| 252 | Accipiter badius | Shikra | 2021/5/11  | 2 | 0 | 10.77672906 | 76.37593724 | <a href="https://www.inaturalist.org/observations/79489686">https://www.inaturalist.org/observations/79489686</a>   |

|     |                  |        |            |   |   |             |             |                                                                                                                     |
|-----|------------------|--------|------------|---|---|-------------|-------------|---------------------------------------------------------------------------------------------------------------------|
| 253 | Accipiter badius | Shikra | 2017/11/21 | 1 | 0 | 10.78438045 | 76.65993502 | <a href="https://www.inaturalist.org/observations/10519138">https://www.inaturalist.org/observations/10519138</a>   |
| 254 | Accipiter badius | Shikra | 2016/1/29  | 2 | 0 | 10.78474500 | 76.66017300 | <a href="https://www.inaturalist.org/observations/7278398">https://www.inaturalist.org/observations/7278398</a>     |
| 255 | Accipiter badius | Shikra | 2014/8/13  | 2 | 0 | 10.78673030 | 76.65479320 | <a href="https://www.inaturalist.org/observations/79711923">https://www.inaturalist.org/observations/79711923</a>   |
| 256 | Accipiter badius | Shikra | 2018/4/10  | 1 | 0 | 10.79048327 | 78.70467234 | <a href="https://www.inaturalist.org/observations/45167398">https://www.inaturalist.org/observations/45167398</a>   |
| 257 | Accipiter badius | Shikra | 2022/3/6   | 5 | 0 | 10.80475000 | 76.72837667 | <a href="https://www.inaturalist.org/observations/115189628">https://www.inaturalist.org/observations/115189628</a> |
| 258 | Accipiter badius | Shikra | 2021/5/3   | 1 | 0 | 10.80578504 | 79.14069492 | <a href="https://www.inaturalist.org/observations/76923234">https://www.inaturalist.org/observations/76923234</a>   |
| 259 | Accipiter badius | Shikra | 2020/7/1   | 2 | 0 | 10.80578504 | 79.14069526 | <a href="https://www.inaturalist.org/observations/51574248">https://www.inaturalist.org/observations/51574248</a>   |
| 260 | Accipiter badius | Shikra | 2020/1/11  | 0 | 0 | 10.80579196 | 79.13904570 | <a href="https://www.inaturalist.org/observations/37508322">https://www.inaturalist.org/observations/37508322</a>   |
| 261 | Accipiter badius | Shikra | 2022/5/24  | 2 | 0 | 10.80579196 | 79.13904570 | <a href="https://www.inaturalist.org/observations/118507614">https://www.inaturalist.org/observations/118507614</a> |
| 262 | Accipiter badius | Shikra | 2017/1/1   | 3 | 0 | 10.82627236 | 76.68464843 | <a href="https://www.inaturalist.org/observations/96866829">https://www.inaturalist.org/observations/96866829</a>   |
| 263 | Accipiter badius | Shikra | 2016/2/2   | 2 | 0 | 10.83178900 | 76.71375300 | <a href="https://www.inaturalist.org/observations/7265795">https://www.inaturalist.org/observations/7265795</a>     |
| 264 | Accipiter badius | Shikra | 2019/12/26 | 4 | 0 | 10.84845193 | 76.43446589 | <a href="https://www.inaturalist.org/observations/52559190">https://www.inaturalist.org/observations/52559190</a>   |
| 265 | Accipiter badius | Shikra | 2021/8/29  | 2 | 0 | 10.84924400 | 76.03251340 | <a href="https://www.inaturalist.org/observations/92888053">https://www.inaturalist.org/observations/92888053</a>   |
| 266 | Accipiter badius | Shikra | 2021/5/28  | 1 | 0 | 10.89103640 | 76.06850345 | <a href="https://www.inaturalist.org/observations/80569074">https://www.inaturalist.org/observations/80569074</a>   |
| 267 | Accipiter badius | Shikra | 2022/7/29  | 4 | 0 | 11.01182830 | 77.01470400 | <a href="https://www.inaturalist.org/observations/128765724">https://www.inaturalist.org/observations/128765724</a> |
| 268 | Accipiter badius | Shikra | 2020/6/13  | 3 | 0 | 11.05957796 | 77.03614391 | <a href="https://www.inaturalist.org/observations/116054525">https://www.inaturalist.org/observations/116054525</a> |
| 269 | Accipiter badius | Shikra | 2020/4/5   | 2 | 0 | 11.07894586 | 79.83002432 | <a href="https://www.inaturalist.org/observations/48643623">https://www.inaturalist.org/observations/48643623</a>   |
| 270 | Accipiter badius | Shikra | 2020/9/19  | 3 | 0 | 11.07894586 | 79.83002432 | <a href="https://www.inaturalist.org/observations/60623604">https://www.inaturalist.org/observations/60623604</a>   |
| 271 | Accipiter badius | Shikra | 2020/9/19  | 2 | 0 | 11.07894586 | 79.83002432 | <a href="https://www.inaturalist.org/observations/88512712">https://www.inaturalist.org/observations/88512712</a>   |
| 272 | Accipiter badius | Shikra | 2022/2/8   | 1 | 0 | 11.10137745 | 79.78553217 | <a href="https://www.inaturalist.org/observations/106375352">https://www.inaturalist.org/observations/106375352</a> |
| 273 | Accipiter badius | Shikra | 2019/11/10 | 2 | 0 | 11.10483300 | 76.76827750 | <a href="https://www.inaturalist.org/observations/101383751">https://www.inaturalist.org/observations/101383751</a> |
| 274 | Accipiter badius | Shikra | 2020/3/18  | 2 | 0 | 11.10773766 | 79.69595276 | <a href="https://www.inaturalist.org/observations/40189242">https://www.inaturalist.org/observations/40189242</a>   |
| 275 | Accipiter badius | Shikra | 2009/4/14  | 3 | 0 | 11.13041964 | 76.30984058 | <a href="https://www.inaturalist.org/observations/62125007">https://www.inaturalist.org/observations/62125007</a>   |

|     |                  |        |            |   |   |             |             |                                                                                                                     |
|-----|------------------|--------|------------|---|---|-------------|-------------|---------------------------------------------------------------------------------------------------------------------|
| 276 | Accipiter badius | Shikra | 2018/12/6  | 2 | 0 | 11.13402670 | 75.89523540 | <a href="https://www.inaturalist.org/observations/55801642">https://www.inaturalist.org/observations/55801642</a>   |
| 277 | Accipiter badius | Shikra | 2022/1/16  | 1 | 0 | 11.13900336 | 77.34377079 | <a href="https://www.inaturalist.org/observations/105823446">https://www.inaturalist.org/observations/105823446</a> |
| 278 | Accipiter badius | Shikra | 2017/9/15  | 2 | 0 | 11.14903187 | 76.88850248 | <a href="https://www.inaturalist.org/observations/42268452">https://www.inaturalist.org/observations/42268452</a>   |
| 279 | Accipiter badius | Shikra | 2020/1/3   | 2 | 0 | 11.20633654 | 79.44923046 | <a href="https://www.inaturalist.org/observations/37407140">https://www.inaturalist.org/observations/37407140</a>   |
| 280 | Accipiter badius | Shikra | 2020/1/18  | 0 | 0 | 11.22686608 | 75.80580466 | <a href="https://www.inaturalist.org/observations/37763729">https://www.inaturalist.org/observations/37763729</a>   |
| 281 | Accipiter badius | Shikra | 2022/2/16  | 4 | 0 | 11.25222573 | 79.52512454 | <a href="https://www.inaturalist.org/observations/106915347">https://www.inaturalist.org/observations/106915347</a> |
| 282 | Accipiter badius | Shikra | 2012/10/26 | 1 | 0 | 11.26394137 | 75.79237640 | <a href="https://www.inaturalist.org/observations/48927110">https://www.inaturalist.org/observations/48927110</a>   |
| 283 | Accipiter badius | Shikra | 2022/6/17  | 5 | 0 | 11.26972593 | 75.79347610 | <a href="https://www.inaturalist.org/observations/126934396">https://www.inaturalist.org/observations/126934396</a> |
| 284 | Accipiter badius | Shikra | 2019/6/11  | 2 | 0 | 11.27578553 | 77.58298729 | <a href="https://www.inaturalist.org/observations/37123259">https://www.inaturalist.org/observations/37123259</a>   |
| 285 | Accipiter badius | Shikra | 2021/1/14  | 1 | 0 | 11.32303840 | 79.24335279 | <a href="https://www.inaturalist.org/observations/68127342">https://www.inaturalist.org/observations/68127342</a>   |
| 286 | Accipiter badius | Shikra | 2016/5/26  | 1 | 0 | 11.32304662 | 79.24335279 | <a href="https://www.inaturalist.org/observations/101828947">https://www.inaturalist.org/observations/101828947</a> |
| 287 | Accipiter badius | Shikra | 2022/1/15  | 3 | 0 | 11.32304662 | 79.24335279 | <a href="https://www.inaturalist.org/observations/104971184">https://www.inaturalist.org/observations/104971184</a> |
| 288 | Accipiter badius | Shikra | 2019/12/29 | 4 | 0 | 11.33617850 | 76.11024990 | <a href="https://www.inaturalist.org/observations/67238301">https://www.inaturalist.org/observations/67238301</a>   |
| 289 | Accipiter badius | Shikra | 2022/5/3   | 4 | 0 | 11.34103099 | 77.71716412 | <a href="https://www.inaturalist.org/observations/116096718">https://www.inaturalist.org/observations/116096718</a> |
| 290 | Accipiter badius | Shikra | 2021/7/30  | 2 | 0 | 11.35284364 | 77.72472493 | <a href="https://www.inaturalist.org/observations/89311909">https://www.inaturalist.org/observations/89311909</a>   |
| 291 | Accipiter badius | Shikra | 2021/1/20  | 1 | 0 | 11.37818900 | 76.71723797 | <a href="https://www.inaturalist.org/observations/69339083">https://www.inaturalist.org/observations/69339083</a>   |
| 292 | Accipiter badius | Shikra | 2022/7/1   | 3 | 0 | 11.39178265 | 79.71320305 | <a href="https://www.inaturalist.org/observations/124487623">https://www.inaturalist.org/observations/124487623</a> |
| 293 | Accipiter badius | Shikra | 2017/5/24  | 1 | 0 | 11.41020380 | 76.69503240 | <a href="https://www.inaturalist.org/observations/92672183">https://www.inaturalist.org/observations/92672183</a>   |
| 294 | Accipiter badius | Shikra | 2022/8/28  | 4 | 0 | 11.49394300 | 78.02952700 | <a href="https://www.inaturalist.org/observations/132914173">https://www.inaturalist.org/observations/132914173</a> |
| 295 | Accipiter badius | Shikra | 2017/9/2   | 1 | 0 | 11.51588596 | 79.32688918 | <a href="https://www.inaturalist.org/observations/81322463">https://www.inaturalist.org/observations/81322463</a>   |
| 296 | Accipiter badius | Shikra | 2015/1/6   | 1 | 0 | 11.53526164 | 76.65010023 | <a href="https://www.inaturalist.org/observations/80580032">https://www.inaturalist.org/observations/80580032</a>   |
| 297 | Accipiter badius | Shikra | 2020/8/21  | 2 | 0 | 11.66432496 | 78.14601414 | <a href="https://www.inaturalist.org/observations/57120715">https://www.inaturalist.org/observations/57120715</a>   |
| 298 | Accipiter badius | Shikra | 2022/7/31  | 4 | 0 | 11.66459585 | 78.14601414 | <a href="https://www.inaturalist.org/observations/128805067">https://www.inaturalist.org/observations/128805067</a> |

|     |                  |        |           |   |   |             |             |                                                                                                                     |
|-----|------------------|--------|-----------|---|---|-------------|-------------|---------------------------------------------------------------------------------------------------------------------|
| 299 | Accipiter badius | Shikra | 2015/1/4  | 1 | 0 | 11.66767830 | 76.63260700 | <a href="https://www.inaturalist.org/observations/99472584">https://www.inaturalist.org/observations/99472584</a>   |
| 300 | Accipiter badius | Shikra | 2022/2/27 | 2 | 0 | 11.66797900 | 78.05295600 | <a href="https://www.inaturalist.org/observations/107548122">https://www.inaturalist.org/observations/107548122</a> |
| 301 | Accipiter badius | Shikra | 2021/2/14 | 1 | 0 | 11.68742128 | 78.18066828 | <a href="https://www.inaturalist.org/observations/69549740">https://www.inaturalist.org/observations/69549740</a>   |
| 302 | Accipiter badius | Shikra | 2022/2/24 | 4 | 0 | 11.68742128 | 78.18066828 | <a href="https://www.inaturalist.org/observations/107351127">https://www.inaturalist.org/observations/107351127</a> |
| 303 | Accipiter badius | Shikra | 2016/9/17 | 2 | 0 | 11.70313381 | 78.18779223 | <a href="https://www.inaturalist.org/observations/79127640">https://www.inaturalist.org/observations/79127640</a>   |
| 304 | Accipiter badius | Shikra | 2020/5/5  | 3 | 0 | 11.71193359 | 76.16388246 | <a href="https://www.inaturalist.org/observations/52665237">https://www.inaturalist.org/observations/52665237</a>   |
| 305 | Accipiter badius | Shikra | 2019/1/8  | 3 | 0 | 11.71501590 | 76.64451090 | <a href="https://www.inaturalist.org/observations/19900836">https://www.inaturalist.org/observations/19900836</a>   |
| 306 | Accipiter badius | Shikra | 2016/9/17 | 1 | 0 | 11.73446034 | 78.20203878 | <a href="https://www.inaturalist.org/observations/54716204">https://www.inaturalist.org/observations/54716204</a>   |
| 307 | Accipiter badius | Shikra | 2022/4/17 | 4 | 0 | 11.73561617 | 78.20203878 | <a href="https://www.inaturalist.org/observations/111778173">https://www.inaturalist.org/observations/111778173</a> |
| 308 | Accipiter badius | Shikra | 2022/9/18 | 4 | 0 | 11.73561617 | 78.20203878 | <a href="https://www.inaturalist.org/observations/136154907">https://www.inaturalist.org/observations/136154907</a> |
| 309 | Accipiter badius | Shikra | 2022/4/10 | 2 | 0 | 11.74613203 | 78.17025661 | <a href="https://www.inaturalist.org/observations/110944621">https://www.inaturalist.org/observations/110944621</a> |
| 310 | Accipiter badius | Shikra | 2021/2/7  | 1 | 0 | 11.74613235 | 78.17025661 | <a href="https://www.inaturalist.org/observations/69193562">https://www.inaturalist.org/observations/69193562</a>   |
| 311 | Accipiter badius | Shikra | 2022/3/27 | 4 | 0 | 11.74707149 | 78.16437017 | <a href="https://www.inaturalist.org/observations/109629190">https://www.inaturalist.org/observations/109629190</a> |
| 312 | Accipiter badius | Shikra | 2019/6/1  | 3 | 0 | 11.82497318 | 79.68320269 | <a href="https://www.inaturalist.org/observations/28281889">https://www.inaturalist.org/observations/28281889</a>   |
| 313 | Accipiter badius | Shikra | 2021/5/17 | 2 | 0 | 11.82816248 | 75.55192929 | <a href="https://www.inaturalist.org/observations/79153813">https://www.inaturalist.org/observations/79153813</a>   |
| 314 | Accipiter badius | Shikra | 2018/6/15 | 1 | 0 | 11.85854557 | 76.36643037 | <a href="https://www.inaturalist.org/observations/98051101">https://www.inaturalist.org/observations/98051101</a>   |
| 315 | Accipiter badius | Shikra | 2022/1/1  | 1 | 0 | 11.86741555 | 79.66333743 | <a href="https://www.inaturalist.org/observations/104072313">https://www.inaturalist.org/observations/104072313</a> |
| 316 | Accipiter badius | Shikra | 2021/5/10 | 1 | 0 | 11.87632753 | 75.39950721 | <a href="https://www.inaturalist.org/observations/78186582">https://www.inaturalist.org/observations/78186582</a>   |
| 317 | Accipiter badius | Shikra | 2015/7/5  | 2 | 0 | 11.92713682 | 75.35569936 | <a href="https://www.inaturalist.org/observations/86837428">https://www.inaturalist.org/observations/86837428</a>   |
| 318 | Accipiter badius | Shikra | 2019/5/9  | 1 | 0 | 11.93373167 | 75.42544500 | <a href="https://www.inaturalist.org/observations/29233797">https://www.inaturalist.org/observations/29233797</a>   |
| 319 | Accipiter badius | Shikra | 2022/3/22 | 1 | 0 | 11.94468399 | 75.38493812 | <a href="https://www.inaturalist.org/observations/116447198">https://www.inaturalist.org/observations/116447198</a> |
| 320 | Accipiter badius | Shikra | 2022/3/22 | 2 | 0 | 11.94468432 | 75.38493812 | <a href="https://www.inaturalist.org/observations/110075593">https://www.inaturalist.org/observations/110075593</a> |
| 321 | Accipiter badius | Shikra | 2022/3/18 | 4 | 0 | 11.94468432 | 75.38493812 | <a href="https://www.inaturalist.org/observations/110827306">https://www.inaturalist.org/observations/110827306</a> |

|     |                  |        |            |   |   |             |             |                                                                                                                     |
|-----|------------------|--------|------------|---|---|-------------|-------------|---------------------------------------------------------------------------------------------------------------------|
| 322 | Accipiter badius | Shikra | 2022/3/22  | 1 | 0 | 11.94468432 | 75.38493812 | <a href="https://www.inaturalist.org/observations/111057459">https://www.inaturalist.org/observations/111057459</a> |
| 323 | Accipiter badius | Shikra | 2022/3/22  | 3 | 0 | 11.94468432 | 75.38493812 | <a href="https://www.inaturalist.org/observations/116257876">https://www.inaturalist.org/observations/116257876</a> |
| 324 | Accipiter badius | Shikra | 2022/3/22  | 1 | 0 | 11.94468432 | 75.38493812 | <a href="https://www.inaturalist.org/observations/116438809">https://www.inaturalist.org/observations/116438809</a> |
| 325 | Accipiter badius | Shikra | 2022/3/22  | 2 | 0 | 11.94468432 | 75.38493812 | <a href="https://www.inaturalist.org/observations/116439196">https://www.inaturalist.org/observations/116439196</a> |
| 326 | Accipiter badius | Shikra | 2018/11/11 | 2 | 0 | 11.94468432 | 75.38493812 | <a href="https://www.inaturalist.org/observations/123696814">https://www.inaturalist.org/observations/123696814</a> |
| 327 | Accipiter badius | Shikra | 2022/5/24  | 1 | 0 | 11.94468432 | 75.38493812 | <a href="https://www.inaturalist.org/observations/124863305">https://www.inaturalist.org/observations/124863305</a> |
| 328 | Accipiter badius | Shikra | 2022/5/25  | 1 | 0 | 11.94468432 | 75.38493812 | <a href="https://www.inaturalist.org/observations/124867324">https://www.inaturalist.org/observations/124867324</a> |
| 329 | Accipiter badius | Shikra | 2022/7/14  | 2 | 0 | 11.94468432 | 75.38493812 | <a href="https://www.inaturalist.org/observations/126444551">https://www.inaturalist.org/observations/126444551</a> |
| 330 | Accipiter badius | Shikra | 2015/7/5   | 2 | 0 | 11.94468432 | 75.38493812 | <a href="https://www.inaturalist.org/observations/127476365">https://www.inaturalist.org/observations/127476365</a> |
| 331 | Accipiter badius | Shikra | 2015/7/5   | 2 | 0 | 11.94468432 | 75.38493812 | <a href="https://www.inaturalist.org/observations/127476451">https://www.inaturalist.org/observations/127476451</a> |
| 332 | Accipiter badius | Shikra | 2020/10/15 | 4 | 0 | 11.94468464 | 75.38493812 | <a href="https://www.inaturalist.org/observations/62620280">https://www.inaturalist.org/observations/62620280</a>   |
| 333 | Accipiter badius | Shikra | 2020/10/15 | 3 | 0 | 11.94468464 | 75.38493812 | <a href="https://www.inaturalist.org/observations/62620615">https://www.inaturalist.org/observations/62620615</a>   |
| 334 | Accipiter badius | Shikra | 2019/1/20  | 1 | 0 | 11.97527831 | 77.07448300 | <a href="https://www.inaturalist.org/observations/97525103">https://www.inaturalist.org/observations/97525103</a>   |
| 335 | Accipiter badius | Shikra | 2019/3/2   | 1 | 0 | 11.98610530 | 76.05481930 | <a href="https://www.inaturalist.org/observations/68925190">https://www.inaturalist.org/observations/68925190</a>   |
| 336 | Accipiter badius | Shikra | 2020/12/13 | 4 | 0 | 11.98977370 | 76.37704070 | <a href="https://www.inaturalist.org/observations/66723941">https://www.inaturalist.org/observations/66723941</a>   |
| 337 | Accipiter badius | Shikra | 2013/9/19  | 3 | 0 | 11.99877500 | 77.13983110 | <a href="https://www.inaturalist.org/observations/65183478">https://www.inaturalist.org/observations/65183478</a>   |
| 338 | Accipiter badius | Shikra | 2020/12/28 | 2 | 0 | 12.00113501 | 79.80104841 | <a href="https://www.inaturalist.org/observations/67619746">https://www.inaturalist.org/observations/67619746</a>   |
| 339 | Accipiter badius | Shikra | 2022/6/12  | 3 | 0 | 12.03234633 | 75.25665645 | <a href="https://www.inaturalist.org/observations/130751575">https://www.inaturalist.org/observations/130751575</a> |
| 340 | Accipiter badius | Shikra | 2022/6/12  | 3 | 0 | 12.03234633 | 75.25665645 | <a href="https://www.inaturalist.org/observations/130751624">https://www.inaturalist.org/observations/130751624</a> |
| 341 | Accipiter badius | Shikra | 2019/10/15 | 1 | 0 | 12.03234670 | 75.25665640 | <a href="https://www.inaturalist.org/observations/34574246">https://www.inaturalist.org/observations/34574246</a>   |
| 342 | Accipiter badius | Shikra | 2020/12/6  | 1 | 0 | 12.03234670 | 75.25665640 | <a href="https://www.inaturalist.org/observations/66999051">https://www.inaturalist.org/observations/66999051</a>   |
| 343 | Accipiter badius | Shikra | 2020/5/23  | 2 | 0 | 12.03240765 | 75.25665645 | <a href="https://www.inaturalist.org/observations/48208562">https://www.inaturalist.org/observations/48208562</a>   |
| 344 | Accipiter badius | Shikra | 2022/6/22  | 3 | 0 | 12.03802333 | 75.26567500 | <a href="https://www.inaturalist.org/observations/126932913">https://www.inaturalist.org/observations/126932913</a> |

|     |                  |        |            |   |   |             |             |                                                                                                                     |
|-----|------------------|--------|------------|---|---|-------------|-------------|---------------------------------------------------------------------------------------------------------------------|
| 345 | Accipiter badius | Shikra | 2019/5/4   | 3 | 0 | 12.04125333 | 75.24326000 | <a href="https://www.inaturalist.org/observations/29242835">https://www.inaturalist.org/observations/29242835</a>   |
| 346 | Accipiter badius | Shikra | 2020/2/5   | 2 | 0 | 12.04853280 | 76.15313988 | <a href="https://www.inaturalist.org/observations/107030182">https://www.inaturalist.org/observations/107030182</a> |
| 347 | Accipiter badius | Shikra | 2017/10/21 | 3 | 0 | 12.05399667 | 75.20078500 | <a href="https://www.inaturalist.org/observations/30660574">https://www.inaturalist.org/observations/30660574</a>   |
| 348 | Accipiter badius | Shikra | 2020/6/6   | 5 | 0 | 12.05749159 | 75.20062644 | <a href="https://www.inaturalist.org/observations/48610830">https://www.inaturalist.org/observations/48610830</a>   |
| 349 | Accipiter badius | Shikra | 2020/4/18  | 2 | 0 | 12.05749173 | 75.20062657 | <a href="https://www.inaturalist.org/observations/42500783">https://www.inaturalist.org/observations/42500783</a>   |
| 350 | Accipiter badius | Shikra | 2020/5/3   | 2 | 0 | 12.05749173 | 75.20062657 | <a href="https://www.inaturalist.org/observations/44755878">https://www.inaturalist.org/observations/44755878</a>   |
| 351 | Accipiter badius | Shikra | 2017/12/7  | 3 | 0 | 12.05891833 | 75.20083167 | <a href="https://www.inaturalist.org/observations/30664122">https://www.inaturalist.org/observations/30664122</a>   |
| 352 | Accipiter badius | Shikra | 2021/12/10 | 4 | 0 | 12.10731711 | 79.73516294 | <a href="https://www.inaturalist.org/observations/102807495">https://www.inaturalist.org/observations/102807495</a> |
| 353 | Accipiter badius | Shikra | 2021/12/23 | 1 | 0 | 12.11972571 | 79.85768259 | <a href="https://www.inaturalist.org/observations/103568121">https://www.inaturalist.org/observations/103568121</a> |
| 354 | Accipiter badius | Shikra | 2022/3/9   | 4 | 0 | 12.11972770 | 79.85768280 | <a href="https://www.inaturalist.org/observations/108294911">https://www.inaturalist.org/observations/108294911</a> |
| 355 | Accipiter badius | Shikra | 2021/5/21  | 2 | 0 | 12.14346023 | 75.28228831 | <a href="https://www.inaturalist.org/observations/79726766">https://www.inaturalist.org/observations/79726766</a>   |
| 356 | Accipiter badius | Shikra | 2020/2/29  | 0 | 0 | 12.14454516 | 75.93820442 | <a href="https://www.inaturalist.org/observations/39355117">https://www.inaturalist.org/observations/39355117</a>   |
| 357 | Accipiter badius | Shikra | 2019/9/24  | 3 | 0 | 12.14596500 | 75.25680000 | <a href="https://www.inaturalist.org/observations/33340417">https://www.inaturalist.org/observations/33340417</a>   |
| 358 | Accipiter badius | Shikra | 2022/1/26  | 0 | 0 | 12.15771983 | 76.47221448 | <a href="https://www.inaturalist.org/observations/105649517">https://www.inaturalist.org/observations/105649517</a> |
| 359 | Accipiter badius | Shikra | 2021/3/28  | 2 | 0 | 12.16499181 | 75.55902924 | <a href="https://www.inaturalist.org/observations/125430151">https://www.inaturalist.org/observations/125430151</a> |
| 360 | Accipiter badius | Shikra | 2020/10/5  | 1 | 0 | 12.18078730 | 79.87983080 | <a href="https://www.inaturalist.org/observations/109834862">https://www.inaturalist.org/observations/109834862</a> |
| 361 | Accipiter badius | Shikra | 2010/12/21 | 2 | 0 | 12.19912498 | 77.66407362 | <a href="https://www.inaturalist.org/observations/64164549">https://www.inaturalist.org/observations/64164549</a>   |
| 362 | Accipiter badius | Shikra | 2022/9/11  | 2 | 0 | 12.20820212 | 78.99260045 | <a href="https://www.inaturalist.org/observations/134720986">https://www.inaturalist.org/observations/134720986</a> |
| 363 | Accipiter badius | Shikra | 2022/8/31  | 1 | 0 | 12.20924255 | 79.03465882 | <a href="https://www.inaturalist.org/observations/134693819">https://www.inaturalist.org/observations/134693819</a> |
| 364 | Accipiter badius | Shikra | 2010/12/25 | 1 | 0 | 12.21329930 | 76.62530007 | <a href="https://www.inaturalist.org/observations/96489021">https://www.inaturalist.org/observations/96489021</a>   |
| 365 | Accipiter badius | Shikra | 2022/7/27  | 4 | 0 | 12.21329930 | 76.62530007 | <a href="https://www.inaturalist.org/observations/128292070">https://www.inaturalist.org/observations/128292070</a> |
| 366 | Accipiter badius | Shikra | 2016/2/20  | 1 | 0 | 12.21451325 | 75.98379016 | <a href="https://www.inaturalist.org/observations/92912022">https://www.inaturalist.org/observations/92912022</a>   |
| 367 | Accipiter badius | Shikra | 2015/5/2   | 1 | 0 | 12.22267357 | 76.57829576 | <a href="https://www.inaturalist.org/observations/98772627">https://www.inaturalist.org/observations/98772627</a>   |

|     |                  |        |            |   |   |             |             |                                                                                                                     |
|-----|------------------|--------|------------|---|---|-------------|-------------|---------------------------------------------------------------------------------------------------------------------|
| 368 | Accipiter badius | Shikra | 2019/12/31 | 1 | 0 | 12.22528410 | 79.07469570 | <a href="https://www.inaturalist.org/observations/89444198">https://www.inaturalist.org/observations/89444198</a>   |
| 369 | Accipiter badius | Shikra | 2017/11/14 | 1 | 0 | 12.22528410 | 79.07469570 | <a href="https://www.inaturalist.org/observations/96106441">https://www.inaturalist.org/observations/96106441</a>   |
| 370 | Accipiter badius | Shikra | 2022/9/4   | 3 | 0 | 12.22550142 | 79.05324000 | <a href="https://www.inaturalist.org/observations/133587041">https://www.inaturalist.org/observations/133587041</a> |
| 371 | Accipiter badius | Shikra | 2022/5/22  | 2 | 0 | 12.22752718 | 75.27594019 | <a href="https://www.inaturalist.org/observations/124509700">https://www.inaturalist.org/observations/124509700</a> |
| 372 | Accipiter badius | Shikra | 2022/5/22  | 1 | 0 | 12.22752718 | 75.27594019 | <a href="https://www.inaturalist.org/observations/124703946">https://www.inaturalist.org/observations/124703946</a> |
| 373 | Accipiter badius | Shikra | 2014/11/4  | 0 | 0 | 12.23502051 | 76.62170875 | <a href="https://www.inaturalist.org/observations/96083178">https://www.inaturalist.org/observations/96083178</a>   |
| 374 | Accipiter badius | Shikra | 2020/5/3   | 1 | 0 | 12.24319756 | 76.58567419 | <a href="https://www.inaturalist.org/observations/96767530">https://www.inaturalist.org/observations/96767530</a>   |
| 375 | Accipiter badius | Shikra | 2020/2/17  | 0 | 0 | 12.24409333 | 75.14007833 | <a href="https://www.inaturalist.org/observations/39321559">https://www.inaturalist.org/observations/39321559</a>   |
| 376 | Accipiter badius | Shikra | 2021/5/18  | 1 | 0 | 12.24772481 | 76.59243316 | <a href="https://www.inaturalist.org/observations/79943917">https://www.inaturalist.org/observations/79943917</a>   |
| 377 | Accipiter badius | Shikra | 2021/4/15  | 1 | 0 | 12.24796153 | 76.59298360 | <a href="https://www.inaturalist.org/observations/80698285">https://www.inaturalist.org/observations/80698285</a>   |
| 378 | Accipiter badius | Shikra | 2021/2/7   | 1 | 0 | 12.24815648 | 76.59255981 | <a href="https://www.inaturalist.org/observations/81278123">https://www.inaturalist.org/observations/81278123</a>   |
| 379 | Accipiter badius | Shikra | 2020/5/3   | 1 | 0 | 12.24855207 | 76.59218967 | <a href="https://www.inaturalist.org/observations/96767840">https://www.inaturalist.org/observations/96767840</a>   |
| 380 | Accipiter badius | Shikra | 2020/5/16  | 1 | 0 | 12.24855207 | 76.59218967 | <a href="https://www.inaturalist.org/observations/96772272">https://www.inaturalist.org/observations/96772272</a>   |
| 381 | Accipiter badius | Shikra | 2022/2/6   | 1 | 0 | 12.24855207 | 76.59218967 | <a href="https://www.inaturalist.org/observations/106222567">https://www.inaturalist.org/observations/106222567</a> |
| 382 | Accipiter badius | Shikra | 2020/8/9   | 2 | 0 | 12.25004167 | 79.67119667 | <a href="https://www.inaturalist.org/observations/55907245">https://www.inaturalist.org/observations/55907245</a>   |
| 383 | Accipiter badius | Shikra | 2021/5/4   | 2 | 0 | 12.25840928 | 76.58909156 | <a href="https://www.inaturalist.org/observations/79947903">https://www.inaturalist.org/observations/79947903</a>   |
| 384 | Accipiter badius | Shikra | 2020/10/23 | 1 | 0 | 12.26093742 | 76.59167244 | <a href="https://www.inaturalist.org/observations/96095660">https://www.inaturalist.org/observations/96095660</a>   |
| 385 | Accipiter badius | Shikra | 2022/6/29  | 4 | 0 | 12.26269942 | 76.56762058 | <a href="https://www.inaturalist.org/observations/124209615">https://www.inaturalist.org/observations/124209615</a> |
| 386 | Accipiter badius | Shikra | 2020/10/28 | 2 | 0 | 12.26937200 | 76.61197800 | <a href="https://www.inaturalist.org/observations/94224578">https://www.inaturalist.org/observations/94224578</a>   |
| 387 | Accipiter badius | Shikra | 2010/11/20 | 2 | 0 | 12.26937200 | 76.61197800 | <a href="https://www.inaturalist.org/observations/94224584">https://www.inaturalist.org/observations/94224584</a>   |
| 388 | Accipiter badius | Shikra | 2011/11/12 | 1 | 0 | 12.26937200 | 76.61197800 | <a href="https://www.inaturalist.org/observations/94687338">https://www.inaturalist.org/observations/94687338</a>   |
| 389 | Accipiter badius | Shikra | 2012/2/25  | 1 | 0 | 12.26937200 | 76.61197800 | <a href="https://www.inaturalist.org/observations/94690336">https://www.inaturalist.org/observations/94690336</a>   |
| 390 | Accipiter badius | Shikra | 2012/11/11 | 1 | 0 | 12.26937200 | 76.61197800 | <a href="https://www.inaturalist.org/observations/94706625">https://www.inaturalist.org/observations/94706625</a>   |



|     |                  |        |            |   |   |             |             |                                                                                                                     |
|-----|------------------|--------|------------|---|---|-------------|-------------|---------------------------------------------------------------------------------------------------------------------|
| 391 | Accipiter badius | Shikra | 2014/6/8   | 1 | 0 | 12.26937200 | 76.61197800 | <a href="https://www.inaturalist.org/observations/94817200">https://www.inaturalist.org/observations/94817200</a>   |
| 392 | Accipiter badius | Shikra | 2021/12/14 | 3 | 0 | 12.26937200 | 76.61197800 | <a href="https://www.inaturalist.org/observations/103041662">https://www.inaturalist.org/observations/103041662</a> |
| 393 | Accipiter badius | Shikra | 2009/4/7   | 1 | 0 | 12.27042491 | 76.77563072 | <a href="https://www.inaturalist.org/observations/90362862">https://www.inaturalist.org/observations/90362862</a>   |
| 394 | Accipiter badius | Shikra | 2015/5/9   | 1 | 0 | 12.27042491 | 76.77563072 | <a href="https://www.inaturalist.org/observations/90402932">https://www.inaturalist.org/observations/90402932</a>   |
| 395 | Accipiter badius | Shikra | 2019/2/17  | 1 | 0 | 12.27525460 | 76.67014750 | <a href="https://www.inaturalist.org/observations/88501835">https://www.inaturalist.org/observations/88501835</a>   |
| 396 | Accipiter badius | Shikra | 2019/11/10 | 1 | 0 | 12.27525460 | 76.67014750 | <a href="https://www.inaturalist.org/observations/88663095">https://www.inaturalist.org/observations/88663095</a>   |
| 397 | Accipiter badius | Shikra | 2020/4/14  | 1 | 0 | 12.27624403 | 76.61636609 | <a href="https://www.inaturalist.org/observations/92211692">https://www.inaturalist.org/observations/92211692</a>   |
| 398 | Accipiter badius | Shikra | 2021/11/8  | 2 | 0 | 12.27899625 | 76.70375456 | <a href="https://www.inaturalist.org/observations/100591269">https://www.inaturalist.org/observations/100591269</a> |
| 399 | Accipiter badius | Shikra | 2021/8/28  | 1 | 0 | 12.28314693 | 76.70619965 | <a href="https://www.inaturalist.org/observations/92764824">https://www.inaturalist.org/observations/92764824</a>   |
| 400 | Accipiter badius | Shikra | 2021/3/12  | 1 | 0 | 12.28416609 | 75.16022064 | <a href="https://www.inaturalist.org/observations/71114297">https://www.inaturalist.org/observations/71114297</a>   |
| 401 | Accipiter badius | Shikra | 2021/10/27 | 1 | 0 | 12.29424209 | 76.56539693 | <a href="https://www.inaturalist.org/observations/99523426">https://www.inaturalist.org/observations/99523426</a>   |
| 402 | Accipiter badius | Shikra | 2021/11/20 | 6 | 0 | 12.29604328 | 76.63938046 | <a href="https://www.inaturalist.org/observations/106534405">https://www.inaturalist.org/observations/106534405</a> |
| 403 | Accipiter badius | Shikra | 2022/8/14  | 4 | 0 | 12.30242620 | 76.58490781 | <a href="https://www.inaturalist.org/observations/130764509">https://www.inaturalist.org/observations/130764509</a> |
| 404 | Accipiter badius | Shikra | 2022/7/23  | 2 | 0 | 12.30921890 | 76.55560459 | <a href="https://www.inaturalist.org/observations/127477995">https://www.inaturalist.org/observations/127477995</a> |
| 405 | Accipiter badius | Shikra | 2019/9/15  | 3 | 0 | 12.30955896 | 77.42443796 | <a href="https://www.inaturalist.org/observations/33148116">https://www.inaturalist.org/observations/33148116</a>   |
| 406 | Accipiter badius | Shikra | 2022/1/31  | 1 | 0 | 12.31016778 | 76.63113076 | <a href="https://www.inaturalist.org/observations/105953971">https://www.inaturalist.org/observations/105953971</a> |
| 407 | Accipiter badius | Shikra | 2014/10/18 | 1 | 0 | 12.31320026 | 76.62030334 | <a href="https://www.inaturalist.org/observations/93558132">https://www.inaturalist.org/observations/93558132</a>   |
| 408 | Accipiter badius | Shikra | 2020/2/17  | 0 | 0 | 12.31698333 | 75.10971667 | <a href="https://www.inaturalist.org/observations/39321515">https://www.inaturalist.org/observations/39321515</a>   |
| 409 | Accipiter badius | Shikra | 2021/8/19  | 1 | 0 | 12.33854000 | 76.60501900 | <a href="https://www.inaturalist.org/observations/91916509">https://www.inaturalist.org/observations/91916509</a>   |
| 410 | Accipiter badius | Shikra | 2019/2/3   | 3 | 0 | 12.35031085 | 78.67933427 | <a href="https://www.inaturalist.org/observations/92692797">https://www.inaturalist.org/observations/92692797</a>   |
| 411 | Accipiter badius | Shikra | 2022/7/30  | 4 | 0 | 12.35073910 | 77.64725740 | <a href="https://www.inaturalist.org/observations/128611410">https://www.inaturalist.org/observations/128611410</a> |
| 412 | Accipiter badius | Shikra | 2014/8/9   | 3 | 0 | 12.37234049 | 77.77381606 | <a href="https://www.inaturalist.org/observations/66150398">https://www.inaturalist.org/observations/66150398</a>   |
| 413 | Accipiter badius | Shikra | 2022/9/4   | 4 | 0 | 12.38019604 | 77.86132607 | <a href="https://www.inaturalist.org/observations/134017768">https://www.inaturalist.org/observations/134017768</a> |

|     |                  |        |            |   |   |             |             |                                                                                                                     |
|-----|------------------|--------|------------|---|---|-------------|-------------|---------------------------------------------------------------------------------------------------------------------|
| 414 | Accipiter badius | Shikra | 2012/9/8   | 2 | 0 | 12.41666670 | 77.75000000 | <a href="https://www.inaturalist.org/observations/63954352">https://www.inaturalist.org/observations/63954352</a>   |
| 415 | Accipiter badius | Shikra | 2011/6/25  | 2 | 0 | 12.41666670 | 77.75000000 | <a href="https://www.inaturalist.org/observations/64111138">https://www.inaturalist.org/observations/64111138</a>   |
| 416 | Accipiter badius | Shikra | 2011/6/25  | 2 | 0 | 12.41666670 | 77.75000000 | <a href="https://www.inaturalist.org/observations/64111143">https://www.inaturalist.org/observations/64111143</a>   |
| 417 | Accipiter badius | Shikra | 2011/6/19  | 1 | 0 | 12.41666670 | 77.75000000 | <a href="https://www.inaturalist.org/observations/64185391">https://www.inaturalist.org/observations/64185391</a>   |
| 418 | Accipiter badius | Shikra | 2013/6/19  | 2 | 0 | 12.41666670 | 77.75000000 | <a href="https://www.inaturalist.org/observations/64289396">https://www.inaturalist.org/observations/64289396</a>   |
| 419 | Accipiter badius | Shikra | 2011/5/28  | 4 | 0 | 12.41666670 | 77.75000000 | <a href="https://www.inaturalist.org/observations/64299550">https://www.inaturalist.org/observations/64299550</a>   |
| 420 | Accipiter badius | Shikra | 2015/3/22  | 3 | 0 | 12.43116600 | 76.37241100 | <a href="http://www.inaturalist.org/observations/1414015">http://www.inaturalist.org/observations/1414015</a>       |
| 421 | Accipiter badius | Shikra | 2019/2/26  | 3 | 0 | 12.44074390 | 75.93616290 | <a href="https://www.inaturalist.org/observations/68473822">https://www.inaturalist.org/observations/68473822</a>   |
| 422 | Accipiter badius | Shikra | 2019/10/8  | 1 | 0 | 12.44404893 | 76.45928545 | <a href="https://www.inaturalist.org/observations/93257719">https://www.inaturalist.org/observations/93257719</a>   |
| 423 | Accipiter badius | Shikra | 2021/12/5  | 3 | 0 | 12.48303667 | 77.58000833 | <a href="https://www.inaturalist.org/observations/102524279">https://www.inaturalist.org/observations/102524279</a> |
| 424 | Accipiter badius | Shikra | 2021/12/5  | 2 | 0 | 12.48368802 | 77.57992124 | <a href="https://www.inaturalist.org/observations/102525758">https://www.inaturalist.org/observations/102525758</a> |
| 425 | Accipiter badius | Shikra | 2021/3/8   | 2 | 0 | 12.49475123 | 77.64646813 | <a href="https://www.inaturalist.org/observations/70806951">https://www.inaturalist.org/observations/70806951</a>   |
| 426 | Accipiter badius | Shikra | 2021/3/21  | 3 | 0 | 12.49866077 | 77.63257904 | <a href="https://www.inaturalist.org/observations/125938578">https://www.inaturalist.org/observations/125938578</a> |
| 427 | Accipiter badius | Shikra | 2016/1/3   | 1 | 0 | 12.52835090 | 76.86993410 | <a href="https://www.inaturalist.org/observations/97987814">https://www.inaturalist.org/observations/97987814</a>   |
| 428 | Accipiter badius | Shikra | 2017/2/10  | 1 | 0 | 12.54545970 | 79.85606940 | <a href="https://www.inaturalist.org/observations/92332989">https://www.inaturalist.org/observations/92332989</a>   |
| 429 | Accipiter badius | Shikra | 2018/8/31  | 4 | 0 | 12.57951972 | 79.82578306 | <a href="https://www.inaturalist.org/observations/22502960">https://www.inaturalist.org/observations/22502960</a>   |
| 430 | Accipiter badius | Shikra | 2021/10/16 | 3 | 0 | 12.59844046 | 77.94741365 | <a href="https://www.inaturalist.org/observations/98356336">https://www.inaturalist.org/observations/98356336</a>   |
| 431 | Accipiter badius | Shikra | 2021/1/26  | 2 | 0 | 12.59985380 | 79.84060570 | <a href="https://www.inaturalist.org/observations/88657323">https://www.inaturalist.org/observations/88657323</a>   |
| 432 | Accipiter badius | Shikra | 2019/10/6  | 1 | 0 | 12.61369133 | 74.93612671 | <a href="https://www.inaturalist.org/observations/34009709">https://www.inaturalist.org/observations/34009709</a>   |
| 433 | Accipiter badius | Shikra | 2022/2/7   | 4 | 0 | 12.62651423 | 78.10315154 | <a href="https://www.inaturalist.org/observations/119593723">https://www.inaturalist.org/observations/119593723</a> |
| 434 | Accipiter badius | Shikra | 2013/6/1   | 3 | 0 | 12.67149699 | 80.13675700 | <a href="https://www.inaturalist.org/observations/22692119">https://www.inaturalist.org/observations/22692119</a>   |
| 435 | Accipiter badius | Shikra | 2015/12/6  | 1 | 0 | 12.67591249 | 77.77037641 | <a href="https://www.inaturalist.org/observations/83273826">https://www.inaturalist.org/observations/83273826</a>   |
| 436 | Accipiter badius | Shikra | 2022/8/21  | 3 | 0 | 12.67974195 | 77.91626895 | <a href="https://www.inaturalist.org/observations/132134440">https://www.inaturalist.org/observations/132134440</a> |

|     |                  |        |            |   |   |             |             |                                                                                                                     |
|-----|------------------|--------|------------|---|---|-------------|-------------|---------------------------------------------------------------------------------------------------------------------|
| 437 | Accipiter badius | Shikra | 2013/6/29  | 3 | 0 | 12.68193720 | 79.98884130 | <a href="https://www.inaturalist.org/observations/65183480">https://www.inaturalist.org/observations/65183480</a>   |
| 438 | Accipiter badius | Shikra | 2013/7/14  | 3 | 0 | 12.68286610 | 80.15703720 | <a href="https://www.inaturalist.org/observations/65183481">https://www.inaturalist.org/observations/65183481</a>   |
| 439 | Accipiter badius | Shikra | 2022/7/9   | 4 | 0 | 12.68912415 | 77.31779528 | <a href="https://www.inaturalist.org/observations/126944279">https://www.inaturalist.org/observations/126944279</a> |
| 440 | Accipiter badius | Shikra | 2022/8/21  | 2 | 0 | 12.69431056 | 77.91143419 | <a href="https://www.inaturalist.org/observations/131699544">https://www.inaturalist.org/observations/131699544</a> |
| 441 | Accipiter badius | Shikra | 2022/2/20  | 2 | 0 | 12.72547600 | 77.86116090 | <a href="https://www.inaturalist.org/observations/107474586">https://www.inaturalist.org/observations/107474586</a> |
| 442 | Accipiter badius | Shikra | 2022/2/20  | 2 | 0 | 12.72671667 | 77.86184333 | <a href="https://www.inaturalist.org/observations/107118238">https://www.inaturalist.org/observations/107118238</a> |
| 443 | Accipiter badius | Shikra | 2020/9/4   | 3 | 0 | 12.74324088 | 77.82748573 | <a href="https://www.inaturalist.org/observations/59956477">https://www.inaturalist.org/observations/59956477</a>   |
| 444 | Accipiter badius | Shikra | 2016/12/16 | 2 | 0 | 12.74605425 | 77.29857532 | <a href="https://www.inaturalist.org/observations/4829455">https://www.inaturalist.org/observations/4829455</a>     |
| 445 | Accipiter badius | Shikra | 2020/1/11  | 0 | 0 | 12.74666407 | 77.50290693 | <a href="https://www.inaturalist.org/observations/37616699">https://www.inaturalist.org/observations/37616699</a>   |
| 446 | Accipiter badius | Shikra | 2022/6/20  | 3 | 0 | 12.75459372 | 77.59961025 | <a href="https://www.inaturalist.org/observations/124847473">https://www.inaturalist.org/observations/124847473</a> |
| 447 | Accipiter badius | Shikra | 2020/10/17 | 4 | 0 | 12.76885310 | 77.57913580 | <a href="https://www.inaturalist.org/observations/62774513">https://www.inaturalist.org/observations/62774513</a>   |
| 448 | Accipiter badius | Shikra | 2022/7/21  | 3 | 0 | 12.77334402 | 77.61835858 | <a href="https://www.inaturalist.org/observations/127211529">https://www.inaturalist.org/observations/127211529</a> |
| 449 | Accipiter badius | Shikra | 2022/7/8   | 3 | 0 | 12.77366184 | 77.61809707 | <a href="https://www.inaturalist.org/observations/125278063">https://www.inaturalist.org/observations/125278063</a> |
| 450 | Accipiter badius | Shikra | 2022/7/19  | 4 | 0 | 12.77371612 | 77.61810444 | <a href="https://www.inaturalist.org/observations/126954683">https://www.inaturalist.org/observations/126954683</a> |
| 451 | Accipiter badius | Shikra | 2020/11/4  | 1 | 0 | 12.77647842 | 77.61314269 | <a href="https://www.inaturalist.org/observations/64162419">https://www.inaturalist.org/observations/64162419</a>   |
| 452 | Accipiter badius | Shikra | 2020/6/9   | 2 | 0 | 12.77910303 | 77.64359783 | <a href="https://www.inaturalist.org/observations/62115849">https://www.inaturalist.org/observations/62115849</a>   |
| 453 | Accipiter badius | Shikra | 2020/11/23 | 2 | 0 | 12.80001438 | 79.07551705 | <a href="https://www.inaturalist.org/observations/72511512">https://www.inaturalist.org/observations/72511512</a>   |
| 454 | Accipiter badius | Shikra | 2021/12/22 | 4 | 0 | 12.80536080 | 80.21848960 | <a href="https://www.inaturalist.org/observations/103571986">https://www.inaturalist.org/observations/103571986</a> |
| 455 | Accipiter badius | Shikra | 2021/9/3   | 1 | 0 | 12.80542450 | 80.21844139 | <a href="https://www.inaturalist.org/observations/93566001">https://www.inaturalist.org/observations/93566001</a>   |
| 456 | Accipiter badius | Shikra | 2022/2/2   | 2 | 0 | 12.80548203 | 80.21838337 | <a href="https://www.inaturalist.org/observations/106006686">https://www.inaturalist.org/observations/106006686</a> |
| 457 | Accipiter badius | Shikra | 2020/7/11  | 2 | 0 | 12.80864643 | 79.78519253 | <a href="https://www.inaturalist.org/observations/52687936">https://www.inaturalist.org/observations/52687936</a>   |
| 458 | Accipiter badius | Shikra | 2021/1/22  | 2 | 0 | 12.81637040 | 79.15261225 | <a href="https://www.inaturalist.org/observations/71929146">https://www.inaturalist.org/observations/71929146</a>   |
| 459 | Accipiter badius | Shikra | 2021/7/11  | 1 | 0 | 12.82548500 | 80.20209800 | <a href="https://www.inaturalist.org/observations/86588578">https://www.inaturalist.org/observations/86588578</a>   |

|     |                  |        |            |   |   |             |             |                                                                                                                     |
|-----|------------------|--------|------------|---|---|-------------|-------------|---------------------------------------------------------------------------------------------------------------------|
| 460 | Accipiter badius | Shikra | 2019/6/9   | 1 | 0 | 12.82552510 | 77.03485730 | <a href="https://www.inaturalist.org/observations/92329136">https://www.inaturalist.org/observations/92329136</a>   |
| 461 | Accipiter badius | Shikra | 2021/2/6   | 2 | 0 | 12.83858100 | 77.65284800 | <a href="https://www.inaturalist.org/observations/84538547">https://www.inaturalist.org/observations/84538547</a>   |
| 462 | Accipiter badius | Shikra | 2020/9/14  | 2 | 0 | 12.83862938 | 77.65201590 | <a href="https://www.inaturalist.org/observations/84542206">https://www.inaturalist.org/observations/84542206</a>   |
| 463 | Accipiter badius | Shikra | 2020/12/18 | 3 | 0 | 12.84196587 | 80.17382381 | <a href="https://www.inaturalist.org/observations/67621395">https://www.inaturalist.org/observations/67621395</a>   |
| 464 | Accipiter badius | Shikra | 2021/9/19  | 1 | 0 | 12.84275000 | 77.72446300 | <a href="https://www.inaturalist.org/observations/95396129">https://www.inaturalist.org/observations/95396129</a>   |
| 465 | Accipiter badius | Shikra | 2021/11/6  | 1 | 0 | 12.84275000 | 77.72446300 | <a href="https://www.inaturalist.org/observations/100385463">https://www.inaturalist.org/observations/100385463</a> |
| 466 | Accipiter badius | Shikra | 2022/1/12  | 3 | 0 | 12.84275000 | 77.72446300 | <a href="https://www.inaturalist.org/observations/104802122">https://www.inaturalist.org/observations/104802122</a> |
| 467 | Accipiter badius | Shikra | 2022/2/27  | 3 | 0 | 12.84461010 | 77.77496103 | <a href="https://www.inaturalist.org/observations/107566768">https://www.inaturalist.org/observations/107566768</a> |
| 468 | Accipiter badius | Shikra | 2021/1/12  | 2 | 0 | 12.84524772 | 77.65790677 | <a href="https://www.inaturalist.org/observations/75791756">https://www.inaturalist.org/observations/75791756</a>   |
| 469 | Accipiter badius | Shikra | 2019/1/20  | 1 | 0 | 12.84944180 | 77.48845420 | <a href="https://www.inaturalist.org/observations/67130839">https://www.inaturalist.org/observations/67130839</a>   |
| 470 | Accipiter badius | Shikra | 2019/1/20  | 1 | 0 | 12.84944180 | 77.48845420 | <a href="https://www.inaturalist.org/observations/67130845">https://www.inaturalist.org/observations/67130845</a>   |
| 471 | Accipiter badius | Shikra | 2018/10/6  | 5 | 0 | 12.85502749 | 80.22369534 | <a href="https://www.inaturalist.org/observations/19393458">https://www.inaturalist.org/observations/19393458</a>   |
| 472 | Accipiter badius | Shikra | 2019/8/4   | 2 | 0 | 12.85519491 | 79.09978068 | <a href="https://www.inaturalist.org/observations/73297325">https://www.inaturalist.org/observations/73297325</a>   |
| 473 | Accipiter badius | Shikra | 2021/3/27  | 1 | 0 | 12.85637283 | 79.12241198 | <a href="https://www.inaturalist.org/observations/74622571">https://www.inaturalist.org/observations/74622571</a>   |
| 474 | Accipiter badius | Shikra | 2021/3/21  | 1 | 0 | 12.85718650 | 77.50891100 | <a href="https://www.inaturalist.org/observations/71692553">https://www.inaturalist.org/observations/71692553</a>   |
| 475 | Accipiter badius | Shikra | 2021/4/4   | 1 | 0 | 12.85718650 | 77.50891100 | <a href="https://www.inaturalist.org/observations/72895893">https://www.inaturalist.org/observations/72895893</a>   |
| 476 | Accipiter badius | Shikra | 2021/8/22  | 1 | 0 | 12.85718650 | 77.50891100 | <a href="https://www.inaturalist.org/observations/92075997">https://www.inaturalist.org/observations/92075997</a>   |
| 477 | Accipiter badius | Shikra | 2021/7/25  | 0 | 0 | 12.86323940 | 77.53899850 | <a href="https://www.inaturalist.org/observations/88530709">https://www.inaturalist.org/observations/88530709</a>   |
| 478 | Accipiter badius | Shikra | 2020/9/26  | 2 | 0 | 12.86329194 | 77.52634406 | <a href="https://www.inaturalist.org/observations/61099266">https://www.inaturalist.org/observations/61099266</a>   |
| 479 | Accipiter badius | Shikra | 2021/2/7   | 1 | 0 | 12.86391821 | 79.14074186 | <a href="https://www.inaturalist.org/observations/69259227">https://www.inaturalist.org/observations/69259227</a>   |
| 480 | Accipiter badius | Shikra | 2021/1/22  | 3 | 0 | 12.87260722 | 79.10971604 | <a href="https://www.inaturalist.org/observations/71929145">https://www.inaturalist.org/observations/71929145</a>   |
| 481 | Accipiter badius | Shikra | 2021/11/13 | 3 | 0 | 12.87278285 | 77.52285182 | <a href="https://www.inaturalist.org/observations/101263990">https://www.inaturalist.org/observations/101263990</a> |
| 482 | Accipiter badius | Shikra | 2016/12/24 | 1 | 0 | 12.87399093 | 77.50029646 | <a href="https://www.inaturalist.org/observations/64919363">https://www.inaturalist.org/observations/64919363</a>   |

|     |                  |        |            |   |   |             |             |                                                                                                                     |
|-----|------------------|--------|------------|---|---|-------------|-------------|---------------------------------------------------------------------------------------------------------------------|
| 483 | Accipiter badius | Shikra | 2022/4/17  | 4 | 0 | 12.87634111 | 79.13161593 | <a href="https://www.inaturalist.org/observations/124098440">https://www.inaturalist.org/observations/124098440</a> |
| 484 | Accipiter badius | Shikra | 2022/8/1   | 2 | 0 | 12.87742833 | 77.51162745 | <a href="https://www.inaturalist.org/observations/129013802">https://www.inaturalist.org/observations/129013802</a> |
| 485 | Accipiter badius | Shikra | 2016/12/1  | 4 | 0 | 12.87860069 | 77.42738738 | <a href="https://www.inaturalist.org/observations/5993255">https://www.inaturalist.org/observations/5993255</a>     |
| 486 | Accipiter badius | Shikra | 2021/4/11  | 3 | 0 | 12.87892400 | 77.53009120 | <a href="https://www.inaturalist.org/observations/73598942">https://www.inaturalist.org/observations/73598942</a>   |
| 487 | Accipiter badius | Shikra | 2019/4/19  | 5 | 0 | 12.87894620 | 77.52977930 | <a href="https://www.inaturalist.org/observations/61196344">https://www.inaturalist.org/observations/61196344</a>   |
| 488 | Accipiter badius | Shikra | 2020/10/2  | 1 | 0 | 12.87894620 | 77.52977930 | <a href="https://www.inaturalist.org/observations/61472029">https://www.inaturalist.org/observations/61472029</a>   |
| 489 | Accipiter badius | Shikra | 2019/4/19  | 1 | 0 | 12.87941557 | 77.52970496 | <a href="https://www.inaturalist.org/observations/67135865">https://www.inaturalist.org/observations/67135865</a>   |
| 490 | Accipiter badius | Shikra | 2020/11/28 | 1 | 0 | 12.87941685 | 77.52982221 | <a href="https://www.inaturalist.org/observations/65761550">https://www.inaturalist.org/observations/65761550</a>   |
| 491 | Accipiter badius | Shikra | 2022/2/26  | 1 | 0 | 12.88028579 | 77.53002570 | <a href="https://www.inaturalist.org/observations/107472282">https://www.inaturalist.org/observations/107472282</a> |
| 492 | Accipiter badius | Shikra | 2021/10/16 | 1 | 0 | 12.88032549 | 77.52918998 | <a href="https://www.inaturalist.org/observations/98359302">https://www.inaturalist.org/observations/98359302</a>   |
| 493 | Accipiter badius | Shikra | 2021/10/14 | 1 | 0 | 12.88061834 | 77.52884665 | <a href="https://www.inaturalist.org/observations/98184784">https://www.inaturalist.org/observations/98184784</a>   |
| 494 | Accipiter badius | Shikra | 2022/8/21  | 4 | 0 | 12.88076868 | 77.63815714 | <a href="https://www.inaturalist.org/observations/132026860">https://www.inaturalist.org/observations/132026860</a> |
| 495 | Accipiter badius | Shikra | 2020/11/24 | 2 | 0 | 12.88139356 | 77.53780011 | <a href="https://www.inaturalist.org/observations/65513638">https://www.inaturalist.org/observations/65513638</a>   |
| 496 | Accipiter badius | Shikra | 2021/10/11 | 3 | 0 | 12.88172890 | 77.51767885 | <a href="https://www.inaturalist.org/observations/101191247">https://www.inaturalist.org/observations/101191247</a> |
| 497 | Accipiter badius | Shikra | 2018/6/2   | 1 | 0 | 12.88180176 | 77.52433209 | <a href="https://www.inaturalist.org/observations/67089514">https://www.inaturalist.org/observations/67089514</a>   |
| 498 | Accipiter badius | Shikra | 2018/2/24  | 2 | 0 | 12.88184360 | 77.52716450 | <a href="https://www.inaturalist.org/observations/66087775">https://www.inaturalist.org/observations/66087775</a>   |
| 499 | Accipiter badius | Shikra | 2017/11/19 | 2 | 0 | 12.88184360 | 77.52716450 | <a href="https://www.inaturalist.org/observations/66175831">https://www.inaturalist.org/observations/66175831</a>   |
| 500 | Accipiter badius | Shikra | 2017/3/4   | 1 | 0 | 12.88259664 | 77.52360254 | <a href="https://www.inaturalist.org/observations/64917458">https://www.inaturalist.org/observations/64917458</a>   |
| 501 | Accipiter badius | Shikra | 2013/11/3  | 5 | 0 | 12.88348000 | 80.24674000 | <a href="http://www.inaturalist.org/observations/446800">http://www.inaturalist.org/observations/446800</a>         |
| 502 | Accipiter badius | Shikra | 2012/2/23  | 2 | 0 | 12.88353408 | 76.48434445 | <a href="https://www.inaturalist.org/observations/19168478">https://www.inaturalist.org/observations/19168478</a>   |
| 503 | Accipiter badius | Shikra | 2020/10/18 | 1 | 0 | 12.88391870 | 77.46309020 | <a href="https://www.inaturalist.org/observations/69553986">https://www.inaturalist.org/observations/69553986</a>   |
| 504 | Accipiter badius | Shikra | 2019/8/18  | 4 | 0 | 12.88626896 | 77.57800676 | <a href="https://www.inaturalist.org/observations/58421547">https://www.inaturalist.org/observations/58421547</a>   |
| 505 | Accipiter badius | Shikra | 2021/1/21  | 1 | 0 | 12.88672226 | 79.12670170 | <a href="https://www.inaturalist.org/observations/71931073">https://www.inaturalist.org/observations/71931073</a>   |

|     |                  |        |            |   |   |             |             |                                                                                                                     |
|-----|------------------|--------|------------|---|---|-------------|-------------|---------------------------------------------------------------------------------------------------------------------|
| 506 | Accipiter badius | Shikra | 2014/11/9  | 2 | 0 | 12.88738750 | 77.59688660 | <a href="https://www.inaturalist.org/observations/98206848">https://www.inaturalist.org/observations/98206848</a>   |
| 507 | Accipiter badius | Shikra | 2019/5/19  | 1 | 0 | 12.88806230 | 77.57817400 | <a href="https://www.inaturalist.org/observations/42375250">https://www.inaturalist.org/observations/42375250</a>   |
| 508 | Accipiter badius | Shikra | 2019/9/15  | 1 | 0 | 12.88912709 | 79.18535070 | <a href="https://www.inaturalist.org/observations/73587573">https://www.inaturalist.org/observations/73587573</a>   |
| 509 | Accipiter badius | Shikra | 2012/5/21  | 1 | 0 | 12.89041400 | 77.58719000 | <a href="https://www.inaturalist.org/observations/86258295">https://www.inaturalist.org/observations/86258295</a>   |
| 510 | Accipiter badius | Shikra | 2021/1/23  | 2 | 0 | 12.89078895 | 80.22544972 | <a href="https://www.inaturalist.org/observations/69561908">https://www.inaturalist.org/observations/69561908</a>   |
| 511 | Accipiter badius | Shikra | 2020/2/16  | 1 | 0 | 12.89622333 | 77.59367667 | <a href="https://www.inaturalist.org/observations/39084290">https://www.inaturalist.org/observations/39084290</a>   |
| 512 | Accipiter badius | Shikra | 2020/11/24 | 2 | 0 | 12.89652889 | 77.66267333 | <a href="https://www.inaturalist.org/observations/65518548">https://www.inaturalist.org/observations/65518548</a>   |
| 513 | Accipiter badius | Shikra | 2021/8/22  | 1 | 0 | 12.89827400 | 77.54887100 | <a href="https://www.inaturalist.org/observations/92087744">https://www.inaturalist.org/observations/92087744</a>   |
| 514 | Accipiter badius | Shikra | 2020/6/19  | 2 | 0 | 12.90273063 | 79.11475025 | <a href="https://www.inaturalist.org/observations/50146693">https://www.inaturalist.org/observations/50146693</a>   |
| 515 | Accipiter badius | Shikra | 2019/3/2   | 4 | 0 | 12.90550229 | 77.66990595 | <a href="https://www.inaturalist.org/observations/20915381">https://www.inaturalist.org/observations/20915381</a>   |
| 516 | Accipiter badius | Shikra | 2020/1/26  | 3 | 0 | 12.90653869 | 80.21292419 | <a href="https://www.inaturalist.org/observations/109827705">https://www.inaturalist.org/observations/109827705</a> |
| 517 | Accipiter badius | Shikra | 2020/9/15  | 3 | 0 | 12.90658880 | 77.58686380 | <a href="https://www.inaturalist.org/observations/59659441">https://www.inaturalist.org/observations/59659441</a>   |
| 518 | Accipiter badius | Shikra | 2020/6/23  | 2 | 0 | 12.90898530 | 77.49020970 | <a href="https://www.inaturalist.org/observations/52463422">https://www.inaturalist.org/observations/52463422</a>   |
| 519 | Accipiter badius | Shikra | 2015/7/12  | 2 | 0 | 12.91142904 | 77.64986910 | <a href="https://www.inaturalist.org/observations/34106408">https://www.inaturalist.org/observations/34106408</a>   |
| 520 | Accipiter badius | Shikra | 2019/4/10  | 2 | 0 | 12.91264444 | 79.39720833 | <a href="https://www.inaturalist.org/observations/22313478">https://www.inaturalist.org/observations/22313478</a>   |
| 521 | Accipiter badius | Shikra | 2020/8/15  | 1 | 0 | 12.91288796 | 77.67441466 | <a href="https://www.inaturalist.org/observations/56499861">https://www.inaturalist.org/observations/56499861</a>   |
| 522 | Accipiter badius | Shikra | 2021/2/13  | 1 | 0 | 12.91488092 | 77.66386072 | <a href="https://www.inaturalist.org/observations/69979241">https://www.inaturalist.org/observations/69979241</a>   |
| 523 | Accipiter badius | Shikra | 2021/6/12  | 1 | 0 | 12.91492946 | 77.55692584 | <a href="https://www.inaturalist.org/observations/84015357">https://www.inaturalist.org/observations/84015357</a>   |
| 524 | Accipiter badius | Shikra | 2022/5/14  | 2 | 0 | 12.91509453 | 77.46969799 | <a href="https://www.inaturalist.org/observations/117173728">https://www.inaturalist.org/observations/117173728</a> |
| 525 | Accipiter badius | Shikra | 2020/6/9   | 2 | 0 | 12.91515991 | 77.66314611 | <a href="https://www.inaturalist.org/observations/52764193">https://www.inaturalist.org/observations/52764193</a>   |
| 526 | Accipiter badius | Shikra | 2020/4/25  | 2 | 0 | 12.91584889 | 77.48884786 | <a href="https://www.inaturalist.org/observations/44155473">https://www.inaturalist.org/observations/44155473</a>   |
| 527 | Accipiter badius | Shikra | 2020/7/7   | 2 | 0 | 12.91674920 | 80.09749040 | <a href="https://www.inaturalist.org/observations/58034233">https://www.inaturalist.org/observations/58034233</a>   |
| 528 | Accipiter badius | Shikra | 2020/7/10  | 4 | 0 | 12.91674920 | 80.09749040 | <a href="https://www.inaturalist.org/observations/58034236">https://www.inaturalist.org/observations/58034236</a>   |

|     |                  |        |            |   |   |             |             |                                                                                                                     |
|-----|------------------|--------|------------|---|---|-------------|-------------|---------------------------------------------------------------------------------------------------------------------|
| 529 | Accipiter badius | Shikra | 2018/11/18 | 2 | 0 | 12.91831260 | 77.68009700 | <a href="https://www.inaturalist.org/observations/65007293">https://www.inaturalist.org/observations/65007293</a>   |
| 530 | Accipiter badius | Shikra | 2012/5/4   | 4 | 0 | 12.92191988 | 77.56051306 | <a href="https://www.inaturalist.org/observations/132863188">https://www.inaturalist.org/observations/132863188</a> |
| 531 | Accipiter badius | Shikra | 2019/10/8  | 2 | 0 | 12.92198181 | 80.09561920 | <a href="https://www.inaturalist.org/observations/34069348">https://www.inaturalist.org/observations/34069348</a>   |
| 532 | Accipiter badius | Shikra | 2020/9/12  | 2 | 0 | 12.92469167 | 77.58785123 | <a href="https://www.inaturalist.org/observations/67664800">https://www.inaturalist.org/observations/67664800</a>   |
| 533 | Accipiter badius | Shikra | 2021/8/20  | 1 | 0 | 12.92475290 | 77.53243250 | <a href="https://www.inaturalist.org/observations/93004144">https://www.inaturalist.org/observations/93004144</a>   |
| 534 | Accipiter badius | Shikra | 2014/11/29 | 3 | 0 | 12.92478741 | 77.58778488 | <a href="https://www.inaturalist.org/observations/66529981">https://www.inaturalist.org/observations/66529981</a>   |
| 535 | Accipiter badius | Shikra | 2021/6/15  | 2 | 0 | 12.92484516 | 77.54729799 | <a href="https://www.inaturalist.org/observations/84067061">https://www.inaturalist.org/observations/84067061</a>   |
| 536 | Accipiter badius | Shikra | 2022/8/14  | 4 | 0 | 12.92614551 | 80.17216120 | <a href="https://www.inaturalist.org/observations/130737674">https://www.inaturalist.org/observations/130737674</a> |
| 537 | Accipiter badius | Shikra | 2020/9/20  | 4 | 0 | 12.92881365 | 77.67913738 | <a href="https://www.inaturalist.org/observations/60171754">https://www.inaturalist.org/observations/60171754</a>   |
| 538 | Accipiter badius | Shikra | 2017/12/28 | 4 | 0 | 12.92898480 | 80.17216130 | <a href="https://www.inaturalist.org/observations/22941732">https://www.inaturalist.org/observations/22941732</a>   |
| 539 | Accipiter badius | Shikra | 2013/6/20  | 3 | 0 | 12.93489120 | 80.21371240 | <a href="https://www.inaturalist.org/observations/65183482">https://www.inaturalist.org/observations/65183482</a>   |
| 540 | Accipiter badius | Shikra | 2021/11/22 | 2 | 0 | 12.93525500 | 80.18425860 | <a href="https://www.inaturalist.org/observations/101689944">https://www.inaturalist.org/observations/101689944</a> |
| 541 | Accipiter badius | Shikra | 2020/4/5   | 2 | 0 | 12.93531446 | 77.62448072 | <a href="https://www.inaturalist.org/observations/46853150">https://www.inaturalist.org/observations/46853150</a>   |
| 542 | Accipiter badius | Shikra | 2019/9/19  | 2 | 0 | 12.93560358 | 77.42708440 | <a href="https://www.inaturalist.org/observations/69361290">https://www.inaturalist.org/observations/69361290</a>   |
| 543 | Accipiter badius | Shikra | 2022/4/14  | 5 | 0 | 12.93618399 | 80.20533610 | <a href="https://www.inaturalist.org/observations/111419672">https://www.inaturalist.org/observations/111419672</a> |
| 544 | Accipiter badius | Shikra | 2019/6/23  | 5 | 0 | 12.93757176 | 80.20640999 | <a href="https://www.inaturalist.org/observations/28836761">https://www.inaturalist.org/observations/28836761</a>   |
| 545 | Accipiter badius | Shikra | 2019/6/23  | 5 | 0 | 12.93757928 | 80.20669799 | <a href="https://www.inaturalist.org/observations/28836748">https://www.inaturalist.org/observations/28836748</a>   |
| 546 | Accipiter badius | Shikra | 2019/8/29  | 2 | 0 | 12.93799819 | 80.20613875 | <a href="https://www.inaturalist.org/observations/31710309">https://www.inaturalist.org/observations/31710309</a>   |
| 547 | Accipiter badius | Shikra | 2022/3/21  | 5 | 0 | 12.93920722 | 80.20738129 | <a href="https://www.inaturalist.org/observations/109284577">https://www.inaturalist.org/observations/109284577</a> |
| 548 | Accipiter badius | Shikra | 2021/7/4   | 1 | 0 | 12.93922323 | 80.21336965 | <a href="https://www.inaturalist.org/observations/85906867">https://www.inaturalist.org/observations/85906867</a>   |
| 549 | Accipiter badius | Shikra | 2020/4/24  | 2 | 0 | 12.93973214 | 77.56048538 | <a href="https://www.inaturalist.org/observations/43835998">https://www.inaturalist.org/observations/43835998</a>   |
| 550 | Accipiter badius | Shikra | 2020/4/24  | 2 | 0 | 12.93973446 | 77.56049719 | <a href="https://www.inaturalist.org/observations/43836006">https://www.inaturalist.org/observations/43836006</a>   |
| 551 | Accipiter badius | Shikra | 2020/4/24  | 2 | 0 | 12.93974623 | 77.56048378 | <a href="https://www.inaturalist.org/observations/43836004">https://www.inaturalist.org/observations/43836004</a>   |

|     |                  |        |            |   |   |             |             |                                                                                                                     |
|-----|------------------|--------|------------|---|---|-------------|-------------|---------------------------------------------------------------------------------------------------------------------|
| 552 | Accipiter badius | Shikra | 2020/4/24  | 1 | 0 | 12.93976060 | 77.56048378 | <a href="https://www.inaturalist.org/observations/43836003">https://www.inaturalist.org/observations/43836003</a>   |
| 553 | Accipiter badius | Shikra | 2020/1/9   | 2 | 0 | 12.94102478 | 79.31480353 | <a href="https://www.inaturalist.org/observations/69774045">https://www.inaturalist.org/observations/69774045</a>   |
| 554 | Accipiter badius | Shikra | 2020/2/15  | 1 | 0 | 12.94171333 | 77.51022667 | <a href="https://www.inaturalist.org/observations/39082816">https://www.inaturalist.org/observations/39082816</a>   |
| 555 | Accipiter badius | Shikra | 2022/4/3   | 2 | 0 | 12.94315219 | 80.21771986 | <a href="https://www.inaturalist.org/observations/110260214">https://www.inaturalist.org/observations/110260214</a> |
| 556 | Accipiter badius | Shikra | 2022/3/27  | 2 | 0 | 12.94663116 | 80.22376589 | <a href="https://www.inaturalist.org/observations/109638806">https://www.inaturalist.org/observations/109638806</a> |
| 557 | Accipiter badius | Shikra | 2021/1/21  | 1 | 0 | 12.94716599 | 79.03491496 | <a href="https://www.inaturalist.org/observations/71931086">https://www.inaturalist.org/observations/71931086</a>   |
| 558 | Accipiter badius | Shikra | 2012/10/5  | 2 | 0 | 12.94785734 | 77.58494895 | <a href="https://www.inaturalist.org/observations/31298442">https://www.inaturalist.org/observations/31298442</a>   |
| 559 | Accipiter badius | Shikra | 2015/5/10  | 3 | 0 | 12.95125789 | 77.58637729 | <a href="https://www.inaturalist.org/observations/66529980">https://www.inaturalist.org/observations/66529980</a>   |
| 560 | Accipiter badius | Shikra | 2020/2/13  | 0 | 0 | 12.95439167 | 77.51694833 | <a href="https://www.inaturalist.org/observations/38946308">https://www.inaturalist.org/observations/38946308</a>   |
| 561 | Accipiter badius | Shikra | 2021/5/15  | 1 | 0 | 12.95472833 | 77.64932167 | <a href="https://www.inaturalist.org/observations/78824493">https://www.inaturalist.org/observations/78824493</a>   |
| 562 | Accipiter badius | Shikra | 2022/9/4   | 1 | 0 | 12.95785520 | 80.21392286 | <a href="https://www.inaturalist.org/observations/133791559">https://www.inaturalist.org/observations/133791559</a> |
| 563 | Accipiter badius | Shikra | 2020/8/7   | 3 | 0 | 12.95791238 | 77.70669077 | <a href="https://www.inaturalist.org/observations/55686858">https://www.inaturalist.org/observations/55686858</a>   |
| 564 | Accipiter badius | Shikra | 2021/1/8   | 1 | 0 | 12.96045997 | 77.30937797 | <a href="https://www.inaturalist.org/observations/67746239">https://www.inaturalist.org/observations/67746239</a>   |
| 565 | Accipiter badius | Shikra | 2021/1/22  | 4 | 0 | 12.96203383 | 79.18092299 | <a href="https://www.inaturalist.org/observations/71929156">https://www.inaturalist.org/observations/71929156</a>   |
| 566 | Accipiter badius | Shikra | 2021/2/21  | 2 | 0 | 12.96434210 | 79.99802554 | <a href="https://www.inaturalist.org/observations/70043673">https://www.inaturalist.org/observations/70043673</a>   |
| 567 | Accipiter badius | Shikra | 2020/7/21  | 1 | 0 | 12.96536517 | 80.24610568 | <a href="https://www.inaturalist.org/observations/54745810">https://www.inaturalist.org/observations/54745810</a>   |
| 568 | Accipiter badius | Shikra | 2020/6/23  | 2 | 0 | 12.96690014 | 77.49916658 | <a href="https://www.inaturalist.org/observations/51681141">https://www.inaturalist.org/observations/51681141</a>   |
| 569 | Accipiter badius | Shikra | 2020/8/15  | 1 | 0 | 12.96690014 | 77.49919944 | <a href="https://www.inaturalist.org/observations/56517622">https://www.inaturalist.org/observations/56517622</a>   |
| 570 | Accipiter badius | Shikra | 2021/11/30 | 3 | 0 | 12.96958679 | 77.67536893 | <a href="https://www.inaturalist.org/observations/103460760">https://www.inaturalist.org/observations/103460760</a> |
| 571 | Accipiter badius | Shikra | 2016/7/11  | 2 | 0 | 12.97088139 | 80.22645639 | <a href="https://www.inaturalist.org/observations/63711210">https://www.inaturalist.org/observations/63711210</a>   |
| 572 | Accipiter badius | Shikra | 2022/7/26  | 5 | 0 | 12.97097406 | 80.13185564 | <a href="https://www.inaturalist.org/observations/130754208">https://www.inaturalist.org/observations/130754208</a> |
| 573 | Accipiter badius | Shikra | 2020/5/9   | 1 | 0 | 12.97159870 | 77.59456270 | <a href="https://www.inaturalist.org/observations/55914758">https://www.inaturalist.org/observations/55914758</a>   |
| 574 | Accipiter badius | Shikra | 2020/5/9   | 1 | 0 | 12.97159870 | 77.59456270 | <a href="https://www.inaturalist.org/observations/55914759">https://www.inaturalist.org/observations/55914759</a>   |



|     |                  |        |           |   |   |             |             |                                                                                                                     |
|-----|------------------|--------|-----------|---|---|-------------|-------------|---------------------------------------------------------------------------------------------------------------------|
| 575 | Accipiter badius | Shikra | 2020/5/16 | 1 | 0 | 12.97159870 | 77.59456270 | <a href="https://www.inaturalist.org/observations/55914760">https://www.inaturalist.org/observations/55914760</a>   |
| 576 | Accipiter badius | Shikra | 2020/2/23 | 1 | 0 | 12.97159870 | 77.59456270 | <a href="https://www.inaturalist.org/observations/55914762">https://www.inaturalist.org/observations/55914762</a>   |
| 577 | Accipiter badius | Shikra | 2020/2/23 | 1 | 0 | 12.97159870 | 77.59456270 | <a href="https://www.inaturalist.org/observations/55914764">https://www.inaturalist.org/observations/55914764</a>   |
| 578 | Accipiter badius | Shikra | 2020/3/20 | 1 | 0 | 12.97159870 | 77.59456270 | <a href="https://www.inaturalist.org/observations/55914765">https://www.inaturalist.org/observations/55914765</a>   |
| 579 | Accipiter badius | Shikra | 2020/3/20 | 1 | 0 | 12.97159870 | 77.59456270 | <a href="https://www.inaturalist.org/observations/55914768">https://www.inaturalist.org/observations/55914768</a>   |
| 580 | Accipiter badius | Shikra | 2019/3/24 | 2 | 0 | 12.97159870 | 77.59456270 | <a href="https://www.inaturalist.org/observations/55914769">https://www.inaturalist.org/observations/55914769</a>   |
| 581 | Accipiter badius | Shikra | 2019/3/24 | 2 | 0 | 12.97159870 | 77.59456270 | <a href="https://www.inaturalist.org/observations/55914770">https://www.inaturalist.org/observations/55914770</a>   |
| 582 | Accipiter badius | Shikra | 2020/4/4  | 2 | 0 | 12.97159870 | 77.59456270 | <a href="https://www.inaturalist.org/observations/55914773">https://www.inaturalist.org/observations/55914773</a>   |
| 583 | Accipiter badius | Shikra | 2020/4/4  | 2 | 0 | 12.97159870 | 77.59456270 | <a href="https://www.inaturalist.org/observations/55914776">https://www.inaturalist.org/observations/55914776</a>   |
| 584 | Accipiter badius | Shikra | 2020/4/4  | 2 | 0 | 12.97159870 | 77.59456270 | <a href="https://www.inaturalist.org/observations/55914777">https://www.inaturalist.org/observations/55914777</a>   |
| 585 | Accipiter badius | Shikra | 2020/4/12 | 2 | 0 | 12.97159870 | 77.59456270 | <a href="https://www.inaturalist.org/observations/55914779">https://www.inaturalist.org/observations/55914779</a>   |
| 586 | Accipiter badius | Shikra | 2020/4/12 | 2 | 0 | 12.97159870 | 77.59456270 | <a href="https://www.inaturalist.org/observations/55914781">https://www.inaturalist.org/observations/55914781</a>   |
| 587 | Accipiter badius | Shikra | 2020/4/12 | 2 | 0 | 12.97159870 | 77.59456270 | <a href="https://www.inaturalist.org/observations/55914782">https://www.inaturalist.org/observations/55914782</a>   |
| 588 | Accipiter badius | Shikra | 2020/4/12 | 2 | 0 | 12.97159870 | 77.59456270 | <a href="https://www.inaturalist.org/observations/55914783">https://www.inaturalist.org/observations/55914783</a>   |
| 589 | Accipiter badius | Shikra | 2020/5/9  | 2 | 0 | 12.97159870 | 77.59456270 | <a href="https://www.inaturalist.org/observations/55914784">https://www.inaturalist.org/observations/55914784</a>   |
| 590 | Accipiter badius | Shikra | 2021/9/13 | 2 | 0 | 12.97159870 | 77.59456270 | <a href="https://www.inaturalist.org/observations/120866579">https://www.inaturalist.org/observations/120866579</a> |
| 591 | Accipiter badius | Shikra | 2021/6/27 | 3 | 0 | 12.97159870 | 77.59456270 | <a href="https://www.inaturalist.org/observations/122618518">https://www.inaturalist.org/observations/122618518</a> |
| 592 | Accipiter badius | Shikra | 2019/3/11 | 1 | 0 | 12.97159900 | 77.59456300 | <a href="https://www.inaturalist.org/observations/51881580">https://www.inaturalist.org/observations/51881580</a>   |
| 593 | Accipiter badius | Shikra | 2021/6/29 | 1 | 0 | 12.97178367 | 77.86615714 | <a href="https://www.inaturalist.org/observations/85042334">https://www.inaturalist.org/observations/85042334</a>   |
| 594 | Accipiter badius | Shikra | 2017/12/6 | 2 | 0 | 12.97559639 | 80.22992139 | <a href="https://www.inaturalist.org/observations/63743334">https://www.inaturalist.org/observations/63743334</a>   |
| 595 | Accipiter badius | Shikra | 2021/7/1  | 1 | 0 | 12.97637437 | 80.22385407 | <a href="https://www.inaturalist.org/observations/85199569">https://www.inaturalist.org/observations/85199569</a>   |
| 596 | Accipiter badius | Shikra | 2019/8/18 | 4 | 0 | 12.97932540 | 77.66418410 | <a href="https://www.inaturalist.org/observations/31474713">https://www.inaturalist.org/observations/31474713</a>   |
| 597 | Accipiter badius | Shikra | 2021/9/25 | 2 | 0 | 12.98363510 | 77.67974110 | <a href="https://www.inaturalist.org/observations/96900214">https://www.inaturalist.org/observations/96900214</a>   |

|     |                  |        |            |   |   |             |             |                                                                                                                     |
|-----|------------------|--------|------------|---|---|-------------|-------------|---------------------------------------------------------------------------------------------------------------------|
| 598 | Accipiter badius | Shikra | 2021/1/17  | 1 | 0 | 12.98480833 | 80.18899198 | <a href="https://www.inaturalist.org/observations/68233032">https://www.inaturalist.org/observations/68233032</a>   |
| 599 | Accipiter badius | Shikra | 2015/6/15  | 4 | 0 | 12.98551300 | 80.25652600 | <a href="http://www.inaturalist.org/observations/1701188">http://www.inaturalist.org/observations/1701188</a>       |
| 600 | Accipiter badius | Shikra | 2019/8/12  | 2 | 0 | 12.98880300 | 80.25832500 | <a href="https://www.inaturalist.org/observations/31238500">https://www.inaturalist.org/observations/31238500</a>   |
| 601 | Accipiter badius | Shikra | 2019/8/12  | 3 | 0 | 12.98897934 | 80.25885773 | <a href="https://www.inaturalist.org/observations/31238582">https://www.inaturalist.org/observations/31238582</a>   |
| 602 | Accipiter badius | Shikra | 2017/12/15 | 2 | 0 | 12.98980000 | 77.59880000 | <a href="https://www.inaturalist.org/observations/69967814">https://www.inaturalist.org/observations/69967814</a>   |
| 603 | Accipiter badius | Shikra | 2020/11/6  | 2 | 0 | 12.99015087 | 77.66240180 | <a href="https://www.inaturalist.org/observations/64353096">https://www.inaturalist.org/observations/64353096</a>   |
| 604 | Accipiter badius | Shikra | 2020/12/30 | 2 | 0 | 12.99015087 | 77.66240180 | <a href="https://www.inaturalist.org/observations/67356866">https://www.inaturalist.org/observations/67356866</a>   |
| 605 | Accipiter badius | Shikra | 2021/1/1   | 1 | 0 | 12.99015087 | 77.66240180 | <a href="https://www.inaturalist.org/observations/67444308">https://www.inaturalist.org/observations/67444308</a>   |
| 606 | Accipiter badius | Shikra | 2021/7/3   | 1 | 0 | 12.99015610 | 77.66240180 | <a href="https://www.inaturalist.org/observations/85487820">https://www.inaturalist.org/observations/85487820</a>   |
| 607 | Accipiter badius | Shikra | 2021/5/28  | 1 | 0 | 12.99080160 | 77.66266133 | <a href="https://www.inaturalist.org/observations/84830730">https://www.inaturalist.org/observations/84830730</a>   |
| 608 | Accipiter badius | Shikra | 2016/1/26  | 4 | 0 | 12.99131759 | 80.23428786 | <a href="https://www.inaturalist.org/observations/28436734">https://www.inaturalist.org/observations/28436734</a>   |
| 609 | Accipiter badius | Shikra | 2019/10/5  | 1 | 0 | 12.99149290 | 80.23369070 | <a href="https://www.inaturalist.org/observations/52654517">https://www.inaturalist.org/observations/52654517</a>   |
| 610 | Accipiter badius | Shikra | 2019/10/5  | 2 | 0 | 12.99149290 | 80.23369070 | <a href="https://www.inaturalist.org/observations/52654537">https://www.inaturalist.org/observations/52654537</a>   |
| 611 | Accipiter badius | Shikra | 2021/6/29  | 1 | 0 | 12.99149290 | 80.23369070 | <a href="https://www.inaturalist.org/observations/86131869">https://www.inaturalist.org/observations/86131869</a>   |
| 612 | Accipiter badius | Shikra | 2021/6/29  | 1 | 0 | 12.99149290 | 80.23369070 | <a href="https://www.inaturalist.org/observations/86131877">https://www.inaturalist.org/observations/86131877</a>   |
| 613 | Accipiter badius | Shikra | 2020/7/26  | 3 | 0 | 12.99263964 | 80.23667599 | <a href="https://www.inaturalist.org/observations/54821319">https://www.inaturalist.org/observations/54821319</a>   |
| 614 | Accipiter badius | Shikra | 2021/12/16 | 4 | 0 | 12.99547418 | 80.23978467 | <a href="https://www.inaturalist.org/observations/103157228">https://www.inaturalist.org/observations/103157228</a> |
| 615 | Accipiter badius | Shikra | 2021/5/30  | 1 | 0 | 12.99592545 | 80.23686643 | <a href="https://www.inaturalist.org/observations/85794776">https://www.inaturalist.org/observations/85794776</a>   |
| 616 | Accipiter badius | Shikra | 2020/10/27 | 2 | 0 | 12.99653729 | 77.48749010 | <a href="https://www.inaturalist.org/observations/63620545">https://www.inaturalist.org/observations/63620545</a>   |
| 617 | Accipiter badius | Shikra | 2017/2/6   | 4 | 0 | 12.99767293 | 77.57508785 | <a href="https://www.inaturalist.org/observations/132862482">https://www.inaturalist.org/observations/132862482</a> |
| 618 | Accipiter badius | Shikra | 2020/9/2   | 2 | 0 | 12.99821173 | 74.84698764 | <a href="https://www.inaturalist.org/observations/78586694">https://www.inaturalist.org/observations/78586694</a>   |
| 619 | Accipiter badius | Shikra | 2017/11/12 | 4 | 0 | 12.99953435 | 80.22393784 | <a href="https://www.inaturalist.org/observations/22543918">https://www.inaturalist.org/observations/22543918</a>   |
| 620 | Accipiter badius | Shikra | 2019/5/14  | 2 | 0 | 13.00237473 | 77.55473190 | <a href="https://www.inaturalist.org/observations/104334765">https://www.inaturalist.org/observations/104334765</a> |

|     |                  |        |            |   |   |             |             |                                                                                                                     |
|-----|------------------|--------|------------|---|---|-------------|-------------|---------------------------------------------------------------------------------------------------------------------|
| 621 | Accipiter badius | Shikra | 2012/3/9   | 4 | 0 | 13.00332340 | 76.10038940 | <a href="https://www.inaturalist.org/observations/28918369">https://www.inaturalist.org/observations/28918369</a>   |
| 622 | Accipiter badius | Shikra | 2019/8/25  | 1 | 0 | 13.00423300 | 80.23862840 | <a href="https://www.inaturalist.org/observations/31457292">https://www.inaturalist.org/observations/31457292</a>   |
| 623 | Accipiter badius | Shikra | 2020/10/23 | 2 | 0 | 13.00984518 | 80.22090548 | <a href="https://www.inaturalist.org/observations/64021639">https://www.inaturalist.org/observations/64021639</a>   |
| 624 | Accipiter badius | Shikra | 2019/12/31 | 2 | 0 | 13.01562778 | 77.56688611 | <a href="https://www.inaturalist.org/observations/37158100">https://www.inaturalist.org/observations/37158100</a>   |
| 625 | Accipiter badius | Shikra | 2020/2/12  | 3 | 0 | 13.01671021 | 80.23639034 | <a href="https://www.inaturalist.org/observations/109828198">https://www.inaturalist.org/observations/109828198</a> |
| 626 | Accipiter badius | Shikra | 2011/7/15  | 1 | 0 | 13.01785801 | 77.56212938 | <a href="https://www.inaturalist.org/observations/72171929">https://www.inaturalist.org/observations/72171929</a>   |
| 627 | Accipiter badius | Shikra | 2022/9/10  | 2 | 0 | 13.01817621 | 77.38663115 | <a href="https://www.inaturalist.org/observations/134434001">https://www.inaturalist.org/observations/134434001</a> |
| 628 | Accipiter badius | Shikra | 2021/7/27  | 2 | 0 | 13.01923007 | 77.56885093 | <a href="https://www.inaturalist.org/observations/105149595">https://www.inaturalist.org/observations/105149595</a> |
| 629 | Accipiter badius | Shikra | 2022/9/17  | 1 | 0 | 13.02228335 | 77.40921582 | <a href="https://www.inaturalist.org/observations/136136811">https://www.inaturalist.org/observations/136136811</a> |
| 630 | Accipiter badius | Shikra | 2018/5/13  | 1 | 0 | 13.02381444 | 77.56963000 | <a href="https://www.inaturalist.org/observations/106329299">https://www.inaturalist.org/observations/106329299</a> |
| 631 | Accipiter badius | Shikra | 2021/7/4   | 2 | 0 | 13.03040769 | 80.25310723 | <a href="https://www.inaturalist.org/observations/85597087">https://www.inaturalist.org/observations/85597087</a>   |
| 632 | Accipiter badius | Shikra | 2019/10/26 | 3 | 0 | 13.03040929 | 80.25319107 | <a href="https://www.inaturalist.org/observations/45850396">https://www.inaturalist.org/observations/45850396</a>   |
| 633 | Accipiter badius | Shikra | 2021/6/6   | 2 | 0 | 13.03042491 | 80.25317874 | <a href="https://www.inaturalist.org/observations/81832984">https://www.inaturalist.org/observations/81832984</a>   |
| 634 | Accipiter badius | Shikra | 2020/6/14  | 3 | 0 | 13.03046351 | 80.25309082 | <a href="https://www.inaturalist.org/observations/49572500">https://www.inaturalist.org/observations/49572500</a>   |
| 635 | Accipiter badius | Shikra | 2015/6/23  | 2 | 0 | 13.03088700 | 77.60986660 | <a href="https://www.inaturalist.org/observations/48912592">https://www.inaturalist.org/observations/48912592</a>   |
| 636 | Accipiter badius | Shikra | 2019/1/22  | 7 | 0 | 13.03366164 | 77.57889966 | <a href="https://www.inaturalist.org/observations/108353774">https://www.inaturalist.org/observations/108353774</a> |
| 637 | Accipiter badius | Shikra | 2022/2/13  | 5 | 0 | 13.03378716 | 77.57353526 | <a href="https://www.inaturalist.org/observations/109216983">https://www.inaturalist.org/observations/109216983</a> |
| 638 | Accipiter badius | Shikra | 2022/4/16  | 3 | 0 | 13.03473835 | 77.57304168 | <a href="https://www.inaturalist.org/observations/119394709">https://www.inaturalist.org/observations/119394709</a> |
| 639 | Accipiter badius | Shikra | 2022/3/28  | 4 | 0 | 13.03476972 | 77.57303096 | <a href="https://www.inaturalist.org/observations/113200404">https://www.inaturalist.org/observations/113200404</a> |
| 640 | Accipiter badius | Shikra | 2021/3/5   | 1 | 0 | 13.03480441 | 77.57322406 | <a href="https://www.inaturalist.org/observations/105153461">https://www.inaturalist.org/observations/105153461</a> |
| 641 | Accipiter badius | Shikra | 2021/3/13  | 1 | 0 | 13.03480441 | 77.57322406 | <a href="https://www.inaturalist.org/observations/105153466">https://www.inaturalist.org/observations/105153466</a> |
| 642 | Accipiter badius | Shikra | 2020/3/31  | 1 | 0 | 13.03505574 | 80.24183527 | <a href="https://www.inaturalist.org/observations/88661425">https://www.inaturalist.org/observations/88661425</a>   |
| 643 | Accipiter badius | Shikra | 2018/4/9   | 3 | 0 | 13.03831444 | 80.22533394 | <a href="https://www.inaturalist.org/observations/30877940">https://www.inaturalist.org/observations/30877940</a>   |

|     |                  |        |            |   |   |             |             |                                                                                                                     |
|-----|------------------|--------|------------|---|---|-------------|-------------|---------------------------------------------------------------------------------------------------------------------|
| 644 | Accipiter badius | Shikra | 2021/5/6   | 1 | 0 | 13.03964418 | 80.25823693 | <a href="https://www.inaturalist.org/observations/78325423">https://www.inaturalist.org/observations/78325423</a>   |
| 645 | Accipiter badius | Shikra | 2020/3/12  | 2 | 0 | 13.04292462 | 80.26906841 | <a href="https://www.inaturalist.org/observations/40011070">https://www.inaturalist.org/observations/40011070</a>   |
| 646 | Accipiter badius | Shikra | 2022/3/15  | 1 | 0 | 13.04550700 | 80.25255900 | <a href="https://www.inaturalist.org/observations/108648542">https://www.inaturalist.org/observations/108648542</a> |
| 647 | Accipiter badius | Shikra | 2022/2/18  | 1 | 0 | 13.04634046 | 80.25335569 | <a href="https://www.inaturalist.org/observations/106961179">https://www.inaturalist.org/observations/106961179</a> |
| 648 | Accipiter badius | Shikra | 2022/3/4   | 4 | 0 | 13.04634046 | 80.25335569 | <a href="https://www.inaturalist.org/observations/107883918">https://www.inaturalist.org/observations/107883918</a> |
| 649 | Accipiter badius | Shikra | 2022/3/4   | 3 | 0 | 13.04634046 | 80.25335569 | <a href="https://www.inaturalist.org/observations/107884096">https://www.inaturalist.org/observations/107884096</a> |
| 650 | Accipiter badius | Shikra | 2019/11/6  | 1 | 0 | 13.04734870 | 80.25400040 | <a href="https://www.inaturalist.org/observations/89443302">https://www.inaturalist.org/observations/89443302</a>   |
| 651 | Accipiter badius | Shikra | 2021/2/15  | 1 | 0 | 13.04734870 | 80.25400040 | <a href="https://www.inaturalist.org/observations/89748857">https://www.inaturalist.org/observations/89748857</a>   |
| 652 | Accipiter badius | Shikra | 2021/2/22  | 1 | 0 | 13.04734870 | 80.25400040 | <a href="https://www.inaturalist.org/observations/89748865">https://www.inaturalist.org/observations/89748865</a>   |
| 653 | Accipiter badius | Shikra | 2019/1/21  | 1 | 0 | 13.05054078 | 77.55335501 | <a href="https://www.inaturalist.org/observations/103525129">https://www.inaturalist.org/observations/103525129</a> |
| 654 | Accipiter badius | Shikra | 2022/9/13  | 2 | 0 | 13.05993889 | 80.23443611 | <a href="https://www.inaturalist.org/observations/136690844">https://www.inaturalist.org/observations/136690844</a> |
| 655 | Accipiter badius | Shikra | 2022/9/9   | 1 | 0 | 13.06415652 | 80.23456393 | <a href="https://www.inaturalist.org/observations/136245070">https://www.inaturalist.org/observations/136245070</a> |
| 656 | Accipiter badius | Shikra | 2020/10/27 | 5 | 0 | 13.06487045 | 79.67057938 | <a href="https://www.inaturalist.org/observations/131037403">https://www.inaturalist.org/observations/131037403</a> |
| 657 | Accipiter badius | Shikra | 2019/9/19  | 2 | 0 | 13.06532620 | 80.22305235 | <a href="https://www.inaturalist.org/observations/90627147">https://www.inaturalist.org/observations/90627147</a>   |
| 658 | Accipiter badius | Shikra | 2021/6/22  | 1 | 0 | 13.06558420 | 80.16077680 | <a href="https://www.inaturalist.org/observations/84040473">https://www.inaturalist.org/observations/84040473</a>   |
| 659 | Accipiter badius | Shikra | 2021/7/1   | 2 | 0 | 13.06558420 | 80.16077680 | <a href="https://www.inaturalist.org/observations/85319017">https://www.inaturalist.org/observations/85319017</a>   |
| 660 | Accipiter badius | Shikra | 2021/10/19 | 1 | 0 | 13.06558420 | 80.16077680 | <a href="https://www.inaturalist.org/observations/98671519">https://www.inaturalist.org/observations/98671519</a>   |
| 661 | Accipiter badius | Shikra | 2021/10/27 | 1 | 0 | 13.06558420 | 80.16077680 | <a href="https://www.inaturalist.org/observations/99698461">https://www.inaturalist.org/observations/99698461</a>   |
| 662 | Accipiter badius | Shikra | 2021/12/14 | 6 | 0 | 13.06558420 | 80.16077680 | <a href="https://www.inaturalist.org/observations/103099306">https://www.inaturalist.org/observations/103099306</a> |
| 663 | Accipiter badius | Shikra | 2021/6/8   | 1 | 0 | 13.06563718 | 80.16077656 | <a href="https://www.inaturalist.org/observations/82986845">https://www.inaturalist.org/observations/82986845</a>   |
| 664 | Accipiter badius | Shikra | 2021/7/21  | 2 | 0 | 13.06563718 | 80.16077656 | <a href="https://www.inaturalist.org/observations/87955606">https://www.inaturalist.org/observations/87955606</a>   |
| 665 | Accipiter badius | Shikra | 2019/7/23  | 3 | 0 | 13.06907890 | 77.61173620 | <a href="https://www.inaturalist.org/observations/29496756">https://www.inaturalist.org/observations/29496756</a>   |
| 666 | Accipiter badius | Shikra | 2022/7/8   | 3 | 0 | 13.06939820 | 78.56349320 | <a href="https://www.inaturalist.org/observations/126078457">https://www.inaturalist.org/observations/126078457</a> |

|     |                  |        |            |   |   |             |             |                                                                                                                     |
|-----|------------------|--------|------------|---|---|-------------|-------------|---------------------------------------------------------------------------------------------------------------------|
| 667 | Accipiter badius | Shikra | 2022/8/15  | 4 | 0 | 13.06941261 | 77.57241536 | <a href="https://www.inaturalist.org/observations/131289375">https://www.inaturalist.org/observations/131289375</a> |
| 668 | Accipiter badius | Shikra | 2022/9/5   | 2 | 0 | 13.07377159 | 77.57401429 | <a href="https://www.inaturalist.org/observations/134006797">https://www.inaturalist.org/observations/134006797</a> |
| 669 | Accipiter badius | Shikra | 2021/6/22  | 2 | 0 | 13.07637710 | 80.23395060 | <a href="https://www.inaturalist.org/observations/84396103">https://www.inaturalist.org/observations/84396103</a>   |
| 670 | Accipiter badius | Shikra | 2021/12/28 | 3 | 0 | 13.07637710 | 80.23395060 | <a href="https://www.inaturalist.org/observations/106079329">https://www.inaturalist.org/observations/106079329</a> |
| 671 | Accipiter badius | Shikra | 2021/7/15  | 2 | 0 | 13.07638099 | 80.23395058 | <a href="https://www.inaturalist.org/observations/87100059">https://www.inaturalist.org/observations/87100059</a>   |
| 672 | Accipiter badius | Shikra | 2021/8/11  | 1 | 0 | 13.07975228 | 77.58853544 | <a href="https://www.inaturalist.org/observations/90865567">https://www.inaturalist.org/observations/90865567</a>   |
| 673 | Accipiter badius | Shikra | 2017/5/26  | 4 | 0 | 13.07989390 | 77.58384121 | <a href="https://www.inaturalist.org/observations/29644235">https://www.inaturalist.org/observations/29644235</a>   |
| 674 | Accipiter badius | Shikra | 2015/2/7   | 3 | 0 | 13.08001931 | 77.58384121 | <a href="https://www.inaturalist.org/observations/29639256">https://www.inaturalist.org/observations/29639256</a>   |
| 675 | Accipiter badius | Shikra | 2012/3/24  | 1 | 0 | 13.08268020 | 80.27071840 | <a href="https://www.inaturalist.org/observations/89616110">https://www.inaturalist.org/observations/89616110</a>   |
| 676 | Accipiter badius | Shikra | 2016/12/3  | 1 | 0 | 13.08268020 | 80.27071840 | <a href="https://www.inaturalist.org/observations/92325088">https://www.inaturalist.org/observations/92325088</a>   |
| 677 | Accipiter badius | Shikra | 2021/9/28  | 1 | 0 | 13.08268020 | 80.27071840 | <a href="https://www.inaturalist.org/observations/96585900">https://www.inaturalist.org/observations/96585900</a>   |
| 678 | Accipiter badius | Shikra | 2021/12/28 | 4 | 0 | 13.08308237 | 80.27071830 | <a href="https://www.inaturalist.org/observations/105141444">https://www.inaturalist.org/observations/105141444</a> |
| 679 | Accipiter badius | Shikra | 2022/7/2   | 1 | 0 | 13.08314017 | 77.60966353 | <a href="https://www.inaturalist.org/observations/136103557">https://www.inaturalist.org/observations/136103557</a> |
| 680 | Accipiter badius | Shikra | 2018/12/23 | 3 | 0 | 13.08369763 | 77.60111332 | <a href="https://www.inaturalist.org/observations/20858303">https://www.inaturalist.org/observations/20858303</a>   |
| 681 | Accipiter badius | Shikra | 2015/3/24  | 7 | 0 | 13.08784000 | 80.27847000 | <a href="http://www.inaturalist.org/observations/1495599">http://www.inaturalist.org/observations/1495599</a>       |
| 682 | Accipiter badius | Shikra | 2021/8/9   | 2 | 0 | 13.08835418 | 77.48489857 | <a href="https://www.inaturalist.org/observations/90511151">https://www.inaturalist.org/observations/90511151</a>   |
| 683 | Accipiter badius | Shikra | 2019/12/30 | 2 | 0 | 13.10360283 | 74.97311333 | <a href="https://www.inaturalist.org/observations/64839145">https://www.inaturalist.org/observations/64839145</a>   |
| 684 | Accipiter badius | Shikra | 2020/7/21  | 3 | 0 | 13.11920885 | 80.13550814 | <a href="https://www.inaturalist.org/observations/57812317">https://www.inaturalist.org/observations/57812317</a>   |
| 685 | Accipiter badius | Shikra | 2020/7/13  | 2 | 0 | 13.11920918 | 80.13550848 | <a href="https://www.inaturalist.org/observations/57812188">https://www.inaturalist.org/observations/57812188</a>   |
| 686 | Accipiter badius | Shikra | 2020/7/11  | 1 | 0 | 13.12305562 | 79.91195273 | <a href="https://www.inaturalist.org/observations/83609109">https://www.inaturalist.org/observations/83609109</a>   |
| 687 | Accipiter badius | Shikra | 2021/8/1   | 1 | 0 | 13.12306345 | 79.91195273 | <a href="https://www.inaturalist.org/observations/90135573">https://www.inaturalist.org/observations/90135573</a>   |
| 688 | Accipiter badius | Shikra | 2006/8/8   | 1 | 0 | 13.12509600 | 77.54687027 | <a href="https://www.inaturalist.org/observations/44192633">https://www.inaturalist.org/observations/44192633</a>   |
| 689 | Accipiter badius | Shikra | 2020/6/25  | 2 | 0 | 13.13362906 | 77.54732819 | <a href="https://www.inaturalist.org/observations/62774558">https://www.inaturalist.org/observations/62774558</a>   |

|     |                  |        |           |   |   |             |             |                                                                                                                     |
|-----|------------------|--------|-----------|---|---|-------------|-------------|---------------------------------------------------------------------------------------------------------------------|
| 690 | Accipiter badius | Shikra | 2021/3/17 | 2 | 0 | 13.15823297 | 79.02497200 | <a href="https://www.inaturalist.org/observations/71928167">https://www.inaturalist.org/observations/71928167</a>   |
| 691 | Accipiter badius | Shikra | 2019/6/30 | 3 | 0 | 13.18643651 | 78.56131159 | <a href="https://www.inaturalist.org/observations/29300952">https://www.inaturalist.org/observations/29300952</a>   |
| 692 | Accipiter badius | Shikra | 2020/5/17 | 2 | 0 | 13.20501830 | 77.64880940 | <a href="https://www.inaturalist.org/observations/46221473">https://www.inaturalist.org/observations/46221473</a>   |
| 693 | Accipiter badius | Shikra | 2017/4/30 | 2 | 0 | 13.25441494 | 76.47571814 | <a href="https://www.inaturalist.org/observations/6599715">https://www.inaturalist.org/observations/6599715</a>     |
| 694 | Accipiter badius | Shikra | 2021/7/8  | 1 | 0 | 13.36106236 | 74.78681255 | <a href="https://www.inaturalist.org/observations/87236421">https://www.inaturalist.org/observations/87236421</a>   |
| 695 | Accipiter badius | Shikra | 2022/4/13 | 2 | 0 | 13.37420074 | 77.21271336 | <a href="https://www.inaturalist.org/observations/132092041">https://www.inaturalist.org/observations/132092041</a> |
| 696 | Accipiter badius | Shikra | 2015/12/8 | 1 | 0 | 13.47765120 | 75.75314240 | <a href="https://www.inaturalist.org/observations/91842548">https://www.inaturalist.org/observations/91842548</a>   |
| 697 | Accipiter badius | Shikra | 2022/3/25 | 2 | 0 | 13.52030500 | 79.31848833 | <a href="https://www.inaturalist.org/observations/111898648">https://www.inaturalist.org/observations/111898648</a> |
| 698 | Accipiter badius | Shikra | 2022/3/25 | 3 | 0 | 13.52030500 | 79.31848833 | <a href="https://www.inaturalist.org/observations/115298463">https://www.inaturalist.org/observations/115298463</a> |
| 699 | Accipiter badius | Shikra | 2022/2/13 | 1 | 0 | 13.53307151 | 78.35147899 | <a href="https://www.inaturalist.org/observations/106909356">https://www.inaturalist.org/observations/106909356</a> |
| 700 | Accipiter badius | Shikra | 2022/2/13 | 1 | 0 | 13.53380166 | 78.35247168 | <a href="https://www.inaturalist.org/observations/106909322">https://www.inaturalist.org/observations/106909322</a> |
| 701 | Accipiter badius | Shikra | 2022/2/13 | 1 | 0 | 13.53535000 | 78.35145394 | <a href="https://www.inaturalist.org/observations/106909373">https://www.inaturalist.org/observations/106909373</a> |
| 702 | Accipiter badius | Shikra | 2018/5/17 | 3 | 0 | 13.56508160 | 74.93695068 | <a href="https://www.inaturalist.org/observations/18652247">https://www.inaturalist.org/observations/18652247</a>   |
| 703 | Accipiter badius | Shikra | 2022/4/2  | 2 | 0 | 13.57245653 | 79.40611437 | <a href="https://www.inaturalist.org/observations/110368370">https://www.inaturalist.org/observations/110368370</a> |
| 704 | Accipiter badius | Shikra | 2022/3/23 | 6 | 0 | 13.57438530 | 79.34259623 | <a href="https://www.inaturalist.org/observations/109294900">https://www.inaturalist.org/observations/109294900</a> |
| 705 | Accipiter badius | Shikra | 2022/8/26 | 1 | 0 | 13.58525372 | 79.42889647 | <a href="https://www.inaturalist.org/observations/133349913">https://www.inaturalist.org/observations/133349913</a> |
| 706 | Accipiter badius | Shikra | 2022/6/3  | 4 | 0 | 13.58751595 | 79.42876198 | <a href="https://www.inaturalist.org/observations/119974788">https://www.inaturalist.org/observations/119974788</a> |
| 707 | Accipiter badius | Shikra | 2022/3/27 | 3 | 0 | 13.59693952 | 79.36816048 | <a href="https://www.inaturalist.org/observations/109660291">https://www.inaturalist.org/observations/109660291</a> |
| 708 | Accipiter badius | Shikra | 2021/4/23 | 1 | 0 | 13.59734853 | 79.39343719 | <a href="https://www.inaturalist.org/observations/74914477">https://www.inaturalist.org/observations/74914477</a>   |
| 709 | Accipiter badius | Shikra | 2022/6/11 | 2 | 0 | 13.59854142 | 79.36566134 | <a href="https://www.inaturalist.org/observations/121890602">https://www.inaturalist.org/observations/121890602</a> |
| 710 | Accipiter badius | Shikra | 2022/2/10 | 3 | 0 | 13.60901000 | 79.38754000 | <a href="https://www.inaturalist.org/observations/112238214">https://www.inaturalist.org/observations/112238214</a> |
| 711 | Accipiter badius | Shikra | 2022/8/15 | 5 | 0 | 13.60944892 | 79.41486478 | <a href="https://www.inaturalist.org/observations/132004385">https://www.inaturalist.org/observations/132004385</a> |
| 712 | Accipiter badius | Shikra | 2022/2/4  | 2 | 0 | 13.61090000 | 79.46099200 | <a href="https://www.inaturalist.org/observations/106120555">https://www.inaturalist.org/observations/106120555</a> |

|     |                  |        |            |   |   |             |             |                                                                                                                     |
|-----|------------------|--------|------------|---|---|-------------|-------------|---------------------------------------------------------------------------------------------------------------------|
| 713 | Accipiter badius | Shikra | 2022/2/9   | 3 | 0 | 13.61583784 | 79.37123367 | <a href="https://www.inaturalist.org/observations/112235714">https://www.inaturalist.org/observations/112235714</a> |
| 714 | Accipiter badius | Shikra | 2022/2/9   | 3 | 0 | 13.62395000 | 79.37700000 | <a href="https://www.inaturalist.org/observations/112235342">https://www.inaturalist.org/observations/112235342</a> |
| 715 | Accipiter badius | Shikra | 2022/2/9   | 3 | 0 | 13.62597770 | 79.39161713 | <a href="https://www.inaturalist.org/observations/112235035">https://www.inaturalist.org/observations/112235035</a> |
| 716 | Accipiter badius | Shikra | 2022/2/4   | 3 | 0 | 13.62809291 | 79.37445087 | <a href="https://www.inaturalist.org/observations/112017211">https://www.inaturalist.org/observations/112017211</a> |
| 717 | Accipiter badius | Shikra | 2022/2/7   | 3 | 0 | 13.62816257 | 79.37454872 | <a href="https://www.inaturalist.org/observations/112129141">https://www.inaturalist.org/observations/112129141</a> |
| 718 | Accipiter badius | Shikra | 2021/2/16  | 2 | 0 | 13.62849080 | 79.39801010 | <a href="https://www.inaturalist.org/observations/71361319">https://www.inaturalist.org/observations/71361319</a>   |
| 719 | Accipiter badius | Shikra | 2022/2/9   | 2 | 0 | 13.62918660 | 79.41484040 | <a href="https://www.inaturalist.org/observations/106600501">https://www.inaturalist.org/observations/106600501</a> |
| 720 | Accipiter badius | Shikra | 2022/8/17  | 3 | 0 | 13.63246937 | 79.48626457 | <a href="https://www.inaturalist.org/observations/131991205">https://www.inaturalist.org/observations/131991205</a> |
| 721 | Accipiter badius | Shikra | 2022/3/12  | 4 | 0 | 13.63711500 | 79.33161333 | <a href="https://www.inaturalist.org/observations/111174095">https://www.inaturalist.org/observations/111174095</a> |
| 722 | Accipiter badius | Shikra | 2021/3/31  | 1 | 0 | 13.64020200 | 79.41334300 | <a href="https://www.inaturalist.org/observations/74357756">https://www.inaturalist.org/observations/74357756</a>   |
| 723 | Accipiter badius | Shikra | 2022/3/2   | 4 | 0 | 13.64137773 | 79.41919998 | <a href="https://www.inaturalist.org/observations/111179425">https://www.inaturalist.org/observations/111179425</a> |
| 724 | Accipiter badius | Shikra | 2022/3/2   | 2 | 0 | 13.64153655 | 79.41914586 | <a href="https://www.inaturalist.org/observations/115052909">https://www.inaturalist.org/observations/115052909</a> |
| 725 | Accipiter badius | Shikra | 2021/4/22  | 3 | 0 | 13.64653622 | 79.44663734 | <a href="https://www.inaturalist.org/observations/74914464">https://www.inaturalist.org/observations/74914464</a>   |
| 726 | Accipiter badius | Shikra | 2022/8/22  | 3 | 0 | 13.64715000 | 79.39387500 | <a href="https://www.inaturalist.org/observations/132118939">https://www.inaturalist.org/observations/132118939</a> |
| 727 | Accipiter badius | Shikra | 2022/7/30  | 3 | 0 | 13.64776625 | 79.47191419 | <a href="https://www.inaturalist.org/observations/128743946">https://www.inaturalist.org/observations/128743946</a> |
| 728 | Accipiter badius | Shikra | 2022/2/7   | 2 | 0 | 13.64923833 | 79.58360000 | <a href="https://www.inaturalist.org/observations/111099885">https://www.inaturalist.org/observations/111099885</a> |
| 729 | Accipiter badius | Shikra | 2021/10/13 | 1 | 0 | 13.65137879 | 79.46846168 | <a href="https://www.inaturalist.org/observations/98083271">https://www.inaturalist.org/observations/98083271</a>   |
| 730 | Accipiter badius | Shikra | 2021/8/28  | 1 | 0 | 13.65174536 | 79.41623926 | <a href="https://www.inaturalist.org/observations/93230457">https://www.inaturalist.org/observations/93230457</a>   |
| 731 | Accipiter badius | Shikra | 2022/3/23  | 1 | 0 | 13.65182529 | 79.41626072 | <a href="https://www.inaturalist.org/observations/111061486">https://www.inaturalist.org/observations/111061486</a> |
| 732 | Accipiter badius | Shikra | 2021/9/3   | 2 | 0 | 13.65253099 | 79.41622630 | <a href="https://www.inaturalist.org/observations/93445311">https://www.inaturalist.org/observations/93445311</a>   |
| 733 | Accipiter badius | Shikra | 2021/4/24  | 4 | 0 | 13.65399058 | 79.45556849 | <a href="https://www.inaturalist.org/observations/123968277">https://www.inaturalist.org/observations/123968277</a> |
| 734 | Accipiter badius | Shikra | 2020/8/14  | 1 | 0 | 13.65412569 | 79.45572973 | <a href="https://www.inaturalist.org/observations/56434859">https://www.inaturalist.org/observations/56434859</a>   |
| 735 | Accipiter badius | Shikra | 2021/3/24  | 1 | 0 | 13.65514640 | 79.41858549 | <a href="https://www.inaturalist.org/observations/71941024">https://www.inaturalist.org/observations/71941024</a>   |

|     |                  |        |            |   |   |             |             |                                                                                                                     |
|-----|------------------|--------|------------|---|---|-------------|-------------|---------------------------------------------------------------------------------------------------------------------|
| 736 | Accipiter badius | Shikra | 2018/1/13  | 3 | 0 | 13.65768790 | 79.48697440 | <a href="https://www.inaturalist.org/observations/11014835">https://www.inaturalist.org/observations/11014835</a>   |
| 737 | Accipiter badius | Shikra | 2021/1/8   | 2 | 0 | 13.65827775 | 79.48729534 | <a href="https://www.inaturalist.org/observations/67745218">https://www.inaturalist.org/observations/67745218</a>   |
| 738 | Accipiter badius | Shikra | 2017/8/28  | 1 | 0 | 13.65941944 | 79.48811944 | <a href="https://www.inaturalist.org/observations/74834313">https://www.inaturalist.org/observations/74834313</a>   |
| 739 | Accipiter badius | Shikra | 2019/1/30  | 1 | 0 | 13.65957734 | 79.48841382 | <a href="https://www.inaturalist.org/observations/65587162">https://www.inaturalist.org/observations/65587162</a>   |
| 740 | Accipiter badius | Shikra | 2019/2/15  | 4 | 0 | 13.66004482 | 79.48968047 | <a href="https://www.inaturalist.org/observations/55889038">https://www.inaturalist.org/observations/55889038</a>   |
| 741 | Accipiter badius | Shikra | 2018/10/21 | 2 | 0 | 13.66140438 | 79.48561963 | <a href="https://www.inaturalist.org/observations/65829204">https://www.inaturalist.org/observations/65829204</a>   |
| 742 | Accipiter badius | Shikra | 2022/2/8   | 3 | 0 | 13.66222122 | 79.47650359 | <a href="https://www.inaturalist.org/observations/112141759">https://www.inaturalist.org/observations/112141759</a> |
| 743 | Accipiter badius | Shikra | 2018/10/23 | 2 | 0 | 13.66315322 | 79.48551904 | <a href="https://www.inaturalist.org/observations/65829201">https://www.inaturalist.org/observations/65829201</a>   |
| 744 | Accipiter badius | Shikra | 2022/7/9   | 3 | 0 | 13.66321806 | 77.45965306 | <a href="https://www.inaturalist.org/observations/125565865">https://www.inaturalist.org/observations/125565865</a> |
| 745 | Accipiter badius | Shikra | 2021/7/8   | 1 | 0 | 13.66365266 | 79.48466814 | <a href="https://www.inaturalist.org/observations/86243662">https://www.inaturalist.org/observations/86243662</a>   |
| 746 | Accipiter badius | Shikra | 2021/7/8   | 1 | 0 | 13.66365530 | 79.48383326 | <a href="https://www.inaturalist.org/observations/86239249">https://www.inaturalist.org/observations/86239249</a>   |
| 747 | Accipiter badius | Shikra | 2021/11/13 | 2 | 0 | 13.66457593 | 79.48835240 | <a href="https://www.inaturalist.org/observations/115386108">https://www.inaturalist.org/observations/115386108</a> |
| 748 | Accipiter badius | Shikra | 2022/7/7   | 4 | 0 | 13.66622214 | 79.48603780 | <a href="https://www.inaturalist.org/observations/126464345">https://www.inaturalist.org/observations/126464345</a> |
| 749 | Accipiter badius | Shikra | 2022/3/5   | 6 | 0 | 13.67671500 | 79.62464429 | <a href="https://www.inaturalist.org/observations/108348176">https://www.inaturalist.org/observations/108348176</a> |
| 750 | Accipiter badius | Shikra | 2019/4/27  | 2 | 0 | 13.69487374 | 75.63522711 | <a href="https://www.inaturalist.org/observations/40381646">https://www.inaturalist.org/observations/40381646</a>   |
| 751 | Accipiter badius | Shikra | 2019/3/15  | 2 | 0 | 13.69487380 | 75.63522700 | <a href="https://www.inaturalist.org/observations/93857687">https://www.inaturalist.org/observations/93857687</a>   |
| 752 | Accipiter badius | Shikra | 2022/3/15  | 4 | 0 | 13.69629500 | 79.60944500 | <a href="https://www.inaturalist.org/observations/115069202">https://www.inaturalist.org/observations/115069202</a> |
| 753 | Accipiter badius | Shikra | 2022/10/1  | 2 | 0 | 13.70574797 | 79.59391897 | <a href="https://www.inaturalist.org/observations/137127110">https://www.inaturalist.org/observations/137127110</a> |
| 754 | Accipiter badius | Shikra | 2022/1/23  | 2 | 0 | 13.72068427 | 79.59605507 | <a href="https://www.inaturalist.org/observations/115403138">https://www.inaturalist.org/observations/115403138</a> |
| 755 | Accipiter badius | Shikra | 2022/5/15  | 3 | 0 | 13.73788688 | 79.15597275 | <a href="https://www.inaturalist.org/observations/119023811">https://www.inaturalist.org/observations/119023811</a> |
| 756 | Accipiter badius | Shikra | 2018/11/1  | 3 | 0 | 13.74005210 | 77.32323650 | <a href="https://www.inaturalist.org/observations/18325546">https://www.inaturalist.org/observations/18325546</a>   |
| 757 | Accipiter badius | Shikra | 2021/3/22  | 1 | 0 | 13.74183893 | 79.58940794 | <a href="https://www.inaturalist.org/observations/71940991">https://www.inaturalist.org/observations/71940991</a>   |
| 758 | Accipiter badius | Shikra | 2021/9/23  | 1 | 0 | 13.74237840 | 80.20982190 | <a href="https://www.inaturalist.org/observations/96075941">https://www.inaturalist.org/observations/96075941</a>   |



|     |                  |        |            |   |   |             |             |                                                                                                                     |
|-----|------------------|--------|------------|---|---|-------------|-------------|---------------------------------------------------------------------------------------------------------------------|
| 759 | Accipiter badius | Shikra | 2022/2/13  | 2 | 0 | 13.74317850 | 79.60248000 | <a href="https://www.inaturalist.org/observations/106842556">https://www.inaturalist.org/observations/106842556</a> |
| 760 | Accipiter badius | Shikra | 2021/12/10 | 2 | 0 | 13.74676880 | 79.59907430 | <a href="https://www.inaturalist.org/observations/102882208">https://www.inaturalist.org/observations/102882208</a> |
| 761 | Accipiter badius | Shikra | 2021/12/11 | 2 | 0 | 13.74713296 | 79.60443558 | <a href="https://www.inaturalist.org/observations/102907005">https://www.inaturalist.org/observations/102907005</a> |
| 762 | Accipiter badius | Shikra | 2019/11/2  | 2 | 0 | 13.75031944 | 79.46619444 | <a href="https://www.inaturalist.org/observations/78806733">https://www.inaturalist.org/observations/78806733</a>   |
| 763 | Accipiter badius | Shikra | 2018/8/25  | 1 | 0 | 13.75448056 | 79.59668889 | <a href="https://www.inaturalist.org/observations/78429488">https://www.inaturalist.org/observations/78429488</a>   |
| 764 | Accipiter badius | Shikra | 2022/9/8   | 1 | 0 | 13.75912355 | 79.47194573 | <a href="https://www.inaturalist.org/observations/134601161">https://www.inaturalist.org/observations/134601161</a> |
| 765 | Accipiter badius | Shikra | 2020/11/14 | 2 | 0 | 13.80894000 | 79.40813667 | <a href="https://www.inaturalist.org/observations/64839736">https://www.inaturalist.org/observations/64839736</a>   |
| 766 | Accipiter badius | Shikra | 2022/9/3   | 2 | 0 | 13.81890167 | 79.58402500 | <a href="https://www.inaturalist.org/observations/133598851">https://www.inaturalist.org/observations/133598851</a> |
| 767 | Accipiter badius | Shikra | 2022/9/3   | 3 | 0 | 13.83610450 | 79.58113209 | <a href="https://www.inaturalist.org/observations/133598844">https://www.inaturalist.org/observations/133598844</a> |
| 768 | Accipiter badius | Shikra | 2021/2/16  | 2 | 0 | 14.09811916 | 74.50409666 | <a href="https://www.inaturalist.org/observations/82140664">https://www.inaturalist.org/observations/82140664</a>   |
| 769 | Accipiter badius | Shikra | 2021/1/20  | 1 | 0 | 14.18602806 | 77.82058806 | <a href="https://www.inaturalist.org/observations/88445745">https://www.inaturalist.org/observations/88445745</a>   |
| 770 | Accipiter badius | Shikra | 2016/6/17  | 1 | 0 | 14.21604870 | 76.39891340 | <a href="https://www.inaturalist.org/observations/88920414">https://www.inaturalist.org/observations/88920414</a>   |
| 771 | Accipiter badius | Shikra | 2018/4/7   | 1 | 0 | 14.33676209 | 79.41120377 | <a href="https://www.inaturalist.org/observations/89016031">https://www.inaturalist.org/observations/89016031</a>   |
| 772 | Accipiter badius | Shikra | 2018/4/8   | 1 | 0 | 14.33676209 | 79.41120377 | <a href="https://www.inaturalist.org/observations/89016049">https://www.inaturalist.org/observations/89016049</a>   |
| 773 | Accipiter badius | Shikra | 2016/1/2   | 1 | 0 | 15.23611910 | 74.61728190 | <a href="https://www.inaturalist.org/observations/41282816">https://www.inaturalist.org/observations/41282816</a>   |
| 774 | Accipiter badius | Shikra | 2019/3/10  | 1 | 0 | 15.23611910 | 74.61728190 | <a href="https://www.inaturalist.org/observations/56497517">https://www.inaturalist.org/observations/56497517</a>   |
| 775 | Accipiter badius | Shikra | 2019/3/8   | 2 | 0 | 15.28426770 | 74.53021590 | <a href="https://www.inaturalist.org/observations/102237324">https://www.inaturalist.org/observations/102237324</a> |
| 776 | Accipiter badius | Shikra | 2018/10/26 | 1 | 0 | 15.29932650 | 74.12399600 | <a href="https://www.inaturalist.org/observations/56304058">https://www.inaturalist.org/observations/56304058</a>   |
| 777 | Accipiter badius | Shikra | 2016/11/8  | 0 | 0 | 15.30115000 | 73.94991357 | <a href="https://www.inaturalist.org/observations/37781540">https://www.inaturalist.org/observations/37781540</a>   |
| 778 | Accipiter badius | Shikra | 2010/5/7   | 3 | 0 | 15.32726800 | 76.46262600 | <a href="http://www.inaturalist.org/observations/323346">http://www.inaturalist.org/observations/323346</a>         |
| 779 | Accipiter badius | Shikra | 2019/1/30  | 1 | 0 | 15.33501320 | 76.46002400 | <a href="https://www.inaturalist.org/observations/84849982">https://www.inaturalist.org/observations/84849982</a>   |
| 780 | Accipiter badius | Shikra | 2021/11/29 | 1 | 0 | 15.33501320 | 76.46002400 | <a href="https://www.inaturalist.org/observations/104324144">https://www.inaturalist.org/observations/104324144</a> |
| 781 | Accipiter badius | Shikra | 2022/8/3   | 2 | 0 | 15.33501320 | 76.46002400 | <a href="https://www.inaturalist.org/observations/129444697">https://www.inaturalist.org/observations/129444697</a> |

|     |                  |        |            |   |   |             |             |                                                                                                                     |
|-----|------------------|--------|------------|---|---|-------------|-------------|---------------------------------------------------------------------------------------------------------------------|
| 782 | Accipiter badius | Shikra | 2021/12/28 | 1 | 0 | 15.33567681 | 76.45863201 | <a href="https://www.inaturalist.org/observations/104517061">https://www.inaturalist.org/observations/104517061</a> |
| 783 | Accipiter badius | Shikra | 2019/11/29 | 3 | 0 | 15.33569304 | 73.89937688 | <a href="https://www.inaturalist.org/observations/65468697">https://www.inaturalist.org/observations/65468697</a>   |
| 784 | Accipiter badius | Shikra | 2019/5/22  | 3 | 0 | 15.45894180 | 73.82989128 | <a href="https://www.inaturalist.org/observations/26478925">https://www.inaturalist.org/observations/26478925</a>   |
| 785 | Accipiter badius | Shikra | 2021/12/12 | 1 | 0 | 15.52834535 | 73.84673252 | <a href="https://www.inaturalist.org/observations/105759260">https://www.inaturalist.org/observations/105759260</a> |
| 786 | Accipiter badius | Shikra | 2021/4/26  | 1 | 0 | 15.58681064 | 73.74532957 | <a href="https://www.inaturalist.org/observations/78027786">https://www.inaturalist.org/observations/78027786</a>   |
| 787 | Accipiter badius | Shikra | 2019/1/29  | 3 | 0 | 15.74701125 | 78.36675967 | <a href="https://www.inaturalist.org/observations/65329641">https://www.inaturalist.org/observations/65329641</a>   |
| 788 | Accipiter badius | Shikra | 2020/5/17  | 2 | 0 | 15.83211786 | 74.49285854 | <a href="https://www.inaturalist.org/observations/79960427">https://www.inaturalist.org/observations/79960427</a>   |
| 789 | Accipiter badius | Shikra | 2022/2/13  | 3 | 0 | 15.84198500 | 74.00063280 | <a href="https://www.inaturalist.org/observations/108876853">https://www.inaturalist.org/observations/108876853</a> |
| 790 | Accipiter badius | Shikra | 2021/11/12 | 3 | 0 | 15.86257898 | 74.01089222 | <a href="https://www.inaturalist.org/observations/100924661">https://www.inaturalist.org/observations/100924661</a> |
| 791 | Accipiter badius | Shikra | 2022/3/3   | 2 | 0 | 15.86827000 | 80.50706500 | <a href="https://www.inaturalist.org/observations/107816232">https://www.inaturalist.org/observations/107816232</a> |
| 792 | Accipiter badius | Shikra | 2021/6/26  | 1 | 0 | 15.90535738 | 80.47035411 | <a href="https://www.inaturalist.org/observations/84532284">https://www.inaturalist.org/observations/84532284</a>   |
| 793 | Accipiter badius | Shikra | 2020/12/16 | 1 | 0 | 16.19620197 | 77.38451897 | <a href="https://www.inaturalist.org/observations/81808976">https://www.inaturalist.org/observations/81808976</a>   |
| 794 | Accipiter badius | Shikra | 2022/1/2   | 3 | 0 | 16.23948974 | 74.75857761 | <a href="https://www.inaturalist.org/observations/104193570">https://www.inaturalist.org/observations/104193570</a> |
| 795 | Accipiter badius | Shikra | 2018/5/25  | 1 | 0 | 16.30113766 | 80.48254238 | <a href="https://www.inaturalist.org/observations/98190419">https://www.inaturalist.org/observations/98190419</a>   |
| 796 | Accipiter badius | Shikra | 2014/3/30  | 2 | 0 | 16.30623848 | 80.51239546 | <a href="https://www.inaturalist.org/observations/93876427">https://www.inaturalist.org/observations/93876427</a>   |
| 797 | Accipiter badius | Shikra | 2019/10/14 | 1 | 0 | 16.30656588 | 80.51290478 | <a href="https://www.inaturalist.org/observations/92915225">https://www.inaturalist.org/observations/92915225</a>   |
| 798 | Accipiter badius | Shikra | 2022/1/30  | 1 | 0 | 16.36015833 | 81.58036833 | <a href="https://www.inaturalist.org/observations/105837390">https://www.inaturalist.org/observations/105837390</a> |
| 799 | Accipiter badius | Shikra | 2022/1/30  | 3 | 0 | 16.36015833 | 81.58036833 | <a href="https://www.inaturalist.org/observations/111321846">https://www.inaturalist.org/observations/111321846</a> |
| 800 | Accipiter badius | Shikra | 2022/1/30  | 3 | 0 | 16.36023667 | 81.58051000 | <a href="https://www.inaturalist.org/observations/111192724">https://www.inaturalist.org/observations/111192724</a> |
| 801 | Accipiter badius | Shikra | 2022/1/30  | 2 | 0 | 16.36024500 | 81.58050667 | <a href="https://www.inaturalist.org/observations/105837364">https://www.inaturalist.org/observations/105837364</a> |
| 802 | Accipiter badius | Shikra | 2022/1/30  | 3 | 0 | 16.36024500 | 81.58050667 | <a href="https://www.inaturalist.org/observations/113231096">https://www.inaturalist.org/observations/113231096</a> |
| 803 | Accipiter badius | Shikra | 2022/1/30  | 3 | 0 | 16.36026000 | 81.58052667 | <a href="https://www.inaturalist.org/observations/114321169">https://www.inaturalist.org/observations/114321169</a> |
| 804 | Accipiter badius | Shikra | 2013/9/18  | 2 | 0 | 16.41196831 | 80.70773251 | <a href="https://www.inaturalist.org/observations/93872857">https://www.inaturalist.org/observations/93872857</a>   |

|     |                  |        |            |   |   |             |             |                                                                                                                     |
|-----|------------------|--------|------------|---|---|-------------|-------------|---------------------------------------------------------------------------------------------------------------------|
| 805 | Accipiter badius | Shikra | 2012/7/26  | 1 | 0 | 16.49843801 | 80.59845821 | <a href="https://www.inaturalist.org/observations/93589698">https://www.inaturalist.org/observations/93589698</a>   |
| 806 | Accipiter badius | Shikra | 2012/10/7  | 1 | 0 | 16.49954804 | 80.60048653 | <a href="https://www.inaturalist.org/observations/93597280">https://www.inaturalist.org/observations/93597280</a>   |
| 807 | Accipiter badius | Shikra | 2020/9/6   | 2 | 0 | 16.50320821 | 79.27453280 | <a href="https://www.inaturalist.org/observations/64864381">https://www.inaturalist.org/observations/64864381</a>   |
| 808 | Accipiter badius | Shikra | 2020/1/3   | 2 | 0 | 16.51329710 | 80.62676870 | <a href="https://www.inaturalist.org/observations/37219236">https://www.inaturalist.org/observations/37219236</a>   |
| 809 | Accipiter badius | Shikra | 2021/12/22 | 3 | 0 | 16.51706220 | 80.59044700 | <a href="https://www.inaturalist.org/observations/105490162">https://www.inaturalist.org/observations/105490162</a> |
| 810 | Accipiter badius | Shikra | 2020/11/20 | 2 | 0 | 16.51837470 | 81.27583260 | <a href="https://www.inaturalist.org/observations/67455538">https://www.inaturalist.org/observations/67455538</a>   |
| 811 | Accipiter badius | Shikra | 2020/8/28  | 1 | 0 | 16.52000000 | 80.67600000 | <a href="https://www.inaturalist.org/observations/57797130">https://www.inaturalist.org/observations/57797130</a>   |
| 812 | Accipiter badius | Shikra | 2011/12/15 | 1 | 0 | 16.52009848 | 80.61679602 | <a href="https://www.inaturalist.org/observations/89651947">https://www.inaturalist.org/observations/89651947</a>   |
| 813 | Accipiter badius | Shikra | 2012/1/24  | 3 | 0 | 16.52067325 | 80.59530691 | <a href="https://www.inaturalist.org/observations/93496575">https://www.inaturalist.org/observations/93496575</a>   |
| 814 | Accipiter badius | Shikra | 2021/12/24 | 3 | 0 | 16.52264888 | 73.53148177 | <a href="https://www.inaturalist.org/observations/115095087">https://www.inaturalist.org/observations/115095087</a> |
| 815 | Accipiter badius | Shikra | 2020/9/19  | 4 | 0 | 16.52273333 | 80.63137222 | <a href="https://www.inaturalist.org/observations/61292232">https://www.inaturalist.org/observations/61292232</a>   |
| 816 | Accipiter badius | Shikra | 2020/5/16  | 2 | 0 | 16.52940106 | 80.59264023 | <a href="https://www.inaturalist.org/observations/46066257">https://www.inaturalist.org/observations/46066257</a>   |
| 817 | Accipiter badius | Shikra | 2020/5/16  | 1 | 0 | 16.53120225 | 80.59179824 | <a href="https://www.inaturalist.org/observations/46085677">https://www.inaturalist.org/observations/46085677</a>   |
| 818 | Accipiter badius | Shikra | 2020/5/17  | 2 | 0 | 16.53285785 | 80.59184442 | <a href="https://www.inaturalist.org/observations/46214713">https://www.inaturalist.org/observations/46214713</a>   |
| 819 | Accipiter badius | Shikra | 2021/12/31 | 1 | 0 | 16.53981146 | 81.50537699 | <a href="https://www.inaturalist.org/observations/104020371">https://www.inaturalist.org/observations/104020371</a> |
| 820 | Accipiter badius | Shikra | 2022/5/2   | 2 | 0 | 16.54489085 | 81.52124092 | <a href="https://www.inaturalist.org/observations/116724807">https://www.inaturalist.org/observations/116724807</a> |
| 821 | Accipiter badius | Shikra | 2020/5/8   | 2 | 0 | 16.54676863 | 80.59146382 | <a href="https://www.inaturalist.org/observations/45249084">https://www.inaturalist.org/observations/45249084</a>   |
| 822 | Accipiter badius | Shikra | 2022/1/9   | 1 | 0 | 16.55096000 | 81.55773000 | <a href="https://www.inaturalist.org/observations/104640343">https://www.inaturalist.org/observations/104640343</a> |
| 823 | Accipiter badius | Shikra | 2020/5/6   | 1 | 0 | 16.55308049 | 80.59296365 | <a href="https://www.inaturalist.org/observations/45105564">https://www.inaturalist.org/observations/45105564</a>   |
| 824 | Accipiter badius | Shikra | 2022/2/4   | 2 | 0 | 16.55737833 | 81.49427500 | <a href="https://www.inaturalist.org/observations/106119850">https://www.inaturalist.org/observations/106119850</a> |
| 825 | Accipiter badius | Shikra | 2021/10/28 | 1 | 0 | 16.55811900 | 81.49816353 | <a href="https://www.inaturalist.org/observations/101398086">https://www.inaturalist.org/observations/101398086</a> |
| 826 | Accipiter badius | Shikra | 2021/8/29  | 1 | 0 | 16.56266500 | 80.74711000 | <a href="https://www.inaturalist.org/observations/92894898">https://www.inaturalist.org/observations/92894898</a>   |
| 827 | Accipiter badius | Shikra | 2021/12/5  | 1 | 0 | 16.57559146 | 80.68230191 | <a href="https://www.inaturalist.org/observations/104498290">https://www.inaturalist.org/observations/104498290</a> |

|     |                  |        |            |   |   |             |             |                                                                                                                     |
|-----|------------------|--------|------------|---|---|-------------|-------------|---------------------------------------------------------------------------------------------------------------------|
| 828 | Accipiter badius | Shikra | 2022/4/30  | 2 | 0 | 16.58896111 | 80.79010000 | <a href="https://www.inaturalist.org/observations/118759488">https://www.inaturalist.org/observations/118759488</a> |
| 829 | Accipiter badius | Shikra | 2020/12/27 | 1 | 0 | 16.59577924 | 80.61818580 | <a href="https://www.inaturalist.org/observations/90049747">https://www.inaturalist.org/observations/90049747</a>   |
| 830 | Accipiter badius | Shikra | 2022/1/9   | 2 | 0 | 16.59776527 | 80.61998585 | <a href="https://www.inaturalist.org/observations/104863263">https://www.inaturalist.org/observations/104863263</a> |
| 831 | Accipiter badius | Shikra | 2021/7/14  | 2 | 0 | 16.63067404 | 80.78982281 | <a href="https://www.inaturalist.org/observations/90768347">https://www.inaturalist.org/observations/90768347</a>   |
| 832 | Accipiter badius | Shikra | 2021/8/15  | 1 | 0 | 16.64249177 | 80.48667067 | <a href="https://www.inaturalist.org/observations/91540448">https://www.inaturalist.org/observations/91540448</a>   |
| 833 | Accipiter badius | Shikra | 2021/8/15  | 1 | 0 | 16.64249177 | 80.48667067 | <a href="https://www.inaturalist.org/observations/91540454">https://www.inaturalist.org/observations/91540454</a>   |
| 834 | Accipiter badius | Shikra | 2021/9/12  | 1 | 0 | 16.64309974 | 80.48695564 | <a href="https://www.inaturalist.org/observations/94807579">https://www.inaturalist.org/observations/94807579</a>   |
| 835 | Accipiter badius | Shikra | 2021/9/12  | 1 | 0 | 16.64309974 | 80.48695564 | <a href="https://www.inaturalist.org/observations/94807581">https://www.inaturalist.org/observations/94807581</a>   |
| 836 | Accipiter badius | Shikra | 2021/8/15  | 1 | 0 | 16.64457999 | 80.48804998 | <a href="https://www.inaturalist.org/observations/91255083">https://www.inaturalist.org/observations/91255083</a>   |
| 837 | Accipiter badius | Shikra | 2021/6/27  | 1 | 0 | 16.64582641 | 80.48862354 | <a href="https://www.inaturalist.org/observations/91648856">https://www.inaturalist.org/observations/91648856</a>   |
| 838 | Accipiter badius | Shikra | 2022/3/6   | 1 | 0 | 16.65391605 | 80.46723317 | <a href="https://www.inaturalist.org/observations/108249503">https://www.inaturalist.org/observations/108249503</a> |
| 839 | Accipiter badius | Shikra | 2022/3/6   | 6 | 0 | 16.65391605 | 80.46723317 | <a href="https://www.inaturalist.org/observations/108249510">https://www.inaturalist.org/observations/108249510</a> |
| 840 | Accipiter badius | Shikra | 2022/3/13  | 2 | 0 | 16.66112798 | 80.47830352 | <a href="https://www.inaturalist.org/observations/108944396">https://www.inaturalist.org/observations/108944396</a> |
| 841 | Accipiter badius | Shikra | 2021/12/3  | 2 | 0 | 16.66244810 | 80.69972200 | <a href="https://www.inaturalist.org/observations/102400959">https://www.inaturalist.org/observations/102400959</a> |
| 842 | Accipiter badius | Shikra | 2022/7/17  | 3 | 0 | 16.66802497 | 80.50041997 | <a href="https://www.inaturalist.org/observations/127460301">https://www.inaturalist.org/observations/127460301</a> |
| 843 | Accipiter badius | Shikra | 2021/12/11 | 2 | 0 | 16.69735868 | 82.12394445 | <a href="https://www.inaturalist.org/observations/102916353">https://www.inaturalist.org/observations/102916353</a> |
| 844 | Accipiter badius | Shikra | 2021/4/3   | 1 | 0 | 16.71150500 | 73.34016833 | <a href="https://www.inaturalist.org/observations/72865017">https://www.inaturalist.org/observations/72865017</a>   |
| 845 | Accipiter badius | Shikra | 2019/11/9  | 3 | 0 | 16.74883790 | 78.00351720 | <a href="https://www.inaturalist.org/observations/63688487">https://www.inaturalist.org/observations/63688487</a>   |
| 846 | Accipiter badius | Shikra | 2021/11/23 | 3 | 0 | 16.74975593 | 82.15602162 | <a href="https://www.inaturalist.org/observations/102231586">https://www.inaturalist.org/observations/102231586</a> |
| 847 | Accipiter badius | Shikra | 2020/10/23 | 1 | 0 | 16.75538535 | 82.16875286 | <a href="https://www.inaturalist.org/observations/63813485">https://www.inaturalist.org/observations/63813485</a>   |
| 848 | Accipiter badius | Shikra | 2020/6/13  | 1 | 0 | 16.86775939 | 75.68699944 | <a href="https://www.inaturalist.org/observations/49418007">https://www.inaturalist.org/observations/49418007</a>   |
| 849 | Accipiter badius | Shikra | 2022/5/31  | 4 | 0 | 16.98058644 | 81.79679699 | <a href="https://www.inaturalist.org/observations/119625035">https://www.inaturalist.org/observations/119625035</a> |
| 850 | Accipiter badius | Shikra | 2021/8/20  | 1 | 0 | 16.98868002 | 81.32065929 | <a href="https://www.inaturalist.org/observations/95121512">https://www.inaturalist.org/observations/95121512</a>   |

|     |                  |        |            |   |   |             |             |                                                                                                                     |
|-----|------------------|--------|------------|---|---|-------------|-------------|---------------------------------------------------------------------------------------------------------------------|
| 851 | Accipiter badius | Shikra | 2018/9/28  | 2 | 0 | 17.04999590 | 75.21350090 | <a href="https://www.inaturalist.org/observations/41524590">https://www.inaturalist.org/observations/41524590</a>   |
| 852 | Accipiter badius | Shikra | 2018/9/28  | 1 | 0 | 17.04999590 | 75.21350090 | <a href="https://www.inaturalist.org/observations/41524595">https://www.inaturalist.org/observations/41524595</a>   |
| 853 | Accipiter badius | Shikra | 2018/9/28  | 1 | 0 | 17.04999590 | 75.21350090 | <a href="https://www.inaturalist.org/observations/41524607">https://www.inaturalist.org/observations/41524607</a>   |
| 854 | Accipiter badius | Shikra | 2016/12/6  | 1 | 0 | 17.16206183 | 79.50543442 | <a href="https://www.inaturalist.org/observations/88671656">https://www.inaturalist.org/observations/88671656</a>   |
| 855 | Accipiter badius | Shikra | 2020/10/1  | 2 | 0 | 17.18777649 | 82.04783432 | <a href="https://www.inaturalist.org/observations/61476730">https://www.inaturalist.org/observations/61476730</a>   |
| 856 | Accipiter badius | Shikra | 2020/11/20 | 5 | 0 | 17.22720543 | 80.07309463 | <a href="https://www.inaturalist.org/observations/65270041">https://www.inaturalist.org/observations/65270041</a>   |
| 857 | Accipiter badius | Shikra | 2021/7/7   | 1 | 0 | 17.30236978 | 77.86156990 | <a href="https://www.inaturalist.org/observations/95631511">https://www.inaturalist.org/observations/95631511</a>   |
| 858 | Accipiter badius | Shikra | 2014/6/10  | 5 | 0 | 17.32689501 | 74.76560354 | <a href="https://www.inaturalist.org/observations/38416361">https://www.inaturalist.org/observations/38416361</a>   |
| 859 | Accipiter badius | Shikra | 2022/7/3   | 5 | 0 | 17.36218160 | 78.58169880 | <a href="https://www.inaturalist.org/observations/130470645">https://www.inaturalist.org/observations/130470645</a> |
| 860 | Accipiter badius | Shikra | 2021/1/27  | 2 | 0 | 17.37116930 | 73.90069781 | <a href="https://www.inaturalist.org/observations/73316823">https://www.inaturalist.org/observations/73316823</a>   |
| 861 | Accipiter badius | Shikra | 2019/7/20  | 1 | 0 | 17.37727200 | 78.49647600 | <a href="https://www.inaturalist.org/observations/29476489">https://www.inaturalist.org/observations/29476489</a>   |
| 862 | Accipiter badius | Shikra | 2020/5/23  | 1 | 0 | 17.40843805 | 78.42830314 | <a href="https://www.inaturalist.org/observations/46961781">https://www.inaturalist.org/observations/46961781</a>   |
| 863 | Accipiter badius | Shikra | 2012/8/22  | 1 | 0 | 17.41688900 | 78.43867000 | <a href="https://www.inaturalist.org/observations/79272445">https://www.inaturalist.org/observations/79272445</a>   |
| 864 | Accipiter badius | Shikra | 2022/2/10  | 2 | 0 | 17.42202128 | 78.47700898 | <a href="https://www.inaturalist.org/observations/106484047">https://www.inaturalist.org/observations/106484047</a> |
| 865 | Accipiter badius | Shikra | 2022/5/14  | 2 | 0 | 17.43030065 | 78.53972655 | <a href="https://www.inaturalist.org/observations/117427309">https://www.inaturalist.org/observations/117427309</a> |
| 866 | Accipiter badius | Shikra | 2022/9/19  | 0 | 0 | 17.43147833 | 78.47822000 | <a href="https://www.inaturalist.org/observations/135667035">https://www.inaturalist.org/observations/135667035</a> |
| 867 | Accipiter badius | Shikra | 2016/9/5   | 1 | 0 | 17.44072015 | 78.35357420 | <a href="https://www.inaturalist.org/observations/31063584">https://www.inaturalist.org/observations/31063584</a>   |
| 868 | Accipiter badius | Shikra | 2022/4/10  | 2 | 0 | 17.44147023 | 81.52410083 | <a href="https://www.inaturalist.org/observations/111893975">https://www.inaturalist.org/observations/111893975</a> |
| 869 | Accipiter badius | Shikra | 2014/3/25  | 4 | 0 | 17.44578025 | 73.42171573 | <a href="https://www.inaturalist.org/observations/131304669">https://www.inaturalist.org/observations/131304669</a> |
| 870 | Accipiter badius | Shikra | 2020/10/3  | 3 | 0 | 17.45536450 | 78.13116660 | <a href="https://www.inaturalist.org/observations/63702887">https://www.inaturalist.org/observations/63702887</a>   |
| 871 | Accipiter badius | Shikra | 2022/6/20  | 5 | 0 | 17.46575011 | 77.49181618 | <a href="https://www.inaturalist.org/observations/122793598">https://www.inaturalist.org/observations/122793598</a> |
| 872 | Accipiter badius | Shikra | 2020/12/4  | 2 | 0 | 17.47234320 | 78.79742500 | <a href="https://www.inaturalist.org/observations/67861389">https://www.inaturalist.org/observations/67861389</a>   |
| 873 | Accipiter badius | Shikra | 2021/1/20  | 2 | 0 | 17.48438497 | 78.49876197 | <a href="https://www.inaturalist.org/observations/68367401">https://www.inaturalist.org/observations/68367401</a>   |

|     |                  |        |            |   |   |             |             |                                                                                                                     |
|-----|------------------|--------|------------|---|---|-------------|-------------|---------------------------------------------------------------------------------------------------------------------|
| 874 | Accipiter badius | Shikra | 2022/2/5   | 2 | 0 | 17.48605690 | 78.34653110 | <a href="https://www.inaturalist.org/observations/106478858">https://www.inaturalist.org/observations/106478858</a> |
| 875 | Accipiter badius | Shikra | 2022/9/3   | 4 | 0 | 17.48605690 | 78.34653110 | <a href="https://www.inaturalist.org/observations/133432850">https://www.inaturalist.org/observations/133432850</a> |
| 876 | Accipiter badius | Shikra | 2021/11/19 | 1 | 0 | 17.49219190 | 78.33633196 | <a href="https://www.inaturalist.org/observations/101508694">https://www.inaturalist.org/observations/101508694</a> |
| 877 | Accipiter badius | Shikra | 2013/2/8   | 4 | 0 | 17.59354800 | 74.45109720 | <a href="https://www.inaturalist.org/observations/66918440">https://www.inaturalist.org/observations/66918440</a>   |
| 878 | Accipiter badius | Shikra | 2015/11/29 | 2 | 0 | 17.59583480 | 73.61153670 | <a href="http://www.inaturalist.org/observations/4333214">http://www.inaturalist.org/observations/4333214</a>       |
| 879 | Accipiter badius | Shikra | 2018/9/22  | 1 | 0 | 17.59833550 | 81.71354750 | <a href="https://www.inaturalist.org/observations/88961918">https://www.inaturalist.org/observations/88961918</a>   |
| 880 | Accipiter badius | Shikra | 2022/7/21  | 5 | 0 | 17.61535000 | 78.08132150 | <a href="https://www.inaturalist.org/observations/127821128">https://www.inaturalist.org/observations/127821128</a> |
| 881 | Accipiter badius | Shikra | 2021/1/2   | 3 | 0 | 17.63556488 | 74.55682956 | <a href="https://www.inaturalist.org/observations/67520136">https://www.inaturalist.org/observations/67520136</a>   |
| 882 | Accipiter badius | Shikra | 2013/2/17  | 3 | 0 | 17.66546360 | 74.36167980 | <a href="https://www.inaturalist.org/observations/38154925">https://www.inaturalist.org/observations/38154925</a>   |
| 883 | Accipiter badius | Shikra | 2020/12/30 | 1 | 0 | 17.67234320 | 73.99047210 | <a href="https://www.inaturalist.org/observations/69495988">https://www.inaturalist.org/observations/69495988</a>   |
| 884 | Accipiter badius | Shikra | 2020/12/25 | 1 | 0 | 17.67234320 | 73.99047210 | <a href="https://www.inaturalist.org/observations/70947721">https://www.inaturalist.org/observations/70947721</a>   |
| 885 | Accipiter badius | Shikra | 2020/12/25 | 1 | 0 | 17.67234320 | 73.99047210 | <a href="https://www.inaturalist.org/observations/70947728">https://www.inaturalist.org/observations/70947728</a>   |
| 886 | Accipiter badius | Shikra | 2020/12/25 | 1 | 0 | 17.67234320 | 73.99047210 | <a href="https://www.inaturalist.org/observations/70947729">https://www.inaturalist.org/observations/70947729</a>   |
| 887 | Accipiter badius | Shikra | 2022/4/3   | 3 | 0 | 17.73178917 | 73.77093889 | <a href="https://www.inaturalist.org/observations/111068593">https://www.inaturalist.org/observations/111068593</a> |
| 888 | Accipiter badius | Shikra | 2022/6/14  | 2 | 0 | 17.73331978 | 73.18897303 | <a href="https://www.inaturalist.org/observations/133725087">https://www.inaturalist.org/observations/133725087</a> |
| 889 | Accipiter badius | Shikra | 2022/2/1   | 3 | 0 | 17.76249598 | 78.71689819 | <a href="https://www.inaturalist.org/observations/107183610">https://www.inaturalist.org/observations/107183610</a> |
| 890 | Accipiter badius | Shikra | 2020/5/11  | 9 | 0 | 17.76672460 | 83.36520550 | <a href="https://www.inaturalist.org/observations/46856290">https://www.inaturalist.org/observations/46856290</a>   |
| 891 | Accipiter badius | Shikra | 2021/7/30  | 1 | 0 | 17.90192885 | 82.68606971 | <a href="https://www.inaturalist.org/observations/90019950">https://www.inaturalist.org/observations/90019950</a>   |
| 892 | Accipiter badius | Shikra | 2021/7/30  | 1 | 0 | 17.90192885 | 82.68606971 | <a href="https://www.inaturalist.org/observations/90019979">https://www.inaturalist.org/observations/90019979</a>   |
| 893 | Accipiter badius | Shikra | 2013/1/20  | 3 | 0 | 17.93665855 | 73.82644920 | <a href="https://www.inaturalist.org/observations/104576433">https://www.inaturalist.org/observations/104576433</a> |
| 894 | Accipiter badius | Shikra | 2021/12/25 | 2 | 0 | 17.99156090 | 82.98022851 | <a href="https://www.inaturalist.org/observations/103678462">https://www.inaturalist.org/observations/103678462</a> |
| 895 | Accipiter badius | Shikra | 2022/1/9   | 1 | 0 | 17.99360301 | 82.97898296 | <a href="https://www.inaturalist.org/observations/104632445">https://www.inaturalist.org/observations/104632445</a> |
| 896 | Accipiter badius | Shikra | 2022/9/23  | 0 | 0 | 18.10878346 | 74.77388783 | <a href="https://www.inaturalist.org/observations/136925626">https://www.inaturalist.org/observations/136925626</a> |

|     |                  |        |            |   |   |             |              |                                                                                                                     |
|-----|------------------|--------|------------|---|---|-------------|--------------|---------------------------------------------------------------------------------------------------------------------|
| 897 | Accipiter badius | Shikra | 2016/8/9   | 2 | 0 | 18.11243700 | 79.01930000  | <a href="https://www.inaturalist.org/observations/63555497">https://www.inaturalist.org/observations/63555497</a>   |
| 898 | Accipiter badius | Shikra | 2016/2/7   | 2 | 0 | 18.11243700 | 79.01930000  | <a href="https://www.inaturalist.org/observations/63558626">https://www.inaturalist.org/observations/63558626</a>   |
| 899 | Accipiter badius | Shikra | 2018/2/17  | 2 | 0 | 18.11243700 | 79.01930000  | <a href="https://www.inaturalist.org/observations/63558674">https://www.inaturalist.org/observations/63558674</a>   |
| 900 | Accipiter badius | Shikra | 2018/9/10  | 2 | 0 | 18.11243720 | 79.01929970  | <a href="https://www.inaturalist.org/observations/63616686">https://www.inaturalist.org/observations/63616686</a>   |
| 901 | Accipiter badius | Shikra | 2021/8/20  | 1 | 0 | 18.11869430 | 75.02340740  | <a href="https://www.inaturalist.org/observations/92320238">https://www.inaturalist.org/observations/92320238</a>   |
| 902 | Accipiter badius | Shikra | 2018/5/25  | 2 | 0 | 18.13524743 | 73.78678042  | <a href="https://www.inaturalist.org/observations/91549574">https://www.inaturalist.org/observations/91549574</a>   |
| 903 | Accipiter badius | Shikra | 2015/1/30  | 2 | 0 | 18.13848937 | 73.78712107  | <a href="https://www.inaturalist.org/observations/92074812">https://www.inaturalist.org/observations/92074812</a>   |
| 904 | Accipiter badius | Shikra | 2021/11/30 | 2 | 0 | 18.14658770 | 73.81574730  | <a href="https://www.inaturalist.org/observations/102244523">https://www.inaturalist.org/observations/102244523</a> |
| 905 | Accipiter badius | Shikra | 2020/10/26 | 2 | 0 | 18.15957915 | 74.58538268  | <a href="https://www.inaturalist.org/observations/66832817">https://www.inaturalist.org/observations/66832817</a>   |
| 906 | Accipiter badius | Shikra | 2017/11/8  | 3 | 0 | 18.21103486 | 109.48405270 | <a href="https://www.inaturalist.org/observations/8748383">https://www.inaturalist.org/observations/8748383</a>     |
| 907 | Accipiter badius | Shikra | 2011/10/26 | 1 | 0 | 18.23619660 | 73.42023100  | <a href="https://www.inaturalist.org/observations/52812877">https://www.inaturalist.org/observations/52812877</a>   |
| 908 | Accipiter badius | Shikra | 2011/10/26 | 1 | 0 | 18.23619660 | 73.42023100  | <a href="https://www.inaturalist.org/observations/52813185">https://www.inaturalist.org/observations/52813185</a>   |
| 909 | Accipiter badius | Shikra | 2020/8/11  | 1 | 0 | 18.27303995 | 84.00484376  | <a href="https://www.inaturalist.org/observations/95508463">https://www.inaturalist.org/observations/95508463</a>   |
| 910 | Accipiter badius | Shikra | 2022/2/18  | 1 | 0 | 18.27966514 | 73.12849178  | <a href="https://www.inaturalist.org/observations/107092447">https://www.inaturalist.org/observations/107092447</a> |
| 911 | Accipiter badius | Shikra | 2022/1/21  | 1 | 0 | 18.28896864 | 73.13570523  | <a href="https://www.inaturalist.org/observations/105359781">https://www.inaturalist.org/observations/105359781</a> |
| 912 | Accipiter badius | Shikra | 2021/10/12 | 1 | 0 | 18.28907973 | 73.13580159  | <a href="https://www.inaturalist.org/observations/98089669">https://www.inaturalist.org/observations/98089669</a>   |
| 913 | Accipiter badius | Shikra | 2022/2/15  | 2 | 0 | 18.28956091 | 73.13587938  | <a href="https://www.inaturalist.org/observations/106788914">https://www.inaturalist.org/observations/106788914</a> |
| 914 | Accipiter badius | Shikra | 2021/9/24  | 1 | 0 | 18.29173567 | 74.73803523  | <a href="https://www.inaturalist.org/observations/98499758">https://www.inaturalist.org/observations/98499758</a>   |
| 915 | Accipiter badius | Shikra | 2014/1/5   | 2 | 0 | 18.29894780 | 74.75425710  | <a href="https://www.inaturalist.org/observations/41029755">https://www.inaturalist.org/observations/41029755</a>   |
| 916 | Accipiter badius | Shikra | 2010/2/28  | 2 | 0 | 18.29894780 | 74.75425710  | <a href="https://www.inaturalist.org/observations/55140880">https://www.inaturalist.org/observations/55140880</a>   |
| 917 | Accipiter badius | Shikra | 2022/9/19  | 1 | 0 | 18.32445183 | 82.86563802  | <a href="https://www.inaturalist.org/observations/135664786">https://www.inaturalist.org/observations/135664786</a> |
| 918 | Accipiter badius | Shikra | 2018/12/7  | 1 | 0 | 18.32668154 | 109.53921150 | <a href="https://www.inaturalist.org/observations/19269224">https://www.inaturalist.org/observations/19269224</a>   |
| 919 | Accipiter badius | Shikra | 2021/6/16  | 2 | 0 | 18.34775051 | 75.97163145  | <a href="https://www.inaturalist.org/observations/99576942">https://www.inaturalist.org/observations/99576942</a>   |

|     |                  |        |            |   |   |             |              |                                                                                                                     |
|-----|------------------|--------|------------|---|---|-------------|--------------|---------------------------------------------------------------------------------------------------------------------|
| 920 | Accipiter badius | Shikra | 2020/10/27 | 3 | 0 | 18.34835578 | 75.97278647  | <a href="https://www.inaturalist.org/observations/63629518">https://www.inaturalist.org/observations/63629518</a>   |
| 921 | Accipiter badius | Shikra | 2021/1/6   | 1 | 0 | 18.35154150 | 74.36754460  | <a href="https://www.inaturalist.org/observations/70980209">https://www.inaturalist.org/observations/70980209</a>   |
| 922 | Accipiter badius | Shikra | 2011/12/3  | 1 | 0 | 18.35154150 | 74.36754460  | <a href="https://www.inaturalist.org/observations/78029314">https://www.inaturalist.org/observations/78029314</a>   |
| 923 | Accipiter badius | Shikra | 2020/9/24  | 2 | 0 | 18.35558679 | 75.97239319  | <a href="https://www.inaturalist.org/observations/60679288">https://www.inaturalist.org/observations/60679288</a>   |
| 924 | Accipiter badius | Shikra | 2018/12/14 | 1 | 0 | 18.36936282 | 109.58798400 | <a href="https://www.inaturalist.org/observations/19244084">https://www.inaturalist.org/observations/19244084</a>   |
| 925 | Accipiter badius | Shikra | 2016/2/14  | 3 | 0 | 18.37387469 | 74.07006154  | <a href="https://www.inaturalist.org/observations/48557161">https://www.inaturalist.org/observations/48557161</a>   |
| 926 | Accipiter badius | Shikra | 2012/12/23 | 4 | 0 | 18.37499735 | 73.76974406  | <a href="https://www.inaturalist.org/observations/128264582">https://www.inaturalist.org/observations/128264582</a> |
| 927 | Accipiter badius | Shikra | 2018/2/25  | 1 | 0 | 18.37586273 | 73.76916468  | <a href="https://www.inaturalist.org/observations/70915221">https://www.inaturalist.org/observations/70915221</a>   |
| 928 | Accipiter badius | Shikra | 2018/2/25  | 3 | 0 | 18.37586273 | 73.76916468  | <a href="https://www.inaturalist.org/observations/108347726">https://www.inaturalist.org/observations/108347726</a> |
| 929 | Accipiter badius | Shikra | 2018/9/15  | 2 | 0 | 18.37999136 | 109.49460430 | <a href="https://www.inaturalist.org/observations/16548137">https://www.inaturalist.org/observations/16548137</a>   |
| 930 | Accipiter badius | Shikra | 2022/3/3   | 0 | 0 | 18.38349002 | 79.20612413  | <a href="https://www.inaturalist.org/observations/107810265">https://www.inaturalist.org/observations/107810265</a> |
| 931 | Accipiter badius | Shikra | 2020/12/17 | 2 | 0 | 18.38941905 | 74.12983191  | <a href="https://www.inaturalist.org/observations/66731677">https://www.inaturalist.org/observations/66731677</a>   |
| 932 | Accipiter badius | Shikra | 2021/1/21  | 1 | 0 | 18.42294203 | 74.15734424  | <a href="https://www.inaturalist.org/observations/68414056">https://www.inaturalist.org/observations/68414056</a>   |
| 933 | Accipiter badius | Shikra | 2019/2/21  | 1 | 0 | 18.42641730 | 72.95017865  | <a href="https://www.inaturalist.org/observations/52685766">https://www.inaturalist.org/observations/52685766</a>   |
| 934 | Accipiter badius | Shikra | 2021/4/2   | 3 | 0 | 18.43632120 | 73.89634960  | <a href="https://www.inaturalist.org/observations/88944879">https://www.inaturalist.org/observations/88944879</a>   |
| 935 | Accipiter badius | Shikra | 2021/11/18 | 2 | 0 | 18.44213675 | 73.79962156  | <a href="https://www.inaturalist.org/observations/101391482">https://www.inaturalist.org/observations/101391482</a> |
| 936 | Accipiter badius | Shikra | 2022/2/27  | 3 | 0 | 18.44432783 | 73.42742812  | <a href="https://www.inaturalist.org/observations/108577708">https://www.inaturalist.org/observations/108577708</a> |
| 937 | Accipiter badius | Shikra | 2022/3/13  | 0 | 0 | 18.44690320 | 73.43054390  | <a href="https://www.inaturalist.org/observations/109041925">https://www.inaturalist.org/observations/109041925</a> |
| 938 | Accipiter badius | Shikra | 2021/4/15  | 1 | 0 | 18.45232287 | 73.85137506  | <a href="https://www.inaturalist.org/observations/74125413">https://www.inaturalist.org/observations/74125413</a>   |
| 939 | Accipiter badius | Shikra | 2021/5/5   | 1 | 0 | 18.45365244 | 73.78373106  | <a href="https://www.inaturalist.org/observations/77587332">https://www.inaturalist.org/observations/77587332</a>   |
| 940 | Accipiter badius | Shikra | 2021/5/5   | 1 | 0 | 18.45365244 | 73.78373106  | <a href="https://www.inaturalist.org/observations/77587333">https://www.inaturalist.org/observations/77587333</a>   |
| 941 | Accipiter badius | Shikra | 2021/5/8   | 1 | 0 | 18.45494381 | 73.78648102  | <a href="https://www.inaturalist.org/observations/77855801">https://www.inaturalist.org/observations/77855801</a>   |
| 942 | Accipiter badius | Shikra | 2021/5/21  | 3 | 0 | 18.45494381 | 73.78648102  | <a href="https://www.inaturalist.org/observations/79906771">https://www.inaturalist.org/observations/79906771</a>   |



|     |                  |        |            |   |   |             |             |                                                                                                                     |
|-----|------------------|--------|------------|---|---|-------------|-------------|---------------------------------------------------------------------------------------------------------------------|
| 943 | Accipiter badius | Shikra | 2021/5/18  | 3 | 0 | 18.45494381 | 73.78648102 | <a href="https://www.inaturalist.org/observations/79906849">https://www.inaturalist.org/observations/79906849</a>   |
| 944 | Accipiter badius | Shikra | 2021/5/18  | 1 | 0 | 18.45494381 | 73.78648102 | <a href="https://www.inaturalist.org/observations/79906925">https://www.inaturalist.org/observations/79906925</a>   |
| 945 | Accipiter badius | Shikra | 2021/5/12  | 2 | 0 | 18.45494381 | 73.78648102 | <a href="https://www.inaturalist.org/observations/79906956">https://www.inaturalist.org/observations/79906956</a>   |
| 946 | Accipiter badius | Shikra | 2020/5/29  | 3 | 0 | 18.45545620 | 73.78447310 | <a href="https://www.inaturalist.org/observations/73316815">https://www.inaturalist.org/observations/73316815</a>   |
| 947 | Accipiter badius | Shikra | 2020/5/21  | 2 | 0 | 18.46012460 | 73.78584370 | <a href="https://www.inaturalist.org/observations/57377840">https://www.inaturalist.org/observations/57377840</a>   |
| 948 | Accipiter badius | Shikra | 2020/6/15  | 2 | 0 | 18.46012460 | 73.78584370 | <a href="https://www.inaturalist.org/observations/57377972">https://www.inaturalist.org/observations/57377972</a>   |
| 949 | Accipiter badius | Shikra | 2020/5/19  | 3 | 0 | 18.46324328 | 73.85149899 | <a href="https://www.inaturalist.org/observations/46471287">https://www.inaturalist.org/observations/46471287</a>   |
| 950 | Accipiter badius | Shikra | 2018/2/16  | 3 | 0 | 18.46334992 | 73.85168933 | <a href="https://www.inaturalist.org/observations/9907178">https://www.inaturalist.org/observations/9907178</a>     |
| 951 | Accipiter badius | Shikra | 2012/10/21 | 3 | 0 | 18.46350188 | 73.85355569 | <a href="https://www.inaturalist.org/observations/17737059">https://www.inaturalist.org/observations/17737059</a>   |
| 952 | Accipiter badius | Shikra | 2021/7/10  | 2 | 0 | 18.47660500 | 73.82217500 | <a href="https://www.inaturalist.org/observations/86516978">https://www.inaturalist.org/observations/86516978</a>   |
| 953 | Accipiter badius | Shikra | 2011/12/11 | 2 | 0 | 18.48184261 | 73.81061714 | <a href="https://www.inaturalist.org/observations/68086451">https://www.inaturalist.org/observations/68086451</a>   |
| 954 | Accipiter badius | Shikra | 2012/2/21  | 1 | 0 | 18.48184261 | 73.81061714 | <a href="https://www.inaturalist.org/observations/77856071">https://www.inaturalist.org/observations/77856071</a>   |
| 955 | Accipiter badius | Shikra | 2022/2/3   | 3 | 0 | 18.48199109 | 73.82793792 | <a href="https://www.inaturalist.org/observations/107310098">https://www.inaturalist.org/observations/107310098</a> |
| 956 | Accipiter badius | Shikra | 2021/3/4   | 1 | 0 | 18.49195366 | 73.50904934 | <a href="https://www.inaturalist.org/observations/70856305">https://www.inaturalist.org/observations/70856305</a>   |
| 957 | Accipiter badius | Shikra | 2017/6/11  | 2 | 0 | 18.49259270 | 73.80134580 | <a href="https://www.inaturalist.org/observations/9796294">https://www.inaturalist.org/observations/9796294</a>     |
| 958 | Accipiter badius | Shikra | 2020/7/7   | 1 | 0 | 18.49706560 | 73.83535800 | <a href="https://www.inaturalist.org/observations/52461761">https://www.inaturalist.org/observations/52461761</a>   |
| 959 | Accipiter badius | Shikra | 2022/1/20  | 3 | 0 | 18.50053809 | 73.90156112 | <a href="https://www.inaturalist.org/observations/105273764">https://www.inaturalist.org/observations/105273764</a> |
| 960 | Accipiter badius | Shikra | 2022/4/11  | 4 | 0 | 18.50105360 | 73.51376540 | <a href="https://www.inaturalist.org/observations/121450021">https://www.inaturalist.org/observations/121450021</a> |
| 961 | Accipiter badius | Shikra | 2013/10/10 | 4 | 0 | 18.51717500 | 73.82172500 | <a href="http://www.inaturalist.org/observations/3923249">http://www.inaturalist.org/observations/3923249</a>       |
| 962 | Accipiter badius | Shikra | 2022/6/16  | 3 | 0 | 18.52043030 | 73.85674370 | <a href="https://www.inaturalist.org/observations/122281340">https://www.inaturalist.org/observations/122281340</a> |
| 963 | Accipiter badius | Shikra | 2018/10/14 | 4 | 0 | 18.52438102 | 73.81773312 | <a href="https://www.inaturalist.org/observations/17518699">https://www.inaturalist.org/observations/17518699</a>   |
| 964 | Accipiter badius | Shikra | 2014/2/1   | 4 | 0 | 18.52486420 | 73.81387710 | <a href="https://www.inaturalist.org/observations/33576463">https://www.inaturalist.org/observations/33576463</a>   |
| 965 | Accipiter badius | Shikra | 2018/3/17  | 4 | 0 | 18.52548923 | 73.81538451 | <a href="https://www.inaturalist.org/observations/66283791">https://www.inaturalist.org/observations/66283791</a>   |

|     |                  |        |            |   |   |             |              |                                                                                                                     |
|-----|------------------|--------|------------|---|---|-------------|--------------|---------------------------------------------------------------------------------------------------------------------|
| 966 | Accipiter badius | Shikra | 2021/12/7  | 2 | 0 | 18.52548990 | 73.81538450  | <a href="https://www.inaturalist.org/observations/105501787">https://www.inaturalist.org/observations/105501787</a> |
| 967 | Accipiter badius | Shikra | 2013/3/17  | 2 | 0 | 18.52566000 | 73.81543560  | <a href="https://www.inaturalist.org/observations/128112598">https://www.inaturalist.org/observations/128112598</a> |
| 968 | Accipiter badius | Shikra | 2022/6/5   | 2 | 0 | 18.52781549 | 73.81122068  | <a href="https://www.inaturalist.org/observations/120480953">https://www.inaturalist.org/observations/120480953</a> |
| 969 | Accipiter badius | Shikra | 2021/9/4   | 4 | 0 | 18.53922560 | 73.93130549  | <a href="https://www.inaturalist.org/observations/121125624">https://www.inaturalist.org/observations/121125624</a> |
| 970 | Accipiter badius | Shikra | 2020/9/25  | 5 | 0 | 18.54454778 | 73.78596361  | <a href="https://www.inaturalist.org/observations/60685900">https://www.inaturalist.org/observations/60685900</a>   |
| 971 | Accipiter badius | Shikra | 2014/2/6   | 2 | 0 | 18.54508200 | 73.80813280  | <a href="https://www.inaturalist.org/observations/45486638">https://www.inaturalist.org/observations/45486638</a>   |
| 972 | Accipiter badius | Shikra | 2022/9/25  | 2 | 0 | 18.54635806 | 74.07483277  | <a href="https://www.inaturalist.org/observations/136829649">https://www.inaturalist.org/observations/136829649</a> |
| 973 | Accipiter badius | Shikra | 2022/9/7   | 1 | 0 | 18.55517086 | 73.77882724  | <a href="https://www.inaturalist.org/observations/136403039">https://www.inaturalist.org/observations/136403039</a> |
| 974 | Accipiter badius | Shikra | 2021/3/7   | 2 | 0 | 18.55524200 | 73.77867700  | <a href="https://www.inaturalist.org/observations/70720635">https://www.inaturalist.org/observations/70720635</a>   |
| 975 | Accipiter badius | Shikra | 2021/7/8   | 2 | 0 | 18.55533188 | 73.77866666  | <a href="https://www.inaturalist.org/observations/86130678">https://www.inaturalist.org/observations/86130678</a>   |
| 976 | Accipiter badius | Shikra | 2005/1/9   | 2 | 0 | 18.55731110 | 73.80796664  | <a href="https://www.inaturalist.org/observations/44442488">https://www.inaturalist.org/observations/44442488</a>   |
| 977 | Accipiter badius | Shikra | 2018/5/18  | 2 | 0 | 18.59809363 | 109.54124450 | <a href="https://www.inaturalist.org/observations/12981818">https://www.inaturalist.org/observations/12981818</a>   |
| 978 | Accipiter badius | Shikra | 2021/8/5   | 1 | 0 | 18.60469722 | 73.73513889  | <a href="https://www.inaturalist.org/observations/93614042">https://www.inaturalist.org/observations/93614042</a>   |
| 979 | Accipiter badius | Shikra | 2022/2/15  | 2 | 0 | 18.61915807 | 73.06462252  | <a href="https://www.inaturalist.org/observations/106788910">https://www.inaturalist.org/observations/106788910</a> |
| 980 | Accipiter badius | Shikra | 2021/11/18 | 1 | 0 | 18.64917810 | 73.77068180  | <a href="https://www.inaturalist.org/observations/101406705">https://www.inaturalist.org/observations/101406705</a> |
| 981 | Accipiter badius | Shikra | 2017/10/28 | 3 | 0 | 18.68500699 | 110.24952140 | <a href="https://www.inaturalist.org/observations/59720504">https://www.inaturalist.org/observations/59720504</a>   |
| 982 | Accipiter badius | Shikra | 2010/12/12 | 1 | 0 | 18.70381540 | 72.81348420  | <a href="https://www.inaturalist.org/observations/104561520">https://www.inaturalist.org/observations/104561520</a> |
| 983 | Accipiter badius | Shikra | 2014/10/5  | 1 | 0 | 18.75521050 | 73.44453920  | <a href="https://www.inaturalist.org/observations/77856073">https://www.inaturalist.org/observations/77856073</a>   |
| 984 | Accipiter badius | Shikra | 2020/2/26  | 2 | 0 | 18.75572370 | 73.40907570  | <a href="https://www.inaturalist.org/observations/56727396">https://www.inaturalist.org/observations/56727396</a>   |
| 985 | Accipiter badius | Shikra | 2019/4/2   | 1 | 0 | 18.75958500 | 73.38966139  | <a href="https://www.inaturalist.org/observations/52661557">https://www.inaturalist.org/observations/52661557</a>   |
| 986 | Accipiter badius | Shikra | 2020/3/24  | 3 | 0 | 18.78691486 | 82.03435149  | <a href="https://www.inaturalist.org/observations/41361640">https://www.inaturalist.org/observations/41361640</a>   |
| 987 | Accipiter badius | Shikra | 2022/5/13  | 3 | 0 | 18.81908197 | 82.03411874  | <a href="https://www.inaturalist.org/observations/127382625">https://www.inaturalist.org/observations/127382625</a> |
| 988 | Accipiter badius | Shikra | 2020/4/1   | 3 | 0 | 18.82621651 | 82.06186500  | <a href="https://www.inaturalist.org/observations/41361540">https://www.inaturalist.org/observations/41361540</a>   |

|      |                  |        |            |   |   |             |              |                                                                                                                     |
|------|------------------|--------|------------|---|---|-------------|--------------|---------------------------------------------------------------------------------------------------------------------|
| 989  | Accipiter badius | Shikra | 2017/7/14  | 2 | 0 | 18.87275447 | 82.01259814  | <a href="https://www.inaturalist.org/observations/7716125">https://www.inaturalist.org/observations/7716125</a>     |
| 990  | Accipiter badius | Shikra | 2014/12/25 | 1 | 0 | 18.87723460 | 72.92833910  | <a href="https://www.inaturalist.org/observations/41747834">https://www.inaturalist.org/observations/41747834</a>   |
| 991  | Accipiter badius | Shikra | 2017/12/22 | 4 | 0 | 18.89103790 | 73.12191850  | <a href="https://www.inaturalist.org/observations/30939733">https://www.inaturalist.org/observations/30939733</a>   |
| 992  | Accipiter badius | Shikra | 2021/10/23 | 2 | 0 | 18.89374000 | 73.11150167  | <a href="https://www.inaturalist.org/observations/99359307">https://www.inaturalist.org/observations/99359307</a>   |
| 993  | Accipiter badius | Shikra | 2020/8/27  | 4 | 0 | 18.90224878 | 82.11980732  | <a href="https://www.inaturalist.org/observations/59110903">https://www.inaturalist.org/observations/59110903</a>   |
| 994  | Accipiter badius | Shikra | 2021/10/16 | 1 | 0 | 18.92690529 | 72.83269152  | <a href="https://www.inaturalist.org/observations/98704269">https://www.inaturalist.org/observations/98704269</a>   |
| 995  | Accipiter badius | Shikra | 2022/6/22  | 5 | 0 | 18.98214000 | 77.92106833  | <a href="https://www.inaturalist.org/observations/122967757">https://www.inaturalist.org/observations/122967757</a> |
| 996  | Accipiter badius | Shikra | 2022/6/22  | 4 | 0 | 18.98214000 | 77.92106833  | <a href="https://www.inaturalist.org/observations/125626996">https://www.inaturalist.org/observations/125626996</a> |
| 997  | Accipiter badius | Shikra | 2022/6/22  | 3 | 0 | 18.98216167 | 77.92109500  | <a href="https://www.inaturalist.org/observations/123561684">https://www.inaturalist.org/observations/123561684</a> |
| 998  | Accipiter badius | Shikra | 2022/6/22  | 6 | 0 | 18.98216167 | 77.92111000  | <a href="https://www.inaturalist.org/observations/122970272">https://www.inaturalist.org/observations/122970272</a> |
| 999  | Accipiter badius | Shikra | 2011/11/26 | 2 | 0 | 18.98865870 | 73.27117900  | <a href="https://www.inaturalist.org/observations/68112525">https://www.inaturalist.org/observations/68112525</a>   |
| 1000 | Accipiter badius | Shikra | 2018/10/6  | 2 | 0 | 18.99888640 | 109.07169050 | <a href="https://www.inaturalist.org/observations/17669995">https://www.inaturalist.org/observations/17669995</a>   |
| 1001 | Accipiter badius | Shikra | 2022/5/22  | 3 | 0 | 19.00573760 | 73.02015630  | <a href="https://www.inaturalist.org/observations/130359444">https://www.inaturalist.org/observations/130359444</a> |
| 1002 | Accipiter badius | Shikra | 2020/11/15 | 2 | 0 | 19.01659100 | 73.00593960  | <a href="https://www.inaturalist.org/observations/64922801">https://www.inaturalist.org/observations/64922801</a>   |
| 1003 | Accipiter badius | Shikra | 2021/11/21 | 3 | 0 | 19.01793070 | 73.00716690  | <a href="https://www.inaturalist.org/observations/130360701">https://www.inaturalist.org/observations/130360701</a> |
| 1004 | Accipiter badius | Shikra | 2021/11/21 | 2 | 0 | 19.01793070 | 73.00716690  | <a href="https://www.inaturalist.org/observations/130360707">https://www.inaturalist.org/observations/130360707</a> |
| 1005 | Accipiter badius | Shikra | 2016/1/26  | 3 | 0 | 19.01842138 | 73.00601620  | <a href="https://www.inaturalist.org/observations/68670694">https://www.inaturalist.org/observations/68670694</a>   |
| 1006 | Accipiter badius | Shikra | 2021/2/26  | 2 | 0 | 19.03197498 | 73.03356249  | <a href="https://www.inaturalist.org/observations/70496232">https://www.inaturalist.org/observations/70496232</a>   |
| 1007 | Accipiter badius | Shikra | 2022/3/27  | 3 | 0 | 19.03197500 | 73.03356250  | <a href="https://www.inaturalist.org/observations/132106796">https://www.inaturalist.org/observations/132106796</a> |
| 1008 | Accipiter badius | Shikra | 2019/12/31 | 3 | 0 | 19.03204915 | 73.03396113  | <a href="https://www.inaturalist.org/observations/62177173">https://www.inaturalist.org/observations/62177173</a>   |
| 1009 | Accipiter badius | Shikra | 2019/3/17  | 1 | 0 | 19.05225815 | 72.86276411  | <a href="https://www.inaturalist.org/observations/71499213">https://www.inaturalist.org/observations/71499213</a>   |
| 1010 | Accipiter badius | Shikra | 2022/3/27  | 2 | 0 | 19.07701001 | 82.02844000  | <a href="https://www.inaturalist.org/observations/112016282">https://www.inaturalist.org/observations/112016282</a> |
| 1011 | Accipiter badius | Shikra | 2020/9/23  | 3 | 0 | 19.08342270 | 82.02385638  | <a href="https://www.inaturalist.org/observations/60498141">https://www.inaturalist.org/observations/60498141</a>   |

|      |                  |        |            |   |   |             |              |                                                                                                                     |
|------|------------------|--------|------------|---|---|-------------|--------------|---------------------------------------------------------------------------------------------------------------------|
| 1012 | Accipiter badius | Shikra | 2020/5/14  | 2 | 0 | 19.08557790 | 82.01831695  | <a href="https://www.inaturalist.org/observations/60041375">https://www.inaturalist.org/observations/60041375</a>   |
| 1013 | Accipiter badius | Shikra | 2022/1/26  | 0 | 0 | 19.10345113 | 108.65216140 | <a href="https://www.inaturalist.org/observations/125036507">https://www.inaturalist.org/observations/125036507</a> |
| 1014 | Accipiter badius | Shikra | 2019/10/30 | 3 | 0 | 19.11100761 | 73.01555013  | <a href="https://www.inaturalist.org/observations/35078771">https://www.inaturalist.org/observations/35078771</a>   |
| 1015 | Accipiter badius | Shikra | 2012/11/8  | 2 | 0 | 19.11480815 | 73.56371228  | <a href="https://www.inaturalist.org/observations/108014555">https://www.inaturalist.org/observations/108014555</a> |
| 1016 | Accipiter badius | Shikra | 2021/11/10 | 0 | 0 | 19.13965950 | 82.10595176  | <a href="https://www.inaturalist.org/observations/100898921">https://www.inaturalist.org/observations/100898921</a> |
| 1017 | Accipiter badius | Shikra | 2020/3/14  | 7 | 0 | 19.14190550 | 72.96462840  | <a href="https://www.inaturalist.org/observations/41282176">https://www.inaturalist.org/observations/41282176</a>   |
| 1018 | Accipiter badius | Shikra | 2020/10/10 | 4 | 0 | 19.14190550 | 72.96462840  | <a href="https://www.inaturalist.org/observations/62186490">https://www.inaturalist.org/observations/62186490</a>   |
| 1019 | Accipiter badius | Shikra | 2018/11/2  | 1 | 0 | 19.14192483 | 72.96462536  | <a href="https://www.inaturalist.org/observations/56300050">https://www.inaturalist.org/observations/56300050</a>   |
| 1020 | Accipiter badius | Shikra | 2017/11/26 | 1 | 0 | 19.14192483 | 72.96462536  | <a href="https://www.inaturalist.org/observations/56404340">https://www.inaturalist.org/observations/56404340</a>   |
| 1021 | Accipiter badius | Shikra | 2020/12/3  | 3 | 0 | 19.14192483 | 72.96462536  | <a href="https://www.inaturalist.org/observations/66248628">https://www.inaturalist.org/observations/66248628</a>   |
| 1022 | Accipiter badius | Shikra | 2014/12/7  | 2 | 0 | 19.15000000 | 72.93333000  | <a href="http://www.inaturalist.org/observations/1518794">http://www.inaturalist.org/observations/1518794</a>       |
| 1023 | Accipiter badius | Shikra | 2015/10/31 | 1 | 0 | 19.15073276 | 72.95655034  | <a href="https://www.inaturalist.org/observations/41424850">https://www.inaturalist.org/observations/41424850</a>   |
| 1024 | Accipiter badius | Shikra | 2019/11/23 | 3 | 0 | 19.15089620 | 72.95811027  | <a href="https://www.inaturalist.org/observations/36091082">https://www.inaturalist.org/observations/36091082</a>   |
| 1025 | Accipiter badius | Shikra | 2018/11/10 | 2 | 0 | 19.15454833 | 72.95796404  | <a href="https://www.inaturalist.org/observations/54272598">https://www.inaturalist.org/observations/54272598</a>   |
| 1026 | Accipiter badius | Shikra | 2021/11/8  | 2 | 0 | 19.16291090 | 72.89202936  | <a href="https://www.inaturalist.org/observations/100612111">https://www.inaturalist.org/observations/100612111</a> |
| 1027 | Accipiter badius | Shikra | 2016/1/16  | 3 | 0 | 19.17884974 | 72.94292247  | <a href="https://www.inaturalist.org/observations/27529848">https://www.inaturalist.org/observations/27529848</a>   |
| 1028 | Accipiter badius | Shikra | 2020/11/10 | 2 | 0 | 19.17887080 | 72.85787810  | <a href="https://www.inaturalist.org/observations/65758975">https://www.inaturalist.org/observations/65758975</a>   |
| 1029 | Accipiter badius | Shikra | 2020/11/5  | 2 | 0 | 19.17983000 | 72.94215833  | <a href="https://www.inaturalist.org/observations/64345829">https://www.inaturalist.org/observations/64345829</a>   |
| 1030 | Accipiter badius | Shikra | 2020/9/19  | 2 | 0 | 19.19909064 | 77.27964420  | <a href="https://www.inaturalist.org/observations/61195710">https://www.inaturalist.org/observations/61195710</a>   |
| 1031 | Accipiter badius | Shikra | 2020/6/1   | 2 | 0 | 19.20732784 | 81.93386860  | <a href="https://www.inaturalist.org/observations/48932433">https://www.inaturalist.org/observations/48932433</a>   |
| 1032 | Accipiter badius | Shikra | 2020/5/7   | 3 | 0 | 19.20748995 | 81.93386860  | <a href="https://www.inaturalist.org/observations/45770865">https://www.inaturalist.org/observations/45770865</a>   |
| 1033 | Accipiter badius | Shikra | 2016/12/25 | 4 | 0 | 19.21796352 | 72.81300797  | <a href="https://www.inaturalist.org/observations/59593481">https://www.inaturalist.org/observations/59593481</a>   |
| 1034 | Accipiter badius | Shikra | 2021/12/28 | 3 | 0 | 19.23142124 | 72.95341438  | <a href="https://www.inaturalist.org/observations/103816862">https://www.inaturalist.org/observations/103816862</a> |

|      |                  |        |            |   |   |             |              |                                                                                                                     |
|------|------------------|--------|------------|---|---|-------------|--------------|---------------------------------------------------------------------------------------------------------------------|
| 1035 | Accipiter badius | Shikra | 2022/1/16  | 0 | 0 | 19.23167252 | 108.72171630 | <a href="https://www.inaturalist.org/observations/125272332">https://www.inaturalist.org/observations/125272332</a> |
| 1036 | Accipiter badius | Shikra | 2021/8/28  | 3 | 0 | 19.23376500 | 72.94458020  | <a href="https://www.inaturalist.org/observations/92764050">https://www.inaturalist.org/observations/92764050</a>   |
| 1037 | Accipiter badius | Shikra | 2021/12/24 | 3 | 0 | 19.23376500 | 72.94458020  | <a href="https://www.inaturalist.org/observations/103580662">https://www.inaturalist.org/observations/103580662</a> |
| 1038 | Accipiter badius | Shikra | 2022/1/29  | 3 | 0 | 19.23376500 | 72.94458020  | <a href="https://www.inaturalist.org/observations/105781340">https://www.inaturalist.org/observations/105781340</a> |
| 1039 | Accipiter badius | Shikra | 2022/4/2   | 2 | 0 | 19.23376500 | 72.94458020  | <a href="https://www.inaturalist.org/observations/110176838">https://www.inaturalist.org/observations/110176838</a> |
| 1040 | Accipiter badius | Shikra | 2019/1/24  | 1 | 0 | 19.23700000 | 72.96400000  | <a href="https://www.inaturalist.org/observations/56498313">https://www.inaturalist.org/observations/56498313</a>   |
| 1041 | Accipiter badius | Shikra | 2019/1/24  | 2 | 0 | 19.23700000 | 72.96400000  | <a href="https://www.inaturalist.org/observations/56498315">https://www.inaturalist.org/observations/56498315</a>   |
| 1042 | Accipiter badius | Shikra | 2019/1/24  | 1 | 0 | 19.23700000 | 72.96400000  | <a href="https://www.inaturalist.org/observations/56498316">https://www.inaturalist.org/observations/56498316</a>   |
| 1043 | Accipiter badius | Shikra | 2019/1/5   | 4 | 0 | 19.23806009 | 72.95951456  | <a href="https://www.inaturalist.org/observations/19442721">https://www.inaturalist.org/observations/19442721</a>   |
| 1044 | Accipiter badius | Shikra | 2018/10/28 | 4 | 0 | 19.23971154 | 72.99727716  | <a href="https://www.inaturalist.org/observations/17900002">https://www.inaturalist.org/observations/17900002</a>   |
| 1045 | Accipiter badius | Shikra | 2020/1/1   | 4 | 0 | 19.24161420 | 72.99651240  | <a href="https://www.inaturalist.org/observations/37522964">https://www.inaturalist.org/observations/37522964</a>   |
| 1046 | Accipiter badius | Shikra | 2020/11/22 | 4 | 0 | 19.24161420 | 72.99651240  | <a href="https://www.inaturalist.org/observations/65391620">https://www.inaturalist.org/observations/65391620</a>   |
| 1047 | Accipiter badius | Shikra | 2021/1/9   | 3 | 0 | 19.24161420 | 72.99651240  | <a href="https://www.inaturalist.org/observations/67789803">https://www.inaturalist.org/observations/67789803</a>   |
| 1048 | Accipiter badius | Shikra | 2019/12/7  | 4 | 0 | 19.24161420 | 72.99651240  | <a href="https://www.inaturalist.org/observations/88106877">https://www.inaturalist.org/observations/88106877</a>   |
| 1049 | Accipiter badius | Shikra | 2021/8/1   | 2 | 0 | 19.24161420 | 72.99651240  | <a href="https://www.inaturalist.org/observations/89475193">https://www.inaturalist.org/observations/89475193</a>   |
| 1050 | Accipiter badius | Shikra | 2018/10/28 | 2 | 0 | 19.24515270 | 72.99792940  | <a href="https://www.inaturalist.org/observations/75050257">https://www.inaturalist.org/observations/75050257</a>   |
| 1051 | Accipiter badius | Shikra | 2019/10/23 | 1 | 0 | 19.25834100 | 110.47464800 | <a href="https://www.inaturalist.org/observations/64951193">https://www.inaturalist.org/observations/64951193</a>   |
| 1052 | Accipiter badius | Shikra | 2013/5/31  | 3 | 0 | 19.26116450 | 73.38887480  | <a href="https://www.inaturalist.org/observations/32287091">https://www.inaturalist.org/observations/32287091</a>   |
| 1053 | Accipiter badius | Shikra | 2016/2/9   | 3 | 0 | 19.26980700 | 73.14209600  | <a href="http://www.inaturalist.org/observations/2659420">http://www.inaturalist.org/observations/2659420</a>       |
| 1054 | Accipiter badius | Shikra | 2021/8/10  | 1 | 0 | 19.30460425 | 84.80418697  | <a href="https://www.inaturalist.org/observations/90629355">https://www.inaturalist.org/observations/90629355</a>   |
| 1055 | Accipiter badius | Shikra | 2021/8/9   | 3 | 0 | 19.33128239 | 84.80688795  | <a href="https://www.inaturalist.org/observations/90892200">https://www.inaturalist.org/observations/90892200</a>   |
| 1056 | Accipiter badius | Shikra | 2021/9/2   | 2 | 0 | 19.33558407 | 84.81020786  | <a href="https://www.inaturalist.org/observations/93379349">https://www.inaturalist.org/observations/93379349</a>   |
| 1057 | Accipiter badius | Shikra | 2015/5/16  | 2 | 0 | 19.35000000 | 72.80000000  | <a href="http://www.inaturalist.org/observations/1505624">http://www.inaturalist.org/observations/1505624</a>       |

|      |                  |        |            |   |   |             |              |                                                                                                                     |
|------|------------------|--------|------------|---|---|-------------|--------------|---------------------------------------------------------------------------------------------------------------------|
| 1058 | Accipiter badius | Shikra | 2018/12/2  | 1 | 0 | 19.37115069 | 72.76251655  | <a href="https://www.inaturalist.org/observations/52688570">https://www.inaturalist.org/observations/52688570</a>   |
| 1059 | Accipiter badius | Shikra | 2017/10/8  | 1 | 0 | 19.38246770 | 72.77177750  | <a href="https://www.inaturalist.org/observations/42584198">https://www.inaturalist.org/observations/42584198</a>   |
| 1060 | Accipiter badius | Shikra | 2021/11/17 | 2 | 0 | 19.40664031 | 72.83944767  | <a href="https://www.inaturalist.org/observations/101341523">https://www.inaturalist.org/observations/101341523</a> |
| 1061 | Accipiter badius | Shikra | 2019/1/27  | 1 | 0 | 19.43723083 | 108.84164990 | <a href="https://www.inaturalist.org/observations/39043226">https://www.inaturalist.org/observations/39043226</a>   |
| 1062 | Accipiter badius | Shikra | 2018/10/14 | 2 | 0 | 19.44475119 | 72.92753279  | <a href="https://www.inaturalist.org/observations/71600658">https://www.inaturalist.org/observations/71600658</a>   |
| 1063 | Accipiter badius | Shikra | 2014/5/21  | 4 | 0 | 19.45207770 | 73.32795860  | <a href="https://www.inaturalist.org/observations/66918050">https://www.inaturalist.org/observations/66918050</a>   |
| 1064 | Accipiter badius | Shikra | 2021/12/12 | 4 | 0 | 19.45807790 | 72.80483540  | <a href="https://www.inaturalist.org/observations/130360146">https://www.inaturalist.org/observations/130360146</a> |
| 1065 | Accipiter badius | Shikra | 2021/12/12 | 1 | 0 | 19.46042482 | 72.79322680  | <a href="https://www.inaturalist.org/observations/103410557">https://www.inaturalist.org/observations/103410557</a> |
| 1066 | Accipiter badius | Shikra | 2022/3/1   | 3 | 0 | 19.51586707 | 83.50825779  | <a href="https://www.inaturalist.org/observations/107684688">https://www.inaturalist.org/observations/107684688</a> |
| 1067 | Accipiter badius | Shikra | 2021/5/21  | 1 | 0 | 19.64110532 | 81.29905645  | <a href="https://www.inaturalist.org/observations/79604801">https://www.inaturalist.org/observations/79604801</a>   |
| 1068 | Accipiter badius | Shikra | 2022/1/15  | 0 | 0 | 19.74114167 | 109.30398330 | <a href="https://www.inaturalist.org/observations/125272347">https://www.inaturalist.org/observations/125272347</a> |
| 1069 | Accipiter badius | Shikra | 2015/12/7  | 1 | 0 | 19.78344338 | 85.78709622  | <a href="https://www.inaturalist.org/observations/97906760">https://www.inaturalist.org/observations/97906760</a>   |
| 1070 | Accipiter badius | Shikra | 2012/1/22  | 3 | 0 | 19.80000000 | 72.75000000  | <a href="https://www.inaturalist.org/observations/32858509">https://www.inaturalist.org/observations/32858509</a>   |
| 1071 | Accipiter badius | Shikra | 2021/6/13  | 1 | 0 | 19.87754100 | 75.35802600  | <a href="https://www.inaturalist.org/observations/83024269">https://www.inaturalist.org/observations/83024269</a>   |
| 1072 | Accipiter badius | Shikra | 2020/11/15 | 3 | 0 | 19.87833360 | 75.32214110  | <a href="https://www.inaturalist.org/observations/64934665">https://www.inaturalist.org/observations/64934665</a>   |
| 1073 | Accipiter badius | Shikra | 2016/12/12 | 2 | 0 | 19.88767292 | 86.09443159  | <a href="https://www.inaturalist.org/observations/110401467">https://www.inaturalist.org/observations/110401467</a> |
| 1074 | Accipiter badius | Shikra | 2018/2/23  | 3 | 0 | 19.91311506 | 85.43275215  | <a href="https://www.inaturalist.org/observations/10111079">https://www.inaturalist.org/observations/10111079</a>   |
| 1075 | Accipiter badius | Shikra | 2022/2/19  | 6 | 0 | 19.91940470 | 85.42543170  | <a href="https://www.inaturalist.org/observations/107825094">https://www.inaturalist.org/observations/107825094</a> |
| 1076 | Accipiter badius | Shikra | 2018/2/18  | 1 | 0 | 19.94819629 | 72.84580752  | <a href="https://www.inaturalist.org/observations/107165923">https://www.inaturalist.org/observations/107165923</a> |
| 1077 | Accipiter badius | Shikra | 2022/2/2   | 1 | 0 | 19.95371622 | 73.77345655  | <a href="https://www.inaturalist.org/observations/106226898">https://www.inaturalist.org/observations/106226898</a> |
| 1078 | Accipiter badius | Shikra | 2021/2/18  | 1 | 0 | 19.98773069 | 75.22512406  | <a href="https://www.inaturalist.org/observations/134952966">https://www.inaturalist.org/observations/134952966</a> |
| 1079 | Accipiter badius | Shikra | 2022/4/12  | 3 | 0 | 20.00030654 | 73.75332406  | <a href="https://www.inaturalist.org/observations/112377621">https://www.inaturalist.org/observations/112377621</a> |
| 1080 | Accipiter badius | Shikra | 2020/11/25 | 2 | 0 | 20.00045409 | 73.75387810  | <a href="https://www.inaturalist.org/observations/65593919">https://www.inaturalist.org/observations/65593919</a>   |

|      |                  |        |            |   |   |             |              |                                                                                                                     |
|------|------------------|--------|------------|---|---|-------------|--------------|---------------------------------------------------------------------------------------------------------------------|
| 1081 | Accipiter badius | Shikra | 2020/11/14 | 3 | 0 | 20.00854861 | 73.74554213  | <a href="https://www.inaturalist.org/observations/66181430">https://www.inaturalist.org/observations/66181430</a>   |
| 1082 | Accipiter badius | Shikra | 2021/2/17  | 1 | 0 | 20.01375644 | 110.23660080 | <a href="https://www.inaturalist.org/observations/69702099">https://www.inaturalist.org/observations/69702099</a>   |
| 1083 | Accipiter badius | Shikra | 2022/2/6   | 0 | 0 | 20.01996990 | 110.34863000 | <a href="https://www.inaturalist.org/observations/132394350">https://www.inaturalist.org/observations/132394350</a> |
| 1084 | Accipiter badius | Shikra | 2020/2/10  | 1 | 0 | 20.02347821 | 75.17776774  | <a href="https://www.inaturalist.org/observations/104967766">https://www.inaturalist.org/observations/104967766</a> |
| 1085 | Accipiter badius | Shikra | 2017/2/26  | 3 | 0 | 20.02352167 | 75.17910667  | <a href="https://www.inaturalist.org/observations/5192271">https://www.inaturalist.org/observations/5192271</a>     |
| 1086 | Accipiter badius | Shikra | 2014/3/15  | 1 | 0 | 20.19583667 | 79.34224501  | <a href="https://www.inaturalist.org/observations/37720651">https://www.inaturalist.org/observations/37720651</a>   |
| 1087 | Accipiter badius | Shikra | 2015/11/7  | 2 | 0 | 20.24838270 | 79.36068900  | <a href="https://www.inaturalist.org/observations/55895391">https://www.inaturalist.org/observations/55895391</a>   |
| 1088 | Accipiter badius | Shikra | 2015/6/12  | 2 | 0 | 20.24838270 | 79.36068900  | <a href="https://www.inaturalist.org/observations/55897757">https://www.inaturalist.org/observations/55897757</a>   |
| 1089 | Accipiter badius | Shikra | 2020/3/14  | 2 | 0 | 20.24838270 | 79.36068900  | <a href="https://www.inaturalist.org/observations/56727537">https://www.inaturalist.org/observations/56727537</a>   |
| 1090 | Accipiter badius | Shikra | 2021/11/19 | 3 | 0 | 20.27100210 | 79.02840693  | <a href="https://www.inaturalist.org/observations/101452915">https://www.inaturalist.org/observations/101452915</a> |
| 1091 | Accipiter badius | Shikra | 2021/10/1  | 1 | 0 | 20.34002557 | 79.30590056  | <a href="https://www.inaturalist.org/observations/97214794">https://www.inaturalist.org/observations/97214794</a>   |
| 1092 | Accipiter badius | Shikra | 2019/5/27  | 3 | 0 | 20.34083330 | 79.33741769  | <a href="https://www.inaturalist.org/observations/27853885">https://www.inaturalist.org/observations/27853885</a>   |
| 1093 | Accipiter badius | Shikra | 2018/5/14  | 1 | 0 | 20.34968515 | 79.32529779  | <a href="https://www.inaturalist.org/observations/52550513">https://www.inaturalist.org/observations/52550513</a>   |
| 1094 | Accipiter badius | Shikra | 2019/5/27  | 2 | 0 | 20.35259745 | 79.35899750  | <a href="https://www.inaturalist.org/observations/27644363">https://www.inaturalist.org/observations/27644363</a>   |
| 1095 | Accipiter badius | Shikra | 2020/9/14  | 2 | 0 | 20.36435247 | 85.83459478  | <a href="https://www.inaturalist.org/observations/59664306">https://www.inaturalist.org/observations/59664306</a>   |
| 1096 | Accipiter badius | Shikra | 2016/12/19 | 2 | 0 | 20.40032712 | 85.82660573  | <a href="https://www.inaturalist.org/observations/110266630">https://www.inaturalist.org/observations/110266630</a> |
| 1097 | Accipiter badius | Shikra | 2021/3/1   | 2 | 0 | 20.61875522 | 81.57263808  | <a href="https://www.inaturalist.org/observations/82511614">https://www.inaturalist.org/observations/82511614</a>   |
| 1098 | Accipiter badius | Shikra | 2015/1/18  | 4 | 0 | 20.70021590 | 77.00816780  | <a href="https://www.inaturalist.org/observations/67139310">https://www.inaturalist.org/observations/67139310</a>   |
| 1099 | Accipiter badius | Shikra | 2022/1/14  | 6 | 0 | 20.70998992 | 81.55021548  | <a href="https://www.inaturalist.org/observations/104909894">https://www.inaturalist.org/observations/104909894</a> |
| 1100 | Accipiter badius | Shikra | 2020/1/11  | 1 | 0 | 20.71297045 | 81.52871858  | <a href="https://www.inaturalist.org/observations/37814109">https://www.inaturalist.org/observations/37814109</a>   |
| 1101 | Accipiter badius | Shikra | 2020/10/11 | 2 | 0 | 20.73187330 | 77.07209570  | <a href="https://www.inaturalist.org/observations/62270231">https://www.inaturalist.org/observations/62270231</a>   |
| 1102 | Accipiter badius | Shikra | 2016/3/24  | 3 | 0 | 20.73845760 | 82.44151228  | <a href="https://www.inaturalist.org/observations/61468076">https://www.inaturalist.org/observations/61468076</a>   |
| 1103 | Accipiter badius | Shikra | 2015/8/26  | 3 | 0 | 20.90114500 | 75.67899100  | <a href="http://www.inaturalist.org/observations/1926973">http://www.inaturalist.org/observations/1926973</a>       |

|      |                  |        |            |   |   |             |             |                                                                                                                     |
|------|------------------|--------|------------|---|---|-------------|-------------|---------------------------------------------------------------------------------------------------------------------|
| 1104 | Accipiter badius | Shikra | 2020/12/15 | 1 | 0 | 20.98333570 | 75.53609099 | <a href="https://www.inaturalist.org/observations/66959440">https://www.inaturalist.org/observations/66959440</a>   |
| 1105 | Accipiter badius | Shikra | 2020/12/15 | 1 | 0 | 20.98341052 | 75.53575102 | <a href="https://www.inaturalist.org/observations/66960369">https://www.inaturalist.org/observations/66960369</a>   |
| 1106 | Accipiter badius | Shikra | 2021/3/25  | 1 | 0 | 20.98462279 | 75.53618079 | <a href="https://www.inaturalist.org/observations/72079227">https://www.inaturalist.org/observations/72079227</a>   |
| 1107 | Accipiter badius | Shikra | 2020/12/15 | 1 | 0 | 20.98462449 | 75.53604003 | <a href="https://www.inaturalist.org/observations/66784562">https://www.inaturalist.org/observations/66784562</a>   |
| 1108 | Accipiter badius | Shikra | 2022/1/14  | 1 | 0 | 20.98658442 | 75.56872174 | <a href="https://www.inaturalist.org/observations/105027239">https://www.inaturalist.org/observations/105027239</a> |
| 1109 | Accipiter badius | Shikra | 2021/1/2   | 1 | 0 | 20.98926968 | 75.54479040 | <a href="https://www.inaturalist.org/observations/107104350">https://www.inaturalist.org/observations/107104350</a> |
| 1110 | Accipiter badius | Shikra | 2021/1/1   | 1 | 0 | 20.98940991 | 75.54475553 | <a href="https://www.inaturalist.org/observations/107102641">https://www.inaturalist.org/observations/107102641</a> |
| 1111 | Accipiter badius | Shikra | 2021/1/2   | 1 | 0 | 20.98949255 | 75.54472602 | <a href="https://www.inaturalist.org/observations/107104318">https://www.inaturalist.org/observations/107104318</a> |
| 1112 | Accipiter badius | Shikra | 2020/12/31 | 4 | 0 | 20.98960524 | 75.54502911 | <a href="https://www.inaturalist.org/observations/67351992">https://www.inaturalist.org/observations/67351992</a>   |
| 1113 | Accipiter badius | Shikra | 2020/12/31 | 2 | 0 | 20.98960524 | 75.54502911 | <a href="https://www.inaturalist.org/observations/67352251">https://www.inaturalist.org/observations/67352251</a>   |
| 1114 | Accipiter badius | Shikra | 2021/3/19  | 2 | 0 | 20.98963022 | 75.54377921 | <a href="https://www.inaturalist.org/observations/71552428">https://www.inaturalist.org/observations/71552428</a>   |
| 1115 | Accipiter badius | Shikra | 2021/2/6   | 2 | 0 | 20.98963028 | 75.54377920 | <a href="https://www.inaturalist.org/observations/70501289">https://www.inaturalist.org/observations/70501289</a>   |
| 1116 | Accipiter badius | Shikra | 2021/3/10  | 2 | 0 | 20.99091650 | 75.53032126 | <a href="https://www.inaturalist.org/observations/70929061">https://www.inaturalist.org/observations/70929061</a>   |
| 1117 | Accipiter badius | Shikra | 2020/12/17 | 2 | 0 | 20.99213067 | 75.54411381 | <a href="https://www.inaturalist.org/observations/66969570">https://www.inaturalist.org/observations/66969570</a>   |
| 1118 | Accipiter badius | Shikra | 2022/7/2   | 1 | 0 | 20.99886849 | 75.55522126 | <a href="https://www.inaturalist.org/observations/129555170">https://www.inaturalist.org/observations/129555170</a> |
| 1119 | Accipiter badius | Shikra | 2022/7/8   | 3 | 0 | 21.00218528 | 75.55435898 | <a href="https://www.inaturalist.org/observations/125304164">https://www.inaturalist.org/observations/125304164</a> |
| 1120 | Accipiter badius | Shikra | 2020/11/26 | 3 | 0 | 21.04226000 | 75.84380667 | <a href="https://www.inaturalist.org/observations/65628805">https://www.inaturalist.org/observations/65628805</a>   |
| 1121 | Accipiter badius | Shikra | 2021/5/25  | 2 | 0 | 21.04321961 | 75.84834505 | <a href="https://www.inaturalist.org/observations/80481598">https://www.inaturalist.org/observations/80481598</a>   |
| 1122 | Accipiter badius | Shikra | 2020/5/26  | 2 | 0 | 21.04333664 | 75.84850531 | <a href="https://www.inaturalist.org/observations/51022484">https://www.inaturalist.org/observations/51022484</a>   |
| 1123 | Accipiter badius | Shikra | 2021/9/26  | 2 | 0 | 21.04340266 | 75.84768053 | <a href="https://www.inaturalist.org/observations/96345456">https://www.inaturalist.org/observations/96345456</a>   |
| 1124 | Accipiter badius | Shikra | 2020/9/10  | 2 | 0 | 21.04350999 | 75.84856063 | <a href="https://www.inaturalist.org/observations/59136625">https://www.inaturalist.org/observations/59136625</a>   |
| 1125 | Accipiter badius | Shikra | 2020/5/26  | 2 | 0 | 21.04357508 | 75.84805973 | <a href="https://www.inaturalist.org/observations/62462463">https://www.inaturalist.org/observations/62462463</a>   |
| 1126 | Accipiter badius | Shikra | 2022/8/31  | 2 | 0 | 21.04861111 | 75.84916667 | <a href="https://www.inaturalist.org/observations/133139332">https://www.inaturalist.org/observations/133139332</a> |



|      |                  |        |            |   |   |             |             |                                                                                                                     |
|------|------------------|--------|------------|---|---|-------------|-------------|---------------------------------------------------------------------------------------------------------------------|
| 1127 | Accipiter badius | Shikra | 2019/9/17  | 4 | 0 | 21.05671008 | 75.83675791 | <a href="https://www.inaturalist.org/observations/59872542">https://www.inaturalist.org/observations/59872542</a>   |
| 1128 | Accipiter badius | Shikra | 2021/6/25  | 1 | 0 | 21.06935836 | 81.45041786 | <a href="https://www.inaturalist.org/observations/85102183">https://www.inaturalist.org/observations/85102183</a>   |
| 1129 | Accipiter badius | Shikra | 2021/2/8   | 1 | 0 | 21.08287305 | 81.47934716 | <a href="https://www.inaturalist.org/observations/69257176">https://www.inaturalist.org/observations/69257176</a>   |
| 1130 | Accipiter badius | Shikra | 2021/2/14  | 1 | 0 | 21.11434631 | 81.82483446 | <a href="https://www.inaturalist.org/observations/120628841">https://www.inaturalist.org/observations/120628841</a> |
| 1131 | Accipiter badius | Shikra | 2021/2/14  | 1 | 0 | 21.11434631 | 81.82483446 | <a href="https://www.inaturalist.org/observations/120628846">https://www.inaturalist.org/observations/120628846</a> |
| 1132 | Accipiter badius | Shikra | 2020/4/3   | 1 | 0 | 21.12142598 | 80.71127146 | <a href="https://www.inaturalist.org/observations/41372457">https://www.inaturalist.org/observations/41372457</a>   |
| 1133 | Accipiter badius | Shikra | 2020/3/1   | 2 | 0 | 21.12430540 | 70.82415070 | <a href="https://www.inaturalist.org/observations/104691234">https://www.inaturalist.org/observations/104691234</a> |
| 1134 | Accipiter badius | Shikra | 2020/3/2   | 2 | 0 | 21.12430540 | 70.82415070 | <a href="https://www.inaturalist.org/observations/104691694">https://www.inaturalist.org/observations/104691694</a> |
| 1135 | Accipiter badius | Shikra | 2018/7/6   | 2 | 0 | 21.14452950 | 79.05796966 | <a href="https://www.inaturalist.org/observations/21644357">https://www.inaturalist.org/observations/21644357</a>   |
| 1136 | Accipiter badius | Shikra | 2016/7/28  | 3 | 0 | 21.14580048 | 79.08815447 | <a href="https://www.inaturalist.org/observations/56120593">https://www.inaturalist.org/observations/56120593</a>   |
| 1137 | Accipiter badius | Shikra | 2021/5/24  | 1 | 0 | 21.18703461 | 80.76186329 | <a href="https://www.inaturalist.org/observations/84342055">https://www.inaturalist.org/observations/84342055</a>   |
| 1138 | Accipiter badius | Shikra | 2021/8/3   | 2 | 0 | 21.18835696 | 81.28757391 | <a href="https://www.inaturalist.org/observations/90969733">https://www.inaturalist.org/observations/90969733</a>   |
| 1139 | Accipiter badius | Shikra | 2022/3/27  | 4 | 0 | 21.19049270 | 80.76270550 | <a href="https://www.inaturalist.org/observations/111914881">https://www.inaturalist.org/observations/111914881</a> |
| 1140 | Accipiter badius | Shikra | 2019/11/25 | 1 | 0 | 21.19111572 | 80.74757416 | <a href="https://www.inaturalist.org/observations/41442173">https://www.inaturalist.org/observations/41442173</a>   |
| 1141 | Accipiter badius | Shikra | 2021/5/19  | 2 | 0 | 21.19197194 | 80.74789938 | <a href="https://www.inaturalist.org/observations/79401500">https://www.inaturalist.org/observations/79401500</a>   |
| 1142 | Accipiter badius | Shikra | 2021/5/13  | 1 | 0 | 21.19329018 | 80.76111596 | <a href="https://www.inaturalist.org/observations/88266035">https://www.inaturalist.org/observations/88266035</a>   |
| 1143 | Accipiter badius | Shikra | 2018/1/21  | 1 | 0 | 21.19406481 | 81.35094143 | <a href="https://www.inaturalist.org/observations/95121729">https://www.inaturalist.org/observations/95121729</a>   |
| 1144 | Accipiter badius | Shikra | 2022/8/23  | 1 | 0 | 21.19463123 | 80.76293048 | <a href="https://www.inaturalist.org/observations/135329672">https://www.inaturalist.org/observations/135329672</a> |
| 1145 | Accipiter badius | Shikra | 2021/8/1   | 1 | 0 | 21.20284731 | 81.35708369 | <a href="https://www.inaturalist.org/observations/89441138">https://www.inaturalist.org/observations/89441138</a>   |
| 1146 | Accipiter badius | Shikra | 2021/8/29  | 1 | 0 | 21.20311425 | 81.35719970 | <a href="https://www.inaturalist.org/observations/92882607">https://www.inaturalist.org/observations/92882607</a>   |
| 1147 | Accipiter badius | Shikra | 2020/1/28  | 2 | 0 | 21.20349600 | 81.15655260 | <a href="https://www.inaturalist.org/observations/121768212">https://www.inaturalist.org/observations/121768212</a> |
| 1148 | Accipiter badius | Shikra | 2021/4/6   | 2 | 0 | 21.20575620 | 81.60818640 | <a href="https://www.inaturalist.org/observations/121442333">https://www.inaturalist.org/observations/121442333</a> |
| 1149 | Accipiter badius | Shikra | 2022/7/10  | 4 | 0 | 21.20575620 | 81.60818640 | <a href="https://www.inaturalist.org/observations/125892134">https://www.inaturalist.org/observations/125892134</a> |

|      |                  |        |            |   |   |             |             |                                                                                                                     |
|------|------------------|--------|------------|---|---|-------------|-------------|---------------------------------------------------------------------------------------------------------------------|
| 1150 | Accipiter badius | Shikra | 2022/9/11  | 1 | 0 | 21.20575620 | 81.60818640 | <a href="https://www.inaturalist.org/observations/135684715">https://www.inaturalist.org/observations/135684715</a> |
| 1151 | Accipiter badius | Shikra | 2021/5/19  | 1 | 0 | 21.20743154 | 80.66863675 | <a href="https://www.inaturalist.org/observations/79376436">https://www.inaturalist.org/observations/79376436</a>   |
| 1152 | Accipiter badius | Shikra | 2021/5/20  | 3 | 0 | 21.20796822 | 80.66669516 | <a href="https://www.inaturalist.org/observations/79598690">https://www.inaturalist.org/observations/79598690</a>   |
| 1153 | Accipiter badius | Shikra | 2022/5/6   | 2 | 0 | 21.20855522 | 81.33873805 | <a href="https://www.inaturalist.org/observations/116461544">https://www.inaturalist.org/observations/116461544</a> |
| 1154 | Accipiter badius | Shikra | 2015/2/3   | 1 | 0 | 21.20967690 | 72.10776350 | <a href="https://www.inaturalist.org/observations/39871066">https://www.inaturalist.org/observations/39871066</a>   |
| 1155 | Accipiter badius | Shikra | 2016/10/24 | 4 | 0 | 21.23192000 | 70.55331000 | <a href="https://www.inaturalist.org/observations/16030389">https://www.inaturalist.org/observations/16030389</a>   |
| 1156 | Accipiter badius | Shikra | 2022/6/15  | 4 | 0 | 21.24685990 | 81.59744520 | <a href="https://www.inaturalist.org/observations/121904180">https://www.inaturalist.org/observations/121904180</a> |
| 1157 | Accipiter badius | Shikra | 2022/7/31  | 3 | 0 | 21.25876286 | 81.62378308 | <a href="https://www.inaturalist.org/observations/129304462">https://www.inaturalist.org/observations/129304462</a> |
| 1158 | Accipiter badius | Shikra | 2022/8/12  | 5 | 0 | 21.25876286 | 81.62378308 | <a href="https://www.inaturalist.org/observations/130532424">https://www.inaturalist.org/observations/130532424</a> |
| 1159 | Accipiter badius | Shikra | 2022/8/16  | 5 | 0 | 21.25876286 | 81.62378308 | <a href="https://www.inaturalist.org/observations/131339982">https://www.inaturalist.org/observations/131339982</a> |
| 1160 | Accipiter badius | Shikra | 2022/8/21  | 1 | 0 | 21.25876286 | 81.62378308 | <a href="https://www.inaturalist.org/observations/131788495">https://www.inaturalist.org/observations/131788495</a> |
| 1161 | Accipiter badius | Shikra | 2022/8/21  | 1 | 0 | 21.25876286 | 81.62378308 | <a href="https://www.inaturalist.org/observations/131788497">https://www.inaturalist.org/observations/131788497</a> |
| 1162 | Accipiter badius | Shikra | 2022/8/23  | 2 | 0 | 21.25876286 | 81.62378308 | <a href="https://www.inaturalist.org/observations/133428927">https://www.inaturalist.org/observations/133428927</a> |
| 1163 | Accipiter badius | Shikra | 2022/8/27  | 0 | 0 | 21.26745960 | 81.61849590 | <a href="https://www.inaturalist.org/observations/133927863">https://www.inaturalist.org/observations/133927863</a> |
| 1164 | Accipiter badius | Shikra | 2018/10/8  | 3 | 0 | 21.27095430 | 81.67111760 | <a href="https://www.inaturalist.org/observations/17315689">https://www.inaturalist.org/observations/17315689</a>   |
| 1165 | Accipiter badius | Shikra | 2017/3/23  | 2 | 0 | 21.27647800 | 71.03696230 | <a href="https://www.inaturalist.org/observations/62785914">https://www.inaturalist.org/observations/62785914</a>   |
| 1166 | Accipiter badius | Shikra | 2022/8/31  | 4 | 0 | 21.27667700 | 81.64460490 | <a href="https://www.inaturalist.org/observations/134196250">https://www.inaturalist.org/observations/134196250</a> |
| 1167 | Accipiter badius | Shikra | 2020/9/28  | 2 | 0 | 21.27876833 | 80.81421667 | <a href="https://www.inaturalist.org/observations/61189454">https://www.inaturalist.org/observations/61189454</a>   |
| 1168 | Accipiter badius | Shikra | 2020/10/27 | 3 | 0 | 21.30139894 | 80.33747882 | <a href="https://www.inaturalist.org/observations/63676154">https://www.inaturalist.org/observations/63676154</a>   |
| 1169 | Accipiter badius | Shikra | 2022/7/13  | 3 | 0 | 21.30422399 | 81.63851984 | <a href="https://www.inaturalist.org/observations/126445134">https://www.inaturalist.org/observations/126445134</a> |
| 1170 | Accipiter badius | Shikra | 2021/5/19  | 1 | 0 | 21.33712201 | 81.38753984 | <a href="https://www.inaturalist.org/observations/79374124">https://www.inaturalist.org/observations/79374124</a>   |
| 1171 | Accipiter badius | Shikra | 2020/1/1   | 1 | 0 | 21.35994399 | 81.39914643 | <a href="https://www.inaturalist.org/observations/50969804">https://www.inaturalist.org/observations/50969804</a>   |
| 1172 | Accipiter badius | Shikra | 2013/2/10  | 1 | 0 | 21.40703127 | 77.16112333 | <a href="https://www.inaturalist.org/observations/85331568">https://www.inaturalist.org/observations/85331568</a>   |

|      |                  |        |            |   |   |             |              |                                                                                                                     |
|------|------------------|--------|------------|---|---|-------------|--------------|---------------------------------------------------------------------------------------------------------------------|
| 1173 | Accipiter badius | Shikra | 2019/10/5  | 0 | 0 | 21.45115140 | 109.05612950 | <a href="https://www.inaturalist.org/observations/110071883">https://www.inaturalist.org/observations/110071883</a> |
| 1174 | Accipiter badius | Shikra | 2016/6/2   | 4 | 0 | 21.47909900 | 83.88386600  | <a href="http://www.inaturalist.org/observations/3454510">http://www.inaturalist.org/observations/3454510</a>       |
| 1175 | Accipiter badius | Shikra | 2021/7/20  | 2 | 0 | 21.47974470 | 82.53135810  | <a href="https://www.inaturalist.org/observations/121442627">https://www.inaturalist.org/observations/121442627</a> |
| 1176 | Accipiter badius | Shikra | 2022/2/8   | 1 | 0 | 21.47974470 | 82.53135810  | <a href="https://www.inaturalist.org/observations/135563686">https://www.inaturalist.org/observations/135563686</a> |
| 1177 | Accipiter badius | Shikra | 2022/2/8   | 1 | 0 | 21.47974470 | 82.53135810  | <a href="https://www.inaturalist.org/observations/135563687">https://www.inaturalist.org/observations/135563687</a> |
| 1178 | Accipiter badius | Shikra | 2019/2/9   | 1 | 0 | 21.54541610 | 80.28424420  | <a href="https://www.inaturalist.org/observations/90531590">https://www.inaturalist.org/observations/90531590</a>   |
| 1179 | Accipiter badius | Shikra | 2022/6/5   | 2 | 0 | 21.58683800 | 79.28303000  | <a href="https://www.inaturalist.org/observations/121057429">https://www.inaturalist.org/observations/121057429</a> |
| 1180 | Accipiter badius | Shikra | 2018/6/8   | 1 | 0 | 21.63591260 | 79.23227860  | <a href="https://www.inaturalist.org/observations/56209636">https://www.inaturalist.org/observations/56209636</a>   |
| 1181 | Accipiter badius | Shikra | 2018/6/8   | 1 | 0 | 21.63591260 | 79.23227860  | <a href="https://www.inaturalist.org/observations/56209637">https://www.inaturalist.org/observations/56209637</a>   |
| 1182 | Accipiter badius | Shikra | 2018/6/8   | 1 | 0 | 21.63591260 | 79.23227860  | <a href="https://www.inaturalist.org/observations/56209639">https://www.inaturalist.org/observations/56209639</a>   |
| 1183 | Accipiter badius | Shikra | 2019/5/29  | 2 | 0 | 21.63591260 | 79.23227860  | <a href="https://www.inaturalist.org/observations/56498915">https://www.inaturalist.org/observations/56498915</a>   |
| 1184 | Accipiter badius | Shikra | 2019/6/5   | 1 | 0 | 21.63591661 | 79.23227862  | <a href="https://www.inaturalist.org/observations/101797880">https://www.inaturalist.org/observations/101797880</a> |
| 1185 | Accipiter badius | Shikra | 2019/6/5   | 2 | 0 | 21.63591661 | 79.23227862  | <a href="https://www.inaturalist.org/observations/101798419">https://www.inaturalist.org/observations/101798419</a> |
| 1186 | Accipiter badius | Shikra | 2016/4/20  | 2 | 0 | 21.66477333 | 87.57362500  | <a href="https://www.inaturalist.org/observations/61107383">https://www.inaturalist.org/observations/61107383</a>   |
| 1187 | Accipiter badius | Shikra | 2022/8/10  | 4 | 0 | 21.70246333 | 83.38997167  | <a href="https://www.inaturalist.org/observations/131690236">https://www.inaturalist.org/observations/131690236</a> |
| 1188 | Accipiter badius | Shikra | 2022/8/5   | 6 | 0 | 21.70671270 | 83.23283590  | <a href="https://www.inaturalist.org/observations/131437317">https://www.inaturalist.org/observations/131437317</a> |
| 1189 | Accipiter badius | Shikra | 2021/10/8  | 2 | 0 | 21.71619234 | 81.53684400  | <a href="https://www.inaturalist.org/observations/97539306">https://www.inaturalist.org/observations/97539306</a>   |
| 1190 | Accipiter badius | Shikra | 2020/3/8   | 1 | 0 | 21.72093428 | 73.00435582  | <a href="https://www.inaturalist.org/observations/63693882">https://www.inaturalist.org/observations/63693882</a>   |
| 1191 | Accipiter badius | Shikra | 2019/11/19 | 2 | 0 | 21.75605049 | 72.12881019  | <a href="https://www.inaturalist.org/observations/36372808">https://www.inaturalist.org/observations/36372808</a>   |
| 1192 | Accipiter badius | Shikra | 2017/10/24 | 5 | 0 | 21.76293720 | 72.16086500  | <a href="https://www.inaturalist.org/observations/70023774">https://www.inaturalist.org/observations/70023774</a>   |
| 1193 | Accipiter badius | Shikra | 2022/6/23  | 2 | 0 | 21.78046225 | 83.31330108  | <a href="https://www.inaturalist.org/observations/127787603">https://www.inaturalist.org/observations/127787603</a> |
| 1194 | Accipiter badius | Shikra | 2021/5/21  | 2 | 0 | 21.80616920 | 83.29993909  | <a href="https://www.inaturalist.org/observations/79642166">https://www.inaturalist.org/observations/79642166</a>   |
| 1195 | Accipiter badius | Shikra | 2020/3/10  | 1 | 0 | 21.80637996 | 83.30406297  | <a href="https://www.inaturalist.org/observations/79921741">https://www.inaturalist.org/observations/79921741</a>   |

|      |                  |        |            |    |   |             |             |                                                                                                                     |
|------|------------------|--------|------------|----|---|-------------|-------------|---------------------------------------------------------------------------------------------------------------------|
| 1196 | Accipiter badius | Shikra | 2021/8/6   | 1  | 0 | 21.80806833 | 83.30173167 | <a href="https://www.inaturalist.org/observations/90800733">https://www.inaturalist.org/observations/90800733</a>   |
| 1197 | Accipiter badius | Shikra | 2021/8/4   | 1  | 0 | 21.80903833 | 83.30913333 | <a href="https://www.inaturalist.org/observations/89949234">https://www.inaturalist.org/observations/89949234</a>   |
| 1198 | Accipiter badius | Shikra | 2021/8/9   | 1  | 0 | 21.81896000 | 83.31215500 | <a href="https://www.inaturalist.org/observations/92548157">https://www.inaturalist.org/observations/92548157</a>   |
| 1199 | Accipiter badius | Shikra | 2022/3/13  | 4  | 0 | 21.83585950 | 88.88420110 | <a href="https://www.inaturalist.org/observations/132030810">https://www.inaturalist.org/observations/132030810</a> |
| 1200 | Accipiter badius | Shikra | 2020/9/4   | 1  | 0 | 21.88831306 | 83.40347607 | <a href="https://www.inaturalist.org/observations/69162790">https://www.inaturalist.org/observations/69162790</a>   |
| 1201 | Accipiter badius | Shikra | 2020/9/12  | 3  | 0 | 22.01060918 | 81.23592831 | <a href="https://www.inaturalist.org/observations/59299398">https://www.inaturalist.org/observations/59299398</a>   |
| 1202 | Accipiter badius | Shikra | 2021/8/15  | 1  | 0 | 22.01127638 | 81.20628221 | <a href="https://www.inaturalist.org/observations/91257202">https://www.inaturalist.org/observations/91257202</a>   |
| 1203 | Accipiter badius | Shikra | 2014/4/17  | 1  | 0 | 22.04410790 | 72.02028130 | <a href="https://www.inaturalist.org/observations/39919783">https://www.inaturalist.org/observations/39919783</a>   |
| 1204 | Accipiter badius | Shikra | 2011/1/28  | 3  | 0 | 22.04410790 | 72.02028130 | <a href="https://www.inaturalist.org/observations/55253248">https://www.inaturalist.org/observations/55253248</a>   |
| 1205 | Accipiter badius | Shikra | 2017/12/22 | 1  | 0 | 22.04410790 | 72.02028130 | <a href="https://www.inaturalist.org/observations/56417908">https://www.inaturalist.org/observations/56417908</a>   |
| 1206 | Accipiter badius | Shikra | 2017/12/22 | 1  | 0 | 22.04410790 | 72.02028130 | <a href="https://www.inaturalist.org/observations/56417909">https://www.inaturalist.org/observations/56417909</a>   |
| 1207 | Accipiter badius | Shikra | 2021/2/8   | 4  | 0 | 22.05971510 | 82.04343800 | <a href="https://www.inaturalist.org/observations/70801428">https://www.inaturalist.org/observations/70801428</a>   |
| 1208 | Accipiter badius | Shikra | 2021/12/27 | 2  | 0 | 22.06880000 | 81.66290639 | <a href="https://www.inaturalist.org/observations/106557474">https://www.inaturalist.org/observations/106557474</a> |
| 1209 | Accipiter badius | Shikra | 2021/5/29  | 3  | 0 | 22.07263000 | 81.56638806 | <a href="https://www.inaturalist.org/observations/106690001">https://www.inaturalist.org/observations/106690001</a> |
| 1210 | Accipiter badius | Shikra | 2019/9/30  | 2  | 0 | 22.07965450 | 82.14091520 | <a href="https://www.inaturalist.org/observations/60434149">https://www.inaturalist.org/observations/60434149</a>   |
| 1211 | Accipiter badius | Shikra | 2021/8/16  | 2  | 0 | 22.12383333 | 82.14530667 | <a href="https://www.inaturalist.org/observations/93631091">https://www.inaturalist.org/observations/93631091</a>   |
| 1212 | Accipiter badius | Shikra | 2021/6/25  | 1  | 0 | 22.12559150 | 82.13923331 | <a href="https://www.inaturalist.org/observations/84508213">https://www.inaturalist.org/observations/84508213</a>   |
| 1213 | Accipiter badius | Shikra | 2021/8/16  | 1  | 0 | 22.12762390 | 82.14318672 | <a href="https://www.inaturalist.org/observations/93694810">https://www.inaturalist.org/observations/93694810</a>   |
| 1214 | Accipiter badius | Shikra | 2021/8/16  | 1  | 0 | 22.12827167 | 82.14367500 | <a href="https://www.inaturalist.org/observations/93622456">https://www.inaturalist.org/observations/93622456</a>   |
| 1215 | Accipiter badius | Shikra | 2021/8/31  | 2  | 0 | 22.13072167 | 82.13716500 | <a href="https://www.inaturalist.org/observations/93439094">https://www.inaturalist.org/observations/93439094</a>   |
| 1216 | Accipiter badius | Shikra | 2021/8/31  | 1  | 0 | 22.13072167 | 82.13716500 | <a href="https://www.inaturalist.org/observations/93448470">https://www.inaturalist.org/observations/93448470</a>   |
| 1217 | Accipiter badius | Shikra | 2021/8/31  | 1  | 0 | 22.13103833 | 82.13723500 | <a href="https://www.inaturalist.org/observations/93452569">https://www.inaturalist.org/observations/93452569</a>   |
| 1218 | Accipiter badius | Shikra | 2016/2/17  | 10 | 0 | 22.17659594 | 81.03652954 | <a href="https://www.inaturalist.org/observations/7704206">https://www.inaturalist.org/observations/7704206</a>     |

|      |                  |        |            |   |   |             |             |                                                                                                                     |
|------|------------------|--------|------------|---|---|-------------|-------------|---------------------------------------------------------------------------------------------------------------------|
| 1219 | Accipiter badius | Shikra | 2021/1/6   | 1 | 0 | 22.18261700 | 80.29052597 | <a href="https://www.inaturalist.org/observations/70138369">https://www.inaturalist.org/observations/70138369</a>   |
| 1220 | Accipiter badius | Shikra | 2021/8/19  | 3 | 0 | 22.23461032 | 73.11765023 | <a href="https://www.inaturalist.org/observations/91712392">https://www.inaturalist.org/observations/91712392</a>   |
| 1221 | Accipiter badius | Shikra | 2020/9/3   | 2 | 0 | 22.24666460 | 82.02300320 | <a href="https://www.inaturalist.org/observations/59103505">https://www.inaturalist.org/observations/59103505</a>   |
| 1222 | Accipiter badius | Shikra | 2021/8/11  | 1 | 0 | 22.24886398 | 82.02352608 | <a href="https://www.inaturalist.org/observations/92551528">https://www.inaturalist.org/observations/92551528</a>   |
| 1223 | Accipiter badius | Shikra | 2020/12/28 | 2 | 0 | 22.27429201 | 81.31597314 | <a href="https://www.inaturalist.org/observations/72009344">https://www.inaturalist.org/observations/72009344</a>   |
| 1224 | Accipiter badius | Shikra | 2022/3/1   | 6 | 0 | 22.30311168 | 73.24382588 | <a href="https://www.inaturalist.org/observations/108213039">https://www.inaturalist.org/observations/108213039</a> |
| 1225 | Accipiter badius | Shikra | 2017/3/8   | 3 | 0 | 22.31260205 | 80.61149597 | <a href="https://www.inaturalist.org/observations/5621174">https://www.inaturalist.org/observations/5621174</a>     |
| 1226 | Accipiter badius | Shikra | 2022/3/6   | 5 | 0 | 22.31648890 | 73.17016670 | <a href="https://www.inaturalist.org/observations/108167552">https://www.inaturalist.org/observations/108167552</a> |
| 1227 | Accipiter badius | Shikra | 2021/3/18  | 1 | 0 | 22.33407770 | 80.61120460 | <a href="https://www.inaturalist.org/observations/73364927">https://www.inaturalist.org/observations/73364927</a>   |
| 1228 | Accipiter badius | Shikra | 2015/4/3   | 1 | 0 | 22.33451320 | 80.61151300 | <a href="https://www.inaturalist.org/observations/41608054">https://www.inaturalist.org/observations/41608054</a>   |
| 1229 | Accipiter badius | Shikra | 2015/4/3   | 1 | 0 | 22.33451320 | 80.61151300 | <a href="https://www.inaturalist.org/observations/41608071">https://www.inaturalist.org/observations/41608071</a>   |
| 1230 | Accipiter badius | Shikra | 2014/3/7   | 1 | 0 | 22.33451320 | 80.61151300 | <a href="https://www.inaturalist.org/observations/52654310">https://www.inaturalist.org/observations/52654310</a>   |
| 1231 | Accipiter badius | Shikra | 2008/5/20  | 2 | 0 | 22.33451320 | 80.61151300 | <a href="https://www.inaturalist.org/observations/55157485">https://www.inaturalist.org/observations/55157485</a>   |
| 1232 | Accipiter badius | Shikra | 2021/4/3   | 1 | 0 | 22.33451320 | 80.61151300 | <a href="https://www.inaturalist.org/observations/73485867">https://www.inaturalist.org/observations/73485867</a>   |
| 1233 | Accipiter badius | Shikra | 2021/4/4   | 1 | 0 | 22.33451320 | 80.61151300 | <a href="https://www.inaturalist.org/observations/73485882">https://www.inaturalist.org/observations/73485882</a>   |
| 1234 | Accipiter badius | Shikra | 2019/4/7   | 4 | 0 | 22.33451320 | 80.61151300 | <a href="https://www.inaturalist.org/observations/101452823">https://www.inaturalist.org/observations/101452823</a> |
| 1235 | Accipiter badius | Shikra | 2021/5/13  | 1 | 0 | 22.33905913 | 73.21905568 | <a href="https://www.inaturalist.org/observations/79928100">https://www.inaturalist.org/observations/79928100</a>   |
| 1236 | Accipiter badius | Shikra | 2012/4/9   | 3 | 0 | 22.34967920 | 80.59422992 | <a href="https://www.inaturalist.org/observations/20776262">https://www.inaturalist.org/observations/20776262</a>   |
| 1237 | Accipiter badius | Shikra | 2022/2/23  | 4 | 0 | 22.35942345 | 82.75005944 | <a href="https://www.inaturalist.org/observations/121760824">https://www.inaturalist.org/observations/121760824</a> |
| 1238 | Accipiter badius | Shikra | 2022/3/29  | 3 | 0 | 22.35966000 | 73.57102000 | <a href="https://www.inaturalist.org/observations/119424369">https://www.inaturalist.org/observations/119424369</a> |
| 1239 | Accipiter badius | Shikra | 2012/4/9   | 3 | 0 | 22.36497822 | 80.56803480 | <a href="https://www.inaturalist.org/observations/20753494">https://www.inaturalist.org/observations/20753494</a>   |
| 1240 | Accipiter badius | Shikra | 2021/4/6   | 2 | 0 | 22.36843096 | 73.21511652 | <a href="https://www.inaturalist.org/observations/73595334">https://www.inaturalist.org/observations/73595334</a>   |
| 1241 | Accipiter badius | Shikra | 2007/12/21 | 2 | 0 | 22.37747600 | 72.99920130 | <a href="https://www.inaturalist.org/observations/78545588">https://www.inaturalist.org/observations/78545588</a>   |

|      |                  |        |            |   |   |             |             |                                                                                                                     |
|------|------------------|--------|------------|---|---|-------------|-------------|---------------------------------------------------------------------------------------------------------------------|
| 1242 | Accipiter badius | Shikra | 2021/1/26  | 3 | 0 | 22.38179372 | 69.83237855 | <a href="https://www.inaturalist.org/observations/69081820">https://www.inaturalist.org/observations/69081820</a>   |
| 1243 | Accipiter badius | Shikra | 2019/4/14  | 4 | 0 | 22.41641000 | 80.78335050 | <a href="https://www.inaturalist.org/observations/123257118">https://www.inaturalist.org/observations/123257118</a> |
| 1244 | Accipiter badius | Shikra | 2019/4/14  | 4 | 0 | 22.41641000 | 80.78335050 | <a href="https://www.inaturalist.org/observations/123260438">https://www.inaturalist.org/observations/123260438</a> |
| 1245 | Accipiter badius | Shikra | 2019/4/14  | 5 | 0 | 22.41641000 | 80.78335050 | <a href="https://www.inaturalist.org/observations/123289691">https://www.inaturalist.org/observations/123289691</a> |
| 1246 | Accipiter badius | Shikra | 2019/4/15  | 4 | 0 | 22.41641000 | 80.78335050 | <a href="https://www.inaturalist.org/observations/123318453">https://www.inaturalist.org/observations/123318453</a> |
| 1247 | Accipiter badius | Shikra | 2020/1/13  | 2 | 0 | 22.43869780 | 73.19539927 | <a href="https://www.inaturalist.org/observations/37678851">https://www.inaturalist.org/observations/37678851</a>   |
| 1248 | Accipiter badius | Shikra | 2017/3/14  | 3 | 0 | 22.44461036 | 78.14482342 | <a href="https://www.inaturalist.org/observations/5565642">https://www.inaturalist.org/observations/5565642</a>     |
| 1249 | Accipiter badius | Shikra | 2017/3/15  | 3 | 0 | 22.44992547 | 78.11732161 | <a href="https://www.inaturalist.org/observations/5417244">https://www.inaturalist.org/observations/5417244</a>     |
| 1250 | Accipiter badius | Shikra | 2018/1/5   | 2 | 0 | 22.47070190 | 70.05773000 | <a href="https://www.inaturalist.org/observations/102294341">https://www.inaturalist.org/observations/102294341</a> |
| 1251 | Accipiter badius | Shikra | 2020/12/20 | 1 | 0 | 22.47219847 | 88.32611844 | <a href="https://www.inaturalist.org/observations/66871553">https://www.inaturalist.org/observations/66871553</a>   |
| 1252 | Accipiter badius | Shikra | 2020/5/9   | 2 | 0 | 22.47362782 | 88.31298005 | <a href="https://www.inaturalist.org/observations/131995628">https://www.inaturalist.org/observations/131995628</a> |
| 1253 | Accipiter badius | Shikra | 2020/3/28  | 2 | 0 | 22.47377443 | 88.31290111 | <a href="https://www.inaturalist.org/observations/47779090">https://www.inaturalist.org/observations/47779090</a>   |
| 1254 | Accipiter badius | Shikra | 2020/9/13  | 3 | 0 | 22.47388838 | 88.31300922 | <a href="https://www.inaturalist.org/observations/61576465">https://www.inaturalist.org/observations/61576465</a>   |
| 1255 | Accipiter badius | Shikra | 2020/11/23 | 2 | 0 | 22.47418055 | 88.31291253 | <a href="https://www.inaturalist.org/observations/65470300">https://www.inaturalist.org/observations/65470300</a>   |
| 1256 | Accipiter badius | Shikra | 2020/11/19 | 2 | 0 | 22.47428188 | 88.31299868 | <a href="https://www.inaturalist.org/observations/65217625">https://www.inaturalist.org/observations/65217625</a>   |
| 1257 | Accipiter badius | Shikra | 2022/6/19  | 2 | 0 | 22.48140167 | 73.52037333 | <a href="https://www.inaturalist.org/observations/125051010">https://www.inaturalist.org/observations/125051010</a> |
| 1258 | Accipiter badius | Shikra | 2019/4/15  | 3 | 0 | 22.49315100 | 88.26231900 | <a href="https://www.inaturalist.org/observations/64163161">https://www.inaturalist.org/observations/64163161</a>   |
| 1259 | Accipiter badius | Shikra | 2021/10/5  | 1 | 0 | 22.49342500 | 73.50268833 | <a href="https://www.inaturalist.org/observations/97340987">https://www.inaturalist.org/observations/97340987</a>   |
| 1260 | Accipiter badius | Shikra | 2020/11/15 | 1 | 0 | 22.50139020 | 70.02417490 | <a href="https://www.inaturalist.org/observations/135876633">https://www.inaturalist.org/observations/135876633</a> |
| 1261 | Accipiter badius | Shikra | 2016/3/26  | 2 | 0 | 22.50333100 | 78.43585080 | <a href="https://www.inaturalist.org/observations/55498142">https://www.inaturalist.org/observations/55498142</a>   |
| 1262 | Accipiter badius | Shikra | 2016/3/27  | 2 | 0 | 22.50333100 | 78.43585080 | <a href="https://www.inaturalist.org/observations/55498783">https://www.inaturalist.org/observations/55498783</a>   |
| 1263 | Accipiter badius | Shikra | 2021/11/22 | 2 | 0 | 22.51077292 | 88.36627722 | <a href="https://www.inaturalist.org/observations/115399092">https://www.inaturalist.org/observations/115399092</a> |
| 1264 | Accipiter badius | Shikra | 2016/3/25  | 1 | 0 | 22.51415730 | 70.15411590 | <a href="https://www.inaturalist.org/observations/41357527">https://www.inaturalist.org/observations/41357527</a>   |

|      |                  |        |            |   |   |             |             |                                                                                                                     |
|------|------------------|--------|------------|---|---|-------------|-------------|---------------------------------------------------------------------------------------------------------------------|
| 1265 | Accipiter badius | Shikra | 2010/11/30 | 1 | 0 | 22.51415730 | 70.15411590 | <a href="https://www.inaturalist.org/observations/92550676">https://www.inaturalist.org/observations/92550676</a>   |
| 1266 | Accipiter badius | Shikra | 2020/12/4  | 1 | 0 | 22.51743630 | 70.15337829 | <a href="https://www.inaturalist.org/observations/136479177">https://www.inaturalist.org/observations/136479177</a> |
| 1267 | Accipiter badius | Shikra | 2018/2/25  | 1 | 0 | 22.52320472 | 70.14427639 | <a href="https://www.inaturalist.org/observations/54915748">https://www.inaturalist.org/observations/54915748</a>   |
| 1268 | Accipiter badius | Shikra | 2021/10/17 | 1 | 0 | 22.52651344 | 72.93418482 | <a href="https://www.inaturalist.org/observations/98488268">https://www.inaturalist.org/observations/98488268</a>   |
| 1269 | Accipiter badius | Shikra | 2019/2/22  | 2 | 0 | 22.53400320 | 72.98690920 | <a href="https://www.inaturalist.org/observations/54241576">https://www.inaturalist.org/observations/54241576</a>   |
| 1270 | Accipiter badius | Shikra | 2022/7/3   | 4 | 0 | 22.53951262 | 72.97031866 | <a href="https://www.inaturalist.org/observations/124505469">https://www.inaturalist.org/observations/124505469</a> |
| 1271 | Accipiter badius | Shikra | 2021/11/4  | 2 | 0 | 22.54068700 | 72.96746350 | <a href="https://www.inaturalist.org/observations/100306826">https://www.inaturalist.org/observations/100306826</a> |
| 1272 | Accipiter badius | Shikra | 2020/12/18 | 4 | 0 | 22.54068700 | 72.96746400 | <a href="https://www.inaturalist.org/observations/66738030">https://www.inaturalist.org/observations/66738030</a>   |
| 1273 | Accipiter badius | Shikra | 2013/2/10  | 1 | 0 | 22.54490349 | 88.34243774 | <a href="https://www.inaturalist.org/observations/79812100">https://www.inaturalist.org/observations/79812100</a>   |
| 1274 | Accipiter badius | Shikra | 2013/2/10  | 1 | 0 | 22.54490349 | 88.34243774 | <a href="https://www.inaturalist.org/observations/79812105">https://www.inaturalist.org/observations/79812105</a>   |
| 1275 | Accipiter badius | Shikra | 2014/10/15 | 1 | 0 | 22.55216410 | 72.61808400 | <a href="https://www.inaturalist.org/observations/39918951">https://www.inaturalist.org/observations/39918951</a>   |
| 1276 | Accipiter badius | Shikra | 2021/9/25  | 1 | 0 | 22.55580289 | 88.29664708 | <a href="https://www.inaturalist.org/observations/96190535">https://www.inaturalist.org/observations/96190535</a>   |
| 1277 | Accipiter badius | Shikra | 2021/12/22 | 1 | 0 | 22.55678476 | 88.29180733 | <a href="https://www.inaturalist.org/observations/104096084">https://www.inaturalist.org/observations/104096084</a> |
| 1278 | Accipiter badius | Shikra | 2021/10/10 | 2 | 0 | 22.55679456 | 88.29809566 | <a href="https://www.inaturalist.org/observations/97906858">https://www.inaturalist.org/observations/97906858</a>   |
| 1279 | Accipiter badius | Shikra | 2022/9/4   | 2 | 0 | 22.55686429 | 88.30071364 | <a href="https://www.inaturalist.org/observations/134844533">https://www.inaturalist.org/observations/134844533</a> |
| 1280 | Accipiter badius | Shikra | 2022/9/25  | 1 | 0 | 22.55772096 | 88.29333205 | <a href="https://www.inaturalist.org/observations/136582699">https://www.inaturalist.org/observations/136582699</a> |
| 1281 | Accipiter badius | Shikra | 2022/9/4   | 3 | 0 | 22.55874620 | 88.29112038 | <a href="https://www.inaturalist.org/observations/134290150">https://www.inaturalist.org/observations/134290150</a> |
| 1282 | Accipiter badius | Shikra | 2018/6/29  | 5 | 0 | 22.55979700 | 88.28949000 | <a href="https://www.inaturalist.org/observations/16524572">https://www.inaturalist.org/observations/16524572</a>   |
| 1283 | Accipiter badius | Shikra | 2022/4/14  | 2 | 0 | 22.57052990 | 78.14377380 | <a href="https://www.inaturalist.org/observations/132103863">https://www.inaturalist.org/observations/132103863</a> |
| 1284 | Accipiter badius | Shikra | 2016/1/29  | 6 | 0 | 22.58041253 | 78.14598799 | <a href="https://www.inaturalist.org/observations/5118694">https://www.inaturalist.org/observations/5118694</a>     |
| 1285 | Accipiter badius | Shikra | 2019/2/9   | 2 | 0 | 22.58295638 | 88.43368746 | <a href="https://www.inaturalist.org/observations/61544893">https://www.inaturalist.org/observations/61544893</a>   |
| 1286 | Accipiter badius | Shikra | 2021/4/8   | 1 | 0 | 22.62015305 | 73.45790841 | <a href="https://www.inaturalist.org/observations/96564767">https://www.inaturalist.org/observations/96564767</a>   |
| 1287 | Accipiter badius | Shikra | 2020/12/11 | 1 | 0 | 22.62015305 | 73.45790841 | <a href="https://www.inaturalist.org/observations/96581877">https://www.inaturalist.org/observations/96581877</a>   |

|      |                  |        |            |   |   |             |             |                                                                                                                     |
|------|------------------|--------|------------|---|---|-------------|-------------|---------------------------------------------------------------------------------------------------------------------|
| 1288 | Accipiter badius | Shikra | 2021/1/4   | 1 | 0 | 22.62015305 | 73.45790841 | <a href="https://www.inaturalist.org/observations/97773204">https://www.inaturalist.org/observations/97773204</a>   |
| 1289 | Accipiter badius | Shikra | 2021/1/4   | 1 | 0 | 22.62015305 | 73.45790841 | <a href="https://www.inaturalist.org/observations/97773263">https://www.inaturalist.org/observations/97773263</a>   |
| 1290 | Accipiter badius | Shikra | 2021/4/8   | 2 | 0 | 22.62015305 | 73.45790841 | <a href="https://www.inaturalist.org/observations/97887950">https://www.inaturalist.org/observations/97887950</a>   |
| 1291 | Accipiter badius | Shikra | 2021/4/8   | 4 | 0 | 22.62015305 | 73.45790841 | <a href="https://www.inaturalist.org/observations/97887965">https://www.inaturalist.org/observations/97887965</a>   |
| 1292 | Accipiter badius | Shikra | 2021/5/7   | 1 | 0 | 22.62015305 | 73.45790841 | <a href="https://www.inaturalist.org/observations/97887979">https://www.inaturalist.org/observations/97887979</a>   |
| 1293 | Accipiter badius | Shikra | 2021/6/12  | 2 | 0 | 22.62015305 | 73.45790841 | <a href="https://www.inaturalist.org/observations/97887993">https://www.inaturalist.org/observations/97887993</a>   |
| 1294 | Accipiter badius | Shikra | 2021/6/12  | 1 | 0 | 22.62015305 | 73.45790841 | <a href="https://www.inaturalist.org/observations/97887997">https://www.inaturalist.org/observations/97887997</a>   |
| 1295 | Accipiter badius | Shikra | 2021/1/13  | 4 | 0 | 22.62015305 | 73.45790841 | <a href="https://www.inaturalist.org/observations/98494413">https://www.inaturalist.org/observations/98494413</a>   |
| 1296 | Accipiter badius | Shikra | 2022/3/3   | 1 | 0 | 22.62018833 | 73.45844167 | <a href="https://www.inaturalist.org/observations/120118664">https://www.inaturalist.org/observations/120118664</a> |
| 1297 | Accipiter badius | Shikra | 2021/11/28 | 4 | 0 | 22.62022167 | 73.45837333 | <a href="https://www.inaturalist.org/observations/122130157">https://www.inaturalist.org/observations/122130157</a> |
| 1298 | Accipiter badius | Shikra | 2022/1/1   | 1 | 0 | 22.62023167 | 73.45837833 | <a href="https://www.inaturalist.org/observations/121711728">https://www.inaturalist.org/observations/121711728</a> |
| 1299 | Accipiter badius | Shikra | 2021/12/5  | 3 | 0 | 22.62024167 | 73.45841500 | <a href="https://www.inaturalist.org/observations/122026015">https://www.inaturalist.org/observations/122026015</a> |
| 1300 | Accipiter badius | Shikra | 2022/1/8   | 1 | 0 | 22.62030667 | 73.45882500 | <a href="https://www.inaturalist.org/observations/120793597">https://www.inaturalist.org/observations/120793597</a> |
| 1301 | Accipiter badius | Shikra | 2022/2/6   | 2 | 0 | 22.62039500 | 73.45797167 | <a href="https://www.inaturalist.org/observations/120502435">https://www.inaturalist.org/observations/120502435</a> |
| 1302 | Accipiter badius | Shikra | 2022/1/7   | 1 | 0 | 22.62042036 | 73.45781500 | <a href="https://www.inaturalist.org/observations/120793594">https://www.inaturalist.org/observations/120793594</a> |
| 1303 | Accipiter badius | Shikra | 2022/3/11  | 3 | 0 | 22.62049667 | 73.45864167 | <a href="https://www.inaturalist.org/observations/119756702">https://www.inaturalist.org/observations/119756702</a> |
| 1304 | Accipiter badius | Shikra | 2022/3/11  | 3 | 0 | 22.62057833 | 73.45857000 | <a href="https://www.inaturalist.org/observations/119756699">https://www.inaturalist.org/observations/119756699</a> |
| 1305 | Accipiter badius | Shikra | 2022/3/11  | 3 | 0 | 22.62059167 | 73.45855167 | <a href="https://www.inaturalist.org/observations/119756697">https://www.inaturalist.org/observations/119756697</a> |
| 1306 | Accipiter badius | Shikra | 2021/10/29 | 3 | 0 | 22.62062667 | 73.45812167 | <a href="https://www.inaturalist.org/observations/122141549">https://www.inaturalist.org/observations/122141549</a> |
| 1307 | Accipiter badius | Shikra | 2019/12/29 | 3 | 0 | 22.62362883 | 88.44098009 | <a href="https://www.inaturalist.org/observations/37303857">https://www.inaturalist.org/observations/37303857</a>   |
| 1308 | Accipiter badius | Shikra | 2018/4/15  | 2 | 0 | 22.66632974 | 72.63816632 | <a href="https://www.inaturalist.org/observations/67147800">https://www.inaturalist.org/observations/67147800</a>   |
| 1309 | Accipiter badius | Shikra | 2019/11/20 | 0 | 0 | 22.68107330 | 88.31542690 | <a href="https://www.inaturalist.org/observations/36591259">https://www.inaturalist.org/observations/36591259</a>   |
| 1310 | Accipiter badius | Shikra | 2020/8/12  | 0 | 0 | 22.68385478 | 88.43341344 | <a href="https://www.inaturalist.org/observations/56514151">https://www.inaturalist.org/observations/56514151</a>   |



|      |                  |        |            |   |   |             |             |                                                                                                                     |
|------|------------------|--------|------------|---|---|-------------|-------------|---------------------------------------------------------------------------------------------------------------------|
| 1311 | Accipiter badius | Shikra | 2020/4/14  | 5 | 0 | 22.68961881 | 88.36805594 | <a href="https://www.inaturalist.org/observations/108787514">https://www.inaturalist.org/observations/108787514</a> |
| 1312 | Accipiter badius | Shikra | 2015/2/15  | 3 | 0 | 22.70000000 | 72.86667000 | <a href="http://www.inaturalist.org/observations/1247678">http://www.inaturalist.org/observations/1247678</a>       |
| 1313 | Accipiter badius | Shikra | 2021/2/8   | 3 | 0 | 22.70598479 | 88.42221268 | <a href="https://www.inaturalist.org/observations/121770443">https://www.inaturalist.org/observations/121770443</a> |
| 1314 | Accipiter badius | Shikra | 2013/3/20  | 2 | 0 | 22.70637595 | 71.66830581 | <a href="https://www.inaturalist.org/observations/32856455">https://www.inaturalist.org/observations/32856455</a>   |
| 1315 | Accipiter badius | Shikra | 2018/12/22 | 3 | 0 | 22.71779373 | 75.91650217 | <a href="https://www.inaturalist.org/observations/27841657">https://www.inaturalist.org/observations/27841657</a>   |
| 1316 | Accipiter badius | Shikra | 2012/1/4   | 1 | 0 | 22.71872910 | 71.63766940 | <a href="https://www.inaturalist.org/observations/32858682">https://www.inaturalist.org/observations/32858682</a>   |
| 1317 | Accipiter badius | Shikra | 2019/5/26  | 1 | 0 | 22.71952737 | 75.85772574 | <a href="https://www.inaturalist.org/observations/79356242">https://www.inaturalist.org/observations/79356242</a>   |
| 1318 | Accipiter badius | Shikra | 2019/11/6  | 1 | 0 | 22.72780037 | 75.90643311 | <a href="https://www.inaturalist.org/observations/35365701">https://www.inaturalist.org/observations/35365701</a>   |
| 1319 | Accipiter badius | Shikra | 2019/11/6  | 2 | 0 | 22.72782580 | 75.90634530 | <a href="https://www.inaturalist.org/observations/35365735">https://www.inaturalist.org/observations/35365735</a>   |
| 1320 | Accipiter badius | Shikra | 2012/2/2   | 3 | 0 | 22.75000000 | 71.66666700 | <a href="https://www.inaturalist.org/observations/32858400">https://www.inaturalist.org/observations/32858400</a>   |
| 1321 | Accipiter badius | Shikra | 2019/10/2  | 1 | 0 | 22.78712776 | 86.29583146 | <a href="https://www.inaturalist.org/observations/44497407">https://www.inaturalist.org/observations/44497407</a>   |
| 1322 | Accipiter badius | Shikra | 2022/7/30  | 3 | 0 | 22.81495638 | 88.23448084 | <a href="https://www.inaturalist.org/observations/128566294">https://www.inaturalist.org/observations/128566294</a> |
| 1323 | Accipiter badius | Shikra | 2018/6/8   | 1 | 0 | 22.81722189 | 84.23339642 | <a href="https://www.inaturalist.org/observations/49094237">https://www.inaturalist.org/observations/49094237</a>   |
| 1324 | Accipiter badius | Shikra | 2019/11/15 | 2 | 0 | 22.83186456 | 72.05958860 | <a href="https://www.inaturalist.org/observations/56511090">https://www.inaturalist.org/observations/56511090</a>   |
| 1325 | Accipiter badius | Shikra | 2019/11/17 | 1 | 0 | 22.83186456 | 72.05958860 | <a href="https://www.inaturalist.org/observations/56511158">https://www.inaturalist.org/observations/56511158</a>   |
| 1326 | Accipiter badius | Shikra | 2019/11/17 | 1 | 0 | 22.83186456 | 72.05958860 | <a href="https://www.inaturalist.org/observations/56511163">https://www.inaturalist.org/observations/56511163</a>   |
| 1327 | Accipiter badius | Shikra | 2020/2/11  | 1 | 0 | 22.83227752 | 72.05785281 | <a href="https://www.inaturalist.org/observations/72150929">https://www.inaturalist.org/observations/72150929</a>   |
| 1328 | Accipiter badius | Shikra | 2021/1/30  | 1 | 0 | 22.84329570 | 72.06036200 | <a href="https://www.inaturalist.org/observations/69197010">https://www.inaturalist.org/observations/69197010</a>   |
| 1329 | Accipiter badius | Shikra | 2019/7/14  | 2 | 0 | 22.84725190 | 88.31357482 | <a href="https://www.inaturalist.org/observations/100462174">https://www.inaturalist.org/observations/100462174</a> |
| 1330 | Accipiter badius | Shikra | 2018/1/5   | 1 | 0 | 22.84939042 | 88.33588185 | <a href="https://www.inaturalist.org/observations/100378037">https://www.inaturalist.org/observations/100378037</a> |
| 1331 | Accipiter badius | Shikra | 2018/7/14  | 3 | 0 | 22.85559767 | 72.45031993 | <a href="https://www.inaturalist.org/observations/14343630">https://www.inaturalist.org/observations/14343630</a>   |
| 1332 | Accipiter badius | Shikra | 2021/2/2   | 1 | 0 | 22.85737898 | 88.21249682 | <a href="https://www.inaturalist.org/observations/97992269">https://www.inaturalist.org/observations/97992269</a>   |
| 1333 | Accipiter badius | Shikra | 2020/10/27 | 2 | 0 | 22.91035530 | 87.81935770 | <a href="https://www.inaturalist.org/observations/64911988">https://www.inaturalist.org/observations/64911988</a>   |

|      |                  |        |            |   |   |             |             |                                                                                                                     |
|------|------------------|--------|------------|---|---|-------------|-------------|---------------------------------------------------------------------------------------------------------------------|
| 1334 | Accipiter badius | Shikra | 2022/2/12  | 2 | 0 | 22.91776700 | 77.72229400 | <a href="https://www.inaturalist.org/observations/107305190">https://www.inaturalist.org/observations/107305190</a> |
| 1335 | Accipiter badius | Shikra | 2018/9/18  | 4 | 0 | 22.93806300 | 86.80167731 | <a href="https://www.inaturalist.org/observations/17155967">https://www.inaturalist.org/observations/17155967</a>   |
| 1336 | Accipiter badius | Shikra | 2022/7/10  | 1 | 0 | 22.95505943 | 88.53746586 | <a href="https://www.inaturalist.org/observations/126446682">https://www.inaturalist.org/observations/126446682</a> |
| 1337 | Accipiter badius | Shikra | 2020/9/15  | 1 | 0 | 22.95665962 | 86.74613746 | <a href="https://www.inaturalist.org/observations/59684099">https://www.inaturalist.org/observations/59684099</a>   |
| 1338 | Accipiter badius | Shikra | 2021/7/15  | 1 | 0 | 22.97380181 | 83.02899912 | <a href="https://www.inaturalist.org/observations/88261429">https://www.inaturalist.org/observations/88261429</a>   |
| 1339 | Accipiter badius | Shikra | 2020/8/30  | 2 | 0 | 22.97577274 | 86.98740953 | <a href="https://www.inaturalist.org/observations/58057724">https://www.inaturalist.org/observations/58057724</a>   |
| 1340 | Accipiter badius | Shikra | 2019/3/12  | 3 | 0 | 22.98204831 | 87.01658965 | <a href="https://www.inaturalist.org/observations/21177387">https://www.inaturalist.org/observations/21177387</a>   |
| 1341 | Accipiter badius | Shikra | 2019/7/24  | 2 | 0 | 22.98614375 | 87.00700613 | <a href="https://www.inaturalist.org/observations/29456505">https://www.inaturalist.org/observations/29456505</a>   |
| 1342 | Accipiter badius | Shikra | 2020/11/8  | 2 | 0 | 22.98705315 | 86.99579126 | <a href="https://www.inaturalist.org/observations/64517196">https://www.inaturalist.org/observations/64517196</a>   |
| 1343 | Accipiter badius | Shikra | 2020/4/5   | 2 | 0 | 22.98713473 | 86.99644683 | <a href="https://www.inaturalist.org/observations/42086350">https://www.inaturalist.org/observations/42086350</a>   |
| 1344 | Accipiter badius | Shikra | 2019/3/8   | 3 | 0 | 22.98776357 | 87.00711341 | <a href="https://www.inaturalist.org/observations/21050455">https://www.inaturalist.org/observations/21050455</a>   |
| 1345 | Accipiter badius | Shikra | 2020/11/23 | 2 | 0 | 22.98802267 | 86.99711729 | <a href="https://www.inaturalist.org/observations/65470607">https://www.inaturalist.org/observations/65470607</a>   |
| 1346 | Accipiter badius | Shikra | 2019/3/2   | 2 | 0 | 22.98845494 | 87.00563283 | <a href="https://www.inaturalist.org/observations/20876322">https://www.inaturalist.org/observations/20876322</a>   |
| 1347 | Accipiter badius | Shikra | 2020/9/1   | 2 | 0 | 22.98877100 | 87.00707050 | <a href="https://www.inaturalist.org/observations/58713323">https://www.inaturalist.org/observations/58713323</a>   |
| 1348 | Accipiter badius | Shikra | 2020/3/22  | 1 | 0 | 22.98879761 | 87.00680496 | <a href="https://www.inaturalist.org/observations/40750041">https://www.inaturalist.org/observations/40750041</a>   |
| 1349 | Accipiter badius | Shikra | 2017/12/1  | 3 | 0 | 22.98966685 | 87.00730147 | <a href="https://www.inaturalist.org/observations/13358398">https://www.inaturalist.org/observations/13358398</a>   |
| 1350 | Accipiter badius | Shikra | 2019/6/30  | 3 | 0 | 22.98967603 | 86.99962502 | <a href="https://www.inaturalist.org/observations/27986042">https://www.inaturalist.org/observations/27986042</a>   |
| 1351 | Accipiter badius | Shikra | 2020/12/14 | 1 | 0 | 22.99084846 | 86.99988218 | <a href="https://www.inaturalist.org/observations/66568022">https://www.inaturalist.org/observations/66568022</a>   |
| 1352 | Accipiter badius | Shikra | 2020/12/14 | 1 | 0 | 22.99084846 | 86.99988218 | <a href="https://www.inaturalist.org/observations/66568023">https://www.inaturalist.org/observations/66568023</a>   |
| 1353 | Accipiter badius | Shikra | 2020/7/4   | 2 | 0 | 22.99206617 | 87.00635650 | <a href="https://www.inaturalist.org/observations/51923346">https://www.inaturalist.org/observations/51923346</a>   |
| 1354 | Accipiter badius | Shikra | 2020/11/21 | 2 | 0 | 22.99270251 | 87.00054282 | <a href="https://www.inaturalist.org/observations/65682911">https://www.inaturalist.org/observations/65682911</a>   |
| 1355 | Accipiter badius | Shikra | 2019/5/13  | 2 | 0 | 22.99285222 | 72.49861698 | <a href="https://www.inaturalist.org/observations/25049897">https://www.inaturalist.org/observations/25049897</a>   |
| 1356 | Accipiter badius | Shikra | 2020/11/16 | 2 | 0 | 22.99575820 | 83.04813802 | <a href="https://www.inaturalist.org/observations/65020881">https://www.inaturalist.org/observations/65020881</a>   |

|      |                  |        |            |   |   |             |             |                                                                                                                     |
|------|------------------|--------|------------|---|---|-------------|-------------|---------------------------------------------------------------------------------------------------------------------|
| 1357 | Accipiter badius | Shikra | 2020/4/10  | 2 | 0 | 23.00101443 | 87.58846108 | <a href="https://www.inaturalist.org/observations/41881174">https://www.inaturalist.org/observations/41881174</a>   |
| 1358 | Accipiter badius | Shikra | 2020/6/21  | 3 | 0 | 23.01876483 | 72.51292124 | <a href="https://www.inaturalist.org/observations/50374987">https://www.inaturalist.org/observations/50374987</a>   |
| 1359 | Accipiter badius | Shikra | 2018/7/12  | 2 | 0 | 23.02274237 | 72.46917777 | <a href="https://www.inaturalist.org/observations/31164521">https://www.inaturalist.org/observations/31164521</a>   |
| 1360 | Accipiter badius | Shikra | 2015/10/29 | 2 | 0 | 23.03293600 | 78.07375100 | <a href="http://www.inaturalist.org/observations/2353695">http://www.inaturalist.org/observations/2353695</a>       |
| 1361 | Accipiter badius | Shikra | 2021/8/1   | 2 | 0 | 23.03335159 | 72.56165769 | <a href="https://www.inaturalist.org/observations/89429129">https://www.inaturalist.org/observations/89429129</a>   |
| 1362 | Accipiter badius | Shikra | 2021/8/28  | 1 | 0 | 23.07706404 | 72.57023473 | <a href="https://www.inaturalist.org/observations/92892212">https://www.inaturalist.org/observations/92892212</a>   |
| 1363 | Accipiter badius | Shikra | 2020/10/26 | 1 | 0 | 23.09182561 | 70.08175523 | <a href="https://www.inaturalist.org/observations/64506060">https://www.inaturalist.org/observations/64506060</a>   |
| 1364 | Accipiter badius | Shikra | 2022/7/30  | 3 | 0 | 23.13418159 | 72.41075871 | <a href="https://www.inaturalist.org/observations/128551938">https://www.inaturalist.org/observations/128551938</a> |
| 1365 | Accipiter badius | Shikra | 2019/7/21  | 1 | 0 | 23.13797222 | 72.39296944 | <a href="https://www.inaturalist.org/observations/29262941">https://www.inaturalist.org/observations/29262941</a>   |
| 1366 | Accipiter badius | Shikra | 2018/11/15 | 2 | 0 | 23.15283350 | 71.39578430 | <a href="https://www.inaturalist.org/observations/56308623">https://www.inaturalist.org/observations/56308623</a>   |
| 1367 | Accipiter badius | Shikra | 2021/3/18  | 1 | 0 | 23.15821000 | 88.65342000 | <a href="https://www.inaturalist.org/observations/71498050">https://www.inaturalist.org/observations/71498050</a>   |
| 1368 | Accipiter badius | Shikra | 2022/3/6   | 2 | 0 | 23.18422934 | 88.57752599 | <a href="https://www.inaturalist.org/observations/108253641">https://www.inaturalist.org/observations/108253641</a> |
| 1369 | Accipiter badius | Shikra | 2019/3/28  | 1 | 0 | 23.18553300 | 86.75392500 | <a href="https://www.inaturalist.org/observations/22030630">https://www.inaturalist.org/observations/22030630</a>   |
| 1370 | Accipiter badius | Shikra | 2022/1/19  | 3 | 0 | 23.18665769 | 77.41165151 | <a href="https://www.inaturalist.org/observations/107497202">https://www.inaturalist.org/observations/107497202</a> |
| 1371 | Accipiter badius | Shikra | 2019/11/30 | 7 | 0 | 23.18894414 | 72.55234888 | <a href="https://www.inaturalist.org/observations/36208993">https://www.inaturalist.org/observations/36208993</a>   |
| 1372 | Accipiter badius | Shikra | 2018/11/9  | 3 | 0 | 23.19023727 | 71.71287496 | <a href="https://www.inaturalist.org/observations/63757251">https://www.inaturalist.org/observations/63757251</a>   |
| 1373 | Accipiter badius | Shikra | 2019/7/1   | 4 | 0 | 23.20086713 | 77.45176859 | <a href="https://www.inaturalist.org/observations/34844064">https://www.inaturalist.org/observations/34844064</a>   |
| 1374 | Accipiter badius | Shikra | 2022/1/9   | 2 | 0 | 23.20629978 | 72.63406807 | <a href="https://www.inaturalist.org/observations/104695134">https://www.inaturalist.org/observations/104695134</a> |
| 1375 | Accipiter badius | Shikra | 2021/10/13 | 1 | 0 | 23.20675800 | 77.46016200 | <a href="https://www.inaturalist.org/observations/98686530">https://www.inaturalist.org/observations/98686530</a>   |
| 1376 | Accipiter badius | Shikra | 2021/10/24 | 2 | 0 | 23.20675800 | 77.46016200 | <a href="https://www.inaturalist.org/observations/100851907">https://www.inaturalist.org/observations/100851907</a> |
| 1377 | Accipiter badius | Shikra | 2021/2/12  | 2 | 0 | 23.20805556 | 77.38361111 | <a href="https://www.inaturalist.org/observations/72906141">https://www.inaturalist.org/observations/72906141</a>   |
| 1378 | Accipiter badius | Shikra | 2022/1/15  | 1 | 0 | 23.20944800 | 77.45817100 | <a href="https://www.inaturalist.org/observations/105034602">https://www.inaturalist.org/observations/105034602</a> |
| 1379 | Accipiter badius | Shikra | 2020/12/8  | 3 | 0 | 23.21026759 | 75.77803094 | <a href="https://www.inaturalist.org/observations/66458081">https://www.inaturalist.org/observations/66458081</a>   |

|      |                  |        |            |   |   |             |             |                                                                                                                     |
|------|------------------|--------|------------|---|---|-------------|-------------|---------------------------------------------------------------------------------------------------------------------|
| 1380 | Accipiter badius | Shikra | 2018/10/24 | 2 | 0 | 23.25049370 | 69.35412658 | <a href="https://www.inaturalist.org/observations/94353349">https://www.inaturalist.org/observations/94353349</a>   |
| 1381 | Accipiter badius | Shikra | 2022/6/5   | 4 | 0 | 23.29916115 | 77.41712350 | <a href="https://www.inaturalist.org/observations/120764484">https://www.inaturalist.org/observations/120764484</a> |
| 1382 | Accipiter badius | Shikra | 2021/9/24  | 1 | 0 | 23.31466200 | 81.36810523 | <a href="https://www.inaturalist.org/observations/96482197">https://www.inaturalist.org/observations/96482197</a>   |
| 1383 | Accipiter badius | Shikra | 2021/9/5   | 2 | 0 | 23.32452798 | 77.77536034 | <a href="https://www.inaturalist.org/observations/93734791">https://www.inaturalist.org/observations/93734791</a>   |
| 1384 | Accipiter badius | Shikra | 2020/4/29  | 1 | 0 | 23.34070495 | 77.77864303 | <a href="https://www.inaturalist.org/observations/57835617">https://www.inaturalist.org/observations/57835617</a>   |
| 1385 | Accipiter badius | Shikra | 2021/4/3   | 1 | 0 | 23.34350287 | 77.77685534 | <a href="https://www.inaturalist.org/observations/72865912">https://www.inaturalist.org/observations/72865912</a>   |
| 1386 | Accipiter badius | Shikra | 2021/6/27  | 2 | 0 | 23.34805686 | 77.77376141 | <a href="https://www.inaturalist.org/observations/86257792">https://www.inaturalist.org/observations/86257792</a>   |
| 1387 | Accipiter badius | Shikra | 2020/4/2   | 1 | 0 | 23.34965181 | 69.36738549 | <a href="https://www.inaturalist.org/observations/136011524">https://www.inaturalist.org/observations/136011524</a> |
| 1388 | Accipiter badius | Shikra | 2021/2/18  | 1 | 0 | 23.34973633 | 77.77261175 | <a href="https://www.inaturalist.org/observations/70080509">https://www.inaturalist.org/observations/70080509</a>   |
| 1389 | Accipiter badius | Shikra | 2021/4/4   | 2 | 0 | 23.35759966 | 72.05540212 | <a href="https://www.inaturalist.org/observations/73502235">https://www.inaturalist.org/observations/73502235</a>   |
| 1390 | Accipiter badius | Shikra | 2020/4/2   | 1 | 0 | 23.39424621 | 69.34911905 | <a href="https://www.inaturalist.org/observations/136827446">https://www.inaturalist.org/observations/136827446</a> |
| 1391 | Accipiter badius | Shikra | 2019/4/24  | 2 | 0 | 23.39514120 | 86.98743260 | <a href="https://www.inaturalist.org/observations/23123057">https://www.inaturalist.org/observations/23123057</a>   |
| 1392 | Accipiter badius | Shikra | 2021/3/22  | 1 | 0 | 23.41230500 | 85.43990100 | <a href="https://www.inaturalist.org/observations/71807708">https://www.inaturalist.org/observations/71807708</a>   |
| 1393 | Accipiter badius | Shikra | 2020/1/12  | 0 | 0 | 23.46130319 | 88.33243310 | <a href="https://www.inaturalist.org/observations/38570528">https://www.inaturalist.org/observations/38570528</a>   |
| 1394 | Accipiter badius | Shikra | 2015/12/11 | 2 | 0 | 23.46182050 | 71.28742090 | <a href="https://www.inaturalist.org/observations/56202858">https://www.inaturalist.org/observations/56202858</a>   |
| 1395 | Accipiter badius | Shikra | 2018/9/3   | 1 | 0 | 23.46851306 | 87.30271817 | <a href="https://www.inaturalist.org/observations/55575004">https://www.inaturalist.org/observations/55575004</a>   |
| 1396 | Accipiter badius | Shikra | 2016/9/13  | 3 | 0 | 23.47283200 | 87.30087300 | <a href="http://www.inaturalist.org/observations/4099783">http://www.inaturalist.org/observations/4099783</a>       |
| 1397 | Accipiter badius | Shikra | 2015/1/13  | 3 | 0 | 23.47760400 | 87.30749300 | <a href="http://www.inaturalist.org/observations/1176404">http://www.inaturalist.org/observations/1176404</a>       |
| 1398 | Accipiter badius | Shikra | 2019/2/17  | 2 | 0 | 23.48032833 | 87.30491500 | <a href="https://www.inaturalist.org/observations/20418576">https://www.inaturalist.org/observations/20418576</a>   |
| 1399 | Accipiter badius | Shikra | 2014/10/1  | 2 | 0 | 23.48061600 | 87.30471300 | <a href="http://www.inaturalist.org/observations/904323">http://www.inaturalist.org/observations/904323</a>         |
| 1400 | Accipiter badius | Shikra | 2016/12/11 | 2 | 0 | 23.53850430 | 87.30720460 | <a href="https://www.inaturalist.org/observations/5601747">https://www.inaturalist.org/observations/5601747</a>     |
| 1401 | Accipiter badius | Shikra | 2017/12/22 | 1 | 0 | 23.56073000 | 87.30193500 | <a href="https://www.inaturalist.org/observations/102353751">https://www.inaturalist.org/observations/102353751</a> |
| 1402 | Accipiter badius | Shikra | 2021/1/10  | 3 | 0 | 23.58241636 | 72.13691209 | <a href="https://www.inaturalist.org/observations/67856804">https://www.inaturalist.org/observations/67856804</a>   |

|      |                  |        |            |   |   |             |             |                                                                                                                     |
|------|------------------|--------|------------|---|---|-------------|-------------|---------------------------------------------------------------------------------------------------------------------|
| 1403 | Accipiter badius | Shikra | 2020/10/22 | 1 | 0 | 23.64898979 | 86.92017663 | <a href="https://www.inaturalist.org/observations/123844010">https://www.inaturalist.org/observations/123844010</a> |
| 1404 | Accipiter badius | Shikra | 2015/2/22  | 1 | 0 | 23.68555030 | 81.02581680 | <a href="https://www.inaturalist.org/observations/69229870">https://www.inaturalist.org/observations/69229870</a>   |
| 1405 | Accipiter badius | Shikra | 2019/4/30  | 2 | 0 | 23.69944400 | 80.96194400 | <a href="https://www.inaturalist.org/observations/55674782">https://www.inaturalist.org/observations/55674782</a>   |
| 1406 | Accipiter badius | Shikra | 2019/4/28  | 1 | 0 | 23.69944400 | 80.96194400 | <a href="https://www.inaturalist.org/observations/55674787">https://www.inaturalist.org/observations/55674787</a>   |
| 1407 | Accipiter badius | Shikra | 2019/4/30  | 2 | 0 | 23.69944400 | 80.96194400 | <a href="https://www.inaturalist.org/observations/55674811">https://www.inaturalist.org/observations/55674811</a>   |
| 1408 | Accipiter badius | Shikra | 2019/4/30  | 2 | 0 | 23.69944400 | 80.96194400 | <a href="https://www.inaturalist.org/observations/55674813">https://www.inaturalist.org/observations/55674813</a>   |
| 1409 | Accipiter badius | Shikra | 2017/3/5   | 2 | 0 | 23.70379425 | 81.03232384 | <a href="https://www.inaturalist.org/observations/5864528">https://www.inaturalist.org/observations/5864528</a>     |
| 1410 | Accipiter badius | Shikra | 2020/4/12  | 2 | 0 | 23.70843991 | 92.71875529 | <a href="https://www.inaturalist.org/observations/42041490">https://www.inaturalist.org/observations/42041490</a>   |
| 1411 | Accipiter badius | Shikra | 2012/5/29  | 2 | 0 | 23.72221060 | 81.02327100 | <a href="https://www.inaturalist.org/observations/55153472">https://www.inaturalist.org/observations/55153472</a>   |
| 1412 | Accipiter badius | Shikra | 2018/4/25  | 1 | 0 | 23.72221762 | 81.02327105 | <a href="https://www.inaturalist.org/observations/37093082">https://www.inaturalist.org/observations/37093082</a>   |
| 1413 | Accipiter badius | Shikra | 2022/5/19  | 4 | 0 | 23.72381403 | 81.02348697 | <a href="https://www.inaturalist.org/observations/118790878">https://www.inaturalist.org/observations/118790878</a> |
| 1414 | Accipiter badius | Shikra | 2022/6/18  | 2 | 0 | 23.80861700 | 86.45599197 | <a href="https://www.inaturalist.org/observations/131997608">https://www.inaturalist.org/observations/131997608</a> |
| 1415 | Accipiter badius | Shikra | 2022/9/9   | 2 | 0 | 23.81446012 | 69.48267695 | <a href="https://www.inaturalist.org/observations/134720846">https://www.inaturalist.org/observations/134720846</a> |
| 1416 | Accipiter badius | Shikra | 2015/11/19 | 2 | 0 | 23.83084500 | 80.40722500 | <a href="http://www.inaturalist.org/observations/2404000">http://www.inaturalist.org/observations/2404000</a>       |
| 1417 | Accipiter badius | Shikra | 2020/10/3  | 3 | 0 | 23.85633734 | 77.94023875 | <a href="https://www.inaturalist.org/observations/64918284">https://www.inaturalist.org/observations/64918284</a>   |
| 1418 | Accipiter badius | Shikra | 2021/9/13  | 1 | 0 | 24.04542860 | 70.14558050 | <a href="https://www.inaturalist.org/observations/101936566">https://www.inaturalist.org/observations/101936566</a> |
| 1419 | Accipiter badius | Shikra | 2019/1/12  | 3 | 0 | 24.04542860 | 70.14558050 | <a href="https://www.inaturalist.org/observations/102182208">https://www.inaturalist.org/observations/102182208</a> |
| 1420 | Accipiter badius | Shikra | 2019/1/10  | 3 | 0 | 24.04542860 | 70.14558050 | <a href="https://www.inaturalist.org/observations/102182239">https://www.inaturalist.org/observations/102182239</a> |
| 1421 | Accipiter badius | Shikra | 2017/4/17  | 3 | 0 | 24.07827454 | 88.69165298 | <a href="https://www.inaturalist.org/observations/117837941">https://www.inaturalist.org/observations/117837941</a> |
| 1422 | Accipiter badius | Shikra | 2017/11/25 | 3 | 0 | 24.35267400 | 92.34481500 | <a href="https://www.inaturalist.org/observations/19818200">https://www.inaturalist.org/observations/19818200</a>   |
| 1423 | Accipiter badius | Shikra | 2019/2/6   | 2 | 0 | 24.35267420 | 92.34481540 | <a href="https://www.inaturalist.org/observations/20383605">https://www.inaturalist.org/observations/20383605</a>   |
| 1424 | Accipiter badius | Shikra | 2019/3/16  | 4 | 0 | 24.35267420 | 92.34481540 | <a href="https://www.inaturalist.org/observations/21508567">https://www.inaturalist.org/observations/21508567</a>   |
| 1425 | Accipiter badius | Shikra | 2019/4/18  | 2 | 0 | 24.35267420 | 92.34481540 | <a href="https://www.inaturalist.org/observations/23111123">https://www.inaturalist.org/observations/23111123</a>   |

|      |                  |        |            |   |   |             |             |                                                                                                                     |
|------|------------------|--------|------------|---|---|-------------|-------------|---------------------------------------------------------------------------------------------------------------------|
| 1426 | Accipiter badius | Shikra | 2020/4/13  | 1 | 0 | 24.35267784 | 92.34481394 | <a href="https://www.inaturalist.org/observations/44559947">https://www.inaturalist.org/observations/44559947</a>   |
| 1427 | Accipiter badius | Shikra | 2020/3/11  | 1 | 0 | 24.35267784 | 92.34481394 | <a href="https://www.inaturalist.org/observations/47486043">https://www.inaturalist.org/observations/47486043</a>   |
| 1428 | Accipiter badius | Shikra | 2018/1/27  | 1 | 0 | 24.35267784 | 92.34481394 | <a href="https://www.inaturalist.org/observations/48995764">https://www.inaturalist.org/observations/48995764</a>   |
| 1429 | Accipiter badius | Shikra | 2022/1/7   | 1 | 0 | 24.35267784 | 92.34481394 | <a href="https://www.inaturalist.org/observations/110643588">https://www.inaturalist.org/observations/110643588</a> |
| 1430 | Accipiter badius | Shikra | 2020/3/6   | 1 | 0 | 24.42813514 | 92.33542255 | <a href="https://www.inaturalist.org/observations/46825206">https://www.inaturalist.org/observations/46825206</a>   |
| 1431 | Accipiter badius | Shikra | 2012/4/17  | 3 | 0 | 24.43202000 | 92.33068900 | <a href="http://www.inaturalist.org/observations/405515">http://www.inaturalist.org/observations/405515</a>         |
| 1432 | Accipiter badius | Shikra | 2017/5/6   | 2 | 0 | 24.43202000 | 92.33068900 | <a href="https://www.inaturalist.org/observations/6586859">https://www.inaturalist.org/observations/6586859</a>     |
| 1433 | Accipiter badius | Shikra | 2010/9/9   | 1 | 0 | 24.43202000 | 92.33068900 | <a href="https://www.inaturalist.org/observations/103519403">https://www.inaturalist.org/observations/103519403</a> |
| 1434 | Accipiter badius | Shikra | 2021/12/21 | 3 | 0 | 24.45798040 | 73.67698844 | <a href="https://www.inaturalist.org/observations/103417370">https://www.inaturalist.org/observations/103417370</a> |
| 1435 | Accipiter badius | Shikra | 2016/1/24  | 3 | 0 | 24.46055600 | 92.28774200 | <a href="http://www.inaturalist.org/observations/4207363">http://www.inaturalist.org/observations/4207363</a>       |
| 1436 | Accipiter badius | Shikra | 2016/1/31  | 3 | 0 | 24.46555600 | 92.27400900 | <a href="http://www.inaturalist.org/observations/4173789">http://www.inaturalist.org/observations/4173789</a>       |
| 1437 | Accipiter badius | Shikra | 2016/8/14  | 2 | 0 | 24.47024300 | 92.30216200 | <a href="http://www.inaturalist.org/observations/4245600">http://www.inaturalist.org/observations/4245600</a>       |
| 1438 | Accipiter badius | Shikra | 2020/2/23  | 3 | 0 | 24.47504000 | 92.29597900 | <a href="https://www.inaturalist.org/observations/41096793">https://www.inaturalist.org/observations/41096793</a>   |
| 1439 | Accipiter badius | Shikra | 2018/1/21  | 2 | 0 | 24.48109000 | 92.29999500 | <a href="https://www.inaturalist.org/observations/9630642">https://www.inaturalist.org/observations/9630642</a>     |
| 1440 | Accipiter badius | Shikra | 2021/1/6   | 1 | 0 | 24.48294400 | 92.29071229 | <a href="https://www.inaturalist.org/observations/95625321">https://www.inaturalist.org/observations/95625321</a>   |
| 1441 | Accipiter badius | Shikra | 2020/2/4   | 1 | 0 | 24.49770100 | 92.31476800 | <a href="https://www.inaturalist.org/observations/61186762">https://www.inaturalist.org/observations/61186762</a>   |
| 1442 | Accipiter badius | Shikra | 2017/11/26 | 2 | 0 | 24.50061700 | 92.28797800 | <a href="https://www.inaturalist.org/observations/9482967">https://www.inaturalist.org/observations/9482967</a>     |
| 1443 | Accipiter badius | Shikra | 2021/1/6   | 2 | 0 | 24.50145000 | 92.29966100 | <a href="https://www.inaturalist.org/observations/69314268">https://www.inaturalist.org/observations/69314268</a>   |
| 1444 | Accipiter badius | Shikra | 2021/8/10  | 1 | 0 | 24.51733573 | 92.29742373 | <a href="https://www.inaturalist.org/observations/95631434">https://www.inaturalist.org/observations/95631434</a>   |
| 1445 | Accipiter badius | Shikra | 2012/11/25 | 2 | 0 | 24.53637132 | 71.70971357 | <a href="https://www.inaturalist.org/observations/32856783">https://www.inaturalist.org/observations/32856783</a>   |
| 1446 | Accipiter badius | Shikra | 2012/11/25 | 2 | 0 | 24.53637132 | 71.75365888 | <a href="https://www.inaturalist.org/observations/32856799">https://www.inaturalist.org/observations/32856799</a>   |
| 1447 | Accipiter badius | Shikra | 2016/11/23 | 1 | 0 | 24.56551536 | 79.90575023 | <a href="https://www.inaturalist.org/observations/33846398">https://www.inaturalist.org/observations/33846398</a>   |
| 1448 | Accipiter badius | Shikra | 2021/9/11  | 3 | 0 | 24.59283225 | 73.72672845 | <a href="https://www.inaturalist.org/observations/94715775">https://www.inaturalist.org/observations/94715775</a>   |

|      |                  |        |            |   |   |             |             |                                                                                                                     |
|------|------------------|--------|------------|---|---|-------------|-------------|---------------------------------------------------------------------------------------------------------------------|
| 1449 | Accipiter badius | Shikra | 2015/1/25  | 2 | 0 | 24.60054800 | 92.38136200 | <a href="http://www.inaturalist.org/observations/1203406">http://www.inaturalist.org/observations/1203406</a>       |
| 1450 | Accipiter badius | Shikra | 2015/6/21  | 2 | 0 | 24.60054800 | 92.38136200 | <a href="http://www.inaturalist.org/observations/1675336">http://www.inaturalist.org/observations/1675336</a>       |
| 1451 | Accipiter badius | Shikra | 2013/3/3   | 3 | 0 | 24.60728790 | 92.38344120 | <a href="http://www.inaturalist.org/observations/208430">http://www.inaturalist.org/observations/208430</a>         |
| 1452 | Accipiter badius | Shikra | 2013/11/17 | 3 | 0 | 24.60728800 | 92.38344100 | <a href="http://www.inaturalist.org/observations/460868">http://www.inaturalist.org/observations/460868</a>         |
| 1453 | Accipiter badius | Shikra | 2016/9/21  | 1 | 0 | 24.61660000 | 73.66680000 | <a href="https://www.inaturalist.org/observations/73924383">https://www.inaturalist.org/observations/73924383</a>   |
| 1454 | Accipiter badius | Shikra | 2019/8/15  | 1 | 0 | 24.63115828 | 73.99832960 | <a href="https://www.inaturalist.org/observations/90866934">https://www.inaturalist.org/observations/90866934</a>   |
| 1455 | Accipiter badius | Shikra | 2019/10/19 | 1 | 0 | 24.66488306 | 79.98560806 | <a href="https://www.inaturalist.org/observations/41025572">https://www.inaturalist.org/observations/41025572</a>   |
| 1456 | Accipiter badius | Shikra | 2021/11/14 | 2 | 0 | 24.69561900 | 78.41251500 | <a href="https://www.inaturalist.org/observations/102524886">https://www.inaturalist.org/observations/102524886</a> |
| 1457 | Accipiter badius | Shikra | 2021/11/15 | 2 | 0 | 24.69561900 | 78.41251500 | <a href="https://www.inaturalist.org/observations/102525479">https://www.inaturalist.org/observations/102525479</a> |
| 1458 | Accipiter badius | Shikra | 2021/5/6   | 2 | 0 | 24.79203197 | 73.04437297 | <a href="https://www.inaturalist.org/observations/78778704">https://www.inaturalist.org/observations/78778704</a>   |
| 1459 | Accipiter badius | Shikra | 2018/11/17 | 2 | 0 | 24.83184520 | 79.91985490 | <a href="https://www.inaturalist.org/observations/44704679">https://www.inaturalist.org/observations/44704679</a>   |
| 1460 | Accipiter badius | Shikra | 2018/11/17 | 1 | 0 | 24.83184520 | 79.91985490 | <a href="https://www.inaturalist.org/observations/44704693">https://www.inaturalist.org/observations/44704693</a>   |
| 1461 | Accipiter badius | Shikra | 2018/11/17 | 1 | 0 | 24.83184520 | 79.91985490 | <a href="https://www.inaturalist.org/observations/67007140">https://www.inaturalist.org/observations/67007140</a>   |
| 1462 | Accipiter badius | Shikra | 2018/11/17 | 1 | 0 | 24.83184520 | 79.91985490 | <a href="https://www.inaturalist.org/observations/67007304">https://www.inaturalist.org/observations/67007304</a>   |
| 1463 | Accipiter badius | Shikra | 2020/6/13  | 2 | 0 | 24.92312262 | 76.84470791 | <a href="https://www.inaturalist.org/observations/58508536">https://www.inaturalist.org/observations/58508536</a>   |
| 1464 | Accipiter badius | Shikra | 2019/6/13  | 3 | 0 | 25.00317904 | 85.42324383 | <a href="https://www.inaturalist.org/observations/27312066">https://www.inaturalist.org/observations/27312066</a>   |
| 1465 | Accipiter badius | Shikra | 2020/9/3   | 2 | 0 | 25.00858968 | 76.28836513 | <a href="https://www.inaturalist.org/observations/58509987">https://www.inaturalist.org/observations/58509987</a>   |
| 1466 | Accipiter badius | Shikra | 2021/11/13 | 2 | 0 | 25.01725730 | 85.41616420 | <a href="https://www.inaturalist.org/observations/103692279">https://www.inaturalist.org/observations/103692279</a> |
| 1467 | Accipiter badius | Shikra | 2020/2/7   | 1 | 0 | 25.04210330 | 72.84859390 | <a href="https://www.inaturalist.org/observations/54445081">https://www.inaturalist.org/observations/54445081</a>   |
| 1468 | Accipiter badius | Shikra | 2020/2/12  | 1 | 0 | 25.04210330 | 72.84859390 | <a href="https://www.inaturalist.org/observations/54445497">https://www.inaturalist.org/observations/54445497</a>   |
| 1469 | Accipiter badius | Shikra | 2020/11/14 | 3 | 0 | 25.11698756 | 73.14381167 | <a href="https://www.inaturalist.org/observations/65524041">https://www.inaturalist.org/observations/65524041</a>   |
| 1470 | Accipiter badius | Shikra | 2020/2/15  | 1 | 0 | 25.14954950 | 73.58370500 | <a href="https://www.inaturalist.org/observations/54446161">https://www.inaturalist.org/observations/54446161</a>   |
| 1471 | Accipiter badius | Shikra | 2017/12/30 | 2 | 0 | 25.15218911 | 85.45504309 | <a href="https://www.inaturalist.org/observations/21694651">https://www.inaturalist.org/observations/21694651</a>   |

|      |                  |        |            |   |   |             |             |                                                                                                                     |
|------|------------------|--------|------------|---|---|-------------|-------------|---------------------------------------------------------------------------------------------------------------------|
| 1472 | Accipiter badius | Shikra | 2020/9/1   | 2 | 0 | 25.24739368 | 77.15283036 | <a href="https://www.inaturalist.org/observations/58509238">https://www.inaturalist.org/observations/58509238</a>   |
| 1473 | Accipiter badius | Shikra | 2019/3/30  | 1 | 0 | 25.27468906 | 85.47099151 | <a href="https://www.inaturalist.org/observations/21775654">https://www.inaturalist.org/observations/21775654</a>   |
| 1474 | Accipiter badius | Shikra | 2006/1/14  | 2 | 0 | 25.28237500 | 82.97166200 | <a href="https://www.inaturalist.org/observations/9774040">https://www.inaturalist.org/observations/9774040</a>     |
| 1475 | Accipiter badius | Shikra | 2005/7/6   | 1 | 0 | 25.29406079 | 98.77155300 | <a href="https://www.inaturalist.org/observations/35747948">https://www.inaturalist.org/observations/35747948</a>   |
| 1476 | Accipiter badius | Shikra | 2021/5/25  | 1 | 0 | 25.29846944 | 82.95068056 | <a href="https://www.inaturalist.org/observations/94022879">https://www.inaturalist.org/observations/94022879</a>   |
| 1477 | Accipiter badius | Shikra | 2013/7/2   | 3 | 0 | 25.30000000 | 91.70000000 | <a href="http://www.inaturalist.org/observations/388676">http://www.inaturalist.org/observations/388676</a>         |
| 1478 | Accipiter badius | Shikra | 2020/12/25 | 1 | 0 | 25.31107588 | 91.90016672 | <a href="https://www.inaturalist.org/observations/105092646">https://www.inaturalist.org/observations/105092646</a> |
| 1479 | Accipiter badius | Shikra | 2020/6/8   | 1 | 0 | 25.34610410 | 74.65706010 | <a href="https://www.inaturalist.org/observations/48999324">https://www.inaturalist.org/observations/48999324</a>   |
| 1480 | Accipiter badius | Shikra | 2021/1/11  | 2 | 0 | 25.58169154 | 85.02637345 | <a href="https://www.inaturalist.org/observations/102867333">https://www.inaturalist.org/observations/102867333</a> |
| 1481 | Accipiter badius | Shikra | 2017/9/24  | 2 | 0 | 25.59500558 | 85.09077799 | <a href="https://www.inaturalist.org/observations/21602682">https://www.inaturalist.org/observations/21602682</a>   |
| 1482 | Accipiter badius | Shikra | 2021/12/3  | 2 | 0 | 25.60616725 | 85.88214800 | <a href="https://www.inaturalist.org/observations/106902982">https://www.inaturalist.org/observations/106902982</a> |
| 1483 | Accipiter badius | Shikra | 2021/8/17  | 2 | 0 | 25.60635954 | 85.88220801 | <a href="https://www.inaturalist.org/observations/91508144">https://www.inaturalist.org/observations/91508144</a>   |
| 1484 | Accipiter badius | Shikra | 2021/11/4  | 1 | 0 | 25.60668440 | 85.09065570 | <a href="https://www.inaturalist.org/observations/100222370">https://www.inaturalist.org/observations/100222370</a> |
| 1485 | Accipiter badius | Shikra | 2014/8/22  | 2 | 0 | 25.86510272 | 76.57246841 | <a href="https://www.inaturalist.org/observations/64934517">https://www.inaturalist.org/observations/64934517</a>   |
| 1486 | Accipiter badius | Shikra | 2012/2/5   | 3 | 0 | 25.98369190 | 76.36546262 | <a href="https://www.inaturalist.org/observations/18316895">https://www.inaturalist.org/observations/18316895</a>   |
| 1487 | Accipiter badius | Shikra | 2016/11/9  | 4 | 0 | 25.98377870 | 76.36504420 | <a href="http://www.inaturalist.org/observations/4683574">http://www.inaturalist.org/observations/4683574</a>       |
| 1488 | Accipiter badius | Shikra | 2020/2/11  | 2 | 0 | 26.01300797 | 76.50329674 | <a href="https://www.inaturalist.org/observations/61858051">https://www.inaturalist.org/observations/61858051</a>   |
| 1489 | Accipiter badius | Shikra | 2015/4/23  | 1 | 0 | 26.01732619 | 76.50257405 | <a href="https://www.inaturalist.org/observations/106609170">https://www.inaturalist.org/observations/106609170</a> |
| 1490 | Accipiter badius | Shikra | 2013/6/7   | 2 | 0 | 26.01732740 | 76.50257420 | <a href="https://www.inaturalist.org/observations/55273193">https://www.inaturalist.org/observations/55273193</a>   |
| 1491 | Accipiter badius | Shikra | 2014/5/29  | 2 | 0 | 26.01732740 | 76.50257420 | <a href="https://www.inaturalist.org/observations/55379520">https://www.inaturalist.org/observations/55379520</a>   |
| 1492 | Accipiter badius | Shikra | 2014/5/31  | 2 | 0 | 26.01732740 | 76.50257420 | <a href="https://www.inaturalist.org/observations/55380186">https://www.inaturalist.org/observations/55380186</a>   |
| 1493 | Accipiter badius | Shikra | 2014/5/31  | 2 | 0 | 26.01732740 | 76.50257420 | <a href="https://www.inaturalist.org/observations/55380193">https://www.inaturalist.org/observations/55380193</a>   |
| 1494 | Accipiter badius | Shikra | 2013/6/7   | 2 | 0 | 26.01732740 | 76.50257420 | <a href="https://www.inaturalist.org/observations/55788651">https://www.inaturalist.org/observations/55788651</a>   |



|      |                  |        |            |   |   |             |             |                                                                                                                     |
|------|------------------|--------|------------|---|---|-------------|-------------|---------------------------------------------------------------------------------------------------------------------|
| 1495 | Accipiter badius | Shikra | 2018/5/28  | 1 | 0 | 26.01732740 | 76.50257420 | <a href="https://www.inaturalist.org/observations/56208355">https://www.inaturalist.org/observations/56208355</a>   |
| 1496 | Accipiter badius | Shikra | 2020/2/14  | 2 | 0 | 26.01801543 | 76.35632285 | <a href="https://www.inaturalist.org/observations/62458039">https://www.inaturalist.org/observations/62458039</a>   |
| 1497 | Accipiter badius | Shikra | 2018/5/28  | 2 | 0 | 26.02126050 | 76.45208040 | <a href="https://www.inaturalist.org/observations/55588128">https://www.inaturalist.org/observations/55588128</a>   |
| 1498 | Accipiter badius | Shikra | 2016/11/5  | 3 | 0 | 26.04636667 | 76.46668500 | <a href="https://www.inaturalist.org/observations/9469375">https://www.inaturalist.org/observations/9469375</a>     |
| 1499 | Accipiter badius | Shikra | 2016/2/10  | 3 | 0 | 26.04769580 | 76.41961530 | <a href="https://www.inaturalist.org/observations/18293934">https://www.inaturalist.org/observations/18293934</a>   |
| 1500 | Accipiter badius | Shikra | 2021/1/19  | 2 | 0 | 26.17755919 | 91.76785804 | <a href="https://www.inaturalist.org/observations/69042924">https://www.inaturalist.org/observations/69042924</a>   |
| 1501 | Accipiter badius | Shikra | 2019/8/17  | 2 | 0 | 26.21658570 | 74.86825690 | <a href="https://www.inaturalist.org/observations/31340177">https://www.inaturalist.org/observations/31340177</a>   |
| 1502 | Accipiter badius | Shikra | 2021/8/13  | 1 | 0 | 26.22772167 | 72.96869667 | <a href="https://www.inaturalist.org/observations/90994176">https://www.inaturalist.org/observations/90994176</a>   |
| 1503 | Accipiter badius | Shikra | 2013/10/2  | 1 | 0 | 26.23894690 | 73.02430940 | <a href="https://www.inaturalist.org/observations/34005728">https://www.inaturalist.org/observations/34005728</a>   |
| 1504 | Accipiter badius | Shikra | 2014/11/12 | 1 | 0 | 26.23894690 | 73.02430940 | <a href="https://www.inaturalist.org/observations/95866835">https://www.inaturalist.org/observations/95866835</a>   |
| 1505 | Accipiter badius | Shikra | 2022/8/12  | 2 | 0 | 26.29839750 | 74.73542420 | <a href="https://www.inaturalist.org/observations/132148402">https://www.inaturalist.org/observations/132148402</a> |
| 1506 | Accipiter badius | Shikra | 2015/3/15  | 1 | 0 | 26.29897690 | 73.01614036 | <a href="https://www.inaturalist.org/observations/46321267">https://www.inaturalist.org/observations/46321267</a>   |
| 1507 | Accipiter badius | Shikra | 2011/10/29 | 0 | 0 | 26.29929871 | 73.01788381 | <a href="https://www.inaturalist.org/observations/63820041">https://www.inaturalist.org/observations/63820041</a>   |
| 1508 | Accipiter badius | Shikra | 2017/12/5  | 1 | 0 | 26.30453725 | 73.01955432 | <a href="https://www.inaturalist.org/observations/9145363">https://www.inaturalist.org/observations/9145363</a>     |
| 1509 | Accipiter badius | Shikra | 2013/9/15  | 3 | 0 | 26.35052900 | 76.63513200 | <a href="http://www.inaturalist.org/observations/399496">http://www.inaturalist.org/observations/399496</a>         |
| 1510 | Accipiter badius | Shikra | 2021/6/8   | 2 | 0 | 26.42683412 | 80.30337755 | <a href="https://www.inaturalist.org/observations/83369560">https://www.inaturalist.org/observations/83369560</a>   |
| 1511 | Accipiter badius | Shikra | 2019/8/17  | 2 | 0 | 26.45009294 | 74.63991635 | <a href="https://www.inaturalist.org/observations/101817667">https://www.inaturalist.org/observations/101817667</a> |
| 1512 | Accipiter badius | Shikra | 2020/8/10  | 1 | 0 | 26.47364616 | 73.11049652 | <a href="https://www.inaturalist.org/observations/56303847">https://www.inaturalist.org/observations/56303847</a>   |
| 1513 | Accipiter badius | Shikra | 2021/3/15  | 0 | 0 | 26.48989537 | 80.28211836 | <a href="https://www.inaturalist.org/observations/135228857">https://www.inaturalist.org/observations/135228857</a> |
| 1514 | Accipiter badius | Shikra | 2011/10/24 | 2 | 0 | 26.49009067 | 74.55142792 | <a href="https://www.inaturalist.org/observations/66150106">https://www.inaturalist.org/observations/66150106</a>   |
| 1515 | Accipiter badius | Shikra | 2002/2/21  | 1 | 0 | 26.57753100 | 93.17112200 | <a href="https://www.inaturalist.org/observations/103854131">https://www.inaturalist.org/observations/103854131</a> |
| 1516 | Accipiter badius | Shikra | 2020/10/11 | 2 | 0 | 26.60681522 | 73.68924960 | <a href="https://www.inaturalist.org/observations/63483445">https://www.inaturalist.org/observations/63483445</a>   |
| 1517 | Accipiter badius | Shikra | 2020/8/13  | 1 | 0 | 26.60690275 | 73.68927207 | <a href="https://www.inaturalist.org/observations/56496125">https://www.inaturalist.org/observations/56496125</a>   |

|      |                  |        |            |   |   |             |             |                                                                                                                     |
|------|------------------|--------|------------|---|---|-------------|-------------|---------------------------------------------------------------------------------------------------------------------|
| 1518 | Accipiter badius | Shikra | 2020/3/8   | 2 | 0 | 26.61838537 | 80.65322503 | <a href="https://www.inaturalist.org/observations/69850526">https://www.inaturalist.org/observations/69850526</a>   |
| 1519 | Accipiter badius | Shikra | 2022/4/21  | 3 | 0 | 26.65942270 | 91.00113110 | <a href="https://www.inaturalist.org/observations/123960509">https://www.inaturalist.org/observations/123960509</a> |
| 1520 | Accipiter badius | Shikra | 2022/4/21  | 3 | 0 | 26.65942270 | 91.00113110 | <a href="https://www.inaturalist.org/observations/123960511">https://www.inaturalist.org/observations/123960511</a> |
| 1521 | Accipiter badius | Shikra | 2015/5/2   | 3 | 0 | 26.74599040 | 91.02032390 | <a href="https://www.inaturalist.org/observations/5954460">https://www.inaturalist.org/observations/5954460</a>     |
| 1522 | Accipiter badius | Shikra | 2017/4/11  | 3 | 0 | 26.76112800 | 89.58313200 | <a href="https://www.inaturalist.org/observations/5711290">https://www.inaturalist.org/observations/5711290</a>     |
| 1523 | Accipiter badius | Shikra | 2021/11/18 | 1 | 0 | 26.80554000 | 81.02101700 | <a href="https://www.inaturalist.org/observations/101691738">https://www.inaturalist.org/observations/101691738</a> |
| 1524 | Accipiter badius | Shikra | 2017/12/21 | 2 | 0 | 26.80717974 | 94.17600463 | <a href="https://www.inaturalist.org/observations/45854450">https://www.inaturalist.org/observations/45854450</a>   |
| 1525 | Accipiter badius | Shikra | 2020/1/13  | 1 | 0 | 26.83045270 | 70.50715650 | <a href="https://www.inaturalist.org/observations/37816066">https://www.inaturalist.org/observations/37816066</a>   |
| 1526 | Accipiter badius | Shikra | 2018/7/22  | 1 | 0 | 26.85382709 | 91.86936968 | <a href="https://www.inaturalist.org/observations/57043613">https://www.inaturalist.org/observations/57043613</a>   |
| 1527 | Accipiter badius | Shikra | 2022/8/14  | 3 | 0 | 26.85491140 | 75.83284110 | <a href="https://www.inaturalist.org/observations/132146911">https://www.inaturalist.org/observations/132146911</a> |
| 1528 | Accipiter badius | Shikra | 2022/8/14  | 4 | 0 | 26.85491140 | 75.83284110 | <a href="https://www.inaturalist.org/observations/132146924">https://www.inaturalist.org/observations/132146924</a> |
| 1529 | Accipiter badius | Shikra | 2017/10/16 | 1 | 0 | 26.85503840 | 75.83284660 | <a href="https://www.inaturalist.org/observations/45730704">https://www.inaturalist.org/observations/45730704</a>   |
| 1530 | Accipiter badius | Shikra | 2021/12/29 | 1 | 0 | 26.85540229 | 75.84251509 | <a href="https://www.inaturalist.org/observations/104653039">https://www.inaturalist.org/observations/104653039</a> |
| 1531 | Accipiter badius | Shikra | 2022/1/24  | 1 | 0 | 26.85552014 | 75.84058440 | <a href="https://www.inaturalist.org/observations/106661422">https://www.inaturalist.org/observations/106661422</a> |
| 1532 | Accipiter badius | Shikra | 2021/5/30  | 1 | 0 | 26.85562741 | 80.99721439 | <a href="https://www.inaturalist.org/observations/81811436">https://www.inaturalist.org/observations/81811436</a>   |
| 1533 | Accipiter badius | Shikra | 2017/12/9  | 1 | 0 | 26.85567230 | 75.83672050 | <a href="https://www.inaturalist.org/observations/56417049">https://www.inaturalist.org/observations/56417049</a>   |
| 1534 | Accipiter badius | Shikra | 2019/3/10  | 2 | 0 | 26.86717779 | 80.90665966 | <a href="https://www.inaturalist.org/observations/47993733">https://www.inaturalist.org/observations/47993733</a>   |
| 1535 | Accipiter badius | Shikra | 2019/11/21 | 1 | 0 | 26.86765291 | 75.83758807 | <a href="https://www.inaturalist.org/observations/36217536">https://www.inaturalist.org/observations/36217536</a>   |
| 1536 | Accipiter badius | Shikra | 2022/3/30  | 1 | 0 | 26.87081588 | 78.56389802 | <a href="https://www.inaturalist.org/observations/137177902">https://www.inaturalist.org/observations/137177902</a> |
| 1537 | Accipiter badius | Shikra | 2013/12/23 | 3 | 0 | 26.87243972 | 78.56495156 | <a href="https://www.inaturalist.org/observations/11428251">https://www.inaturalist.org/observations/11428251</a>   |
| 1538 | Accipiter badius | Shikra | 2017/4/15  | 2 | 0 | 26.87703720 | 75.81594930 | <a href="https://www.inaturalist.org/observations/55575612">https://www.inaturalist.org/observations/55575612</a>   |
| 1539 | Accipiter badius | Shikra | 2022/8/21  | 3 | 0 | 26.88404410 | 80.92900370 | <a href="https://www.inaturalist.org/observations/132521947">https://www.inaturalist.org/observations/132521947</a> |
| 1540 | Accipiter badius | Shikra | 2022/7/24  | 2 | 0 | 26.89751500 | 75.81376200 | <a href="https://www.inaturalist.org/observations/130323137">https://www.inaturalist.org/observations/130323137</a> |

|      |                  |        |            |   |   |             |             |                                                                                                                     |
|------|------------------|--------|------------|---|---|-------------|-------------|---------------------------------------------------------------------------------------------------------------------|
| 1541 | Accipiter badius | Shikra | 2018/9/21  | 4 | 0 | 26.90867601 | 75.82873777 | <a href="https://www.inaturalist.org/observations/17523413">https://www.inaturalist.org/observations/17523413</a>   |
| 1542 | Accipiter badius | Shikra | 2022/7/18  | 0 | 0 | 26.91686047 | 75.86473536 | <a href="https://www.inaturalist.org/observations/128823623">https://www.inaturalist.org/observations/128823623</a> |
| 1543 | Accipiter badius | Shikra | 2013/12/24 | 1 | 0 | 26.92916021 | 75.79040252 | <a href="https://www.inaturalist.org/observations/66844483">https://www.inaturalist.org/observations/66844483</a>   |
| 1544 | Accipiter badius | Shikra | 2013/4/18  | 3 | 0 | 26.93064051 | 92.84683251 | <a href="https://www.inaturalist.org/observations/7458824">https://www.inaturalist.org/observations/7458824</a>     |
| 1545 | Accipiter badius | Shikra | 2020/2/25  | 2 | 0 | 26.95396740 | 80.92356918 | <a href="https://www.inaturalist.org/observations/47944996">https://www.inaturalist.org/observations/47944996</a>   |
| 1546 | Accipiter badius | Shikra | 2020/2/26  | 2 | 0 | 26.95396740 | 80.92356918 | <a href="https://www.inaturalist.org/observations/47945017">https://www.inaturalist.org/observations/47945017</a>   |
| 1547 | Accipiter badius | Shikra | 2012/2/24  | 2 | 0 | 27.01951613 | 77.38174418 | <a href="https://www.inaturalist.org/observations/69201665">https://www.inaturalist.org/observations/69201665</a>   |
| 1548 | Accipiter badius | Shikra | 2017/6/4   | 1 | 0 | 27.06056700 | 88.25646080 | <a href="https://www.inaturalist.org/observations/86835501">https://www.inaturalist.org/observations/86835501</a>   |
| 1549 | Accipiter badius | Shikra | 2019/3/11  | 5 | 0 | 27.15692000 | 77.52365100 | <a href="https://www.inaturalist.org/observations/23054019">https://www.inaturalist.org/observations/23054019</a>   |
| 1550 | Accipiter badius | Shikra | 2010/8/30  | 2 | 0 | 27.15692000 | 77.52365100 | <a href="https://www.inaturalist.org/observations/42171326">https://www.inaturalist.org/observations/42171326</a>   |
| 1551 | Accipiter badius | Shikra | 2010/8/31  | 2 | 0 | 27.15692000 | 77.52365100 | <a href="https://www.inaturalist.org/observations/42171418">https://www.inaturalist.org/observations/42171418</a>   |
| 1552 | Accipiter badius | Shikra | 2010/8/31  | 4 | 0 | 27.15692000 | 77.52365100 | <a href="https://www.inaturalist.org/observations/42171428">https://www.inaturalist.org/observations/42171428</a>   |
| 1553 | Accipiter badius | Shikra | 2019/3/11  | 2 | 0 | 27.15692000 | 77.52365100 | <a href="https://www.inaturalist.org/observations/42552731">https://www.inaturalist.org/observations/42552731</a>   |
| 1554 | Accipiter badius | Shikra | 2017/2/5   | 3 | 0 | 27.15692463 | 77.52365112 | <a href="https://www.inaturalist.org/observations/61103898">https://www.inaturalist.org/observations/61103898</a>   |
| 1555 | Accipiter badius | Shikra | 2018/6/13  | 3 | 0 | 27.15715756 | 73.50157717 | <a href="https://www.inaturalist.org/observations/13395147">https://www.inaturalist.org/observations/13395147</a>   |
| 1556 | Accipiter badius | Shikra | 2018/2/22  | 1 | 0 | 27.15925594 | 77.52319984 | <a href="https://www.inaturalist.org/observations/89168657">https://www.inaturalist.org/observations/89168657</a>   |
| 1557 | Accipiter badius | Shikra | 2011/1/26  | 3 | 0 | 27.15926900 | 77.52319990 | <a href="https://www.inaturalist.org/observations/24371106">https://www.inaturalist.org/observations/24371106</a>   |
| 1558 | Accipiter badius | Shikra | 2015/2/20  | 3 | 0 | 27.15926900 | 77.52319990 | <a href="https://www.inaturalist.org/observations/43872539">https://www.inaturalist.org/observations/43872539</a>   |
| 1559 | Accipiter badius | Shikra | 2018/7/17  | 2 | 0 | 27.15926900 | 77.52319990 | <a href="https://www.inaturalist.org/observations/46907793">https://www.inaturalist.org/observations/46907793</a>   |
| 1560 | Accipiter badius | Shikra | 2008/12/2  | 2 | 0 | 27.15926900 | 77.52319990 | <a href="https://www.inaturalist.org/observations/55245747">https://www.inaturalist.org/observations/55245747</a>   |
| 1561 | Accipiter badius | Shikra | 2008/12/2  | 2 | 0 | 27.15926900 | 77.52319990 | <a href="https://www.inaturalist.org/observations/55245749">https://www.inaturalist.org/observations/55245749</a>   |
| 1562 | Accipiter badius | Shikra | 2021/2/11  | 1 | 0 | 27.15926900 | 77.52319990 | <a href="https://www.inaturalist.org/observations/70137881">https://www.inaturalist.org/observations/70137881</a>   |
| 1563 | Accipiter badius | Shikra | 2019/11/24 | 2 | 0 | 27.15951511 | 78.06039621 | <a href="https://www.inaturalist.org/observations/36549839">https://www.inaturalist.org/observations/36549839</a>   |

|      |                  |        |            |   |   |             |             |                                                                                                                     |
|------|------------------|--------|------------|---|---|-------------|-------------|---------------------------------------------------------------------------------------------------------------------|
| 1564 | Accipiter badius | Shikra | 2012/1/8   | 3 | 0 | 27.15951843 | 77.52233460 | <a href="https://www.inaturalist.org/observations/121110568">https://www.inaturalist.org/observations/121110568</a> |
| 1565 | Accipiter badius | Shikra | 2011/12/16 | 2 | 0 | 27.16505462 | 77.52059240 | <a href="https://www.inaturalist.org/observations/21690366">https://www.inaturalist.org/observations/21690366</a>   |
| 1566 | Accipiter badius | Shikra | 2013/12/28 | 2 | 0 | 27.17200882 | 77.51154880 | <a href="https://www.inaturalist.org/observations/67050617">https://www.inaturalist.org/observations/67050617</a>   |
| 1567 | Accipiter badius | Shikra | 2016/10/19 | 4 | 0 | 27.17495020 | 77.52025152 | <a href="https://www.inaturalist.org/observations/20027592">https://www.inaturalist.org/observations/20027592</a>   |
| 1568 | Accipiter badius | Shikra | 2020/3/17  | 2 | 0 | 27.17501167 | 77.52001000 | <a href="https://www.inaturalist.org/observations/48646169">https://www.inaturalist.org/observations/48646169</a>   |
| 1569 | Accipiter badius | Shikra | 2014/5/24  | 3 | 0 | 27.17504506 | 78.04221830 | <a href="https://www.inaturalist.org/observations/69290610">https://www.inaturalist.org/observations/69290610</a>   |
| 1570 | Accipiter badius | Shikra | 2017/2/28  | 3 | 0 | 27.17994950 | 78.04168790 | <a href="https://www.inaturalist.org/observations/5383629">https://www.inaturalist.org/observations/5383629</a>     |
| 1571 | Accipiter badius | Shikra | 2020/9/23  | 2 | 0 | 27.18203333 | 77.51637167 | <a href="https://www.inaturalist.org/observations/60529518">https://www.inaturalist.org/observations/60529518</a>   |
| 1572 | Accipiter badius | Shikra | 2011/2/5   | 3 | 0 | 27.18447007 | 77.50833823 | <a href="https://www.inaturalist.org/observations/37272360">https://www.inaturalist.org/observations/37272360</a>   |
| 1573 | Accipiter badius | Shikra | 2021/11/27 | 2 | 0 | 27.19834667 | 77.50913833 | <a href="https://www.inaturalist.org/observations/102695310">https://www.inaturalist.org/observations/102695310</a> |
| 1574 | Accipiter badius | Shikra | 2015/11/23 | 3 | 0 | 27.20161188 | 77.50727895 | <a href="https://www.inaturalist.org/observations/104523590">https://www.inaturalist.org/observations/104523590</a> |
| 1575 | Accipiter badius | Shikra | 2015/2/7   | 3 | 0 | 27.21731000 | 77.49009000 | <a href="http://www.inaturalist.org/observations/1657040">http://www.inaturalist.org/observations/1657040</a>       |
| 1576 | Accipiter badius | Shikra | 2018/4/5   | 2 | 0 | 27.57365280 | 95.39148744 | <a href="https://www.inaturalist.org/observations/60104655">https://www.inaturalist.org/observations/60104655</a>   |
| 1577 | Accipiter badius | Shikra | 2021/1/12  | 1 | 0 | 27.57999832 | 95.37009459 | <a href="https://www.inaturalist.org/observations/69829096">https://www.inaturalist.org/observations/69829096</a>   |
| 1578 | Accipiter badius | Shikra | 2021/7/19  | 0 | 0 | 27.79825814 | 74.43497613 | <a href="https://www.inaturalist.org/observations/89200380">https://www.inaturalist.org/observations/89200380</a>   |
| 1579 | Accipiter badius | Shikra | 2021/7/14  | 1 | 0 | 27.80237672 | 74.45054602 | <a href="https://www.inaturalist.org/observations/87967621">https://www.inaturalist.org/observations/87967621</a>   |
| 1580 | Accipiter badius | Shikra | 2016/12/16 | 2 | 0 | 27.81493695 | 74.46010049 | <a href="https://www.inaturalist.org/observations/65582300">https://www.inaturalist.org/observations/65582300</a>   |
| 1581 | Accipiter badius | Shikra | 2019/8/1   | 3 | 0 | 28.20069934 | 80.27360794 | <a href="https://www.inaturalist.org/observations/29964789">https://www.inaturalist.org/observations/29964789</a>   |
| 1582 | Accipiter badius | Shikra | 2018/4/29  | 1 | 0 | 28.38287510 | 80.40134720 | <a href="https://www.inaturalist.org/observations/56201793">https://www.inaturalist.org/observations/56201793</a>   |
| 1583 | Accipiter badius | Shikra | 2019/6/29  | 1 | 0 | 28.39468930 | 77.31795687 | <a href="https://www.inaturalist.org/observations/47944465">https://www.inaturalist.org/observations/47944465</a>   |
| 1584 | Accipiter badius | Shikra | 2022/1/10  | 4 | 0 | 28.40518345 | 77.58174415 | <a href="https://www.inaturalist.org/observations/104699914">https://www.inaturalist.org/observations/104699914</a> |
| 1585 | Accipiter badius | Shikra | 2020/12/3  | 1 | 0 | 28.44611167 | 77.53099167 | <a href="https://www.inaturalist.org/observations/66720952">https://www.inaturalist.org/observations/66720952</a>   |
| 1586 | Accipiter badius | Shikra | 2021/8/3   | 1 | 0 | 28.45229654 | 77.50388901 | <a href="https://www.inaturalist.org/observations/89777219">https://www.inaturalist.org/observations/89777219</a>   |

|      |                  |        |            |   |   |             |             |                                                                                                                     |
|------|------------------|--------|------------|---|---|-------------|-------------|---------------------------------------------------------------------------------------------------------------------|
| 1587 | Accipiter badius | Shikra | 2021/8/8   | 1 | 0 | 28.45229654 | 77.50388901 | <a href="https://www.inaturalist.org/observations/90369026">https://www.inaturalist.org/observations/90369026</a>   |
| 1588 | Accipiter badius | Shikra | 2021/7/29  | 1 | 0 | 28.45229664 | 77.50388894 | <a href="https://www.inaturalist.org/observations/89064812">https://www.inaturalist.org/observations/89064812</a>   |
| 1589 | Accipiter badius | Shikra | 2018/10/11 | 3 | 0 | 28.46712183 | 76.89127173 | <a href="https://www.inaturalist.org/observations/17431775">https://www.inaturalist.org/observations/17431775</a>   |
| 1590 | Accipiter badius | Shikra | 2017/1/16  | 2 | 0 | 28.46855500 | 77.29075100 | <a href="https://www.inaturalist.org/observations/4968746">https://www.inaturalist.org/observations/4968746</a>     |
| 1591 | Accipiter badius | Shikra | 2017/4/30  | 3 | 0 | 28.46857300 | 77.29074200 | <a href="https://www.inaturalist.org/observations/6020650">https://www.inaturalist.org/observations/6020650</a>     |
| 1592 | Accipiter badius | Shikra | 2016/10/23 | 2 | 0 | 28.46875428 | 77.29072954 | <a href="http://www.inaturalist.org/observations/4423520">http://www.inaturalist.org/observations/4423520</a>       |
| 1593 | Accipiter badius | Shikra | 2022/1/15  | 2 | 0 | 28.47294695 | 77.58485464 | <a href="https://www.inaturalist.org/observations/105977997">https://www.inaturalist.org/observations/105977997</a> |
| 1594 | Accipiter badius | Shikra | 2018/11/18 | 2 | 0 | 28.47344948 | 77.38020357 | <a href="https://www.inaturalist.org/observations/18535451">https://www.inaturalist.org/observations/18535451</a>   |
| 1595 | Accipiter badius | Shikra | 2016/11/6  | 1 | 0 | 28.47351400 | 77.28978200 | <a href="http://www.inaturalist.org/observations/4509185">http://www.inaturalist.org/observations/4509185</a>       |
| 1596 | Accipiter badius | Shikra | 2021/2/9   | 1 | 0 | 28.48219251 | 77.11162403 | <a href="https://www.inaturalist.org/observations/69616588">https://www.inaturalist.org/observations/69616588</a>   |
| 1597 | Accipiter badius | Shikra | 2018/11/24 | 3 | 0 | 28.48277750 | 77.10982050 | <a href="https://www.inaturalist.org/observations/55904447">https://www.inaturalist.org/observations/55904447</a>   |
| 1598 | Accipiter badius | Shikra | 2019/2/23  | 2 | 0 | 28.48444581 | 77.30327017 | <a href="https://www.inaturalist.org/observations/20718808">https://www.inaturalist.org/observations/20718808</a>   |
| 1599 | Accipiter badius | Shikra | 2020/4/30  | 2 | 0 | 28.51616931 | 77.38643602 | <a href="https://www.inaturalist.org/observations/62109214">https://www.inaturalist.org/observations/62109214</a>   |
| 1600 | Accipiter badius | Shikra | 2017/1/31  | 2 | 0 | 28.53602810 | 77.10190200 | <a href="https://www.inaturalist.org/observations/5152673">https://www.inaturalist.org/observations/5152673</a>     |
| 1601 | Accipiter badius | Shikra | 2019/10/12 | 2 | 0 | 28.55144250 | 77.31852150 | <a href="https://www.inaturalist.org/observations/108285312">https://www.inaturalist.org/observations/108285312</a> |
| 1602 | Accipiter badius | Shikra | 2022/6/8   | 3 | 0 | 28.55150833 | 77.24662000 | <a href="https://www.inaturalist.org/observations/120900413">https://www.inaturalist.org/observations/120900413</a> |
| 1603 | Accipiter badius | Shikra | 2010/1/9   | 1 | 0 | 28.55460099 | 77.31779594 | <a href="https://www.inaturalist.org/observations/31582623">https://www.inaturalist.org/observations/31582623</a>   |
| 1604 | Accipiter badius | Shikra | 2010/6/4   | 4 | 0 | 28.55578290 | 77.30705740 | <a href="http://www.inaturalist.org/observations/19029">http://www.inaturalist.org/observations/19029</a>           |
| 1605 | Accipiter badius | Shikra | 2019/3/15  | 3 | 0 | 28.55679893 | 77.21408844 | <a href="https://www.inaturalist.org/observations/21253667">https://www.inaturalist.org/observations/21253667</a>   |
| 1606 | Accipiter badius | Shikra | 2009/7/15  | 3 | 0 | 28.55720980 | 77.21278910 | <a href="https://www.inaturalist.org/observations/31584657">https://www.inaturalist.org/observations/31584657</a>   |
| 1607 | Accipiter badius | Shikra | 2020/10/12 | 2 | 0 | 28.56411484 | 77.22138790 | <a href="https://www.inaturalist.org/observations/62386239">https://www.inaturalist.org/observations/62386239</a>   |
| 1608 | Accipiter badius | Shikra | 2020/5/15  | 2 | 0 | 28.56441500 | 77.36506000 | <a href="https://www.inaturalist.org/observations/51988154">https://www.inaturalist.org/observations/51988154</a>   |
| 1609 | Accipiter badius | Shikra | 2020/5/15  | 2 | 0 | 28.56441500 | 77.36506000 | <a href="https://www.inaturalist.org/observations/51988233">https://www.inaturalist.org/observations/51988233</a>   |

|      |                  |        |            |   |   |             |             |                                                                                                                     |
|------|------------------|--------|------------|---|---|-------------|-------------|---------------------------------------------------------------------------------------------------------------------|
| 1610 | Accipiter badius | Shikra | 2012/10/29 | 2 | 0 | 28.56512875 | 77.30727196 | <a href="https://www.inaturalist.org/observations/8997707">https://www.inaturalist.org/observations/8997707</a>     |
| 1611 | Accipiter badius | Shikra | 2007/11/30 | 0 | 0 | 28.59309590 | 77.21967940 | <a href="https://www.inaturalist.org/observations/103818419">https://www.inaturalist.org/observations/103818419</a> |
| 1612 | Accipiter badius | Shikra | 2013/1/25  | 3 | 0 | 28.59510641 | 77.11692598 | <a href="https://www.inaturalist.org/observations/87680841">https://www.inaturalist.org/observations/87680841</a>   |
| 1613 | Accipiter badius | Shikra | 2021/10/24 | 1 | 0 | 28.61349592 | 77.33832523 | <a href="https://www.inaturalist.org/observations/99189842">https://www.inaturalist.org/observations/99189842</a>   |
| 1614 | Accipiter badius | Shikra | 2020/4/17  | 2 | 0 | 28.63625650 | 77.07911080 | <a href="https://www.inaturalist.org/observations/48092928">https://www.inaturalist.org/observations/48092928</a>   |
| 1615 | Accipiter badius | Shikra | 2020/12/24 | 1 | 0 | 28.63864380 | 77.07206000 | <a href="https://www.inaturalist.org/observations/66999274">https://www.inaturalist.org/observations/66999274</a>   |
| 1616 | Accipiter badius | Shikra | 2021/8/23  | 1 | 0 | 28.68487613 | 77.21608490 | <a href="https://www.inaturalist.org/observations/92442553">https://www.inaturalist.org/observations/92442553</a>   |
| 1617 | Accipiter badius | Shikra | 2019/1/2   | 3 | 0 | 28.68627380 | 77.22178310 | <a href="https://www.inaturalist.org/observations/19395994">https://www.inaturalist.org/observations/19395994</a>   |
| 1618 | Accipiter badius | Shikra | 2022/5/24  | 1 | 0 | 28.68702300 | 77.31772460 | <a href="https://www.inaturalist.org/observations/126851648">https://www.inaturalist.org/observations/126851648</a> |
| 1619 | Accipiter badius | Shikra | 2021/11/13 | 0 | 0 | 28.69004075 | 77.31334969 | <a href="https://www.inaturalist.org/observations/100986450">https://www.inaturalist.org/observations/100986450</a> |
| 1620 | Accipiter badius | Shikra | 2018/12/5  | 3 | 0 | 28.70919530 | 77.20150750 | <a href="https://www.inaturalist.org/observations/18943706">https://www.inaturalist.org/observations/18943706</a>   |
| 1621 | Accipiter badius | Shikra | 2020/11/18 | 2 | 0 | 28.71745597 | 77.05882597 | <a href="https://www.inaturalist.org/observations/65200536">https://www.inaturalist.org/observations/65200536</a>   |
| 1622 | Accipiter badius | Shikra | 2018/7/7   | 3 | 0 | 28.73417610 | 77.21466630 | <a href="https://www.inaturalist.org/observations/14121387">https://www.inaturalist.org/observations/14121387</a>   |
| 1623 | Accipiter badius | Shikra | 2022/8/11  | 4 | 0 | 28.87041064 | 77.29142490 | <a href="https://www.inaturalist.org/observations/134338854">https://www.inaturalist.org/observations/134338854</a> |
| 1624 | Accipiter badius | Shikra | 2020/4/20  | 1 | 0 | 28.89495333 | 76.57997167 | <a href="https://www.inaturalist.org/observations/44108414">https://www.inaturalist.org/observations/44108414</a>   |
| 1625 | Accipiter badius | Shikra | 2021/11/30 | 3 | 0 | 28.96407146 | 79.80427679 | <a href="https://www.inaturalist.org/observations/102229547">https://www.inaturalist.org/observations/102229547</a> |
| 1626 | Accipiter badius | Shikra | 2022/9/18  | 1 | 0 | 28.96410556 | 79.80416111 | <a href="https://www.inaturalist.org/observations/135501633">https://www.inaturalist.org/observations/135501633</a> |
| 1627 | Accipiter badius | Shikra | 2019/10/17 | 1 | 0 | 29.02286260 | 79.48794120 | <a href="https://www.inaturalist.org/observations/48679190">https://www.inaturalist.org/observations/48679190</a>   |
| 1628 | Accipiter badius | Shikra | 2020/7/1   | 2 | 0 | 29.02286260 | 79.48794120 | <a href="https://www.inaturalist.org/observations/52180497">https://www.inaturalist.org/observations/52180497</a>   |
| 1629 | Accipiter badius | Shikra | 2021/4/10  | 1 | 0 | 29.14033298 | 79.51885957 | <a href="https://www.inaturalist.org/observations/73571660">https://www.inaturalist.org/observations/73571660</a>   |
| 1630 | Accipiter badius | Shikra | 2021/8/29  | 0 | 0 | 29.21444246 | 79.13462790 | <a href="https://www.inaturalist.org/observations/96567395">https://www.inaturalist.org/observations/96567395</a>   |
| 1631 | Accipiter badius | Shikra | 2021/9/12  | 1 | 0 | 29.23304458 | 79.04915135 | <a href="https://www.inaturalist.org/observations/96682442">https://www.inaturalist.org/observations/96682442</a>   |
| 1632 | Accipiter badius | Shikra | 2021/1/20  | 2 | 0 | 29.30010296 | 79.54145115 | <a href="https://www.inaturalist.org/observations/68354990">https://www.inaturalist.org/observations/68354990</a>   |

|      |                  |        |            |   |   |             |             |                                                                                                                     |
|------|------------------|--------|------------|---|---|-------------|-------------|---------------------------------------------------------------------------------------------------------------------|
| 1633 | Accipiter badius | Shikra | 2021/5/5   | 1 | 0 | 29.41012020 | 79.00727550 | <a href="https://www.inaturalist.org/observations/79508069">https://www.inaturalist.org/observations/79508069</a>   |
| 1634 | Accipiter badius | Shikra | 2021/5/5   | 1 | 0 | 29.41012020 | 79.00727550 | <a href="https://www.inaturalist.org/observations/79508070">https://www.inaturalist.org/observations/79508070</a>   |
| 1635 | Accipiter badius | Shikra | 2021/5/5   | 1 | 0 | 29.41560610 | 78.99386200 | <a href="https://www.inaturalist.org/observations/80623545">https://www.inaturalist.org/observations/80623545</a>   |
| 1636 | Accipiter badius | Shikra | 2022/7/4   | 3 | 0 | 29.43227333 | 78.95109500 | <a href="https://www.inaturalist.org/observations/133178308">https://www.inaturalist.org/observations/133178308</a> |
| 1637 | Accipiter badius | Shikra | 2022/4/5   | 3 | 0 | 29.46346668 | 79.64484199 | <a href="https://www.inaturalist.org/observations/110495407">https://www.inaturalist.org/observations/110495407</a> |
| 1638 | Accipiter badius | Shikra | 2021/6/28  | 1 | 0 | 29.79529638 | 79.53347594 | <a href="https://www.inaturalist.org/observations/104314922">https://www.inaturalist.org/observations/104314922</a> |
| 1639 | Accipiter badius | Shikra | 2021/5/13  | 1 | 0 | 29.79560072 | 79.53368448 | <a href="https://www.inaturalist.org/observations/104549686">https://www.inaturalist.org/observations/104549686</a> |
| 1640 | Accipiter badius | Shikra | 2021/5/29  | 1 | 0 | 29.84887036 | 79.51970614 | <a href="https://www.inaturalist.org/observations/80871272">https://www.inaturalist.org/observations/80871272</a>   |
| 1641 | Accipiter badius | Shikra | 2019/10/28 | 1 | 0 | 29.91536900 | 78.09545520 | <a href="https://www.inaturalist.org/observations/35041350">https://www.inaturalist.org/observations/35041350</a>   |
| 1642 | Accipiter badius | Shikra | 2019/10/28 | 2 | 0 | 29.91536900 | 78.09545520 | <a href="https://www.inaturalist.org/observations/67242311">https://www.inaturalist.org/observations/67242311</a>   |
| 1643 | Accipiter badius | Shikra | 2021/10/26 | 3 | 0 | 29.91538060 | 78.09690760 | <a href="https://www.inaturalist.org/observations/99443244">https://www.inaturalist.org/observations/99443244</a>   |
| 1644 | Accipiter badius | Shikra | 2021/10/26 | 3 | 0 | 29.91538060 | 78.09690760 | <a href="https://www.inaturalist.org/observations/99443245">https://www.inaturalist.org/observations/99443245</a>   |
| 1645 | Accipiter badius | Shikra | 2017/10/7  | 1 | 0 | 29.95106851 | 78.07552255 | <a href="https://www.inaturalist.org/observations/67243392">https://www.inaturalist.org/observations/67243392</a>   |
| 1646 | Accipiter badius | Shikra | 2017/10/8  | 1 | 0 | 29.95112600 | 78.07547654 | <a href="https://www.inaturalist.org/observations/67182288">https://www.inaturalist.org/observations/67182288</a>   |
| 1647 | Accipiter badius | Shikra | 2022/1/21  | 2 | 0 | 30.03986028 | 80.19390151 | <a href="https://www.inaturalist.org/observations/105309767">https://www.inaturalist.org/observations/105309767</a> |
| 1648 | Accipiter badius | Shikra | 2021/10/15 | 1 | 0 | 30.28276580 | 77.97393501 | <a href="https://www.inaturalist.org/observations/98855355">https://www.inaturalist.org/observations/98855355</a>   |
| 1649 | Accipiter badius | Shikra | 2021/12/26 | 1 | 0 | 30.31670087 | 78.02390087 | <a href="https://www.inaturalist.org/observations/103678427">https://www.inaturalist.org/observations/103678427</a> |
| 1650 | Accipiter badius | Shikra | 2020/4/18  | 1 | 0 | 30.31843249 | 78.05791095 | <a href="https://www.inaturalist.org/observations/42537277">https://www.inaturalist.org/observations/42537277</a>   |
| 1651 | Accipiter badius | Shikra | 2020/6/13  | 1 | 0 | 30.31843249 | 78.05791095 | <a href="https://www.inaturalist.org/observations/54382996">https://www.inaturalist.org/observations/54382996</a>   |
| 1652 | Accipiter badius | Shikra | 2021/3/24  | 2 | 0 | 30.36441337 | 76.78801943 | <a href="https://www.inaturalist.org/observations/71945865">https://www.inaturalist.org/observations/71945865</a>   |
| 1653 | Accipiter badius | Shikra | 2022/8/12  | 2 | 0 | 30.38383760 | 78.08946280 | <a href="https://www.inaturalist.org/observations/130475974">https://www.inaturalist.org/observations/130475974</a> |
| 1654 | Accipiter badius | Shikra | 2015/3/7   | 3 | 0 | 30.54479167 | 77.25127222 | <a href="https://www.inaturalist.org/observations/59429338">https://www.inaturalist.org/observations/59429338</a>   |
| 1655 | Accipiter badius | Shikra | 2022/8/27  | 2 | 0 | 30.67798781 | 76.70952198 | <a href="https://www.inaturalist.org/observations/132484877">https://www.inaturalist.org/observations/132484877</a> |

|      |                  |        |           |   |   |             |             |                                                                                                                     |
|------|------------------|--------|-----------|---|---|-------------|-------------|---------------------------------------------------------------------------------------------------------------------|
| 1656 | Accipiter badius | Shikra | 2021/12/2 | 2 | 0 | 30.72940164 | 76.80977446 | <a href="https://www.inaturalist.org/observations/134268866">https://www.inaturalist.org/observations/134268866</a> |
| 1657 | Accipiter badius | Shikra | 2018/11/8 | 3 | 0 | 30.79776941 | 76.75798929 | <a href="https://www.inaturalist.org/observations/134974056">https://www.inaturalist.org/observations/134974056</a> |
| 1658 | Accipiter badius | Shikra | 2019/1/20 | 2 | 0 | 30.79872785 | 76.75893343 | <a href="https://www.inaturalist.org/observations/135481754">https://www.inaturalist.org/observations/135481754</a> |
| 1659 | Accipiter badius | Shikra | 2018/6/3  | 2 | 0 | 30.80093959 | 76.75996342 | <a href="https://www.inaturalist.org/observations/135481576">https://www.inaturalist.org/observations/135481576</a> |
| 1660 | Accipiter badius | Shikra | 2018/8/21 | 2 | 0 | 30.83844552 | 76.73849149 | <a href="https://www.inaturalist.org/observations/135481819">https://www.inaturalist.org/observations/135481819</a> |
| 1661 | Accipiter badius | Shikra | 2019/7/21 | 2 | 0 | 31.11392610 | 77.53908189 | <a href="https://www.inaturalist.org/observations/29767939">https://www.inaturalist.org/observations/29767939</a>   |
| 1662 | Accipiter badius | Shikra | 2019/8/14 | 4 | 0 | 31.25702043 | 76.98303332 | <a href="https://www.inaturalist.org/observations/30915408">https://www.inaturalist.org/observations/30915408</a>   |
| 1663 | Accipiter badius | Shikra | 2022/8/28 | 3 | 0 | 31.30868573 | 75.59431207 | <a href="https://www.inaturalist.org/observations/132531948">https://www.inaturalist.org/observations/132531948</a> |
| 1664 | Accipiter badius | Shikra | 2021/5/19 | 5 | 0 | 31.56642281 | 76.86075624 | <a href="https://www.inaturalist.org/observations/79769033">https://www.inaturalist.org/observations/79769033</a>   |
| 1665 | Accipiter badius | Shikra | 2019/7/26 | 2 | 0 | 31.63831091 | 77.42598359 | <a href="https://www.inaturalist.org/observations/105030526">https://www.inaturalist.org/observations/105030526</a> |
| 1666 | Accipiter badius | Shikra | 2015/6/21 | 2 | 0 | 32.21904200 | 76.32340370 | <a href="https://www.inaturalist.org/observations/30503230">https://www.inaturalist.org/observations/30503230</a>   |



| No | scientific name         | common name            | date       | NIA | NID | latitude    | longitude   | url                                                                                                                 |
|----|-------------------------|------------------------|------------|-----|-----|-------------|-------------|---------------------------------------------------------------------------------------------------------------------|
| 1  | Acrocephalus stentoreus | Clamorous Reed-warbler | 2020/2/16  | 3   | 0   | 6.17860000  | 81.21961333 | <a href="https://www.inaturalist.org/observations/39488265">https://www.inaturalist.org/observations/39488265</a>   |
| 2  | Acrocephalus stentoreus | Clamorous Reed-warbler | 2020/1/28  | 0   | 0   | 6.19908600  | 81.21049300 | <a href="https://www.inaturalist.org/observations/38514489">https://www.inaturalist.org/observations/38514489</a>   |
| 3  | Acrocephalus stentoreus | Clamorous Reed-warbler | 2018/12/15 | 1   | 0   | 6.21271944  | 80.73063056 | <a href="https://www.inaturalist.org/observations/19091682">https://www.inaturalist.org/observations/19091682</a>   |
| 4  | Acrocephalus stentoreus | Clamorous Reed-warbler | 2020/2/22  | 2   | 0   | 6.23082704  | 81.22815040 | <a href="https://www.inaturalist.org/observations/41975790">https://www.inaturalist.org/observations/41975790</a>   |
| 5  | Acrocephalus stentoreus | Clamorous Reed-warbler | 2017/7/15  | 2   | 0   | 6.87586480  | 79.93919360 | <a href="https://www.inaturalist.org/observations/20823051">https://www.inaturalist.org/observations/20823051</a>   |
| 6  | Acrocephalus stentoreus | Clamorous Reed-warbler | 2022/2/28  | 4   | 0   | 8.44886289  | 76.98382538 | <a href="https://www.inaturalist.org/observations/107683702">https://www.inaturalist.org/observations/107683702</a> |
| 7  | Acrocephalus stentoreus | Clamorous Reed-warbler | 2022/1/15  | 1   | 0   | 8.44948073  | 76.97886061 | <a href="https://www.inaturalist.org/observations/105015876">https://www.inaturalist.org/observations/105015876</a> |
| 8  | Acrocephalus stentoreus | Clamorous Reed-warbler | 2022/2/5   | 1   | 0   | 9.01169542  | 76.66305452 | <a href="https://www.inaturalist.org/observations/106840893">https://www.inaturalist.org/observations/106840893</a> |
| 9  | Acrocephalus stentoreus | Clamorous Reed-warbler | 2019/1/6   | 3   | 0   | 9.29579226  | 76.51043128 | <a href="https://www.inaturalist.org/observations/65921295">https://www.inaturalist.org/observations/65921295</a>   |
| 10 | Acrocephalus stentoreus | Clamorous Reed-warbler | 2018/12/27 | 1   | 0   | 9.56554858  | 76.44082783 | <a href="https://www.inaturalist.org/observations/66035271">https://www.inaturalist.org/observations/66035271</a>   |
| 11 | Acrocephalus stentoreus | Clamorous Reed-warbler | 2020/12/9  | 2   | 0   | 9.58566092  | 76.52925868 | <a href="https://www.inaturalist.org/observations/129571900">https://www.inaturalist.org/observations/129571900</a> |
| 12 | Acrocephalus stentoreus | Clamorous Reed-warbler | 2021/1/31  | 1   | 0   | 9.79747010  | 76.28890690 | <a href="https://www.inaturalist.org/observations/104281457">https://www.inaturalist.org/observations/104281457</a> |
| 13 | Acrocephalus stentoreus | Clamorous Reed-warbler | 2020/12/16 | 3   | 0   | 9.79747423  | 76.28890693 | <a href="https://www.inaturalist.org/observations/87818822">https://www.inaturalist.org/observations/87818822</a>   |
| 14 | Acrocephalus stentoreus | Clamorous Reed-warbler | 2021/10/31 | 2   | 0   | 9.79747423  | 76.28890693 | <a href="https://www.inaturalist.org/observations/100143870">https://www.inaturalist.org/observations/100143870</a> |
| 15 | Acrocephalus stentoreus | Clamorous Reed-warbler | 2021/10/31 | 2   | 0   | 9.79747423  | 76.28890693 | <a href="https://www.inaturalist.org/observations/100144136">https://www.inaturalist.org/observations/100144136</a> |
| 16 | Acrocephalus stentoreus | Clamorous Reed-warbler | 2020/11/30 | 2   | 0   | 9.79747423  | 76.28890693 | <a href="https://www.inaturalist.org/observations/132780967">https://www.inaturalist.org/observations/132780967</a> |
| 17 | Acrocephalus stentoreus | Clamorous Reed-warbler | 2020/11/30 | 3   | 0   | 10.05112890 | 76.33982532 | <a href="https://www.inaturalist.org/observations/131900452">https://www.inaturalist.org/observations/131900452</a> |
| 18 | Acrocephalus stentoreus | Clamorous Reed-warbler | 2015/11/18 | 1   | 0   | 10.35067493 | 76.25209036 | <a href="https://www.inaturalist.org/observations/35271980">https://www.inaturalist.org/observations/35271980</a>   |
| 19 | Acrocephalus stentoreus | Clamorous Reed-warbler | 2020/2/1   | 2   | 0   | 10.43731000 | 76.17277667 | <a href="https://www.inaturalist.org/observations/67039862">https://www.inaturalist.org/observations/67039862</a>   |
| 20 | Acrocephalus stentoreus | Clamorous Reed-warbler | 2020/11/29 | 0   | 0   | 10.46853511 | 76.15901262 | <a href="https://www.inaturalist.org/observations/67708502">https://www.inaturalist.org/observations/67708502</a>   |
| 21 | Acrocephalus stentoreus | Clamorous Reed-warbler | 2016/12/29 | 1   | 0   | 10.47814399 | 76.20426731 | <a href="https://www.inaturalist.org/observations/65918782">https://www.inaturalist.org/observations/65918782</a>   |
| 22 | Acrocephalus stentoreus | Clamorous Reed-warbler | 2020/1/29  | 1   | 0   | 10.53395167 | 76.12862833 | <a href="https://www.inaturalist.org/observations/67019453">https://www.inaturalist.org/observations/67019453</a>   |

|    |                                |                        |            |   |   |             |             |                                                                                                                     |
|----|--------------------------------|------------------------|------------|---|---|-------------|-------------|---------------------------------------------------------------------------------------------------------------------|
| 23 | <i>Acrocephalus stentoreus</i> | Clamorous Reed-warbler | 2022/3/19  | 2 | 0 | 10.84015309 | 76.83562236 | <a href="https://www.inaturalist.org/observations/115064866">https://www.inaturalist.org/observations/115064866</a> |
| 24 | <i>Acrocephalus stentoreus</i> | Clamorous Reed-warbler | 2019/1/23  | 1 | 0 | 10.88777170 | 76.07321890 | <a href="https://www.inaturalist.org/observations/67240020">https://www.inaturalist.org/observations/67240020</a>   |
| 25 | <i>Acrocephalus stentoreus</i> | Clamorous Reed-warbler | 2022/1/14  | 1 | 0 | 11.12315726 | 79.81049348 | <a href="https://www.inaturalist.org/observations/104977666">https://www.inaturalist.org/observations/104977666</a> |
| 26 | <i>Acrocephalus stentoreus</i> | Clamorous Reed-warbler | 2022/1/14  | 1 | 0 | 11.12668487 | 79.80649564 | <a href="https://www.inaturalist.org/observations/104908980">https://www.inaturalist.org/observations/104908980</a> |
| 27 | <i>Acrocephalus stentoreus</i> | Clamorous Reed-warbler | 2022/2/12  | 2 | 0 | 11.26389476 | 77.77742352 | <a href="https://www.inaturalist.org/observations/106969149">https://www.inaturalist.org/observations/106969149</a> |
| 28 | <i>Acrocephalus stentoreus</i> | Clamorous Reed-warbler | 2017/12/14 | 1 | 0 | 11.59478800 | 92.69443000 | <a href="https://www.inaturalist.org/observations/9558327">https://www.inaturalist.org/observations/9558327</a>     |
| 29 | <i>Acrocephalus stentoreus</i> | Clamorous Reed-warbler | 2022/2/23  | 0 | 0 | 11.66642990 | 92.67092900 | <a href="https://www.inaturalist.org/observations/107880796">https://www.inaturalist.org/observations/107880796</a> |
| 30 | <i>Acrocephalus stentoreus</i> | Clamorous Reed-warbler | 2022/2/23  | 0 | 0 | 11.66642990 | 92.67092900 | <a href="https://www.inaturalist.org/observations/107880798">https://www.inaturalist.org/observations/107880798</a> |
| 31 | <i>Acrocephalus stentoreus</i> | Clamorous Reed-warbler | 2022/2/23  | 0 | 0 | 11.66642990 | 92.67092900 | <a href="https://www.inaturalist.org/observations/107880799">https://www.inaturalist.org/observations/107880799</a> |
| 32 | <i>Acrocephalus stentoreus</i> | Clamorous Reed-warbler | 2019/1/6   | 1 | 0 | 11.73446034 | 78.20203878 | <a href="https://www.inaturalist.org/observations/54605679">https://www.inaturalist.org/observations/54605679</a>   |
| 33 | <i>Acrocephalus stentoreus</i> | Clamorous Reed-warbler | 2022/4/3   | 2 | 0 | 11.76588932 | 78.23842596 | <a href="https://www.inaturalist.org/observations/110491229">https://www.inaturalist.org/observations/110491229</a> |
| 34 | <i>Acrocephalus stentoreus</i> | Clamorous Reed-warbler | 2021/1/24  | 1 | 0 | 11.93320530 | 79.42678450 | <a href="https://www.inaturalist.org/observations/69402276">https://www.inaturalist.org/observations/69402276</a>   |
| 35 | <i>Acrocephalus stentoreus</i> | Clamorous Reed-warbler | 2022/3/23  | 2 | 0 | 11.94468432 | 75.38493812 | <a href="https://www.inaturalist.org/observations/110828058">https://www.inaturalist.org/observations/110828058</a> |
| 36 | <i>Acrocephalus stentoreus</i> | Clamorous Reed-warbler | 2022/3/23  | 1 | 0 | 11.94468432 | 75.38493812 | <a href="https://www.inaturalist.org/observations/111057139">https://www.inaturalist.org/observations/111057139</a> |
| 37 | <i>Acrocephalus stentoreus</i> | Clamorous Reed-warbler | 2022/3/28  | 0 | 0 | 11.94468432 | 75.38493812 | <a href="https://www.inaturalist.org/observations/116443875">https://www.inaturalist.org/observations/116443875</a> |
| 38 | <i>Acrocephalus stentoreus</i> | Clamorous Reed-warbler | 2022/3/23  | 1 | 0 | 11.94468432 | 75.38493812 | <a href="https://www.inaturalist.org/observations/116515421">https://www.inaturalist.org/observations/116515421</a> |
| 39 | <i>Acrocephalus stentoreus</i> | Clamorous Reed-warbler | 2021/3/9   | 2 | 0 | 11.94468432 | 75.38493812 | <a href="https://www.inaturalist.org/observations/122789319">https://www.inaturalist.org/observations/122789319</a> |
| 40 | <i>Acrocephalus stentoreus</i> | Clamorous Reed-warbler | 2021/3/9   | 2 | 0 | 11.94468432 | 75.38493812 | <a href="https://www.inaturalist.org/observations/122789520">https://www.inaturalist.org/observations/122789520</a> |
| 41 | <i>Acrocephalus stentoreus</i> | Clamorous Reed-warbler | 2022/1/2   | 1 | 0 | 11.94468432 | 75.38493812 | <a href="https://www.inaturalist.org/observations/125767490">https://www.inaturalist.org/observations/125767490</a> |
| 42 | <i>Acrocephalus stentoreus</i> | Clamorous Reed-warbler | 2022/1/4   | 1 | 0 | 11.94468432 | 75.38493812 | <a href="https://www.inaturalist.org/observations/125767716">https://www.inaturalist.org/observations/125767716</a> |
| 43 | <i>Acrocephalus stentoreus</i> | Clamorous Reed-warbler | 2022/1/4   | 1 | 0 | 11.94468432 | 75.38493812 | <a href="https://www.inaturalist.org/observations/125769212">https://www.inaturalist.org/observations/125769212</a> |
| 44 | <i>Acrocephalus stentoreus</i> | Clamorous Reed-warbler | 2022/1/4   | 2 | 0 | 11.94468432 | 75.38493812 | <a href="https://www.inaturalist.org/observations/125769435">https://www.inaturalist.org/observations/125769435</a> |
| 45 | <i>Acrocephalus stentoreus</i> | Clamorous Reed-warbler | 2020/12/22 | 0 | 0 | 11.94468464 | 75.38493812 | <a href="https://www.inaturalist.org/observations/67658031">https://www.inaturalist.org/observations/67658031</a>   |

|    |                                |                        |            |   |   |             |             |                                                                                                                     |
|----|--------------------------------|------------------------|------------|---|---|-------------|-------------|---------------------------------------------------------------------------------------------------------------------|
| 46 | <i>Acrocephalus stentoreus</i> | Clamorous Reed-warbler | 2021/1/31  | 1 | 0 | 11.94468464 | 75.38493812 | <a href="https://www.inaturalist.org/observations/83934763">https://www.inaturalist.org/observations/83934763</a>   |
| 47 | <i>Acrocephalus stentoreus</i> | Clamorous Reed-warbler | 2021/1/31  | 1 | 0 | 11.94468464 | 75.38493812 | <a href="https://www.inaturalist.org/observations/83934849">https://www.inaturalist.org/observations/83934849</a>   |
| 48 | <i>Acrocephalus stentoreus</i> | Clamorous Reed-warbler | 2020/12/14 | 2 | 0 | 11.94468464 | 75.38493812 | <a href="https://www.inaturalist.org/observations/83935012">https://www.inaturalist.org/observations/83935012</a>   |
| 49 | <i>Acrocephalus stentoreus</i> | Clamorous Reed-warbler | 2020/12/17 | 2 | 0 | 11.94468464 | 75.38493812 | <a href="https://www.inaturalist.org/observations/83935085">https://www.inaturalist.org/observations/83935085</a>   |
| 50 | <i>Acrocephalus stentoreus</i> | Clamorous Reed-warbler | 2019/1/20  | 1 | 0 | 12.01856132 | 77.03826106 | <a href="https://www.inaturalist.org/observations/97525286">https://www.inaturalist.org/observations/97525286</a>   |
| 51 | <i>Acrocephalus stentoreus</i> | Clamorous Reed-warbler | 2017/3/18  | 1 | 0 | 12.03000078 | 75.20706394 | <a href="https://www.inaturalist.org/observations/30603902">https://www.inaturalist.org/observations/30603902</a>   |
| 52 | <i>Acrocephalus stentoreus</i> | Clamorous Reed-warbler | 2015/12/11 | 1 | 0 | 12.08230054 | 76.71351780 | <a href="https://www.inaturalist.org/observations/95515552">https://www.inaturalist.org/observations/95515552</a>   |
| 53 | <i>Acrocephalus stentoreus</i> | Clamorous Reed-warbler | 2020/12/22 | 1 | 0 | 12.11029334 | 75.21946393 | <a href="https://www.inaturalist.org/observations/136778019">https://www.inaturalist.org/observations/136778019</a> |
| 54 | <i>Acrocephalus stentoreus</i> | Clamorous Reed-warbler | 2016/12/4  | 2 | 0 | 12.20879290 | 76.64664330 | <a href="https://www.inaturalist.org/observations/94208132">https://www.inaturalist.org/observations/94208132</a>   |
| 55 | <i>Acrocephalus stentoreus</i> | Clamorous Reed-warbler | 2018/3/26  | 1 | 0 | 12.21444459 | 79.02994359 | <a href="https://www.inaturalist.org/observations/95839995">https://www.inaturalist.org/observations/95839995</a>   |
| 56 | <i>Acrocephalus stentoreus</i> | Clamorous Reed-warbler | 2008/7/31  | 1 | 0 | 12.26937200 | 76.61197800 | <a href="https://www.inaturalist.org/observations/94573364">https://www.inaturalist.org/observations/94573364</a>   |
| 57 | <i>Acrocephalus stentoreus</i> | Clamorous Reed-warbler | 2015/12/16 | 1 | 0 | 12.74091270 | 77.82529230 | <a href="https://www.inaturalist.org/observations/33655047">https://www.inaturalist.org/observations/33655047</a>   |
| 58 | <i>Acrocephalus stentoreus</i> | Clamorous Reed-warbler | 2015/12/16 | 1 | 0 | 12.74091270 | 77.82529230 | <a href="https://www.inaturalist.org/observations/33655048">https://www.inaturalist.org/observations/33655048</a>   |
| 59 | <i>Acrocephalus stentoreus</i> | Clamorous Reed-warbler | 2021/10/29 | 0 | 0 | 12.78806036 | 76.93665770 | <a href="https://www.inaturalist.org/observations/99976207">https://www.inaturalist.org/observations/99976207</a>   |
| 60 | <i>Acrocephalus stentoreus</i> | Clamorous Reed-warbler | 2020/12/27 | 2 | 0 | 12.82782739 | 77.72278714 | <a href="https://www.inaturalist.org/observations/67460348">https://www.inaturalist.org/observations/67460348</a>   |
| 61 | <i>Acrocephalus stentoreus</i> | Clamorous Reed-warbler | 2020/12/20 | 2 | 0 | 12.87498745 | 77.62998562 | <a href="https://www.inaturalist.org/observations/66882073">https://www.inaturalist.org/observations/66882073</a>   |
| 62 | <i>Acrocephalus stentoreus</i> | Clamorous Reed-warbler | 2019/2/2   | 4 | 0 | 12.90251755 | 80.20602610 | <a href="https://www.inaturalist.org/observations/29122190">https://www.inaturalist.org/observations/29122190</a>   |
| 63 | <i>Acrocephalus stentoreus</i> | Clamorous Reed-warbler | 2019/3/2   | 2 | 0 | 12.90405943 | 80.21011101 | <a href="https://www.inaturalist.org/observations/22557723">https://www.inaturalist.org/observations/22557723</a>   |
| 64 | <i>Acrocephalus stentoreus</i> | Clamorous Reed-warbler | 2013/8/7   | 3 | 0 | 12.93489120 | 80.21371240 | <a href="https://www.inaturalist.org/observations/22536998">https://www.inaturalist.org/observations/22536998</a>   |
| 65 | <i>Acrocephalus stentoreus</i> | Clamorous Reed-warbler | 2022/1/24  | 1 | 0 | 12.94657594 | 80.22376589 | <a href="https://www.inaturalist.org/observations/106970163">https://www.inaturalist.org/observations/106970163</a> |
| 66 | <i>Acrocephalus stentoreus</i> | Clamorous Reed-warbler | 2022/3/27  | 3 | 0 | 12.94891679 | 80.21969933 | <a href="https://www.inaturalist.org/observations/109916696">https://www.inaturalist.org/observations/109916696</a> |
| 67 | <i>Acrocephalus stentoreus</i> | Clamorous Reed-warbler | 2018/11/10 | 3 | 0 | 12.94982970 | 74.85656130 | <a href="https://www.inaturalist.org/observations/18325017">https://www.inaturalist.org/observations/18325017</a>   |
| 68 | <i>Acrocephalus stentoreus</i> | Clamorous Reed-warbler | 2019/6/11  | 4 | 0 | 12.94984247 | 80.22028539 | <a href="https://www.inaturalist.org/observations/27193089">https://www.inaturalist.org/observations/27193089</a>   |

|    |                                |                        |            |   |   |             |             |                                                                                                                     |
|----|--------------------------------|------------------------|------------|---|---|-------------|-------------|---------------------------------------------------------------------------------------------------------------------|
| 69 | <i>Acrocephalus stentoreus</i> | Clamorous Reed-warbler | 2022/3/13  | 4 | 0 | 12.95785520 | 80.21392286 | <a href="https://www.inaturalist.org/observations/109364946">https://www.inaturalist.org/observations/109364946</a> |
| 70 | <i>Acrocephalus stentoreus</i> | Clamorous Reed-warbler | 2022/8/27  | 0 | 0 | 12.95785520 | 80.21392286 | <a href="https://www.inaturalist.org/observations/133023744">https://www.inaturalist.org/observations/133023744</a> |
| 71 | <i>Acrocephalus stentoreus</i> | Clamorous Reed-warbler | 2022/1/8   | 2 | 0 | 12.95954173 | 80.21512813 | <a href="https://www.inaturalist.org/observations/104689622">https://www.inaturalist.org/observations/104689622</a> |
| 72 | <i>Acrocephalus stentoreus</i> | Clamorous Reed-warbler | 2016/7/11  | 2 | 0 | 12.97087972 | 80.22646806 | <a href="https://www.inaturalist.org/observations/63744590">https://www.inaturalist.org/observations/63744590</a>   |
| 73 | <i>Acrocephalus stentoreus</i> | Clamorous Reed-warbler | 2019/3/16  | 3 | 0 | 13.06554051 | 77.76779350 | <a href="https://www.inaturalist.org/observations/21353228">https://www.inaturalist.org/observations/21353228</a>   |
| 74 | <i>Acrocephalus stentoreus</i> | Clamorous Reed-warbler | 2019/8/29  | 0 | 0 | 13.06825601 | 77.76923203 | <a href="https://www.inaturalist.org/observations/92251981">https://www.inaturalist.org/observations/92251981</a>   |
| 75 | <i>Acrocephalus stentoreus</i> | Clamorous Reed-warbler | 2020/8/15  | 1 | 0 | 13.12287510 | 80.18053180 | <a href="https://www.inaturalist.org/observations/56615336">https://www.inaturalist.org/observations/56615336</a>   |
| 76 | <i>Acrocephalus stentoreus</i> | Clamorous Reed-warbler | 2022/2/27  | 2 | 0 | 13.12287510 | 80.18053180 | <a href="https://www.inaturalist.org/observations/107630403">https://www.inaturalist.org/observations/107630403</a> |
| 77 | <i>Acrocephalus stentoreus</i> | Clamorous Reed-warbler | 2022/2/27  | 1 | 0 | 13.12287510 | 80.18053180 | <a href="https://www.inaturalist.org/observations/107697177">https://www.inaturalist.org/observations/107697177</a> |
| 78 | <i>Acrocephalus stentoreus</i> | Clamorous Reed-warbler | 2017/1/15  | 1 | 0 | 13.14923025 | 80.05772464 | <a href="https://www.inaturalist.org/observations/46809464">https://www.inaturalist.org/observations/46809464</a>   |
| 79 | <i>Acrocephalus stentoreus</i> | Clamorous Reed-warbler | 2019/1/27  | 1 | 0 | 13.65911635 | 79.48097763 | <a href="https://www.inaturalist.org/observations/55805493">https://www.inaturalist.org/observations/55805493</a>   |
| 80 | <i>Acrocephalus stentoreus</i> | Clamorous Reed-warbler | 2020/12/13 | 0 | 0 | 15.21926390 | 75.51401138 | <a href="https://www.inaturalist.org/observations/66901771">https://www.inaturalist.org/observations/66901771</a>   |
| 81 | <i>Acrocephalus stentoreus</i> | Clamorous Reed-warbler | 2021/12/5  | 3 | 0 | 16.06467884 | 78.87752194 | <a href="https://www.inaturalist.org/observations/106479501">https://www.inaturalist.org/observations/106479501</a> |
| 82 | <i>Acrocephalus stentoreus</i> | Clamorous Reed-warbler | 2015/12/27 | 1 | 0 | 16.30689104 | 80.51252635 | <a href="https://www.inaturalist.org/observations/87981043">https://www.inaturalist.org/observations/87981043</a>   |
| 83 | <i>Acrocephalus stentoreus</i> | Clamorous Reed-warbler | 2011/12/18 | 1 | 0 | 16.50126925 | 80.60247008 | <a href="https://www.inaturalist.org/observations/88018956">https://www.inaturalist.org/observations/88018956</a>   |
| 84 | <i>Acrocephalus stentoreus</i> | Clamorous Reed-warbler | 2020/11/22 | 1 | 0 | 16.55493600 | 80.72975710 | <a href="https://www.inaturalist.org/observations/92664018">https://www.inaturalist.org/observations/92664018</a>   |
| 85 | <i>Acrocephalus stentoreus</i> | Clamorous Reed-warbler | 2020/12/20 | 0 | 0 | 16.55772920 | 80.72698540 | <a href="https://www.inaturalist.org/observations/92475029">https://www.inaturalist.org/observations/92475029</a>   |
| 86 | <i>Acrocephalus stentoreus</i> | Clamorous Reed-warbler | 2020/12/6  | 1 | 0 | 16.55921794 | 80.76100097 | <a href="https://www.inaturalist.org/observations/92452602">https://www.inaturalist.org/observations/92452602</a>   |
| 87 | <i>Acrocephalus stentoreus</i> | Clamorous Reed-warbler | 2021/12/5  | 1 | 0 | 16.57559146 | 80.68230191 | <a href="https://www.inaturalist.org/observations/104498318">https://www.inaturalist.org/observations/104498318</a> |
| 88 | <i>Acrocephalus stentoreus</i> | Clamorous Reed-warbler | 2020/12/27 | 2 | 0 | 16.59577924 | 80.61818580 | <a href="https://www.inaturalist.org/observations/90049734">https://www.inaturalist.org/observations/90049734</a>   |
| 89 | <i>Acrocephalus stentoreus</i> | Clamorous Reed-warbler | 2020/12/27 | 1 | 0 | 16.59577924 | 80.61818580 | <a href="https://www.inaturalist.org/observations/90049756">https://www.inaturalist.org/observations/90049756</a>   |
| 90 | <i>Acrocephalus stentoreus</i> | Clamorous Reed-warbler | 2020/12/27 | 2 | 0 | 16.59577924 | 80.61818580 | <a href="https://www.inaturalist.org/observations/90049783">https://www.inaturalist.org/observations/90049783</a>   |
| 91 | <i>Acrocephalus stentoreus</i> | Clamorous Reed-warbler | 2022/2/18  | 3 | 0 | 16.60132391 | 80.58064514 | <a href="https://www.inaturalist.org/observations/107609865">https://www.inaturalist.org/observations/107609865</a> |

|     |                                |                        |            |   |   |             |             |                                                                                                                     |
|-----|--------------------------------|------------------------|------------|---|---|-------------|-------------|---------------------------------------------------------------------------------------------------------------------|
| 92  | <i>Acrocephalus stentoreus</i> | Clamorous Reed-warbler | 2022/1/13  | 1 | 0 | 16.64999933 | 81.21666670 | <a href="https://www.inaturalist.org/observations/104854403">https://www.inaturalist.org/observations/104854403</a> |
| 93  | <i>Acrocephalus stentoreus</i> | Clamorous Reed-warbler | 2022/1/13  | 2 | 0 | 16.64999933 | 81.21666670 | <a href="https://www.inaturalist.org/observations/105095830">https://www.inaturalist.org/observations/105095830</a> |
| 94  | <i>Acrocephalus stentoreus</i> | Clamorous Reed-warbler | 2022/1/13  | 1 | 0 | 16.64999933 | 81.21666670 | <a href="https://www.inaturalist.org/observations/105253884">https://www.inaturalist.org/observations/105253884</a> |
| 95  | <i>Acrocephalus stentoreus</i> | Clamorous Reed-warbler | 2022/1/13  | 1 | 0 | 16.64999933 | 81.21666670 | <a href="https://www.inaturalist.org/observations/105566148">https://www.inaturalist.org/observations/105566148</a> |
| 96  | <i>Acrocephalus stentoreus</i> | Clamorous Reed-warbler | 2022/1/13  | 1 | 0 | 16.64999933 | 81.21666670 | <a href="https://www.inaturalist.org/observations/105566333">https://www.inaturalist.org/observations/105566333</a> |
| 97  | <i>Acrocephalus stentoreus</i> | Clamorous Reed-warbler | 2022/5/7   | 1 | 0 | 16.64999933 | 81.21666670 | <a href="https://www.inaturalist.org/observations/116492170">https://www.inaturalist.org/observations/116492170</a> |
| 98  | <i>Acrocephalus stentoreus</i> | Clamorous Reed-warbler | 2022/1/3   | 1 | 0 | 16.64999933 | 81.21666670 | <a href="https://www.inaturalist.org/observations/116994211">https://www.inaturalist.org/observations/116994211</a> |
| 99  | <i>Acrocephalus stentoreus</i> | Clamorous Reed-warbler | 2022/5/2   | 1 | 0 | 16.64999933 | 81.21666670 | <a href="https://www.inaturalist.org/observations/119896580">https://www.inaturalist.org/observations/119896580</a> |
| 100 | <i>Acrocephalus stentoreus</i> | Clamorous Reed-warbler | 2022/2/10  | 2 | 0 | 16.66521167 | 81.18135000 | <a href="https://www.inaturalist.org/observations/106494430">https://www.inaturalist.org/observations/106494430</a> |
| 101 | <i>Acrocephalus stentoreus</i> | Clamorous Reed-warbler | 2021/1/25  | 1 | 0 | 16.69256671 | 74.21056978 | <a href="https://www.inaturalist.org/observations/68629873">https://www.inaturalist.org/observations/68629873</a>   |
| 102 | <i>Acrocephalus stentoreus</i> | Clamorous Reed-warbler | 2022/1/13  | 1 | 0 | 16.72948167 | 81.31074000 | <a href="https://www.inaturalist.org/observations/105566595">https://www.inaturalist.org/observations/105566595</a> |
| 103 | <i>Acrocephalus stentoreus</i> | Clamorous Reed-warbler | 2022/1/13  | 1 | 0 | 16.73037833 | 81.31273167 | <a href="https://www.inaturalist.org/observations/105775601">https://www.inaturalist.org/observations/105775601</a> |
| 104 | <i>Acrocephalus stentoreus</i> | Clamorous Reed-warbler | 2022/1/13  | 1 | 0 | 16.73039000 | 81.31274167 | <a href="https://www.inaturalist.org/observations/105566864">https://www.inaturalist.org/observations/105566864</a> |
| 105 | <i>Acrocephalus stentoreus</i> | Clamorous Reed-warbler | 2022/1/13  | 2 | 0 | 16.75385622 | 81.34725139 | <a href="https://www.inaturalist.org/observations/104854513">https://www.inaturalist.org/observations/104854513</a> |
| 106 | <i>Acrocephalus stentoreus</i> | Clamorous Reed-warbler | 2022/1/13  | 2 | 0 | 16.75743294 | 81.34733219 | <a href="https://www.inaturalist.org/observations/104959389">https://www.inaturalist.org/observations/104959389</a> |
| 107 | <i>Acrocephalus stentoreus</i> | Clamorous Reed-warbler | 2018/12/2  | 1 | 0 | 16.84584446 | 75.88182492 | <a href="https://www.inaturalist.org/observations/48512719">https://www.inaturalist.org/observations/48512719</a>   |
| 108 | <i>Acrocephalus stentoreus</i> | Clamorous Reed-warbler | 2019/11/28 | 1 | 0 | 16.88650185 | 75.70990551 | <a href="https://www.inaturalist.org/observations/48867743">https://www.inaturalist.org/observations/48867743</a>   |
| 109 | <i>Acrocephalus stentoreus</i> | Clamorous Reed-warbler | 2019/12/20 | 1 | 0 | 16.88650185 | 75.70990551 | <a href="https://www.inaturalist.org/observations/48894214">https://www.inaturalist.org/observations/48894214</a>   |
| 110 | <i>Acrocephalus stentoreus</i> | Clamorous Reed-warbler | 2019/12/29 | 1 | 0 | 16.88650185 | 75.70990551 | <a href="https://www.inaturalist.org/observations/48894482">https://www.inaturalist.org/observations/48894482</a>   |
| 111 | <i>Acrocephalus stentoreus</i> | Clamorous Reed-warbler | 2019/6/8   | 1 | 0 | 17.52246770 | 78.33443850 | <a href="https://www.inaturalist.org/observations/63635989">https://www.inaturalist.org/observations/63635989</a>   |
| 112 | <i>Acrocephalus stentoreus</i> | Clamorous Reed-warbler | 2021/12/19 | 2 | 0 | 17.63782333 | 78.06467833 | <a href="https://www.inaturalist.org/observations/121718403">https://www.inaturalist.org/observations/121718403</a> |
| 113 | <i>Acrocephalus stentoreus</i> | Clamorous Reed-warbler | 2021/12/19 | 3 | 0 | 17.63813833 | 78.06170833 | <a href="https://www.inaturalist.org/observations/121718463">https://www.inaturalist.org/observations/121718463</a> |
| 114 | <i>Acrocephalus stentoreus</i> | Clamorous Reed-warbler | 2021/12/19 | 1 | 0 | 17.64084333 | 78.06885333 | <a href="https://www.inaturalist.org/observations/121718359">https://www.inaturalist.org/observations/121718359</a> |

|     |                         |                        |            |   |   |             |             |                                                                                                                     |
|-----|-------------------------|------------------------|------------|---|---|-------------|-------------|---------------------------------------------------------------------------------------------------------------------|
| 115 | Acrocephalus stentoreus | Clamorous Reed-warbler | 2010/11/10 | 0 | 0 | 17.68058160 | 75.31550350 | <a href="https://www.inaturalist.org/observations/38153249">https://www.inaturalist.org/observations/38153249</a>   |
| 116 | Acrocephalus stentoreus | Clamorous Reed-warbler | 2018/9/22  | 2 | 0 | 18.11243720 | 79.01929970 | <a href="https://www.inaturalist.org/observations/63616699">https://www.inaturalist.org/observations/63616699</a>   |
| 117 | Acrocephalus stentoreus | Clamorous Reed-warbler | 2018/11/14 | 2 | 0 | 18.24599000 | 74.80134667 | <a href="https://www.inaturalist.org/observations/53710605">https://www.inaturalist.org/observations/53710605</a>   |
| 118 | Acrocephalus stentoreus | Clamorous Reed-warbler | 2017/12/23 | 3 | 0 | 18.26380250 | 74.80458120 | <a href="https://www.inaturalist.org/observations/9373597">https://www.inaturalist.org/observations/9373597</a>     |
| 119 | Acrocephalus stentoreus | Clamorous Reed-warbler | 2018/4/22  | 1 | 0 | 18.27204390 | 74.79507051 | <a href="https://www.inaturalist.org/observations/56201123">https://www.inaturalist.org/observations/56201123</a>   |
| 120 | Acrocephalus stentoreus | Clamorous Reed-warbler | 2019/3/16  | 0 | 0 | 18.27204390 | 74.79507051 | <a href="https://www.inaturalist.org/observations/56496242">https://www.inaturalist.org/observations/56496242</a>   |
| 121 | Acrocephalus stentoreus | Clamorous Reed-warbler | 2019/3/16  | 0 | 0 | 18.27204390 | 74.79507051 | <a href="https://www.inaturalist.org/observations/56496244">https://www.inaturalist.org/observations/56496244</a>   |
| 122 | Acrocephalus stentoreus | Clamorous Reed-warbler | 2019/3/17  | 1 | 0 | 18.27204390 | 74.79507051 | <a href="https://www.inaturalist.org/observations/56496375">https://www.inaturalist.org/observations/56496375</a>   |
| 123 | Acrocephalus stentoreus | Clamorous Reed-warbler | 2018/10/30 | 1 | 0 | 18.27249167 | 74.79581500 | <a href="https://www.inaturalist.org/observations/54152946">https://www.inaturalist.org/observations/54152946</a>   |
| 124 | Acrocephalus stentoreus | Clamorous Reed-warbler | 2020/12/27 | 1 | 0 | 18.27891820 | 74.78029550 | <a href="https://www.inaturalist.org/observations/67303648">https://www.inaturalist.org/observations/67303648</a>   |
| 125 | Acrocephalus stentoreus | Clamorous Reed-warbler | 2018/10/11 | 1 | 0 | 18.29759500 | 74.78025639 | <a href="https://www.inaturalist.org/observations/53934834">https://www.inaturalist.org/observations/53934834</a>   |
| 126 | Acrocephalus stentoreus | Clamorous Reed-warbler | 2013/2/17  | 1 | 0 | 18.29894780 | 74.75425710 | <a href="https://www.inaturalist.org/observations/38154530">https://www.inaturalist.org/observations/38154530</a>   |
| 127 | Acrocephalus stentoreus | Clamorous Reed-warbler | 2019/1/15  | 3 | 0 | 18.62008900 | 73.65509300 | <a href="https://www.inaturalist.org/observations/20451842">https://www.inaturalist.org/observations/20451842</a>   |
| 128 | Acrocephalus stentoreus | Clamorous Reed-warbler | 2017/3/25  | 1 | 0 | 19.00471356 | 72.83881098 | <a href="https://www.inaturalist.org/observations/5596945">https://www.inaturalist.org/observations/5596945</a>     |
| 129 | Acrocephalus stentoreus | Clamorous Reed-warbler | 2021/3/29  | 2 | 0 | 19.14190550 | 72.96462840 | <a href="https://www.inaturalist.org/observations/72351683">https://www.inaturalist.org/observations/72351683</a>   |
| 130 | Acrocephalus stentoreus | Clamorous Reed-warbler | 2021/3/29  | 1 | 0 | 19.14190550 | 72.96462840 | <a href="https://www.inaturalist.org/observations/72351684">https://www.inaturalist.org/observations/72351684</a>   |
| 131 | Acrocephalus stentoreus | Clamorous Reed-warbler | 2019/4/7   | 2 | 0 | 19.14192483 | 72.96458244 | <a href="https://www.inaturalist.org/observations/22133902">https://www.inaturalist.org/observations/22133902</a>   |
| 132 | Acrocephalus stentoreus | Clamorous Reed-warbler | 2018/3/29  | 3 | 0 | 19.14192483 | 72.96462536 | <a href="https://www.inaturalist.org/observations/56123689">https://www.inaturalist.org/observations/56123689</a>   |
| 133 | Acrocephalus stentoreus | Clamorous Reed-warbler | 2019/12/23 | 2 | 0 | 19.14192483 | 72.96462536 | <a href="https://www.inaturalist.org/observations/56510775">https://www.inaturalist.org/observations/56510775</a>   |
| 134 | Acrocephalus stentoreus | Clamorous Reed-warbler | 2020/3/1   | 1 | 0 | 19.16978790 | 74.68444170 | <a href="https://www.inaturalist.org/observations/55132188">https://www.inaturalist.org/observations/55132188</a>   |
| 135 | Acrocephalus stentoreus | Clamorous Reed-warbler | 2021/12/13 | 0 | 0 | 19.46087907 | 72.79824492 | <a href="https://www.inaturalist.org/observations/103448337">https://www.inaturalist.org/observations/103448337</a> |
| 136 | Acrocephalus stentoreus | Clamorous Reed-warbler | 2014/2/6   | 2 | 0 | 19.89199168 | 85.46043333 | <a href="https://www.inaturalist.org/observations/20203057">https://www.inaturalist.org/observations/20203057</a>   |
| 137 | Acrocephalus stentoreus | Clamorous Reed-warbler | 2021/12/23 | 4 | 0 | 19.89278360 | 85.43909970 | <a href="https://www.inaturalist.org/observations/121448421">https://www.inaturalist.org/observations/121448421</a> |

|     |                                |                        |           |   |   |             |             |                                                                                                                     |
|-----|--------------------------------|------------------------|-----------|---|---|-------------|-------------|---------------------------------------------------------------------------------------------------------------------|
| 138 | <i>Acrocephalus stentoreus</i> | Clamorous Reed-warbler | 2019/3/14 | 1 | 0 | 19.89487152 | 85.51195042 | <a href="https://www.inaturalist.org/observations/100293013">https://www.inaturalist.org/observations/100293013</a> |
| 139 | <i>Acrocephalus stentoreus</i> | Clamorous Reed-warbler | 2020/1/27 | 1 | 0 | 19.91940470 | 85.42543170 | <a href="https://www.inaturalist.org/observations/56725620">https://www.inaturalist.org/observations/56725620</a>   |
| 140 | <i>Acrocephalus stentoreus</i> | Clamorous Reed-warbler | 2022/2/18 | 3 | 0 | 19.91940470 | 85.42543170 | <a href="https://www.inaturalist.org/observations/107771893">https://www.inaturalist.org/observations/107771893</a> |
| 141 | <i>Acrocephalus stentoreus</i> | Clamorous Reed-warbler | 2022/1/30 | 1 | 0 | 20.93249983 | 75.54778006 | <a href="https://www.inaturalist.org/observations/106307422">https://www.inaturalist.org/observations/106307422</a> |
| 142 | <i>Acrocephalus stentoreus</i> | Clamorous Reed-warbler | 2021/4/13 | 1 | 0 | 21.02650235 | 81.45983342 | <a href="https://www.inaturalist.org/observations/73832194">https://www.inaturalist.org/observations/73832194</a>   |
| 143 | <i>Acrocephalus stentoreus</i> | Clamorous Reed-warbler | 2022/1/3  | 2 | 0 | 21.05548887 | 75.86236864 | <a href="https://www.inaturalist.org/observations/104399828">https://www.inaturalist.org/observations/104399828</a> |
| 144 | <i>Acrocephalus stentoreus</i> | Clamorous Reed-warbler | 2022/2/8  | 2 | 0 | 21.05690532 | 81.46109506 | <a href="https://www.inaturalist.org/observations/107026301">https://www.inaturalist.org/observations/107026301</a> |
| 145 | <i>Acrocephalus stentoreus</i> | Clamorous Reed-warbler | 2021/1/9  | 1 | 0 | 21.05848000 | 76.06352167 | <a href="https://www.inaturalist.org/observations/67904799">https://www.inaturalist.org/observations/67904799</a>   |
| 146 | <i>Acrocephalus stentoreus</i> | Clamorous Reed-warbler | 2019/4/29 | 0 | 0 | 21.05921535 | 75.86279579 | <a href="https://www.inaturalist.org/observations/62543620">https://www.inaturalist.org/observations/62543620</a>   |
| 147 | <i>Acrocephalus stentoreus</i> | Clamorous Reed-warbler | 2022/1/21 | 2 | 0 | 21.06583643 | 81.51004873 | <a href="https://www.inaturalist.org/observations/106161822">https://www.inaturalist.org/observations/106161822</a> |
| 148 | <i>Acrocephalus stentoreus</i> | Clamorous Reed-warbler | 2018/6/25 | 2 | 0 | 21.37048536 | 81.97227784 | <a href="https://www.inaturalist.org/observations/16557092">https://www.inaturalist.org/observations/16557092</a>   |
| 149 | <i>Acrocephalus stentoreus</i> | Clamorous Reed-warbler | 2015/2/9  | 0 | 0 | 21.66087160 | 87.57197290 | <a href="https://www.inaturalist.org/observations/61332980">https://www.inaturalist.org/observations/61332980</a>   |
| 150 | <i>Acrocephalus stentoreus</i> | Clamorous Reed-warbler | 2021/1/10 | 2 | 0 | 21.70720509 | 72.21391353 | <a href="https://www.inaturalist.org/observations/67898313">https://www.inaturalist.org/observations/67898313</a>   |
| 151 | <i>Acrocephalus stentoreus</i> | Clamorous Reed-warbler | 2019/3/3  | 2 | 0 | 21.83600580 | 88.88351440 | <a href="https://www.inaturalist.org/observations/97936685">https://www.inaturalist.org/observations/97936685</a>   |
| 152 | <i>Acrocephalus stentoreus</i> | Clamorous Reed-warbler | 2021/2/2  | 1 | 0 | 21.85012208 | 81.81631174 | <a href="https://www.inaturalist.org/observations/68952504">https://www.inaturalist.org/observations/68952504</a>   |
| 153 | <i>Acrocephalus stentoreus</i> | Clamorous Reed-warbler | 2022/1/14 | 1 | 0 | 22.17194667 | 73.50567333 | <a href="https://www.inaturalist.org/observations/120788799">https://www.inaturalist.org/observations/120788799</a> |
| 154 | <i>Acrocephalus stentoreus</i> | Clamorous Reed-warbler | 2022/1/4  | 1 | 0 | 22.30619667 | 73.27809000 | <a href="https://www.inaturalist.org/observations/120809310">https://www.inaturalist.org/observations/120809310</a> |
| 155 | <i>Acrocephalus stentoreus</i> | Clamorous Reed-warbler | 2022/1/26 | 1 | 0 | 22.31381000 | 73.27448333 | <a href="https://www.inaturalist.org/observations/120510341">https://www.inaturalist.org/observations/120510341</a> |
| 156 | <i>Acrocephalus stentoreus</i> | Clamorous Reed-warbler | 2021/3/28 | 1 | 0 | 22.31784418 | 73.27948451 | <a href="https://www.inaturalist.org/observations/72576992">https://www.inaturalist.org/observations/72576992</a>   |
| 157 | <i>Acrocephalus stentoreus</i> | Clamorous Reed-warbler | 2021/2/6  | 1 | 0 | 22.35604000 | 88.39384300 | <a href="https://www.inaturalist.org/observations/69149536">https://www.inaturalist.org/observations/69149536</a>   |
| 158 | <i>Acrocephalus stentoreus</i> | Clamorous Reed-warbler | 2021/2/6  | 1 | 0 | 22.35605600 | 88.39360300 | <a href="https://www.inaturalist.org/observations/69149533">https://www.inaturalist.org/observations/69149533</a>   |
| 159 | <i>Acrocephalus stentoreus</i> | Clamorous Reed-warbler | 2021/1/31 | 1 | 0 | 22.35619796 | 88.39314089 | <a href="https://www.inaturalist.org/observations/73324240">https://www.inaturalist.org/observations/73324240</a>   |
| 160 | <i>Acrocephalus stentoreus</i> | Clamorous Reed-warbler | 2021/1/31 | 1 | 0 | 22.35666450 | 88.38990216 | <a href="https://www.inaturalist.org/observations/104113872">https://www.inaturalist.org/observations/104113872</a> |

|     |                                |                        |            |   |   |             |             |                                                                                                                     |
|-----|--------------------------------|------------------------|------------|---|---|-------------|-------------|---------------------------------------------------------------------------------------------------------------------|
| 161 | <i>Acrocephalus stentoreus</i> | Clamorous Reed-warbler | 2021/1/31  | 1 | 0 | 22.35666450 | 88.38990216 | <a href="https://www.inaturalist.org/observations/104113922">https://www.inaturalist.org/observations/104113922</a> |
| 162 | <i>Acrocephalus stentoreus</i> | Clamorous Reed-warbler | 2021/2/17  | 1 | 0 | 22.36238296 | 88.39061791 | <a href="https://www.inaturalist.org/observations/81271539">https://www.inaturalist.org/observations/81271539</a>   |
| 163 | <i>Acrocephalus stentoreus</i> | Clamorous Reed-warbler | 2021/2/17  | 1 | 0 | 22.36293524 | 88.39874268 | <a href="https://www.inaturalist.org/observations/81271541">https://www.inaturalist.org/observations/81271541</a>   |
| 164 | <i>Acrocephalus stentoreus</i> | Clamorous Reed-warbler | 2021/1/28  | 1 | 0 | 22.36388620 | 88.39269980 | <a href="https://www.inaturalist.org/observations/68793776">https://www.inaturalist.org/observations/68793776</a>   |
| 165 | <i>Acrocephalus stentoreus</i> | Clamorous Reed-warbler | 2021/1/28  | 1 | 0 | 22.36391755 | 88.39232148 | <a href="https://www.inaturalist.org/observations/68792735">https://www.inaturalist.org/observations/68792735</a>   |
| 166 | <i>Acrocephalus stentoreus</i> | Clamorous Reed-warbler | 2018/1/18  | 2 | 0 | 22.36968026 | 70.09274525 | <a href="https://www.inaturalist.org/observations/30345378">https://www.inaturalist.org/observations/30345378</a>   |
| 167 | <i>Acrocephalus stentoreus</i> | Clamorous Reed-warbler | 2018/2/25  | 4 | 0 | 22.48094526 | 70.04069590 | <a href="https://www.inaturalist.org/observations/33243091">https://www.inaturalist.org/observations/33243091</a>   |
| 168 | <i>Acrocephalus stentoreus</i> | Clamorous Reed-warbler | 2020/12/4  | 0 | 0 | 22.51743010 | 70.15337860 | <a href="https://www.inaturalist.org/observations/136535262">https://www.inaturalist.org/observations/136535262</a> |
| 169 | <i>Acrocephalus stentoreus</i> | Clamorous Reed-warbler | 2020/2/7   | 1 | 0 | 22.51743630 | 70.15337829 | <a href="https://www.inaturalist.org/observations/136476933">https://www.inaturalist.org/observations/136476933</a> |
| 170 | <i>Acrocephalus stentoreus</i> | Clamorous Reed-warbler | 2011/11/20 | 4 | 0 | 22.56412517 | 88.43545239 | <a href="https://www.inaturalist.org/observations/22222045">https://www.inaturalist.org/observations/22222045</a>   |
| 171 | <i>Acrocephalus stentoreus</i> | Clamorous Reed-warbler | 2022/2/18  | 2 | 0 | 22.58794500 | 72.55819300 | <a href="https://www.inaturalist.org/observations/126467110">https://www.inaturalist.org/observations/126467110</a> |
| 172 | <i>Acrocephalus stentoreus</i> | Clamorous Reed-warbler | 2022/9/28  | 2 | 0 | 22.60914167 | 88.46364333 | <a href="https://www.inaturalist.org/observations/136790588">https://www.inaturalist.org/observations/136790588</a> |
| 173 | <i>Acrocephalus stentoreus</i> | Clamorous Reed-warbler | 2020/12/21 | 3 | 0 | 22.61291084 | 88.47763072 | <a href="https://www.inaturalist.org/observations/97905853">https://www.inaturalist.org/observations/97905853</a>   |
| 174 | <i>Acrocephalus stentoreus</i> | Clamorous Reed-warbler | 2020/2/16  | 2 | 0 | 22.68527047 | 88.31860264 | <a href="https://www.inaturalist.org/observations/38752799">https://www.inaturalist.org/observations/38752799</a>   |
| 175 | <i>Acrocephalus stentoreus</i> | Clamorous Reed-warbler | 2019/12/18 | 1 | 0 | 22.76742782 | 88.38834543 | <a href="https://www.inaturalist.org/observations/44374842">https://www.inaturalist.org/observations/44374842</a>   |
| 176 | <i>Acrocephalus stentoreus</i> | Clamorous Reed-warbler | 2021/12/12 | 1 | 0 | 22.79245360 | 88.29597950 | <a href="https://www.inaturalist.org/observations/102916665">https://www.inaturalist.org/observations/102916665</a> |
| 177 | <i>Acrocephalus stentoreus</i> | Clamorous Reed-warbler | 2022/2/20  | 1 | 0 | 22.79245360 | 88.29597950 | <a href="https://www.inaturalist.org/observations/107093870">https://www.inaturalist.org/observations/107093870</a> |
| 178 | <i>Acrocephalus stentoreus</i> | Clamorous Reed-warbler | 2021/1/7   | 1 | 0 | 22.79397200 | 88.29358800 | <a href="https://www.inaturalist.org/observations/67713206">https://www.inaturalist.org/observations/67713206</a>   |
| 179 | <i>Acrocephalus stentoreus</i> | Clamorous Reed-warbler | 2021/12/10 | 2 | 0 | 22.80416040 | 88.33392340 | <a href="https://www.inaturalist.org/observations/102803260">https://www.inaturalist.org/observations/102803260</a> |
| 180 | <i>Acrocephalus stentoreus</i> | Clamorous Reed-warbler | 2020/11/8  | 1 | 0 | 22.80416874 | 88.33392341 | <a href="https://www.inaturalist.org/observations/107117395">https://www.inaturalist.org/observations/107117395</a> |
| 181 | <i>Acrocephalus stentoreus</i> | Clamorous Reed-warbler | 2012/1/5   | 3 | 0 | 22.82094770 | 72.05718630 | <a href="https://www.inaturalist.org/observations/32858643">https://www.inaturalist.org/observations/32858643</a>   |
| 182 | <i>Acrocephalus stentoreus</i> | Clamorous Reed-warbler | 2020/2/9   | 2 | 0 | 22.82350100 | 72.03220800 | <a href="https://www.inaturalist.org/observations/112128505">https://www.inaturalist.org/observations/112128505</a> |
| 183 | <i>Acrocephalus stentoreus</i> | Clamorous Reed-warbler | 2018/10/7  | 3 | 0 | 22.85129060 | 88.21933810 | <a href="https://www.inaturalist.org/observations/98035011">https://www.inaturalist.org/observations/98035011</a>   |



|     |                                |                        |           |   |   |             |              |                                                                                                                     |
|-----|--------------------------------|------------------------|-----------|---|---|-------------|--------------|---------------------------------------------------------------------------------------------------------------------|
| 184 | <i>Acrocephalus stentoreus</i> | Clamorous Reed-warbler | 2017/2/11 | 1 | 0 | 22.95209300 | 88.53517800  | <a href="https://www.inaturalist.org/observations/5101504">https://www.inaturalist.org/observations/5101504</a>     |
| 185 | <i>Acrocephalus stentoreus</i> | Clamorous Reed-warbler | 2022/1/2  | 1 | 0 | 22.95505943 | 88.53746586  | <a href="https://www.inaturalist.org/observations/104753548">https://www.inaturalist.org/observations/104753548</a> |
| 186 | <i>Acrocephalus stentoreus</i> | Clamorous Reed-warbler | 2017/1/1  | 1 | 0 | 23.60778840 | 87.44863080  | <a href="https://www.inaturalist.org/observations/6127011">https://www.inaturalist.org/observations/6127011</a>     |
| 187 | <i>Acrocephalus stentoreus</i> | Clamorous Reed-warbler | 2017/1/1  | 1 | 0 | 23.60925900 | 87.46081400  | <a href="https://www.inaturalist.org/observations/4896933">https://www.inaturalist.org/observations/4896933</a>     |
| 188 | <i>Acrocephalus stentoreus</i> | Clamorous Reed-warbler | 2022/3/6  | 1 | 0 | 23.96911333 | 72.99241000  | <a href="https://www.inaturalist.org/observations/120128431">https://www.inaturalist.org/observations/120128431</a> |
| 189 | <i>Acrocephalus stentoreus</i> | Clamorous Reed-warbler | 2021/1/22 | 2 | 0 | 24.04542860 | 70.14558050  | <a href="https://www.inaturalist.org/observations/69203402">https://www.inaturalist.org/observations/69203402</a>   |
| 190 | <i>Acrocephalus stentoreus</i> | Clamorous Reed-warbler | 2021/1/22 | 3 | 0 | 24.04542860 | 70.14558050  | <a href="https://www.inaturalist.org/observations/69203404">https://www.inaturalist.org/observations/69203404</a>   |
| 191 | <i>Acrocephalus stentoreus</i> | Clamorous Reed-warbler | 2021/5/3  | 1 | 0 | 26.64680980 | 106.54746180 | <a href="https://www.inaturalist.org/observations/78330383">https://www.inaturalist.org/observations/78330383</a>   |
| 192 | <i>Acrocephalus stentoreus</i> | Clamorous Reed-warbler | 2013/12/7 | 2 | 0 | 27.00857691 | 77.31604439  | <a href="https://www.inaturalist.org/observations/7483365">https://www.inaturalist.org/observations/7483365</a>     |
| 193 | <i>Acrocephalus stentoreus</i> | Clamorous Reed-warbler | 2019/2/24 | 1 | 0 | 27.15691986 | 77.52365112  | <a href="https://www.inaturalist.org/observations/62015684">https://www.inaturalist.org/observations/62015684</a>   |
| 194 | <i>Acrocephalus stentoreus</i> | Clamorous Reed-warbler | 2016/4/17 | 2 | 0 | 27.57886829 | 95.39174592  | <a href="https://www.inaturalist.org/observations/19516792">https://www.inaturalist.org/observations/19516792</a>   |
| 195 | <i>Acrocephalus stentoreus</i> | Clamorous Reed-warbler | 2015/6/12 | 0 | 0 | 34.01637278 | 74.81150832  | <a href="https://www.inaturalist.org/observations/61409391">https://www.inaturalist.org/observations/61409391</a>   |
| 196 | <i>Acrocephalus stentoreus</i> | Clamorous Reed-warbler | 2020/9/28 | 1 | 0 | 34.02483978 | 74.79733922  | <a href="https://www.inaturalist.org/observations/61111803">https://www.inaturalist.org/observations/61111803</a>   |
| 197 | <i>Acrocephalus stentoreus</i> | Clamorous Reed-warbler | 2020/8/14 | 1 | 0 | 34.03046490 | 74.79880169  | <a href="https://www.inaturalist.org/observations/63784959">https://www.inaturalist.org/observations/63784959</a>   |

| No | scientific name       | common name      | date       | NIA | NID | latitude    | longitude   | url                                                                                                                 |
|----|-----------------------|------------------|------------|-----|-----|-------------|-------------|---------------------------------------------------------------------------------------------------------------------|
| 1  | <i>Alauda gulgula</i> | Oriental Skylark | 2018/12/8  | 2   | 0   | 6.09418164  | 80.94968779 | <a href="https://www.inaturalist.org/observations/68549607">https://www.inaturalist.org/observations/68549607</a>   |
| 2  | <i>Alauda gulgula</i> | Oriental Skylark | 2011/1/23  | 3   | 0   | 6.18239875  | 81.23759865 | <a href="https://www.inaturalist.org/observations/57915478">https://www.inaturalist.org/observations/57915478</a>   |
| 3  | <i>Alauda gulgula</i> | Oriental Skylark | 2012/12/31 | 1   | 0   | 6.18388132  | 81.19325197 | <a href="https://www.inaturalist.org/observations/30547338">https://www.inaturalist.org/observations/30547338</a>   |
| 4  | <i>Alauda gulgula</i> | Oriental Skylark | 2015/11/10 | 2   | 0   | 6.31774392  | 81.36216974 | <a href="https://www.inaturalist.org/observations/63415533">https://www.inaturalist.org/observations/63415533</a>   |
| 5  | <i>Alauda gulgula</i> | Oriental Skylark | 2012/11/5  | 4   | 0   | 6.34112671  | 81.44922855 | <a href="https://www.inaturalist.org/observations/41228976">https://www.inaturalist.org/observations/41228976</a>   |
| 6  | <i>Alauda gulgula</i> | Oriental Skylark | 2017/12/28 | 1   | 0   | 6.38382589  | 81.55189158 | <a href="https://www.inaturalist.org/observations/14142760">https://www.inaturalist.org/observations/14142760</a>   |
| 7  | <i>Alauda gulgula</i> | Oriental Skylark | 2019/7/16  | 3   | 0   | 6.45249066  | 80.88582642 | <a href="https://www.inaturalist.org/observations/54823422">https://www.inaturalist.org/observations/54823422</a>   |
| 8  | <i>Alauda gulgula</i> | Oriental Skylark | 2015/2/23  | 1   | 0   | 6.49216867  | 80.87028639 | <a href="https://www.inaturalist.org/observations/36776728">https://www.inaturalist.org/observations/36776728</a>   |
| 9  | <i>Alauda gulgula</i> | Oriental Skylark | 2018/12/24 | 1   | 0   | 8.49270585  | 77.75093012 | <a href="https://www.inaturalist.org/observations/103628233">https://www.inaturalist.org/observations/103628233</a> |
| 10 | <i>Alauda gulgula</i> | Oriental Skylark | 2017/1/1   | 1   | 0   | 8.49622960  | 77.75593700 | <a href="https://www.inaturalist.org/observations/92338212">https://www.inaturalist.org/observations/92338212</a>   |
| 11 | <i>Alauda gulgula</i> | Oriental Skylark | 2015/12/24 | 2   | 0   | 8.57440259  | 77.79032165 | <a href="https://www.inaturalist.org/observations/66176550">https://www.inaturalist.org/observations/66176550</a>   |
| 12 | <i>Alauda gulgula</i> | Oriental Skylark | 2015/12/24 | 1   | 0   | 8.57448589  | 77.78958128 | <a href="https://www.inaturalist.org/observations/66176549">https://www.inaturalist.org/observations/66176549</a>   |
| 13 | <i>Alauda gulgula</i> | Oriental Skylark | 2021/11/21 | 2   | 0   | 9.25063150  | 76.56616220 | <a href="https://www.inaturalist.org/observations/102978839">https://www.inaturalist.org/observations/102978839</a> |
| 14 | <i>Alauda gulgula</i> | Oriental Skylark | 2020/1/1   | 1   | 0   | 10.52485667 | 76.15999000 | <a href="https://www.inaturalist.org/observations/44103389">https://www.inaturalist.org/observations/44103389</a>   |
| 15 | <i>Alauda gulgula</i> | Oriental Skylark | 2020/1/1   | 1   | 0   | 10.52603000 | 76.15893167 | <a href="https://www.inaturalist.org/observations/44103400">https://www.inaturalist.org/observations/44103400</a>   |
| 16 | <i>Alauda gulgula</i> | Oriental Skylark | 2020/1/6   | 2   | 0   | 10.52618167 | 76.15949833 | <a href="https://www.inaturalist.org/observations/44162247">https://www.inaturalist.org/observations/44162247</a>   |
| 17 | <i>Alauda gulgula</i> | Oriental Skylark | 2016/1/20  | 1   | 0   | 10.83178900 | 76.71409600 | <a href="https://www.inaturalist.org/observations/7281245">https://www.inaturalist.org/observations/7281245</a>     |
| 18 | <i>Alauda gulgula</i> | Oriental Skylark | 2021/12/19 | 1   | 0   | 11.01240759 | 79.84238125 | <a href="https://www.inaturalist.org/observations/103410089">https://www.inaturalist.org/observations/103410089</a> |
| 19 | <i>Alauda gulgula</i> | Oriental Skylark | 2021/9/3   | 1   | 0   | 11.07430916 | 79.85120773 | <a href="https://www.inaturalist.org/observations/93456239">https://www.inaturalist.org/observations/93456239</a>   |
| 20 | <i>Alauda gulgula</i> | Oriental Skylark | 2022/1/14  | 1   | 0   | 11.12315726 | 79.81049348 | <a href="https://www.inaturalist.org/observations/104977874">https://www.inaturalist.org/observations/104977874</a> |
| 21 | <i>Alauda gulgula</i> | Oriental Skylark | 2021/1/3   | 1   | 0   | 11.32042530 | 76.62463570 | <a href="https://www.inaturalist.org/observations/120876072">https://www.inaturalist.org/observations/120876072</a> |
| 22 | <i>Alauda gulgula</i> | Oriental Skylark | 2017/9/29  | 1   | 0   | 11.43438713 | 78.03794259 | <a href="https://www.inaturalist.org/observations/92688756">https://www.inaturalist.org/observations/92688756</a>   |

|    |                       |                  |            |   |   |             |             |                                                                                                                     |
|----|-----------------------|------------------|------------|---|---|-------------|-------------|---------------------------------------------------------------------------------------------------------------------|
| 23 | <i>Alauda gulgula</i> | Oriental Skylark | 2020/10/7  | 1 | 0 | 11.83129974 | 76.98281714 | <a href="https://www.inaturalist.org/observations/86542899">https://www.inaturalist.org/observations/86542899</a>   |
| 24 | <i>Alauda gulgula</i> | Oriental Skylark | 2020/12/5  | 1 | 0 | 11.90131900 | 77.77199900 | <a href="https://www.inaturalist.org/observations/87715615">https://www.inaturalist.org/observations/87715615</a>   |
| 25 | <i>Alauda gulgula</i> | Oriental Skylark | 2021/7/17  | 1 | 0 | 11.90326500 | 77.76951000 | <a href="https://www.inaturalist.org/observations/87693553">https://www.inaturalist.org/observations/87693553</a>   |
| 26 | <i>Alauda gulgula</i> | Oriental Skylark | 2022/7/30  | 2 | 0 | 11.94468432 | 75.38493812 | <a href="https://www.inaturalist.org/observations/131554477">https://www.inaturalist.org/observations/131554477</a> |
| 27 | <i>Alauda gulgula</i> | Oriental Skylark | 2019/9/20  | 2 | 0 | 12.02896500 | 75.25411167 | <a href="https://www.inaturalist.org/observations/33136204">https://www.inaturalist.org/observations/33136204</a>   |
| 28 | <i>Alauda gulgula</i> | Oriental Skylark | 2019/10/15 | 1 | 0 | 12.02967667 | 75.25369500 | <a href="https://www.inaturalist.org/observations/34573212">https://www.inaturalist.org/observations/34573212</a>   |
| 29 | <i>Alauda gulgula</i> | Oriental Skylark | 2019/6/2   | 3 | 0 | 12.03155766 | 75.25693901 | <a href="https://www.inaturalist.org/observations/65925949">https://www.inaturalist.org/observations/65925949</a>   |
| 30 | <i>Alauda gulgula</i> | Oriental Skylark | 2019/9/5   | 1 | 0 | 12.03181667 | 75.25606500 | <a href="https://www.inaturalist.org/observations/32201124">https://www.inaturalist.org/observations/32201124</a>   |
| 31 | <i>Alauda gulgula</i> | Oriental Skylark | 2019/10/15 | 1 | 0 | 12.03213167 | 75.25636333 | <a href="https://www.inaturalist.org/observations/34572376">https://www.inaturalist.org/observations/34572376</a>   |
| 32 | <i>Alauda gulgula</i> | Oriental Skylark | 2019/10/15 | 1 | 0 | 12.03213500 | 75.25636000 | <a href="https://www.inaturalist.org/observations/34572378">https://www.inaturalist.org/observations/34572378</a>   |
| 33 | <i>Alauda gulgula</i> | Oriental Skylark | 2019/10/15 | 1 | 0 | 12.03213500 | 75.25636000 | <a href="https://www.inaturalist.org/observations/34573234">https://www.inaturalist.org/observations/34573234</a>   |
| 34 | <i>Alauda gulgula</i> | Oriental Skylark | 2019/10/15 | 1 | 0 | 12.03213500 | 75.25636500 | <a href="https://www.inaturalist.org/observations/34572380">https://www.inaturalist.org/observations/34572380</a>   |
| 35 | <i>Alauda gulgula</i> | Oriental Skylark | 2019/10/15 | 1 | 0 | 12.03215333 | 75.26139833 | <a href="https://www.inaturalist.org/observations/34572497">https://www.inaturalist.org/observations/34572497</a>   |
| 36 | <i>Alauda gulgula</i> | Oriental Skylark | 2019/10/13 | 1 | 0 | 12.03234633 | 75.25665645 | <a href="https://www.inaturalist.org/observations/97434431">https://www.inaturalist.org/observations/97434431</a>   |
| 37 | <i>Alauda gulgula</i> | Oriental Skylark | 2019/10/13 | 1 | 0 | 12.03234633 | 75.25665645 | <a href="https://www.inaturalist.org/observations/97434582">https://www.inaturalist.org/observations/97434582</a>   |
| 38 | <i>Alauda gulgula</i> | Oriental Skylark | 2019/10/13 | 1 | 0 | 12.03234633 | 75.25665645 | <a href="https://www.inaturalist.org/observations/110009343">https://www.inaturalist.org/observations/110009343</a> |
| 39 | <i>Alauda gulgula</i> | Oriental Skylark | 2022/3/26  | 1 | 0 | 12.03234633 | 75.25665645 | <a href="https://www.inaturalist.org/observations/113318392">https://www.inaturalist.org/observations/113318392</a> |
| 40 | <i>Alauda gulgula</i> | Oriental Skylark | 2022/4/29  | 0 | 0 | 12.03234633 | 75.25665645 | <a href="https://www.inaturalist.org/observations/113332868">https://www.inaturalist.org/observations/113332868</a> |
| 41 | <i>Alauda gulgula</i> | Oriental Skylark | 2022/4/29  | 1 | 0 | 12.03234633 | 75.25665645 | <a href="https://www.inaturalist.org/observations/113332903">https://www.inaturalist.org/observations/113332903</a> |
| 42 | <i>Alauda gulgula</i> | Oriental Skylark | 2022/3/26  | 0 | 0 | 12.03234633 | 75.25665645 | <a href="https://www.inaturalist.org/observations/116545736">https://www.inaturalist.org/observations/116545736</a> |
| 43 | <i>Alauda gulgula</i> | Oriental Skylark | 2022/3/26  | 1 | 0 | 12.03234633 | 75.25665645 | <a href="https://www.inaturalist.org/observations/116548255">https://www.inaturalist.org/observations/116548255</a> |
| 44 | <i>Alauda gulgula</i> | Oriental Skylark | 2022/3/26  | 0 | 0 | 12.03234633 | 75.25665645 | <a href="https://www.inaturalist.org/observations/116548464">https://www.inaturalist.org/observations/116548464</a> |
| 45 | <i>Alauda gulgula</i> | Oriental Skylark | 2022/7/24  | 2 | 0 | 12.03234633 | 75.25665645 | <a href="https://www.inaturalist.org/observations/130350442">https://www.inaturalist.org/observations/130350442</a> |

|    |                       |                  |            |   |   |             |             |                                                                                                                     |
|----|-----------------------|------------------|------------|---|---|-------------|-------------|---------------------------------------------------------------------------------------------------------------------|
| 46 | <i>Alauda gulgula</i> | Oriental Skylark | 2022/7/24  | 2 | 0 | 12.03234633 | 75.25665645 | <a href="https://www.inaturalist.org/observations/130350558">https://www.inaturalist.org/observations/130350558</a> |
| 47 | <i>Alauda gulgula</i> | Oriental Skylark | 2022/7/24  | 2 | 0 | 12.03234633 | 75.25665645 | <a href="https://www.inaturalist.org/observations/130350976">https://www.inaturalist.org/observations/130350976</a> |
| 48 | <i>Alauda gulgula</i> | Oriental Skylark | 2022/7/24  | 1 | 0 | 12.03234633 | 75.25665645 | <a href="https://www.inaturalist.org/observations/130351215">https://www.inaturalist.org/observations/130351215</a> |
| 49 | <i>Alauda gulgula</i> | Oriental Skylark | 2022/7/24  | 1 | 0 | 12.03234633 | 75.25665645 | <a href="https://www.inaturalist.org/observations/130351244">https://www.inaturalist.org/observations/130351244</a> |
| 50 | <i>Alauda gulgula</i> | Oriental Skylark | 2022/7/30  | 0 | 0 | 12.03234633 | 75.25665645 | <a href="https://www.inaturalist.org/observations/131553219">https://www.inaturalist.org/observations/131553219</a> |
| 51 | <i>Alauda gulgula</i> | Oriental Skylark | 2022/7/30  | 2 | 0 | 12.03234633 | 75.25665645 | <a href="https://www.inaturalist.org/observations/131554610">https://www.inaturalist.org/observations/131554610</a> |
| 52 | <i>Alauda gulgula</i> | Oriental Skylark | 2022/7/30  | 1 | 0 | 12.03234633 | 75.25665645 | <a href="https://www.inaturalist.org/observations/131557711">https://www.inaturalist.org/observations/131557711</a> |
| 53 | <i>Alauda gulgula</i> | Oriental Skylark | 2022/7/30  | 2 | 0 | 12.03234633 | 75.25665645 | <a href="https://www.inaturalist.org/observations/131860729">https://www.inaturalist.org/observations/131860729</a> |
| 54 | <i>Alauda gulgula</i> | Oriental Skylark | 2022/7/30  | 1 | 0 | 12.03234633 | 75.25665645 | <a href="https://www.inaturalist.org/observations/131860875">https://www.inaturalist.org/observations/131860875</a> |
| 55 | <i>Alauda gulgula</i> | Oriental Skylark | 2022/7/30  | 1 | 0 | 12.03234633 | 75.25665645 | <a href="https://www.inaturalist.org/observations/131860910">https://www.inaturalist.org/observations/131860910</a> |
| 56 | <i>Alauda gulgula</i> | Oriental Skylark | 2022/7/30  | 1 | 0 | 12.03234633 | 75.25665645 | <a href="https://www.inaturalist.org/observations/131863065">https://www.inaturalist.org/observations/131863065</a> |
| 57 | <i>Alauda gulgula</i> | Oriental Skylark | 2022/8/21  | 1 | 0 | 12.03234633 | 75.25665645 | <a href="https://www.inaturalist.org/observations/135649716">https://www.inaturalist.org/observations/135649716</a> |
| 58 | <i>Alauda gulgula</i> | Oriental Skylark | 2022/8/21  | 2 | 0 | 12.03234633 | 75.25665645 | <a href="https://www.inaturalist.org/observations/135649847">https://www.inaturalist.org/observations/135649847</a> |
| 59 | <i>Alauda gulgula</i> | Oriental Skylark | 2022/8/28  | 0 | 0 | 12.03234633 | 75.25665645 | <a href="https://www.inaturalist.org/observations/136676793">https://www.inaturalist.org/observations/136676793</a> |
| 60 | <i>Alauda gulgula</i> | Oriental Skylark | 2022/8/28  | 0 | 0 | 12.03234633 | 75.25665645 | <a href="https://www.inaturalist.org/observations/136698496">https://www.inaturalist.org/observations/136698496</a> |
| 61 | <i>Alauda gulgula</i> | Oriental Skylark | 2022/8/28  | 0 | 0 | 12.03234633 | 75.25665645 | <a href="https://www.inaturalist.org/observations/136698599">https://www.inaturalist.org/observations/136698599</a> |
| 62 | <i>Alauda gulgula</i> | Oriental Skylark | 2022/8/28  | 0 | 0 | 12.03234633 | 75.25665645 | <a href="https://www.inaturalist.org/observations/136702789">https://www.inaturalist.org/observations/136702789</a> |
| 63 | <i>Alauda gulgula</i> | Oriental Skylark | 2022/8/28  | 0 | 0 | 12.03234633 | 75.25665645 | <a href="https://www.inaturalist.org/observations/136702920">https://www.inaturalist.org/observations/136702920</a> |
| 64 | <i>Alauda gulgula</i> | Oriental Skylark | 2022/8/28  | 1 | 0 | 12.03234633 | 75.25665645 | <a href="https://www.inaturalist.org/observations/136703012">https://www.inaturalist.org/observations/136703012</a> |
| 65 | <i>Alauda gulgula</i> | Oriental Skylark | 2022/9/4   | 0 | 0 | 12.03234633 | 75.25665645 | <a href="https://www.inaturalist.org/observations/137132492">https://www.inaturalist.org/observations/137132492</a> |
| 66 | <i>Alauda gulgula</i> | Oriental Skylark | 2019/6/30  | 1 | 0 | 12.03234666 | 75.25665645 | <a href="https://www.inaturalist.org/observations/46394157">https://www.inaturalist.org/observations/46394157</a>   |
| 67 | <i>Alauda gulgula</i> | Oriental Skylark | 2019/10/15 | 1 | 0 | 12.03234670 | 75.25665640 | <a href="https://www.inaturalist.org/observations/34572279">https://www.inaturalist.org/observations/34572279</a>   |
| 68 | <i>Alauda gulgula</i> | Oriental Skylark | 2019/10/15 | 1 | 0 | 12.03234670 | 75.25665640 | <a href="https://www.inaturalist.org/observations/34572280">https://www.inaturalist.org/observations/34572280</a>   |

|    |                       |                  |            |   |   |             |             |                                                                                                                     |
|----|-----------------------|------------------|------------|---|---|-------------|-------------|---------------------------------------------------------------------------------------------------------------------|
| 69 | <i>Alauda gulgula</i> | Oriental Skylark | 2019/10/15 | 1 | 0 | 12.03234670 | 75.25665640 | <a href="https://www.inaturalist.org/observations/34572340">https://www.inaturalist.org/observations/34572340</a>   |
| 70 | <i>Alauda gulgula</i> | Oriental Skylark | 2019/10/15 | 1 | 0 | 12.03234670 | 75.25665640 | <a href="https://www.inaturalist.org/observations/34572341">https://www.inaturalist.org/observations/34572341</a>   |
| 71 | <i>Alauda gulgula</i> | Oriental Skylark | 2019/10/15 | 1 | 0 | 12.03234670 | 75.25665640 | <a href="https://www.inaturalist.org/observations/34573219">https://www.inaturalist.org/observations/34573219</a>   |
| 72 | <i>Alauda gulgula</i> | Oriental Skylark | 2019/10/15 | 1 | 0 | 12.03234670 | 75.25665640 | <a href="https://www.inaturalist.org/observations/34573220">https://www.inaturalist.org/observations/34573220</a>   |
| 73 | <i>Alauda gulgula</i> | Oriental Skylark | 2019/10/15 | 1 | 0 | 12.03234670 | 75.25665640 | <a href="https://www.inaturalist.org/observations/34573221">https://www.inaturalist.org/observations/34573221</a>   |
| 74 | <i>Alauda gulgula</i> | Oriental Skylark | 2019/10/15 | 2 | 0 | 12.03234670 | 75.25665640 | <a href="https://www.inaturalist.org/observations/34573222">https://www.inaturalist.org/observations/34573222</a>   |
| 75 | <i>Alauda gulgula</i> | Oriental Skylark | 2019/10/15 | 1 | 0 | 12.03234670 | 75.25665640 | <a href="https://www.inaturalist.org/observations/34573223">https://www.inaturalist.org/observations/34573223</a>   |
| 76 | <i>Alauda gulgula</i> | Oriental Skylark | 2019/10/27 | 1 | 0 | 12.03234670 | 75.25665640 | <a href="https://www.inaturalist.org/observations/67238851">https://www.inaturalist.org/observations/67238851</a>   |
| 77 | <i>Alauda gulgula</i> | Oriental Skylark | 2021/9/11  | 1 | 0 | 12.03234670 | 75.25665640 | <a href="https://www.inaturalist.org/observations/94542574">https://www.inaturalist.org/observations/94542574</a>   |
| 78 | <i>Alauda gulgula</i> | Oriental Skylark | 2021/9/11  | 1 | 0 | 12.03234670 | 75.25665640 | <a href="https://www.inaturalist.org/observations/94542580">https://www.inaturalist.org/observations/94542580</a>   |
| 79 | <i>Alauda gulgula</i> | Oriental Skylark | 2021/9/11  | 1 | 0 | 12.03234670 | 75.25665640 | <a href="https://www.inaturalist.org/observations/94542582">https://www.inaturalist.org/observations/94542582</a>   |
| 80 | <i>Alauda gulgula</i> | Oriental Skylark | 2021/9/11  | 1 | 0 | 12.03234670 | 75.25665640 | <a href="https://www.inaturalist.org/observations/94542610">https://www.inaturalist.org/observations/94542610</a>   |
| 81 | <i>Alauda gulgula</i> | Oriental Skylark | 2021/9/11  | 1 | 0 | 12.03234670 | 75.25665640 | <a href="https://www.inaturalist.org/observations/94542613">https://www.inaturalist.org/observations/94542613</a>   |
| 82 | <i>Alauda gulgula</i> | Oriental Skylark | 2021/9/11  | 1 | 0 | 12.03234670 | 75.25665640 | <a href="https://www.inaturalist.org/observations/94542618">https://www.inaturalist.org/observations/94542618</a>   |
| 83 | <i>Alauda gulgula</i> | Oriental Skylark | 2021/9/16  | 1 | 0 | 12.03234670 | 75.25665640 | <a href="https://www.inaturalist.org/observations/95050240">https://www.inaturalist.org/observations/95050240</a>   |
| 84 | <i>Alauda gulgula</i> | Oriental Skylark | 2021/9/23  | 1 | 0 | 12.03234670 | 75.25665640 | <a href="https://www.inaturalist.org/observations/95875553">https://www.inaturalist.org/observations/95875553</a>   |
| 85 | <i>Alauda gulgula</i> | Oriental Skylark | 2021/8/23  | 1 | 0 | 12.03237190 | 75.25665645 | <a href="https://www.inaturalist.org/observations/92763630">https://www.inaturalist.org/observations/92763630</a>   |
| 86 | <i>Alauda gulgula</i> | Oriental Skylark | 2021/8/22  | 0 | 0 | 12.03237190 | 75.25665645 | <a href="https://www.inaturalist.org/observations/92764349">https://www.inaturalist.org/observations/92764349</a>   |
| 87 | <i>Alauda gulgula</i> | Oriental Skylark | 2022/8/13  | 1 | 0 | 12.03237190 | 75.25665645 | <a href="https://www.inaturalist.org/observations/136584199">https://www.inaturalist.org/observations/136584199</a> |
| 88 | <i>Alauda gulgula</i> | Oriental Skylark | 2019/10/15 | 1 | 0 | 12.03238500 | 75.26051333 | <a href="https://www.inaturalist.org/observations/34572499">https://www.inaturalist.org/observations/34572499</a>   |
| 89 | <i>Alauda gulgula</i> | Oriental Skylark | 2019/10/15 | 1 | 0 | 12.03238500 | 75.26057833 | <a href="https://www.inaturalist.org/observations/34572498">https://www.inaturalist.org/observations/34572498</a>   |
| 90 | <i>Alauda gulgula</i> | Oriental Skylark | 2019/10/15 | 1 | 0 | 12.03247833 | 75.25619500 | <a href="https://www.inaturalist.org/observations/34572391">https://www.inaturalist.org/observations/34572391</a>   |
| 91 | <i>Alauda gulgula</i> | Oriental Skylark | 2019/10/15 | 1 | 0 | 12.03249333 | 75.25617333 | <a href="https://www.inaturalist.org/observations/34572395">https://www.inaturalist.org/observations/34572395</a>   |

|     |                       |                  |            |   |   |             |             |                                                                                                                     |
|-----|-----------------------|------------------|------------|---|---|-------------|-------------|---------------------------------------------------------------------------------------------------------------------|
| 92  | <i>Alauda gulgula</i> | Oriental Skylark | 2019/10/15 | 1 | 0 | 12.03249333 | 75.25617500 | <a href="https://www.inaturalist.org/observations/34572408">https://www.inaturalist.org/observations/34572408</a>   |
| 93  | <i>Alauda gulgula</i> | Oriental Skylark | 2019/10/15 | 1 | 0 | 12.03249333 | 75.25618167 | <a href="https://www.inaturalist.org/observations/34572411">https://www.inaturalist.org/observations/34572411</a>   |
| 94  | <i>Alauda gulgula</i> | Oriental Skylark | 2019/10/15 | 1 | 0 | 12.03249500 | 75.25618500 | <a href="https://www.inaturalist.org/observations/34572413">https://www.inaturalist.org/observations/34572413</a>   |
| 95  | <i>Alauda gulgula</i> | Oriental Skylark | 2019/10/15 | 1 | 0 | 12.03249667 | 75.25619000 | <a href="https://www.inaturalist.org/observations/34572417">https://www.inaturalist.org/observations/34572417</a>   |
| 96  | <i>Alauda gulgula</i> | Oriental Skylark | 2019/10/15 | 1 | 0 | 12.03249833 | 75.25619167 | <a href="https://www.inaturalist.org/observations/34572421">https://www.inaturalist.org/observations/34572421</a>   |
| 97  | <i>Alauda gulgula</i> | Oriental Skylark | 2019/10/15 | 1 | 0 | 12.03288333 | 75.26143167 | <a href="https://www.inaturalist.org/observations/34572485">https://www.inaturalist.org/observations/34572485</a>   |
| 98  | <i>Alauda gulgula</i> | Oriental Skylark | 2019/10/15 | 1 | 0 | 12.03290167 | 75.26144167 | <a href="https://www.inaturalist.org/observations/34572484">https://www.inaturalist.org/observations/34572484</a>   |
| 99  | <i>Alauda gulgula</i> | Oriental Skylark | 2019/10/15 | 1 | 0 | 12.03290333 | 75.26144167 | <a href="https://www.inaturalist.org/observations/34572483">https://www.inaturalist.org/observations/34572483</a>   |
| 100 | <i>Alauda gulgula</i> | Oriental Skylark | 2019/10/15 | 1 | 0 | 12.03301667 | 75.26131167 | <a href="https://www.inaturalist.org/observations/34572481">https://www.inaturalist.org/observations/34572481</a>   |
| 101 | <i>Alauda gulgula</i> | Oriental Skylark | 2019/10/15 | 1 | 0 | 12.03311667 | 75.26121333 | <a href="https://www.inaturalist.org/observations/34572473">https://www.inaturalist.org/observations/34572473</a>   |
| 102 | <i>Alauda gulgula</i> | Oriental Skylark | 2019/10/15 | 1 | 0 | 12.03312000 | 75.26120500 | <a href="https://www.inaturalist.org/observations/34572478">https://www.inaturalist.org/observations/34572478</a>   |
| 103 | <i>Alauda gulgula</i> | Oriental Skylark | 2019/10/15 | 1 | 0 | 12.03325667 | 75.26109667 | <a href="https://www.inaturalist.org/observations/34572470">https://www.inaturalist.org/observations/34572470</a>   |
| 104 | <i>Alauda gulgula</i> | Oriental Skylark | 2019/10/15 | 2 | 0 | 12.03332167 | 75.25457833 | <a href="https://www.inaturalist.org/observations/34573225">https://www.inaturalist.org/observations/34573225</a>   |
| 105 | <i>Alauda gulgula</i> | Oriental Skylark | 2019/10/15 | 1 | 0 | 12.03341833 | 75.26071167 | <a href="https://www.inaturalist.org/observations/34572465">https://www.inaturalist.org/observations/34572465</a>   |
| 106 | <i>Alauda gulgula</i> | Oriental Skylark | 2019/5/24  | 2 | 0 | 12.03350833 | 75.26008833 | <a href="https://www.inaturalist.org/observations/29234776">https://www.inaturalist.org/observations/29234776</a>   |
| 107 | <i>Alauda gulgula</i> | Oriental Skylark | 2022/6/22  | 1 | 0 | 12.03371167 | 75.25996833 | <a href="https://www.inaturalist.org/observations/126932785">https://www.inaturalist.org/observations/126932785</a> |
| 108 | <i>Alauda gulgula</i> | Oriental Skylark | 2019/10/15 | 1 | 0 | 12.03567833 | 75.25470000 | <a href="https://www.inaturalist.org/observations/34572446">https://www.inaturalist.org/observations/34572446</a>   |
| 109 | <i>Alauda gulgula</i> | Oriental Skylark | 2019/11/25 | 1 | 0 | 12.04009244 | 75.29748503 | <a href="https://www.inaturalist.org/observations/110001528">https://www.inaturalist.org/observations/110001528</a> |
| 110 | <i>Alauda gulgula</i> | Oriental Skylark | 2022/5/6   | 2 | 0 | 12.15344666 | 76.67556111 | <a href="https://www.inaturalist.org/observations/129535110">https://www.inaturalist.org/observations/129535110</a> |
| 111 | <i>Alauda gulgula</i> | Oriental Skylark | 2016/10/27 | 0 | 0 | 12.17115774 | 75.83730486 | <a href="https://www.inaturalist.org/observations/92801541">https://www.inaturalist.org/observations/92801541</a>   |
| 112 | <i>Alauda gulgula</i> | Oriental Skylark | 2015/6/28  | 0 | 0 | 12.18060864 | 76.72620090 | <a href="https://www.inaturalist.org/observations/91381541">https://www.inaturalist.org/observations/91381541</a>   |
| 113 | <i>Alauda gulgula</i> | Oriental Skylark | 2017/9/24  | 1 | 0 | 12.21041795 | 79.03337682 | <a href="https://www.inaturalist.org/observations/95924958">https://www.inaturalist.org/observations/95924958</a>   |
| 114 | <i>Alauda gulgula</i> | Oriental Skylark | 2017/9/24  | 3 | 0 | 12.24059467 | 78.95612374 | <a href="https://www.inaturalist.org/observations/134958312">https://www.inaturalist.org/observations/134958312</a> |

|     |                       |                  |           |   |   |             |             |                                                                                                                     |
|-----|-----------------------|------------------|-----------|---|---|-------------|-------------|---------------------------------------------------------------------------------------------------------------------|
| 115 | <i>Alauda gulgula</i> | Oriental Skylark | 2015/9/27 | 0 | 0 | 12.28234021 | 76.32413459 | <a href="https://www.inaturalist.org/observations/92777200">https://www.inaturalist.org/observations/92777200</a>   |
| 116 | <i>Alauda gulgula</i> | Oriental Skylark | 2021/8/1  | 0 | 0 | 12.35129825 | 76.69519351 | <a href="https://www.inaturalist.org/observations/90002659">https://www.inaturalist.org/observations/90002659</a>   |
| 117 | <i>Alauda gulgula</i> | Oriental Skylark | 2022/6/18 | 2 | 0 | 12.40299200 | 76.44404600 | <a href="https://www.inaturalist.org/observations/122286203">https://www.inaturalist.org/observations/122286203</a> |
| 118 | <i>Alauda gulgula</i> | Oriental Skylark | 2019/4/4  | 0 | 0 | 12.44404893 | 76.45928545 | <a href="https://www.inaturalist.org/observations/93257532">https://www.inaturalist.org/observations/93257532</a>   |
| 119 | <i>Alauda gulgula</i> | Oriental Skylark | 2020/2/18 | 0 | 0 | 12.44404893 | 76.45928545 | <a href="https://www.inaturalist.org/observations/93259679">https://www.inaturalist.org/observations/93259679</a>   |
| 120 | <i>Alauda gulgula</i> | Oriental Skylark | 2018/1/11 | 1 | 0 | 12.44404893 | 76.45928545 | <a href="https://www.inaturalist.org/observations/93269024">https://www.inaturalist.org/observations/93269024</a>   |
| 121 | <i>Alauda gulgula</i> | Oriental Skylark | 2018/1/21 | 0 | 0 | 12.44404893 | 76.45928545 | <a href="https://www.inaturalist.org/observations/93475328">https://www.inaturalist.org/observations/93475328</a>   |
| 122 | <i>Alauda gulgula</i> | Oriental Skylark | 2022/6/7  | 3 | 0 | 12.47068760 | 75.89405920 | <a href="https://www.inaturalist.org/observations/121411294">https://www.inaturalist.org/observations/121411294</a> |
| 123 | <i>Alauda gulgula</i> | Oriental Skylark | 2022/6/7  | 3 | 0 | 12.49438021 | 75.85903367 | <a href="https://www.inaturalist.org/observations/121410901">https://www.inaturalist.org/observations/121410901</a> |
| 124 | <i>Alauda gulgula</i> | Oriental Skylark | 2021/1/9  | 2 | 0 | 12.59458327 | 74.94718082 | <a href="https://www.inaturalist.org/observations/128443474">https://www.inaturalist.org/observations/128443474</a> |
| 125 | <i>Alauda gulgula</i> | Oriental Skylark | 2021/8/22 | 1 | 0 | 12.62845500 | 74.97677333 | <a href="https://www.inaturalist.org/observations/92343161">https://www.inaturalist.org/observations/92343161</a>   |
| 126 | <i>Alauda gulgula</i> | Oriental Skylark | 2020/1/12 | 0 | 0 | 12.68359230 | 80.14425400 | <a href="https://www.inaturalist.org/observations/37518264">https://www.inaturalist.org/observations/37518264</a>   |
| 127 | <i>Alauda gulgula</i> | Oriental Skylark | 2022/2/27 | 1 | 0 | 12.68359230 | 80.14425400 | <a href="https://www.inaturalist.org/observations/107752298">https://www.inaturalist.org/observations/107752298</a> |
| 128 | <i>Alauda gulgula</i> | Oriental Skylark | 2020/1/12 | 2 | 0 | 12.68535257 | 80.15015150 | <a href="https://www.inaturalist.org/observations/37521250">https://www.inaturalist.org/observations/37521250</a>   |
| 129 | <i>Alauda gulgula</i> | Oriental Skylark | 2016/5/4  | 5 | 0 | 12.68564139 | 80.14945139 | <a href="https://www.inaturalist.org/observations/22516526">https://www.inaturalist.org/observations/22516526</a>   |
| 130 | <i>Alauda gulgula</i> | Oriental Skylark | 2020/8/4  | 1 | 0 | 12.78647163 | 80.22066596 | <a href="https://www.inaturalist.org/observations/57312137">https://www.inaturalist.org/observations/57312137</a>   |
| 131 | <i>Alauda gulgula</i> | Oriental Skylark | 2020/8/4  | 1 | 0 | 12.78668665 | 80.22079470 | <a href="https://www.inaturalist.org/observations/57312138">https://www.inaturalist.org/observations/57312138</a>   |
| 132 | <i>Alauda gulgula</i> | Oriental Skylark | 2021/1/23 | 0 | 0 | 12.82189776 | 77.00029854 | <a href="https://www.inaturalist.org/observations/81677449">https://www.inaturalist.org/observations/81677449</a>   |
| 133 | <i>Alauda gulgula</i> | Oriental Skylark | 2020/11/8 | 0 | 0 | 12.82189776 | 77.00029854 | <a href="https://www.inaturalist.org/observations/97208365">https://www.inaturalist.org/observations/97208365</a>   |
| 134 | <i>Alauda gulgula</i> | Oriental Skylark | 2017/2/16 | 1 | 0 | 12.85050868 | 77.49145627 | <a href="https://www.inaturalist.org/observations/64915793">https://www.inaturalist.org/observations/64915793</a>   |
| 135 | <i>Alauda gulgula</i> | Oriental Skylark | 2020/5/11 | 1 | 0 | 12.91509453 | 77.46969799 | <a href="https://www.inaturalist.org/observations/48670601">https://www.inaturalist.org/observations/48670601</a>   |
| 136 | <i>Alauda gulgula</i> | Oriental Skylark | 2020/2/13 | 1 | 0 | 12.93764332 | 80.21768063 | <a href="https://www.inaturalist.org/observations/38666534">https://www.inaturalist.org/observations/38666534</a>   |
| 137 | <i>Alauda gulgula</i> | Oriental Skylark | 2019/7/1  | 0 | 0 | 12.96259988 | 76.90253177 | <a href="https://www.inaturalist.org/observations/95010220">https://www.inaturalist.org/observations/95010220</a>   |

|     |                       |                  |            |   |   |             |             |                                                                                                                     |
|-----|-----------------------|------------------|------------|---|---|-------------|-------------|---------------------------------------------------------------------------------------------------------------------|
| 138 | <i>Alauda gulgula</i> | Oriental Skylark | 2018/3/25  | 1 | 0 | 13.06830050 | 80.01839990 | <a href="https://www.inaturalist.org/observations/45850112">https://www.inaturalist.org/observations/45850112</a>   |
| 139 | <i>Alauda gulgula</i> | Oriental Skylark | 2018/10/27 | 2 | 0 | 13.07029150 | 77.76952550 | <a href="https://www.inaturalist.org/observations/18056019">https://www.inaturalist.org/observations/18056019</a>   |
| 140 | <i>Alauda gulgula</i> | Oriental Skylark | 2022/1/10  | 1 | 0 | 13.15028100 | 77.48914700 | <a href="https://www.inaturalist.org/observations/104919169">https://www.inaturalist.org/observations/104919169</a> |
| 141 | <i>Alauda gulgula</i> | Oriental Skylark | 2017/1/27  | 1 | 0 | 13.15593391 | 77.49077246 | <a href="https://www.inaturalist.org/observations/64929579">https://www.inaturalist.org/observations/64929579</a>   |
| 142 | <i>Alauda gulgula</i> | Oriental Skylark | 2020/4/16  | 2 | 0 | 13.55925333 | 75.57788000 | <a href="https://www.inaturalist.org/observations/42306042">https://www.inaturalist.org/observations/42306042</a>   |
| 143 | <i>Alauda gulgula</i> | Oriental Skylark | 2021/4/4   | 1 | 0 | 13.58570653 | 75.53086692 | <a href="https://www.inaturalist.org/observations/72915028">https://www.inaturalist.org/observations/72915028</a>   |
| 144 | <i>Alauda gulgula</i> | Oriental Skylark | 2020/7/7   | 1 | 0 | 13.59249809 | 75.48478648 | <a href="https://www.inaturalist.org/observations/52284153">https://www.inaturalist.org/observations/52284153</a>   |
| 145 | <i>Alauda gulgula</i> | Oriental Skylark | 2021/4/4   | 1 | 0 | 13.59284326 | 75.56150024 | <a href="https://www.inaturalist.org/observations/72914910">https://www.inaturalist.org/observations/72914910</a>   |
| 146 | <i>Alauda gulgula</i> | Oriental Skylark | 2021/4/3   | 1 | 0 | 13.59461323 | 75.53239148 | <a href="https://www.inaturalist.org/observations/72973124">https://www.inaturalist.org/observations/72973124</a>   |
| 147 | <i>Alauda gulgula</i> | Oriental Skylark | 2020/7/25  | 1 | 0 | 13.59658470 | 77.75633910 | <a href="https://www.inaturalist.org/observations/54259729">https://www.inaturalist.org/observations/54259729</a>   |
| 148 | <i>Alauda gulgula</i> | Oriental Skylark | 2022/2/7   | 1 | 0 | 13.65283833 | 79.60000333 | <a href="https://www.inaturalist.org/observations/111082990">https://www.inaturalist.org/observations/111082990</a> |
| 149 | <i>Alauda gulgula</i> | Oriental Skylark | 2017/12/25 | 1 | 0 | 13.72421330 | 80.12344490 | <a href="https://www.inaturalist.org/observations/46190269">https://www.inaturalist.org/observations/46190269</a>   |
| 150 | <i>Alauda gulgula</i> | Oriental Skylark | 2021/10/26 | 1 | 0 | 16.33073012 | 81.69718612 | <a href="https://www.inaturalist.org/observations/99615028">https://www.inaturalist.org/observations/99615028</a>   |
| 151 | <i>Alauda gulgula</i> | Oriental Skylark | 2021/8/10  | 2 | 0 | 16.34263512 | 81.66264765 | <a href="https://www.inaturalist.org/observations/92878006">https://www.inaturalist.org/observations/92878006</a>   |
| 152 | <i>Alauda gulgula</i> | Oriental Skylark | 2022/4/16  | 3 | 0 | 16.36355544 | 81.55696426 | <a href="https://www.inaturalist.org/observations/112027121">https://www.inaturalist.org/observations/112027121</a> |
| 153 | <i>Alauda gulgula</i> | Oriental Skylark | 2022/2/20  | 3 | 0 | 16.40877180 | 80.70754036 | <a href="https://www.inaturalist.org/observations/108113530">https://www.inaturalist.org/observations/108113530</a> |
| 154 | <i>Alauda gulgula</i> | Oriental Skylark | 2022/2/20  | 4 | 0 | 16.40877180 | 80.70754036 | <a href="https://www.inaturalist.org/observations/108113565">https://www.inaturalist.org/observations/108113565</a> |
| 155 | <i>Alauda gulgula</i> | Oriental Skylark | 2022/5/11  | 1 | 0 | 16.54489085 | 81.52124092 | <a href="https://www.inaturalist.org/observations/116578702">https://www.inaturalist.org/observations/116578702</a> |
| 156 | <i>Alauda gulgula</i> | Oriental Skylark | 2021/4/19  | 1 | 0 | 16.56216761 | 81.53060820 | <a href="https://www.inaturalist.org/observations/93127452">https://www.inaturalist.org/observations/93127452</a>   |
| 157 | <i>Alauda gulgula</i> | Oriental Skylark | 2020/11/29 | 0 | 0 | 16.57589266 | 80.68862217 | <a href="https://www.inaturalist.org/observations/92670119">https://www.inaturalist.org/observations/92670119</a>   |
| 158 | <i>Alauda gulgula</i> | Oriental Skylark | 2020/3/8   | 0 | 0 | 16.77634689 | 77.15534184 | <a href="https://www.inaturalist.org/observations/95630120">https://www.inaturalist.org/observations/95630120</a>   |
| 159 | <i>Alauda gulgula</i> | Oriental Skylark | 2020/1/23  | 1 | 0 | 16.84584446 | 75.88182492 | <a href="https://www.inaturalist.org/observations/48502112">https://www.inaturalist.org/observations/48502112</a>   |
| 160 | <i>Alauda gulgula</i> | Oriental Skylark | 2020/1/23  | 1 | 0 | 16.84584446 | 75.88182492 | <a href="https://www.inaturalist.org/observations/63679423">https://www.inaturalist.org/observations/63679423</a>   |



|     |                       |                  |            |   |   |             |              |                                                                                                                     |
|-----|-----------------------|------------------|------------|---|---|-------------|--------------|---------------------------------------------------------------------------------------------------------------------|
| 161 | <i>Alauda gulgula</i> | Oriental Skylark | 2019/5/22  | 1 | 0 | 16.88609009 | 75.70935188  | <a href="https://www.inaturalist.org/observations/48657952">https://www.inaturalist.org/observations/48657952</a>   |
| 162 | <i>Alauda gulgula</i> | Oriental Skylark | 2019/5/22  | 1 | 0 | 16.88609009 | 75.70935188  | <a href="https://www.inaturalist.org/observations/48657953">https://www.inaturalist.org/observations/48657953</a>   |
| 163 | <i>Alauda gulgula</i> | Oriental Skylark | 2019/6/28  | 1 | 0 | 16.88609009 | 75.70935188  | <a href="https://www.inaturalist.org/observations/48659150">https://www.inaturalist.org/observations/48659150</a>   |
| 164 | <i>Alauda gulgula</i> | Oriental Skylark | 2019/11/28 | 1 | 0 | 16.88650185 | 75.70990551  | <a href="https://www.inaturalist.org/observations/48867753">https://www.inaturalist.org/observations/48867753</a>   |
| 165 | <i>Alauda gulgula</i> | Oriental Skylark | 2019/12/5  | 1 | 0 | 16.88650185 | 75.70990551  | <a href="https://www.inaturalist.org/observations/48878336">https://www.inaturalist.org/observations/48878336</a>   |
| 166 | <i>Alauda gulgula</i> | Oriental Skylark | 2020/8/31  | 1 | 0 | 16.88650185 | 75.70990551  | <a href="https://www.inaturalist.org/observations/58143666">https://www.inaturalist.org/observations/58143666</a>   |
| 167 | <i>Alauda gulgula</i> | Oriental Skylark | 2021/10/16 | 2 | 0 | 17.11164084 | 75.72146357  | <a href="https://www.inaturalist.org/observations/98597693">https://www.inaturalist.org/observations/98597693</a>   |
| 168 | <i>Alauda gulgula</i> | Oriental Skylark | 2021/12/26 | 0 | 0 | 17.26193010 | 78.38797100  | <a href="https://www.inaturalist.org/observations/103874563">https://www.inaturalist.org/observations/103874563</a> |
| 169 | <i>Alauda gulgula</i> | Oriental Skylark | 2018/9/30  | 2 | 0 | 17.37626560 | 78.29886370  | <a href="https://www.inaturalist.org/observations/17303140">https://www.inaturalist.org/observations/17303140</a>   |
| 170 | <i>Alauda gulgula</i> | Oriental Skylark | 2018/9/30  | 2 | 0 | 17.37626560 | 78.29886370  | <a href="https://www.inaturalist.org/observations/17303145">https://www.inaturalist.org/observations/17303145</a>   |
| 171 | <i>Alauda gulgula</i> | Oriental Skylark | 2019/4/2   | 1 | 0 | 17.38113500 | 78.31638070  | <a href="https://www.inaturalist.org/observations/63633446">https://www.inaturalist.org/observations/63633446</a>   |
| 172 | <i>Alauda gulgula</i> | Oriental Skylark | 2020/3/10  | 0 | 0 | 17.45391449 | 76.99728338  | <a href="https://www.inaturalist.org/observations/95631666">https://www.inaturalist.org/observations/95631666</a>   |
| 173 | <i>Alauda gulgula</i> | Oriental Skylark | 2021/11/14 | 0 | 0 | 18.26768090 | 74.78636980  | <a href="https://www.inaturalist.org/observations/101937554">https://www.inaturalist.org/observations/101937554</a> |
| 174 | <i>Alauda gulgula</i> | Oriental Skylark | 2018/4/30  | 1 | 0 | 19.03615612 | 109.00634770 | <a href="https://www.inaturalist.org/observations/12159071">https://www.inaturalist.org/observations/12159071</a>   |
| 175 | <i>Alauda gulgula</i> | Oriental Skylark | 2015/2/15  | 4 | 0 | 19.20007140 | 73.07430410  | <a href="https://www.inaturalist.org/observations/108714528">https://www.inaturalist.org/observations/108714528</a> |
| 176 | <i>Alauda gulgula</i> | Oriental Skylark | 2015/2/15  | 4 | 0 | 19.20007140 | 73.07430410  | <a href="https://www.inaturalist.org/observations/108714531">https://www.inaturalist.org/observations/108714531</a> |
| 177 | <i>Alauda gulgula</i> | Oriental Skylark | 2020/11/7  | 0 | 0 | 19.21942330 | 73.12483440  | <a href="https://www.inaturalist.org/observations/64660783">https://www.inaturalist.org/observations/64660783</a>   |
| 178 | <i>Alauda gulgula</i> | Oriental Skylark | 2021/10/2  | 1 | 0 | 19.72080800 | 109.27225200 | <a href="https://www.inaturalist.org/observations/97908856">https://www.inaturalist.org/observations/97908856</a>   |
| 179 | <i>Alauda gulgula</i> | Oriental Skylark | 2021/5/21  | 2 | 0 | 19.91370362 | 82.64322940  | <a href="https://www.inaturalist.org/observations/79633147">https://www.inaturalist.org/observations/79633147</a>   |
| 180 | <i>Alauda gulgula</i> | Oriental Skylark | 2017/4/3   | 1 | 0 | 19.96840089 | 110.50782220 | <a href="https://www.inaturalist.org/observations/33543825">https://www.inaturalist.org/observations/33543825</a>   |
| 181 | <i>Alauda gulgula</i> | Oriental Skylark | 2019/10/12 | 1 | 0 | 21.00294181 | 81.45032968  | <a href="https://www.inaturalist.org/observations/68407210">https://www.inaturalist.org/observations/68407210</a>   |
| 182 | <i>Alauda gulgula</i> | Oriental Skylark | 2021/9/18  | 0 | 0 | 21.01360506 | 81.45435669  | <a href="https://www.inaturalist.org/observations/95273859">https://www.inaturalist.org/observations/95273859</a>   |
| 183 | <i>Alauda gulgula</i> | Oriental Skylark | 2022/3/9   | 2 | 0 | 21.01616176 | 81.45239063  | <a href="https://www.inaturalist.org/observations/116815893">https://www.inaturalist.org/observations/116815893</a> |

|     |                       |                  |            |   |   |             |              |                                                                                                                     |
|-----|-----------------------|------------------|------------|---|---|-------------|--------------|---------------------------------------------------------------------------------------------------------------------|
| 184 | <i>Alauda gulgula</i> | Oriental Skylark | 2021/3/10  | 1 | 0 | 21.05127542 | 81.46164894  | <a href="https://www.inaturalist.org/observations/70991057">https://www.inaturalist.org/observations/70991057</a>   |
| 185 | <i>Alauda gulgula</i> | Oriental Skylark | 2021/6/20  | 1 | 0 | 21.06912965 | 81.52061697  | <a href="https://www.inaturalist.org/observations/83754574">https://www.inaturalist.org/observations/83754574</a>   |
| 186 | <i>Alauda gulgula</i> | Oriental Skylark | 2017/10/27 | 1 | 0 | 21.18407382 | 81.37352664  | <a href="https://www.inaturalist.org/observations/78507524">https://www.inaturalist.org/observations/78507524</a>   |
| 187 | <i>Alauda gulgula</i> | Oriental Skylark | 2021/12/19 | 1 | 0 | 21.18427452 | 82.22203977  | <a href="https://www.inaturalist.org/observations/103514124">https://www.inaturalist.org/observations/103514124</a> |
| 188 | <i>Alauda gulgula</i> | Oriental Skylark | 2016/3/27  | 2 | 0 | 21.27153919 | 81.79441452  | <a href="https://www.inaturalist.org/observations/5080280">https://www.inaturalist.org/observations/5080280</a>     |
| 189 | <i>Alauda gulgula</i> | Oriental Skylark | 2018/9/5   | 2 | 0 | 21.52298603 | 81.90871753  | <a href="https://www.inaturalist.org/observations/16382936">https://www.inaturalist.org/observations/16382936</a>   |
| 190 | <i>Alauda gulgula</i> | Oriental Skylark | 2019/4/15  | 0 | 0 | 21.57687850 | 88.29233630  | <a href="https://www.inaturalist.org/observations/97936534">https://www.inaturalist.org/observations/97936534</a>   |
| 191 | <i>Alauda gulgula</i> | Oriental Skylark | 2019/4/15  | 0 | 0 | 21.57985960 | 88.30142410  | <a href="https://www.inaturalist.org/observations/97936535">https://www.inaturalist.org/observations/97936535</a>   |
| 192 | <i>Alauda gulgula</i> | Oriental Skylark | 2021/1/2   | 1 | 0 | 21.88947349 | 112.00438510 | <a href="https://www.inaturalist.org/observations/67453732">https://www.inaturalist.org/observations/67453732</a>   |
| 193 | <i>Alauda gulgula</i> | Oriental Skylark | 2022/7/6   | 1 | 0 | 21.91857074 | 120.84217610 | <a href="https://www.inaturalist.org/observations/126055774">https://www.inaturalist.org/observations/126055774</a> |
| 194 | <i>Alauda gulgula</i> | Oriental Skylark | 2019/10/12 | 1 | 0 | 21.91871390 | 120.84673810 | <a href="https://www.inaturalist.org/observations/34456677">https://www.inaturalist.org/observations/34456677</a>   |
| 195 | <i>Alauda gulgula</i> | Oriental Skylark | 2016/10/2  | 1 | 0 | 21.91935994 | 120.84371200 | <a href="https://www.inaturalist.org/observations/56514905">https://www.inaturalist.org/observations/56514905</a>   |
| 196 | <i>Alauda gulgula</i> | Oriental Skylark | 2018/4/3   | 2 | 0 | 21.92568700 | 120.84729000 | <a href="https://www.inaturalist.org/observations/11824109">https://www.inaturalist.org/observations/11824109</a>   |
| 197 | <i>Alauda gulgula</i> | Oriental Skylark | 2021/2/21  | 1 | 0 | 21.94414833 | 120.72763170 | <a href="https://www.inaturalist.org/observations/69967338">https://www.inaturalist.org/observations/69967338</a>   |
| 198 | <i>Alauda gulgula</i> | Oriental Skylark | 2020/9/24  | 1 | 0 | 22.03928374 | 120.72953230 | <a href="https://www.inaturalist.org/observations/60686300">https://www.inaturalist.org/observations/60686300</a>   |
| 199 | <i>Alauda gulgula</i> | Oriental Skylark | 2019/1/16  | 1 | 0 | 22.05971510 | 82.04343800  | <a href="https://www.inaturalist.org/observations/60721324">https://www.inaturalist.org/observations/60721324</a>   |
| 200 | <i>Alauda gulgula</i> | Oriental Skylark | 2019/4/7   | 2 | 0 | 22.07402910 | 120.72237550 | <a href="https://www.inaturalist.org/observations/22133800">https://www.inaturalist.org/observations/22133800</a>   |
| 201 | <i>Alauda gulgula</i> | Oriental Skylark | 2022/4/16  | 0 | 0 | 22.09256032 | 88.76125764  | <a href="https://www.inaturalist.org/observations/112236323">https://www.inaturalist.org/observations/112236323</a> |
| 202 | <i>Alauda gulgula</i> | Oriental Skylark | 2021/9/4   | 1 | 0 | 22.24788667 | 82.02089167  | <a href="https://www.inaturalist.org/observations/93751402">https://www.inaturalist.org/observations/93751402</a>   |
| 203 | <i>Alauda gulgula</i> | Oriental Skylark | 2022/9/3   | 3 | 0 | 22.24893110 | 82.01951858  | <a href="https://www.inaturalist.org/observations/133552968">https://www.inaturalist.org/observations/133552968</a> |
| 204 | <i>Alauda gulgula</i> | Oriental Skylark | 2020/2/17  | 1 | 0 | 22.24952067 | 82.02166409  | <a href="https://www.inaturalist.org/observations/79921695">https://www.inaturalist.org/observations/79921695</a>   |
| 205 | <i>Alauda gulgula</i> | Oriental Skylark | 2021/2/13  | 0 | 0 | 22.36270000 | 88.39060000  | <a href="https://www.inaturalist.org/observations/73499951">https://www.inaturalist.org/observations/73499951</a>   |
| 206 | <i>Alauda gulgula</i> | Oriental Skylark | 2021/2/17  | 1 | 0 | 22.36309435 | 88.39071966  | <a href="https://www.inaturalist.org/observations/81271557">https://www.inaturalist.org/observations/81271557</a>   |

|     |                       |                  |            |   |   |             |              |                                                                                                                     |
|-----|-----------------------|------------------|------------|---|---|-------------|--------------|---------------------------------------------------------------------------------------------------------------------|
| 207 | <i>Alauda gulgula</i> | Oriental Skylark | 2021/1/28  | 1 | 0 | 22.36379849 | 88.39165630  | <a href="https://www.inaturalist.org/observations/68793012">https://www.inaturalist.org/observations/68793012</a>   |
| 208 | <i>Alauda gulgula</i> | Oriental Skylark | 2022/4/20  | 1 | 0 | 22.49669880 | 120.49986040 | <a href="https://www.inaturalist.org/observations/112147974">https://www.inaturalist.org/observations/112147974</a> |
| 209 | <i>Alauda gulgula</i> | Oriental Skylark | 2022/4/24  | 1 | 0 | 22.49702402 | 120.49922150 | <a href="https://www.inaturalist.org/observations/112817690">https://www.inaturalist.org/observations/112817690</a> |
| 210 | <i>Alauda gulgula</i> | Oriental Skylark | 2019/5/11  | 2 | 0 | 22.50333100 | 78.43585080  | <a href="https://www.inaturalist.org/observations/56499083">https://www.inaturalist.org/observations/56499083</a>   |
| 211 | <i>Alauda gulgula</i> | Oriental Skylark | 2015/10/6  | 3 | 0 | 22.60505300 | 88.47500000  | <a href="http://www.inaturalist.org/observations/2097316">http://www.inaturalist.org/observations/2097316</a>       |
| 212 | <i>Alauda gulgula</i> | Oriental Skylark | 2022/7/23  | 2 | 0 | 22.60565627 | 88.45803435  | <a href="https://www.inaturalist.org/observations/127475632">https://www.inaturalist.org/observations/127475632</a> |
| 213 | <i>Alauda gulgula</i> | Oriental Skylark | 2020/8/23  | 1 | 0 | 22.63890109 | 120.60567400 | <a href="https://www.inaturalist.org/observations/57336531">https://www.inaturalist.org/observations/57336531</a>   |
| 214 | <i>Alauda gulgula</i> | Oriental Skylark | 2021/5/22  | 1 | 0 | 22.63963535 | 120.60633170 | <a href="https://www.inaturalist.org/observations/79735756">https://www.inaturalist.org/observations/79735756</a>   |
| 215 | <i>Alauda gulgula</i> | Oriental Skylark | 2020/11/8  | 1 | 0 | 22.64260998 | 120.60386410 | <a href="https://www.inaturalist.org/observations/64791673">https://www.inaturalist.org/observations/64791673</a>   |
| 216 | <i>Alauda gulgula</i> | Oriental Skylark | 2018/4/9   | 2 | 0 | 22.66422700 | 120.44143800 | <a href="https://www.inaturalist.org/observations/14711427">https://www.inaturalist.org/observations/14711427</a>   |
| 217 | <i>Alauda gulgula</i> | Oriental Skylark | 2020/12/28 | 1 | 0 | 22.68893400 | 88.32104000  | <a href="https://www.inaturalist.org/observations/67358575">https://www.inaturalist.org/observations/67358575</a>   |
| 218 | <i>Alauda gulgula</i> | Oriental Skylark | 2018/10/25 | 2 | 0 | 22.69206098 | 121.05834880 | <a href="https://www.inaturalist.org/observations/18089575">https://www.inaturalist.org/observations/18089575</a>   |
| 219 | <i>Alauda gulgula</i> | Oriental Skylark | 2022/4/4   | 1 | 0 | 22.73282495 | 120.30713830 | <a href="https://www.inaturalist.org/observations/110379748">https://www.inaturalist.org/observations/110379748</a> |
| 220 | <i>Alauda gulgula</i> | Oriental Skylark | 2021/5/9   | 1 | 0 | 22.80416040 | 88.33392340  | <a href="https://www.inaturalist.org/observations/97992285">https://www.inaturalist.org/observations/97992285</a>   |
| 221 | <i>Alauda gulgula</i> | Oriental Skylark | 2018/12/23 | 0 | 0 | 22.80763268 | 88.32934630  | <a href="https://www.inaturalist.org/observations/100377988">https://www.inaturalist.org/observations/100377988</a> |
| 222 | <i>Alauda gulgula</i> | Oriental Skylark | 2018/11/25 | 2 | 0 | 22.84712192 | 120.49699720 | <a href="https://www.inaturalist.org/observations/18649247">https://www.inaturalist.org/observations/18649247</a>   |
| 223 | <i>Alauda gulgula</i> | Oriental Skylark | 2020/2/11  | 1 | 0 | 22.89833582 | 72.08325869  | <a href="https://www.inaturalist.org/observations/72150947">https://www.inaturalist.org/observations/72150947</a>   |
| 224 | <i>Alauda gulgula</i> | Oriental Skylark | 2019/11/23 | 1 | 0 | 22.91017337 | 120.31226750 | <a href="https://www.inaturalist.org/observations/45049437">https://www.inaturalist.org/observations/45049437</a>   |
| 225 | <i>Alauda gulgula</i> | Oriental Skylark | 2020/8/22  | 1 | 0 | 22.91031946 | 120.31202650 | <a href="https://www.inaturalist.org/observations/57634783">https://www.inaturalist.org/observations/57634783</a>   |
| 226 | <i>Alauda gulgula</i> | Oriental Skylark | 2019/9/28  | 1 | 0 | 22.91034667 | 120.31259000 | <a href="https://www.inaturalist.org/observations/37194403">https://www.inaturalist.org/observations/37194403</a>   |
| 227 | <i>Alauda gulgula</i> | Oriental Skylark | 2021/5/22  | 1 | 0 | 22.91053129 | 120.31592490 | <a href="https://www.inaturalist.org/observations/81823302">https://www.inaturalist.org/observations/81823302</a>   |
| 228 | <i>Alauda gulgula</i> | Oriental Skylark | 2022/1/27  | 1 | 0 | 22.91341584 | 120.31177000 | <a href="https://www.inaturalist.org/observations/133233434">https://www.inaturalist.org/observations/133233434</a> |
| 229 | <i>Alauda gulgula</i> | Oriental Skylark | 2022/1/27  | 1 | 0 | 22.91341584 | 120.31177000 | <a href="https://www.inaturalist.org/observations/133233435">https://www.inaturalist.org/observations/133233435</a> |

|     |                       |                  |            |   |   |             |              |                                                                                                                     |
|-----|-----------------------|------------------|------------|---|---|-------------|--------------|---------------------------------------------------------------------------------------------------------------------|
| 230 | <i>Alauda gulgula</i> | Oriental Skylark | 2022/1/27  | 1 | 0 | 22.91341584 | 120.31177000 | <a href="https://www.inaturalist.org/observations/133233439">https://www.inaturalist.org/observations/133233439</a> |
| 231 | <i>Alauda gulgula</i> | Oriental Skylark | 2022/1/27  | 1 | 0 | 22.91341584 | 120.31177000 | <a href="https://www.inaturalist.org/observations/133233454">https://www.inaturalist.org/observations/133233454</a> |
| 232 | <i>Alauda gulgula</i> | Oriental Skylark | 2020/8/22  | 1 | 0 | 22.91405690 | 120.31208690 | <a href="https://www.inaturalist.org/observations/57541918">https://www.inaturalist.org/observations/57541918</a>   |
| 233 | <i>Alauda gulgula</i> | Oriental Skylark | 2021/5/2   | 1 | 0 | 22.91606290 | 120.31215270 | <a href="https://www.inaturalist.org/observations/77704835">https://www.inaturalist.org/observations/77704835</a>   |
| 234 | <i>Alauda gulgula</i> | Oriental Skylark | 2019/4/6   | 1 | 0 | 22.92131500 | 120.31230170 | <a href="https://www.inaturalist.org/observations/52767170">https://www.inaturalist.org/observations/52767170</a>   |
| 235 | <i>Alauda gulgula</i> | Oriental Skylark | 2018/9/29  | 2 | 0 | 22.92161628 | 120.31095300 | <a href="https://www.inaturalist.org/observations/17025419">https://www.inaturalist.org/observations/17025419</a>   |
| 236 | <i>Alauda gulgula</i> | Oriental Skylark | 2021/8/28  | 1 | 0 | 22.92182472 | 120.31129500 | <a href="https://www.inaturalist.org/observations/94709268">https://www.inaturalist.org/observations/94709268</a>   |
| 237 | <i>Alauda gulgula</i> | Oriental Skylark | 2018/5/10  | 1 | 0 | 22.92256677 | 120.31075510 | <a href="https://www.inaturalist.org/observations/81665989">https://www.inaturalist.org/observations/81665989</a>   |
| 238 | <i>Alauda gulgula</i> | Oriental Skylark | 2018/5/10  | 1 | 0 | 22.92295681 | 120.31058110 | <a href="https://www.inaturalist.org/observations/81665913">https://www.inaturalist.org/observations/81665913</a>   |
| 239 | <i>Alauda gulgula</i> | Oriental Skylark | 2019/4/27  | 2 | 0 | 22.92325833 | 120.31000500 | <a href="https://www.inaturalist.org/observations/25059936">https://www.inaturalist.org/observations/25059936</a>   |
| 240 | <i>Alauda gulgula</i> | Oriental Skylark | 2019/4/6   | 1 | 0 | 22.92499500 | 120.31002500 | <a href="https://www.inaturalist.org/observations/52767019">https://www.inaturalist.org/observations/52767019</a>   |
| 241 | <i>Alauda gulgula</i> | Oriental Skylark | 2018/5/10  | 1 | 0 | 22.92737703 | 120.30105480 | <a href="https://www.inaturalist.org/observations/81665914">https://www.inaturalist.org/observations/81665914</a>   |
| 242 | <i>Alauda gulgula</i> | Oriental Skylark | 2019/4/27  | 2 | 0 | 22.92825035 | 120.30021600 | <a href="https://www.inaturalist.org/observations/23275798">https://www.inaturalist.org/observations/23275798</a>   |
| 243 | <i>Alauda gulgula</i> | Oriental Skylark | 2020/4/25  | 1 | 0 | 22.93107351 | 120.26739950 | <a href="https://www.inaturalist.org/observations/43208979">https://www.inaturalist.org/observations/43208979</a>   |
| 244 | <i>Alauda gulgula</i> | Oriental Skylark | 2022/6/11  | 3 | 0 | 22.93354000 | 77.70981500  | <a href="https://www.inaturalist.org/observations/124768952">https://www.inaturalist.org/observations/124768952</a> |
| 245 | <i>Alauda gulgula</i> | Oriental Skylark | 2020/11/15 | 1 | 0 | 22.94316096 | 86.73708349  | <a href="https://www.inaturalist.org/observations/65285192">https://www.inaturalist.org/observations/65285192</a>   |
| 246 | <i>Alauda gulgula</i> | Oriental Skylark | 2020/11/15 | 2 | 0 | 22.94316096 | 86.73708349  | <a href="https://www.inaturalist.org/observations/65285196">https://www.inaturalist.org/observations/65285196</a>   |
| 247 | <i>Alauda gulgula</i> | Oriental Skylark | 2020/11/15 | 1 | 0 | 22.94316096 | 86.73708349  | <a href="https://www.inaturalist.org/observations/65285203">https://www.inaturalist.org/observations/65285203</a>   |
| 248 | <i>Alauda gulgula</i> | Oriental Skylark | 2020/11/1  | 1 | 0 | 22.99114007 | 86.99750511  | <a href="https://www.inaturalist.org/observations/63950875">https://www.inaturalist.org/observations/63950875</a>   |
| 249 | <i>Alauda gulgula</i> | Oriental Skylark | 2020/11/1  | 1 | 0 | 22.99116970 | 86.99751852  | <a href="https://www.inaturalist.org/observations/63950883">https://www.inaturalist.org/observations/63950883</a>   |
| 250 | <i>Alauda gulgula</i> | Oriental Skylark | 2020/11/9  | 1 | 0 | 22.99200651 | 87.00011464  | <a href="https://www.inaturalist.org/observations/64511167">https://www.inaturalist.org/observations/64511167</a>   |
| 251 | <i>Alauda gulgula</i> | Oriental Skylark | 2020/11/9  | 1 | 0 | 22.99212487 | 86.99997790  | <a href="https://www.inaturalist.org/observations/64511159">https://www.inaturalist.org/observations/64511159</a>   |
| 252 | <i>Alauda gulgula</i> | Oriental Skylark | 2020/11/9  | 1 | 0 | 22.99226961 | 86.99974314  | <a href="https://www.inaturalist.org/observations/64511165">https://www.inaturalist.org/observations/64511165</a>   |

|     |                            |                  |            |   |   |             |              |                                                                                                                     |
|-----|----------------------------|------------------|------------|---|---|-------------|--------------|---------------------------------------------------------------------------------------------------------------------|
| 253 | Alauda gulgula             | Oriental Skylark | 2020/11/9  | 1 | 0 | 22.99228404 | 86.99966402  | <a href="https://www.inaturalist.org/observations/64511166">https://www.inaturalist.org/observations/64511166</a>   |
| 254 | Alauda gulgula             | Oriental Skylark | 2020/12/16 | 0 | 0 | 22.99259099 | 86.99742530  | <a href="https://www.inaturalist.org/observations/66657078">https://www.inaturalist.org/observations/66657078</a>   |
| 255 | Alauda gulgula             | Oriental Skylark | 2020/11/21 | 1 | 0 | 22.99270251 | 87.00054282  | <a href="https://www.inaturalist.org/observations/65682905">https://www.inaturalist.org/observations/65682905</a>   |
| 256 | Alauda gulgula             | Oriental Skylark | 2020/11/20 | 1 | 0 | 22.99429960 | 86.99939895  | <a href="https://www.inaturalist.org/observations/65334717">https://www.inaturalist.org/observations/65334717</a>   |
| 257 | Alauda gulgula             | Oriental Skylark | 2020/11/20 | 1 | 0 | 22.99429960 | 86.99939895  | <a href="https://www.inaturalist.org/observations/65334718">https://www.inaturalist.org/observations/65334718</a>   |
| 258 | Alauda gulgula             | Oriental Skylark | 2014/3/9   | 1 | 0 | 23.00993290 | 120.15848740 | <a href="https://www.inaturalist.org/observations/56906415">https://www.inaturalist.org/observations/56906415</a>   |
| 259 | Alauda gulgula             | Oriental Skylark | 2017/4/4   | 2 | 0 | 23.08105713 | 120.16807850 | <a href="https://www.inaturalist.org/observations/29978969">https://www.inaturalist.org/observations/29978969</a>   |
| 260 | Alauda gulgula             | Oriental Skylark | 2021/5/14  | 1 | 0 | 23.08842832 | 120.19855320 | <a href="https://www.inaturalist.org/observations/82681090">https://www.inaturalist.org/observations/82681090</a>   |
| 261 | Alauda gulgula             | Oriental Skylark | 2021/5/14  | 1 | 0 | 23.08846862 | 120.19844060 | <a href="https://www.inaturalist.org/observations/82681094">https://www.inaturalist.org/observations/82681094</a>   |
| 262 | Alauda gulgula             | Oriental Skylark | 2022/2/8   | 2 | 0 | 23.09703118 | 121.20128100 | <a href="https://www.inaturalist.org/observations/106343615">https://www.inaturalist.org/observations/106343615</a> |
| 263 | Alauda gulgula<br>coelivox | Oriental Skylark | 2015/4/16  | 1 | 0 | 23.24860154 | 119.61399080 | <a href="https://www.inaturalist.org/observations/12172031">https://www.inaturalist.org/observations/12172031</a>   |
| 264 | Alauda gulgula<br>coelivox | Oriental Skylark | 2019/6/23  | 2 | 0 | 23.24916670 | 119.61555560 | <a href="https://www.inaturalist.org/observations/28266895">https://www.inaturalist.org/observations/28266895</a>   |
| 265 | Alauda gulgula<br>coelivox | Oriental Skylark | 2019/6/23  | 2 | 0 | 23.24916670 | 119.61555560 | <a href="https://www.inaturalist.org/observations/28268846">https://www.inaturalist.org/observations/28268846</a>   |
| 266 | Alauda gulgula<br>coelivox | Oriental Skylark | 2019/6/22  | 2 | 0 | 23.25583330 | 119.67250000 | <a href="https://www.inaturalist.org/observations/28266135">https://www.inaturalist.org/observations/28266135</a>   |
| 267 | Alauda gulgula<br>coelivox | Oriental Skylark | 2019/6/22  | 2 | 0 | 23.25583330 | 119.67250000 | <a href="https://www.inaturalist.org/observations/28266136">https://www.inaturalist.org/observations/28266136</a>   |
| 268 | Alauda gulgula             | Oriental Skylark | 2020/8/8   | 1 | 0 | 23.25953953 | 119.67078340 | <a href="https://www.inaturalist.org/observations/56928951">https://www.inaturalist.org/observations/56928951</a>   |
| 269 | Alauda gulgula<br>coelivox | Oriental Skylark | 2020/5/14  | 1 | 0 | 23.26033185 | 119.67080800 | <a href="https://www.inaturalist.org/observations/46210046">https://www.inaturalist.org/observations/46210046</a>   |
| 270 | Alauda gulgula             | Oriental Skylark | 2018/9/6   | 1 | 0 | 23.26134718 | 87.03561632  | <a href="https://www.inaturalist.org/observations/16263772">https://www.inaturalist.org/observations/16263772</a>   |
| 271 | Alauda gulgula             | Oriental Skylark | 2018/9/6   | 1 | 0 | 23.26868586 | 87.02619235  | <a href="https://www.inaturalist.org/observations/55576035">https://www.inaturalist.org/observations/55576035</a>   |
| 272 | Alauda gulgula             | Oriental Skylark | 2018/9/6   | 1 | 0 | 23.26868586 | 87.02619235  | <a href="https://www.inaturalist.org/observations/55576036">https://www.inaturalist.org/observations/55576036</a>   |
| 273 | Alauda gulgula             | Oriental Skylark | 2017/12/29 | 2 | 0 | 23.26934189 | 120.58312960 | <a href="https://www.inaturalist.org/observations/14196570">https://www.inaturalist.org/observations/14196570</a>   |
| 274 | Alauda gulgula             | Oriental Skylark | 2022/2/26  | 1 | 0 | 23.29024960 | 113.71532400 | <a href="https://www.inaturalist.org/observations/107999243">https://www.inaturalist.org/observations/107999243</a> |
| 275 | Alauda gulgula             | Oriental Skylark | 2022/4/21  | 1 | 0 | 23.29394333 | 121.27645500 | <a href="https://www.inaturalist.org/observations/119554621">https://www.inaturalist.org/observations/119554621</a> |

|     |                            |                  |           |   |   |             |              |                                                                                                                     |
|-----|----------------------------|------------------|-----------|---|---|-------------|--------------|---------------------------------------------------------------------------------------------------------------------|
| 276 | Alauda gulgula             | Oriental Skylark | 2018/8/17 | 2 | 0 | 23.35216660 | 120.17362400 | <a href="https://www.inaturalist.org/observations/15546329">https://www.inaturalist.org/observations/15546329</a>   |
| 277 | Alauda gulgula             | Oriental Skylark | 2021/5/22 | 1 | 0 | 23.38877730 | 121.34922070 | <a href="https://www.inaturalist.org/observations/87852044">https://www.inaturalist.org/observations/87852044</a>   |
| 278 | Alauda gulgula             | Oriental Skylark | 2020/9/23 | 1 | 0 | 23.40889667 | 120.38216500 | <a href="https://www.inaturalist.org/observations/61950799">https://www.inaturalist.org/observations/61950799</a>   |
| 279 | Alauda gulgula             | Oriental Skylark | 2016/1/8  | 2 | 0 | 23.41591606 | 121.34987730 | <a href="https://www.inaturalist.org/observations/14814718">https://www.inaturalist.org/observations/14814718</a>   |
| 280 | Alauda gulgula             | Oriental Skylark | 2021/2/15 | 1 | 0 | 23.43826058 | 120.25269640 | <a href="https://www.inaturalist.org/observations/81449412">https://www.inaturalist.org/observations/81449412</a>   |
| 281 | Alauda gulgula             | Oriental Skylark | 2022/4/21 | 2 | 0 | 23.45523667 | 121.38484670 | <a href="https://www.inaturalist.org/observations/112940637">https://www.inaturalist.org/observations/112940637</a> |
| 282 | Alauda gulgula             | Oriental Skylark | 2022/3/18 | 1 | 0 | 23.45605636 | 121.38048450 | <a href="https://www.inaturalist.org/observations/115496751">https://www.inaturalist.org/observations/115496751</a> |
| 283 | Alauda gulgula             | Oriental Skylark | 2019/4/27 | 1 | 0 | 23.46106629 | 120.51573510 | <a href="https://www.inaturalist.org/observations/23341073">https://www.inaturalist.org/observations/23341073</a>   |
| 284 | Alauda gulgula<br>coelivox | Oriental Skylark | 2020/4/27 | 1 | 0 | 23.52860500 | 119.56057830 | <a href="https://www.inaturalist.org/observations/43839091">https://www.inaturalist.org/observations/43839091</a>   |
| 285 | Alauda gulgula             | Oriental Skylark | 2022/6/28 | 1 | 0 | 23.54325650 | 120.27066430 | <a href="https://www.inaturalist.org/observations/124066950">https://www.inaturalist.org/observations/124066950</a> |
| 286 | Alauda gulgula             | Oriental Skylark | 2022/6/28 | 1 | 0 | 23.54326581 | 120.27065890 | <a href="https://www.inaturalist.org/observations/124066953">https://www.inaturalist.org/observations/124066953</a> |
| 287 | Alauda gulgula             | Oriental Skylark | 2019/12/7 | 1 | 0 | 23.55107510 | 119.59785020 | <a href="https://www.inaturalist.org/observations/90414802">https://www.inaturalist.org/observations/90414802</a>   |
| 288 | Alauda gulgula             | Oriental Skylark | 2015/8/1  | 1 | 0 | 23.55971000 | 87.33767200  | <a href="http://www.inaturalist.org/observations/1822998">http://www.inaturalist.org/observations/1822998</a>       |
| 289 | Alauda gulgula             | Oriental Skylark | 2021/1/11 | 0 | 0 | 23.56101700 | 88.29929500  | <a href="https://www.inaturalist.org/observations/67951625">https://www.inaturalist.org/observations/67951625</a>   |
| 290 | Alauda gulgula             | Oriental Skylark | 2020/2/13 | 0 | 0 | 23.56150290 | 119.68768610 | <a href="https://www.inaturalist.org/observations/39484176">https://www.inaturalist.org/observations/39484176</a>   |
| 291 | Alauda gulgula             | Oriental Skylark | 2022/5/20 | 1 | 0 | 23.56497000 | 119.48973000 | <a href="https://www.inaturalist.org/observations/120501448">https://www.inaturalist.org/observations/120501448</a> |
| 292 | Alauda gulgula             | Oriental Skylark | 2020/2/13 | 0 | 0 | 23.56526500 | 119.68250600 | <a href="https://www.inaturalist.org/observations/39484182">https://www.inaturalist.org/observations/39484182</a>   |
| 293 | Alauda gulgula<br>coelivox | Oriental Skylark | 2011/5/19 | 2 | 0 | 23.56577172 | 119.48889960 | <a href="https://www.inaturalist.org/observations/37393581">https://www.inaturalist.org/observations/37393581</a>   |
| 294 | Alauda gulgula             | Oriental Skylark | 2020/4/25 | 1 | 0 | 23.56758528 | 120.16587890 | <a href="https://www.inaturalist.org/observations/44296101">https://www.inaturalist.org/observations/44296101</a>   |
| 295 | Alauda gulgula             | Oriental Skylark | 2021/4/20 | 1 | 0 | 23.57134036 | 120.17243740 | <a href="https://www.inaturalist.org/observations/74716769">https://www.inaturalist.org/observations/74716769</a>   |
| 296 | Alauda gulgula             | Oriental Skylark | 2022/4/30 | 1 | 0 | 23.57305475 | 120.16986100 | <a href="https://www.inaturalist.org/observations/114454842">https://www.inaturalist.org/observations/114454842</a> |
| 297 | Alauda gulgula<br>coelivox | Oriental Skylark | 2022/6/5  | 1 | 0 | 23.57527451 | 119.68069050 | <a href="https://www.inaturalist.org/observations/120793300">https://www.inaturalist.org/observations/120793300</a> |
| 298 | Alauda gulgula<br>coelivox | Oriental Skylark | 2020/1/15 | 0 | 0 | 23.57554306 | 119.58436810 | <a href="https://www.inaturalist.org/observations/37709911">https://www.inaturalist.org/observations/37709911</a>   |

|     |                 |         |                  |            |   |   |             |              |                                                                                                                     |
|-----|-----------------|---------|------------------|------------|---|---|-------------|--------------|---------------------------------------------------------------------------------------------------------------------|
| 299 | Alauda coelivox | gulgula | Oriental Skylark | 2020/1/14  | 0 | 0 | 23.57594639 | 119.58424810 | <a href="https://www.inaturalist.org/observations/37709565">https://www.inaturalist.org/observations/37709565</a>   |
| 300 | Alauda coelivox | gulgula | Oriental Skylark | 2020/1/15  | 0 | 0 | 23.57599972 | 119.58544810 | <a href="https://www.inaturalist.org/observations/37709916">https://www.inaturalist.org/observations/37709916</a>   |
| 301 | Alauda          | gulgula | Oriental Skylark | 2017/12/23 | 1 | 0 | 23.57637788 | 119.58021980 | <a href="https://www.inaturalist.org/observations/90414805">https://www.inaturalist.org/observations/90414805</a>   |
| 302 | Alauda coelivox | gulgula | Oriental Skylark | 2022/6/6   | 0 | 0 | 23.57660886 | 119.58623540 | <a href="https://www.inaturalist.org/observations/120793309">https://www.inaturalist.org/observations/120793309</a> |
| 303 | Alauda coelivox | gulgula | Oriental Skylark | 2005/4/3   | 2 | 0 | 23.57736820 | 119.66150550 | <a href="https://www.inaturalist.org/observations/16280140">https://www.inaturalist.org/observations/16280140</a>   |
| 304 | Alauda coelivox | gulgula | Oriental Skylark | 2020/1/16  | 1 | 0 | 23.60449774 | 119.51921890 | <a href="https://www.inaturalist.org/observations/44750757">https://www.inaturalist.org/observations/44750757</a>   |
| 305 | Alauda coelivox | gulgula | Oriental Skylark | 2020/1/16  | 1 | 0 | 23.60454900 | 119.51924590 | <a href="https://www.inaturalist.org/observations/44750760">https://www.inaturalist.org/observations/44750760</a>   |
| 306 | Alauda          | gulgula | Oriental Skylark | 2020/1/16  | 1 | 0 | 23.60483647 | 119.51883260 | <a href="https://www.inaturalist.org/observations/44438833">https://www.inaturalist.org/observations/44438833</a>   |
| 307 | Alauda          | gulgula | Oriental Skylark | 2017/1/3   | 1 | 0 | 23.61763530 | 87.23988990  | <a href="https://www.inaturalist.org/observations/5426783">https://www.inaturalist.org/observations/5426783</a>     |
| 308 | Alauda          | gulgula | Oriental Skylark | 2018/9/20  | 2 | 0 | 23.62595900 | 119.50753900 | <a href="https://www.inaturalist.org/observations/17423904">https://www.inaturalist.org/observations/17423904</a>   |
| 309 | Alauda          | gulgula | Oriental Skylark | 2021/6/7   | 1 | 0 | 23.63276800 | 120.28851530 | <a href="https://www.inaturalist.org/observations/81949061">https://www.inaturalist.org/observations/81949061</a>   |
| 310 | Alauda          | gulgula | Oriental Skylark | 2022/3/24  | 1 | 0 | 23.63342821 | 120.28341350 | <a href="https://www.inaturalist.org/observations/109331407">https://www.inaturalist.org/observations/109331407</a> |
| 311 | Alauda          | gulgula | Oriental Skylark | 2022/3/2   | 1 | 0 | 23.63462067 | 120.23944010 | <a href="https://www.inaturalist.org/observations/107752155">https://www.inaturalist.org/observations/107752155</a> |
| 312 | Alauda          | gulgula | Oriental Skylark | 2022/3/2   | 1 | 0 | 23.63465843 | 120.24013710 | <a href="https://www.inaturalist.org/observations/107981013">https://www.inaturalist.org/observations/107981013</a> |
| 313 | Alauda          | gulgula | Oriental Skylark | 2021/6/27  | 1 | 0 | 23.71723103 | 120.36995070 | <a href="https://www.inaturalist.org/observations/84624573">https://www.inaturalist.org/observations/84624573</a>   |
| 314 | Alauda          | gulgula | Oriental Skylark | 2020/5/9   | 1 | 0 | 23.71803208 | 120.37095520 | <a href="https://www.inaturalist.org/observations/45345225">https://www.inaturalist.org/observations/45345225</a>   |
| 315 | Alauda          | gulgula | Oriental Skylark | 2019/8/29  | 2 | 0 | 23.73254802 | 120.48110860 | <a href="https://www.inaturalist.org/observations/31718155">https://www.inaturalist.org/observations/31718155</a>   |
| 316 | Alauda          | gulgula | Oriental Skylark | 2004/7/8   | 2 | 0 | 23.73272710 | 120.37165070 | <a href="https://www.inaturalist.org/observations/13814490">https://www.inaturalist.org/observations/13814490</a>   |
| 317 | Alauda          | gulgula | Oriental Skylark | 2021/10/15 | 1 | 0 | 23.77420940 | 121.46980140 | <a href="https://www.inaturalist.org/observations/98263258">https://www.inaturalist.org/observations/98263258</a>   |
| 318 | Alauda          | gulgula | Oriental Skylark | 2021/10/15 | 1 | 0 | 23.77424409 | 121.46970980 | <a href="https://www.inaturalist.org/observations/98263260">https://www.inaturalist.org/observations/98263260</a>   |
| 319 | Alauda          | gulgula | Oriental Skylark | 2021/12/25 | 1 | 0 | 23.80626528 | 121.50772020 | <a href="https://www.inaturalist.org/observations/106915960">https://www.inaturalist.org/observations/106915960</a> |
| 320 | Alauda          | gulgula | Oriental Skylark | 2022/6/2   | 0 | 0 | 23.80962566 | 121.53736530 | <a href="https://www.inaturalist.org/observations/120956551">https://www.inaturalist.org/observations/120956551</a> |
| 321 | Alauda          | gulgula | Oriental Skylark | 2019/4/10  | 2 | 0 | 23.81122258 | 120.68600370 | <a href="https://www.inaturalist.org/observations/22277030">https://www.inaturalist.org/observations/22277030</a>   |

|     |                       |                  |            |   |   |             |              |                                                                                                                     |
|-----|-----------------------|------------------|------------|---|---|-------------|--------------|---------------------------------------------------------------------------------------------------------------------|
| 322 | <i>Alauda gulgula</i> | Oriental Skylark | 2020/6/19  | 1 | 0 | 23.81877051 | 120.35738080 | <a href="https://www.inaturalist.org/observations/50557089">https://www.inaturalist.org/observations/50557089</a>   |
| 323 | <i>Alauda gulgula</i> | Oriental Skylark | 2020/2/11  | 0 | 0 | 23.82692687 | 120.39057950 | <a href="https://www.inaturalist.org/observations/38536466">https://www.inaturalist.org/observations/38536466</a>   |
| 324 | <i>Alauda gulgula</i> | Oriental Skylark | 2020/2/11  | 0 | 0 | 23.82904450 | 120.39740920 | <a href="https://www.inaturalist.org/observations/38530979">https://www.inaturalist.org/observations/38530979</a>   |
| 325 | <i>Alauda gulgula</i> | Oriental Skylark | 2020/1/31  | 1 | 0 | 23.84400664 | 120.27240420 | <a href="https://www.inaturalist.org/observations/49711486">https://www.inaturalist.org/observations/49711486</a>   |
| 326 | <i>Alauda gulgula</i> | Oriental Skylark | 2019/5/30  | 4 | 0 | 23.86236395 | 121.50687820 | <a href="https://www.inaturalist.org/observations/26063231">https://www.inaturalist.org/observations/26063231</a>   |
| 327 | <i>Alauda gulgula</i> | Oriental Skylark | 2022/5/4   | 1 | 0 | 23.91052027 | 121.56418030 | <a href="https://www.inaturalist.org/observations/124988148">https://www.inaturalist.org/observations/124988148</a> |
| 328 | <i>Alauda gulgula</i> | Oriental Skylark | 2021/11/18 | 2 | 0 | 23.91401577 | 121.57507560 | <a href="https://www.inaturalist.org/observations/101596498">https://www.inaturalist.org/observations/101596498</a> |
| 329 | <i>Alauda gulgula</i> | Oriental Skylark | 2022/6/23  | 0 | 0 | 23.92951781 | 121.60468800 | <a href="https://www.inaturalist.org/observations/127813090">https://www.inaturalist.org/observations/127813090</a> |
| 330 | <i>Alauda gulgula</i> | Oriental Skylark | 2021/4/6   | 1 | 0 | 23.93664068 | 121.59923110 | <a href="https://www.inaturalist.org/observations/74049114">https://www.inaturalist.org/observations/74049114</a>   |
| 331 | <i>Alauda gulgula</i> | Oriental Skylark | 2020/4/23  | 1 | 0 | 23.93895447 | 121.60249600 | <a href="https://www.inaturalist.org/observations/44750750">https://www.inaturalist.org/observations/44750750</a>   |
| 332 | <i>Alauda gulgula</i> | Oriental Skylark | 2011/2/22  | 3 | 0 | 24.00530941 | 121.58414480 | <a href="https://www.inaturalist.org/observations/16358189">https://www.inaturalist.org/observations/16358189</a>   |
| 333 | <i>Alauda gulgula</i> | Oriental Skylark | 2020/4/2   | 2 | 0 | 24.03062988 | 121.62729980 | <a href="https://www.inaturalist.org/observations/41898737">https://www.inaturalist.org/observations/41898737</a>   |
| 334 | <i>Alauda gulgula</i> | Oriental Skylark | 2021/4/5   | 1 | 0 | 24.03164437 | 121.62720020 | <a href="https://www.inaturalist.org/observations/79769969">https://www.inaturalist.org/observations/79769969</a>   |
| 335 | <i>Alauda gulgula</i> | Oriental Skylark | 2022/5/6   | 1 | 0 | 24.03191667 | 121.62784000 | <a href="https://www.inaturalist.org/observations/116062730">https://www.inaturalist.org/observations/116062730</a> |
| 336 | <i>Alauda gulgula</i> | Oriental Skylark | 2021/1/29  | 1 | 0 | 24.03214020 | 121.62711240 | <a href="https://www.inaturalist.org/observations/68812278">https://www.inaturalist.org/observations/68812278</a>   |
| 337 | <i>Alauda gulgula</i> | Oriental Skylark | 2016/12/5  | 1 | 0 | 24.03223139 | 121.62691860 | <a href="https://www.inaturalist.org/observations/64903173">https://www.inaturalist.org/observations/64903173</a>   |
| 338 | <i>Alauda gulgula</i> | Oriental Skylark | 2018/11/30 | 3 | 0 | 24.03229254 | 121.62689550 | <a href="https://www.inaturalist.org/observations/18775204">https://www.inaturalist.org/observations/18775204</a>   |
| 339 | <i>Alauda gulgula</i> | Oriental Skylark | 2020/4/26  | 1 | 0 | 24.03496139 | 120.39307670 | <a href="https://www.inaturalist.org/observations/44215011">https://www.inaturalist.org/observations/44215011</a>   |
| 340 | <i>Alauda gulgula</i> | Oriental Skylark | 2019/4/8   | 2 | 0 | 24.04096725 | 120.38582040 | <a href="https://www.inaturalist.org/observations/22189919">https://www.inaturalist.org/observations/22189919</a>   |
| 341 | <i>Alauda gulgula</i> | Oriental Skylark | 2020/4/3   | 1 | 0 | 24.04804667 | 120.39482500 | <a href="https://www.inaturalist.org/observations/41291604">https://www.inaturalist.org/observations/41291604</a>   |
| 342 | <i>Alauda gulgula</i> | Oriental Skylark | 2022/4/12  | 1 | 0 | 24.17567976 | 120.74541990 | <a href="https://www.inaturalist.org/observations/115074015">https://www.inaturalist.org/observations/115074015</a> |
| 343 | <i>Alauda gulgula</i> | Oriental Skylark | 2022/3/30  | 1 | 0 | 24.21113796 | 120.60439620 | <a href="https://www.inaturalist.org/observations/109914846">https://www.inaturalist.org/observations/109914846</a> |
| 344 | <i>Alauda gulgula</i> | Oriental Skylark | 2020/3/28  | 1 | 0 | 24.22869954 | 120.60090560 | <a href="https://www.inaturalist.org/observations/40869007">https://www.inaturalist.org/observations/40869007</a>   |



|     |                       |                  |            |   |   |             |              |                                                                                                                     |
|-----|-----------------------|------------------|------------|---|---|-------------|--------------|---------------------------------------------------------------------------------------------------------------------|
| 345 | <i>Alauda gulgula</i> | Oriental Skylark | 2022/4/23  | 1 | 0 | 24.37412181 | 120.64361940 | <a href="https://www.inaturalist.org/observations/130242130">https://www.inaturalist.org/observations/130242130</a> |
| 346 | <i>Alauda gulgula</i> | Oriental Skylark | 2022/4/23  | 1 | 0 | 24.39103972 | 120.78955840 | <a href="https://www.inaturalist.org/observations/130242136">https://www.inaturalist.org/observations/130242136</a> |
| 347 | <i>Alauda gulgula</i> | Oriental Skylark | 2015/2/23  | 1 | 0 | 24.42908282 | 118.34779180 | <a href="https://www.inaturalist.org/observations/57606445">https://www.inaturalist.org/observations/57606445</a>   |
| 348 | <i>Alauda gulgula</i> | Oriental Skylark | 2015/2/23  | 1 | 0 | 24.42908282 | 118.34779180 | <a href="https://www.inaturalist.org/observations/57606490">https://www.inaturalist.org/observations/57606490</a>   |
| 349 | <i>Alauda gulgula</i> | Oriental Skylark | 2011/6/2   | 1 | 0 | 24.44881164 | 118.37384690 | <a href="https://www.inaturalist.org/observations/55863993">https://www.inaturalist.org/observations/55863993</a>   |
| 350 | <i>Alauda gulgula</i> | Oriental Skylark | 2015/2/23  | 2 | 0 | 24.47412600 | 118.32324420 | <a href="https://www.inaturalist.org/observations/57606454">https://www.inaturalist.org/observations/57606454</a>   |
| 351 | <i>Alauda gulgula</i> | Oriental Skylark | 2015/2/23  | 1 | 0 | 24.47412600 | 118.32324420 | <a href="https://www.inaturalist.org/observations/57606456">https://www.inaturalist.org/observations/57606456</a>   |
| 352 | <i>Alauda gulgula</i> | Oriental Skylark | 2015/2/23  | 2 | 0 | 24.47412600 | 118.32324420 | <a href="https://www.inaturalist.org/observations/57606461">https://www.inaturalist.org/observations/57606461</a>   |
| 353 | <i>Alauda gulgula</i> | Oriental Skylark | 2015/2/23  | 1 | 0 | 24.47412600 | 118.32324420 | <a href="https://www.inaturalist.org/observations/57606501">https://www.inaturalist.org/observations/57606501</a>   |
| 354 | <i>Alauda gulgula</i> | Oriental Skylark | 2021/7/8   | 1 | 0 | 24.48198833 | 118.41082000 | <a href="https://www.inaturalist.org/observations/87098504">https://www.inaturalist.org/observations/87098504</a>   |
| 355 | <i>Alauda gulgula</i> | Oriental Skylark | 2020/3/20  | 1 | 0 | 24.70788990 | 121.75714020 | <a href="https://www.inaturalist.org/observations/40527506">https://www.inaturalist.org/observations/40527506</a>   |
| 356 | <i>Alauda gulgula</i> | Oriental Skylark | 2022/7/11  | 1 | 0 | 24.71161428 | 121.70997320 | <a href="https://www.inaturalist.org/observations/126599914">https://www.inaturalist.org/observations/126599914</a> |
| 357 | <i>Alauda gulgula</i> | Oriental Skylark | 2019/11/24 | 1 | 0 | 24.71904159 | 121.76370440 | <a href="https://www.inaturalist.org/observations/107172860">https://www.inaturalist.org/observations/107172860</a> |
| 358 | <i>Alauda gulgula</i> | Oriental Skylark | 2021/1/17  | 1 | 0 | 24.77725748 | 121.68573720 | <a href="https://www.inaturalist.org/observations/107172859">https://www.inaturalist.org/observations/107172859</a> |
| 359 | <i>Alauda gulgula</i> | Oriental Skylark | 2022/7/8   | 1 | 0 | 24.79666133 | 120.91545600 | <a href="https://www.inaturalist.org/observations/128910942">https://www.inaturalist.org/observations/128910942</a> |
| 360 | <i>Alauda gulgula</i> | Oriental Skylark | 2020/7/15  | 1 | 0 | 24.81693339 | 121.00303050 | <a href="https://www.inaturalist.org/observations/53339983">https://www.inaturalist.org/observations/53339983</a>   |
| 361 | <i>Alauda gulgula</i> | Oriental Skylark | 2019/5/24  | 1 | 0 | 24.82806600 | 98.77049500  | <a href="https://www.inaturalist.org/observations/26392847">https://www.inaturalist.org/observations/26392847</a>   |
| 362 | <i>Alauda gulgula</i> | Oriental Skylark | 2020/3/5   | 1 | 0 | 24.85168132 | 120.92368580 | <a href="https://www.inaturalist.org/observations/40948158">https://www.inaturalist.org/observations/40948158</a>   |
| 363 | <i>Alauda gulgula</i> | Oriental Skylark | 2009/10/31 | 1 | 0 | 24.98018776 | 121.43597730 | <a href="https://www.inaturalist.org/observations/55449447">https://www.inaturalist.org/observations/55449447</a>   |
| 364 | <i>Alauda gulgula</i> | Oriental Skylark | 2022/5/12  | 1 | 0 | 24.98963667 | 121.01504500 | <a href="https://www.inaturalist.org/observations/123831358">https://www.inaturalist.org/observations/123831358</a> |
| 365 | <i>Alauda gulgula</i> | Oriental Skylark | 2022/2/2   | 1 | 0 | 25.05091501 | 121.53244350 | <a href="https://www.inaturalist.org/observations/106053168">https://www.inaturalist.org/observations/106053168</a> |
| 366 | <i>Alauda gulgula</i> | Oriental Skylark | 2020/4/25  | 1 | 0 | 25.05546387 | 121.48074590 | <a href="https://www.inaturalist.org/observations/43519473">https://www.inaturalist.org/observations/43519473</a>   |
| 367 | <i>Alauda gulgula</i> | Oriental Skylark | 2021/11/16 | 1 | 0 | 25.05822625 | 121.47905870 | <a href="https://www.inaturalist.org/observations/104337064">https://www.inaturalist.org/observations/104337064</a> |

|     |                       |                  |            |   |   |             |              |                                                                                                                     |
|-----|-----------------------|------------------|------------|---|---|-------------|--------------|---------------------------------------------------------------------------------------------------------------------|
| 368 | <i>Alauda gulgula</i> | Oriental Skylark | 2021/11/17 | 1 | 0 | 25.05939897 | 121.47846860 | <a href="https://www.inaturalist.org/observations/101317678">https://www.inaturalist.org/observations/101317678</a> |
| 369 | <i>Alauda gulgula</i> | Oriental Skylark | 2022/2/2   | 1 | 0 | 25.08291734 | 121.54573550 | <a href="https://www.inaturalist.org/observations/106053169">https://www.inaturalist.org/observations/106053169</a> |
| 370 | <i>Alauda gulgula</i> | Oriental Skylark | 2021/4/27  | 1 | 0 | 25.08365945 | 121.18321190 | <a href="https://www.inaturalist.org/observations/75794735">https://www.inaturalist.org/observations/75794735</a>   |
| 371 | <i>Alauda gulgula</i> | Oriental Skylark | 2012/6/10  | 1 | 0 | 25.08872078 | 121.19887850 | <a href="https://www.inaturalist.org/observations/56403880">https://www.inaturalist.org/observations/56403880</a>   |
| 372 | <i>Alauda gulgula</i> | Oriental Skylark | 2012/10/14 | 1 | 0 | 25.09204120 | 121.18974790 | <a href="https://www.inaturalist.org/observations/56501020">https://www.inaturalist.org/observations/56501020</a>   |
| 373 | <i>Alauda gulgula</i> | Oriental Skylark | 2021/6/13  | 1 | 0 | 25.09739728 | 121.45492940 | <a href="https://www.inaturalist.org/observations/83004267">https://www.inaturalist.org/observations/83004267</a>   |
| 374 | <i>Alauda gulgula</i> | Oriental Skylark | 2019/3/20  | 2 | 0 | 25.09747966 | 121.22086350 | <a href="https://www.inaturalist.org/observations/21418597">https://www.inaturalist.org/observations/21418597</a>   |
| 375 | <i>Alauda gulgula</i> | Oriental Skylark | 2020/4/25  | 2 | 0 | 25.09828612 | 121.45459440 | <a href="https://www.inaturalist.org/observations/44147073">https://www.inaturalist.org/observations/44147073</a>   |
| 376 | <i>Alauda gulgula</i> | Oriental Skylark | 2018/2/8   | 3 | 0 | 25.16380200 | 121.40756900 | <a href="https://www.inaturalist.org/observations/27985773">https://www.inaturalist.org/observations/27985773</a>   |
| 377 | <i>Alauda gulgula</i> | Oriental Skylark | 2021/4/2   | 1 | 0 | 25.25858780 | 121.47489460 | <a href="https://www.inaturalist.org/observations/82579215">https://www.inaturalist.org/observations/82579215</a>   |
| 378 | <i>Alauda gulgula</i> | Oriental Skylark | 2021/4/1   | 1 | 0 | 25.25863029 | 121.47495780 | <a href="https://www.inaturalist.org/observations/80446603">https://www.inaturalist.org/observations/80446603</a>   |
| 379 | <i>Alauda gulgula</i> | Oriental Skylark | 2013/12/4  | 2 | 0 | 25.98377870 | 76.36504420  | <a href="https://www.inaturalist.org/observations/7458859">https://www.inaturalist.org/observations/7458859</a>     |
| 380 | <i>Alauda gulgula</i> | Oriental Skylark | 2022/6/3   | 0 | 0 | 26.01893997 | 119.62437990 | <a href="https://www.inaturalist.org/observations/132116146">https://www.inaturalist.org/observations/132116146</a> |
| 381 | <i>Alauda gulgula</i> | Oriental Skylark | 2022/6/3   | 0 | 0 | 26.02024997 | 119.63134660 | <a href="https://www.inaturalist.org/observations/132116141">https://www.inaturalist.org/observations/132116141</a> |
| 382 | <i>Alauda gulgula</i> | Oriental Skylark | 2022/6/3   | 1 | 0 | 26.02038270 | 119.63131720 | <a href="https://www.inaturalist.org/observations/119982450">https://www.inaturalist.org/observations/119982450</a> |
| 383 | <i>Alauda gulgula</i> | Oriental Skylark | 2022/6/3   | 0 | 0 | 26.02064333 | 119.63155330 | <a href="https://www.inaturalist.org/observations/132116145">https://www.inaturalist.org/observations/132116145</a> |
| 384 | <i>Alauda gulgula</i> | Oriental Skylark | 2022/6/3   | 0 | 0 | 26.02130661 | 119.63192660 | <a href="https://www.inaturalist.org/observations/132116147">https://www.inaturalist.org/observations/132116147</a> |
| 385 | <i>Alauda gulgula</i> | Oriental Skylark | 2016/2/15  | 1 | 0 | 26.07348706 | 76.33188900  | <a href="https://www.inaturalist.org/observations/48175936">https://www.inaturalist.org/observations/48175936</a>   |
| 386 | <i>Alauda gulgula</i> | Oriental Skylark | 2022/4/22  | 1 | 0 | 26.42342173 | 106.36952590 | <a href="https://www.inaturalist.org/observations/112481387">https://www.inaturalist.org/observations/112481387</a> |
| 387 | <i>Alauda gulgula</i> | Oriental Skylark | 2022/5/14  | 1 | 0 | 26.42342173 | 106.36952590 | <a href="https://www.inaturalist.org/observations/118212080">https://www.inaturalist.org/observations/118212080</a> |
| 388 | <i>Alauda gulgula</i> | Oriental Skylark | 2022/5/14  | 2 | 0 | 26.42342173 | 106.36952590 | <a href="https://www.inaturalist.org/observations/118212091">https://www.inaturalist.org/observations/118212091</a> |
| 389 | <i>Alauda gulgula</i> | Oriental Skylark | 2014/12/17 | 1 | 0 | 26.61044820 | 77.64931710  | <a href="https://www.inaturalist.org/observations/69151967">https://www.inaturalist.org/observations/69151967</a>   |
| 390 | <i>Alauda gulgula</i> | Oriental Skylark | 2022/5/20  | 0 | 0 | 26.73460493 | 106.65555950 | <a href="https://www.inaturalist.org/observations/119718913">https://www.inaturalist.org/observations/119718913</a> |

|     |                       |                  |            |   |   |             |              |                                                                                                                     |
|-----|-----------------------|------------------|------------|---|---|-------------|--------------|---------------------------------------------------------------------------------------------------------------------|
| 391 | <i>Alauda gulgula</i> | Oriental Skylark | 2020/2/17  | 2 | 0 | 26.77049896 | 78.64739631  | <a href="https://www.inaturalist.org/observations/63140467">https://www.inaturalist.org/observations/63140467</a>   |
| 392 | <i>Alauda gulgula</i> | Oriental Skylark | 2022/2/22  | 1 | 0 | 28.12676842 | 112.92630950 | <a href="https://www.inaturalist.org/observations/107551049">https://www.inaturalist.org/observations/107551049</a> |
| 393 | <i>Alauda gulgula</i> | Oriental Skylark | 2020/2/14  | 1 | 0 | 28.50252220 | 76.94569170  | <a href="https://www.inaturalist.org/observations/39694073">https://www.inaturalist.org/observations/39694073</a>   |
| 394 | <i>Alauda gulgula</i> | Oriental Skylark | 2011/11/13 | 1 | 0 | 28.55257720 | 77.55481000  | <a href="https://www.inaturalist.org/observations/31512822">https://www.inaturalist.org/observations/31512822</a>   |
| 395 | <i>Alauda gulgula</i> | Oriental Skylark | 2009/4/4   | 2 | 0 | 28.55257720 | 77.55481000  | <a href="https://www.inaturalist.org/observations/31585702">https://www.inaturalist.org/observations/31585702</a>   |
| 396 | <i>Alauda gulgula</i> | Oriental Skylark | 2018/12/31 | 1 | 0 | 28.94543910 | 116.35842790 | <a href="https://www.inaturalist.org/observations/36380968">https://www.inaturalist.org/observations/36380968</a>   |
| 397 | <i>Alauda gulgula</i> | Oriental Skylark | 2008/11/20 | 1 | 0 | 29.12531330 | 116.27770730 | <a href="https://www.inaturalist.org/observations/65073515">https://www.inaturalist.org/observations/65073515</a>   |
| 398 | <i>Alauda gulgula</i> | Oriental Skylark | 2017/12/15 | 1 | 0 | 29.17354617 | 115.99938120 | <a href="https://www.inaturalist.org/observations/10449611">https://www.inaturalist.org/observations/10449611</a>   |
| 399 | <i>Alauda gulgula</i> | Oriental Skylark | 2018/4/17  | 1 | 0 | 29.41389496 | 111.94005220 | <a href="https://www.inaturalist.org/observations/64896100">https://www.inaturalist.org/observations/64896100</a>   |
| 400 | <i>Alauda gulgula</i> | Oriental Skylark | 2022/4/6   | 0 | 0 | 30.23864740 | 119.75016590 | <a href="https://www.inaturalist.org/observations/112098844">https://www.inaturalist.org/observations/112098844</a> |
| 401 | <i>Alauda gulgula</i> | Oriental Skylark | 2022/4/6   | 1 | 0 | 30.23864740 | 119.75016590 | <a href="https://www.inaturalist.org/observations/112098847">https://www.inaturalist.org/observations/112098847</a> |
| 402 | <i>Alauda gulgula</i> | Oriental Skylark | 2022/3/29  | 1 | 0 | 30.25472961 | 119.91609230 | <a href="https://www.inaturalist.org/observations/110656199">https://www.inaturalist.org/observations/110656199</a> |
| 403 | <i>Alauda gulgula</i> | Oriental Skylark | 2021/11/28 | 1 | 0 | 30.31777220 | 113.83765220 | <a href="https://www.inaturalist.org/observations/120538315">https://www.inaturalist.org/observations/120538315</a> |
| 404 | <i>Alauda gulgula</i> | Oriental Skylark | 2021/1/16  | 1 | 0 | 30.31777220 | 113.83765220 | <a href="https://www.inaturalist.org/observations/120538320">https://www.inaturalist.org/observations/120538320</a> |
| 405 | <i>Alauda gulgula</i> | Oriental Skylark | 2011/9/12  | 1 | 0 | 30.35780639 | 120.44123640 | <a href="https://www.inaturalist.org/observations/27021253">https://www.inaturalist.org/observations/27021253</a>   |
| 406 | <i>Alauda gulgula</i> | Oriental Skylark | 2011/3/17  | 1 | 0 | 30.37259234 | 120.53757070 | <a href="https://www.inaturalist.org/observations/27003280">https://www.inaturalist.org/observations/27003280</a>   |
| 407 | <i>Alauda gulgula</i> | Oriental Skylark | 2020/3/7   | 1 | 0 | 30.83548188 | 117.15130810 | <a href="https://www.inaturalist.org/observations/39745798">https://www.inaturalist.org/observations/39745798</a>   |
| 408 | <i>Alauda gulgula</i> | Oriental Skylark | 2021/6/7   | 1 | 0 | 30.93756839 | 121.87065140 | <a href="https://www.inaturalist.org/observations/81988439">https://www.inaturalist.org/observations/81988439</a>   |
| 409 | <i>Alauda gulgula</i> | Oriental Skylark | 2021/11/6  | 2 | 0 | 30.93756839 | 121.87065140 | <a href="https://www.inaturalist.org/observations/100498242">https://www.inaturalist.org/observations/100498242</a> |
| 410 | <i>Alauda gulgula</i> | Oriental Skylark | 2020/5/10  | 2 | 0 | 31.11845235 | 117.17324980 | <a href="https://www.inaturalist.org/observations/45475316">https://www.inaturalist.org/observations/45475316</a>   |
| 411 | <i>Alauda gulgula</i> | Oriental Skylark | 2006/5/22  | 1 | 0 | 31.23084031 | 121.44688940 | <a href="https://www.inaturalist.org/observations/87232745">https://www.inaturalist.org/observations/87232745</a>   |
| 412 | <i>Alauda gulgula</i> | Oriental Skylark | 2021/10/17 | 1 | 0 | 31.46432554 | 120.36493010 | <a href="https://www.inaturalist.org/observations/98589713">https://www.inaturalist.org/observations/98589713</a>   |
| 413 | <i>Alauda gulgula</i> | Oriental Skylark | 2020/5/21  | 0 | 0 | 31.49728200 | 120.43965500 | <a href="https://www.inaturalist.org/observations/65412238">https://www.inaturalist.org/observations/65412238</a>   |

|     |                       |                  |           |   |   |             |              |                                                                                                                     |
|-----|-----------------------|------------------|-----------|---|---|-------------|--------------|---------------------------------------------------------------------------------------------------------------------|
| 414 | <i>Alauda gulgula</i> | Oriental Skylark | 2018/6/13 | 2 | 0 | 31.74726572 | 120.92506890 | <a href="https://www.inaturalist.org/observations/13416656">https://www.inaturalist.org/observations/13416656</a>   |
| 415 | <i>Alauda gulgula</i> | Oriental Skylark | 2017/3/22 | 2 | 0 | 33.63001889 | 78.31598443  | <a href="https://www.inaturalist.org/observations/10524104">https://www.inaturalist.org/observations/10524104</a>   |
| 416 | <i>Alauda gulgula</i> | Oriental Skylark | 2019/6/22 | 2 | 0 | 34.19427148 | 77.58018844  | <a href="https://www.inaturalist.org/observations/104204412">https://www.inaturalist.org/observations/104204412</a> |

| No | scientific name              | common name             | date       | NIA | NID | latitude   | longitude   | url                                                                                                                 |
|----|------------------------------|-------------------------|------------|-----|-----|------------|-------------|---------------------------------------------------------------------------------------------------------------------|
| 1  | <i>Amauornis phoenicurus</i> | White-breasted Waterhen | 2022/2/1   | 2   | 0   | 5.94688667 | 80.46397500 | <a href="https://www.inaturalist.org/observations/105944906">https://www.inaturalist.org/observations/105944906</a> |
| 2  | <i>Amauornis phoenicurus</i> | White-breasted Waterhen | 2022/2/2   | 2   | 0   | 5.96306717 | 80.70826616 | <a href="https://www.inaturalist.org/observations/106111722">https://www.inaturalist.org/observations/106111722</a> |
| 3  | <i>Amauornis phoenicurus</i> | White-breasted Waterhen | 2014/2/25  | 4   | 0   | 5.97737820 | 80.42884870 | <a href="https://www.inaturalist.org/observations/39276977">https://www.inaturalist.org/observations/39276977</a>   |
| 4  | <i>Amauornis phoenicurus</i> | White-breasted Waterhen | 2017/11/3  | 3   | 0   | 5.99170183 | 80.33553774 | <a href="https://www.inaturalist.org/observations/51134700">https://www.inaturalist.org/observations/51134700</a>   |
| 5  | <i>Amauornis phoenicurus</i> | White-breasted Waterhen | 2017/2/13  | 5   | 0   | 6.00717518 | 80.31590313 | <a href="https://www.inaturalist.org/observations/5102363">https://www.inaturalist.org/observations/5102363</a>     |
| 6  | <i>Amauornis phoenicurus</i> | White-breasted Waterhen | 2022/3/7   | 3   | 0   | 6.01185179 | 80.78355408 | <a href="https://www.inaturalist.org/observations/108097842">https://www.inaturalist.org/observations/108097842</a> |
| 7  | <i>Amauornis phoenicurus</i> | White-breasted Waterhen | 2019/12/26 | 6   | 0   | 6.01744658 | 80.24885964 | <a href="https://www.inaturalist.org/observations/65523750">https://www.inaturalist.org/observations/65523750</a>   |
| 8  | <i>Amauornis phoenicurus</i> | White-breasted Waterhen | 2009/12/31 | 3   | 0   | 6.02379190 | 80.25466985 | <a href="https://www.inaturalist.org/observations/66578516">https://www.inaturalist.org/observations/66578516</a>   |
| 9  | <i>Amauornis phoenicurus</i> | White-breasted Waterhen | 2018/12/9  | 4   | 0   | 6.04274194 | 80.19395511 | <a href="https://www.inaturalist.org/observations/19230177">https://www.inaturalist.org/observations/19230177</a>   |
| 10 | <i>Amauornis phoenicurus</i> | White-breasted Waterhen | 2019/12/5  | 4   | 0   | 6.04358928 | 80.82332346 | <a href="https://www.inaturalist.org/observations/104809830">https://www.inaturalist.org/observations/104809830</a> |
| 11 | <i>Amauornis phoenicurus</i> | White-breasted Waterhen | 2019/3/16  | 4   | 0   | 6.04832619 | 80.85939780 | <a href="https://www.inaturalist.org/observations/22425530">https://www.inaturalist.org/observations/22425530</a>   |
| 12 | <i>Amauornis phoenicurus</i> | White-breasted Waterhen | 2019/3/14  | 4   | 0   | 6.04904427 | 80.85678903 | <a href="https://www.inaturalist.org/observations/22406879">https://www.inaturalist.org/observations/22406879</a>   |
| 13 | <i>Amauornis phoenicurus</i> | White-breasted Waterhen | 2019/12/15 | 3   | 0   | 6.10891427 | 81.02485496 | <a href="https://www.inaturalist.org/observations/104920818">https://www.inaturalist.org/observations/104920818</a> |
| 14 | <i>Amauornis phoenicurus</i> | White-breasted Waterhen | 2019/7/26  | 5   | 0   | 6.11219717 | 81.06215833 | <a href="https://www.inaturalist.org/observations/51214987">https://www.inaturalist.org/observations/51214987</a>   |
| 15 | <i>Amauornis phoenicurus</i> | White-breasted Waterhen | 2017/8/26  | 6   | 0   | 6.11296353 | 81.06292507 | <a href="https://www.inaturalist.org/observations/69669275">https://www.inaturalist.org/observations/69669275</a>   |
| 16 | <i>Amauornis phoenicurus</i> | White-breasted Waterhen | 2014/2/18  | 4   | 0   | 6.13946760 | 80.10628610 | <a href="https://www.inaturalist.org/observations/39273167">https://www.inaturalist.org/observations/39273167</a>   |
| 17 | <i>Amauornis phoenicurus</i> | White-breasted Waterhen | 2017/7/15  | 4   | 0   | 6.15420873 | 81.11755371 | <a href="https://www.inaturalist.org/observations/11190488">https://www.inaturalist.org/observations/11190488</a>   |
| 18 | <i>Amauornis phoenicurus</i> | White-breasted Waterhen | 2017/7/29  | 3   | 0   | 6.16883796 | 81.20407104 | <a href="https://www.inaturalist.org/observations/10310243">https://www.inaturalist.org/observations/10310243</a>   |
| 19 | <i>Amauornis phoenicurus</i> | White-breasted Waterhen | 2019/9/2   | 5   | 0   | 6.17821161 | 81.21860728 | <a href="https://www.inaturalist.org/observations/66311363">https://www.inaturalist.org/observations/66311363</a>   |
| 20 | <i>Amauornis phoenicurus</i> | White-breasted Waterhen | 2016/4/6   | 4   | 0   | 6.18678500 | 81.22532528 | <a href="https://www.inaturalist.org/observations/127156626">https://www.inaturalist.org/observations/127156626</a> |
| 21 | <i>Amauornis phoenicurus</i> | White-breasted Waterhen | 2022/1/1   | 2   | 0   | 6.18918333 | 80.06665000 | <a href="https://www.inaturalist.org/observations/104088310">https://www.inaturalist.org/observations/104088310</a> |
| 22 | <i>Amauornis phoenicurus</i> | White-breasted Waterhen | 2018/12/12 | 4   | 0   | 6.19045105 | 81.22241147 | <a href="https://www.inaturalist.org/observations/19440881">https://www.inaturalist.org/observations/19440881</a>   |

|    |                       |                         |            |   |   |            |             |                                                                                                                     |
|----|-----------------------|-------------------------|------------|---|---|------------|-------------|---------------------------------------------------------------------------------------------------------------------|
| 23 | Amauornis phoenicurus | White-breasted Waterhen | 2020/2/16  | 3 | 0 | 6.19908625 | 81.21049326 | <a href="https://www.inaturalist.org/observations/102108494">https://www.inaturalist.org/observations/102108494</a> |
| 24 | Amauornis phoenicurus | White-breasted Waterhen | 2019/3/15  | 6 | 0 | 6.19908630 | 81.21049350 | <a href="https://www.inaturalist.org/observations/54438258">https://www.inaturalist.org/observations/54438258</a>   |
| 25 | Amauornis phoenicurus | White-breasted Waterhen | 2014/11/21 | 5 | 0 | 6.19917170 | 81.21710245 | <a href="https://www.inaturalist.org/observations/71017518">https://www.inaturalist.org/observations/71017518</a>   |
| 26 | Amauornis phoenicurus | White-breasted Waterhen | 2018/12/14 | 3 | 0 | 6.20000000 | 81.25000000 | <a href="https://www.inaturalist.org/observations/19099120">https://www.inaturalist.org/observations/19099120</a>   |
| 27 | Amauornis phoenicurus | White-breasted Waterhen | 2019/8/11  | 3 | 0 | 6.20048889 | 81.19967778 | <a href="https://www.inaturalist.org/observations/32798211">https://www.inaturalist.org/observations/32798211</a>   |
| 28 | Amauornis phoenicurus | White-breasted Waterhen | 2019/8/11  | 3 | 0 | 6.20089444 | 81.19839444 | <a href="https://www.inaturalist.org/observations/32798197">https://www.inaturalist.org/observations/32798197</a>   |
| 29 | Amauornis phoenicurus | White-breasted Waterhen | 2019/8/11  | 3 | 0 | 6.20098611 | 81.19794167 | <a href="https://www.inaturalist.org/observations/32798198">https://www.inaturalist.org/observations/32798198</a>   |
| 30 | Amauornis phoenicurus | White-breasted Waterhen | 2019/6/28  | 4 | 0 | 6.23071667 | 80.11073167 | <a href="https://www.inaturalist.org/observations/29790229">https://www.inaturalist.org/observations/29790229</a>   |
| 31 | Amauornis phoenicurus | White-breasted Waterhen | 2020/11/10 | 4 | 0 | 6.23210665 | 80.10895727 | <a href="https://www.inaturalist.org/observations/65028554">https://www.inaturalist.org/observations/65028554</a>   |
| 32 | Amauornis phoenicurus | White-breasted Waterhen | 2019/4/29  | 3 | 0 | 6.23354900 | 80.17579600 | <a href="https://www.inaturalist.org/observations/24154994">https://www.inaturalist.org/observations/24154994</a>   |
| 33 | Amauornis phoenicurus | White-breasted Waterhen | 2004/12/6  | 2 | 0 | 6.26299108 | 81.35499933 | <a href="https://www.inaturalist.org/observations/36325252">https://www.inaturalist.org/observations/36325252</a>   |
| 34 | Amauornis phoenicurus | White-breasted Waterhen | 2019/1/17  | 4 | 0 | 6.27915380 | 81.28766910 | <a href="https://www.inaturalist.org/observations/21949686">https://www.inaturalist.org/observations/21949686</a>   |
| 35 | Amauornis phoenicurus | White-breasted Waterhen | 2015/9/29  | 3 | 0 | 6.28557738 | 81.28226973 | <a href="https://www.inaturalist.org/observations/21332751">https://www.inaturalist.org/observations/21332751</a>   |
| 36 | Amauornis phoenicurus | White-breasted Waterhen | 2013/11/24 | 5 | 0 | 6.28695300 | 81.27853900 | <a href="https://www.inaturalist.org/observations/6505957">https://www.inaturalist.org/observations/6505957</a>     |
| 37 | Amauornis phoenicurus | White-breasted Waterhen | 2019/9/1   | 3 | 0 | 6.28732949 | 81.27757933 | <a href="https://www.inaturalist.org/observations/42046980">https://www.inaturalist.org/observations/42046980</a>   |
| 38 | Amauornis phoenicurus | White-breasted Waterhen | 2019/11/28 | 3 | 0 | 6.28958180 | 81.28216470 | <a href="https://www.inaturalist.org/observations/37082404">https://www.inaturalist.org/observations/37082404</a>   |
| 39 | Amauornis phoenicurus | White-breasted Waterhen | 2017/6/24  | 4 | 0 | 6.29222171 | 81.26949549 | <a href="https://www.inaturalist.org/observations/6870332">https://www.inaturalist.org/observations/6870332</a>     |
| 40 | Amauornis phoenicurus | White-breasted Waterhen | 2019/11/28 | 2 | 0 | 6.29263029 | 81.27010430 | <a href="https://www.inaturalist.org/observations/37057265">https://www.inaturalist.org/observations/37057265</a>   |
| 41 | Amauornis phoenicurus | White-breasted Waterhen | 2019/11/28 | 3 | 0 | 6.29279220 | 81.27042115 | <a href="https://www.inaturalist.org/observations/37057264">https://www.inaturalist.org/observations/37057264</a>   |
| 42 | Amauornis phoenicurus | White-breasted Waterhen | 2011/1/21  | 3 | 0 | 6.29302248 | 81.26677764 | <a href="https://www.inaturalist.org/observations/57910375">https://www.inaturalist.org/observations/57910375</a>   |
| 43 | Amauornis phoenicurus | White-breasted Waterhen | 2007/7/25  | 4 | 0 | 6.29400000 | 81.27660000 | <a href="https://www.inaturalist.org/observations/53812311">https://www.inaturalist.org/observations/53812311</a>   |
| 44 | Amauornis phoenicurus | White-breasted Waterhen | 2014/11/22 | 4 | 0 | 6.29744348 | 81.27033525 | <a href="https://www.inaturalist.org/observations/71017431">https://www.inaturalist.org/observations/71017431</a>   |
| 45 | Amauornis phoenicurus | White-breasted Waterhen | 2019/11/29 | 3 | 0 | 6.31178449 | 81.42920611 | <a href="https://www.inaturalist.org/observations/37224963">https://www.inaturalist.org/observations/37224963</a>   |

|    |                              |                         |            |   |   |            |             |                                                                                                                     |
|----|------------------------------|-------------------------|------------|---|---|------------|-------------|---------------------------------------------------------------------------------------------------------------------|
| 46 | <i>Amauornis phoenicurus</i> | White-breasted Waterhen | 2019/4/2   | 4 | 0 | 6.34638134 | 80.56122737 | <a href="https://www.inaturalist.org/observations/50934721">https://www.inaturalist.org/observations/50934721</a>   |
| 47 | <i>Amauornis phoenicurus</i> | White-breasted Waterhen | 2018/12/25 | 3 | 0 | 6.35621449 | 81.37262620 | <a href="https://www.inaturalist.org/observations/19486761">https://www.inaturalist.org/observations/19486761</a>   |
| 48 | <i>Amauornis phoenicurus</i> | White-breasted Waterhen | 2019/10/7  | 4 | 0 | 6.36453686 | 81.50843762 | <a href="https://www.inaturalist.org/observations/34531311">https://www.inaturalist.org/observations/34531311</a>   |
| 49 | <i>Amauornis phoenicurus</i> | White-breasted Waterhen | 2019/9/4   | 4 | 0 | 6.42346671 | 80.85703142 | <a href="https://www.inaturalist.org/observations/68026306">https://www.inaturalist.org/observations/68026306</a>   |
| 50 | <i>Amauornis phoenicurus</i> | White-breasted Waterhen | 2019/12/1  | 4 | 0 | 6.43152709 | 80.02410485 | <a href="https://www.inaturalist.org/observations/104807445">https://www.inaturalist.org/observations/104807445</a> |
| 51 | <i>Amauornis phoenicurus</i> | White-breasted Waterhen | 2015/2/27  | 2 | 0 | 6.43378119 | 80.41713731 | <a href="https://www.inaturalist.org/observations/36780415">https://www.inaturalist.org/observations/36780415</a>   |
| 52 | <i>Amauornis phoenicurus</i> | White-breasted Waterhen | 2020/1/27  | 4 | 0 | 6.43959420 | 80.89078499 | <a href="https://www.inaturalist.org/observations/38023444">https://www.inaturalist.org/observations/38023444</a>   |
| 53 | <i>Amauornis phoenicurus</i> | White-breasted Waterhen | 2022/1/2   | 2 | 0 | 6.44070347 | 79.98848142 | <a href="https://www.inaturalist.org/observations/105161025">https://www.inaturalist.org/observations/105161025</a> |
| 54 | <i>Amauornis phoenicurus</i> | White-breasted Waterhen | 2018/3/6   | 3 | 0 | 6.45318339 | 80.31035900 | <a href="https://www.inaturalist.org/observations/10180277">https://www.inaturalist.org/observations/10180277</a>   |
| 55 | <i>Amauornis phoenicurus</i> | White-breasted Waterhen | 2018/7/26  | 1 | 0 | 6.46160163 | 79.97443584 | <a href="https://www.inaturalist.org/observations/106238674">https://www.inaturalist.org/observations/106238674</a> |
| 56 | <i>Amauornis phoenicurus</i> | White-breasted Waterhen | 2018/12/10 | 3 | 0 | 6.46266332 | 80.90519863 | <a href="https://www.inaturalist.org/observations/19287238">https://www.inaturalist.org/observations/19287238</a>   |
| 57 | <i>Amauornis phoenicurus</i> | White-breasted Waterhen | 2018/3/5   | 3 | 0 | 6.47088010 | 80.27744293 | <a href="https://www.inaturalist.org/observations/10168580">https://www.inaturalist.org/observations/10168580</a>   |
| 58 | <i>Amauornis phoenicurus</i> | White-breasted Waterhen | 2018/3/5   | 3 | 0 | 6.50888889 | 80.24555556 | <a href="https://www.inaturalist.org/observations/10168609">https://www.inaturalist.org/observations/10168609</a>   |
| 59 | <i>Amauornis phoenicurus</i> | White-breasted Waterhen | 2018/7/19  | 4 | 0 | 6.58539500 | 79.96074000 | <a href="https://www.inaturalist.org/observations/15082562">https://www.inaturalist.org/observations/15082562</a>   |
| 60 | <i>Amauornis phoenicurus</i> | White-breasted Waterhen | 2020/1/2   | 4 | 0 | 6.62449088 | 79.94159788 | <a href="https://www.inaturalist.org/observations/37192612">https://www.inaturalist.org/observations/37192612</a>   |
| 61 | <i>Amauornis phoenicurus</i> | White-breasted Waterhen | 2022/2/25  | 4 | 0 | 6.76758289 | 81.81304169 | <a href="https://www.inaturalist.org/observations/108309279">https://www.inaturalist.org/observations/108309279</a> |
| 62 | <i>Amauornis phoenicurus</i> | White-breasted Waterhen | 2022/4/22  | 1 | 0 | 6.79916407 | 80.81316582 | <a href="https://www.inaturalist.org/observations/117102064">https://www.inaturalist.org/observations/117102064</a> |
| 63 | <i>Amauornis phoenicurus</i> | White-breasted Waterhen | 2021/6/25  | 4 | 0 | 6.81472430 | 80.14075450 | <a href="https://www.inaturalist.org/observations/85254353">https://www.inaturalist.org/observations/85254353</a>   |
| 64 | <i>Amauornis phoenicurus</i> | White-breasted Waterhen | 2022/3/17  | 3 | 0 | 6.83030833 | 80.80709333 | <a href="https://www.inaturalist.org/observations/110029943">https://www.inaturalist.org/observations/110029943</a> |
| 65 | <i>Amauornis phoenicurus</i> | White-breasted Waterhen | 2018/7/21  | 4 | 0 | 6.84116600 | 79.90247800 | <a href="https://www.inaturalist.org/observations/15103459">https://www.inaturalist.org/observations/15103459</a>   |
| 66 | <i>Amauornis phoenicurus</i> | White-breasted Waterhen | 2021/6/22  | 4 | 0 | 6.84296667 | 79.91725333 | <a href="https://www.inaturalist.org/observations/84025415">https://www.inaturalist.org/observations/84025415</a>   |
| 67 | <i>Amauornis phoenicurus</i> | White-breasted Waterhen | 2020/4/29  | 5 | 0 | 6.85167460 | 80.03270010 | <a href="https://www.inaturalist.org/observations/44261384">https://www.inaturalist.org/observations/44261384</a>   |
| 68 | <i>Amauornis phoenicurus</i> | White-breasted Waterhen | 2020/3/15  | 4 | 0 | 6.85591367 | 79.87423706 | <a href="https://www.inaturalist.org/observations/40858316">https://www.inaturalist.org/observations/40858316</a>   |

|    |                              |                         |            |   |   |            |             |                                                                                                                     |
|----|------------------------------|-------------------------|------------|---|---|------------|-------------|---------------------------------------------------------------------------------------------------------------------|
| 69 | <i>Amauornis phoenicurus</i> | White-breasted Waterhen | 2017/7/27  | 5 | 0 | 6.85650231 | 81.82170700 | <a href="https://www.inaturalist.org/observations/30751619">https://www.inaturalist.org/observations/30751619</a>   |
| 70 | <i>Amauornis phoenicurus</i> | White-breasted Waterhen | 2021/10/29 | 3 | 0 | 6.87605238 | 79.93413544 | <a href="https://www.inaturalist.org/observations/99678422">https://www.inaturalist.org/observations/99678422</a>   |
| 71 | <i>Amauornis phoenicurus</i> | White-breasted Waterhen | 2020/12/24 | 4 | 0 | 6.87928910 | 79.93007192 | <a href="https://www.inaturalist.org/observations/67112191">https://www.inaturalist.org/observations/67112191</a>   |
| 72 | <i>Amauornis phoenicurus</i> | White-breasted Waterhen | 2020/12/31 | 4 | 0 | 6.87949515 | 79.93002844 | <a href="https://www.inaturalist.org/observations/92880174">https://www.inaturalist.org/observations/92880174</a>   |
| 73 | <i>Amauornis phoenicurus</i> | White-breasted Waterhen | 2020/2/9   | 6 | 0 | 6.87949826 | 79.92935658 | <a href="https://www.inaturalist.org/observations/45267743">https://www.inaturalist.org/observations/45267743</a>   |
| 74 | <i>Amauornis phoenicurus</i> | White-breasted Waterhen | 2022/2/27  | 3 | 0 | 6.88031951 | 79.92968511 | <a href="https://www.inaturalist.org/observations/107530616">https://www.inaturalist.org/observations/107530616</a> |
| 75 | <i>Amauornis phoenicurus</i> | White-breasted Waterhen | 2011/1/28  | 3 | 0 | 6.88457610 | 79.94811471 | <a href="https://www.inaturalist.org/observations/57821600">https://www.inaturalist.org/observations/57821600</a>   |
| 76 | <i>Amauornis phoenicurus</i> | White-breasted Waterhen | 2022/2/6   | 2 | 0 | 6.88567300 | 79.94801186 | <a href="https://www.inaturalist.org/observations/106662802">https://www.inaturalist.org/observations/106662802</a> |
| 77 | <i>Amauornis phoenicurus</i> | White-breasted Waterhen | 2018/5/17  | 3 | 0 | 6.88675520 | 79.94759990 | <a href="https://www.inaturalist.org/observations/79421425">https://www.inaturalist.org/observations/79421425</a>   |
| 78 | <i>Amauornis phoenicurus</i> | White-breasted Waterhen | 2019/7/31  | 2 | 0 | 6.88824667 | 79.93853833 | <a href="https://www.inaturalist.org/observations/29924258">https://www.inaturalist.org/observations/29924258</a>   |
| 79 | <i>Amauornis phoenicurus</i> | White-breasted Waterhen | 2020/4/26  | 4 | 0 | 6.88947237 | 79.89514232 | <a href="https://www.inaturalist.org/observations/43576082">https://www.inaturalist.org/observations/43576082</a>   |
| 80 | <i>Amauornis phoenicurus</i> | White-breasted Waterhen | 2022/5/23  | 3 | 0 | 6.89034667 | 79.91056167 | <a href="https://www.inaturalist.org/observations/118472632">https://www.inaturalist.org/observations/118472632</a> |
| 81 | <i>Amauornis phoenicurus</i> | White-breasted Waterhen | 2022/1/30  | 4 | 0 | 6.89898502 | 79.97873359 | <a href="https://www.inaturalist.org/observations/105830878">https://www.inaturalist.org/observations/105830878</a> |
| 82 | <i>Amauornis phoenicurus</i> | White-breasted Waterhen | 2021/8/12  | 3 | 0 | 6.89963333 | 79.92790333 | <a href="https://www.inaturalist.org/observations/90903401">https://www.inaturalist.org/observations/90903401</a>   |
| 83 | <i>Amauornis phoenicurus</i> | White-breasted Waterhen | 2022/5/8   | 3 | 0 | 6.90210703 | 79.97912531 | <a href="https://www.inaturalist.org/observations/116040848">https://www.inaturalist.org/observations/116040848</a> |
| 84 | <i>Amauornis phoenicurus</i> | White-breasted Waterhen | 2020/2/11  | 2 | 0 | 6.90328000 | 80.79161000 | <a href="https://www.inaturalist.org/observations/39425287">https://www.inaturalist.org/observations/39425287</a>   |
| 85 | <i>Amauornis phoenicurus</i> | White-breasted Waterhen | 2019/4/10  | 5 | 0 | 6.90484600 | 79.91023800 | <a href="https://www.inaturalist.org/observations/22311486">https://www.inaturalist.org/observations/22311486</a>   |
| 86 | <i>Amauornis phoenicurus</i> | White-breasted Waterhen | 2014/6/2   | 3 | 0 | 6.91381673 | 79.86132168 | <a href="https://www.inaturalist.org/observations/69396881">https://www.inaturalist.org/observations/69396881</a>   |
| 87 | <i>Amauornis phoenicurus</i> | White-breasted Waterhen | 2022/5/11  | 5 | 0 | 6.91433565 | 79.86136075 | <a href="https://www.inaturalist.org/observations/116675366">https://www.inaturalist.org/observations/116675366</a> |
| 88 | <i>Amauornis phoenicurus</i> | White-breasted Waterhen | 2022/2/2   | 2 | 0 | 6.95381070 | 80.77989332 | <a href="https://www.inaturalist.org/observations/106518063">https://www.inaturalist.org/observations/106518063</a> |
| 89 | <i>Amauornis phoenicurus</i> | White-breasted Waterhen | 2012/8/20  | 4 | 0 | 6.95571000 | 80.78311400 | <a href="https://www.inaturalist.org/observations/18678746">https://www.inaturalist.org/observations/18678746</a>   |
| 90 | <i>Amauornis phoenicurus</i> | White-breasted Waterhen | 2017/6/22  | 4 | 0 | 6.98625775 | 80.41892409 | <a href="https://www.inaturalist.org/observations/6870194">https://www.inaturalist.org/observations/6870194</a>     |
| 91 | <i>Amauornis phoenicurus</i> | White-breasted Waterhen | 2015/1/15  | 6 | 0 | 6.98654700 | 80.42404200 | <a href="https://www.inaturalist.org/observations/35084644">https://www.inaturalist.org/observations/35084644</a>   |



|     |                              |                         |            |   |   |            |             |                                                                                                                     |
|-----|------------------------------|-------------------------|------------|---|---|------------|-------------|---------------------------------------------------------------------------------------------------------------------|
| 92  | <i>Amauornis phoenicurus</i> | White-breasted Waterhen | 2022/4/29  | 2 | 0 | 7.06679840 | 79.90409320 | <a href="https://www.inaturalist.org/observations/113404455">https://www.inaturalist.org/observations/113404455</a> |
| 93  | <i>Amauornis phoenicurus</i> | White-breasted Waterhen | 2022/5/7   | 3 | 0 | 7.06679840 | 79.90409320 | <a href="https://www.inaturalist.org/observations/115896815">https://www.inaturalist.org/observations/115896815</a> |
| 94  | <i>Amauornis phoenicurus</i> | White-breasted Waterhen | 2019/7/22  | 6 | 0 | 7.08194532 | 79.99795012 | <a href="https://www.inaturalist.org/observations/51559610">https://www.inaturalist.org/observations/51559610</a>   |
| 95  | <i>Amauornis phoenicurus</i> | White-breasted Waterhen | 2018/7/13  | 2 | 0 | 7.10887765 | 79.84873458 | <a href="https://www.inaturalist.org/observations/35653786">https://www.inaturalist.org/observations/35653786</a>   |
| 96  | <i>Amauornis phoenicurus</i> | White-breasted Waterhen | 2022/8/3   | 1 | 0 | 7.11519920 | 79.89268090 | <a href="https://www.inaturalist.org/observations/131463809">https://www.inaturalist.org/observations/131463809</a> |
| 97  | <i>Amauornis phoenicurus</i> | White-breasted Waterhen | 2010/4/15  | 2 | 0 | 7.14341900 | 79.86950100 | <a href="https://www.inaturalist.org/observations/134335339">https://www.inaturalist.org/observations/134335339</a> |
| 98  | <i>Amauornis phoenicurus</i> | White-breasted Waterhen | 2019/4/26  | 4 | 0 | 7.15296900 | 80.03282500 | <a href="https://www.inaturalist.org/observations/23897169">https://www.inaturalist.org/observations/23897169</a>   |
| 99  | <i>Amauornis phoenicurus</i> | White-breasted Waterhen | 2016/9/10  | 7 | 0 | 7.16804018 | 79.82589908 | <a href="https://www.inaturalist.org/observations/100144456">https://www.inaturalist.org/observations/100144456</a> |
| 100 | <i>Amauornis phoenicurus</i> | White-breasted Waterhen | 2020/4/27  | 4 | 0 | 7.18049896 | 80.31230662 | <a href="https://www.inaturalist.org/observations/43873766">https://www.inaturalist.org/observations/43873766</a>   |
| 101 | <i>Amauornis phoenicurus</i> | White-breasted Waterhen | 2018/10/13 | 3 | 0 | 7.20079680 | 79.87367540 | <a href="https://www.inaturalist.org/observations/17706727">https://www.inaturalist.org/observations/17706727</a>   |
| 102 | <i>Amauornis phoenicurus</i> | White-breasted Waterhen | 2017/7/7   | 3 | 0 | 7.27213076 | 80.59572401 | <a href="https://www.inaturalist.org/observations/19140037">https://www.inaturalist.org/observations/19140037</a>   |
| 103 | <i>Amauornis phoenicurus</i> | White-breasted Waterhen | 2021/12/10 | 3 | 0 | 7.27432653 | 80.57900336 | <a href="https://www.inaturalist.org/observations/102836057">https://www.inaturalist.org/observations/102836057</a> |
| 104 | <i>Amauornis phoenicurus</i> | White-breasted Waterhen | 2018/10/27 | 4 | 0 | 7.28574055 | 79.84097750 | <a href="https://www.inaturalist.org/observations/18327961">https://www.inaturalist.org/observations/18327961</a>   |
| 105 | <i>Amauornis phoenicurus</i> | White-breasted Waterhen | 2013/4/16  | 3 | 0 | 7.28896180 | 80.64619803 | <a href="https://www.inaturalist.org/observations/97071630">https://www.inaturalist.org/observations/97071630</a>   |
| 106 | <i>Amauornis phoenicurus</i> | White-breasted Waterhen | 2007/7/23  | 4 | 0 | 7.28920000 | 80.64740000 | <a href="https://www.inaturalist.org/observations/53812281">https://www.inaturalist.org/observations/53812281</a>   |
| 107 | <i>Amauornis phoenicurus</i> | White-breasted Waterhen | 2016/4/11  | 5 | 0 | 7.29057150 | 80.63372620 | <a href="https://www.inaturalist.org/observations/58181388">https://www.inaturalist.org/observations/58181388</a>   |
| 108 | <i>Amauornis phoenicurus</i> | White-breasted Waterhen | 2022/4/5   | 2 | 0 | 7.29101493 | 80.76350458 | <a href="https://www.inaturalist.org/observations/114252873">https://www.inaturalist.org/observations/114252873</a> |
| 109 | <i>Amauornis phoenicurus</i> | White-breasted Waterhen | 2019/4/11  | 2 | 0 | 7.29109000 | 80.63981500 | <a href="https://www.inaturalist.org/observations/22363947">https://www.inaturalist.org/observations/22363947</a>   |
| 110 | <i>Amauornis phoenicurus</i> | White-breasted Waterhen | 2019/2/5   | 3 | 0 | 7.29110422 | 80.63802246 | <a href="https://www.inaturalist.org/observations/30608575">https://www.inaturalist.org/observations/30608575</a>   |
| 111 | <i>Amauornis phoenicurus</i> | White-breasted Waterhen | 2019/4/23  | 4 | 0 | 7.33502853 | 80.63186810 | <a href="https://www.inaturalist.org/observations/22932378">https://www.inaturalist.org/observations/22932378</a>   |
| 112 | <i>Amauornis phoenicurus</i> | White-breasted Waterhen | 2022/7/6   | 2 | 0 | 7.33969387 | 79.84830855 | <a href="https://www.inaturalist.org/observations/125400213">https://www.inaturalist.org/observations/125400213</a> |
| 113 | <i>Amauornis phoenicurus</i> | White-breasted Waterhen | 2022/7/3   | 5 | 0 | 7.34061830 | 79.84823082 | <a href="https://www.inaturalist.org/observations/124599771">https://www.inaturalist.org/observations/124599771</a> |
| 114 | <i>Amauornis phoenicurus</i> | White-breasted Waterhen | 2022/7/6   | 3 | 0 | 7.34061830 | 79.84823082 | <a href="https://www.inaturalist.org/observations/125019636">https://www.inaturalist.org/observations/125019636</a> |

|     |                              |                         |            |   |   |            |             |                                                                                                                     |
|-----|------------------------------|-------------------------|------------|---|---|------------|-------------|---------------------------------------------------------------------------------------------------------------------|
| 115 | <i>Amauornis phoenicurus</i> | White-breasted Waterhen | 2022/7/3   | 5 | 0 | 7.34936171 | 79.83527675 | <a href="https://www.inaturalist.org/observations/124599897">https://www.inaturalist.org/observations/124599897</a> |
| 116 | <i>Amauornis phoenicurus</i> | White-breasted Waterhen | 2022/7/3   | 4 | 0 | 7.34936171 | 79.83527675 | <a href="https://www.inaturalist.org/observations/124600270">https://www.inaturalist.org/observations/124600270</a> |
| 117 | <i>Amauornis phoenicurus</i> | White-breasted Waterhen | 2015/12/26 | 4 | 0 | 7.39020724 | 80.98727674 | <a href="https://www.inaturalist.org/observations/46835663">https://www.inaturalist.org/observations/46835663</a>   |
| 118 | <i>Amauornis phoenicurus</i> | White-breasted Waterhen | 2019/4/1   | 3 | 0 | 7.64120910 | 79.80153540 | <a href="https://www.inaturalist.org/observations/61979886">https://www.inaturalist.org/observations/61979886</a>   |
| 119 | <i>Amauornis phoenicurus</i> | White-breasted Waterhen | 2017/11/28 | 3 | 0 | 7.87305400 | 80.77179700 | <a href="https://www.inaturalist.org/observations/9951467">https://www.inaturalist.org/observations/9951467</a>     |
| 120 | <i>Amauornis phoenicurus</i> | White-breasted Waterhen | 2017/8/14  | 5 | 0 | 7.88756401 | 80.77179685 | <a href="https://www.inaturalist.org/observations/44565561">https://www.inaturalist.org/observations/44565561</a>   |
| 121 | <i>Amauornis phoenicurus</i> | White-breasted Waterhen | 2012/12/24 | 5 | 0 | 7.94172366 | 80.73440552 | <a href="http://www.inaturalist.org/observations/183269">http://www.inaturalist.org/observations/183269</a>         |
| 122 | <i>Amauornis phoenicurus</i> | White-breasted Waterhen | 2019/7/7   | 6 | 0 | 7.94244600 | 80.99756200 | <a href="https://www.inaturalist.org/observations/66287326">https://www.inaturalist.org/observations/66287326</a>   |
| 123 | <i>Amauornis phoenicurus</i> | White-breasted Waterhen | 2022/3/12  | 1 | 0 | 7.95190843 | 80.76015289 | <a href="https://www.inaturalist.org/observations/109821200">https://www.inaturalist.org/observations/109821200</a> |
| 124 | <i>Amauornis phoenicurus</i> | White-breasted Waterhen | 2007/10/21 | 3 | 0 | 8.15352764 | 80.90337490 | <a href="https://www.inaturalist.org/observations/56474358">https://www.inaturalist.org/observations/56474358</a>   |
| 125 | <i>Amauornis phoenicurus</i> | White-breasted Waterhen | 2018/6/13  | 3 | 0 | 8.18300508 | 77.46462431 | <a href="https://www.inaturalist.org/observations/135101311">https://www.inaturalist.org/observations/135101311</a> |
| 126 | <i>Amauornis phoenicurus</i> | White-breasted Waterhen | 2017/7/21  | 4 | 0 | 8.25767617 | 80.96393542 | <a href="https://www.inaturalist.org/observations/21271137">https://www.inaturalist.org/observations/21271137</a>   |
| 127 | <i>Amauornis phoenicurus</i> | White-breasted Waterhen | 2018/9/2   | 5 | 0 | 8.32147333 | 80.41955667 | <a href="https://www.inaturalist.org/observations/27130833">https://www.inaturalist.org/observations/27130833</a>   |
| 128 | <i>Amauornis phoenicurus</i> | White-breasted Waterhen | 2019/3/2   | 1 | 0 | 8.32801667 | 80.37935500 | <a href="https://www.inaturalist.org/observations/20866186">https://www.inaturalist.org/observations/20866186</a>   |
| 129 | <i>Amauornis phoenicurus</i> | White-breasted Waterhen | 2019/3/2   | 3 | 0 | 8.32801667 | 80.37935500 | <a href="https://www.inaturalist.org/observations/20928994">https://www.inaturalist.org/observations/20928994</a>   |
| 130 | <i>Amauornis phoenicurus</i> | White-breasted Waterhen | 2019/3/2   | 6 | 0 | 8.32857000 | 80.38050833 | <a href="https://www.inaturalist.org/observations/20866262">https://www.inaturalist.org/observations/20866262</a>   |
| 131 | <i>Amauornis phoenicurus</i> | White-breasted Waterhen | 2019/3/2   | 3 | 0 | 8.32857000 | 80.38050833 | <a href="https://www.inaturalist.org/observations/20929149">https://www.inaturalist.org/observations/20929149</a>   |
| 132 | <i>Amauornis phoenicurus</i> | White-breasted Waterhen | 2017/8/6   | 3 | 0 | 8.34232320 | 80.39661884 | <a href="https://www.inaturalist.org/observations/10363899">https://www.inaturalist.org/observations/10363899</a>   |
| 133 | <i>Amauornis phoenicurus</i> | White-breasted Waterhen | 2019/12/28 | 4 | 0 | 8.44711416 | 76.98103555 | <a href="https://www.inaturalist.org/observations/81285348">https://www.inaturalist.org/observations/81285348</a>   |
| 134 | <i>Amauornis phoenicurus</i> | White-breasted Waterhen | 2014/5/10  | 5 | 0 | 8.45255400 | 76.97438700 | <a href="http://www.inaturalist.org/observations/678218">http://www.inaturalist.org/observations/678218</a>         |
| 135 | <i>Amauornis phoenicurus</i> | White-breasted Waterhen | 2022/3/14  | 4 | 0 | 8.46178890 | 76.97521180 | <a href="https://www.inaturalist.org/observations/124246521">https://www.inaturalist.org/observations/124246521</a> |
| 136 | <i>Amauornis phoenicurus</i> | White-breasted Waterhen | 2021/6/25  | 1 | 0 | 8.49468145 | 77.31133189 | <a href="https://www.inaturalist.org/observations/85188675">https://www.inaturalist.org/observations/85188675</a>   |
| 137 | <i>Amauornis phoenicurus</i> | White-breasted Waterhen | 2022/1/7   | 1 | 0 | 8.51990104 | 77.76244115 | <a href="https://www.inaturalist.org/observations/107031450">https://www.inaturalist.org/observations/107031450</a> |

|     |                              |                         |            |   |   |            |             |                                                                                                                     |
|-----|------------------------------|-------------------------|------------|---|---|------------|-------------|---------------------------------------------------------------------------------------------------------------------|
| 138 | <i>Amauornis phoenicurus</i> | White-breasted Waterhen | 2021/2/25  | 3 | 0 | 8.53756535 | 80.49098030 | <a href="https://www.inaturalist.org/observations/70236988">https://www.inaturalist.org/observations/70236988</a>   |
| 139 | <i>Amauornis phoenicurus</i> | White-breasted Waterhen | 2021/4/8   | 2 | 0 | 8.56125961 | 81.24040492 | <a href="https://www.inaturalist.org/observations/73287324">https://www.inaturalist.org/observations/73287324</a>   |
| 140 | <i>Amauornis phoenicurus</i> | White-breasted Waterhen | 2021/4/12  | 1 | 0 | 8.56125961 | 81.24040492 | <a href="https://www.inaturalist.org/observations/74233360">https://www.inaturalist.org/observations/74233360</a>   |
| 141 | <i>Amauornis phoenicurus</i> | White-breasted Waterhen | 2020/4/7   | 2 | 0 | 8.58342309 | 77.02684868 | <a href="https://www.inaturalist.org/observations/81723450">https://www.inaturalist.org/observations/81723450</a>   |
| 142 | <i>Amauornis phoenicurus</i> | White-breasted Waterhen | 2019/3/2   | 4 | 0 | 8.68225940 | 77.13652920 | <a href="https://www.inaturalist.org/observations/20876029">https://www.inaturalist.org/observations/20876029</a>   |
| 143 | <i>Amauornis phoenicurus</i> | White-breasted Waterhen | 2019/4/16  | 3 | 0 | 8.71781254 | 77.64513397 | <a href="https://www.inaturalist.org/observations/97422136">https://www.inaturalist.org/observations/97422136</a>   |
| 144 | <i>Amauornis phoenicurus</i> | White-breasted Waterhen | 2019/12/23 | 2 | 0 | 8.81582778 | 76.65128611 | <a href="https://www.inaturalist.org/observations/65883931">https://www.inaturalist.org/observations/65883931</a>   |
| 145 | <i>Amauornis phoenicurus</i> | White-breasted Waterhen | 2018/3/23  | 2 | 0 | 8.87013851 | 76.60143615 | <a href="https://www.inaturalist.org/observations/65919733">https://www.inaturalist.org/observations/65919733</a>   |
| 146 | <i>Amauornis phoenicurus</i> | White-breasted Waterhen | 2021/7/5   | 1 | 0 | 8.88362144 | 76.77100483 | <a href="https://www.inaturalist.org/observations/85738287">https://www.inaturalist.org/observations/85738287</a>   |
| 147 | <i>Amauornis phoenicurus</i> | White-breasted Waterhen | 2021/7/5   | 1 | 0 | 8.88362144 | 76.77100483 | <a href="https://www.inaturalist.org/observations/85738514">https://www.inaturalist.org/observations/85738514</a>   |
| 148 | <i>Amauornis phoenicurus</i> | White-breasted Waterhen | 2022/2/5   | 1 | 0 | 9.01000338 | 76.66011943 | <a href="https://www.inaturalist.org/observations/106714953">https://www.inaturalist.org/observations/106714953</a> |
| 149 | <i>Amauornis phoenicurus</i> | White-breasted Waterhen | 2022/2/5   | 2 | 0 | 9.01041908 | 76.66015297 | <a href="https://www.inaturalist.org/observations/106715288">https://www.inaturalist.org/observations/106715288</a> |
| 150 | <i>Amauornis phoenicurus</i> | White-breasted Waterhen | 2022/2/5   | 2 | 0 | 9.01222742 | 76.66402027 | <a href="https://www.inaturalist.org/observations/106727200">https://www.inaturalist.org/observations/106727200</a> |
| 151 | <i>Amauornis phoenicurus</i> | White-breasted Waterhen | 2022/2/5   | 2 | 0 | 9.01330607 | 76.66644484 | <a href="https://www.inaturalist.org/observations/106829278">https://www.inaturalist.org/observations/106829278</a> |
| 152 | <i>Amauornis phoenicurus</i> | White-breasted Waterhen | 2017/5/7   | 4 | 0 | 9.02159974 | 76.65150643 | <a href="https://www.inaturalist.org/observations/66361343">https://www.inaturalist.org/observations/66361343</a>   |
| 153 | <i>Amauornis phoenicurus</i> | White-breasted Waterhen | 2022/1/9   | 3 | 0 | 9.25330068 | 76.46368216 | <a href="https://www.inaturalist.org/observations/104754325">https://www.inaturalist.org/observations/104754325</a> |
| 154 | <i>Amauornis phoenicurus</i> | White-breasted Waterhen | 2019/4/12  | 3 | 0 | 9.26918800 | 76.61363240 | <a href="https://www.inaturalist.org/observations/22361529">https://www.inaturalist.org/observations/22361529</a>   |
| 155 | <i>Amauornis phoenicurus</i> | White-breasted Waterhen | 2022/5/2   | 1 | 0 | 9.45916830 | 77.55350120 | <a href="https://www.inaturalist.org/observations/114544812">https://www.inaturalist.org/observations/114544812</a> |
| 156 | <i>Amauornis phoenicurus</i> | White-breasted Waterhen | 2010/3/19  | 1 | 0 | 9.52736000 | 76.39699630 | <a href="https://www.inaturalist.org/observations/93538972">https://www.inaturalist.org/observations/93538972</a>   |
| 157 | <i>Amauornis phoenicurus</i> | White-breasted Waterhen | 2019/1/20  | 3 | 0 | 9.56843087 | 76.45208918 | <a href="https://www.inaturalist.org/observations/41036536">https://www.inaturalist.org/observations/41036536</a>   |
| 158 | <i>Amauornis phoenicurus</i> | White-breasted Waterhen | 2018/4/28  | 3 | 0 | 9.56929622 | 76.43931867 | <a href="https://www.inaturalist.org/observations/65978512">https://www.inaturalist.org/observations/65978512</a>   |
| 159 | <i>Amauornis phoenicurus</i> | White-breasted Waterhen | 2022/5/15  | 4 | 0 | 9.57595913 | 76.43655802 | <a href="https://www.inaturalist.org/observations/124899464">https://www.inaturalist.org/observations/124899464</a> |
| 160 | <i>Amauornis phoenicurus</i> | White-breasted Waterhen | 2022/5/15  | 4 | 0 | 9.57613862 | 76.43712611 | <a href="https://www.inaturalist.org/observations/124898378">https://www.inaturalist.org/observations/124898378</a> |

|     |                              |                         |           |   |   |            |             |                                                                                                                     |
|-----|------------------------------|-------------------------|-----------|---|---|------------|-------------|---------------------------------------------------------------------------------------------------------------------|
| 161 | <i>Amauornis phoenicurus</i> | White-breasted Waterhen | 2020/4/27 | 3 | 0 | 9.59766245 | 76.51108997 | <a href="https://www.inaturalist.org/observations/43869700">https://www.inaturalist.org/observations/43869700</a>   |
| 162 | <i>Amauornis phoenicurus</i> | White-breasted Waterhen | 2022/9/2  | 2 | 0 | 9.60418779 | 76.36581824 | <a href="https://www.inaturalist.org/observations/133338185">https://www.inaturalist.org/observations/133338185</a> |
| 163 | <i>Amauornis phoenicurus</i> | White-breasted Waterhen | 2022/6/21 | 4 | 0 | 9.61912652 | 76.38439902 | <a href="https://www.inaturalist.org/observations/122815264">https://www.inaturalist.org/observations/122815264</a> |
| 164 | <i>Amauornis phoenicurus</i> | White-breasted Waterhen | 2016/12/3 | 4 | 0 | 9.62449197 | 76.47736195 | <a href="https://www.inaturalist.org/observations/20198720">https://www.inaturalist.org/observations/20198720</a>   |
| 165 | <i>Amauornis phoenicurus</i> | White-breasted Waterhen | 2020/4/16 | 2 | 0 | 9.66815579 | 76.32186994 | <a href="https://www.inaturalist.org/observations/44487653">https://www.inaturalist.org/observations/44487653</a>   |
| 166 | <i>Amauornis phoenicurus</i> | White-breasted Waterhen | 2021/7/24 | 3 | 0 | 9.66816934 | 76.32184178 | <a href="https://www.inaturalist.org/observations/89793210">https://www.inaturalist.org/observations/89793210</a>   |
| 167 | <i>Amauornis phoenicurus</i> | White-breasted Waterhen | 2021/8/14 | 2 | 0 | 9.66820735 | 76.32180825 | <a href="https://www.inaturalist.org/observations/92443587">https://www.inaturalist.org/observations/92443587</a>   |
| 168 | <i>Amauornis phoenicurus</i> | White-breasted Waterhen | 2021/6/26 | 1 | 0 | 9.66821131 | 76.32181160 | <a href="https://www.inaturalist.org/observations/85496369">https://www.inaturalist.org/observations/85496369</a>   |
| 169 | <i>Amauornis phoenicurus</i> | White-breasted Waterhen | 2018/3/15 | 2 | 0 | 9.66830914 | 76.32181596 | <a href="https://www.inaturalist.org/observations/48612994">https://www.inaturalist.org/observations/48612994</a>   |
| 170 | <i>Amauornis phoenicurus</i> | White-breasted Waterhen | 2018/3/15 | 5 | 0 | 9.66918368 | 76.32591806 | <a href="https://www.inaturalist.org/observations/49545645">https://www.inaturalist.org/observations/49545645</a>   |
| 171 | <i>Amauornis phoenicurus</i> | White-breasted Waterhen | 2020/9/24 | 3 | 0 | 9.67413539 | 76.34009622 | <a href="https://www.inaturalist.org/observations/61119555">https://www.inaturalist.org/observations/61119555</a>   |
| 172 | <i>Amauornis phoenicurus</i> | White-breasted Waterhen | 2020/9/24 | 2 | 0 | 9.67413539 | 76.34009622 | <a href="https://www.inaturalist.org/observations/61119602">https://www.inaturalist.org/observations/61119602</a>   |
| 173 | <i>Amauornis phoenicurus</i> | White-breasted Waterhen | 2022/8/4  | 3 | 0 | 9.67413539 | 76.34009622 | <a href="https://www.inaturalist.org/observations/129522338">https://www.inaturalist.org/observations/129522338</a> |
| 174 | <i>Amauornis phoenicurus</i> | White-breasted Waterhen | 2022/9/4  | 4 | 0 | 9.67413630 | 76.34009630 | <a href="https://www.inaturalist.org/observations/133582346">https://www.inaturalist.org/observations/133582346</a> |
| 175 | <i>Amauornis phoenicurus</i> | White-breasted Waterhen | 2022/9/3  | 2 | 0 | 9.67413630 | 76.34009630 | <a href="https://www.inaturalist.org/observations/133597679">https://www.inaturalist.org/observations/133597679</a> |
| 176 | <i>Amauornis phoenicurus</i> | White-breasted Waterhen | 2022/9/3  | 4 | 0 | 9.67413630 | 76.34009630 | <a href="https://www.inaturalist.org/observations/133598762">https://www.inaturalist.org/observations/133598762</a> |
| 177 | <i>Amauornis phoenicurus</i> | White-breasted Waterhen | 2022/9/3  | 3 | 0 | 9.67413630 | 76.34009630 | <a href="https://www.inaturalist.org/observations/133599041">https://www.inaturalist.org/observations/133599041</a> |
| 178 | <i>Amauornis phoenicurus</i> | White-breasted Waterhen | 2022/9/11 | 5 | 0 | 9.67413630 | 76.34009630 | <a href="https://www.inaturalist.org/observations/134592606">https://www.inaturalist.org/observations/134592606</a> |
| 179 | <i>Amauornis phoenicurus</i> | White-breasted Waterhen | 2020/2/7  | 3 | 0 | 9.71861111 | 80.17638889 | <a href="https://www.inaturalist.org/observations/38383168">https://www.inaturalist.org/observations/38383168</a>   |
| 180 | <i>Amauornis phoenicurus</i> | White-breasted Waterhen | 2019/7/24 | 3 | 0 | 9.71923930 | 76.32049000 | <a href="https://www.inaturalist.org/observations/32784426">https://www.inaturalist.org/observations/32784426</a>   |
| 181 | <i>Amauornis phoenicurus</i> | White-breasted Waterhen | 2022/8/12 | 4 | 0 | 9.77999200 | 76.38284937 | <a href="https://www.inaturalist.org/observations/130660144">https://www.inaturalist.org/observations/130660144</a> |
| 182 | <i>Amauornis phoenicurus</i> | White-breasted Waterhen | 2020/5/2  | 3 | 0 | 9.78957592 | 76.30338248 | <a href="https://www.inaturalist.org/observations/47091748">https://www.inaturalist.org/observations/47091748</a>   |
| 183 | <i>Amauornis phoenicurus</i> | White-breasted Waterhen | 2020/1/9  | 1 | 0 | 9.79072000 | 76.30446639 | <a href="https://www.inaturalist.org/observations/46824500">https://www.inaturalist.org/observations/46824500</a>   |

|     |                              |                         |            |   |   |             |             |                                                                                                                     |
|-----|------------------------------|-------------------------|------------|---|---|-------------|-------------|---------------------------------------------------------------------------------------------------------------------|
| 184 | <i>Amauornis phoenicurus</i> | White-breasted Waterhen | 2017/11/20 | 4 | 0 | 9.79950480  | 76.28851530 | <a href="https://www.inaturalist.org/observations/10518984">https://www.inaturalist.org/observations/10518984</a>   |
| 185 | <i>Amauornis phoenicurus</i> | White-breasted Waterhen | 2019/4/23  | 1 | 0 | 9.80465139  | 76.28257806 | <a href="https://www.inaturalist.org/observations/46953325">https://www.inaturalist.org/observations/46953325</a>   |
| 186 | <i>Amauornis phoenicurus</i> | White-breasted Waterhen | 2022/7/25  | 4 | 0 | 9.81385570  | 76.30122062 | <a href="https://www.inaturalist.org/observations/129498842">https://www.inaturalist.org/observations/129498842</a> |
| 187 | <i>Amauornis phoenicurus</i> | White-breasted Waterhen | 2022/6/2   | 2 | 0 | 9.83235783  | 76.78814859 | <a href="https://www.inaturalist.org/observations/119888228">https://www.inaturalist.org/observations/119888228</a> |
| 188 | <i>Amauornis phoenicurus</i> | White-breasted Waterhen | 2018/11/17 | 2 | 0 | 9.84778689  | 76.74538611 | <a href="https://www.inaturalist.org/observations/87107770">https://www.inaturalist.org/observations/87107770</a>   |
| 189 | <i>Amauornis phoenicurus</i> | White-breasted Waterhen | 2019/1/6   | 1 | 0 | 9.85762033  | 76.75922866 | <a href="https://www.inaturalist.org/observations/96801427">https://www.inaturalist.org/observations/96801427</a>   |
| 190 | <i>Amauornis phoenicurus</i> | White-breasted Waterhen | 2022/8/12  | 1 | 0 | 9.86909290  | 76.39038831 | <a href="https://www.inaturalist.org/observations/136892109">https://www.inaturalist.org/observations/136892109</a> |
| 191 | <i>Amauornis phoenicurus</i> | White-breasted Waterhen | 2018/12/4  | 2 | 0 | 9.87819861  | 76.72524984 | <a href="https://www.inaturalist.org/observations/88139164">https://www.inaturalist.org/observations/88139164</a>   |
| 192 | <i>Amauornis phoenicurus</i> | White-breasted Waterhen | 2021/10/24 | 3 | 0 | 9.90570669  | 76.70752461 | <a href="https://www.inaturalist.org/observations/99715076">https://www.inaturalist.org/observations/99715076</a>   |
| 193 | <i>Amauornis phoenicurus</i> | White-breasted Waterhen | 2021/4/2   | 1 | 0 | 9.91008702  | 78.10296703 | <a href="https://www.inaturalist.org/observations/85361575">https://www.inaturalist.org/observations/85361575</a>   |
| 194 | <i>Amauornis phoenicurus</i> | White-breasted Waterhen | 2021/9/29  | 1 | 0 | 9.94147500  | 78.15750000 | <a href="https://www.inaturalist.org/observations/96567781">https://www.inaturalist.org/observations/96567781</a>   |
| 195 | <i>Amauornis phoenicurus</i> | White-breasted Waterhen | 2013/11/8  | 2 | 0 | 9.94695760  | 76.63589970 | <a href="https://www.inaturalist.org/observations/91676807">https://www.inaturalist.org/observations/91676807</a>   |
| 196 | <i>Amauornis phoenicurus</i> | White-breasted Waterhen | 2022/9/13  | 2 | 0 | 9.95071706  | 76.64227892 | <a href="https://www.inaturalist.org/observations/134829374">https://www.inaturalist.org/observations/134829374</a> |
| 197 | <i>Amauornis phoenicurus</i> | White-breasted Waterhen | 2015/5/13  | 1 | 0 | 9.95205500  | 76.31138429 | <a href="https://www.inaturalist.org/observations/48518232">https://www.inaturalist.org/observations/48518232</a>   |
| 198 | <i>Amauornis phoenicurus</i> | White-breasted Waterhen | 2013/9/29  | 2 | 0 | 9.95205500  | 76.31138429 | <a href="https://www.inaturalist.org/observations/48612621">https://www.inaturalist.org/observations/48612621</a>   |
| 199 | <i>Amauornis phoenicurus</i> | White-breasted Waterhen | 2020/6/22  | 3 | 0 | 10.01561052 | 76.54845223 | <a href="https://www.inaturalist.org/observations/50579264">https://www.inaturalist.org/observations/50579264</a>   |
| 200 | <i>Amauornis phoenicurus</i> | White-breasted Waterhen | 2020/8/11  | 3 | 0 | 10.03524263 | 76.54705446 | <a href="https://www.inaturalist.org/observations/58349890">https://www.inaturalist.org/observations/58349890</a>   |
| 201 | <i>Amauornis phoenicurus</i> | White-breasted Waterhen | 2020/8/9   | 2 | 0 | 10.03550444 | 76.54765695 | <a href="https://www.inaturalist.org/observations/55882002">https://www.inaturalist.org/observations/55882002</a>   |
| 202 | <i>Amauornis phoenicurus</i> | White-breasted Waterhen | 2020/1/31  | 3 | 0 | 10.05514667 | 76.33586833 | <a href="https://www.inaturalist.org/observations/67019378">https://www.inaturalist.org/observations/67019378</a>   |
| 203 | <i>Amauornis phoenicurus</i> | White-breasted Waterhen | 2019/1/26  | 3 | 0 | 10.09647387 | 76.93173776 | <a href="https://www.inaturalist.org/observations/121626573">https://www.inaturalist.org/observations/121626573</a> |
| 204 | <i>Amauornis phoenicurus</i> | White-breasted Waterhen | 2020/12/3  | 3 | 0 | 10.09851993 | 76.33183468 | <a href="https://www.inaturalist.org/observations/66607099">https://www.inaturalist.org/observations/66607099</a>   |
| 205 | <i>Amauornis phoenicurus</i> | White-breasted Waterhen | 2018/12/15 | 4 | 0 | 10.10398030 | 76.70046050 | <a href="https://www.inaturalist.org/observations/32152976">https://www.inaturalist.org/observations/32152976</a>   |
| 206 | <i>Amauornis phoenicurus</i> | White-breasted Waterhen | 2012/11/13 | 2 | 0 | 10.10398030 | 76.70046050 | <a href="https://www.inaturalist.org/observations/45996785">https://www.inaturalist.org/observations/45996785</a>   |

|     |                              |                         |            |   |   |             |             |                                                                                                                     |
|-----|------------------------------|-------------------------|------------|---|---|-------------|-------------|---------------------------------------------------------------------------------------------------------------------|
| 207 | <i>Amauornis phoenicurus</i> | White-breasted Waterhen | 2018/12/15 | 2 | 0 | 10.10398030 | 76.70046050 | <a href="https://www.inaturalist.org/observations/56312200">https://www.inaturalist.org/observations/56312200</a>   |
| 208 | <i>Amauornis phoenicurus</i> | White-breasted Waterhen | 2018/12/15 | 2 | 0 | 10.10398030 | 76.70046050 | <a href="https://www.inaturalist.org/observations/56312207">https://www.inaturalist.org/observations/56312207</a>   |
| 209 | <i>Amauornis phoenicurus</i> | White-breasted Waterhen | 2019/5/15  | 3 | 0 | 10.12979136 | 76.68711841 | <a href="https://www.inaturalist.org/observations/80905531">https://www.inaturalist.org/observations/80905531</a>   |
| 210 | <i>Amauornis phoenicurus</i> | White-breasted Waterhen | 2019/12/7  | 3 | 0 | 10.13098780 | 76.24104930 | <a href="https://www.inaturalist.org/observations/41278731">https://www.inaturalist.org/observations/41278731</a>   |
| 211 | <i>Amauornis phoenicurus</i> | White-breasted Waterhen | 2017/12/7  | 4 | 0 | 10.18501845 | 76.51256561 | <a href="https://www.inaturalist.org/observations/9391627">https://www.inaturalist.org/observations/9391627</a>     |
| 212 | <i>Amauornis phoenicurus</i> | White-breasted Waterhen | 2020/3/11  | 2 | 0 | 10.25351048 | 77.32870013 | <a href="https://www.inaturalist.org/observations/41225438">https://www.inaturalist.org/observations/41225438</a>   |
| 213 | <i>Amauornis phoenicurus</i> | White-breasted Waterhen | 2019/3/29  | 3 | 0 | 10.26038230 | 77.16759130 | <a href="https://www.inaturalist.org/observations/21740282">https://www.inaturalist.org/observations/21740282</a>   |
| 214 | <i>Amauornis phoenicurus</i> | White-breasted Waterhen | 2020/11/6  | 2 | 0 | 10.26754555 | 77.50030920 | <a href="https://www.inaturalist.org/observations/64280324">https://www.inaturalist.org/observations/64280324</a>   |
| 215 | <i>Amauornis phoenicurus</i> | White-breasted Waterhen | 2021/12/25 | 2 | 0 | 10.29600337 | 79.81704712 | <a href="https://www.inaturalist.org/observations/103956414">https://www.inaturalist.org/observations/103956414</a> |
| 216 | <i>Amauornis phoenicurus</i> | White-breasted Waterhen | 2022/4/12  | 3 | 0 | 10.30219148 | 76.42738435 | <a href="https://www.inaturalist.org/observations/111296940">https://www.inaturalist.org/observations/111296940</a> |
| 217 | <i>Amauornis phoenicurus</i> | White-breasted Waterhen | 2022/4/29  | 2 | 0 | 10.30219148 | 76.42738435 | <a href="https://www.inaturalist.org/observations/113674765">https://www.inaturalist.org/observations/113674765</a> |
| 218 | <i>Amauornis phoenicurus</i> | White-breasted Waterhen | 2021/12/25 | 2 | 0 | 10.30754333 | 79.83360667 | <a href="https://www.inaturalist.org/observations/103752068">https://www.inaturalist.org/observations/103752068</a> |
| 219 | <i>Amauornis phoenicurus</i> | White-breasted Waterhen | 2020/5/4   | 4 | 0 | 10.33442052 | 76.25640292 | <a href="https://www.inaturalist.org/observations/45454221">https://www.inaturalist.org/observations/45454221</a>   |
| 220 | <i>Amauornis phoenicurus</i> | White-breasted Waterhen | 2021/2/4   | 2 | 0 | 10.33450232 | 76.95485450 | <a href="https://www.inaturalist.org/observations/79244308">https://www.inaturalist.org/observations/79244308</a>   |
| 221 | <i>Amauornis phoenicurus</i> | White-breasted Waterhen | 2019/12/28 | 1 | 0 | 10.35058544 | 76.26444257 | <a href="https://www.inaturalist.org/observations/41549225">https://www.inaturalist.org/observations/41549225</a>   |
| 222 | <i>Amauornis phoenicurus</i> | White-breasted Waterhen | 2020/7/6   | 2 | 0 | 10.37018898 | 76.28248103 | <a href="https://www.inaturalist.org/observations/53695855">https://www.inaturalist.org/observations/53695855</a>   |
| 223 | <i>Amauornis phoenicurus</i> | White-breasted Waterhen | 2017/5/16  | 0 | 0 | 10.42362678 | 76.09806151 | <a href="https://www.inaturalist.org/observations/30260527">https://www.inaturalist.org/observations/30260527</a>   |
| 224 | <i>Amauornis phoenicurus</i> | White-breasted Waterhen | 2020/10/28 | 3 | 0 | 10.43934984 | 76.11984327 | <a href="https://www.inaturalist.org/observations/63693414">https://www.inaturalist.org/observations/63693414</a>   |
| 225 | <i>Amauornis phoenicurus</i> | White-breasted Waterhen | 2016/12/29 | 3 | 0 | 10.47764173 | 76.20449262 | <a href="https://www.inaturalist.org/observations/65918785">https://www.inaturalist.org/observations/65918785</a>   |
| 226 | <i>Amauornis phoenicurus</i> | White-breasted Waterhen | 2018/10/30 | 4 | 0 | 10.53595206 | 76.12947280 | <a href="https://www.inaturalist.org/observations/18264233">https://www.inaturalist.org/observations/18264233</a>   |
| 227 | <i>Amauornis phoenicurus</i> | White-breasted Waterhen | 2020/6/1   | 1 | 0 | 10.60914533 | 76.19730776 | <a href="https://www.inaturalist.org/observations/50171410">https://www.inaturalist.org/observations/50171410</a>   |
| 228 | <i>Amauornis phoenicurus</i> | White-breasted Waterhen | 2019/9/10  | 5 | 0 | 10.61068333 | 76.20377500 | <a href="https://www.inaturalist.org/observations/32704955">https://www.inaturalist.org/observations/32704955</a>   |
| 229 | <i>Amauornis phoenicurus</i> | White-breasted Waterhen | 2017/7/26  | 3 | 0 | 10.61347802 | 76.25900466 | <a href="https://www.inaturalist.org/observations/100861296">https://www.inaturalist.org/observations/100861296</a> |

|     |                              |                         |            |   |   |             |             |                                                                                                                     |
|-----|------------------------------|-------------------------|------------|---|---|-------------|-------------|---------------------------------------------------------------------------------------------------------------------|
| 230 | <i>Amauornis phoenicurus</i> | White-breasted Waterhen | 2020/4/18  | 3 | 0 | 10.61648464 | 76.19203172 | <a href="https://www.inaturalist.org/observations/48353997">https://www.inaturalist.org/observations/48353997</a>   |
| 231 | <i>Amauornis phoenicurus</i> | White-breasted Waterhen | 2022/8/30  | 4 | 0 | 10.67747437 | 78.73756025 | <a href="https://www.inaturalist.org/observations/134390654">https://www.inaturalist.org/observations/134390654</a> |
| 232 | <i>Amauornis phoenicurus</i> | White-breasted Waterhen | 2017/11/11 | 4 | 0 | 10.78445890 | 76.66137079 | <a href="https://www.inaturalist.org/observations/10518654">https://www.inaturalist.org/observations/10518654</a>   |
| 233 | <i>Amauornis phoenicurus</i> | White-breasted Waterhen | 2017/11/9  | 4 | 0 | 10.78467352 | 76.66182140 | <a href="https://www.inaturalist.org/observations/10518012">https://www.inaturalist.org/observations/10518012</a>   |
| 234 | <i>Amauornis phoenicurus</i> | White-breasted Waterhen | 2022/1/19  | 3 | 0 | 10.86793930 | 75.97628720 | <a href="https://www.inaturalist.org/observations/105212010">https://www.inaturalist.org/observations/105212010</a> |
| 235 | <i>Amauornis phoenicurus</i> | White-breasted Waterhen | 2022/8/9   | 2 | 0 | 10.89485278 | 79.18818056 | <a href="https://www.inaturalist.org/observations/133582926">https://www.inaturalist.org/observations/133582926</a> |
| 236 | <i>Amauornis phoenicurus</i> | White-breasted Waterhen | 2020/8/22  | 6 | 0 | 10.96521810 | 76.74663090 | <a href="https://www.inaturalist.org/observations/108945409">https://www.inaturalist.org/observations/108945409</a> |
| 237 | <i>Amauornis phoenicurus</i> | White-breasted Waterhen | 2021/12/24 | 1 | 0 | 10.96716426 | 79.04414730 | <a href="https://www.inaturalist.org/observations/103949077">https://www.inaturalist.org/observations/103949077</a> |
| 238 | <i>Amauornis phoenicurus</i> | White-breasted Waterhen | 2021/12/24 | 2 | 0 | 10.96868333 | 79.04431000 | <a href="https://www.inaturalist.org/observations/103744511">https://www.inaturalist.org/observations/103744511</a> |
| 239 | <i>Amauornis phoenicurus</i> | White-breasted Waterhen | 2022/7/27  | 4 | 0 | 10.98408611 | 76.73735833 | <a href="https://www.inaturalist.org/observations/130595545">https://www.inaturalist.org/observations/130595545</a> |
| 240 | <i>Amauornis phoenicurus</i> | White-breasted Waterhen | 2020/10/25 | 2 | 0 | 11.07894586 | 79.83002432 | <a href="https://www.inaturalist.org/observations/63555731">https://www.inaturalist.org/observations/63555731</a>   |
| 241 | <i>Amauornis phoenicurus</i> | White-breasted Waterhen | 2021/7/22  | 2 | 0 | 11.07894586 | 79.83002432 | <a href="https://www.inaturalist.org/observations/88119996">https://www.inaturalist.org/observations/88119996</a>   |
| 242 | <i>Amauornis phoenicurus</i> | White-breasted Waterhen | 2021/8/5   | 1 | 0 | 11.09623870 | 77.37241390 | <a href="https://www.inaturalist.org/observations/90118911">https://www.inaturalist.org/observations/90118911</a>   |
| 243 | <i>Amauornis phoenicurus</i> | White-breasted Waterhen | 2022/1/2   | 0 | 0 | 11.09628247 | 77.37244293 | <a href="https://www.inaturalist.org/observations/104170026">https://www.inaturalist.org/observations/104170026</a> |
| 244 | <i>Amauornis phoenicurus</i> | White-breasted Waterhen | 2022/1/10  | 1 | 0 | 11.09632890 | 77.37245100 | <a href="https://www.inaturalist.org/observations/106158860">https://www.inaturalist.org/observations/106158860</a> |
| 245 | <i>Amauornis phoenicurus</i> | White-breasted Waterhen | 2022/4/10  | 2 | 0 | 11.10138469 | 79.78548322 | <a href="https://www.inaturalist.org/observations/110925246">https://www.inaturalist.org/observations/110925246</a> |
| 246 | <i>Amauornis phoenicurus</i> | White-breasted Waterhen | 2021/7/25  | 1 | 0 | 11.10558010 | 79.70181808 | <a href="https://www.inaturalist.org/observations/88503893">https://www.inaturalist.org/observations/88503893</a>   |
| 247 | <i>Amauornis phoenicurus</i> | White-breasted Waterhen | 2020/12/25 | 1 | 0 | 11.16253983 | 75.87942488 | <a href="https://www.inaturalist.org/observations/67196755">https://www.inaturalist.org/observations/67196755</a>   |
| 248 | <i>Amauornis phoenicurus</i> | White-breasted Waterhen | 2020/9/5   | 1 | 0 | 11.18033246 | 77.06349287 | <a href="https://www.inaturalist.org/observations/105837002">https://www.inaturalist.org/observations/105837002</a> |
| 249 | <i>Amauornis phoenicurus</i> | White-breasted Waterhen | 2020/1/1   | 3 | 0 | 11.23409110 | 77.65862357 | <a href="https://www.inaturalist.org/observations/37156880">https://www.inaturalist.org/observations/37156880</a>   |
| 250 | <i>Amauornis phoenicurus</i> | White-breasted Waterhen | 2020/1/19  | 2 | 0 | 11.25875300 | 75.78041000 | <a href="https://www.inaturalist.org/observations/37772626">https://www.inaturalist.org/observations/37772626</a>   |
| 251 | <i>Amauornis phoenicurus</i> | White-breasted Waterhen | 2019/10/7  | 1 | 0 | 11.27591377 | 77.58298729 | <a href="https://www.inaturalist.org/observations/38752021">https://www.inaturalist.org/observations/38752021</a>   |
| 252 | <i>Amauornis phoenicurus</i> | White-breasted Waterhen | 2022/5/23  | 6 | 0 | 11.28401440 | 79.54993162 | <a href="https://www.inaturalist.org/observations/119446119">https://www.inaturalist.org/observations/119446119</a> |

|     |                                        |                         |            |   |   |             |             |                                                                                                                     |
|-----|----------------------------------------|-------------------------|------------|---|---|-------------|-------------|---------------------------------------------------------------------------------------------------------------------|
| 253 | <i>Amauornis phoenicurus</i>           | White-breasted Waterhen | 2021/7/21  | 1 | 0 | 11.33267128 | 79.22819730 | <a href="https://www.inaturalist.org/observations/90043049">https://www.inaturalist.org/observations/90043049</a>   |
| 254 | <i>Amauornis phoenicurus</i>           | White-breasted Waterhen | 2014/11/22 | 8 | 0 | 11.35689700 | 76.79969500 | <a href="http://www.inaturalist.org/observations/1529598">http://www.inaturalist.org/observations/1529598</a>       |
| 255 | <i>Amauornis phoenicurus</i>           | White-breasted Waterhen | 2021/6/26  | 2 | 0 | 11.41522053 | 76.71850059 | <a href="https://www.inaturalist.org/observations/86820862">https://www.inaturalist.org/observations/86820862</a>   |
| 256 | <i>Amauornis phoenicurus</i>           | White-breasted Waterhen | 2012/8/9   | 2 | 0 | 11.41887510 | 76.71138780 | <a href="https://www.inaturalist.org/observations/41748173">https://www.inaturalist.org/observations/41748173</a>   |
| 257 | <i>Amauornis phoenicurus</i>           | White-breasted Waterhen | 2020/10/19 | 2 | 0 | 11.41887732 | 76.71138771 | <a href="https://www.inaturalist.org/observations/63460959">https://www.inaturalist.org/observations/63460959</a>   |
| 258 | <i>Amauornis phoenicurus</i>           | White-breasted Waterhen | 2014/8/4   | 4 | 0 | 11.43902050 | 76.63852747 | <a href="https://www.inaturalist.org/observations/20047586">https://www.inaturalist.org/observations/20047586</a>   |
| 259 | <i>Amauornis phoenicurus</i>           | White-breasted Waterhen | 2011/8/23  | 7 | 0 | 11.60365500 | 76.14223000 | <a href="http://www.inaturalist.org/observations/29988">http://www.inaturalist.org/observations/29988</a>           |
| 260 | <i>Amauornis phoenicurus insularis</i> | White-breasted Waterhen | 2022/4/6   | 2 | 0 | 11.61532522 | 92.61926226 | <a href="https://www.inaturalist.org/observations/111492095">https://www.inaturalist.org/observations/111492095</a> |
| 261 | <i>Amauornis phoenicurus</i>           | White-breasted Waterhen | 2022/7/17  | 4 | 0 | 11.68238375 | 78.16777088 | <a href="https://www.inaturalist.org/observations/126605118">https://www.inaturalist.org/observations/126605118</a> |
| 262 | <i>Amauornis phoenicurus</i>           | White-breasted Waterhen | 2021/1/24  | 2 | 0 | 11.68388914 | 78.16556409 | <a href="https://www.inaturalist.org/observations/68637251">https://www.inaturalist.org/observations/68637251</a>   |
| 263 | <i>Amauornis phoenicurus</i>           | White-breasted Waterhen | 2021/2/20  | 2 | 0 | 11.68388914 | 78.16556409 | <a href="https://www.inaturalist.org/observations/69863978">https://www.inaturalist.org/observations/69863978</a>   |
| 264 | <i>Amauornis phoenicurus</i>           | White-breasted Waterhen | 2021/2/21  | 2 | 0 | 11.68388914 | 78.16556409 | <a href="https://www.inaturalist.org/observations/69910796">https://www.inaturalist.org/observations/69910796</a>   |
| 265 | <i>Amauornis phoenicurus</i>           | White-breasted Waterhen | 2021/2/27  | 2 | 0 | 11.68388914 | 78.16556409 | <a href="https://www.inaturalist.org/observations/70255708">https://www.inaturalist.org/observations/70255708</a>   |
| 266 | <i>Amauornis phoenicurus</i>           | White-breasted Waterhen | 2021/4/20  | 3 | 0 | 11.68388914 | 78.16556409 | <a href="https://www.inaturalist.org/observations/74816362">https://www.inaturalist.org/observations/74816362</a>   |
| 267 | <i>Amauornis phoenicurus</i>           | White-breasted Waterhen | 2021/5/10  | 3 | 0 | 11.68388914 | 78.16556409 | <a href="https://www.inaturalist.org/observations/78203022">https://www.inaturalist.org/observations/78203022</a>   |
| 268 | <i>Amauornis phoenicurus</i>           | White-breasted Waterhen | 2021/5/10  | 3 | 0 | 11.68388914 | 78.16556409 | <a href="https://www.inaturalist.org/observations/78203301">https://www.inaturalist.org/observations/78203301</a>   |
| 269 | <i>Amauornis phoenicurus</i>           | White-breasted Waterhen | 2021/5/17  | 2 | 0 | 11.68388914 | 78.16556409 | <a href="https://www.inaturalist.org/observations/79242832">https://www.inaturalist.org/observations/79242832</a>   |
| 270 | <i>Amauornis phoenicurus</i>           | White-breasted Waterhen | 2021/5/18  | 2 | 0 | 11.68388914 | 78.16556409 | <a href="https://www.inaturalist.org/observations/79242992">https://www.inaturalist.org/observations/79242992</a>   |
| 271 | <i>Amauornis phoenicurus</i>           | White-breasted Waterhen | 2021/6/2   | 1 | 0 | 11.68388914 | 78.16556409 | <a href="https://www.inaturalist.org/observations/81277577">https://www.inaturalist.org/observations/81277577</a>   |
| 272 | <i>Amauornis phoenicurus</i>           | White-breasted Waterhen | 2021/6/3   | 1 | 0 | 11.68388914 | 78.16556409 | <a href="https://www.inaturalist.org/observations/81398559">https://www.inaturalist.org/observations/81398559</a>   |
| 273 | <i>Amauornis phoenicurus</i>           | White-breasted Waterhen | 2021/2/28  | 1 | 0 | 11.68742128 | 78.18066828 | <a href="https://www.inaturalist.org/observations/70304211">https://www.inaturalist.org/observations/70304211</a>   |
| 274 | <i>Amauornis phoenicurus</i>           | White-breasted Waterhen | 2021/10/2  | 3 | 0 | 11.68742128 | 78.18066828 | <a href="https://www.inaturalist.org/observations/100578423">https://www.inaturalist.org/observations/100578423</a> |
| 275 | <i>Amauornis phoenicurus</i>           | White-breasted Waterhen | 2021/11/7  | 2 | 0 | 11.68742128 | 78.18066828 | <a href="https://www.inaturalist.org/observations/100985115">https://www.inaturalist.org/observations/100985115</a> |



|     |                                        |                         |            |   |   |             |             |                                                                                                                     |
|-----|----------------------------------------|-------------------------|------------|---|---|-------------|-------------|---------------------------------------------------------------------------------------------------------------------|
| 276 | <i>Amauornis phoenicurus</i>           | White-breasted Waterhen | 2021/12/25 | 1 | 0 | 11.68742128 | 78.18066828 | <a href="https://www.inaturalist.org/observations/103620491">https://www.inaturalist.org/observations/103620491</a> |
| 277 | <i>Amauornis phoenicurus</i>           | White-breasted Waterhen | 2021/12/26 | 2 | 0 | 11.68742128 | 78.18066828 | <a href="https://www.inaturalist.org/observations/103682062">https://www.inaturalist.org/observations/103682062</a> |
| 278 | <i>Amauornis phoenicurus</i>           | White-breasted Waterhen | 2022/2/19  | 1 | 0 | 11.68742128 | 78.18066828 | <a href="https://www.inaturalist.org/observations/107030696">https://www.inaturalist.org/observations/107030696</a> |
| 279 | <i>Amauornis phoenicurus</i>           | White-breasted Waterhen | 2021/3/22  | 1 | 0 | 11.69761230 | 78.18062872 | <a href="https://www.inaturalist.org/observations/71864836">https://www.inaturalist.org/observations/71864836</a>   |
| 280 | <i>Amauornis phoenicurus</i>           | White-breasted Waterhen | 2021/6/11  | 2 | 0 | 11.69761230 | 78.18062872 | <a href="https://www.inaturalist.org/observations/82788664">https://www.inaturalist.org/observations/82788664</a>   |
| 281 | <i>Amauornis phoenicurus</i>           | White-breasted Waterhen | 2021/6/12  | 1 | 0 | 11.69761230 | 78.18062872 | <a href="https://www.inaturalist.org/observations/82789336">https://www.inaturalist.org/observations/82789336</a>   |
| 282 | <i>Amauornis phoenicurus</i>           | White-breasted Waterhen | 2021/8/25  | 2 | 0 | 11.70954753 | 78.18930868 | <a href="https://www.inaturalist.org/observations/92460168">https://www.inaturalist.org/observations/92460168</a>   |
| 283 | <i>Amauornis phoenicurus</i>           | White-breasted Waterhen | 2022/10/2  | 3 | 0 | 11.71028587 | 78.18906192 | <a href="https://www.inaturalist.org/observations/137256077">https://www.inaturalist.org/observations/137256077</a> |
| 284 | <i>Amauornis phoenicurus insularis</i> | White-breasted Waterhen | 2013/2/11  | 1 | 0 | 11.72019670 | 92.73345460 | <a href="https://www.inaturalist.org/observations/31318924">https://www.inaturalist.org/observations/31318924</a>   |
| 285 | <i>Amauornis phoenicurus</i>           | White-breasted Waterhen | 2018/12/8  | 1 | 0 | 11.73446034 | 78.20203878 | <a href="https://www.inaturalist.org/observations/54734994">https://www.inaturalist.org/observations/54734994</a>   |
| 286 | <i>Amauornis phoenicurus</i>           | White-breasted Waterhen | 2021/5/17  | 2 | 0 | 11.82777657 | 75.55191856 | <a href="https://www.inaturalist.org/observations/79153975">https://www.inaturalist.org/observations/79153975</a>   |
| 287 | <i>Amauornis phoenicurus</i>           | White-breasted Waterhen | 2018/5/22  | 2 | 0 | 11.86416956 | 78.12001766 | <a href="https://www.inaturalist.org/observations/56912042">https://www.inaturalist.org/observations/56912042</a>   |
| 288 | <i>Amauornis phoenicurus</i>           | White-breasted Waterhen | 2020/9/13  | 2 | 0 | 11.93667197 | 79.80234400 | <a href="https://www.inaturalist.org/observations/65519008">https://www.inaturalist.org/observations/65519008</a>   |
| 289 | <i>Amauornis phoenicurus</i>           | White-breasted Waterhen | 2022/5/20  | 4 | 0 | 11.94468432 | 75.38493812 | <a href="https://www.inaturalist.org/observations/124348122">https://www.inaturalist.org/observations/124348122</a> |
| 290 | <i>Amauornis phoenicurus</i>           | White-breasted Waterhen | 2022/4/9   | 1 | 0 | 11.94468432 | 75.38493812 | <a href="https://www.inaturalist.org/observations/128114419">https://www.inaturalist.org/observations/128114419</a> |
| 291 | <i>Amauornis phoenicurus</i>           | White-breasted Waterhen | 2022/8/20  | 3 | 0 | 11.94468432 | 75.38493812 | <a href="https://www.inaturalist.org/observations/135645563">https://www.inaturalist.org/observations/135645563</a> |
| 292 | <i>Amauornis phoenicurus</i>           | White-breasted Waterhen | 2021/6/11  | 4 | 0 | 11.95201834 | 75.33462390 | <a href="https://www.inaturalist.org/observations/82535669">https://www.inaturalist.org/observations/82535669</a>   |
| 293 | <i>Amauornis phoenicurus</i>           | White-breasted Waterhen | 2021/10/27 | 2 | 0 | 11.96140314 | 75.32850411 | <a href="https://www.inaturalist.org/observations/99517240">https://www.inaturalist.org/observations/99517240</a>   |
| 294 | <i>Amauornis phoenicurus</i>           | White-breasted Waterhen | 2019/12/29 | 1 | 0 | 11.98977400 | 76.37704100 | <a href="https://www.inaturalist.org/observations/40870694">https://www.inaturalist.org/observations/40870694</a>   |
| 295 | <i>Amauornis phoenicurus</i>           | White-breasted Waterhen | 2017/1/15  | 5 | 0 | 11.99563240 | 77.14276400 | <a href="https://www.inaturalist.org/observations/19862796">https://www.inaturalist.org/observations/19862796</a>   |
| 296 | <i>Amauornis phoenicurus</i>           | White-breasted Waterhen | 2019/5/9   | 4 | 0 | 12.02828333 | 75.27404500 | <a href="https://www.inaturalist.org/observations/29242853">https://www.inaturalist.org/observations/29242853</a>   |
| 297 | <i>Amauornis phoenicurus</i>           | White-breasted Waterhen | 2022/5/15  | 3 | 0 | 12.04009244 | 75.29748503 | <a href="https://www.inaturalist.org/observations/124347227">https://www.inaturalist.org/observations/124347227</a> |
| 298 | <i>Amauornis phoenicurus</i>           | White-breasted Waterhen | 2022/3/8   | 2 | 0 | 12.15031167 | 75.19580833 | <a href="https://www.inaturalist.org/observations/115189689">https://www.inaturalist.org/observations/115189689</a> |

|     |                              |                         |            |   |   |             |             |                                                                                                                     |
|-----|------------------------------|-------------------------|------------|---|---|-------------|-------------|---------------------------------------------------------------------------------------------------------------------|
| 299 | <i>Amauornis phoenicurus</i> | White-breasted Waterhen | 2019/9/14  | 5 | 0 | 12.15262333 | 75.20986500 | <a href="https://www.inaturalist.org/observations/32704917">https://www.inaturalist.org/observations/32704917</a>   |
| 300 | <i>Amauornis phoenicurus</i> | White-breasted Waterhen | 2019/10/13 | 2 | 0 | 12.16422194 | 76.54256171 | <a href="https://www.inaturalist.org/observations/90642116">https://www.inaturalist.org/observations/90642116</a>   |
| 301 | <i>Amauornis phoenicurus</i> | White-breasted Waterhen | 2021/12/12 | 1 | 0 | 12.16529924 | 75.42718928 | <a href="https://www.inaturalist.org/observations/119990970">https://www.inaturalist.org/observations/119990970</a> |
| 302 | <i>Amauornis phoenicurus</i> | White-breasted Waterhen | 2021/4/17  | 2 | 0 | 12.16646476 | 76.60647922 | <a href="https://www.inaturalist.org/observations/80699599">https://www.inaturalist.org/observations/80699599</a>   |
| 303 | <i>Amauornis phoenicurus</i> | White-breasted Waterhen | 2012/7/1   | 3 | 0 | 12.16770120 | 76.53148170 | <a href="https://www.inaturalist.org/observations/85740563">https://www.inaturalist.org/observations/85740563</a>   |
| 304 | <i>Amauornis phoenicurus</i> | White-breasted Waterhen | 2017/1/1   | 2 | 0 | 12.17063659 | 76.54343269 | <a href="https://www.inaturalist.org/observations/82548752">https://www.inaturalist.org/observations/82548752</a>   |
| 305 | <i>Amauornis phoenicurus</i> | White-breasted Waterhen | 2022/9/29  | 3 | 0 | 12.21017640 | 79.02620180 | <a href="https://www.inaturalist.org/observations/136894919">https://www.inaturalist.org/observations/136894919</a> |
| 306 | <i>Amauornis phoenicurus</i> | White-breasted Waterhen | 2017/5/30  | 1 | 0 | 12.22528410 | 79.07469570 | <a href="https://www.inaturalist.org/observations/96337199">https://www.inaturalist.org/observations/96337199</a>   |
| 307 | <i>Amauornis phoenicurus</i> | White-breasted Waterhen | 2022/1/22  | 3 | 0 | 12.23502051 | 76.62170875 | <a href="https://www.inaturalist.org/observations/105351372">https://www.inaturalist.org/observations/105351372</a> |
| 308 | <i>Amauornis phoenicurus</i> | White-breasted Waterhen | 2018/1/20  | 1 | 0 | 12.26937200 | 76.61197800 | <a href="https://www.inaturalist.org/observations/93867751">https://www.inaturalist.org/observations/93867751</a>   |
| 309 | <i>Amauornis phoenicurus</i> | White-breasted Waterhen | 2018/2/24  | 4 | 0 | 12.27107720 | 76.61383270 | <a href="https://www.inaturalist.org/observations/10030292">https://www.inaturalist.org/observations/10030292</a>   |
| 310 | <i>Amauornis phoenicurus</i> | White-breasted Waterhen | 2022/2/6   | 3 | 0 | 12.27758333 | 76.32226667 | <a href="https://www.inaturalist.org/observations/106241303">https://www.inaturalist.org/observations/106241303</a> |
| 311 | <i>Amauornis phoenicurus</i> | White-breasted Waterhen | 2011/8/26  | 4 | 0 | 12.30998264 | 76.60118580 | <a href="http://www.inaturalist.org/observations/125622">http://www.inaturalist.org/observations/125622</a>         |
| 312 | <i>Amauornis phoenicurus</i> | White-breasted Waterhen | 2018/2/18  | 3 | 0 | 12.32203100 | 75.89011760 | <a href="https://www.inaturalist.org/observations/37518100">https://www.inaturalist.org/observations/37518100</a>   |
| 313 | <i>Amauornis phoenicurus</i> | White-breasted Waterhen | 2010/3/20  | 6 | 0 | 12.33239574 | 80.05362248 | <a href="https://www.inaturalist.org/observations/22698373">https://www.inaturalist.org/observations/22698373</a>   |
| 314 | <i>Amauornis phoenicurus</i> | White-breasted Waterhen | 2020/12/20 | 2 | 0 | 12.34993038 | 75.09181614 | <a href="https://www.inaturalist.org/observations/66994722">https://www.inaturalist.org/observations/66994722</a>   |
| 315 | <i>Amauornis phoenicurus</i> | White-breasted Waterhen | 2021/7/23  | 1 | 0 | 12.35139324 | 76.68743230 | <a href="https://www.inaturalist.org/observations/88391421">https://www.inaturalist.org/observations/88391421</a>   |
| 316 | <i>Amauornis phoenicurus</i> | White-breasted Waterhen | 2022/4/18  | 5 | 0 | 12.42360545 | 76.65693252 | <a href="https://www.inaturalist.org/observations/112123400">https://www.inaturalist.org/observations/112123400</a> |
| 317 | <i>Amauornis phoenicurus</i> | White-breasted Waterhen | 2018/3/25  | 5 | 0 | 12.42436111 | 76.65635000 | <a href="https://www.inaturalist.org/observations/66303273">https://www.inaturalist.org/observations/66303273</a>   |
| 318 | <i>Amauornis phoenicurus</i> | White-breasted Waterhen | 2020/11/22 | 3 | 0 | 12.43017725 | 77.65239414 | <a href="https://www.inaturalist.org/observations/65467619">https://www.inaturalist.org/observations/65467619</a>   |
| 319 | <i>Amauornis phoenicurus</i> | White-breasted Waterhen | 2021/11/16 | 3 | 0 | 12.46945117 | 75.71128548 | <a href="https://www.inaturalist.org/observations/102292466">https://www.inaturalist.org/observations/102292466</a> |
| 320 | <i>Amauornis phoenicurus</i> | White-breasted Waterhen | 2021/11/16 | 3 | 0 | 12.47511618 | 75.68926478 | <a href="https://www.inaturalist.org/observations/102292464">https://www.inaturalist.org/observations/102292464</a> |
| 321 | <i>Amauornis phoenicurus</i> | White-breasted Waterhen | 2020/5/6   | 1 | 0 | 12.49304449 | 76.40336752 | <a href="https://www.inaturalist.org/observations/69723152">https://www.inaturalist.org/observations/69723152</a>   |

|     |                              |                         |            |   |   |             |             |                                                                                                                     |
|-----|------------------------------|-------------------------|------------|---|---|-------------|-------------|---------------------------------------------------------------------------------------------------------------------|
| 322 | <i>Amauornis phoenicurus</i> | White-breasted Waterhen | 2022/9/29  | 1 | 0 | 12.51117865 | 75.81066427 | <a href="https://www.inaturalist.org/observations/137007238">https://www.inaturalist.org/observations/137007238</a> |
| 323 | <i>Amauornis phoenicurus</i> | White-breasted Waterhen | 2016/11/20 | 2 | 0 | 12.54545970 | 79.85606940 | <a href="https://www.inaturalist.org/observations/45850468">https://www.inaturalist.org/observations/45850468</a>   |
| 324 | <i>Amauornis phoenicurus</i> | White-breasted Waterhen | 2013/3/17  | 4 | 0 | 12.54547341 | 79.85605717 | <a href="https://www.inaturalist.org/observations/74721065">https://www.inaturalist.org/observations/74721065</a>   |
| 325 | <i>Amauornis phoenicurus</i> | White-breasted Waterhen | 2019/2/26  | 2 | 0 | 12.57648016 | 75.98306044 | <a href="https://www.inaturalist.org/observations/69904291">https://www.inaturalist.org/observations/69904291</a>   |
| 326 | <i>Amauornis phoenicurus</i> | White-breasted Waterhen | 2022/6/22  | 6 | 0 | 12.60689833 | 76.08892500 | <a href="https://www.inaturalist.org/observations/124087317">https://www.inaturalist.org/observations/124087317</a> |
| 327 | <i>Amauornis phoenicurus</i> | White-breasted Waterhen | 2022/6/23  | 4 | 0 | 12.61196000 | 76.08395167 | <a href="https://www.inaturalist.org/observations/125588530">https://www.inaturalist.org/observations/125588530</a> |
| 328 | <i>Amauornis phoenicurus</i> | White-breasted Waterhen | 2022/6/21  | 5 | 0 | 12.61354833 | 76.08424500 | <a href="https://www.inaturalist.org/observations/124086981">https://www.inaturalist.org/observations/124086981</a> |
| 329 | <i>Amauornis phoenicurus</i> | White-breasted Waterhen | 2012/2/5   | 4 | 0 | 12.64780281 | 76.62294091 | <a href="https://www.inaturalist.org/observations/98173391">https://www.inaturalist.org/observations/98173391</a>   |
| 330 | <i>Amauornis phoenicurus</i> | White-breasted Waterhen | 2022/8/11  | 4 | 0 | 12.67588167 | 77.76973500 | <a href="https://www.inaturalist.org/observations/130367502">https://www.inaturalist.org/observations/130367502</a> |
| 331 | <i>Amauornis phoenicurus</i> | White-breasted Waterhen | 2022/8/11  | 5 | 0 | 12.67590500 | 77.76986333 | <a href="https://www.inaturalist.org/observations/130367544">https://www.inaturalist.org/observations/130367544</a> |
| 332 | <i>Amauornis phoenicurus</i> | White-breasted Waterhen | 2022/7/24  | 2 | 0 | 12.67597500 | 77.76702167 | <a href="https://www.inaturalist.org/observations/127643170">https://www.inaturalist.org/observations/127643170</a> |
| 333 | <i>Amauornis phoenicurus</i> | White-breasted Waterhen | 2022/6/26  | 3 | 0 | 12.67608290 | 77.76725155 | <a href="https://www.inaturalist.org/observations/123478784">https://www.inaturalist.org/observations/123478784</a> |
| 334 | <i>Amauornis phoenicurus</i> | White-breasted Waterhen | 2022/6/26  | 3 | 0 | 12.67611000 | 77.76709667 | <a href="https://www.inaturalist.org/observations/123478790">https://www.inaturalist.org/observations/123478790</a> |
| 335 | <i>Amauornis phoenicurus</i> | White-breasted Waterhen | 2022/2/19  | 1 | 0 | 12.71269193 | 77.80709054 | <a href="https://www.inaturalist.org/observations/107472815">https://www.inaturalist.org/observations/107472815</a> |
| 336 | <i>Amauornis phoenicurus</i> | White-breasted Waterhen | 2022/2/19  | 3 | 0 | 12.71347833 | 77.81036833 | <a href="https://www.inaturalist.org/observations/107120071">https://www.inaturalist.org/observations/107120071</a> |
| 337 | <i>Amauornis phoenicurus</i> | White-breasted Waterhen | 2016/4/16  | 5 | 0 | 12.74310139 | 80.23948972 | <a href="https://www.inaturalist.org/observations/22504408">https://www.inaturalist.org/observations/22504408</a>   |
| 338 | <i>Amauornis phoenicurus</i> | White-breasted Waterhen | 2022/5/1   | 1 | 0 | 12.76735598 | 77.87396908 | <a href="https://www.inaturalist.org/observations/114131682">https://www.inaturalist.org/observations/114131682</a> |
| 339 | <i>Amauornis phoenicurus</i> | White-breasted Waterhen | 2022/5/1   | 2 | 0 | 12.76943667 | 77.87832667 | <a href="https://www.inaturalist.org/observations/114394977">https://www.inaturalist.org/observations/114394977</a> |
| 340 | <i>Amauornis phoenicurus</i> | White-breasted Waterhen | 2021/12/12 | 1 | 0 | 12.77886903 | 77.82087504 | <a href="https://www.inaturalist.org/observations/102921098">https://www.inaturalist.org/observations/102921098</a> |
| 341 | <i>Amauornis phoenicurus</i> | White-breasted Waterhen | 2019/6/17  | 5 | 0 | 12.78343025 | 77.62222627 | <a href="https://www.inaturalist.org/observations/126172206">https://www.inaturalist.org/observations/126172206</a> |
| 342 | <i>Amauornis phoenicurus</i> | White-breasted Waterhen | 2022/6/11  | 3 | 0 | 12.81789726 | 77.54734700 | <a href="https://www.inaturalist.org/observations/121214337">https://www.inaturalist.org/observations/121214337</a> |
| 343 | <i>Amauornis phoenicurus</i> | White-breasted Waterhen | 2018/10/8  | 6 | 0 | 12.81926620 | 80.21560157 | <a href="https://www.inaturalist.org/observations/19418936">https://www.inaturalist.org/observations/19418936</a>   |
| 344 | <i>Amauornis phoenicurus</i> | White-breasted Waterhen | 2020/12/30 | 2 | 0 | 12.82954751 | 79.16970485 | <a href="https://www.inaturalist.org/observations/73090002">https://www.inaturalist.org/observations/73090002</a>   |

|     |                              |                         |            |   |   |             |             |                                                                                                                     |
|-----|------------------------------|-------------------------|------------|---|---|-------------|-------------|---------------------------------------------------------------------------------------------------------------------|
| 345 | <i>Amauornis phoenicurus</i> | White-breasted Waterhen | 2018/1/6   | 2 | 0 | 12.84944180 | 77.48845420 | <a href="https://www.inaturalist.org/observations/66097352">https://www.inaturalist.org/observations/66097352</a>   |
| 346 | <i>Amauornis phoenicurus</i> | White-breasted Waterhen | 2017/6/4   | 5 | 0 | 12.85629043 | 74.86194277 | <a href="https://www.inaturalist.org/observations/18326897">https://www.inaturalist.org/observations/18326897</a>   |
| 347 | <i>Amauornis phoenicurus</i> | White-breasted Waterhen | 2021/8/29  | 1 | 0 | 12.86323940 | 77.53899850 | <a href="https://www.inaturalist.org/observations/92916089">https://www.inaturalist.org/observations/92916089</a>   |
| 348 | <i>Amauornis phoenicurus</i> | White-breasted Waterhen | 2021/9/29  | 4 | 0 | 12.87950540 | 79.40612680 | <a href="https://www.inaturalist.org/observations/96660315">https://www.inaturalist.org/observations/96660315</a>   |
| 349 | <i>Amauornis phoenicurus</i> | White-breasted Waterhen | 2022/7/12  | 1 | 0 | 12.88026204 | 80.21554358 | <a href="https://www.inaturalist.org/observations/125859700">https://www.inaturalist.org/observations/125859700</a> |
| 350 | <i>Amauornis phoenicurus</i> | White-breasted Waterhen | 2019/4/19  | 4 | 0 | 12.88206881 | 75.82580443 | <a href="https://www.inaturalist.org/observations/26592832">https://www.inaturalist.org/observations/26592832</a>   |
| 351 | <i>Amauornis phoenicurus</i> | White-breasted Waterhen | 2017/3/1   | 2 | 0 | 12.88259664 | 77.52360254 | <a href="https://www.inaturalist.org/observations/64917459">https://www.inaturalist.org/observations/64917459</a>   |
| 352 | <i>Amauornis phoenicurus</i> | White-breasted Waterhen | 2022/7/19  | 2 | 0 | 12.88311011 | 80.21373913 | <a href="https://www.inaturalist.org/observations/126959422">https://www.inaturalist.org/observations/126959422</a> |
| 353 | <i>Amauornis phoenicurus</i> | White-breasted Waterhen | 2021/6/27  | 1 | 0 | 12.88553032 | 77.46760335 | <a href="https://www.inaturalist.org/observations/85446840">https://www.inaturalist.org/observations/85446840</a>   |
| 354 | <i>Amauornis phoenicurus</i> | White-breasted Waterhen | 2019/12/10 | 1 | 0 | 12.89041400 | 77.58719000 | <a href="https://www.inaturalist.org/observations/86123970">https://www.inaturalist.org/observations/86123970</a>   |
| 355 | <i>Amauornis phoenicurus</i> | White-breasted Waterhen | 2019/10/14 | 2 | 0 | 12.89231570 | 80.18889170 | <a href="https://www.inaturalist.org/observations/109824194">https://www.inaturalist.org/observations/109824194</a> |
| 356 | <i>Amauornis phoenicurus</i> | White-breasted Waterhen | 2020/5/31  | 4 | 0 | 12.89917930 | 77.66699090 | <a href="https://www.inaturalist.org/observations/48096193">https://www.inaturalist.org/observations/48096193</a>   |
| 357 | <i>Amauornis phoenicurus</i> | White-breasted Waterhen | 2019/8/3   | 4 | 0 | 12.89924844 | 80.23584757 | <a href="https://www.inaturalist.org/observations/31128592">https://www.inaturalist.org/observations/31128592</a>   |
| 358 | <i>Amauornis phoenicurus</i> | White-breasted Waterhen | 2020/4/23  | 1 | 0 | 12.90053772 | 80.21841690 | <a href="https://www.inaturalist.org/observations/43392928">https://www.inaturalist.org/observations/43392928</a>   |
| 359 | <i>Amauornis phoenicurus</i> | White-breasted Waterhen | 2020/8/15  | 3 | 0 | 12.91196393 | 77.67348842 | <a href="https://www.inaturalist.org/observations/56825544">https://www.inaturalist.org/observations/56825544</a>   |
| 360 | <i>Amauornis phoenicurus</i> | White-breasted Waterhen | 2020/8/15  | 1 | 0 | 12.91256387 | 77.67398133 | <a href="https://www.inaturalist.org/observations/56499862">https://www.inaturalist.org/observations/56499862</a>   |
| 361 | <i>Amauornis phoenicurus</i> | White-breasted Waterhen | 2020/8/15  | 1 | 0 | 12.91268694 | 77.67422882 | <a href="https://www.inaturalist.org/observations/56499878">https://www.inaturalist.org/observations/56499878</a>   |
| 362 | <i>Amauornis phoenicurus</i> | White-breasted Waterhen | 2022/2/21  | 4 | 0 | 12.91269250 | 77.67329750 | <a href="https://www.inaturalist.org/observations/107175661">https://www.inaturalist.org/observations/107175661</a> |
| 363 | <i>Amauornis phoenicurus</i> | White-breasted Waterhen | 2021/1/22  | 2 | 0 | 12.91269260 | 77.67329726 | <a href="https://www.inaturalist.org/observations/68437926">https://www.inaturalist.org/observations/68437926</a>   |
| 364 | <i>Amauornis phoenicurus</i> | White-breasted Waterhen | 2021/12/28 | 3 | 0 | 12.91341677 | 77.67334160 | <a href="https://www.inaturalist.org/observations/103823680">https://www.inaturalist.org/observations/103823680</a> |
| 365 | <i>Amauornis phoenicurus</i> | White-breasted Waterhen | 2020/12/20 | 2 | 0 | 12.91499040 | 80.07201710 | <a href="https://www.inaturalist.org/observations/66809762">https://www.inaturalist.org/observations/66809762</a>   |
| 366 | <i>Amauornis phoenicurus</i> | White-breasted Waterhen | 2022/4/2   | 1 | 0 | 12.91566807 | 77.68122688 | <a href="https://www.inaturalist.org/observations/110147867">https://www.inaturalist.org/observations/110147867</a> |
| 367 | <i>Amauornis phoenicurus</i> | White-breasted Waterhen | 1980/1/1   | 1 | 0 | 12.91674920 | 80.09749040 | <a href="https://www.inaturalist.org/observations/58036993">https://www.inaturalist.org/observations/58036993</a>   |

|     |                              |                         |           |   |   |             |             |                                                                                                                     |
|-----|------------------------------|-------------------------|-----------|---|---|-------------|-------------|---------------------------------------------------------------------------------------------------------------------|
| 368 | <i>Amauornis phoenicurus</i> | White-breasted Waterhen | 2020/2/20 | 3 | 0 | 12.91733347 | 77.66497708 | <a href="https://www.inaturalist.org/observations/70025654">https://www.inaturalist.org/observations/70025654</a>   |
| 369 | <i>Amauornis phoenicurus</i> | White-breasted Waterhen | 2019/9/2  | 4 | 0 | 12.91763667 | 77.66574667 | <a href="https://www.inaturalist.org/observations/31985912">https://www.inaturalist.org/observations/31985912</a>   |
| 370 | <i>Amauornis phoenicurus</i> | White-breasted Waterhen | 2022/3/19 | 5 | 0 | 12.93064200 | 77.46784003 | <a href="https://www.inaturalist.org/observations/108933470">https://www.inaturalist.org/observations/108933470</a> |
| 371 | <i>Amauornis phoenicurus</i> | White-breasted Waterhen | 2022/3/19 | 6 | 0 | 12.93064200 | 77.46784003 | <a href="https://www.inaturalist.org/observations/108933481">https://www.inaturalist.org/observations/108933481</a> |
| 372 | <i>Amauornis phoenicurus</i> | White-breasted Waterhen | 2020/7/11 | 3 | 0 | 12.93379041 | 80.16516466 | <a href="https://www.inaturalist.org/observations/65750892">https://www.inaturalist.org/observations/65750892</a>   |
| 373 | <i>Amauornis phoenicurus</i> | White-breasted Waterhen | 2022/1/24 | 2 | 0 | 12.93488966 | 80.21371230 | <a href="https://www.inaturalist.org/observations/106969820">https://www.inaturalist.org/observations/106969820</a> |
| 374 | <i>Amauornis phoenicurus</i> | White-breasted Waterhen | 2013/6/16 | 5 | 0 | 12.93489120 | 80.21371240 | <a href="https://www.inaturalist.org/observations/22537208">https://www.inaturalist.org/observations/22537208</a>   |
| 375 | <i>Amauornis phoenicurus</i> | White-breasted Waterhen | 2019/2/2  | 2 | 0 | 12.93489120 | 80.21371240 | <a href="https://www.inaturalist.org/observations/64436327">https://www.inaturalist.org/observations/64436327</a>   |
| 376 | <i>Amauornis phoenicurus</i> | White-breasted Waterhen | 2019/9/3  | 4 | 0 | 12.93775704 | 80.21360300 | <a href="https://www.inaturalist.org/observations/32052758">https://www.inaturalist.org/observations/32052758</a>   |
| 377 | <i>Amauornis phoenicurus</i> | White-breasted Waterhen | 2020/10/6 | 2 | 0 | 12.93919317 | 80.21173920 | <a href="https://www.inaturalist.org/observations/62180713">https://www.inaturalist.org/observations/62180713</a>   |
| 378 | <i>Amauornis phoenicurus</i> | White-breasted Waterhen | 2021/7/17 | 2 | 0 | 12.93990191 | 80.21622352 | <a href="https://www.inaturalist.org/observations/87493922">https://www.inaturalist.org/observations/87493922</a>   |
| 379 | <i>Amauornis phoenicurus</i> | White-breasted Waterhen | 2020/2/14 | 0 | 0 | 12.94243333 | 77.51247667 | <a href="https://www.inaturalist.org/observations/38954382">https://www.inaturalist.org/observations/38954382</a>   |
| 380 | <i>Amauornis phoenicurus</i> | White-breasted Waterhen | 2022/6/25 | 5 | 0 | 12.94388333 | 77.58293833 | <a href="https://www.inaturalist.org/observations/124850867">https://www.inaturalist.org/observations/124850867</a> |
| 381 | <i>Amauornis phoenicurus</i> | White-breasted Waterhen | 2019/1/12 | 5 | 0 | 12.94392955 | 77.58177560 | <a href="https://www.inaturalist.org/observations/19676939">https://www.inaturalist.org/observations/19676939</a>   |
| 382 | <i>Amauornis phoenicurus</i> | White-breasted Waterhen | 2022/7/9  | 2 | 0 | 12.94398379 | 77.50462890 | <a href="https://www.inaturalist.org/observations/125457723">https://www.inaturalist.org/observations/125457723</a> |
| 383 | <i>Amauornis phoenicurus</i> | White-breasted Waterhen | 2021/2/10 | 3 | 0 | 12.94542297 | 80.25106997 | <a href="https://www.inaturalist.org/observations/69337959">https://www.inaturalist.org/observations/69337959</a>   |
| 384 | <i>Amauornis phoenicurus</i> | White-breasted Waterhen | 2013/6/16 | 5 | 0 | 12.94657610 | 80.22376600 | <a href="https://www.inaturalist.org/observations/22695427">https://www.inaturalist.org/observations/22695427</a>   |
| 385 | <i>Amauornis phoenicurus</i> | White-breasted Waterhen | 2021/2/24 | 3 | 0 | 12.94701313 | 77.58376781 | <a href="https://www.inaturalist.org/observations/77750614">https://www.inaturalist.org/observations/77750614</a>   |
| 386 | <i>Amauornis phoenicurus</i> | White-breasted Waterhen | 2010/7/11 | 5 | 0 | 12.95074320 | 77.58477730 | <a href="https://www.inaturalist.org/observations/28845433">https://www.inaturalist.org/observations/28845433</a>   |
| 387 | <i>Amauornis phoenicurus</i> | White-breasted Waterhen | 2021/9/15 | 2 | 0 | 12.95852375 | 80.19190979 | <a href="https://www.inaturalist.org/observations/94884830">https://www.inaturalist.org/observations/94884830</a>   |
| 388 | <i>Amauornis phoenicurus</i> | White-breasted Waterhen | 2019/8/24 | 5 | 0 | 12.96113008 | 80.21339715 | <a href="https://www.inaturalist.org/observations/31477630">https://www.inaturalist.org/observations/31477630</a>   |
| 389 | <i>Amauornis phoenicurus</i> | White-breasted Waterhen | 2020/1/25 | 1 | 0 | 12.97159870 | 77.59456270 | <a href="https://www.inaturalist.org/observations/55895100">https://www.inaturalist.org/observations/55895100</a>   |
| 390 | <i>Amauornis phoenicurus</i> | White-breasted Waterhen | 2021/6/19 | 5 | 0 | 12.97159870 | 77.59456270 | <a href="https://www.inaturalist.org/observations/120976948">https://www.inaturalist.org/observations/120976948</a> |

|     |                              |                         |            |   |   |             |             |                                                                                                                     |
|-----|------------------------------|-------------------------|------------|---|---|-------------|-------------|---------------------------------------------------------------------------------------------------------------------|
| 391 | <i>Amauornis phoenicurus</i> | White-breasted Waterhen | 2021/9/15  | 6 | 0 | 12.97159870 | 77.59456270 | <a href="https://www.inaturalist.org/observations/121528153">https://www.inaturalist.org/observations/121528153</a> |
| 392 | <i>Amauornis phoenicurus</i> | White-breasted Waterhen | 2020/8/6   | 2 | 0 | 12.97436806 | 80.22963500 | <a href="https://www.inaturalist.org/observations/63743354">https://www.inaturalist.org/observations/63743354</a>   |
| 393 | <i>Amauornis phoenicurus</i> | White-breasted Waterhen | 2018/10/25 | 4 | 0 | 12.98324680 | 77.61996080 | <a href="https://www.inaturalist.org/observations/17844281">https://www.inaturalist.org/observations/17844281</a>   |
| 394 | <i>Amauornis phoenicurus</i> | White-breasted Waterhen | 2022/2/13  | 2 | 0 | 12.98698070 | 80.19639850 | <a href="https://www.inaturalist.org/observations/106674616">https://www.inaturalist.org/observations/106674616</a> |
| 395 | <i>Amauornis phoenicurus</i> | White-breasted Waterhen | 2020/10/17 | 2 | 0 | 12.98883752 | 80.23982759 | <a href="https://www.inaturalist.org/observations/63151439">https://www.inaturalist.org/observations/63151439</a>   |
| 396 | <i>Amauornis phoenicurus</i> | White-breasted Waterhen | 2019/6/9   | 9 | 0 | 12.98999851 | 80.23768512 | <a href="https://www.inaturalist.org/observations/28546608">https://www.inaturalist.org/observations/28546608</a>   |
| 397 | <i>Amauornis phoenicurus</i> | White-breasted Waterhen | 2020/2/16  | 2 | 0 | 12.99149290 | 80.23369070 | <a href="https://www.inaturalist.org/observations/52654524">https://www.inaturalist.org/observations/52654524</a>   |
| 398 | <i>Amauornis phoenicurus</i> | White-breasted Waterhen | 2020/10/17 | 5 | 0 | 12.99174909 | 80.23688083 | <a href="https://www.inaturalist.org/observations/62792205">https://www.inaturalist.org/observations/62792205</a>   |
| 399 | <i>Amauornis phoenicurus</i> | White-breasted Waterhen | 2018/8/12  | 6 | 0 | 12.99464037 | 80.23969358 | <a href="https://www.inaturalist.org/observations/15353867">https://www.inaturalist.org/observations/15353867</a>   |
| 400 | <i>Amauornis phoenicurus</i> | White-breasted Waterhen | 2021/11/20 | 1 | 0 | 12.99547418 | 80.23978467 | <a href="https://www.inaturalist.org/observations/101549353">https://www.inaturalist.org/observations/101549353</a> |
| 401 | <i>Amauornis phoenicurus</i> | White-breasted Waterhen | 2015/6/14  | 1 | 0 | 13.01144465 | 80.05908027 | <a href="https://www.inaturalist.org/observations/45499976">https://www.inaturalist.org/observations/45499976</a>   |
| 402 | <i>Amauornis phoenicurus</i> | White-breasted Waterhen | 2021/8/25  | 1 | 0 | 13.02017085 | 77.56867927 | <a href="https://www.inaturalist.org/observations/105188845">https://www.inaturalist.org/observations/105188845</a> |
| 403 | <i>Amauornis phoenicurus</i> | White-breasted Waterhen | 2022/2/13  | 3 | 0 | 13.02398153 | 80.24441052 | <a href="https://www.inaturalist.org/observations/106908595">https://www.inaturalist.org/observations/106908595</a> |
| 404 | <i>Amauornis phoenicurus</i> | White-breasted Waterhen | 2022/3/1   | 2 | 0 | 13.02398545 | 80.24441052 | <a href="https://www.inaturalist.org/observations/107682006">https://www.inaturalist.org/observations/107682006</a> |
| 405 | <i>Amauornis phoenicurus</i> | White-breasted Waterhen | 2021/4/7   | 4 | 0 | 13.03391316 | 77.55000886 | <a href="https://www.inaturalist.org/observations/132921631">https://www.inaturalist.org/observations/132921631</a> |
| 406 | <i>Amauornis phoenicurus</i> | White-breasted Waterhen | 2022/3/24  | 6 | 0 | 13.06213883 | 80.23348333 | <a href="https://www.inaturalist.org/observations/109351971">https://www.inaturalist.org/observations/109351971</a> |
| 407 | <i>Amauornis phoenicurus</i> | White-breasted Waterhen | 2021/7/11  | 3 | 0 | 13.06558420 | 80.16077680 | <a href="https://www.inaturalist.org/observations/86683241">https://www.inaturalist.org/observations/86683241</a>   |
| 408 | <i>Amauornis phoenicurus</i> | White-breasted Waterhen | 2021/7/7   | 2 | 0 | 13.06563718 | 80.16077656 | <a href="https://www.inaturalist.org/observations/86041997">https://www.inaturalist.org/observations/86041997</a>   |
| 409 | <i>Amauornis phoenicurus</i> | White-breasted Waterhen | 2022/5/27  | 3 | 0 | 13.06638611 | 80.25228333 | <a href="https://www.inaturalist.org/observations/118870816">https://www.inaturalist.org/observations/118870816</a> |
| 410 | <i>Amauornis phoenicurus</i> | White-breasted Waterhen | 2022/9/14  | 2 | 0 | 13.07096389 | 77.57965833 | <a href="https://www.inaturalist.org/observations/135202792">https://www.inaturalist.org/observations/135202792</a> |
| 411 | <i>Amauornis phoenicurus</i> | White-breasted Waterhen | 2022/9/14  | 2 | 0 | 13.07096389 | 77.57965833 | <a href="https://www.inaturalist.org/observations/135533358">https://www.inaturalist.org/observations/135533358</a> |
| 412 | <i>Amauornis phoenicurus</i> | White-breasted Waterhen | 2022/3/16  | 2 | 0 | 13.07722129 | 77.74413507 | <a href="https://www.inaturalist.org/observations/110969090">https://www.inaturalist.org/observations/110969090</a> |
| 413 | <i>Amauornis phoenicurus</i> | White-breasted Waterhen | 2017/2/9   | 2 | 0 | 13.08268020 | 80.27071840 | <a href="https://www.inaturalist.org/observations/92230621">https://www.inaturalist.org/observations/92230621</a>   |

|     |                              |                         |            |   |   |             |             |                                                                                                                     |
|-----|------------------------------|-------------------------|------------|---|---|-------------|-------------|---------------------------------------------------------------------------------------------------------------------|
| 414 | <i>Amauornis phoenicurus</i> | White-breasted Waterhen | 2021/8/5   | 3 | 0 | 13.08634024 | 80.21377333 | <a href="https://www.inaturalist.org/observations/90262408">https://www.inaturalist.org/observations/90262408</a>   |
| 415 | <i>Amauornis phoenicurus</i> | White-breasted Waterhen | 2021/8/5   | 1 | 0 | 13.08643410 | 80.21470260 | <a href="https://www.inaturalist.org/observations/90357996">https://www.inaturalist.org/observations/90357996</a>   |
| 416 | <i>Amauornis phoenicurus</i> | White-breasted Waterhen | 2019/12/20 | 2 | 0 | 13.08736710 | 77.60993500 | <a href="https://www.inaturalist.org/observations/45950773">https://www.inaturalist.org/observations/45950773</a>   |
| 417 | <i>Amauornis phoenicurus</i> | White-breasted Waterhen | 2019/12/20 | 2 | 0 | 13.08736710 | 77.60993500 | <a href="https://www.inaturalist.org/observations/45950775">https://www.inaturalist.org/observations/45950775</a>   |
| 418 | <i>Amauornis phoenicurus</i> | White-breasted Waterhen | 2020/8/27  | 3 | 0 | 13.09375390 | 80.21648873 | <a href="https://www.inaturalist.org/observations/58132224">https://www.inaturalist.org/observations/58132224</a>   |
| 419 | <i>Amauornis phoenicurus</i> | White-breasted Waterhen | 2020/5/23  | 2 | 0 | 13.09598333 | 74.85290667 | <a href="https://www.inaturalist.org/observations/46962231">https://www.inaturalist.org/observations/46962231</a>   |
| 420 | <i>Amauornis phoenicurus</i> | White-breasted Waterhen | 2020/8/3   | 2 | 0 | 13.11920983 | 80.13550881 | <a href="https://www.inaturalist.org/observations/57812252">https://www.inaturalist.org/observations/57812252</a>   |
| 421 | <i>Amauornis phoenicurus</i> | White-breasted Waterhen | 2020/8/15  | 3 | 0 | 13.12287510 | 80.18053180 | <a href="https://www.inaturalist.org/observations/56615349">https://www.inaturalist.org/observations/56615349</a>   |
| 422 | <i>Amauornis phoenicurus</i> | White-breasted Waterhen | 2022/7/8   | 4 | 0 | 13.15640674 | 80.10465570 | <a href="https://www.inaturalist.org/observations/125400130">https://www.inaturalist.org/observations/125400130</a> |
| 423 | <i>Amauornis phoenicurus</i> | White-breasted Waterhen | 2020/9/23  | 3 | 0 | 13.15737593 | 80.24074173 | <a href="https://www.inaturalist.org/observations/60819511">https://www.inaturalist.org/observations/60819511</a>   |
| 424 | <i>Amauornis phoenicurus</i> | White-breasted Waterhen | 2020/3/11  | 2 | 0 | 13.20678333 | 74.74518000 | <a href="https://www.inaturalist.org/observations/46958930">https://www.inaturalist.org/observations/46958930</a>   |
| 425 | <i>Amauornis phoenicurus</i> | White-breasted Waterhen | 2018/10/10 | 2 | 0 | 13.28936629 | 80.24250899 | <a href="https://www.inaturalist.org/observations/109821290">https://www.inaturalist.org/observations/109821290</a> |
| 426 | <i>Amauornis phoenicurus</i> | White-breasted Waterhen | 2020/8/21  | 3 | 0 | 13.28936629 | 80.24250899 | <a href="https://www.inaturalist.org/observations/109831973">https://www.inaturalist.org/observations/109831973</a> |
| 427 | <i>Amauornis phoenicurus</i> | White-breasted Waterhen | 2022/4/3   | 5 | 0 | 13.43126568 | 79.36495664 | <a href="https://www.inaturalist.org/observations/110652982">https://www.inaturalist.org/observations/110652982</a> |
| 428 | <i>Amauornis phoenicurus</i> | White-breasted Waterhen | 2021/12/1  | 1 | 0 | 13.51013282 | 75.09962182 | <a href="https://www.inaturalist.org/observations/102293873">https://www.inaturalist.org/observations/102293873</a> |
| 429 | <i>Amauornis phoenicurus</i> | White-breasted Waterhen | 2022/3/27  | 3 | 0 | 13.59693430 | 79.36820340 | <a href="https://www.inaturalist.org/observations/109660286">https://www.inaturalist.org/observations/109660286</a> |
| 430 | <i>Amauornis phoenicurus</i> | White-breasted Waterhen | 2022/4/17  | 3 | 0 | 13.62671667 | 79.35592333 | <a href="https://www.inaturalist.org/observations/115078616">https://www.inaturalist.org/observations/115078616</a> |
| 431 | <i>Amauornis phoenicurus</i> | White-breasted Waterhen | 2022/4/2   | 2 | 0 | 13.63556786 | 79.47148466 | <a href="https://www.inaturalist.org/observations/110156829">https://www.inaturalist.org/observations/110156829</a> |
| 432 | <i>Amauornis phoenicurus</i> | White-breasted Waterhen | 2019/2/15  | 5 | 0 | 13.65766110 | 79.48698470 | <a href="https://www.inaturalist.org/observations/35667280">https://www.inaturalist.org/observations/35667280</a>   |
| 433 | <i>Amauornis phoenicurus</i> | White-breasted Waterhen | 2019/1/15  | 2 | 0 | 13.65911635 | 79.48097763 | <a href="https://www.inaturalist.org/observations/55805475">https://www.inaturalist.org/observations/55805475</a>   |
| 434 | <i>Amauornis phoenicurus</i> | White-breasted Waterhen | 2019/2/15  | 3 | 0 | 13.66004482 | 79.48968047 | <a href="https://www.inaturalist.org/observations/55889069">https://www.inaturalist.org/observations/55889069</a>   |
| 435 | <i>Amauornis phoenicurus</i> | White-breasted Waterhen | 2019/3/16  | 2 | 0 | 13.69487380 | 75.63522700 | <a href="https://www.inaturalist.org/observations/93857755">https://www.inaturalist.org/observations/93857755</a>   |
| 436 | <i>Amauornis phoenicurus</i> | White-breasted Waterhen | 2022/9/3   | 3 | 0 | 13.81890000 | 79.58392333 | <a href="https://www.inaturalist.org/observations/133598852">https://www.inaturalist.org/observations/133598852</a> |

|     |                              |                         |            |   |   |             |             |                                                                                                                     |
|-----|------------------------------|-------------------------|------------|---|---|-------------|-------------|---------------------------------------------------------------------------------------------------------------------|
| 437 | <i>Amauornis phoenicurus</i> | White-breasted Waterhen | 2016/4/16  | 5 | 0 | 13.85362750 | 75.52241470 | <a href="https://www.inaturalist.org/observations/9989180">https://www.inaturalist.org/observations/9989180</a>     |
| 438 | <i>Amauornis phoenicurus</i> | White-breasted Waterhen | 2021/12/31 | 1 | 0 | 14.27648253 | 74.46011547 | <a href="https://www.inaturalist.org/observations/104629922">https://www.inaturalist.org/observations/104629922</a> |
| 439 | <i>Amauornis phoenicurus</i> | White-breasted Waterhen | 2021/1/21  | 4 | 0 | 14.54785860 | 74.31884100 | <a href="https://www.inaturalist.org/observations/69714273">https://www.inaturalist.org/observations/69714273</a>   |
| 440 | <i>Amauornis phoenicurus</i> | White-breasted Waterhen | 2020/11/8  | 2 | 0 | 14.65410162 | 74.91647651 | <a href="https://www.inaturalist.org/observations/64512763">https://www.inaturalist.org/observations/64512763</a>   |
| 441 | <i>Amauornis phoenicurus</i> | White-breasted Waterhen | 2021/3/18  | 6 | 0 | 14.84148752 | 74.22108768 | <a href="https://www.inaturalist.org/observations/121113418">https://www.inaturalist.org/observations/121113418</a> |
| 442 | <i>Amauornis phoenicurus</i> | White-breasted Waterhen | 2022/7/4   | 2 | 0 | 14.99763586 | 74.04113397 | <a href="https://www.inaturalist.org/observations/124698194">https://www.inaturalist.org/observations/124698194</a> |
| 443 | <i>Amauornis phoenicurus</i> | White-breasted Waterhen | 2022/6/10  | 4 | 0 | 15.15652370 | 73.94758606 | <a href="https://www.inaturalist.org/observations/121068384">https://www.inaturalist.org/observations/121068384</a> |
| 444 | <i>Amauornis phoenicurus</i> | White-breasted Waterhen | 2020/3/19  | 1 | 0 | 15.21376257 | 73.93572807 | <a href="https://www.inaturalist.org/observations/43567777">https://www.inaturalist.org/observations/43567777</a>   |
| 445 | <i>Amauornis phoenicurus</i> | White-breasted Waterhen | 2017/11/23 | 3 | 0 | 15.21834773 | 73.96689709 | <a href="https://www.inaturalist.org/observations/42937973">https://www.inaturalist.org/observations/42937973</a>   |
| 446 | <i>Amauornis phoenicurus</i> | White-breasted Waterhen | 2018/9/1   | 5 | 0 | 15.25434417 | 76.67400911 | <a href="https://www.inaturalist.org/observations/16207048">https://www.inaturalist.org/observations/16207048</a>   |
| 447 | <i>Amauornis phoenicurus</i> | White-breasted Waterhen | 2021/6/14  | 1 | 0 | 15.28321870 | 73.98619100 | <a href="https://www.inaturalist.org/observations/93017343">https://www.inaturalist.org/observations/93017343</a>   |
| 448 | <i>Amauornis phoenicurus</i> | White-breasted Waterhen | 2015/12/29 | 3 | 0 | 15.29932650 | 74.12399600 | <a href="https://www.inaturalist.org/observations/106974811">https://www.inaturalist.org/observations/106974811</a> |
| 449 | <i>Amauornis phoenicurus</i> | White-breasted Waterhen | 2019/3/19  | 5 | 0 | 15.33501320 | 76.46002400 | <a href="https://www.inaturalist.org/observations/116089205">https://www.inaturalist.org/observations/116089205</a> |
| 450 | <i>Amauornis phoenicurus</i> | White-breasted Waterhen | 2016/9/24  | 4 | 0 | 15.33778614 | 76.46251306 | <a href="https://www.inaturalist.org/observations/33847117">https://www.inaturalist.org/observations/33847117</a>   |
| 451 | <i>Amauornis phoenicurus</i> | White-breasted Waterhen | 2020/11/18 | 3 | 0 | 15.38125989 | 75.10026568 | <a href="https://www.inaturalist.org/observations/65757352">https://www.inaturalist.org/observations/65757352</a>   |
| 452 | <i>Amauornis phoenicurus</i> | White-breasted Waterhen | 2008/12/30 | 2 | 0 | 15.39934400 | 73.84417300 | <a href="https://www.inaturalist.org/observations/57421283">https://www.inaturalist.org/observations/57421283</a>   |
| 453 | <i>Amauornis phoenicurus</i> | White-breasted Waterhen | 2020/8/24  | 2 | 0 | 15.39934400 | 73.84417300 | <a href="https://www.inaturalist.org/observations/57421543">https://www.inaturalist.org/observations/57421543</a>   |
| 454 | <i>Amauornis phoenicurus</i> | White-breasted Waterhen | 2019/2/10  | 4 | 0 | 15.51428320 | 73.78115416 | <a href="https://www.inaturalist.org/observations/20244059">https://www.inaturalist.org/observations/20244059</a>   |
| 455 | <i>Amauornis phoenicurus</i> | White-breasted Waterhen | 2016/11/8  | 1 | 0 | 15.53198662 | 73.87457404 | <a href="https://www.inaturalist.org/observations/36780410">https://www.inaturalist.org/observations/36780410</a>   |
| 456 | <i>Amauornis phoenicurus</i> | White-breasted Waterhen | 2017/6/1   | 5 | 0 | 15.53727829 | 73.82098153 | <a href="https://www.inaturalist.org/observations/36215499">https://www.inaturalist.org/observations/36215499</a>   |
| 457 | <i>Amauornis phoenicurus</i> | White-breasted Waterhen | 2021/5/2   | 2 | 0 | 15.58681064 | 73.74532957 | <a href="https://www.inaturalist.org/observations/76447899">https://www.inaturalist.org/observations/76447899</a>   |
| 458 | <i>Amauornis phoenicurus</i> | White-breasted Waterhen | 2015/7/12  | 4 | 0 | 15.60536467 | 73.81666627 | <a href="https://www.inaturalist.org/observations/14424865">https://www.inaturalist.org/observations/14424865</a>   |
| 459 | <i>Amauornis phoenicurus</i> | White-breasted Waterhen | 2021/4/11  | 2 | 0 | 15.62089607 | 73.89776923 | <a href="https://www.inaturalist.org/observations/73610208">https://www.inaturalist.org/observations/73610208</a>   |



|     |                              |                         |            |   |   |             |             |                                                                                                                     |
|-----|------------------------------|-------------------------|------------|---|---|-------------|-------------|---------------------------------------------------------------------------------------------------------------------|
| 460 | <i>Amauornis phoenicurus</i> | White-breasted Waterhen | 2019/3/30  | 3 | 0 | 15.67160881 | 73.73275390 | <a href="https://www.inaturalist.org/observations/21773860">https://www.inaturalist.org/observations/21773860</a>   |
| 461 | <i>Amauornis phoenicurus</i> | White-breasted Waterhen | 2019/4/17  | 3 | 0 | 15.67160881 | 73.73275390 | <a href="https://www.inaturalist.org/observations/22645254">https://www.inaturalist.org/observations/22645254</a>   |
| 462 | <i>Amauornis phoenicurus</i> | White-breasted Waterhen | 2020/8/4   | 3 | 0 | 15.79163889 | 78.11226389 | <a href="https://www.inaturalist.org/observations/63328807">https://www.inaturalist.org/observations/63328807</a>   |
| 463 | <i>Amauornis phoenicurus</i> | White-breasted Waterhen | 2016/6/25  | 1 | 0 | 15.96471560 | 74.00357090 | <a href="https://www.inaturalist.org/observations/57616937">https://www.inaturalist.org/observations/57616937</a>   |
| 464 | <i>Amauornis phoenicurus</i> | White-breasted Waterhen | 2021/12/17 | 2 | 0 | 16.08632067 | 80.36578417 | <a href="https://www.inaturalist.org/observations/103196846">https://www.inaturalist.org/observations/103196846</a> |
| 465 | <i>Amauornis phoenicurus</i> | White-breasted Waterhen | 2016/8/21  | 1 | 0 | 16.30486298 | 80.51467124 | <a href="https://www.inaturalist.org/observations/103375395">https://www.inaturalist.org/observations/103375395</a> |
| 466 | <i>Amauornis phoenicurus</i> | White-breasted Waterhen | 2012/5/8   | 1 | 0 | 16.30626953 | 80.51271021 | <a href="https://www.inaturalist.org/observations/93594552">https://www.inaturalist.org/observations/93594552</a>   |
| 467 | <i>Amauornis phoenicurus</i> | White-breasted Waterhen | 2013/9/25  | 2 | 0 | 16.30627480 | 80.51265153 | <a href="https://www.inaturalist.org/observations/88105314">https://www.inaturalist.org/observations/88105314</a>   |
| 468 | <i>Amauornis phoenicurus</i> | White-breasted Waterhen | 2019/10/13 | 2 | 0 | 16.30664313 | 80.43654017 | <a href="https://www.inaturalist.org/observations/94459261">https://www.inaturalist.org/observations/94459261</a>   |
| 469 | <i>Amauornis phoenicurus</i> | White-breasted Waterhen | 2014/4/16  | 2 | 0 | 16.30689104 | 80.51252635 | <a href="https://www.inaturalist.org/observations/89169676">https://www.inaturalist.org/observations/89169676</a>   |
| 470 | <i>Amauornis phoenicurus</i> | White-breasted Waterhen | 2014/5/7   | 2 | 0 | 16.30689104 | 80.51252635 | <a href="https://www.inaturalist.org/observations/90128771">https://www.inaturalist.org/observations/90128771</a>   |
| 471 | <i>Amauornis phoenicurus</i> | White-breasted Waterhen | 2014/5/21  | 3 | 0 | 16.30689104 | 80.51252635 | <a href="https://www.inaturalist.org/observations/90240691">https://www.inaturalist.org/observations/90240691</a>   |
| 472 | <i>Amauornis phoenicurus</i> | White-breasted Waterhen | 2014/6/16  | 1 | 0 | 16.30689104 | 80.51252635 | <a href="https://www.inaturalist.org/observations/94112034">https://www.inaturalist.org/observations/94112034</a>   |
| 473 | <i>Amauornis phoenicurus</i> | White-breasted Waterhen | 2016/6/10  | 2 | 0 | 16.30689104 | 80.51252635 | <a href="https://www.inaturalist.org/observations/94317484">https://www.inaturalist.org/observations/94317484</a>   |
| 474 | <i>Amauornis phoenicurus</i> | White-breasted Waterhen | 2017/3/18  | 1 | 0 | 16.30689104 | 80.51252635 | <a href="https://www.inaturalist.org/observations/98109610">https://www.inaturalist.org/observations/98109610</a>   |
| 475 | <i>Amauornis phoenicurus</i> | White-breasted Waterhen | 2021/7/29  | 1 | 0 | 16.36004000 | 74.29583900 | <a href="https://www.inaturalist.org/observations/89038949">https://www.inaturalist.org/observations/89038949</a>   |
| 476 | <i>Amauornis phoenicurus</i> | White-breasted Waterhen | 2012/4/3   | 2 | 0 | 16.49826408 | 80.59840241 | <a href="https://www.inaturalist.org/observations/90890105">https://www.inaturalist.org/observations/90890105</a>   |
| 477 | <i>Amauornis phoenicurus</i> | White-breasted Waterhen | 2012/4/11  | 1 | 0 | 16.50137720 | 80.59020218 | <a href="https://www.inaturalist.org/observations/88021981">https://www.inaturalist.org/observations/88021981</a>   |
| 478 | <i>Amauornis phoenicurus</i> | White-breasted Waterhen | 2022/1/10  | 3 | 0 | 16.53860833 | 81.46399167 | <a href="https://www.inaturalist.org/observations/104692887">https://www.inaturalist.org/observations/104692887</a> |
| 479 | <i>Amauornis phoenicurus</i> | White-breasted Waterhen | 2022/1/10  | 1 | 0 | 16.53860833 | 81.46399167 | <a href="https://www.inaturalist.org/observations/105567885">https://www.inaturalist.org/observations/105567885</a> |
| 480 | <i>Amauornis phoenicurus</i> | White-breasted Waterhen | 2022/3/16  | 7 | 0 | 16.53937167 | 81.50565000 | <a href="https://www.inaturalist.org/observations/108722277">https://www.inaturalist.org/observations/108722277</a> |
| 481 | <i>Amauornis phoenicurus</i> | White-breasted Waterhen | 2022/8/16  | 5 | 0 | 16.53961637 | 81.50647301 | <a href="https://www.inaturalist.org/observations/131026495">https://www.inaturalist.org/observations/131026495</a> |
| 482 | <i>Amauornis phoenicurus</i> | White-breasted Waterhen | 2021/12/26 | 1 | 0 | 16.54489085 | 81.52124092 | <a href="https://www.inaturalist.org/observations/103686936">https://www.inaturalist.org/observations/103686936</a> |

|     |                              |                         |            |   |   |             |             |                                                                                                                     |
|-----|------------------------------|-------------------------|------------|---|---|-------------|-------------|---------------------------------------------------------------------------------------------------------------------|
| 483 | <i>Amauornis phoenicurus</i> | White-breasted Waterhen | 2021/12/26 | 3 | 0 | 16.54693833 | 81.49575333 | <a href="https://www.inaturalist.org/observations/112054271">https://www.inaturalist.org/observations/112054271</a> |
| 484 | <i>Amauornis phoenicurus</i> | White-breasted Waterhen | 2021/12/26 | 1 | 0 | 16.54695333 | 81.49576667 | <a href="https://www.inaturalist.org/observations/104648962">https://www.inaturalist.org/observations/104648962</a> |
| 485 | <i>Amauornis phoenicurus</i> | White-breasted Waterhen | 2021/12/26 | 1 | 0 | 16.54705167 | 81.49559333 | <a href="https://www.inaturalist.org/observations/104648583">https://www.inaturalist.org/observations/104648583</a> |
| 486 | <i>Amauornis phoenicurus</i> | White-breasted Waterhen | 2021/12/26 | 2 | 0 | 16.54705167 | 81.49559500 | <a href="https://www.inaturalist.org/observations/111966989">https://www.inaturalist.org/observations/111966989</a> |
| 487 | <i>Amauornis phoenicurus</i> | White-breasted Waterhen | 2020/12/6  | 2 | 0 | 16.55921794 | 80.76100097 | <a href="https://www.inaturalist.org/observations/92452612">https://www.inaturalist.org/observations/92452612</a>   |
| 488 | <i>Amauornis phoenicurus</i> | White-breasted Waterhen | 2013/10/5  | 2 | 0 | 16.58107066 | 80.69672080 | <a href="https://www.inaturalist.org/observations/88105809">https://www.inaturalist.org/observations/88105809</a>   |
| 489 | <i>Amauornis phoenicurus</i> | White-breasted Waterhen | 2020/6/7   | 3 | 0 | 16.58499342 | 80.59512313 | <a href="https://www.inaturalist.org/observations/49004003">https://www.inaturalist.org/observations/49004003</a>   |
| 490 | <i>Amauornis phoenicurus</i> | White-breasted Waterhen | 2022/5/6   | 4 | 0 | 16.58888829 | 81.11999989 | <a href="https://www.inaturalist.org/observations/117831023">https://www.inaturalist.org/observations/117831023</a> |
| 491 | <i>Amauornis phoenicurus</i> | White-breasted Waterhen | 2022/2/18  | 4 | 0 | 16.60132391 | 80.58064514 | <a href="https://www.inaturalist.org/observations/107609842">https://www.inaturalist.org/observations/107609842</a> |
| 492 | <i>Amauornis phoenicurus</i> | White-breasted Waterhen | 2022/2/18  | 3 | 0 | 16.60132391 | 80.58064514 | <a href="https://www.inaturalist.org/observations/107609858">https://www.inaturalist.org/observations/107609858</a> |
| 493 | <i>Amauornis phoenicurus</i> | White-breasted Waterhen | 2021/7/14  | 1 | 0 | 16.63067404 | 80.78982281 | <a href="https://www.inaturalist.org/observations/90768336">https://www.inaturalist.org/observations/90768336</a>   |
| 494 | <i>Amauornis phoenicurus</i> | White-breasted Waterhen | 2022/9/18  | 1 | 0 | 16.65113183 | 80.46691172 | <a href="https://www.inaturalist.org/observations/135761433">https://www.inaturalist.org/observations/135761433</a> |
| 495 | <i>Amauornis phoenicurus</i> | White-breasted Waterhen | 2022/3/6   | 5 | 0 | 16.65391605 | 80.46723317 | <a href="https://www.inaturalist.org/observations/108249511">https://www.inaturalist.org/observations/108249511</a> |
| 496 | <i>Amauornis phoenicurus</i> | White-breasted Waterhen | 2021/9/18  | 1 | 0 | 16.65992506 | 81.35204919 | <a href="https://www.inaturalist.org/observations/95376404">https://www.inaturalist.org/observations/95376404</a>   |
| 497 | <i>Amauornis phoenicurus</i> | White-breasted Waterhen | 2021/7/21  | 3 | 0 | 16.71956910 | 73.35530210 | <a href="https://www.inaturalist.org/observations/87992854">https://www.inaturalist.org/observations/87992854</a>   |
| 498 | <i>Amauornis phoenicurus</i> | White-breasted Waterhen | 2018/12/10 | 1 | 0 | 16.84902020 | 75.71943613 | <a href="https://www.inaturalist.org/observations/50447949">https://www.inaturalist.org/observations/50447949</a>   |
| 499 | <i>Amauornis phoenicurus</i> | White-breasted Waterhen | 2018/3/9   | 5 | 0 | 17.15709806 | 74.08085500 | <a href="https://www.inaturalist.org/observations/30848017">https://www.inaturalist.org/observations/30848017</a>   |
| 500 | <i>Amauornis phoenicurus</i> | White-breasted Waterhen | 2018/3/9   | 3 | 0 | 17.15709806 | 74.08085500 | <a href="https://www.inaturalist.org/observations/54821566">https://www.inaturalist.org/observations/54821566</a>   |
| 501 | <i>Amauornis phoenicurus</i> | White-breasted Waterhen | 2016/4/12  | 6 | 0 | 17.32689501 | 74.76560354 | <a href="https://www.inaturalist.org/observations/38323680">https://www.inaturalist.org/observations/38323680</a>   |
| 502 | <i>Amauornis phoenicurus</i> | White-breasted Waterhen | 2021/12/26 | 3 | 0 | 17.37626560 | 78.29886370 | <a href="https://www.inaturalist.org/observations/104752864">https://www.inaturalist.org/observations/104752864</a> |
| 503 | <i>Amauornis phoenicurus</i> | White-breasted Waterhen | 2021/12/26 | 2 | 0 | 17.37626560 | 78.29886370 | <a href="https://www.inaturalist.org/observations/104753095">https://www.inaturalist.org/observations/104753095</a> |
| 504 | <i>Amauornis phoenicurus</i> | White-breasted Waterhen | 2021/5/6   | 3 | 0 | 17.38338632 | 78.37138843 | <a href="https://www.inaturalist.org/observations/77595101">https://www.inaturalist.org/observations/77595101</a>   |
| 505 | <i>Amauornis phoenicurus</i> | White-breasted Waterhen | 2021/7/17  | 1 | 0 | 17.41360914 | 78.42068609 | <a href="https://www.inaturalist.org/observations/87413434">https://www.inaturalist.org/observations/87413434</a>   |

|     |                              |                         |           |   |   |             |              |                                                                                                                     |
|-----|------------------------------|-------------------------|-----------|---|---|-------------|--------------|---------------------------------------------------------------------------------------------------------------------|
| 506 | <i>Amauornis phoenicurus</i> | White-breasted Waterhen | 2017/12/1 | 4 | 0 | 17.43598766 | 78.39194605  | <a href="https://www.inaturalist.org/observations/9014908">https://www.inaturalist.org/observations/9014908</a>     |
| 507 | <i>Amauornis phoenicurus</i> | White-breasted Waterhen | 2022/8/15 | 5 | 0 | 17.45564667 | 78.36147167  | <a href="https://www.inaturalist.org/observations/130891064">https://www.inaturalist.org/observations/130891064</a> |
| 508 | <i>Amauornis phoenicurus</i> | White-breasted Waterhen | 2022/7/9  | 2 | 0 | 17.45618916 | 78.36033228  | <a href="https://www.inaturalist.org/observations/127617499">https://www.inaturalist.org/observations/127617499</a> |
| 509 | <i>Amauornis phoenicurus</i> | White-breasted Waterhen | 2022/9/3  | 5 | 0 | 17.48605690 | 78.34653110  | <a href="https://www.inaturalist.org/observations/133432816">https://www.inaturalist.org/observations/133432816</a> |
| 510 | <i>Amauornis phoenicurus</i> | White-breasted Waterhen | 2022/9/3  | 5 | 0 | 17.48605690 | 78.34653110  | <a href="https://www.inaturalist.org/observations/133432835">https://www.inaturalist.org/observations/133432835</a> |
| 511 | <i>Amauornis phoenicurus</i> | White-breasted Waterhen | 2020/6/16 | 2 | 0 | 17.54839820 | 78.46781100  | <a href="https://www.inaturalist.org/observations/49815910">https://www.inaturalist.org/observations/49815910</a>   |
| 512 | <i>Amauornis phoenicurus</i> | White-breasted Waterhen | 2022/6/12 | 4 | 0 | 17.65950130 | 78.06029990  | <a href="https://www.inaturalist.org/observations/123695254">https://www.inaturalist.org/observations/123695254</a> |
| 513 | <i>Amauornis phoenicurus</i> | White-breasted Waterhen | 2015/12/7 | 5 | 0 | 18.00403388 | 79.38242952  | <a href="https://www.inaturalist.org/observations/34109754">https://www.inaturalist.org/observations/34109754</a>   |
| 514 | <i>Amauornis phoenicurus</i> | White-breasted Waterhen | 2018/7/1  | 2 | 0 | 18.14207789 | 73.79107431  | <a href="https://www.inaturalist.org/observations/91638846">https://www.inaturalist.org/observations/91638846</a>   |
| 515 | <i>Amauornis phoenicurus</i> | White-breasted Waterhen | 2020/12/1 | 6 | 0 | 18.14555643 | 73.79329383  | <a href="https://www.inaturalist.org/observations/65998641">https://www.inaturalist.org/observations/65998641</a>   |
| 516 | <i>Amauornis phoenicurus</i> | White-breasted Waterhen | 2021/6/16 | 2 | 0 | 18.15077440 | 74.08728920  | <a href="https://www.inaturalist.org/observations/83913945">https://www.inaturalist.org/observations/83913945</a>   |
| 517 | <i>Amauornis phoenicurus</i> | White-breasted Waterhen | 2022/1/30 | 1 | 0 | 18.23163500 | 109.50909000 | <a href="https://www.inaturalist.org/observations/106124401">https://www.inaturalist.org/observations/106124401</a> |
| 518 | <i>Amauornis phoenicurus</i> | White-breasted Waterhen | 2017/3/10 | 2 | 0 | 18.23797182 | 109.51273870 | <a href="https://www.inaturalist.org/observations/5400836">https://www.inaturalist.org/observations/5400836</a>     |
| 519 | <i>Amauornis phoenicurus</i> | White-breasted Waterhen | 2016/12/3 | 3 | 0 | 18.25284700 | 109.51190900 | <a href="http://www.inaturalist.org/observations/4693122">http://www.inaturalist.org/observations/4693122</a>       |
| 520 | <i>Amauornis phoenicurus</i> | White-breasted Waterhen | 2019/1/23 | 2 | 0 | 18.27222306 | 74.79530806  | <a href="https://www.inaturalist.org/observations/53335666">https://www.inaturalist.org/observations/53335666</a>   |
| 521 | <i>Amauornis phoenicurus</i> | White-breasted Waterhen | 2021/1/13 | 3 | 0 | 18.27264780 | 74.32062080  | <a href="https://www.inaturalist.org/observations/70932623">https://www.inaturalist.org/observations/70932623</a>   |
| 522 | <i>Amauornis phoenicurus</i> | White-breasted Waterhen | 2021/6/24 | 3 | 0 | 18.27809970 | 74.16121940  | <a href="https://www.inaturalist.org/observations/85194605">https://www.inaturalist.org/observations/85194605</a>   |
| 523 | <i>Amauornis phoenicurus</i> | White-breasted Waterhen | 2004/4/24 | 2 | 0 | 18.29270781 | 74.77271997  | <a href="https://www.inaturalist.org/observations/44448587">https://www.inaturalist.org/observations/44448587</a>   |
| 524 | <i>Amauornis phoenicurus</i> | White-breasted Waterhen | 2019/9/30 | 2 | 0 | 18.30761306 | 74.03739806  | <a href="https://www.inaturalist.org/observations/52242312">https://www.inaturalist.org/observations/52242312</a>   |
| 525 | <i>Amauornis phoenicurus</i> | White-breasted Waterhen | 2016/2/14 | 2 | 0 | 18.39146079 | 74.16687855  | <a href="https://www.inaturalist.org/observations/48557198">https://www.inaturalist.org/observations/48557198</a>   |
| 526 | <i>Amauornis phoenicurus</i> | White-breasted Waterhen | 2022/8/7  | 3 | 0 | 18.48346593 | 73.82558176  | <a href="https://www.inaturalist.org/observations/131032020">https://www.inaturalist.org/observations/131032020</a> |
| 527 | <i>Amauornis phoenicurus</i> | White-breasted Waterhen | 2022/6/6  | 2 | 0 | 18.49742055 | 73.73418767  | <a href="https://www.inaturalist.org/observations/120477499">https://www.inaturalist.org/observations/120477499</a> |
| 528 | <i>Amauornis phoenicurus</i> | White-breasted Waterhen | 2014/1/6  | 6 | 0 | 18.50077304 | 73.85267258  | <a href="http://www.inaturalist.org/observations/3891356">http://www.inaturalist.org/observations/3891356</a>       |

|     |                              |                         |            |   |   |             |              |                                                                                                                     |
|-----|------------------------------|-------------------------|------------|---|---|-------------|--------------|---------------------------------------------------------------------------------------------------------------------|
| 529 | <i>Amauornis phoenicurus</i> | White-breasted Waterhen | 2019/7/23  | 2 | 0 | 18.50088806 | 73.85285306  | <a href="https://www.inaturalist.org/observations/52337083">https://www.inaturalist.org/observations/52337083</a>   |
| 530 | <i>Amauornis phoenicurus</i> | White-breasted Waterhen | 2013/8/17  | 4 | 0 | 18.50095620 | 73.85294080  | <a href="https://www.inaturalist.org/observations/33243302">https://www.inaturalist.org/observations/33243302</a>   |
| 531 | <i>Amauornis phoenicurus</i> | White-breasted Waterhen | 2019/7/23  | 2 | 0 | 18.50135306 | 73.85282639  | <a href="https://www.inaturalist.org/observations/52337076">https://www.inaturalist.org/observations/52337076</a>   |
| 532 | <i>Amauornis phoenicurus</i> | White-breasted Waterhen | 2016/2/28  | 3 | 0 | 18.50595689 | 73.99659564  | <a href="https://www.inaturalist.org/observations/48914756">https://www.inaturalist.org/observations/48914756</a>   |
| 533 | <i>Amauornis phoenicurus</i> | White-breasted Waterhen | 2021/8/8   | 2 | 0 | 18.52159880 | 73.89707786  | <a href="https://www.inaturalist.org/observations/90350710">https://www.inaturalist.org/observations/90350710</a>   |
| 534 | <i>Amauornis phoenicurus</i> | White-breasted Waterhen | 2021/8/8   | 2 | 0 | 18.52161409 | 73.89700548  | <a href="https://www.inaturalist.org/observations/90350626">https://www.inaturalist.org/observations/90350626</a>   |
| 535 | <i>Amauornis phoenicurus</i> | White-breasted Waterhen | 2021/11/26 | 1 | 0 | 18.52548990 | 73.81538450  | <a href="https://www.inaturalist.org/observations/105500663">https://www.inaturalist.org/observations/105500663</a> |
| 536 | <i>Amauornis phoenicurus</i> | White-breasted Waterhen | 2016/7/15  | 2 | 0 | 18.52907639 | 73.51983000  | <a href="https://www.inaturalist.org/observations/95639261">https://www.inaturalist.org/observations/95639261</a>   |
| 537 | <i>Amauornis phoenicurus</i> | White-breasted Waterhen | 2019/10/20 | 2 | 0 | 18.53144091 | 73.84456158  | <a href="https://www.inaturalist.org/observations/66571563">https://www.inaturalist.org/observations/66571563</a>   |
| 538 | <i>Amauornis phoenicurus</i> | White-breasted Waterhen | 2022/5/15  | 4 | 0 | 18.53439690 | 73.78529220  | <a href="https://www.inaturalist.org/observations/136829017">https://www.inaturalist.org/observations/136829017</a> |
| 539 | <i>Amauornis phoenicurus</i> | White-breasted Waterhen | 2022/8/24  | 2 | 0 | 18.55744026 | 73.79471909  | <a href="https://www.inaturalist.org/observations/133031900">https://www.inaturalist.org/observations/133031900</a> |
| 540 | <i>Amauornis phoenicurus</i> | White-breasted Waterhen | 2016/8/27  | 5 | 0 | 18.59112920 | 73.91882000  | <a href="http://www.inaturalist.org/observations/3973587">http://www.inaturalist.org/observations/3973587</a>       |
| 541 | <i>Amauornis phoenicurus</i> | White-breasted Waterhen | 2013/5/31  | 3 | 0 | 18.71490195 | 72.93752242  | <a href="https://www.inaturalist.org/observations/104699734">https://www.inaturalist.org/observations/104699734</a> |
| 542 | <i>Amauornis phoenicurus</i> | White-breasted Waterhen | 2020/10/24 | 1 | 0 | 18.71853833 | 73.68935333  | <a href="https://www.inaturalist.org/observations/63864434">https://www.inaturalist.org/observations/63864434</a>   |
| 543 | <i>Amauornis phoenicurus</i> | White-breasted Waterhen | 2019/1/28  | 0 | 0 | 18.71921373 | 108.91166600 | <a href="https://www.inaturalist.org/observations/39036400">https://www.inaturalist.org/observations/39036400</a>   |
| 544 | <i>Amauornis phoenicurus</i> | White-breasted Waterhen | 2019/8/11  | 3 | 0 | 18.74209000 | 83.40488833  | <a href="https://www.inaturalist.org/observations/34631683">https://www.inaturalist.org/observations/34631683</a>   |
| 545 | <i>Amauornis phoenicurus</i> | White-breasted Waterhen | 2009/6/5   | 2 | 0 | 18.74242523 | 72.86362405  | <a href="https://www.inaturalist.org/observations/67488822">https://www.inaturalist.org/observations/67488822</a>   |
| 546 | <i>Amauornis phoenicurus</i> | White-breasted Waterhen | 2012/5/28  | 4 | 0 | 18.87439338 | 72.92351548  | <a href="https://www.inaturalist.org/observations/17459865">https://www.inaturalist.org/observations/17459865</a>   |
| 547 | <i>Amauornis phoenicurus</i> | White-breasted Waterhen | 2020/11/10 | 1 | 0 | 18.92690529 | 72.83269152  | <a href="https://www.inaturalist.org/observations/78250103">https://www.inaturalist.org/observations/78250103</a>   |
| 548 | <i>Amauornis phoenicurus</i> | White-breasted Waterhen | 2021/7/22  | 2 | 0 | 18.98673630 | 84.58820343  | <a href="https://www.inaturalist.org/observations/88099377">https://www.inaturalist.org/observations/88099377</a>   |
| 549 | <i>Amauornis phoenicurus</i> | White-breasted Waterhen | 2020/12/13 | 3 | 0 | 19.00573760 | 73.02015630  | <a href="https://www.inaturalist.org/observations/66570133">https://www.inaturalist.org/observations/66570133</a>   |
| 550 | <i>Amauornis phoenicurus</i> | White-breasted Waterhen | 2021/5/23  | 1 | 0 | 19.00590499 | 73.01038494  | <a href="https://www.inaturalist.org/observations/79903531">https://www.inaturalist.org/observations/79903531</a>   |
| 551 | <i>Amauornis phoenicurus</i> | White-breasted Waterhen | 2019/1/5   | 2 | 0 | 19.00678040 | 73.01469960  | <a href="https://www.inaturalist.org/observations/55676191">https://www.inaturalist.org/observations/55676191</a>   |

|     |                              |                         |            |   |   |             |              |                                                                                                                     |
|-----|------------------------------|-------------------------|------------|---|---|-------------|--------------|---------------------------------------------------------------------------------------------------------------------|
| 552 | <i>Amauornis phoenicurus</i> | White-breasted Waterhen | 2022/6/20  | 3 | 0 | 19.02371333 | 77.95378167  | <a href="https://www.inaturalist.org/observations/122676365">https://www.inaturalist.org/observations/122676365</a> |
| 553 | <i>Amauornis phoenicurus</i> | White-breasted Waterhen | 2022/9/3   | 0 | 0 | 19.03466222 | 73.03556822  | <a href="https://www.inaturalist.org/observations/133595544">https://www.inaturalist.org/observations/133595544</a> |
| 554 | <i>Amauornis phoenicurus</i> | White-breasted Waterhen | 2021/12/26 | 2 | 0 | 19.05564082 | 72.86260620  | <a href="https://www.inaturalist.org/observations/103733290">https://www.inaturalist.org/observations/103733290</a> |
| 555 | <i>Amauornis phoenicurus</i> | White-breasted Waterhen | 2018/6/5   | 4 | 0 | 19.09489546 | 82.00458203  | <a href="https://www.inaturalist.org/observations/13417837">https://www.inaturalist.org/observations/13417837</a>   |
| 556 | <i>Amauornis phoenicurus</i> | White-breasted Waterhen | 2020/11/18 | 1 | 0 | 19.11722214 | 110.55296170 | <a href="https://www.inaturalist.org/observations/65250662">https://www.inaturalist.org/observations/65250662</a>   |
| 557 | <i>Amauornis phoenicurus</i> | White-breasted Waterhen | 2018/1/1   | 4 | 0 | 19.14190380 | 72.96462540  | <a href="https://www.inaturalist.org/observations/30158102">https://www.inaturalist.org/observations/30158102</a>   |
| 558 | <i>Amauornis phoenicurus</i> | White-breasted Waterhen | 2019/4/7   | 3 | 0 | 19.14190456 | 72.96462536  | <a href="https://www.inaturalist.org/observations/22134047">https://www.inaturalist.org/observations/22134047</a>   |
| 559 | <i>Amauornis phoenicurus</i> | White-breasted Waterhen | 2018/11/29 | 2 | 0 | 19.14192483 | 72.96462536  | <a href="https://www.inaturalist.org/observations/56300077">https://www.inaturalist.org/observations/56300077</a>   |
| 560 | <i>Amauornis phoenicurus</i> | White-breasted Waterhen | 2017/11/19 | 1 | 0 | 19.14192483 | 72.96462536  | <a href="https://www.inaturalist.org/observations/56404279">https://www.inaturalist.org/observations/56404279</a>   |
| 561 | <i>Amauornis phoenicurus</i> | White-breasted Waterhen | 2019/6/9   | 1 | 0 | 19.14192483 | 72.96462536  | <a href="https://www.inaturalist.org/observations/56496814">https://www.inaturalist.org/observations/56496814</a>   |
| 562 | <i>Amauornis phoenicurus</i> | White-breasted Waterhen | 2018/5/15  | 3 | 0 | 19.14439690 | 72.81794410  | <a href="https://www.inaturalist.org/observations/58146235">https://www.inaturalist.org/observations/58146235</a>   |
| 563 | <i>Amauornis phoenicurus</i> | White-breasted Waterhen | 2019/5/25  | 5 | 0 | 19.15056016 | 72.95647144  | <a href="https://www.inaturalist.org/observations/25743264">https://www.inaturalist.org/observations/25743264</a>   |
| 564 | <i>Amauornis phoenicurus</i> | White-breasted Waterhen | 2017/1/8   | 2 | 0 | 19.15056016 | 72.95648217  | <a href="https://www.inaturalist.org/observations/54038007">https://www.inaturalist.org/observations/54038007</a>   |
| 565 | <i>Amauornis phoenicurus</i> | White-breasted Waterhen | 2017/1/8   | 3 | 0 | 19.15454600 | 72.95806500  | <a href="https://www.inaturalist.org/observations/55570619">https://www.inaturalist.org/observations/55570619</a>   |
| 566 | <i>Amauornis phoenicurus</i> | White-breasted Waterhen | 2021/9/7   | 2 | 0 | 19.17887080 | 72.85787810  | <a href="https://www.inaturalist.org/observations/94105443">https://www.inaturalist.org/observations/94105443</a>   |
| 567 | <i>Amauornis phoenicurus</i> | White-breasted Waterhen | 2021/9/10  | 1 | 0 | 19.17887080 | 72.85787810  | <a href="https://www.inaturalist.org/observations/94342046">https://www.inaturalist.org/observations/94342046</a>   |
| 568 | <i>Amauornis phoenicurus</i> | White-breasted Waterhen | 2021/9/11  | 1 | 0 | 19.17887080 | 72.85787810  | <a href="https://www.inaturalist.org/observations/94465450">https://www.inaturalist.org/observations/94465450</a>   |
| 569 | <i>Amauornis phoenicurus</i> | White-breasted Waterhen | 2020/12/26 | 2 | 0 | 19.19601333 | 72.97077167  | <a href="https://www.inaturalist.org/observations/67996754">https://www.inaturalist.org/observations/67996754</a>   |
| 570 | <i>Amauornis phoenicurus</i> | White-breasted Waterhen | 2018/1/21  | 3 | 0 | 19.21844279 | 72.81462014  | <a href="https://www.inaturalist.org/observations/68434302">https://www.inaturalist.org/observations/68434302</a>   |
| 571 | <i>Amauornis phoenicurus</i> | White-breasted Waterhen | 2018/4/28  | 4 | 0 | 19.22793994 | 72.87279323  | <a href="https://www.inaturalist.org/observations/11725667">https://www.inaturalist.org/observations/11725667</a>   |
| 572 | <i>Amauornis phoenicurus</i> | White-breasted Waterhen | 2020/8/1   | 2 | 0 | 19.23429345 | 72.99913135  | <a href="https://www.inaturalist.org/observations/55010620">https://www.inaturalist.org/observations/55010620</a>   |
| 573 | <i>Amauornis phoenicurus</i> | White-breasted Waterhen | 2021/8/11  | 3 | 0 | 19.28185333 | 76.44610833  | <a href="https://www.inaturalist.org/observations/130212212">https://www.inaturalist.org/observations/130212212</a> |
| 574 | <i>Amauornis phoenicurus</i> | White-breasted Waterhen | 2021/8/31  | 1 | 0 | 19.33815008 | 84.80814356  | <a href="https://www.inaturalist.org/observations/93103930">https://www.inaturalist.org/observations/93103930</a>   |

|     |                              |                         |            |   |   |             |              |                                                                                                                     |
|-----|------------------------------|-------------------------|------------|---|---|-------------|--------------|---------------------------------------------------------------------------------------------------------------------|
| 575 | <i>Amauornis phoenicurus</i> | White-breasted Waterhen | 2022/7/26  | 4 | 0 | 19.33970688 | 84.85553551  | <a href="https://www.inaturalist.org/observations/128001175">https://www.inaturalist.org/observations/128001175</a> |
| 576 | <i>Amauornis phoenicurus</i> | White-breasted Waterhen | 2021/5/25  | 2 | 0 | 19.35030760 | 82.14120850  | <a href="https://www.inaturalist.org/observations/80227452">https://www.inaturalist.org/observations/80227452</a>   |
| 577 | <i>Amauornis phoenicurus</i> | White-breasted Waterhen | 2022/2/23  | 5 | 0 | 19.40664031 | 72.83944767  | <a href="https://www.inaturalist.org/observations/107310760">https://www.inaturalist.org/observations/107310760</a> |
| 578 | <i>Amauornis phoenicurus</i> | White-breasted Waterhen | 2020/11/15 | 4 | 0 | 19.47837166 | 72.77700918  | <a href="https://www.inaturalist.org/observations/64928198">https://www.inaturalist.org/observations/64928198</a>   |
| 579 | <i>Amauornis phoenicurus</i> | White-breasted Waterhen | 2022/4/8   | 4 | 0 | 19.49613271 | 73.01643796  | <a href="https://www.inaturalist.org/observations/110840851">https://www.inaturalist.org/observations/110840851</a> |
| 580 | <i>Amauornis phoenicurus</i> | White-breasted Waterhen | 2022/2/27  | 3 | 0 | 19.50753200 | 73.01551900  | <a href="https://www.inaturalist.org/observations/107764353">https://www.inaturalist.org/observations/107764353</a> |
| 581 | <i>Amauornis phoenicurus</i> | White-breasted Waterhen | 2022/1/15  | 1 | 0 | 19.76525500 | 109.31695670 | <a href="https://www.inaturalist.org/observations/125272343">https://www.inaturalist.org/observations/125272343</a> |
| 582 | <i>Amauornis phoenicurus</i> | White-breasted Waterhen | 2022/1/30  | 1 | 0 | 19.90705200 | 75.31106200  | <a href="https://www.inaturalist.org/observations/105906480">https://www.inaturalist.org/observations/105906480</a> |
| 583 | <i>Amauornis phoenicurus</i> | White-breasted Waterhen | 2020/10/31 | 3 | 0 | 19.90734438 | 75.32153975  | <a href="https://www.inaturalist.org/observations/63880795">https://www.inaturalist.org/observations/63880795</a>   |
| 584 | <i>Amauornis phoenicurus</i> | White-breasted Waterhen | 2022/2/1   | 1 | 0 | 19.98727481 | 110.46623150 | <a href="https://www.inaturalist.org/observations/106010960">https://www.inaturalist.org/observations/106010960</a> |
| 585 | <i>Amauornis phoenicurus</i> | White-breasted Waterhen | 2020/5/5   | 1 | 0 | 20.03935581 | 110.21596160 | <a href="https://www.inaturalist.org/observations/45038659">https://www.inaturalist.org/observations/45038659</a>   |
| 586 | <i>Amauornis phoenicurus</i> | White-breasted Waterhen | 2022/8/11  | 2 | 0 | 20.23555302 | 81.79325178  | <a href="https://www.inaturalist.org/observations/135924353">https://www.inaturalist.org/observations/135924353</a> |
| 587 | <i>Amauornis phoenicurus</i> | White-breasted Waterhen | 2016/6/10  | 2 | 0 | 20.24838270 | 79.36068900  | <a href="https://www.inaturalist.org/observations/58942610">https://www.inaturalist.org/observations/58942610</a>   |
| 588 | <i>Amauornis phoenicurus</i> | White-breasted Waterhen | 2015/6/15  | 5 | 0 | 20.25069651 | 79.35328902  | <a href="https://www.inaturalist.org/observations/11442189">https://www.inaturalist.org/observations/11442189</a>   |
| 589 | <i>Amauornis phoenicurus</i> | White-breasted Waterhen | 2021/11/19 | 2 | 0 | 20.27100210 | 79.02840693  | <a href="https://www.inaturalist.org/observations/101452852">https://www.inaturalist.org/observations/101452852</a> |
| 590 | <i>Amauornis phoenicurus</i> | White-breasted Waterhen | 2019/5/27  | 3 | 0 | 20.32095223 | 79.31171263  | <a href="https://www.inaturalist.org/observations/28305836">https://www.inaturalist.org/observations/28305836</a>   |
| 591 | <i>Amauornis phoenicurus</i> | White-breasted Waterhen | 2020/7/18  | 1 | 0 | 20.39221056 | 72.89327866  | <a href="https://www.inaturalist.org/observations/53503429">https://www.inaturalist.org/observations/53503429</a>   |
| 592 | <i>Amauornis phoenicurus</i> | White-breasted Waterhen | 2017/6/29  | 4 | 0 | 20.40137400 | 85.82553200  | <a href="https://www.inaturalist.org/observations/6862698">https://www.inaturalist.org/observations/6862698</a>     |
| 593 | <i>Amauornis phoenicurus</i> | White-breasted Waterhen | 2020/3/3   | 2 | 0 | 20.48309014 | 79.28314000  | <a href="https://www.inaturalist.org/observations/39520652">https://www.inaturalist.org/observations/39520652</a>   |
| 594 | <i>Amauornis phoenicurus</i> | White-breasted Waterhen | 2019/1/5   | 0 | 0 | 20.70088538 | 116.72633100 | <a href="https://www.inaturalist.org/observations/19429164">https://www.inaturalist.org/observations/19429164</a>   |
| 595 | <i>Amauornis phoenicurus</i> | White-breasted Waterhen | 2019/11/6  | 2 | 0 | 20.70117795 | 116.72827370 | <a href="https://www.inaturalist.org/observations/35412400">https://www.inaturalist.org/observations/35412400</a>   |
| 596 | <i>Amauornis phoenicurus</i> | White-breasted Waterhen | 2019/11/5  | 2 | 0 | 20.70123024 | 116.72808900 | <a href="https://www.inaturalist.org/observations/35411710">https://www.inaturalist.org/observations/35411710</a>   |
| 597 | <i>Amauornis phoenicurus</i> | White-breasted Waterhen | 2022/6/24  | 6 | 0 | 20.70627891 | 81.55063592  | <a href="https://www.inaturalist.org/observations/123214300">https://www.inaturalist.org/observations/123214300</a> |

|     |                              |                         |            |   |   |             |             |                                                                                                                     |
|-----|------------------------------|-------------------------|------------|---|---|-------------|-------------|---------------------------------------------------------------------------------------------------------------------|
| 598 | <i>Amauornis phoenicurus</i> | White-breasted Waterhen | 2022/6/24  | 5 | 0 | 20.70679481 | 81.55094471 | <a href="https://www.inaturalist.org/observations/123213966">https://www.inaturalist.org/observations/123213966</a> |
| 599 | <i>Amauornis phoenicurus</i> | White-breasted Waterhen | 2019/6/16  | 3 | 0 | 20.71265810 | 81.53392140 | <a href="https://www.inaturalist.org/observations/37777615">https://www.inaturalist.org/observations/37777615</a>   |
| 600 | <i>Amauornis phoenicurus</i> | White-breasted Waterhen | 2020/1/25  | 3 | 0 | 20.71413810 | 86.82014290 | <a href="https://www.inaturalist.org/observations/55596466">https://www.inaturalist.org/observations/55596466</a>   |
| 601 | <i>Amauornis phoenicurus</i> | White-breasted Waterhen | 2020/10/24 | 3 | 0 | 20.74936483 | 78.59999847 | <a href="https://www.inaturalist.org/observations/63566737">https://www.inaturalist.org/observations/63566737</a>   |
| 602 | <i>Amauornis phoenicurus</i> | White-breasted Waterhen | 2022/8/21  | 0 | 0 | 20.83348271 | 81.71465319 | <a href="https://www.inaturalist.org/observations/137228991">https://www.inaturalist.org/observations/137228991</a> |
| 603 | <i>Amauornis phoenicurus</i> | White-breasted Waterhen | 2021/1/4   | 4 | 0 | 21.00056552 | 75.54419189 | <a href="https://www.inaturalist.org/observations/70597217">https://www.inaturalist.org/observations/70597217</a>   |
| 604 | <i>Amauornis phoenicurus</i> | White-breasted Waterhen | 2021/1/28  | 2 | 0 | 21.01591357 | 81.45530183 | <a href="https://www.inaturalist.org/observations/68723667">https://www.inaturalist.org/observations/68723667</a>   |
| 605 | <i>Amauornis phoenicurus</i> | White-breasted Waterhen | 2021/1/30  | 2 | 0 | 21.02733606 | 81.45470068 | <a href="https://www.inaturalist.org/observations/68828616">https://www.inaturalist.org/observations/68828616</a>   |
| 606 | <i>Amauornis phoenicurus</i> | White-breasted Waterhen | 2020/7/10  | 2 | 0 | 21.04834000 | 75.86792000 | <a href="https://www.inaturalist.org/observations/52686606">https://www.inaturalist.org/observations/52686606</a>   |
| 607 | <i>Amauornis phoenicurus</i> | White-breasted Waterhen | 2021/8/27  | 2 | 0 | 21.05113556 | 75.86404972 | <a href="https://www.inaturalist.org/observations/92674809">https://www.inaturalist.org/observations/92674809</a>   |
| 608 | <i>Amauornis phoenicurus</i> | White-breasted Waterhen | 2020/8/7   | 2 | 0 | 21.05680167 | 75.86352333 | <a href="https://www.inaturalist.org/observations/55721503">https://www.inaturalist.org/observations/55721503</a>   |
| 609 | <i>Amauornis phoenicurus</i> | White-breasted Waterhen | 2020/9/4   | 4 | 0 | 21.06193833 | 75.80708667 | <a href="https://www.inaturalist.org/observations/58527644">https://www.inaturalist.org/observations/58527644</a>   |
| 610 | <i>Amauornis phoenicurus</i> | White-breasted Waterhen | 2020/3/2   | 2 | 0 | 21.12430540 | 70.82415070 | <a href="https://www.inaturalist.org/observations/104692454">https://www.inaturalist.org/observations/104692454</a> |
| 611 | <i>Amauornis phoenicurus</i> | White-breasted Waterhen | 2018/10/20 | 2 | 0 | 21.12430540 | 70.82415070 | <a href="https://www.inaturalist.org/observations/136884921">https://www.inaturalist.org/observations/136884921</a> |
| 612 | <i>Amauornis phoenicurus</i> | White-breasted Waterhen | 2021/8/14  | 2 | 0 | 21.17849189 | 81.30464215 | <a href="https://www.inaturalist.org/observations/91269311">https://www.inaturalist.org/observations/91269311</a>   |
| 613 | <i>Amauornis phoenicurus</i> | White-breasted Waterhen | 2021/1/28  | 1 | 0 | 21.18757314 | 81.35884073 | <a href="https://www.inaturalist.org/observations/68709471">https://www.inaturalist.org/observations/68709471</a>   |
| 614 | <i>Amauornis phoenicurus</i> | White-breasted Waterhen | 2022/8/28  | 1 | 0 | 21.20575620 | 81.60818640 | <a href="https://www.inaturalist.org/observations/134176519">https://www.inaturalist.org/observations/134176519</a> |
| 615 | <i>Amauornis phoenicurus</i> | White-breasted Waterhen | 2022/8/28  | 2 | 0 | 21.20575620 | 81.60818640 | <a href="https://www.inaturalist.org/observations/134176531">https://www.inaturalist.org/observations/134176531</a> |
| 616 | <i>Amauornis phoenicurus</i> | White-breasted Waterhen | 2022/8/28  | 2 | 0 | 21.20575620 | 81.60818640 | <a href="https://www.inaturalist.org/observations/134176532">https://www.inaturalist.org/observations/134176532</a> |
| 617 | <i>Amauornis phoenicurus</i> | White-breasted Waterhen | 2022/8/28  | 0 | 0 | 21.20575620 | 81.60818640 | <a href="https://www.inaturalist.org/observations/134176533">https://www.inaturalist.org/observations/134176533</a> |
| 618 | <i>Amauornis phoenicurus</i> | White-breasted Waterhen | 2022/8/7   | 3 | 0 | 21.20899063 | 80.75791407 | <a href="https://www.inaturalist.org/observations/131764409">https://www.inaturalist.org/observations/131764409</a> |
| 619 | <i>Amauornis phoenicurus</i> | White-breasted Waterhen | 2021/5/19  | 1 | 0 | 21.21614339 | 81.45645608 | <a href="https://www.inaturalist.org/observations/79381955">https://www.inaturalist.org/observations/79381955</a>   |
| 620 | <i>Amauornis phoenicurus</i> | White-breasted Waterhen | 2019/1/14  | 1 | 0 | 21.23001019 | 81.43766597 | <a href="https://www.inaturalist.org/observations/78353891">https://www.inaturalist.org/observations/78353891</a>   |

|     |                              |                         |           |   |   |             |              |                                                                                                                     |
|-----|------------------------------|-------------------------|-----------|---|---|-------------|--------------|---------------------------------------------------------------------------------------------------------------------|
| 621 | <i>Amauornis phoenicurus</i> | White-breasted Waterhen | 2022/7/10 | 3 | 0 | 21.24685990 | 81.59744520  | <a href="https://www.inaturalist.org/observations/125595534">https://www.inaturalist.org/observations/125595534</a> |
| 622 | <i>Amauornis phoenicurus</i> | White-breasted Waterhen | 2021/5/10 | 1 | 0 | 21.24821881 | 80.78279626  | <a href="https://www.inaturalist.org/observations/78347727">https://www.inaturalist.org/observations/78347727</a>   |
| 623 | <i>Amauornis phoenicurus</i> | White-breasted Waterhen | 2022/8/7  | 2 | 0 | 21.25876286 | 81.62378308  | <a href="https://www.inaturalist.org/observations/130103013">https://www.inaturalist.org/observations/130103013</a> |
| 624 | <i>Amauornis phoenicurus</i> | White-breasted Waterhen | 2019/3/17 | 3 | 0 | 21.26520132 | 81.69345517  | <a href="https://www.inaturalist.org/observations/21523944">https://www.inaturalist.org/observations/21523944</a>   |
| 625 | <i>Amauornis phoenicurus</i> | White-breasted Waterhen | 2021/2/9  | 1 | 0 | 21.27667700 | 81.64460490  | <a href="https://www.inaturalist.org/observations/120628139">https://www.inaturalist.org/observations/120628139</a> |
| 626 | <i>Amauornis phoenicurus</i> | White-breasted Waterhen | 2021/2/9  | 2 | 0 | 21.27667700 | 81.64460490  | <a href="https://www.inaturalist.org/observations/120628141">https://www.inaturalist.org/observations/120628141</a> |
| 627 | <i>Amauornis phoenicurus</i> | White-breasted Waterhen | 2022/7/8  | 2 | 0 | 21.27667700 | 81.64460490  | <a href="https://www.inaturalist.org/observations/125802367">https://www.inaturalist.org/observations/125802367</a> |
| 628 | <i>Amauornis phoenicurus</i> | White-breasted Waterhen | 2020/7/5  | 3 | 0 | 21.27747813 | 81.61482901  | <a href="https://www.inaturalist.org/observations/122789346">https://www.inaturalist.org/observations/122789346</a> |
| 629 | <i>Amauornis phoenicurus</i> | White-breasted Waterhen | 2018/9/17 | 4 | 0 | 21.27813190 | 81.68516750  | <a href="https://www.inaturalist.org/observations/16723390">https://www.inaturalist.org/observations/16723390</a>   |
| 630 | <i>Amauornis phoenicurus</i> | White-breasted Waterhen | 2022/2/18 | 4 | 0 | 21.28389763 | 81.68227471  | <a href="https://www.inaturalist.org/observations/110650944">https://www.inaturalist.org/observations/110650944</a> |
| 631 | <i>Amauornis phoenicurus</i> | White-breasted Waterhen | 2021/5/19 | 3 | 0 | 21.29265698 | 80.87456301  | <a href="https://www.inaturalist.org/observations/79375317">https://www.inaturalist.org/observations/79375317</a>   |
| 632 | <i>Amauornis phoenicurus</i> | White-breasted Waterhen | 2022/8/4  | 4 | 0 | 21.30422399 | 81.63851984  | <a href="https://www.inaturalist.org/observations/130220389">https://www.inaturalist.org/observations/130220389</a> |
| 633 | <i>Amauornis phoenicurus</i> | White-breasted Waterhen | 2022/6/5  | 3 | 0 | 21.58683800 | 79.28303000  | <a href="https://www.inaturalist.org/observations/121057440">https://www.inaturalist.org/observations/121057440</a> |
| 634 | <i>Amauornis phoenicurus</i> | White-breasted Waterhen | 2020/12/7 | 1 | 0 | 21.63695940 | 111.70007140 | <a href="https://www.inaturalist.org/observations/68360887">https://www.inaturalist.org/observations/68360887</a>   |
| 635 | <i>Amauornis phoenicurus</i> | White-breasted Waterhen | 2016/2/4  | 3 | 0 | 21.65048500 | 87.57225333  | <a href="https://www.inaturalist.org/observations/58691118">https://www.inaturalist.org/observations/58691118</a>   |
| 636 | <i>Amauornis phoenicurus</i> | White-breasted Waterhen | 2016/2/4  | 3 | 0 | 21.65048500 | 87.57225333  | <a href="https://www.inaturalist.org/observations/61330477">https://www.inaturalist.org/observations/61330477</a>   |
| 637 | <i>Amauornis phoenicurus</i> | White-breasted Waterhen | 2021/1/7  | 1 | 0 | 21.66778574 | 111.70140750 | <a href="https://www.inaturalist.org/observations/68360857">https://www.inaturalist.org/observations/68360857</a>   |
| 638 | <i>Amauornis phoenicurus</i> | White-breasted Waterhen | 2014/4/9  | 2 | 0 | 21.75604860 | 72.12570720  | <a href="https://www.inaturalist.org/observations/39749662">https://www.inaturalist.org/observations/39749662</a>   |
| 639 | <i>Amauornis phoenicurus</i> | White-breasted Waterhen | 2020/5/9  | 2 | 0 | 21.80637244 | 83.30512433  | <a href="https://www.inaturalist.org/observations/79921768">https://www.inaturalist.org/observations/79921768</a>   |
| 640 | <i>Amauornis phoenicurus</i> | White-breasted Waterhen | 2021/5/21 | 3 | 0 | 21.80950750 | 83.30867932  | <a href="https://www.inaturalist.org/observations/79642170">https://www.inaturalist.org/observations/79642170</a>   |
| 641 | <i>Amauornis phoenicurus</i> | White-breasted Waterhen | 2021/8/4  | 1 | 0 | 21.81932500 | 83.31208500  | <a href="https://www.inaturalist.org/observations/89949270">https://www.inaturalist.org/observations/89949270</a>   |
| 642 | <i>Amauornis phoenicurus</i> | White-breasted Waterhen | 2021/7/6  | 0 | 0 | 21.84714808 | 83.29263794  | <a href="https://www.inaturalist.org/observations/92915904">https://www.inaturalist.org/observations/92915904</a>   |
| 643 | <i>Amauornis phoenicurus</i> | White-breasted Waterhen | 2018/3/20 | 2 | 0 | 21.93269550 | 101.25017170 | <a href="https://www.inaturalist.org/observations/10413411">https://www.inaturalist.org/observations/10413411</a>   |



|     |                              |                         |            |   |   |             |              |                                                                                                                     |
|-----|------------------------------|-------------------------|------------|---|---|-------------|--------------|---------------------------------------------------------------------------------------------------------------------|
| 644 | <i>Amauornis phoenicurus</i> | White-breasted Waterhen | 2003/8/11  | 1 | 0 | 21.97503643 | 120.73770120 | <a href="https://www.inaturalist.org/observations/83483184">https://www.inaturalist.org/observations/83483184</a>   |
| 645 | <i>Amauornis phoenicurus</i> | White-breasted Waterhen | 2019/12/1  | 1 | 0 | 21.98626639 | 120.73645060 | <a href="https://www.inaturalist.org/observations/45760248">https://www.inaturalist.org/observations/45760248</a>   |
| 646 | <i>Amauornis phoenicurus</i> | White-breasted Waterhen | 2021/2/19  | 2 | 0 | 21.98896472 | 88.75584126  | <a href="https://www.inaturalist.org/observations/81275004">https://www.inaturalist.org/observations/81275004</a>   |
| 647 | <i>Amauornis phoenicurus</i> | White-breasted Waterhen | 2019/10/15 | 4 | 0 | 22.01853521 | 120.74077980 | <a href="https://www.inaturalist.org/observations/34403153">https://www.inaturalist.org/observations/34403153</a>   |
| 648 | <i>Amauornis phoenicurus</i> | White-breasted Waterhen | 2016/7/18  | 1 | 0 | 22.04356160 | 121.54841800 | <a href="https://www.inaturalist.org/observations/122151098">https://www.inaturalist.org/observations/122151098</a> |
| 649 | <i>Amauornis phoenicurus</i> | White-breasted Waterhen | 2021/8/20  | 1 | 0 | 22.06059500 | 82.05792833  | <a href="https://www.inaturalist.org/observations/93631072">https://www.inaturalist.org/observations/93631072</a>   |
| 650 | <i>Amauornis phoenicurus</i> | White-breasted Waterhen | 2021/9/3   | 1 | 0 | 22.06072000 | 82.21396167  | <a href="https://www.inaturalist.org/observations/93740048">https://www.inaturalist.org/observations/93740048</a>   |
| 651 | <i>Amauornis phoenicurus</i> | White-breasted Waterhen | 2021/8/15  | 2 | 0 | 22.06473333 | 82.20982667  | <a href="https://www.inaturalist.org/observations/93617566">https://www.inaturalist.org/observations/93617566</a>   |
| 652 | <i>Amauornis phoenicurus</i> | White-breasted Waterhen | 2021/8/31  | 2 | 0 | 22.06628333 | 82.21179500  | <a href="https://www.inaturalist.org/observations/93449082">https://www.inaturalist.org/observations/93449082</a>   |
| 653 | <i>Amauornis phoenicurus</i> | White-breasted Waterhen | 2019/9/11  | 1 | 0 | 22.07986817 | 121.51839290 | <a href="https://www.inaturalist.org/observations/36993396">https://www.inaturalist.org/observations/36993396</a>   |
| 654 | <i>Amauornis phoenicurus</i> | White-breasted Waterhen | 2022/4/16  | 1 | 0 | 22.09585948 | 88.76099110  | <a href="https://www.inaturalist.org/observations/112969787">https://www.inaturalist.org/observations/112969787</a> |
| 655 | <i>Amauornis phoenicurus</i> | White-breasted Waterhen | 2021/11/13 | 1 | 0 | 22.11186312 | 113.57403680 | <a href="https://www.inaturalist.org/observations/101069034">https://www.inaturalist.org/observations/101069034</a> |
| 656 | <i>Amauornis phoenicurus</i> | White-breasted Waterhen | 2020/10/17 | 1 | 0 | 22.12300585 | 113.47503910 | <a href="https://www.inaturalist.org/observations/63244597">https://www.inaturalist.org/observations/63244597</a>   |
| 657 | <i>Amauornis phoenicurus</i> | White-breasted Waterhen | 2020/4/25  | 1 | 0 | 22.12599717 | 113.55822830 | <a href="https://www.inaturalist.org/observations/43257636">https://www.inaturalist.org/observations/43257636</a>   |
| 658 | <i>Amauornis phoenicurus</i> | White-breasted Waterhen | 2021/12/12 | 1 | 0 | 22.12625900 | 113.55784300 | <a href="https://www.inaturalist.org/observations/102973160">https://www.inaturalist.org/observations/102973160</a> |
| 659 | <i>Amauornis phoenicurus</i> | White-breasted Waterhen | 2021/8/16  | 1 | 0 | 22.12690626 | 82.14175512  | <a href="https://www.inaturalist.org/observations/93631014">https://www.inaturalist.org/observations/93631014</a>   |
| 660 | <i>Amauornis phoenicurus</i> | White-breasted Waterhen | 2021/8/16  | 1 | 0 | 22.12727183 | 82.14172329  | <a href="https://www.inaturalist.org/observations/93622411">https://www.inaturalist.org/observations/93622411</a>   |
| 661 | <i>Amauornis phoenicurus</i> | White-breasted Waterhen | 2021/8/16  | 1 | 0 | 22.12865000 | 82.14429000  | <a href="https://www.inaturalist.org/observations/93622468">https://www.inaturalist.org/observations/93622468</a>   |
| 662 | <i>Amauornis phoenicurus</i> | White-breasted Waterhen | 2017/12/12 | 3 | 0 | 22.14641145 | 80.65652224  | <a href="https://www.inaturalist.org/observations/75614845">https://www.inaturalist.org/observations/75614845</a>   |
| 663 | <i>Amauornis phoenicurus</i> | White-breasted Waterhen | 2020/12/24 | 1 | 0 | 22.15347733 | 113.55967800 | <a href="https://www.inaturalist.org/observations/67002543">https://www.inaturalist.org/observations/67002543</a>   |
| 664 | <i>Amauornis phoenicurus</i> | White-breasted Waterhen | 2021/5/13  | 1 | 0 | 22.15352572 | 113.56086090 | <a href="https://www.inaturalist.org/observations/78549544">https://www.inaturalist.org/observations/78549544</a>   |
| 665 | <i>Amauornis phoenicurus</i> | White-breasted Waterhen | 2021/2/16  | 1 | 0 | 22.15361117 | 113.55980500 | <a href="https://www.inaturalist.org/observations/69664263">https://www.inaturalist.org/observations/69664263</a>   |
| 666 | <i>Amauornis phoenicurus</i> | White-breasted Waterhen | 2021/9/18  | 1 | 0 | 22.15364388 | 113.55932280 | <a href="https://www.inaturalist.org/observations/117286586">https://www.inaturalist.org/observations/117286586</a> |

|     |                              |                         |            |   |   |             |              |                                                                                                                     |
|-----|------------------------------|-------------------------|------------|---|---|-------------|--------------|---------------------------------------------------------------------------------------------------------------------|
| 667 | <i>Amauornis phoenicurus</i> | White-breasted Waterhen | 2019/1/27  | 2 | 0 | 22.15365004 | 113.55995870 | <a href="https://www.inaturalist.org/observations/23891122">https://www.inaturalist.org/observations/23891122</a>   |
| 668 | <i>Amauornis phoenicurus</i> | White-breasted Waterhen | 2021/6/19  | 1 | 0 | 22.15372395 | 113.55980780 | <a href="https://www.inaturalist.org/observations/83654775">https://www.inaturalist.org/observations/83654775</a>   |
| 669 | <i>Amauornis phoenicurus</i> | White-breasted Waterhen | 2021/6/19  | 1 | 0 | 22.15373792 | 113.55982290 | <a href="https://www.inaturalist.org/observations/83655148">https://www.inaturalist.org/observations/83655148</a>   |
| 670 | <i>Amauornis phoenicurus</i> | White-breasted Waterhen | 2021/2/2   | 5 | 0 | 22.16194050 | 73.48404960  | <a href="https://www.inaturalist.org/observations/98494459">https://www.inaturalist.org/observations/98494459</a>   |
| 671 | <i>Amauornis phoenicurus</i> | White-breasted Waterhen | 2021/10/7  | 1 | 0 | 22.17540043 | 113.32007780 | <a href="https://www.inaturalist.org/observations/97523106">https://www.inaturalist.org/observations/97523106</a>   |
| 672 | <i>Amauornis phoenicurus</i> | White-breasted Waterhen | 2015/12/12 | 1 | 0 | 22.20000560 | 114.13501730 | <a href="https://www.inaturalist.org/observations/59101135">https://www.inaturalist.org/observations/59101135</a>   |
| 673 | <i>Amauornis phoenicurus</i> | White-breasted Waterhen | 2020/9/29  | 2 | 0 | 22.20057764 | 113.54785240 | <a href="https://www.inaturalist.org/observations/61206632">https://www.inaturalist.org/observations/61206632</a>   |
| 674 | <i>Amauornis phoenicurus</i> | White-breasted Waterhen | 2020/4/4   | 1 | 0 | 22.20619687 | 114.05787990 | <a href="https://www.inaturalist.org/observations/86979424">https://www.inaturalist.org/observations/86979424</a>   |
| 675 | <i>Amauornis phoenicurus</i> | White-breasted Waterhen | 2020/4/27  | 1 | 0 | 22.22674667 | 114.11264720 | <a href="https://www.inaturalist.org/observations/44092877">https://www.inaturalist.org/observations/44092877</a>   |
| 676 | <i>Amauornis phoenicurus</i> | White-breasted Waterhen | 2022/1/29  | 1 | 0 | 22.22768600 | 113.93200100 | <a href="https://www.inaturalist.org/observations/105991928">https://www.inaturalist.org/observations/105991928</a> |
| 677 | <i>Amauornis phoenicurus</i> | White-breasted Waterhen | 2021/5/2   | 1 | 0 | 22.23793898 | 113.54908040 | <a href="https://www.inaturalist.org/observations/81532631">https://www.inaturalist.org/observations/81532631</a>   |
| 678 | <i>Amauornis phoenicurus</i> | White-breasted Waterhen | 2021/11/19 | 1 | 0 | 22.24093823 | 113.97584190 | <a href="https://www.inaturalist.org/observations/101545732">https://www.inaturalist.org/observations/101545732</a> |
| 679 | <i>Amauornis phoenicurus</i> | White-breasted Waterhen | 2021/12/7  | 1 | 0 | 22.24106313 | 113.97563730 | <a href="https://www.inaturalist.org/observations/102688964">https://www.inaturalist.org/observations/102688964</a> |
| 680 | <i>Amauornis phoenicurus</i> | White-breasted Waterhen | 2020/4/25  | 1 | 0 | 22.24152423 | 113.98038890 | <a href="https://www.inaturalist.org/observations/43314169">https://www.inaturalist.org/observations/43314169</a>   |
| 681 | <i>Amauornis phoenicurus</i> | White-breasted Waterhen | 2021/11/29 | 2 | 0 | 22.24205502 | 113.97492490 | <a href="https://www.inaturalist.org/observations/102352730">https://www.inaturalist.org/observations/102352730</a> |
| 682 | <i>Amauornis phoenicurus</i> | White-breasted Waterhen | 2022/6/1   | 1 | 0 | 22.24273276 | 113.96922730 | <a href="https://www.inaturalist.org/observations/127787845">https://www.inaturalist.org/observations/127787845</a> |
| 683 | <i>Amauornis phoenicurus</i> | White-breasted Waterhen | 2019/4/17  | 1 | 0 | 22.24337600 | 113.97534900 | <a href="https://www.inaturalist.org/observations/27596404">https://www.inaturalist.org/observations/27596404</a>   |
| 684 | <i>Amauornis phoenicurus</i> | White-breasted Waterhen | 2020/11/1  | 1 | 0 | 22.24362693 | 113.97897580 | <a href="https://www.inaturalist.org/observations/64041797">https://www.inaturalist.org/observations/64041797</a>   |
| 685 | <i>Amauornis phoenicurus</i> | White-breasted Waterhen | 2020/5/5   | 1 | 0 | 22.24451576 | 114.17653930 | <a href="https://www.inaturalist.org/observations/45143890">https://www.inaturalist.org/observations/45143890</a>   |
| 686 | <i>Amauornis phoenicurus</i> | White-breasted Waterhen | 2021/4/1   | 2 | 0 | 22.24546100 | 113.97784100 | <a href="https://www.inaturalist.org/observations/72600226">https://www.inaturalist.org/observations/72600226</a>   |
| 687 | <i>Amauornis phoenicurus</i> | White-breasted Waterhen | 2021/9/30  | 1 | 0 | 22.24585707 | 113.98091510 | <a href="https://www.inaturalist.org/observations/96704148">https://www.inaturalist.org/observations/96704148</a>   |
| 688 | <i>Amauornis phoenicurus</i> | White-breasted Waterhen | 2018/11/23 | 3 | 0 | 22.24729950 | 114.17624750 | <a href="https://www.inaturalist.org/observations/18709648">https://www.inaturalist.org/observations/18709648</a>   |
| 689 | <i>Amauornis phoenicurus</i> | White-breasted Waterhen | 2013/2/14  | 3 | 0 | 22.25476412 | 113.85661980 | <a href="http://www.inaturalist.org/observations/198184">http://www.inaturalist.org/observations/198184</a>         |

|     |                              |                         |            |   |   |             |              |                                                                                                                     |
|-----|------------------------------|-------------------------|------------|---|---|-------------|--------------|---------------------------------------------------------------------------------------------------------------------|
| 690 | <i>Amauornis phoenicurus</i> | White-breasted Waterhen | 2018/12/24 | 3 | 0 | 22.26378213 | 113.99071050 | <a href="https://www.inaturalist.org/observations/19221698">https://www.inaturalist.org/observations/19221698</a>   |
| 691 | <i>Amauornis phoenicurus</i> | White-breasted Waterhen | 2018/11/26 | 4 | 0 | 22.26396676 | 113.99079580 | <a href="https://www.inaturalist.org/observations/18664587">https://www.inaturalist.org/observations/18664587</a>   |
| 692 | <i>Amauornis phoenicurus</i> | White-breasted Waterhen | 2020/7/23  | 1 | 0 | 22.26445481 | 113.99033470 | <a href="https://www.inaturalist.org/observations/55502841">https://www.inaturalist.org/observations/55502841</a>   |
| 693 | <i>Amauornis phoenicurus</i> | White-breasted Waterhen | 2020/10/3  | 1 | 0 | 22.26603200 | 113.99474410 | <a href="https://www.inaturalist.org/observations/61827904">https://www.inaturalist.org/observations/61827904</a>   |
| 694 | <i>Amauornis phoenicurus</i> | White-breasted Waterhen | 2022/9/23  | 4 | 0 | 22.26677799 | 113.94175070 | <a href="https://www.inaturalist.org/observations/136285960">https://www.inaturalist.org/observations/136285960</a> |
| 695 | <i>Amauornis phoenicurus</i> | White-breasted Waterhen | 2022/1/7   | 3 | 0 | 22.26691288 | 113.99153060 | <a href="https://www.inaturalist.org/observations/104505671">https://www.inaturalist.org/observations/104505671</a> |
| 696 | <i>Amauornis phoenicurus</i> | White-breasted Waterhen | 2021/7/7   | 2 | 0 | 22.26885458 | 113.99757660 | <a href="https://www.inaturalist.org/observations/86062397">https://www.inaturalist.org/observations/86062397</a>   |
| 697 | <i>Amauornis phoenicurus</i> | White-breasted Waterhen | 2017/6/10  | 3 | 0 | 22.26996738 | 113.99244980 | <a href="https://www.inaturalist.org/observations/24179817">https://www.inaturalist.org/observations/24179817</a>   |
| 698 | <i>Amauornis phoenicurus</i> | White-breasted Waterhen | 2020/2/7   | 1 | 0 | 22.27198928 | 113.99774810 | <a href="https://www.inaturalist.org/observations/38378160">https://www.inaturalist.org/observations/38378160</a>   |
| 699 | <i>Amauornis phoenicurus</i> | White-breasted Waterhen | 2021/9/25  | 1 | 0 | 22.27460606 | 113.93118130 | <a href="https://www.inaturalist.org/observations/96175583">https://www.inaturalist.org/observations/96175583</a>   |
| 700 | <i>Amauornis phoenicurus</i> | White-breasted Waterhen | 2014/10/19 | 3 | 0 | 22.27831510 | 114.17469500 | <a href="http://www.inaturalist.org/observations/3904266">http://www.inaturalist.org/observations/3904266</a>       |
| 701 | <i>Amauornis phoenicurus</i> | White-breasted Waterhen | 2017/11/4  | 2 | 0 | 22.27986911 | 113.92957450 | <a href="https://www.inaturalist.org/observations/9247896">https://www.inaturalist.org/observations/9247896</a>     |
| 702 | <i>Amauornis phoenicurus</i> | White-breasted Waterhen | 2022/7/22  | 2 | 0 | 22.28000781 | 114.21131020 | <a href="https://www.inaturalist.org/observations/127341685">https://www.inaturalist.org/observations/127341685</a> |
| 703 | <i>Amauornis phoenicurus</i> | White-breasted Waterhen | 2022/5/29  | 2 | 0 | 22.28001045 | 114.21152290 | <a href="https://www.inaturalist.org/observations/119216207">https://www.inaturalist.org/observations/119216207</a> |
| 704 | <i>Amauornis phoenicurus</i> | White-breasted Waterhen | 2021/11/14 | 2 | 0 | 22.28272076 | 114.04000200 | <a href="https://www.inaturalist.org/observations/127312033">https://www.inaturalist.org/observations/127312033</a> |
| 705 | <i>Amauornis phoenicurus</i> | White-breasted Waterhen | 2021/11/15 | 1 | 0 | 22.28553530 | 113.93534830 | <a href="https://www.inaturalist.org/observations/101191895">https://www.inaturalist.org/observations/101191895</a> |
| 706 | <i>Amauornis phoenicurus</i> | White-breasted Waterhen | 2019/10/8  | 3 | 0 | 22.28782232 | 114.00498850 | <a href="https://www.inaturalist.org/observations/34106689">https://www.inaturalist.org/observations/34106689</a>   |
| 707 | <i>Amauornis phoenicurus</i> | White-breasted Waterhen | 2020/8/6   | 1 | 0 | 22.29779167 | 114.27387170 | <a href="https://www.inaturalist.org/observations/55565031">https://www.inaturalist.org/observations/55565031</a>   |
| 708 | <i>Amauornis phoenicurus</i> | White-breasted Waterhen | 2019/4/28  | 2 | 0 | 22.29869351 | 114.16566650 | <a href="https://www.inaturalist.org/observations/23641490">https://www.inaturalist.org/observations/23641490</a>   |
| 709 | <i>Amauornis phoenicurus</i> | White-breasted Waterhen | 2019/1/11  | 1 | 0 | 22.30073300 | 114.17007000 | <a href="https://www.inaturalist.org/observations/39438307">https://www.inaturalist.org/observations/39438307</a>   |
| 710 | <i>Amauornis phoenicurus</i> | White-breasted Waterhen | 2022/5/22  | 3 | 0 | 22.30148952 | 73.12527416  | <a href="https://www.inaturalist.org/observations/118746520">https://www.inaturalist.org/observations/118746520</a> |
| 711 | <i>Amauornis phoenicurus</i> | White-breasted Waterhen | 2021/11/14 | 1 | 0 | 22.30441083 | 114.02366960 | <a href="https://www.inaturalist.org/observations/101175744">https://www.inaturalist.org/observations/101175744</a> |
| 712 | <i>Amauornis phoenicurus</i> | White-breasted Waterhen | 2022/5/22  | 1 | 0 | 22.30481800 | 114.01340100 | <a href="https://www.inaturalist.org/observations/118124670">https://www.inaturalist.org/observations/118124670</a> |

|     |                              |                         |            |   |   |             |              |                                                                                                                     |
|-----|------------------------------|-------------------------|------------|---|---|-------------|--------------|---------------------------------------------------------------------------------------------------------------------|
| 713 | <i>Amauornis phoenicurus</i> | White-breasted Waterhen | 2022/8/11  | 1 | 0 | 22.30489722 | 114.01163890 | <a href="https://www.inaturalist.org/observations/130478402">https://www.inaturalist.org/observations/130478402</a> |
| 714 | <i>Amauornis phoenicurus</i> | White-breasted Waterhen | 2020/11/1  | 1 | 0 | 22.30493889 | 114.01285830 | <a href="https://www.inaturalist.org/observations/65518142">https://www.inaturalist.org/observations/65518142</a>   |
| 715 | <i>Amauornis phoenicurus</i> | White-breasted Waterhen | 2019/5/12  | 4 | 0 | 22.30493890 | 114.01316780 | <a href="https://www.inaturalist.org/observations/24986701">https://www.inaturalist.org/observations/24986701</a>   |
| 716 | <i>Amauornis phoenicurus</i> | White-breasted Waterhen | 2021/3/13  | 2 | 0 | 22.30498000 | 114.01275560 | <a href="https://www.inaturalist.org/observations/71113377">https://www.inaturalist.org/observations/71113377</a>   |
| 717 | <i>Amauornis phoenicurus</i> | White-breasted Waterhen | 2021/4/30  | 1 | 0 | 22.30499667 | 114.01281110 | <a href="https://www.inaturalist.org/observations/76111354">https://www.inaturalist.org/observations/76111354</a>   |
| 718 | <i>Amauornis phoenicurus</i> | White-breasted Waterhen | 2020/11/1  | 2 | 0 | 22.30517778 | 114.01241940 | <a href="https://www.inaturalist.org/observations/65518241">https://www.inaturalist.org/observations/65518241</a>   |
| 719 | <i>Amauornis phoenicurus</i> | White-breasted Waterhen | 2020/10/24 | 2 | 0 | 22.30526270 | 114.01248660 | <a href="https://www.inaturalist.org/observations/63370765">https://www.inaturalist.org/observations/63370765</a>   |
| 720 | <i>Amauornis phoenicurus</i> | White-breasted Waterhen | 2020/5/2   | 1 | 0 | 22.30526333 | 114.01228330 | <a href="https://www.inaturalist.org/observations/44556504">https://www.inaturalist.org/observations/44556504</a>   |
| 721 | <i>Amauornis phoenicurus</i> | White-breasted Waterhen | 2019/1/8   | 6 | 0 | 22.31214888 | 73.19125660  | <a href="https://www.inaturalist.org/observations/19512200">https://www.inaturalist.org/observations/19512200</a>   |
| 722 | <i>Amauornis phoenicurus</i> | White-breasted Waterhen | 2022/1/4   | 4 | 0 | 22.31271588 | 73.28538168  | <a href="https://www.inaturalist.org/observations/105309225">https://www.inaturalist.org/observations/105309225</a> |
| 723 | <i>Amauornis phoenicurus</i> | White-breasted Waterhen | 2022/1/4   | 3 | 0 | 22.31350167 | 73.27734167  | <a href="https://www.inaturalist.org/observations/120809266">https://www.inaturalist.org/observations/120809266</a> |
| 724 | <i>Amauornis phoenicurus</i> | White-breasted Waterhen | 2020/2/8   | 0 | 0 | 22.31930390 | 114.16936110 | <a href="https://www.inaturalist.org/observations/38423677">https://www.inaturalist.org/observations/38423677</a>   |
| 725 | <i>Amauornis phoenicurus</i> | White-breasted Waterhen | 2021/5/8   | 1 | 0 | 22.31975072 | 114.19316690 | <a href="https://www.inaturalist.org/observations/77897847">https://www.inaturalist.org/observations/77897847</a>   |
| 726 | <i>Amauornis phoenicurus</i> | White-breasted Waterhen | 2020/7/1   | 1 | 0 | 22.32353833 | 114.03814170 | <a href="https://www.inaturalist.org/observations/51672104">https://www.inaturalist.org/observations/51672104</a>   |
| 727 | <i>Amauornis phoenicurus</i> | White-breasted Waterhen | 2020/2/1   | 1 | 0 | 22.33202985 | 114.18951870 | <a href="https://www.inaturalist.org/observations/38178648">https://www.inaturalist.org/observations/38178648</a>   |
| 728 | <i>Amauornis phoenicurus</i> | White-breasted Waterhen | 2021/7/25  | 2 | 0 | 22.33218833 | 87.31338667  | <a href="https://www.inaturalist.org/observations/88502026">https://www.inaturalist.org/observations/88502026</a>   |
| 729 | <i>Amauornis phoenicurus</i> | White-breasted Waterhen | 2022/5/4   | 1 | 0 | 22.33340626 | 114.23949330 | <a href="https://www.inaturalist.org/observations/115322269">https://www.inaturalist.org/observations/115322269</a> |
| 730 | <i>Amauornis phoenicurus</i> | White-breasted Waterhen | 2022/8/21  | 1 | 0 | 22.33362911 | 114.23909080 | <a href="https://www.inaturalist.org/observations/131699183">https://www.inaturalist.org/observations/131699183</a> |
| 731 | <i>Amauornis phoenicurus</i> | White-breasted Waterhen | 2022/2/12  | 2 | 0 | 22.33380266 | 114.23870310 | <a href="https://www.inaturalist.org/observations/106684318">https://www.inaturalist.org/observations/106684318</a> |
| 732 | <i>Amauornis phoenicurus</i> | White-breasted Waterhen | 2022/9/13  | 1 | 0 | 22.33380321 | 114.23893690 | <a href="https://www.inaturalist.org/observations/134836442">https://www.inaturalist.org/observations/134836442</a> |
| 733 | <i>Amauornis phoenicurus</i> | White-breasted Waterhen | 2022/1/2   | 3 | 0 | 22.33384444 | 114.23872780 | <a href="https://www.inaturalist.org/observations/104170964">https://www.inaturalist.org/observations/104170964</a> |
| 734 | <i>Amauornis phoenicurus</i> | White-breasted Waterhen | 2021/11/14 | 1 | 0 | 22.35048037 | 113.91283280 | <a href="https://www.inaturalist.org/observations/101091016">https://www.inaturalist.org/observations/101091016</a> |
| 735 | <i>Amauornis phoenicurus</i> | White-breasted Waterhen | 2021/8/7   | 1 | 0 | 22.35497178 | 114.24707520 | <a href="https://www.inaturalist.org/observations/90367293">https://www.inaturalist.org/observations/90367293</a>   |

|     |                              |                         |            |   |   |             |              |                                                                                                                     |
|-----|------------------------------|-------------------------|------------|---|---|-------------|--------------|---------------------------------------------------------------------------------------------------------------------|
| 736 | <i>Amauornis phoenicurus</i> | White-breasted Waterhen | 2021/8/7   | 1 | 0 | 22.35498721 | 114.24708560 | <a href="https://www.inaturalist.org/observations/90367395">https://www.inaturalist.org/observations/90367395</a>   |
| 737 | <i>Amauornis phoenicurus</i> | White-breasted Waterhen | 2022/4/13  | 2 | 0 | 22.35513596 | 114.24724480 | <a href="https://www.inaturalist.org/observations/124845101">https://www.inaturalist.org/observations/124845101</a> |
| 738 | <i>Amauornis phoenicurus</i> | White-breasted Waterhen | 2021/8/7   | 1 | 0 | 22.35522956 | 114.24994620 | <a href="https://www.inaturalist.org/observations/90367108">https://www.inaturalist.org/observations/90367108</a>   |
| 739 | <i>Amauornis phoenicurus</i> | White-breasted Waterhen | 2022/1/27  | 2 | 0 | 22.35525203 | 114.24593600 | <a href="https://www.inaturalist.org/observations/105664540">https://www.inaturalist.org/observations/105664540</a> |
| 740 | <i>Amauornis phoenicurus</i> | White-breasted Waterhen | 2021/11/21 | 1 | 0 | 22.35582475 | 114.10600420 | <a href="https://www.inaturalist.org/observations/101604631">https://www.inaturalist.org/observations/101604631</a> |
| 741 | <i>Amauornis phoenicurus</i> | White-breasted Waterhen | 2019/1/17  | 3 | 0 | 22.35609177 | 114.10585340 | <a href="https://www.inaturalist.org/observations/68842136">https://www.inaturalist.org/observations/68842136</a>   |
| 742 | <i>Amauornis phoenicurus</i> | White-breasted Waterhen | 2019/1/6   | 1 | 0 | 22.35609177 | 114.10585340 | <a href="https://www.inaturalist.org/observations/68843059">https://www.inaturalist.org/observations/68843059</a>   |
| 743 | <i>Amauornis phoenicurus</i> | White-breasted Waterhen | 2019/1/3   | 2 | 0 | 22.35613541 | 114.10619030 | <a href="https://www.inaturalist.org/observations/19702156">https://www.inaturalist.org/observations/19702156</a>   |
| 744 | <i>Amauornis phoenicurus</i> | White-breasted Waterhen | 2021/8/22  | 1 | 0 | 22.35700960 | 114.10574550 | <a href="https://www.inaturalist.org/observations/92092942">https://www.inaturalist.org/observations/92092942</a>   |
| 745 | <i>Amauornis phoenicurus</i> | White-breasted Waterhen | 2021/2/6   | 2 | 0 | 22.35992390 | 88.43254622  | <a href="https://www.inaturalist.org/observations/75230893">https://www.inaturalist.org/observations/75230893</a>   |
| 746 | <i>Amauornis phoenicurus</i> | White-breasted Waterhen | 2021/2/6   | 1 | 0 | 22.36412100 | 88.38740400  | <a href="https://www.inaturalist.org/observations/69177817">https://www.inaturalist.org/observations/69177817</a>   |
| 747 | <i>Amauornis phoenicurus</i> | White-breasted Waterhen | 2021/3/8   | 2 | 0 | 22.36870910 | 114.01163340 | <a href="https://www.inaturalist.org/observations/70809076">https://www.inaturalist.org/observations/70809076</a>   |
| 748 | <i>Amauornis phoenicurus</i> | White-breasted Waterhen | 2021/3/8   | 2 | 0 | 22.36870910 | 114.01163340 | <a href="https://www.inaturalist.org/observations/70809089">https://www.inaturalist.org/observations/70809089</a>   |
| 749 | <i>Amauornis phoenicurus</i> | White-breasted Waterhen | 2021/9/21  | 1 | 0 | 22.36928202 | 113.58005720 | <a href="https://www.inaturalist.org/observations/97189938">https://www.inaturalist.org/observations/97189938</a>   |
| 750 | <i>Amauornis phoenicurus</i> | White-breasted Waterhen | 2018/1/19  | 5 | 0 | 22.36968026 | 70.09274525  | <a href="https://www.inaturalist.org/observations/30345381">https://www.inaturalist.org/observations/30345381</a>   |
| 751 | <i>Amauornis phoenicurus</i> | White-breasted Waterhen | 2022/4/6   | 1 | 0 | 22.37409295 | 114.26505380 | <a href="https://www.inaturalist.org/observations/111284906">https://www.inaturalist.org/observations/111284906</a> |
| 752 | <i>Amauornis phoenicurus</i> | White-breasted Waterhen | 2021/5/31  | 1 | 0 | 22.37451863 | 114.26368350 | <a href="https://www.inaturalist.org/observations/81033164">https://www.inaturalist.org/observations/81033164</a>   |
| 753 | <i>Amauornis phoenicurus</i> | White-breasted Waterhen | 2020/4/6   | 1 | 0 | 22.37453227 | 114.18246540 | <a href="https://www.inaturalist.org/observations/44951188">https://www.inaturalist.org/observations/44951188</a>   |
| 754 | <i>Amauornis phoenicurus</i> | White-breasted Waterhen | 2022/5/17  | 2 | 0 | 22.37487265 | 114.26413410 | <a href="https://www.inaturalist.org/observations/117526343">https://www.inaturalist.org/observations/117526343</a> |
| 755 | <i>Amauornis phoenicurus</i> | White-breasted Waterhen | 2021/9/14  | 1 | 0 | 22.37528919 | 114.18317490 | <a href="https://www.inaturalist.org/observations/94835203">https://www.inaturalist.org/observations/94835203</a>   |
| 756 | <i>Amauornis phoenicurus</i> | White-breasted Waterhen | 2020/4/2   | 1 | 0 | 22.37535278 | 114.26363890 | <a href="https://www.inaturalist.org/observations/96035067">https://www.inaturalist.org/observations/96035067</a>   |
| 757 | <i>Amauornis phoenicurus</i> | White-breasted Waterhen | 2021/12/30 | 1 | 0 | 22.37545358 | 114.18516580 | <a href="https://www.inaturalist.org/observations/103949965">https://www.inaturalist.org/observations/103949965</a> |
| 758 | <i>Amauornis phoenicurus</i> | White-breasted Waterhen | 2022/6/1   | 1 | 0 | 22.37574123 | 114.18590990 | <a href="https://www.inaturalist.org/observations/119736415">https://www.inaturalist.org/observations/119736415</a> |

|     |                              |                         |            |   |   |             |              |                                                                                                                     |
|-----|------------------------------|-------------------------|------------|---|---|-------------|--------------|---------------------------------------------------------------------------------------------------------------------|
| 759 | <i>Amauornis phoenicurus</i> | White-breasted Waterhen | 2020/4/8   | 1 | 0 | 22.37586509 | 114.18500820 | <a href="https://www.inaturalist.org/observations/44859040">https://www.inaturalist.org/observations/44859040</a>   |
| 760 | <i>Amauornis phoenicurus</i> | White-breasted Waterhen | 2021/5/1   | 1 | 0 | 22.37653000 | 114.18794330 | <a href="https://www.inaturalist.org/observations/76077895">https://www.inaturalist.org/observations/76077895</a>   |
| 761 | <i>Amauornis phoenicurus</i> | White-breasted Waterhen | 2021/5/1   | 1 | 0 | 22.37653000 | 114.18794500 | <a href="https://www.inaturalist.org/observations/76077776">https://www.inaturalist.org/observations/76077776</a>   |
| 762 | <i>Amauornis phoenicurus</i> | White-breasted Waterhen | 2022/3/13  | 1 | 0 | 22.37663333 | 114.26223670 | <a href="https://www.inaturalist.org/observations/108507690">https://www.inaturalist.org/observations/108507690</a> |
| 763 | <i>Amauornis phoenicurus</i> | White-breasted Waterhen | 2022/2/6   | 1 | 0 | 22.37738084 | 114.19738770 | <a href="https://www.inaturalist.org/observations/112025381">https://www.inaturalist.org/observations/112025381</a> |
| 764 | <i>Amauornis phoenicurus</i> | White-breasted Waterhen | 2021/3/22  | 1 | 0 | 22.37787333 | 114.18812170 | <a href="https://www.inaturalist.org/observations/71858068">https://www.inaturalist.org/observations/71858068</a>   |
| 765 | <i>Amauornis phoenicurus</i> | White-breasted Waterhen | 2021/11/6  | 2 | 0 | 22.37788167 | 114.18811000 | <a href="https://www.inaturalist.org/observations/100388918">https://www.inaturalist.org/observations/100388918</a> |
| 766 | <i>Amauornis phoenicurus</i> | White-breasted Waterhen | 2020/6/22  | 1 | 0 | 22.37813667 | 114.18822500 | <a href="https://www.inaturalist.org/observations/50503482">https://www.inaturalist.org/observations/50503482</a>   |
| 767 | <i>Amauornis phoenicurus</i> | White-breasted Waterhen | 2020/6/22  | 1 | 0 | 22.37825000 | 114.18833000 | <a href="https://www.inaturalist.org/observations/50540340">https://www.inaturalist.org/observations/50540340</a>   |
| 768 | <i>Amauornis phoenicurus</i> | White-breasted Waterhen | 2021/3/3   | 2 | 0 | 22.37831028 | 114.18736620 | <a href="https://www.inaturalist.org/observations/91549044">https://www.inaturalist.org/observations/91549044</a>   |
| 769 | <i>Amauornis phoenicurus</i> | White-breasted Waterhen | 2020/6/22  | 2 | 0 | 22.37834630 | 114.18815140 | <a href="https://www.inaturalist.org/observations/50503824">https://www.inaturalist.org/observations/50503824</a>   |
| 770 | <i>Amauornis phoenicurus</i> | White-breasted Waterhen | 2021/5/29  | 2 | 0 | 22.37840934 | 114.18856500 | <a href="https://www.inaturalist.org/observations/80856128">https://www.inaturalist.org/observations/80856128</a>   |
| 771 | <i>Amauornis phoenicurus</i> | White-breasted Waterhen | 2020/4/12  | 1 | 0 | 22.37872833 | 114.18723330 | <a href="https://www.inaturalist.org/observations/41976709">https://www.inaturalist.org/observations/41976709</a>   |
| 772 | <i>Amauornis phoenicurus</i> | White-breasted Waterhen | 2020/12/5  | 2 | 0 | 22.37872833 | 114.18936670 | <a href="https://www.inaturalist.org/observations/66174067">https://www.inaturalist.org/observations/66174067</a>   |
| 773 | <i>Amauornis phoenicurus</i> | White-breasted Waterhen | 2017/4/22  | 4 | 0 | 22.37881400 | 114.18924200 | <a href="https://www.inaturalist.org/observations/6119864">https://www.inaturalist.org/observations/6119864</a>     |
| 774 | <i>Amauornis phoenicurus</i> | White-breasted Waterhen | 2021/10/23 | 1 | 0 | 22.37882896 | 114.18934960 | <a href="https://www.inaturalist.org/observations/99810332">https://www.inaturalist.org/observations/99810332</a>   |
| 775 | <i>Amauornis phoenicurus</i> | White-breasted Waterhen | 2020/5/11  | 1 | 0 | 22.37883394 | 114.18928310 | <a href="https://www.inaturalist.org/observations/50794817">https://www.inaturalist.org/observations/50794817</a>   |
| 776 | <i>Amauornis phoenicurus</i> | White-breasted Waterhen | 2020/3/19  | 1 | 0 | 22.37883539 | 114.18943020 | <a href="https://www.inaturalist.org/observations/40487080">https://www.inaturalist.org/observations/40487080</a>   |
| 777 | <i>Amauornis phoenicurus</i> | White-breasted Waterhen | 2020/1/22  | 1 | 0 | 22.37888741 | 114.18951700 | <a href="https://www.inaturalist.org/observations/37903388">https://www.inaturalist.org/observations/37903388</a>   |
| 778 | <i>Amauornis phoenicurus</i> | White-breasted Waterhen | 2020/6/22  | 1 | 0 | 22.37888889 | 114.18916670 | <a href="https://www.inaturalist.org/observations/50502497">https://www.inaturalist.org/observations/50502497</a>   |
| 779 | <i>Amauornis phoenicurus</i> | White-breasted Waterhen | 2020/8/14  | 1 | 0 | 22.37889891 | 114.18948140 | <a href="https://www.inaturalist.org/observations/56396839">https://www.inaturalist.org/observations/56396839</a>   |
| 780 | <i>Amauornis phoenicurus</i> | White-breasted Waterhen | 2019/12/29 | 3 | 0 | 22.37890625 | 114.18954470 | <a href="https://www.inaturalist.org/observations/37093483">https://www.inaturalist.org/observations/37093483</a>   |
| 781 | <i>Amauornis phoenicurus</i> | White-breasted Waterhen | 2016/11/2  | 2 | 0 | 22.37891078 | 114.18949680 | <a href="https://www.inaturalist.org/observations/22450396">https://www.inaturalist.org/observations/22450396</a>   |

|     |                              |                         |            |   |   |             |              |                                                                                                                     |
|-----|------------------------------|-------------------------|------------|---|---|-------------|--------------|---------------------------------------------------------------------------------------------------------------------|
| 782 | <i>Amauornis phoenicurus</i> | White-breasted Waterhen | 2022/2/16  | 2 | 0 | 22.37892505 | 114.18951240 | <a href="https://www.inaturalist.org/observations/107377072">https://www.inaturalist.org/observations/107377072</a> |
| 783 | <i>Amauornis phoenicurus</i> | White-breasted Waterhen | 2020/6/22  | 2 | 0 | 22.37894253 | 114.18957340 | <a href="https://www.inaturalist.org/observations/50541800">https://www.inaturalist.org/observations/50541800</a>   |
| 784 | <i>Amauornis phoenicurus</i> | White-breasted Waterhen | 2022/6/25  | 2 | 0 | 22.37894899 | 114.18939530 | <a href="https://www.inaturalist.org/observations/124089887">https://www.inaturalist.org/observations/124089887</a> |
| 785 | <i>Amauornis phoenicurus</i> | White-breasted Waterhen | 2021/2/3   | 1 | 0 | 22.37894997 | 114.18939120 | <a href="https://www.inaturalist.org/observations/69007792">https://www.inaturalist.org/observations/69007792</a>   |
| 786 | <i>Amauornis phoenicurus</i> | White-breasted Waterhen | 2021/7/20  | 2 | 0 | 22.37895000 | 114.18953000 | <a href="https://www.inaturalist.org/observations/87833805">https://www.inaturalist.org/observations/87833805</a>   |
| 787 | <i>Amauornis phoenicurus</i> | White-breasted Waterhen | 2020/12/17 | 1 | 0 | 22.37895500 | 114.18925500 | <a href="https://www.inaturalist.org/observations/66690960">https://www.inaturalist.org/observations/66690960</a>   |
| 788 | <i>Amauornis phoenicurus</i> | White-breasted Waterhen | 2022/5/14  | 1 | 0 | 22.37896167 | 114.18924670 | <a href="https://www.inaturalist.org/observations/119719579">https://www.inaturalist.org/observations/119719579</a> |
| 789 | <i>Amauornis phoenicurus</i> | White-breasted Waterhen | 2022/5/14  | 1 | 0 | 22.37896333 | 114.18928670 | <a href="https://www.inaturalist.org/observations/120094012">https://www.inaturalist.org/observations/120094012</a> |
| 790 | <i>Amauornis phoenicurus</i> | White-breasted Waterhen | 2022/1/31  | 1 | 0 | 22.37896347 | 114.18952940 | <a href="https://www.inaturalist.org/observations/105897614">https://www.inaturalist.org/observations/105897614</a> |
| 791 | <i>Amauornis phoenicurus</i> | White-breasted Waterhen | 2020/12/17 | 2 | 0 | 22.37896667 | 114.18925500 | <a href="https://www.inaturalist.org/observations/66703276">https://www.inaturalist.org/observations/66703276</a>   |
| 792 | <i>Amauornis phoenicurus</i> | White-breasted Waterhen | 2022/6/22  | 2 | 0 | 22.37896801 | 114.18942120 | <a href="https://www.inaturalist.org/observations/123049085">https://www.inaturalist.org/observations/123049085</a> |
| 793 | <i>Amauornis phoenicurus</i> | White-breasted Waterhen | 2022/3/8   | 1 | 0 | 22.37897668 | 114.18946070 | <a href="https://www.inaturalist.org/observations/108241358">https://www.inaturalist.org/observations/108241358</a> |
| 794 | <i>Amauornis phoenicurus</i> | White-breasted Waterhen | 2022/8/12  | 2 | 0 | 22.37898200 | 114.18941500 | <a href="https://www.inaturalist.org/observations/130494699">https://www.inaturalist.org/observations/130494699</a> |
| 795 | <i>Amauornis phoenicurus</i> | White-breasted Waterhen | 2019/3/13  | 3 | 0 | 22.37901333 | 114.18957330 | <a href="https://www.inaturalist.org/observations/21198277">https://www.inaturalist.org/observations/21198277</a>   |
| 796 | <i>Amauornis phoenicurus</i> | White-breasted Waterhen | 2020/12/6  | 1 | 0 | 22.37902000 | 114.18942170 | <a href="https://www.inaturalist.org/observations/66177618">https://www.inaturalist.org/observations/66177618</a>   |
| 797 | <i>Amauornis phoenicurus</i> | White-breasted Waterhen | 2021/12/25 | 2 | 0 | 22.37903224 | 114.18956150 | <a href="https://www.inaturalist.org/observations/103762191">https://www.inaturalist.org/observations/103762191</a> |
| 798 | <i>Amauornis phoenicurus</i> | White-breasted Waterhen | 2018/10/14 | 3 | 0 | 22.37903521 | 114.18924300 | <a href="https://www.inaturalist.org/observations/17493117">https://www.inaturalist.org/observations/17493117</a>   |
| 799 | <i>Amauornis phoenicurus</i> | White-breasted Waterhen | 2017/11/19 | 3 | 0 | 22.37906443 | 114.18902400 | <a href="https://www.inaturalist.org/observations/10356070">https://www.inaturalist.org/observations/10356070</a>   |
| 800 | <i>Amauornis phoenicurus</i> | White-breasted Waterhen | 2020/8/12  | 1 | 0 | 22.37915500 | 114.18949830 | <a href="https://www.inaturalist.org/observations/56212765">https://www.inaturalist.org/observations/56212765</a>   |
| 801 | <i>Amauornis phoenicurus</i> | White-breasted Waterhen | 2020/4/27  | 1 | 0 | 22.37918809 | 114.18915580 | <a href="https://www.inaturalist.org/observations/43811777">https://www.inaturalist.org/observations/43811777</a>   |
| 802 | <i>Amauornis phoenicurus</i> | White-breasted Waterhen | 2020/4/27  | 1 | 0 | 22.37918809 | 114.18915580 | <a href="https://www.inaturalist.org/observations/43811785">https://www.inaturalist.org/observations/43811785</a>   |
| 803 | <i>Amauornis phoenicurus</i> | White-breasted Waterhen | 2020/4/27  | 1 | 0 | 22.37918809 | 114.18915580 | <a href="https://www.inaturalist.org/observations/43811786">https://www.inaturalist.org/observations/43811786</a>   |
| 804 | <i>Amauornis phoenicurus</i> | White-breasted Waterhen | 2020/6/22  | 1 | 0 | 22.37942559 | 114.18958550 | <a href="https://www.inaturalist.org/observations/50537208">https://www.inaturalist.org/observations/50537208</a>   |

|     |                              |                         |            |   |   |             |              |                                                                                                                     |
|-----|------------------------------|-------------------------|------------|---|---|-------------|--------------|---------------------------------------------------------------------------------------------------------------------|
| 805 | <i>Amauornis phoenicurus</i> | White-breasted Waterhen | 2020/6/22  | 1 | 0 | 22.37944544 | 114.19027210 | <a href="https://www.inaturalist.org/observations/50536952">https://www.inaturalist.org/observations/50536952</a>   |
| 806 | <i>Amauornis phoenicurus</i> | White-breasted Waterhen | 2020/12/14 | 2 | 0 | 22.37952510 | 114.18968340 | <a href="https://www.inaturalist.org/observations/66568671">https://www.inaturalist.org/observations/66568671</a>   |
| 807 | <i>Amauornis phoenicurus</i> | White-breasted Waterhen | 2018/8/6   | 3 | 0 | 22.37957770 | 114.19014340 | <a href="https://www.inaturalist.org/observations/15161666">https://www.inaturalist.org/observations/15161666</a>   |
| 808 | <i>Amauornis phoenicurus</i> | White-breasted Waterhen | 2020/6/22  | 1 | 0 | 22.37957770 | 114.19014340 | <a href="https://www.inaturalist.org/observations/50536949">https://www.inaturalist.org/observations/50536949</a>   |
| 809 | <i>Amauornis phoenicurus</i> | White-breasted Waterhen | 2020/6/22  | 1 | 0 | 22.37957769 | 114.19014340 | <a href="https://www.inaturalist.org/observations/50546526">https://www.inaturalist.org/observations/50546526</a>   |
| 810 | <i>Amauornis phoenicurus</i> | White-breasted Waterhen | 2021/5/29  | 2 | 0 | 22.37957770 | 114.19014340 | <a href="https://www.inaturalist.org/observations/80888880">https://www.inaturalist.org/observations/80888880</a>   |
| 811 | <i>Amauornis phoenicurus</i> | White-breasted Waterhen | 2021/5/29  | 2 | 0 | 22.37957770 | 114.19014340 | <a href="https://www.inaturalist.org/observations/80967087">https://www.inaturalist.org/observations/80967087</a>   |
| 812 | <i>Amauornis phoenicurus</i> | White-breasted Waterhen | 2022/1/31  | 1 | 0 | 22.37957770 | 114.19014340 | <a href="https://www.inaturalist.org/observations/107483063">https://www.inaturalist.org/observations/107483063</a> |
| 813 | <i>Amauornis phoenicurus</i> | White-breasted Waterhen | 2022/5/14  | 2 | 0 | 22.37957769 | 114.19014340 | <a href="https://www.inaturalist.org/observations/117126046">https://www.inaturalist.org/observations/117126046</a> |
| 814 | <i>Amauornis phoenicurus</i> | White-breasted Waterhen | 2022/5/14  | 2 | 0 | 22.37957769 | 114.19014340 | <a href="https://www.inaturalist.org/observations/117126489">https://www.inaturalist.org/observations/117126489</a> |
| 815 | <i>Amauornis phoenicurus</i> | White-breasted Waterhen | 2021/4/7   | 1 | 0 | 22.37957769 | 114.19014340 | <a href="https://www.inaturalist.org/observations/123190559">https://www.inaturalist.org/observations/123190559</a> |
| 816 | <i>Amauornis phoenicurus</i> | White-breasted Waterhen | 2020/12/10 | 1 | 0 | 22.37958172 | 114.19014340 | <a href="https://www.inaturalist.org/observations/66379168">https://www.inaturalist.org/observations/66379168</a>   |
| 817 | <i>Amauornis phoenicurus</i> | White-breasted Waterhen | 2020/12/13 | 2 | 0 | 22.37973320 | 114.18978260 | <a href="https://www.inaturalist.org/observations/66515389">https://www.inaturalist.org/observations/66515389</a>   |
| 818 | <i>Amauornis phoenicurus</i> | White-breasted Waterhen | 2020/4/17  | 1 | 0 | 22.37974519 | 114.18987120 | <a href="https://www.inaturalist.org/observations/42380089">https://www.inaturalist.org/observations/42380089</a>   |
| 819 | <i>Amauornis phoenicurus</i> | White-breasted Waterhen | 2021/4/24  | 1 | 0 | 22.38031038 | 114.19025160 | <a href="https://www.inaturalist.org/observations/75159214">https://www.inaturalist.org/observations/75159214</a>   |
| 820 | <i>Amauornis phoenicurus</i> | White-breasted Waterhen | 2020/1/4   | 2 | 0 | 22.38061933 | 114.18951240 | <a href="https://www.inaturalist.org/observations/37359295">https://www.inaturalist.org/observations/37359295</a>   |
| 821 | <i>Amauornis phoenicurus</i> | White-breasted Waterhen | 2020/4/3   | 1 | 0 | 22.38145798 | 114.22114510 | <a href="https://www.inaturalist.org/observations/41444487">https://www.inaturalist.org/observations/41444487</a>   |
| 822 | <i>Amauornis phoenicurus</i> | White-breasted Waterhen | 2020/4/17  | 1 | 0 | 22.38145798 | 114.22114510 | <a href="https://www.inaturalist.org/observations/42560526">https://www.inaturalist.org/observations/42560526</a>   |
| 823 | <i>Amauornis phoenicurus</i> | White-breasted Waterhen | 2020/5/4   | 2 | 0 | 22.38145798 | 114.22114510 | <a href="https://www.inaturalist.org/observations/44967873">https://www.inaturalist.org/observations/44967873</a>   |
| 824 | <i>Amauornis phoenicurus</i> | White-breasted Waterhen | 2021/7/4   | 2 | 0 | 22.38162500 | 114.22233900 | <a href="https://www.inaturalist.org/observations/85862727">https://www.inaturalist.org/observations/85862727</a>   |
| 825 | <i>Amauornis phoenicurus</i> | White-breasted Waterhen | 2021/10/31 | 2 | 0 | 22.38188177 | 114.19213260 | <a href="https://www.inaturalist.org/observations/99865948">https://www.inaturalist.org/observations/99865948</a>   |
| 826 | <i>Amauornis phoenicurus</i> | White-breasted Waterhen | 2021/6/20  | 2 | 0 | 22.38224419 | 114.21668670 | <a href="https://www.inaturalist.org/observations/84033032">https://www.inaturalist.org/observations/84033032</a>   |
| 827 | <i>Amauornis phoenicurus</i> | White-breasted Waterhen | 2016/7/10  | 3 | 0 | 22.38239629 | 114.19573630 | <a href="https://www.inaturalist.org/observations/27197325">https://www.inaturalist.org/observations/27197325</a>   |



|     |                              |                         |            |   |   |             |              |                                                                                                                     |
|-----|------------------------------|-------------------------|------------|---|---|-------------|--------------|---------------------------------------------------------------------------------------------------------------------|
| 828 | <i>Amauornis phoenicurus</i> | White-breasted Waterhen | 2016/7/7   | 2 | 0 | 22.38247566 | 114.19582220 | <a href="https://www.inaturalist.org/observations/27201448">https://www.inaturalist.org/observations/27201448</a>   |
| 829 | <i>Amauornis phoenicurus</i> | White-breasted Waterhen | 2016/9/16  | 3 | 0 | 22.38263439 | 114.19599380 | <a href="https://www.inaturalist.org/observations/27559022">https://www.inaturalist.org/observations/27559022</a>   |
| 830 | <i>Amauornis phoenicurus</i> | White-breasted Waterhen | 2016/7/10  | 3 | 0 | 22.38267407 | 114.19599380 | <a href="https://www.inaturalist.org/observations/27197285">https://www.inaturalist.org/observations/27197285</a>   |
| 831 | <i>Amauornis phoenicurus</i> | White-breasted Waterhen | 2019/6/8   | 3 | 0 | 22.38279312 | 114.19616550 | <a href="https://www.inaturalist.org/observations/26604437">https://www.inaturalist.org/observations/26604437</a>   |
| 832 | <i>Amauornis phoenicurus</i> | White-breasted Waterhen | 2016/7/10  | 4 | 0 | 22.38299153 | 114.19629420 | <a href="https://www.inaturalist.org/observations/27198580">https://www.inaturalist.org/observations/27198580</a>   |
| 833 | <i>Amauornis phoenicurus</i> | White-breasted Waterhen | 2016/7/10  | 3 | 0 | 22.38342803 | 114.19672340 | <a href="https://www.inaturalist.org/observations/27200997">https://www.inaturalist.org/observations/27200997</a>   |
| 834 | <i>Amauornis phoenicurus</i> | White-breasted Waterhen | 2017/3/12  | 3 | 0 | 22.38366612 | 114.19702380 | <a href="https://www.inaturalist.org/observations/29139529">https://www.inaturalist.org/observations/29139529</a>   |
| 835 | <i>Amauornis phoenicurus</i> | White-breasted Waterhen | 2017/5/14  | 3 | 0 | 22.38366612 | 114.19702380 | <a href="https://www.inaturalist.org/observations/29965816">https://www.inaturalist.org/observations/29965816</a>   |
| 836 | <i>Amauornis phoenicurus</i> | White-breasted Waterhen | 2017/6/24  | 3 | 0 | 22.38366612 | 114.19702380 | <a href="https://www.inaturalist.org/observations/30078607">https://www.inaturalist.org/observations/30078607</a>   |
| 837 | <i>Amauornis phoenicurus</i> | White-breasted Waterhen | 2017/10/6  | 3 | 0 | 22.38366612 | 114.19702380 | <a href="https://www.inaturalist.org/observations/31098644">https://www.inaturalist.org/observations/31098644</a>   |
| 838 | <i>Amauornis phoenicurus</i> | White-breasted Waterhen | 2017/10/5  | 4 | 0 | 22.38366612 | 114.19702380 | <a href="https://www.inaturalist.org/observations/31202398">https://www.inaturalist.org/observations/31202398</a>   |
| 839 | <i>Amauornis phoenicurus</i> | White-breasted Waterhen | 2017/11/14 | 2 | 0 | 22.38366612 | 114.19702380 | <a href="https://www.inaturalist.org/observations/31450866">https://www.inaturalist.org/observations/31450866</a>   |
| 840 | <i>Amauornis phoenicurus</i> | White-breasted Waterhen | 2017/11/16 | 2 | 0 | 22.38366612 | 114.19702380 | <a href="https://www.inaturalist.org/observations/31456661">https://www.inaturalist.org/observations/31456661</a>   |
| 841 | <i>Amauornis phoenicurus</i> | White-breasted Waterhen | 2017/11/22 | 2 | 0 | 22.38366612 | 114.19702380 | <a href="https://www.inaturalist.org/observations/31463476">https://www.inaturalist.org/observations/31463476</a>   |
| 842 | <i>Amauornis phoenicurus</i> | White-breasted Waterhen | 2018/1/20  | 2 | 0 | 22.38366612 | 114.19702380 | <a href="https://www.inaturalist.org/observations/31539205">https://www.inaturalist.org/observations/31539205</a>   |
| 843 | <i>Amauornis phoenicurus</i> | White-breasted Waterhen | 2018/12/9  | 2 | 0 | 22.38366612 | 114.19702380 | <a href="https://www.inaturalist.org/observations/33633844">https://www.inaturalist.org/observations/33633844</a>   |
| 844 | <i>Amauornis phoenicurus</i> | White-breasted Waterhen | 2019/2/8   | 2 | 0 | 22.38366612 | 114.19702380 | <a href="https://www.inaturalist.org/observations/33732607">https://www.inaturalist.org/observations/33732607</a>   |
| 845 | <i>Amauornis phoenicurus</i> | White-breasted Waterhen | 2019/2/9   | 2 | 0 | 22.38366612 | 114.19702380 | <a href="https://www.inaturalist.org/observations/33733193">https://www.inaturalist.org/observations/33733193</a>   |
| 846 | <i>Amauornis phoenicurus</i> | White-breasted Waterhen | 2019/12/10 | 1 | 0 | 22.38366612 | 114.19702380 | <a href="https://www.inaturalist.org/observations/36524143">https://www.inaturalist.org/observations/36524143</a>   |
| 847 | <i>Amauornis phoenicurus</i> | White-breasted Waterhen | 2022/6/1   | 1 | 0 | 22.38495040 | 114.27136130 | <a href="https://www.inaturalist.org/observations/119684889">https://www.inaturalist.org/observations/119684889</a> |
| 848 | <i>Amauornis phoenicurus</i> | White-breasted Waterhen | 2022/5/24  | 1 | 0 | 22.38558797 | 114.27100500 | <a href="https://www.inaturalist.org/observations/118590163">https://www.inaturalist.org/observations/118590163</a> |
| 849 | <i>Amauornis phoenicurus</i> | White-breasted Waterhen | 2022/7/4   | 1 | 0 | 22.38564320 | 114.27124060 | <a href="https://www.inaturalist.org/observations/124698678">https://www.inaturalist.org/observations/124698678</a> |
| 850 | <i>Amauornis phoenicurus</i> | White-breasted Waterhen | 2022/1/18  | 2 | 0 | 22.38572740 | 114.27105100 | <a href="https://www.inaturalist.org/observations/105143114">https://www.inaturalist.org/observations/105143114</a> |

|     |                              |                         |            |   |   |             |              |                                                                                                                     |
|-----|------------------------------|-------------------------|------------|---|---|-------------|--------------|---------------------------------------------------------------------------------------------------------------------|
| 851 | <i>Amauornis phoenicurus</i> | White-breasted Waterhen | 2021/5/1   | 2 | 0 | 22.38574869 | 114.27024010 | <a href="https://www.inaturalist.org/observations/76590079">https://www.inaturalist.org/observations/76590079</a>   |
| 852 | <i>Amauornis phoenicurus</i> | White-breasted Waterhen | 2018/11/2  | 3 | 0 | 22.38593265 | 114.27058000 | <a href="https://www.inaturalist.org/observations/18028954">https://www.inaturalist.org/observations/18028954</a>   |
| 853 | <i>Amauornis phoenicurus</i> | White-breasted Waterhen | 2021/5/3   | 1 | 0 | 22.38653697 | 114.26828590 | <a href="https://www.inaturalist.org/observations/76830111">https://www.inaturalist.org/observations/76830111</a>   |
| 854 | <i>Amauornis phoenicurus</i> | White-breasted Waterhen | 2015/1/11  | 4 | 0 | 22.38795170 | 114.20071450 | <a href="https://www.inaturalist.org/observations/19682939">https://www.inaturalist.org/observations/19682939</a>   |
| 855 | <i>Amauornis phoenicurus</i> | White-breasted Waterhen | 2016/3/28  | 4 | 0 | 22.38795170 | 114.20071450 | <a href="https://www.inaturalist.org/observations/25429620">https://www.inaturalist.org/observations/25429620</a>   |
| 856 | <i>Amauornis phoenicurus</i> | White-breasted Waterhen | 2016/3/13  | 4 | 0 | 22.38795170 | 114.20071450 | <a href="https://www.inaturalist.org/observations/25471461">https://www.inaturalist.org/observations/25471461</a>   |
| 857 | <i>Amauornis phoenicurus</i> | White-breasted Waterhen | 2016/3/5   | 5 | 0 | 22.38795170 | 114.20071450 | <a href="https://www.inaturalist.org/observations/25554241">https://www.inaturalist.org/observations/25554241</a>   |
| 858 | <i>Amauornis phoenicurus</i> | White-breasted Waterhen | 2016/4/10  | 3 | 0 | 22.38795170 | 114.20071450 | <a href="https://www.inaturalist.org/observations/25666513">https://www.inaturalist.org/observations/25666513</a>   |
| 859 | <i>Amauornis phoenicurus</i> | White-breasted Waterhen | 2016/7/30  | 3 | 0 | 22.38795170 | 114.20071450 | <a href="https://www.inaturalist.org/observations/26473441">https://www.inaturalist.org/observations/26473441</a>   |
| 860 | <i>Amauornis phoenicurus</i> | White-breasted Waterhen | 2019/6/8   | 3 | 0 | 22.38795170 | 114.20071450 | <a href="https://www.inaturalist.org/observations/26604025">https://www.inaturalist.org/observations/26604025</a>   |
| 861 | <i>Amauornis phoenicurus</i> | White-breasted Waterhen | 2016/8/13  | 3 | 0 | 22.38795170 | 114.20071450 | <a href="https://www.inaturalist.org/observations/27534490">https://www.inaturalist.org/observations/27534490</a>   |
| 862 | <i>Amauornis phoenicurus</i> | White-breasted Waterhen | 2016/10/23 | 3 | 0 | 22.38795170 | 114.20071450 | <a href="https://www.inaturalist.org/observations/27983448">https://www.inaturalist.org/observations/27983448</a>   |
| 863 | <i>Amauornis phoenicurus</i> | White-breasted Waterhen | 2016/12/17 | 4 | 0 | 22.38795170 | 114.20071450 | <a href="https://www.inaturalist.org/observations/28545003">https://www.inaturalist.org/observations/28545003</a>   |
| 864 | <i>Amauornis phoenicurus</i> | White-breasted Waterhen | 2022/5/1   | 2 | 0 | 22.38809124 | 114.24655580 | <a href="https://www.inaturalist.org/observations/114544685">https://www.inaturalist.org/observations/114544685</a> |
| 865 | <i>Amauornis phoenicurus</i> | White-breasted Waterhen | 2020/10/10 | 1 | 0 | 22.38862915 | 114.27110010 | <a href="https://www.inaturalist.org/observations/62290115">https://www.inaturalist.org/observations/62290115</a>   |
| 866 | <i>Amauornis phoenicurus</i> | White-breasted Waterhen | 2020/4/27  | 1 | 0 | 22.39056937 | 113.92304890 | <a href="https://www.inaturalist.org/observations/44207539">https://www.inaturalist.org/observations/44207539</a>   |
| 867 | <i>Amauornis phoenicurus</i> | White-breasted Waterhen | 2021/11/12 | 1 | 0 | 22.39064000 | 113.92297000 | <a href="https://www.inaturalist.org/observations/100916826">https://www.inaturalist.org/observations/100916826</a> |
| 868 | <i>Amauornis phoenicurus</i> | White-breasted Waterhen | 2020/4/12  | 1 | 0 | 22.39194419 | 113.97376360 | <a href="https://www.inaturalist.org/observations/48913907">https://www.inaturalist.org/observations/48913907</a>   |
| 869 | <i>Amauornis phoenicurus</i> | White-breasted Waterhen | 2020/3/6   | 0 | 0 | 22.39201312 | 113.97383130 | <a href="https://www.inaturalist.org/observations/39605368">https://www.inaturalist.org/observations/39605368</a>   |
| 870 | <i>Amauornis phoenicurus</i> | White-breasted Waterhen | 2020/10/24 | 1 | 0 | 22.39204598 | 113.97374310 | <a href="https://www.inaturalist.org/observations/63470488">https://www.inaturalist.org/observations/63470488</a>   |
| 871 | <i>Amauornis phoenicurus</i> | White-breasted Waterhen | 2020/4/9   | 1 | 0 | 22.39209254 | 113.97368610 | <a href="https://www.inaturalist.org/observations/41743048">https://www.inaturalist.org/observations/41743048</a>   |
| 872 | <i>Amauornis phoenicurus</i> | White-breasted Waterhen | 2021/11/6  | 1 | 0 | 22.39215292 | 113.97358790 | <a href="https://www.inaturalist.org/observations/101070195">https://www.inaturalist.org/observations/101070195</a> |
| 873 | <i>Amauornis phoenicurus</i> | White-breasted Waterhen | 2021/11/27 | 1 | 0 | 22.39215292 | 113.97358790 | <a href="https://www.inaturalist.org/observations/101999710">https://www.inaturalist.org/observations/101999710</a> |

|     |                              |                         |            |   |   |             |              |                                                                                                                     |
|-----|------------------------------|-------------------------|------------|---|---|-------------|--------------|---------------------------------------------------------------------------------------------------------------------|
| 874 | <i>Amauornis phoenicurus</i> | White-breasted Waterhen | 2021/4/30  | 1 | 0 | 22.39371500 | 114.10756820 | <a href="https://www.inaturalist.org/observations/75782759">https://www.inaturalist.org/observations/75782759</a>   |
| 875 | <i>Amauornis phoenicurus</i> | White-breasted Waterhen | 2021/4/24  | 1 | 0 | 22.40607054 | 114.02570280 | <a href="https://www.inaturalist.org/observations/78461649">https://www.inaturalist.org/observations/78461649</a>   |
| 876 | <i>Amauornis phoenicurus</i> | White-breasted Waterhen | 2021/2/18  | 1 | 0 | 22.40909635 | 113.97032060 | <a href="https://www.inaturalist.org/observations/69759512">https://www.inaturalist.org/observations/69759512</a>   |
| 877 | <i>Amauornis phoenicurus</i> | White-breasted Waterhen | 2020/5/18  | 2 | 0 | 22.40998151 | 113.97106850 | <a href="https://www.inaturalist.org/observations/46446474">https://www.inaturalist.org/observations/46446474</a>   |
| 878 | <i>Amauornis phoenicurus</i> | White-breasted Waterhen | 2018/12/29 | 4 | 0 | 22.41492217 | 114.21012490 | <a href="https://www.inaturalist.org/observations/19368375">https://www.inaturalist.org/observations/19368375</a>   |
| 879 | <i>Amauornis phoenicurus</i> | White-breasted Waterhen | 2021/12/15 | 1 | 0 | 22.41496194 | 114.21018570 | <a href="https://www.inaturalist.org/observations/103128018">https://www.inaturalist.org/observations/103128018</a> |
| 880 | <i>Amauornis phoenicurus</i> | White-breasted Waterhen | 2021/12/27 | 1 | 0 | 22.41499326 | 114.20933020 | <a href="https://www.inaturalist.org/observations/103948314">https://www.inaturalist.org/observations/103948314</a> |
| 881 | <i>Amauornis phoenicurus</i> | White-breasted Waterhen | 2020/12/30 | 1 | 0 | 22.41514158 | 114.21018310 | <a href="https://www.inaturalist.org/observations/67348156">https://www.inaturalist.org/observations/67348156</a>   |
| 882 | <i>Amauornis phoenicurus</i> | White-breasted Waterhen | 2020/10/1  | 2 | 0 | 22.41524623 | 114.21013790 | <a href="https://www.inaturalist.org/observations/61378940">https://www.inaturalist.org/observations/61378940</a>   |
| 883 | <i>Amauornis phoenicurus</i> | White-breasted Waterhen | 2020/11/13 | 1 | 0 | 22.41533046 | 114.20959300 | <a href="https://www.inaturalist.org/observations/64792291">https://www.inaturalist.org/observations/64792291</a>   |
| 884 | <i>Amauornis phoenicurus</i> | White-breasted Waterhen | 2022/4/10  | 1 | 0 | 22.41543704 | 114.21131840 | <a href="https://www.inaturalist.org/observations/110944232">https://www.inaturalist.org/observations/110944232</a> |
| 885 | <i>Amauornis phoenicurus</i> | White-breasted Waterhen | 2019/4/30  | 4 | 0 | 22.41548068 | 114.20951840 | <a href="https://www.inaturalist.org/observations/25100034">https://www.inaturalist.org/observations/25100034</a>   |
| 886 | <i>Amauornis phoenicurus</i> | White-breasted Waterhen | 2021/5/11  | 1 | 0 | 22.41549410 | 114.21013900 | <a href="https://www.inaturalist.org/observations/78335742">https://www.inaturalist.org/observations/78335742</a>   |
| 887 | <i>Amauornis phoenicurus</i> | White-breasted Waterhen | 2018/12/30 | 4 | 0 | 22.41555789 | 114.20997880 | <a href="https://www.inaturalist.org/observations/19503910">https://www.inaturalist.org/observations/19503910</a>   |
| 888 | <i>Amauornis phoenicurus</i> | White-breasted Waterhen | 2021/5/27  | 4 | 0 | 22.41567834 | 114.20990420 | <a href="https://www.inaturalist.org/observations/80459250">https://www.inaturalist.org/observations/80459250</a>   |
| 889 | <i>Amauornis phoenicurus</i> | White-breasted Waterhen | 2021/6/14  | 3 | 0 | 22.41570867 | 114.20940360 | <a href="https://www.inaturalist.org/observations/82975143">https://www.inaturalist.org/observations/82975143</a>   |
| 890 | <i>Amauornis phoenicurus</i> | White-breasted Waterhen | 2020/6/24  | 1 | 0 | 22.41573611 | 114.21005560 | <a href="https://www.inaturalist.org/observations/96342777">https://www.inaturalist.org/observations/96342777</a>   |
| 891 | <i>Amauornis phoenicurus</i> | White-breasted Waterhen | 2020/10/8  | 1 | 0 | 22.41579243 | 114.20898060 | <a href="https://www.inaturalist.org/observations/62078311">https://www.inaturalist.org/observations/62078311</a>   |
| 892 | <i>Amauornis phoenicurus</i> | White-breasted Waterhen | 2020/1/17  | 2 | 0 | 22.41586591 | 114.21028390 | <a href="https://www.inaturalist.org/observations/37700484">https://www.inaturalist.org/observations/37700484</a>   |
| 893 | <i>Amauornis phoenicurus</i> | White-breasted Waterhen | 2021/3/22  | 1 | 0 | 22.41586876 | 114.21076970 | <a href="https://www.inaturalist.org/observations/71791595">https://www.inaturalist.org/observations/71791595</a>   |
| 894 | <i>Amauornis phoenicurus</i> | White-breasted Waterhen | 2018/8/18  | 4 | 0 | 22.41588714 | 114.21029230 | <a href="https://www.inaturalist.org/observations/17271457">https://www.inaturalist.org/observations/17271457</a>   |
| 895 | <i>Amauornis phoenicurus</i> | White-breasted Waterhen | 2020/5/23  | 1 | 0 | 22.41588740 | 114.20979310 | <a href="https://www.inaturalist.org/observations/47082420">https://www.inaturalist.org/observations/47082420</a>   |
| 896 | <i>Amauornis phoenicurus</i> | White-breasted Waterhen | 2020/12/5  | 1 | 0 | 22.41588740 | 114.20979310 | <a href="https://www.inaturalist.org/observations/66146087">https://www.inaturalist.org/observations/66146087</a>   |

|     |                              |                         |            |   |   |             |              |                                                                                                                     |
|-----|------------------------------|-------------------------|------------|---|---|-------------|--------------|---------------------------------------------------------------------------------------------------------------------|
| 897 | <i>Amauornis phoenicurus</i> | White-breasted Waterhen | 2020/12/25 | 1 | 0 | 22.41588740 | 114.20979310 | <a href="https://www.inaturalist.org/observations/67078444">https://www.inaturalist.org/observations/67078444</a>   |
| 898 | <i>Amauornis phoenicurus</i> | White-breasted Waterhen | 2020/12/31 | 1 | 0 | 22.41588740 | 114.20979310 | <a href="https://www.inaturalist.org/observations/67447409">https://www.inaturalist.org/observations/67447409</a>   |
| 899 | <i>Amauornis phoenicurus</i> | White-breasted Waterhen | 2021/2/3   | 1 | 0 | 22.41588740 | 114.20979310 | <a href="https://www.inaturalist.org/observations/69258249">https://www.inaturalist.org/observations/69258249</a>   |
| 900 | <i>Amauornis phoenicurus</i> | White-breasted Waterhen | 2021/2/11  | 1 | 0 | 22.41588740 | 114.20979310 | <a href="https://www.inaturalist.org/observations/70862854">https://www.inaturalist.org/observations/70862854</a>   |
| 901 | <i>Amauornis phoenicurus</i> | White-breasted Waterhen | 2021/4/17  | 2 | 0 | 22.41588740 | 114.20979310 | <a href="https://www.inaturalist.org/observations/75165514">https://www.inaturalist.org/observations/75165514</a>   |
| 902 | <i>Amauornis phoenicurus</i> | White-breasted Waterhen | 2021/5/15  | 3 | 0 | 22.41588740 | 114.20979310 | <a href="https://www.inaturalist.org/observations/78994108">https://www.inaturalist.org/observations/78994108</a>   |
| 903 | <i>Amauornis phoenicurus</i> | White-breasted Waterhen | 2021/5/19  | 1 | 0 | 22.41588740 | 114.20979310 | <a href="https://www.inaturalist.org/observations/79387316">https://www.inaturalist.org/observations/79387316</a>   |
| 904 | <i>Amauornis phoenicurus</i> | White-breasted Waterhen | 2021/6/19  | 2 | 0 | 22.41588740 | 114.20979310 | <a href="https://www.inaturalist.org/observations/84033414">https://www.inaturalist.org/observations/84033414</a>   |
| 905 | <i>Amauornis phoenicurus</i> | White-breasted Waterhen | 2021/7/17  | 2 | 0 | 22.41588740 | 114.20979310 | <a href="https://www.inaturalist.org/observations/88238767">https://www.inaturalist.org/observations/88238767</a>   |
| 906 | <i>Amauornis phoenicurus</i> | White-breasted Waterhen | 2021/12/22 | 1 | 0 | 22.41623272 | 114.21087880 | <a href="https://www.inaturalist.org/observations/103462108">https://www.inaturalist.org/observations/103462108</a> |
| 907 | <i>Amauornis phoenicurus</i> | White-breasted Waterhen | 2021/5/27  | 1 | 0 | 22.41628897 | 114.21069740 | <a href="https://www.inaturalist.org/observations/80459263">https://www.inaturalist.org/observations/80459263</a>   |
| 908 | <i>Amauornis phoenicurus</i> | White-breasted Waterhen | 2022/1/4   | 1 | 0 | 22.41706155 | 114.06157130 | <a href="https://www.inaturalist.org/observations/104409550">https://www.inaturalist.org/observations/104409550</a> |
| 909 | <i>Amauornis phoenicurus</i> | White-breasted Waterhen | 2021/8/13  | 1 | 0 | 22.41902353 | 114.08018300 | <a href="https://www.inaturalist.org/observations/91410754">https://www.inaturalist.org/observations/91410754</a>   |
| 910 | <i>Amauornis phoenicurus</i> | White-breasted Waterhen | 2022/1/27  | 1 | 0 | 22.41903042 | 114.08019640 | <a href="https://www.inaturalist.org/observations/113313306">https://www.inaturalist.org/observations/113313306</a> |
| 911 | <i>Amauornis phoenicurus</i> | White-breasted Waterhen | 2022/3/16  | 2 | 0 | 22.42036069 | 113.98129480 | <a href="https://www.inaturalist.org/observations/108709792">https://www.inaturalist.org/observations/108709792</a> |
| 912 | <i>Amauornis phoenicurus</i> | White-breasted Waterhen | 2018/2/25  | 2 | 0 | 22.42230000 | 88.28640000  | <a href="https://www.inaturalist.org/observations/69879130">https://www.inaturalist.org/observations/69879130</a>   |
| 913 | <i>Amauornis phoenicurus</i> | White-breasted Waterhen | 2018/9/25  | 2 | 0 | 22.42259582 | 114.08572600 | <a href="https://www.inaturalist.org/observations/16898813">https://www.inaturalist.org/observations/16898813</a>   |
| 914 | <i>Amauornis phoenicurus</i> | White-breasted Waterhen | 2022/4/24  | 2 | 0 | 22.42260016 | 88.38098578  | <a href="https://www.inaturalist.org/observations/115049864">https://www.inaturalist.org/observations/115049864</a> |
| 915 | <i>Amauornis phoenicurus</i> | White-breasted Waterhen | 2021/1/23  | 1 | 0 | 22.42522390 | 114.14215630 | <a href="https://www.inaturalist.org/observations/68758819">https://www.inaturalist.org/observations/68758819</a>   |
| 916 | <i>Amauornis phoenicurus</i> | White-breasted Waterhen | 2021/3/8   | 1 | 0 | 22.42710304 | 114.23360440 | <a href="https://www.inaturalist.org/observations/70793289">https://www.inaturalist.org/observations/70793289</a>   |
| 917 | <i>Amauornis phoenicurus</i> | White-breasted Waterhen | 2021/6/4   | 1 | 0 | 22.42715073 | 114.23349000 | <a href="https://www.inaturalist.org/observations/81527461">https://www.inaturalist.org/observations/81527461</a>   |
| 918 | <i>Amauornis phoenicurus</i> | White-breasted Waterhen | 2022/3/6   | 1 | 0 | 22.42723490 | 114.23325020 | <a href="https://www.inaturalist.org/observations/108015193">https://www.inaturalist.org/observations/108015193</a> |
| 919 | <i>Amauornis phoenicurus</i> | White-breasted Waterhen | 2020/1/1   | 4 | 0 | 22.42750251 | 113.64169060 | <a href="https://www.inaturalist.org/observations/37154056">https://www.inaturalist.org/observations/37154056</a>   |

|     |                              |                         |            |   |   |             |              |                                                                                                                     |
|-----|------------------------------|-------------------------|------------|---|---|-------------|--------------|---------------------------------------------------------------------------------------------------------------------|
| 920 | <i>Amauornis phoenicurus</i> | White-breasted Waterhen | 2019/11/10 | 3 | 0 | 22.42786983 | 114.08756550 | <a href="https://www.inaturalist.org/observations/35530398">https://www.inaturalist.org/observations/35530398</a>   |
| 921 | <i>Amauornis phoenicurus</i> | White-breasted Waterhen | 2021/5/16  | 1 | 0 | 22.42807900 | 114.23285200 | <a href="https://www.inaturalist.org/observations/78942858">https://www.inaturalist.org/observations/78942858</a>   |
| 922 | <i>Amauornis phoenicurus</i> | White-breasted Waterhen | 2011/10/30 | 5 | 0 | 22.42966385 | 88.40058837  | <a href="https://www.inaturalist.org/observations/24823259">https://www.inaturalist.org/observations/24823259</a>   |
| 923 | <i>Amauornis phoenicurus</i> | White-breasted Waterhen | 2022/9/4   | 1 | 0 | 22.43041539 | 114.23751220 | <a href="https://www.inaturalist.org/observations/133622449">https://www.inaturalist.org/observations/133622449</a> |
| 924 | <i>Amauornis phoenicurus</i> | White-breasted Waterhen | 2021/3/20  | 1 | 0 | 22.43101664 | 114.09451480 | <a href="https://www.inaturalist.org/observations/71685896">https://www.inaturalist.org/observations/71685896</a>   |
| 925 | <i>Amauornis phoenicurus</i> | White-breasted Waterhen | 2020/11/19 | 1 | 0 | 22.43103300 | 114.25784000 | <a href="https://www.inaturalist.org/observations/65273418">https://www.inaturalist.org/observations/65273418</a>   |
| 926 | <i>Amauornis phoenicurus</i> | White-breasted Waterhen | 2021/6/11  | 1 | 0 | 22.43105779 | 114.08515280 | <a href="https://www.inaturalist.org/observations/82567297">https://www.inaturalist.org/observations/82567297</a>   |
| 927 | <i>Amauornis phoenicurus</i> | White-breasted Waterhen | 2022/5/1   | 1 | 0 | 22.43105779 | 114.08515280 | <a href="https://www.inaturalist.org/observations/114058854">https://www.inaturalist.org/observations/114058854</a> |
| 928 | <i>Amauornis phoenicurus</i> | White-breasted Waterhen | 2021/2/20  | 1 | 0 | 22.43112804 | 114.09418920 | <a href="https://www.inaturalist.org/observations/69907639">https://www.inaturalist.org/observations/69907639</a>   |
| 929 | <i>Amauornis phoenicurus</i> | White-breasted Waterhen | 2019/11/19 | 2 | 0 | 22.43164306 | 120.49594110 | <a href="https://www.inaturalist.org/observations/36124717">https://www.inaturalist.org/observations/36124717</a>   |
| 930 | <i>Amauornis phoenicurus</i> | White-breasted Waterhen | 2022/3/31  | 1 | 0 | 22.43226050 | 114.16550440 | <a href="https://www.inaturalist.org/observations/109990127">https://www.inaturalist.org/observations/109990127</a> |
| 931 | <i>Amauornis phoenicurus</i> | White-breasted Waterhen | 2021/6/27  | 1 | 0 | 22.43228750 | 114.08368290 | <a href="https://www.inaturalist.org/observations/84954206">https://www.inaturalist.org/observations/84954206</a>   |
| 932 | <i>Amauornis phoenicurus</i> | White-breasted Waterhen | 2022/8/26  | 1 | 0 | 22.43267462 | 114.08457330 | <a href="https://www.inaturalist.org/observations/132359040">https://www.inaturalist.org/observations/132359040</a> |
| 933 | <i>Amauornis phoenicurus</i> | White-breasted Waterhen | 2021/2/19  | 1 | 0 | 22.43275970 | 114.07972690 | <a href="https://www.inaturalist.org/observations/71478158">https://www.inaturalist.org/observations/71478158</a>   |
| 934 | <i>Amauornis phoenicurus</i> | White-breasted Waterhen | 2020/10/1  | 1 | 0 | 22.43330750 | 114.06040550 | <a href="https://www.inaturalist.org/observations/61524966">https://www.inaturalist.org/observations/61524966</a>   |
| 935 | <i>Amauornis phoenicurus</i> | White-breasted Waterhen | 2022/4/30  | 2 | 0 | 22.43345991 | 114.16500240 | <a href="https://www.inaturalist.org/observations/113685226">https://www.inaturalist.org/observations/113685226</a> |
| 936 | <i>Amauornis phoenicurus</i> | White-breasted Waterhen | 2020/4/24  | 2 | 0 | 22.43765370 | 114.06259830 | <a href="https://www.inaturalist.org/observations/43050512">https://www.inaturalist.org/observations/43050512</a>   |
| 937 | <i>Amauornis phoenicurus</i> | White-breasted Waterhen | 2020/3/24  | 1 | 0 | 22.43912789 | 113.94782780 | <a href="https://www.inaturalist.org/observations/40644025">https://www.inaturalist.org/observations/40644025</a>   |
| 938 | <i>Amauornis phoenicurus</i> | White-breasted Waterhen | 2020/7/22  | 1 | 0 | 22.44002500 | 113.99715500 | <a href="https://www.inaturalist.org/observations/54275094">https://www.inaturalist.org/observations/54275094</a>   |
| 939 | <i>Amauornis phoenicurus</i> | White-breasted Waterhen | 2021/12/7  | 3 | 0 | 22.44152201 | 114.05823230 | <a href="https://www.inaturalist.org/observations/103049702">https://www.inaturalist.org/observations/103049702</a> |
| 940 | <i>Amauornis phoenicurus</i> | White-breasted Waterhen | 2021/12/21 | 1 | 0 | 22.44180103 | 114.05685910 | <a href="https://www.inaturalist.org/observations/103463862">https://www.inaturalist.org/observations/103463862</a> |
| 941 | <i>Amauornis phoenicurus</i> | White-breasted Waterhen | 2022/1/3   | 1 | 0 | 22.44181442 | 114.05776130 | <a href="https://www.inaturalist.org/observations/104981575">https://www.inaturalist.org/observations/104981575</a> |
| 942 | <i>Amauornis phoenicurus</i> | White-breasted Waterhen | 2021/12/13 | 2 | 0 | 22.44201549 | 114.05756790 | <a href="https://www.inaturalist.org/observations/103002031">https://www.inaturalist.org/observations/103002031</a> |

|     |                              |                         |            |   |   |             |              |                                                                                                                     |
|-----|------------------------------|-------------------------|------------|---|---|-------------|--------------|---------------------------------------------------------------------------------------------------------------------|
| 943 | <i>Amauornis phoenicurus</i> | White-breasted Waterhen | 2019/1/16  | 2 | 0 | 22.44232180 | 114.16550640 | <a href="https://www.inaturalist.org/observations/19675597">https://www.inaturalist.org/observations/19675597</a>   |
| 944 | <i>Amauornis phoenicurus</i> | White-breasted Waterhen | 2021/10/31 | 1 | 0 | 22.44237000 | 114.06001950 | <a href="https://www.inaturalist.org/observations/99849527">https://www.inaturalist.org/observations/99849527</a>   |
| 945 | <i>Amauornis phoenicurus</i> | White-breasted Waterhen | 2021/12/18 | 1 | 0 | 22.44249562 | 114.05700190 | <a href="https://www.inaturalist.org/observations/103415819">https://www.inaturalist.org/observations/103415819</a> |
| 946 | <i>Amauornis phoenicurus</i> | White-breasted Waterhen | 2021/12/15 | 1 | 0 | 22.44255800 | 114.05776700 | <a href="https://www.inaturalist.org/observations/103407228">https://www.inaturalist.org/observations/103407228</a> |
| 947 | <i>Amauornis phoenicurus</i> | White-breasted Waterhen | 2020/9/15  | 1 | 0 | 22.44403167 | 114.05561130 | <a href="https://www.inaturalist.org/observations/59662999">https://www.inaturalist.org/observations/59662999</a>   |
| 948 | <i>Amauornis phoenicurus</i> | White-breasted Waterhen | 2020/4/18  | 1 | 0 | 22.44515711 | 114.13763630 | <a href="https://www.inaturalist.org/observations/46810635">https://www.inaturalist.org/observations/46810635</a>   |
| 949 | <i>Amauornis phoenicurus</i> | White-breasted Waterhen | 2019/7/20  | 3 | 0 | 22.44516400 | 114.13859600 | <a href="https://www.inaturalist.org/observations/29501400">https://www.inaturalist.org/observations/29501400</a>   |
| 950 | <i>Amauornis phoenicurus</i> | White-breasted Waterhen | 2021/5/1   | 1 | 0 | 22.44526265 | 114.13994990 | <a href="https://www.inaturalist.org/observations/76139019">https://www.inaturalist.org/observations/76139019</a>   |
| 951 | <i>Amauornis phoenicurus</i> | White-breasted Waterhen | 2019/3/30  | 3 | 0 | 22.44541500 | 114.13884580 | <a href="https://www.inaturalist.org/observations/21908467">https://www.inaturalist.org/observations/21908467</a>   |
| 952 | <i>Amauornis phoenicurus</i> | White-breasted Waterhen | 2019/5/26  | 3 | 0 | 22.44553653 | 114.13767040 | <a href="https://www.inaturalist.org/observations/25917589">https://www.inaturalist.org/observations/25917589</a>   |
| 953 | <i>Amauornis phoenicurus</i> | White-breasted Waterhen | 2022/5/31  | 1 | 0 | 22.44573108 | 114.02110500 | <a href="https://www.inaturalist.org/observations/119664778">https://www.inaturalist.org/observations/119664778</a> |
| 954 | <i>Amauornis phoenicurus</i> | White-breasted Waterhen | 2020/3/29  | 1 | 0 | 22.44589691 | 114.13765070 | <a href="https://www.inaturalist.org/observations/41215578">https://www.inaturalist.org/observations/41215578</a>   |
| 955 | <i>Amauornis phoenicurus</i> | White-breasted Waterhen | 2016/7/10  | 3 | 0 | 22.44590756 | 114.00628030 | <a href="http://www.inaturalist.org/observations/3659185">http://www.inaturalist.org/observations/3659185</a>       |
| 956 | <i>Amauornis phoenicurus</i> | White-breasted Waterhen | 2019/2/19  | 3 | 0 | 22.44639758 | 114.00537130 | <a href="https://www.inaturalist.org/observations/20712650">https://www.inaturalist.org/observations/20712650</a>   |
| 957 | <i>Amauornis phoenicurus</i> | White-breasted Waterhen | 2020/8/4   | 1 | 0 | 22.44832376 | 114.18222570 | <a href="https://www.inaturalist.org/observations/55675238">https://www.inaturalist.org/observations/55675238</a>   |
| 958 | <i>Amauornis phoenicurus</i> | White-breasted Waterhen | 2014/11/23 | 3 | 0 | 22.44836600 | 114.06287400 | <a href="http://www.inaturalist.org/observations/1096598">http://www.inaturalist.org/observations/1096598</a>       |
| 959 | <i>Amauornis phoenicurus</i> | White-breasted Waterhen | 2021/12/19 | 1 | 0 | 22.44986908 | 114.04350630 | <a href="https://www.inaturalist.org/observations/103461968">https://www.inaturalist.org/observations/103461968</a> |
| 960 | <i>Amauornis phoenicurus</i> | White-breasted Waterhen | 2020/12/13 | 1 | 0 | 22.45078333 | 114.14295000 | <a href="https://www.inaturalist.org/observations/66497838">https://www.inaturalist.org/observations/66497838</a>   |
| 961 | <i>Amauornis phoenicurus</i> | White-breasted Waterhen | 2021/6/21  | 2 | 0 | 22.45082829 | 114.05135350 | <a href="https://www.inaturalist.org/observations/84012182">https://www.inaturalist.org/observations/84012182</a>   |
| 962 | <i>Amauornis phoenicurus</i> | White-breasted Waterhen | 2022/7/20  | 1 | 0 | 22.45143257 | 114.12467050 | <a href="https://www.inaturalist.org/observations/127089991">https://www.inaturalist.org/observations/127089991</a> |
| 963 | <i>Amauornis phoenicurus</i> | White-breasted Waterhen | 2020/4/24  | 2 | 0 | 22.45205300 | 114.13683880 | <a href="https://www.inaturalist.org/observations/43019928">https://www.inaturalist.org/observations/43019928</a>   |
| 964 | <i>Amauornis phoenicurus</i> | White-breasted Waterhen | 2021/4/12  | 2 | 0 | 22.45233165 | 114.03498360 | <a href="https://www.inaturalist.org/observations/73727815">https://www.inaturalist.org/observations/73727815</a>   |
| 965 | <i>Amauornis phoenicurus</i> | White-breasted Waterhen | 2020/8/24  | 1 | 0 | 22.45335139 | 114.05236730 | <a href="https://www.inaturalist.org/observations/58490401">https://www.inaturalist.org/observations/58490401</a>   |

|     |                              |                         |            |   |   |             |              |                                                                                                                     |
|-----|------------------------------|-------------------------|------------|---|---|-------------|--------------|---------------------------------------------------------------------------------------------------------------------|
| 966 | <i>Amauornis phoenicurus</i> | White-breasted Waterhen | 2021/10/30 | 2 | 0 | 22.45407000 | 114.03485280 | <a href="https://www.inaturalist.org/observations/100373423">https://www.inaturalist.org/observations/100373423</a> |
| 967 | <i>Amauornis phoenicurus</i> | White-breasted Waterhen | 2021/4/12  | 2 | 0 | 22.45453627 | 114.03565180 | <a href="https://www.inaturalist.org/observations/73727807">https://www.inaturalist.org/observations/73727807</a>   |
| 968 | <i>Amauornis phoenicurus</i> | White-breasted Waterhen | 2020/5/24  | 1 | 0 | 22.45456305 | 114.00254600 | <a href="https://www.inaturalist.org/observations/47236235">https://www.inaturalist.org/observations/47236235</a>   |
| 969 | <i>Amauornis phoenicurus</i> | White-breasted Waterhen | 2019/7/28  | 3 | 0 | 22.45462599 | 114.01045310 | <a href="https://www.inaturalist.org/observations/29700425">https://www.inaturalist.org/observations/29700425</a>   |
| 970 | <i>Amauornis phoenicurus</i> | White-breasted Waterhen | 2021/5/1   | 1 | 0 | 22.45547981 | 114.14547270 | <a href="https://www.inaturalist.org/observations/76121681">https://www.inaturalist.org/observations/76121681</a>   |
| 971 | <i>Amauornis phoenicurus</i> | White-breasted Waterhen | 2021/11/5  | 1 | 0 | 22.45632590 | 114.04460420 | <a href="https://www.inaturalist.org/observations/100324081">https://www.inaturalist.org/observations/100324081</a> |
| 972 | <i>Amauornis phoenicurus</i> | White-breasted Waterhen | 2020/7/7   | 1 | 0 | 22.45680333 | 114.15115470 | <a href="https://www.inaturalist.org/observations/52242459">https://www.inaturalist.org/observations/52242459</a>   |
| 973 | <i>Amauornis phoenicurus</i> | White-breasted Waterhen | 2021/12/5  | 2 | 0 | 22.45695069 | 114.15143600 | <a href="https://www.inaturalist.org/observations/103089907">https://www.inaturalist.org/observations/103089907</a> |
| 974 | <i>Amauornis phoenicurus</i> | White-breasted Waterhen | 2021/11/30 | 1 | 0 | 22.45703320 | 114.15126880 | <a href="https://www.inaturalist.org/observations/102245545">https://www.inaturalist.org/observations/102245545</a> |
| 975 | <i>Amauornis phoenicurus</i> | White-breasted Waterhen | 2021/1/17  | 2 | 0 | 22.45842833 | 114.03358500 | <a href="https://www.inaturalist.org/observations/97131118">https://www.inaturalist.org/observations/97131118</a>   |
| 976 | <i>Amauornis phoenicurus</i> | White-breasted Waterhen | 2019/2/20  | 2 | 0 | 22.46037223 | 113.99444340 | <a href="https://www.inaturalist.org/observations/20507023">https://www.inaturalist.org/observations/20507023</a>   |
| 977 | <i>Amauornis phoenicurus</i> | White-breasted Waterhen | 2015/11/7  | 5 | 0 | 22.46064190 | 114.00419960 | <a href="https://www.inaturalist.org/observations/24433149">https://www.inaturalist.org/observations/24433149</a>   |
| 978 | <i>Amauornis phoenicurus</i> | White-breasted Waterhen | 2016/2/20  | 4 | 0 | 22.46064190 | 114.00419960 | <a href="https://www.inaturalist.org/observations/24834503">https://www.inaturalist.org/observations/24834503</a>   |
| 979 | <i>Amauornis phoenicurus</i> | White-breasted Waterhen | 2016/2/13  | 2 | 0 | 22.46064190 | 114.00419960 | <a href="https://www.inaturalist.org/observations/24879859">https://www.inaturalist.org/observations/24879859</a>   |
| 980 | <i>Amauornis phoenicurus</i> | White-breasted Waterhen | 2016/3/5   | 3 | 0 | 22.46064190 | 114.00419960 | <a href="https://www.inaturalist.org/observations/25605660">https://www.inaturalist.org/observations/25605660</a>   |
| 981 | <i>Amauornis phoenicurus</i> | White-breasted Waterhen | 2016/7/16  | 3 | 0 | 22.46064190 | 114.00419960 | <a href="https://www.inaturalist.org/observations/27139155">https://www.inaturalist.org/observations/27139155</a>   |
| 982 | <i>Amauornis phoenicurus</i> | White-breasted Waterhen | 2020/10/17 | 1 | 0 | 22.46064190 | 114.00419960 | <a href="https://www.inaturalist.org/observations/63813423">https://www.inaturalist.org/observations/63813423</a>   |
| 983 | <i>Amauornis phoenicurus</i> | White-breasted Waterhen | 2017/11/4  | 2 | 0 | 22.46095918 | 114.02651560 | <a href="https://www.inaturalist.org/observations/31325955">https://www.inaturalist.org/observations/31325955</a>   |
| 984 | <i>Amauornis phoenicurus</i> | White-breasted Waterhen | 2017/11/4  | 3 | 0 | 22.46095918 | 114.02651560 | <a href="https://www.inaturalist.org/observations/31330173">https://www.inaturalist.org/observations/31330173</a>   |
| 985 | <i>Amauornis phoenicurus</i> | White-breasted Waterhen | 2020/4/27  | 2 | 0 | 22.46218849 | 114.03809380 | <a href="https://www.inaturalist.org/observations/43883533">https://www.inaturalist.org/observations/43883533</a>   |
| 986 | <i>Amauornis phoenicurus</i> | White-breasted Waterhen | 2020/12/23 | 1 | 0 | 22.46224232 | 114.03839410 | <a href="https://www.inaturalist.org/observations/66957263">https://www.inaturalist.org/observations/66957263</a>   |
| 987 | <i>Amauornis phoenicurus</i> | White-breasted Waterhen | 2021/1/10  | 1 | 0 | 22.46224250 | 114.03839420 | <a href="https://www.inaturalist.org/observations/67862571">https://www.inaturalist.org/observations/67862571</a>   |
| 988 | <i>Amauornis phoenicurus</i> | White-breasted Waterhen | 2021/5/29  | 1 | 0 | 22.46224263 | 114.03839410 | <a href="https://www.inaturalist.org/observations/80754183">https://www.inaturalist.org/observations/80754183</a>   |

|      |                              |                         |            |   |   |             |              |                                                                                                                     |
|------|------------------------------|-------------------------|------------|---|---|-------------|--------------|---------------------------------------------------------------------------------------------------------------------|
| 989  | <i>Amauornis phoenicurus</i> | White-breasted Waterhen | 2021/2/12  | 2 | 0 | 22.46224300 | 114.03839400 | <a href="https://www.inaturalist.org/observations/69484269">https://www.inaturalist.org/observations/69484269</a>   |
| 990  | <i>Amauornis phoenicurus</i> | White-breasted Waterhen | 2021/10/23 | 1 | 0 | 22.46224300 | 114.03839400 | <a href="https://www.inaturalist.org/observations/99207448">https://www.inaturalist.org/observations/99207448</a>   |
| 991  | <i>Amauornis phoenicurus</i> | White-breasted Waterhen | 2021/11/7  | 1 | 0 | 22.46224300 | 114.03839400 | <a href="https://www.inaturalist.org/observations/101093994">https://www.inaturalist.org/observations/101093994</a> |
| 992  | <i>Amauornis phoenicurus</i> | White-breasted Waterhen | 2021/11/27 | 1 | 0 | 22.46224300 | 114.03839400 | <a href="https://www.inaturalist.org/observations/102348400">https://www.inaturalist.org/observations/102348400</a> |
| 993  | <i>Amauornis phoenicurus</i> | White-breasted Waterhen | 2019/12/23 | 1 | 0 | 22.46235211 | 114.03063560 | <a href="https://www.inaturalist.org/observations/38412961">https://www.inaturalist.org/observations/38412961</a>   |
| 994  | <i>Amauornis phoenicurus</i> | White-breasted Waterhen | 2021/2/15  | 1 | 0 | 22.46238309 | 113.99398440 | <a href="https://www.inaturalist.org/observations/70142932">https://www.inaturalist.org/observations/70142932</a>   |
| 995  | <i>Amauornis phoenicurus</i> | White-breasted Waterhen | 2020/12/9  | 1 | 0 | 22.46285281 | 114.04429820 | <a href="https://www.inaturalist.org/observations/66339086">https://www.inaturalist.org/observations/66339086</a>   |
| 996  | <i>Amauornis phoenicurus</i> | White-breasted Waterhen | 2020/12/25 | 1 | 0 | 22.46285866 | 114.04402640 | <a href="https://www.inaturalist.org/observations/69298437">https://www.inaturalist.org/observations/69298437</a>   |
| 997  | <i>Amauornis phoenicurus</i> | White-breasted Waterhen | 2021/11/21 | 1 | 0 | 22.46388410 | 114.00825860 | <a href="https://www.inaturalist.org/observations/101626264">https://www.inaturalist.org/observations/101626264</a> |
| 998  | <i>Amauornis phoenicurus</i> | White-breasted Waterhen | 2022/1/13  | 2 | 0 | 22.46413016 | 114.04262420 | <a href="https://www.inaturalist.org/observations/104859984">https://www.inaturalist.org/observations/104859984</a> |
| 999  | <i>Amauornis phoenicurus</i> | White-breasted Waterhen | 2022/1/3   | 1 | 0 | 22.46417156 | 113.99514450 | <a href="https://www.inaturalist.org/observations/104269489">https://www.inaturalist.org/observations/104269489</a> |
| 1000 | <i>Amauornis phoenicurus</i> | White-breasted Waterhen | 2021/4/24  | 1 | 0 | 22.46424812 | 113.99463070 | <a href="https://www.inaturalist.org/observations/75649759">https://www.inaturalist.org/observations/75649759</a>   |
| 1001 | <i>Amauornis phoenicurus</i> | White-breasted Waterhen | 2020/12/18 | 1 | 0 | 22.46433000 | 113.98027500 | <a href="https://www.inaturalist.org/observations/66727604">https://www.inaturalist.org/observations/66727604</a>   |
| 1002 | <i>Amauornis phoenicurus</i> | White-breasted Waterhen | 2019/3/30  | 3 | 0 | 22.46434600 | 114.02970700 | <a href="https://www.inaturalist.org/observations/21969463">https://www.inaturalist.org/observations/21969463</a>   |
| 1003 | <i>Amauornis phoenicurus</i> | White-breasted Waterhen | 2021/4/3   | 1 | 0 | 22.46455000 | 114.02971670 | <a href="https://www.inaturalist.org/observations/72764723">https://www.inaturalist.org/observations/72764723</a>   |
| 1004 | <i>Amauornis phoenicurus</i> | White-breasted Waterhen | 2020/4/14  | 1 | 0 | 22.46475100 | 114.05055300 | <a href="https://www.inaturalist.org/observations/42309281">https://www.inaturalist.org/observations/42309281</a>   |
| 1005 | <i>Amauornis phoenicurus</i> | White-breasted Waterhen | 2021/3/28  | 3 | 0 | 22.46516910 | 114.04400500 | <a href="https://www.inaturalist.org/observations/72236191">https://www.inaturalist.org/observations/72236191</a>   |
| 1006 | <i>Amauornis phoenicurus</i> | White-breasted Waterhen | 2014/12/23 | 0 | 0 | 22.46546666 | 114.03543210 | <a href="https://www.inaturalist.org/observations/38321184">https://www.inaturalist.org/observations/38321184</a>   |
| 1007 | <i>Amauornis phoenicurus</i> | White-breasted Waterhen | 2021/11/20 | 1 | 0 | 22.46554228 | 114.01392720 | <a href="https://www.inaturalist.org/observations/101580224">https://www.inaturalist.org/observations/101580224</a> |
| 1008 | <i>Amauornis phoenicurus</i> | White-breasted Waterhen | 2021/1/15  | 1 | 0 | 22.46576542 | 114.02836200 | <a href="https://www.inaturalist.org/observations/68155525">https://www.inaturalist.org/observations/68155525</a>   |
| 1009 | <i>Amauornis phoenicurus</i> | White-breasted Waterhen | 2021/11/23 | 1 | 0 | 22.46608300 | 114.01701500 | <a href="https://www.inaturalist.org/observations/101873857">https://www.inaturalist.org/observations/101873857</a> |
| 1010 | <i>Amauornis phoenicurus</i> | White-breasted Waterhen | 2022/6/18  | 2 | 0 | 22.46618998 | 113.99620430 | <a href="https://www.inaturalist.org/observations/123031096">https://www.inaturalist.org/observations/123031096</a> |
| 1011 | <i>Amauornis phoenicurus</i> | White-breasted Waterhen | 2021/4/30  | 1 | 0 | 22.46636000 | 113.99551330 | <a href="https://www.inaturalist.org/observations/76086383">https://www.inaturalist.org/observations/76086383</a>   |



|      |                              |                         |            |   |   |             |              |                                                                                                                     |
|------|------------------------------|-------------------------|------------|---|---|-------------|--------------|---------------------------------------------------------------------------------------------------------------------|
| 1012 | <i>Amauornis phoenicurus</i> | White-breasted Waterhen | 2020/9/19  | 1 | 0 | 22.46654667 | 114.02911000 | <a href="https://www.inaturalist.org/observations/60044611">https://www.inaturalist.org/observations/60044611</a>   |
| 1013 | <i>Amauornis phoenicurus</i> | White-breasted Waterhen | 2020/11/16 | 1 | 0 | 22.46659611 | 114.02775340 | <a href="https://www.inaturalist.org/observations/65047625">https://www.inaturalist.org/observations/65047625</a>   |
| 1014 | <i>Amauornis phoenicurus</i> | White-breasted Waterhen | 2018/4/28  | 4 | 0 | 22.46677500 | 113.99665000 | <a href="https://www.inaturalist.org/observations/11585618">https://www.inaturalist.org/observations/11585618</a>   |
| 1015 | <i>Amauornis phoenicurus</i> | White-breasted Waterhen | 2019/5/18  | 4 | 0 | 22.46720315 | 114.00808510 | <a href="https://www.inaturalist.org/observations/25305565">https://www.inaturalist.org/observations/25305565</a>   |
| 1016 | <i>Amauornis phoenicurus</i> | White-breasted Waterhen | 2022/1/1   | 2 | 0 | 22.46799484 | 114.01844500 | <a href="https://www.inaturalist.org/observations/104104346">https://www.inaturalist.org/observations/104104346</a> |
| 1017 | <i>Amauornis phoenicurus</i> | White-breasted Waterhen | 2021/11/27 | 1 | 0 | 22.46805262 | 114.02827460 | <a href="https://www.inaturalist.org/observations/102286809">https://www.inaturalist.org/observations/102286809</a> |
| 1018 | <i>Amauornis phoenicurus</i> | White-breasted Waterhen | 2020/7/7   | 2 | 0 | 22.46808433 | 88.31912992  | <a href="https://www.inaturalist.org/observations/55512005">https://www.inaturalist.org/observations/55512005</a>   |
| 1019 | <i>Amauornis phoenicurus</i> | White-breasted Waterhen | 2020/8/1   | 1 | 0 | 22.46825450 | 120.49221380 | <a href="https://www.inaturalist.org/observations/55039442">https://www.inaturalist.org/observations/55039442</a>   |
| 1020 | <i>Amauornis phoenicurus</i> | White-breasted Waterhen | 2015/11/28 | 1 | 0 | 22.46833745 | 114.00921200 | <a href="https://www.inaturalist.org/observations/47397376">https://www.inaturalist.org/observations/47397376</a>   |
| 1021 | <i>Amauornis phoenicurus</i> | White-breasted Waterhen | 2016/12/31 | 5 | 0 | 22.46840446 | 114.00824430 | <a href="https://www.inaturalist.org/observations/4873370">https://www.inaturalist.org/observations/4873370</a>     |
| 1022 | <i>Amauornis phoenicurus</i> | White-breasted Waterhen | 2017/3/30  | 2 | 0 | 22.46856500 | 114.00519200 | <a href="https://www.inaturalist.org/observations/6369033">https://www.inaturalist.org/observations/6369033</a>     |
| 1023 | <i>Amauornis phoenicurus</i> | White-breasted Waterhen | 2019/1/11  | 0 | 0 | 22.46878944 | 114.00744140 | <a href="https://www.inaturalist.org/observations/39202513">https://www.inaturalist.org/observations/39202513</a>   |
| 1024 | <i>Amauornis phoenicurus</i> | White-breasted Waterhen | 2019/1/11  | 1 | 0 | 22.46878944 | 114.00744140 | <a href="https://www.inaturalist.org/observations/39202571">https://www.inaturalist.org/observations/39202571</a>   |
| 1025 | <i>Amauornis phoenicurus</i> | White-breasted Waterhen | 2009/7/15  | 2 | 0 | 22.46885900 | 114.00497300 | <a href="https://www.inaturalist.org/observations/9775713">https://www.inaturalist.org/observations/9775713</a>     |
| 1026 | <i>Amauornis phoenicurus</i> | White-breasted Waterhen | 2020/1/12  | 1 | 0 | 22.46919962 | 113.99702780 | <a href="https://www.inaturalist.org/observations/37648674">https://www.inaturalist.org/observations/37648674</a>   |
| 1027 | <i>Amauornis phoenicurus</i> | White-breasted Waterhen | 2022/4/29  | 1 | 0 | 22.46927833 | 113.99696330 | <a href="https://www.inaturalist.org/observations/114197228">https://www.inaturalist.org/observations/114197228</a> |
| 1028 | <i>Amauornis phoenicurus</i> | White-breasted Waterhen | 2010/2/16  | 2 | 0 | 22.46930300 | 114.03197500 | <a href="https://www.inaturalist.org/observations/137117978">https://www.inaturalist.org/observations/137117978</a> |
| 1029 | <i>Amauornis phoenicurus</i> | White-breasted Waterhen | 2016/3/10  | 1 | 0 | 22.46938107 | 114.00522430 | <a href="https://www.inaturalist.org/observations/105011859">https://www.inaturalist.org/observations/105011859</a> |
| 1030 | <i>Amauornis phoenicurus</i> | White-breasted Waterhen | 2020/1/3   | 1 | 0 | 22.46941186 | 113.99786100 | <a href="https://www.inaturalist.org/observations/37218383">https://www.inaturalist.org/observations/37218383</a>   |
| 1031 | <i>Amauornis phoenicurus</i> | White-breasted Waterhen | 2021/10/31 | 1 | 0 | 22.46945139 | 114.03066640 | <a href="https://www.inaturalist.org/observations/99867013">https://www.inaturalist.org/observations/99867013</a>   |
| 1032 | <i>Amauornis phoenicurus</i> | White-breasted Waterhen | 2020/6/3   | 1 | 0 | 22.46950330 | 114.00731270 | <a href="https://www.inaturalist.org/observations/53844809">https://www.inaturalist.org/observations/53844809</a>   |
| 1033 | <i>Amauornis phoenicurus</i> | White-breasted Waterhen | 2009/9/13  | 3 | 0 | 22.46954700 | 114.00959100 | <a href="https://www.inaturalist.org/observations/12598819">https://www.inaturalist.org/observations/12598819</a>   |
| 1034 | <i>Amauornis phoenicurus</i> | White-breasted Waterhen | 2017/12/13 | 5 | 0 | 22.46980529 | 114.00688610 | <a href="https://www.inaturalist.org/observations/9150298">https://www.inaturalist.org/observations/9150298</a>     |

|      |                              |                         |            |   |   |             |              |                                                                                                                     |
|------|------------------------------|-------------------------|------------|---|---|-------------|--------------|---------------------------------------------------------------------------------------------------------------------|
| 1035 | <i>Amauornis phoenicurus</i> | White-breasted Waterhen | 2021/11/21 | 1 | 0 | 22.46987252 | 114.00881770 | <a href="https://www.inaturalist.org/observations/101704543">https://www.inaturalist.org/observations/101704543</a> |
| 1036 | <i>Amauornis phoenicurus</i> | White-breasted Waterhen | 2018/12/28 | 3 | 0 | 22.47005098 | 114.00650020 | <a href="https://www.inaturalist.org/observations/19288933">https://www.inaturalist.org/observations/19288933</a>   |
| 1037 | <i>Amauornis phoenicurus</i> | White-breasted Waterhen | 2021/2/16  | 1 | 0 | 22.47005729 | 114.03085310 | <a href="https://www.inaturalist.org/observations/69660513">https://www.inaturalist.org/observations/69660513</a>   |
| 1038 | <i>Amauornis phoenicurus</i> | White-breasted Waterhen | 2021/5/9   | 1 | 0 | 22.47005841 | 114.00658310 | <a href="https://www.inaturalist.org/observations/78082873">https://www.inaturalist.org/observations/78082873</a>   |
| 1039 | <i>Amauornis phoenicurus</i> | White-breasted Waterhen | 2019/12/15 | 2 | 0 | 22.47005850 | 114.00658310 | <a href="https://www.inaturalist.org/observations/36717598">https://www.inaturalist.org/observations/36717598</a>   |
| 1040 | <i>Amauornis phoenicurus</i> | White-breasted Waterhen | 2020/1/5   | 1 | 0 | 22.47005850 | 114.00658310 | <a href="https://www.inaturalist.org/observations/37323794">https://www.inaturalist.org/observations/37323794</a>   |
| 1041 | <i>Amauornis phoenicurus</i> | White-breasted Waterhen | 2020/10/11 | 2 | 0 | 22.47005850 | 114.00658310 | <a href="https://www.inaturalist.org/observations/62286121">https://www.inaturalist.org/observations/62286121</a>   |
| 1042 | <i>Amauornis phoenicurus</i> | White-breasted Waterhen | 2022/6/30  | 1 | 0 | 22.47005850 | 114.00658310 | <a href="https://www.inaturalist.org/observations/124338364">https://www.inaturalist.org/observations/124338364</a> |
| 1043 | <i>Amauornis phoenicurus</i> | White-breasted Waterhen | 2021/11/28 | 1 | 0 | 22.47006244 | 114.00658310 | <a href="https://www.inaturalist.org/observations/102164520">https://www.inaturalist.org/observations/102164520</a> |
| 1044 | <i>Amauornis phoenicurus</i> | White-breasted Waterhen | 2021/6/14  | 3 | 0 | 22.47012805 | 114.03024260 | <a href="https://www.inaturalist.org/observations/82994649">https://www.inaturalist.org/observations/82994649</a>   |
| 1045 | <i>Amauornis phoenicurus</i> | White-breasted Waterhen | 2021/6/26  | 1 | 0 | 22.47018243 | 114.00638400 | <a href="https://www.inaturalist.org/observations/84690855">https://www.inaturalist.org/observations/84690855</a>   |
| 1046 | <i>Amauornis phoenicurus</i> | White-breasted Waterhen | 2018/5/12  | 3 | 0 | 22.47018730 | 114.00624740 | <a href="https://www.inaturalist.org/observations/12407426">https://www.inaturalist.org/observations/12407426</a>   |
| 1047 | <i>Amauornis phoenicurus</i> | White-breasted Waterhen | 2019/4/9   | 2 | 0 | 22.47033200 | 114.04378400 | <a href="https://www.inaturalist.org/observations/22399688">https://www.inaturalist.org/observations/22399688</a>   |
| 1048 | <i>Amauornis phoenicurus</i> | White-breasted Waterhen | 2018/1/5   | 5 | 0 | 22.47034265 | 114.00585650 | <a href="https://www.inaturalist.org/observations/11637731">https://www.inaturalist.org/observations/11637731</a>   |
| 1049 | <i>Amauornis phoenicurus</i> | White-breasted Waterhen | 2017/12/25 | 2 | 0 | 22.47034477 | 114.00509260 | <a href="https://www.inaturalist.org/observations/10501547">https://www.inaturalist.org/observations/10501547</a>   |
| 1050 | <i>Amauornis phoenicurus</i> | White-breasted Waterhen | 2019/1/1   | 2 | 0 | 22.47040900 | 114.00561800 | <a href="https://www.inaturalist.org/observations/19398021">https://www.inaturalist.org/observations/19398021</a>   |
| 1051 | <i>Amauornis phoenicurus</i> | White-breasted Waterhen | 2017/2/13  | 3 | 0 | 22.47046167 | 114.00542000 | <a href="https://www.inaturalist.org/observations/5102400">https://www.inaturalist.org/observations/5102400</a>     |
| 1052 | <i>Amauornis phoenicurus</i> | White-breasted Waterhen | 2019/1/27  | 3 | 0 | 22.47055626 | 114.00638580 | <a href="https://www.inaturalist.org/observations/19896531">https://www.inaturalist.org/observations/19896531</a>   |
| 1053 | <i>Amauornis phoenicurus</i> | White-breasted Waterhen | 2021/11/28 | 1 | 0 | 22.47072833 | 114.00632500 | <a href="https://www.inaturalist.org/observations/102073871">https://www.inaturalist.org/observations/102073871</a> |
| 1054 | <i>Amauornis phoenicurus</i> | White-breasted Waterhen | 2019/8/15  | 3 | 0 | 22.47078714 | 114.00587770 | <a href="https://www.inaturalist.org/observations/30983023">https://www.inaturalist.org/observations/30983023</a>   |
| 1055 | <i>Amauornis phoenicurus</i> | White-breasted Waterhen | 2022/2/2   | 1 | 0 | 22.47087847 | 114.12839440 | <a href="https://www.inaturalist.org/observations/106021100">https://www.inaturalist.org/observations/106021100</a> |
| 1056 | <i>Amauornis phoenicurus</i> | White-breasted Waterhen | 2019/12/29 | 2 | 0 | 22.47095500 | 114.00625560 | <a href="https://www.inaturalist.org/observations/72884880">https://www.inaturalist.org/observations/72884880</a>   |
| 1057 | <i>Amauornis phoenicurus</i> | White-breasted Waterhen | 2022/3/21  | 3 | 0 | 22.47096928 | 114.04270500 | <a href="https://www.inaturalist.org/observations/109140044">https://www.inaturalist.org/observations/109140044</a> |

|      |                              |                         |            |   |   |             |              |                                                                                                                     |
|------|------------------------------|-------------------------|------------|---|---|-------------|--------------|---------------------------------------------------------------------------------------------------------------------|
| 1058 | <i>Amauornis phoenicurus</i> | White-breasted Waterhen | 2021/5/1   | 2 | 0 | 22.47097000 | 114.04270500 | <a href="https://www.inaturalist.org/observations/77913732">https://www.inaturalist.org/observations/77913732</a>   |
| 1059 | <i>Amauornis phoenicurus</i> | White-breasted Waterhen | 2021/11/21 | 1 | 0 | 22.47097000 | 114.04270500 | <a href="https://www.inaturalist.org/observations/101750874">https://www.inaturalist.org/observations/101750874</a> |
| 1060 | <i>Amauornis phoenicurus</i> | White-breasted Waterhen | 2022/4/30  | 1 | 0 | 22.47097000 | 114.04270500 | <a href="https://www.inaturalist.org/observations/114562754">https://www.inaturalist.org/observations/114562754</a> |
| 1061 | <i>Amauornis phoenicurus</i> | White-breasted Waterhen | 2018/9/1   | 3 | 0 | 22.47108000 | 114.00527700 | <a href="https://www.inaturalist.org/observations/16568119">https://www.inaturalist.org/observations/16568119</a>   |
| 1062 | <i>Amauornis phoenicurus</i> | White-breasted Waterhen | 2017/4/6   | 3 | 0 | 22.47142410 | 114.00763750 | <a href="https://www.inaturalist.org/observations/7362988">https://www.inaturalist.org/observations/7362988</a>     |
| 1063 | <i>Amauornis phoenicurus</i> | White-breasted Waterhen | 2022/2/15  | 1 | 0 | 22.47186700 | 114.03207400 | <a href="https://www.inaturalist.org/observations/107541084">https://www.inaturalist.org/observations/107541084</a> |
| 1064 | <i>Amauornis phoenicurus</i> | White-breasted Waterhen | 2009/4/26  | 3 | 0 | 22.47202000 | 114.00622700 | <a href="https://www.inaturalist.org/observations/12599024">https://www.inaturalist.org/observations/12599024</a>   |
| 1065 | <i>Amauornis phoenicurus</i> | White-breasted Waterhen | 2021/6/14  | 2 | 0 | 22.47206792 | 114.02372380 | <a href="https://www.inaturalist.org/observations/82966872">https://www.inaturalist.org/observations/82966872</a>   |
| 1066 | <i>Amauornis phoenicurus</i> | White-breasted Waterhen | 2020/1/3   | 1 | 0 | 22.47208845 | 114.00847870 | <a href="https://www.inaturalist.org/observations/37218835">https://www.inaturalist.org/observations/37218835</a>   |
| 1067 | <i>Amauornis phoenicurus</i> | White-breasted Waterhen | 2022/5/2   | 1 | 0 | 22.47232167 | 114.02354500 | <a href="https://www.inaturalist.org/observations/115559304">https://www.inaturalist.org/observations/115559304</a> |
| 1068 | <i>Amauornis phoenicurus</i> | White-breasted Waterhen | 2013/12/21 | 1 | 0 | 22.47232198 | 114.00695800 | <a href="https://www.inaturalist.org/observations/51119529">https://www.inaturalist.org/observations/51119529</a>   |
| 1069 | <i>Amauornis phoenicurus</i> | White-breasted Waterhen | 2013/12/21 | 1 | 0 | 22.47232240 | 114.00695960 | <a href="https://www.inaturalist.org/observations/51114993">https://www.inaturalist.org/observations/51114993</a>   |
| 1070 | <i>Amauornis phoenicurus</i> | White-breasted Waterhen | 2012/1/11  | 1 | 0 | 22.47232655 | 114.00707030 | <a href="https://www.inaturalist.org/observations/105008605">https://www.inaturalist.org/observations/105008605</a> |
| 1071 | <i>Amauornis phoenicurus</i> | White-breasted Waterhen | 2020/10/15 | 2 | 0 | 22.47234000 | 114.00700000 | <a href="https://www.inaturalist.org/observations/62996452">https://www.inaturalist.org/observations/62996452</a>   |
| 1072 | <i>Amauornis phoenicurus</i> | White-breasted Waterhen | 2009/8/23  | 1 | 0 | 22.47241300 | 114.00721800 | <a href="https://www.inaturalist.org/observations/68859315">https://www.inaturalist.org/observations/68859315</a>   |
| 1073 | <i>Amauornis phoenicurus</i> | White-breasted Waterhen | 2021/3/14  | 1 | 0 | 22.47244234 | 114.00713260 | <a href="https://www.inaturalist.org/observations/71226680">https://www.inaturalist.org/observations/71226680</a>   |
| 1074 | <i>Amauornis phoenicurus</i> | White-breasted Waterhen | 2019/12/29 | 2 | 0 | 22.47245400 | 114.00700400 | <a href="https://www.inaturalist.org/observations/37058619">https://www.inaturalist.org/observations/37058619</a>   |
| 1075 | <i>Amauornis phoenicurus</i> | White-breasted Waterhen | 2021/4/4   | 1 | 0 | 22.47247494 | 114.00726010 | <a href="https://www.inaturalist.org/observations/72963473">https://www.inaturalist.org/observations/72963473</a>   |
| 1076 | <i>Amauornis phoenicurus</i> | White-breasted Waterhen | 2022/7/20  | 1 | 0 | 22.47248333 | 114.00709170 | <a href="https://www.inaturalist.org/observations/127082439">https://www.inaturalist.org/observations/127082439</a> |
| 1077 | <i>Amauornis phoenicurus</i> | White-breasted Waterhen | 2013/7/4   | 3 | 0 | 22.47249125 | 114.01192140 | <a href="https://www.inaturalist.org/observations/15841467">https://www.inaturalist.org/observations/15841467</a>   |
| 1078 | <i>Amauornis phoenicurus</i> | White-breasted Waterhen | 2020/7/13  | 1 | 0 | 22.47926233 | 114.03806360 | <a href="https://www.inaturalist.org/observations/53226230">https://www.inaturalist.org/observations/53226230</a>   |
| 1079 | <i>Amauornis phoenicurus</i> | White-breasted Waterhen | 2020/7/25  | 1 | 0 | 22.47964865 | 120.47209150 | <a href="https://www.inaturalist.org/observations/54354204">https://www.inaturalist.org/observations/54354204</a>   |
| 1080 | <i>Amauornis phoenicurus</i> | White-breasted Waterhen | 2021/2/14  | 1 | 0 | 22.48022152 | 114.17515460 | <a href="https://www.inaturalist.org/observations/69675964">https://www.inaturalist.org/observations/69675964</a>   |

|      |                              |                         |            |   |   |             |              |                                                                                                                     |
|------|------------------------------|-------------------------|------------|---|---|-------------|--------------|---------------------------------------------------------------------------------------------------------------------|
| 1081 | <i>Amauornis phoenicurus</i> | White-breasted Waterhen | 2022/4/5   | 2 | 0 | 22.48092333 | 73.49487333  | <a href="https://www.inaturalist.org/observations/119413929">https://www.inaturalist.org/observations/119413929</a> |
| 1082 | <i>Amauornis phoenicurus</i> | White-breasted Waterhen | 2021/3/9   | 1 | 0 | 22.48387740 | 114.34297510 | <a href="https://www.inaturalist.org/observations/118917536">https://www.inaturalist.org/observations/118917536</a> |
| 1083 | <i>Amauornis phoenicurus</i> | White-breasted Waterhen | 2020/4/15  | 1 | 0 | 22.48548500 | 114.03211200 | <a href="https://www.inaturalist.org/observations/43042624">https://www.inaturalist.org/observations/43042624</a>   |
| 1084 | <i>Amauornis phoenicurus</i> | White-breasted Waterhen | 2022/4/11  | 1 | 0 | 22.48589569 | 114.00395950 | <a href="https://www.inaturalist.org/observations/111102219">https://www.inaturalist.org/observations/111102219</a> |
| 1085 | <i>Amauornis phoenicurus</i> | White-breasted Waterhen | 2022/9/24  | 1 | 0 | 22.48706282 | 114.04123900 | <a href="https://www.inaturalist.org/observations/136582723">https://www.inaturalist.org/observations/136582723</a> |
| 1086 | <i>Amauornis phoenicurus</i> | White-breasted Waterhen | 2017/4/3   | 2 | 0 | 22.48938729 | 114.03578930 | <a href="https://www.inaturalist.org/observations/73674141">https://www.inaturalist.org/observations/73674141</a>   |
| 1087 | <i>Amauornis phoenicurus</i> | White-breasted Waterhen | 2022/1/10  | 1 | 0 | 22.49007100 | 114.04318700 | <a href="https://www.inaturalist.org/observations/104759157">https://www.inaturalist.org/observations/104759157</a> |
| 1088 | <i>Amauornis phoenicurus</i> | White-breasted Waterhen | 2022/4/6   | 1 | 0 | 22.49011100 | 114.04350500 | <a href="https://www.inaturalist.org/observations/111057281">https://www.inaturalist.org/observations/111057281</a> |
| 1089 | <i>Amauornis phoenicurus</i> | White-breasted Waterhen | 2020/4/25  | 1 | 0 | 22.49032697 | 114.04295740 | <a href="https://www.inaturalist.org/observations/43858599">https://www.inaturalist.org/observations/43858599</a>   |
| 1090 | <i>Amauornis phoenicurus</i> | White-breasted Waterhen | 2019/5/11  | 1 | 0 | 22.49042736 | 88.26714135  | <a href="https://www.inaturalist.org/observations/63642050">https://www.inaturalist.org/observations/63642050</a>   |
| 1091 | <i>Amauornis phoenicurus</i> | White-breasted Waterhen | 2018/5/21  | 3 | 0 | 22.49061203 | 114.11854550 | <a href="https://www.inaturalist.org/observations/12752214">https://www.inaturalist.org/observations/12752214</a>   |
| 1092 | <i>Amauornis phoenicurus</i> | White-breasted Waterhen | 2021/4/11  | 1 | 0 | 22.49061519 | 114.04429930 | <a href="https://www.inaturalist.org/observations/73723682">https://www.inaturalist.org/observations/73723682</a>   |
| 1093 | <i>Amauornis phoenicurus</i> | White-breasted Waterhen | 2017/11/21 | 3 | 0 | 22.49123871 | 114.03831050 | <a href="https://www.inaturalist.org/observations/24183408">https://www.inaturalist.org/observations/24183408</a>   |
| 1094 | <i>Amauornis phoenicurus</i> | White-breasted Waterhen | 2021/1/1   | 1 | 0 | 22.49135524 | 114.10010360 | <a href="https://www.inaturalist.org/observations/69660717">https://www.inaturalist.org/observations/69660717</a>   |
| 1095 | <i>Amauornis phoenicurus</i> | White-breasted Waterhen | 2019/4/27  | 3 | 0 | 22.49170754 | 114.04503220 | <a href="https://www.inaturalist.org/observations/23344005">https://www.inaturalist.org/observations/23344005</a>   |
| 1096 | <i>Amauornis phoenicurus</i> | White-breasted Waterhen | 2017/4/29  | 2 | 0 | 22.49222200 | 114.04454500 | <a href="https://www.inaturalist.org/observations/6219470">https://www.inaturalist.org/observations/6219470</a>     |
| 1097 | <i>Amauornis phoenicurus</i> | White-breasted Waterhen | 2018/4/30  | 5 | 0 | 22.49236300 | 114.03588200 | <a href="https://www.inaturalist.org/observations/11980403">https://www.inaturalist.org/observations/11980403</a>   |
| 1098 | <i>Amauornis phoenicurus</i> | White-breasted Waterhen | 2019/1/1   | 3 | 0 | 22.49241000 | 114.10420170 | <a href="https://www.inaturalist.org/observations/19351100">https://www.inaturalist.org/observations/19351100</a>   |
| 1099 | <i>Amauornis phoenicurus</i> | White-breasted Waterhen | 2018/4/29  | 2 | 0 | 22.49259394 | 114.03502490 | <a href="https://www.inaturalist.org/observations/11851732">https://www.inaturalist.org/observations/11851732</a>   |
| 1100 | <i>Amauornis phoenicurus</i> | White-breasted Waterhen | 2022/3/30  | 1 | 0 | 22.49269617 | 114.03692540 | <a href="https://www.inaturalist.org/observations/109971606">https://www.inaturalist.org/observations/109971606</a> |
| 1101 | <i>Amauornis phoenicurus</i> | White-breasted Waterhen | 2022/4/15  | 1 | 0 | 22.49269617 | 114.03692540 | <a href="https://www.inaturalist.org/observations/111868649">https://www.inaturalist.org/observations/111868649</a> |
| 1102 | <i>Amauornis phoenicurus</i> | White-breasted Waterhen | 2022/1/30  | 1 | 0 | 22.49311404 | 114.04080070 | <a href="https://www.inaturalist.org/observations/106056691">https://www.inaturalist.org/observations/106056691</a> |
| 1103 | <i>Amauornis phoenicurus</i> | White-breasted Waterhen | 2022/8/21  | 2 | 0 | 22.49320820 | 114.11736370 | <a href="https://www.inaturalist.org/observations/134265441">https://www.inaturalist.org/observations/134265441</a> |

|      |                              |                         |            |   |   |             |              |                                                                                                                     |
|------|------------------------------|-------------------------|------------|---|---|-------------|--------------|---------------------------------------------------------------------------------------------------------------------|
| 1104 | <i>Amauornis phoenicurus</i> | White-breasted Waterhen | 2018/4/29  | 6 | 0 | 22.49327167 | 114.04524170 | <a href="https://www.inaturalist.org/observations/11738200">https://www.inaturalist.org/observations/11738200</a>   |
| 1105 | <i>Amauornis phoenicurus</i> | White-breasted Waterhen | 2016/12/9  | 2 | 0 | 22.49337400 | 114.04563400 | <a href="https://www.inaturalist.org/observations/12193345">https://www.inaturalist.org/observations/12193345</a>   |
| 1106 | <i>Amauornis phoenicurus</i> | White-breasted Waterhen | 2019/4/29  | 3 | 0 | 22.49339500 | 114.10494170 | <a href="https://www.inaturalist.org/observations/23826023">https://www.inaturalist.org/observations/23826023</a>   |
| 1107 | <i>Amauornis phoenicurus</i> | White-breasted Waterhen | 2019/6/2   | 4 | 0 | 22.49343000 | 114.10390500 | <a href="https://www.inaturalist.org/observations/26256788">https://www.inaturalist.org/observations/26256788</a>   |
| 1108 | <i>Amauornis phoenicurus</i> | White-breasted Waterhen | 2020/7/12  | 1 | 0 | 22.49348000 | 114.03373030 | <a href="https://www.inaturalist.org/observations/53002683">https://www.inaturalist.org/observations/53002683</a>   |
| 1109 | <i>Amauornis phoenicurus</i> | White-breasted Waterhen | 2022/9/24  | 3 | 0 | 22.49357127 | 114.10500000 | <a href="https://www.inaturalist.org/observations/136239268">https://www.inaturalist.org/observations/136239268</a> |
| 1110 | <i>Amauornis phoenicurus</i> | White-breasted Waterhen | 2020/4/25  | 1 | 0 | 22.49372000 | 114.04601400 | <a href="https://www.inaturalist.org/observations/43556219">https://www.inaturalist.org/observations/43556219</a>   |
| 1111 | <i>Amauornis phoenicurus</i> | White-breasted Waterhen | 2018/12/5  | 3 | 0 | 22.49373167 | 114.10452670 | <a href="https://www.inaturalist.org/observations/18842426">https://www.inaturalist.org/observations/18842426</a>   |
| 1112 | <i>Amauornis phoenicurus</i> | White-breasted Waterhen | 2022/5/2   | 1 | 0 | 22.49375524 | 114.04599320 | <a href="https://www.inaturalist.org/observations/115503619">https://www.inaturalist.org/observations/115503619</a> |
| 1113 | <i>Amauornis phoenicurus</i> | White-breasted Waterhen | 2021/12/19 | 1 | 0 | 22.49383075 | 114.04536770 | <a href="https://www.inaturalist.org/observations/103352947">https://www.inaturalist.org/observations/103352947</a> |
| 1114 | <i>Amauornis phoenicurus</i> | White-breasted Waterhen | 2022/5/2   | 1 | 0 | 22.49386725 | 114.04037150 | <a href="https://www.inaturalist.org/observations/116033853">https://www.inaturalist.org/observations/116033853</a> |
| 1115 | <i>Amauornis phoenicurus</i> | White-breasted Waterhen | 2020/2/4   | 0 | 0 | 22.49402600 | 114.04002820 | <a href="https://www.inaturalist.org/observations/38354239">https://www.inaturalist.org/observations/38354239</a>   |
| 1116 | <i>Amauornis phoenicurus</i> | White-breasted Waterhen | 2010/3/14  | 1 | 0 | 22.49408000 | 114.04572900 | <a href="https://www.inaturalist.org/observations/104462697">https://www.inaturalist.org/observations/104462697</a> |
| 1117 | <i>Amauornis phoenicurus</i> | White-breasted Waterhen | 2010/9/29  | 3 | 0 | 22.49428600 | 114.04574200 | <a href="https://www.inaturalist.org/observations/12478762">https://www.inaturalist.org/observations/12478762</a>   |
| 1118 | <i>Amauornis phoenicurus</i> | White-breasted Waterhen | 2022/1/1   | 1 | 0 | 22.49481900 | 114.03732450 | <a href="https://www.inaturalist.org/observations/104099860">https://www.inaturalist.org/observations/104099860</a> |
| 1119 | <i>Amauornis phoenicurus</i> | White-breasted Waterhen | 2019/4/7   | 3 | 0 | 22.49487100 | 114.04827100 | <a href="https://www.inaturalist.org/observations/23033704">https://www.inaturalist.org/observations/23033704</a>   |
| 1120 | <i>Amauornis phoenicurus</i> | White-breasted Waterhen | 2018/12/14 | 3 | 0 | 22.49492500 | 114.10488330 | <a href="https://www.inaturalist.org/observations/19007875">https://www.inaturalist.org/observations/19007875</a>   |
| 1121 | <i>Amauornis phoenicurus</i> | White-breasted Waterhen | 2010/5/9   | 3 | 0 | 22.49496000 | 114.05363800 | <a href="https://www.inaturalist.org/observations/12479081">https://www.inaturalist.org/observations/12479081</a>   |
| 1122 | <i>Amauornis phoenicurus</i> | White-breasted Waterhen | 2021/11/17 | 2 | 0 | 22.49496500 | 114.04724300 | <a href="https://www.inaturalist.org/observations/101397359">https://www.inaturalist.org/observations/101397359</a> |
| 1123 | <i>Amauornis phoenicurus</i> | White-breasted Waterhen | 2021/2/15  | 1 | 0 | 22.49500167 | 114.10467700 | <a href="https://www.inaturalist.org/observations/69621087">https://www.inaturalist.org/observations/69621087</a>   |
| 1124 | <i>Amauornis phoenicurus</i> | White-breasted Waterhen | 2020/11/28 | 1 | 0 | 22.49501107 | 114.06961300 | <a href="https://www.inaturalist.org/observations/65749846">https://www.inaturalist.org/observations/65749846</a>   |
| 1125 | <i>Amauornis phoenicurus</i> | White-breasted Waterhen | 2018/12/26 | 2 | 0 | 22.49501210 | 114.06961310 | <a href="https://www.inaturalist.org/observations/19919284">https://www.inaturalist.org/observations/19919284</a>   |
| 1126 | <i>Amauornis phoenicurus</i> | White-breasted Waterhen | 2020/12/23 | 1 | 0 | 22.49501210 | 114.06961310 | <a href="https://www.inaturalist.org/observations/67028134">https://www.inaturalist.org/observations/67028134</a>   |

|      |                              |                         |            |   |   |             |              |                                                                                                                     |
|------|------------------------------|-------------------------|------------|---|---|-------------|--------------|---------------------------------------------------------------------------------------------------------------------|
| 1127 | <i>Amauornis phoenicurus</i> | White-breasted Waterhen | 2006/4/13  | 1 | 0 | 22.49501210 | 114.06961310 | <a href="https://www.inaturalist.org/observations/67034226">https://www.inaturalist.org/observations/67034226</a>   |
| 1128 | <i>Amauornis phoenicurus</i> | White-breasted Waterhen | 2022/3/27  | 1 | 0 | 22.49501210 | 114.06961310 | <a href="https://www.inaturalist.org/observations/110072198">https://www.inaturalist.org/observations/110072198</a> |
| 1129 | <i>Amauornis phoenicurus</i> | White-breasted Waterhen | 2021/5/9   | 1 | 0 | 22.49505167 | 114.04797170 | <a href="https://www.inaturalist.org/observations/78048066">https://www.inaturalist.org/observations/78048066</a>   |
| 1130 | <i>Amauornis phoenicurus</i> | White-breasted Waterhen | 2016/12/23 | 4 | 0 | 22.49505690 | 114.03393420 | <a href="https://www.inaturalist.org/observations/4841794">https://www.inaturalist.org/observations/4841794</a>     |
| 1131 | <i>Amauornis phoenicurus</i> | White-breasted Waterhen | 2019/1/12  | 0 | 0 | 22.49505690 | 114.03393420 | <a href="https://www.inaturalist.org/observations/39199465">https://www.inaturalist.org/observations/39199465</a>   |
| 1132 | <i>Amauornis phoenicurus</i> | White-breasted Waterhen | 2019/1/12  | 0 | 0 | 22.49505690 | 114.03393420 | <a href="https://www.inaturalist.org/observations/39199538">https://www.inaturalist.org/observations/39199538</a>   |
| 1133 | <i>Amauornis phoenicurus</i> | White-breasted Waterhen | 2020/4/25  | 3 | 0 | 22.49505690 | 114.03393420 | <a href="https://www.inaturalist.org/observations/43280666">https://www.inaturalist.org/observations/43280666</a>   |
| 1134 | <i>Amauornis phoenicurus</i> | White-breasted Waterhen | 2020/4/26  | 1 | 0 | 22.49505691 | 114.03393420 | <a href="https://www.inaturalist.org/observations/43588933">https://www.inaturalist.org/observations/43588933</a>   |
| 1135 | <i>Amauornis phoenicurus</i> | White-breasted Waterhen | 2020/4/30  | 1 | 0 | 22.49505690 | 114.03393420 | <a href="https://www.inaturalist.org/observations/44578988">https://www.inaturalist.org/observations/44578988</a>   |
| 1136 | <i>Amauornis phoenicurus</i> | White-breasted Waterhen | 2020/5/9   | 2 | 0 | 22.49505691 | 114.03393420 | <a href="https://www.inaturalist.org/observations/45366366">https://www.inaturalist.org/observations/45366366</a>   |
| 1137 | <i>Amauornis phoenicurus</i> | White-breasted Waterhen | 2020/7/26  | 1 | 0 | 22.49505690 | 114.03393420 | <a href="https://www.inaturalist.org/observations/54372433">https://www.inaturalist.org/observations/54372433</a>   |
| 1138 | <i>Amauornis phoenicurus</i> | White-breasted Waterhen | 2020/11/26 | 1 | 0 | 22.49505690 | 114.03393420 | <a href="https://www.inaturalist.org/observations/75533986">https://www.inaturalist.org/observations/75533986</a>   |
| 1139 | <i>Amauornis phoenicurus</i> | White-breasted Waterhen | 2021/12/18 | 1 | 0 | 22.49505690 | 114.03393420 | <a href="https://www.inaturalist.org/observations/110747643">https://www.inaturalist.org/observations/110747643</a> |
| 1140 | <i>Amauornis phoenicurus</i> | White-breasted Waterhen | 2022/5/19  | 1 | 0 | 22.49506125 | 114.03393420 | <a href="https://www.inaturalist.org/observations/117859379">https://www.inaturalist.org/observations/117859379</a> |
| 1141 | <i>Amauornis phoenicurus</i> | White-breasted Waterhen | 2018/4/2   | 3 | 0 | 22.49509800 | 114.04781200 | <a href="https://www.inaturalist.org/observations/10728024">https://www.inaturalist.org/observations/10728024</a>   |
| 1142 | <i>Amauornis phoenicurus</i> | White-breasted Waterhen | 2010/11/10 | 1 | 0 | 22.49514200 | 114.04748800 | <a href="https://www.inaturalist.org/observations/135077513">https://www.inaturalist.org/observations/135077513</a> |
| 1143 | <i>Amauornis phoenicurus</i> | White-breasted Waterhen | 2018/4/29  | 3 | 0 | 22.49525743 | 114.05458690 | <a href="https://www.inaturalist.org/observations/11773817">https://www.inaturalist.org/observations/11773817</a>   |
| 1144 | <i>Amauornis phoenicurus</i> | White-breasted Waterhen | 2021/2/24  | 1 | 0 | 22.49529789 | 114.02982550 | <a href="https://www.inaturalist.org/observations/71860583">https://www.inaturalist.org/observations/71860583</a>   |
| 1145 | <i>Amauornis phoenicurus</i> | White-breasted Waterhen | 2019/5/11  | 3 | 0 | 22.49538712 | 114.04842480 | <a href="https://www.inaturalist.org/observations/24930476">https://www.inaturalist.org/observations/24930476</a>   |
| 1146 | <i>Amauornis phoenicurus</i> | White-breasted Waterhen | 2021/6/6   | 2 | 0 | 22.49539500 | 114.05318400 | <a href="https://www.inaturalist.org/observations/82000127">https://www.inaturalist.org/observations/82000127</a>   |
| 1147 | <i>Amauornis phoenicurus</i> | White-breasted Waterhen | 2020/9/29  | 2 | 0 | 22.49541972 | 114.02991440 | <a href="https://www.inaturalist.org/observations/62704610">https://www.inaturalist.org/observations/62704610</a>   |
| 1148 | <i>Amauornis phoenicurus</i> | White-breasted Waterhen | 2021/5/1   | 1 | 0 | 22.49545279 | 114.10689730 | <a href="https://www.inaturalist.org/observations/76358771">https://www.inaturalist.org/observations/76358771</a>   |
| 1149 | <i>Amauornis phoenicurus</i> | White-breasted Waterhen | 2019/4/27  | 3 | 0 | 22.49553264 | 114.05427610 | <a href="https://www.inaturalist.org/observations/23652127">https://www.inaturalist.org/observations/23652127</a>   |

|      |                              |                         |            |   |   |             |              |                                                                                                                     |
|------|------------------------------|-------------------------|------------|---|---|-------------|--------------|---------------------------------------------------------------------------------------------------------------------|
| 1150 | <i>Amauornis phoenicurus</i> | White-breasted Waterhen | 2020/4/25  | 1 | 0 | 22.49553264 | 114.05427610 | <a href="https://www.inaturalist.org/observations/44098222">https://www.inaturalist.org/observations/44098222</a>   |
| 1151 | <i>Amauornis phoenicurus</i> | White-breasted Waterhen | 2020/4/9   | 1 | 0 | 22.49573015 | 114.03655890 | <a href="https://www.inaturalist.org/observations/44858622">https://www.inaturalist.org/observations/44858622</a>   |
| 1152 | <i>Amauornis phoenicurus</i> | White-breasted Waterhen | 2020/4/19  | 1 | 0 | 22.49594689 | 114.04792170 | <a href="https://www.inaturalist.org/observations/42568312">https://www.inaturalist.org/observations/42568312</a>   |
| 1153 | <i>Amauornis phoenicurus</i> | White-breasted Waterhen | 2020/4/13  | 1 | 0 | 22.49640837 | 114.03835370 | <a href="https://www.inaturalist.org/observations/44211409">https://www.inaturalist.org/observations/44211409</a>   |
| 1154 | <i>Amauornis phoenicurus</i> | White-breasted Waterhen | 2017/12/6  | 3 | 0 | 22.49690308 | 114.03762580 | <a href="https://www.inaturalist.org/observations/10943833">https://www.inaturalist.org/observations/10943833</a>   |
| 1155 | <i>Amauornis phoenicurus</i> | White-breasted Waterhen | 2022/1/12  | 1 | 0 | 22.49815667 | 114.02931000 | <a href="https://www.inaturalist.org/observations/104807235">https://www.inaturalist.org/observations/104807235</a> |
| 1156 | <i>Amauornis phoenicurus</i> | White-breasted Waterhen | 2021/12/4  | 1 | 0 | 22.49872545 | 114.05279200 | <a href="https://www.inaturalist.org/observations/103413312">https://www.inaturalist.org/observations/103413312</a> |
| 1157 | <i>Amauornis phoenicurus</i> | White-breasted Waterhen | 2021/11/17 | 2 | 0 | 22.49876414 | 114.04582750 | <a href="https://www.inaturalist.org/observations/102230797">https://www.inaturalist.org/observations/102230797</a> |
| 1158 | <i>Amauornis phoenicurus</i> | White-breasted Waterhen | 2022/3/14  | 1 | 0 | 22.49876414 | 114.04582750 | <a href="https://www.inaturalist.org/observations/108580324">https://www.inaturalist.org/observations/108580324</a> |
| 1159 | <i>Amauornis phoenicurus</i> | White-breasted Waterhen | 2021/7/11  | 1 | 0 | 22.49876600 | 114.04582750 | <a href="https://www.inaturalist.org/observations/86559610">https://www.inaturalist.org/observations/86559610</a>   |
| 1160 | <i>Amauornis phoenicurus</i> | White-breasted Waterhen | 2020/11/29 | 1 | 0 | 22.49920860 | 114.13403140 | <a href="https://www.inaturalist.org/observations/65827372">https://www.inaturalist.org/observations/65827372</a>   |
| 1161 | <i>Amauornis phoenicurus</i> | White-breasted Waterhen | 2020/3/2   | 0 | 0 | 22.49942800 | 114.02772000 | <a href="https://www.inaturalist.org/observations/39526441">https://www.inaturalist.org/observations/39526441</a>   |
| 1162 | <i>Amauornis phoenicurus</i> | White-breasted Waterhen | 2022/1/10  | 2 | 0 | 22.49968490 | 114.06111280 | <a href="https://www.inaturalist.org/observations/104704789">https://www.inaturalist.org/observations/104704789</a> |
| 1163 | <i>Amauornis phoenicurus</i> | White-breasted Waterhen | 2019/1/13  | 0 | 0 | 22.50000000 | 114.11666670 | <a href="https://www.inaturalist.org/observations/39140428">https://www.inaturalist.org/observations/39140428</a>   |
| 1164 | <i>Amauornis phoenicurus</i> | White-breasted Waterhen | 2019/1/10  | 0 | 0 | 22.50000000 | 114.11666670 | <a href="https://www.inaturalist.org/observations/39441305">https://www.inaturalist.org/observations/39441305</a>   |
| 1165 | <i>Amauornis phoenicurus</i> | White-breasted Waterhen | 2020/4/17  | 1 | 0 | 22.50000000 | 114.11666670 | <a href="https://www.inaturalist.org/observations/44716799">https://www.inaturalist.org/observations/44716799</a>   |
| 1166 | <i>Amauornis phoenicurus</i> | White-breasted Waterhen | 2020/12/5  | 1 | 0 | 22.50000000 | 114.11666670 | <a href="https://www.inaturalist.org/observations/66173584">https://www.inaturalist.org/observations/66173584</a>   |
| 1167 | <i>Amauornis phoenicurus</i> | White-breasted Waterhen | 2021/1/10  | 1 | 0 | 22.50000000 | 114.11666670 | <a href="https://www.inaturalist.org/observations/113795119">https://www.inaturalist.org/observations/113795119</a> |
| 1168 | <i>Amauornis phoenicurus</i> | White-breasted Waterhen | 2022/1/20  | 1 | 0 | 22.50000000 | 114.11666700 | <a href="https://www.inaturalist.org/observations/105354378">https://www.inaturalist.org/observations/105354378</a> |
| 1169 | <i>Amauornis phoenicurus</i> | White-breasted Waterhen | 2022/5/29  | 1 | 0 | 22.50000000 | 114.11666700 | <a href="https://www.inaturalist.org/observations/120151991">https://www.inaturalist.org/observations/120151991</a> |
| 1170 | <i>Amauornis phoenicurus</i> | White-breasted Waterhen | 2021/3/12  | 1 | 0 | 22.50004095 | 114.11666660 | <a href="https://www.inaturalist.org/observations/71302674">https://www.inaturalist.org/observations/71302674</a>   |
| 1171 | <i>Amauornis phoenicurus</i> | White-breasted Waterhen | 2017/3/6   | 2 | 0 | 22.50036988 | 114.03865480 | <a href="https://www.inaturalist.org/observations/33546548">https://www.inaturalist.org/observations/33546548</a>   |
| 1172 | <i>Amauornis phoenicurus</i> | White-breasted Waterhen | 2021/5/1   | 2 | 0 | 22.50076051 | 114.05804560 | <a href="https://www.inaturalist.org/observations/77379248">https://www.inaturalist.org/observations/77379248</a>   |

|      |                              |                         |            |   |   |             |              |                                                                                                                     |
|------|------------------------------|-------------------------|------------|---|---|-------------|--------------|---------------------------------------------------------------------------------------------------------------------|
| 1173 | <i>Amauornis phoenicurus</i> | White-breasted Waterhen | 2022/2/27  | 1 | 0 | 22.50094912 | 114.07359220 | <a href="https://www.inaturalist.org/observations/107564094">https://www.inaturalist.org/observations/107564094</a> |
| 1174 | <i>Amauornis phoenicurus</i> | White-breasted Waterhen | 2019/11/27 | 2 | 0 | 22.50148400 | 114.07259900 | <a href="https://www.inaturalist.org/observations/36158108">https://www.inaturalist.org/observations/36158108</a>   |
| 1175 | <i>Amauornis phoenicurus</i> | White-breasted Waterhen | 2022/1/8   | 1 | 0 | 22.50168388 | 114.14762940 | <a href="https://www.inaturalist.org/observations/104564400">https://www.inaturalist.org/observations/104564400</a> |
| 1176 | <i>Amauornis phoenicurus</i> | White-breasted Waterhen | 2021/12/21 | 1 | 0 | 22.50249698 | 114.14856550 | <a href="https://www.inaturalist.org/observations/103406630">https://www.inaturalist.org/observations/103406630</a> |
| 1177 | <i>Amauornis phoenicurus</i> | White-breasted Waterhen | 2021/11/12 | 1 | 0 | 22.50265960 | 114.14873010 | <a href="https://www.inaturalist.org/observations/100913629">https://www.inaturalist.org/observations/100913629</a> |
| 1178 | <i>Amauornis phoenicurus</i> | White-breasted Waterhen | 2021/8/19  | 1 | 0 | 22.50308310 | 114.14905510 | <a href="https://www.inaturalist.org/observations/91720508">https://www.inaturalist.org/observations/91720508</a>   |
| 1179 | <i>Amauornis phoenicurus</i> | White-breasted Waterhen | 2021/8/6   | 1 | 0 | 22.50315488 | 114.14943720 | <a href="https://www.inaturalist.org/observations/90097067">https://www.inaturalist.org/observations/90097067</a>   |
| 1180 | <i>Amauornis phoenicurus</i> | White-breasted Waterhen | 2011/2/16  | 1 | 0 | 22.50403010 | 88.39891590  | <a href="https://www.inaturalist.org/observations/99439163">https://www.inaturalist.org/observations/99439163</a>   |
| 1181 | <i>Amauornis phoenicurus</i> | White-breasted Waterhen | 2011/2/16  | 1 | 0 | 22.50403010 | 88.39891590  | <a href="https://www.inaturalist.org/observations/99439164">https://www.inaturalist.org/observations/99439164</a>   |
| 1182 | <i>Amauornis phoenicurus</i> | White-breasted Waterhen | 2011/2/16  | 1 | 0 | 22.50403010 | 88.39891590  | <a href="https://www.inaturalist.org/observations/99439165">https://www.inaturalist.org/observations/99439165</a>   |
| 1183 | <i>Amauornis phoenicurus</i> | White-breasted Waterhen | 2011/2/16  | 1 | 0 | 22.50403010 | 88.39891590  | <a href="https://www.inaturalist.org/observations/99439166">https://www.inaturalist.org/observations/99439166</a>   |
| 1184 | <i>Amauornis phoenicurus</i> | White-breasted Waterhen | 2020/4/24  | 2 | 0 | 22.50539248 | 114.11143720 | <a href="https://www.inaturalist.org/observations/43601492">https://www.inaturalist.org/observations/43601492</a>   |
| 1185 | <i>Amauornis phoenicurus</i> | White-breasted Waterhen | 2021/5/1   | 1 | 0 | 22.50587833 | 114.11030500 | <a href="https://www.inaturalist.org/observations/77276143">https://www.inaturalist.org/observations/77276143</a>   |
| 1186 | <i>Amauornis phoenicurus</i> | White-breasted Waterhen | 2022/4/3   | 1 | 0 | 22.50590882 | 114.24414400 | <a href="https://www.inaturalist.org/observations/110276682">https://www.inaturalist.org/observations/110276682</a> |
| 1187 | <i>Amauornis phoenicurus</i> | White-breasted Waterhen | 2021/10/22 | 1 | 0 | 22.50650937 | 114.11283680 | <a href="https://www.inaturalist.org/observations/99108566">https://www.inaturalist.org/observations/99108566</a>   |
| 1188 | <i>Amauornis phoenicurus</i> | White-breasted Waterhen | 2021/4/25  | 1 | 0 | 22.50708333 | 114.11234170 | <a href="https://www.inaturalist.org/observations/75304831">https://www.inaturalist.org/observations/75304831</a>   |
| 1189 | <i>Amauornis phoenicurus</i> | White-breasted Waterhen | 2021/5/2   | 1 | 0 | 22.50720352 | 114.11355660 | <a href="https://www.inaturalist.org/observations/76583044">https://www.inaturalist.org/observations/76583044</a>   |
| 1190 | <i>Amauornis phoenicurus</i> | White-breasted Waterhen | 2021/5/1   | 2 | 0 | 22.50737500 | 114.11071000 | <a href="https://www.inaturalist.org/observations/76921963">https://www.inaturalist.org/observations/76921963</a>   |
| 1191 | <i>Amauornis phoenicurus</i> | White-breasted Waterhen | 2017/12/6  | 4 | 0 | 22.50773370 | 114.07467370 | <a href="https://www.inaturalist.org/observations/10613535">https://www.inaturalist.org/observations/10613535</a>   |
| 1192 | <i>Amauornis phoenicurus</i> | White-breasted Waterhen | 2019/10/24 | 2 | 0 | 22.50775354 | 114.11348400 | <a href="https://www.inaturalist.org/observations/37059483">https://www.inaturalist.org/observations/37059483</a>   |
| 1193 | <i>Amauornis phoenicurus</i> | White-breasted Waterhen | 2020/12/11 | 1 | 0 | 22.50775354 | 114.11348400 | <a href="https://www.inaturalist.org/observations/70609403">https://www.inaturalist.org/observations/70609403</a>   |
| 1194 | <i>Amauornis phoenicurus</i> | White-breasted Waterhen | 2021/5/3   | 1 | 0 | 22.50775354 | 114.11348400 | <a href="https://www.inaturalist.org/observations/77371539">https://www.inaturalist.org/observations/77371539</a>   |
| 1195 | <i>Amauornis phoenicurus</i> | White-breasted Waterhen | 2019/12/19 | 1 | 0 | 22.50786167 | 114.11304000 | <a href="https://www.inaturalist.org/observations/36958485">https://www.inaturalist.org/observations/36958485</a>   |



|      |                              |                         |            |   |   |             |              |                                                                                                                     |
|------|------------------------------|-------------------------|------------|---|---|-------------|--------------|---------------------------------------------------------------------------------------------------------------------|
| 1196 | <i>Amauornis phoenicurus</i> | White-breasted Waterhen | 2021/12/26 | 2 | 0 | 22.50826130 | 114.11050090 | <a href="https://www.inaturalist.org/observations/103688818">https://www.inaturalist.org/observations/103688818</a> |
| 1197 | <i>Amauornis phoenicurus</i> | White-breasted Waterhen | 2019/12/21 | 1 | 0 | 22.50836389 | 114.11349170 | <a href="https://www.inaturalist.org/observations/36824261">https://www.inaturalist.org/observations/36824261</a>   |
| 1198 | <i>Amauornis phoenicurus</i> | White-breasted Waterhen | 2016/3/13  | 2 | 0 | 22.50850319 | 114.11333410 | <a href="https://www.inaturalist.org/observations/49218238">https://www.inaturalist.org/observations/49218238</a>   |
| 1199 | <i>Amauornis phoenicurus</i> | White-breasted Waterhen | 2021/10/31 | 1 | 0 | 22.50873742 | 114.11372510 | <a href="https://www.inaturalist.org/observations/100154670">https://www.inaturalist.org/observations/100154670</a> |
| 1200 | <i>Amauornis phoenicurus</i> | White-breasted Waterhen | 2014/2/22  | 3 | 0 | 22.50879520 | 114.11297710 | <a href="https://www.inaturalist.org/observations/12264407">https://www.inaturalist.org/observations/12264407</a>   |
| 1201 | <i>Amauornis phoenicurus</i> | White-breasted Waterhen | 2018/12/28 | 3 | 0 | 22.50879520 | 114.11297710 | <a href="https://www.inaturalist.org/observations/19924500">https://www.inaturalist.org/observations/19924500</a>   |
| 1202 | <i>Amauornis phoenicurus</i> | White-breasted Waterhen | 2019/1/26  | 2 | 0 | 22.50879520 | 114.11297710 | <a href="https://www.inaturalist.org/observations/20404524">https://www.inaturalist.org/observations/20404524</a>   |
| 1203 | <i>Amauornis phoenicurus</i> | White-breasted Waterhen | 2014/6/1   | 1 | 0 | 22.50879520 | 114.11297710 | <a href="https://www.inaturalist.org/observations/41607686">https://www.inaturalist.org/observations/41607686</a>   |
| 1204 | <i>Amauornis phoenicurus</i> | White-breasted Waterhen | 2020/4/30  | 1 | 0 | 22.50879520 | 114.11297710 | <a href="https://www.inaturalist.org/observations/44365542">https://www.inaturalist.org/observations/44365542</a>   |
| 1205 | <i>Amauornis phoenicurus</i> | White-breasted Waterhen | 2020/11/28 | 2 | 0 | 22.50879520 | 114.11297710 | <a href="https://www.inaturalist.org/observations/65808785">https://www.inaturalist.org/observations/65808785</a>   |
| 1206 | <i>Amauornis phoenicurus</i> | White-breasted Waterhen | 2021/4/5   | 2 | 0 | 22.50879520 | 114.11297710 | <a href="https://www.inaturalist.org/observations/79538288">https://www.inaturalist.org/observations/79538288</a>   |
| 1207 | <i>Amauornis phoenicurus</i> | White-breasted Waterhen | 2017/5/6   | 1 | 0 | 22.50879558 | 114.11297590 | <a href="https://www.inaturalist.org/observations/72428779">https://www.inaturalist.org/observations/72428779</a>   |
| 1208 | <i>Amauornis phoenicurus</i> | White-breasted Waterhen | 2022/5/27  | 1 | 0 | 22.50893682 | 114.11529000 | <a href="https://www.inaturalist.org/observations/118886206">https://www.inaturalist.org/observations/118886206</a> |
| 1209 | <i>Amauornis phoenicurus</i> | White-breasted Waterhen | 2020/10/17 | 1 | 0 | 22.50897337 | 114.11362660 | <a href="https://www.inaturalist.org/observations/62855704">https://www.inaturalist.org/observations/62855704</a>   |
| 1210 | <i>Amauornis phoenicurus</i> | White-breasted Waterhen | 2020/4/27  | 1 | 0 | 22.50915475 | 114.11152600 | <a href="https://www.inaturalist.org/observations/43886040">https://www.inaturalist.org/observations/43886040</a>   |
| 1211 | <i>Amauornis phoenicurus</i> | White-breasted Waterhen | 2021/3/12  | 1 | 0 | 22.50940421 | 114.11304900 | <a href="https://www.inaturalist.org/observations/71064197">https://www.inaturalist.org/observations/71064197</a>   |
| 1212 | <i>Amauornis phoenicurus</i> | White-breasted Waterhen | 2019/12/11 | 1 | 0 | 22.50951460 | 114.11417190 | <a href="https://www.inaturalist.org/observations/47255293">https://www.inaturalist.org/observations/47255293</a>   |
| 1213 | <i>Amauornis phoenicurus</i> | White-breasted Waterhen | 2019/3/22  | 2 | 0 | 22.50951874 | 114.11470440 | <a href="https://www.inaturalist.org/observations/22175131">https://www.inaturalist.org/observations/22175131</a>   |
| 1214 | <i>Amauornis phoenicurus</i> | White-breasted Waterhen | 2020/12/21 | 2 | 0 | 22.50967167 | 114.11278830 | <a href="https://www.inaturalist.org/observations/66915182">https://www.inaturalist.org/observations/66915182</a>   |
| 1215 | <i>Amauornis phoenicurus</i> | White-breasted Waterhen | 2020/4/25  | 1 | 0 | 22.50987667 | 114.11353500 | <a href="https://www.inaturalist.org/observations/44290175">https://www.inaturalist.org/observations/44290175</a>   |
| 1216 | <i>Amauornis phoenicurus</i> | White-breasted Waterhen | 2018/4/29  | 3 | 0 | 22.51016894 | 114.11184070 | <a href="https://www.inaturalist.org/observations/11883915">https://www.inaturalist.org/observations/11883915</a>   |
| 1217 | <i>Amauornis phoenicurus</i> | White-breasted Waterhen | 2020/4/25  | 1 | 0 | 22.51022600 | 114.11326600 | <a href="https://www.inaturalist.org/observations/44454215">https://www.inaturalist.org/observations/44454215</a>   |
| 1218 | <i>Amauornis phoenicurus</i> | White-breasted Waterhen | 2019/1/6   | 3 | 0 | 22.51049006 | 114.11142140 | <a href="https://www.inaturalist.org/observations/20020692">https://www.inaturalist.org/observations/20020692</a>   |

|      |                              |                         |            |   |   |             |              |                                                                                                                     |
|------|------------------------------|-------------------------|------------|---|---|-------------|--------------|---------------------------------------------------------------------------------------------------------------------|
| 1219 | <i>Amauornis phoenicurus</i> | White-breasted Waterhen | 2020/12/17 | 2 | 0 | 22.51053611 | 114.11179810 | <a href="https://www.inaturalist.org/observations/66734415">https://www.inaturalist.org/observations/66734415</a>   |
| 1220 | <i>Amauornis phoenicurus</i> | White-breasted Waterhen | 2020/11/23 | 2 | 0 | 22.51058600 | 114.11088500 | <a href="https://www.inaturalist.org/observations/65465035">https://www.inaturalist.org/observations/65465035</a>   |
| 1221 | <i>Amauornis phoenicurus</i> | White-breasted Waterhen | 2019/12/3  | 1 | 0 | 22.51101296 | 114.11234830 | <a href="https://www.inaturalist.org/observations/36317964">https://www.inaturalist.org/observations/36317964</a>   |
| 1222 | <i>Amauornis phoenicurus</i> | White-breasted Waterhen | 2021/5/2   | 1 | 0 | 22.51128831 | 114.12597660 | <a href="https://www.inaturalist.org/observations/76822819">https://www.inaturalist.org/observations/76822819</a>   |
| 1223 | <i>Amauornis phoenicurus</i> | White-breasted Waterhen | 2021/12/18 | 1 | 0 | 22.51128831 | 114.12597660 | <a href="https://www.inaturalist.org/observations/103353154">https://www.inaturalist.org/observations/103353154</a> |
| 1224 | <i>Amauornis phoenicurus</i> | White-breasted Waterhen | 2020/9/1   | 1 | 0 | 22.51133106 | 114.11366560 | <a href="https://www.inaturalist.org/observations/58243516">https://www.inaturalist.org/observations/58243516</a>   |
| 1225 | <i>Amauornis phoenicurus</i> | White-breasted Waterhen | 2015/2/25  | 1 | 0 | 22.51211537 | 88.36260086  | <a href="https://www.inaturalist.org/observations/93052434">https://www.inaturalist.org/observations/93052434</a>   |
| 1226 | <i>Amauornis phoenicurus</i> | White-breasted Waterhen | 2021/2/27  | 1 | 0 | 22.51245624 | 114.11397380 | <a href="https://www.inaturalist.org/observations/70383324">https://www.inaturalist.org/observations/70383324</a>   |
| 1227 | <i>Amauornis phoenicurus</i> | White-breasted Waterhen | 2022/6/18  | 1 | 0 | 22.51302395 | 114.10846990 | <a href="https://www.inaturalist.org/observations/127701811">https://www.inaturalist.org/observations/127701811</a> |
| 1228 | <i>Amauornis phoenicurus</i> | White-breasted Waterhen | 2021/9/25  | 2 | 0 | 22.51780382 | 72.97847062  | <a href="https://www.inaturalist.org/observations/96224523">https://www.inaturalist.org/observations/96224523</a>   |
| 1229 | <i>Amauornis phoenicurus</i> | White-breasted Waterhen | 2021/7/17  | 3 | 0 | 22.51871763 | 72.97032960  | <a href="https://www.inaturalist.org/observations/90272502">https://www.inaturalist.org/observations/90272502</a>   |
| 1230 | <i>Amauornis phoenicurus</i> | White-breasted Waterhen | 2022/8/7   | 5 | 0 | 22.51882748 | 72.97094528  | <a href="https://www.inaturalist.org/observations/129783813">https://www.inaturalist.org/observations/129783813</a> |
| 1231 | <i>Amauornis phoenicurus</i> | White-breasted Waterhen | 2022/3/5   | 2 | 0 | 22.52132225 | 114.17527770 | <a href="https://www.inaturalist.org/observations/108019546">https://www.inaturalist.org/observations/108019546</a> |
| 1232 | <i>Amauornis phoenicurus</i> | White-breasted Waterhen | 2020/7/19  | 1 | 0 | 22.52218889 | 114.20799390 | <a href="https://www.inaturalist.org/observations/53610825">https://www.inaturalist.org/observations/53610825</a>   |
| 1233 | <i>Amauornis phoenicurus</i> | White-breasted Waterhen | 2021/2/14  | 1 | 0 | 22.52309531 | 114.21103810 | <a href="https://www.inaturalist.org/observations/78586821">https://www.inaturalist.org/observations/78586821</a>   |
| 1234 | <i>Amauornis phoenicurus</i> | White-breasted Waterhen | 2022/8/28  | 3 | 0 | 22.52675128 | 72.93319775  | <a href="https://www.inaturalist.org/observations/132550749">https://www.inaturalist.org/observations/132550749</a> |
| 1235 | <i>Amauornis phoenicurus</i> | White-breasted Waterhen | 2021/7/4   | 2 | 0 | 22.52746410 | 72.93369140  | <a href="https://www.inaturalist.org/observations/85607988">https://www.inaturalist.org/observations/85607988</a>   |
| 1236 | <i>Amauornis phoenicurus</i> | White-breasted Waterhen | 2019/12/12 | 3 | 0 | 22.52966303 | 88.26159798  | <a href="https://www.inaturalist.org/observations/36608000">https://www.inaturalist.org/observations/36608000</a>   |
| 1237 | <i>Amauornis phoenicurus</i> | White-breasted Waterhen | 2022/8/1   | 2 | 0 | 22.53009268 | 88.25637883  | <a href="https://www.inaturalist.org/observations/129812459">https://www.inaturalist.org/observations/129812459</a> |
| 1238 | <i>Amauornis phoenicurus</i> | White-breasted Waterhen | 2020/1/15  | 1 | 0 | 22.53029513 | 113.93196540 | <a href="https://www.inaturalist.org/observations/66412450">https://www.inaturalist.org/observations/66412450</a>   |
| 1239 | <i>Amauornis phoenicurus</i> | White-breasted Waterhen | 2019/4/28  | 1 | 0 | 22.53107458 | 114.23595360 | <a href="https://www.inaturalist.org/observations/24243200">https://www.inaturalist.org/observations/24243200</a>   |
| 1240 | <i>Amauornis phoenicurus</i> | White-breasted Waterhen | 2021/7/25  | 1 | 0 | 22.53681278 | 113.93061200 | <a href="https://www.inaturalist.org/observations/93828025">https://www.inaturalist.org/observations/93828025</a>   |
| 1241 | <i>Amauornis phoenicurus</i> | White-breasted Waterhen | 2020/6/11  | 1 | 0 | 22.53682149 | 113.93056530 | <a href="https://www.inaturalist.org/observations/66564552">https://www.inaturalist.org/observations/66564552</a>   |

|      |                              |                         |            |   |   |             |              |                                                                                                                     |
|------|------------------------------|-------------------------|------------|---|---|-------------|--------------|---------------------------------------------------------------------------------------------------------------------|
| 1242 | <i>Amauornis phoenicurus</i> | White-breasted Waterhen | 2020/5/20  | 1 | 0 | 22.53686732 | 113.93056660 | <a href="https://www.inaturalist.org/observations/66564135">https://www.inaturalist.org/observations/66564135</a>   |
| 1243 | <i>Amauornis phoenicurus</i> | White-breasted Waterhen | 2020/6/4   | 1 | 0 | 22.53696024 | 113.93086370 | <a href="https://www.inaturalist.org/observations/72075505">https://www.inaturalist.org/observations/72075505</a>   |
| 1244 | <i>Amauornis phoenicurus</i> | White-breasted Waterhen | 2021/5/19  | 1 | 0 | 22.53704943 | 113.93096160 | <a href="https://www.inaturalist.org/observations/82144841">https://www.inaturalist.org/observations/82144841</a>   |
| 1245 | <i>Amauornis phoenicurus</i> | White-breasted Waterhen | 2021/1/27  | 1 | 0 | 22.53705836 | 113.93102700 | <a href="https://www.inaturalist.org/observations/73184512">https://www.inaturalist.org/observations/73184512</a>   |
| 1246 | <i>Amauornis phoenicurus</i> | White-breasted Waterhen | 2021/6/14  | 1 | 0 | 22.53706380 | 113.93088930 | <a href="https://www.inaturalist.org/observations/87686022">https://www.inaturalist.org/observations/87686022</a>   |
| 1247 | <i>Amauornis phoenicurus</i> | White-breasted Waterhen | 2020/8/12  | 1 | 0 | 22.53723645 | 113.93057340 | <a href="https://www.inaturalist.org/observations/66644561">https://www.inaturalist.org/observations/66644561</a>   |
| 1248 | <i>Amauornis phoenicurus</i> | White-breasted Waterhen | 2022/8/13  | 3 | 0 | 22.53826860 | 88.33138490  | <a href="https://www.inaturalist.org/observations/130656011">https://www.inaturalist.org/observations/130656011</a> |
| 1249 | <i>Amauornis phoenicurus</i> | White-breasted Waterhen | 2020/4/20  | 1 | 0 | 22.53872018 | 120.59035780 | <a href="https://www.inaturalist.org/observations/42752780">https://www.inaturalist.org/observations/42752780</a>   |
| 1250 | <i>Amauornis phoenicurus</i> | White-breasted Waterhen | 2018/9/16  | 3 | 0 | 22.54068700 | 72.96746350  | <a href="https://www.inaturalist.org/observations/54242452">https://www.inaturalist.org/observations/54242452</a>   |
| 1251 | <i>Amauornis phoenicurus</i> | White-breasted Waterhen | 2021/2/17  | 1 | 0 | 22.54285990 | 114.05956000 | <a href="https://www.inaturalist.org/observations/106368032">https://www.inaturalist.org/observations/106368032</a> |
| 1252 | <i>Amauornis phoenicurus</i> | White-breasted Waterhen | 2021/6/2   | 2 | 0 | 22.54610711 | 87.81060934  | <a href="https://www.inaturalist.org/observations/83206825">https://www.inaturalist.org/observations/83206825</a>   |
| 1253 | <i>Amauornis phoenicurus</i> | White-breasted Waterhen | 2021/7/14  | 3 | 0 | 22.54611702 | 87.81060934  | <a href="https://www.inaturalist.org/observations/107823079">https://www.inaturalist.org/observations/107823079</a> |
| 1254 | <i>Amauornis phoenicurus</i> | White-breasted Waterhen | 2022/2/2   | 2 | 0 | 22.54724689 | 114.10140840 | <a href="https://www.inaturalist.org/observations/106014349">https://www.inaturalist.org/observations/106014349</a> |
| 1255 | <i>Amauornis phoenicurus</i> | White-breasted Waterhen | 2022/2/3   | 1 | 0 | 22.54786383 | 114.17958980 | <a href="https://www.inaturalist.org/observations/106378760">https://www.inaturalist.org/observations/106378760</a> |
| 1256 | <i>Amauornis phoenicurus</i> | White-breasted Waterhen | 2020/5/8   | 1 | 0 | 22.55258078 | 114.02770470 | <a href="https://www.inaturalist.org/observations/46487371">https://www.inaturalist.org/observations/46487371</a>   |
| 1257 | <i>Amauornis phoenicurus</i> | White-breasted Waterhen | 2020/3/16  | 4 | 0 | 22.55351727 | 78.12767267  | <a href="https://www.inaturalist.org/observations/66187526">https://www.inaturalist.org/observations/66187526</a>   |
| 1258 | <i>Amauornis phoenicurus</i> | White-breasted Waterhen | 2018/11/3  | 1 | 0 | 22.55359350 | 114.05867300 | <a href="https://www.inaturalist.org/observations/124968680">https://www.inaturalist.org/observations/124968680</a> |
| 1259 | <i>Amauornis phoenicurus</i> | White-breasted Waterhen | 2019/10/14 | 5 | 0 | 22.55386230 | 87.81336750  | <a href="https://www.inaturalist.org/observations/34338748">https://www.inaturalist.org/observations/34338748</a>   |
| 1260 | <i>Amauornis phoenicurus</i> | White-breasted Waterhen | 2022/9/25  | 1 | 0 | 22.55678465 | 88.29953332  | <a href="https://www.inaturalist.org/observations/136580779">https://www.inaturalist.org/observations/136580779</a> |
| 1261 | <i>Amauornis phoenicurus</i> | White-breasted Waterhen | 2022/9/25  | 1 | 0 | 22.55678465 | 88.29953332  | <a href="https://www.inaturalist.org/observations/136580784">https://www.inaturalist.org/observations/136580784</a> |
| 1262 | <i>Amauornis phoenicurus</i> | White-breasted Waterhen | 2018/11/16 | 1 | 0 | 22.55690150 | 114.11996700 | <a href="https://www.inaturalist.org/observations/124964399">https://www.inaturalist.org/observations/124964399</a> |
| 1263 | <i>Amauornis phoenicurus</i> | White-breasted Waterhen | 2021/12/22 | 1 | 0 | 22.55710179 | 88.29189318  | <a href="https://www.inaturalist.org/observations/104273091">https://www.inaturalist.org/observations/104273091</a> |
| 1264 | <i>Amauornis phoenicurus</i> | White-breasted Waterhen | 2020/12/5  | 1 | 0 | 22.55720138 | 120.61811390 | <a href="https://www.inaturalist.org/observations/66122062">https://www.inaturalist.org/observations/66122062</a>   |

|      |                              |                         |            |   |   |             |              |                                                                                                                     |
|------|------------------------------|-------------------------|------------|---|---|-------------|--------------|---------------------------------------------------------------------------------------------------------------------|
| 1265 | <i>Amauornis phoenicurus</i> | White-breasted Waterhen | 2022/8/14  | 6 | 0 | 22.55868582 | 88.29112038  | <a href="https://www.inaturalist.org/observations/130798662">https://www.inaturalist.org/observations/130798662</a> |
| 1266 | <i>Amauornis phoenicurus</i> | White-breasted Waterhen | 2020/2/16  | 1 | 0 | 22.55869522 | 88.29191948  | <a href="https://www.inaturalist.org/observations/47779001">https://www.inaturalist.org/observations/47779001</a>   |
| 1267 | <i>Amauornis phoenicurus</i> | White-breasted Waterhen | 2021/10/10 | 4 | 0 | 22.56012363 | 88.28998466  | <a href="https://www.inaturalist.org/observations/98021392">https://www.inaturalist.org/observations/98021392</a>   |
| 1268 | <i>Amauornis phoenicurus</i> | White-breasted Waterhen | 2018/6/29  | 5 | 0 | 22.56177800 | 88.29099200  | <a href="https://www.inaturalist.org/observations/16524581">https://www.inaturalist.org/observations/16524581</a>   |
| 1269 | <i>Amauornis phoenicurus</i> | White-breasted Waterhen | 2022/5/10  | 1 | 0 | 22.56547344 | 114.11852810 | <a href="https://www.inaturalist.org/observations/125279352">https://www.inaturalist.org/observations/125279352</a> |
| 1270 | <i>Amauornis phoenicurus</i> | White-breasted Waterhen | 2021/1/22  | 1 | 0 | 22.56620162 | 114.11979160 | <a href="https://www.inaturalist.org/observations/72993463">https://www.inaturalist.org/observations/72993463</a>   |
| 1271 | <i>Amauornis phoenicurus</i> | White-breasted Waterhen | 2022/3/27  | 1 | 0 | 22.57789587 | 114.10360740 | <a href="https://www.inaturalist.org/observations/109654897">https://www.inaturalist.org/observations/109654897</a> |
| 1272 | <i>Amauornis phoenicurus</i> | White-breasted Waterhen | 2022/1/11  | 1 | 0 | 22.57862263 | 114.10440230 | <a href="https://www.inaturalist.org/observations/104758576">https://www.inaturalist.org/observations/104758576</a> |
| 1273 | <i>Amauornis phoenicurus</i> | White-breasted Waterhen | 2021/12/18 | 1 | 0 | 22.57947735 | 114.17344390 | <a href="https://www.inaturalist.org/observations/103366203">https://www.inaturalist.org/observations/103366203</a> |
| 1274 | <i>Amauornis phoenicurus</i> | White-breasted Waterhen | 2020/2/16  | 3 | 0 | 22.58132701 | 88.28413021  | <a href="https://www.inaturalist.org/observations/64942421">https://www.inaturalist.org/observations/64942421</a>   |
| 1275 | <i>Amauornis phoenicurus</i> | White-breasted Waterhen | 2022/1/12  | 3 | 0 | 22.58248278 | 88.28319806  | <a href="https://www.inaturalist.org/observations/106331189">https://www.inaturalist.org/observations/106331189</a> |
| 1276 | <i>Amauornis phoenicurus</i> | White-breasted Waterhen | 2021/6/25  | 3 | 0 | 22.58413977 | 88.36168781  | <a href="https://www.inaturalist.org/observations/84404678">https://www.inaturalist.org/observations/84404678</a>   |
| 1277 | <i>Amauornis phoenicurus</i> | White-breasted Waterhen | 2022/5/9   | 3 | 0 | 22.58461030 | 88.41616260  | <a href="https://www.inaturalist.org/observations/124841979">https://www.inaturalist.org/observations/124841979</a> |
| 1278 | <i>Amauornis phoenicurus</i> | White-breasted Waterhen | 2017/4/9   | 5 | 0 | 22.58675970 | 88.41494010  | <a href="https://www.inaturalist.org/observations/6149953">https://www.inaturalist.org/observations/6149953</a>     |
| 1279 | <i>Amauornis phoenicurus</i> | White-breasted Waterhen | 2018/10/4  | 1 | 0 | 22.59790833 | 113.98004170 | <a href="https://www.inaturalist.org/observations/81275910">https://www.inaturalist.org/observations/81275910</a>   |
| 1280 | <i>Amauornis phoenicurus</i> | White-breasted Waterhen | 2019/7/29  | 8 | 0 | 22.61456806 | 88.38771712  | <a href="https://www.inaturalist.org/observations/29832689">https://www.inaturalist.org/observations/29832689</a>   |
| 1281 | <i>Amauornis phoenicurus</i> | White-breasted Waterhen | 2018/5/14  | 1 | 0 | 22.61809125 | 120.37649990 | <a href="https://www.inaturalist.org/observations/12445190">https://www.inaturalist.org/observations/12445190</a>   |
| 1282 | <i>Amauornis phoenicurus</i> | White-breasted Waterhen | 2021/12/11 | 2 | 0 | 22.62319092 | 88.40902593  | <a href="https://www.inaturalist.org/observations/102850959">https://www.inaturalist.org/observations/102850959</a> |
| 1283 | <i>Amauornis phoenicurus</i> | White-breasted Waterhen | 2017/3/20  | 3 | 0 | 22.62711412 | 120.52353320 | <a href="https://www.inaturalist.org/observations/14034958">https://www.inaturalist.org/observations/14034958</a>   |
| 1284 | <i>Amauornis phoenicurus</i> | White-breasted Waterhen | 2022/2/18  | 4 | 0 | 22.63032000 | 73.51347500  | <a href="https://www.inaturalist.org/observations/119838430">https://www.inaturalist.org/observations/119838430</a> |
| 1285 | <i>Amauornis phoenicurus</i> | White-breasted Waterhen | 2021/5/22  | 2 | 0 | 22.63834623 | 120.61666080 | <a href="https://www.inaturalist.org/observations/80084295">https://www.inaturalist.org/observations/80084295</a>   |
| 1286 | <i>Amauornis phoenicurus</i> | White-breasted Waterhen | 2020/7/6   | 1 | 0 | 22.63837908 | 120.61696740 | <a href="https://www.inaturalist.org/observations/52131989">https://www.inaturalist.org/observations/52131989</a>   |
| 1287 | <i>Amauornis phoenicurus</i> | White-breasted Waterhen | 2020/7/19  | 1 | 0 | 22.63889500 | 120.61635880 | <a href="https://www.inaturalist.org/observations/53707367">https://www.inaturalist.org/observations/53707367</a>   |

|      |                              |                         |            |   |   |             |              |                                                                                                                     |
|------|------------------------------|-------------------------|------------|---|---|-------------|--------------|---------------------------------------------------------------------------------------------------------------------|
| 1288 | <i>Amauornis phoenicurus</i> | White-breasted Waterhen | 2022/6/11  | 1 | 0 | 22.64387700 | 114.19610100 | <a href="https://www.inaturalist.org/observations/133482405">https://www.inaturalist.org/observations/133482405</a> |
| 1289 | <i>Amauornis phoenicurus</i> | White-breasted Waterhen | 2020/4/6   | 0 | 0 | 22.64424476 | 120.36108640 | <a href="https://www.inaturalist.org/observations/41517859">https://www.inaturalist.org/observations/41517859</a>   |
| 1290 | <i>Amauornis phoenicurus</i> | White-breasted Waterhen | 2019/3/6   | 2 | 0 | 22.65224314 | 114.29271660 | <a href="https://www.inaturalist.org/observations/27765726">https://www.inaturalist.org/observations/27765726</a>   |
| 1291 | <i>Amauornis phoenicurus</i> | White-breasted Waterhen | 2022/5/15  | 1 | 0 | 22.65582083 | 86.50575256  | <a href="https://www.inaturalist.org/observations/117165875">https://www.inaturalist.org/observations/117165875</a> |
| 1292 | <i>Amauornis phoenicurus</i> | White-breasted Waterhen | 2022/8/5   | 0 | 0 | 22.65716311 | 120.28563350 | <a href="https://www.inaturalist.org/observations/129663718">https://www.inaturalist.org/observations/129663718</a> |
| 1293 | <i>Amauornis phoenicurus</i> | White-breasted Waterhen | 2022/7/1   | 1 | 0 | 22.65744364 | 120.28604180 | <a href="https://www.inaturalist.org/observations/124232211">https://www.inaturalist.org/observations/124232211</a> |
| 1294 | <i>Amauornis phoenicurus</i> | White-breasted Waterhen | 2019/7/18  | 4 | 0 | 22.66837780 | 88.35941577  | <a href="https://www.inaturalist.org/observations/29500842">https://www.inaturalist.org/observations/29500842</a>   |
| 1295 | <i>Amauornis phoenicurus</i> | White-breasted Waterhen | 2020/5/6   | 1 | 0 | 22.68383449 | 88.43333244  | <a href="https://www.inaturalist.org/observations/56515377">https://www.inaturalist.org/observations/56515377</a>   |
| 1296 | <i>Amauornis phoenicurus</i> | White-breasted Waterhen | 2021/9/20  | 1 | 0 | 22.68826958 | 114.34309590 | <a href="https://www.inaturalist.org/observations/100121974">https://www.inaturalist.org/observations/100121974</a> |
| 1297 | <i>Amauornis phoenicurus</i> | White-breasted Waterhen | 2017/6/5   | 6 | 0 | 22.69541622 | 121.06399540 | <a href="https://www.inaturalist.org/observations/9132915">https://www.inaturalist.org/observations/9132915</a>     |
| 1298 | <i>Amauornis phoenicurus</i> | White-breasted Waterhen | 2022/2/8   | 1 | 0 | 22.69711500 | 120.33694110 | <a href="https://www.inaturalist.org/observations/106605871">https://www.inaturalist.org/observations/106605871</a> |
| 1299 | <i>Amauornis phoenicurus</i> | White-breasted Waterhen | 2022/1/30  | 1 | 0 | 22.69796300 | 113.83266400 | <a href="https://www.inaturalist.org/observations/105954131">https://www.inaturalist.org/observations/105954131</a> |
| 1300 | <i>Amauornis phoenicurus</i> | White-breasted Waterhen | 2020/5/15  | 1 | 0 | 22.70903921 | 120.50654640 | <a href="https://www.inaturalist.org/observations/46095356">https://www.inaturalist.org/observations/46095356</a>   |
| 1301 | <i>Amauornis phoenicurus</i> | White-breasted Waterhen | 2022/1/25  | 1 | 0 | 22.71017900 | 120.50728100 | <a href="https://www.inaturalist.org/observations/106071803">https://www.inaturalist.org/observations/106071803</a> |
| 1302 | <i>Amauornis phoenicurus</i> | White-breasted Waterhen | 2019/6/7   | 2 | 0 | 22.71259963 | 120.50946400 | <a href="https://www.inaturalist.org/observations/26548485">https://www.inaturalist.org/observations/26548485</a>   |
| 1303 | <i>Amauornis phoenicurus</i> | White-breasted Waterhen | 2018/5/18  | 2 | 0 | 22.71641357 | 120.47369450 | <a href="https://www.inaturalist.org/observations/14067167">https://www.inaturalist.org/observations/14067167</a>   |
| 1304 | <i>Amauornis phoenicurus</i> | White-breasted Waterhen | 2022/6/28  | 2 | 0 | 22.71871655 | 121.10889180 | <a href="https://www.inaturalist.org/observations/125120825">https://www.inaturalist.org/observations/125120825</a> |
| 1305 | <i>Amauornis phoenicurus</i> | White-breasted Waterhen | 2021/12/31 | 3 | 0 | 22.72105511 | 88.37756865  | <a href="https://www.inaturalist.org/observations/104747856">https://www.inaturalist.org/observations/104747856</a> |
| 1306 | <i>Amauornis phoenicurus</i> | White-breasted Waterhen | 2015/8/18  | 5 | 0 | 22.72403043 | 77.76655553  | <a href="https://www.inaturalist.org/observations/17836060">https://www.inaturalist.org/observations/17836060</a>   |
| 1307 | <i>Amauornis phoenicurus</i> | White-breasted Waterhen | 2022/6/12  | 1 | 0 | 22.72516441 | 114.23696140 | <a href="https://www.inaturalist.org/observations/121410634">https://www.inaturalist.org/observations/121410634</a> |
| 1308 | <i>Amauornis phoenicurus</i> | White-breasted Waterhen | 2011/6/24  | 1 | 0 | 22.73011950 | 114.36536070 | <a href="https://www.inaturalist.org/observations/116452212">https://www.inaturalist.org/observations/116452212</a> |
| 1309 | <i>Amauornis phoenicurus</i> | White-breasted Waterhen | 2021/4/24  | 1 | 0 | 22.74168582 | 120.33577060 | <a href="https://www.inaturalist.org/observations/75019702">https://www.inaturalist.org/observations/75019702</a>   |
| 1310 | <i>Amauornis phoenicurus</i> | White-breasted Waterhen | 2022/1/9   | 1 | 0 | 22.74833333 | 74.33510500  | <a href="https://www.inaturalist.org/observations/120793611">https://www.inaturalist.org/observations/120793611</a> |

|      |                              |                         |            |   |   |             |              |                                                                                                                     |
|------|------------------------------|-------------------------|------------|---|---|-------------|--------------|---------------------------------------------------------------------------------------------------------------------|
| 1311 | <i>Amauornis phoenicurus</i> | White-breasted Waterhen | 2022/8/25  | 1 | 0 | 22.76256139 | 121.13358500 | <a href="https://www.inaturalist.org/observations/132813936">https://www.inaturalist.org/observations/132813936</a> |
| 1312 | <i>Amauornis phoenicurus</i> | White-breasted Waterhen | 2022/8/25  | 1 | 0 | 22.76288000 | 121.13302000 | <a href="https://www.inaturalist.org/observations/132812962">https://www.inaturalist.org/observations/132812962</a> |
| 1313 | <i>Amauornis phoenicurus</i> | White-breasted Waterhen | 2020/4/7   | 1 | 0 | 22.76742782 | 88.38834543  | <a href="https://www.inaturalist.org/observations/41752947">https://www.inaturalist.org/observations/41752947</a>   |
| 1314 | <i>Amauornis phoenicurus</i> | White-breasted Waterhen | 2020/5/25  | 2 | 0 | 22.78583336 | 121.12972260 | <a href="https://www.inaturalist.org/observations/49243892">https://www.inaturalist.org/observations/49243892</a>   |
| 1315 | <i>Amauornis phoenicurus</i> | White-breasted Waterhen | 2022/7/24  | 3 | 0 | 22.79202178 | 88.33095957  | <a href="https://www.inaturalist.org/observations/128647422">https://www.inaturalist.org/observations/128647422</a> |
| 1316 | <i>Amauornis phoenicurus</i> | White-breasted Waterhen | 2022/7/24  | 2 | 0 | 22.79202178 | 88.33095957  | <a href="https://www.inaturalist.org/observations/128647751">https://www.inaturalist.org/observations/128647751</a> |
| 1317 | <i>Amauornis phoenicurus</i> | White-breasted Waterhen | 2021/1/7   | 3 | 0 | 22.79540300 | 88.28752200  | <a href="https://www.inaturalist.org/observations/67749184">https://www.inaturalist.org/observations/67749184</a>   |
| 1318 | <i>Amauornis phoenicurus</i> | White-breasted Waterhen | 2022/4/3   | 0 | 0 | 22.79741287 | 108.38774870 | <a href="https://www.inaturalist.org/observations/129939609">https://www.inaturalist.org/observations/129939609</a> |
| 1319 | <i>Amauornis phoenicurus</i> | White-breasted Waterhen | 2019/9/14  | 1 | 0 | 22.80333333 | 120.60388890 | <a href="https://www.inaturalist.org/observations/43012478">https://www.inaturalist.org/observations/43012478</a>   |
| 1320 | <i>Amauornis phoenicurus</i> | White-breasted Waterhen | 2020/7/20  | 3 | 0 | 22.82387944 | 120.24646060 | <a href="https://www.inaturalist.org/observations/54497068">https://www.inaturalist.org/observations/54497068</a>   |
| 1321 | <i>Amauornis phoenicurus</i> | White-breasted Waterhen | 2019/6/22  | 2 | 0 | 22.83347693 | 120.59433910 | <a href="https://www.inaturalist.org/observations/134936053">https://www.inaturalist.org/observations/134936053</a> |
| 1322 | <i>Amauornis phoenicurus</i> | White-breasted Waterhen | 2005/5/19  | 1 | 0 | 22.83911346 | 120.51098180 | <a href="https://www.inaturalist.org/observations/58023561">https://www.inaturalist.org/observations/58023561</a>   |
| 1323 | <i>Amauornis phoenicurus</i> | White-breasted Waterhen | 2020/4/10  | 3 | 0 | 22.85051167 | 88.35796441  | <a href="https://www.inaturalist.org/observations/98035035">https://www.inaturalist.org/observations/98035035</a>   |
| 1324 | <i>Amauornis phoenicurus</i> | White-breasted Waterhen | 2022/4/4   | 2 | 0 | 22.87925116 | 120.51394830 | <a href="https://www.inaturalist.org/observations/110574246">https://www.inaturalist.org/observations/110574246</a> |
| 1325 | <i>Amauornis phoenicurus</i> | White-breasted Waterhen | 2021/8/13  | 1 | 0 | 22.89282372 | 120.54862940 | <a href="https://www.inaturalist.org/observations/90951138">https://www.inaturalist.org/observations/90951138</a>   |
| 1326 | <i>Amauornis phoenicurus</i> | White-breasted Waterhen | 2019/2/17  | 2 | 0 | 22.89636060 | 113.88970430 | <a href="https://www.inaturalist.org/observations/20472718">https://www.inaturalist.org/observations/20472718</a>   |
| 1327 | <i>Amauornis phoenicurus</i> | White-breasted Waterhen | 2020/5/20  | 1 | 0 | 22.89688642 | 120.55256960 | <a href="https://www.inaturalist.org/observations/47400504">https://www.inaturalist.org/observations/47400504</a>   |
| 1328 | <i>Amauornis phoenicurus</i> | White-breasted Waterhen | 2020/10/30 | 1 | 0 | 22.89896874 | 120.54260630 | <a href="https://www.inaturalist.org/observations/65271632">https://www.inaturalist.org/observations/65271632</a>   |
| 1329 | <i>Amauornis phoenicurus</i> | White-breasted Waterhen | 2020/6/18  | 1 | 0 | 22.90998206 | 120.55583950 | <a href="https://www.inaturalist.org/observations/51584929">https://www.inaturalist.org/observations/51584929</a>   |
| 1330 | <i>Amauornis phoenicurus</i> | White-breasted Waterhen | 2022/7/4   | 1 | 0 | 22.91135837 | 120.55451050 | <a href="https://www.inaturalist.org/observations/126333065">https://www.inaturalist.org/observations/126333065</a> |
| 1331 | <i>Amauornis phoenicurus</i> | White-breasted Waterhen | 2019/6/2   | 2 | 0 | 22.91150128 | 120.55540550 | <a href="https://www.inaturalist.org/observations/26298408">https://www.inaturalist.org/observations/26298408</a>   |
| 1332 | <i>Amauornis phoenicurus</i> | White-breasted Waterhen | 2019/3/30  | 2 | 0 | 22.91292100 | 120.55262400 | <a href="https://www.inaturalist.org/observations/21824430">https://www.inaturalist.org/observations/21824430</a>   |
| 1333 | <i>Amauornis phoenicurus</i> | White-breasted Waterhen | 2021/6/14  | 1 | 0 | 22.91440972 | 88.38772636  | <a href="https://www.inaturalist.org/observations/82929678">https://www.inaturalist.org/observations/82929678</a>   |

|      |                              |                         |            |   |   |             |              |                                                                                                                     |
|------|------------------------------|-------------------------|------------|---|---|-------------|--------------|---------------------------------------------------------------------------------------------------------------------|
| 1334 | <i>Amauornis phoenicurus</i> | White-breasted Waterhen | 2021/6/10  | 1 | 0 | 22.91443648 | 88.38790342  | <a href="https://www.inaturalist.org/observations/82361903">https://www.inaturalist.org/observations/82361903</a>   |
| 1335 | <i>Amauornis phoenicurus</i> | White-breasted Waterhen | 2021/10/31 | 1 | 0 | 22.92028700 | 120.26348400 | <a href="https://www.inaturalist.org/observations/101073100">https://www.inaturalist.org/observations/101073100</a> |
| 1336 | <i>Amauornis phoenicurus</i> | White-breasted Waterhen | 2019/6/8   | 2 | 0 | 22.94417717 | 121.12788530 | <a href="https://www.inaturalist.org/observations/26577119">https://www.inaturalist.org/observations/26577119</a>   |
| 1337 | <i>Amauornis phoenicurus</i> | White-breasted Waterhen | 2022/8/6   | 0 | 0 | 22.97086167 | 113.48282500 | <a href="https://www.inaturalist.org/observations/129624744">https://www.inaturalist.org/observations/129624744</a> |
| 1338 | <i>Amauornis phoenicurus</i> | White-breasted Waterhen | 2021/9/26  | 1 | 0 | 22.97220620 | 120.22512760 | <a href="https://www.inaturalist.org/observations/96200027">https://www.inaturalist.org/observations/96200027</a>   |
| 1339 | <i>Amauornis phoenicurus</i> | White-breasted Waterhen | 2018/10/28 | 3 | 0 | 22.97505660 | 88.43454417  | <a href="https://www.inaturalist.org/observations/56397602">https://www.inaturalist.org/observations/56397602</a>   |
| 1340 | <i>Amauornis phoenicurus</i> | White-breasted Waterhen | 2020/6/13  | 1 | 0 | 22.97641438 | 120.20803570 | <a href="https://www.inaturalist.org/observations/49548515">https://www.inaturalist.org/observations/49548515</a>   |
| 1341 | <i>Amauornis phoenicurus</i> | White-breasted Waterhen | 2017/7/2   | 4 | 0 | 22.98876440 | 87.00596675  | <a href="https://www.inaturalist.org/observations/13135423">https://www.inaturalist.org/observations/13135423</a>   |
| 1342 | <i>Amauornis phoenicurus</i> | White-breasted Waterhen | 2018/5/13  | 1 | 0 | 22.98893696 | 87.00653406  | <a href="https://www.inaturalist.org/observations/54553641">https://www.inaturalist.org/observations/54553641</a>   |
| 1343 | <i>Amauornis phoenicurus</i> | White-breasted Waterhen | 2019/7/6   | 8 | 0 | 22.98970103 | 87.00745942  | <a href="https://www.inaturalist.org/observations/28486710">https://www.inaturalist.org/observations/28486710</a>   |
| 1344 | <i>Amauornis phoenicurus</i> | White-breasted Waterhen | 2018/4/13  | 2 | 0 | 22.98970339 | 87.00751191  | <a href="https://www.inaturalist.org/observations/50587918">https://www.inaturalist.org/observations/50587918</a>   |
| 1345 | <i>Amauornis phoenicurus</i> | White-breasted Waterhen | 2018/5/15  | 1 | 0 | 22.99045004 | 87.00867982  | <a href="https://www.inaturalist.org/observations/54556972">https://www.inaturalist.org/observations/54556972</a>   |
| 1346 | <i>Amauornis phoenicurus</i> | White-breasted Waterhen | 2022/6/28  | 6 | 0 | 22.99138365 | 87.00890067  | <a href="https://www.inaturalist.org/observations/124277542">https://www.inaturalist.org/observations/124277542</a> |
| 1347 | <i>Amauornis phoenicurus</i> | White-breasted Waterhen | 2020/8/13  | 1 | 0 | 22.99340031 | 87.00878434  | <a href="https://www.inaturalist.org/observations/56436749">https://www.inaturalist.org/observations/56436749</a>   |
| 1348 | <i>Amauornis phoenicurus</i> | White-breasted Waterhen | 2020/8/13  | 1 | 0 | 22.99342747 | 87.00890906  | <a href="https://www.inaturalist.org/observations/56436750">https://www.inaturalist.org/observations/56436750</a>   |
| 1349 | <i>Amauornis phoenicurus</i> | White-breasted Waterhen | 2020/8/6   | 1 | 0 | 23.02720671 | 87.85497542  | <a href="https://www.inaturalist.org/observations/56092568">https://www.inaturalist.org/observations/56092568</a>   |
| 1350 | <i>Amauornis phoenicurus</i> | White-breasted Waterhen | 2022/7/2   | 1 | 0 | 23.03992746 | 121.17459220 | <a href="https://www.inaturalist.org/observations/124545961">https://www.inaturalist.org/observations/124545961</a> |
| 1351 | <i>Amauornis phoenicurus</i> | White-breasted Waterhen | 2022/7/2   | 1 | 0 | 23.04041525 | 121.17439340 | <a href="https://www.inaturalist.org/observations/124546350">https://www.inaturalist.org/observations/124546350</a> |
| 1352 | <i>Amauornis phoenicurus</i> | White-breasted Waterhen | 2017/5/2   | 1 | 0 | 23.04054197 | 113.37217750 | <a href="https://www.inaturalist.org/observations/59197562">https://www.inaturalist.org/observations/59197562</a>   |
| 1353 | <i>Amauornis phoenicurus</i> | White-breasted Waterhen | 2017/5/2   | 1 | 0 | 23.04054197 | 113.37217750 | <a href="https://www.inaturalist.org/observations/116230923">https://www.inaturalist.org/observations/116230923</a> |
| 1354 | <i>Amauornis phoenicurus</i> | White-breasted Waterhen | 2022/7/2   | 1 | 0 | 23.04156576 | 121.17539420 | <a href="https://www.inaturalist.org/observations/124546694">https://www.inaturalist.org/observations/124546694</a> |
| 1355 | <i>Amauornis phoenicurus</i> | White-breasted Waterhen | 2021/4/16  | 1 | 0 | 23.05172487 | 120.19221510 | <a href="https://www.inaturalist.org/observations/76802665">https://www.inaturalist.org/observations/76802665</a>   |
| 1356 | <i>Amauornis phoenicurus</i> | White-breasted Waterhen | 2020/6/28  | 2 | 0 | 23.07599666 | 120.16916740 | <a href="https://www.inaturalist.org/observations/51196387">https://www.inaturalist.org/observations/51196387</a>   |

|      |                              |                         |            |   |   |             |              |                                                                                                                     |
|------|------------------------------|-------------------------|------------|---|---|-------------|--------------|---------------------------------------------------------------------------------------------------------------------|
| 1357 | <i>Amauornis phoenicurus</i> | White-breasted Waterhen | 2017/4/30  | 3 | 0 | 23.07634442 | 120.16942160 | <a href="https://www.inaturalist.org/observations/29979141">https://www.inaturalist.org/observations/29979141</a>   |
| 1358 | <i>Amauornis phoenicurus</i> | White-breasted Waterhen | 2018/3/16  | 2 | 0 | 23.08194727 | 120.16969190 | <a href="https://www.inaturalist.org/observations/29103953">https://www.inaturalist.org/observations/29103953</a>   |
| 1359 | <i>Amauornis phoenicurus</i> | White-breasted Waterhen | 2020/5/1   | 1 | 0 | 23.08527050 | 120.17352170 | <a href="https://www.inaturalist.org/observations/50366013">https://www.inaturalist.org/observations/50366013</a>   |
| 1360 | <i>Amauornis phoenicurus</i> | White-breasted Waterhen | 2020/12/26 | 1 | 0 | 23.10038900 | 120.15774840 | <a href="https://www.inaturalist.org/observations/67305018">https://www.inaturalist.org/observations/67305018</a>   |
| 1361 | <i>Amauornis phoenicurus</i> | White-breasted Waterhen | 2020/4/3   | 1 | 0 | 23.13502829 | 121.20274940 | <a href="https://www.inaturalist.org/observations/48230792">https://www.inaturalist.org/observations/48230792</a>   |
| 1362 | <i>Amauornis phoenicurus</i> | White-breasted Waterhen | 2020/2/10  | 1 | 0 | 23.14415328 | 72.39298761  | <a href="https://www.inaturalist.org/observations/72150149">https://www.inaturalist.org/observations/72150149</a>   |
| 1363 | <i>Amauornis phoenicurus</i> | White-breasted Waterhen | 2021/2/15  | 1 | 0 | 23.14909542 | 113.27948750 | <a href="https://www.inaturalist.org/observations/69717028">https://www.inaturalist.org/observations/69717028</a>   |
| 1364 | <i>Amauornis phoenicurus</i> | White-breasted Waterhen | 2019/10/21 | 2 | 0 | 23.17330949 | 120.46488050 | <a href="https://www.inaturalist.org/observations/36181761">https://www.inaturalist.org/observations/36181761</a>   |
| 1365 | <i>Amauornis phoenicurus</i> | White-breasted Waterhen | 2017/8/7   | 2 | 0 | 23.17913032 | 113.36693290 | <a href="https://www.inaturalist.org/observations/8067049">https://www.inaturalist.org/observations/8067049</a>     |
| 1366 | <i>Amauornis phoenicurus</i> | White-breasted Waterhen | 2017/8/7   | 2 | 0 | 23.17913032 | 113.36693290 | <a href="https://www.inaturalist.org/observations/8067057">https://www.inaturalist.org/observations/8067057</a>     |
| 1367 | <i>Amauornis phoenicurus</i> | White-breasted Waterhen | 2019/11/14 | 2 | 0 | 23.18361172 | 120.31281420 | <a href="https://www.inaturalist.org/observations/35663082">https://www.inaturalist.org/observations/35663082</a>   |
| 1368 | <i>Amauornis phoenicurus</i> | White-breasted Waterhen | 2018/2/10  | 1 | 0 | 23.18378803 | 113.36790830 | <a href="https://www.inaturalist.org/observations/68913490">https://www.inaturalist.org/observations/68913490</a>   |
| 1369 | <i>Amauornis phoenicurus</i> | White-breasted Waterhen | 2017/8/6   | 2 | 0 | 23.18687830 | 113.36418630 | <a href="https://www.inaturalist.org/observations/8066984">https://www.inaturalist.org/observations/8066984</a>     |
| 1370 | <i>Amauornis phoenicurus</i> | White-breasted Waterhen | 2021/5/31  | 2 | 0 | 23.18930000 | 120.31266670 | <a href="https://www.inaturalist.org/observations/81115862">https://www.inaturalist.org/observations/81115862</a>   |
| 1371 | <i>Amauornis phoenicurus</i> | White-breasted Waterhen | 2021/10/10 | 3 | 0 | 23.20675800 | 77.46016200  | <a href="https://www.inaturalist.org/observations/98684719">https://www.inaturalist.org/observations/98684719</a>   |
| 1372 | <i>Amauornis phoenicurus</i> | White-breasted Waterhen | 2022/1/2   | 2 | 0 | 23.20944800 | 77.45817100  | <a href="https://www.inaturalist.org/observations/104178726">https://www.inaturalist.org/observations/104178726</a> |
| 1373 | <i>Amauornis phoenicurus</i> | White-breasted Waterhen | 2019/9/2   | 3 | 0 | 23.21759872 | 72.66718223  | <a href="https://www.inaturalist.org/observations/32398240">https://www.inaturalist.org/observations/32398240</a>   |
| 1374 | <i>Amauornis phoenicurus</i> | White-breasted Waterhen | 2022/4/21  | 3 | 0 | 23.22846000 | 121.28843670 | <a href="https://www.inaturalist.org/observations/119554085">https://www.inaturalist.org/observations/119554085</a> |
| 1375 | <i>Amauornis phoenicurus</i> | White-breasted Waterhen | 2021/12/30 | 2 | 0 | 23.22900900 | 77.36402600  | <a href="https://www.inaturalist.org/observations/104103505">https://www.inaturalist.org/observations/104103505</a> |
| 1376 | <i>Amauornis phoenicurus</i> | White-breasted Waterhen | 2022/1/3   | 3 | 0 | 23.22900900 | 77.36402600  | <a href="https://www.inaturalist.org/observations/104254858">https://www.inaturalist.org/observations/104254858</a> |
| 1377 | <i>Amauornis phoenicurus</i> | White-breasted Waterhen | 2020/10/15 | 2 | 0 | 23.23661749 | 120.11496650 | <a href="https://www.inaturalist.org/observations/62990749">https://www.inaturalist.org/observations/62990749</a>   |
| 1378 | <i>Amauornis phoenicurus</i> | White-breasted Waterhen | 2019/2/17  | 1 | 0 | 23.23736257 | 69.29991378  | <a href="https://www.inaturalist.org/observations/137051671">https://www.inaturalist.org/observations/137051671</a> |
| 1379 | <i>Amauornis phoenicurus</i> | White-breasted Waterhen | 2019/7/11  | 8 | 0 | 23.23944473 | 87.05388641  | <a href="https://www.inaturalist.org/observations/28649639">https://www.inaturalist.org/observations/28649639</a>   |



|      |                              |                         |            |   |   |             |              |                                                                                                                     |
|------|------------------------------|-------------------------|------------|---|---|-------------|--------------|---------------------------------------------------------------------------------------------------------------------|
| 1380 | <i>Amauornis phoenicurus</i> | White-breasted Waterhen | 2021/7/24  | 1 | 0 | 23.24580565 | 120.12721180 | <a href="https://www.inaturalist.org/observations/88373672">https://www.inaturalist.org/observations/88373672</a>   |
| 1381 | <i>Amauornis phoenicurus</i> | White-breasted Waterhen | 2022/3/20  | 1 | 0 | 23.27953249 | 91.38541105  | <a href="https://www.inaturalist.org/observations/111103840">https://www.inaturalist.org/observations/111103840</a> |
| 1382 | <i>Amauornis phoenicurus</i> | White-breasted Waterhen | 2020/7/27  | 4 | 0 | 23.34264528 | 77.78043078  | <a href="https://www.inaturalist.org/observations/64589462">https://www.inaturalist.org/observations/64589462</a>   |
| 1383 | <i>Amauornis phoenicurus</i> | White-breasted Waterhen | 2021/9/15  | 2 | 0 | 23.34295981 | 77.77232886  | <a href="https://www.inaturalist.org/observations/94903097">https://www.inaturalist.org/observations/94903097</a>   |
| 1384 | <i>Amauornis phoenicurus</i> | White-breasted Waterhen | 2022/7/24  | 3 | 0 | 23.37379028 | 72.03834000  | <a href="https://www.inaturalist.org/observations/127673208">https://www.inaturalist.org/observations/127673208</a> |
| 1385 | <i>Amauornis phoenicurus</i> | White-breasted Waterhen | 2022/4/17  | 1 | 0 | 23.41260722 | 121.35172420 | <a href="https://www.inaturalist.org/observations/126179590">https://www.inaturalist.org/observations/126179590</a> |
| 1386 | <i>Amauornis phoenicurus</i> | White-breasted Waterhen | 2022/6/3   | 0 | 0 | 23.43229500 | 120.42224170 | <a href="https://www.inaturalist.org/observations/120784941">https://www.inaturalist.org/observations/120784941</a> |
| 1387 | <i>Amauornis phoenicurus</i> | White-breasted Waterhen | 2022/2/7   | 2 | 0 | 23.44877200 | 121.39474500 | <a href="https://www.inaturalist.org/observations/107672407">https://www.inaturalist.org/observations/107672407</a> |
| 1388 | <i>Amauornis phoenicurus</i> | White-breasted Waterhen | 2021/12/12 | 1 | 0 | 23.45161043 | 121.39501750 | <a href="https://www.inaturalist.org/observations/102915560">https://www.inaturalist.org/observations/102915560</a> |
| 1389 | <i>Amauornis phoenicurus</i> | White-breasted Waterhen | 2021/12/12 | 1 | 0 | 23.46691909 | 121.40738510 | <a href="https://www.inaturalist.org/observations/102903173">https://www.inaturalist.org/observations/102903173</a> |
| 1390 | <i>Amauornis phoenicurus</i> | White-breasted Waterhen | 2021/5/17  | 1 | 0 | 23.47089850 | 120.48647930 | <a href="https://www.inaturalist.org/observations/79097316">https://www.inaturalist.org/observations/79097316</a>   |
| 1391 | <i>Amauornis phoenicurus</i> | White-breasted Waterhen | 2022/5/8   | 1 | 0 | 23.47249581 | 120.29179270 | <a href="https://www.inaturalist.org/observations/116942392">https://www.inaturalist.org/observations/116942392</a> |
| 1392 | <i>Amauornis phoenicurus</i> | White-breasted Waterhen | 2015/6/15  | 6 | 0 | 23.48123600 | 87.30549100  | <a href="http://www.inaturalist.org/observations/1634520">http://www.inaturalist.org/observations/1634520</a>       |
| 1393 | <i>Amauornis phoenicurus</i> | White-breasted Waterhen | 2019/2/17  | 5 | 0 | 23.48128082 | 87.30273302  | <a href="https://www.inaturalist.org/observations/20418564">https://www.inaturalist.org/observations/20418564</a>   |
| 1394 | <i>Amauornis phoenicurus</i> | White-breasted Waterhen | 2019/4/11  | 2 | 0 | 23.49532167 | 120.46101330 | <a href="https://www.inaturalist.org/observations/22325110">https://www.inaturalist.org/observations/22325110</a>   |
| 1395 | <i>Amauornis phoenicurus</i> | White-breasted Waterhen | 2020/4/25  | 1 | 0 | 23.51554833 | 120.15147170 | <a href="https://www.inaturalist.org/observations/43889118">https://www.inaturalist.org/observations/43889118</a>   |
| 1396 | <i>Amauornis phoenicurus</i> | White-breasted Waterhen | 2019/6/9   | 1 | 0 | 23.55743948 | 119.61462720 | <a href="https://www.inaturalist.org/observations/71311439">https://www.inaturalist.org/observations/71311439</a>   |
| 1397 | <i>Amauornis phoenicurus</i> | White-breasted Waterhen | 2014/7/11  | 6 | 0 | 23.56991700 | 87.30872600  | <a href="http://www.inaturalist.org/observations/778467">http://www.inaturalist.org/observations/778467</a>         |
| 1398 | <i>Amauornis phoenicurus</i> | White-breasted Waterhen | 2020/8/12  | 4 | 0 | 23.57949840 | 87.22824180  | <a href="https://www.inaturalist.org/observations/57618204">https://www.inaturalist.org/observations/57618204</a>   |
| 1399 | <i>Amauornis phoenicurus</i> | White-breasted Waterhen | 2022/6/14  | 3 | 0 | 23.58459722 | 121.39611940 | <a href="https://www.inaturalist.org/observations/127813002">https://www.inaturalist.org/observations/127813002</a> |
| 1400 | <i>Amauornis phoenicurus</i> | White-breasted Waterhen | 2021/2/19  | 1 | 0 | 23.59327384 | 121.39044870 | <a href="https://www.inaturalist.org/observations/69865277">https://www.inaturalist.org/observations/69865277</a>   |
| 1401 | <i>Amauornis phoenicurus</i> | White-breasted Waterhen | 2018/8/16  | 2 | 0 | 23.59388500 | 121.39202330 | <a href="https://www.inaturalist.org/observations/15475175">https://www.inaturalist.org/observations/15475175</a>   |
| 1402 | <i>Amauornis phoenicurus</i> | White-breasted Waterhen | 2014/8/18  | 7 | 0 | 23.60906900 | 88.11958200  | <a href="http://www.inaturalist.org/observations/839076">http://www.inaturalist.org/observations/839076</a>         |

|      |                              |                         |            |   |   |             |              |                                                                                                                     |
|------|------------------------------|-------------------------|------------|---|---|-------------|--------------|---------------------------------------------------------------------------------------------------------------------|
| 1403 | <i>Amauornis phoenicurus</i> | White-breasted Waterhen | 2013/8/2   | 1 | 0 | 23.61844200 | 120.48616390 | <a href="https://www.inaturalist.org/observations/123804673">https://www.inaturalist.org/observations/123804673</a> |
| 1404 | <i>Amauornis phoenicurus</i> | White-breasted Waterhen | 2021/6/5   | 2 | 0 | 23.63848840 | 120.51333930 | <a href="https://www.inaturalist.org/observations/81980011">https://www.inaturalist.org/observations/81980011</a>   |
| 1405 | <i>Amauornis phoenicurus</i> | White-breasted Waterhen | 2021/8/2   | 2 | 0 | 23.63858483 | 120.52256640 | <a href="https://www.inaturalist.org/observations/89635968">https://www.inaturalist.org/observations/89635968</a>   |
| 1406 | <i>Amauornis phoenicurus</i> | White-breasted Waterhen | 2020/4/28  | 2 | 0 | 23.63880500 | 120.52222500 | <a href="https://www.inaturalist.org/observations/44102005">https://www.inaturalist.org/observations/44102005</a>   |
| 1407 | <i>Amauornis phoenicurus</i> | White-breasted Waterhen | 2019/12/14 | 2 | 0 | 23.63897946 | 120.52190910 | <a href="https://www.inaturalist.org/observations/36630114">https://www.inaturalist.org/observations/36630114</a>   |
| 1408 | <i>Amauornis phoenicurus</i> | White-breasted Waterhen | 2020/4/21  | 1 | 0 | 23.64042978 | 120.54731230 | <a href="https://www.inaturalist.org/observations/42740176">https://www.inaturalist.org/observations/42740176</a>   |
| 1409 | <i>Amauornis phoenicurus</i> | White-breasted Waterhen | 2021/3/27  | 1 | 0 | 23.64345880 | 120.53865910 | <a href="https://www.inaturalist.org/observations/72362735">https://www.inaturalist.org/observations/72362735</a>   |
| 1410 | <i>Amauornis phoenicurus</i> | White-breasted Waterhen | 2020/3/10  | 1 | 0 | 23.65118364 | 120.24396640 | <a href="https://www.inaturalist.org/observations/39832549">https://www.inaturalist.org/observations/39832549</a>   |
| 1411 | <i>Amauornis phoenicurus</i> | White-breasted Waterhen | 2022/5/30  | 0 | 0 | 23.66052970 | 120.52449120 | <a href="https://www.inaturalist.org/observations/119402626">https://www.inaturalist.org/observations/119402626</a> |
| 1412 | <i>Amauornis phoenicurus</i> | White-breasted Waterhen | 2022/5/30  | 1 | 0 | 23.66209194 | 120.52111920 | <a href="https://www.inaturalist.org/observations/119402667">https://www.inaturalist.org/observations/119402667</a> |
| 1413 | <i>Amauornis phoenicurus</i> | White-breasted Waterhen | 2015/4/3   | 3 | 0 | 23.67974500 | 120.55653500 | <a href="https://www.inaturalist.org/observations/16714034">https://www.inaturalist.org/observations/16714034</a>   |
| 1414 | <i>Amauornis phoenicurus</i> | White-breasted Waterhen | 2019/5/30  | 3 | 0 | 23.68843569 | 120.53554000 | <a href="https://www.inaturalist.org/observations/26060389">https://www.inaturalist.org/observations/26060389</a>   |
| 1415 | <i>Amauornis phoenicurus</i> | White-breasted Waterhen | 2021/5/4   | 1 | 0 | 23.69123611 | 120.57165280 | <a href="https://www.inaturalist.org/observations/77192701">https://www.inaturalist.org/observations/77192701</a>   |
| 1416 | <i>Amauornis phoenicurus</i> | White-breasted Waterhen | 2020/5/21  | 1 | 0 | 23.70509975 | 120.59931210 | <a href="https://www.inaturalist.org/observations/46712150">https://www.inaturalist.org/observations/46712150</a>   |
| 1417 | <i>Amauornis phoenicurus</i> | White-breasted Waterhen | 2005/1/22  | 4 | 0 | 23.71717032 | 120.36590770 | <a href="https://www.inaturalist.org/observations/13421743">https://www.inaturalist.org/observations/13421743</a>   |
| 1418 | <i>Amauornis phoenicurus</i> | White-breasted Waterhen | 2020/5/9   | 1 | 0 | 23.72185167 | 120.38218330 | <a href="https://www.inaturalist.org/observations/45345912">https://www.inaturalist.org/observations/45345912</a>   |
| 1419 | <i>Amauornis phoenicurus</i> | White-breasted Waterhen | 2022/5/21  | 5 | 0 | 23.72381403 | 81.02348697  | <a href="https://www.inaturalist.org/observations/118791216">https://www.inaturalist.org/observations/118791216</a> |
| 1420 | <i>Amauornis phoenicurus</i> | White-breasted Waterhen | 2019/11/14 | 2 | 0 | 23.72406728 | 120.62286580 | <a href="https://www.inaturalist.org/observations/35663113">https://www.inaturalist.org/observations/35663113</a>   |
| 1421 | <i>Amauornis phoenicurus</i> | White-breasted Waterhen | 2022/5/2   | 1 | 0 | 23.72659797 | 120.62352300 | <a href="https://www.inaturalist.org/observations/114635645">https://www.inaturalist.org/observations/114635645</a> |
| 1422 | <i>Amauornis phoenicurus</i> | White-breasted Waterhen | 2020/6/30  | 2 | 0 | 23.72701021 | 120.37771360 | <a href="https://www.inaturalist.org/observations/51536268">https://www.inaturalist.org/observations/51536268</a>   |
| 1423 | <i>Amauornis phoenicurus</i> | White-breasted Waterhen | 2019/1/3   | 2 | 0 | 23.72702550 | 120.61947540 | <a href="https://www.inaturalist.org/observations/31974364">https://www.inaturalist.org/observations/31974364</a>   |
| 1424 | <i>Amauornis phoenicurus</i> | White-breasted Waterhen | 2017/4/30  | 4 | 0 | 23.72744712 | 120.61805950 | <a href="https://www.inaturalist.org/observations/19484910">https://www.inaturalist.org/observations/19484910</a>   |
| 1425 | <i>Amauornis phoenicurus</i> | White-breasted Waterhen | 2019/11/14 | 2 | 0 | 23.72794053 | 120.61319040 | <a href="https://www.inaturalist.org/observations/35663123">https://www.inaturalist.org/observations/35663123</a>   |

|      |                              |                         |            |   |   |             |              |                                                                                                                     |
|------|------------------------------|-------------------------|------------|---|---|-------------|--------------|---------------------------------------------------------------------------------------------------------------------|
| 1426 | <i>Amauornis phoenicurus</i> | White-breasted Waterhen | 2019/11/14 | 2 | 0 | 23.72895151 | 120.61272560 | <a href="https://www.inaturalist.org/observations/35672708">https://www.inaturalist.org/observations/35672708</a>   |
| 1427 | <i>Amauornis phoenicurus</i> | White-breasted Waterhen | 2022/3/13  | 1 | 0 | 23.73589576 | 120.38898000 | <a href="https://www.inaturalist.org/observations/108488287">https://www.inaturalist.org/observations/108488287</a> |
| 1428 | <i>Amauornis phoenicurus</i> | White-breasted Waterhen | 2021/3/1   | 1 | 0 | 23.75117000 | 121.43503670 | <a href="https://www.inaturalist.org/observations/70425357">https://www.inaturalist.org/observations/70425357</a>   |
| 1429 | <i>Amauornis phoenicurus</i> | White-breasted Waterhen | 2019/4/30  | 2 | 0 | 23.75562500 | 121.46934500 | <a href="https://www.inaturalist.org/observations/24143774">https://www.inaturalist.org/observations/24143774</a>   |
| 1430 | <i>Amauornis phoenicurus</i> | White-breasted Waterhen | 2021/10/15 | 2 | 0 | 23.76964270 | 121.46260650 | <a href="https://www.inaturalist.org/observations/98263263">https://www.inaturalist.org/observations/98263263</a>   |
| 1431 | <i>Amauornis phoenicurus</i> | White-breasted Waterhen | 2016/12/14 | 0 | 0 | 23.77329579 | 121.47073300 | <a href="https://www.inaturalist.org/observations/36794597">https://www.inaturalist.org/observations/36794597</a>   |
| 1432 | <i>Amauornis phoenicurus</i> | White-breasted Waterhen | 2021/9/25  | 1 | 0 | 23.80262845 | 120.22774480 | <a href="https://www.inaturalist.org/observations/97525667">https://www.inaturalist.org/observations/97525667</a>   |
| 1433 | <i>Amauornis phoenicurus</i> | White-breasted Waterhen | 2022/4/3   | 1 | 0 | 23.81050720 | 120.39020530 | <a href="https://www.inaturalist.org/observations/110275561">https://www.inaturalist.org/observations/110275561</a> |
| 1434 | <i>Amauornis phoenicurus</i> | White-breasted Waterhen | 2014/5/5   | 5 | 0 | 23.82006500 | 91.29730400  | <a href="http://www.inaturalist.org/observations/774616">http://www.inaturalist.org/observations/774616</a>         |
| 1435 | <i>Amauornis phoenicurus</i> | White-breasted Waterhen | 2022/3/29  | 1 | 0 | 23.82693085 | 120.80137920 | <a href="https://www.inaturalist.org/observations/116047554">https://www.inaturalist.org/observations/116047554</a> |
| 1436 | <i>Amauornis phoenicurus</i> | White-breasted Waterhen | 2019/2/17  | 4 | 0 | 23.82717881 | 120.80154350 | <a href="https://www.inaturalist.org/observations/20417348">https://www.inaturalist.org/observations/20417348</a>   |
| 1437 | <i>Amauornis phoenicurus</i> | White-breasted Waterhen | 2021/10/1  | 2 | 0 | 23.84333201 | 121.51921500 | <a href="https://www.inaturalist.org/observations/96990400">https://www.inaturalist.org/observations/96990400</a>   |
| 1438 | <i>Amauornis phoenicurus</i> | White-breasted Waterhen | 2022/5/6   | 1 | 0 | 23.84569098 | 121.50043830 | <a href="https://www.inaturalist.org/observations/115651704">https://www.inaturalist.org/observations/115651704</a> |
| 1439 | <i>Amauornis phoenicurus</i> | White-breasted Waterhen | 2021/2/15  | 3 | 0 | 23.85175462 | 120.95515360 | <a href="https://www.inaturalist.org/observations/97880996">https://www.inaturalist.org/observations/97880996</a>   |
| 1440 | <i>Amauornis phoenicurus</i> | White-breasted Waterhen | 2021/12/17 | 2 | 0 | 23.85475895 | 121.51643000 | <a href="https://www.inaturalist.org/observations/103416919">https://www.inaturalist.org/observations/103416919</a> |
| 1441 | <i>Amauornis phoenicurus</i> | White-breasted Waterhen | 2020/11/6  | 2 | 0 | 23.86661918 | 121.52276450 | <a href="https://www.inaturalist.org/observations/64444440">https://www.inaturalist.org/observations/64444440</a>   |
| 1442 | <i>Amauornis phoenicurus</i> | White-breasted Waterhen | 2022/7/15  | 2 | 0 | 23.86772988 | 121.56165210 | <a href="https://www.inaturalist.org/observations/128753610">https://www.inaturalist.org/observations/128753610</a> |
| 1443 | <i>Amauornis phoenicurus</i> | White-breasted Waterhen | 2021/12/7  | 2 | 0 | 23.87343586 | 121.51960260 | <a href="https://www.inaturalist.org/observations/102651529">https://www.inaturalist.org/observations/102651529</a> |
| 1444 | <i>Amauornis phoenicurus</i> | White-breasted Waterhen | 2020/10/30 | 1 | 0 | 23.88173525 | 121.53322340 | <a href="https://www.inaturalist.org/observations/63801290">https://www.inaturalist.org/observations/63801290</a>   |
| 1445 | <i>Amauornis phoenicurus</i> | White-breasted Waterhen | 2020/12/18 | 1 | 0 | 23.88295333 | 121.54391330 | <a href="https://www.inaturalist.org/observations/67190378">https://www.inaturalist.org/observations/67190378</a>   |
| 1446 | <i>Amauornis phoenicurus</i> | White-breasted Waterhen | 2020/4/18  | 3 | 0 | 23.88872565 | 121.53649240 | <a href="https://www.inaturalist.org/observations/47110745">https://www.inaturalist.org/observations/47110745</a>   |
| 1447 | <i>Amauornis phoenicurus</i> | White-breasted Waterhen | 2020/4/18  | 1 | 0 | 23.88931090 | 121.53745360 | <a href="https://www.inaturalist.org/observations/42565772">https://www.inaturalist.org/observations/42565772</a>   |
| 1448 | <i>Amauornis phoenicurus</i> | White-breasted Waterhen | 2021/4/1   | 1 | 0 | 23.88975518 | 121.53978740 | <a href="https://www.inaturalist.org/observations/72579245">https://www.inaturalist.org/observations/72579245</a>   |

|      |                              |                         |            |   |   |             |              |                                                                                                                     |
|------|------------------------------|-------------------------|------------|---|---|-------------|--------------|---------------------------------------------------------------------------------------------------------------------|
| 1449 | <i>Amauornis phoenicurus</i> | White-breasted Waterhen | 2021/11/17 | 1 | 0 | 23.89339899 | 121.54182990 | <a href="https://www.inaturalist.org/observations/101309699">https://www.inaturalist.org/observations/101309699</a> |
| 1450 | <i>Amauornis phoenicurus</i> | White-breasted Waterhen | 2021/3/27  | 2 | 0 | 23.89443833 | 121.54167170 | <a href="https://www.inaturalist.org/observations/72141114">https://www.inaturalist.org/observations/72141114</a>   |
| 1451 | <i>Amauornis phoenicurus</i> | White-breasted Waterhen | 2020/9/28  | 1 | 0 | 23.89508421 | 121.53650230 | <a href="https://www.inaturalist.org/observations/61108764">https://www.inaturalist.org/observations/61108764</a>   |
| 1452 | <i>Amauornis phoenicurus</i> | White-breasted Waterhen | 2018/8/16  | 2 | 0 | 23.89518167 | 121.52256170 | <a href="https://www.inaturalist.org/observations/15475173">https://www.inaturalist.org/observations/15475173</a>   |
| 1453 | <i>Amauornis phoenicurus</i> | White-breasted Waterhen | 2020/9/23  | 1 | 0 | 23.89574767 | 121.53902120 | <a href="https://www.inaturalist.org/observations/61121924">https://www.inaturalist.org/observations/61121924</a>   |
| 1454 | <i>Amauornis phoenicurus</i> | White-breasted Waterhen | 2020/10/14 | 1 | 0 | 23.89591667 | 121.54388330 | <a href="https://www.inaturalist.org/observations/62652564">https://www.inaturalist.org/observations/62652564</a>   |
| 1455 | <i>Amauornis phoenicurus</i> | White-breasted Waterhen | 2022/2/13  | 1 | 0 | 23.89621944 | 121.54406670 | <a href="https://www.inaturalist.org/observations/106664252">https://www.inaturalist.org/observations/106664252</a> |
| 1456 | <i>Amauornis phoenicurus</i> | White-breasted Waterhen | 2019/1/1   | 2 | 0 | 23.89638770 | 121.54520040 | <a href="https://www.inaturalist.org/observations/19883724">https://www.inaturalist.org/observations/19883724</a>   |
| 1457 | <i>Amauornis phoenicurus</i> | White-breasted Waterhen | 2022/3/26  | 1 | 0 | 23.89641025 | 121.54852600 | <a href="https://www.inaturalist.org/observations/123485452">https://www.inaturalist.org/observations/123485452</a> |
| 1458 | <i>Amauornis phoenicurus</i> | White-breasted Waterhen | 2020/4/29  | 3 | 0 | 23.89653833 | 121.54489670 | <a href="https://www.inaturalist.org/observations/44238182">https://www.inaturalist.org/observations/44238182</a>   |
| 1459 | <i>Amauornis phoenicurus</i> | White-breasted Waterhen | 2020/10/14 | 1 | 0 | 23.89660667 | 121.54432170 | <a href="https://www.inaturalist.org/observations/62652550">https://www.inaturalist.org/observations/62652550</a>   |
| 1460 | <i>Amauornis phoenicurus</i> | White-breasted Waterhen | 2021/5/23  | 2 | 0 | 23.89667800 | 121.54499100 | <a href="https://www.inaturalist.org/observations/80078872">https://www.inaturalist.org/observations/80078872</a>   |
| 1461 | <i>Amauornis phoenicurus</i> | White-breasted Waterhen | 2020/9/25  | 2 | 0 | 23.89686321 | 121.54157560 | <a href="https://www.inaturalist.org/observations/60713448">https://www.inaturalist.org/observations/60713448</a>   |
| 1462 | <i>Amauornis phoenicurus</i> | White-breasted Waterhen | 2022/4/2   | 1 | 0 | 23.89704957 | 121.54252660 | <a href="https://www.inaturalist.org/observations/119551960">https://www.inaturalist.org/observations/119551960</a> |
| 1463 | <i>Amauornis phoenicurus</i> | White-breasted Waterhen | 2020/5/2   | 3 | 0 | 23.90047943 | 121.53918020 | <a href="https://www.inaturalist.org/observations/44541849">https://www.inaturalist.org/observations/44541849</a>   |
| 1464 | <i>Amauornis phoenicurus</i> | White-breasted Waterhen | 2021/5/28  | 1 | 0 | 23.90081786 | 121.54147280 | <a href="https://www.inaturalist.org/observations/80604017">https://www.inaturalist.org/observations/80604017</a>   |
| 1465 | <i>Amauornis phoenicurus</i> | White-breasted Waterhen | 2020/4/10  | 2 | 0 | 23.90114481 | 121.54547980 | <a href="https://www.inaturalist.org/observations/42749954">https://www.inaturalist.org/observations/42749954</a>   |
| 1466 | <i>Amauornis phoenicurus</i> | White-breasted Waterhen | 2020/4/10  | 3 | 0 | 23.90120696 | 121.54557130 | <a href="https://www.inaturalist.org/observations/41809529">https://www.inaturalist.org/observations/41809529</a>   |
| 1467 | <i>Amauornis phoenicurus</i> | White-breasted Waterhen | 2022/4/2   | 1 | 0 | 23.90121779 | 121.54556590 | <a href="https://www.inaturalist.org/observations/119842726">https://www.inaturalist.org/observations/119842726</a> |
| 1468 | <i>Amauornis phoenicurus</i> | White-breasted Waterhen | 2020/4/14  | 2 | 0 | 23.90124103 | 121.54744450 | <a href="https://www.inaturalist.org/observations/42158202">https://www.inaturalist.org/observations/42158202</a>   |
| 1469 | <i>Amauornis phoenicurus</i> | White-breasted Waterhen | 2020/4/14  | 3 | 0 | 23.90134667 | 121.54769500 | <a href="https://www.inaturalist.org/observations/42749785">https://www.inaturalist.org/observations/42749785</a>   |
| 1470 | <i>Amauornis phoenicurus</i> | White-breasted Waterhen | 2020/4/14  | 2 | 0 | 23.90141941 | 121.54765800 | <a href="https://www.inaturalist.org/observations/42123230">https://www.inaturalist.org/observations/42123230</a>   |
| 1471 | <i>Amauornis phoenicurus</i> | White-breasted Waterhen | 2020/4/25  | 3 | 0 | 23.90148500 | 121.54581000 | <a href="https://www.inaturalist.org/observations/43288693">https://www.inaturalist.org/observations/43288693</a>   |

|      |                              |                         |            |   |   |             |              |                                                                                                                     |
|------|------------------------------|-------------------------|------------|---|---|-------------|--------------|---------------------------------------------------------------------------------------------------------------------|
| 1472 | <i>Amauornis phoenicurus</i> | White-breasted Waterhen | 2016/7/18  | 1 | 0 | 23.90341614 | 121.54718300 | <a href="https://www.inaturalist.org/observations/40015278">https://www.inaturalist.org/observations/40015278</a>   |
| 1473 | <i>Amauornis phoenicurus</i> | White-breasted Waterhen | 2022/8/12  | 1 | 0 | 23.90504815 | 121.52646780 | <a href="https://www.inaturalist.org/observations/130479371">https://www.inaturalist.org/observations/130479371</a> |
| 1474 | <i>Amauornis phoenicurus</i> | White-breasted Waterhen | 2022/2/17  | 1 | 0 | 23.90519127 | 121.54327470 | <a href="https://www.inaturalist.org/observations/106919915">https://www.inaturalist.org/observations/106919915</a> |
| 1475 | <i>Amauornis phoenicurus</i> | White-breasted Waterhen | 2022/5/17  | 1 | 0 | 23.90737024 | 121.54222340 | <a href="https://www.inaturalist.org/observations/117686832">https://www.inaturalist.org/observations/117686832</a> |
| 1476 | <i>Amauornis phoenicurus</i> | White-breasted Waterhen | 2020/5/27  | 1 | 0 | 23.90764602 | 121.55755170 | <a href="https://www.inaturalist.org/observations/47707094">https://www.inaturalist.org/observations/47707094</a>   |
| 1477 | <i>Amauornis phoenicurus</i> | White-breasted Waterhen | 2020/5/23  | 1 | 0 | 23.91067620 | 121.56030280 | <a href="https://www.inaturalist.org/observations/107253832">https://www.inaturalist.org/observations/107253832</a> |
| 1478 | <i>Amauornis phoenicurus</i> | White-breasted Waterhen | 2021/4/12  | 1 | 0 | 23.91388182 | 121.56486210 | <a href="https://www.inaturalist.org/observations/74051165">https://www.inaturalist.org/observations/74051165</a>   |
| 1479 | <i>Amauornis phoenicurus</i> | White-breasted Waterhen | 2022/3/16  | 1 | 0 | 23.91444086 | 121.50391030 | <a href="https://www.inaturalist.org/observations/108740695">https://www.inaturalist.org/observations/108740695</a> |
| 1480 | <i>Amauornis phoenicurus</i> | White-breasted Waterhen | 2022/5/17  | 1 | 0 | 23.91467466 | 121.55623320 | <a href="https://www.inaturalist.org/observations/117686834">https://www.inaturalist.org/observations/117686834</a> |
| 1481 | <i>Amauornis phoenicurus</i> | White-breasted Waterhen | 2022/4/17  | 1 | 0 | 23.92239862 | 121.50734670 | <a href="https://www.inaturalist.org/observations/111897333">https://www.inaturalist.org/observations/111897333</a> |
| 1482 | <i>Amauornis phoenicurus</i> | White-breasted Waterhen | 2022/1/16  | 1 | 0 | 23.92530748 | 121.50599290 | <a href="https://www.inaturalist.org/observations/105023842">https://www.inaturalist.org/observations/105023842</a> |
| 1483 | <i>Amauornis phoenicurus</i> | White-breasted Waterhen | 2020/3/28  | 1 | 0 | 23.92558872 | 121.50650010 | <a href="https://www.inaturalist.org/observations/40956658">https://www.inaturalist.org/observations/40956658</a>   |
| 1484 | <i>Amauornis phoenicurus</i> | White-breasted Waterhen | 2022/5/24  | 1 | 0 | 23.92717974 | 121.59198350 | <a href="https://www.inaturalist.org/observations/118505998">https://www.inaturalist.org/observations/118505998</a> |
| 1485 | <i>Amauornis phoenicurus</i> | White-breasted Waterhen | 2022/5/18  | 1 | 0 | 23.94446642 | 120.93647370 | <a href="https://www.inaturalist.org/observations/117569350">https://www.inaturalist.org/observations/117569350</a> |
| 1486 | <i>Amauornis phoenicurus</i> | White-breasted Waterhen | 2020/11/3  | 1 | 0 | 23.96513710 | 120.96737680 | <a href="https://www.inaturalist.org/observations/64098657">https://www.inaturalist.org/observations/64098657</a>   |
| 1487 | <i>Amauornis phoenicurus</i> | White-breasted Waterhen | 2020/11/7  | 1 | 0 | 23.96513710 | 120.96737680 | <a href="https://www.inaturalist.org/observations/64349154">https://www.inaturalist.org/observations/64349154</a>   |
| 1488 | <i>Amauornis phoenicurus</i> | White-breasted Waterhen | 2020/11/16 | 1 | 0 | 23.96513710 | 120.96737680 | <a href="https://www.inaturalist.org/observations/65005463">https://www.inaturalist.org/observations/65005463</a>   |
| 1489 | <i>Amauornis phoenicurus</i> | White-breasted Waterhen | 2022/3/5   | 1 | 0 | 23.96873500 | 72.99184500  | <a href="https://www.inaturalist.org/observations/120122818">https://www.inaturalist.org/observations/120122818</a> |
| 1490 | <i>Amauornis phoenicurus</i> | White-breasted Waterhen | 2020/4/19  | 2 | 0 | 23.98188333 | 120.96328670 | <a href="https://www.inaturalist.org/observations/42648316">https://www.inaturalist.org/observations/42648316</a>   |
| 1491 | <i>Amauornis phoenicurus</i> | White-breasted Waterhen | 2018/4/4   | 3 | 0 | 23.98970583 | 120.37927710 | <a href="https://www.inaturalist.org/observations/10546876">https://www.inaturalist.org/observations/10546876</a>   |
| 1492 | <i>Amauornis phoenicurus</i> | White-breasted Waterhen | 2021/3/14  | 1 | 0 | 24.00937000 | 121.60815670 | <a href="https://www.inaturalist.org/observations/71364787">https://www.inaturalist.org/observations/71364787</a>   |
| 1493 | <i>Amauornis phoenicurus</i> | White-breasted Waterhen | 2019/8/26  | 2 | 0 | 24.02178177 | 121.59607370 | <a href="https://www.inaturalist.org/observations/31779597">https://www.inaturalist.org/observations/31779597</a>   |
| 1494 | <i>Amauornis phoenicurus</i> | White-breasted Waterhen | 2021/5/22  | 3 | 0 | 24.03978803 | 84.06691122  | <a href="https://www.inaturalist.org/observations/79757418">https://www.inaturalist.org/observations/79757418</a>   |

|      |                              |                         |            |   |   |             |              |                                                                                                                     |
|------|------------------------------|-------------------------|------------|---|---|-------------|--------------|---------------------------------------------------------------------------------------------------------------------|
| 1495 | <i>Amauornis phoenicurus</i> | White-breasted Waterhen | 2021/1/23  | 3 | 0 | 24.04542860 | 70.14558050  | <a href="https://www.inaturalist.org/observations/69203464">https://www.inaturalist.org/observations/69203464</a>   |
| 1496 | <i>Amauornis phoenicurus</i> | White-breasted Waterhen | 2022/5/2   | 1 | 0 | 24.04986612 | 120.71058880 | <a href="https://www.inaturalist.org/observations/114607382">https://www.inaturalist.org/observations/114607382</a> |
| 1497 | <i>Amauornis phoenicurus</i> | White-breasted Waterhen | 2014/3/22  | 1 | 0 | 24.06099072 | 120.94207280 | <a href="https://www.inaturalist.org/observations/93262056">https://www.inaturalist.org/observations/93262056</a>   |
| 1498 | <i>Amauornis phoenicurus</i> | White-breasted Waterhen | 2016/10/13 | 2 | 0 | 24.07827454 | 88.69165298  | <a href="https://www.inaturalist.org/observations/117572820">https://www.inaturalist.org/observations/117572820</a> |
| 1499 | <i>Amauornis phoenicurus</i> | White-breasted Waterhen | 2018/9/27  | 2 | 0 | 24.08419260 | 120.55907820 | <a href="https://www.inaturalist.org/observations/16957235">https://www.inaturalist.org/observations/16957235</a>   |
| 1500 | <i>Amauornis phoenicurus</i> | White-breasted Waterhen | 2021/10/24 | 1 | 0 | 24.11483007 | 120.44324610 | <a href="https://www.inaturalist.org/observations/99149147">https://www.inaturalist.org/observations/99149147</a>   |
| 1501 | <i>Amauornis phoenicurus</i> | White-breasted Waterhen | 2017/8/4   | 2 | 0 | 24.12852906 | 104.12775280 | <a href="https://www.inaturalist.org/observations/8005053">https://www.inaturalist.org/observations/8005053</a>     |
| 1502 | <i>Amauornis phoenicurus</i> | White-breasted Waterhen | 2017/8/4   | 2 | 0 | 24.12852906 | 104.12775280 | <a href="https://www.inaturalist.org/observations/8005055">https://www.inaturalist.org/observations/8005055</a>     |
| 1503 | <i>Amauornis phoenicurus</i> | White-breasted Waterhen | 2022/5/2   | 1 | 0 | 24.17999825 | 120.71604710 | <a href="https://www.inaturalist.org/observations/129114737">https://www.inaturalist.org/observations/129114737</a> |
| 1504 | <i>Amauornis phoenicurus</i> | White-breasted Waterhen | 2019/4/27  | 2 | 0 | 24.20782902 | 120.59864040 | <a href="https://www.inaturalist.org/observations/25430977">https://www.inaturalist.org/observations/25430977</a>   |
| 1505 | <i>Amauornis phoenicurus</i> | White-breasted Waterhen | 2021/1/29  | 1 | 0 | 24.20930833 | 120.59759670 | <a href="https://www.inaturalist.org/observations/68746055">https://www.inaturalist.org/observations/68746055</a>   |
| 1506 | <i>Amauornis phoenicurus</i> | White-breasted Waterhen | 2020/5/1   | 2 | 0 | 24.21163300 | 120.80681600 | <a href="https://www.inaturalist.org/observations/44844495">https://www.inaturalist.org/observations/44844495</a>   |
| 1507 | <i>Amauornis phoenicurus</i> | White-breasted Waterhen | 2021/10/31 | 2 | 0 | 24.21518620 | 120.64455580 | <a href="https://www.inaturalist.org/observations/103418787">https://www.inaturalist.org/observations/103418787</a> |
| 1508 | <i>Amauornis phoenicurus</i> | White-breasted Waterhen | 2021/6/11  | 1 | 0 | 24.23947979 | 120.79678750 | <a href="https://www.inaturalist.org/observations/109752965">https://www.inaturalist.org/observations/109752965</a> |
| 1509 | <i>Amauornis phoenicurus</i> | White-breasted Waterhen | 2021/7/7   | 1 | 0 | 24.24202778 | 120.67653890 | <a href="https://www.inaturalist.org/observations/86003065">https://www.inaturalist.org/observations/86003065</a>   |
| 1510 | <i>Amauornis phoenicurus</i> | White-breasted Waterhen | 2019/3/18  | 3 | 0 | 24.35267420 | 92.34481540  | <a href="https://www.inaturalist.org/observations/21510249">https://www.inaturalist.org/observations/21510249</a>   |
| 1511 | <i>Amauornis phoenicurus</i> | White-breasted Waterhen | 2020/12/15 | 2 | 0 | 24.35858008 | 92.34624677  | <a href="https://www.inaturalist.org/observations/69713700">https://www.inaturalist.org/observations/69713700</a>   |
| 1512 | <i>Amauornis phoenicurus</i> | White-breasted Waterhen | 2022/6/9   | 1 | 0 | 24.39285000 | 118.31520830 | <a href="https://www.inaturalist.org/observations/120944926">https://www.inaturalist.org/observations/120944926</a> |
| 1513 | <i>Amauornis phoenicurus</i> | White-breasted Waterhen | 2019/11/25 | 2 | 0 | 24.40907106 | 118.29797860 | <a href="https://www.inaturalist.org/observations/36159178">https://www.inaturalist.org/observations/36159178</a>   |
| 1514 | <i>Amauornis phoenicurus</i> | White-breasted Waterhen | 2021/9/11  | 1 | 0 | 24.40973333 | 118.29023000 | <a href="https://www.inaturalist.org/observations/94420010">https://www.inaturalist.org/observations/94420010</a>   |
| 1515 | <i>Amauornis phoenicurus</i> | White-breasted Waterhen | 2022/7/4   | 2 | 0 | 24.42636196 | 118.31758250 | <a href="https://www.inaturalist.org/observations/125126896">https://www.inaturalist.org/observations/125126896</a> |
| 1516 | <i>Amauornis phoenicurus</i> | White-breasted Waterhen | 2018/7/28  | 4 | 0 | 24.43184100 | 92.33207100  | <a href="https://www.inaturalist.org/observations/14979656">https://www.inaturalist.org/observations/14979656</a>   |
| 1517 | <i>Amauornis phoenicurus</i> | White-breasted Waterhen | 2020/1/16  | 3 | 0 | 24.43195915 | 92.33039093  | <a href="https://www.inaturalist.org/observations/37649209">https://www.inaturalist.org/observations/37649209</a>   |

|      |                              |                         |            |   |   |             |              |                                                                                                                     |
|------|------------------------------|-------------------------|------------|---|---|-------------|--------------|---------------------------------------------------------------------------------------------------------------------|
| 1518 | <i>Amauornis phoenicurus</i> | White-breasted Waterhen | 2012/6/20  | 5 | 0 | 24.43201970 | 92.33068940  | <a href="http://www.inaturalist.org/observations/119247">http://www.inaturalist.org/observations/119247</a>         |
| 1519 | <i>Amauornis phoenicurus</i> | White-breasted Waterhen | 2012/5/22  | 5 | 0 | 24.43201970 | 92.33068940  | <a href="http://www.inaturalist.org/observations/127699">http://www.inaturalist.org/observations/127699</a>         |
| 1520 | <i>Amauornis phoenicurus</i> | White-breasted Waterhen | 2021/3/22  | 3 | 0 | 24.43201971 | 92.33068943  | <a href="https://www.inaturalist.org/observations/71806503">https://www.inaturalist.org/observations/71806503</a>   |
| 1521 | <i>Amauornis phoenicurus</i> | White-breasted Waterhen | 2014/1/3   | 7 | 0 | 24.43202000 | 92.33068900  | <a href="http://www.inaturalist.org/observations/497234">http://www.inaturalist.org/observations/497234</a>         |
| 1522 | <i>Amauornis phoenicurus</i> | White-breasted Waterhen | 2014/5/21  | 6 | 0 | 24.43202000 | 92.33068900  | <a href="http://www.inaturalist.org/observations/706873">http://www.inaturalist.org/observations/706873</a>         |
| 1523 | <i>Amauornis phoenicurus</i> | White-breasted Waterhen | 2010/10/3  | 1 | 0 | 24.43202000 | 92.33068900  | <a href="https://www.inaturalist.org/observations/103528311">https://www.inaturalist.org/observations/103528311</a> |
| 1524 | <i>Amauornis phoenicurus</i> | White-breasted Waterhen | 2021/4/15  | 2 | 0 | 24.43202338 | 92.33068943  | <a href="https://www.inaturalist.org/observations/74022075">https://www.inaturalist.org/observations/74022075</a>   |
| 1525 | <i>Amauornis phoenicurus</i> | White-breasted Waterhen | 2021/4/15  | 4 | 0 | 24.43202521 | 92.33068943  | <a href="https://www.inaturalist.org/observations/74916206">https://www.inaturalist.org/observations/74916206</a>   |
| 1526 | <i>Amauornis phoenicurus</i> | White-breasted Waterhen | 2021/3/21  | 2 | 0 | 24.43202674 | 92.33068943  | <a href="https://www.inaturalist.org/observations/72377406">https://www.inaturalist.org/observations/72377406</a>   |
| 1527 | <i>Amauornis phoenicurus</i> | White-breasted Waterhen | 2020/7/14  | 1 | 0 | 24.43268425 | 92.32988242  | <a href="https://www.inaturalist.org/observations/53038911">https://www.inaturalist.org/observations/53038911</a>   |
| 1528 | <i>Amauornis phoenicurus</i> | White-breasted Waterhen | 2020/2/27  | 2 | 0 | 24.43380452 | 92.32822850  | <a href="https://www.inaturalist.org/observations/39514990">https://www.inaturalist.org/observations/39514990</a>   |
| 1529 | <i>Amauornis phoenicurus</i> | White-breasted Waterhen | 2017/10/29 | 2 | 0 | 24.43398800 | 92.32306400  | <a href="https://www.inaturalist.org/observations/49002075">https://www.inaturalist.org/observations/49002075</a>   |
| 1530 | <i>Amauornis phoenicurus</i> | White-breasted Waterhen | 2020/2/23  | 4 | 0 | 24.43428074 | 92.33013141  | <a href="https://www.inaturalist.org/observations/46580829">https://www.inaturalist.org/observations/46580829</a>   |
| 1531 | <i>Amauornis phoenicurus</i> | White-breasted Waterhen | 2010/10/31 | 1 | 0 | 24.44059955 | 118.38584160 | <a href="https://www.inaturalist.org/observations/55688221">https://www.inaturalist.org/observations/55688221</a>   |
| 1532 | <i>Amauornis phoenicurus</i> | White-breasted Waterhen | 2022/5/12  | 1 | 0 | 24.44510500 | 118.44531330 | <a href="https://www.inaturalist.org/observations/116778757">https://www.inaturalist.org/observations/116778757</a> |
| 1533 | <i>Amauornis phoenicurus</i> | White-breasted Waterhen | 2017/12/30 | 2 | 0 | 24.44606403 | 118.37089000 | <a href="https://www.inaturalist.org/observations/16627387">https://www.inaturalist.org/observations/16627387</a>   |
| 1534 | <i>Amauornis phoenicurus</i> | White-breasted Waterhen | 2018/12/29 | 3 | 0 | 24.44647020 | 118.44712000 | <a href="https://www.inaturalist.org/observations/19330588">https://www.inaturalist.org/observations/19330588</a>   |
| 1535 | <i>Amauornis phoenicurus</i> | White-breasted Waterhen | 2022/6/21  | 1 | 0 | 24.44796792 | 118.39365740 | <a href="https://www.inaturalist.org/observations/123201133">https://www.inaturalist.org/observations/123201133</a> |
| 1536 | <i>Amauornis phoenicurus</i> | White-breasted Waterhen | 2011/6/2   | 1 | 0 | 24.44881164 | 118.37384690 | <a href="https://www.inaturalist.org/observations/55863958">https://www.inaturalist.org/observations/55863958</a>   |
| 1537 | <i>Amauornis phoenicurus</i> | White-breasted Waterhen | 2021/5/2   | 1 | 0 | 24.45100442 | 118.43846780 | <a href="https://www.inaturalist.org/observations/76841707">https://www.inaturalist.org/observations/76841707</a>   |
| 1538 | <i>Amauornis phoenicurus</i> | White-breasted Waterhen | 2022/5/10  | 1 | 0 | 24.45457571 | 118.30467400 | <a href="https://www.inaturalist.org/observations/128144993">https://www.inaturalist.org/observations/128144993</a> |
| 1539 | <i>Amauornis phoenicurus</i> | White-breasted Waterhen | 2021/5/13  | 1 | 0 | 24.47265667 | 118.29183500 | <a href="https://www.inaturalist.org/observations/79367324">https://www.inaturalist.org/observations/79367324</a>   |
| 1540 | <i>Amauornis phoenicurus</i> | White-breasted Waterhen | 2020/11/7  | 1 | 0 | 24.47668000 | 118.31005170 | <a href="https://www.inaturalist.org/observations/66419075">https://www.inaturalist.org/observations/66419075</a>   |

|      |                              |                         |            |   |   |             |              |                                                                                                                     |
|------|------------------------------|-------------------------|------------|---|---|-------------|--------------|---------------------------------------------------------------------------------------------------------------------|
| 1541 | <i>Amauornis phoenicurus</i> | White-breasted Waterhen | 2016/6/28  | 3 | 0 | 24.47737167 | 118.39839170 | <a href="https://www.inaturalist.org/observations/29150527">https://www.inaturalist.org/observations/29150527</a>   |
| 1542 | <i>Amauornis phoenicurus</i> | White-breasted Waterhen | 2011/3/27  | 2 | 0 | 24.47963200 | 92.32400800  | <a href="https://www.inaturalist.org/observations/103684884">https://www.inaturalist.org/observations/103684884</a> |
| 1543 | <i>Amauornis phoenicurus</i> | White-breasted Waterhen | 2011/7/24  | 1 | 0 | 24.47963200 | 92.32400800  | <a href="https://www.inaturalist.org/observations/103685775">https://www.inaturalist.org/observations/103685775</a> |
| 1544 | <i>Amauornis phoenicurus</i> | White-breasted Waterhen | 2011/11/6  | 2 | 0 | 24.47963200 | 92.32400800  | <a href="https://www.inaturalist.org/observations/103747296">https://www.inaturalist.org/observations/103747296</a> |
| 1545 | <i>Amauornis phoenicurus</i> | White-breasted Waterhen | 2020/12/31 | 1 | 0 | 24.48276859 | 118.30771540 | <a href="https://www.inaturalist.org/observations/67562846">https://www.inaturalist.org/observations/67562846</a>   |
| 1546 | <i>Amauornis phoenicurus</i> | White-breasted Waterhen | 2021/1/6   | 1 | 0 | 24.48294400 | 92.29071229  | <a href="https://www.inaturalist.org/observations/95625323">https://www.inaturalist.org/observations/95625323</a>   |
| 1547 | <i>Amauornis phoenicurus</i> | White-breasted Waterhen | 2016/1/30  | 2 | 0 | 24.48301167 | 118.40967830 | <a href="https://www.inaturalist.org/observations/14232728">https://www.inaturalist.org/observations/14232728</a>   |
| 1548 | <i>Amauornis phoenicurus</i> | White-breasted Waterhen | 2019/5/18  | 2 | 0 | 24.49265690 | 118.44997500 | <a href="https://www.inaturalist.org/observations/25554659">https://www.inaturalist.org/observations/25554659</a>   |
| 1549 | <i>Amauornis phoenicurus</i> | White-breasted Waterhen | 2019/4/6   | 3 | 0 | 24.50008578 | 120.74343650 | <a href="https://www.inaturalist.org/observations/22542395">https://www.inaturalist.org/observations/22542395</a>   |
| 1550 | <i>Amauornis phoenicurus</i> | White-breasted Waterhen | 2022/7/31  | 2 | 0 | 24.50222500 | 118.41976390 | <a href="https://www.inaturalist.org/observations/130084537">https://www.inaturalist.org/observations/130084537</a> |
| 1551 | <i>Amauornis phoenicurus</i> | White-breasted Waterhen | 2021/12/6  | 1 | 0 | 24.50882990 | 118.40560920 | <a href="https://www.inaturalist.org/observations/133073651">https://www.inaturalist.org/observations/133073651</a> |
| 1552 | <i>Amauornis phoenicurus</i> | White-breasted Waterhen | 2021/3/23  | 1 | 0 | 24.54384833 | 120.76434170 | <a href="https://www.inaturalist.org/observations/71862184">https://www.inaturalist.org/observations/71862184</a>   |
| 1553 | <i>Amauornis phoenicurus</i> | White-breasted Waterhen | 2011/4/24  | 1 | 0 | 24.54564200 | 92.28520100  | <a href="https://www.inaturalist.org/observations/103756531">https://www.inaturalist.org/observations/103756531</a> |
| 1554 | <i>Amauornis phoenicurus</i> | White-breasted Waterhen | 2021/1/12  | 1 | 0 | 24.55162500 | 118.23205200 | <a href="https://www.inaturalist.org/observations/68854161">https://www.inaturalist.org/observations/68854161</a>   |
| 1555 | <i>Amauornis phoenicurus</i> | White-breasted Waterhen | 2021/12/10 | 1 | 0 | 24.57011945 | 92.46276408  | <a href="https://www.inaturalist.org/observations/102821948">https://www.inaturalist.org/observations/102821948</a> |
| 1556 | <i>Amauornis phoenicurus</i> | White-breasted Waterhen | 2014/11/16 | 1 | 0 | 24.58544500 | 73.71247900  | <a href="https://www.inaturalist.org/observations/95917316">https://www.inaturalist.org/observations/95917316</a>   |
| 1557 | <i>Amauornis phoenicurus</i> | White-breasted Waterhen | 2020/7/12  | 1 | 0 | 24.59696833 | 74.11480800  | <a href="https://www.inaturalist.org/observations/52900841">https://www.inaturalist.org/observations/52900841</a>   |
| 1558 | <i>Amauornis phoenicurus</i> | White-breasted Waterhen | 2016/9/21  | 2 | 0 | 24.59937327 | 73.65098009  | <a href="https://www.inaturalist.org/observations/73924389">https://www.inaturalist.org/observations/73924389</a>   |
| 1559 | <i>Amauornis phoenicurus</i> | White-breasted Waterhen | 2012/9/9   | 5 | 0 | 24.60728790 | 92.38344120  | <a href="http://www.inaturalist.org/observations/120986">http://www.inaturalist.org/observations/120986</a>         |
| 1560 | <i>Amauornis phoenicurus</i> | White-breasted Waterhen | 2021/9/9   | 1 | 0 | 24.61308294 | 121.84412720 | <a href="https://www.inaturalist.org/observations/94200115">https://www.inaturalist.org/observations/94200115</a>   |
| 1561 | <i>Amauornis phoenicurus</i> | White-breasted Waterhen | 2021/10/10 | 2 | 0 | 24.61426226 | 121.84459730 | <a href="https://www.inaturalist.org/observations/97734141">https://www.inaturalist.org/observations/97734141</a>   |
| 1562 | <i>Amauornis phoenicurus</i> | White-breasted Waterhen | 2022/8/18  | 1 | 0 | 24.62295671 | 120.83387930 | <a href="https://www.inaturalist.org/observations/135674445">https://www.inaturalist.org/observations/135674445</a> |
| 1563 | <i>Amauornis phoenicurus</i> | White-breasted Waterhen | 2021/9/12  | 2 | 0 | 24.62933045 | 121.78987450 | <a href="https://www.inaturalist.org/observations/100860438">https://www.inaturalist.org/observations/100860438</a> |



|      |                              |                         |            |   |   |             |              |                                                                                                                     |
|------|------------------------------|-------------------------|------------|---|---|-------------|--------------|---------------------------------------------------------------------------------------------------------------------|
| 1564 | <i>Amauornis phoenicurus</i> | White-breasted Waterhen | 2021/8/17  | 1 | 0 | 24.63720794 | 121.78136220 | <a href="https://www.inaturalist.org/observations/94083185">https://www.inaturalist.org/observations/94083185</a>   |
| 1565 | <i>Amauornis phoenicurus</i> | White-breasted Waterhen | 2017/1/31  | 3 | 0 | 24.64552139 | 121.73452310 | <a href="https://www.inaturalist.org/observations/18799175">https://www.inaturalist.org/observations/18799175</a>   |
| 1566 | <i>Amauornis phoenicurus</i> | White-breasted Waterhen | 2021/7/23  | 1 | 0 | 24.65224379 | 121.81421760 | <a href="https://www.inaturalist.org/observations/92549965">https://www.inaturalist.org/observations/92549965</a>   |
| 1567 | <i>Amauornis phoenicurus</i> | White-breasted Waterhen | 2021/2/26  | 1 | 0 | 24.65301597 | 121.81924950 | <a href="https://www.inaturalist.org/observations/73373827">https://www.inaturalist.org/observations/73373827</a>   |
| 1568 | <i>Amauornis phoenicurus</i> | White-breasted Waterhen | 2021/1/2   | 2 | 0 | 24.65444490 | 121.82087030 | <a href="https://www.inaturalist.org/observations/67479319">https://www.inaturalist.org/observations/67479319</a>   |
| 1569 | <i>Amauornis phoenicurus</i> | White-breasted Waterhen | 2021/6/22  | 2 | 0 | 24.65447482 | 121.82228270 | <a href="https://www.inaturalist.org/observations/85884334">https://www.inaturalist.org/observations/85884334</a>   |
| 1570 | <i>Amauornis phoenicurus</i> | White-breasted Waterhen | 2020/5/13  | 1 | 0 | 24.65654350 | 121.75089230 | <a href="https://www.inaturalist.org/observations/47072446">https://www.inaturalist.org/observations/47072446</a>   |
| 1571 | <i>Amauornis phoenicurus</i> | White-breasted Waterhen | 2019/4/8   | 4 | 0 | 24.66356600 | 121.81783400 | <a href="https://www.inaturalist.org/observations/22274077">https://www.inaturalist.org/observations/22274077</a>   |
| 1572 | <i>Amauornis phoenicurus</i> | White-breasted Waterhen | 2022/8/10  | 2 | 0 | 24.66591529 | 121.75983890 | <a href="https://www.inaturalist.org/observations/136362929">https://www.inaturalist.org/observations/136362929</a> |
| 1573 | <i>Amauornis phoenicurus</i> | White-breasted Waterhen | 2020/8/31  | 1 | 0 | 24.66750569 | 121.81766990 | <a href="https://www.inaturalist.org/observations/58128455">https://www.inaturalist.org/observations/58128455</a>   |
| 1574 | <i>Amauornis phoenicurus</i> | White-breasted Waterhen | 2020/10/2  | 1 | 0 | 24.66941350 | 121.73361990 | <a href="https://www.inaturalist.org/observations/61470913">https://www.inaturalist.org/observations/61470913</a>   |
| 1575 | <i>Amauornis phoenicurus</i> | White-breasted Waterhen | 2020/10/2  | 1 | 0 | 24.66941350 | 121.73361990 | <a href="https://www.inaturalist.org/observations/61470958">https://www.inaturalist.org/observations/61470958</a>   |
| 1576 | <i>Amauornis phoenicurus</i> | White-breasted Waterhen | 2022/6/11  | 2 | 0 | 24.67671560 | 121.67833830 | <a href="https://www.inaturalist.org/observations/121230465">https://www.inaturalist.org/observations/121230465</a> |
| 1577 | <i>Amauornis phoenicurus</i> | White-breasted Waterhen | 2020/4/25  | 4 | 0 | 24.67906389 | 118.64099720 | <a href="https://www.inaturalist.org/observations/43321767">https://www.inaturalist.org/observations/43321767</a>   |
| 1578 | <i>Amauornis phoenicurus</i> | White-breasted Waterhen | 2020/8/26  | 1 | 0 | 24.67968897 | 121.74700850 | <a href="https://www.inaturalist.org/observations/58128443">https://www.inaturalist.org/observations/58128443</a>   |
| 1579 | <i>Amauornis phoenicurus</i> | White-breasted Waterhen | 2020/10/25 | 2 | 0 | 24.68377624 | 121.77448950 | <a href="https://www.inaturalist.org/observations/63490827">https://www.inaturalist.org/observations/63490827</a>   |
| 1580 | <i>Amauornis phoenicurus</i> | White-breasted Waterhen | 2020/12/23 | 1 | 0 | 24.68501746 | 121.72651500 | <a href="https://www.inaturalist.org/observations/67032438">https://www.inaturalist.org/observations/67032438</a>   |
| 1581 | <i>Amauornis phoenicurus</i> | White-breasted Waterhen | 1980/1/1   | 1 | 0 | 24.68876330 | 121.80501250 | <a href="https://www.inaturalist.org/observations/44234748">https://www.inaturalist.org/observations/44234748</a>   |
| 1582 | <i>Amauornis phoenicurus</i> | White-breasted Waterhen | 2020/9/10  | 2 | 0 | 24.69860956 | 121.76271800 | <a href="https://www.inaturalist.org/observations/59114253">https://www.inaturalist.org/observations/59114253</a>   |
| 1583 | <i>Amauornis phoenicurus</i> | White-breasted Waterhen | 2020/4/9   | 1 | 0 | 24.70052085 | 121.75672580 | <a href="https://www.inaturalist.org/observations/45278322">https://www.inaturalist.org/observations/45278322</a>   |
| 1584 | <i>Amauornis phoenicurus</i> | White-breasted Waterhen | 2020/9/9   | 2 | 0 | 24.70184004 | 121.75527880 | <a href="https://www.inaturalist.org/observations/59025777">https://www.inaturalist.org/observations/59025777</a>   |
| 1585 | <i>Amauornis phoenicurus</i> | White-breasted Waterhen | 2020/1/9   | 1 | 0 | 24.70427833 | 121.80653170 | <a href="https://www.inaturalist.org/observations/37632825">https://www.inaturalist.org/observations/37632825</a>   |
| 1586 | <i>Amauornis phoenicurus</i> | White-breasted Waterhen | 2019/1/26  | 1 | 0 | 24.70518990 | 97.93183990  | <a href="https://www.inaturalist.org/observations/119983810">https://www.inaturalist.org/observations/119983810</a> |

|      |                              |                         |            |   |   |             |              |                                                                                                                     |
|------|------------------------------|-------------------------|------------|---|---|-------------|--------------|---------------------------------------------------------------------------------------------------------------------|
| 1587 | <i>Amauornis phoenicurus</i> | White-breasted Waterhen | 2019/12/1  | 2 | 0 | 24.70565500 | 121.80755170 | <a href="https://www.inaturalist.org/observations/36251000">https://www.inaturalist.org/observations/36251000</a>   |
| 1588 | <i>Amauornis phoenicurus</i> | White-breasted Waterhen | 2014/4/4   | 1 | 0 | 24.70585081 | 121.15815460 | <a href="https://www.inaturalist.org/observations/44469004">https://www.inaturalist.org/observations/44469004</a>   |
| 1589 | <i>Amauornis phoenicurus</i> | White-breasted Waterhen | 2020/10/30 | 1 | 0 | 24.70596224 | 121.76041540 | <a href="https://www.inaturalist.org/observations/66558056">https://www.inaturalist.org/observations/66558056</a>   |
| 1590 | <i>Amauornis phoenicurus</i> | White-breasted Waterhen | 2020/9/14  | 1 | 0 | 24.70613727 | 121.76265730 | <a href="https://www.inaturalist.org/observations/61279457">https://www.inaturalist.org/observations/61279457</a>   |
| 1591 | <i>Amauornis phoenicurus</i> | White-breasted Waterhen | 2020/9/14  | 1 | 0 | 24.70613727 | 121.76265730 | <a href="https://www.inaturalist.org/observations/61279458">https://www.inaturalist.org/observations/61279458</a>   |
| 1592 | <i>Amauornis phoenicurus</i> | White-breasted Waterhen | 2020/9/16  | 1 | 0 | 24.70673201 | 121.76155200 | <a href="https://www.inaturalist.org/observations/61279554">https://www.inaturalist.org/observations/61279554</a>   |
| 1593 | <i>Amauornis phoenicurus</i> | White-breasted Waterhen | 2020/10/7  | 1 | 0 | 24.70679498 | 121.76209100 | <a href="https://www.inaturalist.org/observations/62481382">https://www.inaturalist.org/observations/62481382</a>   |
| 1594 | <i>Amauornis phoenicurus</i> | White-breasted Waterhen | 2020/2/20  | 0 | 0 | 24.70764181 | 121.76535200 | <a href="https://www.inaturalist.org/observations/39090237">https://www.inaturalist.org/observations/39090237</a>   |
| 1595 | <i>Amauornis phoenicurus</i> | White-breasted Waterhen | 2020/5/21  | 1 | 0 | 24.71375167 | 121.64049830 | <a href="https://www.inaturalist.org/observations/49696968">https://www.inaturalist.org/observations/49696968</a>   |
| 1596 | <i>Amauornis phoenicurus</i> | White-breasted Waterhen | 2017/8/24  | 1 | 0 | 24.71580636 | 97.91918694  | <a href="https://www.inaturalist.org/observations/38643076">https://www.inaturalist.org/observations/38643076</a>   |
| 1597 | <i>Amauornis phoenicurus</i> | White-breasted Waterhen | 2020/4/25  | 2 | 0 | 24.71798350 | 121.72807040 | <a href="https://www.inaturalist.org/observations/43286955">https://www.inaturalist.org/observations/43286955</a>   |
| 1598 | <i>Amauornis phoenicurus</i> | White-breasted Waterhen | 2020/6/23  | 1 | 0 | 24.71916631 | 121.73033190 | <a href="https://www.inaturalist.org/observations/53133336">https://www.inaturalist.org/observations/53133336</a>   |
| 1599 | <i>Amauornis phoenicurus</i> | White-breasted Waterhen | 2020/5/16  | 0 | 0 | 24.71935000 | 121.80707300 | <a href="https://www.inaturalist.org/observations/46063061">https://www.inaturalist.org/observations/46063061</a>   |
| 1600 | <i>Amauornis phoenicurus</i> | White-breasted Waterhen | 2021/2/7   | 1 | 0 | 24.71946667 | 121.81425330 | <a href="https://www.inaturalist.org/observations/69194180">https://www.inaturalist.org/observations/69194180</a>   |
| 1601 | <i>Amauornis phoenicurus</i> | White-breasted Waterhen | 2020/6/1   | 1 | 0 | 24.71971337 | 121.73177080 | <a href="https://www.inaturalist.org/observations/48903814">https://www.inaturalist.org/observations/48903814</a>   |
| 1602 | <i>Amauornis phoenicurus</i> | White-breasted Waterhen | 2020/3/31  | 2 | 0 | 24.72020238 | 121.71442970 | <a href="https://www.inaturalist.org/observations/41608186">https://www.inaturalist.org/observations/41608186</a>   |
| 1603 | <i>Amauornis phoenicurus</i> | White-breasted Waterhen | 2020/2/23  | 0 | 0 | 24.72054951 | 121.80501260 | <a href="https://www.inaturalist.org/observations/39088260">https://www.inaturalist.org/observations/39088260</a>   |
| 1604 | <i>Amauornis phoenicurus</i> | White-breasted Waterhen | 2017/4/15  | 4 | 0 | 24.72123052 | 121.80823570 | <a href="https://www.inaturalist.org/observations/9264034">https://www.inaturalist.org/observations/9264034</a>     |
| 1605 | <i>Amauornis phoenicurus</i> | White-breasted Waterhen | 2022/5/1   | 1 | 0 | 24.72315400 | 121.73125050 | <a href="https://www.inaturalist.org/observations/114184526">https://www.inaturalist.org/observations/114184526</a> |
| 1606 | <i>Amauornis phoenicurus</i> | White-breasted Waterhen | 2022/5/1   | 1 | 0 | 24.72315400 | 121.73125050 | <a href="https://www.inaturalist.org/observations/114184527">https://www.inaturalist.org/observations/114184527</a> |
| 1607 | <i>Amauornis phoenicurus</i> | White-breasted Waterhen | 2022/9/25  | 2 | 0 | 24.72363294 | 121.69520850 | <a href="https://www.inaturalist.org/observations/136392691">https://www.inaturalist.org/observations/136392691</a> |
| 1608 | <i>Amauornis phoenicurus</i> | White-breasted Waterhen | 2021/10/23 | 1 | 0 | 24.72422411 | 121.72670550 | <a href="https://www.inaturalist.org/observations/99061591">https://www.inaturalist.org/observations/99061591</a>   |
| 1609 | <i>Amauornis phoenicurus</i> | White-breasted Waterhen | 2021/2/4   | 1 | 0 | 24.72433009 | 121.69354660 | <a href="https://www.inaturalist.org/observations/69077793">https://www.inaturalist.org/observations/69077793</a>   |

|      |                              |                         |            |   |   |             |              |                                                                                                                     |
|------|------------------------------|-------------------------|------------|---|---|-------------|--------------|---------------------------------------------------------------------------------------------------------------------|
| 1610 | <i>Amauornis phoenicurus</i> | White-breasted Waterhen | 2021/12/16 | 1 | 0 | 24.72476116 | 121.71362040 | <a href="https://www.inaturalist.org/observations/105306627">https://www.inaturalist.org/observations/105306627</a> |
| 1611 | <i>Amauornis phoenicurus</i> | White-breasted Waterhen | 2018/11/12 | 2 | 0 | 24.72497660 | 121.81464140 | <a href="https://www.inaturalist.org/observations/18350714">https://www.inaturalist.org/observations/18350714</a>   |
| 1612 | <i>Amauornis phoenicurus</i> | White-breasted Waterhen | 2022/7/22  | 0 | 0 | 24.72607264 | 110.46663340 | <a href="https://www.inaturalist.org/observations/137045954">https://www.inaturalist.org/observations/137045954</a> |
| 1613 | <i>Amauornis phoenicurus</i> | White-breasted Waterhen | 2018/1/16  | 0 | 0 | 24.72612900 | 121.73139000 | <a href="https://www.inaturalist.org/observations/38779088">https://www.inaturalist.org/observations/38779088</a>   |
| 1614 | <i>Amauornis phoenicurus</i> | White-breasted Waterhen | 2018/1/16  | 1 | 0 | 24.72612900 | 121.73139000 | <a href="https://www.inaturalist.org/observations/38779091">https://www.inaturalist.org/observations/38779091</a>   |
| 1615 | <i>Amauornis phoenicurus</i> | White-breasted Waterhen | 2021/7/27  | 1 | 0 | 24.72678000 | 121.75825500 | <a href="https://www.inaturalist.org/observations/88795656">https://www.inaturalist.org/observations/88795656</a>   |
| 1616 | <i>Amauornis phoenicurus</i> | White-breasted Waterhen | 2021/5/29  | 1 | 0 | 24.72757667 | 121.76360330 | <a href="https://www.inaturalist.org/observations/80859635">https://www.inaturalist.org/observations/80859635</a>   |
| 1617 | <i>Amauornis phoenicurus</i> | White-breasted Waterhen | 2020/3/24  | 3 | 0 | 24.72798200 | 121.70541200 | <a href="https://www.inaturalist.org/observations/40807551">https://www.inaturalist.org/observations/40807551</a>   |
| 1618 | <i>Amauornis phoenicurus</i> | White-breasted Waterhen | 2019/12/24 | 2 | 0 | 24.72906789 | 121.78988700 | <a href="https://www.inaturalist.org/observations/36911834">https://www.inaturalist.org/observations/36911834</a>   |
| 1619 | <i>Amauornis phoenicurus</i> | White-breasted Waterhen | 2022/2/13  | 1 | 0 | 24.72939765 | 121.70784850 | <a href="https://www.inaturalist.org/observations/106851702">https://www.inaturalist.org/observations/106851702</a> |
| 1620 | <i>Amauornis phoenicurus</i> | White-breasted Waterhen | 2022/2/13  | 1 | 0 | 24.72939765 | 121.70784850 | <a href="https://www.inaturalist.org/observations/106851704">https://www.inaturalist.org/observations/106851704</a> |
| 1621 | <i>Amauornis phoenicurus</i> | White-breasted Waterhen | 2022/2/13  | 1 | 0 | 24.72939765 | 121.70784850 | <a href="https://www.inaturalist.org/observations/106851706">https://www.inaturalist.org/observations/106851706</a> |
| 1622 | <i>Amauornis phoenicurus</i> | White-breasted Waterhen | 2022/5/21  | 1 | 0 | 24.72959667 | 121.68884500 | <a href="https://www.inaturalist.org/observations/117952162">https://www.inaturalist.org/observations/117952162</a> |
| 1623 | <i>Amauornis phoenicurus</i> | White-breasted Waterhen | 2022/9/25  | 2 | 0 | 24.72989760 | 121.71282690 | <a href="https://www.inaturalist.org/observations/136394159">https://www.inaturalist.org/observations/136394159</a> |
| 1624 | <i>Amauornis phoenicurus</i> | White-breasted Waterhen | 2022/6/4   | 1 | 0 | 24.73275667 | 121.76039500 | <a href="https://www.inaturalist.org/observations/120147434">https://www.inaturalist.org/observations/120147434</a> |
| 1625 | <i>Amauornis phoenicurus</i> | White-breasted Waterhen | 2021/3/15  | 2 | 0 | 24.73556230 | 121.75923200 | <a href="https://www.inaturalist.org/observations/71342401">https://www.inaturalist.org/observations/71342401</a>   |
| 1626 | <i>Amauornis phoenicurus</i> | White-breasted Waterhen | 2022/6/12  | 1 | 0 | 24.73680573 | 121.74331430 | <a href="https://www.inaturalist.org/observations/122285850">https://www.inaturalist.org/observations/122285850</a> |
| 1627 | <i>Amauornis phoenicurus</i> | White-breasted Waterhen | 2021/12/31 | 2 | 0 | 24.73770386 | 121.72994860 | <a href="https://www.inaturalist.org/observations/104069573">https://www.inaturalist.org/observations/104069573</a> |
| 1628 | <i>Amauornis phoenicurus</i> | White-breasted Waterhen | 2022/1/1   | 2 | 0 | 24.73995311 | 121.74600730 | <a href="https://www.inaturalist.org/observations/105743561">https://www.inaturalist.org/observations/105743561</a> |
| 1629 | <i>Amauornis phoenicurus</i> | White-breasted Waterhen | 2022/1/1   | 2 | 0 | 24.73995311 | 121.74600730 | <a href="https://www.inaturalist.org/observations/105743562">https://www.inaturalist.org/observations/105743562</a> |
| 1630 | <i>Amauornis phoenicurus</i> | White-breasted Waterhen | 2020/1/4   | 1 | 0 | 24.74073170 | 121.76096010 | <a href="https://www.inaturalist.org/observations/37298641">https://www.inaturalist.org/observations/37298641</a>   |
| 1631 | <i>Amauornis phoenicurus</i> | White-breasted Waterhen | 2018/1/16  | 1 | 0 | 24.74187395 | 121.74652040 | <a href="https://www.inaturalist.org/observations/38778894">https://www.inaturalist.org/observations/38778894</a>   |
| 1632 | <i>Amauornis phoenicurus</i> | White-breasted Waterhen | 2022/3/19  | 3 | 0 | 24.74265010 | 121.73668670 | <a href="https://www.inaturalist.org/observations/110250320">https://www.inaturalist.org/observations/110250320</a> |

|      |                              |                         |            |   |   |             |              |                                                                                                                     |
|------|------------------------------|-------------------------|------------|---|---|-------------|--------------|---------------------------------------------------------------------------------------------------------------------|
| 1633 | <i>Amauornis phoenicurus</i> | White-breasted Waterhen | 2022/6/10  | 1 | 0 | 24.74265010 | 121.73668670 | <a href="https://www.inaturalist.org/observations/121230435">https://www.inaturalist.org/observations/121230435</a> |
| 1634 | <i>Amauornis phoenicurus</i> | White-breasted Waterhen | 2022/6/10  | 2 | 0 | 24.74265010 | 121.73668670 | <a href="https://www.inaturalist.org/observations/121230453">https://www.inaturalist.org/observations/121230453</a> |
| 1635 | <i>Amauornis phoenicurus</i> | White-breasted Waterhen | 2022/6/5   | 2 | 0 | 24.74265010 | 121.73668670 | <a href="https://www.inaturalist.org/observations/121848791">https://www.inaturalist.org/observations/121848791</a> |
| 1636 | <i>Amauornis phoenicurus</i> | White-breasted Waterhen | 2022/6/5   | 3 | 0 | 24.74265010 | 121.73668670 | <a href="https://www.inaturalist.org/observations/121848792">https://www.inaturalist.org/observations/121848792</a> |
| 1637 | <i>Amauornis phoenicurus</i> | White-breasted Waterhen | 2022/9/25  | 2 | 0 | 24.74265010 | 121.73668670 | <a href="https://www.inaturalist.org/observations/136395031">https://www.inaturalist.org/observations/136395031</a> |
| 1638 | <i>Amauornis phoenicurus</i> | White-breasted Waterhen | 2021/2/7   | 2 | 0 | 24.74347010 | 121.73409940 | <a href="https://www.inaturalist.org/observations/69603545">https://www.inaturalist.org/observations/69603545</a>   |
| 1639 | <i>Amauornis phoenicurus</i> | White-breasted Waterhen | 2022/3/14  | 2 | 0 | 24.74347010 | 121.73409940 | <a href="https://www.inaturalist.org/observations/110251491">https://www.inaturalist.org/observations/110251491</a> |
| 1640 | <i>Amauornis phoenicurus</i> | White-breasted Waterhen | 2022/3/18  | 3 | 0 | 24.74347010 | 121.73409940 | <a href="https://www.inaturalist.org/observations/110251666">https://www.inaturalist.org/observations/110251666</a> |
| 1641 | <i>Amauornis phoenicurus</i> | White-breasted Waterhen | 2021/6/29  | 3 | 0 | 24.74357933 | 121.73559670 | <a href="https://www.inaturalist.org/observations/88340600">https://www.inaturalist.org/observations/88340600</a>   |
| 1642 | <i>Amauornis phoenicurus</i> | White-breasted Waterhen | 2021/6/29  | 3 | 0 | 24.74357933 | 121.73559670 | <a href="https://www.inaturalist.org/observations/88340605">https://www.inaturalist.org/observations/88340605</a>   |
| 1643 | <i>Amauornis phoenicurus</i> | White-breasted Waterhen | 2022/9/10  | 2 | 0 | 24.74375400 | 121.69702100 | <a href="https://www.inaturalist.org/observations/134407430">https://www.inaturalist.org/observations/134407430</a> |
| 1644 | <i>Amauornis phoenicurus</i> | White-breasted Waterhen | 2021/1/24  | 2 | 0 | 24.74378572 | 121.73714750 | <a href="https://www.inaturalist.org/observations/68758448">https://www.inaturalist.org/observations/68758448</a>   |
| 1645 | <i>Amauornis phoenicurus</i> | White-breasted Waterhen | 2021/7/10  | 2 | 0 | 24.74399474 | 121.73503450 | <a href="https://www.inaturalist.org/observations/88254681">https://www.inaturalist.org/observations/88254681</a>   |
| 1646 | <i>Amauornis phoenicurus</i> | White-breasted Waterhen | 2022/2/5   | 2 | 0 | 24.74501610 | 121.73233190 | <a href="https://www.inaturalist.org/observations/110252772">https://www.inaturalist.org/observations/110252772</a> |
| 1647 | <i>Amauornis phoenicurus</i> | White-breasted Waterhen | 2022/2/5   | 3 | 0 | 24.74524480 | 121.73257350 | <a href="https://www.inaturalist.org/observations/110240140">https://www.inaturalist.org/observations/110240140</a> |
| 1648 | <i>Amauornis phoenicurus</i> | White-breasted Waterhen | 2020/10/10 | 2 | 0 | 24.74526595 | 121.78878340 | <a href="https://www.inaturalist.org/observations/62186115">https://www.inaturalist.org/observations/62186115</a>   |
| 1649 | <i>Amauornis phoenicurus</i> | White-breasted Waterhen | 2020/3/8   | 0 | 0 | 24.74591000 | 121.73586500 | <a href="https://www.inaturalist.org/observations/39690125">https://www.inaturalist.org/observations/39690125</a>   |
| 1650 | <i>Amauornis phoenicurus</i> | White-breasted Waterhen | 2020/9/3   | 1 | 0 | 24.74614517 | 121.74496210 | <a href="https://www.inaturalist.org/observations/58681666">https://www.inaturalist.org/observations/58681666</a>   |
| 1651 | <i>Amauornis phoenicurus</i> | White-breasted Waterhen | 2020/5/14  | 1 | 0 | 24.74624620 | 121.74770070 | <a href="https://www.inaturalist.org/observations/46063854">https://www.inaturalist.org/observations/46063854</a>   |
| 1652 | <i>Amauornis phoenicurus</i> | White-breasted Waterhen | 2020/6/2   | 1 | 0 | 24.74624620 | 121.74770070 | <a href="https://www.inaturalist.org/observations/50213903">https://www.inaturalist.org/observations/50213903</a>   |
| 1653 | <i>Amauornis phoenicurus</i> | White-breasted Waterhen | 2021/4/2   | 2 | 0 | 24.74624620 | 121.74770070 | <a href="https://www.inaturalist.org/observations/75522653">https://www.inaturalist.org/observations/75522653</a>   |
| 1654 | <i>Amauornis phoenicurus</i> | White-breasted Waterhen | 2021/4/2   | 1 | 0 | 24.74624620 | 121.74770070 | <a href="https://www.inaturalist.org/observations/75522673">https://www.inaturalist.org/observations/75522673</a>   |
| 1655 | <i>Amauornis phoenicurus</i> | White-breasted Waterhen | 2021/1/17  | 2 | 0 | 24.74664569 | 121.74743250 | <a href="https://www.inaturalist.org/observations/68320875">https://www.inaturalist.org/observations/68320875</a>   |

|      |                              |                         |            |   |   |             |              |                                                                                                                     |
|------|------------------------------|-------------------------|------------|---|---|-------------|--------------|---------------------------------------------------------------------------------------------------------------------|
| 1656 | <i>Amauornis phoenicurus</i> | White-breasted Waterhen | 2021/1/1   | 1 | 0 | 24.74669970 | 121.72865890 | <a href="https://www.inaturalist.org/observations/67389007">https://www.inaturalist.org/observations/67389007</a>   |
| 1657 | <i>Amauornis phoenicurus</i> | White-breasted Waterhen | 2019/12/1  | 0 | 0 | 24.74769167 | 121.79529830 | <a href="https://www.inaturalist.org/observations/36250897">https://www.inaturalist.org/observations/36250897</a>   |
| 1658 | <i>Amauornis phoenicurus</i> | White-breasted Waterhen | 2019/4/5   | 3 | 0 | 24.74923419 | 121.76812450 | <a href="https://www.inaturalist.org/observations/22346235">https://www.inaturalist.org/observations/22346235</a>   |
| 1659 | <i>Amauornis phoenicurus</i> | White-breasted Waterhen | 2019/4/5   | 3 | 0 | 24.74923419 | 121.76812450 | <a href="https://www.inaturalist.org/observations/22346236">https://www.inaturalist.org/observations/22346236</a>   |
| 1660 | <i>Amauornis phoenicurus</i> | White-breasted Waterhen | 2019/4/5   | 3 | 0 | 24.74923419 | 121.76812450 | <a href="https://www.inaturalist.org/observations/22346240">https://www.inaturalist.org/observations/22346240</a>   |
| 1661 | <i>Amauornis phoenicurus</i> | White-breasted Waterhen | 2019/8/7   | 2 | 0 | 24.74927043 | 121.74716800 | <a href="https://www.inaturalist.org/observations/31174889">https://www.inaturalist.org/observations/31174889</a>   |
| 1662 | <i>Amauornis phoenicurus</i> | White-breasted Waterhen | 2020/6/26  | 1 | 0 | 24.74965999 | 121.74533880 | <a href="https://www.inaturalist.org/observations/51447503">https://www.inaturalist.org/observations/51447503</a>   |
| 1663 | <i>Amauornis phoenicurus</i> | White-breasted Waterhen | 2021/1/19  | 2 | 0 | 24.74985428 | 121.76656840 | <a href="https://www.inaturalist.org/observations/68320895">https://www.inaturalist.org/observations/68320895</a>   |
| 1664 | <i>Amauornis phoenicurus</i> | White-breasted Waterhen | 2020/11/2  | 2 | 0 | 24.74988739 | 121.76648260 | <a href="https://www.inaturalist.org/observations/66508139">https://www.inaturalist.org/observations/66508139</a>   |
| 1665 | <i>Amauornis phoenicurus</i> | White-breasted Waterhen | 2022/5/2   | 2 | 0 | 24.74992110 | 121.76701400 | <a href="https://www.inaturalist.org/observations/115107950">https://www.inaturalist.org/observations/115107950</a> |
| 1666 | <i>Amauornis phoenicurus</i> | White-breasted Waterhen | 2020/3/30  | 2 | 0 | 24.74996758 | 121.74670560 | <a href="https://www.inaturalist.org/observations/42054924">https://www.inaturalist.org/observations/42054924</a>   |
| 1667 | <i>Amauornis phoenicurus</i> | White-breasted Waterhen | 2020/3/30  | 1 | 0 | 24.74996758 | 121.74670560 | <a href="https://www.inaturalist.org/observations/42054927">https://www.inaturalist.org/observations/42054927</a>   |
| 1668 | <i>Amauornis phoenicurus</i> | White-breasted Waterhen | 2019/4/7   | 4 | 0 | 24.75053593 | 121.72427360 | <a href="https://www.inaturalist.org/observations/22506246">https://www.inaturalist.org/observations/22506246</a>   |
| 1669 | <i>Amauornis phoenicurus</i> | White-breasted Waterhen | 2021/6/9   | 1 | 0 | 24.75067997 | 84.37208597  | <a href="https://www.inaturalist.org/observations/82243240">https://www.inaturalist.org/observations/82243240</a>   |
| 1670 | <i>Amauornis phoenicurus</i> | White-breasted Waterhen | 2021/6/7   | 1 | 0 | 24.75092797 | 84.37155797  | <a href="https://www.inaturalist.org/observations/82005877">https://www.inaturalist.org/observations/82005877</a>   |
| 1671 | <i>Amauornis phoenicurus</i> | White-breasted Waterhen | 2021/7/19  | 3 | 0 | 24.75100000 | 84.37157700  | <a href="https://www.inaturalist.org/observations/87681434">https://www.inaturalist.org/observations/87681434</a>   |
| 1672 | <i>Amauornis phoenicurus</i> | White-breasted Waterhen | 2022/1/26  | 1 | 0 | 24.75621254 | 121.64880140 | <a href="https://www.inaturalist.org/observations/105745220">https://www.inaturalist.org/observations/105745220</a> |
| 1673 | <i>Amauornis phoenicurus</i> | White-breasted Waterhen | 2007/5/11  | 2 | 0 | 24.75641810 | 121.59463270 | <a href="https://www.inaturalist.org/observations/16280073">https://www.inaturalist.org/observations/16280073</a>   |
| 1674 | <i>Amauornis phoenicurus</i> | White-breasted Waterhen | 2020/4/2   | 4 | 0 | 24.75751325 | 121.65478010 | <a href="https://www.inaturalist.org/observations/107145853">https://www.inaturalist.org/observations/107145853</a> |
| 1675 | <i>Amauornis phoenicurus</i> | White-breasted Waterhen | 2015/10/15 | 3 | 0 | 24.75911500 | 121.75374000 | <a href="https://www.inaturalist.org/observations/9320448">https://www.inaturalist.org/observations/9320448</a>     |
| 1676 | <i>Amauornis phoenicurus</i> | White-breasted Waterhen | 2021/2/20  | 1 | 0 | 24.75985667 | 121.58386330 | <a href="https://www.inaturalist.org/observations/69924049">https://www.inaturalist.org/observations/69924049</a>   |
| 1677 | <i>Amauornis phoenicurus</i> | White-breasted Waterhen | 2022/8/4   | 2 | 0 | 24.76009667 | 121.58329670 | <a href="https://www.inaturalist.org/observations/129355048">https://www.inaturalist.org/observations/129355048</a> |
| 1678 | <i>Amauornis phoenicurus</i> | White-breasted Waterhen | 2019/4/14  | 3 | 0 | 24.76262190 | 121.10581030 | <a href="https://www.inaturalist.org/observations/24325803">https://www.inaturalist.org/observations/24325803</a>   |

|      |                              |                         |            |   |   |             |              |                                                                                                                     |
|------|------------------------------|-------------------------|------------|---|---|-------------|--------------|---------------------------------------------------------------------------------------------------------------------|
| 1679 | <i>Amauornis phoenicurus</i> | White-breasted Waterhen | 2021/8/7   | 1 | 0 | 24.76956900 | 121.79931680 | <a href="https://www.inaturalist.org/observations/136132533">https://www.inaturalist.org/observations/136132533</a> |
| 1680 | <i>Amauornis phoenicurus</i> | White-breasted Waterhen | 2020/12/26 | 2 | 0 | 24.77402500 | 120.96952670 | <a href="https://www.inaturalist.org/observations/67074621">https://www.inaturalist.org/observations/67074621</a>   |
| 1681 | <i>Amauornis phoenicurus</i> | White-breasted Waterhen | 2020/7/12  | 2 | 0 | 24.77544006 | 121.00038730 | <a href="https://www.inaturalist.org/observations/57824215">https://www.inaturalist.org/observations/57824215</a>   |
| 1682 | <i>Amauornis phoenicurus</i> | White-breasted Waterhen | 2020/12/26 | 1 | 0 | 24.78094712 | 121.78181490 | <a href="https://www.inaturalist.org/observations/67078855">https://www.inaturalist.org/observations/67078855</a>   |
| 1683 | <i>Amauornis phoenicurus</i> | White-breasted Waterhen | 2020/12/26 | 2 | 0 | 24.78094712 | 121.78181490 | <a href="https://www.inaturalist.org/observations/67078857">https://www.inaturalist.org/observations/67078857</a>   |
| 1684 | <i>Amauornis phoenicurus</i> | White-breasted Waterhen | 2020/5/4   | 1 | 0 | 24.78156520 | 121.77869660 | <a href="https://www.inaturalist.org/observations/46064285">https://www.inaturalist.org/observations/46064285</a>   |
| 1685 | <i>Amauornis phoenicurus</i> | White-breasted Waterhen | 2018/8/31  | 2 | 0 | 24.78662171 | 121.80358810 | <a href="https://www.inaturalist.org/observations/19888607">https://www.inaturalist.org/observations/19888607</a>   |
| 1686 | <i>Amauornis phoenicurus</i> | White-breasted Waterhen | 2019/12/6  | 1 | 0 | 24.79377747 | 121.73908230 | <a href="https://www.inaturalist.org/observations/36498654">https://www.inaturalist.org/observations/36498654</a>   |
| 1687 | <i>Amauornis phoenicurus</i> | White-breasted Waterhen | 2021/4/5   | 2 | 0 | 24.79593333 | 121.74312500 | <a href="https://www.inaturalist.org/observations/73596662">https://www.inaturalist.org/observations/73596662</a>   |
| 1688 | <i>Amauornis phoenicurus</i> | White-breasted Waterhen | 2021/7/9   | 1 | 0 | 24.79709270 | 121.04039070 | <a href="https://www.inaturalist.org/observations/86295763">https://www.inaturalist.org/observations/86295763</a>   |
| 1689 | <i>Amauornis phoenicurus</i> | White-breasted Waterhen | 2020/12/26 | 2 | 0 | 24.79864000 | 121.80674100 | <a href="https://www.inaturalist.org/observations/67080215">https://www.inaturalist.org/observations/67080215</a>   |
| 1690 | <i>Amauornis phoenicurus</i> | White-breasted Waterhen | 2020/12/26 | 1 | 0 | 24.79864000 | 121.80674100 | <a href="https://www.inaturalist.org/observations/67080236">https://www.inaturalist.org/observations/67080236</a>   |
| 1691 | <i>Amauornis phoenicurus</i> | White-breasted Waterhen | 2020/7/12  | 1 | 0 | 24.79899229 | 120.95682570 | <a href="https://www.inaturalist.org/observations/52733557">https://www.inaturalist.org/observations/52733557</a>   |
| 1692 | <i>Amauornis phoenicurus</i> | White-breasted Waterhen | 2022/7/29  | 1 | 0 | 24.79940900 | 121.74120040 | <a href="https://www.inaturalist.org/observations/130331456">https://www.inaturalist.org/observations/130331456</a> |
| 1693 | <i>Amauornis phoenicurus</i> | White-breasted Waterhen | 2021/7/20  | 1 | 0 | 24.79972274 | 120.95551540 | <a href="https://www.inaturalist.org/observations/87827432">https://www.inaturalist.org/observations/87827432</a>   |
| 1694 | <i>Amauornis phoenicurus</i> | White-breasted Waterhen | 2022/7/7   | 1 | 0 | 24.79991631 | 120.95527700 | <a href="https://www.inaturalist.org/observations/125736133">https://www.inaturalist.org/observations/125736133</a> |
| 1695 | <i>Amauornis phoenicurus</i> | White-breasted Waterhen | 2022/4/11  | 1 | 0 | 24.80080898 | 120.95372600 | <a href="https://www.inaturalist.org/observations/110992615">https://www.inaturalist.org/observations/110992615</a> |
| 1696 | <i>Amauornis phoenicurus</i> | White-breasted Waterhen | 2020/5/16  | 1 | 0 | 24.80226734 | 120.97885010 | <a href="https://www.inaturalist.org/observations/46080725">https://www.inaturalist.org/observations/46080725</a>   |
| 1697 | <i>Amauornis phoenicurus</i> | White-breasted Waterhen | 2021/7/7   | 1 | 0 | 24.80369333 | 121.79972500 | <a href="https://www.inaturalist.org/observations/86395696">https://www.inaturalist.org/observations/86395696</a>   |
| 1698 | <i>Amauornis phoenicurus</i> | White-breasted Waterhen | 2021/11/14 | 1 | 0 | 24.80511167 | 121.80266830 | <a href="https://www.inaturalist.org/observations/101084089">https://www.inaturalist.org/observations/101084089</a> |
| 1699 | <i>Amauornis phoenicurus</i> | White-breasted Waterhen | 2020/6/1   | 1 | 0 | 24.81160140 | 121.03447280 | <a href="https://www.inaturalist.org/observations/66947459">https://www.inaturalist.org/observations/66947459</a>   |
| 1700 | <i>Amauornis phoenicurus</i> | White-breasted Waterhen | 2017/12/10 | 3 | 0 | 24.81734317 | 121.80110100 | <a href="https://www.inaturalist.org/observations/9117590">https://www.inaturalist.org/observations/9117590</a>     |
| 1701 | <i>Amauornis phoenicurus</i> | White-breasted Waterhen | 2020/6/22  | 2 | 0 | 24.81739590 | 121.18633340 | <a href="https://www.inaturalist.org/observations/50528232">https://www.inaturalist.org/observations/50528232</a>   |

|      |                              |                         |            |   |   |             |              |                                                                                                                     |
|------|------------------------------|-------------------------|------------|---|---|-------------|--------------|---------------------------------------------------------------------------------------------------------------------|
| 1702 | <i>Amauornis phoenicurus</i> | White-breasted Waterhen | 2021/1/26  | 2 | 0 | 24.81754938 | 121.79741600 | <a href="https://www.inaturalist.org/observations/68760541">https://www.inaturalist.org/observations/68760541</a>   |
| 1703 | <i>Amauornis phoenicurus</i> | White-breasted Waterhen | 2020/4/24  | 3 | 0 | 24.82030057 | 120.91844740 | <a href="https://www.inaturalist.org/observations/43290314">https://www.inaturalist.org/observations/43290314</a>   |
| 1704 | <i>Amauornis phoenicurus</i> | White-breasted Waterhen | 2019/4/11  | 2 | 0 | 24.82112856 | 102.80102640 | <a href="https://www.inaturalist.org/observations/26680680">https://www.inaturalist.org/observations/26680680</a>   |
| 1705 | <i>Amauornis phoenicurus</i> | White-breasted Waterhen | 2021/10/28 | 2 | 0 | 24.82473078 | 102.77009500 | <a href="https://www.inaturalist.org/observations/99708403">https://www.inaturalist.org/observations/99708403</a>   |
| 1706 | <i>Amauornis phoenicurus</i> | White-breasted Waterhen | 2022/4/3   | 2 | 0 | 24.83636803 | 121.81363350 | <a href="https://www.inaturalist.org/observations/110268721">https://www.inaturalist.org/observations/110268721</a> |
| 1707 | <i>Amauornis phoenicurus</i> | White-breasted Waterhen | 2020/6/19  | 1 | 0 | 24.84936338 | 120.98296700 | <a href="https://www.inaturalist.org/observations/50138494">https://www.inaturalist.org/observations/50138494</a>   |
| 1708 | <i>Amauornis phoenicurus</i> | White-breasted Waterhen | 2021/4/15  | 1 | 0 | 24.86739036 | 102.80572040 | <a href="https://www.inaturalist.org/observations/74026626">https://www.inaturalist.org/observations/74026626</a>   |
| 1709 | <i>Amauornis phoenicurus</i> | White-breasted Waterhen | 2018/12/30 | 0 | 0 | 24.88009500 | 102.83289100 | <a href="https://www.inaturalist.org/observations/39524596">https://www.inaturalist.org/observations/39524596</a>   |
| 1710 | <i>Amauornis phoenicurus</i> | White-breasted Waterhen | 2019/2/17  | 4 | 0 | 24.93059540 | 75.59092590  | <a href="https://www.inaturalist.org/observations/20409310">https://www.inaturalist.org/observations/20409310</a>   |
| 1711 | <i>Amauornis phoenicurus</i> | White-breasted Waterhen | 2022/5/5   | 1 | 0 | 24.93244425 | 121.00114560 | <a href="https://www.inaturalist.org/observations/135743465">https://www.inaturalist.org/observations/135743465</a> |
| 1712 | <i>Amauornis phoenicurus</i> | White-breasted Waterhen | 2019/10/23 | 2 | 0 | 24.94269721 | 121.36853850 | <a href="https://www.inaturalist.org/observations/34771391">https://www.inaturalist.org/observations/34771391</a>   |
| 1713 | <i>Amauornis phoenicurus</i> | White-breasted Waterhen | 2020/6/2   | 3 | 0 | 24.94295500 | 121.36801170 | <a href="https://www.inaturalist.org/observations/48208886">https://www.inaturalist.org/observations/48208886</a>   |
| 1714 | <i>Amauornis phoenicurus</i> | White-breasted Waterhen | 2019/10/23 | 2 | 0 | 24.94314527 | 121.36794700 | <a href="https://www.inaturalist.org/observations/34771920">https://www.inaturalist.org/observations/34771920</a>   |
| 1715 | <i>Amauornis phoenicurus</i> | White-breasted Waterhen | 2020/4/26  | 1 | 0 | 24.98086600 | 121.27555430 | <a href="https://www.inaturalist.org/observations/43568372">https://www.inaturalist.org/observations/43568372</a>   |
| 1716 | <i>Amauornis phoenicurus</i> | White-breasted Waterhen | 2019/4/7   | 1 | 0 | 24.98507833 | 121.57752830 | <a href="https://www.inaturalist.org/observations/38056099">https://www.inaturalist.org/observations/38056099</a>   |
| 1717 | <i>Amauornis phoenicurus</i> | White-breasted Waterhen | 2022/1/28  | 1 | 0 | 24.98508149 | 121.57818970 | <a href="https://www.inaturalist.org/observations/105761871">https://www.inaturalist.org/observations/105761871</a> |
| 1718 | <i>Amauornis phoenicurus</i> | White-breasted Waterhen | 2022/1/28  | 1 | 0 | 24.98535865 | 121.57964990 | <a href="https://www.inaturalist.org/observations/105761864">https://www.inaturalist.org/observations/105761864</a> |
| 1719 | <i>Amauornis phoenicurus</i> | White-breasted Waterhen | 2019/12/29 | 3 | 0 | 24.98589897 | 121.57647710 | <a href="https://www.inaturalist.org/observations/37060588">https://www.inaturalist.org/observations/37060588</a>   |
| 1720 | <i>Amauornis phoenicurus</i> | White-breasted Waterhen | 2021/11/18 | 2 | 0 | 24.98767763 | 121.57268550 | <a href="https://www.inaturalist.org/observations/101715313">https://www.inaturalist.org/observations/101715313</a> |
| 1721 | <i>Amauornis phoenicurus</i> | White-breasted Waterhen | 2021/12/7  | 1 | 0 | 24.98773059 | 121.57271430 | <a href="https://www.inaturalist.org/observations/102665362">https://www.inaturalist.org/observations/102665362</a> |
| 1722 | <i>Amauornis phoenicurus</i> | White-breasted Waterhen | 2021/11/18 | 2 | 0 | 24.98789309 | 121.57287900 | <a href="https://www.inaturalist.org/observations/101715331">https://www.inaturalist.org/observations/101715331</a> |
| 1723 | <i>Amauornis phoenicurus</i> | White-breasted Waterhen | 2020/3/4   | 1 | 0 | 24.99334939 | 121.58506860 | <a href="https://www.inaturalist.org/observations/40938142">https://www.inaturalist.org/observations/40938142</a>   |
| 1724 | <i>Amauornis phoenicurus</i> | White-breasted Waterhen | 2018/8/19  | 3 | 0 | 24.99400147 | 121.58726290 | <a href="https://www.inaturalist.org/observations/20816887">https://www.inaturalist.org/observations/20816887</a>   |

|      |                              |                         |            |   |   |             |              |                                                                                                                     |
|------|------------------------------|-------------------------|------------|---|---|-------------|--------------|---------------------------------------------------------------------------------------------------------------------|
| 1725 | <i>Amauornis phoenicurus</i> | White-breasted Waterhen | 2022/5/28  | 1 | 0 | 24.99521224 | 121.59065480 | <a href="https://www.inaturalist.org/observations/119103062">https://www.inaturalist.org/observations/119103062</a> |
| 1726 | <i>Amauornis phoenicurus</i> | White-breasted Waterhen | 2018/9/26  | 3 | 0 | 24.99537833 | 121.58345830 | <a href="https://www.inaturalist.org/observations/17027061">https://www.inaturalist.org/observations/17027061</a>   |
| 1727 | <i>Amauornis phoenicurus</i> | White-breasted Waterhen | 2021/11/1  | 2 | 0 | 24.99555948 | 121.58946210 | <a href="https://www.inaturalist.org/observations/100111987">https://www.inaturalist.org/observations/100111987</a> |
| 1728 | <i>Amauornis phoenicurus</i> | White-breasted Waterhen | 2020/7/18  | 1 | 0 | 24.99581333 | 121.58980500 | <a href="https://www.inaturalist.org/observations/53703866">https://www.inaturalist.org/observations/53703866</a>   |
| 1729 | <i>Amauornis phoenicurus</i> | White-breasted Waterhen | 2020/7/15  | 1 | 0 | 24.99582930 | 121.58967480 | <a href="https://www.inaturalist.org/observations/53353008">https://www.inaturalist.org/observations/53353008</a>   |
| 1730 | <i>Amauornis phoenicurus</i> | White-breasted Waterhen | 2020/7/3   | 2 | 0 | 24.99608199 | 121.58898810 | <a href="https://www.inaturalist.org/observations/106237212">https://www.inaturalist.org/observations/106237212</a> |
| 1731 | <i>Amauornis phoenicurus</i> | White-breasted Waterhen | 2020/8/1   | 1 | 0 | 24.99663295 | 121.58303140 | <a href="https://www.inaturalist.org/observations/55013856">https://www.inaturalist.org/observations/55013856</a>   |
| 1732 | <i>Amauornis phoenicurus</i> | White-breasted Waterhen | 2022/5/11  | 2 | 0 | 24.99815955 | 121.58770230 | <a href="https://www.inaturalist.org/observations/116504183">https://www.inaturalist.org/observations/116504183</a> |
| 1733 | <i>Amauornis phoenicurus</i> | White-breasted Waterhen | 2020/5/6   | 1 | 0 | 24.99858478 | 121.58232090 | <a href="https://www.inaturalist.org/observations/102180884">https://www.inaturalist.org/observations/102180884</a> |
| 1734 | <i>Amauornis phoenicurus</i> | White-breasted Waterhen | 2018/11/12 | 2 | 0 | 24.99863287 | 121.60388570 | <a href="https://www.inaturalist.org/observations/30580884">https://www.inaturalist.org/observations/30580884</a>   |
| 1735 | <i>Amauornis phoenicurus</i> | White-breasted Waterhen | 2020/1/17  | 1 | 0 | 25.00000000 | 121.59000000 | <a href="https://www.inaturalist.org/observations/37673349">https://www.inaturalist.org/observations/37673349</a>   |
| 1736 | <i>Amauornis phoenicurus</i> | White-breasted Waterhen | 2022/4/23  | 2 | 0 | 25.00061935 | 121.34628130 | <a href="https://www.inaturalist.org/observations/112932903">https://www.inaturalist.org/observations/112932903</a> |
| 1737 | <i>Amauornis phoenicurus</i> | White-breasted Waterhen | 2022/8/27  | 2 | 0 | 25.00410618 | 121.59800550 | <a href="https://www.inaturalist.org/observations/132475829">https://www.inaturalist.org/observations/132475829</a> |
| 1738 | <i>Amauornis phoenicurus</i> | White-breasted Waterhen | 2021/11/10 | 1 | 0 | 25.00727824 | 121.59075080 | <a href="https://www.inaturalist.org/observations/101275615">https://www.inaturalist.org/observations/101275615</a> |
| 1739 | <i>Amauornis phoenicurus</i> | White-breasted Waterhen | 2022/5/28  | 1 | 0 | 25.00945000 | 121.53213440 | <a href="https://www.inaturalist.org/observations/119033183">https://www.inaturalist.org/observations/119033183</a> |
| 1740 | <i>Amauornis phoenicurus</i> | White-breasted Waterhen | 2017/10/20 | 4 | 0 | 25.01610377 | 121.54010390 | <a href="https://www.inaturalist.org/observations/8476121">https://www.inaturalist.org/observations/8476121</a>     |
| 1741 | <i>Amauornis phoenicurus</i> | White-breasted Waterhen | 2017/11/9  | 4 | 0 | 25.01625691 | 121.54023000 | <a href="https://www.inaturalist.org/observations/8738631">https://www.inaturalist.org/observations/8738631</a>     |
| 1742 | <i>Amauornis phoenicurus</i> | White-breasted Waterhen | 2020/10/28 | 2 | 0 | 25.01632460 | 121.54001400 | <a href="https://www.inaturalist.org/observations/97559210">https://www.inaturalist.org/observations/97559210</a>   |
| 1743 | <i>Amauornis phoenicurus</i> | White-breasted Waterhen | 2019/1/10  | 1 | 0 | 25.01655386 | 121.54023750 | <a href="https://www.inaturalist.org/observations/48523071">https://www.inaturalist.org/observations/48523071</a>   |
| 1744 | <i>Amauornis phoenicurus</i> | White-breasted Waterhen | 2018/11/13 | 1 | 0 | 25.01734050 | 121.53975180 | <a href="https://www.inaturalist.org/observations/98794269">https://www.inaturalist.org/observations/98794269</a>   |
| 1745 | <i>Amauornis phoenicurus</i> | White-breasted Waterhen | 2021/10/6  | 1 | 0 | 25.01734397 | 121.53975180 | <a href="https://www.inaturalist.org/observations/97297937">https://www.inaturalist.org/observations/97297937</a>   |
| 1746 | <i>Amauornis phoenicurus</i> | White-breasted Waterhen | 2010/9/27  | 1 | 0 | 25.01771964 | 121.53803510 | <a href="https://www.inaturalist.org/observations/55684920">https://www.inaturalist.org/observations/55684920</a>   |
| 1747 | <i>Amauornis phoenicurus</i> | White-breasted Waterhen | 2022/9/23  | 0 | 0 | 25.01987783 | 121.53777170 | <a href="https://www.inaturalist.org/observations/136699565">https://www.inaturalist.org/observations/136699565</a> |



|      |                              |                         |            |   |   |             |              |                                                                                                                     |
|------|------------------------------|-------------------------|------------|---|---|-------------|--------------|---------------------------------------------------------------------------------------------------------------------|
| 1748 | <i>Amauornis phoenicurus</i> | White-breasted Waterhen | 2022/1/24  | 1 | 0 | 25.01990302 | 121.53765520 | <a href="https://www.inaturalist.org/observations/105489463">https://www.inaturalist.org/observations/105489463</a> |
| 1749 | <i>Amauornis phoenicurus</i> | White-breasted Waterhen | 2022/2/18  | 1 | 0 | 25.01996117 | 121.53766670 | <a href="https://www.inaturalist.org/observations/106969193">https://www.inaturalist.org/observations/106969193</a> |
| 1750 | <i>Amauornis phoenicurus</i> | White-breasted Waterhen | 2021/12/13 | 1 | 0 | 25.02031950 | 121.53740500 | <a href="https://www.inaturalist.org/observations/102969874">https://www.inaturalist.org/observations/102969874</a> |
| 1751 | <i>Amauornis phoenicurus</i> | White-breasted Waterhen | 2022/9/10  | 1 | 0 | 25.02072119 | 121.53718960 | <a href="https://www.inaturalist.org/observations/134432343">https://www.inaturalist.org/observations/134432343</a> |
| 1752 | <i>Amauornis phoenicurus</i> | White-breasted Waterhen | 2022/6/19  | 1 | 0 | 25.02073050 | 121.53717000 | <a href="https://www.inaturalist.org/observations/122446775">https://www.inaturalist.org/observations/122446775</a> |
| 1753 | <i>Amauornis phoenicurus</i> | White-breasted Waterhen | 2018/12/16 | 3 | 0 | 25.02305560 | 121.50527780 | <a href="https://www.inaturalist.org/observations/19046548">https://www.inaturalist.org/observations/19046548</a>   |
| 1754 | <i>Amauornis phoenicurus</i> | White-breasted Waterhen | 2020/12/19 | 1 | 0 | 25.02305560 | 121.50527780 | <a href="https://www.inaturalist.org/observations/67078754">https://www.inaturalist.org/observations/67078754</a>   |
| 1755 | <i>Amauornis phoenicurus</i> | White-breasted Waterhen | 2021/2/14  | 2 | 0 | 25.02347851 | 121.50536360 | <a href="https://www.inaturalist.org/observations/69604959">https://www.inaturalist.org/observations/69604959</a>   |
| 1756 | <i>Amauornis phoenicurus</i> | White-breasted Waterhen | 2021/2/14  | 2 | 0 | 25.02347851 | 121.50536360 | <a href="https://www.inaturalist.org/observations/69604960">https://www.inaturalist.org/observations/69604960</a>   |
| 1757 | <i>Amauornis phoenicurus</i> | White-breasted Waterhen | 2018/7/11  | 3 | 0 | 25.02422143 | 121.50457510 | <a href="https://www.inaturalist.org/observations/14256438">https://www.inaturalist.org/observations/14256438</a>   |
| 1758 | <i>Amauornis phoenicurus</i> | White-breasted Waterhen | 2020/4/24  | 3 | 0 | 25.02423617 | 121.50650830 | <a href="https://www.inaturalist.org/observations/43025346">https://www.inaturalist.org/observations/43025346</a>   |
| 1759 | <i>Amauornis phoenicurus</i> | White-breasted Waterhen | 2018/10/26 | 4 | 0 | 25.02435939 | 121.50457510 | <a href="https://www.inaturalist.org/observations/17847759">https://www.inaturalist.org/observations/17847759</a>   |
| 1760 | <i>Amauornis phoenicurus</i> | White-breasted Waterhen | 2022/2/2   | 1 | 0 | 25.02446667 | 121.50451670 | <a href="https://www.inaturalist.org/observations/106009977">https://www.inaturalist.org/observations/106009977</a> |
| 1761 | <i>Amauornis phoenicurus</i> | White-breasted Waterhen | 2019/11/10 | 2 | 0 | 25.02448000 | 121.50516000 | <a href="https://www.inaturalist.org/observations/35526896">https://www.inaturalist.org/observations/35526896</a>   |
| 1762 | <i>Amauornis phoenicurus</i> | White-breasted Waterhen | 2020/4/24  | 1 | 0 | 25.02461155 | 121.50680310 | <a href="https://www.inaturalist.org/observations/43020970">https://www.inaturalist.org/observations/43020970</a>   |
| 1763 | <i>Amauornis phoenicurus</i> | White-breasted Waterhen | 2021/12/12 | 2 | 0 | 25.02483617 | 121.48697830 | <a href="https://www.inaturalist.org/observations/102918126">https://www.inaturalist.org/observations/102918126</a> |
| 1764 | <i>Amauornis phoenicurus</i> | White-breasted Waterhen | 2018/7/13  | 2 | 0 | 25.02517188 | 121.45030170 | <a href="https://www.inaturalist.org/observations/14385418">https://www.inaturalist.org/observations/14385418</a>   |
| 1765 | <i>Amauornis phoenicurus</i> | White-breasted Waterhen | 2011/11/16 | 2 | 0 | 25.02967442 | 121.53562860 | <a href="https://www.inaturalist.org/observations/129751059">https://www.inaturalist.org/observations/129751059</a> |
| 1766 | <i>Amauornis phoenicurus</i> | White-breasted Waterhen | 2021/12/20 | 1 | 0 | 25.03039621 | 121.53554180 | <a href="https://www.inaturalist.org/observations/103444649">https://www.inaturalist.org/observations/103444649</a> |
| 1767 | <i>Amauornis phoenicurus</i> | White-breasted Waterhen | 2021/1/8   | 1 | 0 | 25.03078269 | 121.53586580 | <a href="https://www.inaturalist.org/observations/67742048">https://www.inaturalist.org/observations/67742048</a>   |
| 1768 | <i>Amauornis phoenicurus</i> | White-breasted Waterhen | 2020/10/30 | 1 | 0 | 25.03100420 | 121.50865500 | <a href="https://www.inaturalist.org/observations/63818483">https://www.inaturalist.org/observations/63818483</a>   |
| 1769 | <i>Amauornis phoenicurus</i> | White-breasted Waterhen | 2019/3/4   | 1 | 0 | 25.03100420 | 121.50865500 | <a href="https://www.inaturalist.org/observations/65111913">https://www.inaturalist.org/observations/65111913</a>   |
| 1770 | <i>Amauornis phoenicurus</i> | White-breasted Waterhen | 2022/7/2   | 3 | 0 | 25.03100420 | 121.50865500 | <a href="https://www.inaturalist.org/observations/124357590">https://www.inaturalist.org/observations/124357590</a> |

|      |                              |                         |            |   |   |             |              |                                                                                                                     |
|------|------------------------------|-------------------------|------------|---|---|-------------|--------------|---------------------------------------------------------------------------------------------------------------------|
| 1771 | <i>Amauornis phoenicurus</i> | White-breasted Waterhen | 2021/2/27  | 1 | 0 | 25.03100720 | 121.53589080 | <a href="https://www.inaturalist.org/observations/70240680">https://www.inaturalist.org/observations/70240680</a>   |
| 1772 | <i>Amauornis phoenicurus</i> | White-breasted Waterhen | 2021/10/22 | 2 | 0 | 25.03101606 | 121.53512030 | <a href="https://www.inaturalist.org/observations/98947520">https://www.inaturalist.org/observations/98947520</a>   |
| 1773 | <i>Amauornis phoenicurus</i> | White-breasted Waterhen | 2020/11/14 | 1 | 0 | 25.03101695 | 121.50863890 | <a href="https://www.inaturalist.org/observations/72655050">https://www.inaturalist.org/observations/72655050</a>   |
| 1774 | <i>Amauornis phoenicurus</i> | White-breasted Waterhen | 2020/10/14 | 1 | 0 | 25.03105078 | 121.53487200 | <a href="https://www.inaturalist.org/observations/62540806">https://www.inaturalist.org/observations/62540806</a>   |
| 1775 | <i>Amauornis phoenicurus</i> | White-breasted Waterhen | 2021/10/18 | 2 | 0 | 25.03107500 | 121.53490500 | <a href="https://www.inaturalist.org/observations/98587620">https://www.inaturalist.org/observations/98587620</a>   |
| 1776 | <i>Amauornis phoenicurus</i> | White-breasted Waterhen | 2021/4/18  | 1 | 0 | 25.03108883 | 121.53659670 | <a href="https://www.inaturalist.org/observations/74354747">https://www.inaturalist.org/observations/74354747</a>   |
| 1777 | <i>Amauornis phoenicurus</i> | White-breasted Waterhen | 2021/10/17 | 3 | 0 | 25.03113050 | 121.53638670 | <a href="https://www.inaturalist.org/observations/98552441">https://www.inaturalist.org/observations/98552441</a>   |
| 1778 | <i>Amauornis phoenicurus</i> | White-breasted Waterhen | 2020/9/22  | 1 | 0 | 25.03114444 | 121.53453330 | <a href="https://www.inaturalist.org/observations/60398640">https://www.inaturalist.org/observations/60398640</a>   |
| 1779 | <i>Amauornis phoenicurus</i> | White-breasted Waterhen | 2022/7/2   | 2 | 0 | 25.03121383 | 121.53649170 | <a href="https://www.inaturalist.org/observations/124374732">https://www.inaturalist.org/observations/124374732</a> |
| 1780 | <i>Amauornis phoenicurus</i> | White-breasted Waterhen | 2021/1/3   | 1 | 0 | 25.03129066 | 121.57705900 | <a href="https://www.inaturalist.org/observations/79254471">https://www.inaturalist.org/observations/79254471</a>   |
| 1781 | <i>Amauornis phoenicurus</i> | White-breasted Waterhen | 2021/6/17  | 1 | 0 | 25.03130795 | 121.53542520 | <a href="https://www.inaturalist.org/observations/83383965">https://www.inaturalist.org/observations/83383965</a>   |
| 1782 | <i>Amauornis phoenicurus</i> | White-breasted Waterhen | 2020/2/13  | 2 | 0 | 25.03140074 | 121.50825740 | <a href="https://www.inaturalist.org/observations/38633398">https://www.inaturalist.org/observations/38633398</a>   |
| 1783 | <i>Amauornis phoenicurus</i> | White-breasted Waterhen | 2021/3/20  | 1 | 0 | 25.03141254 | 121.53519180 | <a href="https://www.inaturalist.org/observations/71595872">https://www.inaturalist.org/observations/71595872</a>   |
| 1784 | <i>Amauornis phoenicurus</i> | White-breasted Waterhen | 2021/11/16 | 1 | 0 | 25.03153303 | 121.53492040 | <a href="https://www.inaturalist.org/observations/101391269">https://www.inaturalist.org/observations/101391269</a> |
| 1785 | <i>Amauornis phoenicurus</i> | White-breasted Waterhen | 2012/4/25  | 1 | 0 | 25.03156980 | 121.51119940 | <a href="https://www.inaturalist.org/observations/70846707">https://www.inaturalist.org/observations/70846707</a>   |
| 1786 | <i>Amauornis phoenicurus</i> | White-breasted Waterhen | 2022/2/28  | 1 | 0 | 25.03158617 | 121.53437000 | <a href="https://www.inaturalist.org/observations/107626234">https://www.inaturalist.org/observations/107626234</a> |
| 1787 | <i>Amauornis phoenicurus</i> | White-breasted Waterhen | 2022/1/15  | 1 | 0 | 25.03163526 | 121.53442030 | <a href="https://www.inaturalist.org/observations/104961081">https://www.inaturalist.org/observations/104961081</a> |
| 1788 | <i>Amauornis phoenicurus</i> | White-breasted Waterhen | 2022/2/13  | 1 | 0 | 25.03170283 | 121.53433830 | <a href="https://www.inaturalist.org/observations/107682005">https://www.inaturalist.org/observations/107682005</a> |
| 1789 | <i>Amauornis phoenicurus</i> | White-breasted Waterhen | 2011/11/2  | 6 | 0 | 25.03175906 | 121.51131030 | <a href="https://www.inaturalist.org/observations/5709743">https://www.inaturalist.org/observations/5709743</a>     |
| 1790 | <i>Amauornis phoenicurus</i> | White-breasted Waterhen | 2022/2/26  | 1 | 0 | 25.03179584 | 121.53438670 | <a href="https://www.inaturalist.org/observations/107483862">https://www.inaturalist.org/observations/107483862</a> |
| 1791 | <i>Amauornis phoenicurus</i> | White-breasted Waterhen | 2019/8/25  | 1 | 0 | 25.03189327 | 121.51136290 | <a href="https://www.inaturalist.org/observations/36313489">https://www.inaturalist.org/observations/36313489</a>   |
| 1792 | <i>Amauornis phoenicurus</i> | White-breasted Waterhen | 2020/1/25  | 0 | 0 | 25.03194833 | 121.53443670 | <a href="https://www.inaturalist.org/observations/38237122">https://www.inaturalist.org/observations/38237122</a>   |
| 1793 | <i>Amauornis phoenicurus</i> | White-breasted Waterhen | 2019/10/12 | 2 | 0 | 25.03200007 | 121.50834910 | <a href="https://www.inaturalist.org/observations/34253656">https://www.inaturalist.org/observations/34253656</a>   |

|      |                              |                         |            |   |   |             |              |                                                                                                                     |
|------|------------------------------|-------------------------|------------|---|---|-------------|--------------|---------------------------------------------------------------------------------------------------------------------|
| 1794 | <i>Amauornis phoenicurus</i> | White-breasted Waterhen | 2020/1/12  | 2 | 0 | 25.03207300 | 121.51126100 | <a href="https://www.inaturalist.org/observations/37617153">https://www.inaturalist.org/observations/37617153</a>   |
| 1795 | <i>Amauornis phoenicurus</i> | White-breasted Waterhen | 2022/8/5   | 1 | 0 | 25.03208472 | 121.50954450 | <a href="https://www.inaturalist.org/observations/134322190">https://www.inaturalist.org/observations/134322190</a> |
| 1796 | <i>Amauornis phoenicurus</i> | White-breasted Waterhen | 2020/1/12  | 1 | 0 | 25.03209900 | 121.51132000 | <a href="https://www.inaturalist.org/observations/37617150">https://www.inaturalist.org/observations/37617150</a>   |
| 1797 | <i>Amauornis phoenicurus</i> | White-breasted Waterhen | 2019/12/24 | 1 | 0 | 25.03210204 | 121.50978830 | <a href="https://www.inaturalist.org/observations/36919223">https://www.inaturalist.org/observations/36919223</a>   |
| 1798 | <i>Amauornis phoenicurus</i> | White-breasted Waterhen | 2011/8/7   | 1 | 0 | 25.03210576 | 121.50966080 | <a href="https://www.inaturalist.org/observations/55875435">https://www.inaturalist.org/observations/55875435</a>   |
| 1799 | <i>Amauornis phoenicurus</i> | White-breasted Waterhen | 2011/12/8  | 2 | 0 | 25.03216218 | 121.50930910 | <a href="https://www.inaturalist.org/observations/130554587">https://www.inaturalist.org/observations/130554587</a> |
| 1800 | <i>Amauornis phoenicurus</i> | White-breasted Waterhen | 2011/3/16  | 1 | 0 | 25.03218353 | 121.50950520 | <a href="https://www.inaturalist.org/observations/55776050">https://www.inaturalist.org/observations/55776050</a>   |
| 1801 | <i>Amauornis phoenicurus</i> | White-breasted Waterhen | 2021/1/15  | 3 | 0 | 25.03219167 | 121.51106500 | <a href="https://www.inaturalist.org/observations/68119264">https://www.inaturalist.org/observations/68119264</a>   |
| 1802 | <i>Amauornis phoenicurus</i> | White-breasted Waterhen | 2018/7/27  | 3 | 0 | 25.03220490 | 121.50988350 | <a href="https://www.inaturalist.org/observations/15260475">https://www.inaturalist.org/observations/15260475</a>   |
| 1803 | <i>Amauornis phoenicurus</i> | White-breasted Waterhen | 2017/2/7   | 1 | 0 | 25.03222760 | 121.51107950 | <a href="https://www.inaturalist.org/observations/102614420">https://www.inaturalist.org/observations/102614420</a> |
| 1804 | <i>Amauornis phoenicurus</i> | White-breasted Waterhen | 2015/1/25  | 5 | 0 | 25.03223200 | 121.51108000 | <a href="http://www.inaturalist.org/observations/1192728">http://www.inaturalist.org/observations/1192728</a>       |
| 1805 | <i>Amauornis phoenicurus</i> | White-breasted Waterhen | 2012/2/29  | 2 | 0 | 25.03223523 | 121.51139560 | <a href="https://www.inaturalist.org/observations/19794935">https://www.inaturalist.org/observations/19794935</a>   |
| 1806 | <i>Amauornis phoenicurus</i> | White-breasted Waterhen | 2013/3/31  | 2 | 0 | 25.03224185 | 121.50954280 | <a href="https://www.inaturalist.org/observations/56712165">https://www.inaturalist.org/observations/56712165</a>   |
| 1807 | <i>Amauornis phoenicurus</i> | White-breasted Waterhen | 2022/2/27  | 2 | 0 | 25.03226667 | 121.51128330 | <a href="https://www.inaturalist.org/observations/114601238">https://www.inaturalist.org/observations/114601238</a> |
| 1808 | <i>Amauornis phoenicurus</i> | White-breasted Waterhen | 2019/12/17 | 3 | 0 | 25.03227998 | 121.51120100 | <a href="https://www.inaturalist.org/observations/36723781">https://www.inaturalist.org/observations/36723781</a>   |
| 1809 | <i>Amauornis phoenicurus</i> | White-breasted Waterhen | 2020/1/12  | 1 | 0 | 25.03243500 | 121.53490540 | <a href="https://www.inaturalist.org/observations/37617137">https://www.inaturalist.org/observations/37617137</a>   |
| 1810 | <i>Amauornis phoenicurus</i> | White-breasted Waterhen | 2021/11/25 | 2 | 0 | 25.03243988 | 121.53490540 | <a href="https://www.inaturalist.org/observations/101872600">https://www.inaturalist.org/observations/101872600</a> |
| 1811 | <i>Amauornis phoenicurus</i> | White-breasted Waterhen | 2022/1/9   | 1 | 0 | 25.03253101 | 121.58007180 | <a href="https://www.inaturalist.org/observations/104643235">https://www.inaturalist.org/observations/104643235</a> |
| 1812 | <i>Amauornis phoenicurus</i> | White-breasted Waterhen | 2022/2/11  | 2 | 0 | 25.03253100 | 121.58007180 | <a href="https://www.inaturalist.org/observations/110064655">https://www.inaturalist.org/observations/110064655</a> |
| 1813 | <i>Amauornis phoenicurus</i> | White-breasted Waterhen | 2020/11/8  | 2 | 0 | 25.03253527 | 121.58007180 | <a href="https://www.inaturalist.org/observations/64437341">https://www.inaturalist.org/observations/64437341</a>   |
| 1814 | <i>Amauornis phoenicurus</i> | White-breasted Waterhen | 2019/8/12  | 3 | 0 | 25.03254782 | 121.51130290 | <a href="https://www.inaturalist.org/observations/30671783">https://www.inaturalist.org/observations/30671783</a>   |
| 1815 | <i>Amauornis phoenicurus</i> | White-breasted Waterhen | 2022/8/1   | 2 | 0 | 25.03257150 | 121.51127000 | <a href="https://www.inaturalist.org/observations/128938849">https://www.inaturalist.org/observations/128938849</a> |
| 1816 | <i>Amauornis phoenicurus</i> | White-breasted Waterhen | 2015/12/23 | 5 | 0 | 25.03296360 | 121.56542680 | <a href="http://www.inaturalist.org/observations/4447289">http://www.inaturalist.org/observations/4447289</a>       |

|      |                              |                         |            |   |   |             |              |                                                                                                                     |
|------|------------------------------|-------------------------|------------|---|---|-------------|--------------|---------------------------------------------------------------------------------------------------------------------|
| 1817 | <i>Amauornis phoenicurus</i> | White-breasted Waterhen | 2019/12/24 | 2 | 0 | 25.03296360 | 121.56542680 | <a href="https://www.inaturalist.org/observations/122155591">https://www.inaturalist.org/observations/122155591</a> |
| 1818 | <i>Amauornis phoenicurus</i> | White-breasted Waterhen | 2020/10/31 | 1 | 0 | 25.03298617 | 121.58056670 | <a href="https://www.inaturalist.org/observations/63921530">https://www.inaturalist.org/observations/63921530</a>   |
| 1819 | <i>Amauornis phoenicurus</i> | White-breasted Waterhen | 2020/12/26 | 1 | 0 | 25.03348617 | 121.58072000 | <a href="https://www.inaturalist.org/observations/67073553">https://www.inaturalist.org/observations/67073553</a>   |
| 1820 | <i>Amauornis phoenicurus</i> | White-breasted Waterhen | 2021/1/21  | 1 | 0 | 25.03375233 | 121.58059760 | <a href="https://www.inaturalist.org/observations/68392230">https://www.inaturalist.org/observations/68392230</a>   |
| 1821 | <i>Amauornis phoenicurus</i> | White-breasted Waterhen | 2021/12/1  | 1 | 0 | 25.03382667 | 121.58077000 | <a href="https://www.inaturalist.org/observations/102275019">https://www.inaturalist.org/observations/102275019</a> |
| 1822 | <i>Amauornis phoenicurus</i> | White-breasted Waterhen | 2021/4/14  | 2 | 0 | 25.03387852 | 121.58073950 | <a href="https://www.inaturalist.org/observations/85075446">https://www.inaturalist.org/observations/85075446</a>   |
| 1823 | <i>Amauornis phoenicurus</i> | White-breasted Waterhen | 2020/12/19 | 1 | 0 | 25.03387889 | 121.58056730 | <a href="https://www.inaturalist.org/observations/66776928">https://www.inaturalist.org/observations/66776928</a>   |
| 1824 | <i>Amauornis phoenicurus</i> | White-breasted Waterhen | 2022/6/3   | 1 | 0 | 25.03394617 | 121.58078930 | <a href="https://www.inaturalist.org/observations/120462796">https://www.inaturalist.org/observations/120462796</a> |
| 1825 | <i>Amauornis phoenicurus</i> | White-breasted Waterhen | 2021/1/21  | 2 | 0 | 25.03402923 | 121.58047730 | <a href="https://www.inaturalist.org/observations/68389821">https://www.inaturalist.org/observations/68389821</a>   |
| 1826 | <i>Amauornis phoenicurus</i> | White-breasted Waterhen | 2021/2/20  | 1 | 0 | 25.03418611 | 121.58092780 | <a href="https://www.inaturalist.org/observations/115487901">https://www.inaturalist.org/observations/115487901</a> |
| 1827 | <i>Amauornis phoenicurus</i> | White-breasted Waterhen | 2021/12/1  | 1 | 0 | 25.03447295 | 121.51905690 | <a href="https://www.inaturalist.org/observations/102466548">https://www.inaturalist.org/observations/102466548</a> |
| 1828 | <i>Amauornis phoenicurus</i> | White-breasted Waterhen | 2022/5/14  | 1 | 0 | 25.03459793 | 121.52049760 | <a href="https://www.inaturalist.org/observations/116945710">https://www.inaturalist.org/observations/116945710</a> |
| 1829 | <i>Amauornis phoenicurus</i> | White-breasted Waterhen | 2022/3/12  | 1 | 0 | 25.03532487 | 121.52046180 | <a href="https://www.inaturalist.org/observations/108511092">https://www.inaturalist.org/observations/108511092</a> |
| 1830 | <i>Amauornis phoenicurus</i> | White-breasted Waterhen | 2019/8/25  | 2 | 0 | 25.03585831 | 121.54304560 | <a href="https://www.inaturalist.org/observations/31514811">https://www.inaturalist.org/observations/31514811</a>   |
| 1831 | <i>Amauornis phoenicurus</i> | White-breasted Waterhen | 2021/10/31 | 2 | 0 | 25.03590839 | 121.52118370 | <a href="https://www.inaturalist.org/observations/100255130">https://www.inaturalist.org/observations/100255130</a> |
| 1832 | <i>Amauornis phoenicurus</i> | White-breasted Waterhen | 2020/2/3   | 0 | 0 | 25.03676100 | 121.52007300 | <a href="https://www.inaturalist.org/observations/38838339">https://www.inaturalist.org/observations/38838339</a>   |
| 1833 | <i>Amauornis phoenicurus</i> | White-breasted Waterhen | 2021/6/8   | 1 | 0 | 25.03677825 | 121.52041060 | <a href="https://www.inaturalist.org/observations/82171593">https://www.inaturalist.org/observations/82171593</a>   |
| 1834 | <i>Amauornis phoenicurus</i> | White-breasted Waterhen | 2017/12/30 | 4 | 0 | 25.03773000 | 121.49032830 | <a href="https://www.inaturalist.org/observations/9663751">https://www.inaturalist.org/observations/9663751</a>     |
| 1835 | <i>Amauornis phoenicurus</i> | White-breasted Waterhen | 2020/7/5   | 1 | 0 | 25.03795177 | 121.55852900 | <a href="https://www.inaturalist.org/observations/52000789">https://www.inaturalist.org/observations/52000789</a>   |
| 1836 | <i>Amauornis phoenicurus</i> | White-breasted Waterhen | 2019/1/22  | 2 | 0 | 25.03796667 | 121.55805330 | <a href="https://www.inaturalist.org/observations/19795906">https://www.inaturalist.org/observations/19795906</a>   |
| 1837 | <i>Amauornis phoenicurus</i> | White-breasted Waterhen | 2020/5/24  | 1 | 0 | 25.03808333 | 121.55844170 | <a href="https://www.inaturalist.org/observations/47083831">https://www.inaturalist.org/observations/47083831</a>   |
| 1838 | <i>Amauornis phoenicurus</i> | White-breasted Waterhen | 2022/4/14  | 1 | 0 | 25.03815550 | 121.55847170 | <a href="https://www.inaturalist.org/observations/111404296">https://www.inaturalist.org/observations/111404296</a> |
| 1839 | <i>Amauornis phoenicurus</i> | White-breasted Waterhen | 2022/3/19  | 3 | 0 | 25.03819166 | 121.55838460 | <a href="https://www.inaturalist.org/observations/108972932">https://www.inaturalist.org/observations/108972932</a> |

|      |                              |                         |            |   |   |             |              |                                                                                                                     |
|------|------------------------------|-------------------------|------------|---|---|-------------|--------------|---------------------------------------------------------------------------------------------------------------------|
| 1840 | <i>Amauornis phoenicurus</i> | White-breasted Waterhen | 2020/6/5   | 1 | 0 | 25.03819437 | 121.55856560 | <a href="https://www.inaturalist.org/observations/48540721">https://www.inaturalist.org/observations/48540721</a>   |
| 1841 | <i>Amauornis phoenicurus</i> | White-breasted Waterhen | 2020/7/9   | 2 | 0 | 25.03828245 | 121.55888670 | <a href="https://www.inaturalist.org/observations/52445334">https://www.inaturalist.org/observations/52445334</a>   |
| 1842 | <i>Amauornis phoenicurus</i> | White-breasted Waterhen | 2020/5/13  | 1 | 0 | 25.03836047 | 121.55881290 | <a href="https://www.inaturalist.org/observations/73816719">https://www.inaturalist.org/observations/73816719</a>   |
| 1843 | <i>Amauornis phoenicurus</i> | White-breasted Waterhen | 2019/1/31  | 3 | 0 | 25.03836383 | 121.55881330 | <a href="https://www.inaturalist.org/observations/19983013">https://www.inaturalist.org/observations/19983013</a>   |
| 1844 | <i>Amauornis phoenicurus</i> | White-breasted Waterhen | 2021/4/30  | 2 | 0 | 25.03849686 | 121.55932520 | <a href="https://www.inaturalist.org/observations/75780414">https://www.inaturalist.org/observations/75780414</a>   |
| 1845 | <i>Amauornis phoenicurus</i> | White-breasted Waterhen | 2019/5/27  | 3 | 0 | 25.03864167 | 121.55805330 | <a href="https://www.inaturalist.org/observations/29902576">https://www.inaturalist.org/observations/29902576</a>   |
| 1846 | <i>Amauornis phoenicurus</i> | White-breasted Waterhen | 2021/5/19  | 2 | 0 | 25.03867308 | 121.55853780 | <a href="https://www.inaturalist.org/observations/108947891">https://www.inaturalist.org/observations/108947891</a> |
| 1847 | <i>Amauornis phoenicurus</i> | White-breasted Waterhen | 2018/12/21 | 2 | 0 | 25.03867462 | 121.55916760 | <a href="https://www.inaturalist.org/observations/19129243">https://www.inaturalist.org/observations/19129243</a>   |
| 1848 | <i>Amauornis phoenicurus</i> | White-breasted Waterhen | 2019/3/25  | 3 | 0 | 25.03905244 | 121.49324670 | <a href="https://www.inaturalist.org/observations/26529962">https://www.inaturalist.org/observations/26529962</a>   |
| 1849 | <i>Amauornis phoenicurus</i> | White-breasted Waterhen | 2018/12/3  | 3 | 0 | 25.03949958 | 121.49232400 | <a href="https://www.inaturalist.org/observations/19749699">https://www.inaturalist.org/observations/19749699</a>   |
| 1850 | <i>Amauornis phoenicurus</i> | White-breasted Waterhen | 2019/11/26 | 4 | 0 | 25.04004030 | 121.56024520 | <a href="https://www.inaturalist.org/observations/36091724">https://www.inaturalist.org/observations/36091724</a>   |
| 1851 | <i>Amauornis phoenicurus</i> | White-breasted Waterhen | 2020/12/5  | 2 | 0 | 25.04149227 | 121.49673350 | <a href="https://www.inaturalist.org/observations/66188773">https://www.inaturalist.org/observations/66188773</a>   |
| 1852 | <i>Amauornis phoenicurus</i> | White-breasted Waterhen | 2020/7/11  | 2 | 0 | 25.04313611 | 121.56276940 | <a href="https://www.inaturalist.org/observations/52656758">https://www.inaturalist.org/observations/52656758</a>   |
| 1853 | <i>Amauornis phoenicurus</i> | White-breasted Waterhen | 2021/5/5   | 1 | 0 | 25.04313892 | 121.56218480 | <a href="https://www.inaturalist.org/observations/77419865">https://www.inaturalist.org/observations/77419865</a>   |
| 1854 | <i>Amauornis phoenicurus</i> | White-breasted Waterhen | 2022/9/12  | 1 | 0 | 25.04321244 | 121.56210700 | <a href="https://www.inaturalist.org/observations/134698010">https://www.inaturalist.org/observations/134698010</a> |
| 1855 | <i>Amauornis phoenicurus</i> | White-breasted Waterhen | 2022/3/20  | 2 | 0 | 25.04325319 | 121.56218160 | <a href="https://www.inaturalist.org/observations/109023817">https://www.inaturalist.org/observations/109023817</a> |
| 1856 | <i>Amauornis phoenicurus</i> | White-breasted Waterhen | 2022/7/30  | 1 | 0 | 25.04337839 | 121.56179660 | <a href="https://www.inaturalist.org/observations/129086597">https://www.inaturalist.org/observations/129086597</a> |
| 1857 | <i>Amauornis phoenicurus</i> | White-breasted Waterhen | 2020/7/16  | 2 | 0 | 25.04353571 | 121.56218320 | <a href="https://www.inaturalist.org/observations/53467477">https://www.inaturalist.org/observations/53467477</a>   |
| 1858 | <i>Amauornis phoenicurus</i> | White-breasted Waterhen | 2021/11/14 | 2 | 0 | 25.04372730 | 121.56199430 | <a href="https://www.inaturalist.org/observations/101092336">https://www.inaturalist.org/observations/101092336</a> |
| 1859 | <i>Amauornis phoenicurus</i> | White-breasted Waterhen | 2022/2/20  | 2 | 0 | 25.04417748 | 121.56224260 | <a href="https://www.inaturalist.org/observations/107094938">https://www.inaturalist.org/observations/107094938</a> |
| 1860 | <i>Amauornis phoenicurus</i> | White-breasted Waterhen | 2019/6/27  | 1 | 0 | 25.05006651 | 121.53265500 | <a href="https://www.inaturalist.org/observations/28859446">https://www.inaturalist.org/observations/28859446</a>   |
| 1861 | <i>Amauornis phoenicurus</i> | White-breasted Waterhen | 2020/5/13  | 1 | 0 | 25.05600100 | 121.55261400 | <a href="https://www.inaturalist.org/observations/56377343">https://www.inaturalist.org/observations/56377343</a>   |
| 1862 | <i>Amauornis phoenicurus</i> | White-breasted Waterhen | 2021/2/18  | 1 | 0 | 25.05674506 | 121.45357610 | <a href="https://www.inaturalist.org/observations/69922248">https://www.inaturalist.org/observations/69922248</a>   |

|      |                              |                         |            |   |   |             |              |                                                                                                                     |
|------|------------------------------|-------------------------|------------|---|---|-------------|--------------|---------------------------------------------------------------------------------------------------------------------|
| 1863 | <i>Amauornis phoenicurus</i> | White-breasted Waterhen | 2021/12/17 | 2 | 0 | 25.05681652 | 121.45349340 | <a href="https://www.inaturalist.org/observations/104100433">https://www.inaturalist.org/observations/104100433</a> |
| 1864 | <i>Amauornis phoenicurus</i> | White-breasted Waterhen | 2020/10/9  | 1 | 0 | 25.06290297 | 121.56057310 | <a href="https://www.inaturalist.org/observations/66238880">https://www.inaturalist.org/observations/66238880</a>   |
| 1865 | <i>Amauornis phoenicurus</i> | White-breasted Waterhen | 2018/11/20 | 2 | 0 | 25.06304717 | 121.54024500 | <a href="https://www.inaturalist.org/observations/18513269">https://www.inaturalist.org/observations/18513269</a>   |
| 1866 | <i>Amauornis phoenicurus</i> | White-breasted Waterhen | 2017/2/21  | 0 | 0 | 25.06886650 | 121.64852310 | <a href="https://www.inaturalist.org/observations/39045891">https://www.inaturalist.org/observations/39045891</a>   |
| 1867 | <i>Amauornis phoenicurus</i> | White-breasted Waterhen | 2022/4/15  | 1 | 0 | 25.07090300 | 121.59670700 | <a href="https://www.inaturalist.org/observations/111510321">https://www.inaturalist.org/observations/111510321</a> |
| 1868 | <i>Amauornis phoenicurus</i> | White-breasted Waterhen | 2022/4/14  | 2 | 0 | 25.07090600 | 121.59673900 | <a href="https://www.inaturalist.org/observations/111474177">https://www.inaturalist.org/observations/111474177</a> |
| 1869 | <i>Amauornis phoenicurus</i> | White-breasted Waterhen | 2022/4/14  | 2 | 0 | 25.07100397 | 121.59689600 | <a href="https://www.inaturalist.org/observations/111384190">https://www.inaturalist.org/observations/111384190</a> |
| 1870 | <i>Amauornis phoenicurus</i> | White-breasted Waterhen | 2021/4/3   | 2 | 0 | 25.07120749 | 121.59681820 | <a href="https://www.inaturalist.org/observations/80998375">https://www.inaturalist.org/observations/80998375</a>   |
| 1871 | <i>Amauornis phoenicurus</i> | White-breasted Waterhen | 2021/4/3   | 2 | 0 | 25.07141759 | 121.59676920 | <a href="https://www.inaturalist.org/observations/72769981">https://www.inaturalist.org/observations/72769981</a>   |
| 1872 | <i>Amauornis phoenicurus</i> | White-breasted Waterhen | 2021/6/20  | 2 | 0 | 25.07167639 | 121.89213400 | <a href="https://www.inaturalist.org/observations/83741088">https://www.inaturalist.org/observations/83741088</a>   |
| 1873 | <i>Amauornis phoenicurus</i> | White-breasted Waterhen | 2022/6/5   | 2 | 0 | 25.07445022 | 121.62286140 | <a href="https://www.inaturalist.org/observations/120273087">https://www.inaturalist.org/observations/120273087</a> |
| 1874 | <i>Amauornis phoenicurus</i> | White-breasted Waterhen | 2021/7/28  | 1 | 0 | 25.07470803 | 121.67841130 | <a href="https://www.inaturalist.org/observations/88915639">https://www.inaturalist.org/observations/88915639</a>   |
| 1875 | <i>Amauornis phoenicurus</i> | White-breasted Waterhen | 2019/12/13 | 2 | 0 | 25.07492387 | 121.62203630 | <a href="https://www.inaturalist.org/observations/36604198">https://www.inaturalist.org/observations/36604198</a>   |
| 1876 | <i>Amauornis phoenicurus</i> | White-breasted Waterhen | 2022/5/20  | 1 | 0 | 25.07668095 | 121.67431060 | <a href="https://www.inaturalist.org/observations/117894163">https://www.inaturalist.org/observations/117894163</a> |
| 1877 | <i>Amauornis phoenicurus</i> | White-breasted Waterhen | 2021/12/18 | 2 | 0 | 25.08100174 | 121.67091010 | <a href="https://www.inaturalist.org/observations/103223924">https://www.inaturalist.org/observations/103223924</a> |
| 1878 | <i>Amauornis phoenicurus</i> | White-breasted Waterhen | 2022/1/15  | 1 | 0 | 25.08100174 | 121.67091010 | <a href="https://www.inaturalist.org/observations/104961464">https://www.inaturalist.org/observations/104961464</a> |
| 1879 | <i>Amauornis phoenicurus</i> | White-breasted Waterhen | 2022/4/25  | 1 | 0 | 25.08100174 | 121.67091010 | <a href="https://www.inaturalist.org/observations/112802940">https://www.inaturalist.org/observations/112802940</a> |
| 1880 | <i>Amauornis phoenicurus</i> | White-breasted Waterhen | 2020/11/14 | 1 | 0 | 25.08128636 | 121.60464750 | <a href="https://www.inaturalist.org/observations/64844994">https://www.inaturalist.org/observations/64844994</a>   |
| 1881 | <i>Amauornis phoenicurus</i> | White-breasted Waterhen | 2022/5/29  | 1 | 0 | 25.08166950 | 121.60338670 | <a href="https://www.inaturalist.org/observations/119210769">https://www.inaturalist.org/observations/119210769</a> |
| 1882 | <i>Amauornis phoenicurus</i> | White-breasted Waterhen | 2021/2/1   | 2 | 0 | 25.08186105 | 121.60331390 | <a href="https://www.inaturalist.org/observations/72437828">https://www.inaturalist.org/observations/72437828</a>   |
| 1883 | <i>Amauornis phoenicurus</i> | White-breasted Waterhen | 2021/1/16  | 2 | 0 | 25.08190638 | 121.60283130 | <a href="https://www.inaturalist.org/observations/68213068">https://www.inaturalist.org/observations/68213068</a>   |
| 1884 | <i>Amauornis phoenicurus</i> | White-breasted Waterhen | 2021/6/17  | 2 | 0 | 25.08191657 | 121.60362290 | <a href="https://www.inaturalist.org/observations/83369164">https://www.inaturalist.org/observations/83369164</a>   |
| 1885 | <i>Amauornis phoenicurus</i> | White-breasted Waterhen | 2021/2/3   | 2 | 0 | 25.08208036 | 121.60305130 | <a href="https://www.inaturalist.org/observations/68996784">https://www.inaturalist.org/observations/68996784</a>   |

|      |                              |                         |            |   |   |             |              |                                                                                                                     |
|------|------------------------------|-------------------------|------------|---|---|-------------|--------------|---------------------------------------------------------------------------------------------------------------------|
| 1886 | <i>Amauornis phoenicurus</i> | White-breasted Waterhen | 2021/11/16 | 1 | 0 | 25.08228389 | 121.60445170 | <a href="https://www.inaturalist.org/observations/101252885">https://www.inaturalist.org/observations/101252885</a> |
| 1887 | <i>Amauornis phoenicurus</i> | White-breasted Waterhen | 2022/6/1   | 1 | 0 | 25.08228389 | 121.60445170 | <a href="https://www.inaturalist.org/observations/119709052">https://www.inaturalist.org/observations/119709052</a> |
| 1888 | <i>Amauornis phoenicurus</i> | White-breasted Waterhen | 2022/7/15  | 3 | 0 | 25.08269296 | 121.60401820 | <a href="https://www.inaturalist.org/observations/126324759">https://www.inaturalist.org/observations/126324759</a> |
| 1889 | <i>Amauornis phoenicurus</i> | White-breasted Waterhen | 2011/5/15  | 1 | 0 | 25.08395229 | 121.19954030 | <a href="https://www.inaturalist.org/observations/55785566">https://www.inaturalist.org/observations/55785566</a>   |
| 1890 | <i>Amauornis phoenicurus</i> | White-breasted Waterhen | 2012/6/1   | 1 | 0 | 25.08477383 | 121.19604630 | <a href="https://www.inaturalist.org/observations/56401303">https://www.inaturalist.org/observations/56401303</a>   |
| 1891 | <i>Amauornis phoenicurus</i> | White-breasted Waterhen | 2022/7/24  | 1 | 0 | 25.08536994 | 121.68119680 | <a href="https://www.inaturalist.org/observations/127573847">https://www.inaturalist.org/observations/127573847</a> |
| 1892 | <i>Amauornis phoenicurus</i> | White-breasted Waterhen | 1980/1/1   | 2 | 0 | 25.09061507 | 121.58207660 | <a href="https://www.inaturalist.org/observations/24066525">https://www.inaturalist.org/observations/24066525</a>   |
| 1893 | <i>Amauornis phoenicurus</i> | White-breasted Waterhen | 1980/1/1   | 2 | 0 | 25.09069223 | 121.58199480 | <a href="https://www.inaturalist.org/observations/28360769">https://www.inaturalist.org/observations/28360769</a>   |
| 1894 | <i>Amauornis phoenicurus</i> | White-breasted Waterhen | 2019/7/7   | 2 | 0 | 25.09074446 | 121.58243450 | <a href="https://www.inaturalist.org/observations/39870535">https://www.inaturalist.org/observations/39870535</a>   |
| 1895 | <i>Amauornis phoenicurus</i> | White-breasted Waterhen | 2020/6/21  | 1 | 0 | 25.09079192 | 121.58232090 | <a href="https://www.inaturalist.org/observations/56280316">https://www.inaturalist.org/observations/56280316</a>   |
| 1896 | <i>Amauornis phoenicurus</i> | White-breasted Waterhen | 2021/6/18  | 1 | 0 | 25.09088639 | 121.58215690 | <a href="https://www.inaturalist.org/observations/85043015">https://www.inaturalist.org/observations/85043015</a>   |
| 1897 | <i>Amauornis phoenicurus</i> | White-breasted Waterhen | 2019/6/20  | 5 | 0 | 25.09089518 | 121.58258060 | <a href="https://www.inaturalist.org/observations/27315931">https://www.inaturalist.org/observations/27315931</a>   |
| 1898 | <i>Amauornis phoenicurus</i> | White-breasted Waterhen | 2019/6/4   | 4 | 0 | 25.09091374 | 121.58243350 | <a href="https://www.inaturalist.org/observations/26908240">https://www.inaturalist.org/observations/26908240</a>   |
| 1899 | <i>Amauornis phoenicurus</i> | White-breasted Waterhen | 2019/4/18  | 3 | 0 | 25.09091815 | 121.58244390 | <a href="https://www.inaturalist.org/observations/27689649">https://www.inaturalist.org/observations/27689649</a>   |
| 1900 | <i>Amauornis phoenicurus</i> | White-breasted Waterhen | 2019/7/16  | 2 | 0 | 25.09093006 | 121.58258140 | <a href="https://www.inaturalist.org/observations/28989305">https://www.inaturalist.org/observations/28989305</a>   |
| 1901 | <i>Amauornis phoenicurus</i> | White-breasted Waterhen | 2019/4/18  | 3 | 0 | 25.09093090 | 121.58248440 | <a href="https://www.inaturalist.org/observations/27334385">https://www.inaturalist.org/observations/27334385</a>   |
| 1902 | <i>Amauornis phoenicurus</i> | White-breasted Waterhen | 2020/9/3   | 1 | 0 | 25.09094922 | 121.58184740 | <a href="https://www.inaturalist.org/observations/59006893">https://www.inaturalist.org/observations/59006893</a>   |
| 1903 | <i>Amauornis phoenicurus</i> | White-breasted Waterhen | 2019/6/3   | 4 | 0 | 25.09095397 | 121.58251230 | <a href="https://www.inaturalist.org/observations/27143385">https://www.inaturalist.org/observations/27143385</a>   |
| 1904 | <i>Amauornis phoenicurus</i> | White-breasted Waterhen | 2019/7/7   | 2 | 0 | 25.09095701 | 121.58243410 | <a href="https://www.inaturalist.org/observations/39835604">https://www.inaturalist.org/observations/39835604</a>   |
| 1905 | <i>Amauornis phoenicurus</i> | White-breasted Waterhen | 2019/6/25  | 3 | 0 | 25.09095823 | 121.58255080 | <a href="https://www.inaturalist.org/observations/28161234">https://www.inaturalist.org/observations/28161234</a>   |
| 1906 | <i>Amauornis phoenicurus</i> | White-breasted Waterhen | 2021/3/14  | 2 | 0 | 25.09096038 | 121.58220090 | <a href="https://www.inaturalist.org/observations/71208189">https://www.inaturalist.org/observations/71208189</a>   |
| 1907 | <i>Amauornis phoenicurus</i> | White-breasted Waterhen | 2021/3/14  | 2 | 0 | 25.09096734 | 121.58247600 | <a href="https://www.inaturalist.org/observations/71215732">https://www.inaturalist.org/observations/71215732</a>   |
| 1908 | <i>Amauornis phoenicurus</i> | White-breasted Waterhen | 2020/5/14  | 1 | 0 | 25.09097373 | 121.58216400 | <a href="https://www.inaturalist.org/observations/59104280">https://www.inaturalist.org/observations/59104280</a>   |

|      |                              |                         |            |   |   |             |              |                                                                                                                     |
|------|------------------------------|-------------------------|------------|---|---|-------------|--------------|---------------------------------------------------------------------------------------------------------------------|
| 1909 | <i>Amauornis phoenicurus</i> | White-breasted Waterhen | 2019/4/17  | 3 | 0 | 25.09097484 | 121.58293240 | <a href="https://www.inaturalist.org/observations/22609249">https://www.inaturalist.org/observations/22609249</a>   |
| 1910 | <i>Amauornis phoenicurus</i> | White-breasted Waterhen | 2019/6/25  | 2 | 0 | 25.09098297 | 121.58252570 | <a href="https://www.inaturalist.org/observations/28051303">https://www.inaturalist.org/observations/28051303</a>   |
| 1911 | <i>Amauornis phoenicurus</i> | White-breasted Waterhen | 2020/8/2   | 2 | 0 | 25.09098774 | 121.58173880 | <a href="https://www.inaturalist.org/observations/55131194">https://www.inaturalist.org/observations/55131194</a>   |
| 1912 | <i>Amauornis phoenicurus</i> | White-breasted Waterhen | 2022/4/26  | 1 | 0 | 25.09099661 | 121.58246770 | <a href="https://www.inaturalist.org/observations/113196350">https://www.inaturalist.org/observations/113196350</a> |
| 1913 | <i>Amauornis phoenicurus</i> | White-breasted Waterhen | 2019/5/6   | 3 | 0 | 25.09100078 | 121.58291570 | <a href="https://www.inaturalist.org/observations/24656946">https://www.inaturalist.org/observations/24656946</a>   |
| 1914 | <i>Amauornis phoenicurus</i> | White-breasted Waterhen | 2019/5/14  | 2 | 0 | 25.09100319 | 121.58296250 | <a href="https://www.inaturalist.org/observations/25096394">https://www.inaturalist.org/observations/25096394</a>   |
| 1915 | <i>Amauornis phoenicurus</i> | White-breasted Waterhen | 2018/8/28  | 2 | 0 | 25.09101167 | 121.58272380 | <a href="https://www.inaturalist.org/observations/16223438">https://www.inaturalist.org/observations/16223438</a>   |
| 1916 | <i>Amauornis phoenicurus</i> | White-breasted Waterhen | 2020/5/14  | 1 | 0 | 25.09103445 | 121.58139680 | <a href="https://www.inaturalist.org/observations/59104281">https://www.inaturalist.org/observations/59104281</a>   |
| 1917 | <i>Amauornis phoenicurus</i> | White-breasted Waterhen | 2020/8/22  | 1 | 0 | 25.09103474 | 121.58137070 | <a href="https://www.inaturalist.org/observations/58820041">https://www.inaturalist.org/observations/58820041</a>   |
| 1918 | <i>Amauornis phoenicurus</i> | White-breasted Waterhen | 2019/4/17  | 2 | 0 | 25.09103686 | 121.58269290 | <a href="https://www.inaturalist.org/observations/22600502">https://www.inaturalist.org/observations/22600502</a>   |
| 1919 | <i>Amauornis phoenicurus</i> | White-breasted Waterhen | 2019/6/17  | 3 | 0 | 25.09105053 | 121.58236880 | <a href="https://www.inaturalist.org/observations/27561943">https://www.inaturalist.org/observations/27561943</a>   |
| 1920 | <i>Amauornis phoenicurus</i> | White-breasted Waterhen | 2019/4/17  | 4 | 0 | 25.09106264 | 121.58289360 | <a href="https://www.inaturalist.org/observations/22609294">https://www.inaturalist.org/observations/22609294</a>   |
| 1921 | <i>Amauornis phoenicurus</i> | White-breasted Waterhen | 2019/12/3  | 1 | 0 | 25.09107994 | 121.58234130 | <a href="https://www.inaturalist.org/observations/36496233">https://www.inaturalist.org/observations/36496233</a>   |
| 1922 | <i>Amauornis phoenicurus</i> | White-breasted Waterhen | 2020/11/19 | 2 | 0 | 25.09108053 | 121.58166540 | <a href="https://www.inaturalist.org/observations/73728788">https://www.inaturalist.org/observations/73728788</a>   |
| 1923 | <i>Amauornis phoenicurus</i> | White-breasted Waterhen | 2020/4/16  | 1 | 0 | 25.09109600 | 121.58130200 | <a href="https://www.inaturalist.org/observations/59027287">https://www.inaturalist.org/observations/59027287</a>   |
| 1924 | <i>Amauornis phoenicurus</i> | White-breasted Waterhen | 2019/4/9   | 3 | 0 | 25.09109608 | 121.58130190 | <a href="https://www.inaturalist.org/observations/22230286">https://www.inaturalist.org/observations/22230286</a>   |
| 1925 | <i>Amauornis phoenicurus</i> | White-breasted Waterhen | 2021/1/18  | 1 | 0 | 25.09109608 | 121.58130190 | <a href="https://www.inaturalist.org/observations/68319717">https://www.inaturalist.org/observations/68319717</a>   |
| 1926 | <i>Amauornis phoenicurus</i> | White-breasted Waterhen | 2018/8/28  | 2 | 0 | 25.09109620 | 121.58130170 | <a href="https://www.inaturalist.org/observations/16222856">https://www.inaturalist.org/observations/16222856</a>   |
| 1927 | <i>Amauornis phoenicurus</i> | White-breasted Waterhen | 2021/4/4   | 1 | 0 | 25.09110283 | 121.43106170 | <a href="https://www.inaturalist.org/observations/72875923">https://www.inaturalist.org/observations/72875923</a>   |
| 1928 | <i>Amauornis phoenicurus</i> | White-breasted Waterhen | 2021/6/18  | 1 | 0 | 25.09119111 | 121.58080080 | <a href="https://www.inaturalist.org/observations/85043022">https://www.inaturalist.org/observations/85043022</a>   |
| 1929 | <i>Amauornis phoenicurus</i> | White-breasted Waterhen | 2020/12/10 | 2 | 0 | 25.09122333 | 121.58241030 | <a href="https://www.inaturalist.org/observations/73818535">https://www.inaturalist.org/observations/73818535</a>   |
| 1930 | <i>Amauornis phoenicurus</i> | White-breasted Waterhen | 2019/4/23  | 3 | 0 | 25.09127095 | 121.58123240 | <a href="https://www.inaturalist.org/observations/23289511">https://www.inaturalist.org/observations/23289511</a>   |
| 1931 | <i>Amauornis phoenicurus</i> | White-breasted Waterhen | 2021/8/3   | 1 | 0 | 25.09137421 | 121.58301580 | <a href="https://www.inaturalist.org/observations/89718751">https://www.inaturalist.org/observations/89718751</a>   |



|      |                              |                         |            |   |   |             |              |                                                                                                                     |
|------|------------------------------|-------------------------|------------|---|---|-------------|--------------|---------------------------------------------------------------------------------------------------------------------|
| 1932 | <i>Amauornis phoenicurus</i> | White-breasted Waterhen | 2020/5/13  | 2 | 0 | 25.09227266 | 121.58424590 | <a href="https://www.inaturalist.org/observations/56377132">https://www.inaturalist.org/observations/56377132</a>   |
| 1933 | <i>Amauornis phoenicurus</i> | White-breasted Waterhen | 2021/9/24  | 2 | 0 | 25.09684259 | 121.61404770 | <a href="https://www.inaturalist.org/observations/95905952">https://www.inaturalist.org/observations/95905952</a>   |
| 1934 | <i>Amauornis phoenicurus</i> | White-breasted Waterhen | 2015/3/17  | 2 | 0 | 25.09733112 | 121.47821220 | <a href="https://www.inaturalist.org/observations/21254903">https://www.inaturalist.org/observations/21254903</a>   |
| 1935 | <i>Amauornis phoenicurus</i> | White-breasted Waterhen | 2015/4/7   | 2 | 0 | 25.10006733 | 121.55155050 | <a href="https://www.inaturalist.org/observations/18641933">https://www.inaturalist.org/observations/18641933</a>   |
| 1936 | <i>Amauornis phoenicurus</i> | White-breasted Waterhen | 2022/4/3   | 1 | 0 | 25.10020000 | 121.53062500 | <a href="https://www.inaturalist.org/observations/110368902">https://www.inaturalist.org/observations/110368902</a> |
| 1937 | <i>Amauornis phoenicurus</i> | White-breasted Waterhen | 2022/4/23  | 1 | 0 | 25.10051642 | 121.52723340 | <a href="https://www.inaturalist.org/observations/114008833">https://www.inaturalist.org/observations/114008833</a> |
| 1938 | <i>Amauornis phoenicurus</i> | White-breasted Waterhen | 2022/5/30  | 3 | 0 | 25.10054900 | 121.53155900 | <a href="https://www.inaturalist.org/observations/120319095">https://www.inaturalist.org/observations/120319095</a> |
| 1939 | <i>Amauornis phoenicurus</i> | White-breasted Waterhen | 2022/5/18  | 2 | 0 | 25.10059556 | 121.53302270 | <a href="https://www.inaturalist.org/observations/117567142">https://www.inaturalist.org/observations/117567142</a> |
| 1940 | <i>Amauornis phoenicurus</i> | White-breasted Waterhen | 2022/5/6   | 1 | 0 | 25.10122949 | 121.62625180 | <a href="https://www.inaturalist.org/observations/116069878">https://www.inaturalist.org/observations/116069878</a> |
| 1941 | <i>Amauornis phoenicurus</i> | White-breasted Waterhen | 2020/3/7   | 1 | 0 | 25.10616500 | 121.45604930 | <a href="https://www.inaturalist.org/observations/43833446">https://www.inaturalist.org/observations/43833446</a>   |
| 1942 | <i>Amauornis phoenicurus</i> | White-breasted Waterhen | 2020/3/7   | 1 | 0 | 25.10639915 | 121.45599700 | <a href="https://www.inaturalist.org/observations/43833445">https://www.inaturalist.org/observations/43833445</a>   |
| 1943 | <i>Amauornis phoenicurus</i> | White-breasted Waterhen | 2018/10/14 | 2 | 0 | 25.11318450 | 121.48977680 | <a href="https://www.inaturalist.org/observations/18369631">https://www.inaturalist.org/observations/18369631</a>   |
| 1944 | <i>Amauornis phoenicurus</i> | White-breasted Waterhen | 2020/8/9   | 1 | 0 | 25.11410497 | 121.46307280 | <a href="https://www.inaturalist.org/observations/57188558">https://www.inaturalist.org/observations/57188558</a>   |
| 1945 | <i>Amauornis phoenicurus</i> | White-breasted Waterhen | 2022/5/6   | 1 | 0 | 25.11642113 | 121.52509380 | <a href="https://www.inaturalist.org/observations/115705299">https://www.inaturalist.org/observations/115705299</a> |
| 1946 | <i>Amauornis phoenicurus</i> | White-breasted Waterhen | 2021/2/19  | 1 | 0 | 25.11876129 | 121.46845270 | <a href="https://www.inaturalist.org/observations/94091405">https://www.inaturalist.org/observations/94091405</a>   |
| 1947 | <i>Amauornis phoenicurus</i> | White-breasted Waterhen | 2020/4/18  | 2 | 0 | 25.12096944 | 121.53432780 | <a href="https://www.inaturalist.org/observations/42455073">https://www.inaturalist.org/observations/42455073</a>   |
| 1948 | <i>Amauornis phoenicurus</i> | White-breasted Waterhen | 2020/4/22  | 2 | 0 | 25.12243300 | 121.42181410 | <a href="https://www.inaturalist.org/observations/56217558">https://www.inaturalist.org/observations/56217558</a>   |
| 1949 | <i>Amauornis phoenicurus</i> | White-breasted Waterhen | 2020/4/22  | 2 | 0 | 25.12599129 | 121.57424380 | <a href="https://www.inaturalist.org/observations/56217757">https://www.inaturalist.org/observations/56217757</a>   |
| 1950 | <i>Amauornis phoenicurus</i> | White-breasted Waterhen | 2022/4/28  | 1 | 0 | 25.12713742 | 121.50388240 | <a href="https://www.inaturalist.org/observations/113181552">https://www.inaturalist.org/observations/113181552</a> |
| 1951 | <i>Amauornis phoenicurus</i> | White-breasted Waterhen | 2018/5/19  | 2 | 0 | 25.12834810 | 121.47434200 | <a href="https://www.inaturalist.org/observations/18691723">https://www.inaturalist.org/observations/18691723</a>   |
| 1952 | <i>Amauornis phoenicurus</i> | White-breasted Waterhen | 2021/5/3   | 1 | 0 | 25.12867325 | 121.46526430 | <a href="https://www.inaturalist.org/observations/95925586">https://www.inaturalist.org/observations/95925586</a>   |
| 1953 | <i>Amauornis phoenicurus</i> | White-breasted Waterhen | 2015/12/13 | 6 | 0 | 25.13369900 | 82.56443400  | <a href="http://www.inaturalist.org/observations/2498601">http://www.inaturalist.org/observations/2498601</a>       |
| 1954 | <i>Amauornis phoenicurus</i> | White-breasted Waterhen | 2020/11/29 | 1 | 0 | 25.13702833 | 121.45810330 | <a href="https://www.inaturalist.org/observations/65794996">https://www.inaturalist.org/observations/65794996</a>   |

|      |                              |                         |            |   |   |             |              |                                                                                                                     |
|------|------------------------------|-------------------------|------------|---|---|-------------|--------------|---------------------------------------------------------------------------------------------------------------------|
| 1955 | <i>Amauornis phoenicurus</i> | White-breasted Waterhen | 2022/7/13  | 1 | 0 | 25.17740796 | 121.53916820 | <a href="https://www.inaturalist.org/observations/126045864">https://www.inaturalist.org/observations/126045864</a> |
| 1956 | <i>Amauornis phoenicurus</i> | White-breasted Waterhen | 2022/2/22  | 2 | 0 | 25.20540778 | 75.82379778  | <a href="https://www.inaturalist.org/observations/107245990">https://www.inaturalist.org/observations/107245990</a> |
| 1957 | <i>Amauornis phoenicurus</i> | White-breasted Waterhen | 2020/11/15 | 3 | 0 | 25.26771874 | 82.99125809  | <a href="https://www.inaturalist.org/observations/64929751">https://www.inaturalist.org/observations/64929751</a>   |
| 1958 | <i>Amauornis phoenicurus</i> | White-breasted Waterhen | 2019/3/7   | 5 | 0 | 25.40922167 | 86.66033833  | <a href="https://www.inaturalist.org/observations/21014592">https://www.inaturalist.org/observations/21014592</a>   |
| 1959 | <i>Amauornis phoenicurus</i> | White-breasted Waterhen | 2022/2/26  | 1 | 0 | 25.41151535 | 81.90803893  | <a href="https://www.inaturalist.org/observations/107471438">https://www.inaturalist.org/observations/107471438</a> |
| 1960 | <i>Amauornis phoenicurus</i> | White-breasted Waterhen | 2020/9/4   | 2 | 0 | 25.62975466 | 88.12817317  | <a href="https://www.inaturalist.org/observations/58478886">https://www.inaturalist.org/observations/58478886</a>   |
| 1961 | <i>Amauornis phoenicurus</i> | White-breasted Waterhen | 2015/8/25  | 5 | 0 | 25.72160265 | 85.18182794  | <a href="https://www.inaturalist.org/observations/17836238">https://www.inaturalist.org/observations/17836238</a>   |
| 1962 | <i>Amauornis phoenicurus</i> | White-breasted Waterhen | 2019/6/17  | 1 | 0 | 25.74916300 | 116.19974900 | <a href="https://www.inaturalist.org/observations/69255572">https://www.inaturalist.org/observations/69255572</a>   |
| 1963 | <i>Amauornis phoenicurus</i> | White-breasted Waterhen | 2020/9/10  | 1 | 0 | 25.83087100 | 118.48268180 | <a href="https://www.inaturalist.org/observations/59677434">https://www.inaturalist.org/observations/59677434</a>   |
| 1964 | <i>Amauornis phoenicurus</i> | White-breasted Waterhen | 2020/5/16  | 1 | 0 | 25.83108306 | 118.48168470 | <a href="https://www.inaturalist.org/observations/55686096">https://www.inaturalist.org/observations/55686096</a>   |
| 1965 | <i>Amauornis phoenicurus</i> | White-breasted Waterhen | 2018/4/1   | 1 | 0 | 25.85306890 | 93.72411580  | <a href="https://www.inaturalist.org/observations/95157222">https://www.inaturalist.org/observations/95157222</a>   |
| 1966 | <i>Amauornis phoenicurus</i> | White-breasted Waterhen | 2022/6/3   | 1 | 0 | 26.00535831 | 119.62365490 | <a href="https://www.inaturalist.org/observations/132116152">https://www.inaturalist.org/observations/132116152</a> |
| 1967 | <i>Amauornis phoenicurus</i> | White-breasted Waterhen | 2022/6/3   | 0 | 0 | 26.00535831 | 119.62365490 | <a href="https://www.inaturalist.org/observations/132116154">https://www.inaturalist.org/observations/132116154</a> |
| 1968 | <i>Amauornis phoenicurus</i> | White-breasted Waterhen | 2014/12/4  | 4 | 0 | 26.01601500 | 76.50401970  | <a href="https://www.inaturalist.org/observations/20498013">https://www.inaturalist.org/observations/20498013</a>   |
| 1969 | <i>Amauornis phoenicurus</i> | White-breasted Waterhen | 2001/1/25  | 5 | 0 | 26.01732740 | 76.50257420  | <a href="https://www.inaturalist.org/observations/27412453">https://www.inaturalist.org/observations/27412453</a>   |
| 1970 | <i>Amauornis phoenicurus</i> | White-breasted Waterhen | 2019/11/16 | 5 | 0 | 26.01732740 | 76.50257420  | <a href="https://www.inaturalist.org/observations/36157073">https://www.inaturalist.org/observations/36157073</a>   |
| 1971 | <i>Amauornis phoenicurus</i> | White-breasted Waterhen | 2016/3/24  | 2 | 0 | 26.01732740 | 76.50257420  | <a href="https://www.inaturalist.org/observations/46933220">https://www.inaturalist.org/observations/46933220</a>   |
| 1972 | <i>Amauornis phoenicurus</i> | White-breasted Waterhen | 2015/5/27  | 2 | 0 | 26.01732740 | 76.50257420  | <a href="https://www.inaturalist.org/observations/55474952">https://www.inaturalist.org/observations/55474952</a>   |
| 1973 | <i>Amauornis phoenicurus</i> | White-breasted Waterhen | 2013/6/5   | 2 | 0 | 26.01732740 | 76.50257420  | <a href="https://www.inaturalist.org/observations/55788612">https://www.inaturalist.org/observations/55788612</a>   |
| 1974 | <i>Amauornis phoenicurus</i> | White-breasted Waterhen | 2013/6/7   | 3 | 0 | 26.01732740 | 76.50257420  | <a href="https://www.inaturalist.org/observations/55788643">https://www.inaturalist.org/observations/55788643</a>   |
| 1975 | <i>Amauornis phoenicurus</i> | White-breasted Waterhen | 2015/5/27  | 2 | 0 | 26.01732740 | 76.50257420  | <a href="https://www.inaturalist.org/observations/56408079">https://www.inaturalist.org/observations/56408079</a>   |
| 1976 | <i>Amauornis phoenicurus</i> | White-breasted Waterhen | 2020/2/25  | 1 | 0 | 26.01732740 | 76.50257420  | <a href="https://www.inaturalist.org/observations/104613521">https://www.inaturalist.org/observations/104613521</a> |
| 1977 | <i>Amauornis phoenicurus</i> | White-breasted Waterhen | 2022/6/7   | 5 | 0 | 26.01732740 | 76.50257420  | <a href="https://www.inaturalist.org/observations/130133019">https://www.inaturalist.org/observations/130133019</a> |

|      |                              |                         |            |   |   |             |              |                                                                                                                     |
|------|------------------------------|-------------------------|------------|---|---|-------------|--------------|---------------------------------------------------------------------------------------------------------------------|
| 1978 | <i>Amauornis phoenicurus</i> | White-breasted Waterhen | 2019/12/28 | 2 | 0 | 26.02126050 | 76.45208040  | <a href="https://www.inaturalist.org/observations/37780315">https://www.inaturalist.org/observations/37780315</a>   |
| 1979 | <i>Amauornis phoenicurus</i> | White-breasted Waterhen | 2021/11/26 | 1 | 0 | 26.06467100 | 119.19181100 | <a href="https://www.inaturalist.org/observations/101993662">https://www.inaturalist.org/observations/101993662</a> |
| 1980 | <i>Amauornis phoenicurus</i> | White-breasted Waterhen | 2021/6/7   | 2 | 0 | 26.10639020 | 82.87936863  | <a href="https://www.inaturalist.org/observations/82038769">https://www.inaturalist.org/observations/82038769</a>   |
| 1981 | <i>Amauornis phoenicurus</i> | White-breasted Waterhen | 2020/9/20  | 2 | 0 | 26.15431990 | 91.66316790  | <a href="https://www.inaturalist.org/observations/60345625">https://www.inaturalist.org/observations/60345625</a>   |
| 1982 | <i>Amauornis phoenicurus</i> | White-breasted Waterhen | 2021/4/2   | 1 | 0 | 26.18780800 | 91.69158300  | <a href="https://www.inaturalist.org/observations/84203684">https://www.inaturalist.org/observations/84203684</a>   |
| 1983 | <i>Amauornis phoenicurus</i> | White-breasted Waterhen | 2022/6/4   | 1 | 0 | 26.22975664 | 119.58318670 | <a href="https://www.inaturalist.org/observations/132378167">https://www.inaturalist.org/observations/132378167</a> |
| 1984 | <i>Amauornis phoenicurus</i> | White-breasted Waterhen | 2020/3/21  | 4 | 0 | 26.33152595 | 89.66819398  | <a href="https://www.inaturalist.org/observations/40684207">https://www.inaturalist.org/observations/40684207</a>   |
| 1985 | <i>Amauornis phoenicurus</i> | White-breasted Waterhen | 2020/9/3   | 2 | 0 | 26.35869100 | 79.63669200  | <a href="https://www.inaturalist.org/observations/58486384">https://www.inaturalist.org/observations/58486384</a>   |
| 1986 | <i>Amauornis phoenicurus</i> | White-breasted Waterhen | 2020/9/3   | 3 | 0 | 26.35870070 | 79.63669871  | <a href="https://www.inaturalist.org/observations/58486386">https://www.inaturalist.org/observations/58486386</a>   |
| 1987 | <i>Amauornis phoenicurus</i> | White-breasted Waterhen | 2021/5/21  | 1 | 0 | 26.42342173 | 106.36952590 | <a href="https://www.inaturalist.org/observations/80365548">https://www.inaturalist.org/observations/80365548</a>   |
| 1988 | <i>Amauornis phoenicurus</i> | White-breasted Waterhen | 2022/4/22  | 1 | 0 | 26.42342173 | 106.36952590 | <a href="https://www.inaturalist.org/observations/112481420">https://www.inaturalist.org/observations/112481420</a> |
| 1989 | <i>Amauornis phoenicurus</i> | White-breasted Waterhen | 2022/4/22  | 1 | 0 | 26.42342173 | 106.36952590 | <a href="https://www.inaturalist.org/observations/112481421">https://www.inaturalist.org/observations/112481421</a> |
| 1990 | <i>Amauornis phoenicurus</i> | White-breasted Waterhen | 2022/4/22  | 2 | 0 | 26.42342173 | 106.36952590 | <a href="https://www.inaturalist.org/observations/112481430">https://www.inaturalist.org/observations/112481430</a> |
| 1991 | <i>Amauornis phoenicurus</i> | White-breasted Waterhen | 2022/5/14  | 2 | 0 | 26.42342173 | 106.36952590 | <a href="https://www.inaturalist.org/observations/118212148">https://www.inaturalist.org/observations/118212148</a> |
| 1992 | <i>Amauornis phoenicurus</i> | White-breasted Waterhen | 2022/3/11  | 4 | 0 | 26.49610109 | 90.52268375  | <a href="https://www.inaturalist.org/observations/108344864">https://www.inaturalist.org/observations/108344864</a> |
| 1993 | <i>Amauornis phoenicurus</i> | White-breasted Waterhen | 2014/5/30  | 4 | 0 | 26.50300467 | 90.55357240  | <a href="https://www.inaturalist.org/observations/64303577">https://www.inaturalist.org/observations/64303577</a>   |
| 1994 | <i>Amauornis phoenicurus</i> | White-breasted Waterhen | 2022/4/19  | 3 | 0 | 26.50311748 | 93.97333458  | <a href="https://www.inaturalist.org/observations/113237631">https://www.inaturalist.org/observations/113237631</a> |
| 1995 | <i>Amauornis phoenicurus</i> | White-breasted Waterhen | 2022/4/18  | 1 | 0 | 26.50934121 | 106.64975520 | <a href="https://www.inaturalist.org/observations/112151029">https://www.inaturalist.org/observations/112151029</a> |
| 1996 | <i>Amauornis phoenicurus</i> | White-breasted Waterhen | 2019/12/9  | 2 | 0 | 26.52528130 | 92.99380800  | <a href="https://www.inaturalist.org/observations/39928066">https://www.inaturalist.org/observations/39928066</a>   |
| 1997 | <i>Amauornis phoenicurus</i> | White-breasted Waterhen | 2020/12/12 | 1 | 0 | 26.54010823 | 106.67006280 | <a href="https://www.inaturalist.org/observations/67505119">https://www.inaturalist.org/observations/67505119</a>   |
| 1998 | <i>Amauornis phoenicurus</i> | White-breasted Waterhen | 2011/11/17 | 2 | 0 | 26.58780784 | 93.40313372  | <a href="https://www.inaturalist.org/observations/57252703">https://www.inaturalist.org/observations/57252703</a>   |
| 1999 | <i>Amauornis phoenicurus</i> | White-breasted Waterhen | 2019/12/19 | 1 | 0 | 26.61840888 | 80.65318487  | <a href="https://www.inaturalist.org/observations/48514547">https://www.inaturalist.org/observations/48514547</a>   |
| 2000 | <i>Amauornis phoenicurus</i> | White-breasted Waterhen | 2020/3/7   | 2 | 0 | 26.61847582 | 80.65376239  | <a href="https://www.inaturalist.org/observations/69848879">https://www.inaturalist.org/observations/69848879</a>   |

|      |                              |                         |            |   |   |             |              |                                                                                                                     |
|------|------------------------------|-------------------------|------------|---|---|-------------|--------------|---------------------------------------------------------------------------------------------------------------------|
| 2001 | <i>Amauornis phoenicurus</i> | White-breasted Waterhen | 2022/5/27  | 1 | 0 | 26.61853386 | 106.65192600 | <a href="https://www.inaturalist.org/observations/119731606">https://www.inaturalist.org/observations/119731606</a> |
| 2002 | <i>Amauornis phoenicurus</i> | White-breasted Waterhen | 2018/4/26  | 4 | 0 | 26.63048120 | 92.78109320  | <a href="https://www.inaturalist.org/observations/14283408">https://www.inaturalist.org/observations/14283408</a>   |
| 2003 | <i>Amauornis phoenicurus</i> | White-breasted Waterhen | 2018/11/28 | 4 | 0 | 26.63319167 | 93.36884833  | <a href="https://www.inaturalist.org/observations/19623982">https://www.inaturalist.org/observations/19623982</a>   |
| 2004 | <i>Amauornis phoenicurus</i> | White-breasted Waterhen | 2013/2/14  | 3 | 0 | 26.64377600 | 93.39820800  | <a href="https://www.inaturalist.org/observations/9788876">https://www.inaturalist.org/observations/9788876</a>     |
| 2005 | <i>Amauornis phoenicurus</i> | White-breasted Waterhen | 2017/6/9   | 2 | 0 | 26.65942270 | 91.00113110  | <a href="https://www.inaturalist.org/observations/44344055">https://www.inaturalist.org/observations/44344055</a>   |
| 2006 | <i>Amauornis phoenicurus</i> | White-breasted Waterhen | 2022/1/22  | 2 | 0 | 26.67558608 | 88.37101514  | <a href="https://www.inaturalist.org/observations/105356849">https://www.inaturalist.org/observations/105356849</a> |
| 2007 | <i>Amauornis phoenicurus</i> | White-breasted Waterhen | 2019/8/3   | 3 | 0 | 26.68471146 | 92.76640320  | <a href="https://www.inaturalist.org/observations/30868479">https://www.inaturalist.org/observations/30868479</a>   |
| 2008 | <i>Amauornis phoenicurus</i> | White-breasted Waterhen | 2021/5/8   | 5 | 0 | 26.69693001 | 93.97730324  | <a href="https://www.inaturalist.org/observations/78306609">https://www.inaturalist.org/observations/78306609</a>   |
| 2009 | <i>Amauornis phoenicurus</i> | White-breasted Waterhen | 2021/6/20  | 2 | 0 | 26.70584320 | 88.31038434  | <a href="https://www.inaturalist.org/observations/83788837">https://www.inaturalist.org/observations/83788837</a>   |
| 2010 | <i>Amauornis phoenicurus</i> | White-breasted Waterhen | 2022/9/18  | 2 | 0 | 26.70644400 | 92.48530090  | <a href="https://www.inaturalist.org/observations/135490636">https://www.inaturalist.org/observations/135490636</a> |
| 2011 | <i>Amauornis phoenicurus</i> | White-breasted Waterhen | 2019/2/10  | 4 | 0 | 26.76124167 | 88.60307167  | <a href="https://www.inaturalist.org/observations/20281827">https://www.inaturalist.org/observations/20281827</a>   |
| 2012 | <i>Amauornis phoenicurus</i> | White-breasted Waterhen | 2021/1/10  | 1 | 0 | 26.76607384 | 91.08923636  | <a href="https://www.inaturalist.org/observations/69797030">https://www.inaturalist.org/observations/69797030</a>   |
| 2013 | <i>Amauornis phoenicurus</i> | White-breasted Waterhen | 2020/10/7  | 3 | 0 | 26.78856434 | 94.21399679  | <a href="https://www.inaturalist.org/observations/61933992">https://www.inaturalist.org/observations/61933992</a>   |
| 2014 | <i>Amauornis phoenicurus</i> | White-breasted Waterhen | 2021/11/19 | 2 | 0 | 26.84617400 | 80.95239100  | <a href="https://www.inaturalist.org/observations/101694135">https://www.inaturalist.org/observations/101694135</a> |
| 2015 | <i>Amauornis phoenicurus</i> | White-breasted Waterhen | 2019/11/23 | 3 | 0 | 26.85790714 | 80.97840560  | <a href="https://www.inaturalist.org/observations/48328849">https://www.inaturalist.org/observations/48328849</a>   |
| 2016 | <i>Amauornis phoenicurus</i> | White-breasted Waterhen | 2017/11/25 | 1 | 0 | 26.87180000 | 78.56290000  | <a href="https://www.inaturalist.org/observations/70002798">https://www.inaturalist.org/observations/70002798</a>   |
| 2017 | <i>Amauornis phoenicurus</i> | White-breasted Waterhen | 2022/3/9   | 3 | 0 | 26.87252600 | 75.81309400  | <a href="https://www.inaturalist.org/observations/108237822">https://www.inaturalist.org/observations/108237822</a> |
| 2018 | <i>Amauornis phoenicurus</i> | White-breasted Waterhen | 2002/1/1   | 1 | 0 | 26.90776658 | 70.92243981  | <a href="https://www.inaturalist.org/observations/104624903">https://www.inaturalist.org/observations/104624903</a> |
| 2019 | <i>Amauornis phoenicurus</i> | White-breasted Waterhen | 2018/10/15 | 4 | 0 | 26.91739081 | 75.93205612  | <a href="https://www.inaturalist.org/observations/17523420">https://www.inaturalist.org/observations/17523420</a>   |
| 2020 | <i>Amauornis phoenicurus</i> | White-breasted Waterhen | 2019/10/21 | 4 | 0 | 26.95057678 | 75.85514069  | <a href="https://www.inaturalist.org/observations/34676990">https://www.inaturalist.org/observations/34676990</a>   |
| 2021 | <i>Amauornis phoenicurus</i> | White-breasted Waterhen | 2011/12/26 | 3 | 0 | 26.95285830 | 94.17122430  | <a href="https://www.inaturalist.org/observations/60350223">https://www.inaturalist.org/observations/60350223</a>   |
| 2022 | <i>Amauornis phoenicurus</i> | White-breasted Waterhen | 2020/3/3   | 3 | 0 | 26.95396700 | 80.92356900  | <a href="https://www.inaturalist.org/observations/69846955">https://www.inaturalist.org/observations/69846955</a>   |
| 2023 | <i>Amauornis phoenicurus</i> | White-breasted Waterhen | 2019/12/11 | 2 | 0 | 26.96666670 | 94.23333330  | <a href="https://www.inaturalist.org/observations/39929684">https://www.inaturalist.org/observations/39929684</a>   |

|      |                              |                         |            |   |   |             |              |                                                                                                                     |
|------|------------------------------|-------------------------|------------|---|---|-------------|--------------|---------------------------------------------------------------------------------------------------------------------|
| 2024 | <i>Amauornis phoenicurus</i> | White-breasted Waterhen | 2013/12/24 | 3 | 0 | 26.96699140 | 75.84833530  | <a href="https://www.inaturalist.org/observations/66941997">https://www.inaturalist.org/observations/66941997</a>   |
| 2025 | <i>Amauornis phoenicurus</i> | White-breasted Waterhen | 2021/12/22 | 1 | 0 | 27.07885500 | 114.02693700 | <a href="https://www.inaturalist.org/observations/103478113">https://www.inaturalist.org/observations/103478113</a> |
| 2026 | <i>Amauornis phoenicurus</i> | White-breasted Waterhen | 2019/10/15 | 2 | 0 | 27.14996252 | 77.54302876  | <a href="https://www.inaturalist.org/observations/44344185">https://www.inaturalist.org/observations/44344185</a>   |
| 2027 | <i>Amauornis phoenicurus</i> | White-breasted Waterhen | 2016/12/18 | 1 | 0 | 27.15183291 | 77.51896578  | <a href="https://www.inaturalist.org/observations/72149811">https://www.inaturalist.org/observations/72149811</a>   |
| 2028 | <i>Amauornis phoenicurus</i> | White-breasted Waterhen | 2011/11/9  | 4 | 0 | 27.15416556 | 77.51995000  | <a href="https://www.inaturalist.org/observations/37304514">https://www.inaturalist.org/observations/37304514</a>   |
| 2029 | <i>Amauornis phoenicurus</i> | White-breasted Waterhen | 2016/2/10  | 3 | 0 | 27.15691986 | 77.52365112  | <a href="https://www.inaturalist.org/observations/47798998">https://www.inaturalist.org/observations/47798998</a>   |
| 2030 | <i>Amauornis phoenicurus</i> | White-breasted Waterhen | 2013/4/4   | 6 | 0 | 27.15692000 | 77.52365100  | <a href="http://www.inaturalist.org/observations/537537">http://www.inaturalist.org/observations/537537</a>         |
| 2031 | <i>Amauornis phoenicurus</i> | White-breasted Waterhen | 2014/8/10  | 6 | 0 | 27.15692000 | 77.52365100  | <a href="https://www.inaturalist.org/observations/39918483">https://www.inaturalist.org/observations/39918483</a>   |
| 2032 | <i>Amauornis phoenicurus</i> | White-breasted Waterhen | 2016/12/20 | 2 | 0 | 27.15692000 | 77.52365100  | <a href="https://www.inaturalist.org/observations/41366755">https://www.inaturalist.org/observations/41366755</a>   |
| 2033 | <i>Amauornis phoenicurus</i> | White-breasted Waterhen | 2013/12/24 | 3 | 0 | 27.15692000 | 77.52365100  | <a href="https://www.inaturalist.org/observations/41744297">https://www.inaturalist.org/observations/41744297</a>   |
| 2034 | <i>Amauornis phoenicurus</i> | White-breasted Waterhen | 2010/8/30  | 3 | 0 | 27.15692000 | 77.52365100  | <a href="https://www.inaturalist.org/observations/42171334">https://www.inaturalist.org/observations/42171334</a>   |
| 2035 | <i>Amauornis phoenicurus</i> | White-breasted Waterhen | 2019/3/12  | 3 | 0 | 27.15692000 | 77.52365100  | <a href="https://www.inaturalist.org/observations/42552867">https://www.inaturalist.org/observations/42552867</a>   |
| 2036 | <i>Amauornis phoenicurus</i> | White-breasted Waterhen | 2019/12/16 | 1 | 0 | 27.15692000 | 77.52365100  | <a href="https://www.inaturalist.org/observations/105767344">https://www.inaturalist.org/observations/105767344</a> |
| 2037 | <i>Amauornis phoenicurus</i> | White-breasted Waterhen | 2018/1/19  | 3 | 0 | 27.15925594 | 77.52319984  | <a href="https://www.inaturalist.org/observations/105709563">https://www.inaturalist.org/observations/105709563</a> |
| 2038 | <i>Amauornis phoenicurus</i> | White-breasted Waterhen | 2012/11/13 | 6 | 0 | 27.15926900 | 77.52319990  | <a href="https://www.inaturalist.org/observations/31165322">https://www.inaturalist.org/observations/31165322</a>   |
| 2039 | <i>Amauornis phoenicurus</i> | White-breasted Waterhen | 2019/11/14 | 4 | 0 | 27.15926900 | 77.52319990  | <a href="https://www.inaturalist.org/observations/35983106">https://www.inaturalist.org/observations/35983106</a>   |
| 2040 | <i>Amauornis phoenicurus</i> | White-breasted Waterhen | 2018/7/17  | 2 | 0 | 27.15926900 | 77.52319990  | <a href="https://www.inaturalist.org/observations/46909058">https://www.inaturalist.org/observations/46909058</a>   |
| 2041 | <i>Amauornis phoenicurus</i> | White-breasted Waterhen | 2009/1/17  | 2 | 0 | 27.15926900 | 77.52319990  | <a href="https://www.inaturalist.org/observations/48312457">https://www.inaturalist.org/observations/48312457</a>   |
| 2042 | <i>Amauornis phoenicurus</i> | White-breasted Waterhen | 2008/12/1  | 3 | 0 | 27.15926900 | 77.52319990  | <a href="https://www.inaturalist.org/observations/55245718">https://www.inaturalist.org/observations/55245718</a>   |
| 2043 | <i>Amauornis phoenicurus</i> | White-breasted Waterhen | 2014/3/27  | 3 | 0 | 27.15926900 | 77.52319990  | <a href="https://www.inaturalist.org/observations/55372105">https://www.inaturalist.org/observations/55372105</a>   |
| 2044 | <i>Amauornis phoenicurus</i> | White-breasted Waterhen | 2015/11/29 | 3 | 0 | 27.15926900 | 77.52319990  | <a href="https://www.inaturalist.org/observations/120817264">https://www.inaturalist.org/observations/120817264</a> |
| 2045 | <i>Amauornis phoenicurus</i> | White-breasted Waterhen | 2019/2/8   | 5 | 0 | 27.15936423 | 77.52296448  | <a href="https://www.inaturalist.org/observations/20303123">https://www.inaturalist.org/observations/20303123</a>   |
| 2046 | <i>Amauornis phoenicurus</i> | White-breasted Waterhen | 2004/12/6  | 3 | 0 | 27.15936423 | 77.52296448  | <a href="https://www.inaturalist.org/observations/54715084">https://www.inaturalist.org/observations/54715084</a>   |

|      |                              |                         |            |   |   |             |             |                                                                                                                     |
|------|------------------------------|-------------------------|------------|---|---|-------------|-------------|---------------------------------------------------------------------------------------------------------------------|
| 2047 | <i>Amauornis phoenicurus</i> | White-breasted Waterhen | 2017/3/3   | 1 | 0 | 27.15936423 | 77.52313614 | <a href="https://www.inaturalist.org/observations/105808026">https://www.inaturalist.org/observations/105808026</a> |
| 2048 | <i>Amauornis phoenicurus</i> | White-breasted Waterhen | 2018/1/8   | 3 | 0 | 27.15943314 | 77.52319984 | <a href="https://www.inaturalist.org/observations/113626424">https://www.inaturalist.org/observations/113626424</a> |
| 2049 | <i>Amauornis phoenicurus</i> | White-breasted Waterhen | 2018/3/5   | 1 | 0 | 27.15948368 | 77.52153723 | <a href="https://www.inaturalist.org/observations/133425333">https://www.inaturalist.org/observations/133425333</a> |
| 2050 | <i>Amauornis phoenicurus</i> | White-breasted Waterhen | 2011/2/27  | 3 | 0 | 27.16000000 | 77.53000000 | <a href="https://www.inaturalist.org/observations/39108808">https://www.inaturalist.org/observations/39108808</a>   |
| 2051 | <i>Amauornis phoenicurus</i> | White-breasted Waterhen | 2019/1/3   | 5 | 0 | 27.16323895 | 77.52216993 | <a href="https://www.inaturalist.org/observations/120664032">https://www.inaturalist.org/observations/120664032</a> |
| 2052 | <i>Amauornis phoenicurus</i> | White-breasted Waterhen | 2020/1/18  | 1 | 0 | 27.16415376 | 77.52865363 | <a href="https://www.inaturalist.org/observations/56724057">https://www.inaturalist.org/observations/56724057</a>   |
| 2053 | <i>Amauornis phoenicurus</i> | White-breasted Waterhen | 2008/2/19  | 5 | 0 | 27.16518200 | 77.52326100 | <a href="https://www.inaturalist.org/observations/109284405">https://www.inaturalist.org/observations/109284405</a> |
| 2054 | <i>Amauornis phoenicurus</i> | White-breasted Waterhen | 2017/1/22  | 5 | 0 | 27.16592500 | 77.51825556 | <a href="https://www.inaturalist.org/observations/14242484">https://www.inaturalist.org/observations/14242484</a>   |
| 2055 | <i>Amauornis phoenicurus</i> | White-breasted Waterhen | 2006/1/9   | 4 | 0 | 27.16700000 | 77.51800000 | <a href="https://www.inaturalist.org/observations/9770180">https://www.inaturalist.org/observations/9770180</a>     |
| 2056 | <i>Amauornis phoenicurus</i> | White-breasted Waterhen | 2017/11/27 | 2 | 0 | 27.17070000 | 78.04810000 | <a href="https://www.inaturalist.org/observations/69972828">https://www.inaturalist.org/observations/69972828</a>   |
| 2057 | <i>Amauornis phoenicurus</i> | White-breasted Waterhen | 2020/2/24  | 3 | 0 | 27.17177000 | 77.52175333 | <a href="https://www.inaturalist.org/observations/39505276">https://www.inaturalist.org/observations/39505276</a>   |
| 2058 | <i>Amauornis phoenicurus</i> | White-breasted Waterhen | 2021/11/13 | 2 | 0 | 27.17225800 | 78.04774200 | <a href="https://www.inaturalist.org/observations/100997320">https://www.inaturalist.org/observations/100997320</a> |
| 2059 | <i>Amauornis phoenicurus</i> | White-breasted Waterhen | 2019/7/11  | 4 | 0 | 27.17302500 | 77.52106333 | <a href="https://www.inaturalist.org/observations/45890597">https://www.inaturalist.org/observations/45890597</a>   |
| 2060 | <i>Amauornis phoenicurus</i> | White-breasted Waterhen | 2018/3/31  | 1 | 0 | 27.17342894 | 77.52098503 | <a href="https://www.inaturalist.org/observations/105619463">https://www.inaturalist.org/observations/105619463</a> |
| 2061 | <i>Amauornis phoenicurus</i> | White-breasted Waterhen | 2020/3/17  | 3 | 0 | 27.17479167 | 77.52015833 | <a href="https://www.inaturalist.org/observations/48468443">https://www.inaturalist.org/observations/48468443</a>   |
| 2062 | <i>Amauornis phoenicurus</i> | White-breasted Waterhen | 2017/3/1   | 5 | 0 | 27.17546633 | 78.04841995 | <a href="https://www.inaturalist.org/observations/5383944">https://www.inaturalist.org/observations/5383944</a>     |
| 2063 | <i>Amauornis phoenicurus</i> | White-breasted Waterhen | 2021/11/28 | 2 | 0 | 27.17551667 | 77.51972333 | <a href="https://www.inaturalist.org/observations/103539516">https://www.inaturalist.org/observations/103539516</a> |
| 2064 | <i>Amauornis phoenicurus</i> | White-breasted Waterhen | 2017/2/14  | 6 | 0 | 27.17739500 | 77.51869333 | <a href="https://www.inaturalist.org/observations/5235314">https://www.inaturalist.org/observations/5235314</a>     |
| 2065 | <i>Amauornis phoenicurus</i> | White-breasted Waterhen | 2007/12/17 | 6 | 0 | 27.17820707 | 77.50328159 | <a href="https://www.inaturalist.org/observations/7427716">https://www.inaturalist.org/observations/7427716</a>     |
| 2066 | <i>Amauornis phoenicurus</i> | White-breasted Waterhen | 2020/2/15  | 2 | 0 | 27.17894012 | 77.51706034 | <a href="https://www.inaturalist.org/observations/62542544">https://www.inaturalist.org/observations/62542544</a>   |
| 2067 | <i>Amauornis phoenicurus</i> | White-breasted Waterhen | 2021/1/13  | 2 | 0 | 27.17950306 | 77.51763500 | <a href="https://www.inaturalist.org/observations/68098871">https://www.inaturalist.org/observations/68098871</a>   |
| 2068 | <i>Amauornis phoenicurus</i> | White-breasted Waterhen | 2017/2/28  | 5 | 0 | 27.17994950 | 78.04168790 | <a href="https://www.inaturalist.org/observations/5383617">https://www.inaturalist.org/observations/5383617</a>     |
| 2069 | <i>Amauornis phoenicurus</i> | White-breasted Waterhen | 2015/2/28  | 4 | 0 | 27.18245099 | 77.51612418 | <a href="https://www.inaturalist.org/observations/66918526">https://www.inaturalist.org/observations/66918526</a>   |

|      |                              |                         |           |   |   |             |              |                                                                                                                     |
|------|------------------------------|-------------------------|-----------|---|---|-------------|--------------|---------------------------------------------------------------------------------------------------------------------|
| 2070 | <i>Amauornis phoenicurus</i> | White-breasted Waterhen | 1994/1/10 | 2 | 0 | 27.20324720 | 77.50702240  | <a href="https://www.inaturalist.org/observations/89164577">https://www.inaturalist.org/observations/89164577</a>   |
| 2071 | <i>Amauornis phoenicurus</i> | White-breasted Waterhen | 2006/1/14 | 1 | 0 | 27.20400000 | 77.50800000  | <a href="https://www.inaturalist.org/observations/104654440">https://www.inaturalist.org/observations/104654440</a> |
| 2072 | <i>Amauornis phoenicurus</i> | White-breasted Waterhen | 2022/7/7  | 5 | 0 | 27.20475251 | 77.51029138  | <a href="https://www.inaturalist.org/observations/125163035">https://www.inaturalist.org/observations/125163035</a> |
| 2073 | <i>Amauornis phoenicurus</i> | White-breasted Waterhen | 2022/3/28 | 5 | 0 | 27.20826182 | 77.53243703  | <a href="https://www.inaturalist.org/observations/109749706">https://www.inaturalist.org/observations/109749706</a> |
| 2074 | <i>Amauornis phoenicurus</i> | White-breasted Waterhen | 2018/7/16 | 2 | 0 | 27.20843740 | 77.53262410  | <a href="https://www.inaturalist.org/observations/46904177">https://www.inaturalist.org/observations/46904177</a>   |
| 2075 | <i>Amauornis phoenicurus</i> | White-breasted Waterhen | 2022/9/4  | 3 | 0 | 27.21518172 | 77.50299945  | <a href="https://www.inaturalist.org/observations/133726129">https://www.inaturalist.org/observations/133726129</a> |
| 2076 | <i>Amauornis phoenicurus</i> | White-breasted Waterhen | 2022/5/10 | 1 | 0 | 27.31977160 | 88.24003330  | <a href="https://www.inaturalist.org/observations/122766221">https://www.inaturalist.org/observations/122766221</a> |
| 2077 | <i>Amauornis phoenicurus</i> | White-breasted Waterhen | 2022/7/16 | 0 | 0 | 27.42500300 | 113.84113800 | <a href="https://www.inaturalist.org/observations/132473668">https://www.inaturalist.org/observations/132473668</a> |
| 2078 | <i>Amauornis phoenicurus</i> | White-breasted Waterhen | 2021/4/23 | 2 | 0 | 27.43472222 | 94.31083333  | <a href="https://www.inaturalist.org/observations/74920149">https://www.inaturalist.org/observations/74920149</a>   |
| 2079 | <i>Amauornis phoenicurus</i> | White-breasted Waterhen | 2022/7/26 | 3 | 0 | 27.49508960 | 77.58249630  | <a href="https://www.inaturalist.org/observations/128129725">https://www.inaturalist.org/observations/128129725</a> |
| 2080 | <i>Amauornis phoenicurus</i> | White-breasted Waterhen | 2019/5/18 | 1 | 0 | 27.87743299 | 108.65754290 | <a href="https://www.inaturalist.org/observations/38632146">https://www.inaturalist.org/observations/38632146</a>   |
| 2081 | <i>Amauornis phoenicurus</i> | White-breasted Waterhen | 2019/7/19 | 2 | 0 | 28.10896172 | 114.48911610 | <a href="https://www.inaturalist.org/observations/30423952">https://www.inaturalist.org/observations/30423952</a>   |
| 2082 | <i>Amauornis phoenicurus</i> | White-breasted Waterhen | 2018/6/13 | 4 | 0 | 28.39569093 | 79.27295712  | <a href="https://www.inaturalist.org/observations/13605272">https://www.inaturalist.org/observations/13605272</a>   |
| 2083 | <i>Amauornis phoenicurus</i> | White-breasted Waterhen | 2020/11/7 | 1 | 0 | 28.45183590 | 76.42842103  | <a href="https://www.inaturalist.org/observations/64869171">https://www.inaturalist.org/observations/64869171</a>   |
| 2084 | <i>Amauornis phoenicurus</i> | White-breasted Waterhen | 2020/1/4  | 3 | 0 | 28.46362617 | 76.88797739  | <a href="https://www.inaturalist.org/observations/65639113">https://www.inaturalist.org/observations/65639113</a>   |
| 2085 | <i>Amauornis phoenicurus</i> | White-breasted Waterhen | 2020/9/24 | 3 | 0 | 28.51269767 | 77.48418577  | <a href="https://www.inaturalist.org/observations/61062775">https://www.inaturalist.org/observations/61062775</a>   |
| 2086 | <i>Amauornis phoenicurus</i> | White-breasted Waterhen | 2018/9/2  | 4 | 0 | 28.52333170 | 77.49523211  | <a href="https://www.inaturalist.org/observations/16160800">https://www.inaturalist.org/observations/16160800</a>   |
| 2087 | <i>Amauornis phoenicurus</i> | White-breasted Waterhen | 2021/2/5  | 3 | 0 | 28.52931210 | 77.14844420  | <a href="https://www.inaturalist.org/observations/72509973">https://www.inaturalist.org/observations/72509973</a>   |
| 2088 | <i>Amauornis phoenicurus</i> | White-breasted Waterhen | 2019/7/14 | 4 | 0 | 28.53090720 | 77.18014900  | <a href="https://www.inaturalist.org/observations/33789401">https://www.inaturalist.org/observations/33789401</a>   |
| 2089 | <i>Amauornis phoenicurus</i> | White-breasted Waterhen | 2011/1/29 | 4 | 0 | 28.55257720 | 77.55481000  | <a href="https://www.inaturalist.org/observations/31494672">https://www.inaturalist.org/observations/31494672</a>   |
| 2090 | <i>Amauornis phoenicurus</i> | White-breasted Waterhen | 2009/10/3 | 4 | 0 | 28.55460099 | 77.31779594  | <a href="https://www.inaturalist.org/observations/31583081">https://www.inaturalist.org/observations/31583081</a>   |
| 2091 | <i>Amauornis phoenicurus</i> | White-breasted Waterhen | 2009/7/15 | 4 | 0 | 28.55720980 | 77.21278910  | <a href="https://www.inaturalist.org/observations/31584668">https://www.inaturalist.org/observations/31584668</a>   |
| 2092 | <i>Amauornis phoenicurus</i> | White-breasted Waterhen | 2017/2/28 | 6 | 0 | 28.56061530 | 77.31074910  | <a href="https://www.inaturalist.org/observations/109191107">https://www.inaturalist.org/observations/109191107</a> |

|      |                              |                         |            |   |   |             |              |                                                                                                                     |
|------|------------------------------|-------------------------|------------|---|---|-------------|--------------|---------------------------------------------------------------------------------------------------------------------|
| 2093 | <i>Amauornis phoenicurus</i> | White-breasted Waterhen | 2021/12/4  | 1 | 0 | 28.56819394 | 77.31148504  | <a href="https://www.inaturalist.org/observations/102508434">https://www.inaturalist.org/observations/102508434</a> |
| 2094 | <i>Amauornis phoenicurus</i> | White-breasted Waterhen | 2021/12/4  | 1 | 0 | 28.58533664 | 77.29909457  | <a href="https://www.inaturalist.org/observations/102470069">https://www.inaturalist.org/observations/102470069</a> |
| 2095 | <i>Amauornis phoenicurus</i> | White-breasted Waterhen | 2020/7/26  | 1 | 0 | 28.59444360 | 77.24539980  | <a href="https://www.inaturalist.org/observations/54505116">https://www.inaturalist.org/observations/54505116</a>   |
| 2096 | <i>Amauornis phoenicurus</i> | White-breasted Waterhen | 2017/1/24  | 2 | 0 | 28.61602500 | 77.17760700  | <a href="https://www.inaturalist.org/observations/133428603">https://www.inaturalist.org/observations/133428603</a> |
| 2097 | <i>Amauornis phoenicurus</i> | White-breasted Waterhen | 2006/8/15  | 3 | 0 | 28.70261391 | 77.36119326  | <a href="https://www.inaturalist.org/observations/36451320">https://www.inaturalist.org/observations/36451320</a>   |
| 2098 | <i>Amauornis phoenicurus</i> | White-breasted Waterhen | 2021/9/26  | 1 | 0 | 28.90489800 | 77.35933000  | <a href="https://www.inaturalist.org/observations/96258012">https://www.inaturalist.org/observations/96258012</a>   |
| 2099 | <i>Amauornis phoenicurus</i> | White-breasted Waterhen | 2020/9/14  | 4 | 0 | 28.94377500 | 79.81140278  | <a href="https://www.inaturalist.org/observations/59541816">https://www.inaturalist.org/observations/59541816</a>   |
| 2100 | <i>Amauornis phoenicurus</i> | White-breasted Waterhen | 2019/10/8  | 2 | 0 | 29.02286260 | 79.48794120  | <a href="https://www.inaturalist.org/observations/48679105">https://www.inaturalist.org/observations/48679105</a>   |
| 2101 | <i>Amauornis phoenicurus</i> | White-breasted Waterhen | 2021/12/31 | 2 | 0 | 29.13063885 | 79.26613731  | <a href="https://www.inaturalist.org/observations/105210639">https://www.inaturalist.org/observations/105210639</a> |
| 2102 | <i>Amauornis phoenicurus</i> | White-breasted Waterhen | 2021/6/19  | 1 | 0 | 29.15496990 | 117.85686000 | <a href="https://www.inaturalist.org/observations/109620477">https://www.inaturalist.org/observations/109620477</a> |
| 2103 | <i>Amauornis phoenicurus</i> | White-breasted Waterhen | 2020/9/29  | 2 | 0 | 29.21841428 | 79.51297682  | <a href="https://www.inaturalist.org/observations/61188091">https://www.inaturalist.org/observations/61188091</a>   |
| 2104 | <i>Amauornis phoenicurus</i> | White-breasted Waterhen | 2021/9/12  | 1 | 0 | 29.22344354 | 79.09863489  | <a href="https://www.inaturalist.org/observations/96682438">https://www.inaturalist.org/observations/96682438</a>   |
| 2105 | <i>Amauornis phoenicurus</i> | White-breasted Waterhen | 2017/6/21  | 4 | 0 | 29.33840912 | 79.48511594  | <a href="https://www.inaturalist.org/observations/6762962">https://www.inaturalist.org/observations/6762962</a>     |
| 2106 | <i>Amauornis phoenicurus</i> | White-breasted Waterhen | 2022/8/11  | 3 | 0 | 29.34608046 | 79.55191445  | <a href="https://www.inaturalist.org/observations/132266069">https://www.inaturalist.org/observations/132266069</a> |
| 2107 | <i>Amauornis phoenicurus</i> | White-breasted Waterhen | 2022/8/13  | 5 | 0 | 29.36038969 | 79.19135283  | <a href="https://www.inaturalist.org/observations/130738163">https://www.inaturalist.org/observations/130738163</a> |
| 2108 | <i>Amauornis phoenicurus</i> | White-breasted Waterhen | 2021/9/12  | 1 | 0 | 29.36355712 | 79.16529273  | <a href="https://www.inaturalist.org/observations/96682431">https://www.inaturalist.org/observations/96682431</a>   |
| 2109 | <i>Amauornis phoenicurus</i> | White-breasted Waterhen | 2020/8/23  | 2 | 0 | 29.51230310 | 76.91303082  | <a href="https://www.inaturalist.org/observations/57297742">https://www.inaturalist.org/observations/57297742</a>   |
| 2110 | <i>Amauornis phoenicurus</i> | White-breasted Waterhen | 2021/5/29  | 2 | 0 | 29.60739156 | 79.61448408  | <a href="https://www.inaturalist.org/observations/80864602">https://www.inaturalist.org/observations/80864602</a>   |
| 2111 | <i>Amauornis phoenicurus</i> | White-breasted Waterhen | 2013/5/25  | 2 | 0 | 29.61269140 | 78.81177360  | <a href="https://www.inaturalist.org/observations/127634497">https://www.inaturalist.org/observations/127634497</a> |
| 2112 | <i>Amauornis phoenicurus</i> | White-breasted Waterhen | 2021/3/3   | 1 | 0 | 29.79772437 | 121.56169460 | <a href="https://www.inaturalist.org/observations/70494295">https://www.inaturalist.org/observations/70494295</a>   |
| 2113 | <i>Amauornis phoenicurus</i> | White-breasted Waterhen | 2021/3/29  | 1 | 0 | 29.79878108 | 121.56131810 | <a href="https://www.inaturalist.org/observations/72518853">https://www.inaturalist.org/observations/72518853</a>   |
| 2114 | <i>Amauornis phoenicurus</i> | White-breasted Waterhen | 2021/4/10  | 1 | 0 | 29.80010953 | 121.56212010 | <a href="https://www.inaturalist.org/observations/73593118">https://www.inaturalist.org/observations/73593118</a>   |
| 2115 | <i>Amauornis phoenicurus</i> | White-breasted Waterhen | 2021/5/1   | 1 | 0 | 29.81203622 | 121.53282600 | <a href="https://www.inaturalist.org/observations/76049240">https://www.inaturalist.org/observations/76049240</a>   |



|      |                              |                         |            |   |   |             |              |                                                                                                                     |
|------|------------------------------|-------------------------|------------|---|---|-------------|--------------|---------------------------------------------------------------------------------------------------------------------|
| 2116 | <i>Amauornis phoenicurus</i> | White-breasted Waterhen | 2021/5/2   | 1 | 0 | 29.81215928 | 121.54695590 | <a href="https://www.inaturalist.org/observations/76394333">https://www.inaturalist.org/observations/76394333</a>   |
| 2117 | <i>Amauornis phoenicurus</i> | White-breasted Waterhen | 2021/1/20  | 1 | 0 | 29.81232771 | 121.53909970 | <a href="https://www.inaturalist.org/observations/69797181">https://www.inaturalist.org/observations/69797181</a>   |
| 2118 | <i>Amauornis phoenicurus</i> | White-breasted Waterhen | 2021/4/18  | 1 | 0 | 29.81238909 | 121.52902060 | <a href="https://www.inaturalist.org/observations/74623332">https://www.inaturalist.org/observations/74623332</a>   |
| 2119 | <i>Amauornis phoenicurus</i> | White-breasted Waterhen | 2020/10/30 | 1 | 0 | 29.81307097 | 76.47076841  | <a href="https://www.inaturalist.org/observations/63831380">https://www.inaturalist.org/observations/63831380</a>   |
| 2120 | <i>Amauornis phoenicurus</i> | White-breasted Waterhen | 2021/10/24 | 2 | 0 | 29.91538060 | 78.09690760  | <a href="https://www.inaturalist.org/observations/99317522">https://www.inaturalist.org/observations/99317522</a>   |
| 2121 | <i>Amauornis phoenicurus</i> | White-breasted Waterhen | 2021/11/7  | 3 | 0 | 29.96962830 | 78.10717430  | <a href="https://www.inaturalist.org/observations/100469155">https://www.inaturalist.org/observations/100469155</a> |
| 2122 | <i>Amauornis phoenicurus</i> | White-breasted Waterhen | 2016/12/4  | 5 | 0 | 30.02493752 | 78.26039904  | <a href="https://www.inaturalist.org/observations/4786140">https://www.inaturalist.org/observations/4786140</a>     |
| 2123 | <i>Amauornis phoenicurus</i> | White-breasted Waterhen | 2021/11/12 | 4 | 0 | 30.12904850 | 77.26739010  | <a href="https://www.inaturalist.org/observations/100921057">https://www.inaturalist.org/observations/100921057</a> |
| 2124 | <i>Amauornis phoenicurus</i> | White-breasted Waterhen | 2021/5/22  | 2 | 0 | 30.13883625 | 120.22105660 | <a href="https://www.inaturalist.org/observations/79917615">https://www.inaturalist.org/observations/79917615</a>   |
| 2125 | <i>Amauornis phoenicurus</i> | White-breasted Waterhen | 2022/1/10  | 1 | 0 | 30.20783034 | 120.14222970 | <a href="https://www.inaturalist.org/observations/104696990">https://www.inaturalist.org/observations/104696990</a> |
| 2126 | <i>Amauornis phoenicurus</i> | White-breasted Waterhen | 2022/1/30  | 1 | 0 | 30.20844227 | 120.14087790 | <a href="https://www.inaturalist.org/observations/105842584">https://www.inaturalist.org/observations/105842584</a> |
| 2127 | <i>Amauornis phoenicurus</i> | White-breasted Waterhen | 2022/2/11  | 1 | 0 | 30.20844227 | 120.14087790 | <a href="https://www.inaturalist.org/observations/106541809">https://www.inaturalist.org/observations/106541809</a> |
| 2128 | <i>Amauornis phoenicurus</i> | White-breasted Waterhen | 2021/1/29  | 1 | 0 | 30.23798011 | 119.76158130 | <a href="https://www.inaturalist.org/observations/68758866">https://www.inaturalist.org/observations/68758866</a>   |
| 2129 | <i>Amauornis phoenicurus</i> | White-breasted Waterhen | 2016/10/20 | 5 | 0 | 30.28302920 | 77.97243740  | <a href="http://www.inaturalist.org/observations/4397583">http://www.inaturalist.org/observations/4397583</a>       |
| 2130 | <i>Amauornis phoenicurus</i> | White-breasted Waterhen | 2015/5/11  | 6 | 0 | 30.28561800 | 77.97529800  | <a href="http://www.inaturalist.org/observations/1477053">http://www.inaturalist.org/observations/1477053</a>       |
| 2131 | <i>Amauornis phoenicurus</i> | White-breasted Waterhen | 2015/5/19  | 5 | 0 | 30.28563200 | 77.97508800  | <a href="http://www.inaturalist.org/observations/1510262">http://www.inaturalist.org/observations/1510262</a>       |
| 2132 | <i>Amauornis phoenicurus</i> | White-breasted Waterhen | 2015/5/5   | 5 | 0 | 30.28566800 | 77.97506800  | <a href="http://www.inaturalist.org/observations/1456642">http://www.inaturalist.org/observations/1456642</a>       |
| 2133 | <i>Amauornis phoenicurus</i> | White-breasted Waterhen | 2015/5/13  | 6 | 0 | 30.28574400 | 77.97463200  | <a href="http://www.inaturalist.org/observations/1489757">http://www.inaturalist.org/observations/1489757</a>       |
| 2134 | <i>Amauornis phoenicurus</i> | White-breasted Waterhen | 2015/5/6   | 5 | 0 | 30.28575300 | 77.97443900  | <a href="http://www.inaturalist.org/observations/1462086">http://www.inaturalist.org/observations/1462086</a>       |
| 2135 | <i>Amauornis phoenicurus</i> | White-breasted Waterhen | 2015/5/18  | 6 | 0 | 30.28584800 | 77.97465700  | <a href="http://www.inaturalist.org/observations/1505296">http://www.inaturalist.org/observations/1505296</a>       |
| 2136 | <i>Amauornis phoenicurus</i> | White-breasted Waterhen | 2020/9/28  | 4 | 0 | 30.30899342 | 78.09480641  | <a href="https://www.inaturalist.org/observations/61288767">https://www.inaturalist.org/observations/61288767</a>   |
| 2137 | <i>Amauornis phoenicurus</i> | White-breasted Waterhen | 2021/12/5  | 2 | 0 | 30.36441337 | 76.78801943  | <a href="https://www.inaturalist.org/observations/102526249">https://www.inaturalist.org/observations/102526249</a> |
| 2138 | <i>Amauornis phoenicurus</i> | White-breasted Waterhen | 2021/3/11  | 3 | 0 | 30.37529424 | 76.78212192  | <a href="https://www.inaturalist.org/observations/71198668">https://www.inaturalist.org/observations/71198668</a>   |

|      |                              |                         |            |   |   |             |              |                                                                                                                     |
|------|------------------------------|-------------------------|------------|---|---|-------------|--------------|---------------------------------------------------------------------------------------------------------------------|
| 2139 | <i>Amauornis phoenicurus</i> | White-breasted Waterhen | 2014/3/22  | 6 | 0 | 30.39233641 | 78.05592393  | <a href="https://www.inaturalist.org/observations/30963611">https://www.inaturalist.org/observations/30963611</a>   |
| 2140 | <i>Amauornis phoenicurus</i> | White-breasted Waterhen | 2021/5/11  | 1 | 0 | 30.46793805 | 76.76528938  | <a href="https://www.inaturalist.org/observations/78342603">https://www.inaturalist.org/observations/78342603</a>   |
| 2141 | <i>Amauornis phoenicurus</i> | White-breasted Waterhen | 2018/11/18 | 4 | 0 | 30.59130840 | 74.81153400  | <a href="https://www.inaturalist.org/observations/18510010">https://www.inaturalist.org/observations/18510010</a>   |
| 2142 | <i>Amauornis phoenicurus</i> | White-breasted Waterhen | 2018/11/18 | 4 | 0 | 30.59130840 | 74.81153400  | <a href="https://www.inaturalist.org/observations/18549218">https://www.inaturalist.org/observations/18549218</a>   |
| 2143 | <i>Amauornis phoenicurus</i> | White-breasted Waterhen | 2018/7/3   | 2 | 0 | 30.74171252 | 76.82433986  | <a href="https://www.inaturalist.org/observations/135487596">https://www.inaturalist.org/observations/135487596</a> |
| 2144 | <i>Amauornis phoenicurus</i> | White-breasted Waterhen | 2019/7/3   | 5 | 0 | 30.74411667 | 76.77563667  | <a href="https://www.inaturalist.org/observations/28099016">https://www.inaturalist.org/observations/28099016</a>   |
| 2145 | <i>Amauornis phoenicurus</i> | White-breasted Waterhen | 2021/2/18  | 4 | 0 | 30.90818877 | 76.80190683  | <a href="https://www.inaturalist.org/observations/134742906">https://www.inaturalist.org/observations/134742906</a> |
| 2146 | <i>Amauornis phoenicurus</i> | White-breasted Waterhen | 2016/11/24 | 2 | 0 | 31.03182690 | 121.44273140 | <a href="https://www.inaturalist.org/observations/19692354">https://www.inaturalist.org/observations/19692354</a>   |
| 2147 | <i>Amauornis phoenicurus</i> | White-breasted Waterhen | 2019/1/1   | 0 | 0 | 31.18808667 | 121.47770000 | <a href="https://www.inaturalist.org/observations/19364961">https://www.inaturalist.org/observations/19364961</a>   |
| 2148 | <i>Amauornis phoenicurus</i> | White-breasted Waterhen | 2021/9/11  | 1 | 0 | 31.21412277 | 117.33238220 | <a href="https://www.inaturalist.org/observations/94579801">https://www.inaturalist.org/observations/94579801</a>   |
| 2149 | <i>Amauornis phoenicurus</i> | White-breasted Waterhen | 2017/11/13 | 2 | 0 | 31.21467872 | 121.55267220 | <a href="https://www.inaturalist.org/observations/8847559">https://www.inaturalist.org/observations/8847559</a>     |
| 2150 | <i>Amauornis phoenicurus</i> | White-breasted Waterhen | 2022/1/15  | 1 | 0 | 31.21539400 | 121.55215700 | <a href="https://www.inaturalist.org/observations/105836793">https://www.inaturalist.org/observations/105836793</a> |
| 2151 | <i>Amauornis phoenicurus</i> | White-breasted Waterhen | 2016/6/20  | 1 | 0 | 31.29722775 | 75.62006325  | <a href="https://www.inaturalist.org/observations/72138346">https://www.inaturalist.org/observations/72138346</a>   |
| 2152 | <i>Amauornis phoenicurus</i> | White-breasted Waterhen | 2022/3/26  | 1 | 0 | 31.36126364 | 120.68376510 | <a href="https://www.inaturalist.org/observations/109624132">https://www.inaturalist.org/observations/109624132</a> |
| 2153 | <i>Amauornis phoenicurus</i> | White-breasted Waterhen | 2020/2/15  | 2 | 0 | 31.40446801 | 75.29340293  | <a href="https://www.inaturalist.org/observations/38659257">https://www.inaturalist.org/observations/38659257</a>   |
| 2154 | <i>Amauornis phoenicurus</i> | White-breasted Waterhen | 2021/1/1   | 1 | 0 | 31.45302058 | 120.33035270 | <a href="https://www.inaturalist.org/observations/67396262">https://www.inaturalist.org/observations/67396262</a>   |
| 2155 | <i>Amauornis phoenicurus</i> | White-breasted Waterhen | 2022/7/6   | 1 | 0 | 32.28719450 | 120.53324460 | <a href="https://www.inaturalist.org/observations/125023120">https://www.inaturalist.org/observations/125023120</a> |
| 2156 | <i>Amauornis phoenicurus</i> | White-breasted Waterhen | 2022/7/7   | 0 | 0 | 32.34121162 | 120.06874610 | <a href="https://www.inaturalist.org/observations/125154776">https://www.inaturalist.org/observations/125154776</a> |
| 2157 | <i>Amauornis phoenicurus</i> | White-breasted Waterhen | 2020/12/12 | 1 | 0 | 32.99409010 | 74.93457330  | <a href="https://www.inaturalist.org/observations/95767928">https://www.inaturalist.org/observations/95767928</a>   |
| 2158 | <i>Amauornis phoenicurus</i> | White-breasted Waterhen | 2022/6/17  | 0 | 0 | 33.08368100 | 119.56465940 | <a href="https://www.inaturalist.org/observations/122033079">https://www.inaturalist.org/observations/122033079</a> |
| 2159 | <i>Amauornis phoenicurus</i> | White-breasted Waterhen | 2021/7/17  | 1 | 0 | 33.11982667 | 114.21381330 | <a href="https://www.inaturalist.org/observations/91264547">https://www.inaturalist.org/observations/91264547</a>   |
| 2160 | <i>Amauornis phoenicurus</i> | White-breasted Waterhen | 2022/7/5   | 1 | 0 | 33.12671144 | 118.87217930 | <a href="https://www.inaturalist.org/observations/124879884">https://www.inaturalist.org/observations/124879884</a> |
| 2161 | <i>Amauornis phoenicurus</i> | White-breasted Waterhen | 2021/7/17  | 0 | 0 | 33.13232167 | 114.20662170 | <a href="https://www.inaturalist.org/observations/91264541">https://www.inaturalist.org/observations/91264541</a>   |

|      |                              |                         |           |   |   |             |              |                                                                                                                     |
|------|------------------------------|-------------------------|-----------|---|---|-------------|--------------|---------------------------------------------------------------------------------------------------------------------|
| 2162 | <i>Amauornis phoenicurus</i> | White-breasted Waterhen | 2022/6/21 | 0 | 0 | 34.00248511 | 118.94568040 | <a href="https://www.inaturalist.org/observations/122799015">https://www.inaturalist.org/observations/122799015</a> |
| 2163 | <i>Amauornis phoenicurus</i> | White-breasted Waterhen | 2022/9/4  | 0 | 0 | 34.75369833 | 113.56539330 | <a href="https://www.inaturalist.org/observations/133609423">https://www.inaturalist.org/observations/133609423</a> |
| 2164 | <i>Amauornis phoenicurus</i> | White-breasted Waterhen | 2021/7/5  | 1 | 0 | 36.37956522 | 117.08021630 | <a href="https://www.inaturalist.org/observations/85755868">https://www.inaturalist.org/observations/85755868</a>   |
| 2165 | <i>Amauornis phoenicurus</i> | White-breasted Waterhen | 2021/7/5  | 1 | 0 | 36.37957278 | 117.08022310 | <a href="https://www.inaturalist.org/observations/85755786">https://www.inaturalist.org/observations/85755786</a>   |
| 2166 | <i>Amauornis phoenicurus</i> | White-breasted Waterhen | 2022/6/9  | 2 | 0 | 40.12546117 | 116.30597000 | <a href="https://www.inaturalist.org/observations/120946401">https://www.inaturalist.org/observations/120946401</a> |

| No | scientific name    | common name            | date       | NIA | NID | latitude    | longitude   | url                                                                                                                 |
|----|--------------------|------------------------|------------|-----|-----|-------------|-------------|---------------------------------------------------------------------------------------------------------------------|
| 1  | Circaetus gallicus | Short-toed Snake-eagle | 2022/1/4   | 1   | 0   | -3.41461000 | 38.96874400 | <a href="https://www.inaturalist.org/observations/105720378">https://www.inaturalist.org/observations/105720378</a> |
| 2  | Circaetus gallicus | Short-toed Snake-eagle | 2020/3/5   | 1   | 0   | 2.54873522  | 34.38257782 | <a href="https://www.inaturalist.org/observations/69714351">https://www.inaturalist.org/observations/69714351</a>   |
| 3  | Circaetus gallicus | Short-toed Snake-eagle | 2014/11/19 | 4   | 0   | 5.26692300  | 39.73352100 | <a href="http://www.inaturalist.org/observations/1175481">http://www.inaturalist.org/observations/1175481</a>       |
| 4  | Circaetus gallicus | Short-toed Snake-eagle | 2014/1/29  | 4   | 0   | 6.99000800  | 38.49633000 | <a href="https://www.inaturalist.org/observations/37371699">https://www.inaturalist.org/observations/37371699</a>   |
| 5  | Circaetus gallicus | Short-toed Snake-eagle | 2020/2/28  | 3   | 0   | 9.35430833  | 40.34861167 | <a href="https://www.inaturalist.org/observations/40517081">https://www.inaturalist.org/observations/40517081</a>   |
| 6  | Circaetus gallicus | Short-toed Snake-eagle | 2010/9/18  | 2   | 0   | 9.69629375  | 46.99218750 | <a href="https://www.inaturalist.org/observations/41298853">https://www.inaturalist.org/observations/41298853</a>   |
| 7  | Circaetus gallicus | Short-toed Snake-eagle | 2022/3/1   | 1   | 0   | 11.57420860 | 37.36135330 | <a href="https://www.inaturalist.org/observations/107690239">https://www.inaturalist.org/observations/107690239</a> |
| 8  | Circaetus gallicus | Short-toed Snake-eagle | 2018/1/28  | 2   | 0   | 14.11719717 | 38.68172167 | <a href="https://www.inaturalist.org/observations/9717557">https://www.inaturalist.org/observations/9717557</a>     |
| 9  | Circaetus gallicus | Short-toed Snake-eagle | 2017/12/15 | 3   | 0   | 8.21768580  | 77.41045700 | <a href="https://www.inaturalist.org/observations/135094358">https://www.inaturalist.org/observations/135094358</a> |
| 10 | Circaetus gallicus | Short-toed Snake-eagle | 2021/11/12 | 1   | 0   | 8.41506991  | 77.47599023 | <a href="https://www.inaturalist.org/observations/104507249">https://www.inaturalist.org/observations/104507249</a> |
| 11 | Circaetus gallicus | Short-toed Snake-eagle | 2020/9/15  | 2   | 0   | 9.72471059  | 77.29336202 | <a href="https://www.inaturalist.org/observations/61117769">https://www.inaturalist.org/observations/61117769</a>   |
| 12 | Circaetus gallicus | Short-toed Snake-eagle | 2015/3/8   | 3   | 0   | 10.30679740 | 77.20602410 | <a href="https://www.inaturalist.org/observations/19749932">https://www.inaturalist.org/observations/19749932</a>   |
| 13 | Circaetus gallicus | Short-toed Snake-eagle | 2015/3/8   | 3   | 0   | 10.30679740 | 77.20602410 | <a href="https://www.inaturalist.org/observations/19749933">https://www.inaturalist.org/observations/19749933</a>   |
| 14 | Circaetus gallicus | Short-toed Snake-eagle | 2021/3/13  | 2   | 0   | 11.45482461 | 77.43653666 | <a href="https://www.inaturalist.org/observations/87223408">https://www.inaturalist.org/observations/87223408</a>   |
| 15 | Circaetus gallicus | Short-toed Snake-eagle | 2018/12/30 | 1   | 0   | 11.56377500 | 76.98435600 | <a href="https://www.inaturalist.org/observations/19727020">https://www.inaturalist.org/observations/19727020</a>   |
| 16 | Circaetus gallicus | Short-toed Snake-eagle | 2021/10/23 | 1   | 0   | 11.90500346 | 76.61019591 | <a href="https://www.inaturalist.org/observations/99193823">https://www.inaturalist.org/observations/99193823</a>   |
| 17 | Circaetus gallicus | Short-toed Snake-eagle | 2020/7/30  | 1   | 0   | 11.98579642 | 76.88772280 | <a href="https://www.inaturalist.org/observations/86544897">https://www.inaturalist.org/observations/86544897</a>   |
| 18 | Circaetus gallicus | Short-toed Snake-eagle | 2012/12/1  | 1   | 0   | 11.99877500 | 77.13983110 | <a href="https://www.inaturalist.org/observations/86172332">https://www.inaturalist.org/observations/86172332</a>   |
| 19 | Circaetus gallicus | Short-toed Snake-eagle | 2017/9/20  | 1   | 0   | 12.01841130 | 76.45040210 | <a href="https://www.inaturalist.org/observations/88820090">https://www.inaturalist.org/observations/88820090</a>   |
| 20 | Circaetus gallicus | Short-toed Snake-eagle | 2017/7/23  | 2   | 0   | 12.01841130 | 76.45040210 | <a href="https://www.inaturalist.org/observations/88822570">https://www.inaturalist.org/observations/88822570</a>   |
| 21 | Circaetus gallicus | Short-toed Snake-eagle | 2007/1/20  | 1   | 0   | 12.08230054 | 76.71351780 | <a href="https://www.inaturalist.org/observations/95515497">https://www.inaturalist.org/observations/95515497</a>   |
| 22 | Circaetus gallicus | Short-toed Snake-eagle | 2015/2/11  | 1   | 0   | 12.08230054 | 76.71351780 | <a href="https://www.inaturalist.org/observations/95515525">https://www.inaturalist.org/observations/95515525</a>   |

|    |                    |                        |            |   |   |             |             |                                                                                                                     |
|----|--------------------|------------------------|------------|---|---|-------------|-------------|---------------------------------------------------------------------------------------------------------------------|
| 23 | Circaetus gallicus | Short-toed Snake-eagle | 2019/1/20  | 1 | 0 | 12.09414810 | 77.02118220 | <a href="https://www.inaturalist.org/observations/97525627">https://www.inaturalist.org/observations/97525627</a>   |
| 24 | Circaetus gallicus | Short-toed Snake-eagle | 2015/9/5   | 2 | 0 | 12.11008395 | 76.53816940 | <a href="https://www.inaturalist.org/observations/91843342">https://www.inaturalist.org/observations/91843342</a>   |
| 25 | Circaetus gallicus | Short-toed Snake-eagle | 2002/1/5   | 1 | 0 | 12.12339666 | 76.48541851 | <a href="https://www.inaturalist.org/observations/91844736">https://www.inaturalist.org/observations/91844736</a>   |
| 26 | Circaetus gallicus | Short-toed Snake-eagle | 2022/2/4   | 2 | 0 | 12.13505074 | 77.04062818 | <a href="https://www.inaturalist.org/observations/106224236">https://www.inaturalist.org/observations/106224236</a> |
| 27 | Circaetus gallicus | Short-toed Snake-eagle | 2016/10/22 | 1 | 0 | 12.15054245 | 76.52973717 | <a href="https://www.inaturalist.org/observations/85741460">https://www.inaturalist.org/observations/85741460</a>   |
| 28 | Circaetus gallicus | Short-toed Snake-eagle | 2021/5/9   | 1 | 0 | 12.15996857 | 76.46044955 | <a href="https://www.inaturalist.org/observations/79961678">https://www.inaturalist.org/observations/79961678</a>   |
| 29 | Circaetus gallicus | Short-toed Snake-eagle | 2010/10/10 | 1 | 0 | 12.16770120 | 76.53148170 | <a href="https://www.inaturalist.org/observations/85738160">https://www.inaturalist.org/observations/85738160</a>   |
| 30 | Circaetus gallicus | Short-toed Snake-eagle | 2014/7/19  | 2 | 0 | 12.19673986 | 76.51225639 | <a href="https://www.inaturalist.org/observations/86131108">https://www.inaturalist.org/observations/86131108</a>   |
| 31 | Circaetus gallicus | Short-toed Snake-eagle | 2021/8/22  | 1 | 0 | 12.19673986 | 76.51225639 | <a href="https://www.inaturalist.org/observations/92089137">https://www.inaturalist.org/observations/92089137</a>   |
| 32 | Circaetus gallicus | Short-toed Snake-eagle | 2017/8/12  | 1 | 0 | 12.22887288 | 79.05260289 | <a href="https://www.inaturalist.org/observations/96108865">https://www.inaturalist.org/observations/96108865</a>   |
| 33 | Circaetus gallicus | Short-toed Snake-eagle | 2021/5/4   | 1 | 0 | 12.25841911 | 76.58913447 | <a href="https://www.inaturalist.org/observations/79947905">https://www.inaturalist.org/observations/79947905</a>   |
| 34 | Circaetus gallicus | Short-toed Snake-eagle | 2017/6/10  | 1 | 0 | 12.26005298 | 76.77324214 | <a href="https://www.inaturalist.org/observations/90360730">https://www.inaturalist.org/observations/90360730</a>   |
| 35 | Circaetus gallicus | Short-toed Snake-eagle | 2020/10/29 | 1 | 0 | 12.26269942 | 76.56762058 | <a href="https://www.inaturalist.org/observations/95042490">https://www.inaturalist.org/observations/95042490</a>   |
| 36 | Circaetus gallicus | Short-toed Snake-eagle | 2022/7/31  | 5 | 0 | 12.26663300 | 76.71565000 | <a href="https://www.inaturalist.org/observations/128761523">https://www.inaturalist.org/observations/128761523</a> |
| 37 | Circaetus gallicus | Short-toed Snake-eagle | 2015/3/29  | 1 | 0 | 12.28314693 | 76.70619965 | <a href="https://www.inaturalist.org/observations/87727439">https://www.inaturalist.org/observations/87727439</a>   |
| 38 | Circaetus gallicus | Short-toed Snake-eagle | 2015/3/29  | 1 | 0 | 12.28314693 | 76.70619965 | <a href="https://www.inaturalist.org/observations/96564368">https://www.inaturalist.org/observations/96564368</a>   |
| 39 | Circaetus gallicus | Short-toed Snake-eagle | 2016/12/16 | 5 | 0 | 12.30354513 | 76.75008728 | <a href="https://www.inaturalist.org/observations/4829353">https://www.inaturalist.org/observations/4829353</a>     |
| 40 | Circaetus gallicus | Short-toed Snake-eagle | 2018/12/6  | 1 | 0 | 12.32573500 | 76.39763210 | <a href="https://www.inaturalist.org/observations/82267999">https://www.inaturalist.org/observations/82267999</a>   |
| 41 | Circaetus gallicus | Short-toed Snake-eagle | 2013/8/15  | 1 | 0 | 12.34979350 | 76.53359580 | <a href="https://www.inaturalist.org/observations/81832320">https://www.inaturalist.org/observations/81832320</a>   |
| 42 | Circaetus gallicus | Short-toed Snake-eagle | 2020/1/4   | 1 | 0 | 12.38496860 | 76.82163960 | <a href="https://www.inaturalist.org/observations/82850094">https://www.inaturalist.org/observations/82850094</a>   |
| 43 | Circaetus gallicus | Short-toed Snake-eagle | 2015/8/2   | 1 | 0 | 12.41666670 | 77.75000000 | <a href="https://www.inaturalist.org/observations/63954335">https://www.inaturalist.org/observations/63954335</a>   |
| 44 | Circaetus gallicus | Short-toed Snake-eagle | 2010/11/28 | 1 | 0 | 12.41666670 | 77.75000000 | <a href="https://www.inaturalist.org/observations/64111136">https://www.inaturalist.org/observations/64111136</a>   |
| 45 | Circaetus gallicus | Short-toed Snake-eagle | 2021/4/18  | 1 | 0 | 12.44104342 | 76.53435104 | <a href="https://www.inaturalist.org/observations/80700440">https://www.inaturalist.org/observations/80700440</a>   |

|    |                    |                        |            |   |   |             |             |                                                                                                                     |
|----|--------------------|------------------------|------------|---|---|-------------|-------------|---------------------------------------------------------------------------------------------------------------------|
| 46 | Circaetus gallicus | Short-toed Snake-eagle | 2015/10/23 | 4 | 0 | 12.57144500 | 79.98759639 | <a href="https://www.inaturalist.org/observations/22499849">https://www.inaturalist.org/observations/22499849</a>   |
| 47 | Circaetus gallicus | Short-toed Snake-eagle | 2022/9/11  | 4 | 0 | 12.68359230 | 80.14425400 | <a href="https://www.inaturalist.org/observations/134613097">https://www.inaturalist.org/observations/134613097</a> |
| 48 | Circaetus gallicus | Short-toed Snake-eagle | 2017/9/2   | 2 | 0 | 12.74747085 | 77.29967250 | <a href="https://www.inaturalist.org/observations/65011263">https://www.inaturalist.org/observations/65011263</a>   |
| 49 | Circaetus gallicus | Short-toed Snake-eagle | 2020/12/20 | 2 | 0 | 12.75439783 | 80.10097940 | <a href="https://www.inaturalist.org/observations/66823376">https://www.inaturalist.org/observations/66823376</a>   |
| 50 | Circaetus gallicus | Short-toed Snake-eagle | 2016/4/8   | 5 | 0 | 12.76315055 | 77.79960012 | <a href="https://www.inaturalist.org/observations/26374055">https://www.inaturalist.org/observations/26374055</a>   |
| 51 | Circaetus gallicus | Short-toed Snake-eagle | 2020/11/21 | 3 | 0 | 12.81385331 | 76.94609644 | <a href="https://www.inaturalist.org/observations/96781608">https://www.inaturalist.org/observations/96781608</a>   |
| 52 | Circaetus gallicus | Short-toed Snake-eagle | 2020/11/20 | 1 | 0 | 12.81385331 | 76.94609644 | <a href="https://www.inaturalist.org/observations/96781610">https://www.inaturalist.org/observations/96781610</a>   |
| 53 | Circaetus gallicus | Short-toed Snake-eagle | 2021/8/10  | 1 | 0 | 12.81845600 | 79.69465860 | <a href="https://www.inaturalist.org/observations/90718640">https://www.inaturalist.org/observations/90718640</a>   |
| 54 | Circaetus gallicus | Short-toed Snake-eagle | 2018/11/25 | 2 | 0 | 12.82046687 | 77.72457819 | <a href="https://www.inaturalist.org/observations/67003319">https://www.inaturalist.org/observations/67003319</a>   |
| 55 | Circaetus gallicus | Short-toed Snake-eagle | 2018/11/25 | 1 | 0 | 12.82046687 | 77.72457819 | <a href="https://www.inaturalist.org/observations/67003320">https://www.inaturalist.org/observations/67003320</a>   |
| 56 | Circaetus gallicus | Short-toed Snake-eagle | 2019/5/11  | 1 | 0 | 12.82552510 | 77.03485730 | <a href="https://www.inaturalist.org/observations/92330437">https://www.inaturalist.org/observations/92330437</a>   |
| 57 | Circaetus gallicus | Short-toed Snake-eagle | 2019/11/12 | 1 | 0 | 12.82552510 | 77.03485730 | <a href="https://www.inaturalist.org/observations/92331624">https://www.inaturalist.org/observations/92331624</a>   |
| 58 | Circaetus gallicus | Short-toed Snake-eagle | 2019/2/2   | 5 | 0 | 12.83006773 | 79.74265080 | <a href="https://www.inaturalist.org/observations/22612024">https://www.inaturalist.org/observations/22612024</a>   |
| 59 | Circaetus gallicus | Short-toed Snake-eagle | 2021/10/1  | 2 | 0 | 12.87950540 | 79.40612680 | <a href="https://www.inaturalist.org/observations/96766182">https://www.inaturalist.org/observations/96766182</a>   |
| 60 | Circaetus gallicus | Short-toed Snake-eagle | 2019/11/1  | 1 | 0 | 12.95447738 | 79.34088964 | <a href="https://www.inaturalist.org/observations/69755282">https://www.inaturalist.org/observations/69755282</a>   |
| 61 | Circaetus gallicus | Short-toed Snake-eagle | 2019/7/30  | 2 | 0 | 12.96248620 | 77.12196045 | <a href="https://www.inaturalist.org/observations/92437275">https://www.inaturalist.org/observations/92437275</a>   |
| 62 | Circaetus gallicus | Short-toed Snake-eagle | 2020/1/25  | 1 | 0 | 12.97159870 | 77.59456270 | <a href="https://www.inaturalist.org/observations/55916962">https://www.inaturalist.org/observations/55916962</a>   |
| 63 | Circaetus gallicus | Short-toed Snake-eagle | 2020/1/25  | 1 | 0 | 12.97159870 | 77.59456270 | <a href="https://www.inaturalist.org/observations/55916963">https://www.inaturalist.org/observations/55916963</a>   |
| 64 | Circaetus gallicus | Short-toed Snake-eagle | 2018/2/25  | 2 | 0 | 12.97167553 | 77.34342109 | <a href="https://www.inaturalist.org/observations/14743748">https://www.inaturalist.org/observations/14743748</a>   |
| 65 | Circaetus gallicus | Short-toed Snake-eagle | 2019/9/15  | 2 | 0 | 12.99373543 | 79.06615321 | <a href="https://www.inaturalist.org/observations/73587582">https://www.inaturalist.org/observations/73587582</a>   |
| 66 | Circaetus gallicus | Short-toed Snake-eagle | 2021/2/7   | 1 | 0 | 13.07131761 | 77.76243210 | <a href="https://www.inaturalist.org/observations/100742370">https://www.inaturalist.org/observations/100742370</a> |
| 67 | Circaetus gallicus | Short-toed Snake-eagle | 2021/8/18  | 1 | 0 | 13.08268020 | 80.27071840 | <a href="https://www.inaturalist.org/observations/91614013">https://www.inaturalist.org/observations/91614013</a>   |
| 68 | Circaetus gallicus | Short-toed Snake-eagle | 2019/3/23  | 2 | 0 | 13.08268020 | 80.27071840 | <a href="https://www.inaturalist.org/observations/106017444">https://www.inaturalist.org/observations/106017444</a> |

|    |                    |                        |            |   |   |             |             |                                                                                                                     |
|----|--------------------|------------------------|------------|---|---|-------------|-------------|---------------------------------------------------------------------------------------------------------------------|
| 69 | Circaetus gallicus | Short-toed Snake-eagle | 2020/2/15  | 3 | 0 | 13.11974181 | 79.00798391 | <a href="https://www.inaturalist.org/observations/75194186">https://www.inaturalist.org/observations/75194186</a>   |
| 70 | Circaetus gallicus | Short-toed Snake-eagle | 2021/5/6   | 1 | 0 | 13.64948611 | 79.54600289 | <a href="https://www.inaturalist.org/observations/86058262">https://www.inaturalist.org/observations/86058262</a>   |
| 71 | Circaetus gallicus | Short-toed Snake-eagle | 2021/1/3   | 1 | 0 | 13.65283051 | 79.47203593 | <a href="https://www.inaturalist.org/observations/71421062">https://www.inaturalist.org/observations/71421062</a>   |
| 72 | Circaetus gallicus | Short-toed Snake-eagle | 2021/5/2   | 2 | 0 | 13.65766297 | 79.26922135 | <a href="https://www.inaturalist.org/observations/76480539">https://www.inaturalist.org/observations/76480539</a>   |
| 73 | Circaetus gallicus | Short-toed Snake-eagle | 2020/8/28  | 3 | 0 | 13.66431661 | 77.20889859 | <a href="https://www.inaturalist.org/observations/59958601">https://www.inaturalist.org/observations/59958601</a>   |
| 74 | Circaetus gallicus | Short-toed Snake-eagle | 2020/11/10 | 1 | 0 | 13.71792977 | 79.32248655 | <a href="https://www.inaturalist.org/observations/64726346">https://www.inaturalist.org/observations/64726346</a>   |
| 75 | Circaetus gallicus | Short-toed Snake-eagle | 2019/1/31  | 1 | 0 | 13.81236420 | 76.86134070 | <a href="https://www.inaturalist.org/observations/84850398">https://www.inaturalist.org/observations/84850398</a>   |
| 76 | Circaetus gallicus | Short-toed Snake-eagle | 2021/10/17 | 1 | 0 | 14.13523842 | 77.94767417 | <a href="https://www.inaturalist.org/observations/101510878">https://www.inaturalist.org/observations/101510878</a> |
| 77 | Circaetus gallicus | Short-toed Snake-eagle | 2019/1/27  | 1 | 0 | 14.33468534 | 79.40868932 | <a href="https://www.inaturalist.org/observations/98628895">https://www.inaturalist.org/observations/98628895</a>   |
| 78 | Circaetus gallicus | Short-toed Snake-eagle | 2015/4/21  | 4 | 0 | 14.44234100 | 75.70573500 | <a href="http://www.inaturalist.org/observations/1450457">http://www.inaturalist.org/observations/1450457</a>       |
| 79 | Circaetus gallicus | Short-toed Snake-eagle | 2021/5/15  | 1 | 0 | 15.11489964 | 76.67179457 | <a href="https://www.inaturalist.org/observations/83112488">https://www.inaturalist.org/observations/83112488</a>   |
| 80 | Circaetus gallicus | Short-toed Snake-eagle | 2019/1/29  | 1 | 0 | 15.24851040 | 76.53148170 | <a href="https://www.inaturalist.org/observations/84849237">https://www.inaturalist.org/observations/84849237</a>   |
| 81 | Circaetus gallicus | Short-toed Snake-eagle | 2019/11/23 | 4 | 0 | 15.26964602 | 76.53137896 | <a href="https://www.inaturalist.org/observations/49424578">https://www.inaturalist.org/observations/49424578</a>   |
| 82 | Circaetus gallicus | Short-toed Snake-eagle | 2018/9/23  | 3 | 0 | 15.32826068 | 75.08109088 | <a href="https://www.inaturalist.org/observations/16941480">https://www.inaturalist.org/observations/16941480</a>   |
| 83 | Circaetus gallicus | Short-toed Snake-eagle | 2022/8/6   | 4 | 0 | 15.35571025 | 73.95338383 | <a href="https://www.inaturalist.org/observations/129673909">https://www.inaturalist.org/observations/129673909</a> |
| 84 | Circaetus gallicus | Short-toed Snake-eagle | 2020/11/16 | 1 | 0 | 16.29039853 | 74.34622876 | <a href="https://www.inaturalist.org/observations/65214685">https://www.inaturalist.org/observations/65214685</a>   |
| 85 | Circaetus gallicus | Short-toed Snake-eagle | 2020/10/6  | 1 | 0 | 16.55359333 | 80.69076667 | <a href="https://www.inaturalist.org/observations/61845676">https://www.inaturalist.org/observations/61845676</a>   |
| 86 | Circaetus gallicus | Short-toed Snake-eagle | 2015/10/28 | 3 | 0 | 16.57247410 | 74.26597538 | <a href="https://www.inaturalist.org/observations/38416370">https://www.inaturalist.org/observations/38416370</a>   |
| 87 | Circaetus gallicus | Short-toed Snake-eagle | 2020/11/29 | 1 | 0 | 16.57589266 | 80.68862217 | <a href="https://www.inaturalist.org/observations/92670127">https://www.inaturalist.org/observations/92670127</a>   |
| 88 | Circaetus gallicus | Short-toed Snake-eagle | 2022/2/18  | 3 | 0 | 16.60132391 | 80.58064514 | <a href="https://www.inaturalist.org/observations/107609847">https://www.inaturalist.org/observations/107609847</a> |
| 89 | Circaetus gallicus | Short-toed Snake-eagle | 2021/7/24  | 1 | 0 | 16.62166000 | 80.51394000 | <a href="https://www.inaturalist.org/observations/88412855">https://www.inaturalist.org/observations/88412855</a>   |
| 90 | Circaetus gallicus | Short-toed Snake-eagle | 2021/9/26  | 1 | 0 | 16.64284764 | 80.48669251 | <a href="https://www.inaturalist.org/observations/96472493">https://www.inaturalist.org/observations/96472493</a>   |
| 91 | Circaetus gallicus | Short-toed Snake-eagle | 2021/7/24  | 1 | 0 | 16.64309974 | 80.48695564 | <a href="https://www.inaturalist.org/observations/88578336">https://www.inaturalist.org/observations/88578336</a>   |

|     |                    |                        |            |   |   |             |             |                                                                                                                     |
|-----|--------------------|------------------------|------------|---|---|-------------|-------------|---------------------------------------------------------------------------------------------------------------------|
| 92  | Circaetus gallicus | Short-toed Snake-eagle | 2020/10/4  | 1 | 0 | 16.64457999 | 80.48804998 | <a href="https://www.inaturalist.org/observations/61654577">https://www.inaturalist.org/observations/61654577</a>   |
| 93  | Circaetus gallicus | Short-toed Snake-eagle | 2021/7/12  | 0 | 0 | 16.64457999 | 80.48804998 | <a href="https://www.inaturalist.org/observations/86720741">https://www.inaturalist.org/observations/86720741</a>   |
| 94  | Circaetus gallicus | Short-toed Snake-eagle | 2021/8/15  | 1 | 0 | 16.64457999 | 80.48804998 | <a href="https://www.inaturalist.org/observations/91255077">https://www.inaturalist.org/observations/91255077</a>   |
| 95  | Circaetus gallicus | Short-toed Snake-eagle | 2021/10/30 | 2 | 0 | 16.64720649 | 80.48950852 | <a href="https://www.inaturalist.org/observations/99798189">https://www.inaturalist.org/observations/99798189</a>   |
| 96  | Circaetus gallicus | Short-toed Snake-eagle | 2021/12/26 | 2 | 0 | 16.65018789 | 80.49149391 | <a href="https://www.inaturalist.org/observations/107254255">https://www.inaturalist.org/observations/107254255</a> |
| 97  | Circaetus gallicus | Short-toed Snake-eagle | 2021/12/26 | 1 | 0 | 16.65018789 | 80.49149391 | <a href="https://www.inaturalist.org/observations/107254330">https://www.inaturalist.org/observations/107254330</a> |
| 98  | Circaetus gallicus | Short-toed Snake-eagle | 2022/3/6   | 4 | 0 | 16.65391605 | 80.46723317 | <a href="https://www.inaturalist.org/observations/108249472">https://www.inaturalist.org/observations/108249472</a> |
| 99  | Circaetus gallicus | Short-toed Snake-eagle | 2022/3/13  | 2 | 0 | 16.66112798 | 80.47830352 | <a href="https://www.inaturalist.org/observations/108944377">https://www.inaturalist.org/observations/108944377</a> |
| 100 | Circaetus gallicus | Short-toed Snake-eagle | 2021/9/26  | 1 | 0 | 16.66141831 | 80.49466497 | <a href="https://www.inaturalist.org/observations/96203092">https://www.inaturalist.org/observations/96203092</a>   |
| 101 | Circaetus gallicus | Short-toed Snake-eagle | 2021/2/14  | 2 | 0 | 16.66244810 | 80.69972200 | <a href="https://www.inaturalist.org/observations/69985821">https://www.inaturalist.org/observations/69985821</a>   |
| 102 | Circaetus gallicus | Short-toed Snake-eagle | 2022/1/24  | 1 | 0 | 16.66244810 | 80.69972200 | <a href="https://www.inaturalist.org/observations/106068614">https://www.inaturalist.org/observations/106068614</a> |
| 103 | Circaetus gallicus | Short-toed Snake-eagle | 2022/7/17  | 4 | 0 | 16.66802497 | 80.50041997 | <a href="https://www.inaturalist.org/observations/127460241">https://www.inaturalist.org/observations/127460241</a> |
| 104 | Circaetus gallicus | Short-toed Snake-eagle | 2020/8/1   | 1 | 0 | 16.77486260 | 74.48626567 | <a href="https://www.inaturalist.org/observations/58730524">https://www.inaturalist.org/observations/58730524</a>   |
| 105 | Circaetus gallicus | Short-toed Snake-eagle | 2012/10/14 | 2 | 0 | 16.81902830 | 74.04847920 | <a href="https://www.inaturalist.org/observations/95233683">https://www.inaturalist.org/observations/95233683</a>   |
| 106 | Circaetus gallicus | Short-toed Snake-eagle | 2022/2/19  | 1 | 0 | 17.10390249 | 80.89836795 | <a href="https://www.inaturalist.org/observations/107241959">https://www.inaturalist.org/observations/107241959</a> |
| 107 | Circaetus gallicus | Short-toed Snake-eagle | 2020/10/30 | 2 | 0 | 17.30509608 | 82.14517739 | <a href="https://www.inaturalist.org/observations/63818840">https://www.inaturalist.org/observations/63818840</a>   |
| 108 | Circaetus gallicus | Short-toed Snake-eagle | 2021/2/5   | 1 | 0 | 17.31196560 | 77.86358360 | <a href="https://www.inaturalist.org/observations/69370902">https://www.inaturalist.org/observations/69370902</a>   |
| 109 | Circaetus gallicus | Short-toed Snake-eagle | 2016/6/17  | 2 | 0 | 17.31196560 | 77.86358360 | <a href="https://www.inaturalist.org/observations/90059582">https://www.inaturalist.org/observations/90059582</a>   |
| 110 | Circaetus gallicus | Short-toed Snake-eagle | 2022/7/21  | 5 | 0 | 17.44337250 | 77.43064050 | <a href="https://www.inaturalist.org/observations/127821321">https://www.inaturalist.org/observations/127821321</a> |
| 111 | Circaetus gallicus | Short-toed Snake-eagle | 2022/7/24  | 2 | 0 | 17.44337250 | 77.43064050 | <a href="https://www.inaturalist.org/observations/127821379">https://www.inaturalist.org/observations/127821379</a> |
| 112 | Circaetus gallicus | Short-toed Snake-eagle | 2022/7/21  | 5 | 0 | 17.44337250 | 77.43064050 | <a href="https://www.inaturalist.org/observations/128128595">https://www.inaturalist.org/observations/128128595</a> |
| 113 | Circaetus gallicus | Short-toed Snake-eagle | 2018/10/13 | 2 | 0 | 17.59470270 | 78.12304001 | <a href="https://www.inaturalist.org/observations/62787539">https://www.inaturalist.org/observations/62787539</a>   |
| 114 | Circaetus gallicus | Short-toed Snake-eagle | 2020/7/24  | 1 | 0 | 17.63556488 | 74.55682956 | <a href="https://www.inaturalist.org/observations/70365168">https://www.inaturalist.org/observations/70365168</a>   |



|     |                    |                        |            |   |   |             |             |                                                                                                                     |
|-----|--------------------|------------------------|------------|---|---|-------------|-------------|---------------------------------------------------------------------------------------------------------------------|
| 115 | Circaetus gallicus | Short-toed Snake-eagle | 2022/6/12  | 4 | 0 | 17.65524480 | 78.07606880 | <a href="https://www.inaturalist.org/observations/121377647">https://www.inaturalist.org/observations/121377647</a> |
| 116 | Circaetus gallicus | Short-toed Snake-eagle | 2022/6/12  | 3 | 0 | 17.65524480 | 78.07606880 | <a href="https://www.inaturalist.org/observations/121428457">https://www.inaturalist.org/observations/121428457</a> |
| 117 | Circaetus gallicus | Short-toed Snake-eagle | 2016/3/26  | 1 | 0 | 17.79931766 | 75.86466802 | <a href="https://www.inaturalist.org/observations/65694241">https://www.inaturalist.org/observations/65694241</a>   |
| 118 | Circaetus gallicus | Short-toed Snake-eagle | 2020/10/21 | 1 | 0 | 17.81384167 | 83.29669167 | <a href="https://www.inaturalist.org/observations/63392805">https://www.inaturalist.org/observations/63392805</a>   |
| 119 | Circaetus gallicus | Short-toed Snake-eagle | 2015/3/16  | 2 | 0 | 17.82126063 | 75.86724278 | <a href="https://www.inaturalist.org/observations/66421014">https://www.inaturalist.org/observations/66421014</a>   |
| 120 | Circaetus gallicus | Short-toed Snake-eagle | 2016/3/26  | 1 | 0 | 17.82763870 | 75.86829958 | <a href="https://www.inaturalist.org/observations/65694240">https://www.inaturalist.org/observations/65694240</a>   |
| 121 | Circaetus gallicus | Short-toed Snake-eagle | 2020/12/3  | 2 | 0 | 17.82787780 | 75.98696090 | <a href="https://www.inaturalist.org/observations/66118185">https://www.inaturalist.org/observations/66118185</a>   |
| 122 | Circaetus gallicus | Short-toed Snake-eagle | 2020/12/3  | 2 | 0 | 17.82787780 | 75.98696090 | <a href="https://www.inaturalist.org/observations/66118406">https://www.inaturalist.org/observations/66118406</a>   |
| 123 | Circaetus gallicus | Short-toed Snake-eagle | 2021/8/22  | 1 | 0 | 17.93625167 | 83.37594664 | <a href="https://www.inaturalist.org/observations/92532107">https://www.inaturalist.org/observations/92532107</a>   |
| 124 | Circaetus gallicus | Short-toed Snake-eagle | 2018/10/21 | 1 | 0 | 17.98865650 | 73.95857558 | <a href="https://www.inaturalist.org/observations/54083123">https://www.inaturalist.org/observations/54083123</a>   |
| 125 | Circaetus gallicus | Short-toed Snake-eagle | 2021/2/21  | 2 | 0 | 18.08873568 | 74.07033272 | <a href="https://www.inaturalist.org/observations/77601010">https://www.inaturalist.org/observations/77601010</a>   |
| 126 | Circaetus gallicus | Short-toed Snake-eagle | 2016/2/27  | 2 | 0 | 18.11243700 | 79.01930000 | <a href="https://www.inaturalist.org/observations/63558640">https://www.inaturalist.org/observations/63558640</a>   |
| 127 | Circaetus gallicus | Short-toed Snake-eagle | 2018/7/28  | 1 | 0 | 18.11243720 | 79.01929970 | <a href="https://www.inaturalist.org/observations/63573619">https://www.inaturalist.org/observations/63573619</a>   |
| 128 | Circaetus gallicus | Short-toed Snake-eagle | 2021/7/7   | 1 | 0 | 18.11869430 | 75.02340740 | <a href="https://www.inaturalist.org/observations/86523073">https://www.inaturalist.org/observations/86523073</a>   |
| 129 | Circaetus gallicus | Short-toed Snake-eagle | 2018/10/24 | 1 | 0 | 18.14912091 | 73.78653400 | <a href="https://www.inaturalist.org/observations/84720484">https://www.inaturalist.org/observations/84720484</a>   |
| 130 | Circaetus gallicus | Short-toed Snake-eagle | 2018/10/24 | 1 | 0 | 18.14963417 | 73.78588457 | <a href="https://www.inaturalist.org/observations/91543888">https://www.inaturalist.org/observations/91543888</a>   |
| 131 | Circaetus gallicus | Short-toed Snake-eagle | 2021/2/3   | 2 | 0 | 18.15077440 | 74.08728920 | <a href="https://www.inaturalist.org/observations/70870318">https://www.inaturalist.org/observations/70870318</a>   |
| 132 | Circaetus gallicus | Short-toed Snake-eagle | 2021/6/16  | 1 | 0 | 18.15077440 | 74.08728920 | <a href="https://www.inaturalist.org/observations/83913942">https://www.inaturalist.org/observations/83913942</a>   |
| 133 | Circaetus gallicus | Short-toed Snake-eagle | 2021/6/16  | 1 | 0 | 18.15077440 | 74.08728920 | <a href="https://www.inaturalist.org/observations/83913943">https://www.inaturalist.org/observations/83913943</a>   |
| 134 | Circaetus gallicus | Short-toed Snake-eagle | 2021/10/12 | 2 | 0 | 18.15077440 | 74.08728920 | <a href="https://www.inaturalist.org/observations/98578810">https://www.inaturalist.org/observations/98578810</a>   |
| 135 | Circaetus gallicus | Short-toed Snake-eagle | 2021/10/24 | 4 | 0 | 18.22335500 | 74.31963167 | <a href="https://www.inaturalist.org/observations/121383490">https://www.inaturalist.org/observations/121383490</a> |
| 136 | Circaetus gallicus | Short-toed Snake-eagle | 2022/1/23  | 3 | 0 | 18.26374040 | 74.68902578 | <a href="https://www.inaturalist.org/observations/127085028">https://www.inaturalist.org/observations/127085028</a> |
| 137 | Circaetus gallicus | Short-toed Snake-eagle | 2020/12/15 | 1 | 0 | 18.26552353 | 74.80328882 | <a href="https://www.inaturalist.org/observations/67035240">https://www.inaturalist.org/observations/67035240</a>   |

|     |                    |                        |            |   |   |             |             |                                                                                                                     |
|-----|--------------------|------------------------|------------|---|---|-------------|-------------|---------------------------------------------------------------------------------------------------------------------|
| 138 | Circaetus gallicus | Short-toed Snake-eagle | 2020/12/15 | 1 | 0 | 18.26552353 | 74.80328882 | <a href="https://www.inaturalist.org/observations/67035241">https://www.inaturalist.org/observations/67035241</a>   |
| 139 | Circaetus gallicus | Short-toed Snake-eagle | 2020/12/15 | 1 | 0 | 18.26552353 | 74.80328882 | <a href="https://www.inaturalist.org/observations/67035242">https://www.inaturalist.org/observations/67035242</a>   |
| 140 | Circaetus gallicus | Short-toed Snake-eagle | 2020/10/29 | 1 | 0 | 18.26768090 | 74.78636980 | <a href="https://www.inaturalist.org/observations/101991394">https://www.inaturalist.org/observations/101991394</a> |
| 141 | Circaetus gallicus | Short-toed Snake-eagle | 2015/11/7  | 2 | 0 | 18.34156490 | 74.36478340 | <a href="https://www.inaturalist.org/observations/55483091">https://www.inaturalist.org/observations/55483091</a>   |
| 142 | Circaetus gallicus | Short-toed Snake-eagle | 2020/12/10 | 1 | 0 | 18.34631280 | 74.03018260 | <a href="https://www.inaturalist.org/observations/101938594">https://www.inaturalist.org/observations/101938594</a> |
| 143 | Circaetus gallicus | Short-toed Snake-eagle | 2018/6/30  | 3 | 0 | 18.35006690 | 74.03718207 | <a href="https://www.inaturalist.org/observations/17724474">https://www.inaturalist.org/observations/17724474</a>   |
| 144 | Circaetus gallicus | Short-toed Snake-eagle | 2014/2/4   | 4 | 0 | 18.35154150 | 74.36754460 | <a href="https://www.inaturalist.org/observations/41677660">https://www.inaturalist.org/observations/41677660</a>   |
| 145 | Circaetus gallicus | Short-toed Snake-eagle | 2021/1/6   | 1 | 0 | 18.35154150 | 74.36754460 | <a href="https://www.inaturalist.org/observations/70980210">https://www.inaturalist.org/observations/70980210</a>   |
| 146 | Circaetus gallicus | Short-toed Snake-eagle | 2020/9/2   | 2 | 0 | 18.35154150 | 74.36754460 | <a href="https://www.inaturalist.org/observations/73316812">https://www.inaturalist.org/observations/73316812</a>   |
| 147 | Circaetus gallicus | Short-toed Snake-eagle | 2013/7/7   | 3 | 0 | 18.35154150 | 74.36754460 | <a href="https://www.inaturalist.org/observations/123544849">https://www.inaturalist.org/observations/123544849</a> |
| 148 | Circaetus gallicus | Short-toed Snake-eagle | 2013/7/7   | 3 | 0 | 18.35154150 | 74.36754460 | <a href="https://www.inaturalist.org/observations/123544917">https://www.inaturalist.org/observations/123544917</a> |
| 149 | Circaetus gallicus | Short-toed Snake-eagle | 2014/11/30 | 4 | 0 | 18.39082200 | 74.12175200 | <a href="http://www.inaturalist.org/observations/4101158">http://www.inaturalist.org/observations/4101158</a>       |
| 150 | Circaetus gallicus | Short-toed Snake-eagle | 2021/10/15 | 2 | 0 | 18.39460833 | 74.03152667 | <a href="https://www.inaturalist.org/observations/98590191">https://www.inaturalist.org/observations/98590191</a>   |
| 151 | Circaetus gallicus | Short-toed Snake-eagle | 2021/1/21  | 1 | 0 | 18.41909428 | 74.13103957 | <a href="https://www.inaturalist.org/observations/68414067">https://www.inaturalist.org/observations/68414067</a>   |
| 152 | Circaetus gallicus | Short-toed Snake-eagle | 2020/12/11 | 1 | 0 | 18.42200462 | 74.13973164 | <a href="https://www.inaturalist.org/observations/67851933">https://www.inaturalist.org/observations/67851933</a>   |
| 153 | Circaetus gallicus | Short-toed Snake-eagle | 2017/11/12 | 3 | 0 | 18.45746548 | 74.15084839 | <a href="https://www.inaturalist.org/observations/8860160">https://www.inaturalist.org/observations/8860160</a>     |
| 154 | Circaetus gallicus | Short-toed Snake-eagle | 2014/10/5  | 2 | 0 | 18.75521050 | 73.44453920 | <a href="https://www.inaturalist.org/observations/127085029">https://www.inaturalist.org/observations/127085029</a> |
| 155 | Circaetus gallicus | Short-toed Snake-eagle | 2015/7/9   | 4 | 0 | 18.89945600 | 74.59904900 | <a href="http://www.inaturalist.org/observations/1806453">http://www.inaturalist.org/observations/1806453</a>       |
| 156 | Circaetus gallicus | Short-toed Snake-eagle | 2014/11/9  | 3 | 0 | 19.07196910 | 73.53569360 | <a href="https://www.inaturalist.org/observations/67150016">https://www.inaturalist.org/observations/67150016</a>   |
| 157 | Circaetus gallicus | Short-toed Snake-eagle | 2012/11/6  | 2 | 0 | 19.08522012 | 73.53907180 | <a href="https://www.inaturalist.org/observations/104562385">https://www.inaturalist.org/observations/104562385</a> |
| 158 | Circaetus gallicus | Short-toed Snake-eagle | 2020/1/12  | 2 | 0 | 19.11168019 | 73.17478783 | <a href="https://www.inaturalist.org/observations/68090695">https://www.inaturalist.org/observations/68090695</a>   |
| 159 | Circaetus gallicus | Short-toed Snake-eagle | 2012/11/8  | 2 | 0 | 19.11480815 | 73.56371228 | <a href="https://www.inaturalist.org/observations/108014973">https://www.inaturalist.org/observations/108014973</a> |
| 160 | Circaetus gallicus | Short-toed Snake-eagle | 2020/11/29 | 2 | 0 | 19.14865887 | 73.15246314 | <a href="https://www.inaturalist.org/observations/111396681">https://www.inaturalist.org/observations/111396681</a> |

|     |                    |                        |            |   |   |             |             |                                                                                                                     |
|-----|--------------------|------------------------|------------|---|---|-------------|-------------|---------------------------------------------------------------------------------------------------------------------|
| 161 | Circaetus gallicus | Short-toed Snake-eagle | 2021/1/8   | 4 | 0 | 19.14952162 | 73.15046120 | <a href="https://www.inaturalist.org/observations/137262732">https://www.inaturalist.org/observations/137262732</a> |
| 162 | Circaetus gallicus | Short-toed Snake-eagle | 2020/1/1   | 2 | 0 | 19.15448700 | 73.15561250 | <a href="https://www.inaturalist.org/observations/135211155">https://www.inaturalist.org/observations/135211155</a> |
| 163 | Circaetus gallicus | Short-toed Snake-eagle | 2013/10/8  | 2 | 0 | 19.20318420 | 73.87425000 | <a href="https://www.inaturalist.org/observations/66917406">https://www.inaturalist.org/observations/66917406</a>   |
| 164 | Circaetus gallicus | Short-toed Snake-eagle | 2020/3/26  | 1 | 0 | 19.21942327 | 73.12483437 | <a href="https://www.inaturalist.org/observations/62095876">https://www.inaturalist.org/observations/62095876</a>   |
| 165 | Circaetus gallicus | Short-toed Snake-eagle | 2020/11/28 | 1 | 0 | 19.24033050 | 73.13053950 | <a href="https://www.inaturalist.org/observations/101939651">https://www.inaturalist.org/observations/101939651</a> |
| 166 | Circaetus gallicus | Short-toed Snake-eagle | 2020/11/28 | 1 | 0 | 19.24033050 | 73.13053950 | <a href="https://www.inaturalist.org/observations/101939652">https://www.inaturalist.org/observations/101939652</a> |
| 167 | Circaetus gallicus | Short-toed Snake-eagle | 2020/11/21 | 1 | 0 | 19.24033050 | 73.13053950 | <a href="https://www.inaturalist.org/observations/101990725">https://www.inaturalist.org/observations/101990725</a> |
| 168 | Circaetus gallicus | Short-toed Snake-eagle | 2020/11/29 | 3 | 0 | 19.29757500 | 73.68663310 | <a href="https://www.inaturalist.org/observations/75144314">https://www.inaturalist.org/observations/75144314</a>   |
| 169 | Circaetus gallicus | Short-toed Snake-eagle | 2020/2/25  | 2 | 0 | 19.71841494 | 73.54931943 | <a href="https://www.inaturalist.org/observations/134952811">https://www.inaturalist.org/observations/134952811</a> |
| 170 | Circaetus gallicus | Short-toed Snake-eagle | 2019/8/20  | 2 | 0 | 19.87195833 | 86.10701833 | <a href="https://www.inaturalist.org/observations/35545774">https://www.inaturalist.org/observations/35545774</a>   |
| 171 | Circaetus gallicus | Short-toed Snake-eagle | 2019/10/6  | 1 | 0 | 20.09568418 | 79.52075858 | <a href="https://www.inaturalist.org/observations/34006206">https://www.inaturalist.org/observations/34006206</a>   |
| 172 | Circaetus gallicus | Short-toed Snake-eagle | 2019/2/17  | 2 | 0 | 20.51907146 | 81.74384616 | <a href="https://www.inaturalist.org/observations/37744119">https://www.inaturalist.org/observations/37744119</a>   |
| 173 | Circaetus gallicus | Short-toed Snake-eagle | 2019/12/22 | 2 | 0 | 20.71514690 | 86.86594490 | <a href="https://www.inaturalist.org/observations/61855074">https://www.inaturalist.org/observations/61855074</a>   |
| 174 | Circaetus gallicus | Short-toed Snake-eagle | 2013/12/20 | 4 | 0 | 20.71514700 | 86.86594500 | <a href="http://www.inaturalist.org/observations/575074">http://www.inaturalist.org/observations/575074</a>         |
| 175 | Circaetus gallicus | Short-toed Snake-eagle | 2021/1/16  | 1 | 0 | 21.00044467 | 81.45266119 | <a href="https://www.inaturalist.org/observations/68206602">https://www.inaturalist.org/observations/68206602</a>   |
| 176 | Circaetus gallicus | Short-toed Snake-eagle | 2021/1/30  | 1 | 0 | 21.00937228 | 81.47347581 | <a href="https://www.inaturalist.org/observations/68795479">https://www.inaturalist.org/observations/68795479</a>   |
| 177 | Circaetus gallicus | Short-toed Snake-eagle | 2022/1/19  | 2 | 0 | 21.01636926 | 81.43938426 | <a href="https://www.inaturalist.org/observations/106161752">https://www.inaturalist.org/observations/106161752</a> |
| 178 | Circaetus gallicus | Short-toed Snake-eagle | 2021/10/9  | 2 | 0 | 21.02005917 | 81.42415769 | <a href="https://www.inaturalist.org/observations/97786514">https://www.inaturalist.org/observations/97786514</a>   |
| 179 | Circaetus gallicus | Short-toed Snake-eagle | 2021/1/30  | 1 | 0 | 21.03784110 | 81.40516162 | <a href="https://www.inaturalist.org/observations/68794846">https://www.inaturalist.org/observations/68794846</a>   |
| 180 | Circaetus gallicus | Short-toed Snake-eagle | 2020/8/23  | 1 | 0 | 21.04718733 | 75.84377993 | <a href="https://www.inaturalist.org/observations/62542126">https://www.inaturalist.org/observations/62542126</a>   |
| 181 | Circaetus gallicus | Short-toed Snake-eagle | 2021/4/15  | 1 | 0 | 21.04783443 | 81.45737350 | <a href="https://www.inaturalist.org/observations/74053987">https://www.inaturalist.org/observations/74053987</a>   |
| 182 | Circaetus gallicus | Short-toed Snake-eagle | 2020/8/23  | 1 | 0 | 21.05026851 | 75.85287999 | <a href="https://www.inaturalist.org/observations/57312255">https://www.inaturalist.org/observations/57312255</a>   |
| 183 | Circaetus gallicus | Short-toed Snake-eagle | 2021/10/15 | 3 | 0 | 21.05060280 | 81.74002030 | <a href="https://www.inaturalist.org/observations/121447465">https://www.inaturalist.org/observations/121447465</a> |

|     |                    |                        |            |   |   |             |             |                                                                                                                     |
|-----|--------------------|------------------------|------------|---|---|-------------|-------------|---------------------------------------------------------------------------------------------------------------------|
| 184 | Circaetus gallicus | Short-toed Snake-eagle | 2020/1/19  | 2 | 0 | 21.06265702 | 75.86496938 | <a href="https://www.inaturalist.org/observations/51047764">https://www.inaturalist.org/observations/51047764</a>   |
| 185 | Circaetus gallicus | Short-toed Snake-eagle | 2020/12/30 | 1 | 0 | 21.06471000 | 75.78570333 | <a href="https://www.inaturalist.org/observations/67393974">https://www.inaturalist.org/observations/67393974</a>   |
| 186 | Circaetus gallicus | Short-toed Snake-eagle | 2021/1/5   | 2 | 0 | 21.06731348 | 81.49033383 | <a href="https://www.inaturalist.org/observations/68103878">https://www.inaturalist.org/observations/68103878</a>   |
| 187 | Circaetus gallicus | Short-toed Snake-eagle | 2020/1/19  | 1 | 0 | 21.09498827 | 76.00350648 | <a href="https://www.inaturalist.org/observations/62542113">https://www.inaturalist.org/observations/62542113</a>   |
| 188 | Circaetus gallicus | Short-toed Snake-eagle | 2021/2/14  | 2 | 0 | 21.11434631 | 81.82483446 | <a href="https://www.inaturalist.org/observations/120628847">https://www.inaturalist.org/observations/120628847</a> |
| 189 | Circaetus gallicus | Short-toed Snake-eagle | 2020/3/1   | 2 | 0 | 21.12430540 | 70.82415070 | <a href="https://www.inaturalist.org/observations/104691893">https://www.inaturalist.org/observations/104691893</a> |
| 190 | Circaetus gallicus | Short-toed Snake-eagle | 2016/1/10  | 4 | 0 | 21.14889500 | 81.82568000 | <a href="https://www.inaturalist.org/observations/13510066">https://www.inaturalist.org/observations/13510066</a>   |
| 191 | Circaetus gallicus | Short-toed Snake-eagle | 2020/8/15  | 1 | 0 | 21.18708525 | 80.76186363 | <a href="https://www.inaturalist.org/observations/56606214">https://www.inaturalist.org/observations/56606214</a>   |
| 192 | Circaetus gallicus | Short-toed Snake-eagle | 2021/5/20  | 1 | 0 | 21.19264060 | 80.75978491 | <a href="https://www.inaturalist.org/observations/88266164">https://www.inaturalist.org/observations/88266164</a>   |
| 193 | Circaetus gallicus | Short-toed Snake-eagle | 2018/7/18  | 1 | 0 | 21.19406481 | 81.35094143 | <a href="https://www.inaturalist.org/observations/62386763">https://www.inaturalist.org/observations/62386763</a>   |
| 194 | Circaetus gallicus | Short-toed Snake-eagle | 2021/9/20  | 1 | 0 | 21.19406481 | 81.35094143 | <a href="https://www.inaturalist.org/observations/95960318">https://www.inaturalist.org/observations/95960318</a>   |
| 195 | Circaetus gallicus | Short-toed Snake-eagle | 2021/6/3   | 2 | 0 | 21.19664497 | 80.76093324 | <a href="https://www.inaturalist.org/observations/88266733">https://www.inaturalist.org/observations/88266733</a>   |
| 196 | Circaetus gallicus | Short-toed Snake-eagle | 2022/6/26  | 4 | 0 | 21.19723858 | 80.76446202 | <a href="https://www.inaturalist.org/observations/128321792">https://www.inaturalist.org/observations/128321792</a> |
| 197 | Circaetus gallicus | Short-toed Snake-eagle | 2020/1/13  | 2 | 0 | 21.20567301 | 81.17750578 | <a href="https://www.inaturalist.org/observations/51161085">https://www.inaturalist.org/observations/51161085</a>   |
| 198 | Circaetus gallicus | Short-toed Snake-eagle | 2021/2/14  | 1 | 0 | 21.29286035 | 80.91485515 | <a href="https://www.inaturalist.org/observations/69624901">https://www.inaturalist.org/observations/69624901</a>   |
| 199 | Circaetus gallicus | Short-toed Snake-eagle | 2021/9/10  | 2 | 0 | 21.36548509 | 81.40499771 | <a href="https://www.inaturalist.org/observations/96806336">https://www.inaturalist.org/observations/96806336</a>   |
| 200 | Circaetus gallicus | Short-toed Snake-eagle | 2020/10/10 | 1 | 0 | 21.39191181 | 83.19275410 | <a href="https://www.inaturalist.org/observations/80077650">https://www.inaturalist.org/observations/80077650</a>   |
| 201 | Circaetus gallicus | Short-toed Snake-eagle | 2019/5/24  | 1 | 0 | 21.41711410 | 86.60062490 | <a href="https://www.inaturalist.org/observations/97911944">https://www.inaturalist.org/observations/97911944</a>   |
| 202 | Circaetus gallicus | Short-toed Snake-eagle | 2022/2/13  | 1 | 0 | 21.43186667 | 69.94947667 | <a href="https://www.inaturalist.org/observations/120161726">https://www.inaturalist.org/observations/120161726</a> |
| 203 | Circaetus gallicus | Short-toed Snake-eagle | 2021/8/25  | 1 | 0 | 21.45803683 | 83.17291865 | <a href="https://www.inaturalist.org/observations/92514914">https://www.inaturalist.org/observations/92514914</a>   |
| 204 | Circaetus gallicus | Short-toed Snake-eagle | 2015/2/18  | 1 | 0 | 21.64170690 | 69.62926540 | <a href="https://www.inaturalist.org/observations/62785923">https://www.inaturalist.org/observations/62785923</a>   |
| 205 | Circaetus gallicus | Short-toed Snake-eagle | 2022/2/21  | 4 | 0 | 21.65334109 | 82.16322999 | <a href="https://www.inaturalist.org/observations/110650656">https://www.inaturalist.org/observations/110650656</a> |
| 206 | Circaetus gallicus | Short-toed Snake-eagle | 2020/11/13 | 1 | 0 | 21.83140370 | 76.34976123 | <a href="https://www.inaturalist.org/observations/64876596">https://www.inaturalist.org/observations/64876596</a>   |

|     |                           |                        |            |   |   |             |             |                                                                                                                     |
|-----|---------------------------|------------------------|------------|---|---|-------------|-------------|---------------------------------------------------------------------------------------------------------------------|
| 207 | <i>Circaetus gallicus</i> | Short-toed Snake-eagle | 2016/1/18  | 3 | 0 | 22.04260239 | 72.01924695 | <a href="https://www.inaturalist.org/observations/68093307">https://www.inaturalist.org/observations/68093307</a>   |
| 208 | <i>Circaetus gallicus</i> | Short-toed Snake-eagle | 2015/10/7  | 3 | 0 | 22.04410790 | 72.02028130 | <a href="https://www.inaturalist.org/observations/39919827">https://www.inaturalist.org/observations/39919827</a>   |
| 209 | <i>Circaetus gallicus</i> | Short-toed Snake-eagle | 2009/1/25  | 2 | 0 | 22.04410790 | 72.02028130 | <a href="https://www.inaturalist.org/observations/55011161">https://www.inaturalist.org/observations/55011161</a>   |
| 210 | <i>Circaetus gallicus</i> | Short-toed Snake-eagle | 2011/1/28  | 2 | 0 | 22.04410790 | 72.02028130 | <a href="https://www.inaturalist.org/observations/55253249">https://www.inaturalist.org/observations/55253249</a>   |
| 211 | <i>Circaetus gallicus</i> | Short-toed Snake-eagle | 2019/12/21 | 1 | 0 | 22.04410790 | 72.02028130 | <a href="https://www.inaturalist.org/observations/55904356">https://www.inaturalist.org/observations/55904356</a>   |
| 212 | <i>Circaetus gallicus</i> | Short-toed Snake-eagle | 2019/12/23 | 2 | 0 | 22.04410790 | 72.02028130 | <a href="https://www.inaturalist.org/observations/55905501">https://www.inaturalist.org/observations/55905501</a>   |
| 213 | <i>Circaetus gallicus</i> | Short-toed Snake-eagle | 2013/2/26  | 2 | 0 | 22.04529129 | 72.02342485 | <a href="https://www.inaturalist.org/observations/39897495">https://www.inaturalist.org/observations/39897495</a>   |
| 214 | <i>Circaetus gallicus</i> | Short-toed Snake-eagle | 2010/2/2   | 1 | 0 | 22.04800910 | 72.01644540 | <a href="https://www.inaturalist.org/observations/78230143">https://www.inaturalist.org/observations/78230143</a>   |
| 215 | <i>Circaetus gallicus</i> | Short-toed Snake-eagle | 2021/12/20 | 1 | 0 | 22.09258090 | 88.82248306 | <a href="https://www.inaturalist.org/observations/104028972">https://www.inaturalist.org/observations/104028972</a> |
| 216 | <i>Circaetus gallicus</i> | Short-toed Snake-eagle | 2018/11/22 | 3 | 0 | 22.10611094 | 81.79140642 | <a href="https://www.inaturalist.org/observations/18575830">https://www.inaturalist.org/observations/18575830</a>   |
| 217 | <i>Circaetus gallicus</i> | Short-toed Snake-eagle | 2021/10/31 | 2 | 0 | 22.16194453 | 73.48404955 | <a href="https://www.inaturalist.org/observations/100495579">https://www.inaturalist.org/observations/100495579</a> |
| 218 | <i>Circaetus gallicus</i> | Short-toed Snake-eagle | 2021/12/10 | 3 | 0 | 22.16820495 | 70.13425696 | <a href="https://www.inaturalist.org/observations/136771888">https://www.inaturalist.org/observations/136771888</a> |
| 219 | <i>Circaetus gallicus</i> | Short-toed Snake-eagle | 2021/1/1   | 1 | 0 | 22.17996020 | 73.47698428 | <a href="https://www.inaturalist.org/observations/67501131">https://www.inaturalist.org/observations/67501131</a>   |
| 220 | <i>Circaetus gallicus</i> | Short-toed Snake-eagle | 2019/10/13 | 1 | 0 | 22.24666460 | 82.02300320 | <a href="https://www.inaturalist.org/observations/59984924">https://www.inaturalist.org/observations/59984924</a>   |
| 221 | <i>Circaetus gallicus</i> | Short-toed Snake-eagle | 2021/12/9  | 2 | 0 | 22.42977635 | 72.47042466 | <a href="https://www.inaturalist.org/observations/102883082">https://www.inaturalist.org/observations/102883082</a> |
| 222 | <i>Circaetus gallicus</i> | Short-toed Snake-eagle | 2020/12/4  | 4 | 0 | 22.60259051 | 72.60465849 | <a href="https://www.inaturalist.org/observations/66378606">https://www.inaturalist.org/observations/66378606</a>   |
| 223 | <i>Circaetus gallicus</i> | Short-toed Snake-eagle | 2012/3/6   | 2 | 0 | 22.81944610 | 72.06344480 | <a href="https://www.inaturalist.org/observations/32858301">https://www.inaturalist.org/observations/32858301</a>   |
| 224 | <i>Circaetus gallicus</i> | Short-toed Snake-eagle | 2019/1/13  | 1 | 0 | 22.82094770 | 72.05718630 | <a href="https://www.inaturalist.org/observations/102230919">https://www.inaturalist.org/observations/102230919</a> |
| 225 | <i>Circaetus gallicus</i> | Short-toed Snake-eagle | 2019/11/17 | 2 | 0 | 22.83186456 | 72.05958860 | <a href="https://www.inaturalist.org/observations/56511148">https://www.inaturalist.org/observations/56511148</a>   |
| 226 | <i>Circaetus gallicus</i> | Short-toed Snake-eagle | 2020/2/11  | 1 | 0 | 22.84327399 | 72.13090897 | <a href="https://www.inaturalist.org/observations/72150934">https://www.inaturalist.org/observations/72150934</a>   |
| 227 | <i>Circaetus gallicus</i> | Short-toed Snake-eagle | 2020/2/11  | 1 | 0 | 22.84327399 | 72.13090897 | <a href="https://www.inaturalist.org/observations/72150946">https://www.inaturalist.org/observations/72150946</a>   |
| 228 | <i>Circaetus gallicus</i> | Short-toed Snake-eagle | 2021/1/31  | 1 | 0 | 22.84329570 | 72.06036200 | <a href="https://www.inaturalist.org/observations/69197058">https://www.inaturalist.org/observations/69197058</a>   |
| 229 | <i>Circaetus gallicus</i> | Short-toed Snake-eagle | 2021/1/31  | 1 | 0 | 22.84329570 | 72.06036200 | <a href="https://www.inaturalist.org/observations/69197060">https://www.inaturalist.org/observations/69197060</a>   |

|     |                    |                        |            |   |   |             |             |                                                                                                                     |
|-----|--------------------|------------------------|------------|---|---|-------------|-------------|---------------------------------------------------------------------------------------------------------------------|
| 230 | Circaetus gallicus | Short-toed Snake-eagle | 2021/1/31  | 1 | 0 | 22.84329570 | 72.06036200 | <a href="https://www.inaturalist.org/observations/69197064">https://www.inaturalist.org/observations/69197064</a>   |
| 231 | Circaetus gallicus | Short-toed Snake-eagle | 2021/5/20  | 1 | 0 | 22.92511803 | 83.01557701 | <a href="https://www.inaturalist.org/observations/79609699">https://www.inaturalist.org/observations/79609699</a>   |
| 232 | Circaetus gallicus | Short-toed Snake-eagle | 2021/9/21  | 1 | 0 | 22.96540043 | 83.03026613 | <a href="https://www.inaturalist.org/observations/95763268">https://www.inaturalist.org/observations/95763268</a>   |
| 233 | Circaetus gallicus | Short-toed Snake-eagle | 2019/11/28 | 2 | 0 | 22.99153436 | 87.00059191 | <a href="https://www.inaturalist.org/observations/102650915">https://www.inaturalist.org/observations/102650915</a> |
| 234 | Circaetus gallicus | Short-toed Snake-eagle | 2019/6/8   | 1 | 0 | 23.04401667 | 72.03721667 | <a href="https://www.inaturalist.org/observations/136019254">https://www.inaturalist.org/observations/136019254</a> |
| 235 | Circaetus gallicus | Short-toed Snake-eagle | 2019/4/9   | 2 | 0 | 23.20027740 | 86.12673230 | <a href="https://www.inaturalist.org/observations/22277395">https://www.inaturalist.org/observations/22277395</a>   |
| 236 | Circaetus gallicus | Short-toed Snake-eagle | 2022/9/26  | 2 | 0 | 23.21578500 | 68.85929833 | <a href="https://www.inaturalist.org/observations/136789491">https://www.inaturalist.org/observations/136789491</a> |
| 237 | Circaetus gallicus | Short-toed Snake-eagle | 2012/1/18  | 2 | 0 | 23.32121472 | 69.31540139 | <a href="https://www.inaturalist.org/observations/52541260">https://www.inaturalist.org/observations/52541260</a>   |
| 238 | Circaetus gallicus | Short-toed Snake-eagle | 2018/1/18  | 2 | 0 | 23.32425210 | 69.15066860 | <a href="https://www.inaturalist.org/observations/30343874">https://www.inaturalist.org/observations/30343874</a>   |
| 239 | Circaetus gallicus | Short-toed Snake-eagle | 2019/9/13  | 3 | 0 | 23.38782170 | 69.90322240 | <a href="https://www.inaturalist.org/observations/33119764">https://www.inaturalist.org/observations/33119764</a>   |
| 240 | Circaetus gallicus | Short-toed Snake-eagle | 2014/1/7   | 3 | 0 | 23.45871830 | 69.25975204 | <a href="https://www.inaturalist.org/observations/35926915">https://www.inaturalist.org/observations/35926915</a>   |
| 241 | Circaetus gallicus | Short-toed Snake-eagle | 2021/2/21  | 3 | 0 | 23.52044430 | 87.31192270 | <a href="https://www.inaturalist.org/observations/71065275">https://www.inaturalist.org/observations/71065275</a>   |
| 242 | Circaetus gallicus | Short-toed Snake-eagle | 2017/3/28  | 3 | 0 | 23.55373833 | 87.39683000 | <a href="https://www.inaturalist.org/observations/5902780">https://www.inaturalist.org/observations/5902780</a>     |
| 243 | Circaetus gallicus | Short-toed Snake-eagle | 2020/1/12  | 5 | 0 | 23.56778500 | 68.92416000 | <a href="https://www.inaturalist.org/observations/130202446">https://www.inaturalist.org/observations/130202446</a> |
| 244 | Circaetus gallicus | Short-toed Snake-eagle | 2009/5/24  | 2 | 0 | 23.72221060 | 81.02327100 | <a href="https://www.inaturalist.org/observations/55146095">https://www.inaturalist.org/observations/55146095</a>   |
| 245 | Circaetus gallicus | Short-toed Snake-eagle | 2018/2/8   | 1 | 0 | 24.04542860 | 70.14558050 | <a href="https://www.inaturalist.org/observations/102348779">https://www.inaturalist.org/observations/102348779</a> |
| 246 | Circaetus gallicus | Short-toed Snake-eagle | 2014/12/3  | 2 | 0 | 26.01732740 | 76.50257420 | <a href="https://www.inaturalist.org/observations/42070625">https://www.inaturalist.org/observations/42070625</a>   |
| 247 | Circaetus gallicus | Short-toed Snake-eagle | 2019/10/30 | 3 | 0 | 26.76956320 | 91.20852760 | <a href="https://www.inaturalist.org/observations/68256035">https://www.inaturalist.org/observations/68256035</a>   |
| 248 | Circaetus gallicus | Short-toed Snake-eagle | 2017/11/26 | 2 | 0 | 26.80446349 | 78.31861036 | <a href="https://www.inaturalist.org/observations/69975159">https://www.inaturalist.org/observations/69975159</a>   |
| 249 | Circaetus gallicus | Short-toed Snake-eagle | 2017/11/26 | 1 | 0 | 26.85383590 | 78.36806775 | <a href="https://www.inaturalist.org/observations/69975170">https://www.inaturalist.org/observations/69975170</a>   |
| 250 | Circaetus gallicus | Short-toed Snake-eagle | 2017/12/8  | 2 | 0 | 26.87675587 | 75.81630707 | <a href="https://www.inaturalist.org/observations/54140613">https://www.inaturalist.org/observations/54140613</a>   |
| 251 | Circaetus gallicus | Short-toed Snake-eagle | 2008/11/5  | 2 | 0 | 27.02644124 | 70.67429568 | <a href="https://www.inaturalist.org/observations/104025856">https://www.inaturalist.org/observations/104025856</a> |
| 252 | Circaetus gallicus | Short-toed Snake-eagle | 2016/12/20 | 1 | 0 | 27.78717810 | 74.37993156 | <a href="https://www.inaturalist.org/observations/65588455">https://www.inaturalist.org/observations/65588455</a>   |

|     |                    |                        |            |   |   |             |              |                                                                                                                     |
|-----|--------------------|------------------------|------------|---|---|-------------|--------------|---------------------------------------------------------------------------------------------------------------------|
| 253 | Circaetus gallicus | Short-toed Snake-eagle | 2019/9/16  | 4 | 0 | 27.80291306 | 74.43097724  | <a href="https://www.inaturalist.org/observations/66293150">https://www.inaturalist.org/observations/66293150</a>   |
| 254 | Circaetus gallicus | Short-toed Snake-eagle | 2019/4/28  | 2 | 0 | 28.37355940 | 77.17085110  | <a href="https://www.inaturalist.org/observations/33789727">https://www.inaturalist.org/observations/33789727</a>   |
| 255 | Circaetus gallicus | Short-toed Snake-eagle | 2019/10/20 | 1 | 0 | 28.37355940 | 77.17085110  | <a href="https://www.inaturalist.org/observations/34628188">https://www.inaturalist.org/observations/34628188</a>   |
| 256 | Circaetus gallicus | Short-toed Snake-eagle | 2021/10/23 | 1 | 0 | 29.53835162 | 106.62024850 | <a href="https://www.inaturalist.org/observations/100316450">https://www.inaturalist.org/observations/100316450</a> |
| 257 | Circaetus gallicus | Short-toed Snake-eagle | 2017/2/10  | 5 | 0 | 29.58315667 | 78.86410500  | <a href="https://www.inaturalist.org/observations/5231206">https://www.inaturalist.org/observations/5231206</a>     |
| 258 | Circaetus gallicus | Short-toed Snake-eagle | 2022/4/1   | 1 | 0 | 40.02908086 | 116.25641980 | <a href="https://www.inaturalist.org/observations/122050235">https://www.inaturalist.org/observations/122050235</a> |
| 259 | Circaetus gallicus | Short-toed Snake-eagle | 2021/9/21  | 4 | 0 | 40.18405533 | 116.68274730 | <a href="https://www.inaturalist.org/observations/95971206">https://www.inaturalist.org/observations/95971206</a>   |
| 260 | Circaetus gallicus | Short-toed Snake-eagle | 2019/10/7  | 1 | 0 | 40.28474333 | 116.73629000 | <a href="https://www.inaturalist.org/observations/34365014">https://www.inaturalist.org/observations/34365014</a>   |

| No | scientific name              | common name               | date       | NIA | NID | latitude   | longitude   | url                                                                                                                 |
|----|------------------------------|---------------------------|------------|-----|-----|------------|-------------|---------------------------------------------------------------------------------------------------------------------|
| 1  | Lalage melanoptera           | Black-headed Cuckooshrike | 2019/3/8   | 2   | 0   | 6.04769173 | 80.85928813 | <a href="https://www.inaturalist.org/observations/22160470">https://www.inaturalist.org/observations/22160470</a>   |
| 2  | Lalage melanoptera           | Black-headed Cuckooshrike | 2022/5/3   | 3   | 0   | 6.21075670 | 81.28375444 | <a href="https://www.inaturalist.org/observations/116824271">https://www.inaturalist.org/observations/116824271</a> |
| 3  | Lalage melanoptera           | Black-headed Cuckooshrike | 2019/10/23 | 3   | 0   | 6.22418210 | 80.11383690 | <a href="https://www.inaturalist.org/observations/35449724">https://www.inaturalist.org/observations/35449724</a>   |
| 4  | Lalage melanoptera           | Black-headed Cuckooshrike | 2020/2/15  | 2   | 0   | 6.22418210 | 80.11383690 | <a href="https://www.inaturalist.org/observations/38680019">https://www.inaturalist.org/observations/38680019</a>   |
| 5  | Lalage melanoptera           | Black-headed Cuckooshrike | 2019/7/27  | 3   | 0   | 6.23060167 | 80.11071667 | <a href="https://www.inaturalist.org/observations/29967685">https://www.inaturalist.org/observations/29967685</a>   |
| 6  | Lalage melanoptera           | Black-headed Cuckooshrike | 2019/8/12  | 3   | 0   | 6.31333056 | 81.46353333 | <a href="https://www.inaturalist.org/observations/32800815">https://www.inaturalist.org/observations/32800815</a>   |
| 7  | Lalage melanoptera           | Black-headed Cuckooshrike | 2013/11/25 | 5   | 0   | 6.35131787 | 81.43438310 | <a href="https://www.inaturalist.org/observations/6985914">https://www.inaturalist.org/observations/6985914</a>     |
| 8  | Lalage melanoptera           | Black-headed Cuckooshrike | 2022/1/2   | 3   | 0   | 6.40621172 | 80.02622017 | <a href="https://www.inaturalist.org/observations/105260480">https://www.inaturalist.org/observations/105260480</a> |
| 9  | Lalage melanoptera<br>svkesi | Black-headed Cuckooshrike | 2022/4/30  | 0   | 0   | 6.42833300 | 80.43861100 | <a href="https://www.inaturalist.org/observations/117371626">https://www.inaturalist.org/observations/117371626</a> |
| 10 | Lalage melanoptera           | Black-headed Cuckooshrike | 2017/12/24 | 4   | 0   | 6.43305149 | 80.41435658 | <a href="https://www.inaturalist.org/observations/10466413">https://www.inaturalist.org/observations/10466413</a>   |
| 11 | Lalage melanoptera           | Black-headed Cuckooshrike | 2018/3/7   | 4   | 0   | 6.45229500 | 80.30821333 | <a href="https://www.inaturalist.org/observations/10183086">https://www.inaturalist.org/observations/10183086</a>   |
| 12 | Lalage melanoptera           | Black-headed Cuckooshrike | 2021/11/6  | 2   | 0   | 6.69155500 | 79.96605000 | <a href="https://www.inaturalist.org/observations/100390326">https://www.inaturalist.org/observations/100390326</a> |
| 13 | Lalage melanoptera           | Black-headed Cuckooshrike | 2021/12/2  | 3   | 0   | 6.74757920 | 80.36864880 | <a href="https://www.inaturalist.org/observations/102766983">https://www.inaturalist.org/observations/102766983</a> |
| 14 | Lalage melanoptera           | Black-headed Cuckooshrike | 2022/2/3   | 2   | 0   | 7.05968636 | 80.33945493 | <a href="https://www.inaturalist.org/observations/106114888">https://www.inaturalist.org/observations/106114888</a> |
| 15 | Lalage melanoptera           | Black-headed Cuckooshrike | 2019/10/18 | 3   | 0   | 7.21444927 | 80.78309331 | <a href="https://www.inaturalist.org/observations/62020829">https://www.inaturalist.org/observations/62020829</a>   |
| 16 | Lalage melanoptera           | Black-headed Cuckooshrike | 2020/6/24  | 3   | 0   | 7.58468757 | 80.74738143 | <a href="https://www.inaturalist.org/observations/52429922">https://www.inaturalist.org/observations/52429922</a>   |
| 17 | Lalage melanoptera           | Black-headed Cuckooshrike | 2019/8/28  | 2   | 0   | 7.95593129 | 80.75742222 | <a href="https://www.inaturalist.org/observations/38164024">https://www.inaturalist.org/observations/38164024</a>   |
| 18 | Lalage melanoptera           | Black-headed Cuckooshrike | 2020/2/3   | 3   | 0   | 8.20963500 | 80.07423667 | <a href="https://www.inaturalist.org/observations/39206890">https://www.inaturalist.org/observations/39206890</a>   |
| 19 | Lalage melanoptera           | Black-headed Cuckooshrike | 2022/4/9   | 3   | 0   | 8.41473991 | 77.54756466 | <a href="https://www.inaturalist.org/observations/116247488">https://www.inaturalist.org/observations/116247488</a> |
| 20 | Lalage melanoptera           | Black-headed Cuckooshrike | 2022/4/9   | 2   | 0   | 8.41729559 | 77.46316411 | <a href="https://www.inaturalist.org/observations/116241805">https://www.inaturalist.org/observations/116241805</a> |
| 21 | Lalage melanoptera           | Black-headed Cuckooshrike | 2022/4/9   | 3   | 0   | 8.44348695 | 77.40810163 | <a href="https://www.inaturalist.org/observations/116241812">https://www.inaturalist.org/observations/116241812</a> |
| 22 | Lalage melanoptera           | Black-headed Cuckooshrike | 2021/11/11 | 2   | 0   | 8.53586136 | 77.59227391 | <a href="https://www.inaturalist.org/observations/104519329">https://www.inaturalist.org/observations/104519329</a> |



|    |                    |                           |            |   |   |             |             |                                                                                                                     |
|----|--------------------|---------------------------|------------|---|---|-------------|-------------|---------------------------------------------------------------------------------------------------------------------|
| 23 | Lalage melanoptera | Black-headed Cuckooshrike | 2022/4/9   | 2 | 0 | 8.55830932  | 77.58276558 | <a href="https://www.inaturalist.org/observations/116247490">https://www.inaturalist.org/observations/116247490</a> |
| 24 | Lalage melanoptera | Black-headed Cuckooshrike | 2019/12/15 | 1 | 0 | 8.65577000  | 77.44803200 | <a href="https://www.inaturalist.org/observations/56766371">https://www.inaturalist.org/observations/56766371</a>   |
| 25 | Lalage melanoptera | Black-headed Cuckooshrike | 2021/12/19 | 3 | 0 | 9.77905783  | 76.89396068 | <a href="https://www.inaturalist.org/observations/104653036">https://www.inaturalist.org/observations/104653036</a> |
| 26 | Lalage melanoptera | Black-headed Cuckooshrike | 2022/4/20  | 2 | 0 | 9.79193117  | 76.88041545 | <a href="https://www.inaturalist.org/observations/114318750">https://www.inaturalist.org/observations/114318750</a> |
| 27 | Lalage melanoptera | Black-headed Cuckooshrike | 2017/3/1   | 1 | 0 | 9.81380760  | 76.92973540 | <a href="https://www.inaturalist.org/observations/91655524">https://www.inaturalist.org/observations/91655524</a>   |
| 28 | Lalage melanoptera | Black-headed Cuckooshrike | 2018/12/15 | 1 | 0 | 9.88868643  | 76.72812668 | <a href="https://www.inaturalist.org/observations/91991778">https://www.inaturalist.org/observations/91991778</a>   |
| 29 | Lalage melanoptera | Black-headed Cuckooshrike | 2021/11/21 | 1 | 0 | 9.89555351  | 76.74879118 | <a href="https://www.inaturalist.org/observations/101639271">https://www.inaturalist.org/observations/101639271</a> |
| 30 | Lalage melanoptera | Black-headed Cuckooshrike | 2020/12/23 | 2 | 0 | 9.92520070  | 78.11977540 | <a href="https://www.inaturalist.org/observations/71801446">https://www.inaturalist.org/observations/71801446</a>   |
| 31 | Lalage melanoptera | Black-headed Cuckooshrike | 2021/1/4   | 2 | 0 | 10.02917766 | 76.35938575 | <a href="https://www.inaturalist.org/observations/67577588">https://www.inaturalist.org/observations/67577588</a>   |
| 32 | Lalage melanoptera | Black-headed Cuckooshrike | 2020/11/12 | 3 | 0 | 10.05003980 | 76.33892380 | <a href="https://www.inaturalist.org/observations/81687503">https://www.inaturalist.org/observations/81687503</a>   |
| 33 | Lalage melanoptera | Black-headed Cuckooshrike | 2020/12/12 | 1 | 0 | 10.11605249 | 76.67404146 | <a href="https://www.inaturalist.org/observations/66516983">https://www.inaturalist.org/observations/66516983</a>   |
| 34 | Lalage melanoptera | Black-headed Cuckooshrike | 2017/12/17 | 3 | 0 | 10.12067400 | 76.75534700 | <a href="https://www.inaturalist.org/observations/9914921">https://www.inaturalist.org/observations/9914921</a>     |
| 35 | Lalage melanoptera | Black-headed Cuckooshrike | 2022/7/2   | 2 | 0 | 10.33009875 | 77.20897477 | <a href="https://www.inaturalist.org/observations/126917490">https://www.inaturalist.org/observations/126917490</a> |
| 36 | Lalage melanoptera | Black-headed Cuckooshrike | 2019/6/9   | 3 | 0 | 10.54804333 | 76.26970167 | <a href="https://www.inaturalist.org/observations/29236162">https://www.inaturalist.org/observations/29236162</a>   |
| 37 | Lalage melanoptera | Black-headed Cuckooshrike | 2020/1/5   | 2 | 0 | 10.55153667 | 76.17567667 | <a href="https://www.inaturalist.org/observations/44104642">https://www.inaturalist.org/observations/44104642</a>   |
| 38 | Lalage melanoptera | Black-headed Cuckooshrike | 2020/4/4   | 3 | 0 | 10.61471850 | 76.19190216 | <a href="https://www.inaturalist.org/observations/48148577">https://www.inaturalist.org/observations/48148577</a>   |
| 39 | Lalage melanoptera | Black-headed Cuckooshrike | 2020/5/7   | 3 | 0 | 10.61582442 | 76.19349004 | <a href="https://www.inaturalist.org/observations/48353972">https://www.inaturalist.org/observations/48353972</a>   |
| 40 | Lalage melanoptera | Black-headed Cuckooshrike | 2016/12/17 | 1 | 0 | 10.72610380 | 76.47799770 | <a href="https://www.inaturalist.org/observations/64966292">https://www.inaturalist.org/observations/64966292</a>   |
| 41 | Lalage melanoptera | Black-headed Cuckooshrike | 2016/12/30 | 1 | 0 | 10.72610380 | 76.47799770 | <a href="https://www.inaturalist.org/observations/64969601">https://www.inaturalist.org/observations/64969601</a>   |
| 42 | Lalage melanoptera | Black-headed Cuckooshrike | 2019/3/23  | 4 | 0 | 10.73968860 | 76.15427312 | <a href="https://www.inaturalist.org/observations/102406271">https://www.inaturalist.org/observations/102406271</a> |
| 43 | Lalage melanoptera | Black-headed Cuckooshrike | 2016/12/29 | 3 | 0 | 10.74751762 | 76.46718671 | <a href="https://www.inaturalist.org/observations/87028930">https://www.inaturalist.org/observations/87028930</a>   |
| 44 | Lalage melanoptera | Black-headed Cuckooshrike | 2016/12/29 | 3 | 0 | 10.74751762 | 76.46718671 | <a href="https://www.inaturalist.org/observations/87028933">https://www.inaturalist.org/observations/87028933</a>   |
| 45 | Lalage melanoptera | Black-headed Cuckooshrike | 2016/12/28 | 4 | 0 | 10.74751762 | 76.46718671 | <a href="https://www.inaturalist.org/observations/87028934">https://www.inaturalist.org/observations/87028934</a>   |

|    |                    |                           |            |   |   |             |             |                                                                                                                     |
|----|--------------------|---------------------------|------------|---|---|-------------|-------------|---------------------------------------------------------------------------------------------------------------------|
| 46 | Lalage melanoptera | Black-headed Cuckooshrike | 2020/11/22 | 2 | 0 | 10.76858611 | 76.13324560 | <a href="https://www.inaturalist.org/observations/65394428">https://www.inaturalist.org/observations/65394428</a>   |
| 47 | Lalage melanoptera | Black-headed Cuckooshrike | 2022/5/21  | 3 | 0 | 10.82095249 | 76.50323468 | <a href="https://www.inaturalist.org/observations/120468925">https://www.inaturalist.org/observations/120468925</a> |
| 48 | Lalage melanoptera | Black-headed Cuckooshrike | 2016/2/2   | 2 | 0 | 10.83280000 | 76.71358100 | <a href="https://www.inaturalist.org/observations/7275802">https://www.inaturalist.org/observations/7275802</a>     |
| 49 | Lalage melanoptera | Black-headed Cuckooshrike | 2022/3/17  | 2 | 0 | 10.86624972 | 76.64740575 | <a href="https://www.inaturalist.org/observations/115064305">https://www.inaturalist.org/observations/115064305</a> |
| 50 | Lalage melanoptera | Black-headed Cuckooshrike | 2022/1/28  | 5 | 0 | 10.88637042 | 76.06631041 | <a href="https://www.inaturalist.org/observations/105719925">https://www.inaturalist.org/observations/105719925</a> |
| 51 | Lalage melanoptera | Black-headed Cuckooshrike | 2020/1/24  | 3 | 0 | 11.29809437 | 77.55831130 | <a href="https://www.inaturalist.org/observations/37916967">https://www.inaturalist.org/observations/37916967</a>   |
| 52 | Lalage melanoptera | Black-headed Cuckooshrike | 2019/1/20  | 4 | 0 | 11.33337330 | 76.12402240 | <a href="https://www.inaturalist.org/observations/67400558">https://www.inaturalist.org/observations/67400558</a>   |
| 53 | Lalage melanoptera | Black-headed Cuckooshrike | 2019/2/17  | 4 | 0 | 11.51557976 | 76.69623391 | <a href="https://www.inaturalist.org/observations/20965177">https://www.inaturalist.org/observations/20965177</a>   |
| 54 | Lalage melanoptera | Black-headed Cuckooshrike | 2013/11/7  | 3 | 0 | 11.57823125 | 76.65370137 | <a href="https://www.inaturalist.org/observations/9896931">https://www.inaturalist.org/observations/9896931</a>     |
| 55 | Lalage melanoptera | Black-headed Cuckooshrike | 2018/12/30 | 3 | 0 | 11.58161700 | 76.99886700 | <a href="https://www.inaturalist.org/observations/19727016">https://www.inaturalist.org/observations/19727016</a>   |
| 56 | Lalage melanoptera | Black-headed Cuckooshrike | 2019/4/29  | 2 | 0 | 11.61032770 | 76.08280870 | <a href="https://www.inaturalist.org/observations/136678640">https://www.inaturalist.org/observations/136678640</a> |
| 57 | Lalage melanoptera | Black-headed Cuckooshrike | 2016/12/24 | 4 | 0 | 11.70320600 | 76.08339990 | <a href="https://www.inaturalist.org/observations/42768359">https://www.inaturalist.org/observations/42768359</a>   |
| 58 | Lalage melanoptera | Black-headed Cuckooshrike | 2020/12/27 | 2 | 0 | 11.72111128 | 78.18351779 | <a href="https://www.inaturalist.org/observations/67128294">https://www.inaturalist.org/observations/67128294</a>   |
| 59 | Lalage melanoptera | Black-headed Cuckooshrike | 2021/12/18 | 1 | 0 | 11.73370072 | 78.17800988 | <a href="https://www.inaturalist.org/observations/103636877">https://www.inaturalist.org/observations/103636877</a> |
| 60 | Lalage melanoptera | Black-headed Cuckooshrike | 2017/3/12  | 1 | 0 | 11.73446034 | 78.20203878 | <a href="https://www.inaturalist.org/observations/54738655">https://www.inaturalist.org/observations/54738655</a>   |
| 61 | Lalage melanoptera | Black-headed Cuckooshrike | 2017/11/12 | 2 | 0 | 11.73561617 | 78.20203878 | <a href="https://www.inaturalist.org/observations/70237362">https://www.inaturalist.org/observations/70237362</a>   |
| 62 | Lalage melanoptera | Black-headed Cuckooshrike | 2021/12/5  | 2 | 0 | 11.74613203 | 78.17025661 | <a href="https://www.inaturalist.org/observations/102598470">https://www.inaturalist.org/observations/102598470</a> |
| 63 | Lalage melanoptera | Black-headed Cuckooshrike | 2019/10/19 | 1 | 0 | 11.94468464 | 75.38493812 | <a href="https://www.inaturalist.org/observations/46397132">https://www.inaturalist.org/observations/46397132</a>   |
| 64 | Lalage melanoptera | Black-headed Cuckooshrike | 2019/12/16 | 5 | 0 | 11.94468464 | 75.38493812 | <a href="https://www.inaturalist.org/observations/82530917">https://www.inaturalist.org/observations/82530917</a>   |
| 65 | Lalage melanoptera | Black-headed Cuckooshrike | 2018/10/28 | 3 | 0 | 11.94468464 | 75.38493812 | <a href="https://www.inaturalist.org/observations/82531692">https://www.inaturalist.org/observations/82531692</a>   |
| 66 | Lalage melanoptera | Black-headed Cuckooshrike | 2020/1/26  | 2 | 0 | 11.98427631 | 75.39945457 | <a href="https://www.inaturalist.org/observations/44399034">https://www.inaturalist.org/observations/44399034</a>   |
| 67 | Lalage melanoptera | Black-headed Cuckooshrike | 2021/12/12 | 3 | 0 | 12.16529924 | 75.42718928 | <a href="https://www.inaturalist.org/observations/119993769">https://www.inaturalist.org/observations/119993769</a> |
| 68 | Lalage melanoptera | Black-headed Cuckooshrike | 2021/5/29  | 1 | 0 | 12.16649623 | 76.60628610 | <a href="https://www.inaturalist.org/observations/80699579">https://www.inaturalist.org/observations/80699579</a>   |

|    |                    |                           |            |   |   |             |             |                                                                                                                     |
|----|--------------------|---------------------------|------------|---|---|-------------|-------------|---------------------------------------------------------------------------------------------------------------------|
| 69 | Lalage melanoptera | Black-headed Cuckooshrike | 2021/9/18  | 1 | 0 | 12.16778836 | 76.45547750 | <a href="https://www.inaturalist.org/observations/95257115">https://www.inaturalist.org/observations/95257115</a>   |
| 70 | Lalage melanoptera | Black-headed Cuckooshrike | 2022/9/3   | 3 | 0 | 12.16778836 | 76.45547750 | <a href="https://www.inaturalist.org/observations/133585901">https://www.inaturalist.org/observations/133585901</a> |
| 71 | Lalage melanoptera | Black-headed Cuckooshrike | 2008/7/6   | 1 | 0 | 12.19673986 | 76.51225639 | <a href="https://www.inaturalist.org/observations/85766517">https://www.inaturalist.org/observations/85766517</a>   |
| 72 | Lalage melanoptera | Black-headed Cuckooshrike | 2022/6/25  | 4 | 0 | 12.19673986 | 76.51225639 | <a href="https://www.inaturalist.org/observations/123335123">https://www.inaturalist.org/observations/123335123</a> |
| 73 | Lalage melanoptera | Black-headed Cuckooshrike | 2021/2/28  | 1 | 0 | 12.21247353 | 76.63342537 | <a href="https://www.inaturalist.org/observations/81272959">https://www.inaturalist.org/observations/81272959</a>   |
| 74 | Lalage melanoptera | Black-headed Cuckooshrike | 2018/4/30  | 2 | 0 | 12.22920841 | 79.05311788 | <a href="https://www.inaturalist.org/observations/96058412">https://www.inaturalist.org/observations/96058412</a>   |
| 75 | Lalage melanoptera | Black-headed Cuckooshrike | 2020/5/3   | 0 | 0 | 12.24855207 | 76.59218967 | <a href="https://www.inaturalist.org/observations/96767833">https://www.inaturalist.org/observations/96767833</a>   |
| 76 | Lalage melanoptera | Black-headed Cuckooshrike | 2022/6/23  | 1 | 0 | 12.26269942 | 76.56762058 | <a href="https://www.inaturalist.org/observations/123083698">https://www.inaturalist.org/observations/123083698</a> |
| 77 | Lalage melanoptera | Black-headed Cuckooshrike | 2011/2/12  | 2 | 0 | 12.26937200 | 76.61197800 | <a href="https://www.inaturalist.org/observations/94578862">https://www.inaturalist.org/observations/94578862</a>   |
| 78 | Lalage melanoptera | Black-headed Cuckooshrike | 2012/1/7   | 1 | 0 | 12.26937200 | 76.61197800 | <a href="https://www.inaturalist.org/observations/94686903">https://www.inaturalist.org/observations/94686903</a>   |
| 79 | Lalage melanoptera | Black-headed Cuckooshrike | 2019/2/25  | 3 | 0 | 12.27557087 | 76.61324968 | <a href="https://www.inaturalist.org/observations/69991990">https://www.inaturalist.org/observations/69991990</a>   |
| 80 | Lalage melanoptera | Black-headed Cuckooshrike | 2010/2/1   | 1 | 0 | 12.30944394 | 76.63499543 | <a href="https://www.inaturalist.org/observations/61450072">https://www.inaturalist.org/observations/61450072</a>   |
| 81 | Lalage melanoptera | Black-headed Cuckooshrike | 2022/7/17  | 3 | 0 | 12.32573500 | 76.39763210 | <a href="https://www.inaturalist.org/observations/126608189">https://www.inaturalist.org/observations/126608189</a> |
| 82 | Lalage melanoptera | Black-headed Cuckooshrike | 2022/6/18  | 2 | 0 | 12.33234113 | 76.38626494 | <a href="https://www.inaturalist.org/observations/122285844">https://www.inaturalist.org/observations/122285844</a> |
| 83 | Lalage melanoptera | Black-headed Cuckooshrike | 2010/11/1  | 2 | 0 | 12.39310129 | 77.86590734 | <a href="https://www.inaturalist.org/observations/64289419">https://www.inaturalist.org/observations/64289419</a>   |
| 84 | Lalage melanoptera | Black-headed Cuckooshrike | 2009/8/18  | 2 | 0 | 12.41666670 | 77.75000000 | <a href="https://www.inaturalist.org/observations/64204030">https://www.inaturalist.org/observations/64204030</a>   |
| 85 | Lalage melanoptera | Black-headed Cuckooshrike | 2021/10/21 | 3 | 0 | 12.51453412 | 77.63349207 | <a href="https://www.inaturalist.org/observations/124502437">https://www.inaturalist.org/observations/124502437</a> |
| 86 | Lalage melanoptera | Black-headed Cuckooshrike | 2022/8/5   | 3 | 0 | 12.51576500 | 77.63719667 | <a href="https://www.inaturalist.org/observations/129513349">https://www.inaturalist.org/observations/129513349</a> |
| 87 | Lalage melanoptera | Black-headed Cuckooshrike | 2017/2/10  | 2 | 0 | 12.54545970 | 79.85606940 | <a href="https://www.inaturalist.org/observations/92332971">https://www.inaturalist.org/observations/92332971</a>   |
| 88 | Lalage melanoptera | Black-headed Cuckooshrike | 2017/2/10  | 2 | 0 | 12.54545970 | 79.85606940 | <a href="https://www.inaturalist.org/observations/92332979">https://www.inaturalist.org/observations/92332979</a>   |
| 89 | Lalage melanoptera | Black-headed Cuckooshrike | 2010/4/23  | 6 | 0 | 12.54639500 | 79.85412600 | <a href="http://www.inaturalist.org/observations/4143949">http://www.inaturalist.org/observations/4143949</a>       |
| 90 | Lalage melanoptera | Black-headed Cuckooshrike | 2014/4/6   | 4 | 0 | 12.56859000 | 79.98574050 | <a href="https://www.inaturalist.org/observations/22500278">https://www.inaturalist.org/observations/22500278</a>   |
| 91 | Lalage melanoptera | Black-headed Cuckooshrike | 2015/9/13  | 4 | 0 | 12.68545160 | 77.66349480 | <a href="https://www.inaturalist.org/observations/68095431">https://www.inaturalist.org/observations/68095431</a>   |

|     |                    |                           |            |   |   |             |             |                                                                                                                     |
|-----|--------------------|---------------------------|------------|---|---|-------------|-------------|---------------------------------------------------------------------------------------------------------------------|
| 92  | Lalage melanoptera | Black-headed Cuckooshrike | 2020/11/4  | 1 | 0 | 12.81385331 | 76.94609644 | <a href="https://www.inaturalist.org/observations/97217290">https://www.inaturalist.org/observations/97217290</a>   |
| 93  | Lalage melanoptera | Black-headed Cuckooshrike | 2020/12/30 | 2 | 0 | 12.82634681 | 79.37718273 | <a href="https://www.inaturalist.org/observations/73090995">https://www.inaturalist.org/observations/73090995</a>   |
| 94  | Lalage melanoptera | Black-headed Cuckooshrike | 2020/11/24 | 5 | 0 | 12.83379651 | 79.10982279 | <a href="https://www.inaturalist.org/observations/73001486">https://www.inaturalist.org/observations/73001486</a>   |
| 95  | Lalage melanoptera | Black-headed Cuckooshrike | 2020/12/18 | 2 | 0 | 12.84198704 | 80.17380304 | <a href="https://www.inaturalist.org/observations/67621202">https://www.inaturalist.org/observations/67621202</a>   |
| 96  | Lalage melanoptera | Black-headed Cuckooshrike | 2020/12/30 | 2 | 0 | 12.85009513 | 79.25417397 | <a href="https://www.inaturalist.org/observations/73090984">https://www.inaturalist.org/observations/73090984</a>   |
| 97  | Lalage melanoptera | Black-headed Cuckooshrike | 2019/3/3   | 3 | 0 | 12.85414192 | 77.50864282 | <a href="https://www.inaturalist.org/observations/21018194">https://www.inaturalist.org/observations/21018194</a>   |
| 98  | Lalage melanoptera | Black-headed Cuckooshrike | 2020/2/23  | 1 | 0 | 12.85431470 | 77.50994530 | <a href="https://www.inaturalist.org/observations/54838333">https://www.inaturalist.org/observations/54838333</a>   |
| 99  | Lalage melanoptera | Black-headed Cuckooshrike | 2022/1/2   | 1 | 0 | 12.85529794 | 77.50802483 | <a href="https://www.inaturalist.org/observations/104173328">https://www.inaturalist.org/observations/104173328</a> |
| 100 | Lalage melanoptera | Black-headed Cuckooshrike | 2021/3/21  | 2 | 0 | 12.85718650 | 77.50891100 | <a href="https://www.inaturalist.org/observations/71692512">https://www.inaturalist.org/observations/71692512</a>   |
| 101 | Lalage melanoptera | Black-headed Cuckooshrike | 2018/10/19 | 1 | 0 | 12.87414820 | 75.76445320 | <a href="https://www.inaturalist.org/observations/65005762">https://www.inaturalist.org/observations/65005762</a>   |
| 102 | Lalage melanoptera | Black-headed Cuckooshrike | 2018/10/19 | 1 | 0 | 12.87414820 | 75.76445320 | <a href="https://www.inaturalist.org/observations/65005771">https://www.inaturalist.org/observations/65005771</a>   |
| 103 | Lalage melanoptera | Black-headed Cuckooshrike | 2021/12/21 | 2 | 0 | 12.87508952 | 75.76269367 | <a href="https://www.inaturalist.org/observations/103678576">https://www.inaturalist.org/observations/103678576</a> |
| 104 | Lalage melanoptera | Black-headed Cuckooshrike | 2020/10/31 | 1 | 0 | 12.87894620 | 77.52977930 | <a href="https://www.inaturalist.org/observations/63871119">https://www.inaturalist.org/observations/63871119</a>   |
| 105 | Lalage melanoptera | Black-headed Cuckooshrike | 2021/10/16 | 2 | 0 | 12.88032549 | 77.52918998 | <a href="https://www.inaturalist.org/observations/98359294">https://www.inaturalist.org/observations/98359294</a>   |
| 106 | Lalage melanoptera | Black-headed Cuckooshrike | 2020/2/14  | 2 | 0 | 12.94326167 | 77.50829000 | <a href="https://www.inaturalist.org/observations/39013981">https://www.inaturalist.org/observations/39013981</a>   |
| 107 | Lalage melanoptera | Black-headed Cuckooshrike | 2021/1/2   | 2 | 0 | 12.95023600 | 74.86877440 | <a href="https://www.inaturalist.org/observations/67505190">https://www.inaturalist.org/observations/67505190</a>   |
| 108 | Lalage melanoptera | Black-headed Cuckooshrike | 2022/5/1   | 3 | 0 | 12.95040480 | 77.50206169 | <a href="https://www.inaturalist.org/observations/129296021">https://www.inaturalist.org/observations/129296021</a> |
| 109 | Lalage melanoptera | Black-headed Cuckooshrike | 2013/11/26 | 4 | 0 | 12.96101903 | 80.11075234 | <a href="https://www.inaturalist.org/observations/22602048">https://www.inaturalist.org/observations/22602048</a>   |
| 110 | Lalage melanoptera | Black-headed Cuckooshrike | 2021/12/17 | 1 | 0 | 12.96297327 | 76.83475620 | <a href="https://www.inaturalist.org/observations/103194529">https://www.inaturalist.org/observations/103194529</a> |
| 111 | Lalage melanoptera | Black-headed Cuckooshrike | 2013/11/26 | 1 | 0 | 12.96376290 | 80.11462210 | <a href="https://www.inaturalist.org/observations/63087536">https://www.inaturalist.org/observations/63087536</a>   |
| 112 | Lalage melanoptera | Black-headed Cuckooshrike | 2018/10/11 | 6 | 0 | 12.98868237 | 77.66251646 | <a href="https://www.inaturalist.org/observations/18329987">https://www.inaturalist.org/observations/18329987</a>   |
| 113 | Lalage melanoptera | Black-headed Cuckooshrike | 2019/2/19  | 4 | 0 | 12.99149290 | 80.23369070 | <a href="https://www.inaturalist.org/observations/24939521">https://www.inaturalist.org/observations/24939521</a>   |
| 114 | Lalage melanoptera | Black-headed Cuckooshrike | 2019/2/19  | 5 | 0 | 13.00153957 | 80.23902172 | <a href="https://www.inaturalist.org/observations/30877843">https://www.inaturalist.org/observations/30877843</a>   |

|     |                    |                           |            |   |   |             |             |                                                                                                                     |
|-----|--------------------|---------------------------|------------|---|---|-------------|-------------|---------------------------------------------------------------------------------------------------------------------|
| 115 | Lalage melanoptera | Black-headed Cuckooshrike | 2020/1/26  | 3 | 0 | 13.00370190 | 80.22934300 | <a href="https://www.inaturalist.org/observations/58037179">https://www.inaturalist.org/observations/58037179</a>   |
| 116 | Lalage melanoptera | Black-headed Cuckooshrike | 2022/1/9   | 2 | 0 | 13.05675785 | 77.53577136 | <a href="https://www.inaturalist.org/observations/104638623">https://www.inaturalist.org/observations/104638623</a> |
| 117 | Lalage melanoptera | Black-headed Cuckooshrike | 2018/2/12  | 5 | 0 | 13.05751775 | 77.63933327 | <a href="https://www.inaturalist.org/observations/28922789">https://www.inaturalist.org/observations/28922789</a>   |
| 118 | Lalage melanoptera | Black-headed Cuckooshrike | 2021/1/23  | 2 | 0 | 13.06045580 | 77.65708400 | <a href="https://www.inaturalist.org/observations/68684633">https://www.inaturalist.org/observations/68684633</a>   |
| 119 | Lalage melanoptera | Black-headed Cuckooshrike | 2020/3/15  | 2 | 0 | 13.06394704 | 77.75041815 | <a href="https://www.inaturalist.org/observations/97309982">https://www.inaturalist.org/observations/97309982</a>   |
| 120 | Lalage melanoptera | Black-headed Cuckooshrike | 2021/2/14  | 2 | 0 | 13.12305562 | 79.91195273 | <a href="https://www.inaturalist.org/observations/83612568">https://www.inaturalist.org/observations/83612568</a>   |
| 121 | Lalage melanoptera | Black-headed Cuckooshrike | 2022/3/27  | 3 | 0 | 13.13279100 | 79.11375600 | <a href="https://www.inaturalist.org/observations/129565240">https://www.inaturalist.org/observations/129565240</a> |
| 122 | Lalage melanoptera | Black-headed Cuckooshrike | 2017/1/15  | 1 | 0 | 13.14914667 | 80.05789630 | <a href="https://www.inaturalist.org/observations/45849465">https://www.inaturalist.org/observations/45849465</a>   |
| 123 | Lalage melanoptera | Black-headed Cuckooshrike | 2017/1/15  | 1 | 0 | 13.14914667 | 80.05789630 | <a href="https://www.inaturalist.org/observations/45849466">https://www.inaturalist.org/observations/45849466</a>   |
| 124 | Lalage melanoptera | Black-headed Cuckooshrike | 2021/3/10  | 2 | 0 | 13.15485260 | 79.03846100 | <a href="https://www.inaturalist.org/observations/90643854">https://www.inaturalist.org/observations/90643854</a>   |
| 125 | Lalage melanoptera | Black-headed Cuckooshrike | 2021/3/28  | 2 | 0 | 13.36347299 | 74.82027948 | <a href="https://www.inaturalist.org/observations/73080959">https://www.inaturalist.org/observations/73080959</a>   |
| 126 | Lalage melanoptera | Black-headed Cuckooshrike | 2014/11/15 | 1 | 0 | 13.43762420 | 75.88892081 | <a href="https://www.inaturalist.org/observations/66578394">https://www.inaturalist.org/observations/66578394</a>   |
| 127 | Lalage melanoptera | Black-headed Cuckooshrike | 2021/1/4   | 1 | 0 | 13.47774650 | 75.21125850 | <a href="https://www.inaturalist.org/observations/81534334">https://www.inaturalist.org/observations/81534334</a>   |
| 128 | Lalage melanoptera | Black-headed Cuckooshrike | 2022/3/28  | 1 | 0 | 13.51737667 | 79.30073333 | <a href="https://www.inaturalist.org/observations/111898605">https://www.inaturalist.org/observations/111898605</a> |
| 129 | Lalage melanoptera | Black-headed Cuckooshrike | 2022/3/13  | 1 | 0 | 13.62963034 | 79.39805749 | <a href="https://www.inaturalist.org/observations/111060366">https://www.inaturalist.org/observations/111060366</a> |
| 130 | Lalage melanoptera | Black-headed Cuckooshrike | 2022/2/21  | 3 | 0 | 13.65045972 | 79.33133441 | <a href="https://www.inaturalist.org/observations/109821255">https://www.inaturalist.org/observations/109821255</a> |
| 131 | Lalage melanoptera | Black-headed Cuckooshrike | 2021/5/2   | 2 | 0 | 13.65462686 | 79.26898129 | <a href="https://www.inaturalist.org/observations/76480548">https://www.inaturalist.org/observations/76480548</a>   |
| 132 | Lalage melanoptera | Black-headed Cuckooshrike | 2022/2/21  | 1 | 0 | 13.65613000 | 79.33511000 | <a href="https://www.inaturalist.org/observations/112250384">https://www.inaturalist.org/observations/112250384</a> |
| 133 | Lalage melanoptera | Black-headed Cuckooshrike | 2019/2/17  | 1 | 0 | 13.65793887 | 79.48242778 | <a href="https://www.inaturalist.org/observations/55892159">https://www.inaturalist.org/observations/55892159</a>   |
| 134 | Lalage melanoptera | Black-headed Cuckooshrike | 2019/1/14  | 1 | 0 | 13.65911635 | 79.48097763 | <a href="https://www.inaturalist.org/observations/55805461">https://www.inaturalist.org/observations/55805461</a>   |
| 135 | Lalage melanoptera | Black-headed Cuckooshrike | 2019/1/14  | 2 | 0 | 13.65911635 | 79.48097763 | <a href="https://www.inaturalist.org/observations/55805467">https://www.inaturalist.org/observations/55805467</a>   |
| 136 | Lalage melanoptera | Black-headed Cuckooshrike | 2018/10/30 | 3 | 0 | 14.16699567 | 77.80914947 | <a href="https://www.inaturalist.org/observations/88441174">https://www.inaturalist.org/observations/88441174</a>   |
| 137 | Lalage melanoptera | Black-headed Cuckooshrike | 2022/3/3   | 1 | 0 | 14.24802993 | 74.65264443 | <a href="https://www.inaturalist.org/observations/107834785">https://www.inaturalist.org/observations/107834785</a> |

|     |                    |                           |            |   |   |             |             |                                                                                                                     |
|-----|--------------------|---------------------------|------------|---|---|-------------|-------------|---------------------------------------------------------------------------------------------------------------------|
| 138 | Lalage melanoptera | Black-headed Cuckooshrike | 2022/1/6   | 4 | 0 | 14.81080840 | 74.17420520 | <a href="https://www.inaturalist.org/observations/121138723">https://www.inaturalist.org/observations/121138723</a> |
| 139 | Lalage melanoptera | Black-headed Cuckooshrike | 2013/2/10  | 3 | 0 | 14.86194578 | 74.44021750 | <a href="https://www.inaturalist.org/observations/35523872">https://www.inaturalist.org/observations/35523872</a>   |
| 140 | Lalage melanoptera | Black-headed Cuckooshrike | 2020/3/18  | 4 | 0 | 15.21376257 | 73.93572807 | <a href="https://www.inaturalist.org/observations/40168090">https://www.inaturalist.org/observations/40168090</a>   |
| 141 | Lalage melanoptera | Black-headed Cuckooshrike | 2020/4/18  | 3 | 0 | 15.21376257 | 73.93572807 | <a href="https://www.inaturalist.org/observations/42738476">https://www.inaturalist.org/observations/42738476</a>   |
| 142 | Lalage melanoptera | Black-headed Cuckooshrike | 2015/4/22  | 1 | 0 | 15.23611910 | 74.61728190 | <a href="https://www.inaturalist.org/observations/63088228">https://www.inaturalist.org/observations/63088228</a>   |
| 143 | Lalage melanoptera | Black-headed Cuckooshrike | 2020/12/10 | 2 | 0 | 15.23611910 | 74.61728190 | <a href="https://www.inaturalist.org/observations/122536665">https://www.inaturalist.org/observations/122536665</a> |
| 144 | Lalage melanoptera | Black-headed Cuckooshrike | 2014/11/16 | 2 | 0 | 15.33390150 | 74.28835360 | <a href="https://www.inaturalist.org/observations/55464150">https://www.inaturalist.org/observations/55464150</a>   |
| 145 | Lalage melanoptera | Black-headed Cuckooshrike | 2019/1/30  | 1 | 0 | 15.33501320 | 76.46002400 | <a href="https://www.inaturalist.org/observations/84849980">https://www.inaturalist.org/observations/84849980</a>   |
| 146 | Lalage melanoptera | Black-headed Cuckooshrike | 2021/11/26 | 0 | 0 | 15.58707550 | 73.82110700 | <a href="https://www.inaturalist.org/observations/101990989">https://www.inaturalist.org/observations/101990989</a> |
| 147 | Lalage melanoptera | Black-headed Cuckooshrike | 2016/9/19  | 2 | 0 | 16.07208524 | 73.65253740 | <a href="https://www.inaturalist.org/observations/60168581">https://www.inaturalist.org/observations/60168581</a>   |
| 148 | Lalage melanoptera | Black-headed Cuckooshrike | 2018/7/7   | 2 | 0 | 16.15918490 | 74.81561990 | <a href="https://www.inaturalist.org/observations/90502479">https://www.inaturalist.org/observations/90502479</a>   |
| 149 | Lalage melanoptera | Black-headed Cuckooshrike | 2020/12/17 | 1 | 0 | 16.19418500 | 77.38355197 | <a href="https://www.inaturalist.org/observations/81808727">https://www.inaturalist.org/observations/81808727</a>   |
| 150 | Lalage melanoptera | Black-headed Cuckooshrike | 2020/10/17 | 1 | 0 | 16.26566341 | 73.68010919 | <a href="https://www.inaturalist.org/observations/63060147">https://www.inaturalist.org/observations/63060147</a>   |
| 151 | Lalage melanoptera | Black-headed Cuckooshrike | 2020/10/26 | 2 | 0 | 16.26937579 | 73.67842559 | <a href="https://www.inaturalist.org/observations/63626275">https://www.inaturalist.org/observations/63626275</a>   |
| 152 | Lalage melanoptera | Black-headed Cuckooshrike | 2020/10/25 | 2 | 0 | 16.26937579 | 73.67842559 | <a href="https://www.inaturalist.org/observations/63626304">https://www.inaturalist.org/observations/63626304</a>   |
| 153 | Lalage melanoptera | Black-headed Cuckooshrike | 2015/1/24  | 1 | 0 | 16.50496381 | 79.27801648 | <a href="https://www.inaturalist.org/observations/92108490">https://www.inaturalist.org/observations/92108490</a>   |
| 154 | Lalage melanoptera | Black-headed Cuckooshrike | 2021/12/25 | 3 | 0 | 16.53580545 | 81.49850350 | <a href="https://www.inaturalist.org/observations/103736905">https://www.inaturalist.org/observations/103736905</a> |
| 155 | Lalage melanoptera | Black-headed Cuckooshrike | 2020/11/22 | 1 | 0 | 16.55493600 | 80.72975710 | <a href="https://www.inaturalist.org/observations/92664060">https://www.inaturalist.org/observations/92664060</a>   |
| 156 | Lalage melanoptera | Black-headed Cuckooshrike | 2021/12/24 | 4 | 0 | 16.57596720 | 79.31240220 | <a href="https://www.inaturalist.org/observations/105613307">https://www.inaturalist.org/observations/105613307</a> |
| 157 | Lalage melanoptera | Black-headed Cuckooshrike | 2020/5/30  | 2 | 0 | 17.31196560 | 77.86358360 | <a href="https://www.inaturalist.org/observations/63701266">https://www.inaturalist.org/observations/63701266</a>   |
| 158 | Lalage melanoptera | Black-headed Cuckooshrike | 2021/1/24  | 3 | 0 | 17.31959955 | 81.44251607 | <a href="https://www.inaturalist.org/observations/114612179">https://www.inaturalist.org/observations/114612179</a> |
| 159 | Lalage melanoptera | Black-headed Cuckooshrike | 2019/2/24  | 3 | 0 | 17.32689501 | 74.76560354 | <a href="https://www.inaturalist.org/observations/38324987">https://www.inaturalist.org/observations/38324987</a>   |
| 160 | Lalage melanoptera | Black-headed Cuckooshrike | 2019/11/3  | 2 | 0 | 17.59833550 | 81.71354750 | <a href="https://www.inaturalist.org/observations/89071820">https://www.inaturalist.org/observations/89071820</a>   |

|     |                    |                           |            |   |   |             |             |                                                                                                                     |
|-----|--------------------|---------------------------|------------|---|---|-------------|-------------|---------------------------------------------------------------------------------------------------------------------|
| 161 | Lalage melanoptera | Black-headed Cuckooshrike | 2019/10/12 | 1 | 0 | 17.65991880 | 75.90639060 | <a href="https://www.inaturalist.org/observations/56517803">https://www.inaturalist.org/observations/56517803</a>   |
| 162 | Lalage melanoptera | Black-headed Cuckooshrike | 2019/11/3  | 1 | 0 | 17.67067090 | 81.70914260 | <a href="https://www.inaturalist.org/observations/92889118">https://www.inaturalist.org/observations/92889118</a>   |
| 163 | Lalage melanoptera | Black-headed Cuckooshrike | 2019/11/2  | 1 | 0 | 17.67067090 | 81.70914260 | <a href="https://www.inaturalist.org/observations/92889119">https://www.inaturalist.org/observations/92889119</a>   |
| 164 | Lalage melanoptera | Black-headed Cuckooshrike | 2020/12/25 | 3 | 0 | 17.68292450 | 73.97297640 | <a href="https://www.inaturalist.org/observations/70934052">https://www.inaturalist.org/observations/70934052</a>   |
| 165 | Lalage melanoptera | Black-headed Cuckooshrike | 2022/1/9   | 3 | 0 | 17.99094737 | 82.98013229 | <a href="https://www.inaturalist.org/observations/110830870">https://www.inaturalist.org/observations/110830870</a> |
| 166 | Lalage melanoptera | Black-headed Cuckooshrike | 2020/10/27 | 2 | 0 | 18.12495100 | 74.04622600 | <a href="https://www.inaturalist.org/observations/63691994">https://www.inaturalist.org/observations/63691994</a>   |
| 167 | Lalage melanoptera | Black-headed Cuckooshrike | 2022/1/21  | 1 | 0 | 18.14082544 | 73.79044633 | <a href="https://www.inaturalist.org/observations/105973861">https://www.inaturalist.org/observations/105973861</a> |
| 168 | Lalage melanoptera | Black-headed Cuckooshrike | 2021/6/17  | 1 | 0 | 18.41239332 | 73.95275641 | <a href="https://www.inaturalist.org/observations/137231336">https://www.inaturalist.org/observations/137231336</a> |
| 169 | Lalage melanoptera | Black-headed Cuckooshrike | 2020/10/23 | 3 | 0 | 18.46556424 | 73.92355979 | <a href="https://www.inaturalist.org/observations/63297297">https://www.inaturalist.org/observations/63297297</a>   |
| 170 | Lalage melanoptera | Black-headed Cuckooshrike | 2017/9/5   | 3 | 0 | 18.52353610 | 73.81538300 | <a href="https://www.inaturalist.org/observations/7791858">https://www.inaturalist.org/observations/7791858</a>     |
| 171 | Lalage melanoptera | Black-headed Cuckooshrike | 2022/7/8   | 2 | 0 | 18.53266154 | 73.81603847 | <a href="https://www.inaturalist.org/observations/125943285">https://www.inaturalist.org/observations/125943285</a> |
| 172 | Lalage melanoptera | Black-headed Cuckooshrike | 2022/6/20  | 4 | 0 | 19.02478167 | 77.95642500 | <a href="https://www.inaturalist.org/observations/122677424">https://www.inaturalist.org/observations/122677424</a> |
| 173 | Lalage melanoptera | Black-headed Cuckooshrike | 2022/6/20  | 4 | 0 | 19.02478167 | 77.95642500 | <a href="https://www.inaturalist.org/observations/125167201">https://www.inaturalist.org/observations/125167201</a> |
| 174 | Lalage melanoptera | Black-headed Cuckooshrike | 2022/6/20  | 4 | 0 | 19.02502333 | 77.95594000 | <a href="https://www.inaturalist.org/observations/125168577">https://www.inaturalist.org/observations/125168577</a> |
| 175 | Lalage melanoptera | Black-headed Cuckooshrike | 2021/10/31 | 3 | 0 | 19.16376731 | 73.31106415 | <a href="https://www.inaturalist.org/observations/132284246">https://www.inaturalist.org/observations/132284246</a> |
| 176 | Lalage melanoptera | Black-headed Cuckooshrike | 2021/10/31 | 3 | 0 | 19.16376731 | 73.31106415 | <a href="https://www.inaturalist.org/observations/132284247">https://www.inaturalist.org/observations/132284247</a> |
| 177 | Lalage melanoptera | Black-headed Cuckooshrike | 2018/1/17  | 2 | 0 | 20.93867058 | 80.12381713 | <a href="https://www.inaturalist.org/observations/117433456">https://www.inaturalist.org/observations/117433456</a> |
| 178 | Lalage melanoptera | Black-headed Cuckooshrike | 2021/5/5   | 1 | 0 | 21.03234974 | 81.45293042 | <a href="https://www.inaturalist.org/observations/77577216">https://www.inaturalist.org/observations/77577216</a>   |
| 179 | Lalage melanoptera | Black-headed Cuckooshrike | 2020/2/23  | 1 | 0 | 21.05614833 | 75.88949500 | <a href="https://www.inaturalist.org/observations/51029996">https://www.inaturalist.org/observations/51029996</a>   |
| 180 | Lalage melanoptera | Black-headed Cuckooshrike | 2020/2/6   | 3 | 0 | 21.19133830 | 80.74753426 | <a href="https://www.inaturalist.org/observations/41518990">https://www.inaturalist.org/observations/41518990</a>   |
| 181 | Lalage melanoptera | Black-headed Cuckooshrike | 2022/5/16  | 2 | 0 | 21.19333770 | 80.76210201 | <a href="https://www.inaturalist.org/observations/120312534">https://www.inaturalist.org/observations/120312534</a> |
| 182 | Lalage melanoptera | Black-headed Cuckooshrike | 2021/7/1   | 2 | 0 | 21.19381942 | 80.76047190 | <a href="https://www.inaturalist.org/observations/88261931">https://www.inaturalist.org/observations/88261931</a>   |
| 183 | Lalage melanoptera | Black-headed Cuckooshrike | 2022/8/23  | 1 | 0 | 21.19839423 | 80.76510239 | <a href="https://www.inaturalist.org/observations/135329645">https://www.inaturalist.org/observations/135329645</a> |

|     |                    |                           |            |   |   |             |             |                                                                                                                     |
|-----|--------------------|---------------------------|------------|---|---|-------------|-------------|---------------------------------------------------------------------------------------------------------------------|
| 184 | Lalage melanoptera | Black-headed Cuckooshrike | 2021/4/14  | 2 | 0 | 21.20017598 | 80.76348066 | <a href="https://www.inaturalist.org/observations/73953139">https://www.inaturalist.org/observations/73953139</a>   |
| 185 | Lalage melanoptera | Black-headed Cuckooshrike | 2022/6/3   | 3 | 0 | 21.58683800 | 79.28303000 | <a href="https://www.inaturalist.org/observations/121056813">https://www.inaturalist.org/observations/121056813</a> |
| 186 | Lalage melanoptera | Black-headed Cuckooshrike | 2020/3/22  | 2 | 0 | 21.67185790 | 87.57640324 | <a href="https://www.inaturalist.org/observations/110268177">https://www.inaturalist.org/observations/110268177</a> |
| 187 | Lalage melanoptera | Black-headed Cuckooshrike | 2020/3/22  | 1 | 0 | 21.67195161 | 87.57493330 | <a href="https://www.inaturalist.org/observations/61387220">https://www.inaturalist.org/observations/61387220</a>   |
| 188 | Lalage melanoptera | Black-headed Cuckooshrike | 2020/1/26  | 2 | 0 | 21.67196758 | 87.57714353 | <a href="https://www.inaturalist.org/observations/110268027">https://www.inaturalist.org/observations/110268027</a> |
| 189 | Lalage melanoptera | Black-headed Cuckooshrike | 2020/5/12  | 2 | 0 | 21.80700898 | 83.31102484 | <a href="https://www.inaturalist.org/observations/79921540">https://www.inaturalist.org/observations/79921540</a>   |
| 190 | Lalage melanoptera | Black-headed Cuckooshrike | 2022/3/11  | 2 | 0 | 21.83585950 | 88.88420110 | <a href="https://www.inaturalist.org/observations/132030679">https://www.inaturalist.org/observations/132030679</a> |
| 191 | Lalage melanoptera | Black-headed Cuckooshrike | 2018/12/30 | 5 | 0 | 22.02953833 | 88.73575000 | <a href="https://www.inaturalist.org/observations/19931370">https://www.inaturalist.org/observations/19931370</a>   |
| 192 | Lalage melanoptera | Black-headed Cuckooshrike | 2022/5/13  | 1 | 0 | 22.16616954 | 70.13339758 | <a href="https://www.inaturalist.org/observations/136659374">https://www.inaturalist.org/observations/136659374</a> |
| 193 | Lalage melanoptera | Black-headed Cuckooshrike | 2021/8/12  | 0 | 0 | 22.25915000 | 82.34174833 | <a href="https://www.inaturalist.org/observations/93174006">https://www.inaturalist.org/observations/93174006</a>   |
| 194 | Lalage melanoptera | Black-headed Cuckooshrike | 2021/10/17 | 1 | 0 | 22.76750666 | 88.38834543 | <a href="https://www.inaturalist.org/observations/103739437">https://www.inaturalist.org/observations/103739437</a> |
| 195 | Lalage melanoptera | Black-headed Cuckooshrike | 2020/10/12 | 1 | 0 | 22.80416040 | 88.33392340 | <a href="https://www.inaturalist.org/observations/97994017">https://www.inaturalist.org/observations/97994017</a>   |
| 196 | Lalage melanoptera | Black-headed Cuckooshrike | 2014/12/18 | 4 | 0 | 22.94731200 | 88.51573400 | <a href="http://www.inaturalist.org/observations/1140802">http://www.inaturalist.org/observations/1140802</a>       |
| 197 | Lalage melanoptera | Black-headed Cuckooshrike | 2019/12/1  | 2 | 0 | 22.96007828 | 88.53103349 | <a href="https://www.inaturalist.org/observations/97880441">https://www.inaturalist.org/observations/97880441</a>   |
| 198 | Lalage melanoptera | Black-headed Cuckooshrike | 2020/9/3   | 0 | 0 | 22.98895327 | 87.00716525 | <a href="https://www.inaturalist.org/observations/58726704">https://www.inaturalist.org/observations/58726704</a>   |
| 199 | Lalage melanoptera | Black-headed Cuckooshrike | 2018/1/16  | 3 | 0 | 22.98988911 | 87.00776014 | <a href="https://www.inaturalist.org/observations/13134753">https://www.inaturalist.org/observations/13134753</a>   |
| 200 | Lalage melanoptera | Black-headed Cuckooshrike | 2019/3/31  | 4 | 0 | 23.25136170 | 88.59443660 | <a href="https://www.inaturalist.org/observations/40806840">https://www.inaturalist.org/observations/40806840</a>   |
| 201 | Lalage melanoptera | Black-headed Cuckooshrike | 2021/4/11  | 3 | 0 | 23.52044430 | 87.31192270 | <a href="https://www.inaturalist.org/observations/75551972">https://www.inaturalist.org/observations/75551972</a>   |
| 202 | Lalage melanoptera | Black-headed Cuckooshrike | 2016/6/22  | 3 | 0 | 23.60778840 | 87.44863080 | <a href="https://www.inaturalist.org/observations/6112198">https://www.inaturalist.org/observations/6112198</a>     |
| 203 | Lalage melanoptera | Black-headed Cuckooshrike | 2019/4/22  | 2 | 0 | 23.65129442 | 87.34541225 | <a href="https://www.inaturalist.org/observations/22935241">https://www.inaturalist.org/observations/22935241</a>   |
| 204 | Lalage melanoptera | Black-headed Cuckooshrike | 2017/5/9   | 5 | 0 | 23.65682800 | 87.28363000 | <a href="https://www.inaturalist.org/observations/6178680">https://www.inaturalist.org/observations/6178680</a>     |
| 205 | Lalage melanoptera | Black-headed Cuckooshrike | 2016/12/27 | 2 | 0 | 24.07827454 | 88.69165298 | <a href="https://www.inaturalist.org/observations/117834851">https://www.inaturalist.org/observations/117834851</a> |



| No | scientific name                      | common name  | date       | NIA | NID | latitude   | longitude   | url                                                                                                                 |
|----|--------------------------------------|--------------|------------|-----|-----|------------|-------------|---------------------------------------------------------------------------------------------------------------------|
| 1  | Eudynamys scolopaceus                | Western Koel | 2022/2/28  | 2   | 0   | 5.94127890 | 80.46820430 | <a href="https://www.inaturalist.org/observations/109635132">https://www.inaturalist.org/observations/109635132</a> |
| 2  | Eudynamys scolopaceus                | Western Koel | 2022/2/26  | 1   | 0   | 5.94139628 | 80.46831159 | <a href="https://www.inaturalist.org/observations/109630196">https://www.inaturalist.org/observations/109630196</a> |
| 3  | Eudynamys scolopaceus<br>scolopaceus | Western Koel | 2019/9/7   | 4   | 0   | 5.96768407 | 80.45085613 | <a href="https://www.inaturalist.org/observations/69296601">https://www.inaturalist.org/observations/69296601</a>   |
| 4  | Eudynamys scolopaceus                | Western Koel | 2022/2/7   | 1   | 0   | 6.00416388 | 80.31829167 | <a href="https://www.inaturalist.org/observations/106308177">https://www.inaturalist.org/observations/106308177</a> |
| 5  | Eudynamys scolopaceus                | Western Koel | 2019/12/21 | 5   | 0   | 6.01542177 | 80.24746043 | <a href="https://www.inaturalist.org/observations/90329869">https://www.inaturalist.org/observations/90329869</a>   |
| 6  | Eudynamys scolopaceus                | Western Koel | 2019/7/31  | 3   | 0   | 6.01616698 | 80.31770860 | <a href="https://www.inaturalist.org/observations/51822627">https://www.inaturalist.org/observations/51822627</a>   |
| 7  | Eudynamys scolopaceus                | Western Koel | 2010/11/14 | 3   | 0   | 6.03245034 | 80.21632645 | <a href="https://www.inaturalist.org/observations/9172297">https://www.inaturalist.org/observations/9172297</a>     |
| 8  | Eudynamys scolopaceus                | Western Koel | 2019/3/16  | 3   | 0   | 6.04716270 | 80.85598908 | <a href="https://www.inaturalist.org/observations/22418413">https://www.inaturalist.org/observations/22418413</a>   |
| 9  | Eudynamys scolopaceus                | Western Koel | 2019/3/8   | 3   | 0   | 6.04795483 | 80.85778430 | <a href="https://www.inaturalist.org/observations/22145691">https://www.inaturalist.org/observations/22145691</a>   |
| 10 | Eudynamys scolopaceus                | Western Koel | 2014/2/18  | 4   | 0   | 6.13946760 | 80.10628610 | <a href="https://www.inaturalist.org/observations/39273176">https://www.inaturalist.org/observations/39273176</a>   |
| 11 | Eudynamys scolopaceus                | Western Koel | 2019/11/22 | 5   | 0   | 6.22418199 | 80.11383690 | <a href="https://www.inaturalist.org/observations/36091222">https://www.inaturalist.org/observations/36091222</a>   |
| 12 | Eudynamys scolopaceus                | Western Koel | 2019/8/25  | 5   | 0   | 6.23066050 | 80.11072590 | <a href="https://www.inaturalist.org/observations/33748351">https://www.inaturalist.org/observations/33748351</a>   |
| 13 | Eudynamys scolopaceus                | Western Koel | 2019/11/29 | 5   | 0   | 6.28734615 | 81.29162202 | <a href="https://www.inaturalist.org/observations/37303904">https://www.inaturalist.org/observations/37303904</a>   |
| 14 | Eudynamys scolopaceus                | Western Koel | 2017/12/30 | 3   | 0   | 6.29096325 | 81.26761793 | <a href="https://www.inaturalist.org/observations/14434741">https://www.inaturalist.org/observations/14434741</a>   |
| 15 | Eudynamys scolopaceus                | Western Koel | 2022/2/22  | 1   | 0   | 6.29332167 | 81.29230167 | <a href="https://www.inaturalist.org/observations/107526044">https://www.inaturalist.org/observations/107526044</a> |
| 16 | Eudynamys scolopaceus                | Western Koel | 2017/12/30 | 3   | 0   | 6.29352270 | 81.26774670 | <a href="https://www.inaturalist.org/observations/14434742">https://www.inaturalist.org/observations/14434742</a>   |
| 17 | Eudynamys scolopaceus                | Western Koel | 2014/4/20  | 4   | 0   | 6.31130419 | 80.03229240 | <a href="https://www.inaturalist.org/observations/19172427">https://www.inaturalist.org/observations/19172427</a>   |
| 18 | Eudynamys scolopaceus<br>scolopaceus | Western Koel | 2022/4/27  | 3   | 0   | 6.31255320 | 81.40243271 | <a href="https://www.inaturalist.org/observations/116687234">https://www.inaturalist.org/observations/116687234</a> |
| 19 | Eudynamys scolopaceus                | Western Koel | 2012/8/22  | 4   | 0   | 6.32070600 | 80.85654200 | <a href="https://www.inaturalist.org/observations/18679043">https://www.inaturalist.org/observations/18679043</a>   |
| 20 | Eudynamys scolopaceus                | Western Koel | 2012/8/22  | 4   | 0   | 6.32070600 | 80.85654200 | <a href="https://www.inaturalist.org/observations/18679056">https://www.inaturalist.org/observations/18679056</a>   |
| 21 | Eudynamys scolopaceus                | Western Koel | 2019/9/6   | 4   | 0   | 6.34364595 | 80.55751584 | <a href="https://www.inaturalist.org/observations/68984908">https://www.inaturalist.org/observations/68984908</a>   |
| 22 | Eudynamys scolopaceus                | Western Koel | 2019/10/9  | 3   | 0   | 6.41848280 | 80.82393800 | <a href="https://www.inaturalist.org/observations/36669550">https://www.inaturalist.org/observations/36669550</a>   |

|    |                              |              |            |   |   |            |             |                                                                                                                     |
|----|------------------------------|--------------|------------|---|---|------------|-------------|---------------------------------------------------------------------------------------------------------------------|
| 23 | <i>Eudynamys scolopaceus</i> | Western Koel | 2015/10/2  | 5 | 0 | 6.41938095 | 80.81301868 | <a href="https://www.inaturalist.org/observations/21463238">https://www.inaturalist.org/observations/21463238</a>   |
| 24 | <i>Eudynamys scolopaceus</i> | Western Koel | 2019/9/3   | 3 | 0 | 6.42534513 | 80.85742638 | <a href="https://www.inaturalist.org/observations/67834200">https://www.inaturalist.org/observations/67834200</a>   |
| 25 | <i>Eudynamys scolopaceus</i> | Western Koel | 2019/9/3   | 4 | 0 | 6.42613374 | 80.85765470 | <a href="https://www.inaturalist.org/observations/67640945">https://www.inaturalist.org/observations/67640945</a>   |
| 26 | <i>Eudynamys scolopaceus</i> | Western Koel | 2019/9/4   | 5 | 0 | 6.42618205 | 80.85649464 | <a href="https://www.inaturalist.org/observations/68369709">https://www.inaturalist.org/observations/68369709</a>   |
| 27 | <i>Eudynamys scolopaceus</i> | Western Koel | 2012/12/11 | 6 | 0 | 6.42678642 | 81.30804420 | <a href="https://www.inaturalist.org/observations/54634035">https://www.inaturalist.org/observations/54634035</a>   |
| 28 | <i>Eudynamys scolopaceus</i> | Western Koel | 2021/12/29 | 2 | 0 | 6.43827806 | 79.99178859 | <a href="https://www.inaturalist.org/observations/105157424">https://www.inaturalist.org/observations/105157424</a> |
| 29 | <i>Eudynamys scolopaceus</i> | Western Koel | 2015/1/22  | 5 | 0 | 6.44327500 | 80.89322100 | <a href="https://www.inaturalist.org/observations/35163314">https://www.inaturalist.org/observations/35163314</a>   |
| 30 | <i>Eudynamys scolopaceus</i> | Western Koel | 2016/4/4   | 3 | 0 | 6.45395746 | 80.89614630 | <a href="https://www.inaturalist.org/observations/127153660">https://www.inaturalist.org/observations/127153660</a> |
| 31 | <i>Eudynamys scolopaceus</i> | Western Koel | 2020/4/26  | 4 | 0 | 6.47383790 | 79.99199950 | <a href="https://www.inaturalist.org/observations/43590875">https://www.inaturalist.org/observations/43590875</a>   |
| 32 | <i>Eudynamys scolopaceus</i> | Western Koel | 2018/10/27 | 2 | 0 | 6.47467500 | 81.22877500 | <a href="https://www.inaturalist.org/observations/52174098">https://www.inaturalist.org/observations/52174098</a>   |
| 33 | <i>Eudynamys scolopaceus</i> | Western Koel | 2021/12/6  | 2 | 0 | 6.52469802 | 80.88317592 | <a href="https://www.inaturalist.org/observations/102600942">https://www.inaturalist.org/observations/102600942</a> |
| 34 | <i>Eudynamys scolopaceus</i> | Western Koel | 2017/7/28  | 4 | 0 | 6.52828165 | 80.93024565 | <a href="https://www.inaturalist.org/observations/21384023">https://www.inaturalist.org/observations/21384023</a>   |
| 35 | <i>Eudynamys scolopaceus</i> | Western Koel | 2020/5/2   | 7 | 0 | 6.60163391 | 79.95267637 | <a href="https://www.inaturalist.org/observations/46440501">https://www.inaturalist.org/observations/46440501</a>   |
| 36 | <i>Eudynamys scolopaceus</i> | Western Koel | 2020/5/2   | 7 | 0 | 6.60163391 | 79.95267637 | <a href="https://www.inaturalist.org/observations/46440637">https://www.inaturalist.org/observations/46440637</a>   |
| 37 | <i>Eudynamys scolopaceus</i> | Western Koel | 2020/4/2   | 5 | 0 | 6.60173370 | 79.95270660 | <a href="https://www.inaturalist.org/observations/41339237">https://www.inaturalist.org/observations/41339237</a>   |
| 38 | <i>Eudynamys scolopaceus</i> | Western Koel | 2020/12/23 | 4 | 0 | 6.72134667 | 81.78935333 | <a href="https://www.inaturalist.org/observations/69553863">https://www.inaturalist.org/observations/69553863</a>   |
| 39 | <i>Eudynamys scolopaceus</i> | Western Koel | 2019/3/8   | 4 | 0 | 6.73925515 | 79.89383246 | <a href="https://www.inaturalist.org/observations/21085924">https://www.inaturalist.org/observations/21085924</a>   |
| 40 | <i>Eudynamys scolopaceus</i> | Western Koel | 2021/1/2   | 3 | 0 | 6.75495560 | 79.95004770 | <a href="https://www.inaturalist.org/observations/67466628">https://www.inaturalist.org/observations/67466628</a>   |
| 41 | <i>Eudynamys scolopaceus</i> | Western Koel | 2022/8/25  | 1 | 0 | 6.76470716 | 79.88696274 | <a href="https://www.inaturalist.org/observations/132295969">https://www.inaturalist.org/observations/132295969</a> |
| 42 | <i>Eudynamys scolopaceus</i> | Western Koel | 2020/4/18  | 3 | 0 | 6.76478715 | 79.94655088 | <a href="https://www.inaturalist.org/observations/42453771">https://www.inaturalist.org/observations/42453771</a>   |
| 43 | <i>Eudynamys scolopaceus</i> | Western Koel | 2020/4/22  | 4 | 0 | 6.83050807 | 79.88008305 | <a href="https://www.inaturalist.org/observations/43274014">https://www.inaturalist.org/observations/43274014</a>   |
| 44 | <i>Eudynamys scolopaceus</i> | Western Koel | 2021/1/15  | 3 | 0 | 6.83184432 | 79.86633559 | <a href="https://www.inaturalist.org/observations/92880124">https://www.inaturalist.org/observations/92880124</a>   |
| 45 | <i>Eudynamys scolopaceus</i> | Western Koel | 2021/1/10  | 6 | 0 | 6.83647709 | 80.09691414 | <a href="https://www.inaturalist.org/observations/68007983">https://www.inaturalist.org/observations/68007983</a>   |

|    |                                      |              |            |   |   |            |             |                                                                                                                     |
|----|--------------------------------------|--------------|------------|---|---|------------|-------------|---------------------------------------------------------------------------------------------------------------------|
| 46 | Eudynamys scolopaceus                | Western Koel | 2021/1/10  | 5 | 0 | 6.83650555 | 80.09690318 | <a href="https://www.inaturalist.org/observations/68007981">https://www.inaturalist.org/observations/68007981</a>   |
| 47 | Eudynamys scolopaceus                | Western Koel | 2021/3/16  | 4 | 0 | 6.84522740 | 79.98896640 | <a href="https://www.inaturalist.org/observations/71354522">https://www.inaturalist.org/observations/71354522</a>   |
| 48 | Eudynamys scolopaceus                | Western Koel | 2021/8/1   | 6 | 0 | 6.84544167 | 79.98915000 | <a href="https://www.inaturalist.org/observations/89449092">https://www.inaturalist.org/observations/89449092</a>   |
| 49 | Eudynamys scolopaceus                | Western Koel | 2022/1/12  | 8 | 0 | 6.84592527 | 80.10277902 | <a href="https://www.inaturalist.org/observations/104861712">https://www.inaturalist.org/observations/104861712</a> |
| 50 | Eudynamys scolopaceus<br>scolopaceus | Western Koel | 2020/5/1   | 2 | 0 | 6.84898240 | 79.95636685 | <a href="https://www.inaturalist.org/observations/44461827">https://www.inaturalist.org/observations/44461827</a>   |
| 51 | Eudynamys scolopaceus                | Western Koel | 2007/1/27  | 3 | 0 | 6.85683500 | 79.87471167 | <a href="https://www.inaturalist.org/observations/43421813">https://www.inaturalist.org/observations/43421813</a>   |
| 52 | Eudynamys scolopaceus                | Western Koel | 2019/4/12  | 4 | 0 | 6.85866900 | 79.92537900 | <a href="https://www.inaturalist.org/observations/22388157">https://www.inaturalist.org/observations/22388157</a>   |
| 53 | Eudynamys scolopaceus                | Western Koel | 2015/1/27  | 5 | 0 | 6.86298992 | 79.90738352 | <a href="https://www.inaturalist.org/observations/100067777">https://www.inaturalist.org/observations/100067777</a> |
| 54 | Eudynamys scolopaceus                | Western Koel | 2022/1/2   | 2 | 0 | 6.87903436 | 79.99040431 | <a href="https://www.inaturalist.org/observations/108640213">https://www.inaturalist.org/observations/108640213</a> |
| 55 | Eudynamys scolopaceus                | Western Koel | 2022/2/27  | 3 | 0 | 6.88001147 | 79.92943784 | <a href="https://www.inaturalist.org/observations/107530948">https://www.inaturalist.org/observations/107530948</a> |
| 56 | Eudynamys scolopaceus                | Western Koel | 2022/2/13  | 2 | 0 | 6.88758575 | 79.94790137 | <a href="https://www.inaturalist.org/observations/107414402">https://www.inaturalist.org/observations/107414402</a> |
| 57 | Eudynamys scolopaceus                | Western Koel | 2022/9/25  | 2 | 0 | 6.88932253 | 79.93767196 | <a href="https://www.inaturalist.org/observations/136399494">https://www.inaturalist.org/observations/136399494</a> |
| 58 | Eudynamys scolopaceus                | Western Koel | 2021/1/12  | 4 | 0 | 6.89045069 | 79.88334892 | <a href="https://www.inaturalist.org/observations/67963036">https://www.inaturalist.org/observations/67963036</a>   |
| 59 | Eudynamys scolopaceus                | Western Koel | 2021/12/25 | 2 | 0 | 6.89492558 | 79.97512003 | <a href="https://www.inaturalist.org/observations/103639773">https://www.inaturalist.org/observations/103639773</a> |
| 60 | Eudynamys scolopaceus                | Western Koel | 2020/11/1  | 4 | 0 | 6.89594204 | 79.86608360 | <a href="https://www.inaturalist.org/observations/65523513">https://www.inaturalist.org/observations/65523513</a>   |
| 61 | Eudynamys scolopaceus                | Western Koel | 2022/7/8   | 3 | 0 | 6.90406812 | 79.88660647 | <a href="https://www.inaturalist.org/observations/125405255">https://www.inaturalist.org/observations/125405255</a> |
| 62 | Eudynamys scolopaceus                | Western Koel | 2022/6/28  | 4 | 0 | 6.90412294 | 79.88670008 | <a href="https://www.inaturalist.org/observations/123965753">https://www.inaturalist.org/observations/123965753</a> |
| 63 | Eudynamys scolopaceus                | Western Koel | 2022/7/10  | 4 | 0 | 6.90462627 | 79.88634970 | <a href="https://www.inaturalist.org/observations/125753582">https://www.inaturalist.org/observations/125753582</a> |
| 64 | Eudynamys scolopaceus                | Western Koel | 2020/11/16 | 3 | 0 | 6.91024167 | 79.87543667 | <a href="https://www.inaturalist.org/observations/64990739">https://www.inaturalist.org/observations/64990739</a>   |
| 65 | Eudynamys scolopaceus                | Western Koel | 2020/5/13  | 5 | 0 | 6.91574060 | 79.87412470 | <a href="https://www.inaturalist.org/observations/45760497">https://www.inaturalist.org/observations/45760497</a>   |
| 66 | Eudynamys scolopaceus                | Western Koel | 2020/4/24  | 4 | 0 | 6.91575355 | 79.87414079 | <a href="https://www.inaturalist.org/observations/45271983">https://www.inaturalist.org/observations/45271983</a>   |
| 67 | Eudynamys scolopaceus                | Western Koel | 2020/4/24  | 5 | 0 | 6.91575986 | 79.87414062 | <a href="https://www.inaturalist.org/observations/45271984">https://www.inaturalist.org/observations/45271984</a>   |
| 68 | Eudynamys scolopaceus                | Western Koel | 2020/3/1   | 6 | 0 | 6.91576252 | 79.87411934 | <a href="https://www.inaturalist.org/observations/45271422">https://www.inaturalist.org/observations/45271422</a>   |

|    |                              |              |            |   |   |            |             |                                                                                                                     |
|----|------------------------------|--------------|------------|---|---|------------|-------------|---------------------------------------------------------------------------------------------------------------------|
| 69 | <i>Eudynamys scolopaceus</i> | Western Koel | 2020/5/9   | 4 | 0 | 6.91580053 | 79.87415202 | <a href="https://www.inaturalist.org/observations/45339162">https://www.inaturalist.org/observations/45339162</a>   |
| 70 | <i>Eudynamys scolopaceus</i> | Western Koel | 2020/11/6  | 5 | 0 | 6.91603667 | 79.87400833 | <a href="https://www.inaturalist.org/observations/64280121">https://www.inaturalist.org/observations/64280121</a>   |
| 71 | <i>Eudynamys scolopaceus</i> | Western Koel | 2020/11/4  | 4 | 0 | 6.91610333 | 79.87403000 | <a href="https://www.inaturalist.org/observations/64170175">https://www.inaturalist.org/observations/64170175</a>   |
| 72 | <i>Eudynamys scolopaceus</i> | Western Koel | 2020/11/10 | 4 | 0 | 6.91612500 | 79.87405333 | <a href="https://www.inaturalist.org/observations/64591414">https://www.inaturalist.org/observations/64591414</a>   |
| 73 | <i>Eudynamys scolopaceus</i> | Western Koel | 2021/4/15  | 5 | 0 | 6.91659089 | 79.86821500 | <a href="https://www.inaturalist.org/observations/75322521">https://www.inaturalist.org/observations/75322521</a>   |
| 74 | <i>Eudynamys scolopaceus</i> | Western Koel | 2020/4/23  | 4 | 0 | 6.91877005 | 79.99489367 | <a href="https://www.inaturalist.org/observations/42972731">https://www.inaturalist.org/observations/42972731</a>   |
| 75 | <i>Eudynamys scolopaceus</i> | Western Koel | 2020/4/26  | 3 | 0 | 6.91966587 | 79.98661052 | <a href="https://www.inaturalist.org/observations/43560490">https://www.inaturalist.org/observations/43560490</a>   |
| 76 | <i>Eudynamys scolopaceus</i> | Western Koel | 2022/8/24  | 3 | 0 | 6.93397103 | 79.92867999 | <a href="https://www.inaturalist.org/observations/132111520">https://www.inaturalist.org/observations/132111520</a> |
| 77 | <i>Eudynamys scolopaceus</i> | Western Koel | 2011/1/20  | 4 | 0 | 6.99570773 | 80.40568719 | <a href="https://www.inaturalist.org/observations/57827251">https://www.inaturalist.org/observations/57827251</a>   |
| 78 | <i>Eudynamys scolopaceus</i> | Western Koel | 2020/4/20  | 4 | 0 | 7.06679840 | 79.90409320 | <a href="https://www.inaturalist.org/observations/42735206">https://www.inaturalist.org/observations/42735206</a>   |
| 79 | <i>Eudynamys scolopaceus</i> | Western Koel | 2021/5/30  | 4 | 0 | 7.08911000 | 79.89662833 | <a href="https://www.inaturalist.org/observations/109918256">https://www.inaturalist.org/observations/109918256</a> |
| 80 | <i>Eudynamys scolopaceus</i> | Western Koel | 2019/4/28  | 4 | 0 | 7.23000000 | 80.11583700 | <a href="https://www.inaturalist.org/observations/24066343">https://www.inaturalist.org/observations/24066343</a>   |
| 81 | <i>Eudynamys scolopaceus</i> | Western Koel | 2021/4/13  | 4 | 0 | 7.23619855 | 80.31217285 | <a href="https://www.inaturalist.org/observations/89149953">https://www.inaturalist.org/observations/89149953</a>   |
| 82 | <i>Eudynamys scolopaceus</i> | Western Koel | 2021/4/11  | 3 | 0 | 7.23624412 | 80.31219900 | <a href="https://www.inaturalist.org/observations/89150060">https://www.inaturalist.org/observations/89150060</a>   |
| 83 | <i>Eudynamys scolopaceus</i> | Western Koel | 2022/3/17  | 1 | 0 | 7.23919532 | 79.84451565 | <a href="https://www.inaturalist.org/observations/109435821">https://www.inaturalist.org/observations/109435821</a> |
| 84 | <i>Eudynamys scolopaceus</i> | Western Koel | 2019/3/24  | 5 | 0 | 7.24034706 | 79.84230731 | <a href="https://www.inaturalist.org/observations/49175571">https://www.inaturalist.org/observations/49175571</a>   |
| 85 | <i>Eudynamys scolopaceus</i> | Western Koel | 2017/7/6   | 4 | 0 | 7.26520032 | 80.58616556 | <a href="https://www.inaturalist.org/observations/37120099">https://www.inaturalist.org/observations/37120099</a>   |
| 86 | <i>Eudynamys scolopaceus</i> | Western Koel | 2018/12/14 | 4 | 0 | 7.27034279 | 80.59601428 | <a href="https://www.inaturalist.org/observations/19568458">https://www.inaturalist.org/observations/19568458</a>   |
| 87 | <i>Eudynamys scolopaceus</i> | Western Koel | 2018/12/14 | 3 | 0 | 7.27436034 | 80.59340181 | <a href="https://www.inaturalist.org/observations/19568476">https://www.inaturalist.org/observations/19568476</a>   |
| 88 | <i>Eudynamys scolopaceus</i> | Western Koel | 2015/11/20 | 4 | 0 | 7.28213790 | 80.66931102 | <a href="https://www.inaturalist.org/observations/37595683">https://www.inaturalist.org/observations/37595683</a>   |
| 89 | <i>Eudynamys scolopaceus</i> | Western Koel | 2017/6/26  | 5 | 0 | 7.28271710 | 79.84068860 | <a href="https://www.inaturalist.org/observations/48102227">https://www.inaturalist.org/observations/48102227</a>   |
| 90 | <i>Eudynamys scolopaceus</i> | Western Koel | 2022/3/19  | 3 | 0 | 7.28732680 | 79.88733407 | <a href="https://www.inaturalist.org/observations/109065029">https://www.inaturalist.org/observations/109065029</a> |
| 91 | <i>Eudynamys scolopaceus</i> | Western Koel | 2018/10/27 | 4 | 0 | 7.28991111 | 79.84111098 | <a href="https://www.inaturalist.org/observations/18327938">https://www.inaturalist.org/observations/18327938</a>   |

|     |                              |              |           |   |   |            |             |                                                                                                                     |
|-----|------------------------------|--------------|-----------|---|---|------------|-------------|---------------------------------------------------------------------------------------------------------------------|
| 92  | <i>Eudynamys scolopaceus</i> | Western Koel | 2019/3/30 | 5 | 0 | 7.29379110 | 79.83957730 | <a href="https://www.inaturalist.org/observations/61253491">https://www.inaturalist.org/observations/61253491</a>   |
| 93  | <i>Eudynamys scolopaceus</i> | Western Koel | 2016/10/4 | 4 | 0 | 7.29530810 | 80.66321030 | <a href="https://www.inaturalist.org/observations/52442647">https://www.inaturalist.org/observations/52442647</a>   |
| 94  | <i>Eudynamys scolopaceus</i> | Western Koel | 2016/11/4 | 4 | 0 | 7.29530810 | 80.66321030 | <a href="https://www.inaturalist.org/observations/52443362">https://www.inaturalist.org/observations/52443362</a>   |
| 95  | <i>Eudynamys scolopaceus</i> | Western Koel | 2020/1/27 | 4 | 0 | 7.30253528 | 80.65485790 | <a href="https://www.inaturalist.org/observations/39700385">https://www.inaturalist.org/observations/39700385</a>   |
| 96  | <i>Eudynamys scolopaceus</i> | Western Koel | 2022/7/21 | 1 | 0 | 7.31252640 | 80.64245770 | <a href="https://www.inaturalist.org/observations/127167811">https://www.inaturalist.org/observations/127167811</a> |
| 97  | <i>Eudynamys scolopaceus</i> | Western Koel | 2022/6/30 | 3 | 0 | 7.34936171 | 79.83527675 | <a href="https://www.inaturalist.org/observations/124284842">https://www.inaturalist.org/observations/124284842</a> |
| 98  | <i>Eudynamys scolopaceus</i> | Western Koel | 2022/6/30 | 4 | 0 | 7.34936171 | 79.83527675 | <a href="https://www.inaturalist.org/observations/124286154">https://www.inaturalist.org/observations/124286154</a> |
| 99  | <i>Eudynamys scolopaceus</i> | Western Koel | 2022/7/12 | 3 | 0 | 7.34936171 | 79.83527675 | <a href="https://www.inaturalist.org/observations/125943696">https://www.inaturalist.org/observations/125943696</a> |
| 100 | <i>Eudynamys scolopaceus</i> | Western Koel | 2014/3/16 | 5 | 0 | 7.42017600 | 79.81739000 | <a href="https://www.inaturalist.org/observations/65279746">https://www.inaturalist.org/observations/65279746</a>   |
| 101 | <i>Eudynamys scolopaceus</i> | Western Koel | 2019/5/10 | 5 | 0 | 7.53091163 | 80.31825187 | <a href="https://www.inaturalist.org/observations/25090215">https://www.inaturalist.org/observations/25090215</a>   |
| 102 | <i>Eudynamys scolopaceus</i> | Western Koel | 2019/4/20 | 5 | 0 | 7.53092862 | 80.31828187 | <a href="https://www.inaturalist.org/observations/25001916">https://www.inaturalist.org/observations/25001916</a>   |
| 103 | <i>Eudynamys scolopaceus</i> | Western Koel | 2020/4/30 | 4 | 0 | 7.70898475 | 80.24499196 | <a href="https://www.inaturalist.org/observations/45164602">https://www.inaturalist.org/observations/45164602</a>   |
| 104 | <i>Eudynamys scolopaceus</i> | Western Koel | 2022/6/14 | 2 | 0 | 7.87311697 | 81.56694031 | <a href="https://www.inaturalist.org/observations/121693440">https://www.inaturalist.org/observations/121693440</a> |
| 105 | <i>Eudynamys scolopaceus</i> | Western Koel | 2018/11/5 | 7 | 0 | 7.87421700 | 80.65112870 | <a href="https://www.inaturalist.org/observations/61374173">https://www.inaturalist.org/observations/61374173</a>   |
| 106 | <i>Eudynamys scolopaceus</i> | Western Koel | 2019/7/17 | 7 | 0 | 7.89321859 | 80.70085404 | <a href="https://www.inaturalist.org/observations/52559105">https://www.inaturalist.org/observations/52559105</a>   |
| 107 | <i>Eudynamys scolopaceus</i> | Western Koel | 2022/3/12 | 2 | 0 | 7.92583833 | 80.70937000 | <a href="https://www.inaturalist.org/observations/109821244">https://www.inaturalist.org/observations/109821244</a> |
| 108 | <i>Eudynamys scolopaceus</i> | Western Koel | 2019/8/29 | 3 | 0 | 7.94074375 | 80.72161272 | <a href="https://www.inaturalist.org/observations/38579321">https://www.inaturalist.org/observations/38579321</a>   |
| 109 | <i>Eudynamys scolopaceus</i> | Western Koel | 2021/8/7  | 3 | 0 | 7.95308690 | 80.48413250 | <a href="https://www.inaturalist.org/observations/91637169">https://www.inaturalist.org/observations/91637169</a>   |
| 110 | <i>Eudynamys scolopaceus</i> | Western Koel | 2019/6/21 | 1 | 0 | 8.18328570 | 77.41189960 | <a href="https://www.inaturalist.org/observations/100648214">https://www.inaturalist.org/observations/100648214</a> |
| 111 | <i>Eudynamys scolopaceus</i> | Western Koel | 2017/3/23 | 3 | 0 | 8.18748031 | 77.42547164 | <a href="https://www.inaturalist.org/observations/61201769">https://www.inaturalist.org/observations/61201769</a>   |
| 112 | <i>Eudynamys scolopaceus</i> | Western Koel | 2021/12/6 | 2 | 0 | 8.36527192 | 77.40554737 | <a href="https://www.inaturalist.org/observations/103956041">https://www.inaturalist.org/observations/103956041</a> |
| 113 | <i>Eudynamys scolopaceus</i> | Western Koel | 2018/2/5  | 2 | 0 | 8.37812190 | 77.40802860 | <a href="https://www.inaturalist.org/observations/92214830">https://www.inaturalist.org/observations/92214830</a>   |
| 114 | <i>Eudynamys scolopaceus</i> | Western Koel | 2015/3/8  | 2 | 0 | 8.39113195 | 76.97292343 | <a href="https://www.inaturalist.org/observations/62472365">https://www.inaturalist.org/observations/62472365</a>   |

|     |                              |              |            |   |   |            |             |                                                                                                                     |
|-----|------------------------------|--------------|------------|---|---|------------|-------------|---------------------------------------------------------------------------------------------------------------------|
| 115 | <i>Eudynamys scolopaceus</i> | Western Koel | 2017/2/22  | 2 | 0 | 8.39291624 | 76.97281510 | <a href="https://www.inaturalist.org/observations/62472364">https://www.inaturalist.org/observations/62472364</a>   |
| 116 | <i>Eudynamys scolopaceus</i> | Western Koel | 2017/2/25  | 2 | 0 | 8.39292774 | 76.97202759 | <a href="https://www.inaturalist.org/observations/62472363">https://www.inaturalist.org/observations/62472363</a>   |
| 117 | <i>Eudynamys scolopaceus</i> | Western Koel | 2020/12/4  | 4 | 0 | 8.42021544 | 81.30620850 | <a href="https://www.inaturalist.org/observations/66138775">https://www.inaturalist.org/observations/66138775</a>   |
| 118 | <i>Eudynamys scolopaceus</i> | Western Koel | 2021/3/20  | 1 | 0 | 8.42930108 | 76.97565805 | <a href="https://www.inaturalist.org/observations/71796948">https://www.inaturalist.org/observations/71796948</a>   |
| 119 | <i>Eudynamys scolopaceus</i> | Western Koel | 2021/3/24  | 5 | 0 | 8.43277482 | 76.97576903 | <a href="https://www.inaturalist.org/observations/71942979">https://www.inaturalist.org/observations/71942979</a>   |
| 120 | <i>Eudynamys scolopaceus</i> | Western Koel | 2020/11/18 | 2 | 0 | 8.44825765 | 76.97903931 | <a href="https://www.inaturalist.org/observations/81124817">https://www.inaturalist.org/observations/81124817</a>   |
| 121 | <i>Eudynamys scolopaceus</i> | Western Koel | 2022/1/12  | 3 | 0 | 8.45000902 | 76.97575796 | <a href="https://www.inaturalist.org/observations/104859883">https://www.inaturalist.org/observations/104859883</a> |
| 122 | <i>Eudynamys scolopaceus</i> | Western Koel | 2021/11/30 | 3 | 0 | 8.46929287 | 76.97858736 | <a href="https://www.inaturalist.org/observations/102237400">https://www.inaturalist.org/observations/102237400</a> |
| 123 | <i>Eudynamys scolopaceus</i> | Western Koel | 2020/12/3  | 3 | 0 | 8.47314114 | 81.34741513 | <a href="https://www.inaturalist.org/observations/66040058">https://www.inaturalist.org/observations/66040058</a>   |
| 124 | <i>Eudynamys scolopaceus</i> | Western Koel | 2021/12/28 | 2 | 0 | 8.47469824 | 77.99568672 | <a href="https://www.inaturalist.org/observations/104154773">https://www.inaturalist.org/observations/104154773</a> |
| 125 | <i>Eudynamys scolopaceus</i> | Western Koel | 2019/1/5   | 2 | 0 | 8.49270650 | 77.75093030 | <a href="https://www.inaturalist.org/observations/88811148">https://www.inaturalist.org/observations/88811148</a>   |
| 126 | <i>Eudynamys scolopaceus</i> | Western Koel | 2020/11/21 | 3 | 0 | 8.49432460 | 76.93981950 | <a href="https://www.inaturalist.org/observations/65933162">https://www.inaturalist.org/observations/65933162</a>   |
| 127 | <i>Eudynamys scolopaceus</i> | Western Koel | 2020/1/27  | 2 | 0 | 8.52009274 | 76.92741657 | <a href="https://www.inaturalist.org/observations/67018528">https://www.inaturalist.org/observations/67018528</a>   |
| 128 | <i>Eudynamys scolopaceus</i> | Western Koel | 2019/2/28  | 4 | 0 | 8.52413910 | 76.93663760 | <a href="https://www.inaturalist.org/observations/20826248">https://www.inaturalist.org/observations/20826248</a>   |
| 129 | <i>Eudynamys scolopaceus</i> | Western Koel | 2017/7/24  | 6 | 0 | 8.57616934 | 81.23296953 | <a href="https://www.inaturalist.org/observations/69816982">https://www.inaturalist.org/observations/69816982</a>   |
| 130 | <i>Eudynamys scolopaceus</i> | Western Koel | 2021/10/19 | 3 | 0 | 8.58833941 | 77.51533669 | <a href="https://www.inaturalist.org/observations/102866269">https://www.inaturalist.org/observations/102866269</a> |
| 131 | <i>Eudynamys scolopaceus</i> | Western Koel | 2020/8/29  | 4 | 0 | 8.65577000 | 77.44803200 | <a href="https://www.inaturalist.org/observations/58133109">https://www.inaturalist.org/observations/58133109</a>   |
| 132 | <i>Eudynamys scolopaceus</i> | Western Koel | 2020/2/17  | 1 | 0 | 8.67839456 | 77.13314697 | <a href="https://www.inaturalist.org/observations/38802471">https://www.inaturalist.org/observations/38802471</a>   |
| 133 | <i>Eudynamys scolopaceus</i> | Western Koel | 2014/10/3  | 3 | 0 | 8.69969770 | 77.63132000 | <a href="https://www.inaturalist.org/observations/23918637">https://www.inaturalist.org/observations/23918637</a>   |
| 134 | <i>Eudynamys scolopaceus</i> | Western Koel | 2019/9/15  | 4 | 0 | 8.71122551 | 77.73107910 | <a href="https://www.inaturalist.org/observations/32746104">https://www.inaturalist.org/observations/32746104</a>   |
| 135 | <i>Eudynamys scolopaceus</i> | Western Koel | 2019/8/27  | 4 | 0 | 8.71271897 | 81.18394677 | <a href="https://www.inaturalist.org/observations/36543109">https://www.inaturalist.org/observations/36543109</a>   |
| 136 | <i>Eudynamys scolopaceus</i> | Western Koel | 2021/10/15 | 1 | 0 | 8.71781159 | 77.64513397 | <a href="https://www.inaturalist.org/observations/98794948">https://www.inaturalist.org/observations/98794948</a>   |
| 137 | <i>Eudynamys scolopaceus</i> | Western Koel | 2014/3/21  | 6 | 0 | 8.77292700 | 76.81426300 | <a href="http://www.inaturalist.org/observations/1531195">http://www.inaturalist.org/observations/1531195</a>       |

|     |                              |              |            |   |   |            |             |                                                                                                                     |
|-----|------------------------------|--------------|------------|---|---|------------|-------------|---------------------------------------------------------------------------------------------------------------------|
| 138 | <i>Eudynamys scolopaceus</i> | Western Koel | 2014/8/3   | 3 | 0 | 8.87004947 | 76.60143351 | <a href="https://www.inaturalist.org/observations/66029289">https://www.inaturalist.org/observations/66029289</a>   |
| 139 | <i>Eudynamys scolopaceus</i> | Western Koel | 2020/11/22 | 3 | 0 | 8.87014444 | 76.60151944 | <a href="https://www.inaturalist.org/observations/65894926">https://www.inaturalist.org/observations/65894926</a>   |
| 140 | <i>Eudynamys scolopaceus</i> | Western Koel | 2021/7/12  | 2 | 0 | 8.92711067 | 76.83676908 | <a href="https://www.inaturalist.org/observations/86675035">https://www.inaturalist.org/observations/86675035</a>   |
| 141 | <i>Eudynamys scolopaceus</i> | Western Koel | 2019/4/14  | 2 | 0 | 8.96324480 | 77.06508090 | <a href="https://www.inaturalist.org/observations/22466326">https://www.inaturalist.org/observations/22466326</a>   |
| 142 | <i>Eudynamys scolopaceus</i> | Western Koel | 2020/11/10 | 4 | 0 | 9.15146597 | 76.47022597 | <a href="https://www.inaturalist.org/observations/64654459">https://www.inaturalist.org/observations/64654459</a>   |
| 143 | <i>Eudynamys scolopaceus</i> | Western Koel | 2021/3/22  | 1 | 0 | 9.25057374 | 76.54008072 | <a href="https://www.inaturalist.org/observations/79834937">https://www.inaturalist.org/observations/79834937</a>   |
| 144 | <i>Eudynamys scolopaceus</i> | Western Koel | 2021/4/25  | 1 | 0 | 9.36024228 | 77.92068515 | <a href="https://www.inaturalist.org/observations/99902787">https://www.inaturalist.org/observations/99902787</a>   |
| 145 | <i>Eudynamys scolopaceus</i> | Western Koel | 2021/4/25  | 1 | 0 | 9.36024228 | 77.92068515 | <a href="https://www.inaturalist.org/observations/99902802">https://www.inaturalist.org/observations/99902802</a>   |
| 146 | <i>Eudynamys scolopaceus</i> | Western Koel | 2021/4/25  | 1 | 0 | 9.36024228 | 77.92068515 | <a href="https://www.inaturalist.org/observations/99902803">https://www.inaturalist.org/observations/99902803</a>   |
| 147 | <i>Eudynamys scolopaceus</i> | Western Koel | 2021/6/19  | 1 | 0 | 9.46057921 | 77.54794255 | <a href="https://www.inaturalist.org/observations/86887466">https://www.inaturalist.org/observations/86887466</a>   |
| 148 | <i>Eudynamys scolopaceus</i> | Western Koel | 2020/1/3   | 1 | 0 | 9.49806670 | 76.33884840 | <a href="https://www.inaturalist.org/observations/41677158">https://www.inaturalist.org/observations/41677158</a>   |
| 149 | <i>Eudynamys scolopaceus</i> | Western Koel | 2020/11/2  | 3 | 0 | 9.50069800 | 76.34738278 | <a href="https://www.inaturalist.org/observations/64022548">https://www.inaturalist.org/observations/64022548</a>   |
| 150 | <i>Eudynamys scolopaceus</i> | Western Koel | 2014/12/25 | 1 | 0 | 9.50071766 | 76.34034371 | <a href="https://www.inaturalist.org/observations/78505830">https://www.inaturalist.org/observations/78505830</a>   |
| 151 | <i>Eudynamys scolopaceus</i> | Western Koel | 2022/2/27  | 4 | 0 | 9.50818810 | 76.34115268 | <a href="https://www.inaturalist.org/observations/107542043">https://www.inaturalist.org/observations/107542043</a> |
| 152 | <i>Eudynamys scolopaceus</i> | Western Koel | 2013/11/26 | 4 | 0 | 9.53245452 | 76.54983482 | <a href="https://www.inaturalist.org/observations/81672409">https://www.inaturalist.org/observations/81672409</a>   |
| 153 | <i>Eudynamys scolopaceus</i> | Western Koel | 2022/8/21  | 5 | 0 | 9.55111597 | 76.58494335 | <a href="https://www.inaturalist.org/observations/132014057">https://www.inaturalist.org/observations/132014057</a> |
| 154 | <i>Eudynamys scolopaceus</i> | Western Koel | 2021/4/23  | 4 | 0 | 9.56422613 | 76.53509114 | <a href="https://www.inaturalist.org/observations/75148256">https://www.inaturalist.org/observations/75148256</a>   |
| 155 | <i>Eudynamys scolopaceus</i> | Western Koel | 2021/4/23  | 4 | 0 | 9.56422613 | 76.53509114 | <a href="https://www.inaturalist.org/observations/75148364">https://www.inaturalist.org/observations/75148364</a>   |
| 156 | <i>Eudynamys scolopaceus</i> | Western Koel | 2022/9/16  | 2 | 0 | 9.57575556 | 76.45651944 | <a href="https://www.inaturalist.org/observations/135246373">https://www.inaturalist.org/observations/135246373</a> |
| 157 | <i>Eudynamys scolopaceus</i> | Western Koel | 2022/5/2   | 4 | 0 | 9.57622687 | 76.43634799 | <a href="https://www.inaturalist.org/observations/124513948">https://www.inaturalist.org/observations/124513948</a> |
| 158 | <i>Eudynamys scolopaceus</i> | Western Koel | 2022/1/30  | 3 | 0 | 9.58127027 | 76.66348211 | <a href="https://www.inaturalist.org/observations/105825169">https://www.inaturalist.org/observations/105825169</a> |
| 159 | <i>Eudynamys scolopaceus</i> | Western Koel | 2021/4/3   | 3 | 0 | 9.59141653 | 76.52691040 | <a href="https://www.inaturalist.org/observations/129495798">https://www.inaturalist.org/observations/129495798</a> |
| 160 | <i>Eudynamys scolopaceus</i> | Western Koel | 2020/10/27 | 3 | 0 | 9.59141653 | 76.52691040 | <a href="https://www.inaturalist.org/observations/129572386">https://www.inaturalist.org/observations/129572386</a> |

|     |                              |              |            |   |   |            |             |                                                                                                                     |
|-----|------------------------------|--------------|------------|---|---|------------|-------------|---------------------------------------------------------------------------------------------------------------------|
| 161 | <i>Eudynamys scolopaceus</i> | Western Koel | 2019/4/6   | 1 | 0 | 9.59754230 | 76.51114739 | <a href="https://www.inaturalist.org/observations/41148871">https://www.inaturalist.org/observations/41148871</a>   |
| 162 | <i>Eudynamys scolopaceus</i> | Western Koel | 2018/12/2  | 3 | 0 | 9.59766245 | 76.51108997 | <a href="https://www.inaturalist.org/observations/42833011">https://www.inaturalist.org/observations/42833011</a>   |
| 163 | <i>Eudynamys scolopaceus</i> | Western Koel | 2020/6/7   | 2 | 0 | 9.59766245 | 76.51108997 | <a href="https://www.inaturalist.org/observations/48906633">https://www.inaturalist.org/observations/48906633</a>   |
| 164 | <i>Eudynamys scolopaceus</i> | Western Koel | 2019/3/9   | 3 | 0 | 9.59781800 | 76.51063409 | <a href="https://www.inaturalist.org/observations/41047908">https://www.inaturalist.org/observations/41047908</a>   |
| 165 | <i>Eudynamys scolopaceus</i> | Western Koel | 2020/1/19  | 2 | 0 | 9.61754068 | 76.43009473 | <a href="https://www.inaturalist.org/observations/130227441">https://www.inaturalist.org/observations/130227441</a> |
| 166 | <i>Eudynamys scolopaceus</i> | Western Koel | 2008/11/25 | 1 | 0 | 9.62739330 | 76.42857220 | <a href="https://www.inaturalist.org/observations/44670755">https://www.inaturalist.org/observations/44670755</a>   |
| 167 | <i>Eudynamys scolopaceus</i> | Western Koel | 2022/9/14  | 3 | 0 | 9.62743750 | 76.42856250 | <a href="https://www.inaturalist.org/observations/135107018">https://www.inaturalist.org/observations/135107018</a> |
| 168 | <i>Eudynamys scolopaceus</i> | Western Koel | 2022/8/21  | 4 | 0 | 9.62743761 | 76.42856251 | <a href="https://www.inaturalist.org/observations/132083380">https://www.inaturalist.org/observations/132083380</a> |
| 169 | <i>Eudynamys scolopaceus</i> | Western Koel | 2019/9/29  | 3 | 0 | 9.65640833 | 77.62779167 | <a href="https://www.inaturalist.org/observations/33584971">https://www.inaturalist.org/observations/33584971</a>   |
| 170 | <i>Eudynamys scolopaceus</i> | Western Koel | 2019/12/22 | 3 | 0 | 9.66479145 | 76.33612694 | <a href="https://www.inaturalist.org/observations/36882366">https://www.inaturalist.org/observations/36882366</a>   |
| 171 | <i>Eudynamys scolopaceus</i> | Western Koel | 2020/9/10  | 3 | 0 | 9.66822652 | 76.32181998 | <a href="https://www.inaturalist.org/observations/59888381">https://www.inaturalist.org/observations/59888381</a>   |
| 172 | <i>Eudynamys scolopaceus</i> | Western Koel | 2019/9/22  | 4 | 0 | 9.66825626 | 76.32178579 | <a href="https://www.inaturalist.org/observations/61273547">https://www.inaturalist.org/observations/61273547</a>   |
| 173 | <i>Eudynamys scolopaceus</i> | Western Koel | 2018/1/21  | 4 | 0 | 9.66918368 | 76.32591806 | <a href="https://www.inaturalist.org/observations/49545208">https://www.inaturalist.org/observations/49545208</a>   |
| 174 | <i>Eudynamys scolopaceus</i> | Western Koel | 2019/2/6   | 2 | 0 | 9.67132375 | 76.32319361 | <a href="https://www.inaturalist.org/observations/48611252">https://www.inaturalist.org/observations/48611252</a>   |
| 175 | <i>Eudynamys scolopaceus</i> | Western Koel | 2022/8/29  | 3 | 0 | 9.68701830 | 76.33103140 | <a href="https://www.inaturalist.org/observations/133086524">https://www.inaturalist.org/observations/133086524</a> |
| 176 | <i>Eudynamys scolopaceus</i> | Western Koel | 2022/8/29  | 3 | 0 | 9.68701830 | 76.33103140 | <a href="https://www.inaturalist.org/observations/133086932">https://www.inaturalist.org/observations/133086932</a> |
| 177 | <i>Eudynamys scolopaceus</i> | Western Koel | 2018/5/11  | 2 | 0 | 9.69253827 | 77.35694545 | <a href="https://www.inaturalist.org/observations/65691487">https://www.inaturalist.org/observations/65691487</a>   |
| 178 | <i>Eudynamys scolopaceus</i> | Western Koel | 2022/9/20  | 2 | 0 | 9.71215350 | 76.42738440 | <a href="https://www.inaturalist.org/observations/135888933">https://www.inaturalist.org/observations/135888933</a> |
| 179 | <i>Eudynamys scolopaceus</i> | Western Koel | 2020/5/6   | 2 | 0 | 9.79050631 | 76.30464546 | <a href="https://www.inaturalist.org/observations/47806222">https://www.inaturalist.org/observations/47806222</a>   |
| 180 | <i>Eudynamys scolopaceus</i> | Western Koel | 2018/11/17 | 2 | 0 | 9.85486030 | 76.73180600 | <a href="https://www.inaturalist.org/observations/87107845">https://www.inaturalist.org/observations/87107845</a>   |
| 181 | <i>Eudynamys scolopaceus</i> | Western Koel | 2021/11/4  | 2 | 0 | 9.87521613 | 76.72705207 | <a href="https://www.inaturalist.org/observations/100221963">https://www.inaturalist.org/observations/100221963</a> |
| 182 | <i>Eudynamys scolopaceus</i> | Western Koel | 2017/5/28  | 5 | 0 | 9.88232708 | 78.05974132 | <a href="https://www.inaturalist.org/observations/6398683">https://www.inaturalist.org/observations/6398683</a>     |
| 183 | <i>Eudynamys scolopaceus</i> | Western Koel | 2018/7/19  | 4 | 0 | 9.88868643 | 76.72812668 | <a href="https://www.inaturalist.org/observations/83783857">https://www.inaturalist.org/observations/83783857</a>   |



|     |                              |              |            |   |   |             |             |                                                                                                                     |
|-----|------------------------------|--------------|------------|---|---|-------------|-------------|---------------------------------------------------------------------------------------------------------------------|
| 184 | <i>Eudynamys scolopaceus</i> | Western Koel | 2018/7/21  | 2 | 0 | 9.88868643  | 76.72812668 | <a href="https://www.inaturalist.org/observations/83949125">https://www.inaturalist.org/observations/83949125</a>   |
| 185 | <i>Eudynamys scolopaceus</i> | Western Koel | 2018/7/22  | 3 | 0 | 9.88868643  | 76.72812668 | <a href="https://www.inaturalist.org/observations/83953054">https://www.inaturalist.org/observations/83953054</a>   |
| 186 | <i>Eudynamys scolopaceus</i> | Western Koel | 2018/7/23  | 1 | 0 | 9.88868643  | 76.72812668 | <a href="https://www.inaturalist.org/observations/83953407">https://www.inaturalist.org/observations/83953407</a>   |
| 187 | <i>Eudynamys scolopaceus</i> | Western Koel | 2018/7/24  | 1 | 0 | 9.88868643  | 76.72812668 | <a href="https://www.inaturalist.org/observations/83956979">https://www.inaturalist.org/observations/83956979</a>   |
| 188 | <i>Eudynamys scolopaceus</i> | Western Koel | 2018/7/28  | 2 | 0 | 9.88868643  | 76.72812668 | <a href="https://www.inaturalist.org/observations/84195451">https://www.inaturalist.org/observations/84195451</a>   |
| 189 | <i>Eudynamys scolopaceus</i> | Western Koel | 2018/11/15 | 1 | 0 | 9.88868643  | 76.72812668 | <a href="https://www.inaturalist.org/observations/87100750">https://www.inaturalist.org/observations/87100750</a>   |
| 190 | <i>Eudynamys scolopaceus</i> | Western Koel | 2018/11/22 | 3 | 0 | 9.88868643  | 76.72812668 | <a href="https://www.inaturalist.org/observations/87115324">https://www.inaturalist.org/observations/87115324</a>   |
| 191 | <i>Eudynamys scolopaceus</i> | Western Koel | 2018/11/25 | 2 | 0 | 9.88868643  | 76.72812668 | <a href="https://www.inaturalist.org/observations/87116524">https://www.inaturalist.org/observations/87116524</a>   |
| 192 | <i>Eudynamys scolopaceus</i> | Western Koel | 2018/11/28 | 4 | 0 | 9.88868643  | 76.72812668 | <a href="https://www.inaturalist.org/observations/87165416">https://www.inaturalist.org/observations/87165416</a>   |
| 193 | <i>Eudynamys scolopaceus</i> | Western Koel | 2018/11/30 | 4 | 0 | 9.88868643  | 76.72812668 | <a href="https://www.inaturalist.org/observations/87168153">https://www.inaturalist.org/observations/87168153</a>   |
| 194 | <i>Eudynamys scolopaceus</i> | Western Koel | 2018/12/3  | 3 | 0 | 9.88868643  | 76.72812668 | <a href="https://www.inaturalist.org/observations/88138851">https://www.inaturalist.org/observations/88138851</a>   |
| 195 | <i>Eudynamys scolopaceus</i> | Western Koel | 2018/12/8  | 2 | 0 | 9.88868643  | 76.72812668 | <a href="https://www.inaturalist.org/observations/91832971">https://www.inaturalist.org/observations/91832971</a>   |
| 196 | <i>Eudynamys scolopaceus</i> | Western Koel | 2018/12/19 | 3 | 0 | 9.90021111  | 78.08362778 | <a href="https://www.inaturalist.org/observations/82120430">https://www.inaturalist.org/observations/82120430</a>   |
| 197 | <i>Eudynamys scolopaceus</i> | Western Koel | 2018/12/13 | 1 | 0 | 9.90143090  | 76.79712470 | <a href="https://www.inaturalist.org/observations/91649396">https://www.inaturalist.org/observations/91649396</a>   |
| 198 | <i>Eudynamys scolopaceus</i> | Western Koel | 2020/4/7   | 1 | 0 | 9.93123276  | 76.26730409 | <a href="https://www.inaturalist.org/observations/41588611">https://www.inaturalist.org/observations/41588611</a>   |
| 199 | <i>Eudynamys scolopaceus</i> | Western Koel | 2021/11/12 | 1 | 0 | 9.94151333  | 78.15752500 | <a href="https://www.inaturalist.org/observations/100921225">https://www.inaturalist.org/observations/100921225</a> |
| 200 | <i>Eudynamys scolopaceus</i> | Western Koel | 2013/6/14  | 1 | 0 | 9.95205500  | 76.31138429 | <a href="https://www.inaturalist.org/observations/48540816">https://www.inaturalist.org/observations/48540816</a>   |
| 201 | <i>Eudynamys scolopaceus</i> | Western Koel | 2014/7/30  | 3 | 0 | 9.95472204  | 78.18749646 | <a href="https://www.inaturalist.org/observations/72031611">https://www.inaturalist.org/observations/72031611</a>   |
| 202 | <i>Eudynamys scolopaceus</i> | Western Koel | 2019/12/29 | 4 | 0 | 9.95696752  | 76.25949134 | <a href="https://www.inaturalist.org/observations/37402557">https://www.inaturalist.org/observations/37402557</a>   |
| 203 | <i>Eudynamys scolopaceus</i> | Western Koel | 2021/7/24  | 1 | 0 | 9.96002000  | 78.49261000 | <a href="https://www.inaturalist.org/observations/88380812">https://www.inaturalist.org/observations/88380812</a>   |
| 204 | <i>Eudynamys scolopaceus</i> | Western Koel | 2020/1/22  | 1 | 0 | 10.01586100 | 76.34186700 | <a href="https://www.inaturalist.org/observations/37872010">https://www.inaturalist.org/observations/37872010</a>   |
| 205 | <i>Eudynamys scolopaceus</i> | Western Koel | 2021/6/2   | 1 | 0 | 10.02286225 | 76.29394200 | <a href="https://www.inaturalist.org/observations/81288948">https://www.inaturalist.org/observations/81288948</a>   |
| 206 | <i>Eudynamys scolopaceus</i> | Western Koel | 2020/5/29  | 1 | 0 | 10.02917766 | 76.35938575 | <a href="https://www.inaturalist.org/observations/47739935">https://www.inaturalist.org/observations/47739935</a>   |

|     |                              |              |            |   |   |             |             |                                                                                                                     |
|-----|------------------------------|--------------|------------|---|---|-------------|-------------|---------------------------------------------------------------------------------------------------------------------|
| 207 | <i>Eudynamys scolopaceus</i> | Western Koel | 2020/5/29  | 1 | 0 | 10.02917766 | 76.35938575 | <a href="https://www.inaturalist.org/observations/47739945">https://www.inaturalist.org/observations/47739945</a>   |
| 208 | <i>Eudynamys scolopaceus</i> | Western Koel | 2022/1/15  | 2 | 0 | 10.09482870 | 76.27204780 | <a href="https://www.inaturalist.org/observations/104953931">https://www.inaturalist.org/observations/104953931</a> |
| 209 | <i>Eudynamys scolopaceus</i> | Western Koel | 2022/1/15  | 5 | 0 | 10.09595288 | 76.26963660 | <a href="https://www.inaturalist.org/observations/105096186">https://www.inaturalist.org/observations/105096186</a> |
| 210 | <i>Eudynamys scolopaceus</i> | Western Koel | 2022/3/24  | 7 | 0 | 10.09663351 | 76.26954474 | <a href="https://www.inaturalist.org/observations/109343915">https://www.inaturalist.org/observations/109343915</a> |
| 211 | <i>Eudynamys scolopaceus</i> | Western Koel | 2018/12/15 | 4 | 0 | 10.10398030 | 76.70046050 | <a href="https://www.inaturalist.org/observations/32149423">https://www.inaturalist.org/observations/32149423</a>   |
| 212 | <i>Eudynamys scolopaceus</i> | Western Koel | 2020/2/15  | 2 | 0 | 10.11364954 | 76.35907318 | <a href="https://www.inaturalist.org/observations/44126455">https://www.inaturalist.org/observations/44126455</a>   |
| 213 | <i>Eudynamys scolopaceus</i> | Western Koel | 2017/12/20 | 4 | 0 | 10.12067400 | 76.75534700 | <a href="https://www.inaturalist.org/observations/9914918">https://www.inaturalist.org/observations/9914918</a>     |
| 214 | <i>Eudynamys scolopaceus</i> | Western Koel | 2020/3/27  | 3 | 0 | 10.13098780 | 76.24104930 | <a href="https://www.inaturalist.org/observations/41220880">https://www.inaturalist.org/observations/41220880</a>   |
| 215 | <i>Eudynamys scolopaceus</i> | Western Koel | 2020/2/2   | 3 | 0 | 10.13098780 | 76.24104930 | <a href="https://www.inaturalist.org/observations/41221279">https://www.inaturalist.org/observations/41221279</a>   |
| 216 | <i>Eudynamys scolopaceus</i> | Western Koel | 2019/12/17 | 1 | 0 | 10.13098780 | 76.24104930 | <a href="https://www.inaturalist.org/observations/41279038">https://www.inaturalist.org/observations/41279038</a>   |
| 217 | <i>Eudynamys scolopaceus</i> | Western Koel | 2019/5/25  | 4 | 0 | 10.13099571 | 76.24104928 | <a href="https://www.inaturalist.org/observations/42944843">https://www.inaturalist.org/observations/42944843</a>   |
| 218 | <i>Eudynamys scolopaceus</i> | Western Koel | 2020/12/16 | 4 | 0 | 10.13242482 | 76.48740079 | <a href="https://www.inaturalist.org/observations/67399918">https://www.inaturalist.org/observations/67399918</a>   |
| 219 | <i>Eudynamys scolopaceus</i> | Western Koel | 2020/10/22 | 2 | 0 | 10.13259579 | 76.48719158 | <a href="https://www.inaturalist.org/observations/63620864">https://www.inaturalist.org/observations/63620864</a>   |
| 220 | <i>Eudynamys scolopaceus</i> | Western Koel | 2021/10/14 | 4 | 0 | 10.15322610 | 76.33767860 | <a href="https://www.inaturalist.org/observations/98209228">https://www.inaturalist.org/observations/98209228</a>   |
| 221 | <i>Eudynamys scolopaceus</i> | Western Koel | 2021/10/14 | 4 | 0 | 10.15322610 | 76.33767860 | <a href="https://www.inaturalist.org/observations/98209238">https://www.inaturalist.org/observations/98209238</a>   |
| 222 | <i>Eudynamys scolopaceus</i> | Western Koel | 2021/11/2  | 3 | 0 | 10.15322610 | 76.33767860 | <a href="https://www.inaturalist.org/observations/100049967">https://www.inaturalist.org/observations/100049967</a> |
| 223 | <i>Eudynamys scolopaceus</i> | Western Koel | 2022/1/3   | 3 | 0 | 10.20456669 | 76.35920007 | <a href="https://www.inaturalist.org/observations/104270858">https://www.inaturalist.org/observations/104270858</a> |
| 224 | <i>Eudynamys scolopaceus</i> | Western Koel | 2017/12/11 | 3 | 0 | 10.25023580 | 77.49100020 | <a href="https://www.inaturalist.org/observations/65815744">https://www.inaturalist.org/observations/65815744</a>   |
| 225 | <i>Eudynamys scolopaceus</i> | Western Koel | 2019/3/30  | 2 | 0 | 10.26038230 | 77.16759130 | <a href="https://www.inaturalist.org/observations/21756804">https://www.inaturalist.org/observations/21756804</a>   |
| 226 | <i>Eudynamys scolopaceus</i> | Western Koel | 2019/3/19  | 4 | 0 | 10.26042549 | 77.16755993 | <a href="https://www.inaturalist.org/observations/21380221">https://www.inaturalist.org/observations/21380221</a>   |
| 227 | <i>Eudynamys scolopaceus</i> | Western Koel | 2021/3/26  | 4 | 0 | 10.29247036 | 76.39274865 | <a href="https://www.inaturalist.org/observations/101084895">https://www.inaturalist.org/observations/101084895</a> |
| 228 | <i>Eudynamys scolopaceus</i> | Western Koel | 2021/12/4  | 3 | 0 | 10.29247036 | 76.39274865 | <a href="https://www.inaturalist.org/observations/103756002">https://www.inaturalist.org/observations/103756002</a> |
| 229 | <i>Eudynamys scolopaceus</i> | Western Koel | 2021/5/17  | 4 | 0 | 10.29460139 | 76.23043444 | <a href="https://www.inaturalist.org/observations/80142898">https://www.inaturalist.org/observations/80142898</a>   |

|     |                              |              |            |   |   |             |             |                                                                                                                     |
|-----|------------------------------|--------------|------------|---|---|-------------|-------------|---------------------------------------------------------------------------------------------------------------------|
| 230 | <i>Eudynamys scolopaceus</i> | Western Koel | 2021/5/15  | 5 | 0 | 10.29552175 | 76.23140372 | <a href="https://www.inaturalist.org/observations/80241913">https://www.inaturalist.org/observations/80241913</a>   |
| 231 | <i>Eudynamys scolopaceus</i> | Western Koel | 2021/5/27  | 2 | 0 | 10.29552175 | 76.23140372 | <a href="https://www.inaturalist.org/observations/80487345">https://www.inaturalist.org/observations/80487345</a>   |
| 232 | <i>Eudynamys scolopaceus</i> | Western Koel | 2020/8/28  | 4 | 0 | 10.29552175 | 76.23140406 | <a href="https://www.inaturalist.org/observations/59960887">https://www.inaturalist.org/observations/59960887</a>   |
| 233 | <i>Eudynamys scolopaceus</i> | Western Koel | 2020/7/22  | 3 | 0 | 10.29552175 | 76.23140406 | <a href="https://www.inaturalist.org/observations/59960945">https://www.inaturalist.org/observations/59960945</a>   |
| 234 | <i>Eudynamys scolopaceus</i> | Western Koel | 2021/12/25 | 1 | 0 | 10.29600337 | 79.81704712 | <a href="https://www.inaturalist.org/observations/103956409">https://www.inaturalist.org/observations/103956409</a> |
| 235 | <i>Eudynamys scolopaceus</i> | Western Koel | 2022/2/24  | 0 | 0 | 10.30214199 | 76.42738435 | <a href="https://www.inaturalist.org/observations/107365397">https://www.inaturalist.org/observations/107365397</a> |
| 236 | <i>Eudynamys scolopaceus</i> | Western Koel | 2022/2/24  | 4 | 0 | 10.30214265 | 76.42738435 | <a href="https://www.inaturalist.org/observations/107369034">https://www.inaturalist.org/observations/107369034</a> |
| 237 | <i>Eudynamys scolopaceus</i> | Western Koel | 2022/3/16  | 4 | 0 | 10.30219148 | 76.42738435 | <a href="https://www.inaturalist.org/observations/108712813">https://www.inaturalist.org/observations/108712813</a> |
| 238 | <i>Eudynamys scolopaceus</i> | Western Koel | 2012/11/23 | 3 | 0 | 10.30679700 | 77.20602400 | <a href="https://www.inaturalist.org/observations/133844538">https://www.inaturalist.org/observations/133844538</a> |
| 239 | <i>Eudynamys scolopaceus</i> | Western Koel | 2020/12/1  | 1 | 0 | 10.30700986 | 76.33405890 | <a href="https://www.inaturalist.org/observations/70258531">https://www.inaturalist.org/observations/70258531</a>   |
| 240 | <i>Eudynamys scolopaceus</i> | Western Koel | 2021/12/25 | 1 | 0 | 10.32442355 | 79.83944487 | <a href="https://www.inaturalist.org/observations/103752059">https://www.inaturalist.org/observations/103752059</a> |
| 241 | <i>Eudynamys scolopaceus</i> | Western Koel | 2021/3/31  | 2 | 0 | 10.32697340 | 76.95539670 | <a href="https://www.inaturalist.org/observations/105256415">https://www.inaturalist.org/observations/105256415</a> |
| 242 | <i>Eudynamys scolopaceus</i> | Western Koel | 2020/2/14  | 3 | 0 | 10.33663933 | 76.26673445 | <a href="https://www.inaturalist.org/observations/46944236">https://www.inaturalist.org/observations/46944236</a>   |
| 243 | <i>Eudynamys scolopaceus</i> | Western Koel | 2015/2/1   | 3 | 0 | 10.43422900 | 77.11551800 | <a href="https://www.inaturalist.org/observations/35375351">https://www.inaturalist.org/observations/35375351</a>   |
| 244 | <i>Eudynamys scolopaceus</i> | Western Koel | 2020/7/22  | 3 | 0 | 10.45089928 | 77.51984172 | <a href="https://www.inaturalist.org/observations/59300605">https://www.inaturalist.org/observations/59300605</a>   |
| 245 | <i>Eudynamys scolopaceus</i> | Western Koel | 2020/4/17  | 4 | 0 | 10.48514570 | 77.29654200 | <a href="https://www.inaturalist.org/observations/54717988">https://www.inaturalist.org/observations/54717988</a>   |
| 246 | <i>Eudynamys scolopaceus</i> | Western Koel | 2021/1/24  | 1 | 0 | 10.52560251 | 76.10302180 | <a href="https://www.inaturalist.org/observations/68548634">https://www.inaturalist.org/observations/68548634</a>   |
| 247 | <i>Eudynamys scolopaceus</i> | Western Koel | 2020/4/4   | 3 | 0 | 10.52764162 | 76.21443506 | <a href="https://www.inaturalist.org/observations/44340144">https://www.inaturalist.org/observations/44340144</a>   |
| 248 | <i>Eudynamys scolopaceus</i> | Western Koel | 2013/12/28 | 6 | 0 | 10.52764200 | 76.21443500 | <a href="http://www.inaturalist.org/observations/515647">http://www.inaturalist.org/observations/515647</a>         |
| 249 | <i>Eudynamys scolopaceus</i> | Western Koel | 2020/1/5   | 3 | 0 | 10.54159000 | 76.15451333 | <a href="https://www.inaturalist.org/observations/44104683">https://www.inaturalist.org/observations/44104683</a>   |
| 250 | <i>Eudynamys scolopaceus</i> | Western Koel | 2021/1/3   | 3 | 0 | 10.54507700 | 76.14649030 | <a href="https://www.inaturalist.org/observations/67513198">https://www.inaturalist.org/observations/67513198</a>   |
| 251 | <i>Eudynamys scolopaceus</i> | Western Koel | 2017/6/18  | 1 | 0 | 10.54768344 | 76.12410105 | <a href="https://www.inaturalist.org/observations/30260545">https://www.inaturalist.org/observations/30260545</a>   |
| 252 | <i>Eudynamys scolopaceus</i> | Western Koel | 2020/5/19  | 2 | 0 | 10.55944292 | 72.63581336 | <a href="https://www.inaturalist.org/observations/53813189">https://www.inaturalist.org/observations/53813189</a>   |

|     |                                      |              |            |   |   |             |             |                                                                                                                     |
|-----|--------------------------------------|--------------|------------|---|---|-------------|-------------|---------------------------------------------------------------------------------------------------------------------|
| 253 | Eudynamys scolopaceus                | Western Koel | 2020/5/19  | 2 | 0 | 10.55944292 | 72.63581336 | <a href="https://www.inaturalist.org/observations/57638797">https://www.inaturalist.org/observations/57638797</a>   |
| 254 | Eudynamys scolopaceus                | Western Koel | 2020/8/31  | 3 | 0 | 10.55944292 | 72.63581336 | <a href="https://www.inaturalist.org/observations/60319702">https://www.inaturalist.org/observations/60319702</a>   |
| 255 | Eudynamys scolopaceus                | Western Koel | 2017/6/18  | 5 | 0 | 10.55999120 | 76.17522672 | <a href="https://www.inaturalist.org/observations/18030078">https://www.inaturalist.org/observations/18030078</a>   |
| 256 | Eudynamys scolopaceus                | Western Koel | 2022/10/2  | 1 | 0 | 10.56044885 | 76.16650432 | <a href="https://www.inaturalist.org/observations/137247983">https://www.inaturalist.org/observations/137247983</a> |
| 257 | Eudynamys scolopaceus                | Western Koel | 2021/5/7   | 1 | 0 | 10.61217511 | 76.19642872 | <a href="https://www.inaturalist.org/observations/77744601">https://www.inaturalist.org/observations/77744601</a>   |
| 258 | Eudynamys scolopaceus                | Western Koel | 2021/2/27  | 1 | 0 | 10.61346618 | 76.60087698 | <a href="https://www.inaturalist.org/observations/70303631">https://www.inaturalist.org/observations/70303631</a>   |
| 259 | Eudynamys scolopaceus                | Western Koel | 2020/7/12  | 1 | 0 | 10.61624261 | 76.19324796 | <a href="https://www.inaturalist.org/observations/52762279">https://www.inaturalist.org/observations/52762279</a>   |
| 260 | Eudynamys scolopaceus                | Western Koel | 2020/3/25  | 2 | 0 | 10.63292234 | 76.36920892 | <a href="https://www.inaturalist.org/observations/48619000">https://www.inaturalist.org/observations/48619000</a>   |
| 261 | Eudynamys scolopaceus                | Western Koel | 2019/1/24  | 4 | 0 | 10.63750217 | 76.30570555 | <a href="https://www.inaturalist.org/observations/19876496">https://www.inaturalist.org/observations/19876496</a>   |
| 262 | Eudynamys scolopaceus                | Western Koel | 2020/8/10  | 1 | 0 | 10.65802400 | 75.98931890 | <a href="https://www.inaturalist.org/observations/55998505">https://www.inaturalist.org/observations/55998505</a>   |
| 263 | Eudynamys scolopaceus                | Western Koel | 2021/12/24 | 2 | 0 | 10.70111235 | 79.32247493 | <a href="https://www.inaturalist.org/observations/103949700">https://www.inaturalist.org/observations/103949700</a> |
| 264 | Eudynamys scolopaceus                | Western Koel | 2021/12/24 | 2 | 0 | 10.70130167 | 79.32261500 | <a href="https://www.inaturalist.org/observations/103745325">https://www.inaturalist.org/observations/103745325</a> |
| 265 | Eudynamys scolopaceus                | Western Koel | 2021/12/24 | 2 | 0 | 10.70133475 | 79.32265972 | <a href="https://www.inaturalist.org/observations/103949676">https://www.inaturalist.org/observations/103949676</a> |
| 266 | Eudynamys scolopaceus                | Western Koel | 2021/12/24 | 2 | 0 | 10.70368500 | 79.32142833 | <a href="https://www.inaturalist.org/observations/103745317">https://www.inaturalist.org/observations/103745317</a> |
| 267 | Eudynamys scolopaceus                | Western Koel | 2020/6/18  | 2 | 0 | 10.71987061 | 78.71671251 | <a href="https://www.inaturalist.org/observations/50041299">https://www.inaturalist.org/observations/50041299</a>   |
| 268 | Eudynamys scolopaceus                | Western Koel | 2021/7/18  | 1 | 0 | 10.72930180 | 78.70104231 | <a href="https://www.inaturalist.org/observations/87677283">https://www.inaturalist.org/observations/87677283</a>   |
| 269 | Eudynamys scolopaceus                | Western Koel | 2016/12/17 | 4 | 0 | 10.74748377 | 76.46733896 | <a href="https://www.inaturalist.org/observations/65300033">https://www.inaturalist.org/observations/65300033</a>   |
| 270 | Eudynamys scolopaceus                | Western Koel | 2021/11/21 | 1 | 0 | 10.74962233 | 76.13333892 | <a href="https://www.inaturalist.org/observations/101612040">https://www.inaturalist.org/observations/101612040</a> |
| 271 | Eudynamys scolopaceus                | Western Koel | 2014/3/2   | 2 | 0 | 10.74974237 | 76.37860390 | <a href="https://www.inaturalist.org/observations/62115036">https://www.inaturalist.org/observations/62115036</a>   |
| 272 | Eudynamys scolopaceus<br>scolopaceus | Western Koel | 2015/3/6   | 3 | 0 | 10.74974237 | 76.37860390 | <a href="https://www.inaturalist.org/observations/62800552">https://www.inaturalist.org/observations/62800552</a>   |
| 273 | Eudynamys scolopaceus                | Western Koel | 2014/3/2   | 3 | 0 | 10.74974237 | 76.37860390 | <a href="https://www.inaturalist.org/observations/98105275">https://www.inaturalist.org/observations/98105275</a>   |
| 274 | Eudynamys scolopaceus                | Western Koel | 2016/1/19  | 2 | 0 | 10.78449200 | 76.66362800 | <a href="https://www.inaturalist.org/observations/7305995">https://www.inaturalist.org/observations/7305995</a>     |
| 275 | Eudynamys scolopaceus                | Western Koel | 2016/1/18  | 3 | 0 | 10.78673000 | 76.65479300 | <a href="https://www.inaturalist.org/observations/7281257">https://www.inaturalist.org/observations/7281257</a>     |

|     |                              |              |            |   |   |             |             |                                                                                                                     |
|-----|------------------------------|--------------|------------|---|---|-------------|-------------|---------------------------------------------------------------------------------------------------------------------|
| 276 | <i>Eudynamys scolopaceus</i> | Western Koel | 2018/4/10  | 1 | 0 | 10.79048327 | 78.70467234 | <a href="https://www.inaturalist.org/observations/45167542">https://www.inaturalist.org/observations/45167542</a>   |
| 277 | <i>Eudynamys scolopaceus</i> | Western Koel | 2022/7/22  | 2 | 0 | 10.80128056 | 78.76070278 | <a href="https://www.inaturalist.org/observations/127351571">https://www.inaturalist.org/observations/127351571</a> |
| 278 | <i>Eudynamys scolopaceus</i> | Western Koel | 2018/5/19  | 5 | 0 | 10.82143083 | 76.64156042 | <a href="https://www.inaturalist.org/observations/98009406">https://www.inaturalist.org/observations/98009406</a>   |
| 279 | <i>Eudynamys scolopaceus</i> | Western Koel | 2017/4/5   | 2 | 0 | 10.87145110 | 76.06529850 | <a href="https://www.inaturalist.org/observations/67236518">https://www.inaturalist.org/observations/67236518</a>   |
| 280 | <i>Eudynamys scolopaceus</i> | Western Koel | 2022/1/12  | 4 | 0 | 10.88637042 | 76.06631041 | <a href="https://www.inaturalist.org/observations/104798240">https://www.inaturalist.org/observations/104798240</a> |
| 281 | <i>Eudynamys scolopaceus</i> | Western Koel | 2022/5/27  | 2 | 0 | 10.95133537 | 76.96962797 | <a href="https://www.inaturalist.org/observations/118874762">https://www.inaturalist.org/observations/118874762</a> |
| 282 | <i>Eudynamys scolopaceus</i> | Western Koel | 2019/6/11  | 4 | 0 | 10.99048537 | 77.02231484 | <a href="https://www.inaturalist.org/observations/27019506">https://www.inaturalist.org/observations/27019506</a>   |
| 283 | <i>Eudynamys scolopaceus</i> | Western Koel | 2021/9/8   | 1 | 0 | 11.04629298 | 76.94710795 | <a href="https://www.inaturalist.org/observations/94407292">https://www.inaturalist.org/observations/94407292</a>   |
| 284 | <i>Eudynamys scolopaceus</i> | Western Koel | 2020/9/12  | 2 | 0 | 11.07894586 | 79.83002432 | <a href="https://www.inaturalist.org/observations/59461634">https://www.inaturalist.org/observations/59461634</a>   |
| 285 | <i>Eudynamys scolopaceus</i> | Western Koel | 2021/1/31  | 2 | 0 | 11.09628247 | 77.37244293 | <a href="https://www.inaturalist.org/observations/68866262">https://www.inaturalist.org/observations/68866262</a>   |
| 286 | <i>Eudynamys scolopaceus</i> | Western Koel | 2021/2/4   | 1 | 0 | 11.09628247 | 77.37244293 | <a href="https://www.inaturalist.org/observations/69056510">https://www.inaturalist.org/observations/69056510</a>   |
| 287 | <i>Eudynamys scolopaceus</i> | Western Koel | 2021/7/2   | 0 | 0 | 11.09629234 | 77.37240940 | <a href="https://www.inaturalist.org/observations/85257815">https://www.inaturalist.org/observations/85257815</a>   |
| 288 | <i>Eudynamys scolopaceus</i> | Western Koel | 2022/3/9   | 2 | 0 | 11.13274384 | 75.90199057 | <a href="https://www.inaturalist.org/observations/111078819">https://www.inaturalist.org/observations/111078819</a> |
| 289 | <i>Eudynamys scolopaceus</i> | Western Koel | 2017/1/6   | 5 | 0 | 11.22405870 | 72.77620990 | <a href="https://www.inaturalist.org/observations/33998729">https://www.inaturalist.org/observations/33998729</a>   |
| 290 | <i>Eudynamys scolopaceus</i> | Western Koel | 2017/1/6   | 3 | 0 | 11.22405870 | 72.77620990 | <a href="https://www.inaturalist.org/observations/127701204">https://www.inaturalist.org/observations/127701204</a> |
| 291 | <i>Eudynamys scolopaceus</i> | Western Koel | 2017/1/6   | 3 | 0 | 11.22405870 | 72.77620990 | <a href="https://www.inaturalist.org/observations/127701205">https://www.inaturalist.org/observations/127701205</a> |
| 292 | <i>Eudynamys scolopaceus</i> | Western Koel | 2019/2/24  | 1 | 0 | 11.24929474 | 76.91614967 | <a href="https://www.inaturalist.org/observations/79668322">https://www.inaturalist.org/observations/79668322</a>   |
| 293 | <i>Eudynamys scolopaceus</i> | Western Koel | 2022/3/2   | 6 | 0 | 11.25461731 | 79.52676404 | <a href="https://www.inaturalist.org/observations/107938782">https://www.inaturalist.org/observations/107938782</a> |
| 294 | <i>Eudynamys scolopaceus</i> | Western Koel | 2019/12/3  | 3 | 0 | 11.27578553 | 77.58298729 | <a href="https://www.inaturalist.org/observations/37125625">https://www.inaturalist.org/observations/37125625</a>   |
| 295 | <i>Eudynamys scolopaceus</i> | Western Koel | 2022/2/7   | 4 | 0 | 11.28024244 | 79.51297045 | <a href="https://www.inaturalist.org/observations/106562279">https://www.inaturalist.org/observations/106562279</a> |
| 296 | <i>Eudynamys scolopaceus</i> | Western Koel | 2018/10/18 | 3 | 0 | 11.29822260 | 77.55831130 | <a href="https://www.inaturalist.org/observations/38752049">https://www.inaturalist.org/observations/38752049</a>   |
| 297 | <i>Eudynamys scolopaceus</i> | Western Koel | 2020/4/21  | 3 | 0 | 11.30350450 | 75.86211010 | <a href="https://www.inaturalist.org/observations/48637791">https://www.inaturalist.org/observations/48637791</a>   |
| 298 | <i>Eudynamys scolopaceus</i> | Western Koel | 2020/5/3   | 3 | 0 | 11.30350450 | 75.86211010 | <a href="https://www.inaturalist.org/observations/48637976">https://www.inaturalist.org/observations/48637976</a>   |

|     |                                      |              |            |   |   |             |             |                                                                                                                     |
|-----|--------------------------------------|--------------|------------|---|---|-------------|-------------|---------------------------------------------------------------------------------------------------------------------|
| 299 | Eudynamys scolopaceus                | Western Koel | 2019/11/18 | 2 | 0 | 11.31535705 | 77.54306462 | <a href="https://www.inaturalist.org/observations/86274010">https://www.inaturalist.org/observations/86274010</a>   |
| 300 | Eudynamys scolopaceus                | Western Koel | 2021/7/24  | 1 | 0 | 11.32304662 | 79.24335279 | <a href="https://www.inaturalist.org/observations/89424644">https://www.inaturalist.org/observations/89424644</a>   |
| 301 | Eudynamys scolopaceus                | Western Koel | 2021/12/8  | 3 | 0 | 11.35793900 | 76.80019400 | <a href="https://www.inaturalist.org/observations/102692415">https://www.inaturalist.org/observations/102692415</a> |
| 302 | Eudynamys scolopaceus                | Western Koel | 2019/3/24  | 2 | 0 | 11.47320910 | 76.67901380 | <a href="https://www.inaturalist.org/observations/23017491">https://www.inaturalist.org/observations/23017491</a>   |
| 303 | Eudynamys scolopaceus                | Western Koel | 2022/2/20  | 4 | 0 | 11.50490636 | 92.70149709 | <a href="https://www.inaturalist.org/observations/107827521">https://www.inaturalist.org/observations/107827521</a> |
| 304 | Eudynamys scolopaceus                | Western Koel | 2015/4/24  | 7 | 0 | 11.59414000 | 78.60143000 | <a href="http://www.inaturalist.org/observations/1535444">http://www.inaturalist.org/observations/1535444</a>       |
| 305 | Eudynamys scolopaceus                | Western Koel | 2022/1/9   | 1 | 0 | 11.61537284 | 92.61920895 | <a href="https://www.inaturalist.org/observations/104639747">https://www.inaturalist.org/observations/104639747</a> |
| 306 | Eudynamys scolopaceus                | Western Koel | 2021/3/24  | 2 | 0 | 11.68388914 | 78.16556409 | <a href="https://www.inaturalist.org/observations/71931669">https://www.inaturalist.org/observations/71931669</a>   |
| 307 | Eudynamys scolopaceus                | Western Koel | 2021/5/20  | 2 | 0 | 11.68388914 | 78.16556409 | <a href="https://www.inaturalist.org/observations/79494104">https://www.inaturalist.org/observations/79494104</a>   |
| 308 | Eudynamys scolopaceus                | Western Koel | 2021/5/21  | 1 | 0 | 11.68388914 | 78.16556409 | <a href="https://www.inaturalist.org/observations/79724317">https://www.inaturalist.org/observations/79724317</a>   |
| 309 | Eudynamys scolopaceus                | Western Koel | 2021/5/21  | 1 | 0 | 11.68388914 | 78.16556409 | <a href="https://www.inaturalist.org/observations/79735815">https://www.inaturalist.org/observations/79735815</a>   |
| 310 | Eudynamys scolopaceus                | Western Koel | 2021/12/25 | 1 | 0 | 11.68742128 | 78.18066828 | <a href="https://www.inaturalist.org/observations/103620734">https://www.inaturalist.org/observations/103620734</a> |
| 311 | Eudynamys scolopaceus                | Western Koel | 2021/6/13  | 1 | 0 | 11.69761230 | 78.18062872 | <a href="https://www.inaturalist.org/observations/82789647">https://www.inaturalist.org/observations/82789647</a>   |
| 312 | Eudynamys scolopaceus                | Western Koel | 2021/6/13  | 0 | 0 | 11.69761230 | 78.18062872 | <a href="https://www.inaturalist.org/observations/82789840">https://www.inaturalist.org/observations/82789840</a>   |
| 313 | Eudynamys scolopaceus                | Western Koel | 2016/12/28 | 2 | 0 | 11.70326738 | 76.64108667 | <a href="https://www.inaturalist.org/observations/68725785">https://www.inaturalist.org/observations/68725785</a>   |
| 314 | Eudynamys scolopaceus                | Western Koel | 2018/3/23  | 2 | 0 | 11.72019670 | 92.73345460 | <a href="https://www.inaturalist.org/observations/101164083">https://www.inaturalist.org/observations/101164083</a> |
| 315 | Eudynamys scolopaceus                | Western Koel | 2018/11/28 | 1 | 0 | 11.73446034 | 78.20203878 | <a href="https://www.inaturalist.org/observations/54529533">https://www.inaturalist.org/observations/54529533</a>   |
| 316 | Eudynamys scolopaceus                | Western Koel | 2022/2/21  | 3 | 0 | 11.79615407 | 92.71869267 | <a href="https://www.inaturalist.org/observations/107877426">https://www.inaturalist.org/observations/107877426</a> |
| 317 | Eudynamys scolopaceus                | Western Koel | 2017/12/11 | 2 | 0 | 11.84390466 | 92.72980121 | <a href="https://www.inaturalist.org/observations/9558309">https://www.inaturalist.org/observations/9558309</a>     |
| 318 | Eudynamys scolopaceus                | Western Koel | 2017/12/15 | 3 | 0 | 11.84390466 | 92.72980121 | <a href="https://www.inaturalist.org/observations/9558310">https://www.inaturalist.org/observations/9558310</a>     |
| 319 | Eudynamys scolopaceus                | Western Koel | 2021/12/9  | 3 | 0 | 11.87619017 | 75.39904022 | <a href="https://www.inaturalist.org/observations/102760206">https://www.inaturalist.org/observations/102760206</a> |
| 320 | Eudynamys scolopaceus<br>scolopaceus | Western Koel | 2020/2/7   | 2 | 0 | 11.89613102 | 75.36956642 | <a href="https://www.inaturalist.org/observations/67039996">https://www.inaturalist.org/observations/67039996</a>   |
| 321 | Eudynamys scolopaceus                | Western Koel | 2020/2/7   | 2 | 0 | 11.89613102 | 75.36956642 | <a href="https://www.inaturalist.org/observations/67039999">https://www.inaturalist.org/observations/67039999</a>   |

|     |                              |              |            |    |   |             |             |                                                                                                                     |
|-----|------------------------------|--------------|------------|----|---|-------------|-------------|---------------------------------------------------------------------------------------------------------------------|
| 322 | <i>Eudynamys scolopaceus</i> | Western Koel | 2018/6/14  | 1  | 0 | 11.91013671 | 76.37264885 | <a href="https://www.inaturalist.org/observations/97807222">https://www.inaturalist.org/observations/97807222</a>   |
| 323 | <i>Eudynamys scolopaceus</i> | Western Koel | 2013/1/15  | 1  | 0 | 11.91056610 | 78.61646590 | <a href="https://www.inaturalist.org/observations/97325987">https://www.inaturalist.org/observations/97325987</a>   |
| 324 | <i>Eudynamys scolopaceus</i> | Western Koel | 2013/1/13  | 1  | 0 | 11.91056610 | 78.61646590 | <a href="https://www.inaturalist.org/observations/97326054">https://www.inaturalist.org/observations/97326054</a>   |
| 325 | <i>Eudynamys scolopaceus</i> | Western Koel | 2020/12/12 | 1  | 0 | 11.96711120 | 76.63725310 | <a href="https://www.inaturalist.org/observations/95033199">https://www.inaturalist.org/observations/95033199</a>   |
| 326 | <i>Eudynamys scolopaceus</i> | Western Koel | 2020/4/5   | 4  | 0 | 11.98427631 | 75.39945457 | <a href="https://www.inaturalist.org/observations/44403379">https://www.inaturalist.org/observations/44403379</a>   |
| 327 | <i>Eudynamys scolopaceus</i> | Western Koel | 2021/4/24  | 3  | 0 | 11.98828865 | 75.32232765 | <a href="https://www.inaturalist.org/observations/75014974">https://www.inaturalist.org/observations/75014974</a>   |
| 328 | <i>Eudynamys scolopaceus</i> | Western Koel | 2017/2/19  | 5  | 0 | 12.01138500 | 75.20902000 | <a href="https://www.inaturalist.org/observations/30663914">https://www.inaturalist.org/observations/30663914</a>   |
| 329 | <i>Eudynamys scolopaceus</i> | Western Koel | 2017/12/28 | 4  | 0 | 12.01138500 | 75.20961000 | <a href="https://www.inaturalist.org/observations/18029917">https://www.inaturalist.org/observations/18029917</a>   |
| 330 | <i>Eudynamys scolopaceus</i> | Western Koel | 2017/12/28 | 10 | 0 | 12.01189000 | 75.20920000 | <a href="https://www.inaturalist.org/observations/18029921">https://www.inaturalist.org/observations/18029921</a>   |
| 331 | <i>Eudynamys scolopaceus</i> | Western Koel | 2016/9/2   | 5  | 0 | 12.01389963 | 75.20599184 | <a href="https://www.inaturalist.org/observations/30665043">https://www.inaturalist.org/observations/30665043</a>   |
| 332 | <i>Eudynamys scolopaceus</i> | Western Koel | 2021/12/23 | 1  | 0 | 12.02686493 | 75.36451109 | <a href="https://www.inaturalist.org/observations/103828741">https://www.inaturalist.org/observations/103828741</a> |
| 333 | <i>Eudynamys scolopaceus</i> | Western Koel | 2017/3/19  | 3  | 0 | 12.02853161 | 75.20036923 | <a href="https://www.inaturalist.org/observations/30603907">https://www.inaturalist.org/observations/30603907</a>   |
| 334 | <i>Eudynamys scolopaceus</i> | Western Koel | 2017/2/8   | 1  | 0 | 12.03747360 | 92.98714120 | <a href="https://www.inaturalist.org/observations/82025987">https://www.inaturalist.org/observations/82025987</a>   |
| 335 | <i>Eudynamys scolopaceus</i> | Western Koel | 2021/6/8   | 1  | 0 | 12.04100695 | 75.20998199 | <a href="https://www.inaturalist.org/observations/82133314">https://www.inaturalist.org/observations/82133314</a>   |
| 336 | <i>Eudynamys scolopaceus</i> | Western Koel | 2017/2/18  | 4  | 0 | 12.05445000 | 75.19920167 | <a href="https://www.inaturalist.org/observations/30660624">https://www.inaturalist.org/observations/30660624</a>   |
| 337 | <i>Eudynamys scolopaceus</i> | Western Koel | 2017/3/20  | 5  | 0 | 12.05450833 | 75.19943833 | <a href="https://www.inaturalist.org/observations/30664085">https://www.inaturalist.org/observations/30664085</a>   |
| 338 | <i>Eudynamys scolopaceus</i> | Western Koel | 2020/4/9   | 2  | 0 | 12.05749173 | 75.20062657 | <a href="https://www.inaturalist.org/observations/41766916">https://www.inaturalist.org/observations/41766916</a>   |
| 339 | <i>Eudynamys scolopaceus</i> | Western Koel | 2020/2/17  | 3  | 0 | 12.10220333 | 75.23668500 | <a href="https://www.inaturalist.org/observations/39321567">https://www.inaturalist.org/observations/39321567</a>   |
| 340 | <i>Eudynamys scolopaceus</i> | Western Koel | 2022/4/6   | 1  | 0 | 12.14453762 | 75.93820307 | <a href="https://www.inaturalist.org/observations/111166540">https://www.inaturalist.org/observations/111166540</a> |
| 341 | <i>Eudynamys scolopaceus</i> | Western Koel | 2020/1/30  | 0  | 0 | 12.14503193 | 75.93902588 | <a href="https://www.inaturalist.org/observations/38212286">https://www.inaturalist.org/observations/38212286</a>   |
| 342 | <i>Eudynamys scolopaceus</i> | Western Koel | 2022/4/14  | 2  | 0 | 12.15150466 | 75.94302770 | <a href="https://www.inaturalist.org/observations/131545812">https://www.inaturalist.org/observations/131545812</a> |
| 343 | <i>Eudynamys scolopaceus</i> | Western Koel | 2022/1/26  | 2  | 0 | 12.17021100 | 76.54373700 | <a href="https://www.inaturalist.org/observations/105649507">https://www.inaturalist.org/observations/105649507</a> |
| 344 | <i>Eudynamys scolopaceus</i> | Western Koel | 2021/7/24  | 1  | 0 | 12.22430563 | 76.63947082 | <a href="https://www.inaturalist.org/observations/88391379">https://www.inaturalist.org/observations/88391379</a>   |

|     |                              |              |            |   |   |             |             |                                                                                                                     |
|-----|------------------------------|--------------|------------|---|---|-------------|-------------|---------------------------------------------------------------------------------------------------------------------|
| 345 | <i>Eudynamys scolopaceus</i> | Western Koel | 2016/1/31  | 1 | 0 | 12.22528410 | 79.07469570 | <a href="https://www.inaturalist.org/observations/96349383">https://www.inaturalist.org/observations/96349383</a>   |
| 346 | <i>Eudynamys scolopaceus</i> | Western Koel | 2020/12/20 | 1 | 0 | 12.25438333 | 75.27689667 | <a href="https://www.inaturalist.org/observations/66994044">https://www.inaturalist.org/observations/66994044</a>   |
| 347 | <i>Eudynamys scolopaceus</i> | Western Koel | 2020/11/14 | 1 | 0 | 12.26269942 | 76.56762058 | <a href="https://www.inaturalist.org/observations/95042471">https://www.inaturalist.org/observations/95042471</a>   |
| 348 | <i>Eudynamys scolopaceus</i> | Western Koel | 2022/1/9   | 1 | 0 | 12.26269942 | 76.56762058 | <a href="https://www.inaturalist.org/observations/104636012">https://www.inaturalist.org/observations/104636012</a> |
| 349 | <i>Eudynamys scolopaceus</i> | Western Koel | 2021/7/20  | 2 | 0 | 12.26696130 | 75.13407882 | <a href="https://www.inaturalist.org/observations/87896592">https://www.inaturalist.org/observations/87896592</a>   |
| 350 | <i>Eudynamys scolopaceus</i> | Western Koel | 2021/12/8  | 2 | 0 | 12.26937200 | 76.61197800 | <a href="https://www.inaturalist.org/observations/102753864">https://www.inaturalist.org/observations/102753864</a> |
| 351 | <i>Eudynamys scolopaceus</i> | Western Koel | 2021/12/11 | 3 | 0 | 12.26937200 | 76.61197800 | <a href="https://www.inaturalist.org/observations/103041635">https://www.inaturalist.org/observations/103041635</a> |
| 352 | <i>Eudynamys scolopaceus</i> | Western Koel | 2018/2/24  | 7 | 0 | 12.27107720 | 76.61383270 | <a href="https://www.inaturalist.org/observations/10111975">https://www.inaturalist.org/observations/10111975</a>   |
| 353 | <i>Eudynamys scolopaceus</i> | Western Koel | 2020/7/29  | 2 | 0 | 12.27360601 | 76.60979985 | <a href="https://www.inaturalist.org/observations/54722633">https://www.inaturalist.org/observations/54722633</a>   |
| 354 | <i>Eudynamys scolopaceus</i> | Western Koel | 2020/7/29  | 3 | 0 | 12.27405700 | 76.61034200 | <a href="https://www.inaturalist.org/observations/54722634">https://www.inaturalist.org/observations/54722634</a>   |
| 355 | <i>Eudynamys scolopaceus</i> | Western Koel | 2018/12/23 | 4 | 0 | 12.27500333 | 76.61572000 | <a href="https://www.inaturalist.org/observations/19331400">https://www.inaturalist.org/observations/19331400</a>   |
| 356 | <i>Eudynamys scolopaceus</i> | Western Koel | 2019/2/25  | 3 | 0 | 12.27522849 | 76.61288726 | <a href="https://www.inaturalist.org/observations/69430422">https://www.inaturalist.org/observations/69430422</a>   |
| 357 | <i>Eudynamys scolopaceus</i> | Western Koel | 2019/11/10 | 1 | 0 | 12.27525460 | 76.67014750 | <a href="https://www.inaturalist.org/observations/88663090">https://www.inaturalist.org/observations/88663090</a>   |
| 358 | <i>Eudynamys scolopaceus</i> | Western Koel | 2021/2/14  | 3 | 0 | 12.28282333 | 76.61473333 | <a href="https://www.inaturalist.org/observations/78184398">https://www.inaturalist.org/observations/78184398</a>   |
| 359 | <i>Eudynamys scolopaceus</i> | Western Koel | 2018/2/22  | 5 | 0 | 12.28302110 | 76.61494013 | <a href="https://www.inaturalist.org/observations/9956879">https://www.inaturalist.org/observations/9956879</a>     |
| 360 | <i>Eudynamys scolopaceus</i> | Western Koel | 2021/1/9   | 4 | 0 | 12.28416609 | 75.16022064 | <a href="https://www.inaturalist.org/observations/67788635">https://www.inaturalist.org/observations/67788635</a>   |
| 361 | <i>Eudynamys scolopaceus</i> | Western Koel | 2015/3/20  | 7 | 0 | 12.29581000 | 76.63938100 | <a href="http://www.inaturalist.org/observations/1379252">http://www.inaturalist.org/observations/1379252</a>       |
| 362 | <i>Eudynamys scolopaceus</i> | Western Koel | 2012/2/5   | 2 | 0 | 12.29581040 | 76.63938050 | <a href="https://www.inaturalist.org/observations/52014968">https://www.inaturalist.org/observations/52014968</a>   |
| 363 | <i>Eudynamys scolopaceus</i> | Western Koel | 2020/1/8   | 1 | 0 | 12.29607236 | 76.62560884 | <a href="https://www.inaturalist.org/observations/37817939">https://www.inaturalist.org/observations/37817939</a>   |
| 364 | <i>Eudynamys scolopaceus</i> | Western Koel | 2012/8/11  | 2 | 0 | 12.29836060 | 76.67232940 | <a href="https://www.inaturalist.org/observations/41748619">https://www.inaturalist.org/observations/41748619</a>   |
| 365 | <i>Eudynamys scolopaceus</i> | Western Koel | 2019/1/20  | 3 | 0 | 12.30792059 | 76.63619868 | <a href="https://www.inaturalist.org/observations/19780223">https://www.inaturalist.org/observations/19780223</a>   |
| 366 | <i>Eudynamys scolopaceus</i> | Western Koel | 2022/7/23  | 3 | 0 | 12.30921890 | 76.55560459 | <a href="https://www.inaturalist.org/observations/127477981">https://www.inaturalist.org/observations/127477981</a> |
| 367 | <i>Eudynamys scolopaceus</i> | Western Koel | 2019/9/12  | 2 | 0 | 12.31586338 | 76.69137917 | <a href="https://www.inaturalist.org/observations/71493261">https://www.inaturalist.org/observations/71493261</a>   |



|     |                              |              |            |   |   |             |             |                                                                                                                     |
|-----|------------------------------|--------------|------------|---|---|-------------|-------------|---------------------------------------------------------------------------------------------------------------------|
| 368 | <i>Eudynamys scolopaceus</i> | Western Koel | 2019/1/6   | 4 | 0 | 12.31973750 | 76.69734770 | <a href="https://www.inaturalist.org/observations/19512072">https://www.inaturalist.org/observations/19512072</a>   |
| 369 | <i>Eudynamys scolopaceus</i> | Western Koel | 2020/1/22  | 4 | 0 | 12.36791488 | 76.48079230 | <a href="https://www.inaturalist.org/observations/38319694">https://www.inaturalist.org/observations/38319694</a>   |
| 370 | <i>Eudynamys scolopaceus</i> | Western Koel | 2020/1/24  | 3 | 0 | 12.36791488 | 76.48079230 | <a href="https://www.inaturalist.org/observations/38319722">https://www.inaturalist.org/observations/38319722</a>   |
| 371 | <i>Eudynamys scolopaceus</i> | Western Koel | 2017/12/26 | 2 | 0 | 12.41598000 | 77.64980167 | <a href="https://www.inaturalist.org/observations/65137418">https://www.inaturalist.org/observations/65137418</a>   |
| 372 | <i>Eudynamys scolopaceus</i> | Western Koel | 2019/6/2   | 4 | 0 | 12.41598196 | 77.85583910 | <a href="https://www.inaturalist.org/observations/126171351">https://www.inaturalist.org/observations/126171351</a> |
| 373 | <i>Eudynamys scolopaceus</i> | Western Koel | 2019/1/21  | 4 | 0 | 12.42337737 | 76.65579926 | <a href="https://www.inaturalist.org/observations/19799916">https://www.inaturalist.org/observations/19799916</a>   |
| 374 | <i>Eudynamys scolopaceus</i> | Western Koel | 2019/1/21  | 3 | 0 | 12.42383511 | 76.65491916 | <a href="https://www.inaturalist.org/observations/19799906">https://www.inaturalist.org/observations/19799906</a>   |
| 375 | <i>Eudynamys scolopaceus</i> | Western Koel | 2017/12/25 | 2 | 0 | 12.42835200 | 77.65528700 | <a href="https://www.inaturalist.org/observations/65137415">https://www.inaturalist.org/observations/65137415</a>   |
| 376 | <i>Eudynamys scolopaceus</i> | Western Koel | 2021/1/23  | 2 | 0 | 12.44703279 | 76.58019383 | <a href="https://www.inaturalist.org/observations/68592608">https://www.inaturalist.org/observations/68592608</a>   |
| 377 | <i>Eudynamys scolopaceus</i> | Western Koel | 2020/9/22  | 2 | 0 | 12.50947777 | 79.88655598 | <a href="https://www.inaturalist.org/observations/63466827">https://www.inaturalist.org/observations/63466827</a>   |
| 378 | <i>Eudynamys scolopaceus</i> | Western Koel | 2015/10/23 | 4 | 0 | 12.57528639 | 80.00165472 | <a href="https://www.inaturalist.org/observations/22609679">https://www.inaturalist.org/observations/22609679</a>   |
| 379 | <i>Eudynamys scolopaceus</i> | Western Koel | 2021/11/28 | 1 | 0 | 12.60355595 | 77.95687298 | <a href="https://www.inaturalist.org/observations/102135377">https://www.inaturalist.org/observations/102135377</a> |
| 380 | <i>Eudynamys scolopaceus</i> | Western Koel | 2021/10/3  | 1 | 0 | 12.62829834 | 74.94471985 | <a href="https://www.inaturalist.org/observations/97151832">https://www.inaturalist.org/observations/97151832</a>   |
| 381 | <i>Eudynamys scolopaceus</i> | Western Koel | 2021/10/3  | 1 | 0 | 12.62829834 | 74.94471985 | <a href="https://www.inaturalist.org/observations/97151880">https://www.inaturalist.org/observations/97151880</a>   |
| 382 | <i>Eudynamys scolopaceus</i> | Western Koel | 2013/1/26  | 1 | 0 | 12.64780281 | 76.62294091 | <a href="https://www.inaturalist.org/observations/98110930">https://www.inaturalist.org/observations/98110930</a>   |
| 383 | <i>Eudynamys scolopaceus</i> | Western Koel | 2021/12/19 | 1 | 0 | 12.67299035 | 77.91888646 | <a href="https://www.inaturalist.org/observations/103307765">https://www.inaturalist.org/observations/103307765</a> |
| 384 | <i>Eudynamys scolopaceus</i> | Western Koel | 2020/12/21 | 1 | 0 | 12.68312463 | 79.98841312 | <a href="https://www.inaturalist.org/observations/72353480">https://www.inaturalist.org/observations/72353480</a>   |
| 385 | <i>Eudynamys scolopaceus</i> | Western Koel | 2021/1/8   | 4 | 0 | 12.69622325 | 75.10973603 | <a href="https://www.inaturalist.org/observations/67734222">https://www.inaturalist.org/observations/67734222</a>   |
| 386 | <i>Eudynamys scolopaceus</i> | Western Koel | 2021/12/16 | 3 | 0 | 12.71181722 | 77.94295739 | <a href="https://www.inaturalist.org/observations/103308145">https://www.inaturalist.org/observations/103308145</a> |
| 387 | <i>Eudynamys scolopaceus</i> | Western Koel | 2021/12/19 | 1 | 0 | 12.71302518 | 77.81449028 | <a href="https://www.inaturalist.org/observations/103948006">https://www.inaturalist.org/observations/103948006</a> |
| 388 | <i>Eudynamys scolopaceus</i> | Western Koel | 2021/12/19 | 1 | 0 | 12.71303810 | 77.81446890 | <a href="https://www.inaturalist.org/observations/103948007">https://www.inaturalist.org/observations/103948007</a> |
| 389 | <i>Eudynamys scolopaceus</i> | Western Koel | 2021/12/19 | 1 | 0 | 12.71367080 | 77.81445943 | <a href="https://www.inaturalist.org/observations/103948005">https://www.inaturalist.org/observations/103948005</a> |
| 390 | <i>Eudynamys scolopaceus</i> | Western Koel | 2021/12/19 | 2 | 0 | 12.71369221 | 77.81449572 | <a href="https://www.inaturalist.org/observations/103948010">https://www.inaturalist.org/observations/103948010</a> |

|     |                              |              |            |   |   |             |             |                                                                                                                     |
|-----|------------------------------|--------------|------------|---|---|-------------|-------------|---------------------------------------------------------------------------------------------------------------------|
| 391 | <i>Eudynamys scolopaceus</i> | Western Koel | 2021/12/31 | 1 | 0 | 12.71384972 | 77.81438833 | <a href="https://www.inaturalist.org/observations/106980784">https://www.inaturalist.org/observations/106980784</a> |
| 392 | <i>Eudynamys scolopaceus</i> | Western Koel | 2022/1/28  | 1 | 0 | 12.71384972 | 77.81438833 | <a href="https://www.inaturalist.org/observations/106980861">https://www.inaturalist.org/observations/106980861</a> |
| 393 | <i>Eudynamys scolopaceus</i> | Western Koel | 2021/12/19 | 2 | 0 | 12.71395198 | 77.81423461 | <a href="https://www.inaturalist.org/observations/103948000">https://www.inaturalist.org/observations/103948000</a> |
| 394 | <i>Eudynamys scolopaceus</i> | Western Koel | 2021/12/4  | 1 | 0 | 12.71967449 | 77.91354155 | <a href="https://www.inaturalist.org/observations/102524686">https://www.inaturalist.org/observations/102524686</a> |
| 395 | <i>Eudynamys scolopaceus</i> | Western Koel | 2021/12/4  | 1 | 0 | 12.72182302 | 77.82010720 | <a href="https://www.inaturalist.org/observations/102524254">https://www.inaturalist.org/observations/102524254</a> |
| 396 | <i>Eudynamys scolopaceus</i> | Western Koel | 2022/2/20  | 2 | 0 | 12.72547600 | 77.86116090 | <a href="https://www.inaturalist.org/observations/107474585">https://www.inaturalist.org/observations/107474585</a> |
| 397 | <i>Eudynamys scolopaceus</i> | Western Koel | 2022/2/20  | 2 | 0 | 12.72547600 | 77.86116090 | <a href="https://www.inaturalist.org/observations/107474591">https://www.inaturalist.org/observations/107474591</a> |
| 398 | <i>Eudynamys scolopaceus</i> | Western Koel | 2022/2/20  | 2 | 0 | 12.72547600 | 77.86116090 | <a href="https://www.inaturalist.org/observations/107474601">https://www.inaturalist.org/observations/107474601</a> |
| 399 | <i>Eudynamys scolopaceus</i> | Western Koel | 2022/8/19  | 3 | 0 | 12.72568839 | 77.86305386 | <a href="https://www.inaturalist.org/observations/132134947">https://www.inaturalist.org/observations/132134947</a> |
| 400 | <i>Eudynamys scolopaceus</i> | Western Koel | 2022/2/20  | 3 | 0 | 12.72597167 | 77.86034333 | <a href="https://www.inaturalist.org/observations/107118249">https://www.inaturalist.org/observations/107118249</a> |
| 401 | <i>Eudynamys scolopaceus</i> | Western Koel | 2022/2/20  | 2 | 0 | 12.72709333 | 77.86208833 | <a href="https://www.inaturalist.org/observations/107118237">https://www.inaturalist.org/observations/107118237</a> |
| 402 | <i>Eudynamys scolopaceus</i> | Western Koel | 2022/2/20  | 2 | 0 | 12.72769500 | 77.86251833 | <a href="https://www.inaturalist.org/observations/107118242">https://www.inaturalist.org/observations/107118242</a> |
| 403 | <i>Eudynamys scolopaceus</i> | Western Koel | 2014/9/7   | 2 | 0 | 12.76443441 | 77.52961993 | <a href="https://www.inaturalist.org/observations/66514082">https://www.inaturalist.org/observations/66514082</a>   |
| 404 | <i>Eudynamys scolopaceus</i> | Western Koel | 2000/1/1   | 4 | 0 | 12.77371383 | 77.61810746 | <a href="https://www.inaturalist.org/observations/125146756">https://www.inaturalist.org/observations/125146756</a> |
| 405 | <i>Eudynamys scolopaceus</i> | Western Koel | 2020/9/9   | 3 | 0 | 12.77910303 | 77.64359783 | <a href="https://www.inaturalist.org/observations/62115962">https://www.inaturalist.org/observations/62115962</a>   |
| 406 | <i>Eudynamys scolopaceus</i> | Western Koel | 2022/6/29  | 3 | 0 | 12.80600120 | 80.21857910 | <a href="https://www.inaturalist.org/observations/123968522">https://www.inaturalist.org/observations/123968522</a> |
| 407 | <i>Eudynamys scolopaceus</i> | Western Koel | 2020/8/6   | 1 | 0 | 12.80903350 | 74.89286180 | <a href="https://www.inaturalist.org/observations/55551071">https://www.inaturalist.org/observations/55551071</a>   |
| 408 | <i>Eudynamys scolopaceus</i> | Western Koel | 2021/10/8  | 2 | 0 | 12.80952594 | 77.52684833 | <a href="https://www.inaturalist.org/observations/105768632">https://www.inaturalist.org/observations/105768632</a> |
| 409 | <i>Eudynamys scolopaceus</i> | Western Koel | 2022/2/3   | 1 | 0 | 12.81290805 | 77.52792573 | <a href="https://www.inaturalist.org/observations/106078237">https://www.inaturalist.org/observations/106078237</a> |
| 410 | <i>Eudynamys scolopaceus</i> | Western Koel | 2022/3/20  | 4 | 0 | 12.83681537 | 77.75931437 | <a href="https://www.inaturalist.org/observations/109026629">https://www.inaturalist.org/observations/109026629</a> |
| 411 | <i>Eudynamys scolopaceus</i> | Western Koel | 2020/7/1   | 3 | 0 | 12.83858335 | 77.65216914 | <a href="https://www.inaturalist.org/observations/84538551">https://www.inaturalist.org/observations/84538551</a>   |
| 412 | <i>Eudynamys scolopaceus</i> | Western Koel | 2021/2/20  | 1 | 0 | 12.84064788 | 75.38225658 | <a href="https://www.inaturalist.org/observations/70247954">https://www.inaturalist.org/observations/70247954</a>   |
| 413 | <i>Eudynamys scolopaceus</i> | Western Koel | 2020/12/31 | 4 | 0 | 12.84196047 | 80.17386101 | <a href="https://www.inaturalist.org/observations/67620650">https://www.inaturalist.org/observations/67620650</a>   |

|     |                              |              |            |   |   |             |             |                                                                                                                     |
|-----|------------------------------|--------------|------------|---|---|-------------|-------------|---------------------------------------------------------------------------------------------------------------------|
| 414 | <i>Eudynamys scolopaceus</i> | Western Koel | 2022/7/31  | 4 | 0 | 12.84240270 | 77.72698600 | <a href="https://www.inaturalist.org/observations/133089374">https://www.inaturalist.org/observations/133089374</a> |
| 415 | <i>Eudynamys scolopaceus</i> | Western Koel | 2021/10/2  | 1 | 0 | 12.84275000 | 77.72446300 | <a href="https://www.inaturalist.org/observations/97151936">https://www.inaturalist.org/observations/97151936</a>   |
| 416 | <i>Eudynamys scolopaceus</i> | Western Koel | 2022/1/15  | 4 | 0 | 12.84275000 | 77.72446300 | <a href="https://www.inaturalist.org/observations/105020320">https://www.inaturalist.org/observations/105020320</a> |
| 417 | <i>Eudynamys scolopaceus</i> | Western Koel | 2021/8/27  | 3 | 0 | 12.84275000 | 77.72446300 | <a href="https://www.inaturalist.org/observations/105407425">https://www.inaturalist.org/observations/105407425</a> |
| 418 | <i>Eudynamys scolopaceus</i> | Western Koel | 2018/3/17  | 2 | 0 | 12.85301910 | 77.50244260 | <a href="https://www.inaturalist.org/observations/64930342">https://www.inaturalist.org/observations/64930342</a>   |
| 419 | <i>Eudynamys scolopaceus</i> | Western Koel | 2018/8/5   | 4 | 0 | 12.85361833 | 77.50742500 | <a href="https://www.inaturalist.org/observations/15161461">https://www.inaturalist.org/observations/15161461</a>   |
| 420 | <i>Eudynamys scolopaceus</i> | Western Koel | 2020/2/1   | 2 | 0 | 12.85400090 | 77.50871148 | <a href="https://www.inaturalist.org/observations/61773023">https://www.inaturalist.org/observations/61773023</a>   |
| 421 | <i>Eudynamys scolopaceus</i> | Western Koel | 2018/12/30 | 6 | 0 | 12.85502749 | 80.22369534 | <a href="https://www.inaturalist.org/observations/19390640">https://www.inaturalist.org/observations/19390640</a>   |
| 422 | <i>Eudynamys scolopaceus</i> | Western Koel | 2021/3/7   | 1 | 0 | 12.85718650 | 77.50891100 | <a href="https://www.inaturalist.org/observations/70743651">https://www.inaturalist.org/observations/70743651</a>   |
| 423 | <i>Eudynamys scolopaceus</i> | Western Koel | 2021/3/7   | 1 | 0 | 12.85718650 | 77.50891100 | <a href="https://www.inaturalist.org/observations/70743688">https://www.inaturalist.org/observations/70743688</a>   |
| 424 | <i>Eudynamys scolopaceus</i> | Western Koel | 2020/3/23  | 3 | 0 | 12.86430660 | 77.52127510 | <a href="https://www.inaturalist.org/observations/54837297">https://www.inaturalist.org/observations/54837297</a>   |
| 425 | <i>Eudynamys scolopaceus</i> | Western Koel | 2020/3/18  | 2 | 0 | 12.86430660 | 77.52127510 | <a href="https://www.inaturalist.org/observations/54837299">https://www.inaturalist.org/observations/54837299</a>   |
| 426 | <i>Eudynamys scolopaceus</i> | Western Koel | 2021/11/21 | 1 | 0 | 12.87315211 | 77.52045631 | <a href="https://www.inaturalist.org/observations/101607906">https://www.inaturalist.org/observations/101607906</a> |
| 427 | <i>Eudynamys scolopaceus</i> | Western Koel | 2020/11/4  | 3 | 0 | 12.87330091 | 77.52265904 | <a href="https://www.inaturalist.org/observations/64167466">https://www.inaturalist.org/observations/64167466</a>   |
| 428 | <i>Eudynamys scolopaceus</i> | Western Koel | 2020/11/4  | 3 | 0 | 12.87339145 | 77.52226442 | <a href="https://www.inaturalist.org/observations/64169141">https://www.inaturalist.org/observations/64169141</a>   |
| 429 | <i>Eudynamys scolopaceus</i> | Western Koel | 2020/11/5  | 2 | 0 | 12.87346303 | 77.51926102 | <a href="https://www.inaturalist.org/observations/64232509">https://www.inaturalist.org/observations/64232509</a>   |
| 430 | <i>Eudynamys scolopaceus</i> | Western Koel | 2022/6/22  | 3 | 0 | 12.87379347 | 77.49782145 | <a href="https://www.inaturalist.org/observations/122922260">https://www.inaturalist.org/observations/122922260</a> |
| 431 | <i>Eudynamys scolopaceus</i> | Western Koel | 2018/1/28  | 2 | 0 | 12.87394525 | 77.48356810 | <a href="https://www.inaturalist.org/observations/67036585">https://www.inaturalist.org/observations/67036585</a>   |
| 432 | <i>Eudynamys scolopaceus</i> | Western Koel | 2020/10/27 | 2 | 0 | 12.87420550 | 77.52724260 | <a href="https://www.inaturalist.org/observations/63621704">https://www.inaturalist.org/observations/63621704</a>   |
| 433 | <i>Eudynamys scolopaceus</i> | Western Koel | 2021/2/13  | 1 | 0 | 12.87420550 | 77.52724260 | <a href="https://www.inaturalist.org/observations/69851638">https://www.inaturalist.org/observations/69851638</a>   |
| 434 | <i>Eudynamys scolopaceus</i> | Western Koel | 2020/11/4  | 2 | 0 | 12.87584836 | 77.51853850 | <a href="https://www.inaturalist.org/observations/64168776">https://www.inaturalist.org/observations/64168776</a>   |
| 435 | <i>Eudynamys scolopaceus</i> | Western Koel | 2021/12/5  | 1 | 0 | 12.87892400 | 77.53009120 | <a href="https://www.inaturalist.org/observations/102527667">https://www.inaturalist.org/observations/102527667</a> |
| 436 | <i>Eudynamys scolopaceus</i> | Western Koel | 2020/10/31 | 2 | 0 | 12.87894620 | 77.52977930 | <a href="https://www.inaturalist.org/observations/63871120">https://www.inaturalist.org/observations/63871120</a>   |

|     |                              |              |            |   |   |             |             |                                                                                                                     |
|-----|------------------------------|--------------|------------|---|---|-------------|-------------|---------------------------------------------------------------------------------------------------------------------|
| 437 | <i>Eudynamys scolopaceus</i> | Western Koel | 2020/12/28 | 1 | 0 | 12.87910180 | 77.52971569 | <a href="https://www.inaturalist.org/observations/67199659">https://www.inaturalist.org/observations/67199659</a>   |
| 438 | <i>Eudynamys scolopaceus</i> | Western Koel | 2021/1/15  | 6 | 0 | 12.87919785 | 79.13032718 | <a href="https://www.inaturalist.org/observations/107939930">https://www.inaturalist.org/observations/107939930</a> |
| 439 | <i>Eudynamys scolopaceus</i> | Western Koel | 2020/11/21 | 2 | 0 | 12.87940639 | 77.52963982 | <a href="https://www.inaturalist.org/observations/65328977">https://www.inaturalist.org/observations/65328977</a>   |
| 440 | <i>Eudynamys scolopaceus</i> | Western Koel | 2021/1/8   | 2 | 0 | 12.87942043 | 74.83640090 | <a href="https://www.inaturalist.org/observations/134274390">https://www.inaturalist.org/observations/134274390</a> |
| 441 | <i>Eudynamys scolopaceus</i> | Western Koel | 2021/1/21  | 2 | 0 | 12.87966654 | 79.13121734 | <a href="https://www.inaturalist.org/observations/68499212">https://www.inaturalist.org/observations/68499212</a>   |
| 442 | <i>Eudynamys scolopaceus</i> | Western Koel | 2021/11/14 | 2 | 0 | 12.88093211 | 77.52918998 | <a href="https://www.inaturalist.org/observations/101099363">https://www.inaturalist.org/observations/101099363</a> |
| 443 | <i>Eudynamys scolopaceus</i> | Western Koel | 2019/2/16  | 4 | 0 | 12.88233048 | 77.52603798 | <a href="https://www.inaturalist.org/observations/21558220">https://www.inaturalist.org/observations/21558220</a>   |
| 444 | <i>Eudynamys scolopaceus</i> | Western Koel | 2020/4/25  | 2 | 0 | 12.88437970 | 77.46371830 | <a href="https://www.inaturalist.org/observations/44093260">https://www.inaturalist.org/observations/44093260</a>   |
| 445 | <i>Eudynamys scolopaceus</i> | Western Koel | 2016/4/14  | 2 | 0 | 12.88662979 | 77.67267399 | <a href="https://www.inaturalist.org/observations/79310117">https://www.inaturalist.org/observations/79310117</a>   |
| 446 | <i>Eudynamys scolopaceus</i> | Western Koel | 2022/7/12  | 2 | 0 | 12.88727658 | 80.21099221 | <a href="https://www.inaturalist.org/observations/125863355">https://www.inaturalist.org/observations/125863355</a> |
| 447 | <i>Eudynamys scolopaceus</i> | Western Koel | 2017/12/3  | 4 | 0 | 12.89006084 | 77.58669913 | <a href="https://www.inaturalist.org/observations/9043772">https://www.inaturalist.org/observations/9043772</a>     |
| 448 | <i>Eudynamys scolopaceus</i> | Western Koel | 2012/3/17  | 3 | 0 | 12.89041400 | 77.58719000 | <a href="https://www.inaturalist.org/observations/86258294">https://www.inaturalist.org/observations/86258294</a>   |
| 449 | <i>Eudynamys scolopaceus</i> | Western Koel | 2021/4/7   | 1 | 0 | 12.89050000 | 77.56400000 | <a href="https://www.inaturalist.org/observations/80291596">https://www.inaturalist.org/observations/80291596</a>   |
| 450 | <i>Eudynamys scolopaceus</i> | Western Koel | 2021/4/7   | 1 | 0 | 12.89050000 | 77.56400000 | <a href="https://www.inaturalist.org/observations/80291598">https://www.inaturalist.org/observations/80291598</a>   |
| 451 | <i>Eudynamys scolopaceus</i> | Western Koel | 2021/4/7   | 2 | 0 | 12.89050000 | 77.56400000 | <a href="https://www.inaturalist.org/observations/80291599">https://www.inaturalist.org/observations/80291599</a>   |
| 452 | <i>Eudynamys scolopaceus</i> | Western Koel | 2020/2/16  | 1 | 0 | 12.89548333 | 77.59019500 | <a href="https://www.inaturalist.org/observations/39083806">https://www.inaturalist.org/observations/39083806</a>   |
| 453 | <i>Eudynamys scolopaceus</i> | Western Koel | 2020/7/12  | 2 | 0 | 12.89729898 | 80.21977309 | <a href="https://www.inaturalist.org/observations/52769269">https://www.inaturalist.org/observations/52769269</a>   |
| 454 | <i>Eudynamys scolopaceus</i> | Western Koel | 2020/6/1   | 2 | 0 | 12.89917930 | 77.66699090 | <a href="https://www.inaturalist.org/observations/48142156">https://www.inaturalist.org/observations/48142156</a>   |
| 455 | <i>Eudynamys scolopaceus</i> | Western Koel | 2020/6/1   | 3 | 0 | 12.89917930 | 77.66699090 | <a href="https://www.inaturalist.org/observations/48142401">https://www.inaturalist.org/observations/48142401</a>   |
| 456 | <i>Eudynamys scolopaceus</i> | Western Koel | 2020/6/6   | 1 | 0 | 12.89917930 | 77.66699090 | <a href="https://www.inaturalist.org/observations/48741586">https://www.inaturalist.org/observations/48741586</a>   |
| 457 | <i>Eudynamys scolopaceus</i> | Western Koel | 2020/8/23  | 2 | 0 | 12.90050833 | 79.09856667 | <a href="https://www.inaturalist.org/observations/57320307">https://www.inaturalist.org/observations/57320307</a>   |
| 458 | <i>Eudynamys scolopaceus</i> | Western Koel | 2020/6/19  | 1 | 0 | 12.90271559 | 79.11381450 | <a href="https://www.inaturalist.org/observations/50146805">https://www.inaturalist.org/observations/50146805</a>   |
| 459 | <i>Eudynamys scolopaceus</i> | Western Koel | 2021/8/3   | 3 | 0 | 12.90332478 | 79.11413667 | <a href="https://www.inaturalist.org/observations/106164869">https://www.inaturalist.org/observations/106164869</a> |

|     |                              |              |            |   |   |             |             |                                                                                                                     |
|-----|------------------------------|--------------|------------|---|---|-------------|-------------|---------------------------------------------------------------------------------------------------------------------|
| 460 | <i>Eudynamys scolopaceus</i> | Western Koel | 2020/6/9   | 2 | 0 | 12.90429049 | 79.10126880 | <a href="https://www.inaturalist.org/observations/49007792">https://www.inaturalist.org/observations/49007792</a>   |
| 461 | <i>Eudynamys scolopaceus</i> | Western Koel | 2022/2/19  | 1 | 0 | 12.90655992 | 77.67636108 | <a href="https://www.inaturalist.org/observations/107036600">https://www.inaturalist.org/observations/107036600</a> |
| 462 | <i>Eudynamys scolopaceus</i> | Western Koel | 2020/7/4   | 1 | 0 | 12.90679560 | 77.67729300 | <a href="https://www.inaturalist.org/observations/51912730">https://www.inaturalist.org/observations/51912730</a>   |
| 463 | <i>Eudynamys scolopaceus</i> | Western Koel | 2020/7/25  | 1 | 0 | 12.91150000 | 80.18580000 | <a href="https://www.inaturalist.org/observations/54405388">https://www.inaturalist.org/observations/54405388</a>   |
| 464 | <i>Eudynamys scolopaceus</i> | Western Koel | 2020/8/15  | 1 | 0 | 12.91287922 | 77.67432560 | <a href="https://www.inaturalist.org/observations/56499884">https://www.inaturalist.org/observations/56499884</a>   |
| 465 | <i>Eudynamys scolopaceus</i> | Western Koel | 2018/9/8   | 1 | 0 | 12.91414200 | 74.85595700 | <a href="https://www.inaturalist.org/observations/16315600">https://www.inaturalist.org/observations/16315600</a>   |
| 466 | <i>Eudynamys scolopaceus</i> | Western Koel | 2019/12/22 | 1 | 0 | 12.91510729 | 77.66305190 | <a href="https://www.inaturalist.org/observations/52766967">https://www.inaturalist.org/observations/52766967</a>   |
| 467 | <i>Eudynamys scolopaceus</i> | Western Koel | 2021/3/9   | 2 | 0 | 12.91514086 | 77.66394769 | <a href="https://www.inaturalist.org/observations/70923095">https://www.inaturalist.org/observations/70923095</a>   |
| 468 | <i>Eudynamys scolopaceus</i> | Western Koel | 2019/11/24 | 1 | 0 | 12.91776019 | 77.66582128 | <a href="https://www.inaturalist.org/observations/36157145">https://www.inaturalist.org/observations/36157145</a>   |
| 469 | <i>Eudynamys scolopaceus</i> | Western Koel | 2022/5/13  | 1 | 0 | 12.91802760 | 80.23494172 | <a href="https://www.inaturalist.org/observations/118344299">https://www.inaturalist.org/observations/118344299</a> |
| 470 | <i>Eudynamys scolopaceus</i> | Western Koel | 2022/6/5   | 4 | 0 | 12.91998273 | 77.64769306 | <a href="https://www.inaturalist.org/observations/120312986">https://www.inaturalist.org/observations/120312986</a> |
| 471 | <i>Eudynamys scolopaceus</i> | Western Koel | 2020/9/1   | 3 | 0 | 12.92004513 | 77.64764074 | <a href="https://www.inaturalist.org/observations/80872873">https://www.inaturalist.org/observations/80872873</a>   |
| 472 | <i>Eudynamys scolopaceus</i> | Western Koel | 2021/3/23  | 2 | 0 | 12.92005621 | 77.64772789 | <a href="https://www.inaturalist.org/observations/80864195">https://www.inaturalist.org/observations/80864195</a>   |
| 473 | <i>Eudynamys scolopaceus</i> | Western Koel | 2022/5/2   | 2 | 0 | 12.92006007 | 77.64768204 | <a href="https://www.inaturalist.org/observations/115525421">https://www.inaturalist.org/observations/115525421</a> |
| 474 | <i>Eudynamys scolopaceus</i> | Western Koel | 2022/3/9   | 3 | 0 | 12.92006643 | 77.64774872 | <a href="https://www.inaturalist.org/observations/118131855">https://www.inaturalist.org/observations/118131855</a> |
| 475 | <i>Eudynamys scolopaceus</i> | Western Koel | 2022/3/13  | 2 | 0 | 12.92009550 | 77.64772927 | <a href="https://www.inaturalist.org/observations/116931173">https://www.inaturalist.org/observations/116931173</a> |
| 476 | <i>Eudynamys scolopaceus</i> | Western Koel | 2020/5/17  | 2 | 0 | 12.92176042 | 80.09581242 | <a href="https://www.inaturalist.org/observations/46190511">https://www.inaturalist.org/observations/46190511</a>   |
| 477 | <i>Eudynamys scolopaceus</i> | Western Koel | 2021/3/9   | 3 | 0 | 12.92304075 | 77.58291554 | <a href="https://www.inaturalist.org/observations/70857790">https://www.inaturalist.org/observations/70857790</a>   |
| 478 | <i>Eudynamys scolopaceus</i> | Western Koel | 2010/12/15 | 4 | 0 | 12.92614289 | 80.17216086 | <a href="https://www.inaturalist.org/observations/22698669">https://www.inaturalist.org/observations/22698669</a>   |
| 479 | <i>Eudynamys scolopaceus</i> | Western Koel | 2022/4/15  | 2 | 0 | 12.93441683 | 77.60601707 | <a href="https://www.inaturalist.org/observations/111523157">https://www.inaturalist.org/observations/111523157</a> |
| 480 | <i>Eudynamys scolopaceus</i> | Western Koel | 2022/5/11  | 1 | 0 | 12.93892736 | 80.25811692 | <a href="https://www.inaturalist.org/observations/116521271">https://www.inaturalist.org/observations/116521271</a> |
| 481 | <i>Eudynamys scolopaceus</i> | Western Koel | 2019/11/10 | 3 | 0 | 12.93898000 | 77.54351667 | <a href="https://www.inaturalist.org/observations/35524488">https://www.inaturalist.org/observations/35524488</a>   |
| 482 | <i>Eudynamys scolopaceus</i> | Western Koel | 2018/11/30 | 5 | 0 | 12.93942549 | 80.20911165 | <a href="https://www.inaturalist.org/observations/29113543">https://www.inaturalist.org/observations/29113543</a>   |

|     |                              |              |            |   |   |             |             |                                                                                                                     |
|-----|------------------------------|--------------|------------|---|---|-------------|-------------|---------------------------------------------------------------------------------------------------------------------|
| 483 | <i>Eudynamys scolopaceus</i> | Western Koel | 2020/4/26  | 2 | 0 | 12.93976845 | 77.56046769 | <a href="https://www.inaturalist.org/observations/43836014">https://www.inaturalist.org/observations/43836014</a>   |
| 484 | <i>Eudynamys scolopaceus</i> | Western Koel | 2021/6/20  | 1 | 0 | 12.94111110 | 79.13492060 | <a href="https://www.inaturalist.org/observations/83759601">https://www.inaturalist.org/observations/83759601</a>   |
| 485 | <i>Eudynamys scolopaceus</i> | Western Koel | 2018/12/9  | 1 | 0 | 12.94281073 | 77.56810606 | <a href="https://www.inaturalist.org/observations/111063161">https://www.inaturalist.org/observations/111063161</a> |
| 486 | <i>Eudynamys scolopaceus</i> | Western Koel | 2016/2/22  | 7 | 0 | 12.94391000 | 77.58246167 | <a href="http://www.inaturalist.org/observations/2729107">http://www.inaturalist.org/observations/2729107</a>       |
| 487 | <i>Eudynamys scolopaceus</i> | Western Koel | 2019/12/5  | 1 | 0 | 12.94657610 | 80.22376600 | <a href="https://www.inaturalist.org/observations/66174044">https://www.inaturalist.org/observations/66174044</a>   |
| 488 | <i>Eudynamys scolopaceus</i> | Western Koel | 2019/1/12  | 6 | 0 | 12.94801659 | 77.58687112 | <a href="https://www.inaturalist.org/observations/19677580">https://www.inaturalist.org/observations/19677580</a>   |
| 489 | <i>Eudynamys scolopaceus</i> | Western Koel | 2017/5/13  | 2 | 0 | 12.94823376 | 77.58310360 | <a href="https://www.inaturalist.org/observations/65646968">https://www.inaturalist.org/observations/65646968</a>   |
| 490 | <i>Eudynamys scolopaceus</i> | Western Koel | 2017/10/12 | 4 | 0 | 12.94823703 | 77.58712239 | <a href="https://www.inaturalist.org/observations/8385289">https://www.inaturalist.org/observations/8385289</a>     |
| 491 | <i>Eudynamys scolopaceus</i> | Western Koel | 2014/6/23  | 7 | 0 | 12.95034082 | 77.57984507 | <a href="https://www.inaturalist.org/observations/5993291">https://www.inaturalist.org/observations/5993291</a>     |
| 492 | <i>Eudynamys scolopaceus</i> | Western Koel | 2015/6/20  | 3 | 0 | 12.95034107 | 77.58294904 | <a href="https://www.inaturalist.org/observations/66529695">https://www.inaturalist.org/observations/66529695</a>   |
| 493 | <i>Eudynamys scolopaceus</i> | Western Koel | 2018/11/16 | 4 | 0 | 12.95074320 | 77.58477730 | <a href="https://www.inaturalist.org/observations/18842737">https://www.inaturalist.org/observations/18842737</a>   |
| 494 | <i>Eudynamys scolopaceus</i> | Western Koel | 2019/10/20 | 5 | 0 | 12.95161100 | 80.14616630 | <a href="https://www.inaturalist.org/observations/36247791">https://www.inaturalist.org/observations/36247791</a>   |
| 495 | <i>Eudynamys scolopaceus</i> | Western Koel | 2020/2/12  | 0 | 0 | 12.95224500 | 77.51598000 | <a href="https://www.inaturalist.org/observations/38945718">https://www.inaturalist.org/observations/38945718</a>   |
| 496 | <i>Eudynamys scolopaceus</i> | Western Koel | 2017/7/11  | 6 | 0 | 12.95403370 | 80.18105490 | <a href="https://www.inaturalist.org/observations/11740095">https://www.inaturalist.org/observations/11740095</a>   |
| 497 | <i>Eudynamys scolopaceus</i> | Western Koel | 2020/2/11  | 1 | 0 | 12.95588167 | 77.51744667 | <a href="https://www.inaturalist.org/observations/38873866">https://www.inaturalist.org/observations/38873866</a>   |
| 498 | <i>Eudynamys scolopaceus</i> | Western Koel | 2020/7/8   | 1 | 0 | 12.95793950 | 77.70674475 | <a href="https://www.inaturalist.org/observations/52332917">https://www.inaturalist.org/observations/52332917</a>   |
| 499 | <i>Eudynamys scolopaceus</i> | Western Koel | 2020/7/8   | 1 | 0 | 12.95793950 | 77.70674475 | <a href="https://www.inaturalist.org/observations/52333889">https://www.inaturalist.org/observations/52333889</a>   |
| 500 | <i>Eudynamys scolopaceus</i> | Western Koel | 2013/6/4   | 4 | 0 | 12.95935900 | 80.11719800 | <a href="https://www.inaturalist.org/observations/22559939">https://www.inaturalist.org/observations/22559939</a>   |
| 501 | <i>Eudynamys scolopaceus</i> | Western Koel | 2019/8/4   | 3 | 0 | 12.95997137 | 79.28181627 | <a href="https://www.inaturalist.org/observations/69613671">https://www.inaturalist.org/observations/69613671</a>   |
| 502 | <i>Eudynamys scolopaceus</i> | Western Koel | 2020/9/19  | 2 | 0 | 12.96030900 | 77.65822962 | <a href="https://www.inaturalist.org/observations/60035741">https://www.inaturalist.org/observations/60035741</a>   |
| 503 | <i>Eudynamys scolopaceus</i> | Western Koel | 2020/5/30  | 2 | 0 | 12.96965270 | 74.88707790 | <a href="https://www.inaturalist.org/observations/47804410">https://www.inaturalist.org/observations/47804410</a>   |
| 504 | <i>Eudynamys scolopaceus</i> | Western Koel | 2020/3/22  | 2 | 0 | 12.97020789 | 77.56447569 | <a href="https://www.inaturalist.org/observations/42403276">https://www.inaturalist.org/observations/42403276</a>   |
| 505 | <i>Eudynamys scolopaceus</i> | Western Koel | 2020/3/11  | 2 | 0 | 12.97039478 | 77.56458633 | <a href="https://www.inaturalist.org/observations/42403137">https://www.inaturalist.org/observations/42403137</a>   |

|     |                              |              |            |   |   |             |             |                                                                                                                     |
|-----|------------------------------|--------------|------------|---|---|-------------|-------------|---------------------------------------------------------------------------------------------------------------------|
| 506 | <i>Eudynamys scolopaceus</i> | Western Koel | 2021/6/25  | 1 | 0 | 12.97083226 | 80.13191365 | <a href="https://www.inaturalist.org/observations/84419914">https://www.inaturalist.org/observations/84419914</a>   |
| 507 | <i>Eudynamys scolopaceus</i> | Western Koel | 2021/8/22  | 2 | 0 | 12.97147851 | 77.59456269 | <a href="https://www.inaturalist.org/observations/93366128">https://www.inaturalist.org/observations/93366128</a>   |
| 508 | <i>Eudynamys scolopaceus</i> | Western Koel | 2022/2/6   | 5 | 0 | 12.97159870 | 77.59456270 | <a href="https://www.inaturalist.org/observations/120968189">https://www.inaturalist.org/observations/120968189</a> |
| 509 | <i>Eudynamys scolopaceus</i> | Western Koel | 2022/8/31  | 1 | 0 | 12.97159870 | 77.59456270 | <a href="https://www.inaturalist.org/observations/136245800">https://www.inaturalist.org/observations/136245800</a> |
| 510 | <i>Eudynamys scolopaceus</i> | Western Koel | 2020/7/7   | 2 | 0 | 12.97303721 | 80.22790261 | <a href="https://www.inaturalist.org/observations/63743338">https://www.inaturalist.org/observations/63743338</a>   |
| 511 | <i>Eudynamys scolopaceus</i> | Western Koel | 2020/7/8   | 2 | 0 | 12.97577139 | 80.23023306 | <a href="https://www.inaturalist.org/observations/63743339">https://www.inaturalist.org/observations/63743339</a>   |
| 512 | <i>Eudynamys scolopaceus</i> | Western Koel | 2018/5/7   | 2 | 0 | 12.98454833 | 74.88610167 | <a href="https://www.inaturalist.org/observations/12224253">https://www.inaturalist.org/observations/12224253</a>   |
| 513 | <i>Eudynamys scolopaceus</i> | Western Koel | 2019/3/2   | 3 | 0 | 12.98545420 | 77.66392480 | <a href="https://www.inaturalist.org/observations/21112909">https://www.inaturalist.org/observations/21112909</a>   |
| 514 | <i>Eudynamys scolopaceus</i> | Western Koel | 2019/3/22  | 5 | 0 | 12.98962431 | 80.23601668 | <a href="https://www.inaturalist.org/observations/62881820">https://www.inaturalist.org/observations/62881820</a>   |
| 515 | <i>Eudynamys scolopaceus</i> | Western Koel | 2021/5/21  | 1 | 0 | 12.99025117 | 80.23073126 | <a href="https://www.inaturalist.org/observations/79599886">https://www.inaturalist.org/observations/79599886</a>   |
| 516 | <i>Eudynamys scolopaceus</i> | Western Koel | 2020/7/21  | 3 | 0 | 12.99411788 | 80.23601047 | <a href="https://www.inaturalist.org/observations/53926452">https://www.inaturalist.org/observations/53926452</a>   |
| 517 | <i>Eudynamys scolopaceus</i> | Western Koel | 2021/6/28  | 2 | 0 | 12.99548638 | 80.23718830 | <a href="https://www.inaturalist.org/observations/85790396">https://www.inaturalist.org/observations/85790396</a>   |
| 518 | <i>Eudynamys scolopaceus</i> | Western Koel | 2010/12/12 | 2 | 0 | 12.99776856 | 74.82396981 | <a href="https://www.inaturalist.org/observations/81842609">https://www.inaturalist.org/observations/81842609</a>   |
| 519 | <i>Eudynamys scolopaceus</i> | Western Koel | 2015/12/19 | 3 | 0 | 13.00255496 | 80.22900203 | <a href="https://www.inaturalist.org/observations/22545616">https://www.inaturalist.org/observations/22545616</a>   |
| 520 | <i>Eudynamys scolopaceus</i> | Western Koel | 2022/7/1   | 3 | 0 | 13.00734537 | 80.25406816 | <a href="https://www.inaturalist.org/observations/124177702">https://www.inaturalist.org/observations/124177702</a> |
| 521 | <i>Eudynamys scolopaceus</i> | Western Koel | 2015/1/2   | 1 | 0 | 13.00850306 | 80.26731367 | <a href="https://www.inaturalist.org/observations/80410726">https://www.inaturalist.org/observations/80410726</a>   |
| 522 | <i>Eudynamys scolopaceus</i> | Western Koel | 2019/11/25 | 1 | 0 | 13.01234210 | 80.26976530 | <a href="https://www.inaturalist.org/observations/45904632">https://www.inaturalist.org/observations/45904632</a>   |
| 523 | <i>Eudynamys scolopaceus</i> | Western Koel | 2020/2/12  | 3 | 0 | 13.01671021 | 80.23639034 | <a href="https://www.inaturalist.org/observations/109828183">https://www.inaturalist.org/observations/109828183</a> |
| 524 | <i>Eudynamys scolopaceus</i> | Western Koel | 2020/2/12  | 3 | 0 | 13.01671021 | 80.23639034 | <a href="https://www.inaturalist.org/observations/109828185">https://www.inaturalist.org/observations/109828185</a> |
| 525 | <i>Eudynamys scolopaceus</i> | Western Koel | 2020/12/8  | 1 | 0 | 13.01762448 | 80.25368258 | <a href="https://www.inaturalist.org/observations/80500819">https://www.inaturalist.org/observations/80500819</a>   |
| 526 | <i>Eudynamys scolopaceus</i> | Western Koel | 2022/1/2   | 1 | 0 | 13.02040000 | 77.56994600 | <a href="https://www.inaturalist.org/observations/104394273">https://www.inaturalist.org/observations/104394273</a> |
| 527 | <i>Eudynamys scolopaceus</i> | Western Koel | 2019/6/19  | 5 | 0 | 13.03143660 | 77.58801122 | <a href="https://www.inaturalist.org/observations/27252803">https://www.inaturalist.org/observations/27252803</a>   |
| 528 | <i>Eudynamys scolopaceus</i> | Western Koel | 2018/11/7  | 5 | 0 | 13.03296283 | 80.22327400 | <a href="https://www.inaturalist.org/observations/30877934">https://www.inaturalist.org/observations/30877934</a>   |

|     |                              |              |            |   |   |             |             |                                                                                                                     |
|-----|------------------------------|--------------|------------|---|---|-------------|-------------|---------------------------------------------------------------------------------------------------------------------|
| 529 | <i>Eudynamys scolopaceus</i> | Western Koel | 2022/2/18  | 4 | 0 | 13.03387080 | 77.57276278 | <a href="https://www.inaturalist.org/observations/109630546">https://www.inaturalist.org/observations/109630546</a> |
| 530 | <i>Eudynamys scolopaceus</i> | Western Koel | 2020/8/20  | 4 | 0 | 13.03391316 | 77.55000886 | <a href="https://www.inaturalist.org/observations/132912084">https://www.inaturalist.org/observations/132912084</a> |
| 531 | <i>Eudynamys scolopaceus</i> | Western Koel | 2021/2/21  | 1 | 0 | 13.03448965 | 77.57224044 | <a href="https://www.inaturalist.org/observations/105090555">https://www.inaturalist.org/observations/105090555</a> |
| 532 | <i>Eudynamys scolopaceus</i> | Western Koel | 2021/2/16  | 1 | 0 | 13.03448965 | 77.57224044 | <a href="https://www.inaturalist.org/observations/105090564">https://www.inaturalist.org/observations/105090564</a> |
| 533 | <i>Eudynamys scolopaceus</i> | Western Koel | 2021/2/13  | 1 | 0 | 13.03448965 | 77.57224044 | <a href="https://www.inaturalist.org/observations/105090569">https://www.inaturalist.org/observations/105090569</a> |
| 534 | <i>Eudynamys scolopaceus</i> | Western Koel | 2021/2/6   | 1 | 0 | 13.03448965 | 77.57224044 | <a href="https://www.inaturalist.org/observations/105090577">https://www.inaturalist.org/observations/105090577</a> |
| 535 | <i>Eudynamys scolopaceus</i> | Western Koel | 2022/1/26  | 3 | 0 | 13.03458903 | 77.57334016 | <a href="https://www.inaturalist.org/observations/106112889">https://www.inaturalist.org/observations/106112889</a> |
| 536 | <i>Eudynamys scolopaceus</i> | Western Koel | 2022/1/29  | 3 | 0 | 13.03458903 | 77.57334016 | <a href="https://www.inaturalist.org/observations/106112898">https://www.inaturalist.org/observations/106112898</a> |
| 537 | <i>Eudynamys scolopaceus</i> | Western Koel | 2022/4/17  | 3 | 0 | 13.03469655 | 77.57300951 | <a href="https://www.inaturalist.org/observations/119562697">https://www.inaturalist.org/observations/119562697</a> |
| 538 | <i>Eudynamys scolopaceus</i> | Western Koel | 2021/7/12  | 2 | 0 | 13.03505574 | 80.24183527 | <a href="https://www.inaturalist.org/observations/88228519">https://www.inaturalist.org/observations/88228519</a>   |
| 539 | <i>Eudynamys scolopaceus</i> | Western Koel | 2020/3/31  | 2 | 0 | 13.03505574 | 80.24183527 | <a href="https://www.inaturalist.org/observations/88661424">https://www.inaturalist.org/observations/88661424</a>   |
| 540 | <i>Eudynamys scolopaceus</i> | Western Koel | 2021/5/7   | 2 | 0 | 13.03543213 | 77.57750871 | <a href="https://www.inaturalist.org/observations/105417780">https://www.inaturalist.org/observations/105417780</a> |
| 541 | <i>Eudynamys scolopaceus</i> | Western Koel | 2018/10/2  | 2 | 0 | 13.03588000 | 80.23112560 | <a href="https://www.inaturalist.org/observations/55703387">https://www.inaturalist.org/observations/55703387</a>   |
| 542 | <i>Eudynamys scolopaceus</i> | Western Koel | 2021/7/5   | 3 | 0 | 13.03794781 | 80.26837758 | <a href="https://www.inaturalist.org/observations/86190006">https://www.inaturalist.org/observations/86190006</a>   |
| 543 | <i>Eudynamys scolopaceus</i> | Western Koel | 2020/2/24  | 1 | 0 | 13.04292462 | 80.26906841 | <a href="https://www.inaturalist.org/observations/39132878">https://www.inaturalist.org/observations/39132878</a>   |
| 544 | <i>Eudynamys scolopaceus</i> | Western Koel | 2020/9/12  | 3 | 0 | 13.04508833 | 80.23078833 | <a href="https://www.inaturalist.org/observations/60332611">https://www.inaturalist.org/observations/60332611</a>   |
| 545 | <i>Eudynamys scolopaceus</i> | Western Koel | 2021/9/23  | 2 | 0 | 13.04634046 | 80.25335569 | <a href="https://www.inaturalist.org/observations/95847124">https://www.inaturalist.org/observations/95847124</a>   |
| 546 | <i>Eudynamys scolopaceus</i> | Western Koel | 2022/5/16  | 3 | 0 | 13.04634046 | 80.25335569 | <a href="https://www.inaturalist.org/observations/117571941">https://www.inaturalist.org/observations/117571941</a> |
| 547 | <i>Eudynamys scolopaceus</i> | Western Koel | 2021/12/16 | 1 | 0 | 13.04634634 | 80.25335569 | <a href="https://www.inaturalist.org/observations/134589700">https://www.inaturalist.org/observations/134589700</a> |
| 548 | <i>Eudynamys scolopaceus</i> | Western Koel | 2022/9/2   | 1 | 0 | 13.04634961 | 80.25335569 | <a href="https://www.inaturalist.org/observations/133335014">https://www.inaturalist.org/observations/133335014</a> |
| 549 | <i>Eudynamys scolopaceus</i> | Western Koel | 2022/9/28  | 0 | 0 | 13.04634961 | 80.25335569 | <a href="https://www.inaturalist.org/observations/136788102">https://www.inaturalist.org/observations/136788102</a> |
| 550 | <i>Eudynamys scolopaceus</i> | Western Koel | 2019/7/12  | 3 | 0 | 13.04734870 | 80.25400040 | <a href="https://www.inaturalist.org/observations/52562008">https://www.inaturalist.org/observations/52562008</a>   |
| 551 | <i>Eudynamys scolopaceus</i> | Western Koel | 2021/2/24  | 3 | 0 | 13.04734870 | 80.25400040 | <a href="https://www.inaturalist.org/observations/89748871">https://www.inaturalist.org/observations/89748871</a>   |



|     |                              |              |            |   |   |             |             |                                                                                                                     |
|-----|------------------------------|--------------|------------|---|---|-------------|-------------|---------------------------------------------------------------------------------------------------------------------|
| 552 | <i>Eudynamys scolopaceus</i> | Western Koel | 2020/2/15  | 3 | 0 | 13.04734874 | 80.25400043 | <a href="https://www.inaturalist.org/observations/88509866">https://www.inaturalist.org/observations/88509866</a>   |
| 553 | <i>Eudynamys scolopaceus</i> | Western Koel | 2021/10/21 | 2 | 0 | 13.04735331 | 80.25400009 | <a href="https://www.inaturalist.org/observations/99361943">https://www.inaturalist.org/observations/99361943</a>   |
| 554 | <i>Eudynamys scolopaceus</i> | Western Koel | 2022/1/6   | 1 | 0 | 13.04735331 | 80.25400009 | <a href="https://www.inaturalist.org/observations/104460211">https://www.inaturalist.org/observations/104460211</a> |
| 555 | <i>Eudynamys scolopaceus</i> | Western Koel | 2018/1/15  | 1 | 0 | 13.04820000 | 80.12100000 | <a href="https://www.inaturalist.org/observations/69872695">https://www.inaturalist.org/observations/69872695</a>   |
| 556 | <i>Eudynamys scolopaceus</i> | Western Koel | 2017/4/13  | 4 | 0 | 13.05512500 | 80.22212100 | <a href="https://www.inaturalist.org/observations/6587041">https://www.inaturalist.org/observations/6587041</a>     |
| 557 | <i>Eudynamys scolopaceus</i> | Western Koel | 2018/6/5   | 4 | 0 | 13.06114383 | 77.54183382 | <a href="https://www.inaturalist.org/observations/132911956">https://www.inaturalist.org/observations/132911956</a> |
| 558 | <i>Eudynamys scolopaceus</i> | Western Koel | 2020/9/1   | 2 | 0 | 13.06362667 | 80.24150667 | <a href="https://www.inaturalist.org/observations/58335302">https://www.inaturalist.org/observations/58335302</a>   |
| 559 | <i>Eudynamys scolopaceus</i> | Western Koel | 2022/1/16  | 4 | 0 | 13.06521367 | 80.23234922 | <a href="https://www.inaturalist.org/observations/105364586">https://www.inaturalist.org/observations/105364586</a> |
| 560 | <i>Eudynamys scolopaceus</i> | Western Koel | 2020/7/9   | 1 | 0 | 13.06552810 | 77.64774587 | <a href="https://www.inaturalist.org/observations/52460005">https://www.inaturalist.org/observations/52460005</a>   |
| 561 | <i>Eudynamys scolopaceus</i> | Western Koel | 2021/6/8   | 3 | 0 | 13.06558420 | 80.16077680 | <a href="https://www.inaturalist.org/observations/87276589">https://www.inaturalist.org/observations/87276589</a>   |
| 562 | <i>Eudynamys scolopaceus</i> | Western Koel | 2021/10/28 | 3 | 0 | 13.06558420 | 80.16077680 | <a href="https://www.inaturalist.org/observations/99698463">https://www.inaturalist.org/observations/99698463</a>   |
| 563 | <i>Eudynamys scolopaceus</i> | Western Koel | 2021/10/29 | 3 | 0 | 13.06558420 | 80.16077680 | <a href="https://www.inaturalist.org/observations/99698468">https://www.inaturalist.org/observations/99698468</a>   |
| 564 | <i>Eudynamys scolopaceus</i> | Western Koel | 2021/11/15 | 5 | 0 | 13.06558420 | 80.16077680 | <a href="https://www.inaturalist.org/observations/101259442">https://www.inaturalist.org/observations/101259442</a> |
| 565 | <i>Eudynamys scolopaceus</i> | Western Koel | 2021/12/3  | 3 | 0 | 13.06558420 | 80.16077680 | <a href="https://www.inaturalist.org/observations/102402355">https://www.inaturalist.org/observations/102402355</a> |
| 566 | <i>Eudynamys scolopaceus</i> | Western Koel | 2022/8/25  | 4 | 0 | 13.06558420 | 80.16077680 | <a href="https://www.inaturalist.org/observations/134152873">https://www.inaturalist.org/observations/134152873</a> |
| 567 | <i>Eudynamys scolopaceus</i> | Western Koel | 2021/5/20  | 1 | 0 | 13.06563718 | 80.16077656 | <a href="https://www.inaturalist.org/observations/82299937">https://www.inaturalist.org/observations/82299937</a>   |
| 568 | <i>Eudynamys scolopaceus</i> | Western Koel | 2021/5/30  | 2 | 0 | 13.06563718 | 80.16077690 | <a href="https://www.inaturalist.org/observations/81833931">https://www.inaturalist.org/observations/81833931</a>   |
| 569 | <i>Eudynamys scolopaceus</i> | Western Koel | 2022/6/30  | 2 | 0 | 13.07030810 | 77.58253840 | <a href="https://www.inaturalist.org/observations/124085187">https://www.inaturalist.org/observations/124085187</a> |
| 570 | <i>Eudynamys scolopaceus</i> | Western Koel | 2022/6/30  | 5 | 0 | 13.07126240 | 77.58069360 | <a href="https://www.inaturalist.org/observations/124097539">https://www.inaturalist.org/observations/124097539</a> |
| 571 | <i>Eudynamys scolopaceus</i> | Western Koel | 2022/4/11  | 3 | 0 | 13.07320046 | 80.24850201 | <a href="https://www.inaturalist.org/observations/111163609">https://www.inaturalist.org/observations/111163609</a> |
| 572 | <i>Eudynamys scolopaceus</i> | Western Koel | 2020/9/3   | 1 | 0 | 13.07637710 | 80.23395060 | <a href="https://www.inaturalist.org/observations/88948011">https://www.inaturalist.org/observations/88948011</a>   |
| 573 | <i>Eudynamys scolopaceus</i> | Western Koel | 2021/11/6  | 4 | 0 | 13.07637710 | 80.23395060 | <a href="https://www.inaturalist.org/observations/102980785">https://www.inaturalist.org/observations/102980785</a> |
| 574 | <i>Eudynamys scolopaceus</i> | Western Koel | 2022/2/11  | 2 | 0 | 13.07637710 | 80.23395060 | <a href="https://www.inaturalist.org/observations/106528362">https://www.inaturalist.org/observations/106528362</a> |

|     |                              |              |            |   |   |             |             |                                                                                                                     |
|-----|------------------------------|--------------|------------|---|---|-------------|-------------|---------------------------------------------------------------------------------------------------------------------|
| 575 | <i>Eudynamys scolopaceus</i> | Western Koel | 2020/4/24  | 2 | 0 | 13.07740722 | 77.63500684 | <a href="https://www.inaturalist.org/observations/43023035">https://www.inaturalist.org/observations/43023035</a>   |
| 576 | <i>Eudynamys scolopaceus</i> | Western Koel | 2015/1/11  | 5 | 0 | 13.07993570 | 77.58379830 | <a href="https://www.inaturalist.org/observations/29638343">https://www.inaturalist.org/observations/29638343</a>   |
| 577 | <i>Eudynamys scolopaceus</i> | Western Koel | 2021/3/8   | 0 | 0 | 13.08264378 | 80.27071830 | <a href="https://www.inaturalist.org/observations/87250796">https://www.inaturalist.org/observations/87250796</a>   |
| 578 | <i>Eudynamys scolopaceus</i> | Western Koel | 2021/7/21  | 1 | 0 | 13.08268020 | 80.27071840 | <a href="https://www.inaturalist.org/observations/88128666">https://www.inaturalist.org/observations/88128666</a>   |
| 579 | <i>Eudynamys scolopaceus</i> | Western Koel | 2017/10/19 | 4 | 0 | 13.08268020 | 80.27071840 | <a href="https://www.inaturalist.org/observations/134846093">https://www.inaturalist.org/observations/134846093</a> |
| 580 | <i>Eudynamys scolopaceus</i> | Western Koel | 2021/8/27  | 1 | 0 | 13.08308237 | 80.27071830 | <a href="https://www.inaturalist.org/observations/96443597">https://www.inaturalist.org/observations/96443597</a>   |
| 581 | <i>Eudynamys scolopaceus</i> | Western Koel | 2019/12/20 | 2 | 0 | 13.08736710 | 77.60993500 | <a href="https://www.inaturalist.org/observations/45945935">https://www.inaturalist.org/observations/45945935</a>   |
| 582 | <i>Eudynamys scolopaceus</i> | Western Koel | 2021/9/4   | 1 | 0 | 13.08747768 | 80.17669547 | <a href="https://www.inaturalist.org/observations/102233879">https://www.inaturalist.org/observations/102233879</a> |
| 583 | <i>Eudynamys scolopaceus</i> | Western Koel | 2013/4/19  | 7 | 0 | 13.08784000 | 80.27847000 | <a href="http://www.inaturalist.org/observations/1221372">http://www.inaturalist.org/observations/1221372</a>       |
| 584 | <i>Eudynamys scolopaceus</i> | Western Koel | 2017/12/4  | 5 | 0 | 13.08921795 | 80.20963669 | <a href="https://www.inaturalist.org/observations/9052054">https://www.inaturalist.org/observations/9052054</a>     |
| 585 | <i>Eudynamys scolopaceus</i> | Western Koel | 2021/12/6  | 4 | 0 | 13.08977376 | 80.18088039 | <a href="https://www.inaturalist.org/observations/102660903">https://www.inaturalist.org/observations/102660903</a> |
| 586 | <i>Eudynamys scolopaceus</i> | Western Koel | 2021/8/3   | 1 | 0 | 13.09963953 | 80.27361449 | <a href="https://www.inaturalist.org/observations/90556612">https://www.inaturalist.org/observations/90556612</a>   |
| 587 | <i>Eudynamys scolopaceus</i> | Western Koel | 2022/3/13  | 3 | 0 | 13.11081733 | 77.57591229 | <a href="https://www.inaturalist.org/observations/120701835">https://www.inaturalist.org/observations/120701835</a> |
| 588 | <i>Eudynamys scolopaceus</i> | Western Koel | 2021/8/11  | 1 | 0 | 13.11266735 | 80.22505591 | <a href="https://www.inaturalist.org/observations/90768058">https://www.inaturalist.org/observations/90768058</a>   |
| 589 | <i>Eudynamys scolopaceus</i> | Western Koel | 2020/7/16  | 3 | 0 | 13.11920885 | 80.13550814 | <a href="https://www.inaturalist.org/observations/57814100">https://www.inaturalist.org/observations/57814100</a>   |
| 590 | <i>Eudynamys scolopaceus</i> | Western Koel | 2020/7/24  | 4 | 0 | 13.11920918 | 80.13550814 | <a href="https://www.inaturalist.org/observations/57814067">https://www.inaturalist.org/observations/57814067</a>   |
| 591 | <i>Eudynamys scolopaceus</i> | Western Koel | 2021/10/30 | 6 | 0 | 13.13074050 | 80.13143860 | <a href="https://www.inaturalist.org/observations/99798248">https://www.inaturalist.org/observations/99798248</a>   |
| 592 | <i>Eudynamys scolopaceus</i> | Western Koel | 2020/5/10  | 1 | 0 | 13.13496613 | 80.22742007 | <a href="https://www.inaturalist.org/observations/46813718">https://www.inaturalist.org/observations/46813718</a>   |
| 593 | <i>Eudynamys scolopaceus</i> | Western Koel | 2020/5/10  | 2 | 0 | 13.13496613 | 80.22742007 | <a href="https://www.inaturalist.org/observations/46813856">https://www.inaturalist.org/observations/46813856</a>   |
| 594 | <i>Eudynamys scolopaceus</i> | Western Koel | 2017/11/12 | 1 | 0 | 13.14916756 | 80.05697362 | <a href="https://www.inaturalist.org/observations/45849796">https://www.inaturalist.org/observations/45849796</a>   |
| 595 | <i>Eudynamys scolopaceus</i> | Western Koel | 2017/11/12 | 1 | 0 | 13.14916756 | 80.05697362 | <a href="https://www.inaturalist.org/observations/45849797">https://www.inaturalist.org/observations/45849797</a>   |
| 596 | <i>Eudynamys scolopaceus</i> | Western Koel | 2020/8/29  | 2 | 0 | 13.16666700 | 80.17152800 | <a href="https://www.inaturalist.org/observations/57899063">https://www.inaturalist.org/observations/57899063</a>   |
| 597 | <i>Eudynamys scolopaceus</i> | Western Koel | 2020/8/29  | 3 | 0 | 13.16666700 | 80.17152800 | <a href="https://www.inaturalist.org/observations/57899067">https://www.inaturalist.org/observations/57899067</a>   |

|     |                                      |              |            |   |   |             |             |                                                                                                                     |
|-----|--------------------------------------|--------------|------------|---|---|-------------|-------------|---------------------------------------------------------------------------------------------------------------------|
| 598 | Eudynamys scolopaceus                | Western Koel | 2020/8/29  | 4 | 0 | 13.16666700 | 80.17152800 | <a href="https://www.inaturalist.org/observations/57899080">https://www.inaturalist.org/observations/57899080</a>   |
| 599 | Eudynamys scolopaceus                | Western Koel | 2020/10/18 | 2 | 0 | 13.16666700 | 80.17152800 | <a href="https://www.inaturalist.org/observations/62870048">https://www.inaturalist.org/observations/62870048</a>   |
| 600 | Eudynamys scolopaceus                | Western Koel | 2019/12/19 | 3 | 0 | 13.44420930 | 94.25897380 | <a href="https://www.inaturalist.org/observations/38790656">https://www.inaturalist.org/observations/38790656</a>   |
| 601 | Eudynamys scolopaceus                | Western Koel | 2019/12/30 | 3 | 0 | 13.44420930 | 94.25897380 | <a href="https://www.inaturalist.org/observations/38791344">https://www.inaturalist.org/observations/38791344</a>   |
| 602 | Eudynamys scolopaceus                | Western Koel | 2020/12/25 | 2 | 0 | 13.50266350 | 75.09031540 | <a href="https://www.inaturalist.org/observations/67998211">https://www.inaturalist.org/observations/67998211</a>   |
| 603 | Eudynamys scolopaceus                | Western Koel | 2022/3/4   | 2 | 0 | 13.61691370 | 79.41012566 | <a href="https://www.inaturalist.org/observations/111902911">https://www.inaturalist.org/observations/111902911</a> |
| 604 | Eudynamys scolopaceus                | Western Koel | 2022/8/22  | 4 | 0 | 13.62502965 | 79.38678844 | <a href="https://www.inaturalist.org/observations/132788389">https://www.inaturalist.org/observations/132788389</a> |
| 605 | Eudynamys scolopaceus                | Western Koel | 2022/3/13  | 1 | 0 | 13.62963034 | 79.39805749 | <a href="https://www.inaturalist.org/observations/111060372">https://www.inaturalist.org/observations/111060372</a> |
| 606 | Eudynamys scolopaceus                | Western Koel | 2014/2/17  | 5 | 0 | 13.63633216 | 78.45386267 | <a href="https://www.inaturalist.org/observations/14004522">https://www.inaturalist.org/observations/14004522</a>   |
| 607 | Eudynamys scolopaceus                | Western Koel | 2021/1/28  | 3 | 0 | 13.64558980 | 79.42535988 | <a href="https://www.inaturalist.org/observations/71361306">https://www.inaturalist.org/observations/71361306</a>   |
| 608 | Eudynamys scolopaceus                | Western Koel | 2021/1/28  | 3 | 0 | 13.64578831 | 79.42491512 | <a href="https://www.inaturalist.org/observations/71542111">https://www.inaturalist.org/observations/71542111</a>   |
| 609 | Eudynamys scolopaceus                | Western Koel | 2021/5/10  | 1 | 0 | 13.64731067 | 79.44694617 | <a href="https://www.inaturalist.org/observations/86058277">https://www.inaturalist.org/observations/86058277</a>   |
| 610 | Eudynamys scolopaceus                | Western Koel | 2020/6/21  | 3 | 0 | 13.64764356 | 79.44662333 | <a href="https://www.inaturalist.org/observations/65588392">https://www.inaturalist.org/observations/65588392</a>   |
| 611 | Eudynamys scolopaceus                | Western Koel | 2022/6/12  | 3 | 0 | 13.65191802 | 79.41631128 | <a href="https://www.inaturalist.org/observations/121892186">https://www.inaturalist.org/observations/121892186</a> |
| 612 | Eudynamys scolopaceus                | Western Koel | 2017/4/18  | 5 | 0 | 13.85362750 | 75.52241470 | <a href="https://www.inaturalist.org/observations/9989157">https://www.inaturalist.org/observations/9989157</a>     |
| 613 | Eudynamys scolopaceus                | Western Koel | 2021/1/6   | 1 | 0 | 13.87793528 | 74.82298819 | <a href="https://www.inaturalist.org/observations/81404124">https://www.inaturalist.org/observations/81404124</a>   |
| 614 | Eudynamys scolopaceus                | Western Koel | 2020/1/19  | 3 | 0 | 13.93475667 | 75.55026167 | <a href="https://www.inaturalist.org/observations/37742677">https://www.inaturalist.org/observations/37742677</a>   |
| 615 | Eudynamys scolopaceus                | Western Koel | 2020/11/7  | 3 | 0 | 14.22126849 | 74.95366915 | <a href="https://www.inaturalist.org/observations/64509949">https://www.inaturalist.org/observations/64509949</a>   |
| 616 | Eudynamys scolopaceus<br>scolopaceus | Western Koel | 2020/11/9  | 0 | 0 | 14.23424946 | 75.64699329 | <a href="https://www.inaturalist.org/observations/106853659">https://www.inaturalist.org/observations/106853659</a> |
| 617 | Eudynamys scolopaceus                | Western Koel | 2021/12/19 | 1 | 0 | 14.24809979 | 74.65263303 | <a href="https://www.inaturalist.org/observations/103416355">https://www.inaturalist.org/observations/103416355</a> |
| 618 | Eudynamys scolopaceus                | Western Koel | 2021/12/5  | 1 | 0 | 14.24851867 | 74.65242650 | <a href="https://www.inaturalist.org/observations/102546315">https://www.inaturalist.org/observations/102546315</a> |
| 619 | Eudynamys scolopaceus                | Western Koel | 2022/7/20  | 3 | 0 | 14.24993483 | 76.96990514 | <a href="https://www.inaturalist.org/observations/127655673">https://www.inaturalist.org/observations/127655673</a> |
| 620 | Eudynamys scolopaceus                | Western Koel | 2020/4/14  | 1 | 0 | 14.28490727 | 74.44557454 | <a href="https://www.inaturalist.org/observations/45235191">https://www.inaturalist.org/observations/45235191</a>   |

|     |                              |              |            |   |   |             |             |                                                                                                                     |
|-----|------------------------------|--------------|------------|---|---|-------------|-------------|---------------------------------------------------------------------------------------------------------------------|
| 621 | <i>Eudynamys scolopaceus</i> | Western Koel | 2018/4/8   | 2 | 0 | 14.33676209 | 79.41120377 | <a href="https://www.inaturalist.org/observations/64865440">https://www.inaturalist.org/observations/64865440</a>   |
| 622 | <i>Eudynamys scolopaceus</i> | Western Koel | 2022/5/18  | 1 | 0 | 14.34904289 | 77.59042358 | <a href="https://www.inaturalist.org/observations/117554214">https://www.inaturalist.org/observations/117554214</a> |
| 623 | <i>Eudynamys scolopaceus</i> | Western Koel | 2021/9/24  | 2 | 0 | 14.46513975 | 78.92144363 | <a href="https://www.inaturalist.org/observations/105706809">https://www.inaturalist.org/observations/105706809</a> |
| 624 | <i>Eudynamys scolopaceus</i> | Western Koel | 2021/12/17 | 1 | 0 | 14.46727044 | 79.98850431 | <a href="https://www.inaturalist.org/observations/103189839">https://www.inaturalist.org/observations/103189839</a> |
| 625 | <i>Eudynamys scolopaceus</i> | Western Koel | 2021/1/21  | 1 | 0 | 14.54785860 | 74.31884100 | <a href="https://www.inaturalist.org/observations/69758153">https://www.inaturalist.org/observations/69758153</a>   |
| 626 | <i>Eudynamys scolopaceus</i> | Western Koel | 2021/6/6   | 4 | 0 | 14.81478829 | 74.13020141 | <a href="https://www.inaturalist.org/observations/123927402">https://www.inaturalist.org/observations/123927402</a> |
| 627 | <i>Eudynamys scolopaceus</i> | Western Koel | 2021/6/9   | 2 | 0 | 14.81486984 | 74.13008264 | <a href="https://www.inaturalist.org/observations/88129568">https://www.inaturalist.org/observations/88129568</a>   |
| 628 | <i>Eudynamys scolopaceus</i> | Western Koel | 2021/6/6   | 2 | 0 | 14.81487593 | 74.13013862 | <a href="https://www.inaturalist.org/observations/88129564">https://www.inaturalist.org/observations/88129564</a>   |
| 629 | <i>Eudynamys scolopaceus</i> | Western Koel | 2021/3/14  | 3 | 0 | 14.81608466 | 74.20954429 | <a href="https://www.inaturalist.org/observations/121107659">https://www.inaturalist.org/observations/121107659</a> |
| 630 | <i>Eudynamys scolopaceus</i> | Western Koel | 2021/12/7  | 3 | 0 | 15.00911300 | 74.02996000 | <a href="https://www.inaturalist.org/observations/102654133">https://www.inaturalist.org/observations/102654133</a> |
| 631 | <i>Eudynamys scolopaceus</i> | Western Koel | 2014/1/28  | 1 | 0 | 15.17456673 | 73.94207590 | <a href="https://www.inaturalist.org/observations/104861061">https://www.inaturalist.org/observations/104861061</a> |
| 632 | <i>Eudynamys scolopaceus</i> | Western Koel | 2019/11/22 | 6 | 0 | 15.17837412 | 73.95285074 | <a href="https://www.inaturalist.org/observations/36153301">https://www.inaturalist.org/observations/36153301</a>   |
| 633 | <i>Eudynamys scolopaceus</i> | Western Koel | 2020/4/5   | 1 | 0 | 15.21376257 | 73.93572807 | <a href="https://www.inaturalist.org/observations/41461882">https://www.inaturalist.org/observations/41461882</a>   |
| 634 | <i>Eudynamys scolopaceus</i> | Western Koel | 2019/3/9   | 2 | 0 | 15.23611910 | 74.61728190 | <a href="https://www.inaturalist.org/observations/56497471">https://www.inaturalist.org/observations/56497471</a>   |
| 635 | <i>Eudynamys scolopaceus</i> | Western Koel | 2021/4/5   | 1 | 0 | 15.27250995 | 73.94543015 | <a href="https://www.inaturalist.org/observations/73000075">https://www.inaturalist.org/observations/73000075</a>   |
| 636 | <i>Eudynamys scolopaceus</i> | Western Koel | 2019/3/19  | 3 | 0 | 15.33501320 | 76.46002400 | <a href="https://www.inaturalist.org/observations/116088876">https://www.inaturalist.org/observations/116088876</a> |
| 637 | <i>Eudynamys scolopaceus</i> | Western Koel | 2019/3/19  | 3 | 0 | 15.33501320 | 76.46002400 | <a href="https://www.inaturalist.org/observations/116089013">https://www.inaturalist.org/observations/116089013</a> |
| 638 | <i>Eudynamys scolopaceus</i> | Western Koel | 2020/2/4   | 1 | 0 | 15.33743465 | 76.47021990 | <a href="https://www.inaturalist.org/observations/68153677">https://www.inaturalist.org/observations/68153677</a>   |
| 639 | <i>Eudynamys scolopaceus</i> | Western Koel | 2020/2/4   | 1 | 0 | 15.33998106 | 76.47396753 | <a href="https://www.inaturalist.org/observations/68153682">https://www.inaturalist.org/observations/68153682</a>   |
| 640 | <i>Eudynamys scolopaceus</i> | Western Koel | 2019/1/22  | 1 | 0 | 15.35289832 | 74.03380759 | <a href="https://www.inaturalist.org/observations/63643626">https://www.inaturalist.org/observations/63643626</a>   |
| 641 | <i>Eudynamys scolopaceus</i> | Western Koel | 2020/2/22  | 2 | 0 | 15.38494118 | 75.09543401 | <a href="https://www.inaturalist.org/observations/41882557">https://www.inaturalist.org/observations/41882557</a>   |
| 642 | <i>Eudynamys scolopaceus</i> | Western Koel | 2020/8/24  | 2 | 0 | 15.39934400 | 73.84417300 | <a href="https://www.inaturalist.org/observations/57421240">https://www.inaturalist.org/observations/57421240</a>   |
| 643 | <i>Eudynamys scolopaceus</i> | Western Koel | 2020/8/24  | 2 | 0 | 15.39934400 | 73.84417300 | <a href="https://www.inaturalist.org/observations/57421401">https://www.inaturalist.org/observations/57421401</a>   |

|     |                              |              |            |   |   |             |             |                                                                                                                     |
|-----|------------------------------|--------------|------------|---|---|-------------|-------------|---------------------------------------------------------------------------------------------------------------------|
| 644 | <i>Eudynamys scolopaceus</i> | Western Koel | 2008/4/18  | 2 | 0 | 15.39934400 | 73.84417300 | <a href="https://www.inaturalist.org/observations/57421506">https://www.inaturalist.org/observations/57421506</a>   |
| 645 | <i>Eudynamys scolopaceus</i> | Western Koel | 2019/2/22  | 4 | 0 | 15.45644309 | 73.83379745 | <a href="https://www.inaturalist.org/observations/24870173">https://www.inaturalist.org/observations/24870173</a>   |
| 646 | <i>Eudynamys scolopaceus</i> | Western Koel | 2021/5/4   | 5 | 0 | 15.45904614 | 75.00780813 | <a href="https://www.inaturalist.org/observations/128266359">https://www.inaturalist.org/observations/128266359</a> |
| 647 | <i>Eudynamys scolopaceus</i> | Western Koel | 2020/10/31 | 2 | 0 | 15.52999753 | 73.85898817 | <a href="https://www.inaturalist.org/observations/63874307">https://www.inaturalist.org/observations/63874307</a>   |
| 648 | <i>Eudynamys scolopaceus</i> | Western Koel | 2021/6/11  | 2 | 0 | 15.53204294 | 73.95331696 | <a href="https://www.inaturalist.org/observations/99687169">https://www.inaturalist.org/observations/99687169</a>   |
| 649 | <i>Eudynamys scolopaceus</i> | Western Koel | 2018/11/17 | 1 | 0 | 15.53669847 | 73.76424618 | <a href="https://www.inaturalist.org/observations/50064716">https://www.inaturalist.org/observations/50064716</a>   |
| 650 | <i>Eudynamys scolopaceus</i> | Western Koel | 2021/4/10  | 3 | 0 | 15.58680612 | 73.74533091 | <a href="https://www.inaturalist.org/observations/75437619">https://www.inaturalist.org/observations/75437619</a>   |
| 651 | <i>Eudynamys scolopaceus</i> | Western Koel | 2021/4/10  | 3 | 0 | 15.58680612 | 73.74533091 | <a href="https://www.inaturalist.org/observations/75437627">https://www.inaturalist.org/observations/75437627</a>   |
| 652 | <i>Eudynamys scolopaceus</i> | Western Koel | 2021/1/30  | 1 | 0 | 15.59173818 | 73.95208577 | <a href="https://www.inaturalist.org/observations/68799491">https://www.inaturalist.org/observations/68799491</a>   |
| 653 | <i>Eudynamys scolopaceus</i> | Western Koel | 2018/12/6  | 4 | 0 | 15.67160881 | 73.73275390 | <a href="https://www.inaturalist.org/observations/20906895">https://www.inaturalist.org/observations/20906895</a>   |
| 654 | <i>Eudynamys scolopaceus</i> | Western Koel | 2019/11/18 | 6 | 0 | 15.77326643 | 74.09167349 | <a href="https://www.inaturalist.org/observations/35875822">https://www.inaturalist.org/observations/35875822</a>   |
| 655 | <i>Eudynamys scolopaceus</i> | Western Koel | 2020/5/17  | 2 | 0 | 15.83211786 | 74.49285854 | <a href="https://www.inaturalist.org/observations/79939685">https://www.inaturalist.org/observations/79939685</a>   |
| 656 | <i>Eudynamys scolopaceus</i> | Western Koel | 2020/5/17  | 1 | 0 | 15.83249300 | 74.49283400 | <a href="https://www.inaturalist.org/observations/79902576">https://www.inaturalist.org/observations/79902576</a>   |
| 657 | <i>Eudynamys scolopaceus</i> | Western Koel | 2020/2/1   | 2 | 0 | 15.85153941 | 73.63890387 | <a href="https://www.inaturalist.org/observations/49928149">https://www.inaturalist.org/observations/49928149</a>   |
| 658 | <i>Eudynamys scolopaceus</i> | Western Koel | 2022/3/24  | 1 | 0 | 16.20484095 | 81.14121200 | <a href="https://www.inaturalist.org/observations/109338667">https://www.inaturalist.org/observations/109338667</a> |
| 659 | <i>Eudynamys scolopaceus</i> | Western Koel | 2020/12/25 | 1 | 0 | 16.21681509 | 77.35803762 | <a href="https://www.inaturalist.org/observations/67124353">https://www.inaturalist.org/observations/67124353</a>   |
| 660 | <i>Eudynamys scolopaceus</i> | Western Koel | 2021/11/10 | 3 | 0 | 16.25098087 | 81.11801572 | <a href="https://www.inaturalist.org/observations/100741904">https://www.inaturalist.org/observations/100741904</a> |
| 661 | <i>Eudynamys scolopaceus</i> | Western Koel | 2020/10/26 | 5 | 0 | 16.26937579 | 73.67842559 | <a href="https://www.inaturalist.org/observations/63626278">https://www.inaturalist.org/observations/63626278</a>   |
| 662 | <i>Eudynamys scolopaceus</i> | Western Koel | 2020/9/29  | 4 | 0 | 16.26937579 | 73.67842559 | <a href="https://www.inaturalist.org/observations/63626356">https://www.inaturalist.org/observations/63626356</a>   |
| 663 | <i>Eudynamys scolopaceus</i> | Western Koel | 2020/9/29  | 4 | 0 | 16.26937579 | 73.67842559 | <a href="https://www.inaturalist.org/observations/63626357">https://www.inaturalist.org/observations/63626357</a>   |
| 664 | <i>Eudynamys scolopaceus</i> | Western Koel | 2022/4/15  | 3 | 0 | 16.28500000 | 80.90809167 | <a href="https://www.inaturalist.org/observations/111514297">https://www.inaturalist.org/observations/111514297</a> |
| 665 | <i>Eudynamys scolopaceus</i> | Western Koel | 2022/4/15  | 2 | 0 | 16.28500471 | 80.90801796 | <a href="https://www.inaturalist.org/observations/111513597">https://www.inaturalist.org/observations/111513597</a> |
| 666 | <i>Eudynamys scolopaceus</i> | Western Koel | 2015/3/1   | 2 | 0 | 16.30689104 | 80.51252635 | <a href="https://www.inaturalist.org/observations/87981007">https://www.inaturalist.org/observations/87981007</a>   |

|     |                              |              |            |   |   |             |             |                                                                                                                     |
|-----|------------------------------|--------------|------------|---|---|-------------|-------------|---------------------------------------------------------------------------------------------------------------------|
| 667 | <i>Eudynamys scolopaceus</i> | Western Koel | 2015/2/22  | 2 | 0 | 16.30689104 | 80.51252635 | <a href="https://www.inaturalist.org/observations/87981008">https://www.inaturalist.org/observations/87981008</a>   |
| 668 | <i>Eudynamys scolopaceus</i> | Western Koel | 2015/4/11  | 1 | 0 | 16.30689104 | 80.51252635 | <a href="https://www.inaturalist.org/observations/94244162">https://www.inaturalist.org/observations/94244162</a>   |
| 669 | <i>Eudynamys scolopaceus</i> | Western Koel | 2020/8/1   | 2 | 0 | 16.36329300 | 74.29151200 | <a href="https://www.inaturalist.org/observations/55039428">https://www.inaturalist.org/observations/55039428</a>   |
| 670 | <i>Eudynamys scolopaceus</i> | Western Koel | 2021/7/14  | 0 | 0 | 16.46651890 | 80.50717030 | <a href="https://www.inaturalist.org/observations/86928557">https://www.inaturalist.org/observations/86928557</a>   |
| 671 | <i>Eudynamys scolopaceus</i> | Western Koel | 2014/3/22  | 1 | 0 | 16.47109155 | 80.63881661 | <a href="https://www.inaturalist.org/observations/93876020">https://www.inaturalist.org/observations/93876020</a>   |
| 672 | <i>Eudynamys scolopaceus</i> | Western Koel | 2022/1/30  | 2 | 0 | 16.48641667 | 81.52044833 | <a href="https://www.inaturalist.org/observations/105837257">https://www.inaturalist.org/observations/105837257</a> |
| 673 | <i>Eudynamys scolopaceus</i> | Western Koel | 2020/10/16 | 2 | 0 | 16.49945036 | 80.60067642 | <a href="https://www.inaturalist.org/observations/64861260">https://www.inaturalist.org/observations/64861260</a>   |
| 674 | <i>Eudynamys scolopaceus</i> | Western Koel | 2012/11/30 | 2 | 0 | 16.49954804 | 80.60048653 | <a href="https://www.inaturalist.org/observations/93597278">https://www.inaturalist.org/observations/93597278</a>   |
| 675 | <i>Eudynamys scolopaceus</i> | Western Koel | 2013/4/28  | 2 | 0 | 16.50030466 | 80.60115399 | <a href="https://www.inaturalist.org/observations/88092038">https://www.inaturalist.org/observations/88092038</a>   |
| 676 | <i>Eudynamys scolopaceus</i> | Western Koel | 2020/11/19 | 3 | 0 | 16.51837470 | 81.27583260 | <a href="https://www.inaturalist.org/observations/67455537">https://www.inaturalist.org/observations/67455537</a>   |
| 677 | <i>Eudynamys scolopaceus</i> | Western Koel | 2020/8/26  | 1 | 0 | 16.52000000 | 80.67600000 | <a href="https://www.inaturalist.org/observations/57607250">https://www.inaturalist.org/observations/57607250</a>   |
| 678 | <i>Eudynamys scolopaceus</i> | Western Koel | 2021/12/21 | 2 | 0 | 16.52310700 | 80.57300840 | <a href="https://www.inaturalist.org/observations/105564132">https://www.inaturalist.org/observations/105564132</a> |
| 679 | <i>Eudynamys scolopaceus</i> | Western Koel | 2020/5/9   | 2 | 0 | 16.52958749 | 80.59098454 | <a href="https://www.inaturalist.org/observations/45555064">https://www.inaturalist.org/observations/45555064</a>   |
| 680 | <i>Eudynamys scolopaceus</i> | Western Koel | 2022/2/1   | 1 | 0 | 16.53560167 | 81.49758833 | <a href="https://www.inaturalist.org/observations/105947621">https://www.inaturalist.org/observations/105947621</a> |
| 681 | <i>Eudynamys scolopaceus</i> | Western Koel | 2022/2/1   | 1 | 0 | 16.53641500 | 81.49709000 | <a href="https://www.inaturalist.org/observations/105948095">https://www.inaturalist.org/observations/105948095</a> |
| 682 | <i>Eudynamys scolopaceus</i> | Western Koel | 2022/2/1   | 1 | 0 | 16.53641500 | 81.49709000 | <a href="https://www.inaturalist.org/observations/114304260">https://www.inaturalist.org/observations/114304260</a> |
| 683 | <i>Eudynamys scolopaceus</i> | Western Koel | 2022/2/1   | 2 | 0 | 16.53642333 | 81.49725000 | <a href="https://www.inaturalist.org/observations/114298572">https://www.inaturalist.org/observations/114298572</a> |
| 684 | <i>Eudynamys scolopaceus</i> | Western Koel | 2022/2/1   | 1 | 0 | 16.53642500 | 81.49724500 | <a href="https://www.inaturalist.org/observations/105946827">https://www.inaturalist.org/observations/105946827</a> |
| 685 | <i>Eudynamys scolopaceus</i> | Western Koel | 2022/2/1   | 2 | 0 | 16.53642500 | 81.49724500 | <a href="https://www.inaturalist.org/observations/113230360">https://www.inaturalist.org/observations/113230360</a> |
| 686 | <i>Eudynamys scolopaceus</i> | Western Koel | 2022/2/1   | 2 | 0 | 16.53642833 | 81.49723000 | <a href="https://www.inaturalist.org/observations/111190931">https://www.inaturalist.org/observations/111190931</a> |
| 687 | <i>Eudynamys scolopaceus</i> | Western Koel | 2022/3/16  | 7 | 0 | 16.53939167 | 81.50560333 | <a href="https://www.inaturalist.org/observations/108722270">https://www.inaturalist.org/observations/108722270</a> |
| 688 | <i>Eudynamys scolopaceus</i> | Western Koel | 2022/1/7   | 1 | 0 | 16.53943167 | 81.50527167 | <a href="https://www.inaturalist.org/observations/105568782">https://www.inaturalist.org/observations/105568782</a> |
| 689 | <i>Eudynamys scolopaceus</i> | Western Koel | 2021/12/28 | 1 | 0 | 16.53987028 | 81.50548529 | <a href="https://www.inaturalist.org/observations/104116009">https://www.inaturalist.org/observations/104116009</a> |

|     |                                      |              |            |   |   |             |             |                                                                                                                     |
|-----|--------------------------------------|--------------|------------|---|---|-------------|-------------|---------------------------------------------------------------------------------------------------------------------|
| 690 | Eudynamys scolopaceus                | Western Koel | 2021/12/28 | 1 | 0 | 16.54065450 | 81.50683511 | <a href="https://www.inaturalist.org/observations/103809740">https://www.inaturalist.org/observations/103809740</a> |
| 691 | Eudynamys scolopaceus                | Western Koel | 2021/10/23 | 3 | 0 | 16.54106204 | 81.50471885 | <a href="https://www.inaturalist.org/observations/99323709">https://www.inaturalist.org/observations/99323709</a>   |
| 692 | Eudynamys scolopaceus                | Western Koel | 2022/1/8   | 2 | 0 | 16.55811900 | 81.49816353 | <a href="https://www.inaturalist.org/observations/104566619">https://www.inaturalist.org/observations/104566619</a> |
| 693 | Eudynamys scolopaceus                | Western Koel | 2020/11/22 | 3 | 0 | 16.56399833 | 80.74516500 | <a href="https://www.inaturalist.org/observations/65397652">https://www.inaturalist.org/observations/65397652</a>   |
| 694 | Eudynamys scolopaceus                | Western Koel | 2022/1/11  | 1 | 0 | 16.56843410 | 81.22663250 | <a href="https://www.inaturalist.org/observations/106068639">https://www.inaturalist.org/observations/106068639</a> |
| 695 | Eudynamys scolopaceus                | Western Koel | 2021/9/23  | 1 | 0 | 16.57485118 | 81.85360819 | <a href="https://www.inaturalist.org/observations/96336433">https://www.inaturalist.org/observations/96336433</a>   |
| 696 | Eudynamys scolopaceus                | Western Koel | 2021/12/5  | 2 | 0 | 16.57559146 | 80.68230191 | <a href="https://www.inaturalist.org/observations/104498293">https://www.inaturalist.org/observations/104498293</a> |
| 697 | Eudynamys scolopaceus                | Western Koel | 2021/12/24 | 5 | 0 | 16.57596720 | 79.31240220 | <a href="https://www.inaturalist.org/observations/105613318">https://www.inaturalist.org/observations/105613318</a> |
| 698 | Eudynamys scolopaceus                | Western Koel | 2020/12/13 | 1 | 0 | 16.61797960 | 80.45904000 | <a href="https://www.inaturalist.org/observations/90124951">https://www.inaturalist.org/observations/90124951</a>   |
| 699 | Eudynamys scolopaceus                | Western Koel | 2020/11/22 | 1 | 0 | 16.61816203 | 75.51782109 | <a href="https://www.inaturalist.org/observations/65560668">https://www.inaturalist.org/observations/65560668</a>   |
| 700 | Eudynamys scolopaceus                | Western Koel | 2021/12/26 | 3 | 0 | 16.65018789 | 80.49149391 | <a href="https://www.inaturalist.org/observations/107254211">https://www.inaturalist.org/observations/107254211</a> |
| 701 | Eudynamys scolopaceus<br>scolopaceus | Western Koel | 2021/12/26 | 2 | 0 | 16.65018789 | 80.49149391 | <a href="https://www.inaturalist.org/observations/107254218">https://www.inaturalist.org/observations/107254218</a> |
| 702 | Eudynamys scolopaceus                | Western Koel | 2020/10/29 | 2 | 0 | 16.66118964 | 74.24120542 | <a href="https://www.inaturalist.org/observations/63769212">https://www.inaturalist.org/observations/63769212</a>   |
| 703 | Eudynamys scolopaceus                | Western Koel | 2020/9/23  | 7 | 0 | 16.66132840 | 74.24114641 | <a href="https://www.inaturalist.org/observations/60686277">https://www.inaturalist.org/observations/60686277</a>   |
| 704 | Eudynamys scolopaceus                | Western Koel | 2021/4/26  | 2 | 0 | 16.69980000 | 73.39510000 | <a href="https://www.inaturalist.org/observations/77420071">https://www.inaturalist.org/observations/77420071</a>   |
| 705 | Eudynamys scolopaceus                | Western Koel | 2022/2/3   | 2 | 0 | 16.72717493 | 80.75218052 | <a href="https://www.inaturalist.org/observations/106064725">https://www.inaturalist.org/observations/106064725</a> |
| 706 | Eudynamys scolopaceus                | Western Koel | 2016/11/12 | 5 | 0 | 16.79660260 | 74.29103570 | <a href="https://www.inaturalist.org/observations/30795998">https://www.inaturalist.org/observations/30795998</a>   |
| 707 | Eudynamys scolopaceus                | Western Koel | 2018/6/5   | 3 | 0 | 16.80926732 | 73.32858790 | <a href="https://www.inaturalist.org/observations/30861023">https://www.inaturalist.org/observations/30861023</a>   |
| 708 | Eudynamys scolopaceus                | Western Koel | 2019/5/12  | 5 | 0 | 16.80975332 | 73.32845093 | <a href="https://www.inaturalist.org/observations/30087638">https://www.inaturalist.org/observations/30087638</a>   |
| 709 | Eudynamys scolopaceus                | Western Koel | 2019/5/10  | 1 | 0 | 16.84902020 | 75.71943613 | <a href="https://www.inaturalist.org/observations/50447927">https://www.inaturalist.org/observations/50447927</a>   |
| 710 | Eudynamys scolopaceus                | Western Koel | 2020/6/20  | 1 | 0 | 16.88650185 | 75.70990551 | <a href="https://www.inaturalist.org/observations/50361852">https://www.inaturalist.org/observations/50361852</a>   |
| 711 | Eudynamys scolopaceus                | Western Koel | 2019/7/21  | 6 | 0 | 16.97560667 | 81.79194333 | <a href="https://www.inaturalist.org/observations/29255484">https://www.inaturalist.org/observations/29255484</a>   |
| 712 | Eudynamys scolopaceus                | Western Koel | 2021/8/20  | 2 | 0 | 16.99021078 | 81.33343264 | <a href="https://www.inaturalist.org/observations/92877874">https://www.inaturalist.org/observations/92877874</a>   |

|     |                                      |              |            |   |   |             |             |                                                                                                                     |
|-----|--------------------------------------|--------------|------------|---|---|-------------|-------------|---------------------------------------------------------------------------------------------------------------------|
| 713 | Eudynamys scolopaceus                | Western Koel | 2020/3/4   | 2 | 0 | 17.06724358 | 81.88337708 | <a href="https://www.inaturalist.org/observations/40522424">https://www.inaturalist.org/observations/40522424</a>   |
| 714 | Eudynamys scolopaceus<br>scolopaceus | Western Koel | 2015/7/24  | 1 | 0 | 17.10974215 | 79.18965336 | <a href="https://www.inaturalist.org/observations/106682458">https://www.inaturalist.org/observations/106682458</a> |
| 715 | Eudynamys scolopaceus                | Western Koel | 2019/12/13 | 1 | 0 | 17.16595968 | 73.26621596 | <a href="https://www.inaturalist.org/observations/50012835">https://www.inaturalist.org/observations/50012835</a>   |
| 716 | Eudynamys scolopaceus                | Western Koel | 2020/6/17  | 2 | 0 | 17.18155701 | 73.54036485 | <a href="https://www.inaturalist.org/observations/52009324">https://www.inaturalist.org/observations/52009324</a>   |
| 717 | Eudynamys scolopaceus                | Western Koel | 2019/4/23  | 7 | 0 | 17.32202530 | 78.40229420 | <a href="https://www.inaturalist.org/observations/28854049">https://www.inaturalist.org/observations/28854049</a>   |
| 718 | Eudynamys scolopaceus                | Western Koel | 2016/8/7   | 3 | 0 | 17.33170960 | 78.57535920 | <a href="https://www.inaturalist.org/observations/119241876">https://www.inaturalist.org/observations/119241876</a> |
| 719 | Eudynamys scolopaceus                | Western Koel | 2021/4/11  | 1 | 0 | 17.33844296 | 78.43415690 | <a href="https://www.inaturalist.org/observations/74220948">https://www.inaturalist.org/observations/74220948</a>   |
| 720 | Eudynamys scolopaceus                | Western Koel | 2021/9/26  | 2 | 0 | 17.34725413 | 78.50830816 | <a href="https://www.inaturalist.org/observations/98196663">https://www.inaturalist.org/observations/98196663</a>   |
| 721 | Eudynamys scolopaceus                | Western Koel | 2017/11/28 | 3 | 0 | 17.36052477 | 78.29916358 | <a href="https://www.inaturalist.org/observations/9127328">https://www.inaturalist.org/observations/9127328</a>     |
| 722 | Eudynamys scolopaceus                | Western Koel | 2022/7/3   | 3 | 0 | 17.36218160 | 78.58169880 | <a href="https://www.inaturalist.org/observations/124853859">https://www.inaturalist.org/observations/124853859</a> |
| 723 | Eudynamys scolopaceus                | Western Koel | 2020/12/6  | 5 | 0 | 17.37587568 | 73.21191296 | <a href="https://www.inaturalist.org/observations/66288085">https://www.inaturalist.org/observations/66288085</a>   |
| 724 | Eudynamys scolopaceus                | Western Koel | 2020/8/6   | 3 | 0 | 17.38494038 | 78.48667111 | <a href="https://www.inaturalist.org/observations/65021341">https://www.inaturalist.org/observations/65021341</a>   |
| 725 | Eudynamys scolopaceus                | Western Koel | 2019/5/19  | 5 | 0 | 17.38974041 | 78.32076668 | <a href="https://www.inaturalist.org/observations/25373467">https://www.inaturalist.org/observations/25373467</a>   |
| 726 | Eudynamys scolopaceus                | Western Koel | 2022/4/24  | 4 | 0 | 17.39092960 | 78.32456340 | <a href="https://www.inaturalist.org/observations/112827634">https://www.inaturalist.org/observations/112827634</a> |
| 727 | Eudynamys scolopaceus                | Western Koel | 2021/5/20  | 1 | 0 | 17.39578470 | 78.43119440 | <a href="https://www.inaturalist.org/observations/79901324">https://www.inaturalist.org/observations/79901324</a>   |
| 728 | Eudynamys scolopaceus                | Western Koel | 2021/5/21  | 1 | 0 | 17.39578470 | 78.43119440 | <a href="https://www.inaturalist.org/observations/79901325">https://www.inaturalist.org/observations/79901325</a>   |
| 729 | Eudynamys scolopaceus                | Western Koel | 2022/7/5   | 1 | 0 | 17.42551514 | 78.50722966 | <a href="https://www.inaturalist.org/observations/124874865">https://www.inaturalist.org/observations/124874865</a> |
| 730 | Eudynamys scolopaceus                | Western Koel | 2021/3/3   | 1 | 0 | 17.43112500 | 78.47262000 | <a href="https://www.inaturalist.org/observations/70486706">https://www.inaturalist.org/observations/70486706</a>   |
| 731 | Eudynamys scolopaceus                | Western Koel | 2022/9/23  | 2 | 0 | 17.43207510 | 78.47538770 | <a href="https://www.inaturalist.org/observations/137090592">https://www.inaturalist.org/observations/137090592</a> |
| 732 | Eudynamys scolopaceus                | Western Koel | 2022/2/9   | 3 | 0 | 17.43212500 | 78.47705833 | <a href="https://www.inaturalist.org/observations/106449036">https://www.inaturalist.org/observations/106449036</a> |
| 733 | Eudynamys scolopaceus                | Western Koel | 2022/9/26  | 0 | 0 | 17.43277000 | 78.47820333 | <a href="https://www.inaturalist.org/observations/136548951">https://www.inaturalist.org/observations/136548951</a> |
| 734 | Eudynamys scolopaceus                | Western Koel | 2021/3/24  | 2 | 0 | 17.43449104 | 78.47561784 | <a href="https://www.inaturalist.org/observations/71927631">https://www.inaturalist.org/observations/71927631</a>   |
| 735 | Eudynamys scolopaceus<br>scolopaceus | Western Koel | 2022/5/4   | 1 | 0 | 17.44254656 | 78.36741842 | <a href="https://www.inaturalist.org/observations/115279173">https://www.inaturalist.org/observations/115279173</a> |



|     |                              |              |            |   |   |             |             |                                                                                                                     |
|-----|------------------------------|--------------|------------|---|---|-------------|-------------|---------------------------------------------------------------------------------------------------------------------|
| 736 | <i>Eudynamys scolopaceus</i> | Western Koel | 2020/8/7   | 3 | 0 | 17.46990432 | 78.54514629 | <a href="https://www.inaturalist.org/observations/55697589">https://www.inaturalist.org/observations/55697589</a>   |
| 737 | <i>Eudynamys scolopaceus</i> | Western Koel | 2022/2/4   | 2 | 0 | 17.48605690 | 78.34653110 | <a href="https://www.inaturalist.org/observations/106121945">https://www.inaturalist.org/observations/106121945</a> |
| 738 | <i>Eudynamys scolopaceus</i> | Western Koel | 2022/2/25  | 4 | 0 | 17.48605690 | 78.34653110 | <a href="https://www.inaturalist.org/observations/108183128">https://www.inaturalist.org/observations/108183128</a> |
| 739 | <i>Eudynamys scolopaceus</i> | Western Koel | 2022/9/3   | 1 | 0 | 17.48605690 | 78.34653110 | <a href="https://www.inaturalist.org/observations/133431104">https://www.inaturalist.org/observations/133431104</a> |
| 740 | <i>Eudynamys scolopaceus</i> | Western Koel | 2021/12/4  | 3 | 0 | 17.48605696 | 78.34653106 | <a href="https://www.inaturalist.org/observations/102468522">https://www.inaturalist.org/observations/102468522</a> |
| 741 | <i>Eudynamys scolopaceus</i> | Western Koel | 2011/10/30 | 3 | 0 | 17.49038739 | 78.55829716 | <a href="https://www.inaturalist.org/observations/9627135">https://www.inaturalist.org/observations/9627135</a>     |
| 742 | <i>Eudynamys scolopaceus</i> | Western Koel | 2022/9/4   | 5 | 0 | 17.49088434 | 78.33838720 | <a href="https://www.inaturalist.org/observations/133638648">https://www.inaturalist.org/observations/133638648</a> |
| 743 | <i>Eudynamys scolopaceus</i> | Western Koel | 2021/4/14  | 2 | 0 | 17.49218470 | 78.33633210 | <a href="https://www.inaturalist.org/observations/75398696">https://www.inaturalist.org/observations/75398696</a>   |
| 744 | <i>Eudynamys scolopaceus</i> | Western Koel | 2021/4/29  | 0 | 0 | 17.49218470 | 78.33633210 | <a href="https://www.inaturalist.org/observations/75659295">https://www.inaturalist.org/observations/75659295</a>   |
| 745 | <i>Eudynamys scolopaceus</i> | Western Koel | 2022/2/8   | 4 | 0 | 17.49303333 | 78.33580000 | <a href="https://www.inaturalist.org/observations/106359336">https://www.inaturalist.org/observations/106359336</a> |
| 746 | <i>Eudynamys scolopaceus</i> | Western Koel | 2022/6/28  | 4 | 0 | 17.50033667 | 78.39926667 | <a href="https://www.inaturalist.org/observations/123835949">https://www.inaturalist.org/observations/123835949</a> |
| 747 | <i>Eudynamys scolopaceus</i> | Western Koel | 2021/12/9  | 2 | 0 | 17.59577525 | 78.45258627 | <a href="https://www.inaturalist.org/observations/102768957">https://www.inaturalist.org/observations/102768957</a> |
| 748 | <i>Eudynamys scolopaceus</i> | Western Koel | 2020/11/5  | 2 | 0 | 17.63556488 | 74.55682956 | <a href="https://www.inaturalist.org/observations/64423270">https://www.inaturalist.org/observations/64423270</a>   |
| 749 | <i>Eudynamys scolopaceus</i> | Western Koel | 2018/7/4   | 3 | 0 | 17.68045874 | 74.01826110 | <a href="https://www.inaturalist.org/observations/66247291">https://www.inaturalist.org/observations/66247291</a>   |
| 750 | <i>Eudynamys scolopaceus</i> | Western Koel | 2018/4/7   | 4 | 0 | 17.68045874 | 74.01826110 | <a href="https://www.inaturalist.org/observations/66413099">https://www.inaturalist.org/observations/66413099</a>   |
| 751 | <i>Eudynamys scolopaceus</i> | Western Koel | 2018/7/4   | 3 | 0 | 17.68046390 | 74.01826100 | <a href="https://www.inaturalist.org/observations/63832982">https://www.inaturalist.org/observations/63832982</a>   |
| 752 | <i>Eudynamys scolopaceus</i> | Western Koel | 2020/12/12 | 3 | 0 | 17.68046390 | 74.01826100 | <a href="https://www.inaturalist.org/observations/69149403">https://www.inaturalist.org/observations/69149403</a>   |
| 753 | <i>Eudynamys scolopaceus</i> | Western Koel | 2012/12/28 | 2 | 0 | 17.68058160 | 75.31550350 | <a href="https://www.inaturalist.org/observations/38153210">https://www.inaturalist.org/observations/38153210</a>   |
| 754 | <i>Eudynamys scolopaceus</i> | Western Koel | 2021/10/6  | 2 | 0 | 17.68665416 | 83.21848143 | <a href="https://www.inaturalist.org/observations/98987301">https://www.inaturalist.org/observations/98987301</a>   |
| 755 | <i>Eudynamys scolopaceus</i> | Western Koel | 2022/2/14  | 5 | 0 | 17.70205506 | 83.29813667 | <a href="https://www.inaturalist.org/observations/109120877">https://www.inaturalist.org/observations/109120877</a> |
| 756 | <i>Eudynamys scolopaceus</i> | Western Koel | 2016/4/21  | 2 | 0 | 17.76769700 | 73.19101150 | <a href="https://www.inaturalist.org/observations/73275914">https://www.inaturalist.org/observations/73275914</a>   |
| 757 | <i>Eudynamys scolopaceus</i> | Western Koel | 2020/12/23 | 1 | 0 | 17.76913300 | 73.74210180 | <a href="https://www.inaturalist.org/observations/68050040">https://www.inaturalist.org/observations/68050040</a>   |
| 758 | <i>Eudynamys scolopaceus</i> | Western Koel | 2020/10/14 | 3 | 0 | 17.80558203 | 83.33932494 | <a href="https://www.inaturalist.org/observations/62548906">https://www.inaturalist.org/observations/62548906</a>   |

|     |                              |              |            |   |   |             |              |                                                                                                                     |
|-----|------------------------------|--------------|------------|---|---|-------------|--------------|---------------------------------------------------------------------------------------------------------------------|
| 759 | <i>Eudynamys scolopaceus</i> | Western Koel | 2022/5/13  | 2 | 0 | 17.82430525 | 83.35642811  | <a href="https://www.inaturalist.org/observations/116807780">https://www.inaturalist.org/observations/116807780</a> |
| 760 | <i>Eudynamys scolopaceus</i> | Western Koel | 2022/2/14  | 2 | 0 | 17.90444069 | 83.43797129  | <a href="https://www.inaturalist.org/observations/106740306">https://www.inaturalist.org/observations/106740306</a> |
| 761 | <i>Eudynamys scolopaceus</i> | Western Koel | 2022/2/14  | 2 | 0 | 17.90447324 | 83.43805879  | <a href="https://www.inaturalist.org/observations/106740311">https://www.inaturalist.org/observations/106740311</a> |
| 762 | <i>Eudynamys scolopaceus</i> | Western Koel | 2022/9/23  | 1 | 0 | 17.90471028 | 83.43805913  | <a href="https://www.inaturalist.org/observations/136665200">https://www.inaturalist.org/observations/136665200</a> |
| 763 | <i>Eudynamys scolopaceus</i> | Western Koel | 2022/3/26  | 4 | 0 | 17.90472591 | 83.43811780  | <a href="https://www.inaturalist.org/observations/109532539">https://www.inaturalist.org/observations/109532539</a> |
| 764 | <i>Eudynamys scolopaceus</i> | Western Koel | 2022/4/3   | 3 | 0 | 17.90484141 | 83.43811210  | <a href="https://www.inaturalist.org/observations/110298417">https://www.inaturalist.org/observations/110298417</a> |
| 765 | <i>Eudynamys scolopaceus</i> | Western Koel | 2020/1/6   | 2 | 0 | 17.93072850 | 73.64773420  | <a href="https://www.inaturalist.org/observations/45058884">https://www.inaturalist.org/observations/45058884</a>   |
| 766 | <i>Eudynamys scolopaceus</i> | Western Koel | 2020/12/24 | 3 | 0 | 17.99172167 | 79.55160500  | <a href="https://www.inaturalist.org/observations/67001668">https://www.inaturalist.org/observations/67001668</a>   |
| 767 | <i>Eudynamys scolopaceus</i> | Western Koel | 2020/12/11 | 3 | 0 | 17.99173508 | 79.55155797  | <a href="https://www.inaturalist.org/observations/66448556">https://www.inaturalist.org/observations/66448556</a>   |
| 768 | <i>Eudynamys scolopaceus</i> | Western Koel | 2021/1/11  | 3 | 0 | 17.99298470 | 73.25752560  | <a href="https://www.inaturalist.org/observations/69193138">https://www.inaturalist.org/observations/69193138</a>   |
| 769 | <i>Eudynamys scolopaceus</i> | Western Koel | 2022/3/27  | 3 | 0 | 17.99378833 | 79.55330000  | <a href="https://www.inaturalist.org/observations/109633338">https://www.inaturalist.org/observations/109633338</a> |
| 770 | <i>Eudynamys scolopaceus</i> | Western Koel | 2018/6/4   | 3 | 0 | 18.11243720 | 79.01929970  | <a href="https://www.inaturalist.org/observations/63573583">https://www.inaturalist.org/observations/63573583</a>   |
| 771 | <i>Eudynamys scolopaceus</i> | Western Koel | 2021/12/5  | 1 | 0 | 18.12338412 | 78.19776502  | <a href="https://www.inaturalist.org/observations/102607096">https://www.inaturalist.org/observations/102607096</a> |
| 772 | <i>Eudynamys scolopaceus</i> | Western Koel | 2020/10/27 | 4 | 0 | 18.12593000 | 74.05343600  | <a href="https://www.inaturalist.org/observations/63691177">https://www.inaturalist.org/observations/63691177</a>   |
| 773 | <i>Eudynamys scolopaceus</i> | Western Koel | 2021/9/6   | 2 | 0 | 18.14080632 | 73.79052646  | <a href="https://www.inaturalist.org/observations/93838194">https://www.inaturalist.org/observations/93838194</a>   |
| 774 | <i>Eudynamys scolopaceus</i> | Western Koel | 2021/12/4  | 2 | 0 | 18.14080632 | 73.79052646  | <a href="https://www.inaturalist.org/observations/103151096">https://www.inaturalist.org/observations/103151096</a> |
| 775 | <i>Eudynamys scolopaceus</i> | Western Koel | 2020/7/8   | 2 | 0 | 18.14944047 | 73.84036761  | <a href="https://www.inaturalist.org/observations/92566382">https://www.inaturalist.org/observations/92566382</a>   |
| 776 | <i>Eudynamys scolopaceus</i> | Western Koel | 2021/1/29  | 3 | 0 | 18.15022580 | 73.84161349  | <a href="https://www.inaturalist.org/observations/92749843">https://www.inaturalist.org/observations/92749843</a>   |
| 777 | <i>Eudynamys scolopaceus</i> | Western Koel | 2018/12/24 | 3 | 0 | 18.16823210 | 72.99018980  | <a href="https://www.inaturalist.org/observations/67147397">https://www.inaturalist.org/observations/67147397</a>   |
| 778 | <i>Eudynamys scolopaceus</i> | Western Koel | 2019/11/13 | 3 | 0 | 18.20420112 | 109.48384500 | <a href="https://www.inaturalist.org/observations/35636352">https://www.inaturalist.org/observations/35636352</a>   |
| 779 | <i>Eudynamys scolopaceus</i> | Western Koel | 2022/1/14  | 2 | 0 | 18.28895734 | 73.13574526  | <a href="https://www.inaturalist.org/observations/104913362">https://www.inaturalist.org/observations/104913362</a> |
| 780 | <i>Eudynamys scolopaceus</i> | Western Koel | 2022/1/18  | 2 | 0 | 18.28913412 | 73.13279443  | <a href="https://www.inaturalist.org/observations/105159585">https://www.inaturalist.org/observations/105159585</a> |
| 781 | <i>Eudynamys scolopaceus</i> | Western Koel | 2021/9/14  | 1 | 0 | 18.29016673 | 73.13359413  | <a href="https://www.inaturalist.org/observations/95295577">https://www.inaturalist.org/observations/95295577</a>   |

|     |                                      |              |            |   |   |             |             |                                                                                                                     |
|-----|--------------------------------------|--------------|------------|---|---|-------------|-------------|---------------------------------------------------------------------------------------------------------------------|
| 782 | Eudynamys scolopaceus<br>scolopaceus | Western Koel | 2020/11/4  | 3 | 0 | 18.34729734 | 75.97441792 | <a href="https://www.inaturalist.org/observations/64581792">https://www.inaturalist.org/observations/64581792</a>   |
| 783 | Eudynamys scolopaceus                | Western Koel | 2020/10/27 | 3 | 0 | 18.35003285 | 75.97227383 | <a href="https://www.inaturalist.org/observations/63635336">https://www.inaturalist.org/observations/63635336</a>   |
| 784 | Eudynamys scolopaceus                | Western Koel | 2020/10/27 | 3 | 0 | 18.35082014 | 75.97128645 | <a href="https://www.inaturalist.org/observations/63635533">https://www.inaturalist.org/observations/63635533</a>   |
| 785 | Eudynamys scolopaceus                | Western Koel | 2014/2/4   | 1 | 0 | 18.35154150 | 74.36754460 | <a href="https://www.inaturalist.org/observations/41677640">https://www.inaturalist.org/observations/41677640</a>   |
| 786 | Eudynamys scolopaceus                | Western Koel | 2014/2/4   | 1 | 0 | 18.35154150 | 74.36754460 | <a href="https://www.inaturalist.org/observations/41677642">https://www.inaturalist.org/observations/41677642</a>   |
| 787 | Eudynamys scolopaceus                | Western Koel | 2012/6/7   | 5 | 0 | 18.44690320 | 73.43054390 | <a href="https://www.inaturalist.org/observations/19696482">https://www.inaturalist.org/observations/19696482</a>   |
| 788 | Eudynamys scolopaceus                | Western Koel | 2021/3/17  | 3 | 0 | 18.45232096 | 73.85134622 | <a href="https://www.inaturalist.org/observations/71687078">https://www.inaturalist.org/observations/71687078</a>   |
| 789 | Eudynamys scolopaceus                | Western Koel | 2015/10/9  | 3 | 0 | 18.45466250 | 73.78510840 | <a href="https://www.inaturalist.org/observations/42171671">https://www.inaturalist.org/observations/42171671</a>   |
| 790 | Eudynamys scolopaceus                | Western Koel | 2017/11/5  | 3 | 0 | 18.45689557 | 73.77881527 | <a href="https://www.inaturalist.org/observations/8705774">https://www.inaturalist.org/observations/8705774</a>     |
| 791 | Eudynamys scolopaceus                | Western Koel | 2020/9/13  | 5 | 0 | 18.46308037 | 73.92139705 | <a href="https://www.inaturalist.org/observations/59417176">https://www.inaturalist.org/observations/59417176</a>   |
| 792 | Eudynamys scolopaceus                | Western Koel | 2021/4/26  | 1 | 0 | 18.46320724 | 73.85169220 | <a href="https://www.inaturalist.org/observations/75269467">https://www.inaturalist.org/observations/75269467</a>   |
| 793 | Eudynamys scolopaceus                | Western Koel | 2020/5/19  | 2 | 0 | 18.46324328 | 73.85149899 | <a href="https://www.inaturalist.org/observations/46471289">https://www.inaturalist.org/observations/46471289</a>   |
| 794 | Eudynamys scolopaceus                | Western Koel | 2020/10/11 | 2 | 0 | 18.46601201 | 73.92651832 | <a href="https://www.inaturalist.org/observations/62307465">https://www.inaturalist.org/observations/62307465</a>   |
| 795 | Eudynamys scolopaceus                | Western Koel | 2020/10/11 | 2 | 0 | 18.46793279 | 73.93028318 | <a href="https://www.inaturalist.org/observations/62378929">https://www.inaturalist.org/observations/62378929</a>   |
| 796 | Eudynamys scolopaceus                | Western Koel | 2020/11/8  | 4 | 0 | 18.46809050 | 73.92936630 | <a href="https://www.inaturalist.org/observations/64653150">https://www.inaturalist.org/observations/64653150</a>   |
| 797 | Eudynamys scolopaceus                | Western Koel | 2011/9/20  | 3 | 0 | 18.48121280 | 73.85279600 | <a href="https://www.inaturalist.org/observations/123345230">https://www.inaturalist.org/observations/123345230</a> |
| 798 | Eudynamys scolopaceus                | Western Koel | 2020/5/24  | 2 | 0 | 18.48453890 | 73.89569554 | <a href="https://www.inaturalist.org/observations/47062815">https://www.inaturalist.org/observations/47062815</a>   |
| 799 | Eudynamys scolopaceus                | Western Koel | 2020/5/28  | 2 | 0 | 18.48465600 | 73.89522429 | <a href="https://www.inaturalist.org/observations/47591049">https://www.inaturalist.org/observations/47591049</a>   |
| 800 | Eudynamys scolopaceus                | Western Koel | 2019/4/27  | 4 | 0 | 18.48661447 | 73.85206673 | <a href="https://www.inaturalist.org/observations/109629135">https://www.inaturalist.org/observations/109629135</a> |
| 801 | Eudynamys scolopaceus                | Western Koel | 2022/4/6   | 2 | 0 | 18.48839834 | 73.84245135 | <a href="https://www.inaturalist.org/observations/110639923">https://www.inaturalist.org/observations/110639923</a> |
| 802 | Eudynamys scolopaceus                | Western Koel | 2022/4/4   | 2 | 0 | 18.48845305 | 73.84259311 | <a href="https://www.inaturalist.org/observations/110980186">https://www.inaturalist.org/observations/110980186</a> |
| 803 | Eudynamys scolopaceus                | Western Koel | 2022/4/5   | 1 | 0 | 18.48845305 | 73.84259311 | <a href="https://www.inaturalist.org/observations/110980191">https://www.inaturalist.org/observations/110980191</a> |
| 804 | Eudynamys scolopaceus                | Western Koel | 2019/5/17  | 4 | 0 | 18.49310510 | 73.89814232 | <a href="https://www.inaturalist.org/observations/26231235">https://www.inaturalist.org/observations/26231235</a>   |

|     |                              |              |            |   |   |             |             |                                                                                                                     |
|-----|------------------------------|--------------|------------|---|---|-------------|-------------|---------------------------------------------------------------------------------------------------------------------|
| 805 | <i>Eudynamys scolopaceus</i> | Western Koel | 2020/6/9   | 3 | 0 | 18.49562887 | 73.81102759 | <a href="https://www.inaturalist.org/observations/77603590">https://www.inaturalist.org/observations/77603590</a>   |
| 806 | <i>Eudynamys scolopaceus</i> | Western Koel | 2018/3/29  | 4 | 0 | 18.49840748 | 73.80444646 | <a href="https://www.inaturalist.org/observations/10488186">https://www.inaturalist.org/observations/10488186</a>   |
| 807 | <i>Eudynamys scolopaceus</i> | Western Koel | 2020/3/15  | 7 | 0 | 18.49934035 | 73.81374132 | <a href="https://www.inaturalist.org/observations/66382752">https://www.inaturalist.org/observations/66382752</a>   |
| 808 | <i>Eudynamys scolopaceus</i> | Western Koel | 2016/12/4  | 3 | 0 | 18.50639320 | 73.82315930 | <a href="https://www.inaturalist.org/observations/133730680">https://www.inaturalist.org/observations/133730680</a> |
| 809 | <i>Eudynamys scolopaceus</i> | Western Koel | 2020/5/10  | 3 | 0 | 18.51148024 | 73.80659028 | <a href="https://www.inaturalist.org/observations/45966064">https://www.inaturalist.org/observations/45966064</a>   |
| 810 | <i>Eudynamys scolopaceus</i> | Western Koel | 2020/9/26  | 5 | 0 | 18.51259680 | 73.89850420 | <a href="https://www.inaturalist.org/observations/66297334">https://www.inaturalist.org/observations/66297334</a>   |
| 811 | <i>Eudynamys scolopaceus</i> | Western Koel | 2013/9/27  | 7 | 0 | 18.51607500 | 73.81576500 | <a href="http://www.inaturalist.org/observations/3897795">http://www.inaturalist.org/observations/3897795</a>       |
| 812 | <i>Eudynamys scolopaceus</i> | Western Koel | 2014/4/8   | 2 | 0 | 18.52043030 | 73.85674370 | <a href="https://www.inaturalist.org/observations/57818092">https://www.inaturalist.org/observations/57818092</a>   |
| 813 | <i>Eudynamys scolopaceus</i> | Western Koel | 2014/3/21  | 2 | 0 | 18.52043030 | 73.85674370 | <a href="https://www.inaturalist.org/observations/57818112">https://www.inaturalist.org/observations/57818112</a>   |
| 814 | <i>Eudynamys scolopaceus</i> | Western Koel | 2015/8/22  | 7 | 0 | 18.52103310 | 73.83536500 | <a href="http://www.inaturalist.org/observations/3910569">http://www.inaturalist.org/observations/3910569</a>       |
| 815 | <i>Eudynamys scolopaceus</i> | Western Koel | 2018/10/2  | 4 | 0 | 18.53038773 | 73.78730211 | <a href="https://www.inaturalist.org/observations/18035954">https://www.inaturalist.org/observations/18035954</a>   |
| 816 | <i>Eudynamys scolopaceus</i> | Western Koel | 2017/4/15  | 5 | 0 | 18.53183050 | 73.78538130 | <a href="https://www.inaturalist.org/observations/33243049">https://www.inaturalist.org/observations/33243049</a>   |
| 817 | <i>Eudynamys scolopaceus</i> | Western Koel | 2016/10/18 | 4 | 0 | 18.53664589 | 73.78356934 | <a href="http://www.inaturalist.org/observations/4385540">http://www.inaturalist.org/observations/4385540</a>       |
| 818 | <i>Eudynamys scolopaceus</i> | Western Koel | 2016/2/10  | 6 | 0 | 18.53683800 | 73.78662300 | <a href="http://www.inaturalist.org/observations/2710861">http://www.inaturalist.org/observations/2710861</a>       |
| 819 | <i>Eudynamys scolopaceus</i> | Western Koel | 2020/10/27 | 5 | 0 | 18.54452111 | 73.78630694 | <a href="https://www.inaturalist.org/observations/63627080">https://www.inaturalist.org/observations/63627080</a>   |
| 820 | <i>Eudynamys scolopaceus</i> | Western Koel | 2020/11/4  | 4 | 0 | 18.54456088 | 73.78595245 | <a href="https://www.inaturalist.org/observations/64300655">https://www.inaturalist.org/observations/64300655</a>   |
| 821 | <i>Eudynamys scolopaceus</i> | Western Koel | 2020/11/22 | 3 | 0 | 18.54667774 | 73.80220447 | <a href="https://www.inaturalist.org/observations/65390576">https://www.inaturalist.org/observations/65390576</a>   |
| 822 | <i>Eudynamys scolopaceus</i> | Western Koel | 2015/3/10  | 6 | 0 | 18.55281800 | 73.82596900 | <a href="http://www.inaturalist.org/observations/4138390">http://www.inaturalist.org/observations/4138390</a>       |
| 823 | <i>Eudynamys scolopaceus</i> | Western Koel | 2021/3/20  | 3 | 0 | 18.55505976 | 73.77891228 | <a href="https://www.inaturalist.org/observations/71609281">https://www.inaturalist.org/observations/71609281</a>   |
| 824 | <i>Eudynamys scolopaceus</i> | Western Koel | 2021/3/8   | 2 | 0 | 18.55521889 | 73.77866773 | <a href="https://www.inaturalist.org/observations/70858205">https://www.inaturalist.org/observations/70858205</a>   |
| 825 | <i>Eudynamys scolopaceus</i> | Western Koel | 2021/6/3   | 2 | 0 | 18.55744820 | 73.79471909 | <a href="https://www.inaturalist.org/observations/81865037">https://www.inaturalist.org/observations/81865037</a>   |
| 826 | <i>Eudynamys scolopaceus</i> | Western Koel | 2021/12/14 | 3 | 0 | 18.55744820 | 73.79471909 | <a href="https://www.inaturalist.org/observations/103037018">https://www.inaturalist.org/observations/103037018</a> |
| 827 | <i>Eudynamys scolopaceus</i> | Western Koel | 2022/2/4   | 3 | 0 | 18.55744820 | 73.79471909 | <a href="https://www.inaturalist.org/observations/106103984">https://www.inaturalist.org/observations/106103984</a> |

|     |                              |              |            |   |   |             |             |                                                                                                                     |
|-----|------------------------------|--------------|------------|---|---|-------------|-------------|---------------------------------------------------------------------------------------------------------------------|
| 828 | <i>Eudynamys scolopaceus</i> | Western Koel | 2020/4/8   | 1 | 0 | 18.57902320 | 73.78599120 | <a href="https://www.inaturalist.org/observations/41678570">https://www.inaturalist.org/observations/41678570</a>   |
| 829 | <i>Eudynamys scolopaceus</i> | Western Koel | 2022/8/11  | 1 | 0 | 18.57979200 | 73.78994900 | <a href="https://www.inaturalist.org/observations/130460353">https://www.inaturalist.org/observations/130460353</a> |
| 830 | <i>Eudynamys scolopaceus</i> | Western Koel | 2020/5/28  | 2 | 0 | 18.58311100 | 73.78616100 | <a href="https://www.inaturalist.org/observations/47614961">https://www.inaturalist.org/observations/47614961</a>   |
| 831 | <i>Eudynamys scolopaceus</i> | Western Koel | 2020/9/26  | 5 | 0 | 18.59372497 | 73.77905697 | <a href="https://www.inaturalist.org/observations/60806884">https://www.inaturalist.org/observations/60806884</a>   |
| 832 | <i>Eudynamys scolopaceus</i> | Western Koel | 2019/7/26  | 3 | 0 | 18.59527596 | 73.80415175 | <a href="https://www.inaturalist.org/observations/31464930">https://www.inaturalist.org/observations/31464930</a>   |
| 833 | <i>Eudynamys scolopaceus</i> | Western Koel | 2020/10/28 | 2 | 0 | 18.59815000 | 73.78021497 | <a href="https://www.inaturalist.org/observations/63696145">https://www.inaturalist.org/observations/63696145</a>   |
| 834 | <i>Eudynamys scolopaceus</i> | Western Koel | 2010/3/19  | 1 | 0 | 18.64917810 | 73.77068180 | <a href="https://www.inaturalist.org/observations/81739985">https://www.inaturalist.org/observations/81739985</a>   |
| 835 | <i>Eudynamys scolopaceus</i> | Western Koel | 2010/3/19  | 2 | 0 | 18.64917810 | 73.77068180 | <a href="https://www.inaturalist.org/observations/81739987">https://www.inaturalist.org/observations/81739987</a>   |
| 836 | <i>Eudynamys scolopaceus</i> | Western Koel | 2020/10/24 | 3 | 0 | 18.69575689 | 76.94728850 | <a href="https://www.inaturalist.org/observations/63593433">https://www.inaturalist.org/observations/63593433</a>   |
| 837 | <i>Eudynamys scolopaceus</i> | Western Koel | 2014/4/16  | 2 | 0 | 18.73564438 | 73.67824503 | <a href="https://www.inaturalist.org/observations/124996422">https://www.inaturalist.org/observations/124996422</a> |
| 838 | <i>Eudynamys scolopaceus</i> | Western Koel | 2014/4/16  | 2 | 0 | 18.73564438 | 73.67824503 | <a href="https://www.inaturalist.org/observations/124996426">https://www.inaturalist.org/observations/124996426</a> |
| 839 | <i>Eudynamys scolopaceus</i> | Western Koel | 2019/12/18 | 2 | 0 | 18.73628854 | 72.86392446 | <a href="https://www.inaturalist.org/observations/70298306">https://www.inaturalist.org/observations/70298306</a>   |
| 840 | <i>Eudynamys scolopaceus</i> | Western Koel | 2019/1/13  | 2 | 0 | 18.87723460 | 72.92833910 | <a href="https://www.inaturalist.org/observations/44451839">https://www.inaturalist.org/observations/44451839</a>   |
| 841 | <i>Eudynamys scolopaceus</i> | Western Koel | 2019/1/13  | 2 | 0 | 18.87723460 | 72.92833910 | <a href="https://www.inaturalist.org/observations/44451855">https://www.inaturalist.org/observations/44451855</a>   |
| 842 | <i>Eudynamys scolopaceus</i> | Western Koel | 2022/3/23  | 3 | 0 | 18.90064326 | 73.25803565 | <a href="https://www.inaturalist.org/observations/110304512">https://www.inaturalist.org/observations/110304512</a> |
| 843 | <i>Eudynamys scolopaceus</i> | Western Koel | 2019/11/8  | 6 | 0 | 18.95452600 | 72.81720400 | <a href="https://www.inaturalist.org/observations/35444246">https://www.inaturalist.org/observations/35444246</a>   |
| 844 | <i>Eudynamys scolopaceus</i> | Western Koel | 2015/1/26  | 1 | 0 | 18.95709180 | 72.80449230 | <a href="https://www.inaturalist.org/observations/41279196">https://www.inaturalist.org/observations/41279196</a>   |
| 845 | <i>Eudynamys scolopaceus</i> | Western Koel | 2016/11/23 | 4 | 0 | 18.95839013 | 72.81609938 | <a href="https://www.inaturalist.org/observations/65988038">https://www.inaturalist.org/observations/65988038</a>   |
| 846 | <i>Eudynamys scolopaceus</i> | Western Koel | 2020/6/19  | 2 | 0 | 18.97667910 | 72.81538990 | <a href="https://www.inaturalist.org/observations/50135725">https://www.inaturalist.org/observations/50135725</a>   |
| 847 | <i>Eudynamys scolopaceus</i> | Western Koel | 2018/3/3   | 2 | 0 | 18.99765666 | 72.83759326 | <a href="https://www.inaturalist.org/observations/70481285">https://www.inaturalist.org/observations/70481285</a>   |
| 848 | <i>Eudynamys scolopaceus</i> | Western Koel | 2018/3/18  | 1 | 0 | 18.99765666 | 72.83759326 | <a href="https://www.inaturalist.org/observations/71499348">https://www.inaturalist.org/observations/71499348</a>   |
| 849 | <i>Eudynamys scolopaceus</i> | Western Koel | 2021/3/25  | 1 | 0 | 18.99765666 | 72.83759326 | <a href="https://www.inaturalist.org/observations/72033874">https://www.inaturalist.org/observations/72033874</a>   |
| 850 | <i>Eudynamys scolopaceus</i> | Western Koel | 2018/4/1   | 2 | 0 | 18.99765666 | 72.83759326 | <a href="https://www.inaturalist.org/observations/72585065">https://www.inaturalist.org/observations/72585065</a>   |

|     |                              |              |            |   |   |             |             |                                                                                                                     |
|-----|------------------------------|--------------|------------|---|---|-------------|-------------|---------------------------------------------------------------------------------------------------------------------|
| 851 | <i>Eudynamys scolopaceus</i> | Western Koel | 2018/4/3   | 1 | 0 | 18.99765666 | 72.83759326 | <a href="https://www.inaturalist.org/observations/72756123">https://www.inaturalist.org/observations/72756123</a>   |
| 852 | <i>Eudynamys scolopaceus</i> | Western Koel | 2017/12/24 | 2 | 0 | 18.99765666 | 72.83759326 | <a href="https://www.inaturalist.org/observations/103570141">https://www.inaturalist.org/observations/103570141</a> |
| 853 | <i>Eudynamys scolopaceus</i> | Western Koel | 2018/1/19  | 3 | 0 | 18.99765666 | 72.83759326 | <a href="https://www.inaturalist.org/observations/105204068">https://www.inaturalist.org/observations/105204068</a> |
| 854 | <i>Eudynamys scolopaceus</i> | Western Koel | 2018/9/9   | 1 | 0 | 19.00477918 | 72.83884183 | <a href="https://www.inaturalist.org/observations/94197907">https://www.inaturalist.org/observations/94197907</a>   |
| 855 | <i>Eudynamys scolopaceus</i> | Western Koel | 2018/1/18  | 2 | 0 | 19.00477981 | 72.83880092 | <a href="https://www.inaturalist.org/observations/105138980">https://www.inaturalist.org/observations/105138980</a> |
| 856 | <i>Eudynamys scolopaceus</i> | Western Koel | 2018/3/2   | 2 | 0 | 19.00478330 | 72.83881567 | <a href="https://www.inaturalist.org/observations/70455021">https://www.inaturalist.org/observations/70455021</a>   |
| 857 | <i>Eudynamys scolopaceus</i> | Western Koel | 2018/9/25  | 1 | 0 | 19.00478615 | 72.83881199 | <a href="https://www.inaturalist.org/observations/96112025">https://www.inaturalist.org/observations/96112025</a>   |
| 858 | <i>Eudynamys scolopaceus</i> | Western Koel | 2018/3/27  | 1 | 0 | 19.00478901 | 72.83865206 | <a href="https://www.inaturalist.org/observations/72135000">https://www.inaturalist.org/observations/72135000</a>   |
| 859 | <i>Eudynamys scolopaceus</i> | Western Koel | 2018/9/24  | 1 | 0 | 19.00479471 | 72.83878751 | <a href="https://www.inaturalist.org/observations/96112121">https://www.inaturalist.org/observations/96112121</a>   |
| 860 | <i>Eudynamys scolopaceus</i> | Western Koel | 2017/3/25  | 2 | 0 | 19.00479788 | 72.83875767 | <a href="https://www.inaturalist.org/observations/72979581">https://www.inaturalist.org/observations/72979581</a>   |
| 861 | <i>Eudynamys scolopaceus</i> | Western Koel | 2018/9/28  | 6 | 0 | 19.00480042 | 72.83874292 | <a href="https://www.inaturalist.org/observations/62012216">https://www.inaturalist.org/observations/62012216</a>   |
| 862 | <i>Eudynamys scolopaceus</i> | Western Koel | 2018/1/15  | 1 | 0 | 19.00480708 | 72.83878315 | <a href="https://www.inaturalist.org/observations/104957568">https://www.inaturalist.org/observations/104957568</a> |
| 863 | <i>Eudynamys scolopaceus</i> | Western Koel | 2018/9/30  | 1 | 0 | 19.00481532 | 72.83879858 | <a href="https://www.inaturalist.org/observations/97500276">https://www.inaturalist.org/observations/97500276</a>   |
| 864 | <i>Eudynamys scolopaceus</i> | Western Koel | 2019/10/21 | 6 | 0 | 19.00481532 | 72.83884753 | <a href="https://www.inaturalist.org/observations/63219870">https://www.inaturalist.org/observations/63219870</a>   |
| 865 | <i>Eudynamys scolopaceus</i> | Western Koel | 2019/9/29  | 1 | 0 | 19.00481817 | 72.83880126 | <a href="https://www.inaturalist.org/observations/96554749">https://www.inaturalist.org/observations/96554749</a>   |
| 866 | <i>Eudynamys scolopaceus</i> | Western Koel | 2017/12/13 | 1 | 0 | 19.00482039 | 72.83876572 | <a href="https://www.inaturalist.org/observations/102973334">https://www.inaturalist.org/observations/102973334</a> |
| 867 | <i>Eudynamys scolopaceus</i> | Western Koel | 2014/12/31 | 1 | 0 | 19.00482293 | 72.83878651 | <a href="https://www.inaturalist.org/observations/104014181">https://www.inaturalist.org/observations/104014181</a> |
| 868 | <i>Eudynamys scolopaceus</i> | Western Koel | 2020/1/12  | 3 | 0 | 19.00485716 | 72.83876639 | <a href="https://www.inaturalist.org/observations/104800540">https://www.inaturalist.org/observations/104800540</a> |
| 869 | <i>Eudynamys scolopaceus</i> | Western Koel | 2021/1/2   | 4 | 0 | 19.00573760 | 73.02015630 | <a href="https://www.inaturalist.org/observations/67668701">https://www.inaturalist.org/observations/67668701</a>   |
| 870 | <i>Eudynamys scolopaceus</i> | Western Koel | 2022/1/16  | 4 | 0 | 19.01659100 | 73.00593960 | <a href="https://www.inaturalist.org/observations/130360331">https://www.inaturalist.org/observations/130360331</a> |
| 871 | <i>Eudynamys scolopaceus</i> | Western Koel | 2018/12/9  | 1 | 0 | 19.01710350 | 73.01750890 | <a href="https://www.inaturalist.org/observations/56312077">https://www.inaturalist.org/observations/56312077</a>   |
| 872 | <i>Eudynamys scolopaceus</i> | Western Koel | 2011/3/28  | 6 | 0 | 19.01761470 | 72.85616440 | <a href="https://www.inaturalist.org/observations/32860350">https://www.inaturalist.org/observations/32860350</a>   |
| 873 | <i>Eudynamys scolopaceus</i> | Western Koel | 2022/1/16  | 2 | 0 | 19.01793070 | 73.00716690 | <a href="https://www.inaturalist.org/observations/105092908">https://www.inaturalist.org/observations/105092908</a> |

|     |                              |              |            |   |   |             |             |                                                                                                                     |
|-----|------------------------------|--------------|------------|---|---|-------------|-------------|---------------------------------------------------------------------------------------------------------------------|
| 874 | <i>Eudynamys scolopaceus</i> | Western Koel | 2019/2/28  | 2 | 0 | 19.02371740 | 73.04039330 | <a href="https://www.inaturalist.org/observations/56499476">https://www.inaturalist.org/observations/56499476</a>   |
| 875 | <i>Eudynamys scolopaceus</i> | Western Koel | 2021/2/27  | 1 | 0 | 19.03197500 | 73.03356250 | <a href="https://www.inaturalist.org/observations/70452664">https://www.inaturalist.org/observations/70452664</a>   |
| 876 | <i>Eudynamys scolopaceus</i> | Western Koel | 2022/3/27  | 4 | 0 | 19.03197500 | 73.03356250 | <a href="https://www.inaturalist.org/observations/132106791">https://www.inaturalist.org/observations/132106791</a> |
| 877 | <i>Eudynamys scolopaceus</i> | Western Koel | 2021/1/20  | 4 | 0 | 19.05225815 | 72.86276411 | <a href="https://www.inaturalist.org/observations/68391082">https://www.inaturalist.org/observations/68391082</a>   |
| 878 | <i>Eudynamys scolopaceus</i> | Western Koel | 2019/12/8  | 1 | 0 | 19.05225815 | 72.86276411 | <a href="https://www.inaturalist.org/observations/102974252">https://www.inaturalist.org/observations/102974252</a> |
| 879 | <i>Eudynamys scolopaceus</i> | Western Koel | 2019/7/14  | 2 | 0 | 19.05225830 | 72.86276410 | <a href="https://www.inaturalist.org/observations/43304122">https://www.inaturalist.org/observations/43304122</a>   |
| 880 | <i>Eudynamys scolopaceus</i> | Western Koel | 2018/3/17  | 3 | 0 | 19.05225830 | 72.86276410 | <a href="https://www.inaturalist.org/observations/56124203">https://www.inaturalist.org/observations/56124203</a>   |
| 881 | <i>Eudynamys scolopaceus</i> | Western Koel | 2018/3/17  | 2 | 0 | 19.05225830 | 72.86276410 | <a href="https://www.inaturalist.org/observations/56124204">https://www.inaturalist.org/observations/56124204</a>   |
| 882 | <i>Eudynamys scolopaceus</i> | Western Koel | 2018/3/17  | 2 | 0 | 19.05225830 | 72.86276410 | <a href="https://www.inaturalist.org/observations/56124205">https://www.inaturalist.org/observations/56124205</a>   |
| 883 | <i>Eudynamys scolopaceus</i> | Western Koel | 2019/3/10  | 3 | 0 | 19.05225830 | 72.86276410 | <a href="https://www.inaturalist.org/observations/88259768">https://www.inaturalist.org/observations/88259768</a>   |
| 884 | <i>Eudynamys scolopaceus</i> | Western Koel | 2019/10/5  | 5 | 0 | 19.05247365 | 72.86326267 | <a href="https://www.inaturalist.org/observations/34152320">https://www.inaturalist.org/observations/34152320</a>   |
| 885 | <i>Eudynamys scolopaceus</i> | Western Koel | 2020/2/17  | 4 | 0 | 19.05265800 | 72.86000200 | <a href="https://www.inaturalist.org/observations/69152588">https://www.inaturalist.org/observations/69152588</a>   |
| 886 | <i>Eudynamys scolopaceus</i> | Western Koel | 2019/3/10  | 3 | 0 | 19.05275390 | 72.86262510 | <a href="https://www.inaturalist.org/observations/21110760">https://www.inaturalist.org/observations/21110760</a>   |
| 887 | <i>Eudynamys scolopaceus</i> | Western Koel | 2021/6/10  | 4 | 0 | 19.06160642 | 72.90697094 | <a href="https://www.inaturalist.org/observations/84032101">https://www.inaturalist.org/observations/84032101</a>   |
| 888 | <i>Eudynamys scolopaceus</i> | Western Koel | 2020/3/20  | 2 | 0 | 19.08283300 | 72.84378997 | <a href="https://www.inaturalist.org/observations/40342013">https://www.inaturalist.org/observations/40342013</a>   |
| 889 | <i>Eudynamys scolopaceus</i> | Western Koel | 2020/7/26  | 2 | 0 | 19.08592773 | 74.73766755 | <a href="https://www.inaturalist.org/observations/55396806">https://www.inaturalist.org/observations/55396806</a>   |
| 890 | <i>Eudynamys scolopaceus</i> | Western Koel | 2020/11/18 | 3 | 0 | 19.11092484 | 72.82831510 | <a href="https://www.inaturalist.org/observations/65386578">https://www.inaturalist.org/observations/65386578</a>   |
| 891 | <i>Eudynamys scolopaceus</i> | Western Koel | 2020/12/26 | 2 | 0 | 19.11572160 | 72.82909711 | <a href="https://www.inaturalist.org/observations/67087513">https://www.inaturalist.org/observations/67087513</a>   |
| 892 | <i>Eudynamys scolopaceus</i> | Western Koel | 2022/2/17  | 3 | 0 | 19.14189474 | 72.83442389 | <a href="https://www.inaturalist.org/observations/107411868">https://www.inaturalist.org/observations/107411868</a> |
| 893 | <i>Eudynamys scolopaceus</i> | Western Koel | 2016/12/3  | 6 | 0 | 19.14190380 | 72.96462540 | <a href="https://www.inaturalist.org/observations/30797322">https://www.inaturalist.org/observations/30797322</a>   |
| 894 | <i>Eudynamys scolopaceus</i> | Western Koel | 2018/2/9   | 2 | 0 | 19.14190550 | 72.96462840 | <a href="https://www.inaturalist.org/observations/56116989">https://www.inaturalist.org/observations/56116989</a>   |
| 895 | <i>Eudynamys scolopaceus</i> | Western Koel | 2021/1/31  | 4 | 0 | 19.14190550 | 72.96462840 | <a href="https://www.inaturalist.org/observations/68852891">https://www.inaturalist.org/observations/68852891</a>   |
| 896 | <i>Eudynamys scolopaceus</i> | Western Koel | 2021/1/31  | 4 | 0 | 19.14190550 | 72.96462840 | <a href="https://www.inaturalist.org/observations/68852894">https://www.inaturalist.org/observations/68852894</a>   |

|     |                              |              |            |   |   |             |             |                                                                                                                     |
|-----|------------------------------|--------------|------------|---|---|-------------|-------------|---------------------------------------------------------------------------------------------------------------------|
| 897 | <i>Eudynamys scolopaceus</i> | Western Koel | 2021/11/21 | 2 | 0 | 19.14190551 | 72.96462838 | <a href="https://www.inaturalist.org/observations/101682968">https://www.inaturalist.org/observations/101682968</a> |
| 898 | <i>Eudynamys scolopaceus</i> | Western Koel | 2015/2/8   | 1 | 0 | 19.14190551 | 72.96462838 | <a href="https://www.inaturalist.org/observations/106671144">https://www.inaturalist.org/observations/106671144</a> |
| 899 | <i>Eudynamys scolopaceus</i> | Western Koel | 2019/1/21  | 1 | 0 | 19.14192483 | 72.96462536 | <a href="https://www.inaturalist.org/observations/56496748">https://www.inaturalist.org/observations/56496748</a>   |
| 900 | <i>Eudynamys scolopaceus</i> | Western Koel | 2019/6/9   | 1 | 0 | 19.14192483 | 72.96462536 | <a href="https://www.inaturalist.org/observations/56496826">https://www.inaturalist.org/observations/56496826</a>   |
| 901 | <i>Eudynamys scolopaceus</i> | Western Koel | 2020/9/21  | 3 | 0 | 19.14192483 | 72.96462536 | <a href="https://www.inaturalist.org/observations/60594190">https://www.inaturalist.org/observations/60594190</a>   |
| 902 | <i>Eudynamys scolopaceus</i> | Western Koel | 2020/12/3  | 3 | 0 | 19.14192483 | 72.96462536 | <a href="https://www.inaturalist.org/observations/66248593">https://www.inaturalist.org/observations/66248593</a>   |
| 903 | <i>Eudynamys scolopaceus</i> | Western Koel | 2020/12/3  | 3 | 0 | 19.14192483 | 72.96462536 | <a href="https://www.inaturalist.org/observations/66248594">https://www.inaturalist.org/observations/66248594</a>   |
| 904 | <i>Eudynamys scolopaceus</i> | Western Koel | 2020/12/3  | 3 | 0 | 19.14192483 | 72.96462536 | <a href="https://www.inaturalist.org/observations/66248600">https://www.inaturalist.org/observations/66248600</a>   |
| 905 | <i>Eudynamys scolopaceus</i> | Western Koel | 2020/12/12 | 4 | 0 | 19.14192483 | 72.96462536 | <a href="https://www.inaturalist.org/observations/66644867">https://www.inaturalist.org/observations/66644867</a>   |
| 906 | <i>Eudynamys scolopaceus</i> | Western Koel | 2020/12/12 | 5 | 0 | 19.14192483 | 72.96462536 | <a href="https://www.inaturalist.org/observations/66644877">https://www.inaturalist.org/observations/66644877</a>   |
| 907 | <i>Eudynamys scolopaceus</i> | Western Koel | 2021/10/29 | 2 | 0 | 19.14192483 | 72.96462536 | <a href="https://www.inaturalist.org/observations/99776330">https://www.inaturalist.org/observations/99776330</a>   |
| 908 | <i>Eudynamys scolopaceus</i> | Western Koel | 2021/10/29 | 4 | 0 | 19.14192483 | 72.96462536 | <a href="https://www.inaturalist.org/observations/99776343">https://www.inaturalist.org/observations/99776343</a>   |
| 909 | <i>Eudynamys scolopaceus</i> | Western Koel | 2017/5/5   | 3 | 0 | 19.14439690 | 72.81794410 | <a href="https://www.inaturalist.org/observations/58147372">https://www.inaturalist.org/observations/58147372</a>   |
| 910 | <i>Eudynamys scolopaceus</i> | Western Koel | 2019/9/8   | 2 | 0 | 19.15131205 | 72.95502439 | <a href="https://www.inaturalist.org/observations/94681732">https://www.inaturalist.org/observations/94681732</a>   |
| 911 | <i>Eudynamys scolopaceus</i> | Western Koel | 2020/3/7   | 2 | 0 | 19.16223540 | 72.85711170 | <a href="https://www.inaturalist.org/observations/39838325">https://www.inaturalist.org/observations/39838325</a>   |
| 912 | <i>Eudynamys scolopaceus</i> | Western Koel | 2018/10/18 | 2 | 0 | 19.16502778 | 72.84278889 | <a href="https://www.inaturalist.org/observations/84273470">https://www.inaturalist.org/observations/84273470</a>   |
| 913 | <i>Eudynamys scolopaceus</i> | Western Koel | 2021/1/18  | 1 | 0 | 19.17270038 | 72.95996167 | <a href="https://www.inaturalist.org/observations/68266034">https://www.inaturalist.org/observations/68266034</a>   |
| 914 | <i>Eudynamys scolopaceus</i> | Western Koel | 2022/6/7   | 2 | 0 | 19.17274111 | 72.95996472 | <a href="https://www.inaturalist.org/observations/120634813">https://www.inaturalist.org/observations/120634813</a> |
| 915 | <i>Eudynamys scolopaceus</i> | Western Koel | 2021/8/28  | 1 | 0 | 19.17340083 | 72.96140278 | <a href="https://www.inaturalist.org/observations/92767712">https://www.inaturalist.org/observations/92767712</a>   |
| 916 | <i>Eudynamys scolopaceus</i> | Western Koel | 2022/4/17  | 1 | 0 | 19.17341917 | 72.95678889 | <a href="https://www.inaturalist.org/observations/111752831">https://www.inaturalist.org/observations/111752831</a> |
| 917 | <i>Eudynamys scolopaceus</i> | Western Koel | 2019/12/9  | 3 | 0 | 19.17755247 | 72.85375055 | <a href="https://www.inaturalist.org/observations/36493304">https://www.inaturalist.org/observations/36493304</a>   |
| 918 | <i>Eudynamys scolopaceus</i> | Western Koel | 2017/11/4  | 5 | 0 | 19.17884323 | 72.94280241 | <a href="https://www.inaturalist.org/observations/27532059">https://www.inaturalist.org/observations/27532059</a>   |
| 919 | <i>Eudynamys scolopaceus</i> | Western Koel | 2018/10/28 | 6 | 0 | 19.18038720 | 72.96700160 | <a href="https://www.inaturalist.org/observations/31473772">https://www.inaturalist.org/observations/31473772</a>   |



|     |                              |              |            |   |   |             |             |                                                                                                                     |
|-----|------------------------------|--------------|------------|---|---|-------------|-------------|---------------------------------------------------------------------------------------------------------------------|
| 920 | <i>Eudynamys scolopaceus</i> | Western Koel | 2019/6/13  | 4 | 0 | 19.19106929 | 72.98146091 | <a href="https://www.inaturalist.org/observations/136793064">https://www.inaturalist.org/observations/136793064</a> |
| 921 | <i>Eudynamys scolopaceus</i> | Western Koel | 2020/11/23 | 3 | 0 | 19.19257320 | 73.33353690 | <a href="https://www.inaturalist.org/observations/65591055">https://www.inaturalist.org/observations/65591055</a>   |
| 922 | <i>Eudynamys scolopaceus</i> | Western Koel | 2020/6/11  | 2 | 0 | 19.20732784 | 81.93386860 | <a href="https://www.inaturalist.org/observations/49433405">https://www.inaturalist.org/observations/49433405</a>   |
| 923 | <i>Eudynamys scolopaceus</i> | Western Koel | 2018/1/23  | 2 | 0 | 19.20993260 | 72.82288670 | <a href="https://www.inaturalist.org/observations/41166159">https://www.inaturalist.org/observations/41166159</a>   |
| 924 | <i>Eudynamys scolopaceus</i> | Western Koel | 2018/1/23  | 3 | 0 | 19.20993260 | 72.82288670 | <a href="https://www.inaturalist.org/observations/41166298">https://www.inaturalist.org/observations/41166298</a>   |
| 925 | <i>Eudynamys scolopaceus</i> | Western Koel | 2017/10/28 | 1 | 0 | 19.20993260 | 72.82288670 | <a href="https://www.inaturalist.org/observations/41222795">https://www.inaturalist.org/observations/41222795</a>   |
| 926 | <i>Eudynamys scolopaceus</i> | Western Koel | 2017/11/8  | 1 | 0 | 19.20993260 | 72.82288670 | <a href="https://www.inaturalist.org/observations/41280047">https://www.inaturalist.org/observations/41280047</a>   |
| 927 | <i>Eudynamys scolopaceus</i> | Western Koel | 2017/11/9  | 1 | 0 | 19.20993260 | 72.82288670 | <a href="https://www.inaturalist.org/observations/41280048">https://www.inaturalist.org/observations/41280048</a>   |
| 928 | <i>Eudynamys scolopaceus</i> | Western Koel | 2017/11/9  | 1 | 0 | 19.20993260 | 72.82288670 | <a href="https://www.inaturalist.org/observations/41280350">https://www.inaturalist.org/observations/41280350</a>   |
| 929 | <i>Eudynamys scolopaceus</i> | Western Koel | 2017/10/16 | 2 | 0 | 19.20993260 | 72.82288670 | <a href="https://www.inaturalist.org/observations/41291751">https://www.inaturalist.org/observations/41291751</a>   |
| 930 | <i>Eudynamys scolopaceus</i> | Western Koel | 2020/3/24  | 1 | 0 | 19.20993260 | 72.82288670 | <a href="https://www.inaturalist.org/observations/41693596">https://www.inaturalist.org/observations/41693596</a>   |
| 931 | <i>Eudynamys scolopaceus</i> | Western Koel | 2013/2/24  | 5 | 0 | 19.21391300 | 72.90115400 | <a href="https://www.inaturalist.org/observations/9789273">https://www.inaturalist.org/observations/9789273</a>     |
| 932 | <i>Eudynamys scolopaceus</i> | Western Koel | 2015/6/14  | 3 | 0 | 19.21614270 | 73.09896160 | <a href="https://www.inaturalist.org/observations/41045474">https://www.inaturalist.org/observations/41045474</a>   |
| 933 | <i>Eudynamys scolopaceus</i> | Western Koel | 2019/1/12  | 1 | 0 | 19.21844279 | 72.81462014 | <a href="https://www.inaturalist.org/observations/104957583">https://www.inaturalist.org/observations/104957583</a> |
| 934 | <i>Eudynamys scolopaceus</i> | Western Koel | 2005/1/1   | 4 | 0 | 19.22902167 | 72.87921833 | <a href="https://www.inaturalist.org/observations/8234538">https://www.inaturalist.org/observations/8234538</a>     |
| 935 | <i>Eudynamys scolopaceus</i> | Western Koel | 2019/6/5   | 4 | 0 | 19.22932434 | 73.07760620 | <a href="https://www.inaturalist.org/observations/26553352">https://www.inaturalist.org/observations/26553352</a>   |
| 936 | <i>Eudynamys scolopaceus</i> | Western Koel | 2021/12/26 | 1 | 0 | 19.23035276 | 72.96845494 | <a href="https://www.inaturalist.org/observations/103871634">https://www.inaturalist.org/observations/103871634</a> |
| 937 | <i>Eudynamys scolopaceus</i> | Western Koel | 2018/4/29  | 4 | 0 | 19.23122810 | 72.87067080 | <a href="https://www.inaturalist.org/observations/11726854">https://www.inaturalist.org/observations/11726854</a>   |
| 938 | <i>Eudynamys scolopaceus</i> | Western Koel | 2012/10/7  | 2 | 0 | 19.23376500 | 72.94458020 | <a href="https://www.inaturalist.org/observations/41890318">https://www.inaturalist.org/observations/41890318</a>   |
| 939 | <i>Eudynamys scolopaceus</i> | Western Koel | 2018/4/22  | 4 | 0 | 19.23574455 | 72.89145738 | <a href="https://www.inaturalist.org/observations/11445604">https://www.inaturalist.org/observations/11445604</a>   |
| 940 | <i>Eudynamys scolopaceus</i> | Western Koel | 2021/6/26  | 2 | 0 | 19.23595411 | 73.47399998 | <a href="https://www.inaturalist.org/observations/89747563">https://www.inaturalist.org/observations/89747563</a>   |
| 941 | <i>Eudynamys scolopaceus</i> | Western Koel | 2018/12/28 | 5 | 0 | 19.23725390 | 72.96455460 | <a href="https://www.inaturalist.org/observations/30319675">https://www.inaturalist.org/observations/30319675</a>   |
| 942 | <i>Eudynamys scolopaceus</i> | Western Koel | 2018/10/28 | 4 | 0 | 19.23946840 | 72.99727719 | <a href="https://www.inaturalist.org/observations/17900084">https://www.inaturalist.org/observations/17900084</a>   |

|     |                              |              |            |   |   |             |             |                                                                                                                     |
|-----|------------------------------|--------------|------------|---|---|-------------|-------------|---------------------------------------------------------------------------------------------------------------------|
| 943 | <i>Eudynamys scolopaceus</i> | Western Koel | 2018/10/21 | 4 | 0 | 19.23971152 | 72.99736303 | <a href="https://www.inaturalist.org/observations/17705637">https://www.inaturalist.org/observations/17705637</a>   |
| 944 | <i>Eudynamys scolopaceus</i> | Western Koel | 2020/4/2   | 1 | 0 | 19.24147985 | 72.85095368 | <a href="https://www.inaturalist.org/observations/97230167">https://www.inaturalist.org/observations/97230167</a>   |
| 945 | <i>Eudynamys scolopaceus</i> | Western Koel | 2020/4/15  | 2 | 0 | 19.24147985 | 72.85095535 | <a href="https://www.inaturalist.org/observations/97230087">https://www.inaturalist.org/observations/97230087</a>   |
| 946 | <i>Eudynamys scolopaceus</i> | Western Koel | 2018/12/9  | 4 | 0 | 19.24294020 | 72.96727900 | <a href="https://www.inaturalist.org/observations/18913951">https://www.inaturalist.org/observations/18913951</a>   |
| 947 | <i>Eudynamys scolopaceus</i> | Western Koel | 2018/10/28 | 3 | 0 | 19.24515270 | 72.99792940 | <a href="https://www.inaturalist.org/observations/75050258">https://www.inaturalist.org/observations/75050258</a>   |
| 948 | <i>Eudynamys scolopaceus</i> | Western Koel | 2021/7/17  | 1 | 0 | 19.24630648 | 72.86231719 | <a href="https://www.inaturalist.org/observations/88504128">https://www.inaturalist.org/observations/88504128</a>   |
| 949 | <i>Eudynamys scolopaceus</i> | Western Koel | 2021/9/21  | 2 | 0 | 19.26511760 | 73.17238930 | <a href="https://www.inaturalist.org/observations/117560866">https://www.inaturalist.org/observations/117560866</a> |
| 950 | <i>Eudynamys scolopaceus</i> | Western Koel | 2011/7/3   | 1 | 0 | 19.26831860 | 72.81018870 | <a href="https://www.inaturalist.org/observations/41744653">https://www.inaturalist.org/observations/41744653</a>   |
| 951 | <i>Eudynamys scolopaceus</i> | Western Koel | 2016/3/13  | 2 | 0 | 19.27007340 | 72.95539970 | <a href="https://www.inaturalist.org/observations/41518230">https://www.inaturalist.org/observations/41518230</a>   |
| 952 | <i>Eudynamys scolopaceus</i> | Western Koel | 2021/3/18  | 1 | 0 | 19.27343072 | 73.03209848 | <a href="https://www.inaturalist.org/observations/71474467">https://www.inaturalist.org/observations/71474467</a>   |
| 953 | <i>Eudynamys scolopaceus</i> | Western Koel | 2022/3/12  | 4 | 0 | 19.30871202 | 84.82198812 | <a href="https://www.inaturalist.org/observations/108409568">https://www.inaturalist.org/observations/108409568</a> |
| 954 | <i>Eudynamys scolopaceus</i> | Western Koel | 2021/5/25  | 1 | 0 | 19.31829380 | 82.13946713 | <a href="https://www.inaturalist.org/observations/80183751">https://www.inaturalist.org/observations/80183751</a>   |
| 955 | <i>Eudynamys scolopaceus</i> | Western Koel | 2021/9/4   | 1 | 0 | 19.33380102 | 84.80560049 | <a href="https://www.inaturalist.org/observations/93654197">https://www.inaturalist.org/observations/93654197</a>   |
| 956 | <i>Eudynamys scolopaceus</i> | Western Koel | 2021/9/4   | 3 | 0 | 19.33437143 | 84.80771206 | <a href="https://www.inaturalist.org/observations/93616480">https://www.inaturalist.org/observations/93616480</a>   |
| 957 | <i>Eudynamys scolopaceus</i> | Western Koel | 2022/1/5   | 2 | 0 | 19.33466028 | 84.80735265 | <a href="https://www.inaturalist.org/observations/104402861">https://www.inaturalist.org/observations/104402861</a> |
| 958 | <i>Eudynamys scolopaceus</i> | Western Koel | 2021/8/30  | 1 | 0 | 19.40662766 | 72.83944767 | <a href="https://www.inaturalist.org/observations/97215663">https://www.inaturalist.org/observations/97215663</a>   |
| 959 | <i>Eudynamys scolopaceus</i> | Western Koel | 2022/8/15  | 2 | 0 | 19.49782290 | 73.01753659 | <a href="https://www.inaturalist.org/observations/131026348">https://www.inaturalist.org/observations/131026348</a> |
| 960 | <i>Eudynamys scolopaceus</i> | Western Koel | 2011/11/25 | 7 | 0 | 19.80000000 | 72.75000000 | <a href="https://www.inaturalist.org/observations/32859079">https://www.inaturalist.org/observations/32859079</a>   |
| 961 | <i>Eudynamys scolopaceus</i> | Western Koel | 2021/12/24 | 1 | 0 | 19.87506230 | 72.76284510 | <a href="https://www.inaturalist.org/observations/107095933">https://www.inaturalist.org/observations/107095933</a> |
| 962 | <i>Eudynamys scolopaceus</i> | Western Koel | 2020/10/31 | 3 | 0 | 19.90734438 | 75.32153975 | <a href="https://www.inaturalist.org/observations/63880285">https://www.inaturalist.org/observations/63880285</a>   |
| 963 | <i>Eudynamys scolopaceus</i> | Western Koel | 2018/1/25  | 2 | 0 | 20.02423796 | 73.75985533 | <a href="https://www.inaturalist.org/observations/107462777">https://www.inaturalist.org/observations/107462777</a> |
| 964 | <i>Eudynamys scolopaceus</i> | Western Koel | 2022/2/4   | 2 | 0 | 20.17488020 | 85.68743666 | <a href="https://www.inaturalist.org/observations/106262052">https://www.inaturalist.org/observations/106262052</a> |
| 965 | <i>Eudynamys scolopaceus</i> | Western Koel | 2022/1/1   | 1 | 0 | 20.17541594 | 85.68322246 | <a href="https://www.inaturalist.org/observations/104092606">https://www.inaturalist.org/observations/104092606</a> |

|     |                              |              |            |   |   |             |             |                                                                                                                     |
|-----|------------------------------|--------------|------------|---|---|-------------|-------------|---------------------------------------------------------------------------------------------------------------------|
| 966 | <i>Eudynamys scolopaceus</i> | Western Koel | 2019/12/14 | 4 | 0 | 20.19024980 | 85.83968728 | <a href="https://www.inaturalist.org/observations/40351053">https://www.inaturalist.org/observations/40351053</a>   |
| 967 | <i>Eudynamys scolopaceus</i> | Western Koel | 2021/11/14 | 2 | 0 | 20.23719702 | 79.01300702 | <a href="https://www.inaturalist.org/observations/101271319">https://www.inaturalist.org/observations/101271319</a> |
| 968 | <i>Eudynamys scolopaceus</i> | Western Koel | 2021/5/9   | 1 | 0 | 20.24656710 | 85.78990415 | <a href="https://www.inaturalist.org/observations/78032973">https://www.inaturalist.org/observations/78032973</a>   |
| 969 | <i>Eudynamys scolopaceus</i> | Western Koel | 2020/2/29  | 4 | 0 | 20.25184974 | 79.01959084 | <a href="https://www.inaturalist.org/observations/43864544">https://www.inaturalist.org/observations/43864544</a>   |
| 970 | <i>Eudynamys scolopaceus</i> | Western Koel | 2016/12/11 | 2 | 0 | 20.30419775 | 85.82320469 | <a href="https://www.inaturalist.org/observations/110212637">https://www.inaturalist.org/observations/110212637</a> |
| 971 | <i>Eudynamys scolopaceus</i> | Western Koel | 2014/7/5   | 6 | 0 | 20.38261313 | 72.91896688 | <a href="https://www.inaturalist.org/observations/5240434">https://www.inaturalist.org/observations/5240434</a>     |
| 972 | <i>Eudynamys scolopaceus</i> | Western Koel | 2017/3/4   | 7 | 0 | 20.40146004 | 72.91563101 | <a href="https://www.inaturalist.org/observations/5229597">https://www.inaturalist.org/observations/5229597</a>     |
| 973 | <i>Eudynamys scolopaceus</i> | Western Koel | 2021/9/20  | 1 | 0 | 20.46251066 | 85.88298921 | <a href="https://www.inaturalist.org/observations/95554022">https://www.inaturalist.org/observations/95554022</a>   |
| 974 | <i>Eudynamys scolopaceus</i> | Western Koel | 2020/3/4   | 2 | 0 | 20.48300691 | 79.28314939 | <a href="https://www.inaturalist.org/observations/39519368">https://www.inaturalist.org/observations/39519368</a>   |
| 975 | <i>Eudynamys scolopaceus</i> | Western Koel | 2021/12/15 | 1 | 0 | 20.58605189 | 81.08296797 | <a href="https://www.inaturalist.org/observations/104002448">https://www.inaturalist.org/observations/104002448</a> |
| 976 | <i>Eudynamys scolopaceus</i> | Western Koel | 2020/10/31 | 2 | 0 | 20.67034898 | 77.08967986 | <a href="https://www.inaturalist.org/observations/63876626">https://www.inaturalist.org/observations/63876626</a>   |
| 977 | <i>Eudynamys scolopaceus</i> | Western Koel | 2020/10/24 | 1 | 0 | 20.67090818 | 77.08836237 | <a href="https://www.inaturalist.org/observations/63587003">https://www.inaturalist.org/observations/63587003</a>   |
| 978 | <i>Eudynamys scolopaceus</i> | Western Koel | 2020/10/31 | 4 | 0 | 20.67304640 | 77.09952344 | <a href="https://www.inaturalist.org/observations/63878555">https://www.inaturalist.org/observations/63878555</a>   |
| 979 | <i>Eudynamys scolopaceus</i> | Western Koel | 2019/2/14  | 2 | 0 | 20.68154427 | 81.55443862 | <a href="https://www.inaturalist.org/observations/37777320">https://www.inaturalist.org/observations/37777320</a>   |
| 980 | <i>Eudynamys scolopaceus</i> | Western Koel | 2020/10/30 | 2 | 0 | 20.69223469 | 77.01748855 | <a href="https://www.inaturalist.org/observations/63805757">https://www.inaturalist.org/observations/63805757</a>   |
| 981 | <i>Eudynamys scolopaceus</i> | Western Koel | 2020/10/18 | 1 | 0 | 20.69252483 | 77.01774426 | <a href="https://www.inaturalist.org/observations/63585227">https://www.inaturalist.org/observations/63585227</a>   |
| 982 | <i>Eudynamys scolopaceus</i> | Western Koel | 2020/10/13 | 0 | 0 | 20.69265249 | 77.01744888 | <a href="https://www.inaturalist.org/observations/62478206">https://www.inaturalist.org/observations/62478206</a>   |
| 983 | <i>Eudynamys scolopaceus</i> | Western Koel | 2021/9/26  | 1 | 0 | 20.72391018 | 81.19390782 | <a href="https://www.inaturalist.org/observations/96192271">https://www.inaturalist.org/observations/96192271</a>   |
| 984 | <i>Eudynamys scolopaceus</i> | Western Koel | 2018/5/27  | 1 | 0 | 20.74922926 | 78.60009234 | <a href="https://www.inaturalist.org/observations/58751910">https://www.inaturalist.org/observations/58751910</a>   |
| 985 | <i>Eudynamys scolopaceus</i> | Western Koel | 2018/6/5   | 4 | 0 | 20.90862955 | 85.00930052 | <a href="https://www.inaturalist.org/observations/13184931">https://www.inaturalist.org/observations/13184931</a>   |
| 986 | <i>Eudynamys scolopaceus</i> | Western Koel | 2020/12/23 | 2 | 0 | 20.99074335 | 75.52818216 | <a href="https://www.inaturalist.org/observations/66968209">https://www.inaturalist.org/observations/66968209</a>   |
| 987 | <i>Eudynamys scolopaceus</i> | Western Koel | 2020/12/23 | 3 | 0 | 20.99076338 | 75.52869044 | <a href="https://www.inaturalist.org/observations/66969141">https://www.inaturalist.org/observations/66969141</a>   |
| 988 | <i>Eudynamys scolopaceus</i> | Western Koel | 2020/12/23 | 3 | 0 | 20.99077684 | 75.52887484 | <a href="https://www.inaturalist.org/observations/66969077">https://www.inaturalist.org/observations/66969077</a>   |

|      |                                      |              |            |   |   |             |             |                                                                                                                     |
|------|--------------------------------------|--------------|------------|---|---|-------------|-------------|---------------------------------------------------------------------------------------------------------------------|
| 989  | Eudynamys scolopaceus                | Western Koel | 2021/3/10  | 2 | 0 | 20.99091650 | 75.53032126 | <a href="https://www.inaturalist.org/observations/70929059">https://www.inaturalist.org/observations/70929059</a>   |
| 990  | Eudynamys scolopaceus                | Western Koel | 2020/12/24 | 4 | 0 | 20.99355367 | 75.54321293 | <a href="https://www.inaturalist.org/observations/67004888">https://www.inaturalist.org/observations/67004888</a>   |
| 991  | Eudynamys scolopaceus                | Western Koel | 2021/1/29  | 2 | 0 | 21.01743806 | 81.46487363 | <a href="https://www.inaturalist.org/observations/68752034">https://www.inaturalist.org/observations/68752034</a>   |
| 992  | Eudynamys scolopaceus                | Western Koel | 2013/6/8   | 1 | 0 | 21.01849249 | 75.57601994 | <a href="https://www.inaturalist.org/observations/85669255">https://www.inaturalist.org/observations/85669255</a>   |
| 993  | Eudynamys scolopaceus                | Western Koel | 2021/1/28  | 1 | 0 | 21.02653146 | 81.45953402 | <a href="https://www.inaturalist.org/observations/68714890">https://www.inaturalist.org/observations/68714890</a>   |
| 994  | Eudynamys scolopaceus                | Western Koel | 2020/2/14  | 3 | 0 | 21.02669638 | 81.45975731 | <a href="https://www.inaturalist.org/observations/69050854">https://www.inaturalist.org/observations/69050854</a>   |
| 995  | Eudynamys scolopaceus                | Western Koel | 2021/8/22  | 2 | 0 | 21.04182778 | 75.79381944 | <a href="https://www.inaturalist.org/observations/92058858">https://www.inaturalist.org/observations/92058858</a>   |
| 996  | Eudynamys scolopaceus                | Western Koel | 2020/4/30  | 2 | 0 | 21.04662629 | 75.84510729 | <a href="https://www.inaturalist.org/observations/51024393">https://www.inaturalist.org/observations/51024393</a>   |
| 997  | Eudynamys scolopaceus                | Western Koel | 2020/4/30  | 2 | 0 | 21.05334806 | 75.84465601 | <a href="https://www.inaturalist.org/observations/51024286">https://www.inaturalist.org/observations/51024286</a>   |
| 998  | Eudynamys scolopaceus                | Western Koel | 2020/9/8   | 3 | 0 | 21.05543667 | 75.84286333 | <a href="https://www.inaturalist.org/observations/58949799">https://www.inaturalist.org/observations/58949799</a>   |
| 999  | Eudynamys scolopaceus                | Western Koel | 2021/5/19  | 3 | 0 | 21.08726047 | 80.66251963 | <a href="https://www.inaturalist.org/observations/79390927">https://www.inaturalist.org/observations/79390927</a>   |
| 1000 | Eudynamys scolopaceus                | Western Koel | 2022/3/18  | 3 | 0 | 21.16828310 | 75.86155887 | <a href="https://www.inaturalist.org/observations/108978917">https://www.inaturalist.org/observations/108978917</a> |
| 1001 | Eudynamys scolopaceus                | Western Koel | 2020/6/21  | 3 | 0 | 21.18708525 | 80.76186363 | <a href="https://www.inaturalist.org/observations/56608565">https://www.inaturalist.org/observations/56608565</a>   |
| 1002 | Eudynamys scolopaceus                | Western Koel | 2022/4/27  | 3 | 0 | 21.19383004 | 81.35094143 | <a href="https://www.inaturalist.org/observations/113139833">https://www.inaturalist.org/observations/113139833</a> |
| 1003 | Eudynamys scolopaceus                | Western Koel | 2017/12/23 | 1 | 0 | 21.19406481 | 81.35094143 | <a href="https://www.inaturalist.org/observations/95792008">https://www.inaturalist.org/observations/95792008</a>   |
| 1004 | Eudynamys scolopaceus                | Western Koel | 2021/5/19  | 2 | 0 | 21.20796822 | 80.66669516 | <a href="https://www.inaturalist.org/observations/79529007">https://www.inaturalist.org/observations/79529007</a>   |
| 1005 | Eudynamys scolopaceus                | Western Koel | 2015/7/27  | 5 | 0 | 21.25852573 | 81.66369505 | <a href="https://www.inaturalist.org/observations/6942766">https://www.inaturalist.org/observations/6942766</a>     |
| 1006 | Eudynamys scolopaceus<br>scolopaceus | Western Koel | 2022/9/4   | 4 | 0 | 21.25876286 | 81.62378308 | <a href="https://www.inaturalist.org/observations/134198455">https://www.inaturalist.org/observations/134198455</a> |
| 1007 | Eudynamys scolopaceus                | Western Koel | 2020/10/28 | 3 | 0 | 21.29707941 | 80.33835657 | <a href="https://www.inaturalist.org/observations/63679792">https://www.inaturalist.org/observations/63679792</a>   |
| 1008 | Eudynamys scolopaceus                | Western Koel | 2020/10/31 | 1 | 0 | 21.29807778 | 80.33802500 | <a href="https://www.inaturalist.org/observations/63861839">https://www.inaturalist.org/observations/63861839</a>   |
| 1009 | Eudynamys scolopaceus                | Western Koel | 2020/10/28 | 0 | 0 | 21.29810579 | 80.33805759 | <a href="https://www.inaturalist.org/observations/63679751">https://www.inaturalist.org/observations/63679751</a>   |
| 1010 | Eudynamys scolopaceus<br>scolopaceus | Western Koel | 2022/8/10  | 0 | 0 | 21.30369758 | 81.63871000 | <a href="https://www.inaturalist.org/observations/130219354">https://www.inaturalist.org/observations/130219354</a> |
| 1011 | Eudynamys scolopaceus                | Western Koel | 2021/5/19  | 2 | 0 | 21.34902090 | 81.38648137 | <a href="https://www.inaturalist.org/observations/79374043">https://www.inaturalist.org/observations/79374043</a>   |

|      |                       |              |            |   |   |             |              |                                                                                                                     |
|------|-----------------------|--------------|------------|---|---|-------------|--------------|---------------------------------------------------------------------------------------------------------------------|
| 1012 | Eudynamys scolopaceus | Western Koel | 2020/6/11  | 2 | 0 | 21.43754228 | 70.58743360  | <a href="https://www.inaturalist.org/observations/49193295">https://www.inaturalist.org/observations/49193295</a>   |
| 1013 | Eudynamys scolopaceus | Western Koel | 2019/10/8  | 1 | 0 | 21.45009150 | 109.05944340 | <a href="https://www.inaturalist.org/observations/111394828">https://www.inaturalist.org/observations/111394828</a> |
| 1014 | Eudynamys scolopaceus | Western Koel | 2022/1/30  | 3 | 0 | 21.66630595 | 81.30579919  | <a href="https://www.inaturalist.org/observations/107025172">https://www.inaturalist.org/observations/107025172</a> |
| 1015 | Eudynamys scolopaceus | Western Koel | 2021/5/25  | 1 | 0 | 21.70222579 | 83.39055385  | <a href="https://www.inaturalist.org/observations/80204031">https://www.inaturalist.org/observations/80204031</a>   |
| 1016 | Eudynamys scolopaceus | Western Koel | 2014/6/30  | 4 | 0 | 21.76447250 | 72.15193040  | <a href="https://www.inaturalist.org/observations/39750203">https://www.inaturalist.org/observations/39750203</a>   |
| 1017 | Eudynamys scolopaceus | Western Koel | 2020/5/2   | 2 | 0 | 21.79675500 | 79.03817039  | <a href="https://www.inaturalist.org/observations/44564694">https://www.inaturalist.org/observations/44564694</a>   |
| 1018 | Eudynamys scolopaceus | Western Koel | 2020/3/24  | 2 | 0 | 21.81672960 | 79.03444980  | <a href="https://www.inaturalist.org/observations/40629727">https://www.inaturalist.org/observations/40629727</a>   |
| 1019 | Eudynamys scolopaceus | Western Koel | 2020/10/1  | 1 | 0 | 21.92882500 | 101.26201330 | <a href="https://www.inaturalist.org/observations/61433900">https://www.inaturalist.org/observations/61433900</a>   |
| 1020 | Eudynamys scolopaceus | Western Koel | 2019/10/18 | 3 | 0 | 21.93198380 | 86.74659280  | <a href="https://www.inaturalist.org/observations/59197851">https://www.inaturalist.org/observations/59197851</a>   |
| 1021 | Eudynamys scolopaceus | Western Koel | 2022/4/17  | 2 | 0 | 21.99807167 | 73.47703833  | <a href="https://www.inaturalist.org/observations/119406704">https://www.inaturalist.org/observations/119406704</a> |
| 1022 | Eudynamys scolopaceus | Western Koel | 2021/8/17  | 0 | 0 | 22.02888533 | 82.35359204  | <a href="https://www.inaturalist.org/observations/92915876">https://www.inaturalist.org/observations/92915876</a>   |
| 1023 | Eudynamys scolopaceus | Western Koel | 2022/5/17  | 3 | 0 | 22.05506400 | 77.86490100  | <a href="https://www.inaturalist.org/observations/129802119">https://www.inaturalist.org/observations/129802119</a> |
| 1024 | Eudynamys scolopaceus | Western Koel | 2021/8/19  | 2 | 0 | 22.06287959 | 82.06046562  | <a href="https://www.inaturalist.org/observations/93704486">https://www.inaturalist.org/observations/93704486</a>   |
| 1025 | Eudynamys scolopaceus | Western Koel | 2019/3/12  | 2 | 0 | 22.07965450 | 82.14091520  | <a href="https://www.inaturalist.org/observations/60719572">https://www.inaturalist.org/observations/60719572</a>   |
| 1026 | Eudynamys scolopaceus | Western Koel | 2021/2/19  | 2 | 0 | 22.08412707 | 113.53306230 | <a href="https://www.inaturalist.org/observations/69851189">https://www.inaturalist.org/observations/69851189</a>   |
| 1027 | Eudynamys scolopaceus | Western Koel | 2022/4/4   | 3 | 0 | 22.09788077 | 88.75652478  | <a href="https://www.inaturalist.org/observations/121340274">https://www.inaturalist.org/observations/121340274</a> |
| 1028 | Eudynamys scolopaceus | Western Koel | 2021/8/31  | 3 | 0 | 22.13103833 | 82.13723500  | <a href="https://www.inaturalist.org/observations/93452537">https://www.inaturalist.org/observations/93452537</a>   |
| 1029 | Eudynamys scolopaceus | Western Koel | 2021/10/19 | 3 | 0 | 22.15437833 | 113.56023330 | <a href="https://www.inaturalist.org/observations/128432331">https://www.inaturalist.org/observations/128432331</a> |
| 1030 | Eudynamys scolopaceus | Western Koel | 2019/5/15  | 1 | 0 | 22.15443617 | 113.56202830 | <a href="https://www.inaturalist.org/observations/25147630">https://www.inaturalist.org/observations/25147630</a>   |
| 1031 | Eudynamys scolopaceus | Western Koel | 2021/5/10  | 1 | 0 | 22.15447939 | 113.56103810 | <a href="https://www.inaturalist.org/observations/109161480">https://www.inaturalist.org/observations/109161480</a> |
| 1032 | Eudynamys scolopaceus | Western Koel | 2022/3/22  | 1 | 0 | 22.15923598 | 113.55061600 | <a href="https://www.inaturalist.org/observations/109815664">https://www.inaturalist.org/observations/109815664</a> |
| 1033 | Eudynamys scolopaceus | Western Koel | 2021/4/3   | 2 | 0 | 22.15966749 | 113.55622310 | <a href="https://www.inaturalist.org/observations/100785210">https://www.inaturalist.org/observations/100785210</a> |
| 1034 | Eudynamys scolopaceus | Western Koel | 2021/5/12  | 1 | 0 | 22.16018029 | 113.55653160 | <a href="https://www.inaturalist.org/observations/78553456">https://www.inaturalist.org/observations/78553456</a>   |

|      |                              |              |           |   |   |             |              |                                                                                                                     |
|------|------------------------------|--------------|-----------|---|---|-------------|--------------|---------------------------------------------------------------------------------------------------------------------|
| 1035 | <i>Eudynamys scolopaceus</i> | Western Koel | 2021/1/10 | 0 | 0 | 22.16384202 | 113.55579560 | <a href="https://www.inaturalist.org/observations/76903398">https://www.inaturalist.org/observations/76903398</a>   |
| 1036 | <i>Eudynamys scolopaceus</i> | Western Koel | 2017/4/8  | 1 | 0 | 22.18970045 | 113.96242810 | <a href="https://www.inaturalist.org/observations/73679404">https://www.inaturalist.org/observations/73679404</a>   |
| 1037 | <i>Eudynamys scolopaceus</i> | Western Koel | 2019/8/8  | 2 | 0 | 22.19673178 | 113.54309860 | <a href="https://www.inaturalist.org/observations/30429427">https://www.inaturalist.org/observations/30429427</a>   |
| 1038 | <i>Eudynamys scolopaceus</i> | Western Koel | 2019/5/11 | 2 | 0 | 22.19703358 | 113.54257530 | <a href="https://www.inaturalist.org/observations/24929486">https://www.inaturalist.org/observations/24929486</a>   |
| 1039 | <i>Eudynamys scolopaceus</i> | Western Koel | 2021/6/12 | 1 | 0 | 22.19767377 | 113.54216020 | <a href="https://www.inaturalist.org/observations/82658320">https://www.inaturalist.org/observations/82658320</a>   |
| 1040 | <i>Eudynamys scolopaceus</i> | Western Koel | 2021/9/19 | 1 | 0 | 22.19993922 | 113.54821770 | <a href="https://www.inaturalist.org/observations/95362592">https://www.inaturalist.org/observations/95362592</a>   |
| 1041 | <i>Eudynamys scolopaceus</i> | Western Koel | 2021/1/10 | 0 | 0 | 22.20037807 | 113.54802660 | <a href="https://www.inaturalist.org/observations/67844334">https://www.inaturalist.org/observations/67844334</a>   |
| 1042 | <i>Eudynamys scolopaceus</i> | Western Koel | 2020/10/2 | 0 | 0 | 22.20052238 | 113.54788020 | <a href="https://www.inaturalist.org/observations/61467468">https://www.inaturalist.org/observations/61467468</a>   |
| 1043 | <i>Eudynamys scolopaceus</i> | Western Koel | 2022/2/28 | 2 | 0 | 22.20289839 | 113.55494430 | <a href="https://www.inaturalist.org/observations/110274088">https://www.inaturalist.org/observations/110274088</a> |
| 1044 | <i>Eudynamys scolopaceus</i> | Western Koel | 2022/2/15 | 1 | 0 | 22.20295739 | 113.55522020 | <a href="https://www.inaturalist.org/observations/106778002">https://www.inaturalist.org/observations/106778002</a> |
| 1045 | <i>Eudynamys scolopaceus</i> | Western Koel | 2022/1/25 | 1 | 0 | 22.20297743 | 113.55514870 | <a href="https://www.inaturalist.org/observations/105543756">https://www.inaturalist.org/observations/105543756</a> |
| 1046 | <i>Eudynamys scolopaceus</i> | Western Koel | 2022/2/8  | 1 | 0 | 22.20336518 | 113.55545060 | <a href="https://www.inaturalist.org/observations/106359740">https://www.inaturalist.org/observations/106359740</a> |
| 1047 | <i>Eudynamys scolopaceus</i> | Western Koel | 2019/1/31 | 2 | 0 | 22.20431512 | 113.55258430 | <a href="https://www.inaturalist.org/observations/23902341">https://www.inaturalist.org/observations/23902341</a>   |
| 1048 | <i>Eudynamys scolopaceus</i> | Western Koel | 2021/7/18 | 1 | 0 | 22.20677016 | 113.54759710 | <a href="https://www.inaturalist.org/observations/88209068">https://www.inaturalist.org/observations/88209068</a>   |
| 1049 | <i>Eudynamys scolopaceus</i> | Western Koel | 2022/4/3  | 2 | 0 | 22.20759400 | 113.54809970 | <a href="https://www.inaturalist.org/observations/110559454">https://www.inaturalist.org/observations/110559454</a> |
| 1050 | <i>Eudynamys scolopaceus</i> | Western Koel | 2019/4/27 | 2 | 0 | 22.20762998 | 113.54812150 | <a href="https://www.inaturalist.org/observations/27844911">https://www.inaturalist.org/observations/27844911</a>   |
| 1051 | <i>Eudynamys scolopaceus</i> | Western Koel | 2019/4/10 | 1 | 0 | 22.20797795 | 113.54788710 | <a href="https://www.inaturalist.org/observations/23794898">https://www.inaturalist.org/observations/23794898</a>   |
| 1052 | <i>Eudynamys scolopaceus</i> | Western Koel | 2019/4/26 | 3 | 0 | 22.22094600 | 113.91576000 | <a href="https://www.inaturalist.org/observations/24255197">https://www.inaturalist.org/observations/24255197</a>   |
| 1053 | <i>Eudynamys scolopaceus</i> | Western Koel | 2020/6/14 | 1 | 0 | 22.22334871 | 114.09964730 | <a href="https://www.inaturalist.org/observations/53104759">https://www.inaturalist.org/observations/53104759</a>   |
| 1054 | <i>Eudynamys scolopaceus</i> | Western Koel | 2022/5/3  | 2 | 0 | 22.23732500 | 114.19814170 | <a href="https://www.inaturalist.org/observations/115510356">https://www.inaturalist.org/observations/115510356</a> |
| 1055 | <i>Eudynamys scolopaceus</i> | Western Koel | 2021/2/19 | 1 | 0 | 22.24042452 | 113.97682560 | <a href="https://www.inaturalist.org/observations/69802161">https://www.inaturalist.org/observations/69802161</a>   |
| 1056 | <i>Eudynamys scolopaceus</i> | Western Koel | 2016/3/20 | 1 | 0 | 22.24136534 | 113.97408440 | <a href="https://www.inaturalist.org/observations/47398098">https://www.inaturalist.org/observations/47398098</a>   |
| 1057 | <i>Eudynamys scolopaceus</i> | Western Koel | 2016/3/20 | 1 | 0 | 22.24138023 | 113.97421850 | <a href="https://www.inaturalist.org/observations/47398097">https://www.inaturalist.org/observations/47398097</a>   |

|      |                              |              |            |   |   |             |              |                                                                                                                     |
|------|------------------------------|--------------|------------|---|---|-------------|--------------|---------------------------------------------------------------------------------------------------------------------|
| 1058 | <i>Eudynamys scolopaceus</i> | Western Koel | 2019/3/29  | 2 | 0 | 22.24478873 | 114.17786380 | <a href="https://www.inaturalist.org/observations/21729913">https://www.inaturalist.org/observations/21729913</a>   |
| 1059 | <i>Eudynamys scolopaceus</i> | Western Koel | 2018/4/27  | 2 | 0 | 22.24500000 | 114.17565830 | <a href="https://www.inaturalist.org/observations/11580927">https://www.inaturalist.org/observations/11580927</a>   |
| 1060 | <i>Eudynamys scolopaceus</i> | Western Koel | 2018/4/24  | 1 | 0 | 22.24513573 | 114.17555240 | <a href="https://www.inaturalist.org/observations/11386751">https://www.inaturalist.org/observations/11386751</a>   |
| 1061 | <i>Eudynamys scolopaceus</i> | Western Koel | 2019/4/26  | 1 | 0 | 22.24519806 | 114.17668630 | <a href="https://www.inaturalist.org/observations/23107635">https://www.inaturalist.org/observations/23107635</a>   |
| 1062 | <i>Eudynamys scolopaceus</i> | Western Koel | 2021/4/1   | 2 | 0 | 22.24546100 | 113.97784100 | <a href="https://www.inaturalist.org/observations/72600229">https://www.inaturalist.org/observations/72600229</a>   |
| 1063 | <i>Eudynamys scolopaceus</i> | Western Koel | 2018/4/24  | 1 | 0 | 22.24552500 | 114.17534670 | <a href="https://www.inaturalist.org/observations/11386423">https://www.inaturalist.org/observations/11386423</a>   |
| 1064 | <i>Eudynamys scolopaceus</i> | Western Koel | 2016/3/16  | 1 | 0 | 22.24609805 | 114.17534720 | <a href="https://www.inaturalist.org/observations/105056834">https://www.inaturalist.org/observations/105056834</a> |
| 1065 | <i>Eudynamys scolopaceus</i> | Western Koel | 2019/4/29  | 1 | 0 | 22.24666100 | 114.17572400 | <a href="https://www.inaturalist.org/observations/24355593">https://www.inaturalist.org/observations/24355593</a>   |
| 1066 | <i>Eudynamys scolopaceus</i> | Western Koel | 2018/4/27  | 1 | 0 | 22.24680976 | 114.17513420 | <a href="https://www.inaturalist.org/observations/11474120">https://www.inaturalist.org/observations/11474120</a>   |
| 1067 | <i>Eudynamys scolopaceus</i> | Western Koel | 2019/12/14 | 1 | 0 | 22.24882591 | 113.94221310 | <a href="https://www.inaturalist.org/observations/36717593">https://www.inaturalist.org/observations/36717593</a>   |
| 1068 | <i>Eudynamys scolopaceus</i> | Western Koel | 2021/3/26  | 3 | 0 | 22.24947333 | 114.17456000 | <a href="https://www.inaturalist.org/observations/72071747">https://www.inaturalist.org/observations/72071747</a>   |
| 1069 | <i>Eudynamys scolopaceus</i> | Western Koel | 2019/4/29  | 1 | 0 | 22.24952833 | 114.17488000 | <a href="https://www.inaturalist.org/observations/23937504">https://www.inaturalist.org/observations/23937504</a>   |
| 1070 | <i>Eudynamys scolopaceus</i> | Western Koel | 2020/4/3   | 1 | 0 | 22.24979667 | 114.15521120 | <a href="https://www.inaturalist.org/observations/41279768">https://www.inaturalist.org/observations/41279768</a>   |
| 1071 | <i>Eudynamys scolopaceus</i> | Western Koel | 2019/4/20  | 1 | 0 | 22.25090421 | 114.16217670 | <a href="https://www.inaturalist.org/observations/67290697">https://www.inaturalist.org/observations/67290697</a>   |
| 1072 | <i>Eudynamys scolopaceus</i> | Western Koel | 2018/4/27  | 2 | 0 | 22.25756350 | 114.24045520 | <a href="https://www.inaturalist.org/observations/11610874">https://www.inaturalist.org/observations/11610874</a>   |
| 1073 | <i>Eudynamys scolopaceus</i> | Western Koel | 2018/4/27  | 2 | 0 | 22.25756350 | 114.24045520 | <a href="https://www.inaturalist.org/observations/11610876">https://www.inaturalist.org/observations/11610876</a>   |
| 1074 | <i>Eudynamys scolopaceus</i> | Western Koel | 2014/10/26 | 2 | 0 | 22.26173200 | 114.25056000 | <a href="https://www.inaturalist.org/observations/10584486">https://www.inaturalist.org/observations/10584486</a>   |
| 1075 | <i>Eudynamys scolopaceus</i> | Western Koel | 2018/5/19  | 3 | 0 | 22.26312546 | 114.24821610 | <a href="https://www.inaturalist.org/observations/17215558">https://www.inaturalist.org/observations/17215558</a>   |
| 1076 | <i>Eudynamys scolopaceus</i> | Western Koel | 2021/11/4  | 1 | 0 | 22.26396167 | 114.24930500 | <a href="https://www.inaturalist.org/observations/100211211">https://www.inaturalist.org/observations/100211211</a> |
| 1077 | <i>Eudynamys scolopaceus</i> | Western Koel | 2021/11/4  | 2 | 0 | 22.26418667 | 114.24937500 | <a href="https://www.inaturalist.org/observations/100211226">https://www.inaturalist.org/observations/100211226</a> |
| 1078 | <i>Eudynamys scolopaceus</i> | Western Koel | 2021/11/4  | 1 | 0 | 22.26421022 | 114.24941400 | <a href="https://www.inaturalist.org/observations/100212866">https://www.inaturalist.org/observations/100212866</a> |
| 1079 | <i>Eudynamys scolopaceus</i> | Western Koel | 2021/3/11  | 1 | 0 | 22.26452941 | 114.25287760 | <a href="https://www.inaturalist.org/observations/71027079">https://www.inaturalist.org/observations/71027079</a>   |
| 1080 | <i>Eudynamys scolopaceus</i> | Western Koel | 2021/11/10 | 0 | 0 | 22.26469077 | 114.24956960 | <a href="https://www.inaturalist.org/observations/100732613">https://www.inaturalist.org/observations/100732613</a> |

|      |                              |              |            |   |   |             |              |                                                                                                                     |
|------|------------------------------|--------------|------------|---|---|-------------|--------------|---------------------------------------------------------------------------------------------------------------------|
| 1081 | <i>Eudynamys scolopaceus</i> | Western Koel | 2020/4/5   | 1 | 0 | 22.26564567 | 114.18786080 | <a href="https://www.inaturalist.org/observations/42645925">https://www.inaturalist.org/observations/42645925</a>   |
| 1082 | <i>Eudynamys scolopaceus</i> | Western Koel | 2021/10/31 | 1 | 0 | 22.26577642 | 114.23845130 | <a href="https://www.inaturalist.org/observations/106301134">https://www.inaturalist.org/observations/106301134</a> |
| 1083 | <i>Eudynamys scolopaceus</i> | Western Koel | 2022/4/29  | 1 | 0 | 22.26591877 | 113.99356590 | <a href="https://www.inaturalist.org/observations/114143059">https://www.inaturalist.org/observations/114143059</a> |
| 1084 | <i>Eudynamys scolopaceus</i> | Western Koel | 2022/3/5   | 1 | 0 | 22.26637310 | 113.99953760 | <a href="https://www.inaturalist.org/observations/107936056">https://www.inaturalist.org/observations/107936056</a> |
| 1085 | <i>Eudynamys scolopaceus</i> | Western Koel | 2020/5/31  | 1 | 0 | 22.26666670 | 114.21666670 | <a href="https://www.inaturalist.org/observations/48233608">https://www.inaturalist.org/observations/48233608</a>   |
| 1086 | <i>Eudynamys scolopaceus</i> | Western Koel | 2021/3/8   | 1 | 0 | 22.26667032 | 114.23844560 | <a href="https://www.inaturalist.org/observations/70814529">https://www.inaturalist.org/observations/70814529</a>   |
| 1087 | <i>Eudynamys scolopaceus</i> | Western Koel | 2022/5/9   | 1 | 0 | 22.26667032 | 114.23844560 | <a href="https://www.inaturalist.org/observations/116262350">https://www.inaturalist.org/observations/116262350</a> |
| 1088 | <i>Eudynamys scolopaceus</i> | Western Koel | 2021/12/2  | 1 | 0 | 22.26692564 | 113.99327960 | <a href="https://www.inaturalist.org/observations/102337572">https://www.inaturalist.org/observations/102337572</a> |
| 1089 | <i>Eudynamys scolopaceus</i> | Western Koel | 2021/2/27  | 1 | 0 | 22.26697500 | 114.23911170 | <a href="https://www.inaturalist.org/observations/70244772">https://www.inaturalist.org/observations/70244772</a>   |
| 1090 | <i>Eudynamys scolopaceus</i> | Western Koel | 2021/11/2  | 1 | 0 | 22.26708713 | 114.23858650 | <a href="https://www.inaturalist.org/observations/100038307">https://www.inaturalist.org/observations/100038307</a> |
| 1091 | <i>Eudynamys scolopaceus</i> | Western Koel | 2021/11/2  | 1 | 0 | 22.26757333 | 114.23876330 | <a href="https://www.inaturalist.org/observations/100040755">https://www.inaturalist.org/observations/100040755</a> |
| 1092 | <i>Eudynamys scolopaceus</i> | Western Koel | 2020/4/4   | 2 | 0 | 22.26818109 | 114.16921750 | <a href="https://www.inaturalist.org/observations/56727210">https://www.inaturalist.org/observations/56727210</a>   |
| 1093 | <i>Eudynamys scolopaceus</i> | Western Koel | 2018/4/29  | 2 | 0 | 22.26825848 | 114.14072550 | <a href="https://www.inaturalist.org/observations/11781412">https://www.inaturalist.org/observations/11781412</a>   |
| 1094 | <i>Eudynamys scolopaceus</i> | Western Koel | 2022/6/13  | 1 | 0 | 22.26943000 | 113.98996170 | <a href="https://www.inaturalist.org/observations/121536003">https://www.inaturalist.org/observations/121536003</a> |
| 1095 | <i>Eudynamys scolopaceus</i> | Western Koel | 2020/8/3   | 3 | 0 | 22.27543799 | 114.06720150 | <a href="https://www.inaturalist.org/observations/55376320">https://www.inaturalist.org/observations/55376320</a>   |
| 1096 | <i>Eudynamys scolopaceus</i> | Western Koel | 2021/5/2   | 1 | 0 | 22.27651003 | 114.15956280 | <a href="https://www.inaturalist.org/observations/76495961">https://www.inaturalist.org/observations/76495961</a>   |
| 1097 | <i>Eudynamys scolopaceus</i> | Western Koel | 2020/4/30  | 1 | 0 | 22.27746544 | 114.15735910 | <a href="https://www.inaturalist.org/observations/45654938">https://www.inaturalist.org/observations/45654938</a>   |
| 1098 | <i>Eudynamys scolopaceus</i> | Western Koel | 2022/7/20  | 1 | 0 | 22.27796604 | 114.16209220 | <a href="https://www.inaturalist.org/observations/127087352">https://www.inaturalist.org/observations/127087352</a> |
| 1099 | <i>Eudynamys scolopaceus</i> | Western Koel | 2020/6/18  | 1 | 0 | 22.27833423 | 114.14381990 | <a href="https://www.inaturalist.org/observations/50424348">https://www.inaturalist.org/observations/50424348</a>   |
| 1100 | <i>Eudynamys scolopaceus</i> | Western Koel | 2021/11/14 | 2 | 0 | 22.27893667 | 114.22975830 | <a href="https://www.inaturalist.org/observations/101079458">https://www.inaturalist.org/observations/101079458</a> |
| 1101 | <i>Eudynamys scolopaceus</i> | Western Koel | 2022/3/17  | 1 | 0 | 22.27951675 | 114.21155640 | <a href="https://www.inaturalist.org/observations/108784247">https://www.inaturalist.org/observations/108784247</a> |
| 1102 | <i>Eudynamys scolopaceus</i> | Western Koel | 2022/3/17  | 1 | 0 | 22.27951675 | 114.21155640 | <a href="https://www.inaturalist.org/observations/108784251">https://www.inaturalist.org/observations/108784251</a> |
| 1103 | <i>Eudynamys scolopaceus</i> | Western Koel | 2011/7/30  | 1 | 0 | 22.27970500 | 113.92933800 | <a href="https://www.inaturalist.org/observations/108223817">https://www.inaturalist.org/observations/108223817</a> |



|      |                              |              |            |   |   |             |              |                                                                                                                     |
|------|------------------------------|--------------|------------|---|---|-------------|--------------|---------------------------------------------------------------------------------------------------------------------|
| 1104 | <i>Eudynamys scolopaceus</i> | Western Koel | 2021/4/30  | 1 | 0 | 22.27984318 | 114.23958670 | <a href="https://www.inaturalist.org/observations/75798310">https://www.inaturalist.org/observations/75798310</a>   |
| 1105 | <i>Eudynamys scolopaceus</i> | Western Koel | 2020/1/22  | 0 | 0 | 22.28018399 | 114.16145680 | <a href="https://www.inaturalist.org/observations/37828731">https://www.inaturalist.org/observations/37828731</a>   |
| 1106 | <i>Eudynamys scolopaceus</i> | Western Koel | 2020/1/22  | 0 | 0 | 22.28018418 | 114.16145620 | <a href="https://www.inaturalist.org/observations/37828732">https://www.inaturalist.org/observations/37828732</a>   |
| 1107 | <i>Eudynamys scolopaceus</i> | Western Koel | 2019/11/28 | 2 | 0 | 22.28092500 | 114.18967900 | <a href="https://www.inaturalist.org/observations/36158142">https://www.inaturalist.org/observations/36158142</a>   |
| 1108 | <i>Eudynamys scolopaceus</i> | Western Koel | 2021/2/28  | 1 | 0 | 22.28145333 | 114.18683670 | <a href="https://www.inaturalist.org/observations/70303298">https://www.inaturalist.org/observations/70303298</a>   |
| 1109 | <i>Eudynamys scolopaceus</i> | Western Koel | 2022/5/27  | 1 | 0 | 22.28153856 | 114.18729540 | <a href="https://www.inaturalist.org/observations/118929865">https://www.inaturalist.org/observations/118929865</a> |
| 1110 | <i>Eudynamys scolopaceus</i> | Western Koel | 2019/5/6   | 1 | 0 | 22.28168301 | 113.44872980 | <a href="https://www.inaturalist.org/observations/67290116">https://www.inaturalist.org/observations/67290116</a>   |
| 1111 | <i>Eudynamys scolopaceus</i> | Western Koel | 2022/1/24  | 1 | 0 | 22.28168487 | 114.09446720 | <a href="https://www.inaturalist.org/observations/105490338">https://www.inaturalist.org/observations/105490338</a> |
| 1112 | <i>Eudynamys scolopaceus</i> | Western Koel | 2017/4/26  | 2 | 0 | 22.28218328 | 114.13501880 | <a href="https://www.inaturalist.org/observations/10564147">https://www.inaturalist.org/observations/10564147</a>   |
| 1113 | <i>Eudynamys scolopaceus</i> | Western Koel | 2022/9/5   | 1 | 0 | 22.28218333 | 114.18690330 | <a href="https://www.inaturalist.org/observations/133756085">https://www.inaturalist.org/observations/133756085</a> |
| 1114 | <i>Eudynamys scolopaceus</i> | Western Koel | 2020/10/13 | 1 | 0 | 22.28235650 | 114.18869690 | <a href="https://www.inaturalist.org/observations/104853697">https://www.inaturalist.org/observations/104853697</a> |
| 1115 | <i>Eudynamys scolopaceus</i> | Western Koel | 2022/4/29  | 1 | 0 | 22.28246630 | 114.22856660 | <a href="https://www.inaturalist.org/observations/113300287">https://www.inaturalist.org/observations/113300287</a> |
| 1116 | <i>Eudynamys scolopaceus</i> | Western Koel | 2021/5/1   | 1 | 0 | 22.28258333 | 114.19022330 | <a href="https://www.inaturalist.org/observations/76040900">https://www.inaturalist.org/observations/76040900</a>   |
| 1117 | <i>Eudynamys scolopaceus</i> | Western Koel | 2019/11/6  | 1 | 0 | 22.28296111 | 114.18701830 | <a href="https://www.inaturalist.org/observations/38421675">https://www.inaturalist.org/observations/38421675</a>   |
| 1118 | <i>Eudynamys scolopaceus</i> | Western Koel | 2022/5/5   | 1 | 0 | 22.28296966 | 114.13976610 | <a href="https://www.inaturalist.org/observations/115542685">https://www.inaturalist.org/observations/115542685</a> |
| 1119 | <i>Eudynamys scolopaceus</i> | Western Koel | 2021/2/21  | 1 | 0 | 22.28314667 | 114.18717170 | <a href="https://www.inaturalist.org/observations/70032455">https://www.inaturalist.org/observations/70032455</a>   |
| 1120 | <i>Eudynamys scolopaceus</i> | Western Koel | 2021/6/12  | 2 | 0 | 22.28314667 | 114.18777500 | <a href="https://www.inaturalist.org/observations/82653128">https://www.inaturalist.org/observations/82653128</a>   |
| 1121 | <i>Eudynamys scolopaceus</i> | Western Koel | 2019/4/26  | 2 | 0 | 22.28346667 | 114.18839170 | <a href="https://www.inaturalist.org/observations/23113644">https://www.inaturalist.org/observations/23113644</a>   |
| 1122 | <i>Eudynamys scolopaceus</i> | Western Koel | 2021/4/5   | 2 | 0 | 22.28376333 | 114.18778000 | <a href="https://www.inaturalist.org/observations/73289868">https://www.inaturalist.org/observations/73289868</a>   |
| 1123 | <i>Eudynamys scolopaceus</i> | Western Koel | 2021/5/30  | 2 | 0 | 22.28377167 | 114.18943000 | <a href="https://www.inaturalist.org/observations/81016836">https://www.inaturalist.org/observations/81016836</a>   |
| 1124 | <i>Eudynamys scolopaceus</i> | Western Koel | 2020/4/8   | 1 | 0 | 22.28480940 | 114.07870780 | <a href="https://www.inaturalist.org/observations/104761190">https://www.inaturalist.org/observations/104761190</a> |
| 1125 | <i>Eudynamys scolopaceus</i> | Western Koel | 2021/3/19  | 1 | 0 | 22.28501333 | 114.19067500 | <a href="https://www.inaturalist.org/observations/85169771">https://www.inaturalist.org/observations/85169771</a>   |
| 1126 | <i>Eudynamys scolopaceus</i> | Western Koel | 2021/3/20  | 1 | 0 | 22.28516950 | 114.13111600 | <a href="https://www.inaturalist.org/observations/71611446">https://www.inaturalist.org/observations/71611446</a>   |

|      |                              |              |           |   |   |             |              |                                                                                                                     |
|------|------------------------------|--------------|-----------|---|---|-------------|--------------|---------------------------------------------------------------------------------------------------------------------|
| 1127 | <i>Eudynamys scolopaceus</i> | Western Koel | 2021/3/11 | 1 | 0 | 22.28573153 | 114.22342250 | <a href="https://www.inaturalist.org/observations/72844754">https://www.inaturalist.org/observations/72844754</a>   |
| 1128 | <i>Eudynamys scolopaceus</i> | Western Koel | 2021/6/12 | 1 | 0 | 22.28579167 | 114.21490500 | <a href="https://www.inaturalist.org/observations/92562886">https://www.inaturalist.org/observations/92562886</a>   |
| 1129 | <i>Eudynamys scolopaceus</i> | Western Koel | 2021/3/11 | 1 | 0 | 22.28585139 | 114.22340730 | <a href="https://www.inaturalist.org/observations/70990710">https://www.inaturalist.org/observations/70990710</a>   |
| 1130 | <i>Eudynamys scolopaceus</i> | Western Koel | 2020/6/13 | 2 | 0 | 22.28600564 | 114.22410690 | <a href="https://www.inaturalist.org/observations/49434194">https://www.inaturalist.org/observations/49434194</a>   |
| 1131 | <i>Eudynamys scolopaceus</i> | Western Koel | 2021/3/30 | 1 | 0 | 22.28609620 | 114.19492870 | <a href="https://www.inaturalist.org/observations/72430822">https://www.inaturalist.org/observations/72430822</a>   |
| 1132 | <i>Eudynamys scolopaceus</i> | Western Koel | 2021/3/6  | 2 | 0 | 22.28637167 | 114.22100000 | <a href="https://www.inaturalist.org/observations/70811923">https://www.inaturalist.org/observations/70811923</a>   |
| 1133 | <i>Eudynamys scolopaceus</i> | Western Koel | 2021/6/25 | 1 | 0 | 22.28710769 | 114.22316440 | <a href="https://www.inaturalist.org/observations/84542741">https://www.inaturalist.org/observations/84542741</a>   |
| 1134 | <i>Eudynamys scolopaceus</i> | Western Koel | 2021/6/25 | 1 | 0 | 22.28727298 | 114.22292330 | <a href="https://www.inaturalist.org/observations/84542618">https://www.inaturalist.org/observations/84542618</a>   |
| 1135 | <i>Eudynamys scolopaceus</i> | Western Koel | 2020/8/15 | 1 | 0 | 22.28750744 | 114.00527780 | <a href="https://www.inaturalist.org/observations/56608499">https://www.inaturalist.org/observations/56608499</a>   |
| 1136 | <i>Eudynamys scolopaceus</i> | Western Koel | 2021/2/9  | 1 | 0 | 22.28792000 | 114.21560500 | <a href="https://www.inaturalist.org/observations/69298142">https://www.inaturalist.org/observations/69298142</a>   |
| 1137 | <i>Eudynamys scolopaceus</i> | Western Koel | 2021/8/1  | 1 | 0 | 22.28797000 | 114.21675170 | <a href="https://www.inaturalist.org/observations/91495988">https://www.inaturalist.org/observations/91495988</a>   |
| 1138 | <i>Eudynamys scolopaceus</i> | Western Koel | 2021/5/1  | 2 | 0 | 22.28807900 | 114.21448840 | <a href="https://www.inaturalist.org/observations/76084992">https://www.inaturalist.org/observations/76084992</a>   |
| 1139 | <i>Eudynamys scolopaceus</i> | Western Koel | 2021/8/1  | 2 | 0 | 22.28810333 | 114.21863670 | <a href="https://www.inaturalist.org/observations/91381050">https://www.inaturalist.org/observations/91381050</a>   |
| 1140 | <i>Eudynamys scolopaceus</i> | Western Koel | 2021/3/29 | 1 | 0 | 22.28810833 | 114.21474500 | <a href="https://www.inaturalist.org/observations/72346268">https://www.inaturalist.org/observations/72346268</a>   |
| 1141 | <i>Eudynamys scolopaceus</i> | Western Koel | 2019/4/29 | 2 | 0 | 22.28815000 | 114.21968000 | <a href="https://www.inaturalist.org/observations/23863155">https://www.inaturalist.org/observations/23863155</a>   |
| 1142 | <i>Eudynamys scolopaceus</i> | Western Koel | 2021/2/13 | 1 | 0 | 22.28819908 | 114.21945780 | <a href="https://www.inaturalist.org/observations/69481882">https://www.inaturalist.org/observations/69481882</a>   |
| 1143 | <i>Eudynamys scolopaceus</i> | Western Koel | 2021/3/13 | 1 | 0 | 22.29068321 | 114.19408620 | <a href="https://www.inaturalist.org/observations/71122571">https://www.inaturalist.org/observations/71122571</a>   |
| 1144 | <i>Eudynamys scolopaceus</i> | Western Koel | 2021/5/3  | 2 | 0 | 22.29104027 | 114.19417640 | <a href="https://www.inaturalist.org/observations/77059222">https://www.inaturalist.org/observations/77059222</a>   |
| 1145 | <i>Eudynamys scolopaceus</i> | Western Koel | 2021/3/25 | 1 | 0 | 22.29124006 | 114.19394470 | <a href="https://www.inaturalist.org/observations/71972582">https://www.inaturalist.org/observations/71972582</a>   |
| 1146 | <i>Eudynamys scolopaceus</i> | Western Koel | 2021/8/21 | 2 | 0 | 22.29553833 | 114.01563890 | <a href="https://www.inaturalist.org/observations/91948061">https://www.inaturalist.org/observations/91948061</a>   |
| 1147 | <i>Eudynamys scolopaceus</i> | Western Koel | 2022/1/15 | 1 | 0 | 22.29731900 | 114.16987300 | <a href="https://www.inaturalist.org/observations/105027052">https://www.inaturalist.org/observations/105027052</a> |
| 1148 | <i>Eudynamys scolopaceus</i> | Western Koel | 2020/4/27 | 1 | 0 | 22.29841137 | 114.17071410 | <a href="https://www.inaturalist.org/observations/43911080">https://www.inaturalist.org/observations/43911080</a>   |
| 1149 | <i>Eudynamys scolopaceus</i> | Western Koel | 2017/6/30 | 5 | 0 | 22.29864606 | 114.17187450 | <a href="https://www.inaturalist.org/observations/7959005">https://www.inaturalist.org/observations/7959005</a>     |

|      |                              |              |            |   |   |             |              |                                                                                                                     |
|------|------------------------------|--------------|------------|---|---|-------------|--------------|---------------------------------------------------------------------------------------------------------------------|
| 1150 | <i>Eudynamys scolopaceus</i> | Western Koel | 2017/4/5   | 3 | 0 | 22.29902326 | 114.17035640 | <a href="https://www.inaturalist.org/observations/8555767">https://www.inaturalist.org/observations/8555767</a>     |
| 1151 | <i>Eudynamys scolopaceus</i> | Western Koel | 2021/5/26  | 2 | 0 | 22.29949427 | 114.17107430 | <a href="https://www.inaturalist.org/observations/80681184">https://www.inaturalist.org/observations/80681184</a>   |
| 1152 | <i>Eudynamys scolopaceus</i> | Western Koel | 2020/10/21 | 1 | 0 | 22.29967603 | 114.17040950 | <a href="https://www.inaturalist.org/observations/63242986">https://www.inaturalist.org/observations/63242986</a>   |
| 1153 | <i>Eudynamys scolopaceus</i> | Western Koel | 2016/3/12  | 4 | 0 | 22.29977000 | 114.17045800 | <a href="http://www.inaturalist.org/observations/2771437">http://www.inaturalist.org/observations/2771437</a>       |
| 1154 | <i>Eudynamys scolopaceus</i> | Western Koel | 2020/8/17  | 1 | 0 | 22.29980688 | 114.16989170 | <a href="https://www.inaturalist.org/observations/56751064">https://www.inaturalist.org/observations/56751064</a>   |
| 1155 | <i>Eudynamys scolopaceus</i> | Western Koel | 2017/12/8  | 3 | 0 | 22.29981485 | 114.17018300 | <a href="https://www.inaturalist.org/observations/16337779">https://www.inaturalist.org/observations/16337779</a>   |
| 1156 | <i>Eudynamys scolopaceus</i> | Western Koel | 2020/8/17  | 1 | 0 | 22.29982106 | 114.16986740 | <a href="https://www.inaturalist.org/observations/56751063">https://www.inaturalist.org/observations/56751063</a>   |
| 1157 | <i>Eudynamys scolopaceus</i> | Western Koel | 2020/1/19  | 0 | 0 | 22.30002778 | 114.16928610 | <a href="https://www.inaturalist.org/observations/38178467">https://www.inaturalist.org/observations/38178467</a>   |
| 1158 | <i>Eudynamys scolopaceus</i> | Western Koel | 2016/3/9   | 1 | 0 | 22.30034273 | 114.17012620 | <a href="https://www.inaturalist.org/observations/105010185">https://www.inaturalist.org/observations/105010185</a> |
| 1159 | <i>Eudynamys scolopaceus</i> | Western Koel | 2019/3/25  | 2 | 0 | 22.30042526 | 114.16925800 | <a href="https://www.inaturalist.org/observations/22175922">https://www.inaturalist.org/observations/22175922</a>   |
| 1160 | <i>Eudynamys scolopaceus</i> | Western Koel | 2017/3/11  | 4 | 0 | 22.30047200 | 114.17136500 | <a href="https://www.inaturalist.org/observations/5385335">https://www.inaturalist.org/observations/5385335</a>     |
| 1161 | <i>Eudynamys scolopaceus</i> | Western Koel | 2019/4/28  | 2 | 0 | 22.30056656 | 114.17665280 | <a href="https://www.inaturalist.org/observations/23641486">https://www.inaturalist.org/observations/23641486</a>   |
| 1162 | <i>Eudynamys scolopaceus</i> | Western Koel | 2018/4/8   | 2 | 0 | 22.30075046 | 114.17015790 | <a href="https://www.inaturalist.org/observations/10723622">https://www.inaturalist.org/observations/10723622</a>   |
| 1163 | <i>Eudynamys scolopaceus</i> | Western Koel | 2011/4/1   | 1 | 0 | 22.30075370 | 114.17005020 | <a href="https://www.inaturalist.org/observations/19741894">https://www.inaturalist.org/observations/19741894</a>   |
| 1164 | <i>Eudynamys scolopaceus</i> | Western Koel | 2017/1/26  | 1 | 0 | 22.30083088 | 114.16987560 | <a href="https://www.inaturalist.org/observations/83676737">https://www.inaturalist.org/observations/83676737</a>   |
| 1165 | <i>Eudynamys scolopaceus</i> | Western Koel | 2019/2/21  | 2 | 0 | 22.30088333 | 114.16939500 | <a href="https://www.inaturalist.org/observations/20528502">https://www.inaturalist.org/observations/20528502</a>   |
| 1166 | <i>Eudynamys scolopaceus</i> | Western Koel | 2020/5/7   | 1 | 0 | 22.30089360 | 114.17269410 | <a href="https://www.inaturalist.org/observations/46083056">https://www.inaturalist.org/observations/46083056</a>   |
| 1167 | <i>Eudynamys scolopaceus</i> | Western Koel | 2008/6/9   | 1 | 0 | 22.30111100 | 114.16981800 | <a href="https://www.inaturalist.org/observations/40740485">https://www.inaturalist.org/observations/40740485</a>   |
| 1168 | <i>Eudynamys scolopaceus</i> | Western Koel | 2020/5/13  | 1 | 0 | 22.30144948 | 114.17208260 | <a href="https://www.inaturalist.org/observations/46079585">https://www.inaturalist.org/observations/46079585</a>   |
| 1169 | <i>Eudynamys scolopaceus</i> | Western Koel | 2018/4/28  | 3 | 0 | 22.30167018 | 114.01701320 | <a href="https://www.inaturalist.org/observations/11560970">https://www.inaturalist.org/observations/11560970</a>   |
| 1170 | <i>Eudynamys scolopaceus</i> | Western Koel | 2022/4/30  | 1 | 0 | 22.30221290 | 114.16962760 | <a href="https://www.inaturalist.org/observations/113696846">https://www.inaturalist.org/observations/113696846</a> |
| 1171 | <i>Eudynamys scolopaceus</i> | Western Koel | 2022/3/14  | 2 | 0 | 22.30314020 | 114.28039530 | <a href="https://www.inaturalist.org/observations/108576746">https://www.inaturalist.org/observations/108576746</a> |
| 1172 | <i>Eudynamys scolopaceus</i> | Western Koel | 2020/3/22  | 1 | 0 | 22.30317070 | 114.25279510 | <a href="https://www.inaturalist.org/observations/44661887">https://www.inaturalist.org/observations/44661887</a>   |

|      |                              |              |            |   |   |             |              |                                                                                                                     |
|------|------------------------------|--------------|------------|---|---|-------------|--------------|---------------------------------------------------------------------------------------------------------------------|
| 1173 | <i>Eudynamys scolopaceus</i> | Western Koel | 2022/6/2   | 2 | 0 | 22.30323880 | 114.25353430 | <a href="https://www.inaturalist.org/observations/119886264">https://www.inaturalist.org/observations/119886264</a> |
| 1174 | <i>Eudynamys scolopaceus</i> | Western Koel | 2020/6/6   | 2 | 0 | 22.30346619 | 114.25265970 | <a href="https://www.inaturalist.org/observations/48629690">https://www.inaturalist.org/observations/48629690</a>   |
| 1175 | <i>Eudynamys scolopaceus</i> | Western Koel | 2021/11/11 | 0 | 0 | 22.30361771 | 114.25805570 | <a href="https://www.inaturalist.org/observations/100818050">https://www.inaturalist.org/observations/100818050</a> |
| 1176 | <i>Eudynamys scolopaceus</i> | Western Koel | 2022/8/19  | 2 | 0 | 22.30376416 | 114.26165480 | <a href="https://www.inaturalist.org/observations/131734652">https://www.inaturalist.org/observations/131734652</a> |
| 1177 | <i>Eudynamys scolopaceus</i> | Western Koel | 2020/6/28  | 2 | 0 | 22.30463714 | 114.01229570 | <a href="https://www.inaturalist.org/observations/51297191">https://www.inaturalist.org/observations/51297191</a>   |
| 1178 | <i>Eudynamys scolopaceus</i> | Western Koel | 2020/11/15 | 3 | 0 | 22.30493454 | 70.76608766  | <a href="https://www.inaturalist.org/observations/64916724">https://www.inaturalist.org/observations/64916724</a>   |
| 1179 | <i>Eudynamys scolopaceus</i> | Western Koel | 2022/3/12  | 1 | 0 | 22.30561913 | 114.26747790 | <a href="https://www.inaturalist.org/observations/108505321">https://www.inaturalist.org/observations/108505321</a> |
| 1180 | <i>Eudynamys scolopaceus</i> | Western Koel | 2021/5/8   | 2 | 0 | 22.30569797 | 114.26693250 | <a href="https://www.inaturalist.org/observations/86807765">https://www.inaturalist.org/observations/86807765</a>   |
| 1181 | <i>Eudynamys scolopaceus</i> | Western Koel | 2020/8/11  | 2 | 0 | 22.30607500 | 114.01677780 | <a href="https://www.inaturalist.org/observations/56114600">https://www.inaturalist.org/observations/56114600</a>   |
| 1182 | <i>Eudynamys scolopaceus</i> | Western Koel | 2022/3/30  | 1 | 0 | 22.30608826 | 114.18932830 | <a href="https://www.inaturalist.org/observations/109907183">https://www.inaturalist.org/observations/109907183</a> |
| 1183 | <i>Eudynamys scolopaceus</i> | Western Koel | 2022/3/20  | 2 | 0 | 22.30622392 | 114.22534280 | <a href="https://www.inaturalist.org/observations/109031432">https://www.inaturalist.org/observations/109031432</a> |
| 1184 | <i>Eudynamys scolopaceus</i> | Western Koel | 2021/5/10  | 1 | 0 | 22.30647476 | 114.22590590 | <a href="https://www.inaturalist.org/observations/78107094">https://www.inaturalist.org/observations/78107094</a>   |
| 1185 | <i>Eudynamys scolopaceus</i> | Western Koel | 2022/4/18  | 2 | 0 | 22.30671806 | 114.19005970 | <a href="https://www.inaturalist.org/observations/111898946">https://www.inaturalist.org/observations/111898946</a> |
| 1186 | <i>Eudynamys scolopaceus</i> | Western Koel | 2022/1/1   | 3 | 0 | 22.30727767 | 114.19084520 | <a href="https://www.inaturalist.org/observations/104106489">https://www.inaturalist.org/observations/104106489</a> |
| 1187 | <i>Eudynamys scolopaceus</i> | Western Koel | 2022/4/30  | 1 | 0 | 22.30731877 | 114.23184540 | <a href="https://www.inaturalist.org/observations/114059649">https://www.inaturalist.org/observations/114059649</a> |
| 1188 | <i>Eudynamys scolopaceus</i> | Western Koel | 2022/3/10  | 1 | 0 | 22.30757940 | 114.19093750 | <a href="https://www.inaturalist.org/observations/108292915">https://www.inaturalist.org/observations/108292915</a> |
| 1189 | <i>Eudynamys scolopaceus</i> | Western Koel | 2018/4/28  | 2 | 0 | 22.30764733 | 114.23031100 | <a href="https://www.inaturalist.org/observations/11584914">https://www.inaturalist.org/observations/11584914</a>   |
| 1190 | <i>Eudynamys scolopaceus</i> | Western Koel | 2022/3/3   | 2 | 0 | 22.30801990 | 114.23756380 | <a href="https://www.inaturalist.org/observations/111884389">https://www.inaturalist.org/observations/111884389</a> |
| 1191 | <i>Eudynamys scolopaceus</i> | Western Koel | 2022/4/16  | 2 | 0 | 22.30858277 | 114.26526950 | <a href="https://www.inaturalist.org/observations/111643824">https://www.inaturalist.org/observations/111643824</a> |
| 1192 | <i>Eudynamys scolopaceus</i> | Western Koel | 2022/3/22  | 2 | 0 | 22.30901774 | 114.25883890 | <a href="https://www.inaturalist.org/observations/109221567">https://www.inaturalist.org/observations/109221567</a> |
| 1193 | <i>Eudynamys scolopaceus</i> | Western Koel | 2022/3/22  | 1 | 0 | 22.30912465 | 114.25886640 | <a href="https://www.inaturalist.org/observations/109224145">https://www.inaturalist.org/observations/109224145</a> |
| 1194 | <i>Eudynamys scolopaceus</i> | Western Koel | 2022/5/20  | 4 | 0 | 22.30912500 | 114.26398330 | <a href="https://www.inaturalist.org/observations/117843793">https://www.inaturalist.org/observations/117843793</a> |
| 1195 | <i>Eudynamys scolopaceus</i> | Western Koel | 2022/4/19  | 1 | 0 | 22.30933531 | 114.19218220 | <a href="https://www.inaturalist.org/observations/112015112">https://www.inaturalist.org/observations/112015112</a> |

|      |                              |              |           |   |   |             |              |                                                                                                                     |
|------|------------------------------|--------------|-----------|---|---|-------------|--------------|---------------------------------------------------------------------------------------------------------------------|
| 1196 | <i>Eudynamys scolopaceus</i> | Western Koel | 2022/3/7  | 2 | 0 | 22.30993271 | 114.25914000 | <a href="https://www.inaturalist.org/observations/108573026">https://www.inaturalist.org/observations/108573026</a> |
| 1197 | <i>Eudynamys scolopaceus</i> | Western Koel | 2021/4/24 | 1 | 0 | 22.31017244 | 114.18000730 | <a href="https://www.inaturalist.org/observations/76400724">https://www.inaturalist.org/observations/76400724</a>   |
| 1198 | <i>Eudynamys scolopaceus</i> | Western Koel | 2019/4/27 | 2 | 0 | 22.31058785 | 114.26278700 | <a href="https://www.inaturalist.org/observations/23308700">https://www.inaturalist.org/observations/23308700</a>   |
| 1199 | <i>Eudynamys scolopaceus</i> | Western Koel | 2020/3/29 | 1 | 0 | 22.31150682 | 114.25856550 | <a href="https://www.inaturalist.org/observations/43331597">https://www.inaturalist.org/observations/43331597</a>   |
| 1200 | <i>Eudynamys scolopaceus</i> | Western Koel | 2018/4/7  | 1 | 0 | 22.31160205 | 114.17537480 | <a href="https://www.inaturalist.org/observations/93121296">https://www.inaturalist.org/observations/93121296</a>   |
| 1201 | <i>Eudynamys scolopaceus</i> | Western Koel | 2019/9/5  | 2 | 0 | 22.31173639 | 114.22954950 | <a href="https://www.inaturalist.org/observations/32153915">https://www.inaturalist.org/observations/32153915</a>   |
| 1202 | <i>Eudynamys scolopaceus</i> | Western Koel | 2020/3/25 | 1 | 0 | 22.31333400 | 114.26535500 | <a href="https://www.inaturalist.org/observations/41017323">https://www.inaturalist.org/observations/41017323</a>   |
| 1203 | <i>Eudynamys scolopaceus</i> | Western Koel | 2019/2/2  | 2 | 0 | 22.31343536 | 114.19151540 | <a href="https://www.inaturalist.org/observations/23033435">https://www.inaturalist.org/observations/23033435</a>   |
| 1204 | <i>Eudynamys scolopaceus</i> | Western Koel | 2022/3/13 | 1 | 0 | 22.31358772 | 114.18236280 | <a href="https://www.inaturalist.org/observations/108516870">https://www.inaturalist.org/observations/108516870</a> |
| 1205 | <i>Eudynamys scolopaceus</i> | Western Koel | 2018/5/21 | 1 | 0 | 22.31413572 | 114.18623140 | <a href="https://www.inaturalist.org/observations/56597897">https://www.inaturalist.org/observations/56597897</a>   |
| 1206 | <i>Eudynamys scolopaceus</i> | Western Koel | 2021/2/28 | 1 | 0 | 22.31426479 | 114.18461270 | <a href="https://www.inaturalist.org/observations/70311442">https://www.inaturalist.org/observations/70311442</a>   |
| 1207 | <i>Eudynamys scolopaceus</i> | Western Koel | 2021/6/5  | 1 | 0 | 22.31440212 | 114.25907550 | <a href="https://www.inaturalist.org/observations/86807463">https://www.inaturalist.org/observations/86807463</a>   |
| 1208 | <i>Eudynamys scolopaceus</i> | Western Koel | 2017/5/14 | 1 | 0 | 22.31519597 | 114.19176550 | <a href="https://www.inaturalist.org/observations/47389876">https://www.inaturalist.org/observations/47389876</a>   |
| 1209 | <i>Eudynamys scolopaceus</i> | Western Koel | 2022/3/26 | 2 | 0 | 22.31538668 | 114.18388030 | <a href="https://www.inaturalist.org/observations/109541571">https://www.inaturalist.org/observations/109541571</a> |
| 1210 | <i>Eudynamys scolopaceus</i> | Western Koel | 2018/4/22 | 3 | 0 | 22.31585440 | 114.23324350 | <a href="https://www.inaturalist.org/observations/11318116">https://www.inaturalist.org/observations/11318116</a>   |
| 1211 | <i>Eudynamys scolopaceus</i> | Western Koel | 2019/1/5  | 2 | 0 | 22.31691742 | 114.26040650 | <a href="https://www.inaturalist.org/observations/19530768">https://www.inaturalist.org/observations/19530768</a>   |
| 1212 | <i>Eudynamys scolopaceus</i> | Western Koel | 2022/5/15 | 1 | 0 | 22.31697848 | 114.18183170 | <a href="https://www.inaturalist.org/observations/119825308">https://www.inaturalist.org/observations/119825308</a> |
| 1213 | <i>Eudynamys scolopaceus</i> | Western Koel | 2019/4/12 | 3 | 0 | 22.31719198 | 114.18318280 | <a href="https://www.inaturalist.org/observations/30410580">https://www.inaturalist.org/observations/30410580</a>   |
| 1214 | <i>Eudynamys scolopaceus</i> | Western Koel | 2019/4/10 | 2 | 0 | 22.31734860 | 114.22890520 | <a href="https://www.inaturalist.org/observations/22307008">https://www.inaturalist.org/observations/22307008</a>   |
| 1215 | <i>Eudynamys scolopaceus</i> | Western Koel | 2019/4/18 | 3 | 0 | 22.31753202 | 114.18512110 | <a href="https://www.inaturalist.org/observations/33924077">https://www.inaturalist.org/observations/33924077</a>   |
| 1216 | <i>Eudynamys scolopaceus</i> | Western Koel | 2021/5/5  | 1 | 0 | 22.31768481 | 114.18334610 | <a href="https://www.inaturalist.org/observations/77474452">https://www.inaturalist.org/observations/77474452</a>   |
| 1217 | <i>Eudynamys scolopaceus</i> | Western Koel | 2022/5/1  | 1 | 0 | 22.31788702 | 114.15960810 | <a href="https://www.inaturalist.org/observations/116119261">https://www.inaturalist.org/observations/116119261</a> |
| 1218 | <i>Eudynamys scolopaceus</i> | Western Koel | 2020/4/25 | 2 | 0 | 22.31793528 | 114.18335170 | <a href="https://www.inaturalist.org/observations/43504338">https://www.inaturalist.org/observations/43504338</a>   |

|      |                              |              |            |   |   |             |              |                                                                                                                     |
|------|------------------------------|--------------|------------|---|---|-------------|--------------|---------------------------------------------------------------------------------------------------------------------|
| 1219 | <i>Eudynamys scolopaceus</i> | Western Koel | 2018/11/21 | 4 | 0 | 22.31803692 | 114.18324310 | <a href="https://www.inaturalist.org/observations/34157341">https://www.inaturalist.org/observations/34157341</a>   |
| 1220 | <i>Eudynamys scolopaceus</i> | Western Koel | 2018/10/27 | 3 | 0 | 22.31836600 | 114.18347400 | <a href="https://www.inaturalist.org/observations/18080961">https://www.inaturalist.org/observations/18080961</a>   |
| 1221 | <i>Eudynamys scolopaceus</i> | Western Koel | 2022/3/15  | 1 | 0 | 22.31840330 | 114.18395360 | <a href="https://www.inaturalist.org/observations/108646564">https://www.inaturalist.org/observations/108646564</a> |
| 1222 | <i>Eudynamys scolopaceus</i> | Western Koel | 2020/4/25  | 2 | 0 | 22.31850700 | 114.17553390 | <a href="https://www.inaturalist.org/observations/44579773">https://www.inaturalist.org/observations/44579773</a>   |
| 1223 | <i>Eudynamys scolopaceus</i> | Western Koel | 2018/4/28  | 5 | 0 | 22.31855848 | 114.18403930 | <a href="https://www.inaturalist.org/observations/11731259">https://www.inaturalist.org/observations/11731259</a>   |
| 1224 | <i>Eudynamys scolopaceus</i> | Western Koel | 2014/2/16  | 3 | 0 | 22.31856700 | 114.17960600 | <a href="http://www.inaturalist.org/observations/533480">http://www.inaturalist.org/observations/533480</a>         |
| 1225 | <i>Eudynamys scolopaceus</i> | Western Koel | 2021/11/14 | 1 | 0 | 22.31886361 | 114.26045240 | <a href="https://www.inaturalist.org/observations/101081924">https://www.inaturalist.org/observations/101081924</a> |
| 1226 | <i>Eudynamys scolopaceus</i> | Western Koel | 2021/4/5   | 0 | 0 | 22.31900013 | 114.18302620 | <a href="https://www.inaturalist.org/observations/72986622">https://www.inaturalist.org/observations/72986622</a>   |
| 1227 | <i>Eudynamys scolopaceus</i> | Western Koel | 2020/4/24  | 2 | 0 | 22.31911449 | 114.24290180 | <a href="https://www.inaturalist.org/observations/43090816">https://www.inaturalist.org/observations/43090816</a>   |
| 1228 | <i>Eudynamys scolopaceus</i> | Western Koel | 2022/5/1   | 1 | 0 | 22.31937355 | 114.16244100 | <a href="https://www.inaturalist.org/observations/116119263">https://www.inaturalist.org/observations/116119263</a> |
| 1229 | <i>Eudynamys scolopaceus</i> | Western Koel | 2022/9/14  | 1 | 0 | 22.31988533 | 114.16936100 | <a href="https://www.inaturalist.org/observations/134991799">https://www.inaturalist.org/observations/134991799</a> |
| 1230 | <i>Eudynamys scolopaceus</i> | Western Koel | 2022/1/16  | 1 | 0 | 22.32196215 | 114.09646560 | <a href="https://www.inaturalist.org/observations/105044821">https://www.inaturalist.org/observations/105044821</a> |
| 1231 | <i>Eudynamys scolopaceus</i> | Western Koel | 2021/6/2   | 2 | 0 | 22.32327904 | 114.20942170 | <a href="https://www.inaturalist.org/observations/81278020">https://www.inaturalist.org/observations/81278020</a>   |
| 1232 | <i>Eudynamys scolopaceus</i> | Western Koel | 2021/4/23  | 2 | 0 | 22.32356498 | 114.15709350 | <a href="https://www.inaturalist.org/observations/78648457">https://www.inaturalist.org/observations/78648457</a>   |
| 1233 | <i>Eudynamys scolopaceus</i> | Western Koel | 2017/4/7   | 3 | 0 | 22.32420900 | 114.21300800 | <a href="https://www.inaturalist.org/observations/5601898">https://www.inaturalist.org/observations/5601898</a>     |
| 1234 | <i>Eudynamys scolopaceus</i> | Western Koel | 2017/5/11  | 2 | 0 | 22.32543300 | 114.17567300 | <a href="https://www.inaturalist.org/observations/6190622">https://www.inaturalist.org/observations/6190622</a>     |
| 1235 | <i>Eudynamys scolopaceus</i> | Western Koel | 2019/4/27  | 2 | 0 | 22.32557610 | 114.17313120 | <a href="https://www.inaturalist.org/observations/23323438">https://www.inaturalist.org/observations/23323438</a>   |
| 1236 | <i>Eudynamys scolopaceus</i> | Western Koel | 2018/4/27  | 1 | 0 | 22.32557833 | 114.22720330 | <a href="https://www.inaturalist.org/observations/11476872">https://www.inaturalist.org/observations/11476872</a>   |
| 1237 | <i>Eudynamys scolopaceus</i> | Western Koel | 2021/3/30  | 0 | 0 | 22.32584953 | 114.17095180 | <a href="https://www.inaturalist.org/observations/72433368">https://www.inaturalist.org/observations/72433368</a>   |
| 1238 | <i>Eudynamys scolopaceus</i> | Western Koel | 2022/5/10  | 1 | 0 | 22.32632341 | 114.21112500 | <a href="https://www.inaturalist.org/observations/116387682">https://www.inaturalist.org/observations/116387682</a> |
| 1239 | <i>Eudynamys scolopaceus</i> | Western Koel | 2022/5/10  | 1 | 0 | 22.32632341 | 114.21112500 | <a href="https://www.inaturalist.org/observations/116387684">https://www.inaturalist.org/observations/116387684</a> |
| 1240 | <i>Eudynamys scolopaceus</i> | Western Koel | 2022/7/15  | 3 | 0 | 22.32632341 | 114.21112500 | <a href="https://www.inaturalist.org/observations/126783614">https://www.inaturalist.org/observations/126783614</a> |
| 1241 | <i>Eudynamys scolopaceus</i> | Western Koel | 2022/3/21  | 2 | 0 | 22.32650721 | 114.17215310 | <a href="https://www.inaturalist.org/observations/109133664">https://www.inaturalist.org/observations/109133664</a> |

|      |                              |              |            |   |   |             |              |                                                                                                                     |
|------|------------------------------|--------------|------------|---|---|-------------|--------------|---------------------------------------------------------------------------------------------------------------------|
| 1242 | <i>Eudynamys scolopaceus</i> | Western Koel | 2020/4/4   | 1 | 0 | 22.32718094 | 114.34495090 | <a href="https://www.inaturalist.org/observations/104761182">https://www.inaturalist.org/observations/104761182</a> |
| 1243 | <i>Eudynamys scolopaceus</i> | Western Koel | 2022/3/21  | 2 | 0 | 22.32775225 | 114.17474760 | <a href="https://www.inaturalist.org/observations/109133665">https://www.inaturalist.org/observations/109133665</a> |
| 1244 | <i>Eudynamys scolopaceus</i> | Western Koel | 2022/1/12  | 1 | 0 | 22.32810824 | 114.36867580 | <a href="https://www.inaturalist.org/observations/104808775">https://www.inaturalist.org/observations/104808775</a> |
| 1245 | <i>Eudynamys scolopaceus</i> | Western Koel | 2021/7/17  | 2 | 0 | 22.32973667 | 114.18410500 | <a href="https://www.inaturalist.org/observations/87958813">https://www.inaturalist.org/observations/87958813</a>   |
| 1246 | <i>Eudynamys scolopaceus</i> | Western Koel | 2020/1/18  | 1 | 0 | 22.33008611 | 114.17281940 | <a href="https://www.inaturalist.org/observations/95734042">https://www.inaturalist.org/observations/95734042</a>   |
| 1247 | <i>Eudynamys scolopaceus</i> | Western Koel | 2017/4/16  | 3 | 0 | 22.33050655 | 114.18537140 | <a href="https://www.inaturalist.org/observations/10488747">https://www.inaturalist.org/observations/10488747</a>   |
| 1248 | <i>Eudynamys scolopaceus</i> | Western Koel | 2022/3/13  | 1 | 0 | 22.33055194 | 114.15657810 | <a href="https://www.inaturalist.org/observations/108494319">https://www.inaturalist.org/observations/108494319</a> |
| 1249 | <i>Eudynamys scolopaceus</i> | Western Koel | 2018/4/27  | 2 | 0 | 22.33069230 | 114.18508170 | <a href="https://www.inaturalist.org/observations/11484431">https://www.inaturalist.org/observations/11484431</a>   |
| 1250 | <i>Eudynamys scolopaceus</i> | Western Koel | 2021/12/18 | 2 | 0 | 22.33083874 | 114.18411490 | <a href="https://www.inaturalist.org/observations/103358637">https://www.inaturalist.org/observations/103358637</a> |
| 1251 | <i>Eudynamys scolopaceus</i> | Western Koel | 2021/3/14  | 0 | 0 | 22.33086667 | 114.18490560 | <a href="https://www.inaturalist.org/observations/71203264">https://www.inaturalist.org/observations/71203264</a>   |
| 1252 | <i>Eudynamys scolopaceus</i> | Western Koel | 2020/4/24  | 2 | 0 | 22.33094757 | 114.18287000 | <a href="https://www.inaturalist.org/observations/43021408">https://www.inaturalist.org/observations/43021408</a>   |
| 1253 | <i>Eudynamys scolopaceus</i> | Western Koel | 2021/3/25  | 1 | 0 | 22.33097820 | 114.15619740 | <a href="https://www.inaturalist.org/observations/72233487">https://www.inaturalist.org/observations/72233487</a>   |
| 1254 | <i>Eudynamys scolopaceus</i> | Western Koel | 2022/1/31  | 1 | 0 | 22.33098415 | 114.18452990 | <a href="https://www.inaturalist.org/observations/105906023">https://www.inaturalist.org/observations/105906023</a> |
| 1255 | <i>Eudynamys scolopaceus</i> | Western Koel | 2020/9/11  | 1 | 0 | 22.33107786 | 114.18477300 | <a href="https://www.inaturalist.org/observations/59299605">https://www.inaturalist.org/observations/59299605</a>   |
| 1256 | <i>Eudynamys scolopaceus</i> | Western Koel | 2022/3/5   | 1 | 0 | 22.33111397 | 114.19208600 | <a href="https://www.inaturalist.org/observations/108152237">https://www.inaturalist.org/observations/108152237</a> |
| 1257 | <i>Eudynamys scolopaceus</i> | Western Koel | 2022/1/6   | 1 | 0 | 22.33119705 | 114.03887900 | <a href="https://www.inaturalist.org/observations/104465801">https://www.inaturalist.org/observations/104465801</a> |
| 1258 | <i>Eudynamys scolopaceus</i> | Western Koel | 2020/1/18  | 1 | 0 | 22.33124620 | 114.17440390 | <a href="https://www.inaturalist.org/observations/95734035">https://www.inaturalist.org/observations/95734035</a>   |
| 1259 | <i>Eudynamys scolopaceus</i> | Western Koel | 2018/3/11  | 2 | 0 | 22.33144476 | 114.15678080 | <a href="https://www.inaturalist.org/observations/13446080">https://www.inaturalist.org/observations/13446080</a>   |
| 1260 | <i>Eudynamys scolopaceus</i> | Western Koel | 2022/3/12  | 1 | 0 | 22.33149153 | 114.18468040 | <a href="https://www.inaturalist.org/observations/108421292">https://www.inaturalist.org/observations/108421292</a> |
| 1261 | <i>Eudynamys scolopaceus</i> | Western Koel | 2021/11/13 | 1 | 0 | 22.33156410 | 114.18869870 | <a href="https://www.inaturalist.org/observations/101004724">https://www.inaturalist.org/observations/101004724</a> |
| 1262 | <i>Eudynamys scolopaceus</i> | Western Koel | 2019/10/25 | 2 | 0 | 22.33166539 | 114.19052850 | <a href="https://www.inaturalist.org/observations/37059547">https://www.inaturalist.org/observations/37059547</a>   |
| 1263 | <i>Eudynamys scolopaceus</i> | Western Koel | 2022/1/3   | 1 | 0 | 22.33166900 | 114.18279800 | <a href="https://www.inaturalist.org/observations/104335108">https://www.inaturalist.org/observations/104335108</a> |
| 1264 | <i>Eudynamys scolopaceus</i> | Western Koel | 2018/9/23  | 1 | 0 | 22.33170272 | 114.19073550 | <a href="https://www.inaturalist.org/observations/104923854">https://www.inaturalist.org/observations/104923854</a> |

|      |                              |              |            |   |   |             |              |                                                                                                                     |
|------|------------------------------|--------------|------------|---|---|-------------|--------------|---------------------------------------------------------------------------------------------------------------------|
| 1265 | <i>Eudynamys scolopaceus</i> | Western Koel | 2021/9/13  | 1 | 0 | 22.33186798 | 114.18492020 | <a href="https://www.inaturalist.org/observations/94708439">https://www.inaturalist.org/observations/94708439</a>   |
| 1266 | <i>Eudynamys scolopaceus</i> | Western Koel | 2019/11/6  | 2 | 0 | 22.33195300 | 114.19027150 | <a href="https://www.inaturalist.org/observations/35364079">https://www.inaturalist.org/observations/35364079</a>   |
| 1267 | <i>Eudynamys scolopaceus</i> | Western Koel | 2021/7/17  | 2 | 0 | 22.33208833 | 114.18975830 | <a href="https://www.inaturalist.org/observations/87377083">https://www.inaturalist.org/observations/87377083</a>   |
| 1268 | <i>Eudynamys scolopaceus</i> | Western Koel | 2022/5/1   | 1 | 0 | 22.33211791 | 114.18250290 | <a href="https://www.inaturalist.org/observations/114157669">https://www.inaturalist.org/observations/114157669</a> |
| 1269 | <i>Eudynamys scolopaceus</i> | Western Koel | 2022/3/13  | 2 | 0 | 22.33217500 | 114.19534500 | <a href="https://www.inaturalist.org/observations/108492365">https://www.inaturalist.org/observations/108492365</a> |
| 1270 | <i>Eudynamys scolopaceus</i> | Western Koel | 2022/1/3   | 1 | 0 | 22.33221351 | 114.18399810 | <a href="https://www.inaturalist.org/observations/104452712">https://www.inaturalist.org/observations/104452712</a> |
| 1271 | <i>Eudynamys scolopaceus</i> | Western Koel | 2019/11/6  | 2 | 0 | 22.33221568 | 114.18985470 | <a href="https://www.inaturalist.org/observations/35394021">https://www.inaturalist.org/observations/35394021</a>   |
| 1272 | <i>Eudynamys scolopaceus</i> | Western Koel | 2021/5/1   | 1 | 0 | 22.33238575 | 114.18459830 | <a href="https://www.inaturalist.org/observations/76088079">https://www.inaturalist.org/observations/76088079</a>   |
| 1273 | <i>Eudynamys scolopaceus</i> | Western Koel | 2019/7/13  | 1 | 0 | 22.33242500 | 114.19065000 | <a href="https://www.inaturalist.org/observations/28720044">https://www.inaturalist.org/observations/28720044</a>   |
| 1274 | <i>Eudynamys scolopaceus</i> | Western Koel | 2019/12/22 | 1 | 0 | 22.33272013 | 114.18228250 | <a href="https://www.inaturalist.org/observations/36848663">https://www.inaturalist.org/observations/36848663</a>   |
| 1275 | <i>Eudynamys scolopaceus</i> | Western Koel | 2019/8/13  | 4 | 0 | 22.33319338 | 114.18242570 | <a href="https://www.inaturalist.org/observations/30800730">https://www.inaturalist.org/observations/30800730</a>   |
| 1276 | <i>Eudynamys scolopaceus</i> | Western Koel | 2022/4/30  | 1 | 0 | 22.33320086 | 114.21111580 | <a href="https://www.inaturalist.org/observations/113724503">https://www.inaturalist.org/observations/113724503</a> |
| 1277 | <i>Eudynamys scolopaceus</i> | Western Koel | 2021/8/21  | 1 | 0 | 22.33329415 | 114.18285350 | <a href="https://www.inaturalist.org/observations/91959507">https://www.inaturalist.org/observations/91959507</a>   |
| 1278 | <i>Eudynamys scolopaceus</i> | Western Koel | 2021/4/9   | 1 | 0 | 22.33399085 | 114.14049700 | <a href="https://www.inaturalist.org/observations/73350911">https://www.inaturalist.org/observations/73350911</a>   |
| 1279 | <i>Eudynamys scolopaceus</i> | Western Koel | 2021/1/29  | 6 | 0 | 22.33441958 | 114.13891400 | <a href="https://www.inaturalist.org/observations/82401362">https://www.inaturalist.org/observations/82401362</a>   |
| 1280 | <i>Eudynamys scolopaceus</i> | Western Koel | 2021/9/4   | 2 | 0 | 22.33451589 | 114.13928570 | <a href="https://www.inaturalist.org/observations/94301564">https://www.inaturalist.org/observations/94301564</a>   |
| 1281 | <i>Eudynamys scolopaceus</i> | Western Koel | 2022/4/5   | 1 | 0 | 22.33501147 | 114.13737130 | <a href="https://www.inaturalist.org/observations/123182137">https://www.inaturalist.org/observations/123182137</a> |
| 1282 | <i>Eudynamys scolopaceus</i> | Western Koel | 2021/12/15 | 1 | 0 | 22.33562340 | 114.18583160 | <a href="https://www.inaturalist.org/observations/103152305">https://www.inaturalist.org/observations/103152305</a> |
| 1283 | <i>Eudynamys scolopaceus</i> | Western Koel | 2021/1/24  | 2 | 0 | 22.33565000 | 114.13759830 | <a href="https://www.inaturalist.org/observations/97131142">https://www.inaturalist.org/observations/97131142</a>   |
| 1284 | <i>Eudynamys scolopaceus</i> | Western Koel | 2021/3/14  | 1 | 0 | 22.33580550 | 114.14948920 | <a href="https://www.inaturalist.org/observations/71203148">https://www.inaturalist.org/observations/71203148</a>   |
| 1285 | <i>Eudynamys scolopaceus</i> | Western Koel | 2022/9/11  | 1 | 0 | 22.33778170 | 114.13592720 | <a href="https://www.inaturalist.org/observations/136893334">https://www.inaturalist.org/observations/136893334</a> |
| 1286 | <i>Eudynamys scolopaceus</i> | Western Koel | 2022/6/24  | 1 | 0 | 22.33880400 | 114.13813600 | <a href="https://www.inaturalist.org/observations/123222070">https://www.inaturalist.org/observations/123222070</a> |
| 1287 | <i>Eudynamys scolopaceus</i> | Western Koel | 2020/3/21  | 4 | 0 | 22.34169020 | 73.19263710  | <a href="https://www.inaturalist.org/observations/42455815">https://www.inaturalist.org/observations/42455815</a>   |



|      |                              |              |            |   |   |             |              |                                                                                                                     |
|------|------------------------------|--------------|------------|---|---|-------------|--------------|---------------------------------------------------------------------------------------------------------------------|
| 1288 | <i>Eudynamys scolopaceus</i> | Western Koel | 2020/3/21  | 4 | 0 | 22.34169020 | 73.19263710  | <a href="https://www.inaturalist.org/observations/42455816">https://www.inaturalist.org/observations/42455816</a>   |
| 1289 | <i>Eudynamys scolopaceus</i> | Western Koel | 2018/3/28  | 3 | 0 | 22.34300725 | 114.18221830 | <a href="https://www.inaturalist.org/observations/19601931">https://www.inaturalist.org/observations/19601931</a>   |
| 1290 | <i>Eudynamys scolopaceus</i> | Western Koel | 2018/6/19  | 1 | 0 | 22.34509010 | 114.19310080 | <a href="https://www.inaturalist.org/observations/13575314">https://www.inaturalist.org/observations/13575314</a>   |
| 1291 | <i>Eudynamys scolopaceus</i> | Western Koel | 2021/4/22  | 2 | 0 | 22.35155180 | 114.20041200 | <a href="https://www.inaturalist.org/observations/75146682">https://www.inaturalist.org/observations/75146682</a>   |
| 1292 | <i>Eudynamys scolopaceus</i> | Western Koel | 2022/5/20  | 1 | 0 | 22.35175427 | 114.10392900 | <a href="https://www.inaturalist.org/observations/129248953">https://www.inaturalist.org/observations/129248953</a> |
| 1293 | <i>Eudynamys scolopaceus</i> | Western Koel | 2022/4/21  | 2 | 0 | 22.35230833 | 114.06131670 | <a href="https://www.inaturalist.org/observations/112253175">https://www.inaturalist.org/observations/112253175</a> |
| 1294 | <i>Eudynamys scolopaceus</i> | Western Koel | 2021/8/7   | 1 | 0 | 22.35527659 | 114.24787180 | <a href="https://www.inaturalist.org/observations/90367612">https://www.inaturalist.org/observations/90367612</a>   |
| 1295 | <i>Eudynamys scolopaceus</i> | Western Koel | 2018/8/2   | 3 | 0 | 22.35580900 | 114.10535100 | <a href="https://www.inaturalist.org/observations/15043803">https://www.inaturalist.org/observations/15043803</a>   |
| 1296 | <i>Eudynamys scolopaceus</i> | Western Koel | 2021/11/21 | 2 | 0 | 22.35582475 | 114.10600420 | <a href="https://www.inaturalist.org/observations/101604629">https://www.inaturalist.org/observations/101604629</a> |
| 1297 | <i>Eudynamys scolopaceus</i> | Western Koel | 2019/4/28  | 2 | 0 | 22.35589830 | 114.10562990 | <a href="https://www.inaturalist.org/observations/23605250">https://www.inaturalist.org/observations/23605250</a>   |
| 1298 | <i>Eudynamys scolopaceus</i> | Western Koel | 2020/4/27  | 1 | 0 | 22.35589830 | 114.10562990 | <a href="https://www.inaturalist.org/observations/43866396">https://www.inaturalist.org/observations/43866396</a>   |
| 1299 | <i>Eudynamys scolopaceus</i> | Western Koel | 2018/11/30 | 2 | 0 | 22.35609177 | 114.10585340 | <a href="https://www.inaturalist.org/observations/69027791">https://www.inaturalist.org/observations/69027791</a>   |
| 1300 | <i>Eudynamys scolopaceus</i> | Western Koel | 2019/4/5   | 1 | 0 | 22.35614636 | 114.10630580 | <a href="https://www.inaturalist.org/observations/49201016">https://www.inaturalist.org/observations/49201016</a>   |
| 1301 | <i>Eudynamys scolopaceus</i> | Western Koel | 2019/4/30  | 3 | 0 | 22.35819402 | 114.12872210 | <a href="https://www.inaturalist.org/observations/24067612">https://www.inaturalist.org/observations/24067612</a>   |
| 1302 | <i>Eudynamys scolopaceus</i> | Western Koel | 2019/9/7   | 2 | 0 | 22.35835805 | 114.12866450 | <a href="https://www.inaturalist.org/observations/32327418">https://www.inaturalist.org/observations/32327418</a>   |
| 1303 | <i>Eudynamys scolopaceus</i> | Western Koel | 2019/8/15  | 3 | 0 | 22.36186553 | 114.12510220 | <a href="https://www.inaturalist.org/observations/30925719">https://www.inaturalist.org/observations/30925719</a>   |
| 1304 | <i>Eudynamys scolopaceus</i> | Western Koel | 2019/4/28  | 3 | 0 | 22.36239937 | 114.11265960 | <a href="https://www.inaturalist.org/observations/23576929">https://www.inaturalist.org/observations/23576929</a>   |
| 1305 | <i>Eudynamys scolopaceus</i> | Western Koel | 2020/4/2   | 1 | 0 | 22.36347440 | 114.11249100 | <a href="https://www.inaturalist.org/observations/58818142">https://www.inaturalist.org/observations/58818142</a>   |
| 1306 | <i>Eudynamys scolopaceus</i> | Western Koel | 2019/4/27  | 2 | 0 | 22.36404610 | 114.11180880 | <a href="https://www.inaturalist.org/observations/23256578">https://www.inaturalist.org/observations/23256578</a>   |
| 1307 | <i>Eudynamys scolopaceus</i> | Western Koel | 2021/5/1   | 1 | 0 | 22.36417325 | 114.18549490 | <a href="https://www.inaturalist.org/observations/76593191">https://www.inaturalist.org/observations/76593191</a>   |
| 1308 | <i>Eudynamys scolopaceus</i> | Western Koel | 2022/5/2   | 1 | 0 | 22.36456092 | 114.37563850 | <a href="https://www.inaturalist.org/observations/115360366">https://www.inaturalist.org/observations/115360366</a> |
| 1309 | <i>Eudynamys scolopaceus</i> | Western Koel | 2018/3/5   | 1 | 0 | 22.36463030 | 114.11289870 | <a href="https://www.inaturalist.org/observations/36314691">https://www.inaturalist.org/observations/36314691</a>   |
| 1310 | <i>Eudynamys scolopaceus</i> | Western Koel | 2021/11/5  | 2 | 0 | 22.36534842 | 114.13933460 | <a href="https://www.inaturalist.org/observations/100292560">https://www.inaturalist.org/observations/100292560</a> |

|      |                              |              |            |   |   |             |              |                                                                                                                     |
|------|------------------------------|--------------|------------|---|---|-------------|--------------|---------------------------------------------------------------------------------------------------------------------|
| 1311 | <i>Eudynamys scolopaceus</i> | Western Koel | 2022/7/24  | 5 | 0 | 22.36574167 | 73.70895333  | <a href="https://www.inaturalist.org/observations/132133838">https://www.inaturalist.org/observations/132133838</a> |
| 1312 | <i>Eudynamys scolopaceus</i> | Western Koel | 2021/4/11  | 1 | 0 | 22.36586808 | 113.99682280 | <a href="https://www.inaturalist.org/observations/76391545">https://www.inaturalist.org/observations/76391545</a>   |
| 1313 | <i>Eudynamys scolopaceus</i> | Western Koel | 2022/3/9   | 1 | 0 | 22.36658561 | 114.13448940 | <a href="https://www.inaturalist.org/observations/108219673">https://www.inaturalist.org/observations/108219673</a> |
| 1314 | <i>Eudynamys scolopaceus</i> | Western Koel | 2022/3/9   | 1 | 0 | 22.36767162 | 114.10086280 | <a href="https://www.inaturalist.org/observations/108218691">https://www.inaturalist.org/observations/108218691</a> |
| 1315 | <i>Eudynamys scolopaceus</i> | Western Koel | 2020/12/3  | 2 | 0 | 22.36887897 | 114.12591700 | <a href="https://www.inaturalist.org/observations/66036251">https://www.inaturalist.org/observations/66036251</a>   |
| 1316 | <i>Eudynamys scolopaceus</i> | Western Koel | 2022/4/15  | 1 | 0 | 22.36991200 | 114.11443100 | <a href="https://www.inaturalist.org/observations/112029870">https://www.inaturalist.org/observations/112029870</a> |
| 1317 | <i>Eudynamys scolopaceus</i> | Western Koel | 2019/10/13 | 2 | 0 | 22.37011513 | 114.12067240 | <a href="https://www.inaturalist.org/observations/34289053">https://www.inaturalist.org/observations/34289053</a>   |
| 1318 | <i>Eudynamys scolopaceus</i> | Western Koel | 2020/4/7   | 1 | 0 | 22.37042430 | 114.12341490 | <a href="https://www.inaturalist.org/observations/42007751">https://www.inaturalist.org/observations/42007751</a>   |
| 1319 | <i>Eudynamys scolopaceus</i> | Western Koel | 2020/9/13  | 1 | 0 | 22.37133329 | 113.97159400 | <a href="https://www.inaturalist.org/observations/59424561">https://www.inaturalist.org/observations/59424561</a>   |
| 1320 | <i>Eudynamys scolopaceus</i> | Western Koel | 2020/9/13  | 1 | 0 | 22.37142352 | 113.97167210 | <a href="https://www.inaturalist.org/observations/59540257">https://www.inaturalist.org/observations/59540257</a>   |
| 1321 | <i>Eudynamys scolopaceus</i> | Western Koel | 2020/9/13  | 1 | 0 | 22.37149886 | 113.97148570 | <a href="https://www.inaturalist.org/observations/59424469">https://www.inaturalist.org/observations/59424469</a>   |
| 1322 | <i>Eudynamys scolopaceus</i> | Western Koel | 2020/9/13  | 1 | 0 | 22.37156955 | 113.97138950 | <a href="https://www.inaturalist.org/observations/59424352">https://www.inaturalist.org/observations/59424352</a>   |
| 1323 | <i>Eudynamys scolopaceus</i> | Western Koel | 2022/4/10  | 1 | 0 | 22.37182640 | 114.12997680 | <a href="https://www.inaturalist.org/observations/113640628">https://www.inaturalist.org/observations/113640628</a> |
| 1324 | <i>Eudynamys scolopaceus</i> | Western Koel | 2021/2/8   | 0 | 0 | 22.37184120 | 114.10058760 | <a href="https://www.inaturalist.org/observations/69239186">https://www.inaturalist.org/observations/69239186</a>   |
| 1325 | <i>Eudynamys scolopaceus</i> | Western Koel | 2021/2/11  | 1 | 0 | 22.37186299 | 114.10299980 | <a href="https://www.inaturalist.org/observations/69440914">https://www.inaturalist.org/observations/69440914</a>   |
| 1326 | <i>Eudynamys scolopaceus</i> | Western Koel | 2019/1/1   | 5 | 0 | 22.37239667 | 114.11585330 | <a href="https://www.inaturalist.org/observations/19366587">https://www.inaturalist.org/observations/19366587</a>   |
| 1327 | <i>Eudynamys scolopaceus</i> | Western Koel | 2019/2/15  | 1 | 0 | 22.37318444 | 114.12302300 | <a href="https://www.inaturalist.org/observations/68351866">https://www.inaturalist.org/observations/68351866</a>   |
| 1328 | <i>Eudynamys scolopaceus</i> | Western Koel | 2020/6/25  | 1 | 0 | 22.37365828 | 113.97029140 | <a href="https://www.inaturalist.org/observations/51571402">https://www.inaturalist.org/observations/51571402</a>   |
| 1329 | <i>Eudynamys scolopaceus</i> | Western Koel | 2022/5/21  | 1 | 0 | 22.37408880 | 114.26505400 | <a href="https://www.inaturalist.org/observations/120490981">https://www.inaturalist.org/observations/120490981</a> |
| 1330 | <i>Eudynamys scolopaceus</i> | Western Koel | 2020/7/3   | 1 | 0 | 22.37410380 | 114.26270450 | <a href="https://www.inaturalist.org/observations/96345055">https://www.inaturalist.org/observations/96345055</a>   |
| 1331 | <i>Eudynamys scolopaceus</i> | Western Koel | 2020/4/6   | 1 | 0 | 22.37453227 | 114.18246540 | <a href="https://www.inaturalist.org/observations/44951186">https://www.inaturalist.org/observations/44951186</a>   |
| 1332 | <i>Eudynamys scolopaceus</i> | Western Koel | 2022/5/14  | 2 | 0 | 22.37462568 | 114.26369100 | <a href="https://www.inaturalist.org/observations/117458764">https://www.inaturalist.org/observations/117458764</a> |
| 1333 | <i>Eudynamys scolopaceus</i> | Western Koel | 2020/4/9   | 1 | 0 | 22.37526833 | 114.18502830 | <a href="https://www.inaturalist.org/observations/41980550">https://www.inaturalist.org/observations/41980550</a>   |

|      |                              |              |            |   |   |             |              |                                                                                                                     |
|------|------------------------------|--------------|------------|---|---|-------------|--------------|---------------------------------------------------------------------------------------------------------------------|
| 1334 | <i>Eudynamys scolopaceus</i> | Western Koel | 2020/4/4   | 1 | 0 | 22.37530461 | 114.03515260 | <a href="https://www.inaturalist.org/observations/104761183">https://www.inaturalist.org/observations/104761183</a> |
| 1335 | <i>Eudynamys scolopaceus</i> | Western Koel | 2019/5/18  | 4 | 0 | 22.37534355 | 114.18255660 | <a href="https://www.inaturalist.org/observations/25368062">https://www.inaturalist.org/observations/25368062</a>   |
| 1336 | <i>Eudynamys scolopaceus</i> | Western Koel | 2020/4/8   | 1 | 0 | 22.37586509 | 114.18500820 | <a href="https://www.inaturalist.org/observations/44859042">https://www.inaturalist.org/observations/44859042</a>   |
| 1337 | <i>Eudynamys scolopaceus</i> | Western Koel | 2021/5/3   | 1 | 0 | 22.37593989 | 114.18444280 | <a href="https://www.inaturalist.org/observations/77315874">https://www.inaturalist.org/observations/77315874</a>   |
| 1338 | <i>Eudynamys scolopaceus</i> | Western Koel | 2021/5/16  | 1 | 0 | 22.37594100 | 114.17862600 | <a href="https://www.inaturalist.org/observations/78991813">https://www.inaturalist.org/observations/78991813</a>   |
| 1339 | <i>Eudynamys scolopaceus</i> | Western Koel | 2022/7/11  | 1 | 0 | 22.37608022 | 114.26248940 | <a href="https://www.inaturalist.org/observations/126817145">https://www.inaturalist.org/observations/126817145</a> |
| 1340 | <i>Eudynamys scolopaceus</i> | Western Koel | 2021/5/9   | 1 | 0 | 22.37651050 | 114.11064750 | <a href="https://www.inaturalist.org/observations/78205894">https://www.inaturalist.org/observations/78205894</a>   |
| 1341 | <i>Eudynamys scolopaceus</i> | Western Koel | 2022/4/24  | 2 | 0 | 22.37760000 | 114.17151700 | <a href="https://www.inaturalist.org/observations/112803856">https://www.inaturalist.org/observations/112803856</a> |
| 1342 | <i>Eudynamys scolopaceus</i> | Western Koel | 2021/10/18 | 1 | 0 | 22.37767914 | 114.18732210 | <a href="https://www.inaturalist.org/observations/98602221">https://www.inaturalist.org/observations/98602221</a>   |
| 1343 | <i>Eudynamys scolopaceus</i> | Western Koel | 2021/3/22  | 1 | 0 | 22.37783667 | 114.18829000 | <a href="https://www.inaturalist.org/observations/71858036">https://www.inaturalist.org/observations/71858036</a>   |
| 1344 | <i>Eudynamys scolopaceus</i> | Western Koel | 2019/3/13  | 2 | 0 | 22.37810500 | 114.18849170 | <a href="https://www.inaturalist.org/observations/21198057">https://www.inaturalist.org/observations/21198057</a>   |
| 1345 | <i>Eudynamys scolopaceus</i> | Western Koel | 2022/5/14  | 1 | 0 | 22.37816167 | 114.18860000 | <a href="https://www.inaturalist.org/observations/120094413">https://www.inaturalist.org/observations/120094413</a> |
| 1346 | <i>Eudynamys scolopaceus</i> | Western Koel | 2022/2/14  | 2 | 0 | 22.37850804 | 114.38688200 | <a href="https://www.inaturalist.org/observations/106833719">https://www.inaturalist.org/observations/106833719</a> |
| 1347 | <i>Eudynamys scolopaceus</i> | Western Koel | 2021/10/31 | 2 | 0 | 22.37876450 | 114.18852940 | <a href="https://www.inaturalist.org/observations/99863466">https://www.inaturalist.org/observations/99863466</a>   |
| 1348 | <i>Eudynamys scolopaceus</i> | Western Koel | 2021/9/17  | 1 | 0 | 22.37900000 | 114.17477700 | <a href="https://www.inaturalist.org/observations/95751865">https://www.inaturalist.org/observations/95751865</a>   |
| 1349 | <i>Eudynamys scolopaceus</i> | Western Koel | 2022/6/25  | 2 | 0 | 22.37904163 | 114.18935270 | <a href="https://www.inaturalist.org/observations/124090290">https://www.inaturalist.org/observations/124090290</a> |
| 1350 | <i>Eudynamys scolopaceus</i> | Western Koel | 2017/4/22  | 2 | 0 | 22.37925500 | 114.18933900 | <a href="https://www.inaturalist.org/observations/5919827">https://www.inaturalist.org/observations/5919827</a>     |
| 1351 | <i>Eudynamys scolopaceus</i> | Western Koel | 2020/6/22  | 1 | 0 | 22.37957770 | 114.19014340 | <a href="https://www.inaturalist.org/observations/50528648">https://www.inaturalist.org/observations/50528648</a>   |
| 1352 | <i>Eudynamys scolopaceus</i> | Western Koel | 2020/9/22  | 1 | 0 | 22.37969333 | 114.18927000 | <a href="https://www.inaturalist.org/observations/60786491">https://www.inaturalist.org/observations/60786491</a>   |
| 1353 | <i>Eudynamys scolopaceus</i> | Western Koel | 2020/2/4   | 1 | 0 | 22.37978826 | 114.18966010 | <a href="https://www.inaturalist.org/observations/38421010">https://www.inaturalist.org/observations/38421010</a>   |
| 1354 | <i>Eudynamys scolopaceus</i> | Western Koel | 2020/12/26 | 2 | 0 | 22.37992191 | 114.19021310 | <a href="https://www.inaturalist.org/observations/67077297">https://www.inaturalist.org/observations/67077297</a>   |
| 1355 | <i>Eudynamys scolopaceus</i> | Western Koel | 2020/12/6  | 2 | 0 | 22.38010333 | 114.19000330 | <a href="https://www.inaturalist.org/observations/66180948">https://www.inaturalist.org/observations/66180948</a>   |
| 1356 | <i>Eudynamys scolopaceus</i> | Western Koel | 2021/2/3   | 1 | 0 | 22.38010433 | 114.18995260 | <a href="https://www.inaturalist.org/observations/69007790">https://www.inaturalist.org/observations/69007790</a>   |

|      |                              |              |           |   |   |             |              |                                                                                                                     |
|------|------------------------------|--------------|-----------|---|---|-------------|--------------|---------------------------------------------------------------------------------------------------------------------|
| 1357 | <i>Eudynamys scolopaceus</i> | Western Koel | 2021/2/3  | 1 | 0 | 22.38011193 | 114.18992610 | <a href="https://www.inaturalist.org/observations/69007791">https://www.inaturalist.org/observations/69007791</a>   |
| 1358 | <i>Eudynamys scolopaceus</i> | Western Koel | 2022/3/22 | 2 | 0 | 22.38045808 | 114.19095220 | <a href="https://www.inaturalist.org/observations/109226366">https://www.inaturalist.org/observations/109226366</a> |
| 1359 | <i>Eudynamys scolopaceus</i> | Western Koel | 2018/8/26 | 4 | 0 | 22.38110333 | 114.19455000 | <a href="https://www.inaturalist.org/observations/15904490">https://www.inaturalist.org/observations/15904490</a>   |
| 1360 | <i>Eudynamys scolopaceus</i> | Western Koel | 2020/5/15 | 2 | 0 | 22.38113625 | 114.19092300 | <a href="https://www.inaturalist.org/observations/103726752">https://www.inaturalist.org/observations/103726752</a> |
| 1361 | <i>Eudynamys scolopaceus</i> | Western Koel | 2020/6/22 | 1 | 0 | 22.38130309 | 114.19094710 | <a href="https://www.inaturalist.org/observations/50541828">https://www.inaturalist.org/observations/50541828</a>   |
| 1362 | <i>Eudynamys scolopaceus</i> | Western Koel | 2020/3/16 | 1 | 0 | 22.38145798 | 114.22114510 | <a href="https://www.inaturalist.org/observations/40175446">https://www.inaturalist.org/observations/40175446</a>   |
| 1363 | <i>Eudynamys scolopaceus</i> | Western Koel | 2020/3/20 | 1 | 0 | 22.38145798 | 114.22114510 | <a href="https://www.inaturalist.org/observations/40345011">https://www.inaturalist.org/observations/40345011</a>   |
| 1364 | <i>Eudynamys scolopaceus</i> | Western Koel | 2020/4/14 | 1 | 0 | 22.38145798 | 114.22114510 | <a href="https://www.inaturalist.org/observations/42444197">https://www.inaturalist.org/observations/42444197</a>   |
| 1365 | <i>Eudynamys scolopaceus</i> | Western Koel | 2020/5/21 | 1 | 0 | 22.38145798 | 114.22114510 | <a href="https://www.inaturalist.org/observations/46911336">https://www.inaturalist.org/observations/46911336</a>   |
| 1366 | <i>Eudynamys scolopaceus</i> | Western Koel | 2020/8/14 | 1 | 0 | 22.38161048 | 114.19190180 | <a href="https://www.inaturalist.org/observations/56396835">https://www.inaturalist.org/observations/56396835</a>   |
| 1367 | <i>Eudynamys scolopaceus</i> | Western Koel | 2020/7/20 | 1 | 0 | 22.38172667 | 114.19219500 | <a href="https://www.inaturalist.org/observations/53683536">https://www.inaturalist.org/observations/53683536</a>   |
| 1368 | <i>Eudynamys scolopaceus</i> | Western Koel | 2020/8/5  | 1 | 0 | 22.38177336 | 114.19199070 | <a href="https://www.inaturalist.org/observations/55623223">https://www.inaturalist.org/observations/55623223</a>   |
| 1369 | <i>Eudynamys scolopaceus</i> | Western Koel | 2019/2/6  | 1 | 0 | 22.38185356 | 114.21372340 | <a href="https://www.inaturalist.org/observations/20163770">https://www.inaturalist.org/observations/20163770</a>   |
| 1370 | <i>Eudynamys scolopaceus</i> | Western Koel | 2021/4/7  | 1 | 0 | 22.38190269 | 114.19133000 | <a href="https://www.inaturalist.org/observations/73188366">https://www.inaturalist.org/observations/73188366</a>   |
| 1371 | <i>Eudynamys scolopaceus</i> | Western Koel | 2020/4/26 | 1 | 0 | 22.38196192 | 114.27431470 | <a href="https://www.inaturalist.org/observations/43812867">https://www.inaturalist.org/observations/43812867</a>   |
| 1372 | <i>Eudynamys scolopaceus</i> | Western Koel | 2018/10/8 | 4 | 0 | 22.38199600 | 114.19016300 | <a href="https://www.inaturalist.org/observations/17309422">https://www.inaturalist.org/observations/17309422</a>   |
| 1373 | <i>Eudynamys scolopaceus</i> | Western Koel | 2019/2/8  | 1 | 0 | 22.38211852 | 114.19440600 | <a href="https://www.inaturalist.org/observations/20201164">https://www.inaturalist.org/observations/20201164</a>   |
| 1374 | <i>Eudynamys scolopaceus</i> | Western Koel | 2020/4/24 | 2 | 0 | 22.38263144 | 114.19221870 | <a href="https://www.inaturalist.org/observations/43503175">https://www.inaturalist.org/observations/43503175</a>   |
| 1375 | <i>Eudynamys scolopaceus</i> | Western Koel | 2020/4/2  | 1 | 0 | 22.38336990 | 114.21397150 | <a href="https://www.inaturalist.org/observations/41219893">https://www.inaturalist.org/observations/41219893</a>   |
| 1376 | <i>Eudynamys scolopaceus</i> | Western Koel | 2019/4/7  | 1 | 0 | 22.38347951 | 114.19692460 | <a href="https://www.inaturalist.org/observations/22190807">https://www.inaturalist.org/observations/22190807</a>   |
| 1377 | <i>Eudynamys scolopaceus</i> | Western Koel | 2017/3/12 | 2 | 0 | 22.38366612 | 114.19702380 | <a href="https://www.inaturalist.org/observations/29141687">https://www.inaturalist.org/observations/29141687</a>   |
| 1378 | <i>Eudynamys scolopaceus</i> | Western Koel | 2017/5/6  | 2 | 0 | 22.38366612 | 114.19702380 | <a href="https://www.inaturalist.org/observations/29967042">https://www.inaturalist.org/observations/29967042</a>   |
| 1379 | <i>Eudynamys scolopaceus</i> | Western Koel | 2017/7/8  | 2 | 0 | 22.38366612 | 114.19702380 | <a href="https://www.inaturalist.org/observations/30281271">https://www.inaturalist.org/observations/30281271</a>   |

|      |                              |              |            |   |   |             |              |                                                                                                                     |
|------|------------------------------|--------------|------------|---|---|-------------|--------------|---------------------------------------------------------------------------------------------------------------------|
| 1380 | <i>Eudynamys scolopaceus</i> | Western Koel | 2018/3/17  | 2 | 0 | 22.38366612 | 114.19702380 | <a href="https://www.inaturalist.org/observations/31829174">https://www.inaturalist.org/observations/31829174</a>   |
| 1381 | <i>Eudynamys scolopaceus</i> | Western Koel | 2018/3/30  | 2 | 0 | 22.38366612 | 114.19702380 | <a href="https://www.inaturalist.org/observations/31888755">https://www.inaturalist.org/observations/31888755</a>   |
| 1382 | <i>Eudynamys scolopaceus</i> | Western Koel | 2018/4/7   | 2 | 0 | 22.38366612 | 114.19702380 | <a href="https://www.inaturalist.org/observations/31959371">https://www.inaturalist.org/observations/31959371</a>   |
| 1383 | <i>Eudynamys scolopaceus</i> | Western Koel | 2018/5/5   | 2 | 0 | 22.38366612 | 114.19702380 | <a href="https://www.inaturalist.org/observations/32078866">https://www.inaturalist.org/observations/32078866</a>   |
| 1384 | <i>Eudynamys scolopaceus</i> | Western Koel | 2018/6/26  | 2 | 0 | 22.38366612 | 114.19702380 | <a href="https://www.inaturalist.org/observations/32441667">https://www.inaturalist.org/observations/32441667</a>   |
| 1385 | <i>Eudynamys scolopaceus</i> | Western Koel | 2019/2/17  | 2 | 0 | 22.38366612 | 114.19702380 | <a href="https://www.inaturalist.org/observations/33736977">https://www.inaturalist.org/observations/33736977</a>   |
| 1386 | <i>Eudynamys scolopaceus</i> | Western Koel | 2020/2/12  | 1 | 0 | 22.38366612 | 114.19702380 | <a href="https://www.inaturalist.org/observations/38627259">https://www.inaturalist.org/observations/38627259</a>   |
| 1387 | <i>Eudynamys scolopaceus</i> | Western Koel | 2022/5/8   | 2 | 0 | 22.38372606 | 114.10791190 | <a href="https://www.inaturalist.org/observations/116018110">https://www.inaturalist.org/observations/116018110</a> |
| 1388 | <i>Eudynamys scolopaceus</i> | Western Koel | 2022/5/17  | 0 | 0 | 22.38505841 | 114.27034960 | <a href="https://www.inaturalist.org/observations/117408272">https://www.inaturalist.org/observations/117408272</a> |
| 1389 | <i>Eudynamys scolopaceus</i> | Western Koel | 2019/5/1   | 3 | 0 | 22.38562396 | 114.19878240 | <a href="https://www.inaturalist.org/observations/24264031">https://www.inaturalist.org/observations/24264031</a>   |
| 1390 | <i>Eudynamys scolopaceus</i> | Western Koel | 2022/3/30  | 1 | 0 | 22.38625336 | 114.19492340 | <a href="https://www.inaturalist.org/observations/109884096">https://www.inaturalist.org/observations/109884096</a> |
| 1391 | <i>Eudynamys scolopaceus</i> | Western Koel | 2020/4/18  | 2 | 0 | 22.38643185 | 114.19528290 | <a href="https://www.inaturalist.org/observations/42917356">https://www.inaturalist.org/observations/42917356</a>   |
| 1392 | <i>Eudynamys scolopaceus</i> | Western Koel | 2020/4/22  | 1 | 0 | 22.38652719 | 114.19545020 | <a href="https://www.inaturalist.org/observations/42830796">https://www.inaturalist.org/observations/42830796</a>   |
| 1393 | <i>Eudynamys scolopaceus</i> | Western Koel | 2020/4/28  | 1 | 0 | 22.38654466 | 114.19542140 | <a href="https://www.inaturalist.org/observations/44205228">https://www.inaturalist.org/observations/44205228</a>   |
| 1394 | <i>Eudynamys scolopaceus</i> | Western Koel | 2020/4/29  | 2 | 0 | 22.38751093 | 114.19550680 | <a href="https://www.inaturalist.org/observations/45564700">https://www.inaturalist.org/observations/45564700</a>   |
| 1395 | <i>Eudynamys scolopaceus</i> | Western Koel | 2018/2/25  | 3 | 0 | 22.38795170 | 114.20071450 | <a href="https://www.inaturalist.org/observations/19406674">https://www.inaturalist.org/observations/19406674</a>   |
| 1396 | <i>Eudynamys scolopaceus</i> | Western Koel | 2014/11/15 | 3 | 0 | 22.38795170 | 114.20071450 | <a href="https://www.inaturalist.org/observations/19683090">https://www.inaturalist.org/observations/19683090</a>   |
| 1397 | <i>Eudynamys scolopaceus</i> | Western Koel | 2012/5/19  | 2 | 0 | 22.38795170 | 114.20071450 | <a href="https://www.inaturalist.org/observations/19728250">https://www.inaturalist.org/observations/19728250</a>   |
| 1398 | <i>Eudynamys scolopaceus</i> | Western Koel | 2011/3/30  | 1 | 0 | 22.38795170 | 114.20071450 | <a href="https://www.inaturalist.org/observations/19742493">https://www.inaturalist.org/observations/19742493</a>   |
| 1399 | <i>Eudynamys scolopaceus</i> | Western Koel | 2018/3/12  | 2 | 0 | 22.38795170 | 114.20071450 | <a href="https://www.inaturalist.org/observations/21313925">https://www.inaturalist.org/observations/21313925</a>   |
| 1400 | <i>Eudynamys scolopaceus</i> | Western Koel | 2019/4/19  | 2 | 0 | 22.38795170 | 114.20071450 | <a href="https://www.inaturalist.org/observations/22743993">https://www.inaturalist.org/observations/22743993</a>   |
| 1401 | <i>Eudynamys scolopaceus</i> | Western Koel | 2016/3/28  | 4 | 0 | 22.38795170 | 114.20071450 | <a href="https://www.inaturalist.org/observations/25429320">https://www.inaturalist.org/observations/25429320</a>   |
| 1402 | <i>Eudynamys scolopaceus</i> | Western Koel | 2016/4/10  | 3 | 0 | 22.38795170 | 114.20071450 | <a href="https://www.inaturalist.org/observations/25666752">https://www.inaturalist.org/observations/25666752</a>   |

|      |                              |              |            |   |   |             |              |                                                                                                                     |
|------|------------------------------|--------------|------------|---|---|-------------|--------------|---------------------------------------------------------------------------------------------------------------------|
| 1403 | <i>Eudynamys scolopaceus</i> | Western Koel | 2021/12/24 | 2 | 0 | 22.38805530 | 70.22202100  | <a href="https://www.inaturalist.org/observations/136772378">https://www.inaturalist.org/observations/136772378</a> |
| 1404 | <i>Eudynamys scolopaceus</i> | Western Koel | 2017/3/4   | 3 | 0 | 22.38885812 | 114.14846070 | <a href="https://www.inaturalist.org/observations/29226114">https://www.inaturalist.org/observations/29226114</a>   |
| 1405 | <i>Eudynamys scolopaceus</i> | Western Koel | 2021/12/14 | 1 | 0 | 22.38944237 | 114.19743840 | <a href="https://www.inaturalist.org/observations/108242903">https://www.inaturalist.org/observations/108242903</a> |
| 1406 | <i>Eudynamys scolopaceus</i> | Western Koel | 2021/5/1   | 1 | 0 | 22.39052230 | 114.27142100 | <a href="https://www.inaturalist.org/observations/76367977">https://www.inaturalist.org/observations/76367977</a>   |
| 1407 | <i>Eudynamys scolopaceus</i> | Western Koel | 2021/2/2   | 1 | 0 | 22.39082950 | 113.97251260 | <a href="https://www.inaturalist.org/observations/68956673">https://www.inaturalist.org/observations/68956673</a>   |
| 1408 | <i>Eudynamys scolopaceus</i> | Western Koel | 2020/12/18 | 1 | 0 | 22.39138747 | 113.97295050 | <a href="https://www.inaturalist.org/observations/66721905">https://www.inaturalist.org/observations/66721905</a>   |
| 1409 | <i>Eudynamys scolopaceus</i> | Western Koel | 2020/5/9   | 1 | 0 | 22.39205776 | 113.97358250 | <a href="https://www.inaturalist.org/observations/45348772">https://www.inaturalist.org/observations/45348772</a>   |
| 1410 | <i>Eudynamys scolopaceus</i> | Western Koel | 2014/1/12  | 4 | 0 | 22.39209000 | 113.97431500 | <a href="https://www.inaturalist.org/observations/13065592">https://www.inaturalist.org/observations/13065592</a>   |
| 1411 | <i>Eudynamys scolopaceus</i> | Western Koel | 2019/2/9   | 1 | 0 | 22.39237780 | 113.97421000 | <a href="https://www.inaturalist.org/observations/20226532">https://www.inaturalist.org/observations/20226532</a>   |
| 1412 | <i>Eudynamys scolopaceus</i> | Western Koel | 2019/3/26  | 3 | 0 | 22.39703449 | 113.97678690 | <a href="https://www.inaturalist.org/observations/21833990">https://www.inaturalist.org/observations/21833990</a>   |
| 1413 | <i>Eudynamys scolopaceus</i> | Western Koel | 2020/4/28  | 1 | 0 | 22.40082323 | 113.97674250 | <a href="https://www.inaturalist.org/observations/44104617">https://www.inaturalist.org/observations/44104617</a>   |
| 1414 | <i>Eudynamys scolopaceus</i> | Western Koel | 2021/11/2  | 0 | 0 | 22.40120280 | 114.19750860 | <a href="https://www.inaturalist.org/observations/100665865">https://www.inaturalist.org/observations/100665865</a> |
| 1415 | <i>Eudynamys scolopaceus</i> | Western Koel | 2021/3/1   | 1 | 0 | 22.40240281 | 114.22563650 | <a href="https://www.inaturalist.org/observations/70395115">https://www.inaturalist.org/observations/70395115</a>   |
| 1416 | <i>Eudynamys scolopaceus</i> | Western Koel | 2020/4/24  | 2 | 0 | 22.40297023 | 113.97659450 | <a href="https://www.inaturalist.org/observations/43088499">https://www.inaturalist.org/observations/43088499</a>   |
| 1417 | <i>Eudynamys scolopaceus</i> | Western Koel | 2020/4/20  | 2 | 0 | 22.40339353 | 113.97675560 | <a href="https://www.inaturalist.org/observations/42747230">https://www.inaturalist.org/observations/42747230</a>   |
| 1418 | <i>Eudynamys scolopaceus</i> | Western Koel | 2021/5/15  | 1 | 0 | 22.40549115 | 113.94291000 | <a href="https://www.inaturalist.org/observations/83374381">https://www.inaturalist.org/observations/83374381</a>   |
| 1419 | <i>Eudynamys scolopaceus</i> | Western Koel | 2018/3/1   | 3 | 0 | 22.40551028 | 113.97371420 | <a href="https://www.inaturalist.org/observations/10174947">https://www.inaturalist.org/observations/10174947</a>   |
| 1420 | <i>Eudynamys scolopaceus</i> | Western Koel | 2018/3/1   | 2 | 0 | 22.40558973 | 113.97332780 | <a href="https://www.inaturalist.org/observations/10174870">https://www.inaturalist.org/observations/10174870</a>   |
| 1421 | <i>Eudynamys scolopaceus</i> | Western Koel | 2019/4/5   | 3 | 0 | 22.40670955 | 113.96695240 | <a href="https://www.inaturalist.org/observations/22972925">https://www.inaturalist.org/observations/22972925</a>   |
| 1422 | <i>Eudynamys scolopaceus</i> | Western Koel | 2022/1/25  | 1 | 0 | 22.40764917 | 113.97738990 | <a href="https://www.inaturalist.org/observations/105611629">https://www.inaturalist.org/observations/105611629</a> |
| 1423 | <i>Eudynamys scolopaceus</i> | Western Koel | 2020/7/17  | 1 | 0 | 22.40840753 | 113.97781070 | <a href="https://www.inaturalist.org/observations/53576624">https://www.inaturalist.org/observations/53576624</a>   |
| 1424 | <i>Eudynamys scolopaceus</i> | Western Koel | 2022/3/11  | 1 | 0 | 22.40864186 | 113.98455880 | <a href="https://www.inaturalist.org/observations/111169763">https://www.inaturalist.org/observations/111169763</a> |
| 1425 | <i>Eudynamys scolopaceus</i> | Western Koel | 2021/9/1   | 1 | 0 | 22.40995328 | 113.98020840 | <a href="https://www.inaturalist.org/observations/93236474">https://www.inaturalist.org/observations/93236474</a>   |

|      |                              |              |            |   |   |             |              |                                                                                                                     |
|------|------------------------------|--------------|------------|---|---|-------------|--------------|---------------------------------------------------------------------------------------------------------------------|
| 1426 | <i>Eudynamys scolopaceus</i> | Western Koel | 2021/9/7   | 1 | 0 | 22.40995328 | 113.98020840 | <a href="https://www.inaturalist.org/observations/94122148">https://www.inaturalist.org/observations/94122148</a>   |
| 1427 | <i>Eudynamys scolopaceus</i> | Western Koel | 2019/10/26 | 1 | 0 | 22.41324892 | 114.16537840 | <a href="https://www.inaturalist.org/observations/67291406">https://www.inaturalist.org/observations/67291406</a>   |
| 1428 | <i>Eudynamys scolopaceus</i> | Western Koel | 2021/4/29  | 0 | 0 | 22.41428794 | 114.21378300 | <a href="https://www.inaturalist.org/observations/75628069">https://www.inaturalist.org/observations/75628069</a>   |
| 1429 | <i>Eudynamys scolopaceus</i> | Western Koel | 2021/5/8   | 1 | 0 | 22.41588740 | 114.20979310 | <a href="https://www.inaturalist.org/observations/78034897">https://www.inaturalist.org/observations/78034897</a>   |
| 1430 | <i>Eudynamys scolopaceus</i> | Western Koel | 2021/3/22  | 2 | 0 | 22.41621590 | 114.20851900 | <a href="https://www.inaturalist.org/observations/71788381">https://www.inaturalist.org/observations/71788381</a>   |
| 1431 | <i>Eudynamys scolopaceus</i> | Western Koel | 2019/7/22  | 4 | 0 | 22.41743790 | 114.23112690 | <a href="https://www.inaturalist.org/observations/29313233">https://www.inaturalist.org/observations/29313233</a>   |
| 1432 | <i>Eudynamys scolopaceus</i> | Western Koel | 2019/6/23  | 3 | 0 | 22.41801532 | 114.23043960 | <a href="https://www.inaturalist.org/observations/27493458">https://www.inaturalist.org/observations/27493458</a>   |
| 1433 | <i>Eudynamys scolopaceus</i> | Western Koel | 2022/2/20  | 4 | 0 | 22.41889400 | 74.56501400  | <a href="https://www.inaturalist.org/observations/126818785">https://www.inaturalist.org/observations/126818785</a> |
| 1434 | <i>Eudynamys scolopaceus</i> | Western Koel | 2020/11/6  | 1 | 0 | 22.41896167 | 114.22922500 | <a href="https://www.inaturalist.org/observations/64283307">https://www.inaturalist.org/observations/64283307</a>   |
| 1435 | <i>Eudynamys scolopaceus</i> | Western Koel | 2014/2/16  | 3 | 0 | 22.42066900 | 114.23066300 | <a href="http://www.inaturalist.org/observations/1138858">http://www.inaturalist.org/observations/1138858</a>       |
| 1436 | <i>Eudynamys scolopaceus</i> | Western Koel | 2018/3/1   | 1 | 0 | 22.42313811 | 88.28729726  | <a href="https://www.inaturalist.org/observations/69906674">https://www.inaturalist.org/observations/69906674</a>   |
| 1437 | <i>Eudynamys scolopaceus</i> | Western Koel | 2021/5/3   | 1 | 0 | 22.42379150 | 114.20918110 | <a href="https://www.inaturalist.org/observations/76708249">https://www.inaturalist.org/observations/76708249</a>   |
| 1438 | <i>Eudynamys scolopaceus</i> | Western Koel | 2020/1/28  | 0 | 0 | 22.42402534 | 114.21469870 | <a href="https://www.inaturalist.org/observations/38087259">https://www.inaturalist.org/observations/38087259</a>   |
| 1439 | <i>Eudynamys scolopaceus</i> | Western Koel | 2018/2/25  | 1 | 0 | 22.42420000 | 88.28590000  | <a href="https://www.inaturalist.org/observations/69879114">https://www.inaturalist.org/observations/69879114</a>   |
| 1440 | <i>Eudynamys scolopaceus</i> | Western Koel | 2018/11/4  | 3 | 0 | 22.42503454 | 113.93998710 | <a href="https://www.inaturalist.org/observations/18127561">https://www.inaturalist.org/observations/18127561</a>   |
| 1441 | <i>Eudynamys scolopaceus</i> | Western Koel | 2017/4/28  | 3 | 0 | 22.42568000 | 114.03105500 | <a href="https://www.inaturalist.org/observations/6358587">https://www.inaturalist.org/observations/6358587</a>     |
| 1442 | <i>Eudynamys scolopaceus</i> | Western Koel | 2013/5/9   | 3 | 0 | 22.42592400 | 114.23406700 | <a href="http://www.inaturalist.org/observations/259964">http://www.inaturalist.org/observations/259964</a>         |
| 1443 | <i>Eudynamys scolopaceus</i> | Western Koel | 2013/6/6   | 3 | 0 | 22.42630300 | 114.23397800 | <a href="http://www.inaturalist.org/observations/291286">http://www.inaturalist.org/observations/291286</a>         |
| 1444 | <i>Eudynamys scolopaceus</i> | Western Koel | 2013/4/14  | 5 | 0 | 22.42651664 | 114.23503730 | <a href="http://www.inaturalist.org/observations/236979">http://www.inaturalist.org/observations/236979</a>         |
| 1445 | <i>Eudynamys scolopaceus</i> | Western Koel | 2019/4/28  | 3 | 0 | 22.42696667 | 114.23366670 | <a href="https://www.inaturalist.org/observations/23602737">https://www.inaturalist.org/observations/23602737</a>   |
| 1446 | <i>Eudynamys scolopaceus</i> | Western Koel | 2019/4/28  | 2 | 0 | 22.42706951 | 114.23366460 | <a href="https://www.inaturalist.org/observations/23602863">https://www.inaturalist.org/observations/23602863</a>   |
| 1447 | <i>Eudynamys scolopaceus</i> | Western Koel | 2022/5/2   | 1 | 0 | 22.42721747 | 114.09262540 | <a href="https://www.inaturalist.org/observations/114553772">https://www.inaturalist.org/observations/114553772</a> |
| 1448 | <i>Eudynamys scolopaceus</i> | Western Koel | 2013/4/15  | 5 | 0 | 22.42745061 | 114.23047960 | <a href="http://www.inaturalist.org/observations/236735">http://www.inaturalist.org/observations/236735</a>         |

|      |                              |              |            |   |   |             |              |                                                                                                                     |
|------|------------------------------|--------------|------------|---|---|-------------|--------------|---------------------------------------------------------------------------------------------------------------------|
| 1449 | <i>Eudynamys scolopaceus</i> | Western Koel | 2019/7/5   | 1 | 0 | 22.42767327 | 114.24027520 | <a href="https://www.inaturalist.org/observations/62472124">https://www.inaturalist.org/observations/62472124</a>   |
| 1450 | <i>Eudynamys scolopaceus</i> | Western Koel | 2013/10/26 | 5 | 0 | 22.42767700 | 114.23832300 | <a href="http://www.inaturalist.org/observations/440545">http://www.inaturalist.org/observations/440545</a>         |
| 1451 | <i>Eudynamys scolopaceus</i> | Western Koel | 2022/5/2   | 1 | 0 | 22.42832376 | 114.08158870 | <a href="https://www.inaturalist.org/observations/114548026">https://www.inaturalist.org/observations/114548026</a> |
| 1452 | <i>Eudynamys scolopaceus</i> | Western Koel | 2022/4/15  | 1 | 0 | 22.42930290 | 114.23593780 | <a href="https://www.inaturalist.org/observations/111628554">https://www.inaturalist.org/observations/111628554</a> |
| 1453 | <i>Eudynamys scolopaceus</i> | Western Koel | 2019/4/28  | 3 | 0 | 22.42936572 | 114.08349410 | <a href="https://www.inaturalist.org/observations/23597875">https://www.inaturalist.org/observations/23597875</a>   |
| 1454 | <i>Eudynamys scolopaceus</i> | Western Koel | 2014/1/19  | 1 | 0 | 22.43011321 | 88.39993358  | <a href="https://www.inaturalist.org/observations/65756319">https://www.inaturalist.org/observations/65756319</a>   |
| 1455 | <i>Eudynamys scolopaceus</i> | Western Koel | 2019/12/28 | 1 | 0 | 22.43012586 | 88.40015279  | <a href="https://www.inaturalist.org/observations/48604035">https://www.inaturalist.org/observations/48604035</a>   |
| 1456 | <i>Eudynamys scolopaceus</i> | Western Koel | 2021/5/17  | 1 | 0 | 22.43017451 | 114.02849520 | <a href="https://www.inaturalist.org/observations/79118124">https://www.inaturalist.org/observations/79118124</a>   |
| 1457 | <i>Eudynamys scolopaceus</i> | Western Koel | 2017/11/12 | 2 | 0 | 22.43034800 | 114.08565900 | <a href="https://www.inaturalist.org/observations/8791407">https://www.inaturalist.org/observations/8791407</a>     |
| 1458 | <i>Eudynamys scolopaceus</i> | Western Koel | 2021/2/20  | 1 | 0 | 22.43090845 | 114.09919280 | <a href="https://www.inaturalist.org/observations/69907628">https://www.inaturalist.org/observations/69907628</a>   |
| 1459 | <i>Eudynamys scolopaceus</i> | Western Koel | 2022/3/5   | 1 | 0 | 22.43105779 | 114.08515280 | <a href="https://www.inaturalist.org/observations/117273350">https://www.inaturalist.org/observations/117273350</a> |
| 1460 | <i>Eudynamys scolopaceus</i> | Western Koel | 2022/2/27  | 1 | 0 | 22.43106442 | 114.09673870 | <a href="https://www.inaturalist.org/observations/107538207">https://www.inaturalist.org/observations/107538207</a> |
| 1461 | <i>Eudynamys scolopaceus</i> | Western Koel | 2013/1/1   | 4 | 0 | 22.43184500 | 114.09018300 | <a href="https://www.inaturalist.org/observations/27011851">https://www.inaturalist.org/observations/27011851</a>   |
| 1462 | <i>Eudynamys scolopaceus</i> | Western Koel | 2015/2/5   | 3 | 0 | 22.43258800 | 114.08421900 | <a href="https://www.inaturalist.org/observations/13065332">https://www.inaturalist.org/observations/13065332</a>   |
| 1463 | <i>Eudynamys scolopaceus</i> | Western Koel | 2021/5/3   | 1 | 0 | 22.43419996 | 114.06420700 | <a href="https://www.inaturalist.org/observations/76792308">https://www.inaturalist.org/observations/76792308</a>   |
| 1464 | <i>Eudynamys scolopaceus</i> | Western Koel | 2018/4/29  | 5 | 0 | 22.43597270 | 88.39423715  | <a href="https://www.inaturalist.org/observations/11753600">https://www.inaturalist.org/observations/11753600</a>   |
| 1465 | <i>Eudynamys scolopaceus</i> | Western Koel | 2017/2/13  | 4 | 0 | 22.43638000 | 114.07423700 | <a href="https://www.inaturalist.org/observations/5131388">https://www.inaturalist.org/observations/5131388</a>     |
| 1466 | <i>Eudynamys scolopaceus</i> | Western Koel | 2018/2/21  | 2 | 0 | 22.43680100 | 114.07427200 | <a href="https://www.inaturalist.org/observations/9975835">https://www.inaturalist.org/observations/9975835</a>     |
| 1467 | <i>Eudynamys scolopaceus</i> | Western Koel | 2020/8/25  | 3 | 0 | 22.43737416 | 114.02827810 | <a href="https://www.inaturalist.org/observations/57551502">https://www.inaturalist.org/observations/57551502</a>   |
| 1468 | <i>Eudynamys scolopaceus</i> | Western Koel | 2010/2/28  | 1 | 0 | 22.43743859 | 114.06852470 | <a href="https://www.inaturalist.org/observations/134711035">https://www.inaturalist.org/observations/134711035</a> |
| 1469 | <i>Eudynamys scolopaceus</i> | Western Koel | 2010/2/28  | 1 | 0 | 22.43745200 | 114.06850000 | <a href="https://www.inaturalist.org/observations/120791545">https://www.inaturalist.org/observations/120791545</a> |
| 1470 | <i>Eudynamys scolopaceus</i> | Western Koel | 2022/4/4   | 1 | 0 | 22.43798439 | 114.00538540 | <a href="https://www.inaturalist.org/observations/110383545">https://www.inaturalist.org/observations/110383545</a> |
| 1471 | <i>Eudynamys scolopaceus</i> | Western Koel | 2010/1/24  | 2 | 0 | 22.43856800 | 114.07078500 | <a href="https://www.inaturalist.org/observations/30019058">https://www.inaturalist.org/observations/30019058</a>   |



|      |                              |              |            |   |   |             |              |                                                                                                                     |
|------|------------------------------|--------------|------------|---|---|-------------|--------------|---------------------------------------------------------------------------------------------------------------------|
| 1472 | <i>Eudynamys scolopaceus</i> | Western Koel | 2021/10/2  | 1 | 0 | 22.44005574 | 114.06500760 | <a href="https://www.inaturalist.org/observations/96883005">https://www.inaturalist.org/observations/96883005</a>   |
| 1473 | <i>Eudynamys scolopaceus</i> | Western Koel | 2022/4/25  | 1 | 0 | 22.44158180 | 114.12481700 | <a href="https://www.inaturalist.org/observations/112795222">https://www.inaturalist.org/observations/112795222</a> |
| 1474 | <i>Eudynamys scolopaceus</i> | Western Koel | 2020/3/17  | 2 | 0 | 22.44165400 | 114.01855200 | <a href="https://www.inaturalist.org/observations/40218973">https://www.inaturalist.org/observations/40218973</a>   |
| 1475 | <i>Eudynamys scolopaceus</i> | Western Koel | 2021/2/7   | 2 | 0 | 22.44178900 | 114.01878400 | <a href="https://www.inaturalist.org/observations/69304800">https://www.inaturalist.org/observations/69304800</a>   |
| 1476 | <i>Eudynamys scolopaceus</i> | Western Koel | 2021/2/7   | 2 | 0 | 22.44178920 | 114.01878430 | <a href="https://www.inaturalist.org/observations/70937315">https://www.inaturalist.org/observations/70937315</a>   |
| 1477 | <i>Eudynamys scolopaceus</i> | Western Koel | 2021/2/15  | 3 | 0 | 22.44178920 | 114.01878430 | <a href="https://www.inaturalist.org/observations/73082987">https://www.inaturalist.org/observations/73082987</a>   |
| 1478 | <i>Eudynamys scolopaceus</i> | Western Koel | 2017/8/1   | 1 | 0 | 22.44201700 | 114.01859000 | <a href="https://www.inaturalist.org/observations/83676729">https://www.inaturalist.org/observations/83676729</a>   |
| 1479 | <i>Eudynamys scolopaceus</i> | Western Koel | 2021/2/28  | 1 | 0 | 22.44212852 | 114.01846740 | <a href="https://www.inaturalist.org/observations/70307434">https://www.inaturalist.org/observations/70307434</a>   |
| 1480 | <i>Eudynamys scolopaceus</i> | Western Koel | 2021/2/28  | 2 | 0 | 22.44228816 | 114.16545870 | <a href="https://www.inaturalist.org/observations/97978555">https://www.inaturalist.org/observations/97978555</a>   |
| 1481 | <i>Eudynamys scolopaceus</i> | Western Koel | 2016/6/4   | 1 | 0 | 22.44232180 | 114.16550640 | <a href="https://www.inaturalist.org/observations/23273035">https://www.inaturalist.org/observations/23273035</a>   |
| 1482 | <i>Eudynamys scolopaceus</i> | Western Koel | 2016/6/3   | 2 | 0 | 22.44232180 | 114.16550640 | <a href="https://www.inaturalist.org/observations/23275250">https://www.inaturalist.org/observations/23275250</a>   |
| 1483 | <i>Eudynamys scolopaceus</i> | Western Koel | 2020/5/11  | 1 | 0 | 22.44232180 | 114.16550640 | <a href="https://www.inaturalist.org/observations/96047123">https://www.inaturalist.org/observations/96047123</a>   |
| 1484 | <i>Eudynamys scolopaceus</i> | Western Koel | 2018/4/29  | 5 | 0 | 22.44235795 | 88.39297602  | <a href="https://www.inaturalist.org/observations/11748810">https://www.inaturalist.org/observations/11748810</a>   |
| 1485 | <i>Eudynamys scolopaceus</i> | Western Koel | 2021/5/12  | 1 | 0 | 22.44275872 | 114.01953230 | <a href="https://www.inaturalist.org/observations/78489180">https://www.inaturalist.org/observations/78489180</a>   |
| 1486 | <i>Eudynamys scolopaceus</i> | Western Koel | 2020/4/14  | 1 | 0 | 22.44297500 | 114.01908700 | <a href="https://www.inaturalist.org/observations/42651379">https://www.inaturalist.org/observations/42651379</a>   |
| 1487 | <i>Eudynamys scolopaceus</i> | Western Koel | 2021/2/25  | 0 | 0 | 22.44427574 | 114.02357420 | <a href="https://www.inaturalist.org/observations/70137455">https://www.inaturalist.org/observations/70137455</a>   |
| 1488 | <i>Eudynamys scolopaceus</i> | Western Koel | 2019/4/27  | 1 | 0 | 22.44442203 | 114.13988250 | <a href="https://www.inaturalist.org/observations/24242448">https://www.inaturalist.org/observations/24242448</a>   |
| 1489 | <i>Eudynamys scolopaceus</i> | Western Koel | 2022/7/11  | 1 | 0 | 22.44453760 | 114.02220760 | <a href="https://www.inaturalist.org/observations/125774905">https://www.inaturalist.org/observations/125774905</a> |
| 1490 | <i>Eudynamys scolopaceus</i> | Western Koel | 2020/4/25  | 1 | 0 | 22.44509900 | 114.13858700 | <a href="https://www.inaturalist.org/observations/44733967">https://www.inaturalist.org/observations/44733967</a>   |
| 1491 | <i>Eudynamys scolopaceus</i> | Western Koel | 2020/12/26 | 1 | 0 | 22.44521400 | 114.02855000 | <a href="https://www.inaturalist.org/observations/67084619">https://www.inaturalist.org/observations/67084619</a>   |
| 1492 | <i>Eudynamys scolopaceus</i> | Western Koel | 2020/12/26 | 1 | 0 | 22.44521900 | 114.02856100 | <a href="https://www.inaturalist.org/observations/67084722">https://www.inaturalist.org/observations/67084722</a>   |
| 1493 | <i>Eudynamys scolopaceus</i> | Western Koel | 2021/4/17  | 1 | 0 | 22.44523203 | 114.13910120 | <a href="https://www.inaturalist.org/observations/74343304">https://www.inaturalist.org/observations/74343304</a>   |
| 1494 | <i>Eudynamys scolopaceus</i> | Western Koel | 2020/6/2   | 1 | 0 | 22.44523218 | 114.17835590 | <a href="https://www.inaturalist.org/observations/48211097">https://www.inaturalist.org/observations/48211097</a>   |

|      |                              |              |            |   |   |             |              |                                                                                                                     |
|------|------------------------------|--------------|------------|---|---|-------------|--------------|---------------------------------------------------------------------------------------------------------------------|
| 1495 | <i>Eudynamys scolopaceus</i> | Western Koel | 2019/4/27  | 2 | 0 | 22.44589754 | 114.17900350 | <a href="https://www.inaturalist.org/observations/23322675">https://www.inaturalist.org/observations/23322675</a>   |
| 1496 | <i>Eudynamys scolopaceus</i> | Western Koel | 2022/6/3   | 1 | 0 | 22.44600000 | 114.17848830 | <a href="https://www.inaturalist.org/observations/119965323">https://www.inaturalist.org/observations/119965323</a> |
| 1497 | <i>Eudynamys scolopaceus</i> | Western Koel | 2020/9/15  | 1 | 0 | 22.44623000 | 114.05995970 | <a href="https://www.inaturalist.org/observations/59663071">https://www.inaturalist.org/observations/59663071</a>   |
| 1498 | <i>Eudynamys scolopaceus</i> | Western Koel | 2019/4/29  | 2 | 0 | 22.44624660 | 114.17837960 | <a href="https://www.inaturalist.org/observations/23871926">https://www.inaturalist.org/observations/23871926</a>   |
| 1499 | <i>Eudynamys scolopaceus</i> | Western Koel | 2022/4/17  | 1 | 0 | 22.44662073 | 114.13752790 | <a href="https://www.inaturalist.org/observations/114618081">https://www.inaturalist.org/observations/114618081</a> |
| 1500 | <i>Eudynamys scolopaceus</i> | Western Koel | 2011/3/13  | 2 | 0 | 22.44662800 | 114.13878600 | <a href="https://www.inaturalist.org/observations/56103047">https://www.inaturalist.org/observations/56103047</a>   |
| 1501 | <i>Eudynamys scolopaceus</i> | Western Koel | 2019/11/17 | 1 | 0 | 22.44664743 | 114.13872470 | <a href="https://www.inaturalist.org/observations/35773353">https://www.inaturalist.org/observations/35773353</a>   |
| 1502 | <i>Eudynamys scolopaceus</i> | Western Koel | 2020/4/24  | 2 | 0 | 22.44671067 | 114.13516090 | <a href="https://www.inaturalist.org/observations/43019920">https://www.inaturalist.org/observations/43019920</a>   |
| 1503 | <i>Eudynamys scolopaceus</i> | Western Koel | 2017/4/5   | 2 | 0 | 22.44763333 | 114.17725000 | <a href="https://www.inaturalist.org/observations/5577742">https://www.inaturalist.org/observations/5577742</a>     |
| 1504 | <i>Eudynamys scolopaceus</i> | Western Koel | 2020/3/29  | 1 | 0 | 22.44775762 | 114.04095360 | <a href="https://www.inaturalist.org/observations/40950469">https://www.inaturalist.org/observations/40950469</a>   |
| 1505 | <i>Eudynamys scolopaceus</i> | Western Koel | 2022/4/17  | 1 | 0 | 22.44869485 | 114.00573830 | <a href="https://www.inaturalist.org/observations/111745306">https://www.inaturalist.org/observations/111745306</a> |
| 1506 | <i>Eudynamys scolopaceus</i> | Western Koel | 2012/3/2   | 3 | 0 | 22.44877400 | 114.06165000 | <a href="https://www.inaturalist.org/observations/28159609">https://www.inaturalist.org/observations/28159609</a>   |
| 1507 | <i>Eudynamys scolopaceus</i> | Western Koel | 2012/3/2   | 3 | 0 | 22.44877400 | 114.06165000 | <a href="https://www.inaturalist.org/observations/28159674">https://www.inaturalist.org/observations/28159674</a>   |
| 1508 | <i>Eudynamys scolopaceus</i> | Western Koel | 2022/4/29  | 1 | 0 | 22.44936626 | 114.14146250 | <a href="https://www.inaturalist.org/observations/113307604">https://www.inaturalist.org/observations/113307604</a> |
| 1509 | <i>Eudynamys scolopaceus</i> | Western Koel | 2019/4/27  | 2 | 0 | 22.45018797 | 114.14166950 | <a href="https://www.inaturalist.org/observations/23339413">https://www.inaturalist.org/observations/23339413</a>   |
| 1510 | <i>Eudynamys scolopaceus</i> | Western Koel | 2022/3/24  | 2 | 0 | 22.45137940 | 114.05383520 | <a href="https://www.inaturalist.org/observations/109356078">https://www.inaturalist.org/observations/109356078</a> |
| 1511 | <i>Eudynamys scolopaceus</i> | Western Koel | 2021/11/23 | 1 | 0 | 22.45158848 | 114.02351610 | <a href="https://www.inaturalist.org/observations/101744440">https://www.inaturalist.org/observations/101744440</a> |
| 1512 | <i>Eudynamys scolopaceus</i> | Western Koel | 2020/3/2   | 0 | 0 | 22.45169016 | 114.02361540 | <a href="https://www.inaturalist.org/observations/39442911">https://www.inaturalist.org/observations/39442911</a>   |
| 1513 | <i>Eudynamys scolopaceus</i> | Western Koel | 2020/4/24  | 1 | 0 | 22.45242228 | 114.18812320 | <a href="https://www.inaturalist.org/observations/43046720">https://www.inaturalist.org/observations/43046720</a>   |
| 1514 | <i>Eudynamys scolopaceus</i> | Western Koel | 2020/4/24  | 2 | 0 | 22.45247106 | 114.18737750 | <a href="https://www.inaturalist.org/observations/43045654">https://www.inaturalist.org/observations/43045654</a>   |
| 1515 | <i>Eudynamys scolopaceus</i> | Western Koel | 2022/4/23  | 1 | 0 | 22.45259669 | 114.04747890 | <a href="https://www.inaturalist.org/observations/112672502">https://www.inaturalist.org/observations/112672502</a> |
| 1516 | <i>Eudynamys scolopaceus</i> | Western Koel | 2022/4/4   | 1 | 0 | 22.45312664 | 114.18284370 | <a href="https://www.inaturalist.org/observations/113197220">https://www.inaturalist.org/observations/113197220</a> |
| 1517 | <i>Eudynamys scolopaceus</i> | Western Koel | 2021/6/16  | 4 | 0 | 22.45339167 | 114.05228520 | <a href="https://www.inaturalist.org/observations/83209392">https://www.inaturalist.org/observations/83209392</a>   |

|      |                       |              |            |   |   |             |              |                                                                                                                     |
|------|-----------------------|--------------|------------|---|---|-------------|--------------|---------------------------------------------------------------------------------------------------------------------|
| 1518 | Eudynamys scolopaceus | Western Koel | 2022/3/8   | 1 | 0 | 22.45593646 | 114.00285600 | <a href="https://www.inaturalist.org/observations/108165578">https://www.inaturalist.org/observations/108165578</a> |
| 1519 | Eudynamys scolopaceus | Western Koel | 2021/1/19  | 1 | 0 | 22.45751431 | 114.00103170 | <a href="https://www.inaturalist.org/observations/68578439">https://www.inaturalist.org/observations/68578439</a>   |
| 1520 | Eudynamys scolopaceus | Western Koel | 2022/4/11  | 1 | 0 | 22.45901597 | 114.10674570 | <a href="https://www.inaturalist.org/observations/111102213">https://www.inaturalist.org/observations/111102213</a> |
| 1521 | Eudynamys scolopaceus | Western Koel | 2020/3/15  | 1 | 0 | 22.45927657 | 114.14210420 | <a href="https://www.inaturalist.org/observations/40017132">https://www.inaturalist.org/observations/40017132</a>   |
| 1522 | Eudynamys scolopaceus | Western Koel | 2021/1/24  | 1 | 0 | 22.46064137 | 114.00419960 | <a href="https://www.inaturalist.org/observations/101822027">https://www.inaturalist.org/observations/101822027</a> |
| 1523 | Eudynamys scolopaceus | Western Koel | 2015/12/5  | 3 | 0 | 22.46064190 | 114.00419960 | <a href="https://www.inaturalist.org/observations/24502362">https://www.inaturalist.org/observations/24502362</a>   |
| 1524 | Eudynamys scolopaceus | Western Koel | 2020/8/23  | 2 | 0 | 22.46132612 | 114.00675770 | <a href="https://www.inaturalist.org/observations/57625196">https://www.inaturalist.org/observations/57625196</a>   |
| 1525 | Eudynamys scolopaceus | Western Koel | 2019/2/2   | 2 | 0 | 22.46224250 | 114.03839420 | <a href="https://www.inaturalist.org/observations/20053733">https://www.inaturalist.org/observations/20053733</a>   |
| 1526 | Eudynamys scolopaceus | Western Koel | 2020/1/5   | 2 | 0 | 22.46343212 | 70.06916147  | <a href="https://www.inaturalist.org/observations/51456371">https://www.inaturalist.org/observations/51456371</a>   |
| 1527 | Eudynamys scolopaceus | Western Koel | 2021/4/30  | 1 | 0 | 22.46346500 | 113.99404170 | <a href="https://www.inaturalist.org/observations/76086374">https://www.inaturalist.org/observations/76086374</a>   |
| 1528 | Eudynamys scolopaceus | Western Koel | 2022/9/24  | 2 | 0 | 22.46448161 | 114.04735550 | <a href="https://www.inaturalist.org/observations/136262504">https://www.inaturalist.org/observations/136262504</a> |
| 1529 | Eudynamys scolopaceus | Western Koel | 2020/4/27  | 1 | 0 | 22.46463168 | 114.03851930 | <a href="https://www.inaturalist.org/observations/44120426">https://www.inaturalist.org/observations/44120426</a>   |
| 1530 | Eudynamys scolopaceus | Western Koel | 2018/1/20  | 5 | 0 | 22.46489665 | 70.06780349  | <a href="https://www.inaturalist.org/observations/30382444">https://www.inaturalist.org/observations/30382444</a>   |
| 1531 | Eudynamys scolopaceus | Western Koel | 2021/3/28  | 1 | 0 | 22.46582903 | 114.04440420 | <a href="https://www.inaturalist.org/observations/72237272">https://www.inaturalist.org/observations/72237272</a>   |
| 1532 | Eudynamys scolopaceus | Western Koel | 2014/12/30 | 3 | 0 | 22.46664307 | 114.02949100 | <a href="https://www.inaturalist.org/observations/13913574">https://www.inaturalist.org/observations/13913574</a>   |
| 1533 | Eudynamys scolopaceus | Western Koel | 2014/12/30 | 0 | 0 | 22.46690426 | 114.03654810 | <a href="https://www.inaturalist.org/observations/38321105">https://www.inaturalist.org/observations/38321105</a>   |
| 1534 | Eudynamys scolopaceus | Western Koel | 2015/1/1   | 0 | 0 | 22.46699723 | 114.03638420 | <a href="https://www.inaturalist.org/observations/38321106">https://www.inaturalist.org/observations/38321106</a>   |
| 1535 | Eudynamys scolopaceus | Western Koel | 2022/6/18  | 1 | 0 | 22.46720382 | 114.01255370 | <a href="https://www.inaturalist.org/observations/123035688">https://www.inaturalist.org/observations/123035688</a> |
| 1536 | Eudynamys scolopaceus | Western Koel | 2014/12/24 | 3 | 0 | 22.46747584 | 114.02992010 | <a href="https://www.inaturalist.org/observations/13913573">https://www.inaturalist.org/observations/13913573</a>   |
| 1537 | Eudynamys scolopaceus | Western Koel | 2022/1/1   | 1 | 0 | 22.46799484 | 114.01844500 | <a href="https://www.inaturalist.org/observations/104104355">https://www.inaturalist.org/observations/104104355</a> |
| 1538 | Eudynamys scolopaceus | Western Koel | 2020/4/14  | 1 | 0 | 22.46845527 | 114.03382730 | <a href="https://www.inaturalist.org/observations/86981368">https://www.inaturalist.org/observations/86981368</a>   |
| 1539 | Eudynamys scolopaceus | Western Koel | 2021/11/29 | 1 | 0 | 22.46913036 | 114.19392300 | <a href="https://www.inaturalist.org/observations/102145552">https://www.inaturalist.org/observations/102145552</a> |
| 1540 | Eudynamys scolopaceus | Western Koel | 2019/11/16 | 1 | 0 | 22.46943288 | 81.78125057  | <a href="https://www.inaturalist.org/observations/77497200">https://www.inaturalist.org/observations/77497200</a>   |

|      |                              |              |            |   |   |             |              |                                                                                                                     |
|------|------------------------------|--------------|------------|---|---|-------------|--------------|---------------------------------------------------------------------------------------------------------------------|
| 1541 | <i>Eudynamys scolopaceus</i> | Western Koel | 2019/11/20 | 1 | 0 | 22.46943288 | 81.78125057  | <a href="https://www.inaturalist.org/observations/77566211">https://www.inaturalist.org/observations/77566211</a>   |
| 1542 | <i>Eudynamys scolopaceus</i> | Western Koel | 2019/11/24 | 1 | 0 | 22.46943288 | 81.78125057  | <a href="https://www.inaturalist.org/observations/77566259">https://www.inaturalist.org/observations/77566259</a>   |
| 1543 | <i>Eudynamys scolopaceus</i> | Western Koel | 2020/3/17  | 1 | 0 | 22.46996200 | 114.04180200 | <a href="https://www.inaturalist.org/observations/40575158">https://www.inaturalist.org/observations/40575158</a>   |
| 1544 | <i>Eudynamys scolopaceus</i> | Western Koel | 2018/7/8   | 3 | 0 | 22.47005850 | 114.00658310 | <a href="https://www.inaturalist.org/observations/17987740">https://www.inaturalist.org/observations/17987740</a>   |
| 1545 | <i>Eudynamys scolopaceus</i> | Western Koel | 2021/5/8   | 2 | 0 | 22.47005850 | 114.00658310 | <a href="https://www.inaturalist.org/observations/78188991">https://www.inaturalist.org/observations/78188991</a>   |
| 1546 | <i>Eudynamys scolopaceus</i> | Western Koel | 2021/5/19  | 2 | 0 | 22.47005850 | 114.00658310 | <a href="https://www.inaturalist.org/observations/79492591">https://www.inaturalist.org/observations/79492591</a>   |
| 1547 | <i>Eudynamys scolopaceus</i> | Western Koel | 2022/6/30  | 2 | 0 | 22.47005850 | 114.00658310 | <a href="https://www.inaturalist.org/observations/124352655">https://www.inaturalist.org/observations/124352655</a> |
| 1548 | <i>Eudynamys scolopaceus</i> | Western Koel | 2021/5/13  | 2 | 0 | 22.47022723 | 114.19540530 | <a href="https://www.inaturalist.org/observations/78516790">https://www.inaturalist.org/observations/78516790</a>   |
| 1549 | <i>Eudynamys scolopaceus</i> | Western Koel | 2021/10/1  | 1 | 0 | 22.47044167 | 114.00947500 | <a href="https://www.inaturalist.org/observations/96790682">https://www.inaturalist.org/observations/96790682</a>   |
| 1550 | <i>Eudynamys scolopaceus</i> | Western Koel | 2022/4/10  | 1 | 0 | 22.47048097 | 114.19545340 | <a href="https://www.inaturalist.org/observations/111885889">https://www.inaturalist.org/observations/111885889</a> |
| 1551 | <i>Eudynamys scolopaceus</i> | Western Koel | 2018/9/1   | 3 | 0 | 22.47076100 | 114.01132500 | <a href="https://www.inaturalist.org/observations/16568075">https://www.inaturalist.org/observations/16568075</a>   |
| 1552 | <i>Eudynamys scolopaceus</i> | Western Koel | 2021/9/20  | 1 | 0 | 22.47101080 | 114.04270500 | <a href="https://www.inaturalist.org/observations/95514979">https://www.inaturalist.org/observations/95514979</a>   |
| 1553 | <i>Eudynamys scolopaceus</i> | Western Koel | 2020/3/8   | 0 | 0 | 22.47121228 | 114.01196470 | <a href="https://www.inaturalist.org/observations/39690353">https://www.inaturalist.org/observations/39690353</a>   |
| 1554 | <i>Eudynamys scolopaceus</i> | Western Koel | 2021/7/11  | 2 | 0 | 22.47148111 | 114.00946140 | <a href="https://www.inaturalist.org/observations/86591324">https://www.inaturalist.org/observations/86591324</a>   |
| 1555 | <i>Eudynamys scolopaceus</i> | Western Koel | 2022/5/21  | 1 | 0 | 22.47182167 | 114.00628610 | <a href="https://www.inaturalist.org/observations/117992829">https://www.inaturalist.org/observations/117992829</a> |
| 1556 | <i>Eudynamys scolopaceus</i> | Western Koel | 2021/2/27  | 1 | 0 | 22.47206415 | 114.00598740 | <a href="https://www.inaturalist.org/observations/70306952">https://www.inaturalist.org/observations/70306952</a>   |
| 1557 | <i>Eudynamys scolopaceus</i> | Western Koel | 2021/4/4   | 0 | 0 | 22.47308356 | 114.04302680 | <a href="https://www.inaturalist.org/observations/72871490">https://www.inaturalist.org/observations/72871490</a>   |
| 1558 | <i>Eudynamys scolopaceus</i> | Western Koel | 2022/2/2   | 1 | 0 | 22.47334874 | 114.03107530 | <a href="https://www.inaturalist.org/observations/106021011">https://www.inaturalist.org/observations/106021011</a> |
| 1559 | <i>Eudynamys scolopaceus</i> | Western Koel | 2020/5/8   | 4 | 0 | 22.47355223 | 88.31298139  | <a href="https://www.inaturalist.org/observations/131911182">https://www.inaturalist.org/observations/131911182</a> |
| 1560 | <i>Eudynamys scolopaceus</i> | Western Koel | 2020/5/6   | 3 | 0 | 22.47355595 | 88.31298541  | <a href="https://www.inaturalist.org/observations/131766674">https://www.inaturalist.org/observations/131766674</a> |
| 1561 | <i>Eudynamys scolopaceus</i> | Western Koel | 2020/5/8   | 3 | 0 | 22.47356834 | 88.31297603  | <a href="https://www.inaturalist.org/observations/131993833">https://www.inaturalist.org/observations/131993833</a> |
| 1562 | <i>Eudynamys scolopaceus</i> | Western Koel | 2020/4/18  | 3 | 0 | 22.47357825 | 88.31298675  | <a href="https://www.inaturalist.org/observations/130817763">https://www.inaturalist.org/observations/130817763</a> |
| 1563 | <i>Eudynamys scolopaceus</i> | Western Koel | 2020/5/13  | 3 | 0 | 22.47359188 | 88.31299748  | <a href="https://www.inaturalist.org/observations/132000743">https://www.inaturalist.org/observations/132000743</a> |

|      |                              |              |            |   |   |             |              |                                                                                                                     |
|------|------------------------------|--------------|------------|---|---|-------------|--------------|---------------------------------------------------------------------------------------------------------------------|
| 1564 | <i>Eudynamys scolopaceus</i> | Western Koel | 2020/5/14  | 4 | 0 | 22.47359188 | 88.31299748  | <a href="https://www.inaturalist.org/observations/132000749">https://www.inaturalist.org/observations/132000749</a> |
| 1565 | <i>Eudynamys scolopaceus</i> | Western Koel | 2021/12/17 | 1 | 0 | 22.47375299 | 88.31289690  | <a href="https://www.inaturalist.org/observations/104041173">https://www.inaturalist.org/observations/104041173</a> |
| 1566 | <i>Eudynamys scolopaceus</i> | Western Koel | 2022/1/4   | 3 | 0 | 22.47376941 | 88.31291635  | <a href="https://www.inaturalist.org/observations/104334903">https://www.inaturalist.org/observations/104334903</a> |
| 1567 | <i>Eudynamys scolopaceus</i> | Western Koel | 2021/2/7   | 1 | 0 | 22.47507925 | 114.03598130 | <a href="https://www.inaturalist.org/observations/69187875">https://www.inaturalist.org/observations/69187875</a>   |
| 1568 | <i>Eudynamys scolopaceus</i> | Western Koel | 2021/3/28  | 2 | 0 | 22.47801465 | 114.07224290 | <a href="https://www.inaturalist.org/observations/72259668">https://www.inaturalist.org/observations/72259668</a>   |
| 1569 | <i>Eudynamys scolopaceus</i> | Western Koel | 2022/1/23  | 3 | 0 | 22.48034000 | 73.49422833  | <a href="https://www.inaturalist.org/observations/120517031">https://www.inaturalist.org/observations/120517031</a> |
| 1570 | <i>Eudynamys scolopaceus</i> | Western Koel | 2022/2/21  | 2 | 0 | 22.48099833 | 73.49463000  | <a href="https://www.inaturalist.org/observations/120027375">https://www.inaturalist.org/observations/120027375</a> |
| 1571 | <i>Eudynamys scolopaceus</i> | Western Koel | 2017/4/14  | 1 | 0 | 22.48580393 | 114.01187540 | <a href="https://www.inaturalist.org/observations/63633509">https://www.inaturalist.org/observations/63633509</a>   |
| 1572 | <i>Eudynamys scolopaceus</i> | Western Koel | 2017/4/14  | 1 | 0 | 22.48580393 | 114.01187540 | <a href="https://www.inaturalist.org/observations/63633510">https://www.inaturalist.org/observations/63633510</a>   |
| 1573 | <i>Eudynamys scolopaceus</i> | Western Koel | 2022/4/17  | 1 | 0 | 22.48597890 | 114.01137580 | <a href="https://www.inaturalist.org/observations/111777132">https://www.inaturalist.org/observations/111777132</a> |
| 1574 | <i>Eudynamys scolopaceus</i> | Western Koel | 2019/10/21 | 3 | 0 | 22.48670695 | 113.90596390 | <a href="https://www.inaturalist.org/observations/34675550">https://www.inaturalist.org/observations/34675550</a>   |
| 1575 | <i>Eudynamys scolopaceus</i> | Western Koel | 2020/3/6   | 1 | 0 | 22.48692300 | 114.10238710 | <a href="https://www.inaturalist.org/observations/39606242">https://www.inaturalist.org/observations/39606242</a>   |
| 1576 | <i>Eudynamys scolopaceus</i> | Western Koel | 2021/10/20 | 1 | 0 | 22.48692848 | 114.03662260 | <a href="https://www.inaturalist.org/observations/98868441">https://www.inaturalist.org/observations/98868441</a>   |
| 1577 | <i>Eudynamys scolopaceus</i> | Western Koel | 2018/4/30  | 3 | 0 | 22.48697000 | 114.04057000 | <a href="https://www.inaturalist.org/observations/12040332">https://www.inaturalist.org/observations/12040332</a>   |
| 1578 | <i>Eudynamys scolopaceus</i> | Western Koel | 2021/5/1   | 2 | 0 | 22.48779488 | 114.03864080 | <a href="https://www.inaturalist.org/observations/77846963">https://www.inaturalist.org/observations/77846963</a>   |
| 1579 | <i>Eudynamys scolopaceus</i> | Western Koel | 2021/4/2   | 1 | 0 | 22.48879635 | 114.04238200 | <a href="https://www.inaturalist.org/observations/72678040">https://www.inaturalist.org/observations/72678040</a>   |
| 1580 | <i>Eudynamys scolopaceus</i> | Western Koel | 2010/9/29  | 2 | 0 | 22.48882300 | 114.04172900 | <a href="https://www.inaturalist.org/observations/30018217">https://www.inaturalist.org/observations/30018217</a>   |
| 1581 | <i>Eudynamys scolopaceus</i> | Western Koel | 2021/9/29  | 0 | 0 | 22.48924800 | 114.04421200 | <a href="https://www.inaturalist.org/observations/96649030">https://www.inaturalist.org/observations/96649030</a>   |
| 1582 | <i>Eudynamys scolopaceus</i> | Western Koel | 2022/9/24  | 1 | 0 | 22.48987561 | 114.04087020 | <a href="https://www.inaturalist.org/observations/136584533">https://www.inaturalist.org/observations/136584533</a> |
| 1583 | <i>Eudynamys scolopaceus</i> | Western Koel | 2021/9/21  | 1 | 0 | 22.49044702 | 114.04327490 | <a href="https://www.inaturalist.org/observations/96861344">https://www.inaturalist.org/observations/96861344</a>   |
| 1584 | <i>Eudynamys scolopaceus</i> | Western Koel | 2018/6/19  | 3 | 0 | 22.49126872 | 114.04395640 | <a href="https://www.inaturalist.org/observations/13574357">https://www.inaturalist.org/observations/13574357</a>   |
| 1585 | <i>Eudynamys scolopaceus</i> | Western Koel | 2022/4/15  | 1 | 0 | 22.49269617 | 114.03692540 | <a href="https://www.inaturalist.org/observations/111869069">https://www.inaturalist.org/observations/111869069</a> |
| 1586 | <i>Eudynamys scolopaceus</i> | Western Koel | 2020/6/21  | 2 | 0 | 22.49284950 | 70.06397624  | <a href="https://www.inaturalist.org/observations/61662326">https://www.inaturalist.org/observations/61662326</a>   |

|      |                              |              |            |   |   |             |              |                                                                                                                     |
|------|------------------------------|--------------|------------|---|---|-------------|--------------|---------------------------------------------------------------------------------------------------------------------|
| 1587 | <i>Eudynamys scolopaceus</i> | Western Koel | 2021/9/19  | 1 | 0 | 22.49291140 | 114.04424570 | <a href="https://www.inaturalist.org/observations/95375833">https://www.inaturalist.org/observations/95375833</a>   |
| 1588 | <i>Eudynamys scolopaceus</i> | Western Koel | 2010/3/14  | 1 | 0 | 22.49316000 | 114.04415000 | <a href="https://www.inaturalist.org/observations/30018762">https://www.inaturalist.org/observations/30018762</a>   |
| 1589 | <i>Eudynamys scolopaceus</i> | Western Koel | 2019/4/28  | 3 | 0 | 22.49345000 | 114.10398170 | <a href="https://www.inaturalist.org/observations/23688631">https://www.inaturalist.org/observations/23688631</a>   |
| 1590 | <i>Eudynamys scolopaceus</i> | Western Koel | 2018/9/15  | 3 | 0 | 22.49347333 | 114.10347000 | <a href="https://www.inaturalist.org/observations/16540907">https://www.inaturalist.org/observations/16540907</a>   |
| 1591 | <i>Eudynamys scolopaceus</i> | Western Koel | 2021/11/26 | 1 | 0 | 22.49347894 | 114.04540700 | <a href="https://www.inaturalist.org/observations/102070918">https://www.inaturalist.org/observations/102070918</a> |
| 1592 | <i>Eudynamys scolopaceus</i> | Western Koel | 2021/2/1   | 1 | 0 | 22.49366333 | 114.10477200 | <a href="https://www.inaturalist.org/observations/68910947">https://www.inaturalist.org/observations/68910947</a>   |
| 1593 | <i>Eudynamys scolopaceus</i> | Western Koel | 2010/4/25  | 1 | 0 | 22.49373000 | 114.04548400 | <a href="https://www.inaturalist.org/observations/30018498">https://www.inaturalist.org/observations/30018498</a>   |
| 1594 | <i>Eudynamys scolopaceus</i> | Western Koel | 2010/4/25  | 1 | 0 | 22.49373000 | 114.04548400 | <a href="https://www.inaturalist.org/observations/30018599">https://www.inaturalist.org/observations/30018599</a>   |
| 1595 | <i>Eudynamys scolopaceus</i> | Western Koel | 2019/12/28 | 3 | 0 | 22.49378454 | 114.04541150 | <a href="https://www.inaturalist.org/observations/37054835">https://www.inaturalist.org/observations/37054835</a>   |
| 1596 | <i>Eudynamys scolopaceus</i> | Western Koel | 2018/4/29  | 3 | 0 | 22.49383003 | 114.04364350 | <a href="https://www.inaturalist.org/observations/11771889">https://www.inaturalist.org/observations/11771889</a>   |
| 1597 | <i>Eudynamys scolopaceus</i> | Western Koel | 2015/3/7   | 3 | 0 | 22.49404800 | 114.04587000 | <a href="https://www.inaturalist.org/observations/12856807">https://www.inaturalist.org/observations/12856807</a>   |
| 1598 | <i>Eudynamys scolopaceus</i> | Western Koel | 2022/5/2   | 1 | 0 | 22.49416000 | 114.04592830 | <a href="https://www.inaturalist.org/observations/115747057">https://www.inaturalist.org/observations/115747057</a> |
| 1599 | <i>Eudynamys scolopaceus</i> | Western Koel | 2020/9/29  | 1 | 0 | 22.49420981 | 114.03462530 | <a href="https://www.inaturalist.org/observations/61472758">https://www.inaturalist.org/observations/61472758</a>   |
| 1600 | <i>Eudynamys scolopaceus</i> | Western Koel | 2011/3/12  | 3 | 0 | 22.49430500 | 114.04584900 | <a href="https://www.inaturalist.org/observations/29833095">https://www.inaturalist.org/observations/29833095</a>   |
| 1601 | <i>Eudynamys scolopaceus</i> | Western Koel | 2022/5/2   | 2 | 0 | 22.49434300 | 114.04602500 | <a href="https://www.inaturalist.org/observations/114617364">https://www.inaturalist.org/observations/114617364</a> |
| 1602 | <i>Eudynamys scolopaceus</i> | Western Koel | 2019/4/7   | 4 | 0 | 22.49463200 | 114.04644800 | <a href="https://www.inaturalist.org/observations/22279974">https://www.inaturalist.org/observations/22279974</a>   |
| 1603 | <i>Eudynamys scolopaceus</i> | Western Koel | 2019/5/18  | 3 | 0 | 22.49471986 | 114.04061830 | <a href="https://www.inaturalist.org/observations/25302513">https://www.inaturalist.org/observations/25302513</a>   |
| 1604 | <i>Eudynamys scolopaceus</i> | Western Koel | 2018/4/28  | 3 | 0 | 22.49472824 | 114.04884880 | <a href="https://www.inaturalist.org/observations/11726272">https://www.inaturalist.org/observations/11726272</a>   |
| 1605 | <i>Eudynamys scolopaceus</i> | Western Koel | 2022/5/7   | 1 | 0 | 22.49496165 | 114.04983740 | <a href="https://www.inaturalist.org/observations/116420500">https://www.inaturalist.org/observations/116420500</a> |
| 1606 | <i>Eudynamys scolopaceus</i> | Western Koel | 2006/4/13  | 1 | 0 | 22.49501210 | 114.06961310 | <a href="https://www.inaturalist.org/observations/67034228">https://www.inaturalist.org/observations/67034228</a>   |
| 1607 | <i>Eudynamys scolopaceus</i> | Western Koel | 2019/1/12  | 0 | 0 | 22.49505690 | 114.03393420 | <a href="https://www.inaturalist.org/observations/39199495">https://www.inaturalist.org/observations/39199495</a>   |
| 1608 | <i>Eudynamys scolopaceus</i> | Western Koel | 2019/1/12  | 0 | 0 | 22.49505690 | 114.03393420 | <a href="https://www.inaturalist.org/observations/39199512">https://www.inaturalist.org/observations/39199512</a>   |
| 1609 | <i>Eudynamys scolopaceus</i> | Western Koel | 2020/4/10  | 1 | 0 | 22.49505690 | 114.03393420 | <a href="https://www.inaturalist.org/observations/44588433">https://www.inaturalist.org/observations/44588433</a>   |

|      |                              |              |           |   |   |             |              |                                                                                                                     |
|------|------------------------------|--------------|-----------|---|---|-------------|--------------|---------------------------------------------------------------------------------------------------------------------|
| 1610 | <i>Eudynamys scolopaceus</i> | Western Koel | 2020/5/8  | 1 | 0 | 22.49505690 | 114.03393420 | <a href="https://www.inaturalist.org/observations/45347121">https://www.inaturalist.org/observations/45347121</a>   |
| 1611 | <i>Eudynamys scolopaceus</i> | Western Koel | 2020/5/16 | 2 | 0 | 22.49505691 | 114.03393420 | <a href="https://www.inaturalist.org/observations/46082310">https://www.inaturalist.org/observations/46082310</a>   |
| 1612 | <i>Eudynamys scolopaceus</i> | Western Koel | 2021/4/13 | 1 | 0 | 22.49505690 | 114.03393420 | <a href="https://www.inaturalist.org/observations/73824476">https://www.inaturalist.org/observations/73824476</a>   |
| 1613 | <i>Eudynamys scolopaceus</i> | Western Koel | 2022/2/26 | 3 | 0 | 22.49505700 | 114.03393400 | <a href="https://www.inaturalist.org/observations/108340762">https://www.inaturalist.org/observations/108340762</a> |
| 1614 | <i>Eudynamys scolopaceus</i> | Western Koel | 2021/9/6  | 1 | 0 | 22.49506125 | 114.03393420 | <a href="https://www.inaturalist.org/observations/93870254">https://www.inaturalist.org/observations/93870254</a>   |
| 1615 | <i>Eudynamys scolopaceus</i> | Western Koel | 2020/4/10 | 1 | 0 | 22.49511205 | 114.03388020 | <a href="https://www.inaturalist.org/observations/44554014">https://www.inaturalist.org/observations/44554014</a>   |
| 1616 | <i>Eudynamys scolopaceus</i> | Western Koel | 2020/4/10 | 1 | 0 | 22.49511205 | 114.03388020 | <a href="https://www.inaturalist.org/observations/44554018">https://www.inaturalist.org/observations/44554018</a>   |
| 1617 | <i>Eudynamys scolopaceus</i> | Western Koel | 2018/4/2  | 2 | 0 | 22.49512100 | 114.04911600 | <a href="https://www.inaturalist.org/observations/10750572">https://www.inaturalist.org/observations/10750572</a>   |
| 1618 | <i>Eudynamys scolopaceus</i> | Western Koel | 2019/3/3  | 2 | 0 | 22.49544000 | 114.10674000 | <a href="https://www.inaturalist.org/observations/20901508">https://www.inaturalist.org/observations/20901508</a>   |
| 1619 | <i>Eudynamys scolopaceus</i> | Western Koel | 2022/5/2  | 1 | 0 | 22.49545009 | 114.10682980 | <a href="https://www.inaturalist.org/observations/114613807">https://www.inaturalist.org/observations/114613807</a> |
| 1620 | <i>Eudynamys scolopaceus</i> | Western Koel | 2021/2/1  | 1 | 0 | 22.49551333 | 114.10599700 | <a href="https://www.inaturalist.org/observations/68910917">https://www.inaturalist.org/observations/68910917</a>   |
| 1621 | <i>Eudynamys scolopaceus</i> | Western Koel | 2019/4/27 | 2 | 0 | 22.49553264 | 114.05427610 | <a href="https://www.inaturalist.org/observations/23652093">https://www.inaturalist.org/observations/23652093</a>   |
| 1622 | <i>Eudynamys scolopaceus</i> | Western Koel | 2020/4/25 | 1 | 0 | 22.49553264 | 114.05427610 | <a href="https://www.inaturalist.org/observations/44098262">https://www.inaturalist.org/observations/44098262</a>   |
| 1623 | <i>Eudynamys scolopaceus</i> | Western Koel | 2020/4/27 | 1 | 0 | 22.49559456 | 114.04168200 | <a href="https://www.inaturalist.org/observations/43904056">https://www.inaturalist.org/observations/43904056</a>   |
| 1624 | <i>Eudynamys scolopaceus</i> | Western Koel | 2022/4/19 | 1 | 0 | 22.49564727 | 114.04747510 | <a href="https://www.inaturalist.org/observations/112044560">https://www.inaturalist.org/observations/112044560</a> |
| 1625 | <i>Eudynamys scolopaceus</i> | Western Koel | 2020/3/2  | 0 | 0 | 22.49571600 | 114.04876200 | <a href="https://www.inaturalist.org/observations/39477407">https://www.inaturalist.org/observations/39477407</a>   |
| 1626 | <i>Eudynamys scolopaceus</i> | Western Koel | 2022/4/11 | 1 | 0 | 22.49615654 | 114.00744710 | <a href="https://www.inaturalist.org/observations/111102179">https://www.inaturalist.org/observations/111102179</a> |
| 1627 | <i>Eudynamys scolopaceus</i> | Western Koel | 2017/12/6 | 2 | 0 | 22.49690308 | 114.03762580 | <a href="https://www.inaturalist.org/observations/10943811">https://www.inaturalist.org/observations/10943811</a>   |
| 1628 | <i>Eudynamys scolopaceus</i> | Western Koel | 2022/7/22 | 2 | 0 | 22.49818756 | 114.13337540 | <a href="https://www.inaturalist.org/observations/127334480">https://www.inaturalist.org/observations/127334480</a> |
| 1629 | <i>Eudynamys scolopaceus</i> | Western Koel | 2019/9/28 | 4 | 0 | 22.49833611 | 114.13352780 | <a href="https://www.inaturalist.org/observations/33749551">https://www.inaturalist.org/observations/33749551</a>   |
| 1630 | <i>Eudynamys scolopaceus</i> | Western Koel | 2021/7/10 | 1 | 0 | 22.49860514 | 113.92275110 | <a href="https://www.inaturalist.org/observations/86518618">https://www.inaturalist.org/observations/86518618</a>   |
| 1631 | <i>Eudynamys scolopaceus</i> | Western Koel | 2019/2/14 | 2 | 0 | 22.49876600 | 114.04582750 | <a href="https://www.inaturalist.org/observations/30760351">https://www.inaturalist.org/observations/30760351</a>   |
| 1632 | <i>Eudynamys scolopaceus</i> | Western Koel | 2020/2/1  | 1 | 0 | 22.49876600 | 114.04582750 | <a href="https://www.inaturalist.org/observations/95951596">https://www.inaturalist.org/observations/95951596</a>   |

|      |                              |              |            |   |   |             |              |                                                                                                                     |
|------|------------------------------|--------------|------------|---|---|-------------|--------------|---------------------------------------------------------------------------------------------------------------------|
| 1633 | <i>Eudynamys scolopaceus</i> | Western Koel | 2020/2/1   | 1 | 0 | 22.49876600 | 114.04582750 | <a href="https://www.inaturalist.org/observations/95951614">https://www.inaturalist.org/observations/95951614</a>   |
| 1634 | <i>Eudynamys scolopaceus</i> | Western Koel | 2021/10/12 | 1 | 0 | 22.49876600 | 114.04582750 | <a href="https://www.inaturalist.org/observations/99761916">https://www.inaturalist.org/observations/99761916</a>   |
| 1635 | <i>Eudynamys scolopaceus</i> | Western Koel | 2021/2/18  | 1 | 0 | 22.49980671 | 114.11772890 | <a href="https://www.inaturalist.org/observations/69907742">https://www.inaturalist.org/observations/69907742</a>   |
| 1636 | <i>Eudynamys scolopaceus</i> | Western Koel | 2020/11/13 | 1 | 0 | 22.50010859 | 114.04431990 | <a href="https://www.inaturalist.org/observations/64895485">https://www.inaturalist.org/observations/64895485</a>   |
| 1637 | <i>Eudynamys scolopaceus</i> | Western Koel | 2020/9/6   | 2 | 0 | 22.50134667 | 114.14929800 | <a href="https://www.inaturalist.org/observations/58688791">https://www.inaturalist.org/observations/58688791</a>   |
| 1638 | <i>Eudynamys scolopaceus</i> | Western Koel | 2022/2/12  | 1 | 0 | 22.50235954 | 114.04451880 | <a href="https://www.inaturalist.org/observations/106606745">https://www.inaturalist.org/observations/106606745</a> |
| 1639 | <i>Eudynamys scolopaceus</i> | Western Koel | 2021/2/18  | 1 | 0 | 22.50258745 | 114.11898350 | <a href="https://www.inaturalist.org/observations/69907743">https://www.inaturalist.org/observations/69907743</a>   |
| 1640 | <i>Eudynamys scolopaceus</i> | Western Koel | 2016/7/3   | 2 | 0 | 22.50298000 | 114.17690600 | <a href="https://www.inaturalist.org/observations/12264013">https://www.inaturalist.org/observations/12264013</a>   |
| 1641 | <i>Eudynamys scolopaceus</i> | Western Koel | 2020/4/21  | 2 | 0 | 22.50398454 | 114.14692100 | <a href="https://www.inaturalist.org/observations/42756407">https://www.inaturalist.org/observations/42756407</a>   |
| 1642 | <i>Eudynamys scolopaceus</i> | Western Koel | 2020/4/9   | 1 | 0 | 22.50416303 | 114.14698010 | <a href="https://www.inaturalist.org/observations/41753475">https://www.inaturalist.org/observations/41753475</a>   |
| 1643 | <i>Eudynamys scolopaceus</i> | Western Koel | 2021/2/14  | 1 | 0 | 22.50573515 | 114.10946140 | <a href="https://www.inaturalist.org/observations/69645621">https://www.inaturalist.org/observations/69645621</a>   |
| 1644 | <i>Eudynamys scolopaceus</i> | Western Koel | 2020/2/21  | 0 | 0 | 22.50721591 | 114.11426340 | <a href="https://www.inaturalist.org/observations/38968927">https://www.inaturalist.org/observations/38968927</a>   |
| 1645 | <i>Eudynamys scolopaceus</i> | Western Koel | 2021/12/25 | 1 | 0 | 22.50782873 | 114.11592050 | <a href="https://www.inaturalist.org/observations/103640381">https://www.inaturalist.org/observations/103640381</a> |
| 1646 | <i>Eudynamys scolopaceus</i> | Western Koel | 2019/7/20  | 1 | 0 | 22.50812089 | 114.12589910 | <a href="https://www.inaturalist.org/observations/37523649">https://www.inaturalist.org/observations/37523649</a>   |
| 1647 | <i>Eudynamys scolopaceus</i> | Western Koel | 2017/4/1   | 2 | 0 | 22.50825998 | 114.11497270 | <a href="https://www.inaturalist.org/observations/29625907">https://www.inaturalist.org/observations/29625907</a>   |
| 1648 | <i>Eudynamys scolopaceus</i> | Western Koel | 2017/4/1   | 4 | 0 | 22.50825998 | 114.11497270 | <a href="https://www.inaturalist.org/observations/29688980">https://www.inaturalist.org/observations/29688980</a>   |
| 1649 | <i>Eudynamys scolopaceus</i> | Western Koel | 2016/3/13  | 2 | 0 | 22.50850319 | 114.11333410 | <a href="https://www.inaturalist.org/observations/49218235">https://www.inaturalist.org/observations/49218235</a>   |
| 1650 | <i>Eudynamys scolopaceus</i> | Western Koel | 2016/4/3   | 3 | 0 | 22.50879520 | 114.11297710 | <a href="https://www.inaturalist.org/observations/12264108">https://www.inaturalist.org/observations/12264108</a>   |
| 1651 | <i>Eudynamys scolopaceus</i> | Western Koel | 2010/4/24  | 1 | 0 | 22.50879520 | 114.11297710 | <a href="https://www.inaturalist.org/observations/68793997">https://www.inaturalist.org/observations/68793997</a>   |
| 1652 | <i>Eudynamys scolopaceus</i> | Western Koel | 2010/4/6   | 1 | 0 | 22.50879520 | 114.11297710 | <a href="https://www.inaturalist.org/observations/119981726">https://www.inaturalist.org/observations/119981726</a> |
| 1653 | <i>Eudynamys scolopaceus</i> | Western Koel | 2020/12/25 | 1 | 0 | 22.50879527 | 114.11297690 | <a href="https://www.inaturalist.org/observations/101687147">https://www.inaturalist.org/observations/101687147</a> |
| 1654 | <i>Eudynamys scolopaceus</i> | Western Koel | 2017/5/6   | 1 | 0 | 22.50879558 | 114.11297590 | <a href="https://www.inaturalist.org/observations/72428762">https://www.inaturalist.org/observations/72428762</a>   |
| 1655 | <i>Eudynamys scolopaceus</i> | Western Koel | 2019/8/28  | 2 | 0 | 22.50895500 | 114.11404330 | <a href="https://www.inaturalist.org/observations/31718914">https://www.inaturalist.org/observations/31718914</a>   |



|      |                              |              |            |   |   |             |              |                                                                                                                     |
|------|------------------------------|--------------|------------|---|---|-------------|--------------|---------------------------------------------------------------------------------------------------------------------|
| 1656 | <i>Eudynamys scolopaceus</i> | Western Koel | 2021/4/25  | 2 | 0 | 22.50947762 | 114.11265200 | <a href="https://www.inaturalist.org/observations/75311468">https://www.inaturalist.org/observations/75311468</a>   |
| 1657 | <i>Eudynamys scolopaceus</i> | Western Koel | 2018/4/29  | 3 | 0 | 22.50986169 | 114.11074870 | <a href="https://www.inaturalist.org/observations/11886045">https://www.inaturalist.org/observations/11886045</a>   |
| 1658 | <i>Eudynamys scolopaceus</i> | Western Koel | 2022/3/25  | 1 | 0 | 22.50999722 | 88.35027222  | <a href="https://www.inaturalist.org/observations/109779601">https://www.inaturalist.org/observations/109779601</a> |
| 1659 | <i>Eudynamys scolopaceus</i> | Western Koel | 2020/4/25  | 1 | 0 | 22.51038100 | 114.11198700 | <a href="https://www.inaturalist.org/observations/44454496">https://www.inaturalist.org/observations/44454496</a>   |
| 1660 | <i>Eudynamys scolopaceus</i> | Western Koel | 2020/4/25  | 1 | 0 | 22.51039000 | 114.11189500 | <a href="https://www.inaturalist.org/observations/44290518">https://www.inaturalist.org/observations/44290518</a>   |
| 1661 | <i>Eudynamys scolopaceus</i> | Western Koel | 2020/4/26  | 1 | 0 | 22.51050665 | 114.11178920 | <a href="https://www.inaturalist.org/observations/43566935">https://www.inaturalist.org/observations/43566935</a>   |
| 1662 | <i>Eudynamys scolopaceus</i> | Western Koel | 2010/5/21  | 1 | 0 | 22.51082700 | 114.11192500 | <a href="https://www.inaturalist.org/observations/30018397">https://www.inaturalist.org/observations/30018397</a>   |
| 1663 | <i>Eudynamys scolopaceus</i> | Western Koel | 2018/12/1  | 4 | 0 | 22.51095110 | 88.35610940  | <a href="https://www.inaturalist.org/observations/18881416">https://www.inaturalist.org/observations/18881416</a>   |
| 1664 | <i>Eudynamys scolopaceus</i> | Western Koel | 2022/1/25  | 2 | 0 | 22.51095110 | 88.35610940  | <a href="https://www.inaturalist.org/observations/105700276">https://www.inaturalist.org/observations/105700276</a> |
| 1665 | <i>Eudynamys scolopaceus</i> | Western Koel | 2021/4/24  | 1 | 0 | 22.51120100 | 114.12609900 | <a href="https://www.inaturalist.org/observations/75645446">https://www.inaturalist.org/observations/75645446</a>   |
| 1666 | <i>Eudynamys scolopaceus</i> | Western Koel | 2020/4/20  | 1 | 0 | 22.51183500 | 114.11254100 | <a href="https://www.inaturalist.org/observations/44679362">https://www.inaturalist.org/observations/44679362</a>   |
| 1667 | <i>Eudynamys scolopaceus</i> | Western Koel | 2021/10/23 | 1 | 0 | 22.51199011 | 88.35820648  | <a href="https://www.inaturalist.org/observations/99238597">https://www.inaturalist.org/observations/99238597</a>   |
| 1668 | <i>Eudynamys scolopaceus</i> | Western Koel | 2022/5/1   | 1 | 0 | 22.51205949 | 88.35820648  | <a href="https://www.inaturalist.org/observations/114297069">https://www.inaturalist.org/observations/114297069</a> |
| 1669 | <i>Eudynamys scolopaceus</i> | Western Koel | 2021/1/5   | 4 | 0 | 22.51214966 | 88.36369492  | <a href="https://www.inaturalist.org/observations/68655283">https://www.inaturalist.org/observations/68655283</a>   |
| 1670 | <i>Eudynamys scolopaceus</i> | Western Koel | 2020/1/5   | 4 | 0 | 22.51215214 | 88.36369526  | <a href="https://www.inaturalist.org/observations/57727959">https://www.inaturalist.org/observations/57727959</a>   |
| 1671 | <i>Eudynamys scolopaceus</i> | Western Koel | 2019/4/2   | 2 | 0 | 22.51220600 | 88.35816100  | <a href="https://www.inaturalist.org/observations/62716760">https://www.inaturalist.org/observations/62716760</a>   |
| 1672 | <i>Eudynamys scolopaceus</i> | Western Koel | 2019/12/4  | 1 | 0 | 22.51223979 | 114.11342750 | <a href="https://www.inaturalist.org/observations/36350754">https://www.inaturalist.org/observations/36350754</a>   |
| 1673 | <i>Eudynamys scolopaceus</i> | Western Koel | 2019/12/4  | 1 | 0 | 22.51227448 | 114.11333970 | <a href="https://www.inaturalist.org/observations/36350785">https://www.inaturalist.org/observations/36350785</a>   |
| 1674 | <i>Eudynamys scolopaceus</i> | Western Koel | 2022/4/30  | 4 | 0 | 22.51238700 | 88.35940600  | <a href="https://www.inaturalist.org/observations/116753411">https://www.inaturalist.org/observations/116753411</a> |
| 1675 | <i>Eudynamys scolopaceus</i> | Western Koel | 2016/3/13  | 1 | 0 | 22.51269455 | 114.11509830 | <a href="https://www.inaturalist.org/observations/105013556">https://www.inaturalist.org/observations/105013556</a> |
| 1676 | <i>Eudynamys scolopaceus</i> | Western Koel | 2021/11/24 | 1 | 0 | 22.51276795 | 88.35617512  | <a href="https://www.inaturalist.org/observations/115399148">https://www.inaturalist.org/observations/115399148</a> |
| 1677 | <i>Eudynamys scolopaceus</i> | Western Koel | 2019/3/19  | 2 | 0 | 22.51296188 | 114.11447050 | <a href="https://www.inaturalist.org/observations/21381188">https://www.inaturalist.org/observations/21381188</a>   |
| 1678 | <i>Eudynamys scolopaceus</i> | Western Koel | 2020/4/26  | 1 | 0 | 22.51307165 | 114.11432100 | <a href="https://www.inaturalist.org/observations/43895267">https://www.inaturalist.org/observations/43895267</a>   |

|      |                              |              |            |   |   |             |              |                                                                                                                     |
|------|------------------------------|--------------|------------|---|---|-------------|--------------|---------------------------------------------------------------------------------------------------------------------|
| 1679 | <i>Eudynamys scolopaceus</i> | Western Koel | 2021/11/22 | 1 | 0 | 22.51322387 | 88.35570305  | <a href="https://www.inaturalist.org/observations/115399132">https://www.inaturalist.org/observations/115399132</a> |
| 1680 | <i>Eudynamys scolopaceus</i> | Western Koel | 2022/5/11  | 1 | 0 | 22.51706667 | 114.04696670 | <a href="https://www.inaturalist.org/observations/117598914">https://www.inaturalist.org/observations/117598914</a> |
| 1681 | <i>Eudynamys scolopaceus</i> | Western Koel | 2009/4/10  | 3 | 0 | 22.52379000 | 114.20835600 | <a href="https://www.inaturalist.org/observations/30157611">https://www.inaturalist.org/observations/30157611</a>   |
| 1682 | <i>Eudynamys scolopaceus</i> | Western Koel | 2021/5/1   | 1 | 0 | 22.52525375 | 114.21164120 | <a href="https://www.inaturalist.org/observations/76836956">https://www.inaturalist.org/observations/76836956</a>   |
| 1683 | <i>Eudynamys scolopaceus</i> | Western Koel | 2021/5/1   | 1 | 0 | 22.52544066 | 114.21078080 | <a href="https://www.inaturalist.org/observations/76219074">https://www.inaturalist.org/observations/76219074</a>   |
| 1684 | <i>Eudynamys scolopaceus</i> | Western Koel | 2012/10/5  | 1 | 0 | 22.52544949 | 114.03322880 | <a href="https://www.inaturalist.org/observations/116452261">https://www.inaturalist.org/observations/116452261</a> |
| 1685 | <i>Eudynamys scolopaceus</i> | Western Koel | 2019/8/12  | 1 | 0 | 22.53116604 | 113.93245470 | <a href="https://www.inaturalist.org/observations/72242776">https://www.inaturalist.org/observations/72242776</a>   |
| 1686 | <i>Eudynamys scolopaceus</i> | Western Koel | 2020/3/8   | 1 | 0 | 22.53164718 | 114.20878590 | <a href="https://www.inaturalist.org/observations/39688855">https://www.inaturalist.org/observations/39688855</a>   |
| 1687 | <i>Eudynamys scolopaceus</i> | Western Koel | 2022/4/10  | 1 | 0 | 22.53300157 | 113.98461960 | <a href="https://www.inaturalist.org/observations/110947650">https://www.inaturalist.org/observations/110947650</a> |
| 1688 | <i>Eudynamys scolopaceus</i> | Western Koel | 2021/5/25  | 1 | 0 | 22.53581495 | 113.93036510 | <a href="https://www.inaturalist.org/observations/82412333">https://www.inaturalist.org/observations/82412333</a>   |
| 1689 | <i>Eudynamys scolopaceus</i> | Western Koel | 2021/1/4   | 1 | 0 | 22.53620125 | 113.92818460 | <a href="https://www.inaturalist.org/observations/68750999">https://www.inaturalist.org/observations/68750999</a>   |
| 1690 | <i>Eudynamys scolopaceus</i> | Western Koel | 2021/1/26  | 1 | 0 | 22.53639008 | 113.92821340 | <a href="https://www.inaturalist.org/observations/72992442">https://www.inaturalist.org/observations/72992442</a>   |
| 1691 | <i>Eudynamys scolopaceus</i> | Western Koel | 2021/5/25  | 1 | 0 | 22.53640952 | 113.93045550 | <a href="https://www.inaturalist.org/observations/82412332">https://www.inaturalist.org/observations/82412332</a>   |
| 1692 | <i>Eudynamys scolopaceus</i> | Western Koel | 2021/4/19  | 1 | 0 | 22.53658867 | 114.15808870 | <a href="https://www.inaturalist.org/observations/74604326">https://www.inaturalist.org/observations/74604326</a>   |
| 1693 | <i>Eudynamys scolopaceus</i> | Western Koel | 2019/6/27  | 1 | 0 | 22.53660844 | 113.92814060 | <a href="https://www.inaturalist.org/observations/65631146">https://www.inaturalist.org/observations/65631146</a>   |
| 1694 | <i>Eudynamys scolopaceus</i> | Western Koel | 2021/7/25  | 1 | 0 | 22.53683482 | 113.92891000 | <a href="https://www.inaturalist.org/observations/93828039">https://www.inaturalist.org/observations/93828039</a>   |
| 1695 | <i>Eudynamys scolopaceus</i> | Western Koel | 2021/2/21  | 1 | 0 | 22.53807421 | 113.92867770 | <a href="https://www.inaturalist.org/observations/70314154">https://www.inaturalist.org/observations/70314154</a>   |
| 1696 | <i>Eudynamys scolopaceus</i> | Western Koel | 2021/3/11  | 1 | 0 | 22.53846519 | 113.92839640 | <a href="https://www.inaturalist.org/observations/72674180">https://www.inaturalist.org/observations/72674180</a>   |
| 1697 | <i>Eudynamys scolopaceus</i> | Western Koel | 2021/3/10  | 1 | 0 | 22.53855566 | 113.92873940 | <a href="https://www.inaturalist.org/observations/72007368">https://www.inaturalist.org/observations/72007368</a>   |
| 1698 | <i>Eudynamys scolopaceus</i> | Western Koel | 2020/4/30  | 1 | 0 | 22.53893716 | 113.92719640 | <a href="https://www.inaturalist.org/observations/66412708">https://www.inaturalist.org/observations/66412708</a>   |
| 1699 | <i>Eudynamys scolopaceus</i> | Western Koel | 2021/1/12  | 2 | 0 | 22.53925349 | 113.93531980 | <a href="https://www.inaturalist.org/observations/68633900">https://www.inaturalist.org/observations/68633900</a>   |
| 1700 | <i>Eudynamys scolopaceus</i> | Western Koel | 2021/11/19 | 4 | 0 | 22.53998460 | 72.96582349  | <a href="https://www.inaturalist.org/observations/101460895">https://www.inaturalist.org/observations/101460895</a> |
| 1701 | <i>Eudynamys scolopaceus</i> | Western Koel | 2021/12/21 | 1 | 0 | 22.54080390 | 88.35124110  | <a href="https://www.inaturalist.org/observations/104085330">https://www.inaturalist.org/observations/104085330</a> |

|      |                              |              |            |   |   |             |              |                                                                                                                     |
|------|------------------------------|--------------|------------|---|---|-------------|--------------|---------------------------------------------------------------------------------------------------------------------|
| 1702 | <i>Eudynamys scolopaceus</i> | Western Koel | 2021/12/21 | 1 | 0 | 22.54080390 | 88.35124110  | <a href="https://www.inaturalist.org/observations/104085351">https://www.inaturalist.org/observations/104085351</a> |
| 1703 | <i>Eudynamys scolopaceus</i> | Western Koel | 2021/12/22 | 1 | 0 | 22.54080390 | 88.35124110  | <a href="https://www.inaturalist.org/observations/104089725">https://www.inaturalist.org/observations/104089725</a> |
| 1704 | <i>Eudynamys scolopaceus</i> | Western Koel | 2020/12/14 | 3 | 0 | 22.54132624 | 72.92552077  | <a href="https://www.inaturalist.org/observations/66550152">https://www.inaturalist.org/observations/66550152</a>   |
| 1705 | <i>Eudynamys scolopaceus</i> | Western Koel | 2021/4/17  | 1 | 0 | 22.54285990 | 114.05956000 | <a href="https://www.inaturalist.org/observations/106367921">https://www.inaturalist.org/observations/106367921</a> |
| 1706 | <i>Eudynamys scolopaceus</i> | Western Koel | 2021/4/17  | 1 | 0 | 22.54285990 | 114.05956000 | <a href="https://www.inaturalist.org/observations/106367922">https://www.inaturalist.org/observations/106367922</a> |
| 1707 | <i>Eudynamys scolopaceus</i> | Western Koel | 2020/5/30  | 1 | 0 | 22.54410445 | 114.02300890 | <a href="https://www.inaturalist.org/observations/81033521">https://www.inaturalist.org/observations/81033521</a>   |
| 1708 | <i>Eudynamys scolopaceus</i> | Western Koel | 2022/4/4   | 1 | 0 | 22.54538690 | 114.00633440 | <a href="https://www.inaturalist.org/observations/110398019">https://www.inaturalist.org/observations/110398019</a> |
| 1709 | <i>Eudynamys scolopaceus</i> | Western Koel | 2022/5/9   | 0 | 0 | 22.54620513 | 114.00110070 | <a href="https://www.inaturalist.org/observations/118553504">https://www.inaturalist.org/observations/118553504</a> |
| 1710 | <i>Eudynamys scolopaceus</i> | Western Koel | 2022/3/14  | 1 | 0 | 22.54655299 | 113.99741240 | <a href="https://www.inaturalist.org/observations/108592245">https://www.inaturalist.org/observations/108592245</a> |
| 1711 | <i>Eudynamys scolopaceus</i> | Western Koel | 2021/3/2   | 1 | 0 | 22.54702908 | 113.91796630 | <a href="https://www.inaturalist.org/observations/72006913">https://www.inaturalist.org/observations/72006913</a>   |
| 1712 | <i>Eudynamys scolopaceus</i> | Western Koel | 2022/6/30  | 1 | 0 | 22.54727900 | 113.91839400 | <a href="https://www.inaturalist.org/observations/137035220">https://www.inaturalist.org/observations/137035220</a> |
| 1713 | <i>Eudynamys scolopaceus</i> | Western Koel | 2013/2/11  | 1 | 0 | 22.55211017 | 88.33897948  | <a href="https://www.inaturalist.org/observations/79821030">https://www.inaturalist.org/observations/79821030</a>   |
| 1714 | <i>Eudynamys scolopaceus</i> | Western Koel | 2020/6/12  | 1 | 0 | 22.55305456 | 114.16352980 | <a href="https://www.inaturalist.org/observations/49660608">https://www.inaturalist.org/observations/49660608</a>   |
| 1715 | <i>Eudynamys scolopaceus</i> | Western Koel | 2022/3/13  | 1 | 0 | 22.55334889 | 114.00411960 | <a href="https://www.inaturalist.org/observations/108513816">https://www.inaturalist.org/observations/108513816</a> |
| 1716 | <i>Eudynamys scolopaceus</i> | Western Koel | 2022/3/31  | 1 | 0 | 22.55475191 | 114.01033190 | <a href="https://www.inaturalist.org/observations/109991003">https://www.inaturalist.org/observations/109991003</a> |
| 1717 | <i>Eudynamys scolopaceus</i> | Western Koel | 2021/12/22 | 2 | 0 | 22.55694381 | 88.29198280  | <a href="https://www.inaturalist.org/observations/104095894">https://www.inaturalist.org/observations/104095894</a> |
| 1718 | <i>Eudynamys scolopaceus</i> | Western Koel | 2010/4/25  | 4 | 0 | 22.55746249 | 88.29436552  | <a href="https://www.inaturalist.org/observations/26744463">https://www.inaturalist.org/observations/26744463</a>   |
| 1719 | <i>Eudynamys scolopaceus</i> | Western Koel | 2021/12/22 | 1 | 0 | 22.55749813 | 88.29172156  | <a href="https://www.inaturalist.org/observations/104274288">https://www.inaturalist.org/observations/104274288</a> |
| 1720 | <i>Eudynamys scolopaceus</i> | Western Koel | 2019/12/28 | 1 | 0 | 22.55866710 | 88.29053285  | <a href="https://www.inaturalist.org/observations/48603456">https://www.inaturalist.org/observations/48603456</a>   |
| 1721 | <i>Eudynamys scolopaceus</i> | Western Koel | 2022/3/28  | 1 | 0 | 22.56186133 | 114.07885290 | <a href="https://www.inaturalist.org/observations/111296899">https://www.inaturalist.org/observations/111296899</a> |
| 1722 | <i>Eudynamys scolopaceus</i> | Western Koel | 2022/5/13  | 1 | 0 | 22.56736663 | 114.08170950 | <a href="https://www.inaturalist.org/observations/116816209">https://www.inaturalist.org/observations/116816209</a> |
| 1723 | <i>Eudynamys scolopaceus</i> | Western Koel | 2021/8/8   | 2 | 0 | 22.56760794 | 114.12291010 | <a href="https://www.inaturalist.org/observations/90395459">https://www.inaturalist.org/observations/90395459</a>   |
| 1724 | <i>Eudynamys scolopaceus</i> | Western Koel | 2020/4/18  | 1 | 0 | 22.56760800 | 114.12291000 | <a href="https://www.inaturalist.org/observations/77614853">https://www.inaturalist.org/observations/77614853</a>   |

|      |                              |              |            |   |   |             |              |                                                                                                                     |
|------|------------------------------|--------------|------------|---|---|-------------|--------------|---------------------------------------------------------------------------------------------------------------------|
| 1725 | <i>Eudynamys scolopaceus</i> | Western Koel | 2020/5/13  | 1 | 0 | 22.57292373 | 113.96869820 | <a href="https://www.inaturalist.org/observations/46258966">https://www.inaturalist.org/observations/46258966</a>   |
| 1726 | <i>Eudynamys scolopaceus</i> | Western Koel | 2020/3/1   | 3 | 0 | 22.57614096 | 88.30433864  | <a href="https://www.inaturalist.org/observations/64940962">https://www.inaturalist.org/observations/64940962</a>   |
| 1727 | <i>Eudynamys scolopaceus</i> | Western Koel | 2021/3/15  | 2 | 0 | 22.57954100 | 88.25541400  | <a href="https://www.inaturalist.org/observations/71297732">https://www.inaturalist.org/observations/71297732</a>   |
| 1728 | <i>Eudynamys scolopaceus</i> | Western Koel | 2020/2/15  | 3 | 0 | 22.57995189 | 88.30843437  | <a href="https://www.inaturalist.org/observations/64940846">https://www.inaturalist.org/observations/64940846</a>   |
| 1729 | <i>Eudynamys scolopaceus</i> | Western Koel | 2021/3/15  | 2 | 0 | 22.58144302 | 88.25936231  | <a href="https://www.inaturalist.org/observations/71300592">https://www.inaturalist.org/observations/71300592</a>   |
| 1730 | <i>Eudynamys scolopaceus</i> | Western Koel | 2022/2/8   | 2 | 0 | 22.58235397 | 88.28408197  | <a href="https://www.inaturalist.org/observations/106371927">https://www.inaturalist.org/observations/106371927</a> |
| 1731 | <i>Eudynamys scolopaceus</i> | Western Koel | 2021/3/15  | 1 | 0 | 22.58286952 | 88.26090729  | <a href="https://www.inaturalist.org/observations/71300590">https://www.inaturalist.org/observations/71300590</a>   |
| 1732 | <i>Eudynamys scolopaceus</i> | Western Koel | 2021/1/25  | 1 | 0 | 22.58738712 | 88.41487600  | <a href="https://www.inaturalist.org/observations/69797162">https://www.inaturalist.org/observations/69797162</a>   |
| 1733 | <i>Eudynamys scolopaceus</i> | Western Koel | 2022/2/27  | 1 | 0 | 22.58897681 | 114.02356380 | <a href="https://www.inaturalist.org/observations/107512708">https://www.inaturalist.org/observations/107512708</a> |
| 1734 | <i>Eudynamys scolopaceus</i> | Western Koel | 2022/2/3   | 2 | 0 | 22.60907333 | 88.46399500  | <a href="https://www.inaturalist.org/observations/107094800">https://www.inaturalist.org/observations/107094800</a> |
| 1735 | <i>Eudynamys scolopaceus</i> | Western Koel | 2019/2/16  | 6 | 0 | 22.61425445 | 88.38747606  | <a href="https://www.inaturalist.org/observations/20396542">https://www.inaturalist.org/observations/20396542</a>   |
| 1736 | <i>Eudynamys scolopaceus</i> | Western Koel | 2021/4/5   | 2 | 0 | 22.62015305 | 73.45790841  | <a href="https://www.inaturalist.org/observations/97887925">https://www.inaturalist.org/observations/97887925</a>   |
| 1737 | <i>Eudynamys scolopaceus</i> | Western Koel | 2021/5/7   | 2 | 0 | 22.62015305 | 73.45790841  | <a href="https://www.inaturalist.org/observations/97887972">https://www.inaturalist.org/observations/97887972</a>   |
| 1738 | <i>Eudynamys scolopaceus</i> | Western Koel | 2022/2/27  | 1 | 0 | 22.62022000 | 73.45802667  | <a href="https://www.inaturalist.org/observations/120118654">https://www.inaturalist.org/observations/120118654</a> |
| 1739 | <i>Eudynamys scolopaceus</i> | Western Koel | 2022/2/11  | 2 | 0 | 22.62023333 | 73.45791667  | <a href="https://www.inaturalist.org/observations/120502527">https://www.inaturalist.org/observations/120502527</a> |
| 1740 | <i>Eudynamys scolopaceus</i> | Western Koel | 2022/1/30  | 4 | 0 | 22.62029333 | 73.45835667  | <a href="https://www.inaturalist.org/observations/120510455">https://www.inaturalist.org/observations/120510455</a> |
| 1741 | <i>Eudynamys scolopaceus</i> | Western Koel | 2022/1/15  | 5 | 0 | 22.62050167 | 73.45851167  | <a href="https://www.inaturalist.org/observations/120665016">https://www.inaturalist.org/observations/120665016</a> |
| 1742 | <i>Eudynamys scolopaceus</i> | Western Koel | 2022/1/28  | 1 | 0 | 22.62050833 | 73.45898667  | <a href="https://www.inaturalist.org/observations/120510424">https://www.inaturalist.org/observations/120510424</a> |
| 1743 | <i>Eudynamys scolopaceus</i> | Western Koel | 2022/1/15  | 4 | 0 | 22.62058167 | 73.45882167  | <a href="https://www.inaturalist.org/observations/120664997">https://www.inaturalist.org/observations/120664997</a> |
| 1744 | <i>Eudynamys scolopaceus</i> | Western Koel | 2021/9/19  | 4 | 0 | 22.62059500 | 73.45845667  | <a href="https://www.inaturalist.org/observations/122171492">https://www.inaturalist.org/observations/122171492</a> |
| 1745 | <i>Eudynamys scolopaceus</i> | Western Koel | 2021/12/10 | 1 | 0 | 22.62476678 | 88.41220837  | <a href="https://www.inaturalist.org/observations/102798398">https://www.inaturalist.org/observations/102798398</a> |
| 1746 | <i>Eudynamys scolopaceus</i> | Western Koel | 2021/10/28 | 1 | 0 | 22.66836452 | 85.62478099  | <a href="https://www.inaturalist.org/observations/99643609">https://www.inaturalist.org/observations/99643609</a>   |
| 1747 | <i>Eudynamys scolopaceus</i> | Western Koel | 2018/3/11  | 4 | 0 | 22.66855687 | 88.35944233  | <a href="https://www.inaturalist.org/observations/25430287">https://www.inaturalist.org/observations/25430287</a>   |

|      |                              |              |            |   |   |             |              |                                                                                                                     |
|------|------------------------------|--------------|------------|---|---|-------------|--------------|---------------------------------------------------------------------------------------------------------------------|
| 1748 | <i>Eudynamys scolopaceus</i> | Western Koel | 2020/12/20 | 2 | 0 | 22.68024400 | 88.31892600  | <a href="https://www.inaturalist.org/observations/66907057">https://www.inaturalist.org/observations/66907057</a>   |
| 1749 | <i>Eudynamys scolopaceus</i> | Western Koel | 2020/5/11  | 1 | 0 | 22.68393472 | 88.43342631  | <a href="https://www.inaturalist.org/observations/56520256">https://www.inaturalist.org/observations/56520256</a>   |
| 1750 | <i>Eudynamys scolopaceus</i> | Western Koel | 2020/12/13 | 2 | 0 | 22.68577605 | 88.32132340  | <a href="https://www.inaturalist.org/observations/66576894">https://www.inaturalist.org/observations/66576894</a>   |
| 1751 | <i>Eudynamys scolopaceus</i> | Western Koel | 2014/7/16  | 1 | 0 | 22.71634460 | 114.24530180 | <a href="https://www.inaturalist.org/observations/116452341">https://www.inaturalist.org/observations/116452341</a> |
| 1752 | <i>Eudynamys scolopaceus</i> | Western Koel | 2021/12/31 | 2 | 0 | 22.71827022 | 88.37803200  | <a href="https://www.inaturalist.org/observations/104750408">https://www.inaturalist.org/observations/104750408</a> |
| 1753 | <i>Eudynamys scolopaceus</i> | Western Koel | 2021/4/19  | 1 | 0 | 22.72684052 | 115.34918160 | <a href="https://www.inaturalist.org/observations/80085043">https://www.inaturalist.org/observations/80085043</a>   |
| 1754 | <i>Eudynamys scolopaceus</i> | Western Koel | 2019/5/5   | 5 | 0 | 22.75590862 | 72.53905300  | <a href="https://www.inaturalist.org/observations/24575501">https://www.inaturalist.org/observations/24575501</a>   |
| 1755 | <i>Eudynamys scolopaceus</i> | Western Koel | 2020/10/12 | 1 | 0 | 22.79246317 | 88.29596043  | <a href="https://www.inaturalist.org/observations/97994016">https://www.inaturalist.org/observations/97994016</a>   |
| 1756 | <i>Eudynamys scolopaceus</i> | Western Koel | 2020/4/24  | 1 | 0 | 22.81954191 | 86.16863374  | <a href="https://www.inaturalist.org/observations/44630668">https://www.inaturalist.org/observations/44630668</a>   |
| 1757 | <i>Eudynamys scolopaceus</i> | Western Koel | 2005/9/23  | 2 | 0 | 22.83284513 | 69.34588286  | <a href="https://www.inaturalist.org/observations/66175347">https://www.inaturalist.org/observations/66175347</a>   |
| 1758 | <i>Eudynamys scolopaceus</i> | Western Koel | 2019/6/22  | 2 | 0 | 22.83799362 | 88.62138367  | <a href="https://www.inaturalist.org/observations/27487584">https://www.inaturalist.org/observations/27487584</a>   |
| 1759 | <i>Eudynamys scolopaceus</i> | Western Koel | 2019/3/4   | 5 | 0 | 22.87299801 | 86.92917826  | <a href="https://www.inaturalist.org/observations/20943823">https://www.inaturalist.org/observations/20943823</a>   |
| 1760 | <i>Eudynamys scolopaceus</i> | Western Koel | 2019/4/29  | 2 | 0 | 22.89636060 | 113.88970430 | <a href="https://www.inaturalist.org/observations/23903107">https://www.inaturalist.org/observations/23903107</a>   |
| 1761 | <i>Eudynamys scolopaceus</i> | Western Koel | 2021/6/14  | 2 | 0 | 22.91438726 | 88.38782753  | <a href="https://www.inaturalist.org/observations/82928949">https://www.inaturalist.org/observations/82928949</a>   |
| 1762 | <i>Eudynamys scolopaceus</i> | Western Koel | 2021/6/10  | 1 | 0 | 22.91444360 | 88.38793040  | <a href="https://www.inaturalist.org/observations/82357269">https://www.inaturalist.org/observations/82357269</a>   |
| 1763 | <i>Eudynamys scolopaceus</i> | Western Koel | 2022/6/10  | 3 | 0 | 22.91777131 | 77.72229385  | <a href="https://www.inaturalist.org/observations/124769968">https://www.inaturalist.org/observations/124769968</a> |
| 1764 | <i>Eudynamys scolopaceus</i> | Western Koel | 2021/11/13 | 1 | 0 | 22.97936500 | 86.85173197  | <a href="https://www.inaturalist.org/observations/100974251">https://www.inaturalist.org/observations/100974251</a> |
| 1765 | <i>Eudynamys scolopaceus</i> | Western Koel | 2020/6/23  | 1 | 0 | 22.98851233 | 87.00703441  | <a href="https://www.inaturalist.org/observations/51196147">https://www.inaturalist.org/observations/51196147</a>   |
| 1766 | <i>Eudynamys scolopaceus</i> | Western Koel | 2020/6/23  | 1 | 0 | 22.98851233 | 87.00703441  | <a href="https://www.inaturalist.org/observations/51196148">https://www.inaturalist.org/observations/51196148</a>   |
| 1767 | <i>Eudynamys scolopaceus</i> | Western Koel | 2018/1/27  | 6 | 0 | 22.98877100 | 87.00653406  | <a href="https://www.inaturalist.org/observations/26807503">https://www.inaturalist.org/observations/26807503</a>   |
| 1768 | <i>Eudynamys scolopaceus</i> | Western Koel | 2018/4/16  | 2 | 0 | 22.98877100 | 87.01056810  | <a href="https://www.inaturalist.org/observations/41042607">https://www.inaturalist.org/observations/41042607</a>   |
| 1769 | <i>Eudynamys scolopaceus</i> | Western Koel | 2018/1/15  | 4 | 0 | 22.98892366 | 87.00639054  | <a href="https://www.inaturalist.org/observations/13223908">https://www.inaturalist.org/observations/13223908</a>   |
| 1770 | <i>Eudynamys scolopaceus</i> | Western Koel | 2020/4/16  | 5 | 0 | 22.98918582 | 87.00715633  | <a href="https://www.inaturalist.org/observations/42942133">https://www.inaturalist.org/observations/42942133</a>   |

|      |                                      |              |            |   |   |             |              |                                                                                                                     |
|------|--------------------------------------|--------------|------------|---|---|-------------|--------------|---------------------------------------------------------------------------------------------------------------------|
| 1771 | Eudynamys scolopaceus                | Western Koel | 2018/1/15  | 1 | 0 | 22.98922533 | 87.00717779  | <a href="https://www.inaturalist.org/observations/50670036">https://www.inaturalist.org/observations/50670036</a>   |
| 1772 | Eudynamys scolopaceus                | Western Koel | 2020/11/15 | 3 | 0 | 22.99191567 | 83.03932462  | <a href="https://www.inaturalist.org/observations/79671692">https://www.inaturalist.org/observations/79671692</a>   |
| 1773 | Eudynamys scolopaceus                | Western Koel | 2018/6/2   | 2 | 0 | 22.99396300 | 120.23637700 | <a href="https://www.inaturalist.org/observations/14517426">https://www.inaturalist.org/observations/14517426</a>   |
| 1774 | Eudynamys scolopaceus                | Western Koel | 2018/6/2   | 2 | 0 | 22.99420100 | 120.23639800 | <a href="https://www.inaturalist.org/observations/17773097">https://www.inaturalist.org/observations/17773097</a>   |
| 1775 | Eudynamys scolopaceus                | Western Koel | 2020/3/22  | 1 | 0 | 23.00253283 | 87.59008985  | <a href="https://www.inaturalist.org/observations/40484168">https://www.inaturalist.org/observations/40484168</a>   |
| 1776 | Eudynamys scolopaceus                | Western Koel | 2020/4/9   | 1 | 0 | 23.00255289 | 87.59132467  | <a href="https://www.inaturalist.org/observations/41759490">https://www.inaturalist.org/observations/41759490</a>   |
| 1777 | Eudynamys scolopaceus                | Western Koel | 2022/1/8   | 2 | 0 | 23.00680555 | 72.56683333  | <a href="https://www.inaturalist.org/observations/104590473">https://www.inaturalist.org/observations/104590473</a> |
| 1778 | Eudynamys scolopaceus                | Western Koel | 2020/5/20  | 2 | 0 | 23.01709630 | 72.53897520  | <a href="https://www.inaturalist.org/observations/46590715">https://www.inaturalist.org/observations/46590715</a>   |
| 1779 | Eudynamys scolopaceus                | Western Koel | 2020/5/20  | 1 | 0 | 23.01749290 | 72.53890030  | <a href="https://www.inaturalist.org/observations/46592607">https://www.inaturalist.org/observations/46592607</a>   |
| 1780 | Eudynamys scolopaceus<br>scolopaceus | Western Koel | 2021/5/20  | 1 | 0 | 23.02330274 | 72.46816892  | <a href="https://www.inaturalist.org/observations/79491099">https://www.inaturalist.org/observations/79491099</a>   |
| 1781 | Eudynamys scolopaceus                | Western Koel | 2020/11/1  | 6 | 0 | 23.02416073 | 72.53596607  | <a href="https://www.inaturalist.org/observations/63935868">https://www.inaturalist.org/observations/63935868</a>   |
| 1782 | Eudynamys scolopaceus                | Western Koel | 2019/7/12  | 8 | 0 | 23.02466389 | 72.55970278  | <a href="https://www.inaturalist.org/observations/28736155">https://www.inaturalist.org/observations/28736155</a>   |
| 1783 | Eudynamys scolopaceus                | Western Koel | 2022/4/25  | 1 | 0 | 23.03706500 | 72.55356333  | <a href="https://www.inaturalist.org/observations/112812899">https://www.inaturalist.org/observations/112812899</a> |
| 1784 | Eudynamys scolopaceus                | Western Koel | 2022/4/25  | 1 | 0 | 23.03707380 | 72.55344790  | <a href="https://www.inaturalist.org/observations/112813370">https://www.inaturalist.org/observations/112813370</a> |
| 1785 | Eudynamys scolopaceus                | Western Koel | 2022/4/25  | 2 | 0 | 23.03709497 | 72.55327598  | <a href="https://www.inaturalist.org/observations/112813419">https://www.inaturalist.org/observations/112813419</a> |
| 1786 | Eudynamys scolopaceus                | Western Koel | 2018/4/27  | 6 | 0 | 23.03922940 | 72.55590440  | <a href="https://www.inaturalist.org/observations/11471597">https://www.inaturalist.org/observations/11471597</a>   |
| 1787 | Eudynamys scolopaceus                | Western Koel | 2021/2/14  | 2 | 0 | 23.03939131 | 72.44818560  | <a href="https://www.inaturalist.org/observations/69672099">https://www.inaturalist.org/observations/69672099</a>   |
| 1788 | Eudynamys scolopaceus                | Western Koel | 2022/4/20  | 3 | 0 | 23.04271833 | 72.54908500  | <a href="https://www.inaturalist.org/observations/112124243">https://www.inaturalist.org/observations/112124243</a> |
| 1789 | Eudynamys scolopaceus                | Western Koel | 2019/5/5   | 3 | 0 | 23.07377842 | 72.22305927  | <a href="https://www.inaturalist.org/observations/24575573">https://www.inaturalist.org/observations/24575573</a>   |
| 1790 | Eudynamys scolopaceus                | Western Koel | 2021/8/19  | 2 | 0 | 23.11674294 | 72.64048241  | <a href="https://www.inaturalist.org/observations/91741814">https://www.inaturalist.org/observations/91741814</a>   |
| 1791 | Eudynamys scolopaceus                | Western Koel | 2020/4/19  | 2 | 0 | 23.13304102 | 72.54672565  | <a href="https://www.inaturalist.org/observations/42540739">https://www.inaturalist.org/observations/42540739</a>   |
| 1792 | Eudynamys scolopaceus                | Western Koel | 2021/1/3   | 1 | 0 | 23.13732658 | 72.40658104  | <a href="https://www.inaturalist.org/observations/71558200">https://www.inaturalist.org/observations/71558200</a>   |
| 1793 | Eudynamys scolopaceus                | Western Koel | 2020/1/5   | 4 | 0 | 23.14172333 | 72.41176667  | <a href="https://www.inaturalist.org/observations/37342482">https://www.inaturalist.org/observations/37342482</a>   |

|      |                                      |              |            |   |   |             |              |                                                                                                                     |
|------|--------------------------------------|--------------|------------|---|---|-------------|--------------|---------------------------------------------------------------------------------------------------------------------|
| 1794 | Eudynamys scolopaceus                | Western Koel | 2022/4/7   | 1 | 0 | 23.14180899 | 113.29044490 | <a href="https://www.inaturalist.org/observations/110631950">https://www.inaturalist.org/observations/110631950</a> |
| 1795 | Eudynamys scolopaceus                | Western Koel | 2018/9/27  | 5 | 0 | 23.16606740 | 88.09619486  | <a href="https://www.inaturalist.org/observations/26540575">https://www.inaturalist.org/observations/26540575</a>   |
| 1796 | Eudynamys scolopaceus                | Western Koel | 2021/12/19 | 3 | 0 | 23.16903524 | 72.57122420  | <a href="https://www.inaturalist.org/observations/103359463">https://www.inaturalist.org/observations/103359463</a> |
| 1797 | Eudynamys scolopaceus                | Western Koel | 2022/2/6   | 1 | 0 | 23.18666472 | 77.42668457  | <a href="https://www.inaturalist.org/observations/106237580">https://www.inaturalist.org/observations/106237580</a> |
| 1798 | Eudynamys scolopaceus                | Western Koel | 2022/4/9   | 3 | 0 | 23.18666472 | 77.42668457  | <a href="https://www.inaturalist.org/observations/110803120">https://www.inaturalist.org/observations/110803120</a> |
| 1799 | Eudynamys scolopaceus<br>scolopaceus | Western Koel | 2018/6/10  | 1 | 0 | 23.18921501 | 77.42357992  | <a href="https://www.inaturalist.org/observations/111496815">https://www.inaturalist.org/observations/111496815</a> |
| 1800 | Eudynamys scolopaceus                | Western Koel | 2019/8/11  | 2 | 0 | 23.20547350 | 72.63300370  | <a href="https://www.inaturalist.org/observations/31052283">https://www.inaturalist.org/observations/31052283</a>   |
| 1801 | Eudynamys scolopaceus                | Western Koel | 2019/6/8   | 4 | 0 | 23.20551074 | 72.63316990  | <a href="https://www.inaturalist.org/observations/26665841">https://www.inaturalist.org/observations/26665841</a>   |
| 1802 | Eudynamys scolopaceus                | Western Koel | 2021/10/13 | 3 | 0 | 23.20675800 | 77.46016200  | <a href="https://www.inaturalist.org/observations/98685480">https://www.inaturalist.org/observations/98685480</a>   |
| 1803 | Eudynamys scolopaceus                | Western Koel | 2021/10/13 | 2 | 0 | 23.20675800 | 77.46016200  | <a href="https://www.inaturalist.org/observations/98686562">https://www.inaturalist.org/observations/98686562</a>   |
| 1804 | Eudynamys scolopaceus                | Western Koel | 2021/10/25 | 2 | 0 | 23.20675800 | 77.46016200  | <a href="https://www.inaturalist.org/observations/100852707">https://www.inaturalist.org/observations/100852707</a> |
| 1805 | Eudynamys scolopaceus                | Western Koel | 2021/11/9  | 1 | 0 | 23.20675800 | 77.46016200  | <a href="https://www.inaturalist.org/observations/102393427">https://www.inaturalist.org/observations/102393427</a> |
| 1806 | Eudynamys scolopaceus                | Western Koel | 2020/1/28  | 3 | 0 | 23.20704920 | 72.63359600  | <a href="https://www.inaturalist.org/observations/38254264">https://www.inaturalist.org/observations/38254264</a>   |
| 1807 | Eudynamys scolopaceus                | Western Koel | 2012/12/22 | 5 | 0 | 23.20759090 | 75.76467900  | <a href="https://www.inaturalist.org/observations/34000089">https://www.inaturalist.org/observations/34000089</a>   |
| 1808 | Eudynamys scolopaceus                | Western Koel | 2022/5/18  | 3 | 0 | 23.20944800 | 77.45817100  | <a href="https://www.inaturalist.org/observations/129802787">https://www.inaturalist.org/observations/129802787</a> |
| 1809 | Eudynamys scolopaceus                | Western Koel | 2021/6/6   | 1 | 0 | 23.21477745 | 113.35397920 | <a href="https://www.inaturalist.org/observations/81849173">https://www.inaturalist.org/observations/81849173</a>   |
| 1810 | Eudynamys scolopaceus                | Western Koel | 2020/12/26 | 2 | 0 | 23.22397660 | 87.89792480  | <a href="https://www.inaturalist.org/observations/67235366">https://www.inaturalist.org/observations/67235366</a>   |
| 1811 | Eudynamys scolopaceus                | Western Koel | 2020/12/26 | 2 | 0 | 23.22397660 | 87.89792480  | <a href="https://www.inaturalist.org/observations/70433858">https://www.inaturalist.org/observations/70433858</a>   |
| 1812 | Eudynamys scolopaceus                | Western Koel | 2022/1/3   | 1 | 0 | 23.22900900 | 77.36402600  | <a href="https://www.inaturalist.org/observations/104274735">https://www.inaturalist.org/observations/104274735</a> |
| 1813 | Eudynamys scolopaceus                | Western Koel | 2022/1/3   | 2 | 0 | 23.22900900 | 77.36402600  | <a href="https://www.inaturalist.org/observations/104274769">https://www.inaturalist.org/observations/104274769</a> |
| 1814 | Eudynamys scolopaceus                | Western Koel | 2021/5/17  | 2 | 0 | 23.23441438 | 87.87751637  | <a href="https://www.inaturalist.org/observations/79235006">https://www.inaturalist.org/observations/79235006</a>   |
| 1815 | Eudynamys scolopaceus                | Western Koel | 2021/1/24  | 1 | 0 | 23.23448246 | 87.87827611  | <a href="https://www.inaturalist.org/observations/68535051">https://www.inaturalist.org/observations/68535051</a>   |
| 1816 | Eudynamys scolopaceus                | Western Koel | 2022/1/23  | 2 | 0 | 23.23800000 | 77.34906900  | <a href="https://www.inaturalist.org/observations/107494663">https://www.inaturalist.org/observations/107494663</a> |

|      |                              |              |            |   |   |             |              |                                                                                                                     |
|------|------------------------------|--------------|------------|---|---|-------------|--------------|---------------------------------------------------------------------------------------------------------------------|
| 1817 | <i>Eudynamys scolopaceus</i> | Western Koel | 2020/2/19  | 3 | 0 | 23.23936970 | 87.05407050  | <a href="https://www.inaturalist.org/observations/38833777">https://www.inaturalist.org/observations/38833777</a>   |
| 1818 | <i>Eudynamys scolopaceus</i> | Western Koel | 2022/2/13  | 2 | 0 | 23.25337965 | 87.06567675  | <a href="https://www.inaturalist.org/observations/106660135">https://www.inaturalist.org/observations/106660135</a> |
| 1819 | <i>Eudynamys scolopaceus</i> | Western Koel | 2019/5/11  | 4 | 0 | 23.25576019 | 119.66902160 | <a href="https://www.inaturalist.org/observations/25792172">https://www.inaturalist.org/observations/25792172</a>   |
| 1820 | <i>Eudynamys scolopaceus</i> | Western Koel | 2019/5/18  | 3 | 0 | 23.32111168 | 82.52944183  | <a href="https://www.inaturalist.org/observations/41898203">https://www.inaturalist.org/observations/41898203</a>   |
| 1821 | <i>Eudynamys scolopaceus</i> | Western Koel | 2021/3/31  | 1 | 0 | 23.32977480 | 77.76112230  | <a href="https://www.inaturalist.org/observations/72523414">https://www.inaturalist.org/observations/72523414</a>   |
| 1822 | <i>Eudynamys scolopaceus</i> | Western Koel | 2021/6/21  | 3 | 0 | 23.34034478 | 77.77864303  | <a href="https://www.inaturalist.org/observations/84024598">https://www.inaturalist.org/observations/84024598</a>   |
| 1823 | <i>Eudynamys scolopaceus</i> | Western Koel | 2021/4/17  | 1 | 0 | 23.34143638 | 77.77983494  | <a href="https://www.inaturalist.org/observations/74395912">https://www.inaturalist.org/observations/74395912</a>   |
| 1824 | <i>Eudynamys scolopaceus</i> | Western Koel | 2012/10/27 | 1 | 0 | 23.46182050 | 71.28742090  | <a href="https://www.inaturalist.org/observations/41213667">https://www.inaturalist.org/observations/41213667</a>   |
| 1825 | <i>Eudynamys scolopaceus</i> | Western Koel | 2012/10/27 | 2 | 0 | 23.46182050 | 71.28742090  | <a href="https://www.inaturalist.org/observations/41213669">https://www.inaturalist.org/observations/41213669</a>   |
| 1826 | <i>Eudynamys scolopaceus</i> | Western Koel | 2012/10/27 | 1 | 0 | 23.46182050 | 71.28742090  | <a href="https://www.inaturalist.org/observations/41213670">https://www.inaturalist.org/observations/41213670</a>   |
| 1827 | <i>Eudynamys scolopaceus</i> | Western Koel | 2012/10/27 | 1 | 0 | 23.46182050 | 71.28742090  | <a href="https://www.inaturalist.org/observations/41213671">https://www.inaturalist.org/observations/41213671</a>   |
| 1828 | <i>Eudynamys scolopaceus</i> | Western Koel | 2019/12/16 | 2 | 0 | 23.46182050 | 71.28742090  | <a href="https://www.inaturalist.org/observations/56614110">https://www.inaturalist.org/observations/56614110</a>   |
| 1829 | <i>Eudynamys scolopaceus</i> | Western Koel | 2016/12/17 | 3 | 0 | 23.46182050 | 71.28742090  | <a href="https://www.inaturalist.org/observations/91124767">https://www.inaturalist.org/observations/91124767</a>   |
| 1830 | <i>Eudynamys scolopaceus</i> | Western Koel | 2019/4/7   | 3 | 0 | 23.47233001 | 87.30178515  | <a href="https://www.inaturalist.org/observations/22135933">https://www.inaturalist.org/observations/22135933</a>   |
| 1831 | <i>Eudynamys scolopaceus</i> | Western Koel | 2021/2/21  | 2 | 0 | 23.47902769 | 116.38657830 | <a href="https://www.inaturalist.org/observations/71809912">https://www.inaturalist.org/observations/71809912</a>   |
| 1832 | <i>Eudynamys scolopaceus</i> | Western Koel | 2015/1/10  | 6 | 0 | 23.49954800 | 87.30467000  | <a href="http://www.inaturalist.org/observations/1175177">http://www.inaturalist.org/observations/1175177</a>       |
| 1833 | <i>Eudynamys scolopaceus</i> | Western Koel | 2016/12/7  | 6 | 0 | 23.49958700 | 87.30488500  | <a href="http://www.inaturalist.org/observations/4755622">http://www.inaturalist.org/observations/4755622</a>       |
| 1834 | <i>Eudynamys scolopaceus</i> | Western Koel | 2013/6/26  | 6 | 0 | 23.49958700 | 87.30531400  | <a href="http://www.inaturalist.org/observations/609949">http://www.inaturalist.org/observations/609949</a>         |
| 1835 | <i>Eudynamys scolopaceus</i> | Western Koel | 2019/3/17  | 4 | 0 | 23.51517414 | 87.37993222  | <a href="https://www.inaturalist.org/observations/21319287">https://www.inaturalist.org/observations/21319287</a>   |
| 1836 | <i>Eudynamys scolopaceus</i> | Western Koel | 2016/8/15  | 4 | 0 | 23.52044430 | 87.31192270  | <a href="https://www.inaturalist.org/observations/6110194">https://www.inaturalist.org/observations/6110194</a>     |
| 1837 | <i>Eudynamys scolopaceus</i> | Western Koel | 2022/1/9   | 3 | 0 | 23.63108900 | 86.96042900  | <a href="https://www.inaturalist.org/observations/104649703">https://www.inaturalist.org/observations/104649703</a> |
| 1838 | <i>Eudynamys scolopaceus</i> | Western Koel | 2021/3/27  | 1 | 0 | 23.73029859 | 116.23121150 | <a href="https://www.inaturalist.org/observations/72170484">https://www.inaturalist.org/observations/72170484</a>   |
| 1839 | <i>Eudynamys scolopaceus</i> | Western Koel | 2016/10/13 | 2 | 0 | 24.07827454 | 88.69165298  | <a href="https://www.inaturalist.org/observations/117567383">https://www.inaturalist.org/observations/117567383</a> |



|      |                              |              |            |   |   |             |              |                                                                                                                     |
|------|------------------------------|--------------|------------|---|---|-------------|--------------|---------------------------------------------------------------------------------------------------------------------|
| 1840 | <i>Eudynamys scolopaceus</i> | Western Koel | 2016/12/25 | 6 | 0 | 24.13509700 | 92.33448900  | <a href="https://www.inaturalist.org/observations/4860079">https://www.inaturalist.org/observations/4860079</a>     |
| 1841 | <i>Eudynamys scolopaceus</i> | Western Koel | 2019/3/10  | 3 | 0 | 24.35267420 | 92.34481540  | <a href="https://www.inaturalist.org/observations/21692601">https://www.inaturalist.org/observations/21692601</a>   |
| 1842 | <i>Eudynamys scolopaceus</i> | Western Koel | 2019/3/10  | 3 | 0 | 24.35267420 | 92.34481540  | <a href="https://www.inaturalist.org/observations/21692603">https://www.inaturalist.org/observations/21692603</a>   |
| 1843 | <i>Eudynamys scolopaceus</i> | Western Koel | 2019/8/22  | 1 | 0 | 24.39325000 | 118.31469670 | <a href="https://www.inaturalist.org/observations/31289400">https://www.inaturalist.org/observations/31289400</a>   |
| 1844 | <i>Eudynamys scolopaceus</i> | Western Koel | 2011/6/2   | 1 | 0 | 24.39543436 | 118.31542650 | <a href="https://www.inaturalist.org/observations/55863918">https://www.inaturalist.org/observations/55863918</a>   |
| 1845 | <i>Eudynamys scolopaceus</i> | Western Koel | 2021/4/4   | 1 | 0 | 24.42082653 | 118.24490910 | <a href="https://www.inaturalist.org/observations/105555651">https://www.inaturalist.org/observations/105555651</a> |
| 1846 | <i>Eudynamys scolopaceus</i> | Western Koel | 2020/2/29  | 3 | 0 | 24.42563331 | 92.33881554  | <a href="https://www.inaturalist.org/observations/46585406">https://www.inaturalist.org/observations/46585406</a>   |
| 1847 | <i>Eudynamys scolopaceus</i> | Western Koel | 2020/2/29  | 3 | 0 | 24.42563331 | 92.33881554  | <a href="https://www.inaturalist.org/observations/46585407">https://www.inaturalist.org/observations/46585407</a>   |
| 1848 | <i>Eudynamys scolopaceus</i> | Western Koel | 2021/3/25  | 1 | 0 | 24.42780257 | 92.33426213  | <a href="https://www.inaturalist.org/observations/74841875">https://www.inaturalist.org/observations/74841875</a>   |
| 1849 | <i>Eudynamys scolopaceus</i> | Western Koel | 2020/4/3   | 2 | 0 | 24.43143082 | 92.32868195  | <a href="https://www.inaturalist.org/observations/41289214">https://www.inaturalist.org/observations/41289214</a>   |
| 1850 | <i>Eudynamys scolopaceus</i> | Western Koel | 2019/10/20 | 5 | 0 | 24.43148994 | 92.33231354  | <a href="https://www.inaturalist.org/observations/34644213">https://www.inaturalist.org/observations/34644213</a>   |
| 1851 | <i>Eudynamys scolopaceus</i> | Western Koel | 2013/3/6   | 6 | 0 | 24.43201970 | 92.33068940  | <a href="http://www.inaturalist.org/observations/214771">http://www.inaturalist.org/observations/214771</a>         |
| 1852 | <i>Eudynamys scolopaceus</i> | Western Koel | 2019/2/19  | 4 | 0 | 24.43201970 | 92.33068940  | <a href="https://www.inaturalist.org/observations/21018970">https://www.inaturalist.org/observations/21018970</a>   |
| 1853 | <i>Eudynamys scolopaceus</i> | Western Koel | 2021/4/3   | 2 | 0 | 24.43201971 | 92.33068943  | <a href="https://www.inaturalist.org/observations/73077474">https://www.inaturalist.org/observations/73077474</a>   |
| 1854 | <i>Eudynamys scolopaceus</i> | Western Koel | 2013/3/6   | 6 | 0 | 24.43202000 | 92.33068900  | <a href="http://www.inaturalist.org/observations/214714">http://www.inaturalist.org/observations/214714</a>         |
| 1855 | <i>Eudynamys scolopaceus</i> | Western Koel | 2017/3/28  | 5 | 0 | 24.43202000 | 92.33068900  | <a href="https://www.inaturalist.org/observations/5672627">https://www.inaturalist.org/observations/5672627</a>     |
| 1856 | <i>Eudynamys scolopaceus</i> | Western Koel | 2010/7/3   | 1 | 0 | 24.43202000 | 92.33068900  | <a href="https://www.inaturalist.org/observations/103477020">https://www.inaturalist.org/observations/103477020</a> |
| 1857 | <i>Eudynamys scolopaceus</i> | Western Koel | 2010/8/27  | 2 | 0 | 24.43202000 | 92.33068900  | <a href="https://www.inaturalist.org/observations/103514621">https://www.inaturalist.org/observations/103514621</a> |
| 1858 | <i>Eudynamys scolopaceus</i> | Western Koel | 2010/8/27  | 1 | 0 | 24.43202000 | 92.33068900  | <a href="https://www.inaturalist.org/observations/103514873">https://www.inaturalist.org/observations/103514873</a> |
| 1859 | <i>Eudynamys scolopaceus</i> | Western Koel | 2010/9/6   | 2 | 0 | 24.43202000 | 92.33068900  | <a href="https://www.inaturalist.org/observations/103518600">https://www.inaturalist.org/observations/103518600</a> |
| 1860 | <i>Eudynamys scolopaceus</i> | Western Koel | 2010/10/4  | 1 | 0 | 24.43202000 | 92.33068900  | <a href="https://www.inaturalist.org/observations/103528474">https://www.inaturalist.org/observations/103528474</a> |
| 1861 | <i>Eudynamys scolopaceus</i> | Western Koel | 2010/10/4  | 1 | 0 | 24.43202000 | 92.33068900  | <a href="https://www.inaturalist.org/observations/103528491">https://www.inaturalist.org/observations/103528491</a> |
| 1862 | <i>Eudynamys scolopaceus</i> | Western Koel | 2010/10/5  | 1 | 0 | 24.43202000 | 92.33068900  | <a href="https://www.inaturalist.org/observations/103529079">https://www.inaturalist.org/observations/103529079</a> |

|      |                              |              |            |   |   |             |              |                                                                                                                     |
|------|------------------------------|--------------|------------|---|---|-------------|--------------|---------------------------------------------------------------------------------------------------------------------|
| 1863 | <i>Eudynamys scolopaceus</i> | Western Koel | 2010/10/5  | 1 | 0 | 24.43202000 | 92.33068900  | <a href="https://www.inaturalist.org/observations/103529096">https://www.inaturalist.org/observations/103529096</a> |
| 1864 | <i>Eudynamys scolopaceus</i> | Western Koel | 2011/8/10  | 1 | 0 | 24.43202000 | 92.33068900  | <a href="https://www.inaturalist.org/observations/103639089">https://www.inaturalist.org/observations/103639089</a> |
| 1865 | <i>Eudynamys scolopaceus</i> | Western Koel | 2011/8/13  | 1 | 0 | 24.43202000 | 92.33068900  | <a href="https://www.inaturalist.org/observations/103670043">https://www.inaturalist.org/observations/103670043</a> |
| 1866 | <i>Eudynamys scolopaceus</i> | Western Koel | 2019/10/30 | 3 | 0 | 24.43384933 | 92.32847595  | <a href="https://www.inaturalist.org/observations/35089484">https://www.inaturalist.org/observations/35089484</a>   |
| 1867 | <i>Eudynamys scolopaceus</i> | Western Koel | 2019/10/1  | 2 | 0 | 24.43392754 | 92.32594299  | <a href="https://www.inaturalist.org/observations/34045971">https://www.inaturalist.org/observations/34045971</a>   |
| 1868 | <i>Eudynamys scolopaceus</i> | Western Koel | 2018/10/15 | 4 | 0 | 24.43424300 | 92.32965400  | <a href="https://www.inaturalist.org/observations/19436117">https://www.inaturalist.org/observations/19436117</a>   |
| 1869 | <i>Eudynamys scolopaceus</i> | Western Koel | 2019/10/2  | 3 | 0 | 24.43433680 | 92.32977237  | <a href="https://www.inaturalist.org/observations/34726150">https://www.inaturalist.org/observations/34726150</a>   |
| 1870 | <i>Eudynamys scolopaceus</i> | Western Koel | 2020/3/10  | 0 | 0 | 24.43504962 | 92.32293248  | <a href="https://www.inaturalist.org/observations/39793376">https://www.inaturalist.org/observations/39793376</a>   |
| 1871 | <i>Eudynamys scolopaceus</i> | Western Koel | 2022/7/17  | 2 | 0 | 24.44163333 | 118.45449000 | <a href="https://www.inaturalist.org/observations/126653697">https://www.inaturalist.org/observations/126653697</a> |
| 1872 | <i>Eudynamys scolopaceus</i> | Western Koel | 2022/7/16  | 1 | 0 | 24.44171736 | 118.09722300 | <a href="https://www.inaturalist.org/observations/126408302">https://www.inaturalist.org/observations/126408302</a> |
| 1873 | <i>Eudynamys scolopaceus</i> | Western Koel | 2021/7/3   | 1 | 0 | 24.44239152 | 118.09807640 | <a href="https://www.inaturalist.org/observations/112968735">https://www.inaturalist.org/observations/112968735</a> |
| 1874 | <i>Eudynamys scolopaceus</i> | Western Koel | 2018/4/23  | 1 | 0 | 24.44292563 | 118.34810940 | <a href="https://www.inaturalist.org/observations/15126750">https://www.inaturalist.org/observations/15126750</a>   |
| 1875 | <i>Eudynamys scolopaceus</i> | Western Koel | 2021/6/11  | 1 | 0 | 24.44369667 | 118.35270500 | <a href="https://www.inaturalist.org/observations/82533085">https://www.inaturalist.org/observations/82533085</a>   |
| 1876 | <i>Eudynamys scolopaceus</i> | Western Koel | 2018/4/23  | 2 | 0 | 24.44417583 | 118.35360260 | <a href="https://www.inaturalist.org/observations/15126752">https://www.inaturalist.org/observations/15126752</a>   |
| 1877 | <i>Eudynamys scolopaceus</i> | Western Koel | 2022/5/9   | 1 | 0 | 24.44537333 | 118.30980000 | <a href="https://www.inaturalist.org/observations/119558512">https://www.inaturalist.org/observations/119558512</a> |
| 1878 | <i>Eudynamys scolopaceus</i> | Western Koel | 2021/7/8   | 1 | 0 | 24.44554167 | 118.45287170 | <a href="https://www.inaturalist.org/observations/87098428">https://www.inaturalist.org/observations/87098428</a>   |
| 1879 | <i>Eudynamys scolopaceus</i> | Western Koel | 2020/4/29  | 1 | 0 | 24.44561000 | 118.31050670 | <a href="https://www.inaturalist.org/observations/46051403">https://www.inaturalist.org/observations/46051403</a>   |
| 1880 | <i>Eudynamys scolopaceus</i> | Western Koel | 2021/7/1   | 1 | 0 | 24.44593333 | 118.45183670 | <a href="https://www.inaturalist.org/observations/85315060">https://www.inaturalist.org/observations/85315060</a>   |
| 1881 | <i>Eudynamys scolopaceus</i> | Western Koel | 2019/6/8   | 1 | 0 | 24.44647020 | 118.44712000 | <a href="https://www.inaturalist.org/observations/93968363">https://www.inaturalist.org/observations/93968363</a>   |
| 1882 | <i>Eudynamys scolopaceus</i> | Western Koel | 2022/7/5   | 2 | 0 | 24.44647020 | 118.44712000 | <a href="https://www.inaturalist.org/observations/125038900">https://www.inaturalist.org/observations/125038900</a> |
| 1883 | <i>Eudynamys scolopaceus</i> | Western Koel | 2022/5/8   | 1 | 0 | 24.44647020 | 118.44712000 | <a href="https://www.inaturalist.org/observations/133068632">https://www.inaturalist.org/observations/133068632</a> |
| 1884 | <i>Eudynamys scolopaceus</i> | Western Koel | 2021/5/15  | 1 | 0 | 24.44660333 | 118.44874500 | <a href="https://www.inaturalist.org/observations/79362660">https://www.inaturalist.org/observations/79362660</a>   |
| 1885 | <i>Eudynamys scolopaceus</i> | Western Koel | 2022/6/21  | 1 | 0 | 24.44796792 | 118.39365740 | <a href="https://www.inaturalist.org/observations/123201113">https://www.inaturalist.org/observations/123201113</a> |

|      |                              |              |            |   |   |             |              |                                                                                                                     |
|------|------------------------------|--------------|------------|---|---|-------------|--------------|---------------------------------------------------------------------------------------------------------------------|
| 1886 | <i>Eudynamys scolopaceus</i> | Western Koel | 2011/6/2   | 1 | 0 | 24.44881164 | 118.37384690 | <a href="https://www.inaturalist.org/observations/55863960">https://www.inaturalist.org/observations/55863960</a>   |
| 1887 | <i>Eudynamys scolopaceus</i> | Western Koel | 2022/5/7   | 1 | 0 | 24.44919729 | 118.43938180 | <a href="https://www.inaturalist.org/observations/129507318">https://www.inaturalist.org/observations/129507318</a> |
| 1888 | <i>Eudynamys scolopaceus</i> | Western Koel | 2019/5/19  | 3 | 0 | 24.45148860 | 118.43790390 | <a href="https://www.inaturalist.org/observations/25556847">https://www.inaturalist.org/observations/25556847</a>   |
| 1889 | <i>Eudynamys scolopaceus</i> | Western Koel | 2019/5/19  | 4 | 0 | 24.45148860 | 118.43790390 | <a href="https://www.inaturalist.org/observations/25556848">https://www.inaturalist.org/observations/25556848</a>   |
| 1890 | <i>Eudynamys scolopaceus</i> | Western Koel | 2022/7/16  | 0 | 0 | 24.45183299 | 118.09895770 | <a href="https://www.inaturalist.org/observations/127483749">https://www.inaturalist.org/observations/127483749</a> |
| 1891 | <i>Eudynamys scolopaceus</i> | Western Koel | 2021/5/1   | 1 | 0 | 24.45561973 | 118.39675150 | <a href="https://www.inaturalist.org/observations/76841622">https://www.inaturalist.org/observations/76841622</a>   |
| 1892 | <i>Eudynamys scolopaceus</i> | Western Koel | 2020/5/16  | 1 | 0 | 24.46072378 | 118.30448180 | <a href="https://www.inaturalist.org/observations/46252706">https://www.inaturalist.org/observations/46252706</a>   |
| 1893 | <i>Eudynamys scolopaceus</i> | Western Koel | 2019/5/18  | 0 | 0 | 24.46230000 | 118.44280000 | <a href="https://www.inaturalist.org/observations/88203187">https://www.inaturalist.org/observations/88203187</a>   |
| 1894 | <i>Eudynamys scolopaceus</i> | Western Koel | 2017/2/4   | 2 | 0 | 24.47191600 | 118.29299830 | <a href="https://www.inaturalist.org/observations/13697370">https://www.inaturalist.org/observations/13697370</a>   |
| 1895 | <i>Eudynamys scolopaceus</i> | Western Koel | 2020/6/4   | 1 | 0 | 24.47209500 | 118.29322000 | <a href="https://www.inaturalist.org/observations/48437189">https://www.inaturalist.org/observations/48437189</a>   |
| 1896 | <i>Eudynamys scolopaceus</i> | Western Koel | 2016/9/11  | 2 | 0 | 24.47267167 | 118.30090330 | <a href="https://www.inaturalist.org/observations/29148925">https://www.inaturalist.org/observations/29148925</a>   |
| 1897 | <i>Eudynamys scolopaceus</i> | Western Koel | 2021/6/17  | 1 | 0 | 24.48369167 | 118.30656330 | <a href="https://www.inaturalist.org/observations/83356290">https://www.inaturalist.org/observations/83356290</a>   |
| 1898 | <i>Eudynamys scolopaceus</i> | Western Koel | 2016/9/23  | 2 | 0 | 24.55770000 | 73.68120000  | <a href="https://www.inaturalist.org/observations/73924374">https://www.inaturalist.org/observations/73924374</a>   |
| 1899 | <i>Eudynamys scolopaceus</i> | Western Koel | 2017/11/14 | 4 | 0 | 24.58544500 | 73.71247900  | <a href="https://www.inaturalist.org/observations/31165104">https://www.inaturalist.org/observations/31165104</a>   |
| 1900 | <i>Eudynamys scolopaceus</i> | Western Koel | 2021/6/11  | 2 | 0 | 24.60049901 | 80.83224278  | <a href="https://www.inaturalist.org/observations/102511856">https://www.inaturalist.org/observations/102511856</a> |
| 1901 | <i>Eudynamys scolopaceus</i> | Western Koel | 2022/1/9   | 3 | 0 | 24.68459361 | 74.08955222  | <a href="https://www.inaturalist.org/observations/104699360">https://www.inaturalist.org/observations/104699360</a> |
| 1902 | <i>Eudynamys scolopaceus</i> | Western Koel | 2021/11/15 | 1 | 0 | 24.69561900 | 78.41251500  | <a href="https://www.inaturalist.org/observations/102525481">https://www.inaturalist.org/observations/102525481</a> |
| 1903 | <i>Eudynamys scolopaceus</i> | Western Koel | 2021/6/10  | 2 | 0 | 24.75086200 | 84.37145700  | <a href="https://www.inaturalist.org/observations/82382092">https://www.inaturalist.org/observations/82382092</a>   |
| 1904 | <i>Eudynamys scolopaceus</i> | Western Koel | 2021/6/9   | 2 | 0 | 24.75097097 | 84.37162297  | <a href="https://www.inaturalist.org/observations/82279392">https://www.inaturalist.org/observations/82279392</a>   |
| 1905 | <i>Eudynamys scolopaceus</i> | Western Koel | 2019/7/25  | 1 | 0 | 24.81238321 | 121.28698240 | <a href="https://www.inaturalist.org/observations/43316550">https://www.inaturalist.org/observations/43316550</a>   |
| 1906 | <i>Eudynamys scolopaceus</i> | Western Koel | 2019/7/22  | 2 | 0 | 24.81894510 | 121.25478150 | <a href="https://www.inaturalist.org/observations/29437953">https://www.inaturalist.org/observations/29437953</a>   |
| 1907 | <i>Eudynamys scolopaceus</i> | Western Koel | 2021/5/10  | 2 | 0 | 24.83649049 | 121.28190920 | <a href="https://www.inaturalist.org/observations/78195351">https://www.inaturalist.org/observations/78195351</a>   |
| 1908 | <i>Eudynamys scolopaceus</i> | Western Koel | 2021/5/14  | 1 | 0 | 24.83947205 | 121.28540970 | <a href="https://www.inaturalist.org/observations/78698420">https://www.inaturalist.org/observations/78698420</a>   |

|      |                              |              |            |   |   |             |              |                                                                                                                     |
|------|------------------------------|--------------|------------|---|---|-------------|--------------|---------------------------------------------------------------------------------------------------------------------|
| 1909 | <i>Eudynamys scolopaceus</i> | Western Koel | 2019/6/15  | 2 | 0 | 24.84771667 | 121.28505170 | <a href="https://www.inaturalist.org/observations/28162061">https://www.inaturalist.org/observations/28162061</a>   |
| 1910 | <i>Eudynamys scolopaceus</i> | Western Koel | 2019/10/23 | 2 | 0 | 24.94286354 | 121.37271240 | <a href="https://www.inaturalist.org/observations/34949686">https://www.inaturalist.org/observations/34949686</a>   |
| 1911 | <i>Eudynamys scolopaceus</i> | Western Koel | 2020/5/24  | 2 | 0 | 24.94882439 | 121.49976740 | <a href="https://www.inaturalist.org/observations/47090759">https://www.inaturalist.org/observations/47090759</a>   |
| 1912 | <i>Eudynamys scolopaceus</i> | Western Koel | 2022/4/28  | 2 | 0 | 24.96905504 | 121.51321150 | <a href="https://www.inaturalist.org/observations/113156208">https://www.inaturalist.org/observations/113156208</a> |
| 1913 | <i>Eudynamys scolopaceus</i> | Western Koel | 2019/5/25  | 1 | 0 | 24.97279277 | 121.42038350 | <a href="https://www.inaturalist.org/observations/25720288">https://www.inaturalist.org/observations/25720288</a>   |
| 1914 | <i>Eudynamys scolopaceus</i> | Western Koel | 2018/5/31  | 2 | 0 | 25.02944255 | 121.53495940 | <a href="https://www.inaturalist.org/observations/13056306">https://www.inaturalist.org/observations/13056306</a>   |
| 1915 | <i>Eudynamys scolopaceus</i> | Western Koel | 2021/4/15  | 1 | 0 | 25.04574000 | 102.59082600 | <a href="https://www.inaturalist.org/observations/74712633">https://www.inaturalist.org/observations/74712633</a>   |
| 1916 | <i>Eudynamys scolopaceus</i> | Western Koel | 2020/5/30  | 1 | 0 | 25.04804897 | 102.59327500 | <a href="https://www.inaturalist.org/observations/69811914">https://www.inaturalist.org/observations/69811914</a>   |
| 1917 | <i>Eudynamys scolopaceus</i> | Western Koel | 2020/4/25  | 2 | 0 | 25.07471889 | 121.56368550 | <a href="https://www.inaturalist.org/observations/43223630">https://www.inaturalist.org/observations/43223630</a>   |
| 1918 | <i>Eudynamys scolopaceus</i> | Western Koel | 2021/4/24  | 2 | 0 | 25.07544176 | 121.55802960 | <a href="https://www.inaturalist.org/observations/75022744">https://www.inaturalist.org/observations/75022744</a>   |
| 1919 | <i>Eudynamys scolopaceus</i> | Western Koel | 2021/4/24  | 2 | 0 | 25.07544482 | 121.55803170 | <a href="https://www.inaturalist.org/observations/75022818">https://www.inaturalist.org/observations/75022818</a>   |
| 1920 | <i>Eudynamys scolopaceus</i> | Western Koel | 2020/4/10  | 1 | 0 | 25.07591416 | 121.56546950 | <a href="https://www.inaturalist.org/observations/41798308">https://www.inaturalist.org/observations/41798308</a>   |
| 1921 | <i>Eudynamys scolopaceus</i> | Western Koel | 2021/6/1   | 1 | 0 | 25.07762293 | 121.56102540 | <a href="https://www.inaturalist.org/observations/81125149">https://www.inaturalist.org/observations/81125149</a>   |
| 1922 | <i>Eudynamys scolopaceus</i> | Western Koel | 2022/5/29  | 1 | 0 | 25.09706900 | 121.52621500 | <a href="https://www.inaturalist.org/observations/119377058">https://www.inaturalist.org/observations/119377058</a> |
| 1923 | <i>Eudynamys scolopaceus</i> | Western Koel | 2021/5/2   | 1 | 0 | 25.11251768 | 121.52913880 | <a href="https://www.inaturalist.org/observations/76330936">https://www.inaturalist.org/observations/76330936</a>   |
| 1924 | <i>Eudynamys scolopaceus</i> | Western Koel | 2022/1/31  | 2 | 0 | 25.25515278 | 75.93568056  | <a href="https://www.inaturalist.org/observations/105904797">https://www.inaturalist.org/observations/105904797</a> |
| 1925 | <i>Eudynamys scolopaceus</i> | Western Koel | 2020/11/3  | 3 | 0 | 25.26771874 | 82.99125809  | <a href="https://www.inaturalist.org/observations/64943239">https://www.inaturalist.org/observations/64943239</a>   |
| 1926 | <i>Eudynamys scolopaceus</i> | Western Koel | 2011/10/31 | 1 | 0 | 25.46215444 | 75.65473194  | <a href="https://www.inaturalist.org/observations/45504656">https://www.inaturalist.org/observations/45504656</a>   |
| 1927 | <i>Eudynamys scolopaceus</i> | Western Koel | 2020/4/19  | 2 | 0 | 25.51704712 | 90.21051147  | <a href="https://www.inaturalist.org/observations/45053135">https://www.inaturalist.org/observations/45053135</a>   |
| 1928 | <i>Eudynamys scolopaceus</i> | Western Koel | 2021/8/28  | 2 | 0 | 25.56119733 | 91.89471882  | <a href="https://www.inaturalist.org/observations/92918655">https://www.inaturalist.org/observations/92918655</a>   |
| 1929 | <i>Eudynamys scolopaceus</i> | Western Koel | 2017/3/9   | 3 | 0 | 25.63092790 | 88.12852860  | <a href="https://www.inaturalist.org/observations/57899331">https://www.inaturalist.org/observations/57899331</a>   |
| 1930 | <i>Eudynamys scolopaceus</i> | Western Koel | 2018/10/15 | 4 | 0 | 25.84179824 | 93.43431920  | <a href="https://www.inaturalist.org/observations/17527413">https://www.inaturalist.org/observations/17527413</a>   |
| 1931 | <i>Eudynamys scolopaceus</i> | Western Koel | 2011/1/15  | 2 | 0 | 25.84652500 | 93.42987500  | <a href="https://www.inaturalist.org/observations/103884115">https://www.inaturalist.org/observations/103884115</a> |

|      |                                                    |              |            |   |   |             |              |                                                                                                                     |
|------|----------------------------------------------------|--------------|------------|---|---|-------------|--------------|---------------------------------------------------------------------------------------------------------------------|
| 1932 | <i>Eudynamys scolopaceus</i>                       | Western Koel | 2011/1/15  | 2 | 0 | 25.84652500 | 93.42987500  | <a href="https://www.inaturalist.org/observations/103884136">https://www.inaturalist.org/observations/103884136</a> |
| 1933 | <i>Eudynamys scolopaceus</i>                       | Western Koel | 2021/3/29  | 2 | 0 | 25.90605800 | 86.77968200  | <a href="https://www.inaturalist.org/observations/84149857">https://www.inaturalist.org/observations/84149857</a>   |
| 1934 | <i>Eudynamys scolopaceus</i>                       | Western Koel | 2018/5/29  | 1 | 0 | 26.01732740 | 76.50257420  | <a href="https://www.inaturalist.org/observations/56208422">https://www.inaturalist.org/observations/56208422</a>   |
| 1935 | <i>Eudynamys scolopaceus</i>                       | Western Koel | 2017/6/21  | 2 | 0 | 26.01732740 | 76.50257420  | <a href="https://www.inaturalist.org/observations/61768759">https://www.inaturalist.org/observations/61768759</a>   |
| 1936 | <i>Eudynamys scolopaceus</i>                       | Western Koel | 2022/5/14  | 3 | 0 | 26.02957423 | 76.48661904  | <a href="https://www.inaturalist.org/observations/119256551">https://www.inaturalist.org/observations/119256551</a> |
| 1937 | <i>Eudynamys scolopaceus</i>                       | Western Koel | 2018/2/16  | 4 | 0 | 26.06535730 | 76.45320766  | <a href="https://www.inaturalist.org/observations/18301765">https://www.inaturalist.org/observations/18301765</a>   |
| 1938 | <i>Eudynamys scolopaceus</i><br><i>scolopaceus</i> | Western Koel | 2021/9/29  | 1 | 0 | 26.09035808 | 91.53285027  | <a href="https://www.inaturalist.org/observations/96701398">https://www.inaturalist.org/observations/96701398</a>   |
| 1939 | <i>Eudynamys scolopaceus</i>                       | Western Koel | 2019/9/9   | 4 | 0 | 26.11904540 | 91.61264430  | <a href="https://www.inaturalist.org/observations/32763531">https://www.inaturalist.org/observations/32763531</a>   |
| 1940 | <i>Eudynamys scolopaceus</i>                       | Western Koel | 2010/2/17  | 3 | 0 | 26.15478500 | 91.67296500  | <a href="https://www.inaturalist.org/observations/59068641">https://www.inaturalist.org/observations/59068641</a>   |
| 1941 | <i>Eudynamys scolopaceus</i>                       | Western Koel | 2018/11/20 | 3 | 0 | 26.20393233 | 78.16612911  | <a href="https://www.inaturalist.org/observations/18509825">https://www.inaturalist.org/observations/18509825</a>   |
| 1942 | <i>Eudynamys scolopaceus</i>                       | Western Koel | 2020/3/8   | 2 | 0 | 26.27357423 | 73.02994180  | <a href="https://www.inaturalist.org/observations/66058973">https://www.inaturalist.org/observations/66058973</a>   |
| 1943 | <i>Eudynamys scolopaceus</i>                       | Western Koel | 2021/5/21  | 1 | 0 | 26.42342173 | 106.36952590 | <a href="https://www.inaturalist.org/observations/80365577">https://www.inaturalist.org/observations/80365577</a>   |
| 1944 | <i>Eudynamys scolopaceus</i>                       | Western Koel | 2021/5/21  | 1 | 0 | 26.42342173 | 106.36952590 | <a href="https://www.inaturalist.org/observations/80367778">https://www.inaturalist.org/observations/80367778</a>   |
| 1945 | <i>Eudynamys scolopaceus</i>                       | Western Koel | 2022/4/22  | 2 | 0 | 26.42342173 | 106.36952590 | <a href="https://www.inaturalist.org/observations/112481451">https://www.inaturalist.org/observations/112481451</a> |
| 1946 | <i>Eudynamys scolopaceus</i>                       | Western Koel | 2021/8/17  | 2 | 0 | 26.42694281 | 80.30266576  | <a href="https://www.inaturalist.org/observations/91532817">https://www.inaturalist.org/observations/91532817</a>   |
| 1947 | <i>Eudynamys scolopaceus</i>                       | Western Koel | 2021/10/5  | 1 | 0 | 26.44118120 | 91.43677740  | <a href="https://www.inaturalist.org/observations/97213637">https://www.inaturalist.org/observations/97213637</a>   |
| 1948 | <i>Eudynamys scolopaceus</i>                       | Western Koel | 2021/4/23  | 1 | 0 | 26.46619599 | 106.67869760 | <a href="https://www.inaturalist.org/observations/75181124">https://www.inaturalist.org/observations/75181124</a>   |
| 1949 | <i>Eudynamys scolopaceus</i>                       | Western Koel | 2020/5/9   | 1 | 0 | 26.46889170 | 106.67842690 | <a href="https://www.inaturalist.org/observations/45377448">https://www.inaturalist.org/observations/45377448</a>   |
| 1950 | <i>Eudynamys scolopaceus</i>                       | Western Koel | 2019/9/14  | 4 | 0 | 26.50233841 | 80.26789093  | <a href="https://www.inaturalist.org/observations/32681293">https://www.inaturalist.org/observations/32681293</a>   |
| 1951 | <i>Eudynamys scolopaceus</i>                       | Western Koel | 2020/9/20  | 2 | 0 | 26.60685389 | 73.68926603  | <a href="https://www.inaturalist.org/observations/60294738">https://www.inaturalist.org/observations/60294738</a>   |
| 1952 | <i>Eudynamys scolopaceus</i>                       | Western Koel | 2018/1/10  | 2 | 0 | 26.62629127 | 92.78583326  | <a href="https://www.inaturalist.org/observations/49100130">https://www.inaturalist.org/observations/49100130</a>   |
| 1953 | <i>Eudynamys scolopaceus</i>                       | Western Koel | 2021/5/5   | 1 | 0 | 26.62737778 | 106.70395640 | <a href="https://www.inaturalist.org/observations/78336388">https://www.inaturalist.org/observations/78336388</a>   |
| 1954 | <i>Eudynamys scolopaceus</i>                       | Western Koel | 2021/5/15  | 0 | 0 | 26.62737778 | 106.70395640 | <a href="https://www.inaturalist.org/observations/80365351">https://www.inaturalist.org/observations/80365351</a>   |

|      |                       |              |            |   |   |             |              |                                                                                                                     |
|------|-----------------------|--------------|------------|---|---|-------------|--------------|---------------------------------------------------------------------------------------------------------------------|
| 1955 | Eudynamys scolopaceus | Western Koel | 2022/5/4   | 1 | 0 | 26.62737778 | 106.70395640 | <a href="https://www.inaturalist.org/observations/117726972">https://www.inaturalist.org/observations/117726972</a> |
| 1956 | Eudynamys scolopaceus | Western Koel | 2021/5/14  | 1 | 0 | 26.65318980 | 106.67011590 | <a href="https://www.inaturalist.org/observations/80365407">https://www.inaturalist.org/observations/80365407</a>   |
| 1957 | Eudynamys scolopaceus | Western Koel | 2021/1/10  | 1 | 0 | 26.67843917 | 91.05357606  | <a href="https://www.inaturalist.org/observations/70069499">https://www.inaturalist.org/observations/70069499</a>   |
| 1958 | Eudynamys scolopaceus | Western Koel | 2022/8/19  | 5 | 0 | 26.69644626 | 93.98164172  | <a href="https://www.inaturalist.org/observations/131735858">https://www.inaturalist.org/observations/131735858</a> |
| 1959 | Eudynamys scolopaceus | Western Koel | 2021/7/5   | 1 | 0 | 26.69670776 | 93.97780314  | <a href="https://www.inaturalist.org/observations/86359364">https://www.inaturalist.org/observations/86359364</a>   |
| 1960 | Eudynamys scolopaceus | Western Koel | 2013/4/24  | 2 | 0 | 26.69980512 | 93.51504000  | <a href="https://www.inaturalist.org/observations/59041171">https://www.inaturalist.org/observations/59041171</a>   |
| 1961 | Eudynamys scolopaceus | Western Koel | 2020/9/30  | 3 | 0 | 26.70029613 | 92.83076014  | <a href="https://www.inaturalist.org/observations/61374641">https://www.inaturalist.org/observations/61374641</a>   |
| 1962 | Eudynamys scolopaceus | Western Koel | 2020/7/28  | 1 | 0 | 26.70546702 | 88.31000850  | <a href="https://www.inaturalist.org/observations/55708049">https://www.inaturalist.org/observations/55708049</a>   |
| 1963 | Eudynamys scolopaceus | Western Koel | 2021/2/3   | 1 | 0 | 26.75359438 | 82.25720270  | <a href="https://www.inaturalist.org/observations/69802265">https://www.inaturalist.org/observations/69802265</a>   |
| 1964 | Eudynamys scolopaceus | Western Koel | 2021/4/8   | 3 | 0 | 26.78856434 | 94.21399679  | <a href="https://www.inaturalist.org/observations/73298379">https://www.inaturalist.org/observations/73298379</a>   |
| 1965 | Eudynamys scolopaceus | Western Koel | 2022/8/14  | 4 | 0 | 26.85491140 | 75.83284110  | <a href="https://www.inaturalist.org/observations/132146917">https://www.inaturalist.org/observations/132146917</a> |
| 1966 | Eudynamys scolopaceus | Western Koel | 2021/5/30  | 1 | 0 | 26.85557058 | 80.99714968  | <a href="https://www.inaturalist.org/observations/80841016">https://www.inaturalist.org/observations/80841016</a>   |
| 1967 | Eudynamys scolopaceus | Western Koel | 2019/10/10 | 3 | 0 | 26.86347534 | 75.84040068  | <a href="https://www.inaturalist.org/observations/41745145">https://www.inaturalist.org/observations/41745145</a>   |
| 1968 | Eudynamys scolopaceus | Western Koel | 2009/4/15  | 3 | 0 | 26.91243360 | 75.78727090  | <a href="https://www.inaturalist.org/observations/11410318">https://www.inaturalist.org/observations/11410318</a>   |
| 1969 | Eudynamys scolopaceus | Western Koel | 2000/1/22  | 2 | 0 | 26.91466683 | 75.73177877  | <a href="https://www.inaturalist.org/observations/37211002">https://www.inaturalist.org/observations/37211002</a>   |
| 1970 | Eudynamys scolopaceus | Western Koel | 2022/7/18  | 3 | 0 | 26.91686047 | 75.86473536  | <a href="https://www.inaturalist.org/observations/128746142">https://www.inaturalist.org/observations/128746142</a> |
| 1971 | Eudynamys scolopaceus | Western Koel | 2022/7/18  | 3 | 0 | 26.91686047 | 75.86473536  | <a href="https://www.inaturalist.org/observations/128746147">https://www.inaturalist.org/observations/128746147</a> |
| 1972 | Eudynamys scolopaceus | Western Koel | 2017/9/2   | 1 | 0 | 26.93346437 | 75.83748516  | <a href="https://www.inaturalist.org/observations/55562556">https://www.inaturalist.org/observations/55562556</a>   |
| 1973 | Eudynamys scolopaceus | Western Koel | 2020/4/29  | 1 | 0 | 26.94941333 | 94.15836543  | <a href="https://www.inaturalist.org/observations/93556413">https://www.inaturalist.org/observations/93556413</a>   |
| 1974 | Eudynamys scolopaceus | Western Koel | 2020/2/25  | 1 | 0 | 26.95396740 | 80.92356918  | <a href="https://www.inaturalist.org/observations/47944973">https://www.inaturalist.org/observations/47944973</a>   |
| 1975 | Eudynamys scolopaceus | Western Koel | 2018/8/23  | 2 | 0 | 26.95881860 | 78.95417610  | <a href="https://www.inaturalist.org/observations/20252712">https://www.inaturalist.org/observations/20252712</a>   |
| 1976 | Eudynamys scolopaceus | Western Koel | 2017/10/3  | 4 | 0 | 27.03527779 | 92.90553144  | <a href="https://www.inaturalist.org/observations/34069831">https://www.inaturalist.org/observations/34069831</a>   |
| 1977 | Eudynamys scolopaceus | Western Koel | 2019/9/24  | 4 | 0 | 27.15692000 | 77.52365100  | <a href="https://www.inaturalist.org/observations/33783914">https://www.inaturalist.org/observations/33783914</a>   |

|      |                       |              |            |   |   |             |              |                                                                                                                     |
|------|-----------------------|--------------|------------|---|---|-------------|--------------|---------------------------------------------------------------------------------------------------------------------|
| 1978 | Eudynamys scolopaceus | Western Koel | 2013/9/27  | 4 | 0 | 27.15692000 | 77.52365100  | <a href="https://www.inaturalist.org/observations/41359954">https://www.inaturalist.org/observations/41359954</a>   |
| 1979 | Eudynamys scolopaceus | Western Koel | 2010/8/30  | 3 | 0 | 27.15692000 | 77.52365100  | <a href="https://www.inaturalist.org/observations/42171305">https://www.inaturalist.org/observations/42171305</a>   |
| 1980 | Eudynamys scolopaceus | Western Koel | 2018/7/17  | 2 | 0 | 27.15926900 | 77.52319990  | <a href="https://www.inaturalist.org/observations/46906846">https://www.inaturalist.org/observations/46906846</a>   |
| 1981 | Eudynamys scolopaceus | Western Koel | 2019/11/24 | 2 | 0 | 27.15975137 | 78.06052496  | <a href="https://www.inaturalist.org/observations/36549843">https://www.inaturalist.org/observations/36549843</a>   |
| 1982 | Eudynamys scolopaceus | Western Koel | 2019/11/24 | 4 | 0 | 27.15976569 | 78.06044985  | <a href="https://www.inaturalist.org/observations/36549845">https://www.inaturalist.org/observations/36549845</a>   |
| 1983 | Eudynamys scolopaceus | Western Koel | 2016/10/19 | 4 | 0 | 27.16380161 | 77.52445723  | <a href="https://www.inaturalist.org/observations/20028249">https://www.inaturalist.org/observations/20028249</a>   |
| 1984 | Eudynamys scolopaceus | Western Koel | 2017/11/27 | 1 | 0 | 27.17260000 | 78.04150000  | <a href="https://www.inaturalist.org/observations/69972864">https://www.inaturalist.org/observations/69972864</a>   |
| 1985 | Eudynamys scolopaceus | Western Koel | 2007/12/17 | 5 | 0 | 27.17820707 | 77.50328159  | <a href="https://www.inaturalist.org/observations/7427717">https://www.inaturalist.org/observations/7427717</a>     |
| 1986 | Eudynamys scolopaceus | Western Koel | 2021/5/2   | 1 | 0 | 27.17967720 | 88.51361901  | <a href="https://www.inaturalist.org/observations/97478917">https://www.inaturalist.org/observations/97478917</a>   |
| 1987 | Eudynamys scolopaceus | Western Koel | 2013/10/21 | 2 | 0 | 27.19421917 | 77.51116645  | <a href="https://www.inaturalist.org/observations/69355760">https://www.inaturalist.org/observations/69355760</a>   |
| 1988 | Eudynamys scolopaceus | Western Koel | 2017/3/1   | 5 | 0 | 27.20564673 | 78.03809881  | <a href="https://www.inaturalist.org/observations/5401127">https://www.inaturalist.org/observations/5401127</a>     |
| 1989 | Eudynamys scolopaceus | Western Koel | 2018/12/17 | 4 | 0 | 27.25267373 | 76.33789614  | <a href="https://www.inaturalist.org/observations/19723543">https://www.inaturalist.org/observations/19723543</a>   |
| 1990 | Eudynamys scolopaceus | Western Koel | 2022/6/26  | 3 | 0 | 27.28105010 | 94.02542274  | <a href="https://www.inaturalist.org/observations/125984240">https://www.inaturalist.org/observations/125984240</a> |
| 1991 | Eudynamys scolopaceus | Western Koel | 2020/9/4   | 3 | 0 | 28.05293830 | 73.34061215  | <a href="https://www.inaturalist.org/observations/65205891">https://www.inaturalist.org/observations/65205891</a>   |
| 1992 | Eudynamys scolopaceus | Western Koel | 2020/9/4   | 3 | 0 | 28.06016762 | 73.33842739  | <a href="https://www.inaturalist.org/observations/58614242">https://www.inaturalist.org/observations/58614242</a>   |
| 1993 | Eudynamys scolopaceus | Western Koel | 2022/6/6   | 0 | 0 | 28.09958150 | 112.98049440 | <a href="https://www.inaturalist.org/observations/120624992">https://www.inaturalist.org/observations/120624992</a> |
| 1994 | Eudynamys scolopaceus | Western Koel | 2011/8/6   | 3 | 0 | 28.24869930 | 77.06351170  | <a href="https://www.inaturalist.org/observations/31507494">https://www.inaturalist.org/observations/31507494</a>   |
| 1995 | Eudynamys scolopaceus | Western Koel | 2017/6/30  | 4 | 0 | 28.31501821 | 79.42142128  | <a href="https://www.inaturalist.org/observations/6914136">https://www.inaturalist.org/observations/6914136</a>     |
| 1996 | Eudynamys scolopaceus | Western Koel | 2017/7/14  | 3 | 0 | 28.33309994 | 79.28050594  | <a href="https://www.inaturalist.org/observations/7114454">https://www.inaturalist.org/observations/7114454</a>     |
| 1997 | Eudynamys scolopaceus | Western Koel | 2017/6/30  | 4 | 0 | 28.33834351 | 79.40248282  | <a href="https://www.inaturalist.org/observations/6945523">https://www.inaturalist.org/observations/6945523</a>     |
| 1998 | Eudynamys scolopaceus | Western Koel | 2021/8/20  | 1 | 0 | 28.35066392 | 77.92698395  | <a href="https://www.inaturalist.org/observations/91922142">https://www.inaturalist.org/observations/91922142</a>   |
| 1999 | Eudynamys scolopaceus | Western Koel | 2020/8/9   | 2 | 0 | 28.36216961 | 75.59041718  | <a href="https://www.inaturalist.org/observations/105544996">https://www.inaturalist.org/observations/105544996</a> |
| 2000 | Eudynamys scolopaceus | Western Koel | 2021/7/24  | 0 | 0 | 28.39564400 | 77.05933460  | <a href="https://www.inaturalist.org/observations/88644917">https://www.inaturalist.org/observations/88644917</a>   |

|      |                              |              |            |   |   |             |             |                                                                                                                     |
|------|------------------------------|--------------|------------|---|---|-------------|-------------|---------------------------------------------------------------------------------------------------------------------|
| 2001 | <i>Eudynamys scolopaceus</i> | Western Koel | 2022/6/5   | 3 | 0 | 28.43158083 | 77.28535292 | <a href="https://www.inaturalist.org/observations/120308339">https://www.inaturalist.org/observations/120308339</a> |
| 2002 | <i>Eudynamys scolopaceus</i> | Western Koel | 2017/4/24  | 4 | 0 | 28.43256639 | 77.09133770 | <a href="https://www.inaturalist.org/observations/6489835">https://www.inaturalist.org/observations/6489835</a>     |
| 2003 | <i>Eudynamys scolopaceus</i> | Western Koel | 2020/11/7  | 0 | 0 | 28.45187481 | 76.42848372 | <a href="https://www.inaturalist.org/observations/64869459">https://www.inaturalist.org/observations/64869459</a>   |
| 2004 | <i>Eudynamys scolopaceus</i> | Western Koel | 2022/10/2  | 0 | 0 | 28.45900500 | 76.89506333 | <a href="https://www.inaturalist.org/observations/137356148">https://www.inaturalist.org/observations/137356148</a> |
| 2005 | <i>Eudynamys scolopaceus</i> | Western Koel | 2018/10/11 | 4 | 0 | 28.46715926 | 76.89128011 | <a href="https://www.inaturalist.org/observations/17423678">https://www.inaturalist.org/observations/17423678</a>   |
| 2006 | <i>Eudynamys scolopaceus</i> | Western Koel | 2017/4/11  | 2 | 0 | 28.46860700 | 77.29076200 | <a href="https://www.inaturalist.org/observations/5666855">https://www.inaturalist.org/observations/5666855</a>     |
| 2007 | <i>Eudynamys scolopaceus</i> | Western Koel | 2010/7/31  | 4 | 0 | 28.46959980 | 76.97955317 | <a href="https://www.inaturalist.org/observations/31577359">https://www.inaturalist.org/observations/31577359</a>   |
| 2008 | <i>Eudynamys scolopaceus</i> | Western Koel | 2022/7/24  | 3 | 0 | 28.48167880 | 77.26494580 | <a href="https://www.inaturalist.org/observations/127950478">https://www.inaturalist.org/observations/127950478</a> |
| 2009 | <i>Eudynamys scolopaceus</i> | Western Koel | 2022/8/19  | 4 | 0 | 28.48168431 | 77.27394632 | <a href="https://www.inaturalist.org/observations/131553852">https://www.inaturalist.org/observations/131553852</a> |
| 2010 | <i>Eudynamys scolopaceus</i> | Western Koel | 2018/7/8   | 3 | 0 | 28.51683130 | 77.48740490 | <a href="https://www.inaturalist.org/observations/14474133">https://www.inaturalist.org/observations/14474133</a>   |
| 2011 | <i>Eudynamys scolopaceus</i> | Western Koel | 2018/10/21 | 4 | 0 | 28.52318206 | 77.49533739 | <a href="https://www.inaturalist.org/observations/17727055">https://www.inaturalist.org/observations/17727055</a>   |
| 2012 | <i>Eudynamys scolopaceus</i> | Western Koel | 2018/10/21 | 4 | 0 | 28.52563900 | 77.18839200 | <a href="https://www.inaturalist.org/observations/123616711">https://www.inaturalist.org/observations/123616711</a> |
| 2013 | <i>Eudynamys scolopaceus</i> | Western Koel | 2022/6/17  | 5 | 0 | 28.52613848 | 77.16618926 | <a href="https://www.inaturalist.org/observations/122124222">https://www.inaturalist.org/observations/122124222</a> |
| 2014 | <i>Eudynamys scolopaceus</i> | Western Koel | 2020/5/15  | 2 | 0 | 28.53551606 | 77.39102662 | <a href="https://www.inaturalist.org/observations/46059919">https://www.inaturalist.org/observations/46059919</a>   |
| 2015 | <i>Eudynamys scolopaceus</i> | Western Koel | 2009/4/9   | 4 | 0 | 28.55257720 | 77.55481000 | <a href="https://www.inaturalist.org/observations/31585213">https://www.inaturalist.org/observations/31585213</a>   |
| 2016 | <i>Eudynamys scolopaceus</i> | Western Koel | 2009/7/15  | 4 | 0 | 28.55720980 | 77.21278910 | <a href="https://www.inaturalist.org/observations/31584029">https://www.inaturalist.org/observations/31584029</a>   |
| 2017 | <i>Eudynamys scolopaceus</i> | Western Koel | 2019/6/8   | 1 | 0 | 28.56143155 | 77.30822182 | <a href="https://www.inaturalist.org/observations/38424426">https://www.inaturalist.org/observations/38424426</a>   |
| 2018 | <i>Eudynamys scolopaceus</i> | Western Koel | 2020/3/30  | 4 | 0 | 28.56441590 | 77.36506210 | <a href="https://www.inaturalist.org/observations/51987112">https://www.inaturalist.org/observations/51987112</a>   |
| 2019 | <i>Eudynamys scolopaceus</i> | Western Koel | 2021/7/24  | 1 | 0 | 28.56724863 | 77.05130401 | <a href="https://www.inaturalist.org/observations/88580515">https://www.inaturalist.org/observations/88580515</a>   |
| 2020 | <i>Eudynamys scolopaceus</i> | Western Koel | 2020/5/18  | 2 | 0 | 28.56816830 | 77.33184749 | <a href="https://www.inaturalist.org/observations/46688587">https://www.inaturalist.org/observations/46688587</a>   |
| 2021 | <i>Eudynamys scolopaceus</i> | Western Koel | 2020/5/23  | 3 | 0 | 28.56816830 | 77.33184749 | <a href="https://www.inaturalist.org/observations/47075841">https://www.inaturalist.org/observations/47075841</a>   |
| 2022 | <i>Eudynamys scolopaceus</i> | Western Koel | 2022/5/16  | 1 | 0 | 28.59274578 | 77.24830485 | <a href="https://www.inaturalist.org/observations/117291247">https://www.inaturalist.org/observations/117291247</a> |
| 2023 | <i>Eudynamys scolopaceus</i> | Western Koel | 2011/8/31  | 6 | 0 | 28.59326400 | 77.21912300 | <a href="http://www.inaturalist.org/observations/30013">http://www.inaturalist.org/observations/30013</a>           |



|      |                              |              |           |   |   |             |              |                                                                                                                     |
|------|------------------------------|--------------|-----------|---|---|-------------|--------------|---------------------------------------------------------------------------------------------------------------------|
| 2024 | <i>Eudynamys scolopaceus</i> | Western Koel | 2021/3/30 | 3 | 0 | 28.59424740 | 77.24540815  | <a href="https://www.inaturalist.org/observations/72439186">https://www.inaturalist.org/observations/72439186</a>   |
| 2025 | <i>Eudynamys scolopaceus</i> | Western Koel | 2020/10/6 | 4 | 0 | 28.59444729 | 77.24539977  | <a href="https://www.inaturalist.org/observations/61935538">https://www.inaturalist.org/observations/61935538</a>   |
| 2026 | <i>Eudynamys scolopaceus</i> | Western Koel | 2021/7/9  | 1 | 0 | 28.59449498 | 77.02754136  | <a href="https://www.inaturalist.org/observations/88651408">https://www.inaturalist.org/observations/88651408</a>   |
| 2027 | <i>Eudynamys scolopaceus</i> | Western Koel | 2022/5/4  | 1 | 0 | 28.59768800 | 77.22269197  | <a href="https://www.inaturalist.org/observations/115281848">https://www.inaturalist.org/observations/115281848</a> |
| 2028 | <i>Eudynamys scolopaceus</i> | Western Koel | 2019/2/3  | 3 | 0 | 28.59892833 | 77.19320500  | <a href="https://www.inaturalist.org/observations/22553693">https://www.inaturalist.org/observations/22553693</a>   |
| 2029 | <i>Eudynamys scolopaceus</i> | Western Koel | 2021/11/2 | 1 | 0 | 28.60354350 | 77.24648150  | <a href="https://www.inaturalist.org/observations/101206032">https://www.inaturalist.org/observations/101206032</a> |
| 2030 | <i>Eudynamys scolopaceus</i> | Western Koel | 2019/12/7 | 2 | 0 | 28.61393910 | 77.20902120  | <a href="https://www.inaturalist.org/observations/49561425">https://www.inaturalist.org/observations/49561425</a>   |
| 2031 | <i>Eudynamys scolopaceus</i> | Western Koel | 2020/4/23 | 3 | 0 | 28.63625650 | 77.07911080  | <a href="https://www.inaturalist.org/observations/48093176">https://www.inaturalist.org/observations/48093176</a>   |
| 2032 | <i>Eudynamys scolopaceus</i> | Western Koel | 2020/9/8  | 2 | 0 | 28.67109500 | 77.09559236  | <a href="https://www.inaturalist.org/observations/61587301">https://www.inaturalist.org/observations/61587301</a>   |
| 2033 | <i>Eudynamys scolopaceus</i> | Western Koel | 2020/9/15 | 3 | 0 | 28.68096619 | 77.18024619  | <a href="https://www.inaturalist.org/observations/59656520">https://www.inaturalist.org/observations/59656520</a>   |
| 2034 | <i>Eudynamys scolopaceus</i> | Western Koel | 2022/7/27 | 2 | 0 | 28.68702300 | 77.31772460  | <a href="https://www.inaturalist.org/observations/128106808">https://www.inaturalist.org/observations/128106808</a> |
| 2035 | <i>Eudynamys scolopaceus</i> | Western Koel | 2019/6/27 | 2 | 0 | 28.72449687 | 77.11965982  | <a href="https://www.inaturalist.org/observations/57525920">https://www.inaturalist.org/observations/57525920</a>   |
| 2036 | <i>Eudynamys scolopaceus</i> | Western Koel | 2022/5/30 | 0 | 0 | 28.81008148 | 113.08187100 | <a href="https://www.inaturalist.org/observations/119335272">https://www.inaturalist.org/observations/119335272</a> |
| 2037 | <i>Eudynamys scolopaceus</i> | Western Koel | 2022/4/29 | 1 | 0 | 28.81641006 | 113.08518220 | <a href="https://www.inaturalist.org/observations/113363679">https://www.inaturalist.org/observations/113363679</a> |
| 2038 | <i>Eudynamys scolopaceus</i> | Western Koel | 2022/6/18 | 1 | 0 | 28.81743622 | 113.08550260 | <a href="https://www.inaturalist.org/observations/122282453">https://www.inaturalist.org/observations/122282453</a> |
| 2039 | <i>Eudynamys scolopaceus</i> | Western Koel | 2022/6/23 | 0 | 0 | 28.81836891 | 113.08533480 | <a href="https://www.inaturalist.org/observations/123001872">https://www.inaturalist.org/observations/123001872</a> |
| 2040 | <i>Eudynamys scolopaceus</i> | Western Koel | 2020/6/19 | 1 | 0 | 28.87366500 | 105.43126100 | <a href="https://www.inaturalist.org/observations/50129633">https://www.inaturalist.org/observations/50129633</a>   |
| 2041 | <i>Eudynamys scolopaceus</i> | Western Koel | 2021/5/2  | 1 | 0 | 28.95354907 | 79.79992691  | <a href="https://www.inaturalist.org/observations/77471074">https://www.inaturalist.org/observations/77471074</a>   |
| 2042 | <i>Eudynamys scolopaceus</i> | Western Koel | 2021/6/12 | 1 | 0 | 28.95358252 | 79.79982331  | <a href="https://www.inaturalist.org/observations/82632186">https://www.inaturalist.org/observations/82632186</a>   |
| 2043 | <i>Eudynamys scolopaceus</i> | Western Koel | 2021/6/6  | 1 | 0 | 28.95654805 | 79.80743409  | <a href="https://www.inaturalist.org/observations/81794842">https://www.inaturalist.org/observations/81794842</a>   |
| 2044 | <i>Eudynamys scolopaceus</i> | Western Koel | 2021/5/2  | 1 | 0 | 28.95829277 | 79.76808004  | <a href="https://www.inaturalist.org/observations/76849514">https://www.inaturalist.org/observations/76849514</a>   |
| 2045 | <i>Eudynamys scolopaceus</i> | Western Koel | 2021/5/2  | 1 | 0 | 28.95841686 | 79.76808071  | <a href="https://www.inaturalist.org/observations/76848842">https://www.inaturalist.org/observations/76848842</a>   |
| 2046 | <i>Eudynamys scolopaceus</i> | Western Koel | 2022/7/11 | 2 | 0 | 28.96160531 | 79.80524138  | <a href="https://www.inaturalist.org/observations/125778328">https://www.inaturalist.org/observations/125778328</a> |

|      |                                      |              |           |   |   |             |              |                                                                                                                     |
|------|--------------------------------------|--------------|-----------|---|---|-------------|--------------|---------------------------------------------------------------------------------------------------------------------|
| 2047 | Eudynamys scolopaceus                | Western Koel | 2021/4/30 | 0 | 0 | 28.97152703 | 79.76505082  | <a href="https://www.inaturalist.org/observations/76022913">https://www.inaturalist.org/observations/76022913</a>   |
| 2048 | Eudynamys scolopaceus                | Western Koel | 2021/5/2  | 0 | 0 | 28.97322000 | 79.75943900  | <a href="https://www.inaturalist.org/observations/76613204">https://www.inaturalist.org/observations/76613204</a>   |
| 2049 | Eudynamys scolopaceus                | Western Koel | 2021/5/3  | 1 | 0 | 28.99415770 | 79.84300160  | <a href="https://www.inaturalist.org/observations/76872283">https://www.inaturalist.org/observations/76872283</a>   |
| 2050 | Eudynamys scolopaceus                | Western Koel | 2021/9/12 | 2 | 0 | 29.20631906 | 79.14228326  | <a href="https://www.inaturalist.org/observations/96682419">https://www.inaturalist.org/observations/96682419</a>   |
| 2051 | Eudynamys scolopaceus                | Western Koel | 2021/4/19 | 1 | 0 | 29.25472044 | 79.53779805  | <a href="https://www.inaturalist.org/observations/74607760">https://www.inaturalist.org/observations/74607760</a>   |
| 2052 | Eudynamys scolopaceus                | Western Koel | 2021/4/3  | 1 | 0 | 29.34616463 | 79.55191445  | <a href="https://www.inaturalist.org/observations/72833777">https://www.inaturalist.org/observations/72833777</a>   |
| 2053 | Eudynamys scolopaceus                | Western Koel | 2021/4/12 | 2 | 0 | 29.46039865 | 77.71092296  | <a href="https://www.inaturalist.org/observations/73702160">https://www.inaturalist.org/observations/73702160</a>   |
| 2054 | Eudynamys scolopaceus                | Western Koel | 2010/5/21 | 6 | 0 | 29.53821700 | 78.87016300  | <a href="http://www.inaturalist.org/observations/328802">http://www.inaturalist.org/observations/328802</a>         |
| 2055 | Eudynamys scolopaceus<br>scolopaceus | Western Koel | 2021/7/13 | 2 | 0 | 29.73010610 | 78.24601260  | <a href="https://www.inaturalist.org/observations/86802496">https://www.inaturalist.org/observations/86802496</a>   |
| 2056 | Eudynamys scolopaceus                | Western Koel | 2022/7/4  | 0 | 0 | 29.79568917 | 121.68767900 | <a href="https://www.inaturalist.org/observations/124691497">https://www.inaturalist.org/observations/124691497</a> |
| 2057 | Eudynamys scolopaceus                | Western Koel | 2017/6/23 | 3 | 0 | 29.89706510 | 79.60844200  | <a href="https://www.inaturalist.org/observations/7099464">https://www.inaturalist.org/observations/7099464</a>     |
| 2058 | Eudynamys scolopaceus                | Western Koel | 2022/5/4  | 1 | 0 | 30.07151702 | 80.23733988  | <a href="https://www.inaturalist.org/observations/115526662">https://www.inaturalist.org/observations/115526662</a> |
| 2059 | Eudynamys scolopaceus                | Western Koel | 2022/5/11 | 1 | 0 | 30.07151702 | 80.23733988  | <a href="https://www.inaturalist.org/observations/116529970">https://www.inaturalist.org/observations/116529970</a> |
| 2060 | Eudynamys scolopaceus                | Western Koel | 2022/5/12 | 0 | 0 | 30.07151702 | 80.23733988  | <a href="https://www.inaturalist.org/observations/116636537">https://www.inaturalist.org/observations/116636537</a> |
| 2061 | Eudynamys scolopaceus                | Western Koel | 2022/5/13 | 1 | 0 | 30.07151702 | 80.23733988  | <a href="https://www.inaturalist.org/observations/116764862">https://www.inaturalist.org/observations/116764862</a> |
| 2062 | Eudynamys scolopaceus                | Western Koel | 2016/9/5  | 6 | 0 | 30.28614200 | 77.97352700  | <a href="http://www.inaturalist.org/observations/4046429">http://www.inaturalist.org/observations/4046429</a>       |
| 2063 | Eudynamys scolopaceus                | Western Koel | 2015/4/29 | 6 | 0 | 30.28633900 | 77.97342800  | <a href="http://www.inaturalist.org/observations/1436072">http://www.inaturalist.org/observations/1436072</a>       |
| 2064 | Eudynamys scolopaceus                | Western Koel | 2021/9/5  | 2 | 0 | 30.31770112 | 78.05934191  | <a href="https://www.inaturalist.org/observations/93960823">https://www.inaturalist.org/observations/93960823</a>   |
| 2065 | Eudynamys scolopaceus                | Western Koel | 2019/9/3  | 5 | 0 | 30.34112084 | 78.00147058  | <a href="https://www.inaturalist.org/observations/32951094">https://www.inaturalist.org/observations/32951094</a>   |
| 2066 | Eudynamys scolopaceus                | Western Koel | 2021/5/9  | 2 | 0 | 30.36441337 | 76.78801943  | <a href="https://www.inaturalist.org/observations/78053688">https://www.inaturalist.org/observations/78053688</a>   |
| 2067 | Eudynamys scolopaceus                | Western Koel | 2020/4/6  | 4 | 0 | 30.44824690 | 77.75494910  | <a href="https://www.inaturalist.org/observations/132805864">https://www.inaturalist.org/observations/132805864</a> |
| 2068 | Eudynamys scolopaceus                | Western Koel | 2020/7/1  | 3 | 0 | 30.44824690 | 77.75494910  | <a href="https://www.inaturalist.org/observations/134590639">https://www.inaturalist.org/observations/134590639</a> |
| 2069 | Eudynamys scolopaceus                | Western Koel | 2019/5/17 | 1 | 0 | 30.47176704 | 114.36110100 | <a href="https://www.inaturalist.org/observations/111455878">https://www.inaturalist.org/observations/111455878</a> |

|      |                              |              |            |   |   |             |              |                                                                                                                     |
|------|------------------------------|--------------|------------|---|---|-------------|--------------|---------------------------------------------------------------------------------------------------------------------|
| 2070 | <i>Eudynamys scolopaceus</i> | Western Koel | 2019/5/9   | 1 | 0 | 30.47650002 | 114.36095790 | <a href="https://www.inaturalist.org/observations/111394829">https://www.inaturalist.org/observations/111394829</a> |
| 2071 | <i>Eudynamys scolopaceus</i> | Western Koel | 2021/5/18  | 2 | 0 | 30.53783998 | 114.36024900 | <a href="https://www.inaturalist.org/observations/113690222">https://www.inaturalist.org/observations/113690222</a> |
| 2072 | <i>Eudynamys scolopaceus</i> | Western Koel | 2020/9/29  | 1 | 0 | 30.54305591 | 114.35723500 | <a href="https://www.inaturalist.org/observations/112849355">https://www.inaturalist.org/observations/112849355</a> |
| 2073 | <i>Eudynamys scolopaceus</i> | Western Koel | 2021/2/6   | 1 | 0 | 30.66269073 | 104.08271820 | <a href="https://www.inaturalist.org/observations/69131282">https://www.inaturalist.org/observations/69131282</a>   |
| 2074 | <i>Eudynamys scolopaceus</i> | Western Koel | 2018/12/20 | 2 | 0 | 30.81848442 | 76.75438440  | <a href="https://www.inaturalist.org/observations/135476170">https://www.inaturalist.org/observations/135476170</a> |
| 2075 | <i>Eudynamys scolopaceus</i> | Western Koel | 2021/6/25  | 1 | 0 | 31.51225259 | 120.23368010 | <a href="https://www.inaturalist.org/observations/84399095">https://www.inaturalist.org/observations/84399095</a>   |
| 2076 | <i>Eudynamys scolopaceus</i> | Western Koel | 2022/3/17  | 3 | 0 | 31.56403500 | 76.86171630  | <a href="https://www.inaturalist.org/observations/108794675">https://www.inaturalist.org/observations/108794675</a> |
| 2077 | <i>Eudynamys scolopaceus</i> | Western Koel | 2022/3/17  | 4 | 0 | 31.56568807 | 76.86132554  | <a href="https://www.inaturalist.org/observations/108794591">https://www.inaturalist.org/observations/108794591</a> |
| 2078 | <i>Eudynamys scolopaceus</i> | Western Koel | 2020/7/29  | 0 | 0 | 31.97297700 | 114.30958600 | <a href="https://www.inaturalist.org/observations/109444079">https://www.inaturalist.org/observations/109444079</a> |
| 2079 | <i>Eudynamys scolopaceus</i> | Western Koel | 2020/7/29  | 1 | 0 | 31.97297700 | 114.30958600 | <a href="https://www.inaturalist.org/observations/109444080">https://www.inaturalist.org/observations/109444080</a> |
| 2080 | <i>Eudynamys scolopaceus</i> | Western Koel | 2020/7/29  | 1 | 0 | 31.97297700 | 114.30958600 | <a href="https://www.inaturalist.org/observations/109444081">https://www.inaturalist.org/observations/109444081</a> |
| 2081 | <i>Eudynamys scolopaceus</i> | Western Koel | 2022/5/14  | 1 | 0 | 32.04718333 | 118.53853830 | <a href="https://www.inaturalist.org/observations/118487140">https://www.inaturalist.org/observations/118487140</a> |
| 2082 | <i>Eudynamys scolopaceus</i> | Western Koel | 2022/4/27  | 1 | 0 | 32.07668523 | 118.81129080 | <a href="https://www.inaturalist.org/observations/113075631">https://www.inaturalist.org/observations/113075631</a> |
| 2083 | <i>Eudynamys scolopaceus</i> | Western Koel | 2022/4/29  | 0 | 0 | 32.07710398 | 118.81553740 | <a href="https://www.inaturalist.org/observations/113363063">https://www.inaturalist.org/observations/113363063</a> |
| 2084 | <i>Eudynamys scolopaceus</i> | Western Koel | 2022/5/7   | 2 | 0 | 32.07715881 | 118.81737240 | <a href="https://www.inaturalist.org/observations/115857752">https://www.inaturalist.org/observations/115857752</a> |
| 2085 | <i>Eudynamys scolopaceus</i> | Western Koel | 2021/5/22  | 1 | 0 | 32.07721726 | 118.81700240 | <a href="https://www.inaturalist.org/observations/79718907">https://www.inaturalist.org/observations/79718907</a>   |
| 2086 | <i>Eudynamys scolopaceus</i> | Western Koel | 2022/5/26  | 0 | 0 | 32.07726566 | 118.81704430 | <a href="https://www.inaturalist.org/observations/118716755">https://www.inaturalist.org/observations/118716755</a> |
| 2087 | <i>Eudynamys scolopaceus</i> | Western Koel | 2022/5/7   | 1 | 0 | 32.07736433 | 118.81697040 | <a href="https://www.inaturalist.org/observations/115853867">https://www.inaturalist.org/observations/115853867</a> |
| 2088 | <i>Eudynamys scolopaceus</i> | Western Koel | 2022/5/20  | 0 | 0 | 32.07751767 | 118.81716720 | <a href="https://www.inaturalist.org/observations/117792470">https://www.inaturalist.org/observations/117792470</a> |
| 2089 | <i>Eudynamys scolopaceus</i> | Western Koel | 2022/5/13  | 1 | 0 | 32.07802927 | 118.80947910 | <a href="https://www.inaturalist.org/observations/116781201">https://www.inaturalist.org/observations/116781201</a> |
| 2090 | <i>Eudynamys scolopaceus</i> | Western Koel | 2021/8/2   | 1 | 0 | 32.07829530 | 118.80893820 | <a href="https://www.inaturalist.org/observations/89612719">https://www.inaturalist.org/observations/89612719</a>   |
| 2091 | <i>Eudynamys scolopaceus</i> | Western Koel | 2022/5/1   | 1 | 0 | 32.08186863 | 118.81887770 | <a href="https://www.inaturalist.org/observations/114578669">https://www.inaturalist.org/observations/114578669</a> |
| 2092 | <i>Eudynamys scolopaceus</i> | Western Koel | 2022/4/6   | 2 | 0 | 32.08808671 | 76.54973967  | <a href="https://www.inaturalist.org/observations/110545398">https://www.inaturalist.org/observations/110545398</a> |

|      |                              |              |           |   |   |             |              |                                                                                                                     |
|------|------------------------------|--------------|-----------|---|---|-------------|--------------|---------------------------------------------------------------------------------------------------------------------|
| 2093 | <i>Eudynamys scolopaceus</i> | Western Koel | 2020/5/28 | 4 | 0 | 32.08809253 | 76.54972091  | <a href="https://www.inaturalist.org/observations/109068994">https://www.inaturalist.org/observations/109068994</a> |
| 2094 | <i>Eudynamys scolopaceus</i> | Western Koel | 2021/5/28 | 2 | 0 | 32.18486404 | 75.97159576  | <a href="https://www.inaturalist.org/observations/80668487">https://www.inaturalist.org/observations/80668487</a>   |
| 2095 | <i>Eudynamys scolopaceus</i> | Western Koel | 2021/4/11 | 1 | 0 | 32.18488842 | 75.97159601  | <a href="https://www.inaturalist.org/observations/74161200">https://www.inaturalist.org/observations/74161200</a>   |
| 2096 | <i>Eudynamys scolopaceus</i> | Western Koel | 2021/6/19 | 1 | 0 | 32.19905833 | 118.97827670 | <a href="https://www.inaturalist.org/observations/88852255">https://www.inaturalist.org/observations/88852255</a>   |
| 2097 | <i>Eudynamys scolopaceus</i> | Western Koel | 2020/5/25 | 1 | 0 | 32.24671248 | 76.33452780  | <a href="https://www.inaturalist.org/observations/57537560">https://www.inaturalist.org/observations/57537560</a>   |
| 2098 | <i>Eudynamys scolopaceus</i> | Western Koel | 2020/8/2  | 4 | 0 | 34.08360808 | 74.79728222  | <a href="https://www.inaturalist.org/observations/61132706">https://www.inaturalist.org/observations/61132706</a>   |
| 2099 | <i>Eudynamys scolopaceus</i> | Western Koel | 2021/6/9  | 1 | 0 | 34.76017897 | 113.66507200 | <a href="https://www.inaturalist.org/observations/82229640">https://www.inaturalist.org/observations/82229640</a>   |
| 2100 | <i>Eudynamys scolopaceus</i> | Western Koel | 2021/6/9  | 1 | 0 | 34.76272548 | 113.67321470 | <a href="https://www.inaturalist.org/observations/82254323">https://www.inaturalist.org/observations/82254323</a>   |
| 2101 | <i>Eudynamys scolopaceus</i> | Western Koel | 2019/5/3  | 0 | 0 | 36.27188000 | 117.04179000 | <a href="https://www.inaturalist.org/observations/127969424">https://www.inaturalist.org/observations/127969424</a> |
| 2102 | <i>Eudynamys scolopaceus</i> | Western Koel | 2022/8/20 | 0 | 0 | 38.37199844 | 114.00388940 | <a href="https://www.inaturalist.org/observations/131564327">https://www.inaturalist.org/observations/131564327</a> |
| 2103 | <i>Eudynamys scolopaceus</i> | Western Koel | 2022/6/30 | 0 | 0 | 40.00763102 | 116.30369730 | <a href="https://www.inaturalist.org/observations/125111389">https://www.inaturalist.org/observations/125111389</a> |
| 2104 | <i>Eudynamys scolopaceus</i> | Western Koel | 2022/6/30 | 1 | 0 | 40.00953557 | 116.30844540 | <a href="https://www.inaturalist.org/observations/129116751">https://www.inaturalist.org/observations/129116751</a> |
| 2105 | <i>Eudynamys scolopaceus</i> | Western Koel | 2019/6/7  | 2 | 0 | 40.27256333 | 116.83514670 | <a href="https://www.inaturalist.org/observations/26917872">https://www.inaturalist.org/observations/26917872</a>   |
| 2106 | <i>Eudynamys scolopaceus</i> | Western Koel | 2021/5/23 | 1 | 0 | 40.54484924 | 116.78955730 | <a href="https://www.inaturalist.org/observations/81171992">https://www.inaturalist.org/observations/81171992</a>   |

| No | scientific name              | common name        | date       | NIA | NID | latitude    | longitude    | url                                                                                                                 |
|----|------------------------------|--------------------|------------|-----|-----|-------------|--------------|---------------------------------------------------------------------------------------------------------------------|
| 1  | <i>Glaucidium cuculoides</i> | Asian Barred Owlet | 2021/2/4   | 2   | 0   | 19.12620281 | 109.08279030 | <a href="https://www.inaturalist.org/observations/69194045">https://www.inaturalist.org/observations/69194045</a>   |
| 2  | <i>Glaucidium cuculoides</i> | Asian Barred Owlet | 2020/1/14  | 1   | 0   | 19.43928300 | 108.84745000 | <a href="https://www.inaturalist.org/observations/37780928">https://www.inaturalist.org/observations/37780928</a>   |
| 3  | <i>Glaucidium cuculoides</i> | Asian Barred Owlet | 2021/1/25  | 1   | 0   | 21.91289336 | 101.23454480 | <a href="https://www.inaturalist.org/observations/68620818">https://www.inaturalist.org/observations/68620818</a>   |
| 4  | <i>Glaucidium cuculoides</i> | Asian Barred Owlet | 2020/2/11  | 0   | 0   | 21.91520834 | 101.26469720 | <a href="https://www.inaturalist.org/observations/38533948">https://www.inaturalist.org/observations/38533948</a>   |
| 5  | <i>Glaucidium cuculoides</i> | Asian Barred Owlet | 2021/11/18 | 0   | 0   | 21.91555977 | 101.26493070 | <a href="https://www.inaturalist.org/observations/101391908">https://www.inaturalist.org/observations/101391908</a> |
| 6  | <i>Glaucidium cuculoides</i> | Asian Barred Owlet | 2021/3/13  | 2   | 0   | 21.91857529 | 101.26787570 | <a href="https://www.inaturalist.org/observations/71107898">https://www.inaturalist.org/observations/71107898</a>   |
| 7  | <i>Glaucidium cuculoides</i> | Asian Barred Owlet | 2017/8/8   | 0   | 0   | 21.92423600 | 101.25923600 | <a href="https://www.inaturalist.org/observations/38562270">https://www.inaturalist.org/observations/38562270</a>   |
| 8  | <i>Glaucidium cuculoides</i> | Asian Barred Owlet | 2013/2/21  | 1   | 0   | 21.92551462 | 101.26529770 | <a href="https://www.inaturalist.org/observations/36622226">https://www.inaturalist.org/observations/36622226</a>   |
| 9  | <i>Glaucidium cuculoides</i> | Asian Barred Owlet | 2020/1/12  | 1   | 0   | 21.93421657 | 101.24413410 | <a href="https://www.inaturalist.org/observations/37608099">https://www.inaturalist.org/observations/37608099</a>   |
| 10 | <i>Glaucidium cuculoides</i> | Asian Barred Owlet | 2020/5/28  | 1   | 0   | 22.31930390 | 114.16936110 | <a href="https://www.inaturalist.org/observations/49546786">https://www.inaturalist.org/observations/49546786</a>   |
| 11 | <i>Glaucidium cuculoides</i> | Asian Barred Owlet | 2017/12/24 | 2   | 0   | 22.37042430 | 114.12341490 | <a href="https://www.inaturalist.org/observations/42744144">https://www.inaturalist.org/observations/42744144</a>   |
| 12 | <i>Glaucidium cuculoides</i> | Asian Barred Owlet | 2016/3/18  | 2   | 0   | 22.40822080 | 114.15826690 | <a href="https://www.inaturalist.org/observations/55466164">https://www.inaturalist.org/observations/55466164</a>   |
| 13 | <i>Glaucidium cuculoides</i> | Asian Barred Owlet | 2022/5/2   | 4   | 0   | 22.41703666 | 114.04914190 | <a href="https://www.inaturalist.org/observations/114988874">https://www.inaturalist.org/observations/114988874</a> |
| 14 | <i>Glaucidium cuculoides</i> | Asian Barred Owlet | 2020/4/25  | 1   | 0   | 22.41704147 | 114.02716650 | <a href="https://www.inaturalist.org/observations/44733992">https://www.inaturalist.org/observations/44733992</a>   |
| 15 | <i>Glaucidium cuculoides</i> | Asian Barred Owlet | 2020/5/23  | 1   | 0   | 22.41737637 | 114.08494240 | <a href="https://www.inaturalist.org/observations/80838248">https://www.inaturalist.org/observations/80838248</a>   |
| 16 | <i>Glaucidium cuculoides</i> | Asian Barred Owlet | 2020/5/10  | 2   | 0   | 22.42301234 | 114.09396270 | <a href="https://www.inaturalist.org/observations/53115746">https://www.inaturalist.org/observations/53115746</a>   |
| 17 | <i>Glaucidium cuculoides</i> | Asian Barred Owlet | 2018/9/3   | 4   | 0   | 22.42890271 | 114.08379110 | <a href="https://www.inaturalist.org/observations/16159253">https://www.inaturalist.org/observations/16159253</a>   |
| 18 | <i>Glaucidium cuculoides</i> | Asian Barred Owlet | 2018/10/8  | 4   | 0   | 22.42906014 | 114.08246880 | <a href="https://www.inaturalist.org/observations/17306365">https://www.inaturalist.org/observations/17306365</a>   |
| 19 | <i>Glaucidium cuculoides</i> | Asian Barred Owlet | 2022/4/23  | 3   | 0   | 22.42964500 | 114.18110500 | <a href="https://www.inaturalist.org/observations/112491600">https://www.inaturalist.org/observations/112491600</a> |
| 20 | <i>Glaucidium cuculoides</i> | Asian Barred Owlet | 2018/10/25 | 3   | 0   | 22.43058057 | 114.08371230 | <a href="https://www.inaturalist.org/observations/17814132">https://www.inaturalist.org/observations/17814132</a>   |
| 21 | <i>Glaucidium cuculoides</i> | Asian Barred Owlet | 2018/10/9  | 4   | 0   | 22.43096641 | 114.09437340 | <a href="https://www.inaturalist.org/observations/17336797">https://www.inaturalist.org/observations/17336797</a>   |
| 22 | <i>Glaucidium cuculoides</i> | Asian Barred Owlet | 2016/4/5   | 2   | 0   | 22.43500694 | 114.07391760 | <a href="https://www.inaturalist.org/observations/36282877">https://www.inaturalist.org/observations/36282877</a>   |

|    |                              |                    |            |   |   |             |              |                                                                                                                     |
|----|------------------------------|--------------------|------------|---|---|-------------|--------------|---------------------------------------------------------------------------------------------------------------------|
| 23 | <i>Glaucidium cuculoides</i> | Asian Barred Owlet | 2008/5/12  | 1 | 0 | 22.44005800 | 114.06500770 | <a href="https://www.inaturalist.org/observations/65011136">https://www.inaturalist.org/observations/65011136</a>   |
| 24 | <i>Glaucidium cuculoides</i> | Asian Barred Owlet | 2020/4/17  | 2 | 0 | 22.44362900 | 114.13137200 | <a href="https://www.inaturalist.org/observations/42375346">https://www.inaturalist.org/observations/42375346</a>   |
| 25 | <i>Glaucidium cuculoides</i> | Asian Barred Owlet | 2020/9/4   | 0 | 0 | 22.44450730 | 114.14079140 | <a href="https://www.inaturalist.org/observations/59127142">https://www.inaturalist.org/observations/59127142</a>   |
| 26 | <i>Glaucidium cuculoides</i> | Asian Barred Owlet | 2019/4/27  | 2 | 0 | 22.44531948 | 114.14108690 | <a href="https://www.inaturalist.org/observations/24242434">https://www.inaturalist.org/observations/24242434</a>   |
| 27 | <i>Glaucidium cuculoides</i> | Asian Barred Owlet | 2020/3/7   | 1 | 0 | 22.44724580 | 114.12853930 | <a href="https://www.inaturalist.org/observations/39838728">https://www.inaturalist.org/observations/39838728</a>   |
| 28 | <i>Glaucidium cuculoides</i> | Asian Barred Owlet | 2020/5/15  | 4 | 0 | 22.44759350 | 114.06069740 | <a href="https://www.inaturalist.org/observations/46036761">https://www.inaturalist.org/observations/46036761</a>   |
| 29 | <i>Glaucidium cuculoides</i> | Asian Barred Owlet | 2020/5/14  | 1 | 0 | 22.44761998 | 114.06072150 | <a href="https://www.inaturalist.org/observations/103726294">https://www.inaturalist.org/observations/103726294</a> |
| 30 | <i>Glaucidium cuculoides</i> | Asian Barred Owlet | 2009/12/20 | 1 | 0 | 22.44763400 | 114.06070500 | <a href="https://www.inaturalist.org/observations/51225218">https://www.inaturalist.org/observations/51225218</a>   |
| 31 | <i>Glaucidium cuculoides</i> | Asian Barred Owlet | 2020/5/15  | 1 | 0 | 22.44765540 | 114.06068630 | <a href="https://www.inaturalist.org/observations/103726744">https://www.inaturalist.org/observations/103726744</a> |
| 32 | <i>Glaucidium cuculoides</i> | Asian Barred Owlet | 2015/4/23  | 4 | 0 | 22.44775800 | 114.06118300 | <a href="https://www.inaturalist.org/observations/15313040">https://www.inaturalist.org/observations/15313040</a>   |
| 33 | <i>Glaucidium cuculoides</i> | Asian Barred Owlet | 2020/5/28  | 1 | 0 | 22.44778889 | 114.06071670 | <a href="https://www.inaturalist.org/observations/96342730">https://www.inaturalist.org/observations/96342730</a>   |
| 34 | <i>Glaucidium cuculoides</i> | Asian Barred Owlet | 2012/3/2   | 1 | 0 | 22.44814700 | 114.06164700 | <a href="https://www.inaturalist.org/observations/35905165">https://www.inaturalist.org/observations/35905165</a>   |
| 35 | <i>Glaucidium cuculoides</i> | Asian Barred Owlet | 2022/4/19  | 3 | 0 | 22.48197042 | 114.18954100 | <a href="https://www.inaturalist.org/observations/112762717">https://www.inaturalist.org/observations/112762717</a> |
| 36 | <i>Glaucidium cuculoides</i> | Asian Barred Owlet | 2017/4/3   | 1 | 0 | 22.48938729 | 114.03578930 | <a href="https://www.inaturalist.org/observations/73674130">https://www.inaturalist.org/observations/73674130</a>   |
| 37 | <i>Glaucidium cuculoides</i> | Asian Barred Owlet | 2016/3/19  | 4 | 0 | 22.48993089 | 114.04178150 | <a href="https://www.inaturalist.org/observations/116948190">https://www.inaturalist.org/observations/116948190</a> |
| 38 | <i>Glaucidium cuculoides</i> | Asian Barred Owlet | 2016/5/13  | 2 | 0 | 22.49038708 | 114.03837710 | <a href="https://www.inaturalist.org/observations/116947974">https://www.inaturalist.org/observations/116947974</a> |
| 39 | <i>Glaucidium cuculoides</i> | Asian Barred Owlet | 2016/4/2   | 2 | 0 | 22.49184506 | 114.03517880 | <a href="https://www.inaturalist.org/observations/58912851">https://www.inaturalist.org/observations/58912851</a>   |
| 40 | <i>Glaucidium cuculoides</i> | Asian Barred Owlet | 2022/5/14  | 4 | 0 | 22.49334256 | 114.04513290 | <a href="https://www.inaturalist.org/observations/116938016">https://www.inaturalist.org/observations/116938016</a> |
| 41 | <i>Glaucidium cuculoides</i> | Asian Barred Owlet | 2016/3/9   | 4 | 0 | 22.49420600 | 114.04462600 | <a href="https://www.inaturalist.org/observations/14469486">https://www.inaturalist.org/observations/14469486</a>   |
| 42 | <i>Glaucidium cuculoides</i> | Asian Barred Owlet | 2016/3/9   | 4 | 0 | 22.49573300 | 114.04882100 | <a href="https://www.inaturalist.org/observations/14469551">https://www.inaturalist.org/observations/14469551</a>   |
| 43 | <i>Glaucidium cuculoides</i> | Asian Barred Owlet | 2021/5/2   | 1 | 0 | 22.49608750 | 114.04751830 | <a href="https://www.inaturalist.org/observations/76775892">https://www.inaturalist.org/observations/76775892</a>   |
| 44 | <i>Glaucidium cuculoides</i> | Asian Barred Owlet | 2017/8/19  | 3 | 0 | 22.50446346 | 114.10926460 | <a href="https://www.inaturalist.org/observations/121862819">https://www.inaturalist.org/observations/121862819</a> |
| 45 | <i>Glaucidium cuculoides</i> | Asian Barred Owlet | 2020/11/8  | 1 | 0 | 22.50685522 | 114.11156470 | <a href="https://www.inaturalist.org/observations/118553099">https://www.inaturalist.org/observations/118553099</a> |

|    |                              |                    |            |   |   |             |              |                                                                                                                     |
|----|------------------------------|--------------------|------------|---|---|-------------|--------------|---------------------------------------------------------------------------------------------------------------------|
| 46 | <i>Glaucidium cuculoides</i> | Asian Barred Owlet | 2019/9/7   | 2 | 0 | 22.50978394 | 114.11175350 | <a href="https://www.inaturalist.org/observations/32456299">https://www.inaturalist.org/observations/32456299</a>   |
| 47 | <i>Glaucidium cuculoides</i> | Asian Barred Owlet | 2011/5/4   | 0 | 0 | 22.51164500 | 114.10990900 | <a href="https://www.inaturalist.org/observations/39272132">https://www.inaturalist.org/observations/39272132</a>   |
| 48 | <i>Glaucidium cuculoides</i> | Asian Barred Owlet | 2022/5/25  | 1 | 0 | 22.56392900 | 113.97499100 | <a href="https://www.inaturalist.org/observations/118500936">https://www.inaturalist.org/observations/118500936</a> |
| 49 | <i>Glaucidium cuculoides</i> | Asian Barred Owlet | 2021/4/25  | 1 | 0 | 23.15144100 | 113.38583330 | <a href="https://www.inaturalist.org/observations/75537625">https://www.inaturalist.org/observations/75537625</a>   |
| 50 | <i>Glaucidium cuculoides</i> | Asian Barred Owlet | 2021/6/6   | 1 | 0 | 23.21605221 | 113.25026450 | <a href="https://www.inaturalist.org/observations/81849424">https://www.inaturalist.org/observations/81849424</a>   |
| 51 | <i>Glaucidium cuculoides</i> | Asian Barred Owlet | 2022/3/19  | 3 | 0 | 23.55402440 | 91.45063720  | <a href="https://www.inaturalist.org/observations/111089257">https://www.inaturalist.org/observations/111089257</a> |
| 52 | <i>Glaucidium cuculoides</i> | Asian Barred Owlet | 2021/3/27  | 1 | 0 | 23.77072687 | 92.70146091  | <a href="https://www.inaturalist.org/observations/72854933">https://www.inaturalist.org/observations/72854933</a>   |
| 53 | <i>Glaucidium cuculoides</i> | Asian Barred Owlet | 2022/3/18  | 2 | 0 | 23.83033923 | 92.61308298  | <a href="https://www.inaturalist.org/observations/111081497">https://www.inaturalist.org/observations/111081497</a> |
| 54 | <i>Glaucidium cuculoides</i> | Asian Barred Owlet | 2021/2/14  | 1 | 0 | 24.32600200 | 92.34160000  | <a href="https://www.inaturalist.org/observations/73584072">https://www.inaturalist.org/observations/73584072</a>   |
| 55 | <i>Glaucidium cuculoides</i> | Asian Barred Owlet | 2016/12/18 | 4 | 0 | 24.33826000 | 92.34176200  | <a href="https://www.inaturalist.org/observations/4799467">https://www.inaturalist.org/observations/4799467</a>     |
| 56 | <i>Glaucidium cuculoides</i> | Asian Barred Owlet | 2021/2/27  | 2 | 0 | 24.35267420 | 92.34481540  | <a href="https://www.inaturalist.org/observations/70992745">https://www.inaturalist.org/observations/70992745</a>   |
| 57 | <i>Glaucidium cuculoides</i> | Asian Barred Owlet | 2021/7/27  | 1 | 0 | 24.35267420 | 92.34481540  | <a href="https://www.inaturalist.org/observations/95629613">https://www.inaturalist.org/observations/95629613</a>   |
| 58 | <i>Glaucidium cuculoides</i> | Asian Barred Owlet | 2019/5/30  | 2 | 0 | 24.35273943 | 92.34482345  | <a href="https://www.inaturalist.org/observations/26848672">https://www.inaturalist.org/observations/26848672</a>   |
| 59 | <i>Glaucidium cuculoides</i> | Asian Barred Owlet | 2018/11/7  | 2 | 0 | 24.35648280 | 92.34330460  | <a href="https://www.inaturalist.org/observations/19131890">https://www.inaturalist.org/observations/19131890</a>   |
| 60 | <i>Glaucidium cuculoides</i> | Asian Barred Owlet | 2020/3/23  | 1 | 0 | 24.42563331 | 92.33881554  | <a href="https://www.inaturalist.org/observations/48099649">https://www.inaturalist.org/observations/48099649</a>   |
| 61 | <i>Glaucidium cuculoides</i> | Asian Barred Owlet | 2021/1/27  | 4 | 0 | 24.42563331 | 92.33881554  | <a href="https://www.inaturalist.org/observations/69979259">https://www.inaturalist.org/observations/69979259</a>   |
| 62 | <i>Glaucidium cuculoides</i> | Asian Barred Owlet | 2019/2/3   | 1 | 0 | 24.42667000 | 92.33882500  | <a href="https://www.inaturalist.org/observations/20340311">https://www.inaturalist.org/observations/20340311</a>   |
| 63 | <i>Glaucidium cuculoides</i> | Asian Barred Owlet | 2018/10/6  | 2 | 0 | 24.42837700 | 92.33509500  | <a href="https://www.inaturalist.org/observations/19434595">https://www.inaturalist.org/observations/19434595</a>   |
| 64 | <i>Glaucidium cuculoides</i> | Asian Barred Owlet | 2019/10/25 | 2 | 0 | 24.43199102 | 92.33041618  | <a href="https://www.inaturalist.org/observations/35039976">https://www.inaturalist.org/observations/35039976</a>   |
| 65 | <i>Glaucidium cuculoides</i> | Asian Barred Owlet | 2020/5/24  | 1 | 0 | 24.43199539 | 92.33054352  | <a href="https://www.inaturalist.org/observations/47141377">https://www.inaturalist.org/observations/47141377</a>   |
| 66 | <i>Glaucidium cuculoides</i> | Asian Barred Owlet | 2012/5/20  | 5 | 0 | 24.43201970 | 92.33068940  | <a href="http://www.inaturalist.org/observations/122941">http://www.inaturalist.org/observations/122941</a>         |
| 67 | <i>Glaucidium cuculoides</i> | Asian Barred Owlet | 2013/3/20  | 4 | 0 | 24.43201970 | 92.33068940  | <a href="http://www.inaturalist.org/observations/220382">http://www.inaturalist.org/observations/220382</a>         |
| 68 | <i>Glaucidium cuculoides</i> | Asian Barred Owlet | 2013/4/1   | 5 | 0 | 24.43201970 | 92.33068940  | <a href="http://www.inaturalist.org/observations/228285">http://www.inaturalist.org/observations/228285</a>         |

|    |                              |                    |            |   |   |             |              |                                                                                                                     |
|----|------------------------------|--------------------|------------|---|---|-------------|--------------|---------------------------------------------------------------------------------------------------------------------|
| 69 | <i>Glaucidium cuculoides</i> | Asian Barred Owlet | 2018/1/28  | 2 | 0 | 24.43201970 | 92.33068940  | <a href="https://www.inaturalist.org/observations/21045082">https://www.inaturalist.org/observations/21045082</a>   |
| 70 | <i>Glaucidium cuculoides</i> | Asian Barred Owlet | 2021/3/12  | 4 | 0 | 24.43201971 | 92.33068943  | <a href="https://www.inaturalist.org/observations/71046353">https://www.inaturalist.org/observations/71046353</a>   |
| 71 | <i>Glaucidium cuculoides</i> | Asian Barred Owlet | 2021/5/27  | 2 | 0 | 24.43201971 | 92.33068943  | <a href="https://www.inaturalist.org/observations/80450957">https://www.inaturalist.org/observations/80450957</a>   |
| 72 | <i>Glaucidium cuculoides</i> | Asian Barred Owlet | 2022/5/30  | 2 | 0 | 24.43201971 | 92.33068943  | <a href="https://www.inaturalist.org/observations/136658223">https://www.inaturalist.org/observations/136658223</a> |
| 73 | <i>Glaucidium cuculoides</i> | Asian Barred Owlet | 2013/9/1   | 4 | 0 | 24.43202000 | 92.33068900  | <a href="http://www.inaturalist.org/observations/388688">http://www.inaturalist.org/observations/388688</a>         |
| 74 | <i>Glaucidium cuculoides</i> | Asian Barred Owlet | 2014/1/3   | 5 | 0 | 24.43202000 | 92.33068900  | <a href="http://www.inaturalist.org/observations/497235">http://www.inaturalist.org/observations/497235</a>         |
| 75 | <i>Glaucidium cuculoides</i> | Asian Barred Owlet | 2017/2/12  | 3 | 0 | 24.43202000 | 92.33068900  | <a href="https://www.inaturalist.org/observations/5134709">https://www.inaturalist.org/observations/5134709</a>     |
| 76 | <i>Glaucidium cuculoides</i> | Asian Barred Owlet | 2018/12/30 | 4 | 0 | 24.43202000 | 92.33068900  | <a href="https://www.inaturalist.org/observations/29239578">https://www.inaturalist.org/observations/29239578</a>   |
| 77 | <i>Glaucidium cuculoides</i> | Asian Barred Owlet | 2010/9/5   | 3 | 0 | 24.43202000 | 92.33068900  | <a href="https://www.inaturalist.org/observations/103518474">https://www.inaturalist.org/observations/103518474</a> |
| 78 | <i>Glaucidium cuculoides</i> | Asian Barred Owlet | 2010/9/11  | 1 | 0 | 24.43202000 | 92.33068900  | <a href="https://www.inaturalist.org/observations/103519498">https://www.inaturalist.org/observations/103519498</a> |
| 79 | <i>Glaucidium cuculoides</i> | Asian Barred Owlet | 2010/9/24  | 1 | 0 | 24.43202000 | 92.33068900  | <a href="https://www.inaturalist.org/observations/103525372">https://www.inaturalist.org/observations/103525372</a> |
| 80 | <i>Glaucidium cuculoides</i> | Asian Barred Owlet | 2011/2/8   | 3 | 0 | 24.43202000 | 92.33068900  | <a href="https://www.inaturalist.org/observations/103623384">https://www.inaturalist.org/observations/103623384</a> |
| 81 | <i>Glaucidium cuculoides</i> | Asian Barred Owlet | 2011/9/16  | 1 | 0 | 24.43202000 | 92.33068900  | <a href="https://www.inaturalist.org/observations/103671627">https://www.inaturalist.org/observations/103671627</a> |
| 82 | <i>Glaucidium cuculoides</i> | Asian Barred Owlet | 2021/4/11  | 2 | 0 | 24.43202521 | 92.33068943  | <a href="https://www.inaturalist.org/observations/74916080">https://www.inaturalist.org/observations/74916080</a>   |
| 83 | <i>Glaucidium cuculoides</i> | Asian Barred Owlet | 2021/4/3   | 1 | 0 | 24.43202674 | 92.33068943  | <a href="https://www.inaturalist.org/observations/72889230">https://www.inaturalist.org/observations/72889230</a>   |
| 84 | <i>Glaucidium cuculoides</i> | Asian Barred Owlet | 2021/4/12  | 3 | 0 | 24.43202674 | 92.33068943  | <a href="https://www.inaturalist.org/observations/73836521">https://www.inaturalist.org/observations/73836521</a>   |
| 85 | <i>Glaucidium cuculoides</i> | Asian Barred Owlet | 2020/5/20  | 2 | 0 | 24.43227400 | 92.33042100  | <a href="https://www.inaturalist.org/observations/48423440">https://www.inaturalist.org/observations/48423440</a>   |
| 86 | <i>Glaucidium cuculoides</i> | Asian Barred Owlet | 2017/1/29  | 3 | 0 | 24.43249300 | 92.33089400  | <a href="https://www.inaturalist.org/observations/5021755">https://www.inaturalist.org/observations/5021755</a>     |
| 87 | <i>Glaucidium cuculoides</i> | Asian Barred Owlet | 2020/3/6   | 2 | 0 | 24.43263388 | 92.33011946  | <a href="https://www.inaturalist.org/observations/39783481">https://www.inaturalist.org/observations/39783481</a>   |
| 88 | <i>Glaucidium cuculoides</i> | Asian Barred Owlet | 2021/7/15  | 1 | 0 | 24.44142194 | 118.09735480 | <a href="https://www.inaturalist.org/observations/112514837">https://www.inaturalist.org/observations/112514837</a> |
| 89 | <i>Glaucidium cuculoides</i> | Asian Barred Owlet | 2020/1/9   | 0 | 0 | 24.44798000 | 97.59565000  | <a href="https://www.inaturalist.org/observations/37424159">https://www.inaturalist.org/observations/37424159</a>   |
| 90 | <i>Glaucidium cuculoides</i> | Asian Barred Owlet | 2018/1/28  | 3 | 0 | 24.45128900 | 92.26333800  | <a href="https://www.inaturalist.org/observations/13138424">https://www.inaturalist.org/observations/13138424</a>   |
| 91 | <i>Glaucidium cuculoides</i> | Asian Barred Owlet | 2018/1/28  | 3 | 0 | 24.45812200 | 92.27699200  | <a href="https://www.inaturalist.org/observations/9729576">https://www.inaturalist.org/observations/9729576</a>     |



|     |                              |                    |            |   |   |             |             |                                                                                                                     |
|-----|------------------------------|--------------------|------------|---|---|-------------|-------------|---------------------------------------------------------------------------------------------------------------------|
| 92  | <i>Glaucidium cuculoides</i> | Asian Barred Owlet | 2019/7/8   | 2 | 0 | 24.46976625 | 92.27903585 | <a href="https://www.inaturalist.org/observations/29904805">https://www.inaturalist.org/observations/29904805</a>   |
| 93  | <i>Glaucidium cuculoides</i> | Asian Barred Owlet | 2020/2/23  | 4 | 0 | 24.47504000 | 92.29597900 | <a href="https://www.inaturalist.org/observations/41096794">https://www.inaturalist.org/observations/41096794</a>   |
| 94  | <i>Glaucidium cuculoides</i> | Asian Barred Owlet | 2011/8/14  | 2 | 0 | 24.47963200 | 92.32400800 | <a href="https://www.inaturalist.org/observations/103694367">https://www.inaturalist.org/observations/103694367</a> |
| 95  | <i>Glaucidium cuculoides</i> | Asian Barred Owlet | 2011/11/27 | 2 | 0 | 24.47963200 | 92.32400800 | <a href="https://www.inaturalist.org/observations/103748350">https://www.inaturalist.org/observations/103748350</a> |
| 96  | <i>Glaucidium cuculoides</i> | Asian Barred Owlet | 2019/11/26 | 2 | 0 | 24.48294400 | 92.29071229 | <a href="https://www.inaturalist.org/observations/45143559">https://www.inaturalist.org/observations/45143559</a>   |
| 97  | <i>Glaucidium cuculoides</i> | Asian Barred Owlet | 2020/2/5   | 1 | 0 | 24.48294400 | 92.29071229 | <a href="https://www.inaturalist.org/observations/46357641">https://www.inaturalist.org/observations/46357641</a>   |
| 98  | <i>Glaucidium cuculoides</i> | Asian Barred Owlet | 2020/3/1   | 2 | 0 | 24.48294400 | 92.29071229 | <a href="https://www.inaturalist.org/observations/46707395">https://www.inaturalist.org/observations/46707395</a>   |
| 99  | <i>Glaucidium cuculoides</i> | Asian Barred Owlet | 2020/3/1   | 1 | 0 | 24.48294400 | 92.29071229 | <a href="https://www.inaturalist.org/observations/46707399">https://www.inaturalist.org/observations/46707399</a>   |
| 100 | <i>Glaucidium cuculoides</i> | Asian Barred Owlet | 2020/3/1   | 2 | 0 | 24.48294400 | 92.29071229 | <a href="https://www.inaturalist.org/observations/46707402">https://www.inaturalist.org/observations/46707402</a>   |
| 101 | <i>Glaucidium cuculoides</i> | Asian Barred Owlet | 2020/3/1   | 2 | 0 | 24.48294400 | 92.29071229 | <a href="https://www.inaturalist.org/observations/46707414">https://www.inaturalist.org/observations/46707414</a>   |
| 102 | <i>Glaucidium cuculoides</i> | Asian Barred Owlet | 2021/10/24 | 3 | 0 | 24.48294400 | 92.29071229 | <a href="https://www.inaturalist.org/observations/101751284">https://www.inaturalist.org/observations/101751284</a> |
| 103 | <i>Glaucidium cuculoides</i> | Asian Barred Owlet | 2021/12/8  | 1 | 0 | 24.48294400 | 92.29071229 | <a href="https://www.inaturalist.org/observations/105087601">https://www.inaturalist.org/observations/105087601</a> |
| 104 | <i>Glaucidium cuculoides</i> | Asian Barred Owlet | 2021/12/18 | 2 | 0 | 24.48294400 | 92.29071229 | <a href="https://www.inaturalist.org/observations/105252918">https://www.inaturalist.org/observations/105252918</a> |
| 105 | <i>Glaucidium cuculoides</i> | Asian Barred Owlet | 2020/2/23  | 0 | 0 | 24.48863082 | 92.29947221 | <a href="https://www.inaturalist.org/observations/39148027">https://www.inaturalist.org/observations/39148027</a>   |
| 106 | <i>Glaucidium cuculoides</i> | Asian Barred Owlet | 2018/3/15  | 3 | 0 | 24.49770100 | 92.31476800 | <a href="https://www.inaturalist.org/observations/10306730">https://www.inaturalist.org/observations/10306730</a>   |
| 107 | <i>Glaucidium cuculoides</i> | Asian Barred Owlet | 2018/9/22  | 3 | 0 | 24.49770120 | 92.31476770 | <a href="https://www.inaturalist.org/observations/19567836">https://www.inaturalist.org/observations/19567836</a>   |
| 108 | <i>Glaucidium cuculoides</i> | Asian Barred Owlet | 2018/9/22  | 3 | 0 | 24.49770120 | 92.31476770 | <a href="https://www.inaturalist.org/observations/19567865">https://www.inaturalist.org/observations/19567865</a>   |
| 109 | <i>Glaucidium cuculoides</i> | Asian Barred Owlet | 2019/2/17  | 2 | 0 | 24.49770120 | 92.31476770 | <a href="https://www.inaturalist.org/observations/20848132">https://www.inaturalist.org/observations/20848132</a>   |
| 110 | <i>Glaucidium cuculoides</i> | Asian Barred Owlet | 2020/3/1   | 2 | 0 | 24.49770129 | 92.31476784 | <a href="https://www.inaturalist.org/observations/39557271">https://www.inaturalist.org/observations/39557271</a>   |
| 111 | <i>Glaucidium cuculoides</i> | Asian Barred Owlet | 2020/3/1   | 2 | 0 | 24.49770129 | 92.31476784 | <a href="https://www.inaturalist.org/observations/39650730">https://www.inaturalist.org/observations/39650730</a>   |
| 112 | <i>Glaucidium cuculoides</i> | Asian Barred Owlet | 2017/11/26 | 2 | 0 | 24.50061700 | 92.28797800 | <a href="https://www.inaturalist.org/observations/9482970">https://www.inaturalist.org/observations/9482970</a>     |
| 113 | <i>Glaucidium cuculoides</i> | Asian Barred Owlet | 2014/6/1   | 4 | 0 | 24.60054800 | 92.38136200 | <a href="http://www.inaturalist.org/observations/711682">http://www.inaturalist.org/observations/711682</a>         |
| 114 | <i>Glaucidium cuculoides</i> | Asian Barred Owlet | 2014/11/23 | 4 | 0 | 24.60054800 | 92.38136200 | <a href="http://www.inaturalist.org/observations/1144712">http://www.inaturalist.org/observations/1144712</a>       |

|     |                              |                    |            |   |   |             |              |                                                                                                                     |
|-----|------------------------------|--------------------|------------|---|---|-------------|--------------|---------------------------------------------------------------------------------------------------------------------|
| 115 | <i>Glaucidium cuculoides</i> | Asian Barred Owlet | 2016/1/4   | 5 | 0 | 24.60054800 | 92.38136200  | <a href="http://www.inaturalist.org/observations/2566764">http://www.inaturalist.org/observations/2566764</a>       |
| 116 | <i>Glaucidium cuculoides</i> | Asian Barred Owlet | 2013/1/6   | 5 | 0 | 24.60728790 | 92.38344120  | <a href="http://www.inaturalist.org/observations/174039">http://www.inaturalist.org/observations/174039</a>         |
| 117 | <i>Glaucidium cuculoides</i> | Asian Barred Owlet | 2013/10/13 | 5 | 0 | 24.60728800 | 92.38344100  | <a href="http://www.inaturalist.org/observations/427317">http://www.inaturalist.org/observations/427317</a>         |
| 118 | <i>Glaucidium cuculoides</i> | Asian Barred Owlet | 2021/5/18  | 1 | 0 | 25.04494950 | 101.52767030 | <a href="https://www.inaturalist.org/observations/132812670">https://www.inaturalist.org/observations/132812670</a> |
| 119 | <i>Glaucidium cuculoides</i> | Asian Barred Owlet | 2015/2/7   | 1 | 0 | 25.21613100 | 98.79726350  | <a href="https://www.inaturalist.org/observations/136024402">https://www.inaturalist.org/observations/136024402</a> |
| 120 | <i>Glaucidium cuculoides</i> | Asian Barred Owlet | 2021/11/16 | 3 | 0 | 25.51413182 | 90.20321421  | <a href="https://www.inaturalist.org/observations/101541421">https://www.inaturalist.org/observations/101541421</a> |
| 121 | <i>Glaucidium cuculoides</i> | Asian Barred Owlet | 2020/9/1   | 1 | 0 | 25.83565428 | 118.48482640 | <a href="https://www.inaturalist.org/observations/59676633">https://www.inaturalist.org/observations/59676633</a>   |
| 122 | <i>Glaucidium cuculoides</i> | Asian Barred Owlet | 2012/3/13  | 1 | 0 | 26.15206700 | 91.67336700  | <a href="https://www.inaturalist.org/observations/58444371">https://www.inaturalist.org/observations/58444371</a>   |
| 123 | <i>Glaucidium cuculoides</i> | Asian Barred Owlet | 2020/7/26  | 2 | 0 | 26.29962811 | 93.38532652  | <a href="https://www.inaturalist.org/observations/54375859">https://www.inaturalist.org/observations/54375859</a>   |
| 124 | <i>Glaucidium cuculoides</i> | Asian Barred Owlet | 2015/5/11  | 1 | 0 | 26.45629870 | 90.53800050  | <a href="https://www.inaturalist.org/observations/63774849">https://www.inaturalist.org/observations/63774849</a>   |
| 125 | <i>Glaucidium cuculoides</i> | Asian Barred Owlet | 2022/4/18  | 2 | 0 | 26.50934121 | 106.64975520 | <a href="https://www.inaturalist.org/observations/112151031">https://www.inaturalist.org/observations/112151031</a> |
| 126 | <i>Glaucidium cuculoides</i> | Asian Barred Owlet | 2014/3/2   | 1 | 0 | 26.52528130 | 92.99380800  | <a href="https://www.inaturalist.org/observations/56209879">https://www.inaturalist.org/observations/56209879</a>   |
| 127 | <i>Glaucidium cuculoides</i> | Asian Barred Owlet | 2014/3/2   | 2 | 0 | 26.52528130 | 92.99380800  | <a href="https://www.inaturalist.org/observations/56209891">https://www.inaturalist.org/observations/56209891</a>   |
| 128 | <i>Glaucidium cuculoides</i> | Asian Barred Owlet | 2022/2/15  | 2 | 0 | 26.54232838 | 91.91480890  | <a href="https://www.inaturalist.org/observations/107011452">https://www.inaturalist.org/observations/107011452</a> |
| 129 | <i>Glaucidium cuculoides</i> | Asian Barred Owlet | 2017/3/1   | 3 | 0 | 26.57753100 | 93.17112200  | <a href="https://www.inaturalist.org/observations/10429627">https://www.inaturalist.org/observations/10429627</a>   |
| 130 | <i>Glaucidium cuculoides</i> | Asian Barred Owlet | 2014/3/1   | 2 | 0 | 26.57753100 | 93.17112200  | <a href="https://www.inaturalist.org/observations/55376538">https://www.inaturalist.org/observations/55376538</a>   |
| 131 | <i>Glaucidium cuculoides</i> | Asian Barred Owlet | 2012/3/9   | 1 | 0 | 26.57755086 | 93.17110062  | <a href="https://www.inaturalist.org/observations/66843328">https://www.inaturalist.org/observations/66843328</a>   |
| 132 | <i>Glaucidium cuculoides</i> | Asian Barred Owlet | 2021/1/15  | 1 | 0 | 26.57890257 | 93.08794610  | <a href="https://www.inaturalist.org/observations/69968126">https://www.inaturalist.org/observations/69968126</a>   |
| 133 | <i>Glaucidium cuculoides</i> | Asian Barred Owlet | 2013/2/8   | 1 | 0 | 26.58517567 | 93.17021897  | <a href="https://www.inaturalist.org/observations/79802211">https://www.inaturalist.org/observations/79802211</a>   |
| 134 | <i>Glaucidium cuculoides</i> | Asian Barred Owlet | 2014/3/25  | 2 | 0 | 26.60853501 | 93.38492832  | <a href="https://www.inaturalist.org/observations/37594566">https://www.inaturalist.org/observations/37594566</a>   |
| 135 | <i>Glaucidium cuculoides</i> | Asian Barred Owlet | 2022/4/23  | 2 | 0 | 26.61607476 | 93.54431357  | <a href="https://www.inaturalist.org/observations/113236281">https://www.inaturalist.org/observations/113236281</a> |
| 136 | <i>Glaucidium cuculoides</i> | Asian Barred Owlet | 2011/2/28  | 3 | 0 | 26.61673545 | 93.39970026  | <a href="https://www.inaturalist.org/observations/55277025">https://www.inaturalist.org/observations/55277025</a>   |
| 137 | <i>Glaucidium cuculoides</i> | Asian Barred Owlet | 2011/2/24  | 3 | 0 | 26.61673545 | 93.39970026  | <a href="https://www.inaturalist.org/observations/55277027">https://www.inaturalist.org/observations/55277027</a>   |

|     |                              |                    |            |   |   |             |             |                                                                                                                     |
|-----|------------------------------|--------------------|------------|---|---|-------------|-------------|---------------------------------------------------------------------------------------------------------------------|
| 138 | <i>Glaucidium cuculoides</i> | Asian Barred Owlet | 2011/2/26  | 2 | 0 | 26.61673545 | 93.39970026 | <a href="https://www.inaturalist.org/observations/55277123">https://www.inaturalist.org/observations/55277123</a>   |
| 139 | <i>Glaucidium cuculoides</i> | Asian Barred Owlet | 2016/4/24  | 2 | 0 | 26.63046062 | 93.39038915 | <a href="https://www.inaturalist.org/observations/19494076">https://www.inaturalist.org/observations/19494076</a>   |
| 140 | <i>Glaucidium cuculoides</i> | Asian Barred Owlet | 2017/4/12  | 3 | 0 | 26.63401651 | 93.41144018 | <a href="https://www.inaturalist.org/observations/44328071">https://www.inaturalist.org/observations/44328071</a>   |
| 141 | <i>Glaucidium cuculoides</i> | Asian Barred Owlet | 2011/4/24  | 3 | 0 | 26.64128456 | 93.31088830 | <a href="https://www.inaturalist.org/observations/26546732">https://www.inaturalist.org/observations/26546732</a>   |
| 142 | <i>Glaucidium cuculoides</i> | Asian Barred Owlet | 2020/3/6   | 3 | 0 | 26.65111912 | 93.40602705 | <a href="https://www.inaturalist.org/observations/104722899">https://www.inaturalist.org/observations/104722899</a> |
| 143 | <i>Glaucidium cuculoides</i> | Asian Barred Owlet | 2006/2/3   | 1 | 0 | 26.65200000 | 93.38000000 | <a href="https://www.inaturalist.org/observations/104803835">https://www.inaturalist.org/observations/104803835</a> |
| 144 | <i>Glaucidium cuculoides</i> | Asian Barred Owlet | 2014/2/25  | 1 | 0 | 26.65279066 | 93.39019881 | <a href="https://www.inaturalist.org/observations/60714260">https://www.inaturalist.org/observations/60714260</a>   |
| 145 | <i>Glaucidium cuculoides</i> | Asian Barred Owlet | 2018/6/23  | 3 | 0 | 26.65873000 | 91.01534167 | <a href="https://www.inaturalist.org/observations/14464391">https://www.inaturalist.org/observations/14464391</a>   |
| 146 | <i>Glaucidium cuculoides</i> | Asian Barred Owlet | 2014/3/28  | 5 | 0 | 26.66394826 | 90.99658207 | <a href="https://www.inaturalist.org/observations/31006380">https://www.inaturalist.org/observations/31006380</a>   |
| 147 | <i>Glaucidium cuculoides</i> | Asian Barred Owlet | 2021/1/10  | 1 | 0 | 26.67336562 | 91.02759182 | <a href="https://www.inaturalist.org/observations/69828242">https://www.inaturalist.org/observations/69828242</a>   |
| 148 | <i>Glaucidium cuculoides</i> | Asian Barred Owlet | 2022/1/26  | 3 | 0 | 26.69690455 | 93.98164205 | <a href="https://www.inaturalist.org/observations/105714278">https://www.inaturalist.org/observations/105714278</a> |
| 149 | <i>Glaucidium cuculoides</i> | Asian Barred Owlet | 2013/4/24  | 2 | 0 | 26.69980512 | 93.51504000 | <a href="https://www.inaturalist.org/observations/59041182">https://www.inaturalist.org/observations/59041182</a>   |
| 150 | <i>Glaucidium cuculoides</i> | Asian Barred Owlet | 2021/2/25  | 1 | 0 | 26.70518278 | 88.31024252 | <a href="https://www.inaturalist.org/observations/70172570">https://www.inaturalist.org/observations/70172570</a>   |
| 151 | <i>Glaucidium cuculoides</i> | Asian Barred Owlet | 2020/10/11 | 1 | 0 | 26.70625862 | 88.30957968 | <a href="https://www.inaturalist.org/observations/62282042">https://www.inaturalist.org/observations/62282042</a>   |
| 152 | <i>Glaucidium cuculoides</i> | Asian Barred Owlet | 2021/4/1   | 2 | 0 | 26.70928443 | 91.09715232 | <a href="https://www.inaturalist.org/observations/73919920">https://www.inaturalist.org/observations/73919920</a>   |
| 153 | <i>Glaucidium cuculoides</i> | Asian Barred Owlet | 2014/3/20  | 2 | 0 | 26.75373002 | 90.98931498 | <a href="https://www.inaturalist.org/observations/37506743">https://www.inaturalist.org/observations/37506743</a>   |
| 154 | <i>Glaucidium cuculoides</i> | Asian Barred Owlet | 2020/2/11  | 1 | 0 | 26.78847964 | 88.36248156 | <a href="https://www.inaturalist.org/observations/49243961">https://www.inaturalist.org/observations/49243961</a>   |
| 155 | <i>Glaucidium cuculoides</i> | Asian Barred Owlet | 2021/1/17  | 3 | 0 | 26.78856434 | 94.21399679 | <a href="https://www.inaturalist.org/observations/68207120">https://www.inaturalist.org/observations/68207120</a>   |
| 156 | <i>Glaucidium cuculoides</i> | Asian Barred Owlet | 2021/4/5   | 1 | 0 | 26.79619320 | 88.36300760 | <a href="https://www.inaturalist.org/observations/73930412">https://www.inaturalist.org/observations/73930412</a>   |
| 157 | <i>Glaucidium cuculoides</i> | Asian Barred Owlet | 2021/4/6   | 2 | 0 | 26.79619320 | 88.36300760 | <a href="https://www.inaturalist.org/observations/74023239">https://www.inaturalist.org/observations/74023239</a>   |
| 158 | <i>Glaucidium cuculoides</i> | Asian Barred Owlet | 2022/5/12  | 3 | 0 | 26.79619320 | 88.36300760 | <a href="https://www.inaturalist.org/observations/118488024">https://www.inaturalist.org/observations/118488024</a> |
| 159 | <i>Glaucidium cuculoides</i> | Asian Barred Owlet | 2021/10/21 | 2 | 0 | 26.79698190 | 88.42773610 | <a href="https://www.inaturalist.org/observations/98969423">https://www.inaturalist.org/observations/98969423</a>   |
| 160 | <i>Glaucidium cuculoides</i> | Asian Barred Owlet | 2020/3/7   | 2 | 0 | 26.83396679 | 88.34159345 | <a href="https://www.inaturalist.org/observations/65870899">https://www.inaturalist.org/observations/65870899</a>   |

|     |                              |                    |            |   |   |             |              |                                                                                                                     |
|-----|------------------------------|--------------------|------------|---|---|-------------|--------------|---------------------------------------------------------------------------------------------------------------------|
| 161 | <i>Glaucidium cuculoides</i> | Asian Barred Owlet | 2022/8/7   | 4 | 0 | 26.83723790 | 88.34579060  | <a href="https://www.inaturalist.org/observations/130211892">https://www.inaturalist.org/observations/130211892</a> |
| 162 | <i>Glaucidium cuculoides</i> | Asian Barred Owlet | 2021/12/21 | 2 | 0 | 26.86171927 | 88.35927299  | <a href="https://www.inaturalist.org/observations/103558813">https://www.inaturalist.org/observations/103558813</a> |
| 163 | <i>Glaucidium cuculoides</i> | Asian Barred Owlet | 2018/11/1  | 2 | 0 | 26.86901384 | 88.35996296  | <a href="https://www.inaturalist.org/observations/70239227">https://www.inaturalist.org/observations/70239227</a>   |
| 164 | <i>Glaucidium cuculoides</i> | Asian Barred Owlet | 2019/2/24  | 1 | 0 | 26.91590700 | 88.40281660  | <a href="https://www.inaturalist.org/observations/97733797">https://www.inaturalist.org/observations/97733797</a>   |
| 165 | <i>Glaucidium cuculoides</i> | Asian Barred Owlet | 2019/2/24  | 2 | 0 | 26.91590700 | 88.40281660  | <a href="https://www.inaturalist.org/observations/99851062">https://www.inaturalist.org/observations/99851062</a>   |
| 166 | <i>Glaucidium cuculoides</i> | Asian Barred Owlet | 2022/4/15  | 2 | 0 | 26.91590700 | 88.40281660  | <a href="https://www.inaturalist.org/observations/112240383">https://www.inaturalist.org/observations/112240383</a> |
| 167 | <i>Glaucidium cuculoides</i> | Asian Barred Owlet | 2021/3/17  | 1 | 0 | 26.91590700 | 88.40281700  | <a href="https://www.inaturalist.org/observations/81334052">https://www.inaturalist.org/observations/81334052</a>   |
| 168 | <i>Glaucidium cuculoides</i> | Asian Barred Owlet | 2017/12/7  | 3 | 0 | 26.93240080 | 92.87721630  | <a href="https://www.inaturalist.org/observations/47086947">https://www.inaturalist.org/observations/47086947</a>   |
| 169 | <i>Glaucidium cuculoides</i> | Asian Barred Owlet | 2021/7/20  | 1 | 0 | 26.94554592 | 94.15167298  | <a href="https://www.inaturalist.org/observations/135914500">https://www.inaturalist.org/observations/135914500</a> |
| 170 | <i>Glaucidium cuculoides</i> | Asian Barred Owlet | 2020/7/13  | 1 | 0 | 26.94789149 | 94.16109692  | <a href="https://www.inaturalist.org/observations/93484115">https://www.inaturalist.org/observations/93484115</a>   |
| 171 | <i>Glaucidium cuculoides</i> | Asian Barred Owlet | 2018/5/13  | 2 | 0 | 26.97404380 | 88.33971960  | <a href="https://www.inaturalist.org/observations/99851063">https://www.inaturalist.org/observations/99851063</a>   |
| 172 | <i>Glaucidium cuculoides</i> | Asian Barred Owlet | 2017/1/8   | 3 | 0 | 26.98087947 | 92.97993306  | <a href="https://www.inaturalist.org/observations/34070887">https://www.inaturalist.org/observations/34070887</a>   |
| 173 | <i>Glaucidium cuculoides</i> | Asian Barred Owlet | 2018/11/13 | 2 | 0 | 26.99748220 | 92.70991700  | <a href="https://www.inaturalist.org/observations/100656004">https://www.inaturalist.org/observations/100656004</a> |
| 174 | <i>Glaucidium cuculoides</i> | Asian Barred Owlet | 2022/1/31  | 3 | 0 | 27.04102180 | 88.26627450  | <a href="https://www.inaturalist.org/observations/105958782">https://www.inaturalist.org/observations/105958782</a> |
| 175 | <i>Glaucidium cuculoides</i> | Asian Barred Owlet | 2019/10/21 | 2 | 0 | 27.04986626 | 88.40887874  | <a href="https://www.inaturalist.org/observations/93212945">https://www.inaturalist.org/observations/93212945</a>   |
| 176 | <i>Glaucidium cuculoides</i> | Asian Barred Owlet | 2018/8/22  | 2 | 0 | 27.07135482 | 113.86470030 | <a href="https://www.inaturalist.org/observations/101834839">https://www.inaturalist.org/observations/101834839</a> |
| 177 | <i>Glaucidium cuculoides</i> | Asian Barred Owlet | 2021/2/12  | 2 | 0 | 27.08111882 | 88.14438444  | <a href="https://www.inaturalist.org/observations/70815612">https://www.inaturalist.org/observations/70815612</a>   |
| 178 | <i>Glaucidium cuculoides</i> | Asian Barred Owlet | 2022/3/5   | 4 | 0 | 27.08244960 | 88.70068880  | <a href="https://www.inaturalist.org/observations/108097395">https://www.inaturalist.org/observations/108097395</a> |
| 179 | <i>Glaucidium cuculoides</i> | Asian Barred Owlet | 2017/4/15  | 2 | 0 | 27.08630780 | 88.66151250  | <a href="https://www.inaturalist.org/observations/99851064">https://www.inaturalist.org/observations/99851064</a>   |
| 180 | <i>Glaucidium cuculoides</i> | Asian Barred Owlet | 2017/4/15  | 2 | 0 | 27.08630780 | 88.66151250  | <a href="https://www.inaturalist.org/observations/99851065">https://www.inaturalist.org/observations/99851065</a>   |
| 181 | <i>Glaucidium cuculoides</i> | Asian Barred Owlet | 2020/10/15 | 2 | 0 | 27.09245505 | 88.14174112  | <a href="https://www.inaturalist.org/observations/92229267">https://www.inaturalist.org/observations/92229267</a>   |
| 182 | <i>Glaucidium cuculoides</i> | Asian Barred Owlet | 2022/4/22  | 4 | 0 | 27.09835550 | 92.81782910  | <a href="https://www.inaturalist.org/observations/115543615">https://www.inaturalist.org/observations/115543615</a> |
| 183 | <i>Glaucidium cuculoides</i> | Asian Barred Owlet | 2022/4/25  | 5 | 0 | 27.09835550 | 92.81782910  | <a href="https://www.inaturalist.org/observations/115545377">https://www.inaturalist.org/observations/115545377</a> |

|     |                              |                    |            |   |   |             |              |                                                                                                                     |
|-----|------------------------------|--------------------|------------|---|---|-------------|--------------|---------------------------------------------------------------------------------------------------------------------|
| 184 | <i>Glaucidium cuculoides</i> | Asian Barred Owlet | 2022/4/25  | 5 | 0 | 27.09835550 | 92.81782910  | <a href="https://www.inaturalist.org/observations/115545384">https://www.inaturalist.org/observations/115545384</a> |
| 185 | <i>Glaucidium cuculoides</i> | Asian Barred Owlet | 2021/3/8   | 2 | 0 | 27.10678170 | 88.64945890  | <a href="https://www.inaturalist.org/observations/99851066">https://www.inaturalist.org/observations/99851066</a>   |
| 186 | <i>Glaucidium cuculoides</i> | Asian Barred Owlet | 2021/3/8   | 1 | 0 | 27.10678170 | 88.64945890  | <a href="https://www.inaturalist.org/observations/99851067">https://www.inaturalist.org/observations/99851067</a>   |
| 187 | <i>Glaucidium cuculoides</i> | Asian Barred Owlet | 2014/4/1   | 3 | 0 | 27.13809800 | 117.06426000 | <a href="http://inaturalist.ca/observations/3950932">http://inaturalist.ca/observations/3950932</a>                 |
| 188 | <i>Glaucidium cuculoides</i> | Asian Barred Owlet | 2020/5/5   | 3 | 0 | 27.19264800 | 95.35421290  | <a href="https://www.inaturalist.org/observations/44900757">https://www.inaturalist.org/observations/44900757</a>   |
| 189 | <i>Glaucidium cuculoides</i> | Asian Barred Owlet | 2022/4/16  | 4 | 0 | 27.19420000 | 88.11830000  | <a href="https://www.inaturalist.org/observations/117879804">https://www.inaturalist.org/observations/117879804</a> |
| 190 | <i>Glaucidium cuculoides</i> | Asian Barred Owlet | 2022/4/18  | 5 | 0 | 27.19420000 | 88.11830000  | <a href="https://www.inaturalist.org/observations/118498927">https://www.inaturalist.org/observations/118498927</a> |
| 191 | <i>Glaucidium cuculoides</i> | Asian Barred Owlet | 2021/11/17 | 3 | 0 | 27.23794389 | 88.76481780  | <a href="https://www.inaturalist.org/observations/101699855">https://www.inaturalist.org/observations/101699855</a> |
| 192 | <i>Glaucidium cuculoides</i> | Asian Barred Owlet | 2021/4/3   | 1 | 0 | 27.25596250 | 88.18264650  | <a href="https://www.inaturalist.org/observations/99851068">https://www.inaturalist.org/observations/99851068</a>   |
| 193 | <i>Glaucidium cuculoides</i> | Asian Barred Owlet | 2021/4/5   | 2 | 0 | 27.25596250 | 88.18264650  | <a href="https://www.inaturalist.org/observations/99851069">https://www.inaturalist.org/observations/99851069</a>   |
| 194 | <i>Glaucidium cuculoides</i> | Asian Barred Owlet | 2021/2/16  | 2 | 0 | 27.25596250 | 88.18264650  | <a href="https://www.inaturalist.org/observations/99851070">https://www.inaturalist.org/observations/99851070</a>   |
| 195 | <i>Glaucidium cuculoides</i> | Asian Barred Owlet | 2020/3/19  | 1 | 0 | 27.26159490 | 95.60941540  | <a href="https://www.inaturalist.org/observations/102073454">https://www.inaturalist.org/observations/102073454</a> |
| 196 | <i>Glaucidium cuculoides</i> | Asian Barred Owlet | 2022/9/17  | 2 | 0 | 27.26325760 | 88.60474572  | <a href="https://www.inaturalist.org/observations/135479359">https://www.inaturalist.org/observations/135479359</a> |
| 197 | <i>Glaucidium cuculoides</i> | Asian Barred Owlet | 2022/4/8   | 2 | 0 | 27.29914692 | 88.22734348  | <a href="https://www.inaturalist.org/observations/110744709">https://www.inaturalist.org/observations/110744709</a> |
| 198 | <i>Glaucidium cuculoides</i> | Asian Barred Owlet | 2022/3/25  | 2 | 0 | 27.30515890 | 95.52578960  | <a href="https://www.inaturalist.org/observations/111207944">https://www.inaturalist.org/observations/111207944</a> |
| 199 | <i>Glaucidium cuculoides</i> | Asian Barred Owlet | 2019/3/13  | 1 | 0 | 27.31435452 | 94.76749296  | <a href="https://www.inaturalist.org/observations/104154774">https://www.inaturalist.org/observations/104154774</a> |
| 200 | <i>Glaucidium cuculoides</i> | Asian Barred Owlet | 2018/12/31 | 3 | 0 | 27.31977160 | 88.24003330  | <a href="https://www.inaturalist.org/observations/119702286">https://www.inaturalist.org/observations/119702286</a> |
| 201 | <i>Glaucidium cuculoides</i> | Asian Barred Owlet | 2014/3/22  | 3 | 0 | 27.33504192 | 88.61117541  | <a href="https://www.inaturalist.org/observations/135346590">https://www.inaturalist.org/observations/135346590</a> |
| 202 | <i>Glaucidium cuculoides</i> | Asian Barred Owlet | 2021/2/28  | 1 | 0 | 27.35718833 | 95.53135667  | <a href="https://www.inaturalist.org/observations/106175562">https://www.inaturalist.org/observations/106175562</a> |
| 203 | <i>Glaucidium cuculoides</i> | Asian Barred Owlet | 2017/11/11 | 2 | 0 | 27.44547170 | 96.53580930  | <a href="https://www.inaturalist.org/observations/33760073">https://www.inaturalist.org/observations/33760073</a>   |
| 204 | <i>Glaucidium cuculoides</i> | Asian Barred Owlet | 2013/4/22  | 5 | 0 | 27.47283300 | 94.91196200  | <a href="http://www.inaturalist.org/observations/1529219">http://www.inaturalist.org/observations/1529219</a>       |
| 205 | <i>Glaucidium cuculoides</i> | Asian Barred Owlet | 2011/3/30  | 4 | 0 | 27.53680149 | 96.44380233  | <a href="https://www.inaturalist.org/observations/29900297">https://www.inaturalist.org/observations/29900297</a>   |
| 206 | <i>Glaucidium cuculoides</i> | Asian Barred Owlet | 2016/4/10  | 4 | 0 | 27.57235437 | 95.37740361  | <a href="http://www.inaturalist.org/observations/3049096">http://www.inaturalist.org/observations/3049096</a>       |

|     |                              |                    |            |   |   |             |              |                                                                                                                     |
|-----|------------------------------|--------------------|------------|---|---|-------------|--------------|---------------------------------------------------------------------------------------------------------------------|
| 207 | <i>Glaucidium cuculoides</i> | Asian Barred Owlet | 2018/12/25 | 4 | 0 | 28.35078639 | 95.93877472  | <a href="https://www.inaturalist.org/observations/103318728">https://www.inaturalist.org/observations/103318728</a> |
| 208 | <i>Glaucidium cuculoides</i> | Asian Barred Owlet | 2017/3/28  | 2 | 0 | 28.46943403 | 113.10888140 | <a href="https://www.inaturalist.org/observations/17707570">https://www.inaturalist.org/observations/17707570</a>   |
| 209 | <i>Glaucidium cuculoides</i> | Asian Barred Owlet | 2021/12/11 | 0 | 0 | 28.65753167 | 108.26322500 | <a href="https://www.inaturalist.org/observations/104530319">https://www.inaturalist.org/observations/104530319</a> |
| 210 | <i>Glaucidium cuculoides</i> | Asian Barred Owlet | 2019/11/23 | 2 | 0 | 28.95572062 | 116.43325190 | <a href="https://www.inaturalist.org/observations/36127286">https://www.inaturalist.org/observations/36127286</a>   |
| 211 | <i>Glaucidium cuculoides</i> | Asian Barred Owlet | 2005/12/9  | 1 | 0 | 29.24808500 | 117.86179700 | <a href="https://www.inaturalist.org/observations/66132841">https://www.inaturalist.org/observations/66132841</a>   |
| 212 | <i>Glaucidium cuculoides</i> | Asian Barred Owlet | 2020/10/20 | 1 | 0 | 29.26932640 | 79.54411980  | <a href="https://www.inaturalist.org/observations/63084598">https://www.inaturalist.org/observations/63084598</a>   |
| 213 | <i>Glaucidium cuculoides</i> | Asian Barred Owlet | 2021/1/17  | 2 | 0 | 29.32424548 | 79.50651070  | <a href="https://www.inaturalist.org/observations/68200696">https://www.inaturalist.org/observations/68200696</a>   |
| 214 | <i>Glaucidium cuculoides</i> | Asian Barred Owlet | 2021/3/18  | 1 | 0 | 29.32849454 | 79.49662297  | <a href="https://www.inaturalist.org/observations/72510200">https://www.inaturalist.org/observations/72510200</a>   |
| 215 | <i>Glaucidium cuculoides</i> | Asian Barred Owlet | 2019/4/3   | 0 | 0 | 29.34131280 | 79.53158500  | <a href="https://www.inaturalist.org/observations/37978415">https://www.inaturalist.org/observations/37978415</a>   |
| 216 | <i>Glaucidium cuculoides</i> | Asian Barred Owlet | 2017/9/20  | 2 | 0 | 29.34270000 | 79.53090000  | <a href="https://www.inaturalist.org/observations/69966725">https://www.inaturalist.org/observations/69966725</a>   |
| 217 | <i>Glaucidium cuculoides</i> | Asian Barred Owlet | 2018/2/16  | 1 | 0 | 29.34430900 | 79.52943180  | <a href="https://www.inaturalist.org/observations/56121747">https://www.inaturalist.org/observations/56121747</a>   |
| 218 | <i>Glaucidium cuculoides</i> | Asian Barred Owlet | 2018/2/18  | 1 | 0 | 29.34430900 | 79.52943180  | <a href="https://www.inaturalist.org/observations/56121872">https://www.inaturalist.org/observations/56121872</a>   |
| 219 | <i>Glaucidium cuculoides</i> | Asian Barred Owlet | 2020/2/17  | 1 | 0 | 29.34430900 | 79.52943180  | <a href="https://www.inaturalist.org/observations/56726738">https://www.inaturalist.org/observations/56726738</a>   |
| 220 | <i>Glaucidium cuculoides</i> | Asian Barred Owlet | 2020/2/18  | 1 | 0 | 29.34430900 | 79.52943180  | <a href="https://www.inaturalist.org/observations/56726885">https://www.inaturalist.org/observations/56726885</a>   |
| 221 | <i>Glaucidium cuculoides</i> | Asian Barred Owlet | 2019/12/14 | 1 | 0 | 29.34430900 | 79.52943180  | <a href="https://www.inaturalist.org/observations/91755106">https://www.inaturalist.org/observations/91755106</a>   |
| 222 | <i>Glaucidium cuculoides</i> | Asian Barred Owlet | 2001/2/2   | 4 | 0 | 29.34436100 | 79.52985800  | <a href="http://inaturalist.ca/observations/3950933">http://inaturalist.ca/observations/3950933</a>                 |
| 223 | <i>Glaucidium cuculoides</i> | Asian Barred Owlet | 2018/10/7  | 2 | 0 | 29.34675089 | 79.55054350  | <a href="https://www.inaturalist.org/observations/17736691">https://www.inaturalist.org/observations/17736691</a>   |
| 224 | <i>Glaucidium cuculoides</i> | Asian Barred Owlet | 2007/12/9  | 3 | 0 | 29.35015990 | 79.54084383  | <a href="https://www.inaturalist.org/observations/7432913">https://www.inaturalist.org/observations/7432913</a>     |
| 225 | <i>Glaucidium cuculoides</i> | Asian Barred Owlet | 2018/10/4  | 3 | 0 | 29.35316061 | 79.55104876  | <a href="https://www.inaturalist.org/observations/35138807">https://www.inaturalist.org/observations/35138807</a>   |
| 226 | <i>Glaucidium cuculoides</i> | Asian Barred Owlet | 2016/1/22  | 3 | 0 | 29.35485325 | 79.52743113  | <a href="https://www.inaturalist.org/observations/31281324">https://www.inaturalist.org/observations/31281324</a>   |
| 227 | <i>Glaucidium cuculoides</i> | Asian Barred Owlet | 2021/12/19 | 3 | 0 | 29.39669265 | 79.12666798  | <a href="https://www.inaturalist.org/observations/104331756">https://www.inaturalist.org/observations/104331756</a> |
| 228 | <i>Glaucidium cuculoides</i> | Asian Barred Owlet | 2020/8/22  | 2 | 0 | 29.41056897 | 79.63529697  | <a href="https://www.inaturalist.org/observations/57196721">https://www.inaturalist.org/observations/57196721</a>   |
| 229 | <i>Glaucidium cuculoides</i> | Asian Barred Owlet | 2021/1/23  | 2 | 0 | 29.41540600 | 79.59405440  | <a href="https://www.inaturalist.org/observations/68504317">https://www.inaturalist.org/observations/68504317</a>   |

|     |                              |                    |            |   |   |             |              |                                                                                                                     |
|-----|------------------------------|--------------------|------------|---|---|-------------|--------------|---------------------------------------------------------------------------------------------------------------------|
| 230 | <i>Glaucidium cuculoides</i> | Asian Barred Owlet | 2022/7/3   | 1 | 0 | 29.43890590 | 79.58855930  | <a href="https://www.inaturalist.org/observations/124849169">https://www.inaturalist.org/observations/124849169</a> |
| 231 | <i>Glaucidium cuculoides</i> | Asian Barred Owlet | 2018/1/24  | 3 | 0 | 29.44563736 | 79.63196363  | <a href="https://www.inaturalist.org/observations/68204630">https://www.inaturalist.org/observations/68204630</a>   |
| 232 | <i>Glaucidium cuculoides</i> | Asian Barred Owlet | 2021/12/23 | 2 | 0 | 29.44563736 | 79.63196363  | <a href="https://www.inaturalist.org/observations/103577630">https://www.inaturalist.org/observations/103577630</a> |
| 233 | <i>Glaucidium cuculoides</i> | Asian Barred Owlet | 2022/1/1   | 2 | 0 | 29.44563736 | 79.63196363  | <a href="https://www.inaturalist.org/observations/104153706">https://www.inaturalist.org/observations/104153706</a> |
| 234 | <i>Glaucidium cuculoides</i> | Asian Barred Owlet | 2022/2/7   | 3 | 0 | 29.44563736 | 79.63196363  | <a href="https://www.inaturalist.org/observations/106741894">https://www.inaturalist.org/observations/106741894</a> |
| 235 | <i>Glaucidium cuculoides</i> | Asian Barred Owlet | 2021/1/3   | 2 | 0 | 29.44590567 | 79.63239413  | <a href="https://www.inaturalist.org/observations/68202842">https://www.inaturalist.org/observations/68202842</a>   |
| 236 | <i>Glaucidium cuculoides</i> | Asian Barred Owlet | 2020/8/20  | 3 | 0 | 29.45557155 | 79.66035754  | <a href="https://www.inaturalist.org/observations/57026522">https://www.inaturalist.org/observations/57026522</a>   |
| 237 | <i>Glaucidium cuculoides</i> | Asian Barred Owlet | 2021/7/16  | 3 | 0 | 29.46041326 | 79.65582423  | <a href="https://www.inaturalist.org/observations/87225611">https://www.inaturalist.org/observations/87225611</a>   |
| 238 | <i>Glaucidium cuculoides</i> | Asian Barred Owlet | 2018/1/3   | 2 | 0 | 29.49969884 | 79.62634843  | <a href="https://www.inaturalist.org/observations/67048330">https://www.inaturalist.org/observations/67048330</a>   |
| 239 | <i>Glaucidium cuculoides</i> | Asian Barred Owlet | 2012/5/26  | 1 | 0 | 29.50892415 | 118.72094110 | <a href="https://www.inaturalist.org/observations/27205984">https://www.inaturalist.org/observations/27205984</a>   |
| 240 | <i>Glaucidium cuculoides</i> | Asian Barred Owlet | 2021/2/15  | 1 | 0 | 29.51999370 | 79.62915610  | <a href="https://www.inaturalist.org/observations/69661939">https://www.inaturalist.org/observations/69661939</a>   |
| 241 | <i>Glaucidium cuculoides</i> | Asian Barred Owlet | 2005/7/24  | 2 | 0 | 29.54625750 | 103.37189410 | <a href="http://inaturalist.ca/observations/4437992">http://inaturalist.ca/observations/4437992</a>                 |
| 242 | <i>Glaucidium cuculoides</i> | Asian Barred Owlet | 2006/1/20  | 3 | 0 | 29.58535600 | 78.86181600  | <a href="https://www.inaturalist.org/observations/9769982">https://www.inaturalist.org/observations/9769982</a>     |
| 243 | <i>Glaucidium cuculoides</i> | Asian Barred Owlet | 2021/5/27  | 1 | 0 | 29.61310380 | 79.65601878  | <a href="https://www.inaturalist.org/observations/80454858">https://www.inaturalist.org/observations/80454858</a>   |
| 244 | <i>Glaucidium cuculoides</i> | Asian Barred Owlet | 2018/1/25  | 3 | 0 | 29.70537330 | 79.75518060  | <a href="https://www.inaturalist.org/observations/9765757">https://www.inaturalist.org/observations/9765757</a>     |
| 245 | <i>Glaucidium cuculoides</i> | Asian Barred Owlet | 2022/3/6   | 1 | 0 | 29.76323589 | 121.32763030 | <a href="https://www.inaturalist.org/observations/108094768">https://www.inaturalist.org/observations/108094768</a> |
| 246 | <i>Glaucidium cuculoides</i> | Asian Barred Owlet | 2021/12/28 | 2 | 0 | 29.79019593 | 79.55914846  | <a href="https://www.inaturalist.org/observations/103813075">https://www.inaturalist.org/observations/103813075</a> |
| 247 | <i>Glaucidium cuculoides</i> | Asian Barred Owlet | 2021/12/28 | 2 | 0 | 29.79019593 | 79.55914846  | <a href="https://www.inaturalist.org/observations/103813098">https://www.inaturalist.org/observations/103813098</a> |
| 248 | <i>Glaucidium cuculoides</i> | Asian Barred Owlet | 2021/2/1   | 1 | 0 | 29.79048067 | 79.55927644  | <a href="https://www.inaturalist.org/observations/68938705">https://www.inaturalist.org/observations/68938705</a>   |
| 249 | <i>Glaucidium cuculoides</i> | Asian Barred Owlet | 2022/1/25  | 1 | 0 | 29.79053466 | 79.55927642  | <a href="https://www.inaturalist.org/observations/105552062">https://www.inaturalist.org/observations/105552062</a> |
| 250 | <i>Glaucidium cuculoides</i> | Asian Barred Owlet | 2020/11/9  | 2 | 0 | 29.79054756 | 79.55940210  | <a href="https://www.inaturalist.org/observations/64519441">https://www.inaturalist.org/observations/64519441</a>   |
| 251 | <i>Glaucidium cuculoides</i> | Asian Barred Owlet | 2020/2/11  | 2 | 0 | 29.79058833 | 79.55905817  | <a href="https://www.inaturalist.org/observations/51974008">https://www.inaturalist.org/observations/51974008</a>   |
| 252 | <i>Glaucidium cuculoides</i> | Asian Barred Owlet | 2020/12/16 | 4 | 0 | 29.79222094 | 79.56031244  | <a href="https://www.inaturalist.org/observations/66651423">https://www.inaturalist.org/observations/66651423</a>   |

|     |                              |                    |            |   |   |             |              |                                                                                                                     |
|-----|------------------------------|--------------------|------------|---|---|-------------|--------------|---------------------------------------------------------------------------------------------------------------------|
| 253 | <i>Glaucidium cuculoides</i> | Asian Barred Owlet | 2022/1/26  | 2 | 0 | 29.79549248 | 79.53363486  | <a href="https://www.inaturalist.org/observations/106017744">https://www.inaturalist.org/observations/106017744</a> |
| 254 | <i>Glaucidium cuculoides</i> | Asian Barred Owlet | 2017/12/1  | 2 | 0 | 29.84452690 | 79.60388420  | <a href="https://www.inaturalist.org/observations/44364795">https://www.inaturalist.org/observations/44364795</a>   |
| 255 | <i>Glaucidium cuculoides</i> | Asian Barred Owlet | 2022/2/2   | 2 | 0 | 30.07052306 | 80.23707778  | <a href="https://www.inaturalist.org/observations/106055270">https://www.inaturalist.org/observations/106055270</a> |
| 256 | <i>Glaucidium cuculoides</i> | Asian Barred Owlet | 2021/12/7  | 0 | 0 | 30.07078556 | 80.23753333  | <a href="https://www.inaturalist.org/observations/102660411">https://www.inaturalist.org/observations/102660411</a> |
| 257 | <i>Glaucidium cuculoides</i> | Asian Barred Owlet | 2022/2/20  | 3 | 0 | 30.07549850 | 80.26049050  | <a href="https://www.inaturalist.org/observations/107118121">https://www.inaturalist.org/observations/107118121</a> |
| 258 | <i>Glaucidium cuculoides</i> | Asian Barred Owlet | 2019/12/24 | 1 | 0 | 30.07614130 | 80.23020994  | <a href="https://www.inaturalist.org/observations/51500883">https://www.inaturalist.org/observations/51500883</a>   |
| 259 | <i>Glaucidium cuculoides</i> | Asian Barred Owlet | 2021/2/6   | 1 | 0 | 30.20783868 | 120.14222970 | <a href="https://www.inaturalist.org/observations/69124770">https://www.inaturalist.org/observations/69124770</a>   |
| 260 | <i>Glaucidium cuculoides</i> | Asian Barred Owlet | 2021/3/13  | 1 | 0 | 30.25287500 | 120.11697780 | <a href="https://www.inaturalist.org/observations/72880409">https://www.inaturalist.org/observations/72880409</a>   |
| 261 | <i>Glaucidium cuculoides</i> | Asian Barred Owlet | 2022/3/19  | 2 | 0 | 30.25418228 | 120.12014610 | <a href="https://www.inaturalist.org/observations/110396758">https://www.inaturalist.org/observations/110396758</a> |
| 262 | <i>Glaucidium cuculoides</i> | Asian Barred Owlet | 2021/2/6   | 2 | 0 | 30.26648481 | 120.04689220 | <a href="https://www.inaturalist.org/observations/69125114">https://www.inaturalist.org/observations/69125114</a>   |
| 263 | <i>Glaucidium cuculoides</i> | Asian Barred Owlet | 2020/11/4  | 1 | 0 | 30.28331388 | 79.24863875  | <a href="https://www.inaturalist.org/observations/64223157">https://www.inaturalist.org/observations/64223157</a>   |
| 264 | <i>Glaucidium cuculoides</i> | Asian Barred Owlet | 2020/12/31 | 2 | 0 | 30.31646354 | 78.03219158  | <a href="https://www.inaturalist.org/observations/91729330">https://www.inaturalist.org/observations/91729330</a>   |
| 265 | <i>Glaucidium cuculoides</i> | Asian Barred Owlet | 2021/1/27  | 2 | 0 | 30.34619080 | 79.04850590  | <a href="https://www.inaturalist.org/observations/101869788">https://www.inaturalist.org/observations/101869788</a> |
| 266 | <i>Glaucidium cuculoides</i> | Asian Barred Owlet | 2015/2/11  | 1 | 0 | 30.35837778 | 79.31664167  | <a href="https://www.inaturalist.org/observations/65336869">https://www.inaturalist.org/observations/65336869</a>   |
| 267 | <i>Glaucidium cuculoides</i> | Asian Barred Owlet | 2015/2/11  | 2 | 0 | 30.35837778 | 79.31664167  | <a href="https://www.inaturalist.org/observations/105725338">https://www.inaturalist.org/observations/105725338</a> |
| 268 | <i>Glaucidium cuculoides</i> | Asian Barred Owlet | 2015/2/12  | 2 | 0 | 30.36383083 | 79.31638083  | <a href="https://www.inaturalist.org/observations/105725341">https://www.inaturalist.org/observations/105725341</a> |
| 269 | <i>Glaucidium cuculoides</i> | Asian Barred Owlet | 2017/9/11  | 3 | 0 | 30.39001838 | 78.81014636  | <a href="https://www.inaturalist.org/observations/31281325">https://www.inaturalist.org/observations/31281325</a>   |
| 270 | <i>Glaucidium cuculoides</i> | Asian Barred Owlet | 2017/7/21  | 4 | 0 | 30.44853730 | 78.64129220  | <a href="https://www.inaturalist.org/observations/8514813">https://www.inaturalist.org/observations/8514813</a>     |
| 271 | <i>Glaucidium cuculoides</i> | Asian Barred Owlet | 2021/2/8   | 1 | 0 | 30.54360085 | 78.18492729  | <a href="https://www.inaturalist.org/observations/69256350">https://www.inaturalist.org/observations/69256350</a>   |
| 272 | <i>Glaucidium cuculoides</i> | Asian Barred Owlet | 2022/6/7   | 3 | 0 | 30.54494442 | 78.19340248  | <a href="https://www.inaturalist.org/observations/129800369">https://www.inaturalist.org/observations/129800369</a> |
| 273 | <i>Glaucidium cuculoides</i> | Asian Barred Owlet | 2021/2/6   | 1 | 0 | 30.54554097 | 78.19296386  | <a href="https://www.inaturalist.org/observations/69195526">https://www.inaturalist.org/observations/69195526</a>   |
| 274 | <i>Glaucidium cuculoides</i> | Asian Barred Owlet | 2021/3/21  | 2 | 0 | 30.54629576 | 78.19278717  | <a href="https://www.inaturalist.org/observations/72003743">https://www.inaturalist.org/observations/72003743</a>   |
| 275 | <i>Glaucidium cuculoides</i> | Asian Barred Owlet | 2018/12/5  | 3 | 0 | 30.65292324 | 111.35239250 | <a href="https://www.inaturalist.org/observations/111175068">https://www.inaturalist.org/observations/111175068</a> |



|     |                              |                    |            |   |   |             |              |                                                                                                                     |
|-----|------------------------------|--------------------|------------|---|---|-------------|--------------|---------------------------------------------------------------------------------------------------------------------|
| 276 | <i>Glaucidium cuculoides</i> | Asian Barred Owlet | 2021/9/18  | 2 | 0 | 30.83298003 | 77.05196232  | <a href="https://www.inaturalist.org/observations/95985426">https://www.inaturalist.org/observations/95985426</a>   |
| 277 | <i>Glaucidium cuculoides</i> | Asian Barred Owlet | 2017/10/6  | 3 | 0 | 31.10481500 | 77.17340300  | <a href="https://www.inaturalist.org/observations/14897627">https://www.inaturalist.org/observations/14897627</a>   |
| 278 | <i>Glaucidium cuculoides</i> | Asian Barred Owlet | 2019/7/20  | 4 | 0 | 31.10949879 | 77.15912819  | <a href="https://www.inaturalist.org/observations/29767927">https://www.inaturalist.org/observations/29767927</a>   |
| 279 | <i>Glaucidium cuculoides</i> | Asian Barred Owlet | 2019/8/8   | 3 | 0 | 31.26183082 | 76.98359369  | <a href="https://www.inaturalist.org/observations/30518836">https://www.inaturalist.org/observations/30518836</a>   |
| 280 | <i>Glaucidium cuculoides</i> | Asian Barred Owlet | 2017/11/6  | 2 | 0 | 31.50848472 | 77.79679222  | <a href="https://www.inaturalist.org/observations/74836691">https://www.inaturalist.org/observations/74836691</a>   |
| 281 | <i>Glaucidium cuculoides</i> | Asian Barred Owlet | 2019/4/11  | 1 | 0 | 31.78904549 | 77.48426469  | <a href="https://www.inaturalist.org/observations/83557315">https://www.inaturalist.org/observations/83557315</a>   |
| 282 | <i>Glaucidium cuculoides</i> | Asian Barred Owlet | 2021/1/24  | 0 | 0 | 31.80000000 | 118.90000000 | <a href="https://www.inaturalist.org/observations/69643824">https://www.inaturalist.org/observations/69643824</a>   |
| 283 | <i>Glaucidium cuculoides</i> | Asian Barred Owlet | 2020/7/29  | 1 | 0 | 31.97297700 | 114.30958600 | <a href="https://www.inaturalist.org/observations/109444076">https://www.inaturalist.org/observations/109444076</a> |
| 284 | <i>Glaucidium cuculoides</i> | Asian Barred Owlet | 2020/12/9  | 2 | 0 | 32.05268600 | 118.83422000 | <a href="https://www.inaturalist.org/observations/109444713">https://www.inaturalist.org/observations/109444713</a> |
| 285 | <i>Glaucidium cuculoides</i> | Asian Barred Owlet | 2021/11/30 | 1 | 0 | 32.05362205 | 118.83335840 | <a href="https://www.inaturalist.org/observations/102301313">https://www.inaturalist.org/observations/102301313</a> |
| 286 | <i>Glaucidium cuculoides</i> | Asian Barred Owlet | 2017/3/16  | 2 | 0 | 32.05509420 | 76.09285110  | <a href="https://www.inaturalist.org/observations/45245100">https://www.inaturalist.org/observations/45245100</a>   |
| 287 | <i>Glaucidium cuculoides</i> | Asian Barred Owlet | 2022/2/8   | 1 | 0 | 32.05889319 | 118.83314950 | <a href="https://www.inaturalist.org/observations/106380330">https://www.inaturalist.org/observations/106380330</a> |
| 288 | <i>Glaucidium cuculoides</i> | Asian Barred Owlet | 2022/8/5   | 1 | 0 | 32.05974154 | 119.03539320 | <a href="https://www.inaturalist.org/observations/129956575">https://www.inaturalist.org/observations/129956575</a> |
| 289 | <i>Glaucidium cuculoides</i> | Asian Barred Owlet | 2020/6/5   | 2 | 0 | 32.06687910 | 118.80432600 | <a href="https://www.inaturalist.org/observations/109443997">https://www.inaturalist.org/observations/109443997</a> |
| 290 | <i>Glaucidium cuculoides</i> | Asian Barred Owlet | 2020/6/7   | 0 | 0 | 32.06687910 | 118.80432600 | <a href="https://www.inaturalist.org/observations/109443999">https://www.inaturalist.org/observations/109443999</a> |
| 291 | <i>Glaucidium cuculoides</i> | Asian Barred Owlet | 2020/6/7   | 1 | 0 | 32.06773791 | 118.78761290 | <a href="https://www.inaturalist.org/observations/117318069">https://www.inaturalist.org/observations/117318069</a> |
| 292 | <i>Glaucidium cuculoides</i> | Asian Barred Owlet | 2020/12/28 | 1 | 0 | 32.06956667 | 118.80517170 | <a href="https://www.inaturalist.org/observations/67797672">https://www.inaturalist.org/observations/67797672</a>   |
| 293 | <i>Glaucidium cuculoides</i> | Asian Barred Owlet | 2022/2/8   | 1 | 0 | 32.07047500 | 118.85329600 | <a href="https://www.inaturalist.org/observations/106377949">https://www.inaturalist.org/observations/106377949</a> |
| 294 | <i>Glaucidium cuculoides</i> | Asian Barred Owlet | 2022/5/1   | 2 | 0 | 32.07734319 | 118.81576340 | <a href="https://www.inaturalist.org/observations/114601795">https://www.inaturalist.org/observations/114601795</a> |
| 295 | <i>Glaucidium cuculoides</i> | Asian Barred Owlet | 2022/4/19  | 0 | 0 | 32.07901532 | 118.80933750 | <a href="https://www.inaturalist.org/observations/112030464">https://www.inaturalist.org/observations/112030464</a> |
| 296 | <i>Glaucidium cuculoides</i> | Asian Barred Owlet | 2022/1/30  | 0 | 0 | 32.07919320 | 118.81787810 | <a href="https://www.inaturalist.org/observations/105829895">https://www.inaturalist.org/observations/105829895</a> |
| 297 | <i>Glaucidium cuculoides</i> | Asian Barred Owlet | 2021/8/19  | 2 | 0 | 32.08044300 | 118.81640700 | <a href="https://www.inaturalist.org/observations/91696687">https://www.inaturalist.org/observations/91696687</a>   |
| 298 | <i>Glaucidium cuculoides</i> | Asian Barred Owlet | 2020/12/21 | 2 | 0 | 32.08090400 | 118.81273600 | <a href="https://www.inaturalist.org/observations/111190459">https://www.inaturalist.org/observations/111190459</a> |

|     |                              |                    |            |   |   |             |              |                                                                                                                     |
|-----|------------------------------|--------------------|------------|---|---|-------------|--------------|---------------------------------------------------------------------------------------------------------------------|
| 299 | <i>Glaucidium cuculoides</i> | Asian Barred Owlet | 2022/2/26  | 3 | 0 | 32.08779867 | 76.54958024  | <a href="https://www.inaturalist.org/observations/107750772">https://www.inaturalist.org/observations/107750772</a> |
| 300 | <i>Glaucidium cuculoides</i> | Asian Barred Owlet | 2019/3/3   | 3 | 0 | 32.10048561 | 76.57822687  | <a href="https://www.inaturalist.org/observations/21176483">https://www.inaturalist.org/observations/21176483</a>   |
| 301 | <i>Glaucidium cuculoides</i> | Asian Barred Owlet | 2022/1/14  | 1 | 0 | 32.11177241 | 76.57262475  | <a href="https://www.inaturalist.org/observations/104901845">https://www.inaturalist.org/observations/104901845</a> |
| 302 | <i>Glaucidium cuculoides</i> | Asian Barred Owlet | 2018/8/8   | 2 | 0 | 32.19227023 | 76.23073015  | <a href="https://www.inaturalist.org/observations/15443875">https://www.inaturalist.org/observations/15443875</a>   |
| 303 | <i>Glaucidium cuculoides</i> | Asian Barred Owlet | 2011/10/20 | 1 | 0 | 32.19347890 | 76.30639770  | <a href="https://www.inaturalist.org/observations/71614054">https://www.inaturalist.org/observations/71614054</a>   |
| 304 | <i>Glaucidium cuculoides</i> | Asian Barred Owlet | 2022/1/11  | 1 | 0 | 32.19911153 | 118.85765050 | <a href="https://www.inaturalist.org/observations/105152793">https://www.inaturalist.org/observations/105152793</a> |
| 305 | <i>Glaucidium cuculoides</i> | Asian Barred Owlet | 2017/4/9   | 2 | 0 | 32.24318720 | 77.18917610  | <a href="https://www.inaturalist.org/observations/64406041">https://www.inaturalist.org/observations/64406041</a>   |
| 306 | <i>Glaucidium cuculoides</i> | Asian Barred Owlet | 2021/8/26  | 2 | 0 | 32.24530900 | 77.17648000  | <a href="https://www.inaturalist.org/observations/92575241">https://www.inaturalist.org/observations/92575241</a>   |
| 307 | <i>Glaucidium cuculoides</i> | Asian Barred Owlet | 2021/8/24  | 1 | 0 | 32.24676800 | 77.17471900  | <a href="https://www.inaturalist.org/observations/92350793">https://www.inaturalist.org/observations/92350793</a>   |
| 308 | <i>Glaucidium cuculoides</i> | Asian Barred Owlet | 2019/12/27 | 2 | 0 | 33.22274990 | 107.54565000 | <a href="https://www.inaturalist.org/observations/124071333">https://www.inaturalist.org/observations/124071333</a> |
| 309 | <i>Glaucidium cuculoides</i> | Asian Barred Owlet | 2019/1/19  | 2 | 0 | 34.28532400 | 113.41668700 | <a href="https://www.inaturalist.org/observations/34143011">https://www.inaturalist.org/observations/34143011</a>   |

| No | scientific name          | common name       | date      | NIA | NID | latitude    | longitude    | url                                                                                                                 |
|----|--------------------------|-------------------|-----------|-----|-----|-------------|--------------|---------------------------------------------------------------------------------------------------------------------|
| 1  | <i>Pitta moluccensis</i> | Blue-winged Pitta | 2022/5/30 | 1   | 0   | 22.61081300 | 120.31972900 | <a href="https://www.inaturalist.org/observations/119675376">https://www.inaturalist.org/observations/119675376</a> |
| 2  | <i>Pitta moluccensis</i> | Blue-winged Pitta | 2022/5/29 | 3   | 0   | 22.61187470 | 120.31970080 | <a href="https://www.inaturalist.org/observations/123574668">https://www.inaturalist.org/observations/123574668</a> |
| 3  | <i>Pitta moluccensis</i> | Blue-winged Pitta | 2022/6/2  | 3   | 0   | 22.61187470 | 120.31970090 | <a href="https://www.inaturalist.org/observations/131063696">https://www.inaturalist.org/observations/131063696</a> |
| 4  | <i>Pitta moluccensis</i> | Blue-winged Pitta | 2022/6/2  | 1   | 0   | 22.61228259 | 120.31981620 | <a href="https://www.inaturalist.org/observations/124379863">https://www.inaturalist.org/observations/124379863</a> |
| 5  | <i>Pitta moluccensis</i> | Blue-winged Pitta | 2022/5/29 | 5   | 0   | 22.61229598 | 120.32052600 | <a href="https://www.inaturalist.org/observations/129507143">https://www.inaturalist.org/observations/129507143</a> |
| 6  | <i>Pitta moluccensis</i> | Blue-winged Pitta | 2022/6/7  | 1   | 0   | 22.61234735 | 120.32045620 | <a href="https://www.inaturalist.org/observations/120963929">https://www.inaturalist.org/observations/120963929</a> |
| 7  | <i>Pitta moluccensis</i> | Blue-winged Pitta | 2022/6/2  | 1   | 0   | 22.61235000 | 120.32023670 | <a href="https://www.inaturalist.org/observations/133308164">https://www.inaturalist.org/observations/133308164</a> |
| 8  | <i>Pitta moluccensis</i> | Blue-winged Pitta | 2022/5/29 | 3   | 0   | 22.61237864 | 120.32060790 | <a href="https://www.inaturalist.org/observations/120771900">https://www.inaturalist.org/observations/120771900</a> |
| 9  | <i>Pitta moluccensis</i> | Blue-winged Pitta | 2022/5/29 | 1   | 0   | 22.61238785 | 120.31954490 | <a href="https://www.inaturalist.org/observations/119353115">https://www.inaturalist.org/observations/119353115</a> |
| 10 | <i>Pitta moluccensis</i> | Blue-winged Pitta | 2022/5/29 | 2   | 0   | 22.61240533 | 120.32050470 | <a href="https://www.inaturalist.org/observations/119385518">https://www.inaturalist.org/observations/119385518</a> |
| 11 | <i>Pitta moluccensis</i> | Blue-winged Pitta | 2022/5/31 | 2   | 0   | 22.61243552 | 120.32011650 | <a href="https://www.inaturalist.org/observations/121961336">https://www.inaturalist.org/observations/121961336</a> |
| 12 | <i>Pitta moluccensis</i> | Blue-winged Pitta | 2022/6/6  | 2   | 0   | 22.61243561 | 120.32007880 | <a href="https://www.inaturalist.org/observations/120947938">https://www.inaturalist.org/observations/120947938</a> |
| 13 | <i>Pitta moluccensis</i> | Blue-winged Pitta | 2022/5/29 | 1   | 0   | 22.61245700 | 120.32040300 | <a href="https://www.inaturalist.org/observations/119209765">https://www.inaturalist.org/observations/119209765</a> |
| 14 | <i>Pitta moluccensis</i> | Blue-winged Pitta | 2022/5/29 | 2   | 0   | 22.61249722 | 120.32027220 | <a href="https://www.inaturalist.org/observations/119212571">https://www.inaturalist.org/observations/119212571</a> |
| 15 | <i>Pitta moluccensis</i> | Blue-winged Pitta | 2022/6/5  | 2   | 0   | 22.61250346 | 120.32002600 | <a href="https://www.inaturalist.org/observations/122105527">https://www.inaturalist.org/observations/122105527</a> |
| 16 | <i>Pitta moluccensis</i> | Blue-winged Pitta | 2022/5/29 | 3   | 0   | 22.61255278 | 120.32039440 | <a href="https://www.inaturalist.org/observations/119210407">https://www.inaturalist.org/observations/119210407</a> |
| 17 | <i>Pitta moluccensis</i> | Blue-winged Pitta | 2022/6/3  | 1   | 0   | 22.61267500 | 120.32046330 | <a href="https://www.inaturalist.org/observations/120855462">https://www.inaturalist.org/observations/120855462</a> |
| 18 | <i>Pitta moluccensis</i> | Blue-winged Pitta | 2022/5/31 | 2   | 0   | 22.73841113 | 120.24815000 | <a href="https://www.inaturalist.org/observations/119846144">https://www.inaturalist.org/observations/119846144</a> |
| 19 | <i>Pitta moluccensis</i> | Blue-winged Pitta | 2022/5/29 | 6   | 0   | 22.79493845 | 120.33244740 | <a href="https://www.inaturalist.org/observations/129390272">https://www.inaturalist.org/observations/129390272</a> |

| No | scientific name                 | common name   | date       | NIA | NID | latitude   | longitude   | url                                                                                                                 |
|----|---------------------------------|---------------|------------|-----|-----|------------|-------------|---------------------------------------------------------------------------------------------------------------------|
| 1  | <i>Saxicola caprata</i>         | Pied Bushchat | 2018/9/7   | 1   | 0   | 6.48023193 | 80.81450529 | <a href="https://www.inaturalist.org/observations/76700610">https://www.inaturalist.org/observations/76700610</a>   |
| 2  | <i>Saxicola caprata</i>         | Pied Bushchat | 2019/12/25 | 3   | 0   | 6.76222323 | 81.00667657 | <a href="https://www.inaturalist.org/observations/36961058">https://www.inaturalist.org/observations/36961058</a>   |
| 3  | <i>Saxicola caprata</i>         | Pied Bushchat | 2019/11/27 | 2   | 0   | 6.78109619 | 80.79329585 | <a href="https://www.inaturalist.org/observations/36748768">https://www.inaturalist.org/observations/36748768</a>   |
| 4  | <i>Saxicola caprata</i>         | Pied Bushchat | 2015/2/1   | 2   | 0   | 6.78228491 | 80.79430281 | <a href="https://www.inaturalist.org/observations/65616338">https://www.inaturalist.org/observations/65616338</a>   |
| 5  | <i>Saxicola caprata</i>         | Pied Bushchat | 2019/2/9   | 3   | 0   | 6.78337842 | 80.79149412 | <a href="https://www.inaturalist.org/observations/20685794">https://www.inaturalist.org/observations/20685794</a>   |
| 6  | <i>Saxicola caprata atratus</i> | Pied Bushchat | 2018/12/13 | 3   | 0   | 6.78394592 | 80.79111112 | <a href="https://www.inaturalist.org/observations/19567468">https://www.inaturalist.org/observations/19567468</a>   |
| 7  | <i>Saxicola caprata</i>         | Pied Bushchat | 2022/2/19  | 3   | 0   | 6.78468736 | 80.79043315 | <a href="https://www.inaturalist.org/observations/108802556">https://www.inaturalist.org/observations/108802556</a> |
| 8  | <i>Saxicola caprata</i>         | Pied Bushchat | 2011/1/17  | 3   | 0   | 6.78540981 | 80.78961528 | <a href="https://www.inaturalist.org/observations/57826049">https://www.inaturalist.org/observations/57826049</a>   |
| 9  | <i>Saxicola caprata</i>         | Pied Bushchat | 2011/1/17  | 3   | 0   | 6.78540981 | 80.78961528 | <a href="https://www.inaturalist.org/observations/57826050">https://www.inaturalist.org/observations/57826050</a>   |
| 10 | <i>Saxicola caprata</i>         | Pied Bushchat | 2022/3/17  | 1   | 0   | 6.78561667 | 80.78945500 | <a href="https://www.inaturalist.org/observations/108804891">https://www.inaturalist.org/observations/108804891</a> |
| 11 | <i>Saxicola caprata</i>         | Pied Bushchat | 2022/2/20  | 4   | 0   | 6.78740000 | 80.78764333 | <a href="https://www.inaturalist.org/observations/107174213">https://www.inaturalist.org/observations/107174213</a> |
| 12 | <i>Saxicola caprata</i>         | Pied Bushchat | 2022/3/17  | 2   | 0   | 6.79247333 | 80.79689167 | <a href="https://www.inaturalist.org/observations/110029933">https://www.inaturalist.org/observations/110029933</a> |
| 13 | <i>Saxicola caprata</i>         | Pied Bushchat | 2018/9/9   | 4   | 0   | 6.79279177 | 80.79745092 | <a href="https://www.inaturalist.org/observations/63760579">https://www.inaturalist.org/observations/63760579</a>   |
| 14 | <i>Saxicola caprata</i>         | Pied Bushchat | 2019/11/27 | 1   | 0   | 6.79316189 | 80.80262297 | <a href="https://www.inaturalist.org/observations/36748770">https://www.inaturalist.org/observations/36748770</a>   |
| 15 | <i>Saxicola caprata</i>         | Pied Bushchat | 2017/6/23  | 2   | 0   | 6.79319126 | 80.79508781 | <a href="https://www.inaturalist.org/observations/6870323">https://www.inaturalist.org/observations/6870323</a>     |
| 16 | <i>Saxicola caprata atratus</i> | Pied Bushchat | 2018/12/13 | 2   | 0   | 6.79373659 | 80.79479111 | <a href="https://www.inaturalist.org/observations/19567615">https://www.inaturalist.org/observations/19567615</a>   |
| 17 | <i>Saxicola caprata</i>         | Pied Bushchat | 2020/1/9   | 3   | 0   | 6.79655310 | 80.80522891 | <a href="https://www.inaturalist.org/observations/132841400">https://www.inaturalist.org/observations/132841400</a> |
| 18 | <i>Saxicola caprata</i>         | Pied Bushchat | 2022/2/20  | 2   | 0   | 6.79673833 | 80.80527333 | <a href="https://www.inaturalist.org/observations/107174210">https://www.inaturalist.org/observations/107174210</a> |
| 19 | <i>Saxicola caprata</i>         | Pied Bushchat | 2011/1/17  | 2   | 0   | 6.79794341 | 80.80543587 | <a href="https://www.inaturalist.org/observations/57826051">https://www.inaturalist.org/observations/57826051</a>   |
| 20 | <i>Saxicola caprata</i>         | Pied Bushchat | 2022/2/19  | 1   | 0   | 6.79880794 | 80.80585630 | <a href="https://www.inaturalist.org/observations/108598821">https://www.inaturalist.org/observations/108598821</a> |
| 21 | <i>Saxicola caprata</i>         | Pied Bushchat | 2022/3/17  | 1   | 0   | 6.79889333 | 80.80609333 | <a href="https://www.inaturalist.org/observations/110029938">https://www.inaturalist.org/observations/110029938</a> |
| 22 | <i>Saxicola caprata</i>         | Pied Bushchat | 2022/4/22  | 3   | 0   | 6.79916407 | 80.81316582 | <a href="https://www.inaturalist.org/observations/117102988">https://www.inaturalist.org/observations/117102988</a> |

|    |                                 |               |            |   |   |            |             |                                                                                                                     |
|----|---------------------------------|---------------|------------|---|---|------------|-------------|---------------------------------------------------------------------------------------------------------------------|
| 23 | <i>Saxicola caprata</i>         | Pied Bushchat | 2019/2/9   | 3 | 0 | 6.79957595 | 80.80629038 | <a href="https://www.inaturalist.org/observations/20685730">https://www.inaturalist.org/observations/20685730</a>   |
| 24 | <i>Saxicola caprata</i>         | Pied Bushchat | 2017/6/23  | 3 | 0 | 6.79975378 | 80.80631018 | <a href="https://www.inaturalist.org/observations/6870282">https://www.inaturalist.org/observations/6870282</a>     |
| 25 | <i>Saxicola caprata</i>         | Pied Bushchat | 2020/10/2  | 2 | 0 | 6.80073155 | 80.80381716 | <a href="https://www.inaturalist.org/observations/93493698">https://www.inaturalist.org/observations/93493698</a>   |
| 26 | <i>Saxicola caprata</i>         | Pied Bushchat | 2017/12/15 | 3 | 0 | 6.80083742 | 80.80701639 | <a href="https://www.inaturalist.org/observations/65652830">https://www.inaturalist.org/observations/65652830</a>   |
| 27 | <i>Saxicola caprata</i>         | Pied Bushchat | 2018/12/6  | 1 | 0 | 6.80157733 | 80.80660000 | <a href="https://www.inaturalist.org/observations/108651998">https://www.inaturalist.org/observations/108651998</a> |
| 28 | <i>Saxicola caprata</i>         | Pied Bushchat | 2018/12/6  | 0 | 0 | 6.80167900 | 80.80672056 | <a href="https://www.inaturalist.org/observations/108651999">https://www.inaturalist.org/observations/108651999</a> |
| 29 | <i>Saxicola caprata atratus</i> | Pied Bushchat | 2018/11/9  | 1 | 0 | 6.80199997 | 80.80756210 | <a href="https://www.inaturalist.org/observations/18354953">https://www.inaturalist.org/observations/18354953</a>   |
| 30 | <i>Saxicola caprata</i>         | Pied Bushchat | 2015/1/23  | 2 | 0 | 6.80209700 | 80.80740500 | <a href="https://www.inaturalist.org/observations/35172289">https://www.inaturalist.org/observations/35172289</a>   |
| 31 | <i>Saxicola caprata atratus</i> | Pied Bushchat | 2017/2/16  | 2 | 0 | 6.80209750 | 80.80740460 | <a href="https://www.inaturalist.org/observations/5362504">https://www.inaturalist.org/observations/5362504</a>     |
| 32 | <i>Saxicola caprata</i>         | Pied Bushchat | 2018/9/6   | 2 | 0 | 6.80209750 | 80.80740460 | <a href="https://www.inaturalist.org/observations/16546092">https://www.inaturalist.org/observations/16546092</a>   |
| 33 | <i>Saxicola caprata</i>         | Pied Bushchat | 2019/11/27 | 1 | 0 | 6.80209750 | 80.80740460 | <a href="https://www.inaturalist.org/observations/36750881">https://www.inaturalist.org/observations/36750881</a>   |
| 34 | <i>Saxicola caprata</i>         | Pied Bushchat | 2015/2/18  | 2 | 0 | 6.80209750 | 80.80740460 | <a href="https://www.inaturalist.org/observations/36774768">https://www.inaturalist.org/observations/36774768</a>   |
| 35 | <i>Saxicola caprata</i>         | Pied Bushchat | 2016/4/14  | 2 | 0 | 6.80209750 | 80.80740460 | <a href="https://www.inaturalist.org/observations/58174502">https://www.inaturalist.org/observations/58174502</a>   |
| 36 | <i>Saxicola caprata</i>         | Pied Bushchat | 2016/4/14  | 3 | 0 | 6.80209750 | 80.80740460 | <a href="https://www.inaturalist.org/observations/58175091">https://www.inaturalist.org/observations/58175091</a>   |
| 37 | <i>Saxicola caprata</i>         | Pied Bushchat | 2020/1/1   | 2 | 0 | 6.80209751 | 80.80736160 | <a href="https://www.inaturalist.org/observations/37294922">https://www.inaturalist.org/observations/37294922</a>   |
| 38 | <i>Saxicola caprata</i>         | Pied Bushchat | 2020/1/1   | 2 | 0 | 6.80209751 | 80.80740452 | <a href="https://www.inaturalist.org/observations/37294924">https://www.inaturalist.org/observations/37294924</a>   |
| 39 | <i>Saxicola caprata</i>         | Pied Bushchat | 2021/4/17  | 3 | 0 | 6.80209751 | 80.80740452 | <a href="https://www.inaturalist.org/observations/79178322">https://www.inaturalist.org/observations/79178322</a>   |
| 40 | <i>Saxicola caprata</i>         | Pied Bushchat | 2020/1/1   | 3 | 0 | 6.80218274 | 80.80736160 | <a href="https://www.inaturalist.org/observations/37294918">https://www.inaturalist.org/observations/37294918</a>   |
| 41 | <i>Saxicola caprata</i>         | Pied Bushchat | 2020/1/1   | 2 | 0 | 6.80220594 | 80.80737087 | <a href="https://www.inaturalist.org/observations/37294913">https://www.inaturalist.org/observations/37294913</a>   |
| 42 | <i>Saxicola caprata</i>         | Pied Bushchat | 2019/6/24  | 2 | 0 | 6.80246898 | 80.80739551 | <a href="https://www.inaturalist.org/observations/28723064">https://www.inaturalist.org/observations/28723064</a>   |
| 43 | <i>Saxicola caprata</i>         | Pied Bushchat | 2020/1/1   | 2 | 0 | 6.80275479 | 80.80710869 | <a href="https://www.inaturalist.org/observations/37294917">https://www.inaturalist.org/observations/37294917</a>   |
| 44 | <i>Saxicola caprata</i>         | Pied Bushchat | 2022/2/5   | 1 | 0 | 6.80281360 | 80.80909640 | <a href="https://www.inaturalist.org/observations/109652977">https://www.inaturalist.org/observations/109652977</a> |
| 45 | <i>Saxicola caprata</i>         | Pied Bushchat | 2013/11/23 | 2 | 0 | 6.80286400 | 80.80703900 | <a href="https://www.inaturalist.org/observations/10150684">https://www.inaturalist.org/observations/10150684</a>   |

|    |                  |               |            |   |   |            |             |                                                                                                                     |
|----|------------------|---------------|------------|---|---|------------|-------------|---------------------------------------------------------------------------------------------------------------------|
| 46 | Saxicola caprata | Pied Bushchat | 2016/10/18 | 1 | 0 | 6.80302222 | 80.80709167 | <a href="https://www.inaturalist.org/observations/18748723">https://www.inaturalist.org/observations/18748723</a>   |
| 47 | Saxicola caprata | Pied Bushchat | 2022/3/17  | 1 | 0 | 6.80374667 | 80.80683667 | <a href="https://www.inaturalist.org/observations/110029946">https://www.inaturalist.org/observations/110029946</a> |
| 48 | Saxicola caprata | Pied Bushchat | 2020/3/14  | 2 | 0 | 6.81003344 | 80.80890626 | <a href="https://www.inaturalist.org/observations/83928196">https://www.inaturalist.org/observations/83928196</a>   |
| 49 | Saxicola caprata | Pied Bushchat | 2019/12/13 | 3 | 0 | 6.82527780 | 80.72111110 | <a href="https://www.inaturalist.org/observations/36776238">https://www.inaturalist.org/observations/36776238</a>   |
| 50 | Saxicola caprata | Pied Bushchat | 2015/4/20  | 5 | 0 | 6.82841200 | 80.77317000 | <a href="http://www.inaturalist.org/observations/1450462">http://www.inaturalist.org/observations/1450462</a>       |
| 51 | Saxicola caprata | Pied Bushchat | 2017/7/11  | 2 | 0 | 6.86345592 | 80.82273464 | <a href="https://www.inaturalist.org/observations/11142553">https://www.inaturalist.org/observations/11142553</a>   |
| 52 | Saxicola caprata | Pied Bushchat | 2017/7/11  | 2 | 0 | 6.89662005 | 80.81596026 | <a href="https://www.inaturalist.org/observations/12071097">https://www.inaturalist.org/observations/12071097</a>   |
| 53 | Saxicola caprata | Pied Bushchat | 2020/2/11  | 2 | 0 | 6.90286667 | 80.78905167 | <a href="https://www.inaturalist.org/observations/39425277">https://www.inaturalist.org/observations/39425277</a>   |
| 54 | Saxicola caprata | Pied Bushchat | 2020/2/11  | 3 | 0 | 6.90337500 | 80.78840167 | <a href="https://www.inaturalist.org/observations/39425276">https://www.inaturalist.org/observations/39425276</a>   |
| 55 | Saxicola caprata | Pied Bushchat | 2019/4/19  | 3 | 0 | 6.91147980 | 79.87059680 | <a href="https://www.inaturalist.org/observations/49864017">https://www.inaturalist.org/observations/49864017</a>   |
| 56 | Saxicola caprata | Pied Bushchat | 2015/1/30  | 5 | 0 | 6.95043709 | 80.78700676 | <a href="https://www.inaturalist.org/observations/49033620">https://www.inaturalist.org/observations/49033620</a>   |
| 57 | Saxicola caprata | Pied Bushchat | 2012/8/20  | 3 | 0 | 6.95634900 | 80.78487300 | <a href="https://www.inaturalist.org/observations/18678797">https://www.inaturalist.org/observations/18678797</a>   |
| 58 | Saxicola caprata | Pied Bushchat | 2020/8/1   | 2 | 0 | 7.00183760 | 80.83841330 | <a href="https://www.inaturalist.org/observations/64102077">https://www.inaturalist.org/observations/64102077</a>   |
| 59 | Saxicola caprata | Pied Bushchat | 2022/7/5   | 3 | 0 | 8.80831949 | 77.44114886 | <a href="https://www.inaturalist.org/observations/127785744">https://www.inaturalist.org/observations/127785744</a> |
| 60 | Saxicola caprata | Pied Bushchat | 2022/7/7   | 4 | 0 | 8.80831949 | 77.44114886 | <a href="https://www.inaturalist.org/observations/128290015">https://www.inaturalist.org/observations/128290015</a> |
| 61 | Saxicola caprata | Pied Bushchat | 2021/3/15  | 1 | 0 | 9.63095770 | 77.35490130 | <a href="https://www.inaturalist.org/observations/71502071">https://www.inaturalist.org/observations/71502071</a>   |
| 62 | Saxicola caprata | Pied Bushchat | 2021/2/27  | 2 | 0 | 9.72819997 | 76.88128397 | <a href="https://www.inaturalist.org/observations/70255016">https://www.inaturalist.org/observations/70255016</a>   |
| 63 | Saxicola caprata | Pied Bushchat | 2021/11/7  | 2 | 0 | 9.73000000 | 76.87000000 | <a href="https://www.inaturalist.org/observations/100518055">https://www.inaturalist.org/observations/100518055</a> |
| 64 | Saxicola caprata | Pied Bushchat | 2021/11/7  | 2 | 0 | 9.73000000 | 76.87000000 | <a href="https://www.inaturalist.org/observations/100518057">https://www.inaturalist.org/observations/100518057</a> |
| 65 | Saxicola caprata | Pied Bushchat | 2021/11/7  | 2 | 0 | 9.73000000 | 76.87000000 | <a href="https://www.inaturalist.org/observations/100518059">https://www.inaturalist.org/observations/100518059</a> |
| 66 | Saxicola caprata | Pied Bushchat | 2022/2/2   | 2 | 0 | 9.73442700 | 76.86224204 | <a href="https://www.inaturalist.org/observations/106114995">https://www.inaturalist.org/observations/106114995</a> |
| 67 | Saxicola caprata | Pied Bushchat | 2021/11/28 | 2 | 0 | 9.73546685 | 76.85957089 | <a href="https://www.inaturalist.org/observations/102414456">https://www.inaturalist.org/observations/102414456</a> |
| 68 | Saxicola caprata | Pied Bushchat | 2021/11/28 | 2 | 0 | 9.73546685 | 76.85957089 | <a href="https://www.inaturalist.org/observations/102414458">https://www.inaturalist.org/observations/102414458</a> |

|    |                  |               |            |   |   |             |             |                                                                                                                     |
|----|------------------|---------------|------------|---|---|-------------|-------------|---------------------------------------------------------------------------------------------------------------------|
| 69 | Saxicola caprata | Pied Bushchat | 2014/11/7  | 2 | 0 | 10.03642057 | 77.12257940 | <a href="https://www.inaturalist.org/observations/70414978">https://www.inaturalist.org/observations/70414978</a>   |
| 70 | Saxicola caprata | Pied Bushchat | 2014/11/7  | 3 | 0 | 10.03650875 | 77.12263369 | <a href="https://www.inaturalist.org/observations/70414934">https://www.inaturalist.org/observations/70414934</a>   |
| 71 | Saxicola caprata | Pied Bushchat | 2014/12/31 | 1 | 0 | 10.05414773 | 77.06824755 | <a href="https://www.inaturalist.org/observations/79699665">https://www.inaturalist.org/observations/79699665</a>   |
| 72 | Saxicola caprata | Pied Bushchat | 2022/4/2   | 2 | 0 | 10.06025360 | 77.00739190 | <a href="https://www.inaturalist.org/observations/110417823">https://www.inaturalist.org/observations/110417823</a> |
| 73 | Saxicola caprata | Pied Bushchat | 2022/4/2   | 1 | 0 | 10.06025360 | 77.00739190 | <a href="https://www.inaturalist.org/observations/110417851">https://www.inaturalist.org/observations/110417851</a> |
| 74 | Saxicola caprata | Pied Bushchat | 2022/4/2   | 1 | 0 | 10.06025360 | 77.00739190 | <a href="https://www.inaturalist.org/observations/110417917">https://www.inaturalist.org/observations/110417917</a> |
| 75 | Saxicola caprata | Pied Bushchat | 2022/4/3   | 1 | 0 | 10.06025360 | 77.00739190 | <a href="https://www.inaturalist.org/observations/110417989">https://www.inaturalist.org/observations/110417989</a> |
| 76 | Saxicola caprata | Pied Bushchat | 2022/4/3   | 3 | 0 | 10.06025360 | 77.00739190 | <a href="https://www.inaturalist.org/observations/110418019">https://www.inaturalist.org/observations/110418019</a> |
| 77 | Saxicola caprata | Pied Bushchat | 2022/4/3   | 3 | 0 | 10.06025360 | 77.00739190 | <a href="https://www.inaturalist.org/observations/110418023">https://www.inaturalist.org/observations/110418023</a> |
| 78 | Saxicola caprata | Pied Bushchat | 2022/4/3   | 2 | 0 | 10.06025360 | 77.00739190 | <a href="https://www.inaturalist.org/observations/110418052">https://www.inaturalist.org/observations/110418052</a> |
| 79 | Saxicola caprata | Pied Bushchat | 2022/4/3   | 2 | 0 | 10.06025360 | 77.00739190 | <a href="https://www.inaturalist.org/observations/110418056">https://www.inaturalist.org/observations/110418056</a> |
| 80 | Saxicola caprata | Pied Bushchat | 2022/4/3   | 2 | 0 | 10.06025360 | 77.00739190 | <a href="https://www.inaturalist.org/observations/110466284">https://www.inaturalist.org/observations/110466284</a> |
| 81 | Saxicola caprata | Pied Bushchat | 2022/4/3   | 2 | 0 | 10.06025360 | 77.00739190 | <a href="https://www.inaturalist.org/observations/110466289">https://www.inaturalist.org/observations/110466289</a> |
| 82 | Saxicola caprata | Pied Bushchat | 2022/4/3   | 2 | 0 | 10.06025360 | 77.00739190 | <a href="https://www.inaturalist.org/observations/110466296">https://www.inaturalist.org/observations/110466296</a> |
| 83 | Saxicola caprata | Pied Bushchat | 2022/8/24  | 3 | 0 | 10.06626900 | 77.00820300 | <a href="https://www.inaturalist.org/observations/132242374">https://www.inaturalist.org/observations/132242374</a> |
| 84 | Saxicola caprata | Pied Bushchat | 2021/11/11 | 3 | 0 | 10.07269066 | 77.05676342 | <a href="https://www.inaturalist.org/observations/100917705">https://www.inaturalist.org/observations/100917705</a> |
| 85 | Saxicola caprata | Pied Bushchat | 2020/6/12  | 2 | 0 | 10.07700447 | 77.06238259 | <a href="https://www.inaturalist.org/observations/53821099">https://www.inaturalist.org/observations/53821099</a>   |
| 86 | Saxicola caprata | Pied Bushchat | 2012/7/23  | 3 | 0 | 10.08604320 | 77.06089880 | <a href="https://www.inaturalist.org/observations/32857289">https://www.inaturalist.org/observations/32857289</a>   |
| 87 | Saxicola caprata | Pied Bushchat | 2019/6/5   | 4 | 0 | 10.08862101 | 77.05901116 | <a href="https://www.inaturalist.org/observations/80850304">https://www.inaturalist.org/observations/80850304</a>   |
| 88 | Saxicola caprata | Pied Bushchat | 2020/2/7   | 3 | 0 | 10.08862101 | 77.05969780 | <a href="https://www.inaturalist.org/observations/81605857">https://www.inaturalist.org/observations/81605857</a>   |
| 89 | Saxicola caprata | Pied Bushchat | 2019/6/5   | 4 | 0 | 10.08879001 | 77.05866783 | <a href="https://www.inaturalist.org/observations/80850298">https://www.inaturalist.org/observations/80850298</a>   |
| 90 | Saxicola caprata | Pied Bushchat | 2020/11/15 | 2 | 0 | 10.08893289 | 77.05952469 | <a href="https://www.inaturalist.org/observations/64992005">https://www.inaturalist.org/observations/64992005</a>   |
| 91 | Saxicola caprata | Pied Bushchat | 2017/4/2   | 2 | 0 | 10.08893330 | 77.05952480 | <a href="https://www.inaturalist.org/observations/64355060">https://www.inaturalist.org/observations/64355060</a>   |

|     |                  |               |            |   |   |             |             |                                                                                                                     |
|-----|------------------|---------------|------------|---|---|-------------|-------------|---------------------------------------------------------------------------------------------------------------------|
| 92  | Saxicola caprata | Pied Bushchat | 2015/9/24  | 1 | 0 | 10.08893330 | 77.05952480 | <a href="https://www.inaturalist.org/observations/91649436">https://www.inaturalist.org/observations/91649436</a>   |
| 93  | Saxicola caprata | Pied Bushchat | 2020/2/7   | 5 | 0 | 10.08895902 | 77.05866783 | <a href="https://www.inaturalist.org/observations/81605906">https://www.inaturalist.org/observations/81605906</a>   |
| 94  | Saxicola caprata | Pied Bushchat | 2022/1/5   | 5 | 0 | 10.08897943 | 77.05952469 | <a href="https://www.inaturalist.org/observations/105154436">https://www.inaturalist.org/observations/105154436</a> |
| 95  | Saxicola caprata | Pied Bushchat | 2019/6/5   | 2 | 0 | 10.08912803 | 77.05712288 | <a href="https://www.inaturalist.org/observations/80850301">https://www.inaturalist.org/observations/80850301</a>   |
| 96  | Saxicola caprata | Pied Bushchat | 2020/2/7   | 5 | 0 | 10.08929703 | 77.05969780 | <a href="https://www.inaturalist.org/observations/81605873">https://www.inaturalist.org/observations/81605873</a>   |
| 97  | Saxicola caprata | Pied Bushchat | 2020/1/29  | 1 | 0 | 10.09362958 | 77.05252202 | <a href="https://www.inaturalist.org/observations/66826420">https://www.inaturalist.org/observations/66826420</a>   |
| 98  | Saxicola caprata | Pied Bushchat | 2020/1/29  | 2 | 0 | 10.09368768 | 77.05242546 | <a href="https://www.inaturalist.org/observations/66826418">https://www.inaturalist.org/observations/66826418</a>   |
| 99  | Saxicola caprata | Pied Bushchat | 2016/12/22 | 2 | 0 | 10.09603148 | 77.10140993 | <a href="https://www.inaturalist.org/observations/68921034">https://www.inaturalist.org/observations/68921034</a>   |
| 100 | Saxicola caprata | Pied Bushchat | 2016/12/22 | 2 | 0 | 10.09603148 | 77.10140993 | <a href="https://www.inaturalist.org/observations/68921035">https://www.inaturalist.org/observations/68921035</a>   |
| 101 | Saxicola caprata | Pied Bushchat | 2013/8/28  | 4 | 0 | 10.10000000 | 77.06667000 | <a href="http://www.inaturalist.org/observations/1556643">http://www.inaturalist.org/observations/1556643</a>       |
| 102 | Saxicola caprata | Pied Bushchat | 2022/6/30  | 3 | 0 | 10.10473243 | 77.95261659 | <a href="https://www.inaturalist.org/observations/124077102">https://www.inaturalist.org/observations/124077102</a> |
| 103 | Saxicola caprata | Pied Bushchat | 2019/2/6   | 5 | 0 | 10.11830800 | 77.05987823 | <a href="https://www.inaturalist.org/observations/122039181">https://www.inaturalist.org/observations/122039181</a> |
| 104 | Saxicola caprata | Pied Bushchat | 2016/2/14  | 3 | 0 | 10.12662640 | 77.25817030 | <a href="https://www.inaturalist.org/observations/33998882">https://www.inaturalist.org/observations/33998882</a>   |
| 105 | Saxicola caprata | Pied Bushchat | 2021/11/11 | 2 | 0 | 10.12662640 | 77.25817030 | <a href="https://www.inaturalist.org/observations/100917732">https://www.inaturalist.org/observations/100917732</a> |
| 106 | Saxicola caprata | Pied Bushchat | 2021/11/11 | 4 | 0 | 10.12662640 | 77.25817030 | <a href="https://www.inaturalist.org/observations/100917736">https://www.inaturalist.org/observations/100917736</a> |
| 107 | Saxicola caprata | Pied Bushchat | 2016/12/22 | 2 | 0 | 10.13555930 | 77.05972970 | <a href="https://www.inaturalist.org/observations/68771797">https://www.inaturalist.org/observations/68771797</a>   |
| 108 | Saxicola caprata | Pied Bushchat | 2016/12/22 | 2 | 0 | 10.13555930 | 77.05972970 | <a href="https://www.inaturalist.org/observations/68921251">https://www.inaturalist.org/observations/68921251</a>   |
| 109 | Saxicola caprata | Pied Bushchat | 2016/4/17  | 3 | 0 | 10.13696500 | 77.05942300 | <a href="http://www.inaturalist.org/observations/3594672">http://www.inaturalist.org/observations/3594672</a>       |
| 110 | Saxicola caprata | Pied Bushchat | 2017/12/19 | 2 | 0 | 10.13741150 | 77.05776750 | <a href="https://www.inaturalist.org/observations/9914937">https://www.inaturalist.org/observations/9914937</a>     |
| 111 | Saxicola caprata | Pied Bushchat | 2017/12/19 | 1 | 0 | 10.13741150 | 77.05776750 | <a href="https://www.inaturalist.org/observations/9914938">https://www.inaturalist.org/observations/9914938</a>     |
| 112 | Saxicola caprata | Pied Bushchat | 2019/2/6   | 1 | 0 | 10.13949514 | 77.05386106 | <a href="https://www.inaturalist.org/observations/49891037">https://www.inaturalist.org/observations/49891037</a>   |
| 113 | Saxicola caprata | Pied Bushchat | 2017/1/30  | 3 | 0 | 10.14285024 | 77.03970436 | <a href="https://www.inaturalist.org/observations/80465336">https://www.inaturalist.org/observations/80465336</a>   |
| 114 | Saxicola caprata | Pied Bushchat | 2022/7/1   | 2 | 0 | 10.14351333 | 77.03876667 | <a href="https://www.inaturalist.org/observations/126919797">https://www.inaturalist.org/observations/126919797</a> |



|     |                  |               |            |   |   |             |             |                                                                                                                     |
|-----|------------------|---------------|------------|---|---|-------------|-------------|---------------------------------------------------------------------------------------------------------------------|
| 115 | Saxicola caprata | Pied Bushchat | 2015/1/30  | 3 | 0 | 10.14355200 | 77.04170200 | <a href="https://www.inaturalist.org/observations/35325076">https://www.inaturalist.org/observations/35325076</a>   |
| 116 | Saxicola caprata | Pied Bushchat | 2020/1/17  | 1 | 0 | 10.14367139 | 77.04009806 | <a href="https://www.inaturalist.org/observations/51566604">https://www.inaturalist.org/observations/51566604</a>   |
| 117 | Saxicola caprata | Pied Bushchat | 2015/1/9   | 4 | 0 | 10.14371309 | 77.04677938 | <a href="https://www.inaturalist.org/observations/83275133">https://www.inaturalist.org/observations/83275133</a>   |
| 118 | Saxicola caprata | Pied Bushchat | 2015/1/9   | 3 | 0 | 10.14371309 | 77.04677938 | <a href="https://www.inaturalist.org/observations/83275142">https://www.inaturalist.org/observations/83275142</a>   |
| 119 | Saxicola caprata | Pied Bushchat | 2014/12/29 | 1 | 0 | 10.14416200 | 77.04622271 | <a href="https://www.inaturalist.org/observations/79406945">https://www.inaturalist.org/observations/79406945</a>   |
| 120 | Saxicola caprata | Pied Bushchat | 2021/4/9   | 2 | 0 | 10.14563490 | 77.04649671 | <a href="https://www.inaturalist.org/observations/74353926">https://www.inaturalist.org/observations/74353926</a>   |
| 121 | Saxicola caprata | Pied Bushchat | 2021/4/6   | 2 | 0 | 10.14645998 | 77.19326367 | <a href="https://www.inaturalist.org/observations/79921702">https://www.inaturalist.org/observations/79921702</a>   |
| 122 | Saxicola caprata | Pied Bushchat | 2018/4/8   | 2 | 0 | 10.16815704 | 77.25903949 | <a href="https://www.inaturalist.org/observations/15820953">https://www.inaturalist.org/observations/15820953</a>   |
| 123 | Saxicola caprata | Pied Bushchat | 2021/3/6   | 3 | 0 | 10.18156667 | 77.25808056 | <a href="https://www.inaturalist.org/observations/70908839">https://www.inaturalist.org/observations/70908839</a>   |
| 124 | Saxicola caprata | Pied Bushchat | 2021/3/4   | 3 | 0 | 10.18496389 | 77.25846667 | <a href="https://www.inaturalist.org/observations/70883550">https://www.inaturalist.org/observations/70883550</a>   |
| 125 | Saxicola caprata | Pied Bushchat | 2021/3/5   | 4 | 0 | 10.18498611 | 77.25943611 | <a href="https://www.inaturalist.org/observations/70883942">https://www.inaturalist.org/observations/70883942</a>   |
| 126 | Saxicola caprata | Pied Bushchat | 2021/3/6   | 3 | 0 | 10.18505556 | 77.25861667 | <a href="https://www.inaturalist.org/observations/70908543">https://www.inaturalist.org/observations/70908543</a>   |
| 127 | Saxicola caprata | Pied Bushchat | 2021/3/5   | 1 | 0 | 10.18559167 | 77.24291389 | <a href="https://www.inaturalist.org/observations/91553199">https://www.inaturalist.org/observations/91553199</a>   |
| 128 | Saxicola caprata | Pied Bushchat | 2021/9/4   | 2 | 0 | 10.19371000 | 77.32008500 | <a href="https://www.inaturalist.org/observations/115325165">https://www.inaturalist.org/observations/115325165</a> |
| 129 | Saxicola caprata | Pied Bushchat | 2022/3/22  | 1 | 0 | 10.19424410 | 77.99670430 | <a href="https://www.inaturalist.org/observations/110408924">https://www.inaturalist.org/observations/110408924</a> |
| 130 | Saxicola caprata | Pied Bushchat | 2021/9/4   | 2 | 0 | 10.20514500 | 77.31820833 | <a href="https://www.inaturalist.org/observations/115327740">https://www.inaturalist.org/observations/115327740</a> |
| 131 | Saxicola caprata | Pied Bushchat | 2020/1/7   | 2 | 0 | 10.21074370 | 77.47506320 | <a href="https://www.inaturalist.org/observations/37374724">https://www.inaturalist.org/observations/37374724</a>   |
| 132 | Saxicola caprata | Pied Bushchat | 2021/8/6   | 4 | 0 | 10.22591283 | 77.48575177 | <a href="https://www.inaturalist.org/observations/115692831">https://www.inaturalist.org/observations/115692831</a> |
| 133 | Saxicola caprata | Pied Bushchat | 2019/6/10  | 1 | 0 | 10.23004080 | 77.49363590 | <a href="https://www.inaturalist.org/observations/37619572">https://www.inaturalist.org/observations/37619572</a>   |
| 134 | Saxicola caprata | Pied Bushchat | 2021/8/6   | 2 | 0 | 10.23028011 | 77.47544299 | <a href="https://www.inaturalist.org/observations/94793504">https://www.inaturalist.org/observations/94793504</a>   |
| 135 | Saxicola caprata | Pied Bushchat | 2018/5/10  | 3 | 0 | 10.23033140 | 77.48435790 | <a href="https://www.inaturalist.org/observations/12668084">https://www.inaturalist.org/observations/12668084</a>   |
| 136 | Saxicola caprata | Pied Bushchat | 2018/5/10  | 3 | 0 | 10.23033140 | 77.48435790 | <a href="https://www.inaturalist.org/observations/12668087">https://www.inaturalist.org/observations/12668087</a>   |
| 137 | Saxicola caprata | Pied Bushchat | 2020/1/18  | 1 | 0 | 10.23120430 | 77.48989200 | <a href="https://www.inaturalist.org/observations/39190442">https://www.inaturalist.org/observations/39190442</a>   |

|     |                  |               |            |   |   |             |             |                                                                                                                     |
|-----|------------------|---------------|------------|---|---|-------------|-------------|---------------------------------------------------------------------------------------------------------------------|
| 138 | Saxicola caprata | Pied Bushchat | 2010/3/22  | 1 | 0 | 10.23218237 | 77.49457024 | <a href="https://www.inaturalist.org/observations/93533944">https://www.inaturalist.org/observations/93533944</a>   |
| 139 | Saxicola caprata | Pied Bushchat | 2010/3/22  | 1 | 0 | 10.23218268 | 77.49456886 | <a href="https://www.inaturalist.org/observations/93533864">https://www.inaturalist.org/observations/93533864</a>   |
| 140 | Saxicola caprata | Pied Bushchat | 2010/3/22  | 1 | 0 | 10.23228004 | 77.49461055 | <a href="https://www.inaturalist.org/observations/93532849">https://www.inaturalist.org/observations/93532849</a>   |
| 141 | Saxicola caprata | Pied Bushchat | 2018/8/15  | 1 | 0 | 10.23247849 | 77.49386181 | <a href="https://www.inaturalist.org/observations/15911689">https://www.inaturalist.org/observations/15911689</a>   |
| 142 | Saxicola caprata | Pied Bushchat | 2010/3/22  | 1 | 0 | 10.23266856 | 77.49479173 | <a href="https://www.inaturalist.org/observations/93533045">https://www.inaturalist.org/observations/93533045</a>   |
| 143 | Saxicola caprata | Pied Bushchat | 2010/3/22  | 1 | 0 | 10.23267558 | 77.49482587 | <a href="https://www.inaturalist.org/observations/93533122">https://www.inaturalist.org/observations/93533122</a>   |
| 144 | Saxicola caprata | Pied Bushchat | 2019/8/11  | 2 | 0 | 10.23811360 | 77.48918220 | <a href="https://www.inaturalist.org/observations/31532538">https://www.inaturalist.org/observations/31532538</a>   |
| 145 | Saxicola caprata | Pied Bushchat | 2011/7/16  | 1 | 0 | 10.23811360 | 77.48918220 | <a href="https://www.inaturalist.org/observations/90010737">https://www.inaturalist.org/observations/90010737</a>   |
| 146 | Saxicola caprata | Pied Bushchat | 2011/6/3   | 1 | 0 | 10.23811360 | 77.48918220 | <a href="https://www.inaturalist.org/observations/91250241">https://www.inaturalist.org/observations/91250241</a>   |
| 147 | Saxicola caprata | Pied Bushchat | 2016/12/18 | 1 | 0 | 10.23811360 | 77.48918220 | <a href="https://www.inaturalist.org/observations/92319668">https://www.inaturalist.org/observations/92319668</a>   |
| 148 | Saxicola caprata | Pied Bushchat | 2019/6/17  | 1 | 0 | 10.24785560 | 77.48883880 | <a href="https://www.inaturalist.org/observations/37619667">https://www.inaturalist.org/observations/37619667</a>   |
| 149 | Saxicola caprata | Pied Bushchat | 2017/12/12 | 1 | 0 | 10.24943297 | 77.40876370 | <a href="https://www.inaturalist.org/observations/65812850">https://www.inaturalist.org/observations/65812850</a>   |
| 150 | Saxicola caprata | Pied Bushchat | 2017/12/12 | 1 | 0 | 10.25133737 | 77.40800196 | <a href="https://www.inaturalist.org/observations/65813116">https://www.inaturalist.org/observations/65813116</a>   |
| 151 | Saxicola caprata | Pied Bushchat | 2020/11/2  | 1 | 0 | 10.26754555 | 77.50030920 | <a href="https://www.inaturalist.org/observations/64020420">https://www.inaturalist.org/observations/64020420</a>   |
| 152 | Saxicola caprata | Pied Bushchat | 2020/11/2  | 2 | 0 | 10.26754555 | 77.50030920 | <a href="https://www.inaturalist.org/observations/64020491">https://www.inaturalist.org/observations/64020491</a>   |
| 153 | Saxicola caprata | Pied Bushchat | 2017/12/11 | 2 | 0 | 10.26774620 | 77.48810268 | <a href="https://www.inaturalist.org/observations/65816578">https://www.inaturalist.org/observations/65816578</a>   |
| 154 | Saxicola caprata | Pied Bushchat | 2021/8/6   | 2 | 0 | 10.28417167 | 77.36205833 | <a href="https://www.inaturalist.org/observations/115693022">https://www.inaturalist.org/observations/115693022</a> |
| 155 | Saxicola caprata | Pied Bushchat | 2021/8/6   | 1 | 0 | 10.28417500 | 77.36205167 | <a href="https://www.inaturalist.org/observations/94815676">https://www.inaturalist.org/observations/94815676</a>   |
| 156 | Saxicola caprata | Pied Bushchat | 2020/10/3  | 2 | 0 | 10.29525960 | 77.36546110 | <a href="https://www.inaturalist.org/observations/62098296">https://www.inaturalist.org/observations/62098296</a>   |
| 157 | Saxicola caprata | Pied Bushchat | 2020/10/3  | 3 | 0 | 10.29525960 | 77.36546110 | <a href="https://www.inaturalist.org/observations/62098297">https://www.inaturalist.org/observations/62098297</a>   |
| 158 | Saxicola caprata | Pied Bushchat | 2019/10/12 | 1 | 0 | 10.32697340 | 76.95539670 | <a href="https://www.inaturalist.org/observations/55779227">https://www.inaturalist.org/observations/55779227</a>   |
| 159 | Saxicola caprata | Pied Bushchat | 2019/10/12 | 1 | 0 | 10.32697340 | 76.95539670 | <a href="https://www.inaturalist.org/observations/55779232">https://www.inaturalist.org/observations/55779232</a>   |
| 160 | Saxicola caprata | Pied Bushchat | 2019/10/13 | 1 | 0 | 10.32697340 | 76.95539670 | <a href="https://www.inaturalist.org/observations/55779239">https://www.inaturalist.org/observations/55779239</a>   |

|     |                  |               |            |   |   |             |             |                                                                                                                     |
|-----|------------------|---------------|------------|---|---|-------------|-------------|---------------------------------------------------------------------------------------------------------------------|
| 161 | Saxicola caprata | Pied Bushchat | 2021/3/29  | 2 | 0 | 10.32697340 | 76.95539670 | <a href="https://www.inaturalist.org/observations/105256389">https://www.inaturalist.org/observations/105256389</a> |
| 162 | Saxicola caprata | Pied Bushchat | 2021/3/31  | 2 | 0 | 10.32697340 | 76.95539670 | <a href="https://www.inaturalist.org/observations/105256422">https://www.inaturalist.org/observations/105256422</a> |
| 163 | Saxicola caprata | Pied Bushchat | 2021/3/31  | 2 | 0 | 10.32697340 | 76.95539670 | <a href="https://www.inaturalist.org/observations/105256431">https://www.inaturalist.org/observations/105256431</a> |
| 164 | Saxicola caprata | Pied Bushchat | 2015/1/7   | 2 | 0 | 10.33290291 | 76.95975705 | <a href="https://www.inaturalist.org/observations/82140696">https://www.inaturalist.org/observations/82140696</a>   |
| 165 | Saxicola caprata | Pied Bushchat | 2020/1/1   | 2 | 0 | 10.35164803 | 76.26316390 | <a href="https://www.inaturalist.org/observations/41676355">https://www.inaturalist.org/observations/41676355</a>   |
| 166 | Saxicola caprata | Pied Bushchat | 2020/1/1   | 3 | 0 | 10.35164803 | 76.26316390 | <a href="https://www.inaturalist.org/observations/41676356">https://www.inaturalist.org/observations/41676356</a>   |
| 167 | Saxicola caprata | Pied Bushchat | 2022/5/1   | 1 | 0 | 10.36571000 | 76.24872000 | <a href="https://www.inaturalist.org/observations/114746635">https://www.inaturalist.org/observations/114746635</a> |
| 168 | Saxicola caprata | Pied Bushchat | 2020/2/17  | 2 | 0 | 10.38811938 | 76.19058459 | <a href="https://www.inaturalist.org/observations/70828660">https://www.inaturalist.org/observations/70828660</a>   |
| 169 | Saxicola caprata | Pied Bushchat | 2020/11/11 | 2 | 0 | 10.39661063 | 77.27402303 | <a href="https://www.inaturalist.org/observations/64677102">https://www.inaturalist.org/observations/64677102</a>   |
| 170 | Saxicola caprata | Pied Bushchat | 2020/1/29  | 2 | 0 | 10.53452333 | 76.10016000 | <a href="https://www.inaturalist.org/observations/67019425">https://www.inaturalist.org/observations/67019425</a>   |
| 171 | Saxicola caprata | Pied Bushchat | 2020/1/29  | 2 | 0 | 10.53470833 | 76.10023333 | <a href="https://www.inaturalist.org/observations/67019426">https://www.inaturalist.org/observations/67019426</a>   |
| 172 | Saxicola caprata | Pied Bushchat | 2020/1/30  | 2 | 0 | 10.54389000 | 76.24140833 | <a href="https://www.inaturalist.org/observations/67019399">https://www.inaturalist.org/observations/67019399</a>   |
| 173 | Saxicola caprata | Pied Bushchat | 2020/1/4   | 3 | 0 | 10.54509167 | 76.24852000 | <a href="https://www.inaturalist.org/observations/44104691">https://www.inaturalist.org/observations/44104691</a>   |
| 174 | Saxicola caprata | Pied Bushchat | 2018/4/15  | 4 | 0 | 10.55993667 | 76.13354500 | <a href="https://www.inaturalist.org/observations/18016397">https://www.inaturalist.org/observations/18016397</a>   |
| 175 | Saxicola caprata | Pied Bushchat | 2021/1/15  | 2 | 0 | 10.58547790 | 77.25134530 | <a href="https://www.inaturalist.org/observations/109837985">https://www.inaturalist.org/observations/109837985</a> |
| 176 | Saxicola caprata | Pied Bushchat | 2022/3/18  | 2 | 0 | 10.63291667 | 76.80624333 | <a href="https://www.inaturalist.org/observations/115064620">https://www.inaturalist.org/observations/115064620</a> |
| 177 | Saxicola caprata | Pied Bushchat | 2020/10/25 | 1 | 0 | 10.64792268 | 76.53948627 | <a href="https://www.inaturalist.org/observations/67087322">https://www.inaturalist.org/observations/67087322</a>   |
| 178 | Saxicola caprata | Pied Bushchat | 2019/10/13 | 1 | 0 | 10.66089250 | 77.00475900 | <a href="https://www.inaturalist.org/observations/55779233">https://www.inaturalist.org/observations/55779233</a>   |
| 179 | Saxicola caprata | Pied Bushchat | 2019/11/28 | 5 | 0 | 10.80019999 | 76.82318170 | <a href="https://www.inaturalist.org/observations/36287978">https://www.inaturalist.org/observations/36287978</a>   |
| 180 | Saxicola caprata | Pied Bushchat | 2020/8/8   | 1 | 0 | 10.81319843 | 76.91151705 | <a href="https://www.inaturalist.org/observations/105836749">https://www.inaturalist.org/observations/105836749</a> |
| 181 | Saxicola caprata | Pied Bushchat | 2020/10/2  | 1 | 0 | 10.82350057 | 76.85248407 | <a href="https://www.inaturalist.org/observations/105836735">https://www.inaturalist.org/observations/105836735</a> |
| 182 | Saxicola caprata | Pied Bushchat | 2016/2/2   | 3 | 0 | 10.83195700 | 76.71375300 | <a href="https://www.inaturalist.org/observations/7275778">https://www.inaturalist.org/observations/7275778</a>     |
| 183 | Saxicola caprata | Pied Bushchat | 2016/2/2   | 3 | 0 | 10.83246300 | 76.71409600 | <a href="https://www.inaturalist.org/observations/7275783">https://www.inaturalist.org/observations/7275783</a>     |

|     |                  |               |            |   |   |             |             |                                                                                                                     |
|-----|------------------|---------------|------------|---|---|-------------|-------------|---------------------------------------------------------------------------------------------------------------------|
| 184 | Saxicola caprata | Pied Bushchat | 2020/12/13 | 4 | 0 | 10.91462072 | 76.89657987 | <a href="https://www.inaturalist.org/observations/108946116">https://www.inaturalist.org/observations/108946116</a> |
| 185 | Saxicola caprata | Pied Bushchat | 2020/8/22  | 5 | 0 | 10.96521810 | 76.74663090 | <a href="https://www.inaturalist.org/observations/108945419">https://www.inaturalist.org/observations/108945419</a> |
| 186 | Saxicola caprata | Pied Bushchat | 2020/10/17 | 2 | 0 | 10.98630000 | 76.90633900 | <a href="https://www.inaturalist.org/observations/107245269">https://www.inaturalist.org/observations/107245269</a> |
| 187 | Saxicola caprata | Pied Bushchat | 2020/8/29  | 2 | 0 | 11.01684450 | 76.95583210 | <a href="https://www.inaturalist.org/observations/118348953">https://www.inaturalist.org/observations/118348953</a> |
| 188 | Saxicola caprata | Pied Bushchat | 2021/1/24  | 1 | 0 | 11.09620950 | 77.37263320 | <a href="https://www.inaturalist.org/observations/69357740">https://www.inaturalist.org/observations/69357740</a>   |
| 189 | Saxicola caprata | Pied Bushchat | 2013/2/13  | 4 | 0 | 11.10483300 | 76.76827750 | <a href="http://www.inaturalist.org/observations/204222">http://www.inaturalist.org/observations/204222</a>         |
| 190 | Saxicola caprata | Pied Bushchat | 2019/5/12  | 3 | 0 | 11.23412300 | 77.65862357 | <a href="https://www.inaturalist.org/observations/38785848">https://www.inaturalist.org/observations/38785848</a>   |
| 191 | Saxicola caprata | Pied Bushchat | 2019/8/31  | 3 | 0 | 11.25438647 | 77.65769083 | <a href="https://www.inaturalist.org/observations/37219637">https://www.inaturalist.org/observations/37219637</a>   |
| 192 | Saxicola caprata | Pied Bushchat | 2018/9/18  | 2 | 0 | 11.27172420 | 76.64472330 | <a href="https://www.inaturalist.org/observations/16957820">https://www.inaturalist.org/observations/16957820</a>   |
| 193 | Saxicola caprata | Pied Bushchat | 2019/1/15  | 1 | 0 | 11.27881776 | 76.63282635 | <a href="https://www.inaturalist.org/observations/61937801">https://www.inaturalist.org/observations/61937801</a>   |
| 194 | Saxicola caprata | Pied Bushchat | 2020/9/20  | 2 | 0 | 11.28143489 | 77.58045697 | <a href="https://www.inaturalist.org/observations/60160300">https://www.inaturalist.org/observations/60160300</a>   |
| 195 | Saxicola caprata | Pied Bushchat | 2019/10/20 | 2 | 0 | 11.31070277 | 77.53739577 | <a href="https://www.inaturalist.org/observations/86271779">https://www.inaturalist.org/observations/86271779</a>   |
| 196 | Saxicola caprata | Pied Bushchat | 2021/8/13  | 1 | 0 | 11.31980610 | 76.62445068 | <a href="https://www.inaturalist.org/observations/120219453">https://www.inaturalist.org/observations/120219453</a> |
| 197 | Saxicola caprata | Pied Bushchat | 2021/4/15  | 2 | 0 | 11.32042482 | 76.62463568 | <a href="https://www.inaturalist.org/observations/120693714">https://www.inaturalist.org/observations/120693714</a> |
| 198 | Saxicola caprata | Pied Bushchat | 2020/11/12 | 2 | 0 | 11.32304662 | 79.24335279 | <a href="https://www.inaturalist.org/observations/66090766">https://www.inaturalist.org/observations/66090766</a>   |
| 199 | Saxicola caprata | Pied Bushchat | 2020/11/12 | 3 | 0 | 11.32304662 | 79.24335279 | <a href="https://www.inaturalist.org/observations/66090952">https://www.inaturalist.org/observations/66090952</a>   |
| 200 | Saxicola caprata | Pied Bushchat | 2021/1/11  | 2 | 0 | 11.32304662 | 79.24335279 | <a href="https://www.inaturalist.org/observations/68470525">https://www.inaturalist.org/observations/68470525</a>   |
| 201 | Saxicola caprata | Pied Bushchat | 2022/1/14  | 1 | 0 | 11.32304662 | 79.24335279 | <a href="https://www.inaturalist.org/observations/104955782">https://www.inaturalist.org/observations/104955782</a> |
| 202 | Saxicola caprata | Pied Bushchat | 2022/1/16  | 2 | 0 | 11.32304662 | 79.24335279 | <a href="https://www.inaturalist.org/observations/105020812">https://www.inaturalist.org/observations/105020812</a> |
| 203 | Saxicola caprata | Pied Bushchat | 2008/2/15  | 1 | 0 | 11.33999920 | 76.82164548 | <a href="https://www.inaturalist.org/observations/37995822">https://www.inaturalist.org/observations/37995822</a>   |
| 204 | Saxicola caprata | Pied Bushchat | 2020/2/23  | 2 | 0 | 11.35565220 | 76.80059130 | <a href="https://www.inaturalist.org/observations/39206101">https://www.inaturalist.org/observations/39206101</a>   |
| 205 | Saxicola caprata | Pied Bushchat | 2020/2/23  | 2 | 0 | 11.35565220 | 76.80059130 | <a href="https://www.inaturalist.org/observations/39206714">https://www.inaturalist.org/observations/39206714</a>   |
| 206 | Saxicola caprata | Pied Bushchat | 2021/7/24  | 1 | 0 | 11.35672500 | 76.79934300 | <a href="https://www.inaturalist.org/observations/91917594">https://www.inaturalist.org/observations/91917594</a>   |

|     |                  |               |            |   |   |             |             |                                                                                                                     |
|-----|------------------|---------------|------------|---|---|-------------|-------------|---------------------------------------------------------------------------------------------------------------------|
| 207 | Saxicola caprata | Pied Bushchat | 2021/8/2   | 1 | 0 | 11.36584340 | 76.82023540 | <a href="https://www.inaturalist.org/observations/94793088">https://www.inaturalist.org/observations/94793088</a>   |
| 208 | Saxicola caprata | Pied Bushchat | 2018/6/30  | 3 | 0 | 11.40081024 | 76.68355560 | <a href="https://www.inaturalist.org/observations/14065577">https://www.inaturalist.org/observations/14065577</a>   |
| 209 | Saxicola caprata | Pied Bushchat | 2013/4/1   | 1 | 0 | 11.40296810 | 76.69247895 | <a href="https://www.inaturalist.org/observations/65003790">https://www.inaturalist.org/observations/65003790</a>   |
| 210 | Saxicola caprata | Pied Bushchat | 2016/12/26 | 4 | 0 | 11.40316371 | 76.69616816 | <a href="https://www.inaturalist.org/observations/65900670">https://www.inaturalist.org/observations/65900670</a>   |
| 211 | Saxicola caprata | Pied Bushchat | 2016/12/26 | 3 | 0 | 11.40316371 | 76.69616816 | <a href="https://www.inaturalist.org/observations/65900671">https://www.inaturalist.org/observations/65900671</a>   |
| 212 | Saxicola caprata | Pied Bushchat | 2020/1/30  | 1 | 0 | 11.40444980 | 76.69433072 | <a href="https://www.inaturalist.org/observations/67451938">https://www.inaturalist.org/observations/67451938</a>   |
| 213 | Saxicola caprata | Pied Bushchat | 2019/3/24  | 3 | 0 | 11.40466610 | 76.70881850 | <a href="https://www.inaturalist.org/observations/23019677">https://www.inaturalist.org/observations/23019677</a>   |
| 214 | Saxicola caprata | Pied Bushchat | 2017/12/30 | 2 | 0 | 11.40466626 | 76.70881849 | <a href="https://www.inaturalist.org/observations/43021507">https://www.inaturalist.org/observations/43021507</a>   |
| 215 | Saxicola caprata | Pied Bushchat | 2014/8/2   | 3 | 0 | 11.40506200 | 76.73462420 | <a href="https://www.inaturalist.org/observations/20002027">https://www.inaturalist.org/observations/20002027</a>   |
| 216 | Saxicola caprata | Pied Bushchat | 2017/5/24  | 2 | 0 | 11.41020380 | 76.69503240 | <a href="https://www.inaturalist.org/observations/92672181">https://www.inaturalist.org/observations/92672181</a>   |
| 217 | Saxicola caprata | Pied Bushchat | 2020/1/31  | 3 | 0 | 11.41030660 | 76.69503227 | <a href="https://www.inaturalist.org/observations/106396740">https://www.inaturalist.org/observations/106396740</a> |
| 218 | Saxicola caprata | Pied Bushchat | 2012/10/15 | 1 | 0 | 11.41310290 | 76.69596710 | <a href="https://www.inaturalist.org/observations/40588321">https://www.inaturalist.org/observations/40588321</a>   |
| 219 | Saxicola caprata | Pied Bushchat | 2020/12/12 | 2 | 0 | 11.41504244 | 76.71571367 | <a href="https://www.inaturalist.org/observations/70932337">https://www.inaturalist.org/observations/70932337</a>   |
| 220 | Saxicola caprata | Pied Bushchat | 2020/10/16 | 1 | 0 | 11.41522053 | 76.71850059 | <a href="https://www.inaturalist.org/observations/63327989">https://www.inaturalist.org/observations/63327989</a>   |
| 221 | Saxicola caprata | Pied Bushchat | 2020/10/19 | 1 | 0 | 11.41522053 | 76.71850059 | <a href="https://www.inaturalist.org/observations/63460607">https://www.inaturalist.org/observations/63460607</a>   |
| 222 | Saxicola caprata | Pied Bushchat | 2021/6/27  | 2 | 0 | 11.41522053 | 76.71850059 | <a href="https://www.inaturalist.org/observations/86823291">https://www.inaturalist.org/observations/86823291</a>   |
| 223 | Saxicola caprata | Pied Bushchat | 2021/7/1   | 2 | 0 | 11.41522053 | 76.71850059 | <a href="https://www.inaturalist.org/observations/86823438">https://www.inaturalist.org/observations/86823438</a>   |
| 224 | Saxicola caprata | Pied Bushchat | 2021/7/1   | 1 | 0 | 11.41522053 | 76.71850059 | <a href="https://www.inaturalist.org/observations/86995559">https://www.inaturalist.org/observations/86995559</a>   |
| 225 | Saxicola caprata | Pied Bushchat | 2021/7/1   | 1 | 0 | 11.41522053 | 76.71850059 | <a href="https://www.inaturalist.org/observations/86995881">https://www.inaturalist.org/observations/86995881</a>   |
| 226 | Saxicola caprata | Pied Bushchat | 2021/7/16  | 2 | 0 | 11.41522053 | 76.71850059 | <a href="https://www.inaturalist.org/observations/87375686">https://www.inaturalist.org/observations/87375686</a>   |
| 227 | Saxicola caprata | Pied Bushchat | 2021/7/15  | 0 | 0 | 11.41528958 | 76.71651619 | <a href="https://www.inaturalist.org/observations/87129747">https://www.inaturalist.org/observations/87129747</a>   |
| 228 | Saxicola caprata | Pied Bushchat | 2021/7/15  | 2 | 0 | 11.41718308 | 76.71997617 | <a href="https://www.inaturalist.org/observations/87135036">https://www.inaturalist.org/observations/87135036</a>   |
| 229 | Saxicola caprata | Pied Bushchat | 2021/7/15  | 0 | 0 | 11.41719689 | 76.72002150 | <a href="https://www.inaturalist.org/observations/87134955">https://www.inaturalist.org/observations/87134955</a>   |

|     |                  |               |            |   |   |             |             |                                                                                                                     |
|-----|------------------|---------------|------------|---|---|-------------|-------------|---------------------------------------------------------------------------------------------------------------------|
| 230 | Saxicola caprata | Pied Bushchat | 2020/1/31  | 1 | 0 | 11.41815595 | 76.69129428 | <a href="https://www.inaturalist.org/observations/67451942">https://www.inaturalist.org/observations/67451942</a>   |
| 231 | Saxicola caprata | Pied Bushchat | 2014/8/5   | 1 | 0 | 11.41855090 | 76.71138467 | <a href="https://www.inaturalist.org/observations/20047918">https://www.inaturalist.org/observations/20047918</a>   |
| 232 | Saxicola caprata | Pied Bushchat | 2012/8/9   | 2 | 0 | 11.41887510 | 76.71138780 | <a href="https://www.inaturalist.org/observations/41748175">https://www.inaturalist.org/observations/41748175</a>   |
| 233 | Saxicola caprata | Pied Bushchat | 2012/8/9   | 2 | 0 | 11.41887510 | 76.71138780 | <a href="https://www.inaturalist.org/observations/41748183">https://www.inaturalist.org/observations/41748183</a>   |
| 234 | Saxicola caprata | Pied Bushchat | 2021/3/28  | 1 | 0 | 11.42086315 | 76.71023560 | <a href="https://www.inaturalist.org/observations/74605099">https://www.inaturalist.org/observations/74605099</a>   |
| 235 | Saxicola caprata | Pied Bushchat | 2016/5/29  | 1 | 0 | 11.42176660 | 76.86172750 | <a href="https://www.inaturalist.org/observations/88545916">https://www.inaturalist.org/observations/88545916</a>   |
| 236 | Saxicola caprata | Pied Bushchat | 2022/5/8   | 2 | 0 | 11.43570920 | 78.03808820 | <a href="https://www.inaturalist.org/observations/133726215">https://www.inaturalist.org/observations/133726215</a> |
| 237 | Saxicola caprata | Pied Bushchat | 2014/8/4   | 3 | 0 | 11.44383304 | 76.63659628 | <a href="https://www.inaturalist.org/observations/20047580">https://www.inaturalist.org/observations/20047580</a>   |
| 238 | Saxicola caprata | Pied Bushchat | 2014/8/1   | 3 | 0 | 11.44416372 | 76.64229337 | <a href="https://www.inaturalist.org/observations/20001890">https://www.inaturalist.org/observations/20001890</a>   |
| 239 | Saxicola caprata | Pied Bushchat | 2021/2/20  | 2 | 0 | 11.46294908 | 76.68173019 | <a href="https://www.inaturalist.org/observations/111511230">https://www.inaturalist.org/observations/111511230</a> |
| 240 | Saxicola caprata | Pied Bushchat | 2019/3/24  | 3 | 0 | 11.47320910 | 76.67901380 | <a href="https://www.inaturalist.org/observations/23017497">https://www.inaturalist.org/observations/23017497</a>   |
| 241 | Saxicola caprata | Pied Bushchat | 2022/9/26  | 1 | 0 | 11.49394290 | 78.02952730 | <a href="https://www.inaturalist.org/observations/136661079">https://www.inaturalist.org/observations/136661079</a> |
| 242 | Saxicola caprata | Pied Bushchat | 2022/9/26  | 1 | 0 | 11.49394290 | 78.02952730 | <a href="https://www.inaturalist.org/observations/136661080">https://www.inaturalist.org/observations/136661080</a> |
| 243 | Saxicola caprata | Pied Bushchat | 2022/9/29  | 1 | 0 | 11.49394290 | 78.02952730 | <a href="https://www.inaturalist.org/observations/137002130">https://www.inaturalist.org/observations/137002130</a> |
| 244 | Saxicola caprata | Pied Bushchat | 2022/4/24  | 2 | 0 | 11.49394300 | 78.02952700 | <a href="https://www.inaturalist.org/observations/117993586">https://www.inaturalist.org/observations/117993586</a> |
| 245 | Saxicola caprata | Pied Bushchat | 2022/9/15  | 2 | 0 | 11.49394300 | 78.02952700 | <a href="https://www.inaturalist.org/observations/135215405">https://www.inaturalist.org/observations/135215405</a> |
| 246 | Saxicola caprata | Pied Bushchat | 2014/11/12 | 3 | 0 | 11.51541499 | 76.69288383 | <a href="https://www.inaturalist.org/observations/70415063">https://www.inaturalist.org/observations/70415063</a>   |
| 247 | Saxicola caprata | Pied Bushchat | 2022/9/15  | 2 | 0 | 11.51662550 | 78.03808820 | <a href="https://www.inaturalist.org/observations/135215406">https://www.inaturalist.org/observations/135215406</a> |
| 248 | Saxicola caprata | Pied Bushchat | 2012/11/18 | 3 | 0 | 11.53127700 | 76.64832700 | <a href="https://www.inaturalist.org/observations/133870412">https://www.inaturalist.org/observations/133870412</a> |
| 249 | Saxicola caprata | Pied Bushchat | 2019/12/26 | 1 | 0 | 11.57217667 | 76.64271511 | <a href="https://www.inaturalist.org/observations/53163950">https://www.inaturalist.org/observations/53163950</a>   |
| 250 | Saxicola caprata | Pied Bushchat | 2018/12/29 | 2 | 0 | 11.57483700 | 76.91790800 | <a href="https://www.inaturalist.org/observations/19400833">https://www.inaturalist.org/observations/19400833</a>   |
| 251 | Saxicola caprata | Pied Bushchat | 2018/12/29 | 2 | 0 | 11.57654500 | 76.91408600 | <a href="https://www.inaturalist.org/observations/19397527">https://www.inaturalist.org/observations/19397527</a>   |
| 252 | Saxicola caprata | Pied Bushchat | 2019/3/24  | 1 | 0 | 11.66474362 | 76.62046070 | <a href="https://www.inaturalist.org/observations/82702536">https://www.inaturalist.org/observations/82702536</a>   |

|     |                  |               |            |   |   |             |             |                                                                                                                     |
|-----|------------------|---------------|------------|---|---|-------------|-------------|---------------------------------------------------------------------------------------------------------------------|
| 253 | Saxicola caprata | Pied Bushchat | 2021/5/21  | 1 | 0 | 11.68388914 | 78.16556409 | <a href="https://www.inaturalist.org/observations/79735907">https://www.inaturalist.org/observations/79735907</a>   |
| 254 | Saxicola caprata | Pied Bushchat | 2021/11/11 | 1 | 0 | 11.68742128 | 78.18066828 | <a href="https://www.inaturalist.org/observations/100985423">https://www.inaturalist.org/observations/100985423</a> |
| 255 | Saxicola caprata | Pied Bushchat | 2021/11/11 | 2 | 0 | 11.68742128 | 78.18066828 | <a href="https://www.inaturalist.org/observations/100985435">https://www.inaturalist.org/observations/100985435</a> |
| 256 | Saxicola caprata | Pied Bushchat | 2022/2/19  | 1 | 0 | 11.68742128 | 78.18066828 | <a href="https://www.inaturalist.org/observations/107030670">https://www.inaturalist.org/observations/107030670</a> |
| 257 | Saxicola caprata | Pied Bushchat | 2022/3/6   | 4 | 0 | 11.70313381 | 78.18779223 | <a href="https://www.inaturalist.org/observations/108009035">https://www.inaturalist.org/observations/108009035</a> |
| 258 | Saxicola caprata | Pied Bushchat | 2022/6/5   | 4 | 0 | 11.70313381 | 78.18779223 | <a href="https://www.inaturalist.org/observations/120298410">https://www.inaturalist.org/observations/120298410</a> |
| 259 | Saxicola caprata | Pied Bushchat | 2022/8/27  | 4 | 0 | 11.70313381 | 78.18779223 | <a href="https://www.inaturalist.org/observations/132521122">https://www.inaturalist.org/observations/132521122</a> |
| 260 | Saxicola caprata | Pied Bushchat | 2021/11/21 | 1 | 0 | 11.70593753 | 78.25615771 | <a href="https://www.inaturalist.org/observations/101607503">https://www.inaturalist.org/observations/101607503</a> |
| 261 | Saxicola caprata | Pied Bushchat | 2021/11/28 | 1 | 0 | 11.71054129 | 78.19028534 | <a href="https://www.inaturalist.org/observations/102076861">https://www.inaturalist.org/observations/102076861</a> |
| 262 | Saxicola caprata | Pied Bushchat | 2020/2/9   | 1 | 0 | 11.71061877 | 78.19016062 | <a href="https://www.inaturalist.org/observations/56489488">https://www.inaturalist.org/observations/56489488</a>   |
| 263 | Saxicola caprata | Pied Bushchat | 2020/2/9   | 1 | 0 | 11.71061877 | 78.19016062 | <a href="https://www.inaturalist.org/observations/56489515">https://www.inaturalist.org/observations/56489515</a>   |
| 264 | Saxicola caprata | Pied Bushchat | 2022/4/9   | 3 | 0 | 11.71068410 | 78.18926577 | <a href="https://www.inaturalist.org/observations/110841474">https://www.inaturalist.org/observations/110841474</a> |
| 265 | Saxicola caprata | Pied Bushchat | 2022/3/6   | 4 | 0 | 11.71096118 | 78.18863176 | <a href="https://www.inaturalist.org/observations/108009407">https://www.inaturalist.org/observations/108009407</a> |
| 266 | Saxicola caprata | Pied Bushchat | 2017/11/16 | 1 | 0 | 11.73446034 | 78.20203878 | <a href="https://www.inaturalist.org/observations/54719227">https://www.inaturalist.org/observations/54719227</a>   |
| 267 | Saxicola caprata | Pied Bushchat | 2019/5/28  | 3 | 0 | 11.73517199 | 76.52261549 | <a href="https://www.inaturalist.org/observations/69358501">https://www.inaturalist.org/observations/69358501</a>   |
| 268 | Saxicola caprata | Pied Bushchat | 2015/1/17  | 2 | 0 | 11.93489366 | 75.98292660 | <a href="https://www.inaturalist.org/observations/66569943">https://www.inaturalist.org/observations/66569943</a>   |
| 269 | Saxicola caprata | Pied Bushchat | 2019/12/28 | 1 | 0 | 11.93534191 | 76.24363124 | <a href="https://www.inaturalist.org/observations/37744199">https://www.inaturalist.org/observations/37744199</a>   |
| 270 | Saxicola caprata | Pied Bushchat | 2015/3/15  | 2 | 0 | 11.93848441 | 76.24346058 | <a href="https://www.inaturalist.org/observations/63687128">https://www.inaturalist.org/observations/63687128</a>   |
| 271 | Saxicola caprata | Pied Bushchat | 2015/3/15  | 2 | 0 | 11.94106697 | 76.24391591 | <a href="https://www.inaturalist.org/observations/63687122">https://www.inaturalist.org/observations/63687122</a>   |
| 272 | Saxicola caprata | Pied Bushchat | 2015/3/14  | 3 | 0 | 11.94113478 | 76.24840210 | <a href="https://www.inaturalist.org/observations/63687130">https://www.inaturalist.org/observations/63687130</a>   |
| 273 | Saxicola caprata | Pied Bushchat | 2021/3/18  | 2 | 0 | 11.94468432 | 75.38493812 | <a href="https://www.inaturalist.org/observations/125425187">https://www.inaturalist.org/observations/125425187</a> |
| 274 | Saxicola caprata | Pied Bushchat | 2018/5/8   | 3 | 0 | 11.94468464 | 75.38493812 | <a href="https://www.inaturalist.org/observations/47724776">https://www.inaturalist.org/observations/47724776</a>   |
| 275 | Saxicola caprata | Pied Bushchat | 2019/1/20  | 1 | 0 | 12.01856132 | 77.03826106 | <a href="https://www.inaturalist.org/observations/97525295">https://www.inaturalist.org/observations/97525295</a>   |

|     |                  |               |            |   |   |             |             |                                                                                                                     |
|-----|------------------|---------------|------------|---|---|-------------|-------------|---------------------------------------------------------------------------------------------------------------------|
| 276 | Saxicola caprata | Pied Bushchat | 2019/10/15 | 2 | 0 | 12.03234670 | 75.25665640 | <a href="https://www.inaturalist.org/observations/34574194">https://www.inaturalist.org/observations/34574194</a>   |
| 277 | Saxicola caprata | Pied Bushchat | 2019/10/15 | 2 | 0 | 12.03234670 | 75.25665640 | <a href="https://www.inaturalist.org/observations/34574214">https://www.inaturalist.org/observations/34574214</a>   |
| 278 | Saxicola caprata | Pied Bushchat | 2020/12/6  | 1 | 0 | 12.03234670 | 75.25665640 | <a href="https://www.inaturalist.org/observations/66999042">https://www.inaturalist.org/observations/66999042</a>   |
| 279 | Saxicola caprata | Pied Bushchat | 2022/4/19  | 3 | 0 | 12.06544961 | 79.67391297 | <a href="https://www.inaturalist.org/observations/112367443">https://www.inaturalist.org/observations/112367443</a> |
| 280 | Saxicola caprata | Pied Bushchat | 2019/1/7   | 3 | 0 | 12.08686500 | 76.17127865 | <a href="https://www.inaturalist.org/observations/30820226">https://www.inaturalist.org/observations/30820226</a>   |
| 281 | Saxicola caprata | Pied Bushchat | 2017/3/23  | 4 | 0 | 12.10630114 | 76.41529006 | <a href="https://www.inaturalist.org/observations/47070581">https://www.inaturalist.org/observations/47070581</a>   |
| 282 | Saxicola caprata | Pied Bushchat | 2019/1/4   | 2 | 0 | 12.11489984 | 76.68540024 | <a href="https://www.inaturalist.org/observations/19584574">https://www.inaturalist.org/observations/19584574</a>   |
| 283 | Saxicola caprata | Pied Bushchat | 2021/11/1  | 1 | 0 | 12.14117849 | 76.58302459 | <a href="https://www.inaturalist.org/observations/99979725">https://www.inaturalist.org/observations/99979725</a>   |
| 284 | Saxicola caprata | Pied Bushchat | 2018/5/5   | 2 | 0 | 12.15093825 | 76.52898616 | <a href="https://www.inaturalist.org/observations/90641716">https://www.inaturalist.org/observations/90641716</a>   |
| 285 | Saxicola caprata | Pied Bushchat | 2022/9/17  | 4 | 0 | 12.16778836 | 76.45547750 | <a href="https://www.inaturalist.org/observations/136250349">https://www.inaturalist.org/observations/136250349</a> |
| 286 | Saxicola caprata | Pied Bushchat | 2016/10/27 | 0 | 0 | 12.16909688 | 75.83859045 | <a href="https://www.inaturalist.org/observations/92801532">https://www.inaturalist.org/observations/92801532</a>   |
| 287 | Saxicola caprata | Pied Bushchat | 2017/9/24  | 3 | 0 | 12.17021100 | 76.54373700 | <a href="https://www.inaturalist.org/observations/82523827">https://www.inaturalist.org/observations/82523827</a>   |
| 288 | Saxicola caprata | Pied Bushchat | 2019/1/5   | 2 | 0 | 12.17244994 | 76.75348262 | <a href="https://www.inaturalist.org/observations/19570851">https://www.inaturalist.org/observations/19570851</a>   |
| 289 | Saxicola caprata | Pied Bushchat | 2018/5/26  | 1 | 0 | 12.21377348 | 79.02822698 | <a href="https://www.inaturalist.org/observations/96053456">https://www.inaturalist.org/observations/96053456</a>   |
| 290 | Saxicola caprata | Pied Bushchat | 2016/2/20  | 1 | 0 | 12.21451325 | 75.98379016 | <a href="https://www.inaturalist.org/observations/92912028">https://www.inaturalist.org/observations/92912028</a>   |
| 291 | Saxicola caprata | Pied Bushchat | 2014/11/4  | 1 | 0 | 12.23502051 | 76.62170875 | <a href="https://www.inaturalist.org/observations/96083196">https://www.inaturalist.org/observations/96083196</a>   |
| 292 | Saxicola caprata | Pied Bushchat | 2022/8/4   | 2 | 0 | 12.25690248 | 76.66142385 | <a href="https://www.inaturalist.org/observations/129418595">https://www.inaturalist.org/observations/129418595</a> |
| 293 | Saxicola caprata | Pied Bushchat | 2019/11/2  | 1 | 0 | 12.26269942 | 76.56762058 | <a href="https://www.inaturalist.org/observations/95039875">https://www.inaturalist.org/observations/95039875</a>   |
| 294 | Saxicola caprata | Pied Bushchat | 2012/4/14  | 1 | 0 | 12.26937200 | 76.61197800 | <a href="https://www.inaturalist.org/observations/94690337">https://www.inaturalist.org/observations/94690337</a>   |
| 295 | Saxicola caprata | Pied Bushchat | 2014/10/4  | 1 | 0 | 12.26937200 | 76.61197800 | <a href="https://www.inaturalist.org/observations/94790708">https://www.inaturalist.org/observations/94790708</a>   |
| 296 | Saxicola caprata | Pied Bushchat | 2009/12/31 | 1 | 0 | 12.26937200 | 76.61197800 | <a href="https://www.inaturalist.org/observations/94821394">https://www.inaturalist.org/observations/94821394</a>   |
| 297 | Saxicola caprata | Pied Bushchat | 2022/1/30  | 1 | 0 | 12.26937200 | 76.61197800 | <a href="https://www.inaturalist.org/observations/105954070">https://www.inaturalist.org/observations/105954070</a> |
| 298 | Saxicola caprata | Pied Bushchat | 2019/9/14  | 2 | 0 | 12.27525460 | 76.67014750 | <a href="https://www.inaturalist.org/observations/88505417">https://www.inaturalist.org/observations/88505417</a>   |



|     |                  |               |            |   |   |             |             |                                                                                                                     |
|-----|------------------|---------------|------------|---|---|-------------|-------------|---------------------------------------------------------------------------------------------------------------------|
| 299 | Saxicola caprata | Pied Bushchat | 2014/6/1   | 1 | 0 | 12.27936203 | 76.58896975 | <a href="https://www.inaturalist.org/observations/92779627">https://www.inaturalist.org/observations/92779627</a>   |
| 300 | Saxicola caprata | Pied Bushchat | 2020/7/18  | 1 | 0 | 12.27936203 | 76.58896975 | <a href="https://www.inaturalist.org/observations/92779673">https://www.inaturalist.org/observations/92779673</a>   |
| 301 | Saxicola caprata | Pied Bushchat | 2018/5/17  | 2 | 0 | 12.28292833 | 76.61486500 | <a href="https://www.inaturalist.org/observations/12705986">https://www.inaturalist.org/observations/12705986</a>   |
| 302 | Saxicola caprata | Pied Bushchat | 2018/5/14  | 3 | 0 | 12.28294333 | 76.61475000 | <a href="https://www.inaturalist.org/observations/12705877">https://www.inaturalist.org/observations/12705877</a>   |
| 303 | Saxicola caprata | Pied Bushchat | 2018/2/11  | 1 | 0 | 12.28302635 | 76.61491867 | <a href="https://www.inaturalist.org/observations/9864539">https://www.inaturalist.org/observations/9864539</a>     |
| 304 | Saxicola caprata | Pied Bushchat | 2018/11/21 | 3 | 0 | 12.28308176 | 76.61487203 | <a href="https://www.inaturalist.org/observations/18774428">https://www.inaturalist.org/observations/18774428</a>   |
| 305 | Saxicola caprata | Pied Bushchat | 2018/8/8   | 2 | 0 | 12.28310680 | 76.61490631 | <a href="https://www.inaturalist.org/observations/15343062">https://www.inaturalist.org/observations/15343062</a>   |
| 306 | Saxicola caprata | Pied Bushchat | 2018/3/15  | 2 | 0 | 12.28363487 | 76.61553123 | <a href="https://www.inaturalist.org/observations/10256302">https://www.inaturalist.org/observations/10256302</a>   |
| 307 | Saxicola caprata | Pied Bushchat | 2021/2/13  | 2 | 0 | 12.28408833 | 76.61704833 | <a href="https://www.inaturalist.org/observations/69483833">https://www.inaturalist.org/observations/69483833</a>   |
| 308 | Saxicola caprata | Pied Bushchat | 2021/11/14 | 1 | 0 | 12.28558200 | 76.56760710 | <a href="https://www.inaturalist.org/observations/101074501">https://www.inaturalist.org/observations/101074501</a> |
| 309 | Saxicola caprata | Pied Bushchat | 2021/11/5  | 1 | 0 | 12.29355833 | 76.57409451 | <a href="https://www.inaturalist.org/observations/100308409">https://www.inaturalist.org/observations/100308409</a> |
| 310 | Saxicola caprata | Pied Bushchat | 2017/1/15  | 4 | 0 | 12.29392240 | 76.60877760 | <a href="https://www.inaturalist.org/observations/47070741">https://www.inaturalist.org/observations/47070741</a>   |
| 311 | Saxicola caprata | Pied Bushchat | 2018/10/8  | 1 | 0 | 12.29581000 | 76.63938100 | <a href="https://www.inaturalist.org/observations/17329241">https://www.inaturalist.org/observations/17329241</a>   |
| 312 | Saxicola caprata | Pied Bushchat | 2018/7/14  | 2 | 0 | 12.29629814 | 76.63938046 | <a href="https://www.inaturalist.org/observations/49297616">https://www.inaturalist.org/observations/49297616</a>   |
| 313 | Saxicola caprata | Pied Bushchat | 2021/11/6  | 1 | 0 | 12.30921890 | 76.55560459 | <a href="https://www.inaturalist.org/observations/100377503">https://www.inaturalist.org/observations/100377503</a> |
| 314 | Saxicola caprata | Pied Bushchat | 2021/6/9   | 2 | 0 | 12.30936750 | 76.60263890 | <a href="https://www.inaturalist.org/observations/82261355">https://www.inaturalist.org/observations/82261355</a>   |
| 315 | Saxicola caprata | Pied Bushchat | 2015/3/18  | 3 | 0 | 12.33313400 | 76.45486300 | <a href="http://www.inaturalist.org/observations/1378482">http://www.inaturalist.org/observations/1378482</a>       |
| 316 | Saxicola caprata | Pied Bushchat | 2018/12/2  | 1 | 0 | 12.34729333 | 76.59819667 | <a href="https://www.inaturalist.org/observations/18774445">https://www.inaturalist.org/observations/18774445</a>   |
| 317 | Saxicola caprata | Pied Bushchat | 2022/8/27  | 1 | 0 | 12.34979350 | 76.53359580 | <a href="https://www.inaturalist.org/observations/132523055">https://www.inaturalist.org/observations/132523055</a> |
| 318 | Saxicola caprata | Pied Bushchat | 2022/7/30  | 3 | 0 | 12.35073910 | 77.64725740 | <a href="https://www.inaturalist.org/observations/128611394">https://www.inaturalist.org/observations/128611394</a> |
| 319 | Saxicola caprata | Pied Bushchat | 2018/3/4   | 1 | 0 | 12.39834324 | 76.68988894 | <a href="https://www.inaturalist.org/observations/64928604">https://www.inaturalist.org/observations/64928604</a>   |
| 320 | Saxicola caprata | Pied Bushchat | 2018/3/4   | 3 | 0 | 12.39834324 | 76.68988894 | <a href="https://www.inaturalist.org/observations/64928605">https://www.inaturalist.org/observations/64928605</a>   |
| 321 | Saxicola caprata | Pied Bushchat | 2020/11/19 | 1 | 0 | 12.42772423 | 77.65065607 | <a href="https://www.inaturalist.org/observations/65198917">https://www.inaturalist.org/observations/65198917</a>   |

|     |                  |               |            |   |   |             |             |                                                                                                                     |
|-----|------------------|---------------|------------|---|---|-------------|-------------|---------------------------------------------------------------------------------------------------------------------|
| 322 | Saxicola caprata | Pied Bushchat | 2020/4/19  | 2 | 0 | 12.42977420 | 77.65286922 | <a href="https://www.inaturalist.org/observations/65135484">https://www.inaturalist.org/observations/65135484</a>   |
| 323 | Saxicola caprata | Pied Bushchat | 2011/1/22  | 2 | 0 | 12.44404893 | 76.45928545 | <a href="https://www.inaturalist.org/observations/93247812">https://www.inaturalist.org/observations/93247812</a>   |
| 324 | Saxicola caprata | Pied Bushchat | 2021/1/23  | 1 | 0 | 12.45049366 | 76.53645974 | <a href="https://www.inaturalist.org/observations/70145605">https://www.inaturalist.org/observations/70145605</a>   |
| 325 | Saxicola caprata | Pied Bushchat | 2015/3/29  | 1 | 0 | 12.47708084 | 77.61969567 | <a href="https://www.inaturalist.org/observations/82643577">https://www.inaturalist.org/observations/82643577</a>   |
| 326 | Saxicola caprata | Pied Bushchat | 2021/6/24  | 1 | 0 | 12.47832298 | 77.85321940 | <a href="https://www.inaturalist.org/observations/84660417">https://www.inaturalist.org/observations/84660417</a>   |
| 327 | Saxicola caprata | Pied Bushchat | 2020/3/2   | 1 | 0 | 12.50904626 | 78.21992402 | <a href="https://www.inaturalist.org/observations/39447032">https://www.inaturalist.org/observations/39447032</a>   |
| 328 | Saxicola caprata | Pied Bushchat | 2022/1/10  | 5 | 0 | 12.52444900 | 77.82765210 | <a href="https://www.inaturalist.org/observations/108816879">https://www.inaturalist.org/observations/108816879</a> |
| 329 | Saxicola caprata | Pied Bushchat | 2021/10/16 | 3 | 0 | 12.52649857 | 78.22414865 | <a href="https://www.inaturalist.org/observations/100316679">https://www.inaturalist.org/observations/100316679</a> |
| 330 | Saxicola caprata | Pied Bushchat | 2021/10/16 | 1 | 0 | 12.53586048 | 78.19059593 | <a href="https://www.inaturalist.org/observations/100316690">https://www.inaturalist.org/observations/100316690</a> |
| 331 | Saxicola caprata | Pied Bushchat | 2021/10/16 | 1 | 0 | 12.53766471 | 78.19626925 | <a href="https://www.inaturalist.org/observations/100316691">https://www.inaturalist.org/observations/100316691</a> |
| 332 | Saxicola caprata | Pied Bushchat | 2019/12/28 | 2 | 0 | 12.54545966 | 79.85606924 | <a href="https://www.inaturalist.org/observations/48641611">https://www.inaturalist.org/observations/48641611</a>   |
| 333 | Saxicola caprata | Pied Bushchat | 2013/3/17  | 4 | 0 | 12.54547341 | 79.85605717 | <a href="https://www.inaturalist.org/observations/74721077">https://www.inaturalist.org/observations/74721077</a>   |
| 334 | Saxicola caprata | Pied Bushchat | 2016/8/27  | 1 | 0 | 12.56056524 | 77.45754574 | <a href="https://www.inaturalist.org/observations/65638671">https://www.inaturalist.org/observations/65638671</a>   |
| 335 | Saxicola caprata | Pied Bushchat | 2022/8/7   | 3 | 0 | 12.59728667 | 77.94769167 | <a href="https://www.inaturalist.org/observations/129819758">https://www.inaturalist.org/observations/129819758</a> |
| 336 | Saxicola caprata | Pied Bushchat | 2022/8/7   | 1 | 0 | 12.59729667 | 77.94767667 | <a href="https://www.inaturalist.org/observations/129819759">https://www.inaturalist.org/observations/129819759</a> |
| 337 | Saxicola caprata | Pied Bushchat | 2022/5/28  | 2 | 0 | 12.59737667 | 77.94761833 | <a href="https://www.inaturalist.org/observations/119073856">https://www.inaturalist.org/observations/119073856</a> |
| 338 | Saxicola caprata | Pied Bushchat | 2022/5/28  | 2 | 0 | 12.59738000 | 77.94761500 | <a href="https://www.inaturalist.org/observations/119073851">https://www.inaturalist.org/observations/119073851</a> |
| 339 | Saxicola caprata | Pied Bushchat | 2022/5/28  | 2 | 0 | 12.59763500 | 77.94773500 | <a href="https://www.inaturalist.org/observations/119073860">https://www.inaturalist.org/observations/119073860</a> |
| 340 | Saxicola caprata | Pied Bushchat | 2022/5/28  | 2 | 0 | 12.59780833 | 77.94625500 | <a href="https://www.inaturalist.org/observations/119073825">https://www.inaturalist.org/observations/119073825</a> |
| 341 | Saxicola caprata | Pied Bushchat | 2022/5/28  | 2 | 0 | 12.59781833 | 77.94626667 | <a href="https://www.inaturalist.org/observations/119073820">https://www.inaturalist.org/observations/119073820</a> |
| 342 | Saxicola caprata | Pied Bushchat | 2022/5/28  | 2 | 0 | 12.59792833 | 77.94634500 | <a href="https://www.inaturalist.org/observations/119073816">https://www.inaturalist.org/observations/119073816</a> |
| 343 | Saxicola caprata | Pied Bushchat | 2022/5/28  | 2 | 0 | 12.59848500 | 77.94912000 | <a href="https://www.inaturalist.org/observations/119073934">https://www.inaturalist.org/observations/119073934</a> |
| 344 | Saxicola caprata | Pied Bushchat | 2021/12/18 | 3 | 0 | 12.60399855 | 77.85586417 | <a href="https://www.inaturalist.org/observations/103308175">https://www.inaturalist.org/observations/103308175</a> |

|     |                  |               |            |   |   |             |             |                                                                                                                     |
|-----|------------------|---------------|------------|---|---|-------------|-------------|---------------------------------------------------------------------------------------------------------------------|
| 345 | Saxicola caprata | Pied Bushchat | 2021/12/18 | 2 | 0 | 12.60836587 | 77.96091670 | <a href="https://www.inaturalist.org/observations/103307577">https://www.inaturalist.org/observations/103307577</a> |
| 346 | Saxicola caprata | Pied Bushchat | 2022/8/15  | 3 | 0 | 12.60992165 | 77.75978741 | <a href="https://www.inaturalist.org/observations/132229408">https://www.inaturalist.org/observations/132229408</a> |
| 347 | Saxicola caprata | Pied Bushchat | 2022/8/15  | 4 | 0 | 12.60992165 | 77.75978741 | <a href="https://www.inaturalist.org/observations/132229435">https://www.inaturalist.org/observations/132229435</a> |
| 348 | Saxicola caprata | Pied Bushchat | 2022/5/29  | 4 | 0 | 12.61076500 | 77.73763167 | <a href="https://www.inaturalist.org/observations/119203478">https://www.inaturalist.org/observations/119203478</a> |
| 349 | Saxicola caprata | Pied Bushchat | 2022/8/15  | 4 | 0 | 12.61142500 | 77.73737500 | <a href="https://www.inaturalist.org/observations/132224171">https://www.inaturalist.org/observations/132224171</a> |
| 350 | Saxicola caprata | Pied Bushchat | 2022/5/29  | 1 | 0 | 12.61244500 | 77.74357500 | <a href="https://www.inaturalist.org/observations/119203393">https://www.inaturalist.org/observations/119203393</a> |
| 351 | Saxicola caprata | Pied Bushchat | 2022/5/29  | 1 | 0 | 12.61265833 | 77.73716500 | <a href="https://www.inaturalist.org/observations/119203431">https://www.inaturalist.org/observations/119203431</a> |
| 352 | Saxicola caprata | Pied Bushchat | 2022/8/15  | 3 | 0 | 12.61272333 | 77.73717000 | <a href="https://www.inaturalist.org/observations/132224152">https://www.inaturalist.org/observations/132224152</a> |
| 353 | Saxicola caprata | Pied Bushchat | 2019/4/28  | 0 | 0 | 12.61282384 | 78.57160460 | <a href="https://www.inaturalist.org/observations/98206908">https://www.inaturalist.org/observations/98206908</a>   |
| 354 | Saxicola caprata | Pied Bushchat | 2022/8/15  | 4 | 0 | 12.61302000 | 77.73745333 | <a href="https://www.inaturalist.org/observations/132224180">https://www.inaturalist.org/observations/132224180</a> |
| 355 | Saxicola caprata | Pied Bushchat | 2022/8/15  | 3 | 0 | 12.61302333 | 77.73713333 | <a href="https://www.inaturalist.org/observations/132224146">https://www.inaturalist.org/observations/132224146</a> |
| 356 | Saxicola caprata | Pied Bushchat | 2022/8/15  | 5 | 0 | 12.61319667 | 77.73712167 | <a href="https://www.inaturalist.org/observations/132224200">https://www.inaturalist.org/observations/132224200</a> |
| 357 | Saxicola caprata | Pied Bushchat | 2021/7/2   | 1 | 0 | 12.61595333 | 77.73732167 | <a href="https://www.inaturalist.org/observations/85582639">https://www.inaturalist.org/observations/85582639</a>   |
| 358 | Saxicola caprata | Pied Bushchat | 2021/3/20  | 1 | 0 | 12.61626167 | 77.73748000 | <a href="https://www.inaturalist.org/observations/82430664">https://www.inaturalist.org/observations/82430664</a>   |
| 359 | Saxicola caprata | Pied Bushchat | 2022/8/15  | 5 | 0 | 12.61795601 | 77.73166716 | <a href="https://www.inaturalist.org/observations/131204341">https://www.inaturalist.org/observations/131204341</a> |
| 360 | Saxicola caprata | Pied Bushchat | 2021/12/17 | 3 | 0 | 12.61911930 | 77.94335124 | <a href="https://www.inaturalist.org/observations/103308154">https://www.inaturalist.org/observations/103308154</a> |
| 361 | Saxicola caprata | Pied Bushchat | 2020/11/1  | 3 | 0 | 12.62552485 | 77.62634587 | <a href="https://www.inaturalist.org/observations/64032280">https://www.inaturalist.org/observations/64032280</a>   |
| 362 | Saxicola caprata | Pied Bushchat | 2021/3/28  | 2 | 0 | 12.62780274 | 77.64490437 | <a href="https://www.inaturalist.org/observations/82431332">https://www.inaturalist.org/observations/82431332</a>   |
| 363 | Saxicola caprata | Pied Bushchat | 2022/5/4   | 2 | 0 | 12.64523533 | 77.95775436 | <a href="https://www.inaturalist.org/observations/119229906">https://www.inaturalist.org/observations/119229906</a> |
| 364 | Saxicola caprata | Pied Bushchat | 2021/9/6   | 1 | 0 | 12.65550130 | 77.66681110 | <a href="https://www.inaturalist.org/observations/103202495">https://www.inaturalist.org/observations/103202495</a> |
| 365 | Saxicola caprata | Pied Bushchat | 2021/9/6   | 3 | 0 | 12.65550130 | 77.66681110 | <a href="https://www.inaturalist.org/observations/103202512">https://www.inaturalist.org/observations/103202512</a> |
| 366 | Saxicola caprata | Pied Bushchat | 2021/12/30 | 1 | 0 | 12.66546219 | 76.41600609 | <a href="https://www.inaturalist.org/observations/104182338">https://www.inaturalist.org/observations/104182338</a> |
| 367 | Saxicola caprata | Pied Bushchat | 2021/12/5  | 1 | 0 | 12.66703004 | 77.77867589 | <a href="https://www.inaturalist.org/observations/102525724">https://www.inaturalist.org/observations/102525724</a> |

|     |                  |               |           |   |   |             |             |                                                                                                                     |
|-----|------------------|---------------|-----------|---|---|-------------|-------------|---------------------------------------------------------------------------------------------------------------------|
| 368 | Saxicola caprata | Pied Bushchat | 2016/1/9  | 1 | 0 | 12.67591249 | 77.77037641 | <a href="https://www.inaturalist.org/observations/83273830">https://www.inaturalist.org/observations/83273830</a>   |
| 369 | Saxicola caprata | Pied Bushchat | 2021/12/4 | 1 | 0 | 12.67768542 | 77.82403184 | <a href="https://www.inaturalist.org/observations/102524252">https://www.inaturalist.org/observations/102524252</a> |
| 370 | Saxicola caprata | Pied Bushchat | 2022/8/14 | 3 | 0 | 12.67842000 | 77.92446333 | <a href="https://www.inaturalist.org/observations/130746543">https://www.inaturalist.org/observations/130746543</a> |
| 371 | Saxicola caprata | Pied Bushchat | 2022/8/14 | 5 | 0 | 12.67959500 | 77.91669833 | <a href="https://www.inaturalist.org/observations/130746612">https://www.inaturalist.org/observations/130746612</a> |
| 372 | Saxicola caprata | Pied Bushchat | 2021/4/10 | 1 | 0 | 12.67991826 | 76.69244187 | <a href="https://www.inaturalist.org/observations/80697122">https://www.inaturalist.org/observations/80697122</a>   |
| 373 | Saxicola caprata | Pied Bushchat | 2022/8/14 | 3 | 0 | 12.67997833 | 77.91835167 | <a href="https://www.inaturalist.org/observations/130746565">https://www.inaturalist.org/observations/130746565</a> |
| 374 | Saxicola caprata | Pied Bushchat | 2022/8/14 | 6 | 0 | 12.68003167 | 77.91850167 | <a href="https://www.inaturalist.org/observations/130746615">https://www.inaturalist.org/observations/130746615</a> |
| 375 | Saxicola caprata | Pied Bushchat | 2019/1/12 | 3 | 0 | 12.68551645 | 80.15189165 | <a href="https://www.inaturalist.org/observations/22516964">https://www.inaturalist.org/observations/22516964</a>   |
| 376 | Saxicola caprata | Pied Bushchat | 2022/2/20 | 1 | 0 | 12.68649030 | 77.66536520 | <a href="https://www.inaturalist.org/observations/107473264">https://www.inaturalist.org/observations/107473264</a> |
| 377 | Saxicola caprata | Pied Bushchat | 2022/5/3  | 1 | 0 | 12.69732391 | 77.87382993 | <a href="https://www.inaturalist.org/observations/115004181">https://www.inaturalist.org/observations/115004181</a> |
| 378 | Saxicola caprata | Pied Bushchat | 2022/8/14 | 2 | 0 | 12.69863353 | 77.91114807 | <a href="https://www.inaturalist.org/observations/131704280">https://www.inaturalist.org/observations/131704280</a> |
| 379 | Saxicola caprata | Pied Bushchat | 2022/8/14 | 2 | 0 | 12.69863353 | 77.91114807 | <a href="https://www.inaturalist.org/observations/131704331">https://www.inaturalist.org/observations/131704331</a> |
| 380 | Saxicola caprata | Pied Bushchat | 2022/5/7  | 2 | 0 | 12.71382667 | 77.81440000 | <a href="https://www.inaturalist.org/observations/119070817">https://www.inaturalist.org/observations/119070817</a> |
| 381 | Saxicola caprata | Pied Bushchat | 2015/11/9 | 1 | 0 | 12.71384555 | 77.81443081 | <a href="https://www.inaturalist.org/observations/83273820">https://www.inaturalist.org/observations/83273820</a>   |
| 382 | Saxicola caprata | Pied Bushchat | 2022/4/23 | 2 | 0 | 12.71384879 | 77.81441230 | <a href="https://www.inaturalist.org/observations/112490292">https://www.inaturalist.org/observations/112490292</a> |
| 383 | Saxicola caprata | Pied Bushchat | 2022/1/9  | 1 | 0 | 12.71384972 | 77.81438833 | <a href="https://www.inaturalist.org/observations/106980811">https://www.inaturalist.org/observations/106980811</a> |
| 384 | Saxicola caprata | Pied Bushchat | 2022/1/9  | 1 | 0 | 12.71384972 | 77.81438833 | <a href="https://www.inaturalist.org/observations/106980816">https://www.inaturalist.org/observations/106980816</a> |
| 385 | Saxicola caprata | Pied Bushchat | 2022/1/10 | 1 | 0 | 12.71384972 | 77.81438833 | <a href="https://www.inaturalist.org/observations/106980822">https://www.inaturalist.org/observations/106980822</a> |
| 386 | Saxicola caprata | Pied Bushchat | 2022/1/26 | 1 | 0 | 12.71384972 | 77.81438833 | <a href="https://www.inaturalist.org/observations/106980846">https://www.inaturalist.org/observations/106980846</a> |
| 387 | Saxicola caprata | Pied Bushchat | 2022/1/26 | 1 | 0 | 12.71384972 | 77.81438833 | <a href="https://www.inaturalist.org/observations/106980855">https://www.inaturalist.org/observations/106980855</a> |
| 388 | Saxicola caprata | Pied Bushchat | 2022/5/8  | 2 | 0 | 12.71385000 | 77.81438833 | <a href="https://www.inaturalist.org/observations/119070829">https://www.inaturalist.org/observations/119070829</a> |
| 389 | Saxicola caprata | Pied Bushchat | 2022/4/23 | 2 | 0 | 12.71385833 | 77.81436000 | <a href="https://www.inaturalist.org/observations/112490100">https://www.inaturalist.org/observations/112490100</a> |
| 390 | Saxicola caprata | Pied Bushchat | 2022/5/8  | 2 | 0 | 12.71392000 | 77.81440000 | <a href="https://www.inaturalist.org/observations/119070845">https://www.inaturalist.org/observations/119070845</a> |

|     |                  |               |            |   |   |             |             |                                                                                                                     |
|-----|------------------|---------------|------------|---|---|-------------|-------------|---------------------------------------------------------------------------------------------------------------------|
| 391 | Saxicola caprata | Pied Bushchat | 2022/2/19  | 2 | 0 | 12.71481833 | 77.80804000 | <a href="https://www.inaturalist.org/observations/107120055">https://www.inaturalist.org/observations/107120055</a> |
| 392 | Saxicola caprata | Pied Bushchat | 2022/5/3   | 1 | 0 | 12.72129362 | 77.87509651 | <a href="https://www.inaturalist.org/observations/115004174">https://www.inaturalist.org/observations/115004174</a> |
| 393 | Saxicola caprata | Pied Bushchat | 2016/1/24  | 4 | 0 | 12.72302695 | 77.56559544 | <a href="https://www.inaturalist.org/observations/21146082">https://www.inaturalist.org/observations/21146082</a>   |
| 394 | Saxicola caprata | Pied Bushchat | 2020/6/6   | 1 | 0 | 12.72344560 | 77.57512270 | <a href="https://www.inaturalist.org/observations/58320790">https://www.inaturalist.org/observations/58320790</a>   |
| 395 | Saxicola caprata | Pied Bushchat | 2020/11/21 | 2 | 0 | 12.73757455 | 76.94467489 | <a href="https://www.inaturalist.org/observations/96781590">https://www.inaturalist.org/observations/96781590</a>   |
| 396 | Saxicola caprata | Pied Bushchat | 2022/1/2   | 1 | 0 | 12.73757455 | 76.94467489 | <a href="https://www.inaturalist.org/observations/104184351">https://www.inaturalist.org/observations/104184351</a> |
| 397 | Saxicola caprata | Pied Bushchat | 2022/2/19  | 2 | 0 | 12.74470935 | 80.09912269 | <a href="https://www.inaturalist.org/observations/107243052">https://www.inaturalist.org/observations/107243052</a> |
| 398 | Saxicola caprata | Pied Bushchat | 2022/5/3   | 1 | 0 | 12.74792821 | 77.80020802 | <a href="https://www.inaturalist.org/observations/115004178">https://www.inaturalist.org/observations/115004178</a> |
| 399 | Saxicola caprata | Pied Bushchat | 2020/12/31 | 2 | 0 | 12.75320165 | 77.30136741 | <a href="https://www.inaturalist.org/observations/67378254">https://www.inaturalist.org/observations/67378254</a>   |
| 400 | Saxicola caprata | Pied Bushchat | 2020/12/31 | 3 | 0 | 12.75320165 | 77.30136741 | <a href="https://www.inaturalist.org/observations/67378269">https://www.inaturalist.org/observations/67378269</a>   |
| 401 | Saxicola caprata | Pied Bushchat | 2021/10/28 | 3 | 0 | 12.75355036 | 77.59964243 | <a href="https://www.inaturalist.org/observations/123975544">https://www.inaturalist.org/observations/123975544</a> |
| 402 | Saxicola caprata | Pied Bushchat | 2022/5/4   | 2 | 0 | 12.75488860 | 77.82652426 | <a href="https://www.inaturalist.org/observations/119229981">https://www.inaturalist.org/observations/119229981</a> |
| 403 | Saxicola caprata | Pied Bushchat | 2021/10/17 | 4 | 0 | 12.76212465 | 78.41948844 | <a href="https://www.inaturalist.org/observations/98479980">https://www.inaturalist.org/observations/98479980</a>   |
| 404 | Saxicola caprata | Pied Bushchat | 2021/12/12 | 1 | 0 | 12.76482167 | 77.86886667 | <a href="https://www.inaturalist.org/observations/102917568">https://www.inaturalist.org/observations/102917568</a> |
| 405 | Saxicola caprata | Pied Bushchat | 2022/7/31  | 2 | 0 | 12.76702167 | 77.86678667 | <a href="https://www.inaturalist.org/observations/128758972">https://www.inaturalist.org/observations/128758972</a> |
| 406 | Saxicola caprata | Pied Bushchat | 2021/12/12 | 1 | 0 | 12.76704167 | 77.86683333 | <a href="https://www.inaturalist.org/observations/102917338">https://www.inaturalist.org/observations/102917338</a> |
| 407 | Saxicola caprata | Pied Bushchat | 2021/12/12 | 1 | 0 | 12.76735598 | 77.87396908 | <a href="https://www.inaturalist.org/observations/102921117">https://www.inaturalist.org/observations/102921117</a> |
| 408 | Saxicola caprata | Pied Bushchat | 2022/5/1   | 1 | 0 | 12.76735598 | 77.87396908 | <a href="https://www.inaturalist.org/observations/114131739">https://www.inaturalist.org/observations/114131739</a> |
| 409 | Saxicola caprata | Pied Bushchat | 2022/5/1   | 1 | 0 | 12.76840500 | 77.88211167 | <a href="https://www.inaturalist.org/observations/114411244">https://www.inaturalist.org/observations/114411244</a> |
| 410 | Saxicola caprata | Pied Bushchat | 2022/5/1   | 1 | 0 | 12.76840667 | 77.88288000 | <a href="https://www.inaturalist.org/observations/114411269">https://www.inaturalist.org/observations/114411269</a> |
| 411 | Saxicola caprata | Pied Bushchat | 2022/5/1   | 1 | 0 | 12.76842333 | 77.88285000 | <a href="https://www.inaturalist.org/observations/114411281">https://www.inaturalist.org/observations/114411281</a> |
| 412 | Saxicola caprata | Pied Bushchat | 2022/5/1   | 1 | 0 | 12.76848833 | 77.88208667 | <a href="https://www.inaturalist.org/observations/114411232">https://www.inaturalist.org/observations/114411232</a> |
| 413 | Saxicola caprata | Pied Bushchat | 2021/10/31 | 2 | 0 | 12.76877833 | 77.87455000 | <a href="https://www.inaturalist.org/observations/99859520">https://www.inaturalist.org/observations/99859520</a>   |

|     |                  |               |            |   |   |             |             |                                                                                                                     |
|-----|------------------|---------------|------------|---|---|-------------|-------------|---------------------------------------------------------------------------------------------------------------------|
| 414 | Saxicola caprata | Pied Bushchat | 2022/5/3   | 1 | 0 | 12.77127296 | 77.85915090 | <a href="https://www.inaturalist.org/observations/115004173">https://www.inaturalist.org/observations/115004173</a> |
| 415 | Saxicola caprata | Pied Bushchat | 2022/7/31  | 1 | 0 | 12.77223500 | 77.87752667 | <a href="https://www.inaturalist.org/observations/128759029">https://www.inaturalist.org/observations/128759029</a> |
| 416 | Saxicola caprata | Pied Bushchat | 2022/7/31  | 1 | 0 | 12.77255833 | 77.87651333 | <a href="https://www.inaturalist.org/observations/128759012">https://www.inaturalist.org/observations/128759012</a> |
| 417 | Saxicola caprata | Pied Bushchat | 2022/5/1   | 1 | 0 | 12.77261667 | 77.87645833 | <a href="https://www.inaturalist.org/observations/114395083">https://www.inaturalist.org/observations/114395083</a> |
| 418 | Saxicola caprata | Pied Bushchat | 2022/4/24  | 1 | 0 | 12.77308500 | 77.87635833 | <a href="https://www.inaturalist.org/observations/112636841">https://www.inaturalist.org/observations/112636841</a> |
| 419 | Saxicola caprata | Pied Bushchat | 2021/12/4  | 0 | 0 | 12.77900975 | 77.99110685 | <a href="https://www.inaturalist.org/observations/102524249">https://www.inaturalist.org/observations/102524249</a> |
| 420 | Saxicola caprata | Pied Bushchat | 2022/8/8   | 3 | 0 | 12.78030301 | 77.61534546 | <a href="https://www.inaturalist.org/observations/129955592">https://www.inaturalist.org/observations/129955592</a> |
| 421 | Saxicola caprata | Pied Bushchat | 2018/11/17 | 2 | 0 | 12.78131629 | 77.66260799 | <a href="https://www.inaturalist.org/observations/18645550">https://www.inaturalist.org/observations/18645550</a>   |
| 422 | Saxicola caprata | Pied Bushchat | 2021/12/18 | 3 | 0 | 12.78205208 | 77.91543004 | <a href="https://www.inaturalist.org/observations/103307585">https://www.inaturalist.org/observations/103307585</a> |
| 423 | Saxicola caprata | Pied Bushchat | 2022/5/1   | 1 | 0 | 12.78386450 | 77.89278629 | <a href="https://www.inaturalist.org/observations/114136783">https://www.inaturalist.org/observations/114136783</a> |
| 424 | Saxicola caprata | Pied Bushchat | 2022/5/1   | 1 | 0 | 12.78386450 | 77.89278629 | <a href="https://www.inaturalist.org/observations/114136790">https://www.inaturalist.org/observations/114136790</a> |
| 425 | Saxicola caprata | Pied Bushchat | 2019/1/2   | 0 | 0 | 12.78806036 | 76.93665770 | <a href="https://www.inaturalist.org/observations/93151680">https://www.inaturalist.org/observations/93151680</a>   |
| 426 | Saxicola caprata | Pied Bushchat | 2015/3/28  | 4 | 0 | 12.79842200 | 77.38721700 | <a href="http://www.inaturalist.org/observations/1417464">http://www.inaturalist.org/observations/1417464</a>       |
| 427 | Saxicola caprata | Pied Bushchat | 2012/2/18  | 2 | 0 | 12.80570057 | 77.59810329 | <a href="https://www.inaturalist.org/observations/48926230">https://www.inaturalist.org/observations/48926230</a>   |
| 428 | Saxicola caprata | Pied Bushchat | 2022/6/30  | 2 | 0 | 12.80797556 | 77.56156515 | <a href="https://www.inaturalist.org/observations/124700566">https://www.inaturalist.org/observations/124700566</a> |
| 429 | Saxicola caprata | Pied Bushchat | 2021/10/2  | 2 | 0 | 12.80972400 | 77.62712100 | <a href="https://www.inaturalist.org/observations/97729378">https://www.inaturalist.org/observations/97729378</a>   |
| 430 | Saxicola caprata | Pied Bushchat | 2021/12/11 | 1 | 0 | 12.81041183 | 80.24337091 | <a href="https://www.inaturalist.org/observations/102856300">https://www.inaturalist.org/observations/102856300</a> |
| 431 | Saxicola caprata | Pied Bushchat | 2018/4/8   | 1 | 0 | 12.81385331 | 76.94609644 | <a href="https://www.inaturalist.org/observations/96773979">https://www.inaturalist.org/observations/96773979</a>   |
| 432 | Saxicola caprata | Pied Bushchat | 2022/7/23  | 3 | 0 | 12.81772988 | 77.55035107 | <a href="https://www.inaturalist.org/observations/127496332">https://www.inaturalist.org/observations/127496332</a> |
| 433 | Saxicola caprata | Pied Bushchat | 2020/1/16  | 1 | 0 | 12.81845600 | 79.69465860 | <a href="https://www.inaturalist.org/observations/89745731">https://www.inaturalist.org/observations/89745731</a>   |
| 434 | Saxicola caprata | Pied Bushchat | 2018/11/25 | 2 | 0 | 12.82046687 | 77.72457819 | <a href="https://www.inaturalist.org/observations/67003312">https://www.inaturalist.org/observations/67003312</a>   |
| 435 | Saxicola caprata | Pied Bushchat | 2018/11/25 | 1 | 0 | 12.82046687 | 77.72457819 | <a href="https://www.inaturalist.org/observations/67003313">https://www.inaturalist.org/observations/67003313</a>   |
| 436 | Saxicola caprata | Pied Bushchat | 2018/11/25 | 1 | 0 | 12.82046687 | 77.72457819 | <a href="https://www.inaturalist.org/observations/67003325">https://www.inaturalist.org/observations/67003325</a>   |

|     |                  |               |            |   |   |             |             |                                                                                                                     |
|-----|------------------|---------------|------------|---|---|-------------|-------------|---------------------------------------------------------------------------------------------------------------------|
| 437 | Saxicola caprata | Pied Bushchat | 2021/6/20  | 1 | 0 | 12.82189776 | 77.00029854 | <a href="https://www.inaturalist.org/observations/84721169">https://www.inaturalist.org/observations/84721169</a>   |
| 438 | Saxicola caprata | Pied Bushchat | 2020/7/11  | 3 | 0 | 12.82333781 | 77.73273400 | <a href="https://www.inaturalist.org/observations/52910812">https://www.inaturalist.org/observations/52910812</a>   |
| 439 | Saxicola caprata | Pied Bushchat | 2020/7/11  | 2 | 0 | 12.82333781 | 77.73273400 | <a href="https://www.inaturalist.org/observations/52910815">https://www.inaturalist.org/observations/52910815</a>   |
| 440 | Saxicola caprata | Pied Bushchat | 2022/6/22  | 2 | 0 | 12.82565567 | 77.73247457 | <a href="https://www.inaturalist.org/observations/127757549">https://www.inaturalist.org/observations/127757549</a> |
| 441 | Saxicola caprata | Pied Bushchat | 2021/1/21  | 2 | 0 | 12.82817427 | 79.08232025 | <a href="https://www.inaturalist.org/observations/71931083">https://www.inaturalist.org/observations/71931083</a>   |
| 442 | Saxicola caprata | Pied Bushchat | 2021/7/23  | 1 | 0 | 12.82926577 | 79.73861720 | <a href="https://www.inaturalist.org/observations/88234421">https://www.inaturalist.org/observations/88234421</a>   |
| 443 | Saxicola caprata | Pied Bushchat | 2020/7/1   | 3 | 0 | 12.83861474 | 77.65219060 | <a href="https://www.inaturalist.org/observations/84538554">https://www.inaturalist.org/observations/84538554</a>   |
| 444 | Saxicola caprata | Pied Bushchat | 2021/9/18  | 1 | 0 | 12.84162626 | 77.77524635 | <a href="https://www.inaturalist.org/observations/95926810">https://www.inaturalist.org/observations/95926810</a>   |
| 445 | Saxicola caprata | Pied Bushchat | 2022/2/20  | 1 | 0 | 12.84162626 | 77.77524635 | <a href="https://www.inaturalist.org/observations/107361911">https://www.inaturalist.org/observations/107361911</a> |
| 446 | Saxicola caprata | Pied Bushchat | 2022/2/27  | 2 | 0 | 12.84162626 | 77.77524635 | <a href="https://www.inaturalist.org/observations/107536026">https://www.inaturalist.org/observations/107536026</a> |
| 447 | Saxicola caprata | Pied Bushchat | 2021/1/2   | 3 | 0 | 12.84197041 | 80.17385905 | <a href="https://www.inaturalist.org/observations/67620492">https://www.inaturalist.org/observations/67620492</a>   |
| 448 | Saxicola caprata | Pied Bushchat | 2022/8/1   | 3 | 0 | 12.84240270 | 77.72698600 | <a href="https://www.inaturalist.org/observations/128948971">https://www.inaturalist.org/observations/128948971</a> |
| 449 | Saxicola caprata | Pied Bushchat | 2022/7/26  | 3 | 0 | 12.84240270 | 77.72698600 | <a href="https://www.inaturalist.org/observations/132829790">https://www.inaturalist.org/observations/132829790</a> |
| 450 | Saxicola caprata | Pied Bushchat | 2021/9/1   | 1 | 0 | 12.84275000 | 77.72446300 | <a href="https://www.inaturalist.org/observations/93261568">https://www.inaturalist.org/observations/93261568</a>   |
| 451 | Saxicola caprata | Pied Bushchat | 2021/9/20  | 1 | 0 | 12.84275000 | 77.72446300 | <a href="https://www.inaturalist.org/observations/95645193">https://www.inaturalist.org/observations/95645193</a>   |
| 452 | Saxicola caprata | Pied Bushchat | 2021/11/22 | 3 | 0 | 12.84275000 | 77.72446300 | <a href="https://www.inaturalist.org/observations/101705131">https://www.inaturalist.org/observations/101705131</a> |
| 453 | Saxicola caprata | Pied Bushchat | 2022/1/29  | 2 | 0 | 12.84275000 | 77.72446300 | <a href="https://www.inaturalist.org/observations/105837466">https://www.inaturalist.org/observations/105837466</a> |
| 454 | Saxicola caprata | Pied Bushchat | 2022/2/27  | 2 | 0 | 12.84275000 | 77.72446300 | <a href="https://www.inaturalist.org/observations/107552985">https://www.inaturalist.org/observations/107552985</a> |
| 455 | Saxicola caprata | Pied Bushchat | 2017/8/13  | 1 | 0 | 12.84290300 | 77.47106450 | <a href="https://www.inaturalist.org/observations/66178157">https://www.inaturalist.org/observations/66178157</a>   |
| 456 | Saxicola caprata | Pied Bushchat | 2022/2/26  | 1 | 0 | 12.84521297 | 77.77543400 | <a href="https://www.inaturalist.org/observations/107467084">https://www.inaturalist.org/observations/107467084</a> |
| 457 | Saxicola caprata | Pied Bushchat | 2015/8/13  | 2 | 0 | 12.84836615 | 77.49472082 | <a href="http://www.inaturalist.org/observations/3707010">http://www.inaturalist.org/observations/3707010</a>       |
| 458 | Saxicola caprata | Pied Bushchat | 2020/11/7  | 1 | 0 | 12.84849973 | 76.80860198 | <a href="https://www.inaturalist.org/observations/97213457">https://www.inaturalist.org/observations/97213457</a>   |
| 459 | Saxicola caprata | Pied Bushchat | 2018/1/6   | 2 | 0 | 12.85058196 | 77.48932323 | <a href="https://www.inaturalist.org/observations/66096079">https://www.inaturalist.org/observations/66096079</a>   |

|     |                  |               |            |   |   |             |             |                                                                                                                     |
|-----|------------------|---------------|------------|---|---|-------------|-------------|---------------------------------------------------------------------------------------------------------------------|
| 460 | Saxicola caprata | Pied Bushchat | 2022/6/13  | 3 | 0 | 12.85090000 | 77.77956333 | <a href="https://www.inaturalist.org/observations/121549884">https://www.inaturalist.org/observations/121549884</a> |
| 461 | Saxicola caprata | Pied Bushchat | 2021/12/12 | 2 | 0 | 12.85121818 | 77.49016882 | <a href="https://www.inaturalist.org/observations/102922059">https://www.inaturalist.org/observations/102922059</a> |
| 462 | Saxicola caprata | Pied Bushchat | 2018/12/31 | 4 | 0 | 12.85502749 | 80.22369534 | <a href="https://www.inaturalist.org/observations/19372750">https://www.inaturalist.org/observations/19372750</a>   |
| 463 | Saxicola caprata | Pied Bushchat | 2022/2/20  | 1 | 0 | 12.85759761 | 77.78640568 | <a href="https://www.inaturalist.org/observations/107357106">https://www.inaturalist.org/observations/107357106</a> |
| 464 | Saxicola caprata | Pied Bushchat | 2022/2/20  | 1 | 0 | 12.85759761 | 77.78640568 | <a href="https://www.inaturalist.org/observations/107357121">https://www.inaturalist.org/observations/107357121</a> |
| 465 | Saxicola caprata | Pied Bushchat | 2021/7/25  | 2 | 0 | 12.86323940 | 77.53899850 | <a href="https://www.inaturalist.org/observations/88530848">https://www.inaturalist.org/observations/88530848</a>   |
| 466 | Saxicola caprata | Pied Bushchat | 2021/2/7   | 1 | 0 | 12.86391821 | 79.14074186 | <a href="https://www.inaturalist.org/observations/69259638">https://www.inaturalist.org/observations/69259638</a>   |
| 467 | Saxicola caprata | Pied Bushchat | 2020/11/8  | 1 | 0 | 12.86515833 | 77.56795500 | <a href="https://www.inaturalist.org/observations/64566136">https://www.inaturalist.org/observations/64566136</a>   |
| 468 | Saxicola caprata | Pied Bushchat | 2019/3/31  | 1 | 0 | 12.86556530 | 77.52171710 | <a href="https://www.inaturalist.org/observations/55779205">https://www.inaturalist.org/observations/55779205</a>   |
| 469 | Saxicola caprata | Pied Bushchat | 2020/4/19  | 1 | 0 | 12.86556530 | 77.52171710 | <a href="https://www.inaturalist.org/observations/55779207">https://www.inaturalist.org/observations/55779207</a>   |
| 470 | Saxicola caprata | Pied Bushchat | 2020/4/19  | 1 | 0 | 12.86556530 | 77.52171710 | <a href="https://www.inaturalist.org/observations/55779212">https://www.inaturalist.org/observations/55779212</a>   |
| 471 | Saxicola caprata | Pied Bushchat | 2019/9/15  | 1 | 0 | 12.86556530 | 77.52171710 | <a href="https://www.inaturalist.org/observations/55779214">https://www.inaturalist.org/observations/55779214</a>   |
| 472 | Saxicola caprata | Pied Bushchat | 2019/10/5  | 1 | 0 | 12.86556530 | 77.52171710 | <a href="https://www.inaturalist.org/observations/55779215">https://www.inaturalist.org/observations/55779215</a>   |
| 473 | Saxicola caprata | Pied Bushchat | 2019/10/6  | 1 | 0 | 12.86556530 | 77.52171710 | <a href="https://www.inaturalist.org/observations/55779219">https://www.inaturalist.org/observations/55779219</a>   |
| 474 | Saxicola caprata | Pied Bushchat | 2019/10/6  | 1 | 0 | 12.86556530 | 77.52171710 | <a href="https://www.inaturalist.org/observations/55779222">https://www.inaturalist.org/observations/55779222</a>   |
| 475 | Saxicola caprata | Pied Bushchat | 2019/10/7  | 1 | 0 | 12.86556530 | 77.52171710 | <a href="https://www.inaturalist.org/observations/55779223">https://www.inaturalist.org/observations/55779223</a>   |
| 476 | Saxicola caprata | Pied Bushchat | 2019/10/19 | 1 | 0 | 12.86556530 | 77.52171710 | <a href="https://www.inaturalist.org/observations/55779225">https://www.inaturalist.org/observations/55779225</a>   |
| 477 | Saxicola caprata | Pied Bushchat | 2019/10/19 | 1 | 0 | 12.86556530 | 77.52171710 | <a href="https://www.inaturalist.org/observations/55779226">https://www.inaturalist.org/observations/55779226</a>   |
| 478 | Saxicola caprata | Pied Bushchat | 2019/11/10 | 1 | 0 | 12.86556530 | 77.52171710 | <a href="https://www.inaturalist.org/observations/55779235">https://www.inaturalist.org/observations/55779235</a>   |
| 479 | Saxicola caprata | Pied Bushchat | 2019/11/10 | 1 | 0 | 12.86556530 | 77.52171710 | <a href="https://www.inaturalist.org/observations/55779236">https://www.inaturalist.org/observations/55779236</a>   |
| 480 | Saxicola caprata | Pied Bushchat | 2019/11/10 | 1 | 0 | 12.86556530 | 77.52171710 | <a href="https://www.inaturalist.org/observations/55779237">https://www.inaturalist.org/observations/55779237</a>   |
| 481 | Saxicola caprata | Pied Bushchat | 2019/12/29 | 1 | 0 | 12.86556530 | 77.52171710 | <a href="https://www.inaturalist.org/observations/55779240">https://www.inaturalist.org/observations/55779240</a>   |
| 482 | Saxicola caprata | Pied Bushchat | 2020/1/12  | 1 | 0 | 12.86556530 | 77.52171710 | <a href="https://www.inaturalist.org/observations/55779241">https://www.inaturalist.org/observations/55779241</a>   |



|     |                  |               |            |   |   |             |             |                                                                                                                     |
|-----|------------------|---------------|------------|---|---|-------------|-------------|---------------------------------------------------------------------------------------------------------------------|
| 483 | Saxicola caprata | Pied Bushchat | 2020/1/25  | 1 | 0 | 12.86556530 | 77.52171710 | <a href="https://www.inaturalist.org/observations/55779242">https://www.inaturalist.org/observations/55779242</a>   |
| 484 | Saxicola caprata | Pied Bushchat | 2019/3/18  | 1 | 0 | 12.86556530 | 77.52171710 | <a href="https://www.inaturalist.org/observations/55779243">https://www.inaturalist.org/observations/55779243</a>   |
| 485 | Saxicola caprata | Pied Bushchat | 2019/3/18  | 1 | 0 | 12.86556530 | 77.52171710 | <a href="https://www.inaturalist.org/observations/55779245">https://www.inaturalist.org/observations/55779245</a>   |
| 486 | Saxicola caprata | Pied Bushchat | 2019/3/26  | 1 | 0 | 12.86556530 | 77.52171710 | <a href="https://www.inaturalist.org/observations/55779246">https://www.inaturalist.org/observations/55779246</a>   |
| 487 | Saxicola caprata | Pied Bushchat | 2019/3/26  | 1 | 0 | 12.86556530 | 77.52171710 | <a href="https://www.inaturalist.org/observations/55779247">https://www.inaturalist.org/observations/55779247</a>   |
| 488 | Saxicola caprata | Pied Bushchat | 2020/9/26  | 2 | 0 | 12.86877172 | 77.64412656 | <a href="https://www.inaturalist.org/observations/60987581">https://www.inaturalist.org/observations/60987581</a>   |
| 489 | Saxicola caprata | Pied Bushchat | 2020/11/3  | 3 | 0 | 12.87226578 | 77.52012368 | <a href="https://www.inaturalist.org/observations/64100028">https://www.inaturalist.org/observations/64100028</a>   |
| 490 | Saxicola caprata | Pied Bushchat | 2020/11/3  | 2 | 0 | 12.87229127 | 77.52030440 | <a href="https://www.inaturalist.org/observations/64100140">https://www.inaturalist.org/observations/64100140</a>   |
| 491 | Saxicola caprata | Pied Bushchat | 2020/11/4  | 1 | 0 | 12.87348362 | 77.52242502 | <a href="https://www.inaturalist.org/observations/64167394">https://www.inaturalist.org/observations/64167394</a>   |
| 492 | Saxicola caprata | Pied Bushchat | 2020/11/4  | 1 | 0 | 12.87364835 | 77.52285384 | <a href="https://www.inaturalist.org/observations/64167738">https://www.inaturalist.org/observations/64167738</a>   |
| 493 | Saxicola caprata | Pied Bushchat | 2019/6/23  | 4 | 0 | 12.87372700 | 77.61980720 | <a href="https://www.inaturalist.org/observations/27694953">https://www.inaturalist.org/observations/27694953</a>   |
| 494 | Saxicola caprata | Pied Bushchat | 2019/6/23  | 3 | 0 | 12.87372730 | 77.61980760 | <a href="https://www.inaturalist.org/observations/27694702">https://www.inaturalist.org/observations/27694702</a>   |
| 495 | Saxicola caprata | Pied Bushchat | 2020/12/13 | 2 | 0 | 12.87398884 | 77.51015662 | <a href="https://www.inaturalist.org/observations/66817742">https://www.inaturalist.org/observations/66817742</a>   |
| 496 | Saxicola caprata | Pied Bushchat | 2020/12/20 | 2 | 0 | 12.87498745 | 77.62998562 | <a href="https://www.inaturalist.org/observations/66882387">https://www.inaturalist.org/observations/66882387</a>   |
| 497 | Saxicola caprata | Pied Bushchat | 2020/10/20 | 3 | 0 | 12.87572645 | 77.51842719 | <a href="https://www.inaturalist.org/observations/64043152">https://www.inaturalist.org/observations/64043152</a>   |
| 498 | Saxicola caprata | Pied Bushchat | 2022/6/24  | 5 | 0 | 12.87597910 | 77.51871083 | <a href="https://www.inaturalist.org/observations/123234000">https://www.inaturalist.org/observations/123234000</a> |
| 499 | Saxicola caprata | Pied Bushchat | 2020/10/3  | 2 | 0 | 12.87950540 | 79.40612680 | <a href="https://www.inaturalist.org/observations/83090795">https://www.inaturalist.org/observations/83090795</a>   |
| 500 | Saxicola caprata | Pied Bushchat | 2021/7/30  | 4 | 0 | 12.87950540 | 79.40612680 | <a href="https://www.inaturalist.org/observations/89295233">https://www.inaturalist.org/observations/89295233</a>   |
| 501 | Saxicola caprata | Pied Bushchat | 2021/9/29  | 1 | 0 | 12.87950540 | 79.40612680 | <a href="https://www.inaturalist.org/observations/96660306">https://www.inaturalist.org/observations/96660306</a>   |
| 502 | Saxicola caprata | Pied Bushchat | 2021/10/2  | 3 | 0 | 12.87950540 | 79.40612680 | <a href="https://www.inaturalist.org/observations/96864206">https://www.inaturalist.org/observations/96864206</a>   |
| 503 | Saxicola caprata | Pied Bushchat | 2019/1/12  | 3 | 0 | 12.88035796 | 77.52937493 | <a href="https://www.inaturalist.org/observations/19590315">https://www.inaturalist.org/observations/19590315</a>   |
| 504 | Saxicola caprata | Pied Bushchat | 2022/7/1   | 5 | 0 | 12.88135173 | 77.50679813 | <a href="https://www.inaturalist.org/observations/124227215">https://www.inaturalist.org/observations/124227215</a> |
| 505 | Saxicola caprata | Pied Bushchat | 2021/6/22  | 1 | 0 | 12.88151167 | 77.46229167 | <a href="https://www.inaturalist.org/observations/84517445">https://www.inaturalist.org/observations/84517445</a>   |

|     |                  |               |            |   |   |             |             |                                                                                                                     |
|-----|------------------|---------------|------------|---|---|-------------|-------------|---------------------------------------------------------------------------------------------------------------------|
| 506 | Saxicola caprata | Pied Bushchat | 2020/2/23  | 3 | 0 | 12.88169215 | 79.17334320 | <a href="https://www.inaturalist.org/observations/70494567">https://www.inaturalist.org/observations/70494567</a>   |
| 507 | Saxicola caprata | Pied Bushchat | 2022/8/19  | 7 | 0 | 12.88258670 | 77.50891100 | <a href="https://www.inaturalist.org/observations/131462965">https://www.inaturalist.org/observations/131462965</a> |
| 508 | Saxicola caprata | Pied Bushchat | 2022/8/15  | 5 | 0 | 12.88288033 | 77.51368758 | <a href="https://www.inaturalist.org/observations/130929893">https://www.inaturalist.org/observations/130929893</a> |
| 509 | Saxicola caprata | Pied Bushchat | 2021/2/8   | 3 | 0 | 12.88305527 | 77.46274621 | <a href="https://www.inaturalist.org/observations/69304725">https://www.inaturalist.org/observations/69304725</a>   |
| 510 | Saxicola caprata | Pied Bushchat | 2016/4/16  | 2 | 0 | 12.88662979 | 77.67267399 | <a href="https://www.inaturalist.org/observations/79308288">https://www.inaturalist.org/observations/79308288</a>   |
| 511 | Saxicola caprata | Pied Bushchat | 2016/4/23  | 1 | 0 | 12.88662979 | 77.67267399 | <a href="https://www.inaturalist.org/observations/79308373">https://www.inaturalist.org/observations/79308373</a>   |
| 512 | Saxicola caprata | Pied Bushchat | 2021/7/7   | 1 | 0 | 12.89020370 | 76.98762540 | <a href="https://www.inaturalist.org/observations/86054779">https://www.inaturalist.org/observations/86054779</a>   |
| 513 | Saxicola caprata | Pied Bushchat | 2012/6/10  | 4 | 0 | 12.89041400 | 77.58719000 | <a href="https://www.inaturalist.org/observations/86261150">https://www.inaturalist.org/observations/86261150</a>   |
| 514 | Saxicola caprata | Pied Bushchat | 2022/8/7   | 3 | 0 | 12.89086680 | 77.51966250 | <a href="https://www.inaturalist.org/observations/129948870">https://www.inaturalist.org/observations/129948870</a> |
| 515 | Saxicola caprata | Pied Bushchat | 2022/4/3   | 2 | 0 | 12.89630813 | 77.49908352 | <a href="https://www.inaturalist.org/observations/110387631">https://www.inaturalist.org/observations/110387631</a> |
| 516 | Saxicola caprata | Pied Bushchat | 2021/12/25 | 4 | 0 | 12.90051288 | 80.22103272 | <a href="https://www.inaturalist.org/observations/103622774">https://www.inaturalist.org/observations/103622774</a> |
| 517 | Saxicola caprata | Pied Bushchat | 2021/12/25 | 3 | 0 | 12.90051288 | 80.22103272 | <a href="https://www.inaturalist.org/observations/103622815">https://www.inaturalist.org/observations/103622815</a> |
| 518 | Saxicola caprata | Pied Bushchat | 2021/12/25 | 3 | 0 | 12.90051288 | 80.22103272 | <a href="https://www.inaturalist.org/observations/103623050">https://www.inaturalist.org/observations/103623050</a> |
| 519 | Saxicola caprata | Pied Bushchat | 2020/9/5   | 3 | 0 | 12.90054450 | 80.22246202 | <a href="https://www.inaturalist.org/observations/58930994">https://www.inaturalist.org/observations/58930994</a>   |
| 520 | Saxicola caprata | Pied Bushchat | 2020/9/5   | 2 | 0 | 12.90054450 | 80.22246202 | <a href="https://www.inaturalist.org/observations/58930999">https://www.inaturalist.org/observations/58930999</a>   |
| 521 | Saxicola caprata | Pied Bushchat | 2020/9/5   | 1 | 0 | 12.90054450 | 80.22246202 | <a href="https://www.inaturalist.org/observations/58931004">https://www.inaturalist.org/observations/58931004</a>   |
| 522 | Saxicola caprata | Pied Bushchat | 2018/12/10 | 2 | 0 | 12.90098770 | 80.22793010 | <a href="https://www.inaturalist.org/observations/109822169">https://www.inaturalist.org/observations/109822169</a> |
| 523 | Saxicola caprata | Pied Bushchat | 2022/6/5   | 3 | 0 | 12.90245020 | 77.30899630 | <a href="https://www.inaturalist.org/observations/120362236">https://www.inaturalist.org/observations/120362236</a> |
| 524 | Saxicola caprata | Pied Bushchat | 2020/9/20  | 2 | 0 | 12.90296626 | 79.11163118 | <a href="https://www.inaturalist.org/observations/60163450">https://www.inaturalist.org/observations/60163450</a>   |
| 525 | Saxicola caprata | Pied Bushchat | 2020/6/4   | 3 | 0 | 12.90410805 | 79.10366821 | <a href="https://www.inaturalist.org/observations/48410530">https://www.inaturalist.org/observations/48410530</a>   |
| 526 | Saxicola caprata | Pied Bushchat | 2020/7/5   | 1 | 0 | 12.90669703 | 77.67727553 | <a href="https://www.inaturalist.org/observations/52021979">https://www.inaturalist.org/observations/52021979</a>   |
| 527 | Saxicola caprata | Pied Bushchat | 2020/6/4   | 1 | 0 | 12.90898963 | 79.09979995 | <a href="https://www.inaturalist.org/observations/48413496">https://www.inaturalist.org/observations/48413496</a>   |
| 528 | Saxicola caprata | Pied Bushchat | 2022/1/15  | 1 | 0 | 12.91327400 | 80.22937100 | <a href="https://www.inaturalist.org/observations/105157964">https://www.inaturalist.org/observations/105157964</a> |

|     |                         |               |            |   |   |             |             |                                                                                                                     |
|-----|-------------------------|---------------|------------|---|---|-------------|-------------|---------------------------------------------------------------------------------------------------------------------|
| 529 | <i>Saxicola caprata</i> | Pied Bushchat | 2018/9/15  | 1 | 0 | 12.91509453 | 77.46969799 | <a href="https://www.inaturalist.org/observations/48771310">https://www.inaturalist.org/observations/48771310</a>   |
| 530 | <i>Saxicola caprata</i> | Pied Bushchat | 2018/9/29  | 1 | 0 | 12.91509453 | 77.46969799 | <a href="https://www.inaturalist.org/observations/48778514">https://www.inaturalist.org/observations/48778514</a>   |
| 531 | <i>Saxicola caprata</i> | Pied Bushchat | 2021/6/15  | 1 | 0 | 12.91509453 | 77.46969799 | <a href="https://www.inaturalist.org/observations/83134585">https://www.inaturalist.org/observations/83134585</a>   |
| 532 | <i>Saxicola caprata</i> | Pied Bushchat | 2021/6/16  | 3 | 0 | 12.91509453 | 77.46969799 | <a href="https://www.inaturalist.org/observations/83254141">https://www.inaturalist.org/observations/83254141</a>   |
| 533 | <i>Saxicola caprata</i> | Pied Bushchat | 2021/6/19  | 2 | 0 | 12.91509453 | 77.46969799 | <a href="https://www.inaturalist.org/observations/83750716">https://www.inaturalist.org/observations/83750716</a>   |
| 534 | <i>Saxicola caprata</i> | Pied Bushchat | 2020/10/1  | 1 | 0 | 12.91509453 | 77.46969799 | <a href="https://www.inaturalist.org/observations/85936213">https://www.inaturalist.org/observations/85936213</a>   |
| 535 | <i>Saxicola caprata</i> | Pied Bushchat | 2021/9/17  | 2 | 0 | 12.91509453 | 77.46969799 | <a href="https://www.inaturalist.org/observations/95142182">https://www.inaturalist.org/observations/95142182</a>   |
| 536 | <i>Saxicola caprata</i> | Pied Bushchat | 2021/11/3  | 1 | 0 | 12.91509453 | 77.46969799 | <a href="https://www.inaturalist.org/observations/100161763">https://www.inaturalist.org/observations/100161763</a> |
| 537 | <i>Saxicola caprata</i> | Pied Bushchat | 2021/12/31 | 1 | 0 | 12.91509453 | 77.46969799 | <a href="https://www.inaturalist.org/observations/104094239">https://www.inaturalist.org/observations/104094239</a> |
| 538 | <i>Saxicola caprata</i> | Pied Bushchat | 2022/1/1   | 1 | 0 | 12.91509453 | 77.46969799 | <a href="https://www.inaturalist.org/observations/104095314">https://www.inaturalist.org/observations/104095314</a> |
| 539 | <i>Saxicola caprata</i> | Pied Bushchat | 2020/4/7   | 3 | 0 | 12.91518899 | 77.66311057 | <a href="https://www.inaturalist.org/observations/52764678">https://www.inaturalist.org/observations/52764678</a>   |
| 540 | <i>Saxicola caprata</i> | Pied Bushchat | 2018/11/18 | 1 | 0 | 12.91831260 | 77.68009700 | <a href="https://www.inaturalist.org/observations/65007282">https://www.inaturalist.org/observations/65007282</a>   |
| 541 | <i>Saxicola caprata</i> | Pied Bushchat | 2018/11/18 | 2 | 0 | 12.91831260 | 77.68009700 | <a href="https://www.inaturalist.org/observations/65007284">https://www.inaturalist.org/observations/65007284</a>   |
| 542 | <i>Saxicola caprata</i> | Pied Bushchat | 2021/8/1   | 2 | 0 | 12.91967609 | 77.67906251 | <a href="https://www.inaturalist.org/observations/89840314">https://www.inaturalist.org/observations/89840314</a>   |
| 543 | <i>Saxicola caprata</i> | Pied Bushchat | 2021/4/10  | 1 | 0 | 12.92411848 | 77.82544572 | <a href="https://www.inaturalist.org/observations/74217976">https://www.inaturalist.org/observations/74217976</a>   |
| 544 | <i>Saxicola caprata</i> | Pied Bushchat | 2021/9/26  | 1 | 0 | 12.92464390 | 77.53466200 | <a href="https://www.inaturalist.org/observations/96759989">https://www.inaturalist.org/observations/96759989</a>   |
| 545 | <i>Saxicola caprata</i> | Pied Bushchat | 2015/5/2   | 3 | 0 | 12.92898480 | 80.17216130 | <a href="https://www.inaturalist.org/observations/24428139">https://www.inaturalist.org/observations/24428139</a>   |
| 546 | <i>Saxicola caprata</i> | Pied Bushchat | 2015/5/2   | 4 | 0 | 12.92898480 | 80.17216130 | <a href="https://www.inaturalist.org/observations/24428489">https://www.inaturalist.org/observations/24428489</a>   |
| 547 | <i>Saxicola caprata</i> | Pied Bushchat | 2020/8/23  | 2 | 0 | 12.93345889 | 77.30773496 | <a href="https://www.inaturalist.org/observations/57431024">https://www.inaturalist.org/observations/57431024</a>   |
| 548 | <i>Saxicola caprata</i> | Pied Bushchat | 2019/9/3   | 2 | 0 | 12.93471876 | 80.21922525 | <a href="https://www.inaturalist.org/observations/32043146">https://www.inaturalist.org/observations/32043146</a>   |
| 549 | <i>Saxicola caprata</i> | Pied Bushchat | 2019/2/2   | 1 | 0 | 12.93489120 | 80.21371240 | <a href="https://www.inaturalist.org/observations/64436332">https://www.inaturalist.org/observations/64436332</a>   |
| 550 | <i>Saxicola caprata</i> | Pied Bushchat | 2020/8/5   | 1 | 0 | 12.93523440 | 77.30947539 | <a href="https://www.inaturalist.org/observations/55672044">https://www.inaturalist.org/observations/55672044</a>   |
| 551 | <i>Saxicola caprata</i> | Pied Bushchat | 2018/11/9  | 3 | 0 | 12.93817040 | 80.21718208 | <a href="https://www.inaturalist.org/observations/25558900">https://www.inaturalist.org/observations/25558900</a>   |

|     |                  |               |            |   |   |             |             |                                                                                                                     |
|-----|------------------|---------------|------------|---|---|-------------|-------------|---------------------------------------------------------------------------------------------------------------------|
| 552 | Saxicola caprata | Pied Bushchat | 2021/7/4   | 3 | 0 | 12.93958528 | 80.21302700 | <a href="https://www.inaturalist.org/observations/86257328">https://www.inaturalist.org/observations/86257328</a>   |
| 553 | Saxicola caprata | Pied Bushchat | 2022/1/22  | 2 | 0 | 12.94105010 | 80.21943078 | <a href="https://www.inaturalist.org/observations/105438877">https://www.inaturalist.org/observations/105438877</a> |
| 554 | Saxicola caprata | Pied Bushchat | 2022/1/22  | 2 | 0 | 12.94105010 | 80.21943078 | <a href="https://www.inaturalist.org/observations/105438879">https://www.inaturalist.org/observations/105438879</a> |
| 555 | Saxicola caprata | Pied Bushchat | 2019/7/30  | 5 | 0 | 12.94232876 | 80.21134760 | <a href="https://www.inaturalist.org/observations/29838356">https://www.inaturalist.org/observations/29838356</a>   |
| 556 | Saxicola caprata | Pied Bushchat | 2020/10/7  | 1 | 0 | 12.94236797 | 79.18306947 | <a href="https://www.inaturalist.org/observations/62046517">https://www.inaturalist.org/observations/62046517</a>   |
| 557 | Saxicola caprata | Pied Bushchat | 2020/8/22  | 1 | 0 | 12.94279962 | 80.21400366 | <a href="https://www.inaturalist.org/observations/57302376">https://www.inaturalist.org/observations/57302376</a>   |
| 558 | Saxicola caprata | Pied Bushchat | 2020/10/7  | 1 | 0 | 12.94429780 | 79.17961579 | <a href="https://www.inaturalist.org/observations/61947570">https://www.inaturalist.org/observations/61947570</a>   |
| 559 | Saxicola caprata | Pied Bushchat | 2013/6/18  | 3 | 0 | 12.94657610 | 80.22376600 | <a href="https://www.inaturalist.org/observations/22691134">https://www.inaturalist.org/observations/22691134</a>   |
| 560 | Saxicola caprata | Pied Bushchat | 2020/12/29 | 4 | 0 | 12.94657610 | 80.22376600 | <a href="https://www.inaturalist.org/observations/83231650">https://www.inaturalist.org/observations/83231650</a>   |
| 561 | Saxicola caprata | Pied Bushchat | 2020/10/24 | 2 | 0 | 12.94917974 | 80.22016932 | <a href="https://www.inaturalist.org/observations/64022449">https://www.inaturalist.org/observations/64022449</a>   |
| 562 | Saxicola caprata | Pied Bushchat | 2020/10/24 | 1 | 0 | 12.94932352 | 80.21641423 | <a href="https://www.inaturalist.org/observations/64022450">https://www.inaturalist.org/observations/64022450</a>   |
| 563 | Saxicola caprata | Pied Bushchat | 2019/1/1   | 3 | 0 | 12.94982970 | 74.85656130 | <a href="https://www.inaturalist.org/observations/19397039">https://www.inaturalist.org/observations/19397039</a>   |
| 564 | Saxicola caprata | Pied Bushchat | 2020/1/26  | 3 | 0 | 12.95452499 | 80.21405026 | <a href="https://www.inaturalist.org/observations/109827231">https://www.inaturalist.org/observations/109827231</a> |
| 565 | Saxicola caprata | Pied Bushchat | 2020/1/26  | 2 | 0 | 12.95452499 | 80.21405026 | <a href="https://www.inaturalist.org/observations/109827238">https://www.inaturalist.org/observations/109827238</a> |
| 566 | Saxicola caprata | Pied Bushchat | 2021/5/26  | 3 | 0 | 12.95490114 | 77.63762590 | <a href="https://www.inaturalist.org/observations/81415512">https://www.inaturalist.org/observations/81415512</a>   |
| 567 | Saxicola caprata | Pied Bushchat | 2019/9/8   | 2 | 0 | 12.95672880 | 77.72146840 | <a href="https://www.inaturalist.org/observations/32592660">https://www.inaturalist.org/observations/32592660</a>   |
| 568 | Saxicola caprata | Pied Bushchat | 2022/2/28  | 5 | 0 | 12.95785100 | 80.21392280 | <a href="https://www.inaturalist.org/observations/107626986">https://www.inaturalist.org/observations/107626986</a> |
| 569 | Saxicola caprata | Pied Bushchat | 2022/2/27  | 3 | 0 | 12.95785100 | 80.21392280 | <a href="https://www.inaturalist.org/observations/107752463">https://www.inaturalist.org/observations/107752463</a> |
| 570 | Saxicola caprata | Pied Bushchat | 2022/9/4   | 3 | 0 | 12.95849038 | 80.21461487 | <a href="https://www.inaturalist.org/observations/133791210">https://www.inaturalist.org/observations/133791210</a> |
| 571 | Saxicola caprata | Pied Bushchat | 2020/8/16  | 3 | 0 | 12.95953888 | 74.85347416 | <a href="https://www.inaturalist.org/observations/58432769">https://www.inaturalist.org/observations/58432769</a>   |
| 572 | Saxicola caprata | Pied Bushchat | 2019/7/7   | 5 | 0 | 12.95968101 | 80.21015067 | <a href="https://www.inaturalist.org/observations/28787824">https://www.inaturalist.org/observations/28787824</a>   |
| 573 | Saxicola caprata | Pied Bushchat | 2019/7/28  | 5 | 0 | 12.96025051 | 80.21020934 | <a href="https://www.inaturalist.org/observations/29693538">https://www.inaturalist.org/observations/29693538</a>   |
| 574 | Saxicola caprata | Pied Bushchat | 2019/9/1   | 3 | 0 | 12.96056810 | 80.21102339 | <a href="https://www.inaturalist.org/observations/32162796">https://www.inaturalist.org/observations/32162796</a>   |

|     |                  |               |            |   |   |             |             |                                                                                                                     |
|-----|------------------|---------------|------------|---|---|-------------|-------------|---------------------------------------------------------------------------------------------------------------------|
| 575 | Saxicola caprata | Pied Bushchat | 2019/7/21  | 2 | 0 | 12.96066677 | 80.21062911 | <a href="https://www.inaturalist.org/observations/29221006">https://www.inaturalist.org/observations/29221006</a>   |
| 576 | Saxicola caprata | Pied Bushchat | 2018/12/22 | 2 | 0 | 12.96461850 | 74.84632690 | <a href="https://www.inaturalist.org/observations/19245008">https://www.inaturalist.org/observations/19245008</a>   |
| 577 | Saxicola caprata | Pied Bushchat | 2016/4/29  | 2 | 0 | 12.97156306 | 80.22715472 | <a href="https://www.inaturalist.org/observations/63744586">https://www.inaturalist.org/observations/63744586</a>   |
| 578 | Saxicola caprata | Pied Bushchat | 2021/7/23  | 2 | 0 | 12.97175884 | 77.86622286 | <a href="https://www.inaturalist.org/observations/88222365">https://www.inaturalist.org/observations/88222365</a>   |
| 579 | Saxicola caprata | Pied Bushchat | 2021/1/21  | 2 | 0 | 12.97181889 | 79.04369166 | <a href="https://www.inaturalist.org/observations/71931080">https://www.inaturalist.org/observations/71931080</a>   |
| 580 | Saxicola caprata | Pied Bushchat | 2019/6/2   | 1 | 0 | 12.97213000 | 77.68796667 | <a href="https://www.inaturalist.org/observations/26227980">https://www.inaturalist.org/observations/26227980</a>   |
| 581 | Saxicola caprata | Pied Bushchat | 2022/5/10  | 1 | 0 | 12.97436692 | 77.68906352 | <a href="https://www.inaturalist.org/observations/119546726">https://www.inaturalist.org/observations/119546726</a> |
| 582 | Saxicola caprata | Pied Bushchat | 2021/6/28  | 1 | 0 | 12.97470257 | 77.86750227 | <a href="https://www.inaturalist.org/observations/84809716">https://www.inaturalist.org/observations/84809716</a>   |
| 583 | Saxicola caprata | Pied Bushchat | 2021/6/28  | 2 | 0 | 12.97479078 | 77.86734771 | <a href="https://www.inaturalist.org/observations/84808819">https://www.inaturalist.org/observations/84808819</a>   |
| 584 | Saxicola caprata | Pied Bushchat | 2021/3/2   | 3 | 0 | 12.99499918 | 77.72550673 | <a href="https://www.inaturalist.org/observations/70493385">https://www.inaturalist.org/observations/70493385</a>   |
| 585 | Saxicola caprata | Pied Bushchat | 2018/8/12  | 1 | 0 | 13.03529983 | 77.75838940 | <a href="https://www.inaturalist.org/observations/15491338">https://www.inaturalist.org/observations/15491338</a>   |
| 586 | Saxicola caprata | Pied Bushchat | 2022/3/2   | 1 | 0 | 13.06169717 | 77.69255000 | <a href="https://www.inaturalist.org/observations/107740765">https://www.inaturalist.org/observations/107740765</a> |
| 587 | Saxicola caprata | Pied Bushchat | 2019/8/29  | 1 | 0 | 13.06825601 | 77.76923203 | <a href="https://www.inaturalist.org/observations/92251997">https://www.inaturalist.org/observations/92251997</a>   |
| 588 | Saxicola caprata | Pied Bushchat | 2018/8/19  | 2 | 0 | 13.06830050 | 80.01839990 | <a href="https://www.inaturalist.org/observations/45379448">https://www.inaturalist.org/observations/45379448</a>   |
| 589 | Saxicola caprata | Pied Bushchat | 2017/12/10 | 2 | 0 | 13.06830050 | 80.01839990 | <a href="https://www.inaturalist.org/observations/45850109">https://www.inaturalist.org/observations/45850109</a>   |
| 590 | Saxicola caprata | Pied Bushchat | 2017/3/11  | 1 | 0 | 13.07029150 | 77.76952550 | <a href="https://www.inaturalist.org/observations/67248223">https://www.inaturalist.org/observations/67248223</a>   |
| 591 | Saxicola caprata | Pied Bushchat | 2017/3/11  | 3 | 0 | 13.07029150 | 77.76952550 | <a href="https://www.inaturalist.org/observations/67248224">https://www.inaturalist.org/observations/67248224</a>   |
| 592 | Saxicola caprata | Pied Bushchat | 2017/3/11  | 2 | 0 | 13.07029150 | 77.76952550 | <a href="https://www.inaturalist.org/observations/67248225">https://www.inaturalist.org/observations/67248225</a>   |
| 593 | Saxicola caprata | Pied Bushchat | 2017/3/11  | 2 | 0 | 13.07029150 | 77.76952550 | <a href="https://www.inaturalist.org/observations/67248233">https://www.inaturalist.org/observations/67248233</a>   |
| 594 | Saxicola caprata | Pied Bushchat | 2019/4/15  | 2 | 0 | 13.07029150 | 77.76952550 | <a href="https://www.inaturalist.org/observations/116078528">https://www.inaturalist.org/observations/116078528</a> |
| 595 | Saxicola caprata | Pied Bushchat | 2010/11/5  | 1 | 0 | 13.08268020 | 80.27071840 | <a href="https://www.inaturalist.org/observations/89039897">https://www.inaturalist.org/observations/89039897</a>   |
| 596 | Saxicola caprata | Pied Bushchat | 2015/2/7   | 6 | 0 | 13.08736710 | 77.60993500 | <a href="https://www.inaturalist.org/observations/29639711">https://www.inaturalist.org/observations/29639711</a>   |
| 597 | Saxicola caprata | Pied Bushchat | 2021/8/1   | 1 | 0 | 13.10295037 | 80.09515683 | <a href="https://www.inaturalist.org/observations/90647801">https://www.inaturalist.org/observations/90647801</a>   |

|     |                  |               |            |   |   |             |             |                                                                                                                     |
|-----|------------------|---------------|------------|---|---|-------------|-------------|---------------------------------------------------------------------------------------------------------------------|
| 598 | Saxicola caprata | Pied Bushchat | 2022/5/14  | 2 | 0 | 13.11525820 | 78.02505810 | <a href="https://www.inaturalist.org/observations/116942938">https://www.inaturalist.org/observations/116942938</a> |
| 599 | Saxicola caprata | Pied Bushchat | 2014/7/1   | 2 | 0 | 13.12660000 | 77.54667100 | <a href="http://www.inaturalist.org/observations/1618938">http://www.inaturalist.org/observations/1618938</a>       |
| 600 | Saxicola caprata | Pied Bushchat | 2022/3/27  | 3 | 0 | 13.13279100 | 79.11375600 | <a href="https://www.inaturalist.org/observations/129565181">https://www.inaturalist.org/observations/129565181</a> |
| 601 | Saxicola caprata | Pied Bushchat | 2022/3/27  | 3 | 0 | 13.13279100 | 79.11375600 | <a href="https://www.inaturalist.org/observations/129565200">https://www.inaturalist.org/observations/129565200</a> |
| 602 | Saxicola caprata | Pied Bushchat | 2021/12/20 | 3 | 0 | 13.13309460 | 80.29179443 | <a href="https://www.inaturalist.org/observations/103359403">https://www.inaturalist.org/observations/103359403</a> |
| 603 | Saxicola caprata | Pied Bushchat | 2019/4/8   | 2 | 0 | 13.14237500 | 77.49118667 | <a href="https://www.inaturalist.org/observations/29238199">https://www.inaturalist.org/observations/29238199</a>   |
| 604 | Saxicola caprata | Pied Bushchat | 2019/4/8   | 2 | 0 | 13.14256333 | 77.49035667 | <a href="https://www.inaturalist.org/observations/29238179">https://www.inaturalist.org/observations/29238179</a>   |
| 605 | Saxicola caprata | Pied Bushchat | 2019/1/13  | 3 | 0 | 13.14692668 | 77.48961892 | <a href="https://www.inaturalist.org/observations/109729003">https://www.inaturalist.org/observations/109729003</a> |
| 606 | Saxicola caprata | Pied Bushchat | 2019/1/13  | 3 | 0 | 13.14692668 | 77.48961892 | <a href="https://www.inaturalist.org/observations/109729034">https://www.inaturalist.org/observations/109729034</a> |
| 607 | Saxicola caprata | Pied Bushchat | 2021/12/21 | 1 | 0 | 13.15004332 | 77.49000013 | <a href="https://www.inaturalist.org/observations/105009897">https://www.inaturalist.org/observations/105009897</a> |
| 608 | Saxicola caprata | Pied Bushchat | 2022/1/10  | 1 | 0 | 13.15028100 | 77.48914700 | <a href="https://www.inaturalist.org/observations/104918824">https://www.inaturalist.org/observations/104918824</a> |
| 609 | Saxicola caprata | Pied Bushchat | 2017/1/27  | 2 | 0 | 13.15593391 | 77.49077246 | <a href="https://www.inaturalist.org/observations/64929580">https://www.inaturalist.org/observations/64929580</a>   |
| 610 | Saxicola caprata | Pied Bushchat | 2017/1/27  | 1 | 0 | 13.15593391 | 77.49077246 | <a href="https://www.inaturalist.org/observations/64929594">https://www.inaturalist.org/observations/64929594</a>   |
| 611 | Saxicola caprata | Pied Bushchat | 2021/7/2   | 4 | 0 | 13.15594152 | 80.10462452 | <a href="https://www.inaturalist.org/observations/122159950">https://www.inaturalist.org/observations/122159950</a> |
| 612 | Saxicola caprata | Pied Bushchat | 2018/12/20 | 2 | 0 | 13.16208148 | 77.47306533 | <a href="https://www.inaturalist.org/observations/106743708">https://www.inaturalist.org/observations/106743708</a> |
| 613 | Saxicola caprata | Pied Bushchat | 2021/9/11  | 1 | 0 | 13.16208148 | 77.47306533 | <a href="https://www.inaturalist.org/observations/117280112">https://www.inaturalist.org/observations/117280112</a> |
| 614 | Saxicola caprata | Pied Bushchat | 2022/6/26  | 4 | 0 | 13.17648386 | 77.49883533 | <a href="https://www.inaturalist.org/observations/124413179">https://www.inaturalist.org/observations/124413179</a> |
| 615 | Saxicola caprata | Pied Bushchat | 2022/6/26  | 3 | 0 | 13.17796822 | 77.49796830 | <a href="https://www.inaturalist.org/observations/124373320">https://www.inaturalist.org/observations/124373320</a> |
| 616 | Saxicola caprata | Pied Bushchat | 2022/6/26  | 4 | 0 | 13.17886236 | 77.49733429 | <a href="https://www.inaturalist.org/observations/124412492">https://www.inaturalist.org/observations/124412492</a> |
| 617 | Saxicola caprata | Pied Bushchat | 2022/6/26  | 3 | 0 | 13.18030492 | 77.49926314 | <a href="https://www.inaturalist.org/observations/124373493">https://www.inaturalist.org/observations/124373493</a> |
| 618 | Saxicola caprata | Pied Bushchat | 2021/8/21  | 5 | 0 | 13.21405594 | 77.44889225 | <a href="https://www.inaturalist.org/observations/126069653">https://www.inaturalist.org/observations/126069653</a> |
| 619 | Saxicola caprata | Pied Bushchat | 2021/1/18  | 2 | 0 | 13.24022650 | 75.25405604 | <a href="https://www.inaturalist.org/observations/68543251">https://www.inaturalist.org/observations/68543251</a>   |
| 620 | Saxicola caprata | Pied Bushchat | 2021/1/18  | 2 | 0 | 13.24022650 | 75.25405604 | <a href="https://www.inaturalist.org/observations/68543786">https://www.inaturalist.org/observations/68543786</a>   |

|     |                  |               |            |   |   |             |             |                                                                                                                     |
|-----|------------------|---------------|------------|---|---|-------------|-------------|---------------------------------------------------------------------------------------------------------------------|
| 621 | Saxicola caprata | Pied Bushchat | 2021/1/14  | 4 | 0 | 13.29655720 | 77.71292686 | <a href="https://www.inaturalist.org/observations/68157885">https://www.inaturalist.org/observations/68157885</a>   |
| 622 | Saxicola caprata | Pied Bushchat | 2021/1/25  | 2 | 0 | 13.29950075 | 77.18437599 | <a href="https://www.inaturalist.org/observations/68599354">https://www.inaturalist.org/observations/68599354</a>   |
| 623 | Saxicola caprata | Pied Bushchat | 2020/10/21 | 4 | 0 | 13.31300063 | 77.54211411 | <a href="https://www.inaturalist.org/observations/115743434">https://www.inaturalist.org/observations/115743434</a> |
| 624 | Saxicola caprata | Pied Bushchat | 2020/5/2   | 1 | 0 | 13.31302217 | 77.54185528 | <a href="https://www.inaturalist.org/observations/62991646">https://www.inaturalist.org/observations/62991646</a>   |
| 625 | Saxicola caprata | Pied Bushchat | 2011/1/30  | 4 | 0 | 13.36813810 | 77.68321690 | <a href="https://www.inaturalist.org/observations/28863440">https://www.inaturalist.org/observations/28863440</a>   |
| 626 | Saxicola caprata | Pied Bushchat | 2022/4/17  | 3 | 0 | 13.37420074 | 77.21271336 | <a href="https://www.inaturalist.org/observations/132091125">https://www.inaturalist.org/observations/132091125</a> |
| 627 | Saxicola caprata | Pied Bushchat | 2021/4/2   | 1 | 0 | 13.47550310 | 79.77610020 | <a href="https://www.inaturalist.org/observations/72766297">https://www.inaturalist.org/observations/72766297</a>   |
| 628 | Saxicola caprata | Pied Bushchat | 2022/3/28  | 3 | 0 | 13.50297167 | 79.30162500 | <a href="https://www.inaturalist.org/observations/115298467">https://www.inaturalist.org/observations/115298467</a> |
| 629 | Saxicola caprata | Pied Bushchat | 2022/3/28  | 1 | 0 | 13.50297833 | 79.30162167 | <a href="https://www.inaturalist.org/observations/111898635">https://www.inaturalist.org/observations/111898635</a> |
| 630 | Saxicola caprata | Pied Bushchat | 2022/9/30  | 1 | 0 | 13.51349600 | 79.32243700 | <a href="https://www.inaturalist.org/observations/137121763">https://www.inaturalist.org/observations/137121763</a> |
| 631 | Saxicola caprata | Pied Bushchat | 2022/3/23  | 1 | 0 | 13.52023333 | 79.32003833 | <a href="https://www.inaturalist.org/observations/111898692">https://www.inaturalist.org/observations/111898692</a> |
| 632 | Saxicola caprata | Pied Bushchat | 2015/3/29  | 2 | 0 | 13.55000000 | 78.50000000 | <a href="http://www.inaturalist.org/observations/1418715">http://www.inaturalist.org/observations/1418715</a>       |
| 633 | Saxicola caprata | Pied Bushchat | 2015/3/29  | 3 | 0 | 13.55000000 | 78.50000000 | <a href="http://www.inaturalist.org/observations/1419614">http://www.inaturalist.org/observations/1419614</a>       |
| 634 | Saxicola caprata | Pied Bushchat | 2022/9/13  | 2 | 0 | 13.56396386 | 79.45808394 | <a href="https://www.inaturalist.org/observations/134835300">https://www.inaturalist.org/observations/134835300</a> |
| 635 | Saxicola caprata | Pied Bushchat | 2022/9/13  | 1 | 0 | 13.57144034 | 79.44668050 | <a href="https://www.inaturalist.org/observations/134837323">https://www.inaturalist.org/observations/134837323</a> |
| 636 | Saxicola caprata | Pied Bushchat | 2022/8/25  | 2 | 0 | 13.58180700 | 79.30559700 | <a href="https://www.inaturalist.org/observations/132558816">https://www.inaturalist.org/observations/132558816</a> |
| 637 | Saxicola caprata | Pied Bushchat | 2022/3/6   | 1 | 0 | 13.58454167 | 79.42928667 | <a href="https://www.inaturalist.org/observations/111179444">https://www.inaturalist.org/observations/111179444</a> |
| 638 | Saxicola caprata | Pied Bushchat | 2021/8/12  | 2 | 0 | 13.58611461 | 79.37573364 | <a href="https://www.inaturalist.org/observations/93245631">https://www.inaturalist.org/observations/93245631</a>   |
| 639 | Saxicola caprata | Pied Bushchat | 2022/6/3   | 2 | 0 | 13.58751595 | 79.42876198 | <a href="https://www.inaturalist.org/observations/119974802">https://www.inaturalist.org/observations/119974802</a> |
| 640 | Saxicola caprata | Pied Bushchat | 2022/6/3   | 3 | 0 | 13.58751595 | 79.42876198 | <a href="https://www.inaturalist.org/observations/119974815">https://www.inaturalist.org/observations/119974815</a> |
| 641 | Saxicola caprata | Pied Bushchat | 2022/3/21  | 2 | 0 | 13.59215742 | 79.44480274 | <a href="https://www.inaturalist.org/observations/111891315">https://www.inaturalist.org/observations/111891315</a> |
| 642 | Saxicola caprata | Pied Bushchat | 2022/3/21  | 3 | 0 | 13.59219314 | 79.44480522 | <a href="https://www.inaturalist.org/observations/111891314">https://www.inaturalist.org/observations/111891314</a> |
| 643 | Saxicola caprata | Pied Bushchat | 2022/6/11  | 3 | 0 | 13.59460513 | 79.37834863 | <a href="https://www.inaturalist.org/observations/121890581">https://www.inaturalist.org/observations/121890581</a> |

|     |                  |               |            |   |   |             |             |                                                                                                                     |
|-----|------------------|---------------|------------|---|---|-------------|-------------|---------------------------------------------------------------------------------------------------------------------|
| 644 | Saxicola caprata | Pied Bushchat | 2022/9/25  | 1 | 0 | 13.60982700 | 79.41513100 | <a href="https://www.inaturalist.org/observations/136407247">https://www.inaturalist.org/observations/136407247</a> |
| 645 | Saxicola caprata | Pied Bushchat | 2022/8/25  | 2 | 0 | 13.61137102 | 79.37735733 | <a href="https://www.inaturalist.org/observations/132255718">https://www.inaturalist.org/observations/132255718</a> |
| 646 | Saxicola caprata | Pied Bushchat | 2022/2/9   | 2 | 0 | 13.61578447 | 79.37129437 | <a href="https://www.inaturalist.org/observations/112235717">https://www.inaturalist.org/observations/112235717</a> |
| 647 | Saxicola caprata | Pied Bushchat | 2022/8/30  | 1 | 0 | 13.61967579 | 79.36408329 | <a href="https://www.inaturalist.org/observations/133596097">https://www.inaturalist.org/observations/133596097</a> |
| 648 | Saxicola caprata | Pied Bushchat | 2022/3/31  | 1 | 0 | 13.62040032 | 79.53866860 | <a href="https://www.inaturalist.org/observations/110015122">https://www.inaturalist.org/observations/110015122</a> |
| 649 | Saxicola caprata | Pied Bushchat | 2022/3/31  | 2 | 0 | 13.62060886 | 79.53842660 | <a href="https://www.inaturalist.org/observations/110015115">https://www.inaturalist.org/observations/110015115</a> |
| 650 | Saxicola caprata | Pied Bushchat | 2021/3/19  | 1 | 0 | 13.64110498 | 79.45543242 | <a href="https://www.inaturalist.org/observations/71540860">https://www.inaturalist.org/observations/71540860</a>   |
| 651 | Saxicola caprata | Pied Bushchat | 2021/3/19  | 1 | 0 | 13.64127187 | 79.45379091 | <a href="https://www.inaturalist.org/observations/71540835">https://www.inaturalist.org/observations/71540835</a>   |
| 652 | Saxicola caprata | Pied Bushchat | 2021/3/19  | 1 | 0 | 13.64363853 | 79.45570797 | <a href="https://www.inaturalist.org/observations/71540861">https://www.inaturalist.org/observations/71540861</a>   |
| 653 | Saxicola caprata | Pied Bushchat | 2021/5/10  | 1 | 0 | 13.64717576 | 79.44701868 | <a href="https://www.inaturalist.org/observations/86058272">https://www.inaturalist.org/observations/86058272</a>   |
| 654 | Saxicola caprata | Pied Bushchat | 2021/4/22  | 3 | 0 | 13.64739227 | 79.44709814 | <a href="https://www.inaturalist.org/observations/74914466">https://www.inaturalist.org/observations/74914466</a>   |
| 655 | Saxicola caprata | Pied Bushchat | 2021/9/27  | 1 | 0 | 13.65050240 | 79.47321867 | <a href="https://www.inaturalist.org/observations/96342032">https://www.inaturalist.org/observations/96342032</a>   |
| 656 | Saxicola caprata | Pied Bushchat | 2020/2/15  | 2 | 0 | 13.65515498 | 79.48030517 | <a href="https://www.inaturalist.org/observations/65634508">https://www.inaturalist.org/observations/65634508</a>   |
| 657 | Saxicola caprata | Pied Bushchat | 2021/5/2   | 1 | 0 | 13.65641126 | 79.26841870 | <a href="https://www.inaturalist.org/observations/76480529">https://www.inaturalist.org/observations/76480529</a>   |
| 658 | Saxicola caprata | Pied Bushchat | 2020/12/27 | 1 | 0 | 13.65683545 | 79.48698822 | <a href="https://www.inaturalist.org/observations/67617008">https://www.inaturalist.org/observations/67617008</a>   |
| 659 | Saxicola caprata | Pied Bushchat | 2021/3/21  | 1 | 0 | 13.65693515 | 79.48698252 | <a href="https://www.inaturalist.org/observations/73367139">https://www.inaturalist.org/observations/73367139</a>   |
| 660 | Saxicola caprata | Pied Bushchat | 2020/12/27 | 1 | 0 | 13.65694068 | 79.48696040 | <a href="https://www.inaturalist.org/observations/67616928">https://www.inaturalist.org/observations/67616928</a>   |
| 661 | Saxicola caprata | Pied Bushchat | 2022/9/23  | 1 | 0 | 13.65715000 | 77.45891806 | <a href="https://www.inaturalist.org/observations/136398045">https://www.inaturalist.org/observations/136398045</a> |
| 662 | Saxicola caprata | Pied Bushchat | 2021/2/15  | 3 | 0 | 13.65725960 | 79.48804560 | <a href="https://www.inaturalist.org/observations/70376482">https://www.inaturalist.org/observations/70376482</a>   |
| 663 | Saxicola caprata | Pied Bushchat | 2018/4/7   | 1 | 0 | 13.65764650 | 79.48697170 | <a href="https://www.inaturalist.org/observations/11014775">https://www.inaturalist.org/observations/11014775</a>   |
| 664 | Saxicola caprata | Pied Bushchat | 2019/1/3   | 1 | 0 | 13.65911635 | 79.48097763 | <a href="https://www.inaturalist.org/observations/55805442">https://www.inaturalist.org/observations/55805442</a>   |
| 665 | Saxicola caprata | Pied Bushchat | 2022/9/28  | 1 | 0 | 13.66431700 | 77.20889900 | <a href="https://www.inaturalist.org/observations/136936069">https://www.inaturalist.org/observations/136936069</a> |
| 666 | Saxicola caprata | Pied Bushchat | 2022/7/13  | 3 | 0 | 13.66622214 | 79.48603780 | <a href="https://www.inaturalist.org/observations/126464352">https://www.inaturalist.org/observations/126464352</a> |



|     |                  |               |            |   |   |             |             |                                                                                                                     |
|-----|------------------|---------------|------------|---|---|-------------|-------------|---------------------------------------------------------------------------------------------------------------------|
| 667 | Saxicola caprata | Pied Bushchat | 2022/2/8   | 5 | 0 | 13.66645321 | 79.49727542 | <a href="https://www.inaturalist.org/observations/112140655">https://www.inaturalist.org/observations/112140655</a> |
| 668 | Saxicola caprata | Pied Bushchat | 2022/2/23  | 4 | 0 | 13.67362404 | 79.66096961 | <a href="https://www.inaturalist.org/observations/108564515">https://www.inaturalist.org/observations/108564515</a> |
| 669 | Saxicola caprata | Pied Bushchat | 2019/6/17  | 2 | 0 | 13.67898370 | 77.24431021 | <a href="https://www.inaturalist.org/observations/69666461">https://www.inaturalist.org/observations/69666461</a>   |
| 670 | Saxicola caprata | Pied Bushchat | 2022/2/20  | 2 | 0 | 13.68732257 | 79.53987401 | <a href="https://www.inaturalist.org/observations/109819595">https://www.inaturalist.org/observations/109819595</a> |
| 671 | Saxicola caprata | Pied Bushchat | 2022/1/30  | 1 | 0 | 13.74317850 | 79.60248000 | <a href="https://www.inaturalist.org/observations/105894218">https://www.inaturalist.org/observations/105894218</a> |
| 672 | Saxicola caprata | Pied Bushchat | 2019/11/17 | 4 | 0 | 13.76755331 | 79.43420939 | <a href="https://www.inaturalist.org/observations/35766737">https://www.inaturalist.org/observations/35766737</a>   |
| 673 | Saxicola caprata | Pied Bushchat | 2022/1/28  | 1 | 0 | 13.79078333 | 79.62712833 | <a href="https://www.inaturalist.org/observations/111082958">https://www.inaturalist.org/observations/111082958</a> |
| 674 | Saxicola caprata | Pied Bushchat | 2021/2/4   | 2 | 0 | 13.81111746 | 79.21580280 | <a href="https://www.inaturalist.org/observations/115681050">https://www.inaturalist.org/observations/115681050</a> |
| 675 | Saxicola caprata | Pied Bushchat | 2019/1/31  | 1 | 0 | 13.81236420 | 76.86134070 | <a href="https://www.inaturalist.org/observations/84850394">https://www.inaturalist.org/observations/84850394</a>   |
| 676 | Saxicola caprata | Pied Bushchat | 2021/1/25  | 1 | 0 | 14.13249806 | 77.81686500 | <a href="https://www.inaturalist.org/observations/88431664">https://www.inaturalist.org/observations/88431664</a>   |
| 677 | Saxicola caprata | Pied Bushchat | 2022/7/4   | 4 | 0 | 14.16704281 | 77.80914947 | <a href="https://www.inaturalist.org/observations/124765959">https://www.inaturalist.org/observations/124765959</a> |
| 678 | Saxicola caprata | Pied Bushchat | 2020/3/19  | 4 | 0 | 14.23288875 | 74.44285814 | <a href="https://www.inaturalist.org/observations/40276676">https://www.inaturalist.org/observations/40276676</a>   |
| 679 | Saxicola caprata | Pied Bushchat | 2021/9/24  | 2 | 0 | 14.46410213 | 78.92603444 | <a href="https://www.inaturalist.org/observations/105706900">https://www.inaturalist.org/observations/105706900</a> |
| 680 | Saxicola caprata | Pied Bushchat | 2021/10/20 | 1 | 0 | 14.48257084 | 79.36525529 | <a href="https://www.inaturalist.org/observations/105705415">https://www.inaturalist.org/observations/105705415</a> |
| 681 | Saxicola caprata | Pied Bushchat | 2011/10/22 | 1 | 0 | 14.48859680 | 78.83189022 | <a href="https://www.inaturalist.org/observations/80834310">https://www.inaturalist.org/observations/80834310</a>   |
| 682 | Saxicola caprata | Pied Bushchat | 2021/10/22 | 2 | 0 | 14.53684008 | 78.81229517 | <a href="https://www.inaturalist.org/observations/105702937">https://www.inaturalist.org/observations/105702937</a> |
| 683 | Saxicola caprata | Pied Bushchat | 2014/1/14  | 5 | 0 | 14.86613746 | 74.43937294 | <a href="https://www.inaturalist.org/observations/109094911">https://www.inaturalist.org/observations/109094911</a> |
| 684 | Saxicola caprata | Pied Bushchat | 2021/9/19  | 5 | 0 | 14.90306735 | 74.10283718 | <a href="https://www.inaturalist.org/observations/124110710">https://www.inaturalist.org/observations/124110710</a> |
| 685 | Saxicola caprata | Pied Bushchat | 2019/4/23  | 3 | 0 | 15.13025160 | 76.22401230 | <a href="https://www.inaturalist.org/observations/116077016">https://www.inaturalist.org/observations/116077016</a> |
| 686 | Saxicola caprata | Pied Bushchat | 2017/9/30  | 1 | 0 | 15.21949179 | 73.96267802 | <a href="https://www.inaturalist.org/observations/42939298">https://www.inaturalist.org/observations/42939298</a>   |
| 687 | Saxicola caprata | Pied Bushchat | 2020/11/4  | 1 | 0 | 15.27025377 | 76.60661090 | <a href="https://www.inaturalist.org/observations/106160048">https://www.inaturalist.org/observations/106160048</a> |
| 688 | Saxicola caprata | Pied Bushchat | 2019/7/6   | 4 | 0 | 15.28038533 | 76.54553627 | <a href="https://www.inaturalist.org/observations/29240408">https://www.inaturalist.org/observations/29240408</a>   |
| 689 | Saxicola caprata | Pied Bushchat | 2018/12/1  | 2 | 0 | 15.36673265 | 75.02592751 | <a href="https://www.inaturalist.org/observations/18826667">https://www.inaturalist.org/observations/18826667</a>   |

|     |                         |               |            |   |   |             |             |                                                                                                                     |
|-----|-------------------------|---------------|------------|---|---|-------------|-------------|---------------------------------------------------------------------------------------------------------------------|
| 690 | <i>Saxicola caprata</i> | Pied Bushchat | 2020/11/18 | 3 | 0 | 15.38125989 | 75.10026568 | <a href="https://www.inaturalist.org/observations/65757350">https://www.inaturalist.org/observations/65757350</a>   |
| 691 | <i>Saxicola caprata</i> | Pied Bushchat | 2020/11/20 | 1 | 0 | 15.38125989 | 75.10026568 | <a href="https://www.inaturalist.org/observations/65757403">https://www.inaturalist.org/observations/65757403</a>   |
| 692 | <i>Saxicola caprata</i> | Pied Bushchat | 2020/11/20 | 2 | 0 | 15.38490147 | 75.10266490 | <a href="https://www.inaturalist.org/observations/66245554">https://www.inaturalist.org/observations/66245554</a>   |
| 693 | <i>Saxicola caprata</i> | Pied Bushchat | 2016/4/17  | 1 | 0 | 15.38556382 | 75.09992208 | <a href="https://www.inaturalist.org/observations/57622902">https://www.inaturalist.org/observations/57622902</a>   |
| 694 | <i>Saxicola caprata</i> | Pied Bushchat | 2021/12/17 | 4 | 0 | 15.40132000 | 75.07002500 | <a href="https://www.inaturalist.org/observations/121719636">https://www.inaturalist.org/observations/121719636</a> |
| 695 | <i>Saxicola caprata</i> | Pied Bushchat | 2021/12/16 | 3 | 0 | 15.40137000 | 75.06986667 | <a href="https://www.inaturalist.org/observations/121719623">https://www.inaturalist.org/observations/121719623</a> |
| 696 | <i>Saxicola caprata</i> | Pied Bushchat | 2021/12/16 | 3 | 0 | 15.40141853 | 75.06980776 | <a href="https://www.inaturalist.org/observations/121719620">https://www.inaturalist.org/observations/121719620</a> |
| 697 | <i>Saxicola caprata</i> | Pied Bushchat | 2020/12/6  | 1 | 0 | 15.42218000 | 75.01581500 | <a href="https://www.inaturalist.org/observations/90238865">https://www.inaturalist.org/observations/90238865</a>   |
| 698 | <i>Saxicola caprata</i> | Pied Bushchat | 2017/6/2   | 2 | 0 | 15.55811430 | 73.81892348 | <a href="https://www.inaturalist.org/observations/106964973">https://www.inaturalist.org/observations/106964973</a> |
| 699 | <i>Saxicola caprata</i> | Pied Bushchat | 2015/5/8   | 1 | 0 | 15.72169800 | 74.69273500 | <a href="http://www.inaturalist.org/observations/1464674">http://www.inaturalist.org/observations/1464674</a>       |
| 700 | <i>Saxicola caprata</i> | Pied Bushchat | 2015/12/31 | 1 | 0 | 15.94881800 | 75.81635200 | <a href="https://www.inaturalist.org/observations/46196288">https://www.inaturalist.org/observations/46196288</a>   |
| 701 | <i>Saxicola caprata</i> | Pied Bushchat | 2015/12/31 | 1 | 0 | 15.94881800 | 75.81635200 | <a href="https://www.inaturalist.org/observations/46196289">https://www.inaturalist.org/observations/46196289</a>   |
| 702 | <i>Saxicola caprata</i> | Pied Bushchat | 2021/7/27  | 1 | 0 | 16.19224797 | 77.35520597 | <a href="https://www.inaturalist.org/observations/88776958">https://www.inaturalist.org/observations/88776958</a>   |
| 703 | <i>Saxicola caprata</i> | Pied Bushchat | 2020/12/9  | 1 | 0 | 16.20275377 | 77.36300625 | <a href="https://www.inaturalist.org/observations/81809472">https://www.inaturalist.org/observations/81809472</a>   |
| 704 | <i>Saxicola caprata</i> | Pied Bushchat | 2020/7/18  | 1 | 0 | 16.36244400 | 74.29439100 | <a href="https://www.inaturalist.org/observations/53445856">https://www.inaturalist.org/observations/53445856</a>   |
| 705 | <i>Saxicola caprata</i> | Pied Bushchat | 2020/7/28  | 1 | 0 | 16.36251100 | 74.29425800 | <a href="https://www.inaturalist.org/observations/54629978">https://www.inaturalist.org/observations/54629978</a>   |
| 706 | <i>Saxicola caprata</i> | Pied Bushchat | 2020/7/14  | 1 | 0 | 16.36265500 | 74.29269200 | <a href="https://www.inaturalist.org/observations/53023148">https://www.inaturalist.org/observations/53023148</a>   |
| 707 | <i>Saxicola caprata</i> | Pied Bushchat | 2013/12/2  | 2 | 0 | 16.40966969 | 80.70889656 | <a href="https://www.inaturalist.org/observations/88106334">https://www.inaturalist.org/observations/88106334</a>   |
| 708 | <i>Saxicola caprata</i> | Pied Bushchat | 2013/10/6  | 2 | 0 | 16.40966969 | 80.70889656 | <a href="https://www.inaturalist.org/observations/88106335">https://www.inaturalist.org/observations/88106335</a>   |
| 709 | <i>Saxicola caprata</i> | Pied Bushchat | 2012/4/2   | 1 | 0 | 16.49848953 | 80.59894754 | <a href="https://www.inaturalist.org/observations/90889361">https://www.inaturalist.org/observations/90889361</a>   |
| 710 | <i>Saxicola caprata</i> | Pied Bushchat | 2012/9/25  | 2 | 0 | 16.49973507 | 80.60132918 | <a href="https://www.inaturalist.org/observations/88032716">https://www.inaturalist.org/observations/88032716</a>   |
| 711 | <i>Saxicola caprata</i> | Pied Bushchat | 2012/9/25  | 2 | 0 | 16.49973507 | 80.60132918 | <a href="https://www.inaturalist.org/observations/88032717">https://www.inaturalist.org/observations/88032717</a>   |
| 712 | <i>Saxicola caprata</i> | Pied Bushchat | 2020/9/5   | 1 | 0 | 16.50810793 | 79.27925024 | <a href="https://www.inaturalist.org/observations/64864369">https://www.inaturalist.org/observations/64864369</a>   |

|     |                  |               |            |   |   |             |             |                                                                                                                     |
|-----|------------------|---------------|------------|---|---|-------------|-------------|---------------------------------------------------------------------------------------------------------------------|
| 713 | Saxicola caprata | Pied Bushchat | 2020/5/8   | 2 | 0 | 16.53652284 | 80.59268937 | <a href="https://www.inaturalist.org/observations/45233816">https://www.inaturalist.org/observations/45233816</a>   |
| 714 | Saxicola caprata | Pied Bushchat | 2020/10/15 | 3 | 0 | 16.54096440 | 74.67224590 | <a href="https://www.inaturalist.org/observations/72459943">https://www.inaturalist.org/observations/72459943</a>   |
| 715 | Saxicola caprata | Pied Bushchat | 2014/1/26  | 1 | 0 | 16.57370661 | 79.32247984 | <a href="https://www.inaturalist.org/observations/89170804">https://www.inaturalist.org/observations/89170804</a>   |
| 716 | Saxicola caprata | Pied Bushchat | 2014/1/26  | 2 | 0 | 16.57370661 | 79.32247984 | <a href="https://www.inaturalist.org/observations/89170806">https://www.inaturalist.org/observations/89170806</a>   |
| 717 | Saxicola caprata | Pied Bushchat | 2020/8/31  | 1 | 0 | 16.57932167 | 80.70114667 | <a href="https://www.inaturalist.org/observations/58122834">https://www.inaturalist.org/observations/58122834</a>   |
| 718 | Saxicola caprata | Pied Bushchat | 2022/2/18  | 4 | 0 | 16.60132391 | 80.58064514 | <a href="https://www.inaturalist.org/observations/107609851">https://www.inaturalist.org/observations/107609851</a> |
| 719 | Saxicola caprata | Pied Bushchat | 2022/1/16  | 1 | 0 | 16.64452667 | 81.21059000 | <a href="https://www.inaturalist.org/observations/105037402">https://www.inaturalist.org/observations/105037402</a> |
| 720 | Saxicola caprata | Pied Bushchat | 2022/1/16  | 1 | 0 | 16.64452667 | 81.21059000 | <a href="https://www.inaturalist.org/observations/105562419">https://www.inaturalist.org/observations/105562419</a> |
| 721 | Saxicola caprata | Pied Bushchat | 2022/1/16  | 1 | 0 | 16.64452667 | 81.21059000 | <a href="https://www.inaturalist.org/observations/105773707">https://www.inaturalist.org/observations/105773707</a> |
| 722 | Saxicola caprata | Pied Bushchat | 2022/3/9   | 3 | 0 | 16.69133889 | 80.77370278 | <a href="https://www.inaturalist.org/observations/108234214">https://www.inaturalist.org/observations/108234214</a> |
| 723 | Saxicola caprata | Pied Bushchat | 2020/12/25 | 1 | 0 | 16.70478488 | 82.09885838 | <a href="https://www.inaturalist.org/observations/67564508">https://www.inaturalist.org/observations/67564508</a>   |
| 724 | Saxicola caprata | Pied Bushchat | 2021/12/5  | 1 | 0 | 16.70909827 | 82.08616718 | <a href="https://www.inaturalist.org/observations/102914877">https://www.inaturalist.org/observations/102914877</a> |
| 725 | Saxicola caprata | Pied Bushchat | 2020/10/31 | 2 | 0 | 16.71296198 | 82.10797518 | <a href="https://www.inaturalist.org/observations/63935026">https://www.inaturalist.org/observations/63935026</a>   |
| 726 | Saxicola caprata | Pied Bushchat | 2021/10/24 | 1 | 0 | 16.73503224 | 80.65353531 | <a href="https://www.inaturalist.org/observations/99225878">https://www.inaturalist.org/observations/99225878</a>   |
| 727 | Saxicola caprata | Pied Bushchat | 2012/2/10  | 3 | 0 | 16.84320231 | 74.74945978 | <a href="https://www.inaturalist.org/observations/32858381">https://www.inaturalist.org/observations/32858381</a>   |
| 728 | Saxicola caprata | Pied Bushchat | 2019/6/14  | 1 | 0 | 16.88609009 | 75.70935188 | <a href="https://www.inaturalist.org/observations/48659111">https://www.inaturalist.org/observations/48659111</a>   |
| 729 | Saxicola caprata | Pied Bushchat | 2019/6/28  | 1 | 0 | 16.88609009 | 75.70935188 | <a href="https://www.inaturalist.org/observations/48659143">https://www.inaturalist.org/observations/48659143</a>   |
| 730 | Saxicola caprata | Pied Bushchat | 2019/7/2   | 1 | 0 | 16.88609009 | 75.70935188 | <a href="https://www.inaturalist.org/observations/48661841">https://www.inaturalist.org/observations/48661841</a>   |
| 731 | Saxicola caprata | Pied Bushchat | 2019/7/4   | 1 | 0 | 16.88609009 | 75.70935188 | <a href="https://www.inaturalist.org/observations/48661856">https://www.inaturalist.org/observations/48661856</a>   |
| 732 | Saxicola caprata | Pied Bushchat | 2019/7/4   | 1 | 0 | 16.88609009 | 75.70935188 | <a href="https://www.inaturalist.org/observations/48661863">https://www.inaturalist.org/observations/48661863</a>   |
| 733 | Saxicola caprata | Pied Bushchat | 2011/1/11  | 2 | 0 | 16.88650185 | 75.70990551 | <a href="https://www.inaturalist.org/observations/48860234">https://www.inaturalist.org/observations/48860234</a>   |
| 734 | Saxicola caprata | Pied Bushchat | 2020/6/12  | 2 | 0 | 16.88650185 | 75.70990551 | <a href="https://www.inaturalist.org/observations/49323822">https://www.inaturalist.org/observations/49323822</a>   |
| 735 | Saxicola caprata | Pied Bushchat | 2020/10/7  | 1 | 0 | 16.88650185 | 75.70990551 | <a href="https://www.inaturalist.org/observations/61950249">https://www.inaturalist.org/observations/61950249</a>   |

|     |                  |               |            |   |   |             |             |                                                                                                                     |
|-----|------------------|---------------|------------|---|---|-------------|-------------|---------------------------------------------------------------------------------------------------------------------|
| 736 | Saxicola caprata | Pied Bushchat | 2020/6/3   | 1 | 0 | 16.90629269 | 75.80910626 | <a href="https://www.inaturalist.org/observations/48346343">https://www.inaturalist.org/observations/48346343</a>   |
| 737 | Saxicola caprata | Pied Bushchat | 2022/5/3   | 2 | 0 | 16.96518514 | 74.36704253 | <a href="https://www.inaturalist.org/observations/115112429">https://www.inaturalist.org/observations/115112429</a> |
| 738 | Saxicola caprata | Pied Bushchat | 2018/12/24 | 2 | 0 | 16.98752773 | 73.78249004 | <a href="https://www.inaturalist.org/observations/50137068">https://www.inaturalist.org/observations/50137068</a>   |
| 739 | Saxicola caprata | Pied Bushchat | 2021/7/31  | 0 | 0 | 17.18129697 | 78.80309701 | <a href="https://www.inaturalist.org/observations/90162531">https://www.inaturalist.org/observations/90162531</a>   |
| 740 | Saxicola caprata | Pied Bushchat | 2021/3/17  | 4 | 0 | 17.18228129 | 78.21585786 | <a href="https://www.inaturalist.org/observations/71419937">https://www.inaturalist.org/observations/71419937</a>   |
| 741 | Saxicola caprata | Pied Bushchat | 2021/1/23  | 2 | 0 | 17.19044556 | 81.53291389 | <a href="https://www.inaturalist.org/observations/115080131">https://www.inaturalist.org/observations/115080131</a> |
| 742 | Saxicola caprata | Pied Bushchat | 2021/1/23  | 3 | 0 | 17.19076234 | 81.53321464 | <a href="https://www.inaturalist.org/observations/114671669">https://www.inaturalist.org/observations/114671669</a> |
| 743 | Saxicola caprata | Pied Bushchat | 2021/12/26 | 1 | 0 | 17.26193010 | 78.38797100 | <a href="https://www.inaturalist.org/observations/103874555">https://www.inaturalist.org/observations/103874555</a> |
| 744 | Saxicola caprata | Pied Bushchat | 2007/3/5   | 2 | 0 | 17.26783900 | 78.67498300 | <a href="https://www.inaturalist.org/observations/18798164">https://www.inaturalist.org/observations/18798164</a>   |
| 745 | Saxicola caprata | Pied Bushchat | 2007/3/5   | 4 | 0 | 17.26783900 | 78.67498300 | <a href="https://www.inaturalist.org/observations/18798190">https://www.inaturalist.org/observations/18798190</a>   |
| 746 | Saxicola caprata | Pied Bushchat | 2007/3/5   | 4 | 0 | 17.26783900 | 78.67498300 | <a href="https://www.inaturalist.org/observations/30748987">https://www.inaturalist.org/observations/30748987</a>   |
| 747 | Saxicola caprata | Pied Bushchat | 2010/11/6  | 1 | 0 | 17.27769300 | 74.18435350 | <a href="https://www.inaturalist.org/observations/42480924">https://www.inaturalist.org/observations/42480924</a>   |
| 748 | Saxicola caprata | Pied Bushchat | 2010/11/6  | 1 | 0 | 17.27769300 | 74.18435350 | <a href="https://www.inaturalist.org/observations/42480935">https://www.inaturalist.org/observations/42480935</a>   |
| 749 | Saxicola caprata | Pied Bushchat | 2018/9/17  | 1 | 0 | 17.32689501 | 74.76560354 | <a href="https://www.inaturalist.org/observations/38324989">https://www.inaturalist.org/observations/38324989</a>   |
| 750 | Saxicola caprata | Pied Bushchat | 2017/11/29 | 2 | 0 | 17.35983420 | 78.30031695 | <a href="https://www.inaturalist.org/observations/9015611">https://www.inaturalist.org/observations/9015611</a>     |
| 751 | Saxicola caprata | Pied Bushchat | 2017/11/29 | 1 | 0 | 17.36007376 | 78.30117163 | <a href="https://www.inaturalist.org/observations/9015621">https://www.inaturalist.org/observations/9015621</a>     |
| 752 | Saxicola caprata | Pied Bushchat | 2017/11/29 | 2 | 0 | 17.36014926 | 78.30076444 | <a href="https://www.inaturalist.org/observations/9015967">https://www.inaturalist.org/observations/9015967</a>     |
| 753 | Saxicola caprata | Pied Bushchat | 2021/10/17 | 1 | 0 | 17.37595760 | 78.53705600 | <a href="https://www.inaturalist.org/observations/99893685">https://www.inaturalist.org/observations/99893685</a>   |
| 754 | Saxicola caprata | Pied Bushchat | 2021/12/26 | 2 | 0 | 17.37626560 | 78.29886370 | <a href="https://www.inaturalist.org/observations/104753084">https://www.inaturalist.org/observations/104753084</a> |
| 755 | Saxicola caprata | Pied Bushchat | 2021/1/7   | 1 | 0 | 17.38504400 | 78.48667100 | <a href="https://www.inaturalist.org/observations/136820462">https://www.inaturalist.org/observations/136820462</a> |
| 756 | Saxicola caprata | Pied Bushchat | 2022/6/8   | 3 | 0 | 17.38557742 | 78.48667111 | <a href="https://www.inaturalist.org/observations/125718352">https://www.inaturalist.org/observations/125718352</a> |
| 757 | Saxicola caprata | Pied Bushchat | 2022/5/26  | 4 | 0 | 17.38557742 | 78.48667111 | <a href="https://www.inaturalist.org/observations/125718829">https://www.inaturalist.org/observations/125718829</a> |
| 758 | Saxicola caprata | Pied Bushchat | 2022/4/24  | 1 | 0 | 17.38954550 | 78.30578030 | <a href="https://www.inaturalist.org/observations/112814837">https://www.inaturalist.org/observations/112814837</a> |

|     |                         |               |            |   |   |             |             |                                                                                                                     |
|-----|-------------------------|---------------|------------|---|---|-------------|-------------|---------------------------------------------------------------------------------------------------------------------|
| 759 | <i>Saxicola caprata</i> | Pied Bushchat | 2022/4/24  | 3 | 0 | 17.39092960 | 78.32456340 | <a href="https://www.inaturalist.org/observations/112827610">https://www.inaturalist.org/observations/112827610</a> |
| 760 | <i>Saxicola caprata</i> | Pied Bushchat | 2022/4/24  | 4 | 0 | 17.39092960 | 78.32456340 | <a href="https://www.inaturalist.org/observations/112832985">https://www.inaturalist.org/observations/112832985</a> |
| 761 | <i>Saxicola caprata</i> | Pied Bushchat | 2021/9/28  | 2 | 0 | 17.40076557 | 78.32398675 | <a href="https://www.inaturalist.org/observations/97450394">https://www.inaturalist.org/observations/97450394</a>   |
| 762 | <i>Saxicola caprata</i> | Pied Bushchat | 2019/9/24  | 2 | 0 | 17.43520927 | 78.38836670 | <a href="https://www.inaturalist.org/observations/33300542">https://www.inaturalist.org/observations/33300542</a>   |
| 763 | <i>Saxicola caprata</i> | Pied Bushchat | 2018/10/6  | 1 | 0 | 17.46900641 | 78.31548472 | <a href="https://www.inaturalist.org/observations/17303445">https://www.inaturalist.org/observations/17303445</a>   |
| 764 | <i>Saxicola caprata</i> | Pied Bushchat | 2015/9/26  | 1 | 0 | 17.47234720 | 73.89776930 | <a href="https://www.inaturalist.org/observations/56302632">https://www.inaturalist.org/observations/56302632</a>   |
| 765 | <i>Saxicola caprata</i> | Pied Bushchat | 2018/2/4   | 1 | 0 | 17.48097038 | 77.98780823 | <a href="https://www.inaturalist.org/observations/9728849">https://www.inaturalist.org/observations/9728849</a>     |
| 766 | <i>Saxicola caprata</i> | Pied Bushchat | 2021/12/30 | 3 | 0 | 17.48605690 | 78.34653110 | <a href="https://www.inaturalist.org/observations/105424271">https://www.inaturalist.org/observations/105424271</a> |
| 767 | <i>Saxicola caprata</i> | Pied Bushchat | 2022/6/26  | 3 | 0 | 17.49512610 | 78.40060741 | <a href="https://www.inaturalist.org/observations/123702833">https://www.inaturalist.org/observations/123702833</a> |
| 768 | <i>Saxicola caprata</i> | Pied Bushchat | 2021/12/2  | 3 | 0 | 17.51635452 | 78.32887843 | <a href="https://www.inaturalist.org/observations/102399864">https://www.inaturalist.org/observations/102399864</a> |
| 769 | <i>Saxicola caprata</i> | Pied Bushchat | 2020/9/30  | 1 | 0 | 17.51713914 | 78.31574198 | <a href="https://www.inaturalist.org/observations/65020433">https://www.inaturalist.org/observations/65020433</a>   |
| 770 | <i>Saxicola caprata</i> | Pied Bushchat | 2020/8/30  | 2 | 0 | 17.51713914 | 78.31574198 | <a href="https://www.inaturalist.org/observations/65022274">https://www.inaturalist.org/observations/65022274</a>   |
| 771 | <i>Saxicola caprata</i> | Pied Bushchat | 2021/12/7  | 1 | 0 | 17.51809512 | 78.26310799 | <a href="https://www.inaturalist.org/observations/106233186">https://www.inaturalist.org/observations/106233186</a> |
| 772 | <i>Saxicola caprata</i> | Pied Bushchat | 2022/9/6   | 3 | 0 | 17.51809512 | 78.26310799 | <a href="https://www.inaturalist.org/observations/134040712">https://www.inaturalist.org/observations/134040712</a> |
| 773 | <i>Saxicola caprata</i> | Pied Bushchat | 2022/6/26  | 4 | 0 | 17.51969000 | 78.34076000 | <a href="https://www.inaturalist.org/observations/123561490">https://www.inaturalist.org/observations/123561490</a> |
| 774 | <i>Saxicola caprata</i> | Pied Bushchat | 2022/6/26  | 4 | 0 | 17.51969000 | 78.34076000 | <a href="https://www.inaturalist.org/observations/130977563">https://www.inaturalist.org/observations/130977563</a> |
| 775 | <i>Saxicola caprata</i> | Pied Bushchat | 2022/6/26  | 3 | 0 | 17.51976500 | 78.34065500 | <a href="https://www.inaturalist.org/observations/123560635">https://www.inaturalist.org/observations/123560635</a> |
| 776 | <i>Saxicola caprata</i> | Pied Bushchat | 2020/8/3   | 1 | 0 | 17.52246770 | 78.33443850 | <a href="https://www.inaturalist.org/observations/56042901">https://www.inaturalist.org/observations/56042901</a>   |
| 777 | <i>Saxicola caprata</i> | Pied Bushchat | 2019/3/15  | 2 | 0 | 17.52246770 | 78.33443850 | <a href="https://www.inaturalist.org/observations/63626497">https://www.inaturalist.org/observations/63626497</a>   |
| 778 | <i>Saxicola caprata</i> | Pied Bushchat | 2018/10/2  | 3 | 0 | 17.52331813 | 78.33089098 | <a href="https://www.inaturalist.org/observations/17302807">https://www.inaturalist.org/observations/17302807</a>   |
| 779 | <i>Saxicola caprata</i> | Pied Bushchat | 2021/9/26  | 1 | 0 | 17.52600424 | 78.33379035 | <a href="https://www.inaturalist.org/observations/96865037">https://www.inaturalist.org/observations/96865037</a>   |
| 780 | <i>Saxicola caprata</i> | Pied Bushchat | 2020/9/13  | 1 | 0 | 17.53092525 | 78.37444073 | <a href="https://www.inaturalist.org/observations/59553326">https://www.inaturalist.org/observations/59553326</a>   |
| 781 | <i>Saxicola caprata</i> | Pied Bushchat | 2020/9/13  | 2 | 0 | 17.53092525 | 78.37444073 | <a href="https://www.inaturalist.org/observations/59553328">https://www.inaturalist.org/observations/59553328</a>   |

|     |                  |               |            |   |   |             |             |                                                                                                                     |
|-----|------------------|---------------|------------|---|---|-------------|-------------|---------------------------------------------------------------------------------------------------------------------|
| 782 | Saxicola caprata | Pied Bushchat | 2020/10/2  | 1 | 0 | 17.53444098 | 78.37456035 | <a href="https://www.inaturalist.org/observations/61560018">https://www.inaturalist.org/observations/61560018</a>   |
| 783 | Saxicola caprata | Pied Bushchat | 2020/3/10  | 1 | 0 | 17.57122191 | 76.90757765 | <a href="https://www.inaturalist.org/observations/95631474">https://www.inaturalist.org/observations/95631474</a>   |
| 784 | Saxicola caprata | Pied Bushchat | 2020/12/20 | 1 | 0 | 17.63556488 | 74.55682956 | <a href="https://www.inaturalist.org/observations/66877525">https://www.inaturalist.org/observations/66877525</a>   |
| 785 | Saxicola caprata | Pied Bushchat | 2021/12/19 | 3 | 0 | 17.64074333 | 78.06650167 | <a href="https://www.inaturalist.org/observations/121718497">https://www.inaturalist.org/observations/121718497</a> |
| 786 | Saxicola caprata | Pied Bushchat | 2021/12/19 | 3 | 0 | 17.64084000 | 78.06896000 | <a href="https://www.inaturalist.org/observations/121718380">https://www.inaturalist.org/observations/121718380</a> |
| 787 | Saxicola caprata | Pied Bushchat | 2020/2/2   | 1 | 0 | 17.68045874 | 74.01826110 | <a href="https://www.inaturalist.org/observations/66400765">https://www.inaturalist.org/observations/66400765</a>   |
| 788 | Saxicola caprata | Pied Bushchat | 2020/12/5  | 3 | 0 | 17.68046390 | 74.01826100 | <a href="https://www.inaturalist.org/observations/69193920">https://www.inaturalist.org/observations/69193920</a>   |
| 789 | Saxicola caprata | Pied Bushchat | 2020/11/17 | 1 | 0 | 17.68046390 | 74.01826100 | <a href="https://www.inaturalist.org/observations/70883119">https://www.inaturalist.org/observations/70883119</a>   |
| 790 | Saxicola caprata | Pied Bushchat | 2020/11/17 | 1 | 0 | 17.68046390 | 74.01826100 | <a href="https://www.inaturalist.org/observations/105498722">https://www.inaturalist.org/observations/105498722</a> |
| 791 | Saxicola caprata | Pied Bushchat | 2020/11/17 | 1 | 0 | 17.68046390 | 74.01826100 | <a href="https://www.inaturalist.org/observations/105498724">https://www.inaturalist.org/observations/105498724</a> |
| 792 | Saxicola caprata | Pied Bushchat | 2020/11/27 | 1 | 0 | 17.68046390 | 74.01826100 | <a href="https://www.inaturalist.org/observations/105500069">https://www.inaturalist.org/observations/105500069</a> |
| 793 | Saxicola caprata | Pied Bushchat | 2020/12/1  | 2 | 0 | 17.68046390 | 74.01826100 | <a href="https://www.inaturalist.org/observations/105500980">https://www.inaturalist.org/observations/105500980</a> |
| 794 | Saxicola caprata | Pied Bushchat | 2019/10/4  | 2 | 0 | 17.68046390 | 74.01826100 | <a href="https://www.inaturalist.org/observations/105501471">https://www.inaturalist.org/observations/105501471</a> |
| 795 | Saxicola caprata | Pied Bushchat | 2020/12/12 | 2 | 0 | 17.68046390 | 74.01826100 | <a href="https://www.inaturalist.org/observations/105501497">https://www.inaturalist.org/observations/105501497</a> |
| 796 | Saxicola caprata | Pied Bushchat | 2020/12/12 | 3 | 0 | 17.68046390 | 74.01826100 | <a href="https://www.inaturalist.org/observations/105501564">https://www.inaturalist.org/observations/105501564</a> |
| 797 | Saxicola caprata | Pied Bushchat | 2021/12/12 | 4 | 0 | 17.68661679 | 78.32732443 | <a href="https://www.inaturalist.org/observations/104444305">https://www.inaturalist.org/observations/104444305</a> |
| 798 | Saxicola caprata | Pied Bushchat | 2020/5/10  | 2 | 0 | 17.70110130 | 73.97914886 | <a href="https://www.inaturalist.org/observations/45451561">https://www.inaturalist.org/observations/45451561</a>   |
| 799 | Saxicola caprata | Pied Bushchat | 2019/9/28  | 3 | 0 | 17.72083140 | 73.82371590 | <a href="https://www.inaturalist.org/observations/56509284">https://www.inaturalist.org/observations/56509284</a>   |
| 800 | Saxicola caprata | Pied Bushchat | 2019/9/28  | 3 | 0 | 17.72083140 | 73.82371590 | <a href="https://www.inaturalist.org/observations/56509286">https://www.inaturalist.org/observations/56509286</a>   |
| 801 | Saxicola caprata | Pied Bushchat | 2011/9/29  | 1 | 0 | 17.72083140 | 73.82371590 | <a href="https://www.inaturalist.org/observations/59152708">https://www.inaturalist.org/observations/59152708</a>   |
| 802 | Saxicola caprata | Pied Bushchat | 2021/10/27 | 2 | 0 | 17.72429807 | 73.83958562 | <a href="https://www.inaturalist.org/observations/99767518">https://www.inaturalist.org/observations/99767518</a>   |
| 803 | Saxicola caprata | Pied Bushchat | 2020/12/23 | 1 | 0 | 17.76913300 | 73.74210180 | <a href="https://www.inaturalist.org/observations/68050045">https://www.inaturalist.org/observations/68050045</a>   |
| 804 | Saxicola caprata | Pied Bushchat | 2017/10/27 | 2 | 0 | 17.81758969 | 75.88472630 | <a href="https://www.inaturalist.org/observations/65020758">https://www.inaturalist.org/observations/65020758</a>   |

|     |                  |               |            |   |   |             |             |                                                                                                                     |
|-----|------------------|---------------|------------|---|---|-------------|-------------|---------------------------------------------------------------------------------------------------------------------|
| 805 | Saxicola caprata | Pied Bushchat | 2021/12/31 | 1 | 0 | 17.93072850 | 73.64773420 | <a href="https://www.inaturalist.org/observations/104321919">https://www.inaturalist.org/observations/104321919</a> |
| 806 | Saxicola caprata | Pied Bushchat | 2022/3/25  | 3 | 0 | 17.93220810 | 73.66704940 | <a href="https://www.inaturalist.org/observations/109997500">https://www.inaturalist.org/observations/109997500</a> |
| 807 | Saxicola caprata | Pied Bushchat | 2014/2/22  | 3 | 0 | 18.05515806 | 73.01371926 | <a href="https://www.inaturalist.org/observations/59949850">https://www.inaturalist.org/observations/59949850</a>   |
| 808 | Saxicola caprata | Pied Bushchat | 2022/9/22  | 1 | 0 | 18.10878346 | 74.77388783 | <a href="https://www.inaturalist.org/observations/136925527">https://www.inaturalist.org/observations/136925527</a> |
| 809 | Saxicola caprata | Pied Bushchat | 2022/9/22  | 1 | 0 | 18.10878346 | 74.77388783 | <a href="https://www.inaturalist.org/observations/136925530">https://www.inaturalist.org/observations/136925530</a> |
| 810 | Saxicola caprata | Pied Bushchat | 2022/9/22  | 0 | 0 | 18.10878346 | 74.77388783 | <a href="https://www.inaturalist.org/observations/136925533">https://www.inaturalist.org/observations/136925533</a> |
| 811 | Saxicola caprata | Pied Bushchat | 2022/5/1   | 1 | 0 | 18.14259860 | 73.79051500 | <a href="https://www.inaturalist.org/observations/114555844">https://www.inaturalist.org/observations/114555844</a> |
| 812 | Saxicola caprata | Pied Bushchat | 2018/10/24 | 1 | 0 | 18.14531971 | 73.79375987 | <a href="https://www.inaturalist.org/observations/91538998">https://www.inaturalist.org/observations/91538998</a>   |
| 813 | Saxicola caprata | Pied Bushchat | 2020/12/1  | 2 | 0 | 18.14532863 | 73.79362140 | <a href="https://www.inaturalist.org/observations/65998779">https://www.inaturalist.org/observations/65998779</a>   |
| 814 | Saxicola caprata | Pied Bushchat | 2020/11/15 | 2 | 0 | 18.15435632 | 74.59262431 | <a href="https://www.inaturalist.org/observations/66828846">https://www.inaturalist.org/observations/66828846</a>   |
| 815 | Saxicola caprata | Pied Bushchat | 2020/9/22  | 3 | 0 | 18.17917625 | 74.60779689 | <a href="https://www.inaturalist.org/observations/63369106">https://www.inaturalist.org/observations/63369106</a>   |
| 816 | Saxicola caprata | Pied Bushchat | 2018/9/1   | 1 | 0 | 18.24734639 | 74.79797139 | <a href="https://www.inaturalist.org/observations/54156155">https://www.inaturalist.org/observations/54156155</a>   |
| 817 | Saxicola caprata | Pied Bushchat | 2019/1/8   | 3 | 0 | 18.26338600 | 74.80422700 | <a href="https://www.inaturalist.org/observations/20424185">https://www.inaturalist.org/observations/20424185</a>   |
| 818 | Saxicola caprata | Pied Bushchat | 2020/2/22  | 0 | 0 | 18.26338600 | 74.80422700 | <a href="https://www.inaturalist.org/observations/39575309">https://www.inaturalist.org/observations/39575309</a>   |
| 819 | Saxicola caprata | Pied Bushchat | 2020/2/22  | 1 | 0 | 18.26338600 | 74.80422700 | <a href="https://www.inaturalist.org/observations/39575331">https://www.inaturalist.org/observations/39575331</a>   |
| 820 | Saxicola caprata | Pied Bushchat | 2020/12/14 | 2 | 0 | 18.26552353 | 74.80328882 | <a href="https://www.inaturalist.org/observations/67035217">https://www.inaturalist.org/observations/67035217</a>   |
| 821 | Saxicola caprata | Pied Bushchat | 2020/12/14 | 1 | 0 | 18.26552353 | 74.80328882 | <a href="https://www.inaturalist.org/observations/67035220">https://www.inaturalist.org/observations/67035220</a>   |
| 822 | Saxicola caprata | Pied Bushchat | 2020/12/15 | 2 | 0 | 18.26552353 | 74.80328882 | <a href="https://www.inaturalist.org/observations/67035257">https://www.inaturalist.org/observations/67035257</a>   |
| 823 | Saxicola caprata | Pied Bushchat | 2013/12/8  | 4 | 0 | 18.26648887 | 74.80910346 | <a href="https://www.inaturalist.org/observations/130751128">https://www.inaturalist.org/observations/130751128</a> |
| 824 | Saxicola caprata | Pied Bushchat | 2015/1/11  | 4 | 0 | 18.26648887 | 74.80910346 | <a href="https://www.inaturalist.org/observations/130754478">https://www.inaturalist.org/observations/130754478</a> |
| 825 | Saxicola caprata | Pied Bushchat | 2015/1/11  | 2 | 0 | 18.26648887 | 74.80910346 | <a href="https://www.inaturalist.org/observations/130758341">https://www.inaturalist.org/observations/130758341</a> |
| 826 | Saxicola caprata | Pied Bushchat | 2018/7/22  | 1 | 0 | 18.26707472 | 74.77580306 | <a href="https://www.inaturalist.org/observations/54385541">https://www.inaturalist.org/observations/54385541</a>   |
| 827 | Saxicola caprata | Pied Bushchat | 2018/12/6  | 1 | 0 | 18.27118812 | 74.79516707 | <a href="https://www.inaturalist.org/observations/56310409">https://www.inaturalist.org/observations/56310409</a>   |

|     |                         |               |            |   |   |             |             |                                                                                                                     |
|-----|-------------------------|---------------|------------|---|---|-------------|-------------|---------------------------------------------------------------------------------------------------------------------|
| 828 | <i>Saxicola caprata</i> | Pied Bushchat | 2018/12/6  | 1 | 0 | 18.27118812 | 74.79516707 | <a href="https://www.inaturalist.org/observations/56310415">https://www.inaturalist.org/observations/56310415</a>   |
| 829 | <i>Saxicola caprata</i> | Pied Bushchat | 2021/9/27  | 2 | 0 | 18.27204390 | 74.79507051 | <a href="https://www.inaturalist.org/observations/98583795">https://www.inaturalist.org/observations/98583795</a>   |
| 830 | <i>Saxicola caprata</i> | Pied Bushchat | 2021/1/13  | 2 | 0 | 18.27264780 | 74.32062080 | <a href="https://www.inaturalist.org/observations/70932614">https://www.inaturalist.org/observations/70932614</a>   |
| 831 | <i>Saxicola caprata</i> | Pied Bushchat | 2021/6/24  | 2 | 0 | 18.27809970 | 74.16121940 | <a href="https://www.inaturalist.org/observations/85194601">https://www.inaturalist.org/observations/85194601</a>   |
| 832 | <i>Saxicola caprata</i> | Pied Bushchat | 2016/2/28  | 3 | 0 | 18.27891820 | 74.78029550 | <a href="https://www.inaturalist.org/observations/55494620">https://www.inaturalist.org/observations/55494620</a>   |
| 833 | <i>Saxicola caprata</i> | Pied Bushchat | 2021/12/19 | 2 | 0 | 18.28021430 | 74.84436035 | <a href="https://www.inaturalist.org/observations/103907947">https://www.inaturalist.org/observations/103907947</a> |
| 834 | <i>Saxicola caprata</i> | Pied Bushchat | 2018/12/2  | 2 | 0 | 18.28336991 | 74.78678972 | <a href="https://www.inaturalist.org/observations/18889540">https://www.inaturalist.org/observations/18889540</a>   |
| 835 | <i>Saxicola caprata</i> | Pied Bushchat | 2018/9/25  | 2 | 0 | 18.28349639 | 74.80900306 | <a href="https://www.inaturalist.org/observations/54252294">https://www.inaturalist.org/observations/54252294</a>   |
| 836 | <i>Saxicola caprata</i> | Pied Bushchat | 2018/12/2  | 4 | 0 | 18.28446043 | 74.78481734 | <a href="https://www.inaturalist.org/observations/19439846">https://www.inaturalist.org/observations/19439846</a>   |
| 837 | <i>Saxicola caprata</i> | Pied Bushchat | 2020/2/4   | 2 | 0 | 18.29125861 | 74.77466995 | <a href="https://www.inaturalist.org/observations/66731981">https://www.inaturalist.org/observations/66731981</a>   |
| 838 | <i>Saxicola caprata</i> | Pied Bushchat | 2014/5/1   | 1 | 0 | 18.29158270 | 74.77408000 | <a href="https://www.inaturalist.org/observations/57547865">https://www.inaturalist.org/observations/57547865</a>   |
| 839 | <i>Saxicola caprata</i> | Pied Bushchat | 2014/5/1   | 1 | 0 | 18.29158270 | 74.77408000 | <a href="https://www.inaturalist.org/observations/57547902">https://www.inaturalist.org/observations/57547902</a>   |
| 840 | <i>Saxicola caprata</i> | Pied Bushchat | 2014/5/1   | 1 | 0 | 18.29158270 | 74.77408000 | <a href="https://www.inaturalist.org/observations/57547946">https://www.inaturalist.org/observations/57547946</a>   |
| 841 | <i>Saxicola caprata</i> | Pied Bushchat | 2022/1/23  | 3 | 0 | 18.29160200 | 74.77386740 | <a href="https://www.inaturalist.org/observations/110736954">https://www.inaturalist.org/observations/110736954</a> |
| 842 | <i>Saxicola caprata</i> | Pied Bushchat | 2022/1/23  | 3 | 0 | 18.29160200 | 74.77386740 | <a href="https://www.inaturalist.org/observations/110736957">https://www.inaturalist.org/observations/110736957</a> |
| 843 | <i>Saxicola caprata</i> | Pied Bushchat | 2022/1/23  | 3 | 0 | 18.29160200 | 74.77386740 | <a href="https://www.inaturalist.org/observations/110736958">https://www.inaturalist.org/observations/110736958</a> |
| 844 | <i>Saxicola caprata</i> | Pied Bushchat | 2020/1/19  | 2 | 0 | 18.29176030 | 74.77320070 | <a href="https://www.inaturalist.org/observations/37806562">https://www.inaturalist.org/observations/37806562</a>   |
| 845 | <i>Saxicola caprata</i> | Pied Bushchat | 2016/2/21  | 1 | 0 | 18.29467470 | 73.42116950 | <a href="https://www.inaturalist.org/observations/46988683">https://www.inaturalist.org/observations/46988683</a>   |
| 846 | <i>Saxicola caprata</i> | Pied Bushchat | 2007/11/17 | 1 | 0 | 18.29846097 | 74.76211123 | <a href="https://www.inaturalist.org/observations/44451383">https://www.inaturalist.org/observations/44451383</a>   |
| 847 | <i>Saxicola caprata</i> | Pied Bushchat | 2010/1/24  | 2 | 0 | 18.29894780 | 74.75425710 | <a href="https://www.inaturalist.org/observations/55140238">https://www.inaturalist.org/observations/55140238</a>   |
| 848 | <i>Saxicola caprata</i> | Pied Bushchat | 2010/1/24  | 2 | 0 | 18.29894780 | 74.75425710 | <a href="https://www.inaturalist.org/observations/55140240">https://www.inaturalist.org/observations/55140240</a>   |
| 849 | <i>Saxicola caprata</i> | Pied Bushchat | 2021/1/28  | 2 | 0 | 18.33481840 | 73.67215150 | <a href="https://www.inaturalist.org/observations/70931517">https://www.inaturalist.org/observations/70931517</a>   |
| 850 | <i>Saxicola caprata</i> | Pied Bushchat | 2019/12/15 | 3 | 0 | 18.34631280 | 74.03018260 | <a href="https://www.inaturalist.org/observations/38710230">https://www.inaturalist.org/observations/38710230</a>   |



|     |                         |               |            |   |   |             |             |                                                                                                                     |
|-----|-------------------------|---------------|------------|---|---|-------------|-------------|---------------------------------------------------------------------------------------------------------------------|
| 851 | <i>Saxicola caprata</i> | Pied Bushchat | 2019/12/15 | 3 | 0 | 18.34631280 | 74.03018260 | <a href="https://www.inaturalist.org/observations/38710448">https://www.inaturalist.org/observations/38710448</a>   |
| 852 | <i>Saxicola caprata</i> | Pied Bushchat | 2016/8/13  | 2 | 0 | 18.34631300 | 74.03018300 | <a href="https://www.inaturalist.org/observations/19729894">https://www.inaturalist.org/observations/19729894</a>   |
| 853 | <i>Saxicola caprata</i> | Pied Bushchat | 2020/10/6  | 1 | 0 | 18.34721206 | 75.97409271 | <a href="https://www.inaturalist.org/observations/62018259">https://www.inaturalist.org/observations/62018259</a>   |
| 854 | <i>Saxicola caprata</i> | Pied Bushchat | 2013/9/22  | 2 | 0 | 18.35154150 | 74.36754460 | <a href="https://www.inaturalist.org/observations/123544850">https://www.inaturalist.org/observations/123544850</a> |
| 855 | <i>Saxicola caprata</i> | Pied Bushchat | 2021/8/31  | 3 | 0 | 18.35314970 | 73.62400150 | <a href="https://www.inaturalist.org/observations/93446482">https://www.inaturalist.org/observations/93446482</a>   |
| 856 | <i>Saxicola caprata</i> | Pied Bushchat | 2016/2/12  | 3 | 0 | 18.35650300 | 73.75072800 | <a href="http://www.inaturalist.org/observations/2708019">http://www.inaturalist.org/observations/2708019</a>       |
| 857 | <i>Saxicola caprata</i> | Pied Bushchat | 2021/11/11 | 1 | 0 | 18.36097349 | 75.96756890 | <a href="https://www.inaturalist.org/observations/101169570">https://www.inaturalist.org/observations/101169570</a> |
| 858 | <i>Saxicola caprata</i> | Pied Bushchat | 2012/1/1   | 1 | 0 | 18.36627697 | 73.75587769 | <a href="https://www.inaturalist.org/observations/79624477">https://www.inaturalist.org/observations/79624477</a>   |
| 859 | <i>Saxicola caprata</i> | Pied Bushchat | 2015/2/1   | 2 | 0 | 18.37499735 | 73.76974406 | <a href="https://www.inaturalist.org/observations/130217403">https://www.inaturalist.org/observations/130217403</a> |
| 860 | <i>Saxicola caprata</i> | Pied Bushchat | 2019/2/3   | 2 | 0 | 18.37586280 | 73.76916470 | <a href="https://www.inaturalist.org/observations/44359041">https://www.inaturalist.org/observations/44359041</a>   |
| 861 | <i>Saxicola caprata</i> | Pied Bushchat | 2019/2/3   | 1 | 0 | 18.37586280 | 73.76916470 | <a href="https://www.inaturalist.org/observations/67006092">https://www.inaturalist.org/observations/67006092</a>   |
| 862 | <i>Saxicola caprata</i> | Pied Bushchat | 2016/3/12  | 2 | 0 | 18.37723776 | 73.76497539 | <a href="https://www.inaturalist.org/observations/47967895">https://www.inaturalist.org/observations/47967895</a>   |
| 863 | <i>Saxicola caprata</i> | Pied Bushchat | 2016/2/14  | 1 | 0 | 18.39146079 | 74.16687855 | <a href="https://www.inaturalist.org/observations/48557224">https://www.inaturalist.org/observations/48557224</a>   |
| 864 | <i>Saxicola caprata</i> | Pied Bushchat | 2016/2/14  | 2 | 0 | 18.39146079 | 74.16687855 | <a href="https://www.inaturalist.org/observations/48557230">https://www.inaturalist.org/observations/48557230</a>   |
| 865 | <i>Saxicola caprata</i> | Pied Bushchat | 2022/3/26  | 2 | 0 | 18.39218717 | 73.76406763 | <a href="https://www.inaturalist.org/observations/110485217">https://www.inaturalist.org/observations/110485217</a> |
| 866 | <i>Saxicola caprata</i> | Pied Bushchat | 2021/8/11  | 2 | 0 | 18.39676460 | 74.12619820 | <a href="https://www.inaturalist.org/observations/92210967">https://www.inaturalist.org/observations/92210967</a>   |
| 867 | <i>Saxicola caprata</i> | Pied Bushchat | 2022/5/27  | 1 | 0 | 18.43672500 | 79.86881111 | <a href="https://www.inaturalist.org/observations/118876731">https://www.inaturalist.org/observations/118876731</a> |
| 868 | <i>Saxicola caprata</i> | Pied Bushchat | 2017/1/8   | 4 | 0 | 18.44690320 | 73.43054390 | <a href="https://www.inaturalist.org/observations/19696505">https://www.inaturalist.org/observations/19696505</a>   |
| 869 | <i>Saxicola caprata</i> | Pied Bushchat | 2017/10/29 | 1 | 0 | 18.45095211 | 73.77890110 | <a href="https://www.inaturalist.org/observations/8601142">https://www.inaturalist.org/observations/8601142</a>     |
| 870 | <i>Saxicola caprata</i> | Pied Bushchat | 2017/11/5  | 2 | 0 | 18.45775043 | 73.78031731 | <a href="https://www.inaturalist.org/observations/8705775">https://www.inaturalist.org/observations/8705775</a>     |
| 871 | <i>Saxicola caprata</i> | Pied Bushchat | 2020/9/12  | 3 | 0 | 18.46348797 | 73.92355004 | <a href="https://www.inaturalist.org/observations/59414744">https://www.inaturalist.org/observations/59414744</a>   |
| 872 | <i>Saxicola caprata</i> | Pied Bushchat | 2020/9/12  | 4 | 0 | 18.46446471 | 73.92570468 | <a href="https://www.inaturalist.org/observations/59416722">https://www.inaturalist.org/observations/59416722</a>   |
| 873 | <i>Saxicola caprata</i> | Pied Bushchat | 2016/1/20  | 3 | 0 | 18.48076681 | 73.83236289 | <a href="http://www.inaturalist.org/observations/3735718">http://www.inaturalist.org/observations/3735718</a>       |

|     |                  |               |            |   |   |             |             |                                                                                                                     |
|-----|------------------|---------------|------------|---|---|-------------|-------------|---------------------------------------------------------------------------------------------------------------------|
| 874 | Saxicola caprata | Pied Bushchat | 2016/5/23  | 3 | 0 | 18.48197100 | 73.84700600 | <a href="http://www.inaturalist.org/observations/3923328">http://www.inaturalist.org/observations/3923328</a>       |
| 875 | Saxicola caprata | Pied Bushchat | 2015/11/28 | 3 | 0 | 18.48197320 | 73.82793810 | <a href="http://www.inaturalist.org/observations/4007911">http://www.inaturalist.org/observations/4007911</a>       |
| 876 | Saxicola caprata | Pied Bushchat | 2017/11/6  | 2 | 0 | 18.48364500 | 73.82569139 | <a href="https://www.inaturalist.org/observations/55241918">https://www.inaturalist.org/observations/55241918</a>   |
| 877 | Saxicola caprata | Pied Bushchat | 2017/11/6  | 2 | 0 | 18.48366639 | 73.82571639 | <a href="https://www.inaturalist.org/observations/55241920">https://www.inaturalist.org/observations/55241920</a>   |
| 878 | Saxicola caprata | Pied Bushchat | 2016/2/28  | 1 | 0 | 18.49566749 | 74.02579357 | <a href="https://www.inaturalist.org/observations/49103531">https://www.inaturalist.org/observations/49103531</a>   |
| 879 | Saxicola caprata | Pied Bushchat | 2014/2/7   | 2 | 0 | 18.50235630 | 73.82433310 | <a href="https://www.inaturalist.org/observations/44109332">https://www.inaturalist.org/observations/44109332</a>   |
| 880 | Saxicola caprata | Pied Bushchat | 2014/1/5   | 4 | 0 | 18.50528910 | 74.00017300 | <a href="https://www.inaturalist.org/observations/41029781">https://www.inaturalist.org/observations/41029781</a>   |
| 881 | Saxicola caprata | Pied Bushchat | 2019/6/15  | 1 | 0 | 18.51431331 | 73.80423799 | <a href="https://www.inaturalist.org/observations/67776953">https://www.inaturalist.org/observations/67776953</a>   |
| 882 | Saxicola caprata | Pied Bushchat | 2019/12/11 | 2 | 0 | 18.54535828 | 73.80718030 | <a href="https://www.inaturalist.org/observations/36591407">https://www.inaturalist.org/observations/36591407</a>   |
| 883 | Saxicola caprata | Pied Bushchat | 2017/5/9   | 1 | 0 | 18.57902320 | 73.78599120 | <a href="https://www.inaturalist.org/observations/24721110">https://www.inaturalist.org/observations/24721110</a>   |
| 884 | Saxicola caprata | Pied Bushchat | 2022/8/12  | 2 | 0 | 18.57979200 | 73.78994900 | <a href="https://www.inaturalist.org/observations/130467766">https://www.inaturalist.org/observations/130467766</a> |
| 885 | Saxicola caprata | Pied Bushchat | 2018/10/23 | 2 | 0 | 18.59474973 | 73.80712196 | <a href="https://www.inaturalist.org/observations/17800677">https://www.inaturalist.org/observations/17800677</a>   |
| 886 | Saxicola caprata | Pied Bushchat | 2020/1/14  | 1 | 0 | 18.62066316 | 73.73172717 | <a href="https://www.inaturalist.org/observations/37706386">https://www.inaturalist.org/observations/37706386</a>   |
| 887 | Saxicola caprata | Pied Bushchat | 2020/1/14  | 1 | 0 | 18.62066316 | 73.73172717 | <a href="https://www.inaturalist.org/observations/37706387">https://www.inaturalist.org/observations/37706387</a>   |
| 888 | Saxicola caprata | Pied Bushchat | 2021/1/31  | 3 | 0 | 18.62312426 | 73.65888197 | <a href="https://www.inaturalist.org/observations/68860845">https://www.inaturalist.org/observations/68860845</a>   |
| 889 | Saxicola caprata | Pied Bushchat | 2020/10/5  | 4 | 0 | 18.69566917 | 76.94744108 | <a href="https://www.inaturalist.org/observations/62770697">https://www.inaturalist.org/observations/62770697</a>   |
| 890 | Saxicola caprata | Pied Bushchat | 2020/10/1  | 5 | 0 | 18.69597379 | 76.94676932 | <a href="https://www.inaturalist.org/observations/61374542">https://www.inaturalist.org/observations/61374542</a>   |
| 891 | Saxicola caprata | Pied Bushchat | 2019/5/25  | 2 | 0 | 18.70122800 | 73.38855300 | <a href="https://www.inaturalist.org/observations/40509340">https://www.inaturalist.org/observations/40509340</a>   |
| 892 | Saxicola caprata | Pied Bushchat | 2020/1/3   | 1 | 0 | 18.70122800 | 73.38855300 | <a href="https://www.inaturalist.org/observations/65515644">https://www.inaturalist.org/observations/65515644</a>   |
| 893 | Saxicola caprata | Pied Bushchat | 2014/10/5  | 1 | 0 | 18.75521050 | 73.44453920 | <a href="https://www.inaturalist.org/observations/77436739">https://www.inaturalist.org/observations/77436739</a>   |
| 894 | Saxicola caprata | Pied Bushchat | 2013/12/21 | 2 | 0 | 18.87723460 | 72.92833910 | <a href="https://www.inaturalist.org/observations/55363629">https://www.inaturalist.org/observations/55363629</a>   |
| 895 | Saxicola caprata | Pied Bushchat | 2016/10/23 | 4 | 0 | 18.89992803 | 72.95202702 | <a href="https://www.inaturalist.org/observations/64249312">https://www.inaturalist.org/observations/64249312</a>   |
| 896 | Saxicola caprata | Pied Bushchat | 2016/10/23 | 2 | 0 | 18.89992803 | 72.95202702 | <a href="https://www.inaturalist.org/observations/100309308">https://www.inaturalist.org/observations/100309308</a> |

|     |                  |               |            |   |   |             |             |                                                                                                                     |
|-----|------------------|---------------|------------|---|---|-------------|-------------|---------------------------------------------------------------------------------------------------------------------|
| 897 | Saxicola caprata | Pied Bushchat | 2020/2/21  | 1 | 0 | 18.91921965 | 81.83882955 | <a href="https://www.inaturalist.org/observations/45142373">https://www.inaturalist.org/observations/45142373</a>   |
| 898 | Saxicola caprata | Pied Bushchat | 2022/6/22  | 3 | 0 | 18.97138500 | 77.91823667 | <a href="https://www.inaturalist.org/observations/125626917">https://www.inaturalist.org/observations/125626917</a> |
| 899 | Saxicola caprata | Pied Bushchat | 2020/10/27 | 3 | 0 | 18.98733182 | 75.72798863 | <a href="https://www.inaturalist.org/observations/63628579">https://www.inaturalist.org/observations/63628579</a>   |
| 900 | Saxicola caprata | Pied Bushchat | 2022/6/20  | 3 | 0 | 19.02831833 | 77.95107500 | <a href="https://www.inaturalist.org/observations/122672949">https://www.inaturalist.org/observations/122672949</a> |
| 901 | Saxicola caprata | Pied Bushchat | 2016/11/6  | 1 | 0 | 19.14190551 | 72.96462838 | <a href="https://www.inaturalist.org/observations/100660099">https://www.inaturalist.org/observations/100660099</a> |
| 902 | Saxicola caprata | Pied Bushchat | 2018/4/14  | 1 | 0 | 19.14192483 | 72.96462536 | <a href="https://www.inaturalist.org/observations/56201366">https://www.inaturalist.org/observations/56201366</a>   |
| 903 | Saxicola caprata | Pied Bushchat | 2022/2/27  | 4 | 0 | 19.14807340 | 73.52112860 | <a href="https://www.inaturalist.org/observations/107621621">https://www.inaturalist.org/observations/107621621</a> |
| 904 | Saxicola caprata | Pied Bushchat | 2022/2/27  | 3 | 0 | 19.14807340 | 73.52112860 | <a href="https://www.inaturalist.org/observations/107621623">https://www.inaturalist.org/observations/107621623</a> |
| 905 | Saxicola caprata | Pied Bushchat | 2022/2/27  | 3 | 0 | 19.14807340 | 73.52112860 | <a href="https://www.inaturalist.org/observations/107621628">https://www.inaturalist.org/observations/107621628</a> |
| 906 | Saxicola caprata | Pied Bushchat | 2020/8/24  | 2 | 0 | 19.17448900 | 73.22511460 | <a href="https://www.inaturalist.org/observations/57506140">https://www.inaturalist.org/observations/57506140</a>   |
| 907 | Saxicola caprata | Pied Bushchat | 2020/12/20 | 2 | 0 | 19.26604640 | 72.98454980 | <a href="https://www.inaturalist.org/observations/66815934">https://www.inaturalist.org/observations/66815934</a>   |
| 908 | Saxicola caprata | Pied Bushchat | 2019/8/18  | 3 | 0 | 19.29357167 | 84.87265500 | <a href="https://www.inaturalist.org/observations/35540154">https://www.inaturalist.org/observations/35540154</a>   |
| 909 | Saxicola caprata | Pied Bushchat | 2022/3/19  | 3 | 0 | 19.31763158 | 84.82649725 | <a href="https://www.inaturalist.org/observations/108965638">https://www.inaturalist.org/observations/108965638</a> |
| 910 | Saxicola caprata | Pied Bushchat | 2017/12/31 | 4 | 0 | 19.38246770 | 72.77177750 | <a href="https://www.inaturalist.org/observations/30818358">https://www.inaturalist.org/observations/30818358</a>   |
| 911 | Saxicola caprata | Pied Bushchat | 2017/10/8  | 2 | 0 | 19.38246770 | 72.77177750 | <a href="https://www.inaturalist.org/observations/42584117">https://www.inaturalist.org/observations/42584117</a>   |
| 912 | Saxicola caprata | Pied Bushchat | 2017/12/31 | 2 | 0 | 19.38788000 | 72.76083246 | <a href="https://www.inaturalist.org/observations/72491150">https://www.inaturalist.org/observations/72491150</a>   |
| 913 | Saxicola caprata | Pied Bushchat | 2021/12/12 | 3 | 0 | 19.45807790 | 72.80483540 | <a href="https://www.inaturalist.org/observations/130360148">https://www.inaturalist.org/observations/130360148</a> |
| 914 | Saxicola caprata | Pied Bushchat | 2020/12/6  | 3 | 0 | 19.45968116 | 72.79629730 | <a href="https://www.inaturalist.org/observations/66369574">https://www.inaturalist.org/observations/66369574</a>   |
| 915 | Saxicola caprata | Pied Bushchat | 2020/12/29 | 3 | 0 | 19.57092419 | 75.29372222 | <a href="https://www.inaturalist.org/observations/107760558">https://www.inaturalist.org/observations/107760558</a> |
| 916 | Saxicola caprata | Pied Bushchat | 2021/1/3   | 2 | 0 | 19.68652794 | 75.48487971 | <a href="https://www.inaturalist.org/observations/108092138">https://www.inaturalist.org/observations/108092138</a> |
| 917 | Saxicola caprata | Pied Bushchat | 2013/3/5   | 2 | 0 | 19.80419430 | 72.74955380 | <a href="https://www.inaturalist.org/observations/32856526">https://www.inaturalist.org/observations/32856526</a>   |
| 918 | Saxicola caprata | Pied Bushchat | 2022/4/20  | 0 | 0 | 19.97584870 | 73.79810650 | <a href="https://www.inaturalist.org/observations/112136718">https://www.inaturalist.org/observations/112136718</a> |
| 919 | Saxicola caprata | Pied Bushchat | 2019/1/12  | 1 | 0 | 19.99745330 | 73.78980230 | <a href="https://www.inaturalist.org/observations/56498509">https://www.inaturalist.org/observations/56498509</a>   |

|     |                  |               |            |   |   |             |             |                                                                                                                     |
|-----|------------------|---------------|------------|---|---|-------------|-------------|---------------------------------------------------------------------------------------------------------------------|
| 920 | Saxicola caprata | Pied Bushchat | 2018/12/18 | 2 | 0 | 20.00773333 | 74.10435333 | <a href="https://www.inaturalist.org/observations/24757621">https://www.inaturalist.org/observations/24757621</a>   |
| 921 | Saxicola caprata | Pied Bushchat | 2014/10/31 | 5 | 0 | 20.24838270 | 79.36068900 | <a href="https://www.inaturalist.org/observations/126320279">https://www.inaturalist.org/observations/126320279</a> |
| 922 | Saxicola caprata | Pied Bushchat | 2021/11/22 | 2 | 0 | 20.26377919 | 79.01825812 | <a href="https://www.inaturalist.org/observations/101683622">https://www.inaturalist.org/observations/101683622</a> |
| 923 | Saxicola caprata | Pied Bushchat | 2016/2/15  | 3 | 0 | 20.37617048 | 79.34669495 | <a href="https://www.inaturalist.org/observations/7699493">https://www.inaturalist.org/observations/7699493</a>     |
| 924 | Saxicola caprata | Pied Bushchat | 2016/12/19 | 2 | 0 | 20.39839637 | 85.83018917 | <a href="https://www.inaturalist.org/observations/110266624">https://www.inaturalist.org/observations/110266624</a> |
| 925 | Saxicola caprata | Pied Bushchat | 2021/3/5   | 1 | 0 | 20.61190277 | 81.60351757 | <a href="https://www.inaturalist.org/observations/74118876">https://www.inaturalist.org/observations/74118876</a>   |
| 926 | Saxicola caprata | Pied Bushchat | 2020/10/31 | 2 | 0 | 20.67112967 | 77.09235675 | <a href="https://www.inaturalist.org/observations/63876634">https://www.inaturalist.org/observations/63876634</a>   |
| 927 | Saxicola caprata | Pied Bushchat | 2022/8/23  | 1 | 0 | 20.79071700 | 82.06450960 | <a href="https://www.inaturalist.org/observations/133782792">https://www.inaturalist.org/observations/133782792</a> |
| 928 | Saxicola caprata | Pied Bushchat | 2022/8/23  | 2 | 0 | 20.79071700 | 82.06450960 | <a href="https://www.inaturalist.org/observations/133786784">https://www.inaturalist.org/observations/133786784</a> |
| 929 | Saxicola caprata | Pied Bushchat | 2022/8/23  | 2 | 0 | 20.79071700 | 82.06450960 | <a href="https://www.inaturalist.org/observations/133786786">https://www.inaturalist.org/observations/133786786</a> |
| 930 | Saxicola caprata | Pied Bushchat | 2021/12/15 | 2 | 0 | 20.87064131 | 81.92030098 | <a href="https://www.inaturalist.org/observations/104497792">https://www.inaturalist.org/observations/104497792</a> |
| 931 | Saxicola caprata | Pied Bushchat | 2022/1/30  | 3 | 0 | 20.93121400 | 75.53807675 | <a href="https://www.inaturalist.org/observations/106789412">https://www.inaturalist.org/observations/106789412</a> |
| 932 | Saxicola caprata | Pied Bushchat | 2021/1/16  | 1 | 0 | 21.00575597 | 81.44821543 | <a href="https://www.inaturalist.org/observations/68206519">https://www.inaturalist.org/observations/68206519</a>   |
| 933 | Saxicola caprata | Pied Bushchat | 2021/5/4   | 1 | 0 | 21.01416654 | 81.45344909 | <a href="https://www.inaturalist.org/observations/77238799">https://www.inaturalist.org/observations/77238799</a>   |
| 934 | Saxicola caprata | Pied Bushchat | 2021/2/27  | 1 | 0 | 21.01834693 | 81.44035220 | <a href="https://www.inaturalist.org/observations/70301628">https://www.inaturalist.org/observations/70301628</a>   |
| 935 | Saxicola caprata | Pied Bushchat | 2021/1/28  | 1 | 0 | 21.03145348 | 81.42917108 | <a href="https://www.inaturalist.org/observations/68715421">https://www.inaturalist.org/observations/68715421</a>   |
| 936 | Saxicola caprata | Pied Bushchat | 2021/5/5   | 1 | 0 | 21.03273434 | 81.43580552 | <a href="https://www.inaturalist.org/observations/78575564">https://www.inaturalist.org/observations/78575564</a>   |
| 937 | Saxicola caprata | Pied Bushchat | 2021/5/27  | 1 | 0 | 21.04492667 | 75.83890333 | <a href="https://www.inaturalist.org/observations/80641675">https://www.inaturalist.org/observations/80641675</a>   |
| 938 | Saxicola caprata | Pied Bushchat | 2020/12/18 | 1 | 0 | 21.04977833 | 75.86579000 | <a href="https://www.inaturalist.org/observations/66746691">https://www.inaturalist.org/observations/66746691</a>   |
| 939 | Saxicola caprata | Pied Bushchat | 2021/10/15 | 3 | 0 | 21.05060280 | 81.74002030 | <a href="https://www.inaturalist.org/observations/121447451">https://www.inaturalist.org/observations/121447451</a> |
| 940 | Saxicola caprata | Pied Bushchat | 2021/3/30  | 2 | 0 | 21.05307427 | 81.43459383 | <a href="https://www.inaturalist.org/observations/72512295">https://www.inaturalist.org/observations/72512295</a>   |
| 941 | Saxicola caprata | Pied Bushchat | 2022/1/2   | 1 | 0 | 21.06729596 | 75.76887924 | <a href="https://www.inaturalist.org/observations/104348578">https://www.inaturalist.org/observations/104348578</a> |
| 942 | Saxicola caprata | Pied Bushchat | 2021/12/28 | 4 | 0 | 21.06855167 | 75.95081500 | <a href="https://www.inaturalist.org/observations/104399546">https://www.inaturalist.org/observations/104399546</a> |

|     |                  |               |            |   |   |             |             |                                                                                                                     |
|-----|------------------|---------------|------------|---|---|-------------|-------------|---------------------------------------------------------------------------------------------------------------------|
| 943 | Saxicola caprata | Pied Bushchat | 2021/12/28 | 3 | 0 | 21.06866000 | 75.95096833 | <a href="https://www.inaturalist.org/observations/104399496">https://www.inaturalist.org/observations/104399496</a> |
| 944 | Saxicola caprata | Pied Bushchat | 2018/12/23 | 3 | 0 | 21.07383640 | 75.94565530 | <a href="https://www.inaturalist.org/observations/56311012">https://www.inaturalist.org/observations/56311012</a>   |
| 945 | Saxicola caprata | Pied Bushchat | 2021/5/24  | 1 | 0 | 21.07384504 | 75.94565526 | <a href="https://www.inaturalist.org/observations/80641371">https://www.inaturalist.org/observations/80641371</a>   |
| 946 | Saxicola caprata | Pied Bushchat | 2021/5/19  | 2 | 0 | 21.08372051 | 80.66400826 | <a href="https://www.inaturalist.org/observations/79376327">https://www.inaturalist.org/observations/79376327</a>   |
| 947 | Saxicola caprata | Pied Bushchat | 2021/5/19  | 1 | 0 | 21.08464586 | 80.66416986 | <a href="https://www.inaturalist.org/observations/79375609">https://www.inaturalist.org/observations/79375609</a>   |
| 948 | Saxicola caprata | Pied Bushchat | 2021/4/12  | 2 | 0 | 21.09663456 | 81.03123486 | <a href="https://www.inaturalist.org/observations/73833938">https://www.inaturalist.org/observations/73833938</a>   |
| 949 | Saxicola caprata | Pied Bushchat | 2021/1/27  | 1 | 0 | 21.10519921 | 81.46876080 | <a href="https://www.inaturalist.org/observations/68673423">https://www.inaturalist.org/observations/68673423</a>   |
| 950 | Saxicola caprata | Pied Bushchat | 2019/10/19 | 2 | 0 | 21.15600490 | 72.76263680 | <a href="https://www.inaturalist.org/observations/34568644">https://www.inaturalist.org/observations/34568644</a>   |
| 951 | Saxicola caprata | Pied Bushchat | 2020/2/2   | 2 | 0 | 21.16945032 | 80.74331179 | <a href="https://www.inaturalist.org/observations/41529060">https://www.inaturalist.org/observations/41529060</a>   |
| 952 | Saxicola caprata | Pied Bushchat | 2021/5/20  | 1 | 0 | 21.17598238 | 81.30712084 | <a href="https://www.inaturalist.org/observations/79505281">https://www.inaturalist.org/observations/79505281</a>   |
| 953 | Saxicola caprata | Pied Bushchat | 2021/9/7   | 2 | 0 | 21.19406481 | 81.35094143 | <a href="https://www.inaturalist.org/observations/99313255">https://www.inaturalist.org/observations/99313255</a>   |
| 954 | Saxicola caprata | Pied Bushchat | 2020/10/21 | 3 | 0 | 21.20071769 | 80.76223779 | <a href="https://www.inaturalist.org/observations/63159567">https://www.inaturalist.org/observations/63159567</a>   |
| 955 | Saxicola caprata | Pied Bushchat | 2021/5/7   | 2 | 0 | 21.20200397 | 81.64748009 | <a href="https://www.inaturalist.org/observations/77769119">https://www.inaturalist.org/observations/77769119</a>   |
| 956 | Saxicola caprata | Pied Bushchat | 2021/9/5   | 2 | 0 | 21.20948261 | 81.43681504 | <a href="https://www.inaturalist.org/observations/93833856">https://www.inaturalist.org/observations/93833856</a>   |
| 957 | Saxicola caprata | Pied Bushchat | 2019/1/14  | 2 | 0 | 21.20978986 | 81.43681537 | <a href="https://www.inaturalist.org/observations/51406188">https://www.inaturalist.org/observations/51406188</a>   |
| 958 | Saxicola caprata | Pied Bushchat | 2021/5/19  | 1 | 0 | 21.22865696 | 80.94253387 | <a href="https://www.inaturalist.org/observations/79402635">https://www.inaturalist.org/observations/79402635</a>   |
| 959 | Saxicola caprata | Pied Bushchat | 2022/6/15  | 3 | 0 | 21.24669537 | 81.59702463 | <a href="https://www.inaturalist.org/observations/122471076">https://www.inaturalist.org/observations/122471076</a> |
| 960 | Saxicola caprata | Pied Bushchat | 2019/7/2   | 2 | 0 | 21.25715089 | 81.75823856 | <a href="https://www.inaturalist.org/observations/89207382">https://www.inaturalist.org/observations/89207382</a>   |
| 961 | Saxicola caprata | Pied Bushchat | 2020/6/5   | 1 | 0 | 21.25768833 | 80.77859826 | <a href="https://www.inaturalist.org/observations/48566988">https://www.inaturalist.org/observations/48566988</a>   |
| 962 | Saxicola caprata | Pied Bushchat | 2022/7/12  | 2 | 0 | 21.25876286 | 81.62378308 | <a href="https://www.inaturalist.org/observations/129098871">https://www.inaturalist.org/observations/129098871</a> |
| 963 | Saxicola caprata | Pied Bushchat | 2022/7/12  | 2 | 0 | 21.25876286 | 81.62378308 | <a href="https://www.inaturalist.org/observations/129098872">https://www.inaturalist.org/observations/129098872</a> |
| 964 | Saxicola caprata | Pied Bushchat | 2022/8/21  | 5 | 0 | 21.25876286 | 81.62378308 | <a href="https://www.inaturalist.org/observations/131788465">https://www.inaturalist.org/observations/131788465</a> |
| 965 | Saxicola caprata | Pied Bushchat | 2022/8/21  | 5 | 0 | 21.25876286 | 81.62378308 | <a href="https://www.inaturalist.org/observations/131788478">https://www.inaturalist.org/observations/131788478</a> |

|     |                  |               |            |   |   |             |             |                                                                                                                     |
|-----|------------------|---------------|------------|---|---|-------------|-------------|---------------------------------------------------------------------------------------------------------------------|
| 966 | Saxicola caprata | Pied Bushchat | 2022/8/21  | 5 | 0 | 21.25876286 | 81.62378308 | <a href="https://www.inaturalist.org/observations/131788481">https://www.inaturalist.org/observations/131788481</a> |
| 967 | Saxicola caprata | Pied Bushchat | 2017/2/2   | 3 | 0 | 21.26404333 | 81.50076000 | <a href="https://www.inaturalist.org/observations/5166247">https://www.inaturalist.org/observations/5166247</a>     |
| 968 | Saxicola caprata | Pied Bushchat | 2019/9/22  | 3 | 0 | 21.26447832 | 81.77133176 | <a href="https://www.inaturalist.org/observations/34188177">https://www.inaturalist.org/observations/34188177</a>   |
| 969 | Saxicola caprata | Pied Bushchat | 2022/7/8   | 1 | 0 | 21.27667700 | 81.64460490 | <a href="https://www.inaturalist.org/observations/125802346">https://www.inaturalist.org/observations/125802346</a> |
| 970 | Saxicola caprata | Pied Bushchat | 2022/8/31  | 4 | 0 | 21.27667700 | 81.64460490 | <a href="https://www.inaturalist.org/observations/134196256">https://www.inaturalist.org/observations/134196256</a> |
| 971 | Saxicola caprata | Pied Bushchat | 2022/8/31  | 4 | 0 | 21.27667700 | 81.64460490 | <a href="https://www.inaturalist.org/observations/134196260">https://www.inaturalist.org/observations/134196260</a> |
| 972 | Saxicola caprata | Pied Bushchat | 2022/8/31  | 4 | 0 | 21.27667700 | 81.64460490 | <a href="https://www.inaturalist.org/observations/134196341">https://www.inaturalist.org/observations/134196341</a> |
| 973 | Saxicola caprata | Pied Bushchat | 2021/5/19  | 2 | 0 | 21.33712201 | 81.38753984 | <a href="https://www.inaturalist.org/observations/79416566">https://www.inaturalist.org/observations/79416566</a>   |
| 974 | Saxicola caprata | Pied Bushchat | 2020/1/26  | 4 | 0 | 21.40602820 | 81.86887510 | <a href="https://www.inaturalist.org/observations/121766462">https://www.inaturalist.org/observations/121766462</a> |
| 975 | Saxicola caprata | Pied Bushchat | 2022/5/8   | 2 | 0 | 21.41711410 | 86.60062490 | <a href="https://www.inaturalist.org/observations/116264867">https://www.inaturalist.org/observations/116264867</a> |
| 976 | Saxicola caprata | Pied Bushchat | 2022/5/8   | 2 | 0 | 21.45141789 | 86.71585701 | <a href="https://www.inaturalist.org/observations/117092000">https://www.inaturalist.org/observations/117092000</a> |
| 977 | Saxicola caprata | Pied Bushchat | 2015/9/18  | 2 | 0 | 21.70636778 | 72.21687468 | <a href="https://www.inaturalist.org/observations/39871786">https://www.inaturalist.org/observations/39871786</a>   |
| 978 | Saxicola caprata | Pied Bushchat | 2021/5/20  | 3 | 0 | 21.86984079 | 83.26400723 | <a href="https://www.inaturalist.org/observations/79763273">https://www.inaturalist.org/observations/79763273</a>   |
| 979 | Saxicola caprata | Pied Bushchat | 2021/5/20  | 1 | 0 | 21.86986070 | 83.26400187 | <a href="https://www.inaturalist.org/observations/79763272">https://www.inaturalist.org/observations/79763272</a>   |
| 980 | Saxicola caprata | Pied Bushchat | 2021/8/7   | 1 | 0 | 21.87161000 | 83.27036833 | <a href="https://www.inaturalist.org/observations/91651962">https://www.inaturalist.org/observations/91651962</a>   |
| 981 | Saxicola caprata | Pied Bushchat | 2021/12/3  | 1 | 0 | 22.03996235 | 81.24989178 | <a href="https://www.inaturalist.org/observations/102407290">https://www.inaturalist.org/observations/102407290</a> |
| 982 | Saxicola caprata | Pied Bushchat | 2021/2/13  | 5 | 0 | 22.05971510 | 82.04343800 | <a href="https://www.inaturalist.org/observations/70803683">https://www.inaturalist.org/observations/70803683</a>   |
| 983 | Saxicola caprata | Pied Bushchat | 2021/5/21  | 2 | 0 | 22.06410806 | 81.68229306 | <a href="https://www.inaturalist.org/observations/106623647">https://www.inaturalist.org/observations/106623647</a> |
| 984 | Saxicola caprata | Pied Bushchat | 2021/12/27 | 2 | 0 | 22.07469472 | 81.57186472 | <a href="https://www.inaturalist.org/observations/106558927">https://www.inaturalist.org/observations/106558927</a> |
| 985 | Saxicola caprata | Pied Bushchat | 2021/12/27 | 2 | 0 | 22.08739472 | 81.57765972 | <a href="https://www.inaturalist.org/observations/106557696">https://www.inaturalist.org/observations/106557696</a> |
| 986 | Saxicola caprata | Pied Bushchat | 2020/12/20 | 1 | 0 | 22.16194453 | 73.48404955 | <a href="https://www.inaturalist.org/observations/66920168">https://www.inaturalist.org/observations/66920168</a>   |
| 987 | Saxicola caprata | Pied Bushchat | 2020/12/6  | 1 | 0 | 22.17263076 | 73.48096420 | <a href="https://www.inaturalist.org/observations/78479031">https://www.inaturalist.org/observations/78479031</a>   |
| 988 | Saxicola caprata | Pied Bushchat | 2021/9/25  | 1 | 0 | 22.22346411 | 81.39195509 | <a href="https://www.inaturalist.org/observations/96646702">https://www.inaturalist.org/observations/96646702</a>   |

|      |                  |               |            |   |   |             |             |                                                                                                                     |
|------|------------------|---------------|------------|---|---|-------------|-------------|---------------------------------------------------------------------------------------------------------------------|
| 989  | Saxicola caprata | Pied Bushchat | 2021/9/28  | 2 | 0 | 22.22709105 | 81.39393490 | <a href="https://www.inaturalist.org/observations/103665703">https://www.inaturalist.org/observations/103665703</a> |
| 990  | Saxicola caprata | Pied Bushchat | 2018/3/12  | 3 | 0 | 22.24666460 | 82.02300320 | <a href="https://www.inaturalist.org/observations/59290900">https://www.inaturalist.org/observations/59290900</a>   |
| 991  | Saxicola caprata | Pied Bushchat | 2020/7/27  | 0 | 0 | 22.24666460 | 82.02300320 | <a href="https://www.inaturalist.org/observations/60148285">https://www.inaturalist.org/observations/60148285</a>   |
| 992  | Saxicola caprata | Pied Bushchat | 2021/2/13  | 3 | 0 | 22.27815219 | 81.41451415 | <a href="https://www.inaturalist.org/observations/72008157">https://www.inaturalist.org/observations/72008157</a>   |
| 993  | Saxicola caprata | Pied Bushchat | 2020/2/1   | 0 | 0 | 22.33451320 | 80.61151300 | <a href="https://www.inaturalist.org/observations/38951206">https://www.inaturalist.org/observations/38951206</a>   |
| 994  | Saxicola caprata | Pied Bushchat | 2016/2/5   | 2 | 0 | 22.37015650 | 70.10390320 | <a href="https://www.inaturalist.org/observations/135881873">https://www.inaturalist.org/observations/135881873</a> |
| 995  | Saxicola caprata | Pied Bushchat | 2014/10/7  | 1 | 0 | 22.56451750 | 72.92887100 | <a href="https://www.inaturalist.org/observations/39915558">https://www.inaturalist.org/observations/39915558</a>   |
| 996  | Saxicola caprata | Pied Bushchat | 2019/2/7   | 1 | 0 | 22.60527499 | 72.60296065 | <a href="https://www.inaturalist.org/observations/67259550">https://www.inaturalist.org/observations/67259550</a>   |
| 997  | Saxicola caprata | Pied Bushchat | 2022/3/22  | 3 | 0 | 22.85901667 | 72.06551000 | <a href="https://www.inaturalist.org/observations/119608171">https://www.inaturalist.org/observations/119608171</a> |
| 998  | Saxicola caprata | Pied Bushchat | 2022/3/22  | 2 | 0 | 22.86054333 | 72.06254167 | <a href="https://www.inaturalist.org/observations/119608248">https://www.inaturalist.org/observations/119608248</a> |
| 999  | Saxicola caprata | Pied Bushchat | 2020/11/3  | 2 | 0 | 22.86403419 | 80.66711340 | <a href="https://www.inaturalist.org/observations/66031964">https://www.inaturalist.org/observations/66031964</a>   |
| 1000 | Saxicola caprata | Pied Bushchat | 2015/10/31 | 1 | 0 | 23.00562700 | 78.23075200 | <a href="http://www.inaturalist.org/observations/2353784">http://www.inaturalist.org/observations/2353784</a>       |
| 1001 | Saxicola caprata | Pied Bushchat | 2020/11/19 | 1 | 0 | 23.01899411 | 83.07613760 | <a href="https://www.inaturalist.org/observations/79654280">https://www.inaturalist.org/observations/79654280</a>   |
| 1002 | Saxicola caprata | Pied Bushchat | 2018/11/18 | 1 | 0 | 23.13728660 | 72.40658100 | <a href="https://www.inaturalist.org/observations/56309083">https://www.inaturalist.org/observations/56309083</a>   |
| 1003 | Saxicola caprata | Pied Bushchat | 2021/11/20 | 1 | 0 | 23.34531472 | 77.78102186 | <a href="https://www.inaturalist.org/observations/101532053">https://www.inaturalist.org/observations/101532053</a> |
| 1004 | Saxicola caprata | Pied Bushchat | 2021/2/7   | 2 | 0 | 23.35363355 | 77.78131016 | <a href="https://www.inaturalist.org/observations/69199267">https://www.inaturalist.org/observations/69199267</a>   |
| 1005 | Saxicola caprata | Pied Bushchat | 2021/2/7   | 1 | 0 | 23.37349651 | 72.04015240 | <a href="https://www.inaturalist.org/observations/69260316">https://www.inaturalist.org/observations/69260316</a>   |
| 1006 | Saxicola caprata | Pied Bushchat | 2021/2/7   | 1 | 0 | 23.37491160 | 72.03915194 | <a href="https://www.inaturalist.org/observations/69259770">https://www.inaturalist.org/observations/69259770</a>   |
| 1007 | Saxicola caprata | Pied Bushchat | 2015/12/11 | 2 | 0 | 23.46182050 | 71.28742090 | <a href="https://www.inaturalist.org/observations/56202841">https://www.inaturalist.org/observations/56202841</a>   |
| 1008 | Saxicola caprata | Pied Bushchat | 2015/10/25 | 2 | 0 | 23.48733900 | 77.74182400 | <a href="http://www.inaturalist.org/observations/2347420">http://www.inaturalist.org/observations/2347420</a>       |
| 1009 | Saxicola caprata | Pied Bushchat | 2020/10/20 | 0 | 0 | 23.53041697 | 80.81061400 | <a href="https://www.inaturalist.org/observations/63145703">https://www.inaturalist.org/observations/63145703</a>   |
| 1010 | Saxicola caprata | Pied Bushchat | 2017/12/23 | 1 | 0 | 24.44037900 | 98.12409500 | <a href="https://www.inaturalist.org/observations/9372274">https://www.inaturalist.org/observations/9372274</a>     |
| 1011 | Saxicola caprata | Pied Bushchat | 2017/11/30 | 2 | 0 | 24.47496200 | 92.30386700 | <a href="https://www.inaturalist.org/observations/13796212">https://www.inaturalist.org/observations/13796212</a>   |

|      |                  |               |            |   |   |             |             |                                                                                                                     |
|------|------------------|---------------|------------|---|---|-------------|-------------|---------------------------------------------------------------------------------------------------------------------|
| 1012 | Saxicola caprata | Pied Bushchat | 2017/11/30 | 3 | 0 | 24.47526000 | 92.29467600 | <a href="https://www.inaturalist.org/observations/19672693">https://www.inaturalist.org/observations/19672693</a>   |
| 1013 | Saxicola caprata | Pied Bushchat | 2017/11/30 | 3 | 0 | 24.47745900 | 92.29382400 | <a href="https://www.inaturalist.org/observations/19672697">https://www.inaturalist.org/observations/19672697</a>   |
| 1014 | Saxicola caprata | Pied Bushchat | 2011/8/14  | 3 | 0 | 24.47963200 | 92.32400800 | <a href="https://www.inaturalist.org/observations/103694293">https://www.inaturalist.org/observations/103694293</a> |
| 1015 | Saxicola caprata | Pied Bushchat | 2011/9/18  | 2 | 0 | 24.47963200 | 92.32400800 | <a href="https://www.inaturalist.org/observations/103742389">https://www.inaturalist.org/observations/103742389</a> |
| 1016 | Saxicola caprata | Pied Bushchat | 2011/10/9  | 1 | 0 | 24.47963200 | 92.32400800 | <a href="https://www.inaturalist.org/observations/103742839">https://www.inaturalist.org/observations/103742839</a> |
| 1017 | Saxicola caprata | Pied Bushchat | 2020/2/4   | 2 | 0 | 24.48294400 | 92.29071229 | <a href="https://www.inaturalist.org/observations/61186759">https://www.inaturalist.org/observations/61186759</a>   |
| 1018 | Saxicola caprata | Pied Bushchat | 2021/2/13  | 1 | 0 | 24.48294400 | 92.29071229 | <a href="https://www.inaturalist.org/observations/70433492">https://www.inaturalist.org/observations/70433492</a>   |
| 1019 | Saxicola caprata | Pied Bushchat | 2021/1/6   | 0 | 0 | 24.48294400 | 92.29071229 | <a href="https://www.inaturalist.org/observations/95625315">https://www.inaturalist.org/observations/95625315</a>   |
| 1020 | Saxicola caprata | Pied Bushchat | 2021/10/24 | 2 | 0 | 24.48294400 | 92.29071229 | <a href="https://www.inaturalist.org/observations/101751290">https://www.inaturalist.org/observations/101751290</a> |
| 1021 | Saxicola caprata | Pied Bushchat | 2021/10/24 | 1 | 0 | 24.49777268 | 92.31476750 | <a href="https://www.inaturalist.org/observations/102743673">https://www.inaturalist.org/observations/102743673</a> |
| 1022 | Saxicola caprata | Pied Bushchat | 2021/10/24 | 1 | 0 | 24.49777268 | 92.31476750 | <a href="https://www.inaturalist.org/observations/102744439">https://www.inaturalist.org/observations/102744439</a> |
| 1023 | Saxicola caprata | Pied Bushchat | 2019/12/15 | 1 | 0 | 24.49895100 | 92.30515500 | <a href="https://www.inaturalist.org/observations/36776774">https://www.inaturalist.org/observations/36776774</a>   |
| 1024 | Saxicola caprata | Pied Bushchat | 2014/8/24  | 2 | 0 | 24.60054800 | 92.38136200 | <a href="http://www.inaturalist.org/observations/899398">http://www.inaturalist.org/observations/899398</a>         |
| 1025 | Saxicola caprata | Pied Bushchat | 2014/8/24  | 3 | 0 | 24.60054800 | 92.38136200 | <a href="http://www.inaturalist.org/observations/899399">http://www.inaturalist.org/observations/899399</a>         |
| 1026 | Saxicola caprata | Pied Bushchat | 2014/12/21 | 2 | 0 | 24.60054800 | 92.38136200 | <a href="http://www.inaturalist.org/observations/1144682">http://www.inaturalist.org/observations/1144682</a>       |
| 1027 | Saxicola caprata | Pied Bushchat | 2012/12/2  | 3 | 0 | 24.60728790 | 92.38344120 | <a href="http://www.inaturalist.org/observations/160053">http://www.inaturalist.org/observations/160053</a>         |
| 1028 | Saxicola caprata | Pied Bushchat | 2013/9/1   | 3 | 0 | 24.60728800 | 92.38344100 | <a href="http://www.inaturalist.org/observations/388682">http://www.inaturalist.org/observations/388682</a>         |
| 1029 | Saxicola caprata | Pied Bushchat | 2013/9/29  | 3 | 0 | 24.60728800 | 92.38344100 | <a href="http://www.inaturalist.org/observations/412009">http://www.inaturalist.org/observations/412009</a>         |
| 1030 | Saxicola caprata | Pied Bushchat | 2013/11/17 | 3 | 0 | 24.60728800 | 92.38344100 | <a href="http://www.inaturalist.org/observations/460871">http://www.inaturalist.org/observations/460871</a>         |
| 1031 | Saxicola caprata | Pied Bushchat | 2015/8/24  | 2 | 0 | 24.61479547 | 92.33503983 | <a href="https://www.inaturalist.org/observations/17836186">https://www.inaturalist.org/observations/17836186</a>   |
| 1032 | Saxicola caprata | Pied Bushchat | 2019/1/22  | 1 | 0 | 24.69369159 | 97.93891975 | <a href="https://www.inaturalist.org/observations/111493117">https://www.inaturalist.org/observations/111493117</a> |
| 1033 | Saxicola caprata | Pied Bushchat | 2019/10/21 | 1 | 0 | 24.85272306 | 79.91960306 | <a href="https://www.inaturalist.org/observations/41161015">https://www.inaturalist.org/observations/41161015</a>   |
| 1034 | Saxicola caprata | Pied Bushchat | 2014/1/2   | 3 | 0 | 24.94256900 | 73.41422800 | <a href="https://www.inaturalist.org/observations/19915450">https://www.inaturalist.org/observations/19915450</a>   |



|      |                  |               |            |   |   |             |              |                                                                                                                     |
|------|------------------|---------------|------------|---|---|-------------|--------------|---------------------------------------------------------------------------------------------------------------------|
| 1035 | Saxicola caprata | Pied Bushchat | 2016/11/17 | 1 | 0 | 25.00191500 | 121.51403980 | <a href="https://www.inaturalist.org/observations/65662942">https://www.inaturalist.org/observations/65662942</a>   |
| 1036 | Saxicola caprata | Pied Bushchat | 2020/2/5   | 2 | 0 | 25.04210330 | 72.84859390  | <a href="https://www.inaturalist.org/observations/54447191">https://www.inaturalist.org/observations/54447191</a>   |
| 1037 | Saxicola caprata | Pied Bushchat | 2020/2/5   | 2 | 0 | 25.04210330 | 72.84859390  | <a href="https://www.inaturalist.org/observations/59941543">https://www.inaturalist.org/observations/59941543</a>   |
| 1038 | Saxicola caprata | Pied Bushchat | 2013/2/22  | 1 | 0 | 25.04854229 | 98.83707688  | <a href="https://www.inaturalist.org/observations/48477893">https://www.inaturalist.org/observations/48477893</a>   |
| 1039 | Saxicola caprata | Pied Bushchat | 2021/12/11 | 3 | 0 | 25.07582217 | 73.86273188  | <a href="https://www.inaturalist.org/observations/102870136">https://www.inaturalist.org/observations/102870136</a> |
| 1040 | Saxicola caprata | Pied Bushchat | 2020/9/3   | 4 | 0 | 25.08337524 | 76.23279143  | <a href="https://www.inaturalist.org/observations/58510571">https://www.inaturalist.org/observations/58510571</a>   |
| 1041 | Saxicola caprata | Pied Bushchat | 2016/11/29 | 1 | 0 | 25.31817014 | 83.02221850  | <a href="https://www.inaturalist.org/observations/41839351">https://www.inaturalist.org/observations/41839351</a>   |
| 1042 | Saxicola caprata | Pied Bushchat | 2020/10/18 | 1 | 0 | 25.58915598 | 90.26505154  | <a href="https://www.inaturalist.org/observations/63083572">https://www.inaturalist.org/observations/63083572</a>   |
| 1043 | Saxicola caprata | Pied Bushchat | 2022/3/8   | 0 | 0 | 26.48992028 | 80.28198525  | <a href="https://www.inaturalist.org/observations/136885856">https://www.inaturalist.org/observations/136885856</a> |
| 1044 | Saxicola caprata | Pied Bushchat | 2019/12/19 | 1 | 0 | 26.61840888 | 80.65318487  | <a href="https://www.inaturalist.org/observations/48514538">https://www.inaturalist.org/observations/48514538</a>   |
| 1045 | Saxicola caprata | Pied Bushchat | 2020/2/16  | 3 | 0 | 26.69485000 | 78.00719167  | <a href="https://www.inaturalist.org/observations/50950101">https://www.inaturalist.org/observations/50950101</a>   |
| 1046 | Saxicola caprata | Pied Bushchat | 2018/1/23  | 2 | 0 | 26.74108464 | 91.18385988  | <a href="https://www.inaturalist.org/observations/31654914">https://www.inaturalist.org/observations/31654914</a>   |
| 1047 | Saxicola caprata | Pied Bushchat | 2021/11/18 | 1 | 0 | 26.79220500 | 81.06548800  | <a href="https://www.inaturalist.org/observations/101466104">https://www.inaturalist.org/observations/101466104</a> |
| 1048 | Saxicola caprata | Pied Bushchat | 2021/11/18 | 1 | 0 | 26.80527300 | 81.02112900  | <a href="https://www.inaturalist.org/observations/101688572">https://www.inaturalist.org/observations/101688572</a> |
| 1049 | Saxicola caprata | Pied Bushchat | 2021/11/18 | 2 | 0 | 26.80530600 | 81.02097900  | <a href="https://www.inaturalist.org/observations/101713915">https://www.inaturalist.org/observations/101713915</a> |
| 1050 | Saxicola caprata | Pied Bushchat | 2017/11/26 | 2 | 0 | 26.84777051 | 78.25068426  | <a href="https://www.inaturalist.org/observations/69975150">https://www.inaturalist.org/observations/69975150</a>   |
| 1051 | Saxicola caprata | Pied Bushchat | 2020/3/6   | 2 | 0 | 26.86333897 | 80.97010907  | <a href="https://www.inaturalist.org/observations/69848185">https://www.inaturalist.org/observations/69848185</a>   |
| 1052 | Saxicola caprata | Pied Bushchat | 2020/3/10  | 1 | 0 | 26.86494053 | 80.97045769  | <a href="https://www.inaturalist.org/observations/69848199">https://www.inaturalist.org/observations/69848199</a>   |
| 1053 | Saxicola caprata | Pied Bushchat | 2020/3/6   | 0 | 0 | 26.86496604 | 80.97162225  | <a href="https://www.inaturalist.org/observations/69848181">https://www.inaturalist.org/observations/69848181</a>   |
| 1054 | Saxicola caprata | Pied Bushchat | 2020/3/6   | 1 | 0 | 26.86496604 | 80.97162225  | <a href="https://www.inaturalist.org/observations/69848182">https://www.inaturalist.org/observations/69848182</a>   |
| 1055 | Saxicola caprata | Pied Bushchat | 2017/11/26 | 2 | 0 | 26.89916014 | 78.27101800  | <a href="https://www.inaturalist.org/observations/69975132">https://www.inaturalist.org/observations/69975132</a>   |
| 1056 | Saxicola caprata | Pied Bushchat | 2021/9/12  | 1 | 0 | 26.91012663 | 70.80856752  | <a href="https://www.inaturalist.org/observations/95288148">https://www.inaturalist.org/observations/95288148</a>   |
| 1057 | Saxicola caprata | Pied Bushchat | 2013/12/7  | 2 | 0 | 27.00857691 | 77.31604439  | <a href="https://www.inaturalist.org/observations/7483363">https://www.inaturalist.org/observations/7483363</a>     |

|      |                          |               |            |   |   |             |             |                                                                                                                     |
|------|--------------------------|---------------|------------|---|---|-------------|-------------|---------------------------------------------------------------------------------------------------------------------|
| 1058 | Saxicola caprata         | Pied Bushchat | 2021/7/21  | 0 | 0 | 27.01490573 | 88.31662282 | <a href="https://www.inaturalist.org/observations/88075395">https://www.inaturalist.org/observations/88075395</a>   |
| 1059 | Saxicola caprata         | Pied Bushchat | 2014/10/18 | 1 | 0 | 27.15147935 | 77.53796261 | <a href="https://www.inaturalist.org/observations/90107577">https://www.inaturalist.org/observations/90107577</a>   |
| 1060 | Saxicola caprata         | Pied Bushchat | 2014/8/11  | 2 | 0 | 27.15692000 | 77.52365100 | <a href="https://www.inaturalist.org/observations/39918521">https://www.inaturalist.org/observations/39918521</a>   |
| 1061 | Saxicola caprata         | Pied Bushchat | 2016/12/20 | 2 | 0 | 27.15692000 | 77.52365100 | <a href="https://www.inaturalist.org/observations/41366733">https://www.inaturalist.org/observations/41366733</a>   |
| 1062 | Saxicola caprata         | Pied Bushchat | 2016/12/20 | 3 | 0 | 27.15692000 | 77.52365100 | <a href="https://www.inaturalist.org/observations/41366776">https://www.inaturalist.org/observations/41366776</a>   |
| 1063 | Saxicola caprata         | Pied Bushchat | 2010/8/30  | 3 | 0 | 27.15692000 | 77.52365100 | <a href="https://www.inaturalist.org/observations/42171289">https://www.inaturalist.org/observations/42171289</a>   |
| 1064 | Saxicola caprata         | Pied Bushchat | 2019/3/12  | 4 | 0 | 27.15692000 | 77.52365100 | <a href="https://www.inaturalist.org/observations/42552908">https://www.inaturalist.org/observations/42552908</a>   |
| 1065 | Saxicola caprata         | Pied Bushchat | 2019/3/11  | 2 | 0 | 27.15692000 | 77.52365100 | <a href="https://www.inaturalist.org/observations/42553328">https://www.inaturalist.org/observations/42553328</a>   |
| 1066 | Saxicola caprata bicolor | Pied Bushchat | 2014/12/16 | 0 | 0 | 27.15926900 | 77.52319990 | <a href="https://www.inaturalist.org/observations/69151977">https://www.inaturalist.org/observations/69151977</a>   |
| 1067 | Saxicola caprata         | Pied Bushchat | 2022/3/12  | 5 | 0 | 27.15926900 | 77.52319990 | <a href="https://www.inaturalist.org/observations/108645059">https://www.inaturalist.org/observations/108645059</a> |
| 1068 | Saxicola caprata         | Pied Bushchat | 2022/3/12  | 2 | 0 | 27.15926900 | 77.52319990 | <a href="https://www.inaturalist.org/observations/109822543">https://www.inaturalist.org/observations/109822543</a> |
| 1069 | Saxicola caprata         | Pied Bushchat | 2022/3/13  | 2 | 0 | 27.15926900 | 77.52319990 | <a href="https://www.inaturalist.org/observations/109825107">https://www.inaturalist.org/observations/109825107</a> |
| 1070 | Saxicola caprata         | Pied Bushchat | 2015/12/1  | 3 | 0 | 27.15926900 | 77.52319990 | <a href="https://www.inaturalist.org/observations/120820253">https://www.inaturalist.org/observations/120820253</a> |
| 1071 | Saxicola caprata         | Pied Bushchat | 2022/2/9   | 1 | 0 | 27.15943314 | 77.52319984 | <a href="https://www.inaturalist.org/observations/106907897">https://www.inaturalist.org/observations/106907897</a> |
| 1072 | Saxicola caprata         | Pied Bushchat | 2006/3/7   | 1 | 0 | 27.16516797 | 77.52502441 | <a href="https://www.inaturalist.org/observations/57038841">https://www.inaturalist.org/observations/57038841</a>   |
| 1073 | Saxicola caprata         | Pied Bushchat | 2017/1/22  | 4 | 0 | 27.16592500 | 77.51825556 | <a href="https://www.inaturalist.org/observations/14248996">https://www.inaturalist.org/observations/14248996</a>   |
| 1074 | Saxicola caprata         | Pied Bushchat | 2022/5/22  | 3 | 0 | 27.17040333 | 83.50276500 | <a href="https://www.inaturalist.org/observations/129599326">https://www.inaturalist.org/observations/129599326</a> |
| 1075 | Saxicola caprata         | Pied Bushchat | 2019/2/8   | 4 | 0 | 27.17306134 | 77.50831420 | <a href="https://www.inaturalist.org/observations/20303107">https://www.inaturalist.org/observations/20303107</a>   |
| 1076 | Saxicola caprata         | Pied Bushchat | 2011/12/11 | 3 | 0 | 27.17395952 | 77.51646481 | <a href="https://www.inaturalist.org/observations/21973893">https://www.inaturalist.org/observations/21973893</a>   |
| 1077 | Saxicola caprata         | Pied Bushchat | 2020/2/24  | 2 | 0 | 27.19126667 | 77.50370333 | <a href="https://www.inaturalist.org/observations/39791280">https://www.inaturalist.org/observations/39791280</a>   |
| 1078 | Saxicola caprata         | Pied Bushchat | 2010/5/18  | 4 | 0 | 27.19464000 | 77.50185000 | <a href="http://www.inaturalist.org/observations/330155">http://www.inaturalist.org/observations/330155</a>         |
| 1079 | Saxicola caprata         | Pied Bushchat | 2021/1/23  | 1 | 0 | 27.20346515 | 77.50769031 | <a href="https://www.inaturalist.org/observations/90422734">https://www.inaturalist.org/observations/90422734</a>   |
| 1080 | Saxicola caprata         | Pied Bushchat | 2022/4/5   | 2 | 0 | 27.25596250 | 88.18264650 | <a href="https://www.inaturalist.org/observations/110790203">https://www.inaturalist.org/observations/110790203</a> |

|      |                  |               |           |   |   |             |             |                                                                                                                     |
|------|------------------|---------------|-----------|---|---|-------------|-------------|---------------------------------------------------------------------------------------------------------------------|
| 1081 | Saxicola caprata | Pied Bushchat | 2019/9/17 | 2 | 0 | 27.77486362 | 74.39586806 | <a href="https://www.inaturalist.org/observations/66293152">https://www.inaturalist.org/observations/66293152</a>   |
| 1082 | Saxicola caprata | Pied Bushchat | 2022/3/25 | 1 | 0 | 27.96388392 | 76.43387676 | <a href="https://www.inaturalist.org/observations/112556545">https://www.inaturalist.org/observations/112556545</a> |
| 1083 | Saxicola caprata | Pied Bushchat | 2021/6/20 | 1 | 0 | 28.34472900 | 77.60869800 | <a href="https://www.inaturalist.org/observations/83896875">https://www.inaturalist.org/observations/83896875</a>   |
| 1084 | Saxicola caprata | Pied Bushchat | 2020/9/16 | 1 | 0 | 28.35268826 | 77.05743123 | <a href="https://www.inaturalist.org/observations/60055750">https://www.inaturalist.org/observations/60055750</a>   |
| 1085 | Saxicola caprata | Pied Bushchat | 2017/2/12 | 4 | 0 | 28.40686310 | 77.87219228 | <a href="https://www.inaturalist.org/observations/5231909">https://www.inaturalist.org/observations/5231909</a>     |
| 1086 | Saxicola caprata | Pied Bushchat | 2020/2/10 | 1 | 0 | 28.45831326 | 76.88911183 | <a href="https://www.inaturalist.org/observations/61820095">https://www.inaturalist.org/observations/61820095</a>   |
| 1087 | Saxicola caprata | Pied Bushchat | 2020/2/10 | 1 | 0 | 28.45832269 | 76.88880069 | <a href="https://www.inaturalist.org/observations/61820096">https://www.inaturalist.org/observations/61820096</a>   |
| 1088 | Saxicola caprata | Pied Bushchat | 2012/10/1 | 2 | 0 | 28.45846539 | 75.47999090 | <a href="https://www.inaturalist.org/observations/105560173">https://www.inaturalist.org/observations/105560173</a> |
| 1089 | Saxicola caprata | Pied Bushchat | 2013/1/14 | 2 | 0 | 28.46143649 | 76.89093609 | <a href="https://www.inaturalist.org/observations/31515576">https://www.inaturalist.org/observations/31515576</a>   |
| 1090 | Saxicola caprata | Pied Bushchat | 2013/1/14 | 2 | 0 | 28.46143649 | 76.89093609 | <a href="https://www.inaturalist.org/observations/31515581">https://www.inaturalist.org/observations/31515581</a>   |
| 1091 | Saxicola caprata | Pied Bushchat | 2018/6/17 | 3 | 0 | 28.47451640 | 76.98244270 | <a href="https://www.inaturalist.org/observations/13540705">https://www.inaturalist.org/observations/13540705</a>   |
| 1092 | Saxicola caprata | Pied Bushchat | 2018/6/17 | 4 | 0 | 28.47451640 | 76.98244270 | <a href="https://www.inaturalist.org/observations/13773631">https://www.inaturalist.org/observations/13773631</a>   |
| 1093 | Saxicola caprata | Pied Bushchat | 2018/8/26 | 3 | 0 | 28.47451640 | 76.98244270 | <a href="https://www.inaturalist.org/observations/15971987">https://www.inaturalist.org/observations/15971987</a>   |
| 1094 | Saxicola caprata | Pied Bushchat | 2018/7/29 | 2 | 0 | 28.47451640 | 76.98244270 | <a href="https://www.inaturalist.org/observations/18426800">https://www.inaturalist.org/observations/18426800</a>   |
| 1095 | Saxicola caprata | Pied Bushchat | 2021/2/9  | 1 | 0 | 28.48219251 | 77.11162403 | <a href="https://www.inaturalist.org/observations/69616592">https://www.inaturalist.org/observations/69616592</a>   |
| 1096 | Saxicola caprata | Pied Bushchat | 2021/2/12 | 1 | 0 | 28.51088815 | 77.40052499 | <a href="https://www.inaturalist.org/observations/72512764">https://www.inaturalist.org/observations/72512764</a>   |
| 1097 | Saxicola caprata | Pied Bushchat | 2021/6/10 | 1 | 0 | 28.51088815 | 77.40052499 | <a href="https://www.inaturalist.org/observations/85788154">https://www.inaturalist.org/observations/85788154</a>   |
| 1098 | Saxicola caprata | Pied Bushchat | 2018/7/8  | 1 | 0 | 28.51683130 | 77.48740490 | <a href="https://www.inaturalist.org/observations/14200515">https://www.inaturalist.org/observations/14200515</a>   |
| 1099 | Saxicola caprata | Pied Bushchat | 2021/3/7  | 2 | 0 | 28.51735450 | 77.47558900 | <a href="https://www.inaturalist.org/observations/79368972">https://www.inaturalist.org/observations/79368972</a>   |
| 1100 | Saxicola caprata | Pied Bushchat | 2018/8/24 | 4 | 0 | 28.52622910 | 77.48812190 | <a href="https://www.inaturalist.org/observations/15869046">https://www.inaturalist.org/observations/15869046</a>   |
| 1101 | Saxicola caprata | Pied Bushchat | 2018/8/31 | 1 | 0 | 28.52622910 | 77.48812190 | <a href="https://www.inaturalist.org/observations/16117183">https://www.inaturalist.org/observations/16117183</a>   |
| 1102 | Saxicola caprata | Pied Bushchat | 2022/9/17 | 1 | 0 | 28.52675881 | 77.57536311 | <a href="https://www.inaturalist.org/observations/135868426">https://www.inaturalist.org/observations/135868426</a> |
| 1103 | Saxicola caprata | Pied Bushchat | 2019/7/14 | 1 | 0 | 28.53430045 | 77.48036999 | <a href="https://www.inaturalist.org/observations/34621161">https://www.inaturalist.org/observations/34621161</a>   |

|      |                  |               |            |   |   |             |             |                                                                                                                     |
|------|------------------|---------------|------------|---|---|-------------|-------------|---------------------------------------------------------------------------------------------------------------------|
| 1104 | Saxicola caprata | Pied Bushchat | 2021/11/21 | 2 | 0 | 28.54012900 | 77.48901800 | <a href="https://www.inaturalist.org/observations/101602965">https://www.inaturalist.org/observations/101602965</a> |
| 1105 | Saxicola caprata | Pied Bushchat | 2018/12/29 | 4 | 0 | 28.55144250 | 77.31852150 | <a href="https://www.inaturalist.org/observations/33745476">https://www.inaturalist.org/observations/33745476</a>   |
| 1106 | Saxicola caprata | Pied Bushchat | 2021/3/28  | 2 | 0 | 28.55144661 | 77.31852148 | <a href="https://www.inaturalist.org/observations/72359561">https://www.inaturalist.org/observations/72359561</a>   |
| 1107 | Saxicola caprata | Pied Bushchat | 2021/3/28  | 2 | 0 | 28.55144661 | 77.31852148 | <a href="https://www.inaturalist.org/observations/72359598">https://www.inaturalist.org/observations/72359598</a>   |
| 1108 | Saxicola caprata | Pied Bushchat | 2011/1/29  | 2 | 0 | 28.55257720 | 77.55481000 | <a href="https://www.inaturalist.org/observations/31494661">https://www.inaturalist.org/observations/31494661</a>   |
| 1109 | Saxicola caprata | Pied Bushchat | 2011/1/29  | 2 | 0 | 28.55257720 | 77.55481000 | <a href="https://www.inaturalist.org/observations/31494669">https://www.inaturalist.org/observations/31494669</a>   |
| 1110 | Saxicola caprata | Pied Bushchat | 2011/11/13 | 3 | 0 | 28.55257720 | 77.55481000 | <a href="https://www.inaturalist.org/observations/31512557">https://www.inaturalist.org/observations/31512557</a>   |
| 1111 | Saxicola caprata | Pied Bushchat | 2010/1/9   | 3 | 0 | 28.55460099 | 77.31779594 | <a href="https://www.inaturalist.org/observations/31582617">https://www.inaturalist.org/observations/31582617</a>   |
| 1112 | Saxicola caprata | Pied Bushchat | 2009/7/15  | 5 | 0 | 28.55720980 | 77.21278910 | <a href="https://www.inaturalist.org/observations/31584253">https://www.inaturalist.org/observations/31584253</a>   |
| 1113 | Saxicola caprata | Pied Bushchat | 2012/10/24 | 1 | 0 | 28.56512875 | 77.30727196 | <a href="https://www.inaturalist.org/observations/8997700">https://www.inaturalist.org/observations/8997700</a>     |
| 1114 | Saxicola caprata | Pied Bushchat | 2019/10/12 | 5 | 0 | 28.57105454 | 77.30663929 | <a href="https://www.inaturalist.org/observations/34818258">https://www.inaturalist.org/observations/34818258</a>   |
| 1115 | Saxicola caprata | Pied Bushchat | 2021/12/4  | 2 | 0 | 28.57311212 | 77.30686024 | <a href="https://www.inaturalist.org/observations/102474300">https://www.inaturalist.org/observations/102474300</a> |
| 1116 | Saxicola caprata | Pied Bushchat | 2015/4/18  | 3 | 0 | 28.63576000 | 77.22445000 | <a href="http://www.inaturalist.org/observations/1500909">http://www.inaturalist.org/observations/1500909</a>       |
| 1117 | Saxicola caprata | Pied Bushchat | 2019/10/12 | 2 | 0 | 29.02286260 | 79.48794120 | <a href="https://www.inaturalist.org/observations/48679155">https://www.inaturalist.org/observations/48679155</a>   |
| 1118 | Saxicola caprata | Pied Bushchat | 2019/8/24  | 1 | 0 | 29.02286260 | 79.48794120 | <a href="https://www.inaturalist.org/observations/48679231">https://www.inaturalist.org/observations/48679231</a>   |
| 1119 | Saxicola caprata | Pied Bushchat | 2018/9/9   | 7 | 0 | 29.17654273 | 76.00610013 | <a href="https://www.inaturalist.org/observations/19710663">https://www.inaturalist.org/observations/19710663</a>   |
| 1120 | Saxicola caprata | Pied Bushchat | 2011/5/25  | 4 | 0 | 29.39297100 | 79.45405100 | <a href="https://www.inaturalist.org/observations/32860686">https://www.inaturalist.org/observations/32860686</a>   |
| 1121 | Saxicola caprata | Pied Bushchat | 2020/10/9  | 2 | 0 | 29.39476823 | 79.12649967 | <a href="https://www.inaturalist.org/observations/63952052">https://www.inaturalist.org/observations/63952052</a>   |
| 1122 | Saxicola caprata | Pied Bushchat | 2022/7/4   | 2 | 0 | 29.43984333 | 78.96193667 | <a href="https://www.inaturalist.org/observations/133089348">https://www.inaturalist.org/observations/133089348</a> |
| 1123 | Saxicola caprata | Pied Bushchat | 2008/5/29  | 2 | 0 | 29.53001380 | 78.77466030 | <a href="https://www.inaturalist.org/observations/55248056">https://www.inaturalist.org/observations/55248056</a>   |
| 1124 | Saxicola caprata | Pied Bushchat | 2008/5/29  | 2 | 0 | 29.53001380 | 78.77466030 | <a href="https://www.inaturalist.org/observations/55248057">https://www.inaturalist.org/observations/55248057</a>   |
| 1125 | Saxicola caprata | Pied Bushchat | 2020/9/18  | 2 | 0 | 29.56042162 | 78.85811326 | <a href="https://www.inaturalist.org/observations/60486737">https://www.inaturalist.org/observations/60486737</a>   |
| 1126 | Saxicola caprata | Pied Bushchat | 2017/2/24  | 3 | 0 | 29.56629100 | 78.85162400 | <a href="https://www.inaturalist.org/observations/10429574">https://www.inaturalist.org/observations/10429574</a>   |

|      |                  |               |            |   |   |             |             |                                                                                                                     |
|------|------------------|---------------|------------|---|---|-------------|-------------|---------------------------------------------------------------------------------------------------------------------|
| 1127 | Saxicola caprata | Pied Bushchat | 2017/3/8   | 1 | 0 | 29.58076432 | 78.86876065 | <a href="https://www.inaturalist.org/observations/102482253">https://www.inaturalist.org/observations/102482253</a> |
| 1128 | Saxicola caprata | Pied Bushchat | 2018/4/21  | 4 | 0 | 29.59101833 | 78.88070333 | <a href="https://www.inaturalist.org/observations/128852649">https://www.inaturalist.org/observations/128852649</a> |
| 1129 | Saxicola caprata | Pied Bushchat | 2018/4/23  | 1 | 0 | 29.59756833 | 78.87458667 | <a href="https://www.inaturalist.org/observations/129075680">https://www.inaturalist.org/observations/129075680</a> |
| 1130 | Saxicola caprata | Pied Bushchat | 2021/5/2   | 1 | 0 | 29.61269140 | 78.81177360 | <a href="https://www.inaturalist.org/observations/78357252">https://www.inaturalist.org/observations/78357252</a>   |
| 1131 | Saxicola caprata | Pied Bushchat | 2021/5/2   | 1 | 0 | 29.61269140 | 78.81177360 | <a href="https://www.inaturalist.org/observations/79267774">https://www.inaturalist.org/observations/79267774</a>   |
| 1132 | Saxicola caprata | Pied Bushchat | 2021/5/3   | 2 | 0 | 29.61269140 | 78.81177360 | <a href="https://www.inaturalist.org/observations/79267815">https://www.inaturalist.org/observations/79267815</a>   |
| 1133 | Saxicola caprata | Pied Bushchat | 2021/5/3   | 2 | 0 | 29.61269140 | 78.81177360 | <a href="https://www.inaturalist.org/observations/79741849">https://www.inaturalist.org/observations/79741849</a>   |
| 1134 | Saxicola caprata | Pied Bushchat | 2022/5/14  | 2 | 0 | 29.78879828 | 79.55964122 | <a href="https://www.inaturalist.org/observations/119159259">https://www.inaturalist.org/observations/119159259</a> |
| 1135 | Saxicola caprata | Pied Bushchat | 2021/5/14  | 1 | 0 | 29.79039687 | 79.55934383 | <a href="https://www.inaturalist.org/observations/78769053">https://www.inaturalist.org/observations/78769053</a>   |
| 1136 | Saxicola caprata | Pied Bushchat | 2021/4/30  | 1 | 0 | 29.79041026 | 79.55918122 | <a href="https://www.inaturalist.org/observations/75766823">https://www.inaturalist.org/observations/75766823</a>   |
| 1137 | Saxicola caprata | Pied Bushchat | 2021/4/30  | 1 | 0 | 29.79058309 | 79.55900788 | <a href="https://www.inaturalist.org/observations/75767965">https://www.inaturalist.org/observations/75767965</a>   |
| 1138 | Saxicola caprata | Pied Bushchat | 2019/11/6  | 2 | 0 | 29.80162282 | 78.19007811 | <a href="https://www.inaturalist.org/observations/48337252">https://www.inaturalist.org/observations/48337252</a>   |
| 1139 | Saxicola caprata | Pied Bushchat | 2017/6/18  | 2 | 0 | 29.89706510 | 79.60844200 | <a href="https://www.inaturalist.org/observations/6997230">https://www.inaturalist.org/observations/6997230</a>     |
| 1140 | Saxicola caprata | Pied Bushchat | 2021/10/23 | 1 | 0 | 29.91538060 | 78.09690760 | <a href="https://www.inaturalist.org/observations/99068978">https://www.inaturalist.org/observations/99068978</a>   |
| 1141 | Saxicola caprata | Pied Bushchat | 2021/10/24 | 2 | 0 | 29.91538060 | 78.09690760 | <a href="https://www.inaturalist.org/observations/99317531">https://www.inaturalist.org/observations/99317531</a>   |
| 1142 | Saxicola caprata | Pied Bushchat | 2021/10/31 | 3 | 0 | 29.91538060 | 78.09690760 | <a href="https://www.inaturalist.org/observations/99987345">https://www.inaturalist.org/observations/99987345</a>   |
| 1143 | Saxicola caprata | Pied Bushchat | 2022/5/16  | 2 | 0 | 29.98420024 | 80.08561738 | <a href="https://www.inaturalist.org/observations/122119815">https://www.inaturalist.org/observations/122119815</a> |
| 1144 | Saxicola caprata | Pied Bushchat | 2019/4/3   | 3 | 0 | 30.09805333 | 77.80598667 | <a href="https://www.inaturalist.org/observations/33278713">https://www.inaturalist.org/observations/33278713</a>   |
| 1145 | Saxicola caprata | Pied Bushchat | 2018/4/2   | 1 | 0 | 30.23638400 | 78.83543300 | <a href="https://www.inaturalist.org/observations/10720036">https://www.inaturalist.org/observations/10720036</a>   |
| 1146 | Saxicola caprata | Pied Bushchat | 2017/6/12  | 2 | 0 | 30.28488193 | 77.97359705 | <a href="https://www.inaturalist.org/observations/6619281">https://www.inaturalist.org/observations/6619281</a>     |
| 1147 | Saxicola caprata | Pied Bushchat | 2017/6/12  | 2 | 0 | 30.28488193 | 77.97359705 | <a href="https://www.inaturalist.org/observations/6619282">https://www.inaturalist.org/observations/6619282</a>     |
| 1148 | Saxicola caprata | Pied Bushchat | 2021/3/16  | 4 | 0 | 30.31582622 | 78.05774231 | <a href="https://www.inaturalist.org/observations/71362999">https://www.inaturalist.org/observations/71362999</a>   |
| 1149 | Saxicola caprata | Pied Bushchat | 2020/8/5   | 2 | 0 | 30.31646354 | 78.03219192 | <a href="https://www.inaturalist.org/observations/60858148">https://www.inaturalist.org/observations/60858148</a>   |

|      |                  |               |            |   |   |             |             |                                                                                                                     |
|------|------------------|---------------|------------|---|---|-------------|-------------|---------------------------------------------------------------------------------------------------------------------|
| 1150 | Saxicola caprata | Pied Bushchat | 2017/4/2   | 2 | 0 | 30.32988510 | 78.04707810 | <a href="https://www.inaturalist.org/observations/5965246">https://www.inaturalist.org/observations/5965246</a>     |
| 1151 | Saxicola caprata | Pied Bushchat | 2014/3/22  | 3 | 0 | 30.39233641 | 78.05592393 | <a href="https://www.inaturalist.org/observations/30950357">https://www.inaturalist.org/observations/30950357</a>   |
| 1152 | Saxicola caprata | Pied Bushchat | 2019/2/4   | 2 | 0 | 30.73632988 | 76.83154431 | <a href="https://www.inaturalist.org/observations/134977828">https://www.inaturalist.org/observations/134977828</a> |
| 1153 | Saxicola caprata | Pied Bushchat | 2015/3/7   | 2 | 0 | 30.74921389 | 77.17058333 | <a href="https://www.inaturalist.org/observations/59429333">https://www.inaturalist.org/observations/59429333</a>   |
| 1154 | Saxicola caprata | Pied Bushchat | 2019/2/25  | 3 | 0 | 30.79533639 | 76.76262415 | <a href="https://www.inaturalist.org/observations/134971126">https://www.inaturalist.org/observations/134971126</a> |
| 1155 | Saxicola caprata | Pied Bushchat | 2018/6/12  | 1 | 0 | 30.79843293 | 76.75541440 | <a href="https://www.inaturalist.org/observations/135481033">https://www.inaturalist.org/observations/135481033</a> |
| 1156 | Saxicola caprata | Pied Bushchat | 2018/12/31 | 1 | 0 | 30.81642047 | 76.75172368 | <a href="https://www.inaturalist.org/observations/135487510">https://www.inaturalist.org/observations/135487510</a> |
| 1157 | Saxicola caprata | Pied Bushchat | 2021/3/24  | 2 | 0 | 30.83617509 | 76.73929178 | <a href="https://www.inaturalist.org/observations/134271427">https://www.inaturalist.org/observations/134271427</a> |
| 1158 | Saxicola caprata | Pied Bushchat | 2019/5/18  | 3 | 0 | 30.84292545 | 76.73824823 | <a href="https://www.inaturalist.org/observations/134970958">https://www.inaturalist.org/observations/134970958</a> |
| 1159 | Saxicola caprata | Pied Bushchat | 2019/5/18  | 1 | 0 | 30.84736461 | 76.73927336 | <a href="https://www.inaturalist.org/observations/134970920">https://www.inaturalist.org/observations/134970920</a> |
| 1160 | Saxicola caprata | Pied Bushchat | 2019/8/4   | 3 | 0 | 31.08855142 | 77.30695840 | <a href="https://www.inaturalist.org/observations/30363713">https://www.inaturalist.org/observations/30363713</a>   |
| 1161 | Saxicola caprata | Pied Bushchat | 2019/8/12  | 5 | 0 | 31.25123262 | 76.99786261 | <a href="https://www.inaturalist.org/observations/30915731">https://www.inaturalist.org/observations/30915731</a>   |
| 1162 | Saxicola caprata | Pied Bushchat | 2019/7/6   | 2 | 0 | 31.25907297 | 76.98695183 | <a href="https://www.inaturalist.org/observations/29766536">https://www.inaturalist.org/observations/29766536</a>   |
| 1163 | Saxicola caprata | Pied Bushchat | 2018/4/25  | 3 | 0 | 31.93780519 | 76.79684222 | <a href="https://www.inaturalist.org/observations/12544277">https://www.inaturalist.org/observations/12544277</a>   |
| 1164 | Saxicola caprata | Pied Bushchat | 2017/4/11  | 1 | 0 | 32.04191483 | 76.71998923 | <a href="https://www.inaturalist.org/observations/64559315">https://www.inaturalist.org/observations/64559315</a>   |
| 1165 | Saxicola caprata | Pied Bushchat | 2022/3/19  | 0 | 0 | 32.10017257 | 76.55228702 | <a href="https://www.inaturalist.org/observations/108941940">https://www.inaturalist.org/observations/108941940</a> |
| 1166 | Saxicola caprata | Pied Bushchat | 2020/7/8   | 2 | 0 | 32.16251432 | 76.54976584 | <a href="https://www.inaturalist.org/observations/52582993">https://www.inaturalist.org/observations/52582993</a>   |
| 1167 | Saxicola caprata | Pied Bushchat | 2016/4/15  | 3 | 0 | 32.31263000 | 75.60143600 | <a href="http://www.inaturalist.org/observations/3466888">http://www.inaturalist.org/observations/3466888</a>       |
| 1168 | Saxicola caprata | Pied Bushchat | 2020/11/28 | 2 | 0 | 33.95876788 | 74.78331495 | <a href="https://www.inaturalist.org/observations/65822048">https://www.inaturalist.org/observations/65822048</a>   |

| No | scientific name | common name   | date       | NIA | NID | latitude   | longitude   | url                                                                                                                 |
|----|-----------------|---------------|------------|-----|-----|------------|-------------|---------------------------------------------------------------------------------------------------------------------|
| 1  | Pastor roseus   | Rosy Starling | 2021/3/7   | 2   | 0   | 6.18508333 | 81.22185833 | <a href="https://www.inaturalist.org/observations/109980135">https://www.inaturalist.org/observations/109980135</a> |
| 2  | Pastor roseus   | Rosy Starling | 2022/1/24  | 2   | 0   | 6.19908630 | 81.21049350 | <a href="https://www.inaturalist.org/observations/107493859">https://www.inaturalist.org/observations/107493859</a> |
| 3  | Pastor roseus   | Rosy Starling | 2018/12/12 | 5   | 0   | 6.20055192 | 81.22000821 | <a href="https://www.inaturalist.org/observations/19439551">https://www.inaturalist.org/observations/19439551</a>   |
| 4  | Pastor roseus   | Rosy Starling | 2022/3/14  | 1   | 0   | 6.44179080 | 80.92886165 | <a href="https://www.inaturalist.org/observations/108775798">https://www.inaturalist.org/observations/108775798</a> |
| 5  | Pastor roseus   | Rosy Starling | 2020/12/6  | 7   | 0   | 6.45054373 | 81.20645940 | <a href="https://www.inaturalist.org/observations/66254577">https://www.inaturalist.org/observations/66254577</a>   |
| 6  | Pastor roseus   | Rosy Starling | 2017/12/29 | 5   | 0   | 6.45135500 | 80.88599500 | <a href="https://www.inaturalist.org/observations/9304782">https://www.inaturalist.org/observations/9304782</a>     |
| 7  | Pastor roseus   | Rosy Starling | 2022/3/14  | 1   | 0   | 6.45385217 | 80.89094731 | <a href="https://www.inaturalist.org/observations/109187680">https://www.inaturalist.org/observations/109187680</a> |
| 8  | Pastor roseus   | Rosy Starling | 2019/3/9   | 2   | 0   | 6.47218833 | 80.88294167 | <a href="https://www.inaturalist.org/observations/21094067">https://www.inaturalist.org/observations/21094067</a>   |
| 9  | Pastor roseus   | Rosy Starling | 2019/3/9   | 3   | 0   | 6.47218833 | 80.88294167 | <a href="https://www.inaturalist.org/observations/21128338">https://www.inaturalist.org/observations/21128338</a>   |
| 10 | Pastor roseus   | Rosy Starling | 2017/12/27 | 4   | 0   | 6.48910000 | 80.86580000 | <a href="https://www.inaturalist.org/observations/10793935">https://www.inaturalist.org/observations/10793935</a>   |
| 11 | Pastor roseus   | Rosy Starling | 2021/12/6  | 5   | 0   | 6.51775774 | 80.87540690 | <a href="https://www.inaturalist.org/observations/102600267">https://www.inaturalist.org/observations/102600267</a> |
| 12 | Pastor roseus   | Rosy Starling | 2022/1/8   | 2   | 0   | 8.08830640 | 77.53845070 | <a href="https://www.inaturalist.org/observations/104638908">https://www.inaturalist.org/observations/104638908</a> |
| 13 | Pastor roseus   | Rosy Starling | 2015/1/9   | 5   | 0   | 8.45255400 | 76.97438700 | <a href="http://www.inaturalist.org/observations/1260389">http://www.inaturalist.org/observations/1260389</a>       |
| 14 | Pastor roseus   | Rosy Starling | 2018/1/20  | 5   | 0   | 8.53023889 | 76.92910000 | <a href="https://www.inaturalist.org/observations/14249103">https://www.inaturalist.org/observations/14249103</a>   |
| 15 | Pastor roseus   | Rosy Starling | 2018/2/25  | 3   | 0   | 8.83844321 | 76.69986265 | <a href="https://www.inaturalist.org/observations/65981926">https://www.inaturalist.org/observations/65981926</a>   |
| 16 | Pastor roseus   | Rosy Starling | 2020/12/15 | 4   | 0   | 8.93326333 | 79.95033333 | <a href="https://www.inaturalist.org/observations/66601437">https://www.inaturalist.org/observations/66601437</a>   |
| 17 | Pastor roseus   | Rosy Starling | 2019/3/17  | 7   | 0   | 9.37240740 | 76.58374680 | <a href="https://www.inaturalist.org/observations/22279937">https://www.inaturalist.org/observations/22279937</a>   |
| 18 | Pastor roseus   | Rosy Starling | 2014/11/23 | 6   | 0   | 9.44047800 | 77.16034700 | <a href="http://www.inaturalist.org/observations/1120893">http://www.inaturalist.org/observations/1120893</a>       |
| 19 | Pastor roseus   | Rosy Starling | 2020/10/21 | 1   | 0   | 9.49806217 | 76.33884832 | <a href="https://www.inaturalist.org/observations/63147945">https://www.inaturalist.org/observations/63147945</a>   |
| 20 | Pastor roseus   | Rosy Starling | 2019/1/20  | 3   | 0   | 9.57668218 | 76.45341184 | <a href="https://www.inaturalist.org/observations/41036826">https://www.inaturalist.org/observations/41036826</a>   |
| 21 | Pastor roseus   | Rosy Starling | 2021/1/26  | 3   | 0   | 9.57686699 | 76.52938508 | <a href="https://www.inaturalist.org/observations/68752211">https://www.inaturalist.org/observations/68752211</a>   |
| 22 | Pastor roseus   | Rosy Starling | 2021/11/18 | 3   | 0   | 9.89555351 | 76.74879118 | <a href="https://www.inaturalist.org/observations/101384703">https://www.inaturalist.org/observations/101384703</a> |

|    |               |               |            |   |   |             |             |                                                                                                                     |
|----|---------------|---------------|------------|---|---|-------------|-------------|---------------------------------------------------------------------------------------------------------------------|
| 23 | Pastor roseus | Rosy Starling | 2019/2/20  | 3 | 0 | 10.06120663 | 76.34652816 | <a href="https://www.inaturalist.org/observations/45569962">https://www.inaturalist.org/observations/45569962</a>   |
| 24 | Pastor roseus | Rosy Starling | 2022/3/27  | 4 | 0 | 10.06324145 | 76.33876550 | <a href="https://www.inaturalist.org/observations/110068203">https://www.inaturalist.org/observations/110068203</a> |
| 25 | Pastor roseus | Rosy Starling | 2017/12/12 | 2 | 0 | 10.25152450 | 77.40798050 | <a href="https://www.inaturalist.org/observations/65812842">https://www.inaturalist.org/observations/65812842</a>   |
| 26 | Pastor roseus | Rosy Starling | 2020/2/1   | 1 | 0 | 10.43786333 | 76.17308167 | <a href="https://www.inaturalist.org/observations/67039860">https://www.inaturalist.org/observations/67039860</a>   |
| 27 | Pastor roseus | Rosy Starling | 2014/1/3   | 2 | 0 | 10.51433628 | 76.05302391 | <a href="https://www.inaturalist.org/observations/30260472">https://www.inaturalist.org/observations/30260472</a>   |
| 28 | Pastor roseus | Rosy Starling | 2020/1/22  | 2 | 0 | 10.52396347 | 76.15875217 | <a href="https://www.inaturalist.org/observations/67016809">https://www.inaturalist.org/observations/67016809</a>   |
| 29 | Pastor roseus | Rosy Starling | 2018/10/14 | 1 | 0 | 10.52435476 | 76.12827722 | <a href="https://www.inaturalist.org/observations/57310915">https://www.inaturalist.org/observations/57310915</a>   |
| 30 | Pastor roseus | Rosy Starling | 2020/1/30  | 2 | 0 | 10.52559500 | 76.11484333 | <a href="https://www.inaturalist.org/observations/67019405">https://www.inaturalist.org/observations/67019405</a>   |
| 31 | Pastor roseus | Rosy Starling | 2018/10/30 | 5 | 0 | 10.53595206 | 76.12947280 | <a href="https://www.inaturalist.org/observations/18264241">https://www.inaturalist.org/observations/18264241</a>   |
| 32 | Pastor roseus | Rosy Starling | 2014/3/7   | 2 | 0 | 10.54684578 | 76.11730687 | <a href="https://www.inaturalist.org/observations/30260174">https://www.inaturalist.org/observations/30260174</a>   |
| 33 | Pastor roseus | Rosy Starling | 2020/3/21  | 1 | 0 | 10.61725857 | 76.19185926 | <a href="https://www.inaturalist.org/observations/47761153">https://www.inaturalist.org/observations/47761153</a>   |
| 34 | Pastor roseus | Rosy Starling | 2016/12/29 | 7 | 0 | 10.74763013 | 76.46721264 | <a href="https://www.inaturalist.org/observations/87154331">https://www.inaturalist.org/observations/87154331</a>   |
| 35 | Pastor roseus | Rosy Starling | 2020/10/24 | 1 | 0 | 10.78405334 | 75.91638364 | <a href="https://www.inaturalist.org/observations/63463676">https://www.inaturalist.org/observations/63463676</a>   |
| 36 | Pastor roseus | Rosy Starling | 2019/11/21 | 0 | 0 | 10.99651218 | 77.13988770 | <a href="https://www.inaturalist.org/observations/38750256">https://www.inaturalist.org/observations/38750256</a>   |
| 37 | Pastor roseus | Rosy Starling | 2020/12/13 | 1 | 0 | 11.07894586 | 79.83002432 | <a href="https://www.inaturalist.org/observations/66529443">https://www.inaturalist.org/observations/66529443</a>   |
| 38 | Pastor roseus | Rosy Starling | 2022/1/8   | 3 | 0 | 11.09039415 | 79.81531173 | <a href="https://www.inaturalist.org/observations/104578984">https://www.inaturalist.org/observations/104578984</a> |
| 39 | Pastor roseus | Rosy Starling | 2021/3/28  | 2 | 0 | 11.68742128 | 78.18066828 | <a href="https://www.inaturalist.org/observations/72244199">https://www.inaturalist.org/observations/72244199</a>   |
| 40 | Pastor roseus | Rosy Starling | 2017/11/18 | 1 | 0 | 11.73446034 | 78.20203878 | <a href="https://www.inaturalist.org/observations/54734358">https://www.inaturalist.org/observations/54734358</a>   |
| 41 | Pastor roseus | Rosy Starling | 2015/10/31 | 4 | 0 | 11.93720603 | 77.03784902 | <a href="https://www.inaturalist.org/observations/86540079">https://www.inaturalist.org/observations/86540079</a>   |
| 42 | Pastor roseus | Rosy Starling | 2015/10/24 | 1 | 0 | 11.97444989 | 76.32194301 | <a href="https://www.inaturalist.org/observations/92581321">https://www.inaturalist.org/observations/92581321</a>   |
| 43 | Pastor roseus | Rosy Starling | 2019/10/15 | 4 | 0 | 12.03234670 | 75.25665640 | <a href="https://www.inaturalist.org/observations/34574208">https://www.inaturalist.org/observations/34574208</a>   |
| 44 | Pastor roseus | Rosy Starling | 2020/12/22 | 2 | 0 | 12.03237190 | 75.25665645 | <a href="https://www.inaturalist.org/observations/136648824">https://www.inaturalist.org/observations/136648824</a> |
| 45 | Pastor roseus | Rosy Starling | 2020/2/6   | 2 | 0 | 12.03847500 | 75.25662167 | <a href="https://www.inaturalist.org/observations/67039941">https://www.inaturalist.org/observations/67039941</a>   |



|    |               |               |            |   |   |             |             |                                                                                                                     |
|----|---------------|---------------|------------|---|---|-------------|-------------|---------------------------------------------------------------------------------------------------------------------|
| 46 | Pastor roseus | Rosy Starling | 2017/10/21 | 3 | 0 | 12.05049833 | 75.19675667 | <a href="https://www.inaturalist.org/observations/30660578">https://www.inaturalist.org/observations/30660578</a>   |
| 47 | Pastor roseus | Rosy Starling | 2020/12/19 | 1 | 0 | 12.12628366 | 76.39239194 | <a href="https://www.inaturalist.org/observations/93041031">https://www.inaturalist.org/observations/93041031</a>   |
| 48 | Pastor roseus | Rosy Starling | 2019/1/5   | 5 | 0 | 12.13873095 | 76.68825245 | <a href="https://www.inaturalist.org/observations/19571192">https://www.inaturalist.org/observations/19571192</a>   |
| 49 | Pastor roseus | Rosy Starling | 2015/1/25  | 3 | 0 | 12.15675877 | 77.06798156 | <a href="https://www.inaturalist.org/observations/97524706">https://www.inaturalist.org/observations/97524706</a>   |
| 50 | Pastor roseus | Rosy Starling | 2015/12/27 | 4 | 0 | 12.16422194 | 76.54256171 | <a href="https://www.inaturalist.org/observations/85735937">https://www.inaturalist.org/observations/85735937</a>   |
| 51 | Pastor roseus | Rosy Starling | 2021/12/22 | 0 | 0 | 12.17647846 | 76.75496656 | <a href="https://www.inaturalist.org/observations/103511913">https://www.inaturalist.org/observations/103511913</a> |
| 52 | Pastor roseus | Rosy Starling | 2018/1/28  | 2 | 0 | 12.18060864 | 76.72620090 | <a href="https://www.inaturalist.org/observations/92316572">https://www.inaturalist.org/observations/92316572</a>   |
| 53 | Pastor roseus | Rosy Starling | 2018/2/3   | 2 | 0 | 12.18060864 | 76.72620090 | <a href="https://www.inaturalist.org/observations/92324710">https://www.inaturalist.org/observations/92324710</a>   |
| 54 | Pastor roseus | Rosy Starling | 2016/3/19  | 3 | 0 | 12.21377348 | 79.03080190 | <a href="https://www.inaturalist.org/observations/96052613">https://www.inaturalist.org/observations/96052613</a>   |
| 55 | Pastor roseus | Rosy Starling | 2016/10/27 | 1 | 0 | 12.21480490 | 75.75904710 | <a href="https://www.inaturalist.org/observations/92801563">https://www.inaturalist.org/observations/92801563</a>   |
| 56 | Pastor roseus | Rosy Starling | 2020/11/25 | 1 | 0 | 12.22716783 | 76.64334475 | <a href="https://www.inaturalist.org/observations/95009894">https://www.inaturalist.org/observations/95009894</a>   |
| 57 | Pastor roseus | Rosy Starling | 2021/11/25 | 2 | 0 | 12.24090600 | 76.59794450 | <a href="https://www.inaturalist.org/observations/101870607">https://www.inaturalist.org/observations/101870607</a> |
| 58 | Pastor roseus | Rosy Starling | 2016/3/5   | 4 | 0 | 12.25610490 | 76.61340729 | <a href="https://www.inaturalist.org/observations/94910584">https://www.inaturalist.org/observations/94910584</a>   |
| 59 | Pastor roseus | Rosy Starling | 2019/2/18  | 3 | 0 | 12.25610490 | 76.61340729 | <a href="https://www.inaturalist.org/observations/96098319">https://www.inaturalist.org/observations/96098319</a>   |
| 60 | Pastor roseus | Rosy Starling | 2018/12/29 | 4 | 0 | 12.26005298 | 76.77324214 | <a href="https://www.inaturalist.org/observations/90361712">https://www.inaturalist.org/observations/90361712</a>   |
| 61 | Pastor roseus | Rosy Starling | 2021/3/20  | 4 | 0 | 12.26065988 | 76.56780272 | <a href="https://www.inaturalist.org/observations/81045056">https://www.inaturalist.org/observations/81045056</a>   |
| 62 | Pastor roseus | Rosy Starling | 2021/5/31  | 4 | 0 | 12.26093611 | 76.59170463 | <a href="https://www.inaturalist.org/observations/81008501">https://www.inaturalist.org/observations/81008501</a>   |
| 63 | Pastor roseus | Rosy Starling | 2015/11/15 | 3 | 0 | 12.26093742 | 76.59167244 | <a href="https://www.inaturalist.org/observations/98771515">https://www.inaturalist.org/observations/98771515</a>   |
| 64 | Pastor roseus | Rosy Starling | 2017/4/2   | 5 | 0 | 12.26937200 | 76.61197800 | <a href="https://www.inaturalist.org/observations/94224597">https://www.inaturalist.org/observations/94224597</a>   |
| 65 | Pastor roseus | Rosy Starling | 2015/11/29 | 3 | 0 | 12.26937200 | 76.61197800 | <a href="https://www.inaturalist.org/observations/94791988">https://www.inaturalist.org/observations/94791988</a>   |
| 66 | Pastor roseus | Rosy Starling | 2013/4/13  | 4 | 0 | 12.26937200 | 76.61197800 | <a href="https://www.inaturalist.org/observations/94904659">https://www.inaturalist.org/observations/94904659</a>   |
| 67 | Pastor roseus | Rosy Starling | 2014/12/28 | 1 | 0 | 12.27284792 | 76.21226472 | <a href="https://www.inaturalist.org/observations/95548800">https://www.inaturalist.org/observations/95548800</a>   |
| 68 | Pastor roseus | Rosy Starling | 2019/2/25  | 5 | 0 | 12.27699078 | 76.61454589 | <a href="https://www.inaturalist.org/observations/69984782">https://www.inaturalist.org/observations/69984782</a>   |

|    |               |               |            |   |   |             |             |                                                                                                                     |
|----|---------------|---------------|------------|---|---|-------------|-------------|---------------------------------------------------------------------------------------------------------------------|
| 69 | Pastor roseus | Rosy Starling | 2021/10/27 | 3 | 0 | 12.29424209 | 76.56539693 | <a href="https://www.inaturalist.org/observations/99523421">https://www.inaturalist.org/observations/99523421</a>   |
| 70 | Pastor roseus | Rosy Starling | 2017/1/14  | 7 | 0 | 12.29974840 | 77.17727370 | <a href="https://www.inaturalist.org/observations/19862825">https://www.inaturalist.org/observations/19862825</a>   |
| 71 | Pastor roseus | Rosy Starling | 2021/11/6  | 1 | 0 | 12.30921890 | 76.55560459 | <a href="https://www.inaturalist.org/observations/100377515">https://www.inaturalist.org/observations/100377515</a> |
| 72 | Pastor roseus | Rosy Starling | 2022/2/19  | 3 | 0 | 12.31618997 | 76.54835281 | <a href="https://www.inaturalist.org/observations/107304117">https://www.inaturalist.org/observations/107304117</a> |
| 73 | Pastor roseus | Rosy Starling | 2014/3/30  | 4 | 0 | 12.31685280 | 76.59830560 | <a href="https://www.inaturalist.org/observations/86150181">https://www.inaturalist.org/observations/86150181</a>   |
| 74 | Pastor roseus | Rosy Starling | 2020/12/20 | 2 | 0 | 12.34993038 | 75.09181614 | <a href="https://www.inaturalist.org/observations/66994729">https://www.inaturalist.org/observations/66994729</a>   |
| 75 | Pastor roseus | Rosy Starling | 2014/3/3   | 5 | 0 | 12.56859000 | 79.98574050 | <a href="https://www.inaturalist.org/observations/22500003">https://www.inaturalist.org/observations/22500003</a>   |
| 76 | Pastor roseus | Rosy Starling | 2021/11/16 | 3 | 0 | 12.59618880 | 75.69501363 | <a href="https://www.inaturalist.org/observations/102291945">https://www.inaturalist.org/observations/102291945</a> |
| 77 | Pastor roseus | Rosy Starling | 2018/12/12 | 5 | 0 | 12.61622187 | 77.13305785 | <a href="https://www.inaturalist.org/observations/19010828">https://www.inaturalist.org/observations/19010828</a>   |
| 78 | Pastor roseus | Rosy Starling | 2012/1/14  | 3 | 0 | 12.71409491 | 77.68653404 | <a href="https://www.inaturalist.org/observations/66663135">https://www.inaturalist.org/observations/66663135</a>   |
| 79 | Pastor roseus | Rosy Starling | 2021/12/12 | 1 | 0 | 12.76482167 | 77.86886667 | <a href="https://www.inaturalist.org/observations/102930431">https://www.inaturalist.org/observations/102930431</a> |
| 80 | Pastor roseus | Rosy Starling | 2013/12/25 | 7 | 0 | 12.78638250 | 80.21348920 | <a href="https://www.inaturalist.org/observations/22537619">https://www.inaturalist.org/observations/22537619</a>   |
| 81 | Pastor roseus | Rosy Starling | 2020/11/21 | 4 | 0 | 12.81385331 | 76.94609644 | <a href="https://www.inaturalist.org/observations/96775287">https://www.inaturalist.org/observations/96775287</a>   |
| 82 | Pastor roseus | Rosy Starling | 2022/2/27  | 2 | 0 | 12.84162626 | 77.77524635 | <a href="https://www.inaturalist.org/observations/107536153">https://www.inaturalist.org/observations/107536153</a> |
| 83 | Pastor roseus | Rosy Starling | 2022/4/3   | 2 | 0 | 12.84162626 | 77.77524635 | <a href="https://www.inaturalist.org/observations/110264411">https://www.inaturalist.org/observations/110264411</a> |
| 84 | Pastor roseus | Rosy Starling | 2022/2/19  | 1 | 0 | 12.84526280 | 77.77687520 | <a href="https://www.inaturalist.org/observations/107090379">https://www.inaturalist.org/observations/107090379</a> |
| 85 | Pastor roseus | Rosy Starling | 2022/2/19  | 1 | 0 | 12.84526280 | 77.77687520 | <a href="https://www.inaturalist.org/observations/107090380">https://www.inaturalist.org/observations/107090380</a> |
| 86 | Pastor roseus | Rosy Starling | 2017/2/16  | 2 | 0 | 12.85050868 | 77.49145627 | <a href="https://www.inaturalist.org/observations/64915770">https://www.inaturalist.org/observations/64915770</a>   |
| 87 | Pastor roseus | Rosy Starling | 2017/3/1   | 2 | 0 | 12.85080013 | 77.49106256 | <a href="https://www.inaturalist.org/observations/64917441">https://www.inaturalist.org/observations/64917441</a>   |
| 88 | Pastor roseus | Rosy Starling | 2018/1/21  | 2 | 0 | 12.85325968 | 77.50384808 | <a href="https://www.inaturalist.org/observations/67036281">https://www.inaturalist.org/observations/67036281</a>   |
| 89 | Pastor roseus | Rosy Starling | 2018/12/16 | 2 | 0 | 12.85718650 | 77.50891100 | <a href="https://www.inaturalist.org/observations/65007032">https://www.inaturalist.org/observations/65007032</a>   |
| 90 | Pastor roseus | Rosy Starling | 2021/3/7   | 1 | 0 | 12.85718650 | 77.50891100 | <a href="https://www.inaturalist.org/observations/70743677">https://www.inaturalist.org/observations/70743677</a>   |
| 91 | Pastor roseus | Rosy Starling | 2021/1/21  | 4 | 0 | 12.86244222 | 79.17800273 | <a href="https://www.inaturalist.org/observations/71944643">https://www.inaturalist.org/observations/71944643</a>   |

|     |               |               |            |   |   |             |             |                                                                                                                     |
|-----|---------------|---------------|------------|---|---|-------------|-------------|---------------------------------------------------------------------------------------------------------------------|
| 92  | Pastor roseus | Rosy Starling | 2022/1/16  | 4 | 0 | 12.86587830 | 79.37550440 | <a href="https://www.inaturalist.org/observations/105607345">https://www.inaturalist.org/observations/105607345</a> |
| 93  | Pastor roseus | Rosy Starling | 2021/1/21  | 4 | 0 | 12.87061448 | 79.02544334 | <a href="https://www.inaturalist.org/observations/71944644">https://www.inaturalist.org/observations/71944644</a>   |
| 94  | Pastor roseus | Rosy Starling | 2021/11/14 | 4 | 0 | 12.87102309 | 77.52039190 | <a href="https://www.inaturalist.org/observations/101102066">https://www.inaturalist.org/observations/101102066</a> |
| 95  | Pastor roseus | Rosy Starling | 2021/11/14 | 3 | 0 | 12.87183107 | 77.52262082 | <a href="https://www.inaturalist.org/observations/101102211">https://www.inaturalist.org/observations/101102211</a> |
| 96  | Pastor roseus | Rosy Starling | 2018/1/28  | 2 | 0 | 12.87394525 | 77.48356810 | <a href="https://www.inaturalist.org/observations/67036581">https://www.inaturalist.org/observations/67036581</a>   |
| 97  | Pastor roseus | Rosy Starling | 2021/2/12  | 1 | 0 | 12.87486455 | 77.63295081 | <a href="https://www.inaturalist.org/observations/69454034">https://www.inaturalist.org/observations/69454034</a>   |
| 98  | Pastor roseus | Rosy Starling | 2020/12/20 | 3 | 0 | 12.87498745 | 77.62998562 | <a href="https://www.inaturalist.org/observations/66882322">https://www.inaturalist.org/observations/66882322</a>   |
| 99  | Pastor roseus | Rosy Starling | 2022/1/16  | 3 | 0 | 12.87950540 | 79.40612680 | <a href="https://www.inaturalist.org/observations/105149553">https://www.inaturalist.org/observations/105149553</a> |
| 100 | Pastor roseus | Rosy Starling | 2012/1/24  | 4 | 0 | 12.89041400 | 77.58719000 | <a href="https://www.inaturalist.org/observations/86260623">https://www.inaturalist.org/observations/86260623</a>   |
| 101 | Pastor roseus | Rosy Starling | 2020/2/28  | 2 | 0 | 12.90744352 | 77.66685158 | <a href="https://www.inaturalist.org/observations/52782526">https://www.inaturalist.org/observations/52782526</a>   |
| 102 | Pastor roseus | Rosy Starling | 2016/3/28  | 3 | 0 | 12.91157015 | 77.67309484 | <a href="http://www.inaturalist.org/observations/2839640">http://www.inaturalist.org/observations/2839640</a>       |
| 103 | Pastor roseus | Rosy Starling | 2020/1/25  | 3 | 0 | 12.91263377 | 77.66325306 | <a href="https://www.inaturalist.org/observations/53243756">https://www.inaturalist.org/observations/53243756</a>   |
| 104 | Pastor roseus | Rosy Starling | 2021/2/13  | 3 | 0 | 12.91328721 | 77.66308824 | <a href="https://www.inaturalist.org/observations/69979243">https://www.inaturalist.org/observations/69979243</a>   |
| 105 | Pastor roseus | Rosy Starling | 2017/1/25  | 2 | 0 | 12.91509453 | 77.46969799 | <a href="https://www.inaturalist.org/observations/48816159">https://www.inaturalist.org/observations/48816159</a>   |
| 106 | Pastor roseus | Rosy Starling | 2022/4/3   | 3 | 0 | 12.93025510 | 77.46727140 | <a href="https://www.inaturalist.org/observations/110387561">https://www.inaturalist.org/observations/110387561</a> |
| 107 | Pastor roseus | Rosy Starling | 2019/1/1   | 5 | 0 | 12.94982970 | 74.85656130 | <a href="https://www.inaturalist.org/observations/19397058">https://www.inaturalist.org/observations/19397058</a>   |
| 108 | Pastor roseus | Rosy Starling | 2019/1/15  | 6 | 0 | 12.96280099 | 77.57634614 | <a href="https://www.inaturalist.org/observations/19672592">https://www.inaturalist.org/observations/19672592</a>   |
| 109 | Pastor roseus | Rosy Starling | 2020/3/30  | 2 | 0 | 12.96986218 | 77.56416036 | <a href="https://www.inaturalist.org/observations/65876550">https://www.inaturalist.org/observations/65876550</a>   |
| 110 | Pastor roseus | Rosy Starling | 2019/10/24 | 5 | 0 | 12.97159870 | 77.59456270 | <a href="https://www.inaturalist.org/observations/34821656">https://www.inaturalist.org/observations/34821656</a>   |
| 111 | Pastor roseus | Rosy Starling | 2019/4/7   | 3 | 0 | 12.97159870 | 77.59456270 | <a href="https://www.inaturalist.org/observations/55892375">https://www.inaturalist.org/observations/55892375</a>   |
| 112 | Pastor roseus | Rosy Starling | 2020/2/22  | 2 | 0 | 12.97159870 | 77.59456270 | <a href="https://www.inaturalist.org/observations/55892376">https://www.inaturalist.org/observations/55892376</a>   |
| 113 | Pastor roseus | Rosy Starling | 2020/2/22  | 2 | 0 | 12.97159870 | 77.59456270 | <a href="https://www.inaturalist.org/observations/55892379">https://www.inaturalist.org/observations/55892379</a>   |
| 114 | Pastor roseus | Rosy Starling | 2020/2/22  | 2 | 0 | 12.97159870 | 77.59456270 | <a href="https://www.inaturalist.org/observations/55892381">https://www.inaturalist.org/observations/55892381</a>   |

|     |               |               |            |   |   |             |             |                                                                                                                     |
|-----|---------------|---------------|------------|---|---|-------------|-------------|---------------------------------------------------------------------------------------------------------------------|
| 115 | Pastor roseus | Rosy Starling | 2020/2/22  | 2 | 0 | 12.97159870 | 77.59456270 | <a href="https://www.inaturalist.org/observations/55892383">https://www.inaturalist.org/observations/55892383</a>   |
| 116 | Pastor roseus | Rosy Starling | 2020/2/23  | 1 | 0 | 12.97159870 | 77.59456270 | <a href="https://www.inaturalist.org/observations/55892385">https://www.inaturalist.org/observations/55892385</a>   |
| 117 | Pastor roseus | Rosy Starling | 2020/2/23  | 1 | 0 | 12.97159870 | 77.59456270 | <a href="https://www.inaturalist.org/observations/55892386">https://www.inaturalist.org/observations/55892386</a>   |
| 118 | Pastor roseus | Rosy Starling | 2020/2/23  | 1 | 0 | 12.97159870 | 77.59456270 | <a href="https://www.inaturalist.org/observations/55892387">https://www.inaturalist.org/observations/55892387</a>   |
| 119 | Pastor roseus | Rosy Starling | 2020/2/23  | 1 | 0 | 12.97159870 | 77.59456270 | <a href="https://www.inaturalist.org/observations/55892388">https://www.inaturalist.org/observations/55892388</a>   |
| 120 | Pastor roseus | Rosy Starling | 2019/3/17  | 1 | 0 | 12.97159870 | 77.59456270 | <a href="https://www.inaturalist.org/observations/55892389">https://www.inaturalist.org/observations/55892389</a>   |
| 121 | Pastor roseus | Rosy Starling | 2019/3/17  | 3 | 0 | 12.97159870 | 77.59456270 | <a href="https://www.inaturalist.org/observations/55892390">https://www.inaturalist.org/observations/55892390</a>   |
| 122 | Pastor roseus | Rosy Starling | 2019/3/17  | 1 | 0 | 12.97159870 | 77.59456270 | <a href="https://www.inaturalist.org/observations/55892391">https://www.inaturalist.org/observations/55892391</a>   |
| 123 | Pastor roseus | Rosy Starling | 2019/3/17  | 1 | 0 | 12.97159870 | 77.59456270 | <a href="https://www.inaturalist.org/observations/55892392">https://www.inaturalist.org/observations/55892392</a>   |
| 124 | Pastor roseus | Rosy Starling | 2019/3/25  | 1 | 0 | 12.97159870 | 77.59456270 | <a href="https://www.inaturalist.org/observations/55892393">https://www.inaturalist.org/observations/55892393</a>   |
| 125 | Pastor roseus | Rosy Starling | 2022/3/24  | 4 | 0 | 12.97159870 | 77.59456270 | <a href="https://www.inaturalist.org/observations/123298856">https://www.inaturalist.org/observations/123298856</a> |
| 126 | Pastor roseus | Rosy Starling | 2016/11/19 | 5 | 0 | 13.00111809 | 80.22425127 | <a href="https://www.inaturalist.org/observations/22552701">https://www.inaturalist.org/observations/22552701</a>   |
| 127 | Pastor roseus | Rosy Starling | 2019/2/12  | 4 | 0 | 13.07029150 | 77.76952550 | <a href="https://www.inaturalist.org/observations/116083828">https://www.inaturalist.org/observations/116083828</a> |
| 128 | Pastor roseus | Rosy Starling | 2021/1/15  | 4 | 0 | 13.08835418 | 77.48489857 | <a href="https://www.inaturalist.org/observations/74379585">https://www.inaturalist.org/observations/74379585</a>   |
| 129 | Pastor roseus | Rosy Starling | 2022/3/17  | 5 | 0 | 13.11081733 | 77.57591229 | <a href="https://www.inaturalist.org/observations/120701815">https://www.inaturalist.org/observations/120701815</a> |
| 130 | Pastor roseus | Rosy Starling | 2021/3/7   | 2 | 0 | 13.14370556 | 77.49532778 | <a href="https://www.inaturalist.org/observations/70713600">https://www.inaturalist.org/observations/70713600</a>   |
| 131 | Pastor roseus | Rosy Starling | 2019/4/8   | 3 | 0 | 13.14756500 | 77.49233167 | <a href="https://www.inaturalist.org/observations/29238181">https://www.inaturalist.org/observations/29238181</a>   |
| 132 | Pastor roseus | Rosy Starling | 2019/4/8   | 4 | 0 | 13.15495667 | 77.48967667 | <a href="https://www.inaturalist.org/observations/29238193">https://www.inaturalist.org/observations/29238193</a>   |
| 133 | Pastor roseus | Rosy Starling | 2019/1/5   | 5 | 0 | 13.16067930 | 77.57395796 | <a href="https://www.inaturalist.org/observations/19485784">https://www.inaturalist.org/observations/19485784</a>   |
| 134 | Pastor roseus | Rosy Starling | 2021/11/11 | 2 | 0 | 13.30142998 | 76.26726151 | <a href="https://www.inaturalist.org/observations/100900703">https://www.inaturalist.org/observations/100900703</a> |
| 135 | Pastor roseus | Rosy Starling | 2021/2/12  | 2 | 0 | 13.32035260 | 74.75700717 | <a href="https://www.inaturalist.org/observations/69459491">https://www.inaturalist.org/observations/69459491</a>   |
| 136 | Pastor roseus | Rosy Starling | 2018/1/27  | 1 | 0 | 13.40196890 | 78.05513840 | <a href="https://www.inaturalist.org/observations/103460419">https://www.inaturalist.org/observations/103460419</a> |
| 137 | Pastor roseus | Rosy Starling | 2016/11/23 | 3 | 0 | 13.41773820 | 80.31852520 | <a href="https://www.inaturalist.org/observations/92321608">https://www.inaturalist.org/observations/92321608</a>   |

|     |               |               |            |   |   |             |             |                                                                                                                     |
|-----|---------------|---------------|------------|---|---|-------------|-------------|---------------------------------------------------------------------------------------------------------------------|
| 138 | Pastor roseus | Rosy Starling | 2022/3/25  | 2 | 0 | 13.51103500 | 79.32277833 | <a href="https://www.inaturalist.org/observations/111898668">https://www.inaturalist.org/observations/111898668</a> |
| 139 | Pastor roseus | Rosy Starling | 2022/3/14  | 3 | 0 | 13.51888000 | 79.32349500 | <a href="https://www.inaturalist.org/observations/115057385">https://www.inaturalist.org/observations/115057385</a> |
| 140 | Pastor roseus | Rosy Starling | 2019/1/25  | 3 | 0 | 13.65294753 | 76.06936908 | <a href="https://www.inaturalist.org/observations/82860165">https://www.inaturalist.org/observations/82860165</a>   |
| 141 | Pastor roseus | Rosy Starling | 2019/1/25  | 3 | 0 | 13.65294753 | 76.06936908 | <a href="https://www.inaturalist.org/observations/82860167">https://www.inaturalist.org/observations/82860167</a>   |
| 142 | Pastor roseus | Rosy Starling | 2017/12/25 | 4 | 0 | 13.72421330 | 80.12344490 | <a href="https://www.inaturalist.org/observations/46190264">https://www.inaturalist.org/observations/46190264</a>   |
| 143 | Pastor roseus | Rosy Starling | 2018/12/20 | 3 | 0 | 13.73940723 | 77.32000273 | <a href="https://www.inaturalist.org/observations/109729556">https://www.inaturalist.org/observations/109729556</a> |
| 144 | Pastor roseus | Rosy Starling | 2016/2/29  | 1 | 0 | 14.13707308 | 77.59586149 | <a href="https://www.inaturalist.org/observations/65643572">https://www.inaturalist.org/observations/65643572</a>   |
| 145 | Pastor roseus | Rosy Starling | 2021/1/20  | 3 | 0 | 14.20020756 | 77.80098718 | <a href="https://www.inaturalist.org/observations/88442260">https://www.inaturalist.org/observations/88442260</a>   |
| 146 | Pastor roseus | Rosy Starling | 2022/1/19  | 3 | 0 | 14.25993772 | 76.98778914 | <a href="https://www.inaturalist.org/observations/105201762">https://www.inaturalist.org/observations/105201762</a> |
| 147 | Pastor roseus | Rosy Starling | 2022/2/9   | 4 | 0 | 14.27076717 | 76.99312606 | <a href="https://www.inaturalist.org/observations/106439630">https://www.inaturalist.org/observations/106439630</a> |
| 148 | Pastor roseus | Rosy Starling | 2019/3/19  | 5 | 0 | 14.57066642 | 74.94006157 | <a href="https://www.inaturalist.org/observations/72441286">https://www.inaturalist.org/observations/72441286</a>   |
| 149 | Pastor roseus | Rosy Starling | 2019/3/19  | 6 | 0 | 14.57066642 | 74.94006157 | <a href="https://www.inaturalist.org/observations/73315548">https://www.inaturalist.org/observations/73315548</a>   |
| 150 | Pastor roseus | Rosy Starling | 2019/1/30  | 3 | 0 | 15.33501320 | 76.46002400 | <a href="https://www.inaturalist.org/observations/84849976">https://www.inaturalist.org/observations/84849976</a>   |
| 151 | Pastor roseus | Rosy Starling | 2019/1/22  | 1 | 0 | 15.35289832 | 74.03380759 | <a href="https://www.inaturalist.org/observations/63643624">https://www.inaturalist.org/observations/63643624</a>   |
| 152 | Pastor roseus | Rosy Starling | 2019/2/20  | 5 | 0 | 15.45644326 | 73.83379793 | <a href="https://www.inaturalist.org/observations/24870237">https://www.inaturalist.org/observations/24870237</a>   |
| 153 | Pastor roseus | Rosy Starling | 2002/2/28  | 4 | 0 | 15.49256310 | 73.77315610 | <a href="https://www.inaturalist.org/observations/36989232">https://www.inaturalist.org/observations/36989232</a>   |
| 154 | Pastor roseus | Rosy Starling | 2002/3/1   | 4 | 0 | 15.49256310 | 73.77315610 | <a href="https://www.inaturalist.org/observations/36989233">https://www.inaturalist.org/observations/36989233</a>   |
| 155 | Pastor roseus | Rosy Starling | 2018/11/17 | 1 | 0 | 15.53669847 | 73.76424618 | <a href="https://www.inaturalist.org/observations/50064536">https://www.inaturalist.org/observations/50064536</a>   |
| 156 | Pastor roseus | Rosy Starling | 1999/12/8  | 1 | 0 | 15.56408571 | 73.75518348 | <a href="https://www.inaturalist.org/observations/42317311">https://www.inaturalist.org/observations/42317311</a>   |
| 157 | Pastor roseus | Rosy Starling | 2018/2/13  | 2 | 0 | 15.73954230 | 78.32708323 | <a href="https://www.inaturalist.org/observations/64952784">https://www.inaturalist.org/observations/64952784</a>   |
| 158 | Pastor roseus | Rosy Starling | 2022/1/29  | 2 | 0 | 15.85565000 | 80.50690000 | <a href="https://www.inaturalist.org/observations/106363105">https://www.inaturalist.org/observations/106363105</a> |
| 159 | Pastor roseus | Rosy Starling | 2020/12/30 | 3 | 0 | 16.18427535 | 77.40994960 | <a href="https://www.inaturalist.org/observations/81796899">https://www.inaturalist.org/observations/81796899</a>   |
| 160 | Pastor roseus | Rosy Starling | 2019/12/24 | 1 | 0 | 16.19095941 | 81.20689675 | <a href="https://www.inaturalist.org/observations/36915382">https://www.inaturalist.org/observations/36915382</a>   |

|     |               |               |            |   |   |             |             |                                                                                                                     |
|-----|---------------|---------------|------------|---|---|-------------|-------------|---------------------------------------------------------------------------------------------------------------------|
| 161 | Pastor roseus | Rosy Starling | 2019/2/17  | 2 | 0 | 16.35570560 | 78.83346130 | <a href="https://www.inaturalist.org/observations/63621564">https://www.inaturalist.org/observations/63621564</a>   |
| 162 | Pastor roseus | Rosy Starling | 2019/3/3   | 4 | 0 | 16.35570560 | 78.83346130 | <a href="https://www.inaturalist.org/observations/87986699">https://www.inaturalist.org/observations/87986699</a>   |
| 163 | Pastor roseus | Rosy Starling | 2022/2/20  | 5 | 0 | 16.40877180 | 80.70754036 | <a href="https://www.inaturalist.org/observations/108113586">https://www.inaturalist.org/observations/108113586</a> |
| 164 | Pastor roseus | Rosy Starling | 2022/1/30  | 1 | 0 | 16.41111338 | 80.70873673 | <a href="https://www.inaturalist.org/observations/106076688">https://www.inaturalist.org/observations/106076688</a> |
| 165 | Pastor roseus | Rosy Starling | 2012/3/3   | 4 | 0 | 16.50024391 | 80.59394776 | <a href="https://www.inaturalist.org/observations/93591655">https://www.inaturalist.org/observations/93591655</a>   |
| 166 | Pastor roseus | Rosy Starling | 2015/1/24  | 3 | 0 | 16.50418502 | 79.27365599 | <a href="https://www.inaturalist.org/observations/94201099">https://www.inaturalist.org/observations/94201099</a>   |
| 167 | Pastor roseus | Rosy Starling | 2020/1/3   | 3 | 0 | 16.52973380 | 80.59211352 | <a href="https://www.inaturalist.org/observations/37551504">https://www.inaturalist.org/observations/37551504</a>   |
| 168 | Pastor roseus | Rosy Starling | 2020/11/22 | 3 | 0 | 16.55493600 | 80.72975710 | <a href="https://www.inaturalist.org/observations/92664030">https://www.inaturalist.org/observations/92664030</a>   |
| 169 | Pastor roseus | Rosy Starling | 2020/11/22 | 2 | 0 | 16.55493600 | 80.72975710 | <a href="https://www.inaturalist.org/observations/92664053">https://www.inaturalist.org/observations/92664053</a>   |
| 170 | Pastor roseus | Rosy Starling | 2022/1/14  | 1 | 0 | 16.55828167 | 81.19467500 | <a href="https://www.inaturalist.org/observations/105564530">https://www.inaturalist.org/observations/105564530</a> |
| 171 | Pastor roseus | Rosy Starling | 2022/1/14  | 1 | 0 | 16.55828167 | 81.19467500 | <a href="https://www.inaturalist.org/observations/105570877">https://www.inaturalist.org/observations/105570877</a> |
| 172 | Pastor roseus | Rosy Starling | 2022/1/14  | 2 | 0 | 16.55828167 | 81.19467500 | <a href="https://www.inaturalist.org/observations/105774498">https://www.inaturalist.org/observations/105774498</a> |
| 173 | Pastor roseus | Rosy Starling | 2022/1/14  | 3 | 0 | 16.55846167 | 81.19447167 | <a href="https://www.inaturalist.org/observations/104969286">https://www.inaturalist.org/observations/104969286</a> |
| 174 | Pastor roseus | Rosy Starling | 2022/1/14  | 1 | 0 | 16.55846167 | 81.19447167 | <a href="https://www.inaturalist.org/observations/105565028">https://www.inaturalist.org/observations/105565028</a> |
| 175 | Pastor roseus | Rosy Starling | 2022/1/14  | 1 | 0 | 16.55850000 | 81.19447500 | <a href="https://www.inaturalist.org/observations/105564807">https://www.inaturalist.org/observations/105564807</a> |
| 176 | Pastor roseus | Rosy Starling | 2020/12/6  | 2 | 0 | 16.55921794 | 80.76100097 | <a href="https://www.inaturalist.org/observations/92452632">https://www.inaturalist.org/observations/92452632</a>   |
| 177 | Pastor roseus | Rosy Starling | 2020/12/6  | 4 | 0 | 16.55921794 | 80.76100097 | <a href="https://www.inaturalist.org/observations/92452641">https://www.inaturalist.org/observations/92452641</a>   |
| 178 | Pastor roseus | Rosy Starling | 2020/11/22 | 2 | 0 | 16.56399833 | 80.74516500 | <a href="https://www.inaturalist.org/observations/65397634">https://www.inaturalist.org/observations/65397634</a>   |
| 179 | Pastor roseus | Rosy Starling | 2021/12/27 | 1 | 0 | 16.58602475 | 80.82345545 | <a href="https://www.inaturalist.org/observations/103745487">https://www.inaturalist.org/observations/103745487</a> |
| 180 | Pastor roseus | Rosy Starling | 2020/12/27 | 3 | 0 | 16.59577924 | 80.61818580 | <a href="https://www.inaturalist.org/observations/90049729">https://www.inaturalist.org/observations/90049729</a>   |
| 181 | Pastor roseus | Rosy Starling | 2022/2/18  | 4 | 0 | 16.60132391 | 80.58064514 | <a href="https://www.inaturalist.org/observations/107609868">https://www.inaturalist.org/observations/107609868</a> |
| 182 | Pastor roseus | Rosy Starling | 2022/1/13  | 1 | 0 | 16.64999933 | 81.21666670 | <a href="https://www.inaturalist.org/observations/104854789">https://www.inaturalist.org/observations/104854789</a> |
| 183 | Pastor roseus | Rosy Starling | 2022/2/10  | 3 | 0 | 16.65012500 | 81.24527167 | <a href="https://www.inaturalist.org/observations/111907232">https://www.inaturalist.org/observations/111907232</a> |

|     |               |               |            |   |   |             |             |                                                                                                                     |
|-----|---------------|---------------|------------|---|---|-------------|-------------|---------------------------------------------------------------------------------------------------------------------|
| 184 | Pastor roseus | Rosy Starling | 2022/2/10  | 5 | 0 | 16.65013000 | 81.24527333 | <a href="https://www.inaturalist.org/observations/106488119">https://www.inaturalist.org/observations/106488119</a> |
| 185 | Pastor roseus | Rosy Starling | 2020/12/13 | 3 | 0 | 16.65462089 | 80.46307863 | <a href="https://www.inaturalist.org/observations/92659357">https://www.inaturalist.org/observations/92659357</a>   |
| 186 | Pastor roseus | Rosy Starling | 2022/1/14  | 1 | 0 | 16.65652667 | 81.25346833 | <a href="https://www.inaturalist.org/observations/104918940">https://www.inaturalist.org/observations/104918940</a> |
| 187 | Pastor roseus | Rosy Starling | 2022/1/14  | 3 | 0 | 16.65652667 | 81.25346833 | <a href="https://www.inaturalist.org/observations/116124045">https://www.inaturalist.org/observations/116124045</a> |
| 188 | Pastor roseus | Rosy Starling | 2022/1/14  | 1 | 0 | 16.65653667 | 81.25345667 | <a href="https://www.inaturalist.org/observations/105563853">https://www.inaturalist.org/observations/105563853</a> |
| 189 | Pastor roseus | Rosy Starling | 2022/1/14  | 2 | 0 | 16.65653667 | 81.25345667 | <a href="https://www.inaturalist.org/observations/105775312">https://www.inaturalist.org/observations/105775312</a> |
| 190 | Pastor roseus | Rosy Starling | 2018/2/18  | 3 | 0 | 16.66497301 | 81.18106842 | <a href="https://www.inaturalist.org/observations/98114807">https://www.inaturalist.org/observations/98114807</a>   |
| 191 | Pastor roseus | Rosy Starling | 2022/1/4   | 5 | 0 | 16.69005556 | 80.77383333 | <a href="https://www.inaturalist.org/observations/104401520">https://www.inaturalist.org/observations/104401520</a> |
| 192 | Pastor roseus | Rosy Starling | 2019/11/13 | 1 | 0 | 16.88650185 | 75.70990551 | <a href="https://www.inaturalist.org/observations/48863100">https://www.inaturalist.org/observations/48863100</a>   |
| 193 | Pastor roseus | Rosy Starling | 2021/10/28 | 4 | 0 | 16.88650185 | 75.70990551 | <a href="https://www.inaturalist.org/observations/99674824">https://www.inaturalist.org/observations/99674824</a>   |
| 194 | Pastor roseus | Rosy Starling | 2022/2/19  | 5 | 0 | 17.01256180 | 81.72738300 | <a href="https://www.inaturalist.org/observations/108345002">https://www.inaturalist.org/observations/108345002</a> |
| 195 | Pastor roseus | Rosy Starling | 2012/10/6  | 8 | 0 | 17.08073162 | 79.29854393 | <a href="http://www.inaturalist.org/observations/4290035">http://www.inaturalist.org/observations/4290035</a>       |
| 196 | Pastor roseus | Rosy Starling | 2017/11/29 | 4 | 0 | 17.35939576 | 78.30086276 | <a href="https://www.inaturalist.org/observations/9111098">https://www.inaturalist.org/observations/9111098</a>     |
| 197 | Pastor roseus | Rosy Starling | 2017/11/28 | 4 | 0 | 17.36060669 | 78.29922795 | <a href="https://www.inaturalist.org/observations/9105976">https://www.inaturalist.org/observations/9105976</a>     |
| 198 | Pastor roseus | Rosy Starling | 2021/1/23  | 2 | 0 | 17.37626560 | 78.29886370 | <a href="https://www.inaturalist.org/observations/69370882">https://www.inaturalist.org/observations/69370882</a>   |
| 199 | Pastor roseus | Rosy Starling | 2019/5/13  | 7 | 0 | 17.37938369 | 78.32286163 | <a href="https://www.inaturalist.org/observations/25072282">https://www.inaturalist.org/observations/25072282</a>   |
| 200 | Pastor roseus | Rosy Starling | 2016/1/12  | 2 | 0 | 17.50309838 | 76.18295396 | <a href="https://www.inaturalist.org/observations/38664038">https://www.inaturalist.org/observations/38664038</a>   |
| 201 | Pastor roseus | Rosy Starling | 2020/12/25 | 1 | 0 | 17.63556488 | 74.55682956 | <a href="https://www.inaturalist.org/observations/67128168">https://www.inaturalist.org/observations/67128168</a>   |
| 202 | Pastor roseus | Rosy Starling | 2021/12/19 | 6 | 0 | 17.63975500 | 78.06936833 | <a href="https://www.inaturalist.org/observations/121718502">https://www.inaturalist.org/observations/121718502</a> |
| 203 | Pastor roseus | Rosy Starling | 2019/12/22 | 5 | 0 | 17.65524480 | 78.07606880 | <a href="https://www.inaturalist.org/observations/63700460">https://www.inaturalist.org/observations/63700460</a>   |
| 204 | Pastor roseus | Rosy Starling | 2022/1/21  | 1 | 0 | 17.65524480 | 78.07606880 | <a href="https://www.inaturalist.org/observations/105428151">https://www.inaturalist.org/observations/105428151</a> |
| 205 | Pastor roseus | Rosy Starling | 2022/2/20  | 4 | 0 | 17.74960000 | 77.92780000 | <a href="https://www.inaturalist.org/observations/107178569">https://www.inaturalist.org/observations/107178569</a> |
| 206 | Pastor roseus | Rosy Starling | 2022/2/20  | 2 | 0 | 17.74960000 | 77.92780000 | <a href="https://www.inaturalist.org/observations/107178575">https://www.inaturalist.org/observations/107178575</a> |

|     |               |               |            |   |   |             |             |                                                                                                                     |
|-----|---------------|---------------|------------|---|---|-------------|-------------|---------------------------------------------------------------------------------------------------------------------|
| 207 | Pastor roseus | Rosy Starling | 2022/2/20  | 5 | 0 | 17.74960000 | 77.92780000 | <a href="https://www.inaturalist.org/observations/107178632">https://www.inaturalist.org/observations/107178632</a> |
| 208 | Pastor roseus | Rosy Starling | 2022/2/20  | 5 | 0 | 17.74960000 | 77.92780000 | <a href="https://www.inaturalist.org/observations/107178634">https://www.inaturalist.org/observations/107178634</a> |
| 209 | Pastor roseus | Rosy Starling | 2022/2/20  | 3 | 0 | 17.74960000 | 77.92780000 | <a href="https://www.inaturalist.org/observations/107178635">https://www.inaturalist.org/observations/107178635</a> |
| 210 | Pastor roseus | Rosy Starling | 2016/12/14 | 4 | 0 | 17.77709310 | 73.11873270 | <a href="https://www.inaturalist.org/observations/30797796">https://www.inaturalist.org/observations/30797796</a>   |
| 211 | Pastor roseus | Rosy Starling | 2015/3/16  | 4 | 0 | 17.82475351 | 75.87173245 | <a href="https://www.inaturalist.org/observations/66421012">https://www.inaturalist.org/observations/66421012</a>   |
| 212 | Pastor roseus | Rosy Starling | 2015/11/4  | 4 | 0 | 17.83395426 | 75.86684220 | <a href="https://www.inaturalist.org/observations/66046879">https://www.inaturalist.org/observations/66046879</a>   |
| 213 | Pastor roseus | Rosy Starling | 2018/2/6   | 3 | 0 | 18.11243700 | 79.01930000 | <a href="https://www.inaturalist.org/observations/63558743">https://www.inaturalist.org/observations/63558743</a>   |
| 214 | Pastor roseus | Rosy Starling | 2018/2/6   | 3 | 0 | 18.11243720 | 79.01929970 | <a href="https://www.inaturalist.org/observations/63573534">https://www.inaturalist.org/observations/63573534</a>   |
| 215 | Pastor roseus | Rosy Starling | 2015/3/15  | 5 | 0 | 18.14237324 | 73.79151486 | <a href="https://www.inaturalist.org/observations/92072549">https://www.inaturalist.org/observations/92072549</a>   |
| 216 | Pastor roseus | Rosy Starling | 2020/10/30 | 2 | 0 | 18.15668294 | 74.59635694 | <a href="https://www.inaturalist.org/observations/67232906">https://www.inaturalist.org/observations/67232906</a>   |
| 217 | Pastor roseus | Rosy Starling | 2021/10/24 | 3 | 0 | 18.21839333 | 74.31741000 | <a href="https://www.inaturalist.org/observations/121383486">https://www.inaturalist.org/observations/121383486</a> |
| 218 | Pastor roseus | Rosy Starling | 2018/11/20 | 1 | 0 | 18.23059500 | 74.79441333 | <a href="https://www.inaturalist.org/observations/53839486">https://www.inaturalist.org/observations/53839486</a>   |
| 219 | Pastor roseus | Rosy Starling | 2017/12/23 | 1 | 0 | 18.26338580 | 74.80422680 | <a href="https://www.inaturalist.org/observations/45570622">https://www.inaturalist.org/observations/45570622</a>   |
| 220 | Pastor roseus | Rosy Starling | 2018/11/27 | 1 | 0 | 18.26600333 | 74.80142500 | <a href="https://www.inaturalist.org/observations/53841839">https://www.inaturalist.org/observations/53841839</a>   |
| 221 | Pastor roseus | Rosy Starling | 2017/11/16 | 2 | 0 | 18.27352000 | 74.75733639 | <a href="https://www.inaturalist.org/observations/55011477">https://www.inaturalist.org/observations/55011477</a>   |
| 222 | Pastor roseus | Rosy Starling | 2022/2/12  | 3 | 0 | 18.27886000 | 74.78027560 | <a href="https://www.inaturalist.org/observations/132293430">https://www.inaturalist.org/observations/132293430</a> |
| 223 | Pastor roseus | Rosy Starling | 2011/3/6   | 3 | 0 | 18.27891820 | 74.78029550 | <a href="https://www.inaturalist.org/observations/55253538">https://www.inaturalist.org/observations/55253538</a>   |
| 224 | Pastor roseus | Rosy Starling | 2020/12/26 | 1 | 0 | 18.27891820 | 74.78029550 | <a href="https://www.inaturalist.org/observations/67302752">https://www.inaturalist.org/observations/67302752</a>   |
| 225 | Pastor roseus | Rosy Starling | 2018/11/27 | 1 | 0 | 18.28333167 | 74.75579833 | <a href="https://www.inaturalist.org/observations/53841582">https://www.inaturalist.org/observations/53841582</a>   |
| 226 | Pastor roseus | Rosy Starling | 2018/11/20 | 2 | 0 | 18.28639000 | 74.75534333 | <a href="https://www.inaturalist.org/observations/53840850">https://www.inaturalist.org/observations/53840850</a>   |
| 227 | Pastor roseus | Rosy Starling | 2011/3/6   | 2 | 0 | 18.29158270 | 74.77408000 | <a href="https://www.inaturalist.org/observations/56006660">https://www.inaturalist.org/observations/56006660</a>   |
| 228 | Pastor roseus | Rosy Starling | 2022/1/23  | 2 | 0 | 18.29167060 | 74.77390340 | <a href="https://www.inaturalist.org/observations/105910958">https://www.inaturalist.org/observations/105910958</a> |
| 229 | Pastor roseus | Rosy Starling | 2007/11/17 | 2 | 0 | 18.29801044 | 74.76206187 | <a href="https://www.inaturalist.org/observations/44451388">https://www.inaturalist.org/observations/44451388</a>   |



|     |               |               |            |   |   |             |             |                                                                                                                     |
|-----|---------------|---------------|------------|---|---|-------------|-------------|---------------------------------------------------------------------------------------------------------------------|
| 230 | Pastor roseus | Rosy Starling | 2018/10/29 | 2 | 0 | 18.30173000 | 74.78177500 | <a href="https://www.inaturalist.org/observations/53935484">https://www.inaturalist.org/observations/53935484</a>   |
| 231 | Pastor roseus | Rosy Starling | 2018/10/29 | 1 | 0 | 18.30236500 | 74.78186500 | <a href="https://www.inaturalist.org/observations/53935483">https://www.inaturalist.org/observations/53935483</a>   |
| 232 | Pastor roseus | Rosy Starling | 2014/10/19 | 2 | 0 | 18.35154150 | 74.36754460 | <a href="https://www.inaturalist.org/observations/123544928">https://www.inaturalist.org/observations/123544928</a> |
| 233 | Pastor roseus | Rosy Starling | 2012/2/18  | 5 | 0 | 18.45307948 | 73.44468076 | <a href="https://www.inaturalist.org/observations/17446420">https://www.inaturalist.org/observations/17446420</a>   |
| 234 | Pastor roseus | Rosy Starling | 2020/12/24 | 3 | 0 | 18.47719932 | 75.01436044 | <a href="https://www.inaturalist.org/observations/70141952">https://www.inaturalist.org/observations/70141952</a>   |
| 235 | Pastor roseus | Rosy Starling | 2020/12/24 | 5 | 0 | 18.48272786 | 75.02843399 | <a href="https://www.inaturalist.org/observations/108170636">https://www.inaturalist.org/observations/108170636</a> |
| 236 | Pastor roseus | Rosy Starling | 2019/1/16  | 3 | 0 | 18.62759139 | 72.89878472 | <a href="https://www.inaturalist.org/observations/53242199">https://www.inaturalist.org/observations/53242199</a>   |
| 237 | Pastor roseus | Rosy Starling | 2018/12/18 | 1 | 0 | 18.64015500 | 72.89804667 | <a href="https://www.inaturalist.org/observations/53458638">https://www.inaturalist.org/observations/53458638</a>   |
| 238 | Pastor roseus | Rosy Starling | 2019/1/13  | 2 | 0 | 18.87723460 | 72.92833910 | <a href="https://www.inaturalist.org/observations/44451862">https://www.inaturalist.org/observations/44451862</a>   |
| 239 | Pastor roseus | Rosy Starling | 2019/1/13  | 7 | 0 | 18.89992800 | 72.95202700 | <a href="https://www.inaturalist.org/observations/19637229">https://www.inaturalist.org/observations/19637229</a>   |
| 240 | Pastor roseus | Rosy Starling | 2018/12/30 | 1 | 0 | 19.01659084 | 73.00593976 | <a href="https://www.inaturalist.org/observations/104248735">https://www.inaturalist.org/observations/104248735</a> |
| 241 | Pastor roseus | Rosy Starling | 2021/3/24  | 4 | 0 | 19.06160642 | 72.90697094 | <a href="https://www.inaturalist.org/observations/84505975">https://www.inaturalist.org/observations/84505975</a>   |
| 242 | Pastor roseus | Rosy Starling | 2019/4/4   | 4 | 0 | 19.13680530 | 72.93464590 | <a href="https://www.inaturalist.org/observations/21977012">https://www.inaturalist.org/observations/21977012</a>   |
| 243 | Pastor roseus | Rosy Starling | 2020/3/29  | 2 | 0 | 19.14048113 | 74.72462739 | <a href="https://www.inaturalist.org/observations/42076303">https://www.inaturalist.org/observations/42076303</a>   |
| 244 | Pastor roseus | Rosy Starling | 2021/3/29  | 3 | 0 | 19.14190550 | 72.96462840 | <a href="https://www.inaturalist.org/observations/72351682">https://www.inaturalist.org/observations/72351682</a>   |
| 245 | Pastor roseus | Rosy Starling | 2017/12/30 | 1 | 0 | 19.14192483 | 72.96462536 | <a href="https://www.inaturalist.org/observations/56406598">https://www.inaturalist.org/observations/56406598</a>   |
| 246 | Pastor roseus | Rosy Starling | 2019/1/4   | 1 | 0 | 19.14192483 | 72.96462536 | <a href="https://www.inaturalist.org/observations/56496737">https://www.inaturalist.org/observations/56496737</a>   |
| 247 | Pastor roseus | Rosy Starling | 2019/1/21  | 1 | 0 | 19.14192483 | 72.96462536 | <a href="https://www.inaturalist.org/observations/56496749">https://www.inaturalist.org/observations/56496749</a>   |
| 248 | Pastor roseus | Rosy Starling | 2019/2/14  | 1 | 0 | 19.14192483 | 72.96462536 | <a href="https://www.inaturalist.org/observations/56496757">https://www.inaturalist.org/observations/56496757</a>   |
| 249 | Pastor roseus | Rosy Starling | 2019/3/29  | 2 | 0 | 19.14192483 | 72.96462536 | <a href="https://www.inaturalist.org/observations/56496776">https://www.inaturalist.org/observations/56496776</a>   |
| 250 | Pastor roseus | Rosy Starling | 2019/3/29  | 2 | 0 | 19.14192483 | 72.96462536 | <a href="https://www.inaturalist.org/observations/56496778">https://www.inaturalist.org/observations/56496778</a>   |
| 251 | Pastor roseus | Rosy Starling | 2019/3/29  | 3 | 0 | 19.14192483 | 72.96462536 | <a href="https://www.inaturalist.org/observations/56496780">https://www.inaturalist.org/observations/56496780</a>   |
| 252 | Pastor roseus | Rosy Starling | 2019/3/29  | 3 | 0 | 19.14192483 | 72.96462536 | <a href="https://www.inaturalist.org/observations/56496784">https://www.inaturalist.org/observations/56496784</a>   |

|     |               |               |            |   |   |             |             |                                                                                                                     |
|-----|---------------|---------------|------------|---|---|-------------|-------------|---------------------------------------------------------------------------------------------------------------------|
| 253 | Pastor roseus | Rosy Starling | 2019/4/19  | 3 | 0 | 19.14192483 | 72.96462536 | <a href="https://www.inaturalist.org/observations/56496795">https://www.inaturalist.org/observations/56496795</a>   |
| 254 | Pastor roseus | Rosy Starling | 2020/9/21  | 1 | 0 | 19.14192483 | 72.96462536 | <a href="https://www.inaturalist.org/observations/60594186">https://www.inaturalist.org/observations/60594186</a>   |
| 255 | Pastor roseus | Rosy Starling | 2021/10/29 | 3 | 0 | 19.14192483 | 72.96462536 | <a href="https://www.inaturalist.org/observations/99776334">https://www.inaturalist.org/observations/99776334</a>   |
| 256 | Pastor roseus | Rosy Starling | 2021/10/29 | 3 | 0 | 19.14192483 | 72.96462536 | <a href="https://www.inaturalist.org/observations/99776339">https://www.inaturalist.org/observations/99776339</a>   |
| 257 | Pastor roseus | Rosy Starling | 2016/2/6   | 3 | 0 | 19.14211254 | 72.96468284 | <a href="https://www.inaturalist.org/observations/52342513">https://www.inaturalist.org/observations/52342513</a>   |
| 258 | Pastor roseus | Rosy Starling | 2019/2/10  | 6 | 0 | 19.14340019 | 72.96190359 | <a href="https://www.inaturalist.org/observations/20319274">https://www.inaturalist.org/observations/20319274</a>   |
| 259 | Pastor roseus | Rosy Starling | 2012/2/10  | 7 | 0 | 19.14418136 | 72.96458459 | <a href="http://www.inaturalist.org/observations/221959">http://www.inaturalist.org/observations/221959</a>         |
| 260 | Pastor roseus | Rosy Starling | 2014/10/5  | 1 | 0 | 19.15055340 | 72.95648930 | <a href="https://www.inaturalist.org/observations/41423319">https://www.inaturalist.org/observations/41423319</a>   |
| 261 | Pastor roseus | Rosy Starling | 2022/10/2  | 1 | 0 | 19.15372960 | 72.95663300 | <a href="https://www.inaturalist.org/observations/137278811">https://www.inaturalist.org/observations/137278811</a> |
| 262 | Pastor roseus | Rosy Starling | 2022/2/22  | 2 | 0 | 19.17314569 | 72.83058376 | <a href="https://www.inaturalist.org/observations/120775121">https://www.inaturalist.org/observations/120775121</a> |
| 263 | Pastor roseus | Rosy Starling | 2020/2/25  | 4 | 0 | 19.18915390 | 72.98164297 | <a href="https://www.inaturalist.org/observations/136795895">https://www.inaturalist.org/observations/136795895</a> |
| 264 | Pastor roseus | Rosy Starling | 2018/1/31  | 2 | 0 | 19.20993260 | 72.82288670 | <a href="https://www.inaturalist.org/observations/41159456">https://www.inaturalist.org/observations/41159456</a>   |
| 265 | Pastor roseus | Rosy Starling | 2018/1/28  | 1 | 0 | 19.20993260 | 72.82288670 | <a href="https://www.inaturalist.org/observations/41164052">https://www.inaturalist.org/observations/41164052</a>   |
| 266 | Pastor roseus | Rosy Starling | 2020/1/19  | 0 | 0 | 19.21935840 | 73.06932020 | <a href="https://www.inaturalist.org/observations/37746450">https://www.inaturalist.org/observations/37746450</a>   |
| 267 | Pastor roseus | Rosy Starling | 2019/2/17  | 6 | 0 | 19.23199519 | 72.87411422 | <a href="https://www.inaturalist.org/observations/20548871">https://www.inaturalist.org/observations/20548871</a>   |
| 268 | Pastor roseus | Rosy Starling | 2018/10/21 | 5 | 0 | 19.24238572 | 72.99684804 | <a href="https://www.inaturalist.org/observations/18087153">https://www.inaturalist.org/observations/18087153</a>   |
| 269 | Pastor roseus | Rosy Starling | 2018/2/24  | 4 | 0 | 19.29878400 | 72.90653100 | <a href="https://www.inaturalist.org/observations/58141532">https://www.inaturalist.org/observations/58141532</a>   |
| 270 | Pastor roseus | Rosy Starling | 2021/3/24  | 1 | 0 | 19.36924910 | 72.81104759 | <a href="https://www.inaturalist.org/observations/95303203">https://www.inaturalist.org/observations/95303203</a>   |
| 271 | Pastor roseus | Rosy Starling | 2020/12/6  | 3 | 0 | 19.44014850 | 72.79209190 | <a href="https://www.inaturalist.org/observations/66189612">https://www.inaturalist.org/observations/66189612</a>   |
| 272 | Pastor roseus | Rosy Starling | 2020/12/6  | 2 | 0 | 19.44014850 | 72.79209190 | <a href="https://www.inaturalist.org/observations/66189613">https://www.inaturalist.org/observations/66189613</a>   |
| 273 | Pastor roseus | Rosy Starling | 2020/12/6  | 3 | 0 | 19.44014850 | 72.79209190 | <a href="https://www.inaturalist.org/observations/66189615">https://www.inaturalist.org/observations/66189615</a>   |
| 274 | Pastor roseus | Rosy Starling | 2020/12/6  | 2 | 0 | 19.44014850 | 72.79209190 | <a href="https://www.inaturalist.org/observations/66189617">https://www.inaturalist.org/observations/66189617</a>   |
| 275 | Pastor roseus | Rosy Starling | 2020/12/6  | 2 | 0 | 19.44014850 | 72.79209190 | <a href="https://www.inaturalist.org/observations/66189626">https://www.inaturalist.org/observations/66189626</a>   |

|     |               |               |            |   |   |             |             |                                                                                                                     |
|-----|---------------|---------------|------------|---|---|-------------|-------------|---------------------------------------------------------------------------------------------------------------------|
| 276 | Pastor roseus | Rosy Starling | 2020/12/19 | 3 | 0 | 19.45591850 | 72.77628150 | <a href="https://www.inaturalist.org/observations/66996713">https://www.inaturalist.org/observations/66996713</a>   |
| 277 | Pastor roseus | Rosy Starling | 2020/12/19 | 3 | 0 | 19.45591850 | 72.77628150 | <a href="https://www.inaturalist.org/observations/66996717">https://www.inaturalist.org/observations/66996717</a>   |
| 278 | Pastor roseus | Rosy Starling | 2022/1/22  | 4 | 0 | 19.45727700 | 81.87290290 | <a href="https://www.inaturalist.org/observations/107186740">https://www.inaturalist.org/observations/107186740</a> |
| 279 | Pastor roseus | Rosy Starling | 2021/12/12 | 4 | 0 | 19.45807790 | 72.80483540 | <a href="https://www.inaturalist.org/observations/130360157">https://www.inaturalist.org/observations/130360157</a> |
| 280 | Pastor roseus | Rosy Starling | 2020/12/6  | 4 | 0 | 19.45968116 | 72.79629730 | <a href="https://www.inaturalist.org/observations/66369577">https://www.inaturalist.org/observations/66369577</a>   |
| 281 | Pastor roseus | Rosy Starling | 2020/12/6  | 5 | 0 | 19.45968116 | 72.79629730 | <a href="https://www.inaturalist.org/observations/66369579">https://www.inaturalist.org/observations/66369579</a>   |
| 282 | Pastor roseus | Rosy Starling | 2020/12/6  | 6 | 0 | 19.45968116 | 72.79629730 | <a href="https://www.inaturalist.org/observations/66369584">https://www.inaturalist.org/observations/66369584</a>   |
| 283 | Pastor roseus | Rosy Starling | 2021/12/12 | 1 | 0 | 19.46042482 | 72.79322680 | <a href="https://www.inaturalist.org/observations/103410570">https://www.inaturalist.org/observations/103410570</a> |
| 284 | Pastor roseus | Rosy Starling | 2021/12/12 | 3 | 0 | 19.46042482 | 72.79322680 | <a href="https://www.inaturalist.org/observations/103410571">https://www.inaturalist.org/observations/103410571</a> |
| 285 | Pastor roseus | Rosy Starling | 2021/12/12 | 2 | 0 | 19.46042482 | 72.79322680 | <a href="https://www.inaturalist.org/observations/103410575">https://www.inaturalist.org/observations/103410575</a> |
| 286 | Pastor roseus | Rosy Starling | 2021/12/12 | 1 | 0 | 19.46042482 | 72.79322680 | <a href="https://www.inaturalist.org/observations/103410576">https://www.inaturalist.org/observations/103410576</a> |
| 287 | Pastor roseus | Rosy Starling | 2017/2/18  | 1 | 0 | 19.47368458 | 72.75684618 | <a href="https://www.inaturalist.org/observations/120112117">https://www.inaturalist.org/observations/120112117</a> |
| 288 | Pastor roseus | Rosy Starling | 2022/4/12  | 2 | 0 | 19.50804444 | 73.01498897 | <a href="https://www.inaturalist.org/observations/111430872">https://www.inaturalist.org/observations/111430872</a> |
| 289 | Pastor roseus | Rosy Starling | 2021/11/18 | 4 | 0 | 19.58681234 | 75.36540777 | <a href="https://www.inaturalist.org/observations/109240577">https://www.inaturalist.org/observations/109240577</a> |
| 290 | Pastor roseus | Rosy Starling | 2022/2/27  | 4 | 0 | 19.62791700 | 75.02789000 | <a href="https://www.inaturalist.org/observations/107689423">https://www.inaturalist.org/observations/107689423</a> |
| 291 | Pastor roseus | Rosy Starling | 2020/11/18 | 3 | 0 | 19.87849070 | 75.32172180 | <a href="https://www.inaturalist.org/observations/65127496">https://www.inaturalist.org/observations/65127496</a>   |
| 292 | Pastor roseus | Rosy Starling | 2020/11/1  | 4 | 0 | 19.90274084 | 75.31047296 | <a href="https://www.inaturalist.org/observations/64051238">https://www.inaturalist.org/observations/64051238</a>   |
| 293 | Pastor roseus | Rosy Starling | 2020/12/2  | 4 | 0 | 20.00786056 | 74.10429228 | <a href="https://www.inaturalist.org/observations/66181369">https://www.inaturalist.org/observations/66181369</a>   |
| 294 | Pastor roseus | Rosy Starling | 2011/2/15  | 2 | 0 | 20.11655422 | 72.74000980 | <a href="https://www.inaturalist.org/observations/106900311">https://www.inaturalist.org/observations/106900311</a> |
| 295 | Pastor roseus | Rosy Starling | 2020/10/31 | 3 | 0 | 20.66293552 | 77.10421827 | <a href="https://www.inaturalist.org/observations/63877240">https://www.inaturalist.org/observations/63877240</a>   |
| 296 | Pastor roseus | Rosy Starling | 2020/10/31 | 1 | 0 | 20.66699043 | 77.11311076 | <a href="https://www.inaturalist.org/observations/63877543">https://www.inaturalist.org/observations/63877543</a>   |
| 297 | Pastor roseus | Rosy Starling | 2021/1/12  | 3 | 0 | 20.89503865 | 74.79227655 | <a href="https://www.inaturalist.org/observations/78248312">https://www.inaturalist.org/observations/78248312</a>   |
| 298 | Pastor roseus | Rosy Starling | 2020/12/31 | 4 | 0 | 20.98960524 | 75.54502911 | <a href="https://www.inaturalist.org/observations/67354118">https://www.inaturalist.org/observations/67354118</a>   |

|     |               |               |            |   |   |             |             |                                                                                                                     |
|-----|---------------|---------------|------------|---|---|-------------|-------------|---------------------------------------------------------------------------------------------------------------------|
| 299 | Pastor roseus | Rosy Starling | 2021/1/29  | 2 | 0 | 21.01872843 | 81.46403644 | <a href="https://www.inaturalist.org/observations/68751990">https://www.inaturalist.org/observations/68751990</a>   |
| 300 | Pastor roseus | Rosy Starling | 2020/12/21 | 1 | 0 | 21.02797385 | 81.45817816 | <a href="https://www.inaturalist.org/observations/68155788">https://www.inaturalist.org/observations/68155788</a>   |
| 301 | Pastor roseus | Rosy Starling | 2021/11/15 | 3 | 0 | 21.03938602 | 81.59141757 | <a href="https://www.inaturalist.org/observations/101264836">https://www.inaturalist.org/observations/101264836</a> |
| 302 | Pastor roseus | Rosy Starling | 2022/3/3   | 4 | 0 | 21.05544788 | 81.97830677 | <a href="https://www.inaturalist.org/observations/107838356">https://www.inaturalist.org/observations/107838356</a> |
| 303 | Pastor roseus | Rosy Starling | 2021/1/27  | 1 | 0 | 21.08156352 | 81.48493923 | <a href="https://www.inaturalist.org/observations/68668634">https://www.inaturalist.org/observations/68668634</a>   |
| 304 | Pastor roseus | Rosy Starling | 2020/3/1   | 2 | 0 | 21.12430540 | 70.82415070 | <a href="https://www.inaturalist.org/observations/104688144">https://www.inaturalist.org/observations/104688144</a> |
| 305 | Pastor roseus | Rosy Starling | 2020/1/19  | 5 | 0 | 21.12939531 | 76.06145158 | <a href="https://www.inaturalist.org/observations/51047850">https://www.inaturalist.org/observations/51047850</a>   |
| 306 | Pastor roseus | Rosy Starling | 2022/2/5   | 3 | 0 | 21.17024000 | 72.83106100 | <a href="https://www.inaturalist.org/observations/106960261">https://www.inaturalist.org/observations/106960261</a> |
| 307 | Pastor roseus | Rosy Starling | 2022/1/27  | 1 | 0 | 21.18126836 | 72.87552505 | <a href="https://www.inaturalist.org/observations/106846481">https://www.inaturalist.org/observations/106846481</a> |
| 308 | Pastor roseus | Rosy Starling | 2021/11/14 | 3 | 0 | 21.19406481 | 81.35094143 | <a href="https://www.inaturalist.org/observations/101696151">https://www.inaturalist.org/observations/101696151</a> |
| 309 | Pastor roseus | Rosy Starling | 2022/2/19  | 2 | 0 | 21.19736723 | 72.93249535 | <a href="https://www.inaturalist.org/observations/107018188">https://www.inaturalist.org/observations/107018188</a> |
| 310 | Pastor roseus | Rosy Starling | 2021/4/11  | 6 | 0 | 21.21273138 | 81.62154280 | <a href="https://www.inaturalist.org/observations/73603088">https://www.inaturalist.org/observations/73603088</a>   |
| 311 | Pastor roseus | Rosy Starling | 2013/3/3   | 3 | 0 | 21.24764480 | 75.54109701 | <a href="https://www.inaturalist.org/observations/85661656">https://www.inaturalist.org/observations/85661656</a>   |
| 312 | Pastor roseus | Rosy Starling | 2018/2/18  | 5 | 0 | 21.28431333 | 81.68111167 | <a href="https://www.inaturalist.org/observations/10257178">https://www.inaturalist.org/observations/10257178</a>   |
| 313 | Pastor roseus | Rosy Starling | 2019/2/16  | 4 | 0 | 21.64545390 | 87.57172625 | <a href="https://www.inaturalist.org/observations/110165882">https://www.inaturalist.org/observations/110165882</a> |
| 314 | Pastor roseus | Rosy Starling | 2014/4/9   | 5 | 0 | 21.75604860 | 72.12570720 | <a href="https://www.inaturalist.org/observations/39749666">https://www.inaturalist.org/observations/39749666</a>   |
| 315 | Pastor roseus | Rosy Starling | 2021/1/24  | 6 | 0 | 21.83918924 | 81.77381717 | <a href="https://www.inaturalist.org/observations/68968507">https://www.inaturalist.org/observations/68968507</a>   |
| 316 | Pastor roseus | Rosy Starling | 2017/12/22 | 3 | 0 | 22.04410790 | 72.02028130 | <a href="https://www.inaturalist.org/observations/54141768">https://www.inaturalist.org/observations/54141768</a>   |
| 317 | Pastor roseus | Rosy Starling | 2019/12/22 | 3 | 0 | 22.04410790 | 72.02028130 | <a href="https://www.inaturalist.org/observations/55601972">https://www.inaturalist.org/observations/55601972</a>   |
| 318 | Pastor roseus | Rosy Starling | 2017/12/22 | 2 | 0 | 22.04410790 | 72.02028130 | <a href="https://www.inaturalist.org/observations/56417894">https://www.inaturalist.org/observations/56417894</a>   |
| 319 | Pastor roseus | Rosy Starling | 2017/12/22 | 2 | 0 | 22.04410790 | 72.02028130 | <a href="https://www.inaturalist.org/observations/56417901">https://www.inaturalist.org/observations/56417901</a>   |
| 320 | Pastor roseus | Rosy Starling | 2017/12/23 | 2 | 0 | 22.04410790 | 72.02028130 | <a href="https://www.inaturalist.org/observations/56417993">https://www.inaturalist.org/observations/56417993</a>   |
| 321 | Pastor roseus | Rosy Starling | 2014/1/9   | 4 | 0 | 22.05404230 | 72.03367320 | <a href="https://www.inaturalist.org/observations/127083411">https://www.inaturalist.org/observations/127083411</a> |

|     |               |               |            |   |   |             |              |                                                                                                                     |
|-----|---------------|---------------|------------|---|---|-------------|--------------|---------------------------------------------------------------------------------------------------------------------|
| 322 | Pastor roseus | Rosy Starling | 2019/3/16  | 2 | 0 | 22.07965450 | 82.14091520  | <a href="https://www.inaturalist.org/observations/59290133">https://www.inaturalist.org/observations/59290133</a>   |
| 323 | Pastor roseus | Rosy Starling | 2021/11/4  | 4 | 0 | 22.25388580 | 68.97850502  | <a href="https://www.inaturalist.org/observations/101380397">https://www.inaturalist.org/observations/101380397</a> |
| 324 | Pastor roseus | Rosy Starling | 2017/1/25  | 5 | 0 | 22.29304367 | 73.19111075  | <a href="https://www.inaturalist.org/observations/65928009">https://www.inaturalist.org/observations/65928009</a>   |
| 325 | Pastor roseus | Rosy Starling | 2012/10/28 | 1 | 0 | 22.30389450 | 70.80215990  | <a href="https://www.inaturalist.org/observations/41278998">https://www.inaturalist.org/observations/41278998</a>   |
| 326 | Pastor roseus | Rosy Starling | 2012/10/28 | 1 | 0 | 22.30389450 | 70.80215990  | <a href="https://www.inaturalist.org/observations/41279024">https://www.inaturalist.org/observations/41279024</a>   |
| 327 | Pastor roseus | Rosy Starling | 2022/1/4   | 3 | 0 | 22.30639667 | 73.27712833  | <a href="https://www.inaturalist.org/observations/120809295">https://www.inaturalist.org/observations/120809295</a> |
| 328 | Pastor roseus | Rosy Starling | 2021/4/13  | 4 | 0 | 22.31271588 | 73.28538168  | <a href="https://www.inaturalist.org/observations/105208883">https://www.inaturalist.org/observations/105208883</a> |
| 329 | Pastor roseus | Rosy Starling | 2020/11/25 | 1 | 0 | 22.43164412 | 114.08840910 | <a href="https://www.inaturalist.org/observations/118553109">https://www.inaturalist.org/observations/118553109</a> |
| 330 | Pastor roseus | Rosy Starling | 2020/1/5   | 3 | 0 | 22.46450510 | 70.07073980  | <a href="https://www.inaturalist.org/observations/51456386">https://www.inaturalist.org/observations/51456386</a>   |
| 331 | Pastor roseus | Rosy Starling | 2018/1/20  | 4 | 0 | 22.46489665 | 70.06780349  | <a href="https://www.inaturalist.org/observations/30382439">https://www.inaturalist.org/observations/30382439</a>   |
| 332 | Pastor roseus | Rosy Starling | 2010/8/10  | 3 | 0 | 22.46561050 | 70.06445610  | <a href="https://www.inaturalist.org/observations/79470018">https://www.inaturalist.org/observations/79470018</a>   |
| 333 | Pastor roseus | Rosy Starling | 2021/10/7  | 1 | 0 | 22.47678599 | 114.03469460 | <a href="https://www.inaturalist.org/observations/115141235">https://www.inaturalist.org/observations/115141235</a> |
| 334 | Pastor roseus | Rosy Starling | 2021/4/9   | 1 | 0 | 22.49668209 | 114.01860470 | <a href="https://www.inaturalist.org/observations/118553157">https://www.inaturalist.org/observations/118553157</a> |
| 335 | Pastor roseus | Rosy Starling | 2021/4/8   | 2 | 0 | 22.50080296 | 114.06513760 | <a href="https://www.inaturalist.org/observations/115268765">https://www.inaturalist.org/observations/115268765</a> |
| 336 | Pastor roseus | Rosy Starling | 2017/3/6   | 3 | 0 | 22.51415730 | 70.15411590  | <a href="https://www.inaturalist.org/observations/37423132">https://www.inaturalist.org/observations/37423132</a>   |
| 337 | Pastor roseus | Rosy Starling | 2016/3/25  | 3 | 0 | 22.51415730 | 70.15411590  | <a href="https://www.inaturalist.org/observations/41357513">https://www.inaturalist.org/observations/41357513</a>   |
| 338 | Pastor roseus | Rosy Starling | 2016/3/25  | 2 | 0 | 22.51415730 | 70.15411590  | <a href="https://www.inaturalist.org/observations/41357541">https://www.inaturalist.org/observations/41357541</a>   |
| 339 | Pastor roseus | Rosy Starling | 2020/1/2   | 4 | 0 | 22.51529000 | 70.02906060  | <a href="https://www.inaturalist.org/observations/51073121">https://www.inaturalist.org/observations/51073121</a>   |
| 340 | Pastor roseus | Rosy Starling | 2019/1/18  | 3 | 0 | 22.51771367 | 72.96727457  | <a href="https://www.inaturalist.org/observations/55169984">https://www.inaturalist.org/observations/55169984</a>   |
| 341 | Pastor roseus | Rosy Starling | 2018/2/25  | 1 | 0 | 22.51987139 | 70.15007139  | <a href="https://www.inaturalist.org/observations/54915745">https://www.inaturalist.org/observations/54915745</a>   |
| 342 | Pastor roseus | Rosy Starling | 2018/2/25  | 3 | 0 | 22.52368460 | 70.14224610  | <a href="https://www.inaturalist.org/observations/33243258">https://www.inaturalist.org/observations/33243258</a>   |
| 343 | Pastor roseus | Rosy Starling | 2019/2/9   | 3 | 0 | 22.52476033 | 72.97283960  | <a href="https://www.inaturalist.org/observations/54070699">https://www.inaturalist.org/observations/54070699</a>   |
| 344 | Pastor roseus | Rosy Starling | 2019/12/24 | 1 | 0 | 22.55218750 | 72.61806250  | <a href="https://www.inaturalist.org/observations/56410561">https://www.inaturalist.org/observations/56410561</a>   |

|     |               |               |            |   |   |             |             |                                                                                                                     |
|-----|---------------|---------------|------------|---|---|-------------|-------------|---------------------------------------------------------------------------------------------------------------------|
| 345 | Pastor roseus | Rosy Starling | 2014/10/2  | 3 | 0 | 22.56451750 | 72.92887100 | <a href="https://www.inaturalist.org/observations/39915528">https://www.inaturalist.org/observations/39915528</a>   |
| 346 | Pastor roseus | Rosy Starling | 2021/12/26 | 7 | 0 | 22.58139590 | 72.93719800 | <a href="https://www.inaturalist.org/observations/113100324">https://www.inaturalist.org/observations/113100324</a> |
| 347 | Pastor roseus | Rosy Starling | 2022/3/10  | 4 | 0 | 22.68740153 | 88.36839926 | <a href="https://www.inaturalist.org/observations/108784317">https://www.inaturalist.org/observations/108784317</a> |
| 348 | Pastor roseus | Rosy Starling | 2022/3/10  | 4 | 0 | 22.68750007 | 88.36704598 | <a href="https://www.inaturalist.org/observations/108784165">https://www.inaturalist.org/observations/108784165</a> |
| 349 | Pastor roseus | Rosy Starling | 2022/3/10  | 4 | 0 | 22.69136094 | 88.36668265 | <a href="https://www.inaturalist.org/observations/108784243">https://www.inaturalist.org/observations/108784243</a> |
| 350 | Pastor roseus | Rosy Starling | 2011/12/3  | 5 | 0 | 22.71872910 | 71.63766940 | <a href="https://www.inaturalist.org/observations/32858952">https://www.inaturalist.org/observations/32858952</a>   |
| 351 | Pastor roseus | Rosy Starling | 2022/9/7   | 6 | 0 | 22.79245360 | 88.29597950 | <a href="https://www.inaturalist.org/observations/134010066">https://www.inaturalist.org/observations/134010066</a> |
| 352 | Pastor roseus | Rosy Starling | 2017/12/30 | 2 | 0 | 22.81789500 | 72.04533900 | <a href="https://www.inaturalist.org/observations/63280323">https://www.inaturalist.org/observations/63280323</a>   |
| 353 | Pastor roseus | Rosy Starling | 2007/3/17  | 2 | 0 | 22.81885280 | 72.04448220 | <a href="https://www.inaturalist.org/observations/54906891">https://www.inaturalist.org/observations/54906891</a>   |
| 354 | Pastor roseus | Rosy Starling | 2019/12/14 | 3 | 0 | 22.82094770 | 72.05718630 | <a href="https://www.inaturalist.org/observations/56614045">https://www.inaturalist.org/observations/56614045</a>   |
| 355 | Pastor roseus | Rosy Starling | 2022/2/17  | 1 | 0 | 22.82094800 | 72.05718600 | <a href="https://www.inaturalist.org/observations/117983057">https://www.inaturalist.org/observations/117983057</a> |
| 356 | Pastor roseus | Rosy Starling | 2022/2/17  | 4 | 0 | 22.82094800 | 72.05718600 | <a href="https://www.inaturalist.org/observations/118116931">https://www.inaturalist.org/observations/118116931</a> |
| 357 | Pastor roseus | Rosy Starling | 2022/9/4   | 2 | 0 | 22.82430435 | 72.05815405 | <a href="https://www.inaturalist.org/observations/135760125">https://www.inaturalist.org/observations/135760125</a> |
| 358 | Pastor roseus | Rosy Starling | 2021/1/31  | 1 | 0 | 22.84329570 | 72.06036200 | <a href="https://www.inaturalist.org/observations/69197036">https://www.inaturalist.org/observations/69197036</a>   |
| 359 | Pastor roseus | Rosy Starling | 2020/3/15  | 3 | 0 | 22.97605610 | 72.60176238 | <a href="https://www.inaturalist.org/observations/40005701">https://www.inaturalist.org/observations/40005701</a>   |
| 360 | Pastor roseus | Rosy Starling | 2021/2/25  | 2 | 0 | 23.02250500 | 72.57136210 | <a href="https://www.inaturalist.org/observations/70856949">https://www.inaturalist.org/observations/70856949</a>   |
| 361 | Pastor roseus | Rosy Starling | 2021/2/24  | 4 | 0 | 23.02296084 | 72.57136188 | <a href="https://www.inaturalist.org/observations/79112779">https://www.inaturalist.org/observations/79112779</a>   |
| 362 | Pastor roseus | Rosy Starling | 2013/2/24  | 2 | 0 | 23.03367690 | 72.46341170 | <a href="https://www.inaturalist.org/observations/55469161">https://www.inaturalist.org/observations/55469161</a>   |
| 363 | Pastor roseus | Rosy Starling | 2020/10/16 | 2 | 0 | 23.03373694 | 72.46334631 | <a href="https://www.inaturalist.org/observations/62694594">https://www.inaturalist.org/observations/62694594</a>   |
| 364 | Pastor roseus | Rosy Starling | 2020/1/12  | 2 | 0 | 23.07735437 | 72.53218801 | <a href="https://www.inaturalist.org/observations/37510680">https://www.inaturalist.org/observations/37510680</a>   |
| 365 | Pastor roseus | Rosy Starling | 2021/1/1   | 3 | 0 | 23.08754125 | 72.46648546 | <a href="https://www.inaturalist.org/observations/67388920">https://www.inaturalist.org/observations/67388920</a>   |
| 366 | Pastor roseus | Rosy Starling | 2019/8/17  | 5 | 0 | 23.15283350 | 71.39578430 | <a href="https://www.inaturalist.org/observations/31793641">https://www.inaturalist.org/observations/31793641</a>   |
| 367 | Pastor roseus | Rosy Starling | 2014/1/3   | 3 | 0 | 23.19559034 | 71.73612822 | <a href="https://www.inaturalist.org/observations/36723339">https://www.inaturalist.org/observations/36723339</a>   |

|     |               |               |            |   |   |             |              |                                                                                                                     |
|-----|---------------|---------------|------------|---|---|-------------|--------------|---------------------------------------------------------------------------------------------------------------------|
| 368 | Pastor roseus | Rosy Starling | 2021/2/4   | 3 | 0 | 23.20027453 | 75.75228442  | <a href="https://www.inaturalist.org/observations/69047912">https://www.inaturalist.org/observations/69047912</a>   |
| 369 | Pastor roseus | Rosy Starling | 2020/3/15  | 2 | 0 | 23.23934570 | 77.38714672  | <a href="https://www.inaturalist.org/observations/66185808">https://www.inaturalist.org/observations/66185808</a>   |
| 370 | Pastor roseus | Rosy Starling | 2008/11/4  | 3 | 0 | 23.24644804 | 71.73349184  | <a href="https://www.inaturalist.org/observations/104025608">https://www.inaturalist.org/observations/104025608</a> |
| 371 | Pastor roseus | Rosy Starling | 2017/9/17  | 1 | 0 | 23.25514556 | 69.32354962  | <a href="https://www.inaturalist.org/observations/136830965">https://www.inaturalist.org/observations/136830965</a> |
| 372 | Pastor roseus | Rosy Starling | 2013/3/3   | 3 | 0 | 23.28390000 | 71.76730000  | <a href="https://www.inaturalist.org/observations/67010175">https://www.inaturalist.org/observations/67010175</a>   |
| 373 | Pastor roseus | Rosy Starling | 2021/2/2   | 2 | 0 | 23.37945600 | 72.03772800  | <a href="https://www.inaturalist.org/observations/68944524">https://www.inaturalist.org/observations/68944524</a>   |
| 374 | Pastor roseus | Rosy Starling | 2021/11/10 | 3 | 0 | 23.39309974 | 77.75118832  | <a href="https://www.inaturalist.org/observations/100845755">https://www.inaturalist.org/observations/100845755</a> |
| 375 | Pastor roseus | Rosy Starling | 2018/1/17  | 5 | 0 | 23.43753550 | 68.75020240  | <a href="https://www.inaturalist.org/observations/30342789">https://www.inaturalist.org/observations/30342789</a>   |
| 376 | Pastor roseus | Rosy Starling | 2021/11/3  | 3 | 0 | 23.54034667 | 72.71771500  | <a href="https://www.inaturalist.org/observations/122138153">https://www.inaturalist.org/observations/122138153</a> |
| 377 | Pastor roseus | Rosy Starling | 2021/11/3  | 3 | 0 | 23.54044167 | 72.71795167  | <a href="https://www.inaturalist.org/observations/122138144">https://www.inaturalist.org/observations/122138144</a> |
| 378 | Pastor roseus | Rosy Starling | 2018/11/19 | 6 | 0 | 23.58914167 | 87.33739000  | <a href="https://www.inaturalist.org/observations/18537705">https://www.inaturalist.org/observations/18537705</a>   |
| 379 | Pastor roseus | Rosy Starling | 2022/9/26  | 3 | 0 | 23.68552667 | 69.21210833  | <a href="https://www.inaturalist.org/observations/136789773">https://www.inaturalist.org/observations/136789773</a> |
| 380 | Pastor roseus | Rosy Starling | 2020/10/24 | 2 | 0 | 23.90749749 | 70.52857675  | <a href="https://www.inaturalist.org/observations/63952695">https://www.inaturalist.org/observations/63952695</a>   |
| 381 | Pastor roseus | Rosy Starling | 2020/1/31  | 5 | 0 | 24.04542860 | 70.14558050  | <a href="https://www.inaturalist.org/observations/51883213">https://www.inaturalist.org/observations/51883213</a>   |
| 382 | Pastor roseus | Rosy Starling | 2021/8/15  | 3 | 0 | 24.42736214 | 73.74396269  | <a href="https://www.inaturalist.org/observations/91222015">https://www.inaturalist.org/observations/91222015</a>   |
| 383 | Pastor roseus | Rosy Starling | 2021/12/13 | 2 | 0 | 25.01384790 | 121.92577860 | <a href="https://www.inaturalist.org/observations/103051055">https://www.inaturalist.org/observations/103051055</a> |
| 384 | Pastor roseus | Rosy Starling | 2022/1/15  | 1 | 0 | 25.01528056 | 121.91904440 | <a href="https://www.inaturalist.org/observations/105261485">https://www.inaturalist.org/observations/105261485</a> |
| 385 | Pastor roseus | Rosy Starling | 2021/12/3  | 1 | 0 | 25.01576501 | 121.91752350 | <a href="https://www.inaturalist.org/observations/133072359">https://www.inaturalist.org/observations/133072359</a> |
| 386 | Pastor roseus | Rosy Starling | 2021/12/3  | 2 | 0 | 25.01593211 | 121.91873920 | <a href="https://www.inaturalist.org/observations/102476880">https://www.inaturalist.org/observations/102476880</a> |
| 387 | Pastor roseus | Rosy Starling | 2021/12/8  | 1 | 0 | 25.01763651 | 121.91782260 | <a href="https://www.inaturalist.org/observations/137228203">https://www.inaturalist.org/observations/137228203</a> |
| 388 | Pastor roseus | Rosy Starling | 2021/12/10 | 1 | 0 | 25.09007068 | 121.86046470 | <a href="https://www.inaturalist.org/observations/105096304">https://www.inaturalist.org/observations/105096304</a> |
| 389 | Pastor roseus | Rosy Starling | 2014/12/27 | 6 | 0 | 25.23000000 | 73.23000000  | <a href="http://www.inaturalist.org/observations/1257183">http://www.inaturalist.org/observations/1257183</a>       |
| 390 | Pastor roseus | Rosy Starling | 2018/2/20  | 1 | 0 | 25.31940000 | 83.03650000  | <a href="https://www.inaturalist.org/observations/69874984">https://www.inaturalist.org/observations/69874984</a>   |

|     |               |               |            |   |   |             |             |                                                                                                                     |
|-----|---------------|---------------|------------|---|---|-------------|-------------|---------------------------------------------------------------------------------------------------------------------|
| 391 | Pastor roseus | Rosy Starling | 2018/2/20  | 1 | 0 | 25.32660000 | 82.98120000 | <a href="https://www.inaturalist.org/observations/69874969">https://www.inaturalist.org/observations/69874969</a>   |
| 392 | Pastor roseus | Rosy Starling | 2019/10/2  | 5 | 0 | 25.33975231 | 74.66014620 | <a href="https://www.inaturalist.org/observations/121576301">https://www.inaturalist.org/observations/121576301</a> |
| 393 | Pastor roseus | Rosy Starling | 2020/2/13  | 2 | 0 | 26.06531969 | 76.34945877 | <a href="https://www.inaturalist.org/observations/61925272">https://www.inaturalist.org/observations/61925272</a>   |
| 394 | Pastor roseus | Rosy Starling | 2011/12/1  | 4 | 0 | 26.13019989 | 76.64608112 | <a href="https://www.inaturalist.org/observations/79512081">https://www.inaturalist.org/observations/79512081</a>   |
| 395 | Pastor roseus | Rosy Starling | 2022/8/12  | 4 | 0 | 26.29839750 | 74.73542420 | <a href="https://www.inaturalist.org/observations/132148389">https://www.inaturalist.org/observations/132148389</a> |
| 396 | Pastor roseus | Rosy Starling | 2017/12/8  | 2 | 0 | 26.85567230 | 75.83672050 | <a href="https://www.inaturalist.org/observations/56416928">https://www.inaturalist.org/observations/56416928</a>   |
| 397 | Pastor roseus | Rosy Starling | 2020/1/17  | 2 | 0 | 26.91012270 | 70.80856750 | <a href="https://www.inaturalist.org/observations/92469021">https://www.inaturalist.org/observations/92469021</a>   |
| 398 | Pastor roseus | Rosy Starling | 2014/11/10 | 3 | 0 | 26.91012270 | 70.80856750 | <a href="https://www.inaturalist.org/observations/95770295">https://www.inaturalist.org/observations/95770295</a>   |
| 399 | Pastor roseus | Rosy Starling | 2018/12/27 | 2 | 0 | 26.91022440 | 75.81913450 | <a href="https://www.inaturalist.org/observations/47779043">https://www.inaturalist.org/observations/47779043</a>   |
| 400 | Pastor roseus | Rosy Starling | 2016/11/20 | 3 | 0 | 26.92838691 | 75.78988268 | <a href="https://www.inaturalist.org/observations/36947516">https://www.inaturalist.org/observations/36947516</a>   |
| 401 | Pastor roseus | Rosy Starling | 2013/9/27  | 2 | 0 | 27.15692000 | 77.52365100 | <a href="https://www.inaturalist.org/observations/41359932">https://www.inaturalist.org/observations/41359932</a>   |
| 402 | Pastor roseus | Rosy Starling | 2015/11/29 | 3 | 0 | 27.15926900 | 77.52319990 | <a href="https://www.inaturalist.org/observations/120791252">https://www.inaturalist.org/observations/120791252</a> |
| 403 | Pastor roseus | Rosy Starling | 2022/3/27  | 2 | 0 | 27.16671700 | 77.52381898 | <a href="https://www.inaturalist.org/observations/112769744">https://www.inaturalist.org/observations/112769744</a> |
| 404 | Pastor roseus | Rosy Starling | 2018/8/10  | 2 | 0 | 27.17806727 | 78.04219353 | <a href="https://www.inaturalist.org/observations/61872308">https://www.inaturalist.org/observations/61872308</a>   |
| 405 | Pastor roseus | Rosy Starling | 2020/10/10 | 1 | 0 | 27.61472569 | 74.45687331 | <a href="https://www.inaturalist.org/observations/62274837">https://www.inaturalist.org/observations/62274837</a>   |
| 406 | Pastor roseus | Rosy Starling | 2021/9/19  | 4 | 0 | 27.79642584 | 74.42541233 | <a href="https://www.inaturalist.org/observations/109439822">https://www.inaturalist.org/observations/109439822</a> |
| 407 | Pastor roseus | Rosy Starling | 2017/11/2  | 4 | 0 | 27.79715585 | 74.43376755 | <a href="https://www.inaturalist.org/observations/72432427">https://www.inaturalist.org/observations/72432427</a>   |
| 408 | Pastor roseus | Rosy Starling | 2019/12/12 | 3 | 0 | 27.96597690 | 73.37662600 | <a href="https://www.inaturalist.org/observations/44106910">https://www.inaturalist.org/observations/44106910</a>   |
| 409 | Pastor roseus | Rosy Starling | 2021/1/10  | 3 | 0 | 28.08183672 | 73.37014834 | <a href="https://www.inaturalist.org/observations/67858924">https://www.inaturalist.org/observations/67858924</a>   |
| 410 | Pastor roseus | Rosy Starling | 2011/8/6   | 3 | 0 | 28.24869930 | 77.06351170 | <a href="https://www.inaturalist.org/observations/31507513">https://www.inaturalist.org/observations/31507513</a>   |
| 411 | Pastor roseus | Rosy Starling | 2019/8/19  | 3 | 0 | 28.36216961 | 75.59041718 | <a href="https://www.inaturalist.org/observations/73391418">https://www.inaturalist.org/observations/73391418</a>   |
| 412 | Pastor roseus | Rosy Starling | 2020/4/17  | 2 | 0 | 28.54404403 | 77.18666911 | <a href="https://www.inaturalist.org/observations/42380778">https://www.inaturalist.org/observations/42380778</a>   |
| 413 | Pastor roseus | Rosy Starling | 2021/3/28  | 6 | 0 | 28.55144661 | 77.31852148 | <a href="https://www.inaturalist.org/observations/72359725">https://www.inaturalist.org/observations/72359725</a>   |



|     |               |               |           |   |   |             |             |                                                                                                                   |
|-----|---------------|---------------|-----------|---|---|-------------|-------------|-------------------------------------------------------------------------------------------------------------------|
| 414 | Pastor roseus | Rosy Starling | 2009/4/4  | 5 | 0 | 28.55257720 | 77.55481000 | <a href="https://www.inaturalist.org/observations/31585722">https://www.inaturalist.org/observations/31585722</a> |
| 415 | Pastor roseus | Rosy Starling | 2021/4/2  | 4 | 0 | 28.55384167 | 77.25781333 | <a href="https://www.inaturalist.org/observations/72745085">https://www.inaturalist.org/observations/72745085</a> |
| 416 | Pastor roseus | Rosy Starling | 2020/4/18 | 2 | 0 | 28.56107788 | 77.24741511 | <a href="https://www.inaturalist.org/observations/42446076">https://www.inaturalist.org/observations/42446076</a> |
| 417 | Pastor roseus | Rosy Starling | 2020/4/14 | 4 | 0 | 28.63625650 | 77.07911080 | <a href="https://www.inaturalist.org/observations/48092933">https://www.inaturalist.org/observations/48092933</a> |
| 418 | Pastor roseus | Rosy Starling | 2021/7/28 | 4 | 0 | 30.29504967 | 80.12937925 | <a href="https://www.inaturalist.org/observations/89781777">https://www.inaturalist.org/observations/89781777</a> |

| No | scientific name              | common name      | date       | NIA | NID | latitude    | longitude    | url                                                                                                                 |
|----|------------------------------|------------------|------------|-----|-----|-------------|--------------|---------------------------------------------------------------------------------------------------------------------|
| 1  | <i>Tephrodornis virgatus</i> | Large Woodshrike | 2014/12/29 | 1   | 0   | 10.35310770 | 77.23112148  | <a href="https://www.inaturalist.org/observations/79458151">https://www.inaturalist.org/observations/79458151</a>   |
| 2  | <i>Tephrodornis virgatus</i> | Large Woodshrike | 2012/3/31  | 1   | 0   | 12.41666670 | 77.75000000  | <a href="https://www.inaturalist.org/observations/63955951">https://www.inaturalist.org/observations/63955951</a>   |
| 3  | <i>Tephrodornis virgatus</i> | Large Woodshrike | 2017/10/21 | 1   | 0   | 17.59833550 | 81.71354750  | <a href="https://www.inaturalist.org/observations/89071826">https://www.inaturalist.org/observations/89071826</a>   |
| 4  | <i>Tephrodornis virgatus</i> | Large Woodshrike | 2021/8/25  | 2   | 0   | 18.01165667 | 82.71150667  | <a href="https://www.inaturalist.org/observations/92539261">https://www.inaturalist.org/observations/92539261</a>   |
| 5  | <i>Tephrodornis virgatus</i> | Large Woodshrike | 2010/1/4   | 1   | 0   | 18.69422764 | 108.90980340 | <a href="https://www.inaturalist.org/observations/64789956">https://www.inaturalist.org/observations/64789956</a>   |
| 6  | <i>Tephrodornis virgatus</i> | Large Woodshrike | 2010/1/1   | 1   | 0   | 18.70699100 | 108.82968700 | <a href="https://www.inaturalist.org/observations/64728118">https://www.inaturalist.org/observations/64728118</a>   |
| 7  | <i>Tephrodornis virgatus</i> | Large Woodshrike | 2019/9/29  | 3   | 0   | 18.82172094 | 81.76991858  | <a href="https://www.inaturalist.org/observations/34170805">https://www.inaturalist.org/observations/34170805</a>   |
| 8  | <i>Tephrodornis virgatus</i> | Large Woodshrike | 2022/4/12  | 1   | 0   | 18.89932639 | 81.91561465  | <a href="https://www.inaturalist.org/observations/112017296">https://www.inaturalist.org/observations/112017296</a> |
| 9  | <i>Tephrodornis virgatus</i> | Large Woodshrike | 2015/4/8   | 2   | 0   | 20.57044537 | 85.17922051  | <a href="https://www.inaturalist.org/observations/61494599">https://www.inaturalist.org/observations/61494599</a>   |
| 10 | <i>Tephrodornis virgatus</i> | Large Woodshrike | 2022/5/6   | 0   | 0   | 22.71809100 | 100.46272200 | <a href="https://www.inaturalist.org/observations/132385443">https://www.inaturalist.org/observations/132385443</a> |
| 11 | <i>Tephrodornis virgatus</i> | Large Woodshrike | 2016/6/7   | 2   | 0   | 23.25456100 | 88.59510700  | <a href="http://www.inaturalist.org/observations/3408614">http://www.inaturalist.org/observations/3408614</a>       |
| 12 | <i>Tephrodornis virgatus</i> | Large Woodshrike | 2016/3/16  | 2   | 0   | 24.32582500 | 92.32463800  | <a href="http://www.inaturalist.org/observations/4251674">http://www.inaturalist.org/observations/4251674</a>       |
| 13 | <i>Tephrodornis virgatus</i> | Large Woodshrike | 2018/3/22  | 1   | 0   | 24.35267400 | 92.34481500  | <a href="https://www.inaturalist.org/observations/13693016">https://www.inaturalist.org/observations/13693016</a>   |
| 14 | <i>Tephrodornis virgatus</i> | Large Woodshrike | 2017/10/6  | 1   | 0   | 24.35267400 | 92.34481500  | <a href="https://www.inaturalist.org/observations/13693022">https://www.inaturalist.org/observations/13693022</a>   |
| 15 | <i>Tephrodornis virgatus</i> | Large Woodshrike | 2017/12/29 | 1   | 0   | 24.35267400 | 92.34481500  | <a href="https://www.inaturalist.org/observations/13693113">https://www.inaturalist.org/observations/13693113</a>   |
| 16 | <i>Tephrodornis virgatus</i> | Large Woodshrike | 2021/10/18 | 1   | 0   | 24.35267420 | 92.34481540  | <a href="https://www.inaturalist.org/observations/101251499">https://www.inaturalist.org/observations/101251499</a> |
| 17 | <i>Tephrodornis virgatus</i> | Large Woodshrike | 2021/10/18 | 0   | 0   | 24.35267420 | 92.34481540  | <a href="https://www.inaturalist.org/observations/101251538">https://www.inaturalist.org/observations/101251538</a> |
| 18 | <i>Tephrodornis virgatus</i> | Large Woodshrike | 2020/3/14  | 2   | 0   | 24.35267784 | 92.34481394  | <a href="https://www.inaturalist.org/observations/47713967">https://www.inaturalist.org/observations/47713967</a>   |
| 19 | <i>Tephrodornis virgatus</i> | Large Woodshrike | 2020/3/14  | 2   | 0   | 24.35472828 | 92.34348323  | <a href="https://www.inaturalist.org/observations/40170495">https://www.inaturalist.org/observations/40170495</a>   |
| 20 | <i>Tephrodornis virgatus</i> | Large Woodshrike | 2018/2/25  | 3   | 0   | 24.37227400 | 92.35416400  | <a href="https://www.inaturalist.org/observations/13072896">https://www.inaturalist.org/observations/13072896</a>   |
| 21 | <i>Tephrodornis virgatus</i> | Large Woodshrike | 2014/9/19  | 2   | 0   | 24.43202000 | 92.33068900  | <a href="http://www.inaturalist.org/observations/899434">http://www.inaturalist.org/observations/899434</a>         |
| 22 | <i>Tephrodornis virgatus</i> | Large Woodshrike | 2019/1/24  | 1   | 0   | 24.45296444 | 97.56170625  | <a href="https://www.inaturalist.org/observations/109069347">https://www.inaturalist.org/observations/109069347</a> |

|    |                              |                  |            |   |   |             |              |                                                                                                                     |
|----|------------------------------|------------------|------------|---|---|-------------|--------------|---------------------------------------------------------------------------------------------------------------------|
| 23 | <i>Tephrodornis virgatus</i> | Large Woodshrike | 2017/11/5  | 1 | 0 | 24.50061700 | 92.28797800  | <a href="https://www.inaturalist.org/observations/9482974">https://www.inaturalist.org/observations/9482974</a>     |
| 24 | <i>Tephrodornis virgatus</i> | Large Woodshrike | 2013/12/15 | 2 | 0 | 24.60728800 | 92.38344100  | <a href="http://www.inaturalist.org/observations/484466">http://www.inaturalist.org/observations/484466</a>         |
| 25 | <i>Tephrodornis virgatus</i> | Large Woodshrike | 2017/12/22 | 1 | 0 | 24.70521000 | 97.93195400  | <a href="https://www.inaturalist.org/observations/9372268">https://www.inaturalist.org/observations/9372268</a>     |
| 26 | <i>Tephrodornis virgatus</i> | Large Woodshrike | 2020/4/30  | 1 | 0 | 25.48774307 | 90.12967341  | <a href="https://www.inaturalist.org/observations/69871069">https://www.inaturalist.org/observations/69871069</a>   |
| 27 | <i>Tephrodornis virgatus</i> | Large Woodshrike | 2018/5/29  | 2 | 0 | 26.01732740 | 76.50257420  | <a href="https://www.inaturalist.org/observations/56208446">https://www.inaturalist.org/observations/56208446</a>   |
| 28 | <i>Tephrodornis virgatus</i> | Large Woodshrike | 2021/2/24  | 0 | 0 | 26.07420990 | 119.29647000 | <a href="https://www.inaturalist.org/observations/123979948">https://www.inaturalist.org/observations/123979948</a> |
| 29 | <i>Tephrodornis virgatus</i> | Large Woodshrike | 2020/5/8   | 1 | 0 | 26.16381080 | 119.28410770 | <a href="https://www.inaturalist.org/observations/45339889">https://www.inaturalist.org/observations/45339889</a>   |
| 30 | <i>Tephrodornis virgatus</i> | Large Woodshrike | 2022/6/3   | 0 | 0 | 26.17139164 | 119.27749330 | <a href="https://www.inaturalist.org/observations/132111012">https://www.inaturalist.org/observations/132111012</a> |
| 31 | <i>Tephrodornis virgatus</i> | Large Woodshrike | 2022/4/22  | 1 | 0 | 26.64733550 | 89.54833710  | <a href="https://www.inaturalist.org/observations/126438027">https://www.inaturalist.org/observations/126438027</a> |
| 32 | <i>Tephrodornis virgatus</i> | Large Woodshrike | 2022/4/20  | 2 | 0 | 26.65942270 | 91.00113110  | <a href="https://www.inaturalist.org/observations/123930379">https://www.inaturalist.org/observations/123930379</a> |
| 33 | <i>Tephrodornis virgatus</i> | Large Woodshrike | 2014/3/27  | 4 | 0 | 26.66394826 | 90.99658207  | <a href="https://www.inaturalist.org/observations/31004778">https://www.inaturalist.org/observations/31004778</a>   |
| 34 | <i>Tephrodornis virgatus</i> | Large Woodshrike | 2021/4/1   | 1 | 0 | 26.70828001 | 91.10093305  | <a href="https://www.inaturalist.org/observations/73920958">https://www.inaturalist.org/observations/73920958</a>   |
| 35 | <i>Tephrodornis virgatus</i> | Large Woodshrike | 2021/4/1   | 1 | 0 | 26.70830307 | 91.10094596  | <a href="https://www.inaturalist.org/observations/73920955">https://www.inaturalist.org/observations/73920955</a>   |
| 36 | <i>Tephrodornis virgatus</i> | Large Woodshrike | 2021/4/6   | 1 | 0 | 26.79619320 | 88.36300760  | <a href="https://www.inaturalist.org/observations/74023198">https://www.inaturalist.org/observations/74023198</a>   |
| 37 | <i>Tephrodornis virgatus</i> | Large Woodshrike | 2017/3/8   | 2 | 0 | 26.79837055 | 91.74183689  | <a href="https://www.inaturalist.org/observations/128948018">https://www.inaturalist.org/observations/128948018</a> |
| 38 | <i>Tephrodornis virgatus</i> | Large Woodshrike | 2021/4/8   | 1 | 0 | 26.91590700 | 88.40281660  | <a href="https://www.inaturalist.org/observations/74221521">https://www.inaturalist.org/observations/74221521</a>   |
| 39 | <i>Tephrodornis virgatus</i> | Large Woodshrike | 2019/2/24  | 1 | 0 | 26.91590700 | 88.40281660  | <a href="https://www.inaturalist.org/observations/99477710">https://www.inaturalist.org/observations/99477710</a>   |
| 40 | <i>Tephrodornis virgatus</i> | Large Woodshrike | 2021/3/17  | 2 | 0 | 26.91590700 | 88.40281700  | <a href="https://www.inaturalist.org/observations/81331990">https://www.inaturalist.org/observations/81331990</a>   |
| 41 | <i>Tephrodornis virgatus</i> | Large Woodshrike | 2022/4/15  | 1 | 0 | 26.92928085 | 88.41536305  | <a href="https://www.inaturalist.org/observations/112227831">https://www.inaturalist.org/observations/112227831</a> |
| 42 | <i>Tephrodornis virgatus</i> | Large Woodshrike | 2022/4/15  | 1 | 0 | 26.92928085 | 88.41536305  | <a href="https://www.inaturalist.org/observations/112227837">https://www.inaturalist.org/observations/112227837</a> |
| 43 | <i>Tephrodornis virgatus</i> | Large Woodshrike | 2021/10/30 | 0 | 0 | 26.93240080 | 92.87721630  | <a href="https://www.inaturalist.org/observations/102856147">https://www.inaturalist.org/observations/102856147</a> |
| 44 | <i>Tephrodornis virgatus</i> | Large Woodshrike | 2017/1/23  | 2 | 0 | 27.03527779 | 92.90553144  | <a href="https://www.inaturalist.org/observations/34069801">https://www.inaturalist.org/observations/34069801</a>   |
| 45 | <i>Tephrodornis virgatus</i> | Large Woodshrike | 2017/1/23  | 2 | 0 | 27.03527779 | 92.90553144  | <a href="https://www.inaturalist.org/observations/34069835">https://www.inaturalist.org/observations/34069835</a>   |

|    |                              |                  |           |   |   |             |             |                                                                                                                     |
|----|------------------------------|------------------|-----------|---|---|-------------|-------------|---------------------------------------------------------------------------------------------------------------------|
| 46 | <i>Tephrodornis virgatus</i> | Large Woodshrike | 2022/4/21 | 1 | 0 | 27.09835550 | 92.81782910 | <a href="https://www.inaturalist.org/observations/115542922">https://www.inaturalist.org/observations/115542922</a> |
| 47 | <i>Tephrodornis virgatus</i> | Large Woodshrike | 2021/3/5  | 0 | 0 | 27.26159490 | 95.60941540 | <a href="https://www.inaturalist.org/observations/101927020">https://www.inaturalist.org/observations/101927020</a> |
| 48 | <i>Tephrodornis virgatus</i> | Large Woodshrike | 2021/2/2  | 2 | 0 | 29.32199780 | 79.50498890 | <a href="https://www.inaturalist.org/observations/69046859">https://www.inaturalist.org/observations/69046859</a>   |
| 49 | <i>Tephrodornis virgatus</i> | Large Woodshrike | 2021/2/2  | 1 | 0 | 29.32199780 | 79.50498890 | <a href="https://www.inaturalist.org/observations/69046860">https://www.inaturalist.org/observations/69046860</a>   |
| 50 | <i>Tephrodornis virgatus</i> | Large Woodshrike | 2021/2/2  | 1 | 0 | 29.32199780 | 79.50498890 | <a href="https://www.inaturalist.org/observations/69046861">https://www.inaturalist.org/observations/69046861</a>   |
| 51 | <i>Tephrodornis virgatus</i> | Large Woodshrike | 2021/2/2  | 2 | 0 | 29.32199780 | 79.50498890 | <a href="https://www.inaturalist.org/observations/69046862">https://www.inaturalist.org/observations/69046862</a>   |
| 52 | <i>Tephrodornis virgatus</i> | Large Woodshrike | 2021/2/2  | 1 | 0 | 29.32199781 | 79.50498886 | <a href="https://www.inaturalist.org/observations/68963290">https://www.inaturalist.org/observations/68963290</a>   |

| No | scientific name | common name     | date       | NIA | NID | latitude    | longitude    | url                                                                                                                 |
|----|-----------------|-----------------|------------|-----|-----|-------------|--------------|---------------------------------------------------------------------------------------------------------------------|
| 1  | Turdus cardis   | Japanese Thrush | 2019/11/24 | 0   | 0   | 22.11759219 | 113.56333780 | <a href="https://www.inaturalist.org/observations/36018844">https://www.inaturalist.org/observations/36018844</a>   |
| 2  | Turdus cardis   | Japanese Thrush | 2021/11/21 | 1   | 0   | 22.12332709 | 113.56369950 | <a href="https://www.inaturalist.org/observations/101607201">https://www.inaturalist.org/observations/101607201</a> |
| 3  | Turdus cardis   | Japanese Thrush | 2021/2/1   | 1   | 0   | 22.15421752 | 113.56084800 | <a href="https://www.inaturalist.org/observations/84728422">https://www.inaturalist.org/observations/84728422</a>   |
| 4  | Turdus cardis   | Japanese Thrush | 2021/11/25 | 1   | 0   | 22.16553503 | 114.25916210 | <a href="https://www.inaturalist.org/observations/101878582">https://www.inaturalist.org/observations/101878582</a> |
| 5  | Turdus cardis   | Japanese Thrush | 2021/11/30 | 1   | 0   | 22.16927353 | 114.25985330 | <a href="https://www.inaturalist.org/observations/102237655">https://www.inaturalist.org/observations/102237655</a> |
| 6  | Turdus cardis   | Japanese Thrush | 2021/11/25 | 1   | 0   | 22.17107745 | 114.25722140 | <a href="https://www.inaturalist.org/observations/101877490">https://www.inaturalist.org/observations/101877490</a> |
| 7  | Turdus cardis   | Japanese Thrush | 2021/1/11  | 1   | 0   | 22.19618766 | 113.54575440 | <a href="https://www.inaturalist.org/observations/101120725">https://www.inaturalist.org/observations/101120725</a> |
| 8  | Turdus cardis   | Japanese Thrush | 2022/2/5   | 1   | 0   | 22.20042520 | 113.54789460 | <a href="https://www.inaturalist.org/observations/106171381">https://www.inaturalist.org/observations/106171381</a> |
| 9  | Turdus cardis   | Japanese Thrush | 2019/4/4   | 0   | 0   | 22.20797981 | 113.54816870 | <a href="https://www.inaturalist.org/observations/23796413">https://www.inaturalist.org/observations/23796413</a>   |
| 10 | Turdus cardis   | Japanese Thrush | 2019/10/27 | 1   | 0   | 22.20798395 | 113.54718120 | <a href="https://www.inaturalist.org/observations/49835594">https://www.inaturalist.org/observations/49835594</a>   |
| 11 | Turdus cardis   | Japanese Thrush | 2016/2/17  | 1   | 0   | 22.20818358 | 114.03055620 | <a href="https://www.inaturalist.org/observations/69682560">https://www.inaturalist.org/observations/69682560</a>   |
| 12 | Turdus cardis   | Japanese Thrush | 2017/6/25  | 2   | 0   | 22.21690232 | 114.21436820 | <a href="https://www.inaturalist.org/observations/36855054">https://www.inaturalist.org/observations/36855054</a>   |
| 13 | Turdus cardis   | Japanese Thrush | 2020/1/27  | 1   | 0   | 22.22438428 | 114.11519650 | <a href="https://www.inaturalist.org/observations/38009888">https://www.inaturalist.org/observations/38009888</a>   |
| 14 | Turdus cardis   | Japanese Thrush | 2021/1/15  | 1   | 0   | 22.23596388 | 114.11835260 | <a href="https://www.inaturalist.org/observations/103792630">https://www.inaturalist.org/observations/103792630</a> |
| 15 | Turdus cardis   | Japanese Thrush | 2016/12/1  | 1   | 0   | 22.24337600 | 113.97534900 | <a href="https://www.inaturalist.org/observations/18935789">https://www.inaturalist.org/observations/18935789</a>   |
| 16 | Turdus cardis   | Japanese Thrush | 2018/12/11 | 1   | 0   | 22.24337600 | 113.97534900 | <a href="https://www.inaturalist.org/observations/27420228">https://www.inaturalist.org/observations/27420228</a>   |
| 17 | Turdus cardis   | Japanese Thrush | 2020/2/8   | 0   | 0   | 22.26069740 | 114.00447230 | <a href="https://www.inaturalist.org/observations/38663005">https://www.inaturalist.org/observations/38663005</a>   |
| 18 | Turdus cardis   | Japanese Thrush | 2021/1/21  | 2   | 0   | 22.26777415 | 114.14984790 | <a href="https://www.inaturalist.org/observations/68437341">https://www.inaturalist.org/observations/68437341</a>   |
| 19 | Turdus cardis   | Japanese Thrush | 2020/12/20 | 1   | 0   | 22.26819463 | 114.14467950 | <a href="https://www.inaturalist.org/observations/66814500">https://www.inaturalist.org/observations/66814500</a>   |
| 20 | Turdus cardis   | Japanese Thrush | 2020/12/20 | 1   | 0   | 22.26825306 | 114.14481580 | <a href="https://www.inaturalist.org/observations/66814504">https://www.inaturalist.org/observations/66814504</a>   |
| 21 | Turdus cardis   | Japanese Thrush | 2018/2/5   | 1   | 0   | 22.27137375 | 114.15135910 | <a href="https://www.inaturalist.org/observations/9738732">https://www.inaturalist.org/observations/9738732</a>     |
| 22 | Turdus cardis   | Japanese Thrush | 2018/2/6   | 1   | 0   | 22.27142760 | 114.15047000 | <a href="https://www.inaturalist.org/observations/9747789">https://www.inaturalist.org/observations/9747789</a>     |

|    |               |                 |            |   |   |             |              |                                                                                                                     |
|----|---------------|-----------------|------------|---|---|-------------|--------------|---------------------------------------------------------------------------------------------------------------------|
| 23 | Turdus cardis | Japanese Thrush | 2020/1/28  | 1 | 0 | 22.27671507 | 114.13087710 | <a href="https://www.inaturalist.org/observations/78214035">https://www.inaturalist.org/observations/78214035</a>   |
| 24 | Turdus cardis | Japanese Thrush | 2021/1/13  | 2 | 0 | 22.27737988 | 114.21111650 | <a href="https://www.inaturalist.org/observations/67992770">https://www.inaturalist.org/observations/67992770</a>   |
| 25 | Turdus cardis | Japanese Thrush | 2017/1/28  | 1 | 0 | 22.27831510 | 114.17469500 | <a href="https://www.inaturalist.org/observations/5191797">https://www.inaturalist.org/observations/5191797</a>     |
| 26 | Turdus cardis | Japanese Thrush | 2016/3/18  | 1 | 0 | 22.30036657 | 114.17016550 | <a href="https://www.inaturalist.org/observations/105060203">https://www.inaturalist.org/observations/105060203</a> |
| 27 | Turdus cardis | Japanese Thrush | 2021/12/7  | 1 | 0 | 22.31517674 | 114.27766450 | <a href="https://www.inaturalist.org/observations/102706946">https://www.inaturalist.org/observations/102706946</a> |
| 28 | Turdus cardis | Japanese Thrush | 2013/2/12  | 1 | 0 | 22.33529100 | 114.13791400 | <a href="https://www.inaturalist.org/observations/69466792">https://www.inaturalist.org/observations/69466792</a>   |
| 29 | Turdus cardis | Japanese Thrush | 2022/3/24  | 1 | 0 | 22.34532979 | 113.90325190 | <a href="https://www.inaturalist.org/observations/109380640">https://www.inaturalist.org/observations/109380640</a> |
| 30 | Turdus cardis | Japanese Thrush | 2022/1/21  | 1 | 0 | 22.35531498 | 114.24579620 | <a href="https://www.inaturalist.org/observations/105303661">https://www.inaturalist.org/observations/105303661</a> |
| 31 | Turdus cardis | Japanese Thrush | 2013/1/20  | 1 | 0 | 22.35567100 | 114.13263700 | <a href="https://www.inaturalist.org/observations/19815381">https://www.inaturalist.org/observations/19815381</a>   |
| 32 | Turdus cardis | Japanese Thrush | 2016/2/21  | 1 | 0 | 22.35721200 | 114.13249300 | <a href="https://www.inaturalist.org/observations/15161343">https://www.inaturalist.org/observations/15161343</a>   |
| 33 | Turdus cardis | Japanese Thrush | 2015/1/3   | 1 | 0 | 22.35733800 | 114.13321600 | <a href="https://www.inaturalist.org/observations/12688179">https://www.inaturalist.org/observations/12688179</a>   |
| 34 | Turdus cardis | Japanese Thrush | 2019/1/28  | 1 | 0 | 22.38392497 | 113.96394030 | <a href="https://www.inaturalist.org/observations/20362990">https://www.inaturalist.org/observations/20362990</a>   |
| 35 | Turdus cardis | Japanese Thrush | 2021/1/26  | 1 | 0 | 22.38602913 | 114.14725890 | <a href="https://www.inaturalist.org/observations/68684170">https://www.inaturalist.org/observations/68684170</a>   |
| 36 | Turdus cardis | Japanese Thrush | 2020/2/4   | 0 | 0 | 22.39407302 | 113.98170930 | <a href="https://www.inaturalist.org/observations/38884045">https://www.inaturalist.org/observations/38884045</a>   |
| 37 | Turdus cardis | Japanese Thrush | 2020/2/2   | 1 | 0 | 22.39438023 | 113.98124790 | <a href="https://www.inaturalist.org/observations/38216819">https://www.inaturalist.org/observations/38216819</a>   |
| 38 | Turdus cardis | Japanese Thrush | 2020/1/20  | 1 | 0 | 22.40458689 | 113.95849810 | <a href="https://www.inaturalist.org/observations/42312434">https://www.inaturalist.org/observations/42312434</a>   |
| 39 | Turdus cardis | Japanese Thrush | 2021/12/31 | 1 | 0 | 22.40767722 | 114.09860390 | <a href="https://www.inaturalist.org/observations/104021843">https://www.inaturalist.org/observations/104021843</a> |
| 40 | Turdus cardis | Japanese Thrush | 2011/2/24  | 2 | 0 | 22.41227500 | 114.02917500 | <a href="https://www.inaturalist.org/observations/30091046">https://www.inaturalist.org/observations/30091046</a>   |
| 41 | Turdus cardis | Japanese Thrush | 2021/1/1   | 1 | 0 | 22.42102105 | 114.17859550 | <a href="https://www.inaturalist.org/observations/67506377">https://www.inaturalist.org/observations/67506377</a>   |
| 42 | Turdus cardis | Japanese Thrush | 2022/2/6   | 3 | 0 | 22.43082000 | 114.23833330 | <a href="https://www.inaturalist.org/observations/106222955">https://www.inaturalist.org/observations/106222955</a> |
| 43 | Turdus cardis | Japanese Thrush | 2015/2/5   | 1 | 0 | 22.43258800 | 114.08421900 | <a href="https://www.inaturalist.org/observations/15287562">https://www.inaturalist.org/observations/15287562</a>   |
| 44 | Turdus cardis | Japanese Thrush | 2018/2/19  | 1 | 0 | 22.43553370 | 114.07453990 | <a href="https://www.inaturalist.org/observations/20970809">https://www.inaturalist.org/observations/20970809</a>   |
| 45 | Turdus cardis | Japanese Thrush | 2019/12/13 | 1 | 0 | 22.44131766 | 114.01845380 | <a href="https://www.inaturalist.org/observations/36642236">https://www.inaturalist.org/observations/36642236</a>   |

|    |               |                 |            |   |   |             |              |                                                                                                                     |
|----|---------------|-----------------|------------|---|---|-------------|--------------|---------------------------------------------------------------------------------------------------------------------|
| 46 | Turdus cardis | Japanese Thrush | 2019/12/21 | 1 | 0 | 22.44133103 | 114.01885730 | <a href="https://www.inaturalist.org/observations/36850576">https://www.inaturalist.org/observations/36850576</a>   |
| 47 | Turdus cardis | Japanese Thrush | 2020/3/17  | 1 | 0 | 22.44181500 | 114.01849670 | <a href="https://www.inaturalist.org/observations/40463914">https://www.inaturalist.org/observations/40463914</a>   |
| 48 | Turdus cardis | Japanese Thrush | 2020/1/1   | 1 | 0 | 22.44199192 | 114.01816080 | <a href="https://www.inaturalist.org/observations/37155141">https://www.inaturalist.org/observations/37155141</a>   |
| 49 | Turdus cardis | Japanese Thrush | 2019/12/29 | 1 | 0 | 22.44208178 | 114.01777290 | <a href="https://www.inaturalist.org/observations/37061452">https://www.inaturalist.org/observations/37061452</a>   |
| 50 | Turdus cardis | Japanese Thrush | 2019/12/29 | 1 | 0 | 22.44212795 | 114.01777420 | <a href="https://www.inaturalist.org/observations/37061434">https://www.inaturalist.org/observations/37061434</a>   |
| 51 | Turdus cardis | Japanese Thrush | 2019/2/2   | 1 | 0 | 22.46224250 | 114.03839420 | <a href="https://www.inaturalist.org/observations/20053335">https://www.inaturalist.org/observations/20053335</a>   |
| 52 | Turdus cardis | Japanese Thrush | 2022/1/18  | 2 | 0 | 22.51415282 | 114.35754620 | <a href="https://www.inaturalist.org/observations/105152369">https://www.inaturalist.org/observations/105152369</a> |
| 53 | Turdus cardis | Japanese Thrush | 2021/1/8   | 1 | 0 | 22.52467147 | 114.16929780 | <a href="https://www.inaturalist.org/observations/67956793">https://www.inaturalist.org/observations/67956793</a>   |
| 54 | Turdus cardis | Japanese Thrush | 2019/3/3   | 1 | 0 | 22.63633829 | 120.27790800 | <a href="https://www.inaturalist.org/observations/43328121">https://www.inaturalist.org/observations/43328121</a>   |
| 55 | Turdus cardis | Japanese Thrush | 2022/1/23  | 1 | 0 | 22.95738966 | 113.33333730 | <a href="https://www.inaturalist.org/observations/105425615">https://www.inaturalist.org/observations/105425615</a> |
| 56 | Turdus cardis | Japanese Thrush | 2021/12/30 | 1 | 0 | 23.18096030 | 113.36268150 | <a href="https://www.inaturalist.org/observations/106319679">https://www.inaturalist.org/observations/106319679</a> |
| 57 | Turdus cardis | Japanese Thrush | 2021/2/15  | 1 | 0 | 23.18204850 | 113.37426100 | <a href="https://www.inaturalist.org/observations/69711895">https://www.inaturalist.org/observations/69711895</a>   |
| 58 | Turdus cardis | Japanese Thrush | 2019/2/12  | 1 | 0 | 24.43382806 | 118.33955080 | <a href="https://www.inaturalist.org/observations/135130314">https://www.inaturalist.org/observations/135130314</a> |
| 59 | Turdus cardis | Japanese Thrush | 2013/2/17  | 1 | 0 | 24.44839901 | 118.37920810 | <a href="https://www.inaturalist.org/observations/56706646">https://www.inaturalist.org/observations/56706646</a>   |
| 60 | Turdus cardis | Japanese Thrush | 2013/2/17  | 1 | 0 | 24.44839901 | 118.37920810 | <a href="https://www.inaturalist.org/observations/56706690">https://www.inaturalist.org/observations/56706690</a>   |
| 61 | Turdus cardis | Japanese Thrush | 2016/1/31  | 2 | 0 | 24.45889200 | 118.44249700 | <a href="https://www.inaturalist.org/observations/14233204">https://www.inaturalist.org/observations/14233204</a>   |
| 62 | Turdus cardis | Japanese Thrush | 2010/11/7  | 1 | 0 | 24.50453542 | 121.52528050 | <a href="https://www.inaturalist.org/observations/55753338">https://www.inaturalist.org/observations/55753338</a>   |
| 63 | Turdus cardis | Japanese Thrush | 2018/1/1   | 1 | 0 | 25.03095738 | 121.53567790 | <a href="https://www.inaturalist.org/observations/14127130">https://www.inaturalist.org/observations/14127130</a>   |
| 64 | Turdus cardis | Japanese Thrush | 2022/4/21  | 1 | 0 | 25.06961693 | 102.71408350 | <a href="https://www.inaturalist.org/observations/112203503">https://www.inaturalist.org/observations/112203503</a> |
| 65 | Turdus cardis | Japanese Thrush | 2021/11/15 | 1 | 0 | 25.10065384 | 121.58003540 | <a href="https://www.inaturalist.org/observations/102807697">https://www.inaturalist.org/observations/102807697</a> |
| 66 | Turdus cardis | Japanese Thrush | 2012/10/22 | 1 | 0 | 26.36930499 | 120.49282680 | <a href="https://www.inaturalist.org/observations/56505189">https://www.inaturalist.org/observations/56505189</a>   |
| 67 | Turdus cardis | Japanese Thrush | 2020/5/10  | 1 | 0 | 26.89177141 | 112.55734340 | <a href="https://www.inaturalist.org/observations/46847413">https://www.inaturalist.org/observations/46847413</a>   |
| 68 | Turdus cardis | Japanese Thrush | 2021/7/19  | 2 | 0 | 27.92382293 | 108.69952510 | <a href="https://www.inaturalist.org/observations/88346339">https://www.inaturalist.org/observations/88346339</a>   |

|    |               |                 |            |   |   |             |              |                                                                                                                     |
|----|---------------|-----------------|------------|---|---|-------------|--------------|---------------------------------------------------------------------------------------------------------------------|
| 69 | Turdus cardis | Japanese Thrush | 2022/7/21  | 0 | 0 | 27.92382293 | 108.69952510 | <a href="https://www.inaturalist.org/observations/129807860">https://www.inaturalist.org/observations/129807860</a> |
| 70 | Turdus cardis | Japanese Thrush | 2022/7/23  | 0 | 0 | 27.92382293 | 108.69952510 | <a href="https://www.inaturalist.org/observations/129954295">https://www.inaturalist.org/observations/129954295</a> |
| 71 | Turdus cardis | Japanese Thrush | 2022/7/23  | 0 | 0 | 27.92382293 | 108.69952510 | <a href="https://www.inaturalist.org/observations/129954315">https://www.inaturalist.org/observations/129954315</a> |
| 72 | Turdus cardis | Japanese Thrush | 2022/7/23  | 0 | 0 | 27.92382293 | 108.69952510 | <a href="https://www.inaturalist.org/observations/129954702">https://www.inaturalist.org/observations/129954702</a> |
| 73 | Turdus cardis | Japanese Thrush | 2022/2/21  | 1 | 0 | 28.00535362 | 112.97322970 | <a href="https://www.inaturalist.org/observations/107410952">https://www.inaturalist.org/observations/107410952</a> |
| 74 | Turdus cardis | Japanese Thrush | 2022/2/21  | 1 | 0 | 28.08894059 | 112.85020310 | <a href="https://www.inaturalist.org/observations/107410921">https://www.inaturalist.org/observations/107410921</a> |
| 75 | Turdus cardis | Japanese Thrush | 2022/2/22  | 1 | 0 | 28.17604483 | 112.93631230 | <a href="https://www.inaturalist.org/observations/107411321">https://www.inaturalist.org/observations/107411321</a> |
| 76 | Turdus cardis | Japanese Thrush | 2022/2/21  | 1 | 0 | 28.20974673 | 112.99805850 | <a href="https://www.inaturalist.org/observations/107411304">https://www.inaturalist.org/observations/107411304</a> |
| 77 | Turdus cardis | Japanese Thrush | 2022/9/24  | 1 | 0 | 28.45000300 | 119.91864000 | <a href="https://www.inaturalist.org/observations/136238887">https://www.inaturalist.org/observations/136238887</a> |
| 78 | Turdus cardis | Japanese Thrush | 2022/1/30  | 1 | 0 | 30.20844227 | 120.14087790 | <a href="https://www.inaturalist.org/observations/105842596">https://www.inaturalist.org/observations/105842596</a> |
| 79 | Turdus cardis | Japanese Thrush | 2020/12/9  | 1 | 0 | 30.53783998 | 114.36024900 | <a href="https://www.inaturalist.org/observations/113690201">https://www.inaturalist.org/observations/113690201</a> |
| 80 | Turdus cardis | Japanese Thrush | 2020/12/9  | 1 | 0 | 30.53783998 | 114.36024900 | <a href="https://www.inaturalist.org/observations/113690212">https://www.inaturalist.org/observations/113690212</a> |
| 81 | Turdus cardis | Japanese Thrush | 2014/3/31  | 1 | 0 | 31.21539400 | 121.55215700 | <a href="https://www.inaturalist.org/observations/93621816">https://www.inaturalist.org/observations/93621816</a>   |
| 82 | Turdus cardis | Japanese Thrush | 2005/11/7  | 1 | 0 | 31.21855477 | 121.53766800 | <a href="https://www.inaturalist.org/observations/89739600">https://www.inaturalist.org/observations/89739600</a>   |
| 83 | Turdus cardis | Japanese Thrush | 2005/11/7  | 1 | 0 | 31.21856181 | 121.53755890 | <a href="https://www.inaturalist.org/observations/89739502">https://www.inaturalist.org/observations/89739502</a>   |
| 84 | Turdus cardis | Japanese Thrush | 2020/7/29  | 0 | 0 | 31.97297700 | 114.30958600 | <a href="https://www.inaturalist.org/observations/109444078">https://www.inaturalist.org/observations/109444078</a> |
| 85 | Turdus cardis | Japanese Thrush | 2021/12/1  | 2 | 0 | 31.97966557 | 118.78774190 | <a href="https://www.inaturalist.org/observations/102286476">https://www.inaturalist.org/observations/102286476</a> |
| 86 | Turdus cardis | Japanese Thrush | 2022/1/18  | 1 | 0 | 32.05335000 | 118.82824330 | <a href="https://www.inaturalist.org/observations/120256921">https://www.inaturalist.org/observations/120256921</a> |
| 87 | Turdus cardis | Japanese Thrush | 2020/10/28 | 0 | 0 | 32.05685000 | 118.82607500 | <a href="https://www.inaturalist.org/observations/67985460">https://www.inaturalist.org/observations/67985460</a>   |
| 88 | Turdus cardis | Japanese Thrush | 2022/5/16  | 1 | 0 | 32.07731972 | 118.81338820 | <a href="https://www.inaturalist.org/observations/117290575">https://www.inaturalist.org/observations/117290575</a> |
| 89 | Turdus cardis | Japanese Thrush | 2022/4/25  | 1 | 0 | 32.07910833 | 118.80887500 | <a href="https://www.inaturalist.org/observations/112811847">https://www.inaturalist.org/observations/112811847</a> |
| 90 | Turdus cardis | Japanese Thrush | 2022/5/21  | 1 | 0 | 32.07921164 | 118.80855000 | <a href="https://www.inaturalist.org/observations/118157903">https://www.inaturalist.org/observations/118157903</a> |



| No | scientific name   | common name          | date       | NIA | NID | latitude   | longitude   | url                                                                                                                 |
|----|-------------------|----------------------|------------|-----|-----|------------|-------------|---------------------------------------------------------------------------------------------------------------------|
| 1  | Geokichla citrina | Orange-headed Thrush | 2020/11/29 | 8   | 0   | 6.84098910 | 79.90171870 | <a href="https://www.inaturalist.org/observations/65871495">https://www.inaturalist.org/observations/65871495</a>   |
| 2  | Geokichla citrina | Orange-headed Thrush | 2020/12/13 | 6   | 0   | 7.70017521 | 80.92283349 | <a href="https://www.inaturalist.org/observations/66574688">https://www.inaturalist.org/observations/66574688</a>   |
| 3  | Geokichla citrina | Orange-headed Thrush | 2020/11/22 | 5   | 0   | 7.70977227 | 81.69162068 | <a href="https://www.inaturalist.org/observations/65408773">https://www.inaturalist.org/observations/65408773</a>   |
| 4  | Geokichla citrina | Orange-headed Thrush | 2018/12/29 | 5   | 0   | 7.91649600 | 80.99472900 | <a href="https://www.inaturalist.org/observations/20799177">https://www.inaturalist.org/observations/20799177</a>   |
| 5  | Geokichla citrina | Orange-headed Thrush | 2018/11/30 | 7   | 0   | 7.95332994 | 80.76620368 | <a href="https://www.inaturalist.org/observations/68546533">https://www.inaturalist.org/observations/68546533</a>   |
| 6  | Geokichla citrina | Orange-headed Thrush | 2018/12/3  | 3   | 0   | 7.96859561 | 80.75997542 | <a href="https://www.inaturalist.org/observations/108584834">https://www.inaturalist.org/observations/108584834</a> |
| 7  | Geokichla citrina | Orange-headed Thrush | 2016/3/21  | 6   | 0   | 7.98083160 | 80.91374911 | <a href="https://www.inaturalist.org/observations/33129549">https://www.inaturalist.org/observations/33129549</a>   |
| 8  | Geokichla citrina | Orange-headed Thrush | 2022/2/11  | 3   | 0   | 8.35583482 | 79.99270908 | <a href="https://www.inaturalist.org/observations/107615633">https://www.inaturalist.org/observations/107615633</a> |
| 9  | Geokichla citrina | Orange-headed Thrush | 2020/2/10  | 3   | 0   | 8.68228650 | 77.13646490 | <a href="https://www.inaturalist.org/observations/38821972">https://www.inaturalist.org/observations/38821972</a>   |
| 10 | Geokichla citrina | Orange-headed Thrush | 2019/6/29  | 4   | 0   | 8.75334530 | 77.02627940 | <a href="https://www.inaturalist.org/observations/64045217">https://www.inaturalist.org/observations/64045217</a>   |
| 11 | Geokichla citrina | Orange-headed Thrush | 2019/7/11  | 3   | 0   | 8.80702119 | 77.05602696 | <a href="https://www.inaturalist.org/observations/41586600">https://www.inaturalist.org/observations/41586600</a>   |
| 12 | Geokichla citrina | Orange-headed Thrush | 2019/4/14  | 2   | 0   | 8.96324480 | 77.06508090 | <a href="https://www.inaturalist.org/observations/22466343">https://www.inaturalist.org/observations/22466343</a>   |
| 13 | Geokichla citrina | Orange-headed Thrush | 2021/6/11  | 3   | 0   | 9.01761170 | 76.92609360 | <a href="https://www.inaturalist.org/observations/104281413">https://www.inaturalist.org/observations/104281413</a> |
| 14 | Geokichla citrina | Orange-headed Thrush | 2021/7/28  | 2   | 0   | 9.06130952 | 76.90699786 | <a href="https://www.inaturalist.org/observations/89033453">https://www.inaturalist.org/observations/89033453</a>   |
| 15 | Geokichla citrina | Orange-headed Thrush | 2021/8/4   | 2   | 0   | 9.33955563 | 76.69613030 | <a href="https://www.inaturalist.org/observations/128987909">https://www.inaturalist.org/observations/128987909</a> |
| 16 | Geokichla citrina | Orange-headed Thrush | 2022/2/27  | 2   | 0   | 9.40375071 | 76.78225182 | <a href="https://www.inaturalist.org/observations/130737545">https://www.inaturalist.org/observations/130737545</a> |
| 17 | Geokichla citrina | Orange-headed Thrush | 2022/2/12  | 1   | 0   | 9.43207610 | 77.08200150 | <a href="https://www.inaturalist.org/observations/106745199">https://www.inaturalist.org/observations/106745199</a> |
| 18 | Geokichla citrina | Orange-headed Thrush | 2010/4/26  | 2   | 0   | 9.45973000 | 77.15200400 | <a href="http://www.inaturalist.org/observations/326862">http://www.inaturalist.org/observations/326862</a>         |
| 19 | Geokichla citrina | Orange-headed Thrush | 2012/11/26 | 3   | 0   | 9.46215500 | 77.23684700 | <a href="https://www.inaturalist.org/observations/133756874">https://www.inaturalist.org/observations/133756874</a> |
| 20 | Geokichla citrina | Orange-headed Thrush | 2020/11/7  | 4   | 0   | 9.46922864 | 76.82819288 | <a href="https://www.inaturalist.org/observations/129572337">https://www.inaturalist.org/observations/129572337</a> |
| 21 | Geokichla citrina | Orange-headed Thrush | 2013/2/19  | 2   | 0   | 9.49782600 | 77.18444800 | <a href="https://www.inaturalist.org/observations/9789168">https://www.inaturalist.org/observations/9789168</a>     |
| 22 | Geokichla citrina | Orange-headed Thrush | 2014/5/9   | 6   | 0   | 9.49806670 | 76.33884840 | <a href="https://www.inaturalist.org/observations/61077270">https://www.inaturalist.org/observations/61077270</a>   |

|    |                   |                      |            |   |   |             |             |                                                                                                                     |
|----|-------------------|----------------------|------------|---|---|-------------|-------------|---------------------------------------------------------------------------------------------------------------------|
| 23 | Geokichla citrina | Orange-headed Thrush | 2015/1/27  | 4 | 0 | 9.51498100  | 77.18191600 | <a href="https://www.inaturalist.org/observations/35239591">https://www.inaturalist.org/observations/35239591</a>   |
| 24 | Geokichla citrina | Orange-headed Thrush | 2015/1/10  | 4 | 0 | 9.55494276  | 77.16748730 | <a href="https://www.inaturalist.org/observations/83531489">https://www.inaturalist.org/observations/83531489</a>   |
| 25 | Geokichla citrina | Orange-headed Thrush | 2021/12/19 | 2 | 0 | 9.62091900  | 77.16170400 | <a href="https://www.inaturalist.org/observations/103298991">https://www.inaturalist.org/observations/103298991</a> |
| 26 | Geokichla citrina | Orange-headed Thrush | 2022/4/8   | 4 | 0 | 9.64711230  | 77.17653870 | <a href="https://www.inaturalist.org/observations/111268698">https://www.inaturalist.org/observations/111268698</a> |
| 27 | Geokichla citrina | Orange-headed Thrush | 2019/3/23  | 4 | 0 | 9.66831906  | 76.32182904 | <a href="https://www.inaturalist.org/observations/48613187">https://www.inaturalist.org/observations/48613187</a>   |
| 28 | Geokichla citrina | Orange-headed Thrush | 2021/11/11 | 5 | 0 | 9.69034185  | 80.01839591 | <a href="https://www.inaturalist.org/observations/100905079">https://www.inaturalist.org/observations/100905079</a> |
| 29 | Geokichla citrina | Orange-headed Thrush | 2013/11/12 | 4 | 0 | 9.69056876  | 80.01845607 | <a href="https://www.inaturalist.org/observations/57831312">https://www.inaturalist.org/observations/57831312</a>   |
| 30 | Geokichla citrina | Orange-headed Thrush | 2020/11/8  | 3 | 0 | 9.70508012  | 76.70488335 | <a href="https://www.inaturalist.org/observations/64513800">https://www.inaturalist.org/observations/64513800</a>   |
| 31 | Geokichla citrina | Orange-headed Thrush | 2018/12/14 | 2 | 0 | 9.77566670  | 76.80844340 | <a href="https://www.inaturalist.org/observations/91991296">https://www.inaturalist.org/observations/91991296</a>   |
| 32 | Geokichla citrina | Orange-headed Thrush | 2018/2/7   | 3 | 0 | 9.88868643  | 76.72812668 | <a href="https://www.inaturalist.org/observations/80070556">https://www.inaturalist.org/observations/80070556</a>   |
| 33 | Geokichla citrina | Orange-headed Thrush | 2018/11/1  | 4 | 0 | 9.88868643  | 76.72812668 | <a href="https://www.inaturalist.org/observations/87089113">https://www.inaturalist.org/observations/87089113</a>   |
| 34 | Geokichla citrina | Orange-headed Thrush | 2021/9/25  | 2 | 0 | 9.89081268  | 76.69041719 | <a href="https://www.inaturalist.org/observations/96106959">https://www.inaturalist.org/observations/96106959</a>   |
| 35 | Geokichla citrina | Orange-headed Thrush | 2021/10/8  | 3 | 0 | 9.89081268  | 76.69041719 | <a href="https://www.inaturalist.org/observations/97531798">https://www.inaturalist.org/observations/97531798</a>   |
| 36 | Geokichla citrina | Orange-headed Thrush | 2021/10/20 | 4 | 0 | 9.89081268  | 76.69041719 | <a href="https://www.inaturalist.org/observations/98805714">https://www.inaturalist.org/observations/98805714</a>   |
| 37 | Geokichla citrina | Orange-headed Thrush | 2021/11/18 | 5 | 0 | 9.89555351  | 76.74879118 | <a href="https://www.inaturalist.org/observations/101384718">https://www.inaturalist.org/observations/101384718</a> |
| 38 | Geokichla citrina | Orange-headed Thrush | 2021/9/30  | 3 | 0 | 9.89584945  | 76.74859806 | <a href="https://www.inaturalist.org/observations/96689457">https://www.inaturalist.org/observations/96689457</a>   |
| 39 | Geokichla citrina | Orange-headed Thrush | 2020/1/25  | 3 | 0 | 10.02290812 | 77.00041316 | <a href="https://www.inaturalist.org/observations/46580683">https://www.inaturalist.org/observations/46580683</a>   |
| 40 | Geokichla citrina | Orange-headed Thrush | 2022/1/1   | 5 | 0 | 10.05319584 | 76.35280754 | <a href="https://www.inaturalist.org/observations/104118271">https://www.inaturalist.org/observations/104118271</a> |
| 41 | Geokichla citrina | Orange-headed Thrush | 2019/1/29  | 3 | 0 | 10.09507236 | 76.93233929 | <a href="https://www.inaturalist.org/observations/49254033">https://www.inaturalist.org/observations/49254033</a>   |
| 42 | Geokichla citrina | Orange-headed Thrush | 2019/1/29  | 4 | 0 | 10.09522520 | 76.93191555 | <a href="https://www.inaturalist.org/observations/121761021">https://www.inaturalist.org/observations/121761021</a> |
| 43 | Geokichla citrina | Orange-headed Thrush | 2016/12/20 | 4 | 0 | 10.09656553 | 76.71391732 | <a href="https://www.inaturalist.org/observations/66625563">https://www.inaturalist.org/observations/66625563</a>   |
| 44 | Geokichla citrina | Orange-headed Thrush | 2018/3/18  | 4 | 0 | 10.10398010 | 76.70046039 | <a href="https://www.inaturalist.org/observations/83611835">https://www.inaturalist.org/observations/83611835</a>   |
| 45 | Geokichla citrina | Orange-headed Thrush | 2018/12/16 | 2 | 0 | 10.10398030 | 76.70046050 | <a href="https://www.inaturalist.org/observations/32152986">https://www.inaturalist.org/observations/32152986</a>   |

|    |                   |                      |            |   |   |             |             |                                                                                                                     |
|----|-------------------|----------------------|------------|---|---|-------------|-------------|---------------------------------------------------------------------------------------------------------------------|
| 46 | Geokichla citrina | Orange-headed Thrush | 2016/1/29  | 2 | 0 | 10.10398030 | 76.70046050 | <a href="https://www.inaturalist.org/observations/91649457">https://www.inaturalist.org/observations/91649457</a>   |
| 47 | Geokichla citrina | Orange-headed Thrush | 2022/1/5   | 5 | 0 | 10.10400453 | 76.70046039 | <a href="https://www.inaturalist.org/observations/104591828">https://www.inaturalist.org/observations/104591828</a> |
| 48 | Geokichla citrina | Orange-headed Thrush | 2020/3/7   | 3 | 0 | 10.10870646 | 76.50085141 | <a href="https://www.inaturalist.org/observations/40039897">https://www.inaturalist.org/observations/40039897</a>   |
| 49 | Geokichla citrina | Orange-headed Thrush | 2020/11/24 | 2 | 0 | 10.11729214 | 76.92685392 | <a href="https://www.inaturalist.org/observations/65519097">https://www.inaturalist.org/observations/65519097</a>   |
| 50 | Geokichla citrina | Orange-headed Thrush | 2017/12/17 | 2 | 0 | 10.12067400 | 76.75534700 | <a href="https://www.inaturalist.org/observations/9914887">https://www.inaturalist.org/observations/9914887</a>     |
| 51 | Geokichla citrina | Orange-headed Thrush | 2022/2/27  | 5 | 0 | 10.12629900 | 76.68492400 | <a href="https://www.inaturalist.org/observations/107677118">https://www.inaturalist.org/observations/107677118</a> |
| 52 | Geokichla citrina | Orange-headed Thrush | 2013/2/23  | 2 | 0 | 10.12875100 | 76.68894700 | <a href="https://www.inaturalist.org/observations/9789238">https://www.inaturalist.org/observations/9789238</a>     |
| 53 | Geokichla citrina | Orange-headed Thrush | 2017/2/4   | 3 | 0 | 10.12886458 | 76.68798608 | <a href="https://www.inaturalist.org/observations/80467410">https://www.inaturalist.org/observations/80467410</a>   |
| 54 | Geokichla citrina | Orange-headed Thrush | 2013/11/19 | 2 | 0 | 10.12979140 | 76.68711840 | <a href="https://www.inaturalist.org/observations/7483360">https://www.inaturalist.org/observations/7483360</a>     |
| 55 | Geokichla citrina | Orange-headed Thrush | 2018/2/10  | 4 | 0 | 10.12980721 | 76.68710232 | <a href="https://www.inaturalist.org/observations/80772017">https://www.inaturalist.org/observations/80772017</a>   |
| 56 | Geokichla citrina | Orange-headed Thrush | 2015/1/11  | 5 | 0 | 10.13000571 | 76.68728661 | <a href="https://www.inaturalist.org/observations/83604913">https://www.inaturalist.org/observations/83604913</a>   |
| 57 | Geokichla citrina | Orange-headed Thrush | 2020/2/2   | 3 | 0 | 10.13098780 | 76.24104930 | <a href="https://www.inaturalist.org/observations/41221286">https://www.inaturalist.org/observations/41221286</a>   |
| 58 | Geokichla citrina | Orange-headed Thrush | 2016/12/10 | 3 | 0 | 10.13372362 | 76.69415301 | <a href="http://www.inaturalist.org/observations/4762201">http://www.inaturalist.org/observations/4762201</a>       |
| 59 | Geokichla citrina | Orange-headed Thrush | 2012/12/24 | 2 | 0 | 10.13403252 | 77.41927106 | <a href="https://www.inaturalist.org/observations/133310580">https://www.inaturalist.org/observations/133310580</a> |
| 60 | Geokichla citrina | Orange-headed Thrush | 2021/12/5  | 6 | 0 | 10.14991250 | 76.36897560 | <a href="https://www.inaturalist.org/observations/102525997">https://www.inaturalist.org/observations/102525997</a> |
| 61 | Geokichla citrina | Orange-headed Thrush | 2022/1/15  | 4 | 0 | 10.14991250 | 76.36897560 | <a href="https://www.inaturalist.org/observations/104959268">https://www.inaturalist.org/observations/104959268</a> |
| 62 | Geokichla citrina | Orange-headed Thrush | 2021/12/31 | 4 | 0 | 10.14995809 | 76.36897087 | <a href="https://www.inaturalist.org/observations/104083378">https://www.inaturalist.org/observations/104083378</a> |
| 63 | Geokichla citrina | Orange-headed Thrush | 2020/2/8   | 2 | 0 | 10.17953639 | 76.67705972 | <a href="https://www.inaturalist.org/observations/46752080">https://www.inaturalist.org/observations/46752080</a>   |
| 64 | Geokichla citrina | Orange-headed Thrush | 2022/1/8   | 5 | 0 | 10.20046174 | 76.56070288 | <a href="https://www.inaturalist.org/observations/105096240">https://www.inaturalist.org/observations/105096240</a> |
| 65 | Geokichla citrina | Orange-headed Thrush | 2018/6/9   | 2 | 0 | 10.20183680 | 76.90378390 | <a href="https://www.inaturalist.org/observations/96636446">https://www.inaturalist.org/observations/96636446</a>   |
| 66 | Geokichla citrina | Orange-headed Thrush | 2022/2/12  | 3 | 0 | 10.29247036 | 76.39274865 | <a href="https://www.inaturalist.org/observations/108871933">https://www.inaturalist.org/observations/108871933</a> |
| 67 | Geokichla citrina | Orange-headed Thrush | 2022/7/20  | 3 | 0 | 10.30219148 | 76.42738435 | <a href="https://www.inaturalist.org/observations/127067208">https://www.inaturalist.org/observations/127067208</a> |
| 68 | Geokichla citrina | Orange-headed Thrush | 2020/3/14  | 2 | 0 | 10.32697337 | 76.95539664 | <a href="https://www.inaturalist.org/observations/40117441">https://www.inaturalist.org/observations/40117441</a>   |

|    |                          |                      |            |   |   |             |             |                                                                                                                     |
|----|--------------------------|----------------------|------------|---|---|-------------|-------------|---------------------------------------------------------------------------------------------------------------------|
| 69 | <i>Geokichla citrina</i> | Orange-headed Thrush | 2021/3/28  | 3 | 0 | 10.32697340 | 76.95539670 | <a href="https://www.inaturalist.org/observations/105202430">https://www.inaturalist.org/observations/105202430</a> |
| 70 | <i>Geokichla citrina</i> | Orange-headed Thrush | 2021/3/31  | 3 | 0 | 10.32697340 | 76.95539670 | <a href="https://www.inaturalist.org/observations/105256442">https://www.inaturalist.org/observations/105256442</a> |
| 71 | <i>Geokichla citrina</i> | Orange-headed Thrush | 2017/12/23 | 5 | 0 | 10.32701724 | 76.95539664 | <a href="https://www.inaturalist.org/observations/108805847">https://www.inaturalist.org/observations/108805847</a> |
| 72 | <i>Geokichla citrina</i> | Orange-headed Thrush | 2020/9/24  | 3 | 0 | 10.33065673 | 76.96040924 | <a href="https://www.inaturalist.org/observations/60687199">https://www.inaturalist.org/observations/60687199</a>   |
| 73 | <i>Geokichla citrina</i> | Orange-headed Thrush | 2018/8/3   | 2 | 0 | 10.33141665 | 76.40064893 | <a href="https://www.inaturalist.org/observations/48518226">https://www.inaturalist.org/observations/48518226</a>   |
| 74 | <i>Geokichla citrina</i> | Orange-headed Thrush | 2020/9/24  | 2 | 0 | 10.34077675 | 76.96929451 | <a href="https://www.inaturalist.org/observations/64831048">https://www.inaturalist.org/observations/64831048</a>   |
| 75 | <i>Geokichla citrina</i> | Orange-headed Thrush | 2016/12/24 | 2 | 0 | 10.34350650 | 76.97132700 | <a href="https://www.inaturalist.org/observations/68641969">https://www.inaturalist.org/observations/68641969</a>   |
| 76 | <i>Geokichla citrina</i> | Orange-headed Thrush | 2021/3/14  | 2 | 0 | 10.39299600 | 76.99330700 | <a href="https://www.inaturalist.org/observations/71224277">https://www.inaturalist.org/observations/71224277</a>   |
| 77 | <i>Geokichla citrina</i> | Orange-headed Thrush | 2018/2/3   | 4 | 0 | 10.46924601 | 76.75739685 | <a href="https://www.inaturalist.org/observations/95855078">https://www.inaturalist.org/observations/95855078</a>   |
| 78 | <i>Geokichla citrina</i> | Orange-headed Thrush | 2022/7/12  | 7 | 0 | 10.53029449 | 76.34731840 | <a href="https://www.inaturalist.org/observations/127997068">https://www.inaturalist.org/observations/127997068</a> |
| 79 | <i>Geokichla citrina</i> | Orange-headed Thrush | 2021/12/9  | 3 | 0 | 10.61970106 | 78.78128089 | <a href="https://www.inaturalist.org/observations/102813238">https://www.inaturalist.org/observations/102813238</a> |
| 80 | <i>Geokichla citrina</i> | Orange-headed Thrush | 2021/12/6  | 2 | 0 | 10.62238995 | 78.77343637 | <a href="https://www.inaturalist.org/observations/102586871">https://www.inaturalist.org/observations/102586871</a> |
| 81 | <i>Geokichla citrina</i> | Orange-headed Thrush | 2020/8/28  | 3 | 0 | 10.70345469 | 76.00738026 | <a href="https://www.inaturalist.org/observations/57814408">https://www.inaturalist.org/observations/57814408</a>   |
| 82 | <i>Geokichla citrina</i> | Orange-headed Thrush | 2016/12/18 | 2 | 0 | 10.74735031 | 76.46734715 | <a href="https://www.inaturalist.org/observations/65596805">https://www.inaturalist.org/observations/65596805</a>   |
| 83 | <i>Geokichla citrina</i> | Orange-headed Thrush | 2021/8/18  | 6 | 0 | 10.74861893 | 76.13425918 | <a href="https://www.inaturalist.org/observations/91611995">https://www.inaturalist.org/observations/91611995</a>   |
| 84 | <i>Geokichla citrina</i> | Orange-headed Thrush | 2014/3/1   | 4 | 0 | 10.74974237 | 76.37860390 | <a href="https://www.inaturalist.org/observations/98105274">https://www.inaturalist.org/observations/98105274</a>   |
| 85 | <i>Geokichla citrina</i> | Orange-headed Thrush | 2020/11/7  | 2 | 0 | 10.76863420 | 76.13325231 | <a href="https://www.inaturalist.org/observations/64365795">https://www.inaturalist.org/observations/64365795</a>   |
| 86 | <i>Geokichla citrina</i> | Orange-headed Thrush | 2020/12/12 | 2 | 0 | 10.76889901 | 76.13287110 | <a href="https://www.inaturalist.org/observations/66513326">https://www.inaturalist.org/observations/66513326</a>   |
| 87 | <i>Geokichla citrina</i> | Orange-headed Thrush | 2016/1/19  | 2 | 0 | 10.78673000 | 76.65479300 | <a href="https://www.inaturalist.org/observations/7281255">https://www.inaturalist.org/observations/7281255</a>     |
| 88 | <i>Geokichla citrina</i> | Orange-headed Thrush | 2020/9/26  | 3 | 0 | 10.78934697 | 76.33051100 | <a href="https://www.inaturalist.org/observations/60812662">https://www.inaturalist.org/observations/60812662</a>   |
| 89 | <i>Geokichla citrina</i> | Orange-headed Thrush | 2022/3/13  | 2 | 0 | 10.84015309 | 76.83562236 | <a href="https://www.inaturalist.org/observations/115189779">https://www.inaturalist.org/observations/115189779</a> |
| 90 | <i>Geokichla citrina</i> | Orange-headed Thrush | 2022/4/3   | 4 | 0 | 10.85364193 | 76.72125531 | <a href="https://www.inaturalist.org/observations/110651038">https://www.inaturalist.org/observations/110651038</a> |
| 91 | <i>Geokichla citrina</i> | Orange-headed Thrush | 2020/1/11  | 3 | 0 | 10.85873648 | 76.27108332 | <a href="https://www.inaturalist.org/observations/38750055">https://www.inaturalist.org/observations/38750055</a>   |

|     |                          |                      |            |   |   |             |             |                                                                                                                     |
|-----|--------------------------|----------------------|------------|---|---|-------------|-------------|---------------------------------------------------------------------------------------------------------------------|
| 92  | <i>Geokichla citrina</i> | Orange-headed Thrush | 2016/12/28 | 3 | 0 | 10.85952081 | 76.62257507 | <a href="https://www.inaturalist.org/observations/96867328">https://www.inaturalist.org/observations/96867328</a>   |
| 93  | <i>Geokichla citrina</i> | Orange-headed Thrush | 2022/4/3   | 2 | 0 | 10.86576010 | 76.65920730 | <a href="https://www.inaturalist.org/observations/110563615">https://www.inaturalist.org/observations/110563615</a> |
| 94  | <i>Geokichla citrina</i> | Orange-headed Thrush | 2021/3/21  | 2 | 0 | 10.88503336 | 76.06602509 | <a href="https://www.inaturalist.org/observations/71677208">https://www.inaturalist.org/observations/71677208</a>   |
| 95  | <i>Geokichla citrina</i> | Orange-headed Thrush | 2022/1/15  | 3 | 0 | 10.88637042 | 76.06631041 | <a href="https://www.inaturalist.org/observations/104957676">https://www.inaturalist.org/observations/104957676</a> |
| 96  | <i>Geokichla citrina</i> | Orange-headed Thrush | 2021/9/2   | 3 | 0 | 10.88735140 | 76.06558880 | <a href="https://www.inaturalist.org/observations/93333072">https://www.inaturalist.org/observations/93333072</a>   |
| 97  | <i>Geokichla citrina</i> | Orange-headed Thrush | 2019/1/15  | 2 | 0 | 10.88777170 | 76.07321890 | <a href="https://www.inaturalist.org/observations/67240406">https://www.inaturalist.org/observations/67240406</a>   |
| 98  | <i>Geokichla citrina</i> | Orange-headed Thrush | 2020/10/24 | 2 | 0 | 11.07894586 | 79.83002432 | <a href="https://www.inaturalist.org/observations/63375388">https://www.inaturalist.org/observations/63375388</a>   |
| 99  | <i>Geokichla citrina</i> | Orange-headed Thrush | 2020/11/1  | 2 | 0 | 11.07894586 | 79.83002432 | <a href="https://www.inaturalist.org/observations/88026266">https://www.inaturalist.org/observations/88026266</a>   |
| 100 | <i>Geokichla citrina</i> | Orange-headed Thrush | 2020/10/24 | 4 | 0 | 11.07894586 | 79.83002432 | <a href="https://www.inaturalist.org/observations/88415092">https://www.inaturalist.org/observations/88415092</a>   |
| 101 | <i>Geokichla citrina</i> | Orange-headed Thrush | 2021/10/30 | 4 | 0 | 11.07894586 | 79.83002432 | <a href="https://www.inaturalist.org/observations/99796505">https://www.inaturalist.org/observations/99796505</a>   |
| 102 | <i>Geokichla citrina</i> | Orange-headed Thrush | 2018/1/28  | 4 | 0 | 11.08783983 | 76.46328092 | <a href="https://www.inaturalist.org/observations/65743913">https://www.inaturalist.org/observations/65743913</a>   |
| 103 | <i>Geokichla citrina</i> | Orange-headed Thrush | 2018/1/28  | 4 | 0 | 11.08930978 | 76.46326657 | <a href="https://www.inaturalist.org/observations/65743596">https://www.inaturalist.org/observations/65743596</a>   |
| 104 | <i>Geokichla citrina</i> | Orange-headed Thrush | 2019/7/3   | 3 | 0 | 11.09543857 | 76.43593524 | <a href="https://www.inaturalist.org/observations/28191067">https://www.inaturalist.org/observations/28191067</a>   |
| 105 | <i>Geokichla citrina</i> | Orange-headed Thrush | 2020/8/30  | 2 | 0 | 11.13041964 | 76.30984058 | <a href="https://www.inaturalist.org/observations/61860103">https://www.inaturalist.org/observations/61860103</a>   |
| 106 | <i>Geokichla citrina</i> | Orange-headed Thrush | 2014/3/1   | 3 | 0 | 11.13041964 | 76.30984058 | <a href="https://www.inaturalist.org/observations/63684364">https://www.inaturalist.org/observations/63684364</a>   |
| 107 | <i>Geokichla citrina</i> | Orange-headed Thrush | 2014/3/1   | 3 | 0 | 11.13041964 | 76.30984058 | <a href="https://www.inaturalist.org/observations/63684365">https://www.inaturalist.org/observations/63684365</a>   |
| 108 | <i>Geokichla citrina</i> | Orange-headed Thrush | 2022/2/23  | 3 | 0 | 11.13278168 | 75.90202041 | <a href="https://www.inaturalist.org/observations/107309990">https://www.inaturalist.org/observations/107309990</a> |
| 109 | <i>Geokichla citrina</i> | Orange-headed Thrush | 2020/8/16  | 5 | 0 | 11.18829610 | 76.26094630 | <a href="https://www.inaturalist.org/observations/58725346">https://www.inaturalist.org/observations/58725346</a>   |
| 110 | <i>Geokichla citrina</i> | Orange-headed Thrush | 2018/8/31  | 2 | 0 | 11.19549840 | 76.23637990 | <a href="https://www.inaturalist.org/observations/16068129">https://www.inaturalist.org/observations/16068129</a>   |
| 111 | <i>Geokichla citrina</i> | Orange-headed Thrush | 2022/1/10  | 2 | 0 | 11.25577643 | 79.52535186 | <a href="https://www.inaturalist.org/observations/104907752">https://www.inaturalist.org/observations/104907752</a> |
| 112 | <i>Geokichla citrina</i> | Orange-headed Thrush | 2020/12/13 | 3 | 0 | 11.30278490 | 76.93833850 | <a href="https://www.inaturalist.org/observations/88791271">https://www.inaturalist.org/observations/88791271</a>   |
| 113 | <i>Geokichla citrina</i> | Orange-headed Thrush | 2018/3/23  | 2 | 0 | 11.32303840 | 79.24335279 | <a href="https://www.inaturalist.org/observations/54540188">https://www.inaturalist.org/observations/54540188</a>   |
| 114 | <i>Geokichla citrina</i> | Orange-headed Thrush | 2016/11/24 | 2 | 0 | 11.49201786 | 76.68398598 | <a href="https://www.inaturalist.org/observations/56904742">https://www.inaturalist.org/observations/56904742</a>   |

|     |                          |                      |            |   |   |             |             |                                                                                                                     |
|-----|--------------------------|----------------------|------------|---|---|-------------|-------------|---------------------------------------------------------------------------------------------------------------------|
| 115 | <i>Geokichla citrina</i> | Orange-headed Thrush | 2015/1/6   | 3 | 0 | 11.53526164 | 76.65010023 | <a href="https://www.inaturalist.org/observations/80580026">https://www.inaturalist.org/observations/80580026</a>   |
| 116 | <i>Geokichla citrina</i> | Orange-headed Thrush | 2022/6/12  | 2 | 0 | 11.55752004 | 76.22789472 | <a href="https://www.inaturalist.org/observations/125455841">https://www.inaturalist.org/observations/125455841</a> |
| 117 | <i>Geokichla citrina</i> | Orange-headed Thrush | 2015/2/3   | 4 | 0 | 11.56612300 | 76.63833800 | <a href="https://www.inaturalist.org/observations/35345264">https://www.inaturalist.org/observations/35345264</a>   |
| 118 | <i>Geokichla citrina</i> | Orange-headed Thrush | 2020/2/24  | 8 | 0 | 11.61046077 | 76.08280867 | <a href="https://www.inaturalist.org/observations/87955804">https://www.inaturalist.org/observations/87955804</a>   |
| 119 | <i>Geokichla citrina</i> | Orange-headed Thrush | 2021/12/22 | 2 | 0 | 11.61532030 | 92.61920996 | <a href="https://www.inaturalist.org/observations/103511030">https://www.inaturalist.org/observations/103511030</a> |
| 120 | <i>Geokichla citrina</i> | Orange-headed Thrush | 2018/12/24 | 3 | 0 | 11.62064211 | 76.17764859 | <a href="https://www.inaturalist.org/observations/19199220">https://www.inaturalist.org/observations/19199220</a>   |
| 121 | <i>Geokichla citrina</i> | Orange-headed Thrush | 2022/9/3   | 1 | 0 | 11.66968158 | 76.06166633 | <a href="https://www.inaturalist.org/observations/133481551">https://www.inaturalist.org/observations/133481551</a> |
| 122 | <i>Geokichla citrina</i> | Orange-headed Thrush | 2021/9/11  | 2 | 0 | 11.67337617 | 76.05474640 | <a href="https://www.inaturalist.org/observations/94406968">https://www.inaturalist.org/observations/94406968</a>   |
| 123 | <i>Geokichla citrina</i> | Orange-headed Thrush | 2018/1/21  | 2 | 0 | 11.67582950 | 92.76242490 | <a href="https://www.inaturalist.org/observations/11000566">https://www.inaturalist.org/observations/11000566</a>   |
| 124 | <i>Geokichla citrina</i> | Orange-headed Thrush | 2014/8/11  | 3 | 0 | 11.70610104 | 76.57098706 | <a href="https://www.inaturalist.org/observations/36274570">https://www.inaturalist.org/observations/36274570</a>   |
| 125 | <i>Geokichla citrina</i> | Orange-headed Thrush | 2021/12/31 | 2 | 0 | 11.71305200 | 75.92220800 | <a href="https://www.inaturalist.org/observations/104079980">https://www.inaturalist.org/observations/104079980</a> |
| 126 | <i>Geokichla citrina</i> | Orange-headed Thrush | 2021/3/4   | 3 | 0 | 11.72019670 | 92.73345460 | <a href="https://www.inaturalist.org/observations/90776773">https://www.inaturalist.org/observations/90776773</a>   |
| 127 | <i>Geokichla citrina</i> | Orange-headed Thrush | 2018/3/23  | 4 | 0 | 11.72019670 | 92.73345460 | <a href="https://www.inaturalist.org/observations/101164088">https://www.inaturalist.org/observations/101164088</a> |
| 128 | <i>Geokichla citrina</i> | Orange-headed Thrush | 2022/6/4   | 4 | 0 | 11.77479240 | 78.20970520 | <a href="https://www.inaturalist.org/observations/121200761">https://www.inaturalist.org/observations/121200761</a> |
| 129 | <i>Geokichla citrina</i> | Orange-headed Thrush | 2021/3/14  | 3 | 0 | 11.80434685 | 75.49209438 | <a href="https://www.inaturalist.org/observations/71180376">https://www.inaturalist.org/observations/71180376</a>   |
| 130 | <i>Geokichla citrina</i> | Orange-headed Thrush | 2016/1/31  | 4 | 0 | 11.83287290 | 75.46411190 | <a href="https://www.inaturalist.org/observations/47131396">https://www.inaturalist.org/observations/47131396</a>   |
| 131 | <i>Geokichla citrina</i> | Orange-headed Thrush | 2015/8/22  | 2 | 0 | 11.90273532 | 77.12276670 | <a href="https://www.inaturalist.org/observations/29645047">https://www.inaturalist.org/observations/29645047</a>   |
| 132 | <i>Geokichla citrina</i> | Orange-headed Thrush | 2020/1/18  | 4 | 0 | 11.92237890 | 75.79245790 | <a href="https://www.inaturalist.org/observations/45969992">https://www.inaturalist.org/observations/45969992</a>   |
| 133 | <i>Geokichla citrina</i> | Orange-headed Thrush | 2017/1/6   | 3 | 0 | 11.92237890 | 75.79245790 | <a href="https://www.inaturalist.org/observations/55457269">https://www.inaturalist.org/observations/55457269</a>   |
| 134 | <i>Geokichla citrina</i> | Orange-headed Thrush | 2019/1/4   | 6 | 0 | 11.92237900 | 75.79245800 | <a href="https://www.inaturalist.org/observations/19553221">https://www.inaturalist.org/observations/19553221</a>   |
| 135 | <i>Geokichla citrina</i> | Orange-headed Thrush | 2019/1/4   | 3 | 0 | 11.92259600 | 75.79082000 | <a href="https://www.inaturalist.org/observations/50974781">https://www.inaturalist.org/observations/50974781</a>   |
| 136 | <i>Geokichla citrina</i> | Orange-headed Thrush | 2021/3/1   | 5 | 0 | 11.94468432 | 75.38493812 | <a href="https://www.inaturalist.org/observations/82136494">https://www.inaturalist.org/observations/82136494</a>   |
| 137 | <i>Geokichla citrina</i> | Orange-headed Thrush | 2021/4/21  | 2 | 0 | 11.94468432 | 75.38493812 | <a href="https://www.inaturalist.org/observations/110254400">https://www.inaturalist.org/observations/110254400</a> |

|     |                          |                      |            |   |   |             |             |                                                                                                                     |
|-----|--------------------------|----------------------|------------|---|---|-------------|-------------|---------------------------------------------------------------------------------------------------------------------|
| 138 | <i>Geokichla citrina</i> | Orange-headed Thrush | 2021/4/21  | 2 | 0 | 11.94468432 | 75.38493812 | <a href="https://www.inaturalist.org/observations/110254523">https://www.inaturalist.org/observations/110254523</a> |
| 139 | <i>Geokichla citrina</i> | Orange-headed Thrush | 2021/4/21  | 2 | 0 | 11.94468432 | 75.38493812 | <a href="https://www.inaturalist.org/observations/110254622">https://www.inaturalist.org/observations/110254622</a> |
| 140 | <i>Geokichla citrina</i> | Orange-headed Thrush | 2021/2/17  | 3 | 0 | 11.94937459 | 75.44758178 | <a href="https://www.inaturalist.org/observations/81271700">https://www.inaturalist.org/observations/81271700</a>   |
| 141 | <i>Geokichla citrina</i> | Orange-headed Thrush | 2022/2/26  | 5 | 0 | 11.98151683 | 79.77675628 | <a href="https://www.inaturalist.org/observations/107745986">https://www.inaturalist.org/observations/107745986</a> |
| 142 | <i>Geokichla citrina</i> | Orange-headed Thrush | 2020/1/15  | 3 | 0 | 11.98427631 | 75.39945457 | <a href="https://www.inaturalist.org/observations/44395415">https://www.inaturalist.org/observations/44395415</a>   |
| 143 | <i>Geokichla citrina</i> | Orange-headed Thrush | 2020/4/3   | 2 | 0 | 11.98659865 | 92.94808064 | <a href="https://www.inaturalist.org/observations/41300920">https://www.inaturalist.org/observations/41300920</a>   |
| 144 | <i>Geokichla citrina</i> | Orange-headed Thrush | 2004/7/6   | 2 | 0 | 11.99003892 | 77.14592508 | <a href="https://www.inaturalist.org/observations/31389387">https://www.inaturalist.org/observations/31389387</a>   |
| 145 | <i>Geokichla citrina</i> | Orange-headed Thrush | 2022/6/11  | 3 | 0 | 11.99443692 | 77.14067761 | <a href="https://www.inaturalist.org/observations/121996333">https://www.inaturalist.org/observations/121996333</a> |
| 146 | <i>Geokichla citrina</i> | Orange-headed Thrush | 2017/1/14  | 5 | 0 | 11.99563240 | 77.14276400 | <a href="https://www.inaturalist.org/observations/19862811">https://www.inaturalist.org/observations/19862811</a>   |
| 147 | <i>Geokichla citrina</i> | Orange-headed Thrush | 2017/1/15  | 6 | 0 | 11.99563240 | 77.14276400 | <a href="https://www.inaturalist.org/observations/19862827">https://www.inaturalist.org/observations/19862827</a>   |
| 148 | <i>Geokichla citrina</i> | Orange-headed Thrush | 2004/7/23  | 3 | 0 | 11.99877500 | 77.13983110 | <a href="https://www.inaturalist.org/observations/31391781">https://www.inaturalist.org/observations/31391781</a>   |
| 149 | <i>Geokichla citrina</i> | Orange-headed Thrush | 2014/6/23  | 3 | 0 | 11.99877500 | 77.13983110 | <a href="https://www.inaturalist.org/observations/86172356">https://www.inaturalist.org/observations/86172356</a>   |
| 150 | <i>Geokichla citrina</i> | Orange-headed Thrush | 2015/6/9   | 3 | 0 | 12.00736445 | 77.15124156 | <a href="https://www.inaturalist.org/observations/66566825">https://www.inaturalist.org/observations/66566825</a>   |
| 151 | <i>Geokichla citrina</i> | Orange-headed Thrush | 2017/3/13  | 2 | 0 | 12.03000078 | 75.20706394 | <a href="https://www.inaturalist.org/observations/30603829">https://www.inaturalist.org/observations/30603829</a>   |
| 152 | <i>Geokichla citrina</i> | Orange-headed Thrush | 2017/5/6   | 2 | 0 | 12.03142588 | 76.12068180 | <a href="https://www.inaturalist.org/observations/85989755">https://www.inaturalist.org/observations/85989755</a>   |
| 153 | <i>Geokichla citrina</i> | Orange-headed Thrush | 2022/1/19  | 3 | 0 | 12.13580660 | 76.05322070 | <a href="https://www.inaturalist.org/observations/105258614">https://www.inaturalist.org/observations/105258614</a> |
| 154 | <i>Geokichla citrina</i> | Orange-headed Thrush | 2022/8/3   | 0 | 0 | 12.14249833 | 75.93626667 | <a href="https://www.inaturalist.org/observations/129226492">https://www.inaturalist.org/observations/129226492</a> |
| 155 | <i>Geokichla citrina</i> | Orange-headed Thrush | 2022/5/9   | 2 | 0 | 12.14453762 | 75.93820307 | <a href="https://www.inaturalist.org/observations/118616381">https://www.inaturalist.org/observations/118616381</a> |
| 156 | <i>Geokichla citrina</i> | Orange-headed Thrush | 2022/5/9   | 3 | 0 | 12.14453762 | 75.93820307 | <a href="https://www.inaturalist.org/observations/126446348">https://www.inaturalist.org/observations/126446348</a> |
| 157 | <i>Geokichla citrina</i> | Orange-headed Thrush | 2021/12/12 | 2 | 0 | 12.16529924 | 75.42718928 | <a href="https://www.inaturalist.org/observations/119992528">https://www.inaturalist.org/observations/119992528</a> |
| 158 | <i>Geokichla citrina</i> | Orange-headed Thrush | 2021/12/12 | 2 | 0 | 12.16529924 | 75.42718928 | <a href="https://www.inaturalist.org/observations/119995912">https://www.inaturalist.org/observations/119995912</a> |
| 159 | <i>Geokichla citrina</i> | Orange-headed Thrush | 2021/12/12 | 2 | 0 | 12.16529924 | 75.42718928 | <a href="https://www.inaturalist.org/observations/119996048">https://www.inaturalist.org/observations/119996048</a> |
| 160 | <i>Geokichla citrina</i> | Orange-headed Thrush | 2019/5/31  | 2 | 0 | 12.20548560 | 75.63244700 | <a href="https://www.inaturalist.org/observations/104459399">https://www.inaturalist.org/observations/104459399</a> |

|     |                          |                      |            |   |   |             |             |                                                                                                                     |
|-----|--------------------------|----------------------|------------|---|---|-------------|-------------|---------------------------------------------------------------------------------------------------------------------|
| 161 | <i>Geokichla citrina</i> | Orange-headed Thrush | 2018/1/9   | 2 | 0 | 12.22197930 | 76.00147120 | <a href="https://www.inaturalist.org/observations/93601709">https://www.inaturalist.org/observations/93601709</a>   |
| 162 | <i>Geokichla citrina</i> | Orange-headed Thrush | 2017/1/21  | 2 | 0 | 12.22904064 | 79.05328954 | <a href="https://www.inaturalist.org/observations/96055817">https://www.inaturalist.org/observations/96055817</a>   |
| 163 | <i>Geokichla citrina</i> | Orange-headed Thrush | 2015/11/12 | 3 | 0 | 12.22920841 | 79.05328954 | <a href="https://www.inaturalist.org/observations/96055247">https://www.inaturalist.org/observations/96055247</a>   |
| 164 | <i>Geokichla citrina</i> | Orange-headed Thrush | 2019/2/28  | 4 | 0 | 12.25632983 | 75.84644314 | <a href="https://www.inaturalist.org/observations/69955081">https://www.inaturalist.org/observations/69955081</a>   |
| 165 | <i>Geokichla citrina</i> | Orange-headed Thrush | 2019/3/24  | 3 | 0 | 12.28119801 | 77.39116236 | <a href="https://www.inaturalist.org/observations/34866482">https://www.inaturalist.org/observations/34866482</a>   |
| 166 | <i>Geokichla citrina</i> | Orange-headed Thrush | 2013/1/26  | 2 | 0 | 12.64780281 | 76.62294091 | <a href="https://www.inaturalist.org/observations/98110937">https://www.inaturalist.org/observations/98110937</a>   |
| 167 | <i>Geokichla citrina</i> | Orange-headed Thrush | 2021/7/18  | 3 | 0 | 12.73394100 | 75.46046100 | <a href="https://www.inaturalist.org/observations/87543633">https://www.inaturalist.org/observations/87543633</a>   |
| 168 | <i>Geokichla citrina</i> | Orange-headed Thrush | 2021/12/3  | 4 | 0 | 12.83717100 | 80.19849410 | <a href="https://www.inaturalist.org/observations/102766038">https://www.inaturalist.org/observations/102766038</a> |
| 169 | <i>Geokichla citrina</i> | Orange-headed Thrush | 2020/11/18 | 2 | 0 | 12.84198368 | 80.17380730 | <a href="https://www.inaturalist.org/observations/67622063">https://www.inaturalist.org/observations/67622063</a>   |
| 170 | <i>Geokichla citrina</i> | Orange-headed Thrush | 2022/6/20  | 3 | 0 | 12.86854744 | 92.87440795 | <a href="https://www.inaturalist.org/observations/124991081">https://www.inaturalist.org/observations/124991081</a> |
| 171 | <i>Geokichla citrina</i> | Orange-headed Thrush | 2019/3/6   | 5 | 0 | 12.88138735 | 75.82561333 | <a href="https://www.inaturalist.org/observations/26593271">https://www.inaturalist.org/observations/26593271</a>   |
| 172 | <i>Geokichla citrina</i> | Orange-headed Thrush | 2018/12/31 | 4 | 0 | 12.92819250 | 74.87716750 | <a href="https://www.inaturalist.org/observations/19338031">https://www.inaturalist.org/observations/19338031</a>   |
| 173 | <i>Geokichla citrina</i> | Orange-headed Thrush | 2017/1/21  | 4 | 0 | 12.92898480 | 80.17216130 | <a href="https://www.inaturalist.org/observations/24737282">https://www.inaturalist.org/observations/24737282</a>   |
| 174 | <i>Geokichla citrina</i> | Orange-headed Thrush | 2012/6/17  | 3 | 0 | 12.93311073 | 74.89575651 | <a href="https://www.inaturalist.org/observations/35533245">https://www.inaturalist.org/observations/35533245</a>   |
| 175 | <i>Geokichla citrina</i> | Orange-headed Thrush | 2020/11/28 | 2 | 0 | 12.93390870 | 80.16537353 | <a href="https://www.inaturalist.org/observations/65750828">https://www.inaturalist.org/observations/65750828</a>   |
| 176 | <i>Geokichla citrina</i> | Orange-headed Thrush | 2021/2/9   | 2 | 0 | 12.94532610 | 79.23287340 | <a href="https://www.inaturalist.org/observations/69457453">https://www.inaturalist.org/observations/69457453</a>   |
| 177 | <i>Geokichla citrina</i> | Orange-headed Thrush | 2013/10/21 | 4 | 0 | 12.95812020 | 80.11922810 | <a href="https://www.inaturalist.org/observations/22659365">https://www.inaturalist.org/observations/22659365</a>   |
| 178 | <i>Geokichla citrina</i> | Orange-headed Thrush | 2019/3/22  | 4 | 0 | 12.98974976 | 80.23608105 | <a href="https://www.inaturalist.org/observations/62881818">https://www.inaturalist.org/observations/62881818</a>   |
| 179 | <i>Geokichla citrina</i> | Orange-headed Thrush | 2019/12/15 | 3 | 0 | 12.99149290 | 80.23369070 | <a href="https://www.inaturalist.org/observations/52654574">https://www.inaturalist.org/observations/52654574</a>   |
| 180 | <i>Geokichla citrina</i> | Orange-headed Thrush | 2016/3/19  | 7 | 0 | 13.00370190 | 80.22934300 | <a href="https://www.inaturalist.org/observations/28436740">https://www.inaturalist.org/observations/28436740</a>   |
| 181 | <i>Geokichla citrina</i> | Orange-headed Thrush | 2017/11/12 | 5 | 0 | 13.00450639 | 80.26283639 | <a href="https://www.inaturalist.org/observations/22516669">https://www.inaturalist.org/observations/22516669</a>   |
| 182 | <i>Geokichla citrina</i> | Orange-headed Thrush | 2020/2/6   | 5 | 0 | 13.01671021 | 80.23639034 | <a href="https://www.inaturalist.org/observations/109841379">https://www.inaturalist.org/observations/109841379</a> |
| 183 | <i>Geokichla citrina</i> | Orange-headed Thrush | 2021/12/3  | 3 | 0 | 13.02438432 | 77.56911556 | <a href="https://www.inaturalist.org/observations/104921688">https://www.inaturalist.org/observations/104921688</a> |



|     |                   |                      |            |   |   |             |             |                                                                                                                     |
|-----|-------------------|----------------------|------------|---|---|-------------|-------------|---------------------------------------------------------------------------------------------------------------------|
| 184 | Geokichla citrina | Orange-headed Thrush | 2017/10/23 | 3 | 0 | 13.08268020 | 80.27071840 | <a href="https://www.inaturalist.org/observations/134972110">https://www.inaturalist.org/observations/134972110</a> |
| 185 | Geokichla citrina | Orange-headed Thrush | 2020/4/25  | 2 | 0 | 13.10224717 | 74.97288667 | <a href="https://www.inaturalist.org/observations/64839686">https://www.inaturalist.org/observations/64839686</a>   |
| 186 | Geokichla citrina | Orange-headed Thrush | 2020/10/1  | 3 | 0 | 13.32030040 | 74.75702226 | <a href="https://www.inaturalist.org/observations/61465784">https://www.inaturalist.org/observations/61465784</a>   |
| 187 | Geokichla citrina | Orange-headed Thrush | 2021/11/27 | 3 | 0 | 13.35557720 | 75.58217070 | <a href="https://www.inaturalist.org/observations/105708955">https://www.inaturalist.org/observations/105708955</a> |
| 188 | Geokichla citrina | Orange-headed Thrush | 2019/5/20  | 3 | 0 | 13.36966838 | 77.68194202 | <a href="https://www.inaturalist.org/observations/51878789">https://www.inaturalist.org/observations/51878789</a>   |
| 189 | Geokichla citrina | Orange-headed Thrush | 2019/4/9   | 3 | 0 | 13.37079154 | 77.68183556 | <a href="https://www.inaturalist.org/observations/29238213">https://www.inaturalist.org/observations/29238213</a>   |
| 190 | Geokichla citrina | Orange-headed Thrush | 2019/4/13  | 5 | 0 | 13.37192613 | 77.68108531 | <a href="https://www.inaturalist.org/observations/22727956">https://www.inaturalist.org/observations/22727956</a>   |
| 191 | Geokichla citrina | Orange-headed Thrush | 2022/4/2   | 2 | 0 | 13.37420074 | 77.21271336 | <a href="https://www.inaturalist.org/observations/132090465">https://www.inaturalist.org/observations/132090465</a> |
| 192 | Geokichla citrina | Orange-headed Thrush | 2022/4/9   | 4 | 0 | 13.37420074 | 77.21271336 | <a href="https://www.inaturalist.org/observations/132091226">https://www.inaturalist.org/observations/132091226</a> |
| 193 | Geokichla citrina | Orange-headed Thrush | 2017/4/9   | 7 | 0 | 13.42536600 | 74.75716700 | <a href="https://www.inaturalist.org/observations/18843588">https://www.inaturalist.org/observations/18843588</a>   |
| 194 | Geokichla citrina | Orange-headed Thrush | 2018/2/18  | 2 | 0 | 13.43512480 | 75.64240880 | <a href="https://www.inaturalist.org/observations/84867262">https://www.inaturalist.org/observations/84867262</a>   |
| 195 | Geokichla citrina | Orange-headed Thrush | 2020/11/29 | 3 | 0 | 13.44041568 | 75.08447573 | <a href="https://www.inaturalist.org/observations/66699554">https://www.inaturalist.org/observations/66699554</a>   |
| 196 | Geokichla citrina | Orange-headed Thrush | 2021/1/4   | 2 | 0 | 13.47709000 | 75.01773020 | <a href="https://www.inaturalist.org/observations/81534366">https://www.inaturalist.org/observations/81534366</a>   |
| 197 | Geokichla citrina | Orange-headed Thrush | 2020/1/17  | 3 | 0 | 13.49774562 | 74.94149692 | <a href="https://www.inaturalist.org/observations/56418860">https://www.inaturalist.org/observations/56418860</a>   |
| 198 | Geokichla citrina | Orange-headed Thrush | 2021/8/26  | 2 | 0 | 13.56508150 | 74.93695220 | <a href="https://www.inaturalist.org/observations/92738041">https://www.inaturalist.org/observations/92738041</a>   |
| 199 | Geokichla citrina | Orange-headed Thrush | 2014/2/18  | 2 | 0 | 13.63633210 | 78.45388020 | <a href="https://www.inaturalist.org/observations/14004632">https://www.inaturalist.org/observations/14004632</a>   |
| 200 | Geokichla citrina | Orange-headed Thrush | 2022/3/24  | 5 | 0 | 13.65182529 | 79.41627145 | <a href="https://www.inaturalist.org/observations/109363185">https://www.inaturalist.org/observations/109363185</a> |
| 201 | Geokichla citrina | Orange-headed Thrush | 2020/6/3   | 2 | 0 | 13.65384647 | 74.93372638 | <a href="https://www.inaturalist.org/observations/51924749">https://www.inaturalist.org/observations/51924749</a>   |
| 202 | Geokichla citrina | Orange-headed Thrush | 2020/1/24  | 5 | 0 | 13.66400833 | 79.48668056 | <a href="https://www.inaturalist.org/observations/83481929">https://www.inaturalist.org/observations/83481929</a>   |
| 203 | Geokichla citrina | Orange-headed Thrush | 2021/1/5   | 2 | 0 | 13.83322398 | 74.81194712 | <a href="https://www.inaturalist.org/observations/81562026">https://www.inaturalist.org/observations/81562026</a>   |
| 204 | Geokichla citrina | Orange-headed Thrush | 2021/11/25 | 3 | 0 | 13.86318650 | 74.81040530 | <a href="https://www.inaturalist.org/observations/104330951">https://www.inaturalist.org/observations/104330951</a> |
| 205 | Geokichla citrina | Orange-headed Thrush | 2019/8/11  | 6 | 0 | 14.73468260 | 74.81578400 | <a href="https://www.inaturalist.org/observations/33851409">https://www.inaturalist.org/observations/33851409</a>   |
| 206 | Geokichla citrina | Orange-headed Thrush | 2022/5/31  | 3 | 0 | 14.80258150 | 74.13119950 | <a href="https://www.inaturalist.org/observations/122314315">https://www.inaturalist.org/observations/122314315</a> |

|     |                   |                      |            |   |   |             |             |                                                                                                                     |
|-----|-------------------|----------------------|------------|---|---|-------------|-------------|---------------------------------------------------------------------------------------------------------------------|
| 207 | Geokichla citrina | Orange-headed Thrush | 2011/12/23 | 2 | 0 | 14.86613746 | 74.43937294 | <a href="https://www.inaturalist.org/observations/103682046">https://www.inaturalist.org/observations/103682046</a> |
| 208 | Geokichla citrina | Orange-headed Thrush | 2019/1/28  | 2 | 0 | 15.01128790 | 76.56430270 | <a href="https://www.inaturalist.org/observations/84832639">https://www.inaturalist.org/observations/84832639</a>   |
| 209 | Geokichla citrina | Orange-headed Thrush | 2019/1/28  | 2 | 0 | 15.06551640 | 76.62971890 | <a href="https://www.inaturalist.org/observations/84833387">https://www.inaturalist.org/observations/84833387</a>   |
| 210 | Geokichla citrina | Orange-headed Thrush | 2018/1/13  | 3 | 0 | 15.20754311 | 75.62984560 | <a href="https://www.inaturalist.org/observations/36881326">https://www.inaturalist.org/observations/36881326</a>   |
| 211 | Geokichla citrina | Orange-headed Thrush | 2016/1/4   | 6 | 0 | 15.23611910 | 74.61728190 | <a href="https://www.inaturalist.org/observations/41283715">https://www.inaturalist.org/observations/41283715</a>   |
| 212 | Geokichla citrina | Orange-headed Thrush | 2014/1/15  | 2 | 0 | 15.23611910 | 74.61728190 | <a href="https://www.inaturalist.org/observations/64078649">https://www.inaturalist.org/observations/64078649</a>   |
| 213 | Geokichla citrina | Orange-headed Thrush | 2015/4/21  | 2 | 0 | 15.23611910 | 74.61728190 | <a href="https://www.inaturalist.org/observations/64078650">https://www.inaturalist.org/observations/64078650</a>   |
| 214 | Geokichla citrina | Orange-headed Thrush | 2021/1/22  | 3 | 0 | 15.23611910 | 74.61728190 | <a href="https://www.inaturalist.org/observations/69714283">https://www.inaturalist.org/observations/69714283</a>   |
| 215 | Geokichla citrina | Orange-headed Thrush | 2021/1/22  | 3 | 0 | 15.23611910 | 74.61728190 | <a href="https://www.inaturalist.org/observations/69714286">https://www.inaturalist.org/observations/69714286</a>   |
| 216 | Geokichla citrina | Orange-headed Thrush | 2011/3/12  | 2 | 0 | 15.23611910 | 74.61728190 | <a href="https://www.inaturalist.org/observations/96665194">https://www.inaturalist.org/observations/96665194</a>   |
| 217 | Geokichla citrina | Orange-headed Thrush | 2014/3/18  | 2 | 0 | 15.26667000 | 74.61667000 | <a href="http://www.inaturalist.org/observations/1512006">http://www.inaturalist.org/observations/1512006</a>       |
| 218 | Geokichla citrina | Orange-headed Thrush | 2019/3/8   | 3 | 0 | 15.28426770 | 74.53021590 | <a href="https://www.inaturalist.org/observations/56497430">https://www.inaturalist.org/observations/56497430</a>   |
| 219 | Geokichla citrina | Orange-headed Thrush | 2019/3/8   | 2 | 0 | 15.28426770 | 74.53021590 | <a href="https://www.inaturalist.org/observations/102237330">https://www.inaturalist.org/observations/102237330</a> |
| 220 | Geokichla citrina | Orange-headed Thrush | 2018/3/2   | 2 | 0 | 15.28426770 | 74.53021590 | <a href="https://www.inaturalist.org/observations/102349345">https://www.inaturalist.org/observations/102349345</a> |
| 221 | Geokichla citrina | Orange-headed Thrush | 2013/12/29 | 3 | 0 | 15.29093264 | 74.52785541 | <a href="https://www.inaturalist.org/observations/56249632">https://www.inaturalist.org/observations/56249632</a>   |
| 222 | Geokichla citrina | Orange-headed Thrush | 2013/5/17  | 2 | 0 | 15.29122590 | 74.52274080 | <a href="https://www.inaturalist.org/observations/124970032">https://www.inaturalist.org/observations/124970032</a> |
| 223 | Geokichla citrina | Orange-headed Thrush | 2020/12/1  | 3 | 0 | 15.29186840 | 74.52093288 | <a href="https://www.inaturalist.org/observations/73292824">https://www.inaturalist.org/observations/73292824</a>   |
| 224 | Geokichla citrina | Orange-headed Thrush | 2018/11/13 | 3 | 0 | 15.29200100 | 74.52086100 | <a href="https://www.inaturalist.org/observations/18622822">https://www.inaturalist.org/observations/18622822</a>   |
| 225 | Geokichla citrina | Orange-headed Thrush | 2014/5/16  | 3 | 0 | 15.29200100 | 74.52086100 | <a href="https://www.inaturalist.org/observations/41282069">https://www.inaturalist.org/observations/41282069</a>   |
| 226 | Geokichla citrina | Orange-headed Thrush | 2016/12/29 | 3 | 0 | 15.29200100 | 74.52086113 | <a href="https://www.inaturalist.org/observations/45575702">https://www.inaturalist.org/observations/45575702</a>   |
| 227 | Geokichla citrina | Orange-headed Thrush | 2022/5/23  | 1 | 0 | 15.41085010 | 74.20031570 | <a href="https://www.inaturalist.org/observations/120791898">https://www.inaturalist.org/observations/120791898</a> |
| 228 | Geokichla citrina | Orange-headed Thrush | 2022/5/22  | 2 | 0 | 15.41085010 | 74.20031570 | <a href="https://www.inaturalist.org/observations/120791945">https://www.inaturalist.org/observations/120791945</a> |
| 229 | Geokichla citrina | Orange-headed Thrush | 2008/11/18 | 4 | 0 | 15.51185719 | 74.07384280 | <a href="https://www.inaturalist.org/observations/104026509">https://www.inaturalist.org/observations/104026509</a> |

|     |                   |                      |            |   |   |             |             |                                                                                                                     |
|-----|-------------------|----------------------|------------|---|---|-------------|-------------|---------------------------------------------------------------------------------------------------------------------|
| 230 | Geokichla citrina | Orange-headed Thrush | 2017/6/3   | 3 | 0 | 15.53727829 | 73.82098153 | <a href="https://www.inaturalist.org/observations/36215509">https://www.inaturalist.org/observations/36215509</a>   |
| 231 | Geokichla citrina | Orange-headed Thrush | 2018/6/6   | 2 | 0 | 15.54043440 | 73.88487650 | <a href="https://www.inaturalist.org/observations/43270332">https://www.inaturalist.org/observations/43270332</a>   |
| 232 | Geokichla citrina | Orange-headed Thrush | 2018/11/6  | 3 | 0 | 15.54669164 | 73.76096249 | <a href="https://www.inaturalist.org/observations/18911221">https://www.inaturalist.org/observations/18911221</a>   |
| 233 | Geokichla citrina | Orange-headed Thrush | 2017/6/3   | 2 | 0 | 15.55811430 | 73.81892348 | <a href="https://www.inaturalist.org/observations/106964976">https://www.inaturalist.org/observations/106964976</a> |
| 234 | Geokichla citrina | Orange-headed Thrush | 2020/11/30 | 3 | 0 | 15.60876754 | 73.83228343 | <a href="https://www.inaturalist.org/observations/65875546">https://www.inaturalist.org/observations/65875546</a>   |
| 235 | Geokichla citrina | Orange-headed Thrush | 2015/11/15 | 5 | 0 | 15.65215900 | 74.11658000 | <a href="https://www.inaturalist.org/observations/33111200">https://www.inaturalist.org/observations/33111200</a>   |
| 236 | Geokichla citrina | Orange-headed Thrush | 2018/12/23 | 5 | 0 | 15.67160881 | 73.73275390 | <a href="https://www.inaturalist.org/observations/19924936">https://www.inaturalist.org/observations/19924936</a>   |
| 237 | Geokichla citrina | Orange-headed Thrush | 2022/1/9   | 3 | 0 | 15.69103599 | 74.36607823 | <a href="https://www.inaturalist.org/observations/104637728">https://www.inaturalist.org/observations/104637728</a> |
| 238 | Geokichla citrina | Orange-headed Thrush | 2020/2/7   | 2 | 0 | 15.77343840 | 74.09176067 | <a href="https://www.inaturalist.org/observations/57192998">https://www.inaturalist.org/observations/57192998</a>   |
| 239 | Geokichla citrina | Orange-headed Thrush | 2019/4/23  | 4 | 0 | 15.83211786 | 74.49285854 | <a href="https://www.inaturalist.org/observations/79946288">https://www.inaturalist.org/observations/79946288</a>   |
| 240 | Geokichla citrina | Orange-headed Thrush | 2009/1/12  | 3 | 0 | 15.96471560 | 74.00357090 | <a href="https://www.inaturalist.org/observations/81864761">https://www.inaturalist.org/observations/81864761</a>   |
| 241 | Geokichla citrina | Orange-headed Thrush | 2021/12/6  | 2 | 0 | 15.96471560 | 74.00357090 | <a href="https://www.inaturalist.org/observations/104856936">https://www.inaturalist.org/observations/104856936</a> |
| 242 | Geokichla citrina | Orange-headed Thrush | 2018/5/8   | 1 | 0 | 16.05967817 | 73.65334254 | <a href="https://www.inaturalist.org/observations/31415986">https://www.inaturalist.org/observations/31415986</a>   |
| 243 | Geokichla citrina | Orange-headed Thrush | 2018/4/17  | 4 | 0 | 16.11805048 | 73.68159892 | <a href="https://www.inaturalist.org/observations/55032321">https://www.inaturalist.org/observations/55032321</a>   |
| 244 | Geokichla citrina | Orange-headed Thrush | 2020/9/20  | 5 | 0 | 16.26937579 | 73.67842559 | <a href="https://www.inaturalist.org/observations/63626310">https://www.inaturalist.org/observations/63626310</a>   |
| 245 | Geokichla citrina | Orange-headed Thrush | 2021/7/6   | 3 | 0 | 16.36004000 | 74.29583900 | <a href="https://www.inaturalist.org/observations/86998327">https://www.inaturalist.org/observations/86998327</a>   |
| 246 | Geokichla citrina | Orange-headed Thrush | 2018/7/22  | 2 | 0 | 16.52278155 | 73.53153180 | <a href="https://www.inaturalist.org/observations/50149153">https://www.inaturalist.org/observations/50149153</a>   |
| 247 | Geokichla citrina | Orange-headed Thrush | 2021/2/6   | 5 | 0 | 16.54503773 | 81.70497794 | <a href="https://www.inaturalist.org/observations/73713897">https://www.inaturalist.org/observations/73713897</a>   |
| 248 | Geokichla citrina | Orange-headed Thrush | 2016/10/21 | 3 | 0 | 16.61307904 | 81.35025412 | <a href="https://www.inaturalist.org/observations/99617872">https://www.inaturalist.org/observations/99617872</a>   |
| 249 | Geokichla citrina | Orange-headed Thrush | 2016/10/25 | 2 | 0 | 16.61307904 | 81.35025412 | <a href="https://www.inaturalist.org/observations/111184508">https://www.inaturalist.org/observations/111184508</a> |
| 250 | Geokichla citrina | Orange-headed Thrush | 2016/10/25 | 3 | 0 | 16.61345398 | 81.34971533 | <a href="https://www.inaturalist.org/observations/98494179">https://www.inaturalist.org/observations/98494179</a>   |
| 251 | Geokichla citrina | Orange-headed Thrush | 2022/5/28  | 3 | 0 | 16.64089955 | 80.48269440 | <a href="https://www.inaturalist.org/observations/131550385">https://www.inaturalist.org/observations/131550385</a> |
| 252 | Geokichla citrina | Orange-headed Thrush | 2022/4/28  | 4 | 0 | 16.68510667 | 73.35926333 | <a href="https://www.inaturalist.org/observations/113179094">https://www.inaturalist.org/observations/113179094</a> |

|     |                          |                      |            |   |   |             |             |                                                                                                                     |
|-----|--------------------------|----------------------|------------|---|---|-------------|-------------|---------------------------------------------------------------------------------------------------------------------|
| 253 | <i>Geokichla citrina</i> | Orange-headed Thrush | 2021/6/1   | 3 | 0 | 16.71099167 | 73.34047500 | <a href="https://www.inaturalist.org/observations/81295258">https://www.inaturalist.org/observations/81295258</a>   |
| 254 | <i>Geokichla citrina</i> | Orange-headed Thrush | 2021/2/6   | 2 | 0 | 16.71956910 | 73.35530210 | <a href="https://www.inaturalist.org/observations/69125775">https://www.inaturalist.org/observations/69125775</a>   |
| 255 | <i>Geokichla citrina</i> | Orange-headed Thrush | 2021/10/31 | 4 | 0 | 16.74975593 | 82.15602162 | <a href="https://www.inaturalist.org/observations/102231222">https://www.inaturalist.org/observations/102231222</a> |
| 256 | <i>Geokichla citrina</i> | Orange-headed Thrush | 2022/4/19  | 2 | 0 | 16.78637427 | 74.33926351 | <a href="https://www.inaturalist.org/observations/112236478">https://www.inaturalist.org/observations/112236478</a> |
| 257 | <i>Geokichla citrina</i> | Orange-headed Thrush | 2017/9/15  | 1 | 0 | 16.94712650 | 73.30026627 | <a href="https://www.inaturalist.org/observations/8476372">https://www.inaturalist.org/observations/8476372</a>     |
| 258 | <i>Geokichla citrina</i> | Orange-headed Thrush | 2020/7/5   | 3 | 0 | 17.18749953 | 73.52832726 | <a href="https://www.inaturalist.org/observations/52009044">https://www.inaturalist.org/observations/52009044</a>   |
| 259 | <i>Geokichla citrina</i> | Orange-headed Thrush | 2019/1/12  | 2 | 0 | 17.31196560 | 77.86358360 | <a href="https://www.inaturalist.org/observations/136246548">https://www.inaturalist.org/observations/136246548</a> |
| 260 | <i>Geokichla citrina</i> | Orange-headed Thrush | 2021/2/7   | 4 | 0 | 17.31196600 | 77.86358400 | <a href="https://www.inaturalist.org/observations/69367903">https://www.inaturalist.org/observations/69367903</a>   |
| 261 | <i>Geokichla citrina</i> | Orange-headed Thrush | 2022/5/22  | 2 | 0 | 17.31234335 | 77.84826880 | <a href="https://www.inaturalist.org/observations/118331020">https://www.inaturalist.org/observations/118331020</a> |
| 262 | <i>Geokichla citrina</i> | Orange-headed Thrush | 2016/6/17  | 3 | 0 | 17.31269160 | 77.85526400 | <a href="https://www.inaturalist.org/observations/89072071">https://www.inaturalist.org/observations/89072071</a>   |
| 263 | <i>Geokichla citrina</i> | Orange-headed Thrush | 2018/3/28  | 5 | 0 | 17.32689501 | 74.76560354 | <a href="https://www.inaturalist.org/observations/38323688">https://www.inaturalist.org/observations/38323688</a>   |
| 264 | <i>Geokichla citrina</i> | Orange-headed Thrush | 2021/1/5   | 2 | 0 | 17.33645550 | 77.90482680 | <a href="https://www.inaturalist.org/observations/136819226">https://www.inaturalist.org/observations/136819226</a> |
| 265 | <i>Geokichla citrina</i> | Orange-headed Thrush | 2019/7/14  | 3 | 0 | 17.33893460 | 73.33255160 | <a href="https://www.inaturalist.org/observations/55612869">https://www.inaturalist.org/observations/55612869</a>   |
| 266 | <i>Geokichla citrina</i> | Orange-headed Thrush | 2022/4/10  | 2 | 0 | 17.44147023 | 81.52410083 | <a href="https://www.inaturalist.org/observations/111754217">https://www.inaturalist.org/observations/111754217</a> |
| 267 | <i>Geokichla citrina</i> | Orange-headed Thrush | 2020/4/27  | 2 | 0 | 17.46970277 | 77.77714580 | <a href="https://www.inaturalist.org/observations/43856385">https://www.inaturalist.org/observations/43856385</a>   |
| 268 | <i>Geokichla citrina</i> | Orange-headed Thrush | 2014/7/19  | 3 | 0 | 17.53190370 | 73.51513410 | <a href="https://www.inaturalist.org/observations/124970033">https://www.inaturalist.org/observations/124970033</a> |
| 269 | <i>Geokichla citrina</i> | Orange-headed Thrush | 2011/12/30 | 2 | 0 | 17.53190370 | 73.51513410 | <a href="https://www.inaturalist.org/observations/124970034">https://www.inaturalist.org/observations/124970034</a> |
| 270 | <i>Geokichla citrina</i> | Orange-headed Thrush | 2020/10/24 | 3 | 0 | 17.60126795 | 81.69805516 | <a href="https://www.inaturalist.org/observations/63567843">https://www.inaturalist.org/observations/63567843</a>   |
| 271 | <i>Geokichla citrina</i> | Orange-headed Thrush | 2020/10/28 | 2 | 0 | 17.60213625 | 81.69877533 | <a href="https://www.inaturalist.org/observations/63737078">https://www.inaturalist.org/observations/63737078</a>   |
| 272 | <i>Geokichla citrina</i> | Orange-headed Thrush | 2014/12/12 | 4 | 0 | 17.67460500 | 81.70940200 | <a href="https://www.inaturalist.org/observations/64873283">https://www.inaturalist.org/observations/64873283</a>   |
| 273 | <i>Geokichla citrina</i> | Orange-headed Thrush | 2022/6/13  | 2 | 0 | 17.73331978 | 73.18897303 | <a href="https://www.inaturalist.org/observations/133725340">https://www.inaturalist.org/observations/133725340</a> |
| 274 | <i>Geokichla citrina</i> | Orange-headed Thrush | 2021/3/7   | 3 | 0 | 17.74921050 | 83.34180160 | <a href="https://www.inaturalist.org/observations/73590730">https://www.inaturalist.org/observations/73590730</a>   |
| 275 | <i>Geokichla citrina</i> | Orange-headed Thrush | 2016/7/23  | 3 | 0 | 17.76769700 | 73.19101150 | <a href="https://www.inaturalist.org/observations/73275878">https://www.inaturalist.org/observations/73275878</a>   |

|     |                          |                      |            |   |   |             |              |                                                                                                                     |
|-----|--------------------------|----------------------|------------|---|---|-------------|--------------|---------------------------------------------------------------------------------------------------------------------|
| 276 | <i>Geokichla citrina</i> | Orange-headed Thrush | 2021/11/4  | 3 | 0 | 17.90464167 | 83.43810833  | <a href="https://www.inaturalist.org/observations/100202847">https://www.inaturalist.org/observations/100202847</a> |
| 277 | <i>Geokichla citrina</i> | Orange-headed Thrush | 2009/10/19 | 4 | 0 | 17.92327746 | 73.79088333  | <a href="https://www.inaturalist.org/observations/44973679">https://www.inaturalist.org/observations/44973679</a>   |
| 278 | <i>Geokichla citrina</i> | Orange-headed Thrush | 2018/2/6   | 3 | 0 | 17.93949099 | 73.63476858  | <a href="https://www.inaturalist.org/observations/36636884">https://www.inaturalist.org/observations/36636884</a>   |
| 279 | <i>Geokichla citrina</i> | Orange-headed Thrush | 2018/2/17  | 3 | 0 | 18.10760008 | 79.01929948  | <a href="https://www.inaturalist.org/observations/63558662">https://www.inaturalist.org/observations/63558662</a>   |
| 280 | <i>Geokichla citrina</i> | Orange-headed Thrush | 2016/4/1   | 3 | 0 | 18.11243700 | 79.01930000  | <a href="https://www.inaturalist.org/observations/63558649">https://www.inaturalist.org/observations/63558649</a>   |
| 281 | <i>Geokichla citrina</i> | Orange-headed Thrush | 2016/4/10  | 4 | 0 | 18.11243700 | 79.01930000  | <a href="https://www.inaturalist.org/observations/63558657">https://www.inaturalist.org/observations/63558657</a>   |
| 282 | <i>Geokichla citrina</i> | Orange-headed Thrush | 2018/4/1   | 4 | 0 | 18.11243720 | 79.01929970  | <a href="https://www.inaturalist.org/observations/63573568">https://www.inaturalist.org/observations/63573568</a>   |
| 283 | <i>Geokichla citrina</i> | Orange-headed Thrush | 2018/7/1   | 4 | 0 | 18.14805903 | 73.77965111  | <a href="https://www.inaturalist.org/observations/91643089">https://www.inaturalist.org/observations/91643089</a>   |
| 284 | <i>Geokichla citrina</i> | Orange-headed Thrush | 2017/6/17  | 3 | 0 | 18.25284700 | 109.51190900 | <a href="https://www.inaturalist.org/observations/6699977">https://www.inaturalist.org/observations/6699977</a>     |
| 285 | <i>Geokichla citrina</i> | Orange-headed Thrush | 2021/9/3   | 4 | 0 | 18.29018740 | 73.13362096  | <a href="https://www.inaturalist.org/observations/95023182">https://www.inaturalist.org/observations/95023182</a>   |
| 286 | <i>Geokichla citrina</i> | Orange-headed Thrush | 2016/7/16  | 2 | 0 | 18.39101761 | 73.63912582  | <a href="http://www.inaturalist.org/observations/3713432">http://www.inaturalist.org/observations/3713432</a>       |
| 287 | <i>Geokichla citrina</i> | Orange-headed Thrush | 2012/1/8   | 4 | 0 | 18.46148214 | 72.93103505  | <a href="https://www.inaturalist.org/observations/17440449">https://www.inaturalist.org/observations/17440449</a>   |
| 288 | <i>Geokichla citrina</i> | Orange-headed Thrush | 2018/6/24  | 2 | 0 | 18.48222080 | 73.50386260  | <a href="https://www.inaturalist.org/observations/44565146">https://www.inaturalist.org/observations/44565146</a>   |
| 289 | <i>Geokichla citrina</i> | Orange-headed Thrush | 2022/8/30  | 3 | 0 | 18.50807580 | 73.90802300  | <a href="https://www.inaturalist.org/observations/132911664">https://www.inaturalist.org/observations/132911664</a> |
| 290 | <i>Geokichla citrina</i> | Orange-headed Thrush | 2021/3/15  | 3 | 0 | 18.54397167 | 73.58249667  | <a href="https://www.inaturalist.org/observations/71274993">https://www.inaturalist.org/observations/71274993</a>   |
| 291 | <i>Geokichla citrina</i> | Orange-headed Thrush | 2016/6/5   | 4 | 0 | 18.63628200 | 73.45291600  | <a href="http://www.inaturalist.org/observations/4138406">http://www.inaturalist.org/observations/4138406</a>       |
| 292 | <i>Geokichla citrina</i> | Orange-headed Thrush | 2021/12/12 | 2 | 0 | 18.67031229 | 73.75881772  | <a href="https://www.inaturalist.org/observations/102908824">https://www.inaturalist.org/observations/102908824</a> |
| 293 | <i>Geokichla citrina</i> | Orange-headed Thrush | 2014/4/25  | 2 | 0 | 18.69460700 | 72.92515992  | <a href="https://www.inaturalist.org/observations/103305608">https://www.inaturalist.org/observations/103305608</a> |
| 294 | <i>Geokichla citrina</i> | Orange-headed Thrush | 2017/5/17  | 4 | 0 | 18.69543644 | 72.92542554  | <a href="https://www.inaturalist.org/observations/53024687">https://www.inaturalist.org/observations/53024687</a>   |
| 295 | <i>Geokichla citrina</i> | Orange-headed Thrush | 2022/1/28  | 1 | 0 | 18.71284755 | 108.88751150 | <a href="https://www.inaturalist.org/observations/121483550">https://www.inaturalist.org/observations/121483550</a> |
| 296 | <i>Geokichla citrina</i> | Orange-headed Thrush | 2020/11/7  | 1 | 0 | 18.73050313 | 108.90289840 | <a href="https://www.inaturalist.org/observations/64924641">https://www.inaturalist.org/observations/64924641</a>   |
| 297 | <i>Geokichla citrina</i> | Orange-headed Thrush | 2010/5/28  | 4 | 0 | 18.74120604 | 72.86439653  | <a href="https://www.inaturalist.org/observations/67639889">https://www.inaturalist.org/observations/67639889</a>   |
| 298 | <i>Geokichla citrina</i> | Orange-headed Thrush | 2016/4/10  | 3 | 0 | 18.82715333 | 82.16632833  | <a href="https://www.inaturalist.org/observations/58829618">https://www.inaturalist.org/observations/58829618</a>   |

|     |                   |                      |            |   |   |             |             |                                                                                                                     |
|-----|-------------------|----------------------|------------|---|---|-------------|-------------|---------------------------------------------------------------------------------------------------------------------|
| 299 | Geokichla citrina | Orange-headed Thrush | 2022/4/19  | 2 | 0 | 18.83162190 | 81.36861619 | <a href="https://www.inaturalist.org/observations/116231667">https://www.inaturalist.org/observations/116231667</a> |
| 300 | Geokichla citrina | Orange-headed Thrush | 2020/3/31  | 5 | 0 | 18.84137595 | 82.09839115 | <a href="https://www.inaturalist.org/observations/41360769">https://www.inaturalist.org/observations/41360769</a>   |
| 301 | Geokichla citrina | Orange-headed Thrush | 2018/10/15 | 2 | 0 | 18.92690150 | 72.83269160 | <a href="https://www.inaturalist.org/observations/85888634">https://www.inaturalist.org/observations/85888634</a>   |
| 302 | Geokichla citrina | Orange-headed Thrush | 2016/12/24 | 6 | 0 | 18.95399744 | 82.23659813 | <a href="https://www.inaturalist.org/observations/37683866">https://www.inaturalist.org/observations/37683866</a>   |
| 303 | Geokichla citrina | Orange-headed Thrush | 2022/3/27  | 2 | 0 | 19.02032122 | 82.14700973 | <a href="https://www.inaturalist.org/observations/111943605">https://www.inaturalist.org/observations/111943605</a> |
| 304 | Geokichla citrina | Orange-headed Thrush | 2019/2/28  | 3 | 0 | 19.02371740 | 73.04039330 | <a href="https://www.inaturalist.org/observations/56499471">https://www.inaturalist.org/observations/56499471</a>   |
| 305 | Geokichla citrina | Orange-headed Thrush | 2021/2/17  | 4 | 0 | 19.02907291 | 73.02786205 | <a href="https://www.inaturalist.org/observations/70190398">https://www.inaturalist.org/observations/70190398</a>   |
| 306 | Geokichla citrina | Orange-headed Thrush | 2021/2/17  | 4 | 0 | 19.02907291 | 73.02786205 | <a href="https://www.inaturalist.org/observations/70190399">https://www.inaturalist.org/observations/70190399</a>   |
| 307 | Geokichla citrina | Orange-headed Thrush | 2021/2/2   | 3 | 0 | 19.02966100 | 73.03444000 | <a href="https://www.inaturalist.org/observations/69477209">https://www.inaturalist.org/observations/69477209</a>   |
| 308 | Geokichla citrina | Orange-headed Thrush | 2021/2/26  | 3 | 0 | 19.03197498 | 73.03356249 | <a href="https://www.inaturalist.org/observations/70488255">https://www.inaturalist.org/observations/70488255</a>   |
| 309 | Geokichla citrina | Orange-headed Thrush | 2019/12/31 | 2 | 0 | 19.03197498 | 73.03356249 | <a href="https://www.inaturalist.org/observations/104163223">https://www.inaturalist.org/observations/104163223</a> |
| 310 | Geokichla citrina | Orange-headed Thrush | 2021/2/2   | 3 | 0 | 19.03197498 | 73.03356249 | <a href="https://www.inaturalist.org/observations/106079063">https://www.inaturalist.org/observations/106079063</a> |
| 311 | Geokichla citrina | Orange-headed Thrush | 2021/2/20  | 7 | 0 | 19.03197500 | 73.03356250 | <a href="https://www.inaturalist.org/observations/69909768">https://www.inaturalist.org/observations/69909768</a>   |
| 312 | Geokichla citrina | Orange-headed Thrush | 2021/2/27  | 2 | 0 | 19.03197500 | 73.03356250 | <a href="https://www.inaturalist.org/observations/70453116">https://www.inaturalist.org/observations/70453116</a>   |
| 313 | Geokichla citrina | Orange-headed Thrush | 2021/3/7   | 3 | 0 | 19.03197500 | 73.03356250 | <a href="https://www.inaturalist.org/observations/70743107">https://www.inaturalist.org/observations/70743107</a>   |
| 314 | Geokichla citrina | Orange-headed Thrush | 2021/3/7   | 3 | 0 | 19.03197500 | 73.03356250 | <a href="https://www.inaturalist.org/observations/70743109">https://www.inaturalist.org/observations/70743109</a>   |
| 315 | Geokichla citrina | Orange-headed Thrush | 2022/3/27  | 4 | 0 | 19.03197500 | 73.03356250 | <a href="https://www.inaturalist.org/observations/132106797">https://www.inaturalist.org/observations/132106797</a> |
| 316 | Geokichla citrina | Orange-headed Thrush | 2022/4/23  | 3 | 0 | 19.03317431 | 73.03467392 | <a href="https://www.inaturalist.org/observations/114159676">https://www.inaturalist.org/observations/114159676</a> |
| 317 | Geokichla citrina | Orange-headed Thrush | 2022/5/31  | 1 | 0 | 19.03326986 | 73.03332519 | <a href="https://www.inaturalist.org/observations/119558366">https://www.inaturalist.org/observations/119558366</a> |
| 318 | Geokichla citrina | Orange-headed Thrush | 2016/4/17  | 2 | 0 | 19.08397427 | 73.53655184 | <a href="https://www.inaturalist.org/observations/7000699">https://www.inaturalist.org/observations/7000699</a>     |
| 319 | Geokichla citrina | Orange-headed Thrush | 2020/8/19  | 3 | 0 | 19.20000000 | 73.20000000 | <a href="https://www.inaturalist.org/observations/56995343">https://www.inaturalist.org/observations/56995343</a>   |
| 320 | Geokichla citrina | Orange-headed Thrush | 2021/3/20  | 6 | 0 | 19.23376500 | 72.94458020 | <a href="https://www.inaturalist.org/observations/71611398">https://www.inaturalist.org/observations/71611398</a>   |
| 321 | Geokichla citrina | Orange-headed Thrush | 2021/6/4   | 3 | 0 | 19.23376500 | 72.94458020 | <a href="https://www.inaturalist.org/observations/81533323">https://www.inaturalist.org/observations/81533323</a>   |

|     |                   |                      |           |   |   |             |             |                                                                                                                     |
|-----|-------------------|----------------------|-----------|---|---|-------------|-------------|---------------------------------------------------------------------------------------------------------------------|
| 322 | Geokichla citrina | Orange-headed Thrush | 2022/5/7  | 2 | 0 | 19.23376500 | 72.94458020 | <a href="https://www.inaturalist.org/observations/115912543">https://www.inaturalist.org/observations/115912543</a> |
| 323 | Geokichla citrina | Orange-headed Thrush | 2022/5/21 | 2 | 0 | 19.23376500 | 72.94458020 | <a href="https://www.inaturalist.org/observations/118353540">https://www.inaturalist.org/observations/118353540</a> |
| 324 | Geokichla citrina | Orange-headed Thrush | 2018/5/27 | 2 | 0 | 19.23825890 | 72.96358970 | <a href="https://www.inaturalist.org/observations/43620966">https://www.inaturalist.org/observations/43620966</a>   |
| 325 | Geokichla citrina | Orange-headed Thrush | 2015/5/24 | 2 | 0 | 19.27007340 | 72.95539970 | <a href="https://www.inaturalist.org/observations/41517284">https://www.inaturalist.org/observations/41517284</a>   |
| 326 | Geokichla citrina | Orange-headed Thrush | 2019/6/5  | 2 | 0 | 19.42713460 | 72.91264310 | <a href="https://www.inaturalist.org/observations/44489258">https://www.inaturalist.org/observations/44489258</a>   |
| 327 | Geokichla citrina | Orange-headed Thrush | 2021/5/28 | 3 | 0 | 20.11262959 | 73.75293396 | <a href="https://www.inaturalist.org/observations/91937441">https://www.inaturalist.org/observations/91937441</a>   |
| 328 | Geokichla citrina | Orange-headed Thrush | 2010/5/20 | 3 | 0 | 20.24838270 | 79.36068900 | <a href="https://www.inaturalist.org/observations/55252594">https://www.inaturalist.org/observations/55252594</a>   |
| 329 | Geokichla citrina | Orange-headed Thrush | 2017/5/1  | 2 | 0 | 20.34002560 | 79.30590060 | <a href="https://www.inaturalist.org/observations/56308243">https://www.inaturalist.org/observations/56308243</a>   |
| 330 | Geokichla citrina | Orange-headed Thrush | 2017/5/3  | 2 | 0 | 20.34002560 | 79.30590060 | <a href="https://www.inaturalist.org/observations/56308270">https://www.inaturalist.org/observations/56308270</a>   |
| 331 | Geokichla citrina | Orange-headed Thrush | 2014/6/22 | 3 | 0 | 20.34002560 | 79.30590060 | <a href="https://www.inaturalist.org/observations/58578716">https://www.inaturalist.org/observations/58578716</a>   |
| 332 | Geokichla citrina | Orange-headed Thrush | 2022/2/27 | 1 | 0 | 20.34002560 | 79.30590060 | <a href="https://www.inaturalist.org/observations/135255704">https://www.inaturalist.org/observations/135255704</a> |
| 333 | Geokichla citrina | Orange-headed Thrush | 2022/2/28 | 2 | 0 | 20.34002560 | 79.30590060 | <a href="https://www.inaturalist.org/observations/135539096">https://www.inaturalist.org/observations/135539096</a> |
| 334 | Geokichla citrina | Orange-headed Thrush | 2022/2/28 | 2 | 0 | 20.34002560 | 79.30590060 | <a href="https://www.inaturalist.org/observations/135539097">https://www.inaturalist.org/observations/135539097</a> |
| 335 | Geokichla citrina | Orange-headed Thrush | 2022/2/28 | 2 | 0 | 20.34002560 | 79.30590060 | <a href="https://www.inaturalist.org/observations/135539104">https://www.inaturalist.org/observations/135539104</a> |
| 336 | Geokichla citrina | Orange-headed Thrush | 2022/2/28 | 2 | 0 | 20.34002560 | 79.30590060 | <a href="https://www.inaturalist.org/observations/135539106">https://www.inaturalist.org/observations/135539106</a> |
| 337 | Geokichla citrina | Orange-headed Thrush | 2022/2/28 | 2 | 0 | 20.34002560 | 79.30590060 | <a href="https://www.inaturalist.org/observations/135539107">https://www.inaturalist.org/observations/135539107</a> |
| 338 | Geokichla citrina | Orange-headed Thrush | 2022/2/28 | 2 | 0 | 20.34002560 | 79.30590060 | <a href="https://www.inaturalist.org/observations/135539116">https://www.inaturalist.org/observations/135539116</a> |
| 339 | Geokichla citrina | Orange-headed Thrush | 2022/2/28 | 1 | 0 | 20.34002560 | 79.30590060 | <a href="https://www.inaturalist.org/observations/135539118">https://www.inaturalist.org/observations/135539118</a> |
| 340 | Geokichla citrina | Orange-headed Thrush | 2022/3/1  | 2 | 0 | 20.34002560 | 79.30590060 | <a href="https://www.inaturalist.org/observations/135555956">https://www.inaturalist.org/observations/135555956</a> |
| 341 | Geokichla citrina | Orange-headed Thrush | 2019/5/27 | 2 | 0 | 20.35672957 | 79.35845770 | <a href="https://www.inaturalist.org/observations/28280449">https://www.inaturalist.org/observations/28280449</a>   |
| 342 | Geokichla citrina | Orange-headed Thrush | 2017/6/11 | 2 | 0 | 20.38255955 | 72.91925721 | <a href="https://www.inaturalist.org/observations/6590368">https://www.inaturalist.org/observations/6590368</a>     |
| 343 | Geokichla citrina | Orange-headed Thrush | 2011/5/18 | 3 | 0 | 20.42795860 | 79.24722940 | <a href="https://www.inaturalist.org/observations/38153365">https://www.inaturalist.org/observations/38153365</a>   |
| 344 | Geokichla citrina | Orange-headed Thrush | 2022/3/6  | 4 | 0 | 20.47847556 | 85.83606719 | <a href="https://www.inaturalist.org/observations/107997593">https://www.inaturalist.org/observations/107997593</a> |

|     |                   |                      |            |   |   |             |             |                                                                                                                     |
|-----|-------------------|----------------------|------------|---|---|-------------|-------------|---------------------------------------------------------------------------------------------------------------------|
| 345 | Geokichla citrina | Orange-headed Thrush | 2022/9/25  | 2 | 0 | 20.50353906 | 84.90677811 | <a href="https://www.inaturalist.org/observations/136394373">https://www.inaturalist.org/observations/136394373</a> |
| 346 | Geokichla citrina | Orange-headed Thrush | 2021/3/20  | 5 | 0 | 20.53203365 | 81.01297304 | <a href="https://www.inaturalist.org/observations/71711392">https://www.inaturalist.org/observations/71711392</a>   |
| 347 | Geokichla citrina | Orange-headed Thrush | 2021/3/22  | 2 | 0 | 20.53760886 | 80.99065203 | <a href="https://www.inaturalist.org/observations/71801216">https://www.inaturalist.org/observations/71801216</a>   |
| 348 | Geokichla citrina | Orange-headed Thrush | 2015/3/6   | 3 | 0 | 20.57316732 | 85.00803263 | <a href="https://www.inaturalist.org/observations/59889064">https://www.inaturalist.org/observations/59889064</a>   |
| 349 | Geokichla citrina | Orange-headed Thrush | 2021/3/21  | 4 | 0 | 20.58148317 | 81.07112166 | <a href="https://www.inaturalist.org/observations/71775657">https://www.inaturalist.org/observations/71775657</a>   |
| 350 | Geokichla citrina | Orange-headed Thrush | 2021/5/30  | 3 | 0 | 20.59665804 | 82.05904897 | <a href="https://www.inaturalist.org/observations/81074169">https://www.inaturalist.org/observations/81074169</a>   |
| 351 | Geokichla citrina | Orange-headed Thrush | 2021/3/1   | 2 | 0 | 20.68005590 | 81.54409971 | <a href="https://www.inaturalist.org/observations/96768090">https://www.inaturalist.org/observations/96768090</a>   |
| 352 | Geokichla citrina | Orange-headed Thrush | 2018/5/8   | 4 | 0 | 20.76383230 | 73.48609350 | <a href="https://www.inaturalist.org/observations/61855075">https://www.inaturalist.org/observations/61855075</a>   |
| 353 | Geokichla citrina | Orange-headed Thrush | 2021/3/27  | 2 | 0 | 20.92898014 | 73.66887420 | <a href="https://www.inaturalist.org/observations/72284626">https://www.inaturalist.org/observations/72284626</a>   |
| 354 | Geokichla citrina | Orange-headed Thrush | 2022/6/27  | 5 | 0 | 20.94336708 | 73.72424874 | <a href="https://www.inaturalist.org/observations/123718569">https://www.inaturalist.org/observations/123718569</a> |
| 355 | Geokichla citrina | Orange-headed Thrush | 2021/5/5   | 4 | 0 | 21.16601175 | 79.05504026 | <a href="https://www.inaturalist.org/observations/80690366">https://www.inaturalist.org/observations/80690366</a>   |
| 356 | Geokichla citrina | Orange-headed Thrush | 2021/8/18  | 3 | 0 | 21.18703461 | 80.76186329 | <a href="https://www.inaturalist.org/observations/94704620">https://www.inaturalist.org/observations/94704620</a>   |
| 357 | Geokichla citrina | Orange-headed Thrush | 2022/1/10  | 6 | 0 | 21.18703461 | 80.76186329 | <a href="https://www.inaturalist.org/observations/104973221">https://www.inaturalist.org/observations/104973221</a> |
| 358 | Geokichla citrina | Orange-headed Thrush | 2020/7/13  | 3 | 0 | 21.18708525 | 80.76186363 | <a href="https://www.inaturalist.org/observations/56608015">https://www.inaturalist.org/observations/56608015</a>   |
| 359 | Geokichla citrina | Orange-headed Thrush | 2019/5/25  | 4 | 0 | 21.19071060 | 80.03433580 | <a href="https://www.inaturalist.org/observations/30294404">https://www.inaturalist.org/observations/30294404</a>   |
| 360 | Geokichla citrina | Orange-headed Thrush | 2021/10/31 | 2 | 0 | 21.19818292 | 80.76089535 | <a href="https://www.inaturalist.org/observations/99983901">https://www.inaturalist.org/observations/99983901</a>   |
| 361 | Geokichla citrina | Orange-headed Thrush | 2022/5/19  | 4 | 0 | 21.19892157 | 80.76093022 | <a href="https://www.inaturalist.org/observations/120312709">https://www.inaturalist.org/observations/120312709</a> |
| 362 | Geokichla citrina | Orange-headed Thrush | 2022/7/1   | 4 | 0 | 21.19926385 | 80.76324798 | <a href="https://www.inaturalist.org/observations/128321271">https://www.inaturalist.org/observations/128321271</a> |
| 363 | Geokichla citrina | Orange-headed Thrush | 2016/12/27 | 4 | 0 | 21.20973485 | 78.99121642 | <a href="https://www.inaturalist.org/observations/106478101">https://www.inaturalist.org/observations/106478101</a> |
| 364 | Geokichla citrina | Orange-headed Thrush | 2021/5/30  | 3 | 0 | 21.21211533 | 80.75755801 | <a href="https://www.inaturalist.org/observations/88262877">https://www.inaturalist.org/observations/88262877</a>   |
| 365 | Geokichla citrina | Orange-headed Thrush | 2020/6/5   | 3 | 0 | 21.21660206 | 80.66869374 | <a href="https://www.inaturalist.org/observations/48566860">https://www.inaturalist.org/observations/48566860</a>   |
| 366 | Geokichla citrina | Orange-headed Thrush | 2018/5/21  | 6 | 0 | 21.29117663 | 81.72872773 | <a href="https://www.inaturalist.org/observations/13142146">https://www.inaturalist.org/observations/13142146</a>   |
| 367 | Geokichla citrina | Orange-headed Thrush | 2019/5/24  | 2 | 0 | 21.41711410 | 86.60062490 | <a href="https://www.inaturalist.org/observations/97911954">https://www.inaturalist.org/observations/97911954</a>   |



|     |                          |                      |            |   |   |             |              |                                                                                                                     |
|-----|--------------------------|----------------------|------------|---|---|-------------|--------------|---------------------------------------------------------------------------------------------------------------------|
| 368 | <i>Geokichla citrina</i> | Orange-headed Thrush | 2018/5/18  | 3 | 0 | 21.46470660 | 82.44215190  | <a href="https://www.inaturalist.org/observations/16589416">https://www.inaturalist.org/observations/16589416</a>   |
| 369 | <i>Geokichla citrina</i> | Orange-headed Thrush | 2022/4/6   | 0 | 0 | 21.48111990 | 109.12008000 | <a href="https://www.inaturalist.org/observations/132409466">https://www.inaturalist.org/observations/132409466</a> |
| 370 | <i>Geokichla citrina</i> | Orange-headed Thrush | 2016/2/14  | 2 | 0 | 21.63580500 | 87.56185500  | <a href="https://www.inaturalist.org/observations/61107393">https://www.inaturalist.org/observations/61107393</a>   |
| 371 | <i>Geokichla citrina</i> | Orange-headed Thrush | 2014/5/8   | 3 | 0 | 21.63591260 | 79.23227860  | <a href="https://www.inaturalist.org/observations/56218610">https://www.inaturalist.org/observations/56218610</a>   |
| 372 | <i>Geokichla citrina</i> | Orange-headed Thrush | 2014/5/10  | 3 | 0 | 21.63591260 | 79.23227860  | <a href="https://www.inaturalist.org/observations/56218676">https://www.inaturalist.org/observations/56218676</a>   |
| 373 | <i>Geokichla citrina</i> | Orange-headed Thrush | 2014/5/8   | 3 | 0 | 21.63591260 | 79.23227860  | <a href="https://www.inaturalist.org/observations/58493162">https://www.inaturalist.org/observations/58493162</a>   |
| 374 | <i>Geokichla citrina</i> | Orange-headed Thrush | 2019/4/16  | 3 | 0 | 21.63591260 | 79.23227860  | <a href="https://www.inaturalist.org/observations/84414304">https://www.inaturalist.org/observations/84414304</a>   |
| 375 | <i>Geokichla citrina</i> | Orange-headed Thrush | 2016/3/9   | 2 | 0 | 21.70597333 | 86.44743167  | <a href="https://www.inaturalist.org/observations/61112413">https://www.inaturalist.org/observations/61112413</a>   |
| 376 | <i>Geokichla citrina</i> | Orange-headed Thrush | 2019/4/11  | 4 | 0 | 21.84337000 | 79.47858500  | <a href="https://www.inaturalist.org/observations/122262986">https://www.inaturalist.org/observations/122262986</a> |
| 377 | <i>Geokichla citrina</i> | Orange-headed Thrush | 2021/11/1  | 2 | 0 | 22.13528189 | 113.57863810 | <a href="https://www.inaturalist.org/observations/99974878">https://www.inaturalist.org/observations/99974878</a>   |
| 378 | <i>Geokichla citrina</i> | Orange-headed Thrush | 2018/12/12 | 4 | 0 | 22.14414704 | 81.09927513  | <a href="https://www.inaturalist.org/observations/50974229">https://www.inaturalist.org/observations/50974229</a>   |
| 379 | <i>Geokichla citrina</i> | Orange-headed Thrush | 2016/4/6   | 4 | 0 | 22.19090272 | 80.65363085  | <a href="https://www.inaturalist.org/observations/75012261">https://www.inaturalist.org/observations/75012261</a>   |
| 380 | <i>Geokichla citrina</i> | Orange-headed Thrush | 2020/4/26  | 2 | 0 | 22.19799922 | 113.55135860 | <a href="https://www.inaturalist.org/observations/43567786">https://www.inaturalist.org/observations/43567786</a>   |
| 381 | <i>Geokichla citrina</i> | Orange-headed Thrush | 2021/10/29 | 0 | 0 | 22.20025538 | 113.54794600 | <a href="https://www.inaturalist.org/observations/99686444">https://www.inaturalist.org/observations/99686444</a>   |
| 382 | <i>Geokichla citrina</i> | Orange-headed Thrush | 2022/4/9   | 2 | 0 | 22.20032608 | 113.54786690 | <a href="https://www.inaturalist.org/observations/110844361">https://www.inaturalist.org/observations/110844361</a> |
| 383 | <i>Geokichla citrina</i> | Orange-headed Thrush | 2022/1/13  | 3 | 0 | 22.20034383 | 113.54784710 | <a href="https://www.inaturalist.org/observations/104853840">https://www.inaturalist.org/observations/104853840</a> |
| 384 | <i>Geokichla citrina</i> | Orange-headed Thrush | 2022/1/7   | 2 | 0 | 22.20041378 | 113.54795600 | <a href="https://www.inaturalist.org/observations/104510208">https://www.inaturalist.org/observations/104510208</a> |
| 385 | <i>Geokichla citrina</i> | Orange-headed Thrush | 2022/1/20  | 3 | 0 | 22.20046830 | 113.54786630 | <a href="https://www.inaturalist.org/observations/105250817">https://www.inaturalist.org/observations/105250817</a> |
| 386 | <i>Geokichla citrina</i> | Orange-headed Thrush | 2022/1/20  | 2 | 0 | 22.20058705 | 113.54782290 | <a href="https://www.inaturalist.org/observations/105257544">https://www.inaturalist.org/observations/105257544</a> |
| 387 | <i>Geokichla citrina</i> | Orange-headed Thrush | 2021/11/12 | 2 | 0 | 22.20063903 | 113.54806220 | <a href="https://www.inaturalist.org/observations/100902884">https://www.inaturalist.org/observations/100902884</a> |
| 388 | <i>Geokichla citrina</i> | Orange-headed Thrush | 2021/11/12 | 2 | 0 | 22.20067095 | 113.54781520 | <a href="https://www.inaturalist.org/observations/100912432">https://www.inaturalist.org/observations/100912432</a> |
| 389 | <i>Geokichla citrina</i> | Orange-headed Thrush | 2019/4/4   | 3 | 0 | 22.20785503 | 113.54795010 | <a href="https://www.inaturalist.org/observations/23796209">https://www.inaturalist.org/observations/23796209</a>   |
| 390 | <i>Geokichla citrina</i> | Orange-headed Thrush | 2020/10/5  | 2 | 0 | 22.20789787 | 113.54716420 | <a href="https://www.inaturalist.org/observations/61764045">https://www.inaturalist.org/observations/61764045</a>   |

|     |                          |                      |            |   |   |             |              |                                                                                                                     |
|-----|--------------------------|----------------------|------------|---|---|-------------|--------------|---------------------------------------------------------------------------------------------------------------------|
| 391 | <i>Geokichla citrina</i> | Orange-headed Thrush | 2019/9/29  | 3 | 0 | 22.20798051 | 113.54707670 | <a href="https://www.inaturalist.org/observations/33707182">https://www.inaturalist.org/observations/33707182</a>   |
| 392 | <i>Geokichla citrina</i> | Orange-headed Thrush | 2020/10/2  | 2 | 0 | 22.20818619 | 113.54777820 | <a href="https://www.inaturalist.org/observations/62253649">https://www.inaturalist.org/observations/62253649</a>   |
| 393 | <i>Geokichla citrina</i> | Orange-headed Thrush | 2020/10/19 | 2 | 0 | 22.20818619 | 113.54777820 | <a href="https://www.inaturalist.org/observations/63244905">https://www.inaturalist.org/observations/63244905</a>   |
| 394 | <i>Geokichla citrina</i> | Orange-headed Thrush | 2019/12/4  | 1 | 0 | 22.25852061 | 114.04693460 | <a href="https://www.inaturalist.org/observations/37903387">https://www.inaturalist.org/observations/37903387</a>   |
| 395 | <i>Geokichla citrina</i> | Orange-headed Thrush | 2022/7/10  | 4 | 0 | 22.26886829 | 82.38076586  | <a href="https://www.inaturalist.org/observations/125746411">https://www.inaturalist.org/observations/125746411</a> |
| 396 | <i>Geokichla citrina</i> | Orange-headed Thrush | 2018/2/19  | 4 | 0 | 22.27379500 | 114.15107780 | <a href="https://www.inaturalist.org/observations/9913821">https://www.inaturalist.org/observations/9913821</a>     |
| 397 | <i>Geokichla citrina</i> | Orange-headed Thrush | 2021/4/22  | 3 | 0 | 22.27415052 | 114.14492520 | <a href="https://www.inaturalist.org/observations/78527454">https://www.inaturalist.org/observations/78527454</a>   |
| 398 | <i>Geokichla citrina</i> | Orange-headed Thrush | 2019/10/6  | 2 | 0 | 22.28398824 | 113.53973950 | <a href="https://www.inaturalist.org/observations/67290121">https://www.inaturalist.org/observations/67290121</a>   |
| 399 | <i>Geokichla citrina</i> | Orange-headed Thrush | 2018/3/24  | 4 | 0 | 22.28764580 | 82.06557230  | <a href="https://www.inaturalist.org/observations/62477661">https://www.inaturalist.org/observations/62477661</a>   |
| 400 | <i>Geokichla citrina</i> | Orange-headed Thrush | 2021/2/21  | 3 | 0 | 22.29688285 | 113.40549730 | <a href="https://www.inaturalist.org/observations/69914623">https://www.inaturalist.org/observations/69914623</a>   |
| 401 | <i>Geokichla citrina</i> | Orange-headed Thrush | 2009/11/7  | 3 | 0 | 22.29977500 | 114.17145900 | <a href="https://www.inaturalist.org/observations/31026850">https://www.inaturalist.org/observations/31026850</a>   |
| 402 | <i>Geokichla citrina</i> | Orange-headed Thrush | 2021/9/30  | 1 | 0 | 22.31754856 | 114.18365100 | <a href="https://www.inaturalist.org/observations/118553193">https://www.inaturalist.org/observations/118553193</a> |
| 403 | <i>Geokichla citrina</i> | Orange-headed Thrush | 2018/10/21 | 3 | 0 | 22.31767545 | 114.18304260 | <a href="https://www.inaturalist.org/observations/17708420">https://www.inaturalist.org/observations/17708420</a>   |
| 404 | <i>Geokichla citrina</i> | Orange-headed Thrush | 2019/10/22 | 3 | 0 | 22.31773000 | 114.18399790 | <a href="https://www.inaturalist.org/observations/34737214">https://www.inaturalist.org/observations/34737214</a>   |
| 405 | <i>Geokichla citrina</i> | Orange-headed Thrush | 2018/11/24 | 3 | 0 | 22.31823958 | 114.18321000 | <a href="https://www.inaturalist.org/observations/29618723">https://www.inaturalist.org/observations/29618723</a>   |
| 406 | <i>Geokichla citrina</i> | Orange-headed Thrush | 2020/9/20  | 2 | 0 | 22.33067260 | 114.15616870 | <a href="https://www.inaturalist.org/observations/60178185">https://www.inaturalist.org/observations/60178185</a>   |
| 407 | <i>Geokichla citrina</i> | Orange-headed Thrush | 2021/3/20  | 4 | 0 | 22.33407770 | 80.61120460  | <a href="https://www.inaturalist.org/observations/73365597">https://www.inaturalist.org/observations/73365597</a>   |
| 408 | <i>Geokichla citrina</i> | Orange-headed Thrush | 2020/3/2   | 4 | 0 | 22.33451320 | 80.61151300  | <a href="https://www.inaturalist.org/observations/40755904">https://www.inaturalist.org/observations/40755904</a>   |
| 409 | <i>Geokichla citrina</i> | Orange-headed Thrush | 2008/5/20  | 4 | 0 | 22.33451320 | 80.61151300  | <a href="https://www.inaturalist.org/observations/55157495">https://www.inaturalist.org/observations/55157495</a>   |
| 410 | <i>Geokichla citrina</i> | Orange-headed Thrush | 2017/3/16  | 1 | 0 | 22.34245484 | 78.12240601  | <a href="https://www.inaturalist.org/observations/5426282">https://www.inaturalist.org/observations/5426282</a>     |
| 411 | <i>Geokichla citrina</i> | Orange-headed Thrush | 2020/10/26 | 2 | 0 | 22.35252890 | 114.14084200 | <a href="https://www.inaturalist.org/observations/63566046">https://www.inaturalist.org/observations/63566046</a>   |
| 412 | <i>Geokichla citrina</i> | Orange-headed Thrush | 2018/5/11  | 4 | 0 | 22.35365967 | 114.18381790 | <a href="https://www.inaturalist.org/observations/12348427">https://www.inaturalist.org/observations/12348427</a>   |
| 413 | <i>Geokichla citrina</i> | Orange-headed Thrush | 2019/12/4  | 1 | 0 | 22.38362614 | 114.10795450 | <a href="https://www.inaturalist.org/observations/123191259">https://www.inaturalist.org/observations/123191259</a> |

|     |                          |                      |            |   |   |             |              |                                                                                                                     |
|-----|--------------------------|----------------------|------------|---|---|-------------|--------------|---------------------------------------------------------------------------------------------------------------------|
| 414 | <i>Geokichla citrina</i> | Orange-headed Thrush | 2019/12/4  | 3 | 0 | 22.38372600 | 114.10791200 | <a href="https://www.inaturalist.org/observations/75530217">https://www.inaturalist.org/observations/75530217</a>   |
| 415 | <i>Geokichla citrina</i> | Orange-headed Thrush | 2020/12/7  | 2 | 0 | 22.38631186 | 114.23951880 | <a href="https://www.inaturalist.org/observations/66286041">https://www.inaturalist.org/observations/66286041</a>   |
| 416 | <i>Geokichla citrina</i> | Orange-headed Thrush | 2022/9/25  | 2 | 0 | 22.39137922 | 114.04034640 | <a href="https://www.inaturalist.org/observations/136393125">https://www.inaturalist.org/observations/136393125</a> |
| 417 | <i>Geokichla citrina</i> | Orange-headed Thrush | 2019/10/20 | 1 | 0 | 22.40254204 | 114.09484550 | <a href="https://www.inaturalist.org/observations/34777611">https://www.inaturalist.org/observations/34777611</a>   |
| 418 | <i>Geokichla citrina</i> | Orange-headed Thrush | 2018/11/27 | 5 | 0 | 22.40765123 | 114.09822580 | <a href="https://www.inaturalist.org/observations/18689420">https://www.inaturalist.org/observations/18689420</a>   |
| 419 | <i>Geokichla citrina</i> | Orange-headed Thrush | 2020/10/18 | 2 | 0 | 22.41173784 | 114.10313820 | <a href="https://www.inaturalist.org/observations/63158845">https://www.inaturalist.org/observations/63158845</a>   |
| 420 | <i>Geokichla citrina</i> | Orange-headed Thrush | 2019/12/8  | 1 | 0 | 22.41541107 | 114.18315520 | <a href="https://www.inaturalist.org/observations/118533797">https://www.inaturalist.org/observations/118533797</a> |
| 421 | <i>Geokichla citrina</i> | Orange-headed Thrush | 2019/10/16 | 2 | 0 | 22.41953427 | 114.20370260 | <a href="https://www.inaturalist.org/observations/34444438">https://www.inaturalist.org/observations/34444438</a>   |
| 422 | <i>Geokichla citrina</i> | Orange-headed Thrush | 2022/4/24  | 1 | 0 | 22.42260016 | 88.38098578  | <a href="https://www.inaturalist.org/observations/115048905">https://www.inaturalist.org/observations/115048905</a> |
| 423 | <i>Geokichla citrina</i> | Orange-headed Thrush | 2018/8/14  | 2 | 0 | 22.42461777 | 114.09631350 | <a href="https://www.inaturalist.org/observations/15405024">https://www.inaturalist.org/observations/15405024</a>   |
| 424 | <i>Geokichla citrina</i> | Orange-headed Thrush | 2018/8/17  | 2 | 0 | 22.42538328 | 114.09879980 | <a href="https://www.inaturalist.org/observations/15557579">https://www.inaturalist.org/observations/15557579</a>   |
| 425 | <i>Geokichla citrina</i> | Orange-headed Thrush | 2018/8/24  | 3 | 0 | 22.42563401 | 114.09811180 | <a href="https://www.inaturalist.org/observations/15841426">https://www.inaturalist.org/observations/15841426</a>   |
| 426 | <i>Geokichla citrina</i> | Orange-headed Thrush | 2021/7/18  | 3 | 0 | 22.42574680 | 114.18120860 | <a href="https://www.inaturalist.org/observations/87506876">https://www.inaturalist.org/observations/87506876</a>   |
| 427 | <i>Geokichla citrina</i> | Orange-headed Thrush | 2022/5/2   | 1 | 0 | 22.42574680 | 114.18120860 | <a href="https://www.inaturalist.org/observations/114625582">https://www.inaturalist.org/observations/114625582</a> |
| 428 | <i>Geokichla citrina</i> | Orange-headed Thrush | 2022/8/28  | 1 | 0 | 22.42604155 | 114.21196680 | <a href="https://www.inaturalist.org/observations/137019391">https://www.inaturalist.org/observations/137019391</a> |
| 429 | <i>Geokichla citrina</i> | Orange-headed Thrush | 2018/8/26  | 2 | 0 | 22.42742800 | 114.18196300 | <a href="https://www.inaturalist.org/observations/20926730">https://www.inaturalist.org/observations/20926730</a>   |
| 430 | <i>Geokichla citrina</i> | Orange-headed Thrush | 2020/10/18 | 2 | 0 | 22.42767327 | 114.24027520 | <a href="https://www.inaturalist.org/observations/62853726">https://www.inaturalist.org/observations/62853726</a>   |
| 431 | <i>Geokichla citrina</i> | Orange-headed Thrush | 2020/2/6   | 6 | 0 | 22.42931710 | 88.40068460  | <a href="https://www.inaturalist.org/observations/108791926">https://www.inaturalist.org/observations/108791926</a> |
| 432 | <i>Geokichla citrina</i> | Orange-headed Thrush | 2011/10/30 | 5 | 0 | 22.42948937 | 88.40066280  | <a href="https://www.inaturalist.org/observations/25427942">https://www.inaturalist.org/observations/25427942</a>   |
| 433 | <i>Geokichla citrina</i> | Orange-headed Thrush | 2015/7/17  | 4 | 0 | 22.42951500 | 88.40006300  | <a href="http://www.inaturalist.org/observations/1787057">http://www.inaturalist.org/observations/1787057</a>       |
| 434 | <i>Geokichla citrina</i> | Orange-headed Thrush | 2019/12/28 | 2 | 0 | 22.42982594 | 88.40045320  | <a href="https://www.inaturalist.org/observations/48602459">https://www.inaturalist.org/observations/48602459</a>   |
| 435 | <i>Geokichla citrina</i> | Orange-headed Thrush | 2021/7/4   | 3 | 0 | 22.43002600 | 114.17887500 | <a href="https://www.inaturalist.org/observations/86142877">https://www.inaturalist.org/observations/86142877</a>   |
| 436 | <i>Geokichla citrina</i> | Orange-headed Thrush | 2018/2/13  | 5 | 0 | 22.43695645 | 88.39406938  | <a href="https://www.inaturalist.org/observations/11832182">https://www.inaturalist.org/observations/11832182</a>   |

|     |                   |                      |            |   |   |             |              |                                                                                                                     |
|-----|-------------------|----------------------|------------|---|---|-------------|--------------|---------------------------------------------------------------------------------------------------------------------|
| 437 | Geokichla citrina | Orange-headed Thrush | 2020/5/17  | 2 | 0 | 22.44325519 | 114.13544520 | <a href="https://www.inaturalist.org/observations/46201828">https://www.inaturalist.org/observations/46201828</a>   |
| 438 | Geokichla citrina | Orange-headed Thrush | 2020/4/24  | 4 | 0 | 22.47281697 | 114.23209240 | <a href="https://www.inaturalist.org/observations/43258552">https://www.inaturalist.org/observations/43258552</a>   |
| 439 | Geokichla citrina | Orange-headed Thrush | 2021/4/5   | 5 | 0 | 22.47941378 | 88.33557330  | <a href="https://www.inaturalist.org/observations/73001364">https://www.inaturalist.org/observations/73001364</a>   |
| 440 | Geokichla citrina | Orange-headed Thrush | 2017/4/28  | 3 | 0 | 22.50333100 | 78.43585080  | <a href="https://www.inaturalist.org/observations/54055938">https://www.inaturalist.org/observations/54055938</a>   |
| 441 | Geokichla citrina | Orange-headed Thrush | 2020/2/8   | 2 | 0 | 22.50333918 | 78.43583822  | <a href="https://www.inaturalist.org/observations/39844033">https://www.inaturalist.org/observations/39844033</a>   |
| 442 | Geokichla citrina | Orange-headed Thrush | 2019/5/24  | 4 | 0 | 22.50515400 | 81.77870210  | <a href="https://www.inaturalist.org/observations/59106535">https://www.inaturalist.org/observations/59106535</a>   |
| 443 | Geokichla citrina | Orange-headed Thrush | 2018/4/15  | 3 | 0 | 22.51095110 | 88.35610940  | <a href="https://www.inaturalist.org/observations/12298838">https://www.inaturalist.org/observations/12298838</a>   |
| 444 | Geokichla citrina | Orange-headed Thrush | 2020/10/22 | 4 | 0 | 22.51113912 | 88.35834657  | <a href="https://www.inaturalist.org/observations/63228674">https://www.inaturalist.org/observations/63228674</a>   |
| 445 | Geokichla citrina | Orange-headed Thrush | 2021/10/8  | 4 | 0 | 22.51197095 | 88.35776389  | <a href="https://www.inaturalist.org/observations/100207107">https://www.inaturalist.org/observations/100207107</a> |
| 446 | Geokichla citrina | Orange-headed Thrush | 2016/10/23 | 3 | 0 | 22.51223979 | 88.36037636  | <a href="https://www.inaturalist.org/observations/97878478">https://www.inaturalist.org/observations/97878478</a>   |
| 447 | Geokichla citrina | Orange-headed Thrush | 2018/9/29  | 3 | 0 | 22.51223979 | 88.36037636  | <a href="https://www.inaturalist.org/observations/97878481">https://www.inaturalist.org/observations/97878481</a>   |
| 448 | Geokichla citrina | Orange-headed Thrush | 2017/11/7  | 3 | 0 | 22.51259846 | 88.35903257  | <a href="https://www.inaturalist.org/observations/93126049">https://www.inaturalist.org/observations/93126049</a>   |
| 449 | Geokichla citrina | Orange-headed Thrush | 2017/4/14  | 4 | 0 | 22.53761033 | 78.09837341  | <a href="https://www.inaturalist.org/observations/7643639">https://www.inaturalist.org/observations/7643639</a>     |
| 450 | Geokichla citrina | Orange-headed Thrush | 2022/4/14  | 2 | 0 | 22.57052990 | 78.14377380  | <a href="https://www.inaturalist.org/observations/132103860">https://www.inaturalist.org/observations/132103860</a> |
| 451 | Geokichla citrina | Orange-headed Thrush | 2022/4/17  | 3 | 0 | 22.57052990 | 78.14377380  | <a href="https://www.inaturalist.org/observations/132104827">https://www.inaturalist.org/observations/132104827</a> |
| 452 | Geokichla citrina | Orange-headed Thrush | 2016/10/16 | 3 | 0 | 22.58675970 | 88.41494010  | <a href="https://www.inaturalist.org/observations/6023608">https://www.inaturalist.org/observations/6023608</a>     |
| 453 | Geokichla citrina | Orange-headed Thrush | 2021/11/10 | 3 | 0 | 22.59404758 | 88.41739916  | <a href="https://www.inaturalist.org/observations/100772451">https://www.inaturalist.org/observations/100772451</a> |
| 454 | Geokichla citrina | Orange-headed Thrush | 2021/10/15 | 4 | 0 | 22.59889660 | 87.97548473  | <a href="https://www.inaturalist.org/observations/133593863">https://www.inaturalist.org/observations/133593863</a> |
| 455 | Geokichla citrina | Orange-headed Thrush | 2017/7/15  | 2 | 0 | 22.77846100 | 113.03156300 | <a href="https://www.inaturalist.org/observations/33540213">https://www.inaturalist.org/observations/33540213</a>   |
| 456 | Geokichla citrina | Orange-headed Thrush | 2022/5/22  | 5 | 0 | 22.79245360 | 88.29597950  | <a href="https://www.inaturalist.org/observations/118136681">https://www.inaturalist.org/observations/118136681</a> |
| 457 | Geokichla citrina | Orange-headed Thrush | 2022/5/22  | 5 | 0 | 22.79826818 | 88.26801717  | <a href="https://www.inaturalist.org/observations/118477344">https://www.inaturalist.org/observations/118477344</a> |
| 458 | Geokichla citrina | Orange-headed Thrush | 2022/4/28  | 3 | 0 | 22.80416040 | 88.33392340  | <a href="https://www.inaturalist.org/observations/113701621">https://www.inaturalist.org/observations/113701621</a> |
| 459 | Geokichla citrina | Orange-headed Thrush | 2020/5/17  | 2 | 0 | 22.84790660 | 88.34113077  | <a href="https://www.inaturalist.org/observations/100462197">https://www.inaturalist.org/observations/100462197</a> |

|     |                          |                      |            |   |   |             |              |                                                                                                                     |
|-----|--------------------------|----------------------|------------|---|---|-------------|--------------|---------------------------------------------------------------------------------------------------------------------|
| 460 | <i>Geokichla citrina</i> | Orange-headed Thrush | 2021/11/3  | 3 | 0 | 22.88999370 | 86.21964100  | <a href="https://www.inaturalist.org/observations/100206384">https://www.inaturalist.org/observations/100206384</a> |
| 461 | <i>Geokichla citrina</i> | Orange-headed Thrush | 2021/11/3  | 6 | 0 | 22.89079427 | 86.23753085  | <a href="https://www.inaturalist.org/observations/100207046">https://www.inaturalist.org/observations/100207046</a> |
| 462 | <i>Geokichla citrina</i> | Orange-headed Thrush | 2021/12/22 | 5 | 0 | 22.89603113 | 83.91577262  | <a href="https://www.inaturalist.org/observations/108297423">https://www.inaturalist.org/observations/108297423</a> |
| 463 | <i>Geokichla citrina</i> | Orange-headed Thrush | 2020/7/19  | 3 | 0 | 22.89659541 | 86.20610286  | <a href="https://www.inaturalist.org/observations/53645881">https://www.inaturalist.org/observations/53645881</a>   |
| 464 | <i>Geokichla citrina</i> | Orange-headed Thrush | 2021/12/23 | 2 | 0 | 22.90531145 | 83.91820841  | <a href="https://www.inaturalist.org/observations/105944294">https://www.inaturalist.org/observations/105944294</a> |
| 465 | <i>Geokichla citrina</i> | Orange-headed Thrush | 2022/5/21  | 3 | 0 | 22.91275180 | 83.03384855  | <a href="https://www.inaturalist.org/observations/122486652">https://www.inaturalist.org/observations/122486652</a> |
| 466 | <i>Geokichla citrina</i> | Orange-headed Thrush | 2017/1/30  | 4 | 0 | 22.91778953 | 87.07161214  | <a href="https://www.inaturalist.org/observations/17165038">https://www.inaturalist.org/observations/17165038</a>   |
| 467 | <i>Geokichla citrina</i> | Orange-headed Thrush | 2018/11/1  | 4 | 0 | 22.98701867 | 87.00964641  | <a href="https://www.inaturalist.org/observations/18026848">https://www.inaturalist.org/observations/18026848</a>   |
| 468 | <i>Geokichla citrina</i> | Orange-headed Thrush | 2014/9/8   | 3 | 0 | 23.09569829 | 113.29829150 | <a href="https://www.inaturalist.org/observations/32844175">https://www.inaturalist.org/observations/32844175</a>   |
| 469 | <i>Geokichla citrina</i> | Orange-headed Thrush | 2014/4/5   | 2 | 0 | 23.09629042 | 113.29869920 | <a href="https://www.inaturalist.org/observations/32843858">https://www.inaturalist.org/observations/32843858</a>   |
| 470 | <i>Geokichla citrina</i> | Orange-headed Thrush | 2013/10/10 | 2 | 0 | 23.09653840 | 113.29888300 | <a href="https://www.inaturalist.org/observations/27215791">https://www.inaturalist.org/observations/27215791</a>   |
| 471 | <i>Geokichla citrina</i> | Orange-headed Thrush | 2019/11/22 | 4 | 0 | 23.18542890 | 88.57909231  | <a href="https://www.inaturalist.org/observations/36212128">https://www.inaturalist.org/observations/36212128</a>   |
| 472 | <i>Geokichla citrina</i> | Orange-headed Thrush | 2019/11/22 | 4 | 0 | 23.18542890 | 88.57909231  | <a href="https://www.inaturalist.org/observations/36212129">https://www.inaturalist.org/observations/36212129</a>   |
| 473 | <i>Geokichla citrina</i> | Orange-headed Thrush | 2016/2/28  | 4 | 0 | 23.18623300 | 88.57800400  | <a href="http://www.inaturalist.org/observations/2735120">http://www.inaturalist.org/observations/2735120</a>       |
| 474 | <i>Geokichla citrina</i> | Orange-headed Thrush | 2016/6/7   | 4 | 0 | 23.25307300 | 88.59444000  | <a href="http://www.inaturalist.org/observations/3407778">http://www.inaturalist.org/observations/3407778</a>       |
| 475 | <i>Geokichla citrina</i> | Orange-headed Thrush | 2020/2/29  | 3 | 0 | 23.27208380 | 86.70998007  | <a href="https://www.inaturalist.org/observations/39575796">https://www.inaturalist.org/observations/39575796</a>   |
| 476 | <i>Geokichla citrina</i> | Orange-headed Thrush | 2018/5/7   | 4 | 0 | 23.39112430 | 86.98974743  | <a href="https://www.inaturalist.org/observations/13068941">https://www.inaturalist.org/observations/13068941</a>   |
| 477 | <i>Geokichla citrina</i> | Orange-headed Thrush | 2018/5/7   | 2 | 0 | 23.39514120 | 86.98743260  | <a href="https://www.inaturalist.org/observations/54550332">https://www.inaturalist.org/observations/54550332</a>   |
| 478 | <i>Geokichla citrina</i> | Orange-headed Thrush | 2021/12/16 | 3 | 0 | 23.47570700 | 87.31483400  | <a href="https://www.inaturalist.org/observations/103143528">https://www.inaturalist.org/observations/103143528</a> |
| 479 | <i>Geokichla citrina</i> | Orange-headed Thrush | 2021/3/21  | 7 | 0 | 23.52044430 | 87.31192270  | <a href="https://www.inaturalist.org/observations/83922221">https://www.inaturalist.org/observations/83922221</a>   |
| 480 | <i>Geokichla citrina</i> | Orange-headed Thrush | 2019/4/18  | 6 | 0 | 23.53949300 | 81.05517550  | <a href="https://www.inaturalist.org/observations/123445371">https://www.inaturalist.org/observations/123445371</a> |
| 481 | <i>Geokichla citrina</i> | Orange-headed Thrush | 2019/4/18  | 5 | 0 | 23.53949300 | 81.05517550  | <a href="https://www.inaturalist.org/observations/123448784">https://www.inaturalist.org/observations/123448784</a> |
| 482 | <i>Geokichla citrina</i> | Orange-headed Thrush | 2018/12/2  | 3 | 0 | 23.60306833 | 87.45105833  | <a href="https://www.inaturalist.org/observations/18941367">https://www.inaturalist.org/observations/18941367</a>   |

|     |                          |                      |            |   |   |             |             |                                                                                                                     |
|-----|--------------------------|----------------------|------------|---|---|-------------|-------------|---------------------------------------------------------------------------------------------------------------------|
| 483 | <i>Geokichla citrina</i> | Orange-headed Thrush | 2018/12/26 | 3 | 0 | 23.65631167 | 91.29886833 | <a href="https://www.inaturalist.org/observations/56520950">https://www.inaturalist.org/observations/56520950</a>   |
| 484 | <i>Geokichla citrina</i> | Orange-headed Thrush | 2021/2/3   | 2 | 0 | 23.68258000 | 87.66311600 | <a href="https://www.inaturalist.org/observations/69037747">https://www.inaturalist.org/observations/69037747</a>   |
| 485 | <i>Geokichla citrina</i> | Orange-headed Thrush | 2012/6/26  | 3 | 0 | 23.68958815 | 81.02927969 | <a href="https://www.inaturalist.org/observations/81011766">https://www.inaturalist.org/observations/81011766</a>   |
| 486 | <i>Geokichla citrina</i> | Orange-headed Thrush | 2009/5/25  | 4 | 0 | 23.72221060 | 81.02327100 | <a href="https://www.inaturalist.org/observations/55146104">https://www.inaturalist.org/observations/55146104</a>   |
| 487 | <i>Geokichla citrina</i> | Orange-headed Thrush | 2018/3/25  | 2 | 0 | 23.72245400 | 81.02421900 | <a href="https://www.inaturalist.org/observations/12201122">https://www.inaturalist.org/observations/12201122</a>   |
| 488 | <i>Geokichla citrina</i> | Orange-headed Thrush | 2022/5/20  | 3 | 0 | 23.72381403 | 81.02348697 | <a href="https://www.inaturalist.org/observations/118791099">https://www.inaturalist.org/observations/118791099</a> |
| 489 | <i>Geokichla citrina</i> | Orange-headed Thrush | 2018/3/23  | 4 | 0 | 24.35267400 | 92.34481500 | <a href="https://www.inaturalist.org/observations/13226113">https://www.inaturalist.org/observations/13226113</a>   |
| 490 | <i>Geokichla citrina</i> | Orange-headed Thrush | 2018/3/23  | 4 | 0 | 24.35267400 | 92.34481500 | <a href="https://www.inaturalist.org/observations/13766584">https://www.inaturalist.org/observations/13766584</a>   |
| 491 | <i>Geokichla citrina</i> | Orange-headed Thrush | 2018/12/2  | 4 | 0 | 24.35267420 | 92.34481540 | <a href="https://www.inaturalist.org/observations/19985409">https://www.inaturalist.org/observations/19985409</a>   |
| 492 | <i>Geokichla citrina</i> | Orange-headed Thrush | 2019/3/13  | 3 | 0 | 24.35267420 | 92.34481540 | <a href="https://www.inaturalist.org/observations/21414262">https://www.inaturalist.org/observations/21414262</a>   |
| 493 | <i>Geokichla citrina</i> | Orange-headed Thrush | 2019/3/13  | 3 | 0 | 24.35267420 | 92.34481540 | <a href="https://www.inaturalist.org/observations/21414268">https://www.inaturalist.org/observations/21414268</a>   |
| 494 | <i>Geokichla citrina</i> | Orange-headed Thrush | 2021/11/29 | 3 | 0 | 24.35267420 | 92.34481540 | <a href="https://www.inaturalist.org/observations/104859012">https://www.inaturalist.org/observations/104859012</a> |
| 495 | <i>Geokichla citrina</i> | Orange-headed Thrush | 2021/12/10 | 2 | 0 | 24.35267420 | 92.34481540 | <a href="https://www.inaturalist.org/observations/105145499">https://www.inaturalist.org/observations/105145499</a> |
| 496 | <i>Geokichla citrina</i> | Orange-headed Thrush | 2021/12/21 | 4 | 0 | 24.35267420 | 92.34481540 | <a href="https://www.inaturalist.org/observations/105254578">https://www.inaturalist.org/observations/105254578</a> |
| 497 | <i>Geokichla citrina</i> | Orange-headed Thrush | 2021/12/21 | 5 | 0 | 24.35267420 | 92.34481540 | <a href="https://www.inaturalist.org/observations/105254579">https://www.inaturalist.org/observations/105254579</a> |
| 498 | <i>Geokichla citrina</i> | Orange-headed Thrush | 2022/1/3   | 4 | 0 | 24.35267420 | 92.34481540 | <a href="https://www.inaturalist.org/observations/105958245">https://www.inaturalist.org/observations/105958245</a> |
| 499 | <i>Geokichla citrina</i> | Orange-headed Thrush | 2022/2/4   | 5 | 0 | 24.35267420 | 92.34481540 | <a href="https://www.inaturalist.org/observations/124687622">https://www.inaturalist.org/observations/124687622</a> |
| 500 | <i>Geokichla citrina</i> | Orange-headed Thrush | 2022/2/7   | 3 | 0 | 24.35267420 | 92.34481540 | <a href="https://www.inaturalist.org/observations/124976555">https://www.inaturalist.org/observations/124976555</a> |
| 501 | <i>Geokichla citrina</i> | Orange-headed Thrush | 2022/2/25  | 2 | 0 | 24.35267420 | 92.34481540 | <a href="https://www.inaturalist.org/observations/124997450">https://www.inaturalist.org/observations/124997450</a> |
| 502 | <i>Geokichla citrina</i> | Orange-headed Thrush | 2022/3/21  | 3 | 0 | 24.35267420 | 92.34481540 | <a href="https://www.inaturalist.org/observations/127805936">https://www.inaturalist.org/observations/127805936</a> |
| 503 | <i>Geokichla citrina</i> | Orange-headed Thrush | 2022/3/29  | 3 | 0 | 24.35267420 | 92.34481540 | <a href="https://www.inaturalist.org/observations/129507106">https://www.inaturalist.org/observations/129507106</a> |
| 504 | <i>Geokichla citrina</i> | Orange-headed Thrush | 2021/12/8  | 3 | 0 | 24.35267784 | 92.34481394 | <a href="https://www.inaturalist.org/observations/105087617">https://www.inaturalist.org/observations/105087617</a> |
| 505 | <i>Geokichla citrina</i> | Orange-headed Thrush | 2021/12/27 | 3 | 0 | 24.35267784 | 92.34481394 | <a href="https://www.inaturalist.org/observations/105300893">https://www.inaturalist.org/observations/105300893</a> |

|     |                          |                      |            |   |   |             |              |                                                                                                                     |
|-----|--------------------------|----------------------|------------|---|---|-------------|--------------|---------------------------------------------------------------------------------------------------------------------|
| 506 | <i>Geokichla citrina</i> | Orange-headed Thrush | 2022/1/3   | 2 | 0 | 24.35267784 | 92.34481394  | <a href="https://www.inaturalist.org/observations/105956722">https://www.inaturalist.org/observations/105956722</a> |
| 507 | <i>Geokichla citrina</i> | Orange-headed Thrush | 2022/1/6   | 3 | 0 | 24.35267784 | 92.34481394  | <a href="https://www.inaturalist.org/observations/110642959">https://www.inaturalist.org/observations/110642959</a> |
| 508 | <i>Geokichla citrina</i> | Orange-headed Thrush | 2022/1/7   | 2 | 0 | 24.35267784 | 92.34481394  | <a href="https://www.inaturalist.org/observations/110643580">https://www.inaturalist.org/observations/110643580</a> |
| 509 | <i>Geokichla citrina</i> | Orange-headed Thrush | 2022/2/10  | 3 | 0 | 24.35267784 | 92.34481394  | <a href="https://www.inaturalist.org/observations/124979037">https://www.inaturalist.org/observations/124979037</a> |
| 510 | <i>Geokichla citrina</i> | Orange-headed Thrush | 2022/2/18  | 3 | 0 | 24.35267784 | 92.34481394  | <a href="https://www.inaturalist.org/observations/124986430">https://www.inaturalist.org/observations/124986430</a> |
| 511 | <i>Geokichla citrina</i> | Orange-headed Thrush | 2018/11/13 | 4 | 0 | 24.35280770 | 92.34460280  | <a href="https://www.inaturalist.org/observations/19394781">https://www.inaturalist.org/observations/19394781</a>   |
| 512 | <i>Geokichla citrina</i> | Orange-headed Thrush | 2020/12/15 | 3 | 0 | 24.35590076 | 92.34551784  | <a href="https://www.inaturalist.org/observations/69713689">https://www.inaturalist.org/observations/69713689</a>   |
| 513 | <i>Geokichla citrina</i> | Orange-headed Thrush | 2019/2/19  | 4 | 0 | 24.43201970 | 92.33068940  | <a href="https://www.inaturalist.org/observations/21019063">https://www.inaturalist.org/observations/21019063</a>   |
| 514 | <i>Geokichla citrina</i> | Orange-headed Thrush | 2022/1/27  | 2 | 0 | 24.43201971 | 92.33068943  | <a href="https://www.inaturalist.org/observations/106063229">https://www.inaturalist.org/observations/106063229</a> |
| 515 | <i>Geokichla citrina</i> | Orange-headed Thrush | 2021/1/4   | 5 | 0 | 24.43202000 | 92.33068900  | <a href="https://www.inaturalist.org/observations/69311767">https://www.inaturalist.org/observations/69311767</a>   |
| 516 | <i>Geokichla citrina</i> | Orange-headed Thrush | 2019/5/27  | 3 | 0 | 24.74053855 | 97.56930587  | <a href="https://www.inaturalist.org/observations/26157025">https://www.inaturalist.org/observations/26157025</a>   |
| 517 | <i>Geokichla citrina</i> | Orange-headed Thrush | 2019/3/16  | 1 | 0 | 25.00194933 | 85.42386375  | <a href="https://www.inaturalist.org/observations/21445034">https://www.inaturalist.org/observations/21445034</a>   |
| 518 | <i>Geokichla citrina</i> | Orange-headed Thrush | 2021/1/19  | 2 | 0 | 25.04270000 | 121.59213060 | <a href="https://www.inaturalist.org/observations/68304400">https://www.inaturalist.org/observations/68304400</a>   |
| 519 | <i>Geokichla citrina</i> | Orange-headed Thrush | 2021/1/11  | 2 | 0 | 25.04566710 | 121.59207330 | <a href="https://www.inaturalist.org/observations/67901697">https://www.inaturalist.org/observations/67901697</a>   |
| 520 | <i>Geokichla citrina</i> | Orange-headed Thrush | 2021/1/20  | 2 | 0 | 25.04570020 | 121.59213170 | <a href="https://www.inaturalist.org/observations/98774300">https://www.inaturalist.org/observations/98774300</a>   |
| 521 | <i>Geokichla citrina</i> | Orange-headed Thrush | 2021/1/9   | 3 | 0 | 25.17283632 | 121.62038480 | <a href="https://www.inaturalist.org/observations/107245425">https://www.inaturalist.org/observations/107245425</a> |
| 522 | <i>Geokichla citrina</i> | Orange-headed Thrush | 2021/11/19 | 2 | 0 | 25.41151535 | 81.90803893  | <a href="https://www.inaturalist.org/observations/102180085">https://www.inaturalist.org/observations/102180085</a> |
| 523 | <i>Geokichla citrina</i> | Orange-headed Thrush | 2012/2/29  | 4 | 0 | 25.83377195 | 91.80425820  | <a href="https://www.inaturalist.org/observations/66784531">https://www.inaturalist.org/observations/66784531</a>   |
| 524 | <i>Geokichla citrina</i> | Orange-headed Thrush | 2020/5/12  | 2 | 0 | 26.31927167 | 89.66909319  | <a href="https://www.inaturalist.org/observations/45653477">https://www.inaturalist.org/observations/45653477</a>   |
| 525 | <i>Geokichla citrina</i> | Orange-headed Thrush | 2018/4/23  | 6 | 0 | 26.40263521 | 90.75365010  | <a href="https://www.inaturalist.org/observations/12090803">https://www.inaturalist.org/observations/12090803</a>   |
| 526 | <i>Geokichla citrina</i> | Orange-headed Thrush | 2019/12/19 | 2 | 0 | 26.61664694 | 80.65099343  | <a href="https://www.inaturalist.org/observations/48570941">https://www.inaturalist.org/observations/48570941</a>   |
| 527 | <i>Geokichla citrina</i> | Orange-headed Thrush | 2014/3/29  | 4 | 0 | 26.66394826 | 90.99658207  | <a href="https://www.inaturalist.org/observations/31088790">https://www.inaturalist.org/observations/31088790</a>   |
| 528 | <i>Geokichla citrina</i> | Orange-headed Thrush | 2013/2/7   | 4 | 0 | 26.67815387 | 94.34716278  | <a href="https://www.inaturalist.org/observations/79794066">https://www.inaturalist.org/observations/79794066</a>   |

|     |                          |                      |            |   |   |             |             |                                                                                                                     |
|-----|--------------------------|----------------------|------------|---|---|-------------|-------------|---------------------------------------------------------------------------------------------------------------------|
| 529 | <i>Geokichla citrina</i> | Orange-headed Thrush | 2021/12/28 | 2 | 0 | 26.69667481 | 93.98157701 | <a href="https://www.inaturalist.org/observations/104644858">https://www.inaturalist.org/observations/104644858</a> |
| 530 | <i>Geokichla citrina</i> | Orange-headed Thrush | 2022/1/9   | 2 | 0 | 26.69678234 | 93.98183450 | <a href="https://www.inaturalist.org/observations/104644788">https://www.inaturalist.org/observations/104644788</a> |
| 531 | <i>Geokichla citrina</i> | Orange-headed Thrush | 2014/3/21  | 4 | 0 | 26.72574832 | 90.98333995 | <a href="https://www.inaturalist.org/observations/37505540">https://www.inaturalist.org/observations/37505540</a>   |
| 532 | <i>Geokichla citrina</i> | Orange-headed Thrush | 2013/12/23 | 3 | 0 | 26.86818090 | 78.54949951 | <a href="https://www.inaturalist.org/observations/11402829">https://www.inaturalist.org/observations/11402829</a>   |
| 533 | <i>Geokichla citrina</i> | Orange-headed Thrush | 2022/3/30  | 4 | 0 | 26.87086693 | 78.56390331 | <a href="https://www.inaturalist.org/observations/110012004">https://www.inaturalist.org/observations/110012004</a> |
| 534 | <i>Geokichla citrina</i> | Orange-headed Thrush | 2020/4/10  | 2 | 0 | 27.12213746 | 88.05852223 | <a href="https://www.inaturalist.org/observations/92229243">https://www.inaturalist.org/observations/92229243</a>   |
| 535 | <i>Geokichla citrina</i> | Orange-headed Thrush | 2021/1/23  | 2 | 0 | 27.15292616 | 77.52314269 | <a href="https://www.inaturalist.org/observations/68765847">https://www.inaturalist.org/observations/68765847</a>   |
| 536 | <i>Geokichla citrina</i> | Orange-headed Thrush | 2014/12/7  | 5 | 0 | 27.15692000 | 77.52365100 | <a href="https://www.inaturalist.org/observations/43505750">https://www.inaturalist.org/observations/43505750</a>   |
| 537 | <i>Geokichla citrina</i> | Orange-headed Thrush | 2008/12/1  | 3 | 0 | 27.15926900 | 77.52319990 | <a href="https://www.inaturalist.org/observations/55245712">https://www.inaturalist.org/observations/55245712</a>   |
| 538 | <i>Geokichla citrina</i> | Orange-headed Thrush | 2014/12/16 | 2 | 0 | 27.15926900 | 77.52319990 | <a href="https://www.inaturalist.org/observations/69151998">https://www.inaturalist.org/observations/69151998</a>   |
| 539 | <i>Geokichla citrina</i> | Orange-headed Thrush | 2005/12/12 | 3 | 0 | 27.15936423 | 77.52296448 | <a href="https://www.inaturalist.org/observations/54715013">https://www.inaturalist.org/observations/54715013</a>   |
| 540 | <i>Geokichla citrina</i> | Orange-headed Thrush | 2013/12/6  | 6 | 0 | 27.16333654 | 77.51964274 | <a href="https://www.inaturalist.org/observations/7427095">https://www.inaturalist.org/observations/7427095</a>     |
| 541 | <i>Geokichla citrina</i> | Orange-headed Thrush | 2006/1/9   | 5 | 0 | 27.16700000 | 77.51800000 | <a href="https://www.inaturalist.org/observations/9772069">https://www.inaturalist.org/observations/9772069</a>     |
| 542 | <i>Geokichla citrina</i> | Orange-headed Thrush | 2017/1/14  | 4 | 0 | 27.17036054 | 77.52227783 | <a href="https://www.inaturalist.org/observations/7614142">https://www.inaturalist.org/observations/7614142</a>     |
| 543 | <i>Geokichla citrina</i> | Orange-headed Thrush | 2007/12/17 | 2 | 0 | 27.19128539 | 77.51480094 | <a href="https://www.inaturalist.org/observations/103835828">https://www.inaturalist.org/observations/103835828</a> |
| 544 | <i>Geokichla citrina</i> | Orange-headed Thrush | 2022/5/7   | 2 | 0 | 27.19593090 | 88.29574850 | <a href="https://www.inaturalist.org/observations/122947734">https://www.inaturalist.org/observations/122947734</a> |
| 545 | <i>Geokichla citrina</i> | Orange-headed Thrush | 2021/4/10  | 2 | 0 | 28.19864913 | 95.80882831 | <a href="https://www.inaturalist.org/observations/77565330">https://www.inaturalist.org/observations/77565330</a>   |
| 546 | <i>Geokichla citrina</i> | Orange-headed Thrush | 2015/6/2   | 3 | 0 | 29.34430900 | 79.52943180 | <a href="https://www.inaturalist.org/observations/124969535">https://www.inaturalist.org/observations/124969535</a> |
| 547 | <i>Geokichla citrina</i> | Orange-headed Thrush | 2015/5/30  | 3 | 0 | 29.34430900 | 79.52943180 | <a href="https://www.inaturalist.org/observations/124969536">https://www.inaturalist.org/observations/124969536</a> |
| 548 | <i>Geokichla citrina</i> | Orange-headed Thrush | 2021/4/3   | 2 | 0 | 29.34436376 | 79.52943183 | <a href="https://www.inaturalist.org/observations/72832789">https://www.inaturalist.org/observations/72832789</a>   |
| 549 | <i>Geokichla citrina</i> | Orange-headed Thrush | 2021/7/30  | 3 | 0 | 29.34436376 | 79.52943183 | <a href="https://www.inaturalist.org/observations/89166912">https://www.inaturalist.org/observations/89166912</a>   |
| 550 | <i>Geokichla citrina</i> | Orange-headed Thrush | 2022/8/11  | 2 | 0 | 29.34608046 | 79.55191445 | <a href="https://www.inaturalist.org/observations/132269602">https://www.inaturalist.org/observations/132269602</a> |
| 551 | <i>Geokichla citrina</i> | Orange-headed Thrush | 2018/4/25  | 3 | 0 | 29.35301000 | 79.52600333 | <a href="https://www.inaturalist.org/observations/129517476">https://www.inaturalist.org/observations/129517476</a> |



|     |                          |                      |            |   |   |             |             |                                                                                                                     |
|-----|--------------------------|----------------------|------------|---|---|-------------|-------------|---------------------------------------------------------------------------------------------------------------------|
| 552 | <i>Geokichla citrina</i> | Orange-headed Thrush | 2018/4/25  | 3 | 0 | 29.35306500 | 79.52605500 | <a href="https://www.inaturalist.org/observations/129516506">https://www.inaturalist.org/observations/129516506</a> |
| 553 | <i>Geokichla citrina</i> | Orange-headed Thrush | 2018/4/26  | 5 | 0 | 29.36092966 | 79.53060298 | <a href="https://www.inaturalist.org/observations/129870592">https://www.inaturalist.org/observations/129870592</a> |
| 554 | <i>Geokichla citrina</i> | Orange-headed Thrush | 2018/4/26  | 4 | 0 | 29.36108167 | 79.53051333 | <a href="https://www.inaturalist.org/observations/129870565">https://www.inaturalist.org/observations/129870565</a> |
| 555 | <i>Geokichla citrina</i> | Orange-headed Thrush | 2016/5/3   | 6 | 0 | 30.08692800 | 78.26761200 | <a href="http://www.inaturalist.org/observations/3518056">http://www.inaturalist.org/observations/3518056</a>       |
| 556 | <i>Geokichla citrina</i> | Orange-headed Thrush | 2019/7/13  | 6 | 0 | 30.28113431 | 77.97434270 | <a href="https://www.inaturalist.org/observations/31744086">https://www.inaturalist.org/observations/31744086</a>   |
| 557 | <i>Geokichla citrina</i> | Orange-headed Thrush | 2021/10/15 | 2 | 0 | 30.28276580 | 77.97393501 | <a href="https://www.inaturalist.org/observations/98855289">https://www.inaturalist.org/observations/98855289</a>   |
| 558 | <i>Geokichla citrina</i> | Orange-headed Thrush | 2018/6/14  | 2 | 0 | 30.28276986 | 77.97393501 | <a href="https://www.inaturalist.org/observations/117427528">https://www.inaturalist.org/observations/117427528</a> |
| 559 | <i>Geokichla citrina</i> | Orange-headed Thrush | 2016/9/7   | 3 | 0 | 30.28302920 | 77.97243740 | <a href="http://www.inaturalist.org/observations/4069642">http://www.inaturalist.org/observations/4069642</a>       |
| 560 | <i>Geokichla citrina</i> | Orange-headed Thrush | 2019/11/13 | 3 | 0 | 30.28661093 | 77.97431756 | <a href="https://www.inaturalist.org/observations/36318078">https://www.inaturalist.org/observations/36318078</a>   |

| No | scientific name   | common name         | date       | NIA | NID | latitude    | longitude    | url                                                                                                                 |
|----|-------------------|---------------------|------------|-----|-----|-------------|--------------|---------------------------------------------------------------------------------------------------------------------|
| 1  | Turdus chrysolaus | Brown-headed Thrush | 2014/3/11  | 1   | 0   | 21.96011239 | 120.77872170 | <a href="https://www.inaturalist.org/observations/92718607">https://www.inaturalist.org/observations/92718607</a>   |
| 2  | Turdus chrysolaus | Brown-headed Thrush | 2014/3/11  | 1   | 0   | 21.96011239 | 120.77872170 | <a href="https://www.inaturalist.org/observations/92718628">https://www.inaturalist.org/observations/92718628</a>   |
| 3  | Turdus chrysolaus | Brown-headed Thrush | 2021/12/19 | 1   | 0   | 21.97294493 | 120.81152790 | <a href="https://www.inaturalist.org/observations/103307095">https://www.inaturalist.org/observations/103307095</a> |
| 4  | Turdus chrysolaus | Brown-headed Thrush | 2019/2/9   | 1   | 0   | 21.97674875 | 120.73512530 | <a href="https://www.inaturalist.org/observations/36463891">https://www.inaturalist.org/observations/36463891</a>   |
| 5  | Turdus chrysolaus | Brown-headed Thrush | 2021/2/10  | 1   | 0   | 21.97683585 | 120.73608670 | <a href="https://www.inaturalist.org/observations/69863177">https://www.inaturalist.org/observations/69863177</a>   |
| 6  | Turdus chrysolaus | Brown-headed Thrush | 2021/2/10  | 1   | 0   | 21.97695027 | 120.73509640 | <a href="https://www.inaturalist.org/observations/69863172">https://www.inaturalist.org/observations/69863172</a>   |
| 7  | Turdus chrysolaus | Brown-headed Thrush | 2019/2/5   | 1   | 0   | 22.01390087 | 120.74173270 | <a href="https://www.inaturalist.org/observations/20128273">https://www.inaturalist.org/observations/20128273</a>   |
| 8  | Turdus chrysolaus | Brown-headed Thrush | 2014/3/10  | 1   | 0   | 22.02192062 | 121.56798740 | <a href="https://www.inaturalist.org/observations/92678642">https://www.inaturalist.org/observations/92678642</a>   |
| 9  | Turdus chrysolaus | Brown-headed Thrush | 2021/11/30 | 1   | 0   | 22.16478003 | 114.25455540 | <a href="https://www.inaturalist.org/observations/118537751">https://www.inaturalist.org/observations/118537751</a> |
| 10 | Turdus chrysolaus | Brown-headed Thrush | 2022/1/16  | 2   | 0   | 22.16519645 | 114.25474000 | <a href="https://www.inaturalist.org/observations/105016283">https://www.inaturalist.org/observations/105016283</a> |
| 11 | Turdus chrysolaus | Brown-headed Thrush | 2022/1/16  | 3   | 0   | 22.16524743 | 114.25478040 | <a href="https://www.inaturalist.org/observations/105029317">https://www.inaturalist.org/observations/105029317</a> |
| 12 | Turdus chrysolaus | Brown-headed Thrush | 2022/1/22  | 1   | 0   | 22.20059821 | 113.54778920 | <a href="https://www.inaturalist.org/observations/105343705">https://www.inaturalist.org/observations/105343705</a> |
| 13 | Turdus chrysolaus | Brown-headed Thrush | 2015/1/1   | 1   | 0   | 22.25222391 | 120.71369630 | <a href="https://www.inaturalist.org/observations/64097646">https://www.inaturalist.org/observations/64097646</a>   |
| 14 | Turdus chrysolaus | Brown-headed Thrush | 2020/1/29  | 0   | 0   | 22.26860149 | 114.13433350 | <a href="https://www.inaturalist.org/observations/38091226">https://www.inaturalist.org/observations/38091226</a>   |
| 15 | Turdus chrysolaus | Brown-headed Thrush | 2011/2/19  | 1   | 0   | 22.27796480 | 114.15641460 | <a href="https://www.inaturalist.org/observations/112249738">https://www.inaturalist.org/observations/112249738</a> |
| 16 | Turdus chrysolaus | Brown-headed Thrush | 2021/1/15  | 1   | 0   | 22.28606635 | 114.01002500 | <a href="https://www.inaturalist.org/observations/103792627">https://www.inaturalist.org/observations/103792627</a> |
| 17 | Turdus chrysolaus | Brown-headed Thrush | 2016/2/24  | 2   | 0   | 22.32641100 | 114.21220800 | <a href="http://www.inaturalist.org/observations/2712454">http://www.inaturalist.org/observations/2712454</a>       |
| 18 | Turdus chrysolaus | Brown-headed Thrush | 2016/2/28  | 1   | 0   | 22.35711300 | 114.13238600 | <a href="https://www.inaturalist.org/observations/15161324">https://www.inaturalist.org/observations/15161324</a>   |
| 19 | Turdus chrysolaus | Brown-headed Thrush | 2019/12/6  | 1   | 0   | 22.40960582 | 113.96315440 | <a href="https://www.inaturalist.org/observations/41098242">https://www.inaturalist.org/observations/41098242</a>   |
| 20 | Turdus chrysolaus | Brown-headed Thrush | 2022/3/20  | 1   | 0   | 22.45275963 | 120.92289520 | <a href="https://www.inaturalist.org/observations/115060849">https://www.inaturalist.org/observations/115060849</a> |
| 21 | Turdus chrysolaus | Brown-headed Thrush | 2014/1/1   | 3   | 0   | 22.50651600 | 114.11222600 | <a href="https://www.inaturalist.org/observations/15479075">https://www.inaturalist.org/observations/15479075</a>   |
| 22 | Turdus chrysolaus | Brown-headed Thrush | 2022/1/18  | 1   | 0   | 22.50673092 | 114.26246070 | <a href="https://www.inaturalist.org/observations/115135405">https://www.inaturalist.org/observations/115135405</a> |

|    |                   |                     |            |   |   |             |              |                                                                                                                     |
|----|-------------------|---------------------|------------|---|---|-------------|--------------|---------------------------------------------------------------------------------------------------------------------|
| 23 | Turdus chrysolaus | Brown-headed Thrush | 2022/1/4   | 1 | 0 | 22.50805560 | 120.65750000 | <a href="https://www.inaturalist.org/observations/104383454">https://www.inaturalist.org/observations/104383454</a> |
| 24 | Turdus chrysolaus | Brown-headed Thrush | 2022/4/7   | 2 | 0 | 22.55395129 | 120.31511220 | <a href="https://www.inaturalist.org/observations/110648907">https://www.inaturalist.org/observations/110648907</a> |
| 25 | Turdus chrysolaus | Brown-headed Thrush | 2018/12/15 | 1 | 0 | 22.55450200 | 120.39328800 | <a href="https://www.inaturalist.org/observations/83732197">https://www.inaturalist.org/observations/83732197</a>   |
| 26 | Turdus chrysolaus | Brown-headed Thrush | 2017/12/16 | 1 | 0 | 22.55485400 | 120.39051300 | <a href="https://www.inaturalist.org/observations/84295349">https://www.inaturalist.org/observations/84295349</a>   |
| 27 | Turdus chrysolaus | Brown-headed Thrush | 2021/1/23  | 1 | 0 | 22.55601237 | 120.39180950 | <a href="https://www.inaturalist.org/observations/68542399">https://www.inaturalist.org/observations/68542399</a>   |
| 28 | Turdus chrysolaus | Brown-headed Thrush | 2020/2/2   | 0 | 0 | 22.55665207 | 120.39236450 | <a href="https://www.inaturalist.org/observations/38216043">https://www.inaturalist.org/observations/38216043</a>   |
| 29 | Turdus chrysolaus | Brown-headed Thrush | 2018/12/31 | 2 | 0 | 22.59632530 | 120.35664550 | <a href="https://www.inaturalist.org/observations/19333462">https://www.inaturalist.org/observations/19333462</a>   |
| 30 | Turdus chrysolaus | Brown-headed Thrush | 2021/2/23  | 2 | 0 | 22.61213423 | 120.35786200 | <a href="https://www.inaturalist.org/observations/70084127">https://www.inaturalist.org/observations/70084127</a>   |
| 31 | Turdus chrysolaus | Brown-headed Thrush | 2020/3/13  | 1 | 0 | 22.61420444 | 120.37630440 | <a href="https://www.inaturalist.org/observations/40069790">https://www.inaturalist.org/observations/40069790</a>   |
| 32 | Turdus chrysolaus | Brown-headed Thrush | 2020/2/7   | 0 | 0 | 22.61446058 | 120.26425520 | <a href="https://www.inaturalist.org/observations/38386677">https://www.inaturalist.org/observations/38386677</a>   |
| 33 | Turdus chrysolaus | Brown-headed Thrush | 2022/3/21  | 2 | 0 | 22.61468056 | 120.37582500 | <a href="https://www.inaturalist.org/observations/109129542">https://www.inaturalist.org/observations/109129542</a> |
| 34 | Turdus chrysolaus | Brown-headed Thrush | 2022/3/21  | 1 | 0 | 22.61469444 | 120.37582780 | <a href="https://www.inaturalist.org/observations/109129541">https://www.inaturalist.org/observations/109129541</a> |
| 35 | Turdus chrysolaus | Brown-headed Thrush | 2022/3/21  | 1 | 0 | 22.61473333 | 120.37576110 | <a href="https://www.inaturalist.org/observations/109129488">https://www.inaturalist.org/observations/109129488</a> |
| 36 | Turdus chrysolaus | Brown-headed Thrush | 2022/3/21  | 1 | 0 | 22.61476111 | 120.37575560 | <a href="https://www.inaturalist.org/observations/109129486">https://www.inaturalist.org/observations/109129486</a> |
| 37 | Turdus chrysolaus | Brown-headed Thrush | 2022/3/21  | 1 | 0 | 22.61478333 | 120.37583610 | <a href="https://www.inaturalist.org/observations/109129540">https://www.inaturalist.org/observations/109129540</a> |
| 38 | Turdus chrysolaus | Brown-headed Thrush | 2020/4/3   | 1 | 0 | 22.61589491 | 120.37646140 | <a href="https://www.inaturalist.org/observations/41283627">https://www.inaturalist.org/observations/41283627</a>   |
| 39 | Turdus chrysolaus | Brown-headed Thrush | 2022/3/21  | 1 | 0 | 22.61732222 | 120.37835830 | <a href="https://www.inaturalist.org/observations/109129518">https://www.inaturalist.org/observations/109129518</a> |
| 40 | Turdus chrysolaus | Brown-headed Thrush | 2022/2/14  | 2 | 0 | 22.62240255 | 120.36413230 | <a href="https://www.inaturalist.org/observations/106734000">https://www.inaturalist.org/observations/106734000</a> |
| 41 | Turdus chrysolaus | Brown-headed Thrush | 2022/2/27  | 1 | 0 | 22.62248125 | 120.36376360 | <a href="https://www.inaturalist.org/observations/107538275">https://www.inaturalist.org/observations/107538275</a> |
| 42 | Turdus chrysolaus | Brown-headed Thrush | 2022/2/14  | 2 | 0 | 22.62256400 | 120.36398210 | <a href="https://www.inaturalist.org/observations/106733997">https://www.inaturalist.org/observations/106733997</a> |
| 43 | Turdus chrysolaus | Brown-headed Thrush | 2020/3/31  | 1 | 0 | 22.63675291 | 121.49670500 | <a href="https://www.inaturalist.org/observations/41418913">https://www.inaturalist.org/observations/41418913</a>   |
| 44 | Turdus chrysolaus | Brown-headed Thrush | 2018/3/21  | 1 | 0 | 22.63886662 | 120.29682780 | <a href="https://www.inaturalist.org/observations/15777995">https://www.inaturalist.org/observations/15777995</a>   |
| 45 | Turdus chrysolaus | Brown-headed Thrush | 2017/4/9   | 1 | 0 | 22.63927900 | 120.29700800 | <a href="https://www.inaturalist.org/observations/15777289">https://www.inaturalist.org/observations/15777289</a>   |

|    |                   |                     |            |   |   |             |              |                                                                                                                     |
|----|-------------------|---------------------|------------|---|---|-------------|--------------|---------------------------------------------------------------------------------------------------------------------|
| 46 | Turdus chrysolaus | Brown-headed Thrush | 2021/12/18 | 1 | 0 | 22.64564086 | 120.35864590 | <a href="https://www.inaturalist.org/observations/103304157">https://www.inaturalist.org/observations/103304157</a> |
| 47 | Turdus chrysolaus | Brown-headed Thrush | 2019/12/28 | 1 | 0 | 22.64574116 | 120.28550130 | <a href="https://www.inaturalist.org/observations/37027214">https://www.inaturalist.org/observations/37027214</a>   |
| 48 | Turdus chrysolaus | Brown-headed Thrush | 2020/2/7   | 0 | 0 | 22.64611200 | 120.28609320 | <a href="https://www.inaturalist.org/observations/38386686">https://www.inaturalist.org/observations/38386686</a>   |
| 49 | Turdus chrysolaus | Brown-headed Thrush | 2020/12/21 | 3 | 0 | 22.64638169 | 120.28690710 | <a href="https://www.inaturalist.org/observations/66915268">https://www.inaturalist.org/observations/66915268</a>   |
| 50 | Turdus chrysolaus | Brown-headed Thrush | 2022/1/3   | 1 | 0 | 22.64665046 | 120.60520650 | <a href="https://www.inaturalist.org/observations/104404642">https://www.inaturalist.org/observations/104404642</a> |
| 51 | Turdus chrysolaus | Brown-headed Thrush | 2020/3/4   | 0 | 0 | 22.64665046 | 120.60523870 | <a href="https://www.inaturalist.org/observations/39566468">https://www.inaturalist.org/observations/39566468</a>   |
| 52 | Turdus chrysolaus | Brown-headed Thrush | 2021/12/31 | 1 | 0 | 22.64665324 | 120.60523900 | <a href="https://www.inaturalist.org/observations/121970430">https://www.inaturalist.org/observations/121970430</a> |
| 53 | Turdus chrysolaus | Brown-headed Thrush | 2022/3/6   | 4 | 0 | 22.64747348 | 120.28668740 | <a href="https://www.inaturalist.org/observations/116366721">https://www.inaturalist.org/observations/116366721</a> |
| 54 | Turdus chrysolaus | Brown-headed Thrush | 2020/2/8   | 1 | 0 | 22.65269610 | 120.34991460 | <a href="https://www.inaturalist.org/observations/38420709">https://www.inaturalist.org/observations/38420709</a>   |
| 55 | Turdus chrysolaus | Brown-headed Thrush | 2020/2/8   | 1 | 0 | 22.65269610 | 120.34991460 | <a href="https://www.inaturalist.org/observations/38535404">https://www.inaturalist.org/observations/38535404</a>   |
| 56 | Turdus chrysolaus | Brown-headed Thrush | 2020/2/11  | 0 | 0 | 22.65269619 | 120.34991450 | <a href="https://www.inaturalist.org/observations/38534702">https://www.inaturalist.org/observations/38534702</a>   |
| 57 | Turdus chrysolaus | Brown-headed Thrush | 2020/2/10  | 0 | 0 | 22.65273866 | 120.35004350 | <a href="https://www.inaturalist.org/observations/38502721">https://www.inaturalist.org/observations/38502721</a>   |
| 58 | Turdus chrysolaus | Brown-headed Thrush | 2021/1/3   | 1 | 0 | 22.65274096 | 120.35120430 | <a href="https://www.inaturalist.org/observations/67954602">https://www.inaturalist.org/observations/67954602</a>   |
| 59 | Turdus chrysolaus | Brown-headed Thrush | 2016/3/7   | 1 | 0 | 22.65282986 | 120.35017320 | <a href="https://www.inaturalist.org/observations/132012190">https://www.inaturalist.org/observations/132012190</a> |
| 60 | Turdus chrysolaus | Brown-headed Thrush | 2020/1/12  | 1 | 0 | 22.65308380 | 120.35068510 | <a href="https://www.inaturalist.org/observations/37517595">https://www.inaturalist.org/observations/37517595</a>   |
| 61 | Turdus chrysolaus | Brown-headed Thrush | 2022/1/19  | 1 | 0 | 22.65669680 | 120.28655110 | <a href="https://www.inaturalist.org/observations/105253539">https://www.inaturalist.org/observations/105253539</a> |
| 62 | Turdus chrysolaus | Brown-headed Thrush | 2021/1/16  | 1 | 0 | 22.66498248 | 120.38801280 | <a href="https://www.inaturalist.org/observations/68152934">https://www.inaturalist.org/observations/68152934</a>   |
| 63 | Turdus chrysolaus | Brown-headed Thrush | 2011/2/8   | 1 | 0 | 22.67866853 | 120.30028220 | <a href="https://www.inaturalist.org/observations/64236087">https://www.inaturalist.org/observations/64236087</a>   |
| 64 | Turdus chrysolaus | Brown-headed Thrush | 2021/1/14  | 0 | 0 | 22.67906241 | 120.30055040 | <a href="https://www.inaturalist.org/observations/68040479">https://www.inaturalist.org/observations/68040479</a>   |
| 65 | Turdus chrysolaus | Brown-headed Thrush | 2021/1/14  | 1 | 0 | 22.67910009 | 120.30061970 | <a href="https://www.inaturalist.org/observations/68040717">https://www.inaturalist.org/observations/68040717</a>   |
| 66 | Turdus chrysolaus | Brown-headed Thrush | 2021/1/14  | 0 | 0 | 22.67911450 | 120.30050330 | <a href="https://www.inaturalist.org/observations/68040577">https://www.inaturalist.org/observations/68040577</a>   |
| 67 | Turdus chrysolaus | Brown-headed Thrush | 2014/8/14  | 1 | 0 | 22.68002778 | 120.30015630 | <a href="https://www.inaturalist.org/observations/68913017">https://www.inaturalist.org/observations/68913017</a>   |
| 68 | Turdus chrysolaus | Brown-headed Thrush | 2014/8/14  | 1 | 0 | 22.68006242 | 120.30031040 | <a href="https://www.inaturalist.org/observations/68913019">https://www.inaturalist.org/observations/68913019</a>   |

|    |                   |                     |            |   |   |             |              |                                                                                                                     |
|----|-------------------|---------------------|------------|---|---|-------------|--------------|---------------------------------------------------------------------------------------------------------------------|
| 69 | Turdus chrysolaus | Brown-headed Thrush | 2014/8/14  | 2 | 0 | 22.68039185 | 120.30097730 | <a href="https://www.inaturalist.org/observations/68912998">https://www.inaturalist.org/observations/68912998</a>   |
| 70 | Turdus chrysolaus | Brown-headed Thrush | 2014/8/14  | 2 | 0 | 22.68044191 | 120.30111340 | <a href="https://www.inaturalist.org/observations/68912991">https://www.inaturalist.org/observations/68912991</a>   |
| 71 | Turdus chrysolaus | Brown-headed Thrush | 2016/12/24 | 0 | 0 | 22.68055080 | 120.30120460 | <a href="https://www.inaturalist.org/observations/38602999">https://www.inaturalist.org/observations/38602999</a>   |
| 72 | Turdus chrysolaus | Brown-headed Thrush | 2014/8/14  | 1 | 0 | 22.68063658 | 120.30080780 | <a href="https://www.inaturalist.org/observations/68913013">https://www.inaturalist.org/observations/68913013</a>   |
| 73 | Turdus chrysolaus | Brown-headed Thrush | 2019/1/30  | 1 | 0 | 22.68081462 | 120.30118510 | <a href="https://www.inaturalist.org/observations/20046550">https://www.inaturalist.org/observations/20046550</a>   |
| 74 | Turdus chrysolaus | Brown-headed Thrush | 2021/1/14  | 0 | 0 | 22.68163190 | 120.30084410 | <a href="https://www.inaturalist.org/observations/68040074">https://www.inaturalist.org/observations/68040074</a>   |
| 75 | Turdus chrysolaus | Brown-headed Thrush | 2011/12/7  | 2 | 0 | 22.68486137 | 120.29827040 | <a href="https://www.inaturalist.org/observations/129467673">https://www.inaturalist.org/observations/129467673</a> |
| 76 | Turdus chrysolaus | Brown-headed Thrush | 2022/4/5   | 1 | 0 | 22.69248000 | 120.30502170 | <a href="https://www.inaturalist.org/observations/110483290">https://www.inaturalist.org/observations/110483290</a> |
| 77 | Turdus chrysolaus | Brown-headed Thrush | 2022/1/2   | 4 | 0 | 22.69251333 | 120.30360330 | <a href="https://www.inaturalist.org/observations/104174996">https://www.inaturalist.org/observations/104174996</a> |
| 78 | Turdus chrysolaus | Brown-headed Thrush | 2021/2/4   | 2 | 0 | 22.71408833 | 120.32540830 | <a href="https://www.inaturalist.org/observations/69050044">https://www.inaturalist.org/observations/69050044</a>   |
| 79 | Turdus chrysolaus | Brown-headed Thrush | 2020/8/17  | 3 | 0 | 22.73477185 | 121.06480430 | <a href="https://www.inaturalist.org/observations/71014687">https://www.inaturalist.org/observations/71014687</a>   |
| 80 | Turdus chrysolaus | Brown-headed Thrush | 2020/4/11  | 1 | 0 | 22.79279597 | 121.10172740 | <a href="https://www.inaturalist.org/observations/47854885">https://www.inaturalist.org/observations/47854885</a>   |
| 81 | Turdus chrysolaus | Brown-headed Thrush | 2021/1/10  | 3 | 0 | 22.79701238 | 121.13720710 | <a href="https://www.inaturalist.org/observations/67838858">https://www.inaturalist.org/observations/67838858</a>   |
| 82 | Turdus chrysolaus | Brown-headed Thrush | 2018/3/11  | 1 | 0 | 22.83341500 | 120.52987000 | <a href="https://www.inaturalist.org/observations/16313000">https://www.inaturalist.org/observations/16313000</a>   |
| 83 | Turdus chrysolaus | Brown-headed Thrush | 2021/3/31  | 1 | 0 | 22.84389610 | 121.09365430 | <a href="https://www.inaturalist.org/observations/73160894">https://www.inaturalist.org/observations/73160894</a>   |
| 84 | Turdus chrysolaus | Brown-headed Thrush | 2020/2/27  | 2 | 0 | 22.86415482 | 120.34675600 | <a href="https://www.inaturalist.org/observations/43202136">https://www.inaturalist.org/observations/43202136</a>   |
| 85 | Turdus chrysolaus | Brown-headed Thrush | 2019/12/10 | 1 | 0 | 22.89845033 | 120.66470400 | <a href="https://www.inaturalist.org/observations/89329263">https://www.inaturalist.org/observations/89329263</a>   |
| 86 | Turdus chrysolaus | Brown-headed Thrush | 2022/1/9   | 1 | 0 | 22.91929283 | 120.54398150 | <a href="https://www.inaturalist.org/observations/104648778">https://www.inaturalist.org/observations/104648778</a> |
| 87 | Turdus chrysolaus | Brown-headed Thrush | 2020/3/4   | 1 | 0 | 22.96036297 | 120.43604210 | <a href="https://www.inaturalist.org/observations/39549428">https://www.inaturalist.org/observations/39549428</a>   |
| 88 | Turdus chrysolaus | Brown-headed Thrush | 2022/4/1   | 1 | 0 | 22.96780387 | 120.22262240 | <a href="https://www.inaturalist.org/observations/131187050">https://www.inaturalist.org/observations/131187050</a> |
| 89 | Turdus chrysolaus | Brown-headed Thrush | 2020/4/24  | 1 | 0 | 22.97105803 | 120.22282570 | <a href="https://www.inaturalist.org/observations/43017631">https://www.inaturalist.org/observations/43017631</a>   |
| 90 | Turdus chrysolaus | Brown-headed Thrush | 2019/1/1   | 1 | 0 | 22.99709292 | 120.21934080 | <a href="https://www.inaturalist.org/observations/19349204">https://www.inaturalist.org/observations/19349204</a>   |
| 91 | Turdus chrysolaus | Brown-headed Thrush | 2021/1/4   | 2 | 0 | 23.00275400 | 120.24403900 | <a href="https://www.inaturalist.org/observations/134715775">https://www.inaturalist.org/observations/134715775</a> |

|     |                   |                     |           |   |   |             |              |                                                                                                                     |
|-----|-------------------|---------------------|-----------|---|---|-------------|--------------|---------------------------------------------------------------------------------------------------------------------|
| 92  | Turdus chrysolaus | Brown-headed Thrush | 2021/1/4  | 2 | 0 | 23.00275400 | 120.24403900 | <a href="https://www.inaturalist.org/observations/134715782">https://www.inaturalist.org/observations/134715782</a> |
| 93  | Turdus chrysolaus | Brown-headed Thrush | 2021/1/4  | 2 | 0 | 23.00275400 | 120.24403900 | <a href="https://www.inaturalist.org/observations/134715783">https://www.inaturalist.org/observations/134715783</a> |
| 94  | Turdus chrysolaus | Brown-headed Thrush | 2021/1/4  | 1 | 0 | 23.00353704 | 120.24347720 | <a href="https://www.inaturalist.org/observations/81662703">https://www.inaturalist.org/observations/81662703</a>   |
| 95  | Turdus chrysolaus | Brown-headed Thrush | 2021/1/4  | 1 | 0 | 23.00354040 | 120.24344770 | <a href="https://www.inaturalist.org/observations/81662708">https://www.inaturalist.org/observations/81662708</a>   |
| 96  | Turdus chrysolaus | Brown-headed Thrush | 2021/1/4  | 1 | 0 | 23.00360706 | 120.24347110 | <a href="https://www.inaturalist.org/observations/81662710">https://www.inaturalist.org/observations/81662710</a>   |
| 97  | Turdus chrysolaus | Brown-headed Thrush | 2019/12/8 | 1 | 0 | 23.01066381 | 120.18104750 | <a href="https://www.inaturalist.org/observations/45953180">https://www.inaturalist.org/observations/45953180</a>   |
| 98  | Turdus chrysolaus | Brown-headed Thrush | 2020/1/19 | 1 | 0 | 23.05370528 | 120.24515670 | <a href="https://www.inaturalist.org/observations/68536167">https://www.inaturalist.org/observations/68536167</a>   |
| 99  | Turdus chrysolaus | Brown-headed Thrush | 2022/3/8  | 2 | 0 | 23.06455712 | 120.19655450 | <a href="https://www.inaturalist.org/observations/108172906">https://www.inaturalist.org/observations/108172906</a> |
| 100 | Turdus chrysolaus | Brown-headed Thrush | 2019/3/14 | 2 | 0 | 23.10632853 | 121.36224190 | <a href="https://www.inaturalist.org/observations/21590123">https://www.inaturalist.org/observations/21590123</a>   |
| 101 | Turdus chrysolaus | Brown-headed Thrush | 2019/1/3  | 1 | 0 | 23.11719000 | 121.22222670 | <a href="https://www.inaturalist.org/observations/19722978">https://www.inaturalist.org/observations/19722978</a>   |
| 102 | Turdus chrysolaus | Brown-headed Thrush | 2021/3/11 | 1 | 0 | 23.12156801 | 121.35958750 | <a href="https://www.inaturalist.org/observations/70991352">https://www.inaturalist.org/observations/70991352</a>   |
| 103 | Turdus chrysolaus | Brown-headed Thrush | 2020/4/3  | 1 | 0 | 23.12539731 | 121.22380730 | <a href="https://www.inaturalist.org/observations/41665553">https://www.inaturalist.org/observations/41665553</a>   |
| 104 | Turdus chrysolaus | Brown-headed Thrush | 2020/4/2  | 1 | 0 | 23.12820800 | 121.17534700 | <a href="https://www.inaturalist.org/observations/45781162">https://www.inaturalist.org/observations/45781162</a>   |
| 105 | Turdus chrysolaus | Brown-headed Thrush | 2021/1/25 | 1 | 0 | 23.12840113 | 121.20737180 | <a href="https://www.inaturalist.org/observations/68582833">https://www.inaturalist.org/observations/68582833</a>   |
| 106 | Turdus chrysolaus | Brown-headed Thrush | 2019/2/10 | 2 | 0 | 23.20838321 | 120.36984930 | <a href="https://www.inaturalist.org/observations/20268966">https://www.inaturalist.org/observations/20268966</a>   |
| 107 | Turdus chrysolaus | Brown-headed Thrush | 2022/4/19 | 1 | 0 | 23.21802915 | 121.27374210 | <a href="https://www.inaturalist.org/observations/119552845">https://www.inaturalist.org/observations/119552845</a> |
| 108 | Turdus chrysolaus | Brown-headed Thrush | 2020/3/29 | 1 | 0 | 23.24182592 | 120.54325040 | <a href="https://www.inaturalist.org/observations/42834008">https://www.inaturalist.org/observations/42834008</a>   |
| 109 | Turdus chrysolaus | Brown-headed Thrush | 2021/1/10 | 1 | 0 | 23.26382500 | 120.82535000 | <a href="https://www.inaturalist.org/observations/67958452">https://www.inaturalist.org/observations/67958452</a>   |
| 110 | Turdus chrysolaus | Brown-headed Thrush | 2021/4/24 | 1 | 0 | 23.27915700 | 120.41548690 | <a href="https://www.inaturalist.org/observations/90120003">https://www.inaturalist.org/observations/90120003</a>   |
| 111 | Turdus chrysolaus | Brown-headed Thrush | 2021/1/31 | 1 | 0 | 23.31850000 | 121.45441830 | <a href="https://www.inaturalist.org/observations/68899664">https://www.inaturalist.org/observations/68899664</a>   |
| 112 | Turdus chrysolaus | Brown-headed Thrush | 2021/4/2  | 1 | 0 | 23.33048870 | 121.42847560 | <a href="https://www.inaturalist.org/observations/74821728">https://www.inaturalist.org/observations/74821728</a>   |
| 113 | Turdus chrysolaus | Brown-headed Thrush | 2016/1/7  | 1 | 0 | 23.41591606 | 121.34987730 | <a href="https://www.inaturalist.org/observations/14814731">https://www.inaturalist.org/observations/14814731</a>   |
| 114 | Turdus chrysolaus | Brown-headed Thrush | 2019/12/6 | 1 | 0 | 23.44007492 | 120.77048490 | <a href="https://www.inaturalist.org/observations/36548068">https://www.inaturalist.org/observations/36548068</a>   |

|     |                   |                     |            |   |   |             |              |                                                                                                                     |
|-----|-------------------|---------------------|------------|---|---|-------------|--------------|---------------------------------------------------------------------------------------------------------------------|
| 115 | Turdus chrysolaus | Brown-headed Thrush | 2019/12/2  | 2 | 0 | 23.45197769 | 120.75513190 | <a href="https://www.inaturalist.org/observations/36551127">https://www.inaturalist.org/observations/36551127</a>   |
| 116 | Turdus chrysolaus | Brown-headed Thrush | 2021/12/29 | 1 | 0 | 23.45286700 | 120.55841000 | <a href="https://www.inaturalist.org/observations/103938467">https://www.inaturalist.org/observations/103938467</a> |
| 117 | Turdus chrysolaus | Brown-headed Thrush | 2012/12/21 | 1 | 0 | 23.45325436 | 120.55937030 | <a href="https://www.inaturalist.org/observations/119343702">https://www.inaturalist.org/observations/119343702</a> |
| 118 | Turdus chrysolaus | Brown-headed Thrush | 2021/1/22  | 1 | 0 | 23.45326946 | 120.56118390 | <a href="https://www.inaturalist.org/observations/68439397">https://www.inaturalist.org/observations/68439397</a>   |
| 119 | Turdus chrysolaus | Brown-headed Thrush | 2014/1/2   | 1 | 0 | 23.45327658 | 120.56031040 | <a href="https://www.inaturalist.org/observations/98086547">https://www.inaturalist.org/observations/98086547</a>   |
| 120 | Turdus chrysolaus | Brown-headed Thrush | 2021/1/14  | 1 | 0 | 23.45347030 | 120.55978320 | <a href="https://www.inaturalist.org/observations/68044426">https://www.inaturalist.org/observations/68044426</a>   |
| 121 | Turdus chrysolaus | Brown-headed Thrush | 2013/3/6   | 1 | 0 | 23.45355065 | 120.55835730 | <a href="https://www.inaturalist.org/observations/102281638">https://www.inaturalist.org/observations/102281638</a> |
| 122 | Turdus chrysolaus | Brown-headed Thrush | 2020/1/14  | 2 | 0 | 23.45355133 | 120.56058010 | <a href="https://www.inaturalist.org/observations/64778582">https://www.inaturalist.org/observations/64778582</a>   |
| 123 | Turdus chrysolaus | Brown-headed Thrush | 2020/2/27  | 1 | 0 | 23.45355133 | 120.56058010 | <a href="https://www.inaturalist.org/observations/64778583">https://www.inaturalist.org/observations/64778583</a>   |
| 124 | Turdus chrysolaus | Brown-headed Thrush | 2020/1/31  | 1 | 0 | 23.45355133 | 120.56058010 | <a href="https://www.inaturalist.org/observations/64778584">https://www.inaturalist.org/observations/64778584</a>   |
| 125 | Turdus chrysolaus | Brown-headed Thrush | 2019/1/7   | 1 | 0 | 23.45375163 | 120.55951930 | <a href="https://www.inaturalist.org/observations/42377261">https://www.inaturalist.org/observations/42377261</a>   |
| 126 | Turdus chrysolaus | Brown-headed Thrush | 2019/12/17 | 1 | 0 | 23.45375163 | 120.55951930 | <a href="https://www.inaturalist.org/observations/42377262">https://www.inaturalist.org/observations/42377262</a>   |
| 127 | Turdus chrysolaus | Brown-headed Thrush | 2019/2/14  | 1 | 0 | 23.45375163 | 120.55951930 | <a href="https://www.inaturalist.org/observations/42377264">https://www.inaturalist.org/observations/42377264</a>   |
| 128 | Turdus chrysolaus | Brown-headed Thrush | 2019/2/18  | 1 | 0 | 23.45375163 | 120.55951930 | <a href="https://www.inaturalist.org/observations/42377266">https://www.inaturalist.org/observations/42377266</a>   |
| 129 | Turdus chrysolaus | Brown-headed Thrush | 2019/12/2  | 2 | 0 | 23.45381024 | 120.74974770 | <a href="https://www.inaturalist.org/observations/36796758">https://www.inaturalist.org/observations/36796758</a>   |
| 130 | Turdus chrysolaus | Brown-headed Thrush | 2021/12/25 | 3 | 0 | 23.45458500 | 120.55260300 | <a href="https://www.inaturalist.org/observations/103735908">https://www.inaturalist.org/observations/103735908</a> |
| 131 | Turdus chrysolaus | Brown-headed Thrush | 2019/12/3  | 1 | 0 | 23.45671987 | 120.74793890 | <a href="https://www.inaturalist.org/observations/36527155">https://www.inaturalist.org/observations/36527155</a>   |
| 132 | Turdus chrysolaus | Brown-headed Thrush | 2019/12/6  | 0 | 0 | 23.45689980 | 120.74793890 | <a href="https://www.inaturalist.org/observations/36548461">https://www.inaturalist.org/observations/36548461</a>   |
| 133 | Turdus chrysolaus | Brown-headed Thrush | 2019/3/2   | 1 | 0 | 23.46134725 | 120.69852080 | <a href="https://www.inaturalist.org/observations/20966481">https://www.inaturalist.org/observations/20966481</a>   |
| 134 | Turdus chrysolaus | Brown-headed Thrush | 2019/3/2   | 1 | 0 | 23.46134772 | 120.69852380 | <a href="https://www.inaturalist.org/observations/20966480">https://www.inaturalist.org/observations/20966480</a>   |
| 135 | Turdus chrysolaus | Brown-headed Thrush | 2021/3/2   | 1 | 0 | 23.47481500 | 120.48911830 | <a href="https://www.inaturalist.org/observations/70485166">https://www.inaturalist.org/observations/70485166</a>   |
| 136 | Turdus chrysolaus | Brown-headed Thrush | 2018/3/24  | 1 | 0 | 23.48753300 | 120.89172400 | <a href="https://www.inaturalist.org/observations/34201240">https://www.inaturalist.org/observations/34201240</a>   |
| 137 | Turdus chrysolaus | Brown-headed Thrush | 2021/1/31  | 2 | 0 | 23.50614806 | 120.82395810 | <a href="https://www.inaturalist.org/observations/68849821">https://www.inaturalist.org/observations/68849821</a>   |

|     |                                 |                     |            |   |   |             |              |                                                                                                                     |
|-----|---------------------------------|---------------------|------------|---|---|-------------|--------------|---------------------------------------------------------------------------------------------------------------------|
| 138 | Turdus chrysolaus               | Brown-headed Thrush | 2021/12/9  | 1 | 0 | 23.50877778 | 120.44515000 | <a href="https://www.inaturalist.org/observations/103126127">https://www.inaturalist.org/observations/103126127</a> |
| 139 | Turdus chrysolaus               | Brown-headed Thrush | 2022/4/21  | 1 | 0 | 23.50895500 | 121.39246830 | <a href="https://www.inaturalist.org/observations/112940631">https://www.inaturalist.org/observations/112940631</a> |
| 140 | Turdus chrysolaus               | Brown-headed Thrush | 2014/3/2   | 1 | 0 | 23.51459846 | 120.81256170 | <a href="https://www.inaturalist.org/observations/56905108">https://www.inaturalist.org/observations/56905108</a>   |
| 141 | Turdus chrysolaus               | Brown-headed Thrush | 2018/3/4   | 1 | 0 | 23.58429859 | 119.58119900 | <a href="https://www.inaturalist.org/observations/98211133">https://www.inaturalist.org/observations/98211133</a>   |
| 142 | Turdus chrysolaus               | Brown-headed Thrush | 2002/11/27 | 1 | 0 | 23.62031939 | 120.26158680 | <a href="https://www.inaturalist.org/observations/13942587">https://www.inaturalist.org/observations/13942587</a>   |
| 143 | Turdus chrysolaus               | Brown-headed Thrush | 2005/3/26  | 2 | 0 | 23.63323490 | 120.40163330 | <a href="https://www.inaturalist.org/observations/13828589">https://www.inaturalist.org/observations/13828589</a>   |
| 144 | Turdus chrysolaus               | Brown-headed Thrush | 2022/3/26  | 1 | 0 | 23.65238364 | 121.42249070 | <a href="https://www.inaturalist.org/observations/109538900">https://www.inaturalist.org/observations/109538900</a> |
| 145 | Turdus chrysolaus               | Brown-headed Thrush | 2021/12/12 | 1 | 0 | 23.70015833 | 120.53093060 | <a href="https://www.inaturalist.org/observations/102980656">https://www.inaturalist.org/observations/102980656</a> |
| 146 | Turdus chrysolaus               | Brown-headed Thrush | 2020/2/15  | 0 | 0 | 23.71721667 | 121.39740280 | <a href="https://www.inaturalist.org/observations/38659201">https://www.inaturalist.org/observations/38659201</a>   |
| 147 | Turdus chrysolaus               | Brown-headed Thrush | 2019/12/10 | 1 | 0 | 23.71739815 | 121.39769360 | <a href="https://www.inaturalist.org/observations/36522407">https://www.inaturalist.org/observations/36522407</a>   |
| 148 | Turdus chrysolaus               | Brown-headed Thrush | 2017/4/8   | 1 | 0 | 23.72527087 | 120.62511390 | <a href="https://www.inaturalist.org/observations/19485346">https://www.inaturalist.org/observations/19485346</a>   |
| 149 | Turdus chrysolaus               | Brown-headed Thrush | 2021/1/10  | 1 | 0 | 23.72620555 | 120.42202640 | <a href="https://www.inaturalist.org/observations/67833383">https://www.inaturalist.org/observations/67833383</a>   |
| 150 | Turdus chrysolaus               | Brown-headed Thrush | 2022/4/12  | 2 | 0 | 23.72667881 | 120.66762790 | <a href="https://www.inaturalist.org/observations/115276568">https://www.inaturalist.org/observations/115276568</a> |
| 151 | Turdus chrysolaus               | Brown-headed Thrush | 2022/2/16  | 1 | 0 | 23.72710400 | 120.42302000 | <a href="https://www.inaturalist.org/observations/107238499">https://www.inaturalist.org/observations/107238499</a> |
| 152 | Turdus chrysolaus               | Brown-headed Thrush | 2022/1/27  | 1 | 0 | 23.82683849 | 120.80121830 | <a href="https://www.inaturalist.org/observations/105646940">https://www.inaturalist.org/observations/105646940</a> |
| 153 | Turdus chrysolaus<br>chrysolaus | Brown-headed Thrush | 2019/11/24 | 1 | 0 | 23.82703832 | 120.80075860 | <a href="https://www.inaturalist.org/observations/36397673">https://www.inaturalist.org/observations/36397673</a>   |
| 154 | Turdus chrysolaus               | Brown-headed Thrush | 2018/4/2   | 1 | 0 | 23.82705633 | 120.80130690 | <a href="https://www.inaturalist.org/observations/66621299">https://www.inaturalist.org/observations/66621299</a>   |
| 155 | Turdus chrysolaus               | Brown-headed Thrush | 2019/2/23  | 2 | 0 | 23.82822602 | 120.80177570 | <a href="https://www.inaturalist.org/observations/20677040">https://www.inaturalist.org/observations/20677040</a>   |
| 156 | Turdus chrysolaus               | Brown-headed Thrush | 2017/1/19  | 3 | 0 | 23.83024515 | 120.52676090 | <a href="https://www.inaturalist.org/observations/13519102">https://www.inaturalist.org/observations/13519102</a>   |
| 157 | Turdus chrysolaus               | Brown-headed Thrush | 2021/3/21  | 3 | 0 | 23.83287003 | 120.78889470 | <a href="https://www.inaturalist.org/observations/71934449">https://www.inaturalist.org/observations/71934449</a>   |
| 158 | Turdus chrysolaus               | Brown-headed Thrush | 2020/3/21  | 3 | 0 | 23.84156147 | 121.52314400 | <a href="https://www.inaturalist.org/observations/40354119">https://www.inaturalist.org/observations/40354119</a>   |
| 159 | Turdus chrysolaus               | Brown-headed Thrush | 2020/3/19  | 2 | 0 | 23.86827362 | 120.78414130 | <a href="https://www.inaturalist.org/observations/40263855">https://www.inaturalist.org/observations/40263855</a>   |
| 160 | Turdus chrysolaus               | Brown-headed Thrush | 2020/3/17  | 3 | 0 | 23.88860022 | 121.53633880 | <a href="https://www.inaturalist.org/observations/47108212">https://www.inaturalist.org/observations/47108212</a>   |



|     |                   |                     |            |   |   |             |              |                                                                                                                     |
|-----|-------------------|---------------------|------------|---|---|-------------|--------------|---------------------------------------------------------------------------------------------------------------------|
| 161 | Turdus chrysolaus | Brown-headed Thrush | 2019/12/28 | 1 | 0 | 23.88863233 | 121.53622810 | <a href="https://www.inaturalist.org/observations/44592466">https://www.inaturalist.org/observations/44592466</a>   |
| 162 | Turdus chrysolaus | Brown-headed Thrush | 2021/3/23  | 1 | 0 | 23.88917807 | 121.53626720 | <a href="https://www.inaturalist.org/observations/72773060">https://www.inaturalist.org/observations/72773060</a>   |
| 163 | Turdus chrysolaus | Brown-headed Thrush | 2019/3/17  | 2 | 0 | 23.89005530 | 121.53561240 | <a href="https://www.inaturalist.org/observations/24596982">https://www.inaturalist.org/observations/24596982</a>   |
| 164 | Turdus chrysolaus | Brown-headed Thrush | 2020/3/27  | 2 | 0 | 23.89267685 | 121.53759500 | <a href="https://www.inaturalist.org/observations/40800143">https://www.inaturalist.org/observations/40800143</a>   |
| 165 | Turdus chrysolaus | Brown-headed Thrush | 2020/4/14  | 3 | 0 | 23.89571167 | 121.54820670 | <a href="https://www.inaturalist.org/observations/42749768">https://www.inaturalist.org/observations/42749768</a>   |
| 166 | Turdus chrysolaus | Brown-headed Thrush | 2020/4/14  | 2 | 0 | 23.89576401 | 121.54818500 | <a href="https://www.inaturalist.org/observations/42119919">https://www.inaturalist.org/observations/42119919</a>   |
| 167 | Turdus chrysolaus | Brown-headed Thrush | 2020/4/14  | 1 | 0 | 23.89604412 | 121.54786030 | <a href="https://www.inaturalist.org/observations/42158187">https://www.inaturalist.org/observations/42158187</a>   |
| 168 | Turdus chrysolaus | Brown-headed Thrush | 2022/4/5   | 1 | 0 | 23.89684082 | 121.54890080 | <a href="https://www.inaturalist.org/observations/119397360">https://www.inaturalist.org/observations/119397360</a> |
| 169 | Turdus chrysolaus | Brown-headed Thrush | 2018/3/8   | 2 | 0 | 23.89713800 | 121.54220500 | <a href="https://www.inaturalist.org/observations/15945521">https://www.inaturalist.org/observations/15945521</a>   |
| 170 | Turdus chrysolaus | Brown-headed Thrush | 2018/3/8   | 2 | 0 | 23.89753850 | 121.54180180 | <a href="https://www.inaturalist.org/observations/68260990">https://www.inaturalist.org/observations/68260990</a>   |
| 171 | Turdus chrysolaus | Brown-headed Thrush | 2020/4/14  | 2 | 0 | 23.89893500 | 121.54968500 | <a href="https://www.inaturalist.org/observations/42749775">https://www.inaturalist.org/observations/42749775</a>   |
| 172 | Turdus chrysolaus | Brown-headed Thrush | 2020/4/14  | 2 | 0 | 23.89903686 | 121.54960520 | <a href="https://www.inaturalist.org/observations/42122248">https://www.inaturalist.org/observations/42122248</a>   |
| 173 | Turdus chrysolaus | Brown-headed Thrush | 2020/1/7   | 1 | 0 | 23.89927800 | 121.54097900 | <a href="https://www.inaturalist.org/observations/37395074">https://www.inaturalist.org/observations/37395074</a>   |
| 174 | Turdus chrysolaus | Brown-headed Thrush | 2020/1/7   | 0 | 0 | 23.89942200 | 121.54095300 | <a href="https://www.inaturalist.org/observations/37395134">https://www.inaturalist.org/observations/37395134</a>   |
| 175 | Turdus chrysolaus | Brown-headed Thrush | 2020/4/14  | 2 | 0 | 23.89946871 | 121.54944600 | <a href="https://www.inaturalist.org/observations/42158197">https://www.inaturalist.org/observations/42158197</a>   |
| 176 | Turdus chrysolaus | Brown-headed Thrush | 2020/4/14  | 2 | 0 | 23.89946998 | 121.54943720 | <a href="https://www.inaturalist.org/observations/42158194">https://www.inaturalist.org/observations/42158194</a>   |
| 177 | Turdus chrysolaus | Brown-headed Thrush | 2020/1/2   | 1 | 0 | 23.89967700 | 121.54086600 | <a href="https://www.inaturalist.org/observations/37395057">https://www.inaturalist.org/observations/37395057</a>   |
| 178 | Turdus chrysolaus | Brown-headed Thrush | 2020/1/2   | 1 | 0 | 23.89968500 | 121.54086800 | <a href="https://www.inaturalist.org/observations/37395058">https://www.inaturalist.org/observations/37395058</a>   |
| 179 | Turdus chrysolaus | Brown-headed Thrush | 2021/1/16  | 1 | 0 | 23.90037432 | 121.54937930 | <a href="https://www.inaturalist.org/observations/68194951">https://www.inaturalist.org/observations/68194951</a>   |
| 180 | Turdus chrysolaus | Brown-headed Thrush | 2021/3/23  | 1 | 0 | 23.90042900 | 121.54940400 | <a href="https://www.inaturalist.org/observations/72078920">https://www.inaturalist.org/observations/72078920</a>   |
| 181 | Turdus chrysolaus | Brown-headed Thrush | 2021/1/11  | 1 | 0 | 23.90043501 | 121.54947410 | <a href="https://www.inaturalist.org/observations/67890185">https://www.inaturalist.org/observations/67890185</a>   |
| 182 | Turdus chrysolaus | Brown-headed Thrush | 2020/4/3   | 2 | 0 | 23.90049545 | 121.54514410 | <a href="https://www.inaturalist.org/observations/47109121">https://www.inaturalist.org/observations/47109121</a>   |
| 183 | Turdus chrysolaus | Brown-headed Thrush | 2020/4/14  | 3 | 0 | 23.90118167 | 121.54803670 | <a href="https://www.inaturalist.org/observations/42749777">https://www.inaturalist.org/observations/42749777</a>   |

|     |                   |                     |            |   |   |             |              |                                                                                                                     |
|-----|-------------------|---------------------|------------|---|---|-------------|--------------|---------------------------------------------------------------------------------------------------------------------|
| 184 | Turdus chrysolaus | Brown-headed Thrush | 2021/1/17  | 1 | 0 | 23.90126753 | 121.54748800 | <a href="https://www.inaturalist.org/observations/68197660">https://www.inaturalist.org/observations/68197660</a>   |
| 185 | Turdus chrysolaus | Brown-headed Thrush | 2020/3/8   | 5 | 0 | 23.90130278 | 121.53721980 | <a href="https://www.inaturalist.org/observations/40118976">https://www.inaturalist.org/observations/40118976</a>   |
| 186 | Turdus chrysolaus | Brown-headed Thrush | 2021/2/5   | 1 | 0 | 23.90135383 | 121.54903940 | <a href="https://www.inaturalist.org/observations/69077231">https://www.inaturalist.org/observations/69077231</a>   |
| 187 | Turdus chrysolaus | Brown-headed Thrush | 2021/1/12  | 1 | 0 | 23.90163000 | 121.54723700 | <a href="https://www.inaturalist.org/observations/67940758">https://www.inaturalist.org/observations/67940758</a>   |
| 188 | Turdus chrysolaus | Brown-headed Thrush | 2020/4/17  | 1 | 0 | 23.90171981 | 121.54541430 | <a href="https://www.inaturalist.org/observations/42565741">https://www.inaturalist.org/observations/42565741</a>   |
| 189 | Turdus chrysolaus | Brown-headed Thrush | 2020/3/27  | 3 | 0 | 23.90192346 | 121.53864570 | <a href="https://www.inaturalist.org/observations/40800133">https://www.inaturalist.org/observations/40800133</a>   |
| 190 | Turdus chrysolaus | Brown-headed Thrush | 2022/4/10  | 2 | 0 | 23.90207134 | 121.54916470 | <a href="https://www.inaturalist.org/observations/119551336">https://www.inaturalist.org/observations/119551336</a> |
| 191 | Turdus chrysolaus | Brown-headed Thrush | 2020/1/6   | 0 | 0 | 23.91048900 | 121.54133300 | <a href="https://www.inaturalist.org/observations/37395061">https://www.inaturalist.org/observations/37395061</a>   |
| 192 | Turdus chrysolaus | Brown-headed Thrush | 2022/2/15  | 2 | 0 | 23.91237718 | 121.55303790 | <a href="https://www.inaturalist.org/observations/106791753">https://www.inaturalist.org/observations/106791753</a> |
| 193 | Turdus chrysolaus | Brown-headed Thrush | 2020/1/6   | 0 | 0 | 23.91323600 | 121.54365700 | <a href="https://www.inaturalist.org/observations/37395066">https://www.inaturalist.org/observations/37395066</a>   |
| 194 | Turdus chrysolaus | Brown-headed Thrush | 2021/1/30  | 1 | 0 | 23.92519397 | 121.50659340 | <a href="https://www.inaturalist.org/observations/73183301">https://www.inaturalist.org/observations/73183301</a>   |
| 195 | Turdus chrysolaus | Brown-headed Thrush | 2020/12/9  | 0 | 0 | 23.92520054 | 120.63984260 | <a href="https://www.inaturalist.org/observations/66315142">https://www.inaturalist.org/observations/66315142</a>   |
| 196 | Turdus chrysolaus | Brown-headed Thrush | 2021/1/30  | 2 | 0 | 23.93013585 | 121.50670600 | <a href="https://www.inaturalist.org/observations/68785142">https://www.inaturalist.org/observations/68785142</a>   |
| 197 | Turdus chrysolaus | Brown-headed Thrush | 2021/1/30  | 0 | 0 | 23.93505269 | 121.50772210 | <a href="https://www.inaturalist.org/observations/68784667">https://www.inaturalist.org/observations/68784667</a>   |
| 198 | Turdus chrysolaus | Brown-headed Thrush | 2019/1/22  | 1 | 0 | 23.93521310 | 121.50840000 | <a href="https://www.inaturalist.org/observations/19801788">https://www.inaturalist.org/observations/19801788</a>   |
| 199 | Turdus chrysolaus | Brown-headed Thrush | 2019/3/2   | 1 | 0 | 23.94436264 | 120.89255410 | <a href="https://www.inaturalist.org/observations/30470310">https://www.inaturalist.org/observations/30470310</a>   |
| 200 | Turdus chrysolaus | Brown-headed Thrush | 2020/12/26 | 1 | 0 | 23.96513710 | 120.96737680 | <a href="https://www.inaturalist.org/observations/67295482">https://www.inaturalist.org/observations/67295482</a>   |
| 201 | Turdus chrysolaus | Brown-headed Thrush | 2020/12/26 | 2 | 0 | 23.96513710 | 120.96737680 | <a href="https://www.inaturalist.org/observations/67295484">https://www.inaturalist.org/observations/67295484</a>   |
| 202 | Turdus chrysolaus | Brown-headed Thrush | 2021/1/15  | 1 | 0 | 23.96513710 | 120.96737680 | <a href="https://www.inaturalist.org/observations/68627142">https://www.inaturalist.org/observations/68627142</a>   |
| 203 | Turdus chrysolaus | Brown-headed Thrush | 2021/1/30  | 2 | 0 | 23.97633333 | 121.58235500 | <a href="https://www.inaturalist.org/observations/68792689">https://www.inaturalist.org/observations/68792689</a>   |
| 204 | Turdus chrysolaus | Brown-headed Thrush | 2021/3/16  | 2 | 0 | 24.01393231 | 121.11895510 | <a href="https://www.inaturalist.org/observations/71693165">https://www.inaturalist.org/observations/71693165</a>   |
| 205 | Turdus chrysolaus | Brown-headed Thrush | 2019/12/7  | 2 | 0 | 24.01734856 | 121.60312570 | <a href="https://www.inaturalist.org/observations/36427739">https://www.inaturalist.org/observations/36427739</a>   |
| 206 | Turdus chrysolaus | Brown-headed Thrush | 2021/3/16  | 2 | 0 | 24.04559016 | 121.14800080 | <a href="https://www.inaturalist.org/observations/71693142">https://www.inaturalist.org/observations/71693142</a>   |

|     |                   |                     |            |   |   |             |              |                                                                                                                     |
|-----|-------------------|---------------------|------------|---|---|-------------|--------------|---------------------------------------------------------------------------------------------------------------------|
| 207 | Turdus chrysolaus | Brown-headed Thrush | 2021/2/14  | 1 | 0 | 24.04663650 | 120.88442660 | <a href="https://www.inaturalist.org/observations/69542570">https://www.inaturalist.org/observations/69542570</a>   |
| 208 | Turdus chrysolaus | Brown-headed Thrush | 2021/3/22  | 1 | 0 | 24.06616254 | 120.75667200 | <a href="https://www.inaturalist.org/observations/72251268">https://www.inaturalist.org/observations/72251268</a>   |
| 209 | Turdus chrysolaus | Brown-headed Thrush | 2021/2/8   | 2 | 0 | 24.08777216 | 121.17438470 | <a href="https://www.inaturalist.org/observations/106407681">https://www.inaturalist.org/observations/106407681</a> |
| 210 | Turdus chrysolaus | Brown-headed Thrush | 2019/1/30  | 1 | 0 | 24.08866505 | 121.03463100 | <a href="https://www.inaturalist.org/observations/20276273">https://www.inaturalist.org/observations/20276273</a>   |
| 211 | Turdus chrysolaus | Brown-headed Thrush | 2019/1/30  | 1 | 0 | 24.08866505 | 121.03463100 | <a href="https://www.inaturalist.org/observations/20276360">https://www.inaturalist.org/observations/20276360</a>   |
| 212 | Turdus chrysolaus | Brown-headed Thrush | 2022/2/8   | 2 | 0 | 24.11759000 | 120.59076670 | <a href="https://www.inaturalist.org/observations/106432306">https://www.inaturalist.org/observations/106432306</a> |
| 213 | Turdus chrysolaus | Brown-headed Thrush | 2020/1/2   | 1 | 0 | 24.12285472 | 120.67677000 | <a href="https://www.inaturalist.org/observations/37187390">https://www.inaturalist.org/observations/37187390</a>   |
| 214 | Turdus chrysolaus | Brown-headed Thrush | 2021/2/15  | 1 | 0 | 24.12583044 | 121.11867170 | <a href="https://www.inaturalist.org/observations/70090001">https://www.inaturalist.org/observations/70090001</a>   |
| 215 | Turdus chrysolaus | Brown-headed Thrush | 2011/1/7   | 1 | 0 | 24.15857430 | 120.66834200 | <a href="https://www.inaturalist.org/observations/110633170">https://www.inaturalist.org/observations/110633170</a> |
| 216 | Turdus chrysolaus | Brown-headed Thrush | 2015/12/20 | 1 | 0 | 24.17042483 | 121.57442400 | <a href="https://www.inaturalist.org/observations/19691571">https://www.inaturalist.org/observations/19691571</a>   |
| 217 | Turdus chrysolaus | Brown-headed Thrush | 2019/12/12 | 0 | 0 | 24.17063883 | 121.57260480 | <a href="https://www.inaturalist.org/observations/36608147">https://www.inaturalist.org/observations/36608147</a>   |
| 218 | Turdus chrysolaus | Brown-headed Thrush | 2021/1/13  | 1 | 0 | 24.17152173 | 121.57437470 | <a href="https://www.inaturalist.org/observations/69850344">https://www.inaturalist.org/observations/69850344</a>   |
| 219 | Turdus chrysolaus | Brown-headed Thrush | 2021/2/6   | 1 | 0 | 24.19016129 | 120.60735770 | <a href="https://www.inaturalist.org/observations/69127516">https://www.inaturalist.org/observations/69127516</a>   |
| 220 | Turdus chrysolaus | Brown-headed Thrush | 2019/12/15 | 1 | 0 | 24.19407581 | 120.60975910 | <a href="https://www.inaturalist.org/observations/36933534">https://www.inaturalist.org/observations/36933534</a>   |
| 221 | Turdus chrysolaus | Brown-headed Thrush | 2022/1/18  | 1 | 0 | 24.20426167 | 120.59988000 | <a href="https://www.inaturalist.org/observations/105152556">https://www.inaturalist.org/observations/105152556</a> |
| 222 | Turdus chrysolaus | Brown-headed Thrush | 2020/1/14  | 1 | 0 | 24.20782902 | 120.59881210 | <a href="https://www.inaturalist.org/observations/37585059">https://www.inaturalist.org/observations/37585059</a>   |
| 223 | Turdus chrysolaus | Brown-headed Thrush | 2022/1/5   | 2 | 0 | 24.20916206 | 120.59697520 | <a href="https://www.inaturalist.org/observations/120285505">https://www.inaturalist.org/observations/120285505</a> |
| 224 | Turdus chrysolaus | Brown-headed Thrush | 2020/12/5  | 2 | 0 | 24.20964389 | 120.59537750 | <a href="https://www.inaturalist.org/observations/66260886">https://www.inaturalist.org/observations/66260886</a>   |
| 225 | Turdus chrysolaus | Brown-headed Thrush | 2022/1/24  | 1 | 0 | 24.24456300 | 120.97511630 | <a href="https://www.inaturalist.org/observations/105662942">https://www.inaturalist.org/observations/105662942</a> |
| 226 | Turdus chrysolaus | Brown-headed Thrush | 2017/2/13  | 2 | 0 | 24.24518910 | 120.91486320 | <a href="https://www.inaturalist.org/observations/89754223">https://www.inaturalist.org/observations/89754223</a>   |
| 227 | Turdus chrysolaus | Brown-headed Thrush | 2022/1/27  | 1 | 0 | 24.26495030 | 121.00320370 | <a href="https://www.inaturalist.org/observations/105640450">https://www.inaturalist.org/observations/105640450</a> |
| 228 | Turdus chrysolaus | Brown-headed Thrush | 2019/2/10  | 2 | 0 | 24.32915698 | 121.00637640 | <a href="https://www.inaturalist.org/observations/20279789">https://www.inaturalist.org/observations/20279789</a>   |
| 229 | Turdus chrysolaus | Brown-headed Thrush | 2021/4/21  | 1 | 0 | 24.35410500 | 121.31252830 | <a href="https://www.inaturalist.org/observations/74700215">https://www.inaturalist.org/observations/74700215</a>   |

|     |                   |                     |            |   |   |             |              |                                                                                                                     |
|-----|-------------------|---------------------|------------|---|---|-------------|--------------|---------------------------------------------------------------------------------------------------------------------|
| 230 | Turdus chrysolaus | Brown-headed Thrush | 2019/12/15 | 1 | 0 | 24.36189811 | 120.86140480 | <a href="https://www.inaturalist.org/observations/107245300">https://www.inaturalist.org/observations/107245300</a> |
| 231 | Turdus chrysolaus | Brown-headed Thrush | 2017/1/18  | 1 | 0 | 24.45774497 | 118.44361670 | <a href="https://www.inaturalist.org/observations/41991305">https://www.inaturalist.org/observations/41991305</a>   |
| 232 | Turdus chrysolaus | Brown-headed Thrush | 2016/1/31  | 1 | 0 | 24.45840000 | 118.37856670 | <a href="https://www.inaturalist.org/observations/14233206">https://www.inaturalist.org/observations/14233206</a>   |
| 233 | Turdus chrysolaus | Brown-headed Thrush | 2021/3/12  | 3 | 0 | 24.50614753 | 121.11396520 | <a href="https://www.inaturalist.org/observations/71054951">https://www.inaturalist.org/observations/71054951</a>   |
| 234 | Turdus chrysolaus | Brown-headed Thrush | 2021/4/3   | 1 | 0 | 24.63147725 | 121.76028480 | <a href="https://www.inaturalist.org/observations/75014399">https://www.inaturalist.org/observations/75014399</a>   |
| 235 | Turdus chrysolaus | Brown-headed Thrush | 2022/1/19  | 2 | 0 | 24.63356944 | 121.76235280 | <a href="https://www.inaturalist.org/observations/105183189">https://www.inaturalist.org/observations/105183189</a> |
| 236 | Turdus chrysolaus | Brown-headed Thrush | 2019/11/21 | 2 | 0 | 24.70290000 | 121.63672830 | <a href="https://www.inaturalist.org/observations/36015132">https://www.inaturalist.org/observations/36015132</a>   |
| 237 | Turdus chrysolaus | Brown-headed Thrush | 2020/3/10  | 1 | 0 | 24.70390667 | 121.80603830 | <a href="https://www.inaturalist.org/observations/40854980">https://www.inaturalist.org/observations/40854980</a>   |
| 238 | Turdus chrysolaus | Brown-headed Thrush | 2020/2/8   | 0 | 0 | 24.72785760 | 121.76171940 | <a href="https://www.inaturalist.org/observations/38605700">https://www.inaturalist.org/observations/38605700</a>   |
| 239 | Turdus chrysolaus | Brown-headed Thrush | 2018/2/21  | 1 | 0 | 24.73456883 | 121.74042870 | <a href="https://www.inaturalist.org/observations/34303704">https://www.inaturalist.org/observations/34303704</a>   |
| 240 | Turdus chrysolaus | Brown-headed Thrush | 2022/2/4   | 2 | 0 | 24.73812930 | 121.66253200 | <a href="https://www.inaturalist.org/observations/106242824">https://www.inaturalist.org/observations/106242824</a> |
| 241 | Turdus chrysolaus | Brown-headed Thrush | 2022/2/4   | 2 | 0 | 24.74265010 | 121.73668670 | <a href="https://www.inaturalist.org/observations/110239684">https://www.inaturalist.org/observations/110239684</a> |
| 242 | Turdus chrysolaus | Brown-headed Thrush | 2022/2/4   | 2 | 0 | 24.74265010 | 121.73668670 | <a href="https://www.inaturalist.org/observations/110239708">https://www.inaturalist.org/observations/110239708</a> |
| 243 | Turdus chrysolaus | Brown-headed Thrush | 2022/2/4   | 1 | 0 | 24.74265010 | 121.73668670 | <a href="https://www.inaturalist.org/observations/110239710">https://www.inaturalist.org/observations/110239710</a> |
| 244 | Turdus chrysolaus | Brown-headed Thrush | 2021/2/19  | 2 | 0 | 24.74624620 | 121.74770070 | <a href="https://www.inaturalist.org/observations/69851219">https://www.inaturalist.org/observations/69851219</a>   |
| 245 | Turdus chrysolaus | Brown-headed Thrush | 2021/12/5  | 2 | 0 | 24.75226399 | 121.63646020 | <a href="https://www.inaturalist.org/observations/102524707">https://www.inaturalist.org/observations/102524707</a> |
| 246 | Turdus chrysolaus | Brown-headed Thrush | 2019/4/4   | 1 | 0 | 24.76470674 | 121.10723720 | <a href="https://www.inaturalist.org/observations/24473208">https://www.inaturalist.org/observations/24473208</a>   |
| 247 | Turdus chrysolaus | Brown-headed Thrush | 2021/1/13  | 1 | 0 | 24.76649667 | 121.75302000 | <a href="https://www.inaturalist.org/observations/68397269">https://www.inaturalist.org/observations/68397269</a>   |
| 248 | Turdus chrysolaus | Brown-headed Thrush | 2020/1/5   | 1 | 0 | 24.77102798 | 121.04739360 | <a href="https://www.inaturalist.org/observations/45155381">https://www.inaturalist.org/observations/45155381</a>   |
| 249 | Turdus chrysolaus | Brown-headed Thrush | 2011/2/13  | 1 | 0 | 24.77580661 | 121.79804520 | <a href="https://www.inaturalist.org/observations/55764095">https://www.inaturalist.org/observations/55764095</a>   |
| 250 | Turdus chrysolaus | Brown-headed Thrush | 2020/2/1   | 1 | 0 | 24.79635333 | 120.99463000 | <a href="https://www.inaturalist.org/observations/38165783">https://www.inaturalist.org/observations/38165783</a>   |
| 251 | Turdus chrysolaus | Brown-headed Thrush | 2021/1/28  | 1 | 0 | 24.95163009 | 121.22840800 | <a href="https://www.inaturalist.org/observations/90266823">https://www.inaturalist.org/observations/90266823</a>   |
| 252 | Turdus chrysolaus | Brown-headed Thrush | 2022/3/14  | 1 | 0 | 24.95194155 | 121.22869310 | <a href="https://www.inaturalist.org/observations/108648179">https://www.inaturalist.org/observations/108648179</a> |

|     |                   |                     |            |   |   |             |              |                                                                                                                     |
|-----|-------------------|---------------------|------------|---|---|-------------|--------------|---------------------------------------------------------------------------------------------------------------------|
| 253 | Turdus chrysolaus | Brown-headed Thrush | 2021/12/20 | 1 | 0 | 24.98930315 | 121.53676710 | <a href="https://www.inaturalist.org/observations/103428513">https://www.inaturalist.org/observations/103428513</a> |
| 254 | Turdus chrysolaus | Brown-headed Thrush | 2020/1/16  | 1 | 0 | 24.99337603 | 121.53734990 | <a href="https://www.inaturalist.org/observations/37738433">https://www.inaturalist.org/observations/37738433</a>   |
| 255 | Turdus chrysolaus | Brown-headed Thrush | 2012/12/9  | 1 | 0 | 24.99386120 | 121.33903610 | <a href="https://www.inaturalist.org/observations/56615655">https://www.inaturalist.org/observations/56615655</a>   |
| 256 | Turdus chrysolaus | Brown-headed Thrush | 2012/12/9  | 1 | 0 | 24.99386120 | 121.33903610 | <a href="https://www.inaturalist.org/observations/56615657">https://www.inaturalist.org/observations/56615657</a>   |
| 257 | Turdus chrysolaus | Brown-headed Thrush | 2013/1/15  | 1 | 0 | 25.01515067 | 121.46318130 | <a href="https://www.inaturalist.org/observations/66996802">https://www.inaturalist.org/observations/66996802</a>   |
| 258 | Turdus chrysolaus | Brown-headed Thrush | 2021/1/18  | 2 | 0 | 25.01526946 | 121.52973210 | <a href="https://www.inaturalist.org/observations/68241339">https://www.inaturalist.org/observations/68241339</a>   |
| 259 | Turdus chrysolaus | Brown-headed Thrush | 2020/12/28 | 1 | 0 | 25.01572010 | 121.53897740 | <a href="https://www.inaturalist.org/observations/97558915">https://www.inaturalist.org/observations/97558915</a>   |
| 260 | Turdus chrysolaus | Brown-headed Thrush | 2021/11/27 | 1 | 0 | 25.02031145 | 121.47221080 | <a href="https://www.inaturalist.org/observations/101980796">https://www.inaturalist.org/observations/101980796</a> |
| 261 | Turdus chrysolaus | Brown-headed Thrush | 2021/2/2   | 2 | 0 | 25.02586948 | 121.29725660 | <a href="https://www.inaturalist.org/observations/68957475">https://www.inaturalist.org/observations/68957475</a>   |
| 262 | Turdus chrysolaus | Brown-headed Thrush | 2019/12/15 | 1 | 0 | 25.02769781 | 121.53615410 | <a href="https://www.inaturalist.org/observations/36669917">https://www.inaturalist.org/observations/36669917</a>   |
| 263 | Turdus chrysolaus | Brown-headed Thrush | 2010/12/5  | 2 | 0 | 25.02990465 | 121.53595380 | <a href="https://www.inaturalist.org/observations/55758185">https://www.inaturalist.org/observations/55758185</a>   |
| 264 | Turdus chrysolaus | Brown-headed Thrush | 2021/2/24  | 1 | 0 | 25.03062304 | 121.53556520 | <a href="https://www.inaturalist.org/observations/82171612">https://www.inaturalist.org/observations/82171612</a>   |
| 265 | Turdus chrysolaus | Brown-headed Thrush | 2018/1/1   | 1 | 0 | 25.03117249 | 121.53548240 | <a href="https://www.inaturalist.org/observations/14127132">https://www.inaturalist.org/observations/14127132</a>   |
| 266 | Turdus chrysolaus | Brown-headed Thrush | 2020/12/4  | 1 | 0 | 25.03186570 | 121.50945280 | <a href="https://www.inaturalist.org/observations/98211135">https://www.inaturalist.org/observations/98211135</a>   |
| 267 | Turdus chrysolaus | Brown-headed Thrush | 2017/12/30 | 1 | 0 | 25.03206167 | 121.53456830 | <a href="https://www.inaturalist.org/observations/9663756">https://www.inaturalist.org/observations/9663756</a>     |
| 268 | Turdus chrysolaus | Brown-headed Thrush | 2015/1/25  | 3 | 0 | 25.03214500 | 121.50936600 | <a href="http://www.inaturalist.org/observations/1192732">http://www.inaturalist.org/observations/1192732</a>       |
| 269 | Turdus chrysolaus | Brown-headed Thrush | 2021/12/1  | 1 | 0 | 25.03236195 | 121.51070840 | <a href="https://www.inaturalist.org/observations/102463706">https://www.inaturalist.org/observations/102463706</a> |
| 270 | Turdus chrysolaus | Brown-headed Thrush | 2022/3/14  | 1 | 0 | 25.03243988 | 121.53490540 | <a href="https://www.inaturalist.org/observations/108575464">https://www.inaturalist.org/observations/108575464</a> |
| 271 | Turdus chrysolaus | Brown-headed Thrush | 2017/3/23  | 1 | 0 | 25.03296360 | 121.56542680 | <a href="https://www.inaturalist.org/observations/5441623">https://www.inaturalist.org/observations/5441623</a>     |
| 272 | Turdus chrysolaus | Brown-headed Thrush | 2013/1/15  | 2 | 0 | 25.03341903 | 121.52181870 | <a href="https://www.inaturalist.org/observations/66992436">https://www.inaturalist.org/observations/66992436</a>   |
| 273 | Turdus chrysolaus | Brown-headed Thrush | 2021/1/20  | 1 | 0 | 25.03528651 | 121.52185630 | <a href="https://www.inaturalist.org/observations/98211137">https://www.inaturalist.org/observations/98211137</a>   |
| 274 | Turdus chrysolaus | Brown-headed Thrush | 2020/12/15 | 1 | 0 | 25.03632011 | 121.52129910 | <a href="https://www.inaturalist.org/observations/98211136">https://www.inaturalist.org/observations/98211136</a>   |
| 275 | Turdus chrysolaus | Brown-headed Thrush | 2022/1/11  | 1 | 0 | 25.04337133 | 121.59182490 | <a href="https://www.inaturalist.org/observations/105024585">https://www.inaturalist.org/observations/105024585</a> |

|     |                   |                     |            |   |   |             |              |                                                                                                                     |
|-----|-------------------|---------------------|------------|---|---|-------------|--------------|---------------------------------------------------------------------------------------------------------------------|
| 276 | Turdus chrysolaus | Brown-headed Thrush | 2020/1/5   | 1 | 0 | 25.05390358 | 121.78881070 | <a href="https://www.inaturalist.org/observations/37298667">https://www.inaturalist.org/observations/37298667</a>   |
| 277 | Turdus chrysolaus | Brown-headed Thrush | 2022/1/31  | 1 | 0 | 25.11343777 | 121.53485880 | <a href="https://www.inaturalist.org/observations/105889216">https://www.inaturalist.org/observations/105889216</a> |
| 278 | Turdus chrysolaus | Brown-headed Thrush | 2019/12/18 | 1 | 0 | 25.11956770 | 121.46690350 | <a href="https://www.inaturalist.org/observations/122151617">https://www.inaturalist.org/observations/122151617</a> |
| 279 | Turdus chrysolaus | Brown-headed Thrush | 2022/3/16  | 1 | 0 | 25.13444860 | 121.49025360 | <a href="https://www.inaturalist.org/observations/108725440">https://www.inaturalist.org/observations/108725440</a> |
| 280 | Turdus chrysolaus | Brown-headed Thrush | 2021/1/9   | 2 | 0 | 25.13449833 | 121.54485500 | <a href="https://www.inaturalist.org/observations/68170710">https://www.inaturalist.org/observations/68170710</a>   |
| 281 | Turdus chrysolaus | Brown-headed Thrush | 2008/12/19 | 2 | 0 | 25.13694974 | 121.50966630 | <a href="https://www.inaturalist.org/observations/104144796">https://www.inaturalist.org/observations/104144796</a> |
| 282 | Turdus chrysolaus | Brown-headed Thrush | 2019/12/3  | 1 | 0 | 25.14310817 | 121.52828500 | <a href="https://www.inaturalist.org/observations/36314470">https://www.inaturalist.org/observations/36314470</a>   |
| 283 | Turdus chrysolaus | Brown-headed Thrush | 2020/12/22 | 2 | 0 | 25.16130575 | 121.40662400 | <a href="https://www.inaturalist.org/observations/107245303">https://www.inaturalist.org/observations/107245303</a> |
| 284 | Turdus chrysolaus | Brown-headed Thrush | 2007/2/4   | 1 | 0 | 25.16342723 | 121.53801790 | <a href="https://www.inaturalist.org/observations/16280075">https://www.inaturalist.org/observations/16280075</a>   |
| 285 | Turdus chrysolaus | Brown-headed Thrush | 2020/2/20  | 1 | 0 | 25.17087412 | 121.43788870 | <a href="https://www.inaturalist.org/observations/98211134">https://www.inaturalist.org/observations/98211134</a>   |
| 286 | Turdus chrysolaus | Brown-headed Thrush | 2021/1/18  | 1 | 0 | 25.22323479 | 121.64189900 | <a href="https://www.inaturalist.org/observations/68264501">https://www.inaturalist.org/observations/68264501</a>   |
| 287 | Turdus chrysolaus | Brown-headed Thrush | 2022/3/7   | 1 | 0 | 25.22538650 | 121.64124620 | <a href="https://www.inaturalist.org/observations/131190611">https://www.inaturalist.org/observations/131190611</a> |
| 288 | Turdus chrysolaus | Brown-headed Thrush | 2017/3/19  | 1 | 0 | 25.22541630 | 121.64199000 | <a href="https://www.inaturalist.org/observations/27159376">https://www.inaturalist.org/observations/27159376</a>   |
| 289 | Turdus chrysolaus | Brown-headed Thrush | 2020/2/13  | 1 | 0 | 25.22544134 | 121.64195540 | <a href="https://www.inaturalist.org/observations/40640429">https://www.inaturalist.org/observations/40640429</a>   |
| 290 | Turdus chrysolaus | Brown-headed Thrush | 2020/1/29  | 1 | 0 | 25.22612946 | 121.64224670 | <a href="https://www.inaturalist.org/observations/42747942">https://www.inaturalist.org/observations/42747942</a>   |
| 291 | Turdus chrysolaus | Brown-headed Thrush | 2019/12/9  | 1 | 0 | 25.22615837 | 121.64266940 | <a href="https://www.inaturalist.org/observations/37949845">https://www.inaturalist.org/observations/37949845</a>   |
| 292 | Turdus chrysolaus | Brown-headed Thrush | 2020/12/16 | 1 | 0 | 25.22621992 | 121.64279090 | <a href="https://www.inaturalist.org/observations/66645891">https://www.inaturalist.org/observations/66645891</a>   |
| 293 | Turdus chrysolaus | Brown-headed Thrush | 2020/2/22  | 2 | 0 | 25.22623708 | 121.64144130 | <a href="https://www.inaturalist.org/observations/110839828">https://www.inaturalist.org/observations/110839828</a> |
| 294 | Turdus chrysolaus | Brown-headed Thrush | 2020/1/29  | 1 | 0 | 25.22658098 | 121.64246210 | <a href="https://www.inaturalist.org/observations/42747935">https://www.inaturalist.org/observations/42747935</a>   |
| 295 | Turdus chrysolaus | Brown-headed Thrush | 2020/2/28  | 0 | 0 | 25.22735821 | 121.64092100 | <a href="https://www.inaturalist.org/observations/39315829">https://www.inaturalist.org/observations/39315829</a>   |
| 296 | Turdus chrysolaus | Brown-headed Thrush | 2018/3/6   | 1 | 0 | 25.22777012 | 121.63993270 | <a href="https://www.inaturalist.org/observations/103242166">https://www.inaturalist.org/observations/103242166</a> |
| 297 | Turdus chrysolaus | Brown-headed Thrush | 2021/2/8   | 1 | 0 | 25.26169016 | 121.62010930 | <a href="https://www.inaturalist.org/observations/69298959">https://www.inaturalist.org/observations/69298959</a>   |
| 298 | Turdus chrysolaus | Brown-headed Thrush | 2022/4/18  | 2 | 0 | 25.96784300 | 119.93367900 | <a href="https://www.inaturalist.org/observations/115350649">https://www.inaturalist.org/observations/115350649</a> |

|     |                          |                     |           |   |   |             |              |                                                                                                                     |
|-----|--------------------------|---------------------|-----------|---|---|-------------|--------------|---------------------------------------------------------------------------------------------------------------------|
| 299 | <i>Turdus chrysolaus</i> | Brown-headed Thrush | 2022/4/18 | 2 | 0 | 25.97017500 | 119.93331700 | <a href="https://www.inaturalist.org/observations/115350656">https://www.inaturalist.org/observations/115350656</a> |
| 300 | <i>Turdus chrysolaus</i> | Brown-headed Thrush | 2022/4/18 | 2 | 0 | 25.97057704 | 119.93318680 | <a href="https://www.inaturalist.org/observations/115350655">https://www.inaturalist.org/observations/115350655</a> |
